# Supplementary material for: Comparing efficacy in reducing pulling and welfare impacts of four types of leash walking equipment
Source: PeerJ journal article supplement (doi:10.7717/peerj.18131), 2024-10-24
Supplement: Shelter1_Tension_files.zip [file Royal_star_2022912110131 copy.xlsx]

## Sheet: averaged newtons
Date	Time	averaged newtons	impulse	total steps
2022-09-12	11:02:00	4.19313	4.19313	0		Impulse	1022.25
2022-09-12	11:02:01	4.16273	8.35586	0		Total steps	13
2022-09-12	11:02:02	1.96785	10.3237	0		# >5 sec	0
2022-09-12	11:02:03	2.16485	12.4886	0
2022-09-12	11:02:04	2.53078	15.0193	0
2022-09-12	11:02:05	1.85215	16.8715	0
2022-09-12	11:02:06	1.17441	18.0459	0
2022-09-12	11:02:07	1.27221	19.3181	0
2022-09-12	11:02:08	0.48155	19.7997	0
2022-09-12	11:02:09	-0.360721	19.7997	0
2022-09-12	11:02:10	2.72738	22.527	0
2022-09-12	11:02:11	3.94147	26.4685	0
2022-09-12	11:02:12	1.782	28.2505	0
2022-09-12	11:02:13	1.73276	29.9833	0
2022-09-12	11:02:14	1.78975	31.773	0
2022-09-12	11:02:15	2.44934	34.2224	0
2022-09-12	11:02:16	7.0655	41.2879	0
2022-09-12	11:02:17	5.2925	46.5804	0
2022-09-12	11:02:18	2.44147	49.0218	0
2022-09-12	11:02:19	3.63541	52.6572	0
2022-09-12	11:02:20	2.43242	55.0897	0
2022-09-12	11:02:21	1.80503	56.8947	0
2022-09-12	11:02:22	1.49328	58.388	0
2022-09-12	11:02:23	1.80095	60.1889	0
2022-09-12	11:02:24	2.07752	62.2665	0
2022-09-12	11:02:25	1.779	64.0455	0
2022-09-12	11:02:26	1.87064	65.9161	0
2022-09-12	11:02:27	1.69394	67.61	0
2022-09-12	11:02:28	1.83016	69.4402	0
2022-09-12	11:02:29	1.85693	71.2971	0
2022-09-12	11:02:30	1.64651	72.9436	0
2022-09-12	11:02:31	1.77202	74.7156	0
2022-09-12	11:02:32	1.66349	76.3791	0
2022-09-12	11:02:33	1.51482	77.894	0
2022-09-12	11:02:34	1.58749	79.4814	0
2022-09-12	11:02:35	1.6577	81.1391	0
2022-09-12	11:02:36	1.86643	83.0056	0
2022-09-12	11:02:37	1.82348	84.8291	0
2022-09-12	11:02:38	1.558	86.3871	0
2022-09-12	11:02:39	1.60677	87.9938	0
2022-09-12	11:02:40	1.50639	89.5002	0
2022-09-12	11:02:41	1.58534	91.0856	0
2022-09-12	11:02:42	1.47906	92.5646	0
2022-09-12	11:02:43	1.4056	93.9702	0
2022-09-12	11:02:44	1.55495	95.5252	0
2022-09-12	11:02:45	1.54114	97.0663	0
2022-09-12	11:02:46	1.57905	98.6453	0
2022-09-12	11:02:47	1.55146	100.197	0
2022-09-12	11:02:48	1.69411	101.891	0
2022-09-12	11:02:49	1.59813	103.489	0
2022-09-12	11:02:50	1.50305	104.992	0
2022-09-12	11:02:51	1.70226	106.694	0
2022-09-12	11:02:52	1.40665	108.101	0
2022-09-12	11:02:53	1.49467	109.596	0
2022-09-12	11:02:54	1.92206	111.518	0
2022-09-12	11:02:55	1.88466	113.402	0
2022-09-12	11:02:56	1.68969	115.092	0
2022-09-12	11:02:57	1.67951	116.772	0
2022-09-12	11:02:58	6.26443	123.036	0
2022-09-12	11:02:59	10.9759	134.012	0
2022-09-12	11:03:00	4.77642	138.788	0
2022-09-12	11:03:01	2.51289	141.301	0
2022-09-12	11:03:02	3.55024	144.851	0
2022-09-12	11:03:03	3.95579	148.807	0
2022-09-12	11:03:04	1.85366	150.661	0
2022-09-12	11:03:05	1.52642	152.187	0
2022-09-12	11:03:06	7.57337	159.761	0
2022-09-12	11:03:07	6.43444	166.195	0
2022-09-12	11:03:08	1.23378	167.429	0
2022-09-12	11:03:09	0.877246	168.306	0
2022-09-12	11:03:10	1.10713	169.413	0
2022-09-12	11:03:11	1.10464	170.518	0
2022-09-12	11:03:12	1.15461	171.673	0
2022-09-12	11:03:13	1.39126	173.064	0
2022-09-12	11:03:14	3.07797	176.142	0
2022-09-12	11:03:15	2.73253	178.874	0
2022-09-12	11:03:16	1.41392	180.288	0
2022-09-12	11:03:17	1.52301	181.811	0
2022-09-12	11:03:18	1.95223	183.763	0
2022-09-12	11:03:19	1.26196	185.025	0
2022-09-12	11:03:20	2.00503	187.03	0
2022-09-12	11:03:21	0.921012	187.951	0
2022-09-12	11:03:22	-0.233954	187.951	0
2022-09-12	11:03:23	2.66434	190.616	0
2022-09-12	11:03:24	3.10796	193.724	0
2022-09-12	11:03:25	2.11059	195.834	0
2022-09-12	11:03:26	1.96021	197.795	0
2022-09-12	11:03:27	1.01822	198.813	0
2022-09-12	11:03:28	2.264	201.077	0
2022-09-12	11:03:29	1.69603	202.773	0
2022-09-12	11:03:30	1.49275	204.266	0
2022-09-12	11:03:31	0.401074	204.667	0
2022-09-12	11:03:32	0.444537	205.111	0
2022-09-12	11:03:33	7.82374	212.935	0
2022-09-12	11:03:34	30.5179	243.453	1
2022-09-12	11:03:35	19.7383	263.191	2
2022-09-12	11:03:36	3.37322	266.564	2
2022-09-12	11:03:37	3.70151	270.266	2
2022-09-12	11:03:38	16.275	286.541	3
2022-09-12	11:03:39	5.06992	291.611	3
2022-09-12	11:03:40	2.18443	293.795	3
2022-09-12	11:03:41	1.52535	295.32	3
2022-09-12	11:03:42	1.54542	296.866	3
2022-09-12	11:03:43	1.5846	298.451	3
2022-09-12	11:03:44	1.73327	300.184	3
2022-09-12	11:03:45	1.73253	301.916	3
2022-09-12	11:03:46	1.79586	303.712	3
2022-09-12	11:03:47	1.78245	305.495	3
2022-09-12	11:03:48	1.73797	307.233	3
2022-09-12	11:03:49	3.10893	310.342	3
2022-09-12	11:03:50	23.2742	333.616	4
2022-09-12	11:03:51	45.0581	378.674	5
2022-09-12	11:03:52	17.9098	396.584	6
2022-09-12	11:03:53	11.4696	408.053	6
2022-09-12	11:03:54	11.0757	419.129	6
2022-09-12	11:03:55	3.97023	423.099	6
2022-09-12	11:03:56	1.66989	424.769	6
2022-09-12	11:03:57	2.58143	427.351	6
2022-09-12	11:03:58	2.11318	429.464	6
2022-09-12	11:03:59	1.69332	431.157	6
2022-09-12	11:04:00	2.50899	433.666	6
2022-09-12	11:04:01	2.24866	435.915	6
2022-09-12	11:04:02	4.91939	440.834	6
2022-09-12	11:04:03	4.54432	445.378	6
2022-09-12	11:04:04	5.92447	451.303	6
2022-09-12	11:04:05	3.67259	454.975	6
2022-09-12	11:04:06	4.10847	459.084	6
2022-09-12	11:04:07	3.54058	462.625	6
2022-09-12	11:04:08	6.57694	469.201	6
2022-09-12	11:04:09	6.53411	475.736	6
2022-09-12	11:04:10	3.33208	479.068	6
2022-09-12	11:04:11	1.96496	481.033	6
2022-09-12	11:04:12	1.98534	483.018	6
2022-09-12	11:04:13	1.80384	484.822	6
2022-09-12	11:04:14	3.6255	488.447	6
2022-09-12	11:04:15	14.3578	502.805	7
2022-09-12	11:04:16	10.0527	512.858	7
2022-09-12	11:04:17	3.95828	516.816	7
2022-09-12	11:04:18	2.51414	519.33	7
2022-09-12	11:04:19	1.96366	521.294	7
2022-09-12	11:04:20	1.84551	523.139	7
2022-09-12	11:04:21	1.70101	524.84	7
2022-09-12	11:04:22	1.92416	526.765	7
2022-09-12	11:04:23	1.85845	528.623	7
2022-09-12	11:04:24	2.20989	530.833	7
2022-09-12	11:04:25	9.46537	540.298	7
2022-09-12	11:04:26	9.16539	549.464	7
2022-09-12	11:04:27	6.52515	555.989	7
2022-09-12	11:04:28	2.12327	558.112	7
2022-09-12	11:04:29	1.54233	559.654	7
2022-09-12	11:04:30	1.53446	561.189	7
2022-09-12	11:04:31	1.48817	562.677	7
2022-09-12	11:04:32	2.81377	565.491	7
2022-09-12	11:04:33	7.88926	573.38	7
2022-09-12	11:04:34	4.81577	578.196	7
2022-09-12	11:04:35	1.96609	580.162	7
2022-09-12	11:04:36	2.31108	582.473	7
2022-09-12	11:04:37	1.51999	583.993	7
2022-09-12	11:04:38	1.39484	585.388	7
2022-09-12	11:04:39	1.6747	587.063	7
2022-09-12	11:04:40	13.4298	600.492	8
2022-09-12	11:04:41	4.58522	605.078	8
2022-09-12	11:04:42	3.30718	608.385	8
2022-09-12	11:04:43	1.25766	609.642	8
2022-09-12	11:04:44	0.573287	610.216	8
2022-09-12	11:04:45	0.490831	610.707	8
2022-09-12	11:04:46	0.914259	611.621	8
2022-09-12	11:04:47	1.29411	612.915	8
2022-09-12	11:04:48	1.35048	614.265	8
2022-09-12	11:04:49	1.61771	615.883	8
2022-09-12	11:04:50	1.62801	617.511	8
2022-09-12	11:04:51	1.54312	619.054	8
2022-09-12	11:04:52	1.51329	620.567	8
2022-09-12	11:04:53	1.38288	621.95	8
2022-09-12	11:04:54	1.48619	623.437	8
2022-09-12	11:04:55	1.19926	624.636	8
2022-09-12	11:04:56	0.996997	625.633	8
2022-09-12	11:04:57	1.40746	627.04	8
2022-09-12	11:04:58	1.492	628.532	8
2022-09-12	11:04:59	2.44419	630.976	8
2022-09-12	11:05:00	2.06813	633.045	8
2022-09-12	11:05:01	1.60175	634.646	8
2022-09-12	11:05:02	1.04823	635.695	8
2022-09-12	11:05:03	0.975379	636.67	8
2022-09-12	11:05:04	0.487511	637.157	8
2022-09-12	11:05:05	0.816399	637.974	8
2022-09-12	11:05:06	1.31618	639.29	8
2022-09-12	11:05:07	1.80588	641.096	8
2022-09-12	11:05:08	1.98896	643.085	8
2022-09-12	11:05:09	1.97232	645.057	8
2022-09-12	11:05:10	2.24438	647.302	8
2022-09-12	11:05:11	2.32557	649.627	8
2022-09-12	11:05:12	1.83791	651.465	8
2022-09-12	11:05:13	1.4627	652.928	8
2022-09-12	11:05:14	1.52693	654.455	8
2022-09-12	11:05:15	1.71488	656.17	8
2022-09-12	11:05:16	1.60124	657.771	8
2022-09-12	11:05:17	1.86123	659.632	8
2022-09-12	11:05:18	1.55855	661.191	8
2022-09-12	11:05:19	1.73848	662.929	8
2022-09-12	11:05:20	12.5261	675.455	8
2022-09-12	11:05:21	9.05339	684.509	8
2022-09-12	11:05:22	1.60565	686.114	8
2022-09-12	11:05:23	2.09958	688.214	8
2022-09-12	11:05:24	1.95427	690.168	8
2022-09-12	11:05:25	1.9666	692.135	8
2022-09-12	11:05:26	1.79999	693.935	8
2022-09-12	11:05:27	1.73021	695.665	8
2022-09-12	11:05:28	1.72229	697.387	8
2022-09-12	11:05:29	1.83667	699.224	8
2022-09-12	11:05:30	2.6765	701.9	8
2022-09-12	11:05:31	6.16656	708.067	8
2022-09-12	11:05:32	4.84831	712.915	8
2022-09-12	11:05:33	0.717089	713.632	8
2022-09-12	11:05:34	0.172496	713.805	8
2022-09-12	11:05:35	0.635707	714.441	8
2022-09-12	11:05:36	1.41833	715.859	8
2022-09-12	11:05:37	2.34232	718.201	8
2022-09-12	11:05:38	-0.820199	718.201	8
2022-09-12	11:05:39	-1.60718	718.201	8
2022-09-12	11:05:40	0.355743	718.557	8
2022-09-12	11:05:41	-0.358458	718.557	8
2022-09-12	11:05:42	0.606054	719.163	8
2022-09-12	11:05:43	1.30403	720.467	8
2022-09-12	11:05:44	1.75913	722.226	8
2022-09-12	11:05:45	1.85025	724.076	8
2022-09-12	11:05:46	1.67079	725.747	8
2022-09-12	11:05:47	1.68013	727.427	8
2022-09-12	11:05:48	1.70267	729.13	8
2022-09-12	11:05:49	1.05993	730.19	8
2022-09-12	11:05:50	1.89552	732.085	8
2022-09-12	11:05:51	1.95059	734.036	8
2022-09-12	11:05:52	2.02706	736.063	8
2022-09-12	11:05:53	1.9777	738.041	8
2022-09-12	11:05:54	1.9481	739.989	8
2022-09-12	11:05:55	1.93406	741.923	8
2022-09-12	11:05:56	1.99507	743.918	8
2022-09-12	11:05:57	3.52404	747.442	8
2022-09-12	11:05:58	0.53537	747.977	8
2022-09-12	11:05:59	2.54119	750.519	8
2022-09-12	11:06:00	14.3779	764.897	9
2022-09-12	11:06:01	3.98199	768.878	9
2022-09-12	11:06:02	4.5482	773.427	9
2022-09-12	11:06:03	2.65375	776.08	9
2022-09-12	11:06:04	5.62848	781.709	9
2022-09-12	11:06:05	2.98991	784.699	9
2022-09-12	11:06:06	2.27583	786.975	9
2022-09-12	11:06:07	3.03349	790.008	9
2022-09-12	11:06:08	2.06055	792.069	9
2022-09-12	11:06:09	2.06751	794.136	9
2022-09-12	11:06:10	2.0743	796.211	9
2022-09-12	11:06:11	2.08935	798.3	9
2022-09-12	11:06:12	2.80587	801.106	9
2022-09-12	11:06:13	3.91402	805.02	9
2022-09-12	11:06:14	2.66071	807.68	9
2022-09-12	11:06:15	4.10049	811.781	9
2022-09-12	11:06:16	2.06315	813.844	9
2022-09-12	11:06:17	2.03152	815.876	9
2022-09-12	11:06:18	2.02461	817.9	9
2022-09-12	11:06:19	2.09371	819.994	9
2022-09-12	11:06:20	4.80134	824.795	9
2022-09-12	11:06:21	10.5734	835.369	9
2022-09-12	11:06:22	2.00373	837.372	9
2022-09-12	11:06:23	1.95715	839.33	9
2022-09-12	11:06:24	2.55839	841.888	9
2022-09-12	11:06:25	1.80379	843.692	9
2022-09-12	11:06:26	2.38782	846.08	9
2022-09-12	11:06:27	2.19207	848.272	9
2022-09-12	11:06:28	1.92914	850.201	9
2022-09-12	11:06:29	2.08101	852.282	9
2022-09-12	11:06:30	3.38035	855.662	9
2022-09-12	11:06:31	2.00163	857.664	9
2022-09-12	11:06:32	2.85794	860.522	9
2022-09-12	11:06:33	2.00882	862.531	9
2022-09-12	11:06:34	2.62031	865.151	9
2022-09-12	11:06:35	1.77628	866.927	9
2022-09-12	11:06:36	2.05455	868.982	9
2022-09-12	11:06:37	1.62297	870.605	9
2022-09-12	11:06:38	7.285	877.89	9
2022-09-12	11:06:39	33.8451	911.735	10
2022-09-12	11:06:40	18.0162	929.751	11
2022-09-12	11:06:41	1.69745	931.448	11
2022-09-12	11:06:42	1.61001	933.058	11
2022-09-12	11:06:43	3.40497	936.463	11
2022-09-12	11:06:44	1.94578	938.409	11
2022-09-12	11:06:45	1.54329	939.952	11
2022-09-12	11:06:46	1.2405	941.193	11
2022-09-12	11:06:47	1.33786	942.531	11
2022-09-12	11:06:48	1.31437	943.845	11
2022-09-12	11:06:49	16.4608	960.306	12
2022-09-12	11:06:50	26.7511	987.057	13
2022-09-12	11:06:51	4.76043	991.817	13
2022-09-12	11:06:52	2.55432	994.372	13
2022-09-12	11:06:53	10.7031	1005.07	13
2022-09-12	11:06:54	3.31384	1008.39	13
2022-09-12	11:06:55	3.21804	1011.61	13
2022-09-12	11:06:56	3.95176	1015.56	13
2022-09-12	11:06:57	2.41284	1017.97	13
2022-09-12	11:06:58	2.90039	1020.87	13
2022-09-12	11:06:59	0.972248	1021.84	13
2022-09-12	11:07:00	0.405263	1022.25	13

## Sheet: Royal_star_2022912110131 (E (3)
Date	Time	Lbs	Newtons	averaged newtons	Total Force x time	Total Time Steps Force >13.345
								**GoPro Fitting: 1050
2022-09-12	11:02:00	0.63416	2.82087	4.19313
2022-09-12	11:02:00	1.16281	5.17241	4.19313
2022-09-12	11:02:00	1.33482	5.93755	4.19313
2022-09-12	11:02:00	0.638842	2.8417	4.19313
2022-09-12	11:02:01	0.778842	3.46444	4.16273
2022-09-12	11:02:01	1.06938	4.75682	4.16273
2022-09-12	11:02:01	0.959249	4.26693	4.16273
2022-09-12	11:02:02	0.563219	2.50531	1.96785
2022-09-12	11:02:02	0.422812	1.88075	1.96785
2022-09-12	11:02:02	0.410496	1.82597	1.96785
2022-09-12	11:02:02	0.373041	1.65936	1.96785
2022-09-12	11:02:03	0.381387	1.69649	2.16485
2022-09-12	11:02:03	0.449275	1.99847	2.16485
2022-09-12	11:02:03	0.452277	2.01182	2.16485
2022-09-12	11:02:03	0.663779	2.95262	2.16485
2022-09-12	11:02:04	0.581336	2.5859	2.53078	2.5859	FALSE	#REF!			Total Force x time	#REF!
2022-09-12	11:02:04	0.520267	2.31425	2.53078	#REF!	FALSE	#REF!			Total Time Steps Force >3	52
2022-09-12	11:02:04	0.563829	2.50802	2.53078	5.09392	FALSE	#REF!
2022-09-12	11:02:04	0.610344	2.71493	2.53078	#REF!	FALSE	#REF!
2022-09-12	11:02:05	0.443117	1.97107	1.85215	7.065	FALSE	#REF!
2022-09-12	11:02:05	0.395992	1.76145	1.85215	#REF!	FALSE	#REF!
2022-09-12	11:02:05	0.410038	1.82393	1.85215	8.88893	FALSE	#REF!
2022-09-12	11:02:06	0.359351	1.59847	1.17441	#REF!	FALSE	#REF!
2022-09-12	11:02:06	0.341692	1.51991	1.17441	10.4088	FALSE	#REF!
2022-09-12	11:02:06	0.175789	0.781945	1.17441	#REF!	FALSE	#REF!
2022-09-12	11:02:06	0.179249	0.797335	1.17441	11.2062	FALSE	#REF!
2022-09-12	11:02:07	0.254262	1.13101	1.27221	#REF!	FALSE	#REF!
2022-09-12	11:02:07	0.292685	1.30192	1.27221	12.5081	FALSE	#REF!
2022-09-12	11:02:07	0.304797	1.3558	1.27221	#REF!	FALSE	#REF!
2022-09-12	11:02:07	0.292277	1.30011	1.27221	13.8082	FALSE	#REF!
2022-09-12	11:02:08	0.332176	1.47759	0.48155	#REF!	FALSE	#REF!
2022-09-12	11:02:08	0.144644	0.643405	0.48155	14.4516	FALSE	#REF!
2022-09-12	11:02:08	0.0487661	0.216921	0.48155	#REF!	FALSE	#REF!
2022-09-12	11:02:08	-0.092557	-0.411712	0.48155	14.4516	FALSE	#REF!
2022-09-12	11:02:09	-0.0910811	-0.405147	-0.360721	#REF!	FALSE	#REF!
2022-09-12	11:02:09	-0.25276	-1.12433	-0.360721	14.4516	FALSE	#REF!
2022-09-12	11:02:09	-0.244567	-1.08788	-0.360721	#REF!	FALSE	#REF!
2022-09-12	11:02:09	0.264033	1.17447	-0.360721	15.6261	FALSE	#REF!
2022-09-12	11:02:10	0.359046	1.59711	2.72738	#REF!	FALSE	#REF!
2022-09-12	11:02:10	0.468461	2.08381	2.72738	17.7099	FALSE	#REF!
2022-09-12	11:02:10	1.01192	4.50122	2.72738	#REF!	FALSE	#REF!
2022-09-12	11:02:11	1.59335	7.08754	3.94147	24.7974	FALSE	#REF!
2022-09-12	11:02:11	0.760063	3.38091	3.94147	#REF!	FALSE	#REF!
2022-09-12	11:02:11	0.660674	2.93881	3.94147	27.7362	FALSE	#REF!
2022-09-12	11:02:11	0.530241	2.35862	3.94147	#REF!	FALSE	#REF!
2022-09-12	11:02:12	0.525254	2.33643	1.782	30.0727	FALSE	#REF!
2022-09-12	11:02:12	0.363524	1.61703	1.782	#REF!	FALSE	#REF!
2022-09-12	11:02:12	0.376501	1.67475	1.782	31.7474	FALSE	#REF!
2022-09-12	11:02:12	0.337163	1.49977	1.782	#REF!	FALSE	#REF!
2022-09-12	11:02:13	0.379453	1.68788	1.73276	33.4353	FALSE	#REF!
2022-09-12	11:02:13	0.354415	1.57651	1.73276	#REF!	FALSE	#REF!
2022-09-12	11:02:13	0.353651	1.57311	1.73276	35.0084	FALSE	#REF!
2022-09-12	11:02:13	0.470649	2.09354	1.73276	#REF!	FALSE	#REF!
2022-09-12	11:02:14	0.358741	1.59575	1.78975	36.6042	FALSE	#REF!
2022-09-12	11:02:14	0.505611	2.24906	1.78975	#REF!	FALSE	#REF!
2022-09-12	11:02:14	0.34271	1.52444	1.78975	38.1286	FALSE	#REF!
2022-09-12	11:02:15	0.405254	1.80265	2.44934	#REF!	FALSE	#REF!
2022-09-12	11:02:15	0.440471	1.9593	2.44934	40.0879	FALSE	#REF!
2022-09-12	11:02:15	0.59416	2.64294	2.44934	#REF!	FALSE	#REF!
2022-09-12	11:02:15	0.762659	3.39246	2.44934	43.4804	FALSE	#REF!
2022-09-12	11:02:16	0.91472	4.06886	7.0655	#REF!	FALSE	#REF!
2022-09-12	11:02:16	0.917112	4.0795	7.0655	47.5599	FALSE	#REF!
2022-09-12	11:02:16	1.37431	6.11321	7.0655	#REF!	FALSE	#REF!
2022-09-12	11:02:16	3.14744	14.0004	7.0655	61.5603	1	#REF!
2022-09-12	11:02:17	1.04128	4.63182	5.2925	#REF!	FALSE	#REF!
2022-09-12	11:02:17	1.09167	4.85597	5.2925	66.4163	FALSE	#REF!
2022-09-12	11:02:17	1.44734	6.43806	5.2925	#REF!	FALSE	#REF!
2022-09-12	11:02:17	1.17894	5.24416	5.2925	71.6604	FALSE	#REF!
2022-09-12	11:02:18	0.605102	2.69161	2.44147	#REF!	FALSE	#REF!
2022-09-12	11:02:18	0.544695	2.42291	2.44147	74.0834	FALSE	#REF!
2022-09-12	11:02:18	0.496807	2.2099	2.44147	#REF!	FALSE	#REF!
2022-09-12	11:02:19	0.837519	3.72545	3.63541	77.8088	FALSE	#REF!
2022-09-12	11:02:19	0.697112	3.10089	3.63541	#REF!	FALSE	#REF!
2022-09-12	11:02:19	0.972532	4.32602	3.63541	82.1348	FALSE	#REF!
2022-09-12	11:02:19	0.761946	3.38929	3.63541	#REF!	FALSE	#REF!
2022-09-12	11:02:20	0.822506	3.65867	2.43242	85.7935	FALSE	#REF!
2022-09-12	11:02:20	0.50388	2.24136	2.43242	#REF!	FALSE	#REF!
2022-09-12	11:02:20	0.447799	1.9919	2.43242	87.7854	FALSE	#REF!
2022-09-12	11:02:20	0.413143	1.83774	2.43242	#REF!	FALSE	#REF!
2022-09-12	11:02:21	0.426425	1.89682	1.80503	89.6822	FALSE	#REF!
2022-09-12	11:02:21	0.396451	1.76349	1.80503	#REF!	FALSE	#REF!
2022-09-12	11:02:21	0.416145	1.8511	1.80503	91.5333	FALSE	#REF!
2022-09-12	11:02:21	0.384135	1.70871	1.80503	#REF!	FALSE	#REF!
2022-09-12	11:02:22	0.334975	1.49004	1.49328	93.0234	FALSE	#REF!
2022-09-12	11:02:22	0.323372	1.43842	1.49328	#REF!	FALSE	#REF!
2022-09-12	11:02:22	0.348766	1.55138	1.49328	94.5747	FALSE	#REF!
2022-09-12	11:02:23	0.340827	1.51607	1.80095	#REF!	FALSE	#REF!
2022-09-12	11:02:23	0.391718	1.74244	1.80095	96.3172	FALSE	#REF!
2022-09-12	11:02:23	0.41701	1.85494	1.80095	#REF!	FALSE	#REF!
2022-09-12	11:02:23	0.469936	2.09037	1.80095	98.4075	FALSE	#REF!
2022-09-12	11:02:24	0.532277	2.36767	2.07752	#REF!	FALSE	#REF!
2022-09-12	11:02:24	0.517519	2.30203	2.07752	100.71	FALSE	#REF!
2022-09-12	11:02:24	0.384237	1.70916	2.07752	#REF!	FALSE	#REF!
2022-09-12	11:02:24	0.43416	1.93123	2.07752	102.641	FALSE	#REF!
2022-09-12	11:02:25	0.441641	1.96451	1.779	#REF!	FALSE	#REF!
2022-09-12	11:02:25	0.352125	1.56632	1.779	104.207	FALSE	#REF!
2022-09-12	11:02:25	0.477977	2.12614	1.779	#REF!	FALSE	#REF!
2022-09-12	11:02:25	0.328003	1.45902	1.779	105.666	FALSE	#REF!
2022-09-12	11:02:26	0.470751	2.09399	1.87064	#REF!	FALSE	#REF!
2022-09-12	11:02:26	0.374313	1.66502	1.87064	107.331	FALSE	#REF!
2022-09-12	11:02:26	0.416552	1.85291	1.87064	#REF!	FALSE	#REF!
2022-09-12	11:02:27	0.398741	1.77368	1.69394	109.105	FALSE	#REF!
2022-09-12	11:02:27	0.373652	1.66208	1.69394	#REF!	FALSE	#REF!
2022-09-12	11:02:27	0.444644	1.97787	1.69394	111.083	FALSE	#REF!
2022-09-12	11:02:27	0.306221	1.36213	1.69394	#REF!	FALSE	#REF!
2022-09-12	11:02:28	0.39126	1.7404	1.83016	112.823	FALSE	#REF!
2022-09-12	11:02:28	0.386323	1.71844	1.83016	#REF!	FALSE	#REF!
2022-09-12	11:02:28	0.521539	2.31991	1.83016	115.143	FALSE	#REF!
2022-09-12	11:02:28	0.346629	1.54188	1.83016	#REF!	FALSE	#REF!
2022-09-12	11:02:29	0.505916	2.25042	1.85693	117.393	FALSE	#REF!
2022-09-12	11:02:29	0.360929	1.60548	1.85693	#REF!	FALSE	#REF!
2022-09-12	11:02:29	0.506781	2.25426	1.85693	119.648	FALSE	#REF!
2022-09-12	11:02:29	0.296196	1.31754	1.85693	#REF!	FALSE	#REF!
2022-09-12	11:02:30	0.449173	1.99801	1.64651	121.646	FALSE	#REF!
2022-09-12	11:02:30	0.266425	1.18511	1.64651	#REF!	FALSE	#REF!
2022-09-12	11:02:30	0.489987	2.17956	1.64651	123.825	FALSE	#REF!
2022-09-12	11:02:30	0.275025	1.22337	1.64651	#REF!	FALSE	#REF!
2022-09-12	11:02:31	0.405356	1.8031	1.77202	125.628	FALSE	#REF!
2022-09-12	11:02:31	0.303015	1.34787	1.77202	#REF!	FALSE	#REF!
2022-09-12	11:02:31	0.48673	2.16507	1.77202	127.793	FALSE	#REF!
2022-09-12	11:02:32	0.268562	1.19462	1.66349	#REF!	FALSE	#REF!
2022-09-12	11:02:32	0.499809	2.22325	1.66349	130.017	FALSE	#REF!
2022-09-12	11:02:32	0.250547	1.11448	1.66349	#REF!	FALSE	#REF!
2022-09-12	11:02:32	0.476959	2.12161	1.66349	132.138	FALSE	#REF!
2022-09-12	11:02:33	0.241081	1.07238	1.51482	#REF!	FALSE	#REF!
2022-09-12	11:02:33	0.388461	1.72795	1.51482	133.866	FALSE	#REF!
2022-09-12	11:02:33	0.247443	1.10068	1.51482	#REF!	FALSE	#REF!
2022-09-12	11:02:33	0.485204	2.15828	1.51482	136.025	FALSE	#REF!
2022-09-12	11:02:34	0.280471	1.24759	1.58749	#REF!	FALSE	#REF!
2022-09-12	11:02:34	0.473143	2.10463	1.58749	138.129	FALSE	#REF!
2022-09-12	11:02:34	0.292125	1.29943	1.58749	#REF!	FALSE	#REF!
2022-09-12	11:02:34	0.381794	1.6983	1.58749	139.827	FALSE	#REF!
2022-09-12	11:02:35	0.345407	1.53644	1.6577	#REF!	FALSE	#REF!
2022-09-12	11:02:35	0.427392	1.90113	1.6577	141.729	FALSE	#REF!
2022-09-12	11:02:35	0.345204	1.53554	1.6577	#REF!	FALSE	#REF!
2022-09-12	11:02:36	0.450038	2.00186	1.86643	143.73	FALSE	#REF!
2022-09-12	11:02:36	0.451209	2.00707	1.86643	#REF!	FALSE	#REF!
2022-09-12	11:02:36	0.402048	1.78839	1.86643	145.519	FALSE	#REF!
2022-09-12	11:02:36	0.375076	1.66841	1.86643	#REF!	FALSE	#REF!
2022-09-12	11:02:37	0.425051	1.89071	1.82348	147.41	FALSE	#REF!
2022-09-12	11:02:37	0.411158	1.82891	1.82348	#REF!	FALSE	#REF!
2022-09-12	11:02:37	0.419911	1.86785	1.82348	149.277	FALSE	#REF!
2022-09-12	11:02:37	0.383626	1.70645	1.82348	#REF!	FALSE	#REF!
2022-09-12	11:02:38	0.371056	1.65053	1.558	150.928	FALSE	#REF!
2022-09-12	11:02:38	0.357977	1.59235	1.558	#REF!	FALSE	#REF!
2022-09-12	11:02:38	0.408664	1.81782	1.558	152.746	FALSE	#REF!
2022-09-12	11:02:38	0.263321	1.1713	1.558	#REF!	FALSE	#REF!
2022-09-12	11:02:39	0.376145	1.67317	1.60677	154.419	FALSE	#REF!
2022-09-12	11:02:39	0.323626	1.43955	1.60677	#REF!	FALSE	#REF!
2022-09-12	11:02:39	0.383881	1.70758	1.60677	156.127	FALSE	#REF!
2022-09-12	11:02:40	0.232685	1.03503	1.50639	#REF!	FALSE	#REF!
2022-09-12	11:02:40	0.389631	1.73316	1.50639	157.86	FALSE	#REF!
2022-09-12	11:02:40	0.331056	1.4726	1.50639	#REF!	FALSE	#REF!
2022-09-12	11:02:40	0.401234	1.78477	1.50639	159.644	FALSE	#REF!
2022-09-12	11:02:41	0.242405	1.07827	1.58534	#REF!	FALSE	#REF!
2022-09-12	11:02:41	0.42271	1.8803	1.58534	161.525	FALSE	#REF!
2022-09-12	11:02:41	0.322863	1.43616	1.58534	#REF!	FALSE	#REF!
2022-09-12	11:02:41	0.437621	1.94663	1.58534	163.471	FALSE	#REF!
2022-09-12	11:02:42	0.275891	1.22722	1.47906	#REF!	FALSE	#REF!
2022-09-12	11:02:42	0.407952	1.81465	1.47906	165.286	FALSE	#REF!
2022-09-12	11:02:42	0.274059	1.21907	1.47906	#REF!	FALSE	#REF!
2022-09-12	11:02:42	0.372125	1.65529	1.47906	166.941	FALSE	#REF!
2022-09-12	11:02:43	0.285407	1.26955	1.4056	#REF!	FALSE	#REF!
2022-09-12	11:02:43	0.368817	1.64057	1.4056	168.582	FALSE	#REF!
2022-09-12	11:02:43	0.293753	1.30667	1.4056	#REF!	FALSE	#REF!
2022-09-12	11:02:44	0.372125	1.65529	1.55495	170.237	FALSE	#REF!
2022-09-12	11:02:44	0.300267	1.33565	1.55495	#REF!	FALSE	#REF!
2022-09-12	11:02:44	0.347799	1.54708	1.55495	171.784	FALSE	#REF!
2022-09-12	11:02:44	0.378079	1.68177	1.55495	#REF!	FALSE	#REF!
2022-09-12	11:02:45	0.28444	1.26525	1.54114	173.049	FALSE	#REF!
2022-09-12	11:02:45	0.397723	1.76915	1.54114	#REF!	FALSE	#REF!
2022-09-12	11:02:45	0.329071	1.46377	1.54114	174.513	FALSE	#REF!
2022-09-12	11:02:45	0.374619	1.66638	1.54114	#REF!	FALSE	#REF!
2022-09-12	11:02:46	0.298842	1.32931	1.57905	175.843	FALSE	#REF!
2022-09-12	11:02:46	0.513499	2.28415	1.57905	#REF!	FALSE	#REF!
2022-09-12	11:02:46	0.223575	0.994506	1.57905	176.837	FALSE	#REF!
2022-09-12	11:02:46	0.384033	1.70826	1.57905	#REF!	FALSE	#REF!
2022-09-12	11:02:47	0.330395	1.46966	1.55146	178.307	FALSE	#REF!
2022-09-12	11:02:47	0.402659	1.79111	1.55146	#REF!	FALSE	#REF!
2022-09-12	11:02:47	0.313295	1.3936	1.55146	179.7	FALSE	#REF!
2022-09-12	11:02:48	0.494771	2.20084	1.69411	#REF!	FALSE	#REF!
2022-09-12	11:02:48	0.282812	1.258	1.69411	180.958	FALSE	#REF!
2022-09-12	11:02:48	0.481285	2.14085	1.69411	#REF!	FALSE	#REF!
2022-09-12	11:02:48	0.264542	1.17674	1.69411	182.135	FALSE	#REF!
2022-09-12	11:02:49	0.48785	2.17005	1.59813	#REF!	FALSE	#REF!
2022-09-12	11:02:49	0.245865	1.09366	1.59813	183.229	FALSE	#REF!
2022-09-12	11:02:49	0.470751	2.09399	1.59813	#REF!	FALSE	#REF!
2022-09-12	11:02:49	0.232634	1.0348	1.59813	184.264	FALSE	#REF!
2022-09-12	11:02:50	0.473652	2.1069	1.50305	#REF!	FALSE	#REF!
2022-09-12	11:02:50	0.242914	1.08053	1.50305	185.344	FALSE	#REF!
2022-09-12	11:02:50	0.418893	1.86332	1.50305	#REF!	FALSE	#REF!
2022-09-12	11:02:50	0.216145	0.961456	1.50305	186.306	FALSE	#REF!
2022-09-12	11:02:51	0.425967	1.89479	1.70226	#REF!	FALSE	#REF!
2022-09-12	11:02:51	0.311056	1.38364	1.70226	187.689	FALSE	#REF!
2022-09-12	11:02:51	0.420166	1.86898	1.70226	#REF!	FALSE	#REF!
2022-09-12	11:02:51	0.37355	1.66163	1.70226	189.351	FALSE	#REF!
2022-09-12	11:02:52	0.379555	1.68834	1.40665	#REF!	FALSE	#REF!
2022-09-12	11:02:52	0.286069	1.27249	1.40665	190.623	FALSE	#REF!
2022-09-12	11:02:52	0.283066	1.25913	1.40665	#REF!	FALSE	#REF!
2022-09-12	11:02:53	0.44042	1.95908	1.49467	192.582	FALSE	#REF!
2022-09-12	11:02:53	0.22729	1.01103	1.49467	#REF!	FALSE	#REF!
2022-09-12	11:02:53	0.365763	1.62699	1.49467	194.209	FALSE	#REF!
2022-09-12	11:02:53	0.310598	1.3816	1.49467	#REF!	FALSE	#REF!
2022-09-12	11:02:54	0.417214	1.85585	1.92206	196.065	FALSE	#REF!
2022-09-12	11:02:54	0.31701	1.41012	1.92206	#REF!	FALSE	#REF!
2022-09-12	11:02:54	0.577672	2.5696	1.92206	198.635	FALSE	#REF!
2022-09-12	11:02:54	0.416501	1.85268	1.92206	#REF!	FALSE	#REF!
2022-09-12	11:02:55	0.512939	2.28166	1.88466	200.916	FALSE	#REF!
2022-09-12	11:02:55	0.334618	1.48845	1.88466	#REF!	FALSE	#REF!
2022-09-12	11:02:55	0.386985	1.72139	1.88466	202.638	FALSE	#REF!
2022-09-12	11:02:55	0.460216	2.04713	1.88466	#REF!	FALSE	#REF!
2022-09-12	11:02:56	0.383219	1.70463	1.68969	204.342	FALSE	#REF!
2022-09-12	11:02:56	0.424848	1.88981	1.68969	#REF!	FALSE	#REF!
2022-09-12	11:02:56	0.331514	1.47464	1.68969	205.817	FALSE	#REF!
2022-09-12	11:02:57	0.467137	2.07792	1.67951	#REF!	FALSE	#REF!
2022-09-12	11:02:57	0.298181	1.32637	1.67951	207.143	FALSE	#REF!
2022-09-12	11:02:57	0.451209	2.00707	1.67951	#REF!	FALSE	#REF!
2022-09-12	11:02:57	0.293753	1.30667	1.67951	208.45	FALSE	#REF!
2022-09-12	11:02:58	0.42841	1.90565	6.26443	#REF!	FALSE	#REF!
2022-09-12	11:02:58	0.481539	2.14198	6.26443	210.592	FALSE	#REF!
2022-09-12	11:02:58	1.27915	5.68992	6.26443	#REF!	FALSE	#REF!
2022-09-12	11:02:58	3.44413	15.3202	6.26443	225.912	1	#REF!
2022-09-12	11:02:59	4.90454	21.8164	10.9759	#REF!	1	#REF!
2022-09-12	11:02:59	2.55065	11.3458	10.9759	237.258	FALSE	#REF!
2022-09-12	11:02:59	1.61538	7.18553	10.9759	#REF!	FALSE	#REF!
2022-09-12	11:02:59	0.799402	3.5559	10.9759	240.814	FALSE	#REF!
2022-09-12	11:03:00	1.65808	7.37547	4.77642	#REF!	FALSE	#REF!
2022-09-12	11:03:00	0.77187	3.43343	4.77642	244.247	FALSE	#REF!
2022-09-12	11:03:00	0.791412	3.52036	4.77642	#REF!	FALSE	#REF!
2022-09-12	11:03:01	0.713346	3.17311	2.51289	247.421	FALSE	#REF!
2022-09-12	11:03:01	0.435127	1.93553	2.51289	#REF!	FALSE	#REF!
2022-09-12	11:03:01	0.632023	2.81136	2.51289	250.232	FALSE	#REF!
2022-09-12	11:03:01	0.479199	2.13157	2.51289	#REF!	FALSE	#REF!
2022-09-12	11:03:02	0.810344	3.60457	3.55024	253.836	FALSE	#REF!
2022-09-12	11:03:02	0.821081	3.65233	3.55024	#REF!	FALSE	#REF!
2022-09-12	11:03:02	0.860165	3.82619	3.55024	257.663	FALSE	#REF!
2022-09-12	11:03:02	0.700929	3.11787	3.55024	#REF!	FALSE	#REF!
2022-09-12	11:03:03	0.913091	4.06161	3.95579	261.724	FALSE	#REF!
2022-09-12	11:03:03	1.08775	4.83853	3.95579	#REF!	FALSE	#REF!
2022-09-12	11:03:03	1.05045	4.67261	3.95579	266.397	FALSE	#REF!
2022-09-12	11:03:03	0.505916	2.25042	3.95579	#REF!	FALSE	#REF!
2022-09-12	11:03:04	0.532634	2.36926	1.85366	268.766	FALSE	#REF!
2022-09-12	11:03:04	0.295942	1.31641	1.85366	#REF!	FALSE	#REF!
2022-09-12	11:03:04	0.42159	1.87532	1.85366	270.641	FALSE	#REF!
2022-09-12	11:03:05	0.279097	1.24148	1.52642	#REF!	FALSE	#REF!
2022-09-12	11:03:05	0.451209	2.00707	1.52642	272.649	FALSE	#REF!
2022-09-12	11:03:05	0.266985	1.1876	1.52642	#REF!	FALSE	#REF!
2022-09-12	11:03:05	0.375331	1.66955	1.52642	274.318	FALSE	#REF!
2022-09-12	11:03:06	0.335891	1.49411	7.57337	#REF!	FALSE	#REF!
2022-09-12	11:03:06	1.44765	6.43944	7.57337	280.758	FALSE	#REF!
2022-09-12	11:03:06	1.66836	7.4212	7.57337	#REF!	FALSE	#REF!
2022-09-12	11:03:06	3.35838	14.9387	7.57337	295.696	1	#REF!
2022-09-12	11:03:07	2.90571	12.9252	6.43444	#REF!	FALSE	#REF!
2022-09-12	11:03:07	1.76948	7.871	6.43444	303.567	FALSE	#REF!
2022-09-12	11:03:07	0.687901	3.05992	6.43444	#REF!	FALSE	#REF!
2022-09-12	11:03:07	0.423015	1.88166	6.43444	305.449	FALSE	#REF!
2022-09-12	11:03:08	0.414517	1.84385	1.23378	#REF!	FALSE	#REF!
2022-09-12	11:03:08	0.272328	1.21137	1.23378	306.66	FALSE	#REF!
2022-09-12	11:03:08	0.145255	0.646123	1.23378	#REF!	FALSE	#REF!
2022-09-12	11:03:09	0.274364	1.22043	0.877246	307.881	FALSE	#REF!
2022-09-12	11:03:09	0.0206236	0.0917379	0.877246	#REF!	FALSE	#REF!
2022-09-12	11:03:09	0.252684	1.12399	0.877246	309.005	FALSE	#REF!
2022-09-12	11:03:09	0.241183	1.07283	0.877246	#REF!	FALSE	#REF!
2022-09-12	11:03:10	0.202099	0.898977	1.10713	309.904	FALSE	#REF!
2022-09-12	11:03:10	0.291056	1.29468	1.10713	#REF!	FALSE	#REF!
2022-09-12	11:03:10	0.131616	0.585454	1.10713	310.489	FALSE	#REF!
2022-09-12	11:03:10	0.370802	1.6494	1.10713	#REF!	FALSE	#REF!
2022-09-12	11:03:11	0.188563	0.838766	1.10464	311.328	FALSE	#REF!
2022-09-12	11:03:11	0.319707	1.42212	1.10464	#REF!	FALSE	#REF!
2022-09-12	11:03:11	0.284186	1.26412	1.10464	312.592	FALSE	#REF!
2022-09-12	11:03:11	0.200878	0.893546	1.10464	#REF!	FALSE	#REF!
2022-09-12	11:03:12	0.378741	1.68472	1.15461	314.277	FALSE	#REF!
2022-09-12	11:03:12	0.1907	0.848272	1.15461	#REF!	FALSE	#REF!
2022-09-12	11:03:12	0.308919	1.37413	1.15461	315.651	FALSE	#REF!
2022-09-12	11:03:12	0.159911	0.711316	1.15461	#REF!	FALSE	#REF!
2022-09-12	11:03:13	0.293194	1.30419	1.39126	316.955	FALSE	#REF!
2022-09-12	11:03:13	0.237723	1.05744	1.39126	#REF!	FALSE	#REF!
2022-09-12	11:03:13	0.407392	1.81216	1.39126	318.767	FALSE	#REF!
2022-09-12	11:03:14	1.37029	6.09532	3.07797	#REF!	FALSE	#REF!
2022-09-12	11:03:14	0.537774	2.39213	3.07797	321.159	FALSE	#REF!
2022-09-12	11:03:14	0.388359	1.7275	3.07797	#REF!	FALSE	#REF!
2022-09-12	11:03:14	0.471412	2.09693	3.07797	323.256	FALSE	#REF!
2022-09-12	11:03:15	0.520267	2.31425	2.73253	#REF!	FALSE	#REF!
2022-09-12	11:03:15	0.483015	2.14855	2.73253	325.405	FALSE	#REF!
2022-09-12	11:03:15	1.0679	4.75023	2.73253	#REF!	FALSE	#REF!
2022-09-12	11:03:15	0.386018	1.71709	2.73253	327.122	FALSE	#REF!
2022-09-12	11:03:16	0.300318	1.33587	1.41392	#REF!	FALSE	#REF!
2022-09-12	11:03:16	0.470446	2.09264	1.41392	329.215	FALSE	#REF!
2022-09-12	11:03:16	0.286425	1.27408	1.41392	#REF!	FALSE	#REF!
2022-09-12	11:03:16	0.214262	0.95308	1.41392	330.168	FALSE	#REF!
2022-09-12	11:03:17	0.336654	1.4975	1.52301	#REF!	FALSE	#REF!
2022-09-12	11:03:17	0.234771	1.04431	1.52301	331.212	FALSE	#REF!
2022-09-12	11:03:17	0.455738	2.02721	1.52301	#REF!	FALSE	#REF!
2022-09-12	11:03:18	0.365865	1.62744	1.95223	332.839	FALSE	#REF!
2022-09-12	11:03:18	0.431056	1.91742	1.95223	#REF!	FALSE	#REF!
2022-09-12	11:03:18	0.440878	1.96111	1.95223	334.8	FALSE	#REF!
2022-09-12	11:03:18	0.517723	2.30294	1.95223	#REF!	FALSE	#REF!
2022-09-12	11:03:19	0.289529	1.28788	1.26196	336.088	FALSE	#REF!
2022-09-12	11:03:19	0.271107	1.20594	1.26196	#REF!	FALSE	#REF!
2022-09-12	11:03:19	0.358486	1.59462	1.26196	337.683	FALSE	#REF!
2022-09-12	11:03:19	0.215687	0.959419	1.26196	#REF!	FALSE	#REF!
2022-09-12	11:03:20	0.385814	1.71618	2.00503	339.399	FALSE	#REF!
2022-09-12	11:03:20	0.705713	3.13915	2.00503	#REF!	FALSE	#REF!
2022-09-12	11:03:20	0.438079	1.94866	2.00503	341.348	FALSE	#REF!
2022-09-12	11:03:20	0.273397	1.21612	2.00503	#REF!	FALSE	#REF!
2022-09-12	11:03:21	0.241031	1.07215	0.921012	342.42	FALSE	#REF!
2022-09-12	11:03:21	0.242659	1.0794	0.921012	#REF!	FALSE	#REF!
2022-09-12	11:03:21	0.137468	0.611485	0.921012	343.031	FALSE	#REF!
2022-09-12	11:03:22	-0.0485875	-0.216127	-0.233954	#REF!	FALSE	#REF!
2022-09-12	11:03:22	-0.054389	-0.241933	-0.233954	343.031	FALSE	#REF!
2022-09-12	11:03:22	-0.0672134	-0.298979	-0.233954	#REF!	FALSE	#REF!
2022-09-12	11:03:22	-0.0401906	-0.178776	-0.233954	343.031	FALSE	#REF!
2022-09-12	11:03:23	0.00337174	0.0149982	2.66434	#REF!	FALSE	#REF!
2022-09-12	11:03:23	0.0351783	0.15648	2.66434	343.188	FALSE	#REF!
2022-09-12	11:03:23	0.0514125	0.228693	2.66434	#REF!	FALSE	#REF!
2022-09-12	11:03:23	2.30592	10.2572	2.66434	353.445	FALSE	#REF!
2022-09-12	11:03:24	1.75436	7.80374	3.10796	#REF!	FALSE	#REF!
2022-09-12	11:03:24	0.438791	1.95183	3.10796	355.397	FALSE	#REF!
2022-09-12	11:03:24	0.257824	1.14685	3.10796	#REF!	FALSE	#REF!
2022-09-12	11:03:24	0.34383	1.52942	3.10796	356.926	FALSE	#REF!
2022-09-12	11:03:25	0.487901	2.17028	2.11059	#REF!	FALSE	#REF!
2022-09-12	11:03:25	0.345611	1.53735	2.11059	358.464	FALSE	#REF!
2022-09-12	11:03:25	0.589936	2.62415	2.11059	#REF!	FALSE	#REF!
2022-09-12	11:03:26	0.48612	2.16236	1.96021	360.626	FALSE	#REF!
2022-09-12	11:03:26	0.325509	1.44793	1.96021	#REF!	FALSE	#REF!
2022-09-12	11:03:26	0.698792	3.10837	1.96021	363.734	FALSE	#REF!
2022-09-12	11:03:26	0.252277	1.12218	1.96021	#REF!	FALSE	#REF!
2022-09-12	11:03:27	0.282354	1.25597	1.01822	364.99	FALSE	#REF!
2022-09-12	11:03:27	0.158435	0.704751	1.01822	#REF!	FALSE	#REF!
2022-09-12	11:03:27	0.297061	1.32139	1.01822	366.312	FALSE	#REF!
2022-09-12	11:03:27	0.177774	0.790774	1.01822	#REF!	FALSE	#REF!
2022-09-12	11:03:28	0.290496	1.29218	2.264	367.604	FALSE	#REF!
2022-09-12	11:03:28	0.256909	1.14278	2.264	#REF!	FALSE	#REF!
2022-09-12	11:03:28	0.603168	2.68301	2.264	370.287	FALSE	#REF!
2022-09-12	11:03:28	0.885305	3.93801	2.264	#REF!	FALSE	#REF!
2022-09-12	11:03:29	0.321743	1.43118	1.69603	371.718	FALSE	#REF!
2022-09-12	11:03:29	0.467036	2.07747	1.69603	#REF!	FALSE	#REF!
2022-09-12	11:03:29	0.355077	1.57945	1.69603	373.298	FALSE	#REF!
2022-09-12	11:03:30	0.957672	4.25992	1.49275	#REF!	FALSE	#REF!
2022-09-12	11:03:30	0.138181	0.614657	1.49275	373.912	FALSE	#REF!
2022-09-12	11:03:30	0.153448	0.682567	1.49275	#REF!	FALSE	#REF!
2022-09-12	11:03:30	0.0930409	0.413865	1.49275	374.326	FALSE	#REF!
2022-09-12	11:03:31	0.100573	0.447369	0.401074	#REF!	FALSE	#REF!
2022-09-12	11:03:31	0.134618	0.598808	0.401074	374.925	FALSE	#REF!
2022-09-12	11:03:31	0.0867305	0.385795	0.401074	#REF!	FALSE	#REF!
2022-09-12	11:03:31	0.0387407	0.172326	0.401074	375.097	FALSE	#REF!
2022-09-12	11:03:32	0.0386898	0.1721	0.444537	#REF!	FALSE	#REF!
2022-09-12	11:03:32	0.0874429	0.388964	0.444537	375.486	FALSE	#REF!
2022-09-12	11:03:32	0.127341	0.566438	0.444537	#REF!	FALSE	#REF!
2022-09-12	11:03:32	0.146272	0.650647	0.444537	376.137	FALSE	#REF!
2022-09-12	11:03:33	0.714211	3.17695	7.82374	#REF!	FALSE	#REF!
2022-09-12	11:03:33	0.778079	3.46105	7.82374	379.598	FALSE	#REF!
2022-09-12	11:03:33	2.03223	9.03977	7.82374	#REF!	FALSE	#REF!
2022-09-12	11:03:33	3.5109	15.6172	7.82374	395.215	1	#REF!
2022-09-12	11:03:34	5.00602	22.2678	30.5179	#REF!	1	#REF!
2022-09-12	11:03:34	7.37991	32.8273	30.5179	428.042	1	#REF!
2022-09-12	11:03:34	8.19624	36.4585	30.5179	#REF!	1	#REF!
2022-09-12	11:03:35	5.85517	26.045	19.7383	454.087	1	#REF!
2022-09-12	11:03:35	4.9592	22.0595	19.7383	#REF!	1	#REF!
2022-09-12	11:03:35	4.62627	20.5786	19.7383	474.666	1	#REF!
2022-09-12	11:03:35	2.30882	10.2701	19.7383	#REF!	FALSE	#REF!
2022-09-12	11:03:36	0.910191	4.04871	3.37322	478.715	FALSE	#REF!
2022-09-12	11:03:36	0.79813	3.55024	3.37322	#REF!	FALSE	#REF!
2022-09-12	11:03:36	0.610598	2.71606	3.37322	481.431	FALSE	#REF!
2022-09-12	11:03:36	0.714415	3.17786	3.37322	#REF!	FALSE	#REF!
2022-09-12	11:03:37	1.30067	5.78564	3.70151	487.216	FALSE	#REF!
2022-09-12	11:03:37	0.485509	2.15964	3.70151	#REF!	FALSE	#REF!
2022-09-12	11:03:37	0.865916	3.85177	3.70151	491.068	FALSE	#REF!
2022-09-12	11:03:37	0.67645	3.00898	3.70151	#REF!	FALSE	#REF!
2022-09-12	11:03:38	1.86302	8.28709	16.275	499.355	FALSE	#REF!
2022-09-12	11:03:38	3.87385	17.2317	16.275	#REF!	1	#REF!
2022-09-12	11:03:38	5.23945	23.3061	16.275	522.661	1	#REF!
2022-09-12	11:03:39	3.36581	14.9718	5.06992	#REF!	1	#REF!
2022-09-12	11:03:39	0.474568	2.11097	5.06992	524.772	FALSE	#REF!
2022-09-12	11:03:39	0.37472	1.66683	5.06992	#REF!	FALSE	#REF!
2022-09-12	11:03:39	0.343982	1.5301	5.06992	526.302	FALSE	#REF!
2022-09-12	11:03:40	0.288257	1.28222	2.18443	#REF!	FALSE	#REF!
2022-09-12	11:03:40	0.555331	2.47022	2.18443	528.773	FALSE	#REF!
2022-09-12	11:03:40	0.758588	3.37435	2.18443	#REF!	FALSE	#REF!
2022-09-12	11:03:40	0.36215	1.61092	2.18443	530.384	FALSE	#REF!
2022-09-12	11:03:41	0.406527	1.80831	1.52535	#REF!	FALSE	#REF!
2022-09-12	11:03:41	0.307799	1.36915	1.52535	531.753	FALSE	#REF!
2022-09-12	11:03:41	0.332837	1.48053	1.52535	#REF!	FALSE	#REF!
2022-09-12	11:03:41	0.324491	1.4434	1.52535	533.196	FALSE	#REF!
2022-09-12	11:03:42	0.328969	1.46332	1.54542	#REF!	FALSE	#REF!
2022-09-12	11:03:42	0.339707	1.51108	1.54542	534.707	FALSE	#REF!
2022-09-12	11:03:42	0.373601	1.66185	1.54542	#REF!	FALSE	#REF!
2022-09-12	11:03:43	0.325458	1.4477	1.5846	536.155	FALSE	#REF!
2022-09-12	11:03:43	0.329224	1.46445	1.5846	#REF!	FALSE	#REF!
2022-09-12	11:03:43	0.371158	1.65099	1.5846	537.806	FALSE	#REF!
2022-09-12	11:03:43	0.399097	1.77526	1.5846	#REF!	FALSE	#REF!
2022-09-12	11:03:44	0.392583	1.74629	1.73327	539.552	FALSE	#REF!
2022-09-12	11:03:44	0.395942	1.76123	1.73327	#REF!	FALSE	#REF!
2022-09-12	11:03:44	0.389021	1.73044	1.73327	541.283	FALSE	#REF!
2022-09-12	11:03:44	0.381082	1.69513	1.73327	#REF!	FALSE	#REF!
2022-09-12	11:03:45	0.388715	1.72908	1.73253	543.012	FALSE	#REF!
2022-09-12	11:03:45	0.382354	1.70079	1.73253	#REF!	FALSE	#REF!
2022-09-12	11:03:45	0.387443	1.72342	1.73253	544.735	FALSE	#REF!
2022-09-12	11:03:45	0.399453	1.77685	1.73253	#REF!	FALSE	#REF!
2022-09-12	11:03:46	0.40042	1.78115	1.79586	546.516	FALSE	#REF!
2022-09-12	11:03:46	0.407036	1.81058	1.79586	#REF!	FALSE	#REF!
2022-09-12	11:03:46	0.403728	1.79586	1.79586	548.312	FALSE	#REF!
2022-09-12	11:03:47	0.401031	1.78387	1.78245	#REF!	FALSE	#REF!
2022-09-12	11:03:47	0.399809	1.77843	1.78245	550.091	FALSE	#REF!
2022-09-12	11:03:47	0.404084	1.79745	1.78245	#REF!	FALSE	#REF!
2022-09-12	11:03:47	0.397926	1.77005	1.78245	551.861	FALSE	#REF!
2022-09-12	11:03:48	0.391972	1.74357	1.73797	#REF!	FALSE	#REF!
2022-09-12	11:03:48	0.387494	1.72365	1.73797	553.584	FALSE	#REF!
2022-09-12	11:03:48	0.39131	1.74063	1.73797	#REF!	FALSE	#REF!
2022-09-12	11:03:48	0.392074	1.74402	1.73797	555.328	FALSE	#REF!
2022-09-12	11:03:49	0.378944	1.68562	3.10893	#REF!	FALSE	#REF!
2022-09-12	11:03:49	0.475636	2.11572	3.10893	557.444	FALSE	#REF!
2022-09-12	11:03:49	0.574517	2.55557	3.10893	#REF!	FALSE	#REF!
2022-09-12	11:03:49	1.36658	6.07882	3.10893	563.523	FALSE	#REF!
2022-09-12	11:03:50	3.13528	13.9464	23.2742	#REF!	1	#REF!
2022-09-12	11:03:50	4.59304	20.4308	23.2742	583.954	1	#REF!
2022-09-12	11:03:50	7.96851	35.4455	23.2742	#REF!	1	#REF!
2022-09-12	11:03:51	13.6263	60.6125	45.0581	644.566	1	#REF!
2022-09-12	11:03:51	12.2031	54.2818	45.0581	#REF!	1	#REF!
2022-09-12	11:03:51	8.01894	35.6698	45.0581	680.236	1	#REF!
2022-09-12	11:03:51	6.66973	29.6683	45.0581	#REF!	1	#REF!
2022-09-12	11:03:52	5.15248	22.9193	17.9098	703.155	1	#REF!
2022-09-12	11:03:52	4.65299	20.6974	17.9098	#REF!	1	#REF!
2022-09-12	11:03:52	3.62037	16.1041	17.9098	719.259	1	#REF!
2022-09-12	11:03:52	2.6794	11.9185	17.9098	#REF!	FALSE	#REF!
2022-09-12	11:03:53	2.65589	11.8139	11.4696	731.073	FALSE	#REF!
2022-09-12	11:03:53	2.83818	12.6248	11.4696	#REF!	FALSE	#REF!
2022-09-12	11:03:53	2.41706	10.7516	11.4696	741.825	FALSE	#REF!
2022-09-12	11:03:53	2.40276	10.688	11.4696	#REF!	FALSE	#REF!
2022-09-12	11:03:54	2.5766	11.4612	11.0757	753.286	FALSE	#REF!
2022-09-12	11:03:54	2.5534	11.358	11.0757	#REF!	FALSE	#REF!
2022-09-12	11:03:54	2.51849	11.2027	11.0757	764.489	FALSE	#REF!
2022-09-12	11:03:54	2.31126	10.2809	11.0757	#REF!	FALSE	#REF!
2022-09-12	11:03:55	1.40118	6.23273	3.97023	770.722	FALSE	#REF!
2022-09-12	11:03:55	0.779911	3.4692	3.97023	#REF!	FALSE	#REF!
2022-09-12	11:03:55	0.496552	2.20876	3.97023	772.93	FALSE	#REF!
2022-09-12	11:03:56	0.346374	1.54074	1.66989	#REF!	FALSE	#REF!
2022-09-12	11:03:56	0.342405	1.52309	1.66989	774.453	FALSE	#REF!
2022-09-12	11:03:56	0.416196	1.85132	1.66989	#REF!	FALSE	#REF!
2022-09-12	11:03:56	0.396654	1.7644	1.66989	776.218	FALSE	#REF!
2022-09-12	11:03:57	0.507239	2.2563	2.58143	#REF!	FALSE	#REF!
2022-09-12	11:03:57	0.643779	2.86366	2.58143	779.082	FALSE	#REF!
2022-09-12	11:03:57	0.525712	2.33847	2.58143	#REF!	FALSE	#REF!
2022-09-12	11:03:57	0.644593	2.86728	2.58143	781.949	FALSE	#REF!
2022-09-12	11:03:58	0.577265	2.56779	2.11318	#REF!	FALSE	#REF!
2022-09-12	11:03:58	0.491667	2.18703	2.11318	784.136	FALSE	#REF!
2022-09-12	11:03:58	0.28098	1.24986	2.11318	#REF!	FALSE	#REF!
2022-09-12	11:03:58	0.550343	2.44804	2.11318	786.584	FALSE	#REF!
2022-09-12	11:03:59	0.3793	1.6872	1.69332	#REF!	FALSE	#REF!
2022-09-12	11:03:59	0.475331	2.11437	1.69332	788.698	FALSE	#REF!
2022-09-12	11:03:59	0.287392	1.27838	1.69332	#REF!	FALSE	#REF!
2022-09-12	11:04:00	0.644695	2.86773	2.50899	791.566	FALSE	#REF!
2022-09-12	11:04:00	0.40383	1.79632	2.50899	#REF!	FALSE	#REF!
2022-09-12	11:04:00	0.710445	3.1602	2.50899	794.726	FALSE	#REF!
2022-09-12	11:04:00	0.497214	2.21171	2.50899	#REF!	FALSE	#REF!
2022-09-12	11:04:01	0.4993	2.22099	2.24866	796.947	FALSE	#REF!
2022-09-12	11:04:01	0.369275	1.64261	2.24866	#REF!	FALSE	#REF!
2022-09-12	11:04:01	0.5707	2.53859	2.24866	799.486	FALSE	#REF!
2022-09-12	11:04:01	0.582812	2.59246	2.24866	#REF!	FALSE	#REF!
2022-09-12	11:04:02	0.788257	3.50632	4.91939	802.992	FALSE	#REF!
2022-09-12	11:04:02	0.648969	2.88674	4.91939	#REF!	FALSE	#REF!
2022-09-12	11:04:02	1.09971	4.89173	4.91939	807.884	FALSE	#REF!
2022-09-12	11:04:02	1.88678	8.39277	4.91939	#REF!	FALSE	#REF!
2022-09-12	11:04:03	0.712685	3.17017	4.54432	811.054	FALSE	#REF!
2022-09-12	11:04:03	1.29472	5.75917	4.54432	#REF!	FALSE	#REF!
2022-09-12	11:04:03	1.05742	4.70362	4.54432	815.758	FALSE	#REF!
2022-09-12	11:04:04	1.231	5.47573	5.92447	#REF!	FALSE	#REF!
2022-09-12	11:04:04	2.03324	9.04426	5.92447	824.802	FALSE	#REF!
2022-09-12	11:04:04	0.634924	2.82427	5.92447	#REF!	FALSE	#REF!
2022-09-12	11:04:04	1.42836	6.35363	5.92447	831.155	FALSE	#REF!
2022-09-12	11:04:05	0.622252	2.7679	3.67259	#REF!	FALSE	#REF!
2022-09-12	11:04:05	0.899351	4.00049	3.67259	835.156	FALSE	#REF!
2022-09-12	11:04:05	1.09813	4.8847	3.67259	#REF!	FALSE	#REF!
2022-09-12	11:04:05	0.682811	3.03728	3.67259	838.193	FALSE	#REF!
2022-09-12	11:04:06	1.01604	4.51955	4.10847	#REF!	FALSE	#REF!
2022-09-12	11:04:06	0.559097	2.48698	4.10847	840.68	FALSE	#REF!
2022-09-12	11:04:06	0.836298	3.72002	4.10847	#REF!	FALSE	#REF!
2022-09-12	11:04:06	1.28307	5.70735	4.10847	846.388	FALSE	#REF!
2022-09-12	11:04:07	0.499249	2.22076	3.54058	#REF!	FALSE	#REF!
2022-09-12	11:04:07	0.989835	4.40298	3.54058	850.791	FALSE	#REF!
2022-09-12	11:04:07	0.898791	3.998	3.54058	#REF!	FALSE	#REF!
2022-09-12	11:04:08	0.918079	4.0838	6.57694	854.874	FALSE	#REF!
2022-09-12	11:04:08	1.34607	5.98759	6.57694	#REF!	FALSE	#REF!
2022-09-12	11:04:08	2.46245	10.9535	6.57694	865.828	FALSE	#REF!
2022-09-12	11:04:08	1.18765	5.2829	6.57694	#REF!	FALSE	#REF!
2022-09-12	11:04:09	2.52943	11.2514	6.53411	877.079	FALSE	#REF!
2022-09-12	11:04:09	1.65279	7.35194	6.53411	#REF!	FALSE	#REF!
2022-09-12	11:04:09	0.782608	3.4812	6.53411	880.56	FALSE	#REF!
2022-09-12	11:04:09	0.910903	4.05188	6.53411	#REF!	FALSE	#REF!
2022-09-12	11:04:10	0.727341	3.23536	3.33208	883.796	FALSE	#REF!
2022-09-12	11:04:10	0.859606	3.8237	3.33208	#REF!	FALSE	#REF!
2022-09-12	11:04:10	0.842608	3.74809	3.33208	887.544	FALSE	#REF!
2022-09-12	11:04:10	0.566781	2.52116	3.33208	#REF!	FALSE	#REF!
2022-09-12	11:04:11	0.477621	2.12455	1.96496	889.668	FALSE	#REF!
2022-09-12	11:04:11	0.436858	1.94323	1.96496	#REF!	FALSE	#REF!
2022-09-12	11:04:11	0.410751	1.8271	1.96496	891.496	FALSE	#REF!
2022-09-12	11:04:12	0.395534	1.75941	1.98534	#REF!	FALSE	#REF!
2022-09-12	11:04:12	0.537723	2.3919	1.98534	893.887	FALSE	#REF!
2022-09-12	11:04:12	0.359911	1.60096	1.98534	#REF!	FALSE	#REF!
2022-09-12	11:04:12	0.492125	2.18907	1.98534	896.076	FALSE	#REF!
2022-09-12	11:04:13	0.451514	2.00842	1.80384	#REF!	FALSE	#REF!
2022-09-12	11:04:13	0.309835	1.37821	1.80384	897.455	FALSE	#REF!
2022-09-12	11:04:13	0.50785	2.25902	1.80384	#REF!	FALSE	#REF!
2022-09-12	11:04:13	0.352888	1.56972	1.80384	899.024	FALSE	#REF!
2022-09-12	11:04:14	0.597316	2.65698	3.6255	#REF!	FALSE	#REF!
2022-09-12	11:04:14	0.864186	3.84407	3.6255	902.868	FALSE	#REF!
2022-09-12	11:04:14	0.598537	2.66241	3.6255	#REF!	FALSE	#REF!
2022-09-12	11:04:14	1.20016	5.33855	3.6255	908.207	FALSE	#REF!
2022-09-12	11:04:15	1.00704	4.47952	14.3578	#REF!	FALSE	#REF!
2022-09-12	11:04:15	2.50245	11.1314	14.3578	919.338	FALSE	#REF!
2022-09-12	11:04:15	3.94337	17.5409	14.3578	#REF!	1	#REF!
2022-09-12	11:04:15	5.45828	24.2795	14.3578	943.618	1	#REF!
2022-09-12	11:04:16	3.94342	17.5411	10.0527	#REF!	1	#REF!
2022-09-12	11:04:16	1.38072	6.14172	10.0527	949.76	FALSE	#REF!
2022-09-12	11:04:16	1.45569	6.4752	10.0527	#REF!	FALSE	#REF!
2022-09-12	11:04:17	1.5879	7.0633	3.95828	956.823	FALSE	#REF!
2022-09-12	11:04:17	0.612735	2.72557	3.95828	#REF!	FALSE	#REF!
2022-09-12	11:04:17	0.793092	3.52783	3.95828	960.351	FALSE	#REF!
2022-09-12	11:04:17	0.565713	2.5164	3.95828	#REF!	FALSE	#REF!
2022-09-12	11:04:18	0.385764	1.71596	2.51414	962.067	FALSE	#REF!
2022-09-12	11:04:18	0.45243	2.0125	2.51414	#REF!	FALSE	#REF!
2022-09-12	11:04:18	0.626781	2.78805	2.51414	964.855	FALSE	#REF!
2022-09-12	11:04:18	0.79584	3.54006	2.51414	#REF!	FALSE	#REF!
2022-09-12	11:04:19	0.603066	2.68256	1.96366	967.537	FALSE	#REF!
2022-09-12	11:04:19	0.31986	1.4228	1.96366	#REF!	FALSE	#REF!
2022-09-12	11:04:19	0.489428	2.17707	1.96366	969.714	FALSE	#REF!
2022-09-12	11:04:19	0.353448	1.57221	1.96366	#REF!	FALSE	#REF!
2022-09-12	11:04:20	0.53584	2.38352	1.84551	972.098	FALSE	#REF!
2022-09-12	11:04:20	0.415331	1.84748	1.84551	#REF!	FALSE	#REF!
2022-09-12	11:04:20	0.293499	1.30554	1.84551	973.404	FALSE	#REF!
2022-09-12	11:04:21	0.476807	2.12093	1.70101	#REF!	FALSE	#REF!
2022-09-12	11:04:21	0.265865	1.18262	1.70101	974.586	FALSE	#REF!
2022-09-12	11:04:21	0.558995	2.48652	1.70101	#REF!	FALSE	#REF!
2022-09-12	11:04:21	0.227952	1.01398	1.70101	975.6	FALSE	#REF!
2022-09-12	11:04:22	0.541896	2.41046	1.92416	#REF!	FALSE	#REF!
2022-09-12	11:04:22	0.352278	1.567	1.92416	977.167	FALSE	#REF!
2022-09-12	11:04:22	0.508054	2.25993	1.92416	#REF!	FALSE	#REF!
2022-09-12	11:04:22	0.328054	1.45925	1.92416	978.626	FALSE	#REF!
2022-09-12	11:04:23	0.474618	2.1112	1.85845	#REF!	FALSE	#REF!
2022-09-12	11:04:23	0.424135	1.88664	1.85845	980.513	FALSE	#REF!
2022-09-12	11:04:23	0.367646	1.63536	1.85845	#REF!	FALSE	#REF!
2022-09-12	11:04:23	0.404797	1.80062	1.85845	982.314	FALSE	#REF!
2022-09-12	11:04:24	0.395534	1.75941	2.20989	#REF!	FALSE	#REF!
2022-09-12	11:04:24	0.453804	2.01861	2.20989	984.332	FALSE	#REF!
2022-09-12	11:04:24	0.641081	2.85166	2.20989	#REF!	FALSE	#REF!
2022-09-12	11:04:25	1.38352	6.15417	9.46537	990.486	FALSE	#REF!
2022-09-12	11:04:25	1.34128	5.96628	9.46537	#REF!	FALSE	#REF!
2022-09-12	11:04:25	2.7796	12.3642	9.46537	1002.85	FALSE	#REF!
2022-09-12	11:04:25	3.00724	13.3768	9.46537	#REF!	1	#REF!
2022-09-12	11:04:26	1.0048	4.46955	9.16539	1007.32	FALSE	#REF!
2022-09-12	11:04:26	2.32902	10.3599	9.16539	#REF!	FALSE	#REF!
2022-09-12	11:04:26	2.94083	13.0814	9.16539	1020.4	FALSE	#REF!
2022-09-12	11:04:26	1.96724	8.75068	9.16539	#REF!	FALSE	#REF!
2022-09-12	11:04:27	2.78291	12.3789	6.52515	1032.78	FALSE	#REF!
2022-09-12	11:04:27	0.569021	2.53112	6.52515	#REF!	FALSE	#REF!
2022-09-12	11:04:27	1.45014	6.45051	6.52515	1039.23	FALSE	#REF!
2022-09-12	11:04:27	1.06561	4.74005	6.52515	#REF!	FALSE	#REF!
2022-09-12	11:04:28	0.509326	2.26558	2.12327	1041.5	FALSE	#REF!
2022-09-12	11:04:28	0.405	1.80152	2.12327	#REF!	FALSE	#REF!
2022-09-12	11:04:28	0.517672	2.30271	2.12327	1043.8	FALSE	#REF!
2022-09-12	11:04:29	0.280827	1.24917	1.54233	#REF!	FALSE	#REF!
2022-09-12	11:04:29	0.391972	1.74357	1.54233	1045.54	FALSE	#REF!
2022-09-12	11:04:29	0.313601	1.39496	1.54233	#REF!	FALSE	#REF!
2022-09-12	11:04:29	0.400522	1.7816	1.54233	1047.32	FALSE	#REF!
2022-09-12	11:04:30	0.290293	1.29128	1.53446	#REF!	FALSE	#REF!
2022-09-12	11:04:30	0.460827	2.04985	1.53446	1049.37	FALSE	#REF!
2022-09-12	11:04:30	0.286934	1.27634	1.53446	#REF!	FALSE	#REF!
2022-09-12	11:04:30	0.341794	1.52037	1.53446	1050.89	FALSE	#REF!
2022-09-12	11:04:31	0.304797	1.3558	1.48817	#REF!	FALSE	#REF!
2022-09-12	11:04:31	0.317417	1.41193	1.48817	1052.31	FALSE	#REF!
2022-09-12	11:04:31	0.38958	1.73293	1.48817	#REF!	FALSE	#REF!
2022-09-12	11:04:31	0.326425	1.452	1.48817	1053.76	FALSE	#REF!
2022-09-12	11:04:32	0.417926	1.85902	2.81377	#REF!	FALSE	#REF!
2022-09-12	11:04:32	0.448868	1.99665	2.81377	1055.76	FALSE	#REF!
2022-09-12	11:04:32	1.0309	4.58565	2.81377	#REF!	FALSE	#REF!
2022-09-12	11:04:33	1.00347	4.46364	7.88926	1060.22	FALSE	#REF!
2022-09-12	11:04:33	1.63782	7.28535	7.88926	#REF!	FALSE	#REF!
2022-09-12	11:04:33	2.8966	12.8847	7.88926	1073.1	FALSE	#REF!
2022-09-12	11:04:33	1.55645	6.9234	7.88926	#REF!	FALSE	#REF!
2022-09-12	11:04:34	1.84464	8.20533	4.81577	1081.31	FALSE	#REF!
2022-09-12	11:04:34	1.02159	4.54424	4.81577	#REF!	FALSE	#REF!
2022-09-12	11:04:34	0.964694	4.29115	4.81577	1085.6	FALSE	#REF!
2022-09-12	11:04:34	0.499606	2.22235	4.81577	#REF!	FALSE	#REF!
2022-09-12	11:04:35	0.286069	1.27249	1.96609	1086.87	FALSE	#REF!
2022-09-12	11:04:35	0.457977	2.03717	1.96609	#REF!	FALSE	#REF!
2022-09-12	11:04:35	0.465305	2.06977	1.96609	1088.94	FALSE	#REF!
2022-09-12	11:04:35	0.558639	2.48494	1.96609	#REF!	FALSE	#REF!
2022-09-12	11:04:36	0.501946	2.23276	2.31108	1091.18	FALSE	#REF!
2022-09-12	11:04:36	0.66673	2.96575	2.31108	#REF!	FALSE	#REF!
2022-09-12	11:04:36	0.391463	1.74131	2.31108	1092.92	FALSE	#REF!
2022-09-12	11:04:36	0.518079	2.30452	2.31108	#REF!	FALSE	#REF!
2022-09-12	11:04:37	0.41701	1.85494	1.51999	1094.77	FALSE	#REF!
2022-09-12	11:04:37	0.351514	1.5636	1.51999	#REF!	FALSE	#REF!
2022-09-12	11:04:37	0.256603	1.14142	1.51999	1095.91	FALSE	#REF!
2022-09-12	11:04:38	0.248155	1.10384	1.39484	#REF!	FALSE	#REF!
2022-09-12	11:04:38	0.358486	1.59462	1.39484	1097.51	FALSE	#REF!
2022-09-12	11:04:38	0.205967	0.916182	1.39484	#REF!	FALSE	#REF!
2022-09-12	11:04:38	0.441692	1.96473	1.39484	1099.47	FALSE	#REF!
2022-09-12	11:04:39	0.237621	1.05699	1.6747	#REF!	FALSE	#REF!
2022-09-12	11:04:39	0.409631	1.82212	1.6747	1101.29	FALSE	#REF!
2022-09-12	11:04:39	0.214771	0.955344	1.6747	#REF!	FALSE	#REF!
2022-09-12	11:04:39	0.643931	2.86433	1.6747	1104.16	FALSE	#REF!
2022-09-12	11:04:40	1.39029	6.18429	13.4298	#REF!	FALSE	#REF!
2022-09-12	11:04:40	4.07879	18.1433	13.4298	1122.3	1	#REF!
2022-09-12	11:04:40	3.21004	14.2789	13.4298	#REF!	1	#REF!
2022-09-12	11:04:40	3.39747	15.1126	13.4298	1137.41	1	#REF!
2022-09-12	11:04:41	1.04307	4.63978	4.58522	#REF!	FALSE	#REF!
2022-09-12	11:04:41	1.50363	6.68845	4.58522	1144.1	FALSE	#REF!
2022-09-12	11:04:41	0.545712	2.42744	4.58522	#REF!	FALSE	#REF!
2022-09-12	11:04:42	1.09162	4.85574	3.30718	1148.96	FALSE	#REF!
2022-09-12	11:04:42	1.02388	4.55442	3.30718	#REF!	FALSE	#REF!
2022-09-12	11:04:42	0.363372	1.61635	3.30718	1150.58	FALSE	#REF!
2022-09-12	11:04:42	0.495076	2.2022	3.30718	#REF!	FALSE	#REF!
2022-09-12	11:04:43	0.254059	1.13011	1.25766	1151.71	FALSE	#REF!
2022-09-12	11:04:43	0.43645	1.94142	1.25766	#REF!	FALSE	#REF!
2022-09-12	11:04:43	0.170445	0.758173	1.25766	1152.46	FALSE	#REF!
2022-09-12	11:04:43	0.269987	1.20096	1.25766	#REF!	FALSE	#REF!
2022-09-12	11:04:44	0.103626	0.460949	0.573287	1152.92	FALSE	#REF!
2022-09-12	11:04:44	0.190751	0.848499	0.573287	#REF!	FALSE	#REF!
2022-09-12	11:04:44	0.0104964	0.0466901	0.573287	1152.97	FALSE	#REF!
2022-09-12	11:04:44	0.210649	0.937009	0.573287	#REF!	FALSE	#REF!
2022-09-12	11:04:45	0.0666796	0.296604	0.490831	1153.27	FALSE	#REF!
2022-09-12	11:04:45	0.215382	0.958062	0.490831	#REF!	FALSE	#REF!
2022-09-12	11:04:45	0.0489697	0.217827	0.490831	1153.49	FALSE	#REF!
2022-09-12	11:04:46	0.210445	0.936101	0.914259	#REF!	FALSE	#REF!
2022-09-12	11:04:46	0.160522	0.714034	0.914259	1154.2	FALSE	#REF!
2022-09-12	11:04:46	0.251565	1.11901	0.914259	#REF!	FALSE	#REF!
2022-09-12	11:04:46	0.199606	0.887887	0.914259	1155.09	FALSE	#REF!
2022-09-12	11:04:47	0.373143	1.65981	1.29411	#REF!	FALSE	#REF!
2022-09-12	11:04:47	0.220013	0.978662	1.29411	1156.07	FALSE	#REF!
2022-09-12	11:04:47	0.413193	1.83797	1.29411	#REF!	FALSE	#REF!
2022-09-12	11:04:47	0.157367	0.7	1.29411	1156.77	FALSE	#REF!
2022-09-12	11:04:48	0.44785	1.99213	1.35048	#REF!	FALSE	#REF!
2022-09-12	11:04:48	0.186985	0.831747	1.35048	1157.6	FALSE	#REF!
2022-09-12	11:04:48	0.462456	2.0571	1.35048	#REF!	FALSE	#REF!
2022-09-12	11:04:48	0.117112	0.520938	1.35048	1158.12	FALSE	#REF!
2022-09-12	11:04:49	0.453957	2.01929	1.61771	#REF!	FALSE	#REF!
2022-09-12	11:04:49	0.187341	0.83333	1.61771	1158.95	FALSE	#REF!
2022-09-12	11:04:49	0.449733	2.0005	1.61771	#REF!	FALSE	#REF!
2022-09-12	11:04:50	0.207748	0.924105	1.62801	1159.88	FALSE	#REF!
2022-09-12	11:04:50	0.503982	2.24181	1.62801	#REF!	FALSE	#REF!
2022-09-12	11:04:50	0.268104	1.19258	1.62801	1161.07	FALSE	#REF!
2022-09-12	11:04:50	0.484135	2.15353	1.62801	#REF!	FALSE	#REF!
2022-09-12	11:04:51	0.174364	0.775606	1.54312	1161.84	FALSE	#REF!
2022-09-12	11:04:51	0.460369	2.04781	1.54312	#REF!	FALSE	#REF!
2022-09-12	11:04:51	0.280725	1.24872	1.54312	1163.09	FALSE	#REF!
2022-09-12	11:04:51	0.472176	2.10033	1.54312	#REF!	FALSE	#REF!
2022-09-12	11:04:52	0.184135	0.819069	1.51329	1163.91	FALSE	#REF!
2022-09-12	11:04:52	0.446781	1.98737	1.51329	#REF!	FALSE	#REF!
2022-09-12	11:04:52	0.257366	1.14482	1.51329	1165.06	FALSE	#REF!
2022-09-12	11:04:52	0.472532	2.10192	1.51329	#REF!	FALSE	#REF!
2022-09-12	11:04:53	0.25416	1.13055	1.38288	1166.19	FALSE	#REF!
2022-09-12	11:04:53	0.388308	1.72727	1.38288	#REF!	FALSE	#REF!
2022-09-12	11:04:53	0.290191	1.29083	1.38288	1167.48	FALSE	#REF!
2022-09-12	11:04:54	0.484695	2.15602	1.48619	#REF!	FALSE	#REF!
2022-09-12	11:04:54	0.223372	0.993603	1.48619	1168.47	FALSE	#REF!
2022-09-12	11:04:54	0.410242	1.82484	1.48619	#REF!	FALSE	#REF!
2022-09-12	11:04:54	0.21813	0.970286	1.48619	1169.44	FALSE	#REF!
2022-09-12	11:04:55	0.35528	1.58036	1.19926	#REF!	FALSE	#REF!
2022-09-12	11:04:55	0.19299	0.858458	1.19926	1170.3	FALSE	#REF!
2022-09-12	11:04:55	0.381336	1.69626	1.19926	#REF!	FALSE	#REF!
2022-09-12	11:04:55	0.148817	0.661968	1.19926	1170.96	FALSE	#REF!
2022-09-12	11:04:56	0.20729	0.922067	0.996997	#REF!	FALSE	#REF!
2022-09-12	11:04:56	0.0978246	0.435143	0.996997	1171.4	FALSE	#REF!
2022-09-12	11:04:56	0.162812	0.72422	0.996997	#REF!	FALSE	#REF!
2022-09-12	11:04:56	0.428613	1.90656	0.996997	1173.3	FALSE	#REF!
2022-09-12	11:04:57	0.215687	0.959419	1.40746	#REF!	FALSE	#REF!
2022-09-12	11:04:57	0.327188	1.4554	1.40746	1174.76	FALSE	#REF!
2022-09-12	11:04:57	0.392786	1.74719	1.40746	#REF!	FALSE	#REF!
2022-09-12	11:04:57	0.329987	1.46785	1.40746	1176.23	FALSE	#REF!
2022-09-12	11:04:58	0.270903	1.20503	1.492	#REF!	FALSE	#REF!
2022-09-12	11:04:58	0.450242	2.00277	1.492	1178.23	FALSE	#REF!
2022-09-12	11:04:58	0.285102	1.26819	1.492	#REF!	FALSE	#REF!
2022-09-12	11:04:59	0.403728	1.79586	2.44419	1180.03	FALSE	#REF!
2022-09-12	11:04:59	0.935025	4.15918	2.44419	#REF!	FALSE	#REF!
2022-09-12	11:04:59	0.433804	1.92965	2.44419	1181.96	FALSE	#REF!
2022-09-12	11:04:59	0.425356	1.89207	2.44419	#REF!	FALSE	#REF!
2022-09-12	11:05:00	0.812582	3.61453	2.06813	1185.57	FALSE	#REF!
2022-09-12	11:05:00	0.389173	1.73112	2.06813	#REF!	FALSE	#REF!
2022-09-12	11:05:00	0.309529	1.37685	2.06813	1186.95	FALSE	#REF!
2022-09-12	11:05:00	0.348461	1.55002	2.06813	#REF!	FALSE	#REF!
2022-09-12	11:05:01	0.331667	1.47532	1.60175	1188.42	FALSE	#REF!
2022-09-12	11:05:01	0.40841	1.81669	1.60175	#REF!	FALSE	#REF!
2022-09-12	11:05:01	0.334466	1.48777	1.60175	1189.91	FALSE	#REF!
2022-09-12	11:05:01	0.365814	1.62721	1.60175	#REF!	FALSE	#REF!
2022-09-12	11:05:02	0.322506	1.43457	1.04823	1191.34	FALSE	#REF!
2022-09-12	11:05:02	0.128868	0.573231	1.04823	#REF!	FALSE	#REF!
2022-09-12	11:05:02	0.255585	1.13689	1.04823	1192.48	FALSE	#REF!
2022-09-12	11:05:03	0.184593	0.821107	0.975379	#REF!	FALSE	#REF!
2022-09-12	11:05:03	0.261896	1.16497	0.975379	1193.65	FALSE	#REF!
2022-09-12	11:05:03	0.288817	1.28472	0.975379	#REF!	FALSE	#REF!
2022-09-12	11:05:03	0.141794	0.630728	0.975379	1194.28	FALSE	#REF!
2022-09-12	11:05:04	0.238537	1.06106	0.487511	#REF!	FALSE	#REF!
2022-09-12	11:05:04	0.0062725	0.0279013	0.487511	1194.31	FALSE	#REF!
2022-09-12	11:05:04	0.0839824	0.373571	0.487511	#REF!	FALSE	#REF!
2022-09-12	11:05:05	0.114771	0.510524	0.816399	1194.82	FALSE	#REF!
2022-09-12	11:05:05	0.216858	0.964628	0.816399	#REF!	FALSE	#REF!
2022-09-12	11:05:05	0.197774	0.879738	0.816399	1195.7	FALSE	#REF!
2022-09-12	11:05:05	0.0947712	0.421561	0.816399	#REF!	FALSE	#REF!
2022-09-12	11:05:05	0.293499	1.30554	0.816399	1197	FALSE	#REF!
2022-09-12	11:05:06	0.192888	0.858004	1.31618	#REF!	FALSE	#REF!
2022-09-12	11:05:06	0.36729	1.63378	1.31618	1198.63	FALSE	#REF!
2022-09-12	11:05:06	0.327494	1.45676	1.31618	#REF!	FALSE	#REF!
2022-09-12	11:05:07	0.39528	1.75828	1.80588	1200.39	FALSE	#REF!
2022-09-12	11:05:07	0.414211	1.84249	1.80588	#REF!	FALSE	#REF!
2022-09-12	11:05:07	0.354618	1.57741	1.80588	1201.97	FALSE	#REF!
2022-09-12	11:05:07	0.459809	2.04532	1.80588	#REF!	FALSE	#REF!
2022-09-12	11:05:08	0.405713	1.80469	1.98896	1203.78	FALSE	#REF!
2022-09-12	11:05:08	0.463422	2.06139	1.98896	#REF!	FALSE	#REF!
2022-09-12	11:05:08	0.464593	2.0666	1.98896	1205.84	FALSE	#REF!
2022-09-12	11:05:08	0.454822	2.02314	1.98896	#REF!	FALSE	#REF!
2022-09-12	11:05:09	0.432074	1.92195	1.97232	1207.76	FALSE	#REF!
2022-09-12	11:05:09	0.452023	2.01069	1.97232	#REF!	FALSE	#REF!
2022-09-12	11:05:09	0.441234	1.9627	1.97232	1209.73	FALSE	#REF!
2022-09-12	11:05:09	0.448257	1.99394	1.97232	#REF!	FALSE	#REF!
2022-09-12	11:05:10	0.477367	2.12342	2.24438	1211.85	FALSE	#REF!
2022-09-12	11:05:10	0.443117	1.97107	2.24438	#REF!	FALSE	#REF!
2022-09-12	11:05:10	0.593194	2.63865	2.24438	1214.49	FALSE	#REF!
2022-09-12	11:05:11	0.532837	2.37017	2.32557	#REF!	FALSE	#REF!
2022-09-12	11:05:11	0.556552	2.47565	2.32557	1216.96	FALSE	#REF!
2022-09-12	11:05:11	0.440267	1.9584	2.32557	#REF!	FALSE	#REF!
2022-09-12	11:05:11	0.56159	2.49806	2.32557	1219.46	FALSE	#REF!
2022-09-12	11:05:12	0.291565	1.29694	1.83791	#REF!	FALSE	#REF!
2022-09-12	11:05:12	0.419555	1.86626	1.83791	1221.33	FALSE	#REF!
2022-09-12	11:05:12	0.429326	1.90973	1.83791	#REF!	FALSE	#REF!
2022-09-12	11:05:12	0.512277	2.27871	1.83791	1223.61	FALSE	#REF!
2022-09-12	11:05:13	0.328817	1.46264	1.4627	#REF!	FALSE	#REF!
2022-09-12	11:05:13	0.27014	1.20164	1.4627	1224.81	FALSE	#REF!
2022-09-12	11:05:13	0.36612	1.62857	1.4627	#REF!	FALSE	#REF!
2022-09-12	11:05:13	0.350242	1.55795	1.4627	1226.37	FALSE	#REF!
2022-09-12	11:05:14	0.355585	1.58171	1.52693	#REF!	FALSE	#REF!
2022-09-12	11:05:14	0.345611	1.53735	1.52693	1227.9	FALSE	#REF!
2022-09-12	11:05:14	0.328613	1.46174	1.52693	#REF!	FALSE	#REF!
2022-09-12	11:05:15	0.392532	1.74606	1.71488	1229.65	FALSE	#REF!
2022-09-12	11:05:15	0.36612	1.62857	1.71488	#REF!	FALSE	#REF!
2022-09-12	11:05:15	0.287799	1.28019	1.71488	1230.93	FALSE	#REF!
2022-09-12	11:05:15	0.495636	2.20469	1.71488	#REF!	FALSE	#REF!
2022-09-12	11:05:16	0.263015	1.16994	1.60124	1232.1	FALSE	#REF!
2022-09-12	11:05:16	0.506476	2.25291	1.60124	#REF!	FALSE	#REF!
2022-09-12	11:05:16	0.241794	1.07555	1.60124	1233.18	FALSE	#REF!
2022-09-12	11:05:16	0.428613	1.90656	1.60124	#REF!	FALSE	#REF!
2022-09-12	11:05:17	0.289886	1.28947	1.86123	1234.47	FALSE	#REF!
2022-09-12	11:05:17	0.521947	2.32172	1.86123	#REF!	FALSE	#REF!
2022-09-12	11:05:17	0.287443	1.2786	1.86123	1235.74	FALSE	#REF!
2022-09-12	11:05:17	0.574415	2.55511	1.86123	#REF!	FALSE	#REF!
2022-09-12	11:05:18	0.291616	1.29717	1.55855	1237.04	FALSE	#REF!
2022-09-12	11:05:18	0.497163	2.21148	1.55855	#REF!	FALSE	#REF!
2022-09-12	11:05:18	0.262354	1.167	1.55855	1238.21	FALSE	#REF!
2022-09-12	11:05:19	0.532939	2.37062	1.73848	#REF!	FALSE	#REF!
2022-09-12	11:05:19	0.237977	1.05857	1.73848	1239.27	FALSE	#REF!
2022-09-12	11:05:19	0.50668	2.25381	1.73848	#REF!	FALSE	#REF!
2022-09-12	11:05:19	0.285713	1.27091	1.73848	1240.54	FALSE	#REF!
2022-09-12	11:05:20	1.02464	4.5578	12.5261	#REF!	FALSE	#REF!
2022-09-12	11:05:20	1.89838	8.44437	12.5261	1248.98	FALSE	#REF!
2022-09-12	11:05:20	4.25034	18.9064	12.5261	#REF!	1	#REF!
2022-09-12	11:05:20	4.09065	18.196	12.5261	1267.18	1	#REF!
2022-09-12	11:05:21	3.80714	16.9349	9.05339	#REF!	1	#REF!
2022-09-12	11:05:21	2.01055	8.94333	9.05339	1276.12	FALSE	#REF!
2022-09-12	11:05:21	1.78785	7.95271	9.05339	#REF!	FALSE	#REF!
2022-09-12	11:05:21	0.535636	2.38262	9.05339	1278.5	FALSE	#REF!
2022-09-12	11:05:22	0.353397	1.57198	1.60565	#REF!	FALSE	#REF!
2022-09-12	11:05:22	0.240115	1.06808	1.60565	1279.57	FALSE	#REF!
2022-09-12	11:05:22	0.434568	1.93305	1.60565	#REF!	FALSE	#REF!
2022-09-12	11:05:22	0.415789	1.84951	1.60565	1281.42	FALSE	#REF!
2022-09-12	11:05:23	0.559046	2.48675	2.09958	#REF!	FALSE	#REF!
2022-09-12	11:05:23	0.481081	2.13994	2.09958	1283.56	FALSE	#REF!
2022-09-12	11:05:23	0.375891	1.67204	2.09958	#REF!	FALSE	#REF!
2022-09-12	11:05:24	0.503575	2.24	1.95427	1285.8	FALSE	#REF!
2022-09-12	11:05:24	0.444695	1.97809	1.95427	#REF!	FALSE	#REF!
2022-09-12	11:05:24	0.43014	1.91335	1.95427	1287.71	FALSE	#REF!
2022-09-12	11:05:24	0.378944	1.68562	1.95427	#REF!	FALSE	#REF!
2022-09-12	11:05:25	0.479707	2.13383	1.9666	1289.85	FALSE	#REF!
2022-09-12	11:05:25	0.387799	1.72501	1.9666	#REF!	FALSE	#REF!
2022-09-12	11:05:25	0.475636	2.11572	1.9666	1291.96	FALSE	#REF!
2022-09-12	11:05:25	0.425305	1.89184	1.9666	#REF!	FALSE	#REF!
2022-09-12	11:05:26	0.364084	1.61952	1.79999	1293.58	FALSE	#REF!
2022-09-12	11:05:26	0.433295	1.92738	1.79999	#REF!	FALSE	#REF!
2022-09-12	11:05:26	0.412481	1.8348	1.79999	1295.42	FALSE	#REF!
2022-09-12	11:05:26	0.408766	1.81827	1.79999	#REF!	FALSE	#REF!
2022-09-12	11:05:27	0.41126	1.82937	1.73021	1297.25	FALSE	#REF!
2022-09-12	11:05:27	0.42841	1.90565	1.73021	#REF!	FALSE	#REF!
2022-09-12	11:05:27	0.327239	1.45562	1.73021	1298.7	FALSE	#REF!
2022-09-12	11:05:28	0.392023	1.7438	1.72229	#REF!	FALSE	#REF!
2022-09-12	11:05:28	0.376145	1.67317	1.72229	1300.38	FALSE	#REF!
2022-09-12	11:05:28	0.362608	1.61295	1.72229	#REF!	FALSE	#REF!
2022-09-12	11:05:28	0.417977	1.85925	1.72229	1302.24	FALSE	#REF!
2022-09-12	11:05:29	0.417112	1.8554	1.83667	#REF!	FALSE	#REF!
2022-09-12	11:05:29	0.379758	1.68924	1.83667	1303.93	FALSE	#REF!
2022-09-12	11:05:29	0.436094	1.93983	1.83667	#REF!	FALSE	#REF!
2022-09-12	11:05:29	0.418639	1.86219	1.83667	1305.79	FALSE	#REF!
2022-09-12	11:05:30	0.477875	2.12568	2.6765	#REF!	FALSE	#REF!
2022-09-12	11:05:30	0.513397	2.28369	2.6765	1308.07	FALSE	#REF!
2022-09-12	11:05:30	0.647239	2.87905	2.6765	#REF!	FALSE	#REF!
2022-09-12	11:05:30	0.768308	3.41759	2.6765	1311.49	FALSE	#REF!
2022-09-12	11:05:31	0.66673	2.96575	6.16656	#REF!	FALSE	#REF!
2022-09-12	11:05:31	3.00245	13.3555	6.16656	1324.84	1	#REF!
2022-09-12	11:05:31	0.489733	2.17843	6.16656	#REF!	FALSE	#REF!
2022-09-12	11:05:32	3.76362	16.7413	4.84831	1341.59	1	#REF!
2022-09-12	11:05:32	0.399657	1.77775	4.84831	#REF!	FALSE	#REF!
2022-09-12	11:05:32	0.113753	0.505996	4.84831	1342.09	FALSE	#REF!
2022-09-12	11:05:32	0.082761	0.368137	4.84831	#REF!	FALSE	#REF!
2022-09-12	11:05:33	0.192685	0.857101	0.717089	1342.95	FALSE	#REF!
2022-09-12	11:05:33	0.0571631	0.254273	0.717089	#REF!	FALSE	#REF!
2022-09-12	11:05:33	0.136654	0.607864	0.717089	1343.56	FALSE	#REF!
2022-09-12	11:05:33	0.258333	1.14912	0.717089	#REF!	FALSE	#REF!
2022-09-12	11:05:34	0.0197585	0.0878898	0.172496	1343.64	FALSE	#REF!
2022-09-12	11:05:34	0.0603692	0.268534	0.172496	#REF!	FALSE	#REF!
2022-09-12	11:05:34	0.0703946	0.313129	0.172496	1343.96	FALSE	#REF!
2022-09-12	11:05:34	0.00459311	0.0204311	0.172496	#REF!	FALSE	#REF!
2022-09-12	11:05:35	0.115585	0.514145	0.635707	1344.47	FALSE	#REF!
2022-09-12	11:05:35	0.152786	0.679623	0.635707	#REF!	FALSE	#REF!
2022-09-12	11:05:35	0.160369	0.713353	0.635707	1345.19	FALSE	#REF!
2022-09-12	11:05:36	0.203117	0.903505	1.41833	#REF!	FALSE	#REF!
2022-09-12	11:05:36	0.226781	1.00877	1.41833	1346.19	FALSE	#REF!
2022-09-12	11:05:36	0.42383	1.88528	1.41833	#REF!	FALSE	#REF!
2022-09-12	11:05:36	0.421692	1.87577	1.41833	1348.07	FALSE	#REF!
2022-09-12	11:05:37	0.38673	1.72025	2.34232	#REF!	FALSE	#REF!
2022-09-12	11:05:37	0.759504	3.37843	2.34232	1351.45	FALSE	#REF!
2022-09-12	11:05:37	0.733244	3.26162	2.34232	#REF!	FALSE	#REF!
2022-09-12	11:05:37	0.226832	1.00899	2.34232	1352.46	FALSE	#REF!
2022-09-12	11:05:38	0.245305	1.09117	-0.820199	#REF!	FALSE	#REF!
2022-09-12	11:05:38	-0.0422771	-0.188057	-0.820199	1352.46	FALSE	#REF!
2022-09-12	11:05:38	-0.462226	-2.05607	-0.820199	#REF!	FALSE	#REF!
2022-09-12	11:05:38	-0.478358	-2.12783	-0.820199	1352.46	FALSE	#REF!
2022-09-12	11:05:39	-0.501055	-2.22879	-1.60718	#REF!	FALSE	#REF!
2022-09-12	11:05:39	-0.544007	-2.41985	-1.60718	1352.46	FALSE	#REF!
2022-09-12	11:05:39	-0.0388674	-0.17289	-1.60718	#REF!	FALSE	#REF!
2022-09-12	11:05:40	0.0846439	0.376513	0.355743	1352.83	FALSE	#REF!
2022-09-12	11:05:40	0.189478	0.842836	0.355743	#REF!	FALSE	#REF!
2022-09-12	11:05:40	0.0960943	0.427447	0.355743	1353.26	FALSE	#REF!
2022-09-12	11:05:40	-0.0503178	-0.223824	0.355743	#REF!	FALSE	#REF!
2022-09-12	11:05:41	-0.0521498	-0.231973	-0.358458	1353.26	FALSE	#REF!
2022-09-12	11:05:41	-0.0275188	-0.122409	-0.358458	#REF!	FALSE	#REF!
2022-09-12	11:05:41	-0.222633	-0.990316	-0.358458	1353.26	FALSE	#REF!
2022-09-12	11:05:41	-0.0200379	-0.0891326	-0.358458	#REF!	FALSE	#REF!
2022-09-12	11:05:42	0.0358399	0.159423	0.606054	1353.42	FALSE	#REF!
2022-09-12	11:05:42	0.406171	1.80673	0.606054	#REF!	FALSE	#REF!
2022-09-12	11:05:42	0.00566182	0.0251849	0.606054	1353.45	FALSE	#REF!
2022-09-12	11:05:42	0.0973158	0.43288	0.606054	#REF!	FALSE	#REF!
2022-09-12	11:05:43	0.173092	0.769948	1.30403	1354.22	FALSE	#REF!
2022-09-12	11:05:43	0.333651	1.48415	1.30403	#REF!	FALSE	#REF!
2022-09-12	11:05:43	0.372735	1.658	1.30403	1355.87	FALSE	#REF!
2022-09-12	11:05:44	0.390547	1.73723	1.75913	#REF!	FALSE	#REF!
2022-09-12	11:05:44	0.400216	1.78024	1.75913	1357.65	FALSE	#REF!
2022-09-12	11:05:44	0.396247	1.76259	1.75913	#REF!	FALSE	#REF!
2022-09-12	11:05:44	0.394873	1.75647	1.75913	1359.41	FALSE	#REF!
2022-09-12	11:05:45	0.399962	1.77911	1.85025	#REF!	FALSE	#REF!
2022-09-12	11:05:45	0.421845	1.87645	1.85025	1361.29	FALSE	#REF!
2022-09-12	11:05:45	0.471463	2.09716	1.85025	#REF!	FALSE	#REF!
2022-09-12	11:05:45	0.370547	1.64827	1.85025	1362.94	FALSE	#REF!
2022-09-12	11:05:46	0.373143	1.65981	1.67079	#REF!	FALSE	#REF!
2022-09-12	11:05:46	0.376094	1.67294	1.67079	1364.61	FALSE	#REF!
2022-09-12	11:05:46	0.381031	1.6949	1.67079	#REF!	FALSE	#REF!
2022-09-12	11:05:46	0.372176	1.65551	1.67079	1366.26	FALSE	#REF!
2022-09-12	11:05:47	0.380471	1.69241	1.68013	#REF!	FALSE	#REF!
2022-09-12	11:05:47	0.382405	1.70101	1.68013	1367.96	FALSE	#REF!
2022-09-12	11:05:47	0.36902	1.64147	1.68013	#REF!	FALSE	#REF!
2022-09-12	11:05:47	0.378944	1.68562	1.68013	1369.65	FALSE	#REF!
2022-09-12	11:05:48	0.381387	1.69649	1.70267	#REF!	FALSE	#REF!
2022-09-12	11:05:48	0.381285	1.69603	1.70267	1371.35	FALSE	#REF!
2022-09-12	11:05:48	0.385662	1.7155	1.70267	#REF!	FALSE	#REF!
2022-09-12	11:05:49	0.535942	2.38398	1.05993	1373.73	FALSE	#REF!
2022-09-12	11:05:49	0.492379	2.1902	1.05993	#REF!	FALSE	#REF!
2022-09-12	11:05:49	-0.0327606	-0.145726	1.05993	1373.73	FALSE	#REF!
2022-09-12	11:05:49	-0.0424297	-0.188736	1.05993	#REF!	FALSE	#REF!
2022-09-12	11:05:50	0.1393	0.619634	1.89552	1374.35	FALSE	#REF!
2022-09-12	11:05:50	0.405814	1.80514	1.89552	#REF!	FALSE	#REF!
2022-09-12	11:05:50	0.551666	2.45392	1.89552	1376.8	FALSE	#REF!
2022-09-12	11:05:50	0.607748	2.70338	1.89552	#REF!	FALSE	#REF!
2022-09-12	11:05:51	0.469682	2.08924	1.95059	1378.89	FALSE	#REF!
2022-09-12	11:05:51	0.437723	1.94708	1.95059	#REF!	FALSE	#REF!
2022-09-12	11:05:51	0.443219	1.97153	1.95059	1380.86	FALSE	#REF!
2022-09-12	11:05:51	0.403423	1.79451	1.95059	#REF!	FALSE	#REF!
2022-09-12	11:05:52	0.417723	1.85812	2.02706	1382.72	FALSE	#REF!
2022-09-12	11:05:52	0.482405	2.14583	2.02706	#REF!	FALSE	#REF!
2022-09-12	11:05:52	0.466985	2.07724	2.02706	1384.8	FALSE	#REF!
2022-09-12	11:05:53	0.435738	1.93825	1.9777	#REF!	FALSE	#REF!
2022-09-12	11:05:53	0.444847	1.97877	1.9777	1386.78	FALSE	#REF!
2022-09-12	11:05:53	0.446171	1.98466	1.9777	#REF!	FALSE	#REF!
2022-09-12	11:05:53	0.451667	2.00911	1.9777	1388.79	FALSE	#REF!
2022-09-12	11:05:54	0.456298	2.0297	1.9481	#REF!	FALSE	#REF!
2022-09-12	11:05:54	0.442456	1.96813	1.9481	1390.76	FALSE	#REF!
2022-09-12	11:05:54	0.425407	1.8923	1.9481	#REF!	FALSE	#REF!
2022-09-12	11:05:54	0.427646	1.90225	1.9481	1392.66	FALSE	#REF!
2022-09-12	11:05:55	0.428053	1.90407	1.93406	#REF!	FALSE	#REF!
2022-09-12	11:05:55	0.420776	1.8717	1.93406	1394.53	FALSE	#REF!
2022-09-12	11:05:55	0.431972	1.9215	1.93406	#REF!	FALSE	#REF!
2022-09-12	11:05:55	0.458384	2.03898	1.93406	1396.57	FALSE	#REF!
2022-09-12	11:05:56	0.474975	2.11278	1.99507	#REF!	FALSE	#REF!
2022-09-12	11:05:56	0.482303	2.14538	1.99507	1398.71	FALSE	#REF!
2022-09-12	11:05:56	0.388257	1.72704	1.99507	#REF!	FALSE	#REF!
2022-09-12	11:05:57	0.456196	2.02925	3.52404	1400.74	FALSE	#REF!
2022-09-12	11:05:57	0.313601	1.39496	3.52404	#REF!	FALSE	#REF!
2022-09-12	11:05:57	1.96398	8.73618	3.52404	1409.48	FALSE	#REF!
2022-09-12	11:05:57	0.435178	1.93576	3.52404	#REF!	FALSE	#REF!
2022-09-12	11:05:58	0.321031	1.42801	0.53537	1410.91	FALSE	#REF!
2022-09-12	11:05:58	0.0612852	0.272609	0.53537	#REF!	FALSE	#REF!
2022-09-12	11:05:58	0.0937534	0.417034	0.53537	1411.32	FALSE	#REF!
2022-09-12	11:05:58	0.00535648	0.0238267	0.53537	#REF!	FALSE	#REF!
2022-09-12	11:05:59	-0.0107758	-0.0479329	2.54119	1411.32	FALSE	#REF!
2022-09-12	11:05:59	0.0814888	0.362478	2.54119	#REF!	FALSE	#REF!
2022-09-12	11:05:59	0.221743	0.986357	2.54119	1412.31	FALSE	#REF!
2022-09-12	11:05:59	1.99268	8.86384	2.54119	#REF!	FALSE	#REF!
2022-09-12	11:06:00	5.06485	22.5295	14.3779	1434.84	1	#REF!
2022-09-12	11:06:00	2.47223	10.997	14.3779	#REF!	FALSE	#REF!
2022-09-12	11:06:00	2.15981	9.60727	14.3779	1444.45	FALSE	#REF!
2022-09-12	11:06:01	1.45258	6.46137	3.98199	#REF!	FALSE	#REF!
2022-09-12	11:06:01	0.489529	2.17752	3.98199	1446.63	FALSE	#REF!
2022-09-12	11:06:01	0.381794	1.6983	3.98199	#REF!	FALSE	#REF!
2022-09-12	11:06:01	1.25686	5.59076	3.98199	1452.22	FALSE	#REF!
2022-09-12	11:06:02	0.933346	4.15171	4.5482	#REF!	FALSE	#REF!
2022-09-12	11:06:02	1.20475	5.35897	4.5482	1457.58	FALSE	#REF!
2022-09-12	11:06:02	1.15762	5.14933	4.5482	#REF!	FALSE	#REF!
2022-09-12	11:06:02	0.794211	3.53281	4.5482	1461.11	FALSE	#REF!
2022-09-12	11:06:03	0.534109	2.37582	2.65375	#REF!	FALSE	#REF!
2022-09-12	11:06:03	0.49355	2.19541	2.65375	1463.3	FALSE	#REF!
2022-09-12	11:06:03	0.596807	2.65472	2.65375	#REF!	FALSE	#REF!
2022-09-12	11:06:03	0.761896	3.38907	2.65375	1466.69	FALSE	#REF!
2022-09-12	11:06:04	0.973855	4.3319	5.62848	#REF!	FALSE	#REF!
2022-09-12	11:06:04	1.36113	6.05458	5.62848	1472.75	FALSE	#REF!
2022-09-12	11:06:04	1.46103	6.49895	5.62848	#REF!	FALSE	#REF!
2022-09-12	11:06:05	0.806069	3.58556	2.98991	1476.33	FALSE	#REF!
2022-09-12	11:06:05	1.01075	4.49602	2.98991	#REF!	FALSE	#REF!
2022-09-12	11:06:05	0.383575	1.70622	2.98991	1478.04	FALSE	#REF!
2022-09-12	11:06:05	0.488257	2.17186	2.98991	#REF!	FALSE	#REF!
2022-09-12	11:06:06	0.484746	2.15625	2.27583	1480.19	FALSE	#REF!
2022-09-12	11:06:06	0.549885	2.446	2.27583	#REF!	FALSE	#REF!
2022-09-12	11:06:06	0.532583	2.36904	2.27583	1482.56	FALSE	#REF!
2022-09-12	11:06:06	0.4793	2.13202	2.27583	#REF!	FALSE	#REF!
2022-09-12	11:06:07	0.625865	2.78397	3.03349	1485.35	FALSE	#REF!
2022-09-12	11:06:07	0.758435	3.37367	3.03349	#REF!	FALSE	#REF!
2022-09-12	11:06:07	0.657723	2.92568	3.03349	1488.27	FALSE	#REF!
2022-09-12	11:06:07	0.685814	3.05064	3.03349	#REF!	FALSE	#REF!
2022-09-12	11:06:08	0.375026	1.66819	2.06055	1489.94	FALSE	#REF!
2022-09-12	11:06:08	0.549885	2.446	2.06055	#REF!	FALSE	#REF!
2022-09-12	11:06:08	0.455891	2.02789	2.06055	1491.97	FALSE	#REF!
2022-09-12	11:06:08	0.472125	2.10011	2.06055	#REF!	FALSE	#REF!
2022-09-12	11:06:09	0.468868	2.08562	2.06751	1494.06	FALSE	#REF!
2022-09-12	11:06:09	0.46556	2.0709	2.06751	#REF!	FALSE	#REF!
2022-09-12	11:06:09	0.459962	2.046	2.06751	1496.1	FALSE	#REF!
2022-09-12	11:06:10	0.46098	2.05053	2.0743	#REF!	FALSE	#REF!
2022-09-12	11:06:10	0.494109	2.1979	2.0743	1498.3	FALSE	#REF!
2022-09-12	11:06:10	0.454313	2.02088	2.0743	#REF!	FALSE	#REF!
2022-09-12	11:06:10	0.455891	2.02789	2.0743	1500.33	FALSE	#REF!
2022-09-12	11:06:11	0.440471	1.9593	2.08935	#REF!	FALSE	#REF!
2022-09-12	11:06:11	0.443931	1.97469	2.08935	1502.3	FALSE	#REF!
2022-09-12	11:06:11	0.484746	2.15625	2.08935	#REF!	FALSE	#REF!
2022-09-12	11:06:11	0.509682	2.26717	2.08935	1504.57	FALSE	#REF!
2022-09-12	11:06:12	0.44215	1.96677	2.80587	#REF!	FALSE	#REF!
2022-09-12	11:06:12	0.893244	3.97333	2.80587	1508.54	FALSE	#REF!
2022-09-12	11:06:12	0.630343	2.80389	2.80587	#REF!	FALSE	#REF!
2022-09-12	11:06:12	0.557417	2.4795	2.80587	1511.02	FALSE	#REF!
2022-09-12	11:06:13	1.07584	4.78555	3.91402	#REF!	FALSE	#REF!
2022-09-12	11:06:13	0.565254	2.51436	3.91402	1513.54	FALSE	#REF!
2022-09-12	11:06:13	0.998639	4.44215	3.91402	#REF!	FALSE	#REF!
2022-09-12	11:06:14	0.73014	3.24781	2.66071	1516.78	FALSE	#REF!
2022-09-12	11:06:14	0.51813	2.30475	2.66071	#REF!	FALSE	#REF!
2022-09-12	11:06:14	0.54444	2.42178	2.66071	1519.21	FALSE	#REF!
2022-09-12	11:06:14	0.599911	2.66852	2.66071	#REF!	FALSE	#REF!
2022-09-12	11:06:15	1.11579	4.96326	4.10049	1524.17	FALSE	#REF!
2022-09-12	11:06:15	1.54846	6.88786	4.10049	#REF!	FALSE	#REF!
2022-09-12	11:06:15	0.544084	2.42019	4.10049	1526.59	FALSE	#REF!
2022-09-12	11:06:15	0.478995	2.13067	4.10049	#REF!	FALSE	#REF!
2022-09-12	11:06:16	0.494109	2.1979	2.06315	1528.79	FALSE	#REF!
2022-09-12	11:06:16	0.413499	1.83933	2.06315	#REF!	FALSE	#REF!
2022-09-12	11:06:16	0.512634	2.2803	2.06315	1531.07	FALSE	#REF!
2022-09-12	11:06:16	0.435026	1.93508	2.06315	#REF!	FALSE	#REF!
2022-09-12	11:06:17	0.460013	2.04623	2.03152	1533.11	FALSE	#REF!
2022-09-12	11:06:17	0.466323	2.0743	2.03152	#REF!	FALSE	#REF!
2022-09-12	11:06:17	0.443779	1.97402	2.03152	1535.09	FALSE	#REF!
2022-09-12	11:06:18	0.455433	2.02586	2.02461	#REF!	FALSE	#REF!
2022-09-12	11:06:18	0.444746	1.97832	2.02461	1537.07	FALSE	#REF!
2022-09-12	11:06:18	0.456552	2.03083	2.02461	#REF!	FALSE	#REF!
2022-09-12	11:06:18	0.46388	2.06343	2.02461	1539.13	FALSE	#REF!
2022-09-12	11:06:19	0.436908	1.94345	2.09371	#REF!	FALSE	#REF!
2022-09-12	11:06:19	0.495331	2.20333	2.09371	1541.33	FALSE	#REF!
2022-09-12	11:06:19	0.48841	2.17255	2.09371	#REF!	FALSE	#REF!
2022-09-12	11:06:19	0.462099	2.05551	2.09371	1543.39	FALSE	#REF!
2022-09-12	11:06:20	0.525153	2.33599	4.80134	#REF!	FALSE	#REF!
2022-09-12	11:06:20	0.423168	1.88234	4.80134	1545.27	FALSE	#REF!
2022-09-12	11:06:20	0.574059	2.55353	4.80134	#REF!	FALSE	#REF!
2022-09-12	11:06:20	2.79518	12.4335	4.80134	1557.7	FALSE	#REF!
2022-09-12	11:06:21	4.31319	19.1859	10.5734	#REF!	1	#REF!
2022-09-12	11:06:21	1.96719	8.75045	10.5734	1566.45	FALSE	#REF!
2022-09-12	11:06:21	0.850649	3.78386	10.5734	#REF!	FALSE	#REF!
2022-09-12	11:06:22	0.412176	1.83344	2.00373	1568.29	FALSE	#REF!
2022-09-12	11:06:22	0.551412	2.45279	2.00373	#REF!	FALSE	#REF!
2022-09-12	11:06:22	0.329326	1.46491	2.00373	1569.75	FALSE	#REF!
2022-09-12	11:06:22	0.508919	2.26377	2.00373	#REF!	FALSE	#REF!
2022-09-12	11:06:23	0.325407	1.44748	1.95715	1571.2	FALSE	#REF!
2022-09-12	11:06:23	0.4936	2.19563	1.95715	#REF!	FALSE	#REF!
2022-09-12	11:06:23	0.39813	1.77096	1.95715	1572.97	FALSE	#REF!
2022-09-12	11:06:23	0.542812	2.41454	1.95715	#REF!	FALSE	#REF!
2022-09-12	11:06:24	0.673651	2.99653	2.55839	1575.97	FALSE	#REF!
2022-09-12	11:06:24	0.66271	2.94787	2.55839	#REF!	FALSE	#REF!
2022-09-12	11:06:24	0.431361	1.91878	2.55839	1577.89	FALSE	#REF!
2022-09-12	11:06:24	0.532888	2.37039	2.55839	#REF!	FALSE	#REF!
2022-09-12	11:06:25	0.330649	1.47079	1.80379	1579.36	FALSE	#REF!
2022-09-12	11:06:25	0.497621	2.21352	1.80379	#REF!	FALSE	#REF!
2022-09-12	11:06:25	0.388257	1.72704	1.80379	1581.08	FALSE	#REF!
2022-09-12	11:06:26	0.379606	1.68856	2.38782	#REF!	FALSE	#REF!
2022-09-12	11:06:26	0.48042	2.137	2.38782	1583.22	FALSE	#REF!
2022-09-12	11:06:26	0.749428	3.33361	2.38782	#REF!	FALSE	#REF!
2022-09-12	11:06:26	0.537774	2.39213	2.38782	1585.61	FALSE	#REF!
2022-09-12	11:06:27	0.64673	2.87678	2.19207	#REF!	FALSE	#REF!
2022-09-12	11:06:27	0.553092	2.46026	2.19207	1588.07	FALSE	#REF!
2022-09-12	11:06:27	0.358741	1.59575	2.19207	#REF!	FALSE	#REF!
2022-09-12	11:06:27	0.412634	1.83548	2.19207	1589.91	FALSE	#REF!
2022-09-12	11:06:28	0.339199	1.50882	1.92914	#REF!	FALSE	#REF!
2022-09-12	11:06:28	0.538181	2.39394	1.92914	1592.3	FALSE	#REF!
2022-09-12	11:06:28	0.403575	1.79518	1.92914	#REF!	FALSE	#REF!
2022-09-12	11:06:28	0.453804	2.01861	1.92914	1594.32	FALSE	#REF!
2022-09-12	11:06:29	0.521539	2.31991	2.08101	#REF!	FALSE	#REF!
2022-09-12	11:06:29	0.449631	2.00005	2.08101	1596.32	FALSE	#REF!
2022-09-12	11:06:29	0.432328	1.92308	2.08101	#REF!	FALSE	#REF!
2022-09-12	11:06:30	0.63299	2.81567	3.38035	1599.14	FALSE	#REF!
2022-09-12	11:06:30	0.584847	2.60152	3.38035	#REF!	FALSE	#REF!
2022-09-12	11:06:30	0.540572	2.40457	3.38035	1601.54	FALSE	#REF!
2022-09-12	11:06:30	1.28134	5.69966	3.38035	#REF!	FALSE	#REF!
2022-09-12	11:06:31	0.364898	1.62314	2.00163	1603.17	FALSE	#REF!
2022-09-12	11:06:31	0.519148	2.30927	2.00163	#REF!	FALSE	#REF!
2022-09-12	11:06:31	0.483321	2.14991	2.00163	1605.32	FALSE	#REF!
2022-09-12	11:06:31	0.432583	1.92422	2.00163	#REF!	FALSE	#REF!
2022-09-12	11:06:32	1.00088	4.45211	2.85794	1609.77	FALSE	#REF!
2022-09-12	11:06:32	0.490344	2.18115	2.85794	#REF!	FALSE	#REF!
2022-09-12	11:06:32	0.627036	2.78918	2.85794	1612.56	FALSE	#REF!
2022-09-12	11:06:32	0.451718	2.00933	2.85794	#REF!	FALSE	#REF!
2022-09-12	11:06:33	0.403931	1.79677	2.00882	1614.35	FALSE	#REF!
2022-09-12	11:06:33	0.475891	2.11686	2.00882	#REF!	FALSE	#REF!
2022-09-12	11:06:33	0.490954	2.18386	2.00882	1616.54	FALSE	#REF!
2022-09-12	11:06:33	0.435636	1.9378	2.00882	#REF!	FALSE	#REF!
2022-09-12	11:06:34	0.590343	2.62596	2.62031	1619.16	FALSE	#REF!
2022-09-12	11:06:34	0.60042	2.67079	2.62031	#REF!	FALSE	#REF!
2022-09-12	11:06:34	0.57645	2.56416	2.62031	1621.73	FALSE	#REF!
2022-09-12	11:06:35	0.365865	1.62744	1.77628	#REF!	FALSE	#REF!
2022-09-12	11:06:35	0.484695	2.15602	1.77628	1623.88	FALSE	#REF!
2022-09-12	11:06:35	0.271565	1.20798	1.77628	#REF!	FALSE	#REF!
2022-09-12	11:06:35	0.475178	2.11369	1.77628	1626	FALSE	#REF!
2022-09-12	11:06:36	0.45584	2.02767	2.05455	#REF!	FALSE	#REF!
2022-09-12	11:06:36	0.424033	1.88618	2.05455	1627.88	FALSE	#REF!
2022-09-12	11:06:36	0.476552	2.1198	2.05455	#REF!	FALSE	#REF!
2022-09-12	11:06:36	0.491107	2.18454	2.05455	1630.07	FALSE	#REF!
2022-09-12	11:06:37	0.468868	2.08562	1.62297	#REF!	FALSE	#REF!
2022-09-12	11:06:37	0.304949	1.35647	1.62297	1631.42	FALSE	#REF!
2022-09-12	11:06:37	0.321947	1.43208	1.62297	#REF!	FALSE	#REF!
2022-09-12	11:06:37	0.363677	1.61771	1.62297	1633.04	FALSE	#REF!
2022-09-12	11:06:38	0.411565	1.83072	7.285	#REF!	FALSE	#REF!
2022-09-12	11:06:38	0.918435	4.08538	7.285	1637.13	FALSE	#REF!
2022-09-12	11:06:38	3.58322	15.9389	7.285	#REF!	1	#REF!
2022-09-12	11:06:39	5.82306	25.9021	33.8451	1663.03	1	#REF!
2022-09-12	11:06:39	11.5673	51.4537	33.8451	#REF!	1	#REF!
2022-09-12	11:06:39	7.2312	32.1658	33.8451	1695.2	1	#REF!
2022-09-12	11:06:39	5.81329	25.8587	33.8451	#REF!	1	#REF!
2022-09-12	11:06:40	4.54826	20.2316	18.0162	1715.43	1	#REF!
2022-09-12	11:06:40	5.22703	23.2509	18.0162	#REF!	1	#REF!
2022-09-12	11:06:40	4.39462	19.5481	18.0162	1734.97	1	#REF!
2022-09-12	11:06:40	2.031	9.03429	18.0162	#REF!	FALSE	#REF!
2022-09-12	11:06:41	0.614007	2.73123	1.69745	1737.71	FALSE	#REF!
2022-09-12	11:06:41	0.352379	1.56745	1.69745	#REF!	FALSE	#REF!
2022-09-12	11:06:41	0.342048	1.5215	1.69745	1739.23	FALSE	#REF!
2022-09-12	11:06:41	0.217977	0.969605	1.69745	#REF!	FALSE	#REF!
2022-09-12	11:06:42	0.364237	1.6202	1.61001	1740.85	FALSE	#REF!
2022-09-12	11:06:42	0.298486	1.32773	1.61001	#REF!	FALSE	#REF!
2022-09-12	11:06:42	0.423117	1.88211	1.61001	1742.73	FALSE	#REF!
2022-09-12	11:06:43	0.901845	4.01159	3.40497	#REF!	FALSE	#REF!
2022-09-12	11:06:43	1.36505	6.07202	3.40497	1748.8	FALSE	#REF!
2022-09-12	11:06:43	0.468155	2.08245	3.40497	#REF!	FALSE	#REF!
2022-09-12	11:06:43	0.326832	1.45381	3.40497	1750.26	FALSE	#REF!
2022-09-12	11:06:44	0.335178	1.49094	1.94578	#REF!	FALSE	#REF!
2022-09-12	11:06:44	0.415891	1.84997	1.94578	1752.11	FALSE	#REF!
2022-09-12	11:06:44	0.437316	1.94527	1.94578	#REF!	FALSE	#REF!
2022-09-12	11:06:44	0.561336	2.49693	1.94578	1754.6	FALSE	#REF!
2022-09-12	11:06:45	0.491361	2.18567	1.54329	#REF!	FALSE	#REF!
2022-09-12	11:06:45	0.324797	1.44476	1.54329	1756.05	FALSE	#REF!
2022-09-12	11:06:45	0.291768	1.29784	1.54329	#REF!	FALSE	#REF!
2022-09-12	11:06:45	0.27986	1.24487	1.54329	1757.29	FALSE	#REF!
2022-09-12	11:06:46	0.268155	1.19281	1.2405	#REF!	FALSE	#REF!
2022-09-12	11:06:46	0.275891	1.22722	1.2405	1758.52	FALSE	#REF!
2022-09-12	11:06:46	0.292583	1.30147	1.2405	#REF!	FALSE	#REF!
2022-09-12	11:06:47	0.274313	1.2202	1.33786	1759.74	FALSE	#REF!
2022-09-12	11:06:47	0.280674	1.24849	1.33786	#REF!	FALSE	#REF!
2022-09-12	11:06:47	0.387646	1.72433	1.33786	1761.46	FALSE	#REF!
2022-09-12	11:06:47	0.26042	1.1584	1.33786	#REF!	FALSE	#REF!
2022-09-12	11:06:48	0.16958	0.754326	1.31437	1762.22	FALSE	#REF!
2022-09-12	11:06:48	0.211311	0.939954	1.31437	#REF!	FALSE	#REF!
2022-09-12	11:06:48	0.326934	1.45427	1.31437	1763.67	FALSE	#REF!
2022-09-12	11:06:48	0.47411	2.10894	1.31437	#REF!	FALSE	#REF!
2022-09-12	11:06:49	0.329987	1.46785	16.4608	1765.14	FALSE	#REF!
2022-09-12	11:06:49	0.386883	1.72093	16.4608	#REF!	FALSE	#REF!
2022-09-12	11:06:49	3.1763	14.1288	16.4608	1779.27	1	#REF!
2022-09-12	11:06:49	10.909	48.5254	16.4608	#REF!	1	#REF!
2022-09-12	11:06:50	10.688	47.5424	26.7511	1826.81	1	#REF!
2022-09-12	11:06:50	3.63823	16.1836	26.7511	#REF!	1	#REF!
2022-09-12	11:06:50	3.71553	16.5274	26.7511	1843.34	1	#REF!
2022-09-12	11:06:51	1.9022	8.46137	4.76043	#REF!	FALSE	#REF!
2022-09-12	11:06:51	1.14821	5.10747	4.76043	1848.45	FALSE	#REF!
2022-09-12	11:06:51	0.858842	3.8203	4.76043	#REF!	FALSE	#REF!
2022-09-12	11:06:51	0.371514	1.65257	4.76043	1850.1	FALSE	#REF!
2022-09-12	11:06:52	0.615077	2.73599	2.55432	#REF!	FALSE	#REF!
2022-09-12	11:06:52	0.404186	1.7979	2.55432	1851.9	FALSE	#REF!
2022-09-12	11:06:52	0.490496	2.18182	2.55432	#REF!	FALSE	#REF!
2022-09-12	11:06:52	0.787188	3.50157	2.55432	1855.4	FALSE	#REF!
2022-09-12	11:06:53	3.51289	15.626	10.7031	#REF!	1	#REF!
2022-09-12	11:06:53	1.45314	6.46386	10.7031	1861.86	FALSE	#REF!
2022-09-12	11:06:53	2.53446	11.2738	10.7031	#REF!	FALSE	#REF!
2022-09-12	11:06:53	2.12413	9.44856	10.7031	1871.31	FALSE	#REF!
2022-09-12	11:06:54	1.58872	7.06694	3.31384	#REF!	FALSE	#REF!
2022-09-12	11:06:54	0.497468	2.21284	3.31384	1873.52	FALSE	#REF!
2022-09-12	11:06:54	0.148766	0.661741	3.31384	#REF!	FALSE	#REF!
2022-09-12	11:06:55	0.345916	1.5387	3.21804	1875.06	FALSE	#REF!
2022-09-12	11:06:55	0.168868	0.751159	3.21804	#REF!	FALSE	#REF!
2022-09-12	11:06:55	0.590394	2.62619	3.21804	1877.69	FALSE	#REF!
2022-09-12	11:06:55	1.78861	7.9561	3.21804	#REF!	FALSE	#REF!
2022-09-12	11:06:56	1.47039	6.54059	3.95176	1884.23	FALSE	#REF!
2022-09-12	11:06:56	0.905662	4.02857	3.95176	#REF!	FALSE	#REF!
2022-09-12	11:06:56	0.73584	3.27316	3.95176	1887.5	FALSE	#REF!
2022-09-12	11:06:56	0.441692	1.96473	3.95176	#REF!	FALSE	#REF!
2022-09-12	11:06:57	0.775382	3.44905	2.41284	1890.95	FALSE	#REF!
2022-09-12	11:06:57	0.532837	2.37017	2.41284	#REF!	FALSE	#REF!
2022-09-12	11:06:57	0.234669	1.04385	2.41284	1892	FALSE	#REF!
2022-09-12	11:06:57	0.626832	2.78827	2.41284	#REF!	FALSE	#REF!
2022-09-12	11:06:58	0.197875	0.880188	2.90039	1892.88	FALSE	#REF!
2022-09-12	11:06:58	1.73391	7.71278	2.90039	#REF!	FALSE	#REF!
2022-09-12	11:06:58	0.21528	0.957608	2.90039	1893.83	FALSE	#REF!
2022-09-12	11:06:58	0.461082	2.05098	2.90039	#REF!	FALSE	#REF!
2022-09-12	11:06:59	0.197316	0.877701	0.972248	1894.71	FALSE	#REF!
2022-09-12	11:06:59	0.294008	1.30781	0.972248	#REF!	FALSE	#REF!
2022-09-12	11:06:59	0.164389	0.731235	0.972248	1895.44	FALSE	#REF!
2022-09-12	11:07:00	0.0911071	0.405263	0.405263	#REF!	FALSE	#REF!

## Sheet: Royal_star_2022912110131 (E (2)
Date	Time	Lbs	Newtons	Total Force x time	Total Time Steps Force >13.345
							**GoPro Fitting: 1050
2022-09-12	11:02:00	0.63416	2.82087
2022-09-12	11:02:00	1.16281	5.17241
2022-09-12	11:02:00	1.33482	5.93755
2022-09-12	11:02:00	0.638842	2.8417
2022-09-12	11:02:01	0.778842	3.46444
2022-09-12	11:02:01	1.06938	4.75682
2022-09-12	11:02:01	0.959249	4.26693
2022-09-12	11:02:02	0.563219	2.50531
2022-09-12	11:02:02	0.422812	1.88075
2022-09-12	11:02:02	0.410496	1.82597
2022-09-12	11:02:02	0.373041	1.65936
2022-09-12	11:02:03	0.381387	1.69649
2022-09-12	11:02:03	0.449275	1.99847
2022-09-12	11:02:03	0.452277	2.01182
2022-09-12	11:02:03	0.663779	2.95262
2022-09-12	11:02:04	0.581336	2.5859	2.5859	FALSE	#REF!			Total Force x time	#REF!
2022-09-12	11:02:04	0.520267	2.31425	#REF!	FALSE	#REF!			Total Time Steps Force >3	52
2022-09-12	11:02:04	0.563829	2.50802	5.09392	FALSE	#REF!
2022-09-12	11:02:04	0.610344	2.71493	#REF!	FALSE	#REF!
2022-09-12	11:02:05	0.443117	1.97107	7.065	FALSE	#REF!
2022-09-12	11:02:05	0.395992	1.76145	#REF!	FALSE	#REF!
2022-09-12	11:02:05	0.410038	1.82393	8.88893	FALSE	#REF!
2022-09-12	11:02:06	0.359351	1.59847	#REF!	FALSE	#REF!
2022-09-12	11:02:06	0.341692	1.51991	10.4088	FALSE	#REF!
2022-09-12	11:02:06	0.175789	0.781945	#REF!	FALSE	#REF!
2022-09-12	11:02:06	0.179249	0.797335	11.2062	FALSE	#REF!
2022-09-12	11:02:07	0.254262	1.13101	#REF!	FALSE	#REF!
2022-09-12	11:02:07	0.292685	1.30192	12.5081	FALSE	#REF!
2022-09-12	11:02:07	0.304797	1.3558	#REF!	FALSE	#REF!
2022-09-12	11:02:07	0.292277	1.30011	13.8082	FALSE	#REF!
2022-09-12	11:02:08	0.332176	1.47759	#REF!	FALSE	#REF!
2022-09-12	11:02:08	0.144644	0.643405	14.4516	FALSE	#REF!
2022-09-12	11:02:08	0.0487661	0.216921	#REF!	FALSE	#REF!
2022-09-12	11:02:08	-0.092557	-0.411712	14.4516	FALSE	#REF!
2022-09-12	11:02:09	-0.0910811	-0.405147	#REF!	FALSE	#REF!
2022-09-12	11:02:09	-0.25276	-1.12433	14.4516	FALSE	#REF!
2022-09-12	11:02:09	-0.244567	-1.08788	#REF!	FALSE	#REF!
2022-09-12	11:02:09	0.264033	1.17447	15.6261	FALSE	#REF!
2022-09-12	11:02:10	0.359046	1.59711	#REF!	FALSE	#REF!
2022-09-12	11:02:10	0.468461	2.08381	17.7099	FALSE	#REF!
2022-09-12	11:02:10	1.01192	4.50122	#REF!	FALSE	#REF!
2022-09-12	11:02:11	1.59335	7.08754	24.7974	FALSE	#REF!
2022-09-12	11:02:11	0.760063	3.38091	#REF!	FALSE	#REF!
2022-09-12	11:02:11	0.660674	2.93881	27.7362	FALSE	#REF!
2022-09-12	11:02:11	0.530241	2.35862	#REF!	FALSE	#REF!
2022-09-12	11:02:12	0.525254	2.33643	30.0727	FALSE	#REF!
2022-09-12	11:02:12	0.363524	1.61703	#REF!	FALSE	#REF!
2022-09-12	11:02:12	0.376501	1.67475	31.7474	FALSE	#REF!
2022-09-12	11:02:12	0.337163	1.49977	#REF!	FALSE	#REF!
2022-09-12	11:02:13	0.379453	1.68788	33.4353	FALSE	#REF!
2022-09-12	11:02:13	0.354415	1.57651	#REF!	FALSE	#REF!
2022-09-12	11:02:13	0.353651	1.57311	35.0084	FALSE	#REF!
2022-09-12	11:02:13	0.470649	2.09354	#REF!	FALSE	#REF!
2022-09-12	11:02:14	0.358741	1.59575	36.6042	FALSE	#REF!
2022-09-12	11:02:14	0.505611	2.24906	#REF!	FALSE	#REF!
2022-09-12	11:02:14	0.34271	1.52444	38.1286	FALSE	#REF!
2022-09-12	11:02:15	0.405254	1.80265	#REF!	FALSE	#REF!
2022-09-12	11:02:15	0.440471	1.9593	40.0879	FALSE	#REF!
2022-09-12	11:02:15	0.59416	2.64294	#REF!	FALSE	#REF!
2022-09-12	11:02:15	0.762659	3.39246	43.4804	FALSE	#REF!
2022-09-12	11:02:16	0.91472	4.06886	#REF!	FALSE	#REF!
2022-09-12	11:02:16	0.917112	4.0795	47.5599	FALSE	#REF!
2022-09-12	11:02:16	1.37431	6.11321	#REF!	FALSE	#REF!
2022-09-12	11:02:16	3.14744	14.0004	61.5603	1	#REF!
2022-09-12	11:02:17	1.04128	4.63182	#REF!	FALSE	#REF!
2022-09-12	11:02:17	1.09167	4.85597	66.4163	FALSE	#REF!
2022-09-12	11:02:17	1.44734	6.43806	#REF!	FALSE	#REF!
2022-09-12	11:02:17	1.17894	5.24416	71.6604	FALSE	#REF!
2022-09-12	11:02:18	0.605102	2.69161	#REF!	FALSE	#REF!
2022-09-12	11:02:18	0.544695	2.42291	74.0834	FALSE	#REF!
2022-09-12	11:02:18	0.496807	2.2099	#REF!	FALSE	#REF!
2022-09-12	11:02:19	0.837519	3.72545	77.8088	FALSE	#REF!
2022-09-12	11:02:19	0.697112	3.10089	#REF!	FALSE	#REF!
2022-09-12	11:02:19	0.972532	4.32602	82.1348	FALSE	#REF!
2022-09-12	11:02:19	0.761946	3.38929	#REF!	FALSE	#REF!
2022-09-12	11:02:20	0.822506	3.65867	85.7935	FALSE	#REF!
2022-09-12	11:02:20	0.50388	2.24136	#REF!	FALSE	#REF!
2022-09-12	11:02:20	0.447799	1.9919	87.7854	FALSE	#REF!
2022-09-12	11:02:20	0.413143	1.83774	#REF!	FALSE	#REF!
2022-09-12	11:02:21	0.426425	1.89682	89.6822	FALSE	#REF!
2022-09-12	11:02:21	0.396451	1.76349	#REF!	FALSE	#REF!
2022-09-12	11:02:21	0.416145	1.8511	91.5333	FALSE	#REF!
2022-09-12	11:02:21	0.384135	1.70871	#REF!	FALSE	#REF!
2022-09-12	11:02:22	0.334975	1.49004	93.0234	FALSE	#REF!
2022-09-12	11:02:22	0.323372	1.43842	#REF!	FALSE	#REF!
2022-09-12	11:02:22	0.348766	1.55138	94.5747	FALSE	#REF!
2022-09-12	11:02:23	0.340827	1.51607	#REF!	FALSE	#REF!
2022-09-12	11:02:23	0.391718	1.74244	96.3172	FALSE	#REF!
2022-09-12	11:02:23	0.41701	1.85494	#REF!	FALSE	#REF!
2022-09-12	11:02:23	0.469936	2.09037	98.4075	FALSE	#REF!
2022-09-12	11:02:24	0.532277	2.36767	#REF!	FALSE	#REF!
2022-09-12	11:02:24	0.517519	2.30203	100.71	FALSE	#REF!
2022-09-12	11:02:24	0.384237	1.70916	#REF!	FALSE	#REF!
2022-09-12	11:02:24	0.43416	1.93123	102.641	FALSE	#REF!
2022-09-12	11:02:25	0.441641	1.96451	#REF!	FALSE	#REF!
2022-09-12	11:02:25	0.352125	1.56632	104.207	FALSE	#REF!
2022-09-12	11:02:25	0.477977	2.12614	#REF!	FALSE	#REF!
2022-09-12	11:02:25	0.328003	1.45902	105.666	FALSE	#REF!
2022-09-12	11:02:26	0.470751	2.09399	#REF!	FALSE	#REF!
2022-09-12	11:02:26	0.374313	1.66502	107.331	FALSE	#REF!
2022-09-12	11:02:26	0.416552	1.85291	#REF!	FALSE	#REF!
2022-09-12	11:02:27	0.398741	1.77368	109.105	FALSE	#REF!
2022-09-12	11:02:27	0.373652	1.66208	#REF!	FALSE	#REF!
2022-09-12	11:02:27	0.444644	1.97787	111.083	FALSE	#REF!
2022-09-12	11:02:27	0.306221	1.36213	#REF!	FALSE	#REF!
2022-09-12	11:02:28	0.39126	1.7404	112.823	FALSE	#REF!
2022-09-12	11:02:28	0.386323	1.71844	#REF!	FALSE	#REF!
2022-09-12	11:02:28	0.521539	2.31991	115.143	FALSE	#REF!
2022-09-12	11:02:28	0.346629	1.54188	#REF!	FALSE	#REF!
2022-09-12	11:02:29	0.505916	2.25042	117.393	FALSE	#REF!
2022-09-12	11:02:29	0.360929	1.60548	#REF!	FALSE	#REF!
2022-09-12	11:02:29	0.506781	2.25426	119.648	FALSE	#REF!
2022-09-12	11:02:29	0.296196	1.31754	#REF!	FALSE	#REF!
2022-09-12	11:02:30	0.449173	1.99801	121.646	FALSE	#REF!
2022-09-12	11:02:30	0.266425	1.18511	#REF!	FALSE	#REF!
2022-09-12	11:02:30	0.489987	2.17956	123.825	FALSE	#REF!
2022-09-12	11:02:30	0.275025	1.22337	#REF!	FALSE	#REF!
2022-09-12	11:02:31	0.405356	1.8031	125.628	FALSE	#REF!
2022-09-12	11:02:31	0.303015	1.34787	#REF!	FALSE	#REF!
2022-09-12	11:02:31	0.48673	2.16507	127.793	FALSE	#REF!
2022-09-12	11:02:32	0.268562	1.19462	#REF!	FALSE	#REF!
2022-09-12	11:02:32	0.499809	2.22325	130.017	FALSE	#REF!
2022-09-12	11:02:32	0.250547	1.11448	#REF!	FALSE	#REF!
2022-09-12	11:02:32	0.476959	2.12161	132.138	FALSE	#REF!
2022-09-12	11:02:33	0.241081	1.07238	#REF!	FALSE	#REF!
2022-09-12	11:02:33	0.388461	1.72795	133.866	FALSE	#REF!
2022-09-12	11:02:33	0.247443	1.10068	#REF!	FALSE	#REF!
2022-09-12	11:02:33	0.485204	2.15828	136.025	FALSE	#REF!
2022-09-12	11:02:34	0.280471	1.24759	#REF!	FALSE	#REF!
2022-09-12	11:02:34	0.473143	2.10463	138.129	FALSE	#REF!
2022-09-12	11:02:34	0.292125	1.29943	#REF!	FALSE	#REF!
2022-09-12	11:02:34	0.381794	1.6983	139.827	FALSE	#REF!
2022-09-12	11:02:35	0.345407	1.53644	#REF!	FALSE	#REF!
2022-09-12	11:02:35	0.427392	1.90113	141.729	FALSE	#REF!
2022-09-12	11:02:35	0.345204	1.53554	#REF!	FALSE	#REF!
2022-09-12	11:02:36	0.450038	2.00186	143.73	FALSE	#REF!
2022-09-12	11:02:36	0.451209	2.00707	#REF!	FALSE	#REF!
2022-09-12	11:02:36	0.402048	1.78839	145.519	FALSE	#REF!
2022-09-12	11:02:36	0.375076	1.66841	#REF!	FALSE	#REF!
2022-09-12	11:02:37	0.425051	1.89071	147.41	FALSE	#REF!
2022-09-12	11:02:37	0.411158	1.82891	#REF!	FALSE	#REF!
2022-09-12	11:02:37	0.419911	1.86785	149.277	FALSE	#REF!
2022-09-12	11:02:37	0.383626	1.70645	#REF!	FALSE	#REF!
2022-09-12	11:02:38	0.371056	1.65053	150.928	FALSE	#REF!
2022-09-12	11:02:38	0.357977	1.59235	#REF!	FALSE	#REF!
2022-09-12	11:02:38	0.408664	1.81782	152.746	FALSE	#REF!
2022-09-12	11:02:38	0.263321	1.1713	#REF!	FALSE	#REF!
2022-09-12	11:02:39	0.376145	1.67317	154.419	FALSE	#REF!
2022-09-12	11:02:39	0.323626	1.43955	#REF!	FALSE	#REF!
2022-09-12	11:02:39	0.383881	1.70758	156.127	FALSE	#REF!
2022-09-12	11:02:40	0.232685	1.03503	#REF!	FALSE	#REF!
2022-09-12	11:02:40	0.389631	1.73316	157.86	FALSE	#REF!
2022-09-12	11:02:40	0.331056	1.4726	#REF!	FALSE	#REF!
2022-09-12	11:02:40	0.401234	1.78477	159.644	FALSE	#REF!
2022-09-12	11:02:41	0.242405	1.07827	#REF!	FALSE	#REF!
2022-09-12	11:02:41	0.42271	1.8803	161.525	FALSE	#REF!
2022-09-12	11:02:41	0.322863	1.43616	#REF!	FALSE	#REF!
2022-09-12	11:02:41	0.437621	1.94663	163.471	FALSE	#REF!
2022-09-12	11:02:42	0.275891	1.22722	#REF!	FALSE	#REF!
2022-09-12	11:02:42	0.407952	1.81465	165.286	FALSE	#REF!
2022-09-12	11:02:42	0.274059	1.21907	#REF!	FALSE	#REF!
2022-09-12	11:02:42	0.372125	1.65529	166.941	FALSE	#REF!
2022-09-12	11:02:43	0.285407	1.26955	#REF!	FALSE	#REF!
2022-09-12	11:02:43	0.368817	1.64057	168.582	FALSE	#REF!
2022-09-12	11:02:43	0.293753	1.30667	#REF!	FALSE	#REF!
2022-09-12	11:02:44	0.372125	1.65529	170.237	FALSE	#REF!
2022-09-12	11:02:44	0.300267	1.33565	#REF!	FALSE	#REF!
2022-09-12	11:02:44	0.347799	1.54708	171.784	FALSE	#REF!
2022-09-12	11:02:44	0.378079	1.68177	#REF!	FALSE	#REF!
2022-09-12	11:02:45	0.28444	1.26525	173.049	FALSE	#REF!
2022-09-12	11:02:45	0.397723	1.76915	#REF!	FALSE	#REF!
2022-09-12	11:02:45	0.329071	1.46377	174.513	FALSE	#REF!
2022-09-12	11:02:45	0.374619	1.66638	#REF!	FALSE	#REF!
2022-09-12	11:02:46	0.298842	1.32931	175.843	FALSE	#REF!
2022-09-12	11:02:46	0.513499	2.28415	#REF!	FALSE	#REF!
2022-09-12	11:02:46	0.223575	0.994506	176.837	FALSE	#REF!
2022-09-12	11:02:46	0.384033	1.70826	#REF!	FALSE	#REF!
2022-09-12	11:02:47	0.330395	1.46966	178.307	FALSE	#REF!
2022-09-12	11:02:47	0.402659	1.79111	#REF!	FALSE	#REF!
2022-09-12	11:02:47	0.313295	1.3936	179.7	FALSE	#REF!
2022-09-12	11:02:48	0.494771	2.20084	#REF!	FALSE	#REF!
2022-09-12	11:02:48	0.282812	1.258	180.958	FALSE	#REF!
2022-09-12	11:02:48	0.481285	2.14085	#REF!	FALSE	#REF!
2022-09-12	11:02:48	0.264542	1.17674	182.135	FALSE	#REF!
2022-09-12	11:02:49	0.48785	2.17005	#REF!	FALSE	#REF!
2022-09-12	11:02:49	0.245865	1.09366	183.229	FALSE	#REF!
2022-09-12	11:02:49	0.470751	2.09399	#REF!	FALSE	#REF!
2022-09-12	11:02:49	0.232634	1.0348	184.264	FALSE	#REF!
2022-09-12	11:02:50	0.473652	2.1069	#REF!	FALSE	#REF!
2022-09-12	11:02:50	0.242914	1.08053	185.344	FALSE	#REF!
2022-09-12	11:02:50	0.418893	1.86332	#REF!	FALSE	#REF!
2022-09-12	11:02:50	0.216145	0.961456	186.306	FALSE	#REF!
2022-09-12	11:02:51	0.425967	1.89479	#REF!	FALSE	#REF!
2022-09-12	11:02:51	0.311056	1.38364	187.689	FALSE	#REF!
2022-09-12	11:02:51	0.420166	1.86898	#REF!	FALSE	#REF!
2022-09-12	11:02:51	0.37355	1.66163	189.351	FALSE	#REF!
2022-09-12	11:02:52	0.379555	1.68834	#REF!	FALSE	#REF!
2022-09-12	11:02:52	0.286069	1.27249	190.623	FALSE	#REF!
2022-09-12	11:02:52	0.283066	1.25913	#REF!	FALSE	#REF!
2022-09-12	11:02:53	0.44042	1.95908	192.582	FALSE	#REF!
2022-09-12	11:02:53	0.22729	1.01103	#REF!	FALSE	#REF!
2022-09-12	11:02:53	0.365763	1.62699	194.209	FALSE	#REF!
2022-09-12	11:02:53	0.310598	1.3816	#REF!	FALSE	#REF!
2022-09-12	11:02:54	0.417214	1.85585	196.065	FALSE	#REF!
2022-09-12	11:02:54	0.31701	1.41012	#REF!	FALSE	#REF!
2022-09-12	11:02:54	0.577672	2.5696	198.635	FALSE	#REF!
2022-09-12	11:02:54	0.416501	1.85268	#REF!	FALSE	#REF!
2022-09-12	11:02:55	0.512939	2.28166	200.916	FALSE	#REF!
2022-09-12	11:02:55	0.334618	1.48845	#REF!	FALSE	#REF!
2022-09-12	11:02:55	0.386985	1.72139	202.638	FALSE	#REF!
2022-09-12	11:02:55	0.460216	2.04713	#REF!	FALSE	#REF!
2022-09-12	11:02:56	0.383219	1.70463	204.342	FALSE	#REF!
2022-09-12	11:02:56	0.424848	1.88981	#REF!	FALSE	#REF!
2022-09-12	11:02:56	0.331514	1.47464	205.817	FALSE	#REF!
2022-09-12	11:02:57	0.467137	2.07792	#REF!	FALSE	#REF!
2022-09-12	11:02:57	0.298181	1.32637	207.143	FALSE	#REF!
2022-09-12	11:02:57	0.451209	2.00707	#REF!	FALSE	#REF!
2022-09-12	11:02:57	0.293753	1.30667	208.45	FALSE	#REF!
2022-09-12	11:02:58	0.42841	1.90565	#REF!	FALSE	#REF!
2022-09-12	11:02:58	0.481539	2.14198	210.592	FALSE	#REF!
2022-09-12	11:02:58	1.27915	5.68992	#REF!	FALSE	#REF!
2022-09-12	11:02:58	3.44413	15.3202	225.912	1	#REF!
2022-09-12	11:02:59	4.90454	21.8164	#REF!	1	#REF!
2022-09-12	11:02:59	2.55065	11.3458	237.258	FALSE	#REF!
2022-09-12	11:02:59	1.61538	7.18553	#REF!	FALSE	#REF!
2022-09-12	11:02:59	0.799402	3.5559	240.814	FALSE	#REF!
2022-09-12	11:03:00	1.65808	7.37547	#REF!	FALSE	#REF!
2022-09-12	11:03:00	0.77187	3.43343	244.247	FALSE	#REF!
2022-09-12	11:03:00	0.791412	3.52036	#REF!	FALSE	#REF!
2022-09-12	11:03:01	0.713346	3.17311	247.421	FALSE	#REF!
2022-09-12	11:03:01	0.435127	1.93553	#REF!	FALSE	#REF!
2022-09-12	11:03:01	0.632023	2.81136	250.232	FALSE	#REF!
2022-09-12	11:03:01	0.479199	2.13157	#REF!	FALSE	#REF!
2022-09-12	11:03:02	0.810344	3.60457	253.836	FALSE	#REF!
2022-09-12	11:03:02	0.821081	3.65233	#REF!	FALSE	#REF!
2022-09-12	11:03:02	0.860165	3.82619	257.663	FALSE	#REF!
2022-09-12	11:03:02	0.700929	3.11787	#REF!	FALSE	#REF!
2022-09-12	11:03:03	0.913091	4.06161	261.724	FALSE	#REF!
2022-09-12	11:03:03	1.08775	4.83853	#REF!	FALSE	#REF!
2022-09-12	11:03:03	1.05045	4.67261	266.397	FALSE	#REF!
2022-09-12	11:03:03	0.505916	2.25042	#REF!	FALSE	#REF!
2022-09-12	11:03:04	0.532634	2.36926	268.766	FALSE	#REF!
2022-09-12	11:03:04	0.295942	1.31641	#REF!	FALSE	#REF!
2022-09-12	11:03:04	0.42159	1.87532	270.641	FALSE	#REF!
2022-09-12	11:03:05	0.279097	1.24148	#REF!	FALSE	#REF!
2022-09-12	11:03:05	0.451209	2.00707	272.649	FALSE	#REF!
2022-09-12	11:03:05	0.266985	1.1876	#REF!	FALSE	#REF!
2022-09-12	11:03:05	0.375331	1.66955	274.318	FALSE	#REF!
2022-09-12	11:03:06	0.335891	1.49411	#REF!	FALSE	#REF!
2022-09-12	11:03:06	1.44765	6.43944	280.758	FALSE	#REF!
2022-09-12	11:03:06	1.66836	7.4212	#REF!	FALSE	#REF!
2022-09-12	11:03:06	3.35838	14.9387	295.696	1	#REF!
2022-09-12	11:03:07	2.90571	12.9252	#REF!	FALSE	#REF!
2022-09-12	11:03:07	1.76948	7.871	303.567	FALSE	#REF!
2022-09-12	11:03:07	0.687901	3.05992	#REF!	FALSE	#REF!
2022-09-12	11:03:07	0.423015	1.88166	305.449	FALSE	#REF!
2022-09-12	11:03:08	0.414517	1.84385	#REF!	FALSE	#REF!
2022-09-12	11:03:08	0.272328	1.21137	306.66	FALSE	#REF!
2022-09-12	11:03:08	0.145255	0.646123	#REF!	FALSE	#REF!
2022-09-12	11:03:09	0.274364	1.22043	307.881	FALSE	#REF!
2022-09-12	11:03:09	0.0206236	0.0917379	#REF!	FALSE	#REF!
2022-09-12	11:03:09	0.252684	1.12399	309.005	FALSE	#REF!
2022-09-12	11:03:09	0.241183	1.07283	#REF!	FALSE	#REF!
2022-09-12	11:03:10	0.202099	0.898977	309.904	FALSE	#REF!
2022-09-12	11:03:10	0.291056	1.29468	#REF!	FALSE	#REF!
2022-09-12	11:03:10	0.131616	0.585454	310.489	FALSE	#REF!
2022-09-12	11:03:10	0.370802	1.6494	#REF!	FALSE	#REF!
2022-09-12	11:03:11	0.188563	0.838766	311.328	FALSE	#REF!
2022-09-12	11:03:11	0.319707	1.42212	#REF!	FALSE	#REF!
2022-09-12	11:03:11	0.284186	1.26412	312.592	FALSE	#REF!
2022-09-12	11:03:11	0.200878	0.893546	#REF!	FALSE	#REF!
2022-09-12	11:03:12	0.378741	1.68472	314.277	FALSE	#REF!
2022-09-12	11:03:12	0.1907	0.848272	#REF!	FALSE	#REF!
2022-09-12	11:03:12	0.308919	1.37413	315.651	FALSE	#REF!
2022-09-12	11:03:12	0.159911	0.711316	#REF!	FALSE	#REF!
2022-09-12	11:03:13	0.293194	1.30419	316.955	FALSE	#REF!
2022-09-12	11:03:13	0.237723	1.05744	#REF!	FALSE	#REF!
2022-09-12	11:03:13	0.407392	1.81216	318.767	FALSE	#REF!
2022-09-12	11:03:14	1.37029	6.09532	#REF!	FALSE	#REF!
2022-09-12	11:03:14	0.537774	2.39213	321.159	FALSE	#REF!
2022-09-12	11:03:14	0.388359	1.7275	#REF!	FALSE	#REF!
2022-09-12	11:03:14	0.471412	2.09693	323.256	FALSE	#REF!
2022-09-12	11:03:15	0.520267	2.31425	#REF!	FALSE	#REF!
2022-09-12	11:03:15	0.483015	2.14855	325.405	FALSE	#REF!
2022-09-12	11:03:15	1.0679	4.75023	#REF!	FALSE	#REF!
2022-09-12	11:03:15	0.386018	1.71709	327.122	FALSE	#REF!
2022-09-12	11:03:16	0.300318	1.33587	#REF!	FALSE	#REF!
2022-09-12	11:03:16	0.470446	2.09264	329.215	FALSE	#REF!
2022-09-12	11:03:16	0.286425	1.27408	#REF!	FALSE	#REF!
2022-09-12	11:03:16	0.214262	0.95308	330.168	FALSE	#REF!
2022-09-12	11:03:17	0.336654	1.4975	#REF!	FALSE	#REF!
2022-09-12	11:03:17	0.234771	1.04431	331.212	FALSE	#REF!
2022-09-12	11:03:17	0.455738	2.02721	#REF!	FALSE	#REF!
2022-09-12	11:03:18	0.365865	1.62744	332.839	FALSE	#REF!
2022-09-12	11:03:18	0.431056	1.91742	#REF!	FALSE	#REF!
2022-09-12	11:03:18	0.440878	1.96111	334.8	FALSE	#REF!
2022-09-12	11:03:18	0.517723	2.30294	#REF!	FALSE	#REF!
2022-09-12	11:03:19	0.289529	1.28788	336.088	FALSE	#REF!
2022-09-12	11:03:19	0.271107	1.20594	#REF!	FALSE	#REF!
2022-09-12	11:03:19	0.358486	1.59462	337.683	FALSE	#REF!
2022-09-12	11:03:19	0.215687	0.959419	#REF!	FALSE	#REF!
2022-09-12	11:03:20	0.385814	1.71618	339.399	FALSE	#REF!
2022-09-12	11:03:20	0.705713	3.13915	#REF!	FALSE	#REF!
2022-09-12	11:03:20	0.438079	1.94866	341.348	FALSE	#REF!
2022-09-12	11:03:20	0.273397	1.21612	#REF!	FALSE	#REF!
2022-09-12	11:03:21	0.241031	1.07215	342.42	FALSE	#REF!
2022-09-12	11:03:21	0.242659	1.0794	#REF!	FALSE	#REF!
2022-09-12	11:03:21	0.137468	0.611485	343.031	FALSE	#REF!
2022-09-12	11:03:22	-0.0485875	-0.216127	#REF!	FALSE	#REF!
2022-09-12	11:03:22	-0.054389	-0.241933	343.031	FALSE	#REF!
2022-09-12	11:03:22	-0.0672134	-0.298979	#REF!	FALSE	#REF!
2022-09-12	11:03:22	-0.0401906	-0.178776	343.031	FALSE	#REF!
2022-09-12	11:03:23	0.00337174	0.0149982	#REF!	FALSE	#REF!
2022-09-12	11:03:23	0.0351783	0.15648	343.188	FALSE	#REF!
2022-09-12	11:03:23	0.0514125	0.228693	#REF!	FALSE	#REF!
2022-09-12	11:03:23	2.30592	10.2572	353.445	FALSE	#REF!
2022-09-12	11:03:24	1.75436	7.80374	#REF!	FALSE	#REF!
2022-09-12	11:03:24	0.438791	1.95183	355.397	FALSE	#REF!
2022-09-12	11:03:24	0.257824	1.14685	#REF!	FALSE	#REF!
2022-09-12	11:03:24	0.34383	1.52942	356.926	FALSE	#REF!
2022-09-12	11:03:25	0.487901	2.17028	#REF!	FALSE	#REF!
2022-09-12	11:03:25	0.345611	1.53735	358.464	FALSE	#REF!
2022-09-12	11:03:25	0.589936	2.62415	#REF!	FALSE	#REF!
2022-09-12	11:03:26	0.48612	2.16236	360.626	FALSE	#REF!
2022-09-12	11:03:26	0.325509	1.44793	#REF!	FALSE	#REF!
2022-09-12	11:03:26	0.698792	3.10837	363.734	FALSE	#REF!
2022-09-12	11:03:26	0.252277	1.12218	#REF!	FALSE	#REF!
2022-09-12	11:03:27	0.282354	1.25597	364.99	FALSE	#REF!
2022-09-12	11:03:27	0.158435	0.704751	#REF!	FALSE	#REF!
2022-09-12	11:03:27	0.297061	1.32139	366.312	FALSE	#REF!
2022-09-12	11:03:27	0.177774	0.790774	#REF!	FALSE	#REF!
2022-09-12	11:03:28	0.290496	1.29218	367.604	FALSE	#REF!
2022-09-12	11:03:28	0.256909	1.14278	#REF!	FALSE	#REF!
2022-09-12	11:03:28	0.603168	2.68301	370.287	FALSE	#REF!
2022-09-12	11:03:28	0.885305	3.93801	#REF!	FALSE	#REF!
2022-09-12	11:03:29	0.321743	1.43118	371.718	FALSE	#REF!
2022-09-12	11:03:29	0.467036	2.07747	#REF!	FALSE	#REF!
2022-09-12	11:03:29	0.355077	1.57945	373.298	FALSE	#REF!
2022-09-12	11:03:30	0.957672	4.25992	#REF!	FALSE	#REF!
2022-09-12	11:03:30	0.138181	0.614657	373.912	FALSE	#REF!
2022-09-12	11:03:30	0.153448	0.682567	#REF!	FALSE	#REF!
2022-09-12	11:03:30	0.0930409	0.413865	374.326	FALSE	#REF!
2022-09-12	11:03:31	0.100573	0.447369	#REF!	FALSE	#REF!
2022-09-12	11:03:31	0.134618	0.598808	374.925	FALSE	#REF!
2022-09-12	11:03:31	0.0867305	0.385795	#REF!	FALSE	#REF!
2022-09-12	11:03:31	0.0387407	0.172326	375.097	FALSE	#REF!
2022-09-12	11:03:32	0.0386898	0.1721	#REF!	FALSE	#REF!
2022-09-12	11:03:32	0.0874429	0.388964	375.486	FALSE	#REF!
2022-09-12	11:03:32	0.127341	0.566438	#REF!	FALSE	#REF!
2022-09-12	11:03:32	0.146272	0.650647	376.137	FALSE	#REF!
2022-09-12	11:03:33	0.714211	3.17695	#REF!	FALSE	#REF!
2022-09-12	11:03:33	0.778079	3.46105	379.598	FALSE	#REF!
2022-09-12	11:03:33	2.03223	9.03977	#REF!	FALSE	#REF!
2022-09-12	11:03:33	3.5109	15.6172	395.215	1	#REF!
2022-09-12	11:03:34	5.00602	22.2678	#REF!	1	#REF!
2022-09-12	11:03:34	7.37991	32.8273	428.042	1	#REF!
2022-09-12	11:03:34	8.19624	36.4585	#REF!	1	#REF!
2022-09-12	11:03:35	5.85517	26.045	454.087	1	#REF!
2022-09-12	11:03:35	4.9592	22.0595	#REF!	1	#REF!
2022-09-12	11:03:35	4.62627	20.5786	474.666	1	#REF!
2022-09-12	11:03:35	2.30882	10.2701	#REF!	FALSE	#REF!
2022-09-12	11:03:36	0.910191	4.04871	478.715	FALSE	#REF!
2022-09-12	11:03:36	0.79813	3.55024	#REF!	FALSE	#REF!
2022-09-12	11:03:36	0.610598	2.71606	481.431	FALSE	#REF!
2022-09-12	11:03:36	0.714415	3.17786	#REF!	FALSE	#REF!
2022-09-12	11:03:37	1.30067	5.78564	487.216	FALSE	#REF!
2022-09-12	11:03:37	0.485509	2.15964	#REF!	FALSE	#REF!
2022-09-12	11:03:37	0.865916	3.85177	491.068	FALSE	#REF!
2022-09-12	11:03:37	0.67645	3.00898	#REF!	FALSE	#REF!
2022-09-12	11:03:38	1.86302	8.28709	499.355	FALSE	#REF!
2022-09-12	11:03:38	3.87385	17.2317	#REF!	1	#REF!
2022-09-12	11:03:38	5.23945	23.3061	522.661	1	#REF!
2022-09-12	11:03:39	3.36581	14.9718	#REF!	1	#REF!
2022-09-12	11:03:39	0.474568	2.11097	524.772	FALSE	#REF!
2022-09-12	11:03:39	0.37472	1.66683	#REF!	FALSE	#REF!
2022-09-12	11:03:39	0.343982	1.5301	526.302	FALSE	#REF!
2022-09-12	11:03:40	0.288257	1.28222	#REF!	FALSE	#REF!
2022-09-12	11:03:40	0.555331	2.47022	528.773	FALSE	#REF!
2022-09-12	11:03:40	0.758588	3.37435	#REF!	FALSE	#REF!
2022-09-12	11:03:40	0.36215	1.61092	530.384	FALSE	#REF!
2022-09-12	11:03:41	0.406527	1.80831	#REF!	FALSE	#REF!
2022-09-12	11:03:41	0.307799	1.36915	531.753	FALSE	#REF!
2022-09-12	11:03:41	0.332837	1.48053	#REF!	FALSE	#REF!
2022-09-12	11:03:41	0.324491	1.4434	533.196	FALSE	#REF!
2022-09-12	11:03:42	0.328969	1.46332	#REF!	FALSE	#REF!
2022-09-12	11:03:42	0.339707	1.51108	534.707	FALSE	#REF!
2022-09-12	11:03:42	0.373601	1.66185	#REF!	FALSE	#REF!
2022-09-12	11:03:43	0.325458	1.4477	536.155	FALSE	#REF!
2022-09-12	11:03:43	0.329224	1.46445	#REF!	FALSE	#REF!
2022-09-12	11:03:43	0.371158	1.65099	537.806	FALSE	#REF!
2022-09-12	11:03:43	0.399097	1.77526	#REF!	FALSE	#REF!
2022-09-12	11:03:44	0.392583	1.74629	539.552	FALSE	#REF!
2022-09-12	11:03:44	0.395942	1.76123	#REF!	FALSE	#REF!
2022-09-12	11:03:44	0.389021	1.73044	541.283	FALSE	#REF!
2022-09-12	11:03:44	0.381082	1.69513	#REF!	FALSE	#REF!
2022-09-12	11:03:45	0.388715	1.72908	543.012	FALSE	#REF!
2022-09-12	11:03:45	0.382354	1.70079	#REF!	FALSE	#REF!
2022-09-12	11:03:45	0.387443	1.72342	544.735	FALSE	#REF!
2022-09-12	11:03:45	0.399453	1.77685	#REF!	FALSE	#REF!
2022-09-12	11:03:46	0.40042	1.78115	546.516	FALSE	#REF!
2022-09-12	11:03:46	0.407036	1.81058	#REF!	FALSE	#REF!
2022-09-12	11:03:46	0.403728	1.79586	548.312	FALSE	#REF!
2022-09-12	11:03:47	0.401031	1.78387	#REF!	FALSE	#REF!
2022-09-12	11:03:47	0.399809	1.77843	550.091	FALSE	#REF!
2022-09-12	11:03:47	0.404084	1.79745	#REF!	FALSE	#REF!
2022-09-12	11:03:47	0.397926	1.77005	551.861	FALSE	#REF!
2022-09-12	11:03:48	0.391972	1.74357	#REF!	FALSE	#REF!
2022-09-12	11:03:48	0.387494	1.72365	553.584	FALSE	#REF!
2022-09-12	11:03:48	0.39131	1.74063	#REF!	FALSE	#REF!
2022-09-12	11:03:48	0.392074	1.74402	555.328	FALSE	#REF!
2022-09-12	11:03:49	0.378944	1.68562	#REF!	FALSE	#REF!
2022-09-12	11:03:49	0.475636	2.11572	557.444	FALSE	#REF!
2022-09-12	11:03:49	0.574517	2.55557	#REF!	FALSE	#REF!
2022-09-12	11:03:49	1.36658	6.07882	563.523	FALSE	#REF!
2022-09-12	11:03:50	3.13528	13.9464	#REF!	1	#REF!
2022-09-12	11:03:50	4.59304	20.4308	583.954	1	#REF!
2022-09-12	11:03:50	7.96851	35.4455	#REF!	1	#REF!
2022-09-12	11:03:51	13.6263	60.6125	644.566	1	#REF!
2022-09-12	11:03:51	12.2031	54.2818	#REF!	1	#REF!
2022-09-12	11:03:51	8.01894	35.6698	680.236	1	#REF!
2022-09-12	11:03:51	6.66973	29.6683	#REF!	1	#REF!
2022-09-12	11:03:52	5.15248	22.9193	703.155	1	#REF!
2022-09-12	11:03:52	4.65299	20.6974	#REF!	1	#REF!
2022-09-12	11:03:52	3.62037	16.1041	719.259	1	#REF!
2022-09-12	11:03:52	2.6794	11.9185	#REF!	FALSE	#REF!
2022-09-12	11:03:53	2.65589	11.8139	731.073	FALSE	#REF!
2022-09-12	11:03:53	2.83818	12.6248	#REF!	FALSE	#REF!
2022-09-12	11:03:53	2.41706	10.7516	741.825	FALSE	#REF!
2022-09-12	11:03:53	2.40276	10.688	#REF!	FALSE	#REF!
2022-09-12	11:03:54	2.5766	11.4612	753.286	FALSE	#REF!
2022-09-12	11:03:54	2.5534	11.358	#REF!	FALSE	#REF!
2022-09-12	11:03:54	2.51849	11.2027	764.489	FALSE	#REF!
2022-09-12	11:03:54	2.31126	10.2809	#REF!	FALSE	#REF!
2022-09-12	11:03:55	1.40118	6.23273	770.722	FALSE	#REF!
2022-09-12	11:03:55	0.779911	3.4692	#REF!	FALSE	#REF!
2022-09-12	11:03:55	0.496552	2.20876	772.93	FALSE	#REF!
2022-09-12	11:03:56	0.346374	1.54074	#REF!	FALSE	#REF!
2022-09-12	11:03:56	0.342405	1.52309	774.453	FALSE	#REF!
2022-09-12	11:03:56	0.416196	1.85132	#REF!	FALSE	#REF!
2022-09-12	11:03:56	0.396654	1.7644	776.218	FALSE	#REF!
2022-09-12	11:03:57	0.507239	2.2563	#REF!	FALSE	#REF!
2022-09-12	11:03:57	0.643779	2.86366	779.082	FALSE	#REF!
2022-09-12	11:03:57	0.525712	2.33847	#REF!	FALSE	#REF!
2022-09-12	11:03:57	0.644593	2.86728	781.949	FALSE	#REF!
2022-09-12	11:03:58	0.577265	2.56779	#REF!	FALSE	#REF!
2022-09-12	11:03:58	0.491667	2.18703	784.136	FALSE	#REF!
2022-09-12	11:03:58	0.28098	1.24986	#REF!	FALSE	#REF!
2022-09-12	11:03:58	0.550343	2.44804	786.584	FALSE	#REF!
2022-09-12	11:03:59	0.3793	1.6872	#REF!	FALSE	#REF!
2022-09-12	11:03:59	0.475331	2.11437	788.698	FALSE	#REF!
2022-09-12	11:03:59	0.287392	1.27838	#REF!	FALSE	#REF!
2022-09-12	11:04:00	0.644695	2.86773	791.566	FALSE	#REF!
2022-09-12	11:04:00	0.40383	1.79632	#REF!	FALSE	#REF!
2022-09-12	11:04:00	0.710445	3.1602	794.726	FALSE	#REF!
2022-09-12	11:04:00	0.497214	2.21171	#REF!	FALSE	#REF!
2022-09-12	11:04:01	0.4993	2.22099	796.947	FALSE	#REF!
2022-09-12	11:04:01	0.369275	1.64261	#REF!	FALSE	#REF!
2022-09-12	11:04:01	0.5707	2.53859	799.486	FALSE	#REF!
2022-09-12	11:04:01	0.582812	2.59246	#REF!	FALSE	#REF!
2022-09-12	11:04:02	0.788257	3.50632	802.992	FALSE	#REF!
2022-09-12	11:04:02	0.648969	2.88674	#REF!	FALSE	#REF!
2022-09-12	11:04:02	1.09971	4.89173	807.884	FALSE	#REF!
2022-09-12	11:04:02	1.88678	8.39277	#REF!	FALSE	#REF!
2022-09-12	11:04:03	0.712685	3.17017	811.054	FALSE	#REF!
2022-09-12	11:04:03	1.29472	5.75917	#REF!	FALSE	#REF!
2022-09-12	11:04:03	1.05742	4.70362	815.758	FALSE	#REF!
2022-09-12	11:04:04	1.231	5.47573	#REF!	FALSE	#REF!
2022-09-12	11:04:04	2.03324	9.04426	824.802	FALSE	#REF!
2022-09-12	11:04:04	0.634924	2.82427	#REF!	FALSE	#REF!
2022-09-12	11:04:04	1.42836	6.35363	831.155	FALSE	#REF!
2022-09-12	11:04:05	0.622252	2.7679	#REF!	FALSE	#REF!
2022-09-12	11:04:05	0.899351	4.00049	835.156	FALSE	#REF!
2022-09-12	11:04:05	1.09813	4.8847	#REF!	FALSE	#REF!
2022-09-12	11:04:05	0.682811	3.03728	838.193	FALSE	#REF!
2022-09-12	11:04:06	1.01604	4.51955	#REF!	FALSE	#REF!
2022-09-12	11:04:06	0.559097	2.48698	840.68	FALSE	#REF!
2022-09-12	11:04:06	0.836298	3.72002	#REF!	FALSE	#REF!
2022-09-12	11:04:06	1.28307	5.70735	846.388	FALSE	#REF!
2022-09-12	11:04:07	0.499249	2.22076	#REF!	FALSE	#REF!
2022-09-12	11:04:07	0.989835	4.40298	850.791	FALSE	#REF!
2022-09-12	11:04:07	0.898791	3.998	#REF!	FALSE	#REF!
2022-09-12	11:04:08	0.918079	4.0838	854.874	FALSE	#REF!
2022-09-12	11:04:08	1.34607	5.98759	#REF!	FALSE	#REF!
2022-09-12	11:04:08	2.46245	10.9535	865.828	FALSE	#REF!
2022-09-12	11:04:08	1.18765	5.2829	#REF!	FALSE	#REF!
2022-09-12	11:04:09	2.52943	11.2514	877.079	FALSE	#REF!
2022-09-12	11:04:09	1.65279	7.35194	#REF!	FALSE	#REF!
2022-09-12	11:04:09	0.782608	3.4812	880.56	FALSE	#REF!
2022-09-12	11:04:09	0.910903	4.05188	#REF!	FALSE	#REF!
2022-09-12	11:04:10	0.727341	3.23536	883.796	FALSE	#REF!
2022-09-12	11:04:10	0.859606	3.8237	#REF!	FALSE	#REF!
2022-09-12	11:04:10	0.842608	3.74809	887.544	FALSE	#REF!
2022-09-12	11:04:10	0.566781	2.52116	#REF!	FALSE	#REF!
2022-09-12	11:04:11	0.477621	2.12455	889.668	FALSE	#REF!
2022-09-12	11:04:11	0.436858	1.94323	#REF!	FALSE	#REF!
2022-09-12	11:04:11	0.410751	1.8271	891.496	FALSE	#REF!
2022-09-12	11:04:12	0.395534	1.75941	#REF!	FALSE	#REF!
2022-09-12	11:04:12	0.537723	2.3919	893.887	FALSE	#REF!
2022-09-12	11:04:12	0.359911	1.60096	#REF!	FALSE	#REF!
2022-09-12	11:04:12	0.492125	2.18907	896.076	FALSE	#REF!
2022-09-12	11:04:13	0.451514	2.00842	#REF!	FALSE	#REF!
2022-09-12	11:04:13	0.309835	1.37821	897.455	FALSE	#REF!
2022-09-12	11:04:13	0.50785	2.25902	#REF!	FALSE	#REF!
2022-09-12	11:04:13	0.352888	1.56972	899.024	FALSE	#REF!
2022-09-12	11:04:14	0.597316	2.65698	#REF!	FALSE	#REF!
2022-09-12	11:04:14	0.864186	3.84407	902.868	FALSE	#REF!
2022-09-12	11:04:14	0.598537	2.66241	#REF!	FALSE	#REF!
2022-09-12	11:04:14	1.20016	5.33855	908.207	FALSE	#REF!
2022-09-12	11:04:15	1.00704	4.47952	#REF!	FALSE	#REF!
2022-09-12	11:04:15	2.50245	11.1314	919.338	FALSE	#REF!
2022-09-12	11:04:15	3.94337	17.5409	#REF!	1	#REF!
2022-09-12	11:04:15	5.45828	24.2795	943.618	1	#REF!
2022-09-12	11:04:16	3.94342	17.5411	#REF!	1	#REF!
2022-09-12	11:04:16	1.38072	6.14172	949.76	FALSE	#REF!
2022-09-12	11:04:16	1.45569	6.4752	#REF!	FALSE	#REF!
2022-09-12	11:04:17	1.5879	7.0633	956.823	FALSE	#REF!
2022-09-12	11:04:17	0.612735	2.72557	#REF!	FALSE	#REF!
2022-09-12	11:04:17	0.793092	3.52783	960.351	FALSE	#REF!
2022-09-12	11:04:17	0.565713	2.5164	#REF!	FALSE	#REF!
2022-09-12	11:04:18	0.385764	1.71596	962.067	FALSE	#REF!
2022-09-12	11:04:18	0.45243	2.0125	#REF!	FALSE	#REF!
2022-09-12	11:04:18	0.626781	2.78805	964.855	FALSE	#REF!
2022-09-12	11:04:18	0.79584	3.54006	#REF!	FALSE	#REF!
2022-09-12	11:04:19	0.603066	2.68256	967.537	FALSE	#REF!
2022-09-12	11:04:19	0.31986	1.4228	#REF!	FALSE	#REF!
2022-09-12	11:04:19	0.489428	2.17707	969.714	FALSE	#REF!
2022-09-12	11:04:19	0.353448	1.57221	#REF!	FALSE	#REF!
2022-09-12	11:04:20	0.53584	2.38352	972.098	FALSE	#REF!
2022-09-12	11:04:20	0.415331	1.84748	#REF!	FALSE	#REF!
2022-09-12	11:04:20	0.293499	1.30554	973.404	FALSE	#REF!
2022-09-12	11:04:21	0.476807	2.12093	#REF!	FALSE	#REF!
2022-09-12	11:04:21	0.265865	1.18262	974.586	FALSE	#REF!
2022-09-12	11:04:21	0.558995	2.48652	#REF!	FALSE	#REF!
2022-09-12	11:04:21	0.227952	1.01398	975.6	FALSE	#REF!
2022-09-12	11:04:22	0.541896	2.41046	#REF!	FALSE	#REF!
2022-09-12	11:04:22	0.352278	1.567	977.167	FALSE	#REF!
2022-09-12	11:04:22	0.508054	2.25993	#REF!	FALSE	#REF!
2022-09-12	11:04:22	0.328054	1.45925	978.626	FALSE	#REF!
2022-09-12	11:04:23	0.474618	2.1112	#REF!	FALSE	#REF!
2022-09-12	11:04:23	0.424135	1.88664	980.513	FALSE	#REF!
2022-09-12	11:04:23	0.367646	1.63536	#REF!	FALSE	#REF!
2022-09-12	11:04:23	0.404797	1.80062	982.314	FALSE	#REF!
2022-09-12	11:04:24	0.395534	1.75941	#REF!	FALSE	#REF!
2022-09-12	11:04:24	0.453804	2.01861	984.332	FALSE	#REF!
2022-09-12	11:04:24	0.641081	2.85166	#REF!	FALSE	#REF!
2022-09-12	11:04:25	1.38352	6.15417	990.486	FALSE	#REF!
2022-09-12	11:04:25	1.34128	5.96628	#REF!	FALSE	#REF!
2022-09-12	11:04:25	2.7796	12.3642	1002.85	FALSE	#REF!
2022-09-12	11:04:25	3.00724	13.3768	#REF!	1	#REF!
2022-09-12	11:04:26	1.0048	4.46955	1007.32	FALSE	#REF!
2022-09-12	11:04:26	2.32902	10.3599	#REF!	FALSE	#REF!
2022-09-12	11:04:26	2.94083	13.0814	1020.4	FALSE	#REF!
2022-09-12	11:04:26	1.96724	8.75068	#REF!	FALSE	#REF!
2022-09-12	11:04:27	2.78291	12.3789	1032.78	FALSE	#REF!
2022-09-12	11:04:27	0.569021	2.53112	#REF!	FALSE	#REF!
2022-09-12	11:04:27	1.45014	6.45051	1039.23	FALSE	#REF!
2022-09-12	11:04:27	1.06561	4.74005	#REF!	FALSE	#REF!
2022-09-12	11:04:28	0.509326	2.26558	1041.5	FALSE	#REF!
2022-09-12	11:04:28	0.405	1.80152	#REF!	FALSE	#REF!
2022-09-12	11:04:28	0.517672	2.30271	1043.8	FALSE	#REF!
2022-09-12	11:04:29	0.280827	1.24917	#REF!	FALSE	#REF!
2022-09-12	11:04:29	0.391972	1.74357	1045.54	FALSE	#REF!
2022-09-12	11:04:29	0.313601	1.39496	#REF!	FALSE	#REF!
2022-09-12	11:04:29	0.400522	1.7816	1047.32	FALSE	#REF!
2022-09-12	11:04:30	0.290293	1.29128	#REF!	FALSE	#REF!
2022-09-12	11:04:30	0.460827	2.04985	1049.37	FALSE	#REF!
2022-09-12	11:04:30	0.286934	1.27634	#REF!	FALSE	#REF!
2022-09-12	11:04:30	0.341794	1.52037	1050.89	FALSE	#REF!
2022-09-12	11:04:31	0.304797	1.3558	#REF!	FALSE	#REF!
2022-09-12	11:04:31	0.317417	1.41193	1052.31	FALSE	#REF!
2022-09-12	11:04:31	0.38958	1.73293	#REF!	FALSE	#REF!
2022-09-12	11:04:31	0.326425	1.452	1053.76	FALSE	#REF!
2022-09-12	11:04:32	0.417926	1.85902	#REF!	FALSE	#REF!
2022-09-12	11:04:32	0.448868	1.99665	1055.76	FALSE	#REF!
2022-09-12	11:04:32	1.0309	4.58565	#REF!	FALSE	#REF!
2022-09-12	11:04:33	1.00347	4.46364	1060.22	FALSE	#REF!
2022-09-12	11:04:33	1.63782	7.28535	#REF!	FALSE	#REF!
2022-09-12	11:04:33	2.8966	12.8847	1073.1	FALSE	#REF!
2022-09-12	11:04:33	1.55645	6.9234	#REF!	FALSE	#REF!
2022-09-12	11:04:34	1.84464	8.20533	1081.31	FALSE	#REF!
2022-09-12	11:04:34	1.02159	4.54424	#REF!	FALSE	#REF!
2022-09-12	11:04:34	0.964694	4.29115	1085.6	FALSE	#REF!
2022-09-12	11:04:34	0.499606	2.22235	#REF!	FALSE	#REF!
2022-09-12	11:04:35	0.286069	1.27249	1086.87	FALSE	#REF!
2022-09-12	11:04:35	0.457977	2.03717	#REF!	FALSE	#REF!
2022-09-12	11:04:35	0.465305	2.06977	1088.94	FALSE	#REF!
2022-09-12	11:04:35	0.558639	2.48494	#REF!	FALSE	#REF!
2022-09-12	11:04:36	0.501946	2.23276	1091.18	FALSE	#REF!
2022-09-12	11:04:36	0.66673	2.96575	#REF!	FALSE	#REF!
2022-09-12	11:04:36	0.391463	1.74131	1092.92	FALSE	#REF!
2022-09-12	11:04:36	0.518079	2.30452	#REF!	FALSE	#REF!
2022-09-12	11:04:37	0.41701	1.85494	1094.77	FALSE	#REF!
2022-09-12	11:04:37	0.351514	1.5636	#REF!	FALSE	#REF!
2022-09-12	11:04:37	0.256603	1.14142	1095.91	FALSE	#REF!
2022-09-12	11:04:38	0.248155	1.10384	#REF!	FALSE	#REF!
2022-09-12	11:04:38	0.358486	1.59462	1097.51	FALSE	#REF!
2022-09-12	11:04:38	0.205967	0.916182	#REF!	FALSE	#REF!
2022-09-12	11:04:38	0.441692	1.96473	1099.47	FALSE	#REF!
2022-09-12	11:04:39	0.237621	1.05699	#REF!	FALSE	#REF!
2022-09-12	11:04:39	0.409631	1.82212	1101.29	FALSE	#REF!
2022-09-12	11:04:39	0.214771	0.955344	#REF!	FALSE	#REF!
2022-09-12	11:04:39	0.643931	2.86433	1104.16	FALSE	#REF!
2022-09-12	11:04:40	1.39029	6.18429	#REF!	FALSE	#REF!
2022-09-12	11:04:40	4.07879	18.1433	1122.3	1	#REF!
2022-09-12	11:04:40	3.21004	14.2789	#REF!	1	#REF!
2022-09-12	11:04:40	3.39747	15.1126	1137.41	1	#REF!
2022-09-12	11:04:41	1.04307	4.63978	#REF!	FALSE	#REF!
2022-09-12	11:04:41	1.50363	6.68845	1144.1	FALSE	#REF!
2022-09-12	11:04:41	0.545712	2.42744	#REF!	FALSE	#REF!
2022-09-12	11:04:42	1.09162	4.85574	1148.96	FALSE	#REF!
2022-09-12	11:04:42	1.02388	4.55442	#REF!	FALSE	#REF!
2022-09-12	11:04:42	0.363372	1.61635	1150.58	FALSE	#REF!
2022-09-12	11:04:42	0.495076	2.2022	#REF!	FALSE	#REF!
2022-09-12	11:04:43	0.254059	1.13011	1151.71	FALSE	#REF!
2022-09-12	11:04:43	0.43645	1.94142	#REF!	FALSE	#REF!
2022-09-12	11:04:43	0.170445	0.758173	1152.46	FALSE	#REF!
2022-09-12	11:04:43	0.269987	1.20096	#REF!	FALSE	#REF!
2022-09-12	11:04:44	0.103626	0.460949	1152.92	FALSE	#REF!
2022-09-12	11:04:44	0.190751	0.848499	#REF!	FALSE	#REF!
2022-09-12	11:04:44	0.0104964	0.0466901	1152.97	FALSE	#REF!
2022-09-12	11:04:44	0.210649	0.937009	#REF!	FALSE	#REF!
2022-09-12	11:04:45	0.0666796	0.296604	1153.27	FALSE	#REF!
2022-09-12	11:04:45	0.215382	0.958062	#REF!	FALSE	#REF!
2022-09-12	11:04:45	0.0489697	0.217827	1153.49	FALSE	#REF!
2022-09-12	11:04:46	0.210445	0.936101	#REF!	FALSE	#REF!
2022-09-12	11:04:46	0.160522	0.714034	1154.2	FALSE	#REF!
2022-09-12	11:04:46	0.251565	1.11901	#REF!	FALSE	#REF!
2022-09-12	11:04:46	0.199606	0.887887	1155.09	FALSE	#REF!
2022-09-12	11:04:47	0.373143	1.65981	#REF!	FALSE	#REF!
2022-09-12	11:04:47	0.220013	0.978662	1156.07	FALSE	#REF!
2022-09-12	11:04:47	0.413193	1.83797	#REF!	FALSE	#REF!
2022-09-12	11:04:47	0.157367	0.7	1156.77	FALSE	#REF!
2022-09-12	11:04:48	0.44785	1.99213	#REF!	FALSE	#REF!
2022-09-12	11:04:48	0.186985	0.831747	1157.6	FALSE	#REF!
2022-09-12	11:04:48	0.462456	2.0571	#REF!	FALSE	#REF!
2022-09-12	11:04:48	0.117112	0.520938	1158.12	FALSE	#REF!
2022-09-12	11:04:49	0.453957	2.01929	#REF!	FALSE	#REF!
2022-09-12	11:04:49	0.187341	0.83333	1158.95	FALSE	#REF!
2022-09-12	11:04:49	0.449733	2.0005	#REF!	FALSE	#REF!
2022-09-12	11:04:50	0.207748	0.924105	1159.88	FALSE	#REF!
2022-09-12	11:04:50	0.503982	2.24181	#REF!	FALSE	#REF!
2022-09-12	11:04:50	0.268104	1.19258	1161.07	FALSE	#REF!
2022-09-12	11:04:50	0.484135	2.15353	#REF!	FALSE	#REF!
2022-09-12	11:04:51	0.174364	0.775606	1161.84	FALSE	#REF!
2022-09-12	11:04:51	0.460369	2.04781	#REF!	FALSE	#REF!
2022-09-12	11:04:51	0.280725	1.24872	1163.09	FALSE	#REF!
2022-09-12	11:04:51	0.472176	2.10033	#REF!	FALSE	#REF!
2022-09-12	11:04:52	0.184135	0.819069	1163.91	FALSE	#REF!
2022-09-12	11:04:52	0.446781	1.98737	#REF!	FALSE	#REF!
2022-09-12	11:04:52	0.257366	1.14482	1165.06	FALSE	#REF!
2022-09-12	11:04:52	0.472532	2.10192	#REF!	FALSE	#REF!
2022-09-12	11:04:53	0.25416	1.13055	1166.19	FALSE	#REF!
2022-09-12	11:04:53	0.388308	1.72727	#REF!	FALSE	#REF!
2022-09-12	11:04:53	0.290191	1.29083	1167.48	FALSE	#REF!
2022-09-12	11:04:54	0.484695	2.15602	#REF!	FALSE	#REF!
2022-09-12	11:04:54	0.223372	0.993603	1168.47	FALSE	#REF!
2022-09-12	11:04:54	0.410242	1.82484	#REF!	FALSE	#REF!
2022-09-12	11:04:54	0.21813	0.970286	1169.44	FALSE	#REF!
2022-09-12	11:04:55	0.35528	1.58036	#REF!	FALSE	#REF!
2022-09-12	11:04:55	0.19299	0.858458	1170.3	FALSE	#REF!
2022-09-12	11:04:55	0.381336	1.69626	#REF!	FALSE	#REF!
2022-09-12	11:04:55	0.148817	0.661968	1170.96	FALSE	#REF!
2022-09-12	11:04:56	0.20729	0.922067	#REF!	FALSE	#REF!
2022-09-12	11:04:56	0.0978246	0.435143	1171.4	FALSE	#REF!
2022-09-12	11:04:56	0.162812	0.72422	#REF!	FALSE	#REF!
2022-09-12	11:04:56	0.428613	1.90656	1173.3	FALSE	#REF!
2022-09-12	11:04:57	0.215687	0.959419	#REF!	FALSE	#REF!
2022-09-12	11:04:57	0.327188	1.4554	1174.76	FALSE	#REF!
2022-09-12	11:04:57	0.392786	1.74719	#REF!	FALSE	#REF!
2022-09-12	11:04:57	0.329987	1.46785	1176.23	FALSE	#REF!
2022-09-12	11:04:58	0.270903	1.20503	#REF!	FALSE	#REF!
2022-09-12	11:04:58	0.450242	2.00277	1178.23	FALSE	#REF!
2022-09-12	11:04:58	0.285102	1.26819	#REF!	FALSE	#REF!
2022-09-12	11:04:59	0.403728	1.79586	1180.03	FALSE	#REF!
2022-09-12	11:04:59	0.935025	4.15918	#REF!	FALSE	#REF!
2022-09-12	11:04:59	0.433804	1.92965	1181.96	FALSE	#REF!
2022-09-12	11:04:59	0.425356	1.89207	#REF!	FALSE	#REF!
2022-09-12	11:05:00	0.812582	3.61453	1185.57	FALSE	#REF!
2022-09-12	11:05:00	0.389173	1.73112	#REF!	FALSE	#REF!
2022-09-12	11:05:00	0.309529	1.37685	1186.95	FALSE	#REF!
2022-09-12	11:05:00	0.348461	1.55002	#REF!	FALSE	#REF!
2022-09-12	11:05:01	0.331667	1.47532	1188.42	FALSE	#REF!
2022-09-12	11:05:01	0.40841	1.81669	#REF!	FALSE	#REF!
2022-09-12	11:05:01	0.334466	1.48777	1189.91	FALSE	#REF!
2022-09-12	11:05:01	0.365814	1.62721	#REF!	FALSE	#REF!
2022-09-12	11:05:02	0.322506	1.43457	1191.34	FALSE	#REF!
2022-09-12	11:05:02	0.128868	0.573231	#REF!	FALSE	#REF!
2022-09-12	11:05:02	0.255585	1.13689	1192.48	FALSE	#REF!
2022-09-12	11:05:03	0.184593	0.821107	#REF!	FALSE	#REF!
2022-09-12	11:05:03	0.261896	1.16497	1193.65	FALSE	#REF!
2022-09-12	11:05:03	0.288817	1.28472	#REF!	FALSE	#REF!
2022-09-12	11:05:03	0.141794	0.630728	1194.28	FALSE	#REF!
2022-09-12	11:05:04	0.238537	1.06106	#REF!	FALSE	#REF!
2022-09-12	11:05:04	0.0062725	0.0279013	1194.31	FALSE	#REF!
2022-09-12	11:05:04	0.0839824	0.373571	#REF!	FALSE	#REF!
2022-09-12	11:05:05	0.114771	0.510524	1194.82	FALSE	#REF!
2022-09-12	11:05:05	0.216858	0.964628	#REF!	FALSE	#REF!
2022-09-12	11:05:05	0.197774	0.879738	1195.7	FALSE	#REF!
2022-09-12	11:05:05	0.0947712	0.421561	#REF!	FALSE	#REF!
2022-09-12	11:05:05	0.293499	1.30554	1197	FALSE	#REF!
2022-09-12	11:05:06	0.192888	0.858004	#REF!	FALSE	#REF!
2022-09-12	11:05:06	0.36729	1.63378	1198.63	FALSE	#REF!
2022-09-12	11:05:06	0.327494	1.45676	#REF!	FALSE	#REF!
2022-09-12	11:05:07	0.39528	1.75828	1200.39	FALSE	#REF!
2022-09-12	11:05:07	0.414211	1.84249	#REF!	FALSE	#REF!
2022-09-12	11:05:07	0.354618	1.57741	1201.97	FALSE	#REF!
2022-09-12	11:05:07	0.459809	2.04532	#REF!	FALSE	#REF!
2022-09-12	11:05:08	0.405713	1.80469	1203.78	FALSE	#REF!
2022-09-12	11:05:08	0.463422	2.06139	#REF!	FALSE	#REF!
2022-09-12	11:05:08	0.464593	2.0666	1205.84	FALSE	#REF!
2022-09-12	11:05:08	0.454822	2.02314	#REF!	FALSE	#REF!
2022-09-12	11:05:09	0.432074	1.92195	1207.76	FALSE	#REF!
2022-09-12	11:05:09	0.452023	2.01069	#REF!	FALSE	#REF!
2022-09-12	11:05:09	0.441234	1.9627	1209.73	FALSE	#REF!
2022-09-12	11:05:09	0.448257	1.99394	#REF!	FALSE	#REF!
2022-09-12	11:05:10	0.477367	2.12342	1211.85	FALSE	#REF!
2022-09-12	11:05:10	0.443117	1.97107	#REF!	FALSE	#REF!
2022-09-12	11:05:10	0.593194	2.63865	1214.49	FALSE	#REF!
2022-09-12	11:05:11	0.532837	2.37017	#REF!	FALSE	#REF!
2022-09-12	11:05:11	0.556552	2.47565	1216.96	FALSE	#REF!
2022-09-12	11:05:11	0.440267	1.9584	#REF!	FALSE	#REF!
2022-09-12	11:05:11	0.56159	2.49806	1219.46	FALSE	#REF!
2022-09-12	11:05:12	0.291565	1.29694	#REF!	FALSE	#REF!
2022-09-12	11:05:12	0.419555	1.86626	1221.33	FALSE	#REF!
2022-09-12	11:05:12	0.429326	1.90973	#REF!	FALSE	#REF!
2022-09-12	11:05:12	0.512277	2.27871	1223.61	FALSE	#REF!
2022-09-12	11:05:13	0.328817	1.46264	#REF!	FALSE	#REF!
2022-09-12	11:05:13	0.27014	1.20164	1224.81	FALSE	#REF!
2022-09-12	11:05:13	0.36612	1.62857	#REF!	FALSE	#REF!
2022-09-12	11:05:13	0.350242	1.55795	1226.37	FALSE	#REF!
2022-09-12	11:05:14	0.355585	1.58171	#REF!	FALSE	#REF!
2022-09-12	11:05:14	0.345611	1.53735	1227.9	FALSE	#REF!
2022-09-12	11:05:14	0.328613	1.46174	#REF!	FALSE	#REF!
2022-09-12	11:05:15	0.392532	1.74606	1229.65	FALSE	#REF!
2022-09-12	11:05:15	0.36612	1.62857	#REF!	FALSE	#REF!
2022-09-12	11:05:15	0.287799	1.28019	1230.93	FALSE	#REF!
2022-09-12	11:05:15	0.495636	2.20469	#REF!	FALSE	#REF!
2022-09-12	11:05:16	0.263015	1.16994	1232.1	FALSE	#REF!
2022-09-12	11:05:16	0.506476	2.25291	#REF!	FALSE	#REF!
2022-09-12	11:05:16	0.241794	1.07555	1233.18	FALSE	#REF!
2022-09-12	11:05:16	0.428613	1.90656	#REF!	FALSE	#REF!
2022-09-12	11:05:17	0.289886	1.28947	1234.47	FALSE	#REF!
2022-09-12	11:05:17	0.521947	2.32172	#REF!	FALSE	#REF!
2022-09-12	11:05:17	0.287443	1.2786	1235.74	FALSE	#REF!
2022-09-12	11:05:17	0.574415	2.55511	#REF!	FALSE	#REF!
2022-09-12	11:05:18	0.291616	1.29717	1237.04	FALSE	#REF!
2022-09-12	11:05:18	0.497163	2.21148	#REF!	FALSE	#REF!
2022-09-12	11:05:18	0.262354	1.167	1238.21	FALSE	#REF!
2022-09-12	11:05:19	0.532939	2.37062	#REF!	FALSE	#REF!
2022-09-12	11:05:19	0.237977	1.05857	1239.27	FALSE	#REF!
2022-09-12	11:05:19	0.50668	2.25381	#REF!	FALSE	#REF!
2022-09-12	11:05:19	0.285713	1.27091	1240.54	FALSE	#REF!
2022-09-12	11:05:20	1.02464	4.5578	#REF!	FALSE	#REF!
2022-09-12	11:05:20	1.89838	8.44437	1248.98	FALSE	#REF!
2022-09-12	11:05:20	4.25034	18.9064	#REF!	1	#REF!
2022-09-12	11:05:20	4.09065	18.196	1267.18	1	#REF!
2022-09-12	11:05:21	3.80714	16.9349	#REF!	1	#REF!
2022-09-12	11:05:21	2.01055	8.94333	1276.12	FALSE	#REF!
2022-09-12	11:05:21	1.78785	7.95271	#REF!	FALSE	#REF!
2022-09-12	11:05:21	0.535636	2.38262	1278.5	FALSE	#REF!
2022-09-12	11:05:22	0.353397	1.57198	#REF!	FALSE	#REF!
2022-09-12	11:05:22	0.240115	1.06808	1279.57	FALSE	#REF!
2022-09-12	11:05:22	0.434568	1.93305	#REF!	FALSE	#REF!
2022-09-12	11:05:22	0.415789	1.84951	1281.42	FALSE	#REF!
2022-09-12	11:05:23	0.559046	2.48675	#REF!	FALSE	#REF!
2022-09-12	11:05:23	0.481081	2.13994	1283.56	FALSE	#REF!
2022-09-12	11:05:23	0.375891	1.67204	#REF!	FALSE	#REF!
2022-09-12	11:05:24	0.503575	2.24	1285.8	FALSE	#REF!
2022-09-12	11:05:24	0.444695	1.97809	#REF!	FALSE	#REF!
2022-09-12	11:05:24	0.43014	1.91335	1287.71	FALSE	#REF!
2022-09-12	11:05:24	0.378944	1.68562	#REF!	FALSE	#REF!
2022-09-12	11:05:25	0.479707	2.13383	1289.85	FALSE	#REF!
2022-09-12	11:05:25	0.387799	1.72501	#REF!	FALSE	#REF!
2022-09-12	11:05:25	0.475636	2.11572	1291.96	FALSE	#REF!
2022-09-12	11:05:25	0.425305	1.89184	#REF!	FALSE	#REF!
2022-09-12	11:05:26	0.364084	1.61952	1293.58	FALSE	#REF!
2022-09-12	11:05:26	0.433295	1.92738	#REF!	FALSE	#REF!
2022-09-12	11:05:26	0.412481	1.8348	1295.42	FALSE	#REF!
2022-09-12	11:05:26	0.408766	1.81827	#REF!	FALSE	#REF!
2022-09-12	11:05:27	0.41126	1.82937	1297.25	FALSE	#REF!
2022-09-12	11:05:27	0.42841	1.90565	#REF!	FALSE	#REF!
2022-09-12	11:05:27	0.327239	1.45562	1298.7	FALSE	#REF!
2022-09-12	11:05:28	0.392023	1.7438	#REF!	FALSE	#REF!
2022-09-12	11:05:28	0.376145	1.67317	1300.38	FALSE	#REF!
2022-09-12	11:05:28	0.362608	1.61295	#REF!	FALSE	#REF!
2022-09-12	11:05:28	0.417977	1.85925	1302.24	FALSE	#REF!
2022-09-12	11:05:29	0.417112	1.8554	#REF!	FALSE	#REF!
2022-09-12	11:05:29	0.379758	1.68924	1303.93	FALSE	#REF!
2022-09-12	11:05:29	0.436094	1.93983	#REF!	FALSE	#REF!
2022-09-12	11:05:29	0.418639	1.86219	1305.79	FALSE	#REF!
2022-09-12	11:05:30	0.477875	2.12568	#REF!	FALSE	#REF!
2022-09-12	11:05:30	0.513397	2.28369	1308.07	FALSE	#REF!
2022-09-12	11:05:30	0.647239	2.87905	#REF!	FALSE	#REF!
2022-09-12	11:05:30	0.768308	3.41759	1311.49	FALSE	#REF!
2022-09-12	11:05:31	0.66673	2.96575	#REF!	FALSE	#REF!
2022-09-12	11:05:31	3.00245	13.3555	1324.84	1	#REF!
2022-09-12	11:05:31	0.489733	2.17843	#REF!	FALSE	#REF!
2022-09-12	11:05:32	3.76362	16.7413	1341.59	1	#REF!
2022-09-12	11:05:32	0.399657	1.77775	#REF!	FALSE	#REF!
2022-09-12	11:05:32	0.113753	0.505996	1342.09	FALSE	#REF!
2022-09-12	11:05:32	0.082761	0.368137	#REF!	FALSE	#REF!
2022-09-12	11:05:33	0.192685	0.857101	1342.95	FALSE	#REF!
2022-09-12	11:05:33	0.0571631	0.254273	#REF!	FALSE	#REF!
2022-09-12	11:05:33	0.136654	0.607864	1343.56	FALSE	#REF!
2022-09-12	11:05:33	0.258333	1.14912	#REF!	FALSE	#REF!
2022-09-12	11:05:34	0.0197585	0.0878898	1343.64	FALSE	#REF!
2022-09-12	11:05:34	0.0603692	0.268534	#REF!	FALSE	#REF!
2022-09-12	11:05:34	0.0703946	0.313129	1343.96	FALSE	#REF!
2022-09-12	11:05:34	0.00459311	0.0204311	#REF!	FALSE	#REF!
2022-09-12	11:05:35	0.115585	0.514145	1344.47	FALSE	#REF!
2022-09-12	11:05:35	0.152786	0.679623	#REF!	FALSE	#REF!
2022-09-12	11:05:35	0.160369	0.713353	1345.19	FALSE	#REF!
2022-09-12	11:05:36	0.203117	0.903505	#REF!	FALSE	#REF!
2022-09-12	11:05:36	0.226781	1.00877	1346.19	FALSE	#REF!
2022-09-12	11:05:36	0.42383	1.88528	#REF!	FALSE	#REF!
2022-09-12	11:05:36	0.421692	1.87577	1348.07	FALSE	#REF!
2022-09-12	11:05:37	0.38673	1.72025	#REF!	FALSE	#REF!
2022-09-12	11:05:37	0.759504	3.37843	1351.45	FALSE	#REF!
2022-09-12	11:05:37	0.733244	3.26162	#REF!	FALSE	#REF!
2022-09-12	11:05:37	0.226832	1.00899	1352.46	FALSE	#REF!
2022-09-12	11:05:38	0.245305	1.09117	#REF!	FALSE	#REF!
2022-09-12	11:05:38	-0.0422771	-0.188057	1352.46	FALSE	#REF!
2022-09-12	11:05:38	-0.462226	-2.05607	#REF!	FALSE	#REF!
2022-09-12	11:05:38	-0.478358	-2.12783	1352.46	FALSE	#REF!
2022-09-12	11:05:39	-0.501055	-2.22879	#REF!	FALSE	#REF!
2022-09-12	11:05:39	-0.544007	-2.41985	1352.46	FALSE	#REF!
2022-09-12	11:05:39	-0.0388674	-0.17289	#REF!	FALSE	#REF!
2022-09-12	11:05:40	0.0846439	0.376513	1352.83	FALSE	#REF!
2022-09-12	11:05:40	0.189478	0.842836	#REF!	FALSE	#REF!
2022-09-12	11:05:40	0.0960943	0.427447	1353.26	FALSE	#REF!
2022-09-12	11:05:40	-0.0503178	-0.223824	#REF!	FALSE	#REF!
2022-09-12	11:05:41	-0.0521498	-0.231973	1353.26	FALSE	#REF!
2022-09-12	11:05:41	-0.0275188	-0.122409	#REF!	FALSE	#REF!
2022-09-12	11:05:41	-0.222633	-0.990316	1353.26	FALSE	#REF!
2022-09-12	11:05:41	-0.0200379	-0.0891326	#REF!	FALSE	#REF!
2022-09-12	11:05:42	0.0358399	0.159423	1353.42	FALSE	#REF!
2022-09-12	11:05:42	0.406171	1.80673	#REF!	FALSE	#REF!
2022-09-12	11:05:42	0.00566182	0.0251849	1353.45	FALSE	#REF!
2022-09-12	11:05:42	0.0973158	0.43288	#REF!	FALSE	#REF!
2022-09-12	11:05:43	0.173092	0.769948	1354.22	FALSE	#REF!
2022-09-12	11:05:43	0.333651	1.48415	#REF!	FALSE	#REF!
2022-09-12	11:05:43	0.372735	1.658	1355.87	FALSE	#REF!
2022-09-12	11:05:44	0.390547	1.73723	#REF!	FALSE	#REF!
2022-09-12	11:05:44	0.400216	1.78024	1357.65	FALSE	#REF!
2022-09-12	11:05:44	0.396247	1.76259	#REF!	FALSE	#REF!
2022-09-12	11:05:44	0.394873	1.75647	1359.41	FALSE	#REF!
2022-09-12	11:05:45	0.399962	1.77911	#REF!	FALSE	#REF!
2022-09-12	11:05:45	0.421845	1.87645	1361.29	FALSE	#REF!
2022-09-12	11:05:45	0.471463	2.09716	#REF!	FALSE	#REF!
2022-09-12	11:05:45	0.370547	1.64827	1362.94	FALSE	#REF!
2022-09-12	11:05:46	0.373143	1.65981	#REF!	FALSE	#REF!
2022-09-12	11:05:46	0.376094	1.67294	1364.61	FALSE	#REF!
2022-09-12	11:05:46	0.381031	1.6949	#REF!	FALSE	#REF!
2022-09-12	11:05:46	0.372176	1.65551	1366.26	FALSE	#REF!
2022-09-12	11:05:47	0.380471	1.69241	#REF!	FALSE	#REF!
2022-09-12	11:05:47	0.382405	1.70101	1367.96	FALSE	#REF!
2022-09-12	11:05:47	0.36902	1.64147	#REF!	FALSE	#REF!
2022-09-12	11:05:47	0.378944	1.68562	1369.65	FALSE	#REF!
2022-09-12	11:05:48	0.381387	1.69649	#REF!	FALSE	#REF!
2022-09-12	11:05:48	0.381285	1.69603	1371.35	FALSE	#REF!
2022-09-12	11:05:48	0.385662	1.7155	#REF!	FALSE	#REF!
2022-09-12	11:05:49	0.535942	2.38398	1373.73	FALSE	#REF!
2022-09-12	11:05:49	0.492379	2.1902	#REF!	FALSE	#REF!
2022-09-12	11:05:49	-0.0327606	-0.145726	1373.73	FALSE	#REF!
2022-09-12	11:05:49	-0.0424297	-0.188736	#REF!	FALSE	#REF!
2022-09-12	11:05:50	0.1393	0.619634	1374.35	FALSE	#REF!
2022-09-12	11:05:50	0.405814	1.80514	#REF!	FALSE	#REF!
2022-09-12	11:05:50	0.551666	2.45392	1376.8	FALSE	#REF!
2022-09-12	11:05:50	0.607748	2.70338	#REF!	FALSE	#REF!
2022-09-12	11:05:51	0.469682	2.08924	1378.89	FALSE	#REF!
2022-09-12	11:05:51	0.437723	1.94708	#REF!	FALSE	#REF!
2022-09-12	11:05:51	0.443219	1.97153	1380.86	FALSE	#REF!
2022-09-12	11:05:51	0.403423	1.79451	#REF!	FALSE	#REF!
2022-09-12	11:05:52	0.417723	1.85812	1382.72	FALSE	#REF!
2022-09-12	11:05:52	0.482405	2.14583	#REF!	FALSE	#REF!
2022-09-12	11:05:52	0.466985	2.07724	1384.8	FALSE	#REF!
2022-09-12	11:05:53	0.435738	1.93825	#REF!	FALSE	#REF!
2022-09-12	11:05:53	0.444847	1.97877	1386.78	FALSE	#REF!
2022-09-12	11:05:53	0.446171	1.98466	#REF!	FALSE	#REF!
2022-09-12	11:05:53	0.451667	2.00911	1388.79	FALSE	#REF!
2022-09-12	11:05:54	0.456298	2.0297	#REF!	FALSE	#REF!
2022-09-12	11:05:54	0.442456	1.96813	1390.76	FALSE	#REF!
2022-09-12	11:05:54	0.425407	1.8923	#REF!	FALSE	#REF!
2022-09-12	11:05:54	0.427646	1.90225	1392.66	FALSE	#REF!
2022-09-12	11:05:55	0.428053	1.90407	#REF!	FALSE	#REF!
2022-09-12	11:05:55	0.420776	1.8717	1394.53	FALSE	#REF!
2022-09-12	11:05:55	0.431972	1.9215	#REF!	FALSE	#REF!
2022-09-12	11:05:55	0.458384	2.03898	1396.57	FALSE	#REF!
2022-09-12	11:05:56	0.474975	2.11278	#REF!	FALSE	#REF!
2022-09-12	11:05:56	0.482303	2.14538	1398.71	FALSE	#REF!
2022-09-12	11:05:56	0.388257	1.72704	#REF!	FALSE	#REF!
2022-09-12	11:05:57	0.456196	2.02925	1400.74	FALSE	#REF!
2022-09-12	11:05:57	0.313601	1.39496	#REF!	FALSE	#REF!
2022-09-12	11:05:57	1.96398	8.73618	1409.48	FALSE	#REF!
2022-09-12	11:05:57	0.435178	1.93576	#REF!	FALSE	#REF!
2022-09-12	11:05:58	0.321031	1.42801	1410.91	FALSE	#REF!
2022-09-12	11:05:58	0.0612852	0.272609	#REF!	FALSE	#REF!
2022-09-12	11:05:58	0.0937534	0.417034	1411.32	FALSE	#REF!
2022-09-12	11:05:58	0.00535648	0.0238267	#REF!	FALSE	#REF!
2022-09-12	11:05:59	-0.0107758	-0.0479329	1411.32	FALSE	#REF!
2022-09-12	11:05:59	0.0814888	0.362478	#REF!	FALSE	#REF!
2022-09-12	11:05:59	0.221743	0.986357	1412.31	FALSE	#REF!
2022-09-12	11:05:59	1.99268	8.86384	#REF!	FALSE	#REF!
2022-09-12	11:06:00	5.06485	22.5295	1434.84	1	#REF!
2022-09-12	11:06:00	2.47223	10.997	#REF!	FALSE	#REF!
2022-09-12	11:06:00	2.15981	9.60727	1444.45	FALSE	#REF!
2022-09-12	11:06:01	1.45258	6.46137	#REF!	FALSE	#REF!
2022-09-12	11:06:01	0.489529	2.17752	1446.63	FALSE	#REF!
2022-09-12	11:06:01	0.381794	1.6983	#REF!	FALSE	#REF!
2022-09-12	11:06:01	1.25686	5.59076	1452.22	FALSE	#REF!
2022-09-12	11:06:02	0.933346	4.15171	#REF!	FALSE	#REF!
2022-09-12	11:06:02	1.20475	5.35897	1457.58	FALSE	#REF!
2022-09-12	11:06:02	1.15762	5.14933	#REF!	FALSE	#REF!
2022-09-12	11:06:02	0.794211	3.53281	1461.11	FALSE	#REF!
2022-09-12	11:06:03	0.534109	2.37582	#REF!	FALSE	#REF!
2022-09-12	11:06:03	0.49355	2.19541	1463.3	FALSE	#REF!
2022-09-12	11:06:03	0.596807	2.65472	#REF!	FALSE	#REF!
2022-09-12	11:06:03	0.761896	3.38907	1466.69	FALSE	#REF!
2022-09-12	11:06:04	0.973855	4.3319	#REF!	FALSE	#REF!
2022-09-12	11:06:04	1.36113	6.05458	1472.75	FALSE	#REF!
2022-09-12	11:06:04	1.46103	6.49895	#REF!	FALSE	#REF!
2022-09-12	11:06:05	0.806069	3.58556	1476.33	FALSE	#REF!
2022-09-12	11:06:05	1.01075	4.49602	#REF!	FALSE	#REF!
2022-09-12	11:06:05	0.383575	1.70622	1478.04	FALSE	#REF!
2022-09-12	11:06:05	0.488257	2.17186	#REF!	FALSE	#REF!
2022-09-12	11:06:06	0.484746	2.15625	1480.19	FALSE	#REF!
2022-09-12	11:06:06	0.549885	2.446	#REF!	FALSE	#REF!
2022-09-12	11:06:06	0.532583	2.36904	1482.56	FALSE	#REF!
2022-09-12	11:06:06	0.4793	2.13202	#REF!	FALSE	#REF!
2022-09-12	11:06:07	0.625865	2.78397	1485.35	FALSE	#REF!
2022-09-12	11:06:07	0.758435	3.37367	#REF!	FALSE	#REF!
2022-09-12	11:06:07	0.657723	2.92568	1488.27	FALSE	#REF!
2022-09-12	11:06:07	0.685814	3.05064	#REF!	FALSE	#REF!
2022-09-12	11:06:08	0.375026	1.66819	1489.94	FALSE	#REF!
2022-09-12	11:06:08	0.549885	2.446	#REF!	FALSE	#REF!
2022-09-12	11:06:08	0.455891	2.02789	1491.97	FALSE	#REF!
2022-09-12	11:06:08	0.472125	2.10011	#REF!	FALSE	#REF!
2022-09-12	11:06:09	0.468868	2.08562	1494.06	FALSE	#REF!
2022-09-12	11:06:09	0.46556	2.0709	#REF!	FALSE	#REF!
2022-09-12	11:06:09	0.459962	2.046	1496.1	FALSE	#REF!
2022-09-12	11:06:10	0.46098	2.05053	#REF!	FALSE	#REF!
2022-09-12	11:06:10	0.494109	2.1979	1498.3	FALSE	#REF!
2022-09-12	11:06:10	0.454313	2.02088	#REF!	FALSE	#REF!
2022-09-12	11:06:10	0.455891	2.02789	1500.33	FALSE	#REF!
2022-09-12	11:06:11	0.440471	1.9593	#REF!	FALSE	#REF!
2022-09-12	11:06:11	0.443931	1.97469	1502.3	FALSE	#REF!
2022-09-12	11:06:11	0.484746	2.15625	#REF!	FALSE	#REF!
2022-09-12	11:06:11	0.509682	2.26717	1504.57	FALSE	#REF!
2022-09-12	11:06:12	0.44215	1.96677	#REF!	FALSE	#REF!
2022-09-12	11:06:12	0.893244	3.97333	1508.54	FALSE	#REF!
2022-09-12	11:06:12	0.630343	2.80389	#REF!	FALSE	#REF!
2022-09-12	11:06:12	0.557417	2.4795	1511.02	FALSE	#REF!
2022-09-12	11:06:13	1.07584	4.78555	#REF!	FALSE	#REF!
2022-09-12	11:06:13	0.565254	2.51436	1513.54	FALSE	#REF!
2022-09-12	11:06:13	0.998639	4.44215	#REF!	FALSE	#REF!
2022-09-12	11:06:14	0.73014	3.24781	1516.78	FALSE	#REF!
2022-09-12	11:06:14	0.51813	2.30475	#REF!	FALSE	#REF!
2022-09-12	11:06:14	0.54444	2.42178	1519.21	FALSE	#REF!
2022-09-12	11:06:14	0.599911	2.66852	#REF!	FALSE	#REF!
2022-09-12	11:06:15	1.11579	4.96326	1524.17	FALSE	#REF!
2022-09-12	11:06:15	1.54846	6.88786	#REF!	FALSE	#REF!
2022-09-12	11:06:15	0.544084	2.42019	1526.59	FALSE	#REF!
2022-09-12	11:06:15	0.478995	2.13067	#REF!	FALSE	#REF!
2022-09-12	11:06:16	0.494109	2.1979	1528.79	FALSE	#REF!
2022-09-12	11:06:16	0.413499	1.83933	#REF!	FALSE	#REF!
2022-09-12	11:06:16	0.512634	2.2803	1531.07	FALSE	#REF!
2022-09-12	11:06:16	0.435026	1.93508	#REF!	FALSE	#REF!
2022-09-12	11:06:17	0.460013	2.04623	1533.11	FALSE	#REF!
2022-09-12	11:06:17	0.466323	2.0743	#REF!	FALSE	#REF!
2022-09-12	11:06:17	0.443779	1.97402	1535.09	FALSE	#REF!
2022-09-12	11:06:18	0.455433	2.02586	#REF!	FALSE	#REF!
2022-09-12	11:06:18	0.444746	1.97832	1537.07	FALSE	#REF!
2022-09-12	11:06:18	0.456552	2.03083	#REF!	FALSE	#REF!
2022-09-12	11:06:18	0.46388	2.06343	1539.13	FALSE	#REF!
2022-09-12	11:06:19	0.436908	1.94345	#REF!	FALSE	#REF!
2022-09-12	11:06:19	0.495331	2.20333	1541.33	FALSE	#REF!
2022-09-12	11:06:19	0.48841	2.17255	#REF!	FALSE	#REF!
2022-09-12	11:06:19	0.462099	2.05551	1543.39	FALSE	#REF!
2022-09-12	11:06:20	0.525153	2.33599	#REF!	FALSE	#REF!
2022-09-12	11:06:20	0.423168	1.88234	1545.27	FALSE	#REF!
2022-09-12	11:06:20	0.574059	2.55353	#REF!	FALSE	#REF!
2022-09-12	11:06:20	2.79518	12.4335	1557.7	FALSE	#REF!
2022-09-12	11:06:21	4.31319	19.1859	#REF!	1	#REF!
2022-09-12	11:06:21	1.96719	8.75045	1566.45	FALSE	#REF!
2022-09-12	11:06:21	0.850649	3.78386	#REF!	FALSE	#REF!
2022-09-12	11:06:22	0.412176	1.83344	1568.29	FALSE	#REF!
2022-09-12	11:06:22	0.551412	2.45279	#REF!	FALSE	#REF!
2022-09-12	11:06:22	0.329326	1.46491	1569.75	FALSE	#REF!
2022-09-12	11:06:22	0.508919	2.26377	#REF!	FALSE	#REF!
2022-09-12	11:06:23	0.325407	1.44748	1571.2	FALSE	#REF!
2022-09-12	11:06:23	0.4936	2.19563	#REF!	FALSE	#REF!
2022-09-12	11:06:23	0.39813	1.77096	1572.97	FALSE	#REF!
2022-09-12	11:06:23	0.542812	2.41454	#REF!	FALSE	#REF!
2022-09-12	11:06:24	0.673651	2.99653	1575.97	FALSE	#REF!
2022-09-12	11:06:24	0.66271	2.94787	#REF!	FALSE	#REF!
2022-09-12	11:06:24	0.431361	1.91878	1577.89	FALSE	#REF!
2022-09-12	11:06:24	0.532888	2.37039	#REF!	FALSE	#REF!
2022-09-12	11:06:25	0.330649	1.47079	1579.36	FALSE	#REF!
2022-09-12	11:06:25	0.497621	2.21352	#REF!	FALSE	#REF!
2022-09-12	11:06:25	0.388257	1.72704	1581.08	FALSE	#REF!
2022-09-12	11:06:26	0.379606	1.68856	#REF!	FALSE	#REF!
2022-09-12	11:06:26	0.48042	2.137	1583.22	FALSE	#REF!
2022-09-12	11:06:26	0.749428	3.33361	#REF!	FALSE	#REF!
2022-09-12	11:06:26	0.537774	2.39213	1585.61	FALSE	#REF!
2022-09-12	11:06:27	0.64673	2.87678	#REF!	FALSE	#REF!
2022-09-12	11:06:27	0.553092	2.46026	1588.07	FALSE	#REF!
2022-09-12	11:06:27	0.358741	1.59575	#REF!	FALSE	#REF!
2022-09-12	11:06:27	0.412634	1.83548	1589.91	FALSE	#REF!
2022-09-12	11:06:28	0.339199	1.50882	#REF!	FALSE	#REF!
2022-09-12	11:06:28	0.538181	2.39394	1592.3	FALSE	#REF!
2022-09-12	11:06:28	0.403575	1.79518	#REF!	FALSE	#REF!
2022-09-12	11:06:28	0.453804	2.01861	1594.32	FALSE	#REF!
2022-09-12	11:06:29	0.521539	2.31991	#REF!	FALSE	#REF!
2022-09-12	11:06:29	0.449631	2.00005	1596.32	FALSE	#REF!
2022-09-12	11:06:29	0.432328	1.92308	#REF!	FALSE	#REF!
2022-09-12	11:06:30	0.63299	2.81567	1599.14	FALSE	#REF!
2022-09-12	11:06:30	0.584847	2.60152	#REF!	FALSE	#REF!
2022-09-12	11:06:30	0.540572	2.40457	1601.54	FALSE	#REF!
2022-09-12	11:06:30	1.28134	5.69966	#REF!	FALSE	#REF!
2022-09-12	11:06:31	0.364898	1.62314	1603.17	FALSE	#REF!
2022-09-12	11:06:31	0.519148	2.30927	#REF!	FALSE	#REF!
2022-09-12	11:06:31	0.483321	2.14991	1605.32	FALSE	#REF!
2022-09-12	11:06:31	0.432583	1.92422	#REF!	FALSE	#REF!
2022-09-12	11:06:32	1.00088	4.45211	1609.77	FALSE	#REF!
2022-09-12	11:06:32	0.490344	2.18115	#REF!	FALSE	#REF!
2022-09-12	11:06:32	0.627036	2.78918	1612.56	FALSE	#REF!
2022-09-12	11:06:32	0.451718	2.00933	#REF!	FALSE	#REF!
2022-09-12	11:06:33	0.403931	1.79677	1614.35	FALSE	#REF!
2022-09-12	11:06:33	0.475891	2.11686	#REF!	FALSE	#REF!
2022-09-12	11:06:33	0.490954	2.18386	1616.54	FALSE	#REF!
2022-09-12	11:06:33	0.435636	1.9378	#REF!	FALSE	#REF!
2022-09-12	11:06:34	0.590343	2.62596	1619.16	FALSE	#REF!
2022-09-12	11:06:34	0.60042	2.67079	#REF!	FALSE	#REF!
2022-09-12	11:06:34	0.57645	2.56416	1621.73	FALSE	#REF!
2022-09-12	11:06:35	0.365865	1.62744	#REF!	FALSE	#REF!
2022-09-12	11:06:35	0.484695	2.15602	1623.88	FALSE	#REF!
2022-09-12	11:06:35	0.271565	1.20798	#REF!	FALSE	#REF!
2022-09-12	11:06:35	0.475178	2.11369	1626	FALSE	#REF!
2022-09-12	11:06:36	0.45584	2.02767	#REF!	FALSE	#REF!
2022-09-12	11:06:36	0.424033	1.88618	1627.88	FALSE	#REF!
2022-09-12	11:06:36	0.476552	2.1198	#REF!	FALSE	#REF!
2022-09-12	11:06:36	0.491107	2.18454	1630.07	FALSE	#REF!
2022-09-12	11:06:37	0.468868	2.08562	#REF!	FALSE	#REF!
2022-09-12	11:06:37	0.304949	1.35647	1631.42	FALSE	#REF!
2022-09-12	11:06:37	0.321947	1.43208	#REF!	FALSE	#REF!
2022-09-12	11:06:37	0.363677	1.61771	1633.04	FALSE	#REF!
2022-09-12	11:06:38	0.411565	1.83072	#REF!	FALSE	#REF!
2022-09-12	11:06:38	0.918435	4.08538	1637.13	FALSE	#REF!
2022-09-12	11:06:38	3.58322	15.9389	#REF!	1	#REF!
2022-09-12	11:06:39	5.82306	25.9021	1663.03	1	#REF!
2022-09-12	11:06:39	11.5673	51.4537	#REF!	1	#REF!
2022-09-12	11:06:39	7.2312	32.1658	1695.2	1	#REF!
2022-09-12	11:06:39	5.81329	25.8587	#REF!	1	#REF!
2022-09-12	11:06:40	4.54826	20.2316	1715.43	1	#REF!
2022-09-12	11:06:40	5.22703	23.2509	#REF!	1	#REF!
2022-09-12	11:06:40	4.39462	19.5481	1734.97	1	#REF!
2022-09-12	11:06:40	2.031	9.03429	#REF!	FALSE	#REF!
2022-09-12	11:06:41	0.614007	2.73123	1737.71	FALSE	#REF!
2022-09-12	11:06:41	0.352379	1.56745	#REF!	FALSE	#REF!
2022-09-12	11:06:41	0.342048	1.5215	1739.23	FALSE	#REF!
2022-09-12	11:06:41	0.217977	0.969605	#REF!	FALSE	#REF!
2022-09-12	11:06:42	0.364237	1.6202	1740.85	FALSE	#REF!
2022-09-12	11:06:42	0.298486	1.32773	#REF!	FALSE	#REF!
2022-09-12	11:06:42	0.423117	1.88211	1742.73	FALSE	#REF!
2022-09-12	11:06:43	0.901845	4.01159	#REF!	FALSE	#REF!
2022-09-12	11:06:43	1.36505	6.07202	1748.8	FALSE	#REF!
2022-09-12	11:06:43	0.468155	2.08245	#REF!	FALSE	#REF!
2022-09-12	11:06:43	0.326832	1.45381	1750.26	FALSE	#REF!
2022-09-12	11:06:44	0.335178	1.49094	#REF!	FALSE	#REF!
2022-09-12	11:06:44	0.415891	1.84997	1752.11	FALSE	#REF!
2022-09-12	11:06:44	0.437316	1.94527	#REF!	FALSE	#REF!
2022-09-12	11:06:44	0.561336	2.49693	1754.6	FALSE	#REF!
2022-09-12	11:06:45	0.491361	2.18567	#REF!	FALSE	#REF!
2022-09-12	11:06:45	0.324797	1.44476	1756.05	FALSE	#REF!
2022-09-12	11:06:45	0.291768	1.29784	#REF!	FALSE	#REF!
2022-09-12	11:06:45	0.27986	1.24487	1757.29	FALSE	#REF!
2022-09-12	11:06:46	0.268155	1.19281	#REF!	FALSE	#REF!
2022-09-12	11:06:46	0.275891	1.22722	1758.52	FALSE	#REF!
2022-09-12	11:06:46	0.292583	1.30147	#REF!	FALSE	#REF!
2022-09-12	11:06:47	0.274313	1.2202	1759.74	FALSE	#REF!
2022-09-12	11:06:47	0.280674	1.24849	#REF!	FALSE	#REF!
2022-09-12	11:06:47	0.387646	1.72433	1761.46	FALSE	#REF!
2022-09-12	11:06:47	0.26042	1.1584	#REF!	FALSE	#REF!
2022-09-12	11:06:48	0.16958	0.754326	1762.22	FALSE	#REF!
2022-09-12	11:06:48	0.211311	0.939954	#REF!	FALSE	#REF!
2022-09-12	11:06:48	0.326934	1.45427	1763.67	FALSE	#REF!
2022-09-12	11:06:48	0.47411	2.10894	#REF!	FALSE	#REF!
2022-09-12	11:06:49	0.329987	1.46785	1765.14	FALSE	#REF!
2022-09-12	11:06:49	0.386883	1.72093	#REF!	FALSE	#REF!
2022-09-12	11:06:49	3.1763	14.1288	1779.27	1	#REF!
2022-09-12	11:06:49	10.909	48.5254	#REF!	1	#REF!
2022-09-12	11:06:50	10.688	47.5424	1826.81	1	#REF!
2022-09-12	11:06:50	3.63823	16.1836	#REF!	1	#REF!
2022-09-12	11:06:50	3.71553	16.5274	1843.34	1	#REF!
2022-09-12	11:06:51	1.9022	8.46137	#REF!	FALSE	#REF!
2022-09-12	11:06:51	1.14821	5.10747	1848.45	FALSE	#REF!
2022-09-12	11:06:51	0.858842	3.8203	#REF!	FALSE	#REF!
2022-09-12	11:06:51	0.371514	1.65257	1850.1	FALSE	#REF!
2022-09-12	11:06:52	0.615077	2.73599	#REF!	FALSE	#REF!
2022-09-12	11:06:52	0.404186	1.7979	1851.9	FALSE	#REF!
2022-09-12	11:06:52	0.490496	2.18182	#REF!	FALSE	#REF!
2022-09-12	11:06:52	0.787188	3.50157	1855.4	FALSE	#REF!
2022-09-12	11:06:53	3.51289	15.626	#REF!	1	#REF!
2022-09-12	11:06:53	1.45314	6.46386	1861.86	FALSE	#REF!
2022-09-12	11:06:53	2.53446	11.2738	#REF!	FALSE	#REF!
2022-09-12	11:06:53	2.12413	9.44856	1871.31	FALSE	#REF!
2022-09-12	11:06:54	1.58872	7.06694	#REF!	FALSE	#REF!
2022-09-12	11:06:54	0.497468	2.21284	1873.52	FALSE	#REF!
2022-09-12	11:06:54	0.148766	0.661741	#REF!	FALSE	#REF!
2022-09-12	11:06:55	0.345916	1.5387	1875.06	FALSE	#REF!
2022-09-12	11:06:55	0.168868	0.751159	#REF!	FALSE	#REF!
2022-09-12	11:06:55	0.590394	2.62619	1877.69	FALSE	#REF!
2022-09-12	11:06:55	1.78861	7.9561	#REF!	FALSE	#REF!
2022-09-12	11:06:56	1.47039	6.54059	1884.23	FALSE	#REF!
2022-09-12	11:06:56	0.905662	4.02857	#REF!	FALSE	#REF!
2022-09-12	11:06:56	0.73584	3.27316	1887.5	FALSE	#REF!
2022-09-12	11:06:56	0.441692	1.96473	#REF!	FALSE	#REF!
2022-09-12	11:06:57	0.775382	3.44905	1890.95	FALSE	#REF!
2022-09-12	11:06:57	0.532837	2.37017	#REF!	FALSE	#REF!
2022-09-12	11:06:57	0.234669	1.04385	1892	FALSE	#REF!
2022-09-12	11:06:57	0.626832	2.78827	#REF!	FALSE	#REF!
2022-09-12	11:06:58	0.197875	0.880188	1892.88	FALSE	#REF!
2022-09-12	11:06:58	1.73391	7.71278	#REF!	FALSE	#REF!
2022-09-12	11:06:58	0.21528	0.957608	1893.83	FALSE	#REF!
2022-09-12	11:06:58	0.461082	2.05098	#REF!	FALSE	#REF!
2022-09-12	11:06:59	0.197316	0.877701	1894.71	FALSE	#REF!
2022-09-12	11:06:59	0.294008	1.30781	#REF!	FALSE	#REF!
2022-09-12	11:06:59	0.164389	0.731235	1895.44	FALSE	#REF!
2022-09-12	11:07:00	0.0911071	0.405263	#REF!	FALSE	#REF!

## Sheet: Royal_star_2022912110131 (Edit)
Date	Time	Lbs	Total Force x time	Total Time Steps Force >3
						**GoPro Fitting: 1050
2022-09-12	11:02:00	0.63416
2022-09-12	11:02:00	1.16281
2022-09-12	11:02:00	1.33482
2022-09-12	11:02:00	0.638842
2022-09-12	11:02:01	0.778842
2022-09-12	11:02:01	1.06938
2022-09-12	11:02:01	0.959249
2022-09-12	11:02:02	0.563219
2022-09-12	11:02:02	0.422812
2022-09-12	11:02:02	0.410496
2022-09-12	11:02:02	0.373041
2022-09-12	11:02:03	0.381387
2022-09-12	11:02:03	0.449275
2022-09-12	11:02:03	0.452277
2022-09-12	11:02:03	0.663779
2022-09-12	11:02:04	0.581336	0.581336	FALSE	#REF!			Total Force x time	847.936
2022-09-12	11:02:04	0.520267	1.1016	FALSE	#REF!			Total Time Steps Force >3	52
2022-09-12	11:02:04	0.563829	1.66543	FALSE	#REF!
2022-09-12	11:02:04	0.610344	2.27578	FALSE	#REF!
2022-09-12	11:02:05	0.443117	2.71889	FALSE	#REF!
2022-09-12	11:02:05	0.395992	3.11489	FALSE	#REF!
2022-09-12	11:02:05	0.410038	3.52492	FALSE	#REF!
2022-09-12	11:02:06	0.359351	3.88427	FALSE	#REF!
2022-09-12	11:02:06	0.341692	4.22597	FALSE	#REF!
2022-09-12	11:02:06	0.175789	4.40176	FALSE	#REF!
2022-09-12	11:02:06	0.179249	4.581	FALSE	#REF!
2022-09-12	11:02:07	0.254262	4.83527	FALSE	#REF!
2022-09-12	11:02:07	0.292685	5.12795	FALSE	#REF!
2022-09-12	11:02:07	0.304797	5.43275	FALSE	#REF!
2022-09-12	11:02:07	0.292277	5.72502	FALSE	#REF!
2022-09-12	11:02:08	0.332176	6.0572	FALSE	#REF!
2022-09-12	11:02:08	0.144644	6.20184	FALSE	#REF!
2022-09-12	11:02:08	0.0487661	6.25061	FALSE	#REF!
2022-09-12	11:02:08	-0.092557	6.25061	FALSE	#REF!
2022-09-12	11:02:09	-0.0910811	6.25061	FALSE	#REF!
2022-09-12	11:02:09	-0.25276	6.25061	FALSE	#REF!
2022-09-12	11:02:09	-0.244567	6.25061	FALSE	#REF!
2022-09-12	11:02:09	0.264033	6.51464	FALSE	#REF!
2022-09-12	11:02:10	0.359046	6.87369	FALSE	#REF!
2022-09-12	11:02:10	0.468461	7.34215	FALSE	#REF!
2022-09-12	11:02:10	1.01192	8.35407	FALSE	#REF!
2022-09-12	11:02:11	1.59335	9.94742	FALSE	#REF!
2022-09-12	11:02:11	0.760063	10.7075	FALSE	#REF!
2022-09-12	11:02:11	0.660674	11.3682	FALSE	#REF!
2022-09-12	11:02:11	0.530241	11.8984	FALSE	#REF!
2022-09-12	11:02:12	0.525254	12.4237	FALSE	#REF!
2022-09-12	11:02:12	0.363524	12.7872	FALSE	#REF!
2022-09-12	11:02:12	0.376501	13.1637	FALSE	#REF!
2022-09-12	11:02:12	0.337163	13.5008	FALSE	#REF!
2022-09-12	11:02:13	0.379453	13.8803	FALSE	#REF!
2022-09-12	11:02:13	0.354415	14.2347	FALSE	#REF!
2022-09-12	11:02:13	0.353651	14.5884	FALSE	#REF!
2022-09-12	11:02:13	0.470649	15.059	FALSE	#REF!
2022-09-12	11:02:14	0.358741	15.4178	FALSE	#REF!
2022-09-12	11:02:14	0.505611	15.9234	FALSE	#REF!
2022-09-12	11:02:14	0.34271	16.2661	FALSE	#REF!
2022-09-12	11:02:15	0.405254	16.6713	FALSE	#REF!
2022-09-12	11:02:15	0.440471	17.1118	FALSE	#REF!
2022-09-12	11:02:15	0.59416	17.706	FALSE	#REF!
2022-09-12	11:02:15	0.762659	18.4686	FALSE	#REF!
2022-09-12	11:02:16	0.91472	19.3833	FALSE	#REF!
2022-09-12	11:02:16	0.917112	20.3004	FALSE	#REF!
2022-09-12	11:02:16	1.37431	21.6748	FALSE	#REF!
2022-09-12	11:02:16	3.14744	24.8222	1	#REF!
2022-09-12	11:02:17	1.04128	25.8635	FALSE	#REF!
2022-09-12	11:02:17	1.09167	26.9551	FALSE	#REF!
2022-09-12	11:02:17	1.44734	28.4025	FALSE	#REF!
2022-09-12	11:02:17	1.17894	29.5814	FALSE	#REF!
2022-09-12	11:02:18	0.605102	30.1865	FALSE	#REF!
2022-09-12	11:02:18	0.544695	30.7312	FALSE	#REF!
2022-09-12	11:02:18	0.496807	31.228	FALSE	#REF!
2022-09-12	11:02:19	0.837519	32.0656	FALSE	#REF!
2022-09-12	11:02:19	0.697112	32.7627	FALSE	#REF!
2022-09-12	11:02:19	0.972532	33.7352	FALSE	#REF!
2022-09-12	11:02:19	0.761946	34.4971	FALSE	#REF!
2022-09-12	11:02:20	0.822506	35.3196	FALSE	#REF!
2022-09-12	11:02:20	0.50388	35.8235	FALSE	#REF!
2022-09-12	11:02:20	0.447799	36.2713	FALSE	#REF!
2022-09-12	11:02:20	0.413143	36.6845	FALSE	#REF!
2022-09-12	11:02:21	0.426425	37.1109	FALSE	#REF!
2022-09-12	11:02:21	0.396451	37.5073	FALSE	#REF!
2022-09-12	11:02:21	0.416145	37.9235	FALSE	#REF!
2022-09-12	11:02:21	0.384135	38.3076	FALSE	#REF!
2022-09-12	11:02:22	0.334975	38.6426	FALSE	#REF!
2022-09-12	11:02:22	0.323372	38.966	FALSE	#REF!
2022-09-12	11:02:22	0.348766	39.3147	FALSE	#REF!
2022-09-12	11:02:23	0.340827	39.6556	FALSE	#REF!
2022-09-12	11:02:23	0.391718	40.0473	FALSE	#REF!
2022-09-12	11:02:23	0.41701	40.4643	FALSE	#REF!
2022-09-12	11:02:23	0.469936	40.9342	FALSE	#REF!
2022-09-12	11:02:24	0.532277	41.4665	FALSE	#REF!
2022-09-12	11:02:24	0.517519	41.984	FALSE	#REF!
2022-09-12	11:02:24	0.384237	42.3683	FALSE	#REF!
2022-09-12	11:02:24	0.43416	42.8024	FALSE	#REF!
2022-09-12	11:02:25	0.441641	43.2441	FALSE	#REF!
2022-09-12	11:02:25	0.352125	43.5962	FALSE	#REF!
2022-09-12	11:02:25	0.477977	44.0742	FALSE	#REF!
2022-09-12	11:02:25	0.328003	44.4022	FALSE	#REF!
2022-09-12	11:02:26	0.470751	44.8729	FALSE	#REF!
2022-09-12	11:02:26	0.374313	45.2472	FALSE	#REF!
2022-09-12	11:02:26	0.416552	45.6638	FALSE	#REF!
2022-09-12	11:02:27	0.398741	46.0625	FALSE	#REF!
2022-09-12	11:02:27	0.373652	46.4362	FALSE	#REF!
2022-09-12	11:02:27	0.444644	46.8808	FALSE	#REF!
2022-09-12	11:02:27	0.306221	47.187	FALSE	#REF!
2022-09-12	11:02:28	0.39126	47.5783	FALSE	#REF!
2022-09-12	11:02:28	0.386323	47.9646	FALSE	#REF!
2022-09-12	11:02:28	0.521539	48.4862	FALSE	#REF!
2022-09-12	11:02:28	0.346629	48.8328	FALSE	#REF!
2022-09-12	11:02:29	0.505916	49.3387	FALSE	#REF!
2022-09-12	11:02:29	0.360929	49.6996	FALSE	#REF!
2022-09-12	11:02:29	0.506781	50.2064	FALSE	#REF!
2022-09-12	11:02:29	0.296196	50.5026	FALSE	#REF!
2022-09-12	11:02:30	0.449173	50.9518	FALSE	#REF!
2022-09-12	11:02:30	0.266425	51.2182	FALSE	#REF!
2022-09-12	11:02:30	0.489987	51.7082	FALSE	#REF!
2022-09-12	11:02:30	0.275025	51.9832	FALSE	#REF!
2022-09-12	11:02:31	0.405356	52.3886	FALSE	#REF!
2022-09-12	11:02:31	0.303015	52.6916	FALSE	#REF!
2022-09-12	11:02:31	0.48673	53.1783	FALSE	#REF!
2022-09-12	11:02:32	0.268562	53.4469	FALSE	#REF!
2022-09-12	11:02:32	0.499809	53.9467	FALSE	#REF!
2022-09-12	11:02:32	0.250547	54.1972	FALSE	#REF!
2022-09-12	11:02:32	0.476959	54.6742	FALSE	#REF!
2022-09-12	11:02:33	0.241081	54.9153	FALSE	#REF!
2022-09-12	11:02:33	0.388461	55.3037	FALSE	#REF!
2022-09-12	11:02:33	0.247443	55.5512	FALSE	#REF!
2022-09-12	11:02:33	0.485204	56.0364	FALSE	#REF!
2022-09-12	11:02:34	0.280471	56.3169	FALSE	#REF!
2022-09-12	11:02:34	0.473143	56.79	FALSE	#REF!
2022-09-12	11:02:34	0.292125	57.0821	FALSE	#REF!
2022-09-12	11:02:34	0.381794	57.4639	FALSE	#REF!
2022-09-12	11:02:35	0.345407	57.8093	FALSE	#REF!
2022-09-12	11:02:35	0.427392	58.2367	FALSE	#REF!
2022-09-12	11:02:35	0.345204	58.5819	FALSE	#REF!
2022-09-12	11:02:36	0.450038	59.032	FALSE	#REF!
2022-09-12	11:02:36	0.451209	59.4832	FALSE	#REF!
2022-09-12	11:02:36	0.402048	59.8852	FALSE	#REF!
2022-09-12	11:02:36	0.375076	60.2603	FALSE	#REF!
2022-09-12	11:02:37	0.425051	60.6853	FALSE	#REF!
2022-09-12	11:02:37	0.411158	61.0965	FALSE	#REF!
2022-09-12	11:02:37	0.419911	61.5164	FALSE	#REF!
2022-09-12	11:02:37	0.383626	61.9	FALSE	#REF!
2022-09-12	11:02:38	0.371056	62.2711	FALSE	#REF!
2022-09-12	11:02:38	0.357977	62.6291	FALSE	#REF!
2022-09-12	11:02:38	0.408664	63.0377	FALSE	#REF!
2022-09-12	11:02:38	0.263321	63.3011	FALSE	#REF!
2022-09-12	11:02:39	0.376145	63.6772	FALSE	#REF!
2022-09-12	11:02:39	0.323626	64.0008	FALSE	#REF!
2022-09-12	11:02:39	0.383881	64.3847	FALSE	#REF!
2022-09-12	11:02:40	0.232685	64.6174	FALSE	#REF!
2022-09-12	11:02:40	0.389631	65.007	FALSE	#REF!
2022-09-12	11:02:40	0.331056	65.3381	FALSE	#REF!
2022-09-12	11:02:40	0.401234	65.7393	FALSE	#REF!
2022-09-12	11:02:41	0.242405	65.9817	FALSE	#REF!
2022-09-12	11:02:41	0.42271	66.4044	FALSE	#REF!
2022-09-12	11:02:41	0.322863	66.7273	FALSE	#REF!
2022-09-12	11:02:41	0.437621	67.1649	FALSE	#REF!
2022-09-12	11:02:42	0.275891	67.4408	FALSE	#REF!
2022-09-12	11:02:42	0.407952	67.8488	FALSE	#REF!
2022-09-12	11:02:42	0.274059	68.1228	FALSE	#REF!
2022-09-12	11:02:42	0.372125	68.4949	FALSE	#REF!
2022-09-12	11:02:43	0.285407	68.7804	FALSE	#REF!
2022-09-12	11:02:43	0.368817	69.1492	FALSE	#REF!
2022-09-12	11:02:43	0.293753	69.4429	FALSE	#REF!
2022-09-12	11:02:44	0.372125	69.815	FALSE	#REF!
2022-09-12	11:02:44	0.300267	70.1153	FALSE	#REF!
2022-09-12	11:02:44	0.347799	70.4631	FALSE	#REF!
2022-09-12	11:02:44	0.378079	70.8412	FALSE	#REF!
2022-09-12	11:02:45	0.28444	71.1256	FALSE	#REF!
2022-09-12	11:02:45	0.397723	71.5234	FALSE	#REF!
2022-09-12	11:02:45	0.329071	71.8524	FALSE	#REF!
2022-09-12	11:02:45	0.374619	72.227	FALSE	#REF!
2022-09-12	11:02:46	0.298842	72.5259	FALSE	#REF!
2022-09-12	11:02:46	0.513499	73.0394	FALSE	#REF!
2022-09-12	11:02:46	0.223575	73.263	FALSE	#REF!
2022-09-12	11:02:46	0.384033	73.647	FALSE	#REF!
2022-09-12	11:02:47	0.330395	73.9774	FALSE	#REF!
2022-09-12	11:02:47	0.402659	74.38	FALSE	#REF!
2022-09-12	11:02:47	0.313295	74.6933	FALSE	#REF!
2022-09-12	11:02:48	0.494771	75.1881	FALSE	#REF!
2022-09-12	11:02:48	0.282812	75.4709	FALSE	#REF!
2022-09-12	11:02:48	0.481285	75.9522	FALSE	#REF!
2022-09-12	11:02:48	0.264542	76.2168	FALSE	#REF!
2022-09-12	11:02:49	0.48785	76.7046	FALSE	#REF!
2022-09-12	11:02:49	0.245865	76.9505	FALSE	#REF!
2022-09-12	11:02:49	0.470751	77.4212	FALSE	#REF!
2022-09-12	11:02:49	0.232634	77.6539	FALSE	#REF!
2022-09-12	11:02:50	0.473652	78.1275	FALSE	#REF!
2022-09-12	11:02:50	0.242914	78.3704	FALSE	#REF!
2022-09-12	11:02:50	0.418893	78.7893	FALSE	#REF!
2022-09-12	11:02:50	0.216145	79.0055	FALSE	#REF!
2022-09-12	11:02:51	0.425967	79.4314	FALSE	#REF!
2022-09-12	11:02:51	0.311056	79.7425	FALSE	#REF!
2022-09-12	11:02:51	0.420166	80.1626	FALSE	#REF!
2022-09-12	11:02:51	0.37355	80.5362	FALSE	#REF!
2022-09-12	11:02:52	0.379555	80.9158	FALSE	#REF!
2022-09-12	11:02:52	0.286069	81.2018	FALSE	#REF!
2022-09-12	11:02:52	0.283066	81.4849	FALSE	#REF!
2022-09-12	11:02:53	0.44042	81.9253	FALSE	#REF!
2022-09-12	11:02:53	0.22729	82.1526	FALSE	#REF!
2022-09-12	11:02:53	0.365763	82.5184	FALSE	#REF!
2022-09-12	11:02:53	0.310598	82.829	FALSE	#REF!
2022-09-12	11:02:54	0.417214	83.2462	FALSE	#REF!
2022-09-12	11:02:54	0.31701	83.5632	FALSE	#REF!
2022-09-12	11:02:54	0.577672	84.1409	FALSE	#REF!
2022-09-12	11:02:54	0.416501	84.5574	FALSE	#REF!
2022-09-12	11:02:55	0.512939	85.0703	FALSE	#REF!
2022-09-12	11:02:55	0.334618	85.4049	FALSE	#REF!
2022-09-12	11:02:55	0.386985	85.7919	FALSE	#REF!
2022-09-12	11:02:55	0.460216	86.2521	FALSE	#REF!
2022-09-12	11:02:56	0.383219	86.6353	FALSE	#REF!
2022-09-12	11:02:56	0.424848	87.0602	FALSE	#REF!
2022-09-12	11:02:56	0.331514	87.3917	FALSE	#REF!
2022-09-12	11:02:57	0.467137	87.8588	FALSE	#REF!
2022-09-12	11:02:57	0.298181	88.157	FALSE	#REF!
2022-09-12	11:02:57	0.451209	88.6082	FALSE	#REF!
2022-09-12	11:02:57	0.293753	88.902	FALSE	#REF!
2022-09-12	11:02:58	0.42841	89.3304	FALSE	#REF!
2022-09-12	11:02:58	0.481539	89.8119	FALSE	#REF!
2022-09-12	11:02:58	1.27915	91.0911	FALSE	#REF!
2022-09-12	11:02:58	3.44413	94.5352	1	#REF!
2022-09-12	11:02:59	4.90454	99.4397	1	#REF!
2022-09-12	11:02:59	2.55065	101.99	FALSE	#REF!
2022-09-12	11:02:59	1.61538	103.606	FALSE	#REF!
2022-09-12	11:02:59	0.799402	104.405	FALSE	#REF!
2022-09-12	11:03:00	1.65808	106.063	FALSE	#REF!
2022-09-12	11:03:00	0.77187	106.835	FALSE	#REF!
2022-09-12	11:03:00	0.791412	107.627	FALSE	#REF!
2022-09-12	11:03:01	0.713346	108.34	FALSE	#REF!
2022-09-12	11:03:01	0.435127	108.775	FALSE	#REF!
2022-09-12	11:03:01	0.632023	109.407	FALSE	#REF!
2022-09-12	11:03:01	0.479199	109.886	FALSE	#REF!
2022-09-12	11:03:02	0.810344	110.697	FALSE	#REF!
2022-09-12	11:03:02	0.821081	111.518	FALSE	#REF!
2022-09-12	11:03:02	0.860165	112.378	FALSE	#REF!
2022-09-12	11:03:02	0.700929	113.079	FALSE	#REF!
2022-09-12	11:03:03	0.913091	113.992	FALSE	#REF!
2022-09-12	11:03:03	1.08775	115.08	FALSE	#REF!
2022-09-12	11:03:03	1.05045	116.13	FALSE	#REF!
2022-09-12	11:03:03	0.505916	116.636	FALSE	#REF!
2022-09-12	11:03:04	0.532634	117.169	FALSE	#REF!
2022-09-12	11:03:04	0.295942	117.465	FALSE	#REF!
2022-09-12	11:03:04	0.42159	117.886	FALSE	#REF!
2022-09-12	11:03:05	0.279097	118.165	FALSE	#REF!
2022-09-12	11:03:05	0.451209	118.616	FALSE	#REF!
2022-09-12	11:03:05	0.266985	118.883	FALSE	#REF!
2022-09-12	11:03:05	0.375331	119.259	FALSE	#REF!
2022-09-12	11:03:06	0.335891	119.595	FALSE	#REF!
2022-09-12	11:03:06	1.44765	121.042	FALSE	#REF!
2022-09-12	11:03:06	1.66836	122.711	FALSE	#REF!
2022-09-12	11:03:06	3.35838	126.069	1	#REF!
2022-09-12	11:03:07	2.90571	128.975	FALSE	#REF!
2022-09-12	11:03:07	1.76948	130.744	FALSE	#REF!
2022-09-12	11:03:07	0.687901	131.432	FALSE	#REF!
2022-09-12	11:03:07	0.423015	131.855	FALSE	#REF!
2022-09-12	11:03:08	0.414517	132.27	FALSE	#REF!
2022-09-12	11:03:08	0.272328	132.542	FALSE	#REF!
2022-09-12	11:03:08	0.145255	132.687	FALSE	#REF!
2022-09-12	11:03:09	0.274364	132.962	FALSE	#REF!
2022-09-12	11:03:09	0.0206236	132.982	FALSE	#REF!
2022-09-12	11:03:09	0.252684	133.235	FALSE	#REF!
2022-09-12	11:03:09	0.241183	133.476	FALSE	#REF!
2022-09-12	11:03:10	0.202099	133.678	FALSE	#REF!
2022-09-12	11:03:10	0.291056	133.969	FALSE	#REF!
2022-09-12	11:03:10	0.131616	134.101	FALSE	#REF!
2022-09-12	11:03:10	0.370802	134.472	FALSE	#REF!
2022-09-12	11:03:11	0.188563	134.66	FALSE	#REF!
2022-09-12	11:03:11	0.319707	134.98	FALSE	#REF!
2022-09-12	11:03:11	0.284186	135.264	FALSE	#REF!
2022-09-12	11:03:11	0.200878	135.465	FALSE	#REF!
2022-09-12	11:03:12	0.378741	135.844	FALSE	#REF!
2022-09-12	11:03:12	0.1907	136.034	FALSE	#REF!
2022-09-12	11:03:12	0.308919	136.343	FALSE	#REF!
2022-09-12	11:03:12	0.159911	136.503	FALSE	#REF!
2022-09-12	11:03:13	0.293194	136.796	FALSE	#REF!
2022-09-12	11:03:13	0.237723	137.034	FALSE	#REF!
2022-09-12	11:03:13	0.407392	137.442	FALSE	#REF!
2022-09-12	11:03:14	1.37029	138.812	FALSE	#REF!
2022-09-12	11:03:14	0.537774	139.35	FALSE	#REF!
2022-09-12	11:03:14	0.388359	139.738	FALSE	#REF!
2022-09-12	11:03:14	0.471412	140.209	FALSE	#REF!
2022-09-12	11:03:15	0.520267	140.73	FALSE	#REF!
2022-09-12	11:03:15	0.483015	141.213	FALSE	#REF!
2022-09-12	11:03:15	1.0679	142.281	FALSE	#REF!
2022-09-12	11:03:15	0.386018	142.667	FALSE	#REF!
2022-09-12	11:03:16	0.300318	142.967	FALSE	#REF!
2022-09-12	11:03:16	0.470446	143.437	FALSE	#REF!
2022-09-12	11:03:16	0.286425	143.724	FALSE	#REF!
2022-09-12	11:03:16	0.214262	143.938	FALSE	#REF!
2022-09-12	11:03:17	0.336654	144.275	FALSE	#REF!
2022-09-12	11:03:17	0.234771	144.509	FALSE	#REF!
2022-09-12	11:03:17	0.455738	144.965	FALSE	#REF!
2022-09-12	11:03:18	0.365865	145.331	FALSE	#REF!
2022-09-12	11:03:18	0.431056	145.762	FALSE	#REF!
2022-09-12	11:03:18	0.440878	146.203	FALSE	#REF!
2022-09-12	11:03:18	0.517723	146.721	FALSE	#REF!
2022-09-12	11:03:19	0.289529	147.01	FALSE	#REF!
2022-09-12	11:03:19	0.271107	147.281	FALSE	#REF!
2022-09-12	11:03:19	0.358486	147.64	FALSE	#REF!
2022-09-12	11:03:19	0.215687	147.856	FALSE	#REF!
2022-09-12	11:03:20	0.385814	148.241	FALSE	#REF!
2022-09-12	11:03:20	0.705713	148.947	FALSE	#REF!
2022-09-12	11:03:20	0.438079	149.385	FALSE	#REF!
2022-09-12	11:03:20	0.273397	149.659	FALSE	#REF!
2022-09-12	11:03:21	0.241031	149.9	FALSE	#REF!
2022-09-12	11:03:21	0.242659	150.142	FALSE	#REF!
2022-09-12	11:03:21	0.137468	150.28	FALSE	#REF!
2022-09-12	11:03:22	-0.0485875	150.28	FALSE	#REF!
2022-09-12	11:03:22	-0.054389	150.28	FALSE	#REF!
2022-09-12	11:03:22	-0.0672134	150.28	FALSE	#REF!
2022-09-12	11:03:22	-0.0401906	150.28	FALSE	#REF!
2022-09-12	11:03:23	0.00337174	150.283	FALSE	#REF!
2022-09-12	11:03:23	0.0351783	150.318	FALSE	#REF!
2022-09-12	11:03:23	0.0514125	150.37	FALSE	#REF!
2022-09-12	11:03:23	2.30592	152.676	FALSE	#REF!
2022-09-12	11:03:24	1.75436	154.43	FALSE	#REF!
2022-09-12	11:03:24	0.438791	154.869	FALSE	#REF!
2022-09-12	11:03:24	0.257824	155.127	FALSE	#REF!
2022-09-12	11:03:24	0.34383	155.47	FALSE	#REF!
2022-09-12	11:03:25	0.487901	155.958	FALSE	#REF!
2022-09-12	11:03:25	0.345611	156.304	FALSE	#REF!
2022-09-12	11:03:25	0.589936	156.894	FALSE	#REF!
2022-09-12	11:03:26	0.48612	157.38	FALSE	#REF!
2022-09-12	11:03:26	0.325509	157.705	FALSE	#REF!
2022-09-12	11:03:26	0.698792	158.404	FALSE	#REF!
2022-09-12	11:03:26	0.252277	158.657	FALSE	#REF!
2022-09-12	11:03:27	0.282354	158.939	FALSE	#REF!
2022-09-12	11:03:27	0.158435	159.097	FALSE	#REF!
2022-09-12	11:03:27	0.297061	159.394	FALSE	#REF!
2022-09-12	11:03:27	0.177774	159.572	FALSE	#REF!
2022-09-12	11:03:28	0.290496	159.863	FALSE	#REF!
2022-09-12	11:03:28	0.256909	160.12	FALSE	#REF!
2022-09-12	11:03:28	0.603168	160.723	FALSE	#REF!
2022-09-12	11:03:28	0.885305	161.608	FALSE	#REF!
2022-09-12	11:03:29	0.321743	161.93	FALSE	#REF!
2022-09-12	11:03:29	0.467036	162.397	FALSE	#REF!
2022-09-12	11:03:29	0.355077	162.752	FALSE	#REF!
2022-09-12	11:03:30	0.957672	163.71	FALSE	#REF!
2022-09-12	11:03:30	0.138181	163.848	FALSE	#REF!
2022-09-12	11:03:30	0.153448	164.001	FALSE	#REF!
2022-09-12	11:03:30	0.0930409	164.094	FALSE	#REF!
2022-09-12	11:03:31	0.100573	164.195	FALSE	#REF!
2022-09-12	11:03:31	0.134618	164.329	FALSE	#REF!
2022-09-12	11:03:31	0.0867305	164.416	FALSE	#REF!
2022-09-12	11:03:31	0.0387407	164.455	FALSE	#REF!
2022-09-12	11:03:32	0.0386898	164.494	FALSE	#REF!
2022-09-12	11:03:32	0.0874429	164.581	FALSE	#REF!
2022-09-12	11:03:32	0.127341	164.708	FALSE	#REF!
2022-09-12	11:03:32	0.146272	164.855	FALSE	#REF!
2022-09-12	11:03:33	0.714211	165.569	FALSE	#REF!
2022-09-12	11:03:33	0.778079	166.347	FALSE	#REF!
2022-09-12	11:03:33	2.03223	168.379	FALSE	#REF!
2022-09-12	11:03:33	3.5109	171.89	1	#REF!
2022-09-12	11:03:34	5.00602	176.896	1	#REF!
2022-09-12	11:03:34	7.37991	184.276	1	#REF!
2022-09-12	11:03:34	8.19624	192.472	1	#REF!
2022-09-12	11:03:35	5.85517	198.327	1	#REF!
2022-09-12	11:03:35	4.9592	203.287	1	#REF!
2022-09-12	11:03:35	4.62627	207.913	1	#REF!
2022-09-12	11:03:35	2.30882	210.222	FALSE	#REF!
2022-09-12	11:03:36	0.910191	211.132	FALSE	#REF!
2022-09-12	11:03:36	0.79813	211.93	FALSE	#REF!
2022-09-12	11:03:36	0.610598	212.541	FALSE	#REF!
2022-09-12	11:03:36	0.714415	213.255	FALSE	#REF!
2022-09-12	11:03:37	1.30067	214.556	FALSE	#REF!
2022-09-12	11:03:37	0.485509	215.041	FALSE	#REF!
2022-09-12	11:03:37	0.865916	215.907	FALSE	#REF!
2022-09-12	11:03:37	0.67645	216.584	FALSE	#REF!
2022-09-12	11:03:38	1.86302	218.447	FALSE	#REF!
2022-09-12	11:03:38	3.87385	222.32	1	#REF!
2022-09-12	11:03:38	5.23945	227.56	1	#REF!
2022-09-12	11:03:39	3.36581	230.926	1	#REF!
2022-09-12	11:03:39	0.474568	231.4	FALSE	#REF!
2022-09-12	11:03:39	0.37472	231.775	FALSE	#REF!
2022-09-12	11:03:39	0.343982	232.119	FALSE	#REF!
2022-09-12	11:03:40	0.288257	232.407	FALSE	#REF!
2022-09-12	11:03:40	0.555331	232.963	FALSE	#REF!
2022-09-12	11:03:40	0.758588	233.721	FALSE	#REF!
2022-09-12	11:03:40	0.36215	234.083	FALSE	#REF!
2022-09-12	11:03:41	0.406527	234.49	FALSE	#REF!
2022-09-12	11:03:41	0.307799	234.798	FALSE	#REF!
2022-09-12	11:03:41	0.332837	235.13	FALSE	#REF!
2022-09-12	11:03:41	0.324491	235.455	FALSE	#REF!
2022-09-12	11:03:42	0.328969	235.784	FALSE	#REF!
2022-09-12	11:03:42	0.339707	236.124	FALSE	#REF!
2022-09-12	11:03:42	0.373601	236.497	FALSE	#REF!
2022-09-12	11:03:43	0.325458	236.823	FALSE	#REF!
2022-09-12	11:03:43	0.329224	237.152	FALSE	#REF!
2022-09-12	11:03:43	0.371158	237.523	FALSE	#REF!
2022-09-12	11:03:43	0.399097	237.922	FALSE	#REF!
2022-09-12	11:03:44	0.392583	238.315	FALSE	#REF!
2022-09-12	11:03:44	0.395942	238.711	FALSE	#REF!
2022-09-12	11:03:44	0.389021	239.1	FALSE	#REF!
2022-09-12	11:03:44	0.381082	239.481	FALSE	#REF!
2022-09-12	11:03:45	0.388715	239.87	FALSE	#REF!
2022-09-12	11:03:45	0.382354	240.252	FALSE	#REF!
2022-09-12	11:03:45	0.387443	240.639	FALSE	#REF!
2022-09-12	11:03:45	0.399453	241.039	FALSE	#REF!
2022-09-12	11:03:46	0.40042	241.439	FALSE	#REF!
2022-09-12	11:03:46	0.407036	241.846	FALSE	#REF!
2022-09-12	11:03:46	0.403728	242.25	FALSE	#REF!
2022-09-12	11:03:47	0.401031	242.651	FALSE	#REF!
2022-09-12	11:03:47	0.399809	243.051	FALSE	#REF!
2022-09-12	11:03:47	0.404084	243.455	FALSE	#REF!
2022-09-12	11:03:47	0.397926	243.853	FALSE	#REF!
2022-09-12	11:03:48	0.391972	244.245	FALSE	#REF!
2022-09-12	11:03:48	0.387494	244.632	FALSE	#REF!
2022-09-12	11:03:48	0.39131	245.024	FALSE	#REF!
2022-09-12	11:03:48	0.392074	245.416	FALSE	#REF!
2022-09-12	11:03:49	0.378944	245.795	FALSE	#REF!
2022-09-12	11:03:49	0.475636	246.27	FALSE	#REF!
2022-09-12	11:03:49	0.574517	246.845	FALSE	#REF!
2022-09-12	11:03:49	1.36658	248.211	FALSE	#REF!
2022-09-12	11:03:50	3.13528	251.347	1	#REF!
2022-09-12	11:03:50	4.59304	255.94	1	#REF!
2022-09-12	11:03:50	7.96851	263.908	1	#REF!
2022-09-12	11:03:51	13.6263	277.534	1	#REF!
2022-09-12	11:03:51	12.2031	289.738	1	#REF!
2022-09-12	11:03:51	8.01894	297.757	1	#REF!
2022-09-12	11:03:51	6.66973	304.426	1	#REF!
2022-09-12	11:03:52	5.15248	309.579	1	#REF!
2022-09-12	11:03:52	4.65299	314.232	1	#REF!
2022-09-12	11:03:52	3.62037	317.852	1	#REF!
2022-09-12	11:03:52	2.6794	320.531	FALSE	#REF!
2022-09-12	11:03:53	2.65589	323.187	FALSE	#REF!
2022-09-12	11:03:53	2.83818	326.026	FALSE	#REF!
2022-09-12	11:03:53	2.41706	328.443	FALSE	#REF!
2022-09-12	11:03:53	2.40276	330.845	FALSE	#REF!
2022-09-12	11:03:54	2.5766	333.422	FALSE	#REF!
2022-09-12	11:03:54	2.5534	335.975	FALSE	#REF!
2022-09-12	11:03:54	2.51849	338.494	FALSE	#REF!
2022-09-12	11:03:54	2.31126	340.805	FALSE	#REF!
2022-09-12	11:03:55	1.40118	342.206	FALSE	#REF!
2022-09-12	11:03:55	0.779911	342.986	FALSE	#REF!
2022-09-12	11:03:55	0.496552	343.483	FALSE	#REF!
2022-09-12	11:03:56	0.346374	343.829	FALSE	#REF!
2022-09-12	11:03:56	0.342405	344.172	FALSE	#REF!
2022-09-12	11:03:56	0.416196	344.588	FALSE	#REF!
2022-09-12	11:03:56	0.396654	344.984	FALSE	#REF!
2022-09-12	11:03:57	0.507239	345.492	FALSE	#REF!
2022-09-12	11:03:57	0.643779	346.135	FALSE	#REF!
2022-09-12	11:03:57	0.525712	346.661	FALSE	#REF!
2022-09-12	11:03:57	0.644593	347.306	FALSE	#REF!
2022-09-12	11:03:58	0.577265	347.883	FALSE	#REF!
2022-09-12	11:03:58	0.491667	348.375	FALSE	#REF!
2022-09-12	11:03:58	0.28098	348.656	FALSE	#REF!
2022-09-12	11:03:58	0.550343	349.206	FALSE	#REF!
2022-09-12	11:03:59	0.3793	349.585	FALSE	#REF!
2022-09-12	11:03:59	0.475331	350.061	FALSE	#REF!
2022-09-12	11:03:59	0.287392	350.348	FALSE	#REF!
2022-09-12	11:04:00	0.644695	350.993	FALSE	#REF!
2022-09-12	11:04:00	0.40383	351.397	FALSE	#REF!
2022-09-12	11:04:00	0.710445	352.107	FALSE	#REF!
2022-09-12	11:04:00	0.497214	352.604	FALSE	#REF!
2022-09-12	11:04:01	0.4993	353.103	FALSE	#REF!
2022-09-12	11:04:01	0.369275	353.473	FALSE	#REF!
2022-09-12	11:04:01	0.5707	354.043	FALSE	#REF!
2022-09-12	11:04:01	0.582812	354.626	FALSE	#REF!
2022-09-12	11:04:02	0.788257	355.415	FALSE	#REF!
2022-09-12	11:04:02	0.648969	356.063	FALSE	#REF!
2022-09-12	11:04:02	1.09971	357.163	FALSE	#REF!
2022-09-12	11:04:02	1.88678	359.05	FALSE	#REF!
2022-09-12	11:04:03	0.712685	359.763	FALSE	#REF!
2022-09-12	11:04:03	1.29472	361.057	FALSE	#REF!
2022-09-12	11:04:03	1.05742	362.115	FALSE	#REF!
2022-09-12	11:04:04	1.231	363.346	FALSE	#REF!
2022-09-12	11:04:04	2.03324	365.379	FALSE	#REF!
2022-09-12	11:04:04	0.634924	366.014	FALSE	#REF!
2022-09-12	11:04:04	1.42836	367.442	FALSE	#REF!
2022-09-12	11:04:05	0.622252	368.065	FALSE	#REF!
2022-09-12	11:04:05	0.899351	368.964	FALSE	#REF!
2022-09-12	11:04:05	1.09813	370.062	FALSE	#REF!
2022-09-12	11:04:05	0.682811	370.745	FALSE	#REF!
2022-09-12	11:04:06	1.01604	371.761	FALSE	#REF!
2022-09-12	11:04:06	0.559097	372.32	FALSE	#REF!
2022-09-12	11:04:06	0.836298	373.156	FALSE	#REF!
2022-09-12	11:04:06	1.28307	374.439	FALSE	#REF!
2022-09-12	11:04:07	0.499249	374.939	FALSE	#REF!
2022-09-12	11:04:07	0.989835	375.928	FALSE	#REF!
2022-09-12	11:04:07	0.898791	376.827	FALSE	#REF!
2022-09-12	11:04:08	0.918079	377.745	FALSE	#REF!
2022-09-12	11:04:08	1.34607	379.091	FALSE	#REF!
2022-09-12	11:04:08	2.46245	381.554	FALSE	#REF!
2022-09-12	11:04:08	1.18765	382.741	FALSE	#REF!
2022-09-12	11:04:09	2.52943	385.271	FALSE	#REF!
2022-09-12	11:04:09	1.65279	386.924	FALSE	#REF!
2022-09-12	11:04:09	0.782608	387.706	FALSE	#REF!
2022-09-12	11:04:09	0.910903	388.617	FALSE	#REF!
2022-09-12	11:04:10	0.727341	389.345	FALSE	#REF!
2022-09-12	11:04:10	0.859606	390.204	FALSE	#REF!
2022-09-12	11:04:10	0.842608	391.047	FALSE	#REF!
2022-09-12	11:04:10	0.566781	391.614	FALSE	#REF!
2022-09-12	11:04:11	0.477621	392.091	FALSE	#REF!
2022-09-12	11:04:11	0.436858	392.528	FALSE	#REF!
2022-09-12	11:04:11	0.410751	392.939	FALSE	#REF!
2022-09-12	11:04:12	0.395534	393.334	FALSE	#REF!
2022-09-12	11:04:12	0.537723	393.872	FALSE	#REF!
2022-09-12	11:04:12	0.359911	394.232	FALSE	#REF!
2022-09-12	11:04:12	0.492125	394.724	FALSE	#REF!
2022-09-12	11:04:13	0.451514	395.176	FALSE	#REF!
2022-09-12	11:04:13	0.309835	395.485	FALSE	#REF!
2022-09-12	11:04:13	0.50785	395.993	FALSE	#REF!
2022-09-12	11:04:13	0.352888	396.346	FALSE	#REF!
2022-09-12	11:04:14	0.597316	396.943	FALSE	#REF!
2022-09-12	11:04:14	0.864186	397.808	FALSE	#REF!
2022-09-12	11:04:14	0.598537	398.406	FALSE	#REF!
2022-09-12	11:04:14	1.20016	399.606	FALSE	#REF!
2022-09-12	11:04:15	1.00704	400.613	FALSE	#REF!
2022-09-12	11:04:15	2.50245	403.116	FALSE	#REF!
2022-09-12	11:04:15	3.94337	407.059	1	#REF!
2022-09-12	11:04:15	5.45828	412.518	1	#REF!
2022-09-12	11:04:16	3.94342	416.461	1	#REF!
2022-09-12	11:04:16	1.38072	417.842	FALSE	#REF!
2022-09-12	11:04:16	1.45569	419.297	FALSE	#REF!
2022-09-12	11:04:17	1.5879	420.885	FALSE	#REF!
2022-09-12	11:04:17	0.612735	421.498	FALSE	#REF!
2022-09-12	11:04:17	0.793092	422.291	FALSE	#REF!
2022-09-12	11:04:17	0.565713	422.857	FALSE	#REF!
2022-09-12	11:04:18	0.385764	423.243	FALSE	#REF!
2022-09-12	11:04:18	0.45243	423.695	FALSE	#REF!
2022-09-12	11:04:18	0.626781	424.322	FALSE	#REF!
2022-09-12	11:04:18	0.79584	425.118	FALSE	#REF!
2022-09-12	11:04:19	0.603066	425.721	FALSE	#REF!
2022-09-12	11:04:19	0.31986	426.041	FALSE	#REF!
2022-09-12	11:04:19	0.489428	426.53	FALSE	#REF!
2022-09-12	11:04:19	0.353448	426.883	FALSE	#REF!
2022-09-12	11:04:20	0.53584	427.419	FALSE	#REF!
2022-09-12	11:04:20	0.415331	427.835	FALSE	#REF!
2022-09-12	11:04:20	0.293499	428.128	FALSE	#REF!
2022-09-12	11:04:21	0.476807	428.605	FALSE	#REF!
2022-09-12	11:04:21	0.265865	428.871	FALSE	#REF!
2022-09-12	11:04:21	0.558995	429.43	FALSE	#REF!
2022-09-12	11:04:21	0.227952	429.658	FALSE	#REF!
2022-09-12	11:04:22	0.541896	430.2	FALSE	#REF!
2022-09-12	11:04:22	0.352278	430.552	FALSE	#REF!
2022-09-12	11:04:22	0.508054	431.06	FALSE	#REF!
2022-09-12	11:04:22	0.328054	431.388	FALSE	#REF!
2022-09-12	11:04:23	0.474618	431.863	FALSE	#REF!
2022-09-12	11:04:23	0.424135	432.287	FALSE	#REF!
2022-09-12	11:04:23	0.367646	432.654	FALSE	#REF!
2022-09-12	11:04:23	0.404797	433.059	FALSE	#REF!
2022-09-12	11:04:24	0.395534	433.455	FALSE	#REF!
2022-09-12	11:04:24	0.453804	433.909	FALSE	#REF!
2022-09-12	11:04:24	0.641081	434.55	FALSE	#REF!
2022-09-12	11:04:25	1.38352	435.933	FALSE	#REF!
2022-09-12	11:04:25	1.34128	437.274	FALSE	#REF!
2022-09-12	11:04:25	2.7796	440.054	FALSE	#REF!
2022-09-12	11:04:25	3.00724	443.061	1	#REF!
2022-09-12	11:04:26	1.0048	444.066	FALSE	#REF!
2022-09-12	11:04:26	2.32902	446.395	FALSE	#REF!
2022-09-12	11:04:26	2.94083	449.336	FALSE	#REF!
2022-09-12	11:04:26	1.96724	451.303	FALSE	#REF!
2022-09-12	11:04:27	2.78291	454.086	FALSE	#REF!
2022-09-12	11:04:27	0.569021	454.655	FALSE	#REF!
2022-09-12	11:04:27	1.45014	456.105	FALSE	#REF!
2022-09-12	11:04:27	1.06561	457.171	FALSE	#REF!
2022-09-12	11:04:28	0.509326	457.68	FALSE	#REF!
2022-09-12	11:04:28	0.405	458.085	FALSE	#REF!
2022-09-12	11:04:28	0.517672	458.603	FALSE	#REF!
2022-09-12	11:04:29	0.280827	458.884	FALSE	#REF!
2022-09-12	11:04:29	0.391972	459.276	FALSE	#REF!
2022-09-12	11:04:29	0.313601	459.589	FALSE	#REF!
2022-09-12	11:04:29	0.400522	459.99	FALSE	#REF!
2022-09-12	11:04:30	0.290293	460.28	FALSE	#REF!
2022-09-12	11:04:30	0.460827	460.741	FALSE	#REF!
2022-09-12	11:04:30	0.286934	461.028	FALSE	#REF!
2022-09-12	11:04:30	0.341794	461.37	FALSE	#REF!
2022-09-12	11:04:31	0.304797	461.674	FALSE	#REF!
2022-09-12	11:04:31	0.317417	461.992	FALSE	#REF!
2022-09-12	11:04:31	0.38958	462.381	FALSE	#REF!
2022-09-12	11:04:31	0.326425	462.708	FALSE	#REF!
2022-09-12	11:04:32	0.417926	463.126	FALSE	#REF!
2022-09-12	11:04:32	0.448868	463.575	FALSE	#REF!
2022-09-12	11:04:32	1.0309	464.605	FALSE	#REF!
2022-09-12	11:04:33	1.00347	465.609	FALSE	#REF!
2022-09-12	11:04:33	1.63782	467.247	FALSE	#REF!
2022-09-12	11:04:33	2.8966	470.143	FALSE	#REF!
2022-09-12	11:04:33	1.55645	471.7	FALSE	#REF!
2022-09-12	11:04:34	1.84464	473.544	FALSE	#REF!
2022-09-12	11:04:34	1.02159	474.566	FALSE	#REF!
2022-09-12	11:04:34	0.964694	475.531	FALSE	#REF!
2022-09-12	11:04:34	0.499606	476.03	FALSE	#REF!
2022-09-12	11:04:35	0.286069	476.316	FALSE	#REF!
2022-09-12	11:04:35	0.457977	476.774	FALSE	#REF!
2022-09-12	11:04:35	0.465305	477.24	FALSE	#REF!
2022-09-12	11:04:35	0.558639	477.798	FALSE	#REF!
2022-09-12	11:04:36	0.501946	478.3	FALSE	#REF!
2022-09-12	11:04:36	0.66673	478.967	FALSE	#REF!
2022-09-12	11:04:36	0.391463	479.358	FALSE	#REF!
2022-09-12	11:04:36	0.518079	479.877	FALSE	#REF!
2022-09-12	11:04:37	0.41701	480.294	FALSE	#REF!
2022-09-12	11:04:37	0.351514	480.645	FALSE	#REF!
2022-09-12	11:04:37	0.256603	480.902	FALSE	#REF!
2022-09-12	11:04:38	0.248155	481.15	FALSE	#REF!
2022-09-12	11:04:38	0.358486	481.508	FALSE	#REF!
2022-09-12	11:04:38	0.205967	481.714	FALSE	#REF!
2022-09-12	11:04:38	0.441692	482.156	FALSE	#REF!
2022-09-12	11:04:39	0.237621	482.394	FALSE	#REF!
2022-09-12	11:04:39	0.409631	482.803	FALSE	#REF!
2022-09-12	11:04:39	0.214771	483.018	FALSE	#REF!
2022-09-12	11:04:39	0.643931	483.662	FALSE	#REF!
2022-09-12	11:04:40	1.39029	485.052	FALSE	#REF!
2022-09-12	11:04:40	4.07879	489.131	1	#REF!
2022-09-12	11:04:40	3.21004	492.341	1	#REF!
2022-09-12	11:04:40	3.39747	495.739	1	#REF!
2022-09-12	11:04:41	1.04307	496.782	FALSE	#REF!
2022-09-12	11:04:41	1.50363	498.285	FALSE	#REF!
2022-09-12	11:04:41	0.545712	498.831	FALSE	#REF!
2022-09-12	11:04:42	1.09162	499.923	FALSE	#REF!
2022-09-12	11:04:42	1.02388	500.946	FALSE	#REF!
2022-09-12	11:04:42	0.363372	501.31	FALSE	#REF!
2022-09-12	11:04:42	0.495076	501.805	FALSE	#REF!
2022-09-12	11:04:43	0.254059	502.059	FALSE	#REF!
2022-09-12	11:04:43	0.43645	502.495	FALSE	#REF!
2022-09-12	11:04:43	0.170445	502.666	FALSE	#REF!
2022-09-12	11:04:43	0.269987	502.936	FALSE	#REF!
2022-09-12	11:04:44	0.103626	503.039	FALSE	#REF!
2022-09-12	11:04:44	0.190751	503.23	FALSE	#REF!
2022-09-12	11:04:44	0.0104964	503.241	FALSE	#REF!
2022-09-12	11:04:44	0.210649	503.451	FALSE	#REF!
2022-09-12	11:04:45	0.0666796	503.518	FALSE	#REF!
2022-09-12	11:04:45	0.215382	503.733	FALSE	#REF!
2022-09-12	11:04:45	0.0489697	503.782	FALSE	#REF!
2022-09-12	11:04:46	0.210445	503.993	FALSE	#REF!
2022-09-12	11:04:46	0.160522	504.153	FALSE	#REF!
2022-09-12	11:04:46	0.251565	504.405	FALSE	#REF!
2022-09-12	11:04:46	0.199606	504.605	FALSE	#REF!
2022-09-12	11:04:47	0.373143	504.978	FALSE	#REF!
2022-09-12	11:04:47	0.220013	505.198	FALSE	#REF!
2022-09-12	11:04:47	0.413193	505.611	FALSE	#REF!
2022-09-12	11:04:47	0.157367	505.768	FALSE	#REF!
2022-09-12	11:04:48	0.44785	506.216	FALSE	#REF!
2022-09-12	11:04:48	0.186985	506.403	FALSE	#REF!
2022-09-12	11:04:48	0.462456	506.866	FALSE	#REF!
2022-09-12	11:04:48	0.117112	506.983	FALSE	#REF!
2022-09-12	11:04:49	0.453957	507.437	FALSE	#REF!
2022-09-12	11:04:49	0.187341	507.624	FALSE	#REF!
2022-09-12	11:04:49	0.449733	508.074	FALSE	#REF!
2022-09-12	11:04:50	0.207748	508.281	FALSE	#REF!
2022-09-12	11:04:50	0.503982	508.785	FALSE	#REF!
2022-09-12	11:04:50	0.268104	509.054	FALSE	#REF!
2022-09-12	11:04:50	0.484135	509.538	FALSE	#REF!
2022-09-12	11:04:51	0.174364	509.712	FALSE	#REF!
2022-09-12	11:04:51	0.460369	510.172	FALSE	#REF!
2022-09-12	11:04:51	0.280725	510.453	FALSE	#REF!
2022-09-12	11:04:51	0.472176	510.925	FALSE	#REF!
2022-09-12	11:04:52	0.184135	511.109	FALSE	#REF!
2022-09-12	11:04:52	0.446781	511.556	FALSE	#REF!
2022-09-12	11:04:52	0.257366	511.814	FALSE	#REF!
2022-09-12	11:04:52	0.472532	512.286	FALSE	#REF!
2022-09-12	11:04:53	0.25416	512.54	FALSE	#REF!
2022-09-12	11:04:53	0.388308	512.929	FALSE	#REF!
2022-09-12	11:04:53	0.290191	513.219	FALSE	#REF!
2022-09-12	11:04:54	0.484695	513.703	FALSE	#REF!
2022-09-12	11:04:54	0.223372	513.927	FALSE	#REF!
2022-09-12	11:04:54	0.410242	514.337	FALSE	#REF!
2022-09-12	11:04:54	0.21813	514.555	FALSE	#REF!
2022-09-12	11:04:55	0.35528	514.91	FALSE	#REF!
2022-09-12	11:04:55	0.19299	515.103	FALSE	#REF!
2022-09-12	11:04:55	0.381336	515.485	FALSE	#REF!
2022-09-12	11:04:55	0.148817	515.634	FALSE	#REF!
2022-09-12	11:04:56	0.20729	515.841	FALSE	#REF!
2022-09-12	11:04:56	0.0978246	515.939	FALSE	#REF!
2022-09-12	11:04:56	0.162812	516.102	FALSE	#REF!
2022-09-12	11:04:56	0.428613	516.53	FALSE	#REF!
2022-09-12	11:04:57	0.215687	516.746	FALSE	#REF!
2022-09-12	11:04:57	0.327188	517.073	FALSE	#REF!
2022-09-12	11:04:57	0.392786	517.466	FALSE	#REF!
2022-09-12	11:04:57	0.329987	517.796	FALSE	#REF!
2022-09-12	11:04:58	0.270903	518.067	FALSE	#REF!
2022-09-12	11:04:58	0.450242	518.517	FALSE	#REF!
2022-09-12	11:04:58	0.285102	518.802	FALSE	#REF!
2022-09-12	11:04:59	0.403728	519.206	FALSE	#REF!
2022-09-12	11:04:59	0.935025	520.141	FALSE	#REF!
2022-09-12	11:04:59	0.433804	520.575	FALSE	#REF!
2022-09-12	11:04:59	0.425356	521	FALSE	#REF!
2022-09-12	11:05:00	0.812582	521.813	FALSE	#REF!
2022-09-12	11:05:00	0.389173	522.202	FALSE	#REF!
2022-09-12	11:05:00	0.309529	522.511	FALSE	#REF!
2022-09-12	11:05:00	0.348461	522.86	FALSE	#REF!
2022-09-12	11:05:01	0.331667	523.191	FALSE	#REF!
2022-09-12	11:05:01	0.40841	523.6	FALSE	#REF!
2022-09-12	11:05:01	0.334466	523.934	FALSE	#REF!
2022-09-12	11:05:01	0.365814	524.3	FALSE	#REF!
2022-09-12	11:05:02	0.322506	524.623	FALSE	#REF!
2022-09-12	11:05:02	0.128868	524.751	FALSE	#REF!
2022-09-12	11:05:02	0.255585	525.007	FALSE	#REF!
2022-09-12	11:05:03	0.184593	525.192	FALSE	#REF!
2022-09-12	11:05:03	0.261896	525.454	FALSE	#REF!
2022-09-12	11:05:03	0.288817	525.742	FALSE	#REF!
2022-09-12	11:05:03	0.141794	525.884	FALSE	#REF!
2022-09-12	11:05:04	0.238537	526.123	FALSE	#REF!
2022-09-12	11:05:04	0.0062725	526.129	FALSE	#REF!
2022-09-12	11:05:04	0.0839824	526.213	FALSE	#REF!
2022-09-12	11:05:05	0.114771	526.328	FALSE	#REF!
2022-09-12	11:05:05	0.216858	526.545	FALSE	#REF!
2022-09-12	11:05:05	0.197774	526.742	FALSE	#REF!
2022-09-12	11:05:05	0.0947712	526.837	FALSE	#REF!
2022-09-12	11:05:05	0.293499	527.131	FALSE	#REF!
2022-09-12	11:05:06	0.192888	527.323	FALSE	#REF!
2022-09-12	11:05:06	0.36729	527.691	FALSE	#REF!
2022-09-12	11:05:06	0.327494	528.018	FALSE	#REF!
2022-09-12	11:05:07	0.39528	528.414	FALSE	#REF!
2022-09-12	11:05:07	0.414211	528.828	FALSE	#REF!
2022-09-12	11:05:07	0.354618	529.182	FALSE	#REF!
2022-09-12	11:05:07	0.459809	529.642	FALSE	#REF!
2022-09-12	11:05:08	0.405713	530.048	FALSE	#REF!
2022-09-12	11:05:08	0.463422	530.511	FALSE	#REF!
2022-09-12	11:05:08	0.464593	530.976	FALSE	#REF!
2022-09-12	11:05:08	0.454822	531.431	FALSE	#REF!
2022-09-12	11:05:09	0.432074	531.863	FALSE	#REF!
2022-09-12	11:05:09	0.452023	532.315	FALSE	#REF!
2022-09-12	11:05:09	0.441234	532.756	FALSE	#REF!
2022-09-12	11:05:09	0.448257	533.204	FALSE	#REF!
2022-09-12	11:05:10	0.477367	533.682	FALSE	#REF!
2022-09-12	11:05:10	0.443117	534.125	FALSE	#REF!
2022-09-12	11:05:10	0.593194	534.718	FALSE	#REF!
2022-09-12	11:05:11	0.532837	535.251	FALSE	#REF!
2022-09-12	11:05:11	0.556552	535.807	FALSE	#REF!
2022-09-12	11:05:11	0.440267	536.248	FALSE	#REF!
2022-09-12	11:05:11	0.56159	536.809	FALSE	#REF!
2022-09-12	11:05:12	0.291565	537.101	FALSE	#REF!
2022-09-12	11:05:12	0.419555	537.52	FALSE	#REF!
2022-09-12	11:05:12	0.429326	537.95	FALSE	#REF!
2022-09-12	11:05:12	0.512277	538.462	FALSE	#REF!
2022-09-12	11:05:13	0.328817	538.791	FALSE	#REF!
2022-09-12	11:05:13	0.27014	539.061	FALSE	#REF!
2022-09-12	11:05:13	0.36612	539.427	FALSE	#REF!
2022-09-12	11:05:13	0.350242	539.777	FALSE	#REF!
2022-09-12	11:05:14	0.355585	540.133	FALSE	#REF!
2022-09-12	11:05:14	0.345611	540.478	FALSE	#REF!
2022-09-12	11:05:14	0.328613	540.807	FALSE	#REF!
2022-09-12	11:05:15	0.392532	541.2	FALSE	#REF!
2022-09-12	11:05:15	0.36612	541.566	FALSE	#REF!
2022-09-12	11:05:15	0.287799	541.854	FALSE	#REF!
2022-09-12	11:05:15	0.495636	542.349	FALSE	#REF!
2022-09-12	11:05:16	0.263015	542.612	FALSE	#REF!
2022-09-12	11:05:16	0.506476	543.119	FALSE	#REF!
2022-09-12	11:05:16	0.241794	543.36	FALSE	#REF!
2022-09-12	11:05:16	0.428613	543.789	FALSE	#REF!
2022-09-12	11:05:17	0.289886	544.079	FALSE	#REF!
2022-09-12	11:05:17	0.521947	544.601	FALSE	#REF!
2022-09-12	11:05:17	0.287443	544.888	FALSE	#REF!
2022-09-12	11:05:17	0.574415	545.463	FALSE	#REF!
2022-09-12	11:05:18	0.291616	545.754	FALSE	#REF!
2022-09-12	11:05:18	0.497163	546.252	FALSE	#REF!
2022-09-12	11:05:18	0.262354	546.514	FALSE	#REF!
2022-09-12	11:05:19	0.532939	547.047	FALSE	#REF!
2022-09-12	11:05:19	0.237977	547.285	FALSE	#REF!
2022-09-12	11:05:19	0.50668	547.791	FALSE	#REF!
2022-09-12	11:05:19	0.285713	548.077	FALSE	#REF!
2022-09-12	11:05:20	1.02464	549.102	FALSE	#REF!
2022-09-12	11:05:20	1.89838	551	FALSE	#REF!
2022-09-12	11:05:20	4.25034	555.251	1	#REF!
2022-09-12	11:05:20	4.09065	559.341	1	#REF!
2022-09-12	11:05:21	3.80714	563.148	1	#REF!
2022-09-12	11:05:21	2.01055	565.159	FALSE	#REF!
2022-09-12	11:05:21	1.78785	566.947	FALSE	#REF!
2022-09-12	11:05:21	0.535636	567.482	FALSE	#REF!
2022-09-12	11:05:22	0.353397	567.836	FALSE	#REF!
2022-09-12	11:05:22	0.240115	568.076	FALSE	#REF!
2022-09-12	11:05:22	0.434568	568.51	FALSE	#REF!
2022-09-12	11:05:22	0.415789	568.926	FALSE	#REF!
2022-09-12	11:05:23	0.559046	569.485	FALSE	#REF!
2022-09-12	11:05:23	0.481081	569.966	FALSE	#REF!
2022-09-12	11:05:23	0.375891	570.342	FALSE	#REF!
2022-09-12	11:05:24	0.503575	570.846	FALSE	#REF!
2022-09-12	11:05:24	0.444695	571.291	FALSE	#REF!
2022-09-12	11:05:24	0.43014	571.721	FALSE	#REF!
2022-09-12	11:05:24	0.378944	572.1	FALSE	#REF!
2022-09-12	11:05:25	0.479707	572.579	FALSE	#REF!
2022-09-12	11:05:25	0.387799	572.967	FALSE	#REF!
2022-09-12	11:05:25	0.475636	573.443	FALSE	#REF!
2022-09-12	11:05:25	0.425305	573.868	FALSE	#REF!
2022-09-12	11:05:26	0.364084	574.232	FALSE	#REF!
2022-09-12	11:05:26	0.433295	574.665	FALSE	#REF!
2022-09-12	11:05:26	0.412481	575.078	FALSE	#REF!
2022-09-12	11:05:26	0.408766	575.487	FALSE	#REF!
2022-09-12	11:05:27	0.41126	575.898	FALSE	#REF!
2022-09-12	11:05:27	0.42841	576.326	FALSE	#REF!
2022-09-12	11:05:27	0.327239	576.654	FALSE	#REF!
2022-09-12	11:05:28	0.392023	577.046	FALSE	#REF!
2022-09-12	11:05:28	0.376145	577.422	FALSE	#REF!
2022-09-12	11:05:28	0.362608	577.784	FALSE	#REF!
2022-09-12	11:05:28	0.417977	578.202	FALSE	#REF!
2022-09-12	11:05:29	0.417112	578.619	FALSE	#REF!
2022-09-12	11:05:29	0.379758	578.999	FALSE	#REF!
2022-09-12	11:05:29	0.436094	579.435	FALSE	#REF!
2022-09-12	11:05:29	0.418639	579.854	FALSE	#REF!
2022-09-12	11:05:30	0.477875	580.332	FALSE	#REF!
2022-09-12	11:05:30	0.513397	580.845	FALSE	#REF!
2022-09-12	11:05:30	0.647239	581.492	FALSE	#REF!
2022-09-12	11:05:30	0.768308	582.261	FALSE	#REF!
2022-09-12	11:05:31	0.66673	582.928	FALSE	#REF!
2022-09-12	11:05:31	3.00245	585.93	1	#REF!
2022-09-12	11:05:31	0.489733	586.42	FALSE	#REF!
2022-09-12	11:05:32	3.76362	590.183	1	#REF!
2022-09-12	11:05:32	0.399657	590.583	FALSE	#REF!
2022-09-12	11:05:32	0.113753	590.697	FALSE	#REF!
2022-09-12	11:05:32	0.082761	590.779	FALSE	#REF!
2022-09-12	11:05:33	0.192685	590.972	FALSE	#REF!
2022-09-12	11:05:33	0.0571631	591.029	FALSE	#REF!
2022-09-12	11:05:33	0.136654	591.166	FALSE	#REF!
2022-09-12	11:05:33	0.258333	591.424	FALSE	#REF!
2022-09-12	11:05:34	0.0197585	591.444	FALSE	#REF!
2022-09-12	11:05:34	0.0603692	591.504	FALSE	#REF!
2022-09-12	11:05:34	0.0703946	591.575	FALSE	#REF!
2022-09-12	11:05:34	0.00459311	591.579	FALSE	#REF!
2022-09-12	11:05:35	0.115585	591.695	FALSE	#REF!
2022-09-12	11:05:35	0.152786	591.848	FALSE	#REF!
2022-09-12	11:05:35	0.160369	592.008	FALSE	#REF!
2022-09-12	11:05:36	0.203117	592.211	FALSE	#REF!
2022-09-12	11:05:36	0.226781	592.438	FALSE	#REF!
2022-09-12	11:05:36	0.42383	592.862	FALSE	#REF!
2022-09-12	11:05:36	0.421692	593.284	FALSE	#REF!
2022-09-12	11:05:37	0.38673	593.67	FALSE	#REF!
2022-09-12	11:05:37	0.759504	594.43	FALSE	#REF!
2022-09-12	11:05:37	0.733244	595.163	FALSE	#REF!
2022-09-12	11:05:37	0.226832	595.39	FALSE	#REF!
2022-09-12	11:05:38	0.245305	595.635	FALSE	#REF!
2022-09-12	11:05:38	-0.0422771	595.635	FALSE	#REF!
2022-09-12	11:05:38	-0.462226	595.635	FALSE	#REF!
2022-09-12	11:05:38	-0.478358	595.635	FALSE	#REF!
2022-09-12	11:05:39	-0.501055	595.635	FALSE	#REF!
2022-09-12	11:05:39	-0.544007	595.635	FALSE	#REF!
2022-09-12	11:05:39	-0.0388674	595.635	FALSE	#REF!
2022-09-12	11:05:40	0.0846439	595.72	FALSE	#REF!
2022-09-12	11:05:40	0.189478	595.909	FALSE	#REF!
2022-09-12	11:05:40	0.0960943	596.005	FALSE	#REF!
2022-09-12	11:05:40	-0.0503178	596.005	FALSE	#REF!
2022-09-12	11:05:41	-0.0521498	596.005	FALSE	#REF!
2022-09-12	11:05:41	-0.0275188	596.005	FALSE	#REF!
2022-09-12	11:05:41	-0.222633	596.005	FALSE	#REF!
2022-09-12	11:05:41	-0.0200379	596.005	FALSE	#REF!
2022-09-12	11:05:42	0.0358399	596.041	FALSE	#REF!
2022-09-12	11:05:42	0.406171	596.447	FALSE	#REF!
2022-09-12	11:05:42	0.00566182	596.453	FALSE	#REF!
2022-09-12	11:05:42	0.0973158	596.55	FALSE	#REF!
2022-09-12	11:05:43	0.173092	596.724	FALSE	#REF!
2022-09-12	11:05:43	0.333651	597.057	FALSE	#REF!
2022-09-12	11:05:43	0.372735	597.43	FALSE	#REF!
2022-09-12	11:05:44	0.390547	597.82	FALSE	#REF!
2022-09-12	11:05:44	0.400216	598.221	FALSE	#REF!
2022-09-12	11:05:44	0.396247	598.617	FALSE	#REF!
2022-09-12	11:05:44	0.394873	599.012	FALSE	#REF!
2022-09-12	11:05:45	0.399962	599.412	FALSE	#REF!
2022-09-12	11:05:45	0.421845	599.834	FALSE	#REF!
2022-09-12	11:05:45	0.471463	600.305	FALSE	#REF!
2022-09-12	11:05:45	0.370547	600.676	FALSE	#REF!
2022-09-12	11:05:46	0.373143	601.049	FALSE	#REF!
2022-09-12	11:05:46	0.376094	601.425	FALSE	#REF!
2022-09-12	11:05:46	0.381031	601.806	FALSE	#REF!
2022-09-12	11:05:46	0.372176	602.178	FALSE	#REF!
2022-09-12	11:05:47	0.380471	602.559	FALSE	#REF!
2022-09-12	11:05:47	0.382405	602.941	FALSE	#REF!
2022-09-12	11:05:47	0.36902	603.31	FALSE	#REF!
2022-09-12	11:05:47	0.378944	603.689	FALSE	#REF!
2022-09-12	11:05:48	0.381387	604.07	FALSE	#REF!
2022-09-12	11:05:48	0.381285	604.452	FALSE	#REF!
2022-09-12	11:05:48	0.385662	604.837	FALSE	#REF!
2022-09-12	11:05:49	0.535942	605.373	FALSE	#REF!
2022-09-12	11:05:49	0.492379	605.866	FALSE	#REF!
2022-09-12	11:05:49	-0.0327606	605.866	FALSE	#REF!
2022-09-12	11:05:49	-0.0424297	605.866	FALSE	#REF!
2022-09-12	11:05:50	0.1393	606.005	FALSE	#REF!
2022-09-12	11:05:50	0.405814	606.411	FALSE	#REF!
2022-09-12	11:05:50	0.551666	606.962	FALSE	#REF!
2022-09-12	11:05:50	0.607748	607.57	FALSE	#REF!
2022-09-12	11:05:51	0.469682	608.04	FALSE	#REF!
2022-09-12	11:05:51	0.437723	608.477	FALSE	#REF!
2022-09-12	11:05:51	0.443219	608.921	FALSE	#REF!
2022-09-12	11:05:51	0.403423	609.324	FALSE	#REF!
2022-09-12	11:05:52	0.417723	609.742	FALSE	#REF!
2022-09-12	11:05:52	0.482405	610.224	FALSE	#REF!
2022-09-12	11:05:52	0.466985	610.691	FALSE	#REF!
2022-09-12	11:05:53	0.435738	611.127	FALSE	#REF!
2022-09-12	11:05:53	0.444847	611.572	FALSE	#REF!
2022-09-12	11:05:53	0.446171	612.018	FALSE	#REF!
2022-09-12	11:05:53	0.451667	612.47	FALSE	#REF!
2022-09-12	11:05:54	0.456298	612.926	FALSE	#REF!
2022-09-12	11:05:54	0.442456	613.368	FALSE	#REF!
2022-09-12	11:05:54	0.425407	613.794	FALSE	#REF!
2022-09-12	11:05:54	0.427646	614.221	FALSE	#REF!
2022-09-12	11:05:55	0.428053	614.65	FALSE	#REF!
2022-09-12	11:05:55	0.420776	615.07	FALSE	#REF!
2022-09-12	11:05:55	0.431972	615.502	FALSE	#REF!
2022-09-12	11:05:55	0.458384	615.961	FALSE	#REF!
2022-09-12	11:05:56	0.474975	616.436	FALSE	#REF!
2022-09-12	11:05:56	0.482303	616.918	FALSE	#REF!
2022-09-12	11:05:56	0.388257	617.306	FALSE	#REF!
2022-09-12	11:05:57	0.456196	617.762	FALSE	#REF!
2022-09-12	11:05:57	0.313601	618.076	FALSE	#REF!
2022-09-12	11:05:57	1.96398	620.04	FALSE	#REF!
2022-09-12	11:05:57	0.435178	620.475	FALSE	#REF!
2022-09-12	11:05:58	0.321031	620.796	FALSE	#REF!
2022-09-12	11:05:58	0.0612852	620.857	FALSE	#REF!
2022-09-12	11:05:58	0.0937534	620.951	FALSE	#REF!
2022-09-12	11:05:58	0.00535648	620.957	FALSE	#REF!
2022-09-12	11:05:59	-0.0107758	620.957	FALSE	#REF!
2022-09-12	11:05:59	0.0814888	621.038	FALSE	#REF!
2022-09-12	11:05:59	0.221743	621.26	FALSE	#REF!
2022-09-12	11:05:59	1.99268	623.252	FALSE	#REF!
2022-09-12	11:06:00	5.06485	628.317	1	#REF!
2022-09-12	11:06:00	2.47223	630.79	FALSE	#REF!
2022-09-12	11:06:00	2.15981	632.949	FALSE	#REF!
2022-09-12	11:06:01	1.45258	634.402	FALSE	#REF!
2022-09-12	11:06:01	0.489529	634.891	FALSE	#REF!
2022-09-12	11:06:01	0.381794	635.273	FALSE	#REF!
2022-09-12	11:06:01	1.25686	636.53	FALSE	#REF!
2022-09-12	11:06:02	0.933346	637.463	FALSE	#REF!
2022-09-12	11:06:02	1.20475	638.668	FALSE	#REF!
2022-09-12	11:06:02	1.15762	639.826	FALSE	#REF!
2022-09-12	11:06:02	0.794211	640.62	FALSE	#REF!
2022-09-12	11:06:03	0.534109	641.154	FALSE	#REF!
2022-09-12	11:06:03	0.49355	641.648	FALSE	#REF!
2022-09-12	11:06:03	0.596807	642.245	FALSE	#REF!
2022-09-12	11:06:03	0.761896	643.006	FALSE	#REF!
2022-09-12	11:06:04	0.973855	643.98	FALSE	#REF!
2022-09-12	11:06:04	1.36113	645.341	FALSE	#REF!
2022-09-12	11:06:04	1.46103	646.802	FALSE	#REF!
2022-09-12	11:06:05	0.806069	647.608	FALSE	#REF!
2022-09-12	11:06:05	1.01075	648.619	FALSE	#REF!
2022-09-12	11:06:05	0.383575	649.003	FALSE	#REF!
2022-09-12	11:06:05	0.488257	649.491	FALSE	#REF!
2022-09-12	11:06:06	0.484746	649.976	FALSE	#REF!
2022-09-12	11:06:06	0.549885	650.526	FALSE	#REF!
2022-09-12	11:06:06	0.532583	651.058	FALSE	#REF!
2022-09-12	11:06:06	0.4793	651.538	FALSE	#REF!
2022-09-12	11:06:07	0.625865	652.163	FALSE	#REF!
2022-09-12	11:06:07	0.758435	652.922	FALSE	#REF!
2022-09-12	11:06:07	0.657723	653.58	FALSE	#REF!
2022-09-12	11:06:07	0.685814	654.265	FALSE	#REF!
2022-09-12	11:06:08	0.375026	654.64	FALSE	#REF!
2022-09-12	11:06:08	0.549885	655.19	FALSE	#REF!
2022-09-12	11:06:08	0.455891	655.646	FALSE	#REF!
2022-09-12	11:06:08	0.472125	656.118	FALSE	#REF!
2022-09-12	11:06:09	0.468868	656.587	FALSE	#REF!
2022-09-12	11:06:09	0.46556	657.053	FALSE	#REF!
2022-09-12	11:06:09	0.459962	657.513	FALSE	#REF!
2022-09-12	11:06:10	0.46098	657.974	FALSE	#REF!
2022-09-12	11:06:10	0.494109	658.468	FALSE	#REF!
2022-09-12	11:06:10	0.454313	658.922	FALSE	#REF!
2022-09-12	11:06:10	0.455891	659.378	FALSE	#REF!
2022-09-12	11:06:11	0.440471	659.819	FALSE	#REF!
2022-09-12	11:06:11	0.443931	660.262	FALSE	#REF!
2022-09-12	11:06:11	0.484746	660.747	FALSE	#REF!
2022-09-12	11:06:11	0.509682	661.257	FALSE	#REF!
2022-09-12	11:06:12	0.44215	661.699	FALSE	#REF!
2022-09-12	11:06:12	0.893244	662.592	FALSE	#REF!
2022-09-12	11:06:12	0.630343	663.223	FALSE	#REF!
2022-09-12	11:06:12	0.557417	663.78	FALSE	#REF!
2022-09-12	11:06:13	1.07584	664.856	FALSE	#REF!
2022-09-12	11:06:13	0.565254	665.421	FALSE	#REF!
2022-09-12	11:06:13	0.998639	666.42	FALSE	#REF!
2022-09-12	11:06:14	0.73014	667.15	FALSE	#REF!
2022-09-12	11:06:14	0.51813	667.668	FALSE	#REF!
2022-09-12	11:06:14	0.54444	668.212	FALSE	#REF!
2022-09-12	11:06:14	0.599911	668.812	FALSE	#REF!
2022-09-12	11:06:15	1.11579	669.928	FALSE	#REF!
2022-09-12	11:06:15	1.54846	671.477	FALSE	#REF!
2022-09-12	11:06:15	0.544084	672.021	FALSE	#REF!
2022-09-12	11:06:15	0.478995	672.5	FALSE	#REF!
2022-09-12	11:06:16	0.494109	672.994	FALSE	#REF!
2022-09-12	11:06:16	0.413499	673.407	FALSE	#REF!
2022-09-12	11:06:16	0.512634	673.92	FALSE	#REF!
2022-09-12	11:06:16	0.435026	674.355	FALSE	#REF!
2022-09-12	11:06:17	0.460013	674.815	FALSE	#REF!
2022-09-12	11:06:17	0.466323	675.281	FALSE	#REF!
2022-09-12	11:06:17	0.443779	675.725	FALSE	#REF!
2022-09-12	11:06:18	0.455433	676.181	FALSE	#REF!
2022-09-12	11:06:18	0.444746	676.625	FALSE	#REF!
2022-09-12	11:06:18	0.456552	677.082	FALSE	#REF!
2022-09-12	11:06:18	0.46388	677.546	FALSE	#REF!
2022-09-12	11:06:19	0.436908	677.983	FALSE	#REF!
2022-09-12	11:06:19	0.495331	678.478	FALSE	#REF!
2022-09-12	11:06:19	0.48841	678.966	FALSE	#REF!
2022-09-12	11:06:19	0.462099	679.428	FALSE	#REF!
2022-09-12	11:06:20	0.525153	679.954	FALSE	#REF!
2022-09-12	11:06:20	0.423168	680.377	FALSE	#REF!
2022-09-12	11:06:20	0.574059	680.951	FALSE	#REF!
2022-09-12	11:06:20	2.79518	683.746	FALSE	#REF!
2022-09-12	11:06:21	4.31319	688.059	1	#REF!
2022-09-12	11:06:21	1.96719	690.026	FALSE	#REF!
2022-09-12	11:06:21	0.850649	690.877	FALSE	#REF!
2022-09-12	11:06:22	0.412176	691.289	FALSE	#REF!
2022-09-12	11:06:22	0.551412	691.841	FALSE	#REF!
2022-09-12	11:06:22	0.329326	692.17	FALSE	#REF!
2022-09-12	11:06:22	0.508919	692.679	FALSE	#REF!
2022-09-12	11:06:23	0.325407	693.004	FALSE	#REF!
2022-09-12	11:06:23	0.4936	693.498	FALSE	#REF!
2022-09-12	11:06:23	0.39813	693.896	FALSE	#REF!
2022-09-12	11:06:23	0.542812	694.439	FALSE	#REF!
2022-09-12	11:06:24	0.673651	695.112	FALSE	#REF!
2022-09-12	11:06:24	0.66271	695.775	FALSE	#REF!
2022-09-12	11:06:24	0.431361	696.207	FALSE	#REF!
2022-09-12	11:06:24	0.532888	696.739	FALSE	#REF!
2022-09-12	11:06:25	0.330649	697.07	FALSE	#REF!
2022-09-12	11:06:25	0.497621	697.568	FALSE	#REF!
2022-09-12	11:06:25	0.388257	697.956	FALSE	#REF!
2022-09-12	11:06:26	0.379606	698.336	FALSE	#REF!
2022-09-12	11:06:26	0.48042	698.816	FALSE	#REF!
2022-09-12	11:06:26	0.749428	699.565	FALSE	#REF!
2022-09-12	11:06:26	0.537774	700.103	FALSE	#REF!
2022-09-12	11:06:27	0.64673	700.75	FALSE	#REF!
2022-09-12	11:06:27	0.553092	701.303	FALSE	#REF!
2022-09-12	11:06:27	0.358741	701.662	FALSE	#REF!
2022-09-12	11:06:27	0.412634	702.074	FALSE	#REF!
2022-09-12	11:06:28	0.339199	702.414	FALSE	#REF!
2022-09-12	11:06:28	0.538181	702.952	FALSE	#REF!
2022-09-12	11:06:28	0.403575	703.355	FALSE	#REF!
2022-09-12	11:06:28	0.453804	703.809	FALSE	#REF!
2022-09-12	11:06:29	0.521539	704.331	FALSE	#REF!
2022-09-12	11:06:29	0.449631	704.78	FALSE	#REF!
2022-09-12	11:06:29	0.432328	705.213	FALSE	#REF!
2022-09-12	11:06:30	0.63299	705.846	FALSE	#REF!
2022-09-12	11:06:30	0.584847	706.43	FALSE	#REF!
2022-09-12	11:06:30	0.540572	706.971	FALSE	#REF!
2022-09-12	11:06:30	1.28134	708.252	FALSE	#REF!
2022-09-12	11:06:31	0.364898	708.617	FALSE	#REF!
2022-09-12	11:06:31	0.519148	709.136	FALSE	#REF!
2022-09-12	11:06:31	0.483321	709.62	FALSE	#REF!
2022-09-12	11:06:31	0.432583	710.052	FALSE	#REF!
2022-09-12	11:06:32	1.00088	711.053	FALSE	#REF!
2022-09-12	11:06:32	0.490344	711.544	FALSE	#REF!
2022-09-12	11:06:32	0.627036	712.171	FALSE	#REF!
2022-09-12	11:06:32	0.451718	712.622	FALSE	#REF!
2022-09-12	11:06:33	0.403931	713.026	FALSE	#REF!
2022-09-12	11:06:33	0.475891	713.502	FALSE	#REF!
2022-09-12	11:06:33	0.490954	713.993	FALSE	#REF!
2022-09-12	11:06:33	0.435636	714.429	FALSE	#REF!
2022-09-12	11:06:34	0.590343	715.019	FALSE	#REF!
2022-09-12	11:06:34	0.60042	715.619	FALSE	#REF!
2022-09-12	11:06:34	0.57645	716.196	FALSE	#REF!
2022-09-12	11:06:35	0.365865	716.562	FALSE	#REF!
2022-09-12	11:06:35	0.484695	717.046	FALSE	#REF!
2022-09-12	11:06:35	0.271565	717.318	FALSE	#REF!
2022-09-12	11:06:35	0.475178	717.793	FALSE	#REF!
2022-09-12	11:06:36	0.45584	718.249	FALSE	#REF!
2022-09-12	11:06:36	0.424033	718.673	FALSE	#REF!
2022-09-12	11:06:36	0.476552	719.15	FALSE	#REF!
2022-09-12	11:06:36	0.491107	719.641	FALSE	#REF!
2022-09-12	11:06:37	0.468868	720.11	FALSE	#REF!
2022-09-12	11:06:37	0.304949	720.415	FALSE	#REF!
2022-09-12	11:06:37	0.321947	720.737	FALSE	#REF!
2022-09-12	11:06:37	0.363677	721.1	FALSE	#REF!
2022-09-12	11:06:38	0.411565	721.512	FALSE	#REF!
2022-09-12	11:06:38	0.918435	722.43	FALSE	#REF!
2022-09-12	11:06:38	3.58322	726.013	1	#REF!
2022-09-12	11:06:39	5.82306	731.836	1	#REF!
2022-09-12	11:06:39	11.5673	743.404	1	#REF!
2022-09-12	11:06:39	7.2312	750.635	1	#REF!
2022-09-12	11:06:39	5.81329	756.448	1	#REF!
2022-09-12	11:06:40	4.54826	760.997	1	#REF!
2022-09-12	11:06:40	5.22703	766.224	1	#REF!
2022-09-12	11:06:40	4.39462	770.618	1	#REF!
2022-09-12	11:06:40	2.031	772.649	FALSE	#REF!
2022-09-12	11:06:41	0.614007	773.263	FALSE	#REF!
2022-09-12	11:06:41	0.352379	773.616	FALSE	#REF!
2022-09-12	11:06:41	0.342048	773.958	FALSE	#REF!
2022-09-12	11:06:41	0.217977	774.176	FALSE	#REF!
2022-09-12	11:06:42	0.364237	774.54	FALSE	#REF!
2022-09-12	11:06:42	0.298486	774.838	FALSE	#REF!
2022-09-12	11:06:42	0.423117	775.261	FALSE	#REF!
2022-09-12	11:06:43	0.901845	776.163	FALSE	#REF!
2022-09-12	11:06:43	1.36505	777.528	FALSE	#REF!
2022-09-12	11:06:43	0.468155	777.996	FALSE	#REF!
2022-09-12	11:06:43	0.326832	778.323	FALSE	#REF!
2022-09-12	11:06:44	0.335178	778.659	FALSE	#REF!
2022-09-12	11:06:44	0.415891	779.074	FALSE	#REF!
2022-09-12	11:06:44	0.437316	779.512	FALSE	#REF!
2022-09-12	11:06:44	0.561336	780.073	FALSE	#REF!
2022-09-12	11:06:45	0.491361	780.564	FALSE	#REF!
2022-09-12	11:06:45	0.324797	780.889	FALSE	#REF!
2022-09-12	11:06:45	0.291768	781.181	FALSE	#REF!
2022-09-12	11:06:45	0.27986	781.461	FALSE	#REF!
2022-09-12	11:06:46	0.268155	781.729	FALSE	#REF!
2022-09-12	11:06:46	0.275891	782.005	FALSE	#REF!
2022-09-12	11:06:46	0.292583	782.297	FALSE	#REF!
2022-09-12	11:06:47	0.274313	782.572	FALSE	#REF!
2022-09-12	11:06:47	0.280674	782.852	FALSE	#REF!
2022-09-12	11:06:47	0.387646	783.24	FALSE	#REF!
2022-09-12	11:06:47	0.26042	783.501	FALSE	#REF!
2022-09-12	11:06:48	0.16958	783.67	FALSE	#REF!
2022-09-12	11:06:48	0.211311	783.881	FALSE	#REF!
2022-09-12	11:06:48	0.326934	784.208	FALSE	#REF!
2022-09-12	11:06:48	0.47411	784.682	FALSE	#REF!
2022-09-12	11:06:49	0.329987	785.012	FALSE	#REF!
2022-09-12	11:06:49	0.386883	785.399	FALSE	#REF!
2022-09-12	11:06:49	3.1763	788.576	1	#REF!
2022-09-12	11:06:49	10.909	799.485	1	#REF!
2022-09-12	11:06:50	10.688	810.173	1	#REF!
2022-09-12	11:06:50	3.63823	813.811	1	#REF!
2022-09-12	11:06:50	3.71553	817.526	1	#REF!
2022-09-12	11:06:51	1.9022	819.429	FALSE	#REF!
2022-09-12	11:06:51	1.14821	820.577	FALSE	#REF!
2022-09-12	11:06:51	0.858842	821.436	FALSE	#REF!
2022-09-12	11:06:51	0.371514	821.807	FALSE	#REF!
2022-09-12	11:06:52	0.615077	822.422	FALSE	#REF!
2022-09-12	11:06:52	0.404186	822.826	FALSE	#REF!
2022-09-12	11:06:52	0.490496	823.317	FALSE	#REF!
2022-09-12	11:06:52	0.787188	824.104	FALSE	#REF!
2022-09-12	11:06:53	3.51289	827.617	1	#REF!
2022-09-12	11:06:53	1.45314	829.07	FALSE	#REF!
2022-09-12	11:06:53	2.53446	831.605	FALSE	#REF!
2022-09-12	11:06:53	2.12413	833.729	FALSE	#REF!
2022-09-12	11:06:54	1.58872	835.317	FALSE	#REF!
2022-09-12	11:06:54	0.497468	835.815	FALSE	#REF!
2022-09-12	11:06:54	0.148766	835.964	FALSE	#REF!
2022-09-12	11:06:55	0.345916	836.31	FALSE	#REF!
2022-09-12	11:06:55	0.168868	836.478	FALSE	#REF!
2022-09-12	11:06:55	0.590394	837.069	FALSE	#REF!
2022-09-12	11:06:55	1.78861	838.857	FALSE	#REF!
2022-09-12	11:06:56	1.47039	840.328	FALSE	#REF!
2022-09-12	11:06:56	0.905662	841.234	FALSE	#REF!
2022-09-12	11:06:56	0.73584	841.969	FALSE	#REF!
2022-09-12	11:06:56	0.441692	842.411	FALSE	#REF!
2022-09-12	11:06:57	0.775382	843.186	FALSE	#REF!
2022-09-12	11:06:57	0.532837	843.719	FALSE	#REF!
2022-09-12	11:06:57	0.234669	843.954	FALSE	#REF!
2022-09-12	11:06:57	0.626832	844.581	FALSE	#REF!
2022-09-12	11:06:58	0.197875	844.779	FALSE	#REF!
2022-09-12	11:06:58	1.73391	846.513	FALSE	#REF!
2022-09-12	11:06:58	0.21528	846.728	FALSE	#REF!
2022-09-12	11:06:58	0.461082	847.189	FALSE	#REF!
2022-09-12	11:06:59	0.197316	847.386	FALSE	#REF!
2022-09-12	11:06:59	0.294008	847.68	FALSE	#REF!
2022-09-12	11:06:59	0.164389	847.845	FALSE	#REF!
2022-09-12	11:07:00	0.0911071	847.936	FALSE	#REF!

## Sheet: Royal_star_2022912110131
						**GoPro Fitting: 1050
2022-09-12	11:01:31	0.222812
2022-09-12	11:01:31	0.227443
2022-09-12	11:01:31	0.229835
2022-09-12	11:01:32	0.221336
2022-09-12	11:01:32	0.247697
2022-09-12	11:01:32	0.224898
2022-09-12	11:01:33	0.222201
2022-09-12	11:01:33	0.285763
2022-09-12	11:01:33	0.303321
2022-09-12	11:01:33	0.307443
2022-09-12	11:01:34	0.388562
2022-09-12	11:01:34	0.422863
2022-09-12	11:01:34	0.372227
2022-09-12	11:01:34	0.353601
2022-09-12	11:01:35	0.370751
2022-09-12	11:01:35	0.349987
2022-09-12	11:01:35	0.363321
2022-09-12	11:01:35	0.358283
2022-09-12	11:01:36	0.346425
2022-09-12	11:01:36	0.271972
2022-09-12	11:01:36	0.153855
2022-09-12	11:01:37	0.184084
2022-09-12	11:01:37	0.230954
2022-09-12	11:01:37	0.238232
2022-09-12	11:01:37	0.228512
2022-09-12	11:01:38	0.241743
2022-09-12	11:01:38	0.285255
2022-09-12	11:01:38	0.315789
2022-09-12	11:01:38	0.304237
2022-09-12	11:01:39	0.342405
2022-09-12	11:01:39	0.365763
2022-09-12	11:01:39	0.358435
2022-09-12	11:01:39	0.353295
2022-09-12	11:01:40	0.401794
2022-09-12	11:01:40	0.393499
2022-09-12	11:01:40	0.216145
2022-09-12	11:01:41	0.323066
2022-09-12	11:01:41	0.3364
2022-09-12	11:01:41	0.352481
2022-09-12	11:01:41	0.282608
2022-09-12	11:01:42	0.29645
2022-09-12	11:01:42	0.526934
2022-09-12	11:01:42	0.382303
2022-09-12	11:01:42	0.406476
2022-09-12	11:01:43	0.357672
2022-09-12	11:01:43	0.378893
2022-09-12	11:01:43	0.354262
2022-09-12	11:01:43	0.409275
2022-09-12	11:01:44	0.502964
2022-09-12	11:01:44	0.291667
2022-09-12	11:01:44	0.46159
2022-09-12	11:01:45	0.350191
2022-09-12	11:01:45	0.043728
2022-09-12	11:01:45	-0.136832
2022-09-12	11:01:45	-0.00151375
2022-09-12	11:01:46	0.149021
2022-09-12	11:01:46	0.150954
2022-09-12	11:01:46	0.36841
2022-09-12	11:01:46	0.357468
2022-09-12	11:01:47	0.462405
2022-09-12	11:01:47	0.418842
2022-09-12	11:01:47	0.291921
2022-09-12	11:01:47	0.279606
2022-09-12	11:01:48	0.427748
2022-09-12	11:01:48	0.270802
2022-09-12	11:01:48	0.359402
2022-09-12	11:01:48	0.301489
2022-09-12	11:01:49	0.426679
2022-09-12	11:01:49	0.332328
2022-09-12	11:01:49	0.654466
2022-09-12	11:01:50	0.901234
2022-09-12	11:01:50	1.5935
2022-09-12	11:01:50	0.903524
2022-09-12	11:01:50	1.10373
2022-09-12	11:01:51	0.886832
2022-09-12	11:01:51	0.527748
2022-09-12	11:01:51	0.340013
2022-09-12	11:01:51	0.415942
2022-09-12	11:01:52	0.321794
2022-09-12	11:01:52	0.403117
2022-09-12	11:01:52	0.310649
2022-09-12	11:01:52	0.390089
2022-09-12	11:01:53	0.337417
2022-09-12	11:01:53	0.435789
2022-09-12	11:01:53	0.338791
2022-09-12	11:01:54	0.464949
2022-09-12	11:01:54	0.318079
2022-09-12	11:01:54	0.508257
2022-09-12	11:01:54	0.413499
2022-09-12	11:01:55	0.396043
2022-09-12	11:01:55	0.377825
2022-09-12	11:01:55	0.443677
2022-09-12	11:01:55	0.371565
2022-09-12	11:01:56	0.319657
2022-09-12	11:01:56	0.330344
2022-09-12	11:01:56	0.360929
2022-09-12	11:01:56	0.372532
2022-09-12	11:01:57	0.346425
2022-09-12	11:01:57	0.205204
2022-09-12	11:01:57	0.447392
2022-09-12	11:01:58	0.471514
2022-09-12	11:01:58	0.471921
2022-09-12	11:01:58	1.08047
2022-09-12	11:01:58	0.484949
2022-09-12	11:01:59	0.387646
2022-09-12	11:01:59	0.450903
2022-09-12	11:01:59	0.692888
2022-09-12	11:01:59	0.517366
2022-09-12	11:02:00	0.63416
2022-09-12	11:02:00	1.16281
2022-09-12	11:02:00	1.33482
2022-09-12	11:02:00	0.638842
2022-09-12	11:02:01	0.778842
2022-09-12	11:02:01	1.06938
2022-09-12	11:02:01	0.959249
2022-09-12	11:02:02	0.563219
2022-09-12	11:02:02	0.422812
2022-09-12	11:02:02	0.410496
2022-09-12	11:02:02	0.373041
2022-09-12	11:02:03	0.381387
2022-09-12	11:02:03	0.449275
2022-09-12	11:02:03	0.452277
2022-09-12	11:02:03	0.663779
2022-09-12	11:02:04	0.581336
2022-09-12	11:02:04	0.520267
2022-09-12	11:02:04	0.563829
2022-09-12	11:02:04	0.610344
2022-09-12	11:02:05	0.443117
2022-09-12	11:02:05	0.395992
2022-09-12	11:02:05	0.410038
2022-09-12	11:02:06	0.359351
2022-09-12	11:02:06	0.341692
2022-09-12	11:02:06	0.175789
2022-09-12	11:02:06	0.179249
2022-09-12	11:02:07	0.254262
2022-09-12	11:02:07	0.292685
2022-09-12	11:02:07	0.304797
2022-09-12	11:02:07	0.292277
2022-09-12	11:02:08	0.332176
2022-09-12	11:02:08	0.144644
2022-09-12	11:02:08	0.0487661
2022-09-12	11:02:08	-0.092557
2022-09-12	11:02:09	-0.0910811
2022-09-12	11:02:09	-0.25276
2022-09-12	11:02:09	-0.244567
2022-09-12	11:02:09	0.264033
2022-09-12	11:02:10	0.359046
2022-09-12	11:02:10	0.468461
2022-09-12	11:02:10	1.01192
2022-09-12	11:02:11	1.59335
2022-09-12	11:02:11	0.760063
2022-09-12	11:02:11	0.660674
2022-09-12	11:02:11	0.530241
2022-09-12	11:02:12	0.525254
2022-09-12	11:02:12	0.363524
2022-09-12	11:02:12	0.376501
2022-09-12	11:02:12	0.337163
2022-09-12	11:02:13	0.379453
2022-09-12	11:02:13	0.354415
2022-09-12	11:02:13	0.353651
2022-09-12	11:02:13	0.470649
2022-09-12	11:02:14	0.358741
2022-09-12	11:02:14	0.505611
2022-09-12	11:02:14	0.34271
2022-09-12	11:02:15	0.405254
2022-09-12	11:02:15	0.440471
2022-09-12	11:02:15	0.59416
2022-09-12	11:02:15	0.762659
2022-09-12	11:02:16	0.91472
2022-09-12	11:02:16	0.917112
2022-09-12	11:02:16	1.37431
2022-09-12	11:02:16	3.14744
2022-09-12	11:02:17	1.04128
2022-09-12	11:02:17	1.09167
2022-09-12	11:02:17	1.44734
2022-09-12	11:02:17	1.17894
2022-09-12	11:02:18	0.605102
2022-09-12	11:02:18	0.544695
2022-09-12	11:02:18	0.496807
2022-09-12	11:02:19	0.837519
2022-09-12	11:02:19	0.697112
2022-09-12	11:02:19	0.972532
2022-09-12	11:02:19	0.761946
2022-09-12	11:02:20	0.822506
2022-09-12	11:02:20	0.50388
2022-09-12	11:02:20	0.447799
2022-09-12	11:02:20	0.413143
2022-09-12	11:02:21	0.426425
2022-09-12	11:02:21	0.396451
2022-09-12	11:02:21	0.416145
2022-09-12	11:02:21	0.384135
2022-09-12	11:02:22	0.334975
2022-09-12	11:02:22	0.323372
2022-09-12	11:02:22	0.348766
2022-09-12	11:02:23	0.340827
2022-09-12	11:02:23	0.391718
2022-09-12	11:02:23	0.41701
2022-09-12	11:02:23	0.469936
2022-09-12	11:02:24	0.532277
2022-09-12	11:02:24	0.517519
2022-09-12	11:02:24	0.384237
2022-09-12	11:02:24	0.43416
2022-09-12	11:02:25	0.441641
2022-09-12	11:02:25	0.352125
2022-09-12	11:02:25	0.477977
2022-09-12	11:02:25	0.328003
2022-09-12	11:02:26	0.470751
2022-09-12	11:02:26	0.374313
2022-09-12	11:02:26	0.416552
2022-09-12	11:02:27	0.398741
2022-09-12	11:02:27	0.373652
2022-09-12	11:02:27	0.444644
2022-09-12	11:02:27	0.306221
2022-09-12	11:02:28	0.39126
2022-09-12	11:02:28	0.386323
2022-09-12	11:02:28	0.521539
2022-09-12	11:02:28	0.346629
2022-09-12	11:02:29	0.505916
2022-09-12	11:02:29	0.360929
2022-09-12	11:02:29	0.506781
2022-09-12	11:02:29	0.296196
2022-09-12	11:02:30	0.449173
2022-09-12	11:02:30	0.266425
2022-09-12	11:02:30	0.489987
2022-09-12	11:02:30	0.275025
2022-09-12	11:02:31	0.405356
2022-09-12	11:02:31	0.303015
2022-09-12	11:02:31	0.48673
2022-09-12	11:02:32	0.268562
2022-09-12	11:02:32	0.499809
2022-09-12	11:02:32	0.250547
2022-09-12	11:02:32	0.476959
2022-09-12	11:02:33	0.241081
2022-09-12	11:02:33	0.388461
2022-09-12	11:02:33	0.247443
2022-09-12	11:02:33	0.485204
2022-09-12	11:02:34	0.280471
2022-09-12	11:02:34	0.473143
2022-09-12	11:02:34	0.292125
2022-09-12	11:02:34	0.381794
2022-09-12	11:02:35	0.345407
2022-09-12	11:02:35	0.427392
2022-09-12	11:02:35	0.345204
2022-09-12	11:02:36	0.450038
2022-09-12	11:02:36	0.451209
2022-09-12	11:02:36	0.402048
2022-09-12	11:02:36	0.375076
2022-09-12	11:02:37	0.425051
2022-09-12	11:02:37	0.411158
2022-09-12	11:02:37	0.419911
2022-09-12	11:02:37	0.383626
2022-09-12	11:02:38	0.371056
2022-09-12	11:02:38	0.357977
2022-09-12	11:02:38	0.408664
2022-09-12	11:02:38	0.263321
2022-09-12	11:02:39	0.376145
2022-09-12	11:02:39	0.323626
2022-09-12	11:02:39	0.383881
2022-09-12	11:02:40	0.232685
2022-09-12	11:02:40	0.389631
2022-09-12	11:02:40	0.331056
2022-09-12	11:02:40	0.401234
2022-09-12	11:02:41	0.242405
2022-09-12	11:02:41	0.42271
2022-09-12	11:02:41	0.322863
2022-09-12	11:02:41	0.437621
2022-09-12	11:02:42	0.275891
2022-09-12	11:02:42	0.407952
2022-09-12	11:02:42	0.274059
2022-09-12	11:02:42	0.372125
2022-09-12	11:02:43	0.285407
2022-09-12	11:02:43	0.368817
2022-09-12	11:02:43	0.293753
2022-09-12	11:02:44	0.372125
2022-09-12	11:02:44	0.300267
2022-09-12	11:02:44	0.347799
2022-09-12	11:02:44	0.378079
2022-09-12	11:02:45	0.28444
2022-09-12	11:02:45	0.397723
2022-09-12	11:02:45	0.329071
2022-09-12	11:02:45	0.374619
2022-09-12	11:02:46	0.298842
2022-09-12	11:02:46	0.513499
2022-09-12	11:02:46	0.223575
2022-09-12	11:02:46	0.384033
2022-09-12	11:02:47	0.330395
2022-09-12	11:02:47	0.402659
2022-09-12	11:02:47	0.313295
2022-09-12	11:02:48	0.494771
2022-09-12	11:02:48	0.282812
2022-09-12	11:02:48	0.481285
2022-09-12	11:02:48	0.264542
2022-09-12	11:02:49	0.48785
2022-09-12	11:02:49	0.245865
2022-09-12	11:02:49	0.470751
2022-09-12	11:02:49	0.232634
2022-09-12	11:02:50	0.473652
2022-09-12	11:02:50	0.242914
2022-09-12	11:02:50	0.418893
2022-09-12	11:02:50	0.216145
2022-09-12	11:02:51	0.425967
2022-09-12	11:02:51	0.311056
2022-09-12	11:02:51	0.420166
2022-09-12	11:02:51	0.37355
2022-09-12	11:02:52	0.379555
2022-09-12	11:02:52	0.286069
2022-09-12	11:02:52	0.283066
2022-09-12	11:02:53	0.44042
2022-09-12	11:02:53	0.22729
2022-09-12	11:02:53	0.365763
2022-09-12	11:02:53	0.310598
2022-09-12	11:02:54	0.417214
2022-09-12	11:02:54	0.31701
2022-09-12	11:02:54	0.577672
2022-09-12	11:02:54	0.416501
2022-09-12	11:02:55	0.512939
2022-09-12	11:02:55	0.334618
2022-09-12	11:02:55	0.386985
2022-09-12	11:02:55	0.460216
2022-09-12	11:02:56	0.383219
2022-09-12	11:02:56	0.424848
2022-09-12	11:02:56	0.331514
2022-09-12	11:02:57	0.467137
2022-09-12	11:02:57	0.298181
2022-09-12	11:02:57	0.451209
2022-09-12	11:02:57	0.293753
2022-09-12	11:02:58	0.42841
2022-09-12	11:02:58	0.481539
2022-09-12	11:02:58	1.27915
2022-09-12	11:02:58	3.44413
2022-09-12	11:02:59	4.90454
2022-09-12	11:02:59	2.55065
2022-09-12	11:02:59	1.61538
2022-09-12	11:02:59	0.799402
2022-09-12	11:03:00	1.65808
2022-09-12	11:03:00	0.77187
2022-09-12	11:03:00	0.791412
2022-09-12	11:03:01	0.713346
2022-09-12	11:03:01	0.435127
2022-09-12	11:03:01	0.632023
2022-09-12	11:03:01	0.479199
2022-09-12	11:03:02	0.810344
2022-09-12	11:03:02	0.821081
2022-09-12	11:03:02	0.860165
2022-09-12	11:03:02	0.700929
2022-09-12	11:03:03	0.913091
2022-09-12	11:03:03	1.08775
2022-09-12	11:03:03	1.05045
2022-09-12	11:03:03	0.505916
2022-09-12	11:03:04	0.532634
2022-09-12	11:03:04	0.295942
2022-09-12	11:03:04	0.42159
2022-09-12	11:03:05	0.279097
2022-09-12	11:03:05	0.451209
2022-09-12	11:03:05	0.266985
2022-09-12	11:03:05	0.375331
2022-09-12	11:03:06	0.335891
2022-09-12	11:03:06	1.44765
2022-09-12	11:03:06	1.66836
2022-09-12	11:03:06	3.35838
2022-09-12	11:03:07	2.90571
2022-09-12	11:03:07	1.76948
2022-09-12	11:03:07	0.687901
2022-09-12	11:03:07	0.423015
2022-09-12	11:03:08	0.414517
2022-09-12	11:03:08	0.272328
2022-09-12	11:03:08	0.145255
2022-09-12	11:03:09	0.274364
2022-09-12	11:03:09	0.0206236
2022-09-12	11:03:09	0.252684
2022-09-12	11:03:09	0.241183
2022-09-12	11:03:10	0.202099
2022-09-12	11:03:10	0.291056
2022-09-12	11:03:10	0.131616
2022-09-12	11:03:10	0.370802
2022-09-12	11:03:11	0.188563
2022-09-12	11:03:11	0.319707
2022-09-12	11:03:11	0.284186
2022-09-12	11:03:11	0.200878
2022-09-12	11:03:12	0.378741
2022-09-12	11:03:12	0.1907
2022-09-12	11:03:12	0.308919
2022-09-12	11:03:12	0.159911
2022-09-12	11:03:13	0.293194
2022-09-12	11:03:13	0.237723
2022-09-12	11:03:13	0.407392
2022-09-12	11:03:14	1.37029
2022-09-12	11:03:14	0.537774
2022-09-12	11:03:14	0.388359
2022-09-12	11:03:14	0.471412
2022-09-12	11:03:15	0.520267
2022-09-12	11:03:15	0.483015
2022-09-12	11:03:15	1.0679
2022-09-12	11:03:15	0.386018
2022-09-12	11:03:16	0.300318
2022-09-12	11:03:16	0.470446
2022-09-12	11:03:16	0.286425
2022-09-12	11:03:16	0.214262
2022-09-12	11:03:17	0.336654
2022-09-12	11:03:17	0.234771
2022-09-12	11:03:17	0.455738
2022-09-12	11:03:18	0.365865
2022-09-12	11:03:18	0.431056
2022-09-12	11:03:18	0.440878
2022-09-12	11:03:18	0.517723
2022-09-12	11:03:19	0.289529
2022-09-12	11:03:19	0.271107
2022-09-12	11:03:19	0.358486
2022-09-12	11:03:19	0.215687
2022-09-12	11:03:20	0.385814
2022-09-12	11:03:20	0.705713
2022-09-12	11:03:20	0.438079
2022-09-12	11:03:20	0.273397
2022-09-12	11:03:21	0.241031
2022-09-12	11:03:21	0.242659
2022-09-12	11:03:21	0.137468
2022-09-12	11:03:22	-0.0485875
2022-09-12	11:03:22	-0.054389
2022-09-12	11:03:22	-0.0672134
2022-09-12	11:03:22	-0.0401906
2022-09-12	11:03:23	0.00337174
2022-09-12	11:03:23	0.0351783
2022-09-12	11:03:23	0.0514125
2022-09-12	11:03:23	2.30592
2022-09-12	11:03:24	1.75436
2022-09-12	11:03:24	0.438791
2022-09-12	11:03:24	0.257824
2022-09-12	11:03:24	0.34383
2022-09-12	11:03:25	0.487901
2022-09-12	11:03:25	0.345611
2022-09-12	11:03:25	0.589936
2022-09-12	11:03:26	0.48612
2022-09-12	11:03:26	0.325509
2022-09-12	11:03:26	0.698792
2022-09-12	11:03:26	0.252277
2022-09-12	11:03:27	0.282354
2022-09-12	11:03:27	0.158435
2022-09-12	11:03:27	0.297061
2022-09-12	11:03:27	0.177774
2022-09-12	11:03:28	0.290496
2022-09-12	11:03:28	0.256909
2022-09-12	11:03:28	0.603168
2022-09-12	11:03:28	0.885305
2022-09-12	11:03:29	0.321743
2022-09-12	11:03:29	0.467036
2022-09-12	11:03:29	0.355077
2022-09-12	11:03:30	0.957672
2022-09-12	11:03:30	0.138181
2022-09-12	11:03:30	0.153448
2022-09-12	11:03:30	0.0930409
2022-09-12	11:03:31	0.100573
2022-09-12	11:03:31	0.134618
2022-09-12	11:03:31	0.0867305
2022-09-12	11:03:31	0.0387407
2022-09-12	11:03:32	0.0386898
2022-09-12	11:03:32	0.0874429
2022-09-12	11:03:32	0.127341
2022-09-12	11:03:32	0.146272
2022-09-12	11:03:33	0.714211
2022-09-12	11:03:33	0.778079
2022-09-12	11:03:33	2.03223
2022-09-12	11:03:33	3.5109
2022-09-12	11:03:34	5.00602
2022-09-12	11:03:34	7.37991
2022-09-12	11:03:34	8.19624
2022-09-12	11:03:35	5.85517
2022-09-12	11:03:35	4.9592
2022-09-12	11:03:35	4.62627
2022-09-12	11:03:35	2.30882
2022-09-12	11:03:36	0.910191
2022-09-12	11:03:36	0.79813
2022-09-12	11:03:36	0.610598
2022-09-12	11:03:36	0.714415
2022-09-12	11:03:37	1.30067
2022-09-12	11:03:37	0.485509
2022-09-12	11:03:37	0.865916
2022-09-12	11:03:37	0.67645
2022-09-12	11:03:38	1.86302
2022-09-12	11:03:38	3.87385
2022-09-12	11:03:38	5.23945
2022-09-12	11:03:39	3.36581
2022-09-12	11:03:39	0.474568
2022-09-12	11:03:39	0.37472
2022-09-12	11:03:39	0.343982
2022-09-12	11:03:40	0.288257
2022-09-12	11:03:40	0.555331
2022-09-12	11:03:40	0.758588
2022-09-12	11:03:40	0.36215
2022-09-12	11:03:41	0.406527
2022-09-12	11:03:41	0.307799
2022-09-12	11:03:41	0.332837
2022-09-12	11:03:41	0.324491
2022-09-12	11:03:42	0.328969
2022-09-12	11:03:42	0.339707
2022-09-12	11:03:42	0.373601
2022-09-12	11:03:43	0.325458
2022-09-12	11:03:43	0.329224
2022-09-12	11:03:43	0.371158
2022-09-12	11:03:43	0.399097
2022-09-12	11:03:44	0.392583
2022-09-12	11:03:44	0.395942
2022-09-12	11:03:44	0.389021
2022-09-12	11:03:44	0.381082
2022-09-12	11:03:45	0.388715
2022-09-12	11:03:45	0.382354
2022-09-12	11:03:45	0.387443
2022-09-12	11:03:45	0.399453
2022-09-12	11:03:46	0.40042
2022-09-12	11:03:46	0.407036
2022-09-12	11:03:46	0.403728
2022-09-12	11:03:47	0.401031
2022-09-12	11:03:47	0.399809
2022-09-12	11:03:47	0.404084
2022-09-12	11:03:47	0.397926
2022-09-12	11:03:48	0.391972
2022-09-12	11:03:48	0.387494
2022-09-12	11:03:48	0.39131
2022-09-12	11:03:48	0.392074
2022-09-12	11:03:49	0.378944
2022-09-12	11:03:49	0.475636
2022-09-12	11:03:49	0.574517
2022-09-12	11:03:49	1.36658
2022-09-12	11:03:50	3.13528
2022-09-12	11:03:50	4.59304
2022-09-12	11:03:50	7.96851
2022-09-12	11:03:51	13.6263
2022-09-12	11:03:51	12.2031
2022-09-12	11:03:51	8.01894
2022-09-12	11:03:51	6.66973
2022-09-12	11:03:52	5.15248
2022-09-12	11:03:52	4.65299
2022-09-12	11:03:52	3.62037
2022-09-12	11:03:52	2.6794
2022-09-12	11:03:53	2.65589
2022-09-12	11:03:53	2.83818
2022-09-12	11:03:53	2.41706
2022-09-12	11:03:53	2.40276
2022-09-12	11:03:54	2.5766
2022-09-12	11:03:54	2.5534
2022-09-12	11:03:54	2.51849
2022-09-12	11:03:54	2.31126
2022-09-12	11:03:55	1.40118
2022-09-12	11:03:55	0.779911
2022-09-12	11:03:55	0.496552
2022-09-12	11:03:56	0.346374
2022-09-12	11:03:56	0.342405
2022-09-12	11:03:56	0.416196
2022-09-12	11:03:56	0.396654
2022-09-12	11:03:57	0.507239
2022-09-12	11:03:57	0.643779
2022-09-12	11:03:57	0.525712
2022-09-12	11:03:57	0.644593
2022-09-12	11:03:58	0.577265
2022-09-12	11:03:58	0.491667
2022-09-12	11:03:58	0.28098
2022-09-12	11:03:58	0.550343
2022-09-12	11:03:59	0.3793
2022-09-12	11:03:59	0.475331
2022-09-12	11:03:59	0.287392
2022-09-12	11:04:00	0.644695
2022-09-12	11:04:00	0.40383
2022-09-12	11:04:00	0.710445
2022-09-12	11:04:00	0.497214
2022-09-12	11:04:01	0.4993
2022-09-12	11:04:01	0.369275
2022-09-12	11:04:01	0.5707
2022-09-12	11:04:01	0.582812
2022-09-12	11:04:02	0.788257
2022-09-12	11:04:02	0.648969
2022-09-12	11:04:02	1.09971
2022-09-12	11:04:02	1.88678
2022-09-12	11:04:03	0.712685
2022-09-12	11:04:03	1.29472
2022-09-12	11:04:03	1.05742
2022-09-12	11:04:04	1.231
2022-09-12	11:04:04	2.03324
2022-09-12	11:04:04	0.634924
2022-09-12	11:04:04	1.42836
2022-09-12	11:04:05	0.622252
2022-09-12	11:04:05	0.899351
2022-09-12	11:04:05	1.09813
2022-09-12	11:04:05	0.682811
2022-09-12	11:04:06	1.01604
2022-09-12	11:04:06	0.559097
2022-09-12	11:04:06	0.836298
2022-09-12	11:04:06	1.28307
2022-09-12	11:04:07	0.499249
2022-09-12	11:04:07	0.989835
2022-09-12	11:04:07	0.898791
2022-09-12	11:04:08	0.918079
2022-09-12	11:04:08	1.34607
2022-09-12	11:04:08	2.46245
2022-09-12	11:04:08	1.18765
2022-09-12	11:04:09	2.52943
2022-09-12	11:04:09	1.65279
2022-09-12	11:04:09	0.782608
2022-09-12	11:04:09	0.910903
2022-09-12	11:04:10	0.727341
2022-09-12	11:04:10	0.859606
2022-09-12	11:04:10	0.842608
2022-09-12	11:04:10	0.566781
2022-09-12	11:04:11	0.477621
2022-09-12	11:04:11	0.436858
2022-09-12	11:04:11	0.410751
2022-09-12	11:04:12	0.395534
2022-09-12	11:04:12	0.537723
2022-09-12	11:04:12	0.359911
2022-09-12	11:04:12	0.492125
2022-09-12	11:04:13	0.451514
2022-09-12	11:04:13	0.309835
2022-09-12	11:04:13	0.50785
2022-09-12	11:04:13	0.352888
2022-09-12	11:04:14	0.597316
2022-09-12	11:04:14	0.864186
2022-09-12	11:04:14	0.598537
2022-09-12	11:04:14	1.20016
2022-09-12	11:04:15	1.00704
2022-09-12	11:04:15	2.50245
2022-09-12	11:04:15	3.94337
2022-09-12	11:04:15	5.45828
2022-09-12	11:04:16	3.94342
2022-09-12	11:04:16	1.38072
2022-09-12	11:04:16	1.45569
2022-09-12	11:04:17	1.5879
2022-09-12	11:04:17	0.612735
2022-09-12	11:04:17	0.793092
2022-09-12	11:04:17	0.565713
2022-09-12	11:04:18	0.385764
2022-09-12	11:04:18	0.45243
2022-09-12	11:04:18	0.626781
2022-09-12	11:04:18	0.79584
2022-09-12	11:04:19	0.603066
2022-09-12	11:04:19	0.31986
2022-09-12	11:04:19	0.489428
2022-09-12	11:04:19	0.353448
2022-09-12	11:04:20	0.53584
2022-09-12	11:04:20	0.415331
2022-09-12	11:04:20	0.293499
2022-09-12	11:04:21	0.476807
2022-09-12	11:04:21	0.265865
2022-09-12	11:04:21	0.558995
2022-09-12	11:04:21	0.227952
2022-09-12	11:04:22	0.541896
2022-09-12	11:04:22	0.352278
2022-09-12	11:04:22	0.508054
2022-09-12	11:04:22	0.328054
2022-09-12	11:04:23	0.474618
2022-09-12	11:04:23	0.424135
2022-09-12	11:04:23	0.367646
2022-09-12	11:04:23	0.404797
2022-09-12	11:04:24	0.395534
2022-09-12	11:04:24	0.453804
2022-09-12	11:04:24	0.641081
2022-09-12	11:04:25	1.38352
2022-09-12	11:04:25	1.34128
2022-09-12	11:04:25	2.7796
2022-09-12	11:04:25	3.00724
2022-09-12	11:04:26	1.0048
2022-09-12	11:04:26	2.32902
2022-09-12	11:04:26	2.94083
2022-09-12	11:04:26	1.96724
2022-09-12	11:04:27	2.78291
2022-09-12	11:04:27	0.569021
2022-09-12	11:04:27	1.45014
2022-09-12	11:04:27	1.06561
2022-09-12	11:04:28	0.509326
2022-09-12	11:04:28	0.405
2022-09-12	11:04:28	0.517672
2022-09-12	11:04:29	0.280827
2022-09-12	11:04:29	0.391972
2022-09-12	11:04:29	0.313601
2022-09-12	11:04:29	0.400522
2022-09-12	11:04:30	0.290293
2022-09-12	11:04:30	0.460827
2022-09-12	11:04:30	0.286934
2022-09-12	11:04:30	0.341794
2022-09-12	11:04:31	0.304797
2022-09-12	11:04:31	0.317417
2022-09-12	11:04:31	0.38958
2022-09-12	11:04:31	0.326425
2022-09-12	11:04:32	0.417926
2022-09-12	11:04:32	0.448868
2022-09-12	11:04:32	1.0309
2022-09-12	11:04:33	1.00347
2022-09-12	11:04:33	1.63782
2022-09-12	11:04:33	2.8966
2022-09-12	11:04:33	1.55645
2022-09-12	11:04:34	1.84464
2022-09-12	11:04:34	1.02159
2022-09-12	11:04:34	0.964694
2022-09-12	11:04:34	0.499606
2022-09-12	11:04:35	0.286069
2022-09-12	11:04:35	0.457977
2022-09-12	11:04:35	0.465305
2022-09-12	11:04:35	0.558639
2022-09-12	11:04:36	0.501946
2022-09-12	11:04:36	0.66673
2022-09-12	11:04:36	0.391463
2022-09-12	11:04:36	0.518079
2022-09-12	11:04:37	0.41701
2022-09-12	11:04:37	0.351514
2022-09-12	11:04:37	0.256603
2022-09-12	11:04:38	0.248155
2022-09-12	11:04:38	0.358486
2022-09-12	11:04:38	0.205967
2022-09-12	11:04:38	0.441692
2022-09-12	11:04:39	0.237621
2022-09-12	11:04:39	0.409631
2022-09-12	11:04:39	0.214771
2022-09-12	11:04:39	0.643931
2022-09-12	11:04:40	1.39029
2022-09-12	11:04:40	4.07879
2022-09-12	11:04:40	3.21004
2022-09-12	11:04:40	3.39747
2022-09-12	11:04:41	1.04307
2022-09-12	11:04:41	1.50363
2022-09-12	11:04:41	0.545712
2022-09-12	11:04:42	1.09162
2022-09-12	11:04:42	1.02388
2022-09-12	11:04:42	0.363372
2022-09-12	11:04:42	0.495076
2022-09-12	11:04:43	0.254059
2022-09-12	11:04:43	0.43645
2022-09-12	11:04:43	0.170445
2022-09-12	11:04:43	0.269987
2022-09-12	11:04:44	0.103626
2022-09-12	11:04:44	0.190751
2022-09-12	11:04:44	0.0104964
2022-09-12	11:04:44	0.210649
2022-09-12	11:04:45	0.0666796
2022-09-12	11:04:45	0.215382
2022-09-12	11:04:45	0.0489697
2022-09-12	11:04:46	0.210445
2022-09-12	11:04:46	0.160522
2022-09-12	11:04:46	0.251565
2022-09-12	11:04:46	0.199606
2022-09-12	11:04:47	0.373143
2022-09-12	11:04:47	0.220013
2022-09-12	11:04:47	0.413193
2022-09-12	11:04:47	0.157367
2022-09-12	11:04:48	0.44785
2022-09-12	11:04:48	0.186985
2022-09-12	11:04:48	0.462456
2022-09-12	11:04:48	0.117112
2022-09-12	11:04:49	0.453957
2022-09-12	11:04:49	0.187341
2022-09-12	11:04:49	0.449733
2022-09-12	11:04:50	0.207748
2022-09-12	11:04:50	0.503982
2022-09-12	11:04:50	0.268104
2022-09-12	11:04:50	0.484135
2022-09-12	11:04:51	0.174364
2022-09-12	11:04:51	0.460369
2022-09-12	11:04:51	0.280725
2022-09-12	11:04:51	0.472176
2022-09-12	11:04:52	0.184135
2022-09-12	11:04:52	0.446781
2022-09-12	11:04:52	0.257366
2022-09-12	11:04:52	0.472532
2022-09-12	11:04:53	0.25416
2022-09-12	11:04:53	0.388308
2022-09-12	11:04:53	0.290191
2022-09-12	11:04:54	0.484695
2022-09-12	11:04:54	0.223372
2022-09-12	11:04:54	0.410242
2022-09-12	11:04:54	0.21813
2022-09-12	11:04:55	0.35528
2022-09-12	11:04:55	0.19299
2022-09-12	11:04:55	0.381336
2022-09-12	11:04:55	0.148817
2022-09-12	11:04:56	0.20729
2022-09-12	11:04:56	0.0978246
2022-09-12	11:04:56	0.162812
2022-09-12	11:04:56	0.428613
2022-09-12	11:04:57	0.215687
2022-09-12	11:04:57	0.327188
2022-09-12	11:04:57	0.392786
2022-09-12	11:04:57	0.329987
2022-09-12	11:04:58	0.270903
2022-09-12	11:04:58	0.450242
2022-09-12	11:04:58	0.285102
2022-09-12	11:04:59	0.403728
2022-09-12	11:04:59	0.935025
2022-09-12	11:04:59	0.433804
2022-09-12	11:04:59	0.425356
2022-09-12	11:05:00	0.812582
2022-09-12	11:05:00	0.389173
2022-09-12	11:05:00	0.309529
2022-09-12	11:05:00	0.348461
2022-09-12	11:05:01	0.331667
2022-09-12	11:05:01	0.40841
2022-09-12	11:05:01	0.334466
2022-09-12	11:05:01	0.365814
2022-09-12	11:05:02	0.322506
2022-09-12	11:05:02	0.128868
2022-09-12	11:05:02	0.255585
2022-09-12	11:05:03	0.184593
2022-09-12	11:05:03	0.261896
2022-09-12	11:05:03	0.288817
2022-09-12	11:05:03	0.141794
2022-09-12	11:05:04	0.238537
2022-09-12	11:05:04	0.0062725
2022-09-12	11:05:04	0.0839824
2022-09-12	11:05:05	0.114771
2022-09-12	11:05:05	0.216858
2022-09-12	11:05:05	0.197774
2022-09-12	11:05:05	0.0947712
2022-09-12	11:05:05	0.293499
2022-09-12	11:05:06	0.192888
2022-09-12	11:05:06	0.36729
2022-09-12	11:05:06	0.327494
2022-09-12	11:05:07	0.39528
2022-09-12	11:05:07	0.414211
2022-09-12	11:05:07	0.354618
2022-09-12	11:05:07	0.459809
2022-09-12	11:05:08	0.405713
2022-09-12	11:05:08	0.463422
2022-09-12	11:05:08	0.464593
2022-09-12	11:05:08	0.454822
2022-09-12	11:05:09	0.432074
2022-09-12	11:05:09	0.452023
2022-09-12	11:05:09	0.441234
2022-09-12	11:05:09	0.448257
2022-09-12	11:05:10	0.477367
2022-09-12	11:05:10	0.443117
2022-09-12	11:05:10	0.593194
2022-09-12	11:05:11	0.532837
2022-09-12	11:05:11	0.556552
2022-09-12	11:05:11	0.440267
2022-09-12	11:05:11	0.56159
2022-09-12	11:05:12	0.291565
2022-09-12	11:05:12	0.419555
2022-09-12	11:05:12	0.429326
2022-09-12	11:05:12	0.512277
2022-09-12	11:05:13	0.328817
2022-09-12	11:05:13	0.27014
2022-09-12	11:05:13	0.36612
2022-09-12	11:05:13	0.350242
2022-09-12	11:05:14	0.355585
2022-09-12	11:05:14	0.345611
2022-09-12	11:05:14	0.328613
2022-09-12	11:05:15	0.392532
2022-09-12	11:05:15	0.36612
2022-09-12	11:05:15	0.287799
2022-09-12	11:05:15	0.495636
2022-09-12	11:05:16	0.263015
2022-09-12	11:05:16	0.506476
2022-09-12	11:05:16	0.241794
2022-09-12	11:05:16	0.428613
2022-09-12	11:05:17	0.289886
2022-09-12	11:05:17	0.521947
2022-09-12	11:05:17	0.287443
2022-09-12	11:05:17	0.574415
2022-09-12	11:05:18	0.291616
2022-09-12	11:05:18	0.497163
2022-09-12	11:05:18	0.262354
2022-09-12	11:05:19	0.532939
2022-09-12	11:05:19	0.237977
2022-09-12	11:05:19	0.50668
2022-09-12	11:05:19	0.285713
2022-09-12	11:05:20	1.02464
2022-09-12	11:05:20	1.89838
2022-09-12	11:05:20	4.25034
2022-09-12	11:05:20	4.09065
2022-09-12	11:05:21	3.80714
2022-09-12	11:05:21	2.01055
2022-09-12	11:05:21	1.78785
2022-09-12	11:05:21	0.535636
2022-09-12	11:05:22	0.353397
2022-09-12	11:05:22	0.240115
2022-09-12	11:05:22	0.434568
2022-09-12	11:05:22	0.415789
2022-09-12	11:05:23	0.559046
2022-09-12	11:05:23	0.481081
2022-09-12	11:05:23	0.375891
2022-09-12	11:05:24	0.503575
2022-09-12	11:05:24	0.444695
2022-09-12	11:05:24	0.43014
2022-09-12	11:05:24	0.378944
2022-09-12	11:05:25	0.479707
2022-09-12	11:05:25	0.387799
2022-09-12	11:05:25	0.475636
2022-09-12	11:05:25	0.425305
2022-09-12	11:05:26	0.364084
2022-09-12	11:05:26	0.433295
2022-09-12	11:05:26	0.412481
2022-09-12	11:05:26	0.408766
2022-09-12	11:05:27	0.41126
2022-09-12	11:05:27	0.42841
2022-09-12	11:05:27	0.327239
2022-09-12	11:05:28	0.392023
2022-09-12	11:05:28	0.376145
2022-09-12	11:05:28	0.362608
2022-09-12	11:05:28	0.417977
2022-09-12	11:05:29	0.417112
2022-09-12	11:05:29	0.379758
2022-09-12	11:05:29	0.436094
2022-09-12	11:05:29	0.418639
2022-09-12	11:05:30	0.477875
2022-09-12	11:05:30	0.513397
2022-09-12	11:05:30	0.647239
2022-09-12	11:05:30	0.768308
2022-09-12	11:05:31	0.66673
2022-09-12	11:05:31	3.00245
2022-09-12	11:05:31	0.489733
2022-09-12	11:05:32	3.76362
2022-09-12	11:05:32	0.399657
2022-09-12	11:05:32	0.113753
2022-09-12	11:05:32	0.082761
2022-09-12	11:05:33	0.192685
2022-09-12	11:05:33	0.0571631
2022-09-12	11:05:33	0.136654
2022-09-12	11:05:33	0.258333
2022-09-12	11:05:34	0.0197585
2022-09-12	11:05:34	0.0603692
2022-09-12	11:05:34	0.0703946
2022-09-12	11:05:34	0.00459311
2022-09-12	11:05:35	0.115585
2022-09-12	11:05:35	0.152786
2022-09-12	11:05:35	0.160369
2022-09-12	11:05:36	0.203117
2022-09-12	11:05:36	0.226781
2022-09-12	11:05:36	0.42383
2022-09-12	11:05:36	0.421692
2022-09-12	11:05:37	0.38673
2022-09-12	11:05:37	0.759504
2022-09-12	11:05:37	0.733244
2022-09-12	11:05:37	0.226832
2022-09-12	11:05:38	0.245305
2022-09-12	11:05:38	-0.0422771
2022-09-12	11:05:38	-0.462226
2022-09-12	11:05:38	-0.478358
2022-09-12	11:05:39	-0.501055
2022-09-12	11:05:39	-0.544007
2022-09-12	11:05:39	-0.0388674
2022-09-12	11:05:40	0.0846439
2022-09-12	11:05:40	0.189478
2022-09-12	11:05:40	0.0960943
2022-09-12	11:05:40	-0.0503178
2022-09-12	11:05:41	-0.0521498
2022-09-12	11:05:41	-0.0275188
2022-09-12	11:05:41	-0.222633
2022-09-12	11:05:41	-0.0200379
2022-09-12	11:05:42	0.0358399
2022-09-12	11:05:42	0.406171
2022-09-12	11:05:42	0.00566182
2022-09-12	11:05:42	0.0973158
2022-09-12	11:05:43	0.173092
2022-09-12	11:05:43	0.333651
2022-09-12	11:05:43	0.372735
2022-09-12	11:05:44	0.390547
2022-09-12	11:05:44	0.400216
2022-09-12	11:05:44	0.396247
2022-09-12	11:05:44	0.394873
2022-09-12	11:05:45	0.399962
2022-09-12	11:05:45	0.421845
2022-09-12	11:05:45	0.471463
2022-09-12	11:05:45	0.370547
2022-09-12	11:05:46	0.373143
2022-09-12	11:05:46	0.376094
2022-09-12	11:05:46	0.381031
2022-09-12	11:05:46	0.372176
2022-09-12	11:05:47	0.380471
2022-09-12	11:05:47	0.382405
2022-09-12	11:05:47	0.36902
2022-09-12	11:05:47	0.378944
2022-09-12	11:05:48	0.381387
2022-09-12	11:05:48	0.381285
2022-09-12	11:05:48	0.385662
2022-09-12	11:05:49	0.535942
2022-09-12	11:05:49	0.492379
2022-09-12	11:05:49	-0.0327606
2022-09-12	11:05:49	-0.0424297
2022-09-12	11:05:50	0.1393
2022-09-12	11:05:50	0.405814
2022-09-12	11:05:50	0.551666
2022-09-12	11:05:50	0.607748
2022-09-12	11:05:51	0.469682
2022-09-12	11:05:51	0.437723
2022-09-12	11:05:51	0.443219
2022-09-12	11:05:51	0.403423
2022-09-12	11:05:52	0.417723
2022-09-12	11:05:52	0.482405
2022-09-12	11:05:52	0.466985
2022-09-12	11:05:53	0.435738
2022-09-12	11:05:53	0.444847
2022-09-12	11:05:53	0.446171
2022-09-12	11:05:53	0.451667
2022-09-12	11:05:54	0.456298
2022-09-12	11:05:54	0.442456
2022-09-12	11:05:54	0.425407
2022-09-12	11:05:54	0.427646
2022-09-12	11:05:55	0.428053
2022-09-12	11:05:55	0.420776
2022-09-12	11:05:55	0.431972
2022-09-12	11:05:55	0.458384
2022-09-12	11:05:56	0.474975
2022-09-12	11:05:56	0.482303
2022-09-12	11:05:56	0.388257
2022-09-12	11:05:57	0.456196
2022-09-12	11:05:57	0.313601
2022-09-12	11:05:57	1.96398
2022-09-12	11:05:57	0.435178
2022-09-12	11:05:58	0.321031
2022-09-12	11:05:58	0.0612852
2022-09-12	11:05:58	0.0937534
2022-09-12	11:05:58	0.00535648
2022-09-12	11:05:59	-0.0107758
2022-09-12	11:05:59	0.0814888
2022-09-12	11:05:59	0.221743
2022-09-12	11:05:59	1.99268
2022-09-12	11:06:00	5.06485
2022-09-12	11:06:00	2.47223
2022-09-12	11:06:00	2.15981
2022-09-12	11:06:01	1.45258
2022-09-12	11:06:01	0.489529
2022-09-12	11:06:01	0.381794
2022-09-12	11:06:01	1.25686
2022-09-12	11:06:02	0.933346
2022-09-12	11:06:02	1.20475
2022-09-12	11:06:02	1.15762
2022-09-12	11:06:02	0.794211
2022-09-12	11:06:03	0.534109
2022-09-12	11:06:03	0.49355
2022-09-12	11:06:03	0.596807
2022-09-12	11:06:03	0.761896
2022-09-12	11:06:04	0.973855
2022-09-12	11:06:04	1.36113
2022-09-12	11:06:04	1.46103
2022-09-12	11:06:05	0.806069
2022-09-12	11:06:05	1.01075
2022-09-12	11:06:05	0.383575
2022-09-12	11:06:05	0.488257
2022-09-12	11:06:06	0.484746
2022-09-12	11:06:06	0.549885
2022-09-12	11:06:06	0.532583
2022-09-12	11:06:06	0.4793
2022-09-12	11:06:07	0.625865
2022-09-12	11:06:07	0.758435
2022-09-12	11:06:07	0.657723
2022-09-12	11:06:07	0.685814
2022-09-12	11:06:08	0.375026
2022-09-12	11:06:08	0.549885
2022-09-12	11:06:08	0.455891
2022-09-12	11:06:08	0.472125
2022-09-12	11:06:09	0.468868
2022-09-12	11:06:09	0.46556
2022-09-12	11:06:09	0.459962
2022-09-12	11:06:10	0.46098
2022-09-12	11:06:10	0.494109
2022-09-12	11:06:10	0.454313
2022-09-12	11:06:10	0.455891
2022-09-12	11:06:11	0.440471
2022-09-12	11:06:11	0.443931
2022-09-12	11:06:11	0.484746
2022-09-12	11:06:11	0.509682
2022-09-12	11:06:12	0.44215
2022-09-12	11:06:12	0.893244
2022-09-12	11:06:12	0.630343
2022-09-12	11:06:12	0.557417
2022-09-12	11:06:13	1.07584
2022-09-12	11:06:13	0.565254
2022-09-12	11:06:13	0.998639
2022-09-12	11:06:14	0.73014
2022-09-12	11:06:14	0.51813
2022-09-12	11:06:14	0.54444
2022-09-12	11:06:14	0.599911
2022-09-12	11:06:15	1.11579
2022-09-12	11:06:15	1.54846
2022-09-12	11:06:15	0.544084
2022-09-12	11:06:15	0.478995
2022-09-12	11:06:16	0.494109
2022-09-12	11:06:16	0.413499
2022-09-12	11:06:16	0.512634
2022-09-12	11:06:16	0.435026
2022-09-12	11:06:17	0.460013
2022-09-12	11:06:17	0.466323
2022-09-12	11:06:17	0.443779
2022-09-12	11:06:18	0.455433
2022-09-12	11:06:18	0.444746
2022-09-12	11:06:18	0.456552
2022-09-12	11:06:18	0.46388
2022-09-12	11:06:19	0.436908
2022-09-12	11:06:19	0.495331
2022-09-12	11:06:19	0.48841
2022-09-12	11:06:19	0.462099
2022-09-12	11:06:20	0.525153
2022-09-12	11:06:20	0.423168
2022-09-12	11:06:20	0.574059
2022-09-12	11:06:20	2.79518
2022-09-12	11:06:21	4.31319
2022-09-12	11:06:21	1.96719
2022-09-12	11:06:21	0.850649
2022-09-12	11:06:22	0.412176
2022-09-12	11:06:22	0.551412
2022-09-12	11:06:22	0.329326
2022-09-12	11:06:22	0.508919
2022-09-12	11:06:23	0.325407
2022-09-12	11:06:23	0.4936
2022-09-12	11:06:23	0.39813
2022-09-12	11:06:23	0.542812
2022-09-12	11:06:24	0.673651
2022-09-12	11:06:24	0.66271
2022-09-12	11:06:24	0.431361
2022-09-12	11:06:24	0.532888
2022-09-12	11:06:25	0.330649
2022-09-12	11:06:25	0.497621
2022-09-12	11:06:25	0.388257
2022-09-12	11:06:26	0.379606
2022-09-12	11:06:26	0.48042
2022-09-12	11:06:26	0.749428
2022-09-12	11:06:26	0.537774
2022-09-12	11:06:27	0.64673
2022-09-12	11:06:27	0.553092
2022-09-12	11:06:27	0.358741
2022-09-12	11:06:27	0.412634
2022-09-12	11:06:28	0.339199
2022-09-12	11:06:28	0.538181
2022-09-12	11:06:28	0.403575
2022-09-12	11:06:28	0.453804
2022-09-12	11:06:29	0.521539
2022-09-12	11:06:29	0.449631
2022-09-12	11:06:29	0.432328
2022-09-12	11:06:30	0.63299
2022-09-12	11:06:30	0.584847
2022-09-12	11:06:30	0.540572
2022-09-12	11:06:30	1.28134
2022-09-12	11:06:31	0.364898
2022-09-12	11:06:31	0.519148
2022-09-12	11:06:31	0.483321
2022-09-12	11:06:31	0.432583
2022-09-12	11:06:32	1.00088
2022-09-12	11:06:32	0.490344
2022-09-12	11:06:32	0.627036
2022-09-12	11:06:32	0.451718
2022-09-12	11:06:33	0.403931
2022-09-12	11:06:33	0.475891
2022-09-12	11:06:33	0.490954
2022-09-12	11:06:33	0.435636
2022-09-12	11:06:34	0.590343
2022-09-12	11:06:34	0.60042
2022-09-12	11:06:34	0.57645
2022-09-12	11:06:35	0.365865
2022-09-12	11:06:35	0.484695
2022-09-12	11:06:35	0.271565
2022-09-12	11:06:35	0.475178
2022-09-12	11:06:36	0.45584
2022-09-12	11:06:36	0.424033
2022-09-12	11:06:36	0.476552
2022-09-12	11:06:36	0.491107
2022-09-12	11:06:37	0.468868
2022-09-12	11:06:37	0.304949
2022-09-12	11:06:37	0.321947
2022-09-12	11:06:37	0.363677
2022-09-12	11:06:38	0.411565
2022-09-12	11:06:38	0.918435
2022-09-12	11:06:38	3.58322
2022-09-12	11:06:39	5.82306
2022-09-12	11:06:39	11.5673
2022-09-12	11:06:39	7.2312
2022-09-12	11:06:39	5.81329
2022-09-12	11:06:40	4.54826
2022-09-12	11:06:40	5.22703
2022-09-12	11:06:40	4.39462
2022-09-12	11:06:40	2.031
2022-09-12	11:06:41	0.614007
2022-09-12	11:06:41	0.352379
2022-09-12	11:06:41	0.342048
2022-09-12	11:06:41	0.217977
2022-09-12	11:06:42	0.364237
2022-09-12	11:06:42	0.298486
2022-09-12	11:06:42	0.423117
2022-09-12	11:06:43	0.901845
2022-09-12	11:06:43	1.36505
2022-09-12	11:06:43	0.468155
2022-09-12	11:06:43	0.326832
2022-09-12	11:06:44	0.335178
2022-09-12	11:06:44	0.415891
2022-09-12	11:06:44	0.437316
2022-09-12	11:06:44	0.561336
2022-09-12	11:06:45	0.491361
2022-09-12	11:06:45	0.324797
2022-09-12	11:06:45	0.291768
2022-09-12	11:06:45	0.27986
2022-09-12	11:06:46	0.268155
2022-09-12	11:06:46	0.275891
2022-09-12	11:06:46	0.292583
2022-09-12	11:06:47	0.274313
2022-09-12	11:06:47	0.280674
2022-09-12	11:06:47	0.387646
2022-09-12	11:06:47	0.26042
2022-09-12	11:06:48	0.16958
2022-09-12	11:06:48	0.211311
2022-09-12	11:06:48	0.326934
2022-09-12	11:06:48	0.47411
2022-09-12	11:06:49	0.329987
2022-09-12	11:06:49	0.386883
2022-09-12	11:06:49	3.1763
2022-09-12	11:06:49	10.909
2022-09-12	11:06:50	10.688
2022-09-12	11:06:50	3.63823
2022-09-12	11:06:50	3.71553
2022-09-12	11:06:51	1.9022
2022-09-12	11:06:51	1.14821
2022-09-12	11:06:51	0.858842
2022-09-12	11:06:51	0.371514
2022-09-12	11:06:52	0.615077
2022-09-12	11:06:52	0.404186
2022-09-12	11:06:52	0.490496
2022-09-12	11:06:52	0.787188
2022-09-12	11:06:53	3.51289
2022-09-12	11:06:53	1.45314
2022-09-12	11:06:53	2.53446
2022-09-12	11:06:53	2.12413
2022-09-12	11:06:54	1.58872
2022-09-12	11:06:54	0.497468
2022-09-12	11:06:54	0.148766
2022-09-12	11:06:55	0.345916
2022-09-12	11:06:55	0.168868
2022-09-12	11:06:55	0.590394
2022-09-12	11:06:55	1.78861
2022-09-12	11:06:56	1.47039
2022-09-12	11:06:56	0.905662
2022-09-12	11:06:56	0.73584
2022-09-12	11:06:56	0.441692
2022-09-12	11:06:57	0.775382
2022-09-12	11:06:57	0.532837
2022-09-12	11:06:57	0.234669
2022-09-12	11:06:57	0.626832
2022-09-12	11:06:58	0.197875
2022-09-12	11:06:58	1.73391
2022-09-12	11:06:58	0.21528
2022-09-12	11:06:58	0.461082
2022-09-12	11:06:59	0.197316
2022-09-12	11:06:59	0.294008
2022-09-12	11:06:59	0.164389
2022-09-12	11:07:00	0.0911071
