# Supplementary material for: Comparing efficacy in reducing pulling and welfare impacts of four types of leash walking equipment
Source: PeerJ journal article supplement (doi:10.7717/peerj.18131), 2024-10-24
Supplement: Shelter1_Tension_files.zip [file Saint_harness_202291393758 copy.xlsx]

## Sheet: Averaged Newtons
Date	Time	Averaged Newtons	Impulse	Total steps
2022-09-13	09:38:06	2.10837	2.10837	0		Impulse	1691.77
2022-09-13	09:38:07	2.08924	4.19761	0		Total steps	37
2022-09-13	09:38:08	2.09518	6.29279	0		# > 5 sec	0
2022-09-13	09:38:09	1.80205	8.09484	0
2022-09-13	09:38:10	1.42608	9.52092	0
2022-09-13	09:38:11	0.567005	10.0879	0
2022-09-13	09:38:12	48.775	58.8629	1
2022-09-13	09:38:13	32.971	91.8339	2
2022-09-13	09:38:14	8.11713	99.951	2
2022-09-13	09:38:15	1.97283	101.924	2
2022-09-13	09:38:16	2.3155	104.239	2
2022-09-13	09:38:17	15.077	119.316	3
2022-09-13	09:38:18	2.3888	121.705	3
2022-09-13	09:38:19	2.20288	123.908	3
2022-09-13	09:38:20	7.24485	131.153	3
2022-09-13	09:38:21	12.9755	144.128	3
2022-09-13	09:38:22	13.8804	158.009	4
2022-09-13	09:38:23	15.1963	173.205	5
2022-09-13	09:38:24	0.830558	174.036	5
2022-09-13	09:38:25	2.45121	176.487	5
2022-09-13	09:38:26	2.09569	178.583	5
2022-09-13	09:38:27	4.51571	183.098	5
2022-09-13	09:38:28	14.0911	197.189	6
2022-09-13	09:38:29	2.33129	199.521	6
2022-09-13	09:38:30	-1.09507	199.521	6
2022-09-13	09:38:31	7.98593	207.507	6
2022-09-13	09:38:32	4.74458	212.251	6
2022-09-13	09:38:33	2.34544	214.597	6
2022-09-13	09:38:34	2.56405	217.161	6
2022-09-13	09:38:35	13.1628	230.323	7
2022-09-13	09:38:36	16.7393	247.063	8
2022-09-13	09:38:37	-0.181436	247.063	8
2022-09-13	09:38:38	14.7443	261.807	9
2022-09-13	09:38:39	5.84678	267.654	9
2022-09-13	09:38:40	1.81069	269.464	9
2022-09-13	09:38:41	2.32029	271.785	9
2022-09-13	09:38:42	2.02059	273.805	9
2022-09-13	09:38:43	1.98635	275.792	9
2022-09-13	09:38:44	1.72665	277.518	9
2022-09-13	09:38:45	2.82427	280.343	9
2022-09-13	09:38:46	4.49138	284.834	9
2022-09-13	09:38:47	5.29262	290.127	9
2022-09-13	09:38:48	12.8089	302.935	9
2022-09-13	09:38:49	14.8156	317.751	10
2022-09-13	09:38:50	1.44023	319.191	10
2022-09-13	09:38:51	9.41897	328.61	10
2022-09-13	09:38:52	10.0955	338.706	10
2022-09-13	09:38:53	9.52238	348.228	10
2022-09-13	09:38:54	5.73111	353.959	10
2022-09-13	09:38:55	4.58148	358.541	10
2022-09-13	09:38:56	10.2599	368.801	10
2022-09-13	09:38:57	10.1112	378.912	10
2022-09-13	09:38:58	0.734463	379.646	10
2022-09-13	09:38:59	1.3318	380.978	10
2022-09-13	09:39:00	4.29823	385.276	10
2022-09-13	09:39:01	4.28272	389.559	10
2022-09-13	09:39:02	6.07791	395.637	10
2022-09-13	09:39:03	15.4003	411.037	11
2022-09-13	09:39:04	1.70984	412.747	11
2022-09-13	09:39:05	0.076118	412.823	11
2022-09-13	09:39:06	20.7108	433.534	12
2022-09-13	09:39:07	6.03149	439.565	12
2022-09-13	09:39:08	3.11704	442.682	12
2022-09-13	09:39:09	3.74803	446.431	12
2022-09-13	09:39:10	2.33921	448.77	12
2022-09-13	09:39:11	2.49269	451.262	12
2022-09-13	09:39:12	2.05868	453.321	12
2022-09-13	09:39:13	2.13576	455.457	12
2022-09-13	09:39:14	1.92269	457.38	12
2022-09-13	09:39:15	1.77288	459.152	12
2022-09-13	09:39:16	0.94329	460.096	12
2022-09-13	09:39:17	1.0514	461.147	12
2022-09-13	09:39:18	19.7302	480.877	13
2022-09-13	09:39:19	23.7076	504.585	14
2022-09-13	09:39:20	38.9514	543.536	15
2022-09-13	09:39:21	7.04942	550.586	15
2022-09-13	09:39:22	4.37531	554.961	15
2022-09-13	09:39:23	9.05531	564.016	15
2022-09-13	09:39:24	11.5847	575.601	15
2022-09-13	09:39:25	12.7388	588.34	15
2022-09-13	09:39:26	8.76999	597.11	15
2022-09-13	09:39:27	4.09863	601.208	15
2022-09-13	09:39:28	2.71895	603.927	15
2022-09-13	09:39:29	10.4304	614.358	15
2022-09-13	09:39:30	4.03551	618.393	15
2022-09-13	09:39:31	2.14029	620.534	15
2022-09-13	09:39:32	12.5775	633.111	15
2022-09-13	09:39:33	3.19772	636.309	15
2022-09-13	09:39:34	13.7586	650.067	16
2022-09-13	09:39:35	21.0774	671.145	17
2022-09-13	09:39:36	14.0869	685.232	18
2022-09-13	09:39:37	11.0134	696.245	18
2022-09-13	09:39:38	4.14457	700.39	18
2022-09-13	09:39:39	2.55557	702.945	18
2022-09-13	09:39:40	4.3138	707.259	18
2022-09-13	09:39:41	2.76168	710.021	18
2022-09-13	09:39:42	2.31074	712.331	18
2022-09-13	09:39:43	5.85651	718.188	18
2022-09-13	09:39:44	4.34044	722.528	18
2022-09-13	09:39:45	3.16796	725.696	18
2022-09-13	09:39:46	7.03244	732.729	18
2022-09-13	09:39:47	8.88821	741.617	18
2022-09-13	09:39:48	19.6576	761.275	19
2022-09-13	09:39:49	14.6794	775.954	20
2022-09-13	09:39:50	2.15919	778.113	20
2022-09-13	09:39:51	1.57673	779.69	20
2022-09-13	09:39:52	1.2906	780.981	20
2022-09-13	09:39:53	1.42478	782.405	20
2022-09-13	09:39:54	1.29168	783.697	20
2022-09-13	09:39:55	2.06694	785.764	20
2022-09-13	09:39:56	1.63005	787.394	20
2022-09-13	09:39:57	0.973229	788.367	20
2022-09-13	09:39:58	1.0052	789.372	20
2022-09-13	09:39:59	0.977926	790.35	20
2022-09-13	09:40:00	1.44946	791.8	20
2022-09-13	09:40:01	1.20232	793.002	20
2022-09-13	09:40:02	2.49976	795.502	20
2022-09-13	09:40:03	2.23378	797.736	20
2022-09-13	09:40:04	0.165535	797.901	20
2022-09-13	09:40:05	1.31765	799.219	20
2022-09-13	09:40:06	2.5982	801.817	20
2022-09-13	09:40:07	2.74311	804.56	20
2022-09-13	09:40:08	2.75908	807.319	20
2022-09-13	09:40:09	3.49557	810.815	20
2022-09-13	09:40:10	29.1328	839.948	21
2022-09-13	09:40:11	18.7188	858.666	22
2022-09-13	09:40:12	2.17713	860.844	22
2022-09-13	09:40:13	-0.300847	860.844	22
2022-09-13	09:40:14	0.52705	861.371	22
2022-09-13	09:40:15	-0.367192	861.371	22
2022-09-13	09:40:16	-1.12473	861.371	22
2022-09-13	09:40:17	0.292869	861.664	22
2022-09-13	09:40:18	16.1635	877.827	23
2022-09-13	09:40:19	14.6304	892.457	24
2022-09-13	09:40:20	7.45125	899.909	24
2022-09-13	09:40:21	8.75158	908.66	24
2022-09-13	09:40:22	8.03341	916.694	24
2022-09-13	09:40:23	7.37462	924.068	24
2022-09-13	09:40:24	8.85676	932.925	24
2022-09-13	09:40:25	5.12228	938.047	24
2022-09-13	09:40:26	6.34973	944.397	24
2022-09-13	09:40:27	6.25277	950.65	24
2022-09-13	09:40:28	4.24694	954.897	24
2022-09-13	09:40:29	6.78593	961.683	24
2022-09-13	09:40:30	1.86298	963.546	24
2022-09-13	09:40:31	1.64476	965.19	24
2022-09-13	09:40:32	2.02461	967.215	24
2022-09-13	09:40:33	3.71632	970.931	24
2022-09-13	09:40:34	2.82761	973.759	24
2022-09-13	09:40:35	2.35211	976.111	24
2022-09-13	09:40:36	2.37667	978.488	24
2022-09-13	09:40:37	2.14447	980.632	24
2022-09-13	09:40:38	2.13112	982.763	24
2022-09-13	09:40:39	2.17849	984.942	24
2022-09-13	09:40:40	2.19343	987.135	24
2022-09-13	09:40:41	2.19277	989.328	24
2022-09-13	09:40:42	2.32025	991.648	24
2022-09-13	09:40:43	2.07385	993.722	24
2022-09-13	09:40:44	2.046	995.768	24
2022-09-13	09:40:45	2.37781	998.146	24
2022-09-13	09:40:46	4.95004	1003.1	24
2022-09-13	09:40:47	2.52308	1005.62	24
2022-09-13	09:40:48	2.1876	1007.81	24
2022-09-13	09:40:49	1.99971	1009.81	24
2022-09-13	09:40:50	0.758629	1010.56	24
2022-09-13	09:40:51	0.939046	1011.5	24
2022-09-13	09:40:52	1.59326	1013.1	24
2022-09-13	09:40:53	1.80339	1014.9	24
2022-09-13	09:40:54	2.08743	1016.99	24
2022-09-13	09:40:55	2.30625	1019.29	24
2022-09-13	09:40:56	3.14549	1022.44	24
2022-09-13	09:40:57	0.0937186	1022.53	24
2022-09-13	09:40:58	-0.430727	1022.53	24
2022-09-13	09:40:59	-0.683131	1022.53	24
2022-09-13	09:41:00	1.68166	1024.22	24
2022-09-13	09:41:01	16.1046	1040.32	25
2022-09-13	09:41:02	13.5545	1053.87	26
2022-09-13	09:41:03	6.11418	1059.99	26
2022-09-13	09:41:04	3.64765	1063.64	26
2022-09-13	09:41:05	2.34204	1065.98	26
2022-09-13	09:41:06	2.18318	1068.16	26
2022-09-13	09:41:07	2.19128	1070.35	26
2022-09-13	09:41:08	2.27411	1072.63	26
2022-09-13	09:41:09	1.2086	1073.84	26
2022-09-13	09:41:10	0.498358	1074.33	26
2022-09-13	09:41:11	2.8898	1077.22	26
2022-09-13	09:41:12	2.42585	1079.65	26
2022-09-13	09:41:13	1.75995	1081.41	26
2022-09-13	09:41:14	1.99699	1083.41	26
2022-09-13	09:41:15	2.52478	1085.93	26
2022-09-13	09:41:16	2.43327	1088.36	26
2022-09-13	09:41:17	1.70607	1090.07	26
2022-09-13	09:41:18	2.53627	1092.61	26
2022-09-13	09:41:19	2.36241	1094.97	26
2022-09-13	09:41:20	8.1831	1103.15	26
2022-09-13	09:41:21	6.13087	1109.28	26
2022-09-13	09:41:22	4.8527	1114.14	26
2022-09-13	09:41:23	1.68726	1115.82	26
2022-09-13	09:41:24	2.07181	1117.89	26
2022-09-13	09:41:25	5.62075	1123.52	26
2022-09-13	09:41:26	3.72048	1127.24	26
2022-09-13	09:41:27	3.4795	1130.72	26
2022-09-13	09:41:28	11.1332	1141.85	26
2022-09-13	09:41:29	2.1606	1144.01	26
2022-09-13	09:41:30	0.394396	1144.4	26
2022-09-13	09:41:31	3.74182	1148.15	26
2022-09-13	09:41:32	18.5678	1166.71	27
2022-09-13	09:41:33	18.2176	1184.93	28
2022-09-13	09:41:34	19.9672	1204.9	29
2022-09-13	09:41:35	0.459895	1205.36	29
2022-09-13	09:41:36	-1.61346	1205.36	29
2022-09-13	09:41:37	-2.55743	1205.36	29
2022-09-13	09:41:38	-3.57237	1205.36	29
2022-09-13	09:41:39	-1.48086	1205.36	29
2022-09-13	09:41:40	0.845329	1206.2	29
2022-09-13	09:41:41	1.57798	1207.78	29
2022-09-13	09:41:42	4.38878	1212.17	29
2022-09-13	09:41:43	5.17876	1217.35	29
2022-09-13	09:41:44	11.1049	1228.45	29
2022-09-13	09:41:45	2.89733	1231.35	29
2022-09-13	09:41:46	3.86184	1235.21	29
2022-09-13	09:41:47	23.5175	1258.73	30
2022-09-13	09:41:48	10.893	1269.62	30
2022-09-13	09:41:49	10.644	1280.27	30
2022-09-13	09:41:50	7.22929	1287.5	30
2022-09-13	09:41:51	-0.65144	1287.5	30
2022-09-13	09:41:52	-2.37831	1287.5	30
2022-09-13	09:41:53	0.436728	1287.93	30
2022-09-13	09:41:54	0.742046	1288.68	30
2022-09-13	09:41:55	12.1235	1300.8	30
2022-09-13	09:41:56	22.8043	1323.6	31
2022-09-13	09:41:57	30.2591	1353.86	32
2022-09-13	09:41:58	6.19086	1360.05	32
2022-09-13	09:41:59	0.93718	1360.99	32
2022-09-13	09:42:00	-0.0345205	1360.99	32
2022-09-13	09:42:01	-0.545893	1360.99	32
2022-09-13	09:42:02	-0.481509	1360.99	32
2022-09-13	09:42:03	11.0697	1372.06	32
2022-09-13	09:42:04	14.5219	1386.58	33
2022-09-13	09:42:05	4.42851	1391.01	33
2022-09-13	09:42:06	1.74214	1392.75	33
2022-09-13	09:42:07	1.83168	1394.58	33
2022-09-13	09:42:08	4.09749	1398.68	33
2022-09-13	09:42:09	26.5073	1425.19	34
2022-09-13	09:42:10	13.2613	1438.45	35
2022-09-13	09:42:11	10.8663	1449.32	35
2022-09-13	09:42:12	3.41062	1452.73	35
2022-09-13	09:42:13	2.17186	1454.9	35
2022-09-13	09:42:14	2.54232	1457.44	35
2022-09-13	09:42:15	2.17284	1459.61	35
2022-09-13	09:42:16	2.42048	1462.04	35
2022-09-13	09:42:17	3.04555	1465.08	35
2022-09-13	09:42:18	3.06071	1468.14	35
2022-09-13	09:42:19	2.30191	1470.44	35
2022-09-13	09:42:20	2.51104	1472.95	35
2022-09-13	09:42:21	3.68154	1476.64	35
2022-09-13	09:42:22	6.46546	1483.1	35
2022-09-13	09:42:23	7.77762	1490.88	35
2022-09-13	09:42:24	8.92898	1499.81	35
2022-09-13	09:42:25	10.6527	1510.46	35
2022-09-13	09:42:26	3.06954	1513.53	35
2022-09-13	09:42:27	2.10061	1515.63	35
2022-09-13	09:42:28	2.17752	1517.81	35
2022-09-13	09:42:29	2.08624	1519.89	35
2022-09-13	09:42:30	2.5387	1522.43	35
2022-09-13	09:42:31	6.47451	1528.91	35
2022-09-13	09:42:32	3.93021	1532.84	35
2022-09-13	09:42:33	17.7934	1550.63	36
2022-09-13	09:42:34	7.26172	1557.89	36
2022-09-13	09:42:35	2.06621	1559.96	36
2022-09-13	09:42:36	1.97945	1561.94	36
2022-09-13	09:42:37	1.75957	1563.7	36
2022-09-13	09:42:38	1.84448	1565.54	36
2022-09-13	09:42:39	7.1551	1572.7	36
2022-09-13	09:42:40	6.27094	1578.97	36
2022-09-13	09:42:41	2.74475	1581.71	36
2022-09-13	09:42:42	2.57714	1584.29	36
2022-09-13	09:42:43	2.8323	1587.12	36
2022-09-13	09:42:44	1.85276	1588.98	36
2022-09-13	09:42:45	4.67929	1593.66	36
2022-09-13	09:42:46	5.91438	1599.57	36
2022-09-13	09:42:47	10.0923	1609.66	36
2022-09-13	09:42:48	3.15414	1612.82	36
2022-09-13	09:42:49	2.19914	1615.01	36
2022-09-13	09:42:50	3.57803	1618.59	36
2022-09-13	09:42:51	1.88271	1620.48	36
2022-09-13	09:42:52	2.1121	1622.59	36
2022-09-13	09:42:53	1.43984	1624.03	36
2022-09-13	09:42:54	-0.165929	1624.03	36
2022-09-13	09:42:55	-0.885131	1624.03	36
2022-09-13	09:42:56	2.22931	1626.26	36
2022-09-13	09:42:57	14.0451	1640.3	37
2022-09-13	09:42:58	7.22781	1647.53	37
2022-09-13	09:42:59	3.38284	1650.91	37
2022-09-13	09:43:00	4.59955	1655.51	37
2022-09-13	09:43:01	3.85776	1659.37	37
2022-09-13	09:43:02	4.59478	1663.96	37
2022-09-13	09:43:03	6.24353	1670.21	37
2022-09-13	09:43:04	5.38068	1675.59	37
2022-09-13	09:43:05	10.8276	1686.42	37
2022-09-13	09:43:06	5.35809	1691.77	37

## Sheet: Saint_harness_202291393758  (3)
Date	Time	Lbs	Newtons	Averaged Newtons	Total force x time	total steps > 13.345		**GoPro Fitting: 927
2022-09-13	09:38:06	0.471311	2.09649	2.10837	2.09649	FALSE	0			Total force	3019.56
2022-09-13	09:38:06	0.517519	2.30203	2.10837	2.30203	FALSE	0			Total Steps	133
2022-09-13	09:38:06	0.481031	2.13972	2.10837	4.23621	FALSE	0
2022-09-13	09:38:06	0.426069	1.89524	2.10837	4.19727	FALSE	0
2022-09-13	09:38:07	0.475992	2.11731	2.08924	6.35352	FALSE	0
2022-09-13	09:38:07	0.43869	1.95138	2.08924	6.14865	FALSE	0
2022-09-13	09:38:07	0.58556	2.60469	2.08924	8.9582	FALSE	0
2022-09-13	09:38:07	0.378486	1.68358	2.08924	7.83223	FALSE	0
2022-09-13	09:38:08	0.484491	2.15511	2.09518	11.1133	FALSE	0
2022-09-13	09:38:08	0.428104	1.90429	2.09518	9.73652	FALSE	0
2022-09-13	09:38:08	0.225356	1.00243	2.09518	12.1157	FALSE	0
2022-09-13	09:38:08	0.746119	3.31889	2.09518	13.0554	FALSE	0
2022-09-13	09:38:09	0.410191	1.82461	1.80205	13.9404	FALSE	0
2022-09-13	09:38:09	0.324847	1.44498	1.80205	14.5004	FALSE	0
2022-09-13	09:38:09	0.480318	2.13655	1.80205	16.0769	FALSE	0
2022-09-13	09:38:10	0.371718	1.65348	1.42608	16.1539	FALSE	0
2022-09-13	09:38:10	0.295178	1.31301	1.42608	17.3899	FALSE	0
2022-09-13	09:38:10	0.248155	1.10384	1.42608	17.2577	FALSE	0
2022-09-13	09:38:10	0.367341	1.63401	1.42608	19.0239	FALSE	0
2022-09-13	09:38:11	0.126731	0.563725	0.567005	17.8214	FALSE	0
2022-09-13	09:38:11	0.0968577	0.430842	0.567005	19.4548	FALSE	0
2022-09-13	09:38:11	0.133397	0.593377	0.567005	18.4148	FALSE	0
2022-09-13	09:38:11	0.152888	0.680076	0.567005	20.1348	FALSE	0
2022-09-13	09:38:12	0.531616	2.36473	48.775	20.7795	FALSE	0
2022-09-13	09:38:12	6.2767	27.92	48.775	48.0549	1	1
2022-09-13	09:38:12	21.8009	96.9748	48.775	117.754	1	2
2022-09-13	09:38:12	15.2512	67.8404	48.775	115.895	1	3
2022-09-13	09:38:13	4.24668	18.8901	32.971	136.644	1	4
2022-09-13	09:38:13	5.73451	25.5082	32.971	141.403	1	5
2022-09-13	09:38:13	12.4908	55.5616	32.971	192.206	1	6
2022-09-13	09:38:13	7.17686	31.9241	32.971	173.328	1	7
2022-09-13	09:38:14	3.98393	17.7213	8.11713	209.927	1	8
2022-09-13	09:38:14	1.0509	4.67461	8.11713	178.002	FALSE	8
2022-09-13	09:38:14	0.439606	1.95546	8.11713	211.883	FALSE	8
2022-09-13	09:38:15	0.740725	3.29489	1.97283	181.297	FALSE	8
2022-09-13	09:38:15	0.179504	0.79847	1.97283	212.681	FALSE	8
2022-09-13	09:38:15	0.287341	1.27815	1.97283	182.575	FALSE	8
2022-09-13	09:38:15	0.566476	2.5198	1.97283	215.201	FALSE	8
2022-09-13	09:38:16	0.300318	1.33587	2.3155	183.911	FALSE	8
2022-09-13	09:38:16	0.499046	2.21986	2.3155	217.421	FALSE	8
2022-09-13	09:38:16	0.522913	2.32602	2.3155	186.237	FALSE	8
2022-09-13	09:38:16	0.759911	3.38024	2.3155	220.801	FALSE	8
2022-09-13	09:38:17	2.64551	11.7678	15.077	198.005	FALSE	8
2022-09-13	09:38:17	4.45166	19.8019	15.077	240.603	1	9
2022-09-13	09:38:17	2.85009	12.6778	15.077	210.683	FALSE	9
2022-09-13	09:38:17	3.6106	16.0607	15.077	256.664	1	10
2022-09-13	09:38:18	0.501539	2.23095	2.3888	212.914	FALSE	10
2022-09-13	09:38:18	0.475331	2.11437	2.3888	258.778	FALSE	10
2022-09-13	09:38:18	0.634211	2.8211	2.3888	215.735	FALSE	10
2022-09-13	09:38:19	0.326323	1.45155	2.20288	260.23	FALSE	10
2022-09-13	09:38:19	0.558741	2.48539	2.20288	218.22	FALSE	10
2022-09-13	09:38:19	0.362201	1.61114	2.20288	261.841	FALSE	10
2022-09-13	09:38:19	0.733651	3.26343	2.20288	221.484	FALSE	10
2022-09-13	09:38:20	0.0533972	0.237521	7.24485	262.078	FALSE	10
2022-09-13	09:38:20	-0.305229	-1.35772	7.24485	221.484	FALSE	10
2022-09-13	09:38:20	0.0119723	0.0532552	7.24485	262.131	FALSE	10
2022-09-13	09:38:20	6.75472	30.0463	7.24485	251.53	1	11
2022-09-13	09:38:21	4.3621	19.4035	12.9755	281.535	1	12
2022-09-13	09:38:21	3.40698	15.1549	12.9755	266.685	1	13
2022-09-13	09:38:21	2.19513	9.76438	12.9755	291.299	FALSE	13
2022-09-13	09:38:21	1.70388	7.5792	12.9755	274.264	FALSE	13
2022-09-13	09:38:22	1.91299	8.50936	13.8804	299.809	FALSE	13
2022-09-13	09:38:22	1.31981	5.87078	13.8804	280.135	FALSE	13
2022-09-13	09:38:22	3.33395	14.8301	13.8804	314.639	1	14
2022-09-13	09:38:22	5.91502	26.3112	13.8804	306.446	1	15
2022-09-13	09:38:23	8.10851	36.0683	15.1963	350.707	1	16
2022-09-13	09:38:23	1.94266	8.64134	15.1963	315.087	FALSE	16
2022-09-13	09:38:23	0.197672	0.879285	15.1963	351.586	FALSE	16
2022-09-13	09:38:24	0.0380282	0.169157	0.830558	315.256	FALSE	16
2022-09-13	09:38:24	-0.126297	-0.561794	0.830558	351.586	FALSE	16
2022-09-13	09:38:24	0.195891	0.871362	0.830558	316.128	FALSE	16
2022-09-13	09:38:24	0.639249	2.84351	0.830558	354.43	FALSE	16
2022-09-13	09:38:25	0.430853	1.91652	2.45121	318.044	FALSE	16
2022-09-13	09:38:25	0.798842	3.55341	2.45121	357.983	FALSE	16
2022-09-13	09:38:25	0.285356	1.26932	2.45121	319.314	FALSE	16
2022-09-13	09:38:25	0.689173	3.06558	2.45121	361.049	FALSE	16
2022-09-13	09:38:26	0.251616	1.11924	2.09569	320.433	FALSE	16
2022-09-13	09:38:26	0.648766	2.88584	2.09569	363.935	FALSE	16
2022-09-13	09:38:26	0.428613	1.90656	2.09569	322.339	FALSE	16
2022-09-13	09:38:26	0.555534	2.47113	2.09569	366.406	FALSE	16
2022-09-13	09:38:27	0.549987	2.44645	4.51571	324.786	FALSE	16
2022-09-13	09:38:27	0.755076	3.35873	4.51571	369.765	FALSE	16
2022-09-13	09:38:27	1.74047	7.74196	4.51571	332.528	FALSE	16
2022-09-13	09:38:28	3.58195	15.9332	14.0911	385.698	1	17
2022-09-13	09:38:28	4.65375	20.7008	14.0911	353.229	1	18
2022-09-13	09:38:28	2.61345	11.6251	14.0911	397.323	FALSE	18
2022-09-13	09:38:28	1.8221	8.10507	14.0911	361.334	FALSE	18
2022-09-13	09:38:29	0.462812	2.05868	2.33129	399.382	FALSE	18
2022-09-13	09:38:29	0.589122	2.62053	2.33129	363.954	FALSE	18
2022-09-13	09:38:29	0.621132	2.76292	2.33129	402.145	FALSE	18
2022-09-13	09:38:29	0.423321	1.88302	2.33129	365.837	FALSE	18
2022-09-13	09:38:30	0.0453565	0.201755	-1.09507	402.346	FALSE	18
2022-09-13	09:38:30	-0.223448	-0.993941	-1.09507	365.837	FALSE	18
2022-09-13	09:38:30	-0.454338	-2.02099	-1.09507	402.346	FALSE	18
2022-09-13	09:38:30	-0.352302	-1.56711	-1.09507	365.837	FALSE	18
2022-09-13	09:38:31	0.0384862	0.171194	7.98593	402.517	FALSE	18
2022-09-13	09:38:31	1.84525	8.20804	7.98593	374.045	FALSE	18
2022-09-13	09:38:31	4.17345	18.5643	7.98593	421.082	1	19
2022-09-13	09:38:31	1.12408	5.00013	7.98593	379.045	FALSE	19
2022-09-13	09:38:32	1.4306	6.36359	4.74458	427.445	FALSE	19
2022-09-13	09:38:32	1.10897	4.93292	4.74458	383.978	FALSE	19
2022-09-13	09:38:32	0.660318	2.93723	4.74458	430.383	FALSE	19
2022-09-13	09:38:33	0.888003	3.95001	2.34544	387.928	FALSE	19
2022-09-13	09:38:33	0.261285	1.16225	2.34544	431.545	FALSE	19
2022-09-13	09:38:33	0.652481	2.90237	2.34544	390.831	FALSE	19
2022-09-13	09:38:33	0.307341	1.36711	2.34544	432.912	FALSE	19
2022-09-13	09:38:34	0.62556	2.78262	2.56405	393.613	FALSE	19
2022-09-13	09:38:34	0.695992	3.09591	2.56405	436.008	FALSE	19
2022-09-13	09:38:34	0.716043	3.1851	2.56405	396.799	FALSE	19
2022-09-13	09:38:34	0.268104	1.19258	2.56405	437.2	FALSE	19
2022-09-13	09:38:35	1.88317	8.37672	13.1628	405.175	FALSE	19
2022-09-13	09:38:35	0.502608	2.2357	13.1628	439.436	FALSE	19
2022-09-13	09:38:35	3.68663	16.3989	13.1628	421.574	1	20
2022-09-13	09:38:35	5.76408	25.6398	13.1628	465.076	1	21
2022-09-13	09:38:36	5.53757	24.6322	16.7393	446.206	1	22
2022-09-13	09:38:36	4.69747	20.8953	16.7393	485.971	1	23
2022-09-13	09:38:36	1.05447	4.69049	16.7393	450.897	FALSE	23
2022-09-13	09:38:37	-0.134135	-0.596659	-0.181436	485.971	FALSE	23
2022-09-13	09:38:37	-0.0798852	-0.355345	-0.181436	450.897	FALSE	23
2022-09-13	09:38:37	0.253092	1.1258	-0.181436	487.097	FALSE	23
2022-09-13	09:38:37	-0.202226	-0.899542	-0.181436	450.897	FALSE	23
2022-09-13	09:38:38	0.494822	2.20107	14.7443	489.298	FALSE	23
2022-09-13	09:38:38	1.76775	7.86331	14.7443	458.76	FALSE	23
2022-09-13	09:38:38	5.67263	25.233	14.7443	514.531	1	24
2022-09-13	09:38:38	5.32342	23.6796	14.7443	482.44	1	25
2022-09-13	09:38:39	3.72088	16.5512	5.84678	531.082	1	26
2022-09-13	09:38:39	0.683168	3.03887	5.84678	485.479	FALSE	26
2022-09-13	09:38:39	0.39014	1.73542	5.84678	532.818	FALSE	26
2022-09-13	09:38:39	0.463473	2.06162	5.84678	487.54	FALSE	26
2022-09-13	09:38:40	0.275585	1.22586	1.81069	534.044	FALSE	26
2022-09-13	09:38:40	0.46383	2.06321	1.81069	489.603	FALSE	26
2022-09-13	09:38:40	0.27813	1.23718	1.81069	535.281	FALSE	26
2022-09-13	09:38:40	0.6107	2.71652	1.81069	492.32	FALSE	26
2022-09-13	09:38:41	0.727188	3.23468	2.32029	538.515	FALSE	26
2022-09-13	09:38:41	0.498537	2.21759	2.32029	494.538	FALSE	26
2022-09-13	09:38:41	0.339148	1.5086	2.32029	540.024	FALSE	26
2022-09-13	09:38:42	0.514568	2.2889	2.02059	496.826	FALSE	26
2022-09-13	09:38:42	0.514669	2.28935	2.02059	542.313	FALSE	26
2022-09-13	09:38:42	0.254873	1.13373	2.02059	497.96	FALSE	26
2022-09-13	09:38:42	0.532888	2.37039	2.02059	544.684	FALSE	26
2022-09-13	09:38:43	0.195026	0.867515	1.98635	498.828	FALSE	26
2022-09-13	09:38:43	0.634669	2.82313	1.98635	547.507	FALSE	26
2022-09-13	09:38:43	0.316298	1.40696	1.98635	500.235	FALSE	26
2022-09-13	09:38:43	0.640216	2.84781	1.98635	550.355	FALSE	26
2022-09-13	09:38:44	0.364389	1.62088	1.72665	501.856	FALSE	26
2022-09-13	09:38:44	0.407596	1.81307	1.72665	552.168	FALSE	26
2022-09-13	09:38:44	0.487952	2.17051	1.72665	504.026	FALSE	26
2022-09-13	09:38:44	0.292735	1.30214	1.72665	553.47	FALSE	26
2022-09-13	09:38:45	0.443931	1.97469	2.82427	506.001	FALSE	26
2022-09-13	09:38:45	0.525967	2.33961	2.82427	555.81	FALSE	26
2022-09-13	09:38:45	0.934873	4.1585	2.82427	510.159	FALSE	26
2022-09-13	09:38:46	0.541997	2.41091	4.49138	558.22	FALSE	26
2022-09-13	09:38:46	2.13111	9.4796	4.49138	519.639	FALSE	26
2022-09-13	09:38:46	0.60444	2.68867	4.49138	560.909	FALSE	26
2022-09-13	09:38:46	0.761285	3.38635	4.49138	523.025	FALSE	26
2022-09-13	09:38:47	0.942099	4.19064	5.29262	565.1	FALSE	26
2022-09-13	09:38:47	0.832176	3.70169	5.29262	526.727	FALSE	26
2022-09-13	09:38:47	2.43406	10.8272	5.29262	575.927	FALSE	26
2022-09-13	09:38:47	0.551005	2.45098	5.29262	529.178	FALSE	26
2022-09-13	09:38:48	2.18597	9.72363	12.8089	585.651	FALSE	26
2022-09-13	09:38:48	2.33365	10.3805	12.8089	539.558	FALSE	26
2022-09-13	09:38:48	1.94897	8.66941	12.8089	594.32	FALSE	26
2022-09-13	09:38:48	5.04968	22.462	12.8089	562.02	1	27
2022-09-13	09:38:49	3.23248	14.3787	14.8156	608.699	1	28
2022-09-13	09:38:49	4.0167	17.8671	14.8156	579.887	1	29
2022-09-13	09:38:49	4.45009	19.7949	14.8156	628.494	1	30
2022-09-13	09:38:49	1.62352	7.22174	14.8156	587.109	FALSE	30
2022-09-13	09:38:50	0.269631	1.19937	1.44023	629.693	FALSE	30
2022-09-13	09:38:50	0.770293	3.42642	1.44023	590.536	FALSE	30
2022-09-13	09:38:50	-0.0685875	-0.305091	1.44023	629.693	FALSE	30
2022-09-13	09:38:51	0.0598603	0.266271	9.41897	590.802	FALSE	30
2022-09-13	09:38:51	0.659148	2.93202	9.41897	632.625	FALSE	30
2022-09-13	09:38:51	4.45222	19.8044	9.41897	610.606	1	31
2022-09-13	09:38:51	3.29869	14.6732	9.41897	647.298	1	32
2022-09-13	09:38:52	3.86968	17.2131	10.0955	627.819	1	33
2022-09-13	09:38:52	2.92709	13.0203	10.0955	660.319	FALSE	33
2022-09-13	09:38:52	0.188359	0.837859	10.0955	628.657	FALSE	33
2022-09-13	09:38:52	2.09314	9.31071	10.0955	669.629	FALSE	33
2022-09-13	09:38:53	0.648104	2.8829	9.52238	631.54	FALSE	33
2022-09-13	09:38:53	0.880929	3.91855	9.52238	673.548	FALSE	33
2022-09-13	09:38:53	3.49533	15.5479	9.52238	647.088	1	34
2022-09-13	09:38:53	3.53854	15.7401	9.52238	689.288	1	35
2022-09-13	09:38:54	1.1333	5.04115	5.73111	652.129	FALSE	35
2022-09-13	09:38:54	1.59955	7.11512	5.73111	696.403	FALSE	35
2022-09-13	09:38:54	1.13238	5.03705	5.73111	657.166	FALSE	35
2022-09-13	09:38:55	1.01513	4.5155	4.58148	700.919	FALSE	35
2022-09-13	09:38:55	0.565509	2.5155	4.58148	659.682	FALSE	35
2022-09-13	09:38:55	0.630445	2.80435	4.58148	703.723	FALSE	35
2022-09-13	09:38:55	1.90877	8.49059	4.58148	668.172	FALSE	35
2022-09-13	09:38:56	0.573753	2.55217	10.2599	706.275	FALSE	35
2022-09-13	09:38:56	1.58515	7.05106	10.2599	675.223	FALSE	35
2022-09-13	09:38:56	5.36362	23.8585	10.2599	730.134	1	36
2022-09-13	09:38:56	1.70357	7.57782	10.2599	682.801	FALSE	36
2022-09-13	09:38:57	6.46194	28.744	10.1112	758.878	1	37
2022-09-13	09:38:57	0.793855	3.53123	10.1112	686.332	FALSE	37
2022-09-13	09:38:57	1.23055	5.47373	10.1112	764.351	FALSE	37
2022-09-13	09:38:57	0.606018	2.69569	10.1112	689.028	FALSE	37
2022-09-13	09:38:58	0.200216	0.890601	0.734463	765.242	FALSE	37
2022-09-13	09:38:58	0.222354	0.989075	0.734463	690.017	FALSE	37
2022-09-13	09:38:58	0.0527865	0.234805	0.734463	765.477	FALSE	37
2022-09-13	09:38:58	0.185102	0.823371	0.734463	690.841	FALSE	37
2022-09-13	09:38:59	0.193397	0.860269	1.3318	766.337	FALSE	37
2022-09-13	09:38:59	0.285255	1.26887	1.3318	692.109	FALSE	37
2022-09-13	09:38:59	0.419555	1.86626	1.3318	768.203	FALSE	37
2022-09-13	09:39:00	0.784796	3.49093	4.29823	695.6	FALSE	37
2022-09-13	09:39:00	0.847595	3.77027	4.29823	771.973	FALSE	37
2022-09-13	09:39:00	1.10251	4.90418	4.29823	700.505	FALSE	37
2022-09-13	09:39:00	1.13024	5.02753	4.29823	777.001	FALSE	37
2022-09-13	09:39:01	0.995229	4.42698	4.28272	704.932	FALSE	37
2022-09-13	09:39:01	1.20047	5.33993	4.28272	782.341	FALSE	37
2022-09-13	09:39:01	0.916349	4.0761	4.28272	709.008	FALSE	37
2022-09-13	09:39:01	0.739147	3.28787	4.28272	785.629	FALSE	37
2022-09-13	09:39:02	0.576043	2.56235	6.07791	711.57	FALSE	37
2022-09-13	09:39:02	0.795687	3.53937	6.07791	789.168	FALSE	37
2022-09-13	09:39:02	1.25737	5.59303	6.07791	717.163	FALSE	37
2022-09-13	09:39:02	2.8364	12.6169	6.07791	801.785	FALSE	37
2022-09-13	09:39:03	4.11889	18.3216	15.4003	735.485	1	38
2022-09-13	09:39:03	5.85859	26.0602	15.4003	827.845	1	39
2022-09-13	09:39:03	0.408969	1.81918	15.4003	737.304	FALSE	39
2022-09-13	09:39:04	0.488613	2.17345	1.70984	830.019	FALSE	39
2022-09-13	09:39:04	0.492837	2.19224	1.70984	739.496	FALSE	39
2022-09-13	09:39:04	0.475127	2.11346	1.70984	832.132	FALSE	39
2022-09-13	09:39:04	0.0809798	0.360214	1.70984	739.856	FALSE	39
2022-09-13	09:39:05	0.0272394	0.121166	0.076118	832.253	FALSE	39
2022-09-13	09:39:05	-0.277239	-1.23321	0.076118	739.856	FALSE	39
2022-09-13	09:39:05	0.205458	0.913918	0.076118	833.167	FALSE	39
2022-09-13	09:39:05	0.11299	0.502602	0.076118	740.359	FALSE	39
2022-09-13	09:39:06	7.80337	34.711	20.7108	867.878	1	40
2022-09-13	09:39:06	5.89314	26.2139	20.7108	766.573	1	41
2022-09-13	09:39:06	3.54347	15.7621	20.7108	883.64	1	42
2022-09-13	09:39:06	1.38398	6.15622	20.7108	772.729	FALSE	42
2022-09-13	09:39:07	3.27619	14.5731	6.03149	898.213	1	43
2022-09-13	09:39:07	0.283117	1.25936	6.03149	773.988	FALSE	43
2022-09-13	09:39:07	1.14887	5.1104	6.03149	903.324	FALSE	43
2022-09-13	09:39:07	0.715585	3.18307	6.03149	777.171	FALSE	43
2022-09-13	09:39:08	0.870751	3.87327	3.11704	907.197	FALSE	43
2022-09-13	09:39:08	0.788918	3.50927	3.11704	780.681	FALSE	43
2022-09-13	09:39:08	0.442557	1.96858	3.11704	909.166	FALSE	43
2022-09-13	09:39:09	0.817519	3.63649	3.74803	784.317	FALSE	43
2022-09-13	09:39:09	0.921845	4.10055	3.74803	913.266	FALSE	43
2022-09-13	09:39:09	0.970293	4.31606	3.74803	788.633	FALSE	43
2022-09-13	09:39:09	0.660725	2.93904	3.74803	916.205	FALSE	43
2022-09-13	09:39:10	0.523932	2.33055	2.33921	790.964	FALSE	43
2022-09-13	09:39:10	0.51701	2.29976	2.33921	918.505	FALSE	43
2022-09-13	09:39:10	0.462914	2.05913	2.33921	793.023	FALSE	43
2022-09-13	09:39:10	0.599657	2.66739	2.33921	921.172	FALSE	43
2022-09-13	09:39:11	0.828308	3.68448	2.49269	796.707	FALSE	43
2022-09-13	09:39:11	0.499504	2.22189	2.49269	923.394	FALSE	43
2022-09-13	09:39:11	0.327748	1.45789	2.49269	798.165	FALSE	43
2022-09-13	09:39:11	0.585967	2.6065	2.49269	926.001	FALSE	43
2022-09-13	09:39:12	0.290344	1.29151	2.05868	799.457	FALSE	43
2022-09-13	09:39:12	0.67243	2.9911	2.05868	928.992	FALSE	43
2022-09-13	09:39:12	0.425662	1.89343	2.05868	801.35	FALSE	43
2022-09-13	09:39:13	0.626069	2.78488	2.13576	931.777	FALSE	43
2022-09-13	09:39:13	0.352328	1.56723	2.13576	802.917	FALSE	43
2022-09-13	09:39:13	0.561845	2.4992	2.13576	934.276	FALSE	43
2022-09-13	09:39:13	0.380318	1.69173	2.13576	804.609	FALSE	43
2022-09-13	09:39:14	0.489428	2.17707	1.92269	936.453	FALSE	43
2022-09-13	09:39:14	0.41986	1.86762	1.92269	806.477	FALSE	43
2022-09-13	09:39:14	0.429987	1.91267	1.92269	938.366	FALSE	43
2022-09-13	09:39:14	0.389682	1.73338	1.92269	808.21	FALSE	43
2022-09-13	09:39:15	0.419504	1.86604	1.77288	940.232	FALSE	43
2022-09-13	09:39:15	0.433346	1.92761	1.77288	810.138	FALSE	43
2022-09-13	09:39:15	0.368053	1.63717	1.77288	941.869	FALSE	43
2022-09-13	09:39:15	0.373346	1.66072	1.77288	811.799	FALSE	43
2022-09-13	09:39:16	0.221947	0.987265	0.94329	942.856	FALSE	43
2022-09-13	09:39:16	0.213702	0.950589	0.94329	812.749	FALSE	43
2022-09-13	09:39:16	0.209936	0.933837	0.94329	943.79	FALSE	43
2022-09-13	09:39:16	0.202659	0.901468	0.94329	813.651	FALSE	43
2022-09-13	09:39:17	0.263015	1.16994	1.0514	944.96	FALSE	43
2022-09-13	09:39:17	0.101896	0.453254	1.0514	814.104	FALSE	43
2022-09-13	09:39:17	0.344186	1.53101	1.0514	946.491	FALSE	43
2022-09-13	09:39:18	3.60927	16.0548	19.7302	830.159	1	44
2022-09-13	09:39:18	6.21889	27.6629	19.7302	974.154	1	45
2022-09-13	09:39:18	4.60276	20.474	19.7302	850.633	1	46
2022-09-13	09:39:18	3.31126	14.7291	19.7302	988.883	1	47
2022-09-13	09:39:19	3.83212	17.046	23.7076	867.679	1	48
2022-09-13	09:39:19	1.77569	7.89862	23.7076	996.782	FALSE	48
2022-09-13	09:39:19	10.3813	46.1781	23.7076	913.857	1	49
2022-09-13	09:39:20	8.59624	38.2378	38.9514	1035.02	1	50
2022-09-13	09:39:20	12.5412	55.7858	38.9514	969.642	1	51
2022-09-13	09:39:20	9.75339	43.385	38.9514	1078.4	1	52
2022-09-13	09:39:20	3.84256	17.0925	38.9514	986.735	1	53
2022-09-13	09:39:20	9.04993	40.2559	38.9514	1118.66	1	54
2022-09-13	09:39:21	1.41116	6.27712	7.04942	993.012	FALSE	54
2022-09-13	09:39:21	2.21966	9.87349	7.04942	1128.53	FALSE	54
2022-09-13	09:39:21	1.12352	4.99764	7.04942	998.01	FALSE	54
2022-09-13	09:39:22	0.968969	4.31017	4.37531	1132.84	FALSE	54
2022-09-13	09:39:22	0.718537	3.1962	4.37531	1001.21	FALSE	54
2022-09-13	09:39:22	0.583117	2.59382	4.37531	1135.44	FALSE	54
2022-09-13	09:39:22	1.66383	7.40105	4.37531	1008.61	FALSE	54
2022-09-13	09:39:23	1.01589	4.51888	9.05531	1139.96	FALSE	54
2022-09-13	09:39:23	2.76408	12.2952	9.05531	1020.9	FALSE	54
2022-09-13	09:39:23	0.723168	3.2168	9.05531	1143.17	FALSE	54
2022-09-13	09:39:23	3.63976	16.1904	9.05531	1037.09	1	55
2022-09-13	09:39:24	3.64368	16.2078	11.5847	1159.38	1	56
2022-09-13	09:39:24	2.97777	13.2457	11.5847	1050.34	FALSE	56
2022-09-13	09:39:24	3.18709	14.1768	11.5847	1173.56	1	57
2022-09-13	09:39:24	0.608868	2.70837	11.5847	1053.05	FALSE	57
2022-09-13	09:39:25	1.05798	4.70611	12.7388	1178.26	FALSE	57
2022-09-13	09:39:25	3.33487	14.8342	12.7388	1067.88	1	58
2022-09-13	09:39:25	2.66393	11.8497	12.7388	1190.11	FALSE	58
2022-09-13	09:39:25	4.39843	19.5651	12.7388	1087.45	1	59
2022-09-13	09:39:26	4.32861	19.2545	8.76999	1209.37	1	60
2022-09-13	09:39:26	0.372786	1.65823	8.76999	1089.1	FALSE	60
2022-09-13	09:39:26	1.21335	5.39722	8.76999	1214.77	FALSE	60
2022-09-13	09:39:27	0.916349	4.0761	4.09863	1093.18	FALSE	60
2022-09-13	09:39:27	0.682608	3.03638	4.09863	1217.8	FALSE	60
2022-09-13	09:39:27	0.517926	2.30384	4.09863	1095.48	FALSE	60
2022-09-13	09:39:27	1.56877	6.9782	4.09863	1224.78	FALSE	60
2022-09-13	09:39:28	0.32154	1.43027	2.71895	1096.91	FALSE	60
2022-09-13	09:39:28	1.18963	5.29171	2.71895	1230.07	FALSE	60
2022-09-13	09:39:28	0.319402	1.42076	2.71895	1098.34	FALSE	60
2022-09-13	09:39:28	0.614415	2.73304	2.71895	1232.81	FALSE	60
2022-09-13	09:39:29	1.1967	5.32316	10.4304	1103.66	FALSE	60
2022-09-13	09:39:29	0.498435	2.21714	10.4304	1235.02	FALSE	60
2022-09-13	09:39:29	1.7134	7.62155	10.4304	1111.28	FALSE	60
2022-09-13	09:39:29	5.9709	26.5598	10.4304	1261.58	1	61
2022-09-13	09:39:30	1.42149	6.32307	4.03551	1117.6	FALSE	61
2022-09-13	09:39:30	0.804237	3.57741	4.03551	1265.16	FALSE	61
2022-09-13	09:39:30	0.495942	2.20605	4.03551	1119.81	FALSE	61
2022-09-13	09:39:31	0.169275	0.752969	2.14029	1265.91	FALSE	61
2022-09-13	09:39:31	0.0214887	0.095586	2.14029	1119.9	FALSE	61
2022-09-13	09:39:31	0.402252	1.7893	2.14029	1267.7	FALSE	61
2022-09-13	09:39:31	1.33162	5.92331	2.14029	1125.83	FALSE	61
2022-09-13	09:39:32	7.40754	32.9502	12.5775	1300.65	1	62
2022-09-13	09:39:32	2.17599	9.67924	12.5775	1135.51	FALSE	62
2022-09-13	09:39:32	1.31604	5.85401	12.5775	1306.51	FALSE	62
2022-09-13	09:39:32	0.410649	1.82665	12.5775	1137.33	FALSE	62
2022-09-13	09:39:33	0.559911	2.4906	3.19772	1309	FALSE	62
2022-09-13	09:39:33	0.597774	2.65902	3.19772	1139.99	FALSE	62
2022-09-13	09:39:33	0.71874	3.1971	3.19772	1312.19	FALSE	62
2022-09-13	09:39:33	0.999097	4.44418	3.19772	1144.44	FALSE	62
2022-09-13	09:39:34	2.4705	10.9893	13.7586	1323.18	FALSE	62
2022-09-13	09:39:34	1.85426	8.24812	13.7586	1152.69	FALSE	62
2022-09-13	09:39:34	5.26769	23.4317	13.7586	1346.61	1	63
2022-09-13	09:39:34	2.77986	12.3654	13.7586	1165.05	FALSE	63
2022-09-13	09:39:35	6.13187	27.2758	21.0774	1373.89	1	64
2022-09-13	09:39:35	1.68592	7.49931	21.0774	1172.55	FALSE	64
2022-09-13	09:39:35	6.39746	28.4572	21.0774	1402.35	1	65
2022-09-13	09:39:36	2.4106	10.7228	14.0869	1183.27	FALSE	65
2022-09-13	09:39:36	4.01752	17.8707	14.0869	1420.22	1	66
2022-09-13	09:39:36	4.50357	20.0328	14.0869	1203.31	1	67
2022-09-13	09:39:36	1.73579	7.72114	14.0869	1427.94	FALSE	67
2022-09-13	09:39:37	5.53217	24.6082	11.0134	1227.91	1	68
2022-09-13	09:39:37	0.849631	3.77933	11.0134	1431.72	FALSE	68
2022-09-13	09:39:37	1.63009	7.25097	11.0134	1235.16	FALSE	68
2022-09-13	09:39:37	1.89182	8.41519	11.0134	1440.13	FALSE	68
2022-09-13	09:39:38	0.186425	0.829256	4.14457	1235.99	FALSE	68
2022-09-13	09:39:38	1.56693	6.97002	4.14457	1447.1	FALSE	68
2022-09-13	09:39:38	0.927443	4.12545	4.14457	1240.12	FALSE	68
2022-09-13	09:39:38	1.04617	4.65357	4.14457	1451.76	FALSE	68
2022-09-13	09:39:39	0.37299	1.65913	2.55557	1241.78	FALSE	68
2022-09-13	09:39:39	0.778588	3.46332	2.55557	1455.22	FALSE	68
2022-09-13	09:39:39	0.571972	2.54425	2.55557	1244.32	FALSE	68
2022-09-13	09:39:40	0.875636	3.895	4.3138	1459.12	FALSE	68
2022-09-13	09:39:40	0.898689	3.99755	4.3138	1248.32	FALSE	68
2022-09-13	09:39:40	0.954873	4.24747	4.3138	1463.36	FALSE	68
2022-09-13	09:39:40	1.14994	5.11516	4.3138	1253.44	FALSE	68
2022-09-13	09:39:41	0.797417	3.54707	2.76168	1466.91	FALSE	68
2022-09-13	09:39:41	0.544135	2.42042	2.76168	1255.86	FALSE	68
2022-09-13	09:39:41	0.613397	2.72851	2.76168	1469.64	FALSE	68
2022-09-13	09:39:41	0.528461	2.3507	2.76168	1258.21	FALSE	68
2022-09-13	09:39:42	0.507901	2.25925	2.31074	1471.9	FALSE	68
2022-09-13	09:39:42	0.448613	1.99552	2.31074	1260.2	FALSE	68
2022-09-13	09:39:42	0.466323	2.0743	2.31074	1473.97	FALSE	68
2022-09-13	09:39:42	0.655076	2.91391	2.31074	1263.12	FALSE	68
2022-09-13	09:39:43	0.99299	4.41702	5.85651	1478.39	FALSE	68
2022-09-13	09:39:43	1.12688	5.01259	5.85651	1268.13	FALSE	68
2022-09-13	09:39:43	1.82994	8.13994	5.85651	1486.53	FALSE	68
2022-09-13	09:39:44	1.25253	5.5715	4.34044	1273.7	FALSE	68
2022-09-13	09:39:44	1.48958	6.62595	4.34044	1493.16	FALSE	68
2022-09-13	09:39:44	0.594364	2.64385	4.34044	1276.34	FALSE	68
2022-09-13	09:39:44	0.566628	2.52047	4.34044	1495.68	FALSE	68
2022-09-13	09:39:45	0.854771	3.80219	3.16796	1280.15	FALSE	68
2022-09-13	09:39:45	0.764389	3.40016	3.16796	1499.08	FALSE	68
2022-09-13	09:39:45	0.694975	3.09139	3.16796	1283.24	FALSE	68
2022-09-13	09:39:45	0.534618	2.37809	3.16796	1501.45	FALSE	68
2022-09-13	09:39:46	0.2564	1.14052	7.03244	1284.38	FALSE	68
2022-09-13	09:39:46	3.69874	16.4527	7.03244	1517.91	1	69
2022-09-13	09:39:46	0.787748	3.50406	7.03244	1287.88	FALSE	69
2022-09-13	09:39:47	2.11151	9.39242	8.88821	1527.3	FALSE	69
2022-09-13	09:39:47	0.878486	3.90768	8.88821	1291.79	FALSE	69
2022-09-13	09:39:47	3.3053	14.7026	8.88821	1542	1	70
2022-09-13	09:39:47	2.85803	12.7131	8.88821	1304.5	FALSE	70
2022-09-13	09:39:47	0.837468	3.72523	8.88821	1545.73	FALSE	70
2022-09-13	09:39:48	2.98882	13.2949	19.6576	1317.8	FALSE	70
2022-09-13	09:39:48	5.18072	23.0449	19.6576	1568.77	1	71
2022-09-13	09:39:48	5.08815	22.6331	19.6576	1340.43	1	72
2022-09-13	09:39:49	4.75055	21.1314	14.6794	1589.9	1	73
2022-09-13	09:39:49	4.87227	21.6728	14.6794	1362.1	1	74
2022-09-13	09:39:49	2.18011	9.69757	14.6794	1599.6	FALSE	74
2022-09-13	09:39:49	1.39737	6.21578	14.6794	1368.32	FALSE	74
2022-09-13	09:39:50	0.846883	3.7671	2.15919	1603.37	FALSE	74
2022-09-13	09:39:50	0.331463	1.47441	2.15919	1369.79	FALSE	74
2022-09-13	09:39:50	0.266425	1.18511	2.15919	1604.55	FALSE	74
2022-09-13	09:39:50	0.496858	2.21012	2.15919	1372	FALSE	74
2022-09-13	09:39:51	0.9393	4.17819	1.57673	1608.73	FALSE	74
2022-09-13	09:39:51	0.244339	1.08687	1.57673	1373.09	FALSE	74
2022-09-13	09:39:51	0.103524	0.460495	1.57673	1609.19	FALSE	74
2022-09-13	09:39:51	0.1307	0.58138	1.57673	1373.67	FALSE	74
2022-09-13	09:39:52	0.180318	0.802091	1.2906	1609.99	FALSE	74
2022-09-13	09:39:52	0.301692	1.34199	1.2906	1375.01	FALSE	74
2022-09-13	09:39:52	0.38841	1.72773	1.2906	1611.72	FALSE	74
2022-09-13	09:39:53	0.308461	1.3721	1.42478	1376.39	FALSE	74
2022-09-13	09:39:53	0.281998	1.25438	1.42478	1612.98	FALSE	74
2022-09-13	09:39:53	0.422354	1.87872	1.42478	1378.26	FALSE	74
2022-09-13	09:39:53	0.26841	1.19394	1.42478	1614.17	FALSE	74
2022-09-13	09:39:54	0.244695	1.08845	1.29168	1379.35	FALSE	74
2022-09-13	09:39:54	0.282914	1.25846	1.29168	1615.43	FALSE	74
2022-09-13	09:39:54	0.284135	1.26389	1.29168	1380.62	FALSE	74
2022-09-13	09:39:54	0.349784	1.55591	1.29168	1616.98	FALSE	74
2022-09-13	09:39:55	0.440776	1.96066	2.06694	1382.58	FALSE	74
2022-09-13	09:39:55	0.422252	1.87826	2.06694	1618.86	FALSE	74
2022-09-13	09:39:55	0.463626	2.0623	2.06694	1384.64	FALSE	74
2022-09-13	09:39:55	0.532023	2.36654	2.06694	1621.23	FALSE	74
2022-09-13	09:39:56	0.49986	2.22348	1.63005	1386.86	FALSE	74
2022-09-13	09:39:56	0.414364	1.84317	1.63005	1623.07	FALSE	74
2022-09-13	09:39:56	0.312023	1.38794	1.63005	1388.25	FALSE	74
2022-09-13	09:39:56	0.239555	1.06559	1.63005	1624.14	FALSE	74
2022-09-13	09:39:57	0.212685	0.946065	0.973229	1389.2	FALSE	74
2022-09-13	09:39:57	0.205458	0.913918	0.973229	1625.05	FALSE	74
2022-09-13	09:39:57	0.238232	1.0597	0.973229	1390.26	FALSE	74
2022-09-13	09:39:58	0.223015	0.992015	1.0052	1626.04	FALSE	74
2022-09-13	09:39:58	0.221845	0.986811	1.0052	1391.24	FALSE	74
2022-09-13	09:39:58	0.232939	1.03616	1.0052	1627.08	FALSE	74
2022-09-13	09:39:58	0.22612	1.00583	1.0052	1392.25	FALSE	74
2022-09-13	09:39:59	0.227239	1.0108	0.977926	1628.09	FALSE	74
2022-09-13	09:39:59	0.203372	0.904639	0.977926	1393.15	FALSE	74
2022-09-13	09:39:59	0.19472	0.866154	0.977926	1628.96	FALSE	74
2022-09-13	09:39:59	0.254059	1.13011	0.977926	1394.28	FALSE	74
2022-09-13	09:40:00	0.229122	1.01918	1.44946	1629.98	FALSE	74
2022-09-13	09:40:00	0.350242	1.55795	1.44946	1395.84	FALSE	74
2022-09-13	09:40:00	0.348053	1.54821	1.44946	1631.52	FALSE	74
2022-09-13	09:40:00	0.375992	1.67249	1.44946	1397.52	FALSE	74
2022-09-13	09:40:01	0.378181	1.68222	1.20232	1633.21	FALSE	74
2022-09-13	09:40:01	0.23014	1.02371	1.20232	1398.54	FALSE	74
2022-09-13	09:40:01	0.202557	0.901014	1.20232	1634.11	FALSE	74
2022-09-13	09:40:02	0.244135	1.08596	2.49976	1399.62	FALSE	74
2022-09-13	09:40:02	0.260267	1.15772	2.49976	1635.27	FALSE	74
2022-09-13	09:40:02	0.529987	2.35749	2.49976	1401.98	FALSE	74
2022-09-13	09:40:02	1.2135	5.39789	2.49976	1640.66	FALSE	74
2022-09-13	09:40:03	1.28877	5.73271	2.23378	1407.72	FALSE	74
2022-09-13	09:40:03	0.554618	2.46705	2.23378	1643.13	FALSE	74
2022-09-13	09:40:03	0.251056	1.11675	2.23378	1408.83	FALSE	74
2022-09-13	09:40:03	-0.0857376	-0.381378	2.23378	1643.13	FALSE	74
2022-09-13	09:40:04	-0.106654	-0.474418	0.165535	1408.83	FALSE	74
2022-09-13	09:40:04	0.0219977	0.0978502	0.165535	1643.23	FALSE	74
2022-09-13	09:40:04	0.0729392	0.324448	0.165535	1409.16	FALSE	74
2022-09-13	09:40:04	0.160573	0.714261	0.165535	1643.94	FALSE	74
2022-09-13	09:40:05	0.351514	1.5636	1.31765	1410.72	FALSE	74
2022-09-13	09:40:05	0.17126	0.761799	1.31765	1644.7	FALSE	74
2022-09-13	09:40:05	0.23813	1.05925	1.31765	1411.78	FALSE	74
2022-09-13	09:40:05	0.423982	1.88596	1.31765	1646.59	FALSE	74
2022-09-13	09:40:06	0.483015	2.14855	2.5982	1413.93	FALSE	74
2022-09-13	09:40:06	0.569326	2.53248	2.5982	1649.12	FALSE	74
2022-09-13	09:40:06	0.699962	3.11357	2.5982	1417.04	FALSE	74
2022-09-13	09:40:07	0.705204	3.13689	2.74311	1652.26	FALSE	74
2022-09-13	09:40:07	0.535433	2.38171	2.74311	1419.42	FALSE	74
2022-09-13	09:40:07	0.556959	2.47747	2.74311	1654.74	FALSE	74
2022-09-13	09:40:07	0.669122	2.97639	2.74311	1422.4	FALSE	74
2022-09-13	09:40:08	0.774822	3.44656	2.75908	1658.18	FALSE	74
2022-09-13	09:40:08	0.559606	2.48924	2.75908	1424.89	FALSE	74
2022-09-13	09:40:08	1.05345	4.68596	2.75908	1662.87	FALSE	74
2022-09-13	09:40:08	0.0931936	0.414544	2.75908	1425.3	FALSE	74
2022-09-13	09:40:09	-0.0138293	-0.0615155	3.49557	1662.87	FALSE	74
2022-09-13	09:40:09	0.0947203	0.421335	3.49557	1425.72	FALSE	74
2022-09-13	09:40:09	0.504644	2.24476	3.49557	1665.11	FALSE	74
2022-09-13	09:40:09	2.55782	11.3777	3.49557	1437.1	FALSE	74
2022-09-13	09:40:10	3.93106	17.4861	29.1328	1682.6	1	75
2022-09-13	09:40:10	7.01685	31.2124	29.1328	1468.31	1	76
2022-09-13	09:40:10	8.70016	38.7001	29.1328	1721.3	1	77
2022-09-13	09:40:11	4.188	18.6291	18.7188	1486.94	1	78
2022-09-13	09:40:11	5.82637	25.9169	18.7188	1747.22	1	79
2022-09-13	09:40:11	5.16515	22.9756	18.7188	1509.92	1	80
2022-09-13	09:40:11	1.65314	7.3535	18.7188	1754.57	FALSE	80
2022-09-13	09:40:12	0.9907	4.40683	2.17713	1514.33	FALSE	80
2022-09-13	09:40:12	0.594262	2.6434	2.17713	1757.21	FALSE	80
2022-09-13	09:40:12	0.379402	1.68766	2.17713	1516.01	FALSE	80
2022-09-13	09:40:12	-0.00660282	-0.0293707	2.17713	1757.21	FALSE	80
2022-09-13	09:40:13	0.0558908	0.248613	-0.300847	1516.26	FALSE	80
2022-09-13	09:40:13	-0.130369	-0.579907	-0.300847	1757.21	FALSE	80
2022-09-13	09:40:13	-0.0663992	-0.295357	-0.300847	1516.26	FALSE	80
2022-09-13	09:40:13	-0.129656	-0.576736	-0.300847	1757.21	FALSE	80
2022-09-13	09:40:14	0.138028	0.613976	0.52705	1516.88	FALSE	80
2022-09-13	09:40:14	0.0935498	0.416128	0.52705	1757.63	FALSE	80
2022-09-13	09:40:14	0.167036	0.74301	0.52705	1517.62	FALSE	80
2022-09-13	09:40:14	0.075331	0.335087	0.52705	1757.97	FALSE	80
2022-09-13	09:40:15	0.0695803	0.309507	-0.367192	1517.93	FALSE	80
2022-09-13	09:40:15	0.00805366	0.0358243	-0.367192	1758	FALSE	80
2022-09-13	09:40:15	-0.325279	-1.44691	-0.367192	1517.93	FALSE	80
2022-09-13	09:40:16	-0.326043	-1.4503	-1.12473	1758	FALSE	80
2022-09-13	09:40:16	-0.289453	-1.28754	-1.12473	1517.93	FALSE	80
2022-09-13	09:40:16	-0.263804	-1.17345	-1.12473	1758	FALSE	80
2022-09-13	09:40:16	-0.132099	-0.587603	-1.12473	1517.93	FALSE	80
2022-09-13	09:40:17	0.0872394	0.388058	0.292869	1758.39	FALSE	80
2022-09-13	09:40:17	-0.00258246	-0.0114873	0.292869	1517.93	FALSE	80
2022-09-13	09:40:17	0.194008	0.862986	0.292869	1759.25	FALSE	80
2022-09-13	09:40:17	-0.0153051	-0.0680801	0.292869	1517.93	FALSE	80
2022-09-13	09:40:18	0.537112	2.38918	16.1635	1761.64	FALSE	80
2022-09-13	09:40:18	2.48744	11.0646	16.1635	1528.99	FALSE	80
2022-09-13	09:40:18	5.39126	23.9814	16.1635	1785.62	1	81
2022-09-13	09:40:18	6.11909	27.2189	16.1635	1556.21	1	82
2022-09-13	09:40:19	5.14367	22.8801	14.6304	1808.5	1	83
2022-09-13	09:40:19	4.27467	19.0146	14.6304	1575.23	1	84
2022-09-13	09:40:19	0.448817	1.99643	14.6304	1810.5	FALSE	84
2022-09-13	09:40:20	2.20749	9.81936	7.45125	1585.05	FALSE	84
2022-09-13	09:40:20	0.31869	1.4176	7.45125	1811.92	FALSE	84
2022-09-13	09:40:20	1.31691	5.85788	7.45125	1590.9	FALSE	84
2022-09-13	09:40:20	2.85737	12.7102	7.45125	1824.63	FALSE	84
2022-09-13	09:40:21	0.840522	3.73881	8.75158	1594.64	FALSE	84
2022-09-13	09:40:21	3.54938	15.7884	8.75158	1840.42	1	85
2022-09-13	09:40:21	0.815076	3.62562	8.75158	1598.27	FALSE	85
2022-09-13	09:40:21	2.66479	11.8535	8.75158	1852.27	FALSE	85
2022-09-13	09:40:22	3.35945	14.9435	8.03341	1613.21	1	86
2022-09-13	09:40:22	1.66861	7.42231	8.03341	1859.69	FALSE	86
2022-09-13	09:40:22	1.94648	8.65833	8.03341	1621.87	FALSE	86
2022-09-13	09:40:22	0.249428	1.10951	8.03341	1860.8	FALSE	86
2022-09-13	09:40:23	1.51854	6.75477	7.37462	1628.63	FALSE	86
2022-09-13	09:40:23	2.04795	9.10969	7.37462	1869.91	FALSE	86
2022-09-13	09:40:23	1.02469	4.55803	7.37462	1633.18	FALSE	86
2022-09-13	09:40:23	2.04037	9.07597	7.37462	1878.99	FALSE	86
2022-09-13	09:40:24	0.677926	3.01555	8.85676	1636.2	FALSE	86
2022-09-13	09:40:24	2.16673	9.63805	8.85676	1888.62	FALSE	86
2022-09-13	09:40:24	3.12861	13.9167	8.85676	1650.12	1	87
2022-09-13	09:40:25	0.811769	3.61091	5.12228	1892.24	FALSE	87
2022-09-13	09:40:25	1.99055	8.85436	5.12228	1658.97	FALSE	87
2022-09-13	09:40:25	0.821743	3.65528	5.12228	1895.89	FALSE	87
2022-09-13	09:40:25	0.982099	4.36857	5.12228	1663.34	FALSE	87
2022-09-13	09:40:26	1.86134	8.27961	6.34973	1904.17	FALSE	87
2022-09-13	09:40:26	0.825865	3.67361	6.34973	1667.01	FALSE	87
2022-09-13	09:40:26	2.05681	9.1491	6.34973	1913.32	FALSE	87
2022-09-13	09:40:26	0.965916	4.29659	6.34973	1671.31	FALSE	87
2022-09-13	09:40:27	1.33543	5.94026	6.25277	1919.26	FALSE	87
2022-09-13	09:40:27	2.4049	10.6975	6.25277	1682.01	FALSE	87
2022-09-13	09:40:27	0.852786	3.79336	6.25277	1923.05	FALSE	87
2022-09-13	09:40:27	1.02963	4.58	6.25277	1686.59	FALSE	87
2022-09-13	09:40:28	0.872888	3.88278	4.24694	1926.94	FALSE	87
2022-09-13	09:40:28	1.05645	4.6993	4.24694	1691.29	FALSE	87
2022-09-13	09:40:28	0.934924	4.15873	4.24694	1931.09	FALSE	87
2022-09-13	09:40:29	0.827086	3.67904	6.78593	1694.96	FALSE	87
2022-09-13	09:40:29	1.58642	7.05671	6.78593	1938.15	FALSE	87
2022-09-13	09:40:29	3.1767	14.1306	6.78593	1709.09	1	88
2022-09-13	09:40:29	0.511972	2.27735	6.78593	1940.43	FALSE	88
2022-09-13	09:40:30	0.4364	1.94119	1.86298	1711.04	FALSE	88
2022-09-13	09:40:30	0.655585	2.91617	1.86298	1943.34	FALSE	88
2022-09-13	09:40:30	0.175178	0.779227	1.86298	1711.82	FALSE	88
2022-09-13	09:40:30	0.408104	1.81533	1.86298	1945.16	FALSE	88
2022-09-13	09:40:31	0.493244	2.19405	1.64476	1714.01	FALSE	88
2022-09-13	09:40:31	0.42388	1.8855	1.64476	1947.05	FALSE	88
2022-09-13	09:40:31	0.204949	0.911654	1.64476	1714.92	FALSE	88
2022-09-13	09:40:31	0.356959	1.58783	1.64476	1948.63	FALSE	88
2022-09-13	09:40:32	0.368868	1.6408	2.02461	1716.56	FALSE	88
2022-09-13	09:40:32	0.353244	1.5713	2.02461	1950.2	FALSE	88
2022-09-13	09:40:32	0.520115	2.31358	2.02461	1718.88	FALSE	88
2022-09-13	09:40:32	0.578384	2.57277	2.02461	1952.78	FALSE	88
2022-09-13	09:40:33	0.852837	3.79359	3.71632	1722.67	FALSE	88
2022-09-13	09:40:33	0.979911	4.35884	3.71632	1957.14	FALSE	88
2022-09-13	09:40:33	0.673651	2.99653	3.71632	1725.67	FALSE	88
2022-09-13	09:40:34	0.721591	3.20978	2.82761	1960.35	FALSE	88
2022-09-13	09:40:34	0.786221	3.49727	2.82761	1729.16	FALSE	88
2022-09-13	09:40:34	0.572277	2.5456	2.82761	1962.89	FALSE	88
2022-09-13	09:40:34	0.462608	2.05777	2.82761	1731.22	FALSE	88
2022-09-13	09:40:35	0.512939	2.28166	2.35211	1965.17	FALSE	88
2022-09-13	09:40:35	0.538588	2.39575	2.35211	1733.62	FALSE	88
2022-09-13	09:40:35	0.520674	2.31606	2.35211	1967.49	FALSE	88
2022-09-13	09:40:35	0.542914	2.41499	2.35211	1736.03	FALSE	88
2022-09-13	09:40:36	0.544389	2.42155	2.37667	1969.91	FALSE	88
2022-09-13	09:40:36	0.541794	2.41001	2.37667	1738.44	FALSE	88
2022-09-13	09:40:36	0.537163	2.38941	2.37667	1972.3	FALSE	88
2022-09-13	09:40:36	0.513855	2.28573	2.37667	1740.73	FALSE	88
2022-09-13	09:40:37	0.488359	2.17232	2.14447	1974.47	FALSE	88
2022-09-13	09:40:37	0.476552	2.1198	2.14447	1742.85	FALSE	88
2022-09-13	09:40:37	0.481387	2.14131	2.14447	1976.61	FALSE	88
2022-09-13	09:40:38	0.487494	2.16847	2.13112	1745.02	FALSE	88
2022-09-13	09:40:38	0.464898	2.06796	2.13112	1978.68	FALSE	88
2022-09-13	09:40:38	0.477468	2.12387	2.13112	1747.14	FALSE	88
2022-09-13	09:40:38	0.486527	2.16417	2.13112	1980.85	FALSE	88
2022-09-13	09:40:39	0.485356	2.15896	2.17849	1749.3	FALSE	88
2022-09-13	09:40:39	0.490445	2.1816	2.17849	1983.03	FALSE	88
2022-09-13	09:40:39	0.485916	2.16145	2.17849	1751.46	FALSE	88
2022-09-13	09:40:39	0.497265	2.21193	2.17849	1985.24	FALSE	88
2022-09-13	09:40:40	0.48958	2.17775	2.19343	1753.64	FALSE	88
2022-09-13	09:40:40	0.493499	2.19518	2.19343	1987.43	FALSE	88
2022-09-13	09:40:40	0.497061	2.21103	2.19343	1755.85	FALSE	88
2022-09-13	09:40:40	0.492277	2.18975	2.19343	1989.62	FALSE	88
2022-09-13	09:40:41	0.488206	2.17164	2.19277	1758.02	FALSE	88
2022-09-13	09:40:41	0.494059	2.19767	2.19277	1991.82	FALSE	88
2022-09-13	09:40:41	0.496603	2.20899	2.19277	1760.23	FALSE	88
2022-09-13	09:40:42	0.510343	2.27011	2.32025	1994.09	FALSE	88
2022-09-13	09:40:42	0.510954	2.27283	2.32025	1762.5	FALSE	88
2022-09-13	09:40:42	0.519707	2.31176	2.32025	1996.4	FALSE	88
2022-09-13	09:40:42	0.545458	2.42631	2.32025	1764.93	FALSE	88
2022-09-13	09:40:43	0.478282	2.12749	2.07385	1998.53	FALSE	88
2022-09-13	09:40:43	0.446679	1.98692	2.07385	1766.92	FALSE	88
2022-09-13	09:40:43	0.478588	2.12886	2.07385	2000.66	FALSE	88
2022-09-13	09:40:43	0.461336	2.05211	2.07385	1768.97	FALSE	88
2022-09-13	09:40:44	0.470395	2.09241	2.046	2002.75	FALSE	88
2022-09-13	09:40:44	0.471005	2.09512	2.046	1771.06	FALSE	88
2022-09-13	09:40:44	0.446629	1.9867	2.046	2004.74	FALSE	88
2022-09-13	09:40:44	0.451819	2.00978	2.046	1773.07	FALSE	88
2022-09-13	09:40:45	0.393601	1.75082	2.37781	2006.49	FALSE	88
2022-09-13	09:40:45	0.39869	1.77345	2.37781	1774.85	FALSE	88
2022-09-13	09:40:45	0.617417	2.74639	2.37781	2009.24	FALSE	88
2022-09-13	09:40:45	0.728512	3.24057	2.37781	1778.09	FALSE	88
2022-09-13	09:40:46	0.885458	3.93869	4.95004	2013.18	FALSE	88
2022-09-13	09:40:46	0.926171	4.11979	4.95004	1782.21	FALSE	88
2022-09-13	09:40:46	1.52683	6.79165	4.95004	2019.97	FALSE	88
2022-09-13	09:40:47	0.77874	3.46399	2.52308	1785.67	FALSE	88
2022-09-13	09:40:47	0.587086	2.61148	2.52308	2022.58	FALSE	88
2022-09-13	09:40:47	0.458232	2.03831	2.52308	1787.71	FALSE	88
2022-09-13	09:40:47	0.444796	1.97854	2.52308	2024.56	FALSE	88
2022-09-13	09:40:48	0.486679	2.16485	2.1876	1789.87	FALSE	88
2022-09-13	09:40:48	0.510751	2.27192	2.1876	2026.83	FALSE	88
2022-09-13	09:40:48	0.486679	2.16485	2.1876	1792.04	FALSE	88
2022-09-13	09:40:48	0.483066	2.14877	2.1876	2028.98	FALSE	88
2022-09-13	09:40:49	0.455636	2.02676	1.99971	1794.06	FALSE	88
2022-09-13	09:40:49	0.308969	1.37436	1.99971	2030.35	FALSE	88
2022-09-13	09:40:49	0.604797	2.69026	1.99971	1796.75	FALSE	88
2022-09-13	09:40:49	0.428817	1.90746	1.99971	2032.26	FALSE	88
2022-09-13	09:40:50	0.134517	0.598359	0.758629	1797.35	FALSE	88
2022-09-13	09:40:50	0.103117	0.458685	0.758629	2032.72	FALSE	88
2022-09-13	09:40:50	0.274008	1.21884	0.758629	1798.57	FALSE	88
2022-09-13	09:40:51	0.262456	1.16746	0.939046	2033.89	FALSE	88
2022-09-13	09:40:51	0.127596	0.567573	0.939046	1799.14	FALSE	88
2022-09-13	09:40:51	0.216959	0.965077	0.939046	2034.85	FALSE	88
2022-09-13	09:40:51	0.237417	1.05608	0.939046	1800.2	FALSE	88
2022-09-13	09:40:52	0.305356	1.35828	1.59326	2036.21	FALSE	88
2022-09-13	09:40:52	0.371667	1.65325	1.59326	1801.85	FALSE	88
2022-09-13	09:40:52	0.313855	1.39609	1.59326	2037.61	FALSE	88
2022-09-13	09:40:52	0.441845	1.96541	1.59326	1803.81	FALSE	88
2022-09-13	09:40:53	0.408563	1.81737	1.80339	2039.42	FALSE	88
2022-09-13	09:40:53	0.315789	1.40469	1.80339	1805.22	FALSE	88
2022-09-13	09:40:53	0.438181	1.94912	1.80339	2041.37	FALSE	88
2022-09-13	09:40:53	0.459148	2.04238	1.80339	1807.26	FALSE	88
2022-09-13	09:40:54	0.507035	2.25539	2.08743	2043.63	FALSE	88
2022-09-13	09:40:54	0.446883	1.98782	2.08743	1809.25	FALSE	88
2022-09-13	09:40:54	0.46902	2.08629	2.08743	2045.71	FALSE	88
2022-09-13	09:40:54	0.45416	2.02019	2.08743	1811.27	FALSE	88
2022-09-13	09:40:55	0.463015	2.05958	2.30625	2047.77	FALSE	88
2022-09-13	09:40:55	0.471209	2.09603	2.30625	1813.37	FALSE	88
2022-09-13	09:40:55	0.621183	2.76315	2.30625	2050.54	FALSE	88
2022-09-13	09:40:56	0.900725	4.0066	3.14549	1817.37	FALSE	88
2022-09-13	09:40:56	1.28358	5.70962	3.14549	2056.25	FALSE	88
2022-09-13	09:40:56	0.47243	2.10146	3.14549	1819.47	FALSE	88
2022-09-13	09:40:56	0.171819	0.764285	3.14549	2057.01	FALSE	88
2022-09-13	09:40:57	0.118435	0.526823	0.0937186	1820	FALSE	88
2022-09-13	09:40:57	0.0467814	0.208093	0.0937186	2057.22	FALSE	88
2022-09-13	09:40:57	0.00469491	0.0208839	0.0937186	1820.02	FALSE	88
2022-09-13	09:40:57	-0.0856358	-0.380925	0.0937186	2057.22	FALSE	88
2022-09-13	09:40:58	-0.0272135	-0.121051	-0.430727	1820.02	FALSE	88
2022-09-13	09:40:58	-0.140699	-0.625857	-0.430727	2057.22	FALSE	88
2022-09-13	09:40:58	-0.152608	-0.678831	-0.430727	1820.02	FALSE	88
2022-09-13	09:40:58	-0.0668063	-0.297168	-0.430727	2057.22	FALSE	88
2022-09-13	09:40:59	-0.0584094	-0.259817	-0.683131	1820.02	FALSE	88
2022-09-13	09:40:59	-0.179376	-0.7979	-0.683131	2057.22	FALSE	88
2022-09-13	09:40:59	-0.222939	-0.991677	-0.683131	1820.02	FALSE	88
2022-09-13	09:41:00	-0.0280786	-0.124899	1.68166	2057.22	FALSE	88
2022-09-13	09:41:00	0.0603692	0.268534	1.68166	1820.29	FALSE	88
2022-09-13	09:41:00	0.143728	0.639331	1.68166	2057.86	FALSE	88
2022-09-13	09:41:00	1.3362	5.94368	1.68166	1826.23	FALSE	88
2022-09-13	09:41:01	1.27884	5.68854	16.1046	2063.55	FALSE	88
2022-09-13	09:41:01	4.13767	18.4052	16.1046	1844.64	1	89
2022-09-13	09:41:01	2.04642	9.10289	16.1046	2072.65	FALSE	89
2022-09-13	09:41:01	7.01894	31.2216	16.1046	1875.86	1	90
2022-09-13	09:41:02	3.49848	15.5619	13.5545	2088.21	1	91
2022-09-13	09:41:02	6.05533	26.9353	13.5545	1902.8	1	92
2022-09-13	09:41:02	0.909478	4.04554	13.5545	2092.26	FALSE	92
2022-09-13	09:41:02	1.72546	7.67519	13.5545	1910.47	FALSE	92
2022-09-13	09:41:03	1.18088	5.25279	6.11418	2097.51	FALSE	92
2022-09-13	09:41:03	0.814975	3.62517	6.11418	1914.1	FALSE	92
2022-09-13	09:41:03	2.85329	12.692	6.11418	2110.2	FALSE	92
2022-09-13	09:41:03	0.648969	2.88674	6.11418	1916.98	FALSE	92
2022-09-13	09:41:04	1.26983	5.64846	3.64765	2115.85	FALSE	92
2022-09-13	09:41:04	0.755891	3.36235	3.64765	1920.35	FALSE	92
2022-09-13	09:41:04	0.434364	1.93214	3.64765	2117.78	FALSE	92
2022-09-13	09:41:05	0.65187	2.89965	2.34204	1923.24	FALSE	92
2022-09-13	09:41:05	0.548104	2.43808	2.34204	2120.22	FALSE	92
2022-09-13	09:41:05	0.420064	1.86853	2.34204	1925.11	FALSE	92
2022-09-13	09:41:05	0.486018	2.16191	2.34204	2122.38	FALSE	92
2022-09-13	09:41:06	0.466374	2.07452	2.18318	1927.19	FALSE	92
2022-09-13	09:41:06	0.508461	2.26174	2.18318	2124.64	FALSE	92
2022-09-13	09:41:06	0.406221	1.80695	2.18318	1928.99	FALSE	92
2022-09-13	09:41:06	0.58215	2.58952	2.18318	2127.23	FALSE	92
2022-09-13	09:41:07	0.473143	2.10463	2.19128	1931.1	FALSE	92
2022-09-13	09:41:07	0.526323	2.34119	2.19128	2129.57	FALSE	92
2022-09-13	09:41:07	0.487799	2.16983	2.19128	1933.27	FALSE	92
2022-09-13	09:41:07	0.483219	2.14945	2.19128	2131.72	FALSE	92
2022-09-13	09:41:08	0.522608	2.32466	2.27411	1935.59	FALSE	92
2022-09-13	09:41:08	0.456298	2.0297	2.27411	2133.75	FALSE	92
2022-09-13	09:41:08	0.554822	2.46796	2.27411	1938.06	FALSE	92
2022-09-13	09:41:09	0.528817	2.35228	1.2086	2136.11	FALSE	92
2022-09-13	09:41:09	0.270445	1.20299	1.2086	1939.26	FALSE	92
2022-09-13	09:41:09	0.137061	0.609675	1.2086	2136.72	FALSE	92
2022-09-13	09:41:09	0.150496	0.669436	1.2086	1939.93	FALSE	92
2022-09-13	09:41:10	0.0752292	0.334635	0.498358	2137.05	FALSE	92
2022-09-13	09:41:10	0.0770613	0.342784	0.498358	1940.28	FALSE	92
2022-09-13	09:41:10	0.088817	0.395076	0.498358	2137.44	FALSE	92
2022-09-13	09:41:10	0.207036	0.920938	0.498358	1941.2	FALSE	92
2022-09-13	09:41:11	0.216043	0.961002	2.8898	2138.41	FALSE	92
2022-09-13	09:41:11	0.611209	2.71878	2.8898	1943.92	FALSE	92
2022-09-13	09:41:11	0.840471	3.73858	2.8898	2142.14	FALSE	92
2022-09-13	09:41:11	0.930903	4.14084	2.8898	1948.06	FALSE	92
2022-09-13	09:41:12	0.724796	3.22404	2.42585	2145.37	FALSE	92
2022-09-13	09:41:12	0.521641	2.32036	2.42585	1950.38	FALSE	92
2022-09-13	09:41:12	0.373193	1.66004	2.42585	2147.03	FALSE	92
2022-09-13	09:41:12	0.561794	2.49897	2.42585	1952.88	FALSE	92
2022-09-13	09:41:13	0.324898	1.44521	1.75995	2148.47	FALSE	92
2022-09-13	09:41:13	0.424848	1.88981	1.75995	1954.77	FALSE	92
2022-09-13	09:41:13	0.437214	1.94482	1.75995	2150.42	FALSE	92
2022-09-13	09:41:14	0.617672	2.74753	1.99699	1957.51	FALSE	92
2022-09-13	09:41:14	0.380827	1.69399	1.99699	2152.11	FALSE	92
2022-09-13	09:41:14	0.439656	1.95568	1.99699	1959.47	FALSE	92
2022-09-13	09:41:14	0.357621	1.59077	1.99699	2153.7	FALSE	92
2022-09-13	09:41:15	0.229326	1.02009	2.52478	1960.49	FALSE	92
2022-09-13	09:41:15	0.430903	1.91674	2.52478	2155.62	FALSE	92
2022-09-13	09:41:15	0.947595	4.21509	2.52478	1964.71	FALSE	92
2022-09-13	09:41:15	0.662557	2.94719	2.52478	2158.57	FALSE	92
2022-09-13	09:41:16	0.291463	1.29649	2.43327	1966	FALSE	92
2022-09-13	09:41:16	1.02724	4.56937	2.43327	2163.14	FALSE	92
2022-09-13	09:41:16	0.303422	1.34968	2.43327	1967.35	FALSE	92
2022-09-13	09:41:16	0.565967	2.51753	2.43327	2165.65	FALSE	92
2022-09-13	09:41:17	0.321031	1.42801	1.70607	1968.78	FALSE	92
2022-09-13	09:41:17	0.342405	1.52309	1.70607	2167.18	FALSE	92
2022-09-13	09:41:17	0.487188	2.16711	1.70607	1970.95	FALSE	92
2022-09-13	09:41:18	0.961539	4.27712	2.53627	2171.45	FALSE	92
2022-09-13	09:41:18	0.38841	1.72773	2.53627	1972.67	FALSE	92
2022-09-13	09:41:18	0.307646	1.36847	2.53627	2172.82	FALSE	92
2022-09-13	09:41:18	0.623117	2.77175	2.53627	1975.45	FALSE	92
2022-09-13	09:41:19	0.38159	1.69739	2.36241	2174.52	FALSE	92
2022-09-13	09:41:19	0.531361	2.3636	2.36241	1977.81	FALSE	92
2022-09-13	09:41:19	0.274873	1.22269	2.36241	2175.74	FALSE	92
2022-09-13	09:41:19	0.936552	4.16597	2.36241	1981.98	FALSE	92
2022-09-13	09:41:20	1.41207	6.28117	8.1831	2182.02	FALSE	92
2022-09-13	09:41:20	1.93472	8.60602	8.1831	1990.58	FALSE	92
2022-09-13	09:41:20	2.93253	13.0445	8.1831	2195.07	FALSE	92
2022-09-13	09:41:20	1.07925	4.80072	8.1831	1995.38	FALSE	92
2022-09-13	09:41:21	1.69263	7.52916	6.13087	2202.6	FALSE	92
2022-09-13	09:41:21	0.873855	3.88708	6.13087	1999.27	FALSE	92
2022-09-13	09:41:21	1.40296	6.24065	6.13087	2208.84	FALSE	92
2022-09-13	09:41:21	1.54368	6.8666	6.13087	2006.14	FALSE	92
2022-09-13	09:41:22	0.631158	2.80752	4.8527	2211.65	FALSE	92
2022-09-13	09:41:22	0.96958	4.31289	4.8527	2010.45	FALSE	92
2022-09-13	09:41:22	1.67207	7.4377	4.8527	2219.08	FALSE	92
2022-09-13	09:41:23	0.356959	1.58783	1.68726	2012.04	FALSE	92
2022-09-13	09:41:23	0.361387	1.60752	1.68726	2220.69	FALSE	92
2022-09-13	09:41:23	0.444084	1.97537	1.68726	2014.01	FALSE	92
2022-09-13	09:41:23	0.354822	1.57832	1.68726	2222.27	FALSE	92
2022-09-13	09:41:24	0.35243	1.56768	2.07181	2015.58	FALSE	92
2022-09-13	09:41:24	0.213143	0.948103	2.07181	2223.22	FALSE	92
2022-09-13	09:41:24	0.412685	1.83571	2.07181	2017.42	FALSE	92
2022-09-13	09:41:24	0.884796	3.93575	2.07181	2227.15	FALSE	92
2022-09-13	09:41:25	0.767392	3.41351	5.62075	2020.83	FALSE	92
2022-09-13	09:41:25	1.79182	7.97037	5.62075	2235.12	FALSE	92
2022-09-13	09:41:25	1.86856	8.31173	5.62075	2029.14	FALSE	92
2022-09-13	09:41:25	0.626629	2.78737	5.62075	2237.91	FALSE	92
2022-09-13	09:41:26	1.23172	5.47894	3.72048	2034.62	FALSE	92
2022-09-13	09:41:26	0.898435	3.99642	3.72048	2241.91	FALSE	92
2022-09-13	09:41:26	0.379046	1.68607	3.72048	2036.31	FALSE	92
2022-09-13	09:41:27	0.618435	2.75092	3.4795	2244.66	FALSE	92
2022-09-13	09:41:27	0.513041	2.28211	3.4795	2038.59	FALSE	92
2022-09-13	09:41:27	0.688257	3.0615	3.4795	2247.72	FALSE	92
2022-09-13	09:41:27	1.30917	5.82345	3.4795	2044.41	FALSE	92
2022-09-13	09:41:28	1.73584	7.72136	11.1332	2255.44	FALSE	92
2022-09-13	09:41:28	2.74378	12.2049	11.1332	2056.62	FALSE	92
2022-09-13	09:41:28	3.52647	15.6864	11.1332	2271.13	1	93
2022-09-13	09:41:28	2.00531	8.92002	11.1332	2065.54	FALSE	93
2022-09-13	09:41:29	0.935687	4.16212	2.1606	2275.29	FALSE	93
2022-09-13	09:41:29	0.363372	1.61635	2.1606	2067.15	FALSE	93
2022-09-13	09:41:29	0.410191	1.82461	2.1606	2277.11	FALSE	93
2022-09-13	09:41:29	0.233652	1.03933	2.1606	2068.19	FALSE	93
2022-09-13	09:41:30	0.283422	1.26072	0.394396	2278.38	FALSE	93
2022-09-13	09:41:30	-0.0105723	-0.0470277	0.394396	2068.19	FALSE	93
2022-09-13	09:41:30	0.0674429	0.3	0.394396	2278.68	FALSE	93
2022-09-13	09:41:30	0.0143641	0.0638944	0.394396	2068.26	FALSE	93
2022-09-13	09:41:31	0.179911	0.80028	3.74182	2279.48	FALSE	93
2022-09-13	09:41:31	0.225916	1.00492	3.74182	2069.26	FALSE	93
2022-09-13	09:41:31	2.11777	9.42026	3.74182	2288.9	FALSE	93
2022-09-13	09:41:32	1.76408	7.84698	18.5678	2077.11	FALSE	93
2022-09-13	09:41:32	7.52235	33.4609	18.5678	2322.36	1	94
2022-09-13	09:41:32	1.84042	8.18656	18.5678	2085.29	FALSE	94
2022-09-13	09:41:32	5.57009	24.7769	18.5678	2347.13	1	95
2022-09-13	09:41:33	3.67518	16.3479	18.2176	2101.64	1	96
2022-09-13	09:41:33	2.03284	9.04248	18.2176	2356.18	FALSE	96
2022-09-13	09:41:33	6.84118	30.4309	18.2176	2132.07	1	97
2022-09-13	09:41:33	3.83278	17.049	18.2176	2373.23	1	98
2022-09-13	09:41:34	8.09074	35.9892	19.9672	2168.06	1	99
2022-09-13	09:41:34	6.95533	30.9387	19.9672	2404.16	1	100
2022-09-13	09:41:34	1.92312	8.55442	19.9672	2176.62	FALSE	100
2022-09-13	09:41:34	0.986119	4.38645	19.9672	2408.55	FALSE	100
2022-09-13	09:41:35	0.10668	0.474534	0.459895	2177.09	FALSE	100
2022-09-13	09:41:35	0.274466	1.22088	0.459895	2409.77	FALSE	100
2022-09-13	09:41:35	-0.0709793	-0.31573	0.459895	2177.09	FALSE	100
2022-09-13	09:41:36	-0.172913	-0.769152	-1.61346	2409.77	FALSE	100
2022-09-13	09:41:36	-0.323244	-1.43785	-1.61346	2177.09	FALSE	100
2022-09-13	09:41:36	-0.447061	-1.98862	-1.61346	2409.77	FALSE	100
2022-09-13	09:41:36	-0.507671	-2.25822	-1.61346	2177.09	FALSE	100
2022-09-13	09:41:37	-0.551335	-2.45245	-2.55743	2409.77	FALSE	100
2022-09-13	09:41:37	-0.570114	-2.53598	-2.55743	2177.09	FALSE	100
2022-09-13	09:41:37	-0.624465	-2.77775	-2.55743	2409.77	FALSE	100
2022-09-13	09:41:37	-0.553829	-2.46354	-2.55743	2177.09	FALSE	100
2022-09-13	09:41:38	-0.858002	-3.81656	-3.57237	2409.77	FALSE	100
2022-09-13	09:41:38	-0.757697	-3.37039	-3.57237	2177.09	FALSE	100
2022-09-13	09:41:38	-0.843244	-3.75092	-3.57237	2409.77	FALSE	100
2022-09-13	09:41:38	-0.753473	-3.3516	-3.57237	2177.09	FALSE	100
2022-09-13	09:41:39	-0.555356	-2.47033	-1.48086	2409.77	FALSE	100
2022-09-13	09:41:39	-0.27047	-1.2031	-1.48086	2177.09	FALSE	100
2022-09-13	09:41:39	-0.172913	-0.769152	-1.48086	2409.77	FALSE	100
2022-09-13	09:41:40	-0.0224807	-0.0999986	0.845329	2177.09	FALSE	100
2022-09-13	09:41:40	0.130395	0.580023	0.845329	2410.35	FALSE	100
2022-09-13	09:41:40	0.0477992	0.21262	0.845329	2177.3	FALSE	100
2022-09-13	09:41:40	0.60444	2.68867	0.845329	2413.04	FALSE	100
2022-09-13	09:41:41	0.580827	2.58363	1.57798	2179.89	FALSE	100
2022-09-13	09:41:41	0.319402	1.42076	1.57798	2414.46	FALSE	100
2022-09-13	09:41:41	0.230547	1.02552	1.57798	2180.91	FALSE	100
2022-09-13	09:41:41	0.288206	1.282	1.57798	2415.74	FALSE	100
2022-09-13	09:41:42	0.789987	3.51402	4.38878	2184.43	FALSE	100
2022-09-13	09:41:42	0.400827	1.78296	4.38878	2417.53	FALSE	100
2022-09-13	09:41:42	0.939249	4.17797	4.38878	2188.61	FALSE	100
2022-09-13	09:41:42	1.8165	8.08016	4.38878	2425.61	FALSE	100
2022-09-13	09:41:43	0.174466	0.77606	5.17876	2189.38	FALSE	100
2022-09-13	09:41:43	0.989122	4.39981	5.17876	2430.01	FALSE	100
2022-09-13	09:41:43	0.546069	2.42902	5.17876	2191.81	FALSE	100
2022-09-13	09:41:43	2.94729	13.1101	5.17876	2443.12	FALSE	100
2022-09-13	09:41:44	2.74138	12.1942	11.1049	2204	FALSE	100
2022-09-13	09:41:44	2.32225	10.3298	11.1049	2453.45	FALSE	100
2022-09-13	09:41:44	2.42587	10.7908	11.1049	2214.8	FALSE	100
2022-09-13	09:41:45	0.424898	1.89003	2.89733	2455.34	FALSE	100
2022-09-13	09:41:45	0.787341	3.50225	2.89733	2218.3	FALSE	100
2022-09-13	09:41:45	0.665102	2.95851	2.89733	2458.29	FALSE	100
2022-09-13	09:41:45	0.728054	3.23853	2.89733	2221.54	FALSE	100
2022-09-13	09:41:46	0.415534	1.84838	3.86184	2460.14	FALSE	100
2022-09-13	09:41:46	0.663321	2.95058	3.86184	2224.49	FALSE	100
2022-09-13	09:41:46	0.484339	2.15444	3.86184	2462.3	FALSE	100
2022-09-13	09:41:46	1.90953	8.49397	3.86184	2232.98	FALSE	100
2022-09-13	09:41:47	0.820013	3.64758	23.5175	2465.94	FALSE	100
2022-09-13	09:41:47	6.35263	28.2578	23.5175	2261.24	1	101
2022-09-13	09:41:47	1.94296	8.64267	23.5175	2474.59	FALSE	101
2022-09-13	09:41:47	12.0323	53.5221	23.5175	2314.76	1	102
2022-09-13	09:41:48	2.44871	10.8924	10.893	2485.48	FALSE	102
2022-09-13	09:41:48	3.10647	13.8182	10.893	2328.58	1	103
2022-09-13	09:41:48	1.79141	7.96855	10.893	2493.45	FALSE	103
2022-09-13	09:41:49	1.15915	5.15613	10.644	2333.73	FALSE	103
2022-09-13	09:41:49	4.14286	18.4283	10.644	2511.88	1	104
2022-09-13	09:41:49	1.12454	5.00218	10.644	2338.74	FALSE	104
2022-09-13	09:41:49	3.14495	13.9894	10.644	2525.87	1	105
2022-09-13	09:41:50	5.06144	22.5143	7.22929	2361.25	1	106
2022-09-13	09:41:50	0.49126	2.18522	7.22929	2528.05	FALSE	106
2022-09-13	09:41:50	0.667443	2.96892	7.22929	2364.22	FALSE	106
2022-09-13	09:41:50	0.280725	1.24872	7.22929	2529.3	FALSE	106
2022-09-13	09:41:51	0.329987	1.46785	-0.65144	2365.69	FALSE	106
2022-09-13	09:41:51	0.0300893	0.133843	-0.65144	2529.43	FALSE	106
2022-09-13	09:41:51	-0.383651	-1.70656	-0.65144	2365.69	FALSE	106
2022-09-13	09:41:51	-0.562226	-2.50089	-0.65144	2529.43	FALSE	106
2022-09-13	09:41:52	-0.459223	-2.04272	-2.37831	2365.69	FALSE	106
2022-09-13	09:41:52	-0.595101	-2.64713	-2.37831	2529.43	FALSE	106
2022-09-13	09:41:52	-0.52874	-2.35194	-2.37831	2365.69	FALSE	106
2022-09-13	09:41:52	-0.55561	-2.47146	-2.37831	2529.43	FALSE	106
2022-09-13	09:41:53	-0.0522007	-0.232199	0.436728	2365.69	FALSE	106
2022-09-13	09:41:53	0.157265	0.699546	0.436728	2530.13	FALSE	106
2022-09-13	09:41:53	0.189478	0.842836	0.436728	2366.53	FALSE	106
2022-09-13	09:41:54	0.179402	0.798016	0.742046	2530.93	FALSE	106
2022-09-13	09:41:54	0.157672	0.701357	0.742046	2367.23	FALSE	106
2022-09-13	09:41:54	0.166985	0.742783	0.742046	2531.67	FALSE	106
2022-09-13	09:41:54	0.163219	0.726031	0.742046	2367.96	FALSE	106
2022-09-13	09:41:55	0.233092	1.03684	12.1235	2532.71	FALSE	106
2022-09-13	09:41:55	1.76505	7.8513	12.1235	2375.81	FALSE	106
2022-09-13	09:41:55	4.12424	18.3454	12.1235	2551.06	1	107
2022-09-13	09:41:55	4.77955	21.2604	12.1235	2397.07	1	108
2022-09-13	09:41:56	5.27543	23.4662	22.8043	2574.52	1	109
2022-09-13	09:41:56	3.15182	14.0199	22.8043	2411.09	1	110
2022-09-13	09:41:56	5.03334	22.3893	22.8043	2596.91	1	111
2022-09-13	09:41:56	7.04591	31.3416	22.8043	2442.43	1	112
2022-09-13	09:41:57	9.14326	40.671	30.2591	2637.58	1	113
2022-09-13	09:41:57	6.19263	27.5461	30.2591	2469.98	1	114
2022-09-13	09:41:57	5.07177	22.5602	30.2591	2660.14	1	115
2022-09-13	09:41:58	2.11192	9.39424	6.19086	2479.37	FALSE	115
2022-09-13	09:41:58	2.0249	9.00716	6.19086	2669.15	FALSE	115
2022-09-13	09:41:58	0.745407	3.31572	6.19086	2482.69	FALSE	115
2022-09-13	09:41:58	0.684847	3.04634	6.19086	2672.2	FALSE	115
2022-09-13	09:41:59	0.511616	2.27577	0.93718	2484.96	FALSE	115
2022-09-13	09:41:59	0.299199	1.3309	0.93718	2673.53	FALSE	115
2022-09-13	09:41:59	0.137774	0.612846	0.93718	2485.58	FALSE	115
2022-09-13	09:41:59	-0.105839	-0.470793	0.93718	2673.53	FALSE	115
2022-09-13	09:42:00	-0.0842109	-0.374587	-0.0345205	2485.58	FALSE	115
2022-09-13	09:42:00	0.025102	0.111659	-0.0345205	2673.64	FALSE	115
2022-09-13	09:42:00	-0.00370202	-0.0164673	-0.0345205	2485.58	FALSE	115
2022-09-13	09:42:00	0.0317687	0.141314	-0.0345205	2673.78	FALSE	115
2022-09-13	09:42:01	0.0615905	0.273967	-0.545893	2485.85	FALSE	115
2022-09-13	09:42:01	-0.039529	-0.175833	-0.545893	2673.78	FALSE	115
2022-09-13	09:42:01	-0.230928	-1.02721	-0.545893	2485.85	FALSE	115
2022-09-13	09:42:01	-0.282022	-1.25449	-0.545893	2673.78	FALSE	115
2022-09-13	09:42:02	-0.395508	-1.7593	-0.481509	2485.85	FALSE	115
2022-09-13	09:42:02	-0.0201397	-0.0895854	-0.481509	2673.78	FALSE	115
2022-09-13	09:42:02	0.0909035	0.404357	-0.481509	2486.25	FALSE	115
2022-09-13	09:42:03	1.75279	7.79676	11.0697	2681.58	FALSE	115
2022-09-13	09:42:03	2.43726	10.8414	11.0697	2497.1	FALSE	115
2022-09-13	09:42:03	3.42215	15.2224	11.0697	2696.8	1	116
2022-09-13	09:42:03	2.34215	10.4184	11.0697	2507.51	FALSE	116
2022-09-13	09:42:04	5.1309	22.8233	14.5219	2719.62	1	117
2022-09-13	09:42:04	1.51385	6.73391	14.5219	2514.25	FALSE	117
2022-09-13	09:42:04	4.12927	18.3678	14.5219	2737.99	1	118
2022-09-13	09:42:04	2.28469	10.1628	14.5219	2524.41	FALSE	118
2022-09-13	09:42:05	2.41925	10.7613	4.42851	2748.75	FALSE	118
2022-09-13	09:42:05	0.644695	2.86773	4.42851	2527.28	FALSE	118
2022-09-13	09:42:05	0.530649	2.36043	4.42851	2751.11	FALSE	118
2022-09-13	09:42:05	0.387697	1.72455	4.42851	2529	FALSE	118
2022-09-13	09:42:06	0.416705	1.85359	1.74214	2752.97	FALSE	118
2022-09-13	09:42:06	0.353601	1.57289	1.74214	2530.58	FALSE	118
2022-09-13	09:42:06	0.404644	1.79994	1.74214	2754.77	FALSE	118
2022-09-13	09:42:07	0.380522	1.69264	1.83168	2532.27	FALSE	118
2022-09-13	09:42:07	0.41416	1.84227	1.83168	2756.61	FALSE	118
2022-09-13	09:42:07	0.461132	2.05121	1.83168	2534.32	FALSE	118
2022-09-13	09:42:07	0.39131	1.74063	1.83168	2758.35	FALSE	118
2022-09-13	09:42:08	0.373702	1.6623	4.09749	2535.98	FALSE	118
2022-09-13	09:42:08	0.369733	1.64465	4.09749	2759.99	FALSE	118
2022-09-13	09:42:08	0.778384	3.46241	4.09749	2539.44	FALSE	118
2022-09-13	09:42:08	2.16281	9.62061	4.09749	2769.61	FALSE	118
2022-09-13	09:42:09	0.646374	2.8752	26.5073	2542.32	FALSE	118
2022-09-13	09:42:09	7.08871	31.532	26.5073	2801.15	1	119
2022-09-13	09:42:09	3.13014	13.9235	26.5073	2556.24	1	120
2022-09-13	09:42:09	12.9712	57.6985	26.5073	2858.84	1	121
2022-09-13	09:42:10	1.43777	6.39549	13.2613	2562.64	FALSE	121
2022-09-13	09:42:10	6.08545	27.0693	13.2613	2885.91	1	122
2022-09-13	09:42:10	1.90179	8.45954	13.2613	2571.1	FALSE	122
2022-09-13	09:42:10	2.50011	11.121	13.2613	2897.03	FALSE	122
2022-09-13	09:42:11	2.10698	9.37227	10.8663	2580.47	FALSE	122
2022-09-13	09:42:11	2.64515	11.7662	10.8663	2908.8	FALSE	122
2022-09-13	09:42:11	2.57645	11.4606	10.8663	2591.93	FALSE	122
2022-09-13	09:42:12	1.00449	4.46817	3.41062	2913.27	FALSE	122
2022-09-13	09:42:12	0.758944	3.37593	3.41062	2595.31	FALSE	122
2022-09-13	09:42:12	0.777366	3.45788	3.41062	2916.73	FALSE	122
2022-09-13	09:42:12	0.52617	2.34051	3.41062	2597.65	FALSE	122
2022-09-13	09:42:13	0.466272	2.07407	2.17186	2918.8	FALSE	122
2022-09-13	09:42:13	0.49874	2.2185	2.17186	2599.87	FALSE	122
2022-09-13	09:42:13	0.378333	1.6829	2.17186	2920.48	FALSE	122
2022-09-13	09:42:13	0.609682	2.71199	2.17186	2602.58	FALSE	122
2022-09-13	09:42:14	0.737315	3.27972	2.54232	2923.76	FALSE	122
2022-09-13	09:42:14	0.385254	1.71369	2.54232	2604.29	FALSE	122
2022-09-13	09:42:14	0.489529	2.17752	2.54232	2925.94	FALSE	122
2022-09-13	09:42:14	0.674058	2.99834	2.54232	2607.29	FALSE	122
2022-09-13	09:42:15	0.447748	1.99167	2.17284	2927.93	FALSE	122
2022-09-13	09:42:15	0.543015	2.41544	2.17284	2609.71	FALSE	122
2022-09-13	09:42:15	0.474669	2.11142	2.17284	2930.04	FALSE	122
2022-09-13	09:42:16	0.610751	2.71674	2.42048	2612.42	FALSE	122
2022-09-13	09:42:16	0.42327	1.88279	2.42048	2931.93	FALSE	122
2022-09-13	09:42:16	0.614465	2.73326	2.42048	2615.16	FALSE	122
2022-09-13	09:42:16	0.528104	2.34911	2.42048	2934.28	FALSE	122
2022-09-13	09:42:17	0.421387	1.87441	3.04555	2617.03	FALSE	122
2022-09-13	09:42:17	0.890547	3.96133	3.04555	2938.24	FALSE	122
2022-09-13	09:42:17	0.546628	2.43151	3.04555	2619.46	FALSE	122
2022-09-13	09:42:17	0.880115	3.91493	3.04555	2942.15	FALSE	122
2022-09-13	09:42:18	0.750598	3.33881	3.06071	2622.8	FALSE	122
2022-09-13	09:42:18	0.898741	3.99778	3.06071	2946.15	FALSE	122
2022-09-13	09:42:18	0.533855	2.37469	3.06071	2625.17	FALSE	122
2022-09-13	09:42:18	0.569122	2.53157	3.06071	2948.68	FALSE	122
2022-09-13	09:42:19	0.438893	1.95228	2.30191	2627.13	FALSE	122
2022-09-13	09:42:19	0.577519	2.56892	2.30191	2951.25	FALSE	122
2022-09-13	09:42:19	0.632888	2.81521	2.30191	2629.94	FALSE	122
2022-09-13	09:42:19	0.420674	1.87124	2.30191	2953.12	FALSE	122
2022-09-13	09:42:20	0.615382	2.73734	2.51104	2632.68	FALSE	122
2022-09-13	09:42:20	0.455127	2.0245	2.51104	2955.15	FALSE	122
2022-09-13	09:42:20	0.623015	2.7713	2.51104	2635.45	FALSE	122
2022-09-13	09:42:21	0.376196	1.6734	3.68154	2956.82	FALSE	122
2022-09-13	09:42:21	1.10286	4.90574	3.68154	2640.36	FALSE	122
2022-09-13	09:42:21	0.62154	2.76473	3.68154	2959.58	FALSE	122
2022-09-13	09:42:21	1.20999	5.38228	3.68154	2645.74	FALSE	122
2022-09-13	09:42:22	0.879657	3.91289	6.46546	2963.5	FALSE	122
2022-09-13	09:42:22	0.943931	4.19879	6.46546	2649.94	FALSE	122
2022-09-13	09:42:22	3.14541	13.9914	6.46546	2977.49	1	123
2022-09-13	09:42:22	0.845	3.75873	6.46546	2653.7	FALSE	123
2022-09-13	09:42:23	1.82001	8.09577	7.77762	2985.58	FALSE	123
2022-09-13	09:42:23	2.36475	10.5189	7.77762	2664.22	FALSE	123
2022-09-13	09:42:23	1.12785	5.0169	7.77762	2990.6	FALSE	123
2022-09-13	09:42:23	1.68134	7.47894	7.77762	2671.69	FALSE	123
2022-09-13	09:42:24	1.08566	4.82923	8.92898	2995.43	FALSE	123
2022-09-13	09:42:24	2.29655	10.2155	8.92898	2681.91	FALSE	123
2022-09-13	09:42:24	2.63976	11.7422	8.92898	3007.17	FALSE	123
2022-09-13	09:42:25	1.61197	7.17036	10.6527	2689.08	FALSE	123
2022-09-13	09:42:25	3.19788	14.2248	10.6527	3021.4	1	124
2022-09-13	09:42:25	4.26368	18.9657	10.6527	2708.05	1	125
2022-09-13	09:42:25	0.505814	2.24996	10.6527	3023.65	FALSE	125
2022-09-13	09:42:26	1.11808	4.97344	3.06954	2713.02	FALSE	125
2022-09-13	09:42:26	0.745407	3.31572	3.06954	3026.96	FALSE	125
2022-09-13	09:42:26	0.329479	1.46559	3.06954	2714.48	FALSE	125
2022-09-13	09:42:26	0.56729	2.52342	3.06954	3029.49	FALSE	125
2022-09-13	09:42:27	0.405356	1.8031	2.10061	2716.29	FALSE	125
2022-09-13	09:42:27	0.567086	2.52251	2.10061	3032.01	FALSE	125
2022-09-13	09:42:27	0.434618	1.93327	2.10061	2718.22	FALSE	125
2022-09-13	09:42:27	0.481896	2.14357	2.10061	3034.15	FALSE	125
2022-09-13	09:42:28	0.532634	2.36926	2.17752	2720.59	FALSE	125
2022-09-13	09:42:28	0.493193	2.19382	2.17752	3036.35	FALSE	125
2022-09-13	09:42:28	0.442761	1.96949	2.17752	2722.56	FALSE	125
2022-09-13	09:42:29	0.430395	1.91448	2.08624	3038.26	FALSE	125
2022-09-13	09:42:29	0.514059	2.28664	2.08624	2724.85	FALSE	125
2022-09-13	09:42:29	0.482914	2.1481	2.08624	3040.41	FALSE	125
2022-09-13	09:42:29	0.448664	1.99575	2.08624	2726.84	FALSE	125
2022-09-13	09:42:30	0.470598	2.09331	2.5387	3042.5	FALSE	125
2022-09-13	09:42:30	0.503371	2.23909	2.5387	2729.08	FALSE	125
2022-09-13	09:42:30	0.437468	1.94595	2.5387	3044.45	FALSE	125
2022-09-13	09:42:30	0.871463	3.87644	2.5387	2732.96	FALSE	125
2022-09-13	09:42:31	1.6505	7.34175	6.47451	3051.79	FALSE	125
2022-09-13	09:42:31	0.940674	4.18431	6.47451	2737.14	FALSE	125
2022-09-13	09:42:31	2.55197	11.3517	6.47451	3063.14	FALSE	125
2022-09-13	09:42:31	0.678995	3.02031	6.47451	2740.16	FALSE	125
2022-09-13	09:42:32	0.97243	4.32556	3.93021	3067.47	FALSE	125
2022-09-13	09:42:32	0.965713	4.29568	3.93021	2744.46	FALSE	125
2022-09-13	09:42:32	0.410598	1.82642	3.93021	3069.29	FALSE	125
2022-09-13	09:42:32	1.18546	5.27316	3.93021	2749.73	FALSE	125
2022-09-13	09:42:33	1.44184	6.41359	17.7934	3075.71	FALSE	125
2022-09-13	09:42:33	5.15848	22.946	17.7934	2772.68	1	126
2022-09-13	09:42:33	5.40006	24.0205	17.7934	3099.73	1	127
2022-09-13	09:42:34	3.6105	16.0602	7.26172	2788.74	1	128
2022-09-13	09:42:34	1.24322	5.53009	7.26172	3105.26	FALSE	128
2022-09-13	09:42:34	0.931412	4.14311	7.26172	2792.88	FALSE	128
2022-09-13	09:42:34	0.744898	3.31346	7.26172	3108.57	FALSE	128
2022-09-13	09:42:35	0.334262	1.48686	2.06621	2794.37	FALSE	128
2022-09-13	09:42:35	0.538384	2.39484	2.06621	3110.97	FALSE	128
2022-09-13	09:42:35	0.485356	2.15896	2.06621	2796.53	FALSE	128
2022-09-13	09:42:35	0.500013	2.22416	2.06621	3113.19	FALSE	128
2022-09-13	09:42:36	0.498893	2.21918	1.97945	2798.75	FALSE	128
2022-09-13	09:42:36	0.526578	2.34232	1.97945	3115.53	FALSE	128
2022-09-13	09:42:36	0.430649	1.91561	1.97945	2800.66	FALSE	128
2022-09-13	09:42:36	0.323881	1.44069	1.97945	3116.97	FALSE	128
2022-09-13	09:42:37	0.478384	2.12795	1.75957	2802.79	FALSE	128
2022-09-13	09:42:37	0.383066	1.70395	1.75957	3118.68	FALSE	128
2022-09-13	09:42:37	0.325255	1.4468	1.75957	2804.24	FALSE	128
2022-09-13	09:42:38	0.475942	2.11709	1.84448	3120.79	FALSE	128
2022-09-13	09:42:38	0.31584	1.40492	1.84448	2805.64	FALSE	128
2022-09-13	09:42:38	0.495229	2.20288	1.84448	3123	FALSE	128
2022-09-13	09:42:38	0.371616	1.65302	1.84448	2807.29	FALSE	128
2022-09-13	09:42:39	1.16032	5.16134	7.1551	3128.16	FALSE	128
2022-09-13	09:42:39	0.566272	2.51889	7.1551	2809.81	FALSE	128
2022-09-13	09:42:39	2.68566	11.9464	7.1551	3140.11	FALSE	128
2022-09-13	09:42:39	2.0219	8.99382	7.1551	2818.81	FALSE	128
2022-09-13	09:42:40	2.57584	11.4579	6.27094	3151.56	FALSE	128
2022-09-13	09:42:40	0.950954	4.23003	6.27094	2823.04	FALSE	128
2022-09-13	09:42:40	1.12052	4.9843	6.27094	3156.55	FALSE	128
2022-09-13	09:42:40	0.991768	4.41158	6.27094	2827.45	FALSE	128
2022-09-13	09:42:41	0.380674	1.69331	2.74475	3158.24	FALSE	128
2022-09-13	09:42:41	0.783117	3.48346	2.74475	2830.93	FALSE	128
2022-09-13	09:42:41	0.84958	3.7791	2.74475	3162.02	FALSE	128
2022-09-13	09:42:41	0.454822	2.02314	2.74475	2832.95	FALSE	128
2022-09-13	09:42:42	0.761997	3.38952	2.57714	3165.41	FALSE	128
2022-09-13	09:42:42	0.555992	2.47316	2.57714	2835.43	FALSE	128
2022-09-13	09:42:42	0.420115	1.86876	2.57714	3167.28	FALSE	128
2022-09-13	09:42:43	0.991616	4.41091	2.8323	2839.84	FALSE	128
2022-09-13	09:42:43	0.391209	1.74018	2.8323	3169.02	FALSE	128
2022-09-13	09:42:43	0.370903	1.64985	2.8323	2841.49	FALSE	128
2022-09-13	09:42:43	0.793193	3.52828	2.8323	3172.55	FALSE	128
2022-09-13	09:42:44	0.233499	1.03865	1.85276	2842.53	FALSE	128
2022-09-13	09:42:44	0.632837	2.81499	1.85276	3175.36	FALSE	128
2022-09-13	09:42:44	0.383219	1.70463	1.85276	2844.23	FALSE	128
2022-09-13	09:42:45	0.551463	2.45302	4.67929	3177.81	FALSE	128
2022-09-13	09:42:45	1.46337	6.50936	4.67929	2850.74	FALSE	128
2022-09-13	09:42:45	0.470038	2.09082	4.67929	3179.91	FALSE	128
2022-09-13	09:42:45	0.700624	3.11652	4.67929	2853.86	FALSE	128
2022-09-13	09:42:45	2.07426	9.22672	4.67929	3189.13	FALSE	128
2022-09-13	09:42:46	0.991463	4.41023	5.91438	2858.27	FALSE	128
2022-09-13	09:42:46	2.00973	8.93968	5.91438	3198.07	FALSE	128
2022-09-13	09:42:46	0.987646	4.39325	5.91438	2862.66	FALSE	128
2022-09-13	09:42:47	3.01309	13.4028	10.0923	3211.47	1	129
2022-09-13	09:42:47	3.2336	14.3837	10.0923	2877.05	1	130
2022-09-13	09:42:47	1.63701	7.28175	10.0923	3218.76	FALSE	130
2022-09-13	09:42:47	1.19172	5.30101	10.0923	2882.35	FALSE	130
2022-09-13	09:42:48	1.07726	4.79187	3.15414	3223.55	FALSE	130
2022-09-13	09:42:48	0.394313	1.75398	3.15414	2884.1	FALSE	130
2022-09-13	09:42:48	0.447901	1.99235	3.15414	3225.54	FALSE	130
2022-09-13	09:42:48	0.916857	4.07836	3.15414	2888.18	FALSE	130
2022-09-13	09:42:49	0.52444	2.33281	2.19914	3227.87	FALSE	130
2022-09-13	09:42:49	0.539809	2.40118	2.19914	2890.58	FALSE	130
2022-09-13	09:42:49	0.38327	1.70486	2.19914	3229.58	FALSE	130
2022-09-13	09:42:49	0.530038	2.35772	2.19914	2892.94	FALSE	130
2022-09-13	09:42:50	0.395636	1.75987	3.57803	3231.34	FALSE	130
2022-09-13	09:42:50	0.497672	2.21374	3.57803	2895.15	FALSE	130
2022-09-13	09:42:50	1.95401	8.69183	3.57803	3240.03	FALSE	130
2022-09-13	09:42:50	0.370191	1.64668	3.57803	2896.8	FALSE	130
2022-09-13	09:42:51	0.218232	0.97074	1.88271	3241	FALSE	130
2022-09-13	09:42:51	0.67701	3.01148	1.88271	2899.81	FALSE	130
2022-09-13	09:42:51	0.374517	1.66593	1.88271	3242.67	FALSE	130
2022-09-13	09:42:52	0.37299	1.65913	2.1121	2901.47	FALSE	130
2022-09-13	09:42:52	0.473295	2.10531	2.1121	3244.77	FALSE	130
2022-09-13	09:42:52	0.582761	2.59224	2.1121	2904.06	FALSE	130
2022-09-13	09:42:52	0.470242	2.09173	2.1121	3246.86	FALSE	130
2022-09-13	09:42:53	0.410598	1.82642	1.43984	2905.89	FALSE	130
2022-09-13	09:42:53	0.422761	1.88053	1.43984	3248.74	FALSE	130
2022-09-13	09:42:53	0.254975	1.13418	1.43984	2907.02	FALSE	130
2022-09-13	09:42:53	0.206425	0.91822	1.43984	3249.66	FALSE	130
2022-09-13	09:42:54	-0.0142364	-0.0633264	-0.165929	2907.02	FALSE	130
2022-09-13	09:42:54	0.0416415	0.18523	-0.165929	3249.85	FALSE	130
2022-09-13	09:42:54	0.0403692	0.17957	-0.165929	2907.2	FALSE	130
2022-09-13	09:42:54	-0.216984	-0.965188	-0.165929	3249.85	FALSE	130
2022-09-13	09:42:55	-0.257188	-1.14402	-0.885131	2907.2	FALSE	130
2022-09-13	09:42:55	-0.280547	-1.24793	-0.885131	3249.85	FALSE	130
2022-09-13	09:42:55	-0.0592237	-0.263439	-0.885131	2907.2	FALSE	130
2022-09-13	09:42:56	-0.154491	-0.687207	2.22931	3249.85	FALSE	130
2022-09-13	09:42:56	0.134313	0.597451	2.22931	2907.8	FALSE	130
2022-09-13	09:42:56	0.377621	1.67973	2.22931	3251.53	FALSE	130
2022-09-13	09:42:56	1.64724	7.32725	2.22931	2915.13	FALSE	130
2022-09-13	09:42:57	3.81268	16.9596	14.0451	3268.49	1	131
2022-09-13	09:42:57	2.09553	9.32134	14.0451	2924.45	FALSE	131
2022-09-13	09:42:57	5.83538	25.9569	14.0451	3294.44	1	132
2022-09-13	09:42:57	0.886323	3.94254	14.0451	2928.39	FALSE	132
2022-09-13	09:42:58	3.1939	14.2071	7.22781	3308.65	1	133
2022-09-13	09:42:58	1.67788	7.46355	7.22781	2935.85	FALSE	133
2022-09-13	09:42:58	0.722404	3.2134	7.22781	3311.86	FALSE	133
2022-09-13	09:42:58	0.905356	4.0272	7.22781	2939.88	FALSE	133
2022-09-13	09:42:59	0.61869	2.75206	3.38284	3314.62	FALSE	133
2022-09-13	09:42:59	0.872837	3.88255	3.38284	2943.76	FALSE	133
2022-09-13	09:42:59	0.943982	4.19902	3.38284	3318.82	FALSE	133
2022-09-13	09:42:59	0.606476	2.69773	3.38284	2946.46	FALSE	133
2022-09-13	09:43:00	0.958893	4.26535	4.59955	3323.08	FALSE	133
2022-09-13	09:43:00	1.57823	7.02028	4.59955	2953.48	FALSE	133
2022-09-13	09:43:00	0.564949	2.51301	4.59955	3325.59	FALSE	133
2022-09-13	09:43:01	1.12123	4.98746	3.85776	2958.47	FALSE	133
2022-09-13	09:43:01	0.727087	3.23423	3.85776	3328.83	FALSE	133
2022-09-13	09:43:01	0.500979	2.22845	3.85776	2960.7	FALSE	133
2022-09-13	09:43:01	1.11976	4.98092	3.85776	3333.81	FALSE	133
2022-09-13	09:43:02	0.643015	2.86026	4.59478	2963.56	FALSE	133
2022-09-13	09:43:02	1.89391	8.42449	4.59478	3342.23	FALSE	133
2022-09-13	09:43:02	0.827494	3.68086	4.59478	2967.24	FALSE	133
2022-09-13	09:43:02	0.767392	3.41351	4.59478	3345.65	FALSE	133
2022-09-13	09:43:03	2.12734	9.46283	6.24353	2976.7	FALSE	133
2022-09-13	09:43:03	0.624287	2.77695	6.24353	3348.42	FALSE	133
2022-09-13	09:43:03	1.4592	6.49081	6.24353	2983.19	FALSE	133
2022-09-13	09:43:04	0.676806	3.01057	5.38068	3351.43	FALSE	133
2022-09-13	09:43:04	1.40709	6.25902	5.38068	2989.45	FALSE	133
2022-09-13	09:43:04	2.15314	9.5776	5.38068	3361.01	FALSE	133
2022-09-13	09:43:04	0.601488	2.67554	5.38068	2992.13	FALSE	133
2022-09-13	09:43:05	2.99212	13.3095	10.8276	3374.32	FALSE	133
2022-09-13	09:43:05	1.61574	7.18713	10.8276	2999.31	FALSE	133
2022-09-13	09:43:05	2.84062	12.6356	10.8276	3386.96	FALSE	133
2022-09-13	09:43:05	2.2881	10.1779	10.8276	3009.49	FALSE	133
2022-09-13	09:43:06	0.998588	4.44192	5.35809	3391.4	FALSE	133
2022-09-13	09:43:06	0.989326	4.40072	5.35809	3013.89	FALSE	133
2022-09-13	09:43:06	1.55492	6.9166	5.35809	3398.32	FALSE	133
2022-09-13	09:43:06	1.27538	5.67315	5.35809	3019.56	FALSE	133

## Sheet: Saint_harness_202291393758  (2)
Date	Time	Lbs	Newtons	Total force x time	total steps > 13.345		**GoPro Fitting: 927
2022-09-13	09:38:06	0.471311	2.09649	2.09649	FALSE	0			Total force	3019.56
2022-09-13	09:38:06	0.517519	2.30203	2.30203	FALSE	0			Total Steps	133
2022-09-13	09:38:06	0.481031	2.13972	4.23621	FALSE	0
2022-09-13	09:38:06	0.426069	1.89524	4.19727	FALSE	0
2022-09-13	09:38:07	0.475992	2.11731	6.35352	FALSE	0
2022-09-13	09:38:07	0.43869	1.95138	6.14865	FALSE	0
2022-09-13	09:38:07	0.58556	2.60469	8.9582	FALSE	0
2022-09-13	09:38:07	0.378486	1.68358	7.83223	FALSE	0
2022-09-13	09:38:08	0.484491	2.15511	11.1133	FALSE	0
2022-09-13	09:38:08	0.428104	1.90429	9.73652	FALSE	0
2022-09-13	09:38:08	0.225356	1.00243	12.1157	FALSE	0
2022-09-13	09:38:08	0.746119	3.31889	13.0554	FALSE	0
2022-09-13	09:38:09	0.410191	1.82461	13.9404	FALSE	0
2022-09-13	09:38:09	0.324847	1.44498	14.5004	FALSE	0
2022-09-13	09:38:09	0.480318	2.13655	16.0769	FALSE	0
2022-09-13	09:38:10	0.371718	1.65348	16.1539	FALSE	0
2022-09-13	09:38:10	0.295178	1.31301	17.3899	FALSE	0
2022-09-13	09:38:10	0.248155	1.10384	17.2577	FALSE	0
2022-09-13	09:38:10	0.367341	1.63401	19.0239	FALSE	0
2022-09-13	09:38:11	0.126731	0.563725	17.8214	FALSE	0
2022-09-13	09:38:11	0.0968577	0.430842	19.4548	FALSE	0
2022-09-13	09:38:11	0.133397	0.593377	18.4148	FALSE	0
2022-09-13	09:38:11	0.152888	0.680076	20.1348	FALSE	0
2022-09-13	09:38:12	0.531616	2.36473	20.7795	FALSE	0
2022-09-13	09:38:12	6.2767	27.92	48.0549	1	1
2022-09-13	09:38:12	21.8009	96.9748	117.754	1	2
2022-09-13	09:38:12	15.2512	67.8404	115.895	1	3
2022-09-13	09:38:13	4.24668	18.8901	136.644	1	4
2022-09-13	09:38:13	5.73451	25.5082	141.403	1	5
2022-09-13	09:38:13	12.4908	55.5616	192.206	1	6
2022-09-13	09:38:13	7.17686	31.9241	173.328	1	7
2022-09-13	09:38:14	3.98393	17.7213	209.927	1	8
2022-09-13	09:38:14	1.0509	4.67461	178.002	FALSE	8
2022-09-13	09:38:14	0.439606	1.95546	211.883	FALSE	8
2022-09-13	09:38:15	0.740725	3.29489	181.297	FALSE	8
2022-09-13	09:38:15	0.179504	0.79847	212.681	FALSE	8
2022-09-13	09:38:15	0.287341	1.27815	182.575	FALSE	8
2022-09-13	09:38:15	0.566476	2.5198	215.201	FALSE	8
2022-09-13	09:38:16	0.300318	1.33587	183.911	FALSE	8
2022-09-13	09:38:16	0.499046	2.21986	217.421	FALSE	8
2022-09-13	09:38:16	0.522913	2.32602	186.237	FALSE	8
2022-09-13	09:38:16	0.759911	3.38024	220.801	FALSE	8
2022-09-13	09:38:17	2.64551	11.7678	198.005	FALSE	8
2022-09-13	09:38:17	4.45166	19.8019	240.603	1	9
2022-09-13	09:38:17	2.85009	12.6778	210.683	FALSE	9
2022-09-13	09:38:17	3.6106	16.0607	256.664	1	10
2022-09-13	09:38:18	0.501539	2.23095	212.914	FALSE	10
2022-09-13	09:38:18	0.475331	2.11437	258.778	FALSE	10
2022-09-13	09:38:18	0.634211	2.8211	215.735	FALSE	10
2022-09-13	09:38:19	0.326323	1.45155	260.23	FALSE	10
2022-09-13	09:38:19	0.558741	2.48539	218.22	FALSE	10
2022-09-13	09:38:19	0.362201	1.61114	261.841	FALSE	10
2022-09-13	09:38:19	0.733651	3.26343	221.484	FALSE	10
2022-09-13	09:38:20	0.0533972	0.237521	262.078	FALSE	10
2022-09-13	09:38:20	-0.305229	-1.35772	221.484	FALSE	10
2022-09-13	09:38:20	0.0119723	0.0532552	262.131	FALSE	10
2022-09-13	09:38:20	6.75472	30.0463	251.53	1	11
2022-09-13	09:38:21	4.3621	19.4035	281.535	1	12
2022-09-13	09:38:21	3.40698	15.1549	266.685	1	13
2022-09-13	09:38:21	2.19513	9.76438	291.299	FALSE	13
2022-09-13	09:38:21	1.70388	7.5792	274.264	FALSE	13
2022-09-13	09:38:22	1.91299	8.50936	299.809	FALSE	13
2022-09-13	09:38:22	1.31981	5.87078	280.135	FALSE	13
2022-09-13	09:38:22	3.33395	14.8301	314.639	1	14
2022-09-13	09:38:22	5.91502	26.3112	306.446	1	15
2022-09-13	09:38:23	8.10851	36.0683	350.707	1	16
2022-09-13	09:38:23	1.94266	8.64134	315.087	FALSE	16
2022-09-13	09:38:23	0.197672	0.879285	351.586	FALSE	16
2022-09-13	09:38:24	0.0380282	0.169157	315.256	FALSE	16
2022-09-13	09:38:24	-0.126297	-0.561794	351.586	FALSE	16
2022-09-13	09:38:24	0.195891	0.871362	316.128	FALSE	16
2022-09-13	09:38:24	0.639249	2.84351	354.43	FALSE	16
2022-09-13	09:38:25	0.430853	1.91652	318.044	FALSE	16
2022-09-13	09:38:25	0.798842	3.55341	357.983	FALSE	16
2022-09-13	09:38:25	0.285356	1.26932	319.314	FALSE	16
2022-09-13	09:38:25	0.689173	3.06558	361.049	FALSE	16
2022-09-13	09:38:26	0.251616	1.11924	320.433	FALSE	16
2022-09-13	09:38:26	0.648766	2.88584	363.935	FALSE	16
2022-09-13	09:38:26	0.428613	1.90656	322.339	FALSE	16
2022-09-13	09:38:26	0.555534	2.47113	366.406	FALSE	16
2022-09-13	09:38:27	0.549987	2.44645	324.786	FALSE	16
2022-09-13	09:38:27	0.755076	3.35873	369.765	FALSE	16
2022-09-13	09:38:27	1.74047	7.74196	332.528	FALSE	16
2022-09-13	09:38:28	3.58195	15.9332	385.698	1	17
2022-09-13	09:38:28	4.65375	20.7008	353.229	1	18
2022-09-13	09:38:28	2.61345	11.6251	397.323	FALSE	18
2022-09-13	09:38:28	1.8221	8.10507	361.334	FALSE	18
2022-09-13	09:38:29	0.462812	2.05868	399.382	FALSE	18
2022-09-13	09:38:29	0.589122	2.62053	363.954	FALSE	18
2022-09-13	09:38:29	0.621132	2.76292	402.145	FALSE	18
2022-09-13	09:38:29	0.423321	1.88302	365.837	FALSE	18
2022-09-13	09:38:30	0.0453565	0.201755	402.346	FALSE	18
2022-09-13	09:38:30	-0.223448	-0.993941	365.837	FALSE	18
2022-09-13	09:38:30	-0.454338	-2.02099	402.346	FALSE	18
2022-09-13	09:38:30	-0.352302	-1.56711	365.837	FALSE	18
2022-09-13	09:38:31	0.0384862	0.171194	402.517	FALSE	18
2022-09-13	09:38:31	1.84525	8.20804	374.045	FALSE	18
2022-09-13	09:38:31	4.17345	18.5643	421.082	1	19
2022-09-13	09:38:31	1.12408	5.00013	379.045	FALSE	19
2022-09-13	09:38:32	1.4306	6.36359	427.445	FALSE	19
2022-09-13	09:38:32	1.10897	4.93292	383.978	FALSE	19
2022-09-13	09:38:32	0.660318	2.93723	430.383	FALSE	19
2022-09-13	09:38:33	0.888003	3.95001	387.928	FALSE	19
2022-09-13	09:38:33	0.261285	1.16225	431.545	FALSE	19
2022-09-13	09:38:33	0.652481	2.90237	390.831	FALSE	19
2022-09-13	09:38:33	0.307341	1.36711	432.912	FALSE	19
2022-09-13	09:38:34	0.62556	2.78262	393.613	FALSE	19
2022-09-13	09:38:34	0.695992	3.09591	436.008	FALSE	19
2022-09-13	09:38:34	0.716043	3.1851	396.799	FALSE	19
2022-09-13	09:38:34	0.268104	1.19258	437.2	FALSE	19
2022-09-13	09:38:35	1.88317	8.37672	405.175	FALSE	19
2022-09-13	09:38:35	0.502608	2.2357	439.436	FALSE	19
2022-09-13	09:38:35	3.68663	16.3989	421.574	1	20
2022-09-13	09:38:35	5.76408	25.6398	465.076	1	21
2022-09-13	09:38:36	5.53757	24.6322	446.206	1	22
2022-09-13	09:38:36	4.69747	20.8953	485.971	1	23
2022-09-13	09:38:36	1.05447	4.69049	450.897	FALSE	23
2022-09-13	09:38:37	-0.134135	-0.596659	485.971	FALSE	23
2022-09-13	09:38:37	-0.0798852	-0.355345	450.897	FALSE	23
2022-09-13	09:38:37	0.253092	1.1258	487.097	FALSE	23
2022-09-13	09:38:37	-0.202226	-0.899542	450.897	FALSE	23
2022-09-13	09:38:38	0.494822	2.20107	489.298	FALSE	23
2022-09-13	09:38:38	1.76775	7.86331	458.76	FALSE	23
2022-09-13	09:38:38	5.67263	25.233	514.531	1	24
2022-09-13	09:38:38	5.32342	23.6796	482.44	1	25
2022-09-13	09:38:39	3.72088	16.5512	531.082	1	26
2022-09-13	09:38:39	0.683168	3.03887	485.479	FALSE	26
2022-09-13	09:38:39	0.39014	1.73542	532.818	FALSE	26
2022-09-13	09:38:39	0.463473	2.06162	487.54	FALSE	26
2022-09-13	09:38:40	0.275585	1.22586	534.044	FALSE	26
2022-09-13	09:38:40	0.46383	2.06321	489.603	FALSE	26
2022-09-13	09:38:40	0.27813	1.23718	535.281	FALSE	26
2022-09-13	09:38:40	0.6107	2.71652	492.32	FALSE	26
2022-09-13	09:38:41	0.727188	3.23468	538.515	FALSE	26
2022-09-13	09:38:41	0.498537	2.21759	494.538	FALSE	26
2022-09-13	09:38:41	0.339148	1.5086	540.024	FALSE	26
2022-09-13	09:38:42	0.514568	2.2889	496.826	FALSE	26
2022-09-13	09:38:42	0.514669	2.28935	542.313	FALSE	26
2022-09-13	09:38:42	0.254873	1.13373	497.96	FALSE	26
2022-09-13	09:38:42	0.532888	2.37039	544.684	FALSE	26
2022-09-13	09:38:43	0.195026	0.867515	498.828	FALSE	26
2022-09-13	09:38:43	0.634669	2.82313	547.507	FALSE	26
2022-09-13	09:38:43	0.316298	1.40696	500.235	FALSE	26
2022-09-13	09:38:43	0.640216	2.84781	550.355	FALSE	26
2022-09-13	09:38:44	0.364389	1.62088	501.856	FALSE	26
2022-09-13	09:38:44	0.407596	1.81307	552.168	FALSE	26
2022-09-13	09:38:44	0.487952	2.17051	504.026	FALSE	26
2022-09-13	09:38:44	0.292735	1.30214	553.47	FALSE	26
2022-09-13	09:38:45	0.443931	1.97469	506.001	FALSE	26
2022-09-13	09:38:45	0.525967	2.33961	555.81	FALSE	26
2022-09-13	09:38:45	0.934873	4.1585	510.159	FALSE	26
2022-09-13	09:38:46	0.541997	2.41091	558.22	FALSE	26
2022-09-13	09:38:46	2.13111	9.4796	519.639	FALSE	26
2022-09-13	09:38:46	0.60444	2.68867	560.909	FALSE	26
2022-09-13	09:38:46	0.761285	3.38635	523.025	FALSE	26
2022-09-13	09:38:47	0.942099	4.19064	565.1	FALSE	26
2022-09-13	09:38:47	0.832176	3.70169	526.727	FALSE	26
2022-09-13	09:38:47	2.43406	10.8272	575.927	FALSE	26
2022-09-13	09:38:47	0.551005	2.45098	529.178	FALSE	26
2022-09-13	09:38:48	2.18597	9.72363	585.651	FALSE	26
2022-09-13	09:38:48	2.33365	10.3805	539.558	FALSE	26
2022-09-13	09:38:48	1.94897	8.66941	594.32	FALSE	26
2022-09-13	09:38:48	5.04968	22.462	562.02	1	27
2022-09-13	09:38:49	3.23248	14.3787	608.699	1	28
2022-09-13	09:38:49	4.0167	17.8671	579.887	1	29
2022-09-13	09:38:49	4.45009	19.7949	628.494	1	30
2022-09-13	09:38:49	1.62352	7.22174	587.109	FALSE	30
2022-09-13	09:38:50	0.269631	1.19937	629.693	FALSE	30
2022-09-13	09:38:50	0.770293	3.42642	590.536	FALSE	30
2022-09-13	09:38:50	-0.0685875	-0.305091	629.693	FALSE	30
2022-09-13	09:38:51	0.0598603	0.266271	590.802	FALSE	30
2022-09-13	09:38:51	0.659148	2.93202	632.625	FALSE	30
2022-09-13	09:38:51	4.45222	19.8044	610.606	1	31
2022-09-13	09:38:51	3.29869	14.6732	647.298	1	32
2022-09-13	09:38:52	3.86968	17.2131	627.819	1	33
2022-09-13	09:38:52	2.92709	13.0203	660.319	FALSE	33
2022-09-13	09:38:52	0.188359	0.837859	628.657	FALSE	33
2022-09-13	09:38:52	2.09314	9.31071	669.629	FALSE	33
2022-09-13	09:38:53	0.648104	2.8829	631.54	FALSE	33
2022-09-13	09:38:53	0.880929	3.91855	673.548	FALSE	33
2022-09-13	09:38:53	3.49533	15.5479	647.088	1	34
2022-09-13	09:38:53	3.53854	15.7401	689.288	1	35
2022-09-13	09:38:54	1.1333	5.04115	652.129	FALSE	35
2022-09-13	09:38:54	1.59955	7.11512	696.403	FALSE	35
2022-09-13	09:38:54	1.13238	5.03705	657.166	FALSE	35
2022-09-13	09:38:55	1.01513	4.5155	700.919	FALSE	35
2022-09-13	09:38:55	0.565509	2.5155	659.682	FALSE	35
2022-09-13	09:38:55	0.630445	2.80435	703.723	FALSE	35
2022-09-13	09:38:55	1.90877	8.49059	668.172	FALSE	35
2022-09-13	09:38:56	0.573753	2.55217	706.275	FALSE	35
2022-09-13	09:38:56	1.58515	7.05106	675.223	FALSE	35
2022-09-13	09:38:56	5.36362	23.8585	730.134	1	36
2022-09-13	09:38:56	1.70357	7.57782	682.801	FALSE	36
2022-09-13	09:38:57	6.46194	28.744	758.878	1	37
2022-09-13	09:38:57	0.793855	3.53123	686.332	FALSE	37
2022-09-13	09:38:57	1.23055	5.47373	764.351	FALSE	37
2022-09-13	09:38:57	0.606018	2.69569	689.028	FALSE	37
2022-09-13	09:38:58	0.200216	0.890601	765.242	FALSE	37
2022-09-13	09:38:58	0.222354	0.989075	690.017	FALSE	37
2022-09-13	09:38:58	0.0527865	0.234805	765.477	FALSE	37
2022-09-13	09:38:58	0.185102	0.823371	690.841	FALSE	37
2022-09-13	09:38:59	0.193397	0.860269	766.337	FALSE	37
2022-09-13	09:38:59	0.285255	1.26887	692.109	FALSE	37
2022-09-13	09:38:59	0.419555	1.86626	768.203	FALSE	37
2022-09-13	09:39:00	0.784796	3.49093	695.6	FALSE	37
2022-09-13	09:39:00	0.847595	3.77027	771.973	FALSE	37
2022-09-13	09:39:00	1.10251	4.90418	700.505	FALSE	37
2022-09-13	09:39:00	1.13024	5.02753	777.001	FALSE	37
2022-09-13	09:39:01	0.995229	4.42698	704.932	FALSE	37
2022-09-13	09:39:01	1.20047	5.33993	782.341	FALSE	37
2022-09-13	09:39:01	0.916349	4.0761	709.008	FALSE	37
2022-09-13	09:39:01	0.739147	3.28787	785.629	FALSE	37
2022-09-13	09:39:02	0.576043	2.56235	711.57	FALSE	37
2022-09-13	09:39:02	0.795687	3.53937	789.168	FALSE	37
2022-09-13	09:39:02	1.25737	5.59303	717.163	FALSE	37
2022-09-13	09:39:02	2.8364	12.6169	801.785	FALSE	37
2022-09-13	09:39:03	4.11889	18.3216	735.485	1	38
2022-09-13	09:39:03	5.85859	26.0602	827.845	1	39
2022-09-13	09:39:03	0.408969	1.81918	737.304	FALSE	39
2022-09-13	09:39:04	0.488613	2.17345	830.019	FALSE	39
2022-09-13	09:39:04	0.492837	2.19224	739.496	FALSE	39
2022-09-13	09:39:04	0.475127	2.11346	832.132	FALSE	39
2022-09-13	09:39:04	0.0809798	0.360214	739.856	FALSE	39
2022-09-13	09:39:05	0.0272394	0.121166	832.253	FALSE	39
2022-09-13	09:39:05	-0.277239	-1.23321	739.856	FALSE	39
2022-09-13	09:39:05	0.205458	0.913918	833.167	FALSE	39
2022-09-13	09:39:05	0.11299	0.502602	740.359	FALSE	39
2022-09-13	09:39:06	7.80337	34.711	867.878	1	40
2022-09-13	09:39:06	5.89314	26.2139	766.573	1	41
2022-09-13	09:39:06	3.54347	15.7621	883.64	1	42
2022-09-13	09:39:06	1.38398	6.15622	772.729	FALSE	42
2022-09-13	09:39:07	3.27619	14.5731	898.213	1	43
2022-09-13	09:39:07	0.283117	1.25936	773.988	FALSE	43
2022-09-13	09:39:07	1.14887	5.1104	903.324	FALSE	43
2022-09-13	09:39:07	0.715585	3.18307	777.171	FALSE	43
2022-09-13	09:39:08	0.870751	3.87327	907.197	FALSE	43
2022-09-13	09:39:08	0.788918	3.50927	780.681	FALSE	43
2022-09-13	09:39:08	0.442557	1.96858	909.166	FALSE	43
2022-09-13	09:39:09	0.817519	3.63649	784.317	FALSE	43
2022-09-13	09:39:09	0.921845	4.10055	913.266	FALSE	43
2022-09-13	09:39:09	0.970293	4.31606	788.633	FALSE	43
2022-09-13	09:39:09	0.660725	2.93904	916.205	FALSE	43
2022-09-13	09:39:10	0.523932	2.33055	790.964	FALSE	43
2022-09-13	09:39:10	0.51701	2.29976	918.505	FALSE	43
2022-09-13	09:39:10	0.462914	2.05913	793.023	FALSE	43
2022-09-13	09:39:10	0.599657	2.66739	921.172	FALSE	43
2022-09-13	09:39:11	0.828308	3.68448	796.707	FALSE	43
2022-09-13	09:39:11	0.499504	2.22189	923.394	FALSE	43
2022-09-13	09:39:11	0.327748	1.45789	798.165	FALSE	43
2022-09-13	09:39:11	0.585967	2.6065	926.001	FALSE	43
2022-09-13	09:39:12	0.290344	1.29151	799.457	FALSE	43
2022-09-13	09:39:12	0.67243	2.9911	928.992	FALSE	43
2022-09-13	09:39:12	0.425662	1.89343	801.35	FALSE	43
2022-09-13	09:39:13	0.626069	2.78488	931.777	FALSE	43
2022-09-13	09:39:13	0.352328	1.56723	802.917	FALSE	43
2022-09-13	09:39:13	0.561845	2.4992	934.276	FALSE	43
2022-09-13	09:39:13	0.380318	1.69173	804.609	FALSE	43
2022-09-13	09:39:14	0.489428	2.17707	936.453	FALSE	43
2022-09-13	09:39:14	0.41986	1.86762	806.477	FALSE	43
2022-09-13	09:39:14	0.429987	1.91267	938.366	FALSE	43
2022-09-13	09:39:14	0.389682	1.73338	808.21	FALSE	43
2022-09-13	09:39:15	0.419504	1.86604	940.232	FALSE	43
2022-09-13	09:39:15	0.433346	1.92761	810.138	FALSE	43
2022-09-13	09:39:15	0.368053	1.63717	941.869	FALSE	43
2022-09-13	09:39:15	0.373346	1.66072	811.799	FALSE	43
2022-09-13	09:39:16	0.221947	0.987265	942.856	FALSE	43
2022-09-13	09:39:16	0.213702	0.950589	812.749	FALSE	43
2022-09-13	09:39:16	0.209936	0.933837	943.79	FALSE	43
2022-09-13	09:39:16	0.202659	0.901468	813.651	FALSE	43
2022-09-13	09:39:17	0.263015	1.16994	944.96	FALSE	43
2022-09-13	09:39:17	0.101896	0.453254	814.104	FALSE	43
2022-09-13	09:39:17	0.344186	1.53101	946.491	FALSE	43
2022-09-13	09:39:18	3.60927	16.0548	830.159	1	44
2022-09-13	09:39:18	6.21889	27.6629	974.154	1	45
2022-09-13	09:39:18	4.60276	20.474	850.633	1	46
2022-09-13	09:39:18	3.31126	14.7291	988.883	1	47
2022-09-13	09:39:19	3.83212	17.046	867.679	1	48
2022-09-13	09:39:19	1.77569	7.89862	996.782	FALSE	48
2022-09-13	09:39:19	10.3813	46.1781	913.857	1	49
2022-09-13	09:39:20	8.59624	38.2378	1035.02	1	50
2022-09-13	09:39:20	12.5412	55.7858	969.642	1	51
2022-09-13	09:39:20	9.75339	43.385	1078.4	1	52
2022-09-13	09:39:20	3.84256	17.0925	986.735	1	53
2022-09-13	09:39:20	9.04993	40.2559	1118.66	1	54
2022-09-13	09:39:21	1.41116	6.27712	993.012	FALSE	54
2022-09-13	09:39:21	2.21966	9.87349	1128.53	FALSE	54
2022-09-13	09:39:21	1.12352	4.99764	998.01	FALSE	54
2022-09-13	09:39:22	0.968969	4.31017	1132.84	FALSE	54
2022-09-13	09:39:22	0.718537	3.1962	1001.21	FALSE	54
2022-09-13	09:39:22	0.583117	2.59382	1135.44	FALSE	54
2022-09-13	09:39:22	1.66383	7.40105	1008.61	FALSE	54
2022-09-13	09:39:23	1.01589	4.51888	1139.96	FALSE	54
2022-09-13	09:39:23	2.76408	12.2952	1020.9	FALSE	54
2022-09-13	09:39:23	0.723168	3.2168	1143.17	FALSE	54
2022-09-13	09:39:23	3.63976	16.1904	1037.09	1	55
2022-09-13	09:39:24	3.64368	16.2078	1159.38	1	56
2022-09-13	09:39:24	2.97777	13.2457	1050.34	FALSE	56
2022-09-13	09:39:24	3.18709	14.1768	1173.56	1	57
2022-09-13	09:39:24	0.608868	2.70837	1053.05	FALSE	57
2022-09-13	09:39:25	1.05798	4.70611	1178.26	FALSE	57
2022-09-13	09:39:25	3.33487	14.8342	1067.88	1	58
2022-09-13	09:39:25	2.66393	11.8497	1190.11	FALSE	58
2022-09-13	09:39:25	4.39843	19.5651	1087.45	1	59
2022-09-13	09:39:26	4.32861	19.2545	1209.37	1	60
2022-09-13	09:39:26	0.372786	1.65823	1089.1	FALSE	60
2022-09-13	09:39:26	1.21335	5.39722	1214.77	FALSE	60
2022-09-13	09:39:27	0.916349	4.0761	1093.18	FALSE	60
2022-09-13	09:39:27	0.682608	3.03638	1217.8	FALSE	60
2022-09-13	09:39:27	0.517926	2.30384	1095.48	FALSE	60
2022-09-13	09:39:27	1.56877	6.9782	1224.78	FALSE	60
2022-09-13	09:39:28	0.32154	1.43027	1096.91	FALSE	60
2022-09-13	09:39:28	1.18963	5.29171	1230.07	FALSE	60
2022-09-13	09:39:28	0.319402	1.42076	1098.34	FALSE	60
2022-09-13	09:39:28	0.614415	2.73304	1232.81	FALSE	60
2022-09-13	09:39:29	1.1967	5.32316	1103.66	FALSE	60
2022-09-13	09:39:29	0.498435	2.21714	1235.02	FALSE	60
2022-09-13	09:39:29	1.7134	7.62155	1111.28	FALSE	60
2022-09-13	09:39:29	5.9709	26.5598	1261.58	1	61
2022-09-13	09:39:30	1.42149	6.32307	1117.6	FALSE	61
2022-09-13	09:39:30	0.804237	3.57741	1265.16	FALSE	61
2022-09-13	09:39:30	0.495942	2.20605	1119.81	FALSE	61
2022-09-13	09:39:31	0.169275	0.752969	1265.91	FALSE	61
2022-09-13	09:39:31	0.0214887	0.095586	1119.9	FALSE	61
2022-09-13	09:39:31	0.402252	1.7893	1267.7	FALSE	61
2022-09-13	09:39:31	1.33162	5.92331	1125.83	FALSE	61
2022-09-13	09:39:32	7.40754	32.9502	1300.65	1	62
2022-09-13	09:39:32	2.17599	9.67924	1135.51	FALSE	62
2022-09-13	09:39:32	1.31604	5.85401	1306.51	FALSE	62
2022-09-13	09:39:32	0.410649	1.82665	1137.33	FALSE	62
2022-09-13	09:39:33	0.559911	2.4906	1309	FALSE	62
2022-09-13	09:39:33	0.597774	2.65902	1139.99	FALSE	62
2022-09-13	09:39:33	0.71874	3.1971	1312.19	FALSE	62
2022-09-13	09:39:33	0.999097	4.44418	1144.44	FALSE	62
2022-09-13	09:39:34	2.4705	10.9893	1323.18	FALSE	62
2022-09-13	09:39:34	1.85426	8.24812	1152.69	FALSE	62
2022-09-13	09:39:34	5.26769	23.4317	1346.61	1	63
2022-09-13	09:39:34	2.77986	12.3654	1165.05	FALSE	63
2022-09-13	09:39:35	6.13187	27.2758	1373.89	1	64
2022-09-13	09:39:35	1.68592	7.49931	1172.55	FALSE	64
2022-09-13	09:39:35	6.39746	28.4572	1402.35	1	65
2022-09-13	09:39:36	2.4106	10.7228	1183.27	FALSE	65
2022-09-13	09:39:36	4.01752	17.8707	1420.22	1	66
2022-09-13	09:39:36	4.50357	20.0328	1203.31	1	67
2022-09-13	09:39:36	1.73579	7.72114	1427.94	FALSE	67
2022-09-13	09:39:37	5.53217	24.6082	1227.91	1	68
2022-09-13	09:39:37	0.849631	3.77933	1431.72	FALSE	68
2022-09-13	09:39:37	1.63009	7.25097	1235.16	FALSE	68
2022-09-13	09:39:37	1.89182	8.41519	1440.13	FALSE	68
2022-09-13	09:39:38	0.186425	0.829256	1235.99	FALSE	68
2022-09-13	09:39:38	1.56693	6.97002	1447.1	FALSE	68
2022-09-13	09:39:38	0.927443	4.12545	1240.12	FALSE	68
2022-09-13	09:39:38	1.04617	4.65357	1451.76	FALSE	68
2022-09-13	09:39:39	0.37299	1.65913	1241.78	FALSE	68
2022-09-13	09:39:39	0.778588	3.46332	1455.22	FALSE	68
2022-09-13	09:39:39	0.571972	2.54425	1244.32	FALSE	68
2022-09-13	09:39:40	0.875636	3.895	1459.12	FALSE	68
2022-09-13	09:39:40	0.898689	3.99755	1248.32	FALSE	68
2022-09-13	09:39:40	0.954873	4.24747	1463.36	FALSE	68
2022-09-13	09:39:40	1.14994	5.11516	1253.44	FALSE	68
2022-09-13	09:39:41	0.797417	3.54707	1466.91	FALSE	68
2022-09-13	09:39:41	0.544135	2.42042	1255.86	FALSE	68
2022-09-13	09:39:41	0.613397	2.72851	1469.64	FALSE	68
2022-09-13	09:39:41	0.528461	2.3507	1258.21	FALSE	68
2022-09-13	09:39:42	0.507901	2.25925	1471.9	FALSE	68
2022-09-13	09:39:42	0.448613	1.99552	1260.2	FALSE	68
2022-09-13	09:39:42	0.466323	2.0743	1473.97	FALSE	68
2022-09-13	09:39:42	0.655076	2.91391	1263.12	FALSE	68
2022-09-13	09:39:43	0.99299	4.41702	1478.39	FALSE	68
2022-09-13	09:39:43	1.12688	5.01259	1268.13	FALSE	68
2022-09-13	09:39:43	1.82994	8.13994	1486.53	FALSE	68
2022-09-13	09:39:44	1.25253	5.5715	1273.7	FALSE	68
2022-09-13	09:39:44	1.48958	6.62595	1493.16	FALSE	68
2022-09-13	09:39:44	0.594364	2.64385	1276.34	FALSE	68
2022-09-13	09:39:44	0.566628	2.52047	1495.68	FALSE	68
2022-09-13	09:39:45	0.854771	3.80219	1280.15	FALSE	68
2022-09-13	09:39:45	0.764389	3.40016	1499.08	FALSE	68
2022-09-13	09:39:45	0.694975	3.09139	1283.24	FALSE	68
2022-09-13	09:39:45	0.534618	2.37809	1501.45	FALSE	68
2022-09-13	09:39:46	0.2564	1.14052	1284.38	FALSE	68
2022-09-13	09:39:46	3.69874	16.4527	1517.91	1	69
2022-09-13	09:39:46	0.787748	3.50406	1287.88	FALSE	69
2022-09-13	09:39:47	2.11151	9.39242	1527.3	FALSE	69
2022-09-13	09:39:47	0.878486	3.90768	1291.79	FALSE	69
2022-09-13	09:39:47	3.3053	14.7026	1542	1	70
2022-09-13	09:39:47	2.85803	12.7131	1304.5	FALSE	70
2022-09-13	09:39:47	0.837468	3.72523	1545.73	FALSE	70
2022-09-13	09:39:48	2.98882	13.2949	1317.8	FALSE	70
2022-09-13	09:39:48	5.18072	23.0449	1568.77	1	71
2022-09-13	09:39:48	5.08815	22.6331	1340.43	1	72
2022-09-13	09:39:49	4.75055	21.1314	1589.9	1	73
2022-09-13	09:39:49	4.87227	21.6728	1362.1	1	74
2022-09-13	09:39:49	2.18011	9.69757	1599.6	FALSE	74
2022-09-13	09:39:49	1.39737	6.21578	1368.32	FALSE	74
2022-09-13	09:39:50	0.846883	3.7671	1603.37	FALSE	74
2022-09-13	09:39:50	0.331463	1.47441	1369.79	FALSE	74
2022-09-13	09:39:50	0.266425	1.18511	1604.55	FALSE	74
2022-09-13	09:39:50	0.496858	2.21012	1372	FALSE	74
2022-09-13	09:39:51	0.9393	4.17819	1608.73	FALSE	74
2022-09-13	09:39:51	0.244339	1.08687	1373.09	FALSE	74
2022-09-13	09:39:51	0.103524	0.460495	1609.19	FALSE	74
2022-09-13	09:39:51	0.1307	0.58138	1373.67	FALSE	74
2022-09-13	09:39:52	0.180318	0.802091	1609.99	FALSE	74
2022-09-13	09:39:52	0.301692	1.34199	1375.01	FALSE	74
2022-09-13	09:39:52	0.38841	1.72773	1611.72	FALSE	74
2022-09-13	09:39:53	0.308461	1.3721	1376.39	FALSE	74
2022-09-13	09:39:53	0.281998	1.25438	1612.98	FALSE	74
2022-09-13	09:39:53	0.422354	1.87872	1378.26	FALSE	74
2022-09-13	09:39:53	0.26841	1.19394	1614.17	FALSE	74
2022-09-13	09:39:54	0.244695	1.08845	1379.35	FALSE	74
2022-09-13	09:39:54	0.282914	1.25846	1615.43	FALSE	74
2022-09-13	09:39:54	0.284135	1.26389	1380.62	FALSE	74
2022-09-13	09:39:54	0.349784	1.55591	1616.98	FALSE	74
2022-09-13	09:39:55	0.440776	1.96066	1382.58	FALSE	74
2022-09-13	09:39:55	0.422252	1.87826	1618.86	FALSE	74
2022-09-13	09:39:55	0.463626	2.0623	1384.64	FALSE	74
2022-09-13	09:39:55	0.532023	2.36654	1621.23	FALSE	74
2022-09-13	09:39:56	0.49986	2.22348	1386.86	FALSE	74
2022-09-13	09:39:56	0.414364	1.84317	1623.07	FALSE	74
2022-09-13	09:39:56	0.312023	1.38794	1388.25	FALSE	74
2022-09-13	09:39:56	0.239555	1.06559	1624.14	FALSE	74
2022-09-13	09:39:57	0.212685	0.946065	1389.2	FALSE	74
2022-09-13	09:39:57	0.205458	0.913918	1625.05	FALSE	74
2022-09-13	09:39:57	0.238232	1.0597	1390.26	FALSE	74
2022-09-13	09:39:58	0.223015	0.992015	1626.04	FALSE	74
2022-09-13	09:39:58	0.221845	0.986811	1391.24	FALSE	74
2022-09-13	09:39:58	0.232939	1.03616	1627.08	FALSE	74
2022-09-13	09:39:58	0.22612	1.00583	1392.25	FALSE	74
2022-09-13	09:39:59	0.227239	1.0108	1628.09	FALSE	74
2022-09-13	09:39:59	0.203372	0.904639	1393.15	FALSE	74
2022-09-13	09:39:59	0.19472	0.866154	1628.96	FALSE	74
2022-09-13	09:39:59	0.254059	1.13011	1394.28	FALSE	74
2022-09-13	09:40:00	0.229122	1.01918	1629.98	FALSE	74
2022-09-13	09:40:00	0.350242	1.55795	1395.84	FALSE	74
2022-09-13	09:40:00	0.348053	1.54821	1631.52	FALSE	74
2022-09-13	09:40:00	0.375992	1.67249	1397.52	FALSE	74
2022-09-13	09:40:01	0.378181	1.68222	1633.21	FALSE	74
2022-09-13	09:40:01	0.23014	1.02371	1398.54	FALSE	74
2022-09-13	09:40:01	0.202557	0.901014	1634.11	FALSE	74
2022-09-13	09:40:02	0.244135	1.08596	1399.62	FALSE	74
2022-09-13	09:40:02	0.260267	1.15772	1635.27	FALSE	74
2022-09-13	09:40:02	0.529987	2.35749	1401.98	FALSE	74
2022-09-13	09:40:02	1.2135	5.39789	1640.66	FALSE	74
2022-09-13	09:40:03	1.28877	5.73271	1407.72	FALSE	74
2022-09-13	09:40:03	0.554618	2.46705	1643.13	FALSE	74
2022-09-13	09:40:03	0.251056	1.11675	1408.83	FALSE	74
2022-09-13	09:40:03	-0.0857376	-0.381378	1643.13	FALSE	74
2022-09-13	09:40:04	-0.106654	-0.474418	1408.83	FALSE	74
2022-09-13	09:40:04	0.0219977	0.0978502	1643.23	FALSE	74
2022-09-13	09:40:04	0.0729392	0.324448	1409.16	FALSE	74
2022-09-13	09:40:04	0.160573	0.714261	1643.94	FALSE	74
2022-09-13	09:40:05	0.351514	1.5636	1410.72	FALSE	74
2022-09-13	09:40:05	0.17126	0.761799	1644.7	FALSE	74
2022-09-13	09:40:05	0.23813	1.05925	1411.78	FALSE	74
2022-09-13	09:40:05	0.423982	1.88596	1646.59	FALSE	74
2022-09-13	09:40:06	0.483015	2.14855	1413.93	FALSE	74
2022-09-13	09:40:06	0.569326	2.53248	1649.12	FALSE	74
2022-09-13	09:40:06	0.699962	3.11357	1417.04	FALSE	74
2022-09-13	09:40:07	0.705204	3.13689	1652.26	FALSE	74
2022-09-13	09:40:07	0.535433	2.38171	1419.42	FALSE	74
2022-09-13	09:40:07	0.556959	2.47747	1654.74	FALSE	74
2022-09-13	09:40:07	0.669122	2.97639	1422.4	FALSE	74
2022-09-13	09:40:08	0.774822	3.44656	1658.18	FALSE	74
2022-09-13	09:40:08	0.559606	2.48924	1424.89	FALSE	74
2022-09-13	09:40:08	1.05345	4.68596	1662.87	FALSE	74
2022-09-13	09:40:08	0.0931936	0.414544	1425.3	FALSE	74
2022-09-13	09:40:09	-0.0138293	-0.0615155	1662.87	FALSE	74
2022-09-13	09:40:09	0.0947203	0.421335	1425.72	FALSE	74
2022-09-13	09:40:09	0.504644	2.24476	1665.11	FALSE	74
2022-09-13	09:40:09	2.55782	11.3777	1437.1	FALSE	74
2022-09-13	09:40:10	3.93106	17.4861	1682.6	1	75
2022-09-13	09:40:10	7.01685	31.2124	1468.31	1	76
2022-09-13	09:40:10	8.70016	38.7001	1721.3	1	77
2022-09-13	09:40:11	4.188	18.6291	1486.94	1	78
2022-09-13	09:40:11	5.82637	25.9169	1747.22	1	79
2022-09-13	09:40:11	5.16515	22.9756	1509.92	1	80
2022-09-13	09:40:11	1.65314	7.3535	1754.57	FALSE	80
2022-09-13	09:40:12	0.9907	4.40683	1514.33	FALSE	80
2022-09-13	09:40:12	0.594262	2.6434	1757.21	FALSE	80
2022-09-13	09:40:12	0.379402	1.68766	1516.01	FALSE	80
2022-09-13	09:40:12	-0.00660282	-0.0293707	1757.21	FALSE	80
2022-09-13	09:40:13	0.0558908	0.248613	1516.26	FALSE	80
2022-09-13	09:40:13	-0.130369	-0.579907	1757.21	FALSE	80
2022-09-13	09:40:13	-0.0663992	-0.295357	1516.26	FALSE	80
2022-09-13	09:40:13	-0.129656	-0.576736	1757.21	FALSE	80
2022-09-13	09:40:14	0.138028	0.613976	1516.88	FALSE	80
2022-09-13	09:40:14	0.0935498	0.416128	1757.63	FALSE	80
2022-09-13	09:40:14	0.167036	0.74301	1517.62	FALSE	80
2022-09-13	09:40:14	0.075331	0.335087	1757.97	FALSE	80
2022-09-13	09:40:15	0.0695803	0.309507	1517.93	FALSE	80
2022-09-13	09:40:15	0.00805366	0.0358243	1758	FALSE	80
2022-09-13	09:40:15	-0.325279	-1.44691	1517.93	FALSE	80
2022-09-13	09:40:16	-0.326043	-1.4503	1758	FALSE	80
2022-09-13	09:40:16	-0.289453	-1.28754	1517.93	FALSE	80
2022-09-13	09:40:16	-0.263804	-1.17345	1758	FALSE	80
2022-09-13	09:40:16	-0.132099	-0.587603	1517.93	FALSE	80
2022-09-13	09:40:17	0.0872394	0.388058	1758.39	FALSE	80
2022-09-13	09:40:17	-0.00258246	-0.0114873	1517.93	FALSE	80
2022-09-13	09:40:17	0.194008	0.862986	1759.25	FALSE	80
2022-09-13	09:40:17	-0.0153051	-0.0680801	1517.93	FALSE	80
2022-09-13	09:40:18	0.537112	2.38918	1761.64	FALSE	80
2022-09-13	09:40:18	2.48744	11.0646	1528.99	FALSE	80
2022-09-13	09:40:18	5.39126	23.9814	1785.62	1	81
2022-09-13	09:40:18	6.11909	27.2189	1556.21	1	82
2022-09-13	09:40:19	5.14367	22.8801	1808.5	1	83
2022-09-13	09:40:19	4.27467	19.0146	1575.23	1	84
2022-09-13	09:40:19	0.448817	1.99643	1810.5	FALSE	84
2022-09-13	09:40:20	2.20749	9.81936	1585.05	FALSE	84
2022-09-13	09:40:20	0.31869	1.4176	1811.92	FALSE	84
2022-09-13	09:40:20	1.31691	5.85788	1590.9	FALSE	84
2022-09-13	09:40:20	2.85737	12.7102	1824.63	FALSE	84
2022-09-13	09:40:21	0.840522	3.73881	1594.64	FALSE	84
2022-09-13	09:40:21	3.54938	15.7884	1840.42	1	85
2022-09-13	09:40:21	0.815076	3.62562	1598.27	FALSE	85
2022-09-13	09:40:21	2.66479	11.8535	1852.27	FALSE	85
2022-09-13	09:40:22	3.35945	14.9435	1613.21	1	86
2022-09-13	09:40:22	1.66861	7.42231	1859.69	FALSE	86
2022-09-13	09:40:22	1.94648	8.65833	1621.87	FALSE	86
2022-09-13	09:40:22	0.249428	1.10951	1860.8	FALSE	86
2022-09-13	09:40:23	1.51854	6.75477	1628.63	FALSE	86
2022-09-13	09:40:23	2.04795	9.10969	1869.91	FALSE	86
2022-09-13	09:40:23	1.02469	4.55803	1633.18	FALSE	86
2022-09-13	09:40:23	2.04037	9.07597	1878.99	FALSE	86
2022-09-13	09:40:24	0.677926	3.01555	1636.2	FALSE	86
2022-09-13	09:40:24	2.16673	9.63805	1888.62	FALSE	86
2022-09-13	09:40:24	3.12861	13.9167	1650.12	1	87
2022-09-13	09:40:25	0.811769	3.61091	1892.24	FALSE	87
2022-09-13	09:40:25	1.99055	8.85436	1658.97	FALSE	87
2022-09-13	09:40:25	0.821743	3.65528	1895.89	FALSE	87
2022-09-13	09:40:25	0.982099	4.36857	1663.34	FALSE	87
2022-09-13	09:40:26	1.86134	8.27961	1904.17	FALSE	87
2022-09-13	09:40:26	0.825865	3.67361	1667.01	FALSE	87
2022-09-13	09:40:26	2.05681	9.1491	1913.32	FALSE	87
2022-09-13	09:40:26	0.965916	4.29659	1671.31	FALSE	87
2022-09-13	09:40:27	1.33543	5.94026	1919.26	FALSE	87
2022-09-13	09:40:27	2.4049	10.6975	1682.01	FALSE	87
2022-09-13	09:40:27	0.852786	3.79336	1923.05	FALSE	87
2022-09-13	09:40:27	1.02963	4.58	1686.59	FALSE	87
2022-09-13	09:40:28	0.872888	3.88278	1926.94	FALSE	87
2022-09-13	09:40:28	1.05645	4.6993	1691.29	FALSE	87
2022-09-13	09:40:28	0.934924	4.15873	1931.09	FALSE	87
2022-09-13	09:40:29	0.827086	3.67904	1694.96	FALSE	87
2022-09-13	09:40:29	1.58642	7.05671	1938.15	FALSE	87
2022-09-13	09:40:29	3.1767	14.1306	1709.09	1	88
2022-09-13	09:40:29	0.511972	2.27735	1940.43	FALSE	88
2022-09-13	09:40:30	0.4364	1.94119	1711.04	FALSE	88
2022-09-13	09:40:30	0.655585	2.91617	1943.34	FALSE	88
2022-09-13	09:40:30	0.175178	0.779227	1711.82	FALSE	88
2022-09-13	09:40:30	0.408104	1.81533	1945.16	FALSE	88
2022-09-13	09:40:31	0.493244	2.19405	1714.01	FALSE	88
2022-09-13	09:40:31	0.42388	1.8855	1947.05	FALSE	88
2022-09-13	09:40:31	0.204949	0.911654	1714.92	FALSE	88
2022-09-13	09:40:31	0.356959	1.58783	1948.63	FALSE	88
2022-09-13	09:40:32	0.368868	1.6408	1716.56	FALSE	88
2022-09-13	09:40:32	0.353244	1.5713	1950.2	FALSE	88
2022-09-13	09:40:32	0.520115	2.31358	1718.88	FALSE	88
2022-09-13	09:40:32	0.578384	2.57277	1952.78	FALSE	88
2022-09-13	09:40:33	0.852837	3.79359	1722.67	FALSE	88
2022-09-13	09:40:33	0.979911	4.35884	1957.14	FALSE	88
2022-09-13	09:40:33	0.673651	2.99653	1725.67	FALSE	88
2022-09-13	09:40:34	0.721591	3.20978	1960.35	FALSE	88
2022-09-13	09:40:34	0.786221	3.49727	1729.16	FALSE	88
2022-09-13	09:40:34	0.572277	2.5456	1962.89	FALSE	88
2022-09-13	09:40:34	0.462608	2.05777	1731.22	FALSE	88
2022-09-13	09:40:35	0.512939	2.28166	1965.17	FALSE	88
2022-09-13	09:40:35	0.538588	2.39575	1733.62	FALSE	88
2022-09-13	09:40:35	0.520674	2.31606	1967.49	FALSE	88
2022-09-13	09:40:35	0.542914	2.41499	1736.03	FALSE	88
2022-09-13	09:40:36	0.544389	2.42155	1969.91	FALSE	88
2022-09-13	09:40:36	0.541794	2.41001	1738.44	FALSE	88
2022-09-13	09:40:36	0.537163	2.38941	1972.3	FALSE	88
2022-09-13	09:40:36	0.513855	2.28573	1740.73	FALSE	88
2022-09-13	09:40:37	0.488359	2.17232	1974.47	FALSE	88
2022-09-13	09:40:37	0.476552	2.1198	1742.85	FALSE	88
2022-09-13	09:40:37	0.481387	2.14131	1976.61	FALSE	88
2022-09-13	09:40:38	0.487494	2.16847	1745.02	FALSE	88
2022-09-13	09:40:38	0.464898	2.06796	1978.68	FALSE	88
2022-09-13	09:40:38	0.477468	2.12387	1747.14	FALSE	88
2022-09-13	09:40:38	0.486527	2.16417	1980.85	FALSE	88
2022-09-13	09:40:39	0.485356	2.15896	1749.3	FALSE	88
2022-09-13	09:40:39	0.490445	2.1816	1983.03	FALSE	88
2022-09-13	09:40:39	0.485916	2.16145	1751.46	FALSE	88
2022-09-13	09:40:39	0.497265	2.21193	1985.24	FALSE	88
2022-09-13	09:40:40	0.48958	2.17775	1753.64	FALSE	88
2022-09-13	09:40:40	0.493499	2.19518	1987.43	FALSE	88
2022-09-13	09:40:40	0.497061	2.21103	1755.85	FALSE	88
2022-09-13	09:40:40	0.492277	2.18975	1989.62	FALSE	88
2022-09-13	09:40:41	0.488206	2.17164	1758.02	FALSE	88
2022-09-13	09:40:41	0.494059	2.19767	1991.82	FALSE	88
2022-09-13	09:40:41	0.496603	2.20899	1760.23	FALSE	88
2022-09-13	09:40:42	0.510343	2.27011	1994.09	FALSE	88
2022-09-13	09:40:42	0.510954	2.27283	1762.5	FALSE	88
2022-09-13	09:40:42	0.519707	2.31176	1996.4	FALSE	88
2022-09-13	09:40:42	0.545458	2.42631	1764.93	FALSE	88
2022-09-13	09:40:43	0.478282	2.12749	1998.53	FALSE	88
2022-09-13	09:40:43	0.446679	1.98692	1766.92	FALSE	88
2022-09-13	09:40:43	0.478588	2.12886	2000.66	FALSE	88
2022-09-13	09:40:43	0.461336	2.05211	1768.97	FALSE	88
2022-09-13	09:40:44	0.470395	2.09241	2002.75	FALSE	88
2022-09-13	09:40:44	0.471005	2.09512	1771.06	FALSE	88
2022-09-13	09:40:44	0.446629	1.9867	2004.74	FALSE	88
2022-09-13	09:40:44	0.451819	2.00978	1773.07	FALSE	88
2022-09-13	09:40:45	0.393601	1.75082	2006.49	FALSE	88
2022-09-13	09:40:45	0.39869	1.77345	1774.85	FALSE	88
2022-09-13	09:40:45	0.617417	2.74639	2009.24	FALSE	88
2022-09-13	09:40:45	0.728512	3.24057	1778.09	FALSE	88
2022-09-13	09:40:46	0.885458	3.93869	2013.18	FALSE	88
2022-09-13	09:40:46	0.926171	4.11979	1782.21	FALSE	88
2022-09-13	09:40:46	1.52683	6.79165	2019.97	FALSE	88
2022-09-13	09:40:47	0.77874	3.46399	1785.67	FALSE	88
2022-09-13	09:40:47	0.587086	2.61148	2022.58	FALSE	88
2022-09-13	09:40:47	0.458232	2.03831	1787.71	FALSE	88
2022-09-13	09:40:47	0.444796	1.97854	2024.56	FALSE	88
2022-09-13	09:40:48	0.486679	2.16485	1789.87	FALSE	88
2022-09-13	09:40:48	0.510751	2.27192	2026.83	FALSE	88
2022-09-13	09:40:48	0.486679	2.16485	1792.04	FALSE	88
2022-09-13	09:40:48	0.483066	2.14877	2028.98	FALSE	88
2022-09-13	09:40:49	0.455636	2.02676	1794.06	FALSE	88
2022-09-13	09:40:49	0.308969	1.37436	2030.35	FALSE	88
2022-09-13	09:40:49	0.604797	2.69026	1796.75	FALSE	88
2022-09-13	09:40:49	0.428817	1.90746	2032.26	FALSE	88
2022-09-13	09:40:50	0.134517	0.598359	1797.35	FALSE	88
2022-09-13	09:40:50	0.103117	0.458685	2032.72	FALSE	88
2022-09-13	09:40:50	0.274008	1.21884	1798.57	FALSE	88
2022-09-13	09:40:51	0.262456	1.16746	2033.89	FALSE	88
2022-09-13	09:40:51	0.127596	0.567573	1799.14	FALSE	88
2022-09-13	09:40:51	0.216959	0.965077	2034.85	FALSE	88
2022-09-13	09:40:51	0.237417	1.05608	1800.2	FALSE	88
2022-09-13	09:40:52	0.305356	1.35828	2036.21	FALSE	88
2022-09-13	09:40:52	0.371667	1.65325	1801.85	FALSE	88
2022-09-13	09:40:52	0.313855	1.39609	2037.61	FALSE	88
2022-09-13	09:40:52	0.441845	1.96541	1803.81	FALSE	88
2022-09-13	09:40:53	0.408563	1.81737	2039.42	FALSE	88
2022-09-13	09:40:53	0.315789	1.40469	1805.22	FALSE	88
2022-09-13	09:40:53	0.438181	1.94912	2041.37	FALSE	88
2022-09-13	09:40:53	0.459148	2.04238	1807.26	FALSE	88
2022-09-13	09:40:54	0.507035	2.25539	2043.63	FALSE	88
2022-09-13	09:40:54	0.446883	1.98782	1809.25	FALSE	88
2022-09-13	09:40:54	0.46902	2.08629	2045.71	FALSE	88
2022-09-13	09:40:54	0.45416	2.02019	1811.27	FALSE	88
2022-09-13	09:40:55	0.463015	2.05958	2047.77	FALSE	88
2022-09-13	09:40:55	0.471209	2.09603	1813.37	FALSE	88
2022-09-13	09:40:55	0.621183	2.76315	2050.54	FALSE	88
2022-09-13	09:40:56	0.900725	4.0066	1817.37	FALSE	88
2022-09-13	09:40:56	1.28358	5.70962	2056.25	FALSE	88
2022-09-13	09:40:56	0.47243	2.10146	1819.47	FALSE	88
2022-09-13	09:40:56	0.171819	0.764285	2057.01	FALSE	88
2022-09-13	09:40:57	0.118435	0.526823	1820	FALSE	88
2022-09-13	09:40:57	0.0467814	0.208093	2057.22	FALSE	88
2022-09-13	09:40:57	0.00469491	0.0208839	1820.02	FALSE	88
2022-09-13	09:40:57	-0.0856358	-0.380925	2057.22	FALSE	88
2022-09-13	09:40:58	-0.0272135	-0.121051	1820.02	FALSE	88
2022-09-13	09:40:58	-0.140699	-0.625857	2057.22	FALSE	88
2022-09-13	09:40:58	-0.152608	-0.678831	1820.02	FALSE	88
2022-09-13	09:40:58	-0.0668063	-0.297168	2057.22	FALSE	88
2022-09-13	09:40:59	-0.0584094	-0.259817	1820.02	FALSE	88
2022-09-13	09:40:59	-0.179376	-0.7979	2057.22	FALSE	88
2022-09-13	09:40:59	-0.222939	-0.991677	1820.02	FALSE	88
2022-09-13	09:41:00	-0.0280786	-0.124899	2057.22	FALSE	88
2022-09-13	09:41:00	0.0603692	0.268534	1820.29	FALSE	88
2022-09-13	09:41:00	0.143728	0.639331	2057.86	FALSE	88
2022-09-13	09:41:00	1.3362	5.94368	1826.23	FALSE	88
2022-09-13	09:41:01	1.27884	5.68854	2063.55	FALSE	88
2022-09-13	09:41:01	4.13767	18.4052	1844.64	1	89
2022-09-13	09:41:01	2.04642	9.10289	2072.65	FALSE	89
2022-09-13	09:41:01	7.01894	31.2216	1875.86	1	90
2022-09-13	09:41:02	3.49848	15.5619	2088.21	1	91
2022-09-13	09:41:02	6.05533	26.9353	1902.8	1	92
2022-09-13	09:41:02	0.909478	4.04554	2092.26	FALSE	92
2022-09-13	09:41:02	1.72546	7.67519	1910.47	FALSE	92
2022-09-13	09:41:03	1.18088	5.25279	2097.51	FALSE	92
2022-09-13	09:41:03	0.814975	3.62517	1914.1	FALSE	92
2022-09-13	09:41:03	2.85329	12.692	2110.2	FALSE	92
2022-09-13	09:41:03	0.648969	2.88674	1916.98	FALSE	92
2022-09-13	09:41:04	1.26983	5.64846	2115.85	FALSE	92
2022-09-13	09:41:04	0.755891	3.36235	1920.35	FALSE	92
2022-09-13	09:41:04	0.434364	1.93214	2117.78	FALSE	92
2022-09-13	09:41:05	0.65187	2.89965	1923.24	FALSE	92
2022-09-13	09:41:05	0.548104	2.43808	2120.22	FALSE	92
2022-09-13	09:41:05	0.420064	1.86853	1925.11	FALSE	92
2022-09-13	09:41:05	0.486018	2.16191	2122.38	FALSE	92
2022-09-13	09:41:06	0.466374	2.07452	1927.19	FALSE	92
2022-09-13	09:41:06	0.508461	2.26174	2124.64	FALSE	92
2022-09-13	09:41:06	0.406221	1.80695	1928.99	FALSE	92
2022-09-13	09:41:06	0.58215	2.58952	2127.23	FALSE	92
2022-09-13	09:41:07	0.473143	2.10463	1931.1	FALSE	92
2022-09-13	09:41:07	0.526323	2.34119	2129.57	FALSE	92
2022-09-13	09:41:07	0.487799	2.16983	1933.27	FALSE	92
2022-09-13	09:41:07	0.483219	2.14945	2131.72	FALSE	92
2022-09-13	09:41:08	0.522608	2.32466	1935.59	FALSE	92
2022-09-13	09:41:08	0.456298	2.0297	2133.75	FALSE	92
2022-09-13	09:41:08	0.554822	2.46796	1938.06	FALSE	92
2022-09-13	09:41:09	0.528817	2.35228	2136.11	FALSE	92
2022-09-13	09:41:09	0.270445	1.20299	1939.26	FALSE	92
2022-09-13	09:41:09	0.137061	0.609675	2136.72	FALSE	92
2022-09-13	09:41:09	0.150496	0.669436	1939.93	FALSE	92
2022-09-13	09:41:10	0.0752292	0.334635	2137.05	FALSE	92
2022-09-13	09:41:10	0.0770613	0.342784	1940.28	FALSE	92
2022-09-13	09:41:10	0.088817	0.395076	2137.44	FALSE	92
2022-09-13	09:41:10	0.207036	0.920938	1941.2	FALSE	92
2022-09-13	09:41:11	0.216043	0.961002	2138.41	FALSE	92
2022-09-13	09:41:11	0.611209	2.71878	1943.92	FALSE	92
2022-09-13	09:41:11	0.840471	3.73858	2142.14	FALSE	92
2022-09-13	09:41:11	0.930903	4.14084	1948.06	FALSE	92
2022-09-13	09:41:12	0.724796	3.22404	2145.37	FALSE	92
2022-09-13	09:41:12	0.521641	2.32036	1950.38	FALSE	92
2022-09-13	09:41:12	0.373193	1.66004	2147.03	FALSE	92
2022-09-13	09:41:12	0.561794	2.49897	1952.88	FALSE	92
2022-09-13	09:41:13	0.324898	1.44521	2148.47	FALSE	92
2022-09-13	09:41:13	0.424848	1.88981	1954.77	FALSE	92
2022-09-13	09:41:13	0.437214	1.94482	2150.42	FALSE	92
2022-09-13	09:41:14	0.617672	2.74753	1957.51	FALSE	92
2022-09-13	09:41:14	0.380827	1.69399	2152.11	FALSE	92
2022-09-13	09:41:14	0.439656	1.95568	1959.47	FALSE	92
2022-09-13	09:41:14	0.357621	1.59077	2153.7	FALSE	92
2022-09-13	09:41:15	0.229326	1.02009	1960.49	FALSE	92
2022-09-13	09:41:15	0.430903	1.91674	2155.62	FALSE	92
2022-09-13	09:41:15	0.947595	4.21509	1964.71	FALSE	92
2022-09-13	09:41:15	0.662557	2.94719	2158.57	FALSE	92
2022-09-13	09:41:16	0.291463	1.29649	1966	FALSE	92
2022-09-13	09:41:16	1.02724	4.56937	2163.14	FALSE	92
2022-09-13	09:41:16	0.303422	1.34968	1967.35	FALSE	92
2022-09-13	09:41:16	0.565967	2.51753	2165.65	FALSE	92
2022-09-13	09:41:17	0.321031	1.42801	1968.78	FALSE	92
2022-09-13	09:41:17	0.342405	1.52309	2167.18	FALSE	92
2022-09-13	09:41:17	0.487188	2.16711	1970.95	FALSE	92
2022-09-13	09:41:18	0.961539	4.27712	2171.45	FALSE	92
2022-09-13	09:41:18	0.38841	1.72773	1972.67	FALSE	92
2022-09-13	09:41:18	0.307646	1.36847	2172.82	FALSE	92
2022-09-13	09:41:18	0.623117	2.77175	1975.45	FALSE	92
2022-09-13	09:41:19	0.38159	1.69739	2174.52	FALSE	92
2022-09-13	09:41:19	0.531361	2.3636	1977.81	FALSE	92
2022-09-13	09:41:19	0.274873	1.22269	2175.74	FALSE	92
2022-09-13	09:41:19	0.936552	4.16597	1981.98	FALSE	92
2022-09-13	09:41:20	1.41207	6.28117	2182.02	FALSE	92
2022-09-13	09:41:20	1.93472	8.60602	1990.58	FALSE	92
2022-09-13	09:41:20	2.93253	13.0445	2195.07	FALSE	92
2022-09-13	09:41:20	1.07925	4.80072	1995.38	FALSE	92
2022-09-13	09:41:21	1.69263	7.52916	2202.6	FALSE	92
2022-09-13	09:41:21	0.873855	3.88708	1999.27	FALSE	92
2022-09-13	09:41:21	1.40296	6.24065	2208.84	FALSE	92
2022-09-13	09:41:21	1.54368	6.8666	2006.14	FALSE	92
2022-09-13	09:41:22	0.631158	2.80752	2211.65	FALSE	92
2022-09-13	09:41:22	0.96958	4.31289	2010.45	FALSE	92
2022-09-13	09:41:22	1.67207	7.4377	2219.08	FALSE	92
2022-09-13	09:41:23	0.356959	1.58783	2012.04	FALSE	92
2022-09-13	09:41:23	0.361387	1.60752	2220.69	FALSE	92
2022-09-13	09:41:23	0.444084	1.97537	2014.01	FALSE	92
2022-09-13	09:41:23	0.354822	1.57832	2222.27	FALSE	92
2022-09-13	09:41:24	0.35243	1.56768	2015.58	FALSE	92
2022-09-13	09:41:24	0.213143	0.948103	2223.22	FALSE	92
2022-09-13	09:41:24	0.412685	1.83571	2017.42	FALSE	92
2022-09-13	09:41:24	0.884796	3.93575	2227.15	FALSE	92
2022-09-13	09:41:25	0.767392	3.41351	2020.83	FALSE	92
2022-09-13	09:41:25	1.79182	7.97037	2235.12	FALSE	92
2022-09-13	09:41:25	1.86856	8.31173	2029.14	FALSE	92
2022-09-13	09:41:25	0.626629	2.78737	2237.91	FALSE	92
2022-09-13	09:41:26	1.23172	5.47894	2034.62	FALSE	92
2022-09-13	09:41:26	0.898435	3.99642	2241.91	FALSE	92
2022-09-13	09:41:26	0.379046	1.68607	2036.31	FALSE	92
2022-09-13	09:41:27	0.618435	2.75092	2244.66	FALSE	92
2022-09-13	09:41:27	0.513041	2.28211	2038.59	FALSE	92
2022-09-13	09:41:27	0.688257	3.0615	2247.72	FALSE	92
2022-09-13	09:41:27	1.30917	5.82345	2044.41	FALSE	92
2022-09-13	09:41:28	1.73584	7.72136	2255.44	FALSE	92
2022-09-13	09:41:28	2.74378	12.2049	2056.62	FALSE	92
2022-09-13	09:41:28	3.52647	15.6864	2271.13	1	93
2022-09-13	09:41:28	2.00531	8.92002	2065.54	FALSE	93
2022-09-13	09:41:29	0.935687	4.16212	2275.29	FALSE	93
2022-09-13	09:41:29	0.363372	1.61635	2067.15	FALSE	93
2022-09-13	09:41:29	0.410191	1.82461	2277.11	FALSE	93
2022-09-13	09:41:29	0.233652	1.03933	2068.19	FALSE	93
2022-09-13	09:41:30	0.283422	1.26072	2278.38	FALSE	93
2022-09-13	09:41:30	-0.0105723	-0.0470277	2068.19	FALSE	93
2022-09-13	09:41:30	0.0674429	0.3	2278.68	FALSE	93
2022-09-13	09:41:30	0.0143641	0.0638944	2068.26	FALSE	93
2022-09-13	09:41:31	0.179911	0.80028	2279.48	FALSE	93
2022-09-13	09:41:31	0.225916	1.00492	2069.26	FALSE	93
2022-09-13	09:41:31	2.11777	9.42026	2288.9	FALSE	93
2022-09-13	09:41:32	1.76408	7.84698	2077.11	FALSE	93
2022-09-13	09:41:32	7.52235	33.4609	2322.36	1	94
2022-09-13	09:41:32	1.84042	8.18656	2085.29	FALSE	94
2022-09-13	09:41:32	5.57009	24.7769	2347.13	1	95
2022-09-13	09:41:33	3.67518	16.3479	2101.64	1	96
2022-09-13	09:41:33	2.03284	9.04248	2356.18	FALSE	96
2022-09-13	09:41:33	6.84118	30.4309	2132.07	1	97
2022-09-13	09:41:33	3.83278	17.049	2373.23	1	98
2022-09-13	09:41:34	8.09074	35.9892	2168.06	1	99
2022-09-13	09:41:34	6.95533	30.9387	2404.16	1	100
2022-09-13	09:41:34	1.92312	8.55442	2176.62	FALSE	100
2022-09-13	09:41:34	0.986119	4.38645	2408.55	FALSE	100
2022-09-13	09:41:35	0.10668	0.474534	2177.09	FALSE	100
2022-09-13	09:41:35	0.274466	1.22088	2409.77	FALSE	100
2022-09-13	09:41:35	-0.0709793	-0.31573	2177.09	FALSE	100
2022-09-13	09:41:36	-0.172913	-0.769152	2409.77	FALSE	100
2022-09-13	09:41:36	-0.323244	-1.43785	2177.09	FALSE	100
2022-09-13	09:41:36	-0.447061	-1.98862	2409.77	FALSE	100
2022-09-13	09:41:36	-0.507671	-2.25822	2177.09	FALSE	100
2022-09-13	09:41:37	-0.551335	-2.45245	2409.77	FALSE	100
2022-09-13	09:41:37	-0.570114	-2.53598	2177.09	FALSE	100
2022-09-13	09:41:37	-0.624465	-2.77775	2409.77	FALSE	100
2022-09-13	09:41:37	-0.553829	-2.46354	2177.09	FALSE	100
2022-09-13	09:41:38	-0.858002	-3.81656	2409.77	FALSE	100
2022-09-13	09:41:38	-0.757697	-3.37039	2177.09	FALSE	100
2022-09-13	09:41:38	-0.843244	-3.75092	2409.77	FALSE	100
2022-09-13	09:41:38	-0.753473	-3.3516	2177.09	FALSE	100
2022-09-13	09:41:39	-0.555356	-2.47033	2409.77	FALSE	100
2022-09-13	09:41:39	-0.27047	-1.2031	2177.09	FALSE	100
2022-09-13	09:41:39	-0.172913	-0.769152	2409.77	FALSE	100
2022-09-13	09:41:40	-0.0224807	-0.0999986	2177.09	FALSE	100
2022-09-13	09:41:40	0.130395	0.580023	2410.35	FALSE	100
2022-09-13	09:41:40	0.0477992	0.21262	2177.3	FALSE	100
2022-09-13	09:41:40	0.60444	2.68867	2413.04	FALSE	100
2022-09-13	09:41:41	0.580827	2.58363	2179.89	FALSE	100
2022-09-13	09:41:41	0.319402	1.42076	2414.46	FALSE	100
2022-09-13	09:41:41	0.230547	1.02552	2180.91	FALSE	100
2022-09-13	09:41:41	0.288206	1.282	2415.74	FALSE	100
2022-09-13	09:41:42	0.789987	3.51402	2184.43	FALSE	100
2022-09-13	09:41:42	0.400827	1.78296	2417.53	FALSE	100
2022-09-13	09:41:42	0.939249	4.17797	2188.61	FALSE	100
2022-09-13	09:41:42	1.8165	8.08016	2425.61	FALSE	100
2022-09-13	09:41:43	0.174466	0.77606	2189.38	FALSE	100
2022-09-13	09:41:43	0.989122	4.39981	2430.01	FALSE	100
2022-09-13	09:41:43	0.546069	2.42902	2191.81	FALSE	100
2022-09-13	09:41:43	2.94729	13.1101	2443.12	FALSE	100
2022-09-13	09:41:44	2.74138	12.1942	2204	FALSE	100
2022-09-13	09:41:44	2.32225	10.3298	2453.45	FALSE	100
2022-09-13	09:41:44	2.42587	10.7908	2214.8	FALSE	100
2022-09-13	09:41:45	0.424898	1.89003	2455.34	FALSE	100
2022-09-13	09:41:45	0.787341	3.50225	2218.3	FALSE	100
2022-09-13	09:41:45	0.665102	2.95851	2458.29	FALSE	100
2022-09-13	09:41:45	0.728054	3.23853	2221.54	FALSE	100
2022-09-13	09:41:46	0.415534	1.84838	2460.14	FALSE	100
2022-09-13	09:41:46	0.663321	2.95058	2224.49	FALSE	100
2022-09-13	09:41:46	0.484339	2.15444	2462.3	FALSE	100
2022-09-13	09:41:46	1.90953	8.49397	2232.98	FALSE	100
2022-09-13	09:41:47	0.820013	3.64758	2465.94	FALSE	100
2022-09-13	09:41:47	6.35263	28.2578	2261.24	1	101
2022-09-13	09:41:47	1.94296	8.64267	2474.59	FALSE	101
2022-09-13	09:41:47	12.0323	53.5221	2314.76	1	102
2022-09-13	09:41:48	2.44871	10.8924	2485.48	FALSE	102
2022-09-13	09:41:48	3.10647	13.8182	2328.58	1	103
2022-09-13	09:41:48	1.79141	7.96855	2493.45	FALSE	103
2022-09-13	09:41:49	1.15915	5.15613	2333.73	FALSE	103
2022-09-13	09:41:49	4.14286	18.4283	2511.88	1	104
2022-09-13	09:41:49	1.12454	5.00218	2338.74	FALSE	104
2022-09-13	09:41:49	3.14495	13.9894	2525.87	1	105
2022-09-13	09:41:50	5.06144	22.5143	2361.25	1	106
2022-09-13	09:41:50	0.49126	2.18522	2528.05	FALSE	106
2022-09-13	09:41:50	0.667443	2.96892	2364.22	FALSE	106
2022-09-13	09:41:50	0.280725	1.24872	2529.3	FALSE	106
2022-09-13	09:41:51	0.329987	1.46785	2365.69	FALSE	106
2022-09-13	09:41:51	0.0300893	0.133843	2529.43	FALSE	106
2022-09-13	09:41:51	-0.383651	-1.70656	2365.69	FALSE	106
2022-09-13	09:41:51	-0.562226	-2.50089	2529.43	FALSE	106
2022-09-13	09:41:52	-0.459223	-2.04272	2365.69	FALSE	106
2022-09-13	09:41:52	-0.595101	-2.64713	2529.43	FALSE	106
2022-09-13	09:41:52	-0.52874	-2.35194	2365.69	FALSE	106
2022-09-13	09:41:52	-0.55561	-2.47146	2529.43	FALSE	106
2022-09-13	09:41:53	-0.0522007	-0.232199	2365.69	FALSE	106
2022-09-13	09:41:53	0.157265	0.699546	2530.13	FALSE	106
2022-09-13	09:41:53	0.189478	0.842836	2366.53	FALSE	106
2022-09-13	09:41:54	0.179402	0.798016	2530.93	FALSE	106
2022-09-13	09:41:54	0.157672	0.701357	2367.23	FALSE	106
2022-09-13	09:41:54	0.166985	0.742783	2531.67	FALSE	106
2022-09-13	09:41:54	0.163219	0.726031	2367.96	FALSE	106
2022-09-13	09:41:55	0.233092	1.03684	2532.71	FALSE	106
2022-09-13	09:41:55	1.76505	7.8513	2375.81	FALSE	106
2022-09-13	09:41:55	4.12424	18.3454	2551.06	1	107
2022-09-13	09:41:55	4.77955	21.2604	2397.07	1	108
2022-09-13	09:41:56	5.27543	23.4662	2574.52	1	109
2022-09-13	09:41:56	3.15182	14.0199	2411.09	1	110
2022-09-13	09:41:56	5.03334	22.3893	2596.91	1	111
2022-09-13	09:41:56	7.04591	31.3416	2442.43	1	112
2022-09-13	09:41:57	9.14326	40.671	2637.58	1	113
2022-09-13	09:41:57	6.19263	27.5461	2469.98	1	114
2022-09-13	09:41:57	5.07177	22.5602	2660.14	1	115
2022-09-13	09:41:58	2.11192	9.39424	2479.37	FALSE	115
2022-09-13	09:41:58	2.0249	9.00716	2669.15	FALSE	115
2022-09-13	09:41:58	0.745407	3.31572	2482.69	FALSE	115
2022-09-13	09:41:58	0.684847	3.04634	2672.2	FALSE	115
2022-09-13	09:41:59	0.511616	2.27577	2484.96	FALSE	115
2022-09-13	09:41:59	0.299199	1.3309	2673.53	FALSE	115
2022-09-13	09:41:59	0.137774	0.612846	2485.58	FALSE	115
2022-09-13	09:41:59	-0.105839	-0.470793	2673.53	FALSE	115
2022-09-13	09:42:00	-0.0842109	-0.374587	2485.58	FALSE	115
2022-09-13	09:42:00	0.025102	0.111659	2673.64	FALSE	115
2022-09-13	09:42:00	-0.00370202	-0.0164673	2485.58	FALSE	115
2022-09-13	09:42:00	0.0317687	0.141314	2673.78	FALSE	115
2022-09-13	09:42:01	0.0615905	0.273967	2485.85	FALSE	115
2022-09-13	09:42:01	-0.039529	-0.175833	2673.78	FALSE	115
2022-09-13	09:42:01	-0.230928	-1.02721	2485.85	FALSE	115
2022-09-13	09:42:01	-0.282022	-1.25449	2673.78	FALSE	115
2022-09-13	09:42:02	-0.395508	-1.7593	2485.85	FALSE	115
2022-09-13	09:42:02	-0.0201397	-0.0895854	2673.78	FALSE	115
2022-09-13	09:42:02	0.0909035	0.404357	2486.25	FALSE	115
2022-09-13	09:42:03	1.75279	7.79676	2681.58	FALSE	115
2022-09-13	09:42:03	2.43726	10.8414	2497.1	FALSE	115
2022-09-13	09:42:03	3.42215	15.2224	2696.8	1	116
2022-09-13	09:42:03	2.34215	10.4184	2507.51	FALSE	116
2022-09-13	09:42:04	5.1309	22.8233	2719.62	1	117
2022-09-13	09:42:04	1.51385	6.73391	2514.25	FALSE	117
2022-09-13	09:42:04	4.12927	18.3678	2737.99	1	118
2022-09-13	09:42:04	2.28469	10.1628	2524.41	FALSE	118
2022-09-13	09:42:05	2.41925	10.7613	2748.75	FALSE	118
2022-09-13	09:42:05	0.644695	2.86773	2527.28	FALSE	118
2022-09-13	09:42:05	0.530649	2.36043	2751.11	FALSE	118
2022-09-13	09:42:05	0.387697	1.72455	2529	FALSE	118
2022-09-13	09:42:06	0.416705	1.85359	2752.97	FALSE	118
2022-09-13	09:42:06	0.353601	1.57289	2530.58	FALSE	118
2022-09-13	09:42:06	0.404644	1.79994	2754.77	FALSE	118
2022-09-13	09:42:07	0.380522	1.69264	2532.27	FALSE	118
2022-09-13	09:42:07	0.41416	1.84227	2756.61	FALSE	118
2022-09-13	09:42:07	0.461132	2.05121	2534.32	FALSE	118
2022-09-13	09:42:07	0.39131	1.74063	2758.35	FALSE	118
2022-09-13	09:42:08	0.373702	1.6623	2535.98	FALSE	118
2022-09-13	09:42:08	0.369733	1.64465	2759.99	FALSE	118
2022-09-13	09:42:08	0.778384	3.46241	2539.44	FALSE	118
2022-09-13	09:42:08	2.16281	9.62061	2769.61	FALSE	118
2022-09-13	09:42:09	0.646374	2.8752	2542.32	FALSE	118
2022-09-13	09:42:09	7.08871	31.532	2801.15	1	119
2022-09-13	09:42:09	3.13014	13.9235	2556.24	1	120
2022-09-13	09:42:09	12.9712	57.6985	2858.84	1	121
2022-09-13	09:42:10	1.43777	6.39549	2562.64	FALSE	121
2022-09-13	09:42:10	6.08545	27.0693	2885.91	1	122
2022-09-13	09:42:10	1.90179	8.45954	2571.1	FALSE	122
2022-09-13	09:42:10	2.50011	11.121	2897.03	FALSE	122
2022-09-13	09:42:11	2.10698	9.37227	2580.47	FALSE	122
2022-09-13	09:42:11	2.64515	11.7662	2908.8	FALSE	122
2022-09-13	09:42:11	2.57645	11.4606	2591.93	FALSE	122
2022-09-13	09:42:12	1.00449	4.46817	2913.27	FALSE	122
2022-09-13	09:42:12	0.758944	3.37593	2595.31	FALSE	122
2022-09-13	09:42:12	0.777366	3.45788	2916.73	FALSE	122
2022-09-13	09:42:12	0.52617	2.34051	2597.65	FALSE	122
2022-09-13	09:42:13	0.466272	2.07407	2918.8	FALSE	122
2022-09-13	09:42:13	0.49874	2.2185	2599.87	FALSE	122
2022-09-13	09:42:13	0.378333	1.6829	2920.48	FALSE	122
2022-09-13	09:42:13	0.609682	2.71199	2602.58	FALSE	122
2022-09-13	09:42:14	0.737315	3.27972	2923.76	FALSE	122
2022-09-13	09:42:14	0.385254	1.71369	2604.29	FALSE	122
2022-09-13	09:42:14	0.489529	2.17752	2925.94	FALSE	122
2022-09-13	09:42:14	0.674058	2.99834	2607.29	FALSE	122
2022-09-13	09:42:15	0.447748	1.99167	2927.93	FALSE	122
2022-09-13	09:42:15	0.543015	2.41544	2609.71	FALSE	122
2022-09-13	09:42:15	0.474669	2.11142	2930.04	FALSE	122
2022-09-13	09:42:16	0.610751	2.71674	2612.42	FALSE	122
2022-09-13	09:42:16	0.42327	1.88279	2931.93	FALSE	122
2022-09-13	09:42:16	0.614465	2.73326	2615.16	FALSE	122
2022-09-13	09:42:16	0.528104	2.34911	2934.28	FALSE	122
2022-09-13	09:42:17	0.421387	1.87441	2617.03	FALSE	122
2022-09-13	09:42:17	0.890547	3.96133	2938.24	FALSE	122
2022-09-13	09:42:17	0.546628	2.43151	2619.46	FALSE	122
2022-09-13	09:42:17	0.880115	3.91493	2942.15	FALSE	122
2022-09-13	09:42:18	0.750598	3.33881	2622.8	FALSE	122
2022-09-13	09:42:18	0.898741	3.99778	2946.15	FALSE	122
2022-09-13	09:42:18	0.533855	2.37469	2625.17	FALSE	122
2022-09-13	09:42:18	0.569122	2.53157	2948.68	FALSE	122
2022-09-13	09:42:19	0.438893	1.95228	2627.13	FALSE	122
2022-09-13	09:42:19	0.577519	2.56892	2951.25	FALSE	122
2022-09-13	09:42:19	0.632888	2.81521	2629.94	FALSE	122
2022-09-13	09:42:19	0.420674	1.87124	2953.12	FALSE	122
2022-09-13	09:42:20	0.615382	2.73734	2632.68	FALSE	122
2022-09-13	09:42:20	0.455127	2.0245	2955.15	FALSE	122
2022-09-13	09:42:20	0.623015	2.7713	2635.45	FALSE	122
2022-09-13	09:42:21	0.376196	1.6734	2956.82	FALSE	122
2022-09-13	09:42:21	1.10286	4.90574	2640.36	FALSE	122
2022-09-13	09:42:21	0.62154	2.76473	2959.58	FALSE	122
2022-09-13	09:42:21	1.20999	5.38228	2645.74	FALSE	122
2022-09-13	09:42:22	0.879657	3.91289	2963.5	FALSE	122
2022-09-13	09:42:22	0.943931	4.19879	2649.94	FALSE	122
2022-09-13	09:42:22	3.14541	13.9914	2977.49	1	123
2022-09-13	09:42:22	0.845	3.75873	2653.7	FALSE	123
2022-09-13	09:42:23	1.82001	8.09577	2985.58	FALSE	123
2022-09-13	09:42:23	2.36475	10.5189	2664.22	FALSE	123
2022-09-13	09:42:23	1.12785	5.0169	2990.6	FALSE	123
2022-09-13	09:42:23	1.68134	7.47894	2671.69	FALSE	123
2022-09-13	09:42:24	1.08566	4.82923	2995.43	FALSE	123
2022-09-13	09:42:24	2.29655	10.2155	2681.91	FALSE	123
2022-09-13	09:42:24	2.63976	11.7422	3007.17	FALSE	123
2022-09-13	09:42:25	1.61197	7.17036	2689.08	FALSE	123
2022-09-13	09:42:25	3.19788	14.2248	3021.4	1	124
2022-09-13	09:42:25	4.26368	18.9657	2708.05	1	125
2022-09-13	09:42:25	0.505814	2.24996	3023.65	FALSE	125
2022-09-13	09:42:26	1.11808	4.97344	2713.02	FALSE	125
2022-09-13	09:42:26	0.745407	3.31572	3026.96	FALSE	125
2022-09-13	09:42:26	0.329479	1.46559	2714.48	FALSE	125
2022-09-13	09:42:26	0.56729	2.52342	3029.49	FALSE	125
2022-09-13	09:42:27	0.405356	1.8031	2716.29	FALSE	125
2022-09-13	09:42:27	0.567086	2.52251	3032.01	FALSE	125
2022-09-13	09:42:27	0.434618	1.93327	2718.22	FALSE	125
2022-09-13	09:42:27	0.481896	2.14357	3034.15	FALSE	125
2022-09-13	09:42:28	0.532634	2.36926	2720.59	FALSE	125
2022-09-13	09:42:28	0.493193	2.19382	3036.35	FALSE	125
2022-09-13	09:42:28	0.442761	1.96949	2722.56	FALSE	125
2022-09-13	09:42:29	0.430395	1.91448	3038.26	FALSE	125
2022-09-13	09:42:29	0.514059	2.28664	2724.85	FALSE	125
2022-09-13	09:42:29	0.482914	2.1481	3040.41	FALSE	125
2022-09-13	09:42:29	0.448664	1.99575	2726.84	FALSE	125
2022-09-13	09:42:30	0.470598	2.09331	3042.5	FALSE	125
2022-09-13	09:42:30	0.503371	2.23909	2729.08	FALSE	125
2022-09-13	09:42:30	0.437468	1.94595	3044.45	FALSE	125
2022-09-13	09:42:30	0.871463	3.87644	2732.96	FALSE	125
2022-09-13	09:42:31	1.6505	7.34175	3051.79	FALSE	125
2022-09-13	09:42:31	0.940674	4.18431	2737.14	FALSE	125
2022-09-13	09:42:31	2.55197	11.3517	3063.14	FALSE	125
2022-09-13	09:42:31	0.678995	3.02031	2740.16	FALSE	125
2022-09-13	09:42:32	0.97243	4.32556	3067.47	FALSE	125
2022-09-13	09:42:32	0.965713	4.29568	2744.46	FALSE	125
2022-09-13	09:42:32	0.410598	1.82642	3069.29	FALSE	125
2022-09-13	09:42:32	1.18546	5.27316	2749.73	FALSE	125
2022-09-13	09:42:33	1.44184	6.41359	3075.71	FALSE	125
2022-09-13	09:42:33	5.15848	22.946	2772.68	1	126
2022-09-13	09:42:33	5.40006	24.0205	3099.73	1	127
2022-09-13	09:42:34	3.6105	16.0602	2788.74	1	128
2022-09-13	09:42:34	1.24322	5.53009	3105.26	FALSE	128
2022-09-13	09:42:34	0.931412	4.14311	2792.88	FALSE	128
2022-09-13	09:42:34	0.744898	3.31346	3108.57	FALSE	128
2022-09-13	09:42:35	0.334262	1.48686	2794.37	FALSE	128
2022-09-13	09:42:35	0.538384	2.39484	3110.97	FALSE	128
2022-09-13	09:42:35	0.485356	2.15896	2796.53	FALSE	128
2022-09-13	09:42:35	0.500013	2.22416	3113.19	FALSE	128
2022-09-13	09:42:36	0.498893	2.21918	2798.75	FALSE	128
2022-09-13	09:42:36	0.526578	2.34232	3115.53	FALSE	128
2022-09-13	09:42:36	0.430649	1.91561	2800.66	FALSE	128
2022-09-13	09:42:36	0.323881	1.44069	3116.97	FALSE	128
2022-09-13	09:42:37	0.478384	2.12795	2802.79	FALSE	128
2022-09-13	09:42:37	0.383066	1.70395	3118.68	FALSE	128
2022-09-13	09:42:37	0.325255	1.4468	2804.24	FALSE	128
2022-09-13	09:42:38	0.475942	2.11709	3120.79	FALSE	128
2022-09-13	09:42:38	0.31584	1.40492	2805.64	FALSE	128
2022-09-13	09:42:38	0.495229	2.20288	3123	FALSE	128
2022-09-13	09:42:38	0.371616	1.65302	2807.29	FALSE	128
2022-09-13	09:42:39	1.16032	5.16134	3128.16	FALSE	128
2022-09-13	09:42:39	0.566272	2.51889	2809.81	FALSE	128
2022-09-13	09:42:39	2.68566	11.9464	3140.11	FALSE	128
2022-09-13	09:42:39	2.0219	8.99382	2818.81	FALSE	128
2022-09-13	09:42:40	2.57584	11.4579	3151.56	FALSE	128
2022-09-13	09:42:40	0.950954	4.23003	2823.04	FALSE	128
2022-09-13	09:42:40	1.12052	4.9843	3156.55	FALSE	128
2022-09-13	09:42:40	0.991768	4.41158	2827.45	FALSE	128
2022-09-13	09:42:41	0.380674	1.69331	3158.24	FALSE	128
2022-09-13	09:42:41	0.783117	3.48346	2830.93	FALSE	128
2022-09-13	09:42:41	0.84958	3.7791	3162.02	FALSE	128
2022-09-13	09:42:41	0.454822	2.02314	2832.95	FALSE	128
2022-09-13	09:42:42	0.761997	3.38952	3165.41	FALSE	128
2022-09-13	09:42:42	0.555992	2.47316	2835.43	FALSE	128
2022-09-13	09:42:42	0.420115	1.86876	3167.28	FALSE	128
2022-09-13	09:42:43	0.991616	4.41091	2839.84	FALSE	128
2022-09-13	09:42:43	0.391209	1.74018	3169.02	FALSE	128
2022-09-13	09:42:43	0.370903	1.64985	2841.49	FALSE	128
2022-09-13	09:42:43	0.793193	3.52828	3172.55	FALSE	128
2022-09-13	09:42:44	0.233499	1.03865	2842.53	FALSE	128
2022-09-13	09:42:44	0.632837	2.81499	3175.36	FALSE	128
2022-09-13	09:42:44	0.383219	1.70463	2844.23	FALSE	128
2022-09-13	09:42:45	0.551463	2.45302	3177.81	FALSE	128
2022-09-13	09:42:45	1.46337	6.50936	2850.74	FALSE	128
2022-09-13	09:42:45	0.470038	2.09082	3179.91	FALSE	128
2022-09-13	09:42:45	0.700624	3.11652	2853.86	FALSE	128
2022-09-13	09:42:45	2.07426	9.22672	3189.13	FALSE	128
2022-09-13	09:42:46	0.991463	4.41023	2858.27	FALSE	128
2022-09-13	09:42:46	2.00973	8.93968	3198.07	FALSE	128
2022-09-13	09:42:46	0.987646	4.39325	2862.66	FALSE	128
2022-09-13	09:42:47	3.01309	13.4028	3211.47	1	129
2022-09-13	09:42:47	3.2336	14.3837	2877.05	1	130
2022-09-13	09:42:47	1.63701	7.28175	3218.76	FALSE	130
2022-09-13	09:42:47	1.19172	5.30101	2882.35	FALSE	130
2022-09-13	09:42:48	1.07726	4.79187	3223.55	FALSE	130
2022-09-13	09:42:48	0.394313	1.75398	2884.1	FALSE	130
2022-09-13	09:42:48	0.447901	1.99235	3225.54	FALSE	130
2022-09-13	09:42:48	0.916857	4.07836	2888.18	FALSE	130
2022-09-13	09:42:49	0.52444	2.33281	3227.87	FALSE	130
2022-09-13	09:42:49	0.539809	2.40118	2890.58	FALSE	130
2022-09-13	09:42:49	0.38327	1.70486	3229.58	FALSE	130
2022-09-13	09:42:49	0.530038	2.35772	2892.94	FALSE	130
2022-09-13	09:42:50	0.395636	1.75987	3231.34	FALSE	130
2022-09-13	09:42:50	0.497672	2.21374	2895.15	FALSE	130
2022-09-13	09:42:50	1.95401	8.69183	3240.03	FALSE	130
2022-09-13	09:42:50	0.370191	1.64668	2896.8	FALSE	130
2022-09-13	09:42:51	0.218232	0.97074	3241	FALSE	130
2022-09-13	09:42:51	0.67701	3.01148	2899.81	FALSE	130
2022-09-13	09:42:51	0.374517	1.66593	3242.67	FALSE	130
2022-09-13	09:42:52	0.37299	1.65913	2901.47	FALSE	130
2022-09-13	09:42:52	0.473295	2.10531	3244.77	FALSE	130
2022-09-13	09:42:52	0.582761	2.59224	2904.06	FALSE	130
2022-09-13	09:42:52	0.470242	2.09173	3246.86	FALSE	130
2022-09-13	09:42:53	0.410598	1.82642	2905.89	FALSE	130
2022-09-13	09:42:53	0.422761	1.88053	3248.74	FALSE	130
2022-09-13	09:42:53	0.254975	1.13418	2907.02	FALSE	130
2022-09-13	09:42:53	0.206425	0.91822	3249.66	FALSE	130
2022-09-13	09:42:54	-0.0142364	-0.0633264	2907.02	FALSE	130
2022-09-13	09:42:54	0.0416415	0.18523	3249.85	FALSE	130
2022-09-13	09:42:54	0.0403692	0.17957	2907.2	FALSE	130
2022-09-13	09:42:54	-0.216984	-0.965188	3249.85	FALSE	130
2022-09-13	09:42:55	-0.257188	-1.14402	2907.2	FALSE	130
2022-09-13	09:42:55	-0.280547	-1.24793	3249.85	FALSE	130
2022-09-13	09:42:55	-0.0592237	-0.263439	2907.2	FALSE	130
2022-09-13	09:42:56	-0.154491	-0.687207	3249.85	FALSE	130
2022-09-13	09:42:56	0.134313	0.597451	2907.8	FALSE	130
2022-09-13	09:42:56	0.377621	1.67973	3251.53	FALSE	130
2022-09-13	09:42:56	1.64724	7.32725	2915.13	FALSE	130
2022-09-13	09:42:57	3.81268	16.9596	3268.49	1	131
2022-09-13	09:42:57	2.09553	9.32134	2924.45	FALSE	131
2022-09-13	09:42:57	5.83538	25.9569	3294.44	1	132
2022-09-13	09:42:57	0.886323	3.94254	2928.39	FALSE	132
2022-09-13	09:42:58	3.1939	14.2071	3308.65	1	133
2022-09-13	09:42:58	1.67788	7.46355	2935.85	FALSE	133
2022-09-13	09:42:58	0.722404	3.2134	3311.86	FALSE	133
2022-09-13	09:42:58	0.905356	4.0272	2939.88	FALSE	133
2022-09-13	09:42:59	0.61869	2.75206	3314.62	FALSE	133
2022-09-13	09:42:59	0.872837	3.88255	2943.76	FALSE	133
2022-09-13	09:42:59	0.943982	4.19902	3318.82	FALSE	133
2022-09-13	09:42:59	0.606476	2.69773	2946.46	FALSE	133
2022-09-13	09:43:00	0.958893	4.26535	3323.08	FALSE	133
2022-09-13	09:43:00	1.57823	7.02028	2953.48	FALSE	133
2022-09-13	09:43:00	0.564949	2.51301	3325.59	FALSE	133
2022-09-13	09:43:01	1.12123	4.98746	2958.47	FALSE	133
2022-09-13	09:43:01	0.727087	3.23423	3328.83	FALSE	133
2022-09-13	09:43:01	0.500979	2.22845	2960.7	FALSE	133
2022-09-13	09:43:01	1.11976	4.98092	3333.81	FALSE	133
2022-09-13	09:43:02	0.643015	2.86026	2963.56	FALSE	133
2022-09-13	09:43:02	1.89391	8.42449	3342.23	FALSE	133
2022-09-13	09:43:02	0.827494	3.68086	2967.24	FALSE	133
2022-09-13	09:43:02	0.767392	3.41351	3345.65	FALSE	133
2022-09-13	09:43:03	2.12734	9.46283	2976.7	FALSE	133
2022-09-13	09:43:03	0.624287	2.77695	3348.42	FALSE	133
2022-09-13	09:43:03	1.4592	6.49081	2983.19	FALSE	133
2022-09-13	09:43:04	0.676806	3.01057	3351.43	FALSE	133
2022-09-13	09:43:04	1.40709	6.25902	2989.45	FALSE	133
2022-09-13	09:43:04	2.15314	9.5776	3361.01	FALSE	133
2022-09-13	09:43:04	0.601488	2.67554	2992.13	FALSE	133
2022-09-13	09:43:05	2.99212	13.3095	3374.32	FALSE	133
2022-09-13	09:43:05	1.61574	7.18713	2999.31	FALSE	133
2022-09-13	09:43:05	2.84062	12.6356	3386.96	FALSE	133
2022-09-13	09:43:05	2.2881	10.1779	3009.49	FALSE	133
2022-09-13	09:43:06	0.998588	4.44192	3391.4	FALSE	133
2022-09-13	09:43:06	0.989326	4.40072	3013.89	FALSE	133
2022-09-13	09:43:06	1.55492	6.9166	3398.32	FALSE	133
2022-09-13	09:43:06	1.27538	5.67315	3019.56	FALSE	133

## Sheet: Saint_harness_202291393758 (E)
Date	Time	Lbs	Total force x time			**GoPro Fitting: 927
2022-09-13	09:38:06	0.471311	0.471311	FALSE	0			Total force	1442.8
2022-09-13	09:38:06	0.517519	0.98883	FALSE	0			Total Steps	133
2022-09-13	09:38:06	0.481031	1.46986	FALSE	0
2022-09-13	09:38:06	0.426069	1.89593	FALSE	0
2022-09-13	09:38:07	0.475992	2.37192	FALSE	0
2022-09-13	09:38:07	0.43869	2.81061	FALSE	0
2022-09-13	09:38:07	0.58556	3.39617	FALSE	0
2022-09-13	09:38:07	0.378486	3.77466	FALSE	0
2022-09-13	09:38:08	0.484491	4.25915	FALSE	0
2022-09-13	09:38:08	0.428104	4.68725	FALSE	0
2022-09-13	09:38:08	0.225356	4.91261	FALSE	0
2022-09-13	09:38:08	0.746119	5.65873	FALSE	0
2022-09-13	09:38:09	0.410191	6.06892	FALSE	0
2022-09-13	09:38:09	0.324847	6.39377	FALSE	0
2022-09-13	09:38:09	0.480318	6.87408	FALSE	0
2022-09-13	09:38:10	0.371718	7.2458	FALSE	0
2022-09-13	09:38:10	0.295178	7.54098	FALSE	0
2022-09-13	09:38:10	0.248155	7.78913	FALSE	0
2022-09-13	09:38:10	0.367341	8.15648	FALSE	0
2022-09-13	09:38:11	0.126731	8.28321	FALSE	0
2022-09-13	09:38:11	0.0968577	8.38006	FALSE	0
2022-09-13	09:38:11	0.133397	8.51346	FALSE	0
2022-09-13	09:38:11	0.152888	8.66635	FALSE	0
2022-09-13	09:38:12	0.531616	9.19797	FALSE	0
2022-09-13	09:38:12	6.2767	15.4747	1	1
2022-09-13	09:38:12	21.8009	37.2756	1	2
2022-09-13	09:38:12	15.2512	52.5268	1	3
2022-09-13	09:38:13	4.24668	56.7734	1	4
2022-09-13	09:38:13	5.73451	62.508	1	5
2022-09-13	09:38:13	12.4908	74.9988	1	6
2022-09-13	09:38:13	7.17686	82.1756	1	7
2022-09-13	09:38:14	3.98393	86.1595	1	8
2022-09-13	09:38:14	1.0509	87.2104	FALSE	8
2022-09-13	09:38:14	0.439606	87.6501	FALSE	8
2022-09-13	09:38:15	0.740725	88.3908	FALSE	8
2022-09-13	09:38:15	0.179504	88.5703	FALSE	8
2022-09-13	09:38:15	0.287341	88.8576	FALSE	8
2022-09-13	09:38:15	0.566476	89.4241	FALSE	8
2022-09-13	09:38:16	0.300318	89.7244	FALSE	8
2022-09-13	09:38:16	0.499046	90.2235	FALSE	8
2022-09-13	09:38:16	0.522913	90.7464	FALSE	8
2022-09-13	09:38:16	0.759911	91.5063	FALSE	8
2022-09-13	09:38:17	2.64551	94.1518	FALSE	8
2022-09-13	09:38:17	4.45166	98.6035	1	9
2022-09-13	09:38:17	2.85009	101.454	FALSE	9
2022-09-13	09:38:17	3.6106	105.064	1	10
2022-09-13	09:38:18	0.501539	105.566	FALSE	10
2022-09-13	09:38:18	0.475331	106.041	FALSE	10
2022-09-13	09:38:18	0.634211	106.675	FALSE	10
2022-09-13	09:38:19	0.326323	107.002	FALSE	10
2022-09-13	09:38:19	0.558741	107.56	FALSE	10
2022-09-13	09:38:19	0.362201	107.922	FALSE	10
2022-09-13	09:38:19	0.733651	108.656	FALSE	10
2022-09-13	09:38:20	0.0533972	108.71	FALSE	10
2022-09-13	09:38:20	-0.305229	108.71	FALSE	10
2022-09-13	09:38:20	0.0119723	108.722	FALSE	10
2022-09-13	09:38:20	6.75472	115.476	1	11
2022-09-13	09:38:21	4.3621	119.838	1	12
2022-09-13	09:38:21	3.40698	123.245	1	13
2022-09-13	09:38:21	2.19513	125.44	FALSE	13
2022-09-13	09:38:21	1.70388	127.144	FALSE	13
2022-09-13	09:38:22	1.91299	129.057	FALSE	13
2022-09-13	09:38:22	1.31981	130.377	FALSE	13
2022-09-13	09:38:22	3.33395	133.711	1	14
2022-09-13	09:38:22	5.91502	139.626	1	15
2022-09-13	09:38:23	8.10851	147.735	1	16
2022-09-13	09:38:23	1.94266	149.677	FALSE	16
2022-09-13	09:38:23	0.197672	149.875	FALSE	16
2022-09-13	09:38:24	0.0380282	149.913	FALSE	16
2022-09-13	09:38:24	-0.126297	149.913	FALSE	16
2022-09-13	09:38:24	0.195891	150.109	FALSE	16
2022-09-13	09:38:24	0.639249	150.748	FALSE	16
2022-09-13	09:38:25	0.430853	151.179	FALSE	16
2022-09-13	09:38:25	0.798842	151.978	FALSE	16
2022-09-13	09:38:25	0.285356	152.263	FALSE	16
2022-09-13	09:38:25	0.689173	152.952	FALSE	16
2022-09-13	09:38:26	0.251616	153.204	FALSE	16
2022-09-13	09:38:26	0.648766	153.853	FALSE	16
2022-09-13	09:38:26	0.428613	154.281	FALSE	16
2022-09-13	09:38:26	0.555534	154.837	FALSE	16
2022-09-13	09:38:27	0.549987	155.387	FALSE	16
2022-09-13	09:38:27	0.755076	156.142	FALSE	16
2022-09-13	09:38:27	1.74047	157.882	FALSE	16
2022-09-13	09:38:28	3.58195	161.464	1	17
2022-09-13	09:38:28	4.65375	166.118	1	18
2022-09-13	09:38:28	2.61345	168.732	FALSE	18
2022-09-13	09:38:28	1.8221	170.554	FALSE	18
2022-09-13	09:38:29	0.462812	171.016	FALSE	18
2022-09-13	09:38:29	0.589122	171.606	FALSE	18
2022-09-13	09:38:29	0.621132	172.227	FALSE	18
2022-09-13	09:38:29	0.423321	172.65	FALSE	18
2022-09-13	09:38:30	0.0453565	172.695	FALSE	18
2022-09-13	09:38:30	-0.223448	172.695	FALSE	18
2022-09-13	09:38:30	-0.454338	172.695	FALSE	18
2022-09-13	09:38:30	-0.352302	172.695	FALSE	18
2022-09-13	09:38:31	0.0384862	172.734	FALSE	18
2022-09-13	09:38:31	1.84525	174.579	FALSE	18
2022-09-13	09:38:31	4.17345	178.753	1	19
2022-09-13	09:38:31	1.12408	179.877	FALSE	19
2022-09-13	09:38:32	1.4306	181.307	FALSE	19
2022-09-13	09:38:32	1.10897	182.416	FALSE	19
2022-09-13	09:38:32	0.660318	183.077	FALSE	19
2022-09-13	09:38:33	0.888003	183.965	FALSE	19
2022-09-13	09:38:33	0.261285	184.226	FALSE	19
2022-09-13	09:38:33	0.652481	184.878	FALSE	19
2022-09-13	09:38:33	0.307341	185.186	FALSE	19
2022-09-13	09:38:34	0.62556	185.811	FALSE	19
2022-09-13	09:38:34	0.695992	186.507	FALSE	19
2022-09-13	09:38:34	0.716043	187.223	FALSE	19
2022-09-13	09:38:34	0.268104	187.491	FALSE	19
2022-09-13	09:38:35	1.88317	189.375	FALSE	19
2022-09-13	09:38:35	0.502608	189.877	FALSE	19
2022-09-13	09:38:35	3.68663	193.564	1	20
2022-09-13	09:38:35	5.76408	199.328	1	21
2022-09-13	09:38:36	5.53757	204.865	1	22
2022-09-13	09:38:36	4.69747	209.563	1	23
2022-09-13	09:38:36	1.05447	210.617	FALSE	23
2022-09-13	09:38:37	-0.134135	210.617	FALSE	23
2022-09-13	09:38:37	-0.0798852	210.617	FALSE	23
2022-09-13	09:38:37	0.253092	210.87	FALSE	23
2022-09-13	09:38:37	-0.202226	210.87	FALSE	23
2022-09-13	09:38:38	0.494822	211.365	FALSE	23
2022-09-13	09:38:38	1.76775	213.133	FALSE	23
2022-09-13	09:38:38	5.67263	218.806	1	24
2022-09-13	09:38:38	5.32342	224.129	1	25
2022-09-13	09:38:39	3.72088	227.85	1	26
2022-09-13	09:38:39	0.683168	228.533	FALSE	26
2022-09-13	09:38:39	0.39014	228.923	FALSE	26
2022-09-13	09:38:39	0.463473	229.387	FALSE	26
2022-09-13	09:38:40	0.275585	229.662	FALSE	26
2022-09-13	09:38:40	0.46383	230.126	FALSE	26
2022-09-13	09:38:40	0.27813	230.404	FALSE	26
2022-09-13	09:38:40	0.6107	231.015	FALSE	26
2022-09-13	09:38:41	0.727188	231.742	FALSE	26
2022-09-13	09:38:41	0.498537	232.241	FALSE	26
2022-09-13	09:38:41	0.339148	232.58	FALSE	26
2022-09-13	09:38:42	0.514568	233.094	FALSE	26
2022-09-13	09:38:42	0.514669	233.609	FALSE	26
2022-09-13	09:38:42	0.254873	233.864	FALSE	26
2022-09-13	09:38:42	0.532888	234.397	FALSE	26
2022-09-13	09:38:43	0.195026	234.592	FALSE	26
2022-09-13	09:38:43	0.634669	235.227	FALSE	26
2022-09-13	09:38:43	0.316298	235.543	FALSE	26
2022-09-13	09:38:43	0.640216	236.183	FALSE	26
2022-09-13	09:38:44	0.364389	236.547	FALSE	26
2022-09-13	09:38:44	0.407596	236.955	FALSE	26
2022-09-13	09:38:44	0.487952	237.443	FALSE	26
2022-09-13	09:38:44	0.292735	237.736	FALSE	26
2022-09-13	09:38:45	0.443931	238.18	FALSE	26
2022-09-13	09:38:45	0.525967	238.706	FALSE	26
2022-09-13	09:38:45	0.934873	239.64	FALSE	26
2022-09-13	09:38:46	0.541997	240.182	FALSE	26
2022-09-13	09:38:46	2.13111	242.314	FALSE	26
2022-09-13	09:38:46	0.60444	242.918	FALSE	26
2022-09-13	09:38:46	0.761285	243.679	FALSE	26
2022-09-13	09:38:47	0.942099	244.621	FALSE	26
2022-09-13	09:38:47	0.832176	245.454	FALSE	26
2022-09-13	09:38:47	2.43406	247.888	FALSE	26
2022-09-13	09:38:47	0.551005	248.439	FALSE	26
2022-09-13	09:38:48	2.18597	250.625	FALSE	26
2022-09-13	09:38:48	2.33365	252.958	FALSE	26
2022-09-13	09:38:48	1.94897	254.907	FALSE	26
2022-09-13	09:38:48	5.04968	259.957	1	27
2022-09-13	09:38:49	3.23248	263.189	1	28
2022-09-13	09:38:49	4.0167	267.206	1	29
2022-09-13	09:38:49	4.45009	271.656	1	30
2022-09-13	09:38:49	1.62352	273.28	FALSE	30
2022-09-13	09:38:50	0.269631	273.549	FALSE	30
2022-09-13	09:38:50	0.770293	274.32	FALSE	30
2022-09-13	09:38:50	-0.0685875	274.32	FALSE	30
2022-09-13	09:38:51	0.0598603	274.38	FALSE	30
2022-09-13	09:38:51	0.659148	275.039	FALSE	30
2022-09-13	09:38:51	4.45222	279.491	1	31
2022-09-13	09:38:51	3.29869	282.79	1	32
2022-09-13	09:38:52	3.86968	286.659	1	33
2022-09-13	09:38:52	2.92709	289.586	FALSE	33
2022-09-13	09:38:52	0.188359	289.775	FALSE	33
2022-09-13	09:38:52	2.09314	291.868	FALSE	33
2022-09-13	09:38:53	0.648104	292.516	FALSE	33
2022-09-13	09:38:53	0.880929	293.397	FALSE	33
2022-09-13	09:38:53	3.49533	296.892	1	34
2022-09-13	09:38:53	3.53854	300.431	1	35
2022-09-13	09:38:54	1.1333	301.564	FALSE	35
2022-09-13	09:38:54	1.59955	303.164	FALSE	35
2022-09-13	09:38:54	1.13238	304.296	FALSE	35
2022-09-13	09:38:55	1.01513	305.311	FALSE	35
2022-09-13	09:38:55	0.565509	305.877	FALSE	35
2022-09-13	09:38:55	0.630445	306.507	FALSE	35
2022-09-13	09:38:55	1.90877	308.416	FALSE	35
2022-09-13	09:38:56	0.573753	308.99	FALSE	35
2022-09-13	09:38:56	1.58515	310.575	FALSE	35
2022-09-13	09:38:56	5.36362	315.938	1	36
2022-09-13	09:38:56	1.70357	317.642	FALSE	36
2022-09-13	09:38:57	6.46194	324.104	1	37
2022-09-13	09:38:57	0.793855	324.898	FALSE	37
2022-09-13	09:38:57	1.23055	326.128	FALSE	37
2022-09-13	09:38:57	0.606018	326.734	FALSE	37
2022-09-13	09:38:58	0.200216	326.934	FALSE	37
2022-09-13	09:38:58	0.222354	327.157	FALSE	37
2022-09-13	09:38:58	0.0527865	327.21	FALSE	37
2022-09-13	09:38:58	0.185102	327.395	FALSE	37
2022-09-13	09:38:59	0.193397	327.588	FALSE	37
2022-09-13	09:38:59	0.285255	327.873	FALSE	37
2022-09-13	09:38:59	0.419555	328.293	FALSE	37
2022-09-13	09:39:00	0.784796	329.078	FALSE	37
2022-09-13	09:39:00	0.847595	329.925	FALSE	37
2022-09-13	09:39:00	1.10251	331.028	FALSE	37
2022-09-13	09:39:00	1.13024	332.158	FALSE	37
2022-09-13	09:39:01	0.995229	333.153	FALSE	37
2022-09-13	09:39:01	1.20047	334.354	FALSE	37
2022-09-13	09:39:01	0.916349	335.27	FALSE	37
2022-09-13	09:39:01	0.739147	336.009	FALSE	37
2022-09-13	09:39:02	0.576043	336.585	FALSE	37
2022-09-13	09:39:02	0.795687	337.381	FALSE	37
2022-09-13	09:39:02	1.25737	338.638	FALSE	37
2022-09-13	09:39:02	2.8364	341.475	FALSE	37
2022-09-13	09:39:03	4.11889	345.594	1	38
2022-09-13	09:39:03	5.85859	351.452	1	39
2022-09-13	09:39:03	0.408969	351.861	FALSE	39
2022-09-13	09:39:04	0.488613	352.35	FALSE	39
2022-09-13	09:39:04	0.492837	352.843	FALSE	39
2022-09-13	09:39:04	0.475127	353.318	FALSE	39
2022-09-13	09:39:04	0.0809798	353.399	FALSE	39
2022-09-13	09:39:05	0.0272394	353.426	FALSE	39
2022-09-13	09:39:05	-0.277239	353.426	FALSE	39
2022-09-13	09:39:05	0.205458	353.631	FALSE	39
2022-09-13	09:39:05	0.11299	353.744	FALSE	39
2022-09-13	09:39:06	7.80337	361.548	1	40
2022-09-13	09:39:06	5.89314	367.441	1	41
2022-09-13	09:39:06	3.54347	370.984	1	42
2022-09-13	09:39:06	1.38398	372.368	FALSE	42
2022-09-13	09:39:07	3.27619	375.645	1	43
2022-09-13	09:39:07	0.283117	375.928	FALSE	43
2022-09-13	09:39:07	1.14887	377.077	FALSE	43
2022-09-13	09:39:07	0.715585	377.792	FALSE	43
2022-09-13	09:39:08	0.870751	378.663	FALSE	43
2022-09-13	09:39:08	0.788918	379.452	FALSE	43
2022-09-13	09:39:08	0.442557	379.894	FALSE	43
2022-09-13	09:39:09	0.817519	380.712	FALSE	43
2022-09-13	09:39:09	0.921845	381.634	FALSE	43
2022-09-13	09:39:09	0.970293	382.604	FALSE	43
2022-09-13	09:39:09	0.660725	383.265	FALSE	43
2022-09-13	09:39:10	0.523932	383.789	FALSE	43
2022-09-13	09:39:10	0.51701	384.306	FALSE	43
2022-09-13	09:39:10	0.462914	384.769	FALSE	43
2022-09-13	09:39:10	0.599657	385.368	FALSE	43
2022-09-13	09:39:11	0.828308	386.197	FALSE	43
2022-09-13	09:39:11	0.499504	386.696	FALSE	43
2022-09-13	09:39:11	0.327748	387.024	FALSE	43
2022-09-13	09:39:11	0.585967	387.61	FALSE	43
2022-09-13	09:39:12	0.290344	387.9	FALSE	43
2022-09-13	09:39:12	0.67243	388.573	FALSE	43
2022-09-13	09:39:12	0.425662	388.998	FALSE	43
2022-09-13	09:39:13	0.626069	389.624	FALSE	43
2022-09-13	09:39:13	0.352328	389.977	FALSE	43
2022-09-13	09:39:13	0.561845	390.539	FALSE	43
2022-09-13	09:39:13	0.380318	390.919	FALSE	43
2022-09-13	09:39:14	0.489428	391.408	FALSE	43
2022-09-13	09:39:14	0.41986	391.828	FALSE	43
2022-09-13	09:39:14	0.429987	392.258	FALSE	43
2022-09-13	09:39:14	0.389682	392.648	FALSE	43
2022-09-13	09:39:15	0.419504	393.067	FALSE	43
2022-09-13	09:39:15	0.433346	393.501	FALSE	43
2022-09-13	09:39:15	0.368053	393.869	FALSE	43
2022-09-13	09:39:15	0.373346	394.242	FALSE	43
2022-09-13	09:39:16	0.221947	394.464	FALSE	43
2022-09-13	09:39:16	0.213702	394.678	FALSE	43
2022-09-13	09:39:16	0.209936	394.888	FALSE	43
2022-09-13	09:39:16	0.202659	395.09	FALSE	43
2022-09-13	09:39:17	0.263015	395.353	FALSE	43
2022-09-13	09:39:17	0.101896	395.455	FALSE	43
2022-09-13	09:39:17	0.344186	395.799	FALSE	43
2022-09-13	09:39:18	3.60927	399.409	1	44
2022-09-13	09:39:18	6.21889	405.628	1	45
2022-09-13	09:39:18	4.60276	410.23	1	46
2022-09-13	09:39:18	3.31126	413.542	1	47
2022-09-13	09:39:19	3.83212	417.374	1	48
2022-09-13	09:39:19	1.77569	419.149	FALSE	48
2022-09-13	09:39:19	10.3813	429.531	1	49
2022-09-13	09:39:20	8.59624	438.127	1	50
2022-09-13	09:39:20	12.5412	450.668	1	51
2022-09-13	09:39:20	9.75339	460.422	1	52
2022-09-13	09:39:20	3.84256	464.264	1	53
2022-09-13	09:39:20	9.04993	473.314	1	54
2022-09-13	09:39:21	1.41116	474.725	FALSE	54
2022-09-13	09:39:21	2.21966	476.945	FALSE	54
2022-09-13	09:39:21	1.12352	478.068	FALSE	54
2022-09-13	09:39:22	0.968969	479.037	FALSE	54
2022-09-13	09:39:22	0.718537	479.756	FALSE	54
2022-09-13	09:39:22	0.583117	480.339	FALSE	54
2022-09-13	09:39:22	1.66383	482.003	FALSE	54
2022-09-13	09:39:23	1.01589	483.019	FALSE	54
2022-09-13	09:39:23	2.76408	485.783	FALSE	54
2022-09-13	09:39:23	0.723168	486.506	FALSE	54
2022-09-13	09:39:23	3.63976	490.146	1	55
2022-09-13	09:39:24	3.64368	493.789	1	56
2022-09-13	09:39:24	2.97777	496.767	FALSE	56
2022-09-13	09:39:24	3.18709	499.954	1	57
2022-09-13	09:39:24	0.608868	500.563	FALSE	57
2022-09-13	09:39:25	1.05798	501.621	FALSE	57
2022-09-13	09:39:25	3.33487	504.956	1	58
2022-09-13	09:39:25	2.66393	507.62	FALSE	58
2022-09-13	09:39:25	4.39843	512.018	1	59
2022-09-13	09:39:26	4.32861	516.347	1	60
2022-09-13	09:39:26	0.372786	516.72	FALSE	60
2022-09-13	09:39:26	1.21335	517.933	FALSE	60
2022-09-13	09:39:27	0.916349	518.849	FALSE	60
2022-09-13	09:39:27	0.682608	519.532	FALSE	60
2022-09-13	09:39:27	0.517926	520.05	FALSE	60
2022-09-13	09:39:27	1.56877	521.619	FALSE	60
2022-09-13	09:39:28	0.32154	521.94	FALSE	60
2022-09-13	09:39:28	1.18963	523.13	FALSE	60
2022-09-13	09:39:28	0.319402	523.449	FALSE	60
2022-09-13	09:39:28	0.614415	524.064	FALSE	60
2022-09-13	09:39:29	1.1967	525.26	FALSE	60
2022-09-13	09:39:29	0.498435	525.759	FALSE	60
2022-09-13	09:39:29	1.7134	527.472	FALSE	60
2022-09-13	09:39:29	5.9709	533.443	1	61
2022-09-13	09:39:30	1.42149	534.865	FALSE	61
2022-09-13	09:39:30	0.804237	535.669	FALSE	61
2022-09-13	09:39:30	0.495942	536.165	FALSE	61
2022-09-13	09:39:31	0.169275	536.334	FALSE	61
2022-09-13	09:39:31	0.0214887	536.356	FALSE	61
2022-09-13	09:39:31	0.402252	536.758	FALSE	61
2022-09-13	09:39:31	1.33162	538.089	FALSE	61
2022-09-13	09:39:32	7.40754	545.497	1	62
2022-09-13	09:39:32	2.17599	547.673	FALSE	62
2022-09-13	09:39:32	1.31604	548.989	FALSE	62
2022-09-13	09:39:32	0.410649	549.4	FALSE	62
2022-09-13	09:39:33	0.559911	549.96	FALSE	62
2022-09-13	09:39:33	0.597774	550.557	FALSE	62
2022-09-13	09:39:33	0.71874	551.276	FALSE	62
2022-09-13	09:39:33	0.999097	552.275	FALSE	62
2022-09-13	09:39:34	2.4705	554.746	FALSE	62
2022-09-13	09:39:34	1.85426	556.6	FALSE	62
2022-09-13	09:39:34	5.26769	561.868	1	63
2022-09-13	09:39:34	2.77986	564.647	FALSE	63
2022-09-13	09:39:35	6.13187	570.779	1	64
2022-09-13	09:39:35	1.68592	572.465	FALSE	64
2022-09-13	09:39:35	6.39746	578.863	1	65
2022-09-13	09:39:36	2.4106	581.273	FALSE	65
2022-09-13	09:39:36	4.01752	585.291	1	66
2022-09-13	09:39:36	4.50357	589.794	1	67
2022-09-13	09:39:36	1.73579	591.53	FALSE	67
2022-09-13	09:39:37	5.53217	597.062	1	68
2022-09-13	09:39:37	0.849631	597.912	FALSE	68
2022-09-13	09:39:37	1.63009	599.542	FALSE	68
2022-09-13	09:39:37	1.89182	601.434	FALSE	68
2022-09-13	09:39:38	0.186425	601.62	FALSE	68
2022-09-13	09:39:38	1.56693	603.187	FALSE	68
2022-09-13	09:39:38	0.927443	604.115	FALSE	68
2022-09-13	09:39:38	1.04617	605.161	FALSE	68
2022-09-13	09:39:39	0.37299	605.534	FALSE	68
2022-09-13	09:39:39	0.778588	606.312	FALSE	68
2022-09-13	09:39:39	0.571972	606.884	FALSE	68
2022-09-13	09:39:40	0.875636	607.76	FALSE	68
2022-09-13	09:39:40	0.898689	608.659	FALSE	68
2022-09-13	09:39:40	0.954873	609.614	FALSE	68
2022-09-13	09:39:40	1.14994	610.764	FALSE	68
2022-09-13	09:39:41	0.797417	611.561	FALSE	68
2022-09-13	09:39:41	0.544135	612.105	FALSE	68
2022-09-13	09:39:41	0.613397	612.719	FALSE	68
2022-09-13	09:39:41	0.528461	613.247	FALSE	68
2022-09-13	09:39:42	0.507901	613.755	FALSE	68
2022-09-13	09:39:42	0.448613	614.203	FALSE	68
2022-09-13	09:39:42	0.466323	614.67	FALSE	68
2022-09-13	09:39:42	0.655076	615.325	FALSE	68
2022-09-13	09:39:43	0.99299	616.318	FALSE	68
2022-09-13	09:39:43	1.12688	617.445	FALSE	68
2022-09-13	09:39:43	1.82994	619.275	FALSE	68
2022-09-13	09:39:44	1.25253	620.527	FALSE	68
2022-09-13	09:39:44	1.48958	622.017	FALSE	68
2022-09-13	09:39:44	0.594364	622.611	FALSE	68
2022-09-13	09:39:44	0.566628	623.178	FALSE	68
2022-09-13	09:39:45	0.854771	624.033	FALSE	68
2022-09-13	09:39:45	0.764389	624.797	FALSE	68
2022-09-13	09:39:45	0.694975	625.492	FALSE	68
2022-09-13	09:39:45	0.534618	626.027	FALSE	68
2022-09-13	09:39:46	0.2564	626.283	FALSE	68
2022-09-13	09:39:46	3.69874	629.982	1	69
2022-09-13	09:39:46	0.787748	630.769	FALSE	69
2022-09-13	09:39:47	2.11151	632.881	FALSE	69
2022-09-13	09:39:47	0.878486	633.759	FALSE	69
2022-09-13	09:39:47	3.3053	637.065	1	70
2022-09-13	09:39:47	2.85803	639.923	FALSE	70
2022-09-13	09:39:47	0.837468	640.76	FALSE	70
2022-09-13	09:39:48	2.98882	643.749	FALSE	70
2022-09-13	09:39:48	5.18072	648.93	1	71
2022-09-13	09:39:48	5.08815	654.018	1	72
2022-09-13	09:39:49	4.75055	658.768	1	73
2022-09-13	09:39:49	4.87227	663.641	1	74
2022-09-13	09:39:49	2.18011	665.821	FALSE	74
2022-09-13	09:39:49	1.39737	667.218	FALSE	74
2022-09-13	09:39:50	0.846883	668.065	FALSE	74
2022-09-13	09:39:50	0.331463	668.397	FALSE	74
2022-09-13	09:39:50	0.266425	668.663	FALSE	74
2022-09-13	09:39:50	0.496858	669.16	FALSE	74
2022-09-13	09:39:51	0.9393	670.099	FALSE	74
2022-09-13	09:39:51	0.244339	670.344	FALSE	74
2022-09-13	09:39:51	0.103524	670.447	FALSE	74
2022-09-13	09:39:51	0.1307	670.578	FALSE	74
2022-09-13	09:39:52	0.180318	670.758	FALSE	74
2022-09-13	09:39:52	0.301692	671.06	FALSE	74
2022-09-13	09:39:52	0.38841	671.448	FALSE	74
2022-09-13	09:39:53	0.308461	671.757	FALSE	74
2022-09-13	09:39:53	0.281998	672.039	FALSE	74
2022-09-13	09:39:53	0.422354	672.461	FALSE	74
2022-09-13	09:39:53	0.26841	672.729	FALSE	74
2022-09-13	09:39:54	0.244695	672.974	FALSE	74
2022-09-13	09:39:54	0.282914	673.257	FALSE	74
2022-09-13	09:39:54	0.284135	673.541	FALSE	74
2022-09-13	09:39:54	0.349784	673.891	FALSE	74
2022-09-13	09:39:55	0.440776	674.332	FALSE	74
2022-09-13	09:39:55	0.422252	674.754	FALSE	74
2022-09-13	09:39:55	0.463626	675.218	FALSE	74
2022-09-13	09:39:55	0.532023	675.75	FALSE	74
2022-09-13	09:39:56	0.49986	676.249	FALSE	74
2022-09-13	09:39:56	0.414364	676.664	FALSE	74
2022-09-13	09:39:56	0.312023	676.976	FALSE	74
2022-09-13	09:39:56	0.239555	677.215	FALSE	74
2022-09-13	09:39:57	0.212685	677.428	FALSE	74
2022-09-13	09:39:57	0.205458	677.634	FALSE	74
2022-09-13	09:39:57	0.238232	677.872	FALSE	74
2022-09-13	09:39:58	0.223015	678.095	FALSE	74
2022-09-13	09:39:58	0.221845	678.317	FALSE	74
2022-09-13	09:39:58	0.232939	678.55	FALSE	74
2022-09-13	09:39:58	0.22612	678.776	FALSE	74
2022-09-13	09:39:59	0.227239	679.003	FALSE	74
2022-09-13	09:39:59	0.203372	679.206	FALSE	74
2022-09-13	09:39:59	0.19472	679.401	FALSE	74
2022-09-13	09:39:59	0.254059	679.655	FALSE	74
2022-09-13	09:40:00	0.229122	679.884	FALSE	74
2022-09-13	09:40:00	0.350242	680.234	FALSE	74
2022-09-13	09:40:00	0.348053	680.582	FALSE	74
2022-09-13	09:40:00	0.375992	680.958	FALSE	74
2022-09-13	09:40:01	0.378181	681.337	FALSE	74
2022-09-13	09:40:01	0.23014	681.567	FALSE	74
2022-09-13	09:40:01	0.202557	681.769	FALSE	74
2022-09-13	09:40:02	0.244135	682.013	FALSE	74
2022-09-13	09:40:02	0.260267	682.274	FALSE	74
2022-09-13	09:40:02	0.529987	682.804	FALSE	74
2022-09-13	09:40:02	1.2135	684.017	FALSE	74
2022-09-13	09:40:03	1.28877	685.306	FALSE	74
2022-09-13	09:40:03	0.554618	685.861	FALSE	74
2022-09-13	09:40:03	0.251056	686.112	FALSE	74
2022-09-13	09:40:03	-0.0857376	686.112	FALSE	74
2022-09-13	09:40:04	-0.106654	686.112	FALSE	74
2022-09-13	09:40:04	0.0219977	686.134	FALSE	74
2022-09-13	09:40:04	0.0729392	686.207	FALSE	74
2022-09-13	09:40:04	0.160573	686.367	FALSE	74
2022-09-13	09:40:05	0.351514	686.719	FALSE	74
2022-09-13	09:40:05	0.17126	686.89	FALSE	74
2022-09-13	09:40:05	0.23813	687.128	FALSE	74
2022-09-13	09:40:05	0.423982	687.552	FALSE	74
2022-09-13	09:40:06	0.483015	688.035	FALSE	74
2022-09-13	09:40:06	0.569326	688.604	FALSE	74
2022-09-13	09:40:06	0.699962	689.304	FALSE	74
2022-09-13	09:40:07	0.705204	690.01	FALSE	74
2022-09-13	09:40:07	0.535433	690.545	FALSE	74
2022-09-13	09:40:07	0.556959	691.102	FALSE	74
2022-09-13	09:40:07	0.669122	691.771	FALSE	74
2022-09-13	09:40:08	0.774822	692.546	FALSE	74
2022-09-13	09:40:08	0.559606	693.106	FALSE	74
2022-09-13	09:40:08	1.05345	694.159	FALSE	74
2022-09-13	09:40:08	0.0931936	694.252	FALSE	74
2022-09-13	09:40:09	-0.0138293	694.252	FALSE	74
2022-09-13	09:40:09	0.0947203	694.347	FALSE	74
2022-09-13	09:40:09	0.504644	694.852	FALSE	74
2022-09-13	09:40:09	2.55782	697.409	FALSE	74
2022-09-13	09:40:10	3.93106	701.34	1	75
2022-09-13	09:40:10	7.01685	708.357	1	76
2022-09-13	09:40:10	8.70016	717.057	1	77
2022-09-13	09:40:11	4.188	721.245	1	78
2022-09-13	09:40:11	5.82637	727.072	1	79
2022-09-13	09:40:11	5.16515	732.237	1	80
2022-09-13	09:40:11	1.65314	733.89	FALSE	80
2022-09-13	09:40:12	0.9907	734.881	FALSE	80
2022-09-13	09:40:12	0.594262	735.475	FALSE	80
2022-09-13	09:40:12	0.379402	735.854	FALSE	80
2022-09-13	09:40:12	-0.00660282	735.854	FALSE	80
2022-09-13	09:40:13	0.0558908	735.91	FALSE	80
2022-09-13	09:40:13	-0.130369	735.91	FALSE	80
2022-09-13	09:40:13	-0.0663992	735.91	FALSE	80
2022-09-13	09:40:13	-0.129656	735.91	FALSE	80
2022-09-13	09:40:14	0.138028	736.048	FALSE	80
2022-09-13	09:40:14	0.0935498	736.142	FALSE	80
2022-09-13	09:40:14	0.167036	736.309	FALSE	80
2022-09-13	09:40:14	0.075331	736.384	FALSE	80
2022-09-13	09:40:15	0.0695803	736.454	FALSE	80
2022-09-13	09:40:15	0.00805366	736.462	FALSE	80
2022-09-13	09:40:15	-0.325279	736.462	FALSE	80
2022-09-13	09:40:16	-0.326043	736.462	FALSE	80
2022-09-13	09:40:16	-0.289453	736.462	FALSE	80
2022-09-13	09:40:16	-0.263804	736.462	FALSE	80
2022-09-13	09:40:16	-0.132099	736.462	FALSE	80
2022-09-13	09:40:17	0.0872394	736.549	FALSE	80
2022-09-13	09:40:17	-0.00258246	736.549	FALSE	80
2022-09-13	09:40:17	0.194008	736.743	FALSE	80
2022-09-13	09:40:17	-0.0153051	736.743	FALSE	80
2022-09-13	09:40:18	0.537112	737.28	FALSE	80
2022-09-13	09:40:18	2.48744	739.768	FALSE	80
2022-09-13	09:40:18	5.39126	745.159	1	81
2022-09-13	09:40:18	6.11909	751.278	1	82
2022-09-13	09:40:19	5.14367	756.422	1	83
2022-09-13	09:40:19	4.27467	760.696	1	84
2022-09-13	09:40:19	0.448817	761.145	FALSE	84
2022-09-13	09:40:20	2.20749	763.353	FALSE	84
2022-09-13	09:40:20	0.31869	763.671	FALSE	84
2022-09-13	09:40:20	1.31691	764.988	FALSE	84
2022-09-13	09:40:20	2.85737	767.846	FALSE	84
2022-09-13	09:40:21	0.840522	768.686	FALSE	84
2022-09-13	09:40:21	3.54938	772.236	1	85
2022-09-13	09:40:21	0.815076	773.051	FALSE	85
2022-09-13	09:40:21	2.66479	775.715	FALSE	85
2022-09-13	09:40:22	3.35945	779.075	1	86
2022-09-13	09:40:22	1.66861	780.744	FALSE	86
2022-09-13	09:40:22	1.94648	782.69	FALSE	86
2022-09-13	09:40:22	0.249428	782.939	FALSE	86
2022-09-13	09:40:23	1.51854	784.458	FALSE	86
2022-09-13	09:40:23	2.04795	786.506	FALSE	86
2022-09-13	09:40:23	1.02469	787.531	FALSE	86
2022-09-13	09:40:23	2.04037	789.571	FALSE	86
2022-09-13	09:40:24	0.677926	790.249	FALSE	86
2022-09-13	09:40:24	2.16673	792.416	FALSE	86
2022-09-13	09:40:24	3.12861	795.544	1	87
2022-09-13	09:40:25	0.811769	796.356	FALSE	87
2022-09-13	09:40:25	1.99055	798.347	FALSE	87
2022-09-13	09:40:25	0.821743	799.168	FALSE	87
2022-09-13	09:40:25	0.982099	800.15	FALSE	87
2022-09-13	09:40:26	1.86134	802.012	FALSE	87
2022-09-13	09:40:26	0.825865	802.838	FALSE	87
2022-09-13	09:40:26	2.05681	804.894	FALSE	87
2022-09-13	09:40:26	0.965916	805.86	FALSE	87
2022-09-13	09:40:27	1.33543	807.196	FALSE	87
2022-09-13	09:40:27	2.4049	809.601	FALSE	87
2022-09-13	09:40:27	0.852786	810.453	FALSE	87
2022-09-13	09:40:27	1.02963	811.483	FALSE	87
2022-09-13	09:40:28	0.872888	812.356	FALSE	87
2022-09-13	09:40:28	1.05645	813.412	FALSE	87
2022-09-13	09:40:28	0.934924	814.347	FALSE	87
2022-09-13	09:40:29	0.827086	815.174	FALSE	87
2022-09-13	09:40:29	1.58642	816.761	FALSE	87
2022-09-13	09:40:29	3.1767	819.938	1	88
2022-09-13	09:40:29	0.511972	820.45	FALSE	88
2022-09-13	09:40:30	0.4364	820.886	FALSE	88
2022-09-13	09:40:30	0.655585	821.541	FALSE	88
2022-09-13	09:40:30	0.175178	821.717	FALSE	88
2022-09-13	09:40:30	0.408104	822.125	FALSE	88
2022-09-13	09:40:31	0.493244	822.618	FALSE	88
2022-09-13	09:40:31	0.42388	823.042	FALSE	88
2022-09-13	09:40:31	0.204949	823.247	FALSE	88
2022-09-13	09:40:31	0.356959	823.604	FALSE	88
2022-09-13	09:40:32	0.368868	823.973	FALSE	88
2022-09-13	09:40:32	0.353244	824.326	FALSE	88
2022-09-13	09:40:32	0.520115	824.846	FALSE	88
2022-09-13	09:40:32	0.578384	825.424	FALSE	88
2022-09-13	09:40:33	0.852837	826.277	FALSE	88
2022-09-13	09:40:33	0.979911	827.257	FALSE	88
2022-09-13	09:40:33	0.673651	827.931	FALSE	88
2022-09-13	09:40:34	0.721591	828.652	FALSE	88
2022-09-13	09:40:34	0.786221	829.439	FALSE	88
2022-09-13	09:40:34	0.572277	830.011	FALSE	88
2022-09-13	09:40:34	0.462608	830.474	FALSE	88
2022-09-13	09:40:35	0.512939	830.986	FALSE	88
2022-09-13	09:40:35	0.538588	831.525	FALSE	88
2022-09-13	09:40:35	0.520674	832.046	FALSE	88
2022-09-13	09:40:35	0.542914	832.589	FALSE	88
2022-09-13	09:40:36	0.544389	833.133	FALSE	88
2022-09-13	09:40:36	0.541794	833.675	FALSE	88
2022-09-13	09:40:36	0.537163	834.212	FALSE	88
2022-09-13	09:40:36	0.513855	834.726	FALSE	88
2022-09-13	09:40:37	0.488359	835.214	FALSE	88
2022-09-13	09:40:37	0.476552	835.691	FALSE	88
2022-09-13	09:40:37	0.481387	836.172	FALSE	88
2022-09-13	09:40:38	0.487494	836.66	FALSE	88
2022-09-13	09:40:38	0.464898	837.125	FALSE	88
2022-09-13	09:40:38	0.477468	837.602	FALSE	88
2022-09-13	09:40:38	0.486527	838.089	FALSE	88
2022-09-13	09:40:39	0.485356	838.574	FALSE	88
2022-09-13	09:40:39	0.490445	839.064	FALSE	88
2022-09-13	09:40:39	0.485916	839.55	FALSE	88
2022-09-13	09:40:39	0.497265	840.048	FALSE	88
2022-09-13	09:40:40	0.48958	840.537	FALSE	88
2022-09-13	09:40:40	0.493499	841.031	FALSE	88
2022-09-13	09:40:40	0.497061	841.528	FALSE	88
2022-09-13	09:40:40	0.492277	842.02	FALSE	88
2022-09-13	09:40:41	0.488206	842.508	FALSE	88
2022-09-13	09:40:41	0.494059	843.002	FALSE	88
2022-09-13	09:40:41	0.496603	843.499	FALSE	88
2022-09-13	09:40:42	0.510343	844.009	FALSE	88
2022-09-13	09:40:42	0.510954	844.52	FALSE	88
2022-09-13	09:40:42	0.519707	845.04	FALSE	88
2022-09-13	09:40:42	0.545458	845.585	FALSE	88
2022-09-13	09:40:43	0.478282	846.064	FALSE	88
2022-09-13	09:40:43	0.446679	846.51	FALSE	88
2022-09-13	09:40:43	0.478588	846.989	FALSE	88
2022-09-13	09:40:43	0.461336	847.45	FALSE	88
2022-09-13	09:40:44	0.470395	847.921	FALSE	88
2022-09-13	09:40:44	0.471005	848.392	FALSE	88
2022-09-13	09:40:44	0.446629	848.838	FALSE	88
2022-09-13	09:40:44	0.451819	849.29	FALSE	88
2022-09-13	09:40:45	0.393601	849.684	FALSE	88
2022-09-13	09:40:45	0.39869	850.082	FALSE	88
2022-09-13	09:40:45	0.617417	850.7	FALSE	88
2022-09-13	09:40:45	0.728512	851.428	FALSE	88
2022-09-13	09:40:46	0.885458	852.314	FALSE	88
2022-09-13	09:40:46	0.926171	853.24	FALSE	88
2022-09-13	09:40:46	1.52683	854.767	FALSE	88
2022-09-13	09:40:47	0.77874	855.545	FALSE	88
2022-09-13	09:40:47	0.587086	856.132	FALSE	88
2022-09-13	09:40:47	0.458232	856.591	FALSE	88
2022-09-13	09:40:47	0.444796	857.036	FALSE	88
2022-09-13	09:40:48	0.486679	857.522	FALSE	88
2022-09-13	09:40:48	0.510751	858.033	FALSE	88
2022-09-13	09:40:48	0.486679	858.52	FALSE	88
2022-09-13	09:40:48	0.483066	859.003	FALSE	88
2022-09-13	09:40:49	0.455636	859.458	FALSE	88
2022-09-13	09:40:49	0.308969	859.767	FALSE	88
2022-09-13	09:40:49	0.604797	860.372	FALSE	88
2022-09-13	09:40:49	0.428817	860.801	FALSE	88
2022-09-13	09:40:50	0.134517	860.935	FALSE	88
2022-09-13	09:40:50	0.103117	861.039	FALSE	88
2022-09-13	09:40:50	0.274008	861.313	FALSE	88
2022-09-13	09:40:51	0.262456	861.575	FALSE	88
2022-09-13	09:40:51	0.127596	861.703	FALSE	88
2022-09-13	09:40:51	0.216959	861.92	FALSE	88
2022-09-13	09:40:51	0.237417	862.157	FALSE	88
2022-09-13	09:40:52	0.305356	862.462	FALSE	88
2022-09-13	09:40:52	0.371667	862.834	FALSE	88
2022-09-13	09:40:52	0.313855	863.148	FALSE	88
2022-09-13	09:40:52	0.441845	863.59	FALSE	88
2022-09-13	09:40:53	0.408563	863.998	FALSE	88
2022-09-13	09:40:53	0.315789	864.314	FALSE	88
2022-09-13	09:40:53	0.438181	864.752	FALSE	88
2022-09-13	09:40:53	0.459148	865.211	FALSE	88
2022-09-13	09:40:54	0.507035	865.718	FALSE	88
2022-09-13	09:40:54	0.446883	866.165	FALSE	88
2022-09-13	09:40:54	0.46902	866.634	FALSE	88
2022-09-13	09:40:54	0.45416	867.088	FALSE	88
2022-09-13	09:40:55	0.463015	867.551	FALSE	88
2022-09-13	09:40:55	0.471209	868.023	FALSE	88
2022-09-13	09:40:55	0.621183	868.644	FALSE	88
2022-09-13	09:40:56	0.900725	869.545	FALSE	88
2022-09-13	09:40:56	1.28358	870.828	FALSE	88
2022-09-13	09:40:56	0.47243	871.301	FALSE	88
2022-09-13	09:40:56	0.171819	871.472	FALSE	88
2022-09-13	09:40:57	0.118435	871.591	FALSE	88
2022-09-13	09:40:57	0.0467814	871.638	FALSE	88
2022-09-13	09:40:57	0.00469491	871.642	FALSE	88
2022-09-13	09:40:57	-0.0856358	871.642	FALSE	88
2022-09-13	09:40:58	-0.0272135	871.642	FALSE	88
2022-09-13	09:40:58	-0.140699	871.642	FALSE	88
2022-09-13	09:40:58	-0.152608	871.642	FALSE	88
2022-09-13	09:40:58	-0.0668063	871.642	FALSE	88
2022-09-13	09:40:59	-0.0584094	871.642	FALSE	88
2022-09-13	09:40:59	-0.179376	871.642	FALSE	88
2022-09-13	09:40:59	-0.222939	871.642	FALSE	88
2022-09-13	09:41:00	-0.0280786	871.642	FALSE	88
2022-09-13	09:41:00	0.0603692	871.703	FALSE	88
2022-09-13	09:41:00	0.143728	871.846	FALSE	88
2022-09-13	09:41:00	1.3362	873.183	FALSE	88
2022-09-13	09:41:01	1.27884	874.461	FALSE	88
2022-09-13	09:41:01	4.13767	878.599	1	89
2022-09-13	09:41:01	2.04642	880.646	FALSE	89
2022-09-13	09:41:01	7.01894	887.665	1	90
2022-09-13	09:41:02	3.49848	891.163	1	91
2022-09-13	09:41:02	6.05533	897.218	1	92
2022-09-13	09:41:02	0.909478	898.128	FALSE	92
2022-09-13	09:41:02	1.72546	899.853	FALSE	92
2022-09-13	09:41:03	1.18088	901.034	FALSE	92
2022-09-13	09:41:03	0.814975	901.849	FALSE	92
2022-09-13	09:41:03	2.85329	904.702	FALSE	92
2022-09-13	09:41:03	0.648969	905.351	FALSE	92
2022-09-13	09:41:04	1.26983	906.621	FALSE	92
2022-09-13	09:41:04	0.755891	907.377	FALSE	92
2022-09-13	09:41:04	0.434364	907.811	FALSE	92
2022-09-13	09:41:05	0.65187	908.463	FALSE	92
2022-09-13	09:41:05	0.548104	909.011	FALSE	92
2022-09-13	09:41:05	0.420064	909.432	FALSE	92
2022-09-13	09:41:05	0.486018	909.918	FALSE	92
2022-09-13	09:41:06	0.466374	910.384	FALSE	92
2022-09-13	09:41:06	0.508461	910.892	FALSE	92
2022-09-13	09:41:06	0.406221	911.299	FALSE	92
2022-09-13	09:41:06	0.58215	911.881	FALSE	92
2022-09-13	09:41:07	0.473143	912.354	FALSE	92
2022-09-13	09:41:07	0.526323	912.88	FALSE	92
2022-09-13	09:41:07	0.487799	913.368	FALSE	92
2022-09-13	09:41:07	0.483219	913.851	FALSE	92
2022-09-13	09:41:08	0.522608	914.374	FALSE	92
2022-09-13	09:41:08	0.456298	914.83	FALSE	92
2022-09-13	09:41:08	0.554822	915.385	FALSE	92
2022-09-13	09:41:09	0.528817	915.914	FALSE	92
2022-09-13	09:41:09	0.270445	916.184	FALSE	92
2022-09-13	09:41:09	0.137061	916.321	FALSE	92
2022-09-13	09:41:09	0.150496	916.472	FALSE	92
2022-09-13	09:41:10	0.0752292	916.547	FALSE	92
2022-09-13	09:41:10	0.0770613	916.624	FALSE	92
2022-09-13	09:41:10	0.088817	916.713	FALSE	92
2022-09-13	09:41:10	0.207036	916.92	FALSE	92
2022-09-13	09:41:11	0.216043	917.136	FALSE	92
2022-09-13	09:41:11	0.611209	917.747	FALSE	92
2022-09-13	09:41:11	0.840471	918.588	FALSE	92
2022-09-13	09:41:11	0.930903	919.519	FALSE	92
2022-09-13	09:41:12	0.724796	920.243	FALSE	92
2022-09-13	09:41:12	0.521641	920.765	FALSE	92
2022-09-13	09:41:12	0.373193	921.138	FALSE	92
2022-09-13	09:41:12	0.561794	921.7	FALSE	92
2022-09-13	09:41:13	0.324898	922.025	FALSE	92
2022-09-13	09:41:13	0.424848	922.45	FALSE	92
2022-09-13	09:41:13	0.437214	922.887	FALSE	92
2022-09-13	09:41:14	0.617672	923.505	FALSE	92
2022-09-13	09:41:14	0.380827	923.885	FALSE	92
2022-09-13	09:41:14	0.439656	924.325	FALSE	92
2022-09-13	09:41:14	0.357621	924.683	FALSE	92
2022-09-13	09:41:15	0.229326	924.912	FALSE	92
2022-09-13	09:41:15	0.430903	925.343	FALSE	92
2022-09-13	09:41:15	0.947595	926.291	FALSE	92
2022-09-13	09:41:15	0.662557	926.953	FALSE	92
2022-09-13	09:41:16	0.291463	927.245	FALSE	92
2022-09-13	09:41:16	1.02724	928.272	FALSE	92
2022-09-13	09:41:16	0.303422	928.575	FALSE	92
2022-09-13	09:41:16	0.565967	929.141	FALSE	92
2022-09-13	09:41:17	0.321031	929.462	FALSE	92
2022-09-13	09:41:17	0.342405	929.805	FALSE	92
2022-09-13	09:41:17	0.487188	930.292	FALSE	92
2022-09-13	09:41:18	0.961539	931.253	FALSE	92
2022-09-13	09:41:18	0.38841	931.642	FALSE	92
2022-09-13	09:41:18	0.307646	931.949	FALSE	92
2022-09-13	09:41:18	0.623117	932.572	FALSE	92
2022-09-13	09:41:19	0.38159	932.954	FALSE	92
2022-09-13	09:41:19	0.531361	933.485	FALSE	92
2022-09-13	09:41:19	0.274873	933.76	FALSE	92
2022-09-13	09:41:19	0.936552	934.697	FALSE	92
2022-09-13	09:41:20	1.41207	936.109	FALSE	92
2022-09-13	09:41:20	1.93472	938.044	FALSE	92
2022-09-13	09:41:20	2.93253	940.976	FALSE	92
2022-09-13	09:41:20	1.07925	942.055	FALSE	92
2022-09-13	09:41:21	1.69263	943.748	FALSE	92
2022-09-13	09:41:21	0.873855	944.622	FALSE	92
2022-09-13	09:41:21	1.40296	946.025	FALSE	92
2022-09-13	09:41:21	1.54368	947.569	FALSE	92
2022-09-13	09:41:22	0.631158	948.2	FALSE	92
2022-09-13	09:41:22	0.96958	949.169	FALSE	92
2022-09-13	09:41:22	1.67207	950.841	FALSE	92
2022-09-13	09:41:23	0.356959	951.198	FALSE	92
2022-09-13	09:41:23	0.361387	951.56	FALSE	92
2022-09-13	09:41:23	0.444084	952.004	FALSE	92
2022-09-13	09:41:23	0.354822	952.359	FALSE	92
2022-09-13	09:41:24	0.35243	952.711	FALSE	92
2022-09-13	09:41:24	0.213143	952.924	FALSE	92
2022-09-13	09:41:24	0.412685	953.337	FALSE	92
2022-09-13	09:41:24	0.884796	954.222	FALSE	92
2022-09-13	09:41:25	0.767392	954.989	FALSE	92
2022-09-13	09:41:25	1.79182	956.781	FALSE	92
2022-09-13	09:41:25	1.86856	958.649	FALSE	92
2022-09-13	09:41:25	0.626629	959.276	FALSE	92
2022-09-13	09:41:26	1.23172	960.508	FALSE	92
2022-09-13	09:41:26	0.898435	961.406	FALSE	92
2022-09-13	09:41:26	0.379046	961.785	FALSE	92
2022-09-13	09:41:27	0.618435	962.404	FALSE	92
2022-09-13	09:41:27	0.513041	962.917	FALSE	92
2022-09-13	09:41:27	0.688257	963.605	FALSE	92
2022-09-13	09:41:27	1.30917	964.914	FALSE	92
2022-09-13	09:41:28	1.73584	966.65	FALSE	92
2022-09-13	09:41:28	2.74378	969.394	FALSE	92
2022-09-13	09:41:28	3.52647	972.92	1	93
2022-09-13	09:41:28	2.00531	974.926	FALSE	93
2022-09-13	09:41:29	0.935687	975.861	FALSE	93
2022-09-13	09:41:29	0.363372	976.225	FALSE	93
2022-09-13	09:41:29	0.410191	976.635	FALSE	93
2022-09-13	09:41:29	0.233652	976.868	FALSE	93
2022-09-13	09:41:30	0.283422	977.152	FALSE	93
2022-09-13	09:41:30	-0.0105723	977.152	FALSE	93
2022-09-13	09:41:30	0.0674429	977.219	FALSE	93
2022-09-13	09:41:30	0.0143641	977.234	FALSE	93
2022-09-13	09:41:31	0.179911	977.414	FALSE	93
2022-09-13	09:41:31	0.225916	977.64	FALSE	93
2022-09-13	09:41:31	2.11777	979.757	FALSE	93
2022-09-13	09:41:32	1.76408	981.521	FALSE	93
2022-09-13	09:41:32	7.52235	989.044	1	94
2022-09-13	09:41:32	1.84042	990.884	FALSE	94
2022-09-13	09:41:32	5.57009	996.454	1	95
2022-09-13	09:41:33	3.67518	1000.13	1	96
2022-09-13	09:41:33	2.03284	1002.16	FALSE	96
2022-09-13	09:41:33	6.84118	1009	1	97
2022-09-13	09:41:33	3.83278	1012.84	1	98
2022-09-13	09:41:34	8.09074	1020.93	1	99
2022-09-13	09:41:34	6.95533	1027.88	1	100
2022-09-13	09:41:34	1.92312	1029.81	FALSE	100
2022-09-13	09:41:34	0.986119	1030.79	FALSE	100
2022-09-13	09:41:35	0.10668	1030.9	FALSE	100
2022-09-13	09:41:35	0.274466	1031.17	FALSE	100
2022-09-13	09:41:35	-0.0709793	1031.17	FALSE	100
2022-09-13	09:41:36	-0.172913	1031.17	FALSE	100
2022-09-13	09:41:36	-0.323244	1031.17	FALSE	100
2022-09-13	09:41:36	-0.447061	1031.17	FALSE	100
2022-09-13	09:41:36	-0.507671	1031.17	FALSE	100
2022-09-13	09:41:37	-0.551335	1031.17	FALSE	100
2022-09-13	09:41:37	-0.570114	1031.17	FALSE	100
2022-09-13	09:41:37	-0.624465	1031.17	FALSE	100
2022-09-13	09:41:37	-0.553829	1031.17	FALSE	100
2022-09-13	09:41:38	-0.858002	1031.17	FALSE	100
2022-09-13	09:41:38	-0.757697	1031.17	FALSE	100
2022-09-13	09:41:38	-0.843244	1031.17	FALSE	100
2022-09-13	09:41:38	-0.753473	1031.17	FALSE	100
2022-09-13	09:41:39	-0.555356	1031.17	FALSE	100
2022-09-13	09:41:39	-0.27047	1031.17	FALSE	100
2022-09-13	09:41:39	-0.172913	1031.17	FALSE	100
2022-09-13	09:41:40	-0.0224807	1031.17	FALSE	100
2022-09-13	09:41:40	0.130395	1031.3	FALSE	100
2022-09-13	09:41:40	0.0477992	1031.35	FALSE	100
2022-09-13	09:41:40	0.60444	1031.96	FALSE	100
2022-09-13	09:41:41	0.580827	1032.54	FALSE	100
2022-09-13	09:41:41	0.319402	1032.86	FALSE	100
2022-09-13	09:41:41	0.230547	1033.09	FALSE	100
2022-09-13	09:41:41	0.288206	1033.37	FALSE	100
2022-09-13	09:41:42	0.789987	1034.16	FALSE	100
2022-09-13	09:41:42	0.400827	1034.57	FALSE	100
2022-09-13	09:41:42	0.939249	1035.5	FALSE	100
2022-09-13	09:41:42	1.8165	1037.32	FALSE	100
2022-09-13	09:41:43	0.174466	1037.5	FALSE	100
2022-09-13	09:41:43	0.989122	1038.48	FALSE	100
2022-09-13	09:41:43	0.546069	1039.03	FALSE	100
2022-09-13	09:41:43	2.94729	1041.98	FALSE	100
2022-09-13	09:41:44	2.74138	1044.72	FALSE	100
2022-09-13	09:41:44	2.32225	1047.04	FALSE	100
2022-09-13	09:41:44	2.42587	1049.47	FALSE	100
2022-09-13	09:41:45	0.424898	1049.89	FALSE	100
2022-09-13	09:41:45	0.787341	1050.68	FALSE	100
2022-09-13	09:41:45	0.665102	1051.34	FALSE	100
2022-09-13	09:41:45	0.728054	1052.07	FALSE	100
2022-09-13	09:41:46	0.415534	1052.49	FALSE	100
2022-09-13	09:41:46	0.663321	1053.15	FALSE	100
2022-09-13	09:41:46	0.484339	1053.64	FALSE	100
2022-09-13	09:41:46	1.90953	1055.55	FALSE	100
2022-09-13	09:41:47	0.820013	1056.37	FALSE	100
2022-09-13	09:41:47	6.35263	1062.72	1	101
2022-09-13	09:41:47	1.94296	1064.66	FALSE	101
2022-09-13	09:41:47	12.0323	1076.69	1	102
2022-09-13	09:41:48	2.44871	1079.14	FALSE	102
2022-09-13	09:41:48	3.10647	1082.25	1	103
2022-09-13	09:41:48	1.79141	1084.04	FALSE	103
2022-09-13	09:41:49	1.15915	1085.2	FALSE	103
2022-09-13	09:41:49	4.14286	1089.34	1	104
2022-09-13	09:41:49	1.12454	1090.47	FALSE	104
2022-09-13	09:41:49	3.14495	1093.61	1	105
2022-09-13	09:41:50	5.06144	1098.67	1	106
2022-09-13	09:41:50	0.49126	1099.16	FALSE	106
2022-09-13	09:41:50	0.667443	1099.83	FALSE	106
2022-09-13	09:41:50	0.280725	1100.11	FALSE	106
2022-09-13	09:41:51	0.329987	1100.44	FALSE	106
2022-09-13	09:41:51	0.0300893	1100.47	FALSE	106
2022-09-13	09:41:51	-0.383651	1100.47	FALSE	106
2022-09-13	09:41:51	-0.562226	1100.47	FALSE	106
2022-09-13	09:41:52	-0.459223	1100.47	FALSE	106
2022-09-13	09:41:52	-0.595101	1100.47	FALSE	106
2022-09-13	09:41:52	-0.52874	1100.47	FALSE	106
2022-09-13	09:41:52	-0.55561	1100.47	FALSE	106
2022-09-13	09:41:53	-0.0522007	1100.47	FALSE	106
2022-09-13	09:41:53	0.157265	1100.63	FALSE	106
2022-09-13	09:41:53	0.189478	1100.82	FALSE	106
2022-09-13	09:41:54	0.179402	1101	FALSE	106
2022-09-13	09:41:54	0.157672	1101.16	FALSE	106
2022-09-13	09:41:54	0.166985	1101.32	FALSE	106
2022-09-13	09:41:54	0.163219	1101.49	FALSE	106
2022-09-13	09:41:55	0.233092	1101.72	FALSE	106
2022-09-13	09:41:55	1.76505	1103.48	FALSE	106
2022-09-13	09:41:55	4.12424	1107.61	1	107
2022-09-13	09:41:55	4.77955	1112.39	1	108
2022-09-13	09:41:56	5.27543	1117.66	1	109
2022-09-13	09:41:56	3.15182	1120.82	1	110
2022-09-13	09:41:56	5.03334	1125.85	1	111
2022-09-13	09:41:56	7.04591	1132.89	1	112
2022-09-13	09:41:57	9.14326	1142.04	1	113
2022-09-13	09:41:57	6.19263	1148.23	1	114
2022-09-13	09:41:57	5.07177	1153.3	1	115
2022-09-13	09:41:58	2.11192	1155.41	FALSE	115
2022-09-13	09:41:58	2.0249	1157.44	FALSE	115
2022-09-13	09:41:58	0.745407	1158.18	FALSE	115
2022-09-13	09:41:58	0.684847	1158.87	FALSE	115
2022-09-13	09:41:59	0.511616	1159.38	FALSE	115
2022-09-13	09:41:59	0.299199	1159.68	FALSE	115
2022-09-13	09:41:59	0.137774	1159.82	FALSE	115
2022-09-13	09:41:59	-0.105839	1159.82	FALSE	115
2022-09-13	09:42:00	-0.0842109	1159.82	FALSE	115
2022-09-13	09:42:00	0.025102	1159.84	FALSE	115
2022-09-13	09:42:00	-0.00370202	1159.84	FALSE	115
2022-09-13	09:42:00	0.0317687	1159.88	FALSE	115
2022-09-13	09:42:01	0.0615905	1159.94	FALSE	115
2022-09-13	09:42:01	-0.039529	1159.94	FALSE	115
2022-09-13	09:42:01	-0.230928	1159.94	FALSE	115
2022-09-13	09:42:01	-0.282022	1159.94	FALSE	115
2022-09-13	09:42:02	-0.395508	1159.94	FALSE	115
2022-09-13	09:42:02	-0.0201397	1159.94	FALSE	115
2022-09-13	09:42:02	0.0909035	1160.03	FALSE	115
2022-09-13	09:42:03	1.75279	1161.78	FALSE	115
2022-09-13	09:42:03	2.43726	1164.22	FALSE	115
2022-09-13	09:42:03	3.42215	1167.64	1	116
2022-09-13	09:42:03	2.34215	1169.98	FALSE	116
2022-09-13	09:42:04	5.1309	1175.11	1	117
2022-09-13	09:42:04	1.51385	1176.63	FALSE	117
2022-09-13	09:42:04	4.12927	1180.76	1	118
2022-09-13	09:42:04	2.28469	1183.04	FALSE	118
2022-09-13	09:42:05	2.41925	1185.46	FALSE	118
2022-09-13	09:42:05	0.644695	1186.1	FALSE	118
2022-09-13	09:42:05	0.530649	1186.64	FALSE	118
2022-09-13	09:42:05	0.387697	1187.02	FALSE	118
2022-09-13	09:42:06	0.416705	1187.44	FALSE	118
2022-09-13	09:42:06	0.353601	1187.79	FALSE	118
2022-09-13	09:42:06	0.404644	1188.2	FALSE	118
2022-09-13	09:42:07	0.380522	1188.58	FALSE	118
2022-09-13	09:42:07	0.41416	1188.99	FALSE	118
2022-09-13	09:42:07	0.461132	1189.45	FALSE	118
2022-09-13	09:42:07	0.39131	1189.84	FALSE	118
2022-09-13	09:42:08	0.373702	1190.22	FALSE	118
2022-09-13	09:42:08	0.369733	1190.59	FALSE	118
2022-09-13	09:42:08	0.778384	1191.37	FALSE	118
2022-09-13	09:42:08	2.16281	1193.53	FALSE	118
2022-09-13	09:42:09	0.646374	1194.18	FALSE	118
2022-09-13	09:42:09	7.08871	1201.26	1	119
2022-09-13	09:42:09	3.13014	1204.39	1	120
2022-09-13	09:42:09	12.9712	1217.37	1	121
2022-09-13	09:42:10	1.43777	1218.8	FALSE	121
2022-09-13	09:42:10	6.08545	1224.89	1	122
2022-09-13	09:42:10	1.90179	1226.79	FALSE	122
2022-09-13	09:42:10	2.50011	1229.29	FALSE	122
2022-09-13	09:42:11	2.10698	1231.4	FALSE	122
2022-09-13	09:42:11	2.64515	1234.04	FALSE	122
2022-09-13	09:42:11	2.57645	1236.62	FALSE	122
2022-09-13	09:42:12	1.00449	1237.62	FALSE	122
2022-09-13	09:42:12	0.758944	1238.38	FALSE	122
2022-09-13	09:42:12	0.777366	1239.16	FALSE	122
2022-09-13	09:42:12	0.52617	1239.69	FALSE	122
2022-09-13	09:42:13	0.466272	1240.15	FALSE	122
2022-09-13	09:42:13	0.49874	1240.65	FALSE	122
2022-09-13	09:42:13	0.378333	1241.03	FALSE	122
2022-09-13	09:42:13	0.609682	1241.64	FALSE	122
2022-09-13	09:42:14	0.737315	1242.38	FALSE	122
2022-09-13	09:42:14	0.385254	1242.76	FALSE	122
2022-09-13	09:42:14	0.489529	1243.25	FALSE	122
2022-09-13	09:42:14	0.674058	1243.93	FALSE	122
2022-09-13	09:42:15	0.447748	1244.37	FALSE	122
2022-09-13	09:42:15	0.543015	1244.92	FALSE	122
2022-09-13	09:42:15	0.474669	1245.39	FALSE	122
2022-09-13	09:42:16	0.610751	1246	FALSE	122
2022-09-13	09:42:16	0.42327	1246.43	FALSE	122
2022-09-13	09:42:16	0.614465	1247.04	FALSE	122
2022-09-13	09:42:16	0.528104	1247.57	FALSE	122
2022-09-13	09:42:17	0.421387	1247.99	FALSE	122
2022-09-13	09:42:17	0.890547	1248.88	FALSE	122
2022-09-13	09:42:17	0.546628	1249.43	FALSE	122
2022-09-13	09:42:17	0.880115	1250.31	FALSE	122
2022-09-13	09:42:18	0.750598	1251.06	FALSE	122
2022-09-13	09:42:18	0.898741	1251.96	FALSE	122
2022-09-13	09:42:18	0.533855	1252.49	FALSE	122
2022-09-13	09:42:18	0.569122	1253.06	FALSE	122
2022-09-13	09:42:19	0.438893	1253.5	FALSE	122
2022-09-13	09:42:19	0.577519	1254.08	FALSE	122
2022-09-13	09:42:19	0.632888	1254.71	FALSE	122
2022-09-13	09:42:19	0.420674	1255.13	FALSE	122
2022-09-13	09:42:20	0.615382	1255.74	FALSE	122
2022-09-13	09:42:20	0.455127	1256.2	FALSE	122
2022-09-13	09:42:20	0.623015	1256.82	FALSE	122
2022-09-13	09:42:21	0.376196	1257.2	FALSE	122
2022-09-13	09:42:21	1.10286	1258.3	FALSE	122
2022-09-13	09:42:21	0.62154	1258.92	FALSE	122
2022-09-13	09:42:21	1.20999	1260.13	FALSE	122
2022-09-13	09:42:22	0.879657	1261.01	FALSE	122
2022-09-13	09:42:22	0.943931	1261.96	FALSE	122
2022-09-13	09:42:22	3.14541	1265.1	1	123
2022-09-13	09:42:22	0.845	1265.95	FALSE	123
2022-09-13	09:42:23	1.82001	1267.77	FALSE	123
2022-09-13	09:42:23	2.36475	1270.13	FALSE	123
2022-09-13	09:42:23	1.12785	1271.26	FALSE	123
2022-09-13	09:42:23	1.68134	1272.94	FALSE	123
2022-09-13	09:42:24	1.08566	1274.03	FALSE	123
2022-09-13	09:42:24	2.29655	1276.32	FALSE	123
2022-09-13	09:42:24	2.63976	1278.96	FALSE	123
2022-09-13	09:42:25	1.61197	1280.57	FALSE	123
2022-09-13	09:42:25	3.19788	1283.77	1	124
2022-09-13	09:42:25	4.26368	1288.04	1	125
2022-09-13	09:42:25	0.505814	1288.54	FALSE	125
2022-09-13	09:42:26	1.11808	1289.66	FALSE	125
2022-09-13	09:42:26	0.745407	1290.41	FALSE	125
2022-09-13	09:42:26	0.329479	1290.74	FALSE	125
2022-09-13	09:42:26	0.56729	1291.3	FALSE	125
2022-09-13	09:42:27	0.405356	1291.71	FALSE	125
2022-09-13	09:42:27	0.567086	1292.27	FALSE	125
2022-09-13	09:42:27	0.434618	1292.71	FALSE	125
2022-09-13	09:42:27	0.481896	1293.19	FALSE	125
2022-09-13	09:42:28	0.532634	1293.72	FALSE	125
2022-09-13	09:42:28	0.493193	1294.22	FALSE	125
2022-09-13	09:42:28	0.442761	1294.66	FALSE	125
2022-09-13	09:42:29	0.430395	1295.09	FALSE	125
2022-09-13	09:42:29	0.514059	1295.6	FALSE	125
2022-09-13	09:42:29	0.482914	1296.09	FALSE	125
2022-09-13	09:42:29	0.448664	1296.54	FALSE	125
2022-09-13	09:42:30	0.470598	1297.01	FALSE	125
2022-09-13	09:42:30	0.503371	1297.51	FALSE	125
2022-09-13	09:42:30	0.437468	1297.95	FALSE	125
2022-09-13	09:42:30	0.871463	1298.82	FALSE	125
2022-09-13	09:42:31	1.6505	1300.47	FALSE	125
2022-09-13	09:42:31	0.940674	1301.41	FALSE	125
2022-09-13	09:42:31	2.55197	1303.96	FALSE	125
2022-09-13	09:42:31	0.678995	1304.64	FALSE	125
2022-09-13	09:42:32	0.97243	1305.61	FALSE	125
2022-09-13	09:42:32	0.965713	1306.58	FALSE	125
2022-09-13	09:42:32	0.410598	1306.99	FALSE	125
2022-09-13	09:42:32	1.18546	1308.18	FALSE	125
2022-09-13	09:42:33	1.44184	1309.62	FALSE	125
2022-09-13	09:42:33	5.15848	1314.78	1	126
2022-09-13	09:42:33	5.40006	1320.18	1	127
2022-09-13	09:42:34	3.6105	1323.79	1	128
2022-09-13	09:42:34	1.24322	1325.03	FALSE	128
2022-09-13	09:42:34	0.931412	1325.96	FALSE	128
2022-09-13	09:42:34	0.744898	1326.71	FALSE	128
2022-09-13	09:42:35	0.334262	1327.04	FALSE	128
2022-09-13	09:42:35	0.538384	1327.58	FALSE	128
2022-09-13	09:42:35	0.485356	1328.06	FALSE	128
2022-09-13	09:42:35	0.500013	1328.56	FALSE	128
2022-09-13	09:42:36	0.498893	1329.06	FALSE	128
2022-09-13	09:42:36	0.526578	1329.59	FALSE	128
2022-09-13	09:42:36	0.430649	1330.02	FALSE	128
2022-09-13	09:42:36	0.323881	1330.34	FALSE	128
2022-09-13	09:42:37	0.478384	1330.82	FALSE	128
2022-09-13	09:42:37	0.383066	1331.21	FALSE	128
2022-09-13	09:42:37	0.325255	1331.53	FALSE	128
2022-09-13	09:42:38	0.475942	1332.01	FALSE	128
2022-09-13	09:42:38	0.31584	1332.32	FALSE	128
2022-09-13	09:42:38	0.495229	1332.82	FALSE	128
2022-09-13	09:42:38	0.371616	1333.19	FALSE	128
2022-09-13	09:42:39	1.16032	1334.35	FALSE	128
2022-09-13	09:42:39	0.566272	1334.92	FALSE	128
2022-09-13	09:42:39	2.68566	1337.6	FALSE	128
2022-09-13	09:42:39	2.0219	1339.62	FALSE	128
2022-09-13	09:42:40	2.57584	1342.2	FALSE	128
2022-09-13	09:42:40	0.950954	1343.15	FALSE	128
2022-09-13	09:42:40	1.12052	1344.27	FALSE	128
2022-09-13	09:42:40	0.991768	1345.26	FALSE	128
2022-09-13	09:42:41	0.380674	1345.64	FALSE	128
2022-09-13	09:42:41	0.783117	1346.43	FALSE	128
2022-09-13	09:42:41	0.84958	1347.28	FALSE	128
2022-09-13	09:42:41	0.454822	1347.73	FALSE	128
2022-09-13	09:42:42	0.761997	1348.49	FALSE	128
2022-09-13	09:42:42	0.555992	1349.05	FALSE	128
2022-09-13	09:42:42	0.420115	1349.47	FALSE	128
2022-09-13	09:42:43	0.991616	1350.46	FALSE	128
2022-09-13	09:42:43	0.391209	1350.85	FALSE	128
2022-09-13	09:42:43	0.370903	1351.22	FALSE	128
2022-09-13	09:42:43	0.793193	1352.02	FALSE	128
2022-09-13	09:42:44	0.233499	1352.25	FALSE	128
2022-09-13	09:42:44	0.632837	1352.88	FALSE	128
2022-09-13	09:42:44	0.383219	1353.27	FALSE	128
2022-09-13	09:42:45	0.551463	1353.82	FALSE	128
2022-09-13	09:42:45	1.46337	1355.28	FALSE	128
2022-09-13	09:42:45	0.470038	1355.75	FALSE	128
2022-09-13	09:42:45	0.700624	1356.45	FALSE	128
2022-09-13	09:42:45	2.07426	1358.52	FALSE	128
2022-09-13	09:42:46	0.991463	1359.52	FALSE	128
2022-09-13	09:42:46	2.00973	1361.53	FALSE	128
2022-09-13	09:42:46	0.987646	1362.51	FALSE	128
2022-09-13	09:42:47	3.01309	1365.53	1	129
2022-09-13	09:42:47	3.2336	1368.76	1	130
2022-09-13	09:42:47	1.63701	1370.4	FALSE	130
2022-09-13	09:42:47	1.19172	1371.59	FALSE	130
2022-09-13	09:42:48	1.07726	1372.67	FALSE	130
2022-09-13	09:42:48	0.394313	1373.06	FALSE	130
2022-09-13	09:42:48	0.447901	1373.51	FALSE	130
2022-09-13	09:42:48	0.916857	1374.43	FALSE	130
2022-09-13	09:42:49	0.52444	1374.95	FALSE	130
2022-09-13	09:42:49	0.539809	1375.49	FALSE	130
2022-09-13	09:42:49	0.38327	1375.87	FALSE	130
2022-09-13	09:42:49	0.530038	1376.4	FALSE	130
2022-09-13	09:42:50	0.395636	1376.8	FALSE	130
2022-09-13	09:42:50	0.497672	1377.3	FALSE	130
2022-09-13	09:42:50	1.95401	1379.25	FALSE	130
2022-09-13	09:42:50	0.370191	1379.62	FALSE	130
2022-09-13	09:42:51	0.218232	1379.84	FALSE	130
2022-09-13	09:42:51	0.67701	1380.52	FALSE	130
2022-09-13	09:42:51	0.374517	1380.89	FALSE	130
2022-09-13	09:42:52	0.37299	1381.26	FALSE	130
2022-09-13	09:42:52	0.473295	1381.74	FALSE	130
2022-09-13	09:42:52	0.582761	1382.32	FALSE	130
2022-09-13	09:42:52	0.470242	1382.79	FALSE	130
2022-09-13	09:42:53	0.410598	1383.2	FALSE	130
2022-09-13	09:42:53	0.422761	1383.62	FALSE	130
2022-09-13	09:42:53	0.254975	1383.88	FALSE	130
2022-09-13	09:42:53	0.206425	1384.08	FALSE	130
2022-09-13	09:42:54	-0.0142364	1384.08	FALSE	130
2022-09-13	09:42:54	0.0416415	1384.13	FALSE	130
2022-09-13	09:42:54	0.0403692	1384.17	FALSE	130
2022-09-13	09:42:54	-0.216984	1384.17	FALSE	130
2022-09-13	09:42:55	-0.257188	1384.17	FALSE	130
2022-09-13	09:42:55	-0.280547	1384.17	FALSE	130
2022-09-13	09:42:55	-0.0592237	1384.17	FALSE	130
2022-09-13	09:42:56	-0.154491	1384.17	FALSE	130
2022-09-13	09:42:56	0.134313	1384.3	FALSE	130
2022-09-13	09:42:56	0.377621	1384.68	FALSE	130
2022-09-13	09:42:56	1.64724	1386.33	FALSE	130
2022-09-13	09:42:57	3.81268	1390.14	1	131
2022-09-13	09:42:57	2.09553	1392.23	FALSE	131
2022-09-13	09:42:57	5.83538	1398.07	1	132
2022-09-13	09:42:57	0.886323	1398.96	FALSE	132
2022-09-13	09:42:58	3.1939	1402.15	1	133
2022-09-13	09:42:58	1.67788	1403.83	FALSE	133
2022-09-13	09:42:58	0.722404	1404.55	FALSE	133
2022-09-13	09:42:58	0.905356	1405.45	FALSE	133
2022-09-13	09:42:59	0.61869	1406.07	FALSE	133
2022-09-13	09:42:59	0.872837	1406.95	FALSE	133
2022-09-13	09:42:59	0.943982	1407.89	FALSE	133
2022-09-13	09:42:59	0.606476	1408.5	FALSE	133
2022-09-13	09:43:00	0.958893	1409.46	FALSE	133
2022-09-13	09:43:00	1.57823	1411.03	FALSE	133
2022-09-13	09:43:00	0.564949	1411.6	FALSE	133
2022-09-13	09:43:01	1.12123	1412.72	FALSE	133
2022-09-13	09:43:01	0.727087	1413.45	FALSE	133
2022-09-13	09:43:01	0.500979	1413.95	FALSE	133
2022-09-13	09:43:01	1.11976	1415.07	FALSE	133
2022-09-13	09:43:02	0.643015	1415.71	FALSE	133
2022-09-13	09:43:02	1.89391	1417.6	FALSE	133
2022-09-13	09:43:02	0.827494	1418.43	FALSE	133
2022-09-13	09:43:02	0.767392	1419.2	FALSE	133
2022-09-13	09:43:03	2.12734	1421.33	FALSE	133
2022-09-13	09:43:03	0.624287	1421.95	FALSE	133
2022-09-13	09:43:03	1.4592	1423.41	FALSE	133
2022-09-13	09:43:04	0.676806	1424.09	FALSE	133
2022-09-13	09:43:04	1.40709	1425.49	FALSE	133
2022-09-13	09:43:04	2.15314	1427.65	FALSE	133
2022-09-13	09:43:04	0.601488	1428.25	FALSE	133
2022-09-13	09:43:05	2.99212	1431.24	FALSE	133
2022-09-13	09:43:05	1.61574	1432.86	FALSE	133
2022-09-13	09:43:05	2.84062	1435.7	FALSE	133
2022-09-13	09:43:05	2.2881	1437.99	FALSE	133
2022-09-13	09:43:06	0.998588	1438.98	FALSE	133
2022-09-13	09:43:06	0.989326	1439.97	FALSE	133
2022-09-13	09:43:06	1.55492	1441.53	FALSE	133
2022-09-13	09:43:06	1.27538	1442.8	FALSE	133

## Sheet: Saint_harness_202291393758
2022-09-13	09:37:58	0.405				**GoPro Fitting: 927
2022-09-13	09:37:58	0.41187
2022-09-13	09:37:58	0.412379
2022-09-13	09:37:59	0.398333
2022-09-13	09:37:59	0.410344
2022-09-13	09:37:59	0.416094
2022-09-13	09:37:59	0.415942
2022-09-13	09:38:00	0.406272
2022-09-13	09:38:00	0.38042
2022-09-13	09:38:00	0.414059
2022-09-13	09:38:01	0.335891
2022-09-13	09:38:01	0.388868
2022-09-13	09:38:01	0.396756
2022-09-13	09:38:01	0.402557
2022-09-13	09:38:02	0.401031
2022-09-13	09:38:02	0.398486
2022-09-13	09:38:02	0.395687
2022-09-13	09:38:02	0.397875
2022-09-13	09:38:03	0.417926
2022-09-13	09:38:03	0.41187
2022-09-13	09:38:03	0.468868
2022-09-13	09:38:03	0.424848
2022-09-13	09:38:04	0.491565
2022-09-13	09:38:04	0.411412
2022-09-13	09:38:04	0.456959
2022-09-13	09:38:04	0.467748
2022-09-13	09:38:05	0.456909
2022-09-13	09:38:05	0.491107
2022-09-13	09:38:05	0.463117
2022-09-13	09:38:06	0.471311
2022-09-13	09:38:06	0.517519
2022-09-13	09:38:06	0.481031
2022-09-13	09:38:06	0.426069
2022-09-13	09:38:07	0.475992
2022-09-13	09:38:07	0.43869
2022-09-13	09:38:07	0.58556
2022-09-13	09:38:07	0.378486
2022-09-13	09:38:08	0.484491
2022-09-13	09:38:08	0.428104
2022-09-13	09:38:08	0.225356
2022-09-13	09:38:08	0.746119
2022-09-13	09:38:09	0.410191
2022-09-13	09:38:09	0.324847
2022-09-13	09:38:09	0.480318
2022-09-13	09:38:10	0.371718
2022-09-13	09:38:10	0.295178
2022-09-13	09:38:10	0.248155
2022-09-13	09:38:10	0.367341
2022-09-13	09:38:11	0.126731
2022-09-13	09:38:11	0.0968577
2022-09-13	09:38:11	0.133397
2022-09-13	09:38:11	0.152888
2022-09-13	09:38:12	0.531616
2022-09-13	09:38:12	6.2767
2022-09-13	09:38:12	21.8009
2022-09-13	09:38:12	15.2512
2022-09-13	09:38:13	4.24668
2022-09-13	09:38:13	5.73451
2022-09-13	09:38:13	12.4908
2022-09-13	09:38:13	7.17686
2022-09-13	09:38:14	3.98393
2022-09-13	09:38:14	1.0509
2022-09-13	09:38:14	0.439606
2022-09-13	09:38:15	0.740725
2022-09-13	09:38:15	0.179504
2022-09-13	09:38:15	0.287341
2022-09-13	09:38:15	0.566476
2022-09-13	09:38:16	0.300318
2022-09-13	09:38:16	0.499046
2022-09-13	09:38:16	0.522913
2022-09-13	09:38:16	0.759911
2022-09-13	09:38:17	2.64551
2022-09-13	09:38:17	4.45166
2022-09-13	09:38:17	2.85009
2022-09-13	09:38:17	3.6106
2022-09-13	09:38:18	0.501539
2022-09-13	09:38:18	0.475331
2022-09-13	09:38:18	0.634211
2022-09-13	09:38:19	0.326323
2022-09-13	09:38:19	0.558741
2022-09-13	09:38:19	0.362201
2022-09-13	09:38:19	0.733651
2022-09-13	09:38:20	0.0533972
2022-09-13	09:38:20	-0.305229
2022-09-13	09:38:20	0.0119723
2022-09-13	09:38:20	6.75472
2022-09-13	09:38:21	4.3621
2022-09-13	09:38:21	3.40698
2022-09-13	09:38:21	2.19513
2022-09-13	09:38:21	1.70388
2022-09-13	09:38:22	1.91299
2022-09-13	09:38:22	1.31981
2022-09-13	09:38:22	3.33395
2022-09-13	09:38:22	5.91502
2022-09-13	09:38:23	8.10851
2022-09-13	09:38:23	1.94266
2022-09-13	09:38:23	0.197672
2022-09-13	09:38:24	0.0380282
2022-09-13	09:38:24	-0.126297
2022-09-13	09:38:24	0.195891
2022-09-13	09:38:24	0.639249
2022-09-13	09:38:25	0.430853
2022-09-13	09:38:25	0.798842
2022-09-13	09:38:25	0.285356
2022-09-13	09:38:25	0.689173
2022-09-13	09:38:26	0.251616
2022-09-13	09:38:26	0.648766
2022-09-13	09:38:26	0.428613
2022-09-13	09:38:26	0.555534
2022-09-13	09:38:27	0.549987
2022-09-13	09:38:27	0.755076
2022-09-13	09:38:27	1.74047
2022-09-13	09:38:28	3.58195
2022-09-13	09:38:28	4.65375
2022-09-13	09:38:28	2.61345
2022-09-13	09:38:28	1.8221
2022-09-13	09:38:29	0.462812
2022-09-13	09:38:29	0.589122
2022-09-13	09:38:29	0.621132
2022-09-13	09:38:29	0.423321
2022-09-13	09:38:30	0.0453565
2022-09-13	09:38:30	-0.223448
2022-09-13	09:38:30	-0.454338
2022-09-13	09:38:30	-0.352302
2022-09-13	09:38:31	0.0384862
2022-09-13	09:38:31	1.84525
2022-09-13	09:38:31	4.17345
2022-09-13	09:38:31	1.12408
2022-09-13	09:38:32	1.4306
2022-09-13	09:38:32	1.10897
2022-09-13	09:38:32	0.660318
2022-09-13	09:38:33	0.888003
2022-09-13	09:38:33	0.261285
2022-09-13	09:38:33	0.652481
2022-09-13	09:38:33	0.307341
2022-09-13	09:38:34	0.62556
2022-09-13	09:38:34	0.695992
2022-09-13	09:38:34	0.716043
2022-09-13	09:38:34	0.268104
2022-09-13	09:38:35	1.88317
2022-09-13	09:38:35	0.502608
2022-09-13	09:38:35	3.68663
2022-09-13	09:38:35	5.76408
2022-09-13	09:38:36	5.53757
2022-09-13	09:38:36	4.69747
2022-09-13	09:38:36	1.05447
2022-09-13	09:38:37	-0.134135
2022-09-13	09:38:37	-0.0798852
2022-09-13	09:38:37	0.253092
2022-09-13	09:38:37	-0.202226
2022-09-13	09:38:38	0.494822
2022-09-13	09:38:38	1.76775
2022-09-13	09:38:38	5.67263
2022-09-13	09:38:38	5.32342
2022-09-13	09:38:39	3.72088
2022-09-13	09:38:39	0.683168
2022-09-13	09:38:39	0.39014
2022-09-13	09:38:39	0.463473
2022-09-13	09:38:40	0.275585
2022-09-13	09:38:40	0.46383
2022-09-13	09:38:40	0.27813
2022-09-13	09:38:40	0.6107
2022-09-13	09:38:41	0.727188
2022-09-13	09:38:41	0.498537
2022-09-13	09:38:41	0.339148
2022-09-13	09:38:42	0.514568
2022-09-13	09:38:42	0.514669
2022-09-13	09:38:42	0.254873
2022-09-13	09:38:42	0.532888
2022-09-13	09:38:43	0.195026
2022-09-13	09:38:43	0.634669
2022-09-13	09:38:43	0.316298
2022-09-13	09:38:43	0.640216
2022-09-13	09:38:44	0.364389
2022-09-13	09:38:44	0.407596
2022-09-13	09:38:44	0.487952
2022-09-13	09:38:44	0.292735
2022-09-13	09:38:45	0.443931
2022-09-13	09:38:45	0.525967
2022-09-13	09:38:45	0.934873
2022-09-13	09:38:46	0.541997
2022-09-13	09:38:46	2.13111
2022-09-13	09:38:46	0.60444
2022-09-13	09:38:46	0.761285
2022-09-13	09:38:47	0.942099
2022-09-13	09:38:47	0.832176
2022-09-13	09:38:47	2.43406
2022-09-13	09:38:47	0.551005
2022-09-13	09:38:48	2.18597
2022-09-13	09:38:48	2.33365
2022-09-13	09:38:48	1.94897
2022-09-13	09:38:48	5.04968
2022-09-13	09:38:49	3.23248
2022-09-13	09:38:49	4.0167
2022-09-13	09:38:49	4.45009
2022-09-13	09:38:49	1.62352
2022-09-13	09:38:50	0.269631
2022-09-13	09:38:50	0.770293
2022-09-13	09:38:50	-0.0685875
2022-09-13	09:38:51	0.0598603
2022-09-13	09:38:51	0.659148
2022-09-13	09:38:51	4.45222
2022-09-13	09:38:51	3.29869
2022-09-13	09:38:52	3.86968
2022-09-13	09:38:52	2.92709
2022-09-13	09:38:52	0.188359
2022-09-13	09:38:52	2.09314
2022-09-13	09:38:53	0.648104
2022-09-13	09:38:53	0.880929
2022-09-13	09:38:53	3.49533
2022-09-13	09:38:53	3.53854
2022-09-13	09:38:54	1.1333
2022-09-13	09:38:54	1.59955
2022-09-13	09:38:54	1.13238
2022-09-13	09:38:55	1.01513
2022-09-13	09:38:55	0.565509
2022-09-13	09:38:55	0.630445
2022-09-13	09:38:55	1.90877
2022-09-13	09:38:56	0.573753
2022-09-13	09:38:56	1.58515
2022-09-13	09:38:56	5.36362
2022-09-13	09:38:56	1.70357
2022-09-13	09:38:57	6.46194
2022-09-13	09:38:57	0.793855
2022-09-13	09:38:57	1.23055
2022-09-13	09:38:57	0.606018
2022-09-13	09:38:58	0.200216
2022-09-13	09:38:58	0.222354
2022-09-13	09:38:58	0.0527865
2022-09-13	09:38:58	0.185102
2022-09-13	09:38:59	0.193397
2022-09-13	09:38:59	0.285255
2022-09-13	09:38:59	0.419555
2022-09-13	09:39:00	0.784796
2022-09-13	09:39:00	0.847595
2022-09-13	09:39:00	1.10251
2022-09-13	09:39:00	1.13024
2022-09-13	09:39:01	0.995229
2022-09-13	09:39:01	1.20047
2022-09-13	09:39:01	0.916349
2022-09-13	09:39:01	0.739147
2022-09-13	09:39:02	0.576043
2022-09-13	09:39:02	0.795687
2022-09-13	09:39:02	1.25737
2022-09-13	09:39:02	2.8364
2022-09-13	09:39:03	4.11889
2022-09-13	09:39:03	5.85859
2022-09-13	09:39:03	0.408969
2022-09-13	09:39:04	0.488613
2022-09-13	09:39:04	0.492837
2022-09-13	09:39:04	0.475127
2022-09-13	09:39:04	0.0809798
2022-09-13	09:39:05	0.0272394
2022-09-13	09:39:05	-0.277239
2022-09-13	09:39:05	0.205458
2022-09-13	09:39:05	0.11299
2022-09-13	09:39:06	7.80337
2022-09-13	09:39:06	5.89314
2022-09-13	09:39:06	3.54347
2022-09-13	09:39:06	1.38398
2022-09-13	09:39:07	3.27619
2022-09-13	09:39:07	0.283117
2022-09-13	09:39:07	1.14887
2022-09-13	09:39:07	0.715585
2022-09-13	09:39:08	0.870751
2022-09-13	09:39:08	0.788918
2022-09-13	09:39:08	0.442557
2022-09-13	09:39:09	0.817519
2022-09-13	09:39:09	0.921845
2022-09-13	09:39:09	0.970293
2022-09-13	09:39:09	0.660725
2022-09-13	09:39:10	0.523932
2022-09-13	09:39:10	0.51701
2022-09-13	09:39:10	0.462914
2022-09-13	09:39:10	0.599657
2022-09-13	09:39:11	0.828308
2022-09-13	09:39:11	0.499504
2022-09-13	09:39:11	0.327748
2022-09-13	09:39:11	0.585967
2022-09-13	09:39:12	0.290344
2022-09-13	09:39:12	0.67243
2022-09-13	09:39:12	0.425662
2022-09-13	09:39:13	0.626069
2022-09-13	09:39:13	0.352328
2022-09-13	09:39:13	0.561845
2022-09-13	09:39:13	0.380318
2022-09-13	09:39:14	0.489428
2022-09-13	09:39:14	0.41986
2022-09-13	09:39:14	0.429987
2022-09-13	09:39:14	0.389682
2022-09-13	09:39:15	0.419504
2022-09-13	09:39:15	0.433346
2022-09-13	09:39:15	0.368053
2022-09-13	09:39:15	0.373346
2022-09-13	09:39:16	0.221947
2022-09-13	09:39:16	0.213702
2022-09-13	09:39:16	0.209936
2022-09-13	09:39:16	0.202659
2022-09-13	09:39:17	0.263015
2022-09-13	09:39:17	0.101896
2022-09-13	09:39:17	0.344186
2022-09-13	09:39:18	3.60927
2022-09-13	09:39:18	6.21889
2022-09-13	09:39:18	4.60276
2022-09-13	09:39:18	3.31126
2022-09-13	09:39:19	3.83212
2022-09-13	09:39:19	1.77569
2022-09-13	09:39:19	10.3813
2022-09-13	09:39:20	8.59624
2022-09-13	09:39:20	12.5412
2022-09-13	09:39:20	9.75339
2022-09-13	09:39:20	3.84256
2022-09-13	09:39:20	9.04993
2022-09-13	09:39:21	1.41116
2022-09-13	09:39:21	2.21966
2022-09-13	09:39:21	1.12352
2022-09-13	09:39:22	0.968969
2022-09-13	09:39:22	0.718537
2022-09-13	09:39:22	0.583117
2022-09-13	09:39:22	1.66383
2022-09-13	09:39:23	1.01589
2022-09-13	09:39:23	2.76408
2022-09-13	09:39:23	0.723168
2022-09-13	09:39:23	3.63976
2022-09-13	09:39:24	3.64368
2022-09-13	09:39:24	2.97777
2022-09-13	09:39:24	3.18709
2022-09-13	09:39:24	0.608868
2022-09-13	09:39:25	1.05798
2022-09-13	09:39:25	3.33487
2022-09-13	09:39:25	2.66393
2022-09-13	09:39:25	4.39843
2022-09-13	09:39:26	4.32861
2022-09-13	09:39:26	0.372786
2022-09-13	09:39:26	1.21335
2022-09-13	09:39:27	0.916349
2022-09-13	09:39:27	0.682608
2022-09-13	09:39:27	0.517926
2022-09-13	09:39:27	1.56877
2022-09-13	09:39:28	0.32154
2022-09-13	09:39:28	1.18963
2022-09-13	09:39:28	0.319402
2022-09-13	09:39:28	0.614415
2022-09-13	09:39:29	1.1967
2022-09-13	09:39:29	0.498435
2022-09-13	09:39:29	1.7134
2022-09-13	09:39:29	5.9709
2022-09-13	09:39:30	1.42149
2022-09-13	09:39:30	0.804237
2022-09-13	09:39:30	0.495942
2022-09-13	09:39:31	0.169275
2022-09-13	09:39:31	0.0214887
2022-09-13	09:39:31	0.402252
2022-09-13	09:39:31	1.33162
2022-09-13	09:39:32	7.40754
2022-09-13	09:39:32	2.17599
2022-09-13	09:39:32	1.31604
2022-09-13	09:39:32	0.410649
2022-09-13	09:39:33	0.559911
2022-09-13	09:39:33	0.597774
2022-09-13	09:39:33	0.71874
2022-09-13	09:39:33	0.999097
2022-09-13	09:39:34	2.4705
2022-09-13	09:39:34	1.85426
2022-09-13	09:39:34	5.26769
2022-09-13	09:39:34	2.77986
2022-09-13	09:39:35	6.13187
2022-09-13	09:39:35	1.68592
2022-09-13	09:39:35	6.39746
2022-09-13	09:39:36	2.4106
2022-09-13	09:39:36	4.01752
2022-09-13	09:39:36	4.50357
2022-09-13	09:39:36	1.73579
2022-09-13	09:39:37	5.53217
2022-09-13	09:39:37	0.849631
2022-09-13	09:39:37	1.63009
2022-09-13	09:39:37	1.89182
2022-09-13	09:39:38	0.186425
2022-09-13	09:39:38	1.56693
2022-09-13	09:39:38	0.927443
2022-09-13	09:39:38	1.04617
2022-09-13	09:39:39	0.37299
2022-09-13	09:39:39	0.778588
2022-09-13	09:39:39	0.571972
2022-09-13	09:39:40	0.875636
2022-09-13	09:39:40	0.898689
2022-09-13	09:39:40	0.954873
2022-09-13	09:39:40	1.14994
2022-09-13	09:39:41	0.797417
2022-09-13	09:39:41	0.544135
2022-09-13	09:39:41	0.613397
2022-09-13	09:39:41	0.528461
2022-09-13	09:39:42	0.507901
2022-09-13	09:39:42	0.448613
2022-09-13	09:39:42	0.466323
2022-09-13	09:39:42	0.655076
2022-09-13	09:39:43	0.99299
2022-09-13	09:39:43	1.12688
2022-09-13	09:39:43	1.82994
2022-09-13	09:39:44	1.25253
2022-09-13	09:39:44	1.48958
2022-09-13	09:39:44	0.594364
2022-09-13	09:39:44	0.566628
2022-09-13	09:39:45	0.854771
2022-09-13	09:39:45	0.764389
2022-09-13	09:39:45	0.694975
2022-09-13	09:39:45	0.534618
2022-09-13	09:39:46	0.2564
2022-09-13	09:39:46	3.69874
2022-09-13	09:39:46	0.787748
2022-09-13	09:39:47	2.11151
2022-09-13	09:39:47	0.878486
2022-09-13	09:39:47	3.3053
2022-09-13	09:39:47	2.85803
2022-09-13	09:39:47	0.837468
2022-09-13	09:39:48	2.98882
2022-09-13	09:39:48	5.18072
2022-09-13	09:39:48	5.08815
2022-09-13	09:39:49	4.75055
2022-09-13	09:39:49	4.87227
2022-09-13	09:39:49	2.18011
2022-09-13	09:39:49	1.39737
2022-09-13	09:39:50	0.846883
2022-09-13	09:39:50	0.331463
2022-09-13	09:39:50	0.266425
2022-09-13	09:39:50	0.496858
2022-09-13	09:39:51	0.9393
2022-09-13	09:39:51	0.244339
2022-09-13	09:39:51	0.103524
2022-09-13	09:39:51	0.1307
2022-09-13	09:39:52	0.180318
2022-09-13	09:39:52	0.301692
2022-09-13	09:39:52	0.38841
2022-09-13	09:39:53	0.308461
2022-09-13	09:39:53	0.281998
2022-09-13	09:39:53	0.422354
2022-09-13	09:39:53	0.26841
2022-09-13	09:39:54	0.244695
2022-09-13	09:39:54	0.282914
2022-09-13	09:39:54	0.284135
2022-09-13	09:39:54	0.349784
2022-09-13	09:39:55	0.440776
2022-09-13	09:39:55	0.422252
2022-09-13	09:39:55	0.463626
2022-09-13	09:39:55	0.532023
2022-09-13	09:39:56	0.49986
2022-09-13	09:39:56	0.414364
2022-09-13	09:39:56	0.312023
2022-09-13	09:39:56	0.239555
2022-09-13	09:39:57	0.212685
2022-09-13	09:39:57	0.205458
2022-09-13	09:39:57	0.238232
2022-09-13	09:39:58	0.223015
2022-09-13	09:39:58	0.221845
2022-09-13	09:39:58	0.232939
2022-09-13	09:39:58	0.22612
2022-09-13	09:39:59	0.227239
2022-09-13	09:39:59	0.203372
2022-09-13	09:39:59	0.19472
2022-09-13	09:39:59	0.254059
2022-09-13	09:40:00	0.229122
2022-09-13	09:40:00	0.350242
2022-09-13	09:40:00	0.348053
2022-09-13	09:40:00	0.375992
2022-09-13	09:40:01	0.378181
2022-09-13	09:40:01	0.23014
2022-09-13	09:40:01	0.202557
2022-09-13	09:40:02	0.244135
2022-09-13	09:40:02	0.260267
2022-09-13	09:40:02	0.529987
2022-09-13	09:40:02	1.2135
2022-09-13	09:40:03	1.28877
2022-09-13	09:40:03	0.554618
2022-09-13	09:40:03	0.251056
2022-09-13	09:40:03	-0.0857376
2022-09-13	09:40:04	-0.106654
2022-09-13	09:40:04	0.0219977
2022-09-13	09:40:04	0.0729392
2022-09-13	09:40:04	0.160573
2022-09-13	09:40:05	0.351514
2022-09-13	09:40:05	0.17126
2022-09-13	09:40:05	0.23813
2022-09-13	09:40:05	0.423982
2022-09-13	09:40:06	0.483015
2022-09-13	09:40:06	0.569326
2022-09-13	09:40:06	0.699962
2022-09-13	09:40:07	0.705204
2022-09-13	09:40:07	0.535433
2022-09-13	09:40:07	0.556959
2022-09-13	09:40:07	0.669122
2022-09-13	09:40:08	0.774822
2022-09-13	09:40:08	0.559606
2022-09-13	09:40:08	1.05345
2022-09-13	09:40:08	0.0931936
2022-09-13	09:40:09	-0.0138293
2022-09-13	09:40:09	0.0947203
2022-09-13	09:40:09	0.504644
2022-09-13	09:40:09	2.55782
2022-09-13	09:40:10	3.93106
2022-09-13	09:40:10	7.01685
2022-09-13	09:40:10	8.70016
2022-09-13	09:40:11	4.188
2022-09-13	09:40:11	5.82637
2022-09-13	09:40:11	5.16515
2022-09-13	09:40:11	1.65314
2022-09-13	09:40:12	0.9907
2022-09-13	09:40:12	0.594262
2022-09-13	09:40:12	0.379402
2022-09-13	09:40:12	-0.00660282
2022-09-13	09:40:13	0.0558908
2022-09-13	09:40:13	-0.130369
2022-09-13	09:40:13	-0.0663992
2022-09-13	09:40:13	-0.129656
2022-09-13	09:40:14	0.138028
2022-09-13	09:40:14	0.0935498
2022-09-13	09:40:14	0.167036
2022-09-13	09:40:14	0.075331
2022-09-13	09:40:15	0.0695803
2022-09-13	09:40:15	0.00805366
2022-09-13	09:40:15	-0.325279
2022-09-13	09:40:16	-0.326043
2022-09-13	09:40:16	-0.289453
2022-09-13	09:40:16	-0.263804
2022-09-13	09:40:16	-0.132099
2022-09-13	09:40:17	0.0872394
2022-09-13	09:40:17	-0.00258246
2022-09-13	09:40:17	0.194008
2022-09-13	09:40:17	-0.0153051
2022-09-13	09:40:18	0.537112
2022-09-13	09:40:18	2.48744
2022-09-13	09:40:18	5.39126
2022-09-13	09:40:18	6.11909
2022-09-13	09:40:19	5.14367
2022-09-13	09:40:19	4.27467
2022-09-13	09:40:19	0.448817
2022-09-13	09:40:20	2.20749
2022-09-13	09:40:20	0.31869
2022-09-13	09:40:20	1.31691
2022-09-13	09:40:20	2.85737
2022-09-13	09:40:21	0.840522
2022-09-13	09:40:21	3.54938
2022-09-13	09:40:21	0.815076
2022-09-13	09:40:21	2.66479
2022-09-13	09:40:22	3.35945
2022-09-13	09:40:22	1.66861
2022-09-13	09:40:22	1.94648
2022-09-13	09:40:22	0.249428
2022-09-13	09:40:23	1.51854
2022-09-13	09:40:23	2.04795
2022-09-13	09:40:23	1.02469
2022-09-13	09:40:23	2.04037
2022-09-13	09:40:24	0.677926
2022-09-13	09:40:24	2.16673
2022-09-13	09:40:24	3.12861
2022-09-13	09:40:25	0.811769
2022-09-13	09:40:25	1.99055
2022-09-13	09:40:25	0.821743
2022-09-13	09:40:25	0.982099
2022-09-13	09:40:26	1.86134
2022-09-13	09:40:26	0.825865
2022-09-13	09:40:26	2.05681
2022-09-13	09:40:26	0.965916
2022-09-13	09:40:27	1.33543
2022-09-13	09:40:27	2.4049
2022-09-13	09:40:27	0.852786
2022-09-13	09:40:27	1.02963
2022-09-13	09:40:28	0.872888
2022-09-13	09:40:28	1.05645
2022-09-13	09:40:28	0.934924
2022-09-13	09:40:29	0.827086
2022-09-13	09:40:29	1.58642
2022-09-13	09:40:29	3.1767
2022-09-13	09:40:29	0.511972
2022-09-13	09:40:30	0.4364
2022-09-13	09:40:30	0.655585
2022-09-13	09:40:30	0.175178
2022-09-13	09:40:30	0.408104
2022-09-13	09:40:31	0.493244
2022-09-13	09:40:31	0.42388
2022-09-13	09:40:31	0.204949
2022-09-13	09:40:31	0.356959
2022-09-13	09:40:32	0.368868
2022-09-13	09:40:32	0.353244
2022-09-13	09:40:32	0.520115
2022-09-13	09:40:32	0.578384
2022-09-13	09:40:33	0.852837
2022-09-13	09:40:33	0.979911
2022-09-13	09:40:33	0.673651
2022-09-13	09:40:34	0.721591
2022-09-13	09:40:34	0.786221
2022-09-13	09:40:34	0.572277
2022-09-13	09:40:34	0.462608
2022-09-13	09:40:35	0.512939
2022-09-13	09:40:35	0.538588
2022-09-13	09:40:35	0.520674
2022-09-13	09:40:35	0.542914
2022-09-13	09:40:36	0.544389
2022-09-13	09:40:36	0.541794
2022-09-13	09:40:36	0.537163
2022-09-13	09:40:36	0.513855
2022-09-13	09:40:37	0.488359
2022-09-13	09:40:37	0.476552
2022-09-13	09:40:37	0.481387
2022-09-13	09:40:38	0.487494
2022-09-13	09:40:38	0.464898
2022-09-13	09:40:38	0.477468
2022-09-13	09:40:38	0.486527
2022-09-13	09:40:39	0.485356
2022-09-13	09:40:39	0.490445
2022-09-13	09:40:39	0.485916
2022-09-13	09:40:39	0.497265
2022-09-13	09:40:40	0.48958
2022-09-13	09:40:40	0.493499
2022-09-13	09:40:40	0.497061
2022-09-13	09:40:40	0.492277
2022-09-13	09:40:41	0.488206
2022-09-13	09:40:41	0.494059
2022-09-13	09:40:41	0.496603
2022-09-13	09:40:42	0.510343
2022-09-13	09:40:42	0.510954
2022-09-13	09:40:42	0.519707
2022-09-13	09:40:42	0.545458
2022-09-13	09:40:43	0.478282
2022-09-13	09:40:43	0.446679
2022-09-13	09:40:43	0.478588
2022-09-13	09:40:43	0.461336
2022-09-13	09:40:44	0.470395
2022-09-13	09:40:44	0.471005
2022-09-13	09:40:44	0.446629
2022-09-13	09:40:44	0.451819
2022-09-13	09:40:45	0.393601
2022-09-13	09:40:45	0.39869
2022-09-13	09:40:45	0.617417
2022-09-13	09:40:45	0.728512
2022-09-13	09:40:46	0.885458
2022-09-13	09:40:46	0.926171
2022-09-13	09:40:46	1.52683
2022-09-13	09:40:47	0.77874
2022-09-13	09:40:47	0.587086
2022-09-13	09:40:47	0.458232
2022-09-13	09:40:47	0.444796
2022-09-13	09:40:48	0.486679
2022-09-13	09:40:48	0.510751
2022-09-13	09:40:48	0.486679
2022-09-13	09:40:48	0.483066
2022-09-13	09:40:49	0.455636
2022-09-13	09:40:49	0.308969
2022-09-13	09:40:49	0.604797
2022-09-13	09:40:49	0.428817
2022-09-13	09:40:50	0.134517
2022-09-13	09:40:50	0.103117
2022-09-13	09:40:50	0.274008
2022-09-13	09:40:51	0.262456
2022-09-13	09:40:51	0.127596
2022-09-13	09:40:51	0.216959
2022-09-13	09:40:51	0.237417
2022-09-13	09:40:52	0.305356
2022-09-13	09:40:52	0.371667
2022-09-13	09:40:52	0.313855
2022-09-13	09:40:52	0.441845
2022-09-13	09:40:53	0.408563
2022-09-13	09:40:53	0.315789
2022-09-13	09:40:53	0.438181
2022-09-13	09:40:53	0.459148
2022-09-13	09:40:54	0.507035
2022-09-13	09:40:54	0.446883
2022-09-13	09:40:54	0.46902
2022-09-13	09:40:54	0.45416
2022-09-13	09:40:55	0.463015
2022-09-13	09:40:55	0.471209
2022-09-13	09:40:55	0.621183
2022-09-13	09:40:56	0.900725
2022-09-13	09:40:56	1.28358
2022-09-13	09:40:56	0.47243
2022-09-13	09:40:56	0.171819
2022-09-13	09:40:57	0.118435
2022-09-13	09:40:57	0.0467814
2022-09-13	09:40:57	0.00469491
2022-09-13	09:40:57	-0.0856358
2022-09-13	09:40:58	-0.0272135
2022-09-13	09:40:58	-0.140699
2022-09-13	09:40:58	-0.152608
2022-09-13	09:40:58	-0.0668063
2022-09-13	09:40:59	-0.0584094
2022-09-13	09:40:59	-0.179376
2022-09-13	09:40:59	-0.222939
2022-09-13	09:41:00	-0.0280786
2022-09-13	09:41:00	0.0603692
2022-09-13	09:41:00	0.143728
2022-09-13	09:41:00	1.3362
2022-09-13	09:41:01	1.27884
2022-09-13	09:41:01	4.13767
2022-09-13	09:41:01	2.04642
2022-09-13	09:41:01	7.01894
2022-09-13	09:41:02	3.49848
2022-09-13	09:41:02	6.05533
2022-09-13	09:41:02	0.909478
2022-09-13	09:41:02	1.72546
2022-09-13	09:41:03	1.18088
2022-09-13	09:41:03	0.814975
2022-09-13	09:41:03	2.85329
2022-09-13	09:41:03	0.648969
2022-09-13	09:41:04	1.26983
2022-09-13	09:41:04	0.755891
2022-09-13	09:41:04	0.434364
2022-09-13	09:41:05	0.65187
2022-09-13	09:41:05	0.548104
2022-09-13	09:41:05	0.420064
2022-09-13	09:41:05	0.486018
2022-09-13	09:41:06	0.466374
2022-09-13	09:41:06	0.508461
2022-09-13	09:41:06	0.406221
2022-09-13	09:41:06	0.58215
2022-09-13	09:41:07	0.473143
2022-09-13	09:41:07	0.526323
2022-09-13	09:41:07	0.487799
2022-09-13	09:41:07	0.483219
2022-09-13	09:41:08	0.522608
2022-09-13	09:41:08	0.456298
2022-09-13	09:41:08	0.554822
2022-09-13	09:41:09	0.528817
2022-09-13	09:41:09	0.270445
2022-09-13	09:41:09	0.137061
2022-09-13	09:41:09	0.150496
2022-09-13	09:41:10	0.0752292
2022-09-13	09:41:10	0.0770613
2022-09-13	09:41:10	0.088817
2022-09-13	09:41:10	0.207036
2022-09-13	09:41:11	0.216043
2022-09-13	09:41:11	0.611209
2022-09-13	09:41:11	0.840471
2022-09-13	09:41:11	0.930903
2022-09-13	09:41:12	0.724796
2022-09-13	09:41:12	0.521641
2022-09-13	09:41:12	0.373193
2022-09-13	09:41:12	0.561794
2022-09-13	09:41:13	0.324898
2022-09-13	09:41:13	0.424848
2022-09-13	09:41:13	0.437214
2022-09-13	09:41:14	0.617672
2022-09-13	09:41:14	0.380827
2022-09-13	09:41:14	0.439656
2022-09-13	09:41:14	0.357621
2022-09-13	09:41:15	0.229326
2022-09-13	09:41:15	0.430903
2022-09-13	09:41:15	0.947595
2022-09-13	09:41:15	0.662557
2022-09-13	09:41:16	0.291463
2022-09-13	09:41:16	1.02724
2022-09-13	09:41:16	0.303422
2022-09-13	09:41:16	0.565967
2022-09-13	09:41:17	0.321031
2022-09-13	09:41:17	0.342405
2022-09-13	09:41:17	0.487188
2022-09-13	09:41:18	0.961539
2022-09-13	09:41:18	0.38841
2022-09-13	09:41:18	0.307646
2022-09-13	09:41:18	0.623117
2022-09-13	09:41:19	0.38159
2022-09-13	09:41:19	0.531361
2022-09-13	09:41:19	0.274873
2022-09-13	09:41:19	0.936552
2022-09-13	09:41:20	1.41207
2022-09-13	09:41:20	1.93472
2022-09-13	09:41:20	2.93253
2022-09-13	09:41:20	1.07925
2022-09-13	09:41:21	1.69263
2022-09-13	09:41:21	0.873855
2022-09-13	09:41:21	1.40296
2022-09-13	09:41:21	1.54368
2022-09-13	09:41:22	0.631158
2022-09-13	09:41:22	0.96958
2022-09-13	09:41:22	1.67207
2022-09-13	09:41:23	0.356959
2022-09-13	09:41:23	0.361387
2022-09-13	09:41:23	0.444084
2022-09-13	09:41:23	0.354822
2022-09-13	09:41:24	0.35243
2022-09-13	09:41:24	0.213143
2022-09-13	09:41:24	0.412685
2022-09-13	09:41:24	0.884796
2022-09-13	09:41:25	0.767392
2022-09-13	09:41:25	1.79182
2022-09-13	09:41:25	1.86856
2022-09-13	09:41:25	0.626629
2022-09-13	09:41:26	1.23172
2022-09-13	09:41:26	0.898435
2022-09-13	09:41:26	0.379046
2022-09-13	09:41:27	0.618435
2022-09-13	09:41:27	0.513041
2022-09-13	09:41:27	0.688257
2022-09-13	09:41:27	1.30917
2022-09-13	09:41:28	1.73584
2022-09-13	09:41:28	2.74378
2022-09-13	09:41:28	3.52647
2022-09-13	09:41:28	2.00531
2022-09-13	09:41:29	0.935687
2022-09-13	09:41:29	0.363372
2022-09-13	09:41:29	0.410191
2022-09-13	09:41:29	0.233652
2022-09-13	09:41:30	0.283422
2022-09-13	09:41:30	-0.0105723
2022-09-13	09:41:30	0.0674429
2022-09-13	09:41:30	0.0143641
2022-09-13	09:41:31	0.179911
2022-09-13	09:41:31	0.225916
2022-09-13	09:41:31	2.11777
2022-09-13	09:41:32	1.76408
2022-09-13	09:41:32	7.52235
2022-09-13	09:41:32	1.84042
2022-09-13	09:41:32	5.57009
2022-09-13	09:41:33	3.67518
2022-09-13	09:41:33	2.03284
2022-09-13	09:41:33	6.84118
2022-09-13	09:41:33	3.83278
2022-09-13	09:41:34	8.09074
2022-09-13	09:41:34	6.95533
2022-09-13	09:41:34	1.92312
2022-09-13	09:41:34	0.986119
2022-09-13	09:41:35	0.10668
2022-09-13	09:41:35	0.274466
2022-09-13	09:41:35	-0.0709793
2022-09-13	09:41:36	-0.172913
2022-09-13	09:41:36	-0.323244
2022-09-13	09:41:36	-0.447061
2022-09-13	09:41:36	-0.507671
2022-09-13	09:41:37	-0.551335
2022-09-13	09:41:37	-0.570114
2022-09-13	09:41:37	-0.624465
2022-09-13	09:41:37	-0.553829
2022-09-13	09:41:38	-0.858002
2022-09-13	09:41:38	-0.757697
2022-09-13	09:41:38	-0.843244
2022-09-13	09:41:38	-0.753473
2022-09-13	09:41:39	-0.555356
2022-09-13	09:41:39	-0.27047
2022-09-13	09:41:39	-0.172913
2022-09-13	09:41:40	-0.0224807
2022-09-13	09:41:40	0.130395
2022-09-13	09:41:40	0.0477992
2022-09-13	09:41:40	0.60444
2022-09-13	09:41:41	0.580827
2022-09-13	09:41:41	0.319402
2022-09-13	09:41:41	0.230547
2022-09-13	09:41:41	0.288206
2022-09-13	09:41:42	0.789987
2022-09-13	09:41:42	0.400827
2022-09-13	09:41:42	0.939249
2022-09-13	09:41:42	1.8165
2022-09-13	09:41:43	0.174466
2022-09-13	09:41:43	0.989122
2022-09-13	09:41:43	0.546069
2022-09-13	09:41:43	2.94729
2022-09-13	09:41:44	2.74138
2022-09-13	09:41:44	2.32225
2022-09-13	09:41:44	2.42587
2022-09-13	09:41:45	0.424898
2022-09-13	09:41:45	0.787341
2022-09-13	09:41:45	0.665102
2022-09-13	09:41:45	0.728054
2022-09-13	09:41:46	0.415534
2022-09-13	09:41:46	0.663321
2022-09-13	09:41:46	0.484339
2022-09-13	09:41:46	1.90953
2022-09-13	09:41:47	0.820013
2022-09-13	09:41:47	6.35263
2022-09-13	09:41:47	1.94296
2022-09-13	09:41:47	12.0323
2022-09-13	09:41:48	2.44871
2022-09-13	09:41:48	3.10647
2022-09-13	09:41:48	1.79141
2022-09-13	09:41:49	1.15915
2022-09-13	09:41:49	4.14286
2022-09-13	09:41:49	1.12454
2022-09-13	09:41:49	3.14495
2022-09-13	09:41:50	5.06144
2022-09-13	09:41:50	0.49126
2022-09-13	09:41:50	0.667443
2022-09-13	09:41:50	0.280725
2022-09-13	09:41:51	0.329987
2022-09-13	09:41:51	0.0300893
2022-09-13	09:41:51	-0.383651
2022-09-13	09:41:51	-0.562226
2022-09-13	09:41:52	-0.459223
2022-09-13	09:41:52	-0.595101
2022-09-13	09:41:52	-0.52874
2022-09-13	09:41:52	-0.55561
2022-09-13	09:41:53	-0.0522007
2022-09-13	09:41:53	0.157265
2022-09-13	09:41:53	0.189478
2022-09-13	09:41:54	0.179402
2022-09-13	09:41:54	0.157672
2022-09-13	09:41:54	0.166985
2022-09-13	09:41:54	0.163219
2022-09-13	09:41:55	0.233092
2022-09-13	09:41:55	1.76505
2022-09-13	09:41:55	4.12424
2022-09-13	09:41:55	4.77955
2022-09-13	09:41:56	5.27543
2022-09-13	09:41:56	3.15182
2022-09-13	09:41:56	5.03334
2022-09-13	09:41:56	7.04591
2022-09-13	09:41:57	9.14326
2022-09-13	09:41:57	6.19263
2022-09-13	09:41:57	5.07177
2022-09-13	09:41:58	2.11192
2022-09-13	09:41:58	2.0249
2022-09-13	09:41:58	0.745407
2022-09-13	09:41:58	0.684847
2022-09-13	09:41:59	0.511616
2022-09-13	09:41:59	0.299199
2022-09-13	09:41:59	0.137774
2022-09-13	09:41:59	-0.105839
2022-09-13	09:42:00	-0.0842109
2022-09-13	09:42:00	0.025102
2022-09-13	09:42:00	-0.00370202
2022-09-13	09:42:00	0.0317687
2022-09-13	09:42:01	0.0615905
2022-09-13	09:42:01	-0.039529
2022-09-13	09:42:01	-0.230928
2022-09-13	09:42:01	-0.282022
2022-09-13	09:42:02	-0.395508
2022-09-13	09:42:02	-0.0201397
2022-09-13	09:42:02	0.0909035
2022-09-13	09:42:03	1.75279
2022-09-13	09:42:03	2.43726
2022-09-13	09:42:03	3.42215
2022-09-13	09:42:03	2.34215
2022-09-13	09:42:04	5.1309
2022-09-13	09:42:04	1.51385
2022-09-13	09:42:04	4.12927
2022-09-13	09:42:04	2.28469
2022-09-13	09:42:05	2.41925
2022-09-13	09:42:05	0.644695
2022-09-13	09:42:05	0.530649
2022-09-13	09:42:05	0.387697
2022-09-13	09:42:06	0.416705
2022-09-13	09:42:06	0.353601
2022-09-13	09:42:06	0.404644
2022-09-13	09:42:07	0.380522
2022-09-13	09:42:07	0.41416
2022-09-13	09:42:07	0.461132
2022-09-13	09:42:07	0.39131
2022-09-13	09:42:08	0.373702
2022-09-13	09:42:08	0.369733
2022-09-13	09:42:08	0.778384
2022-09-13	09:42:08	2.16281
2022-09-13	09:42:09	0.646374
2022-09-13	09:42:09	7.08871
2022-09-13	09:42:09	3.13014
2022-09-13	09:42:09	12.9712
2022-09-13	09:42:10	1.43777
2022-09-13	09:42:10	6.08545
2022-09-13	09:42:10	1.90179
2022-09-13	09:42:10	2.50011
2022-09-13	09:42:11	2.10698
2022-09-13	09:42:11	2.64515
2022-09-13	09:42:11	2.57645
2022-09-13	09:42:12	1.00449
2022-09-13	09:42:12	0.758944
2022-09-13	09:42:12	0.777366
2022-09-13	09:42:12	0.52617
2022-09-13	09:42:13	0.466272
2022-09-13	09:42:13	0.49874
2022-09-13	09:42:13	0.378333
2022-09-13	09:42:13	0.609682
2022-09-13	09:42:14	0.737315
2022-09-13	09:42:14	0.385254
2022-09-13	09:42:14	0.489529
2022-09-13	09:42:14	0.674058
2022-09-13	09:42:15	0.447748
2022-09-13	09:42:15	0.543015
2022-09-13	09:42:15	0.474669
2022-09-13	09:42:16	0.610751
2022-09-13	09:42:16	0.42327
2022-09-13	09:42:16	0.614465
2022-09-13	09:42:16	0.528104
2022-09-13	09:42:17	0.421387
2022-09-13	09:42:17	0.890547
2022-09-13	09:42:17	0.546628
2022-09-13	09:42:17	0.880115
2022-09-13	09:42:18	0.750598
2022-09-13	09:42:18	0.898741
2022-09-13	09:42:18	0.533855
2022-09-13	09:42:18	0.569122
2022-09-13	09:42:19	0.438893
2022-09-13	09:42:19	0.577519
2022-09-13	09:42:19	0.632888
2022-09-13	09:42:19	0.420674
2022-09-13	09:42:20	0.615382
2022-09-13	09:42:20	0.455127
2022-09-13	09:42:20	0.623015
2022-09-13	09:42:21	0.376196
2022-09-13	09:42:21	1.10286
2022-09-13	09:42:21	0.62154
2022-09-13	09:42:21	1.20999
2022-09-13	09:42:22	0.879657
2022-09-13	09:42:22	0.943931
2022-09-13	09:42:22	3.14541
2022-09-13	09:42:22	0.845
2022-09-13	09:42:23	1.82001
2022-09-13	09:42:23	2.36475
2022-09-13	09:42:23	1.12785
2022-09-13	09:42:23	1.68134
2022-09-13	09:42:24	1.08566
2022-09-13	09:42:24	2.29655
2022-09-13	09:42:24	2.63976
2022-09-13	09:42:25	1.61197
2022-09-13	09:42:25	3.19788
2022-09-13	09:42:25	4.26368
2022-09-13	09:42:25	0.505814
2022-09-13	09:42:26	1.11808
2022-09-13	09:42:26	0.745407
2022-09-13	09:42:26	0.329479
2022-09-13	09:42:26	0.56729
2022-09-13	09:42:27	0.405356
2022-09-13	09:42:27	0.567086
2022-09-13	09:42:27	0.434618
2022-09-13	09:42:27	0.481896
2022-09-13	09:42:28	0.532634
2022-09-13	09:42:28	0.493193
2022-09-13	09:42:28	0.442761
2022-09-13	09:42:29	0.430395
2022-09-13	09:42:29	0.514059
2022-09-13	09:42:29	0.482914
2022-09-13	09:42:29	0.448664
2022-09-13	09:42:30	0.470598
2022-09-13	09:42:30	0.503371
2022-09-13	09:42:30	0.437468
2022-09-13	09:42:30	0.871463
2022-09-13	09:42:31	1.6505
2022-09-13	09:42:31	0.940674
2022-09-13	09:42:31	2.55197
2022-09-13	09:42:31	0.678995
2022-09-13	09:42:32	0.97243
2022-09-13	09:42:32	0.965713
2022-09-13	09:42:32	0.410598
2022-09-13	09:42:32	1.18546
2022-09-13	09:42:33	1.44184
2022-09-13	09:42:33	5.15848
2022-09-13	09:42:33	5.40006
2022-09-13	09:42:34	3.6105
2022-09-13	09:42:34	1.24322
2022-09-13	09:42:34	0.931412
2022-09-13	09:42:34	0.744898
2022-09-13	09:42:35	0.334262
2022-09-13	09:42:35	0.538384
2022-09-13	09:42:35	0.485356
2022-09-13	09:42:35	0.500013
2022-09-13	09:42:36	0.498893
2022-09-13	09:42:36	0.526578
2022-09-13	09:42:36	0.430649
2022-09-13	09:42:36	0.323881
2022-09-13	09:42:37	0.478384
2022-09-13	09:42:37	0.383066
2022-09-13	09:42:37	0.325255
2022-09-13	09:42:38	0.475942
2022-09-13	09:42:38	0.31584
2022-09-13	09:42:38	0.495229
2022-09-13	09:42:38	0.371616
2022-09-13	09:42:39	1.16032
2022-09-13	09:42:39	0.566272
2022-09-13	09:42:39	2.68566
2022-09-13	09:42:39	2.0219
2022-09-13	09:42:40	2.57584
2022-09-13	09:42:40	0.950954
2022-09-13	09:42:40	1.12052
2022-09-13	09:42:40	0.991768
2022-09-13	09:42:41	0.380674
2022-09-13	09:42:41	0.783117
2022-09-13	09:42:41	0.84958
2022-09-13	09:42:41	0.454822
2022-09-13	09:42:42	0.761997
2022-09-13	09:42:42	0.555992
2022-09-13	09:42:42	0.420115
2022-09-13	09:42:43	0.991616
2022-09-13	09:42:43	0.391209
2022-09-13	09:42:43	0.370903
2022-09-13	09:42:43	0.793193
2022-09-13	09:42:44	0.233499
2022-09-13	09:42:44	0.632837
2022-09-13	09:42:44	0.383219
2022-09-13	09:42:45	0.551463
2022-09-13	09:42:45	1.46337
2022-09-13	09:42:45	0.470038
2022-09-13	09:42:45	0.700624
2022-09-13	09:42:45	2.07426
2022-09-13	09:42:46	0.991463
2022-09-13	09:42:46	2.00973
2022-09-13	09:42:46	0.987646
2022-09-13	09:42:47	3.01309
2022-09-13	09:42:47	3.2336
2022-09-13	09:42:47	1.63701
2022-09-13	09:42:47	1.19172
2022-09-13	09:42:48	1.07726
2022-09-13	09:42:48	0.394313
2022-09-13	09:42:48	0.447901
2022-09-13	09:42:48	0.916857
2022-09-13	09:42:49	0.52444
2022-09-13	09:42:49	0.539809
2022-09-13	09:42:49	0.38327
2022-09-13	09:42:49	0.530038
2022-09-13	09:42:50	0.395636
2022-09-13	09:42:50	0.497672
2022-09-13	09:42:50	1.95401
2022-09-13	09:42:50	0.370191
2022-09-13	09:42:51	0.218232
2022-09-13	09:42:51	0.67701
2022-09-13	09:42:51	0.374517
2022-09-13	09:42:52	0.37299
2022-09-13	09:42:52	0.473295
2022-09-13	09:42:52	0.582761
2022-09-13	09:42:52	0.470242
2022-09-13	09:42:53	0.410598
2022-09-13	09:42:53	0.422761
2022-09-13	09:42:53	0.254975
2022-09-13	09:42:53	0.206425
2022-09-13	09:42:54	-0.0142364
2022-09-13	09:42:54	0.0416415
2022-09-13	09:42:54	0.0403692
2022-09-13	09:42:54	-0.216984
2022-09-13	09:42:55	-0.257188
2022-09-13	09:42:55	-0.280547
2022-09-13	09:42:55	-0.0592237
2022-09-13	09:42:56	-0.154491
2022-09-13	09:42:56	0.134313
2022-09-13	09:42:56	0.377621
2022-09-13	09:42:56	1.64724
2022-09-13	09:42:57	3.81268
2022-09-13	09:42:57	2.09553
2022-09-13	09:42:57	5.83538
2022-09-13	09:42:57	0.886323
2022-09-13	09:42:58	3.1939
2022-09-13	09:42:58	1.67788
2022-09-13	09:42:58	0.722404
2022-09-13	09:42:58	0.905356
2022-09-13	09:42:59	0.61869
2022-09-13	09:42:59	0.872837
2022-09-13	09:42:59	0.943982
2022-09-13	09:42:59	0.606476
2022-09-13	09:43:00	0.958893
2022-09-13	09:43:00	1.57823
2022-09-13	09:43:00	0.564949
2022-09-13	09:43:01	1.12123
2022-09-13	09:43:01	0.727087
2022-09-13	09:43:01	0.500979
2022-09-13	09:43:01	1.11976
2022-09-13	09:43:02	0.643015
2022-09-13	09:43:02	1.89391
2022-09-13	09:43:02	0.827494
2022-09-13	09:43:02	0.767392
2022-09-13	09:43:03	2.12734
2022-09-13	09:43:03	0.624287
2022-09-13	09:43:03	1.4592
2022-09-13	09:43:04	0.676806
2022-09-13	09:43:04	1.40709
2022-09-13	09:43:04	2.15314
2022-09-13	09:43:04	0.601488
2022-09-13	09:43:05	2.99212
2022-09-13	09:43:05	1.61574
2022-09-13	09:43:05	2.84062
2022-09-13	09:43:05	2.2881
2022-09-13	09:43:06	0.998588
2022-09-13	09:43:06	0.989326
2022-09-13	09:43:06	1.55492
2022-09-13	09:43:06	1.27538
2022-09-13	09:43:07	1.39172
2022-09-13	09:43:07	0.716349
2022-09-13	09:43:07	0.475229
2022-09-13	09:43:07	0.389021
2022-09-13	09:43:08	0.630394
2022-09-13	09:43:08	0.315127
2022-09-13	09:43:08	0.629784
2022-09-13	09:43:08	0.497926
2022-09-13	09:43:09	0.326832
2022-09-13	09:43:09	0.441692
2022-09-13	09:43:09	0.489784
2022-09-13	09:43:10	0.605458
2022-09-13	09:43:10	0.717417
2022-09-13	09:43:10	0.895432
2022-09-13	09:43:10	0.713753
2022-09-13	09:43:11	1.08123
2022-09-13	09:43:11	2.28276
2022-09-13	09:43:11	0.547341
2022-09-13	09:43:11	0.588766
2022-09-13	09:43:12	0.429733
2022-09-13	09:43:12	0.396298
2022-09-13	09:43:12	0.412074
2022-09-13	09:43:12	0.765203
2022-09-13	09:43:13	0.478079
2022-09-13	09:43:13	0.597112
2022-09-13	09:43:13	0.778537
2022-09-13	09:43:14	0.860827
2022-09-13	09:43:14	0.425254
2022-09-13	09:43:14	0.243575
2022-09-13	09:43:14	0.455585
2022-09-13	09:43:15	0.475687
2022-09-13	09:43:15	0.673499
2022-09-13	09:43:15	1.49319
2022-09-13	09:43:15	0.453499
2022-09-13	09:43:16	0.232736
2022-09-13	09:43:16	0.531819
2022-09-13	09:43:16	0.16902
2022-09-13	09:43:16	0.0765524
2022-09-13	09:43:17	0.00861346
2022-09-13	09:43:17	0.0201147
2022-09-13	09:43:17	-0.147875
2022-09-13	09:43:18	-0.0268064
2022-09-13	09:43:18	-0.0192746
2022-09-13	09:43:18	0.1507
2022-09-13	09:43:18	0.0730918
2022-09-13	09:43:19	0.449122
2022-09-13	09:43:19	0.159199
2022-09-13	09:43:19	0.282506
2022-09-13	09:43:19	0.312277
2022-09-13	09:43:20	0.200624
2022-09-13	09:43:20	0.198944
2022-09-13	09:43:20	0.298842
2022-09-13	09:43:20	0.210191
2022-09-13	09:43:21	0.289529
2022-09-13	09:43:21	0.207036
