# Supplementary material for: Comparing efficacy in reducing pulling and welfare impacts of four types of leash walking equipment
Source: PeerJ journal article supplement (doi:10.7717/peerj.18131), 2024-10-24
Supplement: Shelter1_Tension_files.zip [file Saint_martin_202291385050 copy.xlsx]

## Sheet: Averaged newtons
Date	Time	Averaged Newtons	Impulse	Total steps
2022-09-13	08:50:52	1.42348	1.42348	0
2022-09-13	08:50:53	1.51867	2.94215	0		Impulse newtons	2188.7
2022-09-13	08:50:54	2.64973	5.59189	0		Total steps	53
2022-09-13	08:50:55	2.07735	7.66924	0		# > 5 sec	3
2022-09-13	08:50:56	1.56581	9.23505	0
2022-09-13	08:50:57	2.31635	11.5514	0
2022-09-13	08:50:58	1.52625	13.0777	0
2022-09-13	08:50:59	1.71422	14.7919	0
2022-09-13	08:51:00	1.24465	16.0365	0
2022-09-13	08:51:01	1.45506	17.4916	0
2022-09-13	08:51:02	1.32988	18.8215	0
2022-09-13	08:51:03	-0.604353	18.8215	0
2022-09-13	08:51:04	3.77899	22.6004	0
2022-09-13	08:51:05	7.33896	29.9394	0
2022-09-13	08:51:06	13.8196	43.759	1
2022-09-13	08:51:07	13.1625	56.9215	2
2022-09-13	08:51:08	9.9398	66.8613	2
2022-09-13	08:51:09	7.41649	74.2778	2
2022-09-13	08:51:10	6.58537	80.8632	2
2022-09-13	08:51:11	5.71549	86.5787	2
2022-09-13	08:51:12	6.77385	93.3525	2
2022-09-13	08:51:13	1.89105	95.2436	2
2022-09-13	08:51:14	0.197906	95.4415	2
2022-09-13	08:51:15	0.99462	96.4361	2
2022-09-13	08:51:16	1.27838	97.7145	2
2022-09-13	08:51:17	2.32572	100.04	2
2022-09-13	08:51:18	1.98024	102.02	2
2022-09-13	08:51:19	2.11742	104.138	2
2022-09-13	08:51:20	2.09388	106.232	2
2022-09-13	08:51:21	2.08624	108.318	2
2022-09-13	08:51:22	2.11022	110.428	2
2022-09-13	08:51:23	2.28499	112.713	2
2022-09-13	08:51:24	2.41493	115.128	2
2022-09-13	08:51:25	2.77464	117.903	2
2022-09-13	08:51:26	3.29082	121.194	2
2022-09-13	08:51:27	2.08737	123.281	2
2022-09-13	08:51:28	1.99648	125.277	2
2022-09-13	08:51:29	2.3949	127.672	2
2022-09-13	08:51:30	2.34776	130.02	2
2022-09-13	08:51:31	5.53973	135.56	2
2022-09-13	08:51:32	15.4801	151.04	3
2022-09-13	08:51:33	6.34281	157.383	3
2022-09-13	08:51:34	9.04977	166.433	3
2022-09-13	08:51:35	2.07243	168.505	3
2022-09-13	08:51:36	1.91335	170.418	3
2022-09-13	08:51:37	1.41567	171.834	3
2022-09-13	08:51:38	1.66502	173.499	3
2022-09-13	08:51:39	2.20667	175.706	3
2022-09-13	08:51:40	6.78139	182.487	3
2022-09-13	08:51:41	8.53052	191.018	3
2022-09-13	08:51:42	4.05148	195.069	3
2022-09-13	08:51:43	1.70888	196.778	3
2022-09-13	08:51:44	9.34331	206.121	3
2022-09-13	08:51:45	6.124	212.245	3
2022-09-13	08:51:46	6.79182	219.037	3
2022-09-13	08:51:47	3.66258	222.7	3
2022-09-13	08:51:48	5.1569	227.857	3
2022-09-13	08:51:49	3.87742	231.734	3
2022-09-13	08:51:50	3.57587	235.31	3
2022-09-13	08:51:51	4.40332	239.713	3
2022-09-13	08:51:52	5.67593	245.389	3
2022-09-13	08:51:53	14.2034	259.593	4
2022-09-13	08:51:54	45.2688	304.861	5
2022-09-13	08:51:55	23.047	327.908	6
2022-09-13	08:51:56	30.2952	358.204	7
2022-09-13	08:51:57	17.2248	375.428	8
2022-09-13	08:51:58	4.21651	379.645	8
2022-09-13	08:51:59	9.22242	388.867	8
2022-09-13	08:52:00	9.65214	398.519	8
2022-09-13	08:52:01	3.41408	401.933	8
2022-09-13	08:52:02	6.59844	408.532	8
2022-09-13	08:52:03	2.05325	410.585	8
2022-09-13	08:52:04	0.611543	411.197	8
2022-09-13	08:52:05	1.14171	412.338	8
2022-09-13	08:52:06	1.93701	414.275	8
2022-09-13	08:52:07	1.83197	416.107	8
2022-09-13	08:52:08	1.89758	418.005	8
2022-09-13	08:52:09	0.00566067	418.011	8
2022-09-13	08:52:10	0.62637	418.637	8
2022-09-13	08:52:11	1.74159	420.379	8
2022-09-13	08:52:12	14.917	435.296	9
2022-09-13	08:52:13	26.1842	461.48	10
2022-09-13	08:52:14	29.241	490.721	11
2022-09-13	08:52:15	40.5567	531.278	12
2022-09-13	08:52:16	22.1317	553.409	13
2022-09-13	08:52:17	9.2668	562.676	13
2022-09-13	08:52:18	23.933	586.609	14
2022-09-13	08:52:19	9.91716	596.526	14
2022-09-13	08:52:20	6.81492	603.341	14
2022-09-13	08:52:21	-0.0930381	603.341	14
2022-09-13	08:52:22	-2.21536	603.341	14
2022-09-13	08:52:23	-2.5336	603.341	14
2022-09-13	08:52:24	-2.01889	603.341	14
2022-09-13	08:52:25	-1.8722	603.341	14
2022-09-13	08:52:26	-1.59601	603.341	14
2022-09-13	08:52:27	-0.135256	603.341	14
2022-09-13	08:52:28	0.860269	604.201	14
2022-09-13	08:52:29	11.6998	615.901	14
2022-09-13	08:52:30	13.3842	629.285	15
2022-09-13	08:52:31	36.2258	665.511	16
2022-09-13	08:52:32	29.2179	694.729	17
2022-09-13	08:52:33	-0.434123	694.729	17
2022-09-13	08:52:34	-2.58391	694.729	17
2022-09-13	08:52:35	-2.1393	694.729	17
2022-09-13	08:52:36	-0.53797	694.729	17
2022-09-13	08:52:37	3.95737	698.686	17
2022-09-13	08:52:38	29.5318	728.218	18
2022-09-13	08:52:39	8.55396	736.772	18
2022-09-13	08:52:40	6.18506	742.957	18
2022-09-13	08:52:41	13.442	756.399	19
2022-09-13	08:52:42	27.2406	783.64	20
2022-09-13	08:52:43	57.7158	841.356	21
2022-09-13	08:52:44	21.6235	862.979	22
2022-09-13	08:52:45	3.09999	866.079	22
2022-09-13	08:52:46	8.59046	874.669	22
2022-09-13	08:52:47	8.71932	883.389	22
2022-09-13	08:52:48	1.33293	884.722	22
2022-09-13	08:52:49	1.16376	885.886	22
2022-09-13	08:52:50	1.19485	887.08	22
2022-09-13	08:52:51	1.72156	888.802	22
2022-09-13	08:52:52	1.53157	890.333	22
2022-09-13	08:52:53	1.97571	892.309	22
2022-09-13	08:52:54	1.87796	894.187	22
2022-09-13	08:52:55	0.835424	895.023	22
2022-09-13	08:52:56	3.67237	898.695	22
2022-09-13	08:52:57	18.7668	917.462	23
2022-09-13	08:52:58	19.7073	937.169	24
2022-09-13	08:52:59	12.6493	949.818	24
2022-09-13	08:53:00	6.33121	956.149	24
2022-09-13	08:53:01	8.79493	964.944	24
2022-09-13	08:53:02	44.4666	1009.41	25
2022-09-13	08:53:03	16.8314	1026.24	26
2022-09-13	08:53:04	22.5095	1048.75	27
2022-09-13	08:53:05	16.8644	1065.62	28
2022-09-13	08:53:06	40.4568	1106.07	29
2022-09-13	08:53:07	8.50697	1114.58	29
2022-09-13	08:53:08	3.28757	1117.87	29
2022-09-13	08:53:09	13.8823	1131.75	30
2022-09-13	08:53:10	3.37826	1135.13	30
2022-09-13	08:53:11	1.95879	1137.09	30
2022-09-13	08:53:12	4.89293	1141.98	30
2022-09-13	08:53:13	26.7183	1168.7	31
2022-09-13	08:53:14	28.6333	1197.33	32
2022-09-13	08:53:15	9.38643	1206.72	32
2022-09-13	08:53:16	6.38442	1213.1	32
2022-09-13	08:53:17	9.19247	1222.29	32
2022-09-13	08:53:18	4.4486	1226.74	32
2022-09-13	08:53:19	12.3693	1239.11	32
2022-09-13	08:53:20	5.85946	1244.97	32
2022-09-13	08:53:21	5.44657	1250.42	32
2022-09-13	08:53:22	5.11153	1255.53	32
2022-09-13	08:53:23	5.38346	1260.91	32
2022-09-13	08:53:24	5.6272	1266.54	32
2022-09-13	08:53:25	3.05517	1269.6	32
2022-09-13	08:53:26	1.91478	1271.51	32
2022-09-13	08:53:27	4.83751	1276.35	32
2022-09-13	08:53:28	5.33348	1281.68	32
2022-09-13	08:53:29	3.91889	1285.6	32
2022-09-13	08:53:30	30.7806	1316.38	33
2022-09-13	08:53:31	25.0907	1341.47	34
2022-09-13	08:53:32	21.1602	1362.63	35
2022-09-13	08:53:33	68.3505	1430.98	36
2022-09-13	08:53:34	20.5055	1451.49	37
2022-09-13	08:53:35	11.7766	1463.26	37
2022-09-13	08:53:36	30.7583	1494.02	38
2022-09-13	08:53:37	24.1371	1518.16	39
2022-09-13	08:53:38	1.43684	1519.6	39
2022-09-13	08:53:39	-0.586867	1519.6	39
2022-09-13	08:53:40	1.9298	1521.53	39
2022-09-13	08:53:41	2.21284	1523.74	39
2022-09-13	08:53:42	5.56863	1529.31	39
2022-09-13	08:53:43	0.700847	1530.01	39
2022-09-13	08:53:44	0.567401	1530.58	39
2022-09-13	08:53:45	7.23903	1537.82	39
2022-09-13	08:53:46	8.0985	1545.91	39
2022-09-13	08:53:47	1.33989	1547.25	39
2022-09-13	08:53:48	1.26808	1548.52	39
2022-09-13	08:53:49	1.63929	1550.16	39
2022-09-13	08:53:50	8.12222	1558.28	39
2022-09-13	08:53:51	3.37876	1561.66	39
2022-09-13	08:53:52	6.54938	1568.21	39
2022-09-13	08:53:53	27.2694	1595.48	40
2022-09-13	08:53:54	39.7582	1635.24	41
2022-09-13	08:53:55	8.25033	1643.49	41
2022-09-13	08:53:56	19.1932	1662.68	42
2022-09-13	08:53:57	6.38854	1669.07	42
2022-09-13	08:53:58	0.64016	1669.71	42
2022-09-13	08:53:59	0.978435	1670.69	42
2022-09-13	08:54:00	3.41702	1674.11	42
2022-09-13	08:54:01	4.70242	1678.81	42
2022-09-13	08:54:02	4.4478	1683.26	42
2022-09-13	08:54:03	2.64981	1685.91	42
2022-09-13	08:54:04	3.92546	1689.83	42
2022-09-13	08:54:05	4.29908	1694.13	42
2022-09-13	08:54:06	2.28318	1696.41	42
2022-09-13	08:54:07	1.98975	1698.4	42
2022-09-13	08:54:08	1.70765	1700.11	42
2022-09-13	08:54:09	1.37532	1701.49	42
2022-09-13	08:54:10	2.23814	1703.73	42
2022-09-13	08:54:11	2.45726	1706.18	42
2022-09-13	08:54:12	2.39718	1708.58	42
2022-09-13	08:54:13	2.79852	1711.38	42
2022-09-13	08:54:14	2.86649	1714.25	42
2022-09-13	08:54:15	2.89484	1717.14	42
2022-09-13	08:54:16	2.00741	1719.15	42
2022-09-13	08:54:17	2.91142	1722.06	42
2022-09-13	08:54:18	4.53009	1726.59	42
2022-09-13	08:54:19	2.32059	1728.91	42
2022-09-13	08:54:20	4.43326	1733.34	42
2022-09-13	08:54:21	1.86694	1735.21	42
2022-09-13	08:54:22	1.73101	1736.94	42
2022-09-13	08:54:23	1.89122	1738.83	42
2022-09-13	08:54:24	23.7199	1762.55	43
2022-09-13	08:54:25	2.70893	1765.26	43
2022-09-13	08:54:26	1.76349	1767.02	43
2022-09-13	08:54:27	1.64091	1768.67	43
2022-09-13	08:54:28	1.59722	1770.26	43
2022-09-13	08:54:29	5.83309	1776.1	43
2022-09-13	08:54:30	1.20537	1777.3	43
2022-09-13	08:54:31	1.40945	1778.71	43
2022-09-13	08:54:32	1.98183	1780.69	43
2022-09-13	08:54:33	2.68533	1783.38	43
2022-09-13	08:54:34	15.8177	1799.2	44
2022-09-13	08:54:35	9.33351	1808.53	44
2022-09-13	08:54:36	4.13621	1812.66	44
2022-09-13	08:54:37	21.853	1834.52	45
2022-09-13	08:54:38	3.00271	1837.52	45
2022-09-13	08:54:39	4.47377	1841.99	45
2022-09-13	08:54:40	2.14855	1844.14	45
2022-09-13	08:54:41	1.22473	1845.37	45
2022-09-13	08:54:42	0.536953	1845.9	45
2022-09-13	08:54:43	9.82265	1855.73	45
2022-09-13	08:54:44	13.9307	1869.66	46
2022-09-13	08:54:45	1.55251	1871.21	46
2022-09-13	08:54:46	1.01533	1872.23	46
2022-09-13	08:54:47	8.67563	1880.9	46
2022-09-13	08:54:48	15.2345	1896.14	47
2022-09-13	08:54:49	3.73866	1899.87	47
2022-09-13	08:54:50	0.235767	1900.11	47
2022-09-13	08:54:51	-0.300393	1900.11	47
2022-09-13	08:54:52	0.251556	1900.36	47
2022-09-13	08:54:53	0.903618	1901.27	47
2022-09-13	08:54:54	1.58269	1902.85	47
2022-09-13	08:54:55	1.61527	1904.46	47
2022-09-13	08:54:56	1.82382	1906.29	47
2022-09-13	08:54:57	1.38528	1907.67	47
2022-09-13	08:54:58	1.22752	1908.9	47
2022-09-13	08:54:59	0.967229	1909.87	47
2022-09-13	08:55:00	3.5194	1913.39	47
2022-09-13	08:55:01	9.4462	1922.83	47
2022-09-13	08:55:02	4.61685	1927.45	47
2022-09-13	08:55:03	1.72033	1929.17	47
2022-09-13	08:55:04	2.98154	1932.15	47
2022-09-13	08:55:05	0.887151	1933.04	47
2022-09-13	08:55:06	0.634181	1933.67	47
2022-09-13	08:55:07	1.20383	1934.88	47
2022-09-13	08:55:08	3.42874	1938.31	47
2022-09-13	08:55:09	1.52908	1939.83	47
2022-09-13	08:55:10	2.57085	1942.41	47
2022-09-13	08:55:11	7.99866	1950.4	47
2022-09-13	08:55:12	14.6999	1965.1	48
2022-09-13	08:55:13	11.4198	1976.52	48
2022-09-13	08:55:14	20.023	1996.55	49
2022-09-13	08:55:15	17.9871	2014.53	50
2022-09-13	08:55:16	5.6238	2020.16	50
2022-09-13	08:55:17	1.75376	2021.91	50
2022-09-13	08:55:18	2.75709	2024.67	50
2022-09-13	08:55:19	1.63712	2026.31	50
2022-09-13	08:55:20	1.19303	2027.5	50
2022-09-13	08:55:21	1.79564	2029.29	50
2022-09-13	08:55:22	3.28261	2032.58	50
2022-09-13	08:55:23	3.28657	2035.86	50
2022-09-13	08:55:24	1.50124	2037.36	50
2022-09-13	08:55:25	1.07691	2038.44	50
2022-09-13	08:55:26	1.53787	2039.98	50
2022-09-13	08:55:27	2.10209	2042.08	50
2022-09-13	08:55:28	1.29128	2043.37	50
2022-09-13	08:55:29	4.38426	2047.76	50
2022-09-13	08:55:30	5.47457	2053.23	50
2022-09-13	08:55:31	5.5036	2058.74	50
2022-09-13	08:55:32	3.68555	2062.42	50
2022-09-13	08:55:33	2.14204	2064.56	50
2022-09-13	08:55:34	1.18647	2065.75	50
2022-09-13	08:55:35	1.14406	2066.89	50
2022-09-13	08:55:36	1.30418	2068.2	50
2022-09-13	08:55:37	1.10679	2069.3	50
2022-09-13	08:55:38	0.437294	2069.74	50
2022-09-13	08:55:39	-1.17611	2069.74	50
2022-09-13	08:55:40	-0.0417456	2069.74	50
2022-09-13	08:55:41	0.429144	2070.17	50
2022-09-13	08:55:42	1.54829	2071.72	50
2022-09-13	08:55:43	16.6962	2088.42	51
2022-09-13	08:55:44	12.0725	2100.49	51
2022-09-13	08:55:45	3.80032	2104.29	51
2022-09-13	08:55:46	7.87824	2112.17	51
2022-09-13	08:55:47	7.61792	2119.78	51
2022-09-13	08:55:48	23.0156	2142.8	52
2022-09-13	08:55:49	11.8331	2154.63	52
2022-09-13	08:55:50	10.1855	2164.82	52
2022-09-13	08:55:51	8.14105	2172.96	52
2022-09-13	08:55:52	15.7388	2188.7	53

## Sheet: Saint_martin_202291385050 (4)
Date	Time	Lbs	Newtons	Averaged Newtons	Total force x time	total steps > 13.345		**GoPro Fitting: 840
2022-09-13	08:50:52	0.318028	1.41465	1.42348	1.41465	FALSE	0			Total force x time	4104.44
2022-09-13	08:50:52	0.315331	1.40266	1.42348	1.40266	FALSE	0			Total steps	188
2022-09-13	08:50:52	0.32271	1.43548	1.42348	2.85013	FALSE	0
2022-09-13	08:50:52	0.323982	1.44114	1.42348	2.84379	FALSE	0
2022-09-13	08:50:53	0.310496	1.38115	1.51867	4.23128	FALSE	0
2022-09-13	08:50:53	0.300013	1.33452	1.51867	4.17831	FALSE	0
2022-09-13	08:50:53	0.347901	1.54753	1.51867	5.77881	FALSE	0
2022-09-13	08:50:53	0.407239	1.81148	1.51867	5.98979	FALSE	0
2022-09-13	08:50:54	0.570954	2.53972	2.64973	8.31853	FALSE	0
2022-09-13	08:50:54	0.656807	2.92161	2.64973	8.9114	FALSE	0
2022-09-13	08:50:54	0.5593	2.48788	2.64973	10.8064	FALSE	0
2022-09-13	08:50:55	0.556196	2.47407	2.07735	11.3855	FALSE	0
2022-09-13	08:50:55	0.504898	2.24589	2.07735	13.0523	FALSE	0
2022-09-13	08:50:55	0.407443	1.81239	2.07735	13.1979	FALSE	0
2022-09-13	08:50:55	0.399504	1.77707	2.07735	14.8294	FALSE	0
2022-09-13	08:50:56	0.406781	1.80944	1.56581	15.0073	FALSE	0
2022-09-13	08:50:56	0.33416	1.48641	1.56581	16.3158	FALSE	0
2022-09-13	08:50:56	0.328308	1.46038	1.56581	16.4677	FALSE	0
2022-09-13	08:50:56	0.338791	1.50701	1.56581	17.8228	FALSE	0
2022-09-13	08:50:57	0.35813	1.59303	2.31635	18.0607	FALSE	0
2022-09-13	08:50:57	0.373193	1.66004	2.31635	19.4828	FALSE	0
2022-09-13	08:50:57	0.619351	2.755	2.31635	20.8157	FALSE	0
2022-09-13	08:50:57	0.732277	3.25731	2.31635	22.7401	FALSE	0
2022-09-13	08:50:58	0.342863	1.52512	1.52625	22.3408	FALSE	0
2022-09-13	08:50:58	0.293601	1.306	1.52625	24.0461	FALSE	0
2022-09-13	08:50:58	0.454873	2.02337	1.52625	24.3642	FALSE	0
2022-09-13	08:50:58	0.281132	1.25053	1.52625	25.2967	FALSE	0
2022-09-13	08:50:59	0.351412	1.56315	1.71422	25.9274	FALSE	0
2022-09-13	08:50:59	0.345153	1.53531	1.71422	26.832	FALSE	0
2022-09-13	08:50:59	0.459555	2.04419	1.71422	27.9715	FALSE	0
2022-09-13	08:51:00	0.293244	1.30441	1.24465	28.1364	FALSE	0
2022-09-13	08:51:00	0.266883	1.18715	1.24465	29.1587	FALSE	0
2022-09-13	08:51:00	0.195738	0.870682	1.24465	29.0071	FALSE	0
2022-09-13	08:51:00	0.363372	1.61635	1.24465	30.775	FALSE	0
2022-09-13	08:51:01	0.0779265	0.346633	1.45506	29.3537	FALSE	0
2022-09-13	08:51:01	0.467799	2.08086	1.45506	32.8559	FALSE	0
2022-09-13	08:51:01	0.274669	1.22178	1.45506	30.5755	FALSE	0
2022-09-13	08:51:01	0.488054	2.17096	1.45506	35.0269	FALSE	0
2022-09-13	08:51:02	0.338588	1.50611	1.32988	32.0816	FALSE	0
2022-09-13	08:51:02	0.238893	1.06264	1.32988	36.0895	FALSE	0
2022-09-13	08:51:02	0.148155	0.659023	1.32988	32.7406	FALSE	0
2022-09-13	08:51:02	0.470242	2.09173	1.32988	38.1812	FALSE	0
2022-09-13	08:51:03	0.213143	0.948103	-0.604353	33.6887	FALSE	0
2022-09-13	08:51:03	-0.197748	-0.879623	-0.604353	38.1812	FALSE	0
2022-09-13	08:51:03	-0.422989	-1.88154	-0.604353	33.6887	FALSE	0
2022-09-13	08:51:04	-0.180191	-0.801526	3.77899	38.1812	FALSE	0
2022-09-13	08:51:04	0.867493	3.85878	3.77899	37.5475	FALSE	0
2022-09-13	08:51:04	1.38933	6.18002	3.77899	44.3613	FALSE	0
2022-09-13	08:51:04	1.32159	5.8787	3.77899	43.4262	FALSE	0
2022-09-13	08:51:05	1.61513	7.18442	7.33896	51.5457	FALSE	0
2022-09-13	08:51:05	1.67151	7.43521	7.33896	50.8614	FALSE	0
2022-09-13	08:51:05	1.93935	8.62662	7.33896	60.1723	FALSE	0
2022-09-13	08:51:05	1.3735	6.1096	7.33896	56.971	FALSE	0
2022-09-13	08:51:06	0.657417	2.92432	13.8196	63.0966	FALSE	0
2022-09-13	08:51:06	2.21375	9.8472	13.8196	66.8182	FALSE	0
2022-09-13	08:51:06	3.99579	17.7741	13.8196	80.8707	1	1
2022-09-13	08:51:06	5.56021	24.7329	13.8196	91.5511	1	2
2022-09-13	08:51:07	4.80342	21.3666	13.1625	102.237	1	3
2022-09-13	08:51:07	1.35716	6.03692	13.1625	97.5881	FALSE	3
2022-09-13	08:51:07	2.56775	11.4219	13.1625	113.659	FALSE	3
2022-09-13	08:51:07	3.1079	13.8246	13.1625	111.413	1	4
2022-09-13	08:51:08	2.34556	10.4335	9.9398	124.093	FALSE	4
2022-09-13	08:51:08	2.24398	9.98167	9.9398	121.394	FALSE	4
2022-09-13	08:51:08	2.11416	9.40421	9.9398	133.497	FALSE	4
2022-09-13	08:51:09	1.78922	7.95881	7.41649	129.353	FALSE	4
2022-09-13	08:51:09	1.84836	8.22187	7.41649	141.719	FALSE	4
2022-09-13	08:51:09	1.30256	5.79405	7.41649	135.147	FALSE	4
2022-09-13	08:51:09	1.72907	7.69125	7.41649	149.41	FALSE	4
2022-09-13	08:51:10	1.7276	7.68471	6.58537	142.832	FALSE	4
2022-09-13	08:51:10	1.4766	6.56821	6.58537	155.978	FALSE	4
2022-09-13	08:51:10	1.34978	6.00409	6.58537	148.836	FALSE	4
2022-09-13	08:51:10	1.36785	6.08447	6.58537	162.063	FALSE	4
2022-09-13	08:51:11	1.38469	6.15938	5.71549	154.995	FALSE	4
2022-09-13	08:51:11	1.45513	6.47271	5.71549	168.535	FALSE	4
2022-09-13	08:51:11	1.44877	6.44442	5.71549	161.44	FALSE	4
2022-09-13	08:51:11	0.851005	3.78544	5.71549	172.321	FALSE	4
2022-09-13	08:51:12	1.0937	4.865	6.77385	166.305	FALSE	4
2022-09-13	08:51:12	2.34434	10.4281	6.77385	182.749	FALSE	4
2022-09-13	08:51:12	1.13045	5.02847	6.77385	171.333	FALSE	4
2022-09-13	08:51:13	0.697061	3.10067	1.89105	185.85	FALSE	4
2022-09-13	08:51:13	0.404898	1.80107	1.89105	173.134	FALSE	4
2022-09-13	08:51:13	0.442608	1.96881	1.89105	187.818	FALSE	4
2022-09-13	08:51:13	0.155942	0.693661	1.89105	173.828	FALSE	4
2022-09-13	08:51:14	-0.0380532	-0.169268	0.197906	187.818	FALSE	4
2022-09-13	08:51:14	0.0149748	0.0666109	0.197906	173.895	FALSE	4
2022-09-13	08:51:14	0.0268832	0.119582	0.197906	187.938	FALSE	4
2022-09-13	08:51:14	0.17416	0.774699	0.197906	174.669	FALSE	4
2022-09-13	08:51:15	-0.0215138	-0.0956977	0.99462	187.938	FALSE	4
2022-09-13	08:51:15	0.383422	1.70554	0.99462	176.375	FALSE	4
2022-09-13	08:51:15	0.291158	1.29513	0.99462	189.233	FALSE	4
2022-09-13	08:51:15	0.241336	1.07351	0.99462	177.448	FALSE	4
2022-09-13	08:51:16	0.420624	1.87102	1.27838	191.104	FALSE	4
2022-09-13	08:51:16	0.213244	0.948552	1.27838	178.397	FALSE	4
2022-09-13	08:51:16	0.334466	1.48777	1.27838	192.592	FALSE	4
2022-09-13	08:51:16	0.181234	0.806165	1.27838	179.203	FALSE	4
2022-09-13	08:51:17	0.359606	1.5996	2.32572	194.191	FALSE	4
2022-09-13	08:51:17	0.816552	3.63219	2.32572	182.835	FALSE	4
2022-09-13	08:51:17	0.392379	1.74538	2.32572	195.937	FALSE	4
2022-09-13	08:51:18	0.3964	1.76327	1.98024	184.598	FALSE	4
2022-09-13	08:51:18	0.439606	1.95546	1.98024	197.892	FALSE	4
2022-09-13	08:51:18	0.482812	2.14764	1.98024	186.746	FALSE	4
2022-09-13	08:51:18	0.461896	2.05461	1.98024	199.947	FALSE	4
2022-09-13	08:51:19	0.456756	2.03174	2.11742	188.778	FALSE	4
2022-09-13	08:51:19	0.488003	2.17073	2.11742	202.118	FALSE	4
2022-09-13	08:51:19	0.489682	2.1782	2.11742	190.956	FALSE	4
2022-09-13	08:51:19	0.469631	2.08901	2.11742	204.207	FALSE	4
2022-09-13	08:51:20	0.480369	2.13678	2.09388	193.093	FALSE	4
2022-09-13	08:51:20	0.47126	2.09626	2.09388	206.303	FALSE	4
2022-09-13	08:51:20	0.465305	2.06977	2.09388	195.163	FALSE	4
2022-09-13	08:51:20	0.465967	2.07271	2.09388	208.376	FALSE	4
2022-09-13	08:51:21	0.460623	2.04894	2.08624	197.212	FALSE	4
2022-09-13	08:51:21	0.46841	2.08358	2.08624	210.459	FALSE	4
2022-09-13	08:51:21	0.471005	2.09512	2.08624	199.307	FALSE	4
2022-09-13	08:51:21	0.475992	2.11731	2.08624	212.577	FALSE	4
2022-09-13	08:51:22	0.47813	2.12682	2.11022	201.433	FALSE	4
2022-09-13	08:51:22	0.473244	2.10508	2.11022	214.682	FALSE	4
2022-09-13	08:51:22	0.471819	2.09875	2.11022	203.532	FALSE	4
2022-09-13	08:51:23	0.481743	2.14289	2.28499	216.825	FALSE	4
2022-09-13	08:51:23	0.504135	2.24249	2.28499	205.775	FALSE	4
2022-09-13	08:51:23	0.545712	2.42744	2.28499	219.252	FALSE	4
2022-09-13	08:51:23	0.523168	2.32716	2.28499	208.102	FALSE	4
2022-09-13	08:51:24	0.512532	2.27984	2.41493	221.532	FALSE	4
2022-09-13	08:51:24	0.47411	2.10894	2.41493	210.211	FALSE	4
2022-09-13	08:51:24	0.64159	2.85392	2.41493	224.386	FALSE	4
2022-09-13	08:51:24	0.543372	2.41703	2.41493	212.628	FALSE	4
2022-09-13	08:51:25	0.541641	2.40933	2.77464	226.795	FALSE	4
2022-09-13	08:51:25	0.646934	2.87769	2.77464	215.506	FALSE	4
2022-09-13	08:51:25	0.529224	2.35409	2.77464	229.149	FALSE	4
2022-09-13	08:51:25	0.777265	3.45743	2.77464	218.963	FALSE	4
2022-09-13	08:51:26	0.664644	2.95647	3.29082	232.106	FALSE	4
2022-09-13	08:51:26	0.799198	3.55499	3.29082	222.518	FALSE	4
2022-09-13	08:51:26	0.755585	3.36099	3.29082	235.467	FALSE	4
2022-09-13	08:51:27	0.453855	2.01884	2.08737	224.537	FALSE	4
2022-09-13	08:51:27	0.466221	2.07384	2.08737	237.54	FALSE	4
2022-09-13	08:51:27	0.50729	2.25653	2.08737	226.793	FALSE	4
2022-09-13	08:51:27	0.449682	2.00028	2.08737	239.541	FALSE	4
2022-09-13	08:51:28	0.456807	2.03197	1.99648	228.825	FALSE	4
2022-09-13	08:51:28	0.424949	1.89026	1.99648	241.431	FALSE	4
2022-09-13	08:51:28	0.454466	2.02156	1.99648	230.847	FALSE	4
2022-09-13	08:51:28	0.459097	2.04216	1.99648	243.473	FALSE	4
2022-09-13	08:51:29	0.461132	2.05121	2.3949	232.898	FALSE	4
2022-09-13	08:51:29	0.511463	2.27509	2.3949	245.748	FALSE	4
2022-09-13	08:51:29	0.633397	2.81748	2.3949	235.716	FALSE	4
2022-09-13	08:51:29	0.547596	2.43582	2.3949	248.184	FALSE	4
2022-09-13	08:51:30	0.492023	2.18862	2.34776	237.904	FALSE	4
2022-09-13	08:51:30	0.499606	2.22235	2.34776	250.406	FALSE	4
2022-09-13	08:51:30	0.530954	2.36179	2.34776	240.266	FALSE	4
2022-09-13	08:51:30	0.588613	2.61827	2.34776	253.025	FALSE	4
2022-09-13	08:51:31	0.875484	3.89433	5.53973	244.16	FALSE	4
2022-09-13	08:51:31	1.11543	4.96166	5.53973	257.986	FALSE	4
2022-09-13	08:51:31	1.74525	7.76322	5.53973	251.923	FALSE	4
2022-09-13	08:51:32	6.27919	27.9311	15.4801	285.917	1	5
2022-09-13	08:51:32	5.05446	22.4832	15.4801	274.407	1	6
2022-09-13	08:51:32	1.64475	7.31618	15.4801	293.234	FALSE	6
2022-09-13	08:51:32	0.941947	4.18997	15.4801	278.597	FALSE	6
2022-09-13	08:51:33	1.3366	5.94546	6.34281	299.179	FALSE	6
2022-09-13	08:51:33	0.839046	3.73224	6.34281	282.329	FALSE	6
2022-09-13	08:51:33	1.97146	8.76945	6.34281	307.948	FALSE	6
2022-09-13	08:51:33	1.5566	6.92407	6.34281	289.253	FALSE	6
2022-09-13	08:51:34	2.02902	9.02549	9.04977	316.974	FALSE	6
2022-09-13	08:51:34	2.33457	10.3846	9.04977	299.638	FALSE	6
2022-09-13	08:51:34	1.86475	8.29478	9.04977	325.269	FALSE	6
2022-09-13	08:51:34	1.90958	8.49419	9.04977	308.132	FALSE	6
2022-09-13	08:51:35	0.414313	1.84295	2.07243	327.112	FALSE	6
2022-09-13	08:51:35	0.718944	3.19801	2.07243	311.33	FALSE	6
2022-09-13	08:51:35	0.223779	0.995414	2.07243	328.107	FALSE	6
2022-09-13	08:51:35	0.506577	2.25336	2.07243	313.583	FALSE	6
2022-09-13	08:51:36	0.295687	1.31527	1.91335	329.422	FALSE	6
2022-09-13	08:51:36	0.480165	2.13587	1.91335	315.719	FALSE	6
2022-09-13	08:51:36	0.514568	2.2889	1.91335	331.711	FALSE	6
2022-09-13	08:51:37	0.302761	1.34674	1.41567	317.066	FALSE	6
2022-09-13	08:51:37	0.487596	2.16892	1.41567	333.88	FALSE	6
2022-09-13	08:51:37	0.315687	1.40424	1.41567	318.47	FALSE	6
2022-09-13	08:51:37	0.166985	0.742783	1.41567	334.623	FALSE	6
2022-09-13	08:51:38	0.514008	2.28641	1.66502	320.756	FALSE	6
2022-09-13	08:51:38	0.371361	1.65189	1.66502	336.275	FALSE	6
2022-09-13	08:51:38	0.218842	0.973453	1.66502	321.73	FALSE	6
2022-09-13	08:51:38	0.393041	1.74832	1.66502	338.023	FALSE	6
2022-09-13	08:51:39	0.275585	1.22586	2.20667	322.956	FALSE	6
2022-09-13	08:51:39	0.286934	1.27634	2.20667	339.3	FALSE	6
2022-09-13	08:51:39	0.48271	2.14719	2.20667	325.103	FALSE	6
2022-09-13	08:51:39	0.939097	4.17729	2.20667	343.477	FALSE	6
2022-09-13	08:51:40	1.2876	5.7275	6.78139	330.83	FALSE	6
2022-09-13	08:51:40	0.945356	4.20513	6.78139	347.682	FALSE	6
2022-09-13	08:51:40	2.34062	10.4115	6.78139	341.242	FALSE	6
2022-09-13	08:51:41	1.34032	5.96201	8.53052	353.644	FALSE	6
2022-09-13	08:51:41	1.82235	8.10618	8.53052	349.348	FALSE	6
2022-09-13	08:51:41	2.83645	12.6171	8.53052	366.261	FALSE	6
2022-09-13	08:51:41	1.67187	7.43681	8.53052	356.785	FALSE	6
2022-09-13	08:51:42	1.3766	6.12339	4.05148	372.384	FALSE	6
2022-09-13	08:51:42	0.847545	3.77005	4.05148	360.555	FALSE	6
2022-09-13	08:51:42	0.836247	3.71979	4.05148	376.104	FALSE	6
2022-09-13	08:51:42	0.582863	2.59269	4.05148	363.148	FALSE	6
2022-09-13	08:51:43	0.211005	0.938592	1.70888	377.043	FALSE	6
2022-09-13	08:51:43	0.442761	1.96949	1.70888	365.117	FALSE	6
2022-09-13	08:51:43	0.298232	1.3266	1.70888	378.369	FALSE	6
2022-09-13	08:51:43	0.584695	2.60084	1.70888	367.718	FALSE	6
2022-09-13	08:51:44	1.79574	7.98781	9.34331	386.357	FALSE	6
2022-09-13	08:51:44	3.04464	13.5432	9.34331	381.261	1	7
2022-09-13	08:51:44	2.45808	10.934	9.34331	397.291	FALSE	7
2022-09-13	08:51:44	1.10342	4.90823	9.34331	386.169	FALSE	7
2022-09-13	08:51:45	1.53212	6.81518	6.124	404.106	FALSE	7
2022-09-13	08:51:45	1.11141	4.94377	6.124	391.113	FALSE	7
2022-09-13	08:51:45	1.48668	6.61305	6.124	410.72	FALSE	7
2022-09-13	08:51:46	2.39986	10.6751	6.79182	401.788	FALSE	7
2022-09-13	08:51:46	1.04561	4.65108	6.79182	415.371	FALSE	7
2022-09-13	08:51:46	1.80286	8.01948	6.79182	409.808	FALSE	7
2022-09-13	08:51:46	0.859148	3.82166	6.79182	419.192	FALSE	7
2022-09-13	08:51:47	1.93335	8.59993	3.66258	418.408	FALSE	7
2022-09-13	08:51:47	0.630547	2.8048	3.66258	421.997	FALSE	7
2022-09-13	08:51:47	0.297265	1.32229	3.66258	419.73	FALSE	7
2022-09-13	08:51:47	0.432379	1.92331	3.66258	423.92	FALSE	7
2022-09-13	08:51:48	0.571565	2.54244	5.1569	422.272	FALSE	7
2022-09-13	08:51:48	1.13263	5.03816	5.1569	428.959	FALSE	7
2022-09-13	08:51:48	1.46571	6.51977	5.1569	428.792	FALSE	7
2022-09-13	08:51:48	1.46739	6.52724	5.1569	435.486	FALSE	7
2022-09-13	08:51:49	1.14149	5.07758	3.87742	433.87	FALSE	7
2022-09-13	08:51:49	0.317977	1.41443	3.87742	436.9	FALSE	7
2022-09-13	08:51:49	1.15558	5.14025	3.87742	439.01	FALSE	7
2022-09-13	08:51:50	0.371972	1.65461	3.57587	438.555	FALSE	7
2022-09-13	08:51:50	1.03726	4.61394	3.57587	443.624	FALSE	7
2022-09-13	08:51:50	1.10917	4.93381	3.57587	443.489	FALSE	7
2022-09-13	08:51:50	0.697163	3.10112	3.57587	446.725	FALSE	7
2022-09-13	08:51:51	1.02556	4.5619	4.40332	448.051	FALSE	7
2022-09-13	08:51:51	0.840674	3.73949	4.40332	450.465	FALSE	7
2022-09-13	08:51:51	1.19777	5.32792	4.40332	453.378	FALSE	7
2022-09-13	08:51:51	0.895636	3.98397	4.40332	454.449	FALSE	7
2022-09-13	08:51:52	1.08332	4.81882	5.67593	458.197	FALSE	7
2022-09-13	08:51:52	1.44444	6.42516	5.67593	460.874	FALSE	7
2022-09-13	08:51:52	1.4764	6.56732	5.67593	464.765	FALSE	7
2022-09-13	08:51:52	1.09986	4.8924	5.67593	465.766	FALSE	7
2022-09-13	08:51:53	0.920369	4.09399	14.2034	468.859	FALSE	7
2022-09-13	08:51:53	1.51543	6.74094	14.2034	472.507	FALSE	7
2022-09-13	08:51:53	1.67777	7.46306	14.2034	476.322	FALSE	7
2022-09-13	08:51:53	8.65873	38.5158	14.2034	511.023	1	8
2022-09-13	08:51:54	18.2191	81.0422	45.2688	557.364	1	9
2022-09-13	08:51:54	5.14719	22.8957	45.2688	533.919	1	10
2022-09-13	08:51:54	7.16434	31.8684	45.2688	589.232	1	11
2022-09-13	08:51:55	5.3024	23.5861	23.047	557.505	1	12
2022-09-13	08:51:55	3.69462	16.4344	23.047	605.667	1	13
2022-09-13	08:51:55	4.31625	19.1995	23.047	576.704	1	14
2022-09-13	08:51:55	7.41156	32.9681	23.047	638.635	1	15
2022-09-13	08:51:56	7.71976	34.339	30.2952	611.043	1	16
2022-09-13	08:51:56	5.44759	24.232	30.2952	662.867	1	17
2022-09-13	08:51:56	6.89976	30.6915	30.2952	641.735	1	18
2022-09-13	08:51:56	7.17553	31.9182	30.2952	694.785	1	19
2022-09-13	08:51:57	3.27116	14.5508	17.2248	656.286	1	20
2022-09-13	08:51:57	7.68657	34.1914	17.2248	728.976	1	21
2022-09-13	08:51:57	2.89039	12.857	17.2248	669.143	FALSE	21
2022-09-13	08:51:57	1.64108	7.29985	17.2248	736.276	FALSE	21
2022-09-13	08:51:58	3.26637	14.5295	4.21651	683.672	1	22
2022-09-13	08:51:58	0.372532	1.6571	4.21651	737.933	FALSE	22
2022-09-13	08:51:58	0.0321249	0.142898	4.21651	683.815	FALSE	22
2022-09-13	08:51:58	0.120624	0.53656	4.21651	738.47	FALSE	22
2022-09-13	08:51:59	2.26617	10.0804	9.22242	693.895	FALSE	22
2022-09-13	08:51:59	1.52464	6.7819	9.22242	745.252	FALSE	22
2022-09-13	08:51:59	2.42907	10.805	9.22242	704.7	FALSE	22
2022-09-13	08:52:00	5.24698	23.3396	9.65214	768.591	1	23
2022-09-13	08:52:00	2.00266	8.90823	9.65214	713.609	FALSE	23
2022-09-13	08:52:00	0.700013	3.1138	9.65214	771.705	FALSE	23
2022-09-13	08:52:00	0.729936	3.2469	9.65214	716.855	FALSE	23
2022-09-13	08:52:01	0.535534	2.38216	3.41408	774.087	FALSE	23
2022-09-13	08:52:01	0.349122	1.55296	3.41408	718.408	FALSE	23
2022-09-13	08:52:01	1.23869	5.50994	3.41408	779.597	FALSE	23
2022-09-13	08:52:01	0.94673	4.21124	3.41408	722.62	FALSE	23
2022-09-13	08:52:02	2.82546	12.5682	6.59844	792.165	FALSE	23
2022-09-13	08:52:02	1.71955	7.6489	6.59844	730.269	FALSE	23
2022-09-13	08:52:02	0.842761	3.74877	6.59844	795.914	FALSE	23
2022-09-13	08:52:02	0.545814	2.42789	6.59844	732.696	FALSE	23
2022-09-13	08:52:03	0.524745	2.33417	2.05325	798.248	FALSE	23
2022-09-13	08:52:03	0.44327	1.97175	2.05325	734.668	FALSE	23
2022-09-13	08:52:03	0.416756	1.85381	2.05325	800.102	FALSE	23
2022-09-13	08:52:04	0.215382	0.958062	0.611543	735.626	FALSE	23
2022-09-13	08:52:04	0.129122	0.57436	0.611543	800.677	FALSE	23
2022-09-13	08:52:04	0.105	0.467061	0.611543	736.093	FALSE	23
2022-09-13	08:52:04	0.10042	0.446688	0.611543	801.123	FALSE	23
2022-09-13	08:52:05	0.318181	1.41533	1.14171	737.509	FALSE	23
2022-09-13	08:52:05	0.23869	1.06174	1.14171	802.185	FALSE	23
2022-09-13	08:52:05	0.254211	1.13078	1.14171	738.639	FALSE	23
2022-09-13	08:52:05	0.215585	0.958965	1.14171	803.144	FALSE	23
2022-09-13	08:52:06	0.365102	1.62405	1.93701	740.263	FALSE	23
2022-09-13	08:52:06	0.443931	1.97469	1.93701	805.119	FALSE	23
2022-09-13	08:52:06	0.488054	2.17096	1.93701	742.434	FALSE	23
2022-09-13	08:52:06	0.444746	1.97832	1.93701	807.097	FALSE	23
2022-09-13	08:52:07	0.438079	1.94866	1.83197	744.383	FALSE	23
2022-09-13	08:52:07	0.417723	1.85812	1.83197	808.955	FALSE	23
2022-09-13	08:52:07	0.386629	1.7198	1.83197	746.103	FALSE	23
2022-09-13	08:52:07	0.404949	1.80129	1.83197	810.756	FALSE	23
2022-09-13	08:52:08	0.509428	2.26604	1.89758	748.369	FALSE	23
2022-09-13	08:52:08	0.272837	1.21363	1.89758	811.97	FALSE	23
2022-09-13	08:52:08	0.497519	2.21306	1.89758	750.582	FALSE	23
2022-09-13	08:52:09	0.495789	2.20537	0.00566067	814.175	FALSE	23
2022-09-13	08:52:09	0.0566033	0.251783	0.00566067	750.834	FALSE	23
2022-09-13	08:52:09	-0.173218	-0.770508	0.00566067	814.175	FALSE	23
2022-09-13	08:52:09	-0.374084	-1.664	0.00566067	750.834	FALSE	23
2022-09-13	08:52:10	-0.229453	-1.02065	0.62637	814.175	FALSE	23
2022-09-13	08:52:10	0.272481	1.21205	0.62637	752.046	FALSE	23
2022-09-13	08:52:10	0.222252	0.988621	0.62637	815.164	FALSE	23
2022-09-13	08:52:10	0.297977	1.32546	0.62637	753.371	FALSE	23
2022-09-13	08:52:11	0.116807	0.519581	1.74159	815.684	FALSE	23
2022-09-13	08:52:11	0.426374	1.8966	1.74159	755.268	FALSE	23
2022-09-13	08:52:11	0.317366	1.41171	1.74159	817.095	FALSE	23
2022-09-13	08:52:11	0.70556	3.13847	1.74159	758.406	FALSE	23
2022-09-13	08:52:12	1.65391	7.35692	14.917	824.452	FALSE	23
2022-09-13	08:52:12	2.20149	9.79267	14.917	768.199	FALSE	23
2022-09-13	08:52:12	6.2051	27.6015	14.917	852.054	1	24
2022-09-13	08:52:13	5.9593	26.5082	26.1842	794.707	1	25
2022-09-13	08:52:13	7.58164	33.7247	26.1842	885.778	1	26
2022-09-13	08:52:13	3.65686	16.2664	26.1842	810.974	1	27
2022-09-13	08:52:13	6.3481	28.2376	26.1842	914.016	1	28
2022-09-13	08:52:14	4.18088	18.5974	29.241	829.571	1	29
2022-09-13	08:52:14	5.69054	25.3127	29.241	939.329	1	30
2022-09-13	08:52:14	10.5586	46.9668	29.241	876.538	1	31
2022-09-13	08:52:14	5.86469	26.0873	29.241	965.416	1	32
2022-09-13	08:52:15	9.79614	43.5752	40.5567	920.113	1	33
2022-09-13	08:52:15	16.8741	75.0594	40.5567	1040.48	1	34
2022-09-13	08:52:15	4.97177	22.1154	40.5567	942.228	1	35
2022-09-13	08:52:15	4.82821	21.4768	40.5567	1061.95	1	36
2022-09-13	08:52:16	6.88321	30.6179	22.1317	972.846	1	37
2022-09-13	08:52:16	2.00174	8.90414	22.1317	1070.86	FALSE	37
2022-09-13	08:52:16	5.04271	22.431	22.1317	995.277	1	38
2022-09-13	08:52:16	5.97406	26.5738	22.1317	1097.43	1	39
2022-09-13	08:52:17	1.25564	5.58534	9.2668	1000.86	FALSE	39
2022-09-13	08:52:17	3.62113	16.1075	9.2668	1113.54	1	40
2022-09-13	08:52:17	1.37304	6.10756	9.2668	1006.97	FALSE	40
2022-09-13	08:52:18	3.80342	16.9184	23.933	1130.46	1	41
2022-09-13	08:52:18	6.70668	29.8327	23.933	1036.8	1	42
2022-09-13	08:52:18	4.58744	20.4059	23.933	1150.86	1	43
2022-09-13	08:52:18	6.42398	28.5751	23.933	1065.38	1	44
2022-09-13	08:52:19	2.2423	9.9742	9.91716	1160.84	FALSE	44
2022-09-13	08:52:19	2.48317	11.0456	9.91716	1076.42	FALSE	44
2022-09-13	08:52:19	2.23029	9.92078	9.91716	1170.76	FALSE	44
2022-09-13	08:52:19	1.96215	8.72804	9.91716	1085.15	FALSE	44
2022-09-13	08:52:20	5.03976	22.4179	6.81492	1193.17	1	45
2022-09-13	08:52:20	0.74327	3.30621	6.81492	1088.46	FALSE	45
2022-09-13	08:52:20	0.149479	0.664912	6.81492	1193.84	FALSE	45
2022-09-13	08:52:20	0.195738	0.870682	6.81492	1089.33	FALSE	45
2022-09-13	08:52:21	0.100267	0.446008	-0.0930381	1194.29	FALSE	45
2022-09-13	08:52:21	0.0211326	0.094002	-0.0930381	1089.42	FALSE	45
2022-09-13	08:52:21	-0.0459412	-0.204356	-0.0930381	1194.29	FALSE	45
2022-09-13	08:52:21	-0.159122	-0.707806	-0.0930381	1089.42	FALSE	45
2022-09-13	08:52:22	-0.344974	-1.53451	-2.21536	1194.29	FALSE	45
2022-09-13	08:52:22	-0.6036	-2.68493	-2.21536	1089.42	FALSE	45
2022-09-13	08:52:22	-0.545534	-2.42664	-2.21536	1194.29	FALSE	45
2022-09-13	08:52:23	-0.590878	-2.62834	-2.5336	1089.42	FALSE	45
2022-09-13	08:52:23	-0.577646	-2.56948	-2.5336	1194.29	FALSE	45
2022-09-13	08:52:23	-0.575559	-2.5602	-2.5336	1089.42	FALSE	45
2022-09-13	08:52:23	-0.534236	-2.37639	-2.5336	1194.29	FALSE	45
2022-09-13	08:52:24	-0.519173	-2.30939	-2.01889	1089.42	FALSE	45
2022-09-13	08:52:24	-0.463702	-2.06264	-2.01889	1194.29	FALSE	45
2022-09-13	08:52:24	-0.423193	-1.88245	-2.01889	1089.42	FALSE	45
2022-09-13	08:52:24	-0.409402	-1.8211	-2.01889	1194.29	FALSE	45
2022-09-13	08:52:25	-0.345178	-1.53542	-1.8722	1089.42	FALSE	45
2022-09-13	08:52:25	-0.458918	-2.04136	-1.8722	1194.29	FALSE	45
2022-09-13	08:52:25	-0.40248	-1.79031	-1.8722	1089.42	FALSE	45
2022-09-13	08:52:25	-0.476984	-2.12172	-1.8722	1194.29	FALSE	45
2022-09-13	08:52:26	-0.466959	-2.07713	-1.59601	1089.42	FALSE	45
2022-09-13	08:52:26	-0.301005	-1.33893	-1.59601	1194.29	FALSE	45
2022-09-13	08:52:26	-0.308435	-1.37198	-1.59601	1089.42	FALSE	45
2022-09-13	08:52:27	-0.251794	-1.12003	-0.135256	1194.29	FALSE	45
2022-09-13	08:52:27	-0.202481	-0.900676	-0.135256	1089.42	FALSE	45
2022-09-13	08:52:27	0.217367	0.966892	-0.135256	1195.25	FALSE	45
2022-09-13	08:52:27	0.11528	0.512788	-0.135256	1089.94	FALSE	45
2022-09-13	08:52:28	0.185306	0.824278	0.860269	1196.08	FALSE	45
2022-09-13	08:52:28	0.183117	0.814541	0.860269	1090.75	FALSE	45
2022-09-13	08:52:28	0.172328	0.766549	0.860269	1196.84	FALSE	45
2022-09-13	08:52:28	0.232837	1.03571	0.860269	1091.79	FALSE	45
2022-09-13	08:52:29	0.458232	2.03831	11.6998	1198.88	FALSE	45
2022-09-13	08:52:29	4.70251	20.9177	11.6998	1112.7	1	46
2022-09-13	08:52:29	4.05848	18.0529	11.6998	1216.93	1	47
2022-09-13	08:52:29	1.30169	5.79018	11.6998	1118.49	FALSE	47
2022-09-13	08:52:30	1.42877	6.35545	13.3842	1223.29	FALSE	47
2022-09-13	08:52:30	3.75095	16.685	13.3842	1135.18	1	48
2022-09-13	08:52:30	3.84042	17.083	13.3842	1240.37	1	49
2022-09-13	08:52:30	3.01543	13.4132	13.3842	1148.59	1	50
2022-09-13	08:52:31	7.52027	33.4517	36.2258	1273.82	1	51
2022-09-13	08:52:31	7.56388	33.6457	36.2258	1182.24	1	52
2022-09-13	08:52:31	9.34759	41.5799	36.2258	1315.4	1	53
2022-09-13	08:52:32	11.9163	53.0061	29.2179	1235.24	1	54
2022-09-13	08:52:32	11.8222	52.5875	29.2179	1367.99	1	55
2022-09-13	08:52:32	2.30128	10.2366	29.2179	1245.48	FALSE	55
2022-09-13	08:52:32	0.23416	1.04159	29.2179	1369.03	FALSE	55
2022-09-13	08:52:33	0.20556	0.914372	-0.434123	1246.39	FALSE	55
2022-09-13	08:52:33	0.0686135	0.305207	-0.434123	1369.34	FALSE	55
2022-09-13	08:52:33	-0.168231	-0.748325	-0.434123	1246.39	FALSE	55
2022-09-13	08:52:33	-0.496323	-2.20774	-0.434123	1369.34	FALSE	55
2022-09-13	08:52:34	-0.69617	-3.0967	-2.58391	1246.39	FALSE	55
2022-09-13	08:52:34	-0.657747	-2.92579	-2.58391	1369.34	FALSE	55
2022-09-13	08:52:34	-0.534745	-2.37865	-2.58391	1246.39	FALSE	55
2022-09-13	08:52:34	-0.434898	-1.93451	-2.58391	1369.34	FALSE	55
2022-09-13	08:52:35	-0.730572	-3.24973	-2.1393	1246.39	FALSE	55
2022-09-13	08:52:35	-0.488485	-2.17288	-2.1393	1369.34	FALSE	55
2022-09-13	08:52:35	-0.223753	-0.995298	-2.1393	1246.39	FALSE	55
2022-09-13	08:52:36	-0.00904555	-0.0402364	-0.53797	1369.34	FALSE	55
2022-09-13	08:52:36	-0.100903	-0.448837	-0.53797	1246.39	FALSE	55
2022-09-13	08:52:36	-0.149758	-0.666154	-0.53797	1369.34	FALSE	55
2022-09-13	08:52:36	-0.224058	-0.996655	-0.53797	1246.39	FALSE	55
2022-09-13	08:52:37	-0.0194272	-0.0864161	3.95737	1369.34	FALSE	55
2022-09-13	08:52:37	0.161896	0.720146	3.95737	1247.11	FALSE	55
2022-09-13	08:52:37	0.356298	1.58488	3.95737	1370.92	FALSE	55
2022-09-13	08:52:37	3.05986	13.6109	3.95737	1260.73	1	56
2022-09-13	08:52:38	7.41604	32.988	29.5318	1403.91	1	57
2022-09-13	08:52:38	11.1656	49.6668	29.5318	1310.39	1	58
2022-09-13	08:52:38	5.42337	24.1242	29.5318	1428.04	1	59
2022-09-13	08:52:38	2.55116	11.3481	29.5318	1321.74	FALSE	59
2022-09-13	08:52:39	3.92622	17.4646	8.55396	1445.5	1	60
2022-09-13	08:52:39	0.644796	2.86818	8.55396	1324.61	FALSE	60
2022-09-13	08:52:39	1.98144	8.81384	8.55396	1454.31	FALSE	60
2022-09-13	08:52:39	1.13961	5.06921	8.55396	1329.68	FALSE	60
2022-09-13	08:52:40	1.47823	6.57546	6.18506	1460.89	FALSE	60
2022-09-13	08:52:40	1.88419	8.38125	6.18506	1338.06	FALSE	60
2022-09-13	08:52:40	0.808969	3.59846	6.18506	1464.49	FALSE	60
2022-09-13	08:52:41	2.76128	12.2827	13.442	1350.34	FALSE	60
2022-09-13	08:52:41	1.80973	8.05004	13.442	1472.54	FALSE	60
2022-09-13	08:52:41	4.2852	19.0614	13.442	1369.4	1	61
2022-09-13	08:52:41	3.23136	14.3737	13.442	1486.91	1	62
2022-09-13	08:52:42	2.03019	9.03069	27.2406	1378.43	FALSE	62
2022-09-13	08:52:42	4.85508	21.5964	27.2406	1508.51	1	63
2022-09-13	08:52:42	4.17813	18.5852	27.2406	1397.02	1	64
2022-09-13	08:52:42	13.4324	59.75	27.2406	1568.26	1	65
2022-09-13	08:52:43	16.1509	71.8424	57.7158	1468.86	1	66
2022-09-13	08:52:43	15.0129	66.7804	57.7158	1635.04	1	67
2022-09-13	08:52:43	11.2748	50.1526	57.7158	1519.01	1	68
2022-09-13	08:52:43	9.46174	42.0877	57.7158	1677.13	1	69
2022-09-13	08:52:44	8.42556	37.4786	21.6235	1556.49	1	70
2022-09-13	08:52:44	5.57731	24.809	21.6235	1701.94	1	71
2022-09-13	08:52:44	4.18047	18.5956	21.6235	1575.09	1	72
2022-09-13	08:52:44	1.26139	5.61091	21.6235	1707.55	FALSE	72
2022-09-13	08:52:45	0.684796	3.04611	3.09999	1578.13	FALSE	72
2022-09-13	08:52:45	0.454466	2.02156	3.09999	1709.57	FALSE	72
2022-09-13	08:52:45	0.951463	4.2323	3.09999	1582.37	FALSE	72
2022-09-13	08:52:46	2.17818	9.68898	8.59046	1719.26	FALSE	72
2022-09-13	08:52:46	2.55309	11.3567	8.59046	1593.72	FALSE	72
2022-09-13	08:52:46	1.52541	6.78533	8.59046	1726.04	FALSE	72
2022-09-13	08:52:46	1.46821	6.53089	8.59046	1600.25	FALSE	72
2022-09-13	08:52:47	2.59294	11.5339	8.71932	1737.58	FALSE	72
2022-09-13	08:52:47	2.3993	10.6726	8.71932	1610.93	FALSE	72
2022-09-13	08:52:47	1.93355	8.60082	8.71932	1746.18	FALSE	72
2022-09-13	08:52:47	0.914974	4.06999	8.71932	1615	FALSE	72
2022-09-13	08:52:48	0.554771	2.46773	1.33293	1748.64	FALSE	72
2022-09-13	08:52:48	0.0986389	0.438766	1.33293	1615.44	FALSE	72
2022-09-13	08:52:48	0.243779	1.08438	1.33293	1749.73	FALSE	72
2022-09-13	08:52:48	0.301438	1.34086	1.33293	1616.78	FALSE	72
2022-09-13	08:52:49	0.169326	0.753196	1.16376	1750.48	FALSE	72
2022-09-13	08:52:49	0.377417	1.67883	1.16376	1618.46	FALSE	72
2022-09-13	08:52:49	0.23813	1.05925	1.16376	1751.54	FALSE	72
2022-09-13	08:52:50	0.212277	0.944251	1.19485	1619.4	FALSE	72
2022-09-13	08:52:50	0.192125	0.85461	1.19485	1752.4	FALSE	72
2022-09-13	08:52:50	0.358995	1.59688	1.19485	1621	FALSE	72
2022-09-13	08:52:50	0.311056	1.38364	1.19485	1753.78	FALSE	72
2022-09-13	08:52:51	0.375026	1.66819	1.72156	1622.66	FALSE	72
2022-09-13	08:52:51	0.459453	2.04374	1.72156	1755.82	FALSE	72
2022-09-13	08:52:51	0.383015	1.70373	1.72156	1624.37	FALSE	72
2022-09-13	08:52:51	0.330598	1.47057	1.72156	1757.29	FALSE	72
2022-09-13	08:52:52	0.294618	1.31052	1.53157	1625.68	FALSE	72
2022-09-13	08:52:52	0.314975	1.40107	1.53157	1758.7	FALSE	72
2022-09-13	08:52:52	0.37411	1.66412	1.53157	1627.34	FALSE	72
2022-09-13	08:52:52	0.39355	1.75059	1.53157	1760.45	FALSE	72
2022-09-13	08:52:53	0.409377	1.82099	1.97571	1629.16	FALSE	72
2022-09-13	08:52:53	0.430038	1.9129	1.97571	1762.36	FALSE	72
2022-09-13	08:52:53	0.553194	2.46072	1.97571	1631.62	FALSE	72
2022-09-13	08:52:53	0.384033	1.70826	1.97571	1764.07	FALSE	72
2022-09-13	08:52:54	0.609529	2.71131	1.87796	1634.34	FALSE	72
2022-09-13	08:52:54	0.365611	1.62631	1.87796	1765.69	FALSE	72
2022-09-13	08:52:54	0.291412	1.29626	1.87796	1635.63	FALSE	72
2022-09-13	08:52:55	0.219148	0.974814	0.835424	1766.67	FALSE	72
2022-09-13	08:52:55	0.153702	0.683697	0.835424	1636.32	FALSE	72
2022-09-13	08:52:55	0.137265	0.610582	0.835424	1767.28	FALSE	72
2022-09-13	08:52:55	0.241132	1.0726	0.835424	1637.39	FALSE	72
2022-09-13	08:52:56	0.471107	2.09558	3.67237	1769.37	FALSE	72
2022-09-13	08:52:56	0.614516	2.73349	3.67237	1640.12	FALSE	72
2022-09-13	08:52:56	0.616247	2.74119	3.67237	1772.12	FALSE	72
2022-09-13	08:52:56	1.60047	7.11921	3.67237	1647.24	FALSE	72
2022-09-13	08:52:57	4.79004	21.3071	18.7668	1793.42	1	73
2022-09-13	08:52:57	4.42637	19.6894	18.7668	1666.93	1	74
2022-09-13	08:52:57	3.99747	17.7815	18.7668	1811.2	1	75
2022-09-13	08:52:57	3.66195	16.2891	18.7668	1683.22	1	76
2022-09-13	08:52:58	5.53034	24.6001	19.7073	1835.8	1	77
2022-09-13	08:52:58	2.29447	10.2063	19.7073	1693.43	FALSE	77
2022-09-13	08:52:58	5.46637	24.3155	19.7073	1860.12	1	78
2022-09-13	08:52:59	3.65681	16.2662	12.6493	1709.69	1	79
2022-09-13	08:52:59	3.0937	13.7614	12.6493	1873.88	1	80
2022-09-13	08:52:59	2.78347	12.3814	12.6493	1722.07	FALSE	80
2022-09-13	08:52:59	1.84078	8.18816	12.6493	1882.07	FALSE	80
2022-09-13	08:53:00	2.76581	12.3029	6.33121	1734.38	FALSE	80
2022-09-13	08:53:00	0.742252	3.30169	6.33121	1885.37	FALSE	80
2022-09-13	08:53:00	1.2195	5.42458	6.33121	1739.8	FALSE	80
2022-09-13	08:53:00	0.965713	4.29568	6.33121	1889.67	FALSE	80
2022-09-13	08:53:01	1.1134	4.95263	8.79493	1744.75	FALSE	80
2022-09-13	08:53:01	1.5252	6.78439	8.79493	1896.45	FALSE	80
2022-09-13	08:53:01	1.26296	5.6179	8.79493	1750.37	FALSE	80
2022-09-13	08:53:01	4.00719	17.8248	8.79493	1914.28	1	81
2022-09-13	08:53:02	5.35263	23.8096	44.4666	1774.18	1	82
2022-09-13	08:53:02	13.7352	61.0969	44.4666	1975.37	1	83
2022-09-13	08:53:02	10.4751	46.5953	44.4666	1820.78	1	84
2022-09-13	08:53:02	10.4232	46.3645	44.4666	2021.74	1	85
2022-09-13	08:53:03	4.61874	20.5451	16.8314	1841.32	1	86
2022-09-13	08:53:03	2.79192	12.419	16.8314	2034.16	FALSE	86
2022-09-13	08:53:03	3.94093	17.53	16.8314	1858.85	1	87
2022-09-13	08:53:04	4.68836	20.8548	22.5095	2055.01	1	88
2022-09-13	08:53:04	5.60184	24.9181	22.5095	1883.77	1	89
2022-09-13	08:53:04	4.78739	21.2953	22.5095	2076.31	1	90
2022-09-13	08:53:04	5.16388	22.97	22.5095	1906.74	1	91
2022-09-13	08:53:05	2.77436	12.3409	16.8644	2088.65	FALSE	91
2022-09-13	08:53:05	2.04637	9.10266	16.8644	1915.84	FALSE	91
2022-09-13	08:53:05	4.01304	17.8508	16.8644	2106.5	1	92
2022-09-13	08:53:05	6.33136	28.1632	16.8644	1944.01	1	93
2022-09-13	08:53:06	7.27843	32.3759	40.4568	2138.87	1	94
2022-09-13	08:53:06	10.2827	45.7395	40.4568	1989.74	1	95
2022-09-13	08:53:06	8.49975	37.8086	40.4568	2176.68	1	96
2022-09-13	08:53:06	10.3195	45.9032	40.4568	2035.65	1	97
2022-09-13	08:53:07	4.8882	21.7437	8.50697	2198.43	1	98
2022-09-13	08:53:07	1.53151	6.81246	8.50697	2042.46	FALSE	98
2022-09-13	08:53:07	0.533193	2.37175	8.50697	2200.8	FALSE	98
2022-09-13	08:53:07	0.696908	3.09999	8.50697	2045.56	FALSE	98
2022-09-13	08:53:08	0.740929	3.2958	3.28757	2204.09	FALSE	98
2022-09-13	08:53:08	0.73416	3.26569	3.28757	2048.83	FALSE	98
2022-09-13	08:53:08	0.74215	3.30123	3.28757	2207.4	FALSE	98
2022-09-13	08:53:09	0.739606	3.28992	13.8823	2052.12	FALSE	98
2022-09-13	08:53:09	0.731717	3.25482	13.8823	2210.65	FALSE	98
2022-09-13	08:53:09	8.31985	37.0084	13.8823	2089.12	1	99
2022-09-13	08:53:09	2.69233	11.976	13.8823	2222.63	FALSE	99
2022-09-13	08:53:10	1.42322	6.33077	3.37826	2095.46	FALSE	99
2022-09-13	08:53:10	0.776145	3.45245	3.37826	2226.08	FALSE	99
2022-09-13	08:53:10	0.511718	2.27622	3.37826	2097.73	FALSE	99
2022-09-13	08:53:10	0.326781	1.45359	3.37826	2227.53	FALSE	99
2022-09-13	08:53:11	0.47874	2.12953	1.95879	2099.86	FALSE	99
2022-09-13	08:53:11	0.417723	1.85812	1.95879	2229.39	FALSE	99
2022-09-13	08:53:11	0.408563	1.81737	1.95879	2101.68	FALSE	99
2022-09-13	08:53:11	0.4564	2.03016	1.95879	2231.42	FALSE	99
2022-09-13	08:53:12	0.810445	3.60502	4.89293	2105.28	FALSE	99
2022-09-13	08:53:12	0.721132	3.20774	4.89293	2234.63	FALSE	99
2022-09-13	08:53:12	1.76836	7.86602	4.89293	2113.15	FALSE	99
2022-09-13	08:53:13	1.83548	8.16458	26.7183	2242.79	FALSE	99
2022-09-13	08:53:13	4.75457	21.1493	26.7183	2134.3	1	100
2022-09-13	08:53:13	9.19986	40.9228	26.7183	2283.72	1	101
2022-09-13	08:53:13	8.23629	36.6367	26.7183	2170.94	1	102
2022-09-13	08:53:14	3.86424	17.1889	28.6333	2300.9	1	103
2022-09-13	08:53:14	5.24378	23.3254	28.6333	2194.26	1	104
2022-09-13	08:53:14	6.02489	26.7999	28.6333	2327.7	1	105
2022-09-13	08:53:14	10.6153	47.219	28.6333	2241.48	1	106
2022-09-13	08:53:15	3.07039	13.6577	9.38643	2341.36	1	107
2022-09-13	08:53:15	2.88856	12.8489	9.38643	2254.33	FALSE	107
2022-09-13	08:53:15	1.75772	7.81869	9.38643	2349.18	FALSE	107
2022-09-13	08:53:15	0.723982	3.22042	9.38643	2257.55	FALSE	107
2022-09-13	08:53:16	0.634364	2.82178	6.38442	2352	FALSE	107
2022-09-13	08:53:16	1.46083	6.49806	6.38442	2264.05	FALSE	107
2022-09-13	08:53:16	1.79116	7.96744	6.38442	2359.97	FALSE	107
2022-09-13	08:53:16	1.85477	8.25039	6.38442	2272.3	FALSE	107
2022-09-13	08:53:17	2.5595	11.3852	9.19247	2371.35	FALSE	107
2022-09-13	08:53:17	2.33711	10.3959	9.19247	2282.69	FALSE	107
2022-09-13	08:53:17	1.30307	5.79632	9.19247	2377.15	FALSE	107
2022-09-13	08:53:18	1.13971	5.06966	4.4486	2287.76	FALSE	107
2022-09-13	08:53:18	0.664033	2.95375	4.4486	2380.1	FALSE	107
2022-09-13	08:53:18	1.01472	4.51368	4.4486	2292.28	FALSE	107
2022-09-13	08:53:18	1.1819	5.25733	4.4486	2385.36	FALSE	107
2022-09-13	08:53:19	1.64358	7.31097	12.3693	2299.59	FALSE	107
2022-09-13	08:53:19	2.65701	11.8189	12.3693	2397.18	FALSE	107
2022-09-13	08:53:19	3.09935	13.7865	12.3693	2313.37	1	108
2022-09-13	08:53:19	3.72301	16.5607	12.3693	2413.74	1	109
2022-09-13	08:53:20	1.86459	8.29407	5.85946	2321.67	FALSE	109
2022-09-13	08:53:20	1.41859	6.31017	5.85946	2420.05	FALSE	109
2022-09-13	08:53:20	1.16765	5.19394	5.85946	2326.86	FALSE	109
2022-09-13	08:53:20	0.818232	3.63966	5.85946	2423.69	FALSE	109
2022-09-13	08:53:21	1.03625	4.60945	5.44657	2331.47	FALSE	109
2022-09-13	08:53:21	1.27798	5.68471	5.44657	2429.38	FALSE	109
2022-09-13	08:53:21	1.17401	5.22223	5.44657	2336.69	FALSE	109
2022-09-13	08:53:21	1.40953	6.26987	5.44657	2435.65	FALSE	109
2022-09-13	08:53:22	1.28877	5.73271	5.11153	2342.43	FALSE	109
2022-09-13	08:53:22	1.14128	5.07664	5.11153	2440.72	FALSE	109
2022-09-13	08:53:22	1.01732	4.52524	5.11153	2346.95	FALSE	109
2022-09-13	08:53:23	1.19874	5.33224	5.38346	2446.06	FALSE	109
2022-09-13	08:53:23	1.22663	5.4563	5.38346	2352.41	FALSE	109
2022-09-13	08:53:23	1.21625	5.41012	5.38346	2451.47	FALSE	109
2022-09-13	08:53:23	1.1994	5.33517	5.38346	2357.74	FALSE	109
2022-09-13	08:53:24	1.28566	5.71887	5.6272	2457.18	FALSE	109
2022-09-13	08:53:24	1.23894	5.51105	5.6272	2363.25	FALSE	109
2022-09-13	08:53:24	1.20098	5.3422	5.6272	2462.53	FALSE	109
2022-09-13	08:53:24	1.33462	5.93666	5.6272	2369.19	FALSE	109
2022-09-13	08:53:25	0.973142	4.32873	3.05517	2466.86	FALSE	109
2022-09-13	08:53:25	0.949224	4.22234	3.05517	2373.41	FALSE	109
2022-09-13	08:53:25	0.471616	2.09784	3.05517	2468.95	FALSE	109
2022-09-13	08:53:25	0.353346	1.57175	3.05517	2374.99	FALSE	109
2022-09-13	08:53:26	0.435789	1.93848	1.91478	2470.89	FALSE	109
2022-09-13	08:53:26	0.424237	1.88709	1.91478	2376.87	FALSE	109
2022-09-13	08:53:26	0.431361	1.91878	1.91478	2472.81	FALSE	109
2022-09-13	08:53:27	0.829071	3.68787	4.83751	2380.56	FALSE	109
2022-09-13	08:53:27	1.05747	4.70384	4.83751	2477.51	FALSE	109
2022-09-13	08:53:27	0.97757	4.34843	4.83751	2384.91	FALSE	109
2022-09-13	08:53:27	1.48597	6.60989	4.83751	2484.12	FALSE	109
2022-09-13	08:53:28	2.13996	9.51897	5.33348	2394.43	FALSE	109
2022-09-13	08:53:28	1.40032	6.2289	5.33348	2490.35	FALSE	109
2022-09-13	08:53:28	0.537926	2.3928	5.33348	2396.82	FALSE	109
2022-09-13	08:53:28	0.717875	3.19325	5.33348	2493.55	FALSE	109
2022-09-13	08:53:29	0.293702	1.30645	3.91889	2398.13	FALSE	109
2022-09-13	08:53:29	0.732837	3.25981	3.91889	2496.81	FALSE	109
2022-09-13	08:53:29	0.73355	3.26298	3.91889	2401.39	FALSE	109
2022-09-13	08:53:29	1.76393	7.84631	3.91889	2504.65	FALSE	109
2022-09-13	08:53:30	4.48988	19.9719	30.7806	2421.36	1	110
2022-09-13	08:53:30	12.6173	56.1243	30.7806	2560.78	1	111
2022-09-13	08:53:30	7.06505	31.4268	30.7806	2452.79	1	112
2022-09-13	08:53:30	3.50693	15.5995	30.7806	2576.38	1	113
2022-09-13	08:53:31	4.15217	18.4697	25.0907	2471.26	1	114
2022-09-13	08:53:31	5.99156	26.6517	25.0907	2603.03	1	115
2022-09-13	08:53:31	6.77818	30.1507	25.0907	2501.41	1	116
2022-09-13	08:53:32	5.90637	26.2727	21.1602	2629.3	1	117
2022-09-13	08:53:32	3.70541	16.4824	21.1602	2517.89	1	118
2022-09-13	08:53:32	5.08021	22.5978	21.1602	2651.9	1	119
2022-09-13	08:53:32	4.33609	19.2878	21.1602	2537.18	1	120
2022-09-13	08:53:33	10.18	45.2827	68.3505	2697.18	1	121
2022-09-13	08:53:33	17.4714	77.7163	68.3505	2614.9	1	122
2022-09-13	08:53:33	17.1983	76.5015	68.3505	2773.68	1	123
2022-09-13	08:53:33	16.6138	73.9015	68.3505	2688.8	1	124
2022-09-13	08:53:34	9.94561	44.2401	20.5055	2817.92	1	125
2022-09-13	08:53:34	3.05955	13.6095	20.5055	2702.41	1	126
2022-09-13	08:53:34	2.2962	10.214	20.5055	2828.14	FALSE	126
2022-09-13	08:53:34	3.13798	13.9584	20.5055	2716.36	1	127
2022-09-13	08:53:35	1.82963	8.13856	11.7766	2836.27	FALSE	127
2022-09-13	08:53:35	1.548	6.88581	11.7766	2723.25	FALSE	127
2022-09-13	08:53:35	4.56485	20.3054	11.7766	2856.58	1	128
2022-09-13	08:53:36	6.44154	28.6533	30.7583	2751.9	1	129
2022-09-13	08:53:36	9.82993	43.7255	30.7583	2900.31	1	130
2022-09-13	08:53:36	3.19452	14.2099	30.7583	2766.11	1	131
2022-09-13	08:53:36	8.19309	36.4445	30.7583	2936.75	1	132
2022-09-13	08:53:37	7.12108	31.676	24.1371	2797.79	1	133
2022-09-13	08:53:37	8.86026	39.4122	24.1371	2976.16	1	134
2022-09-13	08:53:37	4.65121	20.6895	24.1371	2818.48	1	135
2022-09-13	08:53:37	1.07253	4.77083	24.1371	2980.93	FALSE	135
2022-09-13	08:53:38	0.744949	3.31368	1.43684	2821.79	FALSE	135
2022-09-13	08:53:38	0.379606	1.68856	1.43684	2982.62	FALSE	135
2022-09-13	08:53:38	0.119148	0.529994	1.43684	2822.32	FALSE	135
2022-09-13	08:53:38	0.048359	0.215111	1.43684	2982.84	FALSE	135
2022-09-13	08:53:39	-0.138562	-0.616351	-0.586867	2822.32	FALSE	135
2022-09-13	08:53:39	-0.224669	-0.999373	-0.586867	2982.84	FALSE	135
2022-09-13	08:53:39	-0.12757	-0.567457	-0.586867	2822.32	FALSE	135
2022-09-13	08:53:39	-0.0369336	-0.164288	-0.586867	2982.84	FALSE	135
2022-09-13	08:53:40	-0.0363229	-0.161572	1.9298	2822.32	FALSE	135
2022-09-13	08:53:40	0.586679	2.60967	1.9298	2985.45	FALSE	135
2022-09-13	08:53:40	0.751158	3.3413	1.9298	2825.66	FALSE	135
2022-09-13	08:53:41	0.731616	3.25437	2.21284	2988.7	FALSE	135
2022-09-13	08:53:41	0.74444	3.31142	2.21284	2828.98	FALSE	135
2022-09-13	08:53:41	0.507087	2.25562	2.21284	2990.96	FALSE	135
2022-09-13	08:53:41	0.00673053	0.0299387	2.21284	2829.01	FALSE	135
2022-09-13	08:53:42	0.927952	4.12772	5.56863	2995.08	FALSE	135
2022-09-13	08:53:42	2.06851	9.20115	5.56863	2838.21	FALSE	135
2022-09-13	08:53:42	1.67345	7.44384	5.56863	3002.53	FALSE	135
2022-09-13	08:53:42	0.337621	1.50181	5.56863	2839.71	FALSE	135
2022-09-13	08:53:43	0.153652	0.683475	0.700847	3003.21	FALSE	135
2022-09-13	08:53:43	0.107952	0.480192	0.700847	2840.19	FALSE	135
2022-09-13	08:53:43	0.230038	1.02326	0.700847	3004.23	FALSE	135
2022-09-13	08:53:43	0.138588	0.616467	0.700847	2840.8	FALSE	135
2022-09-13	08:53:44	0.121896	0.542218	0.567401	3004.78	FALSE	135
2022-09-13	08:53:44	0.0738552	0.328523	0.567401	2841.13	FALSE	135
2022-09-13	08:53:44	0.138537	0.61624	0.567401	3005.39	FALSE	135
2022-09-13	08:53:44	0.175942	0.782625	0.567401	2841.92	FALSE	135
2022-09-13	08:53:45	0.466781	2.07634	7.23903	3007.47	FALSE	135
2022-09-13	08:53:45	1.60347	7.13256	7.23903	2849.05	FALSE	135
2022-09-13	08:53:45	2.81197	12.5082	7.23903	3019.98	FALSE	135
2022-09-13	08:53:46	2.0076	8.93021	8.0985	2857.98	FALSE	135
2022-09-13	08:53:46	3.73538	16.6157	8.0985	3036.59	1	136
2022-09-13	08:53:46	0.958282	4.26263	8.0985	2862.24	FALSE	136
2022-09-13	08:53:46	0.581234	2.58545	8.0985	3039.18	FALSE	136
2022-09-13	08:53:47	0.263626	1.17266	1.33989	2863.41	FALSE	136
2022-09-13	08:53:47	0.254313	1.13124	1.33989	3040.31	FALSE	136
2022-09-13	08:53:47	0.357825	1.59168	1.33989	2865.01	FALSE	136
2022-09-13	08:53:47	0.329122	1.464	1.33989	3041.77	FALSE	136
2022-09-13	08:53:48	0.270191	1.20186	1.26808	2866.21	FALSE	136
2022-09-13	08:53:48	0.257366	1.14482	1.26808	3042.92	FALSE	136
2022-09-13	08:53:48	0.256654	1.14165	1.26808	2867.35	FALSE	136
2022-09-13	08:53:48	0.356094	1.58398	1.26808	3044.5	FALSE	136
2022-09-13	08:53:49	0.393906	1.75217	1.63929	2869.1	FALSE	136
2022-09-13	08:53:49	0.349326	1.55387	1.63929	3046.06	FALSE	136
2022-09-13	08:53:49	0.362354	1.61182	1.63929	2870.71	FALSE	136
2022-09-13	08:53:50	0.377672	1.67996	8.12222	3047.74	FALSE	136
2022-09-13	08:53:50	1.75818	7.82074	8.12222	2878.53	FALSE	136
2022-09-13	08:53:50	2.99391	13.3175	8.12222	3061.05	FALSE	136
2022-09-13	08:53:50	2.17406	9.67065	8.12222	2888.2	FALSE	136
2022-09-13	08:53:51	0.297367	1.32275	3.37876	3062.38	FALSE	136
2022-09-13	08:53:51	0.716399	3.18669	3.37876	2891.39	FALSE	136
2022-09-13	08:53:51	1.61365	7.17784	3.37876	3069.56	FALSE	136
2022-09-13	08:53:51	0.410903	1.82778	3.37876	2893.22	FALSE	136
2022-09-13	08:53:52	0.266171	1.18398	6.54938	3070.74	FALSE	136
2022-09-13	08:53:52	0.238028	1.0588	6.54938	2894.28	FALSE	136
2022-09-13	08:53:52	1.43274	6.37311	6.54938	3077.11	FALSE	136
2022-09-13	08:53:52	3.95253	17.5816	6.54938	2911.86	1	137
2022-09-13	08:53:53	6.79451	30.2233	27.2694	3107.34	1	138
2022-09-13	08:53:53	3.68454	16.3896	27.2694	2928.25	1	139
2022-09-13	08:53:53	3.97686	17.6899	27.2694	3125.03	1	140
2022-09-13	08:53:53	10.0658	44.7747	27.2694	2973.02	1	141
2022-09-13	08:53:54	10.0811	44.8427	39.7582	3169.87	1	142
2022-09-13	08:53:54	10.5197	46.7937	39.7582	3019.82	1	143
2022-09-13	08:53:54	6.21334	27.6382	39.7582	3197.51	1	144
2022-09-13	08:53:55	3.11406	13.852	8.25033	3033.67	1	145
2022-09-13	08:53:55	3.27319	14.5598	8.25033	3212.07	1	146
2022-09-13	08:53:55	0.481132	2.14017	8.25033	3035.81	FALSE	146
2022-09-13	08:53:55	0.550649	2.4494	8.25033	3214.52	FALSE	146
2022-09-13	08:53:56	4.00683	17.8232	19.1932	3053.63	1	147
2022-09-13	08:53:56	6.1538	27.3733	19.1932	3241.89	1	148
2022-09-13	08:53:56	3.61243	16.0688	19.1932	3069.7	1	149
2022-09-13	08:53:56	3.48627	15.5076	19.1932	3257.4	1	150
2022-09-13	08:53:57	2.2906	10.189	6.38854	3079.89	FALSE	150
2022-09-13	08:53:57	1.85497	8.25128	6.38854	3265.65	FALSE	150
2022-09-13	08:53:57	1.37055	6.09648	6.38854	3085.99	FALSE	150
2022-09-13	08:53:57	0.228715	1.01737	6.38854	3266.67	FALSE	150
2022-09-13	08:53:58	0.230903	1.0271	0.64016	3087.01	FALSE	150
2022-09-13	08:53:58	0.103626	0.460949	0.64016	3267.13	FALSE	150
2022-09-13	08:53:58	0.0972139	0.432427	0.64016	3087.45	FALSE	150
2022-09-13	08:53:59	0.260115	1.15704	0.978435	3268.28	FALSE	150
2022-09-13	08:53:59	0.166374	0.740065	0.978435	3088.19	FALSE	150
2022-09-13	08:53:59	0.228664	1.01714	0.978435	3269.3	FALSE	150
2022-09-13	08:53:59	0.224695	0.999488	0.978435	3089.19	FALSE	150
2022-09-13	08:54:00	0.23528	1.04657	3.41702	3270.35	FALSE	150
2022-09-13	08:54:00	0.235534	1.0477	3.41702	3090.23	FALSE	150
2022-09-13	08:54:00	0.69528	3.09274	3.41702	3273.44	FALSE	150
2022-09-13	08:54:00	1.90663	8.48107	3.41702	3098.72	FALSE	150
2022-09-13	08:54:01	1.05894	4.71038	4.70242	3278.15	FALSE	150
2022-09-13	08:54:01	0.597723	2.65879	4.70242	3101.37	FALSE	150
2022-09-13	08:54:01	1.15854	5.15342	4.70242	3283.3	FALSE	150
2022-09-13	08:54:01	1.4134	6.28709	4.70242	3107.66	FALSE	150
2022-09-13	08:54:02	2.73263	12.1553	4.4478	3295.46	FALSE	150
2022-09-13	08:54:02	0.517621	2.30248	4.4478	3109.96	FALSE	150
2022-09-13	08:54:02	0.29869	1.32863	4.4478	3296.79	FALSE	150
2022-09-13	08:54:02	0.4507	2.0048	4.4478	3111.97	FALSE	150
2022-09-13	08:54:03	0.640929	2.85098	2.64981	3299.64	FALSE	150
2022-09-13	08:54:03	0.64327	2.86139	2.64981	3114.83	FALSE	150
2022-09-13	08:54:03	0.502913	2.23706	2.64981	3301.88	FALSE	150
2022-09-13	08:54:04	0.82785	3.68244	3.92546	3118.51	FALSE	150
2022-09-13	08:54:04	0.651107	2.89625	3.92546	3304.77	FALSE	150
2022-09-13	08:54:04	0.7564	3.36462	3.92546	3121.88	FALSE	150
2022-09-13	08:54:04	1.29457	5.75851	3.92546	3310.53	FALSE	150
2022-09-13	08:54:05	1.3848	6.15987	4.29908	3128.04	FALSE	150
2022-09-13	08:54:05	1.14062	5.07371	4.29908	3315.6	FALSE	150
2022-09-13	08:54:05	0.654516	2.91142	4.29908	3130.95	FALSE	150
2022-09-13	08:54:05	0.685967	3.05132	4.29908	3318.66	FALSE	150
2022-09-13	08:54:06	0.645	2.86909	2.28318	3133.82	FALSE	150
2022-09-13	08:54:06	0.449478	1.99937	2.28318	3320.65	FALSE	150
2022-09-13	08:54:06	0.489122	2.17571	2.28318	3135.99	FALSE	150
2022-09-13	08:54:06	0.469529	2.08856	2.28318	3322.74	FALSE	150
2022-09-13	08:54:07	0.44729	1.98964	1.98975	3137.98	FALSE	150
2022-09-13	08:54:07	0.435433	1.93689	1.98975	3324.68	FALSE	150
2022-09-13	08:54:07	0.433906	1.9301	1.98975	3139.91	FALSE	150
2022-09-13	08:54:07	0.472634	2.10237	1.98975	3326.78	FALSE	150
2022-09-13	08:54:08	0.363931	1.61884	1.70765	3141.53	FALSE	150
2022-09-13	08:54:08	0.40383	1.79632	1.70765	3328.58	FALSE	150
2022-09-13	08:54:08	0.383931	1.7078	1.70765	3143.24	FALSE	150
2022-09-13	08:54:09	0.271107	1.20594	1.37532	3329.78	FALSE	150
2022-09-13	08:54:09	0.341998	1.52128	1.37532	3144.76	FALSE	150
2022-09-13	08:54:09	0.302812	1.34697	1.37532	3331.13	FALSE	150
2022-09-13	08:54:09	0.320827	1.4271	1.37532	3146.19	FALSE	150
2022-09-13	08:54:10	0.308054	1.37029	2.23814	3332.5	FALSE	150
2022-09-13	08:54:10	0.584287	2.59903	2.23814	3148.79	FALSE	150
2022-09-13	08:54:10	0.559758	2.48992	2.23814	3334.99	FALSE	150
2022-09-13	08:54:10	0.560522	2.49331	2.23814	3151.28	FALSE	150
2022-09-13	08:54:11	0.606374	2.69727	2.45726	3337.69	FALSE	150
2022-09-13	08:54:11	0.467799	2.08086	2.45726	3153.36	FALSE	150
2022-09-13	08:54:11	0.600318	2.67033	2.45726	3340.36	FALSE	150
2022-09-13	08:54:11	0.535178	2.38058	2.45726	3155.74	FALSE	150
2022-09-13	08:54:12	0.539911	2.40163	2.39718	3342.76	FALSE	150
2022-09-13	08:54:12	0.580827	2.58363	2.39718	3158.32	FALSE	150
2022-09-13	08:54:12	0.495993	2.20628	2.39718	3344.97	FALSE	150
2022-09-13	08:54:13	0.608817	2.70814	2.79852	3161.03	FALSE	150
2022-09-13	08:54:13	0.567137	2.52274	2.79852	3347.49	FALSE	150
2022-09-13	08:54:13	0.747901	3.32681	2.79852	3164.36	FALSE	150
2022-09-13	08:54:13	0.592685	2.63638	2.79852	3350.13	FALSE	150
2022-09-13	08:54:14	0.594975	2.64657	2.86649	3167.01	FALSE	150
2022-09-13	08:54:14	0.700827	3.11742	2.86649	3353.24	FALSE	150
2022-09-13	08:54:14	0.743524	3.30734	2.86649	3170.31	FALSE	150
2022-09-13	08:54:14	0.538333	2.39461	2.86649	3355.64	FALSE	150
2022-09-13	08:54:15	0.608511	2.70678	2.89484	3173.02	FALSE	150
2022-09-13	08:54:15	0.420064	1.86853	2.89484	3357.51	FALSE	150
2022-09-13	08:54:15	0.846934	3.76733	2.89484	3176.79	FALSE	150
2022-09-13	08:54:15	0.727646	3.23671	2.89484	3360.74	FALSE	150
2022-09-13	08:54:16	0.563779	2.5078	2.00741	3179.3	FALSE	150
2022-09-13	08:54:16	0.496909	2.21035	2.00741	3362.95	FALSE	150
2022-09-13	08:54:16	0.441896	1.96564	2.00741	3181.26	FALSE	150
2022-09-13	08:54:16	0.302557	1.34583	2.00741	3364.3	FALSE	150
2022-09-13	08:54:17	0.444237	1.97606	2.91142	3183.24	FALSE	150
2022-09-13	08:54:17	0.708003	3.14934	2.91142	3367.45	FALSE	150
2022-09-13	08:54:17	0.811311	3.60887	2.91142	3186.85	FALSE	150
2022-09-13	08:54:18	1.08973	4.84734	4.53009	3372.3	FALSE	150
2022-09-13	08:54:18	0.838028	3.72772	4.53009	3190.57	FALSE	150
2022-09-13	08:54:18	1.06663	4.74458	4.53009	3377.04	FALSE	150
2022-09-13	08:54:18	1.07925	4.80072	4.53009	3195.37	FALSE	150
2022-09-13	08:54:19	0.660166	2.93655	2.32059	3379.98	FALSE	150
2022-09-13	08:54:19	0.439453	1.95477	2.32059	3197.33	FALSE	150
2022-09-13	08:54:19	0.451667	2.00911	2.32059	3381.99	FALSE	150
2022-09-13	08:54:19	0.535484	2.38194	2.32059	3199.71	FALSE	150
2022-09-13	08:54:20	0.949784	4.22483	4.43326	3386.21	FALSE	150
2022-09-13	08:54:20	1.40561	6.25243	4.43326	3205.96	FALSE	150
2022-09-13	08:54:20	1.0365	4.61056	4.43326	3390.82	FALSE	150
2022-09-13	08:54:20	0.594669	2.64521	4.43326	3208.61	FALSE	150
2022-09-13	08:54:21	0.431311	1.91856	1.86694	3392.74	FALSE	150
2022-09-13	08:54:21	0.382964	1.7035	1.86694	3210.31	FALSE	150
2022-09-13	08:54:21	0.444847	1.97877	1.86694	3394.72	FALSE	150
2022-09-13	08:54:22	0.358639	1.5953	1.73101	3211.91	FALSE	150
2022-09-13	08:54:22	0.375382	1.66977	1.73101	3396.39	FALSE	150
2022-09-13	08:54:22	0.387188	1.72229	1.73101	3213.63	FALSE	150
2022-09-13	08:54:22	0.435382	1.93667	1.73101	3398.33	FALSE	150
2022-09-13	08:54:23	0.433397	1.92784	1.89122	3215.56	FALSE	150
2022-09-13	08:54:23	0.400878	1.78319	1.89122	3400.11	FALSE	150
2022-09-13	08:54:23	0.446069	1.9842	1.89122	3217.54	FALSE	150
2022-09-13	08:54:23	0.420318	1.86966	1.89122	3401.98	FALSE	150
2022-09-13	08:54:24	0.486679	2.16485	23.7199	3219.71	FALSE	150
2022-09-13	08:54:24	2.44515	10.8765	23.7199	3412.86	FALSE	150
2022-09-13	08:54:24	9.70006	43.1478	23.7199	3262.85	1	151
2022-09-13	08:54:24	8.69798	38.6904	23.7199	3451.55	1	152
2022-09-13	08:54:25	1.29024	5.73925	2.70893	3268.59	FALSE	152
2022-09-13	08:54:25	0.435534	1.93734	2.70893	3453.48	FALSE	152
2022-09-13	08:54:25	0.385509	1.71482	2.70893	3270.31	FALSE	152
2022-09-13	08:54:25	0.324695	1.44431	2.70893	3454.93	FALSE	152
2022-09-13	08:54:26	0.341947	1.52105	1.76349	3271.83	FALSE	152
2022-09-13	08:54:26	0.417316	1.85631	1.76349	3456.78	FALSE	152
2022-09-13	08:54:26	0.430089	1.91312	1.76349	3273.74	FALSE	152
2022-09-13	08:54:27	0.385967	1.71686	1.64091	3458.5	FALSE	152
2022-09-13	08:54:27	0.384135	1.70871	1.64091	3275.45	FALSE	152
2022-09-13	08:54:27	0.399046	1.77504	1.64091	3460.28	FALSE	152
2022-09-13	08:54:27	0.306425	1.36304	1.64091	3276.81	FALSE	152
2022-09-13	08:54:28	0.274618	1.22156	1.59722	3461.5	FALSE	152
2022-09-13	08:54:28	0.334975	1.49004	1.59722	3278.3	FALSE	152
2022-09-13	08:54:28	0.428766	1.90724	1.59722	3463.4	FALSE	152
2022-09-13	08:54:28	0.397926	1.77005	1.59722	3280.07	FALSE	152
2022-09-13	08:54:29	0.877875	3.90496	5.83309	3467.31	FALSE	152
2022-09-13	08:54:29	1.55365	6.91095	5.83309	3286.99	FALSE	152
2022-09-13	08:54:29	1.70327	7.57649	5.83309	3474.89	FALSE	152
2022-09-13	08:54:29	1.11055	4.93995	5.83309	3291.93	FALSE	152
2022-09-13	08:54:30	0.390802	1.73837	1.20537	3476.62	FALSE	152
2022-09-13	08:54:30	0.245967	1.09411	1.20537	3293.02	FALSE	152
2022-09-13	08:54:30	0.235331	1.0468	1.20537	3477.67	FALSE	152
2022-09-13	08:54:30	0.211819	0.942213	1.20537	3293.96	FALSE	152
2022-09-13	08:54:31	0.345204	1.53554	1.40945	3479.21	FALSE	152
2022-09-13	08:54:31	0.341998	1.52128	1.40945	3295.48	FALSE	152
2022-09-13	08:54:31	0.263372	1.17153	1.40945	3480.38	FALSE	152
2022-09-13	08:54:32	0.487239	2.16734	1.98183	3297.65	FALSE	152
2022-09-13	08:54:32	0.36841	1.63876	1.98183	3482.02	FALSE	152
2022-09-13	08:54:32	0.558842	2.48584	1.98183	3300.14	FALSE	152
2022-09-13	08:54:32	0.367646	1.63536	1.98183	3483.65	FALSE	152
2022-09-13	08:54:33	0.455433	2.02586	2.68533	3302.16	FALSE	152
2022-09-13	08:54:33	0.398791	1.7739	2.68533	3485.43	FALSE	152
2022-09-13	08:54:33	0.786985	3.50067	2.68533	3305.66	FALSE	152
2022-09-13	08:54:33	0.77355	3.44091	2.68533	3488.87	FALSE	152
2022-09-13	08:54:34	2.19696	9.77252	15.8177	3315.44	FALSE	152
2022-09-13	08:54:34	4.02444	17.9015	15.8177	3506.77	1	153
2022-09-13	08:54:34	3.60826	16.0503	15.8177	3331.49	1	154
2022-09-13	08:54:34	4.39426	19.5465	15.8177	3526.31	1	155
2022-09-13	08:54:35	2.64088	11.7472	9.33351	3343.23	FALSE	155
2022-09-13	08:54:35	1.20215	5.3474	9.33351	3531.66	FALSE	155
2022-09-13	08:54:35	2.45177	10.906	9.33351	3354.14	FALSE	155
2022-09-13	08:54:36	0.735178	3.27022	4.13621	3534.93	FALSE	155
2022-09-13	08:54:36	0.489224	2.17617	4.13621	3356.32	FALSE	155
2022-09-13	08:54:36	1.13991	5.07055	4.13621	3540	FALSE	155
2022-09-13	08:54:36	1.35513	6.02789	4.13621	3362.34	FALSE	155
2022-09-13	08:54:37	4.60149	20.4683	21.853	3560.47	1	156
2022-09-13	08:54:37	9.29115	41.3289	21.853	3403.67	1	157
2022-09-13	08:54:37	4.69986	20.9059	21.853	3581.38	1	158
2022-09-13	08:54:37	1.05859	4.70882	21.853	3408.38	FALSE	158
2022-09-13	08:54:38	0.779606	3.46784	3.00271	3584.85	FALSE	158
2022-09-13	08:54:38	0.548766	2.44102	3.00271	3410.82	FALSE	158
2022-09-13	08:54:38	0.655891	2.91753	3.00271	3587.76	FALSE	158
2022-09-13	08:54:38	0.71589	3.18442	3.00271	3414.01	FALSE	158
2022-09-13	08:54:39	0.970903	4.31877	4.47377	3592.08	FALSE	158
2022-09-13	08:54:39	0.845	3.75873	4.47377	3417.76	FALSE	158
2022-09-13	08:54:39	1.34352	5.97625	4.47377	3598.06	FALSE	158
2022-09-13	08:54:39	0.863575	3.84135	4.47377	3421.61	FALSE	158
2022-09-13	08:54:40	0.53187	2.36586	2.14855	3600.42	FALSE	158
2022-09-13	08:54:40	0.314313	1.39813	2.14855	3423	FALSE	158
2022-09-13	08:54:40	0.602863	2.68166	2.14855	3603.11	FALSE	158
2022-09-13	08:54:41	0.27187	1.20933	1.22473	3424.21	FALSE	158
2022-09-13	08:54:41	0.304033	1.3524	1.22473	3604.46	FALSE	158
2022-09-13	08:54:41	0.0528374	0.235031	1.22473	3424.45	FALSE	158
2022-09-13	08:54:41	0.472583	2.10214	1.22473	3606.56	FALSE	158
2022-09-13	08:54:42	0.30902	1.37458	0.536953	3425.82	FALSE	158
2022-09-13	08:54:42	0.103575	0.460722	0.536953	3607.02	FALSE	158
2022-09-13	08:54:42	0.0262216	0.116639	0.536953	3425.94	FALSE	158
2022-09-13	08:54:42	0.0440333	0.195869	0.536953	3607.22	FALSE	158
2022-09-13	08:54:43	0.238384	1.06038	9.82265	3427	FALSE	158
2022-09-13	08:54:43	0.698384	3.10655	9.82265	3610.32	FALSE	158
2022-09-13	08:54:43	2.86866	12.7604	9.82265	3439.76	FALSE	158
2022-09-13	08:54:43	5.02749	22.3633	9.82265	3632.69	1	159
2022-09-13	08:54:44	4.78948	21.3046	13.9307	3461.07	1	160
2022-09-13	08:54:44	4.30841	19.1647	13.9307	3651.85	1	161
2022-09-13	08:54:44	0.297367	1.32275	13.9307	3462.39	FALSE	161
2022-09-13	08:54:45	0.0952292	0.423599	1.55251	3652.27	FALSE	161
2022-09-13	08:54:45	0.333753	1.4846	1.55251	3463.87	FALSE	161
2022-09-13	08:54:45	0.289122	1.28607	1.55251	3653.56	FALSE	161
2022-09-13	08:54:45	0.677977	3.01578	1.55251	3466.89	FALSE	161
2022-09-13	08:54:46	0.263779	1.17334	1.01533	3654.73	FALSE	161
2022-09-13	08:54:46	0.130496	0.580472	1.01533	3467.47	FALSE	161
2022-09-13	08:54:46	0.139555	0.620769	1.01533	3655.35	FALSE	161
2022-09-13	08:54:46	0.379199	1.68675	1.01533	3469.16	FALSE	161
2022-09-13	08:54:47	1.83228	8.15035	8.67563	3663.51	FALSE	161
2022-09-13	08:54:47	0.533092	2.3713	8.67563	3471.53	FALSE	161
2022-09-13	08:54:47	2.46871	10.9813	8.67563	3674.49	FALSE	161
2022-09-13	08:54:47	2.96739	13.1995	8.67563	3484.73	FALSE	161
2022-09-13	08:54:48	3.15915	14.0525	15.2345	3688.54	1	162
2022-09-13	08:54:48	5.48779	24.4108	15.2345	3509.14	1	163
2022-09-13	08:54:48	1.44958	6.44802	15.2345	3694.99	FALSE	163
2022-09-13	08:54:48	3.60291	16.0265	15.2345	3525.16	1	164
2022-09-13	08:54:49	1.13228	5.03661	3.73866	3700.02	FALSE	164
2022-09-13	08:54:49	0.818537	3.64102	3.73866	3528.8	FALSE	164
2022-09-13	08:54:49	0.570649	2.53836	3.73866	3702.56	FALSE	164
2022-09-13	08:54:50	0.423779	1.88505	0.235767	3530.69	FALSE	164
2022-09-13	08:54:50	0.0631681	0.280984	0.235767	3702.84	FALSE	164
2022-09-13	08:54:50	-0.193168	-0.85925	0.235767	3530.69	FALSE	164
2022-09-13	08:54:50	-0.0817682	-0.363721	0.235767	3702.84	FALSE	164
2022-09-13	08:54:51	0.0180791	0.0804195	-0.300393	3530.77	FALSE	164
2022-09-13	08:54:51	-0.0163229	-0.0726075	-0.300393	3702.84	FALSE	164
2022-09-13	08:54:51	-0.156221	-0.694902	-0.300393	3530.77	FALSE	164
2022-09-13	08:54:51	-0.115661	-0.514483	-0.300393	3702.84	FALSE	164
2022-09-13	08:54:52	0.0255091	0.11347	0.251556	3530.88	FALSE	164
2022-09-13	08:54:52	0.0588934	0.26197	0.251556	3703.1	FALSE	164
2022-09-13	08:54:52	0.0736007	0.327391	0.251556	3531.21	FALSE	164
2022-09-13	08:54:52	0.0682063	0.303395	0.251556	3703.41	FALSE	164
2022-09-13	08:54:53	0.171514	0.762929	0.903618	3531.97	FALSE	164
2022-09-13	08:54:53	0.193244	0.859588	0.903618	3704.27	FALSE	164
2022-09-13	08:54:53	0.166272	0.739611	0.903618	3532.71	FALSE	164
2022-09-13	08:54:53	0.28154	1.25235	0.903618	3705.52	FALSE	164
2022-09-13	08:54:54	0.306781	1.36462	1.58269	3534.08	FALSE	164
2022-09-13	08:54:54	0.396196	1.76236	1.58269	3707.28	FALSE	164
2022-09-13	08:54:54	0.36444	1.6211	1.58269	3535.7	FALSE	164
2022-09-13	08:54:55	0.425	1.89048	1.61527	3709.17	FALSE	164
2022-09-13	08:54:55	0.32729	1.45585	1.61527	3537.16	FALSE	164
2022-09-13	08:54:55	0.330547	1.47034	1.61527	3710.64	FALSE	164
2022-09-13	08:54:55	0.369682	1.64442	1.61527	3538.8	FALSE	164
2022-09-13	08:54:56	0.391412	1.74108	1.82382	3712.38	FALSE	164
2022-09-13	08:54:56	0.409936	1.82348	1.82382	3540.62	FALSE	164
2022-09-13	08:54:56	0.468664	2.08471	1.82382	3714.47	FALSE	164
2022-09-13	08:54:56	0.370038	1.646	1.82382	3542.27	FALSE	164
2022-09-13	08:54:57	0.294109	1.30826	1.38528	3715.78	FALSE	164
2022-09-13	08:54:57	0.31187	1.38726	1.38528	3543.66	FALSE	164
2022-09-13	08:54:57	0.342964	1.52557	1.38528	3717.3	FALSE	164
2022-09-13	08:54:57	0.296756	1.32003	1.38528	3544.98	FALSE	164
2022-09-13	08:54:58	0.26729	1.18896	1.22752	3718.49	FALSE	164
2022-09-13	08:54:58	0.272939	1.21409	1.22752	3546.19	FALSE	164
2022-09-13	08:54:58	0.287646	1.27951	1.22752	3719.77	FALSE	164
2022-09-13	08:54:59	0.263575	1.17243	0.967229	3547.36	FALSE	164
2022-09-13	08:54:59	0.193193	0.859361	0.967229	3720.63	FALSE	164
2022-09-13	08:54:59	0.229733	1.0219	0.967229	3548.38	FALSE	164
2022-09-13	08:54:59	0.18327	0.815222	0.967229	3721.45	FALSE	164
2022-09-13	08:55:00	0.298893	1.32954	3.5194	3549.71	FALSE	164
2022-09-13	08:55:00	0.463422	2.06139	3.5194	3723.51	FALSE	164
2022-09-13	08:55:00	1.3907	6.18611	3.5194	3555.9	FALSE	164
2022-09-13	08:55:00	1.01177	4.50056	3.5194	3728.01	FALSE	164
2022-09-13	08:55:01	2.01029	8.94217	9.4462	3564.84	FALSE	164
2022-09-13	08:55:01	1.3824	6.14919	9.4462	3734.16	FALSE	164
2022-09-13	08:55:01	2.19793	9.77683	9.4462	3574.62	FALSE	164
2022-09-13	08:55:01	2.90378	12.9166	9.4462	3747.07	FALSE	164
2022-09-13	08:55:02	2.54505	11.3209	4.61685	3585.94	FALSE	164
2022-09-13	08:55:02	0.674008	2.99812	4.61685	3750.07	FALSE	164
2022-09-13	08:55:02	0.280318	1.24691	4.61685	3587.19	FALSE	164
2022-09-13	08:55:02	0.652277	2.90146	4.61685	3752.97	FALSE	164
2022-09-13	08:55:03	0.439046	1.95296	1.72033	3589.14	FALSE	164
2022-09-13	08:55:03	0.346069	1.53938	1.72033	3754.51	FALSE	164
2022-09-13	08:55:03	0.375127	1.66864	1.72033	3590.81	FALSE	164
2022-09-13	08:55:04	0.198486	0.882905	2.98154	3755.4	FALSE	164
2022-09-13	08:55:04	1.12475	5.00311	2.98154	3595.81	FALSE	164
2022-09-13	08:55:04	0.788918	3.50927	2.98154	3758.9	FALSE	164
2022-09-13	08:55:04	0.568969	2.53089	2.98154	3598.34	FALSE	164
2022-09-13	08:55:05	0.327036	1.45472	0.887151	3760.36	FALSE	164
2022-09-13	08:55:05	0.247392	1.10045	0.887151	3599.44	FALSE	164
2022-09-13	08:55:05	0.10098	0.449179	0.887151	3760.81	FALSE	164
2022-09-13	08:55:05	0.122354	0.544255	0.887151	3599.99	FALSE	164
2022-09-13	08:55:06	0.18841	0.838085	0.634181	3761.65	FALSE	164
2022-09-13	08:55:06	0.176298	0.784209	0.634181	3600.77	FALSE	164
2022-09-13	08:55:06	0.156349	0.695472	0.634181	3762.34	FALSE	164
2022-09-13	08:55:06	0.0492242	0.218959	0.634181	3600.99	FALSE	164
2022-09-13	08:55:07	0.224084	0.99677	1.20383	3763.34	FALSE	164
2022-09-13	08:55:07	0.225509	1.00311	1.20383	3601.99	FALSE	164
2022-09-13	08:55:07	0.362303	1.6116	1.20383	3764.95	FALSE	164
2022-09-13	08:55:08	0.468868	2.08562	3.42874	3604.08	FALSE	164
2022-09-13	08:55:08	0.71589	3.18442	3.42874	3768.14	FALSE	164
2022-09-13	08:55:08	0.758282	3.37299	3.42874	3607.45	FALSE	164
2022-09-13	08:55:08	1.14022	5.07193	3.42874	3773.21	FALSE	164
2022-09-13	08:55:09	0.523219	2.32738	1.52908	3609.78	FALSE	164
2022-09-13	08:55:09	0.180166	0.801414	1.52908	3774.01	FALSE	164
2022-09-13	08:55:09	0.448053	1.99303	1.52908	3611.77	FALSE	164
2022-09-13	08:55:09	0.223575	0.994506	1.52908	3775	FALSE	164
2022-09-13	08:55:10	0.409021	1.81941	2.57085	3613.59	FALSE	164
2022-09-13	08:55:10	0.36729	1.63378	2.57085	3776.64	FALSE	164
2022-09-13	08:55:10	0.699708	3.11244	2.57085	3616.7	FALSE	164
2022-09-13	08:55:10	0.835789	3.71776	2.57085	3780.35	FALSE	164
2022-09-13	08:55:11	0.960471	4.27237	7.99866	3620.98	FALSE	164
2022-09-13	08:55:11	0.689529	3.06716	7.99866	3783.42	FALSE	164
2022-09-13	08:55:11	1.88871	8.40136	7.99866	3629.38	FALSE	164
2022-09-13	08:55:11	3.65401	16.2538	7.99866	3799.68	1	165
2022-09-13	08:55:12	3.84678	17.1112	14.6999	3646.49	1	166
2022-09-13	08:55:12	4.22724	18.8036	14.6999	3818.48	1	167
2022-09-13	08:55:12	1.84001	8.18473	14.6999	3654.67	FALSE	167
2022-09-13	08:55:13	2.05314	9.13278	11.4198	3827.61	FALSE	167
2022-09-13	08:55:13	2.89233	12.8657	11.4198	3667.54	FALSE	167
2022-09-13	08:55:13	1.7676	7.86264	11.4198	3835.47	FALSE	167
2022-09-13	08:55:13	3.55609	15.8182	11.4198	3683.36	1	168
2022-09-13	08:55:14	3.62449	16.1225	20.023	3851.6	1	169
2022-09-13	08:55:14	5.48785	24.4111	20.023	3707.77	1	170
2022-09-13	08:55:14	4.33528	19.2842	20.023	3870.88	1	171
2022-09-13	08:55:14	4.55787	20.2743	20.023	3728.04	1	172
2022-09-13	08:55:15	6.05385	26.9287	17.9871	3897.81	1	173
2022-09-13	08:55:15	4.47777	19.918	17.9871	3747.96	1	174
2022-09-13	08:55:15	3.66103	16.285	17.9871	3914.09	1	175
2022-09-13	08:55:15	1.98205	8.81655	17.9871	3756.78	FALSE	175
2022-09-13	08:55:16	2.60525	11.5887	5.6238	3925.68	FALSE	175
2022-09-13	08:55:16	1.50938	6.71402	5.6238	3763.49	FALSE	175
2022-09-13	08:55:16	0.390191	1.73565	5.6238	3927.42	FALSE	175
2022-09-13	08:55:16	0.552328	2.45687	5.6238	3765.95	FALSE	175
2022-09-13	08:55:17	0.140013	0.622806	1.75376	3928.04	FALSE	175
2022-09-13	08:55:17	0.388257	1.72704	1.75376	3767.68	FALSE	175
2022-09-13	08:55:17	0.654516	2.91142	1.75376	3930.95	FALSE	175
2022-09-13	08:55:18	0.657366	2.9241	2.75709	3770.6	FALSE	175
2022-09-13	08:55:18	0.555789	2.47226	2.75709	3933.43	FALSE	175
2022-09-13	08:55:18	0.523015	2.32648	2.75709	3772.93	FALSE	175
2022-09-13	08:55:18	0.743117	3.30553	2.75709	3936.73	FALSE	175
2022-09-13	08:55:19	0.740114	3.29218	1.63712	3776.22	FALSE	175
2022-09-13	08:55:19	0.215942	0.960553	1.63712	3937.69	FALSE	175
2022-09-13	08:55:19	0.260216	1.15749	1.63712	3777.38	FALSE	175
2022-09-13	08:55:19	0.255891	1.13825	1.63712	3938.83	FALSE	175
2022-09-13	08:55:20	0.262557	1.16791	1.19303	3778.54	FALSE	175
2022-09-13	08:55:20	0.296959	1.32093	1.19303	3940.15	FALSE	175
2022-09-13	08:55:20	0.277163	1.23288	1.19303	3779.78	FALSE	175
2022-09-13	08:55:20	0.236145	1.05042	1.19303	3941.2	FALSE	175
2022-09-13	08:55:21	0.288512	1.28336	1.79564	3781.06	FALSE	175
2022-09-13	08:55:21	0.353855	1.57402	1.79564	3942.78	FALSE	175
2022-09-13	08:55:21	0.568664	2.52953	1.79564	3783.59	FALSE	175
2022-09-13	08:55:22	0.735941	3.27361	3.28261	3946.05	FALSE	175
2022-09-13	08:55:22	0.737315	3.27972	3.28261	3786.87	FALSE	175
2022-09-13	08:55:22	0.738486	3.28493	3.28261	3949.33	FALSE	175
2022-09-13	08:55:22	0.740114	3.29218	3.28261	3790.16	FALSE	175
2022-09-13	08:55:23	0.739758	3.29059	3.28657	3952.62	FALSE	175
2022-09-13	08:55:23	0.739046	3.28742	3.28657	3793.45	FALSE	175
2022-09-13	08:55:23	0.734975	3.26932	3.28657	3955.89	FALSE	175
2022-09-13	08:55:23	0.741641	3.29897	3.28657	3796.75	FALSE	175
2022-09-13	08:55:24	0.592786	2.63683	1.50124	3958.53	FALSE	175
2022-09-13	08:55:24	0.29187	1.2983	1.50124	3798.05	FALSE	175
2022-09-13	08:55:24	0.262659	1.16836	1.50124	3959.7	FALSE	175
2022-09-13	08:55:24	0.202659	0.901468	1.50124	3798.95	FALSE	175
2022-09-13	08:55:25	0.271972	1.20979	1.07691	3960.91	FALSE	175
2022-09-13	08:55:25	0.142303	0.632992	1.07691	3799.58	FALSE	175
2022-09-13	08:55:25	0.282608	1.2571	1.07691	3962.17	FALSE	175
2022-09-13	08:55:25	0.271514	1.20775	1.07691	3800.79	FALSE	175
2022-09-13	08:55:26	0.37014	1.64646	1.53787	3963.81	FALSE	175
2022-09-13	08:55:26	0.333448	1.48324	1.53787	3802.27	FALSE	175
2022-09-13	08:55:26	0.333601	1.48392	1.53787	3965.3	FALSE	175
2022-09-13	08:55:27	0.58154	2.58681	2.10209	3804.86	FALSE	175
2022-09-13	08:55:27	0.632226	2.81227	2.10209	3968.11	FALSE	175
2022-09-13	08:55:27	0.305	1.3567	2.10209	3806.22	FALSE	175
2022-09-13	08:55:27	0.371514	1.65257	2.10209	3969.76	FALSE	175
2022-09-13	08:55:28	0.242761	1.07985	1.29128	3807.3	FALSE	175
2022-09-13	08:55:28	0.238384	1.06038	1.29128	3970.82	FALSE	175
2022-09-13	08:55:28	0.331921	1.47645	1.29128	3808.77	FALSE	175
2022-09-13	08:55:28	0.348104	1.54844	1.29128	3972.37	FALSE	175
2022-09-13	08:55:29	0.42729	1.90067	4.38426	3810.67	FALSE	175
2022-09-13	08:55:29	0.726679	3.23241	4.38426	3975.6	FALSE	175
2022-09-13	08:55:29	1.4363	6.38895	4.38426	3817.06	FALSE	175
2022-09-13	08:55:29	1.35223	6.01499	4.38426	3981.62	FALSE	175
2022-09-13	08:55:30	1.23309	5.48503	5.47457	3822.55	FALSE	175
2022-09-13	08:55:30	0.964593	4.2907	5.47457	3985.91	FALSE	175
2022-09-13	08:55:30	1.24088	5.51968	5.47457	3828.07	FALSE	175
2022-09-13	08:55:30	1.48439	6.60286	5.47457	3992.51	FALSE	175
2022-09-13	08:55:31	1.61268	7.17352	5.5036	3835.24	FALSE	175
2022-09-13	08:55:31	0.991463	4.41023	5.5036	3996.92	FALSE	175
2022-09-13	08:55:31	1.10765	4.92705	5.5036	3840.17	FALSE	175
2022-09-13	08:55:32	0.783168	3.48369	3.68555	4000.4	FALSE	175
2022-09-13	08:55:32	1.02322	4.55149	3.68555	3844.72	FALSE	175
2022-09-13	08:55:32	0.849427	3.77842	3.68555	4004.18	FALSE	175
2022-09-13	08:55:32	0.658384	2.92862	3.68555	3847.65	FALSE	175
2022-09-13	08:55:33	0.672277	2.99042	2.14204	4007.17	FALSE	175
2022-09-13	08:55:33	0.511209	2.27396	2.14204	3849.92	FALSE	175
2022-09-13	08:55:33	0.39299	1.7481	2.14204	4008.92	FALSE	175
2022-09-13	08:55:33	0.349733	1.55568	2.14204	3851.48	FALSE	175
2022-09-13	08:55:34	0.406527	1.80831	1.18647	4010.73	FALSE	175
2022-09-13	08:55:34	0.274313	1.2202	1.18647	3852.7	FALSE	175
2022-09-13	08:55:34	0.13355	0.594057	1.18647	4011.32	FALSE	175
2022-09-13	08:55:34	0.252532	1.12331	1.18647	3853.82	FALSE	175
2022-09-13	08:55:35	0.218028	0.969832	1.14406	4012.29	FALSE	175
2022-09-13	08:55:35	0.219657	0.977078	1.14406	3854.8	FALSE	175
2022-09-13	08:55:35	0.333906	1.48528	1.14406	4013.78	FALSE	175
2022-09-13	08:55:36	0.195942	0.871589	1.30418	3855.67	FALSE	175
2022-09-13	08:55:36	0.392277	1.74493	1.30418	4015.52	FALSE	175
2022-09-13	08:55:36	0.276094	1.22812	1.30418	3856.9	FALSE	175
2022-09-13	08:55:36	0.308461	1.3721	1.30418	4016.9	FALSE	175
2022-09-13	08:55:37	0.249071	1.10792	1.10679	3858	FALSE	175
2022-09-13	08:55:37	0.302914	1.34742	1.10679	4018.24	FALSE	175
2022-09-13	08:55:37	0.213397	0.949233	1.10679	3858.95	FALSE	175
2022-09-13	08:55:37	0.229886	1.02258	1.10679	4019.27	FALSE	175
2022-09-13	08:55:38	0.0699875	0.311318	0.437294	3859.27	FALSE	175
2022-09-13	08:55:38	0.057672	0.256537	0.437294	4019.52	FALSE	175
2022-09-13	08:55:38	0.250598	1.11471	0.437294	3860.38	FALSE	175
2022-09-13	08:55:38	0.0149748	0.0666109	0.437294	4019.59	FALSE	175
2022-09-13	08:55:39	-0.269198	-1.19745	-1.17611	3860.38	FALSE	175
2022-09-13	08:55:39	-0.407213	-1.81136	-1.17611	4019.59	FALSE	175
2022-09-13	08:55:39	-0.18304	-0.814199	-1.17611	3860.38	FALSE	175
2022-09-13	08:55:39	-0.198155	-0.881433	-1.17611	4019.59	FALSE	175
2022-09-13	08:55:40	-0.147875	-0.657778	-0.0417456	3860.38	FALSE	175
2022-09-13	08:55:40	-0.0709285	-0.315504	-0.0417456	4019.59	FALSE	175
2022-09-13	08:55:40	0.190649	0.848045	-0.0417456	3861.23	FALSE	175
2022-09-13	08:55:41	0.210445	0.936101	0.429144	4020.53	FALSE	175
2022-09-13	08:55:41	-0.0722007	-0.321163	0.429144	3861.23	FALSE	175
2022-09-13	08:55:41	0.158639	0.705658	0.429144	4021.23	FALSE	175
2022-09-13	08:55:41	0.0890205	0.395981	0.429144	3861.62	FALSE	175
2022-09-13	08:55:42	0.268715	1.1953	1.54829	4022.43	FALSE	175
2022-09-13	08:55:42	0.158944	0.707015	1.54829	3862.33	FALSE	175
2022-09-13	08:55:42	0.616552	2.74255	1.54829	4025.17	FALSE	175
2022-09-13	08:55:43	2.6335	11.7143	16.6962	3874.05	FALSE	175
2022-09-13	08:55:43	3.04154	13.5294	16.6962	4038.7	1	176
2022-09-13	08:55:43	5.24103	23.3131	16.6962	3897.36	1	177
2022-09-13	08:55:43	2.77675	12.3515	16.6962	4051.05	FALSE	177
2022-09-13	08:55:43	5.07451	22.5724	16.6962	3919.93	1	178
2022-09-13	08:55:44	3.16383	14.0733	12.0725	4065.12	1	179
2022-09-13	08:55:44	3.08164	13.7078	12.0725	3933.64	1	180
2022-09-13	08:55:44	1.8966	8.43646	12.0725	4073.56	FALSE	180
2022-09-13	08:55:45	0.648257	2.88358	3.80032	3936.52	FALSE	180
2022-09-13	08:55:45	0.908104	4.03943	3.80032	4077.6	FALSE	180
2022-09-13	08:55:45	0.733651	3.26343	3.80032	3939.79	FALSE	180
2022-09-13	08:55:45	1.12739	5.01486	3.80032	4082.61	FALSE	180
2022-09-13	08:55:46	1.29289	5.75103	7.87824	3945.54	FALSE	180
2022-09-13	08:55:46	1.08851	4.84191	7.87824	4087.46	FALSE	180
2022-09-13	08:55:46	2.83467	12.6092	7.87824	3958.15	FALSE	180
2022-09-13	08:55:46	1.86836	8.31084	7.87824	4095.77	FALSE	180
2022-09-13	08:55:47	1.58592	7.05449	7.61792	3965.2	FALSE	180
2022-09-13	08:55:47	1.06836	4.75228	7.61792	4100.52	FALSE	180
2022-09-13	08:55:47	1.64134	7.30101	7.61792	3972.5	FALSE	180
2022-09-13	08:55:47	2.55472	11.3639	7.61792	4111.88	FALSE	180
2022-09-13	08:55:48	5.58495	24.843	23.0156	3997.34	1	181
2022-09-13	08:55:48	7.14245	31.771	23.0156	4143.65	1	182
2022-09-13	08:55:48	3.86693	17.2009	23.0156	4014.55	1	183
2022-09-13	08:55:48	4.10225	18.2476	23.0156	4161.9	1	184
2022-09-13	08:55:49	2.57238	11.4425	11.8331	4025.99	FALSE	184
2022-09-13	08:55:49	3.32734	14.8007	11.8331	4176.7	1	185
2022-09-13	08:55:49	2.08088	9.25617	11.8331	4035.24	FALSE	185
2022-09-13	08:55:50	1.80006	8.00703	10.1855	4184.71	FALSE	185
2022-09-13	08:55:50	3.49574	15.5498	10.1855	4050.79	1	186
2022-09-13	08:55:50	1.34739	5.99346	10.1855	4190.7	FALSE	186
2022-09-13	08:55:50	2.51604	11.1918	10.1855	4061.99	FALSE	186
2022-09-13	08:55:51	2.89849	12.8931	8.14105	4203.6	FALSE	186
2022-09-13	08:55:51	1.82871	8.13447	8.14105	4070.12	FALSE	186
2022-09-13	08:55:51	1.74866	7.77839	8.14105	4211.37	FALSE	186
2022-09-13	08:55:51	0.844898	3.75828	8.14105	4073.88	FALSE	186
2022-09-13	08:55:52	2.47263	10.9988	15.7388	4222.37	FALSE	186
2022-09-13	08:55:52	2.68912	11.9617	15.7388	4085.84	FALSE	186
2022-09-13	08:55:52	4.80897	21.3913	15.7388	4243.76	1	187
2022-09-13	08:55:52	4.18225	18.6035	15.7388	4104.44	1	188

## Sheet: Saint_martin_202291385050 (3)
Date	Time	Lbs	Newtons	Total force x time	total steps > 13.345		**GoPro Fitting: 840
2022-09-13	08:50:52	0.318028	1.41465	1.41465	FALSE	0			Total force x time	4104.44
2022-09-13	08:50:52	0.315331	1.40266	1.40266	FALSE	0			Total steps	188
2022-09-13	08:50:52	0.32271	1.43548	2.85013	FALSE	0
2022-09-13	08:50:52	0.323982	1.44114	2.84379	FALSE	0
2022-09-13	08:50:53	0.310496	1.38115	4.23128	FALSE	0
2022-09-13	08:50:53	0.300013	1.33452	4.17831	FALSE	0
2022-09-13	08:50:53	0.347901	1.54753	5.77881	FALSE	0
2022-09-13	08:50:53	0.407239	1.81148	5.98979	FALSE	0
2022-09-13	08:50:54	0.570954	2.53972	8.31853	FALSE	0
2022-09-13	08:50:54	0.656807	2.92161	8.9114	FALSE	0
2022-09-13	08:50:54	0.5593	2.48788	10.8064	FALSE	0
2022-09-13	08:50:55	0.556196	2.47407	11.3855	FALSE	0
2022-09-13	08:50:55	0.504898	2.24589	13.0523	FALSE	0
2022-09-13	08:50:55	0.407443	1.81239	13.1979	FALSE	0
2022-09-13	08:50:55	0.399504	1.77707	14.8294	FALSE	0
2022-09-13	08:50:56	0.406781	1.80944	15.0073	FALSE	0
2022-09-13	08:50:56	0.33416	1.48641	16.3158	FALSE	0
2022-09-13	08:50:56	0.328308	1.46038	16.4677	FALSE	0
2022-09-13	08:50:56	0.338791	1.50701	17.8228	FALSE	0
2022-09-13	08:50:57	0.35813	1.59303	18.0607	FALSE	0
2022-09-13	08:50:57	0.373193	1.66004	19.4828	FALSE	0
2022-09-13	08:50:57	0.619351	2.755	20.8157	FALSE	0
2022-09-13	08:50:57	0.732277	3.25731	22.7401	FALSE	0
2022-09-13	08:50:58	0.342863	1.52512	22.3408	FALSE	0
2022-09-13	08:50:58	0.293601	1.306	24.0461	FALSE	0
2022-09-13	08:50:58	0.454873	2.02337	24.3642	FALSE	0
2022-09-13	08:50:58	0.281132	1.25053	25.2967	FALSE	0
2022-09-13	08:50:59	0.351412	1.56315	25.9274	FALSE	0
2022-09-13	08:50:59	0.345153	1.53531	26.832	FALSE	0
2022-09-13	08:50:59	0.459555	2.04419	27.9715	FALSE	0
2022-09-13	08:51:00	0.293244	1.30441	28.1364	FALSE	0
2022-09-13	08:51:00	0.266883	1.18715	29.1587	FALSE	0
2022-09-13	08:51:00	0.195738	0.870682	29.0071	FALSE	0
2022-09-13	08:51:00	0.363372	1.61635	30.775	FALSE	0
2022-09-13	08:51:01	0.0779265	0.346633	29.3537	FALSE	0
2022-09-13	08:51:01	0.467799	2.08086	32.8559	FALSE	0
2022-09-13	08:51:01	0.274669	1.22178	30.5755	FALSE	0
2022-09-13	08:51:01	0.488054	2.17096	35.0269	FALSE	0
2022-09-13	08:51:02	0.338588	1.50611	32.0816	FALSE	0
2022-09-13	08:51:02	0.238893	1.06264	36.0895	FALSE	0
2022-09-13	08:51:02	0.148155	0.659023	32.7406	FALSE	0
2022-09-13	08:51:02	0.470242	2.09173	38.1812	FALSE	0
2022-09-13	08:51:03	0.213143	0.948103	33.6887	FALSE	0
2022-09-13	08:51:03	-0.197748	-0.879623	38.1812	FALSE	0
2022-09-13	08:51:03	-0.422989	-1.88154	33.6887	FALSE	0
2022-09-13	08:51:04	-0.180191	-0.801526	38.1812	FALSE	0
2022-09-13	08:51:04	0.867493	3.85878	37.5475	FALSE	0
2022-09-13	08:51:04	1.38933	6.18002	44.3613	FALSE	0
2022-09-13	08:51:04	1.32159	5.8787	43.4262	FALSE	0
2022-09-13	08:51:05	1.61513	7.18442	51.5457	FALSE	0
2022-09-13	08:51:05	1.67151	7.43521	50.8614	FALSE	0
2022-09-13	08:51:05	1.93935	8.62662	60.1723	FALSE	0
2022-09-13	08:51:05	1.3735	6.1096	56.971	FALSE	0
2022-09-13	08:51:06	0.657417	2.92432	63.0966	FALSE	0
2022-09-13	08:51:06	2.21375	9.8472	66.8182	FALSE	0
2022-09-13	08:51:06	3.99579	17.7741	80.8707	1	1
2022-09-13	08:51:06	5.56021	24.7329	91.5511	1	2
2022-09-13	08:51:07	4.80342	21.3666	102.237	1	3
2022-09-13	08:51:07	1.35716	6.03692	97.5881	FALSE	3
2022-09-13	08:51:07	2.56775	11.4219	113.659	FALSE	3
2022-09-13	08:51:07	3.1079	13.8246	111.413	1	4
2022-09-13	08:51:08	2.34556	10.4335	124.093	FALSE	4
2022-09-13	08:51:08	2.24398	9.98167	121.394	FALSE	4
2022-09-13	08:51:08	2.11416	9.40421	133.497	FALSE	4
2022-09-13	08:51:09	1.78922	7.95881	129.353	FALSE	4
2022-09-13	08:51:09	1.84836	8.22187	141.719	FALSE	4
2022-09-13	08:51:09	1.30256	5.79405	135.147	FALSE	4
2022-09-13	08:51:09	1.72907	7.69125	149.41	FALSE	4
2022-09-13	08:51:10	1.7276	7.68471	142.832	FALSE	4
2022-09-13	08:51:10	1.4766	6.56821	155.978	FALSE	4
2022-09-13	08:51:10	1.34978	6.00409	148.836	FALSE	4
2022-09-13	08:51:10	1.36785	6.08447	162.063	FALSE	4
2022-09-13	08:51:11	1.38469	6.15938	154.995	FALSE	4
2022-09-13	08:51:11	1.45513	6.47271	168.535	FALSE	4
2022-09-13	08:51:11	1.44877	6.44442	161.44	FALSE	4
2022-09-13	08:51:11	0.851005	3.78544	172.321	FALSE	4
2022-09-13	08:51:12	1.0937	4.865	166.305	FALSE	4
2022-09-13	08:51:12	2.34434	10.4281	182.749	FALSE	4
2022-09-13	08:51:12	1.13045	5.02847	171.333	FALSE	4
2022-09-13	08:51:13	0.697061	3.10067	185.85	FALSE	4
2022-09-13	08:51:13	0.404898	1.80107	173.134	FALSE	4
2022-09-13	08:51:13	0.442608	1.96881	187.818	FALSE	4
2022-09-13	08:51:13	0.155942	0.693661	173.828	FALSE	4
2022-09-13	08:51:14	-0.0380532	-0.169268	187.818	FALSE	4
2022-09-13	08:51:14	0.0149748	0.0666109	173.895	FALSE	4
2022-09-13	08:51:14	0.0268832	0.119582	187.938	FALSE	4
2022-09-13	08:51:14	0.17416	0.774699	174.669	FALSE	4
2022-09-13	08:51:15	-0.0215138	-0.0956977	187.938	FALSE	4
2022-09-13	08:51:15	0.383422	1.70554	176.375	FALSE	4
2022-09-13	08:51:15	0.291158	1.29513	189.233	FALSE	4
2022-09-13	08:51:15	0.241336	1.07351	177.448	FALSE	4
2022-09-13	08:51:16	0.420624	1.87102	191.104	FALSE	4
2022-09-13	08:51:16	0.213244	0.948552	178.397	FALSE	4
2022-09-13	08:51:16	0.334466	1.48777	192.592	FALSE	4
2022-09-13	08:51:16	0.181234	0.806165	179.203	FALSE	4
2022-09-13	08:51:17	0.359606	1.5996	194.191	FALSE	4
2022-09-13	08:51:17	0.816552	3.63219	182.835	FALSE	4
2022-09-13	08:51:17	0.392379	1.74538	195.937	FALSE	4
2022-09-13	08:51:18	0.3964	1.76327	184.598	FALSE	4
2022-09-13	08:51:18	0.439606	1.95546	197.892	FALSE	4
2022-09-13	08:51:18	0.482812	2.14764	186.746	FALSE	4
2022-09-13	08:51:18	0.461896	2.05461	199.947	FALSE	4
2022-09-13	08:51:19	0.456756	2.03174	188.778	FALSE	4
2022-09-13	08:51:19	0.488003	2.17073	202.118	FALSE	4
2022-09-13	08:51:19	0.489682	2.1782	190.956	FALSE	4
2022-09-13	08:51:19	0.469631	2.08901	204.207	FALSE	4
2022-09-13	08:51:20	0.480369	2.13678	193.093	FALSE	4
2022-09-13	08:51:20	0.47126	2.09626	206.303	FALSE	4
2022-09-13	08:51:20	0.465305	2.06977	195.163	FALSE	4
2022-09-13	08:51:20	0.465967	2.07271	208.376	FALSE	4
2022-09-13	08:51:21	0.460623	2.04894	197.212	FALSE	4
2022-09-13	08:51:21	0.46841	2.08358	210.459	FALSE	4
2022-09-13	08:51:21	0.471005	2.09512	199.307	FALSE	4
2022-09-13	08:51:21	0.475992	2.11731	212.577	FALSE	4
2022-09-13	08:51:22	0.47813	2.12682	201.433	FALSE	4
2022-09-13	08:51:22	0.473244	2.10508	214.682	FALSE	4
2022-09-13	08:51:22	0.471819	2.09875	203.532	FALSE	4
2022-09-13	08:51:23	0.481743	2.14289	216.825	FALSE	4
2022-09-13	08:51:23	0.504135	2.24249	205.775	FALSE	4
2022-09-13	08:51:23	0.545712	2.42744	219.252	FALSE	4
2022-09-13	08:51:23	0.523168	2.32716	208.102	FALSE	4
2022-09-13	08:51:24	0.512532	2.27984	221.532	FALSE	4
2022-09-13	08:51:24	0.47411	2.10894	210.211	FALSE	4
2022-09-13	08:51:24	0.64159	2.85392	224.386	FALSE	4
2022-09-13	08:51:24	0.543372	2.41703	212.628	FALSE	4
2022-09-13	08:51:25	0.541641	2.40933	226.795	FALSE	4
2022-09-13	08:51:25	0.646934	2.87769	215.506	FALSE	4
2022-09-13	08:51:25	0.529224	2.35409	229.149	FALSE	4
2022-09-13	08:51:25	0.777265	3.45743	218.963	FALSE	4
2022-09-13	08:51:26	0.664644	2.95647	232.106	FALSE	4
2022-09-13	08:51:26	0.799198	3.55499	222.518	FALSE	4
2022-09-13	08:51:26	0.755585	3.36099	235.467	FALSE	4
2022-09-13	08:51:27	0.453855	2.01884	224.537	FALSE	4
2022-09-13	08:51:27	0.466221	2.07384	237.54	FALSE	4
2022-09-13	08:51:27	0.50729	2.25653	226.793	FALSE	4
2022-09-13	08:51:27	0.449682	2.00028	239.541	FALSE	4
2022-09-13	08:51:28	0.456807	2.03197	228.825	FALSE	4
2022-09-13	08:51:28	0.424949	1.89026	241.431	FALSE	4
2022-09-13	08:51:28	0.454466	2.02156	230.847	FALSE	4
2022-09-13	08:51:28	0.459097	2.04216	243.473	FALSE	4
2022-09-13	08:51:29	0.461132	2.05121	232.898	FALSE	4
2022-09-13	08:51:29	0.511463	2.27509	245.748	FALSE	4
2022-09-13	08:51:29	0.633397	2.81748	235.716	FALSE	4
2022-09-13	08:51:29	0.547596	2.43582	248.184	FALSE	4
2022-09-13	08:51:30	0.492023	2.18862	237.904	FALSE	4
2022-09-13	08:51:30	0.499606	2.22235	250.406	FALSE	4
2022-09-13	08:51:30	0.530954	2.36179	240.266	FALSE	4
2022-09-13	08:51:30	0.588613	2.61827	253.025	FALSE	4
2022-09-13	08:51:31	0.875484	3.89433	244.16	FALSE	4
2022-09-13	08:51:31	1.11543	4.96166	257.986	FALSE	4
2022-09-13	08:51:31	1.74525	7.76322	251.923	FALSE	4
2022-09-13	08:51:32	6.27919	27.9311	285.917	1	5
2022-09-13	08:51:32	5.05446	22.4832	274.407	1	6
2022-09-13	08:51:32	1.64475	7.31618	293.234	FALSE	6
2022-09-13	08:51:32	0.941947	4.18997	278.597	FALSE	6
2022-09-13	08:51:33	1.3366	5.94546	299.179	FALSE	6
2022-09-13	08:51:33	0.839046	3.73224	282.329	FALSE	6
2022-09-13	08:51:33	1.97146	8.76945	307.948	FALSE	6
2022-09-13	08:51:33	1.5566	6.92407	289.253	FALSE	6
2022-09-13	08:51:34	2.02902	9.02549	316.974	FALSE	6
2022-09-13	08:51:34	2.33457	10.3846	299.638	FALSE	6
2022-09-13	08:51:34	1.86475	8.29478	325.269	FALSE	6
2022-09-13	08:51:34	1.90958	8.49419	308.132	FALSE	6
2022-09-13	08:51:35	0.414313	1.84295	327.112	FALSE	6
2022-09-13	08:51:35	0.718944	3.19801	311.33	FALSE	6
2022-09-13	08:51:35	0.223779	0.995414	328.107	FALSE	6
2022-09-13	08:51:35	0.506577	2.25336	313.583	FALSE	6
2022-09-13	08:51:36	0.295687	1.31527	329.422	FALSE	6
2022-09-13	08:51:36	0.480165	2.13587	315.719	FALSE	6
2022-09-13	08:51:36	0.514568	2.2889	331.711	FALSE	6
2022-09-13	08:51:37	0.302761	1.34674	317.066	FALSE	6
2022-09-13	08:51:37	0.487596	2.16892	333.88	FALSE	6
2022-09-13	08:51:37	0.315687	1.40424	318.47	FALSE	6
2022-09-13	08:51:37	0.166985	0.742783	334.623	FALSE	6
2022-09-13	08:51:38	0.514008	2.28641	320.756	FALSE	6
2022-09-13	08:51:38	0.371361	1.65189	336.275	FALSE	6
2022-09-13	08:51:38	0.218842	0.973453	321.73	FALSE	6
2022-09-13	08:51:38	0.393041	1.74832	338.023	FALSE	6
2022-09-13	08:51:39	0.275585	1.22586	322.956	FALSE	6
2022-09-13	08:51:39	0.286934	1.27634	339.3	FALSE	6
2022-09-13	08:51:39	0.48271	2.14719	325.103	FALSE	6
2022-09-13	08:51:39	0.939097	4.17729	343.477	FALSE	6
2022-09-13	08:51:40	1.2876	5.7275	330.83	FALSE	6
2022-09-13	08:51:40	0.945356	4.20513	347.682	FALSE	6
2022-09-13	08:51:40	2.34062	10.4115	341.242	FALSE	6
2022-09-13	08:51:41	1.34032	5.96201	353.644	FALSE	6
2022-09-13	08:51:41	1.82235	8.10618	349.348	FALSE	6
2022-09-13	08:51:41	2.83645	12.6171	366.261	FALSE	6
2022-09-13	08:51:41	1.67187	7.43681	356.785	FALSE	6
2022-09-13	08:51:42	1.3766	6.12339	372.384	FALSE	6
2022-09-13	08:51:42	0.847545	3.77005	360.555	FALSE	6
2022-09-13	08:51:42	0.836247	3.71979	376.104	FALSE	6
2022-09-13	08:51:42	0.582863	2.59269	363.148	FALSE	6
2022-09-13	08:51:43	0.211005	0.938592	377.043	FALSE	6
2022-09-13	08:51:43	0.442761	1.96949	365.117	FALSE	6
2022-09-13	08:51:43	0.298232	1.3266	378.369	FALSE	6
2022-09-13	08:51:43	0.584695	2.60084	367.718	FALSE	6
2022-09-13	08:51:44	1.79574	7.98781	386.357	FALSE	6
2022-09-13	08:51:44	3.04464	13.5432	381.261	1	7
2022-09-13	08:51:44	2.45808	10.934	397.291	FALSE	7
2022-09-13	08:51:44	1.10342	4.90823	386.169	FALSE	7
2022-09-13	08:51:45	1.53212	6.81518	404.106	FALSE	7
2022-09-13	08:51:45	1.11141	4.94377	391.113	FALSE	7
2022-09-13	08:51:45	1.48668	6.61305	410.72	FALSE	7
2022-09-13	08:51:46	2.39986	10.6751	401.788	FALSE	7
2022-09-13	08:51:46	1.04561	4.65108	415.371	FALSE	7
2022-09-13	08:51:46	1.80286	8.01948	409.808	FALSE	7
2022-09-13	08:51:46	0.859148	3.82166	419.192	FALSE	7
2022-09-13	08:51:47	1.93335	8.59993	418.408	FALSE	7
2022-09-13	08:51:47	0.630547	2.8048	421.997	FALSE	7
2022-09-13	08:51:47	0.297265	1.32229	419.73	FALSE	7
2022-09-13	08:51:47	0.432379	1.92331	423.92	FALSE	7
2022-09-13	08:51:48	0.571565	2.54244	422.272	FALSE	7
2022-09-13	08:51:48	1.13263	5.03816	428.959	FALSE	7
2022-09-13	08:51:48	1.46571	6.51977	428.792	FALSE	7
2022-09-13	08:51:48	1.46739	6.52724	435.486	FALSE	7
2022-09-13	08:51:49	1.14149	5.07758	433.87	FALSE	7
2022-09-13	08:51:49	0.317977	1.41443	436.9	FALSE	7
2022-09-13	08:51:49	1.15558	5.14025	439.01	FALSE	7
2022-09-13	08:51:50	0.371972	1.65461	438.555	FALSE	7
2022-09-13	08:51:50	1.03726	4.61394	443.624	FALSE	7
2022-09-13	08:51:50	1.10917	4.93381	443.489	FALSE	7
2022-09-13	08:51:50	0.697163	3.10112	446.725	FALSE	7
2022-09-13	08:51:51	1.02556	4.5619	448.051	FALSE	7
2022-09-13	08:51:51	0.840674	3.73949	450.465	FALSE	7
2022-09-13	08:51:51	1.19777	5.32792	453.378	FALSE	7
2022-09-13	08:51:51	0.895636	3.98397	454.449	FALSE	7
2022-09-13	08:51:52	1.08332	4.81882	458.197	FALSE	7
2022-09-13	08:51:52	1.44444	6.42516	460.874	FALSE	7
2022-09-13	08:51:52	1.4764	6.56732	464.765	FALSE	7
2022-09-13	08:51:52	1.09986	4.8924	465.766	FALSE	7
2022-09-13	08:51:53	0.920369	4.09399	468.859	FALSE	7
2022-09-13	08:51:53	1.51543	6.74094	472.507	FALSE	7
2022-09-13	08:51:53	1.67777	7.46306	476.322	FALSE	7
2022-09-13	08:51:53	8.65873	38.5158	511.023	1	8
2022-09-13	08:51:54	18.2191	81.0422	557.364	1	9
2022-09-13	08:51:54	5.14719	22.8957	533.919	1	10
2022-09-13	08:51:54	7.16434	31.8684	589.232	1	11
2022-09-13	08:51:55	5.3024	23.5861	557.505	1	12
2022-09-13	08:51:55	3.69462	16.4344	605.667	1	13
2022-09-13	08:51:55	4.31625	19.1995	576.704	1	14
2022-09-13	08:51:55	7.41156	32.9681	638.635	1	15
2022-09-13	08:51:56	7.71976	34.339	611.043	1	16
2022-09-13	08:51:56	5.44759	24.232	662.867	1	17
2022-09-13	08:51:56	6.89976	30.6915	641.735	1	18
2022-09-13	08:51:56	7.17553	31.9182	694.785	1	19
2022-09-13	08:51:57	3.27116	14.5508	656.286	1	20
2022-09-13	08:51:57	7.68657	34.1914	728.976	1	21
2022-09-13	08:51:57	2.89039	12.857	669.143	FALSE	21
2022-09-13	08:51:57	1.64108	7.29985	736.276	FALSE	21
2022-09-13	08:51:58	3.26637	14.5295	683.672	1	22
2022-09-13	08:51:58	0.372532	1.6571	737.933	FALSE	22
2022-09-13	08:51:58	0.0321249	0.142898	683.815	FALSE	22
2022-09-13	08:51:58	0.120624	0.53656	738.47	FALSE	22
2022-09-13	08:51:59	2.26617	10.0804	693.895	FALSE	22
2022-09-13	08:51:59	1.52464	6.7819	745.252	FALSE	22
2022-09-13	08:51:59	2.42907	10.805	704.7	FALSE	22
2022-09-13	08:52:00	5.24698	23.3396	768.591	1	23
2022-09-13	08:52:00	2.00266	8.90823	713.609	FALSE	23
2022-09-13	08:52:00	0.700013	3.1138	771.705	FALSE	23
2022-09-13	08:52:00	0.729936	3.2469	716.855	FALSE	23
2022-09-13	08:52:01	0.535534	2.38216	774.087	FALSE	23
2022-09-13	08:52:01	0.349122	1.55296	718.408	FALSE	23
2022-09-13	08:52:01	1.23869	5.50994	779.597	FALSE	23
2022-09-13	08:52:01	0.94673	4.21124	722.62	FALSE	23
2022-09-13	08:52:02	2.82546	12.5682	792.165	FALSE	23
2022-09-13	08:52:02	1.71955	7.6489	730.269	FALSE	23
2022-09-13	08:52:02	0.842761	3.74877	795.914	FALSE	23
2022-09-13	08:52:02	0.545814	2.42789	732.696	FALSE	23
2022-09-13	08:52:03	0.524745	2.33417	798.248	FALSE	23
2022-09-13	08:52:03	0.44327	1.97175	734.668	FALSE	23
2022-09-13	08:52:03	0.416756	1.85381	800.102	FALSE	23
2022-09-13	08:52:04	0.215382	0.958062	735.626	FALSE	23
2022-09-13	08:52:04	0.129122	0.57436	800.677	FALSE	23
2022-09-13	08:52:04	0.105	0.467061	736.093	FALSE	23
2022-09-13	08:52:04	0.10042	0.446688	801.123	FALSE	23
2022-09-13	08:52:05	0.318181	1.41533	737.509	FALSE	23
2022-09-13	08:52:05	0.23869	1.06174	802.185	FALSE	23
2022-09-13	08:52:05	0.254211	1.13078	738.639	FALSE	23
2022-09-13	08:52:05	0.215585	0.958965	803.144	FALSE	23
2022-09-13	08:52:06	0.365102	1.62405	740.263	FALSE	23
2022-09-13	08:52:06	0.443931	1.97469	805.119	FALSE	23
2022-09-13	08:52:06	0.488054	2.17096	742.434	FALSE	23
2022-09-13	08:52:06	0.444746	1.97832	807.097	FALSE	23
2022-09-13	08:52:07	0.438079	1.94866	744.383	FALSE	23
2022-09-13	08:52:07	0.417723	1.85812	808.955	FALSE	23
2022-09-13	08:52:07	0.386629	1.7198	746.103	FALSE	23
2022-09-13	08:52:07	0.404949	1.80129	810.756	FALSE	23
2022-09-13	08:52:08	0.509428	2.26604	748.369	FALSE	23
2022-09-13	08:52:08	0.272837	1.21363	811.97	FALSE	23
2022-09-13	08:52:08	0.497519	2.21306	750.582	FALSE	23
2022-09-13	08:52:09	0.495789	2.20537	814.175	FALSE	23
2022-09-13	08:52:09	0.0566033	0.251783	750.834	FALSE	23
2022-09-13	08:52:09	-0.173218	-0.770508	814.175	FALSE	23
2022-09-13	08:52:09	-0.374084	-1.664	750.834	FALSE	23
2022-09-13	08:52:10	-0.229453	-1.02065	814.175	FALSE	23
2022-09-13	08:52:10	0.272481	1.21205	752.046	FALSE	23
2022-09-13	08:52:10	0.222252	0.988621	815.164	FALSE	23
2022-09-13	08:52:10	0.297977	1.32546	753.371	FALSE	23
2022-09-13	08:52:11	0.116807	0.519581	815.684	FALSE	23
2022-09-13	08:52:11	0.426374	1.8966	755.268	FALSE	23
2022-09-13	08:52:11	0.317366	1.41171	817.095	FALSE	23
2022-09-13	08:52:11	0.70556	3.13847	758.406	FALSE	23
2022-09-13	08:52:12	1.65391	7.35692	824.452	FALSE	23
2022-09-13	08:52:12	2.20149	9.79267	768.199	FALSE	23
2022-09-13	08:52:12	6.2051	27.6015	852.054	1	24
2022-09-13	08:52:13	5.9593	26.5082	794.707	1	25
2022-09-13	08:52:13	7.58164	33.7247	885.778	1	26
2022-09-13	08:52:13	3.65686	16.2664	810.974	1	27
2022-09-13	08:52:13	6.3481	28.2376	914.016	1	28
2022-09-13	08:52:14	4.18088	18.5974	829.571	1	29
2022-09-13	08:52:14	5.69054	25.3127	939.329	1	30
2022-09-13	08:52:14	10.5586	46.9668	876.538	1	31
2022-09-13	08:52:14	5.86469	26.0873	965.416	1	32
2022-09-13	08:52:15	9.79614	43.5752	920.113	1	33
2022-09-13	08:52:15	16.8741	75.0594	1040.48	1	34
2022-09-13	08:52:15	4.97177	22.1154	942.228	1	35
2022-09-13	08:52:15	4.82821	21.4768	1061.95	1	36
2022-09-13	08:52:16	6.88321	30.6179	972.846	1	37
2022-09-13	08:52:16	2.00174	8.90414	1070.86	FALSE	37
2022-09-13	08:52:16	5.04271	22.431	995.277	1	38
2022-09-13	08:52:16	5.97406	26.5738	1097.43	1	39
2022-09-13	08:52:17	1.25564	5.58534	1000.86	FALSE	39
2022-09-13	08:52:17	3.62113	16.1075	1113.54	1	40
2022-09-13	08:52:17	1.37304	6.10756	1006.97	FALSE	40
2022-09-13	08:52:18	3.80342	16.9184	1130.46	1	41
2022-09-13	08:52:18	6.70668	29.8327	1036.8	1	42
2022-09-13	08:52:18	4.58744	20.4059	1150.86	1	43
2022-09-13	08:52:18	6.42398	28.5751	1065.38	1	44
2022-09-13	08:52:19	2.2423	9.9742	1160.84	FALSE	44
2022-09-13	08:52:19	2.48317	11.0456	1076.42	FALSE	44
2022-09-13	08:52:19	2.23029	9.92078	1170.76	FALSE	44
2022-09-13	08:52:19	1.96215	8.72804	1085.15	FALSE	44
2022-09-13	08:52:20	5.03976	22.4179	1193.17	1	45
2022-09-13	08:52:20	0.74327	3.30621	1088.46	FALSE	45
2022-09-13	08:52:20	0.149479	0.664912	1193.84	FALSE	45
2022-09-13	08:52:20	0.195738	0.870682	1089.33	FALSE	45
2022-09-13	08:52:21	0.100267	0.446008	1194.29	FALSE	45
2022-09-13	08:52:21	0.0211326	0.094002	1089.42	FALSE	45
2022-09-13	08:52:21	-0.0459412	-0.204356	1194.29	FALSE	45
2022-09-13	08:52:21	-0.159122	-0.707806	1089.42	FALSE	45
2022-09-13	08:52:22	-0.344974	-1.53451	1194.29	FALSE	45
2022-09-13	08:52:22	-0.6036	-2.68493	1089.42	FALSE	45
2022-09-13	08:52:22	-0.545534	-2.42664	1194.29	FALSE	45
2022-09-13	08:52:23	-0.590878	-2.62834	1089.42	FALSE	45
2022-09-13	08:52:23	-0.577646	-2.56948	1194.29	FALSE	45
2022-09-13	08:52:23	-0.575559	-2.5602	1089.42	FALSE	45
2022-09-13	08:52:23	-0.534236	-2.37639	1194.29	FALSE	45
2022-09-13	08:52:24	-0.519173	-2.30939	1089.42	FALSE	45
2022-09-13	08:52:24	-0.463702	-2.06264	1194.29	FALSE	45
2022-09-13	08:52:24	-0.423193	-1.88245	1089.42	FALSE	45
2022-09-13	08:52:24	-0.409402	-1.8211	1194.29	FALSE	45
2022-09-13	08:52:25	-0.345178	-1.53542	1089.42	FALSE	45
2022-09-13	08:52:25	-0.458918	-2.04136	1194.29	FALSE	45
2022-09-13	08:52:25	-0.40248	-1.79031	1089.42	FALSE	45
2022-09-13	08:52:25	-0.476984	-2.12172	1194.29	FALSE	45
2022-09-13	08:52:26	-0.466959	-2.07713	1089.42	FALSE	45
2022-09-13	08:52:26	-0.301005	-1.33893	1194.29	FALSE	45
2022-09-13	08:52:26	-0.308435	-1.37198	1089.42	FALSE	45
2022-09-13	08:52:27	-0.251794	-1.12003	1194.29	FALSE	45
2022-09-13	08:52:27	-0.202481	-0.900676	1089.42	FALSE	45
2022-09-13	08:52:27	0.217367	0.966892	1195.25	FALSE	45
2022-09-13	08:52:27	0.11528	0.512788	1089.94	FALSE	45
2022-09-13	08:52:28	0.185306	0.824278	1196.08	FALSE	45
2022-09-13	08:52:28	0.183117	0.814541	1090.75	FALSE	45
2022-09-13	08:52:28	0.172328	0.766549	1196.84	FALSE	45
2022-09-13	08:52:28	0.232837	1.03571	1091.79	FALSE	45
2022-09-13	08:52:29	0.458232	2.03831	1198.88	FALSE	45
2022-09-13	08:52:29	4.70251	20.9177	1112.7	1	46
2022-09-13	08:52:29	4.05848	18.0529	1216.93	1	47
2022-09-13	08:52:29	1.30169	5.79018	1118.49	FALSE	47
2022-09-13	08:52:30	1.42877	6.35545	1223.29	FALSE	47
2022-09-13	08:52:30	3.75095	16.685	1135.18	1	48
2022-09-13	08:52:30	3.84042	17.083	1240.37	1	49
2022-09-13	08:52:30	3.01543	13.4132	1148.59	1	50
2022-09-13	08:52:31	7.52027	33.4517	1273.82	1	51
2022-09-13	08:52:31	7.56388	33.6457	1182.24	1	52
2022-09-13	08:52:31	9.34759	41.5799	1315.4	1	53
2022-09-13	08:52:32	11.9163	53.0061	1235.24	1	54
2022-09-13	08:52:32	11.8222	52.5875	1367.99	1	55
2022-09-13	08:52:32	2.30128	10.2366	1245.48	FALSE	55
2022-09-13	08:52:32	0.23416	1.04159	1369.03	FALSE	55
2022-09-13	08:52:33	0.20556	0.914372	1246.39	FALSE	55
2022-09-13	08:52:33	0.0686135	0.305207	1369.34	FALSE	55
2022-09-13	08:52:33	-0.168231	-0.748325	1246.39	FALSE	55
2022-09-13	08:52:33	-0.496323	-2.20774	1369.34	FALSE	55
2022-09-13	08:52:34	-0.69617	-3.0967	1246.39	FALSE	55
2022-09-13	08:52:34	-0.657747	-2.92579	1369.34	FALSE	55
2022-09-13	08:52:34	-0.534745	-2.37865	1246.39	FALSE	55
2022-09-13	08:52:34	-0.434898	-1.93451	1369.34	FALSE	55
2022-09-13	08:52:35	-0.730572	-3.24973	1246.39	FALSE	55
2022-09-13	08:52:35	-0.488485	-2.17288	1369.34	FALSE	55
2022-09-13	08:52:35	-0.223753	-0.995298	1246.39	FALSE	55
2022-09-13	08:52:36	-0.00904555	-0.0402364	1369.34	FALSE	55
2022-09-13	08:52:36	-0.100903	-0.448837	1246.39	FALSE	55
2022-09-13	08:52:36	-0.149758	-0.666154	1369.34	FALSE	55
2022-09-13	08:52:36	-0.224058	-0.996655	1246.39	FALSE	55
2022-09-13	08:52:37	-0.0194272	-0.0864161	1369.34	FALSE	55
2022-09-13	08:52:37	0.161896	0.720146	1247.11	FALSE	55
2022-09-13	08:52:37	0.356298	1.58488	1370.92	FALSE	55
2022-09-13	08:52:37	3.05986	13.6109	1260.73	1	56
2022-09-13	08:52:38	7.41604	32.988	1403.91	1	57
2022-09-13	08:52:38	11.1656	49.6668	1310.39	1	58
2022-09-13	08:52:38	5.42337	24.1242	1428.04	1	59
2022-09-13	08:52:38	2.55116	11.3481	1321.74	FALSE	59
2022-09-13	08:52:39	3.92622	17.4646	1445.5	1	60
2022-09-13	08:52:39	0.644796	2.86818	1324.61	FALSE	60
2022-09-13	08:52:39	1.98144	8.81384	1454.31	FALSE	60
2022-09-13	08:52:39	1.13961	5.06921	1329.68	FALSE	60
2022-09-13	08:52:40	1.47823	6.57546	1460.89	FALSE	60
2022-09-13	08:52:40	1.88419	8.38125	1338.06	FALSE	60
2022-09-13	08:52:40	0.808969	3.59846	1464.49	FALSE	60
2022-09-13	08:52:41	2.76128	12.2827	1350.34	FALSE	60
2022-09-13	08:52:41	1.80973	8.05004	1472.54	FALSE	60
2022-09-13	08:52:41	4.2852	19.0614	1369.4	1	61
2022-09-13	08:52:41	3.23136	14.3737	1486.91	1	62
2022-09-13	08:52:42	2.03019	9.03069	1378.43	FALSE	62
2022-09-13	08:52:42	4.85508	21.5964	1508.51	1	63
2022-09-13	08:52:42	4.17813	18.5852	1397.02	1	64
2022-09-13	08:52:42	13.4324	59.75	1568.26	1	65
2022-09-13	08:52:43	16.1509	71.8424	1468.86	1	66
2022-09-13	08:52:43	15.0129	66.7804	1635.04	1	67
2022-09-13	08:52:43	11.2748	50.1526	1519.01	1	68
2022-09-13	08:52:43	9.46174	42.0877	1677.13	1	69
2022-09-13	08:52:44	8.42556	37.4786	1556.49	1	70
2022-09-13	08:52:44	5.57731	24.809	1701.94	1	71
2022-09-13	08:52:44	4.18047	18.5956	1575.09	1	72
2022-09-13	08:52:44	1.26139	5.61091	1707.55	FALSE	72
2022-09-13	08:52:45	0.684796	3.04611	1578.13	FALSE	72
2022-09-13	08:52:45	0.454466	2.02156	1709.57	FALSE	72
2022-09-13	08:52:45	0.951463	4.2323	1582.37	FALSE	72
2022-09-13	08:52:46	2.17818	9.68898	1719.26	FALSE	72
2022-09-13	08:52:46	2.55309	11.3567	1593.72	FALSE	72
2022-09-13	08:52:46	1.52541	6.78533	1726.04	FALSE	72
2022-09-13	08:52:46	1.46821	6.53089	1600.25	FALSE	72
2022-09-13	08:52:47	2.59294	11.5339	1737.58	FALSE	72
2022-09-13	08:52:47	2.3993	10.6726	1610.93	FALSE	72
2022-09-13	08:52:47	1.93355	8.60082	1746.18	FALSE	72
2022-09-13	08:52:47	0.914974	4.06999	1615	FALSE	72
2022-09-13	08:52:48	0.554771	2.46773	1748.64	FALSE	72
2022-09-13	08:52:48	0.0986389	0.438766	1615.44	FALSE	72
2022-09-13	08:52:48	0.243779	1.08438	1749.73	FALSE	72
2022-09-13	08:52:48	0.301438	1.34086	1616.78	FALSE	72
2022-09-13	08:52:49	0.169326	0.753196	1750.48	FALSE	72
2022-09-13	08:52:49	0.377417	1.67883	1618.46	FALSE	72
2022-09-13	08:52:49	0.23813	1.05925	1751.54	FALSE	72
2022-09-13	08:52:50	0.212277	0.944251	1619.4	FALSE	72
2022-09-13	08:52:50	0.192125	0.85461	1752.4	FALSE	72
2022-09-13	08:52:50	0.358995	1.59688	1621	FALSE	72
2022-09-13	08:52:50	0.311056	1.38364	1753.78	FALSE	72
2022-09-13	08:52:51	0.375026	1.66819	1622.66	FALSE	72
2022-09-13	08:52:51	0.459453	2.04374	1755.82	FALSE	72
2022-09-13	08:52:51	0.383015	1.70373	1624.37	FALSE	72
2022-09-13	08:52:51	0.330598	1.47057	1757.29	FALSE	72
2022-09-13	08:52:52	0.294618	1.31052	1625.68	FALSE	72
2022-09-13	08:52:52	0.314975	1.40107	1758.7	FALSE	72
2022-09-13	08:52:52	0.37411	1.66412	1627.34	FALSE	72
2022-09-13	08:52:52	0.39355	1.75059	1760.45	FALSE	72
2022-09-13	08:52:53	0.409377	1.82099	1629.16	FALSE	72
2022-09-13	08:52:53	0.430038	1.9129	1762.36	FALSE	72
2022-09-13	08:52:53	0.553194	2.46072	1631.62	FALSE	72
2022-09-13	08:52:53	0.384033	1.70826	1764.07	FALSE	72
2022-09-13	08:52:54	0.609529	2.71131	1634.34	FALSE	72
2022-09-13	08:52:54	0.365611	1.62631	1765.69	FALSE	72
2022-09-13	08:52:54	0.291412	1.29626	1635.63	FALSE	72
2022-09-13	08:52:55	0.219148	0.974814	1766.67	FALSE	72
2022-09-13	08:52:55	0.153702	0.683697	1636.32	FALSE	72
2022-09-13	08:52:55	0.137265	0.610582	1767.28	FALSE	72
2022-09-13	08:52:55	0.241132	1.0726	1637.39	FALSE	72
2022-09-13	08:52:56	0.471107	2.09558	1769.37	FALSE	72
2022-09-13	08:52:56	0.614516	2.73349	1640.12	FALSE	72
2022-09-13	08:52:56	0.616247	2.74119	1772.12	FALSE	72
2022-09-13	08:52:56	1.60047	7.11921	1647.24	FALSE	72
2022-09-13	08:52:57	4.79004	21.3071	1793.42	1	73
2022-09-13	08:52:57	4.42637	19.6894	1666.93	1	74
2022-09-13	08:52:57	3.99747	17.7815	1811.2	1	75
2022-09-13	08:52:57	3.66195	16.2891	1683.22	1	76
2022-09-13	08:52:58	5.53034	24.6001	1835.8	1	77
2022-09-13	08:52:58	2.29447	10.2063	1693.43	FALSE	77
2022-09-13	08:52:58	5.46637	24.3155	1860.12	1	78
2022-09-13	08:52:59	3.65681	16.2662	1709.69	1	79
2022-09-13	08:52:59	3.0937	13.7614	1873.88	1	80
2022-09-13	08:52:59	2.78347	12.3814	1722.07	FALSE	80
2022-09-13	08:52:59	1.84078	8.18816	1882.07	FALSE	80
2022-09-13	08:53:00	2.76581	12.3029	1734.38	FALSE	80
2022-09-13	08:53:00	0.742252	3.30169	1885.37	FALSE	80
2022-09-13	08:53:00	1.2195	5.42458	1739.8	FALSE	80
2022-09-13	08:53:00	0.965713	4.29568	1889.67	FALSE	80
2022-09-13	08:53:01	1.1134	4.95263	1744.75	FALSE	80
2022-09-13	08:53:01	1.5252	6.78439	1896.45	FALSE	80
2022-09-13	08:53:01	1.26296	5.6179	1750.37	FALSE	80
2022-09-13	08:53:01	4.00719	17.8248	1914.28	1	81
2022-09-13	08:53:02	5.35263	23.8096	1774.18	1	82
2022-09-13	08:53:02	13.7352	61.0969	1975.37	1	83
2022-09-13	08:53:02	10.4751	46.5953	1820.78	1	84
2022-09-13	08:53:02	10.4232	46.3645	2021.74	1	85
2022-09-13	08:53:03	4.61874	20.5451	1841.32	1	86
2022-09-13	08:53:03	2.79192	12.419	2034.16	FALSE	86
2022-09-13	08:53:03	3.94093	17.53	1858.85	1	87
2022-09-13	08:53:04	4.68836	20.8548	2055.01	1	88
2022-09-13	08:53:04	5.60184	24.9181	1883.77	1	89
2022-09-13	08:53:04	4.78739	21.2953	2076.31	1	90
2022-09-13	08:53:04	5.16388	22.97	1906.74	1	91
2022-09-13	08:53:05	2.77436	12.3409	2088.65	FALSE	91
2022-09-13	08:53:05	2.04637	9.10266	1915.84	FALSE	91
2022-09-13	08:53:05	4.01304	17.8508	2106.5	1	92
2022-09-13	08:53:05	6.33136	28.1632	1944.01	1	93
2022-09-13	08:53:06	7.27843	32.3759	2138.87	1	94
2022-09-13	08:53:06	10.2827	45.7395	1989.74	1	95
2022-09-13	08:53:06	8.49975	37.8086	2176.68	1	96
2022-09-13	08:53:06	10.3195	45.9032	2035.65	1	97
2022-09-13	08:53:07	4.8882	21.7437	2198.43	1	98
2022-09-13	08:53:07	1.53151	6.81246	2042.46	FALSE	98
2022-09-13	08:53:07	0.533193	2.37175	2200.8	FALSE	98
2022-09-13	08:53:07	0.696908	3.09999	2045.56	FALSE	98
2022-09-13	08:53:08	0.740929	3.2958	2204.09	FALSE	98
2022-09-13	08:53:08	0.73416	3.26569	2048.83	FALSE	98
2022-09-13	08:53:08	0.74215	3.30123	2207.4	FALSE	98
2022-09-13	08:53:09	0.739606	3.28992	2052.12	FALSE	98
2022-09-13	08:53:09	0.731717	3.25482	2210.65	FALSE	98
2022-09-13	08:53:09	8.31985	37.0084	2089.12	1	99
2022-09-13	08:53:09	2.69233	11.976	2222.63	FALSE	99
2022-09-13	08:53:10	1.42322	6.33077	2095.46	FALSE	99
2022-09-13	08:53:10	0.776145	3.45245	2226.08	FALSE	99
2022-09-13	08:53:10	0.511718	2.27622	2097.73	FALSE	99
2022-09-13	08:53:10	0.326781	1.45359	2227.53	FALSE	99
2022-09-13	08:53:11	0.47874	2.12953	2099.86	FALSE	99
2022-09-13	08:53:11	0.417723	1.85812	2229.39	FALSE	99
2022-09-13	08:53:11	0.408563	1.81737	2101.68	FALSE	99
2022-09-13	08:53:11	0.4564	2.03016	2231.42	FALSE	99
2022-09-13	08:53:12	0.810445	3.60502	2105.28	FALSE	99
2022-09-13	08:53:12	0.721132	3.20774	2234.63	FALSE	99
2022-09-13	08:53:12	1.76836	7.86602	2113.15	FALSE	99
2022-09-13	08:53:13	1.83548	8.16458	2242.79	FALSE	99
2022-09-13	08:53:13	4.75457	21.1493	2134.3	1	100
2022-09-13	08:53:13	9.19986	40.9228	2283.72	1	101
2022-09-13	08:53:13	8.23629	36.6367	2170.94	1	102
2022-09-13	08:53:14	3.86424	17.1889	2300.9	1	103
2022-09-13	08:53:14	5.24378	23.3254	2194.26	1	104
2022-09-13	08:53:14	6.02489	26.7999	2327.7	1	105
2022-09-13	08:53:14	10.6153	47.219	2241.48	1	106
2022-09-13	08:53:15	3.07039	13.6577	2341.36	1	107
2022-09-13	08:53:15	2.88856	12.8489	2254.33	FALSE	107
2022-09-13	08:53:15	1.75772	7.81869	2349.18	FALSE	107
2022-09-13	08:53:15	0.723982	3.22042	2257.55	FALSE	107
2022-09-13	08:53:16	0.634364	2.82178	2352	FALSE	107
2022-09-13	08:53:16	1.46083	6.49806	2264.05	FALSE	107
2022-09-13	08:53:16	1.79116	7.96744	2359.97	FALSE	107
2022-09-13	08:53:16	1.85477	8.25039	2272.3	FALSE	107
2022-09-13	08:53:17	2.5595	11.3852	2371.35	FALSE	107
2022-09-13	08:53:17	2.33711	10.3959	2282.69	FALSE	107
2022-09-13	08:53:17	1.30307	5.79632	2377.15	FALSE	107
2022-09-13	08:53:18	1.13971	5.06966	2287.76	FALSE	107
2022-09-13	08:53:18	0.664033	2.95375	2380.1	FALSE	107
2022-09-13	08:53:18	1.01472	4.51368	2292.28	FALSE	107
2022-09-13	08:53:18	1.1819	5.25733	2385.36	FALSE	107
2022-09-13	08:53:19	1.64358	7.31097	2299.59	FALSE	107
2022-09-13	08:53:19	2.65701	11.8189	2397.18	FALSE	107
2022-09-13	08:53:19	3.09935	13.7865	2313.37	1	108
2022-09-13	08:53:19	3.72301	16.5607	2413.74	1	109
2022-09-13	08:53:20	1.86459	8.29407	2321.67	FALSE	109
2022-09-13	08:53:20	1.41859	6.31017	2420.05	FALSE	109
2022-09-13	08:53:20	1.16765	5.19394	2326.86	FALSE	109
2022-09-13	08:53:20	0.818232	3.63966	2423.69	FALSE	109
2022-09-13	08:53:21	1.03625	4.60945	2331.47	FALSE	109
2022-09-13	08:53:21	1.27798	5.68471	2429.38	FALSE	109
2022-09-13	08:53:21	1.17401	5.22223	2336.69	FALSE	109
2022-09-13	08:53:21	1.40953	6.26987	2435.65	FALSE	109
2022-09-13	08:53:22	1.28877	5.73271	2342.43	FALSE	109
2022-09-13	08:53:22	1.14128	5.07664	2440.72	FALSE	109
2022-09-13	08:53:22	1.01732	4.52524	2346.95	FALSE	109
2022-09-13	08:53:23	1.19874	5.33224	2446.06	FALSE	109
2022-09-13	08:53:23	1.22663	5.4563	2352.41	FALSE	109
2022-09-13	08:53:23	1.21625	5.41012	2451.47	FALSE	109
2022-09-13	08:53:23	1.1994	5.33517	2357.74	FALSE	109
2022-09-13	08:53:24	1.28566	5.71887	2457.18	FALSE	109
2022-09-13	08:53:24	1.23894	5.51105	2363.25	FALSE	109
2022-09-13	08:53:24	1.20098	5.3422	2462.53	FALSE	109
2022-09-13	08:53:24	1.33462	5.93666	2369.19	FALSE	109
2022-09-13	08:53:25	0.973142	4.32873	2466.86	FALSE	109
2022-09-13	08:53:25	0.949224	4.22234	2373.41	FALSE	109
2022-09-13	08:53:25	0.471616	2.09784	2468.95	FALSE	109
2022-09-13	08:53:25	0.353346	1.57175	2374.99	FALSE	109
2022-09-13	08:53:26	0.435789	1.93848	2470.89	FALSE	109
2022-09-13	08:53:26	0.424237	1.88709	2376.87	FALSE	109
2022-09-13	08:53:26	0.431361	1.91878	2472.81	FALSE	109
2022-09-13	08:53:27	0.829071	3.68787	2380.56	FALSE	109
2022-09-13	08:53:27	1.05747	4.70384	2477.51	FALSE	109
2022-09-13	08:53:27	0.97757	4.34843	2384.91	FALSE	109
2022-09-13	08:53:27	1.48597	6.60989	2484.12	FALSE	109
2022-09-13	08:53:28	2.13996	9.51897	2394.43	FALSE	109
2022-09-13	08:53:28	1.40032	6.2289	2490.35	FALSE	109
2022-09-13	08:53:28	0.537926	2.3928	2396.82	FALSE	109
2022-09-13	08:53:28	0.717875	3.19325	2493.55	FALSE	109
2022-09-13	08:53:29	0.293702	1.30645	2398.13	FALSE	109
2022-09-13	08:53:29	0.732837	3.25981	2496.81	FALSE	109
2022-09-13	08:53:29	0.73355	3.26298	2401.39	FALSE	109
2022-09-13	08:53:29	1.76393	7.84631	2504.65	FALSE	109
2022-09-13	08:53:30	4.48988	19.9719	2421.36	1	110
2022-09-13	08:53:30	12.6173	56.1243	2560.78	1	111
2022-09-13	08:53:30	7.06505	31.4268	2452.79	1	112
2022-09-13	08:53:30	3.50693	15.5995	2576.38	1	113
2022-09-13	08:53:31	4.15217	18.4697	2471.26	1	114
2022-09-13	08:53:31	5.99156	26.6517	2603.03	1	115
2022-09-13	08:53:31	6.77818	30.1507	2501.41	1	116
2022-09-13	08:53:32	5.90637	26.2727	2629.3	1	117
2022-09-13	08:53:32	3.70541	16.4824	2517.89	1	118
2022-09-13	08:53:32	5.08021	22.5978	2651.9	1	119
2022-09-13	08:53:32	4.33609	19.2878	2537.18	1	120
2022-09-13	08:53:33	10.18	45.2827	2697.18	1	121
2022-09-13	08:53:33	17.4714	77.7163	2614.9	1	122
2022-09-13	08:53:33	17.1983	76.5015	2773.68	1	123
2022-09-13	08:53:33	16.6138	73.9015	2688.8	1	124
2022-09-13	08:53:34	9.94561	44.2401	2817.92	1	125
2022-09-13	08:53:34	3.05955	13.6095	2702.41	1	126
2022-09-13	08:53:34	2.2962	10.214	2828.14	FALSE	126
2022-09-13	08:53:34	3.13798	13.9584	2716.36	1	127
2022-09-13	08:53:35	1.82963	8.13856	2836.27	FALSE	127
2022-09-13	08:53:35	1.548	6.88581	2723.25	FALSE	127
2022-09-13	08:53:35	4.56485	20.3054	2856.58	1	128
2022-09-13	08:53:36	6.44154	28.6533	2751.9	1	129
2022-09-13	08:53:36	9.82993	43.7255	2900.31	1	130
2022-09-13	08:53:36	3.19452	14.2099	2766.11	1	131
2022-09-13	08:53:36	8.19309	36.4445	2936.75	1	132
2022-09-13	08:53:37	7.12108	31.676	2797.79	1	133
2022-09-13	08:53:37	8.86026	39.4122	2976.16	1	134
2022-09-13	08:53:37	4.65121	20.6895	2818.48	1	135
2022-09-13	08:53:37	1.07253	4.77083	2980.93	FALSE	135
2022-09-13	08:53:38	0.744949	3.31368	2821.79	FALSE	135
2022-09-13	08:53:38	0.379606	1.68856	2982.62	FALSE	135
2022-09-13	08:53:38	0.119148	0.529994	2822.32	FALSE	135
2022-09-13	08:53:38	0.048359	0.215111	2982.84	FALSE	135
2022-09-13	08:53:39	-0.138562	-0.616351	2822.32	FALSE	135
2022-09-13	08:53:39	-0.224669	-0.999373	2982.84	FALSE	135
2022-09-13	08:53:39	-0.12757	-0.567457	2822.32	FALSE	135
2022-09-13	08:53:39	-0.0369336	-0.164288	2982.84	FALSE	135
2022-09-13	08:53:40	-0.0363229	-0.161572	2822.32	FALSE	135
2022-09-13	08:53:40	0.586679	2.60967	2985.45	FALSE	135
2022-09-13	08:53:40	0.751158	3.3413	2825.66	FALSE	135
2022-09-13	08:53:41	0.731616	3.25437	2988.7	FALSE	135
2022-09-13	08:53:41	0.74444	3.31142	2828.98	FALSE	135
2022-09-13	08:53:41	0.507087	2.25562	2990.96	FALSE	135
2022-09-13	08:53:41	0.00673053	0.0299387	2829.01	FALSE	135
2022-09-13	08:53:42	0.927952	4.12772	2995.08	FALSE	135
2022-09-13	08:53:42	2.06851	9.20115	2838.21	FALSE	135
2022-09-13	08:53:42	1.67345	7.44384	3002.53	FALSE	135
2022-09-13	08:53:42	0.337621	1.50181	2839.71	FALSE	135
2022-09-13	08:53:43	0.153652	0.683475	3003.21	FALSE	135
2022-09-13	08:53:43	0.107952	0.480192	2840.19	FALSE	135
2022-09-13	08:53:43	0.230038	1.02326	3004.23	FALSE	135
2022-09-13	08:53:43	0.138588	0.616467	2840.8	FALSE	135
2022-09-13	08:53:44	0.121896	0.542218	3004.78	FALSE	135
2022-09-13	08:53:44	0.0738552	0.328523	2841.13	FALSE	135
2022-09-13	08:53:44	0.138537	0.61624	3005.39	FALSE	135
2022-09-13	08:53:44	0.175942	0.782625	2841.92	FALSE	135
2022-09-13	08:53:45	0.466781	2.07634	3007.47	FALSE	135
2022-09-13	08:53:45	1.60347	7.13256	2849.05	FALSE	135
2022-09-13	08:53:45	2.81197	12.5082	3019.98	FALSE	135
2022-09-13	08:53:46	2.0076	8.93021	2857.98	FALSE	135
2022-09-13	08:53:46	3.73538	16.6157	3036.59	1	136
2022-09-13	08:53:46	0.958282	4.26263	2862.24	FALSE	136
2022-09-13	08:53:46	0.581234	2.58545	3039.18	FALSE	136
2022-09-13	08:53:47	0.263626	1.17266	2863.41	FALSE	136
2022-09-13	08:53:47	0.254313	1.13124	3040.31	FALSE	136
2022-09-13	08:53:47	0.357825	1.59168	2865.01	FALSE	136
2022-09-13	08:53:47	0.329122	1.464	3041.77	FALSE	136
2022-09-13	08:53:48	0.270191	1.20186	2866.21	FALSE	136
2022-09-13	08:53:48	0.257366	1.14482	3042.92	FALSE	136
2022-09-13	08:53:48	0.256654	1.14165	2867.35	FALSE	136
2022-09-13	08:53:48	0.356094	1.58398	3044.5	FALSE	136
2022-09-13	08:53:49	0.393906	1.75217	2869.1	FALSE	136
2022-09-13	08:53:49	0.349326	1.55387	3046.06	FALSE	136
2022-09-13	08:53:49	0.362354	1.61182	2870.71	FALSE	136
2022-09-13	08:53:50	0.377672	1.67996	3047.74	FALSE	136
2022-09-13	08:53:50	1.75818	7.82074	2878.53	FALSE	136
2022-09-13	08:53:50	2.99391	13.3175	3061.05	FALSE	136
2022-09-13	08:53:50	2.17406	9.67065	2888.2	FALSE	136
2022-09-13	08:53:51	0.297367	1.32275	3062.38	FALSE	136
2022-09-13	08:53:51	0.716399	3.18669	2891.39	FALSE	136
2022-09-13	08:53:51	1.61365	7.17784	3069.56	FALSE	136
2022-09-13	08:53:51	0.410903	1.82778	2893.22	FALSE	136
2022-09-13	08:53:52	0.266171	1.18398	3070.74	FALSE	136
2022-09-13	08:53:52	0.238028	1.0588	2894.28	FALSE	136
2022-09-13	08:53:52	1.43274	6.37311	3077.11	FALSE	136
2022-09-13	08:53:52	3.95253	17.5816	2911.86	1	137
2022-09-13	08:53:53	6.79451	30.2233	3107.34	1	138
2022-09-13	08:53:53	3.68454	16.3896	2928.25	1	139
2022-09-13	08:53:53	3.97686	17.6899	3125.03	1	140
2022-09-13	08:53:53	10.0658	44.7747	2973.02	1	141
2022-09-13	08:53:54	10.0811	44.8427	3169.87	1	142
2022-09-13	08:53:54	10.5197	46.7937	3019.82	1	143
2022-09-13	08:53:54	6.21334	27.6382	3197.51	1	144
2022-09-13	08:53:55	3.11406	13.852	3033.67	1	145
2022-09-13	08:53:55	3.27319	14.5598	3212.07	1	146
2022-09-13	08:53:55	0.481132	2.14017	3035.81	FALSE	146
2022-09-13	08:53:55	0.550649	2.4494	3214.52	FALSE	146
2022-09-13	08:53:56	4.00683	17.8232	3053.63	1	147
2022-09-13	08:53:56	6.1538	27.3733	3241.89	1	148
2022-09-13	08:53:56	3.61243	16.0688	3069.7	1	149
2022-09-13	08:53:56	3.48627	15.5076	3257.4	1	150
2022-09-13	08:53:57	2.2906	10.189	3079.89	FALSE	150
2022-09-13	08:53:57	1.85497	8.25128	3265.65	FALSE	150
2022-09-13	08:53:57	1.37055	6.09648	3085.99	FALSE	150
2022-09-13	08:53:57	0.228715	1.01737	3266.67	FALSE	150
2022-09-13	08:53:58	0.230903	1.0271	3087.01	FALSE	150
2022-09-13	08:53:58	0.103626	0.460949	3267.13	FALSE	150
2022-09-13	08:53:58	0.0972139	0.432427	3087.45	FALSE	150
2022-09-13	08:53:59	0.260115	1.15704	3268.28	FALSE	150
2022-09-13	08:53:59	0.166374	0.740065	3088.19	FALSE	150
2022-09-13	08:53:59	0.228664	1.01714	3269.3	FALSE	150
2022-09-13	08:53:59	0.224695	0.999488	3089.19	FALSE	150
2022-09-13	08:54:00	0.23528	1.04657	3270.35	FALSE	150
2022-09-13	08:54:00	0.235534	1.0477	3090.23	FALSE	150
2022-09-13	08:54:00	0.69528	3.09274	3273.44	FALSE	150
2022-09-13	08:54:00	1.90663	8.48107	3098.72	FALSE	150
2022-09-13	08:54:01	1.05894	4.71038	3278.15	FALSE	150
2022-09-13	08:54:01	0.597723	2.65879	3101.37	FALSE	150
2022-09-13	08:54:01	1.15854	5.15342	3283.3	FALSE	150
2022-09-13	08:54:01	1.4134	6.28709	3107.66	FALSE	150
2022-09-13	08:54:02	2.73263	12.1553	3295.46	FALSE	150
2022-09-13	08:54:02	0.517621	2.30248	3109.96	FALSE	150
2022-09-13	08:54:02	0.29869	1.32863	3296.79	FALSE	150
2022-09-13	08:54:02	0.4507	2.0048	3111.97	FALSE	150
2022-09-13	08:54:03	0.640929	2.85098	3299.64	FALSE	150
2022-09-13	08:54:03	0.64327	2.86139	3114.83	FALSE	150
2022-09-13	08:54:03	0.502913	2.23706	3301.88	FALSE	150
2022-09-13	08:54:04	0.82785	3.68244	3118.51	FALSE	150
2022-09-13	08:54:04	0.651107	2.89625	3304.77	FALSE	150
2022-09-13	08:54:04	0.7564	3.36462	3121.88	FALSE	150
2022-09-13	08:54:04	1.29457	5.75851	3310.53	FALSE	150
2022-09-13	08:54:05	1.3848	6.15987	3128.04	FALSE	150
2022-09-13	08:54:05	1.14062	5.07371	3315.6	FALSE	150
2022-09-13	08:54:05	0.654516	2.91142	3130.95	FALSE	150
2022-09-13	08:54:05	0.685967	3.05132	3318.66	FALSE	150
2022-09-13	08:54:06	0.645	2.86909	3133.82	FALSE	150
2022-09-13	08:54:06	0.449478	1.99937	3320.65	FALSE	150
2022-09-13	08:54:06	0.489122	2.17571	3135.99	FALSE	150
2022-09-13	08:54:06	0.469529	2.08856	3322.74	FALSE	150
2022-09-13	08:54:07	0.44729	1.98964	3137.98	FALSE	150
2022-09-13	08:54:07	0.435433	1.93689	3324.68	FALSE	150
2022-09-13	08:54:07	0.433906	1.9301	3139.91	FALSE	150
2022-09-13	08:54:07	0.472634	2.10237	3326.78	FALSE	150
2022-09-13	08:54:08	0.363931	1.61884	3141.53	FALSE	150
2022-09-13	08:54:08	0.40383	1.79632	3328.58	FALSE	150
2022-09-13	08:54:08	0.383931	1.7078	3143.24	FALSE	150
2022-09-13	08:54:09	0.271107	1.20594	3329.78	FALSE	150
2022-09-13	08:54:09	0.341998	1.52128	3144.76	FALSE	150
2022-09-13	08:54:09	0.302812	1.34697	3331.13	FALSE	150
2022-09-13	08:54:09	0.320827	1.4271	3146.19	FALSE	150
2022-09-13	08:54:10	0.308054	1.37029	3332.5	FALSE	150
2022-09-13	08:54:10	0.584287	2.59903	3148.79	FALSE	150
2022-09-13	08:54:10	0.559758	2.48992	3334.99	FALSE	150
2022-09-13	08:54:10	0.560522	2.49331	3151.28	FALSE	150
2022-09-13	08:54:11	0.606374	2.69727	3337.69	FALSE	150
2022-09-13	08:54:11	0.467799	2.08086	3153.36	FALSE	150
2022-09-13	08:54:11	0.600318	2.67033	3340.36	FALSE	150
2022-09-13	08:54:11	0.535178	2.38058	3155.74	FALSE	150
2022-09-13	08:54:12	0.539911	2.40163	3342.76	FALSE	150
2022-09-13	08:54:12	0.580827	2.58363	3158.32	FALSE	150
2022-09-13	08:54:12	0.495993	2.20628	3344.97	FALSE	150
2022-09-13	08:54:13	0.608817	2.70814	3161.03	FALSE	150
2022-09-13	08:54:13	0.567137	2.52274	3347.49	FALSE	150
2022-09-13	08:54:13	0.747901	3.32681	3164.36	FALSE	150
2022-09-13	08:54:13	0.592685	2.63638	3350.13	FALSE	150
2022-09-13	08:54:14	0.594975	2.64657	3167.01	FALSE	150
2022-09-13	08:54:14	0.700827	3.11742	3353.24	FALSE	150
2022-09-13	08:54:14	0.743524	3.30734	3170.31	FALSE	150
2022-09-13	08:54:14	0.538333	2.39461	3355.64	FALSE	150
2022-09-13	08:54:15	0.608511	2.70678	3173.02	FALSE	150
2022-09-13	08:54:15	0.420064	1.86853	3357.51	FALSE	150
2022-09-13	08:54:15	0.846934	3.76733	3176.79	FALSE	150
2022-09-13	08:54:15	0.727646	3.23671	3360.74	FALSE	150
2022-09-13	08:54:16	0.563779	2.5078	3179.3	FALSE	150
2022-09-13	08:54:16	0.496909	2.21035	3362.95	FALSE	150
2022-09-13	08:54:16	0.441896	1.96564	3181.26	FALSE	150
2022-09-13	08:54:16	0.302557	1.34583	3364.3	FALSE	150
2022-09-13	08:54:17	0.444237	1.97606	3183.24	FALSE	150
2022-09-13	08:54:17	0.708003	3.14934	3367.45	FALSE	150
2022-09-13	08:54:17	0.811311	3.60887	3186.85	FALSE	150
2022-09-13	08:54:18	1.08973	4.84734	3372.3	FALSE	150
2022-09-13	08:54:18	0.838028	3.72772	3190.57	FALSE	150
2022-09-13	08:54:18	1.06663	4.74458	3377.04	FALSE	150
2022-09-13	08:54:18	1.07925	4.80072	3195.37	FALSE	150
2022-09-13	08:54:19	0.660166	2.93655	3379.98	FALSE	150
2022-09-13	08:54:19	0.439453	1.95477	3197.33	FALSE	150
2022-09-13	08:54:19	0.451667	2.00911	3381.99	FALSE	150
2022-09-13	08:54:19	0.535484	2.38194	3199.71	FALSE	150
2022-09-13	08:54:20	0.949784	4.22483	3386.21	FALSE	150
2022-09-13	08:54:20	1.40561	6.25243	3205.96	FALSE	150
2022-09-13	08:54:20	1.0365	4.61056	3390.82	FALSE	150
2022-09-13	08:54:20	0.594669	2.64521	3208.61	FALSE	150
2022-09-13	08:54:21	0.431311	1.91856	3392.74	FALSE	150
2022-09-13	08:54:21	0.382964	1.7035	3210.31	FALSE	150
2022-09-13	08:54:21	0.444847	1.97877	3394.72	FALSE	150
2022-09-13	08:54:22	0.358639	1.5953	3211.91	FALSE	150
2022-09-13	08:54:22	0.375382	1.66977	3396.39	FALSE	150
2022-09-13	08:54:22	0.387188	1.72229	3213.63	FALSE	150
2022-09-13	08:54:22	0.435382	1.93667	3398.33	FALSE	150
2022-09-13	08:54:23	0.433397	1.92784	3215.56	FALSE	150
2022-09-13	08:54:23	0.400878	1.78319	3400.11	FALSE	150
2022-09-13	08:54:23	0.446069	1.9842	3217.54	FALSE	150
2022-09-13	08:54:23	0.420318	1.86966	3401.98	FALSE	150
2022-09-13	08:54:24	0.486679	2.16485	3219.71	FALSE	150
2022-09-13	08:54:24	2.44515	10.8765	3412.86	FALSE	150
2022-09-13	08:54:24	9.70006	43.1478	3262.85	1	151
2022-09-13	08:54:24	8.69798	38.6904	3451.55	1	152
2022-09-13	08:54:25	1.29024	5.73925	3268.59	FALSE	152
2022-09-13	08:54:25	0.435534	1.93734	3453.48	FALSE	152
2022-09-13	08:54:25	0.385509	1.71482	3270.31	FALSE	152
2022-09-13	08:54:25	0.324695	1.44431	3454.93	FALSE	152
2022-09-13	08:54:26	0.341947	1.52105	3271.83	FALSE	152
2022-09-13	08:54:26	0.417316	1.85631	3456.78	FALSE	152
2022-09-13	08:54:26	0.430089	1.91312	3273.74	FALSE	152
2022-09-13	08:54:27	0.385967	1.71686	3458.5	FALSE	152
2022-09-13	08:54:27	0.384135	1.70871	3275.45	FALSE	152
2022-09-13	08:54:27	0.399046	1.77504	3460.28	FALSE	152
2022-09-13	08:54:27	0.306425	1.36304	3276.81	FALSE	152
2022-09-13	08:54:28	0.274618	1.22156	3461.5	FALSE	152
2022-09-13	08:54:28	0.334975	1.49004	3278.3	FALSE	152
2022-09-13	08:54:28	0.428766	1.90724	3463.4	FALSE	152
2022-09-13	08:54:28	0.397926	1.77005	3280.07	FALSE	152
2022-09-13	08:54:29	0.877875	3.90496	3467.31	FALSE	152
2022-09-13	08:54:29	1.55365	6.91095	3286.99	FALSE	152
2022-09-13	08:54:29	1.70327	7.57649	3474.89	FALSE	152
2022-09-13	08:54:29	1.11055	4.93995	3291.93	FALSE	152
2022-09-13	08:54:30	0.390802	1.73837	3476.62	FALSE	152
2022-09-13	08:54:30	0.245967	1.09411	3293.02	FALSE	152
2022-09-13	08:54:30	0.235331	1.0468	3477.67	FALSE	152
2022-09-13	08:54:30	0.211819	0.942213	3293.96	FALSE	152
2022-09-13	08:54:31	0.345204	1.53554	3479.21	FALSE	152
2022-09-13	08:54:31	0.341998	1.52128	3295.48	FALSE	152
2022-09-13	08:54:31	0.263372	1.17153	3480.38	FALSE	152
2022-09-13	08:54:32	0.487239	2.16734	3297.65	FALSE	152
2022-09-13	08:54:32	0.36841	1.63876	3482.02	FALSE	152
2022-09-13	08:54:32	0.558842	2.48584	3300.14	FALSE	152
2022-09-13	08:54:32	0.367646	1.63536	3483.65	FALSE	152
2022-09-13	08:54:33	0.455433	2.02586	3302.16	FALSE	152
2022-09-13	08:54:33	0.398791	1.7739	3485.43	FALSE	152
2022-09-13	08:54:33	0.786985	3.50067	3305.66	FALSE	152
2022-09-13	08:54:33	0.77355	3.44091	3488.87	FALSE	152
2022-09-13	08:54:34	2.19696	9.77252	3315.44	FALSE	152
2022-09-13	08:54:34	4.02444	17.9015	3506.77	1	153
2022-09-13	08:54:34	3.60826	16.0503	3331.49	1	154
2022-09-13	08:54:34	4.39426	19.5465	3526.31	1	155
2022-09-13	08:54:35	2.64088	11.7472	3343.23	FALSE	155
2022-09-13	08:54:35	1.20215	5.3474	3531.66	FALSE	155
2022-09-13	08:54:35	2.45177	10.906	3354.14	FALSE	155
2022-09-13	08:54:36	0.735178	3.27022	3534.93	FALSE	155
2022-09-13	08:54:36	0.489224	2.17617	3356.32	FALSE	155
2022-09-13	08:54:36	1.13991	5.07055	3540	FALSE	155
2022-09-13	08:54:36	1.35513	6.02789	3362.34	FALSE	155
2022-09-13	08:54:37	4.60149	20.4683	3560.47	1	156
2022-09-13	08:54:37	9.29115	41.3289	3403.67	1	157
2022-09-13	08:54:37	4.69986	20.9059	3581.38	1	158
2022-09-13	08:54:37	1.05859	4.70882	3408.38	FALSE	158
2022-09-13	08:54:38	0.779606	3.46784	3584.85	FALSE	158
2022-09-13	08:54:38	0.548766	2.44102	3410.82	FALSE	158
2022-09-13	08:54:38	0.655891	2.91753	3587.76	FALSE	158
2022-09-13	08:54:38	0.71589	3.18442	3414.01	FALSE	158
2022-09-13	08:54:39	0.970903	4.31877	3592.08	FALSE	158
2022-09-13	08:54:39	0.845	3.75873	3417.76	FALSE	158
2022-09-13	08:54:39	1.34352	5.97625	3598.06	FALSE	158
2022-09-13	08:54:39	0.863575	3.84135	3421.61	FALSE	158
2022-09-13	08:54:40	0.53187	2.36586	3600.42	FALSE	158
2022-09-13	08:54:40	0.314313	1.39813	3423	FALSE	158
2022-09-13	08:54:40	0.602863	2.68166	3603.11	FALSE	158
2022-09-13	08:54:41	0.27187	1.20933	3424.21	FALSE	158
2022-09-13	08:54:41	0.304033	1.3524	3604.46	FALSE	158
2022-09-13	08:54:41	0.0528374	0.235031	3424.45	FALSE	158
2022-09-13	08:54:41	0.472583	2.10214	3606.56	FALSE	158
2022-09-13	08:54:42	0.30902	1.37458	3425.82	FALSE	158
2022-09-13	08:54:42	0.103575	0.460722	3607.02	FALSE	158
2022-09-13	08:54:42	0.0262216	0.116639	3425.94	FALSE	158
2022-09-13	08:54:42	0.0440333	0.195869	3607.22	FALSE	158
2022-09-13	08:54:43	0.238384	1.06038	3427	FALSE	158
2022-09-13	08:54:43	0.698384	3.10655	3610.32	FALSE	158
2022-09-13	08:54:43	2.86866	12.7604	3439.76	FALSE	158
2022-09-13	08:54:43	5.02749	22.3633	3632.69	1	159
2022-09-13	08:54:44	4.78948	21.3046	3461.07	1	160
2022-09-13	08:54:44	4.30841	19.1647	3651.85	1	161
2022-09-13	08:54:44	0.297367	1.32275	3462.39	FALSE	161
2022-09-13	08:54:45	0.0952292	0.423599	3652.27	FALSE	161
2022-09-13	08:54:45	0.333753	1.4846	3463.87	FALSE	161
2022-09-13	08:54:45	0.289122	1.28607	3653.56	FALSE	161
2022-09-13	08:54:45	0.677977	3.01578	3466.89	FALSE	161
2022-09-13	08:54:46	0.263779	1.17334	3654.73	FALSE	161
2022-09-13	08:54:46	0.130496	0.580472	3467.47	FALSE	161
2022-09-13	08:54:46	0.139555	0.620769	3655.35	FALSE	161
2022-09-13	08:54:46	0.379199	1.68675	3469.16	FALSE	161
2022-09-13	08:54:47	1.83228	8.15035	3663.51	FALSE	161
2022-09-13	08:54:47	0.533092	2.3713	3471.53	FALSE	161
2022-09-13	08:54:47	2.46871	10.9813	3674.49	FALSE	161
2022-09-13	08:54:47	2.96739	13.1995	3484.73	FALSE	161
2022-09-13	08:54:48	3.15915	14.0525	3688.54	1	162
2022-09-13	08:54:48	5.48779	24.4108	3509.14	1	163
2022-09-13	08:54:48	1.44958	6.44802	3694.99	FALSE	163
2022-09-13	08:54:48	3.60291	16.0265	3525.16	1	164
2022-09-13	08:54:49	1.13228	5.03661	3700.02	FALSE	164
2022-09-13	08:54:49	0.818537	3.64102	3528.8	FALSE	164
2022-09-13	08:54:49	0.570649	2.53836	3702.56	FALSE	164
2022-09-13	08:54:50	0.423779	1.88505	3530.69	FALSE	164
2022-09-13	08:54:50	0.0631681	0.280984	3702.84	FALSE	164
2022-09-13	08:54:50	-0.193168	-0.85925	3530.69	FALSE	164
2022-09-13	08:54:50	-0.0817682	-0.363721	3702.84	FALSE	164
2022-09-13	08:54:51	0.0180791	0.0804195	3530.77	FALSE	164
2022-09-13	08:54:51	-0.0163229	-0.0726075	3702.84	FALSE	164
2022-09-13	08:54:51	-0.156221	-0.694902	3530.77	FALSE	164
2022-09-13	08:54:51	-0.115661	-0.514483	3702.84	FALSE	164
2022-09-13	08:54:52	0.0255091	0.11347	3530.88	FALSE	164
2022-09-13	08:54:52	0.0588934	0.26197	3703.1	FALSE	164
2022-09-13	08:54:52	0.0736007	0.327391	3531.21	FALSE	164
2022-09-13	08:54:52	0.0682063	0.303395	3703.41	FALSE	164
2022-09-13	08:54:53	0.171514	0.762929	3531.97	FALSE	164
2022-09-13	08:54:53	0.193244	0.859588	3704.27	FALSE	164
2022-09-13	08:54:53	0.166272	0.739611	3532.71	FALSE	164
2022-09-13	08:54:53	0.28154	1.25235	3705.52	FALSE	164
2022-09-13	08:54:54	0.306781	1.36462	3534.08	FALSE	164
2022-09-13	08:54:54	0.396196	1.76236	3707.28	FALSE	164
2022-09-13	08:54:54	0.36444	1.6211	3535.7	FALSE	164
2022-09-13	08:54:55	0.425	1.89048	3709.17	FALSE	164
2022-09-13	08:54:55	0.32729	1.45585	3537.16	FALSE	164
2022-09-13	08:54:55	0.330547	1.47034	3710.64	FALSE	164
2022-09-13	08:54:55	0.369682	1.64442	3538.8	FALSE	164
2022-09-13	08:54:56	0.391412	1.74108	3712.38	FALSE	164
2022-09-13	08:54:56	0.409936	1.82348	3540.62	FALSE	164
2022-09-13	08:54:56	0.468664	2.08471	3714.47	FALSE	164
2022-09-13	08:54:56	0.370038	1.646	3542.27	FALSE	164
2022-09-13	08:54:57	0.294109	1.30826	3715.78	FALSE	164
2022-09-13	08:54:57	0.31187	1.38726	3543.66	FALSE	164
2022-09-13	08:54:57	0.342964	1.52557	3717.3	FALSE	164
2022-09-13	08:54:57	0.296756	1.32003	3544.98	FALSE	164
2022-09-13	08:54:58	0.26729	1.18896	3718.49	FALSE	164
2022-09-13	08:54:58	0.272939	1.21409	3546.19	FALSE	164
2022-09-13	08:54:58	0.287646	1.27951	3719.77	FALSE	164
2022-09-13	08:54:59	0.263575	1.17243	3547.36	FALSE	164
2022-09-13	08:54:59	0.193193	0.859361	3720.63	FALSE	164
2022-09-13	08:54:59	0.229733	1.0219	3548.38	FALSE	164
2022-09-13	08:54:59	0.18327	0.815222	3721.45	FALSE	164
2022-09-13	08:55:00	0.298893	1.32954	3549.71	FALSE	164
2022-09-13	08:55:00	0.463422	2.06139	3723.51	FALSE	164
2022-09-13	08:55:00	1.3907	6.18611	3555.9	FALSE	164
2022-09-13	08:55:00	1.01177	4.50056	3728.01	FALSE	164
2022-09-13	08:55:01	2.01029	8.94217	3564.84	FALSE	164
2022-09-13	08:55:01	1.3824	6.14919	3734.16	FALSE	164
2022-09-13	08:55:01	2.19793	9.77683	3574.62	FALSE	164
2022-09-13	08:55:01	2.90378	12.9166	3747.07	FALSE	164
2022-09-13	08:55:02	2.54505	11.3209	3585.94	FALSE	164
2022-09-13	08:55:02	0.674008	2.99812	3750.07	FALSE	164
2022-09-13	08:55:02	0.280318	1.24691	3587.19	FALSE	164
2022-09-13	08:55:02	0.652277	2.90146	3752.97	FALSE	164
2022-09-13	08:55:03	0.439046	1.95296	3589.14	FALSE	164
2022-09-13	08:55:03	0.346069	1.53938	3754.51	FALSE	164
2022-09-13	08:55:03	0.375127	1.66864	3590.81	FALSE	164
2022-09-13	08:55:04	0.198486	0.882905	3755.4	FALSE	164
2022-09-13	08:55:04	1.12475	5.00311	3595.81	FALSE	164
2022-09-13	08:55:04	0.788918	3.50927	3758.9	FALSE	164
2022-09-13	08:55:04	0.568969	2.53089	3598.34	FALSE	164
2022-09-13	08:55:05	0.327036	1.45472	3760.36	FALSE	164
2022-09-13	08:55:05	0.247392	1.10045	3599.44	FALSE	164
2022-09-13	08:55:05	0.10098	0.449179	3760.81	FALSE	164
2022-09-13	08:55:05	0.122354	0.544255	3599.99	FALSE	164
2022-09-13	08:55:06	0.18841	0.838085	3761.65	FALSE	164
2022-09-13	08:55:06	0.176298	0.784209	3600.77	FALSE	164
2022-09-13	08:55:06	0.156349	0.695472	3762.34	FALSE	164
2022-09-13	08:55:06	0.0492242	0.218959	3600.99	FALSE	164
2022-09-13	08:55:07	0.224084	0.99677	3763.34	FALSE	164
2022-09-13	08:55:07	0.225509	1.00311	3601.99	FALSE	164
2022-09-13	08:55:07	0.362303	1.6116	3764.95	FALSE	164
2022-09-13	08:55:08	0.468868	2.08562	3604.08	FALSE	164
2022-09-13	08:55:08	0.71589	3.18442	3768.14	FALSE	164
2022-09-13	08:55:08	0.758282	3.37299	3607.45	FALSE	164
2022-09-13	08:55:08	1.14022	5.07193	3773.21	FALSE	164
2022-09-13	08:55:09	0.523219	2.32738	3609.78	FALSE	164
2022-09-13	08:55:09	0.180166	0.801414	3774.01	FALSE	164
2022-09-13	08:55:09	0.448053	1.99303	3611.77	FALSE	164
2022-09-13	08:55:09	0.223575	0.994506	3775	FALSE	164
2022-09-13	08:55:10	0.409021	1.81941	3613.59	FALSE	164
2022-09-13	08:55:10	0.36729	1.63378	3776.64	FALSE	164
2022-09-13	08:55:10	0.699708	3.11244	3616.7	FALSE	164
2022-09-13	08:55:10	0.835789	3.71776	3780.35	FALSE	164
2022-09-13	08:55:11	0.960471	4.27237	3620.98	FALSE	164
2022-09-13	08:55:11	0.689529	3.06716	3783.42	FALSE	164
2022-09-13	08:55:11	1.88871	8.40136	3629.38	FALSE	164
2022-09-13	08:55:11	3.65401	16.2538	3799.68	1	165
2022-09-13	08:55:12	3.84678	17.1112	3646.49	1	166
2022-09-13	08:55:12	4.22724	18.8036	3818.48	1	167
2022-09-13	08:55:12	1.84001	8.18473	3654.67	FALSE	167
2022-09-13	08:55:13	2.05314	9.13278	3827.61	FALSE	167
2022-09-13	08:55:13	2.89233	12.8657	3667.54	FALSE	167
2022-09-13	08:55:13	1.7676	7.86264	3835.47	FALSE	167
2022-09-13	08:55:13	3.55609	15.8182	3683.36	1	168
2022-09-13	08:55:14	3.62449	16.1225	3851.6	1	169
2022-09-13	08:55:14	5.48785	24.4111	3707.77	1	170
2022-09-13	08:55:14	4.33528	19.2842	3870.88	1	171
2022-09-13	08:55:14	4.55787	20.2743	3728.04	1	172
2022-09-13	08:55:15	6.05385	26.9287	3897.81	1	173
2022-09-13	08:55:15	4.47777	19.918	3747.96	1	174
2022-09-13	08:55:15	3.66103	16.285	3914.09	1	175
2022-09-13	08:55:15	1.98205	8.81655	3756.78	FALSE	175
2022-09-13	08:55:16	2.60525	11.5887	3925.68	FALSE	175
2022-09-13	08:55:16	1.50938	6.71402	3763.49	FALSE	175
2022-09-13	08:55:16	0.390191	1.73565	3927.42	FALSE	175
2022-09-13	08:55:16	0.552328	2.45687	3765.95	FALSE	175
2022-09-13	08:55:17	0.140013	0.622806	3928.04	FALSE	175
2022-09-13	08:55:17	0.388257	1.72704	3767.68	FALSE	175
2022-09-13	08:55:17	0.654516	2.91142	3930.95	FALSE	175
2022-09-13	08:55:18	0.657366	2.9241	3770.6	FALSE	175
2022-09-13	08:55:18	0.555789	2.47226	3933.43	FALSE	175
2022-09-13	08:55:18	0.523015	2.32648	3772.93	FALSE	175
2022-09-13	08:55:18	0.743117	3.30553	3936.73	FALSE	175
2022-09-13	08:55:19	0.740114	3.29218	3776.22	FALSE	175
2022-09-13	08:55:19	0.215942	0.960553	3937.69	FALSE	175
2022-09-13	08:55:19	0.260216	1.15749	3777.38	FALSE	175
2022-09-13	08:55:19	0.255891	1.13825	3938.83	FALSE	175
2022-09-13	08:55:20	0.262557	1.16791	3778.54	FALSE	175
2022-09-13	08:55:20	0.296959	1.32093	3940.15	FALSE	175
2022-09-13	08:55:20	0.277163	1.23288	3779.78	FALSE	175
2022-09-13	08:55:20	0.236145	1.05042	3941.2	FALSE	175
2022-09-13	08:55:21	0.288512	1.28336	3781.06	FALSE	175
2022-09-13	08:55:21	0.353855	1.57402	3942.78	FALSE	175
2022-09-13	08:55:21	0.568664	2.52953	3783.59	FALSE	175
2022-09-13	08:55:22	0.735941	3.27361	3946.05	FALSE	175
2022-09-13	08:55:22	0.737315	3.27972	3786.87	FALSE	175
2022-09-13	08:55:22	0.738486	3.28493	3949.33	FALSE	175
2022-09-13	08:55:22	0.740114	3.29218	3790.16	FALSE	175
2022-09-13	08:55:23	0.739758	3.29059	3952.62	FALSE	175
2022-09-13	08:55:23	0.739046	3.28742	3793.45	FALSE	175
2022-09-13	08:55:23	0.734975	3.26932	3955.89	FALSE	175
2022-09-13	08:55:23	0.741641	3.29897	3796.75	FALSE	175
2022-09-13	08:55:24	0.592786	2.63683	3958.53	FALSE	175
2022-09-13	08:55:24	0.29187	1.2983	3798.05	FALSE	175
2022-09-13	08:55:24	0.262659	1.16836	3959.7	FALSE	175
2022-09-13	08:55:24	0.202659	0.901468	3798.95	FALSE	175
2022-09-13	08:55:25	0.271972	1.20979	3960.91	FALSE	175
2022-09-13	08:55:25	0.142303	0.632992	3799.58	FALSE	175
2022-09-13	08:55:25	0.282608	1.2571	3962.17	FALSE	175
2022-09-13	08:55:25	0.271514	1.20775	3800.79	FALSE	175
2022-09-13	08:55:26	0.37014	1.64646	3963.81	FALSE	175
2022-09-13	08:55:26	0.333448	1.48324	3802.27	FALSE	175
2022-09-13	08:55:26	0.333601	1.48392	3965.3	FALSE	175
2022-09-13	08:55:27	0.58154	2.58681	3804.86	FALSE	175
2022-09-13	08:55:27	0.632226	2.81227	3968.11	FALSE	175
2022-09-13	08:55:27	0.305	1.3567	3806.22	FALSE	175
2022-09-13	08:55:27	0.371514	1.65257	3969.76	FALSE	175
2022-09-13	08:55:28	0.242761	1.07985	3807.3	FALSE	175
2022-09-13	08:55:28	0.238384	1.06038	3970.82	FALSE	175
2022-09-13	08:55:28	0.331921	1.47645	3808.77	FALSE	175
2022-09-13	08:55:28	0.348104	1.54844	3972.37	FALSE	175
2022-09-13	08:55:29	0.42729	1.90067	3810.67	FALSE	175
2022-09-13	08:55:29	0.726679	3.23241	3975.6	FALSE	175
2022-09-13	08:55:29	1.4363	6.38895	3817.06	FALSE	175
2022-09-13	08:55:29	1.35223	6.01499	3981.62	FALSE	175
2022-09-13	08:55:30	1.23309	5.48503	3822.55	FALSE	175
2022-09-13	08:55:30	0.964593	4.2907	3985.91	FALSE	175
2022-09-13	08:55:30	1.24088	5.51968	3828.07	FALSE	175
2022-09-13	08:55:30	1.48439	6.60286	3992.51	FALSE	175
2022-09-13	08:55:31	1.61268	7.17352	3835.24	FALSE	175
2022-09-13	08:55:31	0.991463	4.41023	3996.92	FALSE	175
2022-09-13	08:55:31	1.10765	4.92705	3840.17	FALSE	175
2022-09-13	08:55:32	0.783168	3.48369	4000.4	FALSE	175
2022-09-13	08:55:32	1.02322	4.55149	3844.72	FALSE	175
2022-09-13	08:55:32	0.849427	3.77842	4004.18	FALSE	175
2022-09-13	08:55:32	0.658384	2.92862	3847.65	FALSE	175
2022-09-13	08:55:33	0.672277	2.99042	4007.17	FALSE	175
2022-09-13	08:55:33	0.511209	2.27396	3849.92	FALSE	175
2022-09-13	08:55:33	0.39299	1.7481	4008.92	FALSE	175
2022-09-13	08:55:33	0.349733	1.55568	3851.48	FALSE	175
2022-09-13	08:55:34	0.406527	1.80831	4010.73	FALSE	175
2022-09-13	08:55:34	0.274313	1.2202	3852.7	FALSE	175
2022-09-13	08:55:34	0.13355	0.594057	4011.32	FALSE	175
2022-09-13	08:55:34	0.252532	1.12331	3853.82	FALSE	175
2022-09-13	08:55:35	0.218028	0.969832	4012.29	FALSE	175
2022-09-13	08:55:35	0.219657	0.977078	3854.8	FALSE	175
2022-09-13	08:55:35	0.333906	1.48528	4013.78	FALSE	175
2022-09-13	08:55:36	0.195942	0.871589	3855.67	FALSE	175
2022-09-13	08:55:36	0.392277	1.74493	4015.52	FALSE	175
2022-09-13	08:55:36	0.276094	1.22812	3856.9	FALSE	175
2022-09-13	08:55:36	0.308461	1.3721	4016.9	FALSE	175
2022-09-13	08:55:37	0.249071	1.10792	3858	FALSE	175
2022-09-13	08:55:37	0.302914	1.34742	4018.24	FALSE	175
2022-09-13	08:55:37	0.213397	0.949233	3858.95	FALSE	175
2022-09-13	08:55:37	0.229886	1.02258	4019.27	FALSE	175
2022-09-13	08:55:38	0.0699875	0.311318	3859.27	FALSE	175
2022-09-13	08:55:38	0.057672	0.256537	4019.52	FALSE	175
2022-09-13	08:55:38	0.250598	1.11471	3860.38	FALSE	175
2022-09-13	08:55:38	0.0149748	0.0666109	4019.59	FALSE	175
2022-09-13	08:55:39	-0.269198	-1.19745	3860.38	FALSE	175
2022-09-13	08:55:39	-0.407213	-1.81136	4019.59	FALSE	175
2022-09-13	08:55:39	-0.18304	-0.814199	3860.38	FALSE	175
2022-09-13	08:55:39	-0.198155	-0.881433	4019.59	FALSE	175
2022-09-13	08:55:40	-0.147875	-0.657778	3860.38	FALSE	175
2022-09-13	08:55:40	-0.0709285	-0.315504	4019.59	FALSE	175
2022-09-13	08:55:40	0.190649	0.848045	3861.23	FALSE	175
2022-09-13	08:55:41	0.210445	0.936101	4020.53	FALSE	175
2022-09-13	08:55:41	-0.0722007	-0.321163	3861.23	FALSE	175
2022-09-13	08:55:41	0.158639	0.705658	4021.23	FALSE	175
2022-09-13	08:55:41	0.0890205	0.395981	3861.62	FALSE	175
2022-09-13	08:55:42	0.268715	1.1953	4022.43	FALSE	175
2022-09-13	08:55:42	0.158944	0.707015	3862.33	FALSE	175
2022-09-13	08:55:42	0.616552	2.74255	4025.17	FALSE	175
2022-09-13	08:55:43	2.6335	11.7143	3874.05	FALSE	175
2022-09-13	08:55:43	3.04154	13.5294	4038.7	1	176
2022-09-13	08:55:43	5.24103	23.3131	3897.36	1	177
2022-09-13	08:55:43	2.77675	12.3515	4051.05	FALSE	177
2022-09-13	08:55:43	5.07451	22.5724	3919.93	1	178
2022-09-13	08:55:44	3.16383	14.0733	4065.12	1	179
2022-09-13	08:55:44	3.08164	13.7078	3933.64	1	180
2022-09-13	08:55:44	1.8966	8.43646	4073.56	FALSE	180
2022-09-13	08:55:45	0.648257	2.88358	3936.52	FALSE	180
2022-09-13	08:55:45	0.908104	4.03943	4077.6	FALSE	180
2022-09-13	08:55:45	0.733651	3.26343	3939.79	FALSE	180
2022-09-13	08:55:45	1.12739	5.01486	4082.61	FALSE	180
2022-09-13	08:55:46	1.29289	5.75103	3945.54	FALSE	180
2022-09-13	08:55:46	1.08851	4.84191	4087.46	FALSE	180
2022-09-13	08:55:46	2.83467	12.6092	3958.15	FALSE	180
2022-09-13	08:55:46	1.86836	8.31084	4095.77	FALSE	180
2022-09-13	08:55:47	1.58592	7.05449	3965.2	FALSE	180
2022-09-13	08:55:47	1.06836	4.75228	4100.52	FALSE	180
2022-09-13	08:55:47	1.64134	7.30101	3972.5	FALSE	180
2022-09-13	08:55:47	2.55472	11.3639	4111.88	FALSE	180
2022-09-13	08:55:48	5.58495	24.843	3997.34	1	181
2022-09-13	08:55:48	7.14245	31.771	4143.65	1	182
2022-09-13	08:55:48	3.86693	17.2009	4014.55	1	183
2022-09-13	08:55:48	4.10225	18.2476	4161.9	1	184
2022-09-13	08:55:49	2.57238	11.4425	4025.99	FALSE	184
2022-09-13	08:55:49	3.32734	14.8007	4176.7	1	185
2022-09-13	08:55:49	2.08088	9.25617	4035.24	FALSE	185
2022-09-13	08:55:50	1.80006	8.00703	4184.71	FALSE	185
2022-09-13	08:55:50	3.49574	15.5498	4050.79	1	186
2022-09-13	08:55:50	1.34739	5.99346	4190.7	FALSE	186
2022-09-13	08:55:50	2.51604	11.1918	4061.99	FALSE	186
2022-09-13	08:55:51	2.89849	12.8931	4203.6	FALSE	186
2022-09-13	08:55:51	1.82871	8.13447	4070.12	FALSE	186
2022-09-13	08:55:51	1.74866	7.77839	4211.37	FALSE	186
2022-09-13	08:55:51	0.844898	3.75828	4073.88	FALSE	186
2022-09-13	08:55:52	2.47263	10.9988	4222.37	FALSE	186
2022-09-13	08:55:52	2.68912	11.9617	4085.84	FALSE	186
2022-09-13	08:55:52	4.80897	21.3913	4243.76	1	187
2022-09-13	08:55:52	4.18225	18.6035	4104.44	1	188

## Sheet: Saint_martin_202291385050 (2)
Date	Time	Lbs	Total force x time			**GoPro Fitting: 840
2022-09-13	08:50:52	0.318028	0.318028	FALSE	0			Total force x time	1876.76
2022-09-13	08:50:52	0.315331	0.633359	FALSE	0			Total steps	188
2022-09-13	08:50:52	0.32271	0.956069	FALSE	0
2022-09-13	08:50:52	0.323982	1.28005	FALSE	0
2022-09-13	08:50:53	0.310496	1.59055	FALSE	0
2022-09-13	08:50:53	0.300013	1.89056	FALSE	0
2022-09-13	08:50:53	0.347901	2.23846	FALSE	0
2022-09-13	08:50:53	0.407239	2.6457	FALSE	0
2022-09-13	08:50:54	0.570954	3.21665	FALSE	0
2022-09-13	08:50:54	0.656807	3.87346	FALSE	0
2022-09-13	08:50:54	0.5593	4.43276	FALSE	0
2022-09-13	08:50:55	0.556196	4.98896	FALSE	0
2022-09-13	08:50:55	0.504898	5.49385	FALSE	0
2022-09-13	08:50:55	0.407443	5.9013	FALSE	0
2022-09-13	08:50:55	0.399504	6.3008	FALSE	0
2022-09-13	08:50:56	0.406781	6.70758	FALSE	0
2022-09-13	08:50:56	0.33416	7.04174	FALSE	0
2022-09-13	08:50:56	0.328308	7.37005	FALSE	0
2022-09-13	08:50:56	0.338791	7.70884	FALSE	0
2022-09-13	08:50:57	0.35813	8.06697	FALSE	0
2022-09-13	08:50:57	0.373193	8.44016	FALSE	0
2022-09-13	08:50:57	0.619351	9.05952	FALSE	0
2022-09-13	08:50:57	0.732277	9.79179	FALSE	0
2022-09-13	08:50:58	0.342863	10.1347	FALSE	0
2022-09-13	08:50:58	0.293601	10.4283	FALSE	0
2022-09-13	08:50:58	0.454873	10.8831	FALSE	0
2022-09-13	08:50:58	0.281132	11.1643	FALSE	0
2022-09-13	08:50:59	0.351412	11.5157	FALSE	0
2022-09-13	08:50:59	0.345153	11.8608	FALSE	0
2022-09-13	08:50:59	0.459555	12.3204	FALSE	0
2022-09-13	08:51:00	0.293244	12.6136	FALSE	0
2022-09-13	08:51:00	0.266883	12.8805	FALSE	0
2022-09-13	08:51:00	0.195738	13.0762	FALSE	0
2022-09-13	08:51:00	0.363372	13.4396	FALSE	0
2022-09-13	08:51:01	0.0779265	13.5175	FALSE	0
2022-09-13	08:51:01	0.467799	13.9853	FALSE	0
2022-09-13	08:51:01	0.274669	14.26	FALSE	0
2022-09-13	08:51:01	0.488054	14.7481	FALSE	0
2022-09-13	08:51:02	0.338588	15.0867	FALSE	0
2022-09-13	08:51:02	0.238893	15.3255	FALSE	0
2022-09-13	08:51:02	0.148155	15.4737	FALSE	0
2022-09-13	08:51:02	0.470242	15.9439	FALSE	0
2022-09-13	08:51:03	0.213143	16.1571	FALSE	0
2022-09-13	08:51:03	-0.197748	16.1571	FALSE	0
2022-09-13	08:51:03	-0.422989	16.1571	FALSE	0
2022-09-13	08:51:04	-0.180191	16.1571	FALSE	0
2022-09-13	08:51:04	0.867493	17.0246	FALSE	0
2022-09-13	08:51:04	1.38933	18.4139	FALSE	0
2022-09-13	08:51:04	1.32159	19.7355	FALSE	0
2022-09-13	08:51:05	1.61513	21.3506	FALSE	0
2022-09-13	08:51:05	1.67151	23.0221	FALSE	0
2022-09-13	08:51:05	1.93935	24.9615	FALSE	0
2022-09-13	08:51:05	1.3735	26.335	FALSE	0
2022-09-13	08:51:06	0.657417	26.9924	FALSE	0
2022-09-13	08:51:06	2.21375	29.2062	FALSE	0
2022-09-13	08:51:06	3.99579	33.2019	1	1
2022-09-13	08:51:06	5.56021	38.7622	1	2
2022-09-13	08:51:07	4.80342	43.5656	1	3
2022-09-13	08:51:07	1.35716	44.9227	FALSE	3
2022-09-13	08:51:07	2.56775	47.4905	FALSE	3
2022-09-13	08:51:07	3.1079	50.5984	1	4
2022-09-13	08:51:08	2.34556	52.9439	FALSE	4
2022-09-13	08:51:08	2.24398	55.1879	FALSE	4
2022-09-13	08:51:08	2.11416	57.3021	FALSE	4
2022-09-13	08:51:09	1.78922	59.0913	FALSE	4
2022-09-13	08:51:09	1.84836	60.9397	FALSE	4
2022-09-13	08:51:09	1.30256	62.2422	FALSE	4
2022-09-13	08:51:09	1.72907	63.9713	FALSE	4
2022-09-13	08:51:10	1.7276	65.6989	FALSE	4
2022-09-13	08:51:10	1.4766	67.1755	FALSE	4
2022-09-13	08:51:10	1.34978	68.5253	FALSE	4
2022-09-13	08:51:10	1.36785	69.8931	FALSE	4
2022-09-13	08:51:11	1.38469	71.2778	FALSE	4
2022-09-13	08:51:11	1.45513	72.7329	FALSE	4
2022-09-13	08:51:11	1.44877	74.1817	FALSE	4
2022-09-13	08:51:11	0.851005	75.0327	FALSE	4
2022-09-13	08:51:12	1.0937	76.1264	FALSE	4
2022-09-13	08:51:12	2.34434	78.4708	FALSE	4
2022-09-13	08:51:12	1.13045	79.6012	FALSE	4
2022-09-13	08:51:13	0.697061	80.2983	FALSE	4
2022-09-13	08:51:13	0.404898	80.7032	FALSE	4
2022-09-13	08:51:13	0.442608	81.1458	FALSE	4
2022-09-13	08:51:13	0.155942	81.3017	FALSE	4
2022-09-13	08:51:14	-0.0380532	81.3017	FALSE	4
2022-09-13	08:51:14	0.0149748	81.3167	FALSE	4
2022-09-13	08:51:14	0.0268832	81.3436	FALSE	4
2022-09-13	08:51:14	0.17416	81.5177	FALSE	4
2022-09-13	08:51:15	-0.0215138	81.5177	FALSE	4
2022-09-13	08:51:15	0.383422	81.9012	FALSE	4
2022-09-13	08:51:15	0.291158	82.1923	FALSE	4
2022-09-13	08:51:15	0.241336	82.4337	FALSE	4
2022-09-13	08:51:16	0.420624	82.8543	FALSE	4
2022-09-13	08:51:16	0.213244	83.0675	FALSE	4
2022-09-13	08:51:16	0.334466	83.402	FALSE	4
2022-09-13	08:51:16	0.181234	83.5832	FALSE	4
2022-09-13	08:51:17	0.359606	83.9428	FALSE	4
2022-09-13	08:51:17	0.816552	84.7594	FALSE	4
2022-09-13	08:51:17	0.392379	85.1518	FALSE	4
2022-09-13	08:51:18	0.3964	85.5482	FALSE	4
2022-09-13	08:51:18	0.439606	85.9878	FALSE	4
2022-09-13	08:51:18	0.482812	86.4706	FALSE	4
2022-09-13	08:51:18	0.461896	86.9325	FALSE	4
2022-09-13	08:51:19	0.456756	87.3892	FALSE	4
2022-09-13	08:51:19	0.488003	87.8772	FALSE	4
2022-09-13	08:51:19	0.489682	88.3669	FALSE	4
2022-09-13	08:51:19	0.469631	88.8365	FALSE	4
2022-09-13	08:51:20	0.480369	89.3169	FALSE	4
2022-09-13	08:51:20	0.47126	89.7882	FALSE	4
2022-09-13	08:51:20	0.465305	90.2535	FALSE	4
2022-09-13	08:51:20	0.465967	90.7194	FALSE	4
2022-09-13	08:51:21	0.460623	91.1801	FALSE	4
2022-09-13	08:51:21	0.46841	91.6485	FALSE	4
2022-09-13	08:51:21	0.471005	92.1195	FALSE	4
2022-09-13	08:51:21	0.475992	92.5955	FALSE	4
2022-09-13	08:51:22	0.47813	93.0736	FALSE	4
2022-09-13	08:51:22	0.473244	93.5469	FALSE	4
2022-09-13	08:51:22	0.471819	94.0187	FALSE	4
2022-09-13	08:51:23	0.481743	94.5004	FALSE	4
2022-09-13	08:51:23	0.504135	95.0045	FALSE	4
2022-09-13	08:51:23	0.545712	95.5503	FALSE	4
2022-09-13	08:51:23	0.523168	96.0734	FALSE	4
2022-09-13	08:51:24	0.512532	96.586	FALSE	4
2022-09-13	08:51:24	0.47411	97.0601	FALSE	4
2022-09-13	08:51:24	0.64159	97.7017	FALSE	4
2022-09-13	08:51:24	0.543372	98.245	FALSE	4
2022-09-13	08:51:25	0.541641	98.7867	FALSE	4
2022-09-13	08:51:25	0.646934	99.4336	FALSE	4
2022-09-13	08:51:25	0.529224	99.9628	FALSE	4
2022-09-13	08:51:25	0.777265	100.74	FALSE	4
2022-09-13	08:51:26	0.664644	101.405	FALSE	4
2022-09-13	08:51:26	0.799198	102.204	FALSE	4
2022-09-13	08:51:26	0.755585	102.96	FALSE	4
2022-09-13	08:51:27	0.453855	103.413	FALSE	4
2022-09-13	08:51:27	0.466221	103.88	FALSE	4
2022-09-13	08:51:27	0.50729	104.387	FALSE	4
2022-09-13	08:51:27	0.449682	104.837	FALSE	4
2022-09-13	08:51:28	0.456807	105.293	FALSE	4
2022-09-13	08:51:28	0.424949	105.718	FALSE	4
2022-09-13	08:51:28	0.454466	106.173	FALSE	4
2022-09-13	08:51:28	0.459097	106.632	FALSE	4
2022-09-13	08:51:29	0.461132	107.093	FALSE	4
2022-09-13	08:51:29	0.511463	107.604	FALSE	4
2022-09-13	08:51:29	0.633397	108.238	FALSE	4
2022-09-13	08:51:29	0.547596	108.785	FALSE	4
2022-09-13	08:51:30	0.492023	109.278	FALSE	4
2022-09-13	08:51:30	0.499606	109.777	FALSE	4
2022-09-13	08:51:30	0.530954	110.308	FALSE	4
2022-09-13	08:51:30	0.588613	110.897	FALSE	4
2022-09-13	08:51:31	0.875484	111.772	FALSE	4
2022-09-13	08:51:31	1.11543	112.888	FALSE	4
2022-09-13	08:51:31	1.74525	114.633	FALSE	4
2022-09-13	08:51:32	6.27919	120.912	1	5
2022-09-13	08:51:32	5.05446	125.966	1	6
2022-09-13	08:51:32	1.64475	127.611	FALSE	6
2022-09-13	08:51:32	0.941947	128.553	FALSE	6
2022-09-13	08:51:33	1.3366	129.89	FALSE	6
2022-09-13	08:51:33	0.839046	130.729	FALSE	6
2022-09-13	08:51:33	1.97146	132.7	FALSE	6
2022-09-13	08:51:33	1.5566	134.257	FALSE	6
2022-09-13	08:51:34	2.02902	136.286	FALSE	6
2022-09-13	08:51:34	2.33457	138.62	FALSE	6
2022-09-13	08:51:34	1.86475	140.485	FALSE	6
2022-09-13	08:51:34	1.90958	142.395	FALSE	6
2022-09-13	08:51:35	0.414313	142.809	FALSE	6
2022-09-13	08:51:35	0.718944	143.528	FALSE	6
2022-09-13	08:51:35	0.223779	143.752	FALSE	6
2022-09-13	08:51:35	0.506577	144.258	FALSE	6
2022-09-13	08:51:36	0.295687	144.554	FALSE	6
2022-09-13	08:51:36	0.480165	145.034	FALSE	6
2022-09-13	08:51:36	0.514568	145.549	FALSE	6
2022-09-13	08:51:37	0.302761	145.852	FALSE	6
2022-09-13	08:51:37	0.487596	146.339	FALSE	6
2022-09-13	08:51:37	0.315687	146.655	FALSE	6
2022-09-13	08:51:37	0.166985	146.822	FALSE	6
2022-09-13	08:51:38	0.514008	147.336	FALSE	6
2022-09-13	08:51:38	0.371361	147.707	FALSE	6
2022-09-13	08:51:38	0.218842	147.926	FALSE	6
2022-09-13	08:51:38	0.393041	148.319	FALSE	6
2022-09-13	08:51:39	0.275585	148.595	FALSE	6
2022-09-13	08:51:39	0.286934	148.882	FALSE	6
2022-09-13	08:51:39	0.48271	149.364	FALSE	6
2022-09-13	08:51:39	0.939097	150.303	FALSE	6
2022-09-13	08:51:40	1.2876	151.591	FALSE	6
2022-09-13	08:51:40	0.945356	152.536	FALSE	6
2022-09-13	08:51:40	2.34062	154.877	FALSE	6
2022-09-13	08:51:41	1.34032	156.217	FALSE	6
2022-09-13	08:51:41	1.82235	158.04	FALSE	6
2022-09-13	08:51:41	2.83645	160.876	FALSE	6
2022-09-13	08:51:41	1.67187	162.548	FALSE	6
2022-09-13	08:51:42	1.3766	163.925	FALSE	6
2022-09-13	08:51:42	0.847545	164.772	FALSE	6
2022-09-13	08:51:42	0.836247	165.608	FALSE	6
2022-09-13	08:51:42	0.582863	166.191	FALSE	6
2022-09-13	08:51:43	0.211005	166.402	FALSE	6
2022-09-13	08:51:43	0.442761	166.845	FALSE	6
2022-09-13	08:51:43	0.298232	167.143	FALSE	6
2022-09-13	08:51:43	0.584695	167.728	FALSE	6
2022-09-13	08:51:44	1.79574	169.524	FALSE	6
2022-09-13	08:51:44	3.04464	172.568	1	7
2022-09-13	08:51:44	2.45808	175.026	FALSE	7
2022-09-13	08:51:44	1.10342	176.13	FALSE	7
2022-09-13	08:51:45	1.53212	177.662	FALSE	7
2022-09-13	08:51:45	1.11141	178.773	FALSE	7
2022-09-13	08:51:45	1.48668	180.26	FALSE	7
2022-09-13	08:51:46	2.39986	182.66	FALSE	7
2022-09-13	08:51:46	1.04561	183.706	FALSE	7
2022-09-13	08:51:46	1.80286	185.508	FALSE	7
2022-09-13	08:51:46	0.859148	186.368	FALSE	7
2022-09-13	08:51:47	1.93335	188.301	FALSE	7
2022-09-13	08:51:47	0.630547	188.931	FALSE	7
2022-09-13	08:51:47	0.297265	189.229	FALSE	7
2022-09-13	08:51:47	0.432379	189.661	FALSE	7
2022-09-13	08:51:48	0.571565	190.233	FALSE	7
2022-09-13	08:51:48	1.13263	191.365	FALSE	7
2022-09-13	08:51:48	1.46571	192.831	FALSE	7
2022-09-13	08:51:48	1.46739	194.298	FALSE	7
2022-09-13	08:51:49	1.14149	195.44	FALSE	7
2022-09-13	08:51:49	0.317977	195.758	FALSE	7
2022-09-13	08:51:49	1.15558	196.913	FALSE	7
2022-09-13	08:51:50	0.371972	197.285	FALSE	7
2022-09-13	08:51:50	1.03726	198.323	FALSE	7
2022-09-13	08:51:50	1.10917	199.432	FALSE	7
2022-09-13	08:51:50	0.697163	200.129	FALSE	7
2022-09-13	08:51:51	1.02556	201.155	FALSE	7
2022-09-13	08:51:51	0.840674	201.995	FALSE	7
2022-09-13	08:51:51	1.19777	203.193	FALSE	7
2022-09-13	08:51:51	0.895636	204.089	FALSE	7
2022-09-13	08:51:52	1.08332	205.172	FALSE	7
2022-09-13	08:51:52	1.44444	206.616	FALSE	7
2022-09-13	08:51:52	1.4764	208.093	FALSE	7
2022-09-13	08:51:52	1.09986	209.193	FALSE	7
2022-09-13	08:51:53	0.920369	210.113	FALSE	7
2022-09-13	08:51:53	1.51543	211.628	FALSE	7
2022-09-13	08:51:53	1.67777	213.306	FALSE	7
2022-09-13	08:51:53	8.65873	221.965	1	8
2022-09-13	08:51:54	18.2191	240.184	1	9
2022-09-13	08:51:54	5.14719	245.331	1	10
2022-09-13	08:51:54	7.16434	252.496	1	11
2022-09-13	08:51:55	5.3024	257.798	1	12
2022-09-13	08:51:55	3.69462	261.493	1	13
2022-09-13	08:51:55	4.31625	265.809	1	14
2022-09-13	08:51:55	7.41156	273.22	1	15
2022-09-13	08:51:56	7.71976	280.94	1	16
2022-09-13	08:51:56	5.44759	286.388	1	17
2022-09-13	08:51:56	6.89976	293.288	1	18
2022-09-13	08:51:56	7.17553	300.463	1	19
2022-09-13	08:51:57	3.27116	303.734	1	20
2022-09-13	08:51:57	7.68657	311.421	1	21
2022-09-13	08:51:57	2.89039	314.311	FALSE	21
2022-09-13	08:51:57	1.64108	315.952	FALSE	21
2022-09-13	08:51:58	3.26637	319.219	1	22
2022-09-13	08:51:58	0.372532	319.591	FALSE	22
2022-09-13	08:51:58	0.0321249	319.623	FALSE	22
2022-09-13	08:51:58	0.120624	319.744	FALSE	22
2022-09-13	08:51:59	2.26617	322.01	FALSE	22
2022-09-13	08:51:59	1.52464	323.535	FALSE	22
2022-09-13	08:51:59	2.42907	325.964	FALSE	22
2022-09-13	08:52:00	5.24698	331.211	1	23
2022-09-13	08:52:00	2.00266	333.213	FALSE	23
2022-09-13	08:52:00	0.700013	333.913	FALSE	23
2022-09-13	08:52:00	0.729936	334.643	FALSE	23
2022-09-13	08:52:01	0.535534	335.179	FALSE	23
2022-09-13	08:52:01	0.349122	335.528	FALSE	23
2022-09-13	08:52:01	1.23869	336.767	FALSE	23
2022-09-13	08:52:01	0.94673	337.713	FALSE	23
2022-09-13	08:52:02	2.82546	340.539	FALSE	23
2022-09-13	08:52:02	1.71955	342.258	FALSE	23
2022-09-13	08:52:02	0.842761	343.101	FALSE	23
2022-09-13	08:52:02	0.545814	343.647	FALSE	23
2022-09-13	08:52:03	0.524745	344.172	FALSE	23
2022-09-13	08:52:03	0.44327	344.615	FALSE	23
2022-09-13	08:52:03	0.416756	345.032	FALSE	23
2022-09-13	08:52:04	0.215382	345.247	FALSE	23
2022-09-13	08:52:04	0.129122	345.376	FALSE	23
2022-09-13	08:52:04	0.105	345.481	FALSE	23
2022-09-13	08:52:04	0.10042	345.582	FALSE	23
2022-09-13	08:52:05	0.318181	345.9	FALSE	23
2022-09-13	08:52:05	0.23869	346.139	FALSE	23
2022-09-13	08:52:05	0.254211	346.393	FALSE	23
2022-09-13	08:52:05	0.215585	346.608	FALSE	23
2022-09-13	08:52:06	0.365102	346.973	FALSE	23
2022-09-13	08:52:06	0.443931	347.417	FALSE	23
2022-09-13	08:52:06	0.488054	347.905	FALSE	23
2022-09-13	08:52:06	0.444746	348.35	FALSE	23
2022-09-13	08:52:07	0.438079	348.788	FALSE	23
2022-09-13	08:52:07	0.417723	349.206	FALSE	23
2022-09-13	08:52:07	0.386629	349.593	FALSE	23
2022-09-13	08:52:07	0.404949	349.998	FALSE	23
2022-09-13	08:52:08	0.509428	350.507	FALSE	23
2022-09-13	08:52:08	0.272837	350.78	FALSE	23
2022-09-13	08:52:08	0.497519	351.277	FALSE	23
2022-09-13	08:52:09	0.495789	351.773	FALSE	23
2022-09-13	08:52:09	0.0566033	351.83	FALSE	23
2022-09-13	08:52:09	-0.173218	351.83	FALSE	23
2022-09-13	08:52:09	-0.374084	351.83	FALSE	23
2022-09-13	08:52:10	-0.229453	351.83	FALSE	23
2022-09-13	08:52:10	0.272481	352.102	FALSE	23
2022-09-13	08:52:10	0.222252	352.325	FALSE	23
2022-09-13	08:52:10	0.297977	352.622	FALSE	23
2022-09-13	08:52:11	0.116807	352.739	FALSE	23
2022-09-13	08:52:11	0.426374	353.166	FALSE	23
2022-09-13	08:52:11	0.317366	353.483	FALSE	23
2022-09-13	08:52:11	0.70556	354.189	FALSE	23
2022-09-13	08:52:12	1.65391	355.843	FALSE	23
2022-09-13	08:52:12	2.20149	358.044	FALSE	23
2022-09-13	08:52:12	6.2051	364.249	1	24
2022-09-13	08:52:13	5.9593	370.208	1	25
2022-09-13	08:52:13	7.58164	377.79	1	26
2022-09-13	08:52:13	3.65686	381.447	1	27
2022-09-13	08:52:13	6.3481	387.795	1	28
2022-09-13	08:52:14	4.18088	391.976	1	29
2022-09-13	08:52:14	5.69054	397.666	1	30
2022-09-13	08:52:14	10.5586	408.225	1	31
2022-09-13	08:52:14	5.86469	414.09	1	32
2022-09-13	08:52:15	9.79614	423.886	1	33
2022-09-13	08:52:15	16.8741	440.76	1	34
2022-09-13	08:52:15	4.97177	445.732	1	35
2022-09-13	08:52:15	4.82821	450.56	1	36
2022-09-13	08:52:16	6.88321	457.443	1	37
2022-09-13	08:52:16	2.00174	459.445	FALSE	37
2022-09-13	08:52:16	5.04271	464.488	1	38
2022-09-13	08:52:16	5.97406	470.462	1	39
2022-09-13	08:52:17	1.25564	471.717	FALSE	39
2022-09-13	08:52:17	3.62113	475.338	1	40
2022-09-13	08:52:17	1.37304	476.711	FALSE	40
2022-09-13	08:52:18	3.80342	480.515	1	41
2022-09-13	08:52:18	6.70668	487.222	1	42
2022-09-13	08:52:18	4.58744	491.809	1	43
2022-09-13	08:52:18	6.42398	498.233	1	44
2022-09-13	08:52:19	2.2423	500.475	FALSE	44
2022-09-13	08:52:19	2.48317	502.958	FALSE	44
2022-09-13	08:52:19	2.23029	505.189	FALSE	44
2022-09-13	08:52:19	1.96215	507.151	FALSE	44
2022-09-13	08:52:20	5.03976	512.191	1	45
2022-09-13	08:52:20	0.74327	512.934	FALSE	45
2022-09-13	08:52:20	0.149479	513.083	FALSE	45
2022-09-13	08:52:20	0.195738	513.279	FALSE	45
2022-09-13	08:52:21	0.100267	513.379	FALSE	45
2022-09-13	08:52:21	0.0211326	513.401	FALSE	45
2022-09-13	08:52:21	-0.0459412	513.401	FALSE	45
2022-09-13	08:52:21	-0.159122	513.401	FALSE	45
2022-09-13	08:52:22	-0.344974	513.401	FALSE	45
2022-09-13	08:52:22	-0.6036	513.401	FALSE	45
2022-09-13	08:52:22	-0.545534	513.401	FALSE	45
2022-09-13	08:52:23	-0.590878	513.401	FALSE	45
2022-09-13	08:52:23	-0.577646	513.401	FALSE	45
2022-09-13	08:52:23	-0.575559	513.401	FALSE	45
2022-09-13	08:52:23	-0.534236	513.401	FALSE	45
2022-09-13	08:52:24	-0.519173	513.401	FALSE	45
2022-09-13	08:52:24	-0.463702	513.401	FALSE	45
2022-09-13	08:52:24	-0.423193	513.401	FALSE	45
2022-09-13	08:52:24	-0.409402	513.401	FALSE	45
2022-09-13	08:52:25	-0.345178	513.401	FALSE	45
2022-09-13	08:52:25	-0.458918	513.401	FALSE	45
2022-09-13	08:52:25	-0.40248	513.401	FALSE	45
2022-09-13	08:52:25	-0.476984	513.401	FALSE	45
2022-09-13	08:52:26	-0.466959	513.401	FALSE	45
2022-09-13	08:52:26	-0.301005	513.401	FALSE	45
2022-09-13	08:52:26	-0.308435	513.401	FALSE	45
2022-09-13	08:52:27	-0.251794	513.401	FALSE	45
2022-09-13	08:52:27	-0.202481	513.401	FALSE	45
2022-09-13	08:52:27	0.217367	513.618	FALSE	45
2022-09-13	08:52:27	0.11528	513.733	FALSE	45
2022-09-13	08:52:28	0.185306	513.918	FALSE	45
2022-09-13	08:52:28	0.183117	514.102	FALSE	45
2022-09-13	08:52:28	0.172328	514.274	FALSE	45
2022-09-13	08:52:28	0.232837	514.507	FALSE	45
2022-09-13	08:52:29	0.458232	514.965	FALSE	45
2022-09-13	08:52:29	4.70251	519.668	1	46
2022-09-13	08:52:29	4.05848	523.726	1	47
2022-09-13	08:52:29	1.30169	525.028	FALSE	47
2022-09-13	08:52:30	1.42877	526.456	FALSE	47
2022-09-13	08:52:30	3.75095	530.207	1	48
2022-09-13	08:52:30	3.84042	534.048	1	49
2022-09-13	08:52:30	3.01543	537.063	1	50
2022-09-13	08:52:31	7.52027	544.584	1	51
2022-09-13	08:52:31	7.56388	552.147	1	52
2022-09-13	08:52:31	9.34759	561.495	1	53
2022-09-13	08:52:32	11.9163	573.411	1	54
2022-09-13	08:52:32	11.8222	585.233	1	55
2022-09-13	08:52:32	2.30128	587.535	FALSE	55
2022-09-13	08:52:32	0.23416	587.769	FALSE	55
2022-09-13	08:52:33	0.20556	587.974	FALSE	55
2022-09-13	08:52:33	0.0686135	588.043	FALSE	55
2022-09-13	08:52:33	-0.168231	588.043	FALSE	55
2022-09-13	08:52:33	-0.496323	588.043	FALSE	55
2022-09-13	08:52:34	-0.69617	588.043	FALSE	55
2022-09-13	08:52:34	-0.657747	588.043	FALSE	55
2022-09-13	08:52:34	-0.534745	588.043	FALSE	55
2022-09-13	08:52:34	-0.434898	588.043	FALSE	55
2022-09-13	08:52:35	-0.730572	588.043	FALSE	55
2022-09-13	08:52:35	-0.488485	588.043	FALSE	55
2022-09-13	08:52:35	-0.223753	588.043	FALSE	55
2022-09-13	08:52:36	-0.00904555	588.043	FALSE	55
2022-09-13	08:52:36	-0.100903	588.043	FALSE	55
2022-09-13	08:52:36	-0.149758	588.043	FALSE	55
2022-09-13	08:52:36	-0.224058	588.043	FALSE	55
2022-09-13	08:52:37	-0.0194272	588.043	FALSE	55
2022-09-13	08:52:37	0.161896	588.205	FALSE	55
2022-09-13	08:52:37	0.356298	588.561	FALSE	55
2022-09-13	08:52:37	3.05986	591.621	1	56
2022-09-13	08:52:38	7.41604	599.037	1	57
2022-09-13	08:52:38	11.1656	610.203	1	58
2022-09-13	08:52:38	5.42337	615.626	1	59
2022-09-13	08:52:38	2.55116	618.177	FALSE	59
2022-09-13	08:52:39	3.92622	622.104	1	60
2022-09-13	08:52:39	0.644796	622.748	FALSE	60
2022-09-13	08:52:39	1.98144	624.73	FALSE	60
2022-09-13	08:52:39	1.13961	625.869	FALSE	60
2022-09-13	08:52:40	1.47823	627.348	FALSE	60
2022-09-13	08:52:40	1.88419	629.232	FALSE	60
2022-09-13	08:52:40	0.808969	630.041	FALSE	60
2022-09-13	08:52:41	2.76128	632.802	FALSE	60
2022-09-13	08:52:41	1.80973	634.612	FALSE	60
2022-09-13	08:52:41	4.2852	638.897	1	61
2022-09-13	08:52:41	3.23136	642.128	1	62
2022-09-13	08:52:42	2.03019	644.159	FALSE	62
2022-09-13	08:52:42	4.85508	649.014	1	63
2022-09-13	08:52:42	4.17813	653.192	1	64
2022-09-13	08:52:42	13.4324	666.624	1	65
2022-09-13	08:52:43	16.1509	682.775	1	66
2022-09-13	08:52:43	15.0129	697.788	1	67
2022-09-13	08:52:43	11.2748	709.063	1	68
2022-09-13	08:52:43	9.46174	718.524	1	69
2022-09-13	08:52:44	8.42556	726.95	1	70
2022-09-13	08:52:44	5.57731	732.527	1	71
2022-09-13	08:52:44	4.18047	736.708	1	72
2022-09-13	08:52:44	1.26139	737.969	FALSE	72
2022-09-13	08:52:45	0.684796	738.654	FALSE	72
2022-09-13	08:52:45	0.454466	739.108	FALSE	72
2022-09-13	08:52:45	0.951463	740.06	FALSE	72
2022-09-13	08:52:46	2.17818	742.238	FALSE	72
2022-09-13	08:52:46	2.55309	744.791	FALSE	72
2022-09-13	08:52:46	1.52541	746.317	FALSE	72
2022-09-13	08:52:46	1.46821	747.785	FALSE	72
2022-09-13	08:52:47	2.59294	750.378	FALSE	72
2022-09-13	08:52:47	2.3993	752.777	FALSE	72
2022-09-13	08:52:47	1.93355	754.711	FALSE	72
2022-09-13	08:52:47	0.914974	755.626	FALSE	72
2022-09-13	08:52:48	0.554771	756.18	FALSE	72
2022-09-13	08:52:48	0.0986389	756.279	FALSE	72
2022-09-13	08:52:48	0.243779	756.523	FALSE	72
2022-09-13	08:52:48	0.301438	756.824	FALSE	72
2022-09-13	08:52:49	0.169326	756.994	FALSE	72
2022-09-13	08:52:49	0.377417	757.371	FALSE	72
2022-09-13	08:52:49	0.23813	757.609	FALSE	72
2022-09-13	08:52:50	0.212277	757.821	FALSE	72
2022-09-13	08:52:50	0.192125	758.013	FALSE	72
2022-09-13	08:52:50	0.358995	758.372	FALSE	72
2022-09-13	08:52:50	0.311056	758.684	FALSE	72
2022-09-13	08:52:51	0.375026	759.059	FALSE	72
2022-09-13	08:52:51	0.459453	759.518	FALSE	72
2022-09-13	08:52:51	0.383015	759.901	FALSE	72
2022-09-13	08:52:51	0.330598	760.232	FALSE	72
2022-09-13	08:52:52	0.294618	760.526	FALSE	72
2022-09-13	08:52:52	0.314975	760.841	FALSE	72
2022-09-13	08:52:52	0.37411	761.215	FALSE	72
2022-09-13	08:52:52	0.39355	761.609	FALSE	72
2022-09-13	08:52:53	0.409377	762.018	FALSE	72
2022-09-13	08:52:53	0.430038	762.448	FALSE	72
2022-09-13	08:52:53	0.553194	763.002	FALSE	72
2022-09-13	08:52:53	0.384033	763.386	FALSE	72
2022-09-13	08:52:54	0.609529	763.995	FALSE	72
2022-09-13	08:52:54	0.365611	764.361	FALSE	72
2022-09-13	08:52:54	0.291412	764.652	FALSE	72
2022-09-13	08:52:55	0.219148	764.871	FALSE	72
2022-09-13	08:52:55	0.153702	765.025	FALSE	72
2022-09-13	08:52:55	0.137265	765.162	FALSE	72
2022-09-13	08:52:55	0.241132	765.403	FALSE	72
2022-09-13	08:52:56	0.471107	765.874	FALSE	72
2022-09-13	08:52:56	0.614516	766.489	FALSE	72
2022-09-13	08:52:56	0.616247	767.105	FALSE	72
2022-09-13	08:52:56	1.60047	768.706	FALSE	72
2022-09-13	08:52:57	4.79004	773.496	1	73
2022-09-13	08:52:57	4.42637	777.922	1	74
2022-09-13	08:52:57	3.99747	781.92	1	75
2022-09-13	08:52:57	3.66195	785.582	1	76
2022-09-13	08:52:58	5.53034	791.112	1	77
2022-09-13	08:52:58	2.29447	793.406	FALSE	77
2022-09-13	08:52:58	5.46637	798.873	1	78
2022-09-13	08:52:59	3.65681	802.529	1	79
2022-09-13	08:52:59	3.0937	805.623	1	80
2022-09-13	08:52:59	2.78347	808.407	FALSE	80
2022-09-13	08:52:59	1.84078	810.247	FALSE	80
2022-09-13	08:53:00	2.76581	813.013	FALSE	80
2022-09-13	08:53:00	0.742252	813.756	FALSE	80
2022-09-13	08:53:00	1.2195	814.975	FALSE	80
2022-09-13	08:53:00	0.965713	815.941	FALSE	80
2022-09-13	08:53:01	1.1134	817.054	FALSE	80
2022-09-13	08:53:01	1.5252	818.579	FALSE	80
2022-09-13	08:53:01	1.26296	819.842	FALSE	80
2022-09-13	08:53:01	4.00719	823.849	1	81
2022-09-13	08:53:02	5.35263	829.202	1	82
2022-09-13	08:53:02	13.7352	842.937	1	83
2022-09-13	08:53:02	10.4751	853.412	1	84
2022-09-13	08:53:02	10.4232	863.836	1	85
2022-09-13	08:53:03	4.61874	868.454	1	86
2022-09-13	08:53:03	2.79192	871.246	FALSE	86
2022-09-13	08:53:03	3.94093	875.187	1	87
2022-09-13	08:53:04	4.68836	879.876	1	88
2022-09-13	08:53:04	5.60184	885.477	1	89
2022-09-13	08:53:04	4.78739	890.265	1	90
2022-09-13	08:53:04	5.16388	895.429	1	91
2022-09-13	08:53:05	2.77436	898.203	FALSE	91
2022-09-13	08:53:05	2.04637	900.249	FALSE	91
2022-09-13	08:53:05	4.01304	904.262	1	92
2022-09-13	08:53:05	6.33136	910.594	1	93
2022-09-13	08:53:06	7.27843	917.872	1	94
2022-09-13	08:53:06	10.2827	928.155	1	95
2022-09-13	08:53:06	8.49975	936.655	1	96
2022-09-13	08:53:06	10.3195	946.974	1	97
2022-09-13	08:53:07	4.8882	951.862	1	98
2022-09-13	08:53:07	1.53151	953.394	FALSE	98
2022-09-13	08:53:07	0.533193	953.927	FALSE	98
2022-09-13	08:53:07	0.696908	954.624	FALSE	98
2022-09-13	08:53:08	0.740929	955.365	FALSE	98
2022-09-13	08:53:08	0.73416	956.099	FALSE	98
2022-09-13	08:53:08	0.74215	956.841	FALSE	98
2022-09-13	08:53:09	0.739606	957.581	FALSE	98
2022-09-13	08:53:09	0.731717	958.313	FALSE	98
2022-09-13	08:53:09	8.31985	966.632	1	99
2022-09-13	08:53:09	2.69233	969.325	FALSE	99
2022-09-13	08:53:10	1.42322	970.748	FALSE	99
2022-09-13	08:53:10	0.776145	971.524	FALSE	99
2022-09-13	08:53:10	0.511718	972.036	FALSE	99
2022-09-13	08:53:10	0.326781	972.363	FALSE	99
2022-09-13	08:53:11	0.47874	972.841	FALSE	99
2022-09-13	08:53:11	0.417723	973.259	FALSE	99
2022-09-13	08:53:11	0.408563	973.668	FALSE	99
2022-09-13	08:53:11	0.4564	974.124	FALSE	99
2022-09-13	08:53:12	0.810445	974.934	FALSE	99
2022-09-13	08:53:12	0.721132	975.656	FALSE	99
2022-09-13	08:53:12	1.76836	977.424	FALSE	99
2022-09-13	08:53:13	1.83548	979.259	FALSE	99
2022-09-13	08:53:13	4.75457	984.014	1	100
2022-09-13	08:53:13	9.19986	993.214	1	101
2022-09-13	08:53:13	8.23629	1001.45	1	102
2022-09-13	08:53:14	3.86424	1005.31	1	103
2022-09-13	08:53:14	5.24378	1010.56	1	104
2022-09-13	08:53:14	6.02489	1016.58	1	105
2022-09-13	08:53:14	10.6153	1027.2	1	106
2022-09-13	08:53:15	3.07039	1030.27	1	107
2022-09-13	08:53:15	2.88856	1033.16	FALSE	107
2022-09-13	08:53:15	1.75772	1034.92	FALSE	107
2022-09-13	08:53:15	0.723982	1035.64	FALSE	107
2022-09-13	08:53:16	0.634364	1036.27	FALSE	107
2022-09-13	08:53:16	1.46083	1037.73	FALSE	107
2022-09-13	08:53:16	1.79116	1039.53	FALSE	107
2022-09-13	08:53:16	1.85477	1041.38	FALSE	107
2022-09-13	08:53:17	2.5595	1043.94	FALSE	107
2022-09-13	08:53:17	2.33711	1046.28	FALSE	107
2022-09-13	08:53:17	1.30307	1047.58	FALSE	107
2022-09-13	08:53:18	1.13971	1048.72	FALSE	107
2022-09-13	08:53:18	0.664033	1049.38	FALSE	107
2022-09-13	08:53:18	1.01472	1050.4	FALSE	107
2022-09-13	08:53:18	1.1819	1051.58	FALSE	107
2022-09-13	08:53:19	1.64358	1053.22	FALSE	107
2022-09-13	08:53:19	2.65701	1055.88	FALSE	107
2022-09-13	08:53:19	3.09935	1058.98	1	108
2022-09-13	08:53:19	3.72301	1062.7	1	109
2022-09-13	08:53:20	1.86459	1064.57	FALSE	109
2022-09-13	08:53:20	1.41859	1065.99	FALSE	109
2022-09-13	08:53:20	1.16765	1067.15	FALSE	109
2022-09-13	08:53:20	0.818232	1067.97	FALSE	109
2022-09-13	08:53:21	1.03625	1069.01	FALSE	109
2022-09-13	08:53:21	1.27798	1070.29	FALSE	109
2022-09-13	08:53:21	1.17401	1071.46	FALSE	109
2022-09-13	08:53:21	1.40953	1072.87	FALSE	109
2022-09-13	08:53:22	1.28877	1074.16	FALSE	109
2022-09-13	08:53:22	1.14128	1075.3	FALSE	109
2022-09-13	08:53:22	1.01732	1076.32	FALSE	109
2022-09-13	08:53:23	1.19874	1077.52	FALSE	109
2022-09-13	08:53:23	1.22663	1078.74	FALSE	109
2022-09-13	08:53:23	1.21625	1079.96	FALSE	109
2022-09-13	08:53:23	1.1994	1081.16	FALSE	109
2022-09-13	08:53:24	1.28566	1082.44	FALSE	109
2022-09-13	08:53:24	1.23894	1083.68	FALSE	109
2022-09-13	08:53:24	1.20098	1084.88	FALSE	109
2022-09-13	08:53:24	1.33462	1086.22	FALSE	109
2022-09-13	08:53:25	0.973142	1087.19	FALSE	109
2022-09-13	08:53:25	0.949224	1088.14	FALSE	109
2022-09-13	08:53:25	0.471616	1088.61	FALSE	109
2022-09-13	08:53:25	0.353346	1088.97	FALSE	109
2022-09-13	08:53:26	0.435789	1089.4	FALSE	109
2022-09-13	08:53:26	0.424237	1089.83	FALSE	109
2022-09-13	08:53:26	0.431361	1090.26	FALSE	109
2022-09-13	08:53:27	0.829071	1091.09	FALSE	109
2022-09-13	08:53:27	1.05747	1092.14	FALSE	109
2022-09-13	08:53:27	0.97757	1093.12	FALSE	109
2022-09-13	08:53:27	1.48597	1094.61	FALSE	109
2022-09-13	08:53:28	2.13996	1096.75	FALSE	109
2022-09-13	08:53:28	1.40032	1098.15	FALSE	109
2022-09-13	08:53:28	0.537926	1098.69	FALSE	109
2022-09-13	08:53:28	0.717875	1099.4	FALSE	109
2022-09-13	08:53:29	0.293702	1099.7	FALSE	109
2022-09-13	08:53:29	0.732837	1100.43	FALSE	109
2022-09-13	08:53:29	0.73355	1101.16	FALSE	109
2022-09-13	08:53:29	1.76393	1102.93	FALSE	109
2022-09-13	08:53:30	4.48988	1107.42	1	110
2022-09-13	08:53:30	12.6173	1120.03	1	111
2022-09-13	08:53:30	7.06505	1127.1	1	112
2022-09-13	08:53:30	3.50693	1130.61	1	113
2022-09-13	08:53:31	4.15217	1134.76	1	114
2022-09-13	08:53:31	5.99156	1140.75	1	115
2022-09-13	08:53:31	6.77818	1147.53	1	116
2022-09-13	08:53:32	5.90637	1153.43	1	117
2022-09-13	08:53:32	3.70541	1157.14	1	118
2022-09-13	08:53:32	5.08021	1162.22	1	119
2022-09-13	08:53:32	4.33609	1166.56	1	120
2022-09-13	08:53:33	10.18	1176.74	1	121
2022-09-13	08:53:33	17.4714	1194.21	1	122
2022-09-13	08:53:33	17.1983	1211.41	1	123
2022-09-13	08:53:33	16.6138	1228.02	1	124
2022-09-13	08:53:34	9.94561	1237.97	1	125
2022-09-13	08:53:34	3.05955	1241.03	1	126
2022-09-13	08:53:34	2.2962	1243.32	FALSE	126
2022-09-13	08:53:34	3.13798	1246.46	1	127
2022-09-13	08:53:35	1.82963	1248.29	FALSE	127
2022-09-13	08:53:35	1.548	1249.84	FALSE	127
2022-09-13	08:53:35	4.56485	1254.4	1	128
2022-09-13	08:53:36	6.44154	1260.84	1	129
2022-09-13	08:53:36	9.82993	1270.67	1	130
2022-09-13	08:53:36	3.19452	1273.87	1	131
2022-09-13	08:53:36	8.19309	1282.06	1	132
2022-09-13	08:53:37	7.12108	1289.18	1	133
2022-09-13	08:53:37	8.86026	1298.04	1	134
2022-09-13	08:53:37	4.65121	1302.69	1	135
2022-09-13	08:53:37	1.07253	1303.77	FALSE	135
2022-09-13	08:53:38	0.744949	1304.51	FALSE	135
2022-09-13	08:53:38	0.379606	1304.89	FALSE	135
2022-09-13	08:53:38	0.119148	1305.01	FALSE	135
2022-09-13	08:53:38	0.048359	1305.06	FALSE	135
2022-09-13	08:53:39	-0.138562	1305.06	FALSE	135
2022-09-13	08:53:39	-0.224669	1305.06	FALSE	135
2022-09-13	08:53:39	-0.12757	1305.06	FALSE	135
2022-09-13	08:53:39	-0.0369336	1305.06	FALSE	135
2022-09-13	08:53:40	-0.0363229	1305.06	FALSE	135
2022-09-13	08:53:40	0.586679	1305.64	FALSE	135
2022-09-13	08:53:40	0.751158	1306.4	FALSE	135
2022-09-13	08:53:41	0.731616	1307.13	FALSE	135
2022-09-13	08:53:41	0.74444	1307.87	FALSE	135
2022-09-13	08:53:41	0.507087	1308.38	FALSE	135
2022-09-13	08:53:41	0.00673053	1308.39	FALSE	135
2022-09-13	08:53:42	0.927952	1309.31	FALSE	135
2022-09-13	08:53:42	2.06851	1311.38	FALSE	135
2022-09-13	08:53:42	1.67345	1313.06	FALSE	135
2022-09-13	08:53:42	0.337621	1313.39	FALSE	135
2022-09-13	08:53:43	0.153652	1313.55	FALSE	135
2022-09-13	08:53:43	0.107952	1313.65	FALSE	135
2022-09-13	08:53:43	0.230038	1313.89	FALSE	135
2022-09-13	08:53:43	0.138588	1314.02	FALSE	135
2022-09-13	08:53:44	0.121896	1314.15	FALSE	135
2022-09-13	08:53:44	0.0738552	1314.22	FALSE	135
2022-09-13	08:53:44	0.138537	1314.36	FALSE	135
2022-09-13	08:53:44	0.175942	1314.53	FALSE	135
2022-09-13	08:53:45	0.466781	1315	FALSE	135
2022-09-13	08:53:45	1.60347	1316.6	FALSE	135
2022-09-13	08:53:45	2.81197	1319.42	FALSE	135
2022-09-13	08:53:46	2.0076	1321.42	FALSE	135
2022-09-13	08:53:46	3.73538	1325.16	1	136
2022-09-13	08:53:46	0.958282	1326.12	FALSE	136
2022-09-13	08:53:46	0.581234	1326.7	FALSE	136
2022-09-13	08:53:47	0.263626	1326.96	FALSE	136
2022-09-13	08:53:47	0.254313	1327.22	FALSE	136
2022-09-13	08:53:47	0.357825	1327.57	FALSE	136
2022-09-13	08:53:47	0.329122	1327.9	FALSE	136
2022-09-13	08:53:48	0.270191	1328.17	FALSE	136
2022-09-13	08:53:48	0.257366	1328.43	FALSE	136
2022-09-13	08:53:48	0.256654	1328.69	FALSE	136
2022-09-13	08:53:48	0.356094	1329.04	FALSE	136
2022-09-13	08:53:49	0.393906	1329.44	FALSE	136
2022-09-13	08:53:49	0.349326	1329.79	FALSE	136
2022-09-13	08:53:49	0.362354	1330.15	FALSE	136
2022-09-13	08:53:50	0.377672	1330.53	FALSE	136
2022-09-13	08:53:50	1.75818	1332.29	FALSE	136
2022-09-13	08:53:50	2.99391	1335.28	FALSE	136
2022-09-13	08:53:50	2.17406	1337.45	FALSE	136
2022-09-13	08:53:51	0.297367	1337.75	FALSE	136
2022-09-13	08:53:51	0.716399	1338.47	FALSE	136
2022-09-13	08:53:51	1.61365	1340.08	FALSE	136
2022-09-13	08:53:51	0.410903	1340.49	FALSE	136
2022-09-13	08:53:52	0.266171	1340.76	FALSE	136
2022-09-13	08:53:52	0.238028	1341	FALSE	136
2022-09-13	08:53:52	1.43274	1342.43	FALSE	136
2022-09-13	08:53:52	3.95253	1346.38	1	137
2022-09-13	08:53:53	6.79451	1353.18	1	138
2022-09-13	08:53:53	3.68454	1356.86	1	139
2022-09-13	08:53:53	3.97686	1360.84	1	140
2022-09-13	08:53:53	10.0658	1370.9	1	141
2022-09-13	08:53:54	10.0811	1380.98	1	142
2022-09-13	08:53:54	10.5197	1391.5	1	143
2022-09-13	08:53:54	6.21334	1397.72	1	144
2022-09-13	08:53:55	3.11406	1400.83	1	145
2022-09-13	08:53:55	3.27319	1404.1	1	146
2022-09-13	08:53:55	0.481132	1404.59	FALSE	146
2022-09-13	08:53:55	0.550649	1405.14	FALSE	146
2022-09-13	08:53:56	4.00683	1409.14	1	147
2022-09-13	08:53:56	6.1538	1415.3	1	148
2022-09-13	08:53:56	3.61243	1418.91	1	149
2022-09-13	08:53:56	3.48627	1422.4	1	150
2022-09-13	08:53:57	2.2906	1424.69	FALSE	150
2022-09-13	08:53:57	1.85497	1426.54	FALSE	150
2022-09-13	08:53:57	1.37055	1427.91	FALSE	150
2022-09-13	08:53:57	0.228715	1428.14	FALSE	150
2022-09-13	08:53:58	0.230903	1428.37	FALSE	150
2022-09-13	08:53:58	0.103626	1428.47	FALSE	150
2022-09-13	08:53:58	0.0972139	1428.57	FALSE	150
2022-09-13	08:53:59	0.260115	1428.83	FALSE	150
2022-09-13	08:53:59	0.166374	1429	FALSE	150
2022-09-13	08:53:59	0.228664	1429.23	FALSE	150
2022-09-13	08:53:59	0.224695	1429.45	FALSE	150
2022-09-13	08:54:00	0.23528	1429.69	FALSE	150
2022-09-13	08:54:00	0.235534	1429.92	FALSE	150
2022-09-13	08:54:00	0.69528	1430.62	FALSE	150
2022-09-13	08:54:00	1.90663	1432.52	FALSE	150
2022-09-13	08:54:01	1.05894	1433.58	FALSE	150
2022-09-13	08:54:01	0.597723	1434.18	FALSE	150
2022-09-13	08:54:01	1.15854	1435.34	FALSE	150
2022-09-13	08:54:01	1.4134	1436.75	FALSE	150
2022-09-13	08:54:02	2.73263	1439.49	FALSE	150
2022-09-13	08:54:02	0.517621	1440	FALSE	150
2022-09-13	08:54:02	0.29869	1440.3	FALSE	150
2022-09-13	08:54:02	0.4507	1440.75	FALSE	150
2022-09-13	08:54:03	0.640929	1441.39	FALSE	150
2022-09-13	08:54:03	0.64327	1442.04	FALSE	150
2022-09-13	08:54:03	0.502913	1442.54	FALSE	150
2022-09-13	08:54:04	0.82785	1443.37	FALSE	150
2022-09-13	08:54:04	0.651107	1444.02	FALSE	150
2022-09-13	08:54:04	0.7564	1444.78	FALSE	150
2022-09-13	08:54:04	1.29457	1446.07	FALSE	150
2022-09-13	08:54:05	1.3848	1447.45	FALSE	150
2022-09-13	08:54:05	1.14062	1448.6	FALSE	150
2022-09-13	08:54:05	0.654516	1449.25	FALSE	150
2022-09-13	08:54:05	0.685967	1449.94	FALSE	150
2022-09-13	08:54:06	0.645	1450.58	FALSE	150
2022-09-13	08:54:06	0.449478	1451.03	FALSE	150
2022-09-13	08:54:06	0.489122	1451.52	FALSE	150
2022-09-13	08:54:06	0.469529	1451.99	FALSE	150
2022-09-13	08:54:07	0.44729	1452.44	FALSE	150
2022-09-13	08:54:07	0.435433	1452.87	FALSE	150
2022-09-13	08:54:07	0.433906	1453.31	FALSE	150
2022-09-13	08:54:07	0.472634	1453.78	FALSE	150
2022-09-13	08:54:08	0.363931	1454.14	FALSE	150
2022-09-13	08:54:08	0.40383	1454.55	FALSE	150
2022-09-13	08:54:08	0.383931	1454.93	FALSE	150
2022-09-13	08:54:09	0.271107	1455.2	FALSE	150
2022-09-13	08:54:09	0.341998	1455.54	FALSE	150
2022-09-13	08:54:09	0.302812	1455.85	FALSE	150
2022-09-13	08:54:09	0.320827	1456.17	FALSE	150
2022-09-13	08:54:10	0.308054	1456.47	FALSE	150
2022-09-13	08:54:10	0.584287	1457.06	FALSE	150
2022-09-13	08:54:10	0.559758	1457.62	FALSE	150
2022-09-13	08:54:10	0.560522	1458.18	FALSE	150
2022-09-13	08:54:11	0.606374	1458.79	FALSE	150
2022-09-13	08:54:11	0.467799	1459.25	FALSE	150
2022-09-13	08:54:11	0.600318	1459.85	FALSE	150
2022-09-13	08:54:11	0.535178	1460.39	FALSE	150
2022-09-13	08:54:12	0.539911	1460.93	FALSE	150
2022-09-13	08:54:12	0.580827	1461.51	FALSE	150
2022-09-13	08:54:12	0.495993	1462.01	FALSE	150
2022-09-13	08:54:13	0.608817	1462.61	FALSE	150
2022-09-13	08:54:13	0.567137	1463.18	FALSE	150
2022-09-13	08:54:13	0.747901	1463.93	FALSE	150
2022-09-13	08:54:13	0.592685	1464.52	FALSE	150
2022-09-13	08:54:14	0.594975	1465.12	FALSE	150
2022-09-13	08:54:14	0.700827	1465.82	FALSE	150
2022-09-13	08:54:14	0.743524	1466.56	FALSE	150
2022-09-13	08:54:14	0.538333	1467.1	FALSE	150
2022-09-13	08:54:15	0.608511	1467.71	FALSE	150
2022-09-13	08:54:15	0.420064	1468.13	FALSE	150
2022-09-13	08:54:15	0.846934	1468.98	FALSE	150
2022-09-13	08:54:15	0.727646	1469.7	FALSE	150
2022-09-13	08:54:16	0.563779	1470.27	FALSE	150
2022-09-13	08:54:16	0.496909	1470.76	FALSE	150
2022-09-13	08:54:16	0.441896	1471.21	FALSE	150
2022-09-13	08:54:16	0.302557	1471.51	FALSE	150
2022-09-13	08:54:17	0.444237	1471.95	FALSE	150
2022-09-13	08:54:17	0.708003	1472.66	FALSE	150
2022-09-13	08:54:17	0.811311	1473.47	FALSE	150
2022-09-13	08:54:18	1.08973	1474.56	FALSE	150
2022-09-13	08:54:18	0.838028	1475.4	FALSE	150
2022-09-13	08:54:18	1.06663	1476.47	FALSE	150
2022-09-13	08:54:18	1.07925	1477.55	FALSE	150
2022-09-13	08:54:19	0.660166	1478.21	FALSE	150
2022-09-13	08:54:19	0.439453	1478.64	FALSE	150
2022-09-13	08:54:19	0.451667	1479.1	FALSE	150
2022-09-13	08:54:19	0.535484	1479.63	FALSE	150
2022-09-13	08:54:20	0.949784	1480.58	FALSE	150
2022-09-13	08:54:20	1.40561	1481.99	FALSE	150
2022-09-13	08:54:20	1.0365	1483.02	FALSE	150
2022-09-13	08:54:20	0.594669	1483.62	FALSE	150
2022-09-13	08:54:21	0.431311	1484.05	FALSE	150
2022-09-13	08:54:21	0.382964	1484.43	FALSE	150
2022-09-13	08:54:21	0.444847	1484.88	FALSE	150
2022-09-13	08:54:22	0.358639	1485.24	FALSE	150
2022-09-13	08:54:22	0.375382	1485.61	FALSE	150
2022-09-13	08:54:22	0.387188	1486	FALSE	150
2022-09-13	08:54:22	0.435382	1486.43	FALSE	150
2022-09-13	08:54:23	0.433397	1486.87	FALSE	150
2022-09-13	08:54:23	0.400878	1487.27	FALSE	150
2022-09-13	08:54:23	0.446069	1487.71	FALSE	150
2022-09-13	08:54:23	0.420318	1488.13	FALSE	150
2022-09-13	08:54:24	0.486679	1488.62	FALSE	150
2022-09-13	08:54:24	2.44515	1491.07	FALSE	150
2022-09-13	08:54:24	9.70006	1500.77	1	151
2022-09-13	08:54:24	8.69798	1509.46	1	152
2022-09-13	08:54:25	1.29024	1510.75	FALSE	152
2022-09-13	08:54:25	0.435534	1511.19	FALSE	152
2022-09-13	08:54:25	0.385509	1511.58	FALSE	152
2022-09-13	08:54:25	0.324695	1511.9	FALSE	152
2022-09-13	08:54:26	0.341947	1512.24	FALSE	152
2022-09-13	08:54:26	0.417316	1512.66	FALSE	152
2022-09-13	08:54:26	0.430089	1513.09	FALSE	152
2022-09-13	08:54:27	0.385967	1513.48	FALSE	152
2022-09-13	08:54:27	0.384135	1513.86	FALSE	152
2022-09-13	08:54:27	0.399046	1514.26	FALSE	152
2022-09-13	08:54:27	0.306425	1514.57	FALSE	152
2022-09-13	08:54:28	0.274618	1514.84	FALSE	152
2022-09-13	08:54:28	0.334975	1515.18	FALSE	152
2022-09-13	08:54:28	0.428766	1515.6	FALSE	152
2022-09-13	08:54:28	0.397926	1516	FALSE	152
2022-09-13	08:54:29	0.877875	1516.88	FALSE	152
2022-09-13	08:54:29	1.55365	1518.43	FALSE	152
2022-09-13	08:54:29	1.70327	1520.14	FALSE	152
2022-09-13	08:54:29	1.11055	1521.25	FALSE	152
2022-09-13	08:54:30	0.390802	1521.64	FALSE	152
2022-09-13	08:54:30	0.245967	1521.88	FALSE	152
2022-09-13	08:54:30	0.235331	1522.12	FALSE	152
2022-09-13	08:54:30	0.211819	1522.33	FALSE	152
2022-09-13	08:54:31	0.345204	1522.68	FALSE	152
2022-09-13	08:54:31	0.341998	1523.02	FALSE	152
2022-09-13	08:54:31	0.263372	1523.28	FALSE	152
2022-09-13	08:54:32	0.487239	1523.77	FALSE	152
2022-09-13	08:54:32	0.36841	1524.14	FALSE	152
2022-09-13	08:54:32	0.558842	1524.7	FALSE	152
2022-09-13	08:54:32	0.367646	1525.06	FALSE	152
2022-09-13	08:54:33	0.455433	1525.52	FALSE	152
2022-09-13	08:54:33	0.398791	1525.92	FALSE	152
2022-09-13	08:54:33	0.786985	1526.7	FALSE	152
2022-09-13	08:54:33	0.77355	1527.48	FALSE	152
2022-09-13	08:54:34	2.19696	1529.68	FALSE	152
2022-09-13	08:54:34	4.02444	1533.7	1	153
2022-09-13	08:54:34	3.60826	1537.31	1	154
2022-09-13	08:54:34	4.39426	1541.7	1	155
2022-09-13	08:54:35	2.64088	1544.34	FALSE	155
2022-09-13	08:54:35	1.20215	1545.55	FALSE	155
2022-09-13	08:54:35	2.45177	1548	FALSE	155
2022-09-13	08:54:36	0.735178	1548.73	FALSE	155
2022-09-13	08:54:36	0.489224	1549.22	FALSE	155
2022-09-13	08:54:36	1.13991	1550.36	FALSE	155
2022-09-13	08:54:36	1.35513	1551.72	FALSE	155
2022-09-13	08:54:37	4.60149	1556.32	1	156
2022-09-13	08:54:37	9.29115	1565.61	1	157
2022-09-13	08:54:37	4.69986	1570.31	1	158
2022-09-13	08:54:37	1.05859	1571.37	FALSE	158
2022-09-13	08:54:38	0.779606	1572.15	FALSE	158
2022-09-13	08:54:38	0.548766	1572.7	FALSE	158
2022-09-13	08:54:38	0.655891	1573.35	FALSE	158
2022-09-13	08:54:38	0.71589	1574.07	FALSE	158
2022-09-13	08:54:39	0.970903	1575.04	FALSE	158
2022-09-13	08:54:39	0.845	1575.88	FALSE	158
2022-09-13	08:54:39	1.34352	1577.23	FALSE	158
2022-09-13	08:54:39	0.863575	1578.09	FALSE	158
2022-09-13	08:54:40	0.53187	1578.62	FALSE	158
2022-09-13	08:54:40	0.314313	1578.94	FALSE	158
2022-09-13	08:54:40	0.602863	1579.54	FALSE	158
2022-09-13	08:54:41	0.27187	1579.81	FALSE	158
2022-09-13	08:54:41	0.304033	1580.12	FALSE	158
2022-09-13	08:54:41	0.0528374	1580.17	FALSE	158
2022-09-13	08:54:41	0.472583	1580.64	FALSE	158
2022-09-13	08:54:42	0.30902	1580.95	FALSE	158
2022-09-13	08:54:42	0.103575	1581.05	FALSE	158
2022-09-13	08:54:42	0.0262216	1581.08	FALSE	158
2022-09-13	08:54:42	0.0440333	1581.12	FALSE	158
2022-09-13	08:54:43	0.238384	1581.36	FALSE	158
2022-09-13	08:54:43	0.698384	1582.06	FALSE	158
2022-09-13	08:54:43	2.86866	1584.93	FALSE	158
2022-09-13	08:54:43	5.02749	1589.96	1	159
2022-09-13	08:54:44	4.78948	1594.75	1	160
2022-09-13	08:54:44	4.30841	1599.05	1	161
2022-09-13	08:54:44	0.297367	1599.35	FALSE	161
2022-09-13	08:54:45	0.0952292	1599.45	FALSE	161
2022-09-13	08:54:45	0.333753	1599.78	FALSE	161
2022-09-13	08:54:45	0.289122	1600.07	FALSE	161
2022-09-13	08:54:45	0.677977	1600.75	FALSE	161
2022-09-13	08:54:46	0.263779	1601.01	FALSE	161
2022-09-13	08:54:46	0.130496	1601.14	FALSE	161
2022-09-13	08:54:46	0.139555	1601.28	FALSE	161
2022-09-13	08:54:46	0.379199	1601.66	FALSE	161
2022-09-13	08:54:47	1.83228	1603.49	FALSE	161
2022-09-13	08:54:47	0.533092	1604.03	FALSE	161
2022-09-13	08:54:47	2.46871	1606.5	FALSE	161
2022-09-13	08:54:47	2.96739	1609.46	FALSE	161
2022-09-13	08:54:48	3.15915	1612.62	1	162
2022-09-13	08:54:48	5.48779	1618.11	1	163
2022-09-13	08:54:48	1.44958	1619.56	FALSE	163
2022-09-13	08:54:48	3.60291	1623.16	1	164
2022-09-13	08:54:49	1.13228	1624.29	FALSE	164
2022-09-13	08:54:49	0.818537	1625.11	FALSE	164
2022-09-13	08:54:49	0.570649	1625.68	FALSE	164
2022-09-13	08:54:50	0.423779	1626.11	FALSE	164
2022-09-13	08:54:50	0.0631681	1626.17	FALSE	164
2022-09-13	08:54:50	-0.193168	1626.17	FALSE	164
2022-09-13	08:54:50	-0.0817682	1626.17	FALSE	164
2022-09-13	08:54:51	0.0180791	1626.19	FALSE	164
2022-09-13	08:54:51	-0.0163229	1626.19	FALSE	164
2022-09-13	08:54:51	-0.156221	1626.19	FALSE	164
2022-09-13	08:54:51	-0.115661	1626.19	FALSE	164
2022-09-13	08:54:52	0.0255091	1626.21	FALSE	164
2022-09-13	08:54:52	0.0588934	1626.27	FALSE	164
2022-09-13	08:54:52	0.0736007	1626.35	FALSE	164
2022-09-13	08:54:52	0.0682063	1626.42	FALSE	164
2022-09-13	08:54:53	0.171514	1626.59	FALSE	164
2022-09-13	08:54:53	0.193244	1626.78	FALSE	164
2022-09-13	08:54:53	0.166272	1626.95	FALSE	164
2022-09-13	08:54:53	0.28154	1627.23	FALSE	164
2022-09-13	08:54:54	0.306781	1627.53	FALSE	164
2022-09-13	08:54:54	0.396196	1627.93	FALSE	164
2022-09-13	08:54:54	0.36444	1628.3	FALSE	164
2022-09-13	08:54:55	0.425	1628.72	FALSE	164
2022-09-13	08:54:55	0.32729	1629.05	FALSE	164
2022-09-13	08:54:55	0.330547	1629.38	FALSE	164
2022-09-13	08:54:55	0.369682	1629.75	FALSE	164
2022-09-13	08:54:56	0.391412	1630.14	FALSE	164
2022-09-13	08:54:56	0.409936	1630.55	FALSE	164
2022-09-13	08:54:56	0.468664	1631.02	FALSE	164
2022-09-13	08:54:56	0.370038	1631.39	FALSE	164
2022-09-13	08:54:57	0.294109	1631.68	FALSE	164
2022-09-13	08:54:57	0.31187	1631.99	FALSE	164
2022-09-13	08:54:57	0.342964	1632.34	FALSE	164
2022-09-13	08:54:57	0.296756	1632.63	FALSE	164
2022-09-13	08:54:58	0.26729	1632.9	FALSE	164
2022-09-13	08:54:58	0.272939	1633.17	FALSE	164
2022-09-13	08:54:58	0.287646	1633.46	FALSE	164
2022-09-13	08:54:59	0.263575	1633.72	FALSE	164
2022-09-13	08:54:59	0.193193	1633.92	FALSE	164
2022-09-13	08:54:59	0.229733	1634.15	FALSE	164
2022-09-13	08:54:59	0.18327	1634.33	FALSE	164
2022-09-13	08:55:00	0.298893	1634.63	FALSE	164
2022-09-13	08:55:00	0.463422	1635.09	FALSE	164
2022-09-13	08:55:00	1.3907	1636.48	FALSE	164
2022-09-13	08:55:00	1.01177	1637.5	FALSE	164
2022-09-13	08:55:01	2.01029	1639.51	FALSE	164
2022-09-13	08:55:01	1.3824	1640.89	FALSE	164
2022-09-13	08:55:01	2.19793	1643.09	FALSE	164
2022-09-13	08:55:01	2.90378	1645.99	FALSE	164
2022-09-13	08:55:02	2.54505	1648.54	FALSE	164
2022-09-13	08:55:02	0.674008	1649.21	FALSE	164
2022-09-13	08:55:02	0.280318	1649.49	FALSE	164
2022-09-13	08:55:02	0.652277	1650.14	FALSE	164
2022-09-13	08:55:03	0.439046	1650.58	FALSE	164
2022-09-13	08:55:03	0.346069	1650.93	FALSE	164
2022-09-13	08:55:03	0.375127	1651.3	FALSE	164
2022-09-13	08:55:04	0.198486	1651.5	FALSE	164
2022-09-13	08:55:04	1.12475	1652.63	FALSE	164
2022-09-13	08:55:04	0.788918	1653.41	FALSE	164
2022-09-13	08:55:04	0.568969	1653.98	FALSE	164
2022-09-13	08:55:05	0.327036	1654.31	FALSE	164
2022-09-13	08:55:05	0.247392	1654.56	FALSE	164
2022-09-13	08:55:05	0.10098	1654.66	FALSE	164
2022-09-13	08:55:05	0.122354	1654.78	FALSE	164
2022-09-13	08:55:06	0.18841	1654.97	FALSE	164
2022-09-13	08:55:06	0.176298	1655.15	FALSE	164
2022-09-13	08:55:06	0.156349	1655.3	FALSE	164
2022-09-13	08:55:06	0.0492242	1655.35	FALSE	164
2022-09-13	08:55:07	0.224084	1655.58	FALSE	164
2022-09-13	08:55:07	0.225509	1655.8	FALSE	164
2022-09-13	08:55:07	0.362303	1656.16	FALSE	164
2022-09-13	08:55:08	0.468868	1656.63	FALSE	164
2022-09-13	08:55:08	0.71589	1657.35	FALSE	164
2022-09-13	08:55:08	0.758282	1658.11	FALSE	164
2022-09-13	08:55:08	1.14022	1659.25	FALSE	164
2022-09-13	08:55:09	0.523219	1659.77	FALSE	164
2022-09-13	08:55:09	0.180166	1659.95	FALSE	164
2022-09-13	08:55:09	0.448053	1660.4	FALSE	164
2022-09-13	08:55:09	0.223575	1660.62	FALSE	164
2022-09-13	08:55:10	0.409021	1661.03	FALSE	164
2022-09-13	08:55:10	0.36729	1661.4	FALSE	164
2022-09-13	08:55:10	0.699708	1662.1	FALSE	164
2022-09-13	08:55:10	0.835789	1662.93	FALSE	164
2022-09-13	08:55:11	0.960471	1663.89	FALSE	164
2022-09-13	08:55:11	0.689529	1664.58	FALSE	164
2022-09-13	08:55:11	1.88871	1666.47	FALSE	164
2022-09-13	08:55:11	3.65401	1670.13	1	165
2022-09-13	08:55:12	3.84678	1673.97	1	166
2022-09-13	08:55:12	4.22724	1678.2	1	167
2022-09-13	08:55:12	1.84001	1680.04	FALSE	167
2022-09-13	08:55:13	2.05314	1682.09	FALSE	167
2022-09-13	08:55:13	2.89233	1684.99	FALSE	167
2022-09-13	08:55:13	1.7676	1686.75	FALSE	167
2022-09-13	08:55:13	3.55609	1690.31	1	168
2022-09-13	08:55:14	3.62449	1693.93	1	169
2022-09-13	08:55:14	5.48785	1699.42	1	170
2022-09-13	08:55:14	4.33528	1703.76	1	171
2022-09-13	08:55:14	4.55787	1708.31	1	172
2022-09-13	08:55:15	6.05385	1714.37	1	173
2022-09-13	08:55:15	4.47777	1718.85	1	174
2022-09-13	08:55:15	3.66103	1722.51	1	175
2022-09-13	08:55:15	1.98205	1724.49	FALSE	175
2022-09-13	08:55:16	2.60525	1727.09	FALSE	175
2022-09-13	08:55:16	1.50938	1728.6	FALSE	175
2022-09-13	08:55:16	0.390191	1728.99	FALSE	175
2022-09-13	08:55:16	0.552328	1729.55	FALSE	175
2022-09-13	08:55:17	0.140013	1729.69	FALSE	175
2022-09-13	08:55:17	0.388257	1730.07	FALSE	175
2022-09-13	08:55:17	0.654516	1730.73	FALSE	175
2022-09-13	08:55:18	0.657366	1731.39	FALSE	175
2022-09-13	08:55:18	0.555789	1731.94	FALSE	175
2022-09-13	08:55:18	0.523015	1732.47	FALSE	175
2022-09-13	08:55:18	0.743117	1733.21	FALSE	175
2022-09-13	08:55:19	0.740114	1733.95	FALSE	175
2022-09-13	08:55:19	0.215942	1734.16	FALSE	175
2022-09-13	08:55:19	0.260216	1734.42	FALSE	175
2022-09-13	08:55:19	0.255891	1734.68	FALSE	175
2022-09-13	08:55:20	0.262557	1734.94	FALSE	175
2022-09-13	08:55:20	0.296959	1735.24	FALSE	175
2022-09-13	08:55:20	0.277163	1735.52	FALSE	175
2022-09-13	08:55:20	0.236145	1735.75	FALSE	175
2022-09-13	08:55:21	0.288512	1736.04	FALSE	175
2022-09-13	08:55:21	0.353855	1736.4	FALSE	175
2022-09-13	08:55:21	0.568664	1736.96	FALSE	175
2022-09-13	08:55:22	0.735941	1737.7	FALSE	175
2022-09-13	08:55:22	0.737315	1738.44	FALSE	175
2022-09-13	08:55:22	0.738486	1739.18	FALSE	175
2022-09-13	08:55:22	0.740114	1739.92	FALSE	175
2022-09-13	08:55:23	0.739758	1740.66	FALSE	175
2022-09-13	08:55:23	0.739046	1741.4	FALSE	175
2022-09-13	08:55:23	0.734975	1742.13	FALSE	175
2022-09-13	08:55:23	0.741641	1742.87	FALSE	175
2022-09-13	08:55:24	0.592786	1743.46	FALSE	175
2022-09-13	08:55:24	0.29187	1743.76	FALSE	175
2022-09-13	08:55:24	0.262659	1744.02	FALSE	175
2022-09-13	08:55:24	0.202659	1744.22	FALSE	175
2022-09-13	08:55:25	0.271972	1744.49	FALSE	175
2022-09-13	08:55:25	0.142303	1744.64	FALSE	175
2022-09-13	08:55:25	0.282608	1744.92	FALSE	175
2022-09-13	08:55:25	0.271514	1745.19	FALSE	175
2022-09-13	08:55:26	0.37014	1745.56	FALSE	175
2022-09-13	08:55:26	0.333448	1745.89	FALSE	175
2022-09-13	08:55:26	0.333601	1746.23	FALSE	175
2022-09-13	08:55:27	0.58154	1746.81	FALSE	175
2022-09-13	08:55:27	0.632226	1747.44	FALSE	175
2022-09-13	08:55:27	0.305	1747.75	FALSE	175
2022-09-13	08:55:27	0.371514	1748.12	FALSE	175
2022-09-13	08:55:28	0.242761	1748.36	FALSE	175
2022-09-13	08:55:28	0.238384	1748.6	FALSE	175
2022-09-13	08:55:28	0.331921	1748.93	FALSE	175
2022-09-13	08:55:28	0.348104	1749.28	FALSE	175
2022-09-13	08:55:29	0.42729	1749.71	FALSE	175
2022-09-13	08:55:29	0.726679	1750.43	FALSE	175
2022-09-13	08:55:29	1.4363	1751.87	FALSE	175
2022-09-13	08:55:29	1.35223	1753.22	FALSE	175
2022-09-13	08:55:30	1.23309	1754.45	FALSE	175
2022-09-13	08:55:30	0.964593	1755.42	FALSE	175
2022-09-13	08:55:30	1.24088	1756.66	FALSE	175
2022-09-13	08:55:30	1.48439	1758.14	FALSE	175
2022-09-13	08:55:31	1.61268	1759.76	FALSE	175
2022-09-13	08:55:31	0.991463	1760.75	FALSE	175
2022-09-13	08:55:31	1.10765	1761.86	FALSE	175
2022-09-13	08:55:32	0.783168	1762.64	FALSE	175
2022-09-13	08:55:32	1.02322	1763.66	FALSE	175
2022-09-13	08:55:32	0.849427	1764.51	FALSE	175
2022-09-13	08:55:32	0.658384	1765.17	FALSE	175
2022-09-13	08:55:33	0.672277	1765.84	FALSE	175
2022-09-13	08:55:33	0.511209	1766.35	FALSE	175
2022-09-13	08:55:33	0.39299	1766.75	FALSE	175
2022-09-13	08:55:33	0.349733	1767.1	FALSE	175
2022-09-13	08:55:34	0.406527	1767.5	FALSE	175
2022-09-13	08:55:34	0.274313	1767.78	FALSE	175
2022-09-13	08:55:34	0.13355	1767.91	FALSE	175
2022-09-13	08:55:34	0.252532	1768.16	FALSE	175
2022-09-13	08:55:35	0.218028	1768.38	FALSE	175
2022-09-13	08:55:35	0.219657	1768.6	FALSE	175
2022-09-13	08:55:35	0.333906	1768.93	FALSE	175
2022-09-13	08:55:36	0.195942	1769.13	FALSE	175
2022-09-13	08:55:36	0.392277	1769.52	FALSE	175
2022-09-13	08:55:36	0.276094	1769.8	FALSE	175
2022-09-13	08:55:36	0.308461	1770.11	FALSE	175
2022-09-13	08:55:37	0.249071	1770.36	FALSE	175
2022-09-13	08:55:37	0.302914	1770.66	FALSE	175
2022-09-13	08:55:37	0.213397	1770.87	FALSE	175
2022-09-13	08:55:37	0.229886	1771.1	FALSE	175
2022-09-13	08:55:38	0.0699875	1771.17	FALSE	175
2022-09-13	08:55:38	0.057672	1771.23	FALSE	175
2022-09-13	08:55:38	0.250598	1771.48	FALSE	175
2022-09-13	08:55:38	0.0149748	1771.5	FALSE	175
2022-09-13	08:55:39	-0.269198	1771.5	FALSE	175
2022-09-13	08:55:39	-0.407213	1771.5	FALSE	175
2022-09-13	08:55:39	-0.18304	1771.5	FALSE	175
2022-09-13	08:55:39	-0.198155	1771.5	FALSE	175
2022-09-13	08:55:40	-0.147875	1771.5	FALSE	175
2022-09-13	08:55:40	-0.0709285	1771.5	FALSE	175
2022-09-13	08:55:40	0.190649	1771.69	FALSE	175
2022-09-13	08:55:41	0.210445	1771.9	FALSE	175
2022-09-13	08:55:41	-0.0722007	1771.9	FALSE	175
2022-09-13	08:55:41	0.158639	1772.06	FALSE	175
2022-09-13	08:55:41	0.0890205	1772.14	FALSE	175
2022-09-13	08:55:42	0.268715	1772.41	FALSE	175
2022-09-13	08:55:42	0.158944	1772.57	FALSE	175
2022-09-13	08:55:42	0.616552	1773.19	FALSE	175
2022-09-13	08:55:43	2.6335	1775.82	FALSE	175
2022-09-13	08:55:43	3.04154	1778.86	1	176
2022-09-13	08:55:43	5.24103	1784.11	1	177
2022-09-13	08:55:43	2.77675	1786.88	FALSE	177
2022-09-13	08:55:43	5.07451	1791.96	1	178
2022-09-13	08:55:44	3.16383	1795.12	1	179
2022-09-13	08:55:44	3.08164	1798.2	1	180
2022-09-13	08:55:44	1.8966	1800.1	FALSE	180
2022-09-13	08:55:45	0.648257	1800.75	FALSE	180
2022-09-13	08:55:45	0.908104	1801.65	FALSE	180
2022-09-13	08:55:45	0.733651	1802.39	FALSE	180
2022-09-13	08:55:45	1.12739	1803.52	FALSE	180
2022-09-13	08:55:46	1.29289	1804.81	FALSE	180
2022-09-13	08:55:46	1.08851	1805.9	FALSE	180
2022-09-13	08:55:46	2.83467	1808.73	FALSE	180
2022-09-13	08:55:46	1.86836	1810.6	FALSE	180
2022-09-13	08:55:47	1.58592	1812.19	FALSE	180
2022-09-13	08:55:47	1.06836	1813.25	FALSE	180
2022-09-13	08:55:47	1.64134	1814.9	FALSE	180
2022-09-13	08:55:47	2.55472	1817.45	FALSE	180
2022-09-13	08:55:48	5.58495	1823.04	1	181
2022-09-13	08:55:48	7.14245	1830.18	1	182
2022-09-13	08:55:48	3.86693	1834.05	1	183
2022-09-13	08:55:48	4.10225	1838.15	1	184
2022-09-13	08:55:49	2.57238	1840.72	FALSE	184
2022-09-13	08:55:49	3.32734	1844.05	1	185
2022-09-13	08:55:49	2.08088	1846.13	FALSE	185
2022-09-13	08:55:50	1.80006	1847.93	FALSE	185
2022-09-13	08:55:50	3.49574	1851.42	1	186
2022-09-13	08:55:50	1.34739	1852.77	FALSE	186
2022-09-13	08:55:50	2.51604	1855.29	FALSE	186
2022-09-13	08:55:51	2.89849	1858.19	FALSE	186
2022-09-13	08:55:51	1.82871	1860.01	FALSE	186
2022-09-13	08:55:51	1.74866	1861.76	FALSE	186
2022-09-13	08:55:51	0.844898	1862.61	FALSE	186
2022-09-13	08:55:52	2.47263	1865.08	FALSE	186
2022-09-13	08:55:52	2.68912	1867.77	FALSE	186
2022-09-13	08:55:52	4.80897	1872.58	1	187
2022-09-13	08:55:52	4.18225	1876.76	1	188

## Sheet: Saint_martin_202291385050
						**GoPro Fitting: 840
2022-09-13	08:50:51	0.308512
2022-09-13	08:50:51	0.337468
2022-09-13	08:50:51	0.31299
2022-09-13	08:50:51	0.32215
2022-09-13	08:50:52	0.318028
2022-09-13	08:50:52	0.315331
2022-09-13	08:50:52	0.32271
2022-09-13	08:50:52	0.323982
2022-09-13	08:50:53	0.310496
2022-09-13	08:50:53	0.300013
2022-09-13	08:50:53	0.347901
2022-09-13	08:50:53	0.407239
2022-09-13	08:50:54	0.570954
2022-09-13	08:50:54	0.656807
2022-09-13	08:50:54	0.5593
2022-09-13	08:50:55	0.556196
2022-09-13	08:50:55	0.504898
2022-09-13	08:50:55	0.407443
2022-09-13	08:50:55	0.399504
2022-09-13	08:50:56	0.406781
2022-09-13	08:50:56	0.33416
2022-09-13	08:50:56	0.328308
2022-09-13	08:50:56	0.338791
2022-09-13	08:50:57	0.35813
2022-09-13	08:50:57	0.373193
2022-09-13	08:50:57	0.619351
2022-09-13	08:50:57	0.732277
2022-09-13	08:50:58	0.342863
2022-09-13	08:50:58	0.293601
2022-09-13	08:50:58	0.454873
2022-09-13	08:50:58	0.281132
2022-09-13	08:50:59	0.351412
2022-09-13	08:50:59	0.345153
2022-09-13	08:50:59	0.459555
2022-09-13	08:51:00	0.293244
2022-09-13	08:51:00	0.266883
2022-09-13	08:51:00	0.195738
2022-09-13	08:51:00	0.363372
2022-09-13	08:51:01	0.0779265
2022-09-13	08:51:01	0.467799
2022-09-13	08:51:01	0.274669
2022-09-13	08:51:01	0.488054
2022-09-13	08:51:02	0.338588
2022-09-13	08:51:02	0.238893
2022-09-13	08:51:02	0.148155
2022-09-13	08:51:02	0.470242
2022-09-13	08:51:03	0.213143
2022-09-13	08:51:03	-0.197748
2022-09-13	08:51:03	-0.422989
2022-09-13	08:51:04	-0.180191
2022-09-13	08:51:04	0.867493
2022-09-13	08:51:04	1.38933
2022-09-13	08:51:04	1.32159
2022-09-13	08:51:05	1.61513
2022-09-13	08:51:05	1.67151
2022-09-13	08:51:05	1.93935
2022-09-13	08:51:05	1.3735
2022-09-13	08:51:06	0.657417
2022-09-13	08:51:06	2.21375
2022-09-13	08:51:06	3.99579
2022-09-13	08:51:06	5.56021
2022-09-13	08:51:07	4.80342
2022-09-13	08:51:07	1.35716
2022-09-13	08:51:07	2.56775
2022-09-13	08:51:07	3.1079
2022-09-13	08:51:08	2.34556
2022-09-13	08:51:08	2.24398
2022-09-13	08:51:08	2.11416
2022-09-13	08:51:09	1.78922
2022-09-13	08:51:09	1.84836
2022-09-13	08:51:09	1.30256
2022-09-13	08:51:09	1.72907
2022-09-13	08:51:10	1.7276
2022-09-13	08:51:10	1.4766
2022-09-13	08:51:10	1.34978
2022-09-13	08:51:10	1.36785
2022-09-13	08:51:11	1.38469
2022-09-13	08:51:11	1.45513
2022-09-13	08:51:11	1.44877
2022-09-13	08:51:11	0.851005
2022-09-13	08:51:12	1.0937
2022-09-13	08:51:12	2.34434
2022-09-13	08:51:12	1.13045
2022-09-13	08:51:13	0.697061
2022-09-13	08:51:13	0.404898
2022-09-13	08:51:13	0.442608
2022-09-13	08:51:13	0.155942
2022-09-13	08:51:14	-0.0380532
2022-09-13	08:51:14	0.0149748
2022-09-13	08:51:14	0.0268832
2022-09-13	08:51:14	0.17416
2022-09-13	08:51:15	-0.0215138
2022-09-13	08:51:15	0.383422
2022-09-13	08:51:15	0.291158
2022-09-13	08:51:15	0.241336
2022-09-13	08:51:16	0.420624
2022-09-13	08:51:16	0.213244
2022-09-13	08:51:16	0.334466
2022-09-13	08:51:16	0.181234
2022-09-13	08:51:17	0.359606
2022-09-13	08:51:17	0.816552
2022-09-13	08:51:17	0.392379
2022-09-13	08:51:18	0.3964
2022-09-13	08:51:18	0.439606
2022-09-13	08:51:18	0.482812
2022-09-13	08:51:18	0.461896
2022-09-13	08:51:19	0.456756
2022-09-13	08:51:19	0.488003
2022-09-13	08:51:19	0.489682
2022-09-13	08:51:19	0.469631
2022-09-13	08:51:20	0.480369
2022-09-13	08:51:20	0.47126
2022-09-13	08:51:20	0.465305
2022-09-13	08:51:20	0.465967
2022-09-13	08:51:21	0.460623
2022-09-13	08:51:21	0.46841
2022-09-13	08:51:21	0.471005
2022-09-13	08:51:21	0.475992
2022-09-13	08:51:22	0.47813
2022-09-13	08:51:22	0.473244
2022-09-13	08:51:22	0.471819
2022-09-13	08:51:23	0.481743
2022-09-13	08:51:23	0.504135
2022-09-13	08:51:23	0.545712
2022-09-13	08:51:23	0.523168
2022-09-13	08:51:24	0.512532
2022-09-13	08:51:24	0.47411
2022-09-13	08:51:24	0.64159
2022-09-13	08:51:24	0.543372
2022-09-13	08:51:25	0.541641
2022-09-13	08:51:25	0.646934
2022-09-13	08:51:25	0.529224
2022-09-13	08:51:25	0.777265
2022-09-13	08:51:26	0.664644
2022-09-13	08:51:26	0.799198
2022-09-13	08:51:26	0.755585
2022-09-13	08:51:27	0.453855
2022-09-13	08:51:27	0.466221
2022-09-13	08:51:27	0.50729
2022-09-13	08:51:27	0.449682
2022-09-13	08:51:28	0.456807
2022-09-13	08:51:28	0.424949
2022-09-13	08:51:28	0.454466
2022-09-13	08:51:28	0.459097
2022-09-13	08:51:29	0.461132
2022-09-13	08:51:29	0.511463
2022-09-13	08:51:29	0.633397
2022-09-13	08:51:29	0.547596
2022-09-13	08:51:30	0.492023
2022-09-13	08:51:30	0.499606
2022-09-13	08:51:30	0.530954
2022-09-13	08:51:30	0.588613
2022-09-13	08:51:31	0.875484
2022-09-13	08:51:31	1.11543
2022-09-13	08:51:31	1.74525
2022-09-13	08:51:32	6.27919
2022-09-13	08:51:32	5.05446
2022-09-13	08:51:32	1.64475
2022-09-13	08:51:32	0.941947
2022-09-13	08:51:33	1.3366
2022-09-13	08:51:33	0.839046
2022-09-13	08:51:33	1.97146
2022-09-13	08:51:33	1.5566
2022-09-13	08:51:34	2.02902
2022-09-13	08:51:34	2.33457
2022-09-13	08:51:34	1.86475
2022-09-13	08:51:34	1.90958
2022-09-13	08:51:35	0.414313
2022-09-13	08:51:35	0.718944
2022-09-13	08:51:35	0.223779
2022-09-13	08:51:35	0.506577
2022-09-13	08:51:36	0.295687
2022-09-13	08:51:36	0.480165
2022-09-13	08:51:36	0.514568
2022-09-13	08:51:37	0.302761
2022-09-13	08:51:37	0.487596
2022-09-13	08:51:37	0.315687
2022-09-13	08:51:37	0.166985
2022-09-13	08:51:38	0.514008
2022-09-13	08:51:38	0.371361
2022-09-13	08:51:38	0.218842
2022-09-13	08:51:38	0.393041
2022-09-13	08:51:39	0.275585
2022-09-13	08:51:39	0.286934
2022-09-13	08:51:39	0.48271
2022-09-13	08:51:39	0.939097
2022-09-13	08:51:40	1.2876
2022-09-13	08:51:40	0.945356
2022-09-13	08:51:40	2.34062
2022-09-13	08:51:41	1.34032
2022-09-13	08:51:41	1.82235
2022-09-13	08:51:41	2.83645
2022-09-13	08:51:41	1.67187
2022-09-13	08:51:42	1.3766
2022-09-13	08:51:42	0.847545
2022-09-13	08:51:42	0.836247
2022-09-13	08:51:42	0.582863
2022-09-13	08:51:43	0.211005
2022-09-13	08:51:43	0.442761
2022-09-13	08:51:43	0.298232
2022-09-13	08:51:43	0.584695
2022-09-13	08:51:44	1.79574
2022-09-13	08:51:44	3.04464
2022-09-13	08:51:44	2.45808
2022-09-13	08:51:44	1.10342
2022-09-13	08:51:45	1.53212
2022-09-13	08:51:45	1.11141
2022-09-13	08:51:45	1.48668
2022-09-13	08:51:46	2.39986
2022-09-13	08:51:46	1.04561
2022-09-13	08:51:46	1.80286
2022-09-13	08:51:46	0.859148
2022-09-13	08:51:47	1.93335
2022-09-13	08:51:47	0.630547
2022-09-13	08:51:47	0.297265
2022-09-13	08:51:47	0.432379
2022-09-13	08:51:48	0.571565
2022-09-13	08:51:48	1.13263
2022-09-13	08:51:48	1.46571
2022-09-13	08:51:48	1.46739
2022-09-13	08:51:49	1.14149
2022-09-13	08:51:49	0.317977
2022-09-13	08:51:49	1.15558
2022-09-13	08:51:50	0.371972
2022-09-13	08:51:50	1.03726
2022-09-13	08:51:50	1.10917
2022-09-13	08:51:50	0.697163
2022-09-13	08:51:51	1.02556
2022-09-13	08:51:51	0.840674
2022-09-13	08:51:51	1.19777
2022-09-13	08:51:51	0.895636
2022-09-13	08:51:52	1.08332
2022-09-13	08:51:52	1.44444
2022-09-13	08:51:52	1.4764
2022-09-13	08:51:52	1.09986
2022-09-13	08:51:53	0.920369
2022-09-13	08:51:53	1.51543
2022-09-13	08:51:53	1.67777
2022-09-13	08:51:53	8.65873
2022-09-13	08:51:54	18.2191
2022-09-13	08:51:54	5.14719
2022-09-13	08:51:54	7.16434
2022-09-13	08:51:55	5.3024
2022-09-13	08:51:55	3.69462
2022-09-13	08:51:55	4.31625
2022-09-13	08:51:55	7.41156
2022-09-13	08:51:56	7.71976
2022-09-13	08:51:56	5.44759
2022-09-13	08:51:56	6.89976
2022-09-13	08:51:56	7.17553
2022-09-13	08:51:57	3.27116
2022-09-13	08:51:57	7.68657
2022-09-13	08:51:57	2.89039
2022-09-13	08:51:57	1.64108
2022-09-13	08:51:58	3.26637
2022-09-13	08:51:58	0.372532
2022-09-13	08:51:58	0.0321249
2022-09-13	08:51:58	0.120624
2022-09-13	08:51:59	2.26617
2022-09-13	08:51:59	1.52464
2022-09-13	08:51:59	2.42907
2022-09-13	08:52:00	5.24698
2022-09-13	08:52:00	2.00266
2022-09-13	08:52:00	0.700013
2022-09-13	08:52:00	0.729936
2022-09-13	08:52:01	0.535534
2022-09-13	08:52:01	0.349122
2022-09-13	08:52:01	1.23869
2022-09-13	08:52:01	0.94673
2022-09-13	08:52:02	2.82546
2022-09-13	08:52:02	1.71955
2022-09-13	08:52:02	0.842761
2022-09-13	08:52:02	0.545814
2022-09-13	08:52:03	0.524745
2022-09-13	08:52:03	0.44327
2022-09-13	08:52:03	0.416756
2022-09-13	08:52:04	0.215382
2022-09-13	08:52:04	0.129122
2022-09-13	08:52:04	0.105
2022-09-13	08:52:04	0.10042
2022-09-13	08:52:05	0.318181
2022-09-13	08:52:05	0.23869
2022-09-13	08:52:05	0.254211
2022-09-13	08:52:05	0.215585
2022-09-13	08:52:06	0.365102
2022-09-13	08:52:06	0.443931
2022-09-13	08:52:06	0.488054
2022-09-13	08:52:06	0.444746
2022-09-13	08:52:07	0.438079
2022-09-13	08:52:07	0.417723
2022-09-13	08:52:07	0.386629
2022-09-13	08:52:07	0.404949
2022-09-13	08:52:08	0.509428
2022-09-13	08:52:08	0.272837
2022-09-13	08:52:08	0.497519
2022-09-13	08:52:09	0.495789
2022-09-13	08:52:09	0.0566033
2022-09-13	08:52:09	-0.173218
2022-09-13	08:52:09	-0.374084
2022-09-13	08:52:10	-0.229453
2022-09-13	08:52:10	0.272481
2022-09-13	08:52:10	0.222252
2022-09-13	08:52:10	0.297977
2022-09-13	08:52:11	0.116807
2022-09-13	08:52:11	0.426374
2022-09-13	08:52:11	0.317366
2022-09-13	08:52:11	0.70556
2022-09-13	08:52:12	1.65391
2022-09-13	08:52:12	2.20149
2022-09-13	08:52:12	6.2051
2022-09-13	08:52:13	5.9593
2022-09-13	08:52:13	7.58164
2022-09-13	08:52:13	3.65686
2022-09-13	08:52:13	6.3481
2022-09-13	08:52:14	4.18088
2022-09-13	08:52:14	5.69054
2022-09-13	08:52:14	10.5586
2022-09-13	08:52:14	5.86469
2022-09-13	08:52:15	9.79614
2022-09-13	08:52:15	16.8741
2022-09-13	08:52:15	4.97177
2022-09-13	08:52:15	4.82821
2022-09-13	08:52:16	6.88321
2022-09-13	08:52:16	2.00174
2022-09-13	08:52:16	5.04271
2022-09-13	08:52:16	5.97406
2022-09-13	08:52:17	1.25564
2022-09-13	08:52:17	3.62113
2022-09-13	08:52:17	1.37304
2022-09-13	08:52:18	3.80342
2022-09-13	08:52:18	6.70668
2022-09-13	08:52:18	4.58744
2022-09-13	08:52:18	6.42398
2022-09-13	08:52:19	2.2423
2022-09-13	08:52:19	2.48317
2022-09-13	08:52:19	2.23029
2022-09-13	08:52:19	1.96215
2022-09-13	08:52:20	5.03976
2022-09-13	08:52:20	0.74327
2022-09-13	08:52:20	0.149479
2022-09-13	08:52:20	0.195738
2022-09-13	08:52:21	0.100267
2022-09-13	08:52:21	0.0211326
2022-09-13	08:52:21	-0.0459412
2022-09-13	08:52:21	-0.159122
2022-09-13	08:52:22	-0.344974
2022-09-13	08:52:22	-0.6036
2022-09-13	08:52:22	-0.545534
2022-09-13	08:52:23	-0.590878
2022-09-13	08:52:23	-0.577646
2022-09-13	08:52:23	-0.575559
2022-09-13	08:52:23	-0.534236
2022-09-13	08:52:24	-0.519173
2022-09-13	08:52:24	-0.463702
2022-09-13	08:52:24	-0.423193
2022-09-13	08:52:24	-0.409402
2022-09-13	08:52:25	-0.345178
2022-09-13	08:52:25	-0.458918
2022-09-13	08:52:25	-0.40248
2022-09-13	08:52:25	-0.476984
2022-09-13	08:52:26	-0.466959
2022-09-13	08:52:26	-0.301005
2022-09-13	08:52:26	-0.308435
2022-09-13	08:52:27	-0.251794
2022-09-13	08:52:27	-0.202481
2022-09-13	08:52:27	0.217367
2022-09-13	08:52:27	0.11528
2022-09-13	08:52:28	0.185306
2022-09-13	08:52:28	0.183117
2022-09-13	08:52:28	0.172328
2022-09-13	08:52:28	0.232837
2022-09-13	08:52:29	0.458232
2022-09-13	08:52:29	4.70251
2022-09-13	08:52:29	4.05848
2022-09-13	08:52:29	1.30169
2022-09-13	08:52:30	1.42877
2022-09-13	08:52:30	3.75095
2022-09-13	08:52:30	3.84042
2022-09-13	08:52:30	3.01543
2022-09-13	08:52:31	7.52027
2022-09-13	08:52:31	7.56388
2022-09-13	08:52:31	9.34759
2022-09-13	08:52:32	11.9163
2022-09-13	08:52:32	11.8222
2022-09-13	08:52:32	2.30128
2022-09-13	08:52:32	0.23416
2022-09-13	08:52:33	0.20556
2022-09-13	08:52:33	0.0686135
2022-09-13	08:52:33	-0.168231
2022-09-13	08:52:33	-0.496323
2022-09-13	08:52:34	-0.69617
2022-09-13	08:52:34	-0.657747
2022-09-13	08:52:34	-0.534745
2022-09-13	08:52:34	-0.434898
2022-09-13	08:52:35	-0.730572
2022-09-13	08:52:35	-0.488485
2022-09-13	08:52:35	-0.223753
2022-09-13	08:52:36	-0.00904555
2022-09-13	08:52:36	-0.100903
2022-09-13	08:52:36	-0.149758
2022-09-13	08:52:36	-0.224058
2022-09-13	08:52:37	-0.0194272
2022-09-13	08:52:37	0.161896
2022-09-13	08:52:37	0.356298
2022-09-13	08:52:37	3.05986
2022-09-13	08:52:38	7.41604
2022-09-13	08:52:38	11.1656
2022-09-13	08:52:38	5.42337
2022-09-13	08:52:38	2.55116
2022-09-13	08:52:39	3.92622
2022-09-13	08:52:39	0.644796
2022-09-13	08:52:39	1.98144
2022-09-13	08:52:39	1.13961
2022-09-13	08:52:40	1.47823
2022-09-13	08:52:40	1.88419
2022-09-13	08:52:40	0.808969
2022-09-13	08:52:41	2.76128
2022-09-13	08:52:41	1.80973
2022-09-13	08:52:41	4.2852
2022-09-13	08:52:41	3.23136
2022-09-13	08:52:42	2.03019
2022-09-13	08:52:42	4.85508
2022-09-13	08:52:42	4.17813
2022-09-13	08:52:42	13.4324
2022-09-13	08:52:43	16.1509
2022-09-13	08:52:43	15.0129
2022-09-13	08:52:43	11.2748
2022-09-13	08:52:43	9.46174
2022-09-13	08:52:44	8.42556
2022-09-13	08:52:44	5.57731
2022-09-13	08:52:44	4.18047
2022-09-13	08:52:44	1.26139
2022-09-13	08:52:45	0.684796
2022-09-13	08:52:45	0.454466
2022-09-13	08:52:45	0.951463
2022-09-13	08:52:46	2.17818
2022-09-13	08:52:46	2.55309
2022-09-13	08:52:46	1.52541
2022-09-13	08:52:46	1.46821
2022-09-13	08:52:47	2.59294
2022-09-13	08:52:47	2.3993
2022-09-13	08:52:47	1.93355
2022-09-13	08:52:47	0.914974
2022-09-13	08:52:48	0.554771
2022-09-13	08:52:48	0.0986389
2022-09-13	08:52:48	0.243779
2022-09-13	08:52:48	0.301438
2022-09-13	08:52:49	0.169326
2022-09-13	08:52:49	0.377417
2022-09-13	08:52:49	0.23813
2022-09-13	08:52:50	0.212277
2022-09-13	08:52:50	0.192125
2022-09-13	08:52:50	0.358995
2022-09-13	08:52:50	0.311056
2022-09-13	08:52:51	0.375026
2022-09-13	08:52:51	0.459453
2022-09-13	08:52:51	0.383015
2022-09-13	08:52:51	0.330598
2022-09-13	08:52:52	0.294618
2022-09-13	08:52:52	0.314975
2022-09-13	08:52:52	0.37411
2022-09-13	08:52:52	0.39355
2022-09-13	08:52:53	0.409377
2022-09-13	08:52:53	0.430038
2022-09-13	08:52:53	0.553194
2022-09-13	08:52:53	0.384033
2022-09-13	08:52:54	0.609529
2022-09-13	08:52:54	0.365611
2022-09-13	08:52:54	0.291412
2022-09-13	08:52:55	0.219148
2022-09-13	08:52:55	0.153702
2022-09-13	08:52:55	0.137265
2022-09-13	08:52:55	0.241132
2022-09-13	08:52:56	0.471107
2022-09-13	08:52:56	0.614516
2022-09-13	08:52:56	0.616247
2022-09-13	08:52:56	1.60047
2022-09-13	08:52:57	4.79004
2022-09-13	08:52:57	4.42637
2022-09-13	08:52:57	3.99747
2022-09-13	08:52:57	3.66195
2022-09-13	08:52:58	5.53034
2022-09-13	08:52:58	2.29447
2022-09-13	08:52:58	5.46637
2022-09-13	08:52:59	3.65681
2022-09-13	08:52:59	3.0937
2022-09-13	08:52:59	2.78347
2022-09-13	08:52:59	1.84078
2022-09-13	08:53:00	2.76581
2022-09-13	08:53:00	0.742252
2022-09-13	08:53:00	1.2195
2022-09-13	08:53:00	0.965713
2022-09-13	08:53:01	1.1134
2022-09-13	08:53:01	1.5252
2022-09-13	08:53:01	1.26296
2022-09-13	08:53:01	4.00719
2022-09-13	08:53:02	5.35263
2022-09-13	08:53:02	13.7352
2022-09-13	08:53:02	10.4751
2022-09-13	08:53:02	10.4232
2022-09-13	08:53:03	4.61874
2022-09-13	08:53:03	2.79192
2022-09-13	08:53:03	3.94093
2022-09-13	08:53:04	4.68836
2022-09-13	08:53:04	5.60184
2022-09-13	08:53:04	4.78739
2022-09-13	08:53:04	5.16388
2022-09-13	08:53:05	2.77436
2022-09-13	08:53:05	2.04637
2022-09-13	08:53:05	4.01304
2022-09-13	08:53:05	6.33136
2022-09-13	08:53:06	7.27843
2022-09-13	08:53:06	10.2827
2022-09-13	08:53:06	8.49975
2022-09-13	08:53:06	10.3195
2022-09-13	08:53:07	4.8882
2022-09-13	08:53:07	1.53151
2022-09-13	08:53:07	0.533193
2022-09-13	08:53:07	0.696908
2022-09-13	08:53:08	0.740929
2022-09-13	08:53:08	0.73416
2022-09-13	08:53:08	0.74215
2022-09-13	08:53:09	0.739606
2022-09-13	08:53:09	0.731717
2022-09-13	08:53:09	8.31985
2022-09-13	08:53:09	2.69233
2022-09-13	08:53:10	1.42322
2022-09-13	08:53:10	0.776145
2022-09-13	08:53:10	0.511718
2022-09-13	08:53:10	0.326781
2022-09-13	08:53:11	0.47874
2022-09-13	08:53:11	0.417723
2022-09-13	08:53:11	0.408563
2022-09-13	08:53:11	0.4564
2022-09-13	08:53:12	0.810445
2022-09-13	08:53:12	0.721132
2022-09-13	08:53:12	1.76836
2022-09-13	08:53:13	1.83548
2022-09-13	08:53:13	4.75457
2022-09-13	08:53:13	9.19986
2022-09-13	08:53:13	8.23629
2022-09-13	08:53:14	3.86424
2022-09-13	08:53:14	5.24378
2022-09-13	08:53:14	6.02489
2022-09-13	08:53:14	10.6153
2022-09-13	08:53:15	3.07039
2022-09-13	08:53:15	2.88856
2022-09-13	08:53:15	1.75772
2022-09-13	08:53:15	0.723982
2022-09-13	08:53:16	0.634364
2022-09-13	08:53:16	1.46083
2022-09-13	08:53:16	1.79116
2022-09-13	08:53:16	1.85477
2022-09-13	08:53:17	2.5595
2022-09-13	08:53:17	2.33711
2022-09-13	08:53:17	1.30307
2022-09-13	08:53:18	1.13971
2022-09-13	08:53:18	0.664033
2022-09-13	08:53:18	1.01472
2022-09-13	08:53:18	1.1819
2022-09-13	08:53:19	1.64358
2022-09-13	08:53:19	2.65701
2022-09-13	08:53:19	3.09935
2022-09-13	08:53:19	3.72301
2022-09-13	08:53:20	1.86459
2022-09-13	08:53:20	1.41859
2022-09-13	08:53:20	1.16765
2022-09-13	08:53:20	0.818232
2022-09-13	08:53:21	1.03625
2022-09-13	08:53:21	1.27798
2022-09-13	08:53:21	1.17401
2022-09-13	08:53:21	1.40953
2022-09-13	08:53:22	1.28877
2022-09-13	08:53:22	1.14128
2022-09-13	08:53:22	1.01732
2022-09-13	08:53:23	1.19874
2022-09-13	08:53:23	1.22663
2022-09-13	08:53:23	1.21625
2022-09-13	08:53:23	1.1994
2022-09-13	08:53:24	1.28566
2022-09-13	08:53:24	1.23894
2022-09-13	08:53:24	1.20098
2022-09-13	08:53:24	1.33462
2022-09-13	08:53:25	0.973142
2022-09-13	08:53:25	0.949224
2022-09-13	08:53:25	0.471616
2022-09-13	08:53:25	0.353346
2022-09-13	08:53:26	0.435789
2022-09-13	08:53:26	0.424237
2022-09-13	08:53:26	0.431361
2022-09-13	08:53:27	0.829071
2022-09-13	08:53:27	1.05747
2022-09-13	08:53:27	0.97757
2022-09-13	08:53:27	1.48597
2022-09-13	08:53:28	2.13996
2022-09-13	08:53:28	1.40032
2022-09-13	08:53:28	0.537926
2022-09-13	08:53:28	0.717875
2022-09-13	08:53:29	0.293702
2022-09-13	08:53:29	0.732837
2022-09-13	08:53:29	0.73355
2022-09-13	08:53:29	1.76393
2022-09-13	08:53:30	4.48988
2022-09-13	08:53:30	12.6173
2022-09-13	08:53:30	7.06505
2022-09-13	08:53:30	3.50693
2022-09-13	08:53:31	4.15217
2022-09-13	08:53:31	5.99156
2022-09-13	08:53:31	6.77818
2022-09-13	08:53:32	5.90637
2022-09-13	08:53:32	3.70541
2022-09-13	08:53:32	5.08021
2022-09-13	08:53:32	4.33609
2022-09-13	08:53:33	10.18
2022-09-13	08:53:33	17.4714
2022-09-13	08:53:33	17.1983
2022-09-13	08:53:33	16.6138
2022-09-13	08:53:34	9.94561
2022-09-13	08:53:34	3.05955
2022-09-13	08:53:34	2.2962
2022-09-13	08:53:34	3.13798
2022-09-13	08:53:35	1.82963
2022-09-13	08:53:35	1.548
2022-09-13	08:53:35	4.56485
2022-09-13	08:53:36	6.44154
2022-09-13	08:53:36	9.82993
2022-09-13	08:53:36	3.19452
2022-09-13	08:53:36	8.19309
2022-09-13	08:53:37	7.12108
2022-09-13	08:53:37	8.86026
2022-09-13	08:53:37	4.65121
2022-09-13	08:53:37	1.07253
2022-09-13	08:53:38	0.744949
2022-09-13	08:53:38	0.379606
2022-09-13	08:53:38	0.119148
2022-09-13	08:53:38	0.048359
2022-09-13	08:53:39	-0.138562
2022-09-13	08:53:39	-0.224669
2022-09-13	08:53:39	-0.12757
2022-09-13	08:53:39	-0.0369336
2022-09-13	08:53:40	-0.0363229
2022-09-13	08:53:40	0.586679
2022-09-13	08:53:40	0.751158
2022-09-13	08:53:41	0.731616
2022-09-13	08:53:41	0.74444
2022-09-13	08:53:41	0.507087
2022-09-13	08:53:41	0.00673053
2022-09-13	08:53:42	0.927952
2022-09-13	08:53:42	2.06851
2022-09-13	08:53:42	1.67345
2022-09-13	08:53:42	0.337621
2022-09-13	08:53:43	0.153652
2022-09-13	08:53:43	0.107952
2022-09-13	08:53:43	0.230038
2022-09-13	08:53:43	0.138588
2022-09-13	08:53:44	0.121896
2022-09-13	08:53:44	0.0738552
2022-09-13	08:53:44	0.138537
2022-09-13	08:53:44	0.175942
2022-09-13	08:53:45	0.466781
2022-09-13	08:53:45	1.60347
2022-09-13	08:53:45	2.81197
2022-09-13	08:53:46	2.0076
2022-09-13	08:53:46	3.73538
2022-09-13	08:53:46	0.958282
2022-09-13	08:53:46	0.581234
2022-09-13	08:53:47	0.263626
2022-09-13	08:53:47	0.254313
2022-09-13	08:53:47	0.357825
2022-09-13	08:53:47	0.329122
2022-09-13	08:53:48	0.270191
2022-09-13	08:53:48	0.257366
2022-09-13	08:53:48	0.256654
2022-09-13	08:53:48	0.356094
2022-09-13	08:53:49	0.393906
2022-09-13	08:53:49	0.349326
2022-09-13	08:53:49	0.362354
2022-09-13	08:53:50	0.377672
2022-09-13	08:53:50	1.75818
2022-09-13	08:53:50	2.99391
2022-09-13	08:53:50	2.17406
2022-09-13	08:53:51	0.297367
2022-09-13	08:53:51	0.716399
2022-09-13	08:53:51	1.61365
2022-09-13	08:53:51	0.410903
2022-09-13	08:53:52	0.266171
2022-09-13	08:53:52	0.238028
2022-09-13	08:53:52	1.43274
2022-09-13	08:53:52	3.95253
2022-09-13	08:53:53	6.79451
2022-09-13	08:53:53	3.68454
2022-09-13	08:53:53	3.97686
2022-09-13	08:53:53	10.0658
2022-09-13	08:53:54	10.0811
2022-09-13	08:53:54	10.5197
2022-09-13	08:53:54	6.21334
2022-09-13	08:53:55	3.11406
2022-09-13	08:53:55	3.27319
2022-09-13	08:53:55	0.481132
2022-09-13	08:53:55	0.550649
2022-09-13	08:53:56	4.00683
2022-09-13	08:53:56	6.1538
2022-09-13	08:53:56	3.61243
2022-09-13	08:53:56	3.48627
2022-09-13	08:53:57	2.2906
2022-09-13	08:53:57	1.85497
2022-09-13	08:53:57	1.37055
2022-09-13	08:53:57	0.228715
2022-09-13	08:53:58	0.230903
2022-09-13	08:53:58	0.103626
2022-09-13	08:53:58	0.0972139
2022-09-13	08:53:59	0.260115
2022-09-13	08:53:59	0.166374
2022-09-13	08:53:59	0.228664
2022-09-13	08:53:59	0.224695
2022-09-13	08:54:00	0.23528
2022-09-13	08:54:00	0.235534
2022-09-13	08:54:00	0.69528
2022-09-13	08:54:00	1.90663
2022-09-13	08:54:01	1.05894
2022-09-13	08:54:01	0.597723
2022-09-13	08:54:01	1.15854
2022-09-13	08:54:01	1.4134
2022-09-13	08:54:02	2.73263
2022-09-13	08:54:02	0.517621
2022-09-13	08:54:02	0.29869
2022-09-13	08:54:02	0.4507
2022-09-13	08:54:03	0.640929
2022-09-13	08:54:03	0.64327
2022-09-13	08:54:03	0.502913
2022-09-13	08:54:04	0.82785
2022-09-13	08:54:04	0.651107
2022-09-13	08:54:04	0.7564
2022-09-13	08:54:04	1.29457
2022-09-13	08:54:05	1.3848
2022-09-13	08:54:05	1.14062
2022-09-13	08:54:05	0.654516
2022-09-13	08:54:05	0.685967
2022-09-13	08:54:06	0.645
2022-09-13	08:54:06	0.449478
2022-09-13	08:54:06	0.489122
2022-09-13	08:54:06	0.469529
2022-09-13	08:54:07	0.44729
2022-09-13	08:54:07	0.435433
2022-09-13	08:54:07	0.433906
2022-09-13	08:54:07	0.472634
2022-09-13	08:54:08	0.363931
2022-09-13	08:54:08	0.40383
2022-09-13	08:54:08	0.383931
2022-09-13	08:54:09	0.271107
2022-09-13	08:54:09	0.341998
2022-09-13	08:54:09	0.302812
2022-09-13	08:54:09	0.320827
2022-09-13	08:54:10	0.308054
2022-09-13	08:54:10	0.584287
2022-09-13	08:54:10	0.559758
2022-09-13	08:54:10	0.560522
2022-09-13	08:54:11	0.606374
2022-09-13	08:54:11	0.467799
2022-09-13	08:54:11	0.600318
2022-09-13	08:54:11	0.535178
2022-09-13	08:54:12	0.539911
2022-09-13	08:54:12	0.580827
2022-09-13	08:54:12	0.495993
2022-09-13	08:54:13	0.608817
2022-09-13	08:54:13	0.567137
2022-09-13	08:54:13	0.747901
2022-09-13	08:54:13	0.592685
2022-09-13	08:54:14	0.594975
2022-09-13	08:54:14	0.700827
2022-09-13	08:54:14	0.743524
2022-09-13	08:54:14	0.538333
2022-09-13	08:54:15	0.608511
2022-09-13	08:54:15	0.420064
2022-09-13	08:54:15	0.846934
2022-09-13	08:54:15	0.727646
2022-09-13	08:54:16	0.563779
2022-09-13	08:54:16	0.496909
2022-09-13	08:54:16	0.441896
2022-09-13	08:54:16	0.302557
2022-09-13	08:54:17	0.444237
2022-09-13	08:54:17	0.708003
2022-09-13	08:54:17	0.811311
2022-09-13	08:54:18	1.08973
2022-09-13	08:54:18	0.838028
2022-09-13	08:54:18	1.06663
2022-09-13	08:54:18	1.07925
2022-09-13	08:54:19	0.660166
2022-09-13	08:54:19	0.439453
2022-09-13	08:54:19	0.451667
2022-09-13	08:54:19	0.535484
2022-09-13	08:54:20	0.949784
2022-09-13	08:54:20	1.40561
2022-09-13	08:54:20	1.0365
2022-09-13	08:54:20	0.594669
2022-09-13	08:54:21	0.431311
2022-09-13	08:54:21	0.382964
2022-09-13	08:54:21	0.444847
2022-09-13	08:54:22	0.358639
2022-09-13	08:54:22	0.375382
2022-09-13	08:54:22	0.387188
2022-09-13	08:54:22	0.435382
2022-09-13	08:54:23	0.433397
2022-09-13	08:54:23	0.400878
2022-09-13	08:54:23	0.446069
2022-09-13	08:54:23	0.420318
2022-09-13	08:54:24	0.486679
2022-09-13	08:54:24	2.44515
2022-09-13	08:54:24	9.70006
2022-09-13	08:54:24	8.69798
2022-09-13	08:54:25	1.29024
2022-09-13	08:54:25	0.435534
2022-09-13	08:54:25	0.385509
2022-09-13	08:54:25	0.324695
2022-09-13	08:54:26	0.341947
2022-09-13	08:54:26	0.417316
2022-09-13	08:54:26	0.430089
2022-09-13	08:54:27	0.385967
2022-09-13	08:54:27	0.384135
2022-09-13	08:54:27	0.399046
2022-09-13	08:54:27	0.306425
2022-09-13	08:54:28	0.274618
2022-09-13	08:54:28	0.334975
2022-09-13	08:54:28	0.428766
2022-09-13	08:54:28	0.397926
2022-09-13	08:54:29	0.877875
2022-09-13	08:54:29	1.55365
2022-09-13	08:54:29	1.70327
2022-09-13	08:54:29	1.11055
2022-09-13	08:54:30	0.390802
2022-09-13	08:54:30	0.245967
2022-09-13	08:54:30	0.235331
2022-09-13	08:54:30	0.211819
2022-09-13	08:54:31	0.345204
2022-09-13	08:54:31	0.341998
2022-09-13	08:54:31	0.263372
2022-09-13	08:54:32	0.487239
2022-09-13	08:54:32	0.36841
2022-09-13	08:54:32	0.558842
2022-09-13	08:54:32	0.367646
2022-09-13	08:54:33	0.455433
2022-09-13	08:54:33	0.398791
2022-09-13	08:54:33	0.786985
2022-09-13	08:54:33	0.77355
2022-09-13	08:54:34	2.19696
2022-09-13	08:54:34	4.02444
2022-09-13	08:54:34	3.60826
2022-09-13	08:54:34	4.39426
2022-09-13	08:54:35	2.64088
2022-09-13	08:54:35	1.20215
2022-09-13	08:54:35	2.45177
2022-09-13	08:54:36	0.735178
2022-09-13	08:54:36	0.489224
2022-09-13	08:54:36	1.13991
2022-09-13	08:54:36	1.35513
2022-09-13	08:54:37	4.60149
2022-09-13	08:54:37	9.29115
2022-09-13	08:54:37	4.69986
2022-09-13	08:54:37	1.05859
2022-09-13	08:54:38	0.779606
2022-09-13	08:54:38	0.548766
2022-09-13	08:54:38	0.655891
2022-09-13	08:54:38	0.71589
2022-09-13	08:54:39	0.970903
2022-09-13	08:54:39	0.845
2022-09-13	08:54:39	1.34352
2022-09-13	08:54:39	0.863575
2022-09-13	08:54:40	0.53187
2022-09-13	08:54:40	0.314313
2022-09-13	08:54:40	0.602863
2022-09-13	08:54:41	0.27187
2022-09-13	08:54:41	0.304033
2022-09-13	08:54:41	0.0528374
2022-09-13	08:54:41	0.472583
2022-09-13	08:54:42	0.30902
2022-09-13	08:54:42	0.103575
2022-09-13	08:54:42	0.0262216
2022-09-13	08:54:42	0.0440333
2022-09-13	08:54:43	0.238384
2022-09-13	08:54:43	0.698384
2022-09-13	08:54:43	2.86866
2022-09-13	08:54:43	5.02749
2022-09-13	08:54:44	4.78948
2022-09-13	08:54:44	4.30841
2022-09-13	08:54:44	0.297367
2022-09-13	08:54:45	0.0952292
2022-09-13	08:54:45	0.333753
2022-09-13	08:54:45	0.289122
2022-09-13	08:54:45	0.677977
2022-09-13	08:54:46	0.263779
2022-09-13	08:54:46	0.130496
2022-09-13	08:54:46	0.139555
2022-09-13	08:54:46	0.379199
2022-09-13	08:54:47	1.83228
2022-09-13	08:54:47	0.533092
2022-09-13	08:54:47	2.46871
2022-09-13	08:54:47	2.96739
2022-09-13	08:54:48	3.15915
2022-09-13	08:54:48	5.48779
2022-09-13	08:54:48	1.44958
2022-09-13	08:54:48	3.60291
2022-09-13	08:54:49	1.13228
2022-09-13	08:54:49	0.818537
2022-09-13	08:54:49	0.570649
2022-09-13	08:54:50	0.423779
2022-09-13	08:54:50	0.0631681
2022-09-13	08:54:50	-0.193168
2022-09-13	08:54:50	-0.0817682
2022-09-13	08:54:51	0.0180791
2022-09-13	08:54:51	-0.0163229
2022-09-13	08:54:51	-0.156221
2022-09-13	08:54:51	-0.115661
2022-09-13	08:54:52	0.0255091
2022-09-13	08:54:52	0.0588934
2022-09-13	08:54:52	0.0736007
2022-09-13	08:54:52	0.0682063
2022-09-13	08:54:53	0.171514
2022-09-13	08:54:53	0.193244
2022-09-13	08:54:53	0.166272
2022-09-13	08:54:53	0.28154
2022-09-13	08:54:54	0.306781
2022-09-13	08:54:54	0.396196
2022-09-13	08:54:54	0.36444
2022-09-13	08:54:55	0.425
2022-09-13	08:54:55	0.32729
2022-09-13	08:54:55	0.330547
2022-09-13	08:54:55	0.369682
2022-09-13	08:54:56	0.391412
2022-09-13	08:54:56	0.409936
2022-09-13	08:54:56	0.468664
2022-09-13	08:54:56	0.370038
2022-09-13	08:54:57	0.294109
2022-09-13	08:54:57	0.31187
2022-09-13	08:54:57	0.342964
2022-09-13	08:54:57	0.296756
2022-09-13	08:54:58	0.26729
2022-09-13	08:54:58	0.272939
2022-09-13	08:54:58	0.287646
2022-09-13	08:54:59	0.263575
2022-09-13	08:54:59	0.193193
2022-09-13	08:54:59	0.229733
2022-09-13	08:54:59	0.18327
2022-09-13	08:55:00	0.298893
2022-09-13	08:55:00	0.463422
2022-09-13	08:55:00	1.3907
2022-09-13	08:55:00	1.01177
2022-09-13	08:55:01	2.01029
2022-09-13	08:55:01	1.3824
2022-09-13	08:55:01	2.19793
2022-09-13	08:55:01	2.90378
2022-09-13	08:55:02	2.54505
2022-09-13	08:55:02	0.674008
2022-09-13	08:55:02	0.280318
2022-09-13	08:55:02	0.652277
2022-09-13	08:55:03	0.439046
2022-09-13	08:55:03	0.346069
2022-09-13	08:55:03	0.375127
2022-09-13	08:55:04	0.198486
2022-09-13	08:55:04	1.12475
2022-09-13	08:55:04	0.788918
2022-09-13	08:55:04	0.568969
2022-09-13	08:55:05	0.327036
2022-09-13	08:55:05	0.247392
2022-09-13	08:55:05	0.10098
2022-09-13	08:55:05	0.122354
2022-09-13	08:55:06	0.18841
2022-09-13	08:55:06	0.176298
2022-09-13	08:55:06	0.156349
2022-09-13	08:55:06	0.0492242
2022-09-13	08:55:07	0.224084
2022-09-13	08:55:07	0.225509
2022-09-13	08:55:07	0.362303
2022-09-13	08:55:08	0.468868
2022-09-13	08:55:08	0.71589
2022-09-13	08:55:08	0.758282
2022-09-13	08:55:08	1.14022
2022-09-13	08:55:09	0.523219
2022-09-13	08:55:09	0.180166
2022-09-13	08:55:09	0.448053
2022-09-13	08:55:09	0.223575
2022-09-13	08:55:10	0.409021
2022-09-13	08:55:10	0.36729
2022-09-13	08:55:10	0.699708
2022-09-13	08:55:10	0.835789
2022-09-13	08:55:11	0.960471
2022-09-13	08:55:11	0.689529
2022-09-13	08:55:11	1.88871
2022-09-13	08:55:11	3.65401
2022-09-13	08:55:12	3.84678
2022-09-13	08:55:12	4.22724
2022-09-13	08:55:12	1.84001
2022-09-13	08:55:13	2.05314
2022-09-13	08:55:13	2.89233
2022-09-13	08:55:13	1.7676
2022-09-13	08:55:13	3.55609
2022-09-13	08:55:14	3.62449
2022-09-13	08:55:14	5.48785
2022-09-13	08:55:14	4.33528
2022-09-13	08:55:14	4.55787
2022-09-13	08:55:15	6.05385
2022-09-13	08:55:15	4.47777
2022-09-13	08:55:15	3.66103
2022-09-13	08:55:15	1.98205
2022-09-13	08:55:16	2.60525
2022-09-13	08:55:16	1.50938
2022-09-13	08:55:16	0.390191
2022-09-13	08:55:16	0.552328
2022-09-13	08:55:17	0.140013
2022-09-13	08:55:17	0.388257
2022-09-13	08:55:17	0.654516
2022-09-13	08:55:18	0.657366
2022-09-13	08:55:18	0.555789
2022-09-13	08:55:18	0.523015
2022-09-13	08:55:18	0.743117
2022-09-13	08:55:19	0.740114
2022-09-13	08:55:19	0.215942
2022-09-13	08:55:19	0.260216
2022-09-13	08:55:19	0.255891
2022-09-13	08:55:20	0.262557
2022-09-13	08:55:20	0.296959
2022-09-13	08:55:20	0.277163
2022-09-13	08:55:20	0.236145
2022-09-13	08:55:21	0.288512
2022-09-13	08:55:21	0.353855
2022-09-13	08:55:21	0.568664
2022-09-13	08:55:22	0.735941
2022-09-13	08:55:22	0.737315
2022-09-13	08:55:22	0.738486
2022-09-13	08:55:22	0.740114
2022-09-13	08:55:23	0.739758
2022-09-13	08:55:23	0.739046
2022-09-13	08:55:23	0.734975
2022-09-13	08:55:23	0.741641
2022-09-13	08:55:24	0.592786
2022-09-13	08:55:24	0.29187
2022-09-13	08:55:24	0.262659
2022-09-13	08:55:24	0.202659
2022-09-13	08:55:25	0.271972
2022-09-13	08:55:25	0.142303
2022-09-13	08:55:25	0.282608
2022-09-13	08:55:25	0.271514
2022-09-13	08:55:26	0.37014
2022-09-13	08:55:26	0.333448
2022-09-13	08:55:26	0.333601
2022-09-13	08:55:27	0.58154
2022-09-13	08:55:27	0.632226
2022-09-13	08:55:27	0.305
2022-09-13	08:55:27	0.371514
2022-09-13	08:55:28	0.242761
2022-09-13	08:55:28	0.238384
2022-09-13	08:55:28	0.331921
2022-09-13	08:55:28	0.348104
2022-09-13	08:55:29	0.42729
2022-09-13	08:55:29	0.726679
2022-09-13	08:55:29	1.4363
2022-09-13	08:55:29	1.35223
2022-09-13	08:55:30	1.23309
2022-09-13	08:55:30	0.964593
2022-09-13	08:55:30	1.24088
2022-09-13	08:55:30	1.48439
2022-09-13	08:55:31	1.61268
2022-09-13	08:55:31	0.991463
2022-09-13	08:55:31	1.10765
2022-09-13	08:55:32	0.783168
2022-09-13	08:55:32	1.02322
2022-09-13	08:55:32	0.849427
2022-09-13	08:55:32	0.658384
2022-09-13	08:55:33	0.672277
2022-09-13	08:55:33	0.511209
2022-09-13	08:55:33	0.39299
2022-09-13	08:55:33	0.349733
2022-09-13	08:55:34	0.406527
2022-09-13	08:55:34	0.274313
2022-09-13	08:55:34	0.13355
2022-09-13	08:55:34	0.252532
2022-09-13	08:55:35	0.218028
2022-09-13	08:55:35	0.219657
2022-09-13	08:55:35	0.333906
2022-09-13	08:55:36	0.195942
2022-09-13	08:55:36	0.392277
2022-09-13	08:55:36	0.276094
2022-09-13	08:55:36	0.308461
2022-09-13	08:55:37	0.249071
2022-09-13	08:55:37	0.302914
2022-09-13	08:55:37	0.213397
2022-09-13	08:55:37	0.229886
2022-09-13	08:55:38	0.0699875
2022-09-13	08:55:38	0.057672
2022-09-13	08:55:38	0.250598
2022-09-13	08:55:38	0.0149748
2022-09-13	08:55:39	-0.269198
2022-09-13	08:55:39	-0.407213
2022-09-13	08:55:39	-0.18304
2022-09-13	08:55:39	-0.198155
2022-09-13	08:55:40	-0.147875
2022-09-13	08:55:40	-0.0709285
2022-09-13	08:55:40	0.190649
2022-09-13	08:55:41	0.210445
2022-09-13	08:55:41	-0.0722007
2022-09-13	08:55:41	0.158639
2022-09-13	08:55:41	0.0890205
2022-09-13	08:55:42	0.268715
2022-09-13	08:55:42	0.158944
2022-09-13	08:55:42	0.616552
2022-09-13	08:55:43	2.6335
2022-09-13	08:55:43	3.04154
2022-09-13	08:55:43	5.24103
2022-09-13	08:55:43	2.77675
2022-09-13	08:55:43	5.07451
2022-09-13	08:55:44	3.16383
2022-09-13	08:55:44	3.08164
2022-09-13	08:55:44	1.8966
2022-09-13	08:55:45	0.648257
2022-09-13	08:55:45	0.908104
2022-09-13	08:55:45	0.733651
2022-09-13	08:55:45	1.12739
2022-09-13	08:55:46	1.29289
2022-09-13	08:55:46	1.08851
2022-09-13	08:55:46	2.83467
2022-09-13	08:55:46	1.86836
2022-09-13	08:55:47	1.58592
2022-09-13	08:55:47	1.06836
2022-09-13	08:55:47	1.64134
2022-09-13	08:55:47	2.55472
2022-09-13	08:55:48	5.58495
2022-09-13	08:55:48	7.14245
2022-09-13	08:55:48	3.86693
2022-09-13	08:55:48	4.10225
2022-09-13	08:55:49	2.57238
2022-09-13	08:55:49	3.32734
2022-09-13	08:55:49	2.08088
2022-09-13	08:55:50	1.80006
2022-09-13	08:55:50	3.49574
2022-09-13	08:55:50	1.34739
2022-09-13	08:55:50	2.51604
2022-09-13	08:55:51	2.89849
2022-09-13	08:55:51	1.82871
2022-09-13	08:55:51	1.74866
2022-09-13	08:55:51	0.844898
2022-09-13	08:55:52	2.47263
2022-09-13	08:55:52	2.68912
2022-09-13	08:55:52	4.80897
2022-09-13	08:55:52	4.18225
2022-09-13	08:55:53	11.7827
2022-09-13	08:55:53	11.2491
2022-09-13	08:55:53	4.81095
2022-09-13	08:55:53	3.29502
2022-09-13	08:55:54	0.702913
2022-09-13	08:55:54	0.808257
2022-09-13	08:55:54	0.697315
2022-09-13	08:55:55	0.431565
2022-09-13	08:55:55	0.837723
2022-09-13	08:55:55	3.58225
2022-09-13	08:55:55	5.78459
2022-09-13	08:55:56	10.002
2022-09-13	08:55:56	8.5709
2022-09-13	08:55:56	6.35121
2022-09-13	08:55:56	6.98734
2022-09-13	08:55:57	2.31248
2022-09-13	08:55:57	6.32377
2022-09-13	08:55:57	4.98459
2022-09-13	08:55:57	4.95457
2022-09-13	08:55:58	2.60271
2022-09-13	08:55:58	0.741692
2022-09-13	08:55:58	0.569682
2022-09-13	08:55:59	0.532023
2022-09-13	08:55:59	0.480623
2022-09-13	08:55:59	1.15945
2022-09-13	08:55:59	3.5136
2022-09-13	08:56:00	3.35055
2022-09-13	08:56:00	1.66439
2022-09-13	08:56:00	1.47808
2022-09-13	08:56:00	1.1534
2022-09-13	08:56:01	0.536145
2022-09-13	08:56:01	0.73014
2022-09-13	08:56:01	0.504542
2022-09-13	08:56:01	0.64617
2022-09-13	08:56:02	0.489631
2022-09-13	08:56:02	0.537112
2022-09-13	08:56:02	0.481641
2022-09-13	08:56:02	0.802405
2022-09-13	08:56:03	2.69085
2022-09-13	08:56:03	3.31721
2022-09-13	08:56:03	1.50943
2022-09-13	08:56:04	1.35284
2022-09-13	08:56:04	2.45156
2022-09-13	08:56:04	3.87492
2022-09-13	08:56:04	5.78042
2022-09-13	08:56:05	3.20999
2022-09-13	08:56:05	1.70856
2022-09-13	08:56:05	1.74184
2022-09-13	08:56:05	1.83274
2022-09-13	08:56:06	0.676705
2022-09-13	08:56:06	0.47584
2022-09-13	08:56:06	0.327697
2022-09-13	08:56:06	0.535229
2022-09-13	08:56:07	2.06276
2022-09-13	08:56:07	1.01538
2022-09-13	08:56:07	0.93701
2022-09-13	08:56:08	0.923321
2022-09-13	08:56:08	3.88892
2022-09-13	08:56:08	5.12983
2022-09-13	08:56:08	3.53075
2022-09-13	08:56:09	1.70958
2022-09-13	08:56:09	1.18546
2022-09-13	08:56:09	1.57207
2022-09-13	08:56:09	3.8163
2022-09-13	08:56:10	2.95268
2022-09-13	08:56:10	2.00749
2022-09-13	08:56:10	1.25233
2022-09-13	08:56:10	0.451768
2022-09-13	08:56:11	0.503931
2022-09-13	08:56:11	0.77411
2022-09-13	08:56:11	0.599148
2022-09-13	08:56:11	1.33889
2022-09-13	08:56:12	1.28067
2022-09-13	08:56:12	0.722608
2022-09-13	08:56:12	2.37345
2022-09-13	08:56:13	2.00709
2022-09-13	08:56:13	5.81767
2022-09-13	08:56:13	5.97736
2022-09-13	08:56:13	3.70917
2022-09-13	08:56:14	4.16851
2022-09-13	08:56:14	4.35314
2022-09-13	08:56:14	2.84088
2022-09-13	08:56:14	4.35726
2022-09-13	08:56:15	6.02515
2022-09-13	08:56:15	4.9822
2022-09-13	08:56:15	6.34037
2022-09-13	08:56:15	2.38963
2022-09-13	08:56:16	2.23991
2022-09-13	08:56:16	0.824796
2022-09-13	08:56:16	1.62307
2022-09-13	08:56:16	5.58021
2022-09-13	08:56:17	5.10266
2022-09-13	08:56:17	1.38871
2022-09-13	08:56:17	1.39681
2022-09-13	08:56:18	1.11706
2022-09-13	08:56:18	0.352176
2022-09-13	08:56:18	0.830293
