# Supplementary material for: Comparing efficacy in reducing pulling and welfare impacts of four types of leash walking equipment
Source: PeerJ journal article supplement (doi:10.7717/peerj.18131), 2024-10-24
Supplement: Shelter1_Tension_files.zip [file Saint_prong_202291311212 copy.xlsx]

## Sheet: Averaged newtons
Date	Times	Averaged newtons	Impulse	Total steps
2022-09-13	11:21:17	3.24849	3.24849	0
2022-09-13	11:21:18	2.85483	6.10331	0		Impulse	1605.48
2022-09-13	11:21:19	1.31195	7.41527	0		Total steps	32
2022-09-13	11:21:20	1.39417	8.80943	0		# > 5sec	1
2022-09-13	11:21:21	0.904128	9.71356	0
2022-09-13	11:21:22	1.17357	10.8871	0
2022-09-13	11:21:23	1.01986	11.907	0
2022-09-13	11:21:24	1.63955	13.5465	0
2022-09-13	11:21:25	1.47045	15.017	0
2022-09-13	11:21:26	0.988679	16.0057	0
2022-09-13	11:21:27	10.2754	26.281	0
2022-09-13	11:21:28	9.43533	35.7164	0
2022-09-13	11:21:29	-0.480641	35.7164	0
2022-09-13	11:21:30	0.58104	36.2974	0
2022-09-13	11:21:31	1.4425	37.7399	0
2022-09-13	11:21:32	1.48251	39.2224	0
2022-09-13	11:21:33	1.41063	40.633	0
2022-09-13	11:21:34	1.80984	42.4429	0
2022-09-13	11:21:35	3.42196	45.8648	0
2022-09-13	11:21:36	7.59646	53.4613	0
2022-09-13	11:21:37	4.24289	57.7042	0
2022-09-13	11:21:38	4.33727	62.0415	0
2022-09-13	11:21:39	5.64244	67.6839	0
2022-09-13	11:21:40	2.84804	70.5319	0
2022-09-13	11:21:41	2.13463	72.6666	0
2022-09-13	11:21:42	1.21748	73.884	0
2022-09-13	11:21:43	1.49418	75.3782	0
2022-09-13	11:21:44	4.90428	80.2825	0
2022-09-13	11:21:45	2.34798	82.6305	0
2022-09-13	11:21:46	0.923484	83.554	0
2022-09-13	11:21:47	2.32755	85.8815	0
2022-09-13	11:21:48	1.42431	87.3058	0
2022-09-13	11:21:49	1.32337	88.6292	0
2022-09-13	11:21:50	-0.255289	88.6292	0
2022-09-13	11:21:51	10.483	99.1122	0
2022-09-13	11:21:52	4.13624	103.248	0
2022-09-13	11:21:53	3.26224	106.511	0
2022-09-13	11:21:54	2.20995	108.721	0
2022-09-13	11:21:55	7.63093	116.352	0
2022-09-13	11:21:56	11.2242	127.576	0
2022-09-13	11:21:57	4.53649	132.112	0
2022-09-13	11:21:58	6.55934	138.672	0
2022-09-13	11:21:59	11.3672	150.039	0
2022-09-13	11:22:00	14.2384	164.277	1
2022-09-13	11:22:01	5.07672	169.354	1
2022-09-13	11:22:02	3.16349	172.517	1
2022-09-13	11:22:03	9.19623	181.714	1
2022-09-13	11:22:04	16.8984	198.612	2
2022-09-13	11:22:05	20.0733	218.685	3
2022-09-13	11:22:06	3.33587	222.021	3
2022-09-13	11:22:07	4.41124	226.432	3
2022-09-13	11:22:08	3.69505	230.127	3
2022-09-13	11:22:09	1.25184	231.379	3
2022-09-13	11:22:10	1.21165	232.591	3
2022-09-13	11:22:11	2.33802	234.929	3
2022-09-13	11:22:12	4.21464	239.144	3
2022-09-13	11:22:13	-0.458722	239.144	3
2022-09-13	11:22:14	-1.45483	239.144	3
2022-09-13	11:22:15	-0.393262	239.144	3
2022-09-13	11:22:16	5.72006	244.864	3
2022-09-13	11:22:17	15.0842	259.948	4
2022-09-13	11:22:18	7.46646	267.414	4
2022-09-13	11:22:19	11.0902	278.505	4
2022-09-13	11:22:20	2.08534	280.59	4
2022-09-13	11:22:21	2.00556	282.595	4
2022-09-13	11:22:22	5.4315	288.027	4
2022-09-13	11:22:23	1.17051	289.197	4
2022-09-13	11:22:24	1.19586	290.393	4
2022-09-13	11:22:25	1.39677	291.79	4
2022-09-13	11:22:26	0.500566	292.291	4
2022-09-13	11:22:27	0.375268	292.666	4
2022-09-13	11:22:28	0.440917	293.107	4
2022-09-13	11:22:29	0.542897	293.65	4
2022-09-13	11:22:30	0.165706	293.815	4
2022-09-13	11:22:31	1.52444	295.34	4
2022-09-13	11:22:32	3.28969	298.63	4
2022-09-13	11:22:33	21.6949	320.324	5
2022-09-13	11:22:34	9.67977	330.004	5
2022-09-13	11:22:35	7.07676	337.081	5
2022-09-13	11:22:36	8.44252	345.524	5
2022-09-13	11:22:37	11.926	357.45	5
2022-09-13	11:22:38	18.9077	376.357	6
2022-09-13	11:22:39	13.1184	389.476	7
2022-09-13	11:22:40	24.9277	414.403	8
2022-09-13	11:22:41	15.3069	429.71	9
2022-09-13	11:22:42	6.38985	436.1	9
2022-09-13	11:22:43	38.4403	474.54	10
2022-09-13	11:22:44	3.69608	478.237	10
2022-09-13	11:22:45	9.44235	487.679	10
2022-09-13	11:22:46	11.347	499.026	10
2022-09-13	11:22:47	2.52642	501.552	10
2022-09-13	11:22:48	6.92736	508.48	10
2022-09-13	11:22:49	19.0622	527.542	11
2022-09-13	11:22:50	9.72007	537.262	11
2022-09-13	11:22:51	2.91589	540.178	11
2022-09-13	11:22:52	8.63438	548.812	11
2022-09-13	11:22:53	3.18997	552.002	11
2022-09-13	11:22:54	1.63657	553.639	11
2022-09-13	11:22:55	0.35682	553.996	11
2022-09-13	11:22:56	12.9061	566.902	11
2022-09-13	11:22:57	14.5858	581.487	12
2022-09-13	11:22:58	10.5706	592.058	12
2022-09-13	11:22:59	20.1923	612.25	13
2022-09-13	11:23:00	8.16221	620.413	13
2022-09-13	11:23:01	6.63636	627.049	13
2022-09-13	11:23:02	4.66846	631.717	13
2022-09-13	11:23:03	3.08248	634.8	13
2022-09-13	11:23:04	3.92771	638.728	13
2022-09-13	11:23:05	3.87253	642.6	13
2022-09-13	11:23:06	13.5673	656.167	14
2022-09-13	11:23:07	12.6585	668.826	14
2022-09-13	11:23:08	7.34122	676.167	14
2022-09-13	11:23:09	4.25776	680.425	14
2022-09-13	11:23:10	2.92913	683.354	14
2022-09-13	11:23:11	2.43913	685.793	14
2022-09-13	11:23:12	1.9447	687.738	14
2022-09-13	11:23:13	2.37345	690.111	14
2022-09-13	11:23:14	5.72634	695.838	14
2022-09-13	11:23:15	19.8103	715.648	15
2022-09-13	11:23:16	13.651	729.299	16
2022-09-13	11:23:17	10.7206	740.02	16
2022-09-13	11:23:18	3.97163	743.991	16
2022-09-13	11:23:19	13.2093	757.201	17
2022-09-13	11:23:20	5.4405	762.641	17
2022-09-13	11:23:21	2.60854	765.25	17
2022-09-13	11:23:22	5.67518	770.925	17
2022-09-13	11:23:23	1.92574	772.851	17
2022-09-13	11:23:24	21.0809	793.931	18
2022-09-13	11:23:25	13.3683	807.3	19
2022-09-13	11:23:26	37.7823	845.082	20
2022-09-13	11:23:27	3.34142	848.424	20
2022-09-13	11:23:28	-0.515163	848.424	20
2022-09-13	11:23:29	15.3968	863.82	21
2022-09-13	11:23:30	3.39931	867.22	21
2022-09-13	11:23:31	10.1697	877.389	21
2022-09-13	11:23:32	8.66834	886.058	21
2022-09-13	11:23:33	7.5818	893.64	21
2022-09-13	11:23:34	2.05647	895.696	21
2022-09-13	11:23:35	2.02189	897.718	21
2022-09-13	11:23:36	1.45789	899.176	21
2022-09-13	11:23:37	0.547821	899.724	21
2022-09-13	11:23:38	0.51375	900.237	21
2022-09-13	11:23:39	0.791225	901.029	21
2022-09-13	11:23:40	0.819977	901.849	21
2022-09-13	11:23:41	0.862363	902.711	21
2022-09-13	11:23:42	0.760552	903.471	21
2022-09-13	11:23:43	-1.38952	903.471	21
2022-09-13	11:23:44	-1.68007	903.471	21
2022-09-13	11:23:45	-1.58596	903.471	21
2022-09-13	11:23:46	-1.48545	903.471	21
2022-09-13	11:23:47	-0.37685	903.471	21
2022-09-13	11:23:48	-0.0899249	903.471	21
2022-09-13	11:23:49	-0.370512	903.471	21
2022-09-13	11:23:50	-1.17577	903.471	21
2022-09-13	11:23:51	1.64238	905.114	21
2022-09-13	11:23:52	1.30566	906.42	21
2022-09-13	11:23:53	-0.612504	906.42	21
2022-09-13	11:23:54	-0.91154	906.42	21
2022-09-13	11:23:55	-0.352516	906.42	21
2022-09-13	11:23:56	1.46015	907.88	21
2022-09-13	11:23:57	2.64845	910.528	21
2022-09-13	11:23:58	13.5126	924.041	22
2022-09-13	11:23:59	24.186	948.227	23
2022-09-13	11:24:00	4.18708	952.414	23
2022-09-13	11:24:01	3.84928	956.263	23
2022-09-13	11:24:02	4.93122	961.194	23
2022-09-13	11:24:03	7.04157	968.236	23
2022-09-13	11:24:04	2.68867	970.925	23
2022-09-13	11:24:05	1.73489	972.659	23
2022-09-13	11:24:06	2.00775	974.667	23
2022-09-13	11:24:07	3.96768	978.635	23
2022-09-13	11:24:08	31.8507	1010.49	24
2022-09-13	11:24:09	3.71994	1014.21	24
2022-09-13	11:24:10	2.0696	1016.28	24
2022-09-13	11:24:11	-0.854892	1016.28	24
2022-09-13	11:24:12	4.81384	1021.09	24
2022-09-13	11:24:13	3.49274	1024.58	24
2022-09-13	11:24:14	1.07298	1025.65	24
2022-09-13	11:24:15	1.09773	1026.75	24
2022-09-13	11:24:16	3.24255	1029.99	24
2022-09-13	11:24:17	3.2722	1033.27	24
2022-09-13	11:24:18	3.26033	1036.53	24
2022-09-13	11:24:19	3.28635	1039.81	24
2022-09-13	11:24:20	3.26733	1043.08	24
2022-09-13	11:24:21	3.27814	1046.36	24
2022-09-13	11:24:22	3.25762	1049.62	24
2022-09-13	11:24:23	3.26377	1052.88	24
2022-09-13	11:24:24	3.26366	1056.14	24
2022-09-13	11:24:25	3.28097	1059.43	24
2022-09-13	11:24:26	3.27754	1062.7	24
2022-09-13	11:24:27	3.25375	1065.96	24
2022-09-13	11:24:28	3.26835	1069.22	24
2022-09-13	11:24:29	3.26558	1072.49	24
2022-09-13	11:24:30	3.26924	1075.76	24
2022-09-13	11:24:31	3.27639	1079.04	24
2022-09-13	11:24:32	3.26965	1082.31	24
2022-09-13	11:24:33	2.45257	1084.76	24
2022-09-13	11:24:34	3.21821	1087.98	24
2022-09-13	11:24:35	2.60024	1090.58	24
2022-09-13	11:24:36	3.26416	1093.84	24
2022-09-13	11:24:37	3.62913	1097.47	24
2022-09-13	11:24:38	2.95664	1100.43	24
2022-09-13	11:24:39	3.26554	1103.69	24
2022-09-13	11:24:40	2.97045	1106.66	24
2022-09-13	11:24:41	-0.81986	1106.66	24
2022-09-13	11:24:42	-0.196715	1106.66	24
2022-09-13	11:24:43	10.2694	1116.93	24
2022-09-13	11:24:44	19.0104	1135.94	25
2022-09-13	11:24:45	3.8778	1139.82	25
2022-09-13	11:24:46	3.17486	1143	25
2022-09-13	11:24:47	0.587492	1143.58	25
2022-09-13	11:24:48	-0.379963	1143.58	25
2022-09-13	11:24:49	0.15897	1143.74	25
2022-09-13	11:24:50	2.1619	1145.9	25
2022-09-13	11:24:51	3.2749	1149.18	25
2022-09-13	11:24:52	3.27226	1152.45	25
2022-09-13	11:24:53	3.27967	1155.73	25
2022-09-13	11:24:54	3.27712	1159.01	25
2022-09-13	11:24:55	3.26999	1162.28	25
2022-09-13	11:24:56	3.26943	1165.55	25
2022-09-13	11:24:57	3.27803	1168.83	25
2022-09-13	11:24:58	3.26733	1172.09	25
2022-09-13	11:24:59	3.2669	1175.36	25
2022-09-13	11:25:00	3.28476	1178.64	25
2022-09-13	11:25:01	3.27339	1181.92	25
2022-09-13	11:25:02	3.27452	1185.19	25
2022-09-13	11:25:03	3.28873	1188.48	25
2022-09-13	11:25:04	3.27105	1191.75	25
2022-09-13	11:25:05	3.28822	1195.04	25
2022-09-13	11:25:06	3.28674	1198.33	25
2022-09-13	11:25:07	3.2808	1201.61	25
2022-09-13	11:25:08	3.26645	1204.87	25
2022-09-13	11:25:09	3.2653	1208.14	25
2022-09-13	11:25:10	3.26903	1211.41	25
2022-09-13	11:25:11	3.27282	1214.68	25
2022-09-13	11:25:12	3.26547	1217.95	25
2022-09-13	11:25:13	3.27197	1221.22	25
2022-09-13	11:25:14	3.27678	1224.5	25
2022-09-13	11:25:15	3.27718	1227.77	25
2022-09-13	11:25:16	3.26916	1231.04	25
2022-09-13	11:25:17	3.26003	1234.3	25
2022-09-13	11:25:18	3.25924	1237.56	25
2022-09-13	11:25:19	3.26948	1240.83	25
2022-09-13	11:25:20	3.26758	1244.1	25
2022-09-13	11:25:21	3.28374	1247.38	25
2022-09-13	11:25:22	3.27497	1250.66	25
2022-09-13	11:25:23	3.27622	1253.93	25
2022-09-13	11:25:24	3.3224	1257.26	25
2022-09-13	11:25:25	3.27248	1260.53	25
2022-09-13	11:25:26	3.27271	1263.8	25
2022-09-13	11:25:27	3.26207	1267.06	25
2022-09-13	11:25:28	3.26467	1270.33	25
2022-09-13	11:25:29	3.27248	1273.6	25
2022-09-13	11:25:30	3.27101	1276.87	25
2022-09-13	11:25:31	2.21748	1279.09	25
2022-09-13	11:25:32	2.28969	1281.38	25
2022-09-13	11:25:33	5.68469	1287.06	25
2022-09-13	11:25:34	20.1836	1307.25	26
2022-09-13	11:25:35	10.5608	1317.81	26
2022-09-13	11:25:36	1.63474	1319.44	26
2022-09-13	11:25:37	6.07367	1325.52	26
2022-09-13	11:25:38	20.3822	1345.9	27
2022-09-13	11:25:39	3.65285	1349.55	27
2022-09-13	11:25:40	6.39805	1355.95	27
2022-09-13	11:25:41	2.56002	1358.51	27
2022-09-13	11:25:42	2.09388	1360.6	27
2022-09-13	11:25:43	8.79192	1369.39	27
2022-09-13	11:25:44	23.9356	1393.33	28
2022-09-13	11:25:45	34.3373	1427.67	29
2022-09-13	11:25:46	8.63669	1436.3	29
2022-09-13	11:25:47	2.71063	1439.01	29
2022-09-13	11:25:48	2.76717	1441.78	29
2022-09-13	11:25:49	8.03296	1449.81	29
2022-09-13	11:25:50	9.36285	1459.18	29
2022-09-13	11:25:51	16.8861	1476.06	30
2022-09-13	11:25:52	5.41945	1481.48	30
2022-09-13	11:25:53	1.06932	1482.55	30
2022-09-13	11:25:54	14.7863	1497.34	31
2022-09-13	11:25:55	1.73921	1499.08	31
2022-09-13	11:25:56	8.17095	1507.25	31
2022-09-13	11:25:57	2.67017	1509.92	31
2022-09-13	11:25:58	0.819899	1510.74	31
2022-09-13	11:25:59	0.871417	1511.61	31
2022-09-13	11:26:00	9.06889	1520.68	31
2022-09-13	11:26:01	4.73348	1525.41	31
2022-09-13	11:26:02	4.06463	1529.48	31
2022-09-13	11:26:03	5.19211	1534.67	31
2022-09-13	11:26:04	8.03443	1542.7	31
2022-09-13	11:26:05	12.19	1554.89	31
2022-09-13	11:26:06	3.81449	1558.71	31
2022-09-13	11:26:07	3.2662	1561.97	31
2022-09-13	11:26:08	0.785737	1562.76	31
2022-09-13	11:26:09	1.75794	1564.52	31
2022-09-13	11:26:10	13.3466	1577.86	32
2022-09-13	11:26:11	3.12753	1580.99	32
2022-09-13	11:26:12	1.84318	1582.84	32
2022-09-13	11:26:13	3.33428	1586.17	32
2022-09-13	11:26:14	9.52062	1595.69	32
2022-09-13	11:26:15	3.27361	1598.96	32
2022-09-13	11:26:16	3.26643	1602.23	32
2022-09-13	11:26:17	3.25177	1605.48	32

## Sheet: Saint_prong_202291311212 (4)
Date	Times	Lbs	Newtons	Averaged newtons	Total force x time	total steps > 13.345		**GoPro Fitting: 1110
2022-09-13	11:21:17	0.729936	3.2469	3.24849	3.2469	FALSE	0				Total force x time	3029.93
2022-09-13	11:21:17	0.730903	3.2512	3.24849	3.2512	FALSE	0				Total steps	110
2022-09-13	11:21:17	0.732888	3.26003	3.24849	6.50693	FALSE	0
2022-09-13	11:21:17	0.727443	3.23581	3.24849	6.48701	FALSE	0
2022-09-13	11:21:18	0.740623	3.29444	2.85483	9.80137	FALSE	0
2022-09-13	11:21:18	0.737214	3.27928	2.85483	9.76629	FALSE	0
2022-09-13	11:21:18	0.685712	3.05018	2.85483	12.8516	FALSE	0
2022-09-13	11:21:18	0.403626	1.79541	2.85483	11.5617	FALSE	0
2022-09-13	11:21:19	0.324847	1.44498	1.31195	14.2965	FALSE	0
2022-09-13	11:21:19	0.260216	1.15749	1.31195	12.7192	FALSE	0
2022-09-13	11:21:19	0.299758	1.33338	1.31195	15.6299	FALSE	0
2022-09-13	11:21:20	0.298842	1.32931	1.39417	14.0485	FALSE	0
2022-09-13	11:21:20	0.25701	1.14323	1.39417	16.7732	FALSE	0
2022-09-13	11:21:20	0.3164	1.40741	1.39417	15.4559	FALSE	0
2022-09-13	11:21:20	0.381438	1.69671	1.39417	18.4699	FALSE	0
2022-09-13	11:21:21	0.308613	1.37277	0.904128	16.8287	FALSE	0
2022-09-13	11:21:21	0.229529	1.02099	0.904128	19.4909	FALSE	0
2022-09-13	11:21:21	0.098588	0.438539	0.904128	17.2672	FALSE	0
2022-09-13	11:21:21	0.176298	0.784209	0.904128	20.2751	FALSE	0
2022-09-13	11:21:22	0.171209	0.761572	1.17357	18.0288	FALSE	0
2022-09-13	11:21:22	0.402659	1.79111	1.17357	22.0662	FALSE	0
2022-09-13	11:21:22	0.161336	0.717655	1.17357	18.7464	FALSE	0
2022-09-13	11:21:22	0.320115	1.42394	1.17357	23.4901	FALSE	0
2022-09-13	11:21:23	0.196654	0.874756	1.01986	19.6212	FALSE	0
2022-09-13	11:21:23	0.404288	1.79835	1.01986	25.2885	FALSE	0
2022-09-13	11:21:23	0.0868831	0.386473	1.01986	20.0077	FALSE	0
2022-09-13	11:21:24	0.403982	1.79699	1.63955	27.0855	FALSE	0
2022-09-13	11:21:24	0.347596	1.54618	1.63955	21.5539	FALSE	0
2022-09-13	11:21:24	0.423575	1.88415	1.63955	28.9696	FALSE	0
2022-09-13	11:21:24	0.299199	1.3309	1.63955	22.8848	FALSE	0
2022-09-13	11:21:25	0.333143	1.48189	1.47045	30.4515	FALSE	0
2022-09-13	11:21:25	0.501488	2.23072	1.47045	25.1155	FALSE	0
2022-09-13	11:21:25	0.113295	0.503959	1.47045	30.9555	FALSE	0
2022-09-13	11:21:25	0.374364	1.66525	1.47045	26.7807	FALSE	0
2022-09-13	11:21:26	0.0714124	0.317657	0.988679	31.2731	FALSE	0
2022-09-13	11:21:26	0.380369	1.69196	0.988679	28.4727	FALSE	0
2022-09-13	11:21:26	0.110802	0.492869	0.988679	31.766	FALSE	0
2022-09-13	11:21:26	0.326476	1.45223	0.988679	29.9249	FALSE	0
2022-09-13	11:21:27	0.428308	1.9052	10.2754	33.6712	FALSE	0
2022-09-13	11:21:27	2.65131	11.7936	10.2754	41.7185	FALSE	0
2022-09-13	11:21:27	3.85039	17.1273	10.2754	50.7985	1	1
2022-09-13	11:21:28	6.42978	28.6009	9.43533	70.3194	1	2
2022-09-13	11:21:28	1.44515	6.42832	9.43533	57.2268	FALSE	2
2022-09-13	11:21:28	0.335433	1.49207	9.43533	71.8115	FALSE	2
2022-09-13	11:21:28	0.274262	1.21997	9.43533	58.4468	FALSE	2
2022-09-13	11:21:29	0.114466	0.509168	-0.480641	72.3207	FALSE	2
2022-09-13	11:21:29	-0.170267	-0.757382	-0.480641	58.4468	FALSE	2
2022-09-13	11:21:29	-0.198409	-0.882563	-0.480641	72.3207	FALSE	2
2022-09-13	11:21:29	-0.178002	-0.791788	-0.480641	58.4468	FALSE	2
2022-09-13	11:21:30	0.0278501	0.123883	0.58104	72.4445	FALSE	2
2022-09-13	11:21:30	0.299199	1.3309	0.58104	59.7777	FALSE	2
2022-09-13	11:21:30	0.0378755	0.168478	0.58104	72.613	FALSE	2
2022-09-13	11:21:30	0.15757	0.700903	0.58104	60.4786	FALSE	2
2022-09-13	11:21:31	0.16612	0.738935	1.4425	73.3519	FALSE	2
2022-09-13	11:21:31	0.53355	2.37334	1.4425	62.8519	FALSE	2
2022-09-13	11:21:31	0.273193	1.21522	1.4425	74.5672	FALSE	2
2022-09-13	11:21:32	0.321336	1.42937	1.48251	64.2813	FALSE	2
2022-09-13	11:21:32	0.370445	1.64781	1.48251	76.215	FALSE	2
2022-09-13	11:21:32	0.210751	0.937463	1.48251	65.2187	FALSE	2
2022-09-13	11:21:32	0.430598	1.91539	1.48251	78.1304	FALSE	2
2022-09-13	11:21:33	0.318842	1.41827	1.41063	66.637	FALSE	2
2022-09-13	11:21:33	0.441794	1.96519	1.41063	80.0956	FALSE	2
2022-09-13	11:21:33	0.318435	1.41646	1.41063	68.0535	FALSE	2
2022-09-13	11:21:33	0.189428	0.842614	1.41063	80.9382	FALSE	2
2022-09-13	11:21:34	0.548257	2.43876	1.80984	70.4922	FALSE	2
2022-09-13	11:21:34	0.366781	1.63152	1.80984	82.5697	FALSE	2
2022-09-13	11:21:34	0.342354	1.52286	1.80984	72.0151	FALSE	2
2022-09-13	11:21:34	0.370089	1.64623	1.80984	84.2159	FALSE	2
2022-09-13	11:21:35	0.793855	3.53123	3.42196	75.5463	FALSE	2
2022-09-13	11:21:35	0.723422	3.21793	3.42196	87.4338	FALSE	2
2022-09-13	11:21:35	0.790598	3.51674	3.42196	79.0631	FALSE	2
2022-09-13	11:21:36	1.24744	5.54886	7.59646	92.9827	FALSE	2
2022-09-13	11:21:36	2.11961	9.42845	7.59646	88.4915	FALSE	2
2022-09-13	11:21:36	1.85253	8.24042	7.59646	101.223	FALSE	2
2022-09-13	11:21:36	1.61146	7.1681	7.59646	95.6596	FALSE	2
2022-09-13	11:21:37	1.4678	6.52907	4.24289	107.752	FALSE	2
2022-09-13	11:21:37	1.27569	5.67452	4.24289	101.334	FALSE	2
2022-09-13	11:21:37	0.481234	2.14063	4.24289	109.893	FALSE	2
2022-09-13	11:21:37	0.590649	2.62732	4.24289	103.961	FALSE	2
2022-09-13	11:21:38	0.930191	4.13768	4.33727	114.03	FALSE	2
2022-09-13	11:21:38	1.05263	4.68231	4.33727	108.644	FALSE	2
2022-09-13	11:21:38	0.979962	4.35907	4.33727	118.39	FALSE	2
2022-09-13	11:21:38	0.937468	4.17005	4.33727	112.814	FALSE	2
2022-09-13	11:21:39	1.65085	7.34331	5.64244	125.733	FALSE	2
2022-09-13	11:21:39	1.41391	6.28935	5.64244	119.103	FALSE	2
2022-09-13	11:21:39	0.740674	3.29467	5.64244	129.028	FALSE	2
2022-09-13	11:21:40	0.753448	3.35149	2.84804	122.455	FALSE	2
2022-09-13	11:21:40	0.60327	2.68347	2.84804	131.711	FALSE	2
2022-09-13	11:21:40	0.464135	2.06457	2.84804	124.519	FALSE	2
2022-09-13	11:21:40	0.740216	3.29263	2.84804	135.004	FALSE	2
2022-09-13	11:21:41	0.784186	3.48822	2.13463	128.007	FALSE	2
2022-09-13	11:21:41	1.09411	4.86682	2.13463	139.87	FALSE	2
2022-09-13	11:21:41	-0.00879109	-0.0391045	2.13463	128.007	FALSE	2
2022-09-13	11:21:41	0.0500384	0.222581	2.13463	140.093	FALSE	2
2022-09-13	11:21:42	0.220776	0.982056	1.21748	128.989	FALSE	2
2022-09-13	11:21:42	0.235789	1.04884	1.21748	141.142	FALSE	2
2022-09-13	11:21:42	0.312176	1.38862	1.21748	130.378	FALSE	2
2022-09-13	11:21:42	0.326069	1.45042	1.21748	142.592	FALSE	2
2022-09-13	11:21:43	0.284084	1.26366	1.49418	131.642	FALSE	2
2022-09-13	11:21:43	0.361082	1.60616	1.49418	144.198	FALSE	2
2022-09-13	11:21:43	0.362557	1.61273	1.49418	133.254	FALSE	2
2022-09-13	11:21:44	0.597468	2.65766	4.90428	146.856	FALSE	2
2022-09-13	11:21:44	1.14602	5.09773	4.90428	138.352	FALSE	2
2022-09-13	11:21:44	1.43935	6.40252	4.90428	153.259	FALSE	2
2022-09-13	11:21:44	1.22729	5.45923	4.90428	143.811	FALSE	2
2022-09-13	11:21:45	0.647188	2.87882	2.34798	156.137	FALSE	2
2022-09-13	11:21:45	0.645458	2.87113	2.34798	146.683	FALSE	2
2022-09-13	11:21:45	0.457621	2.03559	2.34798	158.173	FALSE	2
2022-09-13	11:21:45	0.361132	1.60639	2.34798	148.289	FALSE	2
2022-09-13	11:21:46	0.0940079	0.418166	0.923484	158.591	FALSE	2
2022-09-13	11:21:46	0.157214	0.699319	0.923484	148.988	FALSE	2
2022-09-13	11:21:46	0.280471	1.24759	0.923484	159.839	FALSE	2
2022-09-13	11:21:46	0.298741	1.32886	0.923484	150.317	FALSE	2
2022-09-13	11:21:47	0.24897	1.10747	2.32755	160.946	FALSE	2
2022-09-13	11:21:47	0.565153	2.51391	2.32755	152.831	FALSE	2
2022-09-13	11:21:47	1.011	4.49713	2.32755	165.443	FALSE	2
2022-09-13	11:21:47	0.267901	1.19168	2.32755	154.023	FALSE	2
2022-09-13	11:21:48	0.330395	1.46966	1.42431	166.913	FALSE	2
2022-09-13	11:21:48	0.327087	1.45495	1.42431	155.478	FALSE	2
2022-09-13	11:21:48	0.303117	1.34833	1.42431	168.261	FALSE	2
2022-09-13	11:21:49	0.222303	0.988848	1.32337	156.467	FALSE	2
2022-09-13	11:21:49	0.453499	2.01725	1.32337	170.279	FALSE	2
2022-09-13	11:21:49	0.183524	0.816351	1.32337	157.283	FALSE	2
2022-09-13	11:21:49	0.3307	1.47102	1.32337	171.75	FALSE	2
2022-09-13	11:21:50	0.135077	0.60085	-0.255289	157.884	FALSE	2
2022-09-13	11:21:50	0.194669	0.865927	-0.255289	172.616	FALSE	2
2022-09-13	11:21:50	-0.216679	-0.963832	-0.255289	157.884	FALSE	2
2022-09-13	11:21:50	-0.342633	-1.5241	-0.255289	172.616	FALSE	2
2022-09-13	11:21:51	1.57452	7.00378	10.483	164.888	FALSE	2
2022-09-13	11:21:51	4.36398	19.4119	10.483	192.027	1	3
2022-09-13	11:21:51	2.4936	11.092	10.483	175.98	FALSE	3
2022-09-13	11:21:51	0.994618	4.42426	10.483	196.452	FALSE	3
2022-09-13	11:21:52	0.808257	3.59529	4.13624	179.575	FALSE	3
2022-09-13	11:21:52	1.29584	5.76416	4.13624	202.216	FALSE	3
2022-09-13	11:21:52	0.685509	3.04928	4.13624	182.624	FALSE	3
2022-09-13	11:21:53	0.726272	3.2306	3.26224	205.446	FALSE	3
2022-09-13	11:21:53	0.945763	4.20694	3.26224	186.831	FALSE	3
2022-09-13	11:21:53	0.436603	1.9421	3.26224	207.389	FALSE	3
2022-09-13	11:21:53	0.824898	3.66931	3.26224	190.5	FALSE	3
2022-09-13	11:21:54	0.566272	2.51889	2.20995	209.907	FALSE	3
2022-09-13	11:21:54	0.426629	1.89773	2.20995	192.398	FALSE	3
2022-09-13	11:21:54	0.604644	2.68958	2.20995	212.597	FALSE	3
2022-09-13	11:21:54	0.389733	1.73361	2.20995	194.132	FALSE	3
2022-09-13	11:21:55	1.25925	5.6014	7.63093	218.198	FALSE	3
2022-09-13	11:21:55	0.777315	3.45765	7.63093	197.589	FALSE	3
2022-09-13	11:21:55	2.10235	9.35167	7.63093	227.55	FALSE	3
2022-09-13	11:21:55	2.72312	12.113	7.63093	209.702	FALSE	3
2022-09-13	11:21:56	3.55691	15.8218	11.2242	243.372	1	4
2022-09-13	11:21:56	2.56225	11.3974	11.2242	221.1	FALSE	4
2022-09-13	11:21:56	1.45075	6.45323	11.2242	249.825	FALSE	4
2022-09-13	11:21:57	1.68271	7.48503	4.53649	228.585	FALSE	4
2022-09-13	11:21:57	0.561692	2.49852	4.53649	252.324	FALSE	4
2022-09-13	11:21:57	1.21971	5.42551	4.53649	234.01	FALSE	4
2022-09-13	11:21:57	0.61528	2.73689	4.53649	255.061	FALSE	4
2022-09-13	11:21:58	0.960013	4.27033	6.55934	238.281	FALSE	4
2022-09-13	11:21:58	1.08882	4.84329	6.55934	259.904	FALSE	4
2022-09-13	11:21:58	0.994873	4.42539	6.55934	242.706	FALSE	4
2022-09-13	11:21:58	2.85472	12.6984	6.55934	272.602	FALSE	4
2022-09-13	11:21:59	1.33823	5.95271	11.3672	248.659	FALSE	4
2022-09-13	11:21:59	3.0879	13.7356	11.3672	286.338	1	5
2022-09-13	11:21:59	2.32586	10.3459	11.3672	259.005	FALSE	5
2022-09-13	11:21:59	3.46983	15.4345	11.3672	301.772	1	6
2022-09-13	11:22:00	3.04744	13.5556	14.2384	272.56	1	7
2022-09-13	11:22:00	2.43345	10.8245	14.2384	312.597	FALSE	7
2022-09-13	11:22:00	4.12189	18.335	14.2384	290.895	1	8
2022-09-13	11:22:01	0.952532	4.23705	5.07672	316.834	FALSE	8
2022-09-13	11:22:01	2.17513	9.67541	5.07672	300.571	FALSE	8
2022-09-13	11:22:01	0.634771	2.82359	5.07672	319.657	FALSE	8
2022-09-13	11:22:01	0.802761	3.57084	5.07672	304.141	FALSE	8
2022-09-13	11:22:02	1.14088	5.07486	3.16349	324.732	FALSE	8
2022-09-13	11:22:02	0.32612	1.45065	3.16349	305.592	FALSE	8
2022-09-13	11:22:02	1.145	5.09319	3.16349	329.825	FALSE	8
2022-09-13	11:22:02	0.232736	1.03526	3.16349	306.627	FALSE	8
2022-09-13	11:22:03	1.1193	4.97887	9.19623	334.804	FALSE	8
2022-09-13	11:22:03	1.51411	6.73506	9.19623	313.362	FALSE	8
2022-09-13	11:22:03	2.88541	12.8349	9.19623	347.639	FALSE	8
2022-09-13	11:22:03	2.7508	12.2361	9.19623	325.599	FALSE	8
2022-09-13	11:22:04	4.30739	19.1601	16.8984	366.799	1	9
2022-09-13	11:22:04	4.48225	19.9379	16.8984	345.537	1	10
2022-09-13	11:22:04	2.60714	11.5971	16.8984	378.396	FALSE	10
2022-09-13	11:22:05	5.35075	23.8012	20.0733	369.338	1	11
2022-09-13	11:22:05	5.17319	23.0114	20.0733	401.408	1	12
2022-09-13	11:22:05	4.39187	19.5359	20.0733	388.874	1	13
2022-09-13	11:22:05	3.13492	13.9448	20.0733	415.353	1	14
2022-09-13	11:22:06	1.08887	4.84351	3.33587	393.717	FALSE	14
2022-09-13	11:22:06	1.31019	5.82799	3.33587	421.181	FALSE	14
2022-09-13	11:22:06	0.292328	1.30033	3.33587	395.017	FALSE	14
2022-09-13	11:22:06	0.308359	1.37164	3.33587	422.552	FALSE	14
2022-09-13	11:22:07	0.562557	2.50237	4.41124	397.52	FALSE	14
2022-09-13	11:22:07	1.16709	5.19145	4.41124	427.744	FALSE	14
2022-09-13	11:22:07	1.18688	5.27948	4.41124	402.799	FALSE	14
2022-09-13	11:22:07	1.05024	4.67168	4.41124	432.415	FALSE	14
2022-09-13	11:22:08	1.02378	4.55398	3.69505	407.353	FALSE	14
2022-09-13	11:22:08	0.812481	3.61408	3.69505	436.029	FALSE	14
2022-09-13	11:22:08	0.655789	2.91708	3.69505	410.27	FALSE	14
2022-09-13	11:22:09	0.37869	1.68449	1.25184	437.714	FALSE	14
2022-09-13	11:22:09	0.299657	1.33293	1.25184	411.603	FALSE	14
2022-09-13	11:22:09	0.273906	1.21839	1.25184	438.932	FALSE	14
2022-09-13	11:22:09	0.173448	0.771531	1.25184	412.375	FALSE	14
2022-09-13	11:22:10	0.476654	2.12025	1.21165	441.053	FALSE	14
2022-09-13	11:22:10	0.056756	0.252462	1.21165	412.627	FALSE	14
2022-09-13	11:22:10	0.217875	0.969152	1.21165	442.022	FALSE	14
2022-09-13	11:22:10	0.338283	1.50475	1.21165	414.132	FALSE	14
2022-09-13	11:22:11	0.441132	1.96224	2.33802	443.984	FALSE	14
2022-09-13	11:22:11	0.216043	0.961002	2.33802	415.093	FALSE	14
2022-09-13	11:22:11	0.39243	1.74561	2.33802	445.73	FALSE	14
2022-09-13	11:22:11	1.05284	4.68324	2.33802	419.776	FALSE	14
2022-09-13	11:22:12	1.4938	6.64472	4.21464	452.374	FALSE	14
2022-09-13	11:22:12	1.54612	6.87745	4.21464	426.654	FALSE	14
2022-09-13	11:22:12	0.75528	3.35964	4.21464	455.734	FALSE	14
2022-09-13	11:22:12	-0.00522877	-0.0232586	4.21464	426.654	FALSE	14
2022-09-13	11:22:13	-0.0717427	-0.319126	-0.458722	455.734	FALSE	14
2022-09-13	11:22:13	-0.170623	-0.758965	-0.458722	426.654	FALSE	14
2022-09-13	11:22:13	-0.0670099	-0.298073	-0.458722	455.734	FALSE	14
2022-09-13	11:22:14	-0.187824	-0.835479	-1.45483	426.654	FALSE	14
2022-09-13	11:22:14	-0.287112	-1.27713	-1.45483	455.734	FALSE	14
2022-09-13	11:22:14	-0.468078	-2.0821	-1.45483	426.654	FALSE	14
2022-09-13	11:22:14	-0.365229	-1.62461	-1.45483	455.734	FALSE	14
2022-09-13	11:22:15	-0.243142	-1.08154	-0.393262	426.654	FALSE	14
2022-09-13	11:22:15	-0.132862	-0.590997	-0.393262	455.734	FALSE	14
2022-09-13	11:22:15	-0.0824297	-0.366664	-0.393262	426.654	FALSE	14
2022-09-13	11:22:15	0.104797	0.466158	-0.393262	456.2	FALSE	14
2022-09-13	11:22:16	0.315229	1.4022	5.72006	428.056	FALSE	14
2022-09-13	11:22:16	0.969733	4.31357	5.72006	460.514	FALSE	14
2022-09-13	11:22:16	1.2707	5.65233	5.72006	433.708	FALSE	14
2022-09-13	11:22:16	2.58805	11.5122	5.72006	472.026	FALSE	14
2022-09-13	11:22:17	3.86322	17.1844	15.0842	450.893	1	15
2022-09-13	11:22:17	3.16632	14.0844	15.0842	486.11	1	16
2022-09-13	11:22:17	3.14373	13.9839	15.0842	464.877	1	17
2022-09-13	11:22:18	2.53701	11.2851	7.46646	497.395	FALSE	17
2022-09-13	11:22:18	1.86673	8.30359	7.46646	473.18	FALSE	17
2022-09-13	11:22:18	1.49258	6.63929	7.46646	504.035	FALSE	17
2022-09-13	11:22:18	0.817824	3.63784	7.46646	476.818	FALSE	17
2022-09-13	11:22:19	1.97553	8.78755	11.0902	512.822	FALSE	17
2022-09-13	11:22:19	2.11055	9.38815	11.0902	486.206	FALSE	17
2022-09-13	11:22:19	2.53599	11.2806	11.0902	524.103	FALSE	17
2022-09-13	11:22:19	3.3507	14.9046	11.0902	501.111	1	18
2022-09-13	11:22:20	1.01457	4.51301	2.08534	528.616	FALSE	18
2022-09-13	11:22:20	0.283728	1.26208	2.08534	502.373	FALSE	18
2022-09-13	11:22:20	0.278893	1.24057	2.08534	529.856	FALSE	18
2022-09-13	11:22:20	0.298028	1.32569	2.08534	503.699	FALSE	18
2022-09-13	11:22:21	0.22439	0.998132	2.00556	530.854	FALSE	18
2022-09-13	11:22:21	0.26556	1.18126	2.00556	504.88	FALSE	18
2022-09-13	11:22:21	0.862659	3.83728	2.00556	534.692	FALSE	18
2022-09-13	11:22:22	0.861794	3.83343	5.4315	508.713	FALSE	18
2022-09-13	11:22:22	1.85767	8.26329	5.4315	542.955	FALSE	18
2022-09-13	11:22:22	1.82592	8.12206	5.4315	516.835	FALSE	18
2022-09-13	11:22:22	0.338842	1.50724	5.4315	544.462	FALSE	18
2022-09-13	11:22:23	0.317519	1.41239	1.17051	518.248	FALSE	18
2022-09-13	11:22:23	0.33187	1.47622	1.17051	545.939	FALSE	18
2022-09-13	11:22:23	0.233244	1.03752	1.17051	519.285	FALSE	18
2022-09-13	11:22:23	0.169937	0.755914	1.17051	546.694	FALSE	18
2022-09-13	11:22:24	0.238995	1.0631	1.19586	520.348	FALSE	18
2022-09-13	11:22:24	0.211463	0.94063	1.19586	547.635	FALSE	18
2022-09-13	11:22:24	0.273702	1.21748	1.19586	521.566	FALSE	18
2022-09-13	11:22:24	0.351209	1.56225	1.19586	549.197	FALSE	18
2022-09-13	11:22:25	0.301387	1.34063	1.39677	522.906	FALSE	18
2022-09-13	11:22:25	0.308868	1.37391	1.39677	550.571	FALSE	18
2022-09-13	11:22:25	0.331769	1.47577	1.39677	524.382	FALSE	18
2022-09-13	11:22:26	0.115993	0.51596	0.500566	551.087	FALSE	18
2022-09-13	11:22:26	0.0117178	0.0521231	0.500566	524.434	FALSE	18
2022-09-13	11:22:26	0.23126	1.02869	0.500566	552.116	FALSE	18
2022-09-13	11:22:26	0.091158	0.405489	0.500566	524.84	FALSE	18
2022-09-13	11:22:27	0.229071	1.01895	0.375268	553.135	FALSE	18
2022-09-13	11:22:27	-0.120903	-0.537801	0.375268	524.84	FALSE	18
2022-09-13	11:22:27	-0.0415137	-0.184661	0.375268	553.135	FALSE	18
2022-09-13	11:22:27	0.270802	1.20458	0.375268	526.044	FALSE	18
2022-09-13	11:22:28	0.0509036	0.226429	0.440917	553.361	FALSE	18
2022-09-13	11:22:28	0.146985	0.653819	0.440917	526.698	FALSE	18
2022-09-13	11:22:28	0.0835753	0.37176	0.440917	553.733	FALSE	18
2022-09-13	11:22:28	0.115026	0.511659	0.440917	527.21	FALSE	18
2022-09-13	11:22:29	0.216451	0.962817	0.542897	554.696	FALSE	18
2022-09-13	11:22:29	0.140522	0.62507	0.542897	527.835	FALSE	18
2022-09-13	11:22:29	0.00917326	0.0408045	0.542897	554.737	FALSE	18
2022-09-13	11:22:30	-0.10589	-0.47102	0.165706	527.835	FALSE	18
2022-09-13	11:22:30	0.0229646	0.102151	0.165706	554.839	FALSE	18
2022-09-13	11:22:30	-0.0616664	-0.274304	0.165706	527.835	FALSE	18
2022-09-13	11:22:30	0.293601	1.306	0.165706	556.145	FALSE	18
2022-09-13	11:22:31	0.225662	1.00379	1.52444	528.839	FALSE	18
2022-09-13	11:22:31	0.414669	1.84453	1.52444	557.989	FALSE	18
2022-09-13	11:22:31	0.467595	2.07996	1.52444	530.919	FALSE	18
2022-09-13	11:22:31	0.262914	1.16949	1.52444	559.159	FALSE	18
2022-09-13	11:22:32	0.445407	1.98126	3.28969	532.9	FALSE	18
2022-09-13	11:22:32	0.112736	0.501472	3.28969	559.66	FALSE	18
2022-09-13	11:22:32	0.620216	2.75884	3.28969	535.659	FALSE	18
2022-09-13	11:22:32	1.77986	7.91717	3.28969	567.577	FALSE	18
2022-09-13	11:22:33	5.07421	22.5711	21.6949	558.23	1	19
2022-09-13	11:22:33	6.02372	26.7947	21.6949	594.372	1	20
2022-09-13	11:22:33	5.03619	22.402	21.6949	580.632	1	21
2022-09-13	11:22:33	3.37482	15.0119	21.6949	609.384	1	22
2022-09-13	11:22:34	2.32917	10.3606	9.67977	590.992	FALSE	22
2022-09-13	11:22:34	1.92093	8.54468	9.67977	617.929	FALSE	22
2022-09-13	11:22:34	2.27823	10.134	9.67977	601.126	FALSE	22
2022-09-13	11:22:35	1.2193	5.42369	7.07676	623.352	FALSE	22
2022-09-13	11:22:35	2.56571	11.4128	7.07676	612.539	FALSE	22
2022-09-13	11:22:35	1.06032	4.71652	7.07676	628.069	FALSE	22
2022-09-13	11:22:35	1.51838	6.75406	7.07676	619.293	FALSE	22
2022-09-13	11:22:36	1.95497	8.6961	8.44252	636.765	FALSE	22
2022-09-13	11:22:36	1.2137	5.39878	8.44252	624.692	FALSE	22
2022-09-13	11:22:36	3.59197	15.9778	8.44252	652.743	1	23
2022-09-13	11:22:36	0.831209	3.69738	8.44252	628.389	FALSE	23
2022-09-13	11:22:37	1.74653	7.76891	11.926	660.512	FALSE	23
2022-09-13	11:22:37	1.72673	7.68084	11.926	636.07	FALSE	23
2022-09-13	11:22:37	1.44765	6.43944	11.926	666.951	FALSE	23
2022-09-13	11:22:37	5.80342	25.8148	11.926	661.885	1	24
2022-09-13	11:22:38	4.11131	18.2879	18.9077	685.239	1	25
2022-09-13	11:22:38	6.50093	28.9174	18.9077	690.803	1	26
2022-09-13	11:22:38	2.13971	9.51786	18.9077	694.757	FALSE	26
2022-09-13	11:22:39	1.21156	5.38926	13.1184	696.192	FALSE	26
2022-09-13	11:22:39	4.63848	20.6329	13.1184	715.39	1	27
2022-09-13	11:22:39	1.00042	4.45007	13.1184	700.642	FALSE	27
2022-09-13	11:22:39	4.94617	22.0016	13.1184	737.391	1	28
2022-09-13	11:22:40	3.74525	16.6596	24.9277	717.301	1	29
2022-09-13	11:22:40	2.27406	10.1155	24.9277	747.507	FALSE	29
2022-09-13	11:22:40	11.8026	52.5003	24.9277	769.802	1	30
2022-09-13	11:22:40	4.59411	20.4355	24.9277	767.942	1	31
2022-09-13	11:22:41	7.03466	31.2916	15.3069	801.093	1	32
2022-09-13	11:22:41	4.35324	19.3641	15.3069	787.306	1	33
2022-09-13	11:22:41	1.20871	5.37658	15.3069	806.47	FALSE	33
2022-09-13	11:22:41	1.16795	5.19528	15.3069	792.502	FALSE	33
2022-09-13	11:22:42	1.30363	5.79881	6.38985	812.269	FALSE	33
2022-09-13	11:22:42	0.644898	2.86864	6.38985	795.37	FALSE	33
2022-09-13	11:22:42	2.36098	10.5021	6.38985	822.771	FALSE	33
2022-09-13	11:22:43	2.72118	12.1044	38.4403	807.475	FALSE	33
2022-09-13	11:22:43	9.87487	43.9254	38.4403	866.696	1	34
2022-09-13	11:22:43	18.7227	83.2823	38.4403	890.757	1	35
2022-09-13	11:22:43	3.24831	14.4491	38.4403	881.145	1	36
2022-09-13	11:22:44	1.47121	6.54424	3.69608	897.301	FALSE	36
2022-09-13	11:22:44	0.890496	3.9611	3.69608	885.107	FALSE	36
2022-09-13	11:22:44	0.198639	0.883586	3.69608	898.185	FALSE	36
2022-09-13	11:22:44	0.763321	3.3954	3.69608	888.502	FALSE	36
2022-09-13	11:22:45	1.05385	4.68774	9.44235	902.873	FALSE	36
2022-09-13	11:22:45	1.6706	7.43116	9.44235	895.933	FALSE	36
2022-09-13	11:22:45	2.46164	10.9499	9.44235	913.822	FALSE	36
2022-09-13	11:22:45	3.30485	14.7006	9.44235	910.634	1	37
2022-09-13	11:22:46	5.07268	22.5643	11.347	936.387	1	38
2022-09-13	11:22:46	0.941132	4.18634	11.347	914.82	FALSE	38
2022-09-13	11:22:46	1.63894	7.29033	11.347	943.677	FALSE	38
2022-09-13	11:22:47	0.658537	2.9293	2.52642	917.749	FALSE	38
2022-09-13	11:22:47	0.754822	3.3576	2.52642	947.035	FALSE	38
2022-09-13	11:22:47	0.401285	1.785	2.52642	919.534	FALSE	38
2022-09-13	11:22:47	0.457214	2.03378	2.52642	949.068	FALSE	38
2022-09-13	11:22:48	0.828409	3.68493	6.92736	923.219	FALSE	38
2022-09-13	11:22:48	1.07304	4.7731	6.92736	953.842	FALSE	38
2022-09-13	11:22:48	1.47884	6.57818	6.92736	929.797	FALSE	38
2022-09-13	11:22:48	2.84907	12.6732	6.92736	966.515	FALSE	38
2022-09-13	11:22:49	4.45065	19.7974	19.0622	949.595	1	39
2022-09-13	11:22:49	6.62968	29.4901	19.0622	996.005	1	40
2022-09-13	11:22:49	3.83324	17.051	19.0622	966.646	1	41
2022-09-13	11:22:49	2.2279	9.91014	19.0622	1005.92	FALSE	41
2022-09-13	11:22:50	1.89813	8.44326	9.72007	975.089	FALSE	41
2022-09-13	11:22:50	2.31228	10.2855	9.72007	1016.2	FALSE	41
2022-09-13	11:22:50	2.3451	10.4315	9.72007	985.521	FALSE	41
2022-09-13	11:22:51	0.957875	4.26082	2.91589	1020.46	FALSE	41
2022-09-13	11:22:51	0.447901	1.99235	2.91589	987.513	FALSE	41
2022-09-13	11:22:51	0.468359	2.08335	2.91589	1022.54	FALSE	41
2022-09-13	11:22:51	0.747952	3.32704	2.91589	990.84	FALSE	41
2022-09-13	11:22:52	3.14983	14.0111	8.63438	1036.56	1	42
2022-09-13	11:22:52	1.50597	6.69886	8.63438	997.539	FALSE	42
2022-09-13	11:22:52	2.09813	9.3329	8.63438	1045.89	FALSE	42
2022-09-13	11:22:52	1.01045	4.49468	8.63438	1002.03	FALSE	42
2022-09-13	11:22:53	1.03492	4.60353	3.18997	1050.49	FALSE	42
2022-09-13	11:22:53	0.985153	4.38216	3.18997	1006.42	FALSE	42
2022-09-13	11:22:53	0.453448	2.01703	3.18997	1052.51	FALSE	42
2022-09-13	11:22:53	0.395026	1.75715	3.18997	1008.17	FALSE	42
2022-09-13	11:22:54	0.455483	2.02608	1.63657	1054.54	FALSE	42
2022-09-13	11:22:54	0.41869	1.86242	1.63657	1010.04	FALSE	42
2022-09-13	11:22:54	0.22958	1.02122	1.63657	1055.56	FALSE	42
2022-09-13	11:22:55	0.156909	0.697963	0.35682	1010.73	FALSE	42
2022-09-13	11:22:55	0.0945168	0.42043	0.35682	1055.98	FALSE	42
2022-09-13	11:22:55	0.0636262	0.283022	0.35682	1011.02	FALSE	42
2022-09-13	11:22:55	0.00581451	0.0258641	0.35682	1056	FALSE	42
2022-09-13	11:22:56	0.314924	1.40084	12.9061	1012.42	FALSE	42
2022-09-13	11:22:56	0.450852	2.00548	12.9061	1058.01	FALSE	42
2022-09-13	11:22:56	2.43986	10.853	12.9061	1023.27	FALSE	42
2022-09-13	11:22:56	8.40001	37.3649	12.9061	1095.37	1	43
2022-09-13	11:22:57	6.49227	28.8789	14.5858	1052.15	1	44
2022-09-13	11:22:57	1.57462	7.00422	14.5858	1102.38	FALSE	44
2022-09-13	11:22:57	3.00464	13.3652	14.5858	1065.51	1	45
2022-09-13	11:22:57	2.04464	9.09497	14.5858	1111.47	FALSE	45
2022-09-13	11:22:58	1.49248	6.63885	10.5706	1072.15	FALSE	45
2022-09-13	11:22:58	2.81431	12.5186	10.5706	1123.99	FALSE	45
2022-09-13	11:22:58	2.82235	12.5544	10.5706	1084.71	FALSE	45
2022-09-13	11:22:59	5.55126	24.6931	20.1923	1148.68	1	46
2022-09-13	11:22:59	5.84052	25.9798	20.1923	1110.69	1	47
2022-09-13	11:22:59	2.53162	11.2612	20.1923	1159.95	FALSE	47
2022-09-13	11:22:59	4.23431	18.8351	20.1923	1129.52	1	48
2022-09-13	11:23:00	2.33268	10.3762	8.16221	1170.32	FALSE	48
2022-09-13	11:23:00	2.26245	10.0638	8.16221	1139.59	FALSE	48
2022-09-13	11:23:00	1.76856	7.86691	8.16221	1178.19	FALSE	48
2022-09-13	11:23:00	0.976094	4.34186	8.16221	1143.93	FALSE	48
2022-09-13	11:23:01	0.867748	3.85992	6.63636	1182.05	FALSE	48
2022-09-13	11:23:01	0.768766	3.41962	6.63636	1147.35	FALSE	48
2022-09-13	11:23:01	3.32006	14.7683	6.63636	1196.82	1	49
2022-09-13	11:23:01	1.01111	4.49762	6.63636	1151.85	FALSE	49
2022-09-13	11:23:02	1.31905	5.8674	4.66846	1202.68	FALSE	49
2022-09-13	11:23:02	1.17258	5.21587	4.66846	1157.06	FALSE	49
2022-09-13	11:23:02	0.800471	3.56066	4.66846	1206.24	FALSE	49
2022-09-13	11:23:02	0.905967	4.02992	4.66846	1161.09	FALSE	49
2022-09-13	11:23:03	0.580216	2.58092	3.08248	1208.83	FALSE	49
2022-09-13	11:23:03	0.470293	2.09196	3.08248	1163.18	FALSE	49
2022-09-13	11:23:03	1.02841	4.57457	3.08248	1213.4	FALSE	49
2022-09-13	11:23:04	1.27609	5.6763	3.92771	1168.86	FALSE	49
2022-09-13	11:23:04	0.859758	3.82438	3.92771	1217.22	FALSE	49
2022-09-13	11:23:04	0.931718	4.14447	3.92771	1173	FALSE	49
2022-09-13	11:23:04	0.464389	2.0657	3.92771	1219.29	FALSE	49
2022-09-13	11:23:05	0.46271	2.05823	3.87253	1175.06	FALSE	49
2022-09-13	11:23:05	0.492634	2.19133	3.87253	1221.48	FALSE	49
2022-09-13	11:23:05	0.896603	3.98827	3.87253	1179.05	FALSE	49
2022-09-13	11:23:05	1.63039	7.2523	3.87253	1228.73	FALSE	49
2022-09-13	11:23:06	2.02444	9.00511	13.5673	1188.06	FALSE	49
2022-09-13	11:23:06	2.73202	12.1526	13.5673	1240.89	FALSE	49
2022-09-13	11:23:06	3.19518	14.2128	13.5673	1202.27	1	50
2022-09-13	11:23:06	4.24866	18.8989	13.5673	1259.79	1	51
2022-09-13	11:23:07	3.23014	14.3683	12.6585	1216.64	1	52
2022-09-13	11:23:07	2.91075	12.9476	12.6585	1272.73	FALSE	52
2022-09-13	11:23:07	2.3964	10.6597	12.6585	1227.3	FALSE	52
2022-09-13	11:23:08	2.68709	11.9527	7.34122	1284.69	FALSE	52
2022-09-13	11:23:08	1.27884	5.68854	7.34122	1232.98	FALSE	52
2022-09-13	11:23:08	1.53258	6.81722	7.34122	1291.5	FALSE	52
2022-09-13	11:23:08	1.10301	4.90641	7.34122	1237.89	FALSE	52
2022-09-13	11:23:09	1.33711	5.94773	4.25776	1297.45	FALSE	52
2022-09-13	11:23:09	1.0052	4.47133	4.25776	1242.36	FALSE	52
2022-09-13	11:23:09	0.773804	3.44203	4.25776	1300.89	FALSE	52
2022-09-13	11:23:09	0.712634	3.16994	4.25776	1245.53	FALSE	52
2022-09-13	11:23:10	0.765	3.40287	2.92913	1304.3	FALSE	52
2022-09-13	11:23:10	0.67869	3.01895	2.92913	1248.55	FALSE	52
2022-09-13	11:23:10	0.661997	2.9447	2.92913	1307.24	FALSE	52
2022-09-13	11:23:10	0.528308	2.35002	2.92913	1250.9	FALSE	52
2022-09-13	11:23:11	0.455738	2.02721	2.43913	1309.27	FALSE	52
2022-09-13	11:23:11	0.513652	2.28483	2.43913	1253.19	FALSE	52
2022-09-13	11:23:11	0.675636	3.00536	2.43913	1312.27	FALSE	52
2022-09-13	11:23:12	0.528919	2.35274	1.9447	1255.54	FALSE	52
2022-09-13	11:23:12	0.410751	1.8271	1.9447	1314.1	FALSE	52
2022-09-13	11:23:12	0.391412	1.74108	1.9447	1257.28	FALSE	52
2022-09-13	11:23:12	0.417672	1.85789	1.9447	1315.96	FALSE	52
2022-09-13	11:23:13	0.450445	2.00367	2.37345	1259.28	FALSE	52
2022-09-13	11:23:13	0.400522	1.7816	2.37345	1317.74	FALSE	52
2022-09-13	11:23:13	0.622354	2.76836	2.37345	1262.05	FALSE	52
2022-09-13	11:23:13	0.66098	2.94017	2.37345	1320.68	FALSE	52
2022-09-13	11:23:14	0.408664	1.81782	5.72634	1263.87	FALSE	52
2022-09-13	11:23:14	1.12347	4.99742	5.72634	1325.68	FALSE	52
2022-09-13	11:23:14	1.02978	4.58067	5.72634	1268.45	FALSE	52
2022-09-13	11:23:14	2.58744	11.5095	5.72634	1337.19	FALSE	52
2022-09-13	11:23:15	2.93202	13.0422	19.8103	1281.49	FALSE	52
2022-09-13	11:23:15	4.77289	21.2308	19.8103	1358.42	1	53
2022-09-13	11:23:15	5.65578	25.158	19.8103	1306.65	1	54
2022-09-13	11:23:16	1.37431	6.11321	13.651	1364.53	FALSE	54
2022-09-13	11:23:16	4.68429	20.8367	13.651	1327.49	1	55
2022-09-13	11:23:16	1.43319	6.37512	13.651	1370.91	FALSE	55
2022-09-13	11:23:16	4.78378	21.2792	13.651	1348.77	1	56
2022-09-13	11:23:17	3.54469	15.7675	10.7206	1386.67	1	57
2022-09-13	11:23:17	1.84195	8.19336	10.7206	1356.96	FALSE	57
2022-09-13	11:23:17	3.53029	15.7034	10.7206	1402.38	1	58
2022-09-13	11:23:17	0.723473	3.21815	10.7206	1360.18	FALSE	58
2022-09-13	11:23:18	1.76724	7.86104	3.97163	1410.24	FALSE	58
2022-09-13	11:23:18	0.748715	3.33043	3.97163	1363.51	FALSE	58
2022-09-13	11:23:18	0.448003	1.99281	3.97163	1412.23	FALSE	58
2022-09-13	11:23:18	0.607494	2.70225	3.97163	1366.21	FALSE	58
2022-09-13	11:23:19	0.685814	3.05064	13.2093	1415.28	FALSE	58
2022-09-13	11:23:19	3.68668	16.3991	13.2093	1382.61	1	59
2022-09-13	11:23:19	4.53625	20.1781	13.2093	1435.46	1	60
2022-09-13	11:23:20	2.54368	11.3148	5.4405	1393.92	FALSE	60
2022-09-13	11:23:20	0.941387	4.18748	5.4405	1439.65	FALSE	60
2022-09-13	11:23:20	1.06123	4.72056	5.4405	1398.65	FALSE	60
2022-09-13	11:23:20	0.346018	1.53916	5.4405	1441.19	FALSE	60
2022-09-13	11:23:21	0.478333	2.12772	2.60854	1400.77	FALSE	60
2022-09-13	11:23:21	0.373906	1.66321	2.60854	1442.85	FALSE	60
2022-09-13	11:23:21	0.526018	2.33983	2.60854	1403.11	FALSE	60
2022-09-13	11:23:21	0.967443	4.30338	2.60854	1447.15	FALSE	60
2022-09-13	11:23:22	1.7536	7.80036	5.67518	1410.91	FALSE	60
2022-09-13	11:23:22	0.591921	2.63298	5.67518	1449.79	FALSE	60
2022-09-13	11:23:22	1.91782	8.53085	5.67518	1419.44	FALSE	60
2022-09-13	11:23:22	0.840013	3.73655	5.67518	1453.52	FALSE	60
2022-09-13	11:23:23	0.470089	2.09105	1.92574	1421.54	FALSE	60
2022-09-13	11:23:23	0.401082	1.78409	1.92574	1455.31	FALSE	60
2022-09-13	11:23:23	0.239962	1.0674	1.92574	1422.6	FALSE	60
2022-09-13	11:23:23	0.620573	2.76043	1.92574	1458.07	FALSE	60
2022-09-13	11:23:24	2.59869	11.5595	21.0809	1434.16	FALSE	60
2022-09-13	11:23:24	7.97248	35.4632	21.0809	1493.53	1	61
2022-09-13	11:23:24	3.64642	16.22	21.0809	1450.38	1	62
2022-09-13	11:23:25	2.97075	13.2145	13.3683	1506.74	FALSE	62
2022-09-13	11:23:25	1.56739	6.97206	13.3683	1457.35	FALSE	62
2022-09-13	11:23:25	2.07294	9.22085	13.3683	1515.96	FALSE	62
2022-09-13	11:23:25	5.41024	24.0658	13.3683	1481.42	1	63
2022-09-13	11:23:26	7.27227	32.3485	37.7823	1548.31	1	64
2022-09-13	11:23:26	12.2713	54.5852	37.7823	1536.01	1	65
2022-09-13	11:23:26	9.69059	43.1057	37.7823	1591.42	1	66
2022-09-13	11:23:26	4.74123	21.0899	37.7823	1557.1	1	67
2022-09-13	11:23:27	1.72037	7.65255	3.34142	1599.07	FALSE	67
2022-09-13	11:23:27	0.600929	2.67305	3.34142	1559.77	FALSE	67
2022-09-13	11:23:27	0.3507	1.55998	3.34142	1600.63	FALSE	67
2022-09-13	11:23:27	0.332736	1.48008	3.34142	1561.25	FALSE	67
2022-09-13	11:23:28	0.0644913	0.28687	-0.515163	1600.92	FALSE	67
2022-09-13	11:23:28	-0.210572	-0.936666	-0.515163	1561.25	FALSE	67
2022-09-13	11:23:28	-0.201361	-0.895694	-0.515163	1600.92	FALSE	67
2022-09-13	11:23:29	0.555636	2.47158	15.3968	1563.72	FALSE	67
2022-09-13	11:23:29	7.40566	32.9419	15.3968	1633.86	1	68
2022-09-13	11:23:29	5.06164	22.5152	15.3968	1586.23	1	69
2022-09-13	11:23:29	0.822506	3.65867	15.3968	1637.52	FALSE	69
2022-09-13	11:23:30	0.628053	2.79371	3.39931	1589.03	FALSE	69
2022-09-13	11:23:30	0.293601	1.306	3.39931	1638.83	FALSE	69
2022-09-13	11:23:30	0.419555	1.86626	3.39931	1590.89	FALSE	69
2022-09-13	11:23:30	1.71559	7.63129	3.39931	1646.46	FALSE	69
2022-09-13	11:23:31	2.3277	10.3541	10.1697	1601.25	FALSE	69
2022-09-13	11:23:31	2.01787	8.97589	10.1697	1655.43	FALSE	69
2022-09-13	11:23:31	2.31996	10.3196	10.1697	1611.57	FALSE	69
2022-09-13	11:23:31	2.4795	11.0293	10.1697	1666.46	FALSE	69
2022-09-13	11:23:32	2.15365	9.57987	8.66834	1621.15	FALSE	69
2022-09-13	11:23:32	1.88169	8.37013	8.66834	1674.83	FALSE	69
2022-09-13	11:23:32	1.81085	8.05502	8.66834	1629.2	FALSE	69
2022-09-13	11:23:33	1.91355	8.51185	7.5818	1683.34	FALSE	69
2022-09-13	11:23:33	1.84749	8.21801	7.5818	1637.42	FALSE	69
2022-09-13	11:23:33	1.56877	6.9782	7.5818	1690.32	FALSE	69
2022-09-13	11:23:33	1.48805	6.61914	7.5818	1644.04	FALSE	69
2022-09-13	11:23:34	0.748766	3.33066	2.05647	1693.65	FALSE	69
2022-09-13	11:23:34	0.427799	1.90294	2.05647	1645.94	FALSE	69
2022-09-13	11:23:34	0.369631	1.64419	2.05647	1695.3	FALSE	69
2022-09-13	11:23:34	0.303066	1.3481	2.05647	1647.29	FALSE	69
2022-09-13	11:23:35	0.261081	1.16134	2.02189	1696.46	FALSE	69
2022-09-13	11:23:35	0.196654	0.874756	2.02189	1648.17	FALSE	69
2022-09-13	11:23:35	0.713957	3.17582	2.02189	1699.63	FALSE	69
2022-09-13	11:23:35	0.646476	2.87565	2.02189	1651.04	FALSE	69
2022-09-13	11:23:36	0.725204	3.22585	1.45789	1702.86	FALSE	69
2022-09-13	11:23:36	0.281998	1.25438	1.45789	1652.3	FALSE	69
2022-09-13	11:23:36	-0.0239565	-0.106563	1.45789	1702.86	FALSE	69
2022-09-13	11:23:37	0.141489	0.629371	0.547821	1652.93	FALSE	69
2022-09-13	11:23:37	0.159148	0.707922	0.547821	1703.57	FALSE	69
2022-09-13	11:23:37	0.158181	0.703621	0.547821	1653.63	FALSE	69
2022-09-13	11:23:37	0.0338043	0.150368	0.547821	1703.72	FALSE	69
2022-09-13	11:23:38	-0.00482162	-0.0214475	0.51375	1653.63	FALSE	69
2022-09-13	11:23:38	0.0759926	0.33803	0.51375	1704.06	FALSE	69
2022-09-13	11:23:38	0.189122	0.841252	0.51375	1654.47	FALSE	69
2022-09-13	11:23:38	0.201692	0.897166	0.51375	1704.95	FALSE	69
2022-09-13	11:23:39	0.201641	0.896939	0.791225	1655.37	FALSE	69
2022-09-13	11:23:39	0.174211	0.774925	0.791225	1705.73	FALSE	69
2022-09-13	11:23:39	0.170547	0.758627	0.791225	1656.13	FALSE	69
2022-09-13	11:23:39	0.165102	0.734407	0.791225	1706.46	FALSE	69
2022-09-13	11:23:40	0.165713	0.737125	0.819977	1656.86	FALSE	69
2022-09-13	11:23:40	0.179708	0.799377	0.819977	1707.26	FALSE	69
2022-09-13	11:23:40	0.207596	0.923429	0.819977	1657.79	FALSE	69
2022-09-13	11:23:41	0.193601	0.861176	0.862363	1708.12	FALSE	69
2022-09-13	11:23:41	0.198944	0.884943	0.862363	1658.67	FALSE	69
2022-09-13	11:23:41	0.195992	0.871812	0.862363	1708.99	FALSE	69
2022-09-13	11:23:41	0.186934	0.83152	0.862363	1659.5	FALSE	69
2022-09-13	11:23:42	0.180471	0.802771	0.760552	1709.8	FALSE	69
2022-09-13	11:23:42	0.170242	0.75727	0.760552	1660.26	FALSE	69
2022-09-13	11:23:42	0.178384	0.793488	0.760552	1710.59	FALSE	69
2022-09-13	11:23:42	0.154822	0.688679	0.760552	1660.95	FALSE	69
2022-09-13	11:23:43	-0.0756104	-0.33633	-1.38952	1710.59	FALSE	69
2022-09-13	11:23:43	-0.343346	-1.52727	-1.38952	1660.95	FALSE	69
2022-09-13	11:23:43	-0.446806	-1.98748	-1.38952	1710.59	FALSE	69
2022-09-13	11:23:43	-0.383753	-1.70701	-1.38952	1660.95	FALSE	69
2022-09-13	11:23:44	-0.363804	-1.61827	-1.68007	1710.59	FALSE	69
2022-09-13	11:23:44	-0.386399	-1.71878	-1.68007	1660.95	FALSE	69
2022-09-13	11:23:44	-0.382888	-1.70316	-1.68007	1710.59	FALSE	69
2022-09-13	11:23:45	-0.368282	-1.63819	-1.58596	1660.95	FALSE	69
2022-09-13	11:23:45	-0.369147	-1.64204	-1.58596	1710.59	FALSE	69
2022-09-13	11:23:45	-0.353829	-1.5739	-1.58596	1660.95	FALSE	69
2022-09-13	11:23:45	-0.334898	-1.48969	-1.58596	1710.59	FALSE	69
2022-09-13	11:23:46	-0.342277	-1.52252	-1.48545	1660.95	FALSE	69
2022-09-13	11:23:46	-0.338053	-1.50373	-1.48545	1710.59	FALSE	69
2022-09-13	11:23:46	-0.336933	-1.49875	-1.48545	1660.95	FALSE	69
2022-09-13	11:23:46	-0.318511	-1.4168	-1.48545	1710.59	FALSE	69
2022-09-13	11:23:47	-0.21561	-0.959076	-0.37685	1660.95	FALSE	69
2022-09-13	11:23:47	-0.0337275	-0.150027	-0.37685	1710.59	FALSE	69
2022-09-13	11:23:47	-0.040445	-0.179907	-0.37685	1660.95	FALSE	69
2022-09-13	11:23:47	-0.0490964	-0.218391	-0.37685	1710.59	FALSE	69
2022-09-13	11:23:48	-0.0344908	-0.153422	-0.0899249	1660.95	FALSE	69
2022-09-13	11:23:48	-0.0169336	-0.075324	-0.0899249	1710.59	FALSE	69
2022-09-13	11:23:48	-0.0156104	-0.0694382	-0.0899249	1660.95	FALSE	69
2022-09-13	11:23:48	-0.0138293	-0.0615155	-0.0899249	1710.59	FALSE	69
2022-09-13	11:23:49	-0.0605468	-0.269324	-0.370512	1660.95	FALSE	69
2022-09-13	11:23:49	-0.0400379	-0.178097	-0.370512	1710.59	FALSE	69
2022-09-13	11:23:49	-0.1493	-0.664116	-0.370512	1660.95	FALSE	69
2022-09-13	11:23:50	-0.107875	-0.47985	-1.17577	1710.59	FALSE	69
2022-09-13	11:23:50	-0.0891473	-0.396545	-1.17577	1660.95	FALSE	69
2022-09-13	11:23:50	-0.45734	-2.03434	-1.17577	1710.59	FALSE	69
2022-09-13	11:23:50	-0.402938	-1.79235	-1.17577	1660.95	FALSE	69
2022-09-13	11:23:51	0.30729	1.36689	1.64238	1711.96	FALSE	69
2022-09-13	11:23:51	0.436603	1.9421	1.64238	1662.89	FALSE	69
2022-09-13	11:23:51	0.291514	1.29671	1.64238	1713.25	FALSE	69
2022-09-13	11:23:51	0.441489	1.96383	1.64238	1664.86	FALSE	69
2022-09-13	11:23:52	0.450598	2.00435	1.30566	1715.26	FALSE	69
2022-09-13	11:23:52	0.454517	2.02178	1.30566	1666.88	FALSE	69
2022-09-13	11:23:52	0.191158	0.850309	1.30566	1716.11	FALSE	69
2022-09-13	11:23:52	0.0778247	0.34618	1.30566	1667.22	FALSE	69
2022-09-13	11:23:53	-0.0278751	-0.123994	-0.612504	1716.11	FALSE	69
2022-09-13	11:23:53	-0.153168	-0.681322	-0.612504	1667.22	FALSE	69
2022-09-13	11:23:53	-0.232048	-1.0322	-0.612504	1716.11	FALSE	69
2022-09-13	11:23:54	-0.202582	-0.901125	-0.91154	1667.22	FALSE	69
2022-09-13	11:23:54	-0.236781	-1.05325	-0.91154	1716.11	FALSE	69
2022-09-13	11:23:54	-0.161768	-0.719576	-0.91154	1667.22	FALSE	69
2022-09-13	11:23:54	-0.218562	-0.972207	-0.91154	1716.11	FALSE	69
2022-09-13	11:23:55	-0.376984	-1.6769	-0.352516	1667.22	FALSE	69
2022-09-13	11:23:55	-0.0574934	-0.255742	-0.352516	1716.11	FALSE	69
2022-09-13	11:23:55	-0.133982	-0.595979	-0.352516	1667.22	FALSE	69
2022-09-13	11:23:55	0.251463	1.11856	-0.352516	1717.23	FALSE	69
2022-09-13	11:23:56	0.242507	1.07872	1.46015	1668.3	FALSE	69
2022-09-13	11:23:56	0.338842	1.50724	1.46015	1718.74	FALSE	69
2022-09-13	11:23:56	0.367494	1.63469	1.46015	1669.94	FALSE	69
2022-09-13	11:23:56	0.364186	1.61997	1.46015	1720.36	FALSE	69
2022-09-13	11:23:57	0.478333	2.12772	2.64845	1672.06	FALSE	69
2022-09-13	11:23:57	0.482812	2.14764	2.64845	1722.5	FALSE	69
2022-09-13	11:23:57	0.825051	3.66999	2.64845	1675.73	FALSE	69
2022-09-13	11:23:58	1.08607	4.83106	13.5126	1727.33	FALSE	69
2022-09-13	11:23:58	2.32724	10.352	13.5126	1686.09	FALSE	69
2022-09-13	11:23:58	4.26826	18.9861	13.5126	1746.32	1	70
2022-09-13	11:23:58	4.46953	19.8814	13.5126	1705.97	1	71
2022-09-13	11:23:59	4.46551	19.8635	24.186	1766.18	1	72
2022-09-13	11:23:59	7.53049	33.4971	24.186	1739.46	1	73
2022-09-13	11:23:59	5.34062	23.7561	24.186	1789.94	1	74
2022-09-13	11:23:59	4.41243	19.6274	24.186	1759.09	1	75
2022-09-13	11:24:00	1.32256	5.88301	4.18708	1795.82	FALSE	75
2022-09-13	11:24:00	0.974567	4.33507	4.18708	1763.43	FALSE	75
2022-09-13	11:24:00	0.754109	3.35443	4.18708	1799.18	FALSE	75
2022-09-13	11:24:00	0.713957	3.17582	4.18708	1766.6	FALSE	75
2022-09-13	11:24:01	0.553804	2.46343	3.84928	1801.64	FALSE	75
2022-09-13	11:24:01	0.579656	2.57843	3.84928	1769.18	FALSE	75
2022-09-13	11:24:01	1.46261	6.50598	3.84928	1808.15	FALSE	75
2022-09-13	11:24:02	2.39406	10.6493	4.93122	1779.83	FALSE	75
2022-09-13	11:24:02	0.928003	4.12794	4.93122	1812.27	FALSE	75
2022-09-13	11:24:02	0.634109	2.82064	4.93122	1782.65	FALSE	75
2022-09-13	11:24:02	0.478181	2.12704	4.93122	1814.4	FALSE	75
2022-09-13	11:24:03	0.497519	2.21306	7.04157	1784.86	FALSE	75
2022-09-13	11:24:03	1.84108	8.18949	7.04157	1822.59	FALSE	75
2022-09-13	11:24:03	1.53192	6.81429	7.04157	1791.68	FALSE	75
2022-09-13	11:24:03	2.46154	10.9494	7.04157	1833.54	FALSE	75
2022-09-13	11:24:04	0.780776	3.47305	2.68867	1795.15	FALSE	75
2022-09-13	11:24:04	0.370598	1.64849	2.68867	1835.19	FALSE	75
2022-09-13	11:24:04	0.529783	2.35658	2.68867	1797.51	FALSE	75
2022-09-13	11:24:04	0.736603	3.27656	2.68867	1838.47	FALSE	75
2022-09-13	11:24:05	0.552074	2.45574	1.73489	1799.96	FALSE	75
2022-09-13	11:24:05	0.193601	0.861176	1.73489	1839.33	FALSE	75
2022-09-13	11:24:05	0.424389	1.88777	1.73489	1801.85	FALSE	75
2022-09-13	11:24:06	0.22897	1.0185	2.00775	1840.34	FALSE	75
2022-09-13	11:24:06	0.201234	0.895129	2.00775	1802.75	FALSE	75
2022-09-13	11:24:06	0.448308	1.99416	2.00775	1842.34	FALSE	75
2022-09-13	11:24:06	0.926934	4.12319	2.00775	1806.87	FALSE	75
2022-09-13	11:24:07	0.659554	2.93383	3.96768	1845.27	FALSE	75
2022-09-13	11:24:07	0.186832	0.831066	3.96768	1807.7	FALSE	75
2022-09-13	11:24:07	1.03274	4.59383	3.96768	1849.87	FALSE	75
2022-09-13	11:24:07	1.68877	7.51199	3.96768	1815.21	FALSE	75
2022-09-13	11:24:08	3.92256	17.4483	31.8507	1867.32	1	76
2022-09-13	11:24:08	12.6604	56.316	31.8507	1871.53	1	77
2022-09-13	11:24:08	9.03945	40.2093	31.8507	1907.52	1	78
2022-09-13	11:24:08	3.01899	13.4291	31.8507	1884.96	1	79
2022-09-13	11:24:09	0.950394	4.22754	3.71994	1911.75	FALSE	79
2022-09-13	11:24:09	1.04047	4.62822	3.71994	1889.59	FALSE	79
2022-09-13	11:24:09	0.517977	2.30407	3.71994	1914.06	FALSE	79
2022-09-13	11:24:10	0.411616	1.83095	2.0696	1891.42	FALSE	79
2022-09-13	11:24:10	0.848969	3.77638	2.0696	1917.83	FALSE	79
2022-09-13	11:24:10	0.379962	1.69015	2.0696	1893.11	FALSE	79
2022-09-13	11:24:10	0.220522	0.980926	2.0696	1918.81	FALSE	79
2022-09-13	11:24:11	-0.176628	-0.785677	-0.854892	1893.11	FALSE	79
2022-09-13	11:24:11	-0.273219	-1.21533	-0.854892	1918.81	FALSE	79
2022-09-13	11:24:11	-0.20986	-0.933499	-0.854892	1893.11	FALSE	79
2022-09-13	11:24:11	-0.109046	-0.485058	-0.854892	1918.81	FALSE	79
2022-09-13	11:24:12	-0.196832	-0.875548	4.81384	1893.11	FALSE	79
2022-09-13	11:24:12	0.10785	0.479738	4.81384	1919.29	FALSE	79
2022-09-13	11:24:12	1.19879	5.33246	4.81384	1898.44	FALSE	79
2022-09-13	11:24:12	3.21899	14.3187	4.81384	1933.61	1	80
2022-09-13	11:24:13	1.79787	7.99729	3.49274	1906.44	FALSE	80
2022-09-13	11:24:13	0.607544	2.70248	3.49274	1936.31	FALSE	80
2022-09-13	11:24:13	0.316298	1.40696	3.49274	1907.84	FALSE	80
2022-09-13	11:24:13	0.419097	1.86423	3.49274	1938.18	FALSE	80
2022-09-13	11:24:14	0.280216	1.24646	1.07298	1909.09	FALSE	80
2022-09-13	11:24:14	0.162659	0.72354	1.07298	1938.9	FALSE	80
2022-09-13	11:24:14	0.280776	1.24895	1.07298	1910.34	FALSE	80
2022-09-13	11:24:15	0.224746	0.999715	1.09773	1939.9	FALSE	80
2022-09-13	11:24:15	0.224797	0.999942	1.09773	1911.34	FALSE	80
2022-09-13	11:24:15	0.303677	1.35082	1.09773	1941.25	FALSE	80
2022-09-13	11:24:15	0.233906	1.04046	1.09773	1912.38	FALSE	80
2022-09-13	11:24:16	0.707646	3.14775	3.24255	1944.4	FALSE	80
2022-09-13	11:24:16	0.733142	3.26116	3.24255	1915.64	FALSE	80
2022-09-13	11:24:16	0.741031	3.29625	3.24255	1947.7	FALSE	80
2022-09-13	11:24:16	0.734008	3.26501	3.24255	1918.91	FALSE	80
2022-09-13	11:24:17	0.730598	3.24985	3.2722	1950.95	FALSE	80
2022-09-13	11:24:17	0.739402	3.28901	3.2722	1922.2	FALSE	80
2022-09-13	11:24:17	0.737315	3.27972	3.2722	1954.23	FALSE	80
2022-09-13	11:24:17	0.735178	3.27022	3.2722	1925.47	FALSE	80
2022-09-13	11:24:18	0.730394	3.24894	3.26033	1957.48	FALSE	80
2022-09-13	11:24:18	0.737214	3.27928	3.26033	1928.74	FALSE	80
2022-09-13	11:24:18	0.731259	3.25279	3.26033	1960.73	FALSE	80
2022-09-13	11:24:19	0.737621	3.28109	3.28635	1932.03	FALSE	80
2022-09-13	11:24:19	0.736908	3.27791	3.28635	1964.01	FALSE	80
2022-09-13	11:24:19	0.74332	3.30644	3.28635	1935.33	FALSE	80
2022-09-13	11:24:19	0.737366	3.27995	3.28635	1967.29	FALSE	80
2022-09-13	11:24:20	0.732379	3.25777	3.26733	1938.59	FALSE	80
2022-09-13	11:24:20	0.73813	3.28335	3.26733	1970.57	FALSE	80
2022-09-13	11:24:20	0.73243	3.258	3.26733	1941.85	FALSE	80
2022-09-13	11:24:20	0.735178	3.27022	3.26733	1973.84	FALSE	80
2022-09-13	11:24:21	0.737315	3.27972	3.27814	1945.13	FALSE	80
2022-09-13	11:24:21	0.734109	3.26546	3.27814	1977.1	FALSE	80
2022-09-13	11:24:21	0.734517	3.26728	3.27814	1948.4	FALSE	80
2022-09-13	11:24:21	0.741896	3.3001	3.27814	1980.4	FALSE	80
2022-09-13	11:24:22	0.728054	3.23853	3.25762	1951.63	FALSE	80
2022-09-13	11:24:22	0.734415	3.26682	3.25762	1983.67	FALSE	80
2022-09-13	11:24:22	0.734568	3.26751	3.25762	1954.9	FALSE	80
2022-09-13	11:24:23	0.731921	3.25573	3.26377	1986.93	FALSE	80
2022-09-13	11:24:23	0.728257	3.23943	3.26377	1958.14	FALSE	80
2022-09-13	11:24:23	0.744542	3.31187	3.26377	1990.24	FALSE	80
2022-09-13	11:24:23	0.730191	3.24804	3.26377	1961.39	FALSE	80
2022-09-13	11:24:24	0.734618	3.26773	3.26366	1993.51	FALSE	80
2022-09-13	11:24:24	0.728461	3.24034	3.26366	1964.63	FALSE	80
2022-09-13	11:24:24	0.729784	3.24623	3.26366	1996.75	FALSE	80
2022-09-13	11:24:24	0.741947	3.30033	3.26366	1967.93	FALSE	80
2022-09-13	11:24:25	0.736145	3.27452	3.28097	2000.03	FALSE	80
2022-09-13	11:24:25	0.741997	3.30055	3.28097	1971.23	FALSE	80
2022-09-13	11:24:25	0.737621	3.28109	3.28097	2003.31	FALSE	80
2022-09-13	11:24:25	0.734618	3.26773	3.28097	1974.5	FALSE	80
2022-09-13	11:24:26	0.737672	3.28131	3.27754	2006.59	FALSE	80
2022-09-13	11:24:26	0.738435	3.28471	3.27754	1977.78	FALSE	80
2022-09-13	11:24:26	0.734364	3.2666	3.27754	2009.86	FALSE	80
2022-09-13	11:24:27	0.732074	3.25641	3.25375	1981.04	FALSE	80
2022-09-13	11:24:27	0.734313	3.26637	3.25375	2013.12	FALSE	80
2022-09-13	11:24:27	0.733855	3.26433	3.25375	1984.3	FALSE	80
2022-09-13	11:24:27	0.725662	3.22789	3.25375	2016.35	FALSE	80
2022-09-13	11:24:28	0.736705	3.27701	3.26835	1987.58	FALSE	80
2022-09-13	11:24:28	0.733753	3.26388	3.26835	2019.61	FALSE	80
2022-09-13	11:24:28	0.735127	3.26999	3.26835	1990.85	FALSE	80
2022-09-13	11:24:28	0.733448	3.26252	3.26835	2022.88	FALSE	80
2022-09-13	11:24:29	0.734517	3.26728	3.26558	1994.12	FALSE	80
2022-09-13	11:24:29	0.733142	3.26116	3.26558	2026.14	FALSE	80
2022-09-13	11:24:29	0.738028	3.2829	3.26558	1997.4	FALSE	80
2022-09-13	11:24:29	0.730852	3.25098	3.26558	2029.39	FALSE	80
2022-09-13	11:24:30	0.734924	3.26909	3.26924	2000.67	FALSE	80
2022-09-13	11:24:30	0.736043	3.27407	3.26924	2032.66	FALSE	80
2022-09-13	11:24:30	0.733906	3.26456	3.26924	2003.93	FALSE	80
2022-09-13	11:24:31	0.732939	3.26026	3.27639	2035.92	FALSE	80
2022-09-13	11:24:31	0.735026	3.26954	3.27639	2007.2	FALSE	80
2022-09-13	11:24:31	0.732888	3.26003	3.27639	2039.18	FALSE	80
2022-09-13	11:24:31	0.745407	3.31572	3.27639	2010.52	FALSE	80
2022-09-13	11:24:32	0.738333	3.28425	3.26965	2042.47	FALSE	80
2022-09-13	11:24:32	0.729682	3.24577	3.26965	2013.76	FALSE	80
2022-09-13	11:24:32	0.734873	3.26886	3.26965	2045.74	FALSE	80
2022-09-13	11:24:32	0.737315	3.27972	3.26965	2017.04	FALSE	80
2022-09-13	11:24:33	0.672888	2.99314	2.45257	2048.73	FALSE	80
2022-09-13	11:24:33	0.586221	2.60763	2.45257	2019.65	FALSE	80
2022-09-13	11:24:33	0.538028	2.39326	2.45257	2051.12	FALSE	80
2022-09-13	11:24:33	0.408308	1.81624	2.45257	2021.47	FALSE	80
2022-09-13	11:24:34	0.73472	3.26818	3.21821	2054.39	FALSE	80
2022-09-13	11:24:34	0.731056	3.25188	3.21821	2024.72	FALSE	80
2022-09-13	11:24:34	0.733957	3.26479	3.21821	2057.66	FALSE	80
2022-09-13	11:24:34	0.694211	3.08799	3.21821	2027.81	FALSE	80
2022-09-13	11:24:35	0.286832	1.27589	2.60024	2058.93	FALSE	80
2022-09-13	11:24:35	0.733855	3.26433	2.60024	2031.07	FALSE	80
2022-09-13	11:24:35	0.73299	3.26049	2.60024	2062.19	FALSE	80
2022-09-13	11:24:36	0.732532	3.25845	3.26416	2034.33	FALSE	80
2022-09-13	11:24:36	0.726934	3.23355	3.26416	2065.43	FALSE	80
2022-09-13	11:24:36	0.736654	3.27678	3.26416	2037.61	FALSE	80
2022-09-13	11:24:36	0.739147	3.28787	3.26416	2068.71	FALSE	80
2022-09-13	11:24:37	1.04581	4.65197	3.62913	2042.26	FALSE	80
2022-09-13	11:24:37	0.743728	3.30825	3.62913	2072.02	FALSE	80
2022-09-13	11:24:37	0.7393	3.28855	3.62913	2045.55	FALSE	80
2022-09-13	11:24:37	0.734618	3.26773	3.62913	2075.29	FALSE	80
2022-09-13	11:24:38	0.739453	3.28923	2.95664	2048.84	FALSE	80
2022-09-13	11:24:38	0.728613	3.24102	2.95664	2078.53	FALSE	80
2022-09-13	11:24:38	0.735738	3.27271	2.95664	2052.11	FALSE	80
2022-09-13	11:24:38	0.454924	2.02359	2.95664	2080.55	FALSE	80
2022-09-13	11:24:39	0.733855	3.26433	3.26554	2055.37	FALSE	80
2022-09-13	11:24:39	0.734262	3.26614	3.26554	2083.82	FALSE	80
2022-09-13	11:24:39	0.734262	3.26614	3.26554	2058.64	FALSE	80
2022-09-13	11:24:40	0.735789	3.27294	2.97045	2087.09	FALSE	80
2022-09-13	11:24:40	0.742913	3.30463	2.97045	2061.95	FALSE	80
2022-09-13	11:24:40	0.455585	2.02653	2.97045	2089.12	FALSE	80
2022-09-13	11:24:40	0.736857	3.27769	2.97045	2065.22	FALSE	80
2022-09-13	11:24:41	0.350445	1.55885	-0.81986	2090.68	FALSE	80
2022-09-13	11:24:41	-0.320699	-1.42653	-0.81986	2065.22	FALSE	80
2022-09-13	11:24:41	-0.469707	-2.08935	-0.81986	2090.68	FALSE	80
2022-09-13	11:24:41	-0.29729	-1.32241	-0.81986	2065.22	FALSE	80
2022-09-13	11:24:42	-0.165432	-0.735875	-0.196715	2090.68	FALSE	80
2022-09-13	11:24:42	-0.0372389	-0.165646	-0.196715	2065.22	FALSE	80
2022-09-13	11:24:42	-0.00202267	-0.00899724	-0.196715	2090.68	FALSE	80
2022-09-13	11:24:42	0.0277992	0.123656	-0.196715	2065.35	FALSE	80
2022-09-13	11:24:43	1.02704	4.56848	10.2694	2095.25	FALSE	80
2022-09-13	11:24:43	2.04525	9.09768	10.2694	2074.44	FALSE	80
2022-09-13	11:24:43	3.8537	17.142	10.2694	2112.39	1	81
2022-09-13	11:24:44	3.06032	13.6129	19.0104	2088.06	1	82
2022-09-13	11:24:44	9.06545	40.3249	19.0104	2152.71	1	83
2022-09-13	11:24:44	2.56352	11.403	19.0104	2099.46	FALSE	83
2022-09-13	11:24:44	2.40566	10.7009	19.0104	2163.42	FALSE	83
2022-09-13	11:24:45	1.26368	5.6211	3.8778	2105.08	FALSE	83
2022-09-13	11:24:45	0.779962	3.46943	3.8778	2166.88	FALSE	83
2022-09-13	11:24:45	0.708155	3.15002	3.8778	2108.23	FALSE	83
2022-09-13	11:24:45	0.73528	3.27067	3.8778	2170.16	FALSE	83
2022-09-13	11:24:46	0.718944	3.19801	3.17486	2111.43	FALSE	83
2022-09-13	11:24:46	0.730903	3.2512	3.17486	2173.41	FALSE	83
2022-09-13	11:24:46	0.672735	2.99246	3.17486	2114.42	FALSE	83
2022-09-13	11:24:46	0.732379	3.25777	3.17486	2176.66	FALSE	83
2022-09-13	11:24:47	0.389886	1.73429	0.587492	2116.16	FALSE	83
2022-09-13	11:24:47	0.0840841	0.374023	0.587492	2177.04	FALSE	83
2022-09-13	11:24:47	-0.0777478	-0.345838	0.587492	2116.16	FALSE	83
2022-09-13	11:24:48	-0.122226	-0.543686	-0.379963	2177.04	FALSE	83
2022-09-13	11:24:48	-0.0187148	-0.0832472	-0.379963	2116.16	FALSE	83
2022-09-13	11:24:48	-0.150267	-0.668418	-0.379963	2177.04	FALSE	83
2022-09-13	11:24:48	-0.0504705	-0.224503	-0.379963	2116.16	FALSE	83
2022-09-13	11:24:49	0.0166033	0.0738548	0.15897	2177.11	FALSE	83
2022-09-13	11:24:49	0.0151783	0.0675161	0.15897	2116.22	FALSE	83
2022-09-13	11:24:49	0.0577738	0.256989	0.15897	2177.37	FALSE	83
2022-09-13	11:24:49	0.0533972	0.237521	0.15897	2116.46	FALSE	83
2022-09-13	11:24:50	0.654619	2.91188	2.1619	2180.28	FALSE	83
2022-09-13	11:24:50	0.118435	0.526823	2.1619	2116.99	FALSE	83
2022-09-13	11:24:50	0.4393	1.95409	2.1619	2182.24	FALSE	83
2022-09-13	11:24:50	0.731717	3.25482	2.1619	2120.24	FALSE	83
2022-09-13	11:24:51	0.737773	3.28176	3.2749	2185.52	FALSE	83
2022-09-13	11:24:51	0.735229	3.27045	3.2749	2123.51	FALSE	83
2022-09-13	11:24:51	0.735687	3.27248	3.2749	2188.79	FALSE	83
2022-09-13	11:24:52	0.738384	3.28448	3.27226	2126.8	FALSE	83
2022-09-13	11:24:52	0.730496	3.24939	3.27226	2192.04	FALSE	83
2022-09-13	11:24:52	0.738689	3.28584	3.27226	2130.08	FALSE	83
2022-09-13	11:24:52	0.734975	3.26932	3.27226	2195.31	FALSE	83
2022-09-13	11:24:53	0.738537	3.28516	3.27967	2133.37	FALSE	83
2022-09-13	11:24:53	0.737163	3.27905	3.27967	2198.59	FALSE	83
2022-09-13	11:24:53	0.733295	3.26184	3.27967	2136.63	FALSE	83
2022-09-13	11:24:53	0.740216	3.29263	3.27967	2201.88	FALSE	83
2022-09-13	11:24:54	0.740165	3.2924	3.27712	2139.92	FALSE	83
2022-09-13	11:24:54	0.733702	3.26365	3.27712	2205.14	FALSE	83
2022-09-13	11:24:54	0.739147	3.28787	3.27712	2143.21	FALSE	83
2022-09-13	11:24:54	0.733906	3.26456	3.27712	2208.41	FALSE	83
2022-09-13	11:24:55	0.736756	3.27724	3.26999	2146.49	FALSE	83
2022-09-13	11:24:55	0.736094	3.27429	3.26999	2211.68	FALSE	83
2022-09-13	11:24:55	0.732532	3.25845	3.26999	2149.75	FALSE	83
2022-09-13	11:24:56	0.740064	3.29195	3.26943	2214.97	FALSE	83
2022-09-13	11:24:56	0.728155	3.23898	3.26943	2152.99	FALSE	83
2022-09-13	11:24:56	0.732328	3.25754	3.26943	2218.23	FALSE	83
2022-09-13	11:24:56	0.739453	3.28923	3.26943	2156.27	FALSE	83
2022-09-13	11:24:57	0.734669	3.26795	3.27803	2221.5	FALSE	83
2022-09-13	11:24:57	0.739911	3.29127	3.27803	2159.57	FALSE	83
2022-09-13	11:24:57	0.737366	3.27995	3.27803	2224.78	FALSE	83
2022-09-13	11:24:57	0.735789	3.27294	3.27803	2162.84	FALSE	83
2022-09-13	11:24:58	0.735127	3.26999	3.26733	2228.05	FALSE	83
2022-09-13	11:24:58	0.735891	3.27339	3.26733	2166.11	FALSE	83
2022-09-13	11:24:58	0.73416	3.26569	3.26733	2231.32	FALSE	83
2022-09-13	11:24:58	0.732939	3.26026	3.26733	2169.37	FALSE	83
2022-09-13	11:24:59	0.731768	3.25505	3.2669	2234.57	FALSE	83
2022-09-13	11:24:59	0.733855	3.26433	3.2669	2172.64	FALSE	83
2022-09-13	11:24:59	0.737672	3.28131	3.2669	2237.85	FALSE	83
2022-09-13	11:25:00	0.739504	3.28946	3.28476	2175.93	FALSE	83
2022-09-13	11:25:00	0.740573	3.29422	3.28476	2241.15	FALSE	83
2022-09-13	11:25:00	0.73584	3.27316	3.28476	2179.2	FALSE	83
2022-09-13	11:25:00	0.737875	3.28222	3.28476	2244.43	FALSE	83
2022-09-13	11:25:01	0.741234	3.29716	3.27339	2182.5	FALSE	83
2022-09-13	11:25:01	0.736908	3.27791	3.27339	2247.71	FALSE	83
2022-09-13	11:25:01	0.736399	3.27565	3.27339	2185.77	FALSE	83
2022-09-13	11:25:01	0.72902	3.24283	3.27339	2250.95	FALSE	83
2022-09-13	11:25:02	0.740522	3.29399	3.27452	2189.07	FALSE	83
2022-09-13	11:25:02	0.734924	3.26909	3.27452	2254.22	FALSE	83
2022-09-13	11:25:02	0.733346	3.26207	3.27452	2192.33	FALSE	83
2022-09-13	11:25:02	0.735789	3.27294	3.27452	2257.49	FALSE	83
2022-09-13	11:25:03	0.736705	3.27701	3.28873	2195.61	FALSE	83
2022-09-13	11:25:03	0.737773	3.28176	3.28873	2260.77	FALSE	83
2022-09-13	11:25:03	0.74327	3.30621	3.28873	2198.91	FALSE	83
2022-09-13	11:25:03	0.739606	3.28992	3.28873	2264.06	FALSE	83
2022-09-13	11:25:04	0.737722	3.28154	3.27105	2202.19	FALSE	83
2022-09-13	11:25:04	0.730191	3.24804	3.27105	2267.31	FALSE	83
2022-09-13	11:25:04	0.738181	3.28358	3.27105	2205.48	FALSE	83
2022-09-13	11:25:05	0.739555	3.28969	3.28822	2270.6	FALSE	83
2022-09-13	11:25:05	0.732481	3.25822	3.28822	2208.74	FALSE	83
2022-09-13	11:25:05	0.742964	3.30485	3.28822	2273.91	FALSE	83
2022-09-13	11:25:05	0.741896	3.3001	3.28822	2212.04	FALSE	83
2022-09-13	11:25:06	0.739656	3.29014	3.28674	2277.2	FALSE	83
2022-09-13	11:25:06	0.74327	3.30621	3.28674	2215.34	FALSE	83
2022-09-13	11:25:06	0.73813	3.28335	3.28674	2280.48	FALSE	83
2022-09-13	11:25:06	0.734517	3.26728	3.28674	2218.61	FALSE	83
2022-09-13	11:25:07	0.737926	3.28244	3.2808	2283.76	FALSE	83
2022-09-13	11:25:07	0.736094	3.27429	3.2808	2221.88	FALSE	83
2022-09-13	11:25:07	0.739453	3.28923	3.2808	2287.05	FALSE	83
2022-09-13	11:25:07	0.736756	3.27724	3.2808	2225.16	FALSE	83
2022-09-13	11:25:08	0.733499	3.26275	3.26645	2290.31	FALSE	83
2022-09-13	11:25:08	0.730394	3.24894	3.26645	2228.41	FALSE	83
2022-09-13	11:25:08	0.739097	3.28765	3.26645	2293.6	FALSE	83
2022-09-13	11:25:09	0.731616	3.25437	3.2653	2231.66	FALSE	83
2022-09-13	11:25:09	0.735483	3.27158	3.2653	2296.87	FALSE	83
2022-09-13	11:25:09	0.736196	3.27475	3.2653	2234.94	FALSE	83
2022-09-13	11:25:09	0.73299	3.26049	3.2653	2300.13	FALSE	83
2022-09-13	11:25:10	0.738333	3.28425	3.26903	2238.22	FALSE	83
2022-09-13	11:25:10	0.736756	3.27724	3.26903	2303.41	FALSE	83
2022-09-13	11:25:10	0.730191	3.24804	3.26903	2241.47	FALSE	83
2022-09-13	11:25:10	0.734364	3.2666	3.26903	2306.68	FALSE	83
2022-09-13	11:25:11	0.735331	3.2709	3.27282	2244.74	FALSE	83
2022-09-13	11:25:11	0.732684	3.25912	3.27282	2309.94	FALSE	83
2022-09-13	11:25:11	0.735382	3.27113	3.27282	2248.01	FALSE	83
2022-09-13	11:25:11	0.739656	3.29014	3.27282	2313.23	FALSE	83
2022-09-13	11:25:12	0.735534	3.2718	3.26547	2251.28	FALSE	83
2022-09-13	11:25:12	0.735382	3.27113	3.26547	2316.5	FALSE	83
2022-09-13	11:25:12	0.731412	3.25347	3.26547	2254.54	FALSE	83
2022-09-13	11:25:13	0.742455	3.30259	3.27197	2319.8	FALSE	83
2022-09-13	11:25:13	0.728868	3.24215	3.27197	2257.78	FALSE	83
2022-09-13	11:25:13	0.737977	3.28267	3.27197	2323.08	FALSE	83
2022-09-13	11:25:13	0.73299	3.26049	3.27197	2261.04	FALSE	83
2022-09-13	11:25:14	0.735026	3.26954	3.27678	2326.35	FALSE	83
2022-09-13	11:25:14	0.731463	3.25369	3.27678	2264.29	FALSE	83
2022-09-13	11:25:14	0.737672	3.28131	3.27678	2329.63	FALSE	83
2022-09-13	11:25:14	0.742455	3.30259	3.27678	2267.6	FALSE	83
2022-09-13	11:25:15	0.737112	3.27882	3.27718	2332.91	FALSE	83
2022-09-13	11:25:15	0.741081	3.29648	3.27718	2270.89	FALSE	83
2022-09-13	11:25:15	0.736399	3.27565	3.27718	2336.19	FALSE	83
2022-09-13	11:25:15	0.732379	3.25777	3.27718	2274.15	FALSE	83
2022-09-13	11:25:16	0.737163	3.27905	3.26916	2339.47	FALSE	83
2022-09-13	11:25:16	0.734873	3.26886	3.26916	2277.42	FALSE	83
2022-09-13	11:25:16	0.732786	3.25958	3.26916	2342.73	FALSE	83
2022-09-13	11:25:17	0.7307	3.2503	3.26003	2280.67	FALSE	83
2022-09-13	11:25:17	0.732226	3.25709	3.26003	2345.98	FALSE	83
2022-09-13	11:25:17	0.739758	3.29059	3.26003	2283.96	FALSE	83
2022-09-13	11:25:17	0.728868	3.24215	3.26003	2349.23	FALSE	83
2022-09-13	11:25:18	0.734008	3.26501	3.25924	2287.23	FALSE	83
2022-09-13	11:25:18	0.729428	3.24464	3.25924	2352.47	FALSE	83
2022-09-13	11:25:18	0.73701	3.27837	3.25924	2290.5	FALSE	83
2022-09-13	11:25:18	0.730394	3.24894	3.25924	2355.72	FALSE	83
2022-09-13	11:25:19	0.733244	3.26162	3.26948	2293.77	FALSE	83
2022-09-13	11:25:19	0.736857	3.27769	3.26948	2359	FALSE	83
2022-09-13	11:25:19	0.731158	3.25234	3.26948	2297.02	FALSE	83
2022-09-13	11:25:19	0.738791	3.28629	3.26948	2362.28	FALSE	83
2022-09-13	11:25:20	0.73299	3.26049	3.26758	2300.28	FALSE	83
2022-09-13	11:25:20	0.735738	3.27271	3.26758	2365.56	FALSE	83
2022-09-13	11:25:20	0.735026	3.26954	3.26758	2303.55	FALSE	83
2022-09-13	11:25:21	0.739249	3.28833	3.28374	2368.84	FALSE	83
2022-09-13	11:25:21	0.736196	3.27475	3.28374	2306.82	FALSE	83
2022-09-13	11:25:21	0.740267	3.29286	3.28374	2372.14	FALSE	83
2022-09-13	11:25:21	0.737163	3.27905	3.28374	2310.1	FALSE	83
2022-09-13	11:25:22	0.740522	3.29399	3.27497	2375.43	FALSE	83
2022-09-13	11:25:22	0.738486	3.28493	3.27497	2313.39	FALSE	83
2022-09-13	11:25:22	0.735127	3.26999	3.27497	2378.7	FALSE	83
2022-09-13	11:25:22	0.730852	3.25098	3.27497	2316.64	FALSE	83
2022-09-13	11:25:23	0.738639	3.28561	3.27622	2381.99	FALSE	83
2022-09-13	11:25:23	0.73243	3.258	3.27622	2319.9	FALSE	83
2022-09-13	11:25:23	0.731412	3.25347	3.27622	2385.24	FALSE	83
2022-09-13	11:25:23	0.743626	3.3078	3.27622	2323.2	FALSE	83
2022-09-13	11:25:24	0.77472	3.44611	3.3224	2388.69	FALSE	83
2022-09-13	11:25:24	0.742303	3.30191	3.3224	2326.51	FALSE	83
2022-09-13	11:25:24	0.733193	3.26139	3.3224	2391.95	FALSE	83
2022-09-13	11:25:24	0.737417	3.28018	3.3224	2329.79	FALSE	83
2022-09-13	11:25:25	0.736552	3.27633	3.27248	2395.22	FALSE	83
2022-09-13	11:25:25	0.734109	3.26546	3.27248	2333.05	FALSE	83
2022-09-13	11:25:25	0.736399	3.27565	3.27248	2398.5	FALSE	83
2022-09-13	11:25:26	0.735382	3.27113	3.27271	2336.32	FALSE	83
2022-09-13	11:25:26	0.737722	3.28154	3.27271	2401.78	FALSE	83
2022-09-13	11:25:26	0.733397	3.2623	3.27271	2339.58	FALSE	83
2022-09-13	11:25:26	0.73645	3.27588	3.27271	2405.06	FALSE	83
2022-09-13	11:25:27	0.734669	3.26795	3.26207	2342.85	FALSE	83
2022-09-13	11:25:27	0.737417	3.28018	3.26207	2408.34	FALSE	83
2022-09-13	11:25:27	0.729682	3.24577	3.26207	2346.1	FALSE	83
2022-09-13	11:25:27	0.731616	3.25437	3.26207	2411.59	FALSE	83
2022-09-13	11:25:28	0.73584	3.27316	3.26467	2349.37	FALSE	83
2022-09-13	11:25:28	0.733397	3.2623	3.26467	2414.85	FALSE	83
2022-09-13	11:25:28	0.731616	3.25437	3.26467	2352.63	FALSE	83
2022-09-13	11:25:28	0.734873	3.26886	3.26467	2418.12	FALSE	83
2022-09-13	11:25:29	0.737519	3.28063	3.27248	2355.91	FALSE	83
2022-09-13	11:25:29	0.736654	3.27678	3.27248	2421.4	FALSE	83
2022-09-13	11:25:29	0.732888	3.26003	3.27248	2359.17	FALSE	83
2022-09-13	11:25:30	0.735127	3.26999	3.27101	2424.67	FALSE	83
2022-09-13	11:25:30	0.74042	3.29354	3.27101	2362.46	FALSE	83
2022-09-13	11:25:30	0.7307	3.2503	3.27101	2427.92	FALSE	83
2022-09-13	11:25:30	0.735178	3.27022	3.27101	2365.73	FALSE	83
2022-09-13	11:25:31	0.728919	3.24238	2.21748	2431.16	FALSE	83
2022-09-13	11:25:31	0.724338	3.222	2.21748	2368.95	FALSE	83
2022-09-13	11:25:31	0.740064	3.29195	2.21748	2434.45	FALSE	83
2022-09-13	11:25:31	-0.199274	-0.886411	2.21748	2368.95	FALSE	83
2022-09-13	11:25:32	0.903626	4.01951	2.28969	2438.47	FALSE	83
2022-09-13	11:25:32	0.300674	1.33746	2.28969	2370.29	FALSE	83
2022-09-13	11:25:32	0.572634	2.54719	2.28969	2441.02	FALSE	83
2022-09-13	11:25:32	0.282048	1.25461	2.28969	2371.54	FALSE	83
2022-09-13	11:25:33	0.572125	2.54493	5.68469	2443.57	FALSE	83
2022-09-13	11:25:33	1.16866	5.19843	5.68469	2376.74	FALSE	83
2022-09-13	11:25:33	2.09314	9.31071	5.68469	2452.88	FALSE	83
2022-09-13	11:25:34	3.41182	15.1765	20.1836	2391.92	1	84
2022-09-13	11:25:34	4.20144	18.6888	20.1836	2471.57	1	85
2022-09-13	11:25:34	6.3422	28.2114	20.1836	2420.13	1	86
2022-09-13	11:25:34	4.19446	18.6578	20.1836	2490.22	1	87
2022-09-13	11:25:35	4.94698	22.0052	10.5608	2442.14	1	88
2022-09-13	11:25:35	2.50276	11.1328	10.5608	2501.36	FALSE	88
2022-09-13	11:25:35	1.32729	5.90405	10.5608	2448.04	FALSE	88
2022-09-13	11:25:35	0.719707	3.2014	10.5608	2504.56	FALSE	88
2022-09-13	11:25:36	0.390802	1.73837	1.63474	2449.78	FALSE	88
2022-09-13	11:25:36	0.356858	1.58738	1.63474	2506.14	FALSE	88
2022-09-13	11:25:36	0.491463	2.18613	1.63474	2451.96	FALSE	88
2022-09-13	11:25:36	0.230903	1.0271	1.63474	2507.17	FALSE	88
2022-09-13	11:25:37	0.481591	2.14221	6.07367	2454.11	FALSE	88
2022-09-13	11:25:37	0.818537	3.64102	6.07367	2510.81	FALSE	88
2022-09-13	11:25:37	2.79614	12.4378	6.07367	2466.54	FALSE	88
2022-09-13	11:25:38	5.19461	23.1067	20.3822	2533.92	1	89
2022-09-13	11:25:38	8.40917	37.4057	20.3822	2503.95	1	90
2022-09-13	11:25:38	3.5395	15.7444	20.3822	2549.66	1	91
2022-09-13	11:25:38	1.18525	5.27223	20.3822	2509.22	FALSE	91
2022-09-13	11:25:39	1.39905	6.22325	3.65285	2555.89	FALSE	91
2022-09-13	11:25:39	0.865814	3.85131	3.65285	2513.07	FALSE	91
2022-09-13	11:25:39	0.820013	3.64758	3.65285	2559.53	FALSE	91
2022-09-13	11:25:39	0.199911	0.889244	3.65285	2513.96	FALSE	91
2022-09-13	11:25:40	0.29299	1.30328	6.39805	2560.84	FALSE	91
2022-09-13	11:25:40	2.03441	9.04946	6.39805	2523.01	FALSE	91
2022-09-13	11:25:40	2.46668	10.9723	6.39805	2571.81	FALSE	91
2022-09-13	11:25:40	0.9593	4.26716	6.39805	2527.28	FALSE	91
2022-09-13	11:25:41	1.02388	4.55442	2.56002	2576.36	FALSE	91
2022-09-13	11:25:41	0.640572	2.84939	2.56002	2530.13	FALSE	91
2022-09-13	11:25:41	0.0620994	0.276231	2.56002	2576.64	FALSE	91
2022-09-13	11:25:42	0.331361	1.47396	2.09388	2531.6	FALSE	91
2022-09-13	11:25:42	0.399504	1.77707	2.09388	2578.42	FALSE	91
2022-09-13	11:25:42	0.476756	2.12071	2.09388	2533.72	FALSE	91
2022-09-13	11:25:42	0.67528	3.00378	2.09388	2581.42	FALSE	91
2022-09-13	11:25:43	0.88154	3.92127	8.79192	2537.64	FALSE	91
2022-09-13	11:25:43	2.67436	11.8961	8.79192	2593.32	FALSE	91
2022-09-13	11:25:43	1.6964	7.54593	8.79192	2545.19	FALSE	91
2022-09-13	11:25:43	2.65375	11.8044	8.79192	2605.12	FALSE	91
2022-09-13	11:25:44	2.71533	12.0783	23.9356	2557.27	FALSE	91
2022-09-13	11:25:44	4.50342	20.0321	23.9356	2625.15	1	92
2022-09-13	11:25:44	6.64108	29.5409	23.9356	2586.81	1	93
2022-09-13	11:25:44	7.66398	34.0909	23.9356	2659.25	1	94
2022-09-13	11:25:45	9.50642	42.2865	34.3373	2629.1	1	95
2022-09-13	11:25:45	3.19681	14.2201	34.3373	2673.47	1	96
2022-09-13	11:25:45	10.4549	46.5055	34.3373	2675.6	1	97
2022-09-13	11:25:46	5.56092	24.7361	8.63669	2698.2	1	98
2022-09-13	11:25:46	0.743117	3.30553	8.63669	2678.91	FALSE	98
2022-09-13	11:25:46	0.739097	3.28765	8.63669	2701.49	FALSE	98
2022-09-13	11:25:46	0.723321	3.21748	8.63669	2682.12	FALSE	98
2022-09-13	11:25:47	0.714567	3.17854	2.71063	2704.67	FALSE	98
2022-09-13	11:25:47	0.556247	2.4743	2.71063	2684.6	FALSE	98
2022-09-13	11:25:47	0.577316	2.56802	2.71063	2707.24	FALSE	98
2022-09-13	11:25:47	0.589377	2.62167	2.71063	2687.22	FALSE	98
2022-09-13	11:25:48	0.637367	2.83514	2.76717	2710.07	FALSE	98
2022-09-13	11:25:48	0.649275	2.88811	2.76717	2690.11	FALSE	98
2022-09-13	11:25:48	0.579097	2.57594	2.76717	2712.65	FALSE	98
2022-09-13	11:25:48	0.622608	2.76948	2.76717	2692.88	FALSE	98
2022-09-13	11:25:49	0.696094	3.09637	8.03296	2715.74	FALSE	98
2022-09-13	11:25:49	2.20159	9.79311	8.03296	2702.67	FALSE	98
2022-09-13	11:25:49	2.52938	11.2512	8.03296	2726.99	FALSE	98
2022-09-13	11:25:49	1.7965	7.99119	8.03296	2710.66	FALSE	98
2022-09-13	11:25:50	1.82464	8.11636	9.36285	2735.11	FALSE	98
2022-09-13	11:25:50	1.72302	7.66434	9.36285	2718.33	FALSE	98
2022-09-13	11:25:50	2.76693	12.3079	9.36285	2747.42	FALSE	98
2022-09-13	11:25:51	2.19981	9.78519	16.8861	2728.11	FALSE	98
2022-09-13	11:25:51	4.7767	21.2477	16.8861	2768.67	1	99
2022-09-13	11:25:51	3.85105	17.1302	16.8861	2745.24	1	100
2022-09-13	11:25:51	4.35711	19.3813	16.8861	2788.05	1	101
2022-09-13	11:25:52	2.82495	12.5659	5.41945	2757.81	FALSE	101
2022-09-13	11:25:52	1.28271	5.70575	5.41945	2793.75	FALSE	101
2022-09-13	11:25:52	0.384644	1.71097	5.41945	2759.52	FALSE	101
2022-09-13	11:25:52	0.381082	1.69513	5.41945	2795.45	FALSE	101
2022-09-13	11:25:53	0.246578	1.09683	1.06932	2760.62	FALSE	101
2022-09-13	11:25:53	0.178741	0.795076	1.06932	2796.24	FALSE	101
2022-09-13	11:25:53	0.257417	1.14504	1.06932	2761.76	FALSE	101
2022-09-13	11:25:53	0.278842	1.24034	1.06932	2797.48	FALSE	101
2022-09-13	11:25:54	1.55584	6.92069	14.7863	2768.68	FALSE	101
2022-09-13	11:25:54	5.55085	24.6913	14.7863	2822.18	1	102
2022-09-13	11:25:54	2.86561	12.7468	14.7863	2781.43	FALSE	102
2022-09-13	11:25:55	0.211819	0.942213	1.73921	2823.12	FALSE	102
2022-09-13	11:25:55	0.219504	0.976398	1.73921	2782.41	FALSE	102
2022-09-13	11:25:55	0.76103	3.38521	1.73921	2826.5	FALSE	102
2022-09-13	11:25:55	0.371616	1.65302	1.73921	2784.06	FALSE	102
2022-09-13	11:25:56	0.500013	2.22416	8.17095	2828.73	FALSE	102
2022-09-13	11:25:56	1.28765	5.72772	8.17095	2789.79	FALSE	102
2022-09-13	11:25:56	1.60475	7.13825	8.17095	2835.87	FALSE	102
2022-09-13	11:25:56	3.95523	17.5937	8.17095	2807.38	1	103
2022-09-13	11:25:57	1.1649	5.18171	2.67017	2841.05	FALSE	103
2022-09-13	11:25:57	0.621489	2.76451	2.67017	2810.14	FALSE	103
2022-09-13	11:25:57	0.384847	1.71188	2.67017	2842.76	FALSE	103
2022-09-13	11:25:57	0.229886	1.02258	2.67017	2811.17	FALSE	103
2022-09-13	11:25:58	0.202557	0.901014	0.819899	2843.66	FALSE	103
2022-09-13	11:25:58	0.25584	1.13803	0.819899	2812.3	FALSE	103
2022-09-13	11:25:58	0.0945677	0.420656	0.819899	2844.08	FALSE	103
2022-09-13	11:25:59	0.213804	0.951043	0.871417	2813.26	FALSE	103
2022-09-13	11:25:59	0.10556	0.469552	0.871417	2844.55	FALSE	103
2022-09-13	11:25:59	0.362455	1.61227	0.871417	2814.87	FALSE	103
2022-09-13	11:25:59	0.101794	0.4528	0.871417	2845	FALSE	103
2022-09-13	11:26:00	0.758333	3.37322	9.06889	2818.24	FALSE	103
2022-09-13	11:26:00	2.21329	9.84516	9.06889	2854.85	FALSE	103
2022-09-13	11:26:00	3.2021	14.2436	9.06889	2832.48	1	104
2022-09-13	11:26:00	1.98139	8.81362	9.06889	2863.66	FALSE	104
2022-09-13	11:26:01	1.00042	4.45007	4.73348	2836.93	FALSE	104
2022-09-13	11:26:01	0.994669	4.42449	4.73348	2868.09	FALSE	104
2022-09-13	11:26:01	0.856349	3.80921	4.73348	2840.74	FALSE	104
2022-09-13	11:26:01	1.4051	6.25017	4.73348	2874.34	FALSE	104
2022-09-13	11:26:02	1.28225	5.7037	4.06463	2846.45	FALSE	104
2022-09-13	11:26:02	0.811005	3.60751	4.06463	2877.94	FALSE	104
2022-09-13	11:26:02	0.648053	2.88267	4.06463	2849.33	FALSE	104
2022-09-13	11:26:03	0.958384	4.26308	5.19211	2882.21	FALSE	104
2022-09-13	11:26:03	0.913906	4.06524	5.19211	2853.4	FALSE	104
2022-09-13	11:26:03	1.52403	6.77919	5.19211	2888.99	FALSE	104
2022-09-13	11:26:03	1.27263	5.66091	5.19211	2859.06	FALSE	104
2022-09-13	11:26:04	0.598283	2.66128	8.03443	2891.65	FALSE	104
2022-09-13	11:26:04	1.44612	6.43263	8.03443	2865.49	FALSE	104
2022-09-13	11:26:04	1.63594	7.27699	8.03443	2898.92	FALSE	104
2022-09-13	11:26:04	3.54454	15.7668	8.03443	2881.26	1	105
2022-09-13	11:26:05	3.4394	15.2991	12.19	2914.22	1	106
2022-09-13	11:26:05	5.32968	23.7075	12.19	2904.96	1	107
2022-09-13	11:26:05	1.45762	6.48379	12.19	2920.71	FALSE	107
2022-09-13	11:26:05	0.735076	3.26977	12.19	2908.23	FALSE	107
2022-09-13	11:26:06	0.737366	3.27995	3.81449	2923.99	FALSE	107
2022-09-13	11:26:06	0.74444	3.31142	3.81449	2911.54	FALSE	107
2022-09-13	11:26:06	1.0908	4.8521	3.81449	2928.84	FALSE	107
2022-09-13	11:26:07	0.736043	3.27407	3.2662	2914.82	FALSE	107
2022-09-13	11:26:07	0.737468	3.28041	3.2662	2932.12	FALSE	107
2022-09-13	11:26:07	0.729428	3.24464	3.2662	2918.06	FALSE	107
2022-09-13	11:26:07	0.73416	3.26569	3.2662	2935.39	FALSE	107
2022-09-13	11:26:08	0.297367	1.32275	0.785737	2919.39	FALSE	107
2022-09-13	11:26:08	-0.439936	-1.95692	0.785737	2935.39	FALSE	107
2022-09-13	11:26:08	0.559046	2.48675	0.785737	2921.87	FALSE	107
2022-09-13	11:26:08	0.290089	1.29037	0.785737	2936.68	FALSE	107
2022-09-13	11:26:09	0.484847	2.1567	1.75794	2924.03	FALSE	107
2022-09-13	11:26:09	0.305509	1.35897	1.75794	2938.03	FALSE	107
2022-09-13	11:26:09	0.43645	1.94142	1.75794	2925.97	FALSE	107
2022-09-13	11:26:09	0.354008	1.5747	1.75794	2939.61	FALSE	107
2022-09-13	11:26:10	0.489529	2.17752	13.3466	2928.15	FALSE	107
2022-09-13	11:26:10	0.805	3.5808	13.3466	2943.19	FALSE	107
2022-09-13	11:26:10	3.04368	13.5389	13.3466	2941.69	1	108
2022-09-13	11:26:10	7.66362	34.0893	13.3466	2977.28	1	109
2022-09-13	11:26:11	1.10037	4.89467	3.12753	2946.58	FALSE	109
2022-09-13	11:26:11	0.509987	2.26852	3.12753	2979.55	FALSE	109
2022-09-13	11:26:11	0.498944	2.2194	3.12753	2948.8	FALSE	109
2022-09-13	11:26:12	0.446171	1.98466	1.84318	2981.53	FALSE	109
2022-09-13	11:26:12	0.486018	2.16191	1.84318	2950.96	FALSE	109
2022-09-13	11:26:12	0.317672	1.41307	1.84318	2982.95	FALSE	109
2022-09-13	11:26:12	0.407596	1.81307	1.84318	2952.78	FALSE	109
2022-09-13	11:26:13	0.496603	2.20899	3.33428	2985.15	FALSE	109
2022-09-13	11:26:13	0.54215	2.41159	3.33428	2955.19	FALSE	109
2022-09-13	11:26:13	0.648613	2.88516	3.33428	2988.04	FALSE	109
2022-09-13	11:26:13	1.31095	5.83137	3.33428	2961.02	FALSE	109
2022-09-13	11:26:14	3.99996	17.7926	9.52062	3005.83	1	110
2022-09-13	11:26:14	2.81309	12.5132	9.52062	2973.53	FALSE	110
2022-09-13	11:26:14	1.01625	4.52048	9.52062	3010.35	FALSE	110
2022-09-13	11:26:14	0.732023	3.25618	9.52062	2976.79	FALSE	110
2022-09-13	11:26:15	0.73416	3.26569	3.27361	3013.62	FALSE	110
2022-09-13	11:26:15	0.734975	3.26932	3.27361	2980.06	FALSE	110
2022-09-13	11:26:15	0.738689	3.28584	3.27361	3016.9	FALSE	110
2022-09-13	11:26:16	0.734669	3.26795	3.26643	2983.33	FALSE	110
2022-09-13	11:26:16	0.728512	3.24057	3.26643	3020.15	FALSE	110
2022-09-13	11:26:16	0.736807	3.27746	3.26643	2986.6	FALSE	110
2022-09-13	11:26:16	0.737315	3.27972	3.26643	3023.42	FALSE	110
2022-09-13	11:26:17	0.732226	3.25709	3.25177	2989.86	FALSE	110
2022-09-13	11:26:17	0.728308	3.23966	3.25177	3026.66	FALSE	110
2022-09-13	11:26:17	0.729173	3.24351	3.25177	2993.1	FALSE	110
2022-09-13	11:26:17	0.734415	3.26682	3.25177	3029.93	FALSE	110

## Sheet: Saint_prong_202291311212 (3)
Date	Times	Lbs	Newtons	Total force x time	total steps > 13.345		**GoPro Fitting: 1110
2022-09-13	11:21:17	0.729936	3.2469	3.2469	FALSE	0				Total force x time	3029.93
2022-09-13	11:21:17	0.730903	3.2512	3.2512	FALSE	0				Total steps	110
2022-09-13	11:21:17	0.732888	3.26003	6.50693	FALSE	0
2022-09-13	11:21:17	0.727443	3.23581	6.48701	FALSE	0
2022-09-13	11:21:18	0.740623	3.29444	9.80137	FALSE	0
2022-09-13	11:21:18	0.737214	3.27928	9.76629	FALSE	0
2022-09-13	11:21:18	0.685712	3.05018	12.8516	FALSE	0
2022-09-13	11:21:18	0.403626	1.79541	11.5617	FALSE	0
2022-09-13	11:21:19	0.324847	1.44498	14.2965	FALSE	0
2022-09-13	11:21:19	0.260216	1.15749	12.7192	FALSE	0
2022-09-13	11:21:19	0.299758	1.33338	15.6299	FALSE	0
2022-09-13	11:21:20	0.298842	1.32931	14.0485	FALSE	0
2022-09-13	11:21:20	0.25701	1.14323	16.7732	FALSE	0
2022-09-13	11:21:20	0.3164	1.40741	15.4559	FALSE	0
2022-09-13	11:21:20	0.381438	1.69671	18.4699	FALSE	0
2022-09-13	11:21:21	0.308613	1.37277	16.8287	FALSE	0
2022-09-13	11:21:21	0.229529	1.02099	19.4909	FALSE	0
2022-09-13	11:21:21	0.098588	0.438539	17.2672	FALSE	0
2022-09-13	11:21:21	0.176298	0.784209	20.2751	FALSE	0
2022-09-13	11:21:22	0.171209	0.761572	18.0288	FALSE	0
2022-09-13	11:21:22	0.402659	1.79111	22.0662	FALSE	0
2022-09-13	11:21:22	0.161336	0.717655	18.7464	FALSE	0
2022-09-13	11:21:22	0.320115	1.42394	23.4901	FALSE	0
2022-09-13	11:21:23	0.196654	0.874756	19.6212	FALSE	0
2022-09-13	11:21:23	0.404288	1.79835	25.2885	FALSE	0
2022-09-13	11:21:23	0.0868831	0.386473	20.0077	FALSE	0
2022-09-13	11:21:24	0.403982	1.79699	27.0855	FALSE	0
2022-09-13	11:21:24	0.347596	1.54618	21.5539	FALSE	0
2022-09-13	11:21:24	0.423575	1.88415	28.9696	FALSE	0
2022-09-13	11:21:24	0.299199	1.3309	22.8848	FALSE	0
2022-09-13	11:21:25	0.333143	1.48189	30.4515	FALSE	0
2022-09-13	11:21:25	0.501488	2.23072	25.1155	FALSE	0
2022-09-13	11:21:25	0.113295	0.503959	30.9555	FALSE	0
2022-09-13	11:21:25	0.374364	1.66525	26.7807	FALSE	0
2022-09-13	11:21:26	0.0714124	0.317657	31.2731	FALSE	0
2022-09-13	11:21:26	0.380369	1.69196	28.4727	FALSE	0
2022-09-13	11:21:26	0.110802	0.492869	31.766	FALSE	0
2022-09-13	11:21:26	0.326476	1.45223	29.9249	FALSE	0
2022-09-13	11:21:27	0.428308	1.9052	33.6712	FALSE	0
2022-09-13	11:21:27	2.65131	11.7936	41.7185	FALSE	0
2022-09-13	11:21:27	3.85039	17.1273	50.7985	1	1
2022-09-13	11:21:28	6.42978	28.6009	70.3194	1	2
2022-09-13	11:21:28	1.44515	6.42832	57.2268	FALSE	2
2022-09-13	11:21:28	0.335433	1.49207	71.8115	FALSE	2
2022-09-13	11:21:28	0.274262	1.21997	58.4468	FALSE	2
2022-09-13	11:21:29	0.114466	0.509168	72.3207	FALSE	2
2022-09-13	11:21:29	-0.170267	-0.757382	58.4468	FALSE	2
2022-09-13	11:21:29	-0.198409	-0.882563	72.3207	FALSE	2
2022-09-13	11:21:29	-0.178002	-0.791788	58.4468	FALSE	2
2022-09-13	11:21:30	0.0278501	0.123883	72.4445	FALSE	2
2022-09-13	11:21:30	0.299199	1.3309	59.7777	FALSE	2
2022-09-13	11:21:30	0.0378755	0.168478	72.613	FALSE	2
2022-09-13	11:21:30	0.15757	0.700903	60.4786	FALSE	2
2022-09-13	11:21:31	0.16612	0.738935	73.3519	FALSE	2
2022-09-13	11:21:31	0.53355	2.37334	62.8519	FALSE	2
2022-09-13	11:21:31	0.273193	1.21522	74.5672	FALSE	2
2022-09-13	11:21:32	0.321336	1.42937	64.2813	FALSE	2
2022-09-13	11:21:32	0.370445	1.64781	76.215	FALSE	2
2022-09-13	11:21:32	0.210751	0.937463	65.2187	FALSE	2
2022-09-13	11:21:32	0.430598	1.91539	78.1304	FALSE	2
2022-09-13	11:21:33	0.318842	1.41827	66.637	FALSE	2
2022-09-13	11:21:33	0.441794	1.96519	80.0956	FALSE	2
2022-09-13	11:21:33	0.318435	1.41646	68.0535	FALSE	2
2022-09-13	11:21:33	0.189428	0.842614	80.9382	FALSE	2
2022-09-13	11:21:34	0.548257	2.43876	70.4922	FALSE	2
2022-09-13	11:21:34	0.366781	1.63152	82.5697	FALSE	2
2022-09-13	11:21:34	0.342354	1.52286	72.0151	FALSE	2
2022-09-13	11:21:34	0.370089	1.64623	84.2159	FALSE	2
2022-09-13	11:21:35	0.793855	3.53123	75.5463	FALSE	2
2022-09-13	11:21:35	0.723422	3.21793	87.4338	FALSE	2
2022-09-13	11:21:35	0.790598	3.51674	79.0631	FALSE	2
2022-09-13	11:21:36	1.24744	5.54886	92.9827	FALSE	2
2022-09-13	11:21:36	2.11961	9.42845	88.4915	FALSE	2
2022-09-13	11:21:36	1.85253	8.24042	101.223	FALSE	2
2022-09-13	11:21:36	1.61146	7.1681	95.6596	FALSE	2
2022-09-13	11:21:37	1.4678	6.52907	107.752	FALSE	2
2022-09-13	11:21:37	1.27569	5.67452	101.334	FALSE	2
2022-09-13	11:21:37	0.481234	2.14063	109.893	FALSE	2
2022-09-13	11:21:37	0.590649	2.62732	103.961	FALSE	2
2022-09-13	11:21:38	0.930191	4.13768	114.03	FALSE	2
2022-09-13	11:21:38	1.05263	4.68231	108.644	FALSE	2
2022-09-13	11:21:38	0.979962	4.35907	118.39	FALSE	2
2022-09-13	11:21:38	0.937468	4.17005	112.814	FALSE	2
2022-09-13	11:21:39	1.65085	7.34331	125.733	FALSE	2
2022-09-13	11:21:39	1.41391	6.28935	119.103	FALSE	2
2022-09-13	11:21:39	0.740674	3.29467	129.028	FALSE	2
2022-09-13	11:21:40	0.753448	3.35149	122.455	FALSE	2
2022-09-13	11:21:40	0.60327	2.68347	131.711	FALSE	2
2022-09-13	11:21:40	0.464135	2.06457	124.519	FALSE	2
2022-09-13	11:21:40	0.740216	3.29263	135.004	FALSE	2
2022-09-13	11:21:41	0.784186	3.48822	128.007	FALSE	2
2022-09-13	11:21:41	1.09411	4.86682	139.87	FALSE	2
2022-09-13	11:21:41	-0.00879109	-0.0391045	128.007	FALSE	2
2022-09-13	11:21:41	0.0500384	0.222581	140.093	FALSE	2
2022-09-13	11:21:42	0.220776	0.982056	128.989	FALSE	2
2022-09-13	11:21:42	0.235789	1.04884	141.142	FALSE	2
2022-09-13	11:21:42	0.312176	1.38862	130.378	FALSE	2
2022-09-13	11:21:42	0.326069	1.45042	142.592	FALSE	2
2022-09-13	11:21:43	0.284084	1.26366	131.642	FALSE	2
2022-09-13	11:21:43	0.361082	1.60616	144.198	FALSE	2
2022-09-13	11:21:43	0.362557	1.61273	133.254	FALSE	2
2022-09-13	11:21:44	0.597468	2.65766	146.856	FALSE	2
2022-09-13	11:21:44	1.14602	5.09773	138.352	FALSE	2
2022-09-13	11:21:44	1.43935	6.40252	153.259	FALSE	2
2022-09-13	11:21:44	1.22729	5.45923	143.811	FALSE	2
2022-09-13	11:21:45	0.647188	2.87882	156.137	FALSE	2
2022-09-13	11:21:45	0.645458	2.87113	146.683	FALSE	2
2022-09-13	11:21:45	0.457621	2.03559	158.173	FALSE	2
2022-09-13	11:21:45	0.361132	1.60639	148.289	FALSE	2
2022-09-13	11:21:46	0.0940079	0.418166	158.591	FALSE	2
2022-09-13	11:21:46	0.157214	0.699319	148.988	FALSE	2
2022-09-13	11:21:46	0.280471	1.24759	159.839	FALSE	2
2022-09-13	11:21:46	0.298741	1.32886	150.317	FALSE	2
2022-09-13	11:21:47	0.24897	1.10747	160.946	FALSE	2
2022-09-13	11:21:47	0.565153	2.51391	152.831	FALSE	2
2022-09-13	11:21:47	1.011	4.49713	165.443	FALSE	2
2022-09-13	11:21:47	0.267901	1.19168	154.023	FALSE	2
2022-09-13	11:21:48	0.330395	1.46966	166.913	FALSE	2
2022-09-13	11:21:48	0.327087	1.45495	155.478	FALSE	2
2022-09-13	11:21:48	0.303117	1.34833	168.261	FALSE	2
2022-09-13	11:21:49	0.222303	0.988848	156.467	FALSE	2
2022-09-13	11:21:49	0.453499	2.01725	170.279	FALSE	2
2022-09-13	11:21:49	0.183524	0.816351	157.283	FALSE	2
2022-09-13	11:21:49	0.3307	1.47102	171.75	FALSE	2
2022-09-13	11:21:50	0.135077	0.60085	157.884	FALSE	2
2022-09-13	11:21:50	0.194669	0.865927	172.616	FALSE	2
2022-09-13	11:21:50	-0.216679	-0.963832	157.884	FALSE	2
2022-09-13	11:21:50	-0.342633	-1.5241	172.616	FALSE	2
2022-09-13	11:21:51	1.57452	7.00378	164.888	FALSE	2
2022-09-13	11:21:51	4.36398	19.4119	192.027	1	3
2022-09-13	11:21:51	2.4936	11.092	175.98	FALSE	3
2022-09-13	11:21:51	0.994618	4.42426	196.452	FALSE	3
2022-09-13	11:21:52	0.808257	3.59529	179.575	FALSE	3
2022-09-13	11:21:52	1.29584	5.76416	202.216	FALSE	3
2022-09-13	11:21:52	0.685509	3.04928	182.624	FALSE	3
2022-09-13	11:21:53	0.726272	3.2306	205.446	FALSE	3
2022-09-13	11:21:53	0.945763	4.20694	186.831	FALSE	3
2022-09-13	11:21:53	0.436603	1.9421	207.389	FALSE	3
2022-09-13	11:21:53	0.824898	3.66931	190.5	FALSE	3
2022-09-13	11:21:54	0.566272	2.51889	209.907	FALSE	3
2022-09-13	11:21:54	0.426629	1.89773	192.398	FALSE	3
2022-09-13	11:21:54	0.604644	2.68958	212.597	FALSE	3
2022-09-13	11:21:54	0.389733	1.73361	194.132	FALSE	3
2022-09-13	11:21:55	1.25925	5.6014	218.198	FALSE	3
2022-09-13	11:21:55	0.777315	3.45765	197.589	FALSE	3
2022-09-13	11:21:55	2.10235	9.35167	227.55	FALSE	3
2022-09-13	11:21:55	2.72312	12.113	209.702	FALSE	3
2022-09-13	11:21:56	3.55691	15.8218	243.372	1	4
2022-09-13	11:21:56	2.56225	11.3974	221.1	FALSE	4
2022-09-13	11:21:56	1.45075	6.45323	249.825	FALSE	4
2022-09-13	11:21:57	1.68271	7.48503	228.585	FALSE	4
2022-09-13	11:21:57	0.561692	2.49852	252.324	FALSE	4
2022-09-13	11:21:57	1.21971	5.42551	234.01	FALSE	4
2022-09-13	11:21:57	0.61528	2.73689	255.061	FALSE	4
2022-09-13	11:21:58	0.960013	4.27033	238.281	FALSE	4
2022-09-13	11:21:58	1.08882	4.84329	259.904	FALSE	4
2022-09-13	11:21:58	0.994873	4.42539	242.706	FALSE	4
2022-09-13	11:21:58	2.85472	12.6984	272.602	FALSE	4
2022-09-13	11:21:59	1.33823	5.95271	248.659	FALSE	4
2022-09-13	11:21:59	3.0879	13.7356	286.338	1	5
2022-09-13	11:21:59	2.32586	10.3459	259.005	FALSE	5
2022-09-13	11:21:59	3.46983	15.4345	301.772	1	6
2022-09-13	11:22:00	3.04744	13.5556	272.56	1	7
2022-09-13	11:22:00	2.43345	10.8245	312.597	FALSE	7
2022-09-13	11:22:00	4.12189	18.335	290.895	1	8
2022-09-13	11:22:01	0.952532	4.23705	316.834	FALSE	8
2022-09-13	11:22:01	2.17513	9.67541	300.571	FALSE	8
2022-09-13	11:22:01	0.634771	2.82359	319.657	FALSE	8
2022-09-13	11:22:01	0.802761	3.57084	304.141	FALSE	8
2022-09-13	11:22:02	1.14088	5.07486	324.732	FALSE	8
2022-09-13	11:22:02	0.32612	1.45065	305.592	FALSE	8
2022-09-13	11:22:02	1.145	5.09319	329.825	FALSE	8
2022-09-13	11:22:02	0.232736	1.03526	306.627	FALSE	8
2022-09-13	11:22:03	1.1193	4.97887	334.804	FALSE	8
2022-09-13	11:22:03	1.51411	6.73506	313.362	FALSE	8
2022-09-13	11:22:03	2.88541	12.8349	347.639	FALSE	8
2022-09-13	11:22:03	2.7508	12.2361	325.599	FALSE	8
2022-09-13	11:22:04	4.30739	19.1601	366.799	1	9
2022-09-13	11:22:04	4.48225	19.9379	345.537	1	10
2022-09-13	11:22:04	2.60714	11.5971	378.396	FALSE	10
2022-09-13	11:22:05	5.35075	23.8012	369.338	1	11
2022-09-13	11:22:05	5.17319	23.0114	401.408	1	12
2022-09-13	11:22:05	4.39187	19.5359	388.874	1	13
2022-09-13	11:22:05	3.13492	13.9448	415.353	1	14
2022-09-13	11:22:06	1.08887	4.84351	393.717	FALSE	14
2022-09-13	11:22:06	1.31019	5.82799	421.181	FALSE	14
2022-09-13	11:22:06	0.292328	1.30033	395.017	FALSE	14
2022-09-13	11:22:06	0.308359	1.37164	422.552	FALSE	14
2022-09-13	11:22:07	0.562557	2.50237	397.52	FALSE	14
2022-09-13	11:22:07	1.16709	5.19145	427.744	FALSE	14
2022-09-13	11:22:07	1.18688	5.27948	402.799	FALSE	14
2022-09-13	11:22:07	1.05024	4.67168	432.415	FALSE	14
2022-09-13	11:22:08	1.02378	4.55398	407.353	FALSE	14
2022-09-13	11:22:08	0.812481	3.61408	436.029	FALSE	14
2022-09-13	11:22:08	0.655789	2.91708	410.27	FALSE	14
2022-09-13	11:22:09	0.37869	1.68449	437.714	FALSE	14
2022-09-13	11:22:09	0.299657	1.33293	411.603	FALSE	14
2022-09-13	11:22:09	0.273906	1.21839	438.932	FALSE	14
2022-09-13	11:22:09	0.173448	0.771531	412.375	FALSE	14
2022-09-13	11:22:10	0.476654	2.12025	441.053	FALSE	14
2022-09-13	11:22:10	0.056756	0.252462	412.627	FALSE	14
2022-09-13	11:22:10	0.217875	0.969152	442.022	FALSE	14
2022-09-13	11:22:10	0.338283	1.50475	414.132	FALSE	14
2022-09-13	11:22:11	0.441132	1.96224	443.984	FALSE	14
2022-09-13	11:22:11	0.216043	0.961002	415.093	FALSE	14
2022-09-13	11:22:11	0.39243	1.74561	445.73	FALSE	14
2022-09-13	11:22:11	1.05284	4.68324	419.776	FALSE	14
2022-09-13	11:22:12	1.4938	6.64472	452.374	FALSE	14
2022-09-13	11:22:12	1.54612	6.87745	426.654	FALSE	14
2022-09-13	11:22:12	0.75528	3.35964	455.734	FALSE	14
2022-09-13	11:22:12	-0.00522877	-0.0232586	426.654	FALSE	14
2022-09-13	11:22:13	-0.0717427	-0.319126	455.734	FALSE	14
2022-09-13	11:22:13	-0.170623	-0.758965	426.654	FALSE	14
2022-09-13	11:22:13	-0.0670099	-0.298073	455.734	FALSE	14
2022-09-13	11:22:14	-0.187824	-0.835479	426.654	FALSE	14
2022-09-13	11:22:14	-0.287112	-1.27713	455.734	FALSE	14
2022-09-13	11:22:14	-0.468078	-2.0821	426.654	FALSE	14
2022-09-13	11:22:14	-0.365229	-1.62461	455.734	FALSE	14
2022-09-13	11:22:15	-0.243142	-1.08154	426.654	FALSE	14
2022-09-13	11:22:15	-0.132862	-0.590997	455.734	FALSE	14
2022-09-13	11:22:15	-0.0824297	-0.366664	426.654	FALSE	14
2022-09-13	11:22:15	0.104797	0.466158	456.2	FALSE	14
2022-09-13	11:22:16	0.315229	1.4022	428.056	FALSE	14
2022-09-13	11:22:16	0.969733	4.31357	460.514	FALSE	14
2022-09-13	11:22:16	1.2707	5.65233	433.708	FALSE	14
2022-09-13	11:22:16	2.58805	11.5122	472.026	FALSE	14
2022-09-13	11:22:17	3.86322	17.1844	450.893	1	15
2022-09-13	11:22:17	3.16632	14.0844	486.11	1	16
2022-09-13	11:22:17	3.14373	13.9839	464.877	1	17
2022-09-13	11:22:18	2.53701	11.2851	497.395	FALSE	17
2022-09-13	11:22:18	1.86673	8.30359	473.18	FALSE	17
2022-09-13	11:22:18	1.49258	6.63929	504.035	FALSE	17
2022-09-13	11:22:18	0.817824	3.63784	476.818	FALSE	17
2022-09-13	11:22:19	1.97553	8.78755	512.822	FALSE	17
2022-09-13	11:22:19	2.11055	9.38815	486.206	FALSE	17
2022-09-13	11:22:19	2.53599	11.2806	524.103	FALSE	17
2022-09-13	11:22:19	3.3507	14.9046	501.111	1	18
2022-09-13	11:22:20	1.01457	4.51301	528.616	FALSE	18
2022-09-13	11:22:20	0.283728	1.26208	502.373	FALSE	18
2022-09-13	11:22:20	0.278893	1.24057	529.856	FALSE	18
2022-09-13	11:22:20	0.298028	1.32569	503.699	FALSE	18
2022-09-13	11:22:21	0.22439	0.998132	530.854	FALSE	18
2022-09-13	11:22:21	0.26556	1.18126	504.88	FALSE	18
2022-09-13	11:22:21	0.862659	3.83728	534.692	FALSE	18
2022-09-13	11:22:22	0.861794	3.83343	508.713	FALSE	18
2022-09-13	11:22:22	1.85767	8.26329	542.955	FALSE	18
2022-09-13	11:22:22	1.82592	8.12206	516.835	FALSE	18
2022-09-13	11:22:22	0.338842	1.50724	544.462	FALSE	18
2022-09-13	11:22:23	0.317519	1.41239	518.248	FALSE	18
2022-09-13	11:22:23	0.33187	1.47622	545.939	FALSE	18
2022-09-13	11:22:23	0.233244	1.03752	519.285	FALSE	18
2022-09-13	11:22:23	0.169937	0.755914	546.694	FALSE	18
2022-09-13	11:22:24	0.238995	1.0631	520.348	FALSE	18
2022-09-13	11:22:24	0.211463	0.94063	547.635	FALSE	18
2022-09-13	11:22:24	0.273702	1.21748	521.566	FALSE	18
2022-09-13	11:22:24	0.351209	1.56225	549.197	FALSE	18
2022-09-13	11:22:25	0.301387	1.34063	522.906	FALSE	18
2022-09-13	11:22:25	0.308868	1.37391	550.571	FALSE	18
2022-09-13	11:22:25	0.331769	1.47577	524.382	FALSE	18
2022-09-13	11:22:26	0.115993	0.51596	551.087	FALSE	18
2022-09-13	11:22:26	0.0117178	0.0521231	524.434	FALSE	18
2022-09-13	11:22:26	0.23126	1.02869	552.116	FALSE	18
2022-09-13	11:22:26	0.091158	0.405489	524.84	FALSE	18
2022-09-13	11:22:27	0.229071	1.01895	553.135	FALSE	18
2022-09-13	11:22:27	-0.120903	-0.537801	524.84	FALSE	18
2022-09-13	11:22:27	-0.0415137	-0.184661	553.135	FALSE	18
2022-09-13	11:22:27	0.270802	1.20458	526.044	FALSE	18
2022-09-13	11:22:28	0.0509036	0.226429	553.361	FALSE	18
2022-09-13	11:22:28	0.146985	0.653819	526.698	FALSE	18
2022-09-13	11:22:28	0.0835753	0.37176	553.733	FALSE	18
2022-09-13	11:22:28	0.115026	0.511659	527.21	FALSE	18
2022-09-13	11:22:29	0.216451	0.962817	554.696	FALSE	18
2022-09-13	11:22:29	0.140522	0.62507	527.835	FALSE	18
2022-09-13	11:22:29	0.00917326	0.0408045	554.737	FALSE	18
2022-09-13	11:22:30	-0.10589	-0.47102	527.835	FALSE	18
2022-09-13	11:22:30	0.0229646	0.102151	554.839	FALSE	18
2022-09-13	11:22:30	-0.0616664	-0.274304	527.835	FALSE	18
2022-09-13	11:22:30	0.293601	1.306	556.145	FALSE	18
2022-09-13	11:22:31	0.225662	1.00379	528.839	FALSE	18
2022-09-13	11:22:31	0.414669	1.84453	557.989	FALSE	18
2022-09-13	11:22:31	0.467595	2.07996	530.919	FALSE	18
2022-09-13	11:22:31	0.262914	1.16949	559.159	FALSE	18
2022-09-13	11:22:32	0.445407	1.98126	532.9	FALSE	18
2022-09-13	11:22:32	0.112736	0.501472	559.66	FALSE	18
2022-09-13	11:22:32	0.620216	2.75884	535.659	FALSE	18
2022-09-13	11:22:32	1.77986	7.91717	567.577	FALSE	18
2022-09-13	11:22:33	5.07421	22.5711	558.23	1	19
2022-09-13	11:22:33	6.02372	26.7947	594.372	1	20
2022-09-13	11:22:33	5.03619	22.402	580.632	1	21
2022-09-13	11:22:33	3.37482	15.0119	609.384	1	22
2022-09-13	11:22:34	2.32917	10.3606	590.992	FALSE	22
2022-09-13	11:22:34	1.92093	8.54468	617.929	FALSE	22
2022-09-13	11:22:34	2.27823	10.134	601.126	FALSE	22
2022-09-13	11:22:35	1.2193	5.42369	623.352	FALSE	22
2022-09-13	11:22:35	2.56571	11.4128	612.539	FALSE	22
2022-09-13	11:22:35	1.06032	4.71652	628.069	FALSE	22
2022-09-13	11:22:35	1.51838	6.75406	619.293	FALSE	22
2022-09-13	11:22:36	1.95497	8.6961	636.765	FALSE	22
2022-09-13	11:22:36	1.2137	5.39878	624.692	FALSE	22
2022-09-13	11:22:36	3.59197	15.9778	652.743	1	23
2022-09-13	11:22:36	0.831209	3.69738	628.389	FALSE	23
2022-09-13	11:22:37	1.74653	7.76891	660.512	FALSE	23
2022-09-13	11:22:37	1.72673	7.68084	636.07	FALSE	23
2022-09-13	11:22:37	1.44765	6.43944	666.951	FALSE	23
2022-09-13	11:22:37	5.80342	25.8148	661.885	1	24
2022-09-13	11:22:38	4.11131	18.2879	685.239	1	25
2022-09-13	11:22:38	6.50093	28.9174	690.803	1	26
2022-09-13	11:22:38	2.13971	9.51786	694.757	FALSE	26
2022-09-13	11:22:39	1.21156	5.38926	696.192	FALSE	26
2022-09-13	11:22:39	4.63848	20.6329	715.39	1	27
2022-09-13	11:22:39	1.00042	4.45007	700.642	FALSE	27
2022-09-13	11:22:39	4.94617	22.0016	737.391	1	28
2022-09-13	11:22:40	3.74525	16.6596	717.301	1	29
2022-09-13	11:22:40	2.27406	10.1155	747.507	FALSE	29
2022-09-13	11:22:40	11.8026	52.5003	769.802	1	30
2022-09-13	11:22:40	4.59411	20.4355	767.942	1	31
2022-09-13	11:22:41	7.03466	31.2916	801.093	1	32
2022-09-13	11:22:41	4.35324	19.3641	787.306	1	33
2022-09-13	11:22:41	1.20871	5.37658	806.47	FALSE	33
2022-09-13	11:22:41	1.16795	5.19528	792.502	FALSE	33
2022-09-13	11:22:42	1.30363	5.79881	812.269	FALSE	33
2022-09-13	11:22:42	0.644898	2.86864	795.37	FALSE	33
2022-09-13	11:22:42	2.36098	10.5021	822.771	FALSE	33
2022-09-13	11:22:43	2.72118	12.1044	807.475	FALSE	33
2022-09-13	11:22:43	9.87487	43.9254	866.696	1	34
2022-09-13	11:22:43	18.7227	83.2823	890.757	1	35
2022-09-13	11:22:43	3.24831	14.4491	881.145	1	36
2022-09-13	11:22:44	1.47121	6.54424	897.301	FALSE	36
2022-09-13	11:22:44	0.890496	3.9611	885.107	FALSE	36
2022-09-13	11:22:44	0.198639	0.883586	898.185	FALSE	36
2022-09-13	11:22:44	0.763321	3.3954	888.502	FALSE	36
2022-09-13	11:22:45	1.05385	4.68774	902.873	FALSE	36
2022-09-13	11:22:45	1.6706	7.43116	895.933	FALSE	36
2022-09-13	11:22:45	2.46164	10.9499	913.822	FALSE	36
2022-09-13	11:22:45	3.30485	14.7006	910.634	1	37
2022-09-13	11:22:46	5.07268	22.5643	936.387	1	38
2022-09-13	11:22:46	0.941132	4.18634	914.82	FALSE	38
2022-09-13	11:22:46	1.63894	7.29033	943.677	FALSE	38
2022-09-13	11:22:47	0.658537	2.9293	917.749	FALSE	38
2022-09-13	11:22:47	0.754822	3.3576	947.035	FALSE	38
2022-09-13	11:22:47	0.401285	1.785	919.534	FALSE	38
2022-09-13	11:22:47	0.457214	2.03378	949.068	FALSE	38
2022-09-13	11:22:48	0.828409	3.68493	923.219	FALSE	38
2022-09-13	11:22:48	1.07304	4.7731	953.842	FALSE	38
2022-09-13	11:22:48	1.47884	6.57818	929.797	FALSE	38
2022-09-13	11:22:48	2.84907	12.6732	966.515	FALSE	38
2022-09-13	11:22:49	4.45065	19.7974	949.595	1	39
2022-09-13	11:22:49	6.62968	29.4901	996.005	1	40
2022-09-13	11:22:49	3.83324	17.051	966.646	1	41
2022-09-13	11:22:49	2.2279	9.91014	1005.92	FALSE	41
2022-09-13	11:22:50	1.89813	8.44326	975.089	FALSE	41
2022-09-13	11:22:50	2.31228	10.2855	1016.2	FALSE	41
2022-09-13	11:22:50	2.3451	10.4315	985.521	FALSE	41
2022-09-13	11:22:51	0.957875	4.26082	1020.46	FALSE	41
2022-09-13	11:22:51	0.447901	1.99235	987.513	FALSE	41
2022-09-13	11:22:51	0.468359	2.08335	1022.54	FALSE	41
2022-09-13	11:22:51	0.747952	3.32704	990.84	FALSE	41
2022-09-13	11:22:52	3.14983	14.0111	1036.56	1	42
2022-09-13	11:22:52	1.50597	6.69886	997.539	FALSE	42
2022-09-13	11:22:52	2.09813	9.3329	1045.89	FALSE	42
2022-09-13	11:22:52	1.01045	4.49468	1002.03	FALSE	42
2022-09-13	11:22:53	1.03492	4.60353	1050.49	FALSE	42
2022-09-13	11:22:53	0.985153	4.38216	1006.42	FALSE	42
2022-09-13	11:22:53	0.453448	2.01703	1052.51	FALSE	42
2022-09-13	11:22:53	0.395026	1.75715	1008.17	FALSE	42
2022-09-13	11:22:54	0.455483	2.02608	1054.54	FALSE	42
2022-09-13	11:22:54	0.41869	1.86242	1010.04	FALSE	42
2022-09-13	11:22:54	0.22958	1.02122	1055.56	FALSE	42
2022-09-13	11:22:55	0.156909	0.697963	1010.73	FALSE	42
2022-09-13	11:22:55	0.0945168	0.42043	1055.98	FALSE	42
2022-09-13	11:22:55	0.0636262	0.283022	1011.02	FALSE	42
2022-09-13	11:22:55	0.00581451	0.0258641	1056	FALSE	42
2022-09-13	11:22:56	0.314924	1.40084	1012.42	FALSE	42
2022-09-13	11:22:56	0.450852	2.00548	1058.01	FALSE	42
2022-09-13	11:22:56	2.43986	10.853	1023.27	FALSE	42
2022-09-13	11:22:56	8.40001	37.3649	1095.37	1	43
2022-09-13	11:22:57	6.49227	28.8789	1052.15	1	44
2022-09-13	11:22:57	1.57462	7.00422	1102.38	FALSE	44
2022-09-13	11:22:57	3.00464	13.3652	1065.51	1	45
2022-09-13	11:22:57	2.04464	9.09497	1111.47	FALSE	45
2022-09-13	11:22:58	1.49248	6.63885	1072.15	FALSE	45
2022-09-13	11:22:58	2.81431	12.5186	1123.99	FALSE	45
2022-09-13	11:22:58	2.82235	12.5544	1084.71	FALSE	45
2022-09-13	11:22:59	5.55126	24.6931	1148.68	1	46
2022-09-13	11:22:59	5.84052	25.9798	1110.69	1	47
2022-09-13	11:22:59	2.53162	11.2612	1159.95	FALSE	47
2022-09-13	11:22:59	4.23431	18.8351	1129.52	1	48
2022-09-13	11:23:00	2.33268	10.3762	1170.32	FALSE	48
2022-09-13	11:23:00	2.26245	10.0638	1139.59	FALSE	48
2022-09-13	11:23:00	1.76856	7.86691	1178.19	FALSE	48
2022-09-13	11:23:00	0.976094	4.34186	1143.93	FALSE	48
2022-09-13	11:23:01	0.867748	3.85992	1182.05	FALSE	48
2022-09-13	11:23:01	0.768766	3.41962	1147.35	FALSE	48
2022-09-13	11:23:01	3.32006	14.7683	1196.82	1	49
2022-09-13	11:23:01	1.01111	4.49762	1151.85	FALSE	49
2022-09-13	11:23:02	1.31905	5.8674	1202.68	FALSE	49
2022-09-13	11:23:02	1.17258	5.21587	1157.06	FALSE	49
2022-09-13	11:23:02	0.800471	3.56066	1206.24	FALSE	49
2022-09-13	11:23:02	0.905967	4.02992	1161.09	FALSE	49
2022-09-13	11:23:03	0.580216	2.58092	1208.83	FALSE	49
2022-09-13	11:23:03	0.470293	2.09196	1163.18	FALSE	49
2022-09-13	11:23:03	1.02841	4.57457	1213.4	FALSE	49
2022-09-13	11:23:04	1.27609	5.6763	1168.86	FALSE	49
2022-09-13	11:23:04	0.859758	3.82438	1217.22	FALSE	49
2022-09-13	11:23:04	0.931718	4.14447	1173	FALSE	49
2022-09-13	11:23:04	0.464389	2.0657	1219.29	FALSE	49
2022-09-13	11:23:05	0.46271	2.05823	1175.06	FALSE	49
2022-09-13	11:23:05	0.492634	2.19133	1221.48	FALSE	49
2022-09-13	11:23:05	0.896603	3.98827	1179.05	FALSE	49
2022-09-13	11:23:05	1.63039	7.2523	1228.73	FALSE	49
2022-09-13	11:23:06	2.02444	9.00511	1188.06	FALSE	49
2022-09-13	11:23:06	2.73202	12.1526	1240.89	FALSE	49
2022-09-13	11:23:06	3.19518	14.2128	1202.27	1	50
2022-09-13	11:23:06	4.24866	18.8989	1259.79	1	51
2022-09-13	11:23:07	3.23014	14.3683	1216.64	1	52
2022-09-13	11:23:07	2.91075	12.9476	1272.73	FALSE	52
2022-09-13	11:23:07	2.3964	10.6597	1227.3	FALSE	52
2022-09-13	11:23:08	2.68709	11.9527	1284.69	FALSE	52
2022-09-13	11:23:08	1.27884	5.68854	1232.98	FALSE	52
2022-09-13	11:23:08	1.53258	6.81722	1291.5	FALSE	52
2022-09-13	11:23:08	1.10301	4.90641	1237.89	FALSE	52
2022-09-13	11:23:09	1.33711	5.94773	1297.45	FALSE	52
2022-09-13	11:23:09	1.0052	4.47133	1242.36	FALSE	52
2022-09-13	11:23:09	0.773804	3.44203	1300.89	FALSE	52
2022-09-13	11:23:09	0.712634	3.16994	1245.53	FALSE	52
2022-09-13	11:23:10	0.765	3.40287	1304.3	FALSE	52
2022-09-13	11:23:10	0.67869	3.01895	1248.55	FALSE	52
2022-09-13	11:23:10	0.661997	2.9447	1307.24	FALSE	52
2022-09-13	11:23:10	0.528308	2.35002	1250.9	FALSE	52
2022-09-13	11:23:11	0.455738	2.02721	1309.27	FALSE	52
2022-09-13	11:23:11	0.513652	2.28483	1253.19	FALSE	52
2022-09-13	11:23:11	0.675636	3.00536	1312.27	FALSE	52
2022-09-13	11:23:12	0.528919	2.35274	1255.54	FALSE	52
2022-09-13	11:23:12	0.410751	1.8271	1314.1	FALSE	52
2022-09-13	11:23:12	0.391412	1.74108	1257.28	FALSE	52
2022-09-13	11:23:12	0.417672	1.85789	1315.96	FALSE	52
2022-09-13	11:23:13	0.450445	2.00367	1259.28	FALSE	52
2022-09-13	11:23:13	0.400522	1.7816	1317.74	FALSE	52
2022-09-13	11:23:13	0.622354	2.76836	1262.05	FALSE	52
2022-09-13	11:23:13	0.66098	2.94017	1320.68	FALSE	52
2022-09-13	11:23:14	0.408664	1.81782	1263.87	FALSE	52
2022-09-13	11:23:14	1.12347	4.99742	1325.68	FALSE	52
2022-09-13	11:23:14	1.02978	4.58067	1268.45	FALSE	52
2022-09-13	11:23:14	2.58744	11.5095	1337.19	FALSE	52
2022-09-13	11:23:15	2.93202	13.0422	1281.49	FALSE	52
2022-09-13	11:23:15	4.77289	21.2308	1358.42	1	53
2022-09-13	11:23:15	5.65578	25.158	1306.65	1	54
2022-09-13	11:23:16	1.37431	6.11321	1364.53	FALSE	54
2022-09-13	11:23:16	4.68429	20.8367	1327.49	1	55
2022-09-13	11:23:16	1.43319	6.37512	1370.91	FALSE	55
2022-09-13	11:23:16	4.78378	21.2792	1348.77	1	56
2022-09-13	11:23:17	3.54469	15.7675	1386.67	1	57
2022-09-13	11:23:17	1.84195	8.19336	1356.96	FALSE	57
2022-09-13	11:23:17	3.53029	15.7034	1402.38	1	58
2022-09-13	11:23:17	0.723473	3.21815	1360.18	FALSE	58
2022-09-13	11:23:18	1.76724	7.86104	1410.24	FALSE	58
2022-09-13	11:23:18	0.748715	3.33043	1363.51	FALSE	58
2022-09-13	11:23:18	0.448003	1.99281	1412.23	FALSE	58
2022-09-13	11:23:18	0.607494	2.70225	1366.21	FALSE	58
2022-09-13	11:23:19	0.685814	3.05064	1415.28	FALSE	58
2022-09-13	11:23:19	3.68668	16.3991	1382.61	1	59
2022-09-13	11:23:19	4.53625	20.1781	1435.46	1	60
2022-09-13	11:23:20	2.54368	11.3148	1393.92	FALSE	60
2022-09-13	11:23:20	0.941387	4.18748	1439.65	FALSE	60
2022-09-13	11:23:20	1.06123	4.72056	1398.65	FALSE	60
2022-09-13	11:23:20	0.346018	1.53916	1441.19	FALSE	60
2022-09-13	11:23:21	0.478333	2.12772	1400.77	FALSE	60
2022-09-13	11:23:21	0.373906	1.66321	1442.85	FALSE	60
2022-09-13	11:23:21	0.526018	2.33983	1403.11	FALSE	60
2022-09-13	11:23:21	0.967443	4.30338	1447.15	FALSE	60
2022-09-13	11:23:22	1.7536	7.80036	1410.91	FALSE	60
2022-09-13	11:23:22	0.591921	2.63298	1449.79	FALSE	60
2022-09-13	11:23:22	1.91782	8.53085	1419.44	FALSE	60
2022-09-13	11:23:22	0.840013	3.73655	1453.52	FALSE	60
2022-09-13	11:23:23	0.470089	2.09105	1421.54	FALSE	60
2022-09-13	11:23:23	0.401082	1.78409	1455.31	FALSE	60
2022-09-13	11:23:23	0.239962	1.0674	1422.6	FALSE	60
2022-09-13	11:23:23	0.620573	2.76043	1458.07	FALSE	60
2022-09-13	11:23:24	2.59869	11.5595	1434.16	FALSE	60
2022-09-13	11:23:24	7.97248	35.4632	1493.53	1	61
2022-09-13	11:23:24	3.64642	16.22	1450.38	1	62
2022-09-13	11:23:25	2.97075	13.2145	1506.74	FALSE	62
2022-09-13	11:23:25	1.56739	6.97206	1457.35	FALSE	62
2022-09-13	11:23:25	2.07294	9.22085	1515.96	FALSE	62
2022-09-13	11:23:25	5.41024	24.0658	1481.42	1	63
2022-09-13	11:23:26	7.27227	32.3485	1548.31	1	64
2022-09-13	11:23:26	12.2713	54.5852	1536.01	1	65
2022-09-13	11:23:26	9.69059	43.1057	1591.42	1	66
2022-09-13	11:23:26	4.74123	21.0899	1557.1	1	67
2022-09-13	11:23:27	1.72037	7.65255	1599.07	FALSE	67
2022-09-13	11:23:27	0.600929	2.67305	1559.77	FALSE	67
2022-09-13	11:23:27	0.3507	1.55998	1600.63	FALSE	67
2022-09-13	11:23:27	0.332736	1.48008	1561.25	FALSE	67
2022-09-13	11:23:28	0.0644913	0.28687	1600.92	FALSE	67
2022-09-13	11:23:28	-0.210572	-0.936666	1561.25	FALSE	67
2022-09-13	11:23:28	-0.201361	-0.895694	1600.92	FALSE	67
2022-09-13	11:23:29	0.555636	2.47158	1563.72	FALSE	67
2022-09-13	11:23:29	7.40566	32.9419	1633.86	1	68
2022-09-13	11:23:29	5.06164	22.5152	1586.23	1	69
2022-09-13	11:23:29	0.822506	3.65867	1637.52	FALSE	69
2022-09-13	11:23:30	0.628053	2.79371	1589.03	FALSE	69
2022-09-13	11:23:30	0.293601	1.306	1638.83	FALSE	69
2022-09-13	11:23:30	0.419555	1.86626	1590.89	FALSE	69
2022-09-13	11:23:30	1.71559	7.63129	1646.46	FALSE	69
2022-09-13	11:23:31	2.3277	10.3541	1601.25	FALSE	69
2022-09-13	11:23:31	2.01787	8.97589	1655.43	FALSE	69
2022-09-13	11:23:31	2.31996	10.3196	1611.57	FALSE	69
2022-09-13	11:23:31	2.4795	11.0293	1666.46	FALSE	69
2022-09-13	11:23:32	2.15365	9.57987	1621.15	FALSE	69
2022-09-13	11:23:32	1.88169	8.37013	1674.83	FALSE	69
2022-09-13	11:23:32	1.81085	8.05502	1629.2	FALSE	69
2022-09-13	11:23:33	1.91355	8.51185	1683.34	FALSE	69
2022-09-13	11:23:33	1.84749	8.21801	1637.42	FALSE	69
2022-09-13	11:23:33	1.56877	6.9782	1690.32	FALSE	69
2022-09-13	11:23:33	1.48805	6.61914	1644.04	FALSE	69
2022-09-13	11:23:34	0.748766	3.33066	1693.65	FALSE	69
2022-09-13	11:23:34	0.427799	1.90294	1645.94	FALSE	69
2022-09-13	11:23:34	0.369631	1.64419	1695.3	FALSE	69
2022-09-13	11:23:34	0.303066	1.3481	1647.29	FALSE	69
2022-09-13	11:23:35	0.261081	1.16134	1696.46	FALSE	69
2022-09-13	11:23:35	0.196654	0.874756	1648.17	FALSE	69
2022-09-13	11:23:35	0.713957	3.17582	1699.63	FALSE	69
2022-09-13	11:23:35	0.646476	2.87565	1651.04	FALSE	69
2022-09-13	11:23:36	0.725204	3.22585	1702.86	FALSE	69
2022-09-13	11:23:36	0.281998	1.25438	1652.3	FALSE	69
2022-09-13	11:23:36	-0.0239565	-0.106563	1702.86	FALSE	69
2022-09-13	11:23:37	0.141489	0.629371	1652.93	FALSE	69
2022-09-13	11:23:37	0.159148	0.707922	1703.57	FALSE	69
2022-09-13	11:23:37	0.158181	0.703621	1653.63	FALSE	69
2022-09-13	11:23:37	0.0338043	0.150368	1703.72	FALSE	69
2022-09-13	11:23:38	-0.00482162	-0.0214475	1653.63	FALSE	69
2022-09-13	11:23:38	0.0759926	0.33803	1704.06	FALSE	69
2022-09-13	11:23:38	0.189122	0.841252	1654.47	FALSE	69
2022-09-13	11:23:38	0.201692	0.897166	1704.95	FALSE	69
2022-09-13	11:23:39	0.201641	0.896939	1655.37	FALSE	69
2022-09-13	11:23:39	0.174211	0.774925	1705.73	FALSE	69
2022-09-13	11:23:39	0.170547	0.758627	1656.13	FALSE	69
2022-09-13	11:23:39	0.165102	0.734407	1706.46	FALSE	69
2022-09-13	11:23:40	0.165713	0.737125	1656.86	FALSE	69
2022-09-13	11:23:40	0.179708	0.799377	1707.26	FALSE	69
2022-09-13	11:23:40	0.207596	0.923429	1657.79	FALSE	69
2022-09-13	11:23:41	0.193601	0.861176	1708.12	FALSE	69
2022-09-13	11:23:41	0.198944	0.884943	1658.67	FALSE	69
2022-09-13	11:23:41	0.195992	0.871812	1708.99	FALSE	69
2022-09-13	11:23:41	0.186934	0.83152	1659.5	FALSE	69
2022-09-13	11:23:42	0.180471	0.802771	1709.8	FALSE	69
2022-09-13	11:23:42	0.170242	0.75727	1660.26	FALSE	69
2022-09-13	11:23:42	0.178384	0.793488	1710.59	FALSE	69
2022-09-13	11:23:42	0.154822	0.688679	1660.95	FALSE	69
2022-09-13	11:23:43	-0.0756104	-0.33633	1710.59	FALSE	69
2022-09-13	11:23:43	-0.343346	-1.52727	1660.95	FALSE	69
2022-09-13	11:23:43	-0.446806	-1.98748	1710.59	FALSE	69
2022-09-13	11:23:43	-0.383753	-1.70701	1660.95	FALSE	69
2022-09-13	11:23:44	-0.363804	-1.61827	1710.59	FALSE	69
2022-09-13	11:23:44	-0.386399	-1.71878	1660.95	FALSE	69
2022-09-13	11:23:44	-0.382888	-1.70316	1710.59	FALSE	69
2022-09-13	11:23:45	-0.368282	-1.63819	1660.95	FALSE	69
2022-09-13	11:23:45	-0.369147	-1.64204	1710.59	FALSE	69
2022-09-13	11:23:45	-0.353829	-1.5739	1660.95	FALSE	69
2022-09-13	11:23:45	-0.334898	-1.48969	1710.59	FALSE	69
2022-09-13	11:23:46	-0.342277	-1.52252	1660.95	FALSE	69
2022-09-13	11:23:46	-0.338053	-1.50373	1710.59	FALSE	69
2022-09-13	11:23:46	-0.336933	-1.49875	1660.95	FALSE	69
2022-09-13	11:23:46	-0.318511	-1.4168	1710.59	FALSE	69
2022-09-13	11:23:47	-0.21561	-0.959076	1660.95	FALSE	69
2022-09-13	11:23:47	-0.0337275	-0.150027	1710.59	FALSE	69
2022-09-13	11:23:47	-0.040445	-0.179907	1660.95	FALSE	69
2022-09-13	11:23:47	-0.0490964	-0.218391	1710.59	FALSE	69
2022-09-13	11:23:48	-0.0344908	-0.153422	1660.95	FALSE	69
2022-09-13	11:23:48	-0.0169336	-0.075324	1710.59	FALSE	69
2022-09-13	11:23:48	-0.0156104	-0.0694382	1660.95	FALSE	69
2022-09-13	11:23:48	-0.0138293	-0.0615155	1710.59	FALSE	69
2022-09-13	11:23:49	-0.0605468	-0.269324	1660.95	FALSE	69
2022-09-13	11:23:49	-0.0400379	-0.178097	1710.59	FALSE	69
2022-09-13	11:23:49	-0.1493	-0.664116	1660.95	FALSE	69
2022-09-13	11:23:50	-0.107875	-0.47985	1710.59	FALSE	69
2022-09-13	11:23:50	-0.0891473	-0.396545	1660.95	FALSE	69
2022-09-13	11:23:50	-0.45734	-2.03434	1710.59	FALSE	69
2022-09-13	11:23:50	-0.402938	-1.79235	1660.95	FALSE	69
2022-09-13	11:23:51	0.30729	1.36689	1711.96	FALSE	69
2022-09-13	11:23:51	0.436603	1.9421	1662.89	FALSE	69
2022-09-13	11:23:51	0.291514	1.29671	1713.25	FALSE	69
2022-09-13	11:23:51	0.441489	1.96383	1664.86	FALSE	69
2022-09-13	11:23:52	0.450598	2.00435	1715.26	FALSE	69
2022-09-13	11:23:52	0.454517	2.02178	1666.88	FALSE	69
2022-09-13	11:23:52	0.191158	0.850309	1716.11	FALSE	69
2022-09-13	11:23:52	0.0778247	0.34618	1667.22	FALSE	69
2022-09-13	11:23:53	-0.0278751	-0.123994	1716.11	FALSE	69
2022-09-13	11:23:53	-0.153168	-0.681322	1667.22	FALSE	69
2022-09-13	11:23:53	-0.232048	-1.0322	1716.11	FALSE	69
2022-09-13	11:23:54	-0.202582	-0.901125	1667.22	FALSE	69
2022-09-13	11:23:54	-0.236781	-1.05325	1716.11	FALSE	69
2022-09-13	11:23:54	-0.161768	-0.719576	1667.22	FALSE	69
2022-09-13	11:23:54	-0.218562	-0.972207	1716.11	FALSE	69
2022-09-13	11:23:55	-0.376984	-1.6769	1667.22	FALSE	69
2022-09-13	11:23:55	-0.0574934	-0.255742	1716.11	FALSE	69
2022-09-13	11:23:55	-0.133982	-0.595979	1667.22	FALSE	69
2022-09-13	11:23:55	0.251463	1.11856	1717.23	FALSE	69
2022-09-13	11:23:56	0.242507	1.07872	1668.3	FALSE	69
2022-09-13	11:23:56	0.338842	1.50724	1718.74	FALSE	69
2022-09-13	11:23:56	0.367494	1.63469	1669.94	FALSE	69
2022-09-13	11:23:56	0.364186	1.61997	1720.36	FALSE	69
2022-09-13	11:23:57	0.478333	2.12772	1672.06	FALSE	69
2022-09-13	11:23:57	0.482812	2.14764	1722.5	FALSE	69
2022-09-13	11:23:57	0.825051	3.66999	1675.73	FALSE	69
2022-09-13	11:23:58	1.08607	4.83106	1727.33	FALSE	69
2022-09-13	11:23:58	2.32724	10.352	1686.09	FALSE	69
2022-09-13	11:23:58	4.26826	18.9861	1746.32	1	70
2022-09-13	11:23:58	4.46953	19.8814	1705.97	1	71
2022-09-13	11:23:59	4.46551	19.8635	1766.18	1	72
2022-09-13	11:23:59	7.53049	33.4971	1739.46	1	73
2022-09-13	11:23:59	5.34062	23.7561	1789.94	1	74
2022-09-13	11:23:59	4.41243	19.6274	1759.09	1	75
2022-09-13	11:24:00	1.32256	5.88301	1795.82	FALSE	75
2022-09-13	11:24:00	0.974567	4.33507	1763.43	FALSE	75
2022-09-13	11:24:00	0.754109	3.35443	1799.18	FALSE	75
2022-09-13	11:24:00	0.713957	3.17582	1766.6	FALSE	75
2022-09-13	11:24:01	0.553804	2.46343	1801.64	FALSE	75
2022-09-13	11:24:01	0.579656	2.57843	1769.18	FALSE	75
2022-09-13	11:24:01	1.46261	6.50598	1808.15	FALSE	75
2022-09-13	11:24:02	2.39406	10.6493	1779.83	FALSE	75
2022-09-13	11:24:02	0.928003	4.12794	1812.27	FALSE	75
2022-09-13	11:24:02	0.634109	2.82064	1782.65	FALSE	75
2022-09-13	11:24:02	0.478181	2.12704	1814.4	FALSE	75
2022-09-13	11:24:03	0.497519	2.21306	1784.86	FALSE	75
2022-09-13	11:24:03	1.84108	8.18949	1822.59	FALSE	75
2022-09-13	11:24:03	1.53192	6.81429	1791.68	FALSE	75
2022-09-13	11:24:03	2.46154	10.9494	1833.54	FALSE	75
2022-09-13	11:24:04	0.780776	3.47305	1795.15	FALSE	75
2022-09-13	11:24:04	0.370598	1.64849	1835.19	FALSE	75
2022-09-13	11:24:04	0.529783	2.35658	1797.51	FALSE	75
2022-09-13	11:24:04	0.736603	3.27656	1838.47	FALSE	75
2022-09-13	11:24:05	0.552074	2.45574	1799.96	FALSE	75
2022-09-13	11:24:05	0.193601	0.861176	1839.33	FALSE	75
2022-09-13	11:24:05	0.424389	1.88777	1801.85	FALSE	75
2022-09-13	11:24:06	0.22897	1.0185	1840.34	FALSE	75
2022-09-13	11:24:06	0.201234	0.895129	1802.75	FALSE	75
2022-09-13	11:24:06	0.448308	1.99416	1842.34	FALSE	75
2022-09-13	11:24:06	0.926934	4.12319	1806.87	FALSE	75
2022-09-13	11:24:07	0.659554	2.93383	1845.27	FALSE	75
2022-09-13	11:24:07	0.186832	0.831066	1807.7	FALSE	75
2022-09-13	11:24:07	1.03274	4.59383	1849.87	FALSE	75
2022-09-13	11:24:07	1.68877	7.51199	1815.21	FALSE	75
2022-09-13	11:24:08	3.92256	17.4483	1867.32	1	76
2022-09-13	11:24:08	12.6604	56.316	1871.53	1	77
2022-09-13	11:24:08	9.03945	40.2093	1907.52	1	78
2022-09-13	11:24:08	3.01899	13.4291	1884.96	1	79
2022-09-13	11:24:09	0.950394	4.22754	1911.75	FALSE	79
2022-09-13	11:24:09	1.04047	4.62822	1889.59	FALSE	79
2022-09-13	11:24:09	0.517977	2.30407	1914.06	FALSE	79
2022-09-13	11:24:10	0.411616	1.83095	1891.42	FALSE	79
2022-09-13	11:24:10	0.848969	3.77638	1917.83	FALSE	79
2022-09-13	11:24:10	0.379962	1.69015	1893.11	FALSE	79
2022-09-13	11:24:10	0.220522	0.980926	1918.81	FALSE	79
2022-09-13	11:24:11	-0.176628	-0.785677	1893.11	FALSE	79
2022-09-13	11:24:11	-0.273219	-1.21533	1918.81	FALSE	79
2022-09-13	11:24:11	-0.20986	-0.933499	1893.11	FALSE	79
2022-09-13	11:24:11	-0.109046	-0.485058	1918.81	FALSE	79
2022-09-13	11:24:12	-0.196832	-0.875548	1893.11	FALSE	79
2022-09-13	11:24:12	0.10785	0.479738	1919.29	FALSE	79
2022-09-13	11:24:12	1.19879	5.33246	1898.44	FALSE	79
2022-09-13	11:24:12	3.21899	14.3187	1933.61	1	80
2022-09-13	11:24:13	1.79787	7.99729	1906.44	FALSE	80
2022-09-13	11:24:13	0.607544	2.70248	1936.31	FALSE	80
2022-09-13	11:24:13	0.316298	1.40696	1907.84	FALSE	80
2022-09-13	11:24:13	0.419097	1.86423	1938.18	FALSE	80
2022-09-13	11:24:14	0.280216	1.24646	1909.09	FALSE	80
2022-09-13	11:24:14	0.162659	0.72354	1938.9	FALSE	80
2022-09-13	11:24:14	0.280776	1.24895	1910.34	FALSE	80
2022-09-13	11:24:15	0.224746	0.999715	1939.9	FALSE	80
2022-09-13	11:24:15	0.224797	0.999942	1911.34	FALSE	80
2022-09-13	11:24:15	0.303677	1.35082	1941.25	FALSE	80
2022-09-13	11:24:15	0.233906	1.04046	1912.38	FALSE	80
2022-09-13	11:24:16	0.707646	3.14775	1944.4	FALSE	80
2022-09-13	11:24:16	0.733142	3.26116	1915.64	FALSE	80
2022-09-13	11:24:16	0.741031	3.29625	1947.7	FALSE	80
2022-09-13	11:24:16	0.734008	3.26501	1918.91	FALSE	80
2022-09-13	11:24:17	0.730598	3.24985	1950.95	FALSE	80
2022-09-13	11:24:17	0.739402	3.28901	1922.2	FALSE	80
2022-09-13	11:24:17	0.737315	3.27972	1954.23	FALSE	80
2022-09-13	11:24:17	0.735178	3.27022	1925.47	FALSE	80
2022-09-13	11:24:18	0.730394	3.24894	1957.48	FALSE	80
2022-09-13	11:24:18	0.737214	3.27928	1928.74	FALSE	80
2022-09-13	11:24:18	0.731259	3.25279	1960.73	FALSE	80
2022-09-13	11:24:19	0.737621	3.28109	1932.03	FALSE	80
2022-09-13	11:24:19	0.736908	3.27791	1964.01	FALSE	80
2022-09-13	11:24:19	0.74332	3.30644	1935.33	FALSE	80
2022-09-13	11:24:19	0.737366	3.27995	1967.29	FALSE	80
2022-09-13	11:24:20	0.732379	3.25777	1938.59	FALSE	80
2022-09-13	11:24:20	0.73813	3.28335	1970.57	FALSE	80
2022-09-13	11:24:20	0.73243	3.258	1941.85	FALSE	80
2022-09-13	11:24:20	0.735178	3.27022	1973.84	FALSE	80
2022-09-13	11:24:21	0.737315	3.27972	1945.13	FALSE	80
2022-09-13	11:24:21	0.734109	3.26546	1977.1	FALSE	80
2022-09-13	11:24:21	0.734517	3.26728	1948.4	FALSE	80
2022-09-13	11:24:21	0.741896	3.3001	1980.4	FALSE	80
2022-09-13	11:24:22	0.728054	3.23853	1951.63	FALSE	80
2022-09-13	11:24:22	0.734415	3.26682	1983.67	FALSE	80
2022-09-13	11:24:22	0.734568	3.26751	1954.9	FALSE	80
2022-09-13	11:24:23	0.731921	3.25573	1986.93	FALSE	80
2022-09-13	11:24:23	0.728257	3.23943	1958.14	FALSE	80
2022-09-13	11:24:23	0.744542	3.31187	1990.24	FALSE	80
2022-09-13	11:24:23	0.730191	3.24804	1961.39	FALSE	80
2022-09-13	11:24:24	0.734618	3.26773	1993.51	FALSE	80
2022-09-13	11:24:24	0.728461	3.24034	1964.63	FALSE	80
2022-09-13	11:24:24	0.729784	3.24623	1996.75	FALSE	80
2022-09-13	11:24:24	0.741947	3.30033	1967.93	FALSE	80
2022-09-13	11:24:25	0.736145	3.27452	2000.03	FALSE	80
2022-09-13	11:24:25	0.741997	3.30055	1971.23	FALSE	80
2022-09-13	11:24:25	0.737621	3.28109	2003.31	FALSE	80
2022-09-13	11:24:25	0.734618	3.26773	1974.5	FALSE	80
2022-09-13	11:24:26	0.737672	3.28131	2006.59	FALSE	80
2022-09-13	11:24:26	0.738435	3.28471	1977.78	FALSE	80
2022-09-13	11:24:26	0.734364	3.2666	2009.86	FALSE	80
2022-09-13	11:24:27	0.732074	3.25641	1981.04	FALSE	80
2022-09-13	11:24:27	0.734313	3.26637	2013.12	FALSE	80
2022-09-13	11:24:27	0.733855	3.26433	1984.3	FALSE	80
2022-09-13	11:24:27	0.725662	3.22789	2016.35	FALSE	80
2022-09-13	11:24:28	0.736705	3.27701	1987.58	FALSE	80
2022-09-13	11:24:28	0.733753	3.26388	2019.61	FALSE	80
2022-09-13	11:24:28	0.735127	3.26999	1990.85	FALSE	80
2022-09-13	11:24:28	0.733448	3.26252	2022.88	FALSE	80
2022-09-13	11:24:29	0.734517	3.26728	1994.12	FALSE	80
2022-09-13	11:24:29	0.733142	3.26116	2026.14	FALSE	80
2022-09-13	11:24:29	0.738028	3.2829	1997.4	FALSE	80
2022-09-13	11:24:29	0.730852	3.25098	2029.39	FALSE	80
2022-09-13	11:24:30	0.734924	3.26909	2000.67	FALSE	80
2022-09-13	11:24:30	0.736043	3.27407	2032.66	FALSE	80
2022-09-13	11:24:30	0.733906	3.26456	2003.93	FALSE	80
2022-09-13	11:24:31	0.732939	3.26026	2035.92	FALSE	80
2022-09-13	11:24:31	0.735026	3.26954	2007.2	FALSE	80
2022-09-13	11:24:31	0.732888	3.26003	2039.18	FALSE	80
2022-09-13	11:24:31	0.745407	3.31572	2010.52	FALSE	80
2022-09-13	11:24:32	0.738333	3.28425	2042.47	FALSE	80
2022-09-13	11:24:32	0.729682	3.24577	2013.76	FALSE	80
2022-09-13	11:24:32	0.734873	3.26886	2045.74	FALSE	80
2022-09-13	11:24:32	0.737315	3.27972	2017.04	FALSE	80
2022-09-13	11:24:33	0.672888	2.99314	2048.73	FALSE	80
2022-09-13	11:24:33	0.586221	2.60763	2019.65	FALSE	80
2022-09-13	11:24:33	0.538028	2.39326	2051.12	FALSE	80
2022-09-13	11:24:33	0.408308	1.81624	2021.47	FALSE	80
2022-09-13	11:24:34	0.73472	3.26818	2054.39	FALSE	80
2022-09-13	11:24:34	0.731056	3.25188	2024.72	FALSE	80
2022-09-13	11:24:34	0.733957	3.26479	2057.66	FALSE	80
2022-09-13	11:24:34	0.694211	3.08799	2027.81	FALSE	80
2022-09-13	11:24:35	0.286832	1.27589	2058.93	FALSE	80
2022-09-13	11:24:35	0.733855	3.26433	2031.07	FALSE	80
2022-09-13	11:24:35	0.73299	3.26049	2062.19	FALSE	80
2022-09-13	11:24:36	0.732532	3.25845	2034.33	FALSE	80
2022-09-13	11:24:36	0.726934	3.23355	2065.43	FALSE	80
2022-09-13	11:24:36	0.736654	3.27678	2037.61	FALSE	80
2022-09-13	11:24:36	0.739147	3.28787	2068.71	FALSE	80
2022-09-13	11:24:37	1.04581	4.65197	2042.26	FALSE	80
2022-09-13	11:24:37	0.743728	3.30825	2072.02	FALSE	80
2022-09-13	11:24:37	0.7393	3.28855	2045.55	FALSE	80
2022-09-13	11:24:37	0.734618	3.26773	2075.29	FALSE	80
2022-09-13	11:24:38	0.739453	3.28923	2048.84	FALSE	80
2022-09-13	11:24:38	0.728613	3.24102	2078.53	FALSE	80
2022-09-13	11:24:38	0.735738	3.27271	2052.11	FALSE	80
2022-09-13	11:24:38	0.454924	2.02359	2080.55	FALSE	80
2022-09-13	11:24:39	0.733855	3.26433	2055.37	FALSE	80
2022-09-13	11:24:39	0.734262	3.26614	2083.82	FALSE	80
2022-09-13	11:24:39	0.734262	3.26614	2058.64	FALSE	80
2022-09-13	11:24:40	0.735789	3.27294	2087.09	FALSE	80
2022-09-13	11:24:40	0.742913	3.30463	2061.95	FALSE	80
2022-09-13	11:24:40	0.455585	2.02653	2089.12	FALSE	80
2022-09-13	11:24:40	0.736857	3.27769	2065.22	FALSE	80
2022-09-13	11:24:41	0.350445	1.55885	2090.68	FALSE	80
2022-09-13	11:24:41	-0.320699	-1.42653	2065.22	FALSE	80
2022-09-13	11:24:41	-0.469707	-2.08935	2090.68	FALSE	80
2022-09-13	11:24:41	-0.29729	-1.32241	2065.22	FALSE	80
2022-09-13	11:24:42	-0.165432	-0.735875	2090.68	FALSE	80
2022-09-13	11:24:42	-0.0372389	-0.165646	2065.22	FALSE	80
2022-09-13	11:24:42	-0.00202267	-0.00899724	2090.68	FALSE	80
2022-09-13	11:24:42	0.0277992	0.123656	2065.35	FALSE	80
2022-09-13	11:24:43	1.02704	4.56848	2095.25	FALSE	80
2022-09-13	11:24:43	2.04525	9.09768	2074.44	FALSE	80
2022-09-13	11:24:43	3.8537	17.142	2112.39	1	81
2022-09-13	11:24:44	3.06032	13.6129	2088.06	1	82
2022-09-13	11:24:44	9.06545	40.3249	2152.71	1	83
2022-09-13	11:24:44	2.56352	11.403	2099.46	FALSE	83
2022-09-13	11:24:44	2.40566	10.7009	2163.42	FALSE	83
2022-09-13	11:24:45	1.26368	5.6211	2105.08	FALSE	83
2022-09-13	11:24:45	0.779962	3.46943	2166.88	FALSE	83
2022-09-13	11:24:45	0.708155	3.15002	2108.23	FALSE	83
2022-09-13	11:24:45	0.73528	3.27067	2170.16	FALSE	83
2022-09-13	11:24:46	0.718944	3.19801	2111.43	FALSE	83
2022-09-13	11:24:46	0.730903	3.2512	2173.41	FALSE	83
2022-09-13	11:24:46	0.672735	2.99246	2114.42	FALSE	83
2022-09-13	11:24:46	0.732379	3.25777	2176.66	FALSE	83
2022-09-13	11:24:47	0.389886	1.73429	2116.16	FALSE	83
2022-09-13	11:24:47	0.0840841	0.374023	2177.04	FALSE	83
2022-09-13	11:24:47	-0.0777478	-0.345838	2116.16	FALSE	83
2022-09-13	11:24:48	-0.122226	-0.543686	2177.04	FALSE	83
2022-09-13	11:24:48	-0.0187148	-0.0832472	2116.16	FALSE	83
2022-09-13	11:24:48	-0.150267	-0.668418	2177.04	FALSE	83
2022-09-13	11:24:48	-0.0504705	-0.224503	2116.16	FALSE	83
2022-09-13	11:24:49	0.0166033	0.0738548	2177.11	FALSE	83
2022-09-13	11:24:49	0.0151783	0.0675161	2116.22	FALSE	83
2022-09-13	11:24:49	0.0577738	0.256989	2177.37	FALSE	83
2022-09-13	11:24:49	0.0533972	0.237521	2116.46	FALSE	83
2022-09-13	11:24:50	0.654619	2.91188	2180.28	FALSE	83
2022-09-13	11:24:50	0.118435	0.526823	2116.99	FALSE	83
2022-09-13	11:24:50	0.4393	1.95409	2182.24	FALSE	83
2022-09-13	11:24:50	0.731717	3.25482	2120.24	FALSE	83
2022-09-13	11:24:51	0.737773	3.28176	2185.52	FALSE	83
2022-09-13	11:24:51	0.735229	3.27045	2123.51	FALSE	83
2022-09-13	11:24:51	0.735687	3.27248	2188.79	FALSE	83
2022-09-13	11:24:52	0.738384	3.28448	2126.8	FALSE	83
2022-09-13	11:24:52	0.730496	3.24939	2192.04	FALSE	83
2022-09-13	11:24:52	0.738689	3.28584	2130.08	FALSE	83
2022-09-13	11:24:52	0.734975	3.26932	2195.31	FALSE	83
2022-09-13	11:24:53	0.738537	3.28516	2133.37	FALSE	83
2022-09-13	11:24:53	0.737163	3.27905	2198.59	FALSE	83
2022-09-13	11:24:53	0.733295	3.26184	2136.63	FALSE	83
2022-09-13	11:24:53	0.740216	3.29263	2201.88	FALSE	83
2022-09-13	11:24:54	0.740165	3.2924	2139.92	FALSE	83
2022-09-13	11:24:54	0.733702	3.26365	2205.14	FALSE	83
2022-09-13	11:24:54	0.739147	3.28787	2143.21	FALSE	83
2022-09-13	11:24:54	0.733906	3.26456	2208.41	FALSE	83
2022-09-13	11:24:55	0.736756	3.27724	2146.49	FALSE	83
2022-09-13	11:24:55	0.736094	3.27429	2211.68	FALSE	83
2022-09-13	11:24:55	0.732532	3.25845	2149.75	FALSE	83
2022-09-13	11:24:56	0.740064	3.29195	2214.97	FALSE	83
2022-09-13	11:24:56	0.728155	3.23898	2152.99	FALSE	83
2022-09-13	11:24:56	0.732328	3.25754	2218.23	FALSE	83
2022-09-13	11:24:56	0.739453	3.28923	2156.27	FALSE	83
2022-09-13	11:24:57	0.734669	3.26795	2221.5	FALSE	83
2022-09-13	11:24:57	0.739911	3.29127	2159.57	FALSE	83
2022-09-13	11:24:57	0.737366	3.27995	2224.78	FALSE	83
2022-09-13	11:24:57	0.735789	3.27294	2162.84	FALSE	83
2022-09-13	11:24:58	0.735127	3.26999	2228.05	FALSE	83
2022-09-13	11:24:58	0.735891	3.27339	2166.11	FALSE	83
2022-09-13	11:24:58	0.73416	3.26569	2231.32	FALSE	83
2022-09-13	11:24:58	0.732939	3.26026	2169.37	FALSE	83
2022-09-13	11:24:59	0.731768	3.25505	2234.57	FALSE	83
2022-09-13	11:24:59	0.733855	3.26433	2172.64	FALSE	83
2022-09-13	11:24:59	0.737672	3.28131	2237.85	FALSE	83
2022-09-13	11:25:00	0.739504	3.28946	2175.93	FALSE	83
2022-09-13	11:25:00	0.740573	3.29422	2241.15	FALSE	83
2022-09-13	11:25:00	0.73584	3.27316	2179.2	FALSE	83
2022-09-13	11:25:00	0.737875	3.28222	2244.43	FALSE	83
2022-09-13	11:25:01	0.741234	3.29716	2182.5	FALSE	83
2022-09-13	11:25:01	0.736908	3.27791	2247.71	FALSE	83
2022-09-13	11:25:01	0.736399	3.27565	2185.77	FALSE	83
2022-09-13	11:25:01	0.72902	3.24283	2250.95	FALSE	83
2022-09-13	11:25:02	0.740522	3.29399	2189.07	FALSE	83
2022-09-13	11:25:02	0.734924	3.26909	2254.22	FALSE	83
2022-09-13	11:25:02	0.733346	3.26207	2192.33	FALSE	83
2022-09-13	11:25:02	0.735789	3.27294	2257.49	FALSE	83
2022-09-13	11:25:03	0.736705	3.27701	2195.61	FALSE	83
2022-09-13	11:25:03	0.737773	3.28176	2260.77	FALSE	83
2022-09-13	11:25:03	0.74327	3.30621	2198.91	FALSE	83
2022-09-13	11:25:03	0.739606	3.28992	2264.06	FALSE	83
2022-09-13	11:25:04	0.737722	3.28154	2202.19	FALSE	83
2022-09-13	11:25:04	0.730191	3.24804	2267.31	FALSE	83
2022-09-13	11:25:04	0.738181	3.28358	2205.48	FALSE	83
2022-09-13	11:25:05	0.739555	3.28969	2270.6	FALSE	83
2022-09-13	11:25:05	0.732481	3.25822	2208.74	FALSE	83
2022-09-13	11:25:05	0.742964	3.30485	2273.91	FALSE	83
2022-09-13	11:25:05	0.741896	3.3001	2212.04	FALSE	83
2022-09-13	11:25:06	0.739656	3.29014	2277.2	FALSE	83
2022-09-13	11:25:06	0.74327	3.30621	2215.34	FALSE	83
2022-09-13	11:25:06	0.73813	3.28335	2280.48	FALSE	83
2022-09-13	11:25:06	0.734517	3.26728	2218.61	FALSE	83
2022-09-13	11:25:07	0.737926	3.28244	2283.76	FALSE	83
2022-09-13	11:25:07	0.736094	3.27429	2221.88	FALSE	83
2022-09-13	11:25:07	0.739453	3.28923	2287.05	FALSE	83
2022-09-13	11:25:07	0.736756	3.27724	2225.16	FALSE	83
2022-09-13	11:25:08	0.733499	3.26275	2290.31	FALSE	83
2022-09-13	11:25:08	0.730394	3.24894	2228.41	FALSE	83
2022-09-13	11:25:08	0.739097	3.28765	2293.6	FALSE	83
2022-09-13	11:25:09	0.731616	3.25437	2231.66	FALSE	83
2022-09-13	11:25:09	0.735483	3.27158	2296.87	FALSE	83
2022-09-13	11:25:09	0.736196	3.27475	2234.94	FALSE	83
2022-09-13	11:25:09	0.73299	3.26049	2300.13	FALSE	83
2022-09-13	11:25:10	0.738333	3.28425	2238.22	FALSE	83
2022-09-13	11:25:10	0.736756	3.27724	2303.41	FALSE	83
2022-09-13	11:25:10	0.730191	3.24804	2241.47	FALSE	83
2022-09-13	11:25:10	0.734364	3.2666	2306.68	FALSE	83
2022-09-13	11:25:11	0.735331	3.2709	2244.74	FALSE	83
2022-09-13	11:25:11	0.732684	3.25912	2309.94	FALSE	83
2022-09-13	11:25:11	0.735382	3.27113	2248.01	FALSE	83
2022-09-13	11:25:11	0.739656	3.29014	2313.23	FALSE	83
2022-09-13	11:25:12	0.735534	3.2718	2251.28	FALSE	83
2022-09-13	11:25:12	0.735382	3.27113	2316.5	FALSE	83
2022-09-13	11:25:12	0.731412	3.25347	2254.54	FALSE	83
2022-09-13	11:25:13	0.742455	3.30259	2319.8	FALSE	83
2022-09-13	11:25:13	0.728868	3.24215	2257.78	FALSE	83
2022-09-13	11:25:13	0.737977	3.28267	2323.08	FALSE	83
2022-09-13	11:25:13	0.73299	3.26049	2261.04	FALSE	83
2022-09-13	11:25:14	0.735026	3.26954	2326.35	FALSE	83
2022-09-13	11:25:14	0.731463	3.25369	2264.29	FALSE	83
2022-09-13	11:25:14	0.737672	3.28131	2329.63	FALSE	83
2022-09-13	11:25:14	0.742455	3.30259	2267.6	FALSE	83
2022-09-13	11:25:15	0.737112	3.27882	2332.91	FALSE	83
2022-09-13	11:25:15	0.741081	3.29648	2270.89	FALSE	83
2022-09-13	11:25:15	0.736399	3.27565	2336.19	FALSE	83
2022-09-13	11:25:15	0.732379	3.25777	2274.15	FALSE	83
2022-09-13	11:25:16	0.737163	3.27905	2339.47	FALSE	83
2022-09-13	11:25:16	0.734873	3.26886	2277.42	FALSE	83
2022-09-13	11:25:16	0.732786	3.25958	2342.73	FALSE	83
2022-09-13	11:25:17	0.7307	3.2503	2280.67	FALSE	83
2022-09-13	11:25:17	0.732226	3.25709	2345.98	FALSE	83
2022-09-13	11:25:17	0.739758	3.29059	2283.96	FALSE	83
2022-09-13	11:25:17	0.728868	3.24215	2349.23	FALSE	83
2022-09-13	11:25:18	0.734008	3.26501	2287.23	FALSE	83
2022-09-13	11:25:18	0.729428	3.24464	2352.47	FALSE	83
2022-09-13	11:25:18	0.73701	3.27837	2290.5	FALSE	83
2022-09-13	11:25:18	0.730394	3.24894	2355.72	FALSE	83
2022-09-13	11:25:19	0.733244	3.26162	2293.77	FALSE	83
2022-09-13	11:25:19	0.736857	3.27769	2359	FALSE	83
2022-09-13	11:25:19	0.731158	3.25234	2297.02	FALSE	83
2022-09-13	11:25:19	0.738791	3.28629	2362.28	FALSE	83
2022-09-13	11:25:20	0.73299	3.26049	2300.28	FALSE	83
2022-09-13	11:25:20	0.735738	3.27271	2365.56	FALSE	83
2022-09-13	11:25:20	0.735026	3.26954	2303.55	FALSE	83
2022-09-13	11:25:21	0.739249	3.28833	2368.84	FALSE	83
2022-09-13	11:25:21	0.736196	3.27475	2306.82	FALSE	83
2022-09-13	11:25:21	0.740267	3.29286	2372.14	FALSE	83
2022-09-13	11:25:21	0.737163	3.27905	2310.1	FALSE	83
2022-09-13	11:25:22	0.740522	3.29399	2375.43	FALSE	83
2022-09-13	11:25:22	0.738486	3.28493	2313.39	FALSE	83
2022-09-13	11:25:22	0.735127	3.26999	2378.7	FALSE	83
2022-09-13	11:25:22	0.730852	3.25098	2316.64	FALSE	83
2022-09-13	11:25:23	0.738639	3.28561	2381.99	FALSE	83
2022-09-13	11:25:23	0.73243	3.258	2319.9	FALSE	83
2022-09-13	11:25:23	0.731412	3.25347	2385.24	FALSE	83
2022-09-13	11:25:23	0.743626	3.3078	2323.2	FALSE	83
2022-09-13	11:25:24	0.77472	3.44611	2388.69	FALSE	83
2022-09-13	11:25:24	0.742303	3.30191	2326.51	FALSE	83
2022-09-13	11:25:24	0.733193	3.26139	2391.95	FALSE	83
2022-09-13	11:25:24	0.737417	3.28018	2329.79	FALSE	83
2022-09-13	11:25:25	0.736552	3.27633	2395.22	FALSE	83
2022-09-13	11:25:25	0.734109	3.26546	2333.05	FALSE	83
2022-09-13	11:25:25	0.736399	3.27565	2398.5	FALSE	83
2022-09-13	11:25:26	0.735382	3.27113	2336.32	FALSE	83
2022-09-13	11:25:26	0.737722	3.28154	2401.78	FALSE	83
2022-09-13	11:25:26	0.733397	3.2623	2339.58	FALSE	83
2022-09-13	11:25:26	0.73645	3.27588	2405.06	FALSE	83
2022-09-13	11:25:27	0.734669	3.26795	2342.85	FALSE	83
2022-09-13	11:25:27	0.737417	3.28018	2408.34	FALSE	83
2022-09-13	11:25:27	0.729682	3.24577	2346.1	FALSE	83
2022-09-13	11:25:27	0.731616	3.25437	2411.59	FALSE	83
2022-09-13	11:25:28	0.73584	3.27316	2349.37	FALSE	83
2022-09-13	11:25:28	0.733397	3.2623	2414.85	FALSE	83
2022-09-13	11:25:28	0.731616	3.25437	2352.63	FALSE	83
2022-09-13	11:25:28	0.734873	3.26886	2418.12	FALSE	83
2022-09-13	11:25:29	0.737519	3.28063	2355.91	FALSE	83
2022-09-13	11:25:29	0.736654	3.27678	2421.4	FALSE	83
2022-09-13	11:25:29	0.732888	3.26003	2359.17	FALSE	83
2022-09-13	11:25:30	0.735127	3.26999	2424.67	FALSE	83
2022-09-13	11:25:30	0.74042	3.29354	2362.46	FALSE	83
2022-09-13	11:25:30	0.7307	3.2503	2427.92	FALSE	83
2022-09-13	11:25:30	0.735178	3.27022	2365.73	FALSE	83
2022-09-13	11:25:31	0.728919	3.24238	2431.16	FALSE	83
2022-09-13	11:25:31	0.724338	3.222	2368.95	FALSE	83
2022-09-13	11:25:31	0.740064	3.29195	2434.45	FALSE	83
2022-09-13	11:25:31	-0.199274	-0.886411	2368.95	FALSE	83
2022-09-13	11:25:32	0.903626	4.01951	2438.47	FALSE	83
2022-09-13	11:25:32	0.300674	1.33746	2370.29	FALSE	83
2022-09-13	11:25:32	0.572634	2.54719	2441.02	FALSE	83
2022-09-13	11:25:32	0.282048	1.25461	2371.54	FALSE	83
2022-09-13	11:25:33	0.572125	2.54493	2443.57	FALSE	83
2022-09-13	11:25:33	1.16866	5.19843	2376.74	FALSE	83
2022-09-13	11:25:33	2.09314	9.31071	2452.88	FALSE	83
2022-09-13	11:25:34	3.41182	15.1765	2391.92	1	84
2022-09-13	11:25:34	4.20144	18.6888	2471.57	1	85
2022-09-13	11:25:34	6.3422	28.2114	2420.13	1	86
2022-09-13	11:25:34	4.19446	18.6578	2490.22	1	87
2022-09-13	11:25:35	4.94698	22.0052	2442.14	1	88
2022-09-13	11:25:35	2.50276	11.1328	2501.36	FALSE	88
2022-09-13	11:25:35	1.32729	5.90405	2448.04	FALSE	88
2022-09-13	11:25:35	0.719707	3.2014	2504.56	FALSE	88
2022-09-13	11:25:36	0.390802	1.73837	2449.78	FALSE	88
2022-09-13	11:25:36	0.356858	1.58738	2506.14	FALSE	88
2022-09-13	11:25:36	0.491463	2.18613	2451.96	FALSE	88
2022-09-13	11:25:36	0.230903	1.0271	2507.17	FALSE	88
2022-09-13	11:25:37	0.481591	2.14221	2454.11	FALSE	88
2022-09-13	11:25:37	0.818537	3.64102	2510.81	FALSE	88
2022-09-13	11:25:37	2.79614	12.4378	2466.54	FALSE	88
2022-09-13	11:25:38	5.19461	23.1067	2533.92	1	89
2022-09-13	11:25:38	8.40917	37.4057	2503.95	1	90
2022-09-13	11:25:38	3.5395	15.7444	2549.66	1	91
2022-09-13	11:25:38	1.18525	5.27223	2509.22	FALSE	91
2022-09-13	11:25:39	1.39905	6.22325	2555.89	FALSE	91
2022-09-13	11:25:39	0.865814	3.85131	2513.07	FALSE	91
2022-09-13	11:25:39	0.820013	3.64758	2559.53	FALSE	91
2022-09-13	11:25:39	0.199911	0.889244	2513.96	FALSE	91
2022-09-13	11:25:40	0.29299	1.30328	2560.84	FALSE	91
2022-09-13	11:25:40	2.03441	9.04946	2523.01	FALSE	91
2022-09-13	11:25:40	2.46668	10.9723	2571.81	FALSE	91
2022-09-13	11:25:40	0.9593	4.26716	2527.28	FALSE	91
2022-09-13	11:25:41	1.02388	4.55442	2576.36	FALSE	91
2022-09-13	11:25:41	0.640572	2.84939	2530.13	FALSE	91
2022-09-13	11:25:41	0.0620994	0.276231	2576.64	FALSE	91
2022-09-13	11:25:42	0.331361	1.47396	2531.6	FALSE	91
2022-09-13	11:25:42	0.399504	1.77707	2578.42	FALSE	91
2022-09-13	11:25:42	0.476756	2.12071	2533.72	FALSE	91
2022-09-13	11:25:42	0.67528	3.00378	2581.42	FALSE	91
2022-09-13	11:25:43	0.88154	3.92127	2537.64	FALSE	91
2022-09-13	11:25:43	2.67436	11.8961	2593.32	FALSE	91
2022-09-13	11:25:43	1.6964	7.54593	2545.19	FALSE	91
2022-09-13	11:25:43	2.65375	11.8044	2605.12	FALSE	91
2022-09-13	11:25:44	2.71533	12.0783	2557.27	FALSE	91
2022-09-13	11:25:44	4.50342	20.0321	2625.15	1	92
2022-09-13	11:25:44	6.64108	29.5409	2586.81	1	93
2022-09-13	11:25:44	7.66398	34.0909	2659.25	1	94
2022-09-13	11:25:45	9.50642	42.2865	2629.1	1	95
2022-09-13	11:25:45	3.19681	14.2201	2673.47	1	96
2022-09-13	11:25:45	10.4549	46.5055	2675.6	1	97
2022-09-13	11:25:46	5.56092	24.7361	2698.2	1	98
2022-09-13	11:25:46	0.743117	3.30553	2678.91	FALSE	98
2022-09-13	11:25:46	0.739097	3.28765	2701.49	FALSE	98
2022-09-13	11:25:46	0.723321	3.21748	2682.12	FALSE	98
2022-09-13	11:25:47	0.714567	3.17854	2704.67	FALSE	98
2022-09-13	11:25:47	0.556247	2.4743	2684.6	FALSE	98
2022-09-13	11:25:47	0.577316	2.56802	2707.24	FALSE	98
2022-09-13	11:25:47	0.589377	2.62167	2687.22	FALSE	98
2022-09-13	11:25:48	0.637367	2.83514	2710.07	FALSE	98
2022-09-13	11:25:48	0.649275	2.88811	2690.11	FALSE	98
2022-09-13	11:25:48	0.579097	2.57594	2712.65	FALSE	98
2022-09-13	11:25:48	0.622608	2.76948	2692.88	FALSE	98
2022-09-13	11:25:49	0.696094	3.09637	2715.74	FALSE	98
2022-09-13	11:25:49	2.20159	9.79311	2702.67	FALSE	98
2022-09-13	11:25:49	2.52938	11.2512	2726.99	FALSE	98
2022-09-13	11:25:49	1.7965	7.99119	2710.66	FALSE	98
2022-09-13	11:25:50	1.82464	8.11636	2735.11	FALSE	98
2022-09-13	11:25:50	1.72302	7.66434	2718.33	FALSE	98
2022-09-13	11:25:50	2.76693	12.3079	2747.42	FALSE	98
2022-09-13	11:25:51	2.19981	9.78519	2728.11	FALSE	98
2022-09-13	11:25:51	4.7767	21.2477	2768.67	1	99
2022-09-13	11:25:51	3.85105	17.1302	2745.24	1	100
2022-09-13	11:25:51	4.35711	19.3813	2788.05	1	101
2022-09-13	11:25:52	2.82495	12.5659	2757.81	FALSE	101
2022-09-13	11:25:52	1.28271	5.70575	2793.75	FALSE	101
2022-09-13	11:25:52	0.384644	1.71097	2759.52	FALSE	101
2022-09-13	11:25:52	0.381082	1.69513	2795.45	FALSE	101
2022-09-13	11:25:53	0.246578	1.09683	2760.62	FALSE	101
2022-09-13	11:25:53	0.178741	0.795076	2796.24	FALSE	101
2022-09-13	11:25:53	0.257417	1.14504	2761.76	FALSE	101
2022-09-13	11:25:53	0.278842	1.24034	2797.48	FALSE	101
2022-09-13	11:25:54	1.55584	6.92069	2768.68	FALSE	101
2022-09-13	11:25:54	5.55085	24.6913	2822.18	1	102
2022-09-13	11:25:54	2.86561	12.7468	2781.43	FALSE	102
2022-09-13	11:25:55	0.211819	0.942213	2823.12	FALSE	102
2022-09-13	11:25:55	0.219504	0.976398	2782.41	FALSE	102
2022-09-13	11:25:55	0.76103	3.38521	2826.5	FALSE	102
2022-09-13	11:25:55	0.371616	1.65302	2784.06	FALSE	102
2022-09-13	11:25:56	0.500013	2.22416	2828.73	FALSE	102
2022-09-13	11:25:56	1.28765	5.72772	2789.79	FALSE	102
2022-09-13	11:25:56	1.60475	7.13825	2835.87	FALSE	102
2022-09-13	11:25:56	3.95523	17.5937	2807.38	1	103
2022-09-13	11:25:57	1.1649	5.18171	2841.05	FALSE	103
2022-09-13	11:25:57	0.621489	2.76451	2810.14	FALSE	103
2022-09-13	11:25:57	0.384847	1.71188	2842.76	FALSE	103
2022-09-13	11:25:57	0.229886	1.02258	2811.17	FALSE	103
2022-09-13	11:25:58	0.202557	0.901014	2843.66	FALSE	103
2022-09-13	11:25:58	0.25584	1.13803	2812.3	FALSE	103
2022-09-13	11:25:58	0.0945677	0.420656	2844.08	FALSE	103
2022-09-13	11:25:59	0.213804	0.951043	2813.26	FALSE	103
2022-09-13	11:25:59	0.10556	0.469552	2844.55	FALSE	103
2022-09-13	11:25:59	0.362455	1.61227	2814.87	FALSE	103
2022-09-13	11:25:59	0.101794	0.4528	2845	FALSE	103
2022-09-13	11:26:00	0.758333	3.37322	2818.24	FALSE	103
2022-09-13	11:26:00	2.21329	9.84516	2854.85	FALSE	103
2022-09-13	11:26:00	3.2021	14.2436	2832.48	1	104
2022-09-13	11:26:00	1.98139	8.81362	2863.66	FALSE	104
2022-09-13	11:26:01	1.00042	4.45007	2836.93	FALSE	104
2022-09-13	11:26:01	0.994669	4.42449	2868.09	FALSE	104
2022-09-13	11:26:01	0.856349	3.80921	2840.74	FALSE	104
2022-09-13	11:26:01	1.4051	6.25017	2874.34	FALSE	104
2022-09-13	11:26:02	1.28225	5.7037	2846.45	FALSE	104
2022-09-13	11:26:02	0.811005	3.60751	2877.94	FALSE	104
2022-09-13	11:26:02	0.648053	2.88267	2849.33	FALSE	104
2022-09-13	11:26:03	0.958384	4.26308	2882.21	FALSE	104
2022-09-13	11:26:03	0.913906	4.06524	2853.4	FALSE	104
2022-09-13	11:26:03	1.52403	6.77919	2888.99	FALSE	104
2022-09-13	11:26:03	1.27263	5.66091	2859.06	FALSE	104
2022-09-13	11:26:04	0.598283	2.66128	2891.65	FALSE	104
2022-09-13	11:26:04	1.44612	6.43263	2865.49	FALSE	104
2022-09-13	11:26:04	1.63594	7.27699	2898.92	FALSE	104
2022-09-13	11:26:04	3.54454	15.7668	2881.26	1	105
2022-09-13	11:26:05	3.4394	15.2991	2914.22	1	106
2022-09-13	11:26:05	5.32968	23.7075	2904.96	1	107
2022-09-13	11:26:05	1.45762	6.48379	2920.71	FALSE	107
2022-09-13	11:26:05	0.735076	3.26977	2908.23	FALSE	107
2022-09-13	11:26:06	0.737366	3.27995	2923.99	FALSE	107
2022-09-13	11:26:06	0.74444	3.31142	2911.54	FALSE	107
2022-09-13	11:26:06	1.0908	4.8521	2928.84	FALSE	107
2022-09-13	11:26:07	0.736043	3.27407	2914.82	FALSE	107
2022-09-13	11:26:07	0.737468	3.28041	2932.12	FALSE	107
2022-09-13	11:26:07	0.729428	3.24464	2918.06	FALSE	107
2022-09-13	11:26:07	0.73416	3.26569	2935.39	FALSE	107
2022-09-13	11:26:08	0.297367	1.32275	2919.39	FALSE	107
2022-09-13	11:26:08	-0.439936	-1.95692	2935.39	FALSE	107
2022-09-13	11:26:08	0.559046	2.48675	2921.87	FALSE	107
2022-09-13	11:26:08	0.290089	1.29037	2936.68	FALSE	107
2022-09-13	11:26:09	0.484847	2.1567	2924.03	FALSE	107
2022-09-13	11:26:09	0.305509	1.35897	2938.03	FALSE	107
2022-09-13	11:26:09	0.43645	1.94142	2925.97	FALSE	107
2022-09-13	11:26:09	0.354008	1.5747	2939.61	FALSE	107
2022-09-13	11:26:10	0.489529	2.17752	2928.15	FALSE	107
2022-09-13	11:26:10	0.805	3.5808	2943.19	FALSE	107
2022-09-13	11:26:10	3.04368	13.5389	2941.69	1	108
2022-09-13	11:26:10	7.66362	34.0893	2977.28	1	109
2022-09-13	11:26:11	1.10037	4.89467	2946.58	FALSE	109
2022-09-13	11:26:11	0.509987	2.26852	2979.55	FALSE	109
2022-09-13	11:26:11	0.498944	2.2194	2948.8	FALSE	109
2022-09-13	11:26:12	0.446171	1.98466	2981.53	FALSE	109
2022-09-13	11:26:12	0.486018	2.16191	2950.96	FALSE	109
2022-09-13	11:26:12	0.317672	1.41307	2982.95	FALSE	109
2022-09-13	11:26:12	0.407596	1.81307	2952.78	FALSE	109
2022-09-13	11:26:13	0.496603	2.20899	2985.15	FALSE	109
2022-09-13	11:26:13	0.54215	2.41159	2955.19	FALSE	109
2022-09-13	11:26:13	0.648613	2.88516	2988.04	FALSE	109
2022-09-13	11:26:13	1.31095	5.83137	2961.02	FALSE	109
2022-09-13	11:26:14	3.99996	17.7926	3005.83	1	110
2022-09-13	11:26:14	2.81309	12.5132	2973.53	FALSE	110
2022-09-13	11:26:14	1.01625	4.52048	3010.35	FALSE	110
2022-09-13	11:26:14	0.732023	3.25618	2976.79	FALSE	110
2022-09-13	11:26:15	0.73416	3.26569	3013.62	FALSE	110
2022-09-13	11:26:15	0.734975	3.26932	2980.06	FALSE	110
2022-09-13	11:26:15	0.738689	3.28584	3016.9	FALSE	110
2022-09-13	11:26:16	0.734669	3.26795	2983.33	FALSE	110
2022-09-13	11:26:16	0.728512	3.24057	3020.15	FALSE	110
2022-09-13	11:26:16	0.736807	3.27746	2986.6	FALSE	110
2022-09-13	11:26:16	0.737315	3.27972	3023.42	FALSE	110
2022-09-13	11:26:17	0.732226	3.25709	2989.86	FALSE	110
2022-09-13	11:26:17	0.728308	3.23966	3026.66	FALSE	110
2022-09-13	11:26:17	0.729173	3.24351	2993.1	FALSE	110
2022-09-13	11:26:17	0.734415	3.26682	3029.93	FALSE	110

## Sheet: Saint_prong_202291311212 (2)
Date	Times	Lbs	Total force x time			**GoPro Fitting: 1110
2022-09-13	11:21:17	0.729936	0.729936	FALSE	0				Total force x time	1354.04
2022-09-13	11:21:17	0.730903	1.46084	FALSE	0				Total steps	110
2022-09-13	11:21:17	0.732888	2.19373	FALSE	0
2022-09-13	11:21:17	0.727443	2.92117	FALSE	0
2022-09-13	11:21:18	0.740623	3.66179	FALSE	0
2022-09-13	11:21:18	0.737214	4.39901	FALSE	0
2022-09-13	11:21:18	0.685712	5.08472	FALSE	0
2022-09-13	11:21:18	0.403626	5.48834	FALSE	0
2022-09-13	11:21:19	0.324847	5.81319	FALSE	0
2022-09-13	11:21:19	0.260216	6.07341	FALSE	0
2022-09-13	11:21:19	0.299758	6.37317	FALSE	0
2022-09-13	11:21:20	0.298842	6.67201	FALSE	0
2022-09-13	11:21:20	0.25701	6.92902	FALSE	0
2022-09-13	11:21:20	0.3164	7.24542	FALSE	0
2022-09-13	11:21:20	0.381438	7.62686	FALSE	0
2022-09-13	11:21:21	0.308613	7.93547	FALSE	0
2022-09-13	11:21:21	0.229529	8.165	FALSE	0
2022-09-13	11:21:21	0.098588	8.26359	FALSE	0
2022-09-13	11:21:21	0.176298	8.43988	FALSE	0
2022-09-13	11:21:22	0.171209	8.61109	FALSE	0
2022-09-13	11:21:22	0.402659	9.01375	FALSE	0
2022-09-13	11:21:22	0.161336	9.17509	FALSE	0
2022-09-13	11:21:22	0.320115	9.4952	FALSE	0
2022-09-13	11:21:23	0.196654	9.69186	FALSE	0
2022-09-13	11:21:23	0.404288	10.0961	FALSE	0
2022-09-13	11:21:23	0.0868831	10.183	FALSE	0
2022-09-13	11:21:24	0.403982	10.587	FALSE	0
2022-09-13	11:21:24	0.347596	10.9346	FALSE	0
2022-09-13	11:21:24	0.423575	11.3582	FALSE	0
2022-09-13	11:21:24	0.299199	11.6574	FALSE	0
2022-09-13	11:21:25	0.333143	11.9905	FALSE	0
2022-09-13	11:21:25	0.501488	12.492	FALSE	0
2022-09-13	11:21:25	0.113295	12.6053	FALSE	0
2022-09-13	11:21:25	0.374364	12.9797	FALSE	0
2022-09-13	11:21:26	0.0714124	13.0511	FALSE	0
2022-09-13	11:21:26	0.380369	13.4315	FALSE	0
2022-09-13	11:21:26	0.110802	13.5423	FALSE	0
2022-09-13	11:21:26	0.326476	13.8687	FALSE	0
2022-09-13	11:21:27	0.428308	14.297	FALSE	0
2022-09-13	11:21:27	2.65131	16.9483	FALSE	0
2022-09-13	11:21:27	3.85039	20.7987	1	1
2022-09-13	11:21:28	6.42978	27.2285	1	2
2022-09-13	11:21:28	1.44515	28.6737	FALSE	2
2022-09-13	11:21:28	0.335433	29.0091	FALSE	2
2022-09-13	11:21:28	0.274262	29.2834	FALSE	2
2022-09-13	11:21:29	0.114466	29.3978	FALSE	2
2022-09-13	11:21:29	-0.170267	29.3978	FALSE	2
2022-09-13	11:21:29	-0.198409	29.3978	FALSE	2
2022-09-13	11:21:29	-0.178002	29.3978	FALSE	2
2022-09-13	11:21:30	0.0278501	29.4257	FALSE	2
2022-09-13	11:21:30	0.299199	29.7249	FALSE	2
2022-09-13	11:21:30	0.0378755	29.7628	FALSE	2
2022-09-13	11:21:30	0.15757	29.9203	FALSE	2
2022-09-13	11:21:31	0.16612	30.0864	FALSE	2
2022-09-13	11:21:31	0.53355	30.62	FALSE	2
2022-09-13	11:21:31	0.273193	30.8932	FALSE	2
2022-09-13	11:21:32	0.321336	31.2145	FALSE	2
2022-09-13	11:21:32	0.370445	31.585	FALSE	2
2022-09-13	11:21:32	0.210751	31.7957	FALSE	2
2022-09-13	11:21:32	0.430598	32.2263	FALSE	2
2022-09-13	11:21:33	0.318842	32.5452	FALSE	2
2022-09-13	11:21:33	0.441794	32.987	FALSE	2
2022-09-13	11:21:33	0.318435	33.3054	FALSE	2
2022-09-13	11:21:33	0.189428	33.4948	FALSE	2
2022-09-13	11:21:34	0.548257	34.0431	FALSE	2
2022-09-13	11:21:34	0.366781	34.4099	FALSE	2
2022-09-13	11:21:34	0.342354	34.7522	FALSE	2
2022-09-13	11:21:34	0.370089	35.1223	FALSE	2
2022-09-13	11:21:35	0.793855	35.9162	FALSE	2
2022-09-13	11:21:35	0.723422	36.6396	FALSE	2
2022-09-13	11:21:35	0.790598	37.4302	FALSE	2
2022-09-13	11:21:36	1.24744	38.6776	FALSE	2
2022-09-13	11:21:36	2.11961	40.7972	FALSE	2
2022-09-13	11:21:36	1.85253	42.6498	FALSE	2
2022-09-13	11:21:36	1.61146	44.2612	FALSE	2
2022-09-13	11:21:37	1.4678	45.729	FALSE	2
2022-09-13	11:21:37	1.27569	47.0047	FALSE	2
2022-09-13	11:21:37	0.481234	47.4859	FALSE	2
2022-09-13	11:21:37	0.590649	48.0766	FALSE	2
2022-09-13	11:21:38	0.930191	49.0068	FALSE	2
2022-09-13	11:21:38	1.05263	50.0594	FALSE	2
2022-09-13	11:21:38	0.979962	51.0394	FALSE	2
2022-09-13	11:21:38	0.937468	51.9768	FALSE	2
2022-09-13	11:21:39	1.65085	53.6277	FALSE	2
2022-09-13	11:21:39	1.41391	55.0416	FALSE	2
2022-09-13	11:21:39	0.740674	55.7823	FALSE	2
2022-09-13	11:21:40	0.753448	56.5357	FALSE	2
2022-09-13	11:21:40	0.60327	57.139	FALSE	2
2022-09-13	11:21:40	0.464135	57.6031	FALSE	2
2022-09-13	11:21:40	0.740216	58.3433	FALSE	2
2022-09-13	11:21:41	0.784186	59.1275	FALSE	2
2022-09-13	11:21:41	1.09411	60.2216	FALSE	2
2022-09-13	11:21:41	-0.00879109	60.2216	FALSE	2
2022-09-13	11:21:41	0.0500384	60.2717	FALSE	2
2022-09-13	11:21:42	0.220776	60.4924	FALSE	2
2022-09-13	11:21:42	0.235789	60.7282	FALSE	2
2022-09-13	11:21:42	0.312176	61.0404	FALSE	2
2022-09-13	11:21:42	0.326069	61.3665	FALSE	2
2022-09-13	11:21:43	0.284084	61.6506	FALSE	2
2022-09-13	11:21:43	0.361082	62.0116	FALSE	2
2022-09-13	11:21:43	0.362557	62.3742	FALSE	2
2022-09-13	11:21:44	0.597468	62.9717	FALSE	2
2022-09-13	11:21:44	1.14602	64.1177	FALSE	2
2022-09-13	11:21:44	1.43935	65.557	FALSE	2
2022-09-13	11:21:44	1.22729	66.7843	FALSE	2
2022-09-13	11:21:45	0.647188	67.4315	FALSE	2
2022-09-13	11:21:45	0.645458	68.077	FALSE	2
2022-09-13	11:21:45	0.457621	68.5346	FALSE	2
2022-09-13	11:21:45	0.361132	68.8957	FALSE	2
2022-09-13	11:21:46	0.0940079	68.9897	FALSE	2
2022-09-13	11:21:46	0.157214	69.147	FALSE	2
2022-09-13	11:21:46	0.280471	69.4274	FALSE	2
2022-09-13	11:21:46	0.298741	69.7262	FALSE	2
2022-09-13	11:21:47	0.24897	69.9751	FALSE	2
2022-09-13	11:21:47	0.565153	70.5403	FALSE	2
2022-09-13	11:21:47	1.011	71.5513	FALSE	2
2022-09-13	11:21:47	0.267901	71.8192	FALSE	2
2022-09-13	11:21:48	0.330395	72.1496	FALSE	2
2022-09-13	11:21:48	0.327087	72.4767	FALSE	2
2022-09-13	11:21:48	0.303117	72.7798	FALSE	2
2022-09-13	11:21:49	0.222303	73.0021	FALSE	2
2022-09-13	11:21:49	0.453499	73.4556	FALSE	2
2022-09-13	11:21:49	0.183524	73.6391	FALSE	2
2022-09-13	11:21:49	0.3307	73.9698	FALSE	2
2022-09-13	11:21:50	0.135077	74.1049	FALSE	2
2022-09-13	11:21:50	0.194669	74.2996	FALSE	2
2022-09-13	11:21:50	-0.216679	74.2996	FALSE	2
2022-09-13	11:21:50	-0.342633	74.2996	FALSE	2
2022-09-13	11:21:51	1.57452	75.8741	FALSE	2
2022-09-13	11:21:51	4.36398	80.2381	1	3
2022-09-13	11:21:51	2.4936	82.7317	FALSE	3
2022-09-13	11:21:51	0.994618	83.7263	FALSE	3
2022-09-13	11:21:52	0.808257	84.5345	FALSE	3
2022-09-13	11:21:52	1.29584	85.8304	FALSE	3
2022-09-13	11:21:52	0.685509	86.5159	FALSE	3
2022-09-13	11:21:53	0.726272	87.2422	FALSE	3
2022-09-13	11:21:53	0.945763	88.1879	FALSE	3
2022-09-13	11:21:53	0.436603	88.6245	FALSE	3
2022-09-13	11:21:53	0.824898	89.4494	FALSE	3
2022-09-13	11:21:54	0.566272	90.0157	FALSE	3
2022-09-13	11:21:54	0.426629	90.4423	FALSE	3
2022-09-13	11:21:54	0.604644	91.047	FALSE	3
2022-09-13	11:21:54	0.389733	91.4367	FALSE	3
2022-09-13	11:21:55	1.25925	92.6959	FALSE	3
2022-09-13	11:21:55	0.777315	93.4733	FALSE	3
2022-09-13	11:21:55	2.10235	95.5756	FALSE	3
2022-09-13	11:21:55	2.72312	98.2987	FALSE	3
2022-09-13	11:21:56	3.55691	101.856	1	4
2022-09-13	11:21:56	2.56225	104.418	FALSE	4
2022-09-13	11:21:56	1.45075	105.869	FALSE	4
2022-09-13	11:21:57	1.68271	107.551	FALSE	4
2022-09-13	11:21:57	0.561692	108.113	FALSE	4
2022-09-13	11:21:57	1.21971	109.333	FALSE	4
2022-09-13	11:21:57	0.61528	109.948	FALSE	4
2022-09-13	11:21:58	0.960013	110.908	FALSE	4
2022-09-13	11:21:58	1.08882	111.997	FALSE	4
2022-09-13	11:21:58	0.994873	112.992	FALSE	4
2022-09-13	11:21:58	2.85472	115.846	FALSE	4
2022-09-13	11:21:59	1.33823	117.185	FALSE	4
2022-09-13	11:21:59	3.0879	120.273	1	5
2022-09-13	11:21:59	2.32586	122.598	FALSE	5
2022-09-13	11:21:59	3.46983	126.068	1	6
2022-09-13	11:22:00	3.04744	129.116	1	7
2022-09-13	11:22:00	2.43345	131.549	FALSE	7
2022-09-13	11:22:00	4.12189	135.671	1	8
2022-09-13	11:22:01	0.952532	136.624	FALSE	8
2022-09-13	11:22:01	2.17513	138.799	FALSE	8
2022-09-13	11:22:01	0.634771	139.433	FALSE	8
2022-09-13	11:22:01	0.802761	140.236	FALSE	8
2022-09-13	11:22:02	1.14088	141.377	FALSE	8
2022-09-13	11:22:02	0.32612	141.703	FALSE	8
2022-09-13	11:22:02	1.145	142.848	FALSE	8
2022-09-13	11:22:02	0.232736	143.081	FALSE	8
2022-09-13	11:22:03	1.1193	144.2	FALSE	8
2022-09-13	11:22:03	1.51411	145.714	FALSE	8
2022-09-13	11:22:03	2.88541	148.6	FALSE	8
2022-09-13	11:22:03	2.7508	151.351	FALSE	8
2022-09-13	11:22:04	4.30739	155.658	1	9
2022-09-13	11:22:04	4.48225	160.14	1	10
2022-09-13	11:22:04	2.60714	162.747	FALSE	10
2022-09-13	11:22:05	5.35075	168.098	1	11
2022-09-13	11:22:05	5.17319	173.271	1	12
2022-09-13	11:22:05	4.39187	177.663	1	13
2022-09-13	11:22:05	3.13492	180.798	1	14
2022-09-13	11:22:06	1.08887	181.887	FALSE	14
2022-09-13	11:22:06	1.31019	183.197	FALSE	14
2022-09-13	11:22:06	0.292328	183.49	FALSE	14
2022-09-13	11:22:06	0.308359	183.798	FALSE	14
2022-09-13	11:22:07	0.562557	184.36	FALSE	14
2022-09-13	11:22:07	1.16709	185.528	FALSE	14
2022-09-13	11:22:07	1.18688	186.714	FALSE	14
2022-09-13	11:22:07	1.05024	187.765	FALSE	14
2022-09-13	11:22:08	1.02378	188.788	FALSE	14
2022-09-13	11:22:08	0.812481	189.601	FALSE	14
2022-09-13	11:22:08	0.655789	190.257	FALSE	14
2022-09-13	11:22:09	0.37869	190.635	FALSE	14
2022-09-13	11:22:09	0.299657	190.935	FALSE	14
2022-09-13	11:22:09	0.273906	191.209	FALSE	14
2022-09-13	11:22:09	0.173448	191.382	FALSE	14
2022-09-13	11:22:10	0.476654	191.859	FALSE	14
2022-09-13	11:22:10	0.056756	191.916	FALSE	14
2022-09-13	11:22:10	0.217875	192.134	FALSE	14
2022-09-13	11:22:10	0.338283	192.472	FALSE	14
2022-09-13	11:22:11	0.441132	192.913	FALSE	14
2022-09-13	11:22:11	0.216043	193.129	FALSE	14
2022-09-13	11:22:11	0.39243	193.522	FALSE	14
2022-09-13	11:22:11	1.05284	194.574	FALSE	14
2022-09-13	11:22:12	1.4938	196.068	FALSE	14
2022-09-13	11:22:12	1.54612	197.614	FALSE	14
2022-09-13	11:22:12	0.75528	198.37	FALSE	14
2022-09-13	11:22:12	-0.00522877	198.37	FALSE	14
2022-09-13	11:22:13	-0.0717427	198.37	FALSE	14
2022-09-13	11:22:13	-0.170623	198.37	FALSE	14
2022-09-13	11:22:13	-0.0670099	198.37	FALSE	14
2022-09-13	11:22:14	-0.187824	198.37	FALSE	14
2022-09-13	11:22:14	-0.287112	198.37	FALSE	14
2022-09-13	11:22:14	-0.468078	198.37	FALSE	14
2022-09-13	11:22:14	-0.365229	198.37	FALSE	14
2022-09-13	11:22:15	-0.243142	198.37	FALSE	14
2022-09-13	11:22:15	-0.132862	198.37	FALSE	14
2022-09-13	11:22:15	-0.0824297	198.37	FALSE	14
2022-09-13	11:22:15	0.104797	198.474	FALSE	14
2022-09-13	11:22:16	0.315229	198.79	FALSE	14
2022-09-13	11:22:16	0.969733	199.759	FALSE	14
2022-09-13	11:22:16	1.2707	201.03	FALSE	14
2022-09-13	11:22:16	2.58805	203.618	FALSE	14
2022-09-13	11:22:17	3.86322	207.481	1	15
2022-09-13	11:22:17	3.16632	210.648	1	16
2022-09-13	11:22:17	3.14373	213.791	1	17
2022-09-13	11:22:18	2.53701	216.328	FALSE	17
2022-09-13	11:22:18	1.86673	218.195	FALSE	17
2022-09-13	11:22:18	1.49258	219.688	FALSE	17
2022-09-13	11:22:18	0.817824	220.506	FALSE	17
2022-09-13	11:22:19	1.97553	222.481	FALSE	17
2022-09-13	11:22:19	2.11055	224.592	FALSE	17
2022-09-13	11:22:19	2.53599	227.128	FALSE	17
2022-09-13	11:22:19	3.3507	230.478	1	18
2022-09-13	11:22:20	1.01457	231.493	FALSE	18
2022-09-13	11:22:20	0.283728	231.777	FALSE	18
2022-09-13	11:22:20	0.278893	232.055	FALSE	18
2022-09-13	11:22:20	0.298028	232.354	FALSE	18
2022-09-13	11:22:21	0.22439	232.578	FALSE	18
2022-09-13	11:22:21	0.26556	232.843	FALSE	18
2022-09-13	11:22:21	0.862659	233.706	FALSE	18
2022-09-13	11:22:22	0.861794	234.568	FALSE	18
2022-09-13	11:22:22	1.85767	236.426	FALSE	18
2022-09-13	11:22:22	1.82592	238.252	FALSE	18
2022-09-13	11:22:22	0.338842	238.59	FALSE	18
2022-09-13	11:22:23	0.317519	238.908	FALSE	18
2022-09-13	11:22:23	0.33187	239.24	FALSE	18
2022-09-13	11:22:23	0.233244	239.473	FALSE	18
2022-09-13	11:22:23	0.169937	239.643	FALSE	18
2022-09-13	11:22:24	0.238995	239.882	FALSE	18
2022-09-13	11:22:24	0.211463	240.093	FALSE	18
2022-09-13	11:22:24	0.273702	240.367	FALSE	18
2022-09-13	11:22:24	0.351209	240.718	FALSE	18
2022-09-13	11:22:25	0.301387	241.02	FALSE	18
2022-09-13	11:22:25	0.308868	241.329	FALSE	18
2022-09-13	11:22:25	0.331769	241.66	FALSE	18
2022-09-13	11:22:26	0.115993	241.776	FALSE	18
2022-09-13	11:22:26	0.0117178	241.788	FALSE	18
2022-09-13	11:22:26	0.23126	242.019	FALSE	18
2022-09-13	11:22:26	0.091158	242.11	FALSE	18
2022-09-13	11:22:27	0.229071	242.34	FALSE	18
2022-09-13	11:22:27	-0.120903	242.34	FALSE	18
2022-09-13	11:22:27	-0.0415137	242.34	FALSE	18
2022-09-13	11:22:27	0.270802	242.61	FALSE	18
2022-09-13	11:22:28	0.0509036	242.661	FALSE	18
2022-09-13	11:22:28	0.146985	242.808	FALSE	18
2022-09-13	11:22:28	0.0835753	242.892	FALSE	18
2022-09-13	11:22:28	0.115026	243.007	FALSE	18
2022-09-13	11:22:29	0.216451	243.223	FALSE	18
2022-09-13	11:22:29	0.140522	243.364	FALSE	18
2022-09-13	11:22:29	0.00917326	243.373	FALSE	18
2022-09-13	11:22:30	-0.10589	243.373	FALSE	18
2022-09-13	11:22:30	0.0229646	243.396	FALSE	18
2022-09-13	11:22:30	-0.0616664	243.396	FALSE	18
2022-09-13	11:22:30	0.293601	243.69	FALSE	18
2022-09-13	11:22:31	0.225662	243.915	FALSE	18
2022-09-13	11:22:31	0.414669	244.33	FALSE	18
2022-09-13	11:22:31	0.467595	244.797	FALSE	18
2022-09-13	11:22:31	0.262914	245.06	FALSE	18
2022-09-13	11:22:32	0.445407	245.506	FALSE	18
2022-09-13	11:22:32	0.112736	245.618	FALSE	18
2022-09-13	11:22:32	0.620216	246.239	FALSE	18
2022-09-13	11:22:32	1.77986	248.019	FALSE	18
2022-09-13	11:22:33	5.07421	253.093	1	19
2022-09-13	11:22:33	6.02372	259.117	1	20
2022-09-13	11:22:33	5.03619	264.153	1	21
2022-09-13	11:22:33	3.37482	267.528	1	22
2022-09-13	11:22:34	2.32917	269.857	FALSE	22
2022-09-13	11:22:34	1.92093	271.778	FALSE	22
2022-09-13	11:22:34	2.27823	274.056	FALSE	22
2022-09-13	11:22:35	1.2193	275.275	FALSE	22
2022-09-13	11:22:35	2.56571	277.841	FALSE	22
2022-09-13	11:22:35	1.06032	278.901	FALSE	22
2022-09-13	11:22:35	1.51838	280.42	FALSE	22
2022-09-13	11:22:36	1.95497	282.375	FALSE	22
2022-09-13	11:22:36	1.2137	283.588	FALSE	22
2022-09-13	11:22:36	3.59197	287.18	1	23
2022-09-13	11:22:36	0.831209	288.011	FALSE	23
2022-09-13	11:22:37	1.74653	289.758	FALSE	23
2022-09-13	11:22:37	1.72673	291.485	FALSE	23
2022-09-13	11:22:37	1.44765	292.932	FALSE	23
2022-09-13	11:22:37	5.80342	298.736	1	24
2022-09-13	11:22:38	4.11131	302.847	1	25
2022-09-13	11:22:38	6.50093	309.348	1	26
2022-09-13	11:22:38	2.13971	311.488	FALSE	26
2022-09-13	11:22:39	1.21156	312.699	FALSE	26
2022-09-13	11:22:39	4.63848	317.338	1	27
2022-09-13	11:22:39	1.00042	318.338	FALSE	27
2022-09-13	11:22:39	4.94617	323.284	1	28
2022-09-13	11:22:40	3.74525	327.03	1	29
2022-09-13	11:22:40	2.27406	329.304	FALSE	29
2022-09-13	11:22:40	11.8026	341.106	1	30
2022-09-13	11:22:40	4.59411	345.7	1	31
2022-09-13	11:22:41	7.03466	352.735	1	32
2022-09-13	11:22:41	4.35324	357.088	1	33
2022-09-13	11:22:41	1.20871	358.297	FALSE	33
2022-09-13	11:22:41	1.16795	359.465	FALSE	33
2022-09-13	11:22:42	1.30363	360.769	FALSE	33
2022-09-13	11:22:42	0.644898	361.413	FALSE	33
2022-09-13	11:22:42	2.36098	363.774	FALSE	33
2022-09-13	11:22:43	2.72118	366.496	FALSE	33
2022-09-13	11:22:43	9.87487	376.37	1	34
2022-09-13	11:22:43	18.7227	395.093	1	35
2022-09-13	11:22:43	3.24831	398.341	1	36
2022-09-13	11:22:44	1.47121	399.813	FALSE	36
2022-09-13	11:22:44	0.890496	400.703	FALSE	36
2022-09-13	11:22:44	0.198639	400.902	FALSE	36
2022-09-13	11:22:44	0.763321	401.665	FALSE	36
2022-09-13	11:22:45	1.05385	402.719	FALSE	36
2022-09-13	11:22:45	1.6706	404.39	FALSE	36
2022-09-13	11:22:45	2.46164	406.851	FALSE	36
2022-09-13	11:22:45	3.30485	410.156	1	37
2022-09-13	11:22:46	5.07268	415.229	1	38
2022-09-13	11:22:46	0.941132	416.17	FALSE	38
2022-09-13	11:22:46	1.63894	417.809	FALSE	38
2022-09-13	11:22:47	0.658537	418.467	FALSE	38
2022-09-13	11:22:47	0.754822	419.222	FALSE	38
2022-09-13	11:22:47	0.401285	419.623	FALSE	38
2022-09-13	11:22:47	0.457214	420.081	FALSE	38
2022-09-13	11:22:48	0.828409	420.909	FALSE	38
2022-09-13	11:22:48	1.07304	421.982	FALSE	38
2022-09-13	11:22:48	1.47884	423.461	FALSE	38
2022-09-13	11:22:48	2.84907	426.31	FALSE	38
2022-09-13	11:22:49	4.45065	430.761	1	39
2022-09-13	11:22:49	6.62968	437.39	1	40
2022-09-13	11:22:49	3.83324	441.224	1	41
2022-09-13	11:22:49	2.2279	443.452	FALSE	41
2022-09-13	11:22:50	1.89813	445.35	FALSE	41
2022-09-13	11:22:50	2.31228	447.662	FALSE	41
2022-09-13	11:22:50	2.3451	450.007	FALSE	41
2022-09-13	11:22:51	0.957875	450.965	FALSE	41
2022-09-13	11:22:51	0.447901	451.413	FALSE	41
2022-09-13	11:22:51	0.468359	451.881	FALSE	41
2022-09-13	11:22:51	0.747952	452.629	FALSE	41
2022-09-13	11:22:52	3.14983	455.779	1	42
2022-09-13	11:22:52	1.50597	457.285	FALSE	42
2022-09-13	11:22:52	2.09813	459.383	FALSE	42
2022-09-13	11:22:52	1.01045	460.393	FALSE	42
2022-09-13	11:22:53	1.03492	461.428	FALSE	42
2022-09-13	11:22:53	0.985153	462.414	FALSE	42
2022-09-13	11:22:53	0.453448	462.867	FALSE	42
2022-09-13	11:22:53	0.395026	463.262	FALSE	42
2022-09-13	11:22:54	0.455483	463.718	FALSE	42
2022-09-13	11:22:54	0.41869	464.136	FALSE	42
2022-09-13	11:22:54	0.22958	464.366	FALSE	42
2022-09-13	11:22:55	0.156909	464.523	FALSE	42
2022-09-13	11:22:55	0.0945168	464.617	FALSE	42
2022-09-13	11:22:55	0.0636262	464.681	FALSE	42
2022-09-13	11:22:55	0.00581451	464.687	FALSE	42
2022-09-13	11:22:56	0.314924	465.002	FALSE	42
2022-09-13	11:22:56	0.450852	465.452	FALSE	42
2022-09-13	11:22:56	2.43986	467.892	FALSE	42
2022-09-13	11:22:56	8.40001	476.292	1	43
2022-09-13	11:22:57	6.49227	482.785	1	44
2022-09-13	11:22:57	1.57462	484.359	FALSE	44
2022-09-13	11:22:57	3.00464	487.364	1	45
2022-09-13	11:22:57	2.04464	489.408	FALSE	45
2022-09-13	11:22:58	1.49248	490.901	FALSE	45
2022-09-13	11:22:58	2.81431	493.715	FALSE	45
2022-09-13	11:22:58	2.82235	496.538	FALSE	45
2022-09-13	11:22:59	5.55126	502.089	1	46
2022-09-13	11:22:59	5.84052	507.929	1	47
2022-09-13	11:22:59	2.53162	510.461	FALSE	47
2022-09-13	11:22:59	4.23431	514.695	1	48
2022-09-13	11:23:00	2.33268	517.028	FALSE	48
2022-09-13	11:23:00	2.26245	519.29	FALSE	48
2022-09-13	11:23:00	1.76856	521.059	FALSE	48
2022-09-13	11:23:00	0.976094	522.035	FALSE	48
2022-09-13	11:23:01	0.867748	522.903	FALSE	48
2022-09-13	11:23:01	0.768766	523.672	FALSE	48
2022-09-13	11:23:01	3.32006	526.992	1	49
2022-09-13	11:23:01	1.01111	528.003	FALSE	49
2022-09-13	11:23:02	1.31905	529.322	FALSE	49
2022-09-13	11:23:02	1.17258	530.494	FALSE	49
2022-09-13	11:23:02	0.800471	531.295	FALSE	49
2022-09-13	11:23:02	0.905967	532.201	FALSE	49
2022-09-13	11:23:03	0.580216	532.781	FALSE	49
2022-09-13	11:23:03	0.470293	533.251	FALSE	49
2022-09-13	11:23:03	1.02841	534.28	FALSE	49
2022-09-13	11:23:04	1.27609	535.556	FALSE	49
2022-09-13	11:23:04	0.859758	536.416	FALSE	49
2022-09-13	11:23:04	0.931718	537.347	FALSE	49
2022-09-13	11:23:04	0.464389	537.812	FALSE	49
2022-09-13	11:23:05	0.46271	538.274	FALSE	49
2022-09-13	11:23:05	0.492634	538.767	FALSE	49
2022-09-13	11:23:05	0.896603	539.664	FALSE	49
2022-09-13	11:23:05	1.63039	541.294	FALSE	49
2022-09-13	11:23:06	2.02444	543.319	FALSE	49
2022-09-13	11:23:06	2.73202	546.051	FALSE	49
2022-09-13	11:23:06	3.19518	549.246	1	50
2022-09-13	11:23:06	4.24866	553.494	1	51
2022-09-13	11:23:07	3.23014	556.725	1	52
2022-09-13	11:23:07	2.91075	559.635	FALSE	52
2022-09-13	11:23:07	2.3964	562.032	FALSE	52
2022-09-13	11:23:08	2.68709	564.719	FALSE	52
2022-09-13	11:23:08	1.27884	565.998	FALSE	52
2022-09-13	11:23:08	1.53258	567.53	FALSE	52
2022-09-13	11:23:08	1.10301	568.633	FALSE	52
2022-09-13	11:23:09	1.33711	569.97	FALSE	52
2022-09-13	11:23:09	1.0052	570.975	FALSE	52
2022-09-13	11:23:09	0.773804	571.749	FALSE	52
2022-09-13	11:23:09	0.712634	572.462	FALSE	52
2022-09-13	11:23:10	0.765	573.227	FALSE	52
2022-09-13	11:23:10	0.67869	573.906	FALSE	52
2022-09-13	11:23:10	0.661997	574.568	FALSE	52
2022-09-13	11:23:10	0.528308	575.096	FALSE	52
2022-09-13	11:23:11	0.455738	575.552	FALSE	52
2022-09-13	11:23:11	0.513652	576.065	FALSE	52
2022-09-13	11:23:11	0.675636	576.741	FALSE	52
2022-09-13	11:23:12	0.528919	577.27	FALSE	52
2022-09-13	11:23:12	0.410751	577.681	FALSE	52
2022-09-13	11:23:12	0.391412	578.072	FALSE	52
2022-09-13	11:23:12	0.417672	578.49	FALSE	52
2022-09-13	11:23:13	0.450445	578.94	FALSE	52
2022-09-13	11:23:13	0.400522	579.341	FALSE	52
2022-09-13	11:23:13	0.622354	579.963	FALSE	52
2022-09-13	11:23:13	0.66098	580.624	FALSE	52
2022-09-13	11:23:14	0.408664	581.033	FALSE	52
2022-09-13	11:23:14	1.12347	582.156	FALSE	52
2022-09-13	11:23:14	1.02978	583.186	FALSE	52
2022-09-13	11:23:14	2.58744	585.773	FALSE	52
2022-09-13	11:23:15	2.93202	588.705	FALSE	52
2022-09-13	11:23:15	4.77289	593.478	1	53
2022-09-13	11:23:15	5.65578	599.134	1	54
2022-09-13	11:23:16	1.37431	600.508	FALSE	54
2022-09-13	11:23:16	4.68429	605.193	1	55
2022-09-13	11:23:16	1.43319	606.626	FALSE	55
2022-09-13	11:23:16	4.78378	611.41	1	56
2022-09-13	11:23:17	3.54469	614.954	1	57
2022-09-13	11:23:17	1.84195	616.796	FALSE	57
2022-09-13	11:23:17	3.53029	620.327	1	58
2022-09-13	11:23:17	0.723473	621.05	FALSE	58
2022-09-13	11:23:18	1.76724	622.817	FALSE	58
2022-09-13	11:23:18	0.748715	623.566	FALSE	58
2022-09-13	11:23:18	0.448003	624.014	FALSE	58
2022-09-13	11:23:18	0.607494	624.621	FALSE	58
2022-09-13	11:23:19	0.685814	625.307	FALSE	58
2022-09-13	11:23:19	3.68668	628.994	1	59
2022-09-13	11:23:19	4.53625	633.53	1	60
2022-09-13	11:23:20	2.54368	636.074	FALSE	60
2022-09-13	11:23:20	0.941387	637.015	FALSE	60
2022-09-13	11:23:20	1.06123	638.077	FALSE	60
2022-09-13	11:23:20	0.346018	638.423	FALSE	60
2022-09-13	11:23:21	0.478333	638.901	FALSE	60
2022-09-13	11:23:21	0.373906	639.275	FALSE	60
2022-09-13	11:23:21	0.526018	639.801	FALSE	60
2022-09-13	11:23:21	0.967443	640.768	FALSE	60
2022-09-13	11:23:22	1.7536	642.522	FALSE	60
2022-09-13	11:23:22	0.591921	643.114	FALSE	60
2022-09-13	11:23:22	1.91782	645.032	FALSE	60
2022-09-13	11:23:22	0.840013	645.872	FALSE	60
2022-09-13	11:23:23	0.470089	646.342	FALSE	60
2022-09-13	11:23:23	0.401082	646.743	FALSE	60
2022-09-13	11:23:23	0.239962	646.983	FALSE	60
2022-09-13	11:23:23	0.620573	647.603	FALSE	60
2022-09-13	11:23:24	2.59869	650.202	FALSE	60
2022-09-13	11:23:24	7.97248	658.174	1	61
2022-09-13	11:23:24	3.64642	661.821	1	62
2022-09-13	11:23:25	2.97075	664.792	FALSE	62
2022-09-13	11:23:25	1.56739	666.359	FALSE	62
2022-09-13	11:23:25	2.07294	668.432	FALSE	62
2022-09-13	11:23:25	5.41024	673.842	1	63
2022-09-13	11:23:26	7.27227	681.114	1	64
2022-09-13	11:23:26	12.2713	693.386	1	65
2022-09-13	11:23:26	9.69059	703.076	1	66
2022-09-13	11:23:26	4.74123	707.818	1	67
2022-09-13	11:23:27	1.72037	709.538	FALSE	67
2022-09-13	11:23:27	0.600929	710.139	FALSE	67
2022-09-13	11:23:27	0.3507	710.49	FALSE	67
2022-09-13	11:23:27	0.332736	710.822	FALSE	67
2022-09-13	11:23:28	0.0644913	710.887	FALSE	67
2022-09-13	11:23:28	-0.210572	710.887	FALSE	67
2022-09-13	11:23:28	-0.201361	710.887	FALSE	67
2022-09-13	11:23:29	0.555636	711.442	FALSE	67
2022-09-13	11:23:29	7.40566	718.848	1	68
2022-09-13	11:23:29	5.06164	723.91	1	69
2022-09-13	11:23:29	0.822506	724.732	FALSE	69
2022-09-13	11:23:30	0.628053	725.36	FALSE	69
2022-09-13	11:23:30	0.293601	725.654	FALSE	69
2022-09-13	11:23:30	0.419555	726.073	FALSE	69
2022-09-13	11:23:30	1.71559	727.789	FALSE	69
2022-09-13	11:23:31	2.3277	730.117	FALSE	69
2022-09-13	11:23:31	2.01787	732.135	FALSE	69
2022-09-13	11:23:31	2.31996	734.455	FALSE	69
2022-09-13	11:23:31	2.4795	736.934	FALSE	69
2022-09-13	11:23:32	2.15365	739.088	FALSE	69
2022-09-13	11:23:32	1.88169	740.969	FALSE	69
2022-09-13	11:23:32	1.81085	742.78	FALSE	69
2022-09-13	11:23:33	1.91355	744.694	FALSE	69
2022-09-13	11:23:33	1.84749	746.541	FALSE	69
2022-09-13	11:23:33	1.56877	748.11	FALSE	69
2022-09-13	11:23:33	1.48805	749.598	FALSE	69
2022-09-13	11:23:34	0.748766	750.347	FALSE	69
2022-09-13	11:23:34	0.427799	750.775	FALSE	69
2022-09-13	11:23:34	0.369631	751.144	FALSE	69
2022-09-13	11:23:34	0.303066	751.447	FALSE	69
2022-09-13	11:23:35	0.261081	751.708	FALSE	69
2022-09-13	11:23:35	0.196654	751.905	FALSE	69
2022-09-13	11:23:35	0.713957	752.619	FALSE	69
2022-09-13	11:23:35	0.646476	753.266	FALSE	69
2022-09-13	11:23:36	0.725204	753.991	FALSE	69
2022-09-13	11:23:36	0.281998	754.273	FALSE	69
2022-09-13	11:23:36	-0.0239565	754.273	FALSE	69
2022-09-13	11:23:37	0.141489	754.414	FALSE	69
2022-09-13	11:23:37	0.159148	754.573	FALSE	69
2022-09-13	11:23:37	0.158181	754.732	FALSE	69
2022-09-13	11:23:37	0.0338043	754.765	FALSE	69
2022-09-13	11:23:38	-0.00482162	754.765	FALSE	69
2022-09-13	11:23:38	0.0759926	754.841	FALSE	69
2022-09-13	11:23:38	0.189122	755.03	FALSE	69
2022-09-13	11:23:38	0.201692	755.232	FALSE	69
2022-09-13	11:23:39	0.201641	755.434	FALSE	69
2022-09-13	11:23:39	0.174211	755.608	FALSE	69
2022-09-13	11:23:39	0.170547	755.779	FALSE	69
2022-09-13	11:23:39	0.165102	755.944	FALSE	69
2022-09-13	11:23:40	0.165713	756.109	FALSE	69
2022-09-13	11:23:40	0.179708	756.289	FALSE	69
2022-09-13	11:23:40	0.207596	756.497	FALSE	69
2022-09-13	11:23:41	0.193601	756.69	FALSE	69
2022-09-13	11:23:41	0.198944	756.889	FALSE	69
2022-09-13	11:23:41	0.195992	757.085	FALSE	69
2022-09-13	11:23:41	0.186934	757.272	FALSE	69
2022-09-13	11:23:42	0.180471	757.453	FALSE	69
2022-09-13	11:23:42	0.170242	757.623	FALSE	69
2022-09-13	11:23:42	0.178384	757.801	FALSE	69
2022-09-13	11:23:42	0.154822	757.956	FALSE	69
2022-09-13	11:23:43	-0.0756104	757.956	FALSE	69
2022-09-13	11:23:43	-0.343346	757.956	FALSE	69
2022-09-13	11:23:43	-0.446806	757.956	FALSE	69
2022-09-13	11:23:43	-0.383753	757.956	FALSE	69
2022-09-13	11:23:44	-0.363804	757.956	FALSE	69
2022-09-13	11:23:44	-0.386399	757.956	FALSE	69
2022-09-13	11:23:44	-0.382888	757.956	FALSE	69
2022-09-13	11:23:45	-0.368282	757.956	FALSE	69
2022-09-13	11:23:45	-0.369147	757.956	FALSE	69
2022-09-13	11:23:45	-0.353829	757.956	FALSE	69
2022-09-13	11:23:45	-0.334898	757.956	FALSE	69
2022-09-13	11:23:46	-0.342277	757.956	FALSE	69
2022-09-13	11:23:46	-0.338053	757.956	FALSE	69
2022-09-13	11:23:46	-0.336933	757.956	FALSE	69
2022-09-13	11:23:46	-0.318511	757.956	FALSE	69
2022-09-13	11:23:47	-0.21561	757.956	FALSE	69
2022-09-13	11:23:47	-0.0337275	757.956	FALSE	69
2022-09-13	11:23:47	-0.040445	757.956	FALSE	69
2022-09-13	11:23:47	-0.0490964	757.956	FALSE	69
2022-09-13	11:23:48	-0.0344908	757.956	FALSE	69
2022-09-13	11:23:48	-0.0169336	757.956	FALSE	69
2022-09-13	11:23:48	-0.0156104	757.956	FALSE	69
2022-09-13	11:23:48	-0.0138293	757.956	FALSE	69
2022-09-13	11:23:49	-0.0605468	757.956	FALSE	69
2022-09-13	11:23:49	-0.0400379	757.956	FALSE	69
2022-09-13	11:23:49	-0.1493	757.956	FALSE	69
2022-09-13	11:23:50	-0.107875	757.956	FALSE	69
2022-09-13	11:23:50	-0.0891473	757.956	FALSE	69
2022-09-13	11:23:50	-0.45734	757.956	FALSE	69
2022-09-13	11:23:50	-0.402938	757.956	FALSE	69
2022-09-13	11:23:51	0.30729	758.263	FALSE	69
2022-09-13	11:23:51	0.436603	758.7	FALSE	69
2022-09-13	11:23:51	0.291514	758.992	FALSE	69
2022-09-13	11:23:51	0.441489	759.433	FALSE	69
2022-09-13	11:23:52	0.450598	759.884	FALSE	69
2022-09-13	11:23:52	0.454517	760.338	FALSE	69
2022-09-13	11:23:52	0.191158	760.529	FALSE	69
2022-09-13	11:23:52	0.0778247	760.607	FALSE	69
2022-09-13	11:23:53	-0.0278751	760.607	FALSE	69
2022-09-13	11:23:53	-0.153168	760.607	FALSE	69
2022-09-13	11:23:53	-0.232048	760.607	FALSE	69
2022-09-13	11:23:54	-0.202582	760.607	FALSE	69
2022-09-13	11:23:54	-0.236781	760.607	FALSE	69
2022-09-13	11:23:54	-0.161768	760.607	FALSE	69
2022-09-13	11:23:54	-0.218562	760.607	FALSE	69
2022-09-13	11:23:55	-0.376984	760.607	FALSE	69
2022-09-13	11:23:55	-0.0574934	760.607	FALSE	69
2022-09-13	11:23:55	-0.133982	760.607	FALSE	69
2022-09-13	11:23:55	0.251463	760.859	FALSE	69
2022-09-13	11:23:56	0.242507	761.101	FALSE	69
2022-09-13	11:23:56	0.338842	761.44	FALSE	69
2022-09-13	11:23:56	0.367494	761.807	FALSE	69
2022-09-13	11:23:56	0.364186	762.172	FALSE	69
2022-09-13	11:23:57	0.478333	762.65	FALSE	69
2022-09-13	11:23:57	0.482812	763.133	FALSE	69
2022-09-13	11:23:57	0.825051	763.958	FALSE	69
2022-09-13	11:23:58	1.08607	765.044	FALSE	69
2022-09-13	11:23:58	2.32724	767.371	FALSE	69
2022-09-13	11:23:58	4.26826	771.639	1	70
2022-09-13	11:23:58	4.46953	776.109	1	71
2022-09-13	11:23:59	4.46551	780.574	1	72
2022-09-13	11:23:59	7.53049	788.105	1	73
2022-09-13	11:23:59	5.34062	793.446	1	74
2022-09-13	11:23:59	4.41243	797.858	1	75
2022-09-13	11:24:00	1.32256	799.18	FALSE	75
2022-09-13	11:24:00	0.974567	800.155	FALSE	75
2022-09-13	11:24:00	0.754109	800.909	FALSE	75
2022-09-13	11:24:00	0.713957	801.623	FALSE	75
2022-09-13	11:24:01	0.553804	802.177	FALSE	75
2022-09-13	11:24:01	0.579656	802.757	FALSE	75
2022-09-13	11:24:01	1.46261	804.219	FALSE	75
2022-09-13	11:24:02	2.39406	806.613	FALSE	75
2022-09-13	11:24:02	0.928003	807.541	FALSE	75
2022-09-13	11:24:02	0.634109	808.175	FALSE	75
2022-09-13	11:24:02	0.478181	808.654	FALSE	75
2022-09-13	11:24:03	0.497519	809.151	FALSE	75
2022-09-13	11:24:03	1.84108	810.992	FALSE	75
2022-09-13	11:24:03	1.53192	812.524	FALSE	75
2022-09-13	11:24:03	2.46154	814.986	FALSE	75
2022-09-13	11:24:04	0.780776	815.766	FALSE	75
2022-09-13	11:24:04	0.370598	816.137	FALSE	75
2022-09-13	11:24:04	0.529783	816.667	FALSE	75
2022-09-13	11:24:04	0.736603	817.403	FALSE	75
2022-09-13	11:24:05	0.552074	817.955	FALSE	75
2022-09-13	11:24:05	0.193601	818.149	FALSE	75
2022-09-13	11:24:05	0.424389	818.573	FALSE	75
2022-09-13	11:24:06	0.22897	818.802	FALSE	75
2022-09-13	11:24:06	0.201234	819.004	FALSE	75
2022-09-13	11:24:06	0.448308	819.452	FALSE	75
2022-09-13	11:24:06	0.926934	820.379	FALSE	75
2022-09-13	11:24:07	0.659554	821.038	FALSE	75
2022-09-13	11:24:07	0.186832	821.225	FALSE	75
2022-09-13	11:24:07	1.03274	822.258	FALSE	75
2022-09-13	11:24:07	1.68877	823.947	FALSE	75
2022-09-13	11:24:08	3.92256	827.869	1	76
2022-09-13	11:24:08	12.6604	840.53	1	77
2022-09-13	11:24:08	9.03945	849.569	1	78
2022-09-13	11:24:08	3.01899	852.588	1	79
2022-09-13	11:24:09	0.950394	853.539	FALSE	79
2022-09-13	11:24:09	1.04047	854.579	FALSE	79
2022-09-13	11:24:09	0.517977	855.097	FALSE	79
2022-09-13	11:24:10	0.411616	855.509	FALSE	79
2022-09-13	11:24:10	0.848969	856.358	FALSE	79
2022-09-13	11:24:10	0.379962	856.738	FALSE	79
2022-09-13	11:24:10	0.220522	856.958	FALSE	79
2022-09-13	11:24:11	-0.176628	856.958	FALSE	79
2022-09-13	11:24:11	-0.273219	856.958	FALSE	79
2022-09-13	11:24:11	-0.20986	856.958	FALSE	79
2022-09-13	11:24:11	-0.109046	856.958	FALSE	79
2022-09-13	11:24:12	-0.196832	856.958	FALSE	79
2022-09-13	11:24:12	0.10785	857.066	FALSE	79
2022-09-13	11:24:12	1.19879	858.265	FALSE	79
2022-09-13	11:24:12	3.21899	861.484	1	80
2022-09-13	11:24:13	1.79787	863.282	FALSE	80
2022-09-13	11:24:13	0.607544	863.889	FALSE	80
2022-09-13	11:24:13	0.316298	864.205	FALSE	80
2022-09-13	11:24:13	0.419097	864.625	FALSE	80
2022-09-13	11:24:14	0.280216	864.905	FALSE	80
2022-09-13	11:24:14	0.162659	865.067	FALSE	80
2022-09-13	11:24:14	0.280776	865.348	FALSE	80
2022-09-13	11:24:15	0.224746	865.573	FALSE	80
2022-09-13	11:24:15	0.224797	865.798	FALSE	80
2022-09-13	11:24:15	0.303677	866.101	FALSE	80
2022-09-13	11:24:15	0.233906	866.335	FALSE	80
2022-09-13	11:24:16	0.707646	867.043	FALSE	80
2022-09-13	11:24:16	0.733142	867.776	FALSE	80
2022-09-13	11:24:16	0.741031	868.517	FALSE	80
2022-09-13	11:24:16	0.734008	869.251	FALSE	80
2022-09-13	11:24:17	0.730598	869.982	FALSE	80
2022-09-13	11:24:17	0.739402	870.721	FALSE	80
2022-09-13	11:24:17	0.737315	871.458	FALSE	80
2022-09-13	11:24:17	0.735178	872.194	FALSE	80
2022-09-13	11:24:18	0.730394	872.924	FALSE	80
2022-09-13	11:24:18	0.737214	873.661	FALSE	80
2022-09-13	11:24:18	0.731259	874.392	FALSE	80
2022-09-13	11:24:19	0.737621	875.13	FALSE	80
2022-09-13	11:24:19	0.736908	875.867	FALSE	80
2022-09-13	11:24:19	0.74332	876.61	FALSE	80
2022-09-13	11:24:19	0.737366	877.348	FALSE	80
2022-09-13	11:24:20	0.732379	878.08	FALSE	80
2022-09-13	11:24:20	0.73813	878.818	FALSE	80
2022-09-13	11:24:20	0.73243	879.551	FALSE	80
2022-09-13	11:24:20	0.735178	880.286	FALSE	80
2022-09-13	11:24:21	0.737315	881.023	FALSE	80
2022-09-13	11:24:21	0.734109	881.757	FALSE	80
2022-09-13	11:24:21	0.734517	882.492	FALSE	80
2022-09-13	11:24:21	0.741896	883.234	FALSE	80
2022-09-13	11:24:22	0.728054	883.962	FALSE	80
2022-09-13	11:24:22	0.734415	884.696	FALSE	80
2022-09-13	11:24:22	0.734568	885.431	FALSE	80
2022-09-13	11:24:23	0.731921	886.163	FALSE	80
2022-09-13	11:24:23	0.728257	886.891	FALSE	80
2022-09-13	11:24:23	0.744542	887.635	FALSE	80
2022-09-13	11:24:23	0.730191	888.366	FALSE	80
2022-09-13	11:24:24	0.734618	889.1	FALSE	80
2022-09-13	11:24:24	0.728461	889.829	FALSE	80
2022-09-13	11:24:24	0.729784	890.558	FALSE	80
2022-09-13	11:24:24	0.741947	891.3	FALSE	80
2022-09-13	11:24:25	0.736145	892.037	FALSE	80
2022-09-13	11:24:25	0.741997	892.779	FALSE	80
2022-09-13	11:24:25	0.737621	893.516	FALSE	80
2022-09-13	11:24:25	0.734618	894.251	FALSE	80
2022-09-13	11:24:26	0.737672	894.988	FALSE	80
2022-09-13	11:24:26	0.738435	895.727	FALSE	80
2022-09-13	11:24:26	0.734364	896.461	FALSE	80
2022-09-13	11:24:27	0.732074	897.193	FALSE	80
2022-09-13	11:24:27	0.734313	897.928	FALSE	80
2022-09-13	11:24:27	0.733855	898.662	FALSE	80
2022-09-13	11:24:27	0.725662	899.387	FALSE	80
2022-09-13	11:24:28	0.736705	900.124	FALSE	80
2022-09-13	11:24:28	0.733753	900.858	FALSE	80
2022-09-13	11:24:28	0.735127	901.593	FALSE	80
2022-09-13	11:24:28	0.733448	902.326	FALSE	80
2022-09-13	11:24:29	0.734517	903.061	FALSE	80
2022-09-13	11:24:29	0.733142	903.794	FALSE	80
2022-09-13	11:24:29	0.738028	904.532	FALSE	80
2022-09-13	11:24:29	0.730852	905.263	FALSE	80
2022-09-13	11:24:30	0.734924	905.998	FALSE	80
2022-09-13	11:24:30	0.736043	906.734	FALSE	80
2022-09-13	11:24:30	0.733906	907.468	FALSE	80
2022-09-13	11:24:31	0.732939	908.201	FALSE	80
2022-09-13	11:24:31	0.735026	908.936	FALSE	80
2022-09-13	11:24:31	0.732888	909.668	FALSE	80
2022-09-13	11:24:31	0.745407	910.414	FALSE	80
2022-09-13	11:24:32	0.738333	911.152	FALSE	80
2022-09-13	11:24:32	0.729682	911.882	FALSE	80
2022-09-13	11:24:32	0.734873	912.617	FALSE	80
2022-09-13	11:24:32	0.737315	913.354	FALSE	80
2022-09-13	11:24:33	0.672888	914.027	FALSE	80
2022-09-13	11:24:33	0.586221	914.613	FALSE	80
2022-09-13	11:24:33	0.538028	915.151	FALSE	80
2022-09-13	11:24:33	0.408308	915.56	FALSE	80
2022-09-13	11:24:34	0.73472	916.294	FALSE	80
2022-09-13	11:24:34	0.731056	917.025	FALSE	80
2022-09-13	11:24:34	0.733957	917.759	FALSE	80
2022-09-13	11:24:34	0.694211	918.453	FALSE	80
2022-09-13	11:24:35	0.286832	918.74	FALSE	80
2022-09-13	11:24:35	0.733855	919.474	FALSE	80
2022-09-13	11:24:35	0.73299	920.207	FALSE	80
2022-09-13	11:24:36	0.732532	920.94	FALSE	80
2022-09-13	11:24:36	0.726934	921.667	FALSE	80
2022-09-13	11:24:36	0.736654	922.403	FALSE	80
2022-09-13	11:24:36	0.739147	923.142	FALSE	80
2022-09-13	11:24:37	1.04581	924.188	FALSE	80
2022-09-13	11:24:37	0.743728	924.932	FALSE	80
2022-09-13	11:24:37	0.7393	925.671	FALSE	80
2022-09-13	11:24:37	0.734618	926.406	FALSE	80
2022-09-13	11:24:38	0.739453	927.145	FALSE	80
2022-09-13	11:24:38	0.728613	927.874	FALSE	80
2022-09-13	11:24:38	0.735738	928.61	FALSE	80
2022-09-13	11:24:38	0.454924	929.065	FALSE	80
2022-09-13	11:24:39	0.733855	929.798	FALSE	80
2022-09-13	11:24:39	0.734262	930.533	FALSE	80
2022-09-13	11:24:39	0.734262	931.267	FALSE	80
2022-09-13	11:24:40	0.735789	932.003	FALSE	80
2022-09-13	11:24:40	0.742913	932.746	FALSE	80
2022-09-13	11:24:40	0.455585	933.201	FALSE	80
2022-09-13	11:24:40	0.736857	933.938	FALSE	80
2022-09-13	11:24:41	0.350445	934.289	FALSE	80
2022-09-13	11:24:41	-0.320699	934.289	FALSE	80
2022-09-13	11:24:41	-0.469707	934.289	FALSE	80
2022-09-13	11:24:41	-0.29729	934.289	FALSE	80
2022-09-13	11:24:42	-0.165432	934.289	FALSE	80
2022-09-13	11:24:42	-0.0372389	934.289	FALSE	80
2022-09-13	11:24:42	-0.00202267	934.289	FALSE	80
2022-09-13	11:24:42	0.0277992	934.316	FALSE	80
2022-09-13	11:24:43	1.02704	935.343	FALSE	80
2022-09-13	11:24:43	2.04525	937.389	FALSE	80
2022-09-13	11:24:43	3.8537	941.242	1	81
2022-09-13	11:24:44	3.06032	944.303	1	82
2022-09-13	11:24:44	9.06545	953.368	1	83
2022-09-13	11:24:44	2.56352	955.932	FALSE	83
2022-09-13	11:24:44	2.40566	958.337	FALSE	83
2022-09-13	11:24:45	1.26368	959.601	FALSE	83
2022-09-13	11:24:45	0.779962	960.381	FALSE	83
2022-09-13	11:24:45	0.708155	961.089	FALSE	83
2022-09-13	11:24:45	0.73528	961.824	FALSE	83
2022-09-13	11:24:46	0.718944	962.543	FALSE	83
2022-09-13	11:24:46	0.730903	963.274	FALSE	83
2022-09-13	11:24:46	0.672735	963.947	FALSE	83
2022-09-13	11:24:46	0.732379	964.679	FALSE	83
2022-09-13	11:24:47	0.389886	965.069	FALSE	83
2022-09-13	11:24:47	0.0840841	965.153	FALSE	83
2022-09-13	11:24:47	-0.0777478	965.153	FALSE	83
2022-09-13	11:24:48	-0.122226	965.153	FALSE	83
2022-09-13	11:24:48	-0.0187148	965.153	FALSE	83
2022-09-13	11:24:48	-0.150267	965.153	FALSE	83
2022-09-13	11:24:48	-0.0504705	965.153	FALSE	83
2022-09-13	11:24:49	0.0166033	965.17	FALSE	83
2022-09-13	11:24:49	0.0151783	965.185	FALSE	83
2022-09-13	11:24:49	0.0577738	965.243	FALSE	83
2022-09-13	11:24:49	0.0533972	965.296	FALSE	83
2022-09-13	11:24:50	0.654619	965.951	FALSE	83
2022-09-13	11:24:50	0.118435	966.069	FALSE	83
2022-09-13	11:24:50	0.4393	966.509	FALSE	83
2022-09-13	11:24:50	0.731717	967.24	FALSE	83
2022-09-13	11:24:51	0.737773	967.978	FALSE	83
2022-09-13	11:24:51	0.735229	968.713	FALSE	83
2022-09-13	11:24:51	0.735687	969.449	FALSE	83
2022-09-13	11:24:52	0.738384	970.187	FALSE	83
2022-09-13	11:24:52	0.730496	970.918	FALSE	83
2022-09-13	11:24:52	0.738689	971.657	FALSE	83
2022-09-13	11:24:52	0.734975	972.392	FALSE	83
2022-09-13	11:24:53	0.738537	973.13	FALSE	83
2022-09-13	11:24:53	0.737163	973.867	FALSE	83
2022-09-13	11:24:53	0.733295	974.601	FALSE	83
2022-09-13	11:24:53	0.740216	975.341	FALSE	83
2022-09-13	11:24:54	0.740165	976.081	FALSE	83
2022-09-13	11:24:54	0.733702	976.815	FALSE	83
2022-09-13	11:24:54	0.739147	977.554	FALSE	83
2022-09-13	11:24:54	0.733906	978.288	FALSE	83
2022-09-13	11:24:55	0.736756	979.024	FALSE	83
2022-09-13	11:24:55	0.736094	979.761	FALSE	83
2022-09-13	11:24:55	0.732532	980.493	FALSE	83
2022-09-13	11:24:56	0.740064	981.233	FALSE	83
2022-09-13	11:24:56	0.728155	981.961	FALSE	83
2022-09-13	11:24:56	0.732328	982.694	FALSE	83
2022-09-13	11:24:56	0.739453	983.433	FALSE	83
2022-09-13	11:24:57	0.734669	984.168	FALSE	83
2022-09-13	11:24:57	0.739911	984.908	FALSE	83
2022-09-13	11:24:57	0.737366	985.645	FALSE	83
2022-09-13	11:24:57	0.735789	986.381	FALSE	83
2022-09-13	11:24:58	0.735127	987.116	FALSE	83
2022-09-13	11:24:58	0.735891	987.852	FALSE	83
2022-09-13	11:24:58	0.73416	988.586	FALSE	83
2022-09-13	11:24:58	0.732939	989.319	FALSE	83
2022-09-13	11:24:59	0.731768	990.051	FALSE	83
2022-09-13	11:24:59	0.733855	990.785	FALSE	83
2022-09-13	11:24:59	0.737672	991.522	FALSE	83
2022-09-13	11:25:00	0.739504	992.262	FALSE	83
2022-09-13	11:25:00	0.740573	993.002	FALSE	83
2022-09-13	11:25:00	0.73584	993.738	FALSE	83
2022-09-13	11:25:00	0.737875	994.476	FALSE	83
2022-09-13	11:25:01	0.741234	995.217	FALSE	83
2022-09-13	11:25:01	0.736908	995.954	FALSE	83
2022-09-13	11:25:01	0.736399	996.691	FALSE	83
2022-09-13	11:25:01	0.72902	997.42	FALSE	83
2022-09-13	11:25:02	0.740522	998.16	FALSE	83
2022-09-13	11:25:02	0.734924	998.895	FALSE	83
2022-09-13	11:25:02	0.733346	999.628	FALSE	83
2022-09-13	11:25:02	0.735789	1000.36	FALSE	83
2022-09-13	11:25:03	0.736705	1001.1	FALSE	83
2022-09-13	11:25:03	0.737773	1001.84	FALSE	83
2022-09-13	11:25:03	0.74327	1002.58	FALSE	83
2022-09-13	11:25:03	0.739606	1003.32	FALSE	83
2022-09-13	11:25:04	0.737722	1004.06	FALSE	83
2022-09-13	11:25:04	0.730191	1004.79	FALSE	83
2022-09-13	11:25:04	0.738181	1005.53	FALSE	83
2022-09-13	11:25:05	0.739555	1006.27	FALSE	83
2022-09-13	11:25:05	0.732481	1007	FALSE	83
2022-09-13	11:25:05	0.742964	1007.74	FALSE	83
2022-09-13	11:25:05	0.741896	1008.48	FALSE	83
2022-09-13	11:25:06	0.739656	1009.22	FALSE	83
2022-09-13	11:25:06	0.74327	1009.97	FALSE	83
2022-09-13	11:25:06	0.73813	1010.71	FALSE	83
2022-09-13	11:25:06	0.734517	1011.44	FALSE	83
2022-09-13	11:25:07	0.737926	1012.18	FALSE	83
2022-09-13	11:25:07	0.736094	1012.91	FALSE	83
2022-09-13	11:25:07	0.739453	1013.65	FALSE	83
2022-09-13	11:25:07	0.736756	1014.39	FALSE	83
2022-09-13	11:25:08	0.733499	1015.12	FALSE	83
2022-09-13	11:25:08	0.730394	1015.85	FALSE	83
2022-09-13	11:25:08	0.739097	1016.59	FALSE	83
2022-09-13	11:25:09	0.731616	1017.32	FALSE	83
2022-09-13	11:25:09	0.735483	1018.06	FALSE	83
2022-09-13	11:25:09	0.736196	1018.8	FALSE	83
2022-09-13	11:25:09	0.73299	1019.53	FALSE	83
2022-09-13	11:25:10	0.738333	1020.27	FALSE	83
2022-09-13	11:25:10	0.736756	1021	FALSE	83
2022-09-13	11:25:10	0.730191	1021.73	FALSE	83
2022-09-13	11:25:10	0.734364	1022.47	FALSE	83
2022-09-13	11:25:11	0.735331	1023.2	FALSE	83
2022-09-13	11:25:11	0.732684	1023.94	FALSE	83
2022-09-13	11:25:11	0.735382	1024.67	FALSE	83
2022-09-13	11:25:11	0.739656	1025.41	FALSE	83
2022-09-13	11:25:12	0.735534	1026.15	FALSE	83
2022-09-13	11:25:12	0.735382	1026.88	FALSE	83
2022-09-13	11:25:12	0.731412	1027.61	FALSE	83
2022-09-13	11:25:13	0.742455	1028.36	FALSE	83
2022-09-13	11:25:13	0.728868	1029.09	FALSE	83
2022-09-13	11:25:13	0.737977	1029.82	FALSE	83
2022-09-13	11:25:13	0.73299	1030.56	FALSE	83
2022-09-13	11:25:14	0.735026	1031.29	FALSE	83
2022-09-13	11:25:14	0.731463	1032.02	FALSE	83
2022-09-13	11:25:14	0.737672	1032.76	FALSE	83
2022-09-13	11:25:14	0.742455	1033.5	FALSE	83
2022-09-13	11:25:15	0.737112	1034.24	FALSE	83
2022-09-13	11:25:15	0.741081	1034.98	FALSE	83
2022-09-13	11:25:15	0.736399	1035.72	FALSE	83
2022-09-13	11:25:15	0.732379	1036.45	FALSE	83
2022-09-13	11:25:16	0.737163	1037.19	FALSE	83
2022-09-13	11:25:16	0.734873	1037.92	FALSE	83
2022-09-13	11:25:16	0.732786	1038.66	FALSE	83
2022-09-13	11:25:17	0.7307	1039.39	FALSE	83
2022-09-13	11:25:17	0.732226	1040.12	FALSE	83
2022-09-13	11:25:17	0.739758	1040.86	FALSE	83
2022-09-13	11:25:17	0.728868	1041.59	FALSE	83
2022-09-13	11:25:18	0.734008	1042.32	FALSE	83
2022-09-13	11:25:18	0.729428	1043.05	FALSE	83
2022-09-13	11:25:18	0.73701	1043.79	FALSE	83
2022-09-13	11:25:18	0.730394	1044.52	FALSE	83
2022-09-13	11:25:19	0.733244	1045.25	FALSE	83
2022-09-13	11:25:19	0.736857	1045.99	FALSE	83
2022-09-13	11:25:19	0.731158	1046.72	FALSE	83
2022-09-13	11:25:19	0.738791	1047.46	FALSE	83
2022-09-13	11:25:20	0.73299	1048.19	FALSE	83
2022-09-13	11:25:20	0.735738	1048.93	FALSE	83
2022-09-13	11:25:20	0.735026	1049.66	FALSE	83
2022-09-13	11:25:21	0.739249	1050.4	FALSE	83
2022-09-13	11:25:21	0.736196	1051.14	FALSE	83
2022-09-13	11:25:21	0.740267	1051.88	FALSE	83
2022-09-13	11:25:21	0.737163	1052.61	FALSE	83
2022-09-13	11:25:22	0.740522	1053.35	FALSE	83
2022-09-13	11:25:22	0.738486	1054.09	FALSE	83
2022-09-13	11:25:22	0.735127	1054.83	FALSE	83
2022-09-13	11:25:22	0.730852	1055.56	FALSE	83
2022-09-13	11:25:23	0.738639	1056.3	FALSE	83
2022-09-13	11:25:23	0.73243	1057.03	FALSE	83
2022-09-13	11:25:23	0.731412	1057.76	FALSE	83
2022-09-13	11:25:23	0.743626	1058.51	FALSE	83
2022-09-13	11:25:24	0.77472	1059.28	FALSE	83
2022-09-13	11:25:24	0.742303	1060.02	FALSE	83
2022-09-13	11:25:24	0.733193	1060.76	FALSE	83
2022-09-13	11:25:24	0.737417	1061.49	FALSE	83
2022-09-13	11:25:25	0.736552	1062.23	FALSE	83
2022-09-13	11:25:25	0.734109	1062.96	FALSE	83
2022-09-13	11:25:25	0.736399	1063.7	FALSE	83
2022-09-13	11:25:26	0.735382	1064.44	FALSE	83
2022-09-13	11:25:26	0.737722	1065.17	FALSE	83
2022-09-13	11:25:26	0.733397	1065.91	FALSE	83
2022-09-13	11:25:26	0.73645	1066.64	FALSE	83
2022-09-13	11:25:27	0.734669	1067.38	FALSE	83
2022-09-13	11:25:27	0.737417	1068.12	FALSE	83
2022-09-13	11:25:27	0.729682	1068.84	FALSE	83
2022-09-13	11:25:27	0.731616	1069.58	FALSE	83
2022-09-13	11:25:28	0.73584	1070.31	FALSE	83
2022-09-13	11:25:28	0.733397	1071.05	FALSE	83
2022-09-13	11:25:28	0.731616	1071.78	FALSE	83
2022-09-13	11:25:28	0.734873	1072.51	FALSE	83
2022-09-13	11:25:29	0.737519	1073.25	FALSE	83
2022-09-13	11:25:29	0.736654	1073.99	FALSE	83
2022-09-13	11:25:29	0.732888	1074.72	FALSE	83
2022-09-13	11:25:30	0.735127	1075.45	FALSE	83
2022-09-13	11:25:30	0.74042	1076.19	FALSE	83
2022-09-13	11:25:30	0.7307	1076.93	FALSE	83
2022-09-13	11:25:30	0.735178	1077.66	FALSE	83
2022-09-13	11:25:31	0.728919	1078.39	FALSE	83
2022-09-13	11:25:31	0.724338	1079.11	FALSE	83
2022-09-13	11:25:31	0.740064	1079.85	FALSE	83
2022-09-13	11:25:31	-0.199274	1079.85	FALSE	83
2022-09-13	11:25:32	0.903626	1080.76	FALSE	83
2022-09-13	11:25:32	0.300674	1081.06	FALSE	83
2022-09-13	11:25:32	0.572634	1081.63	FALSE	83
2022-09-13	11:25:32	0.282048	1081.91	FALSE	83
2022-09-13	11:25:33	0.572125	1082.49	FALSE	83
2022-09-13	11:25:33	1.16866	1083.65	FALSE	83
2022-09-13	11:25:33	2.09314	1085.75	FALSE	83
2022-09-13	11:25:34	3.41182	1089.16	1	84
2022-09-13	11:25:34	4.20144	1093.36	1	85
2022-09-13	11:25:34	6.3422	1099.7	1	86
2022-09-13	11:25:34	4.19446	1103.9	1	87
2022-09-13	11:25:35	4.94698	1108.84	1	88
2022-09-13	11:25:35	2.50276	1111.35	FALSE	88
2022-09-13	11:25:35	1.32729	1112.67	FALSE	88
2022-09-13	11:25:35	0.719707	1113.39	FALSE	88
2022-09-13	11:25:36	0.390802	1113.78	FALSE	88
2022-09-13	11:25:36	0.356858	1114.14	FALSE	88
2022-09-13	11:25:36	0.491463	1114.63	FALSE	88
2022-09-13	11:25:36	0.230903	1114.86	FALSE	88
2022-09-13	11:25:37	0.481591	1115.35	FALSE	88
2022-09-13	11:25:37	0.818537	1116.16	FALSE	88
2022-09-13	11:25:37	2.79614	1118.96	FALSE	88
2022-09-13	11:25:38	5.19461	1124.15	1	89
2022-09-13	11:25:38	8.40917	1132.56	1	90
2022-09-13	11:25:38	3.5395	1136.1	1	91
2022-09-13	11:25:38	1.18525	1137.29	FALSE	91
2022-09-13	11:25:39	1.39905	1138.69	FALSE	91
2022-09-13	11:25:39	0.865814	1139.55	FALSE	91
2022-09-13	11:25:39	0.820013	1140.37	FALSE	91
2022-09-13	11:25:39	0.199911	1140.57	FALSE	91
2022-09-13	11:25:40	0.29299	1140.87	FALSE	91
2022-09-13	11:25:40	2.03441	1142.9	FALSE	91
2022-09-13	11:25:40	2.46668	1145.37	FALSE	91
2022-09-13	11:25:40	0.9593	1146.33	FALSE	91
2022-09-13	11:25:41	1.02388	1147.35	FALSE	91
2022-09-13	11:25:41	0.640572	1147.99	FALSE	91
2022-09-13	11:25:41	0.0620994	1148.05	FALSE	91
2022-09-13	11:25:42	0.331361	1148.38	FALSE	91
2022-09-13	11:25:42	0.399504	1148.78	FALSE	91
2022-09-13	11:25:42	0.476756	1149.26	FALSE	91
2022-09-13	11:25:42	0.67528	1149.94	FALSE	91
2022-09-13	11:25:43	0.88154	1150.82	FALSE	91
2022-09-13	11:25:43	2.67436	1153.49	FALSE	91
2022-09-13	11:25:43	1.6964	1155.19	FALSE	91
2022-09-13	11:25:43	2.65375	1157.84	FALSE	91
2022-09-13	11:25:44	2.71533	1160.56	FALSE	91
2022-09-13	11:25:44	4.50342	1165.06	1	92
2022-09-13	11:25:44	6.64108	1171.7	1	93
2022-09-13	11:25:44	7.66398	1179.37	1	94
2022-09-13	11:25:45	9.50642	1188.87	1	95
2022-09-13	11:25:45	3.19681	1192.07	1	96
2022-09-13	11:25:45	10.4549	1202.52	1	97
2022-09-13	11:25:46	5.56092	1208.08	1	98
2022-09-13	11:25:46	0.743117	1208.83	FALSE	98
2022-09-13	11:25:46	0.739097	1209.57	FALSE	98
2022-09-13	11:25:46	0.723321	1210.29	FALSE	98
2022-09-13	11:25:47	0.714567	1211.01	FALSE	98
2022-09-13	11:25:47	0.556247	1211.56	FALSE	98
2022-09-13	11:25:47	0.577316	1212.14	FALSE	98
2022-09-13	11:25:47	0.589377	1212.73	FALSE	98
2022-09-13	11:25:48	0.637367	1213.37	FALSE	98
2022-09-13	11:25:48	0.649275	1214.01	FALSE	98
2022-09-13	11:25:48	0.579097	1214.59	FALSE	98
2022-09-13	11:25:48	0.622608	1215.22	FALSE	98
2022-09-13	11:25:49	0.696094	1215.91	FALSE	98
2022-09-13	11:25:49	2.20159	1218.11	FALSE	98
2022-09-13	11:25:49	2.52938	1220.64	FALSE	98
2022-09-13	11:25:49	1.7965	1222.44	FALSE	98
2022-09-13	11:25:50	1.82464	1224.26	FALSE	98
2022-09-13	11:25:50	1.72302	1225.99	FALSE	98
2022-09-13	11:25:50	2.76693	1228.75	FALSE	98
2022-09-13	11:25:51	2.19981	1230.95	FALSE	98
2022-09-13	11:25:51	4.7767	1235.73	1	99
2022-09-13	11:25:51	3.85105	1239.58	1	100
2022-09-13	11:25:51	4.35711	1243.94	1	101
2022-09-13	11:25:52	2.82495	1246.76	FALSE	101
2022-09-13	11:25:52	1.28271	1248.05	FALSE	101
2022-09-13	11:25:52	0.384644	1248.43	FALSE	101
2022-09-13	11:25:52	0.381082	1248.81	FALSE	101
2022-09-13	11:25:53	0.246578	1249.06	FALSE	101
2022-09-13	11:25:53	0.178741	1249.24	FALSE	101
2022-09-13	11:25:53	0.257417	1249.5	FALSE	101
2022-09-13	11:25:53	0.278842	1249.77	FALSE	101
2022-09-13	11:25:54	1.55584	1251.33	FALSE	101
2022-09-13	11:25:54	5.55085	1256.88	1	102
2022-09-13	11:25:54	2.86561	1259.75	FALSE	102
2022-09-13	11:25:55	0.211819	1259.96	FALSE	102
2022-09-13	11:25:55	0.219504	1260.18	FALSE	102
2022-09-13	11:25:55	0.76103	1260.94	FALSE	102
2022-09-13	11:25:55	0.371616	1261.31	FALSE	102
2022-09-13	11:25:56	0.500013	1261.81	FALSE	102
2022-09-13	11:25:56	1.28765	1263.1	FALSE	102
2022-09-13	11:25:56	1.60475	1264.7	FALSE	102
2022-09-13	11:25:56	3.95523	1268.66	1	103
2022-09-13	11:25:57	1.1649	1269.82	FALSE	103
2022-09-13	11:25:57	0.621489	1270.44	FALSE	103
2022-09-13	11:25:57	0.384847	1270.83	FALSE	103
2022-09-13	11:25:57	0.229886	1271.06	FALSE	103
2022-09-13	11:25:58	0.202557	1271.26	FALSE	103
2022-09-13	11:25:58	0.25584	1271.52	FALSE	103
2022-09-13	11:25:58	0.0945677	1271.61	FALSE	103
2022-09-13	11:25:59	0.213804	1271.83	FALSE	103
2022-09-13	11:25:59	0.10556	1271.93	FALSE	103
2022-09-13	11:25:59	0.362455	1272.29	FALSE	103
2022-09-13	11:25:59	0.101794	1272.4	FALSE	103
2022-09-13	11:26:00	0.758333	1273.15	FALSE	103
2022-09-13	11:26:00	2.21329	1275.37	FALSE	103
2022-09-13	11:26:00	3.2021	1278.57	1	104
2022-09-13	11:26:00	1.98139	1280.55	FALSE	104
2022-09-13	11:26:01	1.00042	1281.55	FALSE	104
2022-09-13	11:26:01	0.994669	1282.55	FALSE	104
2022-09-13	11:26:01	0.856349	1283.4	FALSE	104
2022-09-13	11:26:01	1.4051	1284.81	FALSE	104
2022-09-13	11:26:02	1.28225	1286.09	FALSE	104
2022-09-13	11:26:02	0.811005	1286.9	FALSE	104
2022-09-13	11:26:02	0.648053	1287.55	FALSE	104
2022-09-13	11:26:03	0.958384	1288.51	FALSE	104
2022-09-13	11:26:03	0.913906	1289.42	FALSE	104
2022-09-13	11:26:03	1.52403	1290.95	FALSE	104
2022-09-13	11:26:03	1.27263	1292.22	FALSE	104
2022-09-13	11:26:04	0.598283	1292.82	FALSE	104
2022-09-13	11:26:04	1.44612	1294.26	FALSE	104
2022-09-13	11:26:04	1.63594	1295.9	FALSE	104
2022-09-13	11:26:04	3.54454	1299.44	1	105
2022-09-13	11:26:05	3.4394	1302.88	1	106
2022-09-13	11:26:05	5.32968	1308.21	1	107
2022-09-13	11:26:05	1.45762	1309.67	FALSE	107
2022-09-13	11:26:05	0.735076	1310.4	FALSE	107
2022-09-13	11:26:06	0.737366	1311.14	FALSE	107
2022-09-13	11:26:06	0.74444	1311.89	FALSE	107
2022-09-13	11:26:06	1.0908	1312.98	FALSE	107
2022-09-13	11:26:07	0.736043	1313.71	FALSE	107
2022-09-13	11:26:07	0.737468	1314.45	FALSE	107
2022-09-13	11:26:07	0.729428	1315.18	FALSE	107
2022-09-13	11:26:07	0.73416	1315.91	FALSE	107
2022-09-13	11:26:08	0.297367	1316.21	FALSE	107
2022-09-13	11:26:08	-0.439936	1316.21	FALSE	107
2022-09-13	11:26:08	0.559046	1316.77	FALSE	107
2022-09-13	11:26:08	0.290089	1317.06	FALSE	107
2022-09-13	11:26:09	0.484847	1317.55	FALSE	107
2022-09-13	11:26:09	0.305509	1317.85	FALSE	107
2022-09-13	11:26:09	0.43645	1318.29	FALSE	107
2022-09-13	11:26:09	0.354008	1318.64	FALSE	107
2022-09-13	11:26:10	0.489529	1319.13	FALSE	107
2022-09-13	11:26:10	0.805	1319.94	FALSE	107
2022-09-13	11:26:10	3.04368	1322.98	1	108
2022-09-13	11:26:10	7.66362	1330.64	1	109
2022-09-13	11:26:11	1.10037	1331.74	FALSE	109
2022-09-13	11:26:11	0.509987	1332.25	FALSE	109
2022-09-13	11:26:11	0.498944	1332.75	FALSE	109
2022-09-13	11:26:12	0.446171	1333.2	FALSE	109
2022-09-13	11:26:12	0.486018	1333.68	FALSE	109
2022-09-13	11:26:12	0.317672	1334	FALSE	109
2022-09-13	11:26:12	0.407596	1334.41	FALSE	109
2022-09-13	11:26:13	0.496603	1334.91	FALSE	109
2022-09-13	11:26:13	0.54215	1335.45	FALSE	109
2022-09-13	11:26:13	0.648613	1336.1	FALSE	109
2022-09-13	11:26:13	1.31095	1337.41	FALSE	109
2022-09-13	11:26:14	3.99996	1341.41	1	110
2022-09-13	11:26:14	2.81309	1344.22	FALSE	110
2022-09-13	11:26:14	1.01625	1345.24	FALSE	110
2022-09-13	11:26:14	0.732023	1345.97	FALSE	110
2022-09-13	11:26:15	0.73416	1346.7	FALSE	110
2022-09-13	11:26:15	0.734975	1347.44	FALSE	110
2022-09-13	11:26:15	0.738689	1348.18	FALSE	110
2022-09-13	11:26:16	0.734669	1348.91	FALSE	110
2022-09-13	11:26:16	0.728512	1349.64	FALSE	110
2022-09-13	11:26:16	0.736807	1350.38	FALSE	110
2022-09-13	11:26:16	0.737315	1351.11	FALSE	110
2022-09-13	11:26:17	0.732226	1351.85	FALSE	110
2022-09-13	11:26:17	0.728308	1352.58	FALSE	110
2022-09-13	11:26:17	0.729173	1353.3	FALSE	110
2022-09-13	11:26:17	0.734415	1354.04	FALSE	110

## Sheet: Saint_prong_202291311212
						**GoPro Fitting: 1110
2022-09-13	11:21:02	0.727901
2022-09-13	11:21:03	0.736857
2022-09-13	11:21:03	0.732125
2022-09-13	11:21:03	0.725763
2022-09-13	11:21:03	0.735026
2022-09-13	11:21:04	0.732532
2022-09-13	11:21:04	0.733499
2022-09-13	11:21:04	0.737875
2022-09-13	11:21:04	0.736196
2022-09-13	11:21:05	0.732074
2022-09-13	11:21:05	0.731768
2022-09-13	11:21:05	0.731514
2022-09-13	11:21:05	0.736857
2022-09-13	11:21:06	0.737519
2022-09-13	11:21:06	0.741896
2022-09-13	11:21:06	0.731921
2022-09-13	11:21:07	0.73528
2022-09-13	11:21:07	0.730751
2022-09-13	11:21:07	0.738231
2022-09-13	11:21:07	0.733906
2022-09-13	11:21:08	0.739606
2022-09-13	11:21:08	0.735941
2022-09-13	11:21:08	0.738181
2022-09-13	11:21:08	0.724593
2022-09-13	11:21:09	0.737214
2022-09-13	11:21:09	0.731565
2022-09-13	11:21:09	0.728003
2022-09-13	11:21:09	0.732939
2022-09-13	11:21:10	0.734008
2022-09-13	11:21:10	0.741336
2022-09-13	11:21:10	0.73299
2022-09-13	11:21:11	0.73813
2022-09-13	11:21:11	0.732125
2022-09-13	11:21:11	0.733651
2022-09-13	11:21:11	0.732532
2022-09-13	11:21:12	0.731107
2022-09-13	11:21:12	0.737061
2022-09-13	11:21:12	0.732888
2022-09-13	11:21:13	0.730598
2022-09-13	11:21:13	0.736857
2022-09-13	11:21:13	0.730801
2022-09-13	11:21:13	0.730852
2022-09-13	11:21:13	0.72729
2022-09-13	11:21:14	0.733957
2022-09-13	11:21:14	0.730445
2022-09-13	11:21:14	0.733092
2022-09-13	11:21:14	0.73472
2022-09-13	11:21:15	0.731768
2022-09-13	11:21:15	0.735229
2022-09-13	11:21:15	0.735433
2022-09-13	11:21:16	0.731565
2022-09-13	11:21:16	0.732328
2022-09-13	11:21:16	0.732939
2022-09-13	11:21:16	0.733448
2022-09-13	11:21:17	0.729936
2022-09-13	11:21:17	0.730903
2022-09-13	11:21:17	0.732888
2022-09-13	11:21:17	0.727443
2022-09-13	11:21:18	0.740623
2022-09-13	11:21:18	0.737214
2022-09-13	11:21:18	0.685712
2022-09-13	11:21:18	0.403626
2022-09-13	11:21:19	0.324847
2022-09-13	11:21:19	0.260216
2022-09-13	11:21:19	0.299758
2022-09-13	11:21:20	0.298842
2022-09-13	11:21:20	0.25701
2022-09-13	11:21:20	0.3164
2022-09-13	11:21:20	0.381438
2022-09-13	11:21:21	0.308613
2022-09-13	11:21:21	0.229529
2022-09-13	11:21:21	0.098588
2022-09-13	11:21:21	0.176298
2022-09-13	11:21:22	0.171209
2022-09-13	11:21:22	0.402659
2022-09-13	11:21:22	0.161336
2022-09-13	11:21:22	0.320115
2022-09-13	11:21:23	0.196654
2022-09-13	11:21:23	0.404288
2022-09-13	11:21:23	0.0868831
2022-09-13	11:21:24	0.403982
2022-09-13	11:21:24	0.347596
2022-09-13	11:21:24	0.423575
2022-09-13	11:21:24	0.299199
2022-09-13	11:21:25	0.333143
2022-09-13	11:21:25	0.501488
2022-09-13	11:21:25	0.113295
2022-09-13	11:21:25	0.374364
2022-09-13	11:21:26	0.0714124
2022-09-13	11:21:26	0.380369
2022-09-13	11:21:26	0.110802
2022-09-13	11:21:26	0.326476
2022-09-13	11:21:27	0.428308
2022-09-13	11:21:27	2.65131
2022-09-13	11:21:27	3.85039
2022-09-13	11:21:28	6.42978
2022-09-13	11:21:28	1.44515
2022-09-13	11:21:28	0.335433
2022-09-13	11:21:28	0.274262
2022-09-13	11:21:29	0.114466
2022-09-13	11:21:29	-0.170267
2022-09-13	11:21:29	-0.198409
2022-09-13	11:21:29	-0.178002
2022-09-13	11:21:30	0.0278501
2022-09-13	11:21:30	0.299199
2022-09-13	11:21:30	0.0378755
2022-09-13	11:21:30	0.15757
2022-09-13	11:21:31	0.16612
2022-09-13	11:21:31	0.53355
2022-09-13	11:21:31	0.273193
2022-09-13	11:21:32	0.321336
2022-09-13	11:21:32	0.370445
2022-09-13	11:21:32	0.210751
2022-09-13	11:21:32	0.430598
2022-09-13	11:21:33	0.318842
2022-09-13	11:21:33	0.441794
2022-09-13	11:21:33	0.318435
2022-09-13	11:21:33	0.189428
2022-09-13	11:21:34	0.548257
2022-09-13	11:21:34	0.366781
2022-09-13	11:21:34	0.342354
2022-09-13	11:21:34	0.370089
2022-09-13	11:21:35	0.793855
2022-09-13	11:21:35	0.723422
2022-09-13	11:21:35	0.790598
2022-09-13	11:21:36	1.24744
2022-09-13	11:21:36	2.11961
2022-09-13	11:21:36	1.85253
2022-09-13	11:21:36	1.61146
2022-09-13	11:21:37	1.4678
2022-09-13	11:21:37	1.27569
2022-09-13	11:21:37	0.481234
2022-09-13	11:21:37	0.590649
2022-09-13	11:21:38	0.930191
2022-09-13	11:21:38	1.05263
2022-09-13	11:21:38	0.979962
2022-09-13	11:21:38	0.937468
2022-09-13	11:21:39	1.65085
2022-09-13	11:21:39	1.41391
2022-09-13	11:21:39	0.740674
2022-09-13	11:21:40	0.753448
2022-09-13	11:21:40	0.60327
2022-09-13	11:21:40	0.464135
2022-09-13	11:21:40	0.740216
2022-09-13	11:21:41	0.784186
2022-09-13	11:21:41	1.09411
2022-09-13	11:21:41	-0.00879109
2022-09-13	11:21:41	0.0500384
2022-09-13	11:21:42	0.220776
2022-09-13	11:21:42	0.235789
2022-09-13	11:21:42	0.312176
2022-09-13	11:21:42	0.326069
2022-09-13	11:21:43	0.284084
2022-09-13	11:21:43	0.361082
2022-09-13	11:21:43	0.362557
2022-09-13	11:21:44	0.597468
2022-09-13	11:21:44	1.14602
2022-09-13	11:21:44	1.43935
2022-09-13	11:21:44	1.22729
2022-09-13	11:21:45	0.647188
2022-09-13	11:21:45	0.645458
2022-09-13	11:21:45	0.457621
2022-09-13	11:21:45	0.361132
2022-09-13	11:21:46	0.0940079
2022-09-13	11:21:46	0.157214
2022-09-13	11:21:46	0.280471
2022-09-13	11:21:46	0.298741
2022-09-13	11:21:47	0.24897
2022-09-13	11:21:47	0.565153
2022-09-13	11:21:47	1.011
2022-09-13	11:21:47	0.267901
2022-09-13	11:21:48	0.330395
2022-09-13	11:21:48	0.327087
2022-09-13	11:21:48	0.303117
2022-09-13	11:21:49	0.222303
2022-09-13	11:21:49	0.453499
2022-09-13	11:21:49	0.183524
2022-09-13	11:21:49	0.3307
2022-09-13	11:21:50	0.135077
2022-09-13	11:21:50	0.194669
2022-09-13	11:21:50	-0.216679
2022-09-13	11:21:50	-0.342633
2022-09-13	11:21:51	1.57452
2022-09-13	11:21:51	4.36398
2022-09-13	11:21:51	2.4936
2022-09-13	11:21:51	0.994618
2022-09-13	11:21:52	0.808257
2022-09-13	11:21:52	1.29584
2022-09-13	11:21:52	0.685509
2022-09-13	11:21:53	0.726272
2022-09-13	11:21:53	0.945763
2022-09-13	11:21:53	0.436603
2022-09-13	11:21:53	0.824898
2022-09-13	11:21:54	0.566272
2022-09-13	11:21:54	0.426629
2022-09-13	11:21:54	0.604644
2022-09-13	11:21:54	0.389733
2022-09-13	11:21:55	1.25925
2022-09-13	11:21:55	0.777315
2022-09-13	11:21:55	2.10235
2022-09-13	11:21:55	2.72312
2022-09-13	11:21:56	3.55691
2022-09-13	11:21:56	2.56225
2022-09-13	11:21:56	1.45075
2022-09-13	11:21:57	1.68271
2022-09-13	11:21:57	0.561692
2022-09-13	11:21:57	1.21971
2022-09-13	11:21:57	0.61528
2022-09-13	11:21:58	0.960013
2022-09-13	11:21:58	1.08882
2022-09-13	11:21:58	0.994873
2022-09-13	11:21:58	2.85472
2022-09-13	11:21:59	1.33823
2022-09-13	11:21:59	3.0879
2022-09-13	11:21:59	2.32586
2022-09-13	11:21:59	3.46983
2022-09-13	11:22:00	3.04744
2022-09-13	11:22:00	2.43345
2022-09-13	11:22:00	4.12189
2022-09-13	11:22:01	0.952532
2022-09-13	11:22:01	2.17513
2022-09-13	11:22:01	0.634771
2022-09-13	11:22:01	0.802761
2022-09-13	11:22:02	1.14088
2022-09-13	11:22:02	0.32612
2022-09-13	11:22:02	1.145
2022-09-13	11:22:02	0.232736
2022-09-13	11:22:03	1.1193
2022-09-13	11:22:03	1.51411
2022-09-13	11:22:03	2.88541
2022-09-13	11:22:03	2.7508
2022-09-13	11:22:04	4.30739
2022-09-13	11:22:04	4.48225
2022-09-13	11:22:04	2.60714
2022-09-13	11:22:05	5.35075
2022-09-13	11:22:05	5.17319
2022-09-13	11:22:05	4.39187
2022-09-13	11:22:05	3.13492
2022-09-13	11:22:06	1.08887
2022-09-13	11:22:06	1.31019
2022-09-13	11:22:06	0.292328
2022-09-13	11:22:06	0.308359
2022-09-13	11:22:07	0.562557
2022-09-13	11:22:07	1.16709
2022-09-13	11:22:07	1.18688
2022-09-13	11:22:07	1.05024
2022-09-13	11:22:08	1.02378
2022-09-13	11:22:08	0.812481
2022-09-13	11:22:08	0.655789
2022-09-13	11:22:09	0.37869
2022-09-13	11:22:09	0.299657
2022-09-13	11:22:09	0.273906
2022-09-13	11:22:09	0.173448
2022-09-13	11:22:10	0.476654
2022-09-13	11:22:10	0.056756
2022-09-13	11:22:10	0.217875
2022-09-13	11:22:10	0.338283
2022-09-13	11:22:11	0.441132
2022-09-13	11:22:11	0.216043
2022-09-13	11:22:11	0.39243
2022-09-13	11:22:11	1.05284
2022-09-13	11:22:12	1.4938
2022-09-13	11:22:12	1.54612
2022-09-13	11:22:12	0.75528
2022-09-13	11:22:12	-0.00522877
2022-09-13	11:22:13	-0.0717427
2022-09-13	11:22:13	-0.170623
2022-09-13	11:22:13	-0.0670099
2022-09-13	11:22:14	-0.187824
2022-09-13	11:22:14	-0.287112
2022-09-13	11:22:14	-0.468078
2022-09-13	11:22:14	-0.365229
2022-09-13	11:22:15	-0.243142
2022-09-13	11:22:15	-0.132862
2022-09-13	11:22:15	-0.0824297
2022-09-13	11:22:15	0.104797
2022-09-13	11:22:16	0.315229
2022-09-13	11:22:16	0.969733
2022-09-13	11:22:16	1.2707
2022-09-13	11:22:16	2.58805
2022-09-13	11:22:17	3.86322
2022-09-13	11:22:17	3.16632
2022-09-13	11:22:17	3.14373
2022-09-13	11:22:18	2.53701
2022-09-13	11:22:18	1.86673
2022-09-13	11:22:18	1.49258
2022-09-13	11:22:18	0.817824
2022-09-13	11:22:19	1.97553
2022-09-13	11:22:19	2.11055
2022-09-13	11:22:19	2.53599
2022-09-13	11:22:19	3.3507
2022-09-13	11:22:20	1.01457
2022-09-13	11:22:20	0.283728
2022-09-13	11:22:20	0.278893
2022-09-13	11:22:20	0.298028
2022-09-13	11:22:21	0.22439
2022-09-13	11:22:21	0.26556
2022-09-13	11:22:21	0.862659
2022-09-13	11:22:22	0.861794
2022-09-13	11:22:22	1.85767
2022-09-13	11:22:22	1.82592
2022-09-13	11:22:22	0.338842
2022-09-13	11:22:23	0.317519
2022-09-13	11:22:23	0.33187
2022-09-13	11:22:23	0.233244
2022-09-13	11:22:23	0.169937
2022-09-13	11:22:24	0.238995
2022-09-13	11:22:24	0.211463
2022-09-13	11:22:24	0.273702
2022-09-13	11:22:24	0.351209
2022-09-13	11:22:25	0.301387
2022-09-13	11:22:25	0.308868
2022-09-13	11:22:25	0.331769
2022-09-13	11:22:26	0.115993
2022-09-13	11:22:26	0.0117178
2022-09-13	11:22:26	0.23126
2022-09-13	11:22:26	0.091158
2022-09-13	11:22:27	0.229071
2022-09-13	11:22:27	-0.120903
2022-09-13	11:22:27	-0.0415137
2022-09-13	11:22:27	0.270802
2022-09-13	11:22:28	0.0509036
2022-09-13	11:22:28	0.146985
2022-09-13	11:22:28	0.0835753
2022-09-13	11:22:28	0.115026
2022-09-13	11:22:29	0.216451
2022-09-13	11:22:29	0.140522
2022-09-13	11:22:29	0.00917326
2022-09-13	11:22:30	-0.10589
2022-09-13	11:22:30	0.0229646
2022-09-13	11:22:30	-0.0616664
2022-09-13	11:22:30	0.293601
2022-09-13	11:22:31	0.225662
2022-09-13	11:22:31	0.414669
2022-09-13	11:22:31	0.467595
2022-09-13	11:22:31	0.262914
2022-09-13	11:22:32	0.445407
2022-09-13	11:22:32	0.112736
2022-09-13	11:22:32	0.620216
2022-09-13	11:22:32	1.77986
2022-09-13	11:22:33	5.07421
2022-09-13	11:22:33	6.02372
2022-09-13	11:22:33	5.03619
2022-09-13	11:22:33	3.37482
2022-09-13	11:22:34	2.32917
2022-09-13	11:22:34	1.92093
2022-09-13	11:22:34	2.27823
2022-09-13	11:22:35	1.2193
2022-09-13	11:22:35	2.56571
2022-09-13	11:22:35	1.06032
2022-09-13	11:22:35	1.51838
2022-09-13	11:22:36	1.95497
2022-09-13	11:22:36	1.2137
2022-09-13	11:22:36	3.59197
2022-09-13	11:22:36	0.831209
2022-09-13	11:22:37	1.74653
2022-09-13	11:22:37	1.72673
2022-09-13	11:22:37	1.44765
2022-09-13	11:22:37	5.80342
2022-09-13	11:22:38	4.11131
2022-09-13	11:22:38	6.50093
2022-09-13	11:22:38	2.13971
2022-09-13	11:22:39	1.21156
2022-09-13	11:22:39	4.63848
2022-09-13	11:22:39	1.00042
2022-09-13	11:22:39	4.94617
2022-09-13	11:22:40	3.74525
2022-09-13	11:22:40	2.27406
2022-09-13	11:22:40	11.8026
2022-09-13	11:22:40	4.59411
2022-09-13	11:22:41	7.03466
2022-09-13	11:22:41	4.35324
2022-09-13	11:22:41	1.20871
2022-09-13	11:22:41	1.16795
2022-09-13	11:22:42	1.30363
2022-09-13	11:22:42	0.644898
2022-09-13	11:22:42	2.36098
2022-09-13	11:22:43	2.72118
2022-09-13	11:22:43	9.87487
2022-09-13	11:22:43	18.7227
2022-09-13	11:22:43	3.24831
2022-09-13	11:22:44	1.47121
2022-09-13	11:22:44	0.890496
2022-09-13	11:22:44	0.198639
2022-09-13	11:22:44	0.763321
2022-09-13	11:22:45	1.05385
2022-09-13	11:22:45	1.6706
2022-09-13	11:22:45	2.46164
2022-09-13	11:22:45	3.30485
2022-09-13	11:22:46	5.07268
2022-09-13	11:22:46	0.941132
2022-09-13	11:22:46	1.63894
2022-09-13	11:22:47	0.658537
2022-09-13	11:22:47	0.754822
2022-09-13	11:22:47	0.401285
2022-09-13	11:22:47	0.457214
2022-09-13	11:22:48	0.828409
2022-09-13	11:22:48	1.07304
2022-09-13	11:22:48	1.47884
2022-09-13	11:22:48	2.84907
2022-09-13	11:22:49	4.45065
2022-09-13	11:22:49	6.62968
2022-09-13	11:22:49	3.83324
2022-09-13	11:22:49	2.2279
2022-09-13	11:22:50	1.89813
2022-09-13	11:22:50	2.31228
2022-09-13	11:22:50	2.3451
2022-09-13	11:22:51	0.957875
2022-09-13	11:22:51	0.447901
2022-09-13	11:22:51	0.468359
2022-09-13	11:22:51	0.747952
2022-09-13	11:22:52	3.14983
2022-09-13	11:22:52	1.50597
2022-09-13	11:22:52	2.09813
2022-09-13	11:22:52	1.01045
2022-09-13	11:22:53	1.03492
2022-09-13	11:22:53	0.985153
2022-09-13	11:22:53	0.453448
2022-09-13	11:22:53	0.395026
2022-09-13	11:22:54	0.455483
2022-09-13	11:22:54	0.41869
2022-09-13	11:22:54	0.22958
2022-09-13	11:22:55	0.156909
2022-09-13	11:22:55	0.0945168
2022-09-13	11:22:55	0.0636262
2022-09-13	11:22:55	0.00581451
2022-09-13	11:22:56	0.314924
2022-09-13	11:22:56	0.450852
2022-09-13	11:22:56	2.43986
2022-09-13	11:22:56	8.40001
2022-09-13	11:22:57	6.49227
2022-09-13	11:22:57	1.57462
2022-09-13	11:22:57	3.00464
2022-09-13	11:22:57	2.04464
2022-09-13	11:22:58	1.49248
2022-09-13	11:22:58	2.81431
2022-09-13	11:22:58	2.82235
2022-09-13	11:22:59	5.55126
2022-09-13	11:22:59	5.84052
2022-09-13	11:22:59	2.53162
2022-09-13	11:22:59	4.23431
2022-09-13	11:23:00	2.33268
2022-09-13	11:23:00	2.26245
2022-09-13	11:23:00	1.76856
2022-09-13	11:23:00	0.976094
2022-09-13	11:23:01	0.867748
2022-09-13	11:23:01	0.768766
2022-09-13	11:23:01	3.32006
2022-09-13	11:23:01	1.01111
2022-09-13	11:23:02	1.31905
2022-09-13	11:23:02	1.17258
2022-09-13	11:23:02	0.800471
2022-09-13	11:23:02	0.905967
2022-09-13	11:23:03	0.580216
2022-09-13	11:23:03	0.470293
2022-09-13	11:23:03	1.02841
2022-09-13	11:23:04	1.27609
2022-09-13	11:23:04	0.859758
2022-09-13	11:23:04	0.931718
2022-09-13	11:23:04	0.464389
2022-09-13	11:23:05	0.46271
2022-09-13	11:23:05	0.492634
2022-09-13	11:23:05	0.896603
2022-09-13	11:23:05	1.63039
2022-09-13	11:23:06	2.02444
2022-09-13	11:23:06	2.73202
2022-09-13	11:23:06	3.19518
2022-09-13	11:23:06	4.24866
2022-09-13	11:23:07	3.23014
2022-09-13	11:23:07	2.91075
2022-09-13	11:23:07	2.3964
2022-09-13	11:23:08	2.68709
2022-09-13	11:23:08	1.27884
2022-09-13	11:23:08	1.53258
2022-09-13	11:23:08	1.10301
2022-09-13	11:23:09	1.33711
2022-09-13	11:23:09	1.0052
2022-09-13	11:23:09	0.773804
2022-09-13	11:23:09	0.712634
2022-09-13	11:23:10	0.765
2022-09-13	11:23:10	0.67869
2022-09-13	11:23:10	0.661997
2022-09-13	11:23:10	0.528308
2022-09-13	11:23:11	0.455738
2022-09-13	11:23:11	0.513652
2022-09-13	11:23:11	0.675636
2022-09-13	11:23:12	0.528919
2022-09-13	11:23:12	0.410751
2022-09-13	11:23:12	0.391412
2022-09-13	11:23:12	0.417672
2022-09-13	11:23:13	0.450445
2022-09-13	11:23:13	0.400522
2022-09-13	11:23:13	0.622354
2022-09-13	11:23:13	0.66098
2022-09-13	11:23:14	0.408664
2022-09-13	11:23:14	1.12347
2022-09-13	11:23:14	1.02978
2022-09-13	11:23:14	2.58744
2022-09-13	11:23:15	2.93202
2022-09-13	11:23:15	4.77289
2022-09-13	11:23:15	5.65578
2022-09-13	11:23:16	1.37431
2022-09-13	11:23:16	4.68429
2022-09-13	11:23:16	1.43319
2022-09-13	11:23:16	4.78378
2022-09-13	11:23:17	3.54469
2022-09-13	11:23:17	1.84195
2022-09-13	11:23:17	3.53029
2022-09-13	11:23:17	0.723473
2022-09-13	11:23:18	1.76724
2022-09-13	11:23:18	0.748715
2022-09-13	11:23:18	0.448003
2022-09-13	11:23:18	0.607494
2022-09-13	11:23:19	0.685814
2022-09-13	11:23:19	3.68668
2022-09-13	11:23:19	4.53625
2022-09-13	11:23:20	2.54368
2022-09-13	11:23:20	0.941387
2022-09-13	11:23:20	1.06123
2022-09-13	11:23:20	0.346018
2022-09-13	11:23:21	0.478333
2022-09-13	11:23:21	0.373906
2022-09-13	11:23:21	0.526018
2022-09-13	11:23:21	0.967443
2022-09-13	11:23:22	1.7536
2022-09-13	11:23:22	0.591921
2022-09-13	11:23:22	1.91782
2022-09-13	11:23:22	0.840013
2022-09-13	11:23:23	0.470089
2022-09-13	11:23:23	0.401082
2022-09-13	11:23:23	0.239962
2022-09-13	11:23:23	0.620573
2022-09-13	11:23:24	2.59869
2022-09-13	11:23:24	7.97248
2022-09-13	11:23:24	3.64642
2022-09-13	11:23:25	2.97075
2022-09-13	11:23:25	1.56739
2022-09-13	11:23:25	2.07294
2022-09-13	11:23:25	5.41024
2022-09-13	11:23:26	7.27227
2022-09-13	11:23:26	12.2713
2022-09-13	11:23:26	9.69059
2022-09-13	11:23:26	4.74123
2022-09-13	11:23:27	1.72037
2022-09-13	11:23:27	0.600929
2022-09-13	11:23:27	0.3507
2022-09-13	11:23:27	0.332736
2022-09-13	11:23:28	0.0644913
2022-09-13	11:23:28	-0.210572
2022-09-13	11:23:28	-0.201361
2022-09-13	11:23:29	0.555636
2022-09-13	11:23:29	7.40566
2022-09-13	11:23:29	5.06164
2022-09-13	11:23:29	0.822506
2022-09-13	11:23:30	0.628053
2022-09-13	11:23:30	0.293601
2022-09-13	11:23:30	0.419555
2022-09-13	11:23:30	1.71559
2022-09-13	11:23:31	2.3277
2022-09-13	11:23:31	2.01787
2022-09-13	11:23:31	2.31996
2022-09-13	11:23:31	2.4795
2022-09-13	11:23:32	2.15365
2022-09-13	11:23:32	1.88169
2022-09-13	11:23:32	1.81085
2022-09-13	11:23:33	1.91355
2022-09-13	11:23:33	1.84749
2022-09-13	11:23:33	1.56877
2022-09-13	11:23:33	1.48805
2022-09-13	11:23:34	0.748766
2022-09-13	11:23:34	0.427799
2022-09-13	11:23:34	0.369631
2022-09-13	11:23:34	0.303066
2022-09-13	11:23:35	0.261081
2022-09-13	11:23:35	0.196654
2022-09-13	11:23:35	0.713957
2022-09-13	11:23:35	0.646476
2022-09-13	11:23:36	0.725204
2022-09-13	11:23:36	0.281998
2022-09-13	11:23:36	-0.0239565
2022-09-13	11:23:37	0.141489
2022-09-13	11:23:37	0.159148
2022-09-13	11:23:37	0.158181
2022-09-13	11:23:37	0.0338043
2022-09-13	11:23:38	-0.00482162
2022-09-13	11:23:38	0.0759926
2022-09-13	11:23:38	0.189122
2022-09-13	11:23:38	0.201692
2022-09-13	11:23:39	0.201641
2022-09-13	11:23:39	0.174211
2022-09-13	11:23:39	0.170547
2022-09-13	11:23:39	0.165102
2022-09-13	11:23:40	0.165713
2022-09-13	11:23:40	0.179708
2022-09-13	11:23:40	0.207596
2022-09-13	11:23:41	0.193601
2022-09-13	11:23:41	0.198944
2022-09-13	11:23:41	0.195992
2022-09-13	11:23:41	0.186934
2022-09-13	11:23:42	0.180471
2022-09-13	11:23:42	0.170242
2022-09-13	11:23:42	0.178384
2022-09-13	11:23:42	0.154822
2022-09-13	11:23:43	-0.0756104
2022-09-13	11:23:43	-0.343346
2022-09-13	11:23:43	-0.446806
2022-09-13	11:23:43	-0.383753
2022-09-13	11:23:44	-0.363804
2022-09-13	11:23:44	-0.386399
2022-09-13	11:23:44	-0.382888
2022-09-13	11:23:45	-0.368282
2022-09-13	11:23:45	-0.369147
2022-09-13	11:23:45	-0.353829
2022-09-13	11:23:45	-0.334898
2022-09-13	11:23:46	-0.342277
2022-09-13	11:23:46	-0.338053
2022-09-13	11:23:46	-0.336933
2022-09-13	11:23:46	-0.318511
2022-09-13	11:23:47	-0.21561
2022-09-13	11:23:47	-0.0337275
2022-09-13	11:23:47	-0.040445
2022-09-13	11:23:47	-0.0490964
2022-09-13	11:23:48	-0.0344908
2022-09-13	11:23:48	-0.0169336
2022-09-13	11:23:48	-0.0156104
2022-09-13	11:23:48	-0.0138293
2022-09-13	11:23:49	-0.0605468
2022-09-13	11:23:49	-0.0400379
2022-09-13	11:23:49	-0.1493
2022-09-13	11:23:50	-0.107875
2022-09-13	11:23:50	-0.0891473
2022-09-13	11:23:50	-0.45734
2022-09-13	11:23:50	-0.402938
2022-09-13	11:23:51	0.30729
2022-09-13	11:23:51	0.436603
2022-09-13	11:23:51	0.291514
2022-09-13	11:23:51	0.441489
2022-09-13	11:23:52	0.450598
2022-09-13	11:23:52	0.454517
2022-09-13	11:23:52	0.191158
2022-09-13	11:23:52	0.0778247
2022-09-13	11:23:53	-0.0278751
2022-09-13	11:23:53	-0.153168
2022-09-13	11:23:53	-0.232048
2022-09-13	11:23:54	-0.202582
2022-09-13	11:23:54	-0.236781
2022-09-13	11:23:54	-0.161768
2022-09-13	11:23:54	-0.218562
2022-09-13	11:23:55	-0.376984
2022-09-13	11:23:55	-0.0574934
2022-09-13	11:23:55	-0.133982
2022-09-13	11:23:55	0.251463
2022-09-13	11:23:56	0.242507
2022-09-13	11:23:56	0.338842
2022-09-13	11:23:56	0.367494
2022-09-13	11:23:56	0.364186
2022-09-13	11:23:57	0.478333
2022-09-13	11:23:57	0.482812
2022-09-13	11:23:57	0.825051
2022-09-13	11:23:58	1.08607
2022-09-13	11:23:58	2.32724
2022-09-13	11:23:58	4.26826
2022-09-13	11:23:58	4.46953
2022-09-13	11:23:59	4.46551
2022-09-13	11:23:59	7.53049
2022-09-13	11:23:59	5.34062
2022-09-13	11:23:59	4.41243
2022-09-13	11:24:00	1.32256
2022-09-13	11:24:00	0.974567
2022-09-13	11:24:00	0.754109
2022-09-13	11:24:00	0.713957
2022-09-13	11:24:01	0.553804
2022-09-13	11:24:01	0.579656
2022-09-13	11:24:01	1.46261
2022-09-13	11:24:02	2.39406
2022-09-13	11:24:02	0.928003
2022-09-13	11:24:02	0.634109
2022-09-13	11:24:02	0.478181
2022-09-13	11:24:03	0.497519
2022-09-13	11:24:03	1.84108
2022-09-13	11:24:03	1.53192
2022-09-13	11:24:03	2.46154
2022-09-13	11:24:04	0.780776
2022-09-13	11:24:04	0.370598
2022-09-13	11:24:04	0.529783
2022-09-13	11:24:04	0.736603
2022-09-13	11:24:05	0.552074
2022-09-13	11:24:05	0.193601
2022-09-13	11:24:05	0.424389
2022-09-13	11:24:06	0.22897
2022-09-13	11:24:06	0.201234
2022-09-13	11:24:06	0.448308
2022-09-13	11:24:06	0.926934
2022-09-13	11:24:07	0.659554
2022-09-13	11:24:07	0.186832
2022-09-13	11:24:07	1.03274
2022-09-13	11:24:07	1.68877
2022-09-13	11:24:08	3.92256
2022-09-13	11:24:08	12.6604
2022-09-13	11:24:08	9.03945
2022-09-13	11:24:08	3.01899
2022-09-13	11:24:09	0.950394
2022-09-13	11:24:09	1.04047
2022-09-13	11:24:09	0.517977
2022-09-13	11:24:10	0.411616
2022-09-13	11:24:10	0.848969
2022-09-13	11:24:10	0.379962
2022-09-13	11:24:10	0.220522
2022-09-13	11:24:11	-0.176628
2022-09-13	11:24:11	-0.273219
2022-09-13	11:24:11	-0.20986
2022-09-13	11:24:11	-0.109046
2022-09-13	11:24:12	-0.196832
2022-09-13	11:24:12	0.10785
2022-09-13	11:24:12	1.19879
2022-09-13	11:24:12	3.21899
2022-09-13	11:24:13	1.79787
2022-09-13	11:24:13	0.607544
2022-09-13	11:24:13	0.316298
2022-09-13	11:24:13	0.419097
2022-09-13	11:24:14	0.280216
2022-09-13	11:24:14	0.162659
2022-09-13	11:24:14	0.280776
2022-09-13	11:24:15	0.224746
2022-09-13	11:24:15	0.224797
2022-09-13	11:24:15	0.303677
2022-09-13	11:24:15	0.233906
2022-09-13	11:24:16	0.707646
2022-09-13	11:24:16	0.733142
2022-09-13	11:24:16	0.741031
2022-09-13	11:24:16	0.734008
2022-09-13	11:24:17	0.730598
2022-09-13	11:24:17	0.739402
2022-09-13	11:24:17	0.737315
2022-09-13	11:24:17	0.735178
2022-09-13	11:24:18	0.730394
2022-09-13	11:24:18	0.737214
2022-09-13	11:24:18	0.731259
2022-09-13	11:24:19	0.737621
2022-09-13	11:24:19	0.736908
2022-09-13	11:24:19	0.74332
2022-09-13	11:24:19	0.737366
2022-09-13	11:24:20	0.732379
2022-09-13	11:24:20	0.73813
2022-09-13	11:24:20	0.73243
2022-09-13	11:24:20	0.735178
2022-09-13	11:24:21	0.737315
2022-09-13	11:24:21	0.734109
2022-09-13	11:24:21	0.734517
2022-09-13	11:24:21	0.741896
2022-09-13	11:24:22	0.728054
2022-09-13	11:24:22	0.734415
2022-09-13	11:24:22	0.734568
2022-09-13	11:24:23	0.731921
2022-09-13	11:24:23	0.728257
2022-09-13	11:24:23	0.744542
2022-09-13	11:24:23	0.730191
2022-09-13	11:24:24	0.734618
2022-09-13	11:24:24	0.728461
2022-09-13	11:24:24	0.729784
2022-09-13	11:24:24	0.741947
2022-09-13	11:24:25	0.736145
2022-09-13	11:24:25	0.741997
2022-09-13	11:24:25	0.737621
2022-09-13	11:24:25	0.734618
2022-09-13	11:24:26	0.737672
2022-09-13	11:24:26	0.738435
2022-09-13	11:24:26	0.734364
2022-09-13	11:24:27	0.732074
2022-09-13	11:24:27	0.734313
2022-09-13	11:24:27	0.733855
2022-09-13	11:24:27	0.725662
2022-09-13	11:24:28	0.736705
2022-09-13	11:24:28	0.733753
2022-09-13	11:24:28	0.735127
2022-09-13	11:24:28	0.733448
2022-09-13	11:24:29	0.734517
2022-09-13	11:24:29	0.733142
2022-09-13	11:24:29	0.738028
2022-09-13	11:24:29	0.730852
2022-09-13	11:24:30	0.734924
2022-09-13	11:24:30	0.736043
2022-09-13	11:24:30	0.733906
2022-09-13	11:24:31	0.732939
2022-09-13	11:24:31	0.735026
2022-09-13	11:24:31	0.732888
2022-09-13	11:24:31	0.745407
2022-09-13	11:24:32	0.738333
2022-09-13	11:24:32	0.729682
2022-09-13	11:24:32	0.734873
2022-09-13	11:24:32	0.737315
2022-09-13	11:24:33	0.672888
2022-09-13	11:24:33	0.586221
2022-09-13	11:24:33	0.538028
2022-09-13	11:24:33	0.408308
2022-09-13	11:24:34	0.73472
2022-09-13	11:24:34	0.731056
2022-09-13	11:24:34	0.733957
2022-09-13	11:24:34	0.694211
2022-09-13	11:24:35	0.286832
2022-09-13	11:24:35	0.733855
2022-09-13	11:24:35	0.73299
2022-09-13	11:24:36	0.732532
2022-09-13	11:24:36	0.726934
2022-09-13	11:24:36	0.736654
2022-09-13	11:24:36	0.739147
2022-09-13	11:24:37	1.04581
2022-09-13	11:24:37	0.743728
2022-09-13	11:24:37	0.7393
2022-09-13	11:24:37	0.734618
2022-09-13	11:24:38	0.739453
2022-09-13	11:24:38	0.728613
2022-09-13	11:24:38	0.735738
2022-09-13	11:24:38	0.454924
2022-09-13	11:24:39	0.733855
2022-09-13	11:24:39	0.734262
2022-09-13	11:24:39	0.734262
2022-09-13	11:24:40	0.735789
2022-09-13	11:24:40	0.742913
2022-09-13	11:24:40	0.455585
2022-09-13	11:24:40	0.736857
2022-09-13	11:24:41	0.350445
2022-09-13	11:24:41	-0.320699
2022-09-13	11:24:41	-0.469707
2022-09-13	11:24:41	-0.29729
2022-09-13	11:24:42	-0.165432
2022-09-13	11:24:42	-0.0372389
2022-09-13	11:24:42	-0.00202267
2022-09-13	11:24:42	0.0277992
2022-09-13	11:24:43	1.02704
2022-09-13	11:24:43	2.04525
2022-09-13	11:24:43	3.8537
2022-09-13	11:24:44	3.06032
2022-09-13	11:24:44	9.06545
2022-09-13	11:24:44	2.56352
2022-09-13	11:24:44	2.40566
2022-09-13	11:24:45	1.26368
2022-09-13	11:24:45	0.779962
2022-09-13	11:24:45	0.708155
2022-09-13	11:24:45	0.73528
2022-09-13	11:24:46	0.718944
2022-09-13	11:24:46	0.730903
2022-09-13	11:24:46	0.672735
2022-09-13	11:24:46	0.732379
2022-09-13	11:24:47	0.389886
2022-09-13	11:24:47	0.0840841
2022-09-13	11:24:47	-0.0777478
2022-09-13	11:24:48	-0.122226
2022-09-13	11:24:48	-0.0187148
2022-09-13	11:24:48	-0.150267
2022-09-13	11:24:48	-0.0504705
2022-09-13	11:24:49	0.0166033
2022-09-13	11:24:49	0.0151783
2022-09-13	11:24:49	0.0577738
2022-09-13	11:24:49	0.0533972
2022-09-13	11:24:50	0.654619
2022-09-13	11:24:50	0.118435
2022-09-13	11:24:50	0.4393
2022-09-13	11:24:50	0.731717
2022-09-13	11:24:51	0.737773
2022-09-13	11:24:51	0.735229
2022-09-13	11:24:51	0.735687
2022-09-13	11:24:52	0.738384
2022-09-13	11:24:52	0.730496
2022-09-13	11:24:52	0.738689
2022-09-13	11:24:52	0.734975
2022-09-13	11:24:53	0.738537
2022-09-13	11:24:53	0.737163
2022-09-13	11:24:53	0.733295
2022-09-13	11:24:53	0.740216
2022-09-13	11:24:54	0.740165
2022-09-13	11:24:54	0.733702
2022-09-13	11:24:54	0.739147
2022-09-13	11:24:54	0.733906
2022-09-13	11:24:55	0.736756
2022-09-13	11:24:55	0.736094
2022-09-13	11:24:55	0.732532
2022-09-13	11:24:56	0.740064
2022-09-13	11:24:56	0.728155
2022-09-13	11:24:56	0.732328
2022-09-13	11:24:56	0.739453
2022-09-13	11:24:57	0.734669
2022-09-13	11:24:57	0.739911
2022-09-13	11:24:57	0.737366
2022-09-13	11:24:57	0.735789
2022-09-13	11:24:58	0.735127
2022-09-13	11:24:58	0.735891
2022-09-13	11:24:58	0.73416
2022-09-13	11:24:58	0.732939
2022-09-13	11:24:59	0.731768
2022-09-13	11:24:59	0.733855
2022-09-13	11:24:59	0.737672
2022-09-13	11:25:00	0.739504
2022-09-13	11:25:00	0.740573
2022-09-13	11:25:00	0.73584
2022-09-13	11:25:00	0.737875
2022-09-13	11:25:01	0.741234
2022-09-13	11:25:01	0.736908
2022-09-13	11:25:01	0.736399
2022-09-13	11:25:01	0.72902
2022-09-13	11:25:02	0.740522
2022-09-13	11:25:02	0.734924
2022-09-13	11:25:02	0.733346
2022-09-13	11:25:02	0.735789
2022-09-13	11:25:03	0.736705
2022-09-13	11:25:03	0.737773
2022-09-13	11:25:03	0.74327
2022-09-13	11:25:03	0.739606
2022-09-13	11:25:04	0.737722
2022-09-13	11:25:04	0.730191
2022-09-13	11:25:04	0.738181
2022-09-13	11:25:05	0.739555
2022-09-13	11:25:05	0.732481
2022-09-13	11:25:05	0.742964
2022-09-13	11:25:05	0.741896
2022-09-13	11:25:06	0.739656
2022-09-13	11:25:06	0.74327
2022-09-13	11:25:06	0.73813
2022-09-13	11:25:06	0.734517
2022-09-13	11:25:07	0.737926
2022-09-13	11:25:07	0.736094
2022-09-13	11:25:07	0.739453
2022-09-13	11:25:07	0.736756
2022-09-13	11:25:08	0.733499
2022-09-13	11:25:08	0.730394
2022-09-13	11:25:08	0.739097
2022-09-13	11:25:09	0.731616
2022-09-13	11:25:09	0.735483
2022-09-13	11:25:09	0.736196
2022-09-13	11:25:09	0.73299
2022-09-13	11:25:10	0.738333
2022-09-13	11:25:10	0.736756
2022-09-13	11:25:10	0.730191
2022-09-13	11:25:10	0.734364
2022-09-13	11:25:11	0.735331
2022-09-13	11:25:11	0.732684
2022-09-13	11:25:11	0.735382
2022-09-13	11:25:11	0.739656
2022-09-13	11:25:12	0.735534
2022-09-13	11:25:12	0.735382
2022-09-13	11:25:12	0.731412
2022-09-13	11:25:13	0.742455
2022-09-13	11:25:13	0.728868
2022-09-13	11:25:13	0.737977
2022-09-13	11:25:13	0.73299
2022-09-13	11:25:14	0.735026
2022-09-13	11:25:14	0.731463
2022-09-13	11:25:14	0.737672
2022-09-13	11:25:14	0.742455
2022-09-13	11:25:15	0.737112
2022-09-13	11:25:15	0.741081
2022-09-13	11:25:15	0.736399
2022-09-13	11:25:15	0.732379
2022-09-13	11:25:16	0.737163
2022-09-13	11:25:16	0.734873
2022-09-13	11:25:16	0.732786
2022-09-13	11:25:17	0.7307
2022-09-13	11:25:17	0.732226
2022-09-13	11:25:17	0.739758
2022-09-13	11:25:17	0.728868
2022-09-13	11:25:18	0.734008
2022-09-13	11:25:18	0.729428
2022-09-13	11:25:18	0.73701
2022-09-13	11:25:18	0.730394
2022-09-13	11:25:19	0.733244
2022-09-13	11:25:19	0.736857
2022-09-13	11:25:19	0.731158
2022-09-13	11:25:19	0.738791
2022-09-13	11:25:20	0.73299
2022-09-13	11:25:20	0.735738
2022-09-13	11:25:20	0.735026
2022-09-13	11:25:21	0.739249
2022-09-13	11:25:21	0.736196
2022-09-13	11:25:21	0.740267
2022-09-13	11:25:21	0.737163
2022-09-13	11:25:22	0.740522
2022-09-13	11:25:22	0.738486
2022-09-13	11:25:22	0.735127
2022-09-13	11:25:22	0.730852
2022-09-13	11:25:23	0.738639
2022-09-13	11:25:23	0.73243
2022-09-13	11:25:23	0.731412
2022-09-13	11:25:23	0.743626
2022-09-13	11:25:24	0.77472
2022-09-13	11:25:24	0.742303
2022-09-13	11:25:24	0.733193
2022-09-13	11:25:24	0.737417
2022-09-13	11:25:25	0.736552
2022-09-13	11:25:25	0.734109
2022-09-13	11:25:25	0.736399
2022-09-13	11:25:26	0.735382
2022-09-13	11:25:26	0.737722
2022-09-13	11:25:26	0.733397
2022-09-13	11:25:26	0.73645
2022-09-13	11:25:27	0.734669
2022-09-13	11:25:27	0.737417
2022-09-13	11:25:27	0.729682
2022-09-13	11:25:27	0.731616
2022-09-13	11:25:28	0.73584
2022-09-13	11:25:28	0.733397
2022-09-13	11:25:28	0.731616
2022-09-13	11:25:28	0.734873
2022-09-13	11:25:29	0.737519
2022-09-13	11:25:29	0.736654
2022-09-13	11:25:29	0.732888
2022-09-13	11:25:30	0.735127
2022-09-13	11:25:30	0.74042
2022-09-13	11:25:30	0.7307
2022-09-13	11:25:30	0.735178
2022-09-13	11:25:31	0.728919
2022-09-13	11:25:31	0.724338
2022-09-13	11:25:31	0.740064
2022-09-13	11:25:31	-0.199274
2022-09-13	11:25:32	0.903626
2022-09-13	11:25:32	0.300674
2022-09-13	11:25:32	0.572634
2022-09-13	11:25:32	0.282048
2022-09-13	11:25:33	0.572125
2022-09-13	11:25:33	1.16866
2022-09-13	11:25:33	2.09314
2022-09-13	11:25:34	3.41182
2022-09-13	11:25:34	4.20144
2022-09-13	11:25:34	6.3422
2022-09-13	11:25:34	4.19446
2022-09-13	11:25:35	4.94698
2022-09-13	11:25:35	2.50276
2022-09-13	11:25:35	1.32729
2022-09-13	11:25:35	0.719707
2022-09-13	11:25:36	0.390802
2022-09-13	11:25:36	0.356858
2022-09-13	11:25:36	0.491463
2022-09-13	11:25:36	0.230903
2022-09-13	11:25:37	0.481591
2022-09-13	11:25:37	0.818537
2022-09-13	11:25:37	2.79614
2022-09-13	11:25:38	5.19461
2022-09-13	11:25:38	8.40917
2022-09-13	11:25:38	3.5395
2022-09-13	11:25:38	1.18525
2022-09-13	11:25:39	1.39905
2022-09-13	11:25:39	0.865814
2022-09-13	11:25:39	0.820013
2022-09-13	11:25:39	0.199911
2022-09-13	11:25:40	0.29299
2022-09-13	11:25:40	2.03441
2022-09-13	11:25:40	2.46668
2022-09-13	11:25:40	0.9593
2022-09-13	11:25:41	1.02388
2022-09-13	11:25:41	0.640572
2022-09-13	11:25:41	0.0620994
2022-09-13	11:25:42	0.331361
2022-09-13	11:25:42	0.399504
2022-09-13	11:25:42	0.476756
2022-09-13	11:25:42	0.67528
2022-09-13	11:25:43	0.88154
2022-09-13	11:25:43	2.67436
2022-09-13	11:25:43	1.6964
2022-09-13	11:25:43	2.65375
2022-09-13	11:25:44	2.71533
2022-09-13	11:25:44	4.50342
2022-09-13	11:25:44	6.64108
2022-09-13	11:25:44	7.66398
2022-09-13	11:25:45	9.50642
2022-09-13	11:25:45	3.19681
2022-09-13	11:25:45	10.4549
2022-09-13	11:25:46	5.56092
2022-09-13	11:25:46	0.743117
2022-09-13	11:25:46	0.739097
2022-09-13	11:25:46	0.723321
2022-09-13	11:25:47	0.714567
2022-09-13	11:25:47	0.556247
2022-09-13	11:25:47	0.577316
2022-09-13	11:25:47	0.589377
2022-09-13	11:25:48	0.637367
2022-09-13	11:25:48	0.649275
2022-09-13	11:25:48	0.579097
2022-09-13	11:25:48	0.622608
2022-09-13	11:25:49	0.696094
2022-09-13	11:25:49	2.20159
2022-09-13	11:25:49	2.52938
2022-09-13	11:25:49	1.7965
2022-09-13	11:25:50	1.82464
2022-09-13	11:25:50	1.72302
2022-09-13	11:25:50	2.76693
2022-09-13	11:25:51	2.19981
2022-09-13	11:25:51	4.7767
2022-09-13	11:25:51	3.85105
2022-09-13	11:25:51	4.35711
2022-09-13	11:25:52	2.82495
2022-09-13	11:25:52	1.28271
2022-09-13	11:25:52	0.384644
2022-09-13	11:25:52	0.381082
2022-09-13	11:25:53	0.246578
2022-09-13	11:25:53	0.178741
2022-09-13	11:25:53	0.257417
2022-09-13	11:25:53	0.278842
2022-09-13	11:25:54	1.55584
2022-09-13	11:25:54	5.55085
2022-09-13	11:25:54	2.86561
2022-09-13	11:25:55	0.211819
2022-09-13	11:25:55	0.219504
2022-09-13	11:25:55	0.76103
2022-09-13	11:25:55	0.371616
2022-09-13	11:25:56	0.500013
2022-09-13	11:25:56	1.28765
2022-09-13	11:25:56	1.60475
2022-09-13	11:25:56	3.95523
2022-09-13	11:25:57	1.1649
2022-09-13	11:25:57	0.621489
2022-09-13	11:25:57	0.384847
2022-09-13	11:25:57	0.229886
2022-09-13	11:25:58	0.202557
2022-09-13	11:25:58	0.25584
2022-09-13	11:25:58	0.0945677
2022-09-13	11:25:59	0.213804
2022-09-13	11:25:59	0.10556
2022-09-13	11:25:59	0.362455
2022-09-13	11:25:59	0.101794
2022-09-13	11:26:00	0.758333
2022-09-13	11:26:00	2.21329
2022-09-13	11:26:00	3.2021
2022-09-13	11:26:00	1.98139
2022-09-13	11:26:01	1.00042
2022-09-13	11:26:01	0.994669
2022-09-13	11:26:01	0.856349
2022-09-13	11:26:01	1.4051
2022-09-13	11:26:02	1.28225
2022-09-13	11:26:02	0.811005
2022-09-13	11:26:02	0.648053
2022-09-13	11:26:03	0.958384
2022-09-13	11:26:03	0.913906
2022-09-13	11:26:03	1.52403
2022-09-13	11:26:03	1.27263
2022-09-13	11:26:04	0.598283
2022-09-13	11:26:04	1.44612
2022-09-13	11:26:04	1.63594
2022-09-13	11:26:04	3.54454
2022-09-13	11:26:05	3.4394
2022-09-13	11:26:05	5.32968
2022-09-13	11:26:05	1.45762
2022-09-13	11:26:05	0.735076
2022-09-13	11:26:06	0.737366
2022-09-13	11:26:06	0.74444
2022-09-13	11:26:06	1.0908
2022-09-13	11:26:07	0.736043
2022-09-13	11:26:07	0.737468
2022-09-13	11:26:07	0.729428
2022-09-13	11:26:07	0.73416
2022-09-13	11:26:08	0.297367
2022-09-13	11:26:08	-0.439936
2022-09-13	11:26:08	0.559046
2022-09-13	11:26:08	0.290089
2022-09-13	11:26:09	0.484847
2022-09-13	11:26:09	0.305509
2022-09-13	11:26:09	0.43645
2022-09-13	11:26:09	0.354008
2022-09-13	11:26:10	0.489529
2022-09-13	11:26:10	0.805
2022-09-13	11:26:10	3.04368
2022-09-13	11:26:10	7.66362
2022-09-13	11:26:11	1.10037
2022-09-13	11:26:11	0.509987
2022-09-13	11:26:11	0.498944
2022-09-13	11:26:12	0.446171
2022-09-13	11:26:12	0.486018
2022-09-13	11:26:12	0.317672
2022-09-13	11:26:12	0.407596
2022-09-13	11:26:13	0.496603
2022-09-13	11:26:13	0.54215
2022-09-13	11:26:13	0.648613
2022-09-13	11:26:13	1.31095
2022-09-13	11:26:14	3.99996
2022-09-13	11:26:14	2.81309
2022-09-13	11:26:14	1.01625
2022-09-13	11:26:14	0.732023
2022-09-13	11:26:15	0.73416
2022-09-13	11:26:15	0.734975
2022-09-13	11:26:15	0.738689
2022-09-13	11:26:16	0.734669
2022-09-13	11:26:16	0.728512
2022-09-13	11:26:16	0.736807
2022-09-13	11:26:16	0.737315
2022-09-13	11:26:17	0.732226
2022-09-13	11:26:17	0.728308
2022-09-13	11:26:17	0.729173
2022-09-13	11:26:17	0.734415
2022-09-13	11:26:18	0.738639
2022-09-13	11:26:18	0.733906
2022-09-13	11:26:18	0.739962
2022-09-13	11:26:18	0.733295
2022-09-13	11:26:19	0.733142
2022-09-13	11:26:19	0.729326
2022-09-13	11:26:19	0.738028
2022-09-13	11:26:20	0.739249
2022-09-13	11:26:20	0.731209
2022-09-13	11:26:20	0.738282
2022-09-13	11:26:20	0.73472
2022-09-13	11:26:21	0.737977
2022-09-13	11:26:21	0.734109
2022-09-13	11:26:21	0.740064
2022-09-13	11:26:21	0.7307
2022-09-13	11:26:22	0.736399
2022-09-13	11:26:22	0.73416
2022-09-13	11:26:22	0.739402
2022-09-13	11:26:22	0.734669
2022-09-13	11:26:23	0.739707
2022-09-13	11:26:23	0.729122
2022-09-13	11:26:23	0.737977
2022-09-13	11:26:24	0.730751
2022-09-13	11:26:24	0.731412
2022-09-13	11:26:24	0.73584
2022-09-13	11:26:24	0.72215
2022-09-13	11:26:25	0.736501
2022-09-13	11:26:25	0.731667
2022-09-13	11:26:25	0.73584
2022-09-13	11:26:25	0.740776
2022-09-13	11:26:26	0.731972
2022-09-13	11:26:26	0.731667
2022-09-13	11:26:26	0.734008
2022-09-13	11:26:26	0.734771
