# Supplementary material for: Comparing efficacy in reducing pulling and welfare impacts of four types of leash walking equipment
Source: PeerJ journal article supplement (doi:10.7717/peerj.18131), 2024-10-24
Supplement: Shelter1_Tension_files.zip [file Saint_star_2022913103243 copy.xlsx]

## Sheet: Averaged Newtons
Date	Time	Averaged Newtons	Impulse	Total steps
2022-09-13	10:32:54	1.76202	1.76202	0
2022-09-13	10:32:55	2.77792	4.53994	0		Impulse newtons	1759.35
2022-09-13	10:32:56	2.7773	7.31723	0		Total steps	36
2022-09-13	10:32:57	1.5919	8.90914	0		# > 5 sec	0
2022-09-13	10:32:58	2.1692	11.0783	0
2022-09-13	10:32:59	1.34555	12.4239	0
2022-09-13	10:33:00	1.72631	14.1502	0
2022-09-13	10:33:01	1.71392	15.8641	0
2022-09-13	10:33:02	1.75064	17.6148	0
2022-09-13	10:33:03	1.54849	19.1633	0
2022-09-13	10:33:04	0.534916	19.6982	0
2022-09-13	10:33:05	10.4054	30.1036	0
2022-09-13	10:33:06	9.80911	39.9127	0
2022-09-13	10:33:07	3.99631	43.909	0
2022-09-13	10:33:08	11.5883	55.4973	0
2022-09-13	10:33:09	14.552	70.0493	1
2022-09-13	10:33:10	2.5444	72.5937	1
2022-09-13	10:33:11	3.86105	76.4547	1
2022-09-13	10:33:12	15.5792	92.034	2
2022-09-13	10:33:13	0.264686	92.2986	2
2022-09-13	10:33:14	-0.499242	92.2986	2
2022-09-13	10:33:15	-1.43123	92.2986	2
2022-09-13	10:33:16	4.51413	96.8128	2
2022-09-13	10:33:17	10.6566	107.469	2
2022-09-13	10:33:18	13.5892	121.059	3
2022-09-13	10:33:19	25.827	146.886	4
2022-09-13	10:33:20	15.3411	162.227	5
2022-09-13	10:33:21	7.1071	169.334	5
2022-09-13	10:33:22	6.80864	176.143	5
2022-09-13	10:33:23	9.2247	185.367	5
2022-09-13	10:33:24	26.6543	212.022	6
2022-09-13	10:33:25	5.9757	217.997	6
2022-09-13	10:33:26	4.11187	222.109	6
2022-09-13	10:33:27	2.14598	224.255	6
2022-09-13	10:33:28	3.34747	227.603	6
2022-09-13	10:33:29	4.45357	232.056	6
2022-09-13	10:33:30	2.21193	234.268	6
2022-09-13	10:33:31	1.43502	235.703	6
2022-09-13	10:33:32	0.931803	236.635	6
2022-09-13	10:33:33	3.38906	240.024	6
2022-09-13	10:33:34	0.145219	240.169	6
2022-09-13	10:33:35	4.14362	244.313	6
2022-09-13	10:33:36	1.50475	245.818	6
2022-09-13	10:33:37	1.74691	247.564	6
2022-09-13	10:33:38	2.51839	250.083	6
2022-09-13	10:33:39	12.1087	262.191	6
2022-09-13	10:33:40	27.511	289.702	7
2022-09-13	10:33:41	18.2694	307.972	8
2022-09-13	10:33:42	13.5928	321.565	9
2022-09-13	10:33:43	8.72527	330.29	9
2022-09-13	10:33:44	5.31315	335.603	9
2022-09-13	10:33:45	5.84587	341.449	9
2022-09-13	10:33:46	10.6444	352.093	9
2022-09-13	10:33:47	11.4237	363.517	9
2022-09-13	10:33:48	1.64651	365.163	9
2022-09-13	10:33:49	-2.21408	365.163	9
2022-09-13	10:33:50	-1.61295	365.163	9
2022-09-13	10:33:51	2.12761	367.291	9
2022-09-13	10:33:52	2.62246	369.914	9
2022-09-13	10:33:53	3.43532	373.349	9
2022-09-13	10:33:54	49.1832	422.532	10
2022-09-13	10:33:55	23.0982	445.63	11
2022-09-13	10:33:56	10.6019	456.232	11
2022-09-13	10:33:57	-0.0910942	456.232	11
2022-09-13	10:33:58	-2.36066	456.232	11
2022-09-13	10:33:59	-1.07849	456.232	11
2022-09-13	10:34:00	-0.0791151	456.232	11
2022-09-13	10:34:01	0.558232	456.79	11
2022-09-13	10:34:02	1.21816	458.009	11
2022-09-13	10:34:03	0.907412	458.916	11
2022-09-13	10:34:04	1.46315	460.379	11
2022-09-13	10:34:05	30.1857	490.565	12
2022-09-13	10:34:06	12.0607	502.626	12
2022-09-13	10:34:07	12.5411	515.167	12
2022-09-13	10:34:08	6.75782	521.925	12
2022-09-13	10:34:09	11.2765	533.201	12
2022-09-13	10:34:10	12.2068	545.408	12
2022-09-13	10:34:11	5.84271	551.25	12
2022-09-13	10:34:12	22.5286	573.779	13
2022-09-13	10:34:13	23.9051	597.684	14
2022-09-13	10:34:14	5.45301	603.137	14
2022-09-13	10:34:15	19.5204	622.658	15
2022-09-13	10:34:16	9.999	632.657	15
2022-09-13	10:34:17	10.6312	643.288	15
2022-09-13	10:34:18	8.80348	652.091	15
2022-09-13	10:34:19	7.2883	659.38	15
2022-09-13	10:34:20	1.61029	660.99	15
2022-09-13	10:34:21	9.18106	670.171	15
2022-09-13	10:34:22	13.6383	683.809	16
2022-09-13	10:34:23	3.15681	686.966	16
2022-09-13	10:34:24	-0.342444	686.966	16
2022-09-13	10:34:25	2.92664	689.893	16
2022-09-13	10:34:26	2.08426	691.977	16
2022-09-13	10:34:27	1.71361	693.691	16
2022-09-13	10:34:28	2.74192	696.433	16
2022-09-13	10:34:29	3.27237	699.705	16
2022-09-13	10:34:30	3.27039	702.975	16
2022-09-13	10:34:31	3.26796	706.243	16
2022-09-13	10:34:32	2.87648	709.12	16
2022-09-13	10:34:33	3.1791	712.299	16
2022-09-13	10:34:34	2.76281	715.062	16
2022-09-13	10:34:35	1.63327	716.695	16
2022-09-13	10:34:36	1.52452	718.219	16
2022-09-13	10:34:37	1.38613	719.606	16
2022-09-13	10:34:38	8.27318	727.879	16
2022-09-13	10:34:39	18.7362	746.615	17
2022-09-13	10:34:40	1.75149	748.366	17
2022-09-13	10:34:41	0.748044	749.114	17
2022-09-13	10:34:42	0.514261	749.629	17
2022-09-13	10:34:43	1.99858	751.627	17
2022-09-13	10:34:44	2.07649	753.704	17
2022-09-13	10:34:45	2.17594	755.88	17
2022-09-13	10:34:46	2.22959	758.109	17
2022-09-13	10:34:47	2.09518	760.205	17
2022-09-13	10:34:48	2.65047	762.855	17
2022-09-13	10:34:49	2.61533	765.47	17
2022-09-13	10:34:50	3.41232	768.883	17
2022-09-13	10:34:51	3.04668	771.929	17
2022-09-13	10:34:52	3.06671	774.996	17
2022-09-13	10:34:53	1.73867	776.735	17
2022-09-13	10:34:54	1.45715	778.192	17
2022-09-13	10:34:55	6.71756	784.909	17
2022-09-13	10:34:56	11.3692	796.279	17
2022-09-13	10:34:57	9.08475	805.363	17
2022-09-13	10:34:58	4.51889	809.882	17
2022-09-13	10:34:59	2.71714	812.599	17
2022-09-13	10:35:00	2.44804	815.047	17
2022-09-13	10:35:01	8.14439	823.192	17
2022-09-13	10:35:02	4.49202	827.684	17
2022-09-13	10:35:03	6.42057	834.104	17
2022-09-13	10:35:04	8.10183	842.206	17
2022-09-13	10:35:05	0.548216	842.754	17
2022-09-13	10:35:06	3.27414	846.029	17
2022-09-13	10:35:07	4.93422	850.963	17
2022-09-13	10:35:08	12.819	863.782	17
2022-09-13	10:35:09	7.75758	871.539	17
2022-09-13	10:35:10	3.09987	874.639	17
2022-09-13	10:35:11	3.89365	878.533	17
2022-09-13	10:35:12	2.41697	880.95	17
2022-09-13	10:35:13	8.39406	889.344	17
2022-09-13	10:35:14	18.9728	908.317	18
2022-09-13	10:35:15	6.41791	914.735	18
2022-09-13	10:35:16	2.83989	917.574	18
2022-09-13	10:35:17	3.15076	920.725	18
2022-09-13	10:35:18	1.87226	922.597	18
2022-09-13	10:35:19	2.56726	925.165	18
2022-09-13	10:35:20	1.68239	926.847	18
2022-09-13	10:35:21	1.21307	928.06	18
2022-09-13	10:35:22	0.932652	928.993	18
2022-09-13	10:35:23	0.481474	929.474	18
2022-09-13	10:35:24	-0.453308	929.474	18
2022-09-13	10:35:25	-1.62597	929.474	18
2022-09-13	10:35:26	0.334408	929.809	18
2022-09-13	10:35:27	0.933047	930.742	18
2022-09-13	10:35:28	1.10369	931.845	18
2022-09-13	10:35:29	-0.699884	931.845	18
2022-09-13	10:35:30	-0.941194	931.845	18
2022-09-13	10:35:31	0.699942	932.545	18
2022-09-13	10:35:32	1.55696	934.102	18
2022-09-13	10:35:33	-1.45336	934.102	18
2022-09-13	10:35:34	-2.35432	934.102	18
2022-09-13	10:35:35	-1.85302	934.102	18
2022-09-13	10:35:36	-0.100073	934.102	18
2022-09-13	10:35:37	1.80237	935.905	18
2022-09-13	10:35:38	0.505432	936.41	18
2022-09-13	10:35:39	0.837575	937.248	18
2022-09-13	10:35:40	1.77543	939.023	18
2022-09-13	10:35:41	2.93111	941.954	18
2022-09-13	10:35:42	3.26999	945.224	18
2022-09-13	10:35:43	3.28556	948.51	18
2022-09-13	10:35:44	3.27565	951.785	18
2022-09-13	10:35:45	3.26373	955.049	18
2022-09-13	10:35:46	3.28906	958.338	18
2022-09-13	10:35:47	3.27605	961.614	18
2022-09-13	10:35:48	3.2791	964.893	18
2022-09-13	10:35:49	3.26109	968.155	18
2022-09-13	10:35:50	3.28646	971.441	18
2022-09-13	10:35:51	3.29274	974.734	18
2022-09-13	10:35:52	3.26931	978.003	18
2022-09-13	10:35:53	4.08413	982.087	18
2022-09-13	10:35:54	0.177005	982.264	18
2022-09-13	10:35:55	1.13039	983.395	18
2022-09-13	10:35:56	52.7604	1036.16	19
2022-09-13	10:35:57	27.4936	1063.65	20
2022-09-13	10:35:58	6.27061	1069.92	20
2022-09-13	10:35:59	12.7443	1082.66	20
2022-09-13	10:36:00	15.4603	1098.12	21
2022-09-13	10:36:01	8.73239	1106.86	21
2022-09-13	10:36:02	5.61399	1112.47	21
2022-09-13	10:36:03	1.37634	1113.85	21
2022-09-13	10:36:04	0.797621	1114.64	21
2022-09-13	10:36:05	-1.39235	1114.64	21
2022-09-13	10:36:06	2.15393	1116.8	21
2022-09-13	10:36:07	5.11303	1121.91	21
2022-09-13	10:36:08	4.39031	1126.3	21
2022-09-13	10:36:09	10.6625	1136.96	21
2022-09-13	10:36:10	12.5245	1149.49	21
2022-09-13	10:36:11	2.64189	1152.13	21
2022-09-13	10:36:12	1.17079	1153.3	21
2022-09-13	10:36:13	2.50757	1155.81	21
2022-09-13	10:36:14	7.01587	1162.82	21
2022-09-13	10:36:15	15.0941	1177.92	22
2022-09-13	10:36:16	0.152179	1178.07	22
2022-09-13	10:36:17	-2.49308	1178.07	22
2022-09-13	10:36:18	-0.672775	1178.07	22
2022-09-13	10:36:19	1.02116	1179.09	22
2022-09-13	10:36:20	1.37315	1180.47	22
2022-09-13	10:36:21	1.72908	1182.19	22
2022-09-13	10:36:22	1.94623	1184.14	22
2022-09-13	10:36:23	1.68217	1185.82	22
2022-09-13	10:36:24	1.12505	1186.95	22
2022-09-13	10:36:25	0.713636	1187.66	22
2022-09-13	10:36:26	0.0280711	1187.69	22
2022-09-13	10:36:27	-0.736612	1187.69	22
2022-09-13	10:36:28	7.23156	1194.92	22
2022-09-13	10:36:29	13.8084	1208.73	23
2022-09-13	10:36:30	10.1613	1218.89	23
2022-09-13	10:36:31	6.6666	1225.56	23
2022-09-13	10:36:32	16.4791	1242.04	24
2022-09-13	10:36:33	7.94705	1249.98	24
2022-09-13	10:36:34	8.18525	1258.17	24
2022-09-13	10:36:35	4.87101	1263.04	24
2022-09-13	10:36:36	2.11131	1265.15	24
2022-09-13	10:36:37	2.53482	1267.69	24
2022-09-13	10:36:38	8.27416	1275.96	24
2022-09-13	10:36:39	2.73394	1278.69	24
2022-09-13	10:36:40	2.82993	1281.52	24
2022-09-13	10:36:41	2.45634	1283.98	24
2022-09-13	10:36:42	1.88154	1285.86	24
2022-09-13	10:36:43	1.08409	1286.95	24
2022-09-13	10:36:44	2.01612	1288.96	24
2022-09-13	10:36:45	1.7942	1290.76	24
2022-09-13	10:36:46	1.78443	1292.54	24
2022-09-13	10:36:47	1.26485	1293.81	24
2022-09-13	10:36:48	1.10492	1294.91	24
2022-09-13	10:36:49	1.19598	1296.11	24
2022-09-13	10:36:50	-1.15391	1296.11	24
2022-09-13	10:36:51	0.516693	1296.62	24
2022-09-13	10:36:52	10.2204	1306.84	24
2022-09-13	10:36:53	10.5087	1317.35	24
2022-09-13	10:36:54	7.81879	1325.17	24
2022-09-13	10:36:55	12.8065	1337.98	24
2022-09-13	10:36:56	7.57258	1345.55	24
2022-09-13	10:36:57	14.058	1359.61	25
2022-09-13	10:36:58	16.0306	1375.64	26
2022-09-13	10:36:59	5.52669	1381.17	26
2022-09-13	10:37:00	12.2865	1393.45	26
2022-09-13	10:37:01	9.94172	1403.39	26
2022-09-13	10:37:02	1.37066	1404.76	26
2022-09-13	10:37:03	1.09411	1405.86	26
2022-09-13	10:37:04	-0.702201	1405.86	26
2022-09-13	10:37:05	5.25216	1411.11	26
2022-09-13	10:37:06	4.63224	1415.74	26
2022-09-13	10:37:07	5.59256	1421.34	26
2022-09-13	10:37:08	10.6482	1431.98	26
2022-09-13	10:37:09	17.5026	1449.49	27
2022-09-13	10:37:10	16.4089	1465.9	28
2022-09-13	10:37:11	19.1256	1485.02	29
2022-09-13	10:37:12	16.7258	1501.75	30
2022-09-13	10:37:13	5.46699	1507.21	30
2022-09-13	10:37:14	5.02759	1512.24	30
2022-09-13	10:37:15	4.60408	1516.85	30
2022-09-13	10:37:16	1.46836	1518.31	30
2022-09-13	10:37:17	5.00745	1523.32	30
2022-09-13	10:37:18	8.04716	1531.37	30
2022-09-13	10:37:19	3.27005	1534.64	30
2022-09-13	10:37:20	3.2909	1537.93	30
2022-09-13	10:37:21	3.2718	1541.2	30
2022-09-13	10:37:22	3.27226	1544.47	30
2022-09-13	10:37:23	3.25817	1547.73	30
2022-09-13	10:37:24	3.26494	1551	30
2022-09-13	10:37:25	3.21544	1554.21	30
2022-09-13	10:37:26	2.35551	1556.57	30
2022-09-13	10:37:27	0.522127	1557.09	30
2022-09-13	10:37:28	-0.290528	1557.09	30
2022-09-13	10:37:29	-1.75551	1557.09	30
2022-09-13	10:37:30	-3.77633	1557.09	30
2022-09-13	10:37:31	-3.20689	1557.09	30
2022-09-13	10:37:32	-1.05015	1557.09	30
2022-09-13	10:37:33	-1.7164	1557.09	30
2022-09-13	10:37:34	-2.31272	1557.09	30
2022-09-13	10:37:35	10.7318	1567.82	30
2022-09-13	10:37:36	9.27535	1577.1	30
2022-09-13	10:37:37	4.83747	1581.93	30
2022-09-13	10:37:38	3.33151	1585.27	30
2022-09-13	10:37:39	2.96213	1588.23	30
2022-09-13	10:37:40	0.538426	1588.77	30
2022-09-13	10:37:41	-1.39114	1588.77	30
2022-09-13	10:37:42	2.16281	1590.93	30
2022-09-13	10:37:43	21.0473	1611.98	31
2022-09-13	10:37:44	7.11265	1619.09	31
2022-09-13	10:37:45	17.6287	1636.72	32
2022-09-13	10:37:46	10.0984	1646.82	32
2022-09-13	10:37:47	2.24934	1649.07	32
2022-09-13	10:37:48	3.49472	1652.56	32
2022-09-13	10:37:49	17.8866	1670.45	33
2022-09-13	10:37:50	7.5146	1677.96	33
2022-09-13	10:37:51	9.51479	1687.48	33
2022-09-13	10:37:52	18.5763	1706.05	34
2022-09-13	10:37:53	27.8096	1733.86	35
2022-09-13	10:37:54	25.4926	1759.35	36

## Sheet: Saint_star_2022913103243 (4)
Date	Time	Lbs	Newtons	Averaged Newtons	Total Force x time	total steps > 13.345		**GoPro Fitting: 1022
2022-09-13	10:32:54	0.366629	1.63084	1.76202	1.63084	FALSE	0			Total force x time	3276.57
2022-09-13	10:32:54	0.386578	1.71958	1.76202	1.71958	FALSE	0			Total steps	146
2022-09-13	10:32:54	0.389631	1.73316	1.76202	3.364	FALSE	0
2022-09-13	10:32:54	0.441641	1.96451	1.76202	3.68408	FALSE	0
2022-09-13	10:32:55	0.354618	1.57741	2.77792	4.94141	FALSE	0
2022-09-13	10:32:55	0.499911	2.2237	2.77792	5.90779	FALSE	0
2022-09-13	10:32:55	0.649275	2.88811	2.77792	7.82951	FALSE	0
2022-09-13	10:32:55	0.994211	4.42245	2.77792	10.3302	FALSE	0
2022-09-13	10:32:56	0.699555	3.11176	2.7773	10.9413	FALSE	0
2022-09-13	10:32:56	0.68556	3.04951	2.7773	13.3797	FALSE	0
2022-09-13	10:32:56	0.641896	2.85528	2.7773	13.7966	FALSE	0
2022-09-13	10:32:56	0.470446	2.09264	2.7773	15.4724	FALSE	0
2022-09-13	10:32:57	0.398842	1.77413	1.5919	15.5707	FALSE	0
2022-09-13	10:32:57	0.374619	1.66638	1.5919	17.1388	FALSE	0
2022-09-13	10:32:57	0.300165	1.33519	1.5919	16.9059	FALSE	0
2022-09-13	10:32:58	0.323931	1.44091	2.1692	18.5797	FALSE	0
2022-09-13	10:32:58	0.494873	2.20129	2.1692	19.1072	FALSE	0
2022-09-13	10:32:58	0.519148	2.30927	2.1692	20.8889	FALSE	0
2022-09-13	10:32:58	0.612684	2.72534	2.1692	21.8325	FALSE	0
2022-09-13	10:32:59	0.372583	1.65732	1.34555	22.5463	FALSE	0
2022-09-13	10:32:59	0.164084	0.729878	1.34555	22.5624	FALSE	0
2022-09-13	10:32:59	0.297163	1.32184	1.34555	23.8681	FALSE	0
2022-09-13	10:32:59	0.376145	1.67317	1.34555	24.2356	FALSE	0
2022-09-13	10:33:00	0.451158	2.00684	1.72631	25.875	FALSE	0
2022-09-13	10:33:00	0.223982	0.996317	1.72631	25.2319	FALSE	0
2022-09-13	10:33:00	0.479962	2.13497	1.72631	28.0099	FALSE	0
2022-09-13	10:33:00	0.397265	1.76711	1.72631	26.999	FALSE	0
2022-09-13	10:33:01	0.407697	1.81352	1.71392	29.8234	FALSE	0
2022-09-13	10:33:01	0.39869	1.77345	1.71392	28.7724	FALSE	0
2022-09-13	10:33:01	0.349529	1.55477	1.71392	31.3782	FALSE	0
2022-09-13	10:33:02	0.399911	1.77888	1.75064	30.5513	FALSE	0
2022-09-13	10:33:02	0.399402	1.77662	1.75064	33.1548	FALSE	0
2022-09-13	10:33:02	0.502913	2.23706	1.75064	32.7884	FALSE	0
2022-09-13	10:33:02	0.272023	1.21001	1.75064	34.3648	FALSE	0
2022-09-13	10:33:03	0.451107	2.00661	1.54849	34.795	FALSE	0
2022-09-13	10:33:03	0.438486	1.95047	1.54849	36.3153	FALSE	0
2022-09-13	10:33:03	0.325407	1.44748	1.54849	36.2425	FALSE	0
2022-09-13	10:33:03	0.177468	0.789413	1.54849	37.1047	FALSE	0
2022-09-13	10:33:04	0.102405	0.455518	0.534916	36.698	FALSE	0
2022-09-13	10:33:04	-0.104771	-0.466042	0.534916	37.1047	FALSE	0
2022-09-13	10:33:04	0.132939	0.591339	0.534916	37.2893	FALSE	0
2022-09-13	10:33:04	0.350445	1.55885	0.534916	38.6636	FALSE	0
2022-09-13	10:33:05	0.354568	1.57719	10.4054	38.8665	FALSE	0
2022-09-13	10:33:05	2.69609	11.9927	10.4054	50.6563	FALSE	0
2022-09-13	10:33:05	3.16505	14.0788	10.4054	52.9453	1	1
2022-09-13	10:33:05	3.14123	13.9728	10.4054	64.6291	1	2
2022-09-13	10:33:06	2.87701	12.7975	9.80911	65.7428	FALSE	2
2022-09-13	10:33:06	1.73014	7.69601	9.80911	72.3252	FALSE	2
2022-09-13	10:33:06	2.00841	8.93381	9.80911	74.6766	FALSE	2
2022-09-13	10:33:07	0.680623	3.02755	3.99631	75.3527	FALSE	2
2022-09-13	10:33:07	0.435433	1.93689	3.99631	76.6135	FALSE	2
2022-09-13	10:33:07	1.28251	5.70486	3.99631	81.0576	FALSE	2
2022-09-13	10:33:07	1.19508	5.31595	3.99631	81.9295	FALSE	2
2022-09-13	10:33:08	0.561081	2.4958	11.5883	83.5534	FALSE	2
2022-09-13	10:33:08	0.993397	4.41883	11.5883	86.3483	FALSE	2
2022-09-13	10:33:08	4.09966	18.2361	11.5883	101.789	1	3
2022-09-13	10:33:08	4.76653	21.2025	11.5883	107.551	1	4
2022-09-13	10:33:09	4.81253	21.4071	14.552	123.197	1	5
2022-09-13	10:33:09	2.7849	12.3878	14.552	119.939	FALSE	5
2022-09-13	10:33:09	4.2224	18.7821	14.552	141.979	1	6
2022-09-13	10:33:09	1.26592	5.63107	14.552	125.57	FALSE	6
2022-09-13	10:33:10	0.67472	3.00129	2.5444	144.98	FALSE	6
2022-09-13	10:33:10	0.577112	2.56711	2.5444	128.137	FALSE	6
2022-09-13	10:33:10	0.464186	2.06479	2.5444	147.045	FALSE	6
2022-09-13	10:33:11	0.265916	1.18285	3.86105	129.32	FALSE	6
2022-09-13	10:33:11	0.387595	1.7241	3.86105	148.769	FALSE	6
2022-09-13	10:33:11	0.990242	4.40479	3.86105	133.724	FALSE	6
2022-09-13	10:33:11	1.82826	8.13247	3.86105	156.901	FALSE	6
2022-09-13	10:33:12	7.3023	32.4821	15.5792	166.206	1	7
2022-09-13	10:33:12	4.71238	20.9616	15.5792	177.863	1	8
2022-09-13	10:33:12	1.37833	6.13109	15.5792	172.338	FALSE	8
2022-09-13	10:33:12	0.61645	2.74209	15.5792	180.605	FALSE	8
2022-09-13	10:33:13	0.430547	1.91516	0.264686	174.253	FALSE	8
2022-09-13	10:33:13	-0.00146287	-0.00650714	0.264686	180.605	FALSE	8
2022-09-13	10:33:13	-0.127213	-0.565869	0.264686	174.253	FALSE	8
2022-09-13	10:33:13	-0.0638547	-0.284038	0.264686	180.605	FALSE	8
2022-09-13	10:33:14	-0.073931	-0.32886	-0.499242	174.253	FALSE	8
2022-09-13	10:33:14	-0.142379	-0.63333	-0.499242	180.605	FALSE	8
2022-09-13	10:33:14	-0.120394	-0.535537	-0.499242	174.253	FALSE	8
2022-09-13	10:33:15	-0.226501	-1.00752	-1.43123	180.605	FALSE	8
2022-09-13	10:33:15	-0.248791	-1.10667	-1.43123	174.253	FALSE	8
2022-09-13	10:33:15	-0.425687	-1.89354	-1.43123	180.605	FALSE	8
2022-09-13	10:33:15	-0.386043	-1.7172	-1.43123	174.253	FALSE	8
2022-09-13	10:33:16	-0.330572	-1.47045	4.51413	180.605	FALSE	8
2022-09-13	10:33:16	0.134771	0.599488	4.51413	174.852	FALSE	8
2022-09-13	10:33:16	1.33177	5.92398	4.51413	186.529	FALSE	8
2022-09-13	10:33:16	2.92332	13.0035	4.51413	187.856	FALSE	8
2022-09-13	10:33:17	2.82108	12.5487	10.6566	199.078	FALSE	8
2022-09-13	10:33:17	1.72525	7.67426	10.6566	195.53	FALSE	8
2022-09-13	10:33:17	2.23075	9.92282	10.6566	209.001	FALSE	8
2022-09-13	10:33:17	2.80576	12.4806	10.6566	208.011	FALSE	8
2022-09-13	10:33:18	4.39563	19.5526	13.5892	228.553	1	9
2022-09-13	10:33:18	2.61599	11.6364	13.5892	219.647	FALSE	9
2022-09-13	10:33:18	2.15335	9.57853	13.5892	238.132	FALSE	9
2022-09-13	10:33:19	3.27787	14.5806	25.827	234.228	1	10
2022-09-13	10:33:19	3.19691	14.2205	25.827	252.352	1	11
2022-09-13	10:33:19	9.4625	42.0911	25.827	276.319	1	12
2022-09-13	10:33:19	7.28744	32.416	25.827	284.768	1	13
2022-09-13	10:33:20	7.7797	34.6057	15.3411	310.924	1	14
2022-09-13	10:33:20	2.88622	12.8385	15.3411	297.607	FALSE	14
2022-09-13	10:33:20	0.789479	3.51176	15.3411	314.436	FALSE	14
2022-09-13	10:33:20	2.33996	10.4086	15.3411	308.015	FALSE	14
2022-09-13	10:33:21	1.55777	6.92927	7.1071	321.365	FALSE	14
2022-09-13	10:33:21	2.04571	9.09973	7.1071	317.115	FALSE	14
2022-09-13	10:33:21	1.27701	5.6804	7.1071	327.046	FALSE	14
2022-09-13	10:33:21	1.5105	6.71901	7.1071	323.834	FALSE	14
2022-09-13	10:33:22	1.65701	7.37071	6.80864	334.417	FALSE	14
2022-09-13	10:33:22	1.37976	6.13745	6.80864	329.971	FALSE	14
2022-09-13	10:33:22	1.95106	8.67871	6.80864	343.095	FALSE	14
2022-09-13	10:33:22	1.13477	5.04768	6.80864	335.019	FALSE	14
2022-09-13	10:33:23	0.769733	3.42393	9.2247	346.519	FALSE	14
2022-09-13	10:33:23	2.07971	9.25097	9.2247	344.27	FALSE	14
2022-09-13	10:33:23	3.37197	14.9992	9.2247	361.518	1	15
2022-09-13	10:33:24	4.71955	20.9935	26.6543	365.264	1	16
2022-09-13	10:33:24	8.82001	39.2332	26.6543	400.752	1	17
2022-09-13	10:33:24	8.38942	37.3178	26.6543	402.581	1	18
2022-09-13	10:33:24	2.03966	9.07282	26.6543	409.824	FALSE	18
2022-09-13	10:33:25	3.62607	16.1295	5.9757	418.711	1	19
2022-09-13	10:33:25	0.795331	3.53779	5.9757	413.362	FALSE	19
2022-09-13	10:33:25	0.413295	1.83842	5.9757	420.549	FALSE	19
2022-09-13	10:33:25	0.538893	2.3971	5.9757	415.759	FALSE	19
2022-09-13	10:33:26	0.358181	1.59326	4.11187	422.143	FALSE	19
2022-09-13	10:33:26	0.6907	3.07237	4.11187	418.832	FALSE	19
2022-09-13	10:33:26	1.70729	7.59437	4.11187	429.737	FALSE	19
2022-09-13	10:33:26	0.941387	4.18748	4.11187	423.019	FALSE	19
2022-09-13	10:33:27	0.571819	2.54357	2.14598	432.281	FALSE	19
2022-09-13	10:33:27	0.45874	2.04057	2.14598	425.06	FALSE	19
2022-09-13	10:33:27	0.416756	1.85381	2.14598	434.134	FALSE	19
2022-09-13	10:33:28	0.381896	1.69875	3.34747	426.758	FALSE	19
2022-09-13	10:33:28	0.760216	3.38159	3.34747	437.516	FALSE	19
2022-09-13	10:33:28	0.825865	3.67361	3.34747	430.432	FALSE	19
2022-09-13	10:33:28	1.0422	4.63591	3.34747	442.152	FALSE	19
2022-09-13	10:33:29	0.664746	2.95692	4.45357	433.389	FALSE	19
2022-09-13	10:33:29	1.62576	7.23171	4.45357	449.384	FALSE	19
2022-09-13	10:33:29	0.757672	3.37028	4.45357	436.759	FALSE	19
2022-09-13	10:33:29	0.956654	4.25539	4.45357	453.639	FALSE	19
2022-09-13	10:33:30	0.737621	3.28109	2.21193	440.04	FALSE	19
2022-09-13	10:33:30	0.445865	1.9833	2.21193	455.622	FALSE	19
2022-09-13	10:33:30	0.448817	1.99643	2.21193	442.037	FALSE	19
2022-09-13	10:33:30	0.356756	1.58692	2.21193	457.209	FALSE	19
2022-09-13	10:33:31	0.452532	2.01295	1.43502	444.05	FALSE	19
2022-09-13	10:33:31	0.123982	0.551497	1.43502	457.761	FALSE	19
2022-09-13	10:33:31	0.39131	1.74063	1.43502	445.79	FALSE	19
2022-09-13	10:33:32	0.120827	0.537463	0.931803	458.298	FALSE	19
2022-09-13	10:33:32	0.299199	1.3309	0.931803	447.121	FALSE	19
2022-09-13	10:33:32	0.153194	0.681438	0.931803	458.98	FALSE	19
2022-09-13	10:33:32	0.264695	1.17742	0.931803	448.299	FALSE	19
2022-09-13	10:33:33	0.294924	1.31188	3.38906	460.291	FALSE	19
2022-09-13	10:33:33	0.724695	3.22359	3.38906	451.522	FALSE	19
2022-09-13	10:33:33	1.38978	6.18202	3.38906	466.473	FALSE	19
2022-09-13	10:33:33	0.63818	2.83875	3.38906	454.361	FALSE	19
2022-09-13	10:33:34	-0.00797683	-0.0354825	0.145219	466.473	FALSE	19
2022-09-13	10:33:34	-0.00487254	-0.021674	0.145219	454.361	FALSE	19
2022-09-13	10:33:34	0.0266287	0.11845	0.145219	466.592	FALSE	19
2022-09-13	10:33:34	0.116807	0.519581	0.145219	454.881	FALSE	19
2022-09-13	10:33:35	0.0141097	0.0627628	4.14362	466.655	FALSE	19
2022-09-13	10:33:35	0.519707	2.31176	4.14362	457.192	FALSE	19
2022-09-13	10:33:35	1.15996	5.15973	4.14362	471.814	FALSE	19
2022-09-13	10:33:35	2.03233	9.04021	4.14362	466.233	FALSE	19
2022-09-13	10:33:36	0.493753	2.19631	1.50475	474.011	FALSE	19
2022-09-13	10:33:36	0.351616	1.56406	1.50475	467.797	FALSE	19
2022-09-13	10:33:36	0.169478	0.753872	1.50475	474.765	FALSE	19
2022-09-13	10:33:37	0.371718	1.65348	1.74691	469.45	FALSE	19
2022-09-13	10:33:37	0.196603	0.874529	1.74691	475.639	FALSE	19
2022-09-13	10:33:37	0.266425	1.18511	1.74691	470.635	FALSE	19
2022-09-13	10:33:37	0.736145	3.27452	1.74691	478.914	FALSE	19
2022-09-13	10:33:38	0.260674	1.15953	2.51839	471.795	FALSE	19
2022-09-13	10:33:38	0.569682	2.53406	2.51839	481.448	FALSE	19
2022-09-13	10:33:38	0.341489	1.51901	2.51839	473.314	FALSE	19
2022-09-13	10:33:38	1.09279	4.86095	2.51839	486.309	FALSE	19
2022-09-13	10:33:39	1.54999	6.89467	12.1087	480.208	FALSE	19
2022-09-13	10:33:39	3.03731	13.5106	12.1087	499.819	1	20
2022-09-13	10:33:39	2.8109	12.5034	12.1087	492.712	FALSE	20
2022-09-13	10:33:39	3.49039	15.526	12.1087	515.345	1	21
2022-09-13	10:33:40	6.77309	30.1281	27.511	522.84	1	22
2022-09-13	10:33:40	4.27024	18.9949	27.511	534.34	1	23
2022-09-13	10:33:40	7.5109	33.41	27.511	556.25	1	24
2022-09-13	10:33:41	5.53787	24.6336	18.2694	558.974	1	25
2022-09-13	10:33:41	2.51706	11.1964	18.2694	567.446	FALSE	25
2022-09-13	10:33:41	4.32042	19.2181	18.2694	578.192	1	26
2022-09-13	10:33:41	4.05319	18.0294	18.2694	585.476	1	27
2022-09-13	10:33:42	2.35034	10.4548	13.5928	588.646	FALSE	27
2022-09-13	10:33:42	4.40709	19.6036	13.5928	605.079	1	28
2022-09-13	10:33:42	2.30892	10.2705	13.5928	598.917	FALSE	28
2022-09-13	10:33:42	3.15686	14.0423	13.5928	619.122	1	29
2022-09-13	10:33:43	3.08307	13.7141	8.72527	612.631	1	30
2022-09-13	10:33:43	0.936909	4.16756	8.72527	623.289	FALSE	30
2022-09-13	10:33:43	2.78785	12.4009	8.72527	625.032	FALSE	30
2022-09-13	10:33:43	1.03828	4.61848	8.72527	627.908	FALSE	30
2022-09-13	10:33:44	1.06429	4.73417	5.31315	629.766	FALSE	30
2022-09-13	10:33:44	1.13508	5.04906	5.31315	632.957	FALSE	30
2022-09-13	10:33:44	1.38398	6.15622	5.31315	635.922	FALSE	30
2022-09-13	10:33:45	1.46515	6.51728	5.84587	639.474	FALSE	30
2022-09-13	10:33:45	0.798181	3.55047	5.84587	639.473	FALSE	30
2022-09-13	10:33:45	2.25039	10.0102	5.84587	649.484	FALSE	30
2022-09-13	10:33:45	0.743117	3.30553	5.84587	642.778	FALSE	30
2022-09-13	10:33:46	1.36637	6.07789	10.6444	655.562	FALSE	30
2022-09-13	10:33:46	1.52408	6.77941	10.6444	649.558	FALSE	30
2022-09-13	10:33:46	2.47421	11.0058	10.6444	666.568	FALSE	30
2022-09-13	10:33:46	4.20719	18.7144	10.6444	668.272	1	31
2022-09-13	10:33:47	2.51508	11.1876	11.4237	677.755	FALSE	31
2022-09-13	10:33:47	5.07319	22.5666	11.4237	690.839	1	32
2022-09-13	10:33:47	1.68073	7.47622	11.4237	685.232	FALSE	32
2022-09-13	10:33:47	1.00363	4.46435	11.4237	695.303	FALSE	32
2022-09-13	10:33:48	0.607341	2.70157	1.64651	687.933	FALSE	32
2022-09-13	10:33:48	0.320471	1.42552	1.64651	696.729	FALSE	32
2022-09-13	10:33:48	0.30154	1.34131	1.64651	689.275	FALSE	32
2022-09-13	10:33:48	0.25126	1.11765	1.64651	697.846	FALSE	32
2022-09-13	10:33:49	-0.283448	-1.26083	-2.21408	689.275	FALSE	32
2022-09-13	10:33:49	-0.595712	-2.64985	-2.21408	697.846	FALSE	32
2022-09-13	10:33:49	-0.614084	-2.73157	-2.21408	689.275	FALSE	32
2022-09-13	10:33:50	-0.512302	-2.27882	-1.61295	697.846	FALSE	32
2022-09-13	10:33:50	-0.446348	-1.98545	-1.61295	689.275	FALSE	32
2022-09-13	10:33:50	-0.440598	-1.95987	-1.61295	697.846	FALSE	32
2022-09-13	10:33:50	-0.0511829	-0.227672	-1.61295	689.275	FALSE	32
2022-09-13	10:33:51	0.271005	1.20548	2.12761	699.052	FALSE	32
2022-09-13	10:33:51	0.553652	2.46275	2.12761	691.737	FALSE	32
2022-09-13	10:33:51	0.456043	2.02857	2.12761	701.08	FALSE	32
2022-09-13	10:33:51	0.632532	2.81363	2.12761	694.551	FALSE	32
2022-09-13	10:33:52	0.942863	4.19404	2.62246	705.274	FALSE	32
2022-09-13	10:33:52	0.327341	1.45608	2.62246	696.007	FALSE	32
2022-09-13	10:33:52	0.700216	3.1147	2.62246	708.389	FALSE	32
2022-09-13	10:33:52	0.387799	1.72501	2.62246	697.732	FALSE	32
2022-09-13	10:33:53	0.664746	2.95692	3.43532	711.346	FALSE	32
2022-09-13	10:33:53	0.634669	2.82313	3.43532	700.555	FALSE	32
2022-09-13	10:33:53	1.01747	4.52591	3.43532	715.872	FALSE	32
2022-09-13	10:33:54	4.13762	18.405	49.1832	718.96	1	33
2022-09-13	10:33:54	9.88561	43.9732	49.1832	759.845	1	34
2022-09-13	10:33:54	23.9049	106.334	49.1832	825.294	1	35
2022-09-13	10:33:54	6.2994	28.021	49.1832	787.866	1	36
2022-09-13	10:33:55	7.22551	32.1405	23.0982	857.434	1	37
2022-09-13	10:33:55	5.68652	25.2948	23.0982	813.161	1	38
2022-09-13	10:33:55	5.88932	26.1969	23.0982	883.631	1	39
2022-09-13	10:33:55	1.96948	8.76064	23.0982	821.922	FALSE	39
2022-09-13	10:33:56	3.37823	15.027	10.6019	898.658	1	40
2022-09-13	10:33:56	4.28698	19.0693	10.6019	840.991	1	41
2022-09-13	10:33:56	0.787697	3.50383	10.6019	902.162	FALSE	41
2022-09-13	10:33:56	1.08073	4.8073	10.6019	845.798	FALSE	41
2022-09-13	10:33:57	0.348868	1.55183	-0.0910942	903.714	FALSE	41
2022-09-13	10:33:57	-0.0368827	-0.164062	-0.0910942	845.798	FALSE	41
2022-09-13	10:33:57	-0.373422	-1.66106	-0.0910942	903.714	FALSE	41
2022-09-13	10:33:58	-0.517849	-2.3035	-2.36066	845.798	FALSE	41
2022-09-13	10:33:58	-0.347722	-1.54674	-2.36066	903.714	FALSE	41
2022-09-13	10:33:58	-0.631284	-2.80808	-2.36066	845.798	FALSE	41
2022-09-13	10:33:58	-0.625941	-2.78431	-2.36066	903.714	FALSE	41
2022-09-13	10:33:59	-0.426704	-1.89806	-1.07849	845.798	FALSE	41
2022-09-13	10:33:59	-0.36131	-1.60718	-1.07849	903.714	FALSE	41
2022-09-13	10:33:59	-0.125076	-0.556363	-1.07849	845.798	FALSE	41
2022-09-13	10:33:59	-0.05673	-0.252346	-1.07849	903.714	FALSE	41
2022-09-13	10:34:00	0.108054	0.480646	-0.0791151	846.279	FALSE	41
2022-09-13	10:34:00	-0.0132186	-0.058799	-0.0791151	903.714	FALSE	41
2022-09-13	10:34:00	-0.166399	-0.740176	-0.0791151	846.279	FALSE	41
2022-09-13	10:34:00	0.0004201	0.00186869	-0.0791151	903.716	FALSE	41
2022-09-13	10:34:01	0.0828119	0.368364	0.558232	846.647	FALSE	41
2022-09-13	10:34:01	0.104898	0.466607	0.558232	904.182	FALSE	41
2022-09-13	10:34:01	0.137977	0.613749	0.558232	847.261	FALSE	41
2022-09-13	10:34:01	0.176298	0.784209	0.558232	904.967	FALSE	41
2022-09-13	10:34:02	0.163982	0.729425	1.21816	847.99	FALSE	41
2022-09-13	10:34:02	0.241387	1.07374	1.21816	906.04	FALSE	41
2022-09-13	10:34:02	0.416196	1.85132	1.21816	849.842	FALSE	41
2022-09-13	10:34:03	0.23411	1.04137	0.907412	907.082	FALSE	41
2022-09-13	10:34:03	0.147138	0.654499	0.907412	850.496	FALSE	41
2022-09-13	10:34:03	0.192786	0.857551	0.907412	907.939	FALSE	41
2022-09-13	10:34:03	0.241947	1.07623	0.907412	851.572	FALSE	41
2022-09-13	10:34:04	0.263779	1.17334	1.46315	909.113	FALSE	41
2022-09-13	10:34:04	0.264237	1.17538	1.46315	852.748	FALSE	41
2022-09-13	10:34:04	0.173652	0.772439	1.46315	909.885	FALSE	41
2022-09-13	10:34:04	0.614058	2.73145	1.46315	855.479	FALSE	41
2022-09-13	10:34:05	3.10011	13.7899	30.1857	923.675	1	42
2022-09-13	10:34:05	6.61655	29.4317	30.1857	884.911	1	43
2022-09-13	10:34:05	9.68123	43.064	30.1857	966.739	1	44
2022-09-13	10:34:05	7.74632	34.4572	30.1857	919.368	1	45
2022-09-13	10:34:06	4.19365	18.6542	12.0607	985.393	1	46
2022-09-13	10:34:06	0.946679	4.21102	12.0607	923.579	FALSE	46
2022-09-13	10:34:06	2.9938	13.317	12.0607	998.71	FALSE	46
2022-09-13	10:34:07	3.11747	13.8671	12.5411	937.446	1	47
2022-09-13	10:34:07	3.81935	16.9892	12.5411	1015.7	1	48
2022-09-13	10:34:07	3.09467	13.7657	12.5411	951.212	1	49
2022-09-13	10:34:07	1.24597	5.54232	12.5411	1021.24	FALSE	49
2022-09-13	10:34:08	1.98653	8.83648	6.75782	960.049	FALSE	49
2022-09-13	10:34:08	1.30327	5.79721	6.75782	1027.04	FALSE	49
2022-09-13	10:34:08	1.04088	4.63004	6.75782	964.679	FALSE	49
2022-09-13	10:34:08	1.74622	7.76754	6.75782	1034.81	FALSE	49
2022-09-13	10:34:09	1.04622	4.6538	11.2765	969.332	FALSE	49
2022-09-13	10:34:09	2.20729	9.81847	11.2765	1044.63	FALSE	49
2022-09-13	10:34:09	1.95986	8.71785	11.2765	978.05	FALSE	49
2022-09-13	10:34:09	4.92688	21.9157	11.2765	1066.54	1	50
2022-09-13	10:34:10	2.41986	10.764	12.2068	988.814	FALSE	50
2022-09-13	10:34:10	3.63284	16.1596	12.2068	1082.7	1	51
2022-09-13	10:34:10	2.17991	9.69668	12.2068	998.511	FALSE	51
2022-09-13	10:34:11	1.23655	5.50042	5.84271	1088.2	FALSE	51
2022-09-13	10:34:11	1.18765	5.2829	5.84271	1003.79	FALSE	51
2022-09-13	10:34:11	0.61299	2.7267	5.84271	1090.93	FALSE	51
2022-09-13	10:34:11	2.21681	9.86081	5.84271	1013.65	FALSE	51
2022-09-13	10:34:12	2.04627	9.10222	22.5286	1100.03	FALSE	51
2022-09-13	10:34:12	5.3082	23.6119	22.5286	1037.27	1	52
2022-09-13	10:34:12	6.70993	29.8471	22.5286	1129.88	1	53
2022-09-13	10:34:12	6.19426	27.5533	22.5286	1064.82	1	54
2022-09-13	10:34:13	6.83039	30.3829	23.9051	1160.26	1	55
2022-09-13	10:34:13	4.70708	20.938	23.9051	1085.76	1	56
2022-09-13	10:34:13	5.04479	22.4402	23.9051	1182.7	1	57
2022-09-13	10:34:13	4.91421	21.8594	23.9051	1107.62	1	58
2022-09-13	10:34:14	0.8393	3.73337	5.45301	1186.43	FALSE	58
2022-09-13	10:34:14	1.61681	7.19189	5.45301	1114.81	FALSE	58
2022-09-13	10:34:14	0.724084	3.22087	5.45301	1189.65	FALSE	58
2022-09-13	10:34:14	1.72337	7.66589	5.45301	1122.48	FALSE	58
2022-09-13	10:34:15	3.92495	17.459	19.5204	1207.11	1	59
2022-09-13	10:34:15	2.73563	12.1686	19.5204	1134.64	FALSE	59
2022-09-13	10:34:15	6.50454	28.9335	19.5204	1236.05	1	60
2022-09-13	10:34:16	3.31151	14.7303	9.999	1149.37	1	61
2022-09-13	10:34:16	3.57798	15.9156	9.999	1251.96	1	62
2022-09-13	10:34:16	0.824033	3.66546	9.999	1153.04	FALSE	62
2022-09-13	10:34:16	1.27798	5.68471	9.999	1257.65	FALSE	62
2022-09-13	10:34:17	2.98515	13.2785	10.6312	1166.32	FALSE	62
2022-09-13	10:34:17	1.22261	5.43841	10.6312	1263.09	FALSE	62
2022-09-13	10:34:17	3.55843	15.8286	10.6312	1182.15	1	63
2022-09-13	10:34:17	1.79385	7.9794	10.6312	1271.06	FALSE	63
2022-09-13	10:34:18	2.21416	9.84903	8.80348	1192	FALSE	63
2022-09-13	10:34:18	2.03976	9.07326	8.80348	1280.14	FALSE	63
2022-09-13	10:34:18	1.01981	4.53632	8.80348	1196.53	FALSE	63
2022-09-13	10:34:18	2.64271	11.7553	8.80348	1291.89	FALSE	63
2022-09-13	10:34:19	1.56281	6.95169	7.2883	1203.48	FALSE	63
2022-09-13	10:34:19	1.808	8.04235	7.2883	1299.94	FALSE	63
2022-09-13	10:34:19	1.54464	6.87087	7.2883	1210.35	FALSE	63
2022-09-13	10:34:20	0.495432	2.20378	1.61029	1302.14	FALSE	63
2022-09-13	10:34:20	0.425153	1.89117	1.61029	1212.25	FALSE	63
2022-09-13	10:34:20	0.224949	1.00062	1.61029	1303.14	FALSE	63
2022-09-13	10:34:20	0.302506	1.34561	1.61029	1213.59	FALSE	63
2022-09-13	10:34:21	0.273041	1.21454	9.18106	1304.35	FALSE	63
2022-09-13	10:34:21	1.77467	7.89409	9.18106	1221.49	FALSE	63
2022-09-13	10:34:21	2.82673	12.5739	9.18106	1316.93	FALSE	63
2022-09-13	10:34:21	3.38154	15.0418	9.18106	1236.53	1	64
2022-09-13	10:34:22	3.81787	16.9826	13.6383	1333.91	1	65
2022-09-13	10:34:22	2.87823	12.8029	13.6383	1249.33	FALSE	65
2022-09-13	10:34:22	4.42617	19.6885	13.6383	1353.6	1	66
2022-09-13	10:34:22	1.14184	5.07913	13.6383	1254.41	FALSE	66
2022-09-13	10:34:23	1.02037	4.53881	3.15681	1358.14	FALSE	66
2022-09-13	10:34:23	0.690191	3.07011	3.15681	1257.48	FALSE	66
2022-09-13	10:34:23	0.418486	1.86151	3.15681	1360	FALSE	66
2022-09-13	10:34:24	0.558537	2.48448	-0.342444	1259.96	FALSE	66
2022-09-13	10:34:24	0.345305	1.53599	-0.342444	1361.54	FALSE	66
2022-09-13	10:34:24	-1.57327	-6.99822	-0.342444	1259.96	FALSE	66
2022-09-13	10:34:24	0.361489	1.60798	-0.342444	1363.14	FALSE	66
2022-09-13	10:34:25	0.560267	2.49218	2.92664	1262.46	FALSE	66
2022-09-13	10:34:25	0.630496	2.80457	2.92664	1365.95	FALSE	66
2022-09-13	10:34:25	0.713295	3.17288	2.92664	1265.63	FALSE	66
2022-09-13	10:34:25	0.727697	3.23694	2.92664	1369.19	FALSE	66
2022-09-13	10:34:26	0.730394	3.24894	2.08426	1268.88	FALSE	66
2022-09-13	10:34:26	0.359148	1.59756	2.08426	1370.78	FALSE	66
2022-09-13	10:34:26	0.428563	1.90633	2.08426	1270.78	FALSE	66
2022-09-13	10:34:26	0.356145	1.5842	2.08426	1372.37	FALSE	66
2022-09-13	10:34:27	0.293397	1.30509	1.71361	1272.09	FALSE	66
2022-09-13	10:34:27	0.2793	1.24238	1.71361	1373.61	FALSE	66
2022-09-13	10:34:27	0.583015	2.59337	1.71361	1274.68	FALSE	66
2022-09-13	10:34:28	0.740776	3.29512	2.74192	1376.9	FALSE	66
2022-09-13	10:34:28	0.678588	3.0185	2.74192	1277.7	FALSE	66
2022-09-13	10:34:28	0.650598	2.89399	2.74192	1379.8	FALSE	66
2022-09-13	10:34:28	0.395687	1.76009	2.74192	1279.46	FALSE	66
2022-09-13	10:34:29	0.731616	3.25437	3.27237	1383.05	FALSE	66
2022-09-13	10:34:29	0.73584	3.27316	3.27237	1282.73	FALSE	66
2022-09-13	10:34:29	0.738435	3.28471	3.27237	1386.34	FALSE	66
2022-09-13	10:34:29	0.736756	3.27724	3.27237	1286.01	FALSE	66
2022-09-13	10:34:30	0.735331	3.2709	3.27039	1389.61	FALSE	66
2022-09-13	10:34:30	0.73355	3.26298	3.27039	1289.27	FALSE	66
2022-09-13	10:34:30	0.733193	3.26139	3.27039	1392.87	FALSE	66
2022-09-13	10:34:30	0.738791	3.28629	3.27039	1292.56	FALSE	66
2022-09-13	10:34:31	0.729682	3.24577	3.26796	1396.12	FALSE	66
2022-09-13	10:34:31	0.744084	3.30983	3.26796	1295.87	FALSE	66
2022-09-13	10:34:31	0.733346	3.26207	3.26796	1399.38	FALSE	66
2022-09-13	10:34:31	0.731565	3.25415	3.26796	1299.12	FALSE	66
2022-09-13	10:34:32	0.527086	2.34458	2.87648	1401.72	FALSE	66
2022-09-13	10:34:32	0.676196	3.00786	2.87648	1302.13	FALSE	66
2022-09-13	10:34:32	0.736705	3.27701	2.87648	1405	FALSE	66
2022-09-13	10:34:33	0.738231	3.2838	3.1791	1305.42	FALSE	66
2022-09-13	10:34:33	0.735382	3.27113	3.1791	1408.27	FALSE	66
2022-09-13	10:34:33	0.731005	3.25166	3.1791	1308.67	FALSE	66
2022-09-13	10:34:33	0.65416	2.90983	3.1791	1411.18	FALSE	66
2022-09-13	10:34:34	0.740623	3.29444	2.76281	1311.96	FALSE	66
2022-09-13	10:34:34	0.734924	3.26909	2.76281	1414.45	FALSE	66
2022-09-13	10:34:34	0.737672	3.28131	2.76281	1315.24	FALSE	66
2022-09-13	10:34:34	0.271209	1.20639	2.76281	1415.66	FALSE	66
2022-09-13	10:34:35	0.305814	1.36032	1.63327	1316.6	FALSE	66
2022-09-13	10:34:35	0.40958	1.82189	1.63327	1417.48	FALSE	66
2022-09-13	10:34:35	0.362863	1.61409	1.63327	1318.22	FALSE	66
2022-09-13	10:34:35	0.390445	1.73678	1.63327	1419.21	FALSE	66
2022-09-13	10:34:36	0.288766	1.28449	1.52452	1319.5	FALSE	66
2022-09-13	10:34:36	0.430344	1.91426	1.52452	1421.13	FALSE	66
2022-09-13	10:34:36	0.309071	1.37481	1.52452	1320.88	FALSE	66
2022-09-13	10:34:37	0.312176	1.38862	1.38613	1422.52	FALSE	66
2022-09-13	10:34:37	0.00148881	0.00662252	1.38613	1320.88	FALSE	66
2022-09-13	10:34:37	0.153143	0.681211	1.38613	1423.2	FALSE	66
2022-09-13	10:34:37	0.779657	3.46807	1.38613	1324.35	FALSE	66
2022-09-13	10:34:38	2.11528	9.40919	8.27318	1432.61	FALSE	66
2022-09-13	10:34:38	1.22088	5.43072	8.27318	1329.78	FALSE	66
2022-09-13	10:34:38	2.24352	9.97963	8.27318	1442.59	FALSE	66
2022-09-13	10:34:39	6.05578	26.9373	18.7362	1356.72	1	67
2022-09-13	10:34:39	5.08052	22.5992	18.7362	1465.19	1	68
2022-09-13	10:34:39	7.36255	32.7501	18.7362	1389.47	1	69
2022-09-13	10:34:39	1.64541	7.31911	18.7362	1472.51	FALSE	69
2022-09-13	10:34:39	0.916145	4.0752	18.7362	1393.55	FALSE	69
2022-09-13	10:34:40	0.391514	1.74153	1.75149	1474.25	FALSE	69
2022-09-13	10:34:40	0.330089	1.4683	1.75149	1395.01	FALSE	69
2022-09-13	10:34:40	0.459657	2.04465	1.75149	1476.29	FALSE	69
2022-09-13	10:34:41	0.378791	1.68494	0.748044	1396.7	FALSE	69
2022-09-13	10:34:41	0.257366	1.14482	0.748044	1477.44	FALSE	69
2022-09-13	10:34:41	0.379249	1.68698	0.748044	1398.39	FALSE	69
2022-09-13	10:34:41	-0.342735	-1.52455	0.748044	1477.44	FALSE	69
2022-09-13	10:34:42	0.103677	0.461176	0.514261	1398.85	FALSE	69
2022-09-13	10:34:42	0.122965	0.546973	0.514261	1477.98	FALSE	69
2022-09-13	10:34:42	0.219911	0.978208	0.514261	1399.83	FALSE	69
2022-09-13	10:34:42	0.0158908	0.0706855	0.514261	1478.05	FALSE	69
2022-09-13	10:34:43	0.266069	1.18353	1.99858	1401.01	FALSE	69
2022-09-13	10:34:43	0.205967	0.916182	1.99858	1478.97	FALSE	69
2022-09-13	10:34:43	0.565407	2.51504	1.99858	1403.52	FALSE	69
2022-09-13	10:34:43	0.759758	3.37956	1.99858	1482.35	FALSE	69
2022-09-13	10:34:44	0.489478	2.1773	2.07649	1405.7	FALSE	69
2022-09-13	10:34:44	0.459809	2.04532	2.07649	1484.4	FALSE	69
2022-09-13	10:34:44	0.451158	2.00684	2.07649	1407.71	FALSE	69
2022-09-13	10:34:45	0.442761	1.96949	2.17594	1486.36	FALSE	69
2022-09-13	10:34:45	0.581132	2.58499	2.17594	1410.29	FALSE	69
2022-09-13	10:34:45	0.595229	2.6477	2.17594	1489.01	FALSE	69
2022-09-13	10:34:45	0.33757	1.50158	2.17594	1411.79	FALSE	69
2022-09-13	10:34:46	0.42215	1.87781	2.22959	1490.89	FALSE	69
2022-09-13	10:34:46	0.577265	2.56779	2.22959	1414.36	FALSE	69
2022-09-13	10:34:46	0.47299	2.10395	2.22959	1492.99	FALSE	69
2022-09-13	10:34:46	0.532532	2.36881	2.22959	1416.73	FALSE	69
2022-09-13	10:34:47	0.596196	2.652	2.09518	1495.65	FALSE	69
2022-09-13	10:34:47	0.500318	2.22551	2.09518	1418.96	FALSE	69
2022-09-13	10:34:47	0.400216	1.78024	2.09518	1497.43	FALSE	69
2022-09-13	10:34:47	0.387341	1.72297	2.09518	1420.68	FALSE	69
2022-09-13	10:34:48	0.475738	2.11618	2.65047	1499.54	FALSE	69
2022-09-13	10:34:48	0.561081	2.4958	2.65047	1423.18	FALSE	69
2022-09-13	10:34:48	0.655891	2.91753	2.65047	1502.46	FALSE	69
2022-09-13	10:34:48	0.6907	3.07237	2.65047	1426.25	FALSE	69
2022-09-13	10:34:49	0.687494	3.05811	2.61533	1505.52	FALSE	69
2022-09-13	10:34:49	0.475127	2.11346	2.61533	1428.36	FALSE	69
2022-09-13	10:34:49	0.601234	2.67441	2.61533	1508.19	FALSE	69
2022-09-13	10:34:50	0.668308	2.97277	3.41232	1431.33	FALSE	69
2022-09-13	10:34:50	0.790649	3.51696	3.41232	1511.71	FALSE	69
2022-09-13	10:34:50	0.658944	2.93111	3.41232	1434.27	FALSE	69
2022-09-13	10:34:50	0.950598	4.22845	3.41232	1515.94	FALSE	69
2022-09-13	10:34:51	0.765661	3.40581	3.04668	1437.67	FALSE	69
2022-09-13	10:34:51	0.556348	2.47475	3.04668	1518.41	FALSE	69
2022-09-13	10:34:51	0.714415	3.17786	3.04668	1440.85	FALSE	69
2022-09-13	10:34:51	0.70327	3.12829	3.04668	1521.54	FALSE	69
2022-09-13	10:34:52	0.789937	3.5138	3.06671	1444.36	FALSE	69
2022-09-13	10:34:52	0.950293	4.22709	3.06671	1525.77	FALSE	69
2022-09-13	10:34:52	0.592685	2.63638	3.06671	1447	FALSE	69
2022-09-13	10:34:52	0.424796	1.88958	3.06671	1527.66	FALSE	69
2022-09-13	10:34:53	0.388461	1.72795	1.73867	1448.73	FALSE	69
2022-09-13	10:34:53	0.632888	2.81521	1.73867	1530.47	FALSE	69
2022-09-13	10:34:53	0.15126	0.672835	1.73867	1449.4	FALSE	69
2022-09-13	10:34:54	0.154568	0.687549	1.45715	1531.16	FALSE	69
2022-09-13	10:34:54	0.0439316	0.195417	1.45715	1449.6	FALSE	69
2022-09-13	10:34:54	0.507035	2.25539	1.45715	1533.42	FALSE	69
2022-09-13	10:34:54	0.604797	2.69026	1.45715	1452.29	FALSE	69
2022-09-13	10:34:55	2.0993	9.33811	6.71756	1542.75	FALSE	69
2022-09-13	10:34:55	1.38296	6.15168	6.71756	1458.44	FALSE	69
2022-09-13	10:34:55	1.55034	6.89622	6.71756	1549.65	FALSE	69
2022-09-13	10:34:55	1.0081	4.48423	6.71756	1462.92	FALSE	69
2022-09-13	10:34:56	1.16449	5.17988	11.3692	1554.83	FALSE	69
2022-09-13	10:34:56	1.77207	7.88252	11.3692	1470.8	FALSE	69
2022-09-13	10:34:56	3.85207	17.1348	11.3692	1571.97	1	70
2022-09-13	10:34:56	3.43497	15.2794	11.3692	1486.08	1	71
2022-09-13	10:34:57	1.30205	5.79178	9.08475	1577.76	FALSE	71
2022-09-13	10:34:57	1.97274	8.77514	9.08475	1494.86	FALSE	71
2022-09-13	10:34:57	2.09798	9.33223	9.08475	1587.09	FALSE	71
2022-09-13	10:34:57	2.7966	12.4398	9.08475	1507.3	FALSE	71
2022-09-13	10:34:58	1.51431	6.73595	4.51889	1593.83	FALSE	71
2022-09-13	10:34:58	1.00302	4.46163	4.51889	1511.76	FALSE	71
2022-09-13	10:34:58	0.530344	2.35908	4.51889	1596.18	FALSE	71
2022-09-13	10:34:59	0.623779	2.77469	2.71714	1514.53	FALSE	71
2022-09-13	10:34:59	0.444338	1.9765	2.71714	1598.16	FALSE	71
2022-09-13	10:34:59	0.712074	3.16745	2.71714	1517.7	FALSE	71
2022-09-13	10:34:59	0.663168	2.9499	2.71714	1601.11	FALSE	71
2022-09-13	10:35:00	0.602405	2.67962	2.44804	1520.38	FALSE	71
2022-09-13	10:35:00	0.495942	2.20605	2.44804	1603.32	FALSE	71
2022-09-13	10:35:00	0.605051	2.69139	2.44804	1523.07	FALSE	71
2022-09-13	10:35:00	0.497977	2.2151	2.44804	1605.53	FALSE	71
2022-09-13	10:35:01	0.8393	3.73337	8.14439	1526.81	FALSE	71
2022-09-13	10:35:01	2.30571	10.2563	8.14439	1615.79	FALSE	71
2022-09-13	10:35:01	2.61548	11.6342	8.14439	1538.44	FALSE	71
2022-09-13	10:35:01	1.56327	6.95374	8.14439	1622.74	FALSE	71
2022-09-13	10:35:02	1.43192	6.36947	4.49202	1544.81	FALSE	71
2022-09-13	10:35:02	0.829987	3.69195	4.49202	1626.43	FALSE	71
2022-09-13	10:35:02	0.767646	3.41464	4.49202	1548.22	FALSE	71
2022-09-13	10:35:03	0.604695	2.6898	6.42057	1629.12	FALSE	71
2022-09-13	10:35:03	0.745102	3.31436	6.42057	1551.54	FALSE	71
2022-09-13	10:35:03	1.30368	5.79903	6.42057	1634.92	FALSE	71
2022-09-13	10:35:03	3.12016	13.8791	6.42057	1565.42	1	72
2022-09-13	10:35:04	3.18637	14.1736	8.10183	1649.1	1	73
2022-09-13	10:35:04	1.90836	8.48877	8.10183	1573.91	FALSE	73
2022-09-13	10:35:04	1.76637	7.85717	8.10183	1656.95	FALSE	73
2022-09-13	10:35:04	0.424389	1.88777	8.10183	1575.79	FALSE	73
2022-09-13	10:35:05	0.191463	0.851666	0.548216	1657.81	FALSE	73
2022-09-13	10:35:05	0.135484	0.60266	0.548216	1576.4	FALSE	73
2022-09-13	10:35:05	0.103575	0.460722	0.548216	1658.27	FALSE	73
2022-09-13	10:35:05	0.0624557	0.277815	0.548216	1576.68	FALSE	73
2022-09-13	10:35:06	0.310954	1.38319	3.27414	1659.65	FALSE	73
2022-09-13	10:35:06	0.393906	1.75217	3.27414	1578.43	FALSE	73
2022-09-13	10:35:06	1.50332	6.68707	3.27414	1666.34	FALSE	73
2022-09-13	10:35:07	1.13701	5.05765	4.93422	1583.48	FALSE	73
2022-09-13	10:35:07	1.0219	4.54562	4.93422	1670.88	FALSE	73
2022-09-13	10:35:07	0.911412	4.05414	4.93422	1587.54	FALSE	73
2022-09-13	10:35:07	1.36673	6.07949	4.93422	1676.96	FALSE	73
2022-09-13	10:35:08	3.65146	16.2424	12.819	1603.78	1	74
2022-09-13	10:35:08	2.01731	8.9734	12.819	1685.93	FALSE	74
2022-09-13	10:35:08	2.44927	10.8948	12.819	1614.68	FALSE	74
2022-09-13	10:35:08	3.40932	15.1653	12.819	1701.1	1	75
2022-09-13	10:35:09	2.44648	10.8824	7.75758	1625.56	FALSE	75
2022-09-13	10:35:09	1.63961	7.29331	7.75758	1708.39	FALSE	75
2022-09-13	10:35:09	1.83553	8.1648	7.75758	1633.72	FALSE	75
2022-09-13	10:35:09	1.05431	4.68978	7.75758	1713.08	FALSE	75
2022-09-13	10:35:10	0.863066	3.83909	3.09987	1637.56	FALSE	75
2022-09-13	10:35:10	0.539504	2.39982	3.09987	1715.48	FALSE	75
2022-09-13	10:35:10	0.642201	2.85664	3.09987	1640.42	FALSE	75
2022-09-13	10:35:10	0.742761	3.30395	3.09987	1718.79	FALSE	75
2022-09-13	10:35:11	0.89701	3.99008	3.89365	1644.41	FALSE	75
2022-09-13	10:35:11	0.765509	3.40514	3.89365	1722.19	FALSE	75
2022-09-13	10:35:11	0.963473	4.28572	3.89365	1648.7	FALSE	75
2022-09-13	10:35:12	0.446527	1.98624	2.41697	1724.18	FALSE	75
2022-09-13	10:35:12	0.615484	2.7378	2.41697	1651.43	FALSE	75
2022-09-13	10:35:12	0.381387	1.69649	2.41697	1725.87	FALSE	75
2022-09-13	10:35:12	0.730038	3.24736	2.41697	1654.68	FALSE	75
2022-09-13	10:35:13	0.76673	3.41057	8.39406	1729.29	FALSE	75
2022-09-13	10:35:13	1.18011	5.24937	8.39406	1659.93	FALSE	75
2022-09-13	10:35:13	2.60876	11.6043	8.39406	1740.89	FALSE	75
2022-09-13	10:35:13	2.99268	13.312	8.39406	1673.24	FALSE	75
2022-09-13	10:35:14	4.21767	18.761	18.9728	1759.65	1	76
2022-09-13	10:35:14	5.17899	23.0372	18.9728	1696.28	1	77
2022-09-13	10:35:14	5.17599	23.0238	18.9728	1782.67	1	78
2022-09-13	10:35:14	2.48841	11.0689	18.9728	1707.35	FALSE	78
2022-09-13	10:35:15	2.17513	9.67541	6.41791	1792.35	FALSE	78
2022-09-13	10:35:15	1.44413	6.42378	6.41791	1713.77	FALSE	78
2022-09-13	10:35:15	0.709173	3.15454	6.41791	1795.5	FALSE	78
2022-09-13	10:35:16	0.58841	2.61737	2.83989	1716.39	FALSE	78
2022-09-13	10:35:16	0.825255	3.6709	2.83989	1799.18	FALSE	78
2022-09-13	10:35:16	0.667697	2.97005	2.83989	1719.36	FALSE	78
2022-09-13	10:35:16	0.472379	2.10124	2.83989	1801.28	FALSE	78
2022-09-13	10:35:17	0.42388	1.8855	3.15076	1721.24	FALSE	78
2022-09-13	10:35:17	1.19788	5.32841	3.15076	1806.6	FALSE	78
2022-09-13	10:35:17	0.782964	3.48278	3.15076	1724.73	FALSE	78
2022-09-13	10:35:17	0.428563	1.90633	3.15076	1808.51	FALSE	78
2022-09-13	10:35:18	0.361947	1.61001	1.87226	1726.34	FALSE	78
2022-09-13	10:35:18	0.3764	1.6743	1.87226	1810.19	FALSE	78
2022-09-13	10:35:18	0.380674	1.69331	1.87226	1728.03	FALSE	78
2022-09-13	10:35:18	0.564593	2.51142	1.87226	1812.7	FALSE	78
2022-09-13	10:35:19	0.59187	2.63276	2.56726	1730.66	FALSE	78
2022-09-13	10:35:19	0.767493	3.41396	2.56726	1816.11	FALSE	78
2022-09-13	10:35:19	0.372074	1.65506	2.56726	1732.32	FALSE	78
2022-09-13	10:35:20	0.343015	1.5258	1.68239	1817.64	FALSE	78
2022-09-13	10:35:20	0.258384	1.14934	1.68239	1733.47	FALSE	78
2022-09-13	10:35:20	0.606476	2.69773	1.68239	1820.33	FALSE	78
2022-09-13	10:35:20	0.305	1.3567	1.68239	1734.82	FALSE	78
2022-09-13	10:35:21	0.177163	0.788056	1.21307	1821.12	FALSE	78
2022-09-13	10:35:21	0.312328	1.3893	1.21307	1736.21	FALSE	78
2022-09-13	10:35:21	0.246323	1.09569	1.21307	1822.22	FALSE	78
2022-09-13	10:35:21	0.355026	1.57923	1.21307	1737.79	FALSE	78
2022-09-13	10:35:22	0.268562	1.19462	0.932652	1823.41	FALSE	78
2022-09-13	10:35:22	0.289835	1.28924	0.932652	1739.08	FALSE	78
2022-09-13	10:35:22	0.242507	1.07872	0.932652	1824.49	FALSE	78
2022-09-13	10:35:22	0.0377738	0.168025	0.932652	1739.25	FALSE	78
2022-09-13	10:35:23	0.159504	0.709506	0.481474	1825.2	FALSE	78
2022-09-13	10:35:23	0.0730918	0.325127	0.481474	1739.58	FALSE	78
2022-09-13	10:35:23	0.0921249	0.40979	0.481474	1825.61	FALSE	78
2022-09-13	10:35:24	0.0725829	0.322863	-0.453308	1739.9	FALSE	78
2022-09-13	10:35:24	-0.11729	-0.521729	-0.453308	1825.61	FALSE	78
2022-09-13	10:35:24	-0.116425	-0.517882	-0.453308	1739.9	FALSE	78
2022-09-13	10:35:24	-0.246501	-1.09649	-0.453308	1825.61	FALSE	78
2022-09-13	10:35:25	-0.351793	-1.56485	-1.62597	1739.9	FALSE	78
2022-09-13	10:35:25	-0.380903	-1.69433	-1.62597	1825.61	FALSE	78
2022-09-13	10:35:25	-0.356323	-1.585	-1.62597	1739.9	FALSE	78
2022-09-13	10:35:25	-0.373116	-1.65969	-1.62597	1825.61	FALSE	78
2022-09-13	10:35:26	-0.0465519	-0.207072	0.334408	1739.9	FALSE	78
2022-09-13	10:35:26	0.026018	0.115733	0.334408	1825.73	FALSE	78
2022-09-13	10:35:26	0.0624048	0.277589	0.334408	1740.18	FALSE	78
2022-09-13	10:35:26	0.258842	1.15138	0.334408	1826.88	FALSE	78
2022-09-13	10:35:27	0.145967	0.64929	0.933047	1740.83	FALSE	78
2022-09-13	10:35:27	0.252125	1.1215	0.933047	1828	FALSE	78
2022-09-13	10:35:27	0.237824	1.05789	0.933047	1741.88	FALSE	78
2022-09-13	10:35:27	0.203117	0.903505	0.933047	1828.9	FALSE	78
2022-09-13	10:35:28	0.288715	1.28426	1.10369	1743.17	FALSE	78
2022-09-13	10:35:28	0.289428	1.28743	1.10369	1830.19	FALSE	78
2022-09-13	10:35:28	0.166222	0.739389	1.10369	1743.91	FALSE	78
2022-09-13	10:35:29	-0.0383585	-0.170626	-0.699884	1830.19	FALSE	78
2022-09-13	10:35:29	-0.212252	-0.944139	-0.699884	1743.91	FALSE	78
2022-09-13	10:35:29	-0.257188	-1.14402	-0.699884	1830.19	FALSE	78
2022-09-13	10:35:29	-0.121565	-0.540745	-0.699884	1743.91	FALSE	78
2022-09-13	10:35:30	-0.234643	-1.04374	-0.941194	1830.19	FALSE	78
2022-09-13	10:35:30	-0.282888	-1.25834	-0.941194	1743.91	FALSE	78
2022-09-13	10:35:30	-0.233727	-1.03966	-0.941194	1830.19	FALSE	78
2022-09-13	10:35:30	-0.0951015	-0.42303	-0.941194	1743.91	FALSE	78
2022-09-13	10:35:31	-0.0980532	-0.43616	0.699942	1830.19	FALSE	78
2022-09-13	10:35:31	0.200624	0.892416	0.699942	1744.8	FALSE	78
2022-09-13	10:35:31	0.243677	1.08392	0.699942	1831.27	FALSE	78
2022-09-13	10:35:31	0.283168	1.25959	0.699942	1746.06	FALSE	78
2022-09-13	10:35:32	0.238079	1.05902	1.55696	1832.33	FALSE	78
2022-09-13	10:35:32	0.399657	1.77775	1.55696	1747.84	FALSE	78
2022-09-13	10:35:32	0.412328	1.83412	1.55696	1834.17	FALSE	78
2022-09-13	10:35:33	-0.148995	-0.66276	-1.45336	1747.84	FALSE	78
2022-09-13	10:35:33	-0.336933	-1.49875	-1.45336	1834.17	FALSE	78
2022-09-13	10:35:33	-0.405687	-1.80458	-1.45336	1747.84	FALSE	78
2022-09-13	10:35:33	-0.415305	-1.84736	-1.45336	1834.17	FALSE	78
2022-09-13	10:35:34	-0.482888	-2.14798	-2.35432	1747.84	FALSE	78
2022-09-13	10:35:34	-0.618409	-2.75081	-2.35432	1834.17	FALSE	78
2022-09-13	10:35:34	-0.525178	-2.3361	-2.35432	1747.84	FALSE	78
2022-09-13	10:35:34	-0.490623	-2.18239	-2.35432	1834.17	FALSE	78
2022-09-13	10:35:35	-0.379783	-1.68935	-1.85302	1747.84	FALSE	78
2022-09-13	10:35:35	-0.416272	-1.85166	-1.85302	1834.17	FALSE	78
2022-09-13	10:35:35	-0.399783	-1.77831	-1.85302	1747.84	FALSE	78
2022-09-13	10:35:35	-0.47047	-2.09274	-1.85302	1834.17	FALSE	78
2022-09-13	10:35:36	-0.328994	-1.46343	-0.100073	1747.84	FALSE	78
2022-09-13	10:35:36	-0.00461808	-0.0205421	-0.100073	1834.17	FALSE	78
2022-09-13	10:35:36	0.26612	1.18375	-0.100073	1749.02	FALSE	78
2022-09-13	10:35:37	0.400318	1.78069	1.80237	1835.95	FALSE	78
2022-09-13	10:35:37	0.307952	1.36983	1.80237	1750.39	FALSE	78
2022-09-13	10:35:37	0.520369	2.31471	1.80237	1838.26	FALSE	78
2022-09-13	10:35:37	0.392125	1.74425	1.80237	1752.13	FALSE	78
2022-09-13	10:35:38	0.164644	0.732369	0.505432	1839	FALSE	78
2022-09-13	10:35:38	0.055331	0.246123	0.505432	1752.38	FALSE	78
2022-09-13	10:35:38	0.114059	0.507357	0.505432	1839.5	FALSE	78
2022-09-13	10:35:38	0.120471	0.535879	0.505432	1752.92	FALSE	78
2022-09-13	10:35:39	0.151005	0.6717	0.837575	1840.17	FALSE	78
2022-09-13	10:35:39	0.154924	0.689133	0.837575	1753.61	FALSE	78
2022-09-13	10:35:39	0.326323	1.45155	0.837575	1841.63	FALSE	78
2022-09-13	10:35:39	0.120929	0.537916	0.837575	1754.14	FALSE	78
2022-09-13	10:35:40	0.260064	1.15682	1.77543	1842.78	FALSE	78
2022-09-13	10:35:40	0.373499	1.6614	1.77543	1755.8	FALSE	78
2022-09-13	10:35:40	0.430802	1.91629	1.77543	1844.7	FALSE	78
2022-09-13	10:35:40	0.532176	2.36723	1.77543	1758.17	FALSE	78
2022-09-13	10:35:41	0.736857	3.27769	2.93111	1847.98	FALSE	78
2022-09-13	10:35:41	0.488308	2.17209	2.93111	1760.34	FALSE	78
2022-09-13	10:35:41	0.751667	3.34357	2.93111	1851.32	FALSE	78
2022-09-13	10:35:42	0.736807	3.27746	3.26999	1763.62	FALSE	78
2022-09-13	10:35:42	0.735992	3.27384	3.26999	1854.59	FALSE	78
2022-09-13	10:35:42	0.731259	3.25279	3.26999	1766.87	FALSE	78
2022-09-13	10:35:42	0.73645	3.27588	3.26999	1857.87	FALSE	78
2022-09-13	10:35:43	0.739758	3.29059	3.28556	1770.16	FALSE	78
2022-09-13	10:35:43	0.737977	3.28267	3.28556	1861.15	FALSE	78
2022-09-13	10:35:43	0.738639	3.28561	3.28556	1773.45	FALSE	78
2022-09-13	10:35:43	0.73813	3.28335	3.28556	1864.44	FALSE	78
2022-09-13	10:35:44	0.738944	3.28697	3.27565	1776.74	FALSE	78
2022-09-13	10:35:44	0.733244	3.26162	3.27565	1867.7	FALSE	78
2022-09-13	10:35:44	0.734415	3.26682	3.27565	1780	FALSE	78
2022-09-13	10:35:44	0.738995	3.2872	3.27565	1870.98	FALSE	78
2022-09-13	10:35:45	0.732888	3.26003	3.26373	1783.26	FALSE	78
2022-09-13	10:35:45	0.732481	3.25822	3.26373	1874.24	FALSE	78
2022-09-13	10:35:45	0.735789	3.27294	3.26373	1786.54	FALSE	78
2022-09-13	10:35:46	0.736857	3.27769	3.28906	1877.52	FALSE	78
2022-09-13	10:35:46	0.738995	3.2872	3.28906	1789.82	FALSE	78
2022-09-13	10:35:46	0.737163	3.27905	3.28906	1880.8	FALSE	78
2022-09-13	10:35:46	0.744644	3.31233	3.28906	1793.14	FALSE	78
2022-09-13	10:35:47	0.733244	3.26162	3.27605	1884.06	FALSE	78
2022-09-13	10:35:47	0.740013	3.29173	3.27605	1796.43	FALSE	78
2022-09-13	10:35:47	0.738181	3.28358	3.27605	1887.34	FALSE	78
2022-09-13	10:35:47	0.734517	3.26728	3.27605	1799.7	FALSE	78
2022-09-13	10:35:48	0.736501	3.2761	3.2791	1890.62	FALSE	78
2022-09-13	10:35:48	0.737722	3.28154	3.2791	1802.98	FALSE	78
2022-09-13	10:35:48	0.737315	3.27972	3.2791	1893.9	FALSE	78
2022-09-13	10:35:48	0.737163	3.27905	3.2791	1806.26	FALSE	78
2022-09-13	10:35:49	0.734975	3.26932	3.26109	1897.17	FALSE	78
2022-09-13	10:35:49	0.730394	3.24894	3.26109	1809.51	FALSE	78
2022-09-13	10:35:49	0.734008	3.26501	3.26109	1900.43	FALSE	78
2022-09-13	10:35:50	0.735076	3.26977	3.28646	1812.78	FALSE	78
2022-09-13	10:35:50	0.742252	3.30169	3.28646	1903.74	FALSE	78
2022-09-13	10:35:50	0.735483	3.27158	3.28646	1816.05	FALSE	78
2022-09-13	10:35:50	0.742506	3.30282	3.28646	1907.04	FALSE	78
2022-09-13	10:35:51	0.738944	3.28697	3.29274	1819.33	FALSE	78
2022-09-13	10:35:51	0.737519	3.28063	3.29274	1910.32	FALSE	78
2022-09-13	10:35:51	0.745661	3.31685	3.29274	1822.65	FALSE	78
2022-09-13	10:35:51	0.738842	3.28652	3.29274	1913.61	FALSE	78
2022-09-13	10:35:52	0.733041	3.26071	3.26931	1825.91	FALSE	78
2022-09-13	10:35:52	0.732328	3.25754	3.26931	1916.86	FALSE	78
2022-09-13	10:35:52	0.736399	3.27565	3.26931	1829.19	FALSE	78
2022-09-13	10:35:52	0.73813	3.28335	3.26931	1920.15	FALSE	78
2022-09-13	10:35:53	0.73472	3.26818	4.08413	1832.46	FALSE	78
2022-09-13	10:35:53	0.741896	3.3001	4.08413	1923.45	FALSE	78
2022-09-13	10:35:53	0.741081	3.29648	4.08413	1835.75	FALSE	78
2022-09-13	10:35:53	1.45492	6.47178	4.08413	1929.92	FALSE	78
2022-09-13	10:35:54	-0.0638038	-0.283812	0.177005	1835.75	FALSE	78
2022-09-13	10:35:54	0.0873412	0.388511	0.177005	1930.31	FALSE	78
2022-09-13	10:35:54	0.0958399	0.426315	0.177005	1836.18	FALSE	78
2022-09-13	10:35:55	0.125356	0.557609	1.13039	1930.87	FALSE	78
2022-09-13	10:35:55	0.262863	1.16927	1.13039	1837.35	FALSE	78
2022-09-13	10:35:55	0.158944	0.707015	1.13039	1931.57	FALSE	78
2022-09-13	10:35:55	0.469326	2.08766	1.13039	1839.43	FALSE	78
2022-09-13	10:35:56	7.24301	32.2184	52.7604	1963.79	1	79
2022-09-13	10:35:56	11.0287	49.0579	52.7604	1888.49	1	80
2022-09-13	10:35:56	17.0459	75.8236	52.7604	2039.61	1	81
2022-09-13	10:35:56	12.1267	53.942	52.7604	1942.43	1	82
2022-09-13	10:35:57	12.9527	57.6162	27.4936	2097.23	1	83
2022-09-13	10:35:57	8.21192	36.5283	27.4936	1978.96	1	84
2022-09-13	10:35:57	2.58357	11.4922	27.4936	2108.72	FALSE	84
2022-09-13	10:35:57	0.975127	4.33756	27.4936	1983.3	FALSE	84
2022-09-13	10:35:58	1.78062	7.92055	6.27061	2116.64	FALSE	84
2022-09-13	10:35:58	1.3051	5.80535	6.27061	1989.11	FALSE	84
2022-09-13	10:35:58	1.14337	5.08594	6.27061	2121.73	FALSE	84
2022-09-13	10:35:59	2.26108	10.0577	12.7443	1999.16	FALSE	84
2022-09-13	10:35:59	3.42006	15.2131	12.7443	2136.94	1	85
2022-09-13	10:35:59	3.00698	13.3756	12.7443	2012.54	1	86
2022-09-13	10:35:59	2.77207	12.3307	12.7443	2149.27	FALSE	86
2022-09-13	10:36:00	2.97131	13.217	15.4603	2025.76	FALSE	86
2022-09-13	10:36:00	4.33742	19.2937	15.4603	2168.57	1	87
2022-09-13	10:36:00	3.80887	16.9426	15.4603	2042.7	1	88
2022-09-13	10:36:00	2.7849	12.3878	15.4603	2180.95	FALSE	88
2022-09-13	10:36:01	2.33772	10.3986	8.73239	2053.1	FALSE	88
2022-09-13	10:36:01	2.18851	9.73493	8.73239	2190.69	FALSE	88
2022-09-13	10:36:01	1.6619	7.39246	8.73239	2060.49	FALSE	88
2022-09-13	10:36:01	1.66439	7.40354	8.73239	2198.09	FALSE	88
2022-09-13	10:36:02	1.52429	6.78035	5.61399	2067.27	FALSE	88
2022-09-13	10:36:02	1.55894	6.93448	5.61399	2205.03	FALSE	88
2022-09-13	10:36:02	0.703015	3.12715	5.61399	2070.4	FALSE	88
2022-09-13	10:36:03	0.516959	2.29954	1.37634	2207.33	FALSE	88
2022-09-13	10:36:03	0.4507	2.0048	1.37634	2072.4	FALSE	88
2022-09-13	10:36:03	0.136094	0.605373	1.37634	2207.93	FALSE	88
2022-09-13	10:36:03	0.133906	0.595641	1.37634	2073	FALSE	88
2022-09-13	10:36:04	0.223117	0.992469	0.797621	2208.93	FALSE	88
2022-09-13	10:36:04	0.254415	1.13169	0.797621	2074.13	FALSE	88
2022-09-13	10:36:04	0.199148	0.88585	0.797621	2209.81	FALSE	88
2022-09-13	10:36:04	0.0405728	0.180476	0.797621	2074.31	FALSE	88
2022-09-13	10:36:05	-0.0138293	-0.0615155	-1.39235	2209.81	FALSE	88
2022-09-13	10:36:05	-0.326399	-1.45189	-1.39235	2074.31	FALSE	88
2022-09-13	10:36:05	-0.513524	-2.28426	-1.39235	2209.81	FALSE	88
2022-09-13	10:36:05	-0.398307	-1.77175	-1.39235	2074.31	FALSE	88
2022-09-13	10:36:06	0.471361	2.09671	2.15393	2211.91	FALSE	88
2022-09-13	10:36:06	0.765051	3.4031	2.15393	2077.71	FALSE	88
2022-09-13	10:36:06	0.52556	2.3378	2.15393	2214.25	FALSE	88
2022-09-13	10:36:06	0.174924	0.778097	2.15393	2078.49	FALSE	88
2022-09-13	10:36:07	1.02393	4.55465	5.11303	2218.8	FALSE	88
2022-09-13	10:36:07	1.77319	7.8875	5.11303	2086.38	FALSE	88
2022-09-13	10:36:07	0.65126	2.89693	5.11303	2221.7	FALSE	88
2022-09-13	10:36:08	0.974822	4.3362	4.39031	2090.71	FALSE	88
2022-09-13	10:36:08	0.757723	3.3705	4.39031	2225.07	FALSE	88
2022-09-13	10:36:08	1.18821	5.2854	4.39031	2096	FALSE	88
2022-09-13	10:36:08	1.02719	4.56915	4.39031	2229.64	FALSE	88
2022-09-13	10:36:09	1.47945	6.58089	10.6625	2102.58	FALSE	88
2022-09-13	10:36:09	1.61421	7.18033	10.6625	2236.82	FALSE	88
2022-09-13	10:36:09	3.36815	14.9822	10.6625	2117.56	1	89
2022-09-13	10:36:09	3.12637	13.9067	10.6625	2250.72	1	90
2022-09-13	10:36:10	2.63579	11.7245	12.5245	2129.29	FALSE	90
2022-09-13	10:36:10	3.57762	15.914	12.5245	2266.64	1	91
2022-09-13	10:36:10	3.368	14.9815	12.5245	2144.27	1	92
2022-09-13	10:36:10	1.68113	7.478	12.5245	2274.12	FALSE	92
2022-09-13	10:36:11	0.908664	4.04192	2.64189	2148.31	FALSE	92
2022-09-13	10:36:11	0.411005	1.82823	2.64189	2275.94	FALSE	92
2022-09-13	10:36:11	0.462099	2.05551	2.64189	2150.37	FALSE	92
2022-09-13	10:36:12	0.424848	1.88981	1.17079	2277.83	FALSE	92
2022-09-13	10:36:12	0.270547	1.20345	1.17079	2151.57	FALSE	92
2022-09-13	10:36:12	0.210089	0.934518	1.17079	2278.77	FALSE	92
2022-09-13	10:36:12	0.147341	0.655402	1.17079	2152.23	FALSE	92
2022-09-13	10:36:13	0.249122	1.10814	2.50757	2279.88	FALSE	92
2022-09-13	10:36:13	0.134008	0.596094	2.50757	2152.82	FALSE	92
2022-09-13	10:36:13	0.443117	1.97107	2.50757	2281.85	FALSE	92
2022-09-13	10:36:13	1.42866	6.35497	2.50757	2159.18	FALSE	92
2022-09-13	10:36:14	0.882812	3.92692	7.01587	2285.77	FALSE	92
2022-09-13	10:36:14	0.969784	4.31379	7.01587	2163.49	FALSE	92
2022-09-13	10:36:14	1.15864	5.15386	7.01587	2290.93	FALSE	92
2022-09-13	10:36:14	3.29772	14.6689	7.01587	2178.16	1	93
2022-09-13	10:36:15	3.55838	15.8284	15.0941	2306.76	1	94
2022-09-13	10:36:15	4.83365	21.501	15.0941	2199.66	1	95
2022-09-13	10:36:15	1.7879	7.95294	15.0941	2314.71	FALSE	95
2022-09-13	10:36:16	0.370394	1.64759	0.152179	2201.31	FALSE	95
2022-09-13	10:36:16	0.20785	0.924558	0.152179	2315.63	FALSE	95
2022-09-13	10:36:16	-0.0337784	-0.150253	0.152179	2201.31	FALSE	95
2022-09-13	10:36:16	-0.40762	-1.81318	0.152179	2315.63	FALSE	95
2022-09-13	10:36:17	-0.449503	-1.99948	-2.49308	2201.31	FALSE	95
2022-09-13	10:36:17	-0.74304	-3.30519	-2.49308	2315.63	FALSE	95
2022-09-13	10:36:17	-0.55215	-2.45607	-2.49308	2201.31	FALSE	95
2022-09-13	10:36:17	-0.497188	-2.21159	-2.49308	2315.63	FALSE	95
2022-09-13	10:36:18	-0.271285	-1.20673	-0.672775	2201.31	FALSE	95
2022-09-13	10:36:18	-0.108689	-0.48347	-0.672775	2315.63	FALSE	95
2022-09-13	10:36:18	-0.12304	-0.547307	-0.672775	2201.31	FALSE	95
2022-09-13	10:36:18	-0.101972	-0.453592	-0.672775	2315.63	FALSE	95
2022-09-13	10:36:19	0.247137	1.09931	1.02116	2202.41	FALSE	95
2022-09-13	10:36:19	0.262863	1.16927	1.02116	2316.8	FALSE	95
2022-09-13	10:36:19	0.261641	1.16383	1.02116	2203.57	FALSE	95
2022-09-13	10:36:19	0.146629	0.652235	1.02116	2317.46	FALSE	95
2022-09-13	10:36:20	0.271056	1.20571	1.37315	2204.78	FALSE	95
2022-09-13	10:36:20	0.328257	1.46015	1.37315	2318.92	FALSE	95
2022-09-13	10:36:20	0.326781	1.45359	1.37315	2206.23	FALSE	95
2022-09-13	10:36:21	0.420318	1.86966	1.72908	2320.79	FALSE	95
2022-09-13	10:36:21	0.333346	1.48279	1.72908	2207.71	FALSE	95
2022-09-13	10:36:21	0.385407	1.71437	1.72908	2322.5	FALSE	95
2022-09-13	10:36:21	0.415789	1.84951	1.72908	2209.56	FALSE	95
2022-09-13	10:36:22	0.425	1.89048	1.94623	2324.39	FALSE	95
2022-09-13	10:36:22	0.505458	2.24838	1.94623	2211.81	FALSE	95
2022-09-13	10:36:22	0.408003	1.81488	1.94623	2326.21	FALSE	95
2022-09-13	10:36:22	0.411667	1.83118	1.94623	2213.64	FALSE	95
2022-09-13	10:36:23	0.417825	1.85857	1.68217	2328.06	FALSE	95
2022-09-13	10:36:23	0.359351	1.59847	1.68217	2215.24	FALSE	95
2022-09-13	10:36:23	0.38897	1.73022	1.68217	2329.79	FALSE	95
2022-09-13	10:36:23	0.346527	1.54142	1.68217	2216.78	FALSE	95
2022-09-13	10:36:24	0.239046	1.06332	1.12505	2330.86	FALSE	95
2022-09-13	10:36:24	0.331921	1.47645	1.12505	2218.26	FALSE	95
2022-09-13	10:36:24	0.187799	0.835368	1.12505	2331.69	FALSE	95
2022-09-13	10:36:25	0.255585	1.13689	0.713636	2219.4	FALSE	95
2022-09-13	10:36:25	0.136349	0.606508	0.713636	2332.3	FALSE	95
2022-09-13	10:36:25	0.118893	0.52886	0.713636	2219.92	FALSE	95
2022-09-13	10:36:25	0.130903	0.582283	0.713636	2332.88	FALSE	95
2022-09-13	10:36:26	0.000572752	0.00254772	0.0280711	2219.93	FALSE	95
2022-09-13	10:36:26	0.0537025	0.238879	0.0280711	2333.12	FALSE	95
2022-09-13	10:36:26	-0.0659921	-0.293546	0.0280711	2219.93	FALSE	95
2022-09-13	10:36:26	0.0369595	0.164403	0.0280711	2333.28	FALSE	95
2022-09-13	10:36:27	-0.108537	-0.482794	-0.736612	2219.93	FALSE	95
2022-09-13	10:36:27	-0.214135	-0.952515	-0.736612	2333.28	FALSE	95
2022-09-13	10:36:27	-0.251081	-1.11686	-0.736612	2219.93	FALSE	95
2022-09-13	10:36:27	-0.0886384	-0.394281	-0.736612	2333.28	FALSE	95
2022-09-13	10:36:28	-0.0137784	-0.0612891	7.23156	2219.93	FALSE	95
2022-09-13	10:36:28	1.10179	4.90098	7.23156	2338.19	FALSE	95
2022-09-13	10:36:28	3.78917	16.855	7.23156	2236.78	1	96
2022-09-13	10:36:29	4.7452	21.1076	13.8084	2359.29	1	97
2022-09-13	10:36:29	2.95635	13.1504	13.8084	2249.93	FALSE	97
2022-09-13	10:36:29	3.31167	14.731	13.8084	2374.02	1	98
2022-09-13	10:36:29	1.40388	6.24474	13.8084	2256.18	FALSE	98
2022-09-13	10:36:30	1.73869	7.73404	10.1613	2381.76	FALSE	98
2022-09-13	10:36:30	2.26301	10.0663	10.1613	2266.24	FALSE	98
2022-09-13	10:36:30	2.85141	12.6836	10.1613	2394.44	FALSE	98
2022-09-13	10:36:31	1.60724	7.14932	6.6666	2273.39	FALSE	98
2022-09-13	10:36:31	1.14474	5.09203	6.6666	2399.53	FALSE	98
2022-09-13	10:36:31	1.70495	7.58396	6.6666	2280.98	FALSE	98
2022-09-13	10:36:31	0.966883	4.30089	6.6666	2403.83	FALSE	98
2022-09-13	10:36:31	2.06978	9.2068	6.6666	2290.18	FALSE	98
2022-09-13	10:36:32	1.81243	8.06205	16.4791	2411.9	FALSE	98
2022-09-13	10:36:32	2.98688	13.2862	16.4791	2303.47	FALSE	98
2022-09-13	10:36:32	6.31466	28.0889	16.4791	2439.99	1	99
2022-09-13	10:36:33	0.854313	3.80016	7.94705	2307.27	FALSE	99
2022-09-13	10:36:33	3.07146	13.6625	7.94705	2453.65	1	100
2022-09-13	10:36:33	0.861336	3.83139	7.94705	2311.1	FALSE	100
2022-09-13	10:36:33	2.3592	10.4942	7.94705	2464.14	FALSE	100
2022-09-13	10:36:34	2.16576	9.63373	8.18525	2320.74	FALSE	100
2022-09-13	10:36:34	0.820318	3.64894	8.18525	2467.79	FALSE	100
2022-09-13	10:36:34	2.69253	11.9769	8.18525	2332.71	FALSE	100
2022-09-13	10:36:34	1.6819	7.48143	8.18525	2475.27	FALSE	100
2022-09-13	10:36:35	2.1305	9.47689	4.87101	2342.19	FALSE	100
2022-09-13	10:36:35	0.785153	3.49252	4.87101	2478.77	FALSE	100
2022-09-13	10:36:35	0.731514	3.25392	4.87101	2345.44	FALSE	100
2022-09-13	10:36:35	0.733041	3.26071	4.87101	2482.03	FALSE	100
2022-09-13	10:36:36	0.736959	3.27814	2.11131	2348.72	FALSE	100
2022-09-13	10:36:36	0.690089	3.06965	2.11131	2485.1	FALSE	100
2022-09-13	10:36:36	0.256807	1.14233	2.11131	2349.86	FALSE	100
2022-09-13	10:36:36	0.21472	0.955118	2.11131	2486.05	FALSE	100
2022-09-13	10:36:37	0.219708	0.977305	2.53482	2350.84	FALSE	100
2022-09-13	10:36:37	0.47528	2.11414	2.53482	2488.16	FALSE	100
2022-09-13	10:36:37	1.01457	4.51301	2.53482	2355.35	FALSE	100
2022-09-13	10:36:38	1.16765	5.19394	8.27416	2493.36	FALSE	100
2022-09-13	10:36:38	2.5795	11.4741	8.27416	2366.83	FALSE	100
2022-09-13	10:36:38	2.30154	10.2377	8.27416	2503.6	FALSE	100
2022-09-13	10:36:38	1.39177	6.19087	8.27416	2373.02	FALSE	100
2022-09-13	10:36:39	0.952226	4.23569	2.73394	2507.83	FALSE	100
2022-09-13	10:36:39	0.195738	0.870682	2.73394	2373.89	FALSE	100
2022-09-13	10:36:39	0.631208	2.80774	2.73394	2510.64	FALSE	100
2022-09-13	10:36:39	0.6793	3.02166	2.73394	2376.91	FALSE	100
2022-09-13	10:36:40	0.722303	3.21295	2.82993	2513.85	FALSE	100
2022-09-13	10:36:40	0.794669	3.53485	2.82993	2380.45	FALSE	100
2022-09-13	10:36:40	0.822404	3.65822	2.82993	2517.51	FALSE	100
2022-09-13	10:36:40	0.205407	0.913691	2.82993	2381.36	FALSE	100
2022-09-13	10:36:41	0.187188	0.83265	2.45634	2518.34	FALSE	100
2022-09-13	10:36:41	0.733142	3.26116	2.45634	2384.62	FALSE	100
2022-09-13	10:36:41	0.736298	3.2752	2.45634	2521.62	FALSE	100
2022-09-13	10:36:42	-0.498816	-2.21883	1.88154	2384.62	FALSE	100
2022-09-13	10:36:42	0.740013	3.29173	1.88154	2524.91	FALSE	100
2022-09-13	10:36:42	0.721234	3.20819	1.88154	2387.83	FALSE	100
2022-09-13	10:36:42	0.729529	3.24509	1.88154	2528.16	FALSE	100
2022-09-13	10:36:43	0.243881	1.08483	1.08409	2388.91	FALSE	100
2022-09-13	10:36:43	0.0175702	0.0781558	1.08409	2528.23	FALSE	100
2022-09-13	10:36:43	0.0214379	0.0953601	1.08409	2389.01	FALSE	100
2022-09-13	10:36:43	0.691972	3.07803	1.08409	2531.31	FALSE	100
2022-09-13	10:36:44	0.405509	1.80379	2.01612	2390.81	FALSE	100
2022-09-13	10:36:44	0.409377	1.82099	2.01612	2533.13	FALSE	100
2022-09-13	10:36:44	0.489682	2.1782	2.01612	2392.99	FALSE	100
2022-09-13	10:36:44	0.50841	2.26151	2.01612	2535.39	FALSE	100
2022-09-13	10:36:45	0.434517	1.93282	1.7942	2394.92	FALSE	100
2022-09-13	10:36:45	0.425254	1.89161	1.7942	2537.29	FALSE	100
2022-09-13	10:36:45	0.350293	1.55817	1.7942	2396.48	FALSE	100
2022-09-13	10:36:46	0.492532	2.19088	1.78443	2539.48	FALSE	100
2022-09-13	10:36:46	0.599097	2.6649	1.78443	2399.15	FALSE	100
2022-09-13	10:36:46	0.26439	1.17606	1.78443	2540.65	FALSE	100
2022-09-13	10:36:46	0.248613	1.10588	1.78443	2400.25	FALSE	100
2022-09-13	10:36:47	0.284949	1.26751	1.26485	2541.92	FALSE	100
2022-09-13	10:36:47	0.31126	1.38455	1.26485	2401.64	FALSE	100
2022-09-13	10:36:47	0.272176	1.21069	1.26485	2543.13	FALSE	100
2022-09-13	10:36:47	0.26902	1.19665	1.26485	2402.83	FALSE	100
2022-09-13	10:36:48	0.259148	1.15274	1.10492	2544.28	FALSE	100
2022-09-13	10:36:48	0.241336	1.07351	1.10492	2403.91	FALSE	100
2022-09-13	10:36:48	0.24215	1.07713	1.10492	2545.36	FALSE	100
2022-09-13	10:36:48	0.250954	1.11629	1.10492	2405.02	FALSE	100
2022-09-13	10:36:49	0.25701	1.14323	1.19598	2546.5	FALSE	100
2022-09-13	10:36:49	0.238792	1.06219	1.19598	2406.09	FALSE	100
2022-09-13	10:36:49	0.224288	0.997678	1.19598	2547.5	FALSE	100
2022-09-13	10:36:49	0.355382	1.58081	1.19598	2407.67	FALSE	100
2022-09-13	10:36:50	0.13126	0.583871	-1.15391	2548.09	FALSE	100
2022-09-13	10:36:50	-0.399071	-1.77515	-1.15391	2407.67	FALSE	100
2022-09-13	10:36:50	-0.510419	-2.27045	-1.15391	2548.09	FALSE	100
2022-09-13	10:36:51	-0.260547	-1.15897	0.516693	2407.67	FALSE	100
2022-09-13	10:36:51	-0.0132186	-0.058799	0.516693	2548.09	FALSE	100
2022-09-13	10:36:51	0.057672	0.256537	0.516693	2407.92	FALSE	100
2022-09-13	10:36:51	0.680725	3.028	0.516693	2551.11	FALSE	100
2022-09-13	10:36:52	0.915941	4.07429	10.2204	2412	FALSE	100
2022-09-13	10:36:52	2.03462	9.0504	10.2204	2560.16	FALSE	100
2022-09-13	10:36:52	2.38184	10.5949	10.2204	2422.59	FALSE	100
2022-09-13	10:36:52	3.85823	17.1622	10.2204	2577.33	1	101
2022-09-13	10:36:53	2.92067	12.9917	10.5087	2435.58	FALSE	101
2022-09-13	10:36:53	1.91966	8.53903	10.5087	2585.87	FALSE	101
2022-09-13	10:36:53	3.20759	14.268	10.5087	2449.85	1	102
2022-09-13	10:36:53	1.40195	6.23615	10.5087	2592.1	FALSE	102
2022-09-13	10:36:54	2.11686	9.41622	7.81879	2459.27	FALSE	102
2022-09-13	10:36:54	1.48821	6.61986	7.81879	2598.72	FALSE	102
2022-09-13	10:36:54	1.66816	7.42031	7.81879	2466.69	FALSE	102
2022-09-13	10:36:55	2.88184	12.819	12.8065	2611.54	FALSE	102
2022-09-13	10:36:55	2.47645	11.0157	12.8065	2477.7	FALSE	102
2022-09-13	10:36:55	3.48647	15.5085	12.8065	2627.05	1	103
2022-09-13	10:36:55	2.67136	11.8827	12.8065	2489.59	FALSE	103
2022-09-13	10:36:56	1.93645	8.61372	7.57258	2635.66	FALSE	103
2022-09-13	10:36:56	2.05976	9.16222	7.57258	2498.75	FALSE	103
2022-09-13	10:36:56	1.31808	5.86308	7.57258	2641.53	FALSE	103
2022-09-13	10:36:56	1.49528	6.6513	7.57258	2505.4	FALSE	103
2022-09-13	10:36:57	2.06103	9.16787	14.058	2650.69	FALSE	103
2022-09-13	10:36:57	2.24556	9.9887	14.058	2515.39	FALSE	103
2022-09-13	10:36:57	4.90144	21.8026	14.058	2672.5	1	104
2022-09-13	10:36:57	3.43345	15.2727	14.058	2530.66	1	105
2022-09-13	10:36:58	6.77792	30.1495	16.0306	2702.65	1	106
2022-09-13	10:36:58	1.1736	5.22041	16.0306	2535.88	FALSE	106
2022-09-13	10:36:58	2.86001	12.7219	16.0306	2715.37	FALSE	106
2022-09-13	10:36:59	1.20123	5.34331	5.52669	2541.23	FALSE	106
2022-09-13	10:36:59	1.34541	5.98465	5.52669	2721.35	FALSE	106
2022-09-13	10:36:59	1.31329	5.84178	5.52669	2547.07	FALSE	106
2022-09-13	10:36:59	1.10989	4.93701	5.52669	2726.29	FALSE	106
2022-09-13	10:37:00	1.12983	5.02571	12.2865	2552.09	FALSE	106
2022-09-13	10:37:00	2.67604	11.9036	12.2865	2738.19	FALSE	106
2022-09-13	10:37:00	3.85019	17.1264	12.2865	2569.22	1	107
2022-09-13	10:37:00	3.39248	15.0904	12.2865	2753.28	1	108
2022-09-13	10:37:01	3.34714	14.8887	9.94172	2584.11	1	109
2022-09-13	10:37:01	2.78617	12.3934	9.94172	2765.68	FALSE	109
2022-09-13	10:37:01	2.28301	10.1553	9.94172	2594.26	FALSE	109
2022-09-13	10:37:01	0.523677	2.32942	9.94172	2768.01	FALSE	109
2022-09-13	10:37:02	0.516043	2.29546	1.37066	2596.56	FALSE	109
2022-09-13	10:37:02	0.236959	1.05404	1.37066	2769.06	FALSE	109
2022-09-13	10:37:02	0.171412	0.762475	1.37066	2597.32	FALSE	109
2022-09-13	10:37:03	0.268715	1.1953	1.09411	2770.26	FALSE	109
2022-09-13	10:37:03	0.191412	0.851439	1.09411	2598.17	FALSE	109
2022-09-13	10:37:03	0.279402	1.24284	1.09411	2771.5	FALSE	109
2022-09-13	10:37:03	0.244339	1.08687	1.09411	2599.26	FALSE	109
2022-09-13	10:37:04	0.284084	1.26366	-0.702201	2772.76	FALSE	109
2022-09-13	10:37:04	0.325051	1.44589	-0.702201	2600.71	FALSE	109
2022-09-13	10:37:04	0.380318	1.69173	-0.702201	2774.45	FALSE	109
2022-09-13	10:37:04	-1.6209	-7.21009	-0.702201	2600.71	FALSE	109
2022-09-13	10:37:05	0.338842	1.50724	5.25216	2775.96	FALSE	109
2022-09-13	10:37:05	0.475178	2.11369	5.25216	2602.82	FALSE	109
2022-09-13	10:37:05	1.42648	6.34527	5.25216	2782.31	FALSE	109
2022-09-13	10:37:05	2.48245	11.0424	5.25216	2613.86	FALSE	109
2022-09-13	10:37:06	0.937875	4.17186	4.63224	2786.48	FALSE	109
2022-09-13	10:37:06	0.844491	3.75646	4.63224	2617.62	FALSE	109
2022-09-13	10:37:06	1.75085	7.78813	4.63224	2794.27	FALSE	109
2022-09-13	10:37:06	0.632277	2.81249	4.63224	2620.43	FALSE	109
2022-09-13	10:37:07	1.45477	6.47111	5.59256	2800.74	FALSE	109
2022-09-13	10:37:07	1.21594	5.40874	5.59256	2625.84	FALSE	109
2022-09-13	10:37:07	1.10108	4.89782	5.59256	2805.64	FALSE	109
2022-09-13	10:37:08	1.38973	6.1818	10.6482	2632.02	FALSE	109
2022-09-13	10:37:08	1.60128	7.12281	10.6482	2812.76	FALSE	109
2022-09-13	10:37:08	2.73431	12.1628	10.6482	2644.18	FALSE	109
2022-09-13	10:37:08	3.84994	17.1253	10.6482	2829.88	1	110
2022-09-13	10:37:09	3.66057	16.2829	17.5026	2660.47	1	111
2022-09-13	10:37:09	5.21192	23.1837	17.5026	2853.07	1	112
2022-09-13	10:37:09	3.01843	13.4266	17.5026	2673.89	1	113
2022-09-13	10:37:09	3.84815	17.1173	17.5026	2870.18	1	114
2022-09-13	10:37:10	4.54713	20.2265	16.4089	2694.12	1	115
2022-09-13	10:37:10	3.05284	13.5796	16.4089	2883.76	1	116
2022-09-13	10:37:10	3.24912	14.4527	16.4089	2708.57	1	117
2022-09-13	10:37:10	3.90647	17.3768	16.4089	2901.14	1	118
2022-09-13	10:37:11	2.22851	9.91286	19.1256	2718.49	FALSE	118
2022-09-13	10:37:11	5.30815	23.6117	19.1256	2924.75	1	119
2022-09-13	10:37:11	5.36225	23.8524	19.1256	2742.34	1	120
2022-09-13	10:37:12	3.7421	16.6456	16.7258	2941.4	1	121
2022-09-13	10:37:12	6.11258	27.19	16.7258	2769.53	1	122
2022-09-13	10:37:12	1.31385	5.84427	16.7258	2947.24	FALSE	122
2022-09-13	10:37:12	3.87197	17.2233	16.7258	2786.75	1	123
2022-09-13	10:37:13	1.83116	8.14537	5.46699	2955.39	FALSE	123
2022-09-13	10:37:13	0.771463	3.43162	5.46699	2790.18	FALSE	123
2022-09-13	10:37:13	1.85793	8.26444	5.46699	2963.65	FALSE	123
2022-09-13	10:37:13	0.455585	2.02653	5.46699	2792.21	FALSE	123
2022-09-13	10:37:14	1.17039	5.20613	5.02759	2968.86	FALSE	123
2022-09-13	10:37:14	0.790344	3.51561	5.02759	2795.73	FALSE	123
2022-09-13	10:37:14	0.619911	2.75749	5.02759	2971.62	FALSE	123
2022-09-13	10:37:14	1.94037	8.63115	5.02759	2804.36	FALSE	123
2022-09-13	10:37:15	0.710191	3.15907	4.60408	2974.77	FALSE	123
2022-09-13	10:37:15	1.86312	8.28753	4.60408	2812.64	FALSE	123
2022-09-13	10:37:15	0.531819	2.36564	4.60408	2977.14	FALSE	123
2022-09-13	10:37:16	0.408206	1.81578	1.46836	2814.46	FALSE	123
2022-09-13	10:37:16	0.387595	1.7241	1.46836	2978.86	FALSE	123
2022-09-13	10:37:16	0.162048	0.720822	1.46836	2815.18	FALSE	123
2022-09-13	10:37:16	0.362557	1.61273	1.46836	2980.48	FALSE	123
2022-09-13	10:37:17	0.760165	3.38137	5.00745	2818.56	FALSE	123
2022-09-13	10:37:17	0.708053	3.14956	5.00745	2983.63	FALSE	123
2022-09-13	10:37:17	1.3278	5.90632	5.00745	2824.47	FALSE	123
2022-09-13	10:37:17	1.70688	7.59254	5.00745	2991.22	FALSE	123
2022-09-13	10:37:18	1.75553	7.80895	8.04716	2832.28	FALSE	123
2022-09-13	10:37:18	2.78505	12.3885	8.04716	3003.61	FALSE	123
2022-09-13	10:37:18	1.12678	5.01214	8.04716	2837.29	FALSE	123
2022-09-13	10:37:18	1.56897	6.97909	8.04716	3010.59	FALSE	123
2022-09-13	10:37:19	0.735433	3.27135	3.27005	2840.56	FALSE	123
2022-09-13	10:37:19	0.733295	3.26184	3.27005	3013.85	FALSE	123
2022-09-13	10:37:19	0.731514	3.25392	3.27005	2843.81	FALSE	123
2022-09-13	10:37:19	0.740318	3.29308	3.27005	3017.14	FALSE	123
2022-09-13	10:37:20	0.737061	3.27859	3.2909	2847.09	FALSE	123
2022-09-13	10:37:20	0.745255	3.31504	3.2909	3020.46	FALSE	123
2022-09-13	10:37:20	0.737163	3.27905	3.2909	2850.37	FALSE	123
2022-09-13	10:37:21	0.737214	3.27928	3.2718	3023.74	FALSE	123
2022-09-13	10:37:21	0.732735	3.25935	3.2718	2853.63	FALSE	123
2022-09-13	10:37:21	0.738181	3.28358	3.2718	3027.02	FALSE	123
2022-09-13	10:37:21	0.734008	3.26501	3.2718	2856.9	FALSE	123
2022-09-13	10:37:22	0.735738	3.27271	3.27226	3030.29	FALSE	123
2022-09-13	10:37:22	0.743423	3.30689	3.27226	2860.2	FALSE	123
2022-09-13	10:37:22	0.729835	3.24645	3.27226	3033.54	FALSE	123
2022-09-13	10:37:22	0.73355	3.26298	3.27226	2863.47	FALSE	123
2022-09-13	10:37:23	0.731158	3.25234	3.25817	3036.79	FALSE	123
2022-09-13	10:37:23	0.730954	3.25143	3.25817	2866.72	FALSE	123
2022-09-13	10:37:23	0.734008	3.26501	3.25817	3040.06	FALSE	123
2022-09-13	10:37:23	0.733753	3.26388	3.25817	2869.98	FALSE	123
2022-09-13	10:37:24	0.732481	3.25822	3.26494	3043.31	FALSE	123
2022-09-13	10:37:24	0.733957	3.26479	3.26494	2873.25	FALSE	123
2022-09-13	10:37:24	0.735534	3.2718	3.26494	3046.59	FALSE	123
2022-09-13	10:37:25	0.735331	3.2709	3.21544	2876.52	FALSE	123
2022-09-13	10:37:25	0.72902	3.24283	3.21544	3049.83	FALSE	123
2022-09-13	10:37:25	0.748664	3.33021	3.21544	2879.85	FALSE	123
2022-09-13	10:37:25	0.678435	3.01781	3.21544	3052.85	FALSE	123
2022-09-13	10:37:26	0.590598	2.6271	2.35551	2882.47	FALSE	123
2022-09-13	10:37:26	0.454059	2.01975	2.35551	3054.87	FALSE	123
2022-09-13	10:37:26	0.354059	1.57493	2.35551	2884.05	FALSE	123
2022-09-13	10:37:26	0.719453	3.20027	2.35551	3058.07	FALSE	123
2022-09-13	10:37:27	0.0387407	0.172326	0.522127	2884.22	FALSE	123
2022-09-13	10:37:27	0.181845	0.808883	0.522127	3058.88	FALSE	123
2022-09-13	10:37:27	0.251718	1.11969	0.522127	2885.34	FALSE	123
2022-09-13	10:37:27	-0.002786	-0.0123927	0.522127	3058.88	FALSE	123
2022-09-13	10:37:28	0.0493768	0.219638	-0.290528	2885.56	FALSE	123
2022-09-13	10:37:28	-0.182328	-0.811031	-0.290528	3058.88	FALSE	123
2022-09-13	10:37:28	-0.0629895	-0.28019	-0.290528	2885.56	FALSE	123
2022-09-13	10:37:29	-0.233626	-1.03922	-1.75551	3058.88	FALSE	123
2022-09-13	10:37:29	-0.270165	-1.20175	-1.75551	2885.56	FALSE	123
2022-09-13	10:37:29	-0.488638	-2.17356	-1.75551	3058.88	FALSE	123
2022-09-13	10:37:29	-0.586195	-2.60751	-1.75551	2885.56	FALSE	123
2022-09-13	10:37:30	-0.745279	-3.31515	-3.77633	3058.88	FALSE	123
2022-09-13	10:37:30	-0.826959	-3.67848	-3.77633	2885.56	FALSE	123
2022-09-13	10:37:30	-0.971692	-4.32228	-3.77633	3058.88	FALSE	123
2022-09-13	10:37:30	-0.851895	-3.7894	-3.77633	2885.56	FALSE	123
2022-09-13	10:37:31	-0.920037	-4.09251	-3.20689	3058.88	FALSE	123
2022-09-13	10:37:31	-0.736882	-3.2778	-3.20689	2885.56	FALSE	123
2022-09-13	10:37:31	-0.693523	-3.08493	-3.20689	3058.88	FALSE	123
2022-09-13	10:37:31	-0.53332	-2.37231	-3.20689	2885.56	FALSE	123
2022-09-13	10:37:32	-0.371997	-1.65472	-1.05015	3058.88	FALSE	123
2022-09-13	10:37:32	-0.212099	-0.943459	-1.05015	2885.56	FALSE	123
2022-09-13	10:37:32	-0.12416	-0.552289	-1.05015	3058.88	FALSE	123
2022-09-13	10:37:33	-0.271234	-1.2065	-1.7164	2885.56	FALSE	123
2022-09-13	10:37:33	-0.376933	-1.67667	-1.7164	3058.88	FALSE	123
2022-09-13	10:37:33	-0.45617	-2.02914	-1.7164	2885.56	FALSE	123
2022-09-13	10:37:33	-0.439122	-1.9533	-1.7164	3058.88	FALSE	123
2022-09-13	10:37:34	-0.458816	-2.04091	-2.31272	2885.56	FALSE	123
2022-09-13	10:37:34	-0.562175	-2.50067	-2.31272	3058.88	FALSE	123
2022-09-13	10:37:34	-0.475814	-2.11652	-2.31272	2885.56	FALSE	123
2022-09-13	10:37:34	-0.582887	-2.5928	-2.31272	3058.88	FALSE	123
2022-09-13	10:37:35	-0.454134	-2.02008	10.7318	2885.56	FALSE	123
2022-09-13	10:37:35	-0.000953954	-0.00424338	10.7318	3058.88	FALSE	123
2022-09-13	10:37:35	5.62439	25.0184	10.7318	2910.58	1	124
2022-09-13	10:37:35	4.48118	19.9332	10.7318	3078.81	1	125
2022-09-13	10:37:36	4.31635	19.2	9.27535	2929.78	1	126
2022-09-13	10:37:36	0.776959	3.45607	9.27535	3082.27	FALSE	126
2022-09-13	10:37:36	2.21238	9.84111	9.27535	2939.62	FALSE	126
2022-09-13	10:37:36	1.03508	4.60424	9.27535	3086.87	FALSE	126
2022-09-13	10:37:37	1.8076	8.04057	4.83747	2947.66	FALSE	126
2022-09-13	10:37:37	1.05523	4.69387	4.83747	3091.56	FALSE	126
2022-09-13	10:37:37	0.399707	1.77798	4.83747	2949.44	FALSE	126
2022-09-13	10:37:38	0.645254	2.87022	3.33151	3094.43	FALSE	126
2022-09-13	10:37:38	0.627799	2.79258	3.33151	2952.23	FALSE	126
2022-09-13	10:37:38	0.675941	3.00672	3.33151	3097.44	FALSE	126
2022-09-13	10:37:38	1.04683	4.65651	3.33151	2956.89	FALSE	126
2022-09-13	10:37:39	1.22612	5.45403	2.96213	3102.89	FALSE	126
2022-09-13	10:37:39	0.811209	3.60842	2.96213	2960.5	FALSE	126
2022-09-13	10:37:39	0.346221	1.54006	2.96213	3104.43	FALSE	126
2022-09-13	10:37:39	0.280115	1.24601	2.96213	2961.74	FALSE	126
2022-09-13	10:37:40	0.144033	0.640688	0.538426	3105.07	FALSE	126
2022-09-13	10:37:40	0.257774	1.14663	0.538426	2962.89	FALSE	126
2022-09-13	10:37:40	0.153601	0.683248	0.538426	3105.76	FALSE	126
2022-09-13	10:37:40	-0.0712338	-0.316862	0.538426	2962.89	FALSE	126
2022-09-13	10:37:41	-0.191895	-0.853587	-1.39114	3105.76	FALSE	126
2022-09-13	10:37:41	-0.358206	-1.59337	-1.39114	2962.89	FALSE	126
2022-09-13	10:37:41	-0.388129	-1.72648	-1.39114	3105.76	FALSE	126
2022-09-13	10:37:42	-0.532201	-2.36734	2.16281	2962.89	FALSE	126
2022-09-13	10:37:42	-0.179733	-0.799488	2.16281	3105.76	FALSE	126
2022-09-13	10:37:42	0.15701	0.698412	2.16281	2963.59	FALSE	126
2022-09-13	10:37:42	2.49981	11.1197	2.16281	3116.88	FALSE	126
2022-09-13	10:37:43	6.51619	28.9853	21.0473	2992.57	1	127
2022-09-13	10:37:43	5.60973	24.9532	21.0473	3141.83	1	128
2022-09-13	10:37:43	5.39385	23.9929	21.0473	3016.57	1	129
2022-09-13	10:37:43	1.40678	6.25764	21.0473	3148.09	FALSE	129
2022-09-13	10:37:44	1.44897	6.44531	7.11265	3023.01	FALSE	129
2022-09-13	10:37:44	1.42709	6.34798	7.11265	3154.44	FALSE	129
2022-09-13	10:37:44	1.56286	6.95191	7.11265	3029.96	FALSE	129
2022-09-13	10:37:44	1.95706	8.70539	7.11265	3163.14	FALSE	129
2022-09-13	10:37:45	3.28027	14.5913	17.6287	3044.55	1	130
2022-09-13	10:37:45	5.59319	24.8796	17.6287	3188.02	1	131
2022-09-13	10:37:45	3.01589	13.4153	17.6287	3057.97	1	132
2022-09-13	10:37:46	3.95314	17.5844	10.0984	3205.61	1	133
2022-09-13	10:37:46	1.79055	7.96472	10.0984	3065.93	FALSE	133
2022-09-13	10:37:46	2.33014	10.3649	10.0984	3215.97	FALSE	133
2022-09-13	10:37:46	1.00704	4.47952	10.0984	3070.41	FALSE	133
2022-09-13	10:37:47	0.562557	2.50237	2.24934	3218.47	FALSE	133
2022-09-13	10:37:47	0.504847	2.24566	2.24934	3072.66	FALSE	133
2022-09-13	10:37:47	0.252888	1.1249	2.24934	3219.6	FALSE	133
2022-09-13	10:37:47	0.702405	3.12444	2.24934	3075.78	FALSE	133
2022-09-13	10:37:48	0.392634	1.74651	3.49472	3221.34	FALSE	133
2022-09-13	10:37:48	0.498181	2.21601	3.49472	3078	FALSE	133
2022-09-13	10:37:48	0.845	3.75873	3.49472	3225.1	FALSE	133
2022-09-13	10:37:48	1.40678	6.25764	3.49472	3084.26	FALSE	133
2022-09-13	10:37:49	4.09187	18.2015	17.8866	3243.3	1	134
2022-09-13	10:37:49	3.27787	14.5806	17.8866	3098.84	1	135
2022-09-13	10:37:49	5.92291	26.3463	17.8866	3269.65	1	136
2022-09-13	10:37:49	2.79172	12.4181	17.8866	3111.26	FALSE	136
2022-09-13	10:37:50	2.56561	11.4123	7.5146	3281.06	FALSE	136
2022-09-13	10:37:50	1.45955	6.49237	7.5146	3117.75	FALSE	136
2022-09-13	10:37:50	1.04291	4.63907	7.5146	3285.7	FALSE	136
2022-09-13	10:37:51	2.52994	11.2537	9.51479	3129	FALSE	136
2022-09-13	10:37:51	1.19487	5.31502	9.51479	3291.02	FALSE	136
2022-09-13	10:37:51	1.95477	8.69521	9.51479	3137.7	FALSE	136
2022-09-13	10:37:51	2.8765	12.7952	9.51479	3303.81	FALSE	136
2022-09-13	10:37:52	3.88546	17.2833	18.5763	3154.98	1	137
2022-09-13	10:37:52	5.04622	22.4466	18.5763	3326.26	1	138
2022-09-13	10:37:52	3.65319	16.2501	18.5763	3171.23	1	139
2022-09-13	10:37:52	4.11971	18.3253	18.5763	3344.58	1	140
2022-09-13	10:37:53	2.63889	11.7383	27.8096	3182.97	FALSE	140
2022-09-13	10:37:53	6.63436	29.511	27.8096	3374.1	1	141
2022-09-13	10:37:53	8.18479	36.4076	27.8096	3219.38	1	142
2022-09-13	10:37:53	7.54947	33.5816	27.8096	3407.68	1	143
2022-09-13	10:37:54	7.27014	32.339	25.4926	3251.72	1	144
2022-09-13	10:37:54	4.33462	19.2813	25.4926	3426.96	1	145
2022-09-13	10:37:54	5.58825	24.8577	25.4926	3276.57	1	146

## Sheet: Saint_star_2022913103243 (3)
Date	Time	Lbs	Newtons	Total Force x time	total steps > 13.345		**GoPro Fitting: 1022
2022-09-13	10:32:54	0.366629	1.63084	1.63084	FALSE	0			Total force x time	3276.57
2022-09-13	10:32:54	0.386578	1.71958	1.71958	FALSE	0			Total steps	146
2022-09-13	10:32:54	0.389631	1.73316	3.364	FALSE	0
2022-09-13	10:32:54	0.441641	1.96451	3.68408	FALSE	0
2022-09-13	10:32:55	0.354618	1.57741	4.94141	FALSE	0
2022-09-13	10:32:55	0.499911	2.2237	5.90779	FALSE	0
2022-09-13	10:32:55	0.649275	2.88811	7.82951	FALSE	0
2022-09-13	10:32:55	0.994211	4.42245	10.3302	FALSE	0
2022-09-13	10:32:56	0.699555	3.11176	10.9413	FALSE	0
2022-09-13	10:32:56	0.68556	3.04951	13.3797	FALSE	0
2022-09-13	10:32:56	0.641896	2.85528	13.7966	FALSE	0
2022-09-13	10:32:56	0.470446	2.09264	15.4724	FALSE	0
2022-09-13	10:32:57	0.398842	1.77413	15.5707	FALSE	0
2022-09-13	10:32:57	0.374619	1.66638	17.1388	FALSE	0
2022-09-13	10:32:57	0.300165	1.33519	16.9059	FALSE	0
2022-09-13	10:32:58	0.323931	1.44091	18.5797	FALSE	0
2022-09-13	10:32:58	0.494873	2.20129	19.1072	FALSE	0
2022-09-13	10:32:58	0.519148	2.30927	20.8889	FALSE	0
2022-09-13	10:32:58	0.612684	2.72534	21.8325	FALSE	0
2022-09-13	10:32:59	0.372583	1.65732	22.5463	FALSE	0
2022-09-13	10:32:59	0.164084	0.729878	22.5624	FALSE	0
2022-09-13	10:32:59	0.297163	1.32184	23.8681	FALSE	0
2022-09-13	10:32:59	0.376145	1.67317	24.2356	FALSE	0
2022-09-13	10:33:00	0.451158	2.00684	25.875	FALSE	0
2022-09-13	10:33:00	0.223982	0.996317	25.2319	FALSE	0
2022-09-13	10:33:00	0.479962	2.13497	28.0099	FALSE	0
2022-09-13	10:33:00	0.397265	1.76711	26.999	FALSE	0
2022-09-13	10:33:01	0.407697	1.81352	29.8234	FALSE	0
2022-09-13	10:33:01	0.39869	1.77345	28.7724	FALSE	0
2022-09-13	10:33:01	0.349529	1.55477	31.3782	FALSE	0
2022-09-13	10:33:02	0.399911	1.77888	30.5513	FALSE	0
2022-09-13	10:33:02	0.399402	1.77662	33.1548	FALSE	0
2022-09-13	10:33:02	0.502913	2.23706	32.7884	FALSE	0
2022-09-13	10:33:02	0.272023	1.21001	34.3648	FALSE	0
2022-09-13	10:33:03	0.451107	2.00661	34.795	FALSE	0
2022-09-13	10:33:03	0.438486	1.95047	36.3153	FALSE	0
2022-09-13	10:33:03	0.325407	1.44748	36.2425	FALSE	0
2022-09-13	10:33:03	0.177468	0.789413	37.1047	FALSE	0
2022-09-13	10:33:04	0.102405	0.455518	36.698	FALSE	0
2022-09-13	10:33:04	-0.104771	-0.466042	37.1047	FALSE	0
2022-09-13	10:33:04	0.132939	0.591339	37.2893	FALSE	0
2022-09-13	10:33:04	0.350445	1.55885	38.6636	FALSE	0
2022-09-13	10:33:05	0.354568	1.57719	38.8665	FALSE	0
2022-09-13	10:33:05	2.69609	11.9927	50.6563	FALSE	0
2022-09-13	10:33:05	3.16505	14.0788	52.9453	1	1
2022-09-13	10:33:05	3.14123	13.9728	64.6291	1	2
2022-09-13	10:33:06	2.87701	12.7975	65.7428	FALSE	2
2022-09-13	10:33:06	1.73014	7.69601	72.3252	FALSE	2
2022-09-13	10:33:06	2.00841	8.93381	74.6766	FALSE	2
2022-09-13	10:33:07	0.680623	3.02755	75.3527	FALSE	2
2022-09-13	10:33:07	0.435433	1.93689	76.6135	FALSE	2
2022-09-13	10:33:07	1.28251	5.70486	81.0576	FALSE	2
2022-09-13	10:33:07	1.19508	5.31595	81.9295	FALSE	2
2022-09-13	10:33:08	0.561081	2.4958	83.5534	FALSE	2
2022-09-13	10:33:08	0.993397	4.41883	86.3483	FALSE	2
2022-09-13	10:33:08	4.09966	18.2361	101.789	1	3
2022-09-13	10:33:08	4.76653	21.2025	107.551	1	4
2022-09-13	10:33:09	4.81253	21.4071	123.197	1	5
2022-09-13	10:33:09	2.7849	12.3878	119.939	FALSE	5
2022-09-13	10:33:09	4.2224	18.7821	141.979	1	6
2022-09-13	10:33:09	1.26592	5.63107	125.57	FALSE	6
2022-09-13	10:33:10	0.67472	3.00129	144.98	FALSE	6
2022-09-13	10:33:10	0.577112	2.56711	128.137	FALSE	6
2022-09-13	10:33:10	0.464186	2.06479	147.045	FALSE	6
2022-09-13	10:33:11	0.265916	1.18285	129.32	FALSE	6
2022-09-13	10:33:11	0.387595	1.7241	148.769	FALSE	6
2022-09-13	10:33:11	0.990242	4.40479	133.724	FALSE	6
2022-09-13	10:33:11	1.82826	8.13247	156.901	FALSE	6
2022-09-13	10:33:12	7.3023	32.4821	166.206	1	7
2022-09-13	10:33:12	4.71238	20.9616	177.863	1	8
2022-09-13	10:33:12	1.37833	6.13109	172.338	FALSE	8
2022-09-13	10:33:12	0.61645	2.74209	180.605	FALSE	8
2022-09-13	10:33:13	0.430547	1.91516	174.253	FALSE	8
2022-09-13	10:33:13	-0.00146287	-0.00650714	180.605	FALSE	8
2022-09-13	10:33:13	-0.127213	-0.565869	174.253	FALSE	8
2022-09-13	10:33:13	-0.0638547	-0.284038	180.605	FALSE	8
2022-09-13	10:33:14	-0.073931	-0.32886	174.253	FALSE	8
2022-09-13	10:33:14	-0.142379	-0.63333	180.605	FALSE	8
2022-09-13	10:33:14	-0.120394	-0.535537	174.253	FALSE	8
2022-09-13	10:33:15	-0.226501	-1.00752	180.605	FALSE	8
2022-09-13	10:33:15	-0.248791	-1.10667	174.253	FALSE	8
2022-09-13	10:33:15	-0.425687	-1.89354	180.605	FALSE	8
2022-09-13	10:33:15	-0.386043	-1.7172	174.253	FALSE	8
2022-09-13	10:33:16	-0.330572	-1.47045	180.605	FALSE	8
2022-09-13	10:33:16	0.134771	0.599488	174.852	FALSE	8
2022-09-13	10:33:16	1.33177	5.92398	186.529	FALSE	8
2022-09-13	10:33:16	2.92332	13.0035	187.856	FALSE	8
2022-09-13	10:33:17	2.82108	12.5487	199.078	FALSE	8
2022-09-13	10:33:17	1.72525	7.67426	195.53	FALSE	8
2022-09-13	10:33:17	2.23075	9.92282	209.001	FALSE	8
2022-09-13	10:33:17	2.80576	12.4806	208.011	FALSE	8
2022-09-13	10:33:18	4.39563	19.5526	228.553	1	9
2022-09-13	10:33:18	2.61599	11.6364	219.647	FALSE	9
2022-09-13	10:33:18	2.15335	9.57853	238.132	FALSE	9
2022-09-13	10:33:19	3.27787	14.5806	234.228	1	10
2022-09-13	10:33:19	3.19691	14.2205	252.352	1	11
2022-09-13	10:33:19	9.4625	42.0911	276.319	1	12
2022-09-13	10:33:19	7.28744	32.416	284.768	1	13
2022-09-13	10:33:20	7.7797	34.6057	310.924	1	14
2022-09-13	10:33:20	2.88622	12.8385	297.607	FALSE	14
2022-09-13	10:33:20	0.789479	3.51176	314.436	FALSE	14
2022-09-13	10:33:20	2.33996	10.4086	308.015	FALSE	14
2022-09-13	10:33:21	1.55777	6.92927	321.365	FALSE	14
2022-09-13	10:33:21	2.04571	9.09973	317.115	FALSE	14
2022-09-13	10:33:21	1.27701	5.6804	327.046	FALSE	14
2022-09-13	10:33:21	1.5105	6.71901	323.834	FALSE	14
2022-09-13	10:33:22	1.65701	7.37071	334.417	FALSE	14
2022-09-13	10:33:22	1.37976	6.13745	329.971	FALSE	14
2022-09-13	10:33:22	1.95106	8.67871	343.095	FALSE	14
2022-09-13	10:33:22	1.13477	5.04768	335.019	FALSE	14
2022-09-13	10:33:23	0.769733	3.42393	346.519	FALSE	14
2022-09-13	10:33:23	2.07971	9.25097	344.27	FALSE	14
2022-09-13	10:33:23	3.37197	14.9992	361.518	1	15
2022-09-13	10:33:24	4.71955	20.9935	365.264	1	16
2022-09-13	10:33:24	8.82001	39.2332	400.752	1	17
2022-09-13	10:33:24	8.38942	37.3178	402.581	1	18
2022-09-13	10:33:24	2.03966	9.07282	409.824	FALSE	18
2022-09-13	10:33:25	3.62607	16.1295	418.711	1	19
2022-09-13	10:33:25	0.795331	3.53779	413.362	FALSE	19
2022-09-13	10:33:25	0.413295	1.83842	420.549	FALSE	19
2022-09-13	10:33:25	0.538893	2.3971	415.759	FALSE	19
2022-09-13	10:33:26	0.358181	1.59326	422.143	FALSE	19
2022-09-13	10:33:26	0.6907	3.07237	418.832	FALSE	19
2022-09-13	10:33:26	1.70729	7.59437	429.737	FALSE	19
2022-09-13	10:33:26	0.941387	4.18748	423.019	FALSE	19
2022-09-13	10:33:27	0.571819	2.54357	432.281	FALSE	19
2022-09-13	10:33:27	0.45874	2.04057	425.06	FALSE	19
2022-09-13	10:33:27	0.416756	1.85381	434.134	FALSE	19
2022-09-13	10:33:28	0.381896	1.69875	426.758	FALSE	19
2022-09-13	10:33:28	0.760216	3.38159	437.516	FALSE	19
2022-09-13	10:33:28	0.825865	3.67361	430.432	FALSE	19
2022-09-13	10:33:28	1.0422	4.63591	442.152	FALSE	19
2022-09-13	10:33:29	0.664746	2.95692	433.389	FALSE	19
2022-09-13	10:33:29	1.62576	7.23171	449.384	FALSE	19
2022-09-13	10:33:29	0.757672	3.37028	436.759	FALSE	19
2022-09-13	10:33:29	0.956654	4.25539	453.639	FALSE	19
2022-09-13	10:33:30	0.737621	3.28109	440.04	FALSE	19
2022-09-13	10:33:30	0.445865	1.9833	455.622	FALSE	19
2022-09-13	10:33:30	0.448817	1.99643	442.037	FALSE	19
2022-09-13	10:33:30	0.356756	1.58692	457.209	FALSE	19
2022-09-13	10:33:31	0.452532	2.01295	444.05	FALSE	19
2022-09-13	10:33:31	0.123982	0.551497	457.761	FALSE	19
2022-09-13	10:33:31	0.39131	1.74063	445.79	FALSE	19
2022-09-13	10:33:32	0.120827	0.537463	458.298	FALSE	19
2022-09-13	10:33:32	0.299199	1.3309	447.121	FALSE	19
2022-09-13	10:33:32	0.153194	0.681438	458.98	FALSE	19
2022-09-13	10:33:32	0.264695	1.17742	448.299	FALSE	19
2022-09-13	10:33:33	0.294924	1.31188	460.291	FALSE	19
2022-09-13	10:33:33	0.724695	3.22359	451.522	FALSE	19
2022-09-13	10:33:33	1.38978	6.18202	466.473	FALSE	19
2022-09-13	10:33:33	0.63818	2.83875	454.361	FALSE	19
2022-09-13	10:33:34	-0.00797683	-0.0354825	466.473	FALSE	19
2022-09-13	10:33:34	-0.00487254	-0.021674	454.361	FALSE	19
2022-09-13	10:33:34	0.0266287	0.11845	466.592	FALSE	19
2022-09-13	10:33:34	0.116807	0.519581	454.881	FALSE	19
2022-09-13	10:33:35	0.0141097	0.0627628	466.655	FALSE	19
2022-09-13	10:33:35	0.519707	2.31176	457.192	FALSE	19
2022-09-13	10:33:35	1.15996	5.15973	471.814	FALSE	19
2022-09-13	10:33:35	2.03233	9.04021	466.233	FALSE	19
2022-09-13	10:33:36	0.493753	2.19631	474.011	FALSE	19
2022-09-13	10:33:36	0.351616	1.56406	467.797	FALSE	19
2022-09-13	10:33:36	0.169478	0.753872	474.765	FALSE	19
2022-09-13	10:33:37	0.371718	1.65348	469.45	FALSE	19
2022-09-13	10:33:37	0.196603	0.874529	475.639	FALSE	19
2022-09-13	10:33:37	0.266425	1.18511	470.635	FALSE	19
2022-09-13	10:33:37	0.736145	3.27452	478.914	FALSE	19
2022-09-13	10:33:38	0.260674	1.15953	471.795	FALSE	19
2022-09-13	10:33:38	0.569682	2.53406	481.448	FALSE	19
2022-09-13	10:33:38	0.341489	1.51901	473.314	FALSE	19
2022-09-13	10:33:38	1.09279	4.86095	486.309	FALSE	19
2022-09-13	10:33:39	1.54999	6.89467	480.208	FALSE	19
2022-09-13	10:33:39	3.03731	13.5106	499.819	1	20
2022-09-13	10:33:39	2.8109	12.5034	492.712	FALSE	20
2022-09-13	10:33:39	3.49039	15.526	515.345	1	21
2022-09-13	10:33:40	6.77309	30.1281	522.84	1	22
2022-09-13	10:33:40	4.27024	18.9949	534.34	1	23
2022-09-13	10:33:40	7.5109	33.41	556.25	1	24
2022-09-13	10:33:41	5.53787	24.6336	558.974	1	25
2022-09-13	10:33:41	2.51706	11.1964	567.446	FALSE	25
2022-09-13	10:33:41	4.32042	19.2181	578.192	1	26
2022-09-13	10:33:41	4.05319	18.0294	585.476	1	27
2022-09-13	10:33:42	2.35034	10.4548	588.646	FALSE	27
2022-09-13	10:33:42	4.40709	19.6036	605.079	1	28
2022-09-13	10:33:42	2.30892	10.2705	598.917	FALSE	28
2022-09-13	10:33:42	3.15686	14.0423	619.122	1	29
2022-09-13	10:33:43	3.08307	13.7141	612.631	1	30
2022-09-13	10:33:43	0.936909	4.16756	623.289	FALSE	30
2022-09-13	10:33:43	2.78785	12.4009	625.032	FALSE	30
2022-09-13	10:33:43	1.03828	4.61848	627.908	FALSE	30
2022-09-13	10:33:44	1.06429	4.73417	629.766	FALSE	30
2022-09-13	10:33:44	1.13508	5.04906	632.957	FALSE	30
2022-09-13	10:33:44	1.38398	6.15622	635.922	FALSE	30
2022-09-13	10:33:45	1.46515	6.51728	639.474	FALSE	30
2022-09-13	10:33:45	0.798181	3.55047	639.473	FALSE	30
2022-09-13	10:33:45	2.25039	10.0102	649.484	FALSE	30
2022-09-13	10:33:45	0.743117	3.30553	642.778	FALSE	30
2022-09-13	10:33:46	1.36637	6.07789	655.562	FALSE	30
2022-09-13	10:33:46	1.52408	6.77941	649.558	FALSE	30
2022-09-13	10:33:46	2.47421	11.0058	666.568	FALSE	30
2022-09-13	10:33:46	4.20719	18.7144	668.272	1	31
2022-09-13	10:33:47	2.51508	11.1876	677.755	FALSE	31
2022-09-13	10:33:47	5.07319	22.5666	690.839	1	32
2022-09-13	10:33:47	1.68073	7.47622	685.232	FALSE	32
2022-09-13	10:33:47	1.00363	4.46435	695.303	FALSE	32
2022-09-13	10:33:48	0.607341	2.70157	687.933	FALSE	32
2022-09-13	10:33:48	0.320471	1.42552	696.729	FALSE	32
2022-09-13	10:33:48	0.30154	1.34131	689.275	FALSE	32
2022-09-13	10:33:48	0.25126	1.11765	697.846	FALSE	32
2022-09-13	10:33:49	-0.283448	-1.26083	689.275	FALSE	32
2022-09-13	10:33:49	-0.595712	-2.64985	697.846	FALSE	32
2022-09-13	10:33:49	-0.614084	-2.73157	689.275	FALSE	32
2022-09-13	10:33:50	-0.512302	-2.27882	697.846	FALSE	32
2022-09-13	10:33:50	-0.446348	-1.98545	689.275	FALSE	32
2022-09-13	10:33:50	-0.440598	-1.95987	697.846	FALSE	32
2022-09-13	10:33:50	-0.0511829	-0.227672	689.275	FALSE	32
2022-09-13	10:33:51	0.271005	1.20548	699.052	FALSE	32
2022-09-13	10:33:51	0.553652	2.46275	691.737	FALSE	32
2022-09-13	10:33:51	0.456043	2.02857	701.08	FALSE	32
2022-09-13	10:33:51	0.632532	2.81363	694.551	FALSE	32
2022-09-13	10:33:52	0.942863	4.19404	705.274	FALSE	32
2022-09-13	10:33:52	0.327341	1.45608	696.007	FALSE	32
2022-09-13	10:33:52	0.700216	3.1147	708.389	FALSE	32
2022-09-13	10:33:52	0.387799	1.72501	697.732	FALSE	32
2022-09-13	10:33:53	0.664746	2.95692	711.346	FALSE	32
2022-09-13	10:33:53	0.634669	2.82313	700.555	FALSE	32
2022-09-13	10:33:53	1.01747	4.52591	715.872	FALSE	32
2022-09-13	10:33:54	4.13762	18.405	718.96	1	33
2022-09-13	10:33:54	9.88561	43.9732	759.845	1	34
2022-09-13	10:33:54	23.9049	106.334	825.294	1	35
2022-09-13	10:33:54	6.2994	28.021	787.866	1	36
2022-09-13	10:33:55	7.22551	32.1405	857.434	1	37
2022-09-13	10:33:55	5.68652	25.2948	813.161	1	38
2022-09-13	10:33:55	5.88932	26.1969	883.631	1	39
2022-09-13	10:33:55	1.96948	8.76064	821.922	FALSE	39
2022-09-13	10:33:56	3.37823	15.027	898.658	1	40
2022-09-13	10:33:56	4.28698	19.0693	840.991	1	41
2022-09-13	10:33:56	0.787697	3.50383	902.162	FALSE	41
2022-09-13	10:33:56	1.08073	4.8073	845.798	FALSE	41
2022-09-13	10:33:57	0.348868	1.55183	903.714	FALSE	41
2022-09-13	10:33:57	-0.0368827	-0.164062	845.798	FALSE	41
2022-09-13	10:33:57	-0.373422	-1.66106	903.714	FALSE	41
2022-09-13	10:33:58	-0.517849	-2.3035	845.798	FALSE	41
2022-09-13	10:33:58	-0.347722	-1.54674	903.714	FALSE	41
2022-09-13	10:33:58	-0.631284	-2.80808	845.798	FALSE	41
2022-09-13	10:33:58	-0.625941	-2.78431	903.714	FALSE	41
2022-09-13	10:33:59	-0.426704	-1.89806	845.798	FALSE	41
2022-09-13	10:33:59	-0.36131	-1.60718	903.714	FALSE	41
2022-09-13	10:33:59	-0.125076	-0.556363	845.798	FALSE	41
2022-09-13	10:33:59	-0.05673	-0.252346	903.714	FALSE	41
2022-09-13	10:34:00	0.108054	0.480646	846.279	FALSE	41
2022-09-13	10:34:00	-0.0132186	-0.058799	903.714	FALSE	41
2022-09-13	10:34:00	-0.166399	-0.740176	846.279	FALSE	41
2022-09-13	10:34:00	0.0004201	0.00186869	903.716	FALSE	41
2022-09-13	10:34:01	0.0828119	0.368364	846.647	FALSE	41
2022-09-13	10:34:01	0.104898	0.466607	904.182	FALSE	41
2022-09-13	10:34:01	0.137977	0.613749	847.261	FALSE	41
2022-09-13	10:34:01	0.176298	0.784209	904.967	FALSE	41
2022-09-13	10:34:02	0.163982	0.729425	847.99	FALSE	41
2022-09-13	10:34:02	0.241387	1.07374	906.04	FALSE	41
2022-09-13	10:34:02	0.416196	1.85132	849.842	FALSE	41
2022-09-13	10:34:03	0.23411	1.04137	907.082	FALSE	41
2022-09-13	10:34:03	0.147138	0.654499	850.496	FALSE	41
2022-09-13	10:34:03	0.192786	0.857551	907.939	FALSE	41
2022-09-13	10:34:03	0.241947	1.07623	851.572	FALSE	41
2022-09-13	10:34:04	0.263779	1.17334	909.113	FALSE	41
2022-09-13	10:34:04	0.264237	1.17538	852.748	FALSE	41
2022-09-13	10:34:04	0.173652	0.772439	909.885	FALSE	41
2022-09-13	10:34:04	0.614058	2.73145	855.479	FALSE	41
2022-09-13	10:34:05	3.10011	13.7899	923.675	1	42
2022-09-13	10:34:05	6.61655	29.4317	884.911	1	43
2022-09-13	10:34:05	9.68123	43.064	966.739	1	44
2022-09-13	10:34:05	7.74632	34.4572	919.368	1	45
2022-09-13	10:34:06	4.19365	18.6542	985.393	1	46
2022-09-13	10:34:06	0.946679	4.21102	923.579	FALSE	46
2022-09-13	10:34:06	2.9938	13.317	998.71	FALSE	46
2022-09-13	10:34:07	3.11747	13.8671	937.446	1	47
2022-09-13	10:34:07	3.81935	16.9892	1015.7	1	48
2022-09-13	10:34:07	3.09467	13.7657	951.212	1	49
2022-09-13	10:34:07	1.24597	5.54232	1021.24	FALSE	49
2022-09-13	10:34:08	1.98653	8.83648	960.049	FALSE	49
2022-09-13	10:34:08	1.30327	5.79721	1027.04	FALSE	49
2022-09-13	10:34:08	1.04088	4.63004	964.679	FALSE	49
2022-09-13	10:34:08	1.74622	7.76754	1034.81	FALSE	49
2022-09-13	10:34:09	1.04622	4.6538	969.332	FALSE	49
2022-09-13	10:34:09	2.20729	9.81847	1044.63	FALSE	49
2022-09-13	10:34:09	1.95986	8.71785	978.05	FALSE	49
2022-09-13	10:34:09	4.92688	21.9157	1066.54	1	50
2022-09-13	10:34:10	2.41986	10.764	988.814	FALSE	50
2022-09-13	10:34:10	3.63284	16.1596	1082.7	1	51
2022-09-13	10:34:10	2.17991	9.69668	998.511	FALSE	51
2022-09-13	10:34:11	1.23655	5.50042	1088.2	FALSE	51
2022-09-13	10:34:11	1.18765	5.2829	1003.79	FALSE	51
2022-09-13	10:34:11	0.61299	2.7267	1090.93	FALSE	51
2022-09-13	10:34:11	2.21681	9.86081	1013.65	FALSE	51
2022-09-13	10:34:12	2.04627	9.10222	1100.03	FALSE	51
2022-09-13	10:34:12	5.3082	23.6119	1037.27	1	52
2022-09-13	10:34:12	6.70993	29.8471	1129.88	1	53
2022-09-13	10:34:12	6.19426	27.5533	1064.82	1	54
2022-09-13	10:34:13	6.83039	30.3829	1160.26	1	55
2022-09-13	10:34:13	4.70708	20.938	1085.76	1	56
2022-09-13	10:34:13	5.04479	22.4402	1182.7	1	57
2022-09-13	10:34:13	4.91421	21.8594	1107.62	1	58
2022-09-13	10:34:14	0.8393	3.73337	1186.43	FALSE	58
2022-09-13	10:34:14	1.61681	7.19189	1114.81	FALSE	58
2022-09-13	10:34:14	0.724084	3.22087	1189.65	FALSE	58
2022-09-13	10:34:14	1.72337	7.66589	1122.48	FALSE	58
2022-09-13	10:34:15	3.92495	17.459	1207.11	1	59
2022-09-13	10:34:15	2.73563	12.1686	1134.64	FALSE	59
2022-09-13	10:34:15	6.50454	28.9335	1236.05	1	60
2022-09-13	10:34:16	3.31151	14.7303	1149.37	1	61
2022-09-13	10:34:16	3.57798	15.9156	1251.96	1	62
2022-09-13	10:34:16	0.824033	3.66546	1153.04	FALSE	62
2022-09-13	10:34:16	1.27798	5.68471	1257.65	FALSE	62
2022-09-13	10:34:17	2.98515	13.2785	1166.32	FALSE	62
2022-09-13	10:34:17	1.22261	5.43841	1263.09	FALSE	62
2022-09-13	10:34:17	3.55843	15.8286	1182.15	1	63
2022-09-13	10:34:17	1.79385	7.9794	1271.06	FALSE	63
2022-09-13	10:34:18	2.21416	9.84903	1192	FALSE	63
2022-09-13	10:34:18	2.03976	9.07326	1280.14	FALSE	63
2022-09-13	10:34:18	1.01981	4.53632	1196.53	FALSE	63
2022-09-13	10:34:18	2.64271	11.7553	1291.89	FALSE	63
2022-09-13	10:34:19	1.56281	6.95169	1203.48	FALSE	63
2022-09-13	10:34:19	1.808	8.04235	1299.94	FALSE	63
2022-09-13	10:34:19	1.54464	6.87087	1210.35	FALSE	63
2022-09-13	10:34:20	0.495432	2.20378	1302.14	FALSE	63
2022-09-13	10:34:20	0.425153	1.89117	1212.25	FALSE	63
2022-09-13	10:34:20	0.224949	1.00062	1303.14	FALSE	63
2022-09-13	10:34:20	0.302506	1.34561	1213.59	FALSE	63
2022-09-13	10:34:21	0.273041	1.21454	1304.35	FALSE	63
2022-09-13	10:34:21	1.77467	7.89409	1221.49	FALSE	63
2022-09-13	10:34:21	2.82673	12.5739	1316.93	FALSE	63
2022-09-13	10:34:21	3.38154	15.0418	1236.53	1	64
2022-09-13	10:34:22	3.81787	16.9826	1333.91	1	65
2022-09-13	10:34:22	2.87823	12.8029	1249.33	FALSE	65
2022-09-13	10:34:22	4.42617	19.6885	1353.6	1	66
2022-09-13	10:34:22	1.14184	5.07913	1254.41	FALSE	66
2022-09-13	10:34:23	1.02037	4.53881	1358.14	FALSE	66
2022-09-13	10:34:23	0.690191	3.07011	1257.48	FALSE	66
2022-09-13	10:34:23	0.418486	1.86151	1360	FALSE	66
2022-09-13	10:34:24	0.558537	2.48448	1259.96	FALSE	66
2022-09-13	10:34:24	0.345305	1.53599	1361.54	FALSE	66
2022-09-13	10:34:24	-1.57327	-6.99822	1259.96	FALSE	66
2022-09-13	10:34:24	0.361489	1.60798	1363.14	FALSE	66
2022-09-13	10:34:25	0.560267	2.49218	1262.46	FALSE	66
2022-09-13	10:34:25	0.630496	2.80457	1365.95	FALSE	66
2022-09-13	10:34:25	0.713295	3.17288	1265.63	FALSE	66
2022-09-13	10:34:25	0.727697	3.23694	1369.19	FALSE	66
2022-09-13	10:34:26	0.730394	3.24894	1268.88	FALSE	66
2022-09-13	10:34:26	0.359148	1.59756	1370.78	FALSE	66
2022-09-13	10:34:26	0.428563	1.90633	1270.78	FALSE	66
2022-09-13	10:34:26	0.356145	1.5842	1372.37	FALSE	66
2022-09-13	10:34:27	0.293397	1.30509	1272.09	FALSE	66
2022-09-13	10:34:27	0.2793	1.24238	1373.61	FALSE	66
2022-09-13	10:34:27	0.583015	2.59337	1274.68	FALSE	66
2022-09-13	10:34:28	0.740776	3.29512	1376.9	FALSE	66
2022-09-13	10:34:28	0.678588	3.0185	1277.7	FALSE	66
2022-09-13	10:34:28	0.650598	2.89399	1379.8	FALSE	66
2022-09-13	10:34:28	0.395687	1.76009	1279.46	FALSE	66
2022-09-13	10:34:29	0.731616	3.25437	1383.05	FALSE	66
2022-09-13	10:34:29	0.73584	3.27316	1282.73	FALSE	66
2022-09-13	10:34:29	0.738435	3.28471	1386.34	FALSE	66
2022-09-13	10:34:29	0.736756	3.27724	1286.01	FALSE	66
2022-09-13	10:34:30	0.735331	3.2709	1389.61	FALSE	66
2022-09-13	10:34:30	0.73355	3.26298	1289.27	FALSE	66
2022-09-13	10:34:30	0.733193	3.26139	1392.87	FALSE	66
2022-09-13	10:34:30	0.738791	3.28629	1292.56	FALSE	66
2022-09-13	10:34:31	0.729682	3.24577	1396.12	FALSE	66
2022-09-13	10:34:31	0.744084	3.30983	1295.87	FALSE	66
2022-09-13	10:34:31	0.733346	3.26207	1399.38	FALSE	66
2022-09-13	10:34:31	0.731565	3.25415	1299.12	FALSE	66
2022-09-13	10:34:32	0.527086	2.34458	1401.72	FALSE	66
2022-09-13	10:34:32	0.676196	3.00786	1302.13	FALSE	66
2022-09-13	10:34:32	0.736705	3.27701	1405	FALSE	66
2022-09-13	10:34:33	0.738231	3.2838	1305.42	FALSE	66
2022-09-13	10:34:33	0.735382	3.27113	1408.27	FALSE	66
2022-09-13	10:34:33	0.731005	3.25166	1308.67	FALSE	66
2022-09-13	10:34:33	0.65416	2.90983	1411.18	FALSE	66
2022-09-13	10:34:34	0.740623	3.29444	1311.96	FALSE	66
2022-09-13	10:34:34	0.734924	3.26909	1414.45	FALSE	66
2022-09-13	10:34:34	0.737672	3.28131	1315.24	FALSE	66
2022-09-13	10:34:34	0.271209	1.20639	1415.66	FALSE	66
2022-09-13	10:34:35	0.305814	1.36032	1316.6	FALSE	66
2022-09-13	10:34:35	0.40958	1.82189	1417.48	FALSE	66
2022-09-13	10:34:35	0.362863	1.61409	1318.22	FALSE	66
2022-09-13	10:34:35	0.390445	1.73678	1419.21	FALSE	66
2022-09-13	10:34:36	0.288766	1.28449	1319.5	FALSE	66
2022-09-13	10:34:36	0.430344	1.91426	1421.13	FALSE	66
2022-09-13	10:34:36	0.309071	1.37481	1320.88	FALSE	66
2022-09-13	10:34:37	0.312176	1.38862	1422.52	FALSE	66
2022-09-13	10:34:37	0.00148881	0.00662252	1320.88	FALSE	66
2022-09-13	10:34:37	0.153143	0.681211	1423.2	FALSE	66
2022-09-13	10:34:37	0.779657	3.46807	1324.35	FALSE	66
2022-09-13	10:34:38	2.11528	9.40919	1432.61	FALSE	66
2022-09-13	10:34:38	1.22088	5.43072	1329.78	FALSE	66
2022-09-13	10:34:38	2.24352	9.97963	1442.59	FALSE	66
2022-09-13	10:34:39	6.05578	26.9373	1356.72	1	67
2022-09-13	10:34:39	5.08052	22.5992	1465.19	1	68
2022-09-13	10:34:39	7.36255	32.7501	1389.47	1	69
2022-09-13	10:34:39	1.64541	7.31911	1472.51	FALSE	69
2022-09-13	10:34:39	0.916145	4.0752	1393.55	FALSE	69
2022-09-13	10:34:40	0.391514	1.74153	1474.25	FALSE	69
2022-09-13	10:34:40	0.330089	1.4683	1395.01	FALSE	69
2022-09-13	10:34:40	0.459657	2.04465	1476.29	FALSE	69
2022-09-13	10:34:41	0.378791	1.68494	1396.7	FALSE	69
2022-09-13	10:34:41	0.257366	1.14482	1477.44	FALSE	69
2022-09-13	10:34:41	0.379249	1.68698	1398.39	FALSE	69
2022-09-13	10:34:41	-0.342735	-1.52455	1477.44	FALSE	69
2022-09-13	10:34:42	0.103677	0.461176	1398.85	FALSE	69
2022-09-13	10:34:42	0.122965	0.546973	1477.98	FALSE	69
2022-09-13	10:34:42	0.219911	0.978208	1399.83	FALSE	69
2022-09-13	10:34:42	0.0158908	0.0706855	1478.05	FALSE	69
2022-09-13	10:34:43	0.266069	1.18353	1401.01	FALSE	69
2022-09-13	10:34:43	0.205967	0.916182	1478.97	FALSE	69
2022-09-13	10:34:43	0.565407	2.51504	1403.52	FALSE	69
2022-09-13	10:34:43	0.759758	3.37956	1482.35	FALSE	69
2022-09-13	10:34:44	0.489478	2.1773	1405.7	FALSE	69
2022-09-13	10:34:44	0.459809	2.04532	1484.4	FALSE	69
2022-09-13	10:34:44	0.451158	2.00684	1407.71	FALSE	69
2022-09-13	10:34:45	0.442761	1.96949	1486.36	FALSE	69
2022-09-13	10:34:45	0.581132	2.58499	1410.29	FALSE	69
2022-09-13	10:34:45	0.595229	2.6477	1489.01	FALSE	69
2022-09-13	10:34:45	0.33757	1.50158	1411.79	FALSE	69
2022-09-13	10:34:46	0.42215	1.87781	1490.89	FALSE	69
2022-09-13	10:34:46	0.577265	2.56779	1414.36	FALSE	69
2022-09-13	10:34:46	0.47299	2.10395	1492.99	FALSE	69
2022-09-13	10:34:46	0.532532	2.36881	1416.73	FALSE	69
2022-09-13	10:34:47	0.596196	2.652	1495.65	FALSE	69
2022-09-13	10:34:47	0.500318	2.22551	1418.96	FALSE	69
2022-09-13	10:34:47	0.400216	1.78024	1497.43	FALSE	69
2022-09-13	10:34:47	0.387341	1.72297	1420.68	FALSE	69
2022-09-13	10:34:48	0.475738	2.11618	1499.54	FALSE	69
2022-09-13	10:34:48	0.561081	2.4958	1423.18	FALSE	69
2022-09-13	10:34:48	0.655891	2.91753	1502.46	FALSE	69
2022-09-13	10:34:48	0.6907	3.07237	1426.25	FALSE	69
2022-09-13	10:34:49	0.687494	3.05811	1505.52	FALSE	69
2022-09-13	10:34:49	0.475127	2.11346	1428.36	FALSE	69
2022-09-13	10:34:49	0.601234	2.67441	1508.19	FALSE	69
2022-09-13	10:34:50	0.668308	2.97277	1431.33	FALSE	69
2022-09-13	10:34:50	0.790649	3.51696	1511.71	FALSE	69
2022-09-13	10:34:50	0.658944	2.93111	1434.27	FALSE	69
2022-09-13	10:34:50	0.950598	4.22845	1515.94	FALSE	69
2022-09-13	10:34:51	0.765661	3.40581	1437.67	FALSE	69
2022-09-13	10:34:51	0.556348	2.47475	1518.41	FALSE	69
2022-09-13	10:34:51	0.714415	3.17786	1440.85	FALSE	69
2022-09-13	10:34:51	0.70327	3.12829	1521.54	FALSE	69
2022-09-13	10:34:52	0.789937	3.5138	1444.36	FALSE	69
2022-09-13	10:34:52	0.950293	4.22709	1525.77	FALSE	69
2022-09-13	10:34:52	0.592685	2.63638	1447	FALSE	69
2022-09-13	10:34:52	0.424796	1.88958	1527.66	FALSE	69
2022-09-13	10:34:53	0.388461	1.72795	1448.73	FALSE	69
2022-09-13	10:34:53	0.632888	2.81521	1530.47	FALSE	69
2022-09-13	10:34:53	0.15126	0.672835	1449.4	FALSE	69
2022-09-13	10:34:54	0.154568	0.687549	1531.16	FALSE	69
2022-09-13	10:34:54	0.0439316	0.195417	1449.6	FALSE	69
2022-09-13	10:34:54	0.507035	2.25539	1533.42	FALSE	69
2022-09-13	10:34:54	0.604797	2.69026	1452.29	FALSE	69
2022-09-13	10:34:55	2.0993	9.33811	1542.75	FALSE	69
2022-09-13	10:34:55	1.38296	6.15168	1458.44	FALSE	69
2022-09-13	10:34:55	1.55034	6.89622	1549.65	FALSE	69
2022-09-13	10:34:55	1.0081	4.48423	1462.92	FALSE	69
2022-09-13	10:34:56	1.16449	5.17988	1554.83	FALSE	69
2022-09-13	10:34:56	1.77207	7.88252	1470.8	FALSE	69
2022-09-13	10:34:56	3.85207	17.1348	1571.97	1	70
2022-09-13	10:34:56	3.43497	15.2794	1486.08	1	71
2022-09-13	10:34:57	1.30205	5.79178	1577.76	FALSE	71
2022-09-13	10:34:57	1.97274	8.77514	1494.86	FALSE	71
2022-09-13	10:34:57	2.09798	9.33223	1587.09	FALSE	71
2022-09-13	10:34:57	2.7966	12.4398	1507.3	FALSE	71
2022-09-13	10:34:58	1.51431	6.73595	1593.83	FALSE	71
2022-09-13	10:34:58	1.00302	4.46163	1511.76	FALSE	71
2022-09-13	10:34:58	0.530344	2.35908	1596.18	FALSE	71
2022-09-13	10:34:59	0.623779	2.77469	1514.53	FALSE	71
2022-09-13	10:34:59	0.444338	1.9765	1598.16	FALSE	71
2022-09-13	10:34:59	0.712074	3.16745	1517.7	FALSE	71
2022-09-13	10:34:59	0.663168	2.9499	1601.11	FALSE	71
2022-09-13	10:35:00	0.602405	2.67962	1520.38	FALSE	71
2022-09-13	10:35:00	0.495942	2.20605	1603.32	FALSE	71
2022-09-13	10:35:00	0.605051	2.69139	1523.07	FALSE	71
2022-09-13	10:35:00	0.497977	2.2151	1605.53	FALSE	71
2022-09-13	10:35:01	0.8393	3.73337	1526.81	FALSE	71
2022-09-13	10:35:01	2.30571	10.2563	1615.79	FALSE	71
2022-09-13	10:35:01	2.61548	11.6342	1538.44	FALSE	71
2022-09-13	10:35:01	1.56327	6.95374	1622.74	FALSE	71
2022-09-13	10:35:02	1.43192	6.36947	1544.81	FALSE	71
2022-09-13	10:35:02	0.829987	3.69195	1626.43	FALSE	71
2022-09-13	10:35:02	0.767646	3.41464	1548.22	FALSE	71
2022-09-13	10:35:03	0.604695	2.6898	1629.12	FALSE	71
2022-09-13	10:35:03	0.745102	3.31436	1551.54	FALSE	71
2022-09-13	10:35:03	1.30368	5.79903	1634.92	FALSE	71
2022-09-13	10:35:03	3.12016	13.8791	1565.42	1	72
2022-09-13	10:35:04	3.18637	14.1736	1649.1	1	73
2022-09-13	10:35:04	1.90836	8.48877	1573.91	FALSE	73
2022-09-13	10:35:04	1.76637	7.85717	1656.95	FALSE	73
2022-09-13	10:35:04	0.424389	1.88777	1575.79	FALSE	73
2022-09-13	10:35:05	0.191463	0.851666	1657.81	FALSE	73
2022-09-13	10:35:05	0.135484	0.60266	1576.4	FALSE	73
2022-09-13	10:35:05	0.103575	0.460722	1658.27	FALSE	73
2022-09-13	10:35:05	0.0624557	0.277815	1576.68	FALSE	73
2022-09-13	10:35:06	0.310954	1.38319	1659.65	FALSE	73
2022-09-13	10:35:06	0.393906	1.75217	1578.43	FALSE	73
2022-09-13	10:35:06	1.50332	6.68707	1666.34	FALSE	73
2022-09-13	10:35:07	1.13701	5.05765	1583.48	FALSE	73
2022-09-13	10:35:07	1.0219	4.54562	1670.88	FALSE	73
2022-09-13	10:35:07	0.911412	4.05414	1587.54	FALSE	73
2022-09-13	10:35:07	1.36673	6.07949	1676.96	FALSE	73
2022-09-13	10:35:08	3.65146	16.2424	1603.78	1	74
2022-09-13	10:35:08	2.01731	8.9734	1685.93	FALSE	74
2022-09-13	10:35:08	2.44927	10.8948	1614.68	FALSE	74
2022-09-13	10:35:08	3.40932	15.1653	1701.1	1	75
2022-09-13	10:35:09	2.44648	10.8824	1625.56	FALSE	75
2022-09-13	10:35:09	1.63961	7.29331	1708.39	FALSE	75
2022-09-13	10:35:09	1.83553	8.1648	1633.72	FALSE	75
2022-09-13	10:35:09	1.05431	4.68978	1713.08	FALSE	75
2022-09-13	10:35:10	0.863066	3.83909	1637.56	FALSE	75
2022-09-13	10:35:10	0.539504	2.39982	1715.48	FALSE	75
2022-09-13	10:35:10	0.642201	2.85664	1640.42	FALSE	75
2022-09-13	10:35:10	0.742761	3.30395	1718.79	FALSE	75
2022-09-13	10:35:11	0.89701	3.99008	1644.41	FALSE	75
2022-09-13	10:35:11	0.765509	3.40514	1722.19	FALSE	75
2022-09-13	10:35:11	0.963473	4.28572	1648.7	FALSE	75
2022-09-13	10:35:12	0.446527	1.98624	1724.18	FALSE	75
2022-09-13	10:35:12	0.615484	2.7378	1651.43	FALSE	75
2022-09-13	10:35:12	0.381387	1.69649	1725.87	FALSE	75
2022-09-13	10:35:12	0.730038	3.24736	1654.68	FALSE	75
2022-09-13	10:35:13	0.76673	3.41057	1729.29	FALSE	75
2022-09-13	10:35:13	1.18011	5.24937	1659.93	FALSE	75
2022-09-13	10:35:13	2.60876	11.6043	1740.89	FALSE	75
2022-09-13	10:35:13	2.99268	13.312	1673.24	FALSE	75
2022-09-13	10:35:14	4.21767	18.761	1759.65	1	76
2022-09-13	10:35:14	5.17899	23.0372	1696.28	1	77
2022-09-13	10:35:14	5.17599	23.0238	1782.67	1	78
2022-09-13	10:35:14	2.48841	11.0689	1707.35	FALSE	78
2022-09-13	10:35:15	2.17513	9.67541	1792.35	FALSE	78
2022-09-13	10:35:15	1.44413	6.42378	1713.77	FALSE	78
2022-09-13	10:35:15	0.709173	3.15454	1795.5	FALSE	78
2022-09-13	10:35:16	0.58841	2.61737	1716.39	FALSE	78
2022-09-13	10:35:16	0.825255	3.6709	1799.18	FALSE	78
2022-09-13	10:35:16	0.667697	2.97005	1719.36	FALSE	78
2022-09-13	10:35:16	0.472379	2.10124	1801.28	FALSE	78
2022-09-13	10:35:17	0.42388	1.8855	1721.24	FALSE	78
2022-09-13	10:35:17	1.19788	5.32841	1806.6	FALSE	78
2022-09-13	10:35:17	0.782964	3.48278	1724.73	FALSE	78
2022-09-13	10:35:17	0.428563	1.90633	1808.51	FALSE	78
2022-09-13	10:35:18	0.361947	1.61001	1726.34	FALSE	78
2022-09-13	10:35:18	0.3764	1.6743	1810.19	FALSE	78
2022-09-13	10:35:18	0.380674	1.69331	1728.03	FALSE	78
2022-09-13	10:35:18	0.564593	2.51142	1812.7	FALSE	78
2022-09-13	10:35:19	0.59187	2.63276	1730.66	FALSE	78
2022-09-13	10:35:19	0.767493	3.41396	1816.11	FALSE	78
2022-09-13	10:35:19	0.372074	1.65506	1732.32	FALSE	78
2022-09-13	10:35:20	0.343015	1.5258	1817.64	FALSE	78
2022-09-13	10:35:20	0.258384	1.14934	1733.47	FALSE	78
2022-09-13	10:35:20	0.606476	2.69773	1820.33	FALSE	78
2022-09-13	10:35:20	0.305	1.3567	1734.82	FALSE	78
2022-09-13	10:35:21	0.177163	0.788056	1821.12	FALSE	78
2022-09-13	10:35:21	0.312328	1.3893	1736.21	FALSE	78
2022-09-13	10:35:21	0.246323	1.09569	1822.22	FALSE	78
2022-09-13	10:35:21	0.355026	1.57923	1737.79	FALSE	78
2022-09-13	10:35:22	0.268562	1.19462	1823.41	FALSE	78
2022-09-13	10:35:22	0.289835	1.28924	1739.08	FALSE	78
2022-09-13	10:35:22	0.242507	1.07872	1824.49	FALSE	78
2022-09-13	10:35:22	0.0377738	0.168025	1739.25	FALSE	78
2022-09-13	10:35:23	0.159504	0.709506	1825.2	FALSE	78
2022-09-13	10:35:23	0.0730918	0.325127	1739.58	FALSE	78
2022-09-13	10:35:23	0.0921249	0.40979	1825.61	FALSE	78
2022-09-13	10:35:24	0.0725829	0.322863	1739.9	FALSE	78
2022-09-13	10:35:24	-0.11729	-0.521729	1825.61	FALSE	78
2022-09-13	10:35:24	-0.116425	-0.517882	1739.9	FALSE	78
2022-09-13	10:35:24	-0.246501	-1.09649	1825.61	FALSE	78
2022-09-13	10:35:25	-0.351793	-1.56485	1739.9	FALSE	78
2022-09-13	10:35:25	-0.380903	-1.69433	1825.61	FALSE	78
2022-09-13	10:35:25	-0.356323	-1.585	1739.9	FALSE	78
2022-09-13	10:35:25	-0.373116	-1.65969	1825.61	FALSE	78
2022-09-13	10:35:26	-0.0465519	-0.207072	1739.9	FALSE	78
2022-09-13	10:35:26	0.026018	0.115733	1825.73	FALSE	78
2022-09-13	10:35:26	0.0624048	0.277589	1740.18	FALSE	78
2022-09-13	10:35:26	0.258842	1.15138	1826.88	FALSE	78
2022-09-13	10:35:27	0.145967	0.64929	1740.83	FALSE	78
2022-09-13	10:35:27	0.252125	1.1215	1828	FALSE	78
2022-09-13	10:35:27	0.237824	1.05789	1741.88	FALSE	78
2022-09-13	10:35:27	0.203117	0.903505	1828.9	FALSE	78
2022-09-13	10:35:28	0.288715	1.28426	1743.17	FALSE	78
2022-09-13	10:35:28	0.289428	1.28743	1830.19	FALSE	78
2022-09-13	10:35:28	0.166222	0.739389	1743.91	FALSE	78
2022-09-13	10:35:29	-0.0383585	-0.170626	1830.19	FALSE	78
2022-09-13	10:35:29	-0.212252	-0.944139	1743.91	FALSE	78
2022-09-13	10:35:29	-0.257188	-1.14402	1830.19	FALSE	78
2022-09-13	10:35:29	-0.121565	-0.540745	1743.91	FALSE	78
2022-09-13	10:35:30	-0.234643	-1.04374	1830.19	FALSE	78
2022-09-13	10:35:30	-0.282888	-1.25834	1743.91	FALSE	78
2022-09-13	10:35:30	-0.233727	-1.03966	1830.19	FALSE	78
2022-09-13	10:35:30	-0.0951015	-0.42303	1743.91	FALSE	78
2022-09-13	10:35:31	-0.0980532	-0.43616	1830.19	FALSE	78
2022-09-13	10:35:31	0.200624	0.892416	1744.8	FALSE	78
2022-09-13	10:35:31	0.243677	1.08392	1831.27	FALSE	78
2022-09-13	10:35:31	0.283168	1.25959	1746.06	FALSE	78
2022-09-13	10:35:32	0.238079	1.05902	1832.33	FALSE	78
2022-09-13	10:35:32	0.399657	1.77775	1747.84	FALSE	78
2022-09-13	10:35:32	0.412328	1.83412	1834.17	FALSE	78
2022-09-13	10:35:33	-0.148995	-0.66276	1747.84	FALSE	78
2022-09-13	10:35:33	-0.336933	-1.49875	1834.17	FALSE	78
2022-09-13	10:35:33	-0.405687	-1.80458	1747.84	FALSE	78
2022-09-13	10:35:33	-0.415305	-1.84736	1834.17	FALSE	78
2022-09-13	10:35:34	-0.482888	-2.14798	1747.84	FALSE	78
2022-09-13	10:35:34	-0.618409	-2.75081	1834.17	FALSE	78
2022-09-13	10:35:34	-0.525178	-2.3361	1747.84	FALSE	78
2022-09-13	10:35:34	-0.490623	-2.18239	1834.17	FALSE	78
2022-09-13	10:35:35	-0.379783	-1.68935	1747.84	FALSE	78
2022-09-13	10:35:35	-0.416272	-1.85166	1834.17	FALSE	78
2022-09-13	10:35:35	-0.399783	-1.77831	1747.84	FALSE	78
2022-09-13	10:35:35	-0.47047	-2.09274	1834.17	FALSE	78
2022-09-13	10:35:36	-0.328994	-1.46343	1747.84	FALSE	78
2022-09-13	10:35:36	-0.00461808	-0.0205421	1834.17	FALSE	78
2022-09-13	10:35:36	0.26612	1.18375	1749.02	FALSE	78
2022-09-13	10:35:37	0.400318	1.78069	1835.95	FALSE	78
2022-09-13	10:35:37	0.307952	1.36983	1750.39	FALSE	78
2022-09-13	10:35:37	0.520369	2.31471	1838.26	FALSE	78
2022-09-13	10:35:37	0.392125	1.74425	1752.13	FALSE	78
2022-09-13	10:35:38	0.164644	0.732369	1839	FALSE	78
2022-09-13	10:35:38	0.055331	0.246123	1752.38	FALSE	78
2022-09-13	10:35:38	0.114059	0.507357	1839.5	FALSE	78
2022-09-13	10:35:38	0.120471	0.535879	1752.92	FALSE	78
2022-09-13	10:35:39	0.151005	0.6717	1840.17	FALSE	78
2022-09-13	10:35:39	0.154924	0.689133	1753.61	FALSE	78
2022-09-13	10:35:39	0.326323	1.45155	1841.63	FALSE	78
2022-09-13	10:35:39	0.120929	0.537916	1754.14	FALSE	78
2022-09-13	10:35:40	0.260064	1.15682	1842.78	FALSE	78
2022-09-13	10:35:40	0.373499	1.6614	1755.8	FALSE	78
2022-09-13	10:35:40	0.430802	1.91629	1844.7	FALSE	78
2022-09-13	10:35:40	0.532176	2.36723	1758.17	FALSE	78
2022-09-13	10:35:41	0.736857	3.27769	1847.98	FALSE	78
2022-09-13	10:35:41	0.488308	2.17209	1760.34	FALSE	78
2022-09-13	10:35:41	0.751667	3.34357	1851.32	FALSE	78
2022-09-13	10:35:42	0.736807	3.27746	1763.62	FALSE	78
2022-09-13	10:35:42	0.735992	3.27384	1854.59	FALSE	78
2022-09-13	10:35:42	0.731259	3.25279	1766.87	FALSE	78
2022-09-13	10:35:42	0.73645	3.27588	1857.87	FALSE	78
2022-09-13	10:35:43	0.739758	3.29059	1770.16	FALSE	78
2022-09-13	10:35:43	0.737977	3.28267	1861.15	FALSE	78
2022-09-13	10:35:43	0.738639	3.28561	1773.45	FALSE	78
2022-09-13	10:35:43	0.73813	3.28335	1864.44	FALSE	78
2022-09-13	10:35:44	0.738944	3.28697	1776.74	FALSE	78
2022-09-13	10:35:44	0.733244	3.26162	1867.7	FALSE	78
2022-09-13	10:35:44	0.734415	3.26682	1780	FALSE	78
2022-09-13	10:35:44	0.738995	3.2872	1870.98	FALSE	78
2022-09-13	10:35:45	0.732888	3.26003	1783.26	FALSE	78
2022-09-13	10:35:45	0.732481	3.25822	1874.24	FALSE	78
2022-09-13	10:35:45	0.735789	3.27294	1786.54	FALSE	78
2022-09-13	10:35:46	0.736857	3.27769	1877.52	FALSE	78
2022-09-13	10:35:46	0.738995	3.2872	1789.82	FALSE	78
2022-09-13	10:35:46	0.737163	3.27905	1880.8	FALSE	78
2022-09-13	10:35:46	0.744644	3.31233	1793.14	FALSE	78
2022-09-13	10:35:47	0.733244	3.26162	1884.06	FALSE	78
2022-09-13	10:35:47	0.740013	3.29173	1796.43	FALSE	78
2022-09-13	10:35:47	0.738181	3.28358	1887.34	FALSE	78
2022-09-13	10:35:47	0.734517	3.26728	1799.7	FALSE	78
2022-09-13	10:35:48	0.736501	3.2761	1890.62	FALSE	78
2022-09-13	10:35:48	0.737722	3.28154	1802.98	FALSE	78
2022-09-13	10:35:48	0.737315	3.27972	1893.9	FALSE	78
2022-09-13	10:35:48	0.737163	3.27905	1806.26	FALSE	78
2022-09-13	10:35:49	0.734975	3.26932	1897.17	FALSE	78
2022-09-13	10:35:49	0.730394	3.24894	1809.51	FALSE	78
2022-09-13	10:35:49	0.734008	3.26501	1900.43	FALSE	78
2022-09-13	10:35:50	0.735076	3.26977	1812.78	FALSE	78
2022-09-13	10:35:50	0.742252	3.30169	1903.74	FALSE	78
2022-09-13	10:35:50	0.735483	3.27158	1816.05	FALSE	78
2022-09-13	10:35:50	0.742506	3.30282	1907.04	FALSE	78
2022-09-13	10:35:51	0.738944	3.28697	1819.33	FALSE	78
2022-09-13	10:35:51	0.737519	3.28063	1910.32	FALSE	78
2022-09-13	10:35:51	0.745661	3.31685	1822.65	FALSE	78
2022-09-13	10:35:51	0.738842	3.28652	1913.61	FALSE	78
2022-09-13	10:35:52	0.733041	3.26071	1825.91	FALSE	78
2022-09-13	10:35:52	0.732328	3.25754	1916.86	FALSE	78
2022-09-13	10:35:52	0.736399	3.27565	1829.19	FALSE	78
2022-09-13	10:35:52	0.73813	3.28335	1920.15	FALSE	78
2022-09-13	10:35:53	0.73472	3.26818	1832.46	FALSE	78
2022-09-13	10:35:53	0.741896	3.3001	1923.45	FALSE	78
2022-09-13	10:35:53	0.741081	3.29648	1835.75	FALSE	78
2022-09-13	10:35:53	1.45492	6.47178	1929.92	FALSE	78
2022-09-13	10:35:54	-0.0638038	-0.283812	1835.75	FALSE	78
2022-09-13	10:35:54	0.0873412	0.388511	1930.31	FALSE	78
2022-09-13	10:35:54	0.0958399	0.426315	1836.18	FALSE	78
2022-09-13	10:35:55	0.125356	0.557609	1930.87	FALSE	78
2022-09-13	10:35:55	0.262863	1.16927	1837.35	FALSE	78
2022-09-13	10:35:55	0.158944	0.707015	1931.57	FALSE	78
2022-09-13	10:35:55	0.469326	2.08766	1839.43	FALSE	78
2022-09-13	10:35:56	7.24301	32.2184	1963.79	1	79
2022-09-13	10:35:56	11.0287	49.0579	1888.49	1	80
2022-09-13	10:35:56	17.0459	75.8236	2039.61	1	81
2022-09-13	10:35:56	12.1267	53.942	1942.43	1	82
2022-09-13	10:35:57	12.9527	57.6162	2097.23	1	83
2022-09-13	10:35:57	8.21192	36.5283	1978.96	1	84
2022-09-13	10:35:57	2.58357	11.4922	2108.72	FALSE	84
2022-09-13	10:35:57	0.975127	4.33756	1983.3	FALSE	84
2022-09-13	10:35:58	1.78062	7.92055	2116.64	FALSE	84
2022-09-13	10:35:58	1.3051	5.80535	1989.11	FALSE	84
2022-09-13	10:35:58	1.14337	5.08594	2121.73	FALSE	84
2022-09-13	10:35:59	2.26108	10.0577	1999.16	FALSE	84
2022-09-13	10:35:59	3.42006	15.2131	2136.94	1	85
2022-09-13	10:35:59	3.00698	13.3756	2012.54	1	86
2022-09-13	10:35:59	2.77207	12.3307	2149.27	FALSE	86
2022-09-13	10:36:00	2.97131	13.217	2025.76	FALSE	86
2022-09-13	10:36:00	4.33742	19.2937	2168.57	1	87
2022-09-13	10:36:00	3.80887	16.9426	2042.7	1	88
2022-09-13	10:36:00	2.7849	12.3878	2180.95	FALSE	88
2022-09-13	10:36:01	2.33772	10.3986	2053.1	FALSE	88
2022-09-13	10:36:01	2.18851	9.73493	2190.69	FALSE	88
2022-09-13	10:36:01	1.6619	7.39246	2060.49	FALSE	88
2022-09-13	10:36:01	1.66439	7.40354	2198.09	FALSE	88
2022-09-13	10:36:02	1.52429	6.78035	2067.27	FALSE	88
2022-09-13	10:36:02	1.55894	6.93448	2205.03	FALSE	88
2022-09-13	10:36:02	0.703015	3.12715	2070.4	FALSE	88
2022-09-13	10:36:03	0.516959	2.29954	2207.33	FALSE	88
2022-09-13	10:36:03	0.4507	2.0048	2072.4	FALSE	88
2022-09-13	10:36:03	0.136094	0.605373	2207.93	FALSE	88
2022-09-13	10:36:03	0.133906	0.595641	2073	FALSE	88
2022-09-13	10:36:04	0.223117	0.992469	2208.93	FALSE	88
2022-09-13	10:36:04	0.254415	1.13169	2074.13	FALSE	88
2022-09-13	10:36:04	0.199148	0.88585	2209.81	FALSE	88
2022-09-13	10:36:04	0.0405728	0.180476	2074.31	FALSE	88
2022-09-13	10:36:05	-0.0138293	-0.0615155	2209.81	FALSE	88
2022-09-13	10:36:05	-0.326399	-1.45189	2074.31	FALSE	88
2022-09-13	10:36:05	-0.513524	-2.28426	2209.81	FALSE	88
2022-09-13	10:36:05	-0.398307	-1.77175	2074.31	FALSE	88
2022-09-13	10:36:06	0.471361	2.09671	2211.91	FALSE	88
2022-09-13	10:36:06	0.765051	3.4031	2077.71	FALSE	88
2022-09-13	10:36:06	0.52556	2.3378	2214.25	FALSE	88
2022-09-13	10:36:06	0.174924	0.778097	2078.49	FALSE	88
2022-09-13	10:36:07	1.02393	4.55465	2218.8	FALSE	88
2022-09-13	10:36:07	1.77319	7.8875	2086.38	FALSE	88
2022-09-13	10:36:07	0.65126	2.89693	2221.7	FALSE	88
2022-09-13	10:36:08	0.974822	4.3362	2090.71	FALSE	88
2022-09-13	10:36:08	0.757723	3.3705	2225.07	FALSE	88
2022-09-13	10:36:08	1.18821	5.2854	2096	FALSE	88
2022-09-13	10:36:08	1.02719	4.56915	2229.64	FALSE	88
2022-09-13	10:36:09	1.47945	6.58089	2102.58	FALSE	88
2022-09-13	10:36:09	1.61421	7.18033	2236.82	FALSE	88
2022-09-13	10:36:09	3.36815	14.9822	2117.56	1	89
2022-09-13	10:36:09	3.12637	13.9067	2250.72	1	90
2022-09-13	10:36:10	2.63579	11.7245	2129.29	FALSE	90
2022-09-13	10:36:10	3.57762	15.914	2266.64	1	91
2022-09-13	10:36:10	3.368	14.9815	2144.27	1	92
2022-09-13	10:36:10	1.68113	7.478	2274.12	FALSE	92
2022-09-13	10:36:11	0.908664	4.04192	2148.31	FALSE	92
2022-09-13	10:36:11	0.411005	1.82823	2275.94	FALSE	92
2022-09-13	10:36:11	0.462099	2.05551	2150.37	FALSE	92
2022-09-13	10:36:12	0.424848	1.88981	2277.83	FALSE	92
2022-09-13	10:36:12	0.270547	1.20345	2151.57	FALSE	92
2022-09-13	10:36:12	0.210089	0.934518	2278.77	FALSE	92
2022-09-13	10:36:12	0.147341	0.655402	2152.23	FALSE	92
2022-09-13	10:36:13	0.249122	1.10814	2279.88	FALSE	92
2022-09-13	10:36:13	0.134008	0.596094	2152.82	FALSE	92
2022-09-13	10:36:13	0.443117	1.97107	2281.85	FALSE	92
2022-09-13	10:36:13	1.42866	6.35497	2159.18	FALSE	92
2022-09-13	10:36:14	0.882812	3.92692	2285.77	FALSE	92
2022-09-13	10:36:14	0.969784	4.31379	2163.49	FALSE	92
2022-09-13	10:36:14	1.15864	5.15386	2290.93	FALSE	92
2022-09-13	10:36:14	3.29772	14.6689	2178.16	1	93
2022-09-13	10:36:15	3.55838	15.8284	2306.76	1	94
2022-09-13	10:36:15	4.83365	21.501	2199.66	1	95
2022-09-13	10:36:15	1.7879	7.95294	2314.71	FALSE	95
2022-09-13	10:36:16	0.370394	1.64759	2201.31	FALSE	95
2022-09-13	10:36:16	0.20785	0.924558	2315.63	FALSE	95
2022-09-13	10:36:16	-0.0337784	-0.150253	2201.31	FALSE	95
2022-09-13	10:36:16	-0.40762	-1.81318	2315.63	FALSE	95
2022-09-13	10:36:17	-0.449503	-1.99948	2201.31	FALSE	95
2022-09-13	10:36:17	-0.74304	-3.30519	2315.63	FALSE	95
2022-09-13	10:36:17	-0.55215	-2.45607	2201.31	FALSE	95
2022-09-13	10:36:17	-0.497188	-2.21159	2315.63	FALSE	95
2022-09-13	10:36:18	-0.271285	-1.20673	2201.31	FALSE	95
2022-09-13	10:36:18	-0.108689	-0.48347	2315.63	FALSE	95
2022-09-13	10:36:18	-0.12304	-0.547307	2201.31	FALSE	95
2022-09-13	10:36:18	-0.101972	-0.453592	2315.63	FALSE	95
2022-09-13	10:36:19	0.247137	1.09931	2202.41	FALSE	95
2022-09-13	10:36:19	0.262863	1.16927	2316.8	FALSE	95
2022-09-13	10:36:19	0.261641	1.16383	2203.57	FALSE	95
2022-09-13	10:36:19	0.146629	0.652235	2317.46	FALSE	95
2022-09-13	10:36:20	0.271056	1.20571	2204.78	FALSE	95
2022-09-13	10:36:20	0.328257	1.46015	2318.92	FALSE	95
2022-09-13	10:36:20	0.326781	1.45359	2206.23	FALSE	95
2022-09-13	10:36:21	0.420318	1.86966	2320.79	FALSE	95
2022-09-13	10:36:21	0.333346	1.48279	2207.71	FALSE	95
2022-09-13	10:36:21	0.385407	1.71437	2322.5	FALSE	95
2022-09-13	10:36:21	0.415789	1.84951	2209.56	FALSE	95
2022-09-13	10:36:22	0.425	1.89048	2324.39	FALSE	95
2022-09-13	10:36:22	0.505458	2.24838	2211.81	FALSE	95
2022-09-13	10:36:22	0.408003	1.81488	2326.21	FALSE	95
2022-09-13	10:36:22	0.411667	1.83118	2213.64	FALSE	95
2022-09-13	10:36:23	0.417825	1.85857	2328.06	FALSE	95
2022-09-13	10:36:23	0.359351	1.59847	2215.24	FALSE	95
2022-09-13	10:36:23	0.38897	1.73022	2329.79	FALSE	95
2022-09-13	10:36:23	0.346527	1.54142	2216.78	FALSE	95
2022-09-13	10:36:24	0.239046	1.06332	2330.86	FALSE	95
2022-09-13	10:36:24	0.331921	1.47645	2218.26	FALSE	95
2022-09-13	10:36:24	0.187799	0.835368	2331.69	FALSE	95
2022-09-13	10:36:25	0.255585	1.13689	2219.4	FALSE	95
2022-09-13	10:36:25	0.136349	0.606508	2332.3	FALSE	95
2022-09-13	10:36:25	0.118893	0.52886	2219.92	FALSE	95
2022-09-13	10:36:25	0.130903	0.582283	2332.88	FALSE	95
2022-09-13	10:36:26	0.000572752	0.00254772	2219.93	FALSE	95
2022-09-13	10:36:26	0.0537025	0.238879	2333.12	FALSE	95
2022-09-13	10:36:26	-0.0659921	-0.293546	2219.93	FALSE	95
2022-09-13	10:36:26	0.0369595	0.164403	2333.28	FALSE	95
2022-09-13	10:36:27	-0.108537	-0.482794	2219.93	FALSE	95
2022-09-13	10:36:27	-0.214135	-0.952515	2333.28	FALSE	95
2022-09-13	10:36:27	-0.251081	-1.11686	2219.93	FALSE	95
2022-09-13	10:36:27	-0.0886384	-0.394281	2333.28	FALSE	95
2022-09-13	10:36:28	-0.0137784	-0.0612891	2219.93	FALSE	95
2022-09-13	10:36:28	1.10179	4.90098	2338.19	FALSE	95
2022-09-13	10:36:28	3.78917	16.855	2236.78	1	96
2022-09-13	10:36:29	4.7452	21.1076	2359.29	1	97
2022-09-13	10:36:29	2.95635	13.1504	2249.93	FALSE	97
2022-09-13	10:36:29	3.31167	14.731	2374.02	1	98
2022-09-13	10:36:29	1.40388	6.24474	2256.18	FALSE	98
2022-09-13	10:36:30	1.73869	7.73404	2381.76	FALSE	98
2022-09-13	10:36:30	2.26301	10.0663	2266.24	FALSE	98
2022-09-13	10:36:30	2.85141	12.6836	2394.44	FALSE	98
2022-09-13	10:36:31	1.60724	7.14932	2273.39	FALSE	98
2022-09-13	10:36:31	1.14474	5.09203	2399.53	FALSE	98
2022-09-13	10:36:31	1.70495	7.58396	2280.98	FALSE	98
2022-09-13	10:36:31	0.966883	4.30089	2403.83	FALSE	98
2022-09-13	10:36:31	2.06978	9.2068	2290.18	FALSE	98
2022-09-13	10:36:32	1.81243	8.06205	2411.9	FALSE	98
2022-09-13	10:36:32	2.98688	13.2862	2303.47	FALSE	98
2022-09-13	10:36:32	6.31466	28.0889	2439.99	1	99
2022-09-13	10:36:33	0.854313	3.80016	2307.27	FALSE	99
2022-09-13	10:36:33	3.07146	13.6625	2453.65	1	100
2022-09-13	10:36:33	0.861336	3.83139	2311.1	FALSE	100
2022-09-13	10:36:33	2.3592	10.4942	2464.14	FALSE	100
2022-09-13	10:36:34	2.16576	9.63373	2320.74	FALSE	100
2022-09-13	10:36:34	0.820318	3.64894	2467.79	FALSE	100
2022-09-13	10:36:34	2.69253	11.9769	2332.71	FALSE	100
2022-09-13	10:36:34	1.6819	7.48143	2475.27	FALSE	100
2022-09-13	10:36:35	2.1305	9.47689	2342.19	FALSE	100
2022-09-13	10:36:35	0.785153	3.49252	2478.77	FALSE	100
2022-09-13	10:36:35	0.731514	3.25392	2345.44	FALSE	100
2022-09-13	10:36:35	0.733041	3.26071	2482.03	FALSE	100
2022-09-13	10:36:36	0.736959	3.27814	2348.72	FALSE	100
2022-09-13	10:36:36	0.690089	3.06965	2485.1	FALSE	100
2022-09-13	10:36:36	0.256807	1.14233	2349.86	FALSE	100
2022-09-13	10:36:36	0.21472	0.955118	2486.05	FALSE	100
2022-09-13	10:36:37	0.219708	0.977305	2350.84	FALSE	100
2022-09-13	10:36:37	0.47528	2.11414	2488.16	FALSE	100
2022-09-13	10:36:37	1.01457	4.51301	2355.35	FALSE	100
2022-09-13	10:36:38	1.16765	5.19394	2493.36	FALSE	100
2022-09-13	10:36:38	2.5795	11.4741	2366.83	FALSE	100
2022-09-13	10:36:38	2.30154	10.2377	2503.6	FALSE	100
2022-09-13	10:36:38	1.39177	6.19087	2373.02	FALSE	100
2022-09-13	10:36:39	0.952226	4.23569	2507.83	FALSE	100
2022-09-13	10:36:39	0.195738	0.870682	2373.89	FALSE	100
2022-09-13	10:36:39	0.631208	2.80774	2510.64	FALSE	100
2022-09-13	10:36:39	0.6793	3.02166	2376.91	FALSE	100
2022-09-13	10:36:40	0.722303	3.21295	2513.85	FALSE	100
2022-09-13	10:36:40	0.794669	3.53485	2380.45	FALSE	100
2022-09-13	10:36:40	0.822404	3.65822	2517.51	FALSE	100
2022-09-13	10:36:40	0.205407	0.913691	2381.36	FALSE	100
2022-09-13	10:36:41	0.187188	0.83265	2518.34	FALSE	100
2022-09-13	10:36:41	0.733142	3.26116	2384.62	FALSE	100
2022-09-13	10:36:41	0.736298	3.2752	2521.62	FALSE	100
2022-09-13	10:36:42	-0.498816	-2.21883	2384.62	FALSE	100
2022-09-13	10:36:42	0.740013	3.29173	2524.91	FALSE	100
2022-09-13	10:36:42	0.721234	3.20819	2387.83	FALSE	100
2022-09-13	10:36:42	0.729529	3.24509	2528.16	FALSE	100
2022-09-13	10:36:43	0.243881	1.08483	2388.91	FALSE	100
2022-09-13	10:36:43	0.0175702	0.0781558	2528.23	FALSE	100
2022-09-13	10:36:43	0.0214379	0.0953601	2389.01	FALSE	100
2022-09-13	10:36:43	0.691972	3.07803	2531.31	FALSE	100
2022-09-13	10:36:44	0.405509	1.80379	2390.81	FALSE	100
2022-09-13	10:36:44	0.409377	1.82099	2533.13	FALSE	100
2022-09-13	10:36:44	0.489682	2.1782	2392.99	FALSE	100
2022-09-13	10:36:44	0.50841	2.26151	2535.39	FALSE	100
2022-09-13	10:36:45	0.434517	1.93282	2394.92	FALSE	100
2022-09-13	10:36:45	0.425254	1.89161	2537.29	FALSE	100
2022-09-13	10:36:45	0.350293	1.55817	2396.48	FALSE	100
2022-09-13	10:36:46	0.492532	2.19088	2539.48	FALSE	100
2022-09-13	10:36:46	0.599097	2.6649	2399.15	FALSE	100
2022-09-13	10:36:46	0.26439	1.17606	2540.65	FALSE	100
2022-09-13	10:36:46	0.248613	1.10588	2400.25	FALSE	100
2022-09-13	10:36:47	0.284949	1.26751	2541.92	FALSE	100
2022-09-13	10:36:47	0.31126	1.38455	2401.64	FALSE	100
2022-09-13	10:36:47	0.272176	1.21069	2543.13	FALSE	100
2022-09-13	10:36:47	0.26902	1.19665	2402.83	FALSE	100
2022-09-13	10:36:48	0.259148	1.15274	2544.28	FALSE	100
2022-09-13	10:36:48	0.241336	1.07351	2403.91	FALSE	100
2022-09-13	10:36:48	0.24215	1.07713	2545.36	FALSE	100
2022-09-13	10:36:48	0.250954	1.11629	2405.02	FALSE	100
2022-09-13	10:36:49	0.25701	1.14323	2546.5	FALSE	100
2022-09-13	10:36:49	0.238792	1.06219	2406.09	FALSE	100
2022-09-13	10:36:49	0.224288	0.997678	2547.5	FALSE	100
2022-09-13	10:36:49	0.355382	1.58081	2407.67	FALSE	100
2022-09-13	10:36:50	0.13126	0.583871	2548.09	FALSE	100
2022-09-13	10:36:50	-0.399071	-1.77515	2407.67	FALSE	100
2022-09-13	10:36:50	-0.510419	-2.27045	2548.09	FALSE	100
2022-09-13	10:36:51	-0.260547	-1.15897	2407.67	FALSE	100
2022-09-13	10:36:51	-0.0132186	-0.058799	2548.09	FALSE	100
2022-09-13	10:36:51	0.057672	0.256537	2407.92	FALSE	100
2022-09-13	10:36:51	0.680725	3.028	2551.11	FALSE	100
2022-09-13	10:36:52	0.915941	4.07429	2412	FALSE	100
2022-09-13	10:36:52	2.03462	9.0504	2560.16	FALSE	100
2022-09-13	10:36:52	2.38184	10.5949	2422.59	FALSE	100
2022-09-13	10:36:52	3.85823	17.1622	2577.33	1	101
2022-09-13	10:36:53	2.92067	12.9917	2435.58	FALSE	101
2022-09-13	10:36:53	1.91966	8.53903	2585.87	FALSE	101
2022-09-13	10:36:53	3.20759	14.268	2449.85	1	102
2022-09-13	10:36:53	1.40195	6.23615	2592.1	FALSE	102
2022-09-13	10:36:54	2.11686	9.41622	2459.27	FALSE	102
2022-09-13	10:36:54	1.48821	6.61986	2598.72	FALSE	102
2022-09-13	10:36:54	1.66816	7.42031	2466.69	FALSE	102
2022-09-13	10:36:55	2.88184	12.819	2611.54	FALSE	102
2022-09-13	10:36:55	2.47645	11.0157	2477.7	FALSE	102
2022-09-13	10:36:55	3.48647	15.5085	2627.05	1	103
2022-09-13	10:36:55	2.67136	11.8827	2489.59	FALSE	103
2022-09-13	10:36:56	1.93645	8.61372	2635.66	FALSE	103
2022-09-13	10:36:56	2.05976	9.16222	2498.75	FALSE	103
2022-09-13	10:36:56	1.31808	5.86308	2641.53	FALSE	103
2022-09-13	10:36:56	1.49528	6.6513	2505.4	FALSE	103
2022-09-13	10:36:57	2.06103	9.16787	2650.69	FALSE	103
2022-09-13	10:36:57	2.24556	9.9887	2515.39	FALSE	103
2022-09-13	10:36:57	4.90144	21.8026	2672.5	1	104
2022-09-13	10:36:57	3.43345	15.2727	2530.66	1	105
2022-09-13	10:36:58	6.77792	30.1495	2702.65	1	106
2022-09-13	10:36:58	1.1736	5.22041	2535.88	FALSE	106
2022-09-13	10:36:58	2.86001	12.7219	2715.37	FALSE	106
2022-09-13	10:36:59	1.20123	5.34331	2541.23	FALSE	106
2022-09-13	10:36:59	1.34541	5.98465	2721.35	FALSE	106
2022-09-13	10:36:59	1.31329	5.84178	2547.07	FALSE	106
2022-09-13	10:36:59	1.10989	4.93701	2726.29	FALSE	106
2022-09-13	10:37:00	1.12983	5.02571	2552.09	FALSE	106
2022-09-13	10:37:00	2.67604	11.9036	2738.19	FALSE	106
2022-09-13	10:37:00	3.85019	17.1264	2569.22	1	107
2022-09-13	10:37:00	3.39248	15.0904	2753.28	1	108
2022-09-13	10:37:01	3.34714	14.8887	2584.11	1	109
2022-09-13	10:37:01	2.78617	12.3934	2765.68	FALSE	109
2022-09-13	10:37:01	2.28301	10.1553	2594.26	FALSE	109
2022-09-13	10:37:01	0.523677	2.32942	2768.01	FALSE	109
2022-09-13	10:37:02	0.516043	2.29546	2596.56	FALSE	109
2022-09-13	10:37:02	0.236959	1.05404	2769.06	FALSE	109
2022-09-13	10:37:02	0.171412	0.762475	2597.32	FALSE	109
2022-09-13	10:37:03	0.268715	1.1953	2770.26	FALSE	109
2022-09-13	10:37:03	0.191412	0.851439	2598.17	FALSE	109
2022-09-13	10:37:03	0.279402	1.24284	2771.5	FALSE	109
2022-09-13	10:37:03	0.244339	1.08687	2599.26	FALSE	109
2022-09-13	10:37:04	0.284084	1.26366	2772.76	FALSE	109
2022-09-13	10:37:04	0.325051	1.44589	2600.71	FALSE	109
2022-09-13	10:37:04	0.380318	1.69173	2774.45	FALSE	109
2022-09-13	10:37:04	-1.6209	-7.21009	2600.71	FALSE	109
2022-09-13	10:37:05	0.338842	1.50724	2775.96	FALSE	109
2022-09-13	10:37:05	0.475178	2.11369	2602.82	FALSE	109
2022-09-13	10:37:05	1.42648	6.34527	2782.31	FALSE	109
2022-09-13	10:37:05	2.48245	11.0424	2613.86	FALSE	109
2022-09-13	10:37:06	0.937875	4.17186	2786.48	FALSE	109
2022-09-13	10:37:06	0.844491	3.75646	2617.62	FALSE	109
2022-09-13	10:37:06	1.75085	7.78813	2794.27	FALSE	109
2022-09-13	10:37:06	0.632277	2.81249	2620.43	FALSE	109
2022-09-13	10:37:07	1.45477	6.47111	2800.74	FALSE	109
2022-09-13	10:37:07	1.21594	5.40874	2625.84	FALSE	109
2022-09-13	10:37:07	1.10108	4.89782	2805.64	FALSE	109
2022-09-13	10:37:08	1.38973	6.1818	2632.02	FALSE	109
2022-09-13	10:37:08	1.60128	7.12281	2812.76	FALSE	109
2022-09-13	10:37:08	2.73431	12.1628	2644.18	FALSE	109
2022-09-13	10:37:08	3.84994	17.1253	2829.88	1	110
2022-09-13	10:37:09	3.66057	16.2829	2660.47	1	111
2022-09-13	10:37:09	5.21192	23.1837	2853.07	1	112
2022-09-13	10:37:09	3.01843	13.4266	2673.89	1	113
2022-09-13	10:37:09	3.84815	17.1173	2870.18	1	114
2022-09-13	10:37:10	4.54713	20.2265	2694.12	1	115
2022-09-13	10:37:10	3.05284	13.5796	2883.76	1	116
2022-09-13	10:37:10	3.24912	14.4527	2708.57	1	117
2022-09-13	10:37:10	3.90647	17.3768	2901.14	1	118
2022-09-13	10:37:11	2.22851	9.91286	2718.49	FALSE	118
2022-09-13	10:37:11	5.30815	23.6117	2924.75	1	119
2022-09-13	10:37:11	5.36225	23.8524	2742.34	1	120
2022-09-13	10:37:12	3.7421	16.6456	2941.4	1	121
2022-09-13	10:37:12	6.11258	27.19	2769.53	1	122
2022-09-13	10:37:12	1.31385	5.84427	2947.24	FALSE	122
2022-09-13	10:37:12	3.87197	17.2233	2786.75	1	123
2022-09-13	10:37:13	1.83116	8.14537	2955.39	FALSE	123
2022-09-13	10:37:13	0.771463	3.43162	2790.18	FALSE	123
2022-09-13	10:37:13	1.85793	8.26444	2963.65	FALSE	123
2022-09-13	10:37:13	0.455585	2.02653	2792.21	FALSE	123
2022-09-13	10:37:14	1.17039	5.20613	2968.86	FALSE	123
2022-09-13	10:37:14	0.790344	3.51561	2795.73	FALSE	123
2022-09-13	10:37:14	0.619911	2.75749	2971.62	FALSE	123
2022-09-13	10:37:14	1.94037	8.63115	2804.36	FALSE	123
2022-09-13	10:37:15	0.710191	3.15907	2974.77	FALSE	123
2022-09-13	10:37:15	1.86312	8.28753	2812.64	FALSE	123
2022-09-13	10:37:15	0.531819	2.36564	2977.14	FALSE	123
2022-09-13	10:37:16	0.408206	1.81578	2814.46	FALSE	123
2022-09-13	10:37:16	0.387595	1.7241	2978.86	FALSE	123
2022-09-13	10:37:16	0.162048	0.720822	2815.18	FALSE	123
2022-09-13	10:37:16	0.362557	1.61273	2980.48	FALSE	123
2022-09-13	10:37:17	0.760165	3.38137	2818.56	FALSE	123
2022-09-13	10:37:17	0.708053	3.14956	2983.63	FALSE	123
2022-09-13	10:37:17	1.3278	5.90632	2824.47	FALSE	123
2022-09-13	10:37:17	1.70688	7.59254	2991.22	FALSE	123
2022-09-13	10:37:18	1.75553	7.80895	2832.28	FALSE	123
2022-09-13	10:37:18	2.78505	12.3885	3003.61	FALSE	123
2022-09-13	10:37:18	1.12678	5.01214	2837.29	FALSE	123
2022-09-13	10:37:18	1.56897	6.97909	3010.59	FALSE	123
2022-09-13	10:37:19	0.735433	3.27135	2840.56	FALSE	123
2022-09-13	10:37:19	0.733295	3.26184	3013.85	FALSE	123
2022-09-13	10:37:19	0.731514	3.25392	2843.81	FALSE	123
2022-09-13	10:37:19	0.740318	3.29308	3017.14	FALSE	123
2022-09-13	10:37:20	0.737061	3.27859	2847.09	FALSE	123
2022-09-13	10:37:20	0.745255	3.31504	3020.46	FALSE	123
2022-09-13	10:37:20	0.737163	3.27905	2850.37	FALSE	123
2022-09-13	10:37:21	0.737214	3.27928	3023.74	FALSE	123
2022-09-13	10:37:21	0.732735	3.25935	2853.63	FALSE	123
2022-09-13	10:37:21	0.738181	3.28358	3027.02	FALSE	123
2022-09-13	10:37:21	0.734008	3.26501	2856.9	FALSE	123
2022-09-13	10:37:22	0.735738	3.27271	3030.29	FALSE	123
2022-09-13	10:37:22	0.743423	3.30689	2860.2	FALSE	123
2022-09-13	10:37:22	0.729835	3.24645	3033.54	FALSE	123
2022-09-13	10:37:22	0.73355	3.26298	2863.47	FALSE	123
2022-09-13	10:37:23	0.731158	3.25234	3036.79	FALSE	123
2022-09-13	10:37:23	0.730954	3.25143	2866.72	FALSE	123
2022-09-13	10:37:23	0.734008	3.26501	3040.06	FALSE	123
2022-09-13	10:37:23	0.733753	3.26388	2869.98	FALSE	123
2022-09-13	10:37:24	0.732481	3.25822	3043.31	FALSE	123
2022-09-13	10:37:24	0.733957	3.26479	2873.25	FALSE	123
2022-09-13	10:37:24	0.735534	3.2718	3046.59	FALSE	123
2022-09-13	10:37:25	0.735331	3.2709	2876.52	FALSE	123
2022-09-13	10:37:25	0.72902	3.24283	3049.83	FALSE	123
2022-09-13	10:37:25	0.748664	3.33021	2879.85	FALSE	123
2022-09-13	10:37:25	0.678435	3.01781	3052.85	FALSE	123
2022-09-13	10:37:26	0.590598	2.6271	2882.47	FALSE	123
2022-09-13	10:37:26	0.454059	2.01975	3054.87	FALSE	123
2022-09-13	10:37:26	0.354059	1.57493	2884.05	FALSE	123
2022-09-13	10:37:26	0.719453	3.20027	3058.07	FALSE	123
2022-09-13	10:37:27	0.0387407	0.172326	2884.22	FALSE	123
2022-09-13	10:37:27	0.181845	0.808883	3058.88	FALSE	123
2022-09-13	10:37:27	0.251718	1.11969	2885.34	FALSE	123
2022-09-13	10:37:27	-0.002786	-0.0123927	3058.88	FALSE	123
2022-09-13	10:37:28	0.0493768	0.219638	2885.56	FALSE	123
2022-09-13	10:37:28	-0.182328	-0.811031	3058.88	FALSE	123
2022-09-13	10:37:28	-0.0629895	-0.28019	2885.56	FALSE	123
2022-09-13	10:37:29	-0.233626	-1.03922	3058.88	FALSE	123
2022-09-13	10:37:29	-0.270165	-1.20175	2885.56	FALSE	123
2022-09-13	10:37:29	-0.488638	-2.17356	3058.88	FALSE	123
2022-09-13	10:37:29	-0.586195	-2.60751	2885.56	FALSE	123
2022-09-13	10:37:30	-0.745279	-3.31515	3058.88	FALSE	123
2022-09-13	10:37:30	-0.826959	-3.67848	2885.56	FALSE	123
2022-09-13	10:37:30	-0.971692	-4.32228	3058.88	FALSE	123
2022-09-13	10:37:30	-0.851895	-3.7894	2885.56	FALSE	123
2022-09-13	10:37:31	-0.920037	-4.09251	3058.88	FALSE	123
2022-09-13	10:37:31	-0.736882	-3.2778	2885.56	FALSE	123
2022-09-13	10:37:31	-0.693523	-3.08493	3058.88	FALSE	123
2022-09-13	10:37:31	-0.53332	-2.37231	2885.56	FALSE	123
2022-09-13	10:37:32	-0.371997	-1.65472	3058.88	FALSE	123
2022-09-13	10:37:32	-0.212099	-0.943459	2885.56	FALSE	123
2022-09-13	10:37:32	-0.12416	-0.552289	3058.88	FALSE	123
2022-09-13	10:37:33	-0.271234	-1.2065	2885.56	FALSE	123
2022-09-13	10:37:33	-0.376933	-1.67667	3058.88	FALSE	123
2022-09-13	10:37:33	-0.45617	-2.02914	2885.56	FALSE	123
2022-09-13	10:37:33	-0.439122	-1.9533	3058.88	FALSE	123
2022-09-13	10:37:34	-0.458816	-2.04091	2885.56	FALSE	123
2022-09-13	10:37:34	-0.562175	-2.50067	3058.88	FALSE	123
2022-09-13	10:37:34	-0.475814	-2.11652	2885.56	FALSE	123
2022-09-13	10:37:34	-0.582887	-2.5928	3058.88	FALSE	123
2022-09-13	10:37:35	-0.454134	-2.02008	2885.56	FALSE	123
2022-09-13	10:37:35	-0.000953954	-0.00424338	3058.88	FALSE	123
2022-09-13	10:37:35	5.62439	25.0184	2910.58	1	124
2022-09-13	10:37:35	4.48118	19.9332	3078.81	1	125
2022-09-13	10:37:36	4.31635	19.2	2929.78	1	126
2022-09-13	10:37:36	0.776959	3.45607	3082.27	FALSE	126
2022-09-13	10:37:36	2.21238	9.84111	2939.62	FALSE	126
2022-09-13	10:37:36	1.03508	4.60424	3086.87	FALSE	126
2022-09-13	10:37:37	1.8076	8.04057	2947.66	FALSE	126
2022-09-13	10:37:37	1.05523	4.69387	3091.56	FALSE	126
2022-09-13	10:37:37	0.399707	1.77798	2949.44	FALSE	126
2022-09-13	10:37:38	0.645254	2.87022	3094.43	FALSE	126
2022-09-13	10:37:38	0.627799	2.79258	2952.23	FALSE	126
2022-09-13	10:37:38	0.675941	3.00672	3097.44	FALSE	126
2022-09-13	10:37:38	1.04683	4.65651	2956.89	FALSE	126
2022-09-13	10:37:39	1.22612	5.45403	3102.89	FALSE	126
2022-09-13	10:37:39	0.811209	3.60842	2960.5	FALSE	126
2022-09-13	10:37:39	0.346221	1.54006	3104.43	FALSE	126
2022-09-13	10:37:39	0.280115	1.24601	2961.74	FALSE	126
2022-09-13	10:37:40	0.144033	0.640688	3105.07	FALSE	126
2022-09-13	10:37:40	0.257774	1.14663	2962.89	FALSE	126
2022-09-13	10:37:40	0.153601	0.683248	3105.76	FALSE	126
2022-09-13	10:37:40	-0.0712338	-0.316862	2962.89	FALSE	126
2022-09-13	10:37:41	-0.191895	-0.853587	3105.76	FALSE	126
2022-09-13	10:37:41	-0.358206	-1.59337	2962.89	FALSE	126
2022-09-13	10:37:41	-0.388129	-1.72648	3105.76	FALSE	126
2022-09-13	10:37:42	-0.532201	-2.36734	2962.89	FALSE	126
2022-09-13	10:37:42	-0.179733	-0.799488	3105.76	FALSE	126
2022-09-13	10:37:42	0.15701	0.698412	2963.59	FALSE	126
2022-09-13	10:37:42	2.49981	11.1197	3116.88	FALSE	126
2022-09-13	10:37:43	6.51619	28.9853	2992.57	1	127
2022-09-13	10:37:43	5.60973	24.9532	3141.83	1	128
2022-09-13	10:37:43	5.39385	23.9929	3016.57	1	129
2022-09-13	10:37:43	1.40678	6.25764	3148.09	FALSE	129
2022-09-13	10:37:44	1.44897	6.44531	3023.01	FALSE	129
2022-09-13	10:37:44	1.42709	6.34798	3154.44	FALSE	129
2022-09-13	10:37:44	1.56286	6.95191	3029.96	FALSE	129
2022-09-13	10:37:44	1.95706	8.70539	3163.14	FALSE	129
2022-09-13	10:37:45	3.28027	14.5913	3044.55	1	130
2022-09-13	10:37:45	5.59319	24.8796	3188.02	1	131
2022-09-13	10:37:45	3.01589	13.4153	3057.97	1	132
2022-09-13	10:37:46	3.95314	17.5844	3205.61	1	133
2022-09-13	10:37:46	1.79055	7.96472	3065.93	FALSE	133
2022-09-13	10:37:46	2.33014	10.3649	3215.97	FALSE	133
2022-09-13	10:37:46	1.00704	4.47952	3070.41	FALSE	133
2022-09-13	10:37:47	0.562557	2.50237	3218.47	FALSE	133
2022-09-13	10:37:47	0.504847	2.24566	3072.66	FALSE	133
2022-09-13	10:37:47	0.252888	1.1249	3219.6	FALSE	133
2022-09-13	10:37:47	0.702405	3.12444	3075.78	FALSE	133
2022-09-13	10:37:48	0.392634	1.74651	3221.34	FALSE	133
2022-09-13	10:37:48	0.498181	2.21601	3078	FALSE	133
2022-09-13	10:37:48	0.845	3.75873	3225.1	FALSE	133
2022-09-13	10:37:48	1.40678	6.25764	3084.26	FALSE	133
2022-09-13	10:37:49	4.09187	18.2015	3243.3	1	134
2022-09-13	10:37:49	3.27787	14.5806	3098.84	1	135
2022-09-13	10:37:49	5.92291	26.3463	3269.65	1	136
2022-09-13	10:37:49	2.79172	12.4181	3111.26	FALSE	136
2022-09-13	10:37:50	2.56561	11.4123	3281.06	FALSE	136
2022-09-13	10:37:50	1.45955	6.49237	3117.75	FALSE	136
2022-09-13	10:37:50	1.04291	4.63907	3285.7	FALSE	136
2022-09-13	10:37:51	2.52994	11.2537	3129	FALSE	136
2022-09-13	10:37:51	1.19487	5.31502	3291.02	FALSE	136
2022-09-13	10:37:51	1.95477	8.69521	3137.7	FALSE	136
2022-09-13	10:37:51	2.8765	12.7952	3303.81	FALSE	136
2022-09-13	10:37:52	3.88546	17.2833	3154.98	1	137
2022-09-13	10:37:52	5.04622	22.4466	3326.26	1	138
2022-09-13	10:37:52	3.65319	16.2501	3171.23	1	139
2022-09-13	10:37:52	4.11971	18.3253	3344.58	1	140
2022-09-13	10:37:53	2.63889	11.7383	3182.97	FALSE	140
2022-09-13	10:37:53	6.63436	29.511	3374.1	1	141
2022-09-13	10:37:53	8.18479	36.4076	3219.38	1	142
2022-09-13	10:37:53	7.54947	33.5816	3407.68	1	143
2022-09-13	10:37:54	7.27014	32.339	3251.72	1	144
2022-09-13	10:37:54	4.33462	19.2813	3426.96	1	145
2022-09-13	10:37:54	5.58825	24.8577	3276.57	1	146

## Sheet: Saint_star_2022913103243 (2)
Date	Time	Lbs	Total Force x time			**GoPro Fitting: 1022
2022-09-13	10:32:54	0.366629	0.366629	FALSE	0			Total force x time	1507.02
2022-09-13	10:32:54	0.386578	0.753207	FALSE	0			Total steps	146
2022-09-13	10:32:54	0.389631	1.14284	FALSE	0
2022-09-13	10:32:54	0.441641	1.58448	FALSE	0
2022-09-13	10:32:55	0.354618	1.9391	FALSE	0
2022-09-13	10:32:55	0.499911	2.43901	FALSE	0
2022-09-13	10:32:55	0.649275	3.08828	FALSE	0
2022-09-13	10:32:55	0.994211	4.08249	FALSE	0
2022-09-13	10:32:56	0.699555	4.78205	FALSE	0
2022-09-13	10:32:56	0.68556	5.46761	FALSE	0
2022-09-13	10:32:56	0.641896	6.1095	FALSE	0
2022-09-13	10:32:56	0.470446	6.57995	FALSE	0
2022-09-13	10:32:57	0.398842	6.97879	FALSE	0
2022-09-13	10:32:57	0.374619	7.35341	FALSE	0
2022-09-13	10:32:57	0.300165	7.65358	FALSE	0
2022-09-13	10:32:58	0.323931	7.97751	FALSE	0
2022-09-13	10:32:58	0.494873	8.47238	FALSE	0
2022-09-13	10:32:58	0.519148	8.99153	FALSE	0
2022-09-13	10:32:58	0.612684	9.60421	FALSE	0
2022-09-13	10:32:59	0.372583	9.9768	FALSE	0
2022-09-13	10:32:59	0.164084	10.1409	FALSE	0
2022-09-13	10:32:59	0.297163	10.438	FALSE	0
2022-09-13	10:32:59	0.376145	10.8142	FALSE	0
2022-09-13	10:33:00	0.451158	11.2653	FALSE	0
2022-09-13	10:33:00	0.223982	11.4893	FALSE	0
2022-09-13	10:33:00	0.479962	11.9693	FALSE	0
2022-09-13	10:33:00	0.397265	12.3666	FALSE	0
2022-09-13	10:33:01	0.407697	12.7743	FALSE	0
2022-09-13	10:33:01	0.39869	13.1729	FALSE	0
2022-09-13	10:33:01	0.349529	13.5225	FALSE	0
2022-09-13	10:33:02	0.399911	13.9224	FALSE	0
2022-09-13	10:33:02	0.399402	14.3218	FALSE	0
2022-09-13	10:33:02	0.502913	14.8247	FALSE	0
2022-09-13	10:33:02	0.272023	15.0967	FALSE	0
2022-09-13	10:33:03	0.451107	15.5478	FALSE	0
2022-09-13	10:33:03	0.438486	15.9863	FALSE	0
2022-09-13	10:33:03	0.325407	16.3117	FALSE	0
2022-09-13	10:33:03	0.177468	16.4892	FALSE	0
2022-09-13	10:33:04	0.102405	16.5916	FALSE	0
2022-09-13	10:33:04	-0.104771	16.5916	FALSE	0
2022-09-13	10:33:04	0.132939	16.7245	FALSE	0
2022-09-13	10:33:04	0.350445	17.075	FALSE	0
2022-09-13	10:33:05	0.354568	17.4295	FALSE	0
2022-09-13	10:33:05	2.69609	20.1256	FALSE	0
2022-09-13	10:33:05	3.16505	23.2907	1	1
2022-09-13	10:33:05	3.14123	26.4319	1	2
2022-09-13	10:33:06	2.87701	29.3089	FALSE	2
2022-09-13	10:33:06	1.73014	31.0391	FALSE	2
2022-09-13	10:33:06	2.00841	33.0475	FALSE	2
2022-09-13	10:33:07	0.680623	33.7281	FALSE	2
2022-09-13	10:33:07	0.435433	34.1635	FALSE	2
2022-09-13	10:33:07	1.28251	35.446	FALSE	2
2022-09-13	10:33:07	1.19508	36.6411	FALSE	2
2022-09-13	10:33:08	0.561081	37.2022	FALSE	2
2022-09-13	10:33:08	0.993397	38.1956	FALSE	2
2022-09-13	10:33:08	4.09966	42.2953	1	3
2022-09-13	10:33:08	4.76653	47.0618	1	4
2022-09-13	10:33:09	4.81253	51.8743	1	5
2022-09-13	10:33:09	2.7849	54.6592	FALSE	5
2022-09-13	10:33:09	4.2224	58.8816	1	6
2022-09-13	10:33:09	1.26592	60.1475	FALSE	6
2022-09-13	10:33:10	0.67472	60.8223	FALSE	6
2022-09-13	10:33:10	0.577112	61.3994	FALSE	6
2022-09-13	10:33:10	0.464186	61.8636	FALSE	6
2022-09-13	10:33:11	0.265916	62.1295	FALSE	6
2022-09-13	10:33:11	0.387595	62.5171	FALSE	6
2022-09-13	10:33:11	0.990242	63.5073	FALSE	6
2022-09-13	10:33:11	1.82826	65.3356	FALSE	6
2022-09-13	10:33:12	7.3023	72.6379	1	7
2022-09-13	10:33:12	4.71238	77.3503	1	8
2022-09-13	10:33:12	1.37833	78.7286	FALSE	8
2022-09-13	10:33:12	0.61645	79.345	FALSE	8
2022-09-13	10:33:13	0.430547	79.7756	FALSE	8
2022-09-13	10:33:13	-0.00146287	79.7756	FALSE	8
2022-09-13	10:33:13	-0.127213	79.7756	FALSE	8
2022-09-13	10:33:13	-0.0638547	79.7756	FALSE	8
2022-09-13	10:33:14	-0.073931	79.7756	FALSE	8
2022-09-13	10:33:14	-0.142379	79.7756	FALSE	8
2022-09-13	10:33:14	-0.120394	79.7756	FALSE	8
2022-09-13	10:33:15	-0.226501	79.7756	FALSE	8
2022-09-13	10:33:15	-0.248791	79.7756	FALSE	8
2022-09-13	10:33:15	-0.425687	79.7756	FALSE	8
2022-09-13	10:33:15	-0.386043	79.7756	FALSE	8
2022-09-13	10:33:16	-0.330572	79.7756	FALSE	8
2022-09-13	10:33:16	0.134771	79.9103	FALSE	8
2022-09-13	10:33:16	1.33177	81.2421	FALSE	8
2022-09-13	10:33:16	2.92332	84.1654	FALSE	8
2022-09-13	10:33:17	2.82108	86.9865	FALSE	8
2022-09-13	10:33:17	1.72525	88.7118	FALSE	8
2022-09-13	10:33:17	2.23075	90.9425	FALSE	8
2022-09-13	10:33:17	2.80576	93.7483	FALSE	8
2022-09-13	10:33:18	4.39563	98.1439	1	9
2022-09-13	10:33:18	2.61599	100.76	FALSE	9
2022-09-13	10:33:18	2.15335	102.913	FALSE	9
2022-09-13	10:33:19	3.27787	106.191	1	10
2022-09-13	10:33:19	3.19691	109.388	1	11
2022-09-13	10:33:19	9.4625	118.851	1	12
2022-09-13	10:33:19	7.28744	126.138	1	13
2022-09-13	10:33:20	7.7797	133.918	1	14
2022-09-13	10:33:20	2.88622	136.804	FALSE	14
2022-09-13	10:33:20	0.789479	137.593	FALSE	14
2022-09-13	10:33:20	2.33996	139.933	FALSE	14
2022-09-13	10:33:21	1.55777	141.491	FALSE	14
2022-09-13	10:33:21	2.04571	143.537	FALSE	14
2022-09-13	10:33:21	1.27701	144.814	FALSE	14
2022-09-13	10:33:21	1.5105	146.324	FALSE	14
2022-09-13	10:33:22	1.65701	147.981	FALSE	14
2022-09-13	10:33:22	1.37976	149.361	FALSE	14
2022-09-13	10:33:22	1.95106	151.312	FALSE	14
2022-09-13	10:33:22	1.13477	152.447	FALSE	14
2022-09-13	10:33:23	0.769733	153.217	FALSE	14
2022-09-13	10:33:23	2.07971	155.296	FALSE	14
2022-09-13	10:33:23	3.37197	158.668	1	15
2022-09-13	10:33:24	4.71955	163.388	1	16
2022-09-13	10:33:24	8.82001	172.208	1	17
2022-09-13	10:33:24	8.38942	180.597	1	18
2022-09-13	10:33:24	2.03966	182.637	FALSE	18
2022-09-13	10:33:25	3.62607	186.263	1	19
2022-09-13	10:33:25	0.795331	187.058	FALSE	19
2022-09-13	10:33:25	0.413295	187.472	FALSE	19
2022-09-13	10:33:25	0.538893	188.011	FALSE	19
2022-09-13	10:33:26	0.358181	188.369	FALSE	19
2022-09-13	10:33:26	0.6907	189.059	FALSE	19
2022-09-13	10:33:26	1.70729	190.767	FALSE	19
2022-09-13	10:33:26	0.941387	191.708	FALSE	19
2022-09-13	10:33:27	0.571819	192.28	FALSE	19
2022-09-13	10:33:27	0.45874	192.739	FALSE	19
2022-09-13	10:33:27	0.416756	193.155	FALSE	19
2022-09-13	10:33:28	0.381896	193.537	FALSE	19
2022-09-13	10:33:28	0.760216	194.298	FALSE	19
2022-09-13	10:33:28	0.825865	195.123	FALSE	19
2022-09-13	10:33:28	1.0422	196.166	FALSE	19
2022-09-13	10:33:29	0.664746	196.83	FALSE	19
2022-09-13	10:33:29	1.62576	198.456	FALSE	19
2022-09-13	10:33:29	0.757672	199.214	FALSE	19
2022-09-13	10:33:29	0.956654	200.17	FALSE	19
2022-09-13	10:33:30	0.737621	200.908	FALSE	19
2022-09-13	10:33:30	0.445865	201.354	FALSE	19
2022-09-13	10:33:30	0.448817	201.803	FALSE	19
2022-09-13	10:33:30	0.356756	202.16	FALSE	19
2022-09-13	10:33:31	0.452532	202.612	FALSE	19
2022-09-13	10:33:31	0.123982	202.736	FALSE	19
2022-09-13	10:33:31	0.39131	203.127	FALSE	19
2022-09-13	10:33:32	0.120827	203.248	FALSE	19
2022-09-13	10:33:32	0.299199	203.547	FALSE	19
2022-09-13	10:33:32	0.153194	203.701	FALSE	19
2022-09-13	10:33:32	0.264695	203.965	FALSE	19
2022-09-13	10:33:33	0.294924	204.26	FALSE	19
2022-09-13	10:33:33	0.724695	204.985	FALSE	19
2022-09-13	10:33:33	1.38978	206.375	FALSE	19
2022-09-13	10:33:33	0.63818	207.013	FALSE	19
2022-09-13	10:33:34	-0.00797683	207.013	FALSE	19
2022-09-13	10:33:34	-0.00487254	207.013	FALSE	19
2022-09-13	10:33:34	0.0266287	207.039	FALSE	19
2022-09-13	10:33:34	0.116807	207.156	FALSE	19
2022-09-13	10:33:35	0.0141097	207.17	FALSE	19
2022-09-13	10:33:35	0.519707	207.69	FALSE	19
2022-09-13	10:33:35	1.15996	208.85	FALSE	19
2022-09-13	10:33:35	2.03233	210.882	FALSE	19
2022-09-13	10:33:36	0.493753	211.376	FALSE	19
2022-09-13	10:33:36	0.351616	211.728	FALSE	19
2022-09-13	10:33:36	0.169478	211.897	FALSE	19
2022-09-13	10:33:37	0.371718	212.269	FALSE	19
2022-09-13	10:33:37	0.196603	212.466	FALSE	19
2022-09-13	10:33:37	0.266425	212.732	FALSE	19
2022-09-13	10:33:37	0.736145	213.468	FALSE	19
2022-09-13	10:33:38	0.260674	213.729	FALSE	19
2022-09-13	10:33:38	0.569682	214.298	FALSE	19
2022-09-13	10:33:38	0.341489	214.64	FALSE	19
2022-09-13	10:33:38	1.09279	215.733	FALSE	19
2022-09-13	10:33:39	1.54999	217.283	FALSE	19
2022-09-13	10:33:39	3.03731	220.32	1	20
2022-09-13	10:33:39	2.8109	223.131	FALSE	20
2022-09-13	10:33:39	3.49039	226.621	1	21
2022-09-13	10:33:40	6.77309	233.394	1	22
2022-09-13	10:33:40	4.27024	237.665	1	23
2022-09-13	10:33:40	7.5109	245.176	1	24
2022-09-13	10:33:41	5.53787	250.713	1	25
2022-09-13	10:33:41	2.51706	253.23	FALSE	25
2022-09-13	10:33:41	4.32042	257.551	1	26
2022-09-13	10:33:41	4.05319	261.604	1	27
2022-09-13	10:33:42	2.35034	263.954	FALSE	27
2022-09-13	10:33:42	4.40709	268.362	1	28
2022-09-13	10:33:42	2.30892	270.67	FALSE	28
2022-09-13	10:33:42	3.15686	273.827	1	29
2022-09-13	10:33:43	3.08307	276.91	1	30
2022-09-13	10:33:43	0.936909	277.847	FALSE	30
2022-09-13	10:33:43	2.78785	280.635	FALSE	30
2022-09-13	10:33:43	1.03828	281.673	FALSE	30
2022-09-13	10:33:44	1.06429	282.738	FALSE	30
2022-09-13	10:33:44	1.13508	283.873	FALSE	30
2022-09-13	10:33:44	1.38398	285.257	FALSE	30
2022-09-13	10:33:45	1.46515	286.722	FALSE	30
2022-09-13	10:33:45	0.798181	287.52	FALSE	30
2022-09-13	10:33:45	2.25039	289.77	FALSE	30
2022-09-13	10:33:45	0.743117	290.514	FALSE	30
2022-09-13	10:33:46	1.36637	291.88	FALSE	30
2022-09-13	10:33:46	1.52408	293.404	FALSE	30
2022-09-13	10:33:46	2.47421	295.878	FALSE	30
2022-09-13	10:33:46	4.20719	300.085	1	31
2022-09-13	10:33:47	2.51508	302.601	FALSE	31
2022-09-13	10:33:47	5.07319	307.674	1	32
2022-09-13	10:33:47	1.68073	309.354	FALSE	32
2022-09-13	10:33:47	1.00363	310.358	FALSE	32
2022-09-13	10:33:48	0.607341	310.965	FALSE	32
2022-09-13	10:33:48	0.320471	311.286	FALSE	32
2022-09-13	10:33:48	0.30154	311.587	FALSE	32
2022-09-13	10:33:48	0.25126	311.839	FALSE	32
2022-09-13	10:33:49	-0.283448	311.839	FALSE	32
2022-09-13	10:33:49	-0.595712	311.839	FALSE	32
2022-09-13	10:33:49	-0.614084	311.839	FALSE	32
2022-09-13	10:33:50	-0.512302	311.839	FALSE	32
2022-09-13	10:33:50	-0.446348	311.839	FALSE	32
2022-09-13	10:33:50	-0.440598	311.839	FALSE	32
2022-09-13	10:33:50	-0.0511829	311.839	FALSE	32
2022-09-13	10:33:51	0.271005	312.11	FALSE	32
2022-09-13	10:33:51	0.553652	312.663	FALSE	32
2022-09-13	10:33:51	0.456043	313.119	FALSE	32
2022-09-13	10:33:51	0.632532	313.752	FALSE	32
2022-09-13	10:33:52	0.942863	314.695	FALSE	32
2022-09-13	10:33:52	0.327341	315.022	FALSE	32
2022-09-13	10:33:52	0.700216	315.722	FALSE	32
2022-09-13	10:33:52	0.387799	316.11	FALSE	32
2022-09-13	10:33:53	0.664746	316.775	FALSE	32
2022-09-13	10:33:53	0.634669	317.41	FALSE	32
2022-09-13	10:33:53	1.01747	318.427	FALSE	32
2022-09-13	10:33:54	4.13762	322.565	1	33
2022-09-13	10:33:54	9.88561	332.45	1	34
2022-09-13	10:33:54	23.9049	356.355	1	35
2022-09-13	10:33:54	6.2994	362.655	1	36
2022-09-13	10:33:55	7.22551	369.88	1	37
2022-09-13	10:33:55	5.68652	375.567	1	38
2022-09-13	10:33:55	5.88932	381.456	1	39
2022-09-13	10:33:55	1.96948	383.425	FALSE	39
2022-09-13	10:33:56	3.37823	386.804	1	40
2022-09-13	10:33:56	4.28698	391.091	1	41
2022-09-13	10:33:56	0.787697	391.878	FALSE	41
2022-09-13	10:33:56	1.08073	392.959	FALSE	41
2022-09-13	10:33:57	0.348868	393.308	FALSE	41
2022-09-13	10:33:57	-0.0368827	393.308	FALSE	41
2022-09-13	10:33:57	-0.373422	393.308	FALSE	41
2022-09-13	10:33:58	-0.517849	393.308	FALSE	41
2022-09-13	10:33:58	-0.347722	393.308	FALSE	41
2022-09-13	10:33:58	-0.631284	393.308	FALSE	41
2022-09-13	10:33:58	-0.625941	393.308	FALSE	41
2022-09-13	10:33:59	-0.426704	393.308	FALSE	41
2022-09-13	10:33:59	-0.36131	393.308	FALSE	41
2022-09-13	10:33:59	-0.125076	393.308	FALSE	41
2022-09-13	10:33:59	-0.05673	393.308	FALSE	41
2022-09-13	10:34:00	0.108054	393.416	FALSE	41
2022-09-13	10:34:00	-0.0132186	393.416	FALSE	41
2022-09-13	10:34:00	-0.166399	393.416	FALSE	41
2022-09-13	10:34:00	0.0004201	393.416	FALSE	41
2022-09-13	10:34:01	0.0828119	393.499	FALSE	41
2022-09-13	10:34:01	0.104898	393.604	FALSE	41
2022-09-13	10:34:01	0.137977	393.742	FALSE	41
2022-09-13	10:34:01	0.176298	393.918	FALSE	41
2022-09-13	10:34:02	0.163982	394.082	FALSE	41
2022-09-13	10:34:02	0.241387	394.324	FALSE	41
2022-09-13	10:34:02	0.416196	394.74	FALSE	41
2022-09-13	10:34:03	0.23411	394.974	FALSE	41
2022-09-13	10:34:03	0.147138	395.121	FALSE	41
2022-09-13	10:34:03	0.192786	395.314	FALSE	41
2022-09-13	10:34:03	0.241947	395.556	FALSE	41
2022-09-13	10:34:04	0.263779	395.82	FALSE	41
2022-09-13	10:34:04	0.264237	396.084	FALSE	41
2022-09-13	10:34:04	0.173652	396.258	FALSE	41
2022-09-13	10:34:04	0.614058	396.872	FALSE	41
2022-09-13	10:34:05	3.10011	399.972	1	42
2022-09-13	10:34:05	6.61655	406.588	1	43
2022-09-13	10:34:05	9.68123	416.27	1	44
2022-09-13	10:34:05	7.74632	424.016	1	45
2022-09-13	10:34:06	4.19365	428.209	1	46
2022-09-13	10:34:06	0.946679	429.156	FALSE	46
2022-09-13	10:34:06	2.9938	432.15	FALSE	46
2022-09-13	10:34:07	3.11747	435.267	1	47
2022-09-13	10:34:07	3.81935	439.087	1	48
2022-09-13	10:34:07	3.09467	442.181	1	49
2022-09-13	10:34:07	1.24597	443.427	FALSE	49
2022-09-13	10:34:08	1.98653	445.414	FALSE	49
2022-09-13	10:34:08	1.30327	446.717	FALSE	49
2022-09-13	10:34:08	1.04088	447.758	FALSE	49
2022-09-13	10:34:08	1.74622	449.504	FALSE	49
2022-09-13	10:34:09	1.04622	450.551	FALSE	49
2022-09-13	10:34:09	2.20729	452.758	FALSE	49
2022-09-13	10:34:09	1.95986	454.718	FALSE	49
2022-09-13	10:34:09	4.92688	459.645	1	50
2022-09-13	10:34:10	2.41986	462.064	FALSE	50
2022-09-13	10:34:10	3.63284	465.697	1	51
2022-09-13	10:34:10	2.17991	467.877	FALSE	51
2022-09-13	10:34:11	1.23655	469.114	FALSE	51
2022-09-13	10:34:11	1.18765	470.301	FALSE	51
2022-09-13	10:34:11	0.61299	470.914	FALSE	51
2022-09-13	10:34:11	2.21681	473.131	FALSE	51
2022-09-13	10:34:12	2.04627	475.177	FALSE	51
2022-09-13	10:34:12	5.3082	480.486	1	52
2022-09-13	10:34:12	6.70993	487.196	1	53
2022-09-13	10:34:12	6.19426	493.39	1	54
2022-09-13	10:34:13	6.83039	500.22	1	55
2022-09-13	10:34:13	4.70708	504.927	1	56
2022-09-13	10:34:13	5.04479	509.972	1	57
2022-09-13	10:34:13	4.91421	514.886	1	58
2022-09-13	10:34:14	0.8393	515.726	FALSE	58
2022-09-13	10:34:14	1.61681	517.342	FALSE	58
2022-09-13	10:34:14	0.724084	518.067	FALSE	58
2022-09-13	10:34:14	1.72337	519.79	FALSE	58
2022-09-13	10:34:15	3.92495	523.715	1	59
2022-09-13	10:34:15	2.73563	526.45	FALSE	59
2022-09-13	10:34:15	6.50454	532.955	1	60
2022-09-13	10:34:16	3.31151	536.267	1	61
2022-09-13	10:34:16	3.57798	539.844	1	62
2022-09-13	10:34:16	0.824033	540.669	FALSE	62
2022-09-13	10:34:16	1.27798	541.947	FALSE	62
2022-09-13	10:34:17	2.98515	544.932	FALSE	62
2022-09-13	10:34:17	1.22261	546.154	FALSE	62
2022-09-13	10:34:17	3.55843	549.713	1	63
2022-09-13	10:34:17	1.79385	551.507	FALSE	63
2022-09-13	10:34:18	2.21416	553.721	FALSE	63
2022-09-13	10:34:18	2.03976	555.76	FALSE	63
2022-09-13	10:34:18	1.01981	556.78	FALSE	63
2022-09-13	10:34:18	2.64271	559.423	FALSE	63
2022-09-13	10:34:19	1.56281	560.986	FALSE	63
2022-09-13	10:34:19	1.808	562.794	FALSE	63
2022-09-13	10:34:19	1.54464	564.338	FALSE	63
2022-09-13	10:34:20	0.495432	564.834	FALSE	63
2022-09-13	10:34:20	0.425153	565.259	FALSE	63
2022-09-13	10:34:20	0.224949	565.484	FALSE	63
2022-09-13	10:34:20	0.302506	565.786	FALSE	63
2022-09-13	10:34:21	0.273041	566.06	FALSE	63
2022-09-13	10:34:21	1.77467	567.834	FALSE	63
2022-09-13	10:34:21	2.82673	570.661	FALSE	63
2022-09-13	10:34:21	3.38154	574.042	1	64
2022-09-13	10:34:22	3.81787	577.86	1	65
2022-09-13	10:34:22	2.87823	580.739	FALSE	65
2022-09-13	10:34:22	4.42617	585.165	1	66
2022-09-13	10:34:22	1.14184	586.307	FALSE	66
2022-09-13	10:34:23	1.02037	587.327	FALSE	66
2022-09-13	10:34:23	0.690191	588.017	FALSE	66
2022-09-13	10:34:23	0.418486	588.436	FALSE	66
2022-09-13	10:34:24	0.558537	588.994	FALSE	66
2022-09-13	10:34:24	0.345305	589.339	FALSE	66
2022-09-13	10:34:24	-1.57327	589.339	FALSE	66
2022-09-13	10:34:24	0.361489	589.701	FALSE	66
2022-09-13	10:34:25	0.560267	590.261	FALSE	66
2022-09-13	10:34:25	0.630496	590.892	FALSE	66
2022-09-13	10:34:25	0.713295	591.605	FALSE	66
2022-09-13	10:34:25	0.727697	592.333	FALSE	66
2022-09-13	10:34:26	0.730394	593.063	FALSE	66
2022-09-13	10:34:26	0.359148	593.422	FALSE	66
2022-09-13	10:34:26	0.428563	593.851	FALSE	66
2022-09-13	10:34:26	0.356145	594.207	FALSE	66
2022-09-13	10:34:27	0.293397	594.5	FALSE	66
2022-09-13	10:34:27	0.2793	594.78	FALSE	66
2022-09-13	10:34:27	0.583015	595.363	FALSE	66
2022-09-13	10:34:28	0.740776	596.103	FALSE	66
2022-09-13	10:34:28	0.678588	596.782	FALSE	66
2022-09-13	10:34:28	0.650598	597.433	FALSE	66
2022-09-13	10:34:28	0.395687	597.828	FALSE	66
2022-09-13	10:34:29	0.731616	598.56	FALSE	66
2022-09-13	10:34:29	0.73584	599.296	FALSE	66
2022-09-13	10:34:29	0.738435	600.034	FALSE	66
2022-09-13	10:34:29	0.736756	600.771	FALSE	66
2022-09-13	10:34:30	0.735331	601.506	FALSE	66
2022-09-13	10:34:30	0.73355	602.24	FALSE	66
2022-09-13	10:34:30	0.733193	602.973	FALSE	66
2022-09-13	10:34:30	0.738791	603.712	FALSE	66
2022-09-13	10:34:31	0.729682	604.441	FALSE	66
2022-09-13	10:34:31	0.744084	605.186	FALSE	66
2022-09-13	10:34:31	0.733346	605.919	FALSE	66
2022-09-13	10:34:31	0.731565	606.65	FALSE	66
2022-09-13	10:34:32	0.527086	607.178	FALSE	66
2022-09-13	10:34:32	0.676196	607.854	FALSE	66
2022-09-13	10:34:32	0.736705	608.59	FALSE	66
2022-09-13	10:34:33	0.738231	609.329	FALSE	66
2022-09-13	10:34:33	0.735382	610.064	FALSE	66
2022-09-13	10:34:33	0.731005	610.795	FALSE	66
2022-09-13	10:34:33	0.65416	611.449	FALSE	66
2022-09-13	10:34:34	0.740623	612.19	FALSE	66
2022-09-13	10:34:34	0.734924	612.925	FALSE	66
2022-09-13	10:34:34	0.737672	613.662	FALSE	66
2022-09-13	10:34:34	0.271209	613.934	FALSE	66
2022-09-13	10:34:35	0.305814	614.24	FALSE	66
2022-09-13	10:34:35	0.40958	614.649	FALSE	66
2022-09-13	10:34:35	0.362863	615.012	FALSE	66
2022-09-13	10:34:35	0.390445	615.402	FALSE	66
2022-09-13	10:34:36	0.288766	615.691	FALSE	66
2022-09-13	10:34:36	0.430344	616.121	FALSE	66
2022-09-13	10:34:36	0.309071	616.431	FALSE	66
2022-09-13	10:34:37	0.312176	616.743	FALSE	66
2022-09-13	10:34:37	0.00148881	616.744	FALSE	66
2022-09-13	10:34:37	0.153143	616.897	FALSE	66
2022-09-13	10:34:37	0.779657	617.677	FALSE	66
2022-09-13	10:34:38	2.11528	619.792	FALSE	66
2022-09-13	10:34:38	1.22088	621.013	FALSE	66
2022-09-13	10:34:38	2.24352	623.257	FALSE	66
2022-09-13	10:34:39	6.05578	629.312	1	67
2022-09-13	10:34:39	5.08052	634.393	1	68
2022-09-13	10:34:39	7.36255	641.756	1	69
2022-09-13	10:34:39	1.64541	643.401	FALSE	69
2022-09-13	10:34:39	0.916145	644.317	FALSE	69
2022-09-13	10:34:40	0.391514	644.709	FALSE	69
2022-09-13	10:34:40	0.330089	645.039	FALSE	69
2022-09-13	10:34:40	0.459657	645.498	FALSE	69
2022-09-13	10:34:41	0.378791	645.877	FALSE	69
2022-09-13	10:34:41	0.257366	646.135	FALSE	69
2022-09-13	10:34:41	0.379249	646.514	FALSE	69
2022-09-13	10:34:41	-0.342735	646.514	FALSE	69
2022-09-13	10:34:42	0.103677	646.617	FALSE	69
2022-09-13	10:34:42	0.122965	646.74	FALSE	69
2022-09-13	10:34:42	0.219911	646.96	FALSE	69
2022-09-13	10:34:42	0.0158908	646.976	FALSE	69
2022-09-13	10:34:43	0.266069	647.242	FALSE	69
2022-09-13	10:34:43	0.205967	647.448	FALSE	69
2022-09-13	10:34:43	0.565407	648.014	FALSE	69
2022-09-13	10:34:43	0.759758	648.773	FALSE	69
2022-09-13	10:34:44	0.489478	649.263	FALSE	69
2022-09-13	10:34:44	0.459809	649.723	FALSE	69
2022-09-13	10:34:44	0.451158	650.174	FALSE	69
2022-09-13	10:34:45	0.442761	650.617	FALSE	69
2022-09-13	10:34:45	0.581132	651.198	FALSE	69
2022-09-13	10:34:45	0.595229	651.793	FALSE	69
2022-09-13	10:34:45	0.33757	652.131	FALSE	69
2022-09-13	10:34:46	0.42215	652.553	FALSE	69
2022-09-13	10:34:46	0.577265	653.13	FALSE	69
2022-09-13	10:34:46	0.47299	653.603	FALSE	69
2022-09-13	10:34:46	0.532532	654.136	FALSE	69
2022-09-13	10:34:47	0.596196	654.732	FALSE	69
2022-09-13	10:34:47	0.500318	655.232	FALSE	69
2022-09-13	10:34:47	0.400216	655.632	FALSE	69
2022-09-13	10:34:47	0.387341	656.02	FALSE	69
2022-09-13	10:34:48	0.475738	656.495	FALSE	69
2022-09-13	10:34:48	0.561081	657.056	FALSE	69
2022-09-13	10:34:48	0.655891	657.712	FALSE	69
2022-09-13	10:34:48	0.6907	658.403	FALSE	69
2022-09-13	10:34:49	0.687494	659.09	FALSE	69
2022-09-13	10:34:49	0.475127	659.566	FALSE	69
2022-09-13	10:34:49	0.601234	660.167	FALSE	69
2022-09-13	10:34:50	0.668308	660.835	FALSE	69
2022-09-13	10:34:50	0.790649	661.626	FALSE	69
2022-09-13	10:34:50	0.658944	662.285	FALSE	69
2022-09-13	10:34:50	0.950598	663.235	FALSE	69
2022-09-13	10:34:51	0.765661	664.001	FALSE	69
2022-09-13	10:34:51	0.556348	664.557	FALSE	69
2022-09-13	10:34:51	0.714415	665.272	FALSE	69
2022-09-13	10:34:51	0.70327	665.975	FALSE	69
2022-09-13	10:34:52	0.789937	666.765	FALSE	69
2022-09-13	10:34:52	0.950293	667.715	FALSE	69
2022-09-13	10:34:52	0.592685	668.308	FALSE	69
2022-09-13	10:34:52	0.424796	668.733	FALSE	69
2022-09-13	10:34:53	0.388461	669.121	FALSE	69
2022-09-13	10:34:53	0.632888	669.754	FALSE	69
2022-09-13	10:34:53	0.15126	669.905	FALSE	69
2022-09-13	10:34:54	0.154568	670.06	FALSE	69
2022-09-13	10:34:54	0.0439316	670.104	FALSE	69
2022-09-13	10:34:54	0.507035	670.611	FALSE	69
2022-09-13	10:34:54	0.604797	671.216	FALSE	69
2022-09-13	10:34:55	2.0993	673.315	FALSE	69
2022-09-13	10:34:55	1.38296	674.698	FALSE	69
2022-09-13	10:34:55	1.55034	676.248	FALSE	69
2022-09-13	10:34:55	1.0081	677.256	FALSE	69
2022-09-13	10:34:56	1.16449	678.421	FALSE	69
2022-09-13	10:34:56	1.77207	680.193	FALSE	69
2022-09-13	10:34:56	3.85207	684.045	1	70
2022-09-13	10:34:56	3.43497	687.48	1	71
2022-09-13	10:34:57	1.30205	688.782	FALSE	71
2022-09-13	10:34:57	1.97274	690.755	FALSE	71
2022-09-13	10:34:57	2.09798	692.853	FALSE	71
2022-09-13	10:34:57	2.7966	695.649	FALSE	71
2022-09-13	10:34:58	1.51431	697.164	FALSE	71
2022-09-13	10:34:58	1.00302	698.167	FALSE	71
2022-09-13	10:34:58	0.530344	698.697	FALSE	71
2022-09-13	10:34:59	0.623779	699.321	FALSE	71
2022-09-13	10:34:59	0.444338	699.765	FALSE	71
2022-09-13	10:34:59	0.712074	700.477	FALSE	71
2022-09-13	10:34:59	0.663168	701.14	FALSE	71
2022-09-13	10:35:00	0.602405	701.743	FALSE	71
2022-09-13	10:35:00	0.495942	702.239	FALSE	71
2022-09-13	10:35:00	0.605051	702.844	FALSE	71
2022-09-13	10:35:00	0.497977	703.342	FALSE	71
2022-09-13	10:35:01	0.8393	704.181	FALSE	71
2022-09-13	10:35:01	2.30571	706.487	FALSE	71
2022-09-13	10:35:01	2.61548	709.102	FALSE	71
2022-09-13	10:35:01	1.56327	710.666	FALSE	71
2022-09-13	10:35:02	1.43192	712.097	FALSE	71
2022-09-13	10:35:02	0.829987	712.927	FALSE	71
2022-09-13	10:35:02	0.767646	713.695	FALSE	71
2022-09-13	10:35:03	0.604695	714.3	FALSE	71
2022-09-13	10:35:03	0.745102	715.045	FALSE	71
2022-09-13	10:35:03	1.30368	716.349	FALSE	71
2022-09-13	10:35:03	3.12016	719.469	1	72
2022-09-13	10:35:04	3.18637	722.655	1	73
2022-09-13	10:35:04	1.90836	724.563	FALSE	73
2022-09-13	10:35:04	1.76637	726.33	FALSE	73
2022-09-13	10:35:04	0.424389	726.754	FALSE	73
2022-09-13	10:35:05	0.191463	726.946	FALSE	73
2022-09-13	10:35:05	0.135484	727.081	FALSE	73
2022-09-13	10:35:05	0.103575	727.185	FALSE	73
2022-09-13	10:35:05	0.0624557	727.247	FALSE	73
2022-09-13	10:35:06	0.310954	727.558	FALSE	73
2022-09-13	10:35:06	0.393906	727.952	FALSE	73
2022-09-13	10:35:06	1.50332	729.455	FALSE	73
2022-09-13	10:35:07	1.13701	730.592	FALSE	73
2022-09-13	10:35:07	1.0219	731.614	FALSE	73
2022-09-13	10:35:07	0.911412	732.526	FALSE	73
2022-09-13	10:35:07	1.36673	733.892	FALSE	73
2022-09-13	10:35:08	3.65146	737.544	1	74
2022-09-13	10:35:08	2.01731	739.561	FALSE	74
2022-09-13	10:35:08	2.44927	742.01	FALSE	74
2022-09-13	10:35:08	3.40932	745.42	1	75
2022-09-13	10:35:09	2.44648	747.866	FALSE	75
2022-09-13	10:35:09	1.63961	749.506	FALSE	75
2022-09-13	10:35:09	1.83553	751.341	FALSE	75
2022-09-13	10:35:09	1.05431	752.396	FALSE	75
2022-09-13	10:35:10	0.863066	753.259	FALSE	75
2022-09-13	10:35:10	0.539504	753.798	FALSE	75
2022-09-13	10:35:10	0.642201	754.44	FALSE	75
2022-09-13	10:35:10	0.742761	755.183	FALSE	75
2022-09-13	10:35:11	0.89701	756.08	FALSE	75
2022-09-13	10:35:11	0.765509	756.846	FALSE	75
2022-09-13	10:35:11	0.963473	757.809	FALSE	75
2022-09-13	10:35:12	0.446527	758.256	FALSE	75
2022-09-13	10:35:12	0.615484	758.871	FALSE	75
2022-09-13	10:35:12	0.381387	759.253	FALSE	75
2022-09-13	10:35:12	0.730038	759.983	FALSE	75
2022-09-13	10:35:13	0.76673	760.749	FALSE	75
2022-09-13	10:35:13	1.18011	761.93	FALSE	75
2022-09-13	10:35:13	2.60876	764.538	FALSE	75
2022-09-13	10:35:13	2.99268	767.531	FALSE	75
2022-09-13	10:35:14	4.21767	771.749	1	76
2022-09-13	10:35:14	5.17899	776.928	1	77
2022-09-13	10:35:14	5.17599	782.104	1	78
2022-09-13	10:35:14	2.48841	784.592	FALSE	78
2022-09-13	10:35:15	2.17513	786.767	FALSE	78
2022-09-13	10:35:15	1.44413	788.211	FALSE	78
2022-09-13	10:35:15	0.709173	788.92	FALSE	78
2022-09-13	10:35:16	0.58841	789.509	FALSE	78
2022-09-13	10:35:16	0.825255	790.334	FALSE	78
2022-09-13	10:35:16	0.667697	791.002	FALSE	78
2022-09-13	10:35:16	0.472379	791.474	FALSE	78
2022-09-13	10:35:17	0.42388	791.898	FALSE	78
2022-09-13	10:35:17	1.19788	793.096	FALSE	78
2022-09-13	10:35:17	0.782964	793.879	FALSE	78
2022-09-13	10:35:17	0.428563	794.307	FALSE	78
2022-09-13	10:35:18	0.361947	794.669	FALSE	78
2022-09-13	10:35:18	0.3764	795.046	FALSE	78
2022-09-13	10:35:18	0.380674	795.426	FALSE	78
2022-09-13	10:35:18	0.564593	795.991	FALSE	78
2022-09-13	10:35:19	0.59187	796.583	FALSE	78
2022-09-13	10:35:19	0.767493	797.35	FALSE	78
2022-09-13	10:35:19	0.372074	797.723	FALSE	78
2022-09-13	10:35:20	0.343015	798.066	FALSE	78
2022-09-13	10:35:20	0.258384	798.324	FALSE	78
2022-09-13	10:35:20	0.606476	798.93	FALSE	78
2022-09-13	10:35:20	0.305	799.235	FALSE	78
2022-09-13	10:35:21	0.177163	799.413	FALSE	78
2022-09-13	10:35:21	0.312328	799.725	FALSE	78
2022-09-13	10:35:21	0.246323	799.971	FALSE	78
2022-09-13	10:35:21	0.355026	800.326	FALSE	78
2022-09-13	10:35:22	0.268562	800.595	FALSE	78
2022-09-13	10:35:22	0.289835	800.885	FALSE	78
2022-09-13	10:35:22	0.242507	801.127	FALSE	78
2022-09-13	10:35:22	0.0377738	801.165	FALSE	78
2022-09-13	10:35:23	0.159504	801.324	FALSE	78
2022-09-13	10:35:23	0.0730918	801.398	FALSE	78
2022-09-13	10:35:23	0.0921249	801.49	FALSE	78
2022-09-13	10:35:24	0.0725829	801.562	FALSE	78
2022-09-13	10:35:24	-0.11729	801.562	FALSE	78
2022-09-13	10:35:24	-0.116425	801.562	FALSE	78
2022-09-13	10:35:24	-0.246501	801.562	FALSE	78
2022-09-13	10:35:25	-0.351793	801.562	FALSE	78
2022-09-13	10:35:25	-0.380903	801.562	FALSE	78
2022-09-13	10:35:25	-0.356323	801.562	FALSE	78
2022-09-13	10:35:25	-0.373116	801.562	FALSE	78
2022-09-13	10:35:26	-0.0465519	801.562	FALSE	78
2022-09-13	10:35:26	0.026018	801.588	FALSE	78
2022-09-13	10:35:26	0.0624048	801.651	FALSE	78
2022-09-13	10:35:26	0.258842	801.909	FALSE	78
2022-09-13	10:35:27	0.145967	802.055	FALSE	78
2022-09-13	10:35:27	0.252125	802.308	FALSE	78
2022-09-13	10:35:27	0.237824	802.545	FALSE	78
2022-09-13	10:35:27	0.203117	802.749	FALSE	78
2022-09-13	10:35:28	0.288715	803.037	FALSE	78
2022-09-13	10:35:28	0.289428	803.327	FALSE	78
2022-09-13	10:35:28	0.166222	803.493	FALSE	78
2022-09-13	10:35:29	-0.0383585	803.493	FALSE	78
2022-09-13	10:35:29	-0.212252	803.493	FALSE	78
2022-09-13	10:35:29	-0.257188	803.493	FALSE	78
2022-09-13	10:35:29	-0.121565	803.493	FALSE	78
2022-09-13	10:35:30	-0.234643	803.493	FALSE	78
2022-09-13	10:35:30	-0.282888	803.493	FALSE	78
2022-09-13	10:35:30	-0.233727	803.493	FALSE	78
2022-09-13	10:35:30	-0.0951015	803.493	FALSE	78
2022-09-13	10:35:31	-0.0980532	803.493	FALSE	78
2022-09-13	10:35:31	0.200624	803.693	FALSE	78
2022-09-13	10:35:31	0.243677	803.937	FALSE	78
2022-09-13	10:35:31	0.283168	804.22	FALSE	78
2022-09-13	10:35:32	0.238079	804.458	FALSE	78
2022-09-13	10:35:32	0.399657	804.858	FALSE	78
2022-09-13	10:35:32	0.412328	805.27	FALSE	78
2022-09-13	10:35:33	-0.148995	805.27	FALSE	78
2022-09-13	10:35:33	-0.336933	805.27	FALSE	78
2022-09-13	10:35:33	-0.405687	805.27	FALSE	78
2022-09-13	10:35:33	-0.415305	805.27	FALSE	78
2022-09-13	10:35:34	-0.482888	805.27	FALSE	78
2022-09-13	10:35:34	-0.618409	805.27	FALSE	78
2022-09-13	10:35:34	-0.525178	805.27	FALSE	78
2022-09-13	10:35:34	-0.490623	805.27	FALSE	78
2022-09-13	10:35:35	-0.379783	805.27	FALSE	78
2022-09-13	10:35:35	-0.416272	805.27	FALSE	78
2022-09-13	10:35:35	-0.399783	805.27	FALSE	78
2022-09-13	10:35:35	-0.47047	805.27	FALSE	78
2022-09-13	10:35:36	-0.328994	805.27	FALSE	78
2022-09-13	10:35:36	-0.00461808	805.27	FALSE	78
2022-09-13	10:35:36	0.26612	805.537	FALSE	78
2022-09-13	10:35:37	0.400318	805.937	FALSE	78
2022-09-13	10:35:37	0.307952	806.245	FALSE	78
2022-09-13	10:35:37	0.520369	806.765	FALSE	78
2022-09-13	10:35:37	0.392125	807.157	FALSE	78
2022-09-13	10:35:38	0.164644	807.322	FALSE	78
2022-09-13	10:35:38	0.055331	807.377	FALSE	78
2022-09-13	10:35:38	0.114059	807.491	FALSE	78
2022-09-13	10:35:38	0.120471	807.612	FALSE	78
2022-09-13	10:35:39	0.151005	807.763	FALSE	78
2022-09-13	10:35:39	0.154924	807.918	FALSE	78
2022-09-13	10:35:39	0.326323	808.244	FALSE	78
2022-09-13	10:35:39	0.120929	808.365	FALSE	78
2022-09-13	10:35:40	0.260064	808.625	FALSE	78
2022-09-13	10:35:40	0.373499	808.999	FALSE	78
2022-09-13	10:35:40	0.430802	809.429	FALSE	78
2022-09-13	10:35:40	0.532176	809.962	FALSE	78
2022-09-13	10:35:41	0.736857	810.698	FALSE	78
2022-09-13	10:35:41	0.488308	811.187	FALSE	78
2022-09-13	10:35:41	0.751667	811.938	FALSE	78
2022-09-13	10:35:42	0.736807	812.675	FALSE	78
2022-09-13	10:35:42	0.735992	813.411	FALSE	78
2022-09-13	10:35:42	0.731259	814.142	FALSE	78
2022-09-13	10:35:42	0.73645	814.879	FALSE	78
2022-09-13	10:35:43	0.739758	815.619	FALSE	78
2022-09-13	10:35:43	0.737977	816.357	FALSE	78
2022-09-13	10:35:43	0.738639	817.095	FALSE	78
2022-09-13	10:35:43	0.73813	817.833	FALSE	78
2022-09-13	10:35:44	0.738944	818.572	FALSE	78
2022-09-13	10:35:44	0.733244	819.306	FALSE	78
2022-09-13	10:35:44	0.734415	820.04	FALSE	78
2022-09-13	10:35:44	0.738995	820.779	FALSE	78
2022-09-13	10:35:45	0.732888	821.512	FALSE	78
2022-09-13	10:35:45	0.732481	822.244	FALSE	78
2022-09-13	10:35:45	0.735789	822.98	FALSE	78
2022-09-13	10:35:46	0.736857	823.717	FALSE	78
2022-09-13	10:35:46	0.738995	824.456	FALSE	78
2022-09-13	10:35:46	0.737163	825.193	FALSE	78
2022-09-13	10:35:46	0.744644	825.938	FALSE	78
2022-09-13	10:35:47	0.733244	826.671	FALSE	78
2022-09-13	10:35:47	0.740013	827.411	FALSE	78
2022-09-13	10:35:47	0.738181	828.149	FALSE	78
2022-09-13	10:35:47	0.734517	828.884	FALSE	78
2022-09-13	10:35:48	0.736501	829.62	FALSE	78
2022-09-13	10:35:48	0.737722	830.358	FALSE	78
2022-09-13	10:35:48	0.737315	831.095	FALSE	78
2022-09-13	10:35:48	0.737163	831.832	FALSE	78
2022-09-13	10:35:49	0.734975	832.567	FALSE	78
2022-09-13	10:35:49	0.730394	833.298	FALSE	78
2022-09-13	10:35:49	0.734008	834.032	FALSE	78
2022-09-13	10:35:50	0.735076	834.767	FALSE	78
2022-09-13	10:35:50	0.742252	835.509	FALSE	78
2022-09-13	10:35:50	0.735483	836.245	FALSE	78
2022-09-13	10:35:50	0.742506	836.987	FALSE	78
2022-09-13	10:35:51	0.738944	837.726	FALSE	78
2022-09-13	10:35:51	0.737519	838.464	FALSE	78
2022-09-13	10:35:51	0.745661	839.209	FALSE	78
2022-09-13	10:35:51	0.738842	839.948	FALSE	78
2022-09-13	10:35:52	0.733041	840.681	FALSE	78
2022-09-13	10:35:52	0.732328	841.413	FALSE	78
2022-09-13	10:35:52	0.736399	842.15	FALSE	78
2022-09-13	10:35:52	0.73813	842.888	FALSE	78
2022-09-13	10:35:53	0.73472	843.623	FALSE	78
2022-09-13	10:35:53	0.741896	844.365	FALSE	78
2022-09-13	10:35:53	0.741081	845.106	FALSE	78
2022-09-13	10:35:53	1.45492	846.561	FALSE	78
2022-09-13	10:35:54	-0.0638038	846.561	FALSE	78
2022-09-13	10:35:54	0.0873412	846.648	FALSE	78
2022-09-13	10:35:54	0.0958399	846.744	FALSE	78
2022-09-13	10:35:55	0.125356	846.869	FALSE	78
2022-09-13	10:35:55	0.262863	847.132	FALSE	78
2022-09-13	10:35:55	0.158944	847.291	FALSE	78
2022-09-13	10:35:55	0.469326	847.76	FALSE	78
2022-09-13	10:35:56	7.24301	855.003	1	79
2022-09-13	10:35:56	11.0287	866.032	1	80
2022-09-13	10:35:56	17.0459	883.078	1	81
2022-09-13	10:35:56	12.1267	895.205	1	82
2022-09-13	10:35:57	12.9527	908.157	1	83
2022-09-13	10:35:57	8.21192	916.369	1	84
2022-09-13	10:35:57	2.58357	918.953	FALSE	84
2022-09-13	10:35:57	0.975127	919.928	FALSE	84
2022-09-13	10:35:58	1.78062	921.709	FALSE	84
2022-09-13	10:35:58	1.3051	923.014	FALSE	84
2022-09-13	10:35:58	1.14337	924.157	FALSE	84
2022-09-13	10:35:59	2.26108	926.418	FALSE	84
2022-09-13	10:35:59	3.42006	929.838	1	85
2022-09-13	10:35:59	3.00698	932.845	1	86
2022-09-13	10:35:59	2.77207	935.617	FALSE	86
2022-09-13	10:36:00	2.97131	938.588	FALSE	86
2022-09-13	10:36:00	4.33742	942.926	1	87
2022-09-13	10:36:00	3.80887	946.735	1	88
2022-09-13	10:36:00	2.7849	949.52	FALSE	88
2022-09-13	10:36:01	2.33772	951.857	FALSE	88
2022-09-13	10:36:01	2.18851	954.046	FALSE	88
2022-09-13	10:36:01	1.6619	955.708	FALSE	88
2022-09-13	10:36:01	1.66439	957.372	FALSE	88
2022-09-13	10:36:02	1.52429	958.896	FALSE	88
2022-09-13	10:36:02	1.55894	960.455	FALSE	88
2022-09-13	10:36:02	0.703015	961.158	FALSE	88
2022-09-13	10:36:03	0.516959	961.675	FALSE	88
2022-09-13	10:36:03	0.4507	962.126	FALSE	88
2022-09-13	10:36:03	0.136094	962.262	FALSE	88
2022-09-13	10:36:03	0.133906	962.396	FALSE	88
2022-09-13	10:36:04	0.223117	962.619	FALSE	88
2022-09-13	10:36:04	0.254415	962.874	FALSE	88
2022-09-13	10:36:04	0.199148	963.073	FALSE	88
2022-09-13	10:36:04	0.0405728	963.113	FALSE	88
2022-09-13	10:36:05	-0.0138293	963.113	FALSE	88
2022-09-13	10:36:05	-0.326399	963.113	FALSE	88
2022-09-13	10:36:05	-0.513524	963.113	FALSE	88
2022-09-13	10:36:05	-0.398307	963.113	FALSE	88
2022-09-13	10:36:06	0.471361	963.585	FALSE	88
2022-09-13	10:36:06	0.765051	964.35	FALSE	88
2022-09-13	10:36:06	0.52556	964.875	FALSE	88
2022-09-13	10:36:06	0.174924	965.05	FALSE	88
2022-09-13	10:36:07	1.02393	966.074	FALSE	88
2022-09-13	10:36:07	1.77319	967.847	FALSE	88
2022-09-13	10:36:07	0.65126	968.499	FALSE	88
2022-09-13	10:36:08	0.974822	969.473	FALSE	88
2022-09-13	10:36:08	0.757723	970.231	FALSE	88
2022-09-13	10:36:08	1.18821	971.419	FALSE	88
2022-09-13	10:36:08	1.02719	972.447	FALSE	88
2022-09-13	10:36:09	1.47945	973.926	FALSE	88
2022-09-13	10:36:09	1.61421	975.54	FALSE	88
2022-09-13	10:36:09	3.36815	978.908	1	89
2022-09-13	10:36:09	3.12637	982.035	1	90
2022-09-13	10:36:10	2.63579	984.671	FALSE	90
2022-09-13	10:36:10	3.57762	988.248	1	91
2022-09-13	10:36:10	3.368	991.616	1	92
2022-09-13	10:36:10	1.68113	993.297	FALSE	92
2022-09-13	10:36:11	0.908664	994.206	FALSE	92
2022-09-13	10:36:11	0.411005	994.617	FALSE	92
2022-09-13	10:36:11	0.462099	995.079	FALSE	92
2022-09-13	10:36:12	0.424848	995.504	FALSE	92
2022-09-13	10:36:12	0.270547	995.774	FALSE	92
2022-09-13	10:36:12	0.210089	995.985	FALSE	92
2022-09-13	10:36:12	0.147341	996.132	FALSE	92
2022-09-13	10:36:13	0.249122	996.381	FALSE	92
2022-09-13	10:36:13	0.134008	996.515	FALSE	92
2022-09-13	10:36:13	0.443117	996.958	FALSE	92
2022-09-13	10:36:13	1.42866	998.387	FALSE	92
2022-09-13	10:36:14	0.882812	999.27	FALSE	92
2022-09-13	10:36:14	0.969784	1000.24	FALSE	92
2022-09-13	10:36:14	1.15864	1001.4	FALSE	92
2022-09-13	10:36:14	3.29772	1004.7	1	93
2022-09-13	10:36:15	3.55838	1008.25	1	94
2022-09-13	10:36:15	4.83365	1013.09	1	95
2022-09-13	10:36:15	1.7879	1014.88	FALSE	95
2022-09-13	10:36:16	0.370394	1015.25	FALSE	95
2022-09-13	10:36:16	0.20785	1015.45	FALSE	95
2022-09-13	10:36:16	-0.0337784	1015.45	FALSE	95
2022-09-13	10:36:16	-0.40762	1015.45	FALSE	95
2022-09-13	10:36:17	-0.449503	1015.45	FALSE	95
2022-09-13	10:36:17	-0.74304	1015.45	FALSE	95
2022-09-13	10:36:17	-0.55215	1015.45	FALSE	95
2022-09-13	10:36:17	-0.497188	1015.45	FALSE	95
2022-09-13	10:36:18	-0.271285	1015.45	FALSE	95
2022-09-13	10:36:18	-0.108689	1015.45	FALSE	95
2022-09-13	10:36:18	-0.12304	1015.45	FALSE	95
2022-09-13	10:36:18	-0.101972	1015.45	FALSE	95
2022-09-13	10:36:19	0.247137	1015.7	FALSE	95
2022-09-13	10:36:19	0.262863	1015.96	FALSE	95
2022-09-13	10:36:19	0.261641	1016.23	FALSE	95
2022-09-13	10:36:19	0.146629	1016.37	FALSE	95
2022-09-13	10:36:20	0.271056	1016.64	FALSE	95
2022-09-13	10:36:20	0.328257	1016.97	FALSE	95
2022-09-13	10:36:20	0.326781	1017.3	FALSE	95
2022-09-13	10:36:21	0.420318	1017.72	FALSE	95
2022-09-13	10:36:21	0.333346	1018.05	FALSE	95
2022-09-13	10:36:21	0.385407	1018.44	FALSE	95
2022-09-13	10:36:21	0.415789	1018.85	FALSE	95
2022-09-13	10:36:22	0.425	1019.28	FALSE	95
2022-09-13	10:36:22	0.505458	1019.78	FALSE	95
2022-09-13	10:36:22	0.408003	1020.19	FALSE	95
2022-09-13	10:36:22	0.411667	1020.6	FALSE	95
2022-09-13	10:36:23	0.417825	1021.02	FALSE	95
2022-09-13	10:36:23	0.359351	1021.38	FALSE	95
2022-09-13	10:36:23	0.38897	1021.77	FALSE	95
2022-09-13	10:36:23	0.346527	1022.12	FALSE	95
2022-09-13	10:36:24	0.239046	1022.36	FALSE	95
2022-09-13	10:36:24	0.331921	1022.69	FALSE	95
2022-09-13	10:36:24	0.187799	1022.87	FALSE	95
2022-09-13	10:36:25	0.255585	1023.13	FALSE	95
2022-09-13	10:36:25	0.136349	1023.27	FALSE	95
2022-09-13	10:36:25	0.118893	1023.39	FALSE	95
2022-09-13	10:36:25	0.130903	1023.52	FALSE	95
2022-09-13	10:36:26	0.000572752	1023.52	FALSE	95
2022-09-13	10:36:26	0.0537025	1023.57	FALSE	95
2022-09-13	10:36:26	-0.0659921	1023.57	FALSE	95
2022-09-13	10:36:26	0.0369595	1023.61	FALSE	95
2022-09-13	10:36:27	-0.108537	1023.61	FALSE	95
2022-09-13	10:36:27	-0.214135	1023.61	FALSE	95
2022-09-13	10:36:27	-0.251081	1023.61	FALSE	95
2022-09-13	10:36:27	-0.0886384	1023.61	FALSE	95
2022-09-13	10:36:28	-0.0137784	1023.61	FALSE	95
2022-09-13	10:36:28	1.10179	1024.71	FALSE	95
2022-09-13	10:36:28	3.78917	1028.5	1	96
2022-09-13	10:36:29	4.7452	1033.24	1	97
2022-09-13	10:36:29	2.95635	1036.2	FALSE	97
2022-09-13	10:36:29	3.31167	1039.51	1	98
2022-09-13	10:36:29	1.40388	1040.92	FALSE	98
2022-09-13	10:36:30	1.73869	1042.65	FALSE	98
2022-09-13	10:36:30	2.26301	1044.92	FALSE	98
2022-09-13	10:36:30	2.85141	1047.77	FALSE	98
2022-09-13	10:36:31	1.60724	1049.38	FALSE	98
2022-09-13	10:36:31	1.14474	1050.52	FALSE	98
2022-09-13	10:36:31	1.70495	1052.23	FALSE	98
2022-09-13	10:36:31	0.966883	1053.19	FALSE	98
2022-09-13	10:36:31	2.06978	1055.26	FALSE	98
2022-09-13	10:36:32	1.81243	1057.07	FALSE	98
2022-09-13	10:36:32	2.98688	1060.06	FALSE	98
2022-09-13	10:36:32	6.31466	1066.38	1	99
2022-09-13	10:36:33	0.854313	1067.23	FALSE	99
2022-09-13	10:36:33	3.07146	1070.3	1	100
2022-09-13	10:36:33	0.861336	1071.16	FALSE	100
2022-09-13	10:36:33	2.3592	1073.52	FALSE	100
2022-09-13	10:36:34	2.16576	1075.69	FALSE	100
2022-09-13	10:36:34	0.820318	1076.51	FALSE	100
2022-09-13	10:36:34	2.69253	1079.2	FALSE	100
2022-09-13	10:36:34	1.6819	1080.88	FALSE	100
2022-09-13	10:36:35	2.1305	1083.01	FALSE	100
2022-09-13	10:36:35	0.785153	1083.8	FALSE	100
2022-09-13	10:36:35	0.731514	1084.53	FALSE	100
2022-09-13	10:36:35	0.733041	1085.26	FALSE	100
2022-09-13	10:36:36	0.736959	1086	FALSE	100
2022-09-13	10:36:36	0.690089	1086.69	FALSE	100
2022-09-13	10:36:36	0.256807	1086.95	FALSE	100
2022-09-13	10:36:36	0.21472	1087.16	FALSE	100
2022-09-13	10:36:37	0.219708	1087.38	FALSE	100
2022-09-13	10:36:37	0.47528	1087.86	FALSE	100
2022-09-13	10:36:37	1.01457	1088.87	FALSE	100
2022-09-13	10:36:38	1.16765	1090.04	FALSE	100
2022-09-13	10:36:38	2.5795	1092.62	FALSE	100
2022-09-13	10:36:38	2.30154	1094.92	FALSE	100
2022-09-13	10:36:38	1.39177	1096.31	FALSE	100
2022-09-13	10:36:39	0.952226	1097.26	FALSE	100
2022-09-13	10:36:39	0.195738	1097.46	FALSE	100
2022-09-13	10:36:39	0.631208	1098.09	FALSE	100
2022-09-13	10:36:39	0.6793	1098.77	FALSE	100
2022-09-13	10:36:40	0.722303	1099.49	FALSE	100
2022-09-13	10:36:40	0.794669	1100.29	FALSE	100
2022-09-13	10:36:40	0.822404	1101.11	FALSE	100
2022-09-13	10:36:40	0.205407	1101.32	FALSE	100
2022-09-13	10:36:41	0.187188	1101.5	FALSE	100
2022-09-13	10:36:41	0.733142	1102.24	FALSE	100
2022-09-13	10:36:41	0.736298	1102.97	FALSE	100
2022-09-13	10:36:42	-0.498816	1102.97	FALSE	100
2022-09-13	10:36:42	0.740013	1103.71	FALSE	100
2022-09-13	10:36:42	0.721234	1104.43	FALSE	100
2022-09-13	10:36:42	0.729529	1105.16	FALSE	100
2022-09-13	10:36:43	0.243881	1105.41	FALSE	100
2022-09-13	10:36:43	0.0175702	1105.42	FALSE	100
2022-09-13	10:36:43	0.0214379	1105.45	FALSE	100
2022-09-13	10:36:43	0.691972	1106.14	FALSE	100
2022-09-13	10:36:44	0.405509	1106.54	FALSE	100
2022-09-13	10:36:44	0.409377	1106.95	FALSE	100
2022-09-13	10:36:44	0.489682	1107.44	FALSE	100
2022-09-13	10:36:44	0.50841	1107.95	FALSE	100
2022-09-13	10:36:45	0.434517	1108.39	FALSE	100
2022-09-13	10:36:45	0.425254	1108.81	FALSE	100
2022-09-13	10:36:45	0.350293	1109.16	FALSE	100
2022-09-13	10:36:46	0.492532	1109.65	FALSE	100
2022-09-13	10:36:46	0.599097	1110.25	FALSE	100
2022-09-13	10:36:46	0.26439	1110.52	FALSE	100
2022-09-13	10:36:46	0.248613	1110.77	FALSE	100
2022-09-13	10:36:47	0.284949	1111.05	FALSE	100
2022-09-13	10:36:47	0.31126	1111.36	FALSE	100
2022-09-13	10:36:47	0.272176	1111.63	FALSE	100
2022-09-13	10:36:47	0.26902	1111.9	FALSE	100
2022-09-13	10:36:48	0.259148	1112.16	FALSE	100
2022-09-13	10:36:48	0.241336	1112.4	FALSE	100
2022-09-13	10:36:48	0.24215	1112.65	FALSE	100
2022-09-13	10:36:48	0.250954	1112.9	FALSE	100
2022-09-13	10:36:49	0.25701	1113.15	FALSE	100
2022-09-13	10:36:49	0.238792	1113.39	FALSE	100
2022-09-13	10:36:49	0.224288	1113.62	FALSE	100
2022-09-13	10:36:49	0.355382	1113.97	FALSE	100
2022-09-13	10:36:50	0.13126	1114.1	FALSE	100
2022-09-13	10:36:50	-0.399071	1114.1	FALSE	100
2022-09-13	10:36:50	-0.510419	1114.1	FALSE	100
2022-09-13	10:36:51	-0.260547	1114.1	FALSE	100
2022-09-13	10:36:51	-0.0132186	1114.1	FALSE	100
2022-09-13	10:36:51	0.057672	1114.16	FALSE	100
2022-09-13	10:36:51	0.680725	1114.84	FALSE	100
2022-09-13	10:36:52	0.915941	1115.76	FALSE	100
2022-09-13	10:36:52	2.03462	1117.79	FALSE	100
2022-09-13	10:36:52	2.38184	1120.17	FALSE	100
2022-09-13	10:36:52	3.85823	1124.03	1	101
2022-09-13	10:36:53	2.92067	1126.95	FALSE	101
2022-09-13	10:36:53	1.91966	1128.87	FALSE	101
2022-09-13	10:36:53	3.20759	1132.08	1	102
2022-09-13	10:36:53	1.40195	1133.48	FALSE	102
2022-09-13	10:36:54	2.11686	1135.6	FALSE	102
2022-09-13	10:36:54	1.48821	1137.09	FALSE	102
2022-09-13	10:36:54	1.66816	1138.76	FALSE	102
2022-09-13	10:36:55	2.88184	1141.64	FALSE	102
2022-09-13	10:36:55	2.47645	1144.11	FALSE	102
2022-09-13	10:36:55	3.48647	1147.6	1	103
2022-09-13	10:36:55	2.67136	1150.27	FALSE	103
2022-09-13	10:36:56	1.93645	1152.21	FALSE	103
2022-09-13	10:36:56	2.05976	1154.27	FALSE	103
2022-09-13	10:36:56	1.31808	1155.59	FALSE	103
2022-09-13	10:36:56	1.49528	1157.08	FALSE	103
2022-09-13	10:36:57	2.06103	1159.14	FALSE	103
2022-09-13	10:36:57	2.24556	1161.39	FALSE	103
2022-09-13	10:36:57	4.90144	1166.29	1	104
2022-09-13	10:36:57	3.43345	1169.72	1	105
2022-09-13	10:36:58	6.77792	1176.5	1	106
2022-09-13	10:36:58	1.1736	1177.67	FALSE	106
2022-09-13	10:36:58	2.86001	1180.53	FALSE	106
2022-09-13	10:36:59	1.20123	1181.74	FALSE	106
2022-09-13	10:36:59	1.34541	1183.08	FALSE	106
2022-09-13	10:36:59	1.31329	1184.39	FALSE	106
2022-09-13	10:36:59	1.10989	1185.5	FALSE	106
2022-09-13	10:37:00	1.12983	1186.63	FALSE	106
2022-09-13	10:37:00	2.67604	1189.31	FALSE	106
2022-09-13	10:37:00	3.85019	1193.16	1	107
2022-09-13	10:37:00	3.39248	1196.55	1	108
2022-09-13	10:37:01	3.34714	1199.9	1	109
2022-09-13	10:37:01	2.78617	1202.69	FALSE	109
2022-09-13	10:37:01	2.28301	1204.97	FALSE	109
2022-09-13	10:37:01	0.523677	1205.49	FALSE	109
2022-09-13	10:37:02	0.516043	1206.01	FALSE	109
2022-09-13	10:37:02	0.236959	1206.25	FALSE	109
2022-09-13	10:37:02	0.171412	1206.42	FALSE	109
2022-09-13	10:37:03	0.268715	1206.69	FALSE	109
2022-09-13	10:37:03	0.191412	1206.88	FALSE	109
2022-09-13	10:37:03	0.279402	1207.16	FALSE	109
2022-09-13	10:37:03	0.244339	1207.4	FALSE	109
2022-09-13	10:37:04	0.284084	1207.68	FALSE	109
2022-09-13	10:37:04	0.325051	1208.01	FALSE	109
2022-09-13	10:37:04	0.380318	1208.39	FALSE	109
2022-09-13	10:37:04	-1.6209	1208.39	FALSE	109
2022-09-13	10:37:05	0.338842	1208.73	FALSE	109
2022-09-13	10:37:05	0.475178	1209.2	FALSE	109
2022-09-13	10:37:05	1.42648	1210.63	FALSE	109
2022-09-13	10:37:05	2.48245	1213.11	FALSE	109
2022-09-13	10:37:06	0.937875	1214.05	FALSE	109
2022-09-13	10:37:06	0.844491	1214.9	FALSE	109
2022-09-13	10:37:06	1.75085	1216.65	FALSE	109
2022-09-13	10:37:06	0.632277	1217.28	FALSE	109
2022-09-13	10:37:07	1.45477	1218.73	FALSE	109
2022-09-13	10:37:07	1.21594	1219.95	FALSE	109
2022-09-13	10:37:07	1.10108	1221.05	FALSE	109
2022-09-13	10:37:08	1.38973	1222.44	FALSE	109
2022-09-13	10:37:08	1.60128	1224.04	FALSE	109
2022-09-13	10:37:08	2.73431	1226.78	FALSE	109
2022-09-13	10:37:08	3.84994	1230.63	1	110
2022-09-13	10:37:09	3.66057	1234.29	1	111
2022-09-13	10:37:09	5.21192	1239.5	1	112
2022-09-13	10:37:09	3.01843	1242.52	1	113
2022-09-13	10:37:09	3.84815	1246.36	1	114
2022-09-13	10:37:10	4.54713	1250.91	1	115
2022-09-13	10:37:10	3.05284	1253.96	1	116
2022-09-13	10:37:10	3.24912	1257.21	1	117
2022-09-13	10:37:10	3.90647	1261.12	1	118
2022-09-13	10:37:11	2.22851	1263.35	FALSE	118
2022-09-13	10:37:11	5.30815	1268.66	1	119
2022-09-13	10:37:11	5.36225	1274.02	1	120
2022-09-13	10:37:12	3.7421	1277.76	1	121
2022-09-13	10:37:12	6.11258	1283.87	1	122
2022-09-13	10:37:12	1.31385	1285.19	FALSE	122
2022-09-13	10:37:12	3.87197	1289.06	1	123
2022-09-13	10:37:13	1.83116	1290.89	FALSE	123
2022-09-13	10:37:13	0.771463	1291.66	FALSE	123
2022-09-13	10:37:13	1.85793	1293.52	FALSE	123
2022-09-13	10:37:13	0.455585	1293.98	FALSE	123
2022-09-13	10:37:14	1.17039	1295.15	FALSE	123
2022-09-13	10:37:14	0.790344	1295.94	FALSE	123
2022-09-13	10:37:14	0.619911	1296.56	FALSE	123
2022-09-13	10:37:14	1.94037	1298.5	FALSE	123
2022-09-13	10:37:15	0.710191	1299.21	FALSE	123
2022-09-13	10:37:15	1.86312	1301.07	FALSE	123
2022-09-13	10:37:15	0.531819	1301.6	FALSE	123
2022-09-13	10:37:16	0.408206	1302.01	FALSE	123
2022-09-13	10:37:16	0.387595	1302.4	FALSE	123
2022-09-13	10:37:16	0.162048	1302.56	FALSE	123
2022-09-13	10:37:16	0.362557	1302.92	FALSE	123
2022-09-13	10:37:17	0.760165	1303.68	FALSE	123
2022-09-13	10:37:17	0.708053	1304.39	FALSE	123
2022-09-13	10:37:17	1.3278	1305.72	FALSE	123
2022-09-13	10:37:17	1.70688	1307.42	FALSE	123
2022-09-13	10:37:18	1.75553	1309.18	FALSE	123
2022-09-13	10:37:18	2.78505	1311.97	FALSE	123
2022-09-13	10:37:18	1.12678	1313.09	FALSE	123
2022-09-13	10:37:18	1.56897	1314.66	FALSE	123
2022-09-13	10:37:19	0.735433	1315.4	FALSE	123
2022-09-13	10:37:19	0.733295	1316.13	FALSE	123
2022-09-13	10:37:19	0.731514	1316.86	FALSE	123
2022-09-13	10:37:19	0.740318	1317.6	FALSE	123
2022-09-13	10:37:20	0.737061	1318.34	FALSE	123
2022-09-13	10:37:20	0.745255	1319.08	FALSE	123
2022-09-13	10:37:20	0.737163	1319.82	FALSE	123
2022-09-13	10:37:21	0.737214	1320.56	FALSE	123
2022-09-13	10:37:21	0.732735	1321.29	FALSE	123
2022-09-13	10:37:21	0.738181	1322.03	FALSE	123
2022-09-13	10:37:21	0.734008	1322.76	FALSE	123
2022-09-13	10:37:22	0.735738	1323.5	FALSE	123
2022-09-13	10:37:22	0.743423	1324.24	FALSE	123
2022-09-13	10:37:22	0.729835	1324.97	FALSE	123
2022-09-13	10:37:22	0.73355	1325.71	FALSE	123
2022-09-13	10:37:23	0.731158	1326.44	FALSE	123
2022-09-13	10:37:23	0.730954	1327.17	FALSE	123
2022-09-13	10:37:23	0.734008	1327.9	FALSE	123
2022-09-13	10:37:23	0.733753	1328.64	FALSE	123
2022-09-13	10:37:24	0.732481	1329.37	FALSE	123
2022-09-13	10:37:24	0.733957	1330.1	FALSE	123
2022-09-13	10:37:24	0.735534	1330.84	FALSE	123
2022-09-13	10:37:25	0.735331	1331.57	FALSE	123
2022-09-13	10:37:25	0.72902	1332.3	FALSE	123
2022-09-13	10:37:25	0.748664	1333.05	FALSE	123
2022-09-13	10:37:25	0.678435	1333.73	FALSE	123
2022-09-13	10:37:26	0.590598	1334.32	FALSE	123
2022-09-13	10:37:26	0.454059	1334.77	FALSE	123
2022-09-13	10:37:26	0.354059	1335.13	FALSE	123
2022-09-13	10:37:26	0.719453	1335.85	FALSE	123
2022-09-13	10:37:27	0.0387407	1335.89	FALSE	123
2022-09-13	10:37:27	0.181845	1336.07	FALSE	123
2022-09-13	10:37:27	0.251718	1336.32	FALSE	123
2022-09-13	10:37:27	-0.002786	1336.32	FALSE	123
2022-09-13	10:37:28	0.0493768	1336.37	FALSE	123
2022-09-13	10:37:28	-0.182328	1336.37	FALSE	123
2022-09-13	10:37:28	-0.0629895	1336.37	FALSE	123
2022-09-13	10:37:29	-0.233626	1336.37	FALSE	123
2022-09-13	10:37:29	-0.270165	1336.37	FALSE	123
2022-09-13	10:37:29	-0.488638	1336.37	FALSE	123
2022-09-13	10:37:29	-0.586195	1336.37	FALSE	123
2022-09-13	10:37:30	-0.745279	1336.37	FALSE	123
2022-09-13	10:37:30	-0.826959	1336.37	FALSE	123
2022-09-13	10:37:30	-0.971692	1336.37	FALSE	123
2022-09-13	10:37:30	-0.851895	1336.37	FALSE	123
2022-09-13	10:37:31	-0.920037	1336.37	FALSE	123
2022-09-13	10:37:31	-0.736882	1336.37	FALSE	123
2022-09-13	10:37:31	-0.693523	1336.37	FALSE	123
2022-09-13	10:37:31	-0.53332	1336.37	FALSE	123
2022-09-13	10:37:32	-0.371997	1336.37	FALSE	123
2022-09-13	10:37:32	-0.212099	1336.37	FALSE	123
2022-09-13	10:37:32	-0.12416	1336.37	FALSE	123
2022-09-13	10:37:33	-0.271234	1336.37	FALSE	123
2022-09-13	10:37:33	-0.376933	1336.37	FALSE	123
2022-09-13	10:37:33	-0.45617	1336.37	FALSE	123
2022-09-13	10:37:33	-0.439122	1336.37	FALSE	123
2022-09-13	10:37:34	-0.458816	1336.37	FALSE	123
2022-09-13	10:37:34	-0.562175	1336.37	FALSE	123
2022-09-13	10:37:34	-0.475814	1336.37	FALSE	123
2022-09-13	10:37:34	-0.582887	1336.37	FALSE	123
2022-09-13	10:37:35	-0.454134	1336.37	FALSE	123
2022-09-13	10:37:35	-0.000953954	1336.37	FALSE	123
2022-09-13	10:37:35	5.62439	1341.99	1	124
2022-09-13	10:37:35	4.48118	1346.47	1	125
2022-09-13	10:37:36	4.31635	1350.79	1	126
2022-09-13	10:37:36	0.776959	1351.57	FALSE	126
2022-09-13	10:37:36	2.21238	1353.78	FALSE	126
2022-09-13	10:37:36	1.03508	1354.82	FALSE	126
2022-09-13	10:37:37	1.8076	1356.62	FALSE	126
2022-09-13	10:37:37	1.05523	1357.68	FALSE	126
2022-09-13	10:37:37	0.399707	1358.08	FALSE	126
2022-09-13	10:37:38	0.645254	1358.72	FALSE	126
2022-09-13	10:37:38	0.627799	1359.35	FALSE	126
2022-09-13	10:37:38	0.675941	1360.03	FALSE	126
2022-09-13	10:37:38	1.04683	1361.07	FALSE	126
2022-09-13	10:37:39	1.22612	1362.3	FALSE	126
2022-09-13	10:37:39	0.811209	1363.11	FALSE	126
2022-09-13	10:37:39	0.346221	1363.46	FALSE	126
2022-09-13	10:37:39	0.280115	1363.74	FALSE	126
2022-09-13	10:37:40	0.144033	1363.88	FALSE	126
2022-09-13	10:37:40	0.257774	1364.14	FALSE	126
2022-09-13	10:37:40	0.153601	1364.29	FALSE	126
2022-09-13	10:37:40	-0.0712338	1364.29	FALSE	126
2022-09-13	10:37:41	-0.191895	1364.29	FALSE	126
2022-09-13	10:37:41	-0.358206	1364.29	FALSE	126
2022-09-13	10:37:41	-0.388129	1364.29	FALSE	126
2022-09-13	10:37:42	-0.532201	1364.29	FALSE	126
2022-09-13	10:37:42	-0.179733	1364.29	FALSE	126
2022-09-13	10:37:42	0.15701	1364.45	FALSE	126
2022-09-13	10:37:42	2.49981	1366.95	FALSE	126
2022-09-13	10:37:43	6.51619	1373.47	1	127
2022-09-13	10:37:43	5.60973	1379.08	1	128
2022-09-13	10:37:43	5.39385	1384.47	1	129
2022-09-13	10:37:43	1.40678	1385.88	FALSE	129
2022-09-13	10:37:44	1.44897	1387.33	FALSE	129
2022-09-13	10:37:44	1.42709	1388.75	FALSE	129
2022-09-13	10:37:44	1.56286	1390.32	FALSE	129
2022-09-13	10:37:44	1.95706	1392.27	FALSE	129
2022-09-13	10:37:45	3.28027	1395.55	1	130
2022-09-13	10:37:45	5.59319	1401.15	1	131
2022-09-13	10:37:45	3.01589	1404.16	1	132
2022-09-13	10:37:46	3.95314	1408.11	1	133
2022-09-13	10:37:46	1.79055	1409.91	FALSE	133
2022-09-13	10:37:46	2.33014	1412.24	FALSE	133
2022-09-13	10:37:46	1.00704	1413.24	FALSE	133
2022-09-13	10:37:47	0.562557	1413.81	FALSE	133
2022-09-13	10:37:47	0.504847	1414.31	FALSE	133
2022-09-13	10:37:47	0.252888	1414.56	FALSE	133
2022-09-13	10:37:47	0.702405	1415.27	FALSE	133
2022-09-13	10:37:48	0.392634	1415.66	FALSE	133
2022-09-13	10:37:48	0.498181	1416.16	FALSE	133
2022-09-13	10:37:48	0.845	1417	FALSE	133
2022-09-13	10:37:48	1.40678	1418.41	FALSE	133
2022-09-13	10:37:49	4.09187	1422.5	1	134
2022-09-13	10:37:49	3.27787	1425.78	1	135
2022-09-13	10:37:49	5.92291	1431.7	1	136
2022-09-13	10:37:49	2.79172	1434.49	FALSE	136
2022-09-13	10:37:50	2.56561	1437.06	FALSE	136
2022-09-13	10:37:50	1.45955	1438.52	FALSE	136
2022-09-13	10:37:50	1.04291	1439.56	FALSE	136
2022-09-13	10:37:51	2.52994	1442.09	FALSE	136
2022-09-13	10:37:51	1.19487	1443.29	FALSE	136
2022-09-13	10:37:51	1.95477	1445.24	FALSE	136
2022-09-13	10:37:51	2.8765	1448.12	FALSE	136
2022-09-13	10:37:52	3.88546	1452	1	137
2022-09-13	10:37:52	5.04622	1457.05	1	138
2022-09-13	10:37:52	3.65319	1460.7	1	139
2022-09-13	10:37:52	4.11971	1464.82	1	140
2022-09-13	10:37:53	2.63889	1467.46	FALSE	140
2022-09-13	10:37:53	6.63436	1474.09	1	141
2022-09-13	10:37:53	8.18479	1482.28	1	142
2022-09-13	10:37:53	7.54947	1489.83	1	143
2022-09-13	10:37:54	7.27014	1497.1	1	144
2022-09-13	10:37:54	4.33462	1501.43	1	145
2022-09-13	10:37:54	5.58825	1507.02	1	146

## Sheet: Saint_star_2022913103243
						**GoPro Fitting: 1022
2022-09-13	10:32:43	0.366832
2022-09-13	10:32:43	0.377163
2022-09-13	10:32:44	0.374771
2022-09-13	10:32:44	0.354313
2022-09-13	10:32:44	0.353702
2022-09-13	10:32:45	0.386272
2022-09-13	10:32:45	0.380573
2022-09-13	10:32:45	0.391056
2022-09-13	10:32:45	0.416399
2022-09-13	10:32:46	0.427646
2022-09-13	10:32:46	0.425611
2022-09-13	10:32:46	0.401387
2022-09-13	10:32:46	0.539198
2022-09-13	10:32:47	0.500267
2022-09-13	10:32:47	0.681234
2022-09-13	10:32:47	0.802761
2022-09-13	10:32:47	1.33355
2022-09-13	10:32:48	0.919096
2022-09-13	10:32:48	1.05625
2022-09-13	10:32:48	0.906934
2022-09-13	10:32:49	0.515636
2022-09-13	10:32:49	0.44159
2022-09-13	10:32:49	0.533855
2022-09-13	10:32:49	0.55472
2022-09-13	10:32:50	0.417926
2022-09-13	10:32:50	0.422761
2022-09-13	10:32:50	0.459809
2022-09-13	10:32:50	0.565305
2022-09-13	10:32:51	0.939504
2022-09-13	10:32:51	0.723626
2022-09-13	10:32:51	1.69533
2022-09-13	10:32:51	0.968969
2022-09-13	10:32:52	0.375026
2022-09-13	10:32:52	0.918791
2022-09-13	10:32:52	1.18739
2022-09-13	10:32:52	0.435433
2022-09-13	10:32:53	0.307952
2022-09-13	10:32:53	0.573193
2022-09-13	10:32:53	0.683524
2022-09-13	10:32:54	0.366629
2022-09-13	10:32:54	0.386578
2022-09-13	10:32:54	0.389631
2022-09-13	10:32:54	0.441641
2022-09-13	10:32:55	0.354618
2022-09-13	10:32:55	0.499911
2022-09-13	10:32:55	0.649275
2022-09-13	10:32:55	0.994211
2022-09-13	10:32:56	0.699555
2022-09-13	10:32:56	0.68556
2022-09-13	10:32:56	0.641896
2022-09-13	10:32:56	0.470446
2022-09-13	10:32:57	0.398842
2022-09-13	10:32:57	0.374619
2022-09-13	10:32:57	0.300165
2022-09-13	10:32:58	0.323931
2022-09-13	10:32:58	0.494873
2022-09-13	10:32:58	0.519148
2022-09-13	10:32:58	0.612684
2022-09-13	10:32:59	0.372583
2022-09-13	10:32:59	0.164084
2022-09-13	10:32:59	0.297163
2022-09-13	10:32:59	0.376145
2022-09-13	10:33:00	0.451158
2022-09-13	10:33:00	0.223982
2022-09-13	10:33:00	0.479962
2022-09-13	10:33:00	0.397265
2022-09-13	10:33:01	0.407697
2022-09-13	10:33:01	0.39869
2022-09-13	10:33:01	0.349529
2022-09-13	10:33:02	0.399911
2022-09-13	10:33:02	0.399402
2022-09-13	10:33:02	0.502913
2022-09-13	10:33:02	0.272023
2022-09-13	10:33:03	0.451107
2022-09-13	10:33:03	0.438486
2022-09-13	10:33:03	0.325407
2022-09-13	10:33:03	0.177468
2022-09-13	10:33:04	0.102405
2022-09-13	10:33:04	-0.104771
2022-09-13	10:33:04	0.132939
2022-09-13	10:33:04	0.350445
2022-09-13	10:33:05	0.354568
2022-09-13	10:33:05	2.69609
2022-09-13	10:33:05	3.16505
2022-09-13	10:33:05	3.14123
2022-09-13	10:33:06	2.87701
2022-09-13	10:33:06	1.73014
2022-09-13	10:33:06	2.00841
2022-09-13	10:33:07	0.680623
2022-09-13	10:33:07	0.435433
2022-09-13	10:33:07	1.28251
2022-09-13	10:33:07	1.19508
2022-09-13	10:33:08	0.561081
2022-09-13	10:33:08	0.993397
2022-09-13	10:33:08	4.09966
2022-09-13	10:33:08	4.76653
2022-09-13	10:33:09	4.81253
2022-09-13	10:33:09	2.7849
2022-09-13	10:33:09	4.2224
2022-09-13	10:33:09	1.26592
2022-09-13	10:33:10	0.67472
2022-09-13	10:33:10	0.577112
2022-09-13	10:33:10	0.464186
2022-09-13	10:33:11	0.265916
2022-09-13	10:33:11	0.387595
2022-09-13	10:33:11	0.990242
2022-09-13	10:33:11	1.82826
2022-09-13	10:33:12	7.3023
2022-09-13	10:33:12	4.71238
2022-09-13	10:33:12	1.37833
2022-09-13	10:33:12	0.61645
2022-09-13	10:33:13	0.430547
2022-09-13	10:33:13	-0.00146287
2022-09-13	10:33:13	-0.127213
2022-09-13	10:33:13	-0.0638547
2022-09-13	10:33:14	-0.073931
2022-09-13	10:33:14	-0.142379
2022-09-13	10:33:14	-0.120394
2022-09-13	10:33:15	-0.226501
2022-09-13	10:33:15	-0.248791
2022-09-13	10:33:15	-0.425687
2022-09-13	10:33:15	-0.386043
2022-09-13	10:33:16	-0.330572
2022-09-13	10:33:16	0.134771
2022-09-13	10:33:16	1.33177
2022-09-13	10:33:16	2.92332
2022-09-13	10:33:17	2.82108
2022-09-13	10:33:17	1.72525
2022-09-13	10:33:17	2.23075
2022-09-13	10:33:17	2.80576
2022-09-13	10:33:18	4.39563
2022-09-13	10:33:18	2.61599
2022-09-13	10:33:18	2.15335
2022-09-13	10:33:19	3.27787
2022-09-13	10:33:19	3.19691
2022-09-13	10:33:19	9.4625
2022-09-13	10:33:19	7.28744
2022-09-13	10:33:20	7.7797
2022-09-13	10:33:20	2.88622
2022-09-13	10:33:20	0.789479
2022-09-13	10:33:20	2.33996
2022-09-13	10:33:21	1.55777
2022-09-13	10:33:21	2.04571
2022-09-13	10:33:21	1.27701
2022-09-13	10:33:21	1.5105
2022-09-13	10:33:22	1.65701
2022-09-13	10:33:22	1.37976
2022-09-13	10:33:22	1.95106
2022-09-13	10:33:22	1.13477
2022-09-13	10:33:23	0.769733
2022-09-13	10:33:23	2.07971
2022-09-13	10:33:23	3.37197
2022-09-13	10:33:24	4.71955
2022-09-13	10:33:24	8.82001
2022-09-13	10:33:24	8.38942
2022-09-13	10:33:24	2.03966
2022-09-13	10:33:25	3.62607
2022-09-13	10:33:25	0.795331
2022-09-13	10:33:25	0.413295
2022-09-13	10:33:25	0.538893
2022-09-13	10:33:26	0.358181
2022-09-13	10:33:26	0.6907
2022-09-13	10:33:26	1.70729
2022-09-13	10:33:26	0.941387
2022-09-13	10:33:27	0.571819
2022-09-13	10:33:27	0.45874
2022-09-13	10:33:27	0.416756
2022-09-13	10:33:28	0.381896
2022-09-13	10:33:28	0.760216
2022-09-13	10:33:28	0.825865
2022-09-13	10:33:28	1.0422
2022-09-13	10:33:29	0.664746
2022-09-13	10:33:29	1.62576
2022-09-13	10:33:29	0.757672
2022-09-13	10:33:29	0.956654
2022-09-13	10:33:30	0.737621
2022-09-13	10:33:30	0.445865
2022-09-13	10:33:30	0.448817
2022-09-13	10:33:30	0.356756
2022-09-13	10:33:31	0.452532
2022-09-13	10:33:31	0.123982
2022-09-13	10:33:31	0.39131
2022-09-13	10:33:32	0.120827
2022-09-13	10:33:32	0.299199
2022-09-13	10:33:32	0.153194
2022-09-13	10:33:32	0.264695
2022-09-13	10:33:33	0.294924
2022-09-13	10:33:33	0.724695
2022-09-13	10:33:33	1.38978
2022-09-13	10:33:33	0.63818
2022-09-13	10:33:34	-0.00797683
2022-09-13	10:33:34	-0.00487254
2022-09-13	10:33:34	0.0266287
2022-09-13	10:33:34	0.116807
2022-09-13	10:33:35	0.0141097
2022-09-13	10:33:35	0.519707
2022-09-13	10:33:35	1.15996
2022-09-13	10:33:35	2.03233
2022-09-13	10:33:36	0.493753
2022-09-13	10:33:36	0.351616
2022-09-13	10:33:36	0.169478
2022-09-13	10:33:37	0.371718
2022-09-13	10:33:37	0.196603
2022-09-13	10:33:37	0.266425
2022-09-13	10:33:37	0.736145
2022-09-13	10:33:38	0.260674
2022-09-13	10:33:38	0.569682
2022-09-13	10:33:38	0.341489
2022-09-13	10:33:38	1.09279
2022-09-13	10:33:39	1.54999
2022-09-13	10:33:39	3.03731
2022-09-13	10:33:39	2.8109
2022-09-13	10:33:39	3.49039
2022-09-13	10:33:40	6.77309
2022-09-13	10:33:40	4.27024
2022-09-13	10:33:40	7.5109
2022-09-13	10:33:41	5.53787
2022-09-13	10:33:41	2.51706
2022-09-13	10:33:41	4.32042
2022-09-13	10:33:41	4.05319
2022-09-13	10:33:42	2.35034
2022-09-13	10:33:42	4.40709
2022-09-13	10:33:42	2.30892
2022-09-13	10:33:42	3.15686
2022-09-13	10:33:43	3.08307
2022-09-13	10:33:43	0.936909
2022-09-13	10:33:43	2.78785
2022-09-13	10:33:43	1.03828
2022-09-13	10:33:44	1.06429
2022-09-13	10:33:44	1.13508
2022-09-13	10:33:44	1.38398
2022-09-13	10:33:45	1.46515
2022-09-13	10:33:45	0.798181
2022-09-13	10:33:45	2.25039
2022-09-13	10:33:45	0.743117
2022-09-13	10:33:46	1.36637
2022-09-13	10:33:46	1.52408
2022-09-13	10:33:46	2.47421
2022-09-13	10:33:46	4.20719
2022-09-13	10:33:47	2.51508
2022-09-13	10:33:47	5.07319
2022-09-13	10:33:47	1.68073
2022-09-13	10:33:47	1.00363
2022-09-13	10:33:48	0.607341
2022-09-13	10:33:48	0.320471
2022-09-13	10:33:48	0.30154
2022-09-13	10:33:48	0.25126
2022-09-13	10:33:49	-0.283448
2022-09-13	10:33:49	-0.595712
2022-09-13	10:33:49	-0.614084
2022-09-13	10:33:50	-0.512302
2022-09-13	10:33:50	-0.446348
2022-09-13	10:33:50	-0.440598
2022-09-13	10:33:50	-0.0511829
2022-09-13	10:33:51	0.271005
2022-09-13	10:33:51	0.553652
2022-09-13	10:33:51	0.456043
2022-09-13	10:33:51	0.632532
2022-09-13	10:33:52	0.942863
2022-09-13	10:33:52	0.327341
2022-09-13	10:33:52	0.700216
2022-09-13	10:33:52	0.387799
2022-09-13	10:33:53	0.664746
2022-09-13	10:33:53	0.634669
2022-09-13	10:33:53	1.01747
2022-09-13	10:33:54	4.13762
2022-09-13	10:33:54	9.88561
2022-09-13	10:33:54	23.9049
2022-09-13	10:33:54	6.2994
2022-09-13	10:33:55	7.22551
2022-09-13	10:33:55	5.68652
2022-09-13	10:33:55	5.88932
2022-09-13	10:33:55	1.96948
2022-09-13	10:33:56	3.37823
2022-09-13	10:33:56	4.28698
2022-09-13	10:33:56	0.787697
2022-09-13	10:33:56	1.08073
2022-09-13	10:33:57	0.348868
2022-09-13	10:33:57	-0.0368827
2022-09-13	10:33:57	-0.373422
2022-09-13	10:33:58	-0.517849
2022-09-13	10:33:58	-0.347722
2022-09-13	10:33:58	-0.631284
2022-09-13	10:33:58	-0.625941
2022-09-13	10:33:59	-0.426704
2022-09-13	10:33:59	-0.36131
2022-09-13	10:33:59	-0.125076
2022-09-13	10:33:59	-0.05673
2022-09-13	10:34:00	0.108054
2022-09-13	10:34:00	-0.0132186
2022-09-13	10:34:00	-0.166399
2022-09-13	10:34:00	0.0004201
2022-09-13	10:34:01	0.0828119
2022-09-13	10:34:01	0.104898
2022-09-13	10:34:01	0.137977
2022-09-13	10:34:01	0.176298
2022-09-13	10:34:02	0.163982
2022-09-13	10:34:02	0.241387
2022-09-13	10:34:02	0.416196
2022-09-13	10:34:03	0.23411
2022-09-13	10:34:03	0.147138
2022-09-13	10:34:03	0.192786
2022-09-13	10:34:03	0.241947
2022-09-13	10:34:04	0.263779
2022-09-13	10:34:04	0.264237
2022-09-13	10:34:04	0.173652
2022-09-13	10:34:04	0.614058
2022-09-13	10:34:05	3.10011
2022-09-13	10:34:05	6.61655
2022-09-13	10:34:05	9.68123
2022-09-13	10:34:05	7.74632
2022-09-13	10:34:06	4.19365
2022-09-13	10:34:06	0.946679
2022-09-13	10:34:06	2.9938
2022-09-13	10:34:07	3.11747
2022-09-13	10:34:07	3.81935
2022-09-13	10:34:07	3.09467
2022-09-13	10:34:07	1.24597
2022-09-13	10:34:08	1.98653
2022-09-13	10:34:08	1.30327
2022-09-13	10:34:08	1.04088
2022-09-13	10:34:08	1.74622
2022-09-13	10:34:09	1.04622
2022-09-13	10:34:09	2.20729
2022-09-13	10:34:09	1.95986
2022-09-13	10:34:09	4.92688
2022-09-13	10:34:10	2.41986
2022-09-13	10:34:10	3.63284
2022-09-13	10:34:10	2.17991
2022-09-13	10:34:11	1.23655
2022-09-13	10:34:11	1.18765
2022-09-13	10:34:11	0.61299
2022-09-13	10:34:11	2.21681
2022-09-13	10:34:12	2.04627
2022-09-13	10:34:12	5.3082
2022-09-13	10:34:12	6.70993
2022-09-13	10:34:12	6.19426
2022-09-13	10:34:13	6.83039
2022-09-13	10:34:13	4.70708
2022-09-13	10:34:13	5.04479
2022-09-13	10:34:13	4.91421
2022-09-13	10:34:14	0.8393
2022-09-13	10:34:14	1.61681
2022-09-13	10:34:14	0.724084
2022-09-13	10:34:14	1.72337
2022-09-13	10:34:15	3.92495
2022-09-13	10:34:15	2.73563
2022-09-13	10:34:15	6.50454
2022-09-13	10:34:16	3.31151
2022-09-13	10:34:16	3.57798
2022-09-13	10:34:16	0.824033
2022-09-13	10:34:16	1.27798
2022-09-13	10:34:17	2.98515
2022-09-13	10:34:17	1.22261
2022-09-13	10:34:17	3.55843
2022-09-13	10:34:17	1.79385
2022-09-13	10:34:18	2.21416
2022-09-13	10:34:18	2.03976
2022-09-13	10:34:18	1.01981
2022-09-13	10:34:18	2.64271
2022-09-13	10:34:19	1.56281
2022-09-13	10:34:19	1.808
2022-09-13	10:34:19	1.54464
2022-09-13	10:34:20	0.495432
2022-09-13	10:34:20	0.425153
2022-09-13	10:34:20	0.224949
2022-09-13	10:34:20	0.302506
2022-09-13	10:34:21	0.273041
2022-09-13	10:34:21	1.77467
2022-09-13	10:34:21	2.82673
2022-09-13	10:34:21	3.38154
2022-09-13	10:34:22	3.81787
2022-09-13	10:34:22	2.87823
2022-09-13	10:34:22	4.42617
2022-09-13	10:34:22	1.14184
2022-09-13	10:34:23	1.02037
2022-09-13	10:34:23	0.690191
2022-09-13	10:34:23	0.418486
2022-09-13	10:34:24	0.558537
2022-09-13	10:34:24	0.345305
2022-09-13	10:34:24	-1.57327
2022-09-13	10:34:24	0.361489
2022-09-13	10:34:25	0.560267
2022-09-13	10:34:25	0.630496
2022-09-13	10:34:25	0.713295
2022-09-13	10:34:25	0.727697
2022-09-13	10:34:26	0.730394
2022-09-13	10:34:26	0.359148
2022-09-13	10:34:26	0.428563
2022-09-13	10:34:26	0.356145
2022-09-13	10:34:27	0.293397
2022-09-13	10:34:27	0.2793
2022-09-13	10:34:27	0.583015
2022-09-13	10:34:28	0.740776
2022-09-13	10:34:28	0.678588
2022-09-13	10:34:28	0.650598
2022-09-13	10:34:28	0.395687
2022-09-13	10:34:29	0.731616
2022-09-13	10:34:29	0.73584
2022-09-13	10:34:29	0.738435
2022-09-13	10:34:29	0.736756
2022-09-13	10:34:30	0.735331
2022-09-13	10:34:30	0.73355
2022-09-13	10:34:30	0.733193
2022-09-13	10:34:30	0.738791
2022-09-13	10:34:31	0.729682
2022-09-13	10:34:31	0.744084
2022-09-13	10:34:31	0.733346
2022-09-13	10:34:31	0.731565
2022-09-13	10:34:32	0.527086
2022-09-13	10:34:32	0.676196
2022-09-13	10:34:32	0.736705
2022-09-13	10:34:33	0.738231
2022-09-13	10:34:33	0.735382
2022-09-13	10:34:33	0.731005
2022-09-13	10:34:33	0.65416
2022-09-13	10:34:34	0.740623
2022-09-13	10:34:34	0.734924
2022-09-13	10:34:34	0.737672
2022-09-13	10:34:34	0.271209
2022-09-13	10:34:35	0.305814
2022-09-13	10:34:35	0.40958
2022-09-13	10:34:35	0.362863
2022-09-13	10:34:35	0.390445
2022-09-13	10:34:36	0.288766
2022-09-13	10:34:36	0.430344
2022-09-13	10:34:36	0.309071
2022-09-13	10:34:37	0.312176
2022-09-13	10:34:37	0.00148881
2022-09-13	10:34:37	0.153143
2022-09-13	10:34:37	0.779657
2022-09-13	10:34:38	2.11528
2022-09-13	10:34:38	1.22088
2022-09-13	10:34:38	2.24352
2022-09-13	10:34:39	6.05578
2022-09-13	10:34:39	5.08052
2022-09-13	10:34:39	7.36255
2022-09-13	10:34:39	1.64541
2022-09-13	10:34:39	0.916145
2022-09-13	10:34:40	0.391514
2022-09-13	10:34:40	0.330089
2022-09-13	10:34:40	0.459657
2022-09-13	10:34:41	0.378791
2022-09-13	10:34:41	0.257366
2022-09-13	10:34:41	0.379249
2022-09-13	10:34:41	-0.342735
2022-09-13	10:34:42	0.103677
2022-09-13	10:34:42	0.122965
2022-09-13	10:34:42	0.219911
2022-09-13	10:34:42	0.0158908
2022-09-13	10:34:43	0.266069
2022-09-13	10:34:43	0.205967
2022-09-13	10:34:43	0.565407
2022-09-13	10:34:43	0.759758
2022-09-13	10:34:44	0.489478
2022-09-13	10:34:44	0.459809
2022-09-13	10:34:44	0.451158
2022-09-13	10:34:45	0.442761
2022-09-13	10:34:45	0.581132
2022-09-13	10:34:45	0.595229
2022-09-13	10:34:45	0.33757
2022-09-13	10:34:46	0.42215
2022-09-13	10:34:46	0.577265
2022-09-13	10:34:46	0.47299
2022-09-13	10:34:46	0.532532
2022-09-13	10:34:47	0.596196
2022-09-13	10:34:47	0.500318
2022-09-13	10:34:47	0.400216
2022-09-13	10:34:47	0.387341
2022-09-13	10:34:48	0.475738
2022-09-13	10:34:48	0.561081
2022-09-13	10:34:48	0.655891
2022-09-13	10:34:48	0.6907
2022-09-13	10:34:49	0.687494
2022-09-13	10:34:49	0.475127
2022-09-13	10:34:49	0.601234
2022-09-13	10:34:50	0.668308
2022-09-13	10:34:50	0.790649
2022-09-13	10:34:50	0.658944
2022-09-13	10:34:50	0.950598
2022-09-13	10:34:51	0.765661
2022-09-13	10:34:51	0.556348
2022-09-13	10:34:51	0.714415
2022-09-13	10:34:51	0.70327
2022-09-13	10:34:52	0.789937
2022-09-13	10:34:52	0.950293
2022-09-13	10:34:52	0.592685
2022-09-13	10:34:52	0.424796
2022-09-13	10:34:53	0.388461
2022-09-13	10:34:53	0.632888
2022-09-13	10:34:53	0.15126
2022-09-13	10:34:54	0.154568
2022-09-13	10:34:54	0.0439316
2022-09-13	10:34:54	0.507035
2022-09-13	10:34:54	0.604797
2022-09-13	10:34:55	2.0993
2022-09-13	10:34:55	1.38296
2022-09-13	10:34:55	1.55034
2022-09-13	10:34:55	1.0081
2022-09-13	10:34:56	1.16449
2022-09-13	10:34:56	1.77207
2022-09-13	10:34:56	3.85207
2022-09-13	10:34:56	3.43497
2022-09-13	10:34:57	1.30205
2022-09-13	10:34:57	1.97274
2022-09-13	10:34:57	2.09798
2022-09-13	10:34:57	2.7966
2022-09-13	10:34:58	1.51431
2022-09-13	10:34:58	1.00302
2022-09-13	10:34:58	0.530344
2022-09-13	10:34:59	0.623779
2022-09-13	10:34:59	0.444338
2022-09-13	10:34:59	0.712074
2022-09-13	10:34:59	0.663168
2022-09-13	10:35:00	0.602405
2022-09-13	10:35:00	0.495942
2022-09-13	10:35:00	0.605051
2022-09-13	10:35:00	0.497977
2022-09-13	10:35:01	0.8393
2022-09-13	10:35:01	2.30571
2022-09-13	10:35:01	2.61548
2022-09-13	10:35:01	1.56327
2022-09-13	10:35:02	1.43192
2022-09-13	10:35:02	0.829987
2022-09-13	10:35:02	0.767646
2022-09-13	10:35:03	0.604695
2022-09-13	10:35:03	0.745102
2022-09-13	10:35:03	1.30368
2022-09-13	10:35:03	3.12016
2022-09-13	10:35:04	3.18637
2022-09-13	10:35:04	1.90836
2022-09-13	10:35:04	1.76637
2022-09-13	10:35:04	0.424389
2022-09-13	10:35:05	0.191463
2022-09-13	10:35:05	0.135484
2022-09-13	10:35:05	0.103575
2022-09-13	10:35:05	0.0624557
2022-09-13	10:35:06	0.310954
2022-09-13	10:35:06	0.393906
2022-09-13	10:35:06	1.50332
2022-09-13	10:35:07	1.13701
2022-09-13	10:35:07	1.0219
2022-09-13	10:35:07	0.911412
2022-09-13	10:35:07	1.36673
2022-09-13	10:35:08	3.65146
2022-09-13	10:35:08	2.01731
2022-09-13	10:35:08	2.44927
2022-09-13	10:35:08	3.40932
2022-09-13	10:35:09	2.44648
2022-09-13	10:35:09	1.63961
2022-09-13	10:35:09	1.83553
2022-09-13	10:35:09	1.05431
2022-09-13	10:35:10	0.863066
2022-09-13	10:35:10	0.539504
2022-09-13	10:35:10	0.642201
2022-09-13	10:35:10	0.742761
2022-09-13	10:35:11	0.89701
2022-09-13	10:35:11	0.765509
2022-09-13	10:35:11	0.963473
2022-09-13	10:35:12	0.446527
2022-09-13	10:35:12	0.615484
2022-09-13	10:35:12	0.381387
2022-09-13	10:35:12	0.730038
2022-09-13	10:35:13	0.76673
2022-09-13	10:35:13	1.18011
2022-09-13	10:35:13	2.60876
2022-09-13	10:35:13	2.99268
2022-09-13	10:35:14	4.21767
2022-09-13	10:35:14	5.17899
2022-09-13	10:35:14	5.17599
2022-09-13	10:35:14	2.48841
2022-09-13	10:35:15	2.17513
2022-09-13	10:35:15	1.44413
2022-09-13	10:35:15	0.709173
2022-09-13	10:35:16	0.58841
2022-09-13	10:35:16	0.825255
2022-09-13	10:35:16	0.667697
2022-09-13	10:35:16	0.472379
2022-09-13	10:35:17	0.42388
2022-09-13	10:35:17	1.19788
2022-09-13	10:35:17	0.782964
2022-09-13	10:35:17	0.428563
2022-09-13	10:35:18	0.361947
2022-09-13	10:35:18	0.3764
2022-09-13	10:35:18	0.380674
2022-09-13	10:35:18	0.564593
2022-09-13	10:35:19	0.59187
2022-09-13	10:35:19	0.767493
2022-09-13	10:35:19	0.372074
2022-09-13	10:35:20	0.343015
2022-09-13	10:35:20	0.258384
2022-09-13	10:35:20	0.606476
2022-09-13	10:35:20	0.305
2022-09-13	10:35:21	0.177163
2022-09-13	10:35:21	0.312328
2022-09-13	10:35:21	0.246323
2022-09-13	10:35:21	0.355026
2022-09-13	10:35:22	0.268562
2022-09-13	10:35:22	0.289835
2022-09-13	10:35:22	0.242507
2022-09-13	10:35:22	0.0377738
2022-09-13	10:35:23	0.159504
2022-09-13	10:35:23	0.0730918
2022-09-13	10:35:23	0.0921249
2022-09-13	10:35:24	0.0725829
2022-09-13	10:35:24	-0.11729
2022-09-13	10:35:24	-0.116425
2022-09-13	10:35:24	-0.246501
2022-09-13	10:35:25	-0.351793
2022-09-13	10:35:25	-0.380903
2022-09-13	10:35:25	-0.356323
2022-09-13	10:35:25	-0.373116
2022-09-13	10:35:26	-0.0465519
2022-09-13	10:35:26	0.026018
2022-09-13	10:35:26	0.0624048
2022-09-13	10:35:26	0.258842
2022-09-13	10:35:27	0.145967
2022-09-13	10:35:27	0.252125
2022-09-13	10:35:27	0.237824
2022-09-13	10:35:27	0.203117
2022-09-13	10:35:28	0.288715
2022-09-13	10:35:28	0.289428
2022-09-13	10:35:28	0.166222
2022-09-13	10:35:29	-0.0383585
2022-09-13	10:35:29	-0.212252
2022-09-13	10:35:29	-0.257188
2022-09-13	10:35:29	-0.121565
2022-09-13	10:35:30	-0.234643
2022-09-13	10:35:30	-0.282888
2022-09-13	10:35:30	-0.233727
2022-09-13	10:35:30	-0.0951015
2022-09-13	10:35:31	-0.0980532
2022-09-13	10:35:31	0.200624
2022-09-13	10:35:31	0.243677
2022-09-13	10:35:31	0.283168
2022-09-13	10:35:32	0.238079
2022-09-13	10:35:32	0.399657
2022-09-13	10:35:32	0.412328
2022-09-13	10:35:33	-0.148995
2022-09-13	10:35:33	-0.336933
2022-09-13	10:35:33	-0.405687
2022-09-13	10:35:33	-0.415305
2022-09-13	10:35:34	-0.482888
2022-09-13	10:35:34	-0.618409
2022-09-13	10:35:34	-0.525178
2022-09-13	10:35:34	-0.490623
2022-09-13	10:35:35	-0.379783
2022-09-13	10:35:35	-0.416272
2022-09-13	10:35:35	-0.399783
2022-09-13	10:35:35	-0.47047
2022-09-13	10:35:36	-0.328994
2022-09-13	10:35:36	-0.00461808
2022-09-13	10:35:36	0.26612
2022-09-13	10:35:37	0.400318
2022-09-13	10:35:37	0.307952
2022-09-13	10:35:37	0.520369
2022-09-13	10:35:37	0.392125
2022-09-13	10:35:38	0.164644
2022-09-13	10:35:38	0.055331
2022-09-13	10:35:38	0.114059
2022-09-13	10:35:38	0.120471
2022-09-13	10:35:39	0.151005
2022-09-13	10:35:39	0.154924
2022-09-13	10:35:39	0.326323
2022-09-13	10:35:39	0.120929
2022-09-13	10:35:40	0.260064
2022-09-13	10:35:40	0.373499
2022-09-13	10:35:40	0.430802
2022-09-13	10:35:40	0.532176
2022-09-13	10:35:41	0.736857
2022-09-13	10:35:41	0.488308
2022-09-13	10:35:41	0.751667
2022-09-13	10:35:42	0.736807
2022-09-13	10:35:42	0.735992
2022-09-13	10:35:42	0.731259
2022-09-13	10:35:42	0.73645
2022-09-13	10:35:43	0.739758
2022-09-13	10:35:43	0.737977
2022-09-13	10:35:43	0.738639
2022-09-13	10:35:43	0.73813
2022-09-13	10:35:44	0.738944
2022-09-13	10:35:44	0.733244
2022-09-13	10:35:44	0.734415
2022-09-13	10:35:44	0.738995
2022-09-13	10:35:45	0.732888
2022-09-13	10:35:45	0.732481
2022-09-13	10:35:45	0.735789
2022-09-13	10:35:46	0.736857
2022-09-13	10:35:46	0.738995
2022-09-13	10:35:46	0.737163
2022-09-13	10:35:46	0.744644
2022-09-13	10:35:47	0.733244
2022-09-13	10:35:47	0.740013
2022-09-13	10:35:47	0.738181
2022-09-13	10:35:47	0.734517
2022-09-13	10:35:48	0.736501
2022-09-13	10:35:48	0.737722
2022-09-13	10:35:48	0.737315
2022-09-13	10:35:48	0.737163
2022-09-13	10:35:49	0.734975
2022-09-13	10:35:49	0.730394
2022-09-13	10:35:49	0.734008
2022-09-13	10:35:50	0.735076
2022-09-13	10:35:50	0.742252
2022-09-13	10:35:50	0.735483
2022-09-13	10:35:50	0.742506
2022-09-13	10:35:51	0.738944
2022-09-13	10:35:51	0.737519
2022-09-13	10:35:51	0.745661
2022-09-13	10:35:51	0.738842
2022-09-13	10:35:52	0.733041
2022-09-13	10:35:52	0.732328
2022-09-13	10:35:52	0.736399
2022-09-13	10:35:52	0.73813
2022-09-13	10:35:53	0.73472
2022-09-13	10:35:53	0.741896
2022-09-13	10:35:53	0.741081
2022-09-13	10:35:53	1.45492
2022-09-13	10:35:54	-0.0638038
2022-09-13	10:35:54	0.0873412
2022-09-13	10:35:54	0.0958399
2022-09-13	10:35:55	0.125356
2022-09-13	10:35:55	0.262863
2022-09-13	10:35:55	0.158944
2022-09-13	10:35:55	0.469326
2022-09-13	10:35:56	7.24301
2022-09-13	10:35:56	11.0287
2022-09-13	10:35:56	17.0459
2022-09-13	10:35:56	12.1267
2022-09-13	10:35:57	12.9527
2022-09-13	10:35:57	8.21192
2022-09-13	10:35:57	2.58357
2022-09-13	10:35:57	0.975127
2022-09-13	10:35:58	1.78062
2022-09-13	10:35:58	1.3051
2022-09-13	10:35:58	1.14337
2022-09-13	10:35:59	2.26108
2022-09-13	10:35:59	3.42006
2022-09-13	10:35:59	3.00698
2022-09-13	10:35:59	2.77207
2022-09-13	10:36:00	2.97131
2022-09-13	10:36:00	4.33742
2022-09-13	10:36:00	3.80887
2022-09-13	10:36:00	2.7849
2022-09-13	10:36:01	2.33772
2022-09-13	10:36:01	2.18851
2022-09-13	10:36:01	1.6619
2022-09-13	10:36:01	1.66439
2022-09-13	10:36:02	1.52429
2022-09-13	10:36:02	1.55894
2022-09-13	10:36:02	0.703015
2022-09-13	10:36:03	0.516959
2022-09-13	10:36:03	0.4507
2022-09-13	10:36:03	0.136094
2022-09-13	10:36:03	0.133906
2022-09-13	10:36:04	0.223117
2022-09-13	10:36:04	0.254415
2022-09-13	10:36:04	0.199148
2022-09-13	10:36:04	0.0405728
2022-09-13	10:36:05	-0.0138293
2022-09-13	10:36:05	-0.326399
2022-09-13	10:36:05	-0.513524
2022-09-13	10:36:05	-0.398307
2022-09-13	10:36:06	0.471361
2022-09-13	10:36:06	0.765051
2022-09-13	10:36:06	0.52556
2022-09-13	10:36:06	0.174924
2022-09-13	10:36:07	1.02393
2022-09-13	10:36:07	1.77319
2022-09-13	10:36:07	0.65126
2022-09-13	10:36:08	0.974822
2022-09-13	10:36:08	0.757723
2022-09-13	10:36:08	1.18821
2022-09-13	10:36:08	1.02719
2022-09-13	10:36:09	1.47945
2022-09-13	10:36:09	1.61421
2022-09-13	10:36:09	3.36815
2022-09-13	10:36:09	3.12637
2022-09-13	10:36:10	2.63579
2022-09-13	10:36:10	3.57762
2022-09-13	10:36:10	3.368
2022-09-13	10:36:10	1.68113
2022-09-13	10:36:11	0.908664
2022-09-13	10:36:11	0.411005
2022-09-13	10:36:11	0.462099
2022-09-13	10:36:12	0.424848
2022-09-13	10:36:12	0.270547
2022-09-13	10:36:12	0.210089
2022-09-13	10:36:12	0.147341
2022-09-13	10:36:13	0.249122
2022-09-13	10:36:13	0.134008
2022-09-13	10:36:13	0.443117
2022-09-13	10:36:13	1.42866
2022-09-13	10:36:14	0.882812
2022-09-13	10:36:14	0.969784
2022-09-13	10:36:14	1.15864
2022-09-13	10:36:14	3.29772
2022-09-13	10:36:15	3.55838
2022-09-13	10:36:15	4.83365
2022-09-13	10:36:15	1.7879
2022-09-13	10:36:16	0.370394
2022-09-13	10:36:16	0.20785
2022-09-13	10:36:16	-0.0337784
2022-09-13	10:36:16	-0.40762
2022-09-13	10:36:17	-0.449503
2022-09-13	10:36:17	-0.74304
2022-09-13	10:36:17	-0.55215
2022-09-13	10:36:17	-0.497188
2022-09-13	10:36:18	-0.271285
2022-09-13	10:36:18	-0.108689
2022-09-13	10:36:18	-0.12304
2022-09-13	10:36:18	-0.101972
2022-09-13	10:36:19	0.247137
2022-09-13	10:36:19	0.262863
2022-09-13	10:36:19	0.261641
2022-09-13	10:36:19	0.146629
2022-09-13	10:36:20	0.271056
2022-09-13	10:36:20	0.328257
2022-09-13	10:36:20	0.326781
2022-09-13	10:36:21	0.420318
2022-09-13	10:36:21	0.333346
2022-09-13	10:36:21	0.385407
2022-09-13	10:36:21	0.415789
2022-09-13	10:36:22	0.425
2022-09-13	10:36:22	0.505458
2022-09-13	10:36:22	0.408003
2022-09-13	10:36:22	0.411667
2022-09-13	10:36:23	0.417825
2022-09-13	10:36:23	0.359351
2022-09-13	10:36:23	0.38897
2022-09-13	10:36:23	0.346527
2022-09-13	10:36:24	0.239046
2022-09-13	10:36:24	0.331921
2022-09-13	10:36:24	0.187799
2022-09-13	10:36:25	0.255585
2022-09-13	10:36:25	0.136349
2022-09-13	10:36:25	0.118893
2022-09-13	10:36:25	0.130903
2022-09-13	10:36:26	0.000572752
2022-09-13	10:36:26	0.0537025
2022-09-13	10:36:26	-0.0659921
2022-09-13	10:36:26	0.0369595
2022-09-13	10:36:27	-0.108537
2022-09-13	10:36:27	-0.214135
2022-09-13	10:36:27	-0.251081
2022-09-13	10:36:27	-0.0886384
2022-09-13	10:36:28	-0.0137784
2022-09-13	10:36:28	1.10179
2022-09-13	10:36:28	3.78917
2022-09-13	10:36:29	4.7452
2022-09-13	10:36:29	2.95635
2022-09-13	10:36:29	3.31167
2022-09-13	10:36:29	1.40388
2022-09-13	10:36:30	1.73869
2022-09-13	10:36:30	2.26301
2022-09-13	10:36:30	2.85141
2022-09-13	10:36:31	1.60724
2022-09-13	10:36:31	1.14474
2022-09-13	10:36:31	1.70495
2022-09-13	10:36:31	0.966883
2022-09-13	10:36:31	2.06978
2022-09-13	10:36:32	1.81243
2022-09-13	10:36:32	2.98688
2022-09-13	10:36:32	6.31466
2022-09-13	10:36:33	0.854313
2022-09-13	10:36:33	3.07146
2022-09-13	10:36:33	0.861336
2022-09-13	10:36:33	2.3592
2022-09-13	10:36:34	2.16576
2022-09-13	10:36:34	0.820318
2022-09-13	10:36:34	2.69253
2022-09-13	10:36:34	1.6819
2022-09-13	10:36:35	2.1305
2022-09-13	10:36:35	0.785153
2022-09-13	10:36:35	0.731514
2022-09-13	10:36:35	0.733041
2022-09-13	10:36:36	0.736959
2022-09-13	10:36:36	0.690089
2022-09-13	10:36:36	0.256807
2022-09-13	10:36:36	0.21472
2022-09-13	10:36:37	0.219708
2022-09-13	10:36:37	0.47528
2022-09-13	10:36:37	1.01457
2022-09-13	10:36:38	1.16765
2022-09-13	10:36:38	2.5795
2022-09-13	10:36:38	2.30154
2022-09-13	10:36:38	1.39177
2022-09-13	10:36:39	0.952226
2022-09-13	10:36:39	0.195738
2022-09-13	10:36:39	0.631208
2022-09-13	10:36:39	0.6793
2022-09-13	10:36:40	0.722303
2022-09-13	10:36:40	0.794669
2022-09-13	10:36:40	0.822404
2022-09-13	10:36:40	0.205407
2022-09-13	10:36:41	0.187188
2022-09-13	10:36:41	0.733142
2022-09-13	10:36:41	0.736298
2022-09-13	10:36:42	-0.498816
2022-09-13	10:36:42	0.740013
2022-09-13	10:36:42	0.721234
2022-09-13	10:36:42	0.729529
2022-09-13	10:36:43	0.243881
2022-09-13	10:36:43	0.0175702
2022-09-13	10:36:43	0.0214379
2022-09-13	10:36:43	0.691972
2022-09-13	10:36:44	0.405509
2022-09-13	10:36:44	0.409377
2022-09-13	10:36:44	0.489682
2022-09-13	10:36:44	0.50841
2022-09-13	10:36:45	0.434517
2022-09-13	10:36:45	0.425254
2022-09-13	10:36:45	0.350293
2022-09-13	10:36:46	0.492532
2022-09-13	10:36:46	0.599097
2022-09-13	10:36:46	0.26439
2022-09-13	10:36:46	0.248613
2022-09-13	10:36:47	0.284949
2022-09-13	10:36:47	0.31126
2022-09-13	10:36:47	0.272176
2022-09-13	10:36:47	0.26902
2022-09-13	10:36:48	0.259148
2022-09-13	10:36:48	0.241336
2022-09-13	10:36:48	0.24215
2022-09-13	10:36:48	0.250954
2022-09-13	10:36:49	0.25701
2022-09-13	10:36:49	0.238792
2022-09-13	10:36:49	0.224288
2022-09-13	10:36:49	0.355382
2022-09-13	10:36:50	0.13126
2022-09-13	10:36:50	-0.399071
2022-09-13	10:36:50	-0.510419
2022-09-13	10:36:51	-0.260547
2022-09-13	10:36:51	-0.0132186
2022-09-13	10:36:51	0.057672
2022-09-13	10:36:51	0.680725
2022-09-13	10:36:52	0.915941
2022-09-13	10:36:52	2.03462
2022-09-13	10:36:52	2.38184
2022-09-13	10:36:52	3.85823
2022-09-13	10:36:53	2.92067
2022-09-13	10:36:53	1.91966
2022-09-13	10:36:53	3.20759
2022-09-13	10:36:53	1.40195
2022-09-13	10:36:54	2.11686
2022-09-13	10:36:54	1.48821
2022-09-13	10:36:54	1.66816
2022-09-13	10:36:55	2.88184
2022-09-13	10:36:55	2.47645
2022-09-13	10:36:55	3.48647
2022-09-13	10:36:55	2.67136
2022-09-13	10:36:56	1.93645
2022-09-13	10:36:56	2.05976
2022-09-13	10:36:56	1.31808
2022-09-13	10:36:56	1.49528
2022-09-13	10:36:57	2.06103
2022-09-13	10:36:57	2.24556
2022-09-13	10:36:57	4.90144
2022-09-13	10:36:57	3.43345
2022-09-13	10:36:58	6.77792
2022-09-13	10:36:58	1.1736
2022-09-13	10:36:58	2.86001
2022-09-13	10:36:59	1.20123
2022-09-13	10:36:59	1.34541
2022-09-13	10:36:59	1.31329
2022-09-13	10:36:59	1.10989
2022-09-13	10:37:00	1.12983
2022-09-13	10:37:00	2.67604
2022-09-13	10:37:00	3.85019
2022-09-13	10:37:00	3.39248
2022-09-13	10:37:01	3.34714
2022-09-13	10:37:01	2.78617
2022-09-13	10:37:01	2.28301
2022-09-13	10:37:01	0.523677
2022-09-13	10:37:02	0.516043
2022-09-13	10:37:02	0.236959
2022-09-13	10:37:02	0.171412
2022-09-13	10:37:03	0.268715
2022-09-13	10:37:03	0.191412
2022-09-13	10:37:03	0.279402
2022-09-13	10:37:03	0.244339
2022-09-13	10:37:04	0.284084
2022-09-13	10:37:04	0.325051
2022-09-13	10:37:04	0.380318
2022-09-13	10:37:04	-1.6209
2022-09-13	10:37:05	0.338842
2022-09-13	10:37:05	0.475178
2022-09-13	10:37:05	1.42648
2022-09-13	10:37:05	2.48245
2022-09-13	10:37:06	0.937875
2022-09-13	10:37:06	0.844491
2022-09-13	10:37:06	1.75085
2022-09-13	10:37:06	0.632277
2022-09-13	10:37:07	1.45477
2022-09-13	10:37:07	1.21594
2022-09-13	10:37:07	1.10108
2022-09-13	10:37:08	1.38973
2022-09-13	10:37:08	1.60128
2022-09-13	10:37:08	2.73431
2022-09-13	10:37:08	3.84994
2022-09-13	10:37:09	3.66057
2022-09-13	10:37:09	5.21192
2022-09-13	10:37:09	3.01843
2022-09-13	10:37:09	3.84815
2022-09-13	10:37:10	4.54713
2022-09-13	10:37:10	3.05284
2022-09-13	10:37:10	3.24912
2022-09-13	10:37:10	3.90647
2022-09-13	10:37:11	2.22851
2022-09-13	10:37:11	5.30815
2022-09-13	10:37:11	5.36225
2022-09-13	10:37:12	3.7421
2022-09-13	10:37:12	6.11258
2022-09-13	10:37:12	1.31385
2022-09-13	10:37:12	3.87197
2022-09-13	10:37:13	1.83116
2022-09-13	10:37:13	0.771463
2022-09-13	10:37:13	1.85793
2022-09-13	10:37:13	0.455585
2022-09-13	10:37:14	1.17039
2022-09-13	10:37:14	0.790344
2022-09-13	10:37:14	0.619911
2022-09-13	10:37:14	1.94037
2022-09-13	10:37:15	0.710191
2022-09-13	10:37:15	1.86312
2022-09-13	10:37:15	0.531819
2022-09-13	10:37:16	0.408206
2022-09-13	10:37:16	0.387595
2022-09-13	10:37:16	0.162048
2022-09-13	10:37:16	0.362557
2022-09-13	10:37:17	0.760165
2022-09-13	10:37:17	0.708053
2022-09-13	10:37:17	1.3278
2022-09-13	10:37:17	1.70688
2022-09-13	10:37:18	1.75553
2022-09-13	10:37:18	2.78505
2022-09-13	10:37:18	1.12678
2022-09-13	10:37:18	1.56897
2022-09-13	10:37:19	0.735433
2022-09-13	10:37:19	0.733295
2022-09-13	10:37:19	0.731514
2022-09-13	10:37:19	0.740318
2022-09-13	10:37:20	0.737061
2022-09-13	10:37:20	0.745255
2022-09-13	10:37:20	0.737163
2022-09-13	10:37:21	0.737214
2022-09-13	10:37:21	0.732735
2022-09-13	10:37:21	0.738181
2022-09-13	10:37:21	0.734008
2022-09-13	10:37:22	0.735738
2022-09-13	10:37:22	0.743423
2022-09-13	10:37:22	0.729835
2022-09-13	10:37:22	0.73355
2022-09-13	10:37:23	0.731158
2022-09-13	10:37:23	0.730954
2022-09-13	10:37:23	0.734008
2022-09-13	10:37:23	0.733753
2022-09-13	10:37:24	0.732481
2022-09-13	10:37:24	0.733957
2022-09-13	10:37:24	0.735534
2022-09-13	10:37:25	0.735331
2022-09-13	10:37:25	0.72902
2022-09-13	10:37:25	0.748664
2022-09-13	10:37:25	0.678435
2022-09-13	10:37:26	0.590598
2022-09-13	10:37:26	0.454059
2022-09-13	10:37:26	0.354059
2022-09-13	10:37:26	0.719453
2022-09-13	10:37:27	0.0387407
2022-09-13	10:37:27	0.181845
2022-09-13	10:37:27	0.251718
2022-09-13	10:37:27	-0.002786
2022-09-13	10:37:28	0.0493768
2022-09-13	10:37:28	-0.182328
2022-09-13	10:37:28	-0.0629895
2022-09-13	10:37:29	-0.233626
2022-09-13	10:37:29	-0.270165
2022-09-13	10:37:29	-0.488638
2022-09-13	10:37:29	-0.586195
2022-09-13	10:37:30	-0.745279
2022-09-13	10:37:30	-0.826959
2022-09-13	10:37:30	-0.971692
2022-09-13	10:37:30	-0.851895
2022-09-13	10:37:31	-0.920037
2022-09-13	10:37:31	-0.736882
2022-09-13	10:37:31	-0.693523
2022-09-13	10:37:31	-0.53332
2022-09-13	10:37:32	-0.371997
2022-09-13	10:37:32	-0.212099
2022-09-13	10:37:32	-0.12416
2022-09-13	10:37:33	-0.271234
2022-09-13	10:37:33	-0.376933
2022-09-13	10:37:33	-0.45617
2022-09-13	10:37:33	-0.439122
2022-09-13	10:37:34	-0.458816
2022-09-13	10:37:34	-0.562175
2022-09-13	10:37:34	-0.475814
2022-09-13	10:37:34	-0.582887
2022-09-13	10:37:35	-0.454134
2022-09-13	10:37:35	-0.000953954
2022-09-13	10:37:35	5.62439
2022-09-13	10:37:35	4.48118
2022-09-13	10:37:36	4.31635
2022-09-13	10:37:36	0.776959
2022-09-13	10:37:36	2.21238
2022-09-13	10:37:36	1.03508
2022-09-13	10:37:37	1.8076
2022-09-13	10:37:37	1.05523
2022-09-13	10:37:37	0.399707
2022-09-13	10:37:38	0.645254
2022-09-13	10:37:38	0.627799
2022-09-13	10:37:38	0.675941
2022-09-13	10:37:38	1.04683
2022-09-13	10:37:39	1.22612
2022-09-13	10:37:39	0.811209
2022-09-13	10:37:39	0.346221
2022-09-13	10:37:39	0.280115
2022-09-13	10:37:40	0.144033
2022-09-13	10:37:40	0.257774
2022-09-13	10:37:40	0.153601
2022-09-13	10:37:40	-0.0712338
2022-09-13	10:37:41	-0.191895
2022-09-13	10:37:41	-0.358206
2022-09-13	10:37:41	-0.388129
2022-09-13	10:37:42	-0.532201
2022-09-13	10:37:42	-0.179733
2022-09-13	10:37:42	0.15701
2022-09-13	10:37:42	2.49981
2022-09-13	10:37:43	6.51619
2022-09-13	10:37:43	5.60973
2022-09-13	10:37:43	5.39385
2022-09-13	10:37:43	1.40678
2022-09-13	10:37:44	1.44897
2022-09-13	10:37:44	1.42709
2022-09-13	10:37:44	1.56286
2022-09-13	10:37:44	1.95706
2022-09-13	10:37:45	3.28027
2022-09-13	10:37:45	5.59319
2022-09-13	10:37:45	3.01589
2022-09-13	10:37:46	3.95314
2022-09-13	10:37:46	1.79055
2022-09-13	10:37:46	2.33014
2022-09-13	10:37:46	1.00704
2022-09-13	10:37:47	0.562557
2022-09-13	10:37:47	0.504847
2022-09-13	10:37:47	0.252888
2022-09-13	10:37:47	0.702405
2022-09-13	10:37:48	0.392634
2022-09-13	10:37:48	0.498181
2022-09-13	10:37:48	0.845
2022-09-13	10:37:48	1.40678
2022-09-13	10:37:49	4.09187
2022-09-13	10:37:49	3.27787
2022-09-13	10:37:49	5.92291
2022-09-13	10:37:49	2.79172
2022-09-13	10:37:50	2.56561
2022-09-13	10:37:50	1.45955
2022-09-13	10:37:50	1.04291
2022-09-13	10:37:51	2.52994
2022-09-13	10:37:51	1.19487
2022-09-13	10:37:51	1.95477
2022-09-13	10:37:51	2.8765
2022-09-13	10:37:52	3.88546
2022-09-13	10:37:52	5.04622
2022-09-13	10:37:52	3.65319
2022-09-13	10:37:52	4.11971
2022-09-13	10:37:53	2.63889
2022-09-13	10:37:53	6.63436
2022-09-13	10:37:53	8.18479
2022-09-13	10:37:53	7.54947
2022-09-13	10:37:54	7.27014
2022-09-13	10:37:54	4.33462
2022-09-13	10:37:54	5.58825
2022-09-13	10:37:55	2.77355
2022-09-13	10:37:55	1.08795
2022-09-13	10:37:55	1.47131
2022-09-13	10:37:55	1.89726
2022-09-13	10:37:56	4.06312
2022-09-13	10:37:56	5.43278
2022-09-13	10:37:56	4.21197
2022-09-13	10:37:56	3.72607
2022-09-13	10:37:57	2.90022
2022-09-13	10:37:57	2.48195
2022-09-13	10:37:57	2.86683
2022-09-13	10:37:57	5.44769
2022-09-13	10:37:58	3.62805
2022-09-13	10:37:58	2.2364
2022-09-13	10:37:58	2.35874
2022-09-13	10:37:59	2.22062
2022-09-13	10:37:59	2.29844
2022-09-13	10:37:59	1.45528
2022-09-13	10:37:59	1.38357
2022-09-13	10:38:00	1.58113
2022-09-13	10:38:00	0.822608
2022-09-13	10:38:00	0.845305
2022-09-13	10:38:00	0.765153
2022-09-13	10:38:01	1.45599
2022-09-13	10:38:01	1.24454
2022-09-13	10:38:01	2.50933
2022-09-13	10:38:01	4.18826
2022-09-13	10:38:02	5.23003
2022-09-13	10:38:02	5.90072
2022-09-13	10:38:02	3.76337
2022-09-13	10:38:03	3.25268
2022-09-13	10:38:03	1.66546
2022-09-13	10:38:03	1.3366
2022-09-13	10:38:03	1.89905
2022-09-13	10:38:04	7.69202
2022-09-13	10:38:04	6.71461
2022-09-13	10:38:04	4.72266
2022-09-13	10:38:04	0.98215
