# Supplementary material for: Comparing efficacy in reducing pulling and welfare impacts of four types of leash walking equipment
Source: PeerJ journal article supplement (doi:10.7717/peerj.18131), 2024-10-24
Supplement: Shelter1_Tension_files.zip [file Sulley_harness_2022913145656 copy.xlsx]

## Sheet: Averaged Newtons
Date	Time	Averaged Newtons	Impulse	Total steps
2022-09-13	14:57:10	2.57973	2.57973	0			Impulse Newtons	702.559
2022-09-13	14:57:11	8.1043	10.684	0			Total steps	5
2022-09-13	14:57:12	2.20684	12.8909	0
2022-09-13	14:57:13	1.97707	14.8679	0
2022-09-13	14:57:14	8.23783	23.1058	0
2022-09-13	14:57:15	1.67709	24.7829	0
2022-09-13	14:57:16	0.246237	25.0291	0
2022-09-13	14:57:17	-0.296149	25.0291	0
2022-09-13	14:57:18	-3.28459	25.0291	0
2022-09-13	14:57:19	-3.39596	25.0291	0
2022-09-13	14:57:20	-0.110073	25.0291	0
2022-09-13	14:57:21	1.36559	26.3947	0
2022-09-13	14:57:22	1.0846	27.4793	0
2022-09-13	14:57:23	1.10565	28.5849	0
2022-09-13	14:57:24	1.17	29.7549	0
2022-09-13	14:57:25	0.35314	30.1081	0
2022-09-13	14:57:26	-2.17079	30.1081	0
2022-09-13	14:57:27	-3.03581	30.1081	0
2022-09-13	14:57:28	-2.25256	30.1081	0
2022-09-13	14:57:29	-0.950589	30.1081	0
2022-09-13	14:57:30	-0.053027	30.1081	0
2022-09-13	14:57:31	0.625296	30.7334	0
2022-09-13	14:57:32	1.27951	32.0129	0
2022-09-13	14:57:33	0.982	32.9949	0
2022-09-13	14:57:34	1.0734	34.0683	0
2022-09-13	14:57:35	1.04589	35.1142	0
2022-09-13	14:57:36	1.41641	36.5306	0
2022-09-13	14:57:37	1.25489	37.7855	0
2022-09-13	14:57:38	1.60118	39.3867	0
2022-09-13	14:57:39	1.70147	41.0881	0
2022-09-13	14:57:40	1.7018	42.7899	0
2022-09-13	14:57:41	1.9009	44.6908	0
2022-09-13	14:57:42	1.30345	45.9943	0
2022-09-13	14:57:43	2.95209	48.9464	0
2022-09-13	14:57:44	9.84993	58.7963	0
2022-09-13	14:57:45	3.62925	62.4255	0
2022-09-13	14:57:46	11.0152	73.4407	0
2022-09-13	14:57:47	7.22381	80.6645	0
2022-09-13	14:57:48	3.83678	84.5013	0
2022-09-13	14:57:49	19.105	103.606	1
2022-09-13	14:57:50	8.11746	111.724	1
2022-09-13	14:57:51	2.29154	114.015	1
2022-09-13	14:57:52	2.30209	116.317	1
2022-09-13	14:57:53	2.57673	118.894	1
2022-09-13	14:57:54	2.00724	120.901	1
2022-09-13	14:57:55	1.57462	122.476	1
2022-09-13	14:57:56	1.64001	124.116	1
2022-09-13	14:57:57	1.3713	125.487	1
2022-09-13	14:57:58	1.40282	126.89	1
2022-09-13	14:57:59	7.68198	134.572	1
2022-09-13	14:58:00	12.9549	147.527	1
2022-09-13	14:58:01	6.25923	153.786	1
2022-09-13	14:58:02	3.50644	157.293	1
2022-09-13	14:58:03	5.8126	163.105	1
2022-09-13	14:58:04	9.9351	173.04	1
2022-09-13	14:58:05	3.37101	176.411	1
2022-09-13	14:58:06	2.54051	178.952	1
2022-09-13	14:58:07	1.57575	180.528	1
2022-09-13	14:58:08	1.78698	182.315	1
2022-09-13	14:58:09	1.79988	184.115	1
2022-09-13	14:58:10	1.47498	185.589	1
2022-09-13	14:58:11	1.37413	186.964	1
2022-09-13	14:58:12	1.42726	188.391	1
2022-09-13	14:58:13	1.36197	189.753	1
2022-09-13	14:58:14	1.10311	190.856	1
2022-09-13	14:58:15	1.08336	191.939	1
2022-09-13	14:58:16	1.9224	193.862	1
2022-09-13	14:58:17	2.41702	196.279	1
2022-09-13	14:58:18	3.54995	199.829	1
2022-09-13	14:58:19	1.26994	201.099	1
2022-09-13	14:58:20	-0.559759	201.099	1
2022-09-13	14:58:21	-0.253308	201.099	1
2022-09-13	14:58:22	1.55732	202.656	1
2022-09-13	14:58:23	1.18404	203.84	1
2022-09-13	14:58:24	1.32116	205.161	1
2022-09-13	14:58:25	1.06197	206.223	1
2022-09-13	14:58:26	1.94719	208.17	1
2022-09-13	14:58:27	2.04159	210.212	1
2022-09-13	14:58:28	1.75278	211.965	1
2022-09-13	14:58:29	1.77702	213.742	1
2022-09-13	14:58:30	1.87334	215.615	1
2022-09-13	14:58:31	1.73757	217.353	1
2022-09-13	14:58:32	2.07641	219.429	1
2022-09-13	14:58:33	1.23282	220.662	1
2022-09-13	14:58:34	0.621957	221.284	1
2022-09-13	14:58:35	-0.982338	221.284	1
2022-09-13	14:58:36	-2.31633	221.284	1
2022-09-13	14:58:37	-2.67735	221.284	1
2022-09-13	14:58:38	-2.22908	221.284	1
2022-09-13	14:58:39	-2.11623	221.284	1
2022-09-13	14:58:40	-0.255138	221.284	1
2022-09-13	14:58:41	12.5408	233.825	1
2022-09-13	14:58:42	9.99108	243.816	1
2022-09-13	14:58:43	6.16692	249.983	1
2022-09-13	14:58:44	3.59529	253.578	1
2022-09-13	14:58:45	2.01884	255.597	1
2022-09-13	14:58:46	1.30469	256.901	1
2022-09-13	14:58:47	1.75489	258.656	1
2022-09-13	14:58:48	0.61858	259.275	1
2022-09-13	14:58:49	0.130731	259.406	1
2022-09-13	14:58:50	1.15687	260.562	1
2022-09-13	14:58:51	4.31311	264.876	1
2022-09-13	14:58:52	5.65556	270.531	1
2022-09-13	14:58:53	1.95636	272.487	1
2022-09-13	14:58:54	1.74012	274.228	1
2022-09-13	14:58:55	2.58811	276.816	1
2022-09-13	14:58:56	3.48059	280.296	1
2022-09-13	14:58:57	1.95794	282.254	1
2022-09-13	14:58:58	0.44137	282.696	1
2022-09-13	14:58:59	-1.864	282.696	1
2022-09-13	14:59:00	-3.08267	282.696	1
2022-09-13	14:59:01	-2.08137	282.696	1
2022-09-13	14:59:02	3.76813	286.464	1
2022-09-13	14:59:03	7.22362	293.687	1
2022-09-13	14:59:04	2.98061	296.668	1
2022-09-13	14:59:05	1.83621	298.504	1
2022-09-13	14:59:06	1.4764	299.981	1
2022-09-13	14:59:07	2.55647	302.537	1
2022-09-13	14:59:08	3.16964	305.707	1
2022-09-13	14:59:09	1.67017	307.377	1
2022-09-13	14:59:10	2.04679	309.424	1
2022-09-13	14:59:11	1.56904	310.993	1
2022-09-13	14:59:12	1.86128	312.854	1
2022-09-13	14:59:13	1.52427	314.378	1
2022-09-13	14:59:14	-0.461229	314.378	1
2022-09-13	14:59:15	-1.97656	314.378	1
2022-09-13	14:59:16	-3.09708	314.378	1
2022-09-13	14:59:17	-1.68652	314.378	1
2022-09-13	14:59:18	-0.202035	314.378	1
2022-09-13	14:59:19	0.35614	314.734	1
2022-09-13	14:59:20	0.627861	315.362	1
2022-09-13	14:59:21	0.611374	315.974	1
2022-09-13	14:59:22	4.23389	320.207	1
2022-09-13	14:59:23	1.57306	321.781	1
2022-09-13	14:59:24	2.79559	324.576	1
2022-09-13	14:59:25	1.28556	325.862	1
2022-09-13	14:59:26	-0.86836	325.862	1
2022-09-13	14:59:27	0.750705	326.612	1
2022-09-13	14:59:28	3.09327	329.706	1
2022-09-13	14:59:29	1.2511	330.957	1
2022-09-13	14:59:30	-0.0723808	330.957	1
2022-09-13	14:59:31	1.64448	332.601	1
2022-09-13	14:59:32	1.75081	334.352	1
2022-09-13	14:59:33	2.26405	336.616	1
2022-09-13	14:59:34	2.23027	338.846	1
2022-09-13	14:59:35	2.07226	340.919	1
2022-09-13	14:59:36	0.947874	341.867	1
2022-09-13	14:59:37	0.253254	342.12	1
2022-09-13	14:59:38	-1.00141	342.12	1
2022-09-13	14:59:39	-0.347513	342.12	1
2022-09-13	14:59:40	-0.329012	342.12	1
2022-09-13	14:59:41	-0.290773	342.12	1
2022-09-13	14:59:42	-0.440914	342.12	1
2022-09-13	14:59:43	0.529143	342.649	1
2022-09-13	14:59:44	0.292228	342.941	1
2022-09-13	14:59:45	0.478438	343.42	1
2022-09-13	14:59:46	0.533331	343.953	1
2022-09-13	14:59:47	0.530616	344.484	1
2022-09-13	14:59:48	0.546595	345.03	1
2022-09-13	14:59:49	0.560666	345.591	1
2022-09-13	14:59:50	0.321449	345.912	1
2022-09-13	14:59:51	0.681379	346.594	1
2022-09-13	14:59:52	1.09124	347.685	1
2022-09-13	14:59:53	1.42518	349.11	1
2022-09-13	14:59:54	1.33135	350.441	1
2022-09-13	14:59:55	1.40147	351.843	1
2022-09-13	14:59:56	1.44265	353.286	1
2022-09-13	14:59:57	1.37153	354.657	1
2022-09-13	14:59:58	1.25302	355.91	1
2022-09-13	14:59:59	1.77328	357.683	1
2022-09-13	15:00:00	5.51515	363.198	1
2022-09-13	15:00:01	6.39918	369.598	1
2022-09-13	15:00:02	9.83409	379.432	1
2022-09-13	15:00:03	11.8894	391.321	1
2022-09-13	15:00:04	3.43978	394.761	1
2022-09-13	15:00:05	0.875719	395.637	1
2022-09-13	15:00:06	1.0545	396.691	1
2022-09-13	15:00:07	1.08059	397.772	1
2022-09-13	15:00:08	1.86649	399.638	1
2022-09-13	15:00:09	4.18471	403.823	1
2022-09-13	15:00:10	19.0605	422.884	2
2022-09-13	15:00:11	29.4949	452.378	3
2022-09-13	15:00:12	16.6048	468.983	4
2022-09-13	15:00:13	12.6566	481.64	4
2022-09-13	15:00:14	3.13201	484.772	4
2022-09-13	15:00:15	3.73377	488.506	4
2022-09-13	15:00:16	1.66902	490.175	4
2022-09-13	15:00:17	0.8189	490.993	4
2022-09-13	15:00:18	0.125411	491.119	4
2022-09-13	15:00:19	-0.127841	491.119	4
2022-09-13	15:00:20	-1.68173	491.119	4
2022-09-13	15:00:21	2.57425	493.693	4
2022-09-13	15:00:22	18.8162	512.509	5
2022-09-13	15:00:23	7.1534	519.663	5
2022-09-13	15:00:24	1.82499	521.488	5
2022-09-13	15:00:25	0.702262	522.19	5
2022-09-13	15:00:26	2.98205	525.172	5
2022-09-13	15:00:27	2.55086	527.723	5
2022-09-13	15:00:28	1.10769	528.831	5
2022-09-13	15:00:29	1.22258	530.053	5
2022-09-13	15:00:30	1.61278	531.666	5
2022-09-13	15:00:31	1.22756	532.893	5
2022-09-13	15:00:32	0.841027	533.735	5
2022-09-13	15:00:33	0.819069	534.554	5
2022-09-13	15:00:34	0.82552	535.379	5
2022-09-13	15:00:35	0.449745	535.829	5
2022-09-13	15:00:36	0.38919	536.218	5
2022-09-13	15:00:37	0.79332	537.011	5
2022-09-13	15:00:38	0.20017	537.212	5
2022-09-13	15:00:39	-0.0306158	537.212	5
2022-09-13	15:00:40	0.152255	537.364	5
2022-09-13	15:00:41	0.69264	538.056	5
2022-09-13	15:00:42	0.873795	538.93	5
2022-09-13	15:00:43	1.01624	539.946	5
2022-09-13	15:00:44	1.79345	541.74	5
2022-09-13	15:00:45	2.07085	543.811	5
2022-09-13	15:00:46	3.51974	547.33	5
2022-09-13	15:00:47	3.10021	550.431	5
2022-09-13	15:00:48	2.25155	552.682	5
2022-09-13	15:00:49	1.8018	554.484	5
2022-09-13	15:00:50	1.28936	555.773	5
2022-09-13	15:00:51	1.71827	557.492	5
2022-09-13	15:00:52	1.82159	559.313	5
2022-09-13	15:00:53	1.82693	561.14	5
2022-09-13	15:00:54	1.93536	563.076	5
2022-09-13	15:00:55	2.32025	565.396	5
2022-09-13	15:00:56	1.96768	567.364	5
2022-09-13	15:00:57	5.865	573.229	5
2022-09-13	15:00:58	6.19155	579.42	5
2022-09-13	15:00:59	2.70644	582.127	5
2022-09-13	15:01:00	3.30856	585.435	5
2022-09-13	15:01:01	2.11414	587.549	5
2022-09-13	15:01:02	1.65761	589.207	5
2022-09-13	15:01:03	1.8417	591.049	5
2022-09-13	15:01:04	8.58941	599.638	5
2022-09-13	15:01:05	5.33993	604.978	5
2022-09-13	15:01:06	0.948441	605.926	5
2022-09-13	15:01:07	0.207188	606.133	5
2022-09-13	15:01:08	0.590132	606.724	5
2022-09-13	15:01:09	0.700281	607.424	5
2022-09-13	15:01:10	0.743857	608.168	5
2022-09-13	15:01:11	0.349179	608.517	5
2022-09-13	15:01:12	1.00764	609.525	5
2022-09-13	15:01:13	1.06519	610.59	5
2022-09-13	15:01:14	0.871702	611.461	5
2022-09-13	15:01:15	0.723088	612.185	5
2022-09-13	15:01:16	0.564401	612.749	5
2022-09-13	15:01:17	0.774926	613.524	5
2022-09-13	15:01:18	0.812221	614.336	5
2022-09-13	15:01:19	0.526654	614.863	5
2022-09-13	15:01:20	0.696527	615.559	5
2022-09-13	15:01:21	0.959363	616.519	5
2022-09-13	15:01:22	1.19462	617.713	5
2022-09-13	15:01:23	1.773	619.486	5
2022-09-13	15:01:24	0.0582349	619.545	5
2022-09-13	15:01:25	-1.65874	619.545	5
2022-09-13	15:01:26	-1.56547	619.545	5
2022-09-13	15:01:27	-0.601978	619.545	5
2022-09-13	15:01:28	-0.0316343	619.545	5
2022-09-13	15:01:29	0.831747	620.376	5
2022-09-13	15:01:30	1.8571	622.233	5
2022-09-13	15:01:31	2.39773	624.631	5
2022-09-13	15:01:32	1.68803	626.319	5
2022-09-13	15:01:33	1.96043	628.28	5
2022-09-13	15:01:34	1.72897	630.009	5
2022-09-13	15:01:35	1.78534	631.794	5
2022-09-13	15:01:36	1.95078	633.745	5
2022-09-13	15:01:37	1.84131	635.586	5
2022-09-13	15:01:38	3.186	638.772	5
2022-09-13	15:01:39	1.49235	640.264	5
2022-09-13	15:01:40	1.22209	641.486	5
2022-09-13	15:01:41	1.53616	643.023	5
2022-09-13	15:01:42	1.65132	644.674	5
2022-09-13	15:01:43	1.92472	646.599	5
2022-09-13	15:01:44	1.70939	648.308	5
2022-09-13	15:01:45	1.68064	649.989	5
2022-09-13	15:01:46	1.68641	651.675	5
2022-09-13	15:01:47	1.58149	653.257	5
2022-09-13	15:01:48	0.200849	653.457	5
2022-09-13	15:01:49	1.66547	655.123	5
2022-09-13	15:01:50	4.39749	659.52	5
2022-09-13	15:01:51	2.57566	662.096	5
2022-09-13	15:01:52	2.37884	664.475	5
2022-09-13	15:01:53	1.97	666.445	5
2022-09-13	15:01:54	1.79767	668.242	5
2022-09-13	15:01:55	1.91357	670.156	5
2022-09-13	15:01:56	1.78092	671.937	5
2022-09-13	15:01:57	1.92025	673.857	5
2022-09-13	15:01:58	2.00186	675.859	5
2022-09-13	15:01:59	1.82535	677.684	5
2022-09-13	15:02:00	1.88769	679.572	5
2022-09-13	15:02:01	2.1975	681.77	5
2022-09-13	15:02:02	2.23253	684.002	5
2022-09-13	15:02:03	2.19411	686.196	5
2022-09-13	15:02:04	2.03423	688.231	5
2022-09-13	15:02:05	3.37843	691.609	5
2022-09-13	15:02:06	2.42863	694.038	5
2022-09-13	15:02:07	2.08567	696.123	5
2022-09-13	15:02:08	2.11158	698.235	5
2022-09-13	15:02:09	2.11369	700.349	5
2022-09-13	15:02:10	2.21046	702.559	5

## Sheet: Sulley_harness_202291314565 (4)
Date	Time	Lbs	Newtons	Averaged Newtons	Total force x time	total steps > 13.345		**GoPro Fitting: 1446
2022-09-13	14:57:10	0.110445	0.491281	2.57973	0.491281	FALSE	0
2022-09-13	14:57:10	0.55472	2.46751	2.57973	2.46751	FALSE	0
2022-09-13	14:57:10	0.659402	2.93315	2.57973	3.42443	FALSE	0
2022-09-13	14:57:10	0.995229	4.42698	2.57973	6.89448	FALSE	0
2022-09-13	14:57:11	1.99553	8.87652	8.1043	12.3009	FALSE	0
2022-09-13	14:57:11	2.61467	11.6306	8.1043	18.5251	FALSE	0
2022-09-13	14:57:11	0.855585	3.80581	8.1043	16.1068	FALSE	0
2022-09-13	14:57:12	0.621845	2.76609	2.20684	21.2911	FALSE	0
2022-09-13	14:57:12	0.512532	2.27984	2.20684	18.3866	FALSE	0
2022-09-13	14:57:12	0.344389	1.53191	2.20684	22.8231	FALSE	0
2022-09-13	14:57:12	0.505713	2.24951	2.20684	20.6361	FALSE	0
2022-09-13	14:57:13	0.180267	0.801864	1.97707	23.6249	FALSE	0
2022-09-13	14:57:13	0.521641	2.32036	1.97707	22.9565	FALSE	0
2022-09-13	14:57:13	0.463931	2.06366	1.97707	25.6886	FALSE	0
2022-09-13	14:57:13	0.612023	2.7224	1.97707	25.6789	FALSE	0
2022-09-13	14:57:14	3.46525	15.4141	8.23783	41.1027	1	1
2022-09-13	14:57:14	1.81055	8.05369	8.23783	33.7326	FALSE	1
2022-09-13	14:57:14	0.440166	1.95795	8.23783	43.0607	FALSE	1
2022-09-13	14:57:14	1.69182	7.52555	8.23783	41.2581	FALSE	1
2022-09-13	14:57:15	0.376349	1.67408	1.67709	44.7347	FALSE	1
2022-09-13	14:57:15	0.434364	1.93214	1.67709	43.1903	FALSE	1
2022-09-13	14:57:15	0.320369	1.42507	1.67709	46.1598	FALSE	1
2022-09-13	14:57:16	-0.000292388	-0.0013006	0.246237	43.1903	FALSE	1
2022-09-13	14:57:16	0.0749239	0.333276	0.246237	46.4931	FALSE	1
2022-09-13	14:57:16	0.00637431	0.0283542	0.246237	43.2186	FALSE	1
2022-09-13	14:57:16	0.14042	0.624616	0.246237	47.1177	FALSE	1
2022-09-13	14:57:17	-0.078562	-0.349459	-0.296149	43.2186	FALSE	1
2022-09-13	14:57:17	-0.0101651	-0.0452164	-0.296149	47.1177	FALSE	1
2022-09-13	14:57:17	0.0176211	0.0783822	-0.296149	43.297	FALSE	1
2022-09-13	14:57:17	-0.195203	-0.868302	-0.296149	47.1177	FALSE	1
2022-09-13	14:57:18	-0.39444	-1.75455	-3.28459	43.297	FALSE	1
2022-09-13	14:57:18	-0.526399	-2.34153	-3.28459	47.1177	FALSE	1
2022-09-13	14:57:18	-0.986348	-4.38747	-3.28459	43.297	FALSE	1
2022-09-13	14:57:18	-1.04645	-4.65482	-3.28459	47.1177	FALSE	1
2022-09-13	14:57:19	-0.927213	-4.12443	-3.39596	43.297	FALSE	1
2022-09-13	14:57:19	-0.787569	-3.50326	-3.39596	47.1177	FALSE	1
2022-09-13	14:57:19	-0.575559	-2.5602	-3.39596	43.297	FALSE	1
2022-09-13	14:57:20	-0.515458	-2.29286	-0.110073	47.1177	FALSE	1
2022-09-13	14:57:20	-0.0906231	-0.40311	-0.110073	43.297	FALSE	1
2022-09-13	14:57:20	0.167239	0.743913	-0.110073	47.8616	FALSE	1
2022-09-13	14:57:20	0.33986	1.51177	-0.110073	44.8088	FALSE	1
2022-09-13	14:57:21	0.499504	2.22189	1.36559	50.0835	FALSE	1
2022-09-13	14:57:21	0.319504	1.42122	1.36559	46.23	FALSE	1
2022-09-13	14:57:21	0.215178	0.957155	1.36559	51.0406	FALSE	1
2022-09-13	14:57:21	0.193804	0.862079	1.36559	47.0921	FALSE	1
2022-09-13	14:57:22	0.31869	1.4176	1.0846	52.4582	FALSE	1
2022-09-13	14:57:22	0.102405	0.455518	1.0846	47.5476	FALSE	1
2022-09-13	14:57:22	0.460471	2.04827	1.0846	54.5065	FALSE	1
2022-09-13	14:57:22	0.0937534	0.417034	1.0846	47.9646	FALSE	1
2022-09-13	14:57:23	0.309071	1.37481	1.10565	55.8813	FALSE	1
2022-09-13	14:57:23	0.175738	0.781718	1.10565	48.7463	FALSE	1
2022-09-13	14:57:23	0.260878	1.16044	1.10565	57.0418	FALSE	1
2022-09-13	14:57:24	0.283066	1.25913	1.17	50.0055	FALSE	1
2022-09-13	14:57:24	0.240827	1.07125	1.17	58.113	FALSE	1
2022-09-13	14:57:24	0.422659	1.88007	1.17	51.8855	FALSE	1
2022-09-13	14:57:24	0.10556	0.469552	1.17	58.5826	FALSE	1
2022-09-13	14:57:25	0.263117	1.1704	0.35314	53.0559	FALSE	1
2022-09-13	14:57:25	0.0586389	0.260838	0.35314	58.8434	FALSE	1
2022-09-13	14:57:25	0.276501	1.22993	0.35314	54.2859	FALSE	1
2022-09-13	14:57:25	-0.280699	-1.24861	0.35314	58.8434	FALSE	1
2022-09-13	14:57:26	-0.342684	-1.52433	-2.17079	54.2859	FALSE	1
2022-09-13	14:57:26	-0.347926	-1.54764	-2.17079	58.8434	FALSE	1
2022-09-13	14:57:26	-0.504719	-2.24509	-2.17079	54.2859	FALSE	1
2022-09-13	14:57:26	-0.75673	-3.36609	-2.17079	58.8434	FALSE	1
2022-09-13	14:57:27	-0.560648	-2.49387	-3.03581	54.2859	FALSE	1
2022-09-13	14:57:27	-0.79561	-3.53903	-3.03581	58.8434	FALSE	1
2022-09-13	14:57:27	-0.691182	-3.07452	-3.03581	54.2859	FALSE	1
2022-09-13	14:57:28	-0.834898	-3.71379	-2.25256	58.8434	FALSE	1
2022-09-13	14:57:28	-0.680495	-3.02698	-2.25256	54.2859	FALSE	1
2022-09-13	14:57:28	-0.388333	-1.72738	-2.25256	58.8434	FALSE	1
2022-09-13	14:57:28	-0.12187	-0.542102	-2.25256	54.2859	FALSE	1
2022-09-13	14:57:29	-0.0862465	-0.383642	-0.950589	58.8434	FALSE	1
2022-09-13	14:57:29	-0.165381	-0.735648	-0.950589	54.2859	FALSE	1
2022-09-13	14:57:29	-0.339325	-1.50939	-0.950589	58.8434	FALSE	1
2022-09-13	14:57:29	-0.263855	-1.17368	-0.950589	54.2859	FALSE	1
2022-09-13	14:57:30	-0.0222771	-0.099093	-0.053027	58.8434	FALSE	1
2022-09-13	14:57:30	-0.0219209	-0.0975085	-0.053027	54.2859	FALSE	1
2022-09-13	14:57:30	-0.106094	-0.471927	-0.053027	58.8434	FALSE	1
2022-09-13	14:57:30	0.102608	0.456421	-0.053027	54.7423	FALSE	1
2022-09-13	14:57:31	0.0849493	0.377871	0.625296	59.2213	FALSE	1
2022-09-13	14:57:31	0.233448	1.03842	0.625296	55.7807	FALSE	1
2022-09-13	14:57:31	0.103321	0.459592	0.625296	59.6809	FALSE	1
2022-09-13	14:57:32	0.228461	1.01624	1.27951	56.797	FALSE	1
2022-09-13	14:57:32	0.436756	1.94278	1.27951	61.6236	FALSE	1
2022-09-13	14:57:32	0.18673	0.830612	1.27951	57.6276	FALSE	1
2022-09-13	14:57:32	0.298639	1.32841	1.27951	62.952	FALSE	1
2022-09-13	14:57:33	0.155993	0.693888	0.982	58.3215	FALSE	1
2022-09-13	14:57:33	0.345458	1.53667	0.982	64.4887	FALSE	1
2022-09-13	14:57:33	0.083728	0.372439	0.982	58.6939	FALSE	1
2022-09-13	14:57:33	0.297875	1.32501	0.982	65.8137	FALSE	1
2022-09-13	14:57:34	0.229886	1.02258	1.0734	59.7165	FALSE	1
2022-09-13	14:57:34	0.223066	0.992242	1.0734	66.806	FALSE	1
2022-09-13	14:57:34	0.252277	1.12218	1.0734	60.8386	FALSE	1
2022-09-13	14:57:34	0.260013	1.15659	1.0734	67.9625	FALSE	1
2022-09-13	14:57:35	0.280064	1.24578	1.04589	62.0844	FALSE	1
2022-09-13	14:57:35	0.0539061	0.239785	1.04589	68.2023	FALSE	1
2022-09-13	14:57:35	0.371412	1.65211	1.04589	63.7365	FALSE	1
2022-09-13	14:57:36	0.18841	0.838085	1.41641	69.0404	FALSE	1
2022-09-13	14:57:36	0.362863	1.61409	1.41641	65.3506	FALSE	1
2022-09-13	14:57:36	0.375942	1.67227	1.41641	70.7127	FALSE	1
2022-09-13	14:57:36	0.346476	1.54119	1.41641	66.8918	FALSE	1
2022-09-13	14:57:37	0.319453	1.42099	1.25489	72.1337	FALSE	1
2022-09-13	14:57:37	0.214364	0.953534	1.25489	67.8454	FALSE	1
2022-09-13	14:57:37	0.38271	1.70237	1.25489	73.836	FALSE	1
2022-09-13	14:57:37	0.211921	0.942667	1.25489	68.788	FALSE	1
2022-09-13	14:57:38	0.445204	1.98036	1.60118	75.8164	FALSE	1
2022-09-13	14:57:38	0.160216	0.712673	1.60118	69.5007	FALSE	1
2022-09-13	14:57:38	0.612125	2.72285	1.60118	78.5393	FALSE	1
2022-09-13	14:57:38	0.222303	0.988848	1.60118	70.4895	FALSE	1
2022-09-13	14:57:39	0.434517	1.93282	1.70147	80.4721	FALSE	1
2022-09-13	14:57:39	0.341998	1.52128	1.70147	72.0108	FALSE	1
2022-09-13	14:57:39	0.371005	1.6503	1.70147	82.1224	FALSE	1
2022-09-13	14:57:40	0.484237	2.15398	1.7018	74.1648	FALSE	1
2022-09-13	14:57:40	0.263372	1.17153	1.7018	83.2939	FALSE	1
2022-09-13	14:57:40	0.567086	2.52251	1.7018	76.6873	FALSE	1
2022-09-13	14:57:40	0.215636	0.959192	1.7018	84.2531	FALSE	1
2022-09-13	14:57:41	0.456603	2.03106	1.9009	78.7184	FALSE	1
2022-09-13	14:57:41	0.329529	1.46581	1.9009	85.7189	FALSE	1
2022-09-13	14:57:41	0.456043	2.02857	1.9009	80.747	FALSE	1
2022-09-13	14:57:41	0.467188	2.07815	1.9009	87.7971	FALSE	1
2022-09-13	14:57:42	0.408206	1.81578	1.30345	82.5627	FALSE	1
2022-09-13	14:57:42	0.403219	1.7936	1.30345	89.5907	FALSE	1
2022-09-13	14:57:42	0.131107	0.58319	1.30345	83.1459	FALSE	1
2022-09-13	14:57:42	0.22958	1.02122	1.30345	90.6119	FALSE	1
2022-09-13	14:57:43	0.203982	0.907353	2.95209	84.0533	FALSE	1
2022-09-13	14:57:43	1.2509	5.56425	2.95209	96.1761	FALSE	1
2022-09-13	14:57:43	0.536094	2.38465	2.95209	86.4379	FALSE	1
2022-09-13	14:57:44	3.63207	16.1562	9.84993	112.332	1	2
2022-09-13	14:57:44	2.68134	11.9271	9.84993	98.3651	FALSE	2
2022-09-13	14:57:44	1.12973	5.02526	9.84993	117.358	FALSE	2
2022-09-13	14:57:44	1.41431	6.29113	9.84993	104.656	FALSE	2
2022-09-13	14:57:45	0.213702	0.950589	3.62925	118.308	FALSE	2
2022-09-13	14:57:45	0.513295	2.28324	3.62925	106.939	FALSE	2
2022-09-13	14:57:45	1.17915	5.2451	3.62925	123.553	FALSE	2
2022-09-13	14:57:45	1.35742	6.03808	3.62925	112.978	FALSE	2
2022-09-13	14:57:46	3.75915	16.7215	11.0152	140.275	1	3
2022-09-13	14:57:46	1.98078	8.81091	11.0152	121.788	FALSE	3
2022-09-13	14:57:46	0.980929	4.36337	11.0152	144.638	FALSE	3
2022-09-13	14:57:46	3.18444	14.165	11.0152	135.953	1	4
2022-09-13	14:57:47	0.853804	3.79789	7.22381	148.436	FALSE	4
2022-09-13	14:57:47	1.82083	8.09942	7.22381	144.053	FALSE	4
2022-09-13	14:57:47	2.19732	9.77412	7.22381	158.21	FALSE	4
2022-09-13	14:57:48	1.01162	4.49989	3.83678	148.553	FALSE	4
2022-09-13	14:57:48	1.76383	7.84587	3.83678	166.056	FALSE	4
2022-09-13	14:57:48	0.0979264	0.435596	3.83678	148.988	FALSE	4
2022-09-13	14:57:48	0.576807	2.56575	3.83678	168.622	FALSE	4
2022-09-13	14:57:49	2.67477	11.8979	19.105	160.886	FALSE	4
2022-09-13	14:57:49	4.08678	18.1788	19.105	186.801	1	5
2022-09-13	14:57:49	6.84764	30.4597	19.105	191.346	1	6
2022-09-13	14:57:49	3.5708	15.8836	19.105	202.684	1	7
2022-09-13	14:57:50	1.74709	7.77141	8.11746	199.117	FALSE	7
2022-09-13	14:57:50	0.772176	3.43479	8.11746	206.119	FALSE	7
2022-09-13	14:57:50	2.93833	13.0703	8.11746	212.188	FALSE	7
2022-09-13	14:57:50	1.84195	8.19336	8.11746	214.312	FALSE	7
2022-09-13	14:57:51	0.783575	3.4855	2.29154	215.673	FALSE	7
2022-09-13	14:57:51	0.331616	1.47509	2.29154	215.787	FALSE	7
2022-09-13	14:57:51	0.430293	1.91403	2.29154	217.587	FALSE	7
2022-09-13	14:57:52	0.451158	2.00684	2.30209	217.794	FALSE	7
2022-09-13	14:57:52	0.666171	2.96326	2.30209	220.55	FALSE	7
2022-09-13	14:57:52	0.304389	1.35398	2.30209	219.148	FALSE	7
2022-09-13	14:57:52	0.64841	2.88426	2.30209	223.435	FALSE	7
2022-09-13	14:57:53	0.662354	2.94628	2.57673	222.095	FALSE	7
2022-09-13	14:57:53	0.585203	2.6031	2.57673	226.038	FALSE	7
2022-09-13	14:57:53	0.491005	2.18409	2.57673	224.279	FALSE	7
2022-09-13	14:57:53	0.578537	2.57345	2.57673	228.611	FALSE	7
2022-09-13	14:57:54	0.415076	1.84634	2.00724	226.125	FALSE	7
2022-09-13	14:57:54	0.613397	2.72851	2.00724	231.34	FALSE	7
2022-09-13	14:57:54	0.271667	1.20843	2.00724	227.333	FALSE	7
2022-09-13	14:57:54	0.504847	2.24566	2.00724	233.585	FALSE	7
2022-09-13	14:57:55	0.270089	1.20141	1.57462	228.535	FALSE	7
2022-09-13	14:57:55	0.367443	1.63446	1.57462	235.22	FALSE	7
2022-09-13	14:57:55	0.42444	1.88799	1.57462	230.423	FALSE	7
2022-09-13	14:57:56	0.384033	1.70826	1.64001	236.928	FALSE	7
2022-09-13	14:57:56	0.357774	1.59145	1.64001	232.014	FALSE	7
2022-09-13	14:57:56	0.281794	1.25348	1.64001	238.182	FALSE	7
2022-09-13	14:57:56	0.451158	2.00684	1.64001	234.021	FALSE	7
2022-09-13	14:57:57	0.261998	1.16542	1.3713	239.347	FALSE	7
2022-09-13	14:57:57	0.377367	1.6786	1.3713	235.7	FALSE	7
2022-09-13	14:57:57	0.277825	1.23582	1.3713	240.583	FALSE	7
2022-09-13	14:57:57	0.315942	1.40537	1.3713	237.105	FALSE	7
2022-09-13	14:57:58	0.0797585	0.354782	1.40282	240.938	FALSE	7
2022-09-13	14:57:58	0.40841	1.81669	1.40282	238.922	FALSE	7
2022-09-13	14:57:58	0.102863	0.457555	1.40282	241.395	FALSE	7
2022-09-13	14:57:58	0.670445	2.98227	1.40282	241.904	FALSE	7
2022-09-13	14:57:59	0.851717	3.78861	7.68198	245.184	FALSE	7
2022-09-13	14:57:59	1.51508	6.73938	7.68198	248.643	FALSE	7
2022-09-13	14:57:59	2.81416	12.5179	7.68198	257.702	FALSE	7
2022-09-13	14:58:00	3.70088	16.4623	12.9549	265.106	1	8
2022-09-13	14:58:00	4.29401	19.1006	12.9549	276.802	1	9
2022-09-13	14:58:00	1.99273	8.86406	12.9549	273.97	FALSE	9
2022-09-13	14:58:00	1.66195	7.39269	12.9549	284.195	FALSE	9
2022-09-13	14:58:01	1.35156	6.01201	6.25923	279.982	FALSE	9
2022-09-13	14:58:01	1.06225	4.7251	6.25923	288.92	FALSE	9
2022-09-13	14:58:01	1.30312	5.79654	6.25923	285.778	FALSE	9
2022-09-13	14:58:01	1.91162	8.50327	6.25923	297.423	FALSE	9
2022-09-13	14:58:02	1.00118	4.45345	3.50644	290.232	FALSE	9
2022-09-13	14:58:02	1.14892	5.11063	3.50644	302.534	FALSE	9
2022-09-13	14:58:02	0.434466	1.93259	3.50644	292.164	FALSE	9
2022-09-13	14:58:02	0.568563	2.52908	3.50644	305.063	FALSE	9
2022-09-13	14:58:03	1.02877	4.57617	5.8126	296.74	FALSE	9
2022-09-13	14:58:03	0.606781	2.69908	5.8126	307.762	FALSE	9
2022-09-13	14:58:03	2.28464	10.1625	5.8126	306.903	FALSE	9
2022-09-13	14:58:04	1.3221	5.88097	9.9351	313.643	FALSE	9
2022-09-13	14:58:04	2.75991	12.2766	9.9351	319.18	FALSE	9
2022-09-13	14:58:04	3.54683	15.777	9.9351	329.42	1	10
2022-09-13	14:58:04	1.3052	5.80579	9.9351	324.985	FALSE	10
2022-09-13	14:58:05	0.79813	3.55024	3.37101	332.97	FALSE	10
2022-09-13	14:58:05	1.25757	5.59392	3.37101	330.579	FALSE	10
2022-09-13	14:58:05	0.606832	2.69931	3.37101	335.67	FALSE	10
2022-09-13	14:58:05	0.368817	1.64057	3.37101	332.22	FALSE	10
2022-09-13	14:58:06	1.20566	5.36302	2.54051	341.033	FALSE	10
2022-09-13	14:58:06	0.259148	1.15274	2.54051	333.373	FALSE	10
2022-09-13	14:58:06	0.535382	2.38149	2.54051	343.414	FALSE	10
2022-09-13	14:58:06	0.284338	1.26479	2.54051	334.637	FALSE	10
2022-09-13	14:58:07	0.378893	1.68539	1.57575	345.1	FALSE	10
2022-09-13	14:58:07	0.343728	1.52897	1.57575	336.166	FALSE	10
2022-09-13	14:58:07	0.340115	1.5129	1.57575	346.612	FALSE	10
2022-09-13	14:58:08	0.286069	1.27249	1.78698	337.439	FALSE	10
2022-09-13	14:58:08	0.541489	2.40865	1.78698	349.021	FALSE	10
2022-09-13	14:58:08	0.35701	1.58805	1.78698	339.027	FALSE	10
2022-09-13	14:58:08	0.422354	1.87872	1.78698	350.9	FALSE	10
2022-09-13	14:58:09	0.33355	1.4837	1.79988	340.511	FALSE	10
2022-09-13	14:58:09	0.427646	1.90225	1.79988	352.802	FALSE	10
2022-09-13	14:58:09	0.327697	1.45766	1.79988	341.968	FALSE	10
2022-09-13	14:58:09	0.529631	2.3559	1.79988	355.158	FALSE	10
2022-09-13	14:58:10	0.284949	1.26751	1.47498	343.236	FALSE	10
2022-09-13	14:58:10	0.32271	1.43548	1.47498	356.593	FALSE	10
2022-09-13	14:58:10	0.252023	1.12105	1.47498	344.357	FALSE	10
2022-09-13	14:58:10	0.466679	2.07588	1.47498	358.669	FALSE	10
2022-09-13	14:58:11	0.188512	0.838539	1.37413	345.195	FALSE	10
2022-09-13	14:58:11	0.159504	0.709506	1.37413	359.379	FALSE	10
2022-09-13	14:58:11	0.355382	1.58081	1.37413	346.776	FALSE	10
2022-09-13	14:58:11	0.532277	2.36767	1.37413	361.747	FALSE	10
2022-09-13	14:58:12	0.226527	1.00764	1.42726	347.784	FALSE	10
2022-09-13	14:58:12	0.419199	1.86468	1.42726	363.611	FALSE	10
2022-09-13	14:58:12	0.316858	1.40945	1.42726	349.193	FALSE	10
2022-09-13	14:58:13	0.231769	1.03095	1.36197	364.642	FALSE	10
2022-09-13	14:58:13	0.414822	1.84521	1.36197	351.039	FALSE	10
2022-09-13	14:58:13	0.219402	0.975944	1.36197	365.618	FALSE	10
2022-09-13	14:58:13	0.358741	1.59575	1.36197	352.634	FALSE	10
2022-09-13	14:58:14	0.0874429	0.388964	1.10311	366.007	FALSE	10
2022-09-13	14:58:14	0.292074	1.2992	1.10311	353.933	FALSE	10
2022-09-13	14:58:14	0.259351	1.15365	1.10311	367.161	FALSE	10
2022-09-13	14:58:14	0.353092	1.57062	1.10311	355.504	FALSE	10
2022-09-13	14:58:15	0.203626	0.905769	1.08336	368.067	FALSE	10
2022-09-13	14:58:15	0.323982	1.44114	1.08336	356.945	FALSE	10
2022-09-13	14:58:15	0.289937	1.2897	1.08336	369.356	FALSE	10
2022-09-13	14:58:15	0.156654	0.696828	1.08336	357.642	FALSE	10
2022-09-13	14:58:16	0.395382	1.75874	1.9224	371.115	FALSE	10
2022-09-13	14:58:16	0.199046	0.885396	1.9224	358.527	FALSE	10
2022-09-13	14:58:16	0.702099	3.12308	1.9224	374.238	FALSE	10
2022-09-13	14:58:17	0.265153	1.17945	2.41702	359.707	FALSE	10
2022-09-13	14:58:17	0.426985	1.89931	2.41702	376.137	FALSE	10
2022-09-13	14:58:17	1.05726	4.7029	2.41702	364.41	FALSE	10
2022-09-13	14:58:17	0.424084	1.88641	2.41702	378.024	FALSE	10
2022-09-13	14:58:18	1.08184	4.81224	3.54995	369.222	FALSE	10
2022-09-13	14:58:18	0.280725	1.24872	3.54995	379.272	FALSE	10
2022-09-13	14:58:18	0.433753	1.92942	3.54995	371.151	FALSE	10
2022-09-13	14:58:18	1.39594	6.20942	3.54995	385.482	FALSE	10
2022-09-13	14:58:19	0.381743	1.69807	1.26994	372.85	FALSE	10
2022-09-13	14:58:19	0.390191	1.73565	1.26994	387.218	FALSE	10
2022-09-13	14:58:19	0.4107	1.82688	1.26994	374.676	FALSE	10
2022-09-13	14:58:19	-0.0406486	-0.180813	1.26994	387.218	FALSE	10
2022-09-13	14:58:20	-0.0673152	-0.299431	-0.559759	374.676	FALSE	10
2022-09-13	14:58:20	-0.0422262	-0.187831	-0.559759	387.218	FALSE	10
2022-09-13	14:58:20	-0.267977	-1.19202	-0.559759	374.676	FALSE	10
2022-09-13	14:58:21	-0.466755	-2.07622	-0.253308	387.218	FALSE	10
2022-09-13	14:58:21	-0.108384	-0.482114	-0.253308	374.676	FALSE	10
2022-09-13	14:58:21	0.122303	0.544028	-0.253308	387.762	FALSE	10
2022-09-13	14:58:21	0.225051	1.00107	-0.253308	375.678	FALSE	10
2022-09-13	14:58:22	0.237723	1.05744	1.55732	388.819	FALSE	10
2022-09-13	14:58:22	0.36215	1.61092	1.55732	377.288	FALSE	10
2022-09-13	14:58:22	0.383881	1.70758	1.55732	390.527	FALSE	10
2022-09-13	14:58:22	0.416654	1.85336	1.55732	379.142	FALSE	10
2022-09-13	14:58:23	0.274975	1.22314	1.18404	391.75	FALSE	10
2022-09-13	14:58:23	0.227697	1.01284	1.18404	380.155	FALSE	10
2022-09-13	14:58:23	0.233753	1.03978	1.18404	392.79	FALSE	10
2022-09-13	14:58:23	0.328308	1.46038	1.18404	381.615	FALSE	10
2022-09-13	14:58:24	0.360471	1.60345	1.32116	394.393	FALSE	10
2022-09-13	14:58:24	0.272939	1.21409	1.32116	382.829	FALSE	10
2022-09-13	14:58:24	0.257621	1.14595	1.32116	395.539	FALSE	10
2022-09-13	14:58:25	0.235534	1.0477	1.06197	383.877	FALSE	10
2022-09-13	14:58:25	0.234924	1.04499	1.06197	396.584	FALSE	10
2022-09-13	14:58:25	0.24841	1.10498	1.06197	384.982	FALSE	10
2022-09-13	14:58:25	0.236094	1.05019	1.06197	397.634	FALSE	10
2022-09-13	14:58:26	0.385407	1.71437	1.94719	386.696	FALSE	10
2022-09-13	14:58:26	0.454618	2.02223	1.94719	399.656	FALSE	10
2022-09-13	14:58:26	0.422506	1.87939	1.94719	388.576	FALSE	10
2022-09-13	14:58:26	0.488461	2.17277	1.94719	401.829	FALSE	10
2022-09-13	14:58:27	0.503473	2.23955	2.04159	390.815	FALSE	10
2022-09-13	14:58:27	0.480573	2.13768	2.04159	403.967	FALSE	10
2022-09-13	14:58:27	0.424389	1.88777	2.04159	392.703	FALSE	10
2022-09-13	14:58:27	0.427443	1.90135	2.04159	405.868	FALSE	10
2022-09-13	14:58:28	0.399809	1.77843	1.75278	394.481	FALSE	10
2022-09-13	14:58:28	0.39299	1.7481	1.75278	407.616	FALSE	10
2022-09-13	14:58:28	0.389326	1.7318	1.75278	396.213	FALSE	10
2022-09-13	14:58:29	0.385407	1.71437	1.77702	409.331	FALSE	10
2022-09-13	14:58:29	0.386527	1.71935	1.77702	397.932	FALSE	10
2022-09-13	14:58:29	0.404338	1.79858	1.77702	411.129	FALSE	10
2022-09-13	14:58:29	0.421692	1.87577	1.77702	399.808	FALSE	10
2022-09-13	14:58:30	0.441692	1.96473	1.87334	413.094	FALSE	10
2022-09-13	14:58:30	0.435433	1.93689	1.87334	401.745	FALSE	10
2022-09-13	14:58:30	0.400878	1.78319	1.87334	414.877	FALSE	10
2022-09-13	14:58:30	0.406578	1.80854	1.87334	403.554	FALSE	10
2022-09-13	14:58:31	0.338842	1.50724	1.73757	416.384	FALSE	10
2022-09-13	14:58:31	0.366272	1.62925	1.73757	405.183	FALSE	10
2022-09-13	14:58:31	0.468155	2.08245	1.73757	418.467	FALSE	10
2022-09-13	14:58:31	0.389224	1.73135	1.73757	406.914	FALSE	10
2022-09-13	14:58:32	0.54556	2.42676	2.07641	420.894	FALSE	10
2022-09-13	14:58:32	0.519606	2.31131	2.07641	409.226	FALSE	10
2022-09-13	14:58:32	0.335229	1.49117	2.07641	422.385	FALSE	10
2022-09-13	14:58:33	0.31528	1.40243	1.23282	410.628	FALSE	10
2022-09-13	14:58:33	0.308664	1.373	1.23282	423.758	FALSE	10
2022-09-13	14:58:33	0.265814	1.18239	1.23282	411.81	FALSE	10
2022-09-13	14:58:33	0.218842	0.973453	1.23282	424.731	FALSE	10
2022-09-13	14:58:34	0.295942	1.31641	0.621957	413.127	FALSE	10
2022-09-13	14:58:34	0.244797	1.08891	0.621957	425.82	FALSE	10
2022-09-13	14:58:34	0.0299366	0.133164	0.621957	413.26	FALSE	10
2022-09-13	14:58:34	-0.0113865	-0.0506494	0.621957	425.82	FALSE	10
2022-09-13	14:58:35	-0.0715901	-0.318447	-0.982338	413.26	FALSE	10
2022-09-13	14:58:35	-0.0845163	-0.375945	-0.982338	425.82	FALSE	10
2022-09-13	14:58:35	-0.310572	-1.38149	-0.982338	413.26	FALSE	10
2022-09-13	14:58:35	-0.416679	-1.85347	-0.982338	425.82	FALSE	10
2022-09-13	14:58:36	-0.3293	-1.46479	-2.31633	413.26	FALSE	10
2022-09-13	14:58:36	-0.543091	-2.41578	-2.31633	425.82	FALSE	10
2022-09-13	14:58:36	-0.689809	-3.06841	-2.31633	413.26	FALSE	10
2022-09-13	14:58:37	-0.493829	-2.19665	-2.67735	425.82	FALSE	10
2022-09-13	14:58:37	-0.647875	-2.88188	-2.67735	413.26	FALSE	10
2022-09-13	14:58:37	-0.640394	-2.8486	-2.67735	425.82	FALSE	10
2022-09-13	14:58:37	-0.625483	-2.78227	-2.67735	413.26	FALSE	10
2022-09-13	14:58:38	-0.533167	-2.37163	-2.22908	425.82	FALSE	10
2022-09-13	14:58:38	-0.481412	-2.14142	-2.22908	413.26	FALSE	10
2022-09-13	14:58:38	-0.430623	-1.9155	-2.22908	425.82	FALSE	10
2022-09-13	14:58:38	-0.559274	-2.48776	-2.22908	413.26	FALSE	10
2022-09-13	14:58:39	-0.63159	-2.80944	-2.11623	425.82	FALSE	10
2022-09-13	14:58:39	-0.491794	-2.1876	-2.11623	413.26	FALSE	10
2022-09-13	14:58:39	-0.492251	-2.18963	-2.11623	425.82	FALSE	10
2022-09-13	14:58:39	-0.287366	-1.27826	-2.11623	413.26	FALSE	10
2022-09-13	14:58:40	-0.371081	-1.65064	-0.255138	425.82	FALSE	10
2022-09-13	14:58:40	0.0997076	0.443519	-0.255138	413.703	FALSE	10
2022-09-13	14:58:40	0.0993004	0.441708	-0.255138	426.262	FALSE	10
2022-09-13	14:58:41	0.877672	3.90406	12.5408	417.608	FALSE	10
2022-09-13	14:58:41	3.07599	13.6826	12.5408	439.944	1	11
2022-09-13	14:58:41	4.23915	18.8566	12.5408	436.464	1	12
2022-09-13	14:58:41	3.08434	13.7198	12.5408	453.664	1	13
2022-09-13	14:58:42	1.7135	7.62199	9.99108	444.086	FALSE	13
2022-09-13	14:58:42	1.90724	8.48378	9.99108	462.148	FALSE	13
2022-09-13	14:58:42	4.45345	19.8098	9.99108	463.896	1	14
2022-09-13	14:58:42	0.910191	4.04871	9.99108	466.197	FALSE	14
2022-09-13	14:58:43	1.59777	7.1072	6.16692	471.003	FALSE	14
2022-09-13	14:58:43	2.32576	10.3454	6.16692	476.542	FALSE	14
2022-09-13	14:58:43	0.616705	2.74323	6.16692	473.746	FALSE	14
2022-09-13	14:58:43	1.00531	4.47182	6.16692	481.014	FALSE	14
2022-09-13	14:58:44	0.416298	1.85178	3.59529	475.598	FALSE	14
2022-09-13	14:58:44	1.47223	6.54877	3.59529	487.563	FALSE	14
2022-09-13	14:58:44	0.536247	2.38533	3.59529	477.983	FALSE	14
2022-09-13	14:58:45	0.825916	3.67384	2.01884	491.237	FALSE	14
2022-09-13	14:58:45	0.300013	1.33452	2.01884	479.318	FALSE	14
2022-09-13	14:58:45	0.278944	1.2408	2.01884	492.477	FALSE	14
2022-09-13	14:58:45	0.410547	1.8262	2.01884	481.144	FALSE	14
2022-09-13	14:58:46	0.205	0.911881	1.30469	493.389	FALSE	14
2022-09-13	14:58:46	0.331718	1.47555	1.30469	482.62	FALSE	14
2022-09-13	14:58:46	0.196298	0.873173	1.30469	494.262	FALSE	14
2022-09-13	14:58:46	0.440216	1.95817	1.30469	484.578	FALSE	14
2022-09-13	14:58:47	0.227646	1.01261	1.75489	495.275	FALSE	14
2022-09-13	14:58:47	0.395534	1.75941	1.75489	486.337	FALSE	14
2022-09-13	14:58:47	0.344033	1.53033	1.75489	496.805	FALSE	14
2022-09-13	14:58:47	0.610852	2.71719	1.75489	489.054	FALSE	14
2022-09-13	14:58:48	0.277621	1.23491	0.61858	498.04	FALSE	14
2022-09-13	14:58:48	0.183423	0.815902	0.61858	489.87	FALSE	14
2022-09-13	14:58:48	-0.0438547	-0.195074	0.61858	498.04	FALSE	14
2022-09-13	14:58:49	-0.0778496	-0.346291	0.130731	489.87	FALSE	14
2022-09-13	14:58:49	-0.0331168	-0.14731	0.130731	498.04	FALSE	14
2022-09-13	14:58:49	0.197672	0.879285	0.130731	490.75	FALSE	14
2022-09-13	14:58:49	0.0308527	0.137239	0.130731	498.177	FALSE	14
2022-09-13	14:58:50	0.375942	1.67227	1.15687	492.422	FALSE	14
2022-09-13	14:58:50	0.10327	0.459366	1.15687	498.637	FALSE	14
2022-09-13	14:58:50	0.446883	1.98782	1.15687	494.41	FALSE	14
2022-09-13	14:58:50	0.114211	0.508033	1.15687	499.145	FALSE	14
2022-09-13	14:58:51	0.455026	2.02405	4.31311	496.434	FALSE	14
2022-09-13	14:58:51	0.650394	2.89308	4.31311	502.038	FALSE	14
2022-09-13	14:58:51	1.73818	7.73177	4.31311	504.166	FALSE	14
2022-09-13	14:58:51	1.03492	4.60353	4.31311	506.641	FALSE	14
2022-09-13	14:58:52	1.63365	7.2668	5.65556	511.432	FALSE	14
2022-09-13	14:58:52	0.304033	1.3524	5.65556	507.994	FALSE	14
2022-09-13	14:58:52	1.8766	8.34749	5.65556	519.78	FALSE	14
2022-09-13	14:58:53	0.21416	0.952627	1.95636	508.947	FALSE	14
2022-09-13	14:58:53	0.66154	2.94266	1.95636	522.723	FALSE	14
2022-09-13	14:58:53	0.49986	2.22348	1.95636	511.17	FALSE	14
2022-09-13	14:58:53	0.383677	1.70667	1.95636	524.429	FALSE	14
2022-09-13	14:58:54	0.495382	2.20356	1.74012	513.374	FALSE	14
2022-09-13	14:58:54	0.375127	1.66864	1.74012	526.098	FALSE	14
2022-09-13	14:58:54	0.393804	1.75172	1.74012	515.125	FALSE	14
2022-09-13	14:58:54	0.300471	1.33656	1.74012	527.434	FALSE	14
2022-09-13	14:58:55	0.495942	2.20605	2.58811	517.331	FALSE	14
2022-09-13	14:58:55	0.745051	3.31414	2.58811	530.749	FALSE	14
2022-09-13	14:58:55	0.288817	1.28472	2.58811	518.616	FALSE	14
2022-09-13	14:58:55	0.797519	3.54752	2.58811	534.296	FALSE	14
2022-09-13	14:58:56	0.719656	3.20117	3.48059	521.817	FALSE	14
2022-09-13	14:58:56	1.10566	4.9182	3.48059	539.214	FALSE	14
2022-09-13	14:58:56	0.522099	2.3224	3.48059	524.14	FALSE	14
2022-09-13	14:58:57	0.532583	2.36904	1.95794	541.583	FALSE	14
2022-09-13	14:58:57	0.590445	2.62642	1.95794	526.766	FALSE	14
2022-09-13	14:58:57	0.161896	0.720146	1.95794	542.303	FALSE	14
2022-09-13	14:58:57	0.475738	2.11618	1.95794	528.882	FALSE	14
2022-09-13	14:58:58	0.142863	0.635483	0.44137	542.939	FALSE	14
2022-09-13	14:58:58	0.385051	1.71278	0.44137	530.595	FALSE	14
2022-09-13	14:58:58	-0.0242618	-0.107921	0.44137	542.939	FALSE	14
2022-09-13	14:58:58	-0.106755	-0.474868	0.44137	530.595	FALSE	14
2022-09-13	14:58:59	-0.261514	-1.16327	-1.864	542.939	FALSE	14
2022-09-13	14:58:59	-0.358104	-1.59292	-1.864	530.595	FALSE	14
2022-09-13	14:58:59	-0.522124	-2.32251	-1.864	542.939	FALSE	14
2022-09-13	14:58:59	-0.53444	-2.3773	-1.864	530.595	FALSE	14
2022-09-13	14:59:00	-0.610979	-2.71776	-3.08267	542.939	FALSE	14
2022-09-13	14:59:00	-0.677086	-3.01181	-3.08267	530.595	FALSE	14
2022-09-13	14:59:00	-0.790979	-3.51843	-3.08267	542.939	FALSE	14
2022-09-13	14:59:01	-0.703701	-3.1302	-2.08137	530.595	FALSE	14
2022-09-13	14:59:01	-0.628231	-2.7945	-2.08137	542.939	FALSE	14
2022-09-13	14:59:01	-0.361513	-1.60808	-2.08137	530.595	FALSE	14
2022-09-13	14:59:01	-0.178206	-0.792696	-2.08137	542.939	FALSE	14
2022-09-13	14:59:02	0.0856109	0.380814	3.76813	530.976	FALSE	14
2022-09-13	14:59:02	0.688308	3.06173	3.76813	546.001	FALSE	14
2022-09-13	14:59:02	0.877672	3.90406	3.76813	534.88	FALSE	14
2022-09-13	14:59:02	1.73686	7.7259	3.76813	553.727	FALSE	14
2022-09-13	14:59:03	1.41833	6.30902	7.22362	541.189	FALSE	14
2022-09-13	14:59:03	2.09574	9.32227	7.22362	563.049	FALSE	14
2022-09-13	14:59:03	1.34174	5.96833	7.22362	547.157	FALSE	14
2022-09-13	14:59:03	1.63996	7.29487	7.22362	570.344	FALSE	14
2022-09-13	14:59:04	0.293499	1.30554	2.98061	548.463	FALSE	14
2022-09-13	14:59:04	1.07207	4.76878	2.98061	575.112	FALSE	14
2022-09-13	14:59:04	0.644644	2.86751	2.98061	551.33	FALSE	14
2022-09-13	14:59:05	0.566679	2.5207	1.83621	577.633	FALSE	14
2022-09-13	14:59:05	0.297977	1.32546	1.83621	552.656	FALSE	14
2022-09-13	14:59:05	0.499453	2.22167	1.83621	579.855	FALSE	14
2022-09-13	14:59:05	0.287087	1.27702	1.83621	553.933	FALSE	14
2022-09-13	14:59:06	0.469377	2.08788	1.4764	581.943	FALSE	14
2022-09-13	14:59:06	0.340064	1.51267	1.4764	555.445	FALSE	14
2022-09-13	14:59:06	0.37584	1.67181	1.4764	583.615	FALSE	14
2022-09-13	14:59:06	0.142354	0.633219	1.4764	556.079	FALSE	14
2022-09-13	14:59:07	0.488308	2.17209	2.55647	585.787	FALSE	14
2022-09-13	14:59:07	0.31869	1.4176	2.55647	557.496	FALSE	14
2022-09-13	14:59:07	0.579911	2.57956	2.55647	588.366	FALSE	14
2022-09-13	14:59:07	0.911972	4.05663	2.55647	561.553	FALSE	14
2022-09-13	14:59:08	0.595941	2.65086	3.16964	591.017	FALSE	14
2022-09-13	14:59:08	1.00999	4.49264	3.16964	566.045	FALSE	14
2022-09-13	14:59:08	0.531769	2.36541	3.16964	593.382	FALSE	14
2022-09-13	14:59:09	0.348053	1.54821	1.67017	567.594	FALSE	14
2022-09-13	14:59:09	0.341387	1.51856	1.67017	594.901	FALSE	14
2022-09-13	14:59:09	0.458893	2.04125	1.67017	569.635	FALSE	14
2022-09-13	14:59:09	0.35355	1.57266	1.67017	596.474	FALSE	14
2022-09-13	14:59:10	0.708206	3.15024	2.04679	572.785	FALSE	14
2022-09-13	14:59:10	0.310649	1.38183	2.04679	597.856	FALSE	14
2022-09-13	14:59:10	0.535891	2.38375	2.04679	575.169	FALSE	14
2022-09-13	14:59:10	0.285814	1.27136	2.04679	599.127	FALSE	14
2022-09-13	14:59:11	0.497723	2.21397	1.56904	577.383	FALSE	14
2022-09-13	14:59:11	0.219453	0.976171	1.56904	600.103	FALSE	14
2022-09-13	14:59:11	0.506374	2.25245	1.56904	579.635	FALSE	14
2022-09-13	14:59:11	0.187392	0.833557	1.56904	600.937	FALSE	14
2022-09-13	14:59:12	0.507138	2.25585	1.86128	581.891	FALSE	14
2022-09-13	14:59:12	0.248868	1.10701	1.86128	602.044	FALSE	14
2022-09-13	14:59:12	0.4993	2.22099	1.86128	584.112	FALSE	14
2022-09-13	14:59:13	0.161641	0.719011	1.52427	602.763	FALSE	14
2022-09-13	14:59:13	0.476858	2.12116	1.52427	586.233	FALSE	14
2022-09-13	14:59:13	0.227138	1.01036	1.52427	603.773	FALSE	14
2022-09-13	14:59:13	0.505051	2.24657	1.52427	588.48	FALSE	14
2022-09-13	14:59:14	0.0841351	0.37425	-0.461229	604.147	FALSE	14
2022-09-13	14:59:14	-0.10533	-0.468529	-0.461229	588.48	FALSE	14
2022-09-13	14:59:14	-0.219783	-0.977639	-0.461229	604.147	FALSE	14
2022-09-13	14:59:14	-0.173778	-0.772999	-0.461229	588.48	FALSE	14
2022-09-13	14:59:15	-0.269809	-1.20016	-1.97656	604.147	FALSE	14
2022-09-13	14:59:15	-0.424771	-1.88947	-1.97656	588.48	FALSE	14
2022-09-13	14:59:15	-0.428638	-1.90667	-1.97656	604.147	FALSE	14
2022-09-13	14:59:15	-0.654185	-2.90995	-1.97656	588.48	FALSE	14
2022-09-13	14:59:16	-0.615	-2.73564	-3.09708	604.147	FALSE	14
2022-09-13	14:59:16	-0.824872	-3.6692	-3.09708	588.48	FALSE	14
2022-09-13	14:59:16	-0.648892	-2.8864	-3.09708	604.147	FALSE	14
2022-09-13	14:59:17	-0.628384	-2.79518	-1.68652	588.48	FALSE	14
2022-09-13	14:59:17	-0.434491	-1.9327	-1.68652	604.147	FALSE	14
2022-09-13	14:59:17	-0.36874	-1.64023	-1.68652	588.48	FALSE	14
2022-09-13	14:59:17	-0.0849743	-0.377983	-1.68652	604.147	FALSE	14
2022-09-13	14:59:18	-0.151488	-0.673849	-0.202035	588.48	FALSE	14
2022-09-13	14:59:18	0.0638806	0.284154	-0.202035	604.431	FALSE	14
2022-09-13	14:59:18	-0.156119	-0.694449	-0.202035	588.48	FALSE	14
2022-09-13	14:59:18	0.0620486	0.276005	-0.202035	604.707	FALSE	14
2022-09-13	14:59:19	0.0461707	0.205377	0.35614	588.685	FALSE	14
2022-09-13	14:59:19	0.206018	0.916409	0.35614	605.624	FALSE	14
2022-09-13	14:59:19	-0.0858903	-0.382057	0.35614	588.685	FALSE	14
2022-09-13	14:59:19	0.153957	0.684832	0.35614	606.309	FALSE	14
2022-09-13	14:59:20	0.0655091	0.291398	0.627861	588.977	FALSE	14
2022-09-13	14:59:20	0.170802	0.759761	0.627861	607.068	FALSE	14
2022-09-13	14:59:20	0.187137	0.832423	0.627861	589.809	FALSE	14
2022-09-13	14:59:21	0.182507	0.811828	0.611374	607.88	FALSE	14
2022-09-13	14:59:21	0.153448	0.682567	0.611374	590.492	FALSE	14
2022-09-13	14:59:21	0.163728	0.728295	0.611374	608.609	FALSE	14
2022-09-13	14:59:21	0.0500893	0.222807	0.611374	590.714	FALSE	14
2022-09-13	14:59:22	0.103881	0.462083	4.23389	609.071	FALSE	14
2022-09-13	14:59:22	0.00820635	0.0365035	4.23389	590.751	FALSE	14
2022-09-13	14:59:22	0.747494	3.325	4.23389	612.396	FALSE	14
2022-09-13	14:59:22	2.9477	13.112	4.23389	603.863	FALSE	14
2022-09-13	14:59:23	0.424135	1.88664	1.57306	614.282	FALSE	14
2022-09-13	14:59:23	0.544491	2.422	1.57306	606.285	FALSE	14
2022-09-13	14:59:23	0.364746	1.62246	1.57306	615.905	FALSE	14
2022-09-13	14:59:23	0.0811834	0.36112	1.57306	606.646	FALSE	14
2022-09-13	14:59:24	1.61757	7.19527	2.79559	623.1	FALSE	14
2022-09-13	14:59:24	0.154059	0.685285	2.79559	607.331	FALSE	14
2022-09-13	14:59:24	0.113804	0.506223	2.79559	623.606	FALSE	14
2022-09-13	14:59:25	0.93243	4.14764	1.28556	611.479	FALSE	14
2022-09-13	14:59:25	0.142303	0.632992	1.28556	624.239	FALSE	14
2022-09-13	14:59:25	0.143321	0.63752	1.28556	612.117	FALSE	14
2022-09-13	14:59:25	-0.0620226	-0.275889	1.28556	624.239	FALSE	14
2022-09-13	14:59:26	-0.107926	-0.480076	-0.86836	612.117	FALSE	14
2022-09-13	14:59:26	-0.236781	-1.05325	-0.86836	624.239	FALSE	14
2022-09-13	14:59:26	-0.262786	-1.16892	-0.86836	612.117	FALSE	14
2022-09-13	14:59:26	-0.173371	-0.771189	-0.86836	624.239	FALSE	14
2022-09-13	14:59:27	-0.00309134	-0.0137509	0.750705	612.117	FALSE	14
2022-09-13	14:59:27	0.167646	0.745723	0.750705	624.985	FALSE	14
2022-09-13	14:59:27	0.255331	1.13576	0.750705	613.252	FALSE	14
2022-09-13	14:59:27	0.255178	1.13508	0.750705	626.12	FALSE	14
2022-09-13	14:59:28	0.727545	3.23627	3.09327	616.489	FALSE	14
2022-09-13	14:59:28	0.882964	3.9276	3.09327	630.048	FALSE	14
2022-09-13	14:59:28	0.475687	2.11595	3.09327	618.605	FALSE	14
2022-09-13	14:59:29	0.591361	2.63049	1.2511	632.678	FALSE	14
2022-09-13	14:59:29	0.542914	2.41499	1.2511	621.019	FALSE	14
2022-09-13	14:59:29	0.0030664	0.01364	1.2511	632.692	FALSE	14
2022-09-13	14:59:29	-0.0123025	-0.054724	1.2511	621.019	FALSE	14
2022-09-13	14:59:30	0.13584	0.604243	-0.0723808	633.296	FALSE	14
2022-09-13	14:59:30	0.0911071	0.405263	-0.0723808	621.425	FALSE	14
2022-09-13	14:59:30	-0.197544	-0.878715	-0.0723808	633.296	FALSE	14
2022-09-13	14:59:30	-0.0944908	-0.420314	-0.0723808	621.425	FALSE	14
2022-09-13	14:59:31	0.118639	0.52773	1.64448	633.824	FALSE	14
2022-09-13	14:59:31	0.550547	2.44894	1.64448	623.874	FALSE	14
2022-09-13	14:59:31	0.370496	1.64804	1.64448	635.472	FALSE	14
2022-09-13	14:59:31	0.439097	1.95319	1.64448	625.827	FALSE	14
2022-09-13	14:59:32	0.384084	1.70848	1.75081	637.18	FALSE	14
2022-09-13	14:59:32	0.47584	2.11663	1.75081	627.944	FALSE	14
2022-09-13	14:59:32	0.320878	1.42733	1.75081	638.608	FALSE	14
2022-09-13	14:59:33	0.675483	3.00468	2.26405	630.948	FALSE	14
2022-09-13	14:59:33	0.270547	1.20345	2.26405	639.811	FALSE	14
2022-09-13	14:59:33	0.59075	2.62777	2.26405	633.576	FALSE	14
2022-09-13	14:59:33	0.499148	2.22031	2.26405	642.031	FALSE	14
2022-09-13	14:59:34	0.414211	1.84249	2.23027	635.418	FALSE	14
2022-09-13	14:59:34	0.600776	2.67237	2.23027	644.704	FALSE	14
2022-09-13	14:59:34	0.3307	1.47102	2.23027	636.889	FALSE	14
2022-09-13	14:59:34	0.65986	2.93519	2.23027	647.639	FALSE	14
2022-09-13	14:59:35	0.32673	1.45336	2.07226	638.343	FALSE	14
2022-09-13	14:59:35	0.583728	2.59654	2.07226	650.235	FALSE	14
2022-09-13	14:59:35	0.401794	1.78726	2.07226	640.13	FALSE	14
2022-09-13	14:59:35	0.551208	2.45188	2.07226	652.687	FALSE	14
2022-09-13	14:59:36	0.418486	1.86151	0.947874	641.992	FALSE	14
2022-09-13	14:59:36	-0.0347453	-0.154554	0.947874	652.687	FALSE	14
2022-09-13	14:59:36	0.255534	1.13667	0.947874	643.128	FALSE	14
2022-09-13	14:59:37	0.204389	0.909163	0.253254	653.596	FALSE	14
2022-09-13	14:59:37	0.34673	1.54232	0.253254	644.671	FALSE	14
2022-09-13	14:59:37	-0.0362211	-0.161119	0.253254	653.596	FALSE	14
2022-09-13	14:59:37	-0.287162	-1.27735	0.253254	644.671	FALSE	14
2022-09-13	14:59:38	-0.324262	-1.44238	-1.00141	653.596	FALSE	14
2022-09-13	14:59:38	-0.276272	-1.22891	-1.00141	644.671	FALSE	14
2022-09-13	14:59:38	-0.074847	-0.332934	-1.00141	653.596	FALSE	14
2022-09-13	14:59:39	-0.0509794	-0.226767	-0.347513	644.671	FALSE	14
2022-09-13	14:59:39	-0.0387147	-0.172211	-0.347513	653.596	FALSE	14
2022-09-13	14:59:39	-0.11103	-0.493884	-0.347513	644.671	FALSE	14
2022-09-13	14:59:39	-0.199631	-0.887999	-0.347513	653.596	FALSE	14
2022-09-13	14:59:39	0.00973306	0.0432946	-0.347513	644.714	FALSE	14
2022-09-13	14:59:40	-0.170878	-0.7601	-0.329012	653.596	FALSE	14
2022-09-13	14:59:40	0.019504	0.0867577	-0.329012	644.801	FALSE	14
2022-09-13	14:59:40	-0.0705214	-0.313693	-0.329012	653.596	FALSE	14
2022-09-13	14:59:41	-0.0485366	-0.215901	-0.290773	644.801	FALSE	14
2022-09-13	14:59:41	-0.0734221	-0.326596	-0.290773	653.596	FALSE	14
2022-09-13	14:59:41	-0.0927605	-0.412617	-0.290773	644.801	FALSE	14
2022-09-13	14:59:41	-0.0467554	-0.207977	-0.290773	653.596	FALSE	14
2022-09-13	14:59:42	-0.18701	-0.831858	-0.440914	644.801	FALSE	14
2022-09-13	14:59:42	0.0253564	0.11279	-0.440914	653.709	FALSE	14
2022-09-13	14:59:42	-0.0875188	-0.389301	-0.440914	644.801	FALSE	14
2022-09-13	14:59:42	-0.147315	-0.655287	-0.440914	653.709	FALSE	14
2022-09-13	14:59:43	0.10958	0.487434	0.529143	645.288	FALSE	14
2022-09-13	14:59:43	0.132379	0.588848	0.529143	654.298	FALSE	14
2022-09-13	14:59:43	0.108664	0.483359	0.529143	645.771	FALSE	14
2022-09-13	14:59:43	0.125204	0.556932	0.529143	654.855	FALSE	14
2022-09-13	14:59:44	0.027443	0.122072	0.292228	645.894	FALSE	14
2022-09-13	14:59:44	0.0915142	0.407073	0.292228	655.262	FALSE	14
2022-09-13	14:59:44	0.07813	0.347538	0.292228	646.241	FALSE	14
2022-09-13	14:59:45	0.0914124	0.406621	0.478438	655.669	FALSE	14
2022-09-13	14:59:45	0.118334	0.526373	0.478438	646.767	FALSE	14
2022-09-13	14:59:45	0.102812	0.457328	0.478438	656.126	FALSE	14
2022-09-13	14:59:45	0.117672	0.523429	0.478438	647.291	FALSE	14
2022-09-13	14:59:46	0.117061	0.520711	0.533331	656.647	FALSE	14
2022-09-13	14:59:46	0.123779	0.550594	0.533331	647.841	FALSE	14
2022-09-13	14:59:46	0.117519	0.522748	0.533331	657.17	FALSE	14
2022-09-13	14:59:46	0.121234	0.539273	0.533331	648.381	FALSE	14
2022-09-13	14:59:47	0.121031	0.53837	0.530616	657.708	FALSE	14
2022-09-13	14:59:47	0.121641	0.541083	0.530616	648.922	FALSE	14
2022-09-13	14:59:47	0.120471	0.535879	0.530616	658.244	FALSE	14
2022-09-13	14:59:47	0.114008	0.50713	0.530616	649.429	FALSE	14
2022-09-13	14:59:48	0.120115	0.534296	0.546595	658.778	FALSE	14
2022-09-13	14:59:48	0.123932	0.551274	0.546595	649.98	FALSE	14
2022-09-13	14:59:48	0.124593	0.554215	0.546595	659.332	FALSE	14
2022-09-13	14:59:49	0.125865	0.559873	0.560666	650.54	FALSE	14
2022-09-13	14:59:49	0.117825	0.524109	0.560666	659.856	FALSE	14
2022-09-13	14:59:49	0.120216	0.534745	0.560666	651.075	FALSE	14
2022-09-13	14:59:49	0.140267	0.623936	0.560666	660.48	FALSE	14
2022-09-13	14:59:50	0.0940587	0.418392	0.321449	651.493	FALSE	14
2022-09-13	14:59:50	0.0534481	0.237748	0.321449	660.718	FALSE	14
2022-09-13	14:59:50	0.0812852	0.361573	0.321449	651.855	FALSE	14
2022-09-13	14:59:50	0.0602674	0.268081	0.321449	660.986	FALSE	14
2022-09-13	14:59:51	0.072532	0.322637	0.681379	652.177	FALSE	14
2022-09-13	14:59:51	0.177316	0.788737	0.681379	661.775	FALSE	14
2022-09-13	14:59:51	0.185407	0.824727	0.681379	653.002	FALSE	14
2022-09-13	14:59:51	0.177468	0.789413	0.681379	662.564	FALSE	14
2022-09-13	14:59:52	0.221183	0.983866	1.09124	653.986	FALSE	14
2022-09-13	14:59:52	0.276705	1.23084	1.09124	663.795	FALSE	14
2022-09-13	14:59:52	0.238079	1.05902	1.09124	655.045	FALSE	14
2022-09-13	14:59:53	0.31014	1.37956	1.42518	665.175	FALSE	14
2022-09-13	14:59:53	0.341438	1.51878	1.42518	656.564	FALSE	14
2022-09-13	14:59:53	0.329835	1.46717	1.42518	666.642	FALSE	14
2022-09-13	14:59:53	0.300165	1.33519	1.42518	657.899	FALSE	14
2022-09-13	14:59:54	0.297316	1.32252	1.33135	667.964	FALSE	14
2022-09-13	14:59:54	0.284389	1.26502	1.33135	659.164	FALSE	14
2022-09-13	14:59:54	0.297926	1.32523	1.33135	669.29	FALSE	14
2022-09-13	14:59:54	0.31757	1.41261	1.33135	660.577	FALSE	14
2022-09-13	14:59:55	0.31584	1.40492	1.40147	670.695	FALSE	14
2022-09-13	14:59:55	0.313753	1.39564	1.40147	661.972	FALSE	14
2022-09-13	14:59:55	0.314567	1.39926	1.40147	672.094	FALSE	14
2022-09-13	14:59:55	0.316094	1.40605	1.40147	663.378	FALSE	14
2022-09-13	14:59:56	0.324339	1.44272	1.44265	673.537	FALSE	14
2022-09-13	14:59:56	0.326985	1.45449	1.44265	664.833	FALSE	14
2022-09-13	14:59:56	0.321641	1.43072	1.44265	674.967	FALSE	14
2022-09-13	14:59:57	0.323881	1.44069	1.37153	666.274	FALSE	14
2022-09-13	14:59:57	0.318537	1.41692	1.37153	676.384	FALSE	14
2022-09-13	14:59:57	0.29645	1.31867	1.37153	667.592	FALSE	14
2022-09-13	14:59:57	0.294466	1.30984	1.37153	677.694	FALSE	14
2022-09-13	14:59:58	0.302405	1.34516	1.25302	668.937	FALSE	14
2022-09-13	14:59:58	0.298537	1.32795	1.25302	679.022	FALSE	14
2022-09-13	14:59:58	0.265763	1.18217	1.25302	670.12	FALSE	14
2022-09-13	14:59:58	0.260064	1.15682	1.25302	680.179	FALSE	14
2022-09-13	14:59:59	0.309377	1.37617	1.77328	671.496	FALSE	14
2022-09-13	14:59:59	0.48785	2.17005	1.77328	682.349	FALSE	14
2022-09-13	14:59:59	0.417367	1.85653	1.77328	673.352	FALSE	14
2022-09-13	14:59:59	0.380013	1.69037	1.77328	684.039	FALSE	14
2022-09-13	15:00:00	1.00994	4.49242	5.51515	677.845	FALSE	14
2022-09-13	15:00:00	1.10118	4.89827	5.51515	688.937	FALSE	14
2022-09-13	15:00:00	1.60846	7.15475	5.51515	684.999	FALSE	14
2022-09-13	15:00:01	1.14027	5.07215	6.39918	694.01	FALSE	14
2022-09-13	15:00:01	1.40276	6.23976	6.39918	691.239	FALSE	14
2022-09-13	15:00:01	1.62215	7.21565	6.39918	701.225	FALSE	14
2022-09-13	15:00:01	1.58922	7.06917	6.39918	698.308	FALSE	14
2022-09-13	15:00:02	2.05452	9.13892	9.83409	710.364	FALSE	14
2022-09-13	15:00:02	1.94037	8.63115	9.83409	706.939	FALSE	14
2022-09-13	15:00:02	2.45268	10.91	9.83409	721.274	FALSE	14
2022-09-13	15:00:02	2.39564	10.6563	9.83409	717.596	FALSE	14
2022-09-13	15:00:03	2.94235	13.0882	11.8894	734.362	FALSE	14
2022-09-13	15:00:03	2.70342	12.0254	11.8894	729.621	FALSE	14
2022-09-13	15:00:03	2.97538	13.2351	11.8894	747.597	FALSE	14
2022-09-13	15:00:03	2.07029	9.20906	11.8894	738.83	FALSE	14
2022-09-13	15:00:04	1.53564	6.83083	3.43978	754.428	FALSE	14
2022-09-13	15:00:04	0.597366	2.6572	3.43978	741.487	FALSE	14
2022-09-13	15:00:04	0.186883	0.831293	3.43978	755.26	FALSE	14
2022-09-13	15:00:05	0.224949	1.00062	0.875719	742.488	FALSE	14
2022-09-13	15:00:05	0.243728	1.08415	0.875719	756.344	FALSE	14
2022-09-13	15:00:05	0.16154	0.718562	0.875719	743.207	FALSE	14
2022-09-13	15:00:05	0.157265	0.699546	0.875719	757.043	FALSE	14
2022-09-13	15:00:06	0.181183	0.805938	1.0545	744.013	FALSE	14
2022-09-13	15:00:06	0.213652	0.950367	1.0545	757.994	FALSE	14
2022-09-13	15:00:06	0.296552	1.31912	1.0545	745.332	FALSE	14
2022-09-13	15:00:06	0.256858	1.14256	1.0545	759.136	FALSE	14
2022-09-13	15:00:07	0.241387	1.07374	1.08059	746.405	FALSE	14
2022-09-13	15:00:07	0.215382	0.958062	1.08059	760.094	FALSE	14
2022-09-13	15:00:07	0.233448	1.03842	1.08059	747.444	FALSE	14
2022-09-13	15:00:07	0.281489	1.25212	1.08059	761.346	FALSE	14
2022-09-13	15:00:08	0.401743	1.78703	1.86649	749.231	FALSE	14
2022-09-13	15:00:08	0.417825	1.85857	1.86649	763.205	FALSE	14
2022-09-13	15:00:08	0.43925	1.95387	1.86649	751.185	FALSE	14
2022-09-13	15:00:09	0.405611	1.80424	4.18471	765.009	FALSE	14
2022-09-13	15:00:09	0.507443	2.25721	4.18471	753.442	FALSE	14
2022-09-13	15:00:09	0.979453	4.3568	4.18471	769.366	FALSE	14
2022-09-13	15:00:09	1.87055	8.32058	4.18471	761.762	FALSE	14
2022-09-13	15:00:10	2.17294	9.66567	19.0605	779.032	FALSE	14
2022-09-13	15:00:10	3.09747	13.7782	19.0605	775.541	1	15
2022-09-13	15:00:10	5.06215	22.5175	19.0605	801.549	1	16
2022-09-13	15:00:10	6.80744	30.2809	19.0605	805.822	1	17
2022-09-13	15:00:11	7.00133	31.1433	29.4949	832.692	1	18
2022-09-13	15:00:11	6.31456	28.0884	29.4949	833.91	1	19
2022-09-13	15:00:11	6.67538	29.6934	29.4949	862.386	1	20
2022-09-13	15:00:11	6.53172	29.0544	29.4949	862.964	1	21
2022-09-13	15:00:12	4.25747	18.9381	16.6048	881.324	1	22
2022-09-13	15:00:12	3.57818	15.9165	16.6048	878.881	1	23
2022-09-13	15:00:12	3.36312	14.9598	16.6048	896.284	1	24
2022-09-13	15:00:13	3.15284	14.0245	12.6566	892.905	1	25
2022-09-13	15:00:13	3.58495	15.9466	12.6566	912.23	1	26
2022-09-13	15:00:13	2.94612	13.1049	12.6566	906.01	FALSE	26
2022-09-13	15:00:13	1.69742	7.55046	12.6566	919.781	FALSE	26
2022-09-13	15:00:14	1.07899	4.79956	3.13201	910.81	FALSE	26
2022-09-13	15:00:14	0.499809	2.22325	3.13201	922.004	FALSE	26
2022-09-13	15:00:14	0.578384	2.57277	3.13201	913.383	FALSE	26
2022-09-13	15:00:14	0.659249	2.93247	3.13201	924.937	FALSE	26
2022-09-13	15:00:15	0.711616	3.16541	3.73377	916.548	FALSE	26
2022-09-13	15:00:15	0.805458	3.58284	3.73377	928.519	FALSE	26
2022-09-13	15:00:15	0.92729	4.12477	3.73377	920.673	FALSE	26
2022-09-13	15:00:15	0.913194	4.06207	3.73377	932.581	FALSE	26
2022-09-13	15:00:16	0.356043	1.58375	1.66902	922.256	FALSE	26
2022-09-13	15:00:16	0.332227	1.47781	1.66902	934.059	FALSE	26
2022-09-13	15:00:16	0.437367	1.9455	1.66902	924.202	FALSE	26
2022-09-13	15:00:17	0.245865	1.09366	0.8189	935.153	FALSE	26
2022-09-13	15:00:17	0.146578	0.652008	0.8189	924.854	FALSE	26
2022-09-13	15:00:17	0.153601	0.683248	0.8189	935.836	FALSE	26
2022-09-13	15:00:17	0.190344	0.846688	0.8189	925.701	FALSE	26
2022-09-13	15:00:18	0.0892241	0.396887	0.125411	936.233	FALSE	26
2022-09-13	15:00:18	0.0235244	0.104641	0.125411	925.805	FALSE	26
2022-09-13	15:00:18	-0.0136257	-0.0606098	0.125411	936.233	FALSE	26
2022-09-13	15:00:18	0.0136516	0.060725	0.125411	925.866	FALSE	26
2022-09-13	15:00:19	-0.150979	-0.671585	-0.127841	936.233	FALSE	26
2022-09-13	15:00:19	0.133041	0.591793	-0.127841	926.458	FALSE	26
2022-09-13	15:00:19	0.056247	0.250198	-0.127841	936.483	FALSE	26
2022-09-13	15:00:19	-0.153269	-0.681771	-0.127841	926.458	FALSE	26
2022-09-13	15:00:20	-0.267163	-1.18839	-1.68173	936.483	FALSE	26
2022-09-13	15:00:20	-0.319682	-1.42201	-1.68173	926.458	FALSE	26
2022-09-13	15:00:20	-0.547366	-2.43479	-1.68173	936.483	FALSE	26
2022-09-13	15:00:21	-0.567671	-2.52511	2.57425	926.458	FALSE	26
2022-09-13	15:00:21	-0.00884198	-0.0393309	2.57425	936.483	FALSE	26
2022-09-13	15:00:21	1.2476	5.54957	2.57425	932.007	FALSE	26
2022-09-13	15:00:21	1.64378	7.31186	2.57425	943.795	FALSE	26
2022-09-13	15:00:22	7.79858	34.6896	18.8162	966.697	1	27
2022-09-13	15:00:22	2.03518	9.05289	18.8162	952.848	FALSE	27
2022-09-13	15:00:22	6.33823	28.1937	18.8162	994.891	1	28
2022-09-13	15:00:22	0.748257	3.3284	18.8162	956.176	FALSE	28
2022-09-13	15:00:23	1.82388	8.11298	7.1534	1003	FALSE	28
2022-09-13	15:00:23	1.38821	6.17504	7.1534	962.351	FALSE	28
2022-09-13	15:00:23	0.522913	2.32602	7.1534	1005.33	FALSE	28
2022-09-13	15:00:23	2.69762	11.9996	7.1534	974.351	FALSE	28
2022-09-13	15:00:24	0.180624	0.803452	1.82499	1006.13	FALSE	28
2022-09-13	15:00:24	0.11126	0.494907	1.82499	974.846	FALSE	28
2022-09-13	15:00:24	0.938944	4.17661	1.82499	1010.31	FALSE	28
2022-09-13	15:00:25	-0.0375952	-0.167231	0.702262	974.846	FALSE	28
2022-09-13	15:00:25	0.148766	0.661741	0.702262	1010.97	FALSE	28
2022-09-13	15:00:25	0.340725	1.51561	0.702262	976.362	FALSE	28
2022-09-13	15:00:25	0.179606	0.798923	0.702262	1011.77	FALSE	28
2022-09-13	15:00:26	0.056247	0.250198	2.98205	976.612	FALSE	28
2022-09-13	15:00:26	0.260573	1.15908	2.98205	1012.93	FALSE	28
2022-09-13	15:00:26	0.229122	1.01918	2.98205	977.631	FALSE	28
2022-09-13	15:00:26	2.13564	9.49975	2.98205	1022.43	FALSE	28
2022-09-13	15:00:27	0.242964	1.08075	2.55086	978.712	FALSE	28
2022-09-13	15:00:27	0.152939	0.680303	2.55086	1023.11	FALSE	28
2022-09-13	15:00:27	1.84408	8.20284	2.55086	986.914	FALSE	28
2022-09-13	15:00:27	0.0538552	0.239559	2.55086	1023.35	FALSE	28
2022-09-13	15:00:28	0.271972	1.20979	1.10769	988.124	FALSE	28
2022-09-13	15:00:28	0.187901	0.835821	1.10769	1024.18	FALSE	28
2022-09-13	15:00:28	0.287188	1.27747	1.10769	989.402	FALSE	28
2022-09-13	15:00:29	0.126578	0.563044	1.22258	1024.75	FALSE	28
2022-09-13	15:00:29	0.26668	1.18625	1.22258	990.588	FALSE	28
2022-09-13	15:00:29	0.425865	1.89433	1.22258	1026.64	FALSE	28
2022-09-13	15:00:29	0.280267	1.24668	1.22258	991.835	FALSE	28
2022-09-13	15:00:30	0.459046	2.04193	1.61278	1028.68	FALSE	28
2022-09-13	15:00:30	0.183117	0.814541	1.61278	992.649	FALSE	28
2022-09-13	15:00:30	0.347188	1.54436	1.61278	1030.23	FALSE	28
2022-09-13	15:00:30	0.460929	2.0503	1.61278	994.7	FALSE	28
2022-09-13	15:00:31	0.307036	1.36576	1.22756	1031.59	FALSE	28
2022-09-13	15:00:31	0.329377	1.46513	1.22756	996.165	FALSE	28
2022-09-13	15:00:31	0.221641	0.985903	1.22756	1032.58	FALSE	28
2022-09-13	15:00:31	0.245814	1.09343	1.22756	997.258	FALSE	28
2022-09-13	15:00:32	0.169529	0.754099	0.841027	1033.33	FALSE	28
2022-09-13	15:00:32	0.361031	1.60594	0.841027	998.864	FALSE	28
2022-09-13	15:00:32	0.0366542	0.163045	0.841027	1033.5	FALSE	28
2022-09-13	15:00:33	0.27014	1.20164	0.819069	1000.07	FALSE	28
2022-09-13	15:00:33	0.137163	0.610128	0.819069	1034.11	FALSE	28
2022-09-13	15:00:33	0.24271	1.07962	0.819069	1001.15	FALSE	28
2022-09-13	15:00:33	0.0865269	0.384889	0.819069	1034.49	FALSE	28
2022-09-13	15:00:34	0.192939	0.858231	0.82552	1002	FALSE	28
2022-09-13	15:00:34	0.238842	1.06242	0.82552	1035.55	FALSE	28
2022-09-13	15:00:34	0.126374	0.562137	0.82552	1002.57	FALSE	28
2022-09-13	15:00:34	0.184186	0.819296	0.82552	1036.37	FALSE	28
2022-09-13	15:00:35	0.0253564	0.11279	0.449745	1002.68	FALSE	28
2022-09-13	15:00:35	0.240064	1.06785	0.449745	1037.44	FALSE	28
2022-09-13	15:00:35	-0.0632949	-0.281548	0.449745	1002.68	FALSE	28
2022-09-13	15:00:35	0.202303	0.899884	0.449745	1038.34	FALSE	28
2022-09-13	15:00:36	0.0298857	0.132938	0.38919	1002.81	FALSE	28
2022-09-13	15:00:36	0.16841	0.749121	0.38919	1039.09	FALSE	28
2022-09-13	15:00:36	0.064186	0.285512	0.38919	1003.1	FALSE	28
2022-09-13	15:00:37	0.180166	0.801414	0.79332	1039.89	FALSE	28
2022-09-13	15:00:37	0.249631	1.11041	0.79332	1004.21	FALSE	28
2022-09-13	15:00:37	0.153346	0.682114	0.79332	1040.57	FALSE	28
2022-09-13	15:00:37	0.130242	0.579342	0.79332	1004.79	FALSE	28
2022-09-13	15:00:38	0.0591478	0.263101	0.20017	1040.84	FALSE	28
2022-09-13	15:00:38	0.141336	0.628691	0.20017	1005.42	FALSE	28
2022-09-13	15:00:38	-0.0973915	-0.433217	0.20017	1040.84	FALSE	28
2022-09-13	15:00:38	0.0769086	0.342105	0.20017	1005.76	FALSE	28
2022-09-13	15:00:39	-0.00695905	-0.0309552	-0.0306158	1040.84	FALSE	28
2022-09-13	15:00:39	0.0965015	0.429258	-0.0306158	1006.19	FALSE	28
2022-09-13	15:00:39	-0.161005	-0.716182	-0.0306158	1040.84	FALSE	28
2022-09-13	15:00:39	0.0439316	0.195417	-0.0306158	1006.38	FALSE	28
2022-09-13	15:00:40	0.0309544	0.137691	0.152255	1040.98	FALSE	28
2022-09-13	15:00:40	0.0954328	0.424504	0.152255	1006.81	FALSE	28
2022-09-13	15:00:40	-0.023702	-0.105431	0.152255	1040.98	FALSE	28
2022-09-13	15:00:41	0.127239	0.565985	0.69264	1007.37	FALSE	28
2022-09-13	15:00:41	0.200267	0.890828	0.69264	1041.87	FALSE	28
2022-09-13	15:00:41	0.075331	0.335087	0.69264	1007.71	FALSE	28
2022-09-13	15:00:41	0.220013	0.978662	0.69264	1042.84	FALSE	28
2022-09-13	15:00:42	0.0767051	0.3412	0.873795	1008.05	FALSE	28
2022-09-13	15:00:42	0.334975	1.49004	0.873795	1044.33	FALSE	28
2022-09-13	15:00:42	0.0465778	0.207187	0.873795	1008.26	FALSE	28
2022-09-13	15:00:42	0.327494	1.45676	0.873795	1045.79	FALSE	28
2022-09-13	15:00:43	0.211921	0.942667	1.01624	1009.2	FALSE	28
2022-09-13	15:00:43	0.174975	0.778324	1.01624	1046.57	FALSE	28
2022-09-13	15:00:43	0.236858	1.05359	1.01624	1010.25	FALSE	28
2022-09-13	15:00:43	0.290089	1.29037	1.01624	1047.86	FALSE	28
2022-09-13	15:00:44	0.316807	1.40922	1.79345	1011.66	FALSE	28
2022-09-13	15:00:44	0.233448	1.03842	1.79345	1048.9	FALSE	28
2022-09-13	15:00:44	0.6593	2.9327	1.79345	1014.59	FALSE	28
2022-09-13	15:00:45	0.328461	1.46106	2.07085	1050.36	FALSE	28
2022-09-13	15:00:45	0.578537	2.57345	2.07085	1017.17	FALSE	28
2022-09-13	15:00:45	0.243982	1.08528	2.07085	1051.45	FALSE	28
2022-09-13	15:00:45	0.711209	3.1636	2.07085	1020.33	FALSE	28
2022-09-13	15:00:46	0.363728	1.61793	3.51974	1053.06	FALSE	28
2022-09-13	15:00:46	0.865662	3.85064	3.51974	1024.18	FALSE	28
2022-09-13	15:00:46	1.17121	5.20978	3.51974	1058.27	FALSE	28
2022-09-13	15:00:46	0.764491	3.40061	3.51974	1027.58	FALSE	28
2022-09-13	15:00:47	0.908766	4.04237	3.10021	1062.32	FALSE	28
2022-09-13	15:00:47	0.996959	4.43467	3.10021	1032.02	FALSE	28
2022-09-13	15:00:47	0.485356	2.15896	3.10021	1064.47	FALSE	28
2022-09-13	15:00:47	0.396756	1.76485	3.10021	1033.78	FALSE	28
2022-09-13	15:00:48	0.640013	2.84691	2.25155	1067.32	FALSE	28
2022-09-13	15:00:48	0.330852	1.4717	2.25155	1035.25	FALSE	28
2022-09-13	15:00:48	0.547646	2.43604	2.25155	1069.76	FALSE	28
2022-09-13	15:00:49	0.293652	1.30622	1.8018	1036.56	FALSE	28
2022-09-13	15:00:49	0.599962	2.66875	1.8018	1072.43	FALSE	28
2022-09-13	15:00:49	0.268613	1.19484	1.8018	1037.75	FALSE	28
2022-09-13	15:00:49	0.458028	2.0374	1.8018	1074.46	FALSE	28
2022-09-13	15:00:50	0.202507	0.900792	1.28936	1038.66	FALSE	28
2022-09-13	15:00:50	0.290038	1.29015	1.28936	1075.75	FALSE	28
2022-09-13	15:00:50	0.124848	0.555349	1.28936	1039.21	FALSE	28
2022-09-13	15:00:50	0.542048	2.41114	1.28936	1078.16	FALSE	28
2022-09-13	15:00:51	0.297214	1.32207	1.71827	1040.53	FALSE	28
2022-09-13	15:00:51	0.489733	2.17843	1.71827	1080.34	FALSE	28
2022-09-13	15:00:51	0.164339	0.731013	1.71827	1041.26	FALSE	28
2022-09-13	15:00:51	0.593855	2.64159	1.71827	1082.98	FALSE	28
2022-09-13	15:00:52	0.399453	1.77685	1.82159	1043.04	FALSE	28
2022-09-13	15:00:52	0.509631	2.26694	1.82159	1085.25	FALSE	28
2022-09-13	15:00:52	0.319453	1.42099	1.82159	1044.46	FALSE	28
2022-09-13	15:00:53	0.491769	2.18749	1.82693	1087.44	FALSE	28
2022-09-13	15:00:53	0.332837	1.48053	1.82693	1045.94	FALSE	28
2022-09-13	15:00:53	0.450598	2.00435	1.82693	1089.44	FALSE	28
2022-09-13	15:00:53	0.367646	1.63536	1.82693	1047.58	FALSE	28
2022-09-13	15:00:54	0.324695	1.44431	1.93536	1090.89	FALSE	28
2022-09-13	15:00:54	0.495942	2.20605	1.93536	1049.78	FALSE	28
2022-09-13	15:00:54	0.43757	1.9464	1.93536	1092.83	FALSE	28
2022-09-13	15:00:54	0.48215	2.1447	1.93536	1051.93	FALSE	28
2022-09-13	15:00:55	0.339962	1.51222	2.32025	1094.35	FALSE	28
2022-09-13	15:00:55	0.614568	2.73372	2.32025	1054.66	FALSE	28
2022-09-13	15:00:55	0.443117	1.97107	2.32025	1096.32	FALSE	28
2022-09-13	15:00:55	0.688817	3.064	2.32025	1057.73	FALSE	28
2022-09-13	15:00:56	0.334771	1.48913	1.96768	1097.81	FALSE	28
2022-09-13	15:00:56	0.664746	2.95692	1.96768	1060.68	FALSE	28
2022-09-13	15:00:56	0.327545	1.45699	1.96768	1099.26	FALSE	28
2022-09-13	15:00:57	1.22531	5.45042	5.865	1066.13	FALSE	28
2022-09-13	15:00:57	0.635178	2.8254	5.865	1102.09	FALSE	28
2022-09-13	15:00:57	2.51716	11.1968	5.865	1077.33	FALSE	28
2022-09-13	15:00:57	0.896399	3.98736	5.865	1106.08	FALSE	28
2022-09-13	15:00:58	3.26536	14.525	6.19155	1091.86	1	29
2022-09-13	15:00:58	0.383066	1.70395	6.19155	1107.78	FALSE	29
2022-09-13	15:00:58	1.80709	8.0383	6.19155	1099.89	FALSE	29
2022-09-13	15:00:58	0.112176	0.498981	6.19155	1108.28	FALSE	29
2022-09-13	15:00:59	0.622201	2.76767	2.70644	1102.66	FALSE	29
2022-09-13	15:00:59	0.971667	4.32217	2.70644	1112.6	FALSE	29
2022-09-13	15:00:59	0.411769	1.83163	2.70644	1104.49	FALSE	29
2022-09-13	15:00:59	0.428104	1.90429	2.70644	1114.51	FALSE	29
2022-09-13	15:01:00	1.17503	5.22677	3.30856	1109.72	FALSE	29
2022-09-13	15:01:00	0.464491	2.06615	3.30856	1116.57	FALSE	29
2022-09-13	15:01:00	0.59187	2.63276	3.30856	1112.35	FALSE	29
2022-09-13	15:01:01	0.766883	3.41125	2.11414	1119.98	FALSE	29
2022-09-13	15:01:01	0.385967	1.71686	2.11414	1114.07	FALSE	29
2022-09-13	15:01:01	0.428155	1.90452	2.11414	1121.89	FALSE	29
2022-09-13	15:01:01	0.320115	1.42394	2.11414	1115.49	FALSE	29
2022-09-13	15:01:02	0.425764	1.89388	1.65761	1123.78	FALSE	29
2022-09-13	15:01:02	0.278028	1.23672	1.65761	1116.73	FALSE	29
2022-09-13	15:01:02	0.40159	1.78635	1.65761	1125.57	FALSE	29
2022-09-13	15:01:02	0.385204	1.71346	1.65761	1118.44	FALSE	29
2022-09-13	15:01:03	0.285611	1.27045	1.8417	1126.84	FALSE	29
2022-09-13	15:01:03	0.383677	1.70667	1.8417	1120.15	FALSE	29
2022-09-13	15:01:03	0.477265	2.12297	1.8417	1128.96	FALSE	29
2022-09-13	15:01:03	0.50958	2.26671	1.8417	1122.42	FALSE	29
2022-09-13	15:01:04	1.6166	7.19096	8.58941	1136.15	FALSE	29
2022-09-13	15:01:04	2.65945	11.8298	8.58941	1134.25	FALSE	29
2022-09-13	15:01:04	1.51691	6.74752	8.58941	1142.9	FALSE	29
2022-09-13	15:01:05	1.65757	7.3732	5.33993	1141.62	FALSE	29
2022-09-13	15:01:05	2.48225	11.0415	5.33993	1153.94	FALSE	29
2022-09-13	15:01:05	0.415687	1.84906	5.33993	1143.47	FALSE	29
2022-09-13	15:01:05	0.246374	1.09592	5.33993	1155.04	FALSE	29
2022-09-13	15:01:06	0.413295	1.83842	0.948441	1145.31	FALSE	29
2022-09-13	15:01:06	0.164389	0.731235	0.948441	1155.77	FALSE	29
2022-09-13	15:01:06	0.155484	0.691624	0.948441	1146	FALSE	29
2022-09-13	15:01:06	0.119708	0.532485	0.948441	1156.3	FALSE	29
2022-09-13	15:01:07	0.060013	0.26695	0.207188	1146.27	FALSE	29
2022-09-13	15:01:07	-0.0440582	-0.19598	0.207188	1156.3	FALSE	29
2022-09-13	15:01:07	0.0377738	0.168025	0.207188	1146.43	FALSE	29
2022-09-13	15:01:07	0.132583	0.589756	0.207188	1156.89	FALSE	29
2022-09-13	15:01:08	0.174008	0.774022	0.590132	1147.21	FALSE	29
2022-09-13	15:01:08	0.0525321	0.233673	0.590132	1157.12	FALSE	29
2022-09-13	15:01:08	0.171463	0.762702	0.590132	1147.97	FALSE	29
2022-09-13	15:01:09	0.128919	0.573457	0.700281	1157.7	FALSE	29
2022-09-13	15:01:09	0.167748	0.746177	0.700281	1148.72	FALSE	29
2022-09-13	15:01:09	0.0718704	0.319694	0.700281	1158.02	FALSE	29
2022-09-13	15:01:09	0.261183	1.16179	0.700281	1149.88	FALSE	29
2022-09-13	15:01:10	0.116705	0.519127	0.743857	1158.54	FALSE	29
2022-09-13	15:01:10	0.265458	1.18081	0.743857	1151.06	FALSE	29
2022-09-13	15:01:10	0.0482572	0.214658	0.743857	1158.75	FALSE	29
2022-09-13	15:01:10	0.238486	1.06083	0.743857	1152.12	FALSE	29
2022-09-13	15:01:11	0.12271	0.545839	0.349179	1159.3	FALSE	29
2022-09-13	15:01:11	0.0556872	0.247708	0.349179	1152.37	FALSE	29
2022-09-13	15:01:11	0.103372	0.459819	0.349179	1159.76	FALSE	29
2022-09-13	15:01:11	0.0322267	0.143351	0.349179	1152.51	FALSE	29
2022-09-13	15:01:12	0.0491224	0.218506	1.00764	1159.98	FALSE	29
2022-09-13	15:01:12	0.399402	1.77662	1.00764	1154.29	FALSE	29
2022-09-13	15:01:12	0.231056	1.02778	1.00764	1161	FALSE	29
2022-09-13	15:01:13	0.240369	1.06921	1.06519	1155.36	FALSE	29
2022-09-13	15:01:13	0.2707	1.20413	1.06519	1162.21	FALSE	29
2022-09-13	15:01:13	0.226476	1.00741	1.06519	1156.36	FALSE	29
2022-09-13	15:01:13	0.220318	0.980019	1.06519	1163.19	FALSE	29
2022-09-13	15:01:14	0.083219	0.370175	0.871702	1156.73	FALSE	29
2022-09-13	15:01:14	0.290344	1.29151	0.871702	1164.48	FALSE	29
2022-09-13	15:01:14	0.173906	0.773569	0.871702	1157.51	FALSE	29
2022-09-13	15:01:14	0.2364	1.05155	0.871702	1165.53	FALSE	29
2022-09-13	15:01:15	0.220522	0.980926	0.723088	1158.49	FALSE	29
2022-09-13	15:01:15	0.207901	0.924785	0.723088	1166.46	FALSE	29
2022-09-13	15:01:15	0.11126	0.494907	0.723088	1158.98	FALSE	29
2022-09-13	15:01:15	0.110547	0.491735	0.723088	1166.95	FALSE	29
2022-09-13	15:01:16	0.113194	0.50351	0.564401	1159.49	FALSE	29
2022-09-13	15:01:16	0.128613	0.572096	0.564401	1167.52	FALSE	29
2022-09-13	15:01:16	0.138842	0.617597	0.564401	1160.11	FALSE	29
2022-09-13	15:01:17	0.155636	0.6923	0.774926	1168.21	FALSE	29
2022-09-13	15:01:17	0.176654	0.785792	0.774926	1160.89	FALSE	29
2022-09-13	15:01:17	0.184797	0.822014	0.774926	1169.03	FALSE	29
2022-09-13	15:01:17	0.179758	0.7996	0.774926	1161.69	FALSE	29
2022-09-13	15:01:18	0.182761	0.812957	0.812221	1169.85	FALSE	29
2022-09-13	15:01:18	0.181285	0.806392	0.812221	1162.5	FALSE	29
2022-09-13	15:01:18	0.182557	0.81205	0.812221	1170.66	FALSE	29
2022-09-13	15:01:18	0.183779	0.817486	0.812221	1163.31	FALSE	29
2022-09-13	15:01:19	0.145916	0.649064	0.526654	1171.31	FALSE	29
2022-09-13	15:01:19	0.087392	0.388737	0.526654	1163.7	FALSE	29
2022-09-13	15:01:19	0.0983335	0.437407	0.526654	1171.74	FALSE	29
2022-09-13	15:01:19	0.141947	0.631409	0.526654	1164.33	FALSE	29
2022-09-13	15:01:20	0.167494	0.745047	0.696527	1172.49	FALSE	29
2022-09-13	15:01:20	0.18327	0.815222	0.696527	1165.15	FALSE	29
2022-09-13	15:01:20	0.118995	0.529314	0.696527	1173.02	FALSE	29
2022-09-13	15:01:21	0.207392	0.922521	0.959363	1166.07	FALSE	29
2022-09-13	15:01:21	0.230293	1.02439	0.959363	1174.04	FALSE	29
2022-09-13	15:01:21	0.222761	0.990885	0.959363	1167.06	FALSE	29
2022-09-13	15:01:21	0.202252	0.899657	0.959363	1174.94	FALSE	29
2022-09-13	15:01:22	0.21126	0.939727	1.19462	1168	FALSE	29
2022-09-13	15:01:22	0.253041	1.12558	1.19462	1176.07	FALSE	29
2022-09-13	15:01:22	0.252939	1.12512	1.19462	1169.13	FALSE	29
2022-09-13	15:01:22	0.35701	1.58805	1.19462	1177.66	FALSE	29
2022-09-13	15:01:23	0.407545	1.81284	1.773	1170.94	FALSE	29
2022-09-13	15:01:23	0.391616	1.74199	1.773	1179.4	FALSE	29
2022-09-13	15:01:23	0.396603	1.76417	1.773	1172.71	FALSE	29
2022-09-13	15:01:24	0.292074	1.2992	0.0582349	1180.7	FALSE	29
2022-09-13	15:01:24	0.048359	0.215111	0.0582349	1172.92	FALSE	29
2022-09-13	15:01:24	-8.88145e-05	-0.000395065	0.0582349	1180.7	FALSE	29
2022-09-13	15:01:24	-0.287977	-1.28098	0.0582349	1172.92	FALSE	29
2022-09-13	15:01:25	-0.27846	-1.23865	-1.65874	1180.7	FALSE	29
2022-09-13	15:01:25	-0.40757	-1.81295	-1.65874	1172.92	FALSE	29
2022-09-13	15:01:25	-0.395	-1.75704	-1.65874	1180.7	FALSE	29
2022-09-13	15:01:25	-0.410572	-1.82631	-1.65874	1172.92	FALSE	29
2022-09-13	15:01:26	-0.431895	-1.92116	-1.56547	1180.7	FALSE	29
2022-09-13	15:01:26	-0.308842	-1.37379	-1.56547	1172.92	FALSE	29
2022-09-13	15:01:26	-0.403702	-1.79575	-1.56547	1180.7	FALSE	29
2022-09-13	15:01:26	-0.263295	-1.17119	-1.56547	1172.92	FALSE	29
2022-09-13	15:01:27	-0.4693	-2.08754	-0.601978	1180.7	FALSE	29
2022-09-13	15:01:27	-0.229504	-1.02088	-0.601978	1172.92	FALSE	29
2022-09-13	15:01:27	-0.00309134	-0.0137509	-0.601978	1180.7	FALSE	29
2022-09-13	15:01:27	0.160573	0.714261	-0.601978	1173.63	FALSE	29
2022-09-13	15:01:28	-0.0798343	-0.355119	-0.0316343	1180.7	FALSE	29
2022-09-13	15:01:28	0.00754479	0.0335607	-0.0316343	1173.67	FALSE	29
2022-09-13	15:01:28	0.0509544	0.226655	-0.0316343	1180.92	FALSE	29
2022-09-13	15:01:29	0.179606	0.798923	0.831747	1174.47	FALSE	29
2022-09-13	15:01:29	0.143473	0.638197	0.831747	1181.56	FALSE	29
2022-09-13	15:01:29	0.201489	0.896263	0.831747	1175.36	FALSE	29
2022-09-13	15:01:29	0.223372	0.993603	0.831747	1182.56	FALSE	29
2022-09-13	15:01:30	0.352328	1.56723	1.8571	1176.93	FALSE	29
2022-09-13	15:01:30	0.279555	1.24352	1.8571	1183.8	FALSE	29
2022-09-13	15:01:30	0.546985	2.4331	1.8571	1179.36	FALSE	29
2022-09-13	15:01:30	0.491107	2.18454	1.8571	1185.98	FALSE	29
2022-09-13	15:01:31	0.387545	1.72388	2.39773	1181.09	FALSE	29
2022-09-13	15:01:31	0.720114	3.20321	2.39773	1189.19	FALSE	29
2022-09-13	15:01:31	0.325916	1.44974	2.39773	1182.54	FALSE	29
2022-09-13	15:01:31	0.722557	3.21408	2.39773	1192.4	FALSE	29
2022-09-13	15:01:32	0.327697	1.45766	1.68803	1183.99	FALSE	29
2022-09-13	15:01:32	0.553346	2.46139	1.68803	1194.86	FALSE	29
2022-09-13	15:01:32	0.257417	1.14504	1.68803	1185.14	FALSE	29
2022-09-13	15:01:33	0.657366	2.9241	1.96043	1197.79	FALSE	29
2022-09-13	15:01:33	0.268359	1.19371	1.96043	1186.33	FALSE	29
2022-09-13	15:01:33	0.517112	2.30022	1.96043	1200.09	FALSE	29
2022-09-13	15:01:33	0.320064	1.42371	1.96043	1187.76	FALSE	29
2022-09-13	15:01:34	0.565356	2.51482	1.72897	1202.6	FALSE	29
2022-09-13	15:01:34	0.255076	1.13463	1.72897	1188.89	FALSE	29
2022-09-13	15:01:34	0.465356	2.07	1.72897	1204.67	FALSE	29
2022-09-13	15:01:34	0.26897	1.19643	1.72897	1190.09	FALSE	29
2022-09-13	15:01:35	0.535178	2.38058	1.78534	1207.05	FALSE	29
2022-09-13	15:01:35	0.30729	1.36689	1.78534	1191.46	FALSE	29
2022-09-13	15:01:35	0.492125	2.18907	1.78534	1209.24	FALSE	29
2022-09-13	15:01:35	0.270853	1.20481	1.78534	1192.66	FALSE	29
2022-09-13	15:01:36	0.524644	2.33372	1.95078	1211.58	FALSE	29
2022-09-13	15:01:36	0.259046	1.15229	1.95078	1193.81	FALSE	29
2022-09-13	15:01:36	0.531972	2.36632	1.95078	1213.94	FALSE	29
2022-09-13	15:01:37	0.244186	1.08619	1.84131	1194.9	FALSE	29
2022-09-13	15:01:37	0.52785	2.34798	1.84131	1216.29	FALSE	29
2022-09-13	15:01:37	0.274567	1.22133	1.84131	1196.12	FALSE	29
2022-09-13	15:01:37	0.609173	2.70972	1.84131	1219	FALSE	29
2022-09-13	15:01:38	0.671768	2.98816	3.186	1199.11	FALSE	29
2022-09-13	15:01:38	1.17044	5.20635	3.186	1224.21	FALSE	29
2022-09-13	15:01:38	0.459148	2.04238	3.186	1201.15	FALSE	29
2022-09-13	15:01:38	0.563626	2.50712	3.186	1226.71	FALSE	29
2022-09-13	15:01:39	0.1793	0.797562	1.49235	1201.95	FALSE	29
2022-09-13	15:01:39	0.460623	2.04894	1.49235	1228.76	FALSE	29
2022-09-13	15:01:39	0.270547	1.20345	1.49235	1203.15	FALSE	29
2022-09-13	15:01:39	0.431514	1.91946	1.49235	1230.68	FALSE	29
2022-09-13	15:01:40	0.187341	0.83333	1.22209	1203.98	FALSE	29
2022-09-13	15:01:40	0.300624	1.33724	1.22209	1232.02	FALSE	29
2022-09-13	15:01:40	0.336247	1.49569	1.22209	1205.48	FALSE	29
2022-09-13	15:01:41	0.385204	1.71346	1.53616	1233.73	FALSE	29
2022-09-13	15:01:41	0.201183	0.894902	1.53616	1206.38	FALSE	29
2022-09-13	15:01:41	0.386425	1.7189	1.53616	1235.45	FALSE	29
2022-09-13	15:01:41	0.408563	1.81737	1.53616	1208.19	FALSE	29
2022-09-13	15:01:42	0.358384	1.59416	1.65132	1237.05	FALSE	29
2022-09-13	15:01:42	0.345458	1.53667	1.65132	1209.73	FALSE	29
2022-09-13	15:01:42	0.294008	1.30781	1.65132	1238.35	FALSE	29
2022-09-13	15:01:42	0.487087	2.16666	1.65132	1211.9	FALSE	29
2022-09-13	15:01:43	0.395636	1.75987	1.92472	1240.11	FALSE	29
2022-09-13	15:01:43	0.514771	2.2898	1.92472	1214.19	FALSE	29
2022-09-13	15:01:43	0.323117	1.43729	1.92472	1241.55	FALSE	29
2022-09-13	15:01:43	0.497265	2.21193	1.92472	1216.4	FALSE	29
2022-09-13	15:01:44	0.321998	1.43231	1.70939	1242.98	FALSE	29
2022-09-13	15:01:44	0.496349	2.20786	1.70939	1218.61	FALSE	29
2022-09-13	15:01:44	0.334517	1.488	1.70939	1244.47	FALSE	29
2022-09-13	15:01:45	0.439097	1.95319	1.68064	1220.56	FALSE	29
2022-09-13	15:01:45	0.303473	1.34991	1.68064	1245.82	FALSE	29
2022-09-13	15:01:45	0.457265	2.03401	1.68064	1222.59	FALSE	29
2022-09-13	15:01:45	0.311463	1.38545	1.68064	1247.21	FALSE	29
2022-09-13	15:01:46	0.357774	1.59145	1.68641	1224.18	FALSE	29
2022-09-13	15:01:46	0.401794	1.78726	1.68641	1248.99	FALSE	29
2022-09-13	15:01:46	0.319962	1.42325	1.68641	1225.61	FALSE	29
2022-09-13	15:01:46	0.436959	1.94368	1.68641	1250.94	FALSE	29
2022-09-13	15:01:47	0.246323	1.09569	1.58149	1226.7	FALSE	29
2022-09-13	15:01:47	0.425051	1.89071	1.58149	1252.83	FALSE	29
2022-09-13	15:01:47	0.308155	1.37074	1.58149	1228.07	FALSE	29
2022-09-13	15:01:47	0.442608	1.96881	1.58149	1254.8	FALSE	29
2022-09-13	15:01:48	0.0902419	0.401414	0.200849	1228.48	FALSE	29
2022-09-13	15:01:48	0.0400639	0.178212	0.200849	1254.97	FALSE	29
2022-09-13	15:01:48	0.00515291	0.0229212	0.200849	1228.5	FALSE	29
2022-09-13	15:01:49	-0.0157122	-0.069891	1.66547	1254.97	FALSE	29
2022-09-13	15:01:49	0.239351	1.06468	1.66547	1229.56	FALSE	29
2022-09-13	15:01:49	0.733651	3.26343	1.66547	1258.24	FALSE	29
2022-09-13	15:01:49	0.540369	2.40367	1.66547	1231.97	FALSE	29
2022-09-13	15:01:50	0.832125	3.70146	4.39749	1261.94	FALSE	29
2022-09-13	15:01:50	0.879962	3.91425	4.39749	1235.88	FALSE	29
2022-09-13	15:01:50	1.56434	6.9585	4.39749	1268.9	FALSE	29
2022-09-13	15:01:50	0.677977	3.01578	4.39749	1238.9	FALSE	29
2022-09-13	15:01:51	0.698893	3.10882	2.57566	1272.01	FALSE	29
2022-09-13	15:01:51	0.499555	2.22212	2.57566	1241.12	FALSE	29
2022-09-13	15:01:51	0.728359	3.23989	2.57566	1275.25	FALSE	29
2022-09-13	15:01:51	0.389326	1.7318	2.57566	1242.85	FALSE	29
2022-09-13	15:01:52	0.502659	2.23593	2.37884	1277.48	FALSE	29
2022-09-13	15:01:52	0.693142	3.08323	2.37884	1245.93	FALSE	29
2022-09-13	15:01:52	0.408563	1.81737	2.37884	1279.3	FALSE	29
2022-09-13	15:01:53	0.476552	2.1198	1.97	1248.05	FALSE	29
2022-09-13	15:01:53	0.424848	1.88981	1.97	1281.19	FALSE	29
2022-09-13	15:01:53	0.50902	2.26422	1.97	1250.32	FALSE	29
2022-09-13	15:01:53	0.361082	1.60616	1.97	1282.8	FALSE	29
2022-09-13	15:01:54	0.430445	1.91471	1.79767	1252.23	FALSE	29
2022-09-13	15:01:54	0.326832	1.45381	1.79767	1284.25	FALSE	29
2022-09-13	15:01:54	0.479555	2.13316	1.79767	1254.37	FALSE	29
2022-09-13	15:01:54	0.379707	1.68901	1.79767	1285.94	FALSE	29
2022-09-13	15:01:55	0.371463	1.65234	1.91357	1256.02	FALSE	29
2022-09-13	15:01:55	0.494211	2.19835	1.91357	1288.14	FALSE	29
2022-09-13	15:01:55	0.400369	1.78092	1.91357	1257.8	FALSE	29
2022-09-13	15:01:55	0.45472	2.02269	1.91357	1290.16	FALSE	29
2022-09-13	15:01:56	0.28897	1.2854	1.78092	1259.08	FALSE	29
2022-09-13	15:01:56	0.56042	2.49286	1.78092	1292.65	FALSE	29
2022-09-13	15:01:56	0.351718	1.56451	1.78092	1260.65	FALSE	29
2022-09-13	15:01:57	0.538181	2.39394	1.92025	1295.05	FALSE	29
2022-09-13	15:01:57	0.298741	1.32886	1.92025	1261.98	FALSE	29
2022-09-13	15:01:57	0.554618	2.46705	1.92025	1297.51	FALSE	29
2022-09-13	15:01:57	0.335229	1.49117	1.92025	1263.47	FALSE	29
2022-09-13	15:01:58	0.579962	2.57979	2.00186	1300.09	FALSE	29
2022-09-13	15:01:58	0.315942	1.40537	2.00186	1264.87	FALSE	29
2022-09-13	15:01:58	0.480267	2.13632	2.00186	1302.23	FALSE	29
2022-09-13	15:01:58	0.423982	1.88596	2.00186	1266.76	FALSE	29
2022-09-13	15:01:59	0.358537	1.59484	1.82535	1303.82	FALSE	29
2022-09-13	15:01:59	0.480471	2.13723	1.82535	1268.9	FALSE	29
2022-09-13	15:01:59	0.316756	1.40899	1.82535	1305.23	FALSE	29
2022-09-13	15:01:59	0.485662	2.16032	1.82535	1271.06	FALSE	29
2022-09-13	15:02:00	0.387239	1.72252	1.88769	1306.96	FALSE	29
2022-09-13	15:02:00	0.582812	2.59246	1.88769	1273.65	FALSE	29
2022-09-13	15:02:00	0.303066	1.3481	1.88769	1308.3	FALSE	29
2022-09-13	15:02:01	0.631972	2.81114	2.1975	1276.46	FALSE	29
2022-09-13	15:02:01	0.389529	1.7327	2.1975	1310.04	FALSE	29
2022-09-13	15:02:01	0.599453	2.66649	2.1975	1279.13	FALSE	29
2022-09-13	15:02:01	0.355127	1.57968	2.1975	1311.62	FALSE	29
2022-09-13	15:02:02	0.623066	2.77152	2.23253	1281.9	FALSE	29
2022-09-13	15:02:02	0.397112	1.76643	2.23253	1313.38	FALSE	29
2022-09-13	15:02:02	0.520471	2.31516	2.23253	1284.21	FALSE	29
2022-09-13	15:02:02	0.466934	2.07702	2.23253	1315.46	FALSE	29
2022-09-13	15:02:03	0.531769	2.36541	2.19411	1286.58	FALSE	29
2022-09-13	15:02:03	0.436603	1.9421	2.19411	1317.4	FALSE	29
2022-09-13	15:02:03	0.436959	1.94368	2.19411	1288.52	FALSE	29
2022-09-13	15:02:03	0.567697	2.52523	2.19411	1319.93	FALSE	29
2022-09-13	15:02:04	0.416501	1.85268	2.03423	1290.38	FALSE	29
2022-09-13	15:02:04	0.425458	1.89252	2.03423	1321.82	FALSE	29
2022-09-13	15:02:04	0.529987	2.35749	2.03423	1292.73	FALSE	29
2022-09-13	15:02:05	0.430395	1.91448	3.37843	1323.73	FALSE	29
2022-09-13	15:02:05	0.971718	4.3224	3.37843	1297.06	FALSE	29
2022-09-13	15:02:05	0.752684	3.34809	3.37843	1327.08	FALSE	29
2022-09-13	15:02:05	0.883219	3.92873	3.37843	1300.98	FALSE	29
2022-09-13	15:02:06	0.667443	2.96892	2.42863	1330.05	FALSE	29
2022-09-13	15:02:06	0.581438	2.58635	2.42863	1303.57	FALSE	29
2022-09-13	15:02:06	0.450802	2.00526	2.42863	1332.06	FALSE	29
2022-09-13	15:02:06	0.484237	2.15398	2.42863	1305.73	FALSE	29
2022-09-13	15:02:07	0.489886	2.17911	2.08567	1334.24	FALSE	29
2022-09-13	15:02:07	0.480776	2.13859	2.08567	1307.86	FALSE	29
2022-09-13	15:02:07	0.455687	2.02699	2.08567	1336.26	FALSE	29
2022-09-13	15:02:07	0.449173	1.99801	2.08567	1309.86	FALSE	29
2022-09-13	15:02:08	0.496909	2.21035	2.11158	1338.47	FALSE	29
2022-09-13	15:02:08	0.480318	2.13655	2.11158	1312	FALSE	29
2022-09-13	15:02:08	0.446883	1.98782	2.11158	1340.46	FALSE	29
2022-09-13	15:02:09	0.410496	1.82597	2.11369	1313.82	FALSE	29
2022-09-13	15:02:09	0.55014	2.44713	2.11369	1342.91	FALSE	29
2022-09-13	15:02:09	0.426018	1.89501	2.11369	1315.72	FALSE	29
2022-09-13	15:02:09	0.514059	2.28664	2.11369	1345.19	FALSE	29
2022-09-13	15:02:10	0.391005	1.73927	2.21046	1317.46	FALSE	29
2022-09-13	15:02:10	0.525967	2.33961	2.21046	1347.53	FALSE	29
2022-09-13	15:02:10	0.398435	1.77232	2.21046	1319.23	FALSE	29
2022-09-13	15:02:10	0.672328	2.99065	2.21046	1350.53	FALSE	29

## Sheet: Sulley_harness_202291314565 (3)
Date	Time	Lbs	Newtons	Total force x time	total steps > 13.345		**GoPro Fitting: 1446
2022-09-13	14:57:10	0.110445	0.491281	0.491281	FALSE	0
2022-09-13	14:57:10	0.55472	2.46751	2.46751	FALSE	0
2022-09-13	14:57:10	0.659402	2.93315	3.42443	FALSE	0
2022-09-13	14:57:10	0.995229	4.42698	6.89448	FALSE	0
2022-09-13	14:57:11	1.99553	8.87652	12.3009	FALSE	0
2022-09-13	14:57:11	2.61467	11.6306	18.5251	FALSE	0
2022-09-13	14:57:11	0.855585	3.80581	16.1068	FALSE	0
2022-09-13	14:57:12	0.621845	2.76609	21.2911	FALSE	0
2022-09-13	14:57:12	0.512532	2.27984	18.3866	FALSE	0
2022-09-13	14:57:12	0.344389	1.53191	22.8231	FALSE	0
2022-09-13	14:57:12	0.505713	2.24951	20.6361	FALSE	0
2022-09-13	14:57:13	0.180267	0.801864	23.6249	FALSE	0
2022-09-13	14:57:13	0.521641	2.32036	22.9565	FALSE	0
2022-09-13	14:57:13	0.463931	2.06366	25.6886	FALSE	0
2022-09-13	14:57:13	0.612023	2.7224	25.6789	FALSE	0
2022-09-13	14:57:14	3.46525	15.4141	41.1027	1	1
2022-09-13	14:57:14	1.81055	8.05369	33.7326	FALSE	1
2022-09-13	14:57:14	0.440166	1.95795	43.0607	FALSE	1
2022-09-13	14:57:14	1.69182	7.52555	41.2581	FALSE	1
2022-09-13	14:57:15	0.376349	1.67408	44.7347	FALSE	1
2022-09-13	14:57:15	0.434364	1.93214	43.1903	FALSE	1
2022-09-13	14:57:15	0.320369	1.42507	46.1598	FALSE	1
2022-09-13	14:57:16	-0.000292388	-0.0013006	43.1903	FALSE	1
2022-09-13	14:57:16	0.0749239	0.333276	46.4931	FALSE	1
2022-09-13	14:57:16	0.00637431	0.0283542	43.2186	FALSE	1
2022-09-13	14:57:16	0.14042	0.624616	47.1177	FALSE	1
2022-09-13	14:57:17	-0.078562	-0.349459	43.2186	FALSE	1
2022-09-13	14:57:17	-0.0101651	-0.0452164	47.1177	FALSE	1
2022-09-13	14:57:17	0.0176211	0.0783822	43.297	FALSE	1
2022-09-13	14:57:17	-0.195203	-0.868302	47.1177	FALSE	1
2022-09-13	14:57:18	-0.39444	-1.75455	43.297	FALSE	1
2022-09-13	14:57:18	-0.526399	-2.34153	47.1177	FALSE	1
2022-09-13	14:57:18	-0.986348	-4.38747	43.297	FALSE	1
2022-09-13	14:57:18	-1.04645	-4.65482	47.1177	FALSE	1
2022-09-13	14:57:19	-0.927213	-4.12443	43.297	FALSE	1
2022-09-13	14:57:19	-0.787569	-3.50326	47.1177	FALSE	1
2022-09-13	14:57:19	-0.575559	-2.5602	43.297	FALSE	1
2022-09-13	14:57:20	-0.515458	-2.29286	47.1177	FALSE	1
2022-09-13	14:57:20	-0.0906231	-0.40311	43.297	FALSE	1
2022-09-13	14:57:20	0.167239	0.743913	47.8616	FALSE	1
2022-09-13	14:57:20	0.33986	1.51177	44.8088	FALSE	1
2022-09-13	14:57:21	0.499504	2.22189	50.0835	FALSE	1
2022-09-13	14:57:21	0.319504	1.42122	46.23	FALSE	1
2022-09-13	14:57:21	0.215178	0.957155	51.0406	FALSE	1
2022-09-13	14:57:21	0.193804	0.862079	47.0921	FALSE	1
2022-09-13	14:57:22	0.31869	1.4176	52.4582	FALSE	1
2022-09-13	14:57:22	0.102405	0.455518	47.5476	FALSE	1
2022-09-13	14:57:22	0.460471	2.04827	54.5065	FALSE	1
2022-09-13	14:57:22	0.0937534	0.417034	47.9646	FALSE	1
2022-09-13	14:57:23	0.309071	1.37481	55.8813	FALSE	1
2022-09-13	14:57:23	0.175738	0.781718	48.7463	FALSE	1
2022-09-13	14:57:23	0.260878	1.16044	57.0418	FALSE	1
2022-09-13	14:57:24	0.283066	1.25913	50.0055	FALSE	1
2022-09-13	14:57:24	0.240827	1.07125	58.113	FALSE	1
2022-09-13	14:57:24	0.422659	1.88007	51.8855	FALSE	1
2022-09-13	14:57:24	0.10556	0.469552	58.5826	FALSE	1
2022-09-13	14:57:25	0.263117	1.1704	53.0559	FALSE	1
2022-09-13	14:57:25	0.0586389	0.260838	58.8434	FALSE	1
2022-09-13	14:57:25	0.276501	1.22993	54.2859	FALSE	1
2022-09-13	14:57:25	-0.280699	-1.24861	58.8434	FALSE	1
2022-09-13	14:57:26	-0.342684	-1.52433	54.2859	FALSE	1
2022-09-13	14:57:26	-0.347926	-1.54764	58.8434	FALSE	1
2022-09-13	14:57:26	-0.504719	-2.24509	54.2859	FALSE	1
2022-09-13	14:57:26	-0.75673	-3.36609	58.8434	FALSE	1
2022-09-13	14:57:27	-0.560648	-2.49387	54.2859	FALSE	1
2022-09-13	14:57:27	-0.79561	-3.53903	58.8434	FALSE	1
2022-09-13	14:57:27	-0.691182	-3.07452	54.2859	FALSE	1
2022-09-13	14:57:28	-0.834898	-3.71379	58.8434	FALSE	1
2022-09-13	14:57:28	-0.680495	-3.02698	54.2859	FALSE	1
2022-09-13	14:57:28	-0.388333	-1.72738	58.8434	FALSE	1
2022-09-13	14:57:28	-0.12187	-0.542102	54.2859	FALSE	1
2022-09-13	14:57:29	-0.0862465	-0.383642	58.8434	FALSE	1
2022-09-13	14:57:29	-0.165381	-0.735648	54.2859	FALSE	1
2022-09-13	14:57:29	-0.339325	-1.50939	58.8434	FALSE	1
2022-09-13	14:57:29	-0.263855	-1.17368	54.2859	FALSE	1
2022-09-13	14:57:30	-0.0222771	-0.099093	58.8434	FALSE	1
2022-09-13	14:57:30	-0.0219209	-0.0975085	54.2859	FALSE	1
2022-09-13	14:57:30	-0.106094	-0.471927	58.8434	FALSE	1
2022-09-13	14:57:30	0.102608	0.456421	54.7423	FALSE	1
2022-09-13	14:57:31	0.0849493	0.377871	59.2213	FALSE	1
2022-09-13	14:57:31	0.233448	1.03842	55.7807	FALSE	1
2022-09-13	14:57:31	0.103321	0.459592	59.6809	FALSE	1
2022-09-13	14:57:32	0.228461	1.01624	56.797	FALSE	1
2022-09-13	14:57:32	0.436756	1.94278	61.6236	FALSE	1
2022-09-13	14:57:32	0.18673	0.830612	57.6276	FALSE	1
2022-09-13	14:57:32	0.298639	1.32841	62.952	FALSE	1
2022-09-13	14:57:33	0.155993	0.693888	58.3215	FALSE	1
2022-09-13	14:57:33	0.345458	1.53667	64.4887	FALSE	1
2022-09-13	14:57:33	0.083728	0.372439	58.6939	FALSE	1
2022-09-13	14:57:33	0.297875	1.32501	65.8137	FALSE	1
2022-09-13	14:57:34	0.229886	1.02258	59.7165	FALSE	1
2022-09-13	14:57:34	0.223066	0.992242	66.806	FALSE	1
2022-09-13	14:57:34	0.252277	1.12218	60.8386	FALSE	1
2022-09-13	14:57:34	0.260013	1.15659	67.9625	FALSE	1
2022-09-13	14:57:35	0.280064	1.24578	62.0844	FALSE	1
2022-09-13	14:57:35	0.0539061	0.239785	68.2023	FALSE	1
2022-09-13	14:57:35	0.371412	1.65211	63.7365	FALSE	1
2022-09-13	14:57:36	0.18841	0.838085	69.0404	FALSE	1
2022-09-13	14:57:36	0.362863	1.61409	65.3506	FALSE	1
2022-09-13	14:57:36	0.375942	1.67227	70.7127	FALSE	1
2022-09-13	14:57:36	0.346476	1.54119	66.8918	FALSE	1
2022-09-13	14:57:37	0.319453	1.42099	72.1337	FALSE	1
2022-09-13	14:57:37	0.214364	0.953534	67.8454	FALSE	1
2022-09-13	14:57:37	0.38271	1.70237	73.836	FALSE	1
2022-09-13	14:57:37	0.211921	0.942667	68.788	FALSE	1
2022-09-13	14:57:38	0.445204	1.98036	75.8164	FALSE	1
2022-09-13	14:57:38	0.160216	0.712673	69.5007	FALSE	1
2022-09-13	14:57:38	0.612125	2.72285	78.5393	FALSE	1
2022-09-13	14:57:38	0.222303	0.988848	70.4895	FALSE	1
2022-09-13	14:57:39	0.434517	1.93282	80.4721	FALSE	1
2022-09-13	14:57:39	0.341998	1.52128	72.0108	FALSE	1
2022-09-13	14:57:39	0.371005	1.6503	82.1224	FALSE	1
2022-09-13	14:57:40	0.484237	2.15398	74.1648	FALSE	1
2022-09-13	14:57:40	0.263372	1.17153	83.2939	FALSE	1
2022-09-13	14:57:40	0.567086	2.52251	76.6873	FALSE	1
2022-09-13	14:57:40	0.215636	0.959192	84.2531	FALSE	1
2022-09-13	14:57:41	0.456603	2.03106	78.7184	FALSE	1
2022-09-13	14:57:41	0.329529	1.46581	85.7189	FALSE	1
2022-09-13	14:57:41	0.456043	2.02857	80.747	FALSE	1
2022-09-13	14:57:41	0.467188	2.07815	87.7971	FALSE	1
2022-09-13	14:57:42	0.408206	1.81578	82.5627	FALSE	1
2022-09-13	14:57:42	0.403219	1.7936	89.5907	FALSE	1
2022-09-13	14:57:42	0.131107	0.58319	83.1459	FALSE	1
2022-09-13	14:57:42	0.22958	1.02122	90.6119	FALSE	1
2022-09-13	14:57:43	0.203982	0.907353	84.0533	FALSE	1
2022-09-13	14:57:43	1.2509	5.56425	96.1761	FALSE	1
2022-09-13	14:57:43	0.536094	2.38465	86.4379	FALSE	1
2022-09-13	14:57:44	3.63207	16.1562	112.332	1	2
2022-09-13	14:57:44	2.68134	11.9271	98.3651	FALSE	2
2022-09-13	14:57:44	1.12973	5.02526	117.358	FALSE	2
2022-09-13	14:57:44	1.41431	6.29113	104.656	FALSE	2
2022-09-13	14:57:45	0.213702	0.950589	118.308	FALSE	2
2022-09-13	14:57:45	0.513295	2.28324	106.939	FALSE	2
2022-09-13	14:57:45	1.17915	5.2451	123.553	FALSE	2
2022-09-13	14:57:45	1.35742	6.03808	112.978	FALSE	2
2022-09-13	14:57:46	3.75915	16.7215	140.275	1	3
2022-09-13	14:57:46	1.98078	8.81091	121.788	FALSE	3
2022-09-13	14:57:46	0.980929	4.36337	144.638	FALSE	3
2022-09-13	14:57:46	3.18444	14.165	135.953	1	4
2022-09-13	14:57:47	0.853804	3.79789	148.436	FALSE	4
2022-09-13	14:57:47	1.82083	8.09942	144.053	FALSE	4
2022-09-13	14:57:47	2.19732	9.77412	158.21	FALSE	4
2022-09-13	14:57:48	1.01162	4.49989	148.553	FALSE	4
2022-09-13	14:57:48	1.76383	7.84587	166.056	FALSE	4
2022-09-13	14:57:48	0.0979264	0.435596	148.988	FALSE	4
2022-09-13	14:57:48	0.576807	2.56575	168.622	FALSE	4
2022-09-13	14:57:49	2.67477	11.8979	160.886	FALSE	4
2022-09-13	14:57:49	4.08678	18.1788	186.801	1	5
2022-09-13	14:57:49	6.84764	30.4597	191.346	1	6
2022-09-13	14:57:49	3.5708	15.8836	202.684	1	7
2022-09-13	14:57:50	1.74709	7.77141	199.117	FALSE	7
2022-09-13	14:57:50	0.772176	3.43479	206.119	FALSE	7
2022-09-13	14:57:50	2.93833	13.0703	212.188	FALSE	7
2022-09-13	14:57:50	1.84195	8.19336	214.312	FALSE	7
2022-09-13	14:57:51	0.783575	3.4855	215.673	FALSE	7
2022-09-13	14:57:51	0.331616	1.47509	215.787	FALSE	7
2022-09-13	14:57:51	0.430293	1.91403	217.587	FALSE	7
2022-09-13	14:57:52	0.451158	2.00684	217.794	FALSE	7
2022-09-13	14:57:52	0.666171	2.96326	220.55	FALSE	7
2022-09-13	14:57:52	0.304389	1.35398	219.148	FALSE	7
2022-09-13	14:57:52	0.64841	2.88426	223.435	FALSE	7
2022-09-13	14:57:53	0.662354	2.94628	222.095	FALSE	7
2022-09-13	14:57:53	0.585203	2.6031	226.038	FALSE	7
2022-09-13	14:57:53	0.491005	2.18409	224.279	FALSE	7
2022-09-13	14:57:53	0.578537	2.57345	228.611	FALSE	7
2022-09-13	14:57:54	0.415076	1.84634	226.125	FALSE	7
2022-09-13	14:57:54	0.613397	2.72851	231.34	FALSE	7
2022-09-13	14:57:54	0.271667	1.20843	227.333	FALSE	7
2022-09-13	14:57:54	0.504847	2.24566	233.585	FALSE	7
2022-09-13	14:57:55	0.270089	1.20141	228.535	FALSE	7
2022-09-13	14:57:55	0.367443	1.63446	235.22	FALSE	7
2022-09-13	14:57:55	0.42444	1.88799	230.423	FALSE	7
2022-09-13	14:57:56	0.384033	1.70826	236.928	FALSE	7
2022-09-13	14:57:56	0.357774	1.59145	232.014	FALSE	7
2022-09-13	14:57:56	0.281794	1.25348	238.182	FALSE	7
2022-09-13	14:57:56	0.451158	2.00684	234.021	FALSE	7
2022-09-13	14:57:57	0.261998	1.16542	239.347	FALSE	7
2022-09-13	14:57:57	0.377367	1.6786	235.7	FALSE	7
2022-09-13	14:57:57	0.277825	1.23582	240.583	FALSE	7
2022-09-13	14:57:57	0.315942	1.40537	237.105	FALSE	7
2022-09-13	14:57:58	0.0797585	0.354782	240.938	FALSE	7
2022-09-13	14:57:58	0.40841	1.81669	238.922	FALSE	7
2022-09-13	14:57:58	0.102863	0.457555	241.395	FALSE	7
2022-09-13	14:57:58	0.670445	2.98227	241.904	FALSE	7
2022-09-13	14:57:59	0.851717	3.78861	245.184	FALSE	7
2022-09-13	14:57:59	1.51508	6.73938	248.643	FALSE	7
2022-09-13	14:57:59	2.81416	12.5179	257.702	FALSE	7
2022-09-13	14:58:00	3.70088	16.4623	265.106	1	8
2022-09-13	14:58:00	4.29401	19.1006	276.802	1	9
2022-09-13	14:58:00	1.99273	8.86406	273.97	FALSE	9
2022-09-13	14:58:00	1.66195	7.39269	284.195	FALSE	9
2022-09-13	14:58:01	1.35156	6.01201	279.982	FALSE	9
2022-09-13	14:58:01	1.06225	4.7251	288.92	FALSE	9
2022-09-13	14:58:01	1.30312	5.79654	285.778	FALSE	9
2022-09-13	14:58:01	1.91162	8.50327	297.423	FALSE	9
2022-09-13	14:58:02	1.00118	4.45345	290.232	FALSE	9
2022-09-13	14:58:02	1.14892	5.11063	302.534	FALSE	9
2022-09-13	14:58:02	0.434466	1.93259	292.164	FALSE	9
2022-09-13	14:58:02	0.568563	2.52908	305.063	FALSE	9
2022-09-13	14:58:03	1.02877	4.57617	296.74	FALSE	9
2022-09-13	14:58:03	0.606781	2.69908	307.762	FALSE	9
2022-09-13	14:58:03	2.28464	10.1625	306.903	FALSE	9
2022-09-13	14:58:04	1.3221	5.88097	313.643	FALSE	9
2022-09-13	14:58:04	2.75991	12.2766	319.18	FALSE	9
2022-09-13	14:58:04	3.54683	15.777	329.42	1	10
2022-09-13	14:58:04	1.3052	5.80579	324.985	FALSE	10
2022-09-13	14:58:05	0.79813	3.55024	332.97	FALSE	10
2022-09-13	14:58:05	1.25757	5.59392	330.579	FALSE	10
2022-09-13	14:58:05	0.606832	2.69931	335.67	FALSE	10
2022-09-13	14:58:05	0.368817	1.64057	332.22	FALSE	10
2022-09-13	14:58:06	1.20566	5.36302	341.033	FALSE	10
2022-09-13	14:58:06	0.259148	1.15274	333.373	FALSE	10
2022-09-13	14:58:06	0.535382	2.38149	343.414	FALSE	10
2022-09-13	14:58:06	0.284338	1.26479	334.637	FALSE	10
2022-09-13	14:58:07	0.378893	1.68539	345.1	FALSE	10
2022-09-13	14:58:07	0.343728	1.52897	336.166	FALSE	10
2022-09-13	14:58:07	0.340115	1.5129	346.612	FALSE	10
2022-09-13	14:58:08	0.286069	1.27249	337.439	FALSE	10
2022-09-13	14:58:08	0.541489	2.40865	349.021	FALSE	10
2022-09-13	14:58:08	0.35701	1.58805	339.027	FALSE	10
2022-09-13	14:58:08	0.422354	1.87872	350.9	FALSE	10
2022-09-13	14:58:09	0.33355	1.4837	340.511	FALSE	10
2022-09-13	14:58:09	0.427646	1.90225	352.802	FALSE	10
2022-09-13	14:58:09	0.327697	1.45766	341.968	FALSE	10
2022-09-13	14:58:09	0.529631	2.3559	355.158	FALSE	10
2022-09-13	14:58:10	0.284949	1.26751	343.236	FALSE	10
2022-09-13	14:58:10	0.32271	1.43548	356.593	FALSE	10
2022-09-13	14:58:10	0.252023	1.12105	344.357	FALSE	10
2022-09-13	14:58:10	0.466679	2.07588	358.669	FALSE	10
2022-09-13	14:58:11	0.188512	0.838539	345.195	FALSE	10
2022-09-13	14:58:11	0.159504	0.709506	359.379	FALSE	10
2022-09-13	14:58:11	0.355382	1.58081	346.776	FALSE	10
2022-09-13	14:58:11	0.532277	2.36767	361.747	FALSE	10
2022-09-13	14:58:12	0.226527	1.00764	347.784	FALSE	10
2022-09-13	14:58:12	0.419199	1.86468	363.611	FALSE	10
2022-09-13	14:58:12	0.316858	1.40945	349.193	FALSE	10
2022-09-13	14:58:13	0.231769	1.03095	364.642	FALSE	10
2022-09-13	14:58:13	0.414822	1.84521	351.039	FALSE	10
2022-09-13	14:58:13	0.219402	0.975944	365.618	FALSE	10
2022-09-13	14:58:13	0.358741	1.59575	352.634	FALSE	10
2022-09-13	14:58:14	0.0874429	0.388964	366.007	FALSE	10
2022-09-13	14:58:14	0.292074	1.2992	353.933	FALSE	10
2022-09-13	14:58:14	0.259351	1.15365	367.161	FALSE	10
2022-09-13	14:58:14	0.353092	1.57062	355.504	FALSE	10
2022-09-13	14:58:15	0.203626	0.905769	368.067	FALSE	10
2022-09-13	14:58:15	0.323982	1.44114	356.945	FALSE	10
2022-09-13	14:58:15	0.289937	1.2897	369.356	FALSE	10
2022-09-13	14:58:15	0.156654	0.696828	357.642	FALSE	10
2022-09-13	14:58:16	0.395382	1.75874	371.115	FALSE	10
2022-09-13	14:58:16	0.199046	0.885396	358.527	FALSE	10
2022-09-13	14:58:16	0.702099	3.12308	374.238	FALSE	10
2022-09-13	14:58:17	0.265153	1.17945	359.707	FALSE	10
2022-09-13	14:58:17	0.426985	1.89931	376.137	FALSE	10
2022-09-13	14:58:17	1.05726	4.7029	364.41	FALSE	10
2022-09-13	14:58:17	0.424084	1.88641	378.024	FALSE	10
2022-09-13	14:58:18	1.08184	4.81224	369.222	FALSE	10
2022-09-13	14:58:18	0.280725	1.24872	379.272	FALSE	10
2022-09-13	14:58:18	0.433753	1.92942	371.151	FALSE	10
2022-09-13	14:58:18	1.39594	6.20942	385.482	FALSE	10
2022-09-13	14:58:19	0.381743	1.69807	372.85	FALSE	10
2022-09-13	14:58:19	0.390191	1.73565	387.218	FALSE	10
2022-09-13	14:58:19	0.4107	1.82688	374.676	FALSE	10
2022-09-13	14:58:19	-0.0406486	-0.180813	387.218	FALSE	10
2022-09-13	14:58:20	-0.0673152	-0.299431	374.676	FALSE	10
2022-09-13	14:58:20	-0.0422262	-0.187831	387.218	FALSE	10
2022-09-13	14:58:20	-0.267977	-1.19202	374.676	FALSE	10
2022-09-13	14:58:21	-0.466755	-2.07622	387.218	FALSE	10
2022-09-13	14:58:21	-0.108384	-0.482114	374.676	FALSE	10
2022-09-13	14:58:21	0.122303	0.544028	387.762	FALSE	10
2022-09-13	14:58:21	0.225051	1.00107	375.678	FALSE	10
2022-09-13	14:58:22	0.237723	1.05744	388.819	FALSE	10
2022-09-13	14:58:22	0.36215	1.61092	377.288	FALSE	10
2022-09-13	14:58:22	0.383881	1.70758	390.527	FALSE	10
2022-09-13	14:58:22	0.416654	1.85336	379.142	FALSE	10
2022-09-13	14:58:23	0.274975	1.22314	391.75	FALSE	10
2022-09-13	14:58:23	0.227697	1.01284	380.155	FALSE	10
2022-09-13	14:58:23	0.233753	1.03978	392.79	FALSE	10
2022-09-13	14:58:23	0.328308	1.46038	381.615	FALSE	10
2022-09-13	14:58:24	0.360471	1.60345	394.393	FALSE	10
2022-09-13	14:58:24	0.272939	1.21409	382.829	FALSE	10
2022-09-13	14:58:24	0.257621	1.14595	395.539	FALSE	10
2022-09-13	14:58:25	0.235534	1.0477	383.877	FALSE	10
2022-09-13	14:58:25	0.234924	1.04499	396.584	FALSE	10
2022-09-13	14:58:25	0.24841	1.10498	384.982	FALSE	10
2022-09-13	14:58:25	0.236094	1.05019	397.634	FALSE	10
2022-09-13	14:58:26	0.385407	1.71437	386.696	FALSE	10
2022-09-13	14:58:26	0.454618	2.02223	399.656	FALSE	10
2022-09-13	14:58:26	0.422506	1.87939	388.576	FALSE	10
2022-09-13	14:58:26	0.488461	2.17277	401.829	FALSE	10
2022-09-13	14:58:27	0.503473	2.23955	390.815	FALSE	10
2022-09-13	14:58:27	0.480573	2.13768	403.967	FALSE	10
2022-09-13	14:58:27	0.424389	1.88777	392.703	FALSE	10
2022-09-13	14:58:27	0.427443	1.90135	405.868	FALSE	10
2022-09-13	14:58:28	0.399809	1.77843	394.481	FALSE	10
2022-09-13	14:58:28	0.39299	1.7481	407.616	FALSE	10
2022-09-13	14:58:28	0.389326	1.7318	396.213	FALSE	10
2022-09-13	14:58:29	0.385407	1.71437	409.331	FALSE	10
2022-09-13	14:58:29	0.386527	1.71935	397.932	FALSE	10
2022-09-13	14:58:29	0.404338	1.79858	411.129	FALSE	10
2022-09-13	14:58:29	0.421692	1.87577	399.808	FALSE	10
2022-09-13	14:58:30	0.441692	1.96473	413.094	FALSE	10
2022-09-13	14:58:30	0.435433	1.93689	401.745	FALSE	10
2022-09-13	14:58:30	0.400878	1.78319	414.877	FALSE	10
2022-09-13	14:58:30	0.406578	1.80854	403.554	FALSE	10
2022-09-13	14:58:31	0.338842	1.50724	416.384	FALSE	10
2022-09-13	14:58:31	0.366272	1.62925	405.183	FALSE	10
2022-09-13	14:58:31	0.468155	2.08245	418.467	FALSE	10
2022-09-13	14:58:31	0.389224	1.73135	406.914	FALSE	10
2022-09-13	14:58:32	0.54556	2.42676	420.894	FALSE	10
2022-09-13	14:58:32	0.519606	2.31131	409.226	FALSE	10
2022-09-13	14:58:32	0.335229	1.49117	422.385	FALSE	10
2022-09-13	14:58:33	0.31528	1.40243	410.628	FALSE	10
2022-09-13	14:58:33	0.308664	1.373	423.758	FALSE	10
2022-09-13	14:58:33	0.265814	1.18239	411.81	FALSE	10
2022-09-13	14:58:33	0.218842	0.973453	424.731	FALSE	10
2022-09-13	14:58:34	0.295942	1.31641	413.127	FALSE	10
2022-09-13	14:58:34	0.244797	1.08891	425.82	FALSE	10
2022-09-13	14:58:34	0.0299366	0.133164	413.26	FALSE	10
2022-09-13	14:58:34	-0.0113865	-0.0506494	425.82	FALSE	10
2022-09-13	14:58:35	-0.0715901	-0.318447	413.26	FALSE	10
2022-09-13	14:58:35	-0.0845163	-0.375945	425.82	FALSE	10
2022-09-13	14:58:35	-0.310572	-1.38149	413.26	FALSE	10
2022-09-13	14:58:35	-0.416679	-1.85347	425.82	FALSE	10
2022-09-13	14:58:36	-0.3293	-1.46479	413.26	FALSE	10
2022-09-13	14:58:36	-0.543091	-2.41578	425.82	FALSE	10
2022-09-13	14:58:36	-0.689809	-3.06841	413.26	FALSE	10
2022-09-13	14:58:37	-0.493829	-2.19665	425.82	FALSE	10
2022-09-13	14:58:37	-0.647875	-2.88188	413.26	FALSE	10
2022-09-13	14:58:37	-0.640394	-2.8486	425.82	FALSE	10
2022-09-13	14:58:37	-0.625483	-2.78227	413.26	FALSE	10
2022-09-13	14:58:38	-0.533167	-2.37163	425.82	FALSE	10
2022-09-13	14:58:38	-0.481412	-2.14142	413.26	FALSE	10
2022-09-13	14:58:38	-0.430623	-1.9155	425.82	FALSE	10
2022-09-13	14:58:38	-0.559274	-2.48776	413.26	FALSE	10
2022-09-13	14:58:39	-0.63159	-2.80944	425.82	FALSE	10
2022-09-13	14:58:39	-0.491794	-2.1876	413.26	FALSE	10
2022-09-13	14:58:39	-0.492251	-2.18963	425.82	FALSE	10
2022-09-13	14:58:39	-0.287366	-1.27826	413.26	FALSE	10
2022-09-13	14:58:40	-0.371081	-1.65064	425.82	FALSE	10
2022-09-13	14:58:40	0.0997076	0.443519	413.703	FALSE	10
2022-09-13	14:58:40	0.0993004	0.441708	426.262	FALSE	10
2022-09-13	14:58:41	0.877672	3.90406	417.608	FALSE	10
2022-09-13	14:58:41	3.07599	13.6826	439.944	1	11
2022-09-13	14:58:41	4.23915	18.8566	436.464	1	12
2022-09-13	14:58:41	3.08434	13.7198	453.664	1	13
2022-09-13	14:58:42	1.7135	7.62199	444.086	FALSE	13
2022-09-13	14:58:42	1.90724	8.48378	462.148	FALSE	13
2022-09-13	14:58:42	4.45345	19.8098	463.896	1	14
2022-09-13	14:58:42	0.910191	4.04871	466.197	FALSE	14
2022-09-13	14:58:43	1.59777	7.1072	471.003	FALSE	14
2022-09-13	14:58:43	2.32576	10.3454	476.542	FALSE	14
2022-09-13	14:58:43	0.616705	2.74323	473.746	FALSE	14
2022-09-13	14:58:43	1.00531	4.47182	481.014	FALSE	14
2022-09-13	14:58:44	0.416298	1.85178	475.598	FALSE	14
2022-09-13	14:58:44	1.47223	6.54877	487.563	FALSE	14
2022-09-13	14:58:44	0.536247	2.38533	477.983	FALSE	14
2022-09-13	14:58:45	0.825916	3.67384	491.237	FALSE	14
2022-09-13	14:58:45	0.300013	1.33452	479.318	FALSE	14
2022-09-13	14:58:45	0.278944	1.2408	492.477	FALSE	14
2022-09-13	14:58:45	0.410547	1.8262	481.144	FALSE	14
2022-09-13	14:58:46	0.205	0.911881	493.389	FALSE	14
2022-09-13	14:58:46	0.331718	1.47555	482.62	FALSE	14
2022-09-13	14:58:46	0.196298	0.873173	494.262	FALSE	14
2022-09-13	14:58:46	0.440216	1.95817	484.578	FALSE	14
2022-09-13	14:58:47	0.227646	1.01261	495.275	FALSE	14
2022-09-13	14:58:47	0.395534	1.75941	486.337	FALSE	14
2022-09-13	14:58:47	0.344033	1.53033	496.805	FALSE	14
2022-09-13	14:58:47	0.610852	2.71719	489.054	FALSE	14
2022-09-13	14:58:48	0.277621	1.23491	498.04	FALSE	14
2022-09-13	14:58:48	0.183423	0.815902	489.87	FALSE	14
2022-09-13	14:58:48	-0.0438547	-0.195074	498.04	FALSE	14
2022-09-13	14:58:49	-0.0778496	-0.346291	489.87	FALSE	14
2022-09-13	14:58:49	-0.0331168	-0.14731	498.04	FALSE	14
2022-09-13	14:58:49	0.197672	0.879285	490.75	FALSE	14
2022-09-13	14:58:49	0.0308527	0.137239	498.177	FALSE	14
2022-09-13	14:58:50	0.375942	1.67227	492.422	FALSE	14
2022-09-13	14:58:50	0.10327	0.459366	498.637	FALSE	14
2022-09-13	14:58:50	0.446883	1.98782	494.41	FALSE	14
2022-09-13	14:58:50	0.114211	0.508033	499.145	FALSE	14
2022-09-13	14:58:51	0.455026	2.02405	496.434	FALSE	14
2022-09-13	14:58:51	0.650394	2.89308	502.038	FALSE	14
2022-09-13	14:58:51	1.73818	7.73177	504.166	FALSE	14
2022-09-13	14:58:51	1.03492	4.60353	506.641	FALSE	14
2022-09-13	14:58:52	1.63365	7.2668	511.432	FALSE	14
2022-09-13	14:58:52	0.304033	1.3524	507.994	FALSE	14
2022-09-13	14:58:52	1.8766	8.34749	519.78	FALSE	14
2022-09-13	14:58:53	0.21416	0.952627	508.947	FALSE	14
2022-09-13	14:58:53	0.66154	2.94266	522.723	FALSE	14
2022-09-13	14:58:53	0.49986	2.22348	511.17	FALSE	14
2022-09-13	14:58:53	0.383677	1.70667	524.429	FALSE	14
2022-09-13	14:58:54	0.495382	2.20356	513.374	FALSE	14
2022-09-13	14:58:54	0.375127	1.66864	526.098	FALSE	14
2022-09-13	14:58:54	0.393804	1.75172	515.125	FALSE	14
2022-09-13	14:58:54	0.300471	1.33656	527.434	FALSE	14
2022-09-13	14:58:55	0.495942	2.20605	517.331	FALSE	14
2022-09-13	14:58:55	0.745051	3.31414	530.749	FALSE	14
2022-09-13	14:58:55	0.288817	1.28472	518.616	FALSE	14
2022-09-13	14:58:55	0.797519	3.54752	534.296	FALSE	14
2022-09-13	14:58:56	0.719656	3.20117	521.817	FALSE	14
2022-09-13	14:58:56	1.10566	4.9182	539.214	FALSE	14
2022-09-13	14:58:56	0.522099	2.3224	524.14	FALSE	14
2022-09-13	14:58:57	0.532583	2.36904	541.583	FALSE	14
2022-09-13	14:58:57	0.590445	2.62642	526.766	FALSE	14
2022-09-13	14:58:57	0.161896	0.720146	542.303	FALSE	14
2022-09-13	14:58:57	0.475738	2.11618	528.882	FALSE	14
2022-09-13	14:58:58	0.142863	0.635483	542.939	FALSE	14
2022-09-13	14:58:58	0.385051	1.71278	530.595	FALSE	14
2022-09-13	14:58:58	-0.0242618	-0.107921	542.939	FALSE	14
2022-09-13	14:58:58	-0.106755	-0.474868	530.595	FALSE	14
2022-09-13	14:58:59	-0.261514	-1.16327	542.939	FALSE	14
2022-09-13	14:58:59	-0.358104	-1.59292	530.595	FALSE	14
2022-09-13	14:58:59	-0.522124	-2.32251	542.939	FALSE	14
2022-09-13	14:58:59	-0.53444	-2.3773	530.595	FALSE	14
2022-09-13	14:59:00	-0.610979	-2.71776	542.939	FALSE	14
2022-09-13	14:59:00	-0.677086	-3.01181	530.595	FALSE	14
2022-09-13	14:59:00	-0.790979	-3.51843	542.939	FALSE	14
2022-09-13	14:59:01	-0.703701	-3.1302	530.595	FALSE	14
2022-09-13	14:59:01	-0.628231	-2.7945	542.939	FALSE	14
2022-09-13	14:59:01	-0.361513	-1.60808	530.595	FALSE	14
2022-09-13	14:59:01	-0.178206	-0.792696	542.939	FALSE	14
2022-09-13	14:59:02	0.0856109	0.380814	530.976	FALSE	14
2022-09-13	14:59:02	0.688308	3.06173	546.001	FALSE	14
2022-09-13	14:59:02	0.877672	3.90406	534.88	FALSE	14
2022-09-13	14:59:02	1.73686	7.7259	553.727	FALSE	14
2022-09-13	14:59:03	1.41833	6.30902	541.189	FALSE	14
2022-09-13	14:59:03	2.09574	9.32227	563.049	FALSE	14
2022-09-13	14:59:03	1.34174	5.96833	547.157	FALSE	14
2022-09-13	14:59:03	1.63996	7.29487	570.344	FALSE	14
2022-09-13	14:59:04	0.293499	1.30554	548.463	FALSE	14
2022-09-13	14:59:04	1.07207	4.76878	575.112	FALSE	14
2022-09-13	14:59:04	0.644644	2.86751	551.33	FALSE	14
2022-09-13	14:59:05	0.566679	2.5207	577.633	FALSE	14
2022-09-13	14:59:05	0.297977	1.32546	552.656	FALSE	14
2022-09-13	14:59:05	0.499453	2.22167	579.855	FALSE	14
2022-09-13	14:59:05	0.287087	1.27702	553.933	FALSE	14
2022-09-13	14:59:06	0.469377	2.08788	581.943	FALSE	14
2022-09-13	14:59:06	0.340064	1.51267	555.445	FALSE	14
2022-09-13	14:59:06	0.37584	1.67181	583.615	FALSE	14
2022-09-13	14:59:06	0.142354	0.633219	556.079	FALSE	14
2022-09-13	14:59:07	0.488308	2.17209	585.787	FALSE	14
2022-09-13	14:59:07	0.31869	1.4176	557.496	FALSE	14
2022-09-13	14:59:07	0.579911	2.57956	588.366	FALSE	14
2022-09-13	14:59:07	0.911972	4.05663	561.553	FALSE	14
2022-09-13	14:59:08	0.595941	2.65086	591.017	FALSE	14
2022-09-13	14:59:08	1.00999	4.49264	566.045	FALSE	14
2022-09-13	14:59:08	0.531769	2.36541	593.382	FALSE	14
2022-09-13	14:59:09	0.348053	1.54821	567.594	FALSE	14
2022-09-13	14:59:09	0.341387	1.51856	594.901	FALSE	14
2022-09-13	14:59:09	0.458893	2.04125	569.635	FALSE	14
2022-09-13	14:59:09	0.35355	1.57266	596.474	FALSE	14
2022-09-13	14:59:10	0.708206	3.15024	572.785	FALSE	14
2022-09-13	14:59:10	0.310649	1.38183	597.856	FALSE	14
2022-09-13	14:59:10	0.535891	2.38375	575.169	FALSE	14
2022-09-13	14:59:10	0.285814	1.27136	599.127	FALSE	14
2022-09-13	14:59:11	0.497723	2.21397	577.383	FALSE	14
2022-09-13	14:59:11	0.219453	0.976171	600.103	FALSE	14
2022-09-13	14:59:11	0.506374	2.25245	579.635	FALSE	14
2022-09-13	14:59:11	0.187392	0.833557	600.937	FALSE	14
2022-09-13	14:59:12	0.507138	2.25585	581.891	FALSE	14
2022-09-13	14:59:12	0.248868	1.10701	602.044	FALSE	14
2022-09-13	14:59:12	0.4993	2.22099	584.112	FALSE	14
2022-09-13	14:59:13	0.161641	0.719011	602.763	FALSE	14
2022-09-13	14:59:13	0.476858	2.12116	586.233	FALSE	14
2022-09-13	14:59:13	0.227138	1.01036	603.773	FALSE	14
2022-09-13	14:59:13	0.505051	2.24657	588.48	FALSE	14
2022-09-13	14:59:14	0.0841351	0.37425	604.147	FALSE	14
2022-09-13	14:59:14	-0.10533	-0.468529	588.48	FALSE	14
2022-09-13	14:59:14	-0.219783	-0.977639	604.147	FALSE	14
2022-09-13	14:59:14	-0.173778	-0.772999	588.48	FALSE	14
2022-09-13	14:59:15	-0.269809	-1.20016	604.147	FALSE	14
2022-09-13	14:59:15	-0.424771	-1.88947	588.48	FALSE	14
2022-09-13	14:59:15	-0.428638	-1.90667	604.147	FALSE	14
2022-09-13	14:59:15	-0.654185	-2.90995	588.48	FALSE	14
2022-09-13	14:59:16	-0.615	-2.73564	604.147	FALSE	14
2022-09-13	14:59:16	-0.824872	-3.6692	588.48	FALSE	14
2022-09-13	14:59:16	-0.648892	-2.8864	604.147	FALSE	14
2022-09-13	14:59:17	-0.628384	-2.79518	588.48	FALSE	14
2022-09-13	14:59:17	-0.434491	-1.9327	604.147	FALSE	14
2022-09-13	14:59:17	-0.36874	-1.64023	588.48	FALSE	14
2022-09-13	14:59:17	-0.0849743	-0.377983	604.147	FALSE	14
2022-09-13	14:59:18	-0.151488	-0.673849	588.48	FALSE	14
2022-09-13	14:59:18	0.0638806	0.284154	604.431	FALSE	14
2022-09-13	14:59:18	-0.156119	-0.694449	588.48	FALSE	14
2022-09-13	14:59:18	0.0620486	0.276005	604.707	FALSE	14
2022-09-13	14:59:19	0.0461707	0.205377	588.685	FALSE	14
2022-09-13	14:59:19	0.206018	0.916409	605.624	FALSE	14
2022-09-13	14:59:19	-0.0858903	-0.382057	588.685	FALSE	14
2022-09-13	14:59:19	0.153957	0.684832	606.309	FALSE	14
2022-09-13	14:59:20	0.0655091	0.291398	588.977	FALSE	14
2022-09-13	14:59:20	0.170802	0.759761	607.068	FALSE	14
2022-09-13	14:59:20	0.187137	0.832423	589.809	FALSE	14
2022-09-13	14:59:21	0.182507	0.811828	607.88	FALSE	14
2022-09-13	14:59:21	0.153448	0.682567	590.492	FALSE	14
2022-09-13	14:59:21	0.163728	0.728295	608.609	FALSE	14
2022-09-13	14:59:21	0.0500893	0.222807	590.714	FALSE	14
2022-09-13	14:59:22	0.103881	0.462083	609.071	FALSE	14
2022-09-13	14:59:22	0.00820635	0.0365035	590.751	FALSE	14
2022-09-13	14:59:22	0.747494	3.325	612.396	FALSE	14
2022-09-13	14:59:22	2.9477	13.112	603.863	FALSE	14
2022-09-13	14:59:23	0.424135	1.88664	614.282	FALSE	14
2022-09-13	14:59:23	0.544491	2.422	606.285	FALSE	14
2022-09-13	14:59:23	0.364746	1.62246	615.905	FALSE	14
2022-09-13	14:59:23	0.0811834	0.36112	606.646	FALSE	14
2022-09-13	14:59:24	1.61757	7.19527	623.1	FALSE	14
2022-09-13	14:59:24	0.154059	0.685285	607.331	FALSE	14
2022-09-13	14:59:24	0.113804	0.506223	623.606	FALSE	14
2022-09-13	14:59:25	0.93243	4.14764	611.479	FALSE	14
2022-09-13	14:59:25	0.142303	0.632992	624.239	FALSE	14
2022-09-13	14:59:25	0.143321	0.63752	612.117	FALSE	14
2022-09-13	14:59:25	-0.0620226	-0.275889	624.239	FALSE	14
2022-09-13	14:59:26	-0.107926	-0.480076	612.117	FALSE	14
2022-09-13	14:59:26	-0.236781	-1.05325	624.239	FALSE	14
2022-09-13	14:59:26	-0.262786	-1.16892	612.117	FALSE	14
2022-09-13	14:59:26	-0.173371	-0.771189	624.239	FALSE	14
2022-09-13	14:59:27	-0.00309134	-0.0137509	612.117	FALSE	14
2022-09-13	14:59:27	0.167646	0.745723	624.985	FALSE	14
2022-09-13	14:59:27	0.255331	1.13576	613.252	FALSE	14
2022-09-13	14:59:27	0.255178	1.13508	626.12	FALSE	14
2022-09-13	14:59:28	0.727545	3.23627	616.489	FALSE	14
2022-09-13	14:59:28	0.882964	3.9276	630.048	FALSE	14
2022-09-13	14:59:28	0.475687	2.11595	618.605	FALSE	14
2022-09-13	14:59:29	0.591361	2.63049	632.678	FALSE	14
2022-09-13	14:59:29	0.542914	2.41499	621.019	FALSE	14
2022-09-13	14:59:29	0.0030664	0.01364	632.692	FALSE	14
2022-09-13	14:59:29	-0.0123025	-0.054724	621.019	FALSE	14
2022-09-13	14:59:30	0.13584	0.604243	633.296	FALSE	14
2022-09-13	14:59:30	0.0911071	0.405263	621.425	FALSE	14
2022-09-13	14:59:30	-0.197544	-0.878715	633.296	FALSE	14
2022-09-13	14:59:30	-0.0944908	-0.420314	621.425	FALSE	14
2022-09-13	14:59:31	0.118639	0.52773	633.824	FALSE	14
2022-09-13	14:59:31	0.550547	2.44894	623.874	FALSE	14
2022-09-13	14:59:31	0.370496	1.64804	635.472	FALSE	14
2022-09-13	14:59:31	0.439097	1.95319	625.827	FALSE	14
2022-09-13	14:59:32	0.384084	1.70848	637.18	FALSE	14
2022-09-13	14:59:32	0.47584	2.11663	627.944	FALSE	14
2022-09-13	14:59:32	0.320878	1.42733	638.608	FALSE	14
2022-09-13	14:59:33	0.675483	3.00468	630.948	FALSE	14
2022-09-13	14:59:33	0.270547	1.20345	639.811	FALSE	14
2022-09-13	14:59:33	0.59075	2.62777	633.576	FALSE	14
2022-09-13	14:59:33	0.499148	2.22031	642.031	FALSE	14
2022-09-13	14:59:34	0.414211	1.84249	635.418	FALSE	14
2022-09-13	14:59:34	0.600776	2.67237	644.704	FALSE	14
2022-09-13	14:59:34	0.3307	1.47102	636.889	FALSE	14
2022-09-13	14:59:34	0.65986	2.93519	647.639	FALSE	14
2022-09-13	14:59:35	0.32673	1.45336	638.343	FALSE	14
2022-09-13	14:59:35	0.583728	2.59654	650.235	FALSE	14
2022-09-13	14:59:35	0.401794	1.78726	640.13	FALSE	14
2022-09-13	14:59:35	0.551208	2.45188	652.687	FALSE	14
2022-09-13	14:59:36	0.418486	1.86151	641.992	FALSE	14
2022-09-13	14:59:36	-0.0347453	-0.154554	652.687	FALSE	14
2022-09-13	14:59:36	0.255534	1.13667	643.128	FALSE	14
2022-09-13	14:59:37	0.204389	0.909163	653.596	FALSE	14
2022-09-13	14:59:37	0.34673	1.54232	644.671	FALSE	14
2022-09-13	14:59:37	-0.0362211	-0.161119	653.596	FALSE	14
2022-09-13	14:59:37	-0.287162	-1.27735	644.671	FALSE	14
2022-09-13	14:59:38	-0.324262	-1.44238	653.596	FALSE	14
2022-09-13	14:59:38	-0.276272	-1.22891	644.671	FALSE	14
2022-09-13	14:59:38	-0.074847	-0.332934	653.596	FALSE	14
2022-09-13	14:59:39	-0.0509794	-0.226767	644.671	FALSE	14
2022-09-13	14:59:39	-0.0387147	-0.172211	653.596	FALSE	14
2022-09-13	14:59:39	-0.11103	-0.493884	644.671	FALSE	14
2022-09-13	14:59:39	-0.199631	-0.887999	653.596	FALSE	14
2022-09-13	14:59:39	0.00973306	0.0432946	644.714	FALSE	14
2022-09-13	14:59:40	-0.170878	-0.7601	653.596	FALSE	14
2022-09-13	14:59:40	0.019504	0.0867577	644.801	FALSE	14
2022-09-13	14:59:40	-0.0705214	-0.313693	653.596	FALSE	14
2022-09-13	14:59:41	-0.0485366	-0.215901	644.801	FALSE	14
2022-09-13	14:59:41	-0.0734221	-0.326596	653.596	FALSE	14
2022-09-13	14:59:41	-0.0927605	-0.412617	644.801	FALSE	14
2022-09-13	14:59:41	-0.0467554	-0.207977	653.596	FALSE	14
2022-09-13	14:59:42	-0.18701	-0.831858	644.801	FALSE	14
2022-09-13	14:59:42	0.0253564	0.11279	653.709	FALSE	14
2022-09-13	14:59:42	-0.0875188	-0.389301	644.801	FALSE	14
2022-09-13	14:59:42	-0.147315	-0.655287	653.709	FALSE	14
2022-09-13	14:59:43	0.10958	0.487434	645.288	FALSE	14
2022-09-13	14:59:43	0.132379	0.588848	654.298	FALSE	14
2022-09-13	14:59:43	0.108664	0.483359	645.771	FALSE	14
2022-09-13	14:59:43	0.125204	0.556932	654.855	FALSE	14
2022-09-13	14:59:44	0.027443	0.122072	645.894	FALSE	14
2022-09-13	14:59:44	0.0915142	0.407073	655.262	FALSE	14
2022-09-13	14:59:44	0.07813	0.347538	646.241	FALSE	14
2022-09-13	14:59:45	0.0914124	0.406621	655.669	FALSE	14
2022-09-13	14:59:45	0.118334	0.526373	646.767	FALSE	14
2022-09-13	14:59:45	0.102812	0.457328	656.126	FALSE	14
2022-09-13	14:59:45	0.117672	0.523429	647.291	FALSE	14
2022-09-13	14:59:46	0.117061	0.520711	656.647	FALSE	14
2022-09-13	14:59:46	0.123779	0.550594	647.841	FALSE	14
2022-09-13	14:59:46	0.117519	0.522748	657.17	FALSE	14
2022-09-13	14:59:46	0.121234	0.539273	648.381	FALSE	14
2022-09-13	14:59:47	0.121031	0.53837	657.708	FALSE	14
2022-09-13	14:59:47	0.121641	0.541083	648.922	FALSE	14
2022-09-13	14:59:47	0.120471	0.535879	658.244	FALSE	14
2022-09-13	14:59:47	0.114008	0.50713	649.429	FALSE	14
2022-09-13	14:59:48	0.120115	0.534296	658.778	FALSE	14
2022-09-13	14:59:48	0.123932	0.551274	649.98	FALSE	14
2022-09-13	14:59:48	0.124593	0.554215	659.332	FALSE	14
2022-09-13	14:59:49	0.125865	0.559873	650.54	FALSE	14
2022-09-13	14:59:49	0.117825	0.524109	659.856	FALSE	14
2022-09-13	14:59:49	0.120216	0.534745	651.075	FALSE	14
2022-09-13	14:59:49	0.140267	0.623936	660.48	FALSE	14
2022-09-13	14:59:50	0.0940587	0.418392	651.493	FALSE	14
2022-09-13	14:59:50	0.0534481	0.237748	660.718	FALSE	14
2022-09-13	14:59:50	0.0812852	0.361573	651.855	FALSE	14
2022-09-13	14:59:50	0.0602674	0.268081	660.986	FALSE	14
2022-09-13	14:59:51	0.072532	0.322637	652.177	FALSE	14
2022-09-13	14:59:51	0.177316	0.788737	661.775	FALSE	14
2022-09-13	14:59:51	0.185407	0.824727	653.002	FALSE	14
2022-09-13	14:59:51	0.177468	0.789413	662.564	FALSE	14
2022-09-13	14:59:52	0.221183	0.983866	653.986	FALSE	14
2022-09-13	14:59:52	0.276705	1.23084	663.795	FALSE	14
2022-09-13	14:59:52	0.238079	1.05902	655.045	FALSE	14
2022-09-13	14:59:53	0.31014	1.37956	665.175	FALSE	14
2022-09-13	14:59:53	0.341438	1.51878	656.564	FALSE	14
2022-09-13	14:59:53	0.329835	1.46717	666.642	FALSE	14
2022-09-13	14:59:53	0.300165	1.33519	657.899	FALSE	14
2022-09-13	14:59:54	0.297316	1.32252	667.964	FALSE	14
2022-09-13	14:59:54	0.284389	1.26502	659.164	FALSE	14
2022-09-13	14:59:54	0.297926	1.32523	669.29	FALSE	14
2022-09-13	14:59:54	0.31757	1.41261	660.577	FALSE	14
2022-09-13	14:59:55	0.31584	1.40492	670.695	FALSE	14
2022-09-13	14:59:55	0.313753	1.39564	661.972	FALSE	14
2022-09-13	14:59:55	0.314567	1.39926	672.094	FALSE	14
2022-09-13	14:59:55	0.316094	1.40605	663.378	FALSE	14
2022-09-13	14:59:56	0.324339	1.44272	673.537	FALSE	14
2022-09-13	14:59:56	0.326985	1.45449	664.833	FALSE	14
2022-09-13	14:59:56	0.321641	1.43072	674.967	FALSE	14
2022-09-13	14:59:57	0.323881	1.44069	666.274	FALSE	14
2022-09-13	14:59:57	0.318537	1.41692	676.384	FALSE	14
2022-09-13	14:59:57	0.29645	1.31867	667.592	FALSE	14
2022-09-13	14:59:57	0.294466	1.30984	677.694	FALSE	14
2022-09-13	14:59:58	0.302405	1.34516	668.937	FALSE	14
2022-09-13	14:59:58	0.298537	1.32795	679.022	FALSE	14
2022-09-13	14:59:58	0.265763	1.18217	670.12	FALSE	14
2022-09-13	14:59:58	0.260064	1.15682	680.179	FALSE	14
2022-09-13	14:59:59	0.309377	1.37617	671.496	FALSE	14
2022-09-13	14:59:59	0.48785	2.17005	682.349	FALSE	14
2022-09-13	14:59:59	0.417367	1.85653	673.352	FALSE	14
2022-09-13	14:59:59	0.380013	1.69037	684.039	FALSE	14
2022-09-13	15:00:00	1.00994	4.49242	677.845	FALSE	14
2022-09-13	15:00:00	1.10118	4.89827	688.937	FALSE	14
2022-09-13	15:00:00	1.60846	7.15475	684.999	FALSE	14
2022-09-13	15:00:01	1.14027	5.07215	694.01	FALSE	14
2022-09-13	15:00:01	1.40276	6.23976	691.239	FALSE	14
2022-09-13	15:00:01	1.62215	7.21565	701.225	FALSE	14
2022-09-13	15:00:01	1.58922	7.06917	698.308	FALSE	14
2022-09-13	15:00:02	2.05452	9.13892	710.364	FALSE	14
2022-09-13	15:00:02	1.94037	8.63115	706.939	FALSE	14
2022-09-13	15:00:02	2.45268	10.91	721.274	FALSE	14
2022-09-13	15:00:02	2.39564	10.6563	717.596	FALSE	14
2022-09-13	15:00:03	2.94235	13.0882	734.362	FALSE	14
2022-09-13	15:00:03	2.70342	12.0254	729.621	FALSE	14
2022-09-13	15:00:03	2.97538	13.2351	747.597	FALSE	14
2022-09-13	15:00:03	2.07029	9.20906	738.83	FALSE	14
2022-09-13	15:00:04	1.53564	6.83083	754.428	FALSE	14
2022-09-13	15:00:04	0.597366	2.6572	741.487	FALSE	14
2022-09-13	15:00:04	0.186883	0.831293	755.26	FALSE	14
2022-09-13	15:00:05	0.224949	1.00062	742.488	FALSE	14
2022-09-13	15:00:05	0.243728	1.08415	756.344	FALSE	14
2022-09-13	15:00:05	0.16154	0.718562	743.207	FALSE	14
2022-09-13	15:00:05	0.157265	0.699546	757.043	FALSE	14
2022-09-13	15:00:06	0.181183	0.805938	744.013	FALSE	14
2022-09-13	15:00:06	0.213652	0.950367	757.994	FALSE	14
2022-09-13	15:00:06	0.296552	1.31912	745.332	FALSE	14
2022-09-13	15:00:06	0.256858	1.14256	759.136	FALSE	14
2022-09-13	15:00:07	0.241387	1.07374	746.405	FALSE	14
2022-09-13	15:00:07	0.215382	0.958062	760.094	FALSE	14
2022-09-13	15:00:07	0.233448	1.03842	747.444	FALSE	14
2022-09-13	15:00:07	0.281489	1.25212	761.346	FALSE	14
2022-09-13	15:00:08	0.401743	1.78703	749.231	FALSE	14
2022-09-13	15:00:08	0.417825	1.85857	763.205	FALSE	14
2022-09-13	15:00:08	0.43925	1.95387	751.185	FALSE	14
2022-09-13	15:00:09	0.405611	1.80424	765.009	FALSE	14
2022-09-13	15:00:09	0.507443	2.25721	753.442	FALSE	14
2022-09-13	15:00:09	0.979453	4.3568	769.366	FALSE	14
2022-09-13	15:00:09	1.87055	8.32058	761.762	FALSE	14
2022-09-13	15:00:10	2.17294	9.66567	779.032	FALSE	14
2022-09-13	15:00:10	3.09747	13.7782	775.541	1	15
2022-09-13	15:00:10	5.06215	22.5175	801.549	1	16
2022-09-13	15:00:10	6.80744	30.2809	805.822	1	17
2022-09-13	15:00:11	7.00133	31.1433	832.692	1	18
2022-09-13	15:00:11	6.31456	28.0884	833.91	1	19
2022-09-13	15:00:11	6.67538	29.6934	862.386	1	20
2022-09-13	15:00:11	6.53172	29.0544	862.964	1	21
2022-09-13	15:00:12	4.25747	18.9381	881.324	1	22
2022-09-13	15:00:12	3.57818	15.9165	878.881	1	23
2022-09-13	15:00:12	3.36312	14.9598	896.284	1	24
2022-09-13	15:00:13	3.15284	14.0245	892.905	1	25
2022-09-13	15:00:13	3.58495	15.9466	912.23	1	26
2022-09-13	15:00:13	2.94612	13.1049	906.01	FALSE	26
2022-09-13	15:00:13	1.69742	7.55046	919.781	FALSE	26
2022-09-13	15:00:14	1.07899	4.79956	910.81	FALSE	26
2022-09-13	15:00:14	0.499809	2.22325	922.004	FALSE	26
2022-09-13	15:00:14	0.578384	2.57277	913.383	FALSE	26
2022-09-13	15:00:14	0.659249	2.93247	924.937	FALSE	26
2022-09-13	15:00:15	0.711616	3.16541	916.548	FALSE	26
2022-09-13	15:00:15	0.805458	3.58284	928.519	FALSE	26
2022-09-13	15:00:15	0.92729	4.12477	920.673	FALSE	26
2022-09-13	15:00:15	0.913194	4.06207	932.581	FALSE	26
2022-09-13	15:00:16	0.356043	1.58375	922.256	FALSE	26
2022-09-13	15:00:16	0.332227	1.47781	934.059	FALSE	26
2022-09-13	15:00:16	0.437367	1.9455	924.202	FALSE	26
2022-09-13	15:00:17	0.245865	1.09366	935.153	FALSE	26
2022-09-13	15:00:17	0.146578	0.652008	924.854	FALSE	26
2022-09-13	15:00:17	0.153601	0.683248	935.836	FALSE	26
2022-09-13	15:00:17	0.190344	0.846688	925.701	FALSE	26
2022-09-13	15:00:18	0.0892241	0.396887	936.233	FALSE	26
2022-09-13	15:00:18	0.0235244	0.104641	925.805	FALSE	26
2022-09-13	15:00:18	-0.0136257	-0.0606098	936.233	FALSE	26
2022-09-13	15:00:18	0.0136516	0.060725	925.866	FALSE	26
2022-09-13	15:00:19	-0.150979	-0.671585	936.233	FALSE	26
2022-09-13	15:00:19	0.133041	0.591793	926.458	FALSE	26
2022-09-13	15:00:19	0.056247	0.250198	936.483	FALSE	26
2022-09-13	15:00:19	-0.153269	-0.681771	926.458	FALSE	26
2022-09-13	15:00:20	-0.267163	-1.18839	936.483	FALSE	26
2022-09-13	15:00:20	-0.319682	-1.42201	926.458	FALSE	26
2022-09-13	15:00:20	-0.547366	-2.43479	936.483	FALSE	26
2022-09-13	15:00:21	-0.567671	-2.52511	926.458	FALSE	26
2022-09-13	15:00:21	-0.00884198	-0.0393309	936.483	FALSE	26
2022-09-13	15:00:21	1.2476	5.54957	932.007	FALSE	26
2022-09-13	15:00:21	1.64378	7.31186	943.795	FALSE	26
2022-09-13	15:00:22	7.79858	34.6896	966.697	1	27
2022-09-13	15:00:22	2.03518	9.05289	952.848	FALSE	27
2022-09-13	15:00:22	6.33823	28.1937	994.891	1	28
2022-09-13	15:00:22	0.748257	3.3284	956.176	FALSE	28
2022-09-13	15:00:23	1.82388	8.11298	1003	FALSE	28
2022-09-13	15:00:23	1.38821	6.17504	962.351	FALSE	28
2022-09-13	15:00:23	0.522913	2.32602	1005.33	FALSE	28
2022-09-13	15:00:23	2.69762	11.9996	974.351	FALSE	28
2022-09-13	15:00:24	0.180624	0.803452	1006.13	FALSE	28
2022-09-13	15:00:24	0.11126	0.494907	974.846	FALSE	28
2022-09-13	15:00:24	0.938944	4.17661	1010.31	FALSE	28
2022-09-13	15:00:25	-0.0375952	-0.167231	974.846	FALSE	28
2022-09-13	15:00:25	0.148766	0.661741	1010.97	FALSE	28
2022-09-13	15:00:25	0.340725	1.51561	976.362	FALSE	28
2022-09-13	15:00:25	0.179606	0.798923	1011.77	FALSE	28
2022-09-13	15:00:26	0.056247	0.250198	976.612	FALSE	28
2022-09-13	15:00:26	0.260573	1.15908	1012.93	FALSE	28
2022-09-13	15:00:26	0.229122	1.01918	977.631	FALSE	28
2022-09-13	15:00:26	2.13564	9.49975	1022.43	FALSE	28
2022-09-13	15:00:27	0.242964	1.08075	978.712	FALSE	28
2022-09-13	15:00:27	0.152939	0.680303	1023.11	FALSE	28
2022-09-13	15:00:27	1.84408	8.20284	986.914	FALSE	28
2022-09-13	15:00:27	0.0538552	0.239559	1023.35	FALSE	28
2022-09-13	15:00:28	0.271972	1.20979	988.124	FALSE	28
2022-09-13	15:00:28	0.187901	0.835821	1024.18	FALSE	28
2022-09-13	15:00:28	0.287188	1.27747	989.402	FALSE	28
2022-09-13	15:00:29	0.126578	0.563044	1024.75	FALSE	28
2022-09-13	15:00:29	0.26668	1.18625	990.588	FALSE	28
2022-09-13	15:00:29	0.425865	1.89433	1026.64	FALSE	28
2022-09-13	15:00:29	0.280267	1.24668	991.835	FALSE	28
2022-09-13	15:00:30	0.459046	2.04193	1028.68	FALSE	28
2022-09-13	15:00:30	0.183117	0.814541	992.649	FALSE	28
2022-09-13	15:00:30	0.347188	1.54436	1030.23	FALSE	28
2022-09-13	15:00:30	0.460929	2.0503	994.7	FALSE	28
2022-09-13	15:00:31	0.307036	1.36576	1031.59	FALSE	28
2022-09-13	15:00:31	0.329377	1.46513	996.165	FALSE	28
2022-09-13	15:00:31	0.221641	0.985903	1032.58	FALSE	28
2022-09-13	15:00:31	0.245814	1.09343	997.258	FALSE	28
2022-09-13	15:00:32	0.169529	0.754099	1033.33	FALSE	28
2022-09-13	15:00:32	0.361031	1.60594	998.864	FALSE	28
2022-09-13	15:00:32	0.0366542	0.163045	1033.5	FALSE	28
2022-09-13	15:00:33	0.27014	1.20164	1000.07	FALSE	28
2022-09-13	15:00:33	0.137163	0.610128	1034.11	FALSE	28
2022-09-13	15:00:33	0.24271	1.07962	1001.15	FALSE	28
2022-09-13	15:00:33	0.0865269	0.384889	1034.49	FALSE	28
2022-09-13	15:00:34	0.192939	0.858231	1002	FALSE	28
2022-09-13	15:00:34	0.238842	1.06242	1035.55	FALSE	28
2022-09-13	15:00:34	0.126374	0.562137	1002.57	FALSE	28
2022-09-13	15:00:34	0.184186	0.819296	1036.37	FALSE	28
2022-09-13	15:00:35	0.0253564	0.11279	1002.68	FALSE	28
2022-09-13	15:00:35	0.240064	1.06785	1037.44	FALSE	28
2022-09-13	15:00:35	-0.0632949	-0.281548	1002.68	FALSE	28
2022-09-13	15:00:35	0.202303	0.899884	1038.34	FALSE	28
2022-09-13	15:00:36	0.0298857	0.132938	1002.81	FALSE	28
2022-09-13	15:00:36	0.16841	0.749121	1039.09	FALSE	28
2022-09-13	15:00:36	0.064186	0.285512	1003.1	FALSE	28
2022-09-13	15:00:37	0.180166	0.801414	1039.89	FALSE	28
2022-09-13	15:00:37	0.249631	1.11041	1004.21	FALSE	28
2022-09-13	15:00:37	0.153346	0.682114	1040.57	FALSE	28
2022-09-13	15:00:37	0.130242	0.579342	1004.79	FALSE	28
2022-09-13	15:00:38	0.0591478	0.263101	1040.84	FALSE	28
2022-09-13	15:00:38	0.141336	0.628691	1005.42	FALSE	28
2022-09-13	15:00:38	-0.0973915	-0.433217	1040.84	FALSE	28
2022-09-13	15:00:38	0.0769086	0.342105	1005.76	FALSE	28
2022-09-13	15:00:39	-0.00695905	-0.0309552	1040.84	FALSE	28
2022-09-13	15:00:39	0.0965015	0.429258	1006.19	FALSE	28
2022-09-13	15:00:39	-0.161005	-0.716182	1040.84	FALSE	28
2022-09-13	15:00:39	0.0439316	0.195417	1006.38	FALSE	28
2022-09-13	15:00:40	0.0309544	0.137691	1040.98	FALSE	28
2022-09-13	15:00:40	0.0954328	0.424504	1006.81	FALSE	28
2022-09-13	15:00:40	-0.023702	-0.105431	1040.98	FALSE	28
2022-09-13	15:00:41	0.127239	0.565985	1007.37	FALSE	28
2022-09-13	15:00:41	0.200267	0.890828	1041.87	FALSE	28
2022-09-13	15:00:41	0.075331	0.335087	1007.71	FALSE	28
2022-09-13	15:00:41	0.220013	0.978662	1042.84	FALSE	28
2022-09-13	15:00:42	0.0767051	0.3412	1008.05	FALSE	28
2022-09-13	15:00:42	0.334975	1.49004	1044.33	FALSE	28
2022-09-13	15:00:42	0.0465778	0.207187	1008.26	FALSE	28
2022-09-13	15:00:42	0.327494	1.45676	1045.79	FALSE	28
2022-09-13	15:00:43	0.211921	0.942667	1009.2	FALSE	28
2022-09-13	15:00:43	0.174975	0.778324	1046.57	FALSE	28
2022-09-13	15:00:43	0.236858	1.05359	1010.25	FALSE	28
2022-09-13	15:00:43	0.290089	1.29037	1047.86	FALSE	28
2022-09-13	15:00:44	0.316807	1.40922	1011.66	FALSE	28
2022-09-13	15:00:44	0.233448	1.03842	1048.9	FALSE	28
2022-09-13	15:00:44	0.6593	2.9327	1014.59	FALSE	28
2022-09-13	15:00:45	0.328461	1.46106	1050.36	FALSE	28
2022-09-13	15:00:45	0.578537	2.57345	1017.17	FALSE	28
2022-09-13	15:00:45	0.243982	1.08528	1051.45	FALSE	28
2022-09-13	15:00:45	0.711209	3.1636	1020.33	FALSE	28
2022-09-13	15:00:46	0.363728	1.61793	1053.06	FALSE	28
2022-09-13	15:00:46	0.865662	3.85064	1024.18	FALSE	28
2022-09-13	15:00:46	1.17121	5.20978	1058.27	FALSE	28
2022-09-13	15:00:46	0.764491	3.40061	1027.58	FALSE	28
2022-09-13	15:00:47	0.908766	4.04237	1062.32	FALSE	28
2022-09-13	15:00:47	0.996959	4.43467	1032.02	FALSE	28
2022-09-13	15:00:47	0.485356	2.15896	1064.47	FALSE	28
2022-09-13	15:00:47	0.396756	1.76485	1033.78	FALSE	28
2022-09-13	15:00:48	0.640013	2.84691	1067.32	FALSE	28
2022-09-13	15:00:48	0.330852	1.4717	1035.25	FALSE	28
2022-09-13	15:00:48	0.547646	2.43604	1069.76	FALSE	28
2022-09-13	15:00:49	0.293652	1.30622	1036.56	FALSE	28
2022-09-13	15:00:49	0.599962	2.66875	1072.43	FALSE	28
2022-09-13	15:00:49	0.268613	1.19484	1037.75	FALSE	28
2022-09-13	15:00:49	0.458028	2.0374	1074.46	FALSE	28
2022-09-13	15:00:50	0.202507	0.900792	1038.66	FALSE	28
2022-09-13	15:00:50	0.290038	1.29015	1075.75	FALSE	28
2022-09-13	15:00:50	0.124848	0.555349	1039.21	FALSE	28
2022-09-13	15:00:50	0.542048	2.41114	1078.16	FALSE	28
2022-09-13	15:00:51	0.297214	1.32207	1040.53	FALSE	28
2022-09-13	15:00:51	0.489733	2.17843	1080.34	FALSE	28
2022-09-13	15:00:51	0.164339	0.731013	1041.26	FALSE	28
2022-09-13	15:00:51	0.593855	2.64159	1082.98	FALSE	28
2022-09-13	15:00:52	0.399453	1.77685	1043.04	FALSE	28
2022-09-13	15:00:52	0.509631	2.26694	1085.25	FALSE	28
2022-09-13	15:00:52	0.319453	1.42099	1044.46	FALSE	28
2022-09-13	15:00:53	0.491769	2.18749	1087.44	FALSE	28
2022-09-13	15:00:53	0.332837	1.48053	1045.94	FALSE	28
2022-09-13	15:00:53	0.450598	2.00435	1089.44	FALSE	28
2022-09-13	15:00:53	0.367646	1.63536	1047.58	FALSE	28
2022-09-13	15:00:54	0.324695	1.44431	1090.89	FALSE	28
2022-09-13	15:00:54	0.495942	2.20605	1049.78	FALSE	28
2022-09-13	15:00:54	0.43757	1.9464	1092.83	FALSE	28
2022-09-13	15:00:54	0.48215	2.1447	1051.93	FALSE	28
2022-09-13	15:00:55	0.339962	1.51222	1094.35	FALSE	28
2022-09-13	15:00:55	0.614568	2.73372	1054.66	FALSE	28
2022-09-13	15:00:55	0.443117	1.97107	1096.32	FALSE	28
2022-09-13	15:00:55	0.688817	3.064	1057.73	FALSE	28
2022-09-13	15:00:56	0.334771	1.48913	1097.81	FALSE	28
2022-09-13	15:00:56	0.664746	2.95692	1060.68	FALSE	28
2022-09-13	15:00:56	0.327545	1.45699	1099.26	FALSE	28
2022-09-13	15:00:57	1.22531	5.45042	1066.13	FALSE	28
2022-09-13	15:00:57	0.635178	2.8254	1102.09	FALSE	28
2022-09-13	15:00:57	2.51716	11.1968	1077.33	FALSE	28
2022-09-13	15:00:57	0.896399	3.98736	1106.08	FALSE	28
2022-09-13	15:00:58	3.26536	14.525	1091.86	1	29
2022-09-13	15:00:58	0.383066	1.70395	1107.78	FALSE	29
2022-09-13	15:00:58	1.80709	8.0383	1099.89	FALSE	29
2022-09-13	15:00:58	0.112176	0.498981	1108.28	FALSE	29
2022-09-13	15:00:59	0.622201	2.76767	1102.66	FALSE	29
2022-09-13	15:00:59	0.971667	4.32217	1112.6	FALSE	29
2022-09-13	15:00:59	0.411769	1.83163	1104.49	FALSE	29
2022-09-13	15:00:59	0.428104	1.90429	1114.51	FALSE	29
2022-09-13	15:01:00	1.17503	5.22677	1109.72	FALSE	29
2022-09-13	15:01:00	0.464491	2.06615	1116.57	FALSE	29
2022-09-13	15:01:00	0.59187	2.63276	1112.35	FALSE	29
2022-09-13	15:01:01	0.766883	3.41125	1119.98	FALSE	29
2022-09-13	15:01:01	0.385967	1.71686	1114.07	FALSE	29
2022-09-13	15:01:01	0.428155	1.90452	1121.89	FALSE	29
2022-09-13	15:01:01	0.320115	1.42394	1115.49	FALSE	29
2022-09-13	15:01:02	0.425764	1.89388	1123.78	FALSE	29
2022-09-13	15:01:02	0.278028	1.23672	1116.73	FALSE	29
2022-09-13	15:01:02	0.40159	1.78635	1125.57	FALSE	29
2022-09-13	15:01:02	0.385204	1.71346	1118.44	FALSE	29
2022-09-13	15:01:03	0.285611	1.27045	1126.84	FALSE	29
2022-09-13	15:01:03	0.383677	1.70667	1120.15	FALSE	29
2022-09-13	15:01:03	0.477265	2.12297	1128.96	FALSE	29
2022-09-13	15:01:03	0.50958	2.26671	1122.42	FALSE	29
2022-09-13	15:01:04	1.6166	7.19096	1136.15	FALSE	29
2022-09-13	15:01:04	2.65945	11.8298	1134.25	FALSE	29
2022-09-13	15:01:04	1.51691	6.74752	1142.9	FALSE	29
2022-09-13	15:01:05	1.65757	7.3732	1141.62	FALSE	29
2022-09-13	15:01:05	2.48225	11.0415	1153.94	FALSE	29
2022-09-13	15:01:05	0.415687	1.84906	1143.47	FALSE	29
2022-09-13	15:01:05	0.246374	1.09592	1155.04	FALSE	29
2022-09-13	15:01:06	0.413295	1.83842	1145.31	FALSE	29
2022-09-13	15:01:06	0.164389	0.731235	1155.77	FALSE	29
2022-09-13	15:01:06	0.155484	0.691624	1146	FALSE	29
2022-09-13	15:01:06	0.119708	0.532485	1156.3	FALSE	29
2022-09-13	15:01:07	0.060013	0.26695	1146.27	FALSE	29
2022-09-13	15:01:07	-0.0440582	-0.19598	1156.3	FALSE	29
2022-09-13	15:01:07	0.0377738	0.168025	1146.43	FALSE	29
2022-09-13	15:01:07	0.132583	0.589756	1156.89	FALSE	29
2022-09-13	15:01:08	0.174008	0.774022	1147.21	FALSE	29
2022-09-13	15:01:08	0.0525321	0.233673	1157.12	FALSE	29
2022-09-13	15:01:08	0.171463	0.762702	1147.97	FALSE	29
2022-09-13	15:01:09	0.128919	0.573457	1157.7	FALSE	29
2022-09-13	15:01:09	0.167748	0.746177	1148.72	FALSE	29
2022-09-13	15:01:09	0.0718704	0.319694	1158.02	FALSE	29
2022-09-13	15:01:09	0.261183	1.16179	1149.88	FALSE	29
2022-09-13	15:01:10	0.116705	0.519127	1158.54	FALSE	29
2022-09-13	15:01:10	0.265458	1.18081	1151.06	FALSE	29
2022-09-13	15:01:10	0.0482572	0.214658	1158.75	FALSE	29
2022-09-13	15:01:10	0.238486	1.06083	1152.12	FALSE	29
2022-09-13	15:01:11	0.12271	0.545839	1159.3	FALSE	29
2022-09-13	15:01:11	0.0556872	0.247708	1152.37	FALSE	29
2022-09-13	15:01:11	0.103372	0.459819	1159.76	FALSE	29
2022-09-13	15:01:11	0.0322267	0.143351	1152.51	FALSE	29
2022-09-13	15:01:12	0.0491224	0.218506	1159.98	FALSE	29
2022-09-13	15:01:12	0.399402	1.77662	1154.29	FALSE	29
2022-09-13	15:01:12	0.231056	1.02778	1161	FALSE	29
2022-09-13	15:01:13	0.240369	1.06921	1155.36	FALSE	29
2022-09-13	15:01:13	0.2707	1.20413	1162.21	FALSE	29
2022-09-13	15:01:13	0.226476	1.00741	1156.36	FALSE	29
2022-09-13	15:01:13	0.220318	0.980019	1163.19	FALSE	29
2022-09-13	15:01:14	0.083219	0.370175	1156.73	FALSE	29
2022-09-13	15:01:14	0.290344	1.29151	1164.48	FALSE	29
2022-09-13	15:01:14	0.173906	0.773569	1157.51	FALSE	29
2022-09-13	15:01:14	0.2364	1.05155	1165.53	FALSE	29
2022-09-13	15:01:15	0.220522	0.980926	1158.49	FALSE	29
2022-09-13	15:01:15	0.207901	0.924785	1166.46	FALSE	29
2022-09-13	15:01:15	0.11126	0.494907	1158.98	FALSE	29
2022-09-13	15:01:15	0.110547	0.491735	1166.95	FALSE	29
2022-09-13	15:01:16	0.113194	0.50351	1159.49	FALSE	29
2022-09-13	15:01:16	0.128613	0.572096	1167.52	FALSE	29
2022-09-13	15:01:16	0.138842	0.617597	1160.11	FALSE	29
2022-09-13	15:01:17	0.155636	0.6923	1168.21	FALSE	29
2022-09-13	15:01:17	0.176654	0.785792	1160.89	FALSE	29
2022-09-13	15:01:17	0.184797	0.822014	1169.03	FALSE	29
2022-09-13	15:01:17	0.179758	0.7996	1161.69	FALSE	29
2022-09-13	15:01:18	0.182761	0.812957	1169.85	FALSE	29
2022-09-13	15:01:18	0.181285	0.806392	1162.5	FALSE	29
2022-09-13	15:01:18	0.182557	0.81205	1170.66	FALSE	29
2022-09-13	15:01:18	0.183779	0.817486	1163.31	FALSE	29
2022-09-13	15:01:19	0.145916	0.649064	1171.31	FALSE	29
2022-09-13	15:01:19	0.087392	0.388737	1163.7	FALSE	29
2022-09-13	15:01:19	0.0983335	0.437407	1171.74	FALSE	29
2022-09-13	15:01:19	0.141947	0.631409	1164.33	FALSE	29
2022-09-13	15:01:20	0.167494	0.745047	1172.49	FALSE	29
2022-09-13	15:01:20	0.18327	0.815222	1165.15	FALSE	29
2022-09-13	15:01:20	0.118995	0.529314	1173.02	FALSE	29
2022-09-13	15:01:21	0.207392	0.922521	1166.07	FALSE	29
2022-09-13	15:01:21	0.230293	1.02439	1174.04	FALSE	29
2022-09-13	15:01:21	0.222761	0.990885	1167.06	FALSE	29
2022-09-13	15:01:21	0.202252	0.899657	1174.94	FALSE	29
2022-09-13	15:01:22	0.21126	0.939727	1168	FALSE	29
2022-09-13	15:01:22	0.253041	1.12558	1176.07	FALSE	29
2022-09-13	15:01:22	0.252939	1.12512	1169.13	FALSE	29
2022-09-13	15:01:22	0.35701	1.58805	1177.66	FALSE	29
2022-09-13	15:01:23	0.407545	1.81284	1170.94	FALSE	29
2022-09-13	15:01:23	0.391616	1.74199	1179.4	FALSE	29
2022-09-13	15:01:23	0.396603	1.76417	1172.71	FALSE	29
2022-09-13	15:01:24	0.292074	1.2992	1180.7	FALSE	29
2022-09-13	15:01:24	0.048359	0.215111	1172.92	FALSE	29
2022-09-13	15:01:24	-8.88145e-05	-0.000395065	1180.7	FALSE	29
2022-09-13	15:01:24	-0.287977	-1.28098	1172.92	FALSE	29
2022-09-13	15:01:25	-0.27846	-1.23865	1180.7	FALSE	29
2022-09-13	15:01:25	-0.40757	-1.81295	1172.92	FALSE	29
2022-09-13	15:01:25	-0.395	-1.75704	1180.7	FALSE	29
2022-09-13	15:01:25	-0.410572	-1.82631	1172.92	FALSE	29
2022-09-13	15:01:26	-0.431895	-1.92116	1180.7	FALSE	29
2022-09-13	15:01:26	-0.308842	-1.37379	1172.92	FALSE	29
2022-09-13	15:01:26	-0.403702	-1.79575	1180.7	FALSE	29
2022-09-13	15:01:26	-0.263295	-1.17119	1172.92	FALSE	29
2022-09-13	15:01:27	-0.4693	-2.08754	1180.7	FALSE	29
2022-09-13	15:01:27	-0.229504	-1.02088	1172.92	FALSE	29
2022-09-13	15:01:27	-0.00309134	-0.0137509	1180.7	FALSE	29
2022-09-13	15:01:27	0.160573	0.714261	1173.63	FALSE	29
2022-09-13	15:01:28	-0.0798343	-0.355119	1180.7	FALSE	29
2022-09-13	15:01:28	0.00754479	0.0335607	1173.67	FALSE	29
2022-09-13	15:01:28	0.0509544	0.226655	1180.92	FALSE	29
2022-09-13	15:01:29	0.179606	0.798923	1174.47	FALSE	29
2022-09-13	15:01:29	0.143473	0.638197	1181.56	FALSE	29
2022-09-13	15:01:29	0.201489	0.896263	1175.36	FALSE	29
2022-09-13	15:01:29	0.223372	0.993603	1182.56	FALSE	29
2022-09-13	15:01:30	0.352328	1.56723	1176.93	FALSE	29
2022-09-13	15:01:30	0.279555	1.24352	1183.8	FALSE	29
2022-09-13	15:01:30	0.546985	2.4331	1179.36	FALSE	29
2022-09-13	15:01:30	0.491107	2.18454	1185.98	FALSE	29
2022-09-13	15:01:31	0.387545	1.72388	1181.09	FALSE	29
2022-09-13	15:01:31	0.720114	3.20321	1189.19	FALSE	29
2022-09-13	15:01:31	0.325916	1.44974	1182.54	FALSE	29
2022-09-13	15:01:31	0.722557	3.21408	1192.4	FALSE	29
2022-09-13	15:01:32	0.327697	1.45766	1183.99	FALSE	29
2022-09-13	15:01:32	0.553346	2.46139	1194.86	FALSE	29
2022-09-13	15:01:32	0.257417	1.14504	1185.14	FALSE	29
2022-09-13	15:01:33	0.657366	2.9241	1197.79	FALSE	29
2022-09-13	15:01:33	0.268359	1.19371	1186.33	FALSE	29
2022-09-13	15:01:33	0.517112	2.30022	1200.09	FALSE	29
2022-09-13	15:01:33	0.320064	1.42371	1187.76	FALSE	29
2022-09-13	15:01:34	0.565356	2.51482	1202.6	FALSE	29
2022-09-13	15:01:34	0.255076	1.13463	1188.89	FALSE	29
2022-09-13	15:01:34	0.465356	2.07	1204.67	FALSE	29
2022-09-13	15:01:34	0.26897	1.19643	1190.09	FALSE	29
2022-09-13	15:01:35	0.535178	2.38058	1207.05	FALSE	29
2022-09-13	15:01:35	0.30729	1.36689	1191.46	FALSE	29
2022-09-13	15:01:35	0.492125	2.18907	1209.24	FALSE	29
2022-09-13	15:01:35	0.270853	1.20481	1192.66	FALSE	29
2022-09-13	15:01:36	0.524644	2.33372	1211.58	FALSE	29
2022-09-13	15:01:36	0.259046	1.15229	1193.81	FALSE	29
2022-09-13	15:01:36	0.531972	2.36632	1213.94	FALSE	29
2022-09-13	15:01:37	0.244186	1.08619	1194.9	FALSE	29
2022-09-13	15:01:37	0.52785	2.34798	1216.29	FALSE	29
2022-09-13	15:01:37	0.274567	1.22133	1196.12	FALSE	29
2022-09-13	15:01:37	0.609173	2.70972	1219	FALSE	29
2022-09-13	15:01:38	0.671768	2.98816	1199.11	FALSE	29
2022-09-13	15:01:38	1.17044	5.20635	1224.21	FALSE	29
2022-09-13	15:01:38	0.459148	2.04238	1201.15	FALSE	29
2022-09-13	15:01:38	0.563626	2.50712	1226.71	FALSE	29
2022-09-13	15:01:39	0.1793	0.797562	1201.95	FALSE	29
2022-09-13	15:01:39	0.460623	2.04894	1228.76	FALSE	29
2022-09-13	15:01:39	0.270547	1.20345	1203.15	FALSE	29
2022-09-13	15:01:39	0.431514	1.91946	1230.68	FALSE	29
2022-09-13	15:01:40	0.187341	0.83333	1203.98	FALSE	29
2022-09-13	15:01:40	0.300624	1.33724	1232.02	FALSE	29
2022-09-13	15:01:40	0.336247	1.49569	1205.48	FALSE	29
2022-09-13	15:01:41	0.385204	1.71346	1233.73	FALSE	29
2022-09-13	15:01:41	0.201183	0.894902	1206.38	FALSE	29
2022-09-13	15:01:41	0.386425	1.7189	1235.45	FALSE	29
2022-09-13	15:01:41	0.408563	1.81737	1208.19	FALSE	29
2022-09-13	15:01:42	0.358384	1.59416	1237.05	FALSE	29
2022-09-13	15:01:42	0.345458	1.53667	1209.73	FALSE	29
2022-09-13	15:01:42	0.294008	1.30781	1238.35	FALSE	29
2022-09-13	15:01:42	0.487087	2.16666	1211.9	FALSE	29
2022-09-13	15:01:43	0.395636	1.75987	1240.11	FALSE	29
2022-09-13	15:01:43	0.514771	2.2898	1214.19	FALSE	29
2022-09-13	15:01:43	0.323117	1.43729	1241.55	FALSE	29
2022-09-13	15:01:43	0.497265	2.21193	1216.4	FALSE	29
2022-09-13	15:01:44	0.321998	1.43231	1242.98	FALSE	29
2022-09-13	15:01:44	0.496349	2.20786	1218.61	FALSE	29
2022-09-13	15:01:44	0.334517	1.488	1244.47	FALSE	29
2022-09-13	15:01:45	0.439097	1.95319	1220.56	FALSE	29
2022-09-13	15:01:45	0.303473	1.34991	1245.82	FALSE	29
2022-09-13	15:01:45	0.457265	2.03401	1222.59	FALSE	29
2022-09-13	15:01:45	0.311463	1.38545	1247.21	FALSE	29
2022-09-13	15:01:46	0.357774	1.59145	1224.18	FALSE	29
2022-09-13	15:01:46	0.401794	1.78726	1248.99	FALSE	29
2022-09-13	15:01:46	0.319962	1.42325	1225.61	FALSE	29
2022-09-13	15:01:46	0.436959	1.94368	1250.94	FALSE	29
2022-09-13	15:01:47	0.246323	1.09569	1226.7	FALSE	29
2022-09-13	15:01:47	0.425051	1.89071	1252.83	FALSE	29
2022-09-13	15:01:47	0.308155	1.37074	1228.07	FALSE	29
2022-09-13	15:01:47	0.442608	1.96881	1254.8	FALSE	29
2022-09-13	15:01:48	0.0902419	0.401414	1228.48	FALSE	29
2022-09-13	15:01:48	0.0400639	0.178212	1254.97	FALSE	29
2022-09-13	15:01:48	0.00515291	0.0229212	1228.5	FALSE	29
2022-09-13	15:01:49	-0.0157122	-0.069891	1254.97	FALSE	29
2022-09-13	15:01:49	0.239351	1.06468	1229.56	FALSE	29
2022-09-13	15:01:49	0.733651	3.26343	1258.24	FALSE	29
2022-09-13	15:01:49	0.540369	2.40367	1231.97	FALSE	29
2022-09-13	15:01:50	0.832125	3.70146	1261.94	FALSE	29
2022-09-13	15:01:50	0.879962	3.91425	1235.88	FALSE	29
2022-09-13	15:01:50	1.56434	6.9585	1268.9	FALSE	29
2022-09-13	15:01:50	0.677977	3.01578	1238.9	FALSE	29
2022-09-13	15:01:51	0.698893	3.10882	1272.01	FALSE	29
2022-09-13	15:01:51	0.499555	2.22212	1241.12	FALSE	29
2022-09-13	15:01:51	0.728359	3.23989	1275.25	FALSE	29
2022-09-13	15:01:51	0.389326	1.7318	1242.85	FALSE	29
2022-09-13	15:01:52	0.502659	2.23593	1277.48	FALSE	29
2022-09-13	15:01:52	0.693142	3.08323	1245.93	FALSE	29
2022-09-13	15:01:52	0.408563	1.81737	1279.3	FALSE	29
2022-09-13	15:01:53	0.476552	2.1198	1248.05	FALSE	29
2022-09-13	15:01:53	0.424848	1.88981	1281.19	FALSE	29
2022-09-13	15:01:53	0.50902	2.26422	1250.32	FALSE	29
2022-09-13	15:01:53	0.361082	1.60616	1282.8	FALSE	29
2022-09-13	15:01:54	0.430445	1.91471	1252.23	FALSE	29
2022-09-13	15:01:54	0.326832	1.45381	1284.25	FALSE	29
2022-09-13	15:01:54	0.479555	2.13316	1254.37	FALSE	29
2022-09-13	15:01:54	0.379707	1.68901	1285.94	FALSE	29
2022-09-13	15:01:55	0.371463	1.65234	1256.02	FALSE	29
2022-09-13	15:01:55	0.494211	2.19835	1288.14	FALSE	29
2022-09-13	15:01:55	0.400369	1.78092	1257.8	FALSE	29
2022-09-13	15:01:55	0.45472	2.02269	1290.16	FALSE	29
2022-09-13	15:01:56	0.28897	1.2854	1259.08	FALSE	29
2022-09-13	15:01:56	0.56042	2.49286	1292.65	FALSE	29
2022-09-13	15:01:56	0.351718	1.56451	1260.65	FALSE	29
2022-09-13	15:01:57	0.538181	2.39394	1295.05	FALSE	29
2022-09-13	15:01:57	0.298741	1.32886	1261.98	FALSE	29
2022-09-13	15:01:57	0.554618	2.46705	1297.51	FALSE	29
2022-09-13	15:01:57	0.335229	1.49117	1263.47	FALSE	29
2022-09-13	15:01:58	0.579962	2.57979	1300.09	FALSE	29
2022-09-13	15:01:58	0.315942	1.40537	1264.87	FALSE	29
2022-09-13	15:01:58	0.480267	2.13632	1302.23	FALSE	29
2022-09-13	15:01:58	0.423982	1.88596	1266.76	FALSE	29
2022-09-13	15:01:59	0.358537	1.59484	1303.82	FALSE	29
2022-09-13	15:01:59	0.480471	2.13723	1268.9	FALSE	29
2022-09-13	15:01:59	0.316756	1.40899	1305.23	FALSE	29
2022-09-13	15:01:59	0.485662	2.16032	1271.06	FALSE	29
2022-09-13	15:02:00	0.387239	1.72252	1306.96	FALSE	29
2022-09-13	15:02:00	0.582812	2.59246	1273.65	FALSE	29
2022-09-13	15:02:00	0.303066	1.3481	1308.3	FALSE	29
2022-09-13	15:02:01	0.631972	2.81114	1276.46	FALSE	29
2022-09-13	15:02:01	0.389529	1.7327	1310.04	FALSE	29
2022-09-13	15:02:01	0.599453	2.66649	1279.13	FALSE	29
2022-09-13	15:02:01	0.355127	1.57968	1311.62	FALSE	29
2022-09-13	15:02:02	0.623066	2.77152	1281.9	FALSE	29
2022-09-13	15:02:02	0.397112	1.76643	1313.38	FALSE	29
2022-09-13	15:02:02	0.520471	2.31516	1284.21	FALSE	29
2022-09-13	15:02:02	0.466934	2.07702	1315.46	FALSE	29
2022-09-13	15:02:03	0.531769	2.36541	1286.58	FALSE	29
2022-09-13	15:02:03	0.436603	1.9421	1317.4	FALSE	29
2022-09-13	15:02:03	0.436959	1.94368	1288.52	FALSE	29
2022-09-13	15:02:03	0.567697	2.52523	1319.93	FALSE	29
2022-09-13	15:02:04	0.416501	1.85268	1290.38	FALSE	29
2022-09-13	15:02:04	0.425458	1.89252	1321.82	FALSE	29
2022-09-13	15:02:04	0.529987	2.35749	1292.73	FALSE	29
2022-09-13	15:02:05	0.430395	1.91448	1323.73	FALSE	29
2022-09-13	15:02:05	0.971718	4.3224	1297.06	FALSE	29
2022-09-13	15:02:05	0.752684	3.34809	1327.08	FALSE	29
2022-09-13	15:02:05	0.883219	3.92873	1300.98	FALSE	29
2022-09-13	15:02:06	0.667443	2.96892	1330.05	FALSE	29
2022-09-13	15:02:06	0.581438	2.58635	1303.57	FALSE	29
2022-09-13	15:02:06	0.450802	2.00526	1332.06	FALSE	29
2022-09-13	15:02:06	0.484237	2.15398	1305.73	FALSE	29
2022-09-13	15:02:07	0.489886	2.17911	1334.24	FALSE	29
2022-09-13	15:02:07	0.480776	2.13859	1307.86	FALSE	29
2022-09-13	15:02:07	0.455687	2.02699	1336.26	FALSE	29
2022-09-13	15:02:07	0.449173	1.99801	1309.86	FALSE	29
2022-09-13	15:02:08	0.496909	2.21035	1338.47	FALSE	29
2022-09-13	15:02:08	0.480318	2.13655	1312	FALSE	29
2022-09-13	15:02:08	0.446883	1.98782	1340.46	FALSE	29
2022-09-13	15:02:09	0.410496	1.82597	1313.82	FALSE	29
2022-09-13	15:02:09	0.55014	2.44713	1342.91	FALSE	29
2022-09-13	15:02:09	0.426018	1.89501	1315.72	FALSE	29
2022-09-13	15:02:09	0.514059	2.28664	1345.19	FALSE	29
2022-09-13	15:02:10	0.391005	1.73927	1317.46	FALSE	29
2022-09-13	15:02:10	0.525967	2.33961	1347.53	FALSE	29
2022-09-13	15:02:10	0.398435	1.77232	1319.23	FALSE	29
2022-09-13	15:02:10	0.672328	2.99065	1350.53	FALSE	29

## Sheet: Sulley_harness_202291314565 (2)
Date	Time	Lbs	Total force x time			**GoPro Fitting: 1446
2022-09-13	14:56:57	0.16612	0.16612	FALSE	0
2022-09-13	14:56:57	0.158639	0.324759	FALSE	0
2022-09-13	14:56:57	0.167952	0.492711	FALSE	0
2022-09-13	14:56:57	0.173346	0.666057	FALSE	0
2022-09-13	14:56:58	0.199555	0.865612	FALSE	0
2022-09-13	14:56:58	0.219097	1.08471	FALSE	0
2022-09-13	14:56:58	0.210038	1.29475	FALSE	0
2022-09-13	14:56:58	0.212939	1.50769	FALSE	0
2022-09-13	14:56:59	0.213702	1.72139	FALSE	0
2022-09-13	14:56:59	0.203372	1.92476	FALSE	0
2022-09-13	14:56:59	0.202507	2.12727	FALSE	0
2022-09-13	14:57:00	0.194873	2.32214	FALSE	0
2022-09-13	14:57:00	0.198333	2.52047	FALSE	0
2022-09-13	14:57:00	0.193092	2.71356	FALSE	0
2022-09-13	14:57:00	0.18958	2.90314	FALSE	0
2022-09-13	14:57:01	0.190903	3.09405	FALSE	0
2022-09-13	14:57:01	0.19472	3.28877	FALSE	0
2022-09-13	14:57:01	0.192685	3.48145	FALSE	0
2022-09-13	14:57:01	0.221998	3.70345	FALSE	0
2022-09-13	14:57:02	0.249835	3.95329	FALSE	0
2022-09-13	14:57:02	0.22388	4.17717	FALSE	0
2022-09-13	14:57:02	0.272023	4.44919	FALSE	0
2022-09-13	14:57:02	0.285763	4.73495	FALSE	0
2022-09-13	14:57:03	0.272888	5.00784	FALSE	0
2022-09-13	14:57:03	0.261489	5.26933	FALSE	0
2022-09-13	14:57:03	0.266578	5.53591	FALSE	0
2022-09-13	14:57:04	0.297774	5.83368	FALSE	0
2022-09-13	14:57:04	0.274008	6.10769	FALSE	0
2022-09-13	14:57:04	0.283168	6.39086	FALSE	0
2022-09-13	14:57:04	0.297214	6.68807	FALSE	0
2022-09-13	14:57:05	0.278028	6.9661	FALSE	0
2022-09-13	14:57:05	0.278181	7.24428	FALSE	0
2022-09-13	14:57:05	0.297774	7.54205	FALSE	0
2022-09-13	14:57:05	0.240471	7.78253	FALSE	0
2022-09-13	14:57:06	0.283422	8.06595	FALSE	0
2022-09-13	14:57:06	0.325967	8.39191	FALSE	0
2022-09-13	14:57:06	0.330547	8.72246	FALSE	0
2022-09-13	14:57:06	0.320827	9.04329	FALSE	0
2022-09-13	14:57:07	0.292227	9.33552	FALSE	0
2022-09-13	14:57:07	0.623473	9.95899	FALSE	0
2022-09-13	14:57:07	0.320115	10.2791	FALSE	0
2022-09-13	14:57:08	0.506934	10.786	FALSE	0
2022-09-13	14:57:08	0.44785	11.2339	FALSE	0
2022-09-13	14:57:08	0.433397	11.6673	FALSE	0
2022-09-13	14:57:08	0.725814	12.3931	FALSE	0
2022-09-13	14:57:09	0.337061	12.7302	FALSE	0
2022-09-13	14:57:09	0.296959	13.0271	FALSE	0
2022-09-13	14:57:09	0.184898	13.212	FALSE	0
2022-09-13	14:57:09	0.232328	13.4443	FALSE	0
2022-09-13	14:57:10	0.110445	13.5548	FALSE	0
2022-09-13	14:57:10	0.55472	14.1095	FALSE	0
2022-09-13	14:57:10	0.659402	14.7689	FALSE	0
2022-09-13	14:57:10	0.995229	15.7641	FALSE	0
2022-09-13	14:57:11	1.99553	17.7597	FALSE	0
2022-09-13	14:57:11	2.61467	20.3743	FALSE	0
2022-09-13	14:57:11	0.855585	21.2299	FALSE	0
2022-09-13	14:57:12	0.621845	21.8518	FALSE	0
2022-09-13	14:57:12	0.512532	22.3643	FALSE	0
2022-09-13	14:57:12	0.344389	22.7087	FALSE	0
2022-09-13	14:57:12	0.505713	23.2144	FALSE	0
2022-09-13	14:57:13	0.180267	23.3947	FALSE	0
2022-09-13	14:57:13	0.521641	23.9163	FALSE	0
2022-09-13	14:57:13	0.463931	24.3802	FALSE	0
2022-09-13	14:57:13	0.612023	24.9923	FALSE	0
2022-09-13	14:57:14	3.46525	28.4575	1	1
2022-09-13	14:57:14	1.81055	30.2681	FALSE	1
2022-09-13	14:57:14	0.440166	30.7082	FALSE	1
2022-09-13	14:57:14	1.69182	32.4001	FALSE	1
2022-09-13	14:57:15	0.376349	32.7764	FALSE	1
2022-09-13	14:57:15	0.434364	33.2108	FALSE	1
2022-09-13	14:57:15	0.320369	33.5311	FALSE	1
2022-09-13	14:57:16	-0.000292388	33.5311	FALSE	1
2022-09-13	14:57:16	0.0749239	33.6061	FALSE	1
2022-09-13	14:57:16	0.00637431	33.6124	FALSE	1
2022-09-13	14:57:16	0.14042	33.7529	FALSE	1
2022-09-13	14:57:17	-0.078562	33.7529	FALSE	1
2022-09-13	14:57:17	-0.0101651	33.7529	FALSE	1
2022-09-13	14:57:17	0.0176211	33.7705	FALSE	1
2022-09-13	14:57:17	-0.195203	33.7705	FALSE	1
2022-09-13	14:57:18	-0.39444	33.7705	FALSE	1
2022-09-13	14:57:18	-0.526399	33.7705	FALSE	1
2022-09-13	14:57:18	-0.986348	33.7705	FALSE	1
2022-09-13	14:57:18	-1.04645	33.7705	FALSE	1
2022-09-13	14:57:19	-0.927213	33.7705	FALSE	1
2022-09-13	14:57:19	-0.787569	33.7705	FALSE	1
2022-09-13	14:57:19	-0.575559	33.7705	FALSE	1
2022-09-13	14:57:20	-0.515458	33.7705	FALSE	1
2022-09-13	14:57:20	-0.0906231	33.7705	FALSE	1
2022-09-13	14:57:20	0.167239	33.9377	FALSE	1
2022-09-13	14:57:20	0.33986	34.2776	FALSE	1
2022-09-13	14:57:21	0.499504	34.7771	FALSE	1
2022-09-13	14:57:21	0.319504	35.0966	FALSE	1
2022-09-13	14:57:21	0.215178	35.3118	FALSE	1
2022-09-13	14:57:21	0.193804	35.5056	FALSE	1
2022-09-13	14:57:22	0.31869	35.8243	FALSE	1
2022-09-13	14:57:22	0.102405	35.9267	FALSE	1
2022-09-13	14:57:22	0.460471	36.3871	FALSE	1
2022-09-13	14:57:22	0.0937534	36.4809	FALSE	1
2022-09-13	14:57:23	0.309071	36.79	FALSE	1
2022-09-13	14:57:23	0.175738	36.9657	FALSE	1
2022-09-13	14:57:23	0.260878	37.2266	FALSE	1
2022-09-13	14:57:24	0.283066	37.5096	FALSE	1
2022-09-13	14:57:24	0.240827	37.7505	FALSE	1
2022-09-13	14:57:24	0.422659	38.1731	FALSE	1
2022-09-13	14:57:24	0.10556	38.2787	FALSE	1
2022-09-13	14:57:25	0.263117	38.5418	FALSE	1
2022-09-13	14:57:25	0.0586389	38.6004	FALSE	1
2022-09-13	14:57:25	0.276501	38.8769	FALSE	1
2022-09-13	14:57:25	-0.280699	38.8769	FALSE	1
2022-09-13	14:57:26	-0.342684	38.8769	FALSE	1
2022-09-13	14:57:26	-0.347926	38.8769	FALSE	1
2022-09-13	14:57:26	-0.504719	38.8769	FALSE	1
2022-09-13	14:57:26	-0.75673	38.8769	FALSE	1
2022-09-13	14:57:27	-0.560648	38.8769	FALSE	1
2022-09-13	14:57:27	-0.79561	38.8769	FALSE	1
2022-09-13	14:57:27	-0.691182	38.8769	FALSE	1
2022-09-13	14:57:28	-0.834898	38.8769	FALSE	1
2022-09-13	14:57:28	-0.680495	38.8769	FALSE	1
2022-09-13	14:57:28	-0.388333	38.8769	FALSE	1
2022-09-13	14:57:28	-0.12187	38.8769	FALSE	1
2022-09-13	14:57:29	-0.0862465	38.8769	FALSE	1
2022-09-13	14:57:29	-0.165381	38.8769	FALSE	1
2022-09-13	14:57:29	-0.339325	38.8769	FALSE	1
2022-09-13	14:57:29	-0.263855	38.8769	FALSE	1
2022-09-13	14:57:30	-0.0222771	38.8769	FALSE	1
2022-09-13	14:57:30	-0.0219209	38.8769	FALSE	1
2022-09-13	14:57:30	-0.106094	38.8769	FALSE	1
2022-09-13	14:57:30	0.102608	38.9795	FALSE	1
2022-09-13	14:57:31	0.0849493	39.0645	FALSE	1
2022-09-13	14:57:31	0.233448	39.2979	FALSE	1
2022-09-13	14:57:31	0.103321	39.4013	FALSE	1
2022-09-13	14:57:32	0.228461	39.6297	FALSE	1
2022-09-13	14:57:32	0.436756	40.0665	FALSE	1
2022-09-13	14:57:32	0.18673	40.2532	FALSE	1
2022-09-13	14:57:32	0.298639	40.5518	FALSE	1
2022-09-13	14:57:33	0.155993	40.7078	FALSE	1
2022-09-13	14:57:33	0.345458	41.0533	FALSE	1
2022-09-13	14:57:33	0.083728	41.137	FALSE	1
2022-09-13	14:57:33	0.297875	41.4349	FALSE	1
2022-09-13	14:57:34	0.229886	41.6648	FALSE	1
2022-09-13	14:57:34	0.223066	41.8879	FALSE	1
2022-09-13	14:57:34	0.252277	42.1401	FALSE	1
2022-09-13	14:57:34	0.260013	42.4001	FALSE	1
2022-09-13	14:57:35	0.280064	42.6802	FALSE	1
2022-09-13	14:57:35	0.0539061	42.7341	FALSE	1
2022-09-13	14:57:35	0.371412	43.1055	FALSE	1
2022-09-13	14:57:36	0.18841	43.2939	FALSE	1
2022-09-13	14:57:36	0.362863	43.6568	FALSE	1
2022-09-13	14:57:36	0.375942	44.0327	FALSE	1
2022-09-13	14:57:36	0.346476	44.3792	FALSE	1
2022-09-13	14:57:37	0.319453	44.6987	FALSE	1
2022-09-13	14:57:37	0.214364	44.913	FALSE	1
2022-09-13	14:57:37	0.38271	45.2957	FALSE	1
2022-09-13	14:57:37	0.211921	45.5077	FALSE	1
2022-09-13	14:57:38	0.445204	45.9529	FALSE	1
2022-09-13	14:57:38	0.160216	46.1131	FALSE	1
2022-09-13	14:57:38	0.612125	46.7252	FALSE	1
2022-09-13	14:57:38	0.222303	46.9475	FALSE	1
2022-09-13	14:57:39	0.434517	47.382	FALSE	1
2022-09-13	14:57:39	0.341998	47.724	FALSE	1
2022-09-13	14:57:39	0.371005	48.095	FALSE	1
2022-09-13	14:57:40	0.484237	48.5793	FALSE	1
2022-09-13	14:57:40	0.263372	48.8426	FALSE	1
2022-09-13	14:57:40	0.567086	49.4097	FALSE	1
2022-09-13	14:57:40	0.215636	49.6254	FALSE	1
2022-09-13	14:57:41	0.456603	50.082	FALSE	1
2022-09-13	14:57:41	0.329529	50.4115	FALSE	1
2022-09-13	14:57:41	0.456043	50.8675	FALSE	1
2022-09-13	14:57:41	0.467188	51.3347	FALSE	1
2022-09-13	14:57:42	0.408206	51.7429	FALSE	1
2022-09-13	14:57:42	0.403219	52.1462	FALSE	1
2022-09-13	14:57:42	0.131107	52.2773	FALSE	1
2022-09-13	14:57:42	0.22958	52.5068	FALSE	1
2022-09-13	14:57:43	0.203982	52.7108	FALSE	1
2022-09-13	14:57:43	1.2509	53.9617	FALSE	1
2022-09-13	14:57:43	0.536094	54.4978	FALSE	1
2022-09-13	14:57:44	3.63207	58.1299	1	2
2022-09-13	14:57:44	2.68134	60.8112	FALSE	2
2022-09-13	14:57:44	1.12973	61.941	FALSE	2
2022-09-13	14:57:44	1.41431	63.3553	FALSE	2
2022-09-13	14:57:45	0.213702	63.569	FALSE	2
2022-09-13	14:57:45	0.513295	64.0823	FALSE	2
2022-09-13	14:57:45	1.17915	65.2614	FALSE	2
2022-09-13	14:57:45	1.35742	66.6188	FALSE	2
2022-09-13	14:57:46	3.75915	70.378	1	3
2022-09-13	14:57:46	1.98078	72.3588	FALSE	3
2022-09-13	14:57:46	0.980929	73.3397	FALSE	3
2022-09-13	14:57:46	3.18444	76.5241	1	4
2022-09-13	14:57:47	0.853804	77.3779	FALSE	4
2022-09-13	14:57:47	1.82083	79.1988	FALSE	4
2022-09-13	14:57:47	2.19732	81.3961	FALSE	4
2022-09-13	14:57:48	1.01162	82.4077	FALSE	4
2022-09-13	14:57:48	1.76383	84.1715	FALSE	4
2022-09-13	14:57:48	0.0979264	84.2695	FALSE	4
2022-09-13	14:57:48	0.576807	84.8463	FALSE	4
2022-09-13	14:57:49	2.67477	87.521	FALSE	4
2022-09-13	14:57:49	4.08678	91.6078	1	5
2022-09-13	14:57:49	6.84764	98.4555	1	6
2022-09-13	14:57:49	3.5708	102.026	1	7
2022-09-13	14:57:50	1.74709	103.773	FALSE	7
2022-09-13	14:57:50	0.772176	104.546	FALSE	7
2022-09-13	14:57:50	2.93833	107.484	FALSE	7
2022-09-13	14:57:50	1.84195	109.326	FALSE	7
2022-09-13	14:57:51	0.783575	110.109	FALSE	7
2022-09-13	14:57:51	0.331616	110.441	FALSE	7
2022-09-13	14:57:51	0.430293	110.871	FALSE	7
2022-09-13	14:57:52	0.451158	111.322	FALSE	7
2022-09-13	14:57:52	0.666171	111.989	FALSE	7
2022-09-13	14:57:52	0.304389	112.293	FALSE	7
2022-09-13	14:57:52	0.64841	112.941	FALSE	7
2022-09-13	14:57:53	0.662354	113.604	FALSE	7
2022-09-13	14:57:53	0.585203	114.189	FALSE	7
2022-09-13	14:57:53	0.491005	114.68	FALSE	7
2022-09-13	14:57:53	0.578537	115.259	FALSE	7
2022-09-13	14:57:54	0.415076	115.674	FALSE	7
2022-09-13	14:57:54	0.613397	116.287	FALSE	7
2022-09-13	14:57:54	0.271667	116.559	FALSE	7
2022-09-13	14:57:54	0.504847	117.064	FALSE	7
2022-09-13	14:57:55	0.270089	117.334	FALSE	7
2022-09-13	14:57:55	0.367443	117.701	FALSE	7
2022-09-13	14:57:55	0.42444	118.125	FALSE	7
2022-09-13	14:57:56	0.384033	118.51	FALSE	7
2022-09-13	14:57:56	0.357774	118.867	FALSE	7
2022-09-13	14:57:56	0.281794	119.149	FALSE	7
2022-09-13	14:57:56	0.451158	119.6	FALSE	7
2022-09-13	14:57:57	0.261998	119.862	FALSE	7
2022-09-13	14:57:57	0.377367	120.24	FALSE	7
2022-09-13	14:57:57	0.277825	120.517	FALSE	7
2022-09-13	14:57:57	0.315942	120.833	FALSE	7
2022-09-13	14:57:58	0.0797585	120.913	FALSE	7
2022-09-13	14:57:58	0.40841	121.322	FALSE	7
2022-09-13	14:57:58	0.102863	121.424	FALSE	7
2022-09-13	14:57:58	0.670445	122.095	FALSE	7
2022-09-13	14:57:59	0.851717	122.947	FALSE	7
2022-09-13	14:57:59	1.51508	124.462	FALSE	7
2022-09-13	14:57:59	2.81416	127.276	FALSE	7
2022-09-13	14:58:00	3.70088	130.977	1	8
2022-09-13	14:58:00	4.29401	135.271	1	9
2022-09-13	14:58:00	1.99273	137.263	FALSE	9
2022-09-13	14:58:00	1.66195	138.925	FALSE	9
2022-09-13	14:58:01	1.35156	140.277	FALSE	9
2022-09-13	14:58:01	1.06225	141.339	FALSE	9
2022-09-13	14:58:01	1.30312	142.642	FALSE	9
2022-09-13	14:58:01	1.91162	144.554	FALSE	9
2022-09-13	14:58:02	1.00118	145.555	FALSE	9
2022-09-13	14:58:02	1.14892	146.704	FALSE	9
2022-09-13	14:58:02	0.434466	147.138	FALSE	9
2022-09-13	14:58:02	0.568563	147.707	FALSE	9
2022-09-13	14:58:03	1.02877	148.736	FALSE	9
2022-09-13	14:58:03	0.606781	149.343	FALSE	9
2022-09-13	14:58:03	2.28464	151.627	FALSE	9
2022-09-13	14:58:04	1.3221	152.949	FALSE	9
2022-09-13	14:58:04	2.75991	155.709	FALSE	9
2022-09-13	14:58:04	3.54683	159.256	1	10
2022-09-13	14:58:04	1.3052	160.561	FALSE	10
2022-09-13	14:58:05	0.79813	161.359	FALSE	10
2022-09-13	14:58:05	1.25757	162.617	FALSE	10
2022-09-13	14:58:05	0.606832	163.224	FALSE	10
2022-09-13	14:58:05	0.368817	163.593	FALSE	10
2022-09-13	14:58:06	1.20566	164.798	FALSE	10
2022-09-13	14:58:06	0.259148	165.057	FALSE	10
2022-09-13	14:58:06	0.535382	165.593	FALSE	10
2022-09-13	14:58:06	0.284338	165.877	FALSE	10
2022-09-13	14:58:07	0.378893	166.256	FALSE	10
2022-09-13	14:58:07	0.343728	166.6	FALSE	10
2022-09-13	14:58:07	0.340115	166.94	FALSE	10
2022-09-13	14:58:08	0.286069	167.226	FALSE	10
2022-09-13	14:58:08	0.541489	167.767	FALSE	10
2022-09-13	14:58:08	0.35701	168.124	FALSE	10
2022-09-13	14:58:08	0.422354	168.547	FALSE	10
2022-09-13	14:58:09	0.33355	168.88	FALSE	10
2022-09-13	14:58:09	0.427646	169.308	FALSE	10
2022-09-13	14:58:09	0.327697	169.636	FALSE	10
2022-09-13	14:58:09	0.529631	170.165	FALSE	10
2022-09-13	14:58:10	0.284949	170.45	FALSE	10
2022-09-13	14:58:10	0.32271	170.773	FALSE	10
2022-09-13	14:58:10	0.252023	171.025	FALSE	10
2022-09-13	14:58:10	0.466679	171.492	FALSE	10
2022-09-13	14:58:11	0.188512	171.68	FALSE	10
2022-09-13	14:58:11	0.159504	171.84	FALSE	10
2022-09-13	14:58:11	0.355382	172.195	FALSE	10
2022-09-13	14:58:11	0.532277	172.727	FALSE	10
2022-09-13	14:58:12	0.226527	172.954	FALSE	10
2022-09-13	14:58:12	0.419199	173.373	FALSE	10
2022-09-13	14:58:12	0.316858	173.69	FALSE	10
2022-09-13	14:58:13	0.231769	173.922	FALSE	10
2022-09-13	14:58:13	0.414822	174.337	FALSE	10
2022-09-13	14:58:13	0.219402	174.556	FALSE	10
2022-09-13	14:58:13	0.358741	174.915	FALSE	10
2022-09-13	14:58:14	0.0874429	175.002	FALSE	10
2022-09-13	14:58:14	0.292074	175.294	FALSE	10
2022-09-13	14:58:14	0.259351	175.554	FALSE	10
2022-09-13	14:58:14	0.353092	175.907	FALSE	10
2022-09-13	14:58:15	0.203626	176.11	FALSE	10
2022-09-13	14:58:15	0.323982	176.434	FALSE	10
2022-09-13	14:58:15	0.289937	176.724	FALSE	10
2022-09-13	14:58:15	0.156654	176.881	FALSE	10
2022-09-13	14:58:16	0.395382	177.276	FALSE	10
2022-09-13	14:58:16	0.199046	177.475	FALSE	10
2022-09-13	14:58:16	0.702099	178.177	FALSE	10
2022-09-13	14:58:17	0.265153	178.443	FALSE	10
2022-09-13	14:58:17	0.426985	178.87	FALSE	10
2022-09-13	14:58:17	1.05726	179.927	FALSE	10
2022-09-13	14:58:17	0.424084	180.351	FALSE	10
2022-09-13	14:58:18	1.08184	181.433	FALSE	10
2022-09-13	14:58:18	0.280725	181.713	FALSE	10
2022-09-13	14:58:18	0.433753	182.147	FALSE	10
2022-09-13	14:58:18	1.39594	183.543	FALSE	10
2022-09-13	14:58:19	0.381743	183.925	FALSE	10
2022-09-13	14:58:19	0.390191	184.315	FALSE	10
2022-09-13	14:58:19	0.4107	184.726	FALSE	10
2022-09-13	14:58:19	-0.0406486	184.726	FALSE	10
2022-09-13	14:58:20	-0.0673152	184.726	FALSE	10
2022-09-13	14:58:20	-0.0422262	184.726	FALSE	10
2022-09-13	14:58:20	-0.267977	184.726	FALSE	10
2022-09-13	14:58:21	-0.466755	184.726	FALSE	10
2022-09-13	14:58:21	-0.108384	184.726	FALSE	10
2022-09-13	14:58:21	0.122303	184.848	FALSE	10
2022-09-13	14:58:21	0.225051	185.073	FALSE	10
2022-09-13	14:58:22	0.237723	185.311	FALSE	10
2022-09-13	14:58:22	0.36215	185.673	FALSE	10
2022-09-13	14:58:22	0.383881	186.057	FALSE	10
2022-09-13	14:58:22	0.416654	186.474	FALSE	10
2022-09-13	14:58:23	0.274975	186.748	FALSE	10
2022-09-13	14:58:23	0.227697	186.976	FALSE	10
2022-09-13	14:58:23	0.233753	187.21	FALSE	10
2022-09-13	14:58:23	0.328308	187.538	FALSE	10
2022-09-13	14:58:24	0.360471	187.899	FALSE	10
2022-09-13	14:58:24	0.272939	188.172	FALSE	10
2022-09-13	14:58:24	0.257621	188.429	FALSE	10
2022-09-13	14:58:25	0.235534	188.665	FALSE	10
2022-09-13	14:58:25	0.234924	188.9	FALSE	10
2022-09-13	14:58:25	0.24841	189.148	FALSE	10
2022-09-13	14:58:25	0.236094	189.384	FALSE	10
2022-09-13	14:58:26	0.385407	189.77	FALSE	10
2022-09-13	14:58:26	0.454618	190.224	FALSE	10
2022-09-13	14:58:26	0.422506	190.647	FALSE	10
2022-09-13	14:58:26	0.488461	191.135	FALSE	10
2022-09-13	14:58:27	0.503473	191.639	FALSE	10
2022-09-13	14:58:27	0.480573	192.119	FALSE	10
2022-09-13	14:58:27	0.424389	192.544	FALSE	10
2022-09-13	14:58:27	0.427443	192.971	FALSE	10
2022-09-13	14:58:28	0.399809	193.371	FALSE	10
2022-09-13	14:58:28	0.39299	193.764	FALSE	10
2022-09-13	14:58:28	0.389326	194.153	FALSE	10
2022-09-13	14:58:29	0.385407	194.539	FALSE	10
2022-09-13	14:58:29	0.386527	194.925	FALSE	10
2022-09-13	14:58:29	0.404338	195.33	FALSE	10
2022-09-13	14:58:29	0.421692	195.751	FALSE	10
2022-09-13	14:58:30	0.441692	196.193	FALSE	10
2022-09-13	14:58:30	0.435433	196.628	FALSE	10
2022-09-13	14:58:30	0.400878	197.029	FALSE	10
2022-09-13	14:58:30	0.406578	197.436	FALSE	10
2022-09-13	14:58:31	0.338842	197.775	FALSE	10
2022-09-13	14:58:31	0.366272	198.141	FALSE	10
2022-09-13	14:58:31	0.468155	198.609	FALSE	10
2022-09-13	14:58:31	0.389224	198.998	FALSE	10
2022-09-13	14:58:32	0.54556	199.544	FALSE	10
2022-09-13	14:58:32	0.519606	200.063	FALSE	10
2022-09-13	14:58:32	0.335229	200.399	FALSE	10
2022-09-13	14:58:33	0.31528	200.714	FALSE	10
2022-09-13	14:58:33	0.308664	201.023	FALSE	10
2022-09-13	14:58:33	0.265814	201.288	FALSE	10
2022-09-13	14:58:33	0.218842	201.507	FALSE	10
2022-09-13	14:58:34	0.295942	201.803	FALSE	10
2022-09-13	14:58:34	0.244797	202.048	FALSE	10
2022-09-13	14:58:34	0.0299366	202.078	FALSE	10
2022-09-13	14:58:34	-0.0113865	202.078	FALSE	10
2022-09-13	14:58:35	-0.0715901	202.078	FALSE	10
2022-09-13	14:58:35	-0.0845163	202.078	FALSE	10
2022-09-13	14:58:35	-0.310572	202.078	FALSE	10
2022-09-13	14:58:35	-0.416679	202.078	FALSE	10
2022-09-13	14:58:36	-0.3293	202.078	FALSE	10
2022-09-13	14:58:36	-0.543091	202.078	FALSE	10
2022-09-13	14:58:36	-0.689809	202.078	FALSE	10
2022-09-13	14:58:37	-0.493829	202.078	FALSE	10
2022-09-13	14:58:37	-0.647875	202.078	FALSE	10
2022-09-13	14:58:37	-0.640394	202.078	FALSE	10
2022-09-13	14:58:37	-0.625483	202.078	FALSE	10
2022-09-13	14:58:38	-0.533167	202.078	FALSE	10
2022-09-13	14:58:38	-0.481412	202.078	FALSE	10
2022-09-13	14:58:38	-0.430623	202.078	FALSE	10
2022-09-13	14:58:38	-0.559274	202.078	FALSE	10
2022-09-13	14:58:39	-0.63159	202.078	FALSE	10
2022-09-13	14:58:39	-0.491794	202.078	FALSE	10
2022-09-13	14:58:39	-0.492251	202.078	FALSE	10
2022-09-13	14:58:39	-0.287366	202.078	FALSE	10
2022-09-13	14:58:40	-0.371081	202.078	FALSE	10
2022-09-13	14:58:40	0.0997076	202.178	FALSE	10
2022-09-13	14:58:40	0.0993004	202.277	FALSE	10
2022-09-13	14:58:41	0.877672	203.155	FALSE	10
2022-09-13	14:58:41	3.07599	206.231	1	11
2022-09-13	14:58:41	4.23915	210.47	1	12
2022-09-13	14:58:41	3.08434	213.554	1	13
2022-09-13	14:58:42	1.7135	215.268	FALSE	13
2022-09-13	14:58:42	1.90724	217.175	FALSE	13
2022-09-13	14:58:42	4.45345	221.628	1	14
2022-09-13	14:58:42	0.910191	222.538	FALSE	14
2022-09-13	14:58:43	1.59777	224.136	FALSE	14
2022-09-13	14:58:43	2.32576	226.462	FALSE	14
2022-09-13	14:58:43	0.616705	227.079	FALSE	14
2022-09-13	14:58:43	1.00531	228.084	FALSE	14
2022-09-13	14:58:44	0.416298	228.5	FALSE	14
2022-09-13	14:58:44	1.47223	229.973	FALSE	14
2022-09-13	14:58:44	0.536247	230.509	FALSE	14
2022-09-13	14:58:45	0.825916	231.335	FALSE	14
2022-09-13	14:58:45	0.300013	231.635	FALSE	14
2022-09-13	14:58:45	0.278944	231.914	FALSE	14
2022-09-13	14:58:45	0.410547	232.324	FALSE	14
2022-09-13	14:58:46	0.205	232.529	FALSE	14
2022-09-13	14:58:46	0.331718	232.861	FALSE	14
2022-09-13	14:58:46	0.196298	233.057	FALSE	14
2022-09-13	14:58:46	0.440216	233.497	FALSE	14
2022-09-13	14:58:47	0.227646	233.725	FALSE	14
2022-09-13	14:58:47	0.395534	234.121	FALSE	14
2022-09-13	14:58:47	0.344033	234.465	FALSE	14
2022-09-13	14:58:47	0.610852	235.076	FALSE	14
2022-09-13	14:58:48	0.277621	235.353	FALSE	14
2022-09-13	14:58:48	0.183423	235.537	FALSE	14
2022-09-13	14:58:48	-0.0438547	235.537	FALSE	14
2022-09-13	14:58:49	-0.0778496	235.537	FALSE	14
2022-09-13	14:58:49	-0.0331168	235.537	FALSE	14
2022-09-13	14:58:49	0.197672	235.734	FALSE	14
2022-09-13	14:58:49	0.0308527	235.765	FALSE	14
2022-09-13	14:58:50	0.375942	236.141	FALSE	14
2022-09-13	14:58:50	0.10327	236.244	FALSE	14
2022-09-13	14:58:50	0.446883	236.691	FALSE	14
2022-09-13	14:58:50	0.114211	236.805	FALSE	14
2022-09-13	14:58:51	0.455026	237.26	FALSE	14
2022-09-13	14:58:51	0.650394	237.911	FALSE	14
2022-09-13	14:58:51	1.73818	239.649	FALSE	14
2022-09-13	14:58:51	1.03492	240.684	FALSE	14
2022-09-13	14:58:52	1.63365	242.318	FALSE	14
2022-09-13	14:58:52	0.304033	242.622	FALSE	14
2022-09-13	14:58:52	1.8766	244.498	FALSE	14
2022-09-13	14:58:53	0.21416	244.712	FALSE	14
2022-09-13	14:58:53	0.66154	245.374	FALSE	14
2022-09-13	14:58:53	0.49986	245.874	FALSE	14
2022-09-13	14:58:53	0.383677	246.257	FALSE	14
2022-09-13	14:58:54	0.495382	246.753	FALSE	14
2022-09-13	14:58:54	0.375127	247.128	FALSE	14
2022-09-13	14:58:54	0.393804	247.522	FALSE	14
2022-09-13	14:58:54	0.300471	247.822	FALSE	14
2022-09-13	14:58:55	0.495942	248.318	FALSE	14
2022-09-13	14:58:55	0.745051	249.063	FALSE	14
2022-09-13	14:58:55	0.288817	249.352	FALSE	14
2022-09-13	14:58:55	0.797519	250.15	FALSE	14
2022-09-13	14:58:56	0.719656	250.869	FALSE	14
2022-09-13	14:58:56	1.10566	251.975	FALSE	14
2022-09-13	14:58:56	0.522099	252.497	FALSE	14
2022-09-13	14:58:57	0.532583	253.03	FALSE	14
2022-09-13	14:58:57	0.590445	253.62	FALSE	14
2022-09-13	14:58:57	0.161896	253.782	FALSE	14
2022-09-13	14:58:57	0.475738	254.258	FALSE	14
2022-09-13	14:58:58	0.142863	254.4	FALSE	14
2022-09-13	14:58:58	0.385051	254.786	FALSE	14
2022-09-13	14:58:58	-0.0242618	254.786	FALSE	14
2022-09-13	14:58:58	-0.106755	254.786	FALSE	14
2022-09-13	14:58:59	-0.261514	254.786	FALSE	14
2022-09-13	14:58:59	-0.358104	254.786	FALSE	14
2022-09-13	14:58:59	-0.522124	254.786	FALSE	14
2022-09-13	14:58:59	-0.53444	254.786	FALSE	14
2022-09-13	14:59:00	-0.610979	254.786	FALSE	14
2022-09-13	14:59:00	-0.677086	254.786	FALSE	14
2022-09-13	14:59:00	-0.790979	254.786	FALSE	14
2022-09-13	14:59:01	-0.703701	254.786	FALSE	14
2022-09-13	14:59:01	-0.628231	254.786	FALSE	14
2022-09-13	14:59:01	-0.361513	254.786	FALSE	14
2022-09-13	14:59:01	-0.178206	254.786	FALSE	14
2022-09-13	14:59:02	0.0856109	254.871	FALSE	14
2022-09-13	14:59:02	0.688308	255.559	FALSE	14
2022-09-13	14:59:02	0.877672	256.437	FALSE	14
2022-09-13	14:59:02	1.73686	258.174	FALSE	14
2022-09-13	14:59:03	1.41833	259.592	FALSE	14
2022-09-13	14:59:03	2.09574	261.688	FALSE	14
2022-09-13	14:59:03	1.34174	263.03	FALSE	14
2022-09-13	14:59:03	1.63996	264.67	FALSE	14
2022-09-13	14:59:04	0.293499	264.963	FALSE	14
2022-09-13	14:59:04	1.07207	266.035	FALSE	14
2022-09-13	14:59:04	0.644644	266.68	FALSE	14
2022-09-13	14:59:05	0.566679	267.247	FALSE	14
2022-09-13	14:59:05	0.297977	267.545	FALSE	14
2022-09-13	14:59:05	0.499453	268.044	FALSE	14
2022-09-13	14:59:05	0.287087	268.331	FALSE	14
2022-09-13	14:59:06	0.469377	268.801	FALSE	14
2022-09-13	14:59:06	0.340064	269.141	FALSE	14
2022-09-13	14:59:06	0.37584	269.516	FALSE	14
2022-09-13	14:59:06	0.142354	269.659	FALSE	14
2022-09-13	14:59:07	0.488308	270.147	FALSE	14
2022-09-13	14:59:07	0.31869	270.466	FALSE	14
2022-09-13	14:59:07	0.579911	271.046	FALSE	14
2022-09-13	14:59:07	0.911972	271.958	FALSE	14
2022-09-13	14:59:08	0.595941	272.554	FALSE	14
2022-09-13	14:59:08	1.00999	273.564	FALSE	14
2022-09-13	14:59:08	0.531769	274.095	FALSE	14
2022-09-13	14:59:09	0.348053	274.443	FALSE	14
2022-09-13	14:59:09	0.341387	274.785	FALSE	14
2022-09-13	14:59:09	0.458893	275.244	FALSE	14
2022-09-13	14:59:09	0.35355	275.597	FALSE	14
2022-09-13	14:59:10	0.708206	276.305	FALSE	14
2022-09-13	14:59:10	0.310649	276.616	FALSE	14
2022-09-13	14:59:10	0.535891	277.152	FALSE	14
2022-09-13	14:59:10	0.285814	277.438	FALSE	14
2022-09-13	14:59:11	0.497723	277.936	FALSE	14
2022-09-13	14:59:11	0.219453	278.155	FALSE	14
2022-09-13	14:59:11	0.506374	278.661	FALSE	14
2022-09-13	14:59:11	0.187392	278.849	FALSE	14
2022-09-13	14:59:12	0.507138	279.356	FALSE	14
2022-09-13	14:59:12	0.248868	279.605	FALSE	14
2022-09-13	14:59:12	0.4993	280.104	FALSE	14
2022-09-13	14:59:13	0.161641	280.266	FALSE	14
2022-09-13	14:59:13	0.476858	280.743	FALSE	14
2022-09-13	14:59:13	0.227138	280.97	FALSE	14
2022-09-13	14:59:13	0.505051	281.475	FALSE	14
2022-09-13	14:59:14	0.0841351	281.559	FALSE	14
2022-09-13	14:59:14	-0.10533	281.559	FALSE	14
2022-09-13	14:59:14	-0.219783	281.559	FALSE	14
2022-09-13	14:59:14	-0.173778	281.559	FALSE	14
2022-09-13	14:59:15	-0.269809	281.559	FALSE	14
2022-09-13	14:59:15	-0.424771	281.559	FALSE	14
2022-09-13	14:59:15	-0.428638	281.559	FALSE	14
2022-09-13	14:59:15	-0.654185	281.559	FALSE	14
2022-09-13	14:59:16	-0.615	281.559	FALSE	14
2022-09-13	14:59:16	-0.824872	281.559	FALSE	14
2022-09-13	14:59:16	-0.648892	281.559	FALSE	14
2022-09-13	14:59:17	-0.628384	281.559	FALSE	14
2022-09-13	14:59:17	-0.434491	281.559	FALSE	14
2022-09-13	14:59:17	-0.36874	281.559	FALSE	14
2022-09-13	14:59:17	-0.0849743	281.559	FALSE	14
2022-09-13	14:59:18	-0.151488	281.559	FALSE	14
2022-09-13	14:59:18	0.0638806	281.623	FALSE	14
2022-09-13	14:59:18	-0.156119	281.623	FALSE	14
2022-09-13	14:59:18	0.0620486	281.685	FALSE	14
2022-09-13	14:59:19	0.0461707	281.731	FALSE	14
2022-09-13	14:59:19	0.206018	281.937	FALSE	14
2022-09-13	14:59:19	-0.0858903	281.937	FALSE	14
2022-09-13	14:59:19	0.153957	282.091	FALSE	14
2022-09-13	14:59:20	0.0655091	282.156	FALSE	14
2022-09-13	14:59:20	0.170802	282.327	FALSE	14
2022-09-13	14:59:20	0.187137	282.514	FALSE	14
2022-09-13	14:59:21	0.182507	282.697	FALSE	14
2022-09-13	14:59:21	0.153448	282.85	FALSE	14
2022-09-13	14:59:21	0.163728	283.014	FALSE	14
2022-09-13	14:59:21	0.0500893	283.064	FALSE	14
2022-09-13	14:59:22	0.103881	283.168	FALSE	14
2022-09-13	14:59:22	0.00820635	283.176	FALSE	14
2022-09-13	14:59:22	0.747494	283.924	FALSE	14
2022-09-13	14:59:22	2.9477	286.871	FALSE	14
2022-09-13	14:59:23	0.424135	287.296	FALSE	14
2022-09-13	14:59:23	0.544491	287.84	FALSE	14
2022-09-13	14:59:23	0.364746	288.205	FALSE	14
2022-09-13	14:59:23	0.0811834	288.286	FALSE	14
2022-09-13	14:59:24	1.61757	289.904	FALSE	14
2022-09-13	14:59:24	0.154059	290.058	FALSE	14
2022-09-13	14:59:24	0.113804	290.171	FALSE	14
2022-09-13	14:59:25	0.93243	291.104	FALSE	14
2022-09-13	14:59:25	0.142303	291.246	FALSE	14
2022-09-13	14:59:25	0.143321	291.39	FALSE	14
2022-09-13	14:59:25	-0.0620226	291.39	FALSE	14
2022-09-13	14:59:26	-0.107926	291.39	FALSE	14
2022-09-13	14:59:26	-0.236781	291.39	FALSE	14
2022-09-13	14:59:26	-0.262786	291.39	FALSE	14
2022-09-13	14:59:26	-0.173371	291.39	FALSE	14
2022-09-13	14:59:27	-0.00309134	291.39	FALSE	14
2022-09-13	14:59:27	0.167646	291.557	FALSE	14
2022-09-13	14:59:27	0.255331	291.812	FALSE	14
2022-09-13	14:59:27	0.255178	292.068	FALSE	14
2022-09-13	14:59:28	0.727545	292.795	FALSE	14
2022-09-13	14:59:28	0.882964	293.678	FALSE	14
2022-09-13	14:59:28	0.475687	294.154	FALSE	14
2022-09-13	14:59:29	0.591361	294.745	FALSE	14
2022-09-13	14:59:29	0.542914	295.288	FALSE	14
2022-09-13	14:59:29	0.0030664	295.291	FALSE	14
2022-09-13	14:59:29	-0.0123025	295.291	FALSE	14
2022-09-13	14:59:30	0.13584	295.427	FALSE	14
2022-09-13	14:59:30	0.0911071	295.518	FALSE	14
2022-09-13	14:59:30	-0.197544	295.518	FALSE	14
2022-09-13	14:59:30	-0.0944908	295.518	FALSE	14
2022-09-13	14:59:31	0.118639	295.637	FALSE	14
2022-09-13	14:59:31	0.550547	296.187	FALSE	14
2022-09-13	14:59:31	0.370496	296.558	FALSE	14
2022-09-13	14:59:31	0.439097	296.997	FALSE	14
2022-09-13	14:59:32	0.384084	297.381	FALSE	14
2022-09-13	14:59:32	0.47584	297.857	FALSE	14
2022-09-13	14:59:32	0.320878	298.178	FALSE	14
2022-09-13	14:59:33	0.675483	298.853	FALSE	14
2022-09-13	14:59:33	0.270547	299.124	FALSE	14
2022-09-13	14:59:33	0.59075	299.715	FALSE	14
2022-09-13	14:59:33	0.499148	300.214	FALSE	14
2022-09-13	14:59:34	0.414211	300.628	FALSE	14
2022-09-13	14:59:34	0.600776	301.229	FALSE	14
2022-09-13	14:59:34	0.3307	301.559	FALSE	14
2022-09-13	14:59:34	0.65986	302.219	FALSE	14
2022-09-13	14:59:35	0.32673	302.546	FALSE	14
2022-09-13	14:59:35	0.583728	303.13	FALSE	14
2022-09-13	14:59:35	0.401794	303.531	FALSE	14
2022-09-13	14:59:35	0.551208	304.083	FALSE	14
2022-09-13	14:59:36	0.418486	304.501	FALSE	14
2022-09-13	14:59:36	-0.0347453	304.501	FALSE	14
2022-09-13	14:59:36	0.255534	304.757	FALSE	14
2022-09-13	14:59:37	0.204389	304.961	FALSE	14
2022-09-13	14:59:37	0.34673	305.308	FALSE	14
2022-09-13	14:59:37	-0.0362211	305.308	FALSE	14
2022-09-13	14:59:37	-0.287162	305.308	FALSE	14
2022-09-13	14:59:38	-0.324262	305.308	FALSE	14
2022-09-13	14:59:38	-0.276272	305.308	FALSE	14
2022-09-13	14:59:38	-0.074847	305.308	FALSE	14
2022-09-13	14:59:39	-0.0509794	305.308	FALSE	14
2022-09-13	14:59:39	-0.0387147	305.308	FALSE	14
2022-09-13	14:59:39	-0.11103	305.308	FALSE	14
2022-09-13	14:59:39	-0.199631	305.308	FALSE	14
2022-09-13	14:59:39	0.00973306	305.318	FALSE	14
2022-09-13	14:59:40	-0.170878	305.318	FALSE	14
2022-09-13	14:59:40	0.019504	305.337	FALSE	14
2022-09-13	14:59:40	-0.0705214	305.337	FALSE	14
2022-09-13	14:59:41	-0.0485366	305.337	FALSE	14
2022-09-13	14:59:41	-0.0734221	305.337	FALSE	14
2022-09-13	14:59:41	-0.0927605	305.337	FALSE	14
2022-09-13	14:59:41	-0.0467554	305.337	FALSE	14
2022-09-13	14:59:42	-0.18701	305.337	FALSE	14
2022-09-13	14:59:42	0.0253564	305.362	FALSE	14
2022-09-13	14:59:42	-0.0875188	305.362	FALSE	14
2022-09-13	14:59:42	-0.147315	305.362	FALSE	14
2022-09-13	14:59:43	0.10958	305.472	FALSE	14
2022-09-13	14:59:43	0.132379	305.604	FALSE	14
2022-09-13	14:59:43	0.108664	305.713	FALSE	14
2022-09-13	14:59:43	0.125204	305.838	FALSE	14
2022-09-13	14:59:44	0.027443	305.866	FALSE	14
2022-09-13	14:59:44	0.0915142	305.957	FALSE	14
2022-09-13	14:59:44	0.07813	306.035	FALSE	14
2022-09-13	14:59:45	0.0914124	306.127	FALSE	14
2022-09-13	14:59:45	0.118334	306.245	FALSE	14
2022-09-13	14:59:45	0.102812	306.348	FALSE	14
2022-09-13	14:59:45	0.117672	306.466	FALSE	14
2022-09-13	14:59:46	0.117061	306.583	FALSE	14
2022-09-13	14:59:46	0.123779	306.706	FALSE	14
2022-09-13	14:59:46	0.117519	306.824	FALSE	14
2022-09-13	14:59:46	0.121234	306.945	FALSE	14
2022-09-13	14:59:47	0.121031	307.066	FALSE	14
2022-09-13	14:59:47	0.121641	307.188	FALSE	14
2022-09-13	14:59:47	0.120471	307.308	FALSE	14
2022-09-13	14:59:47	0.114008	307.422	FALSE	14
2022-09-13	14:59:48	0.120115	307.542	FALSE	14
2022-09-13	14:59:48	0.123932	307.666	FALSE	14
2022-09-13	14:59:48	0.124593	307.791	FALSE	14
2022-09-13	14:59:49	0.125865	307.917	FALSE	14
2022-09-13	14:59:49	0.117825	308.035	FALSE	14
2022-09-13	14:59:49	0.120216	308.155	FALSE	14
2022-09-13	14:59:49	0.140267	308.295	FALSE	14
2022-09-13	14:59:50	0.0940587	308.389	FALSE	14
2022-09-13	14:59:50	0.0534481	308.443	FALSE	14
2022-09-13	14:59:50	0.0812852	308.524	FALSE	14
2022-09-13	14:59:50	0.0602674	308.584	FALSE	14
2022-09-13	14:59:51	0.072532	308.657	FALSE	14
2022-09-13	14:59:51	0.177316	308.834	FALSE	14
2022-09-13	14:59:51	0.185407	309.019	FALSE	14
2022-09-13	14:59:51	0.177468	309.197	FALSE	14
2022-09-13	14:59:52	0.221183	309.418	FALSE	14
2022-09-13	14:59:52	0.276705	309.695	FALSE	14
2022-09-13	14:59:52	0.238079	309.933	FALSE	14
2022-09-13	14:59:53	0.31014	310.243	FALSE	14
2022-09-13	14:59:53	0.341438	310.584	FALSE	14
2022-09-13	14:59:53	0.329835	310.914	FALSE	14
2022-09-13	14:59:53	0.300165	311.214	FALSE	14
2022-09-13	14:59:54	0.297316	311.512	FALSE	14
2022-09-13	14:59:54	0.284389	311.796	FALSE	14
2022-09-13	14:59:54	0.297926	312.094	FALSE	14
2022-09-13	14:59:54	0.31757	312.412	FALSE	14
2022-09-13	14:59:55	0.31584	312.727	FALSE	14
2022-09-13	14:59:55	0.313753	313.041	FALSE	14
2022-09-13	14:59:55	0.314567	313.356	FALSE	14
2022-09-13	14:59:55	0.316094	313.672	FALSE	14
2022-09-13	14:59:56	0.324339	313.996	FALSE	14
2022-09-13	14:59:56	0.326985	314.323	FALSE	14
2022-09-13	14:59:56	0.321641	314.645	FALSE	14
2022-09-13	14:59:57	0.323881	314.969	FALSE	14
2022-09-13	14:59:57	0.318537	315.287	FALSE	14
2022-09-13	14:59:57	0.29645	315.584	FALSE	14
2022-09-13	14:59:57	0.294466	315.878	FALSE	14
2022-09-13	14:59:58	0.302405	316.181	FALSE	14
2022-09-13	14:59:58	0.298537	316.479	FALSE	14
2022-09-13	14:59:58	0.265763	316.745	FALSE	14
2022-09-13	14:59:58	0.260064	317.005	FALSE	14
2022-09-13	14:59:59	0.309377	317.314	FALSE	14
2022-09-13	14:59:59	0.48785	317.802	FALSE	14
2022-09-13	14:59:59	0.417367	318.22	FALSE	14
2022-09-13	14:59:59	0.380013	318.6	FALSE	14
2022-09-13	15:00:00	1.00994	319.61	FALSE	14
2022-09-13	15:00:00	1.10118	320.711	FALSE	14
2022-09-13	15:00:00	1.60846	322.319	FALSE	14
2022-09-13	15:00:01	1.14027	323.459	FALSE	14
2022-09-13	15:00:01	1.40276	324.862	FALSE	14
2022-09-13	15:00:01	1.62215	326.484	FALSE	14
2022-09-13	15:00:01	1.58922	328.074	FALSE	14
2022-09-13	15:00:02	2.05452	330.128	FALSE	14
2022-09-13	15:00:02	1.94037	332.068	FALSE	14
2022-09-13	15:00:02	2.45268	334.521	FALSE	14
2022-09-13	15:00:02	2.39564	336.917	FALSE	14
2022-09-13	15:00:03	2.94235	339.859	FALSE	14
2022-09-13	15:00:03	2.70342	342.563	FALSE	14
2022-09-13	15:00:03	2.97538	345.538	FALSE	14
2022-09-13	15:00:03	2.07029	347.608	FALSE	14
2022-09-13	15:00:04	1.53564	349.144	FALSE	14
2022-09-13	15:00:04	0.597366	349.741	FALSE	14
2022-09-13	15:00:04	0.186883	349.928	FALSE	14
2022-09-13	15:00:05	0.224949	350.153	FALSE	14
2022-09-13	15:00:05	0.243728	350.397	FALSE	14
2022-09-13	15:00:05	0.16154	350.558	FALSE	14
2022-09-13	15:00:05	0.157265	350.716	FALSE	14
2022-09-13	15:00:06	0.181183	350.897	FALSE	14
2022-09-13	15:00:06	0.213652	351.11	FALSE	14
2022-09-13	15:00:06	0.296552	351.407	FALSE	14
2022-09-13	15:00:06	0.256858	351.664	FALSE	14
2022-09-13	15:00:07	0.241387	351.905	FALSE	14
2022-09-13	15:00:07	0.215382	352.121	FALSE	14
2022-09-13	15:00:07	0.233448	352.354	FALSE	14
2022-09-13	15:00:07	0.281489	352.636	FALSE	14
2022-09-13	15:00:08	0.401743	353.037	FALSE	14
2022-09-13	15:00:08	0.417825	353.455	FALSE	14
2022-09-13	15:00:08	0.43925	353.894	FALSE	14
2022-09-13	15:00:09	0.405611	354.3	FALSE	14
2022-09-13	15:00:09	0.507443	354.807	FALSE	14
2022-09-13	15:00:09	0.979453	355.787	FALSE	14
2022-09-13	15:00:09	1.87055	357.657	FALSE	14
2022-09-13	15:00:10	2.17294	359.83	FALSE	14
2022-09-13	15:00:10	3.09747	362.928	1	15
2022-09-13	15:00:10	5.06215	367.99	1	16
2022-09-13	15:00:10	6.80744	374.797	1	17
2022-09-13	15:00:11	7.00133	381.799	1	18
2022-09-13	15:00:11	6.31456	388.113	1	19
2022-09-13	15:00:11	6.67538	394.789	1	20
2022-09-13	15:00:11	6.53172	401.32	1	21
2022-09-13	15:00:12	4.25747	405.578	1	22
2022-09-13	15:00:12	3.57818	409.156	1	23
2022-09-13	15:00:12	3.36312	412.519	1	24
2022-09-13	15:00:13	3.15284	415.672	1	25
2022-09-13	15:00:13	3.58495	419.257	1	26
2022-09-13	15:00:13	2.94612	422.203	FALSE	26
2022-09-13	15:00:13	1.69742	423.9	FALSE	26
2022-09-13	15:00:14	1.07899	424.979	FALSE	26
2022-09-13	15:00:14	0.499809	425.479	FALSE	26
2022-09-13	15:00:14	0.578384	426.058	FALSE	26
2022-09-13	15:00:14	0.659249	426.717	FALSE	26
2022-09-13	15:00:15	0.711616	427.429	FALSE	26
2022-09-13	15:00:15	0.805458	428.234	FALSE	26
2022-09-13	15:00:15	0.92729	429.161	FALSE	26
2022-09-13	15:00:15	0.913194	430.074	FALSE	26
2022-09-13	15:00:16	0.356043	430.431	FALSE	26
2022-09-13	15:00:16	0.332227	430.763	FALSE	26
2022-09-13	15:00:16	0.437367	431.2	FALSE	26
2022-09-13	15:00:17	0.245865	431.446	FALSE	26
2022-09-13	15:00:17	0.146578	431.593	FALSE	26
2022-09-13	15:00:17	0.153601	431.746	FALSE	26
2022-09-13	15:00:17	0.190344	431.937	FALSE	26
2022-09-13	15:00:18	0.0892241	432.026	FALSE	26
2022-09-13	15:00:18	0.0235244	432.049	FALSE	26
2022-09-13	15:00:18	-0.0136257	432.049	FALSE	26
2022-09-13	15:00:18	0.0136516	432.063	FALSE	26
2022-09-13	15:00:19	-0.150979	432.063	FALSE	26
2022-09-13	15:00:19	0.133041	432.196	FALSE	26
2022-09-13	15:00:19	0.056247	432.252	FALSE	26
2022-09-13	15:00:19	-0.153269	432.252	FALSE	26
2022-09-13	15:00:20	-0.267163	432.252	FALSE	26
2022-09-13	15:00:20	-0.319682	432.252	FALSE	26
2022-09-13	15:00:20	-0.547366	432.252	FALSE	26
2022-09-13	15:00:21	-0.567671	432.252	FALSE	26
2022-09-13	15:00:21	-0.00884198	432.252	FALSE	26
2022-09-13	15:00:21	1.2476	433.5	FALSE	26
2022-09-13	15:00:21	1.64378	435.144	FALSE	26
2022-09-13	15:00:22	7.79858	442.942	1	27
2022-09-13	15:00:22	2.03518	444.977	FALSE	27
2022-09-13	15:00:22	6.33823	451.316	1	28
2022-09-13	15:00:22	0.748257	452.064	FALSE	28
2022-09-13	15:00:23	1.82388	453.888	FALSE	28
2022-09-13	15:00:23	1.38821	455.276	FALSE	28
2022-09-13	15:00:23	0.522913	455.799	FALSE	28
2022-09-13	15:00:23	2.69762	458.496	FALSE	28
2022-09-13	15:00:24	0.180624	458.677	FALSE	28
2022-09-13	15:00:24	0.11126	458.788	FALSE	28
2022-09-13	15:00:24	0.938944	459.727	FALSE	28
2022-09-13	15:00:25	-0.0375952	459.727	FALSE	28
2022-09-13	15:00:25	0.148766	459.876	FALSE	28
2022-09-13	15:00:25	0.340725	460.217	FALSE	28
2022-09-13	15:00:25	0.179606	460.396	FALSE	28
2022-09-13	15:00:26	0.056247	460.453	FALSE	28
2022-09-13	15:00:26	0.260573	460.713	FALSE	28
2022-09-13	15:00:26	0.229122	460.942	FALSE	28
2022-09-13	15:00:26	2.13564	463.078	FALSE	28
2022-09-13	15:00:27	0.242964	463.321	FALSE	28
2022-09-13	15:00:27	0.152939	463.474	FALSE	28
2022-09-13	15:00:27	1.84408	465.318	FALSE	28
2022-09-13	15:00:27	0.0538552	465.372	FALSE	28
2022-09-13	15:00:28	0.271972	465.644	FALSE	28
2022-09-13	15:00:28	0.187901	465.832	FALSE	28
2022-09-13	15:00:28	0.287188	466.119	FALSE	28
2022-09-13	15:00:29	0.126578	466.245	FALSE	28
2022-09-13	15:00:29	0.26668	466.512	FALSE	28
2022-09-13	15:00:29	0.425865	466.938	FALSE	28
2022-09-13	15:00:29	0.280267	467.218	FALSE	28
2022-09-13	15:00:30	0.459046	467.677	FALSE	28
2022-09-13	15:00:30	0.183117	467.86	FALSE	28
2022-09-13	15:00:30	0.347188	468.208	FALSE	28
2022-09-13	15:00:30	0.460929	468.669	FALSE	28
2022-09-13	15:00:31	0.307036	468.976	FALSE	28
2022-09-13	15:00:31	0.329377	469.305	FALSE	28
2022-09-13	15:00:31	0.221641	469.527	FALSE	28
2022-09-13	15:00:31	0.245814	469.772	FALSE	28
2022-09-13	15:00:32	0.169529	469.942	FALSE	28
2022-09-13	15:00:32	0.361031	470.303	FALSE	28
2022-09-13	15:00:32	0.0366542	470.34	FALSE	28
2022-09-13	15:00:33	0.27014	470.61	FALSE	28
2022-09-13	15:00:33	0.137163	470.747	FALSE	28
2022-09-13	15:00:33	0.24271	470.99	FALSE	28
2022-09-13	15:00:33	0.0865269	471.076	FALSE	28
2022-09-13	15:00:34	0.192939	471.269	FALSE	28
2022-09-13	15:00:34	0.238842	471.508	FALSE	28
2022-09-13	15:00:34	0.126374	471.634	FALSE	28
2022-09-13	15:00:34	0.184186	471.818	FALSE	28
2022-09-13	15:00:35	0.0253564	471.844	FALSE	28
2022-09-13	15:00:35	0.240064	472.084	FALSE	28
2022-09-13	15:00:35	-0.0632949	472.084	FALSE	28
2022-09-13	15:00:35	0.202303	472.286	FALSE	28
2022-09-13	15:00:36	0.0298857	472.316	FALSE	28
2022-09-13	15:00:36	0.16841	472.484	FALSE	28
2022-09-13	15:00:36	0.064186	472.549	FALSE	28
2022-09-13	15:00:37	0.180166	472.729	FALSE	28
2022-09-13	15:00:37	0.249631	472.978	FALSE	28
2022-09-13	15:00:37	0.153346	473.132	FALSE	28
2022-09-13	15:00:37	0.130242	473.262	FALSE	28
2022-09-13	15:00:38	0.0591478	473.321	FALSE	28
2022-09-13	15:00:38	0.141336	473.463	FALSE	28
2022-09-13	15:00:38	-0.0973915	473.463	FALSE	28
2022-09-13	15:00:38	0.0769086	473.539	FALSE	28
2022-09-13	15:00:39	-0.00695905	473.539	FALSE	28
2022-09-13	15:00:39	0.0965015	473.636	FALSE	28
2022-09-13	15:00:39	-0.161005	473.636	FALSE	28
2022-09-13	15:00:39	0.0439316	473.68	FALSE	28
2022-09-13	15:00:40	0.0309544	473.711	FALSE	28
2022-09-13	15:00:40	0.0954328	473.806	FALSE	28
2022-09-13	15:00:40	-0.023702	473.806	FALSE	28
2022-09-13	15:00:41	0.127239	473.934	FALSE	28
2022-09-13	15:00:41	0.200267	474.134	FALSE	28
2022-09-13	15:00:41	0.075331	474.209	FALSE	28
2022-09-13	15:00:41	0.220013	474.429	FALSE	28
2022-09-13	15:00:42	0.0767051	474.506	FALSE	28
2022-09-13	15:00:42	0.334975	474.841	FALSE	28
2022-09-13	15:00:42	0.0465778	474.887	FALSE	28
2022-09-13	15:00:42	0.327494	475.215	FALSE	28
2022-09-13	15:00:43	0.211921	475.427	FALSE	28
2022-09-13	15:00:43	0.174975	475.602	FALSE	28
2022-09-13	15:00:43	0.236858	475.839	FALSE	28
2022-09-13	15:00:43	0.290089	476.129	FALSE	28
2022-09-13	15:00:44	0.316807	476.446	FALSE	28
2022-09-13	15:00:44	0.233448	476.679	FALSE	28
2022-09-13	15:00:44	0.6593	477.338	FALSE	28
2022-09-13	15:00:45	0.328461	477.667	FALSE	28
2022-09-13	15:00:45	0.578537	478.245	FALSE	28
2022-09-13	15:00:45	0.243982	478.489	FALSE	28
2022-09-13	15:00:45	0.711209	479.2	FALSE	28
2022-09-13	15:00:46	0.363728	479.564	FALSE	28
2022-09-13	15:00:46	0.865662	480.43	FALSE	28
2022-09-13	15:00:46	1.17121	481.601	FALSE	28
2022-09-13	15:00:46	0.764491	482.366	FALSE	28
2022-09-13	15:00:47	0.908766	483.274	FALSE	28
2022-09-13	15:00:47	0.996959	484.271	FALSE	28
2022-09-13	15:00:47	0.485356	484.757	FALSE	28
2022-09-13	15:00:47	0.396756	485.153	FALSE	28
2022-09-13	15:00:48	0.640013	485.793	FALSE	28
2022-09-13	15:00:48	0.330852	486.124	FALSE	28
2022-09-13	15:00:48	0.547646	486.672	FALSE	28
2022-09-13	15:00:49	0.293652	486.966	FALSE	28
2022-09-13	15:00:49	0.599962	487.566	FALSE	28
2022-09-13	15:00:49	0.268613	487.834	FALSE	28
2022-09-13	15:00:49	0.458028	488.292	FALSE	28
2022-09-13	15:00:50	0.202507	488.495	FALSE	28
2022-09-13	15:00:50	0.290038	488.785	FALSE	28
2022-09-13	15:00:50	0.124848	488.91	FALSE	28
2022-09-13	15:00:50	0.542048	489.452	FALSE	28
2022-09-13	15:00:51	0.297214	489.749	FALSE	28
2022-09-13	15:00:51	0.489733	490.239	FALSE	28
2022-09-13	15:00:51	0.164339	490.403	FALSE	28
2022-09-13	15:00:51	0.593855	490.997	FALSE	28
2022-09-13	15:00:52	0.399453	491.396	FALSE	28
2022-09-13	15:00:52	0.509631	491.906	FALSE	28
2022-09-13	15:00:52	0.319453	492.225	FALSE	28
2022-09-13	15:00:53	0.491769	492.717	FALSE	28
2022-09-13	15:00:53	0.332837	493.05	FALSE	28
2022-09-13	15:00:53	0.450598	493.5	FALSE	28
2022-09-13	15:00:53	0.367646	493.868	FALSE	28
2022-09-13	15:00:54	0.324695	494.193	FALSE	28
2022-09-13	15:00:54	0.495942	494.689	FALSE	28
2022-09-13	15:00:54	0.43757	495.126	FALSE	28
2022-09-13	15:00:54	0.48215	495.608	FALSE	28
2022-09-13	15:00:55	0.339962	495.948	FALSE	28
2022-09-13	15:00:55	0.614568	496.563	FALSE	28
2022-09-13	15:00:55	0.443117	497.006	FALSE	28
2022-09-13	15:00:55	0.688817	497.695	FALSE	28
2022-09-13	15:00:56	0.334771	498.03	FALSE	28
2022-09-13	15:00:56	0.664746	498.694	FALSE	28
2022-09-13	15:00:56	0.327545	499.022	FALSE	28
2022-09-13	15:00:57	1.22531	500.247	FALSE	28
2022-09-13	15:00:57	0.635178	500.883	FALSE	28
2022-09-13	15:00:57	2.51716	503.4	FALSE	28
2022-09-13	15:00:57	0.896399	504.296	FALSE	28
2022-09-13	15:00:58	3.26536	507.561	1	29
2022-09-13	15:00:58	0.383066	507.944	FALSE	29
2022-09-13	15:00:58	1.80709	509.752	FALSE	29
2022-09-13	15:00:58	0.112176	509.864	FALSE	29
2022-09-13	15:00:59	0.622201	510.486	FALSE	29
2022-09-13	15:00:59	0.971667	511.458	FALSE	29
2022-09-13	15:00:59	0.411769	511.869	FALSE	29
2022-09-13	15:00:59	0.428104	512.297	FALSE	29
2022-09-13	15:01:00	1.17503	513.473	FALSE	29
2022-09-13	15:01:00	0.464491	513.937	FALSE	29
2022-09-13	15:01:00	0.59187	514.529	FALSE	29
2022-09-13	15:01:01	0.766883	515.296	FALSE	29
2022-09-13	15:01:01	0.385967	515.682	FALSE	29
2022-09-13	15:01:01	0.428155	516.11	FALSE	29
2022-09-13	15:01:01	0.320115	516.43	FALSE	29
2022-09-13	15:01:02	0.425764	516.856	FALSE	29
2022-09-13	15:01:02	0.278028	517.134	FALSE	29
2022-09-13	15:01:02	0.40159	517.535	FALSE	29
2022-09-13	15:01:02	0.385204	517.921	FALSE	29
2022-09-13	15:01:03	0.285611	518.206	FALSE	29
2022-09-13	15:01:03	0.383677	518.59	FALSE	29
2022-09-13	15:01:03	0.477265	519.067	FALSE	29
2022-09-13	15:01:03	0.50958	519.577	FALSE	29
2022-09-13	15:01:04	1.6166	521.193	FALSE	29
2022-09-13	15:01:04	2.65945	523.853	FALSE	29
2022-09-13	15:01:04	1.51691	525.37	FALSE	29
2022-09-13	15:01:05	1.65757	527.027	FALSE	29
2022-09-13	15:01:05	2.48225	529.51	FALSE	29
2022-09-13	15:01:05	0.415687	529.925	FALSE	29
2022-09-13	15:01:05	0.246374	530.172	FALSE	29
2022-09-13	15:01:06	0.413295	530.585	FALSE	29
2022-09-13	15:01:06	0.164389	530.749	FALSE	29
2022-09-13	15:01:06	0.155484	530.905	FALSE	29
2022-09-13	15:01:06	0.119708	531.024	FALSE	29
2022-09-13	15:01:07	0.060013	531.084	FALSE	29
2022-09-13	15:01:07	-0.0440582	531.084	FALSE	29
2022-09-13	15:01:07	0.0377738	531.122	FALSE	29
2022-09-13	15:01:07	0.132583	531.255	FALSE	29
2022-09-13	15:01:08	0.174008	531.429	FALSE	29
2022-09-13	15:01:08	0.0525321	531.481	FALSE	29
2022-09-13	15:01:08	0.171463	531.653	FALSE	29
2022-09-13	15:01:09	0.128919	531.782	FALSE	29
2022-09-13	15:01:09	0.167748	531.949	FALSE	29
2022-09-13	15:01:09	0.0718704	532.021	FALSE	29
2022-09-13	15:01:09	0.261183	532.283	FALSE	29
2022-09-13	15:01:10	0.116705	532.399	FALSE	29
2022-09-13	15:01:10	0.265458	532.665	FALSE	29
2022-09-13	15:01:10	0.0482572	532.713	FALSE	29
2022-09-13	15:01:10	0.238486	532.951	FALSE	29
2022-09-13	15:01:11	0.12271	533.074	FALSE	29
2022-09-13	15:01:11	0.0556872	533.13	FALSE	29
2022-09-13	15:01:11	0.103372	533.233	FALSE	29
2022-09-13	15:01:11	0.0322267	533.265	FALSE	29
2022-09-13	15:01:12	0.0491224	533.315	FALSE	29
2022-09-13	15:01:12	0.399402	533.714	FALSE	29
2022-09-13	15:01:12	0.231056	533.945	FALSE	29
2022-09-13	15:01:13	0.240369	534.185	FALSE	29
2022-09-13	15:01:13	0.2707	534.456	FALSE	29
2022-09-13	15:01:13	0.226476	534.683	FALSE	29
2022-09-13	15:01:13	0.220318	534.903	FALSE	29
2022-09-13	15:01:14	0.083219	534.986	FALSE	29
2022-09-13	15:01:14	0.290344	535.276	FALSE	29
2022-09-13	15:01:14	0.173906	535.45	FALSE	29
2022-09-13	15:01:14	0.2364	535.687	FALSE	29
2022-09-13	15:01:15	0.220522	535.907	FALSE	29
2022-09-13	15:01:15	0.207901	536.115	FALSE	29
2022-09-13	15:01:15	0.11126	536.226	FALSE	29
2022-09-13	15:01:15	0.110547	536.337	FALSE	29
2022-09-13	15:01:16	0.113194	536.45	FALSE	29
2022-09-13	15:01:16	0.128613	536.579	FALSE	29
2022-09-13	15:01:16	0.138842	536.718	FALSE	29
2022-09-13	15:01:17	0.155636	536.873	FALSE	29
2022-09-13	15:01:17	0.176654	537.05	FALSE	29
2022-09-13	15:01:17	0.184797	537.235	FALSE	29
2022-09-13	15:01:17	0.179758	537.414	FALSE	29
2022-09-13	15:01:18	0.182761	537.597	FALSE	29
2022-09-13	15:01:18	0.181285	537.779	FALSE	29
2022-09-13	15:01:18	0.182557	537.961	FALSE	29
2022-09-13	15:01:18	0.183779	538.145	FALSE	29
2022-09-13	15:01:19	0.145916	538.291	FALSE	29
2022-09-13	15:01:19	0.087392	538.378	FALSE	29
2022-09-13	15:01:19	0.0983335	538.476	FALSE	29
2022-09-13	15:01:19	0.141947	538.618	FALSE	29
2022-09-13	15:01:20	0.167494	538.786	FALSE	29
2022-09-13	15:01:20	0.18327	538.969	FALSE	29
2022-09-13	15:01:20	0.118995	539.088	FALSE	29
2022-09-13	15:01:21	0.207392	539.296	FALSE	29
2022-09-13	15:01:21	0.230293	539.526	FALSE	29
2022-09-13	15:01:21	0.222761	539.749	FALSE	29
2022-09-13	15:01:21	0.202252	539.951	FALSE	29
2022-09-13	15:01:22	0.21126	540.162	FALSE	29
2022-09-13	15:01:22	0.253041	540.415	FALSE	29
2022-09-13	15:01:22	0.252939	540.668	FALSE	29
2022-09-13	15:01:22	0.35701	541.025	FALSE	29
2022-09-13	15:01:23	0.407545	541.433	FALSE	29
2022-09-13	15:01:23	0.391616	541.824	FALSE	29
2022-09-13	15:01:23	0.396603	542.221	FALSE	29
2022-09-13	15:01:24	0.292074	542.513	FALSE	29
2022-09-13	15:01:24	0.048359	542.561	FALSE	29
2022-09-13	15:01:24	-8.88145e-05	542.561	FALSE	29
2022-09-13	15:01:24	-0.287977	542.561	FALSE	29
2022-09-13	15:01:25	-0.27846	542.561	FALSE	29
2022-09-13	15:01:25	-0.40757	542.561	FALSE	29
2022-09-13	15:01:25	-0.395	542.561	FALSE	29
2022-09-13	15:01:25	-0.410572	542.561	FALSE	29
2022-09-13	15:01:26	-0.431895	542.561	FALSE	29
2022-09-13	15:01:26	-0.308842	542.561	FALSE	29
2022-09-13	15:01:26	-0.403702	542.561	FALSE	29
2022-09-13	15:01:26	-0.263295	542.561	FALSE	29
2022-09-13	15:01:27	-0.4693	542.561	FALSE	29
2022-09-13	15:01:27	-0.229504	542.561	FALSE	29
2022-09-13	15:01:27	-0.00309134	542.561	FALSE	29
2022-09-13	15:01:27	0.160573	542.722	FALSE	29
2022-09-13	15:01:28	-0.0798343	542.722	FALSE	29
2022-09-13	15:01:28	0.00754479	542.729	FALSE	29
2022-09-13	15:01:28	0.0509544	542.78	FALSE	29
2022-09-13	15:01:29	0.179606	542.96	FALSE	29
2022-09-13	15:01:29	0.143473	543.103	FALSE	29
2022-09-13	15:01:29	0.201489	543.305	FALSE	29
2022-09-13	15:01:29	0.223372	543.528	FALSE	29
2022-09-13	15:01:30	0.352328	543.881	FALSE	29
2022-09-13	15:01:30	0.279555	544.16	FALSE	29
2022-09-13	15:01:30	0.546985	544.707	FALSE	29
2022-09-13	15:01:30	0.491107	545.198	FALSE	29
2022-09-13	15:01:31	0.387545	545.586	FALSE	29
2022-09-13	15:01:31	0.720114	546.306	FALSE	29
2022-09-13	15:01:31	0.325916	546.632	FALSE	29
2022-09-13	15:01:31	0.722557	547.354	FALSE	29
2022-09-13	15:01:32	0.327697	547.682	FALSE	29
2022-09-13	15:01:32	0.553346	548.236	FALSE	29
2022-09-13	15:01:32	0.257417	548.493	FALSE	29
2022-09-13	15:01:33	0.657366	549.15	FALSE	29
2022-09-13	15:01:33	0.268359	549.419	FALSE	29
2022-09-13	15:01:33	0.517112	549.936	FALSE	29
2022-09-13	15:01:33	0.320064	550.256	FALSE	29
2022-09-13	15:01:34	0.565356	550.821	FALSE	29
2022-09-13	15:01:34	0.255076	551.076	FALSE	29
2022-09-13	15:01:34	0.465356	551.542	FALSE	29
2022-09-13	15:01:34	0.26897	551.811	FALSE	29
2022-09-13	15:01:35	0.535178	552.346	FALSE	29
2022-09-13	15:01:35	0.30729	552.653	FALSE	29
2022-09-13	15:01:35	0.492125	553.145	FALSE	29
2022-09-13	15:01:35	0.270853	553.416	FALSE	29
2022-09-13	15:01:36	0.524644	553.941	FALSE	29
2022-09-13	15:01:36	0.259046	554.2	FALSE	29
2022-09-13	15:01:36	0.531972	554.732	FALSE	29
2022-09-13	15:01:37	0.244186	554.976	FALSE	29
2022-09-13	15:01:37	0.52785	555.504	FALSE	29
2022-09-13	15:01:37	0.274567	555.778	FALSE	29
2022-09-13	15:01:37	0.609173	556.387	FALSE	29
2022-09-13	15:01:38	0.671768	557.059	FALSE	29
2022-09-13	15:01:38	1.17044	558.23	FALSE	29
2022-09-13	15:01:38	0.459148	558.689	FALSE	29
2022-09-13	15:01:38	0.563626	559.252	FALSE	29
2022-09-13	15:01:39	0.1793	559.432	FALSE	29
2022-09-13	15:01:39	0.460623	559.892	FALSE	29
2022-09-13	15:01:39	0.270547	560.163	FALSE	29
2022-09-13	15:01:39	0.431514	560.594	FALSE	29
2022-09-13	15:01:40	0.187341	560.782	FALSE	29
2022-09-13	15:01:40	0.300624	561.082	FALSE	29
2022-09-13	15:01:40	0.336247	561.419	FALSE	29
2022-09-13	15:01:41	0.385204	561.804	FALSE	29
2022-09-13	15:01:41	0.201183	562.005	FALSE	29
2022-09-13	15:01:41	0.386425	562.391	FALSE	29
2022-09-13	15:01:41	0.408563	562.8	FALSE	29
2022-09-13	15:01:42	0.358384	563.158	FALSE	29
2022-09-13	15:01:42	0.345458	563.504	FALSE	29
2022-09-13	15:01:42	0.294008	563.798	FALSE	29
2022-09-13	15:01:42	0.487087	564.285	FALSE	29
2022-09-13	15:01:43	0.395636	564.681	FALSE	29
2022-09-13	15:01:43	0.514771	565.195	FALSE	29
2022-09-13	15:01:43	0.323117	565.518	FALSE	29
2022-09-13	15:01:43	0.497265	566.016	FALSE	29
2022-09-13	15:01:44	0.321998	566.338	FALSE	29
2022-09-13	15:01:44	0.496349	566.834	FALSE	29
2022-09-13	15:01:44	0.334517	567.169	FALSE	29
2022-09-13	15:01:45	0.439097	567.608	FALSE	29
2022-09-13	15:01:45	0.303473	567.911	FALSE	29
2022-09-13	15:01:45	0.457265	568.368	FALSE	29
2022-09-13	15:01:45	0.311463	568.68	FALSE	29
2022-09-13	15:01:46	0.357774	569.038	FALSE	29
2022-09-13	15:01:46	0.401794	569.439	FALSE	29
2022-09-13	15:01:46	0.319962	569.759	FALSE	29
2022-09-13	15:01:46	0.436959	570.196	FALSE	29
2022-09-13	15:01:47	0.246323	570.443	FALSE	29
2022-09-13	15:01:47	0.425051	570.868	FALSE	29
2022-09-13	15:01:47	0.308155	571.176	FALSE	29
2022-09-13	15:01:47	0.442608	571.619	FALSE	29
2022-09-13	15:01:48	0.0902419	571.709	FALSE	29
2022-09-13	15:01:48	0.0400639	571.749	FALSE	29
2022-09-13	15:01:48	0.00515291	571.754	FALSE	29
2022-09-13	15:01:49	-0.0157122	571.754	FALSE	29
2022-09-13	15:01:49	0.239351	571.993	FALSE	29
2022-09-13	15:01:49	0.733651	572.727	FALSE	29
2022-09-13	15:01:49	0.540369	573.267	FALSE	29
2022-09-13	15:01:50	0.832125	574.099	FALSE	29
2022-09-13	15:01:50	0.879962	574.979	FALSE	29
2022-09-13	15:01:50	1.56434	576.544	FALSE	29
2022-09-13	15:01:50	0.677977	577.222	FALSE	29
2022-09-13	15:01:51	0.698893	577.921	FALSE	29
2022-09-13	15:01:51	0.499555	578.42	FALSE	29
2022-09-13	15:01:51	0.728359	579.149	FALSE	29
2022-09-13	15:01:51	0.389326	579.538	FALSE	29
2022-09-13	15:01:52	0.502659	580.041	FALSE	29
2022-09-13	15:01:52	0.693142	580.734	FALSE	29
2022-09-13	15:01:52	0.408563	581.142	FALSE	29
2022-09-13	15:01:53	0.476552	581.619	FALSE	29
2022-09-13	15:01:53	0.424848	582.044	FALSE	29
2022-09-13	15:01:53	0.50902	582.553	FALSE	29
2022-09-13	15:01:53	0.361082	582.914	FALSE	29
2022-09-13	15:01:54	0.430445	583.344	FALSE	29
2022-09-13	15:01:54	0.326832	583.671	FALSE	29
2022-09-13	15:01:54	0.479555	584.151	FALSE	29
2022-09-13	15:01:54	0.379707	584.53	FALSE	29
2022-09-13	15:01:55	0.371463	584.902	FALSE	29
2022-09-13	15:01:55	0.494211	585.396	FALSE	29
2022-09-13	15:01:55	0.400369	585.796	FALSE	29
2022-09-13	15:01:55	0.45472	586.251	FALSE	29
2022-09-13	15:01:56	0.28897	586.54	FALSE	29
2022-09-13	15:01:56	0.56042	587.1	FALSE	29
2022-09-13	15:01:56	0.351718	587.452	FALSE	29
2022-09-13	15:01:57	0.538181	587.99	FALSE	29
2022-09-13	15:01:57	0.298741	588.289	FALSE	29
2022-09-13	15:01:57	0.554618	588.844	FALSE	29
2022-09-13	15:01:57	0.335229	589.179	FALSE	29
2022-09-13	15:01:58	0.579962	589.759	FALSE	29
2022-09-13	15:01:58	0.315942	590.075	FALSE	29
2022-09-13	15:01:58	0.480267	590.555	FALSE	29
2022-09-13	15:01:58	0.423982	590.979	FALSE	29
2022-09-13	15:01:59	0.358537	591.338	FALSE	29
2022-09-13	15:01:59	0.480471	591.818	FALSE	29
2022-09-13	15:01:59	0.316756	592.135	FALSE	29
2022-09-13	15:01:59	0.485662	592.621	FALSE	29
2022-09-13	15:02:00	0.387239	593.008	FALSE	29
2022-09-13	15:02:00	0.582812	593.591	FALSE	29
2022-09-13	15:02:00	0.303066	593.894	FALSE	29
2022-09-13	15:02:01	0.631972	594.526	FALSE	29
2022-09-13	15:02:01	0.389529	594.915	FALSE	29
2022-09-13	15:02:01	0.599453	595.515	FALSE	29
2022-09-13	15:02:01	0.355127	595.87	FALSE	29
2022-09-13	15:02:02	0.623066	596.493	FALSE	29
2022-09-13	15:02:02	0.397112	596.89	FALSE	29
2022-09-13	15:02:02	0.520471	597.41	FALSE	29
2022-09-13	15:02:02	0.466934	597.877	FALSE	29
2022-09-13	15:02:03	0.531769	598.409	FALSE	29
2022-09-13	15:02:03	0.436603	598.846	FALSE	29
2022-09-13	15:02:03	0.436959	599.283	FALSE	29
2022-09-13	15:02:03	0.567697	599.85	FALSE	29
2022-09-13	15:02:04	0.416501	600.267	FALSE	29
2022-09-13	15:02:04	0.425458	600.692	FALSE	29
2022-09-13	15:02:04	0.529987	601.222	FALSE	29
2022-09-13	15:02:05	0.430395	601.653	FALSE	29
2022-09-13	15:02:05	0.971718	602.624	FALSE	29
2022-09-13	15:02:05	0.752684	603.377	FALSE	29
2022-09-13	15:02:05	0.883219	604.26	FALSE	29
2022-09-13	15:02:06	0.667443	604.928	FALSE	29
2022-09-13	15:02:06	0.581438	605.509	FALSE	29
2022-09-13	15:02:06	0.450802	605.96	FALSE	29
2022-09-13	15:02:06	0.484237	606.444	FALSE	29
2022-09-13	15:02:07	0.489886	606.934	FALSE	29
2022-09-13	15:02:07	0.480776	607.415	FALSE	29
2022-09-13	15:02:07	0.455687	607.871	FALSE	29
2022-09-13	15:02:07	0.449173	608.32	FALSE	29
2022-09-13	15:02:08	0.496909	608.817	FALSE	29
2022-09-13	15:02:08	0.480318	609.297	FALSE	29
2022-09-13	15:02:08	0.446883	609.744	FALSE	29
2022-09-13	15:02:09	0.410496	610.154	FALSE	29
2022-09-13	15:02:09	0.55014	610.704	FALSE	29
2022-09-13	15:02:09	0.426018	611.131	FALSE	29
2022-09-13	15:02:09	0.514059	611.645	FALSE	29
2022-09-13	15:02:10	0.391005	612.036	FALSE	29
2022-09-13	15:02:10	0.525967	612.562	FALSE	29
2022-09-13	15:02:10	0.398435	612.96	FALSE	29
2022-09-13	15:02:10	0.672328	613.632	FALSE	29
2022-09-13	15:02:11	1.51156	615.144	FALSE	29
2022-09-13	15:02:11	3.84597	618.99	1	30
2022-09-13	15:02:11	1.43182	620.422	FALSE	30
2022-09-13	15:02:11	1.36042	621.782	FALSE	30
2022-09-13	15:02:12	1.16704	622.949	FALSE	30
2022-09-13	15:02:12	1.05075	624	FALSE	30
2022-09-13	15:02:12	0.908715	624.909	FALSE	30
2022-09-13	15:02:13	1.10632	626.015	FALSE	30
2022-09-13	15:02:13	0.841998	626.857	FALSE	30
2022-09-13	15:02:13	0.534771	627.392	FALSE	30
2022-09-13	15:02:13	0.579198	627.971	FALSE	30
2022-09-13	15:02:14	0.512888	628.484	FALSE	30
2022-09-13	15:02:14	0.585102	629.069	FALSE	30
2022-09-13	15:02:14	0.344389	629.413	FALSE	30
2022-09-13	15:02:14	0.633804	630.047	FALSE	30
2022-09-13	15:02:15	0.287138	630.334	FALSE	30
2022-09-13	15:02:15	0.565356	630.9	FALSE	30
2022-09-13	15:02:15	0.338384	631.238	FALSE	30

## Sheet: Sulley_harness_2022913145656
						**GoPro Fitting: 1446
2022-09-13	14:56:57	0.16612
2022-09-13	14:56:57	0.158639
2022-09-13	14:56:57	0.167952
2022-09-13	14:56:57	0.173346
2022-09-13	14:56:58	0.199555
2022-09-13	14:56:58	0.219097
2022-09-13	14:56:58	0.210038
2022-09-13	14:56:58	0.212939
2022-09-13	14:56:59	0.213702
2022-09-13	14:56:59	0.203372
2022-09-13	14:56:59	0.202507
2022-09-13	14:57:00	0.194873
2022-09-13	14:57:00	0.198333
2022-09-13	14:57:00	0.193092
2022-09-13	14:57:00	0.18958
2022-09-13	14:57:01	0.190903
2022-09-13	14:57:01	0.19472
2022-09-13	14:57:01	0.192685
2022-09-13	14:57:01	0.221998
2022-09-13	14:57:02	0.249835
2022-09-13	14:57:02	0.22388
2022-09-13	14:57:02	0.272023
2022-09-13	14:57:02	0.285763
2022-09-13	14:57:03	0.272888
2022-09-13	14:57:03	0.261489
2022-09-13	14:57:03	0.266578
2022-09-13	14:57:04	0.297774
2022-09-13	14:57:04	0.274008
2022-09-13	14:57:04	0.283168
2022-09-13	14:57:04	0.297214
2022-09-13	14:57:05	0.278028
2022-09-13	14:57:05	0.278181
2022-09-13	14:57:05	0.297774
2022-09-13	14:57:05	0.240471
2022-09-13	14:57:06	0.283422
2022-09-13	14:57:06	0.325967
2022-09-13	14:57:06	0.330547
2022-09-13	14:57:06	0.320827
2022-09-13	14:57:07	0.292227
2022-09-13	14:57:07	0.623473
2022-09-13	14:57:07	0.320115
2022-09-13	14:57:08	0.506934
2022-09-13	14:57:08	0.44785
2022-09-13	14:57:08	0.433397
2022-09-13	14:57:08	0.725814
2022-09-13	14:57:09	0.337061
2022-09-13	14:57:09	0.296959
2022-09-13	14:57:09	0.184898
2022-09-13	14:57:09	0.232328
2022-09-13	14:57:10	0.110445
2022-09-13	14:57:10	0.55472
2022-09-13	14:57:10	0.659402
2022-09-13	14:57:10	0.995229
2022-09-13	14:57:11	1.99553
2022-09-13	14:57:11	2.61467
2022-09-13	14:57:11	0.855585
2022-09-13	14:57:12	0.621845
2022-09-13	14:57:12	0.512532
2022-09-13	14:57:12	0.344389
2022-09-13	14:57:12	0.505713
2022-09-13	14:57:13	0.180267
2022-09-13	14:57:13	0.521641
2022-09-13	14:57:13	0.463931
2022-09-13	14:57:13	0.612023
2022-09-13	14:57:14	3.46525
2022-09-13	14:57:14	1.81055
2022-09-13	14:57:14	0.440166
2022-09-13	14:57:14	1.69182
2022-09-13	14:57:15	0.376349
2022-09-13	14:57:15	0.434364
2022-09-13	14:57:15	0.320369
2022-09-13	14:57:16	-0.000292388
2022-09-13	14:57:16	0.0749239
2022-09-13	14:57:16	0.00637431
2022-09-13	14:57:16	0.14042
2022-09-13	14:57:17	-0.078562
2022-09-13	14:57:17	-0.0101651
2022-09-13	14:57:17	0.0176211
2022-09-13	14:57:17	-0.195203
2022-09-13	14:57:18	-0.39444
2022-09-13	14:57:18	-0.526399
2022-09-13	14:57:18	-0.986348
2022-09-13	14:57:18	-1.04645
2022-09-13	14:57:19	-0.927213
2022-09-13	14:57:19	-0.787569
2022-09-13	14:57:19	-0.575559
2022-09-13	14:57:20	-0.515458
2022-09-13	14:57:20	-0.0906231
2022-09-13	14:57:20	0.167239
2022-09-13	14:57:20	0.33986
2022-09-13	14:57:21	0.499504
2022-09-13	14:57:21	0.319504
2022-09-13	14:57:21	0.215178
2022-09-13	14:57:21	0.193804
2022-09-13	14:57:22	0.31869
2022-09-13	14:57:22	0.102405
2022-09-13	14:57:22	0.460471
2022-09-13	14:57:22	0.0937534
2022-09-13	14:57:23	0.309071
2022-09-13	14:57:23	0.175738
2022-09-13	14:57:23	0.260878
2022-09-13	14:57:24	0.283066
2022-09-13	14:57:24	0.240827
2022-09-13	14:57:24	0.422659
2022-09-13	14:57:24	0.10556
2022-09-13	14:57:25	0.263117
2022-09-13	14:57:25	0.0586389
2022-09-13	14:57:25	0.276501
2022-09-13	14:57:25	-0.280699
2022-09-13	14:57:26	-0.342684
2022-09-13	14:57:26	-0.347926
2022-09-13	14:57:26	-0.504719
2022-09-13	14:57:26	-0.75673
2022-09-13	14:57:27	-0.560648
2022-09-13	14:57:27	-0.79561
2022-09-13	14:57:27	-0.691182
2022-09-13	14:57:28	-0.834898
2022-09-13	14:57:28	-0.680495
2022-09-13	14:57:28	-0.388333
2022-09-13	14:57:28	-0.12187
2022-09-13	14:57:29	-0.0862465
2022-09-13	14:57:29	-0.165381
2022-09-13	14:57:29	-0.339325
2022-09-13	14:57:29	-0.263855
2022-09-13	14:57:30	-0.0222771
2022-09-13	14:57:30	-0.0219209
2022-09-13	14:57:30	-0.106094
2022-09-13	14:57:30	0.102608
2022-09-13	14:57:31	0.0849493
2022-09-13	14:57:31	0.233448
2022-09-13	14:57:31	0.103321
2022-09-13	14:57:32	0.228461
2022-09-13	14:57:32	0.436756
2022-09-13	14:57:32	0.18673
2022-09-13	14:57:32	0.298639
2022-09-13	14:57:33	0.155993
2022-09-13	14:57:33	0.345458
2022-09-13	14:57:33	0.083728
2022-09-13	14:57:33	0.297875
2022-09-13	14:57:34	0.229886
2022-09-13	14:57:34	0.223066
2022-09-13	14:57:34	0.252277
2022-09-13	14:57:34	0.260013
2022-09-13	14:57:35	0.280064
2022-09-13	14:57:35	0.0539061
2022-09-13	14:57:35	0.371412
2022-09-13	14:57:36	0.18841
2022-09-13	14:57:36	0.362863
2022-09-13	14:57:36	0.375942
2022-09-13	14:57:36	0.346476
2022-09-13	14:57:37	0.319453
2022-09-13	14:57:37	0.214364
2022-09-13	14:57:37	0.38271
2022-09-13	14:57:37	0.211921
2022-09-13	14:57:38	0.445204
2022-09-13	14:57:38	0.160216
2022-09-13	14:57:38	0.612125
2022-09-13	14:57:38	0.222303
2022-09-13	14:57:39	0.434517
2022-09-13	14:57:39	0.341998
2022-09-13	14:57:39	0.371005
2022-09-13	14:57:40	0.484237
2022-09-13	14:57:40	0.263372
2022-09-13	14:57:40	0.567086
2022-09-13	14:57:40	0.215636
2022-09-13	14:57:41	0.456603
2022-09-13	14:57:41	0.329529
2022-09-13	14:57:41	0.456043
2022-09-13	14:57:41	0.467188
2022-09-13	14:57:42	0.408206
2022-09-13	14:57:42	0.403219
2022-09-13	14:57:42	0.131107
2022-09-13	14:57:42	0.22958
2022-09-13	14:57:43	0.203982
2022-09-13	14:57:43	1.2509
2022-09-13	14:57:43	0.536094
2022-09-13	14:57:44	3.63207
2022-09-13	14:57:44	2.68134
2022-09-13	14:57:44	1.12973
2022-09-13	14:57:44	1.41431
2022-09-13	14:57:45	0.213702
2022-09-13	14:57:45	0.513295
2022-09-13	14:57:45	1.17915
2022-09-13	14:57:45	1.35742
2022-09-13	14:57:46	3.75915
2022-09-13	14:57:46	1.98078
2022-09-13	14:57:46	0.980929
2022-09-13	14:57:46	3.18444
2022-09-13	14:57:47	0.853804
2022-09-13	14:57:47	1.82083
2022-09-13	14:57:47	2.19732
2022-09-13	14:57:48	1.01162
2022-09-13	14:57:48	1.76383
2022-09-13	14:57:48	0.0979264
2022-09-13	14:57:48	0.576807
2022-09-13	14:57:49	2.67477
2022-09-13	14:57:49	4.08678
2022-09-13	14:57:49	6.84764
2022-09-13	14:57:49	3.5708
2022-09-13	14:57:50	1.74709
2022-09-13	14:57:50	0.772176
2022-09-13	14:57:50	2.93833
2022-09-13	14:57:50	1.84195
2022-09-13	14:57:51	0.783575
2022-09-13	14:57:51	0.331616
2022-09-13	14:57:51	0.430293
2022-09-13	14:57:52	0.451158
2022-09-13	14:57:52	0.666171
2022-09-13	14:57:52	0.304389
2022-09-13	14:57:52	0.64841
2022-09-13	14:57:53	0.662354
2022-09-13	14:57:53	0.585203
2022-09-13	14:57:53	0.491005
2022-09-13	14:57:53	0.578537
2022-09-13	14:57:54	0.415076
2022-09-13	14:57:54	0.613397
2022-09-13	14:57:54	0.271667
2022-09-13	14:57:54	0.504847
2022-09-13	14:57:55	0.270089
2022-09-13	14:57:55	0.367443
2022-09-13	14:57:55	0.42444
2022-09-13	14:57:56	0.384033
2022-09-13	14:57:56	0.357774
2022-09-13	14:57:56	0.281794
2022-09-13	14:57:56	0.451158
2022-09-13	14:57:57	0.261998
2022-09-13	14:57:57	0.377367
2022-09-13	14:57:57	0.277825
2022-09-13	14:57:57	0.315942
2022-09-13	14:57:58	0.0797585
2022-09-13	14:57:58	0.40841
2022-09-13	14:57:58	0.102863
2022-09-13	14:57:58	0.670445
2022-09-13	14:57:59	0.851717
2022-09-13	14:57:59	1.51508
2022-09-13	14:57:59	2.81416
2022-09-13	14:58:00	3.70088
2022-09-13	14:58:00	4.29401
2022-09-13	14:58:00	1.99273
2022-09-13	14:58:00	1.66195
2022-09-13	14:58:01	1.35156
2022-09-13	14:58:01	1.06225
2022-09-13	14:58:01	1.30312
2022-09-13	14:58:01	1.91162
2022-09-13	14:58:02	1.00118
2022-09-13	14:58:02	1.14892
2022-09-13	14:58:02	0.434466
2022-09-13	14:58:02	0.568563
2022-09-13	14:58:03	1.02877
2022-09-13	14:58:03	0.606781
2022-09-13	14:58:03	2.28464
2022-09-13	14:58:04	1.3221
2022-09-13	14:58:04	2.75991
2022-09-13	14:58:04	3.54683
2022-09-13	14:58:04	1.3052
2022-09-13	14:58:05	0.79813
2022-09-13	14:58:05	1.25757
2022-09-13	14:58:05	0.606832
2022-09-13	14:58:05	0.368817
2022-09-13	14:58:06	1.20566
2022-09-13	14:58:06	0.259148
2022-09-13	14:58:06	0.535382
2022-09-13	14:58:06	0.284338
2022-09-13	14:58:07	0.378893
2022-09-13	14:58:07	0.343728
2022-09-13	14:58:07	0.340115
2022-09-13	14:58:08	0.286069
2022-09-13	14:58:08	0.541489
2022-09-13	14:58:08	0.35701
2022-09-13	14:58:08	0.422354
2022-09-13	14:58:09	0.33355
2022-09-13	14:58:09	0.427646
2022-09-13	14:58:09	0.327697
2022-09-13	14:58:09	0.529631
2022-09-13	14:58:10	0.284949
2022-09-13	14:58:10	0.32271
2022-09-13	14:58:10	0.252023
2022-09-13	14:58:10	0.466679
2022-09-13	14:58:11	0.188512
2022-09-13	14:58:11	0.159504
2022-09-13	14:58:11	0.355382
2022-09-13	14:58:11	0.532277
2022-09-13	14:58:12	0.226527
2022-09-13	14:58:12	0.419199
2022-09-13	14:58:12	0.316858
2022-09-13	14:58:13	0.231769
2022-09-13	14:58:13	0.414822
2022-09-13	14:58:13	0.219402
2022-09-13	14:58:13	0.358741
2022-09-13	14:58:14	0.0874429
2022-09-13	14:58:14	0.292074
2022-09-13	14:58:14	0.259351
2022-09-13	14:58:14	0.353092
2022-09-13	14:58:15	0.203626
2022-09-13	14:58:15	0.323982
2022-09-13	14:58:15	0.289937
2022-09-13	14:58:15	0.156654
2022-09-13	14:58:16	0.395382
2022-09-13	14:58:16	0.199046
2022-09-13	14:58:16	0.702099
2022-09-13	14:58:17	0.265153
2022-09-13	14:58:17	0.426985
2022-09-13	14:58:17	1.05726
2022-09-13	14:58:17	0.424084
2022-09-13	14:58:18	1.08184
2022-09-13	14:58:18	0.280725
2022-09-13	14:58:18	0.433753
2022-09-13	14:58:18	1.39594
2022-09-13	14:58:19	0.381743
2022-09-13	14:58:19	0.390191
2022-09-13	14:58:19	0.4107
2022-09-13	14:58:19	-0.0406486
2022-09-13	14:58:20	-0.0673152
2022-09-13	14:58:20	-0.0422262
2022-09-13	14:58:20	-0.267977
2022-09-13	14:58:21	-0.466755
2022-09-13	14:58:21	-0.108384
2022-09-13	14:58:21	0.122303
2022-09-13	14:58:21	0.225051
2022-09-13	14:58:22	0.237723
2022-09-13	14:58:22	0.36215
2022-09-13	14:58:22	0.383881
2022-09-13	14:58:22	0.416654
2022-09-13	14:58:23	0.274975
2022-09-13	14:58:23	0.227697
2022-09-13	14:58:23	0.233753
2022-09-13	14:58:23	0.328308
2022-09-13	14:58:24	0.360471
2022-09-13	14:58:24	0.272939
2022-09-13	14:58:24	0.257621
2022-09-13	14:58:25	0.235534
2022-09-13	14:58:25	0.234924
2022-09-13	14:58:25	0.24841
2022-09-13	14:58:25	0.236094
2022-09-13	14:58:26	0.385407
2022-09-13	14:58:26	0.454618
2022-09-13	14:58:26	0.422506
2022-09-13	14:58:26	0.488461
2022-09-13	14:58:27	0.503473
2022-09-13	14:58:27	0.480573
2022-09-13	14:58:27	0.424389
2022-09-13	14:58:27	0.427443
2022-09-13	14:58:28	0.399809
2022-09-13	14:58:28	0.39299
2022-09-13	14:58:28	0.389326
2022-09-13	14:58:29	0.385407
2022-09-13	14:58:29	0.386527
2022-09-13	14:58:29	0.404338
2022-09-13	14:58:29	0.421692
2022-09-13	14:58:30	0.441692
2022-09-13	14:58:30	0.435433
2022-09-13	14:58:30	0.400878
2022-09-13	14:58:30	0.406578
2022-09-13	14:58:31	0.338842
2022-09-13	14:58:31	0.366272
2022-09-13	14:58:31	0.468155
2022-09-13	14:58:31	0.389224
2022-09-13	14:58:32	0.54556
2022-09-13	14:58:32	0.519606
2022-09-13	14:58:32	0.335229
2022-09-13	14:58:33	0.31528
2022-09-13	14:58:33	0.308664
2022-09-13	14:58:33	0.265814
2022-09-13	14:58:33	0.218842
2022-09-13	14:58:34	0.295942
2022-09-13	14:58:34	0.244797
2022-09-13	14:58:34	0.0299366
2022-09-13	14:58:34	-0.0113865
2022-09-13	14:58:35	-0.0715901
2022-09-13	14:58:35	-0.0845163
2022-09-13	14:58:35	-0.310572
2022-09-13	14:58:35	-0.416679
2022-09-13	14:58:36	-0.3293
2022-09-13	14:58:36	-0.543091
2022-09-13	14:58:36	-0.689809
2022-09-13	14:58:37	-0.493829
2022-09-13	14:58:37	-0.647875
2022-09-13	14:58:37	-0.640394
2022-09-13	14:58:37	-0.625483
2022-09-13	14:58:38	-0.533167
2022-09-13	14:58:38	-0.481412
2022-09-13	14:58:38	-0.430623
2022-09-13	14:58:38	-0.559274
2022-09-13	14:58:39	-0.63159
2022-09-13	14:58:39	-0.491794
2022-09-13	14:58:39	-0.492251
2022-09-13	14:58:39	-0.287366
2022-09-13	14:58:40	-0.371081
2022-09-13	14:58:40	0.0997076
2022-09-13	14:58:40	0.0993004
2022-09-13	14:58:41	0.877672
2022-09-13	14:58:41	3.07599
2022-09-13	14:58:41	4.23915
2022-09-13	14:58:41	3.08434
2022-09-13	14:58:42	1.7135
2022-09-13	14:58:42	1.90724
2022-09-13	14:58:42	4.45345
2022-09-13	14:58:42	0.910191
2022-09-13	14:58:43	1.59777
2022-09-13	14:58:43	2.32576
2022-09-13	14:58:43	0.616705
2022-09-13	14:58:43	1.00531
2022-09-13	14:58:44	0.416298
2022-09-13	14:58:44	1.47223
2022-09-13	14:58:44	0.536247
2022-09-13	14:58:45	0.825916
2022-09-13	14:58:45	0.300013
2022-09-13	14:58:45	0.278944
2022-09-13	14:58:45	0.410547
2022-09-13	14:58:46	0.205
2022-09-13	14:58:46	0.331718
2022-09-13	14:58:46	0.196298
2022-09-13	14:58:46	0.440216
2022-09-13	14:58:47	0.227646
2022-09-13	14:58:47	0.395534
2022-09-13	14:58:47	0.344033
2022-09-13	14:58:47	0.610852
2022-09-13	14:58:48	0.277621
2022-09-13	14:58:48	0.183423
2022-09-13	14:58:48	-0.0438547
2022-09-13	14:58:49	-0.0778496
2022-09-13	14:58:49	-0.0331168
2022-09-13	14:58:49	0.197672
2022-09-13	14:58:49	0.0308527
2022-09-13	14:58:50	0.375942
2022-09-13	14:58:50	0.10327
2022-09-13	14:58:50	0.446883
2022-09-13	14:58:50	0.114211
2022-09-13	14:58:51	0.455026
2022-09-13	14:58:51	0.650394
2022-09-13	14:58:51	1.73818
2022-09-13	14:58:51	1.03492
2022-09-13	14:58:52	1.63365
2022-09-13	14:58:52	0.304033
2022-09-13	14:58:52	1.8766
2022-09-13	14:58:53	0.21416
2022-09-13	14:58:53	0.66154
2022-09-13	14:58:53	0.49986
2022-09-13	14:58:53	0.383677
2022-09-13	14:58:54	0.495382
2022-09-13	14:58:54	0.375127
2022-09-13	14:58:54	0.393804
2022-09-13	14:58:54	0.300471
2022-09-13	14:58:55	0.495942
2022-09-13	14:58:55	0.745051
2022-09-13	14:58:55	0.288817
2022-09-13	14:58:55	0.797519
2022-09-13	14:58:56	0.719656
2022-09-13	14:58:56	1.10566
2022-09-13	14:58:56	0.522099
2022-09-13	14:58:57	0.532583
2022-09-13	14:58:57	0.590445
2022-09-13	14:58:57	0.161896
2022-09-13	14:58:57	0.475738
2022-09-13	14:58:58	0.142863
2022-09-13	14:58:58	0.385051
2022-09-13	14:58:58	-0.0242618
2022-09-13	14:58:58	-0.106755
2022-09-13	14:58:59	-0.261514
2022-09-13	14:58:59	-0.358104
2022-09-13	14:58:59	-0.522124
2022-09-13	14:58:59	-0.53444
2022-09-13	14:59:00	-0.610979
2022-09-13	14:59:00	-0.677086
2022-09-13	14:59:00	-0.790979
2022-09-13	14:59:01	-0.703701
2022-09-13	14:59:01	-0.628231
2022-09-13	14:59:01	-0.361513
2022-09-13	14:59:01	-0.178206
2022-09-13	14:59:02	0.0856109
2022-09-13	14:59:02	0.688308
2022-09-13	14:59:02	0.877672
2022-09-13	14:59:02	1.73686
2022-09-13	14:59:03	1.41833
2022-09-13	14:59:03	2.09574
2022-09-13	14:59:03	1.34174
2022-09-13	14:59:03	1.63996
2022-09-13	14:59:04	0.293499
2022-09-13	14:59:04	1.07207
2022-09-13	14:59:04	0.644644
2022-09-13	14:59:05	0.566679
2022-09-13	14:59:05	0.297977
2022-09-13	14:59:05	0.499453
2022-09-13	14:59:05	0.287087
2022-09-13	14:59:06	0.469377
2022-09-13	14:59:06	0.340064
2022-09-13	14:59:06	0.37584
2022-09-13	14:59:06	0.142354
2022-09-13	14:59:07	0.488308
2022-09-13	14:59:07	0.31869
2022-09-13	14:59:07	0.579911
2022-09-13	14:59:07	0.911972
2022-09-13	14:59:08	0.595941
2022-09-13	14:59:08	1.00999
2022-09-13	14:59:08	0.531769
2022-09-13	14:59:09	0.348053
2022-09-13	14:59:09	0.341387
2022-09-13	14:59:09	0.458893
2022-09-13	14:59:09	0.35355
2022-09-13	14:59:10	0.708206
2022-09-13	14:59:10	0.310649
2022-09-13	14:59:10	0.535891
2022-09-13	14:59:10	0.285814
2022-09-13	14:59:11	0.497723
2022-09-13	14:59:11	0.219453
2022-09-13	14:59:11	0.506374
2022-09-13	14:59:11	0.187392
2022-09-13	14:59:12	0.507138
2022-09-13	14:59:12	0.248868
2022-09-13	14:59:12	0.4993
2022-09-13	14:59:13	0.161641
2022-09-13	14:59:13	0.476858
2022-09-13	14:59:13	0.227138
2022-09-13	14:59:13	0.505051
2022-09-13	14:59:14	0.0841351
2022-09-13	14:59:14	-0.10533
2022-09-13	14:59:14	-0.219783
2022-09-13	14:59:14	-0.173778
2022-09-13	14:59:15	-0.269809
2022-09-13	14:59:15	-0.424771
2022-09-13	14:59:15	-0.428638
2022-09-13	14:59:15	-0.654185
2022-09-13	14:59:16	-0.615
2022-09-13	14:59:16	-0.824872
2022-09-13	14:59:16	-0.648892
2022-09-13	14:59:17	-0.628384
2022-09-13	14:59:17	-0.434491
2022-09-13	14:59:17	-0.36874
2022-09-13	14:59:17	-0.0849743
2022-09-13	14:59:18	-0.151488
2022-09-13	14:59:18	0.0638806
2022-09-13	14:59:18	-0.156119
2022-09-13	14:59:18	0.0620486
2022-09-13	14:59:19	0.0461707
2022-09-13	14:59:19	0.206018
2022-09-13	14:59:19	-0.0858903
2022-09-13	14:59:19	0.153957
2022-09-13	14:59:20	0.0655091
2022-09-13	14:59:20	0.170802
2022-09-13	14:59:20	0.187137
2022-09-13	14:59:21	0.182507
2022-09-13	14:59:21	0.153448
2022-09-13	14:59:21	0.163728
2022-09-13	14:59:21	0.0500893
2022-09-13	14:59:22	0.103881
2022-09-13	14:59:22	0.00820635
2022-09-13	14:59:22	0.747494
2022-09-13	14:59:22	2.9477
2022-09-13	14:59:23	0.424135
2022-09-13	14:59:23	0.544491
2022-09-13	14:59:23	0.364746
2022-09-13	14:59:23	0.0811834
2022-09-13	14:59:24	1.61757
2022-09-13	14:59:24	0.154059
2022-09-13	14:59:24	0.113804
2022-09-13	14:59:25	0.93243
2022-09-13	14:59:25	0.142303
2022-09-13	14:59:25	0.143321
2022-09-13	14:59:25	-0.0620226
2022-09-13	14:59:26	-0.107926
2022-09-13	14:59:26	-0.236781
2022-09-13	14:59:26	-0.262786
2022-09-13	14:59:26	-0.173371
2022-09-13	14:59:27	-0.00309134
2022-09-13	14:59:27	0.167646
2022-09-13	14:59:27	0.255331
2022-09-13	14:59:27	0.255178
2022-09-13	14:59:28	0.727545
2022-09-13	14:59:28	0.882964
2022-09-13	14:59:28	0.475687
2022-09-13	14:59:29	0.591361
2022-09-13	14:59:29	0.542914
2022-09-13	14:59:29	0.0030664
2022-09-13	14:59:29	-0.0123025
2022-09-13	14:59:30	0.13584
2022-09-13	14:59:30	0.0911071
2022-09-13	14:59:30	-0.197544
2022-09-13	14:59:30	-0.0944908
2022-09-13	14:59:31	0.118639
2022-09-13	14:59:31	0.550547
2022-09-13	14:59:31	0.370496
2022-09-13	14:59:31	0.439097
2022-09-13	14:59:32	0.384084
2022-09-13	14:59:32	0.47584
2022-09-13	14:59:32	0.320878
2022-09-13	14:59:33	0.675483
2022-09-13	14:59:33	0.270547
2022-09-13	14:59:33	0.59075
2022-09-13	14:59:33	0.499148
2022-09-13	14:59:34	0.414211
2022-09-13	14:59:34	0.600776
2022-09-13	14:59:34	0.3307
2022-09-13	14:59:34	0.65986
2022-09-13	14:59:35	0.32673
2022-09-13	14:59:35	0.583728
2022-09-13	14:59:35	0.401794
2022-09-13	14:59:35	0.551208
2022-09-13	14:59:36	0.418486
2022-09-13	14:59:36	-0.0347453
2022-09-13	14:59:36	0.255534
2022-09-13	14:59:37	0.204389
2022-09-13	14:59:37	0.34673
2022-09-13	14:59:37	-0.0362211
2022-09-13	14:59:37	-0.287162
2022-09-13	14:59:38	-0.324262
2022-09-13	14:59:38	-0.276272
2022-09-13	14:59:38	-0.074847
2022-09-13	14:59:39	-0.0509794
2022-09-13	14:59:39	-0.0387147
2022-09-13	14:59:39	-0.11103
2022-09-13	14:59:39	-0.199631
2022-09-13	14:59:39	0.00973306
2022-09-13	14:59:40	-0.170878
2022-09-13	14:59:40	0.019504
2022-09-13	14:59:40	-0.0705214
2022-09-13	14:59:41	-0.0485366
2022-09-13	14:59:41	-0.0734221
2022-09-13	14:59:41	-0.0927605
2022-09-13	14:59:41	-0.0467554
2022-09-13	14:59:42	-0.18701
2022-09-13	14:59:42	0.0253564
2022-09-13	14:59:42	-0.0875188
2022-09-13	14:59:42	-0.147315
2022-09-13	14:59:43	0.10958
2022-09-13	14:59:43	0.132379
2022-09-13	14:59:43	0.108664
2022-09-13	14:59:43	0.125204
2022-09-13	14:59:44	0.027443
2022-09-13	14:59:44	0.0915142
2022-09-13	14:59:44	0.07813
2022-09-13	14:59:45	0.0914124
2022-09-13	14:59:45	0.118334
2022-09-13	14:59:45	0.102812
2022-09-13	14:59:45	0.117672
2022-09-13	14:59:46	0.117061
2022-09-13	14:59:46	0.123779
2022-09-13	14:59:46	0.117519
2022-09-13	14:59:46	0.121234
2022-09-13	14:59:47	0.121031
2022-09-13	14:59:47	0.121641
2022-09-13	14:59:47	0.120471
2022-09-13	14:59:47	0.114008
2022-09-13	14:59:48	0.120115
2022-09-13	14:59:48	0.123932
2022-09-13	14:59:48	0.124593
2022-09-13	14:59:49	0.125865
2022-09-13	14:59:49	0.117825
2022-09-13	14:59:49	0.120216
2022-09-13	14:59:49	0.140267
2022-09-13	14:59:50	0.0940587
2022-09-13	14:59:50	0.0534481
2022-09-13	14:59:50	0.0812852
2022-09-13	14:59:50	0.0602674
2022-09-13	14:59:51	0.072532
2022-09-13	14:59:51	0.177316
2022-09-13	14:59:51	0.185407
2022-09-13	14:59:51	0.177468
2022-09-13	14:59:52	0.221183
2022-09-13	14:59:52	0.276705
2022-09-13	14:59:52	0.238079
2022-09-13	14:59:53	0.31014
2022-09-13	14:59:53	0.341438
2022-09-13	14:59:53	0.329835
2022-09-13	14:59:53	0.300165
2022-09-13	14:59:54	0.297316
2022-09-13	14:59:54	0.284389
2022-09-13	14:59:54	0.297926
2022-09-13	14:59:54	0.31757
2022-09-13	14:59:55	0.31584
2022-09-13	14:59:55	0.313753
2022-09-13	14:59:55	0.314567
2022-09-13	14:59:55	0.316094
2022-09-13	14:59:56	0.324339
2022-09-13	14:59:56	0.326985
2022-09-13	14:59:56	0.321641
2022-09-13	14:59:57	0.323881
2022-09-13	14:59:57	0.318537
2022-09-13	14:59:57	0.29645
2022-09-13	14:59:57	0.294466
2022-09-13	14:59:58	0.302405
2022-09-13	14:59:58	0.298537
2022-09-13	14:59:58	0.265763
2022-09-13	14:59:58	0.260064
2022-09-13	14:59:59	0.309377
2022-09-13	14:59:59	0.48785
2022-09-13	14:59:59	0.417367
2022-09-13	14:59:59	0.380013
2022-09-13	15:00:00	1.00994
2022-09-13	15:00:00	1.10118
2022-09-13	15:00:00	1.60846
2022-09-13	15:00:01	1.14027
2022-09-13	15:00:01	1.40276
2022-09-13	15:00:01	1.62215
2022-09-13	15:00:01	1.58922
2022-09-13	15:00:02	2.05452
2022-09-13	15:00:02	1.94037
2022-09-13	15:00:02	2.45268
2022-09-13	15:00:02	2.39564
2022-09-13	15:00:03	2.94235
2022-09-13	15:00:03	2.70342
2022-09-13	15:00:03	2.97538
2022-09-13	15:00:03	2.07029
2022-09-13	15:00:04	1.53564
2022-09-13	15:00:04	0.597366
2022-09-13	15:00:04	0.186883
2022-09-13	15:00:05	0.224949
2022-09-13	15:00:05	0.243728
2022-09-13	15:00:05	0.16154
2022-09-13	15:00:05	0.157265
2022-09-13	15:00:06	0.181183
2022-09-13	15:00:06	0.213652
2022-09-13	15:00:06	0.296552
2022-09-13	15:00:06	0.256858
2022-09-13	15:00:07	0.241387
2022-09-13	15:00:07	0.215382
2022-09-13	15:00:07	0.233448
2022-09-13	15:00:07	0.281489
2022-09-13	15:00:08	0.401743
2022-09-13	15:00:08	0.417825
2022-09-13	15:00:08	0.43925
2022-09-13	15:00:09	0.405611
2022-09-13	15:00:09	0.507443
2022-09-13	15:00:09	0.979453
2022-09-13	15:00:09	1.87055
2022-09-13	15:00:10	2.17294
2022-09-13	15:00:10	3.09747
2022-09-13	15:00:10	5.06215
2022-09-13	15:00:10	6.80744
2022-09-13	15:00:11	7.00133
2022-09-13	15:00:11	6.31456
2022-09-13	15:00:11	6.67538
2022-09-13	15:00:11	6.53172
2022-09-13	15:00:12	4.25747
2022-09-13	15:00:12	3.57818
2022-09-13	15:00:12	3.36312
2022-09-13	15:00:13	3.15284
2022-09-13	15:00:13	3.58495
2022-09-13	15:00:13	2.94612
2022-09-13	15:00:13	1.69742
2022-09-13	15:00:14	1.07899
2022-09-13	15:00:14	0.499809
2022-09-13	15:00:14	0.578384
2022-09-13	15:00:14	0.659249
2022-09-13	15:00:15	0.711616
2022-09-13	15:00:15	0.805458
2022-09-13	15:00:15	0.92729
2022-09-13	15:00:15	0.913194
2022-09-13	15:00:16	0.356043
2022-09-13	15:00:16	0.332227
2022-09-13	15:00:16	0.437367
2022-09-13	15:00:17	0.245865
2022-09-13	15:00:17	0.146578
2022-09-13	15:00:17	0.153601
2022-09-13	15:00:17	0.190344
2022-09-13	15:00:18	0.0892241
2022-09-13	15:00:18	0.0235244
2022-09-13	15:00:18	-0.0136257
2022-09-13	15:00:18	0.0136516
2022-09-13	15:00:19	-0.150979
2022-09-13	15:00:19	0.133041
2022-09-13	15:00:19	0.056247
2022-09-13	15:00:19	-0.153269
2022-09-13	15:00:20	-0.267163
2022-09-13	15:00:20	-0.319682
2022-09-13	15:00:20	-0.547366
2022-09-13	15:00:21	-0.567671
2022-09-13	15:00:21	-0.00884198
2022-09-13	15:00:21	1.2476
2022-09-13	15:00:21	1.64378
2022-09-13	15:00:22	7.79858
2022-09-13	15:00:22	2.03518
2022-09-13	15:00:22	6.33823
2022-09-13	15:00:22	0.748257
2022-09-13	15:00:23	1.82388
2022-09-13	15:00:23	1.38821
2022-09-13	15:00:23	0.522913
2022-09-13	15:00:23	2.69762
2022-09-13	15:00:24	0.180624
2022-09-13	15:00:24	0.11126
2022-09-13	15:00:24	0.938944
2022-09-13	15:00:25	-0.0375952
2022-09-13	15:00:25	0.148766
2022-09-13	15:00:25	0.340725
2022-09-13	15:00:25	0.179606
2022-09-13	15:00:26	0.056247
2022-09-13	15:00:26	0.260573
2022-09-13	15:00:26	0.229122
2022-09-13	15:00:26	2.13564
2022-09-13	15:00:27	0.242964
2022-09-13	15:00:27	0.152939
2022-09-13	15:00:27	1.84408
2022-09-13	15:00:27	0.0538552
2022-09-13	15:00:28	0.271972
2022-09-13	15:00:28	0.187901
2022-09-13	15:00:28	0.287188
2022-09-13	15:00:29	0.126578
2022-09-13	15:00:29	0.26668
2022-09-13	15:00:29	0.425865
2022-09-13	15:00:29	0.280267
2022-09-13	15:00:30	0.459046
2022-09-13	15:00:30	0.183117
2022-09-13	15:00:30	0.347188
2022-09-13	15:00:30	0.460929
2022-09-13	15:00:31	0.307036
2022-09-13	15:00:31	0.329377
2022-09-13	15:00:31	0.221641
2022-09-13	15:00:31	0.245814
2022-09-13	15:00:32	0.169529
2022-09-13	15:00:32	0.361031
2022-09-13	15:00:32	0.0366542
2022-09-13	15:00:33	0.27014
2022-09-13	15:00:33	0.137163
2022-09-13	15:00:33	0.24271
2022-09-13	15:00:33	0.0865269
2022-09-13	15:00:34	0.192939
2022-09-13	15:00:34	0.238842
2022-09-13	15:00:34	0.126374
2022-09-13	15:00:34	0.184186
2022-09-13	15:00:35	0.0253564
2022-09-13	15:00:35	0.240064
2022-09-13	15:00:35	-0.0632949
2022-09-13	15:00:35	0.202303
2022-09-13	15:00:36	0.0298857
2022-09-13	15:00:36	0.16841
2022-09-13	15:00:36	0.064186
2022-09-13	15:00:37	0.180166
2022-09-13	15:00:37	0.249631
2022-09-13	15:00:37	0.153346
2022-09-13	15:00:37	0.130242
2022-09-13	15:00:38	0.0591478
2022-09-13	15:00:38	0.141336
2022-09-13	15:00:38	-0.0973915
2022-09-13	15:00:38	0.0769086
2022-09-13	15:00:39	-0.00695905
2022-09-13	15:00:39	0.0965015
2022-09-13	15:00:39	-0.161005
2022-09-13	15:00:39	0.0439316
2022-09-13	15:00:40	0.0309544
2022-09-13	15:00:40	0.0954328
2022-09-13	15:00:40	-0.023702
2022-09-13	15:00:41	0.127239
2022-09-13	15:00:41	0.200267
2022-09-13	15:00:41	0.075331
2022-09-13	15:00:41	0.220013
2022-09-13	15:00:42	0.0767051
2022-09-13	15:00:42	0.334975
2022-09-13	15:00:42	0.0465778
2022-09-13	15:00:42	0.327494
2022-09-13	15:00:43	0.211921
2022-09-13	15:00:43	0.174975
2022-09-13	15:00:43	0.236858
2022-09-13	15:00:43	0.290089
2022-09-13	15:00:44	0.316807
2022-09-13	15:00:44	0.233448
2022-09-13	15:00:44	0.6593
2022-09-13	15:00:45	0.328461
2022-09-13	15:00:45	0.578537
2022-09-13	15:00:45	0.243982
2022-09-13	15:00:45	0.711209
2022-09-13	15:00:46	0.363728
2022-09-13	15:00:46	0.865662
2022-09-13	15:00:46	1.17121
2022-09-13	15:00:46	0.764491
2022-09-13	15:00:47	0.908766
2022-09-13	15:00:47	0.996959
2022-09-13	15:00:47	0.485356
2022-09-13	15:00:47	0.396756
2022-09-13	15:00:48	0.640013
2022-09-13	15:00:48	0.330852
2022-09-13	15:00:48	0.547646
2022-09-13	15:00:49	0.293652
2022-09-13	15:00:49	0.599962
2022-09-13	15:00:49	0.268613
2022-09-13	15:00:49	0.458028
2022-09-13	15:00:50	0.202507
2022-09-13	15:00:50	0.290038
2022-09-13	15:00:50	0.124848
2022-09-13	15:00:50	0.542048
2022-09-13	15:00:51	0.297214
2022-09-13	15:00:51	0.489733
2022-09-13	15:00:51	0.164339
2022-09-13	15:00:51	0.593855
2022-09-13	15:00:52	0.399453
2022-09-13	15:00:52	0.509631
2022-09-13	15:00:52	0.319453
2022-09-13	15:00:53	0.491769
2022-09-13	15:00:53	0.332837
2022-09-13	15:00:53	0.450598
2022-09-13	15:00:53	0.367646
2022-09-13	15:00:54	0.324695
2022-09-13	15:00:54	0.495942
2022-09-13	15:00:54	0.43757
2022-09-13	15:00:54	0.48215
2022-09-13	15:00:55	0.339962
2022-09-13	15:00:55	0.614568
2022-09-13	15:00:55	0.443117
2022-09-13	15:00:55	0.688817
2022-09-13	15:00:56	0.334771
2022-09-13	15:00:56	0.664746
2022-09-13	15:00:56	0.327545
2022-09-13	15:00:57	1.22531
2022-09-13	15:00:57	0.635178
2022-09-13	15:00:57	2.51716
2022-09-13	15:00:57	0.896399
2022-09-13	15:00:58	3.26536
2022-09-13	15:00:58	0.383066
2022-09-13	15:00:58	1.80709
2022-09-13	15:00:58	0.112176
2022-09-13	15:00:59	0.622201
2022-09-13	15:00:59	0.971667
2022-09-13	15:00:59	0.411769
2022-09-13	15:00:59	0.428104
2022-09-13	15:01:00	1.17503
2022-09-13	15:01:00	0.464491
2022-09-13	15:01:00	0.59187
2022-09-13	15:01:01	0.766883
2022-09-13	15:01:01	0.385967
2022-09-13	15:01:01	0.428155
2022-09-13	15:01:01	0.320115
2022-09-13	15:01:02	0.425764
2022-09-13	15:01:02	0.278028
2022-09-13	15:01:02	0.40159
2022-09-13	15:01:02	0.385204
2022-09-13	15:01:03	0.285611
2022-09-13	15:01:03	0.383677
2022-09-13	15:01:03	0.477265
2022-09-13	15:01:03	0.50958
2022-09-13	15:01:04	1.6166
2022-09-13	15:01:04	2.65945
2022-09-13	15:01:04	1.51691
2022-09-13	15:01:05	1.65757
2022-09-13	15:01:05	2.48225
2022-09-13	15:01:05	0.415687
2022-09-13	15:01:05	0.246374
2022-09-13	15:01:06	0.413295
2022-09-13	15:01:06	0.164389
2022-09-13	15:01:06	0.155484
2022-09-13	15:01:06	0.119708
2022-09-13	15:01:07	0.060013
2022-09-13	15:01:07	-0.0440582
2022-09-13	15:01:07	0.0377738
2022-09-13	15:01:07	0.132583
2022-09-13	15:01:08	0.174008
2022-09-13	15:01:08	0.0525321
2022-09-13	15:01:08	0.171463
2022-09-13	15:01:09	0.128919
2022-09-13	15:01:09	0.167748
2022-09-13	15:01:09	0.0718704
2022-09-13	15:01:09	0.261183
2022-09-13	15:01:10	0.116705
2022-09-13	15:01:10	0.265458
2022-09-13	15:01:10	0.0482572
2022-09-13	15:01:10	0.238486
2022-09-13	15:01:11	0.12271
2022-09-13	15:01:11	0.0556872
2022-09-13	15:01:11	0.103372
2022-09-13	15:01:11	0.0322267
2022-09-13	15:01:12	0.0491224
2022-09-13	15:01:12	0.399402
2022-09-13	15:01:12	0.231056
2022-09-13	15:01:13	0.240369
2022-09-13	15:01:13	0.2707
2022-09-13	15:01:13	0.226476
2022-09-13	15:01:13	0.220318
2022-09-13	15:01:14	0.083219
2022-09-13	15:01:14	0.290344
2022-09-13	15:01:14	0.173906
2022-09-13	15:01:14	0.2364
2022-09-13	15:01:15	0.220522
2022-09-13	15:01:15	0.207901
2022-09-13	15:01:15	0.11126
2022-09-13	15:01:15	0.110547
2022-09-13	15:01:16	0.113194
2022-09-13	15:01:16	0.128613
2022-09-13	15:01:16	0.138842
2022-09-13	15:01:17	0.155636
2022-09-13	15:01:17	0.176654
2022-09-13	15:01:17	0.184797
2022-09-13	15:01:17	0.179758
2022-09-13	15:01:18	0.182761
2022-09-13	15:01:18	0.181285
2022-09-13	15:01:18	0.182557
2022-09-13	15:01:18	0.183779
2022-09-13	15:01:19	0.145916
2022-09-13	15:01:19	0.087392
2022-09-13	15:01:19	0.0983335
2022-09-13	15:01:19	0.141947
2022-09-13	15:01:20	0.167494
2022-09-13	15:01:20	0.18327
2022-09-13	15:01:20	0.118995
2022-09-13	15:01:21	0.207392
2022-09-13	15:01:21	0.230293
2022-09-13	15:01:21	0.222761
2022-09-13	15:01:21	0.202252
2022-09-13	15:01:22	0.21126
2022-09-13	15:01:22	0.253041
2022-09-13	15:01:22	0.252939
2022-09-13	15:01:22	0.35701
2022-09-13	15:01:23	0.407545
2022-09-13	15:01:23	0.391616
2022-09-13	15:01:23	0.396603
2022-09-13	15:01:24	0.292074
2022-09-13	15:01:24	0.048359
2022-09-13	15:01:24	-8.88145e-05
2022-09-13	15:01:24	-0.287977
2022-09-13	15:01:25	-0.27846
2022-09-13	15:01:25	-0.40757
2022-09-13	15:01:25	-0.395
2022-09-13	15:01:25	-0.410572
2022-09-13	15:01:26	-0.431895
2022-09-13	15:01:26	-0.308842
2022-09-13	15:01:26	-0.403702
2022-09-13	15:01:26	-0.263295
2022-09-13	15:01:27	-0.4693
2022-09-13	15:01:27	-0.229504
2022-09-13	15:01:27	-0.00309134
2022-09-13	15:01:27	0.160573
2022-09-13	15:01:28	-0.0798343
2022-09-13	15:01:28	0.00754479
2022-09-13	15:01:28	0.0509544
2022-09-13	15:01:29	0.179606
2022-09-13	15:01:29	0.143473
2022-09-13	15:01:29	0.201489
2022-09-13	15:01:29	0.223372
2022-09-13	15:01:30	0.352328
2022-09-13	15:01:30	0.279555
2022-09-13	15:01:30	0.546985
2022-09-13	15:01:30	0.491107
2022-09-13	15:01:31	0.387545
2022-09-13	15:01:31	0.720114
2022-09-13	15:01:31	0.325916
2022-09-13	15:01:31	0.722557
2022-09-13	15:01:32	0.327697
2022-09-13	15:01:32	0.553346
2022-09-13	15:01:32	0.257417
2022-09-13	15:01:33	0.657366
2022-09-13	15:01:33	0.268359
2022-09-13	15:01:33	0.517112
2022-09-13	15:01:33	0.320064
2022-09-13	15:01:34	0.565356
2022-09-13	15:01:34	0.255076
2022-09-13	15:01:34	0.465356
2022-09-13	15:01:34	0.26897
2022-09-13	15:01:35	0.535178
2022-09-13	15:01:35	0.30729
2022-09-13	15:01:35	0.492125
2022-09-13	15:01:35	0.270853
2022-09-13	15:01:36	0.524644
2022-09-13	15:01:36	0.259046
2022-09-13	15:01:36	0.531972
2022-09-13	15:01:37	0.244186
2022-09-13	15:01:37	0.52785
2022-09-13	15:01:37	0.274567
2022-09-13	15:01:37	0.609173
2022-09-13	15:01:38	0.671768
2022-09-13	15:01:38	1.17044
2022-09-13	15:01:38	0.459148
2022-09-13	15:01:38	0.563626
2022-09-13	15:01:39	0.1793
2022-09-13	15:01:39	0.460623
2022-09-13	15:01:39	0.270547
2022-09-13	15:01:39	0.431514
2022-09-13	15:01:40	0.187341
2022-09-13	15:01:40	0.300624
2022-09-13	15:01:40	0.336247
2022-09-13	15:01:41	0.385204
2022-09-13	15:01:41	0.201183
2022-09-13	15:01:41	0.386425
2022-09-13	15:01:41	0.408563
2022-09-13	15:01:42	0.358384
2022-09-13	15:01:42	0.345458
2022-09-13	15:01:42	0.294008
2022-09-13	15:01:42	0.487087
2022-09-13	15:01:43	0.395636
2022-09-13	15:01:43	0.514771
2022-09-13	15:01:43	0.323117
2022-09-13	15:01:43	0.497265
2022-09-13	15:01:44	0.321998
2022-09-13	15:01:44	0.496349
2022-09-13	15:01:44	0.334517
2022-09-13	15:01:45	0.439097
2022-09-13	15:01:45	0.303473
2022-09-13	15:01:45	0.457265
2022-09-13	15:01:45	0.311463
2022-09-13	15:01:46	0.357774
2022-09-13	15:01:46	0.401794
2022-09-13	15:01:46	0.319962
2022-09-13	15:01:46	0.436959
2022-09-13	15:01:47	0.246323
2022-09-13	15:01:47	0.425051
2022-09-13	15:01:47	0.308155
2022-09-13	15:01:47	0.442608
2022-09-13	15:01:48	0.0902419
2022-09-13	15:01:48	0.0400639
2022-09-13	15:01:48	0.00515291
2022-09-13	15:01:49	-0.0157122
2022-09-13	15:01:49	0.239351
2022-09-13	15:01:49	0.733651
2022-09-13	15:01:49	0.540369
2022-09-13	15:01:50	0.832125
2022-09-13	15:01:50	0.879962
2022-09-13	15:01:50	1.56434
2022-09-13	15:01:50	0.677977
2022-09-13	15:01:51	0.698893
2022-09-13	15:01:51	0.499555
2022-09-13	15:01:51	0.728359
2022-09-13	15:01:51	0.389326
2022-09-13	15:01:52	0.502659
2022-09-13	15:01:52	0.693142
2022-09-13	15:01:52	0.408563
2022-09-13	15:01:53	0.476552
2022-09-13	15:01:53	0.424848
2022-09-13	15:01:53	0.50902
2022-09-13	15:01:53	0.361082
2022-09-13	15:01:54	0.430445
2022-09-13	15:01:54	0.326832
2022-09-13	15:01:54	0.479555
2022-09-13	15:01:54	0.379707
2022-09-13	15:01:55	0.371463
2022-09-13	15:01:55	0.494211
2022-09-13	15:01:55	0.400369
2022-09-13	15:01:55	0.45472
2022-09-13	15:01:56	0.28897
2022-09-13	15:01:56	0.56042
2022-09-13	15:01:56	0.351718
2022-09-13	15:01:57	0.538181
2022-09-13	15:01:57	0.298741
2022-09-13	15:01:57	0.554618
2022-09-13	15:01:57	0.335229
2022-09-13	15:01:58	0.579962
2022-09-13	15:01:58	0.315942
2022-09-13	15:01:58	0.480267
2022-09-13	15:01:58	0.423982
2022-09-13	15:01:59	0.358537
2022-09-13	15:01:59	0.480471
2022-09-13	15:01:59	0.316756
2022-09-13	15:01:59	0.485662
2022-09-13	15:02:00	0.387239
2022-09-13	15:02:00	0.582812
2022-09-13	15:02:00	0.303066
2022-09-13	15:02:01	0.631972
2022-09-13	15:02:01	0.389529
2022-09-13	15:02:01	0.599453
2022-09-13	15:02:01	0.355127
2022-09-13	15:02:02	0.623066
2022-09-13	15:02:02	0.397112
2022-09-13	15:02:02	0.520471
2022-09-13	15:02:02	0.466934
2022-09-13	15:02:03	0.531769
2022-09-13	15:02:03	0.436603
2022-09-13	15:02:03	0.436959
2022-09-13	15:02:03	0.567697
2022-09-13	15:02:04	0.416501
2022-09-13	15:02:04	0.425458
2022-09-13	15:02:04	0.529987
2022-09-13	15:02:05	0.430395
2022-09-13	15:02:05	0.971718
2022-09-13	15:02:05	0.752684
2022-09-13	15:02:05	0.883219
2022-09-13	15:02:06	0.667443
2022-09-13	15:02:06	0.581438
2022-09-13	15:02:06	0.450802
2022-09-13	15:02:06	0.484237
2022-09-13	15:02:07	0.489886
2022-09-13	15:02:07	0.480776
2022-09-13	15:02:07	0.455687
2022-09-13	15:02:07	0.449173
2022-09-13	15:02:08	0.496909
2022-09-13	15:02:08	0.480318
2022-09-13	15:02:08	0.446883
2022-09-13	15:02:09	0.410496
2022-09-13	15:02:09	0.55014
2022-09-13	15:02:09	0.426018
2022-09-13	15:02:09	0.514059
2022-09-13	15:02:10	0.391005
2022-09-13	15:02:10	0.525967
2022-09-13	15:02:10	0.398435
2022-09-13	15:02:10	0.672328
2022-09-13	15:02:11	1.51156
2022-09-13	15:02:11	3.84597
2022-09-13	15:02:11	1.43182
2022-09-13	15:02:11	1.36042
2022-09-13	15:02:12	1.16704
2022-09-13	15:02:12	1.05075
2022-09-13	15:02:12	0.908715
2022-09-13	15:02:13	1.10632
2022-09-13	15:02:13	0.841998
2022-09-13	15:02:13	0.534771
2022-09-13	15:02:13	0.579198
2022-09-13	15:02:14	0.512888
2022-09-13	15:02:14	0.585102
2022-09-13	15:02:14	0.344389
2022-09-13	15:02:14	0.633804
2022-09-13	15:02:15	0.287138
2022-09-13	15:02:15	0.565356
2022-09-13	15:02:15	0.338384
