# Supplementary material for: Comparing efficacy in reducing pulling and welfare impacts of four types of leash walking equipment
Source: PeerJ journal article supplement (doi:10.7717/peerj.18131), 2024-10-24
Supplement: Shelter1_Tension_files.zip [file Sulley_martin_202291314104 copy.xlsx]

## Sheet: Averaged Newtons
Date	Time	Averaged Newtons	Impulse	Total steps
2022-09-13	14:10:06	2.08781	2.08781	0		Impulse newtons	1494.58
2022-09-13	14:10:07	2.08211	4.16991	0		Total steps	23
2022-09-13	14:10:08	2.07447	6.24438	0		# > 5 sec	0
2022-09-13	14:10:09	2.01799	8.26237	0
2022-09-13	14:10:10	2.046	10.3084	0
2022-09-13	14:10:11	2.08432	12.3927	0
2022-09-13	14:10:12	2.1533	14.546	0
2022-09-13	14:10:13	2.04323	16.5892	0
2022-09-13	14:10:14	1.30124	17.8905	0
2022-09-13	14:10:15	1.32101	19.2115	0
2022-09-13	14:10:16	2.88805	22.0995	0
2022-09-13	14:10:17	12.9083	35.0078	0
2022-09-13	14:10:18	1.39456	36.4023	0
2022-09-13	14:10:19	0.887207	37.2896	0
2022-09-13	14:10:20	12.7519	50.0415	0
2022-09-13	14:10:21	20.9488	70.9903	1
2022-09-13	14:10:22	1.85438	72.8447	1
2022-09-13	14:10:23	5.83147	78.6761	1
2022-09-13	14:10:24	9.84161	88.5177	1
2022-09-13	14:10:25	3.25974	91.7775	1
2022-09-13	14:10:26	1.72784	93.5053	1
2022-09-13	14:10:27	2.23178	95.7371	1
2022-09-13	14:10:28	0.870682	96.6078	1
2022-09-13	14:10:29	1.34635	97.9541	1
2022-09-13	14:10:30	1.78913	99.7433	1
2022-09-13	14:10:31	1.96768	101.711	1
2022-09-13	14:10:32	1.57141	103.282	1
2022-09-13	14:10:33	1.55093	104.833	1
2022-09-13	14:10:34	1.13865	105.972	1
2022-09-13	14:10:35	2.05574	108.028	1
2022-09-13	14:10:36	1.51109	109.539	1
2022-09-13	14:10:37	6.38588	115.925	1
2022-09-13	14:10:38	28.434	144.359	2
2022-09-13	14:10:39	28.0499	172.408	3
2022-09-13	14:10:40	7.5363	179.945	3
2022-09-13	14:10:41	7.65095	187.596	3
2022-09-13	14:10:42	5.56726	193.163	3
2022-09-13	14:10:43	2.64536	195.808	3
2022-09-13	14:10:44	16.7965	212.605	4
2022-09-13	14:10:45	8.95197	221.557	4
2022-09-13	14:10:46	4.51269	226.069	4
2022-09-13	14:10:47	3.65907	229.729	4
2022-09-13	14:10:48	2.36671	232.095	4
2022-09-13	14:10:49	2.5001	234.595	4
2022-09-13	14:10:50	2.24034	236.836	4
2022-09-13	14:10:51	1.74644	238.582	4
2022-09-13	14:10:52	1.70911	240.291	4
2022-09-13	14:10:53	-0.757606	240.291	4
2022-09-13	14:10:54	-0.890714	240.291	4
2022-09-13	14:10:55	-0.505882	240.291	4
2022-09-13	14:10:56	-0.311825	240.291	4
2022-09-13	14:10:57	-0.231577	240.291	4
2022-09-13	14:10:58	0.932764	241.224	4
2022-09-13	14:10:59	1.1126	242.337	4
2022-09-13	14:11:00	2.32218	244.659	4
2022-09-13	14:11:01	3.60231	248.261	4
2022-09-13	14:11:02	10.5683	258.829	4
2022-09-13	14:11:03	17.825	276.654	5
2022-09-13	14:11:04	34.2235	310.878	6
2022-09-13	14:11:05	37.3677	348.246	7
2022-09-13	14:11:06	48.8268	397.072	8
2022-09-13	14:11:07	5.68673	402.759	8
2022-09-13	14:11:08	1.91509	404.674	8
2022-09-13	14:11:09	4.495	409.169	8
2022-09-13	14:11:10	2.19886	411.368	8
2022-09-13	14:11:11	0.9348	412.303	8
2022-09-13	14:11:12	16.0346	428.338	9
2022-09-13	14:11:13	6.77342	435.111	9
2022-09-13	14:11:14	2.87324	437.984	9
2022-09-13	14:11:15	3.06689	441.051	9
2022-09-13	14:11:16	16.2781	457.329	10
2022-09-13	14:11:17	9.89741	467.227	10
2022-09-13	14:11:18	6.60857	473.835	10
2022-09-13	14:11:19	4.07152	477.907	10
2022-09-13	14:11:20	3.21815	481.125	10
2022-09-13	14:11:21	10.1625	491.287	10
2022-09-13	14:11:22	9.1844	500.472	10
2022-09-13	14:11:23	0.208602	500.68	10
2022-09-13	14:11:24	-2.33255	500.68	10
2022-09-13	14:11:25	1.02048	501.701	10
2022-09-13	14:11:26	9.3844	511.085	10
2022-09-13	14:11:27	2.10045	513.186	10
2022-09-13	14:11:28	2.66038	515.846	10
2022-09-13	14:11:29	3.49902	519.345	10
2022-09-13	14:11:30	0.721673	520.067	10
2022-09-13	14:11:31	1.4404	521.507	10
2022-09-13	14:11:32	0.336294	521.843	10
2022-09-13	14:11:33	-0.947308	521.843	10
2022-09-13	14:11:34	3.09014	524.934	10
2022-09-13	14:11:35	16.0377	540.971	11
2022-09-13	14:11:36	9.96402	550.935	11
2022-09-13	14:11:37	0.272213	551.208	11
2022-09-13	14:11:38	0.545274	551.753	11
2022-09-13	14:11:39	1.558	553.311	11
2022-09-13	14:11:40	1.51018	554.821	11
2022-09-13	14:11:41	1.55789	556.379	11
2022-09-13	14:11:42	2.09139	558.47	11
2022-09-13	14:11:43	1.86643	560.337	11
2022-09-13	14:11:44	1.78356	562.12	11
2022-09-13	14:11:45	8.90482	571.025	11
2022-09-13	14:11:46	19.693	590.718	12
2022-09-13	14:11:47	0.977473	591.696	12
2022-09-13	14:11:48	-0.893203	591.696	12
2022-09-13	14:11:49	3.33971	595.035	12
2022-09-13	14:11:50	8.25295	603.288	12
2022-09-13	14:11:51	6.60314	609.891	12
2022-09-13	14:11:52	12.2058	622.097	12
2022-09-13	14:11:53	0.899091	622.996	12
2022-09-13	14:11:54	0.435823	623.432	12
2022-09-13	14:11:55	-0.679622	623.432	12
2022-09-13	14:11:56	-1.9207	623.432	12
2022-09-13	14:11:57	-2.8628	623.432	12
2022-09-13	14:11:58	0.439954	623.872	12
2022-09-13	14:11:59	2.58347	626.455	12
2022-09-13	14:12:00	2.40337	628.859	12
2022-09-13	14:12:01	1.82269	630.682	12
2022-09-13	14:12:02	1.82359	632.505	12
2022-09-13	14:12:03	2.09841	634.604	12
2022-09-13	14:12:04	2.82872	637.432	12
2022-09-13	14:12:05	1.83587	639.268	12
2022-09-13	14:12:06	1.37702	640.645	12
2022-09-13	14:12:07	1.33757	641.983	12
2022-09-13	14:12:08	0.756083	642.739	12
2022-09-13	14:12:09	2.00397	644.743	12
2022-09-13	14:12:10	3.15166	647.894	12
2022-09-13	14:12:11	3.19869	651.093	12
2022-09-13	14:12:12	2.6919	653.785	12
2022-09-13	14:12:13	1.93304	655.718	12
2022-09-13	14:12:14	1.85591	657.574	12
2022-09-13	14:12:15	2.67554	660.25	12
2022-09-13	14:12:16	2.31244	662.562	12
2022-09-13	14:12:17	2.66935	665.231	12
2022-09-13	14:12:18	2.76371	667.995	12
2022-09-13	14:12:19	2.51674	670.512	12
2022-09-13	14:12:20	3.35166	673.863	12
2022-09-13	14:12:21	3.28939	677.153	12
2022-09-13	14:12:22	2.24385	679.397	12
2022-09-13	14:12:23	10.2444	689.641	12
2022-09-13	14:12:24	3.71397	693.355	12
2022-09-13	14:12:25	1.77503	695.13	12
2022-09-13	14:12:26	4.11544	699.245	12
2022-09-13	14:12:27	11.3876	710.633	12
2022-09-13	14:12:28	1.82546	712.458	12
2022-09-13	14:12:29	1.55055	714.009	12
2022-09-13	14:12:30	1.80627	715.815	12
2022-09-13	14:12:31	4.02771	719.843	12
2022-09-13	14:12:32	4.28532	724.128	12
2022-09-13	14:12:33	2.3427	726.471	12
2022-09-13	14:12:34	1.87515	728.346	12
2022-09-13	14:12:35	1.93418	730.28	12
2022-09-13	14:12:36	1.85981	732.14	12
2022-09-13	14:12:37	1.79624	733.936	12
2022-09-13	14:12:38	1.96632	735.903	12
2022-09-13	14:12:39	2.15098	738.054	12
2022-09-13	14:12:40	1.99264	740.046	12
2022-09-13	14:12:41	-0.510637	740.046	12
2022-09-13	14:12:42	-1.0902	740.046	12
2022-09-13	14:12:43	0.360894	740.407	12
2022-09-13	14:12:44	1.50922	741.916	12
2022-09-13	14:12:45	2.11822	744.035	12
2022-09-13	14:12:46	2.0666	746.101	12
2022-09-13	14:12:47	1.22925	747.331	12
2022-09-13	14:12:48	1.20928	748.54	12
2022-09-13	14:12:49	0.963419	749.503	12
2022-09-13	14:12:50	0.441765	749.945	12
2022-09-13	14:12:51	0.671475	750.616	12
2022-09-13	14:12:52	2.06954	752.686	12
2022-09-13	14:12:53	4.35506	757.041	12
2022-09-13	14:12:54	2.24407	759.285	12
2022-09-13	14:12:55	2.55183	761.837	12
2022-09-13	14:12:56	2.10865	763.946	12
2022-09-13	14:12:57	1.39337	765.339	12
2022-09-13	14:12:58	1.26072	766.6	12
2022-09-13	14:12:59	1.09055	767.69	12
2022-09-13	14:13:00	1.03441	768.725	12
2022-09-13	14:13:01	2.23042	770.955	12
2022-09-13	14:13:02	1.52382	772.479	12
2022-09-13	14:13:03	3.6302	776.109	12
2022-09-13	14:13:04	3.72992	779.839	12
2022-09-13	14:13:05	1.55432	781.393	12
2022-09-13	14:13:06	0.668872	782.062	12
2022-09-13	14:13:07	0.472155	782.534	12
2022-09-13	14:13:08	1.32331	783.858	12
2022-09-13	14:13:09	0.722486	784.58	12
2022-09-13	14:13:10	0.0550093	784.635	12
2022-09-13	14:13:11	-0.286698	784.635	12
2022-09-13	14:13:12	-0.276512	784.635	12
2022-09-13	14:13:13	-1.56213	784.635	12
2022-09-13	14:13:14	0.97919	785.614	12
2022-09-13	14:13:15	1.75744	787.372	12
2022-09-13	14:13:16	10.8306	798.202	12
2022-09-13	14:13:17	26.237	824.439	13
2022-09-13	14:13:18	7.83913	832.279	13
2022-09-13	14:13:19	5.15254	837.431	13
2022-09-13	14:13:20	6.54072	843.972	13
2022-09-13	14:13:21	8.7836	852.756	13
2022-09-13	14:13:22	6.35356	859.109	13
2022-09-13	14:13:23	6.14151	865.251	13
2022-09-13	14:13:24	5.00644	870.257	13
2022-09-13	14:13:25	-0.0711728	870.257	13
2022-09-13	14:13:26	7.06098	877.318	13
2022-09-13	14:13:27	12.5388	889.857	13
2022-09-13	14:13:28	7.43189	897.289	13
2022-09-13	14:13:29	2.82574	900.114	13
2022-09-13	14:13:30	11.107	911.221	13
2022-09-13	14:13:31	23.642	934.864	14
2022-09-13	14:13:32	0.70147	935.565	14
2022-09-13	14:13:33	-3.90123	935.565	14
2022-09-13	14:13:34	-1.42208	935.565	14
2022-09-13	14:13:35	0.747366	936.312	14
2022-09-13	14:13:36	1.84323	938.156	14
2022-09-13	14:13:37	0.966155	939.122	14
2022-09-13	14:13:38	8.0195	947.141	14
2022-09-13	14:13:39	15.4081	962.549	15
2022-09-13	14:13:40	4.01991	966.569	15
2022-09-13	14:13:41	4.42098	970.99	15
2022-09-13	14:13:42	7.41395	978.404	15
2022-09-13	14:13:43	4.72347	983.128	15
2022-09-13	14:13:44	3.82574	986.953	15
2022-09-13	14:13:45	2.8769	989.83	15
2022-09-13	14:13:46	2.42797	992.258	15
2022-09-13	14:13:47	1.75302	994.011	15
2022-09-13	14:13:48	2.41029	996.422	15
2022-09-13	14:13:49	7.23281	1003.65	15
2022-09-13	14:13:50	5.87718	1009.53	15
2022-09-13	14:13:51	2.23876	1011.77	15
2022-09-13	14:13:52	4.00367	1015.77	15
2022-09-13	14:13:53	8.20286	1023.98	15
2022-09-13	14:13:54	5.13303	1029.11	15
2022-09-13	14:13:55	2.18618	1031.3	15
2022-09-13	14:13:56	3.70966	1035.01	15
2022-09-13	14:13:57	4.49918	1039.5	15
2022-09-13	14:13:58	2.22597	1041.73	15
2022-09-13	14:13:59	5.52182	1047.25	15
2022-09-13	14:14:00	13.7594	1061.01	16
2022-09-13	14:14:01	6.02465	1067.04	16
2022-09-13	14:14:02	6.62377	1073.66	16
2022-09-13	14:14:03	5.0114	1078.67	16
2022-09-13	14:14:04	4.41278	1083.08	16
2022-09-13	14:14:05	8.78479	1091.87	16
2022-09-13	14:14:06	1.40462	1093.27	16
2022-09-13	14:14:07	1.47538	1094.75	16
2022-09-13	14:14:08	2.71346	1097.46	16
2022-09-13	14:14:09	2.0533	1099.52	16
2022-09-13	14:14:10	11.6906	1111.21	16
2022-09-13	14:14:11	11.6758	1122.88	16
2022-09-13	14:14:12	6.90519	1129.79	16
2022-09-13	14:14:13	5.06675	1134.85	16
2022-09-13	14:14:14	2.32293	1137.18	16
2022-09-13	14:14:15	6.85424	1144.03	16
2022-09-13	14:14:16	4.69726	1148.73	16
2022-09-13	14:14:17	3.91159	1152.64	16
2022-09-13	14:14:18	2.40782	1155.05	16
2022-09-13	14:14:19	1.58024	1156.63	16
2022-09-13	14:14:20	0.740858	1157.37	16
2022-09-13	14:14:21	-0.744987	1157.37	16
2022-09-13	14:14:22	0.0462365	1157.42	16
2022-09-13	14:14:23	14.3005	1171.72	17
2022-09-13	14:14:24	11.4425	1183.16	17
2022-09-13	14:14:25	3.7997	1186.96	17
2022-09-13	14:14:26	4.14659	1191.11	17
2022-09-13	14:14:27	1.20328	1192.31	17
2022-09-13	14:14:28	1.42252	1193.73	17
2022-09-13	14:14:29	0.824616	1194.56	17
2022-09-13	14:14:30	10.2505	1204.81	17
2022-09-13	14:14:31	1.97741	1206.78	17
2022-09-13	14:14:32	4.55318	1211.34	17
2022-09-13	14:14:33	8.10721	1219.44	17
2022-09-13	14:14:34	12.7422	1232.19	17
2022-09-13	14:14:35	6.70321	1238.89	17
2022-09-13	14:14:36	5.03586	1243.93	17
2022-09-13	14:14:37	1.60254	1245.53	17
2022-09-13	14:14:38	4.31951	1249.85	17
2022-09-13	14:14:39	4.39016	1254.24	17
2022-09-13	14:14:40	2.10186	1256.34	17
2022-09-13	14:14:41	5.32063	1261.66	17
2022-09-13	14:14:42	14.4899	1276.15	18
2022-09-13	14:14:43	1.90452	1278.05	18
2022-09-13	14:14:44	3.907	1281.96	18
2022-09-13	14:14:45	3.73994	1285.7	18
2022-09-13	14:14:46	0.511714	1286.21	18
2022-09-13	14:14:47	-0.902636	1286.21	18
2022-09-13	14:14:48	-1.12286	1286.21	18
2022-09-13	14:14:49	1.7627	1287.98	18
2022-09-13	14:14:50	47.2307	1335.21	19
2022-09-13	14:14:51	14.0755	1349.28	20
2022-09-13	14:14:52	29.1619	1378.44	21
2022-09-13	14:14:53	8.82611	1387.27	21
2022-09-13	14:14:54	1.89835	1389.17	21
2022-09-13	14:14:55	1.35504	1390.52	21
2022-09-13	14:14:56	8.57302	1399.1	21
2022-09-13	14:14:57	8.61389	1407.71	21
2022-09-13	14:14:58	12.6199	1420.33	21
2022-09-13	14:14:59	12.4063	1432.74	21
2022-09-13	14:15:00	14.7944	1447.53	22
2022-09-13	14:15:01	8.39605	1455.93	22
2022-09-13	14:15:02	8.13755	1464.06	22
2022-09-13	14:15:03	15.1632	1479.23	23
2022-09-13	14:15:04	12.0339	1491.26	23
2022-09-13	14:15:05	1.78166	1493.04	23
2022-09-13	14:15:06	1.53236	1494.58	23

## Sheet: Sulley_martin_202291314104 (4)
Date	Time	Lbs	Newtons	Averaged Newtons	Total force x time	total steps > 13.345		**GoPro Fitting: 1359
2022-09-13	14:10:06	0.480776	2.13859	2.08781	2.13859	FALSE	0
2022-09-13	14:10:06	0.479504	2.13293	2.08781	2.13293	FALSE	0
2022-09-13	14:10:06	0.447799	1.9919	2.08781	4.13049	FALSE	0
2022-09-13	14:10:07	0.475433	2.11482	2.08211	4.24775	FALSE	0
2022-09-13	14:10:07	0.465	2.06841	2.08211	6.1989	FALSE	0
2022-09-13	14:10:07	0.463168	2.06026	2.08211	6.30801	FALSE	0
2022-09-13	14:10:07	0.468715	2.08494	2.08211	8.28384	FALSE	0
2022-09-13	14:10:08	0.46383	2.06321	2.07447	8.37122	FALSE	0
2022-09-13	14:10:08	0.45986	2.04555	2.07447	10.3294	FALSE	0
2022-09-13	14:10:08	0.465051	2.06864	2.07447	10.4399	FALSE	0
2022-09-13	14:10:08	0.476705	2.12048	2.07447	12.4499	FALSE	0
2022-09-13	14:10:09	0.458282	2.03853	2.01799	12.4784	FALSE	0
2022-09-13	14:10:09	0.472684	2.10259	2.01799	14.5525	FALSE	0
2022-09-13	14:10:09	0.435484	1.93712	2.01799	14.4155	FALSE	0
2022-09-13	14:10:09	0.448206	1.99371	2.01799	16.5462	FALSE	0
2022-09-13	14:10:10	0.466781	2.07634	2.046	16.4918	FALSE	0
2022-09-13	14:10:10	0.445662	1.98239	2.046	18.5286	FALSE	0
2022-09-13	14:10:10	0.467443	2.07928	2.046	18.5711	FALSE	0
2022-09-13	14:10:11	0.465763	2.07181	2.08432	20.6004	FALSE	0
2022-09-13	14:10:11	0.494364	2.19903	2.08432	20.7702	FALSE	0
2022-09-13	14:10:11	0.467341	2.07883	2.08432	22.6792	FALSE	0
2022-09-13	14:10:11	0.446832	1.9876	2.08432	22.7578	FALSE	0
2022-09-13	14:10:12	0.488104	2.17118	2.1533	24.8504	FALSE	0
2022-09-13	14:10:12	0.477824	2.12546	2.1533	24.8832	FALSE	0
2022-09-13	14:10:12	0.483422	2.15036	2.1533	27.0007	FALSE	0
2022-09-13	14:10:12	0.486985	2.16621	2.1533	27.0494	FALSE	0
2022-09-13	14:10:13	0.463728	2.06275	2.04323	29.0635	FALSE	0
2022-09-13	14:10:13	0.491463	2.18613	2.04323	29.2355	FALSE	0
2022-09-13	14:10:13	0.44556	1.98194	2.04323	31.0454	FALSE	0
2022-09-13	14:10:13	0.436603	1.9421	2.04323	31.1776	FALSE	0
2022-09-13	14:10:14	0.485967	2.16168	1.30124	33.2071	FALSE	0
2022-09-13	14:10:14	0.352532	1.56813	1.30124	32.7458	FALSE	0
2022-09-13	14:10:14	0.230242	1.02416	1.30124	34.2313	FALSE	0
2022-09-13	14:10:14	0.101387	0.45099	1.30124	33.1968	FALSE	0
2022-09-13	14:10:15	0.372634	1.65755	1.32101	35.8888	FALSE	0
2022-09-13	14:10:15	0.271565	1.20798	1.32101	34.4047	FALSE	0
2022-09-13	14:10:15	0.24673	1.0975	1.32101	36.9863	FALSE	0
2022-09-13	14:10:16	0.362354	1.61182	2.88805	36.0166	FALSE	0
2022-09-13	14:10:16	0.508766	2.26309	2.88805	39.2494	FALSE	0
2022-09-13	14:10:16	0.239606	1.06582	2.88805	37.0824	FALSE	0
2022-09-13	14:10:16	1.48632	6.61145	2.88805	45.8609	FALSE	0
2022-09-13	14:10:17	2.52861	11.2478	12.9083	48.3301	FALSE	0
2022-09-13	14:10:17	4.34948	19.3474	12.9083	65.2082	1	1
2022-09-13	14:10:17	3.93426	17.5004	12.9083	65.8305	1	2
2022-09-13	14:10:17	0.79528	3.53756	12.9083	68.7458	FALSE	2
2022-09-13	14:10:18	0.528562	2.35115	1.39456	68.1817	FALSE	2
2022-09-13	14:10:18	0.333244	1.48234	1.39456	70.2281	FALSE	2
2022-09-13	14:10:18	0.348359	1.54957	1.39456	69.7312	FALSE	2
2022-09-13	14:10:18	0.0438806	0.19519	1.39456	70.4233	FALSE	2
2022-09-13	14:10:19	0.366476	1.63016	0.887207	71.3614	FALSE	2
2022-09-13	14:10:19	0.00611985	0.0272223	0.887207	70.4505	FALSE	2
2022-09-13	14:10:19	0.225763	1.00424	0.887207	72.3656	FALSE	2
2022-09-13	14:10:20	0.493041	2.19314	12.7519	72.6437	FALSE	2
2022-09-13	14:10:20	2.58169	11.4839	12.7519	83.8495	FALSE	2
2022-09-13	14:10:20	3.34021	14.8579	12.7519	87.5016	1	3
2022-09-13	14:10:20	5.05212	22.4728	12.7519	106.322	1	4
2022-09-13	14:10:21	6.09991	27.1336	20.9488	114.635	1	5
2022-09-13	14:10:21	4.84001	21.5293	20.9488	127.852	1	6
2022-09-13	14:10:21	5.25512	23.3758	20.9488	138.011	1	7
2022-09-13	14:10:21	2.64296	11.7564	20.9488	139.608	FALSE	7
2022-09-13	14:10:22	1.52953	6.80366	1.85438	144.815	FALSE	7
2022-09-13	14:10:22	0.0730409	0.324901	1.85438	139.933	FALSE	7
2022-09-13	14:10:22	-0.209351	-0.931235	1.85438	144.815	FALSE	7
2022-09-13	14:10:22	0.274313	1.2202	1.85438	141.153	FALSE	7
2022-09-13	14:10:23	0.840216	3.73745	5.83147	148.552	FALSE	7
2022-09-13	14:10:23	1.67131	7.43432	5.83147	148.588	FALSE	7
2022-09-13	14:10:23	1.42139	6.32263	5.83147	154.875	FALSE	7
2022-09-13	14:10:24	2.88642	12.8394	9.84161	161.427	FALSE	7
2022-09-13	14:10:24	2.08266	9.26409	9.84161	164.139	FALSE	7
2022-09-13	14:10:24	2.40373	10.6923	9.84161	172.119	FALSE	7
2022-09-13	14:10:24	1.47716	6.5707	9.84161	170.71	FALSE	7
2022-09-13	14:10:25	0.66159	2.94288	3.25974	175.062	FALSE	7
2022-09-13	14:10:25	1.1653	5.18349	3.25974	175.893	FALSE	7
2022-09-13	14:10:25	0.393193	1.749	3.25974	176.811	FALSE	7
2022-09-13	14:10:25	0.711209	3.1636	3.25974	179.057	FALSE	7
2022-09-13	14:10:26	0.366934	1.6322	1.72784	178.443	FALSE	7
2022-09-13	14:10:26	0.38897	1.73022	1.72784	180.787	FALSE	7
2022-09-13	14:10:26	0.53416	2.37605	1.72784	180.819	FALSE	7
2022-09-13	14:10:26	0.263677	1.17289	1.72784	181.96	FALSE	7
2022-09-13	14:10:27	0.684389	3.0443	2.23178	183.864	FALSE	7
2022-09-13	14:10:27	0.319249	1.42008	2.23178	183.38	FALSE	7
2022-09-13	14:10:27	0.501539	2.23095	2.23178	186.095	FALSE	7
2022-09-13	14:10:28	0.173092	0.769948	0.870682	184.15	FALSE	7
2022-09-13	14:10:28	0.358333	1.59394	0.870682	187.688	FALSE	7
2022-09-13	14:10:28	0.129886	0.577759	0.870682	184.728	FALSE	7
2022-09-13	14:10:28	0.121641	0.541083	0.870682	188.23	FALSE	7
2022-09-13	14:10:29	0.0553819	0.24635	1.34635	184.974	FALSE	7
2022-09-13	14:10:29	0.293397	1.30509	1.34635	189.535	FALSE	7
2022-09-13	14:10:29	0.639453	2.84441	1.34635	187.818	FALSE	7
2022-09-13	14:10:29	0.222456	0.989529	1.34635	190.524	FALSE	7
2022-09-13	14:10:30	0.619758	2.75681	1.78913	190.575	FALSE	7
2022-09-13	14:10:30	0.226171	1.00605	1.78913	191.53	FALSE	7
2022-09-13	14:10:30	0.579198	2.57639	1.78913	193.152	FALSE	7
2022-09-13	14:10:30	0.183728	0.817259	1.78913	192.347	FALSE	7
2022-09-13	14:10:31	0.530802	2.36111	1.96768	195.513	FALSE	7
2022-09-13	14:10:31	0.283117	1.25936	1.96768	193.607	FALSE	7
2022-09-13	14:10:31	0.513143	2.28256	1.96768	197.795	FALSE	7
2022-09-13	14:10:32	0.226883	1.00922	1.57141	194.616	FALSE	7
2022-09-13	14:10:32	0.393346	1.74968	1.57141	199.545	FALSE	7
2022-09-13	14:10:32	0.409529	1.82167	1.57141	196.438	FALSE	7
2022-09-13	14:10:32	0.383321	1.70509	1.57141	201.25	FALSE	7
2022-09-13	14:10:33	0.367443	1.63446	1.55093	198.072	FALSE	7
2022-09-13	14:10:33	0.420064	1.86853	1.55093	203.118	FALSE	7
2022-09-13	14:10:33	0.481641	2.14244	1.55093	200.215	FALSE	7
2022-09-13	14:10:33	0.125509	0.558289	1.55093	203.677	FALSE	7
2022-09-13	14:10:34	-0.110623	-0.492073	1.13865	200.215	FALSE	7
2022-09-13	14:10:34	0.207036	0.920938	1.13865	204.598	FALSE	7
2022-09-13	14:10:34	0.538588	2.39575	1.13865	202.61	FALSE	7
2022-09-13	14:10:34	0.388919	1.72999	1.13865	206.328	FALSE	7
2022-09-13	14:10:35	0.577468	2.56869	2.05574	205.179	FALSE	7
2022-09-13	14:10:35	0.299199	1.3309	2.05574	207.659	FALSE	7
2022-09-13	14:10:35	0.509784	2.26762	2.05574	207.447	FALSE	7
2022-09-13	14:10:36	0.208613	0.927952	1.51109	208.587	FALSE	7
2022-09-13	14:10:36	0.504695	2.24498	1.51109	209.692	FALSE	7
2022-09-13	14:10:36	0.254924	1.13395	1.51109	209.721	FALSE	7
2022-09-13	14:10:36	0.390598	1.73746	1.51109	211.429	FALSE	7
2022-09-13	14:10:37	0.2707	1.20413	6.38588	210.925	FALSE	7
2022-09-13	14:10:37	0.399148	1.77549	6.38588	213.205	FALSE	7
2022-09-13	14:10:37	1.28037	5.69534	6.38588	216.62	FALSE	7
2022-09-13	14:10:37	3.79222	16.8686	6.38588	230.073	1	8
2022-09-13	14:10:38	6.90378	30.7094	28.434	247.329	1	9
2022-09-13	14:10:38	5.86245	26.0774	28.434	256.151	1	10
2022-09-13	14:10:38	8.83161	39.2848	28.434	286.614	1	11
2022-09-13	14:10:38	3.97111	17.6643	28.434	273.815	1	12
2022-09-13	14:10:39	10.0338	44.6323	28.0499	331.246	1	13
2022-09-13	14:10:39	5.43543	24.1779	28.0499	297.993	1	14
2022-09-13	14:10:39	3.44846	15.3394	28.0499	346.586	1	15
2022-09-13	14:10:40	3.42556	15.2376	7.5363	313.23	1	16
2022-09-13	14:10:40	0.980827	4.36291	7.5363	350.949	FALSE	16
2022-09-13	14:10:40	1.21111	5.38726	7.5363	318.618	FALSE	16
2022-09-13	14:10:40	1.15945	5.15747	7.5363	356.106	FALSE	16
2022-09-13	14:10:41	0.952735	4.23796	7.65095	322.855	FALSE	16
2022-09-13	14:10:41	2.34403	10.4267	7.65095	366.533	FALSE	16
2022-09-13	14:10:41	0.921387	4.09851	7.65095	326.954	FALSE	16
2022-09-13	14:10:41	2.66189	11.8406	7.65095	378.374	FALSE	16
2022-09-13	14:10:42	1.99955	8.8944	5.56726	335.848	FALSE	16
2022-09-13	14:10:42	1.44693	6.43623	5.56726	384.81	FALSE	16
2022-09-13	14:10:42	0.872837	3.88255	5.56726	339.731	FALSE	16
2022-09-13	14:10:42	0.686985	3.05585	5.56726	387.866	FALSE	16
2022-09-13	14:10:43	0.632684	2.8143	2.64536	342.545	FALSE	16
2022-09-13	14:10:43	0.419504	1.86604	2.64536	389.732	FALSE	16
2022-09-13	14:10:43	0.731921	3.25573	2.64536	345.801	FALSE	16
2022-09-13	14:10:44	0.965	4.29251	16.7965	394.024	FALSE	16
2022-09-13	14:10:44	3.83823	17.0732	16.7965	362.874	1	17
2022-09-13	14:10:44	4.61731	20.5387	16.7965	414.563	1	18
2022-09-13	14:10:44	5.68352	25.2814	16.7965	388.156	1	19
2022-09-13	14:10:45	1.2392	5.51221	8.95197	420.075	FALSE	19
2022-09-13	14:10:45	3.31273	14.7357	8.95197	402.891	1	20
2022-09-13	14:10:45	1.71095	7.61065	8.95197	427.686	FALSE	20
2022-09-13	14:10:45	1.78709	7.94933	8.95197	410.841	FALSE	20
2022-09-13	14:10:46	1.651	7.34398	4.51269	435.03	FALSE	20
2022-09-13	14:10:46	0.524542	2.33327	4.51269	413.174	FALSE	20
2022-09-13	14:10:46	0.867951	3.86082	4.51269	438.891	FALSE	20
2022-09-13	14:10:47	0.741743	3.29942	3.65907	416.473	FALSE	20
2022-09-13	14:10:47	1.16841	5.19732	3.65907	444.088	FALSE	20
2022-09-13	14:10:47	0.674008	2.99812	3.65907	419.471	FALSE	20
2022-09-13	14:10:47	0.706221	3.14141	3.65907	447.229	FALSE	20
2022-09-13	14:10:48	0.607951	2.70429	2.36671	422.176	FALSE	20
2022-09-13	14:10:48	0.608206	2.70542	2.36671	449.935	FALSE	20
2022-09-13	14:10:48	0.633651	2.81861	2.36671	424.994	FALSE	20
2022-09-13	14:10:48	0.278435	1.23853	2.36671	451.173	FALSE	20
2022-09-13	14:10:49	0.820064	3.64781	2.5001	428.642	FALSE	20
2022-09-13	14:10:49	0.264847	1.17809	2.5001	452.351	FALSE	20
2022-09-13	14:10:49	0.74673	3.3216	2.5001	431.964	FALSE	20
2022-09-13	14:10:49	0.416552	1.85291	2.5001	454.204	FALSE	20
2022-09-13	14:10:50	0.544287	2.4211	2.24034	434.385	FALSE	20
2022-09-13	14:10:50	0.397825	1.76961	2.24034	455.974	FALSE	20
2022-09-13	14:10:50	0.418741	1.86264	2.24034	436.248	FALSE	20
2022-09-13	14:10:50	0.653753	2.90802	2.24034	458.882	FALSE	20
2022-09-13	14:10:51	0.301234	1.33995	1.74644	437.587	FALSE	20
2022-09-13	14:10:51	0.597417	2.65743	1.74644	461.539	FALSE	20
2022-09-13	14:10:51	0.279199	1.24193	1.74644	438.829	FALSE	20
2022-09-13	14:10:52	0.567239	2.52319	1.70911	464.063	FALSE	20
2022-09-13	14:10:52	0.19014	0.845781	1.70911	439.675	FALSE	20
2022-09-13	14:10:52	0.536603	2.38692	1.70911	466.45	FALSE	20
2022-09-13	14:10:52	0.242914	1.08053	1.70911	440.756	FALSE	20
2022-09-13	14:10:53	0.133397	0.593377	-0.757606	467.043	FALSE	20
2022-09-13	14:10:53	-0.271437	-1.20741	-0.757606	440.756	FALSE	20
2022-09-13	14:10:53	-0.264872	-1.1782	-0.757606	467.043	FALSE	20
2022-09-13	14:10:53	-0.278358	-1.23819	-0.757606	440.756	FALSE	20
2022-09-13	14:10:54	-0.248384	-1.10486	-0.890714	467.043	FALSE	20
2022-09-13	14:10:54	-0.331743	-1.47566	-0.890714	440.756	FALSE	20
2022-09-13	14:10:54	-0.207417	-0.922632	-0.890714	467.043	FALSE	20
2022-09-13	14:10:54	-0.0134221	-0.0597042	-0.890714	440.756	FALSE	20
2022-09-13	14:10:55	-0.162531	-0.72297	-0.505882	467.043	FALSE	20
2022-09-13	14:10:55	-0.106552	-0.473965	-0.505882	440.756	FALSE	20
2022-09-13	14:10:55	-0.0720989	-0.32071	-0.505882	467.043	FALSE	20
2022-09-13	14:10:56	-0.0140328	-0.0624207	-0.311825	440.756	FALSE	20
2022-09-13	14:10:56	-0.191946	-0.853814	-0.311825	467.043	FALSE	20
2022-09-13	14:10:56	0.0508018	0.225977	-0.311825	440.982	FALSE	20
2022-09-13	14:10:56	-0.125229	-0.557044	-0.311825	467.043	FALSE	20
2022-09-13	14:10:57	-0.00746796	-0.033219	-0.231577	440.982	FALSE	20
2022-09-13	14:10:57	-0.233117	-1.03695	-0.231577	467.043	FALSE	20
2022-09-13	14:10:57	-0.019071	-0.0848316	-0.231577	440.982	FALSE	20
2022-09-13	14:10:57	0.0514125	0.228693	-0.231577	467.272	FALSE	20
2022-09-13	14:10:58	0.153804	0.684151	0.932764	441.666	FALSE	20
2022-09-13	14:10:58	0.127392	0.566665	0.932764	467.838	FALSE	20
2022-09-13	14:10:58	0.149886	0.666723	0.932764	442.333	FALSE	20
2022-09-13	14:10:58	0.407697	1.81352	0.932764	469.652	FALSE	20
2022-09-13	14:10:59	0.164797	0.73305	1.1126	443.066	FALSE	20
2022-09-13	14:10:59	0.350344	1.5584	1.1126	471.21	FALSE	20
2022-09-13	14:10:59	0.235229	1.04635	1.1126	444.112	FALSE	20
2022-09-13	14:11:00	0.589835	2.6237	2.32218	473.834	FALSE	20
2022-09-13	14:11:00	0.467341	2.07883	2.32218	446.191	FALSE	20
2022-09-13	14:11:00	0.497672	2.21374	2.32218	476.048	FALSE	20
2022-09-13	14:11:00	0.533346	2.37243	2.32218	448.563	FALSE	20
2022-09-13	14:11:01	0.657214	2.92342	3.60231	478.971	FALSE	20
2022-09-13	14:11:01	0.984084	4.3774	3.60231	452.941	FALSE	20
2022-09-13	14:11:01	0.698689	3.10791	3.60231	482.079	FALSE	20
2022-09-13	14:11:01	0.899351	4.00049	3.60231	456.941	FALSE	20
2022-09-13	14:11:02	1.47111	6.54379	10.5683	488.623	FALSE	20
2022-09-13	14:11:02	2.13905	9.51492	10.5683	466.456	FALSE	20
2022-09-13	14:11:02	2.71385	12.0717	10.5683	500.694	FALSE	20
2022-09-13	14:11:02	3.17945	14.1428	10.5683	480.599	1	21
2022-09-13	14:11:03	2.65574	11.8133	17.825	512.508	FALSE	21
2022-09-13	14:11:03	5.01675	22.3155	17.825	502.914	1	22
2022-09-13	14:11:03	4.34922	19.3462	17.825	531.854	1	23
2022-09-13	14:11:04	6.85599	30.4968	34.2235	533.411	1	24
2022-09-13	14:11:04	6.21054	27.6257	34.2235	559.48	1	25
2022-09-13	14:11:04	6.38535	28.4033	34.2235	561.814	1	26
2022-09-13	14:11:04	11.3233	50.3683	34.2235	609.848	1	27
2022-09-13	14:11:05	5.81777	25.8786	37.3677	587.693	1	28
2022-09-13	14:11:05	10.3922	46.2266	37.3677	656.075	1	29
2022-09-13	14:11:05	9.65298	42.9384	37.3677	630.631	1	30
2022-09-13	14:11:05	7.7396	34.4273	37.3677	690.502	1	31
2022-09-13	14:11:06	15.806	70.3082	48.8268	700.94	1	32
2022-09-13	14:11:06	8.78683	39.0856	48.8268	729.587	1	33
2022-09-13	14:11:06	7.80708	34.7275	48.8268	735.667	1	34
2022-09-13	14:11:06	11.5071	51.1859	48.8268	780.773	1	35
2022-09-13	14:11:07	2.09319	9.31093	5.68673	744.978	FALSE	35
2022-09-13	14:11:07	1.8338	8.15711	5.68673	788.93	FALSE	35
2022-09-13	14:11:07	0.743117	3.30553	5.68673	748.284	FALSE	35
2022-09-13	14:11:07	0.443626	1.97334	5.68673	790.904	FALSE	35
2022-09-13	14:11:08	0.434313	1.93191	1.91509	750.216	FALSE	35
2022-09-13	14:11:08	0.470802	2.09422	1.91509	792.998	FALSE	35
2022-09-13	14:11:08	0.386476	1.71912	1.91509	751.935	FALSE	35
2022-09-13	14:11:09	0.839758	3.73541	4.495	796.733	FALSE	35
2022-09-13	14:11:09	0.485255	2.15851	4.495	754.093	FALSE	35
2022-09-13	14:11:09	1.07879	4.79867	4.495	801.532	FALSE	35
2022-09-13	14:11:09	1.63828	7.2874	4.495	761.381	FALSE	35
2022-09-13	14:11:10	0.810191	3.60389	2.19886	805.136	FALSE	35
2022-09-13	14:11:10	0.501183	2.22936	2.19886	763.61	FALSE	35
2022-09-13	14:11:10	0.202812	0.902148	2.19886	806.038	FALSE	35
2022-09-13	14:11:10	0.463117	2.06004	2.19886	765.67	FALSE	35
2022-09-13	14:11:11	0.0413361	0.183871	0.9348	806.222	FALSE	35
2022-09-13	14:11:11	0.317824	1.41374	0.9348	767.084	FALSE	35
2022-09-13	14:11:11	0.130903	0.582283	0.9348	806.804	FALSE	35
2022-09-13	14:11:11	0.350547	1.5593	0.9348	768.643	FALSE	35
2022-09-13	14:11:12	1.41151	6.27868	16.0346	813.083	FALSE	35
2022-09-13	14:11:12	4.07304	18.1177	16.0346	786.761	1	36
2022-09-13	14:11:12	5.32968	23.7075	16.0346	836.79	1	37
2022-09-13	14:11:13	2.11665	9.41528	6.77342	796.176	FALSE	37
2022-09-13	14:11:13	1.95772	8.70833	6.77342	845.499	FALSE	37
2022-09-13	14:11:13	0.678181	3.01668	6.77342	799.193	FALSE	37
2022-09-13	14:11:13	1.33838	5.95338	6.77342	851.452	FALSE	37
2022-09-13	14:11:14	0.609835	2.71267	2.87324	801.905	FALSE	37
2022-09-13	14:11:14	0.413346	1.83865	2.87324	853.291	FALSE	37
2022-09-13	14:11:14	0.914618	4.0684	2.87324	805.974	FALSE	37
2022-09-13	14:11:15	0.808766	3.59755	3.06689	856.888	FALSE	37
2022-09-13	14:11:15	0.40673	1.80922	3.06689	807.783	FALSE	37
2022-09-13	14:11:15	0.55813	2.48267	3.06689	859.371	FALSE	37
2022-09-13	14:11:15	0.558435	2.48403	3.06689	810.267	FALSE	37
2022-09-13	14:11:15	1.11528	4.96099	3.06689	864.332	FALSE	37
2022-09-13	14:11:16	2.51141	11.1713	16.2781	821.438	FALSE	37
2022-09-13	14:11:16	4.35085	19.3535	16.2781	883.685	1	38
2022-09-13	14:11:16	4.11619	18.3096	16.2781	839.748	1	39
2022-09-13	14:11:17	3.10189	13.7978	9.89741	897.483	1	40
2022-09-13	14:11:17	1.84536	8.20853	9.89741	847.956	FALSE	40
2022-09-13	14:11:17	2.45828	10.9349	9.89741	908.418	FALSE	40
2022-09-13	14:11:17	1.49462	6.64837	9.89741	854.605	FALSE	40
2022-09-13	14:11:18	1.53151	6.81246	6.60857	915.231	FALSE	40
2022-09-13	14:11:18	2.11238	9.39629	6.60857	864.001	FALSE	40
2022-09-13	14:11:18	0.930852	4.14062	6.60857	919.371	FALSE	40
2022-09-13	14:11:18	1.36795	6.08492	6.60857	870.086	FALSE	40
2022-09-13	14:11:19	0.910954	4.05211	4.07152	923.423	FALSE	40
2022-09-13	14:11:19	1.06169	4.72261	4.07152	874.809	FALSE	40
2022-09-13	14:11:19	1.16648	5.18874	4.07152	928.612	FALSE	40
2022-09-13	14:11:19	0.52215	2.32263	4.07152	877.131	FALSE	40
2022-09-13	14:11:20	0.872379	3.88052	3.21815	932.493	FALSE	40
2022-09-13	14:11:20	0.564644	2.51165	3.21815	879.643	FALSE	40
2022-09-13	14:11:20	0.733397	3.2623	3.21815	935.755	FALSE	40
2022-09-13	14:11:21	0.656501	2.92025	10.1625	882.563	FALSE	40
2022-09-13	14:11:21	1.21151	5.38904	10.1625	941.144	FALSE	40
2022-09-13	14:11:21	2.78042	12.3679	10.1625	894.931	FALSE	40
2022-09-13	14:11:21	4.49009	19.9728	10.1625	961.117	1	41
2022-09-13	14:11:22	4.09187	18.2015	9.1844	913.132	1	42
2022-09-13	14:11:22	2.93757	13.0669	9.1844	974.184	FALSE	42
2022-09-13	14:11:22	0.955585	4.25063	9.1844	917.383	FALSE	42
2022-09-13	14:11:22	0.273957	1.21862	9.1844	975.402	FALSE	42
2022-09-13	14:11:23	0.536298	2.38556	0.208602	919.769	FALSE	42
2022-09-13	14:11:23	0.198944	0.884943	0.208602	976.287	FALSE	42
2022-09-13	14:11:23	-0.0905213	-0.402657	0.208602	919.769	FALSE	42
2022-09-13	14:11:23	-0.457137	-2.03344	0.208602	976.287	FALSE	42
2022-09-13	14:11:24	-0.838867	-3.73145	-2.33255	919.769	FALSE	42
2022-09-13	14:11:24	-0.57673	-2.56541	-2.33255	976.287	FALSE	42
2022-09-13	14:11:24	-0.157544	-0.700787	-2.33255	919.769	FALSE	42
2022-09-13	14:11:25	0.293143	1.30396	1.02048	977.591	FALSE	42
2022-09-13	14:11:25	0.422914	1.88121	1.02048	921.65	FALSE	42
2022-09-13	14:11:25	0.167443	0.74482	1.02048	978.336	FALSE	42
2022-09-13	14:11:25	0.0341606	0.151953	1.02048	921.802	FALSE	42
2022-09-13	14:11:26	1.19299	5.30666	9.3844	983.643	FALSE	42
2022-09-13	14:11:26	2.58744	11.5095	9.3844	933.311	FALSE	42
2022-09-13	14:11:26	2.89019	12.8561	9.3844	996.499	FALSE	42
2022-09-13	14:11:26	1.76821	7.86535	9.3844	941.177	FALSE	42
2022-09-13	14:11:27	0.597316	2.65698	2.10045	999.156	FALSE	42
2022-09-13	14:11:27	0.244339	1.08687	2.10045	942.263	FALSE	42
2022-09-13	14:11:27	0.528715	2.35183	2.10045	1001.51	FALSE	42
2022-09-13	14:11:27	0.518435	2.3061	2.10045	944.57	FALSE	42
2022-09-13	14:11:28	0.585509	2.60446	2.66038	1004.11	FALSE	42
2022-09-13	14:11:28	0.627443	2.79099	2.66038	947.361	FALSE	42
2022-09-13	14:11:28	0.581285	2.58567	2.66038	1006.7	FALSE	42
2022-09-13	14:11:29	0.718537	3.1962	3.49902	950.557	FALSE	42
2022-09-13	14:11:29	0.650394	2.89308	3.49902	1009.59	FALSE	42
2022-09-13	14:11:29	0.823117	3.66139	3.49902	954.218	FALSE	42
2022-09-13	14:11:29	0.954415	4.24543	3.49902	1013.84	FALSE	42
2022-09-13	14:11:30	0.669682	2.97888	0.721673	957.197	FALSE	42
2022-09-13	14:11:30	0.236603	1.05246	0.721673	1014.89	FALSE	42
2022-09-13	14:11:30	-0.058613	-0.260722	0.721673	957.197	FALSE	42
2022-09-13	14:11:30	-0.198715	-0.883924	0.721673	1014.89	FALSE	42
2022-09-13	14:11:31	0.0324812	0.144483	1.4404	957.342	FALSE	42
2022-09-13	14:11:31	0.443931	1.97469	1.4404	1016.86	FALSE	42
2022-09-13	14:11:31	0.492634	2.19133	1.4404	959.533	FALSE	42
2022-09-13	14:11:31	0.326221	1.4511	1.4404	1018.31	FALSE	42
2022-09-13	14:11:32	0.314262	1.3979	0.336294	960.931	FALSE	42
2022-09-13	14:11:32	0.0289188	0.128637	0.336294	1018.44	FALSE	42
2022-09-13	14:11:32	-0.116374	-0.517655	0.336294	960.931	FALSE	42
2022-09-13	14:11:33	-0.22472	-0.9996	-0.947308	1018.44	FALSE	42
2022-09-13	14:11:33	-0.301463	-1.34097	-0.947308	960.931	FALSE	42
2022-09-13	14:11:33	-0.290827	-1.29366	-0.947308	1018.44	FALSE	42
2022-09-13	14:11:33	-0.0348471	-0.155007	-0.947308	960.931	FALSE	42
2022-09-13	14:11:34	-0.0443127	-0.197112	3.09014	1018.44	FALSE	42
2022-09-13	14:11:34	0.214669	0.954891	3.09014	961.886	FALSE	42
2022-09-13	14:11:34	0.426629	1.89773	3.09014	1020.34	FALSE	42
2022-09-13	14:11:34	2.18179	9.70504	3.09014	971.591	FALSE	42
2022-09-13	14:11:35	2.69853	12.0036	16.0377	1032.34	FALSE	42
2022-09-13	14:11:35	3.31706	14.7549	16.0377	986.346	1	43
2022-09-13	14:11:35	4.41207	19.6258	16.0377	1051.97	1	44
2022-09-13	14:11:35	3.99411	17.7666	16.0377	1004.11	1	45
2022-09-13	14:11:36	4.79782	21.3417	9.96402	1073.31	1	46
2022-09-13	14:11:36	0.641794	2.85483	9.96402	1006.97	FALSE	46
2022-09-13	14:11:36	1.28042	5.69556	9.96402	1079.01	FALSE	46
2022-09-13	14:11:37	0.641947	2.85551	0.272213	1009.82	FALSE	46
2022-09-13	14:11:37	0.144593	0.643179	0.272213	1079.65	FALSE	46
2022-09-13	14:11:37	-0.0705214	-0.313693	0.272213	1009.82	FALSE	46
2022-09-13	14:11:37	-0.471234	-2.09614	0.272213	1079.65	FALSE	46
2022-09-13	14:11:38	-0.51617	-2.29603	0.545274	1009.82	FALSE	46
2022-09-13	14:11:38	0.0180282	0.080193	0.545274	1079.73	FALSE	46
2022-09-13	14:11:38	0.526629	2.34255	0.545274	1012.17	FALSE	46
2022-09-13	14:11:38	0.461845	2.05438	0.545274	1081.79	FALSE	46
2022-09-13	14:11:39	0.45645	2.03038	1.558	1014.2	FALSE	46
2022-09-13	14:11:39	0.31416	1.39745	1.558	1083.18	FALSE	46
2022-09-13	14:11:39	0.288461	1.28313	1.558	1015.48	FALSE	46
2022-09-13	14:11:39	0.341947	1.52105	1.558	1084.7	FALSE	46
2022-09-13	14:11:40	0.348919	1.55206	1.51018	1017.03	FALSE	46
2022-09-13	14:11:40	0.300165	1.33519	1.51018	1086.04	FALSE	46
2022-09-13	14:11:40	0.369428	1.64329	1.51018	1018.67	FALSE	46
2022-09-13	14:11:41	0.339809	1.51154	1.55789	1087.55	FALSE	46
2022-09-13	14:11:41	0.372481	1.65687	1.55789	1020.33	FALSE	46
2022-09-13	14:11:41	0.390445	1.73678	1.55789	1089.29	FALSE	46
2022-09-13	14:11:41	0.298181	1.32637	1.55789	1021.66	FALSE	46
2022-09-13	14:11:42	0.511768	2.27645	2.09139	1091.56	FALSE	46
2022-09-13	14:11:42	0.490242	2.18069	2.09139	1023.84	FALSE	46
2022-09-13	14:11:42	0.456145	2.02902	2.09139	1093.59	FALSE	46
2022-09-13	14:11:42	0.422506	1.87939	2.09139	1025.72	FALSE	46
2022-09-13	14:11:43	0.461031	2.05076	1.86643	1095.64	FALSE	46
2022-09-13	14:11:43	0.38897	1.73022	1.86643	1027.45	FALSE	46
2022-09-13	14:11:43	0.40729	1.81171	1.86643	1097.46	FALSE	46
2022-09-13	14:11:43	0.421082	1.87306	1.86643	1029.32	FALSE	46
2022-09-13	14:11:44	0.479555	2.13316	1.78356	1099.59	FALSE	46
2022-09-13	14:11:44	0.445	1.97945	1.78356	1031.3	FALSE	46
2022-09-13	14:11:44	0.278333	1.23808	1.78356	1100.83	FALSE	46
2022-09-13	14:11:45	0.662863	2.94855	8.90482	1034.25	FALSE	46
2022-09-13	14:11:45	1.13594	5.05289	8.90482	1105.88	FALSE	46
2022-09-13	14:11:45	2.3852	10.6098	8.90482	1044.86	FALSE	46
2022-09-13	14:11:45	3.82357	17.008	8.90482	1122.89	1	47
2022-09-13	14:11:46	6.79797	30.2387	19.693	1075.1	1	48
2022-09-13	14:11:46	4.98072	22.1552	19.693	1145.04	1	49
2022-09-13	14:11:46	4.11253	18.2934	19.693	1093.39	1	50
2022-09-13	14:11:46	1.81752	8.08469	19.693	1153.13	FALSE	50
2022-09-13	14:11:47	0.504186	2.24272	0.977473	1095.63	FALSE	50
2022-09-13	14:11:47	0.438079	1.94866	0.977473	1155.08	FALSE	50
2022-09-13	14:11:47	0.031158	0.138597	0.977473	1095.77	FALSE	50
2022-09-13	14:11:47	-0.0944399	-0.420088	0.977473	1155.08	FALSE	50
2022-09-13	14:11:48	-0.324058	-1.44147	-0.893203	1095.77	FALSE	50
2022-09-13	14:11:48	-0.318867	-1.41838	-0.893203	1155.08	FALSE	50
2022-09-13	14:11:48	0.0405219	0.18025	-0.893203	1095.95	FALSE	50
2022-09-13	14:11:49	0.42159	1.87532	3.33971	1156.95	FALSE	50
2022-09-13	14:11:49	0.641285	2.85256	3.33971	1098.8	FALSE	50
2022-09-13	14:11:49	1.02103	4.54175	3.33971	1161.49	FALSE	50
2022-09-13	14:11:49	0.9193	4.08923	3.33971	1102.89	FALSE	50
2022-09-13	14:11:50	1.37167	6.10146	8.25295	1167.59	FALSE	50
2022-09-13	14:11:50	1.81894	8.09101	8.25295	1110.98	FALSE	50
2022-09-13	14:11:50	1.95569	8.6993	8.25295	1176.29	FALSE	50
2022-09-13	14:11:50	2.27508	10.12	8.25295	1121.1	FALSE	50
2022-09-13	14:11:51	1.63177	7.25844	6.60314	1183.55	FALSE	50
2022-09-13	14:11:51	1.5562	6.92229	6.60314	1128.03	FALSE	50
2022-09-13	14:11:51	1.28413	5.71207	6.60314	1189.26	FALSE	50
2022-09-13	14:11:51	1.46571	6.51977	6.60314	1134.55	FALSE	50
2022-09-13	14:11:52	2.14352	9.53481	12.2058	1198.8	FALSE	50
2022-09-13	14:11:52	3.00882	13.3838	12.2058	1147.93	1	51
2022-09-13	14:11:52	3.0796	13.6987	12.2058	1212.5	1	52
2022-09-13	14:11:53	0.558333	2.48358	0.899091	1150.41	FALSE	52
2022-09-13	14:11:53	0.158079	0.703167	0.899091	1213.2	FALSE	52
2022-09-13	14:11:53	0.107443	0.477928	0.899091	1150.89	FALSE	52
2022-09-13	14:11:53	-0.015356	-0.0683066	0.899091	1213.2	FALSE	52
2022-09-13	14:11:54	0.0139061	0.0618571	0.435823	1150.95	FALSE	52
2022-09-13	14:11:54	0.153652	0.683475	0.435823	1213.88	FALSE	52
2022-09-13	14:11:54	0.144542	0.642952	0.435823	1151.6	FALSE	52
2022-09-13	14:11:54	0.0798094	0.355008	0.435823	1214.24	FALSE	52
2022-09-13	14:11:55	0.0110053	0.0489538	-0.679622	1151.65	FALSE	52
2022-09-13	14:11:55	-0.125585	-0.558627	-0.679622	1214.24	FALSE	52
2022-09-13	14:11:55	-0.193676	-0.86151	-0.679622	1151.65	FALSE	52
2022-09-13	14:11:55	-0.302888	-1.34731	-0.679622	1214.24	FALSE	52
2022-09-13	14:11:56	-0.438765	-1.95171	-1.9207	1151.65	FALSE	52
2022-09-13	14:11:56	-0.445229	-1.98047	-1.9207	1214.24	FALSE	52
2022-09-13	14:11:56	-0.411386	-1.82993	-1.9207	1151.65	FALSE	52
2022-09-13	14:11:57	-0.571132	-2.54051	-2.8628	1214.24	FALSE	52
2022-09-13	14:11:57	-0.48248	-2.14617	-2.8628	1151.65	FALSE	52
2022-09-13	14:11:57	-0.737544	-3.28074	-2.8628	1214.24	FALSE	52
2022-09-13	14:11:57	-0.783193	-3.4838	-2.8628	1151.65	FALSE	52
2022-09-13	14:11:58	-0.366399	-1.62982	0.439954	1214.24	FALSE	52
2022-09-13	14:11:58	0.0182827	0.0813251	0.439954	1151.73	FALSE	52
2022-09-13	14:11:58	0.370293	1.64714	0.439954	1215.89	FALSE	52
2022-09-13	14:11:58	0.373448	1.66117	0.439954	1153.39	FALSE	52
2022-09-13	14:11:59	0.450395	2.00345	2.58347	1217.89	FALSE	52
2022-09-13	14:11:59	0.643321	2.86162	2.58347	1156.25	FALSE	52
2022-09-13	14:11:59	0.566527	2.52003	2.58347	1220.41	FALSE	52
2022-09-13	14:11:59	0.662913	2.94877	2.58347	1159.2	FALSE	52
2022-09-13	14:12:00	0.798028	3.54979	2.40337	1223.96	FALSE	52
2022-09-13	14:12:00	0.510242	2.26966	2.40337	1161.47	FALSE	52
2022-09-13	14:12:00	0.312634	1.39066	2.40337	1225.35	FALSE	52
2022-09-13	14:12:01	0.394211	1.75353	1.82269	1163.22	FALSE	52
2022-09-13	14:12:01	0.425713	1.89366	1.82269	1227.24	FALSE	52
2022-09-13	14:12:01	0.400013	1.77934	1.82269	1165	FALSE	52
2022-09-13	14:12:01	0.419097	1.86423	1.82269	1229.11	FALSE	52
2022-09-13	14:12:02	0.396501	1.76372	1.82359	1166.77	FALSE	52
2022-09-13	14:12:02	0.391158	1.73995	1.82359	1230.85	FALSE	52
2022-09-13	14:12:02	0.407443	1.81239	1.82359	1168.58	FALSE	52
2022-09-13	14:12:02	0.444746	1.97832	1.82359	1232.83	FALSE	52
2022-09-13	14:12:03	0.430395	1.91448	2.09841	1170.49	FALSE	52
2022-09-13	14:12:03	0.562404	2.50169	2.09841	1235.33	FALSE	52
2022-09-13	14:12:03	0.373957	1.66344	2.09841	1172.16	FALSE	52
2022-09-13	14:12:03	0.520216	2.31402	2.09841	1237.64	FALSE	52
2022-09-13	14:12:04	0.528257	2.34979	2.82872	1174.51	FALSE	52
2022-09-13	14:12:04	0.514262	2.28754	2.82872	1239.93	FALSE	52
2022-09-13	14:12:04	0.865254	3.84882	2.82872	1178.35	FALSE	52
2022-09-13	14:12:05	0.455026	2.02405	1.83587	1241.95	FALSE	52
2022-09-13	14:12:05	0.275025	1.22337	1.83587	1179.58	FALSE	52
2022-09-13	14:12:05	0.583524	2.59563	1.83587	1244.55	FALSE	52
2022-09-13	14:12:05	0.337316	1.50045	1.83587	1181.08	FALSE	52
2022-09-13	14:12:06	0.528817	2.35228	1.37702	1246.9	FALSE	52
2022-09-13	14:12:06	0.260369	1.15817	1.37702	1182.24	FALSE	52
2022-09-13	14:12:06	0.202456	0.900565	1.37702	1247.8	FALSE	52
2022-09-13	14:12:06	0.246629	1.09706	1.37702	1183.33	FALSE	52
2022-09-13	14:12:07	0.287494	1.27883	1.33757	1249.08	FALSE	52
2022-09-13	14:12:07	0.361641	1.60865	1.33757	1184.94	FALSE	52
2022-09-13	14:12:07	0.209835	0.933388	1.33757	1250.01	FALSE	52
2022-09-13	14:12:07	0.34383	1.52942	1.33757	1186.47	FALSE	52
2022-09-13	14:12:08	0.122965	0.546973	0.756083	1250.56	FALSE	52
2022-09-13	14:12:08	0.321947	1.43208	0.756083	1187.9	FALSE	52
2022-09-13	14:12:08	0.049784	0.221449	0.756083	1250.78	FALSE	52
2022-09-13	14:12:08	0.185204	0.823824	0.756083	1188.73	FALSE	52
2022-09-13	14:12:09	0.100471	0.446915	2.00397	1251.23	FALSE	52
2022-09-13	14:12:09	0.517723	2.30294	2.00397	1191.03	FALSE	52
2022-09-13	14:12:09	0.733346	3.26207	2.00397	1254.49	FALSE	52
2022-09-13	14:12:10	0.772226	3.43502	3.15166	1194.47	FALSE	52
2022-09-13	14:12:10	0.781081	3.4744	3.15166	1257.97	FALSE	52
2022-09-13	14:12:10	0.663728	2.95239	3.15166	1197.42	FALSE	52
2022-09-13	14:12:10	0.617061	2.74481	3.15166	1260.71	FALSE	52
2022-09-13	14:12:11	0.56271	2.50305	3.19869	1199.92	FALSE	52
2022-09-13	14:12:11	0.802608	3.57016	3.19869	1264.28	FALSE	52
2022-09-13	14:12:11	0.894059	3.97695	3.19869	1203.9	FALSE	52
2022-09-13	14:12:11	0.61701	2.74458	3.19869	1267.03	FALSE	52
2022-09-13	14:12:12	0.585051	2.60242	2.6919	1206.5	FALSE	52
2022-09-13	14:12:12	0.950852	4.22958	2.6919	1271.26	FALSE	52
2022-09-13	14:12:12	0.500979	2.22845	2.6919	1208.73	FALSE	52
2022-09-13	14:12:12	0.383779	1.70713	2.6919	1272.96	FALSE	52
2022-09-13	14:12:13	0.480623	2.13791	1.93304	1210.87	FALSE	52
2022-09-13	14:12:13	0.38444	1.71007	1.93304	1274.67	FALSE	52
2022-09-13	14:12:13	0.438639	1.95115	1.93304	1212.82	FALSE	52
2022-09-13	14:12:14	0.301743	1.34221	1.85591	1276.01	FALSE	52
2022-09-13	14:12:14	0.543168	2.41612	1.85591	1215.23	FALSE	52
2022-09-13	14:12:14	0.405153	1.8022	1.85591	1277.82	FALSE	52
2022-09-13	14:12:14	0.418842	1.86309	1.85591	1217.1	FALSE	52
2022-09-13	14:12:15	0.586018	2.60673	2.67554	1280.42	FALSE	52
2022-09-13	14:12:15	0.473092	2.10441	2.67554	1219.2	FALSE	52
2022-09-13	14:12:15	0.58958	2.62257	2.67554	1283.05	FALSE	52
2022-09-13	14:12:15	0.757265	3.36847	2.67554	1222.57	FALSE	52
2022-09-13	14:12:16	0.373906	1.66321	2.31244	1284.71	FALSE	52
2022-09-13	14:12:16	0.509886	2.26807	2.31244	1224.84	FALSE	52
2022-09-13	14:12:16	0.574618	2.55602	2.31244	1287.27	FALSE	52
2022-09-13	14:12:16	0.621031	2.76247	2.31244	1227.6	FALSE	52
2022-09-13	14:12:17	0.643982	2.86456	2.66935	1290.13	FALSE	52
2022-09-13	14:12:17	0.585509	2.60446	2.66935	1230.2	FALSE	52
2022-09-13	14:12:17	0.570801	2.53904	2.66935	1292.67	FALSE	52
2022-09-13	14:12:18	0.687697	3.05901	2.76371	1233.26	FALSE	52
2022-09-13	14:12:18	0.523778	2.32987	2.76371	1295	FALSE	52
2022-09-13	14:12:18	0.681641	3.03208	2.76371	1236.3	FALSE	52
2022-09-13	14:12:18	0.592124	2.63389	2.76371	1297.63	FALSE	52
2022-09-13	14:12:19	0.535229	2.38081	2.51674	1238.68	FALSE	52
2022-09-13	14:12:19	0.55416	2.46501	2.51674	1300.1	FALSE	52
2022-09-13	14:12:19	0.597214	2.65653	2.51674	1241.33	FALSE	52
2022-09-13	14:12:19	0.576552	2.56462	2.51674	1302.66	FALSE	52
2022-09-13	14:12:20	0.631717	2.81	3.35166	1244.14	FALSE	52
2022-09-13	14:12:20	0.692735	3.08142	3.35166	1305.74	FALSE	52
2022-09-13	14:12:20	0.901234	4.00887	3.35166	1248.15	FALSE	52
2022-09-13	14:12:20	0.788257	3.50632	3.35166	1309.25	FALSE	52
2022-09-13	14:12:21	0.729428	3.24464	3.28939	1251.4	FALSE	52
2022-09-13	14:12:21	1.03686	4.61216	3.28939	1313.86	FALSE	52
2022-09-13	14:12:21	0.452176	2.01137	3.28939	1253.41	FALSE	52
2022-09-13	14:12:22	0.609377	2.71063	2.24385	1316.57	FALSE	52
2022-09-13	14:12:22	0.471667	2.09807	2.24385	1255.51	FALSE	52
2022-09-13	14:12:22	0.365458	1.62563	2.24385	1318.2	FALSE	52
2022-09-13	14:12:22	0.571259	2.54107	2.24385	1258.05	FALSE	52
2022-09-13	14:12:23	0.889275	3.95567	10.2444	1322.15	FALSE	52
2022-09-13	14:12:23	2.74113	12.1931	10.2444	1270.24	FALSE	52
2022-09-13	14:12:23	3.20225	14.2442	10.2444	1336.4	1	53
2022-09-13	14:12:23	2.3795	10.5845	10.2444	1280.82	FALSE	53
2022-09-13	14:12:24	1.78536	7.94164	3.71397	1344.34	FALSE	53
2022-09-13	14:12:24	0.581081	2.58476	3.71397	1283.41	FALSE	53
2022-09-13	14:12:24	0.526934	2.34391	3.71397	1346.68	FALSE	53
2022-09-13	14:12:24	0.446374	1.98556	3.71397	1285.39	FALSE	53
2022-09-13	14:12:25	0.401183	1.78454	1.77503	1348.47	FALSE	53
2022-09-13	14:12:25	0.329122	1.464	1.77503	1286.86	FALSE	53
2022-09-13	14:12:25	0.466832	2.07656	1.77503	1350.55	FALSE	53
2022-09-13	14:12:26	0.420725	1.87147	4.11544	1288.73	FALSE	53
2022-09-13	14:12:26	0.492532	2.19088	4.11544	1352.74	FALSE	53
2022-09-13	14:12:26	1.06266	4.72692	4.11544	1293.46	FALSE	53
2022-09-13	14:12:26	1.72485	7.67248	4.11544	1360.41	FALSE	53
2022-09-13	14:12:27	3.70556	16.4831	11.3876	1309.94	1	54
2022-09-13	14:12:27	3.12678	13.9085	11.3876	1374.32	1	55
2022-09-13	14:12:27	2.37966	10.5852	11.3876	1320.53	FALSE	55
2022-09-13	14:12:27	1.02815	4.57342	11.3876	1378.89	FALSE	55
2022-09-13	14:12:28	0.628104	2.79393	1.82546	1323.32	FALSE	55
2022-09-13	14:12:28	0.291361	1.29603	1.82546	1380.19	FALSE	55
2022-09-13	14:12:28	0.352379	1.56745	1.82546	1324.89	FALSE	55
2022-09-13	14:12:28	0.369682	1.64442	1.82546	1381.83	FALSE	55
2022-09-13	14:12:29	0.375585	1.67068	1.55055	1326.56	FALSE	55
2022-09-13	14:12:29	0.268257	1.19326	1.55055	1383.02	FALSE	55
2022-09-13	14:12:29	0.401896	1.78771	1.55055	1328.35	FALSE	55
2022-09-13	14:12:30	0.429936	1.91244	1.80627	1384.94	FALSE	55
2022-09-13	14:12:30	0.484389	2.15466	1.80627	1330.5	FALSE	55
2022-09-13	14:12:30	0.307443	1.36757	1.80627	1386.3	FALSE	55
2022-09-13	14:12:30	0.402506	1.79043	1.80627	1332.29	FALSE	55
2022-09-13	14:12:31	0.36215	1.61092	4.02771	1387.92	FALSE	55
2022-09-13	14:12:31	0.796298	3.54209	4.02771	1335.83	FALSE	55
2022-09-13	14:12:31	1.49355	6.64361	4.02771	1394.56	FALSE	55
2022-09-13	14:12:31	0.969885	4.31424	4.02771	1340.15	FALSE	55
2022-09-13	14:12:32	1.2906	5.74085	4.28532	1400.3	FALSE	55
2022-09-13	14:12:32	1.2366	5.50064	4.28532	1345.65	FALSE	55
2022-09-13	14:12:32	0.677519	3.01374	4.28532	1403.31	FALSE	55
2022-09-13	14:12:32	0.648817	2.88607	4.28532	1348.53	FALSE	55
2022-09-13	14:12:33	0.615789	2.73915	2.3427	1406.05	FALSE	55
2022-09-13	14:12:33	0.457825	2.0365	2.3427	1350.57	FALSE	55
2022-09-13	14:12:33	0.506374	2.25245	2.3427	1408.31	FALSE	55
2022-09-13	14:12:34	0.361845	1.60956	1.87515	1352.18	FALSE	55
2022-09-13	14:12:34	0.530445	2.35953	1.87515	1410.66	FALSE	55
2022-09-13	14:12:34	0.399046	1.77504	1.87515	1353.95	FALSE	55
2022-09-13	14:12:34	0.394873	1.75647	1.87515	1412.42	FALSE	55
2022-09-13	14:12:35	0.369326	1.64284	1.93418	1355.6	FALSE	55
2022-09-13	14:12:35	0.514822	2.29003	1.93418	1414.71	FALSE	55
2022-09-13	14:12:35	0.396247	1.76259	1.93418	1357.36	FALSE	55
2022-09-13	14:12:35	0.458893	2.04125	1.93418	1416.75	FALSE	55
2022-09-13	14:12:36	0.395484	1.75919	1.85981	1359.12	FALSE	55
2022-09-13	14:12:36	0.472735	2.10282	1.85981	1418.86	FALSE	55
2022-09-13	14:12:36	0.408206	1.81578	1.85981	1360.93	FALSE	55
2022-09-13	14:12:36	0.395992	1.76145	1.85981	1420.62	FALSE	55
2022-09-13	14:12:37	0.434873	1.9344	1.79624	1362.87	FALSE	55
2022-09-13	14:12:37	0.392328	1.74515	1.79624	1422.36	FALSE	55
2022-09-13	14:12:37	0.384237	1.70916	1.79624	1364.58	FALSE	55
2022-09-13	14:12:38	0.34159	1.51946	1.96632	1423.88	FALSE	55
2022-09-13	14:12:38	0.480013	2.13519	1.96632	1366.71	FALSE	55
2022-09-13	14:12:38	0.391158	1.73995	1.96632	1425.62	FALSE	55
2022-09-13	14:12:38	0.555433	2.47068	1.96632	1369.18	FALSE	55
2022-09-13	14:12:39	0.304593	1.35489	2.15098	1426.98	FALSE	55
2022-09-13	14:12:39	0.592074	2.63366	2.15098	1371.82	FALSE	55
2022-09-13	14:12:39	0.390496	1.737	2.15098	1428.71	FALSE	55
2022-09-13	14:12:39	0.647086	2.87837	2.15098	1374.7	FALSE	55
2022-09-13	14:12:40	0.282252	1.25551	1.99264	1429.97	FALSE	55
2022-09-13	14:12:40	0.495993	2.20628	1.99264	1376.9	FALSE	55
2022-09-13	14:12:40	0.468766	2.08516	1.99264	1432.05	FALSE	55
2022-09-13	14:12:40	0.544847	2.42359	1.99264	1379.33	FALSE	55
2022-09-13	14:12:41	0.174975	0.778324	-0.510637	1432.83	FALSE	55
2022-09-13	14:12:41	-0.207621	-0.92354	-0.510637	1379.33	FALSE	55
2022-09-13	14:12:41	-0.311743	-1.3867	-0.510637	1432.83	FALSE	55
2022-09-13	14:12:42	-0.309656	-1.37741	-1.0902	1379.33	FALSE	55
2022-09-13	14:12:42	-0.299325	-1.33146	-1.0902	1432.83	FALSE	55
2022-09-13	14:12:42	-0.225483	-1.00299	-1.0902	1379.33	FALSE	55
2022-09-13	14:12:42	-0.14589	-0.648948	-1.0902	1432.83	FALSE	55
2022-09-13	14:12:43	0.0259162	0.11528	0.360894	1379.44	FALSE	55
2022-09-13	14:12:43	0.139453	0.620315	0.360894	1433.45	FALSE	55
2022-09-13	14:12:43	0.0562979	0.250424	0.360894	1379.69	FALSE	55
2022-09-13	14:12:43	0.102863	0.457555	0.360894	1433.91	FALSE	55
2022-09-13	14:12:44	0.228206	1.01511	1.50922	1380.71	FALSE	55
2022-09-13	14:12:44	0.283473	1.26094	1.50922	1435.17	FALSE	55
2022-09-13	14:12:44	0.402761	1.79156	1.50922	1382.5	FALSE	55
2022-09-13	14:12:44	0.44271	1.96926	1.50922	1437.14	FALSE	55
2022-09-13	14:12:45	0.419199	1.86468	2.11822	1384.36	FALSE	55
2022-09-13	14:12:45	0.366069	1.62835	2.11822	1438.77	FALSE	55
2022-09-13	14:12:45	0.643321	2.86162	2.11822	1387.22	FALSE	55
2022-09-13	14:12:46	0.297774	1.32456	2.0666	1440.09	FALSE	55
2022-09-13	14:12:46	0.670547	2.98273	2.0666	1390.21	FALSE	55
2022-09-13	14:12:46	0.475534	2.11527	2.0666	1442.21	FALSE	55
2022-09-13	14:12:46	0.414517	1.84385	2.0666	1392.05	FALSE	55
2022-09-13	14:12:47	0.230191	1.02394	1.22925	1443.23	FALSE	55
2022-09-13	14:12:47	0.441438	1.9636	1.22925	1394.02	FALSE	55
2022-09-13	14:12:47	0.200674	0.892638	1.22925	1444.12	FALSE	55
2022-09-13	14:12:47	0.233092	1.03684	1.22925	1395.05	FALSE	55
2022-09-13	14:12:48	0.443422	1.97243	1.20928	1446.1	FALSE	55
2022-09-13	14:12:48	0.193651	0.861398	1.20928	1395.91	FALSE	55
2022-09-13	14:12:48	0.229224	1.01963	1.20928	1447.12	FALSE	55
2022-09-13	14:12:48	0.221132	0.983639	1.20928	1396.9	FALSE	55
2022-09-13	14:12:49	0.313397	1.39405	0.963419	1448.51	FALSE	55
2022-09-13	14:12:49	0.08556	0.380588	0.963419	1397.28	FALSE	55
2022-09-13	14:12:49	0.250802	1.11562	0.963419	1449.63	FALSE	55
2022-09-13	14:12:50	0.111158	0.494453	0.441765	1397.77	FALSE	55
2022-09-13	14:12:50	0.17472	0.77719	0.441765	1450.4	FALSE	55
2022-09-13	14:12:50	0.0242877	0.108037	0.441765	1397.88	FALSE	55
2022-09-13	14:12:50	0.0870867	0.387379	0.441765	1450.79	FALSE	55
2022-09-13	14:12:51	0.0834226	0.37108	0.671475	1398.25	FALSE	55
2022-09-13	14:12:51	0.099962	0.444651	0.671475	1451.24	FALSE	55
2022-09-13	14:12:51	0.257621	1.14595	0.671475	1399.4	FALSE	55
2022-09-13	14:12:51	0.162812	0.72422	0.671475	1451.96	FALSE	55
2022-09-13	14:12:52	0.323473	1.43887	2.06954	1400.84	FALSE	55
2022-09-13	14:12:52	0.406221	1.80695	2.06954	1453.77	FALSE	55
2022-09-13	14:12:52	0.631463	2.80887	2.06954	1403.64	FALSE	55
2022-09-13	14:12:52	0.49986	2.22348	2.06954	1455.99	FALSE	55
2022-09-13	14:12:53	0.852278	3.7911	4.35506	1407.44	FALSE	55
2022-09-13	14:12:53	0.729428	3.24464	4.35506	1459.24	FALSE	55
2022-09-13	14:12:53	1.35548	6.02945	4.35506	1413.47	FALSE	55
2022-09-13	14:12:54	1.24296	5.52893	2.24407	1464.76	FALSE	55
2022-09-13	14:12:54	0.318384	1.41624	2.24407	1414.88	FALSE	55
2022-09-13	14:12:54	0.201998	0.898528	2.24407	1465.66	FALSE	55
2022-09-13	14:12:54	0.254618	1.13259	2.24407	1416.01	FALSE	55
2022-09-13	14:12:55	0.471667	2.09807	2.55183	1467.76	FALSE	55
2022-09-13	14:12:55	0.728562	3.24079	2.55183	1419.26	FALSE	55
2022-09-13	14:12:55	0.561081	2.4958	2.55183	1470.26	FALSE	55
2022-09-13	14:12:55	0.533397	2.37266	2.55183	1421.63	FALSE	55
2022-09-13	14:12:56	0.407188	1.81125	2.10865	1472.07	FALSE	55
2022-09-13	14:12:56	0.505967	2.25064	2.10865	1423.88	FALSE	55
2022-09-13	14:12:56	0.458791	2.04079	2.10865	1474.11	FALSE	55
2022-09-13	14:12:56	0.524236	2.33191	2.10865	1426.21	FALSE	55
2022-09-13	14:12:57	0.340623	1.51516	1.39337	1475.62	FALSE	55
2022-09-13	14:12:57	0.2993	1.33135	1.39337	1427.54	FALSE	55
2022-09-13	14:12:57	0.299809	1.33361	1.39337	1476.96	FALSE	55
2022-09-13	14:12:58	0.300267	1.33565	1.26072	1428.88	FALSE	55
2022-09-13	14:12:58	0.261234	1.16202	1.26072	1478.12	FALSE	55
2022-09-13	14:12:58	0.287952	1.28087	1.26072	1430.16	FALSE	55
2022-09-13	14:12:58	0.284237	1.26434	1.26072	1479.38	FALSE	55
2022-09-13	14:12:59	0.253295	1.12671	1.09055	1431.28	FALSE	55
2022-09-13	14:12:59	0.202405	0.900338	1.09055	1480.28	FALSE	55
2022-09-13	14:12:59	0.286883	1.27611	1.09055	1432.56	FALSE	55
2022-09-13	14:12:59	0.238079	1.05902	1.09055	1481.34	FALSE	55
2022-09-13	14:13:00	0.292176	1.29966	1.03441	1433.86	FALSE	55
2022-09-13	14:13:00	0.141845	0.630955	1.03441	1481.97	FALSE	55
2022-09-13	14:13:00	0.261896	1.16497	1.03441	1435.03	FALSE	55
2022-09-13	14:13:00	0.234262	1.04204	1.03441	1483.02	FALSE	55
2022-09-13	14:13:01	0.463728	2.06275	2.23042	1437.09	FALSE	55
2022-09-13	14:13:01	0.627901	2.79303	2.23042	1485.81	FALSE	55
2022-09-13	14:13:01	0.412634	1.83548	2.23042	1438.92	FALSE	55
2022-09-13	14:13:02	0.359199	1.59779	1.52382	1487.41	FALSE	55
2022-09-13	14:13:02	0.330954	1.47215	1.52382	1440.4	FALSE	55
2022-09-13	14:13:02	0.329479	1.46559	1.52382	1488.87	FALSE	55
2022-09-13	14:13:02	0.350649	1.55976	1.52382	1441.96	FALSE	55
2022-09-13	14:13:03	0.543779	2.41884	3.6302	1491.29	FALSE	55
2022-09-13	14:13:03	0.579555	2.57798	3.6302	1444.53	FALSE	55
2022-09-13	14:13:03	1.02581	4.56301	3.6302	1495.85	FALSE	55
2022-09-13	14:13:03	1.11528	4.96099	3.6302	1449.49	FALSE	55
2022-09-13	14:13:04	1.64744	7.32814	3.72992	1503.18	FALSE	55
2022-09-13	14:13:04	0.69925	3.1104	3.72992	1452.61	FALSE	55
2022-09-13	14:13:04	0.607239	2.70112	3.72992	1505.88	FALSE	55
2022-09-13	14:13:04	0.400166	1.78002	3.72992	1454.39	FALSE	55
2022-09-13	14:13:05	0.368664	1.63989	1.55432	1507.52	FALSE	55
2022-09-13	14:13:05	0.36729	1.63378	1.55432	1456.02	FALSE	55
2022-09-13	14:13:05	0.312328	1.3893	1.55432	1508.91	FALSE	55
2022-09-13	14:13:06	0.0369086	0.164177	0.668872	1456.18	FALSE	55
2022-09-13	14:13:06	0.086934	0.3867	0.668872	1509.3	FALSE	55
2022-09-13	14:13:06	0.243626	1.0837	0.668872	1457.27	FALSE	55
2022-09-13	14:13:06	0.234008	1.04091	0.668872	1510.34	FALSE	55
2022-09-13	14:13:07	0.119758	0.532708	0.472155	1457.8	FALSE	55
2022-09-13	14:13:07	0.0239824	0.106679	0.472155	1510.45	FALSE	55
2022-09-13	14:13:07	0.0882572	0.392586	0.472155	1458.19	FALSE	55
2022-09-13	14:13:07	0.192583	0.856648	0.472155	1511.3	FALSE	55
2022-09-13	14:13:08	0.26841	1.19394	1.32331	1459.39	FALSE	55
2022-09-13	14:13:08	0.324746	1.44454	1.32331	1512.75	FALSE	55
2022-09-13	14:13:08	0.277061	1.23242	1.32331	1460.62	FALSE	55
2022-09-13	14:13:08	0.319758	1.42235	1.32331	1514.17	FALSE	55
2022-09-13	14:13:09	0.22897	1.0185	0.722486	1461.64	FALSE	55
2022-09-13	14:13:09	0.188512	0.838539	0.722486	1515.01	FALSE	55
2022-09-13	14:13:09	0.069784	0.310413	0.722486	1461.95	FALSE	55
2022-09-13	14:13:10	0.0812343	0.361346	0.0550093	1515.37	FALSE	55
2022-09-13	14:13:10	0.0811834	0.36112	0.0550093	1462.31	FALSE	55
2022-09-13	14:13:10	-0.0225315	-0.100225	0.0550093	1515.37	FALSE	55
2022-09-13	14:13:10	-0.0904196	-0.402204	0.0550093	1462.31	FALSE	55
2022-09-13	14:13:11	-0.0416155	-0.185114	-0.286698	1515.37	FALSE	55
2022-09-13	14:13:11	-0.0695544	-0.309392	-0.286698	1462.31	FALSE	55
2022-09-13	14:13:11	-0.0531677	-0.236501	-0.286698	1515.37	FALSE	55
2022-09-13	14:13:11	-0.093473	-0.415787	-0.286698	1462.31	FALSE	55
2022-09-13	14:13:12	-0.120445	-0.535763	-0.276512	1515.37	FALSE	55
2022-09-13	14:13:12	-0.0268572	-0.119466	-0.276512	1462.31	FALSE	55
2022-09-13	14:13:12	-0.0354069	-0.157497	-0.276512	1515.37	FALSE	55
2022-09-13	14:13:12	-0.0659412	-0.29332	-0.276512	1462.31	FALSE	55
2022-09-13	14:13:13	-0.225381	-1.00254	-1.56213	1515.37	FALSE	55
2022-09-13	14:13:13	-0.568537	-2.52897	-1.56213	1462.31	FALSE	55
2022-09-13	14:13:13	-0.524618	-2.33361	-1.56213	1515.37	FALSE	55
2022-09-13	14:13:13	-0.0861956	-0.383415	-1.56213	1462.31	FALSE	55
2022-09-13	14:13:14	0.149224	0.663778	0.97919	1516.03	FALSE	55
2022-09-13	14:13:14	0.13299	0.591566	0.97919	1462.9	FALSE	55
2022-09-13	14:13:14	0.378181	1.68222	0.97919	1517.72	FALSE	55
2022-09-13	14:13:15	0.18785	0.835594	1.75744	1463.74	FALSE	55
2022-09-13	14:13:15	0.451718	2.00933	1.75744	1519.73	FALSE	55
2022-09-13	14:13:15	0.224797	0.999942	1.75744	1464.74	FALSE	55
2022-09-13	14:13:15	0.715992	3.18488	1.75744	1522.91	FALSE	55
2022-09-13	14:13:16	0.602099	2.67826	10.8306	1467.41	FALSE	55
2022-09-13	14:13:16	1.97055	8.7654	10.8306	1531.68	FALSE	55
2022-09-13	14:13:16	1.94485	8.65108	10.8306	1476.06	FALSE	55
2022-09-13	14:13:16	5.22184	23.2278	10.8306	1554.9	1	56
2022-09-13	14:13:17	5.9136	26.3049	26.237	1502.37	1	57
2022-09-13	14:13:17	8.75924	38.9629	26.237	1593.87	1	58
2022-09-13	14:13:17	3.0222	13.4434	26.237	1515.81	1	59
2022-09-13	14:13:18	2.79039	12.4122	7.83913	1606.28	FALSE	59
2022-09-13	14:13:18	2.22027	9.87621	7.83913	1525.69	FALSE	59
2022-09-13	14:13:18	0.884542	3.93462	7.83913	1610.21	FALSE	59
2022-09-13	14:13:18	1.15406	5.13349	7.83913	1530.82	FALSE	59
2022-09-13	14:13:19	1.01889	4.53223	5.15254	1614.75	FALSE	59
2022-09-13	14:13:19	1.19304	5.30688	5.15254	1536.13	FALSE	59
2022-09-13	14:13:19	0.817875	3.63807	5.15254	1618.38	FALSE	59
2022-09-13	14:13:19	1.60357	7.133	5.15254	1543.26	FALSE	59
2022-09-13	14:13:20	1.72149	7.65753	6.54072	1626.04	FALSE	59
2022-09-13	14:13:20	1.39935	6.22459	6.54072	1549.49	FALSE	59
2022-09-13	14:13:20	1.43523	6.38419	6.54072	1632.43	FALSE	59
2022-09-13	14:13:20	1.32561	5.89658	6.54072	1555.38	FALSE	59
2022-09-13	14:13:21	2.08067	9.25524	8.7836	1641.68	FALSE	59
2022-09-13	14:13:21	1.60724	7.14932	8.7836	1562.53	FALSE	59
2022-09-13	14:13:21	2.39452	10.6513	8.7836	1652.33	FALSE	59
2022-09-13	14:13:21	1.81614	8.07855	8.7836	1570.61	FALSE	59
2022-09-13	14:13:22	2.10775	9.37569	6.35356	1661.71	FALSE	59
2022-09-13	14:13:22	1.13859	5.06468	6.35356	1575.68	FALSE	59
2022-09-13	14:13:22	1.03869	4.6203	6.35356	1666.33	FALSE	59
2022-09-13	14:13:23	1.34805	5.9964	6.14151	1581.67	FALSE	59
2022-09-13	14:13:23	0.899249	4.00004	6.14151	1670.33	FALSE	59
2022-09-13	14:13:23	1.33314	5.93007	6.14151	1587.6	FALSE	59
2022-09-13	14:13:23	1.94225	8.63952	6.14151	1678.97	FALSE	59
2022-09-13	14:13:24	2.19635	9.7698	5.00644	1597.37	FALSE	59
2022-09-13	14:13:24	1.15462	5.13598	5.00644	1684.1	FALSE	59
2022-09-13	14:13:24	0.781794	3.47758	5.00644	1600.85	FALSE	59
2022-09-13	14:13:24	0.369224	1.64238	5.00644	1685.75	FALSE	59
2022-09-13	14:13:25	0.295433	1.31415	-0.0711728	1602.16	FALSE	59
2022-09-13	14:13:25	-0.0790201	-0.351497	-0.0711728	1685.75	FALSE	59
2022-09-13	14:13:25	-0.264414	-1.17617	-0.0711728	1602.16	FALSE	59
2022-09-13	14:13:26	-0.270063	-1.20129	7.06098	1685.75	FALSE	59
2022-09-13	14:13:26	1.01029	4.49397	7.06098	1606.66	FALSE	59
2022-09-13	14:13:26	2.82612	12.5711	7.06098	1698.32	FALSE	59
2022-09-13	14:13:26	2.78317	12.3801	7.06098	1619.04	FALSE	59
2022-09-13	14:13:27	2.02032	8.98679	12.5388	1707.3	FALSE	59
2022-09-13	14:13:27	3.20413	14.2526	12.5388	1633.29	1	60
2022-09-13	14:13:27	2.20826	9.82278	12.5388	1717.13	FALSE	60
2022-09-13	14:13:27	3.84271	17.0931	12.5388	1650.38	1	61
2022-09-13	14:13:28	2.4165	10.7491	7.43189	1727.88	FALSE	61
2022-09-13	14:13:28	2.84149	12.6395	7.43189	1663.02	FALSE	61
2022-09-13	14:13:28	0.663931	2.9533	7.43189	1730.83	FALSE	61
2022-09-13	14:13:28	0.761132	3.38567	7.43189	1666.41	FALSE	61
2022-09-13	14:13:29	0.754211	3.35488	2.82574	1734.18	FALSE	61
2022-09-13	14:13:29	0.629936	2.80208	2.82574	1669.21	FALSE	61
2022-09-13	14:13:29	0.728512	3.24057	2.82574	1737.42	FALSE	61
2022-09-13	14:13:29	0.428359	1.90543	2.82574	1671.12	FALSE	61
2022-09-13	14:13:30	1.54057	6.85276	11.107	1744.28	FALSE	61
2022-09-13	14:13:30	1.3109	5.83115	11.107	1676.95	FALSE	61
2022-09-13	14:13:30	4.63945	20.6372	11.107	1764.91	1	62
2022-09-13	14:13:31	4.27604	19.0207	23.642	1695.97	1	63
2022-09-13	14:13:31	10.552	46.9374	23.642	1811.85	1	64
2022-09-13	14:13:31	2.42414	10.7831	23.642	1706.75	FALSE	64
2022-09-13	14:13:31	4.0077	17.8271	23.642	1829.68	1	65
2022-09-13	14:13:32	0.813601	3.61906	0.70147	1710.37	FALSE	65
2022-09-13	14:13:32	0.143168	0.63684	0.70147	1830.32	FALSE	65
2022-09-13	14:13:32	0.120827	0.537463	0.70147	1710.91	FALSE	65
2022-09-13	14:13:32	-0.446806	-1.98748	0.70147	1830.32	FALSE	65
2022-09-13	14:13:33	-1.02284	-4.5498	-3.90123	1710.91	FALSE	65
2022-09-13	14:13:33	-0.935101	-4.15952	-3.90123	1830.32	FALSE	65
2022-09-13	14:13:33	-0.899783	-4.00241	-3.90123	1710.91	FALSE	65
2022-09-13	14:13:33	-0.650419	-2.89319	-3.90123	1830.32	FALSE	65
2022-09-13	14:13:34	-0.552811	-2.45901	-1.42208	1710.91	FALSE	65
2022-09-13	14:13:34	-0.384211	-1.70905	-1.42208	1830.32	FALSE	65
2022-09-13	14:13:34	-0.0220735	-0.0981873	-1.42208	1710.91	FALSE	65
2022-09-13	14:13:35	-0.0383585	-0.170626	0.747366	1830.32	FALSE	65
2022-09-13	14:13:35	0.178486	0.793941	0.747366	1711.7	FALSE	65
2022-09-13	14:13:35	0.0708017	0.31494	0.747366	1830.63	FALSE	65
2022-09-13	14:13:35	0.461132	2.05121	0.747366	1713.75	FALSE	65
2022-09-13	14:13:36	0.399606	1.77753	1.84323	1832.41	FALSE	65
2022-09-13	14:13:36	0.635789	2.82812	1.84323	1716.58	FALSE	65
2022-09-13	14:13:36	0.269224	1.19756	1.84323	1833.61	FALSE	65
2022-09-13	14:13:36	0.352888	1.56972	1.84323	1718.15	FALSE	65
2022-09-13	14:13:37	0.252379	1.12263	0.966155	1834.73	FALSE	65
2022-09-13	14:13:37	0.252074	1.12128	0.966155	1719.27	FALSE	65
2022-09-13	14:13:37	0.105102	0.467515	0.966155	1835.2	FALSE	65
2022-09-13	14:13:37	0.25925	1.1532	0.966155	1720.43	FALSE	65
2022-09-13	14:13:38	0.230751	1.02643	8.0195	1836.22	FALSE	65
2022-09-13	14:13:38	1.5192	6.75771	8.0195	1727.18	FALSE	65
2022-09-13	14:13:38	3.65864	16.2744	8.0195	1852.5	1	66
2022-09-13	14:13:39	4.10011	18.2381	15.4081	1745.42	1	67
2022-09-13	14:13:39	5.01777	22.32	15.4081	1874.82	1	68
2022-09-13	14:13:39	2.11192	9.39424	15.4081	1754.82	FALSE	68
2022-09-13	14:13:39	2.62576	11.6799	15.4081	1886.5	FALSE	68
2022-09-13	14:13:40	0.789428	3.51153	4.01991	1758.33	FALSE	68
2022-09-13	14:13:40	1.16444	5.17966	4.01991	1891.68	FALSE	68
2022-09-13	14:13:40	0.868868	3.8649	4.01991	1762.19	FALSE	68
2022-09-13	14:13:40	0.792125	3.52353	4.01991	1895.2	FALSE	68
2022-09-13	14:13:41	0.654516	2.91142	4.42098	1765.1	FALSE	68
2022-09-13	14:13:41	0.979249	4.3559	4.42098	1899.56	FALSE	68
2022-09-13	14:13:41	1.64673	7.32498	4.42098	1772.43	FALSE	68
2022-09-13	14:13:41	0.695025	3.09161	4.42098	1902.65	FALSE	68
2022-09-13	14:13:42	1.90383	8.46862	7.41395	1780.9	FALSE	68
2022-09-13	14:13:42	1.30846	5.82029	7.41395	1908.47	FALSE	68
2022-09-13	14:13:42	1.7879	7.95294	7.41395	1788.85	FALSE	68
2022-09-13	14:13:43	0.94444	4.20106	4.72347	1912.67	FALSE	68
2022-09-13	14:13:43	1.44449	6.42538	4.72347	1795.28	FALSE	68
2022-09-13	14:13:43	0.945305	4.20491	4.72347	1916.87	FALSE	68
2022-09-13	14:13:43	0.913295	4.06252	4.72347	1799.34	FALSE	68
2022-09-13	14:13:44	1.10205	4.90214	3.82574	1921.78	FALSE	68
2022-09-13	14:13:44	0.831209	3.69738	3.82574	1803.04	FALSE	68
2022-09-13	14:13:44	1.06785	4.75001	3.82574	1926.53	FALSE	68
2022-09-13	14:13:44	0.439148	1.95342	3.82574	1804.99	FALSE	68
2022-09-13	14:13:45	0.812481	3.61408	2.8769	1930.14	FALSE	68
2022-09-13	14:13:45	0.567188	2.52297	2.8769	1807.51	FALSE	68
2022-09-13	14:13:45	0.852736	3.79314	2.8769	1933.93	FALSE	68
2022-09-13	14:13:45	0.354618	1.57741	2.8769	1809.09	FALSE	68
2022-09-13	14:13:46	0.74958	3.33428	2.42797	1937.27	FALSE	68
2022-09-13	14:13:46	0.314567	1.39926	2.42797	1810.49	FALSE	68
2022-09-13	14:13:46	0.573346	2.55036	2.42797	1939.82	FALSE	68
2022-09-13	14:13:47	0.432125	1.92218	1.75302	1812.41	FALSE	68
2022-09-13	14:13:47	0.410344	1.82529	1.75302	1941.64	FALSE	68
2022-09-13	14:13:47	0.315331	1.40266	1.75302	1813.81	FALSE	68
2022-09-13	14:13:47	0.418588	1.86196	1.75302	1943.5	FALSE	68
2022-09-13	14:13:48	0.50159	2.23117	2.41029	1816.04	FALSE	68
2022-09-13	14:13:48	0.418842	1.86309	2.41029	1945.37	FALSE	68
2022-09-13	14:13:48	0.609682	2.71199	2.41029	1818.76	FALSE	68
2022-09-13	14:13:48	0.637316	2.83491	2.41029	1948.2	FALSE	68
2022-09-13	14:13:49	1.05732	4.70317	7.23281	1823.46	FALSE	68
2022-09-13	14:13:49	1.8619	8.2821	7.23281	1956.49	FALSE	68
2022-09-13	14:13:49	1.77279	7.88572	7.23281	1831.35	FALSE	68
2022-09-13	14:13:49	1.81202	8.06023	7.23281	1964.55	FALSE	68
2022-09-13	14:13:50	1.74469	7.76073	5.87718	1839.11	FALSE	68
2022-09-13	14:13:50	1.17996	5.2487	5.87718	1969.79	FALSE	68
2022-09-13	14:13:50	1.0391	4.62212	5.87718	1843.73	FALSE	68
2022-09-13	14:13:51	0.540369	2.40367	2.23876	1972.2	FALSE	68
2022-09-13	14:13:51	0.697112	3.10089	2.23876	1846.83	FALSE	68
2022-09-13	14:13:51	0.217214	0.966211	2.23876	1973.16	FALSE	68
2022-09-13	14:13:51	0.558486	2.48426	2.23876	1849.31	FALSE	68
2022-09-13	14:13:52	0.325916	1.44974	4.00367	1974.61	FALSE	68
2022-09-13	14:13:52	0.850852	3.78476	4.00367	1853.1	FALSE	68
2022-09-13	14:13:52	0.92729	4.12477	4.00367	1978.74	FALSE	68
2022-09-13	14:13:52	1.4962	6.6554	4.00367	1859.75	FALSE	68
2022-09-13	14:13:53	1.74144	7.74627	8.20286	1986.48	FALSE	68
2022-09-13	14:13:53	2.30775	10.2653	8.20286	1870.02	FALSE	68
2022-09-13	14:13:53	1.1137	4.95396	8.20286	1991.44	FALSE	68
2022-09-13	14:13:53	2.21345	9.84587	8.20286	1879.86	FALSE	68
2022-09-13	14:13:54	1.0909	4.85254	5.13303	1996.29	FALSE	68
2022-09-13	14:13:54	1.75345	7.7997	5.13303	1887.66	FALSE	68
2022-09-13	14:13:54	0.617519	2.74685	5.13303	1999.04	FALSE	68
2022-09-13	14:13:55	0.664491	2.95579	2.18618	1890.62	FALSE	68
2022-09-13	14:13:55	0.511514	2.27532	2.18618	2001.31	FALSE	68
2022-09-13	14:13:55	0.490293	2.18092	2.18618	1892.8	FALSE	68
2022-09-13	14:13:55	0.299606	1.33271	2.18618	2002.65	FALSE	68
2022-09-13	14:13:56	0.43874	1.9516	3.70966	1894.75	FALSE	68
2022-09-13	14:13:56	0.453906	2.01906	3.70966	2004.67	FALSE	68
2022-09-13	14:13:56	1.0278	4.57186	3.70966	1899.32	FALSE	68
2022-09-13	14:13:56	1.41543	6.29612	3.70966	2010.96	FALSE	68
2022-09-13	14:13:57	1.48184	6.59152	4.49918	1905.92	FALSE	68
2022-09-13	14:13:57	1.17258	5.21587	4.49918	2016.18	FALSE	68
2022-09-13	14:13:57	1.06698	4.74614	4.49918	1910.66	FALSE	68
2022-09-13	14:13:57	0.32444	1.44317	4.49918	2017.62	FALSE	68
2022-09-13	14:13:58	0.638283	2.83921	2.22597	1913.5	FALSE	68
2022-09-13	14:13:58	0.332176	1.47759	2.22597	2019.1	FALSE	68
2022-09-13	14:13:58	0.530802	2.36111	2.22597	1915.86	FALSE	68
2022-09-13	14:13:59	0.332074	1.47713	5.52182	2020.57	FALSE	68
2022-09-13	14:13:59	0.811209	3.60842	5.52182	1919.47	FALSE	68
2022-09-13	14:13:59	0.950038	4.22596	5.52182	2024.8	FALSE	68
2022-09-13	14:13:59	2.87212	12.7758	5.52182	1932.25	FALSE	68
2022-09-13	14:14:00	3.13019	13.9237	13.7594	2038.72	1	69
2022-09-13	14:14:00	3.45116	15.3514	13.7594	1947.6	1	70
2022-09-13	14:14:00	2.32983	10.3635	13.7594	2049.09	FALSE	70
2022-09-13	14:14:00	3.46184	15.399	13.7594	1963	1	71
2022-09-13	14:14:01	0.877163	3.9018	6.02465	2052.99	FALSE	71
2022-09-13	14:14:01	1.85172	8.23682	6.02465	1971.23	FALSE	71
2022-09-13	14:14:01	1.19497	5.31547	6.02465	2058.31	FALSE	71
2022-09-13	14:14:01	1.49375	6.6445	6.02465	1977.88	FALSE	71
2022-09-13	14:14:02	1.38933	6.18002	6.62377	2064.49	FALSE	71
2022-09-13	14:14:02	2.07365	9.22401	6.62377	1987.1	FALSE	71
2022-09-13	14:14:02	1.00429	4.46728	6.62377	2068.95	FALSE	71
2022-09-13	14:14:03	1.66225	7.39402	5.0114	1994.5	FALSE	71
2022-09-13	14:14:03	0.913651	4.0641	5.0114	2073.02	FALSE	71
2022-09-13	14:14:03	1.14301	5.08434	5.0114	1999.58	FALSE	71
2022-09-13	14:14:03	0.787544	3.50315	5.0114	2076.52	FALSE	71
2022-09-13	14:14:04	1.25503	5.58262	4.41278	2005.16	FALSE	71
2022-09-13	14:14:04	0.57243	2.54628	4.41278	2079.07	FALSE	71
2022-09-13	14:14:04	1.01691	4.52342	4.41278	2009.69	FALSE	71
2022-09-13	14:14:04	1.12378	4.9988	4.41278	2084.07	FALSE	71
2022-09-13	14:14:05	2.47034	10.9886	8.78479	2020.68	FALSE	71
2022-09-13	14:14:05	2.70098	12.0145	8.78479	2096.08	FALSE	71
2022-09-13	14:14:05	1.58581	7.054	8.78479	2027.73	FALSE	71
2022-09-13	14:14:05	1.14251	5.08211	8.78479	2101.16	FALSE	71
2022-09-13	14:14:06	0.410242	1.82484	1.40462	2029.55	FALSE	71
2022-09-13	14:14:06	0.358181	1.59326	1.40462	2102.75	FALSE	71
2022-09-13	14:14:06	0.178893	0.795752	1.40462	2030.35	FALSE	71
2022-09-13	14:14:07	0.282863	1.25823	1.47538	2104.01	FALSE	71
2022-09-13	14:14:07	0.40612	1.8065	1.47538	2032.16	FALSE	71
2022-09-13	14:14:07	0.34897	1.55229	1.47538	2105.57	FALSE	71
2022-09-13	14:14:07	0.288766	1.28449	1.47538	2033.44	FALSE	71
2022-09-13	14:14:08	0.623524	2.77356	2.71346	2108.34	FALSE	71
2022-09-13	14:14:08	0.609122	2.7095	2.71346	2036.15	FALSE	71
2022-09-13	14:14:08	0.66215	2.94538	2.71346	2111.28	FALSE	71
2022-09-13	14:14:08	0.545254	2.4254	2.71346	2038.58	FALSE	71
2022-09-13	14:14:09	0.490496	2.18182	2.0533	2113.47	FALSE	71
2022-09-13	14:14:09	0.440674	1.96021	2.0533	2040.54	FALSE	71
2022-09-13	14:14:09	0.40159	1.78635	2.0533	2115.25	FALSE	71
2022-09-13	14:14:09	0.513652	2.28483	2.0533	2042.82	FALSE	71
2022-09-13	14:14:10	1.72546	7.67519	11.6906	2122.93	FALSE	71
2022-09-13	14:14:10	2.74088	12.192	11.6906	2055.01	FALSE	71
2022-09-13	14:14:10	3.41818	15.2047	11.6906	2138.13	1	72
2022-09-13	14:14:11	3.43706	15.2887	11.6758	2070.3	1	73
2022-09-13	14:14:11	2.73284	12.1562	11.6758	2150.29	FALSE	73
2022-09-13	14:14:11	2.21594	9.85694	11.6758	2080.16	FALSE	73
2022-09-13	14:14:11	2.1135	9.40127	11.6758	2159.69	FALSE	73
2022-09-13	14:14:12	2.03625	9.05765	6.90519	2089.22	FALSE	73
2022-09-13	14:14:12	1.6648	7.40536	6.90519	2167.1	FALSE	73
2022-09-13	14:14:12	1.71803	7.64214	6.90519	2096.86	FALSE	73
2022-09-13	14:14:12	0.790344	3.51561	6.90519	2170.61	FALSE	73
2022-09-13	14:14:13	0.611718	2.72104	5.06675	2099.58	FALSE	73
2022-09-13	14:14:13	1.09533	4.87225	5.06675	2175.48	FALSE	73
2022-09-13	14:14:13	1.66113	7.38904	5.06675	2106.97	FALSE	73
2022-09-13	14:14:13	1.18805	5.28468	5.06675	2180.77	FALSE	73
2022-09-13	14:14:14	0.920674	4.09534	2.32293	2111.06	FALSE	73
2022-09-13	14:14:14	0.319504	1.42122	2.32293	2182.19	FALSE	73
2022-09-13	14:14:14	0.326476	1.45223	2.32293	2112.52	FALSE	73
2022-09-13	14:14:15	0.370649	1.64872	6.85424	2183.84	FALSE	73
2022-09-13	14:14:15	1.89533	8.43081	6.85424	2120.95	FALSE	73
2022-09-13	14:14:15	2.00688	8.927	6.85424	2192.76	FALSE	73
2022-09-13	14:14:15	1.89075	8.41043	6.85424	2129.36	FALSE	73
2022-09-13	14:14:16	1.73884	7.73471	4.69726	2200.5	FALSE	73
2022-09-13	14:14:16	0.919504	4.09014	4.69726	2133.45	FALSE	73
2022-09-13	14:14:16	0.738079	3.28312	4.69726	2203.78	FALSE	73
2022-09-13	14:14:16	0.827544	3.68108	4.69726	2137.13	FALSE	73
2022-09-13	14:14:17	0.89813	3.99506	3.91159	2207.78	FALSE	73
2022-09-13	14:14:17	0.905865	4.02947	3.91159	2141.16	FALSE	73
2022-09-13	14:14:17	0.829428	3.68946	3.91159	2211.47	FALSE	73
2022-09-13	14:14:17	0.884033	3.93236	3.91159	2145.09	FALSE	73
2022-09-13	14:14:18	0.709987	3.15816	2.40782	2214.63	FALSE	73
2022-09-13	14:14:18	0.476909	2.12139	2.40782	2147.21	FALSE	73
2022-09-13	14:14:18	0.43701	1.94391	2.40782	2216.57	FALSE	73
2022-09-13	14:14:19	0.49813	2.21578	1.58024	2149.43	FALSE	73
2022-09-13	14:14:19	0.338741	1.50679	1.58024	2218.08	FALSE	73
2022-09-13	14:14:19	0.334364	1.48732	1.58024	2150.91	FALSE	73
2022-09-13	14:14:19	0.249784	1.11109	1.58024	2219.19	FALSE	73
2022-09-13	14:14:20	0.261132	1.16157	0.740858	2152.08	FALSE	73
2022-09-13	14:14:20	0.190649	0.848045	0.740858	2220.04	FALSE	73
2022-09-13	14:14:20	0.127036	0.565082	0.740858	2152.64	FALSE	73
2022-09-13	14:14:20	0.087392	0.388737	0.740858	2220.42	FALSE	73
2022-09-13	14:14:21	-0.0337784	-0.150253	-0.744987	2152.64	FALSE	73
2022-09-13	14:14:21	-0.134338	-0.597562	-0.744987	2220.42	FALSE	73
2022-09-13	14:14:21	-0.238155	-1.05936	-0.744987	2152.64	FALSE	73
2022-09-13	14:14:21	-0.263651	-1.17277	-0.744987	2220.42	FALSE	73
2022-09-13	14:14:22	-0.147926	-0.658004	0.0462365	2152.64	FALSE	73
2022-09-13	14:14:22	-0.0796817	-0.35444	0.0462365	2220.42	FALSE	73
2022-09-13	14:14:22	0.258791	1.15115	0.0462365	2153.79	FALSE	73
2022-09-13	14:14:23	1.21212	5.39175	14.3005	2225.82	FALSE	73
2022-09-13	14:14:23	4.49416	19.9909	14.3005	2173.78	1	74
2022-09-13	14:14:23	3.54413	15.765	14.3005	2241.58	1	75
2022-09-13	14:14:23	3.60917	16.0543	14.3005	2189.84	1	76
2022-09-13	14:14:24	2.39131	10.637	11.4425	2252.22	FALSE	76
2022-09-13	14:14:24	4.4739	19.9008	11.4425	2209.74	1	77
2022-09-13	14:14:24	1.20851	5.37569	11.4425	2257.59	FALSE	77
2022-09-13	14:14:24	2.21584	9.8565	11.4425	2219.6	FALSE	77
2022-09-13	14:14:25	1.29029	5.73947	3.7997	2263.33	FALSE	77
2022-09-13	14:14:25	1.15599	5.14207	3.7997	2224.74	FALSE	77
2022-09-13	14:14:25	0.521743	2.32082	3.7997	2265.65	FALSE	77
2022-09-13	14:14:25	0.448817	1.99643	3.7997	2226.73	FALSE	77
2022-09-13	14:14:26	0.513652	2.28483	4.14659	2267.94	FALSE	77
2022-09-13	14:14:26	0.88785	3.94933	4.14659	2230.68	FALSE	77
2022-09-13	14:14:26	1.39508	6.20559	4.14659	2274.14	FALSE	77
2022-09-13	14:14:27	-0.0224298	-0.0997722	1.20328	2230.68	FALSE	77
2022-09-13	14:14:27	0.203779	0.90645	1.20328	2275.05	FALSE	77
2022-09-13	14:14:27	0.477875	2.12568	1.20328	2232.81	FALSE	77
2022-09-13	14:14:27	0.422812	1.88075	1.20328	2276.93	FALSE	77
2022-09-13	14:14:28	0.226069	1.0056	1.42252	2233.81	FALSE	77
2022-09-13	14:14:28	0.650394	2.89308	1.42252	2279.82	FALSE	77
2022-09-13	14:14:28	0.206018	0.916409	1.42252	2234.73	FALSE	77
2022-09-13	14:14:28	0.196705	0.874983	1.42252	2280.7	FALSE	77
2022-09-13	14:14:29	0.219809	0.977754	0.824616	2235.71	FALSE	77
2022-09-13	14:14:29	0.210242	0.935198	0.824616	2281.63	FALSE	77
2022-09-13	14:14:29	0.165255	0.735087	0.824616	2236.44	FALSE	77
2022-09-13	14:14:29	0.146222	0.650425	0.824616	2282.29	FALSE	77
2022-09-13	14:14:30	1.9563	8.70201	10.2505	2245.15	FALSE	77
2022-09-13	14:14:30	2.63457	11.7191	10.2505	2294	FALSE	77
2022-09-13	14:14:30	2.32235	10.3303	10.2505	2255.48	FALSE	77
2022-09-13	14:14:31	0.605255	2.6923	1.97741	2296.7	FALSE	77
2022-09-13	14:14:31	0.401336	1.78522	1.97741	2257.26	FALSE	77
2022-09-13	14:14:31	0.379199	1.68675	1.97741	2298.38	FALSE	77
2022-09-13	14:14:31	0.392379	1.74538	1.97741	2259.01	FALSE	77
2022-09-13	14:14:32	0.410598	1.82642	4.55318	2300.21	FALSE	77
2022-09-13	14:14:32	0.796654	3.54368	4.55318	2262.55	FALSE	77
2022-09-13	14:14:32	1.48902	6.62346	4.55318	2306.83	FALSE	77
2022-09-13	14:14:32	1.39813	6.21916	4.55318	2268.77	FALSE	77
2022-09-13	14:14:33	1.38271	6.15057	8.10721	2312.98	FALSE	77
2022-09-13	14:14:33	1.92363	8.55669	8.10721	2277.33	FALSE	77
2022-09-13	14:14:33	1.54744	6.88332	8.10721	2319.87	FALSE	77
2022-09-13	14:14:33	2.43655	10.8383	8.10721	2288.16	FALSE	77
2022-09-13	14:14:34	2.46368	10.9589	12.7422	2330.83	FALSE	77
2022-09-13	14:14:34	2.64281	11.7557	12.7422	2299.92	FALSE	77
2022-09-13	14:14:34	3.48724	15.5119	12.7422	2346.34	1	78
2022-09-13	14:14:35	1.05681	4.7009	6.70321	2304.62	FALSE	78
2022-09-13	14:14:35	2.1934	9.75668	6.70321	2356.09	FALSE	78
2022-09-13	14:14:35	1.50765	6.70633	6.70321	2311.33	FALSE	78
2022-09-13	14:14:35	1.26994	5.64895	6.70321	2361.74	FALSE	78
2022-09-13	14:14:36	1.02006	4.53743	5.03586	2315.86	FALSE	78
2022-09-13	14:14:36	2.46963	10.9854	5.03586	2372.73	FALSE	78
2022-09-13	14:14:36	0.408868	1.81873	5.03586	2317.68	FALSE	78
2022-09-13	14:14:36	0.629885	2.80185	5.03586	2375.53	FALSE	78
2022-09-13	14:14:37	0.386069	1.71731	1.60254	2319.4	FALSE	78
2022-09-13	14:14:37	0.36729	1.63378	1.60254	2377.16	FALSE	78
2022-09-13	14:14:37	0.298181	1.32637	1.60254	2320.73	FALSE	78
2022-09-13	14:14:37	0.389529	1.7327	1.60254	2378.9	FALSE	78
2022-09-13	14:14:38	0.833142	3.70598	4.31951	2324.43	FALSE	78
2022-09-13	14:14:38	0.702506	3.12489	4.31951	2382.02	FALSE	78
2022-09-13	14:14:38	1.15966	5.1584	4.31951	2329.59	FALSE	78
2022-09-13	14:14:38	1.18897	5.28878	4.31951	2387.31	FALSE	78
2022-09-13	14:14:39	0.881234	3.91991	4.39016	2333.51	FALSE	78
2022-09-13	14:14:39	1.04653	4.65517	4.39016	2391.97	FALSE	78
2022-09-13	14:14:39	1.03309	4.59539	4.39016	2338.11	FALSE	78
2022-09-13	14:14:40	0.613804	2.73032	2.10186	2394.7	FALSE	78
2022-09-13	14:14:40	0.506018	2.25087	2.10186	2340.36	FALSE	78
2022-09-13	14:14:40	0.432328	1.92308	2.10186	2396.62	FALSE	78
2022-09-13	14:14:40	0.337926	1.50316	2.10186	2341.86	FALSE	78
2022-09-13	14:14:41	0.434822	1.93418	5.32063	2398.55	FALSE	78
2022-09-13	14:14:41	0.661845	2.94402	5.32063	2344.8	FALSE	78
2022-09-13	14:14:41	0.912481	4.0589	5.32063	2402.61	FALSE	78
2022-09-13	14:14:41	2.77538	12.3454	5.32063	2357.15	FALSE	78
2022-09-13	14:14:42	3.85365	17.1418	14.4899	2419.75	1	79
2022-09-13	14:14:42	3.15645	14.0405	14.4899	2371.19	1	80
2022-09-13	14:14:42	2.7623	12.2873	14.4899	2432.04	FALSE	80
2022-09-13	14:14:43	0.613804	2.73032	1.90452	2373.92	FALSE	80
2022-09-13	14:14:43	0.383931	1.7078	1.90452	2433.75	FALSE	80
2022-09-13	14:14:43	0.336043	1.49479	1.90452	2375.42	FALSE	80
2022-09-13	14:14:43	0.378842	1.68516	1.90452	2435.43	FALSE	80
2022-09-13	14:14:44	0.541692	2.40955	3.907	2377.83	FALSE	80
2022-09-13	14:14:44	1.04332	4.6409	3.907	2440.08	FALSE	80
2022-09-13	14:14:44	0.91131	4.05369	3.907	2381.88	FALSE	80
2022-09-13	14:14:44	1.01701	4.52386	3.907	2444.6	FALSE	80
2022-09-13	14:14:45	0.765254	3.404	3.73994	2385.28	FALSE	80
2022-09-13	14:14:45	0.97243	4.32556	3.73994	2448.92	FALSE	80
2022-09-13	14:14:45	1.06388	4.73235	3.73994	2390.02	FALSE	80
2022-09-13	14:14:45	0.561539	2.49784	3.73994	2451.42	FALSE	80
2022-09-13	14:14:46	0.319199	1.41986	0.511714	2391.44	FALSE	80
2022-09-13	14:14:46	0.127036	0.565082	0.511714	2451.99	FALSE	80
2022-09-13	14:14:46	0.120878	0.53769	0.511714	2391.97	FALSE	80
2022-09-13	14:14:46	-0.106959	-0.475775	0.511714	2451.99	FALSE	80
2022-09-13	14:14:47	-0.131692	-0.585792	-0.902636	2391.97	FALSE	80
2022-09-13	14:14:47	-0.215152	-0.957039	-0.902636	2451.99	FALSE	80
2022-09-13	14:14:47	-0.261921	-1.16508	-0.902636	2391.97	FALSE	80
2022-09-13	14:14:48	-0.260089	-1.15693	-1.12286	2451.99	FALSE	80
2022-09-13	14:14:48	-0.25846	-1.14968	-1.12286	2391.97	FALSE	80
2022-09-13	14:14:48	-0.245178	-1.0906	-1.12286	2451.99	FALSE	80
2022-09-13	14:14:48	-0.245992	-1.09422	-1.12286	2391.97	FALSE	80
2022-09-13	14:14:49	-0.245788	-1.09331	1.7627	2451.99	FALSE	80
2022-09-13	14:14:49	-0.206501	-0.918558	1.7627	2391.97	FALSE	80
2022-09-13	14:14:49	0.121896	0.542218	1.7627	2452.53	FALSE	80
2022-09-13	14:14:49	1.91548	8.52044	1.7627	2400.49	FALSE	80
2022-09-13	14:14:50	6.23782	27.7471	47.2307	2480.28	1	81
2022-09-13	14:14:50	12.0565	53.6297	47.2307	2454.12	1	82
2022-09-13	14:14:50	11.2326	49.9649	47.2307	2530.24	1	83
2022-09-13	14:14:50	12.9448	57.5811	47.2307	2511.7	1	84
2022-09-13	14:14:51	1.82134	8.10168	14.0755	2538.34	FALSE	84
2022-09-13	14:14:51	5.25355	23.3688	14.0755	2535.07	1	85
2022-09-13	14:14:51	2.41808	10.7561	14.0755	2549.1	FALSE	85
2022-09-13	14:14:52	2.99146	13.3066	29.1619	2548.38	FALSE	85
2022-09-13	14:14:52	7.52469	33.4713	29.1619	2582.57	1	86
2022-09-13	14:14:52	8.06301	35.8659	29.1619	2584.25	1	87
2022-09-13	14:14:52	7.64439	34.0038	29.1619	2616.57	1	88
2022-09-13	14:14:53	3.57635	15.9083	8.82611	2600.15	1	89
2022-09-13	14:14:53	1.84469	8.20555	8.82611	2624.78	FALSE	89
2022-09-13	14:14:53	1.69258	7.52893	8.82611	2607.68	FALSE	89
2022-09-13	14:14:53	0.823168	3.66162	8.82611	2628.44	FALSE	89
2022-09-13	14:14:54	0.768104	3.41668	1.89835	2611.1	FALSE	89
2022-09-13	14:14:54	0.306832	1.36485	1.89835	2629.81	FALSE	89
2022-09-13	14:14:54	0.362303	1.6116	1.89835	2612.71	FALSE	89
2022-09-13	14:14:54	0.269835	1.20028	1.89835	2631.01	FALSE	89
2022-09-13	14:14:55	0.273957	1.21862	1.35504	2613.93	FALSE	89
2022-09-13	14:14:55	0.296756	1.32003	1.35504	2632.33	FALSE	89
2022-09-13	14:14:55	0.343168	1.52648	1.35504	2615.46	FALSE	89
2022-09-13	14:14:56	0.715178	3.18125	8.57302	2635.51	FALSE	89
2022-09-13	14:14:56	0.82327	3.66207	8.57302	2619.12	FALSE	89
2022-09-13	14:14:56	2.79533	12.4342	8.57302	2647.94	FALSE	89
2022-09-13	14:14:56	3.37543	15.0146	8.57302	2634.13	1	90
2022-09-13	14:14:57	2.62032	11.6557	8.61389	2659.6	FALSE	90
2022-09-13	14:14:57	2.42027	10.7658	8.61389	2644.9	FALSE	90
2022-09-13	14:14:57	1.2965	5.76709	8.61389	2665.37	FALSE	90
2022-09-13	14:14:57	1.40887	6.26694	8.61389	2651.17	FALSE	90
2022-09-13	14:14:58	1.19075	5.29669	12.6199	2670.66	FALSE	90
2022-09-13	14:14:58	3.28831	14.6271	12.6199	2665.79	1	91
2022-09-13	14:14:58	3.62932	16.1439	12.6199	2686.81	1	92
2022-09-13	14:14:58	3.23991	14.4118	12.6199	2680.2	1	93
2022-09-13	14:14:59	3.08586	13.7265	12.4063	2700.53	1	94
2022-09-13	14:14:59	2.54266	11.3103	12.4063	2691.51	FALSE	94
2022-09-13	14:14:59	2.73864	12.182	12.4063	2712.71	FALSE	94
2022-09-13	14:15:00	1.55843	6.93221	14.7944	2698.45	FALSE	94
2022-09-13	14:15:00	5.13314	22.8332	14.7944	2735.55	1	95
2022-09-13	14:15:00	3.15233	14.0222	14.7944	2712.47	1	96
2022-09-13	14:15:00	3.45986	15.3901	14.7944	2750.94	1	97
2022-09-13	14:15:01	3.28057	14.5926	8.39605	2727.06	1	98
2022-09-13	14:15:01	2.23304	9.93301	8.39605	2760.87	FALSE	98
2022-09-13	14:15:01	0.966679	4.29998	8.39605	2731.36	FALSE	98
2022-09-13	14:15:01	1.06978	4.7586	8.39605	2765.63	FALSE	98
2022-09-13	14:15:02	1.25508	5.58285	8.13755	2736.94	FALSE	98
2022-09-13	14:15:02	1.18892	5.28855	8.13755	2770.92	FALSE	98
2022-09-13	14:15:02	1.50907	6.71265	8.13755	2743.66	FALSE	98
2022-09-13	14:15:02	3.36454	14.9661	8.13755	2785.88	1	99
2022-09-13	14:15:03	4.04291	17.9837	15.1632	2761.64	1	100
2022-09-13	14:15:03	2.91014	12.9449	15.1632	2798.83	FALSE	100
2022-09-13	14:15:03	3.2735	14.5612	15.1632	2776.2	1	101
2022-09-13	14:15:04	5.67324	25.2357	12.0339	2824.06	1	102
2022-09-13	14:15:04	3.12373	13.895	12.0339	2790.1	1	103
2022-09-13	14:15:04	1.41508	6.29456	12.0339	2830.36	FALSE	103
2022-09-13	14:15:04	0.609326	2.7104	12.0339	2792.81	FALSE	103
2022-09-13	14:15:05	0.456552	2.03083	1.78166	2832.39	FALSE	103
2022-09-13	14:15:05	0.541285	2.40774	1.78166	2795.22	FALSE	103
2022-09-13	14:15:05	0.300471	1.33656	1.78166	2833.73	FALSE	103
2022-09-13	14:15:05	0.30383	1.3515	1.78166	2796.57	FALSE	103
2022-09-13	14:15:06	0.385356	1.71414	1.53236	2835.44	FALSE	103
2022-09-13	14:15:06	0.283575	1.2614	1.53236	2797.83	FALSE	103
2022-09-13	14:15:06	0.283066	1.25913	1.53236	2836.7	FALSE	103
2022-09-13	14:15:06	0.425967	1.89479	1.53236	2799.72	FALSE	103

## Sheet: Sulley_martin_202291314104 (3)
Date	Time	Lbs	Newtons	Total force x time	total steps > 13.345		**GoPro Fitting: 1359
2022-09-13	14:10:06	0.480776	2.13859	2.13859	FALSE	0
2022-09-13	14:10:06	0.479504	2.13293	2.13293	FALSE	0
2022-09-13	14:10:06	0.447799	1.9919	4.13049	FALSE	0
2022-09-13	14:10:07	0.475433	2.11482	4.24775	FALSE	0
2022-09-13	14:10:07	0.465	2.06841	6.1989	FALSE	0
2022-09-13	14:10:07	0.463168	2.06026	6.30801	FALSE	0
2022-09-13	14:10:07	0.468715	2.08494	8.28384	FALSE	0
2022-09-13	14:10:08	0.46383	2.06321	8.37122	FALSE	0
2022-09-13	14:10:08	0.45986	2.04555	10.3294	FALSE	0
2022-09-13	14:10:08	0.465051	2.06864	10.4399	FALSE	0
2022-09-13	14:10:08	0.476705	2.12048	12.4499	FALSE	0
2022-09-13	14:10:09	0.458282	2.03853	12.4784	FALSE	0
2022-09-13	14:10:09	0.472684	2.10259	14.5525	FALSE	0
2022-09-13	14:10:09	0.435484	1.93712	14.4155	FALSE	0
2022-09-13	14:10:09	0.448206	1.99371	16.5462	FALSE	0
2022-09-13	14:10:10	0.466781	2.07634	16.4918	FALSE	0
2022-09-13	14:10:10	0.445662	1.98239	18.5286	FALSE	0
2022-09-13	14:10:10	0.467443	2.07928	18.5711	FALSE	0
2022-09-13	14:10:11	0.465763	2.07181	20.6004	FALSE	0
2022-09-13	14:10:11	0.494364	2.19903	20.7702	FALSE	0
2022-09-13	14:10:11	0.467341	2.07883	22.6792	FALSE	0
2022-09-13	14:10:11	0.446832	1.9876	22.7578	FALSE	0
2022-09-13	14:10:12	0.488104	2.17118	24.8504	FALSE	0
2022-09-13	14:10:12	0.477824	2.12546	24.8832	FALSE	0
2022-09-13	14:10:12	0.483422	2.15036	27.0007	FALSE	0
2022-09-13	14:10:12	0.486985	2.16621	27.0494	FALSE	0
2022-09-13	14:10:13	0.463728	2.06275	29.0635	FALSE	0
2022-09-13	14:10:13	0.491463	2.18613	29.2355	FALSE	0
2022-09-13	14:10:13	0.44556	1.98194	31.0454	FALSE	0
2022-09-13	14:10:13	0.436603	1.9421	31.1776	FALSE	0
2022-09-13	14:10:14	0.485967	2.16168	33.2071	FALSE	0
2022-09-13	14:10:14	0.352532	1.56813	32.7458	FALSE	0
2022-09-13	14:10:14	0.230242	1.02416	34.2313	FALSE	0
2022-09-13	14:10:14	0.101387	0.45099	33.1968	FALSE	0
2022-09-13	14:10:15	0.372634	1.65755	35.8888	FALSE	0
2022-09-13	14:10:15	0.271565	1.20798	34.4047	FALSE	0
2022-09-13	14:10:15	0.24673	1.0975	36.9863	FALSE	0
2022-09-13	14:10:16	0.362354	1.61182	36.0166	FALSE	0
2022-09-13	14:10:16	0.508766	2.26309	39.2494	FALSE	0
2022-09-13	14:10:16	0.239606	1.06582	37.0824	FALSE	0
2022-09-13	14:10:16	1.48632	6.61145	45.8609	FALSE	0
2022-09-13	14:10:17	2.52861	11.2478	48.3301	FALSE	0
2022-09-13	14:10:17	4.34948	19.3474	65.2082	1	1
2022-09-13	14:10:17	3.93426	17.5004	65.8305	1	2
2022-09-13	14:10:17	0.79528	3.53756	68.7458	FALSE	2
2022-09-13	14:10:18	0.528562	2.35115	68.1817	FALSE	2
2022-09-13	14:10:18	0.333244	1.48234	70.2281	FALSE	2
2022-09-13	14:10:18	0.348359	1.54957	69.7312	FALSE	2
2022-09-13	14:10:18	0.0438806	0.19519	70.4233	FALSE	2
2022-09-13	14:10:19	0.366476	1.63016	71.3614	FALSE	2
2022-09-13	14:10:19	0.00611985	0.0272223	70.4505	FALSE	2
2022-09-13	14:10:19	0.225763	1.00424	72.3656	FALSE	2
2022-09-13	14:10:20	0.493041	2.19314	72.6437	FALSE	2
2022-09-13	14:10:20	2.58169	11.4839	83.8495	FALSE	2
2022-09-13	14:10:20	3.34021	14.8579	87.5016	1	3
2022-09-13	14:10:20	5.05212	22.4728	106.322	1	4
2022-09-13	14:10:21	6.09991	27.1336	114.635	1	5
2022-09-13	14:10:21	4.84001	21.5293	127.852	1	6
2022-09-13	14:10:21	5.25512	23.3758	138.011	1	7
2022-09-13	14:10:21	2.64296	11.7564	139.608	FALSE	7
2022-09-13	14:10:22	1.52953	6.80366	144.815	FALSE	7
2022-09-13	14:10:22	0.0730409	0.324901	139.933	FALSE	7
2022-09-13	14:10:22	-0.209351	-0.931235	144.815	FALSE	7
2022-09-13	14:10:22	0.274313	1.2202	141.153	FALSE	7
2022-09-13	14:10:23	0.840216	3.73745	148.552	FALSE	7
2022-09-13	14:10:23	1.67131	7.43432	148.588	FALSE	7
2022-09-13	14:10:23	1.42139	6.32263	154.875	FALSE	7
2022-09-13	14:10:24	2.88642	12.8394	161.427	FALSE	7
2022-09-13	14:10:24	2.08266	9.26409	164.139	FALSE	7
2022-09-13	14:10:24	2.40373	10.6923	172.119	FALSE	7
2022-09-13	14:10:24	1.47716	6.5707	170.71	FALSE	7
2022-09-13	14:10:25	0.66159	2.94288	175.062	FALSE	7
2022-09-13	14:10:25	1.1653	5.18349	175.893	FALSE	7
2022-09-13	14:10:25	0.393193	1.749	176.811	FALSE	7
2022-09-13	14:10:25	0.711209	3.1636	179.057	FALSE	7
2022-09-13	14:10:26	0.366934	1.6322	178.443	FALSE	7
2022-09-13	14:10:26	0.38897	1.73022	180.787	FALSE	7
2022-09-13	14:10:26	0.53416	2.37605	180.819	FALSE	7
2022-09-13	14:10:26	0.263677	1.17289	181.96	FALSE	7
2022-09-13	14:10:27	0.684389	3.0443	183.864	FALSE	7
2022-09-13	14:10:27	0.319249	1.42008	183.38	FALSE	7
2022-09-13	14:10:27	0.501539	2.23095	186.095	FALSE	7
2022-09-13	14:10:28	0.173092	0.769948	184.15	FALSE	7
2022-09-13	14:10:28	0.358333	1.59394	187.688	FALSE	7
2022-09-13	14:10:28	0.129886	0.577759	184.728	FALSE	7
2022-09-13	14:10:28	0.121641	0.541083	188.23	FALSE	7
2022-09-13	14:10:29	0.0553819	0.24635	184.974	FALSE	7
2022-09-13	14:10:29	0.293397	1.30509	189.535	FALSE	7
2022-09-13	14:10:29	0.639453	2.84441	187.818	FALSE	7
2022-09-13	14:10:29	0.222456	0.989529	190.524	FALSE	7
2022-09-13	14:10:30	0.619758	2.75681	190.575	FALSE	7
2022-09-13	14:10:30	0.226171	1.00605	191.53	FALSE	7
2022-09-13	14:10:30	0.579198	2.57639	193.152	FALSE	7
2022-09-13	14:10:30	0.183728	0.817259	192.347	FALSE	7
2022-09-13	14:10:31	0.530802	2.36111	195.513	FALSE	7
2022-09-13	14:10:31	0.283117	1.25936	193.607	FALSE	7
2022-09-13	14:10:31	0.513143	2.28256	197.795	FALSE	7
2022-09-13	14:10:32	0.226883	1.00922	194.616	FALSE	7
2022-09-13	14:10:32	0.393346	1.74968	199.545	FALSE	7
2022-09-13	14:10:32	0.409529	1.82167	196.438	FALSE	7
2022-09-13	14:10:32	0.383321	1.70509	201.25	FALSE	7
2022-09-13	14:10:33	0.367443	1.63446	198.072	FALSE	7
2022-09-13	14:10:33	0.420064	1.86853	203.118	FALSE	7
2022-09-13	14:10:33	0.481641	2.14244	200.215	FALSE	7
2022-09-13	14:10:33	0.125509	0.558289	203.677	FALSE	7
2022-09-13	14:10:34	-0.110623	-0.492073	200.215	FALSE	7
2022-09-13	14:10:34	0.207036	0.920938	204.598	FALSE	7
2022-09-13	14:10:34	0.538588	2.39575	202.61	FALSE	7
2022-09-13	14:10:34	0.388919	1.72999	206.328	FALSE	7
2022-09-13	14:10:35	0.577468	2.56869	205.179	FALSE	7
2022-09-13	14:10:35	0.299199	1.3309	207.659	FALSE	7
2022-09-13	14:10:35	0.509784	2.26762	207.447	FALSE	7
2022-09-13	14:10:36	0.208613	0.927952	208.587	FALSE	7
2022-09-13	14:10:36	0.504695	2.24498	209.692	FALSE	7
2022-09-13	14:10:36	0.254924	1.13395	209.721	FALSE	7
2022-09-13	14:10:36	0.390598	1.73746	211.429	FALSE	7
2022-09-13	14:10:37	0.2707	1.20413	210.925	FALSE	7
2022-09-13	14:10:37	0.399148	1.77549	213.205	FALSE	7
2022-09-13	14:10:37	1.28037	5.69534	216.62	FALSE	7
2022-09-13	14:10:37	3.79222	16.8686	230.073	1	8
2022-09-13	14:10:38	6.90378	30.7094	247.329	1	9
2022-09-13	14:10:38	5.86245	26.0774	256.151	1	10
2022-09-13	14:10:38	8.83161	39.2848	286.614	1	11
2022-09-13	14:10:38	3.97111	17.6643	273.815	1	12
2022-09-13	14:10:39	10.0338	44.6323	331.246	1	13
2022-09-13	14:10:39	5.43543	24.1779	297.993	1	14
2022-09-13	14:10:39	3.44846	15.3394	346.586	1	15
2022-09-13	14:10:40	3.42556	15.2376	313.23	1	16
2022-09-13	14:10:40	0.980827	4.36291	350.949	FALSE	16
2022-09-13	14:10:40	1.21111	5.38726	318.618	FALSE	16
2022-09-13	14:10:40	1.15945	5.15747	356.106	FALSE	16
2022-09-13	14:10:41	0.952735	4.23796	322.855	FALSE	16
2022-09-13	14:10:41	2.34403	10.4267	366.533	FALSE	16
2022-09-13	14:10:41	0.921387	4.09851	326.954	FALSE	16
2022-09-13	14:10:41	2.66189	11.8406	378.374	FALSE	16
2022-09-13	14:10:42	1.99955	8.8944	335.848	FALSE	16
2022-09-13	14:10:42	1.44693	6.43623	384.81	FALSE	16
2022-09-13	14:10:42	0.872837	3.88255	339.731	FALSE	16
2022-09-13	14:10:42	0.686985	3.05585	387.866	FALSE	16
2022-09-13	14:10:43	0.632684	2.8143	342.545	FALSE	16
2022-09-13	14:10:43	0.419504	1.86604	389.732	FALSE	16
2022-09-13	14:10:43	0.731921	3.25573	345.801	FALSE	16
2022-09-13	14:10:44	0.965	4.29251	394.024	FALSE	16
2022-09-13	14:10:44	3.83823	17.0732	362.874	1	17
2022-09-13	14:10:44	4.61731	20.5387	414.563	1	18
2022-09-13	14:10:44	5.68352	25.2814	388.156	1	19
2022-09-13	14:10:45	1.2392	5.51221	420.075	FALSE	19
2022-09-13	14:10:45	3.31273	14.7357	402.891	1	20
2022-09-13	14:10:45	1.71095	7.61065	427.686	FALSE	20
2022-09-13	14:10:45	1.78709	7.94933	410.841	FALSE	20
2022-09-13	14:10:46	1.651	7.34398	435.03	FALSE	20
2022-09-13	14:10:46	0.524542	2.33327	413.174	FALSE	20
2022-09-13	14:10:46	0.867951	3.86082	438.891	FALSE	20
2022-09-13	14:10:47	0.741743	3.29942	416.473	FALSE	20
2022-09-13	14:10:47	1.16841	5.19732	444.088	FALSE	20
2022-09-13	14:10:47	0.674008	2.99812	419.471	FALSE	20
2022-09-13	14:10:47	0.706221	3.14141	447.229	FALSE	20
2022-09-13	14:10:48	0.607951	2.70429	422.176	FALSE	20
2022-09-13	14:10:48	0.608206	2.70542	449.935	FALSE	20
2022-09-13	14:10:48	0.633651	2.81861	424.994	FALSE	20
2022-09-13	14:10:48	0.278435	1.23853	451.173	FALSE	20
2022-09-13	14:10:49	0.820064	3.64781	428.642	FALSE	20
2022-09-13	14:10:49	0.264847	1.17809	452.351	FALSE	20
2022-09-13	14:10:49	0.74673	3.3216	431.964	FALSE	20
2022-09-13	14:10:49	0.416552	1.85291	454.204	FALSE	20
2022-09-13	14:10:50	0.544287	2.4211	434.385	FALSE	20
2022-09-13	14:10:50	0.397825	1.76961	455.974	FALSE	20
2022-09-13	14:10:50	0.418741	1.86264	436.248	FALSE	20
2022-09-13	14:10:50	0.653753	2.90802	458.882	FALSE	20
2022-09-13	14:10:51	0.301234	1.33995	437.587	FALSE	20
2022-09-13	14:10:51	0.597417	2.65743	461.539	FALSE	20
2022-09-13	14:10:51	0.279199	1.24193	438.829	FALSE	20
2022-09-13	14:10:52	0.567239	2.52319	464.063	FALSE	20
2022-09-13	14:10:52	0.19014	0.845781	439.675	FALSE	20
2022-09-13	14:10:52	0.536603	2.38692	466.45	FALSE	20
2022-09-13	14:10:52	0.242914	1.08053	440.756	FALSE	20
2022-09-13	14:10:53	0.133397	0.593377	467.043	FALSE	20
2022-09-13	14:10:53	-0.271437	-1.20741	440.756	FALSE	20
2022-09-13	14:10:53	-0.264872	-1.1782	467.043	FALSE	20
2022-09-13	14:10:53	-0.278358	-1.23819	440.756	FALSE	20
2022-09-13	14:10:54	-0.248384	-1.10486	467.043	FALSE	20
2022-09-13	14:10:54	-0.331743	-1.47566	440.756	FALSE	20
2022-09-13	14:10:54	-0.207417	-0.922632	467.043	FALSE	20
2022-09-13	14:10:54	-0.0134221	-0.0597042	440.756	FALSE	20
2022-09-13	14:10:55	-0.162531	-0.72297	467.043	FALSE	20
2022-09-13	14:10:55	-0.106552	-0.473965	440.756	FALSE	20
2022-09-13	14:10:55	-0.0720989	-0.32071	467.043	FALSE	20
2022-09-13	14:10:56	-0.0140328	-0.0624207	440.756	FALSE	20
2022-09-13	14:10:56	-0.191946	-0.853814	467.043	FALSE	20
2022-09-13	14:10:56	0.0508018	0.225977	440.982	FALSE	20
2022-09-13	14:10:56	-0.125229	-0.557044	467.043	FALSE	20
2022-09-13	14:10:57	-0.00746796	-0.033219	440.982	FALSE	20
2022-09-13	14:10:57	-0.233117	-1.03695	467.043	FALSE	20
2022-09-13	14:10:57	-0.019071	-0.0848316	440.982	FALSE	20
2022-09-13	14:10:57	0.0514125	0.228693	467.272	FALSE	20
2022-09-13	14:10:58	0.153804	0.684151	441.666	FALSE	20
2022-09-13	14:10:58	0.127392	0.566665	467.838	FALSE	20
2022-09-13	14:10:58	0.149886	0.666723	442.333	FALSE	20
2022-09-13	14:10:58	0.407697	1.81352	469.652	FALSE	20
2022-09-13	14:10:59	0.164797	0.73305	443.066	FALSE	20
2022-09-13	14:10:59	0.350344	1.5584	471.21	FALSE	20
2022-09-13	14:10:59	0.235229	1.04635	444.112	FALSE	20
2022-09-13	14:11:00	0.589835	2.6237	473.834	FALSE	20
2022-09-13	14:11:00	0.467341	2.07883	446.191	FALSE	20
2022-09-13	14:11:00	0.497672	2.21374	476.048	FALSE	20
2022-09-13	14:11:00	0.533346	2.37243	448.563	FALSE	20
2022-09-13	14:11:01	0.657214	2.92342	478.971	FALSE	20
2022-09-13	14:11:01	0.984084	4.3774	452.941	FALSE	20
2022-09-13	14:11:01	0.698689	3.10791	482.079	FALSE	20
2022-09-13	14:11:01	0.899351	4.00049	456.941	FALSE	20
2022-09-13	14:11:02	1.47111	6.54379	488.623	FALSE	20
2022-09-13	14:11:02	2.13905	9.51492	466.456	FALSE	20
2022-09-13	14:11:02	2.71385	12.0717	500.694	FALSE	20
2022-09-13	14:11:02	3.17945	14.1428	480.599	1	21
2022-09-13	14:11:03	2.65574	11.8133	512.508	FALSE	21
2022-09-13	14:11:03	5.01675	22.3155	502.914	1	22
2022-09-13	14:11:03	4.34922	19.3462	531.854	1	23
2022-09-13	14:11:04	6.85599	30.4968	533.411	1	24
2022-09-13	14:11:04	6.21054	27.6257	559.48	1	25
2022-09-13	14:11:04	6.38535	28.4033	561.814	1	26
2022-09-13	14:11:04	11.3233	50.3683	609.848	1	27
2022-09-13	14:11:05	5.81777	25.8786	587.693	1	28
2022-09-13	14:11:05	10.3922	46.2266	656.075	1	29
2022-09-13	14:11:05	9.65298	42.9384	630.631	1	30
2022-09-13	14:11:05	7.7396	34.4273	690.502	1	31
2022-09-13	14:11:06	15.806	70.3082	700.94	1	32
2022-09-13	14:11:06	8.78683	39.0856	729.587	1	33
2022-09-13	14:11:06	7.80708	34.7275	735.667	1	34
2022-09-13	14:11:06	11.5071	51.1859	780.773	1	35
2022-09-13	14:11:07	2.09319	9.31093	744.978	FALSE	35
2022-09-13	14:11:07	1.8338	8.15711	788.93	FALSE	35
2022-09-13	14:11:07	0.743117	3.30553	748.284	FALSE	35
2022-09-13	14:11:07	0.443626	1.97334	790.904	FALSE	35
2022-09-13	14:11:08	0.434313	1.93191	750.216	FALSE	35
2022-09-13	14:11:08	0.470802	2.09422	792.998	FALSE	35
2022-09-13	14:11:08	0.386476	1.71912	751.935	FALSE	35
2022-09-13	14:11:09	0.839758	3.73541	796.733	FALSE	35
2022-09-13	14:11:09	0.485255	2.15851	754.093	FALSE	35
2022-09-13	14:11:09	1.07879	4.79867	801.532	FALSE	35
2022-09-13	14:11:09	1.63828	7.2874	761.381	FALSE	35
2022-09-13	14:11:10	0.810191	3.60389	805.136	FALSE	35
2022-09-13	14:11:10	0.501183	2.22936	763.61	FALSE	35
2022-09-13	14:11:10	0.202812	0.902148	806.038	FALSE	35
2022-09-13	14:11:10	0.463117	2.06004	765.67	FALSE	35
2022-09-13	14:11:11	0.0413361	0.183871	806.222	FALSE	35
2022-09-13	14:11:11	0.317824	1.41374	767.084	FALSE	35
2022-09-13	14:11:11	0.130903	0.582283	806.804	FALSE	35
2022-09-13	14:11:11	0.350547	1.5593	768.643	FALSE	35
2022-09-13	14:11:12	1.41151	6.27868	813.083	FALSE	35
2022-09-13	14:11:12	4.07304	18.1177	786.761	1	36
2022-09-13	14:11:12	5.32968	23.7075	836.79	1	37
2022-09-13	14:11:13	2.11665	9.41528	796.176	FALSE	37
2022-09-13	14:11:13	1.95772	8.70833	845.499	FALSE	37
2022-09-13	14:11:13	0.678181	3.01668	799.193	FALSE	37
2022-09-13	14:11:13	1.33838	5.95338	851.452	FALSE	37
2022-09-13	14:11:14	0.609835	2.71267	801.905	FALSE	37
2022-09-13	14:11:14	0.413346	1.83865	853.291	FALSE	37
2022-09-13	14:11:14	0.914618	4.0684	805.974	FALSE	37
2022-09-13	14:11:15	0.808766	3.59755	856.888	FALSE	37
2022-09-13	14:11:15	0.40673	1.80922	807.783	FALSE	37
2022-09-13	14:11:15	0.55813	2.48267	859.371	FALSE	37
2022-09-13	14:11:15	0.558435	2.48403	810.267	FALSE	37
2022-09-13	14:11:15	1.11528	4.96099	864.332	FALSE	37
2022-09-13	14:11:16	2.51141	11.1713	821.438	FALSE	37
2022-09-13	14:11:16	4.35085	19.3535	883.685	1	38
2022-09-13	14:11:16	4.11619	18.3096	839.748	1	39
2022-09-13	14:11:17	3.10189	13.7978	897.483	1	40
2022-09-13	14:11:17	1.84536	8.20853	847.956	FALSE	40
2022-09-13	14:11:17	2.45828	10.9349	908.418	FALSE	40
2022-09-13	14:11:17	1.49462	6.64837	854.605	FALSE	40
2022-09-13	14:11:18	1.53151	6.81246	915.231	FALSE	40
2022-09-13	14:11:18	2.11238	9.39629	864.001	FALSE	40
2022-09-13	14:11:18	0.930852	4.14062	919.371	FALSE	40
2022-09-13	14:11:18	1.36795	6.08492	870.086	FALSE	40
2022-09-13	14:11:19	0.910954	4.05211	923.423	FALSE	40
2022-09-13	14:11:19	1.06169	4.72261	874.809	FALSE	40
2022-09-13	14:11:19	1.16648	5.18874	928.612	FALSE	40
2022-09-13	14:11:19	0.52215	2.32263	877.131	FALSE	40
2022-09-13	14:11:20	0.872379	3.88052	932.493	FALSE	40
2022-09-13	14:11:20	0.564644	2.51165	879.643	FALSE	40
2022-09-13	14:11:20	0.733397	3.2623	935.755	FALSE	40
2022-09-13	14:11:21	0.656501	2.92025	882.563	FALSE	40
2022-09-13	14:11:21	1.21151	5.38904	941.144	FALSE	40
2022-09-13	14:11:21	2.78042	12.3679	894.931	FALSE	40
2022-09-13	14:11:21	4.49009	19.9728	961.117	1	41
2022-09-13	14:11:22	4.09187	18.2015	913.132	1	42
2022-09-13	14:11:22	2.93757	13.0669	974.184	FALSE	42
2022-09-13	14:11:22	0.955585	4.25063	917.383	FALSE	42
2022-09-13	14:11:22	0.273957	1.21862	975.402	FALSE	42
2022-09-13	14:11:23	0.536298	2.38556	919.769	FALSE	42
2022-09-13	14:11:23	0.198944	0.884943	976.287	FALSE	42
2022-09-13	14:11:23	-0.0905213	-0.402657	919.769	FALSE	42
2022-09-13	14:11:23	-0.457137	-2.03344	976.287	FALSE	42
2022-09-13	14:11:24	-0.838867	-3.73145	919.769	FALSE	42
2022-09-13	14:11:24	-0.57673	-2.56541	976.287	FALSE	42
2022-09-13	14:11:24	-0.157544	-0.700787	919.769	FALSE	42
2022-09-13	14:11:25	0.293143	1.30396	977.591	FALSE	42
2022-09-13	14:11:25	0.422914	1.88121	921.65	FALSE	42
2022-09-13	14:11:25	0.167443	0.74482	978.336	FALSE	42
2022-09-13	14:11:25	0.0341606	0.151953	921.802	FALSE	42
2022-09-13	14:11:26	1.19299	5.30666	983.643	FALSE	42
2022-09-13	14:11:26	2.58744	11.5095	933.311	FALSE	42
2022-09-13	14:11:26	2.89019	12.8561	996.499	FALSE	42
2022-09-13	14:11:26	1.76821	7.86535	941.177	FALSE	42
2022-09-13	14:11:27	0.597316	2.65698	999.156	FALSE	42
2022-09-13	14:11:27	0.244339	1.08687	942.263	FALSE	42
2022-09-13	14:11:27	0.528715	2.35183	1001.51	FALSE	42
2022-09-13	14:11:27	0.518435	2.3061	944.57	FALSE	42
2022-09-13	14:11:28	0.585509	2.60446	1004.11	FALSE	42
2022-09-13	14:11:28	0.627443	2.79099	947.361	FALSE	42
2022-09-13	14:11:28	0.581285	2.58567	1006.7	FALSE	42
2022-09-13	14:11:29	0.718537	3.1962	950.557	FALSE	42
2022-09-13	14:11:29	0.650394	2.89308	1009.59	FALSE	42
2022-09-13	14:11:29	0.823117	3.66139	954.218	FALSE	42
2022-09-13	14:11:29	0.954415	4.24543	1013.84	FALSE	42
2022-09-13	14:11:30	0.669682	2.97888	957.197	FALSE	42
2022-09-13	14:11:30	0.236603	1.05246	1014.89	FALSE	42
2022-09-13	14:11:30	-0.058613	-0.260722	957.197	FALSE	42
2022-09-13	14:11:30	-0.198715	-0.883924	1014.89	FALSE	42
2022-09-13	14:11:31	0.0324812	0.144483	957.342	FALSE	42
2022-09-13	14:11:31	0.443931	1.97469	1016.86	FALSE	42
2022-09-13	14:11:31	0.492634	2.19133	959.533	FALSE	42
2022-09-13	14:11:31	0.326221	1.4511	1018.31	FALSE	42
2022-09-13	14:11:32	0.314262	1.3979	960.931	FALSE	42
2022-09-13	14:11:32	0.0289188	0.128637	1018.44	FALSE	42
2022-09-13	14:11:32	-0.116374	-0.517655	960.931	FALSE	42
2022-09-13	14:11:33	-0.22472	-0.9996	1018.44	FALSE	42
2022-09-13	14:11:33	-0.301463	-1.34097	960.931	FALSE	42
2022-09-13	14:11:33	-0.290827	-1.29366	1018.44	FALSE	42
2022-09-13	14:11:33	-0.0348471	-0.155007	960.931	FALSE	42
2022-09-13	14:11:34	-0.0443127	-0.197112	1018.44	FALSE	42
2022-09-13	14:11:34	0.214669	0.954891	961.886	FALSE	42
2022-09-13	14:11:34	0.426629	1.89773	1020.34	FALSE	42
2022-09-13	14:11:34	2.18179	9.70504	971.591	FALSE	42
2022-09-13	14:11:35	2.69853	12.0036	1032.34	FALSE	42
2022-09-13	14:11:35	3.31706	14.7549	986.346	1	43
2022-09-13	14:11:35	4.41207	19.6258	1051.97	1	44
2022-09-13	14:11:35	3.99411	17.7666	1004.11	1	45
2022-09-13	14:11:36	4.79782	21.3417	1073.31	1	46
2022-09-13	14:11:36	0.641794	2.85483	1006.97	FALSE	46
2022-09-13	14:11:36	1.28042	5.69556	1079.01	FALSE	46
2022-09-13	14:11:37	0.641947	2.85551	1009.82	FALSE	46
2022-09-13	14:11:37	0.144593	0.643179	1079.65	FALSE	46
2022-09-13	14:11:37	-0.0705214	-0.313693	1009.82	FALSE	46
2022-09-13	14:11:37	-0.471234	-2.09614	1079.65	FALSE	46
2022-09-13	14:11:38	-0.51617	-2.29603	1009.82	FALSE	46
2022-09-13	14:11:38	0.0180282	0.080193	1079.73	FALSE	46
2022-09-13	14:11:38	0.526629	2.34255	1012.17	FALSE	46
2022-09-13	14:11:38	0.461845	2.05438	1081.79	FALSE	46
2022-09-13	14:11:39	0.45645	2.03038	1014.2	FALSE	46
2022-09-13	14:11:39	0.31416	1.39745	1083.18	FALSE	46
2022-09-13	14:11:39	0.288461	1.28313	1015.48	FALSE	46
2022-09-13	14:11:39	0.341947	1.52105	1084.7	FALSE	46
2022-09-13	14:11:40	0.348919	1.55206	1017.03	FALSE	46
2022-09-13	14:11:40	0.300165	1.33519	1086.04	FALSE	46
2022-09-13	14:11:40	0.369428	1.64329	1018.67	FALSE	46
2022-09-13	14:11:41	0.339809	1.51154	1087.55	FALSE	46
2022-09-13	14:11:41	0.372481	1.65687	1020.33	FALSE	46
2022-09-13	14:11:41	0.390445	1.73678	1089.29	FALSE	46
2022-09-13	14:11:41	0.298181	1.32637	1021.66	FALSE	46
2022-09-13	14:11:42	0.511768	2.27645	1091.56	FALSE	46
2022-09-13	14:11:42	0.490242	2.18069	1023.84	FALSE	46
2022-09-13	14:11:42	0.456145	2.02902	1093.59	FALSE	46
2022-09-13	14:11:42	0.422506	1.87939	1025.72	FALSE	46
2022-09-13	14:11:43	0.461031	2.05076	1095.64	FALSE	46
2022-09-13	14:11:43	0.38897	1.73022	1027.45	FALSE	46
2022-09-13	14:11:43	0.40729	1.81171	1097.46	FALSE	46
2022-09-13	14:11:43	0.421082	1.87306	1029.32	FALSE	46
2022-09-13	14:11:44	0.479555	2.13316	1099.59	FALSE	46
2022-09-13	14:11:44	0.445	1.97945	1031.3	FALSE	46
2022-09-13	14:11:44	0.278333	1.23808	1100.83	FALSE	46
2022-09-13	14:11:45	0.662863	2.94855	1034.25	FALSE	46
2022-09-13	14:11:45	1.13594	5.05289	1105.88	FALSE	46
2022-09-13	14:11:45	2.3852	10.6098	1044.86	FALSE	46
2022-09-13	14:11:45	3.82357	17.008	1122.89	1	47
2022-09-13	14:11:46	6.79797	30.2387	1075.1	1	48
2022-09-13	14:11:46	4.98072	22.1552	1145.04	1	49
2022-09-13	14:11:46	4.11253	18.2934	1093.39	1	50
2022-09-13	14:11:46	1.81752	8.08469	1153.13	FALSE	50
2022-09-13	14:11:47	0.504186	2.24272	1095.63	FALSE	50
2022-09-13	14:11:47	0.438079	1.94866	1155.08	FALSE	50
2022-09-13	14:11:47	0.031158	0.138597	1095.77	FALSE	50
2022-09-13	14:11:47	-0.0944399	-0.420088	1155.08	FALSE	50
2022-09-13	14:11:48	-0.324058	-1.44147	1095.77	FALSE	50
2022-09-13	14:11:48	-0.318867	-1.41838	1155.08	FALSE	50
2022-09-13	14:11:48	0.0405219	0.18025	1095.95	FALSE	50
2022-09-13	14:11:49	0.42159	1.87532	1156.95	FALSE	50
2022-09-13	14:11:49	0.641285	2.85256	1098.8	FALSE	50
2022-09-13	14:11:49	1.02103	4.54175	1161.49	FALSE	50
2022-09-13	14:11:49	0.9193	4.08923	1102.89	FALSE	50
2022-09-13	14:11:50	1.37167	6.10146	1167.59	FALSE	50
2022-09-13	14:11:50	1.81894	8.09101	1110.98	FALSE	50
2022-09-13	14:11:50	1.95569	8.6993	1176.29	FALSE	50
2022-09-13	14:11:50	2.27508	10.12	1121.1	FALSE	50
2022-09-13	14:11:51	1.63177	7.25844	1183.55	FALSE	50
2022-09-13	14:11:51	1.5562	6.92229	1128.03	FALSE	50
2022-09-13	14:11:51	1.28413	5.71207	1189.26	FALSE	50
2022-09-13	14:11:51	1.46571	6.51977	1134.55	FALSE	50
2022-09-13	14:11:52	2.14352	9.53481	1198.8	FALSE	50
2022-09-13	14:11:52	3.00882	13.3838	1147.93	1	51
2022-09-13	14:11:52	3.0796	13.6987	1212.5	1	52
2022-09-13	14:11:53	0.558333	2.48358	1150.41	FALSE	52
2022-09-13	14:11:53	0.158079	0.703167	1213.2	FALSE	52
2022-09-13	14:11:53	0.107443	0.477928	1150.89	FALSE	52
2022-09-13	14:11:53	-0.015356	-0.0683066	1213.2	FALSE	52
2022-09-13	14:11:54	0.0139061	0.0618571	1150.95	FALSE	52
2022-09-13	14:11:54	0.153652	0.683475	1213.88	FALSE	52
2022-09-13	14:11:54	0.144542	0.642952	1151.6	FALSE	52
2022-09-13	14:11:54	0.0798094	0.355008	1214.24	FALSE	52
2022-09-13	14:11:55	0.0110053	0.0489538	1151.65	FALSE	52
2022-09-13	14:11:55	-0.125585	-0.558627	1214.24	FALSE	52
2022-09-13	14:11:55	-0.193676	-0.86151	1151.65	FALSE	52
2022-09-13	14:11:55	-0.302888	-1.34731	1214.24	FALSE	52
2022-09-13	14:11:56	-0.438765	-1.95171	1151.65	FALSE	52
2022-09-13	14:11:56	-0.445229	-1.98047	1214.24	FALSE	52
2022-09-13	14:11:56	-0.411386	-1.82993	1151.65	FALSE	52
2022-09-13	14:11:57	-0.571132	-2.54051	1214.24	FALSE	52
2022-09-13	14:11:57	-0.48248	-2.14617	1151.65	FALSE	52
2022-09-13	14:11:57	-0.737544	-3.28074	1214.24	FALSE	52
2022-09-13	14:11:57	-0.783193	-3.4838	1151.65	FALSE	52
2022-09-13	14:11:58	-0.366399	-1.62982	1214.24	FALSE	52
2022-09-13	14:11:58	0.0182827	0.0813251	1151.73	FALSE	52
2022-09-13	14:11:58	0.370293	1.64714	1215.89	FALSE	52
2022-09-13	14:11:58	0.373448	1.66117	1153.39	FALSE	52
2022-09-13	14:11:59	0.450395	2.00345	1217.89	FALSE	52
2022-09-13	14:11:59	0.643321	2.86162	1156.25	FALSE	52
2022-09-13	14:11:59	0.566527	2.52003	1220.41	FALSE	52
2022-09-13	14:11:59	0.662913	2.94877	1159.2	FALSE	52
2022-09-13	14:12:00	0.798028	3.54979	1223.96	FALSE	52
2022-09-13	14:12:00	0.510242	2.26966	1161.47	FALSE	52
2022-09-13	14:12:00	0.312634	1.39066	1225.35	FALSE	52
2022-09-13	14:12:01	0.394211	1.75353	1163.22	FALSE	52
2022-09-13	14:12:01	0.425713	1.89366	1227.24	FALSE	52
2022-09-13	14:12:01	0.400013	1.77934	1165	FALSE	52
2022-09-13	14:12:01	0.419097	1.86423	1229.11	FALSE	52
2022-09-13	14:12:02	0.396501	1.76372	1166.77	FALSE	52
2022-09-13	14:12:02	0.391158	1.73995	1230.85	FALSE	52
2022-09-13	14:12:02	0.407443	1.81239	1168.58	FALSE	52
2022-09-13	14:12:02	0.444746	1.97832	1232.83	FALSE	52
2022-09-13	14:12:03	0.430395	1.91448	1170.49	FALSE	52
2022-09-13	14:12:03	0.562404	2.50169	1235.33	FALSE	52
2022-09-13	14:12:03	0.373957	1.66344	1172.16	FALSE	52
2022-09-13	14:12:03	0.520216	2.31402	1237.64	FALSE	52
2022-09-13	14:12:04	0.528257	2.34979	1174.51	FALSE	52
2022-09-13	14:12:04	0.514262	2.28754	1239.93	FALSE	52
2022-09-13	14:12:04	0.865254	3.84882	1178.35	FALSE	52
2022-09-13	14:12:05	0.455026	2.02405	1241.95	FALSE	52
2022-09-13	14:12:05	0.275025	1.22337	1179.58	FALSE	52
2022-09-13	14:12:05	0.583524	2.59563	1244.55	FALSE	52
2022-09-13	14:12:05	0.337316	1.50045	1181.08	FALSE	52
2022-09-13	14:12:06	0.528817	2.35228	1246.9	FALSE	52
2022-09-13	14:12:06	0.260369	1.15817	1182.24	FALSE	52
2022-09-13	14:12:06	0.202456	0.900565	1247.8	FALSE	52
2022-09-13	14:12:06	0.246629	1.09706	1183.33	FALSE	52
2022-09-13	14:12:07	0.287494	1.27883	1249.08	FALSE	52
2022-09-13	14:12:07	0.361641	1.60865	1184.94	FALSE	52
2022-09-13	14:12:07	0.209835	0.933388	1250.01	FALSE	52
2022-09-13	14:12:07	0.34383	1.52942	1186.47	FALSE	52
2022-09-13	14:12:08	0.122965	0.546973	1250.56	FALSE	52
2022-09-13	14:12:08	0.321947	1.43208	1187.9	FALSE	52
2022-09-13	14:12:08	0.049784	0.221449	1250.78	FALSE	52
2022-09-13	14:12:08	0.185204	0.823824	1188.73	FALSE	52
2022-09-13	14:12:09	0.100471	0.446915	1251.23	FALSE	52
2022-09-13	14:12:09	0.517723	2.30294	1191.03	FALSE	52
2022-09-13	14:12:09	0.733346	3.26207	1254.49	FALSE	52
2022-09-13	14:12:10	0.772226	3.43502	1194.47	FALSE	52
2022-09-13	14:12:10	0.781081	3.4744	1257.97	FALSE	52
2022-09-13	14:12:10	0.663728	2.95239	1197.42	FALSE	52
2022-09-13	14:12:10	0.617061	2.74481	1260.71	FALSE	52
2022-09-13	14:12:11	0.56271	2.50305	1199.92	FALSE	52
2022-09-13	14:12:11	0.802608	3.57016	1264.28	FALSE	52
2022-09-13	14:12:11	0.894059	3.97695	1203.9	FALSE	52
2022-09-13	14:12:11	0.61701	2.74458	1267.03	FALSE	52
2022-09-13	14:12:12	0.585051	2.60242	1206.5	FALSE	52
2022-09-13	14:12:12	0.950852	4.22958	1271.26	FALSE	52
2022-09-13	14:12:12	0.500979	2.22845	1208.73	FALSE	52
2022-09-13	14:12:12	0.383779	1.70713	1272.96	FALSE	52
2022-09-13	14:12:13	0.480623	2.13791	1210.87	FALSE	52
2022-09-13	14:12:13	0.38444	1.71007	1274.67	FALSE	52
2022-09-13	14:12:13	0.438639	1.95115	1212.82	FALSE	52
2022-09-13	14:12:14	0.301743	1.34221	1276.01	FALSE	52
2022-09-13	14:12:14	0.543168	2.41612	1215.23	FALSE	52
2022-09-13	14:12:14	0.405153	1.8022	1277.82	FALSE	52
2022-09-13	14:12:14	0.418842	1.86309	1217.1	FALSE	52
2022-09-13	14:12:15	0.586018	2.60673	1280.42	FALSE	52
2022-09-13	14:12:15	0.473092	2.10441	1219.2	FALSE	52
2022-09-13	14:12:15	0.58958	2.62257	1283.05	FALSE	52
2022-09-13	14:12:15	0.757265	3.36847	1222.57	FALSE	52
2022-09-13	14:12:16	0.373906	1.66321	1284.71	FALSE	52
2022-09-13	14:12:16	0.509886	2.26807	1224.84	FALSE	52
2022-09-13	14:12:16	0.574618	2.55602	1287.27	FALSE	52
2022-09-13	14:12:16	0.621031	2.76247	1227.6	FALSE	52
2022-09-13	14:12:17	0.643982	2.86456	1290.13	FALSE	52
2022-09-13	14:12:17	0.585509	2.60446	1230.2	FALSE	52
2022-09-13	14:12:17	0.570801	2.53904	1292.67	FALSE	52
2022-09-13	14:12:18	0.687697	3.05901	1233.26	FALSE	52
2022-09-13	14:12:18	0.523778	2.32987	1295	FALSE	52
2022-09-13	14:12:18	0.681641	3.03208	1236.3	FALSE	52
2022-09-13	14:12:18	0.592124	2.63389	1297.63	FALSE	52
2022-09-13	14:12:19	0.535229	2.38081	1238.68	FALSE	52
2022-09-13	14:12:19	0.55416	2.46501	1300.1	FALSE	52
2022-09-13	14:12:19	0.597214	2.65653	1241.33	FALSE	52
2022-09-13	14:12:19	0.576552	2.56462	1302.66	FALSE	52
2022-09-13	14:12:20	0.631717	2.81	1244.14	FALSE	52
2022-09-13	14:12:20	0.692735	3.08142	1305.74	FALSE	52
2022-09-13	14:12:20	0.901234	4.00887	1248.15	FALSE	52
2022-09-13	14:12:20	0.788257	3.50632	1309.25	FALSE	52
2022-09-13	14:12:21	0.729428	3.24464	1251.4	FALSE	52
2022-09-13	14:12:21	1.03686	4.61216	1313.86	FALSE	52
2022-09-13	14:12:21	0.452176	2.01137	1253.41	FALSE	52
2022-09-13	14:12:22	0.609377	2.71063	1316.57	FALSE	52
2022-09-13	14:12:22	0.471667	2.09807	1255.51	FALSE	52
2022-09-13	14:12:22	0.365458	1.62563	1318.2	FALSE	52
2022-09-13	14:12:22	0.571259	2.54107	1258.05	FALSE	52
2022-09-13	14:12:23	0.889275	3.95567	1322.15	FALSE	52
2022-09-13	14:12:23	2.74113	12.1931	1270.24	FALSE	52
2022-09-13	14:12:23	3.20225	14.2442	1336.4	1	53
2022-09-13	14:12:23	2.3795	10.5845	1280.82	FALSE	53
2022-09-13	14:12:24	1.78536	7.94164	1344.34	FALSE	53
2022-09-13	14:12:24	0.581081	2.58476	1283.41	FALSE	53
2022-09-13	14:12:24	0.526934	2.34391	1346.68	FALSE	53
2022-09-13	14:12:24	0.446374	1.98556	1285.39	FALSE	53
2022-09-13	14:12:25	0.401183	1.78454	1348.47	FALSE	53
2022-09-13	14:12:25	0.329122	1.464	1286.86	FALSE	53
2022-09-13	14:12:25	0.466832	2.07656	1350.55	FALSE	53
2022-09-13	14:12:26	0.420725	1.87147	1288.73	FALSE	53
2022-09-13	14:12:26	0.492532	2.19088	1352.74	FALSE	53
2022-09-13	14:12:26	1.06266	4.72692	1293.46	FALSE	53
2022-09-13	14:12:26	1.72485	7.67248	1360.41	FALSE	53
2022-09-13	14:12:27	3.70556	16.4831	1309.94	1	54
2022-09-13	14:12:27	3.12678	13.9085	1374.32	1	55
2022-09-13	14:12:27	2.37966	10.5852	1320.53	FALSE	55
2022-09-13	14:12:27	1.02815	4.57342	1378.89	FALSE	55
2022-09-13	14:12:28	0.628104	2.79393	1323.32	FALSE	55
2022-09-13	14:12:28	0.291361	1.29603	1380.19	FALSE	55
2022-09-13	14:12:28	0.352379	1.56745	1324.89	FALSE	55
2022-09-13	14:12:28	0.369682	1.64442	1381.83	FALSE	55
2022-09-13	14:12:29	0.375585	1.67068	1326.56	FALSE	55
2022-09-13	14:12:29	0.268257	1.19326	1383.02	FALSE	55
2022-09-13	14:12:29	0.401896	1.78771	1328.35	FALSE	55
2022-09-13	14:12:30	0.429936	1.91244	1384.94	FALSE	55
2022-09-13	14:12:30	0.484389	2.15466	1330.5	FALSE	55
2022-09-13	14:12:30	0.307443	1.36757	1386.3	FALSE	55
2022-09-13	14:12:30	0.402506	1.79043	1332.29	FALSE	55
2022-09-13	14:12:31	0.36215	1.61092	1387.92	FALSE	55
2022-09-13	14:12:31	0.796298	3.54209	1335.83	FALSE	55
2022-09-13	14:12:31	1.49355	6.64361	1394.56	FALSE	55
2022-09-13	14:12:31	0.969885	4.31424	1340.15	FALSE	55
2022-09-13	14:12:32	1.2906	5.74085	1400.3	FALSE	55
2022-09-13	14:12:32	1.2366	5.50064	1345.65	FALSE	55
2022-09-13	14:12:32	0.677519	3.01374	1403.31	FALSE	55
2022-09-13	14:12:32	0.648817	2.88607	1348.53	FALSE	55
2022-09-13	14:12:33	0.615789	2.73915	1406.05	FALSE	55
2022-09-13	14:12:33	0.457825	2.0365	1350.57	FALSE	55
2022-09-13	14:12:33	0.506374	2.25245	1408.31	FALSE	55
2022-09-13	14:12:34	0.361845	1.60956	1352.18	FALSE	55
2022-09-13	14:12:34	0.530445	2.35953	1410.66	FALSE	55
2022-09-13	14:12:34	0.399046	1.77504	1353.95	FALSE	55
2022-09-13	14:12:34	0.394873	1.75647	1412.42	FALSE	55
2022-09-13	14:12:35	0.369326	1.64284	1355.6	FALSE	55
2022-09-13	14:12:35	0.514822	2.29003	1414.71	FALSE	55
2022-09-13	14:12:35	0.396247	1.76259	1357.36	FALSE	55
2022-09-13	14:12:35	0.458893	2.04125	1416.75	FALSE	55
2022-09-13	14:12:36	0.395484	1.75919	1359.12	FALSE	55
2022-09-13	14:12:36	0.472735	2.10282	1418.86	FALSE	55
2022-09-13	14:12:36	0.408206	1.81578	1360.93	FALSE	55
2022-09-13	14:12:36	0.395992	1.76145	1420.62	FALSE	55
2022-09-13	14:12:37	0.434873	1.9344	1362.87	FALSE	55
2022-09-13	14:12:37	0.392328	1.74515	1422.36	FALSE	55
2022-09-13	14:12:37	0.384237	1.70916	1364.58	FALSE	55
2022-09-13	14:12:38	0.34159	1.51946	1423.88	FALSE	55
2022-09-13	14:12:38	0.480013	2.13519	1366.71	FALSE	55
2022-09-13	14:12:38	0.391158	1.73995	1425.62	FALSE	55
2022-09-13	14:12:38	0.555433	2.47068	1369.18	FALSE	55
2022-09-13	14:12:39	0.304593	1.35489	1426.98	FALSE	55
2022-09-13	14:12:39	0.592074	2.63366	1371.82	FALSE	55
2022-09-13	14:12:39	0.390496	1.737	1428.71	FALSE	55
2022-09-13	14:12:39	0.647086	2.87837	1374.7	FALSE	55
2022-09-13	14:12:40	0.282252	1.25551	1429.97	FALSE	55
2022-09-13	14:12:40	0.495993	2.20628	1376.9	FALSE	55
2022-09-13	14:12:40	0.468766	2.08516	1432.05	FALSE	55
2022-09-13	14:12:40	0.544847	2.42359	1379.33	FALSE	55
2022-09-13	14:12:41	0.174975	0.778324	1432.83	FALSE	55
2022-09-13	14:12:41	-0.207621	-0.92354	1379.33	FALSE	55
2022-09-13	14:12:41	-0.311743	-1.3867	1432.83	FALSE	55
2022-09-13	14:12:42	-0.309656	-1.37741	1379.33	FALSE	55
2022-09-13	14:12:42	-0.299325	-1.33146	1432.83	FALSE	55
2022-09-13	14:12:42	-0.225483	-1.00299	1379.33	FALSE	55
2022-09-13	14:12:42	-0.14589	-0.648948	1432.83	FALSE	55
2022-09-13	14:12:43	0.0259162	0.11528	1379.44	FALSE	55
2022-09-13	14:12:43	0.139453	0.620315	1433.45	FALSE	55
2022-09-13	14:12:43	0.0562979	0.250424	1379.69	FALSE	55
2022-09-13	14:12:43	0.102863	0.457555	1433.91	FALSE	55
2022-09-13	14:12:44	0.228206	1.01511	1380.71	FALSE	55
2022-09-13	14:12:44	0.283473	1.26094	1435.17	FALSE	55
2022-09-13	14:12:44	0.402761	1.79156	1382.5	FALSE	55
2022-09-13	14:12:44	0.44271	1.96926	1437.14	FALSE	55
2022-09-13	14:12:45	0.419199	1.86468	1384.36	FALSE	55
2022-09-13	14:12:45	0.366069	1.62835	1438.77	FALSE	55
2022-09-13	14:12:45	0.643321	2.86162	1387.22	FALSE	55
2022-09-13	14:12:46	0.297774	1.32456	1440.09	FALSE	55
2022-09-13	14:12:46	0.670547	2.98273	1390.21	FALSE	55
2022-09-13	14:12:46	0.475534	2.11527	1442.21	FALSE	55
2022-09-13	14:12:46	0.414517	1.84385	1392.05	FALSE	55
2022-09-13	14:12:47	0.230191	1.02394	1443.23	FALSE	55
2022-09-13	14:12:47	0.441438	1.9636	1394.02	FALSE	55
2022-09-13	14:12:47	0.200674	0.892638	1444.12	FALSE	55
2022-09-13	14:12:47	0.233092	1.03684	1395.05	FALSE	55
2022-09-13	14:12:48	0.443422	1.97243	1446.1	FALSE	55
2022-09-13	14:12:48	0.193651	0.861398	1395.91	FALSE	55
2022-09-13	14:12:48	0.229224	1.01963	1447.12	FALSE	55
2022-09-13	14:12:48	0.221132	0.983639	1396.9	FALSE	55
2022-09-13	14:12:49	0.313397	1.39405	1448.51	FALSE	55
2022-09-13	14:12:49	0.08556	0.380588	1397.28	FALSE	55
2022-09-13	14:12:49	0.250802	1.11562	1449.63	FALSE	55
2022-09-13	14:12:50	0.111158	0.494453	1397.77	FALSE	55
2022-09-13	14:12:50	0.17472	0.77719	1450.4	FALSE	55
2022-09-13	14:12:50	0.0242877	0.108037	1397.88	FALSE	55
2022-09-13	14:12:50	0.0870867	0.387379	1450.79	FALSE	55
2022-09-13	14:12:51	0.0834226	0.37108	1398.25	FALSE	55
2022-09-13	14:12:51	0.099962	0.444651	1451.24	FALSE	55
2022-09-13	14:12:51	0.257621	1.14595	1399.4	FALSE	55
2022-09-13	14:12:51	0.162812	0.72422	1451.96	FALSE	55
2022-09-13	14:12:52	0.323473	1.43887	1400.84	FALSE	55
2022-09-13	14:12:52	0.406221	1.80695	1453.77	FALSE	55
2022-09-13	14:12:52	0.631463	2.80887	1403.64	FALSE	55
2022-09-13	14:12:52	0.49986	2.22348	1455.99	FALSE	55
2022-09-13	14:12:53	0.852278	3.7911	1407.44	FALSE	55
2022-09-13	14:12:53	0.729428	3.24464	1459.24	FALSE	55
2022-09-13	14:12:53	1.35548	6.02945	1413.47	FALSE	55
2022-09-13	14:12:54	1.24296	5.52893	1464.76	FALSE	55
2022-09-13	14:12:54	0.318384	1.41624	1414.88	FALSE	55
2022-09-13	14:12:54	0.201998	0.898528	1465.66	FALSE	55
2022-09-13	14:12:54	0.254618	1.13259	1416.01	FALSE	55
2022-09-13	14:12:55	0.471667	2.09807	1467.76	FALSE	55
2022-09-13	14:12:55	0.728562	3.24079	1419.26	FALSE	55
2022-09-13	14:12:55	0.561081	2.4958	1470.26	FALSE	55
2022-09-13	14:12:55	0.533397	2.37266	1421.63	FALSE	55
2022-09-13	14:12:56	0.407188	1.81125	1472.07	FALSE	55
2022-09-13	14:12:56	0.505967	2.25064	1423.88	FALSE	55
2022-09-13	14:12:56	0.458791	2.04079	1474.11	FALSE	55
2022-09-13	14:12:56	0.524236	2.33191	1426.21	FALSE	55
2022-09-13	14:12:57	0.340623	1.51516	1475.62	FALSE	55
2022-09-13	14:12:57	0.2993	1.33135	1427.54	FALSE	55
2022-09-13	14:12:57	0.299809	1.33361	1476.96	FALSE	55
2022-09-13	14:12:58	0.300267	1.33565	1428.88	FALSE	55
2022-09-13	14:12:58	0.261234	1.16202	1478.12	FALSE	55
2022-09-13	14:12:58	0.287952	1.28087	1430.16	FALSE	55
2022-09-13	14:12:58	0.284237	1.26434	1479.38	FALSE	55
2022-09-13	14:12:59	0.253295	1.12671	1431.28	FALSE	55
2022-09-13	14:12:59	0.202405	0.900338	1480.28	FALSE	55
2022-09-13	14:12:59	0.286883	1.27611	1432.56	FALSE	55
2022-09-13	14:12:59	0.238079	1.05902	1481.34	FALSE	55
2022-09-13	14:13:00	0.292176	1.29966	1433.86	FALSE	55
2022-09-13	14:13:00	0.141845	0.630955	1481.97	FALSE	55
2022-09-13	14:13:00	0.261896	1.16497	1435.03	FALSE	55
2022-09-13	14:13:00	0.234262	1.04204	1483.02	FALSE	55
2022-09-13	14:13:01	0.463728	2.06275	1437.09	FALSE	55
2022-09-13	14:13:01	0.627901	2.79303	1485.81	FALSE	55
2022-09-13	14:13:01	0.412634	1.83548	1438.92	FALSE	55
2022-09-13	14:13:02	0.359199	1.59779	1487.41	FALSE	55
2022-09-13	14:13:02	0.330954	1.47215	1440.4	FALSE	55
2022-09-13	14:13:02	0.329479	1.46559	1488.87	FALSE	55
2022-09-13	14:13:02	0.350649	1.55976	1441.96	FALSE	55
2022-09-13	14:13:03	0.543779	2.41884	1491.29	FALSE	55
2022-09-13	14:13:03	0.579555	2.57798	1444.53	FALSE	55
2022-09-13	14:13:03	1.02581	4.56301	1495.85	FALSE	55
2022-09-13	14:13:03	1.11528	4.96099	1449.49	FALSE	55
2022-09-13	14:13:04	1.64744	7.32814	1503.18	FALSE	55
2022-09-13	14:13:04	0.69925	3.1104	1452.61	FALSE	55
2022-09-13	14:13:04	0.607239	2.70112	1505.88	FALSE	55
2022-09-13	14:13:04	0.400166	1.78002	1454.39	FALSE	55
2022-09-13	14:13:05	0.368664	1.63989	1507.52	FALSE	55
2022-09-13	14:13:05	0.36729	1.63378	1456.02	FALSE	55
2022-09-13	14:13:05	0.312328	1.3893	1508.91	FALSE	55
2022-09-13	14:13:06	0.0369086	0.164177	1456.18	FALSE	55
2022-09-13	14:13:06	0.086934	0.3867	1509.3	FALSE	55
2022-09-13	14:13:06	0.243626	1.0837	1457.27	FALSE	55
2022-09-13	14:13:06	0.234008	1.04091	1510.34	FALSE	55
2022-09-13	14:13:07	0.119758	0.532708	1457.8	FALSE	55
2022-09-13	14:13:07	0.0239824	0.106679	1510.45	FALSE	55
2022-09-13	14:13:07	0.0882572	0.392586	1458.19	FALSE	55
2022-09-13	14:13:07	0.192583	0.856648	1511.3	FALSE	55
2022-09-13	14:13:08	0.26841	1.19394	1459.39	FALSE	55
2022-09-13	14:13:08	0.324746	1.44454	1512.75	FALSE	55
2022-09-13	14:13:08	0.277061	1.23242	1460.62	FALSE	55
2022-09-13	14:13:08	0.319758	1.42235	1514.17	FALSE	55
2022-09-13	14:13:09	0.22897	1.0185	1461.64	FALSE	55
2022-09-13	14:13:09	0.188512	0.838539	1515.01	FALSE	55
2022-09-13	14:13:09	0.069784	0.310413	1461.95	FALSE	55
2022-09-13	14:13:10	0.0812343	0.361346	1515.37	FALSE	55
2022-09-13	14:13:10	0.0811834	0.36112	1462.31	FALSE	55
2022-09-13	14:13:10	-0.0225315	-0.100225	1515.37	FALSE	55
2022-09-13	14:13:10	-0.0904196	-0.402204	1462.31	FALSE	55
2022-09-13	14:13:11	-0.0416155	-0.185114	1515.37	FALSE	55
2022-09-13	14:13:11	-0.0695544	-0.309392	1462.31	FALSE	55
2022-09-13	14:13:11	-0.0531677	-0.236501	1515.37	FALSE	55
2022-09-13	14:13:11	-0.093473	-0.415787	1462.31	FALSE	55
2022-09-13	14:13:12	-0.120445	-0.535763	1515.37	FALSE	55
2022-09-13	14:13:12	-0.0268572	-0.119466	1462.31	FALSE	55
2022-09-13	14:13:12	-0.0354069	-0.157497	1515.37	FALSE	55
2022-09-13	14:13:12	-0.0659412	-0.29332	1462.31	FALSE	55
2022-09-13	14:13:13	-0.225381	-1.00254	1515.37	FALSE	55
2022-09-13	14:13:13	-0.568537	-2.52897	1462.31	FALSE	55
2022-09-13	14:13:13	-0.524618	-2.33361	1515.37	FALSE	55
2022-09-13	14:13:13	-0.0861956	-0.383415	1462.31	FALSE	55
2022-09-13	14:13:14	0.149224	0.663778	1516.03	FALSE	55
2022-09-13	14:13:14	0.13299	0.591566	1462.9	FALSE	55
2022-09-13	14:13:14	0.378181	1.68222	1517.72	FALSE	55
2022-09-13	14:13:15	0.18785	0.835594	1463.74	FALSE	55
2022-09-13	14:13:15	0.451718	2.00933	1519.73	FALSE	55
2022-09-13	14:13:15	0.224797	0.999942	1464.74	FALSE	55
2022-09-13	14:13:15	0.715992	3.18488	1522.91	FALSE	55
2022-09-13	14:13:16	0.602099	2.67826	1467.41	FALSE	55
2022-09-13	14:13:16	1.97055	8.7654	1531.68	FALSE	55
2022-09-13	14:13:16	1.94485	8.65108	1476.06	FALSE	55
2022-09-13	14:13:16	5.22184	23.2278	1554.9	1	56
2022-09-13	14:13:17	5.9136	26.3049	1502.37	1	57
2022-09-13	14:13:17	8.75924	38.9629	1593.87	1	58
2022-09-13	14:13:17	3.0222	13.4434	1515.81	1	59
2022-09-13	14:13:18	2.79039	12.4122	1606.28	FALSE	59
2022-09-13	14:13:18	2.22027	9.87621	1525.69	FALSE	59
2022-09-13	14:13:18	0.884542	3.93462	1610.21	FALSE	59
2022-09-13	14:13:18	1.15406	5.13349	1530.82	FALSE	59
2022-09-13	14:13:19	1.01889	4.53223	1614.75	FALSE	59
2022-09-13	14:13:19	1.19304	5.30688	1536.13	FALSE	59
2022-09-13	14:13:19	0.817875	3.63807	1618.38	FALSE	59
2022-09-13	14:13:19	1.60357	7.133	1543.26	FALSE	59
2022-09-13	14:13:20	1.72149	7.65753	1626.04	FALSE	59
2022-09-13	14:13:20	1.39935	6.22459	1549.49	FALSE	59
2022-09-13	14:13:20	1.43523	6.38419	1632.43	FALSE	59
2022-09-13	14:13:20	1.32561	5.89658	1555.38	FALSE	59
2022-09-13	14:13:21	2.08067	9.25524	1641.68	FALSE	59
2022-09-13	14:13:21	1.60724	7.14932	1562.53	FALSE	59
2022-09-13	14:13:21	2.39452	10.6513	1652.33	FALSE	59
2022-09-13	14:13:21	1.81614	8.07855	1570.61	FALSE	59
2022-09-13	14:13:22	2.10775	9.37569	1661.71	FALSE	59
2022-09-13	14:13:22	1.13859	5.06468	1575.68	FALSE	59
2022-09-13	14:13:22	1.03869	4.6203	1666.33	FALSE	59
2022-09-13	14:13:23	1.34805	5.9964	1581.67	FALSE	59
2022-09-13	14:13:23	0.899249	4.00004	1670.33	FALSE	59
2022-09-13	14:13:23	1.33314	5.93007	1587.6	FALSE	59
2022-09-13	14:13:23	1.94225	8.63952	1678.97	FALSE	59
2022-09-13	14:13:24	2.19635	9.7698	1597.37	FALSE	59
2022-09-13	14:13:24	1.15462	5.13598	1684.1	FALSE	59
2022-09-13	14:13:24	0.781794	3.47758	1600.85	FALSE	59
2022-09-13	14:13:24	0.369224	1.64238	1685.75	FALSE	59
2022-09-13	14:13:25	0.295433	1.31415	1602.16	FALSE	59
2022-09-13	14:13:25	-0.0790201	-0.351497	1685.75	FALSE	59
2022-09-13	14:13:25	-0.264414	-1.17617	1602.16	FALSE	59
2022-09-13	14:13:26	-0.270063	-1.20129	1685.75	FALSE	59
2022-09-13	14:13:26	1.01029	4.49397	1606.66	FALSE	59
2022-09-13	14:13:26	2.82612	12.5711	1698.32	FALSE	59
2022-09-13	14:13:26	2.78317	12.3801	1619.04	FALSE	59
2022-09-13	14:13:27	2.02032	8.98679	1707.3	FALSE	59
2022-09-13	14:13:27	3.20413	14.2526	1633.29	1	60
2022-09-13	14:13:27	2.20826	9.82278	1717.13	FALSE	60
2022-09-13	14:13:27	3.84271	17.0931	1650.38	1	61
2022-09-13	14:13:28	2.4165	10.7491	1727.88	FALSE	61
2022-09-13	14:13:28	2.84149	12.6395	1663.02	FALSE	61
2022-09-13	14:13:28	0.663931	2.9533	1730.83	FALSE	61
2022-09-13	14:13:28	0.761132	3.38567	1666.41	FALSE	61
2022-09-13	14:13:29	0.754211	3.35488	1734.18	FALSE	61
2022-09-13	14:13:29	0.629936	2.80208	1669.21	FALSE	61
2022-09-13	14:13:29	0.728512	3.24057	1737.42	FALSE	61
2022-09-13	14:13:29	0.428359	1.90543	1671.12	FALSE	61
2022-09-13	14:13:30	1.54057	6.85276	1744.28	FALSE	61
2022-09-13	14:13:30	1.3109	5.83115	1676.95	FALSE	61
2022-09-13	14:13:30	4.63945	20.6372	1764.91	1	62
2022-09-13	14:13:31	4.27604	19.0207	1695.97	1	63
2022-09-13	14:13:31	10.552	46.9374	1811.85	1	64
2022-09-13	14:13:31	2.42414	10.7831	1706.75	FALSE	64
2022-09-13	14:13:31	4.0077	17.8271	1829.68	1	65
2022-09-13	14:13:32	0.813601	3.61906	1710.37	FALSE	65
2022-09-13	14:13:32	0.143168	0.63684	1830.32	FALSE	65
2022-09-13	14:13:32	0.120827	0.537463	1710.91	FALSE	65
2022-09-13	14:13:32	-0.446806	-1.98748	1830.32	FALSE	65
2022-09-13	14:13:33	-1.02284	-4.5498	1710.91	FALSE	65
2022-09-13	14:13:33	-0.935101	-4.15952	1830.32	FALSE	65
2022-09-13	14:13:33	-0.899783	-4.00241	1710.91	FALSE	65
2022-09-13	14:13:33	-0.650419	-2.89319	1830.32	FALSE	65
2022-09-13	14:13:34	-0.552811	-2.45901	1710.91	FALSE	65
2022-09-13	14:13:34	-0.384211	-1.70905	1830.32	FALSE	65
2022-09-13	14:13:34	-0.0220735	-0.0981873	1710.91	FALSE	65
2022-09-13	14:13:35	-0.0383585	-0.170626	1830.32	FALSE	65
2022-09-13	14:13:35	0.178486	0.793941	1711.7	FALSE	65
2022-09-13	14:13:35	0.0708017	0.31494	1830.63	FALSE	65
2022-09-13	14:13:35	0.461132	2.05121	1713.75	FALSE	65
2022-09-13	14:13:36	0.399606	1.77753	1832.41	FALSE	65
2022-09-13	14:13:36	0.635789	2.82812	1716.58	FALSE	65
2022-09-13	14:13:36	0.269224	1.19756	1833.61	FALSE	65
2022-09-13	14:13:36	0.352888	1.56972	1718.15	FALSE	65
2022-09-13	14:13:37	0.252379	1.12263	1834.73	FALSE	65
2022-09-13	14:13:37	0.252074	1.12128	1719.27	FALSE	65
2022-09-13	14:13:37	0.105102	0.467515	1835.2	FALSE	65
2022-09-13	14:13:37	0.25925	1.1532	1720.43	FALSE	65
2022-09-13	14:13:38	0.230751	1.02643	1836.22	FALSE	65
2022-09-13	14:13:38	1.5192	6.75771	1727.18	FALSE	65
2022-09-13	14:13:38	3.65864	16.2744	1852.5	1	66
2022-09-13	14:13:39	4.10011	18.2381	1745.42	1	67
2022-09-13	14:13:39	5.01777	22.32	1874.82	1	68
2022-09-13	14:13:39	2.11192	9.39424	1754.82	FALSE	68
2022-09-13	14:13:39	2.62576	11.6799	1886.5	FALSE	68
2022-09-13	14:13:40	0.789428	3.51153	1758.33	FALSE	68
2022-09-13	14:13:40	1.16444	5.17966	1891.68	FALSE	68
2022-09-13	14:13:40	0.868868	3.8649	1762.19	FALSE	68
2022-09-13	14:13:40	0.792125	3.52353	1895.2	FALSE	68
2022-09-13	14:13:41	0.654516	2.91142	1765.1	FALSE	68
2022-09-13	14:13:41	0.979249	4.3559	1899.56	FALSE	68
2022-09-13	14:13:41	1.64673	7.32498	1772.43	FALSE	68
2022-09-13	14:13:41	0.695025	3.09161	1902.65	FALSE	68
2022-09-13	14:13:42	1.90383	8.46862	1780.9	FALSE	68
2022-09-13	14:13:42	1.30846	5.82029	1908.47	FALSE	68
2022-09-13	14:13:42	1.7879	7.95294	1788.85	FALSE	68
2022-09-13	14:13:43	0.94444	4.20106	1912.67	FALSE	68
2022-09-13	14:13:43	1.44449	6.42538	1795.28	FALSE	68
2022-09-13	14:13:43	0.945305	4.20491	1916.87	FALSE	68
2022-09-13	14:13:43	0.913295	4.06252	1799.34	FALSE	68
2022-09-13	14:13:44	1.10205	4.90214	1921.78	FALSE	68
2022-09-13	14:13:44	0.831209	3.69738	1803.04	FALSE	68
2022-09-13	14:13:44	1.06785	4.75001	1926.53	FALSE	68
2022-09-13	14:13:44	0.439148	1.95342	1804.99	FALSE	68
2022-09-13	14:13:45	0.812481	3.61408	1930.14	FALSE	68
2022-09-13	14:13:45	0.567188	2.52297	1807.51	FALSE	68
2022-09-13	14:13:45	0.852736	3.79314	1933.93	FALSE	68
2022-09-13	14:13:45	0.354618	1.57741	1809.09	FALSE	68
2022-09-13	14:13:46	0.74958	3.33428	1937.27	FALSE	68
2022-09-13	14:13:46	0.314567	1.39926	1810.49	FALSE	68
2022-09-13	14:13:46	0.573346	2.55036	1939.82	FALSE	68
2022-09-13	14:13:47	0.432125	1.92218	1812.41	FALSE	68
2022-09-13	14:13:47	0.410344	1.82529	1941.64	FALSE	68
2022-09-13	14:13:47	0.315331	1.40266	1813.81	FALSE	68
2022-09-13	14:13:47	0.418588	1.86196	1943.5	FALSE	68
2022-09-13	14:13:48	0.50159	2.23117	1816.04	FALSE	68
2022-09-13	14:13:48	0.418842	1.86309	1945.37	FALSE	68
2022-09-13	14:13:48	0.609682	2.71199	1818.76	FALSE	68
2022-09-13	14:13:48	0.637316	2.83491	1948.2	FALSE	68
2022-09-13	14:13:49	1.05732	4.70317	1823.46	FALSE	68
2022-09-13	14:13:49	1.8619	8.2821	1956.49	FALSE	68
2022-09-13	14:13:49	1.77279	7.88572	1831.35	FALSE	68
2022-09-13	14:13:49	1.81202	8.06023	1964.55	FALSE	68
2022-09-13	14:13:50	1.74469	7.76073	1839.11	FALSE	68
2022-09-13	14:13:50	1.17996	5.2487	1969.79	FALSE	68
2022-09-13	14:13:50	1.0391	4.62212	1843.73	FALSE	68
2022-09-13	14:13:51	0.540369	2.40367	1972.2	FALSE	68
2022-09-13	14:13:51	0.697112	3.10089	1846.83	FALSE	68
2022-09-13	14:13:51	0.217214	0.966211	1973.16	FALSE	68
2022-09-13	14:13:51	0.558486	2.48426	1849.31	FALSE	68
2022-09-13	14:13:52	0.325916	1.44974	1974.61	FALSE	68
2022-09-13	14:13:52	0.850852	3.78476	1853.1	FALSE	68
2022-09-13	14:13:52	0.92729	4.12477	1978.74	FALSE	68
2022-09-13	14:13:52	1.4962	6.6554	1859.75	FALSE	68
2022-09-13	14:13:53	1.74144	7.74627	1986.48	FALSE	68
2022-09-13	14:13:53	2.30775	10.2653	1870.02	FALSE	68
2022-09-13	14:13:53	1.1137	4.95396	1991.44	FALSE	68
2022-09-13	14:13:53	2.21345	9.84587	1879.86	FALSE	68
2022-09-13	14:13:54	1.0909	4.85254	1996.29	FALSE	68
2022-09-13	14:13:54	1.75345	7.7997	1887.66	FALSE	68
2022-09-13	14:13:54	0.617519	2.74685	1999.04	FALSE	68
2022-09-13	14:13:55	0.664491	2.95579	1890.62	FALSE	68
2022-09-13	14:13:55	0.511514	2.27532	2001.31	FALSE	68
2022-09-13	14:13:55	0.490293	2.18092	1892.8	FALSE	68
2022-09-13	14:13:55	0.299606	1.33271	2002.65	FALSE	68
2022-09-13	14:13:56	0.43874	1.9516	1894.75	FALSE	68
2022-09-13	14:13:56	0.453906	2.01906	2004.67	FALSE	68
2022-09-13	14:13:56	1.0278	4.57186	1899.32	FALSE	68
2022-09-13	14:13:56	1.41543	6.29612	2010.96	FALSE	68
2022-09-13	14:13:57	1.48184	6.59152	1905.92	FALSE	68
2022-09-13	14:13:57	1.17258	5.21587	2016.18	FALSE	68
2022-09-13	14:13:57	1.06698	4.74614	1910.66	FALSE	68
2022-09-13	14:13:57	0.32444	1.44317	2017.62	FALSE	68
2022-09-13	14:13:58	0.638283	2.83921	1913.5	FALSE	68
2022-09-13	14:13:58	0.332176	1.47759	2019.1	FALSE	68
2022-09-13	14:13:58	0.530802	2.36111	1915.86	FALSE	68
2022-09-13	14:13:59	0.332074	1.47713	2020.57	FALSE	68
2022-09-13	14:13:59	0.811209	3.60842	1919.47	FALSE	68
2022-09-13	14:13:59	0.950038	4.22596	2024.8	FALSE	68
2022-09-13	14:13:59	2.87212	12.7758	1932.25	FALSE	68
2022-09-13	14:14:00	3.13019	13.9237	2038.72	1	69
2022-09-13	14:14:00	3.45116	15.3514	1947.6	1	70
2022-09-13	14:14:00	2.32983	10.3635	2049.09	FALSE	70
2022-09-13	14:14:00	3.46184	15.399	1963	1	71
2022-09-13	14:14:01	0.877163	3.9018	2052.99	FALSE	71
2022-09-13	14:14:01	1.85172	8.23682	1971.23	FALSE	71
2022-09-13	14:14:01	1.19497	5.31547	2058.31	FALSE	71
2022-09-13	14:14:01	1.49375	6.6445	1977.88	FALSE	71
2022-09-13	14:14:02	1.38933	6.18002	2064.49	FALSE	71
2022-09-13	14:14:02	2.07365	9.22401	1987.1	FALSE	71
2022-09-13	14:14:02	1.00429	4.46728	2068.95	FALSE	71
2022-09-13	14:14:03	1.66225	7.39402	1994.5	FALSE	71
2022-09-13	14:14:03	0.913651	4.0641	2073.02	FALSE	71
2022-09-13	14:14:03	1.14301	5.08434	1999.58	FALSE	71
2022-09-13	14:14:03	0.787544	3.50315	2076.52	FALSE	71
2022-09-13	14:14:04	1.25503	5.58262	2005.16	FALSE	71
2022-09-13	14:14:04	0.57243	2.54628	2079.07	FALSE	71
2022-09-13	14:14:04	1.01691	4.52342	2009.69	FALSE	71
2022-09-13	14:14:04	1.12378	4.9988	2084.07	FALSE	71
2022-09-13	14:14:05	2.47034	10.9886	2020.68	FALSE	71
2022-09-13	14:14:05	2.70098	12.0145	2096.08	FALSE	71
2022-09-13	14:14:05	1.58581	7.054	2027.73	FALSE	71
2022-09-13	14:14:05	1.14251	5.08211	2101.16	FALSE	71
2022-09-13	14:14:06	0.410242	1.82484	2029.55	FALSE	71
2022-09-13	14:14:06	0.358181	1.59326	2102.75	FALSE	71
2022-09-13	14:14:06	0.178893	0.795752	2030.35	FALSE	71
2022-09-13	14:14:07	0.282863	1.25823	2104.01	FALSE	71
2022-09-13	14:14:07	0.40612	1.8065	2032.16	FALSE	71
2022-09-13	14:14:07	0.34897	1.55229	2105.57	FALSE	71
2022-09-13	14:14:07	0.288766	1.28449	2033.44	FALSE	71
2022-09-13	14:14:08	0.623524	2.77356	2108.34	FALSE	71
2022-09-13	14:14:08	0.609122	2.7095	2036.15	FALSE	71
2022-09-13	14:14:08	0.66215	2.94538	2111.28	FALSE	71
2022-09-13	14:14:08	0.545254	2.4254	2038.58	FALSE	71
2022-09-13	14:14:09	0.490496	2.18182	2113.47	FALSE	71
2022-09-13	14:14:09	0.440674	1.96021	2040.54	FALSE	71
2022-09-13	14:14:09	0.40159	1.78635	2115.25	FALSE	71
2022-09-13	14:14:09	0.513652	2.28483	2042.82	FALSE	71
2022-09-13	14:14:10	1.72546	7.67519	2122.93	FALSE	71
2022-09-13	14:14:10	2.74088	12.192	2055.01	FALSE	71
2022-09-13	14:14:10	3.41818	15.2047	2138.13	1	72
2022-09-13	14:14:11	3.43706	15.2887	2070.3	1	73
2022-09-13	14:14:11	2.73284	12.1562	2150.29	FALSE	73
2022-09-13	14:14:11	2.21594	9.85694	2080.16	FALSE	73
2022-09-13	14:14:11	2.1135	9.40127	2159.69	FALSE	73
2022-09-13	14:14:12	2.03625	9.05765	2089.22	FALSE	73
2022-09-13	14:14:12	1.6648	7.40536	2167.1	FALSE	73
2022-09-13	14:14:12	1.71803	7.64214	2096.86	FALSE	73
2022-09-13	14:14:12	0.790344	3.51561	2170.61	FALSE	73
2022-09-13	14:14:13	0.611718	2.72104	2099.58	FALSE	73
2022-09-13	14:14:13	1.09533	4.87225	2175.48	FALSE	73
2022-09-13	14:14:13	1.66113	7.38904	2106.97	FALSE	73
2022-09-13	14:14:13	1.18805	5.28468	2180.77	FALSE	73
2022-09-13	14:14:14	0.920674	4.09534	2111.06	FALSE	73
2022-09-13	14:14:14	0.319504	1.42122	2182.19	FALSE	73
2022-09-13	14:14:14	0.326476	1.45223	2112.52	FALSE	73
2022-09-13	14:14:15	0.370649	1.64872	2183.84	FALSE	73
2022-09-13	14:14:15	1.89533	8.43081	2120.95	FALSE	73
2022-09-13	14:14:15	2.00688	8.927	2192.76	FALSE	73
2022-09-13	14:14:15	1.89075	8.41043	2129.36	FALSE	73
2022-09-13	14:14:16	1.73884	7.73471	2200.5	FALSE	73
2022-09-13	14:14:16	0.919504	4.09014	2133.45	FALSE	73
2022-09-13	14:14:16	0.738079	3.28312	2203.78	FALSE	73
2022-09-13	14:14:16	0.827544	3.68108	2137.13	FALSE	73
2022-09-13	14:14:17	0.89813	3.99506	2207.78	FALSE	73
2022-09-13	14:14:17	0.905865	4.02947	2141.16	FALSE	73
2022-09-13	14:14:17	0.829428	3.68946	2211.47	FALSE	73
2022-09-13	14:14:17	0.884033	3.93236	2145.09	FALSE	73
2022-09-13	14:14:18	0.709987	3.15816	2214.63	FALSE	73
2022-09-13	14:14:18	0.476909	2.12139	2147.21	FALSE	73
2022-09-13	14:14:18	0.43701	1.94391	2216.57	FALSE	73
2022-09-13	14:14:19	0.49813	2.21578	2149.43	FALSE	73
2022-09-13	14:14:19	0.338741	1.50679	2218.08	FALSE	73
2022-09-13	14:14:19	0.334364	1.48732	2150.91	FALSE	73
2022-09-13	14:14:19	0.249784	1.11109	2219.19	FALSE	73
2022-09-13	14:14:20	0.261132	1.16157	2152.08	FALSE	73
2022-09-13	14:14:20	0.190649	0.848045	2220.04	FALSE	73
2022-09-13	14:14:20	0.127036	0.565082	2152.64	FALSE	73
2022-09-13	14:14:20	0.087392	0.388737	2220.42	FALSE	73
2022-09-13	14:14:21	-0.0337784	-0.150253	2152.64	FALSE	73
2022-09-13	14:14:21	-0.134338	-0.597562	2220.42	FALSE	73
2022-09-13	14:14:21	-0.238155	-1.05936	2152.64	FALSE	73
2022-09-13	14:14:21	-0.263651	-1.17277	2220.42	FALSE	73
2022-09-13	14:14:22	-0.147926	-0.658004	2152.64	FALSE	73
2022-09-13	14:14:22	-0.0796817	-0.35444	2220.42	FALSE	73
2022-09-13	14:14:22	0.258791	1.15115	2153.79	FALSE	73
2022-09-13	14:14:23	1.21212	5.39175	2225.82	FALSE	73
2022-09-13	14:14:23	4.49416	19.9909	2173.78	1	74
2022-09-13	14:14:23	3.54413	15.765	2241.58	1	75
2022-09-13	14:14:23	3.60917	16.0543	2189.84	1	76
2022-09-13	14:14:24	2.39131	10.637	2252.22	FALSE	76
2022-09-13	14:14:24	4.4739	19.9008	2209.74	1	77
2022-09-13	14:14:24	1.20851	5.37569	2257.59	FALSE	77
2022-09-13	14:14:24	2.21584	9.8565	2219.6	FALSE	77
2022-09-13	14:14:25	1.29029	5.73947	2263.33	FALSE	77
2022-09-13	14:14:25	1.15599	5.14207	2224.74	FALSE	77
2022-09-13	14:14:25	0.521743	2.32082	2265.65	FALSE	77
2022-09-13	14:14:25	0.448817	1.99643	2226.73	FALSE	77
2022-09-13	14:14:26	0.513652	2.28483	2267.94	FALSE	77
2022-09-13	14:14:26	0.88785	3.94933	2230.68	FALSE	77
2022-09-13	14:14:26	1.39508	6.20559	2274.14	FALSE	77
2022-09-13	14:14:27	-0.0224298	-0.0997722	2230.68	FALSE	77
2022-09-13	14:14:27	0.203779	0.90645	2275.05	FALSE	77
2022-09-13	14:14:27	0.477875	2.12568	2232.81	FALSE	77
2022-09-13	14:14:27	0.422812	1.88075	2276.93	FALSE	77
2022-09-13	14:14:28	0.226069	1.0056	2233.81	FALSE	77
2022-09-13	14:14:28	0.650394	2.89308	2279.82	FALSE	77
2022-09-13	14:14:28	0.206018	0.916409	2234.73	FALSE	77
2022-09-13	14:14:28	0.196705	0.874983	2280.7	FALSE	77
2022-09-13	14:14:29	0.219809	0.977754	2235.71	FALSE	77
2022-09-13	14:14:29	0.210242	0.935198	2281.63	FALSE	77
2022-09-13	14:14:29	0.165255	0.735087	2236.44	FALSE	77
2022-09-13	14:14:29	0.146222	0.650425	2282.29	FALSE	77
2022-09-13	14:14:30	1.9563	8.70201	2245.15	FALSE	77
2022-09-13	14:14:30	2.63457	11.7191	2294	FALSE	77
2022-09-13	14:14:30	2.32235	10.3303	2255.48	FALSE	77
2022-09-13	14:14:31	0.605255	2.6923	2296.7	FALSE	77
2022-09-13	14:14:31	0.401336	1.78522	2257.26	FALSE	77
2022-09-13	14:14:31	0.379199	1.68675	2298.38	FALSE	77
2022-09-13	14:14:31	0.392379	1.74538	2259.01	FALSE	77
2022-09-13	14:14:32	0.410598	1.82642	2300.21	FALSE	77
2022-09-13	14:14:32	0.796654	3.54368	2262.55	FALSE	77
2022-09-13	14:14:32	1.48902	6.62346	2306.83	FALSE	77
2022-09-13	14:14:32	1.39813	6.21916	2268.77	FALSE	77
2022-09-13	14:14:33	1.38271	6.15057	2312.98	FALSE	77
2022-09-13	14:14:33	1.92363	8.55669	2277.33	FALSE	77
2022-09-13	14:14:33	1.54744	6.88332	2319.87	FALSE	77
2022-09-13	14:14:33	2.43655	10.8383	2288.16	FALSE	77
2022-09-13	14:14:34	2.46368	10.9589	2330.83	FALSE	77
2022-09-13	14:14:34	2.64281	11.7557	2299.92	FALSE	77
2022-09-13	14:14:34	3.48724	15.5119	2346.34	1	78
2022-09-13	14:14:35	1.05681	4.7009	2304.62	FALSE	78
2022-09-13	14:14:35	2.1934	9.75668	2356.09	FALSE	78
2022-09-13	14:14:35	1.50765	6.70633	2311.33	FALSE	78
2022-09-13	14:14:35	1.26994	5.64895	2361.74	FALSE	78
2022-09-13	14:14:36	1.02006	4.53743	2315.86	FALSE	78
2022-09-13	14:14:36	2.46963	10.9854	2372.73	FALSE	78
2022-09-13	14:14:36	0.408868	1.81873	2317.68	FALSE	78
2022-09-13	14:14:36	0.629885	2.80185	2375.53	FALSE	78
2022-09-13	14:14:37	0.386069	1.71731	2319.4	FALSE	78
2022-09-13	14:14:37	0.36729	1.63378	2377.16	FALSE	78
2022-09-13	14:14:37	0.298181	1.32637	2320.73	FALSE	78
2022-09-13	14:14:37	0.389529	1.7327	2378.9	FALSE	78
2022-09-13	14:14:38	0.833142	3.70598	2324.43	FALSE	78
2022-09-13	14:14:38	0.702506	3.12489	2382.02	FALSE	78
2022-09-13	14:14:38	1.15966	5.1584	2329.59	FALSE	78
2022-09-13	14:14:38	1.18897	5.28878	2387.31	FALSE	78
2022-09-13	14:14:39	0.881234	3.91991	2333.51	FALSE	78
2022-09-13	14:14:39	1.04653	4.65517	2391.97	FALSE	78
2022-09-13	14:14:39	1.03309	4.59539	2338.11	FALSE	78
2022-09-13	14:14:40	0.613804	2.73032	2394.7	FALSE	78
2022-09-13	14:14:40	0.506018	2.25087	2340.36	FALSE	78
2022-09-13	14:14:40	0.432328	1.92308	2396.62	FALSE	78
2022-09-13	14:14:40	0.337926	1.50316	2341.86	FALSE	78
2022-09-13	14:14:41	0.434822	1.93418	2398.55	FALSE	78
2022-09-13	14:14:41	0.661845	2.94402	2344.8	FALSE	78
2022-09-13	14:14:41	0.912481	4.0589	2402.61	FALSE	78
2022-09-13	14:14:41	2.77538	12.3454	2357.15	FALSE	78
2022-09-13	14:14:42	3.85365	17.1418	2419.75	1	79
2022-09-13	14:14:42	3.15645	14.0405	2371.19	1	80
2022-09-13	14:14:42	2.7623	12.2873	2432.04	FALSE	80
2022-09-13	14:14:43	0.613804	2.73032	2373.92	FALSE	80
2022-09-13	14:14:43	0.383931	1.7078	2433.75	FALSE	80
2022-09-13	14:14:43	0.336043	1.49479	2375.42	FALSE	80
2022-09-13	14:14:43	0.378842	1.68516	2435.43	FALSE	80
2022-09-13	14:14:44	0.541692	2.40955	2377.83	FALSE	80
2022-09-13	14:14:44	1.04332	4.6409	2440.08	FALSE	80
2022-09-13	14:14:44	0.91131	4.05369	2381.88	FALSE	80
2022-09-13	14:14:44	1.01701	4.52386	2444.6	FALSE	80
2022-09-13	14:14:45	0.765254	3.404	2385.28	FALSE	80
2022-09-13	14:14:45	0.97243	4.32556	2448.92	FALSE	80
2022-09-13	14:14:45	1.06388	4.73235	2390.02	FALSE	80
2022-09-13	14:14:45	0.561539	2.49784	2451.42	FALSE	80
2022-09-13	14:14:46	0.319199	1.41986	2391.44	FALSE	80
2022-09-13	14:14:46	0.127036	0.565082	2451.99	FALSE	80
2022-09-13	14:14:46	0.120878	0.53769	2391.97	FALSE	80
2022-09-13	14:14:46	-0.106959	-0.475775	2451.99	FALSE	80
2022-09-13	14:14:47	-0.131692	-0.585792	2391.97	FALSE	80
2022-09-13	14:14:47	-0.215152	-0.957039	2451.99	FALSE	80
2022-09-13	14:14:47	-0.261921	-1.16508	2391.97	FALSE	80
2022-09-13	14:14:48	-0.260089	-1.15693	2451.99	FALSE	80
2022-09-13	14:14:48	-0.25846	-1.14968	2391.97	FALSE	80
2022-09-13	14:14:48	-0.245178	-1.0906	2451.99	FALSE	80
2022-09-13	14:14:48	-0.245992	-1.09422	2391.97	FALSE	80
2022-09-13	14:14:49	-0.245788	-1.09331	2451.99	FALSE	80
2022-09-13	14:14:49	-0.206501	-0.918558	2391.97	FALSE	80
2022-09-13	14:14:49	0.121896	0.542218	2452.53	FALSE	80
2022-09-13	14:14:49	1.91548	8.52044	2400.49	FALSE	80
2022-09-13	14:14:50	6.23782	27.7471	2480.28	1	81
2022-09-13	14:14:50	12.0565	53.6297	2454.12	1	82
2022-09-13	14:14:50	11.2326	49.9649	2530.24	1	83
2022-09-13	14:14:50	12.9448	57.5811	2511.7	1	84
2022-09-13	14:14:51	1.82134	8.10168	2538.34	FALSE	84
2022-09-13	14:14:51	5.25355	23.3688	2535.07	1	85
2022-09-13	14:14:51	2.41808	10.7561	2549.1	FALSE	85
2022-09-13	14:14:52	2.99146	13.3066	2548.38	FALSE	85
2022-09-13	14:14:52	7.52469	33.4713	2582.57	1	86
2022-09-13	14:14:52	8.06301	35.8659	2584.25	1	87
2022-09-13	14:14:52	7.64439	34.0038	2616.57	1	88
2022-09-13	14:14:53	3.57635	15.9083	2600.15	1	89
2022-09-13	14:14:53	1.84469	8.20555	2624.78	FALSE	89
2022-09-13	14:14:53	1.69258	7.52893	2607.68	FALSE	89
2022-09-13	14:14:53	0.823168	3.66162	2628.44	FALSE	89
2022-09-13	14:14:54	0.768104	3.41668	2611.1	FALSE	89
2022-09-13	14:14:54	0.306832	1.36485	2629.81	FALSE	89
2022-09-13	14:14:54	0.362303	1.6116	2612.71	FALSE	89
2022-09-13	14:14:54	0.269835	1.20028	2631.01	FALSE	89
2022-09-13	14:14:55	0.273957	1.21862	2613.93	FALSE	89
2022-09-13	14:14:55	0.296756	1.32003	2632.33	FALSE	89
2022-09-13	14:14:55	0.343168	1.52648	2615.46	FALSE	89
2022-09-13	14:14:56	0.715178	3.18125	2635.51	FALSE	89
2022-09-13	14:14:56	0.82327	3.66207	2619.12	FALSE	89
2022-09-13	14:14:56	2.79533	12.4342	2647.94	FALSE	89
2022-09-13	14:14:56	3.37543	15.0146	2634.13	1	90
2022-09-13	14:14:57	2.62032	11.6557	2659.6	FALSE	90
2022-09-13	14:14:57	2.42027	10.7658	2644.9	FALSE	90
2022-09-13	14:14:57	1.2965	5.76709	2665.37	FALSE	90
2022-09-13	14:14:57	1.40887	6.26694	2651.17	FALSE	90
2022-09-13	14:14:58	1.19075	5.29669	2670.66	FALSE	90
2022-09-13	14:14:58	3.28831	14.6271	2665.79	1	91
2022-09-13	14:14:58	3.62932	16.1439	2686.81	1	92
2022-09-13	14:14:58	3.23991	14.4118	2680.2	1	93
2022-09-13	14:14:59	3.08586	13.7265	2700.53	1	94
2022-09-13	14:14:59	2.54266	11.3103	2691.51	FALSE	94
2022-09-13	14:14:59	2.73864	12.182	2712.71	FALSE	94
2022-09-13	14:15:00	1.55843	6.93221	2698.45	FALSE	94
2022-09-13	14:15:00	5.13314	22.8332	2735.55	1	95
2022-09-13	14:15:00	3.15233	14.0222	2712.47	1	96
2022-09-13	14:15:00	3.45986	15.3901	2750.94	1	97
2022-09-13	14:15:01	3.28057	14.5926	2727.06	1	98
2022-09-13	14:15:01	2.23304	9.93301	2760.87	FALSE	98
2022-09-13	14:15:01	0.966679	4.29998	2731.36	FALSE	98
2022-09-13	14:15:01	1.06978	4.7586	2765.63	FALSE	98
2022-09-13	14:15:02	1.25508	5.58285	2736.94	FALSE	98
2022-09-13	14:15:02	1.18892	5.28855	2770.92	FALSE	98
2022-09-13	14:15:02	1.50907	6.71265	2743.66	FALSE	98
2022-09-13	14:15:02	3.36454	14.9661	2785.88	1	99
2022-09-13	14:15:03	4.04291	17.9837	2761.64	1	100
2022-09-13	14:15:03	2.91014	12.9449	2798.83	FALSE	100
2022-09-13	14:15:03	3.2735	14.5612	2776.2	1	101
2022-09-13	14:15:04	5.67324	25.2357	2824.06	1	102
2022-09-13	14:15:04	3.12373	13.895	2790.1	1	103
2022-09-13	14:15:04	1.41508	6.29456	2830.36	FALSE	103
2022-09-13	14:15:04	0.609326	2.7104	2792.81	FALSE	103
2022-09-13	14:15:05	0.456552	2.03083	2832.39	FALSE	103
2022-09-13	14:15:05	0.541285	2.40774	2795.22	FALSE	103
2022-09-13	14:15:05	0.300471	1.33656	2833.73	FALSE	103
2022-09-13	14:15:05	0.30383	1.3515	2796.57	FALSE	103
2022-09-13	14:15:06	0.385356	1.71414	2835.44	FALSE	103
2022-09-13	14:15:06	0.283575	1.2614	2797.83	FALSE	103
2022-09-13	14:15:06	0.283066	1.25913	2836.7	FALSE	103
2022-09-13	14:15:06	0.425967	1.89479	2799.72	FALSE	103

## Sheet: Sulley_martin_202291314104 (2)
Date	Time	Lbs	Total force x time			**GoPro Fitting: 1359
2022-09-13	14:10:04	0.444084	0.444084	FALSE	0
2022-09-13	14:10:04	0.473499	0.917583	FALSE	0
2022-09-13	14:10:04	0.475331	1.39291	FALSE	0
2022-09-13	14:10:05	0.483982	1.8769	FALSE	0
2022-09-13	14:10:05	0.475026	2.35192	FALSE	0
2022-09-13	14:10:05	0.435585	2.78751	FALSE	0
2022-09-13	14:10:05	0.496552	3.28406	FALSE	0
2022-09-13	14:10:06	0.480776	3.76484	FALSE	0
2022-09-13	14:10:06	0.479504	4.24434	FALSE	0
2022-09-13	14:10:06	0.447799	4.69214	FALSE	0
2022-09-13	14:10:07	0.475433	5.16757	FALSE	0
2022-09-13	14:10:07	0.465	5.63257	FALSE	0
2022-09-13	14:10:07	0.463168	6.09574	FALSE	0
2022-09-13	14:10:07	0.468715	6.56445	FALSE	0
2022-09-13	14:10:08	0.46383	7.02828	FALSE	0
2022-09-13	14:10:08	0.45986	7.48814	FALSE	0
2022-09-13	14:10:08	0.465051	7.95319	FALSE	0
2022-09-13	14:10:08	0.476705	8.4299	FALSE	0
2022-09-13	14:10:09	0.458282	8.88818	FALSE	0
2022-09-13	14:10:09	0.472684	9.36087	FALSE	0
2022-09-13	14:10:09	0.435484	9.79635	FALSE	0
2022-09-13	14:10:09	0.448206	10.2446	FALSE	0
2022-09-13	14:10:10	0.466781	10.7113	FALSE	0
2022-09-13	14:10:10	0.445662	11.157	FALSE	0
2022-09-13	14:10:10	0.467443	11.6244	FALSE	0
2022-09-13	14:10:11	0.465763	12.0902	FALSE	0
2022-09-13	14:10:11	0.494364	12.5846	FALSE	0
2022-09-13	14:10:11	0.467341	13.0519	FALSE	0
2022-09-13	14:10:11	0.446832	13.4987	FALSE	0
2022-09-13	14:10:12	0.488104	13.9868	FALSE	0
2022-09-13	14:10:12	0.477824	14.4647	FALSE	0
2022-09-13	14:10:12	0.483422	14.9481	FALSE	0
2022-09-13	14:10:12	0.486985	15.4351	FALSE	0
2022-09-13	14:10:13	0.463728	15.8988	FALSE	0
2022-09-13	14:10:13	0.491463	16.3903	FALSE	0
2022-09-13	14:10:13	0.44556	16.8358	FALSE	0
2022-09-13	14:10:13	0.436603	17.2724	FALSE	0
2022-09-13	14:10:14	0.485967	17.7584	FALSE	0
2022-09-13	14:10:14	0.352532	18.1109	FALSE	0
2022-09-13	14:10:14	0.230242	18.3412	FALSE	0
2022-09-13	14:10:14	0.101387	18.4426	FALSE	0
2022-09-13	14:10:15	0.372634	18.8152	FALSE	0
2022-09-13	14:10:15	0.271565	19.0868	FALSE	0
2022-09-13	14:10:15	0.24673	19.3335	FALSE	0
2022-09-13	14:10:16	0.362354	19.6958	FALSE	0
2022-09-13	14:10:16	0.508766	20.2046	FALSE	0
2022-09-13	14:10:16	0.239606	20.4442	FALSE	0
2022-09-13	14:10:16	1.48632	21.9305	FALSE	0
2022-09-13	14:10:17	2.52861	24.4591	FALSE	0
2022-09-13	14:10:17	4.34948	28.8086	1	1
2022-09-13	14:10:17	3.93426	32.7429	1	2
2022-09-13	14:10:17	0.79528	33.5382	FALSE	2
2022-09-13	14:10:18	0.528562	34.0667	FALSE	2
2022-09-13	14:10:18	0.333244	34.4	FALSE	2
2022-09-13	14:10:18	0.348359	34.7483	FALSE	2
2022-09-13	14:10:18	0.0438806	34.7922	FALSE	2
2022-09-13	14:10:19	0.366476	35.1587	FALSE	2
2022-09-13	14:10:19	0.00611985	35.1648	FALSE	2
2022-09-13	14:10:19	0.225763	35.3906	FALSE	2
2022-09-13	14:10:20	0.493041	35.8836	FALSE	2
2022-09-13	14:10:20	2.58169	38.4653	FALSE	2
2022-09-13	14:10:20	3.34021	41.8055	1	3
2022-09-13	14:10:20	5.05212	46.8576	1	4
2022-09-13	14:10:21	6.09991	52.9575	1	5
2022-09-13	14:10:21	4.84001	57.7975	1	6
2022-09-13	14:10:21	5.25512	63.0527	1	7
2022-09-13	14:10:21	2.64296	65.6956	FALSE	7
2022-09-13	14:10:22	1.52953	67.2252	FALSE	7
2022-09-13	14:10:22	0.0730409	67.2982	FALSE	7
2022-09-13	14:10:22	-0.209351	67.2982	FALSE	7
2022-09-13	14:10:22	0.274313	67.5725	FALSE	7
2022-09-13	14:10:23	0.840216	68.4127	FALSE	7
2022-09-13	14:10:23	1.67131	70.084	FALSE	7
2022-09-13	14:10:23	1.42139	71.5054	FALSE	7
2022-09-13	14:10:24	2.88642	74.3918	FALSE	7
2022-09-13	14:10:24	2.08266	76.4745	FALSE	7
2022-09-13	14:10:24	2.40373	78.8782	FALSE	7
2022-09-13	14:10:24	1.47716	80.3554	FALSE	7
2022-09-13	14:10:25	0.66159	81.017	FALSE	7
2022-09-13	14:10:25	1.1653	82.1823	FALSE	7
2022-09-13	14:10:25	0.393193	82.5755	FALSE	7
2022-09-13	14:10:25	0.711209	83.2867	FALSE	7
2022-09-13	14:10:26	0.366934	83.6536	FALSE	7
2022-09-13	14:10:26	0.38897	84.0426	FALSE	7
2022-09-13	14:10:26	0.53416	84.5768	FALSE	7
2022-09-13	14:10:26	0.263677	84.8404	FALSE	7
2022-09-13	14:10:27	0.684389	85.5248	FALSE	7
2022-09-13	14:10:27	0.319249	85.8441	FALSE	7
2022-09-13	14:10:27	0.501539	86.3456	FALSE	7
2022-09-13	14:10:28	0.173092	86.5187	FALSE	7
2022-09-13	14:10:28	0.358333	86.877	FALSE	7
2022-09-13	14:10:28	0.129886	87.0069	FALSE	7
2022-09-13	14:10:28	0.121641	87.1286	FALSE	7
2022-09-13	14:10:29	0.0553819	87.1839	FALSE	7
2022-09-13	14:10:29	0.293397	87.4773	FALSE	7
2022-09-13	14:10:29	0.639453	88.1168	FALSE	7
2022-09-13	14:10:29	0.222456	88.3392	FALSE	7
2022-09-13	14:10:30	0.619758	88.959	FALSE	7
2022-09-13	14:10:30	0.226171	89.1852	FALSE	7
2022-09-13	14:10:30	0.579198	89.7644	FALSE	7
2022-09-13	14:10:30	0.183728	89.9481	FALSE	7
2022-09-13	14:10:31	0.530802	90.4789	FALSE	7
2022-09-13	14:10:31	0.283117	90.762	FALSE	7
2022-09-13	14:10:31	0.513143	91.2752	FALSE	7
2022-09-13	14:10:32	0.226883	91.502	FALSE	7
2022-09-13	14:10:32	0.393346	91.8954	FALSE	7
2022-09-13	14:10:32	0.409529	92.3049	FALSE	7
2022-09-13	14:10:32	0.383321	92.6882	FALSE	7
2022-09-13	14:10:33	0.367443	93.0557	FALSE	7
2022-09-13	14:10:33	0.420064	93.4758	FALSE	7
2022-09-13	14:10:33	0.481641	93.9574	FALSE	7
2022-09-13	14:10:33	0.125509	94.0829	FALSE	7
2022-09-13	14:10:34	-0.110623	94.0829	FALSE	7
2022-09-13	14:10:34	0.207036	94.2899	FALSE	7
2022-09-13	14:10:34	0.538588	94.8285	FALSE	7
2022-09-13	14:10:34	0.388919	95.2174	FALSE	7
2022-09-13	14:10:35	0.577468	95.7949	FALSE	7
2022-09-13	14:10:35	0.299199	96.0941	FALSE	7
2022-09-13	14:10:35	0.509784	96.6039	FALSE	7
2022-09-13	14:10:36	0.208613	96.8125	FALSE	7
2022-09-13	14:10:36	0.504695	97.3172	FALSE	7
2022-09-13	14:10:36	0.254924	97.5721	FALSE	7
2022-09-13	14:10:36	0.390598	97.9627	FALSE	7
2022-09-13	14:10:37	0.2707	98.2334	FALSE	7
2022-09-13	14:10:37	0.399148	98.6326	FALSE	7
2022-09-13	14:10:37	1.28037	99.9129	FALSE	7
2022-09-13	14:10:37	3.79222	103.705	1	8
2022-09-13	14:10:38	6.90378	110.609	1	9
2022-09-13	14:10:38	5.86245	116.471	1	10
2022-09-13	14:10:38	8.83161	125.303	1	11
2022-09-13	14:10:38	3.97111	129.274	1	12
2022-09-13	14:10:39	10.0338	139.308	1	13
2022-09-13	14:10:39	5.43543	144.743	1	14
2022-09-13	14:10:39	3.44846	148.192	1	15
2022-09-13	14:10:40	3.42556	151.617	1	16
2022-09-13	14:10:40	0.980827	152.598	FALSE	16
2022-09-13	14:10:40	1.21111	153.809	FALSE	16
2022-09-13	14:10:40	1.15945	154.969	FALSE	16
2022-09-13	14:10:41	0.952735	155.921	FALSE	16
2022-09-13	14:10:41	2.34403	158.266	FALSE	16
2022-09-13	14:10:41	0.921387	159.187	FALSE	16
2022-09-13	14:10:41	2.66189	161.849	FALSE	16
2022-09-13	14:10:42	1.99955	163.848	FALSE	16
2022-09-13	14:10:42	1.44693	165.295	FALSE	16
2022-09-13	14:10:42	0.872837	166.168	FALSE	16
2022-09-13	14:10:42	0.686985	166.855	FALSE	16
2022-09-13	14:10:43	0.632684	167.488	FALSE	16
2022-09-13	14:10:43	0.419504	167.907	FALSE	16
2022-09-13	14:10:43	0.731921	168.639	FALSE	16
2022-09-13	14:10:44	0.965	169.604	FALSE	16
2022-09-13	14:10:44	3.83823	173.442	1	17
2022-09-13	14:10:44	4.61731	178.06	1	18
2022-09-13	14:10:44	5.68352	183.743	1	19
2022-09-13	14:10:45	1.2392	184.982	FALSE	19
2022-09-13	14:10:45	3.31273	188.295	1	20
2022-09-13	14:10:45	1.71095	190.006	FALSE	20
2022-09-13	14:10:45	1.78709	191.793	FALSE	20
2022-09-13	14:10:46	1.651	193.444	FALSE	20
2022-09-13	14:10:46	0.524542	193.969	FALSE	20
2022-09-13	14:10:46	0.867951	194.837	FALSE	20
2022-09-13	14:10:47	0.741743	195.578	FALSE	20
2022-09-13	14:10:47	1.16841	196.747	FALSE	20
2022-09-13	14:10:47	0.674008	197.421	FALSE	20
2022-09-13	14:10:47	0.706221	198.127	FALSE	20
2022-09-13	14:10:48	0.607951	198.735	FALSE	20
2022-09-13	14:10:48	0.608206	199.343	FALSE	20
2022-09-13	14:10:48	0.633651	199.977	FALSE	20
2022-09-13	14:10:48	0.278435	200.255	FALSE	20
2022-09-13	14:10:49	0.820064	201.075	FALSE	20
2022-09-13	14:10:49	0.264847	201.34	FALSE	20
2022-09-13	14:10:49	0.74673	202.087	FALSE	20
2022-09-13	14:10:49	0.416552	202.504	FALSE	20
2022-09-13	14:10:50	0.544287	203.048	FALSE	20
2022-09-13	14:10:50	0.397825	203.446	FALSE	20
2022-09-13	14:10:50	0.418741	203.864	FALSE	20
2022-09-13	14:10:50	0.653753	204.518	FALSE	20
2022-09-13	14:10:51	0.301234	204.819	FALSE	20
2022-09-13	14:10:51	0.597417	205.417	FALSE	20
2022-09-13	14:10:51	0.279199	205.696	FALSE	20
2022-09-13	14:10:52	0.567239	206.263	FALSE	20
2022-09-13	14:10:52	0.19014	206.453	FALSE	20
2022-09-13	14:10:52	0.536603	206.99	FALSE	20
2022-09-13	14:10:52	0.242914	207.233	FALSE	20
2022-09-13	14:10:53	0.133397	207.366	FALSE	20
2022-09-13	14:10:53	-0.271437	207.366	FALSE	20
2022-09-13	14:10:53	-0.264872	207.366	FALSE	20
2022-09-13	14:10:53	-0.278358	207.366	FALSE	20
2022-09-13	14:10:54	-0.248384	207.366	FALSE	20
2022-09-13	14:10:54	-0.331743	207.366	FALSE	20
2022-09-13	14:10:54	-0.207417	207.366	FALSE	20
2022-09-13	14:10:54	-0.0134221	207.366	FALSE	20
2022-09-13	14:10:55	-0.162531	207.366	FALSE	20
2022-09-13	14:10:55	-0.106552	207.366	FALSE	20
2022-09-13	14:10:55	-0.0720989	207.366	FALSE	20
2022-09-13	14:10:56	-0.0140328	207.366	FALSE	20
2022-09-13	14:10:56	-0.191946	207.366	FALSE	20
2022-09-13	14:10:56	0.0508018	207.417	FALSE	20
2022-09-13	14:10:56	-0.125229	207.417	FALSE	20
2022-09-13	14:10:57	-0.00746796	207.417	FALSE	20
2022-09-13	14:10:57	-0.233117	207.417	FALSE	20
2022-09-13	14:10:57	-0.019071	207.417	FALSE	20
2022-09-13	14:10:57	0.0514125	207.469	FALSE	20
2022-09-13	14:10:58	0.153804	207.622	FALSE	20
2022-09-13	14:10:58	0.127392	207.75	FALSE	20
2022-09-13	14:10:58	0.149886	207.9	FALSE	20
2022-09-13	14:10:58	0.407697	208.307	FALSE	20
2022-09-13	14:10:59	0.164797	208.472	FALSE	20
2022-09-13	14:10:59	0.350344	208.822	FALSE	20
2022-09-13	14:10:59	0.235229	209.058	FALSE	20
2022-09-13	14:11:00	0.589835	209.647	FALSE	20
2022-09-13	14:11:00	0.467341	210.115	FALSE	20
2022-09-13	14:11:00	0.497672	210.613	FALSE	20
2022-09-13	14:11:00	0.533346	211.146	FALSE	20
2022-09-13	14:11:01	0.657214	211.803	FALSE	20
2022-09-13	14:11:01	0.984084	212.787	FALSE	20
2022-09-13	14:11:01	0.698689	213.486	FALSE	20
2022-09-13	14:11:01	0.899351	214.385	FALSE	20
2022-09-13	14:11:02	1.47111	215.856	FALSE	20
2022-09-13	14:11:02	2.13905	217.995	FALSE	20
2022-09-13	14:11:02	2.71385	220.709	FALSE	20
2022-09-13	14:11:02	3.17945	223.889	1	21
2022-09-13	14:11:03	2.65574	226.544	FALSE	21
2022-09-13	14:11:03	5.01675	231.561	1	22
2022-09-13	14:11:03	4.34922	235.91	1	23
2022-09-13	14:11:04	6.85599	242.766	1	24
2022-09-13	14:11:04	6.21054	248.977	1	25
2022-09-13	14:11:04	6.38535	255.362	1	26
2022-09-13	14:11:04	11.3233	266.686	1	27
2022-09-13	14:11:05	5.81777	272.503	1	28
2022-09-13	14:11:05	10.3922	282.896	1	29
2022-09-13	14:11:05	9.65298	292.548	1	30
2022-09-13	14:11:05	7.7396	300.288	1	31
2022-09-13	14:11:06	15.806	316.094	1	32
2022-09-13	14:11:06	8.78683	324.881	1	33
2022-09-13	14:11:06	7.80708	332.688	1	34
2022-09-13	14:11:06	11.5071	344.195	1	35
2022-09-13	14:11:07	2.09319	346.288	FALSE	35
2022-09-13	14:11:07	1.8338	348.122	FALSE	35
2022-09-13	14:11:07	0.743117	348.865	FALSE	35
2022-09-13	14:11:07	0.443626	349.309	FALSE	35
2022-09-13	14:11:08	0.434313	349.743	FALSE	35
2022-09-13	14:11:08	0.470802	350.214	FALSE	35
2022-09-13	14:11:08	0.386476	350.6	FALSE	35
2022-09-13	14:11:09	0.839758	351.44	FALSE	35
2022-09-13	14:11:09	0.485255	351.925	FALSE	35
2022-09-13	14:11:09	1.07879	353.004	FALSE	35
2022-09-13	14:11:09	1.63828	354.643	FALSE	35
2022-09-13	14:11:10	0.810191	355.453	FALSE	35
2022-09-13	14:11:10	0.501183	355.954	FALSE	35
2022-09-13	14:11:10	0.202812	356.157	FALSE	35
2022-09-13	14:11:10	0.463117	356.62	FALSE	35
2022-09-13	14:11:11	0.0413361	356.661	FALSE	35
2022-09-13	14:11:11	0.317824	356.979	FALSE	35
2022-09-13	14:11:11	0.130903	357.11	FALSE	35
2022-09-13	14:11:11	0.350547	357.46	FALSE	35
2022-09-13	14:11:12	1.41151	358.872	FALSE	35
2022-09-13	14:11:12	4.07304	362.945	1	36
2022-09-13	14:11:12	5.32968	368.275	1	37
2022-09-13	14:11:13	2.11665	370.391	FALSE	37
2022-09-13	14:11:13	1.95772	372.349	FALSE	37
2022-09-13	14:11:13	0.678181	373.027	FALSE	37
2022-09-13	14:11:13	1.33838	374.366	FALSE	37
2022-09-13	14:11:14	0.609835	374.975	FALSE	37
2022-09-13	14:11:14	0.413346	375.389	FALSE	37
2022-09-13	14:11:14	0.914618	376.303	FALSE	37
2022-09-13	14:11:15	0.808766	377.112	FALSE	37
2022-09-13	14:11:15	0.40673	377.519	FALSE	37
2022-09-13	14:11:15	0.55813	378.077	FALSE	37
2022-09-13	14:11:15	0.558435	378.635	FALSE	37
2022-09-13	14:11:15	1.11528	379.751	FALSE	37
2022-09-13	14:11:16	2.51141	382.262	FALSE	37
2022-09-13	14:11:16	4.35085	386.613	1	38
2022-09-13	14:11:16	4.11619	390.729	1	39
2022-09-13	14:11:17	3.10189	393.831	1	40
2022-09-13	14:11:17	1.84536	395.676	FALSE	40
2022-09-13	14:11:17	2.45828	398.135	FALSE	40
2022-09-13	14:11:17	1.49462	399.629	FALSE	40
2022-09-13	14:11:18	1.53151	401.161	FALSE	40
2022-09-13	14:11:18	2.11238	403.273	FALSE	40
2022-09-13	14:11:18	0.930852	404.204	FALSE	40
2022-09-13	14:11:18	1.36795	405.572	FALSE	40
2022-09-13	14:11:19	0.910954	406.483	FALSE	40
2022-09-13	14:11:19	1.06169	407.545	FALSE	40
2022-09-13	14:11:19	1.16648	408.711	FALSE	40
2022-09-13	14:11:19	0.52215	409.233	FALSE	40
2022-09-13	14:11:20	0.872379	410.106	FALSE	40
2022-09-13	14:11:20	0.564644	410.67	FALSE	40
2022-09-13	14:11:20	0.733397	411.404	FALSE	40
2022-09-13	14:11:21	0.656501	412.06	FALSE	40
2022-09-13	14:11:21	1.21151	413.272	FALSE	40
2022-09-13	14:11:21	2.78042	416.052	FALSE	40
2022-09-13	14:11:21	4.49009	420.542	1	41
2022-09-13	14:11:22	4.09187	424.634	1	42
2022-09-13	14:11:22	2.93757	427.572	FALSE	42
2022-09-13	14:11:22	0.955585	428.527	FALSE	42
2022-09-13	14:11:22	0.273957	428.801	FALSE	42
2022-09-13	14:11:23	0.536298	429.338	FALSE	42
2022-09-13	14:11:23	0.198944	429.536	FALSE	42
2022-09-13	14:11:23	-0.0905213	429.536	FALSE	42
2022-09-13	14:11:23	-0.457137	429.536	FALSE	42
2022-09-13	14:11:24	-0.838867	429.536	FALSE	42
2022-09-13	14:11:24	-0.57673	429.536	FALSE	42
2022-09-13	14:11:24	-0.157544	429.536	FALSE	42
2022-09-13	14:11:25	0.293143	429.83	FALSE	42
2022-09-13	14:11:25	0.422914	430.253	FALSE	42
2022-09-13	14:11:25	0.167443	430.42	FALSE	42
2022-09-13	14:11:25	0.0341606	430.454	FALSE	42
2022-09-13	14:11:26	1.19299	431.647	FALSE	42
2022-09-13	14:11:26	2.58744	434.235	FALSE	42
2022-09-13	14:11:26	2.89019	437.125	FALSE	42
2022-09-13	14:11:26	1.76821	438.893	FALSE	42
2022-09-13	14:11:27	0.597316	439.49	FALSE	42
2022-09-13	14:11:27	0.244339	439.735	FALSE	42
2022-09-13	14:11:27	0.528715	440.263	FALSE	42
2022-09-13	14:11:27	0.518435	440.782	FALSE	42
2022-09-13	14:11:28	0.585509	441.367	FALSE	42
2022-09-13	14:11:28	0.627443	441.995	FALSE	42
2022-09-13	14:11:28	0.581285	442.576	FALSE	42
2022-09-13	14:11:29	0.718537	443.295	FALSE	42
2022-09-13	14:11:29	0.650394	443.945	FALSE	42
2022-09-13	14:11:29	0.823117	444.768	FALSE	42
2022-09-13	14:11:29	0.954415	445.722	FALSE	42
2022-09-13	14:11:30	0.669682	446.392	FALSE	42
2022-09-13	14:11:30	0.236603	446.629	FALSE	42
2022-09-13	14:11:30	-0.058613	446.629	FALSE	42
2022-09-13	14:11:30	-0.198715	446.629	FALSE	42
2022-09-13	14:11:31	0.0324812	446.661	FALSE	42
2022-09-13	14:11:31	0.443931	447.105	FALSE	42
2022-09-13	14:11:31	0.492634	447.598	FALSE	42
2022-09-13	14:11:31	0.326221	447.924	FALSE	42
2022-09-13	14:11:32	0.314262	448.238	FALSE	42
2022-09-13	14:11:32	0.0289188	448.267	FALSE	42
2022-09-13	14:11:32	-0.116374	448.267	FALSE	42
2022-09-13	14:11:33	-0.22472	448.267	FALSE	42
2022-09-13	14:11:33	-0.301463	448.267	FALSE	42
2022-09-13	14:11:33	-0.290827	448.267	FALSE	42
2022-09-13	14:11:33	-0.0348471	448.267	FALSE	42
2022-09-13	14:11:34	-0.0443127	448.267	FALSE	42
2022-09-13	14:11:34	0.214669	448.482	FALSE	42
2022-09-13	14:11:34	0.426629	448.908	FALSE	42
2022-09-13	14:11:34	2.18179	451.09	FALSE	42
2022-09-13	14:11:35	2.69853	453.789	FALSE	42
2022-09-13	14:11:35	3.31706	457.106	1	43
2022-09-13	14:11:35	4.41207	461.518	1	44
2022-09-13	14:11:35	3.99411	465.512	1	45
2022-09-13	14:11:36	4.79782	470.31	1	46
2022-09-13	14:11:36	0.641794	470.952	FALSE	46
2022-09-13	14:11:36	1.28042	472.232	FALSE	46
2022-09-13	14:11:37	0.641947	472.874	FALSE	46
2022-09-13	14:11:37	0.144593	473.019	FALSE	46
2022-09-13	14:11:37	-0.0705214	473.019	FALSE	46
2022-09-13	14:11:37	-0.471234	473.019	FALSE	46
2022-09-13	14:11:38	-0.51617	473.019	FALSE	46
2022-09-13	14:11:38	0.0180282	473.037	FALSE	46
2022-09-13	14:11:38	0.526629	473.563	FALSE	46
2022-09-13	14:11:38	0.461845	474.025	FALSE	46
2022-09-13	14:11:39	0.45645	474.482	FALSE	46
2022-09-13	14:11:39	0.31416	474.796	FALSE	46
2022-09-13	14:11:39	0.288461	475.084	FALSE	46
2022-09-13	14:11:39	0.341947	475.426	FALSE	46
2022-09-13	14:11:40	0.348919	475.775	FALSE	46
2022-09-13	14:11:40	0.300165	476.075	FALSE	46
2022-09-13	14:11:40	0.369428	476.445	FALSE	46
2022-09-13	14:11:41	0.339809	476.784	FALSE	46
2022-09-13	14:11:41	0.372481	477.157	FALSE	46
2022-09-13	14:11:41	0.390445	477.547	FALSE	46
2022-09-13	14:11:41	0.298181	477.846	FALSE	46
2022-09-13	14:11:42	0.511768	478.357	FALSE	46
2022-09-13	14:11:42	0.490242	478.848	FALSE	46
2022-09-13	14:11:42	0.456145	479.304	FALSE	46
2022-09-13	14:11:42	0.422506	479.726	FALSE	46
2022-09-13	14:11:43	0.461031	480.187	FALSE	46
2022-09-13	14:11:43	0.38897	480.576	FALSE	46
2022-09-13	14:11:43	0.40729	480.984	FALSE	46
2022-09-13	14:11:43	0.421082	481.405	FALSE	46
2022-09-13	14:11:44	0.479555	481.884	FALSE	46
2022-09-13	14:11:44	0.445	482.329	FALSE	46
2022-09-13	14:11:44	0.278333	482.607	FALSE	46
2022-09-13	14:11:45	0.662863	483.27	FALSE	46
2022-09-13	14:11:45	1.13594	484.406	FALSE	46
2022-09-13	14:11:45	2.3852	486.791	FALSE	46
2022-09-13	14:11:45	3.82357	490.615	1	47
2022-09-13	14:11:46	6.79797	497.413	1	48
2022-09-13	14:11:46	4.98072	502.394	1	49
2022-09-13	14:11:46	4.11253	506.506	1	50
2022-09-13	14:11:46	1.81752	508.324	FALSE	50
2022-09-13	14:11:47	0.504186	508.828	FALSE	50
2022-09-13	14:11:47	0.438079	509.266	FALSE	50
2022-09-13	14:11:47	0.031158	509.297	FALSE	50
2022-09-13	14:11:47	-0.0944399	509.297	FALSE	50
2022-09-13	14:11:48	-0.324058	509.297	FALSE	50
2022-09-13	14:11:48	-0.318867	509.297	FALSE	50
2022-09-13	14:11:48	0.0405219	509.338	FALSE	50
2022-09-13	14:11:49	0.42159	509.759	FALSE	50
2022-09-13	14:11:49	0.641285	510.401	FALSE	50
2022-09-13	14:11:49	1.02103	511.422	FALSE	50
2022-09-13	14:11:49	0.9193	512.341	FALSE	50
2022-09-13	14:11:50	1.37167	513.713	FALSE	50
2022-09-13	14:11:50	1.81894	515.532	FALSE	50
2022-09-13	14:11:50	1.95569	517.487	FALSE	50
2022-09-13	14:11:50	2.27508	519.762	FALSE	50
2022-09-13	14:11:51	1.63177	521.394	FALSE	50
2022-09-13	14:11:51	1.5562	522.95	FALSE	50
2022-09-13	14:11:51	1.28413	524.234	FALSE	50
2022-09-13	14:11:51	1.46571	525.7	FALSE	50
2022-09-13	14:11:52	2.14352	527.844	FALSE	50
2022-09-13	14:11:52	3.00882	530.852	1	51
2022-09-13	14:11:52	3.0796	533.932	1	52
2022-09-13	14:11:53	0.558333	534.49	FALSE	52
2022-09-13	14:11:53	0.158079	534.648	FALSE	52
2022-09-13	14:11:53	0.107443	534.756	FALSE	52
2022-09-13	14:11:53	-0.015356	534.756	FALSE	52
2022-09-13	14:11:54	0.0139061	534.77	FALSE	52
2022-09-13	14:11:54	0.153652	534.923	FALSE	52
2022-09-13	14:11:54	0.144542	535.068	FALSE	52
2022-09-13	14:11:54	0.0798094	535.148	FALSE	52
2022-09-13	14:11:55	0.0110053	535.159	FALSE	52
2022-09-13	14:11:55	-0.125585	535.159	FALSE	52
2022-09-13	14:11:55	-0.193676	535.159	FALSE	52
2022-09-13	14:11:55	-0.302888	535.159	FALSE	52
2022-09-13	14:11:56	-0.438765	535.159	FALSE	52
2022-09-13	14:11:56	-0.445229	535.159	FALSE	52
2022-09-13	14:11:56	-0.411386	535.159	FALSE	52
2022-09-13	14:11:57	-0.571132	535.159	FALSE	52
2022-09-13	14:11:57	-0.48248	535.159	FALSE	52
2022-09-13	14:11:57	-0.737544	535.159	FALSE	52
2022-09-13	14:11:57	-0.783193	535.159	FALSE	52
2022-09-13	14:11:58	-0.366399	535.159	FALSE	52
2022-09-13	14:11:58	0.0182827	535.177	FALSE	52
2022-09-13	14:11:58	0.370293	535.547	FALSE	52
2022-09-13	14:11:58	0.373448	535.921	FALSE	52
2022-09-13	14:11:59	0.450395	536.371	FALSE	52
2022-09-13	14:11:59	0.643321	537.015	FALSE	52
2022-09-13	14:11:59	0.566527	537.581	FALSE	52
2022-09-13	14:11:59	0.662913	538.244	FALSE	52
2022-09-13	14:12:00	0.798028	539.042	FALSE	52
2022-09-13	14:12:00	0.510242	539.552	FALSE	52
2022-09-13	14:12:00	0.312634	539.865	FALSE	52
2022-09-13	14:12:01	0.394211	540.259	FALSE	52
2022-09-13	14:12:01	0.425713	540.685	FALSE	52
2022-09-13	14:12:01	0.400013	541.085	FALSE	52
2022-09-13	14:12:01	0.419097	541.504	FALSE	52
2022-09-13	14:12:02	0.396501	541.9	FALSE	52
2022-09-13	14:12:02	0.391158	542.292	FALSE	52
2022-09-13	14:12:02	0.407443	542.699	FALSE	52
2022-09-13	14:12:02	0.444746	543.144	FALSE	52
2022-09-13	14:12:03	0.430395	543.574	FALSE	52
2022-09-13	14:12:03	0.562404	544.137	FALSE	52
2022-09-13	14:12:03	0.373957	544.511	FALSE	52
2022-09-13	14:12:03	0.520216	545.031	FALSE	52
2022-09-13	14:12:04	0.528257	545.559	FALSE	52
2022-09-13	14:12:04	0.514262	546.073	FALSE	52
2022-09-13	14:12:04	0.865254	546.939	FALSE	52
2022-09-13	14:12:05	0.455026	547.394	FALSE	52
2022-09-13	14:12:05	0.275025	547.669	FALSE	52
2022-09-13	14:12:05	0.583524	548.252	FALSE	52
2022-09-13	14:12:05	0.337316	548.589	FALSE	52
2022-09-13	14:12:06	0.528817	549.118	FALSE	52
2022-09-13	14:12:06	0.260369	549.379	FALSE	52
2022-09-13	14:12:06	0.202456	549.581	FALSE	52
2022-09-13	14:12:06	0.246629	549.828	FALSE	52
2022-09-13	14:12:07	0.287494	550.115	FALSE	52
2022-09-13	14:12:07	0.361641	550.477	FALSE	52
2022-09-13	14:12:07	0.209835	550.687	FALSE	52
2022-09-13	14:12:07	0.34383	551.031	FALSE	52
2022-09-13	14:12:08	0.122965	551.153	FALSE	52
2022-09-13	14:12:08	0.321947	551.475	FALSE	52
2022-09-13	14:12:08	0.049784	551.525	FALSE	52
2022-09-13	14:12:08	0.185204	551.71	FALSE	52
2022-09-13	14:12:09	0.100471	551.811	FALSE	52
2022-09-13	14:12:09	0.517723	552.329	FALSE	52
2022-09-13	14:12:09	0.733346	553.062	FALSE	52
2022-09-13	14:12:10	0.772226	553.834	FALSE	52
2022-09-13	14:12:10	0.781081	554.615	FALSE	52
2022-09-13	14:12:10	0.663728	555.279	FALSE	52
2022-09-13	14:12:10	0.617061	555.896	FALSE	52
2022-09-13	14:12:11	0.56271	556.459	FALSE	52
2022-09-13	14:12:11	0.802608	557.261	FALSE	52
2022-09-13	14:12:11	0.894059	558.155	FALSE	52
2022-09-13	14:12:11	0.61701	558.772	FALSE	52
2022-09-13	14:12:12	0.585051	559.357	FALSE	52
2022-09-13	14:12:12	0.950852	560.308	FALSE	52
2022-09-13	14:12:12	0.500979	560.809	FALSE	52
2022-09-13	14:12:12	0.383779	561.193	FALSE	52
2022-09-13	14:12:13	0.480623	561.674	FALSE	52
2022-09-13	14:12:13	0.38444	562.058	FALSE	52
2022-09-13	14:12:13	0.438639	562.497	FALSE	52
2022-09-13	14:12:14	0.301743	562.799	FALSE	52
2022-09-13	14:12:14	0.543168	563.342	FALSE	52
2022-09-13	14:12:14	0.405153	563.747	FALSE	52
2022-09-13	14:12:14	0.418842	564.166	FALSE	52
2022-09-13	14:12:15	0.586018	564.752	FALSE	52
2022-09-13	14:12:15	0.473092	565.225	FALSE	52
2022-09-13	14:12:15	0.58958	565.814	FALSE	52
2022-09-13	14:12:15	0.757265	566.572	FALSE	52
2022-09-13	14:12:16	0.373906	566.946	FALSE	52
2022-09-13	14:12:16	0.509886	567.455	FALSE	52
2022-09-13	14:12:16	0.574618	568.03	FALSE	52
2022-09-13	14:12:16	0.621031	568.651	FALSE	52
2022-09-13	14:12:17	0.643982	569.295	FALSE	52
2022-09-13	14:12:17	0.585509	569.881	FALSE	52
2022-09-13	14:12:17	0.570801	570.451	FALSE	52
2022-09-13	14:12:18	0.687697	571.139	FALSE	52
2022-09-13	14:12:18	0.523778	571.663	FALSE	52
2022-09-13	14:12:18	0.681641	572.345	FALSE	52
2022-09-13	14:12:18	0.592124	572.937	FALSE	52
2022-09-13	14:12:19	0.535229	573.472	FALSE	52
2022-09-13	14:12:19	0.55416	574.026	FALSE	52
2022-09-13	14:12:19	0.597214	574.623	FALSE	52
2022-09-13	14:12:19	0.576552	575.2	FALSE	52
2022-09-13	14:12:20	0.631717	575.832	FALSE	52
2022-09-13	14:12:20	0.692735	576.524	FALSE	52
2022-09-13	14:12:20	0.901234	577.425	FALSE	52
2022-09-13	14:12:20	0.788257	578.214	FALSE	52
2022-09-13	14:12:21	0.729428	578.943	FALSE	52
2022-09-13	14:12:21	1.03686	579.98	FALSE	52
2022-09-13	14:12:21	0.452176	580.432	FALSE	52
2022-09-13	14:12:22	0.609377	581.042	FALSE	52
2022-09-13	14:12:22	0.471667	581.513	FALSE	52
2022-09-13	14:12:22	0.365458	581.879	FALSE	52
2022-09-13	14:12:22	0.571259	582.45	FALSE	52
2022-09-13	14:12:23	0.889275	583.339	FALSE	52
2022-09-13	14:12:23	2.74113	586.08	FALSE	52
2022-09-13	14:12:23	3.20225	589.283	1	53
2022-09-13	14:12:23	2.3795	591.662	FALSE	53
2022-09-13	14:12:24	1.78536	593.447	FALSE	53
2022-09-13	14:12:24	0.581081	594.029	FALSE	53
2022-09-13	14:12:24	0.526934	594.555	FALSE	53
2022-09-13	14:12:24	0.446374	595.002	FALSE	53
2022-09-13	14:12:25	0.401183	595.403	FALSE	53
2022-09-13	14:12:25	0.329122	595.732	FALSE	53
2022-09-13	14:12:25	0.466832	596.199	FALSE	53
2022-09-13	14:12:26	0.420725	596.62	FALSE	53
2022-09-13	14:12:26	0.492532	597.112	FALSE	53
2022-09-13	14:12:26	1.06266	598.175	FALSE	53
2022-09-13	14:12:26	1.72485	599.9	FALSE	53
2022-09-13	14:12:27	3.70556	603.605	1	54
2022-09-13	14:12:27	3.12678	606.732	1	55
2022-09-13	14:12:27	2.37966	609.112	FALSE	55
2022-09-13	14:12:27	1.02815	610.14	FALSE	55
2022-09-13	14:12:28	0.628104	610.768	FALSE	55
2022-09-13	14:12:28	0.291361	611.059	FALSE	55
2022-09-13	14:12:28	0.352379	611.412	FALSE	55
2022-09-13	14:12:28	0.369682	611.781	FALSE	55
2022-09-13	14:12:29	0.375585	612.157	FALSE	55
2022-09-13	14:12:29	0.268257	612.425	FALSE	55
2022-09-13	14:12:29	0.401896	612.827	FALSE	55
2022-09-13	14:12:30	0.429936	613.257	FALSE	55
2022-09-13	14:12:30	0.484389	613.742	FALSE	55
2022-09-13	14:12:30	0.307443	614.049	FALSE	55
2022-09-13	14:12:30	0.402506	614.451	FALSE	55
2022-09-13	14:12:31	0.36215	614.814	FALSE	55
2022-09-13	14:12:31	0.796298	615.61	FALSE	55
2022-09-13	14:12:31	1.49355	617.103	FALSE	55
2022-09-13	14:12:31	0.969885	618.073	FALSE	55
2022-09-13	14:12:32	1.2906	619.364	FALSE	55
2022-09-13	14:12:32	1.2366	620.601	FALSE	55
2022-09-13	14:12:32	0.677519	621.278	FALSE	55
2022-09-13	14:12:32	0.648817	621.927	FALSE	55
2022-09-13	14:12:33	0.615789	622.543	FALSE	55
2022-09-13	14:12:33	0.457825	623	FALSE	55
2022-09-13	14:12:33	0.506374	623.507	FALSE	55
2022-09-13	14:12:34	0.361845	623.869	FALSE	55
2022-09-13	14:12:34	0.530445	624.399	FALSE	55
2022-09-13	14:12:34	0.399046	624.798	FALSE	55
2022-09-13	14:12:34	0.394873	625.193	FALSE	55
2022-09-13	14:12:35	0.369326	625.562	FALSE	55
2022-09-13	14:12:35	0.514822	626.077	FALSE	55
2022-09-13	14:12:35	0.396247	626.473	FALSE	55
2022-09-13	14:12:35	0.458893	626.932	FALSE	55
2022-09-13	14:12:36	0.395484	627.328	FALSE	55
2022-09-13	14:12:36	0.472735	627.801	FALSE	55
2022-09-13	14:12:36	0.408206	628.209	FALSE	55
2022-09-13	14:12:36	0.395992	628.605	FALSE	55
2022-09-13	14:12:37	0.434873	629.04	FALSE	55
2022-09-13	14:12:37	0.392328	629.432	FALSE	55
2022-09-13	14:12:37	0.384237	629.816	FALSE	55
2022-09-13	14:12:38	0.34159	630.158	FALSE	55
2022-09-13	14:12:38	0.480013	630.638	FALSE	55
2022-09-13	14:12:38	0.391158	631.029	FALSE	55
2022-09-13	14:12:38	0.555433	631.584	FALSE	55
2022-09-13	14:12:39	0.304593	631.889	FALSE	55
2022-09-13	14:12:39	0.592074	632.481	FALSE	55
2022-09-13	14:12:39	0.390496	632.872	FALSE	55
2022-09-13	14:12:39	0.647086	633.519	FALSE	55
2022-09-13	14:12:40	0.282252	633.801	FALSE	55
2022-09-13	14:12:40	0.495993	634.297	FALSE	55
2022-09-13	14:12:40	0.468766	634.766	FALSE	55
2022-09-13	14:12:40	0.544847	635.311	FALSE	55
2022-09-13	14:12:41	0.174975	635.485	FALSE	55
2022-09-13	14:12:41	-0.207621	635.485	FALSE	55
2022-09-13	14:12:41	-0.311743	635.485	FALSE	55
2022-09-13	14:12:42	-0.309656	635.485	FALSE	55
2022-09-13	14:12:42	-0.299325	635.485	FALSE	55
2022-09-13	14:12:42	-0.225483	635.485	FALSE	55
2022-09-13	14:12:42	-0.14589	635.485	FALSE	55
2022-09-13	14:12:43	0.0259162	635.511	FALSE	55
2022-09-13	14:12:43	0.139453	635.651	FALSE	55
2022-09-13	14:12:43	0.0562979	635.707	FALSE	55
2022-09-13	14:12:43	0.102863	635.81	FALSE	55
2022-09-13	14:12:44	0.228206	636.038	FALSE	55
2022-09-13	14:12:44	0.283473	636.322	FALSE	55
2022-09-13	14:12:44	0.402761	636.724	FALSE	55
2022-09-13	14:12:44	0.44271	637.167	FALSE	55
2022-09-13	14:12:45	0.419199	637.586	FALSE	55
2022-09-13	14:12:45	0.366069	637.952	FALSE	55
2022-09-13	14:12:45	0.643321	638.596	FALSE	55
2022-09-13	14:12:46	0.297774	638.894	FALSE	55
2022-09-13	14:12:46	0.670547	639.564	FALSE	55
2022-09-13	14:12:46	0.475534	640.04	FALSE	55
2022-09-13	14:12:46	0.414517	640.454	FALSE	55
2022-09-13	14:12:47	0.230191	640.684	FALSE	55
2022-09-13	14:12:47	0.441438	641.126	FALSE	55
2022-09-13	14:12:47	0.200674	641.326	FALSE	55
2022-09-13	14:12:47	0.233092	641.56	FALSE	55
2022-09-13	14:12:48	0.443422	642.003	FALSE	55
2022-09-13	14:12:48	0.193651	642.197	FALSE	55
2022-09-13	14:12:48	0.229224	642.426	FALSE	55
2022-09-13	14:12:48	0.221132	642.647	FALSE	55
2022-09-13	14:12:49	0.313397	642.96	FALSE	55
2022-09-13	14:12:49	0.08556	643.046	FALSE	55
2022-09-13	14:12:49	0.250802	643.297	FALSE	55
2022-09-13	14:12:50	0.111158	643.408	FALSE	55
2022-09-13	14:12:50	0.17472	643.583	FALSE	55
2022-09-13	14:12:50	0.0242877	643.607	FALSE	55
2022-09-13	14:12:50	0.0870867	643.694	FALSE	55
2022-09-13	14:12:51	0.0834226	643.777	FALSE	55
2022-09-13	14:12:51	0.099962	643.877	FALSE	55
2022-09-13	14:12:51	0.257621	644.135	FALSE	55
2022-09-13	14:12:51	0.162812	644.298	FALSE	55
2022-09-13	14:12:52	0.323473	644.621	FALSE	55
2022-09-13	14:12:52	0.406221	645.027	FALSE	55
2022-09-13	14:12:52	0.631463	645.659	FALSE	55
2022-09-13	14:12:52	0.49986	646.159	FALSE	55
2022-09-13	14:12:53	0.852278	647.011	FALSE	55
2022-09-13	14:12:53	0.729428	647.741	FALSE	55
2022-09-13	14:12:53	1.35548	649.096	FALSE	55
2022-09-13	14:12:54	1.24296	650.339	FALSE	55
2022-09-13	14:12:54	0.318384	650.657	FALSE	55
2022-09-13	14:12:54	0.201998	650.859	FALSE	55
2022-09-13	14:12:54	0.254618	651.114	FALSE	55
2022-09-13	14:12:55	0.471667	651.586	FALSE	55
2022-09-13	14:12:55	0.728562	652.314	FALSE	55
2022-09-13	14:12:55	0.561081	652.875	FALSE	55
2022-09-13	14:12:55	0.533397	653.409	FALSE	55
2022-09-13	14:12:56	0.407188	653.816	FALSE	55
2022-09-13	14:12:56	0.505967	654.322	FALSE	55
2022-09-13	14:12:56	0.458791	654.781	FALSE	55
2022-09-13	14:12:56	0.524236	655.305	FALSE	55
2022-09-13	14:12:57	0.340623	655.645	FALSE	55
2022-09-13	14:12:57	0.2993	655.945	FALSE	55
2022-09-13	14:12:57	0.299809	656.245	FALSE	55
2022-09-13	14:12:58	0.300267	656.545	FALSE	55
2022-09-13	14:12:58	0.261234	656.806	FALSE	55
2022-09-13	14:12:58	0.287952	657.094	FALSE	55
2022-09-13	14:12:58	0.284237	657.378	FALSE	55
2022-09-13	14:12:59	0.253295	657.632	FALSE	55
2022-09-13	14:12:59	0.202405	657.834	FALSE	55
2022-09-13	14:12:59	0.286883	658.121	FALSE	55
2022-09-13	14:12:59	0.238079	658.359	FALSE	55
2022-09-13	14:13:00	0.292176	658.651	FALSE	55
2022-09-13	14:13:00	0.141845	658.793	FALSE	55
2022-09-13	14:13:00	0.261896	659.055	FALSE	55
2022-09-13	14:13:00	0.234262	659.289	FALSE	55
2022-09-13	14:13:01	0.463728	659.753	FALSE	55
2022-09-13	14:13:01	0.627901	660.381	FALSE	55
2022-09-13	14:13:01	0.412634	660.793	FALSE	55
2022-09-13	14:13:02	0.359199	661.153	FALSE	55
2022-09-13	14:13:02	0.330954	661.484	FALSE	55
2022-09-13	14:13:02	0.329479	661.813	FALSE	55
2022-09-13	14:13:02	0.350649	662.164	FALSE	55
2022-09-13	14:13:03	0.543779	662.707	FALSE	55
2022-09-13	14:13:03	0.579555	663.287	FALSE	55
2022-09-13	14:13:03	1.02581	664.313	FALSE	55
2022-09-13	14:13:03	1.11528	665.428	FALSE	55
2022-09-13	14:13:04	1.64744	667.076	FALSE	55
2022-09-13	14:13:04	0.69925	667.775	FALSE	55
2022-09-13	14:13:04	0.607239	668.382	FALSE	55
2022-09-13	14:13:04	0.400166	668.782	FALSE	55
2022-09-13	14:13:05	0.368664	669.151	FALSE	55
2022-09-13	14:13:05	0.36729	669.518	FALSE	55
2022-09-13	14:13:05	0.312328	669.83	FALSE	55
2022-09-13	14:13:06	0.0369086	669.867	FALSE	55
2022-09-13	14:13:06	0.086934	669.954	FALSE	55
2022-09-13	14:13:06	0.243626	670.198	FALSE	55
2022-09-13	14:13:06	0.234008	670.432	FALSE	55
2022-09-13	14:13:07	0.119758	670.552	FALSE	55
2022-09-13	14:13:07	0.0239824	670.576	FALSE	55
2022-09-13	14:13:07	0.0882572	670.664	FALSE	55
2022-09-13	14:13:07	0.192583	670.857	FALSE	55
2022-09-13	14:13:08	0.26841	671.125	FALSE	55
2022-09-13	14:13:08	0.324746	671.45	FALSE	55
2022-09-13	14:13:08	0.277061	671.727	FALSE	55
2022-09-13	14:13:08	0.319758	672.046	FALSE	55
2022-09-13	14:13:09	0.22897	672.275	FALSE	55
2022-09-13	14:13:09	0.188512	672.464	FALSE	55
2022-09-13	14:13:09	0.069784	672.534	FALSE	55
2022-09-13	14:13:10	0.0812343	672.615	FALSE	55
2022-09-13	14:13:10	0.0811834	672.696	FALSE	55
2022-09-13	14:13:10	-0.0225315	672.696	FALSE	55
2022-09-13	14:13:10	-0.0904196	672.696	FALSE	55
2022-09-13	14:13:11	-0.0416155	672.696	FALSE	55
2022-09-13	14:13:11	-0.0695544	672.696	FALSE	55
2022-09-13	14:13:11	-0.0531677	672.696	FALSE	55
2022-09-13	14:13:11	-0.093473	672.696	FALSE	55
2022-09-13	14:13:12	-0.120445	672.696	FALSE	55
2022-09-13	14:13:12	-0.0268572	672.696	FALSE	55
2022-09-13	14:13:12	-0.0354069	672.696	FALSE	55
2022-09-13	14:13:12	-0.0659412	672.696	FALSE	55
2022-09-13	14:13:13	-0.225381	672.696	FALSE	55
2022-09-13	14:13:13	-0.568537	672.696	FALSE	55
2022-09-13	14:13:13	-0.524618	672.696	FALSE	55
2022-09-13	14:13:13	-0.0861956	672.696	FALSE	55
2022-09-13	14:13:14	0.149224	672.845	FALSE	55
2022-09-13	14:13:14	0.13299	672.978	FALSE	55
2022-09-13	14:13:14	0.378181	673.357	FALSE	55
2022-09-13	14:13:15	0.18785	673.544	FALSE	55
2022-09-13	14:13:15	0.451718	673.996	FALSE	55
2022-09-13	14:13:15	0.224797	674.221	FALSE	55
2022-09-13	14:13:15	0.715992	674.937	FALSE	55
2022-09-13	14:13:16	0.602099	675.539	FALSE	55
2022-09-13	14:13:16	1.97055	677.51	FALSE	55
2022-09-13	14:13:16	1.94485	679.454	FALSE	55
2022-09-13	14:13:16	5.22184	684.676	1	56
2022-09-13	14:13:17	5.9136	690.59	1	57
2022-09-13	14:13:17	8.75924	699.349	1	58
2022-09-13	14:13:17	3.0222	702.371	1	59
2022-09-13	14:13:18	2.79039	705.162	FALSE	59
2022-09-13	14:13:18	2.22027	707.382	FALSE	59
2022-09-13	14:13:18	0.884542	708.266	FALSE	59
2022-09-13	14:13:18	1.15406	709.421	FALSE	59
2022-09-13	14:13:19	1.01889	710.439	FALSE	59
2022-09-13	14:13:19	1.19304	711.632	FALSE	59
2022-09-13	14:13:19	0.817875	712.45	FALSE	59
2022-09-13	14:13:19	1.60357	714.054	FALSE	59
2022-09-13	14:13:20	1.72149	715.775	FALSE	59
2022-09-13	14:13:20	1.39935	717.175	FALSE	59
2022-09-13	14:13:20	1.43523	718.61	FALSE	59
2022-09-13	14:13:20	1.32561	719.936	FALSE	59
2022-09-13	14:13:21	2.08067	722.016	FALSE	59
2022-09-13	14:13:21	1.60724	723.624	FALSE	59
2022-09-13	14:13:21	2.39452	726.018	FALSE	59
2022-09-13	14:13:21	1.81614	727.834	FALSE	59
2022-09-13	14:13:22	2.10775	729.942	FALSE	59
2022-09-13	14:13:22	1.13859	731.081	FALSE	59
2022-09-13	14:13:22	1.03869	732.119	FALSE	59
2022-09-13	14:13:23	1.34805	733.467	FALSE	59
2022-09-13	14:13:23	0.899249	734.367	FALSE	59
2022-09-13	14:13:23	1.33314	735.7	FALSE	59
2022-09-13	14:13:23	1.94225	737.642	FALSE	59
2022-09-13	14:13:24	2.19635	739.838	FALSE	59
2022-09-13	14:13:24	1.15462	740.993	FALSE	59
2022-09-13	14:13:24	0.781794	741.775	FALSE	59
2022-09-13	14:13:24	0.369224	742.144	FALSE	59
2022-09-13	14:13:25	0.295433	742.439	FALSE	59
2022-09-13	14:13:25	-0.0790201	742.439	FALSE	59
2022-09-13	14:13:25	-0.264414	742.439	FALSE	59
2022-09-13	14:13:26	-0.270063	742.439	FALSE	59
2022-09-13	14:13:26	1.01029	743.45	FALSE	59
2022-09-13	14:13:26	2.82612	746.276	FALSE	59
2022-09-13	14:13:26	2.78317	749.059	FALSE	59
2022-09-13	14:13:27	2.02032	751.079	FALSE	59
2022-09-13	14:13:27	3.20413	754.283	1	60
2022-09-13	14:13:27	2.20826	756.492	FALSE	60
2022-09-13	14:13:27	3.84271	760.334	1	61
2022-09-13	14:13:28	2.4165	762.751	FALSE	61
2022-09-13	14:13:28	2.84149	765.592	FALSE	61
2022-09-13	14:13:28	0.663931	766.256	FALSE	61
2022-09-13	14:13:28	0.761132	767.017	FALSE	61
2022-09-13	14:13:29	0.754211	767.772	FALSE	61
2022-09-13	14:13:29	0.629936	768.402	FALSE	61
2022-09-13	14:13:29	0.728512	769.13	FALSE	61
2022-09-13	14:13:29	0.428359	769.558	FALSE	61
2022-09-13	14:13:30	1.54057	771.099	FALSE	61
2022-09-13	14:13:30	1.3109	772.41	FALSE	61
2022-09-13	14:13:30	4.63945	777.049	1	62
2022-09-13	14:13:31	4.27604	781.325	1	63
2022-09-13	14:13:31	10.552	791.877	1	64
2022-09-13	14:13:31	2.42414	794.301	FALSE	64
2022-09-13	14:13:31	4.0077	798.309	1	65
2022-09-13	14:13:32	0.813601	799.123	FALSE	65
2022-09-13	14:13:32	0.143168	799.266	FALSE	65
2022-09-13	14:13:32	0.120827	799.387	FALSE	65
2022-09-13	14:13:32	-0.446806	799.387	FALSE	65
2022-09-13	14:13:33	-1.02284	799.387	FALSE	65
2022-09-13	14:13:33	-0.935101	799.387	FALSE	65
2022-09-13	14:13:33	-0.899783	799.387	FALSE	65
2022-09-13	14:13:33	-0.650419	799.387	FALSE	65
2022-09-13	14:13:34	-0.552811	799.387	FALSE	65
2022-09-13	14:13:34	-0.384211	799.387	FALSE	65
2022-09-13	14:13:34	-0.0220735	799.387	FALSE	65
2022-09-13	14:13:35	-0.0383585	799.387	FALSE	65
2022-09-13	14:13:35	0.178486	799.565	FALSE	65
2022-09-13	14:13:35	0.0708017	799.636	FALSE	65
2022-09-13	14:13:35	0.461132	800.097	FALSE	65
2022-09-13	14:13:36	0.399606	800.497	FALSE	65
2022-09-13	14:13:36	0.635789	801.133	FALSE	65
2022-09-13	14:13:36	0.269224	801.402	FALSE	65
2022-09-13	14:13:36	0.352888	801.755	FALSE	65
2022-09-13	14:13:37	0.252379	802.007	FALSE	65
2022-09-13	14:13:37	0.252074	802.259	FALSE	65
2022-09-13	14:13:37	0.105102	802.364	FALSE	65
2022-09-13	14:13:37	0.25925	802.624	FALSE	65
2022-09-13	14:13:38	0.230751	802.854	FALSE	65
2022-09-13	14:13:38	1.5192	804.373	FALSE	65
2022-09-13	14:13:38	3.65864	808.032	1	66
2022-09-13	14:13:39	4.10011	812.132	1	67
2022-09-13	14:13:39	5.01777	817.15	1	68
2022-09-13	14:13:39	2.11192	819.262	FALSE	68
2022-09-13	14:13:39	2.62576	821.888	FALSE	68
2022-09-13	14:13:40	0.789428	822.677	FALSE	68
2022-09-13	14:13:40	1.16444	823.842	FALSE	68
2022-09-13	14:13:40	0.868868	824.71	FALSE	68
2022-09-13	14:13:40	0.792125	825.503	FALSE	68
2022-09-13	14:13:41	0.654516	826.157	FALSE	68
2022-09-13	14:13:41	0.979249	827.136	FALSE	68
2022-09-13	14:13:41	1.64673	828.783	FALSE	68
2022-09-13	14:13:41	0.695025	829.478	FALSE	68
2022-09-13	14:13:42	1.90383	831.382	FALSE	68
2022-09-13	14:13:42	1.30846	832.69	FALSE	68
2022-09-13	14:13:42	1.7879	834.478	FALSE	68
2022-09-13	14:13:43	0.94444	835.423	FALSE	68
2022-09-13	14:13:43	1.44449	836.867	FALSE	68
2022-09-13	14:13:43	0.945305	837.812	FALSE	68
2022-09-13	14:13:43	0.913295	838.726	FALSE	68
2022-09-13	14:13:44	1.10205	839.828	FALSE	68
2022-09-13	14:13:44	0.831209	840.659	FALSE	68
2022-09-13	14:13:44	1.06785	841.727	FALSE	68
2022-09-13	14:13:44	0.439148	842.166	FALSE	68
2022-09-13	14:13:45	0.812481	842.979	FALSE	68
2022-09-13	14:13:45	0.567188	843.546	FALSE	68
2022-09-13	14:13:45	0.852736	844.398	FALSE	68
2022-09-13	14:13:45	0.354618	844.753	FALSE	68
2022-09-13	14:13:46	0.74958	845.503	FALSE	68
2022-09-13	14:13:46	0.314567	845.817	FALSE	68
2022-09-13	14:13:46	0.573346	846.391	FALSE	68
2022-09-13	14:13:47	0.432125	846.823	FALSE	68
2022-09-13	14:13:47	0.410344	847.233	FALSE	68
2022-09-13	14:13:47	0.315331	847.548	FALSE	68
2022-09-13	14:13:47	0.418588	847.967	FALSE	68
2022-09-13	14:13:48	0.50159	848.469	FALSE	68
2022-09-13	14:13:48	0.418842	848.887	FALSE	68
2022-09-13	14:13:48	0.609682	849.497	FALSE	68
2022-09-13	14:13:48	0.637316	850.134	FALSE	68
2022-09-13	14:13:49	1.05732	851.192	FALSE	68
2022-09-13	14:13:49	1.8619	853.054	FALSE	68
2022-09-13	14:13:49	1.77279	854.826	FALSE	68
2022-09-13	14:13:49	1.81202	856.638	FALSE	68
2022-09-13	14:13:50	1.74469	858.383	FALSE	68
2022-09-13	14:13:50	1.17996	859.563	FALSE	68
2022-09-13	14:13:50	1.0391	860.602	FALSE	68
2022-09-13	14:13:51	0.540369	861.143	FALSE	68
2022-09-13	14:13:51	0.697112	861.84	FALSE	68
2022-09-13	14:13:51	0.217214	862.057	FALSE	68
2022-09-13	14:13:51	0.558486	862.615	FALSE	68
2022-09-13	14:13:52	0.325916	862.941	FALSE	68
2022-09-13	14:13:52	0.850852	863.792	FALSE	68
2022-09-13	14:13:52	0.92729	864.719	FALSE	68
2022-09-13	14:13:52	1.4962	866.216	FALSE	68
2022-09-13	14:13:53	1.74144	867.957	FALSE	68
2022-09-13	14:13:53	2.30775	870.265	FALSE	68
2022-09-13	14:13:53	1.1137	871.378	FALSE	68
2022-09-13	14:13:53	2.21345	873.592	FALSE	68
2022-09-13	14:13:54	1.0909	874.683	FALSE	68
2022-09-13	14:13:54	1.75345	876.436	FALSE	68
2022-09-13	14:13:54	0.617519	877.054	FALSE	68
2022-09-13	14:13:55	0.664491	877.718	FALSE	68
2022-09-13	14:13:55	0.511514	878.23	FALSE	68
2022-09-13	14:13:55	0.490293	878.72	FALSE	68
2022-09-13	14:13:55	0.299606	879.02	FALSE	68
2022-09-13	14:13:56	0.43874	879.458	FALSE	68
2022-09-13	14:13:56	0.453906	879.912	FALSE	68
2022-09-13	14:13:56	1.0278	880.94	FALSE	68
2022-09-13	14:13:56	1.41543	882.356	FALSE	68
2022-09-13	14:13:57	1.48184	883.837	FALSE	68
2022-09-13	14:13:57	1.17258	885.01	FALSE	68
2022-09-13	14:13:57	1.06698	886.077	FALSE	68
2022-09-13	14:13:57	0.32444	886.401	FALSE	68
2022-09-13	14:13:58	0.638283	887.04	FALSE	68
2022-09-13	14:13:58	0.332176	887.372	FALSE	68
2022-09-13	14:13:58	0.530802	887.903	FALSE	68
2022-09-13	14:13:59	0.332074	888.235	FALSE	68
2022-09-13	14:13:59	0.811209	889.046	FALSE	68
2022-09-13	14:13:59	0.950038	889.996	FALSE	68
2022-09-13	14:13:59	2.87212	892.868	FALSE	68
2022-09-13	14:14:00	3.13019	895.998	1	69
2022-09-13	14:14:00	3.45116	899.449	1	70
2022-09-13	14:14:00	2.32983	901.779	FALSE	70
2022-09-13	14:14:00	3.46184	905.241	1	71
2022-09-13	14:14:01	0.877163	906.118	FALSE	71
2022-09-13	14:14:01	1.85172	907.97	FALSE	71
2022-09-13	14:14:01	1.19497	909.165	FALSE	71
2022-09-13	14:14:01	1.49375	910.659	FALSE	71
2022-09-13	14:14:02	1.38933	912.048	FALSE	71
2022-09-13	14:14:02	2.07365	914.122	FALSE	71
2022-09-13	14:14:02	1.00429	915.126	FALSE	71
2022-09-13	14:14:03	1.66225	916.788	FALSE	71
2022-09-13	14:14:03	0.913651	917.702	FALSE	71
2022-09-13	14:14:03	1.14301	918.845	FALSE	71
2022-09-13	14:14:03	0.787544	919.632	FALSE	71
2022-09-13	14:14:04	1.25503	920.887	FALSE	71
2022-09-13	14:14:04	0.57243	921.46	FALSE	71
2022-09-13	14:14:04	1.01691	922.477	FALSE	71
2022-09-13	14:14:04	1.12378	923.601	FALSE	71
2022-09-13	14:14:05	2.47034	926.071	FALSE	71
2022-09-13	14:14:05	2.70098	928.772	FALSE	71
2022-09-13	14:14:05	1.58581	930.358	FALSE	71
2022-09-13	14:14:05	1.14251	931.5	FALSE	71
2022-09-13	14:14:06	0.410242	931.91	FALSE	71
2022-09-13	14:14:06	0.358181	932.269	FALSE	71
2022-09-13	14:14:06	0.178893	932.448	FALSE	71
2022-09-13	14:14:07	0.282863	932.73	FALSE	71
2022-09-13	14:14:07	0.40612	933.137	FALSE	71
2022-09-13	14:14:07	0.34897	933.486	FALSE	71
2022-09-13	14:14:07	0.288766	933.774	FALSE	71
2022-09-13	14:14:08	0.623524	934.398	FALSE	71
2022-09-13	14:14:08	0.609122	935.007	FALSE	71
2022-09-13	14:14:08	0.66215	935.669	FALSE	71
2022-09-13	14:14:08	0.545254	936.214	FALSE	71
2022-09-13	14:14:09	0.490496	936.705	FALSE	71
2022-09-13	14:14:09	0.440674	937.146	FALSE	71
2022-09-13	14:14:09	0.40159	937.547	FALSE	71
2022-09-13	14:14:09	0.513652	938.061	FALSE	71
2022-09-13	14:14:10	1.72546	939.786	FALSE	71
2022-09-13	14:14:10	2.74088	942.527	FALSE	71
2022-09-13	14:14:10	3.41818	945.945	1	72
2022-09-13	14:14:11	3.43706	949.382	1	73
2022-09-13	14:14:11	2.73284	952.115	FALSE	73
2022-09-13	14:14:11	2.21594	954.331	FALSE	73
2022-09-13	14:14:11	2.1135	956.445	FALSE	73
2022-09-13	14:14:12	2.03625	958.481	FALSE	73
2022-09-13	14:14:12	1.6648	960.146	FALSE	73
2022-09-13	14:14:12	1.71803	961.864	FALSE	73
2022-09-13	14:14:12	0.790344	962.654	FALSE	73
2022-09-13	14:14:13	0.611718	963.266	FALSE	73
2022-09-13	14:14:13	1.09533	964.361	FALSE	73
2022-09-13	14:14:13	1.66113	966.022	FALSE	73
2022-09-13	14:14:13	1.18805	967.21	FALSE	73
2022-09-13	14:14:14	0.920674	968.131	FALSE	73
2022-09-13	14:14:14	0.319504	968.45	FALSE	73
2022-09-13	14:14:14	0.326476	968.777	FALSE	73
2022-09-13	14:14:15	0.370649	969.148	FALSE	73
2022-09-13	14:14:15	1.89533	971.043	FALSE	73
2022-09-13	14:14:15	2.00688	973.05	FALSE	73
2022-09-13	14:14:15	1.89075	974.941	FALSE	73
2022-09-13	14:14:16	1.73884	976.679	FALSE	73
2022-09-13	14:14:16	0.919504	977.599	FALSE	73
2022-09-13	14:14:16	0.738079	978.337	FALSE	73
2022-09-13	14:14:16	0.827544	979.164	FALSE	73
2022-09-13	14:14:17	0.89813	980.063	FALSE	73
2022-09-13	14:14:17	0.905865	980.968	FALSE	73
2022-09-13	14:14:17	0.829428	981.798	FALSE	73
2022-09-13	14:14:17	0.884033	982.682	FALSE	73
2022-09-13	14:14:18	0.709987	983.392	FALSE	73
2022-09-13	14:14:18	0.476909	983.869	FALSE	73
2022-09-13	14:14:18	0.43701	984.306	FALSE	73
2022-09-13	14:14:19	0.49813	984.804	FALSE	73
2022-09-13	14:14:19	0.338741	985.143	FALSE	73
2022-09-13	14:14:19	0.334364	985.477	FALSE	73
2022-09-13	14:14:19	0.249784	985.727	FALSE	73
2022-09-13	14:14:20	0.261132	985.988	FALSE	73
2022-09-13	14:14:20	0.190649	986.179	FALSE	73
2022-09-13	14:14:20	0.127036	986.306	FALSE	73
2022-09-13	14:14:20	0.087392	986.393	FALSE	73
2022-09-13	14:14:21	-0.0337784	986.393	FALSE	73
2022-09-13	14:14:21	-0.134338	986.393	FALSE	73
2022-09-13	14:14:21	-0.238155	986.393	FALSE	73
2022-09-13	14:14:21	-0.263651	986.393	FALSE	73
2022-09-13	14:14:22	-0.147926	986.393	FALSE	73
2022-09-13	14:14:22	-0.0796817	986.393	FALSE	73
2022-09-13	14:14:22	0.258791	986.652	FALSE	73
2022-09-13	14:14:23	1.21212	987.864	FALSE	73
2022-09-13	14:14:23	4.49416	992.358	1	74
2022-09-13	14:14:23	3.54413	995.902	1	75
2022-09-13	14:14:23	3.60917	999.511	1	76
2022-09-13	14:14:24	2.39131	1001.9	FALSE	76
2022-09-13	14:14:24	4.4739	1006.38	1	77
2022-09-13	14:14:24	1.20851	1007.59	FALSE	77
2022-09-13	14:14:24	2.21584	1009.8	FALSE	77
2022-09-13	14:14:25	1.29029	1011.09	FALSE	77
2022-09-13	14:14:25	1.15599	1012.25	FALSE	77
2022-09-13	14:14:25	0.521743	1012.77	FALSE	77
2022-09-13	14:14:25	0.448817	1013.22	FALSE	77
2022-09-13	14:14:26	0.513652	1013.73	FALSE	77
2022-09-13	14:14:26	0.88785	1014.62	FALSE	77
2022-09-13	14:14:26	1.39508	1016.01	FALSE	77
2022-09-13	14:14:27	-0.0224298	1016.01	FALSE	77
2022-09-13	14:14:27	0.203779	1016.22	FALSE	77
2022-09-13	14:14:27	0.477875	1016.7	FALSE	77
2022-09-13	14:14:27	0.422812	1017.12	FALSE	77
2022-09-13	14:14:28	0.226069	1017.34	FALSE	77
2022-09-13	14:14:28	0.650394	1018	FALSE	77
2022-09-13	14:14:28	0.206018	1018.2	FALSE	77
2022-09-13	14:14:28	0.196705	1018.4	FALSE	77
2022-09-13	14:14:29	0.219809	1018.62	FALSE	77
2022-09-13	14:14:29	0.210242	1018.83	FALSE	77
2022-09-13	14:14:29	0.165255	1018.99	FALSE	77
2022-09-13	14:14:29	0.146222	1019.14	FALSE	77
2022-09-13	14:14:30	1.9563	1021.1	FALSE	77
2022-09-13	14:14:30	2.63457	1023.73	FALSE	77
2022-09-13	14:14:30	2.32235	1026.05	FALSE	77
2022-09-13	14:14:31	0.605255	1026.66	FALSE	77
2022-09-13	14:14:31	0.401336	1027.06	FALSE	77
2022-09-13	14:14:31	0.379199	1027.44	FALSE	77
2022-09-13	14:14:31	0.392379	1027.83	FALSE	77
2022-09-13	14:14:32	0.410598	1028.24	FALSE	77
2022-09-13	14:14:32	0.796654	1029.04	FALSE	77
2022-09-13	14:14:32	1.48902	1030.53	FALSE	77
2022-09-13	14:14:32	1.39813	1031.93	FALSE	77
2022-09-13	14:14:33	1.38271	1033.31	FALSE	77
2022-09-13	14:14:33	1.92363	1035.23	FALSE	77
2022-09-13	14:14:33	1.54744	1036.78	FALSE	77
2022-09-13	14:14:33	2.43655	1039.22	FALSE	77
2022-09-13	14:14:34	2.46368	1041.68	FALSE	77
2022-09-13	14:14:34	2.64281	1044.32	FALSE	77
2022-09-13	14:14:34	3.48724	1047.81	1	78
2022-09-13	14:14:35	1.05681	1048.87	FALSE	78
2022-09-13	14:14:35	2.1934	1051.06	FALSE	78
2022-09-13	14:14:35	1.50765	1052.57	FALSE	78
2022-09-13	14:14:35	1.26994	1053.84	FALSE	78
2022-09-13	14:14:36	1.02006	1054.86	FALSE	78
2022-09-13	14:14:36	2.46963	1057.33	FALSE	78
2022-09-13	14:14:36	0.408868	1057.74	FALSE	78
2022-09-13	14:14:36	0.629885	1058.37	FALSE	78
2022-09-13	14:14:37	0.386069	1058.75	FALSE	78
2022-09-13	14:14:37	0.36729	1059.12	FALSE	78
2022-09-13	14:14:37	0.298181	1059.42	FALSE	78
2022-09-13	14:14:37	0.389529	1059.81	FALSE	78
2022-09-13	14:14:38	0.833142	1060.64	FALSE	78
2022-09-13	14:14:38	0.702506	1061.34	FALSE	78
2022-09-13	14:14:38	1.15966	1062.5	FALSE	78
2022-09-13	14:14:38	1.18897	1063.69	FALSE	78
2022-09-13	14:14:39	0.881234	1064.57	FALSE	78
2022-09-13	14:14:39	1.04653	1065.62	FALSE	78
2022-09-13	14:14:39	1.03309	1066.65	FALSE	78
2022-09-13	14:14:40	0.613804	1067.27	FALSE	78
2022-09-13	14:14:40	0.506018	1067.77	FALSE	78
2022-09-13	14:14:40	0.432328	1068.2	FALSE	78
2022-09-13	14:14:40	0.337926	1068.54	FALSE	78
2022-09-13	14:14:41	0.434822	1068.98	FALSE	78
2022-09-13	14:14:41	0.661845	1069.64	FALSE	78
2022-09-13	14:14:41	0.912481	1070.55	FALSE	78
2022-09-13	14:14:41	2.77538	1073.33	FALSE	78
2022-09-13	14:14:42	3.85365	1077.18	1	79
2022-09-13	14:14:42	3.15645	1080.34	1	80
2022-09-13	14:14:42	2.7623	1083.1	FALSE	80
2022-09-13	14:14:43	0.613804	1083.71	FALSE	80
2022-09-13	14:14:43	0.383931	1084.1	FALSE	80
2022-09-13	14:14:43	0.336043	1084.43	FALSE	80
2022-09-13	14:14:43	0.378842	1084.81	FALSE	80
2022-09-13	14:14:44	0.541692	1085.35	FALSE	80
2022-09-13	14:14:44	1.04332	1086.4	FALSE	80
2022-09-13	14:14:44	0.91131	1087.31	FALSE	80
2022-09-13	14:14:44	1.01701	1088.32	FALSE	80
2022-09-13	14:14:45	0.765254	1089.09	FALSE	80
2022-09-13	14:14:45	0.97243	1090.06	FALSE	80
2022-09-13	14:14:45	1.06388	1091.13	FALSE	80
2022-09-13	14:14:45	0.561539	1091.69	FALSE	80
2022-09-13	14:14:46	0.319199	1092.01	FALSE	80
2022-09-13	14:14:46	0.127036	1092.13	FALSE	80
2022-09-13	14:14:46	0.120878	1092.26	FALSE	80
2022-09-13	14:14:46	-0.106959	1092.26	FALSE	80
2022-09-13	14:14:47	-0.131692	1092.26	FALSE	80
2022-09-13	14:14:47	-0.215152	1092.26	FALSE	80
2022-09-13	14:14:47	-0.261921	1092.26	FALSE	80
2022-09-13	14:14:48	-0.260089	1092.26	FALSE	80
2022-09-13	14:14:48	-0.25846	1092.26	FALSE	80
2022-09-13	14:14:48	-0.245178	1092.26	FALSE	80
2022-09-13	14:14:48	-0.245992	1092.26	FALSE	80
2022-09-13	14:14:49	-0.245788	1092.26	FALSE	80
2022-09-13	14:14:49	-0.206501	1092.26	FALSE	80
2022-09-13	14:14:49	0.121896	1092.38	FALSE	80
2022-09-13	14:14:49	1.91548	1094.29	FALSE	80
2022-09-13	14:14:50	6.23782	1100.53	1	81
2022-09-13	14:14:50	12.0565	1112.59	1	82
2022-09-13	14:14:50	11.2326	1123.82	1	83
2022-09-13	14:14:50	12.9448	1136.76	1	84
2022-09-13	14:14:51	1.82134	1138.59	FALSE	84
2022-09-13	14:14:51	5.25355	1143.84	1	85
2022-09-13	14:14:51	2.41808	1146.26	FALSE	85
2022-09-13	14:14:52	2.99146	1149.25	FALSE	85
2022-09-13	14:14:52	7.52469	1156.77	1	86
2022-09-13	14:14:52	8.06301	1164.84	1	87
2022-09-13	14:14:52	7.64439	1172.48	1	88
2022-09-13	14:14:53	3.57635	1176.06	1	89
2022-09-13	14:14:53	1.84469	1177.9	FALSE	89
2022-09-13	14:14:53	1.69258	1179.59	FALSE	89
2022-09-13	14:14:53	0.823168	1180.42	FALSE	89
2022-09-13	14:14:54	0.768104	1181.19	FALSE	89
2022-09-13	14:14:54	0.306832	1181.49	FALSE	89
2022-09-13	14:14:54	0.362303	1181.85	FALSE	89
2022-09-13	14:14:54	0.269835	1182.12	FALSE	89
2022-09-13	14:14:55	0.273957	1182.4	FALSE	89
2022-09-13	14:14:55	0.296756	1182.7	FALSE	89
2022-09-13	14:14:55	0.343168	1183.04	FALSE	89
2022-09-13	14:14:56	0.715178	1183.75	FALSE	89
2022-09-13	14:14:56	0.82327	1184.58	FALSE	89
2022-09-13	14:14:56	2.79533	1187.37	FALSE	89
2022-09-13	14:14:56	3.37543	1190.75	1	90
2022-09-13	14:14:57	2.62032	1193.37	FALSE	90
2022-09-13	14:14:57	2.42027	1195.79	FALSE	90
2022-09-13	14:14:57	1.2965	1197.08	FALSE	90
2022-09-13	14:14:57	1.40887	1198.49	FALSE	90
2022-09-13	14:14:58	1.19075	1199.68	FALSE	90
2022-09-13	14:14:58	3.28831	1202.97	1	91
2022-09-13	14:14:58	3.62932	1206.6	1	92
2022-09-13	14:14:58	3.23991	1209.84	1	93
2022-09-13	14:14:59	3.08586	1212.93	1	94
2022-09-13	14:14:59	2.54266	1215.47	FALSE	94
2022-09-13	14:14:59	2.73864	1218.21	FALSE	94
2022-09-13	14:15:00	1.55843	1219.77	FALSE	94
2022-09-13	14:15:00	5.13314	1224.9	1	95
2022-09-13	14:15:00	3.15233	1228.05	1	96
2022-09-13	14:15:00	3.45986	1231.51	1	97
2022-09-13	14:15:01	3.28057	1234.79	1	98
2022-09-13	14:15:01	2.23304	1237.03	FALSE	98
2022-09-13	14:15:01	0.966679	1237.99	FALSE	98
2022-09-13	14:15:01	1.06978	1239.06	FALSE	98
2022-09-13	14:15:02	1.25508	1240.32	FALSE	98
2022-09-13	14:15:02	1.18892	1241.51	FALSE	98
2022-09-13	14:15:02	1.50907	1243.02	FALSE	98
2022-09-13	14:15:02	3.36454	1246.38	1	99
2022-09-13	14:15:03	4.04291	1250.42	1	100
2022-09-13	14:15:03	2.91014	1253.33	FALSE	100
2022-09-13	14:15:03	3.2735	1256.61	1	101
2022-09-13	14:15:04	5.67324	1262.28	1	102
2022-09-13	14:15:04	3.12373	1265.4	1	103
2022-09-13	14:15:04	1.41508	1266.82	FALSE	103
2022-09-13	14:15:04	0.609326	1267.43	FALSE	103
2022-09-13	14:15:05	0.456552	1267.88	FALSE	103
2022-09-13	14:15:05	0.541285	1268.43	FALSE	103
2022-09-13	14:15:05	0.300471	1268.73	FALSE	103
2022-09-13	14:15:05	0.30383	1269.03	FALSE	103
2022-09-13	14:15:06	0.385356	1269.42	FALSE	103
2022-09-13	14:15:06	0.283575	1269.7	FALSE	103
2022-09-13	14:15:06	0.283066	1269.98	FALSE	103
2022-09-13	14:15:06	0.425967	1270.41	FALSE	103
2022-09-13	14:15:07	0.215687	1270.62	FALSE	103
2022-09-13	14:15:07	0.321031	1270.95	FALSE	103
2022-09-13	14:15:07	0.296756	1271.24	FALSE	103
2022-09-13	14:15:08	0.419402	1271.66	FALSE	103
2022-09-13	14:15:08	0.391361	1272.05	FALSE	103
2022-09-13	14:15:08	0.446374	1272.5	FALSE	103
2022-09-13	14:15:08	0.346832	1272.85	FALSE	103
2022-09-13	14:15:09	0.350293	1273.2	FALSE	103
2022-09-13	14:15:09	0.424084	1273.62	FALSE	103
2022-09-13	14:15:09	0.262659	1273.88	FALSE	103
2022-09-13	14:15:09	0.415127	1274.3	FALSE	103
2022-09-13	14:15:10	0.388715	1274.69	FALSE	103
2022-09-13	14:15:10	0.510801	1275.2	FALSE	103
2022-09-13	14:15:10	0.630242	1275.83	FALSE	103
2022-09-13	14:15:10	1.05253	1276.88	FALSE	103
2022-09-13	14:15:11	0.92215	1277.8	FALSE	103
2022-09-13	14:15:11	0.920063	1278.72	FALSE	103
2022-09-13	14:15:11	0.679097	1279.4	FALSE	103
2022-09-13	14:15:12	0.64556	1280.05	FALSE	103
2022-09-13	14:15:12	0.597112	1280.64	FALSE	103
2022-09-13	14:15:12	0.634822	1281.28	FALSE	103
2022-09-13	14:15:12	0.605305	1281.88	FALSE	103
2022-09-13	14:15:13	0.505203	1282.39	FALSE	103
2022-09-13	14:15:13	0.496501	1282.89	FALSE	103
2022-09-13	14:15:13	0.448919	1283.34	FALSE	103
2022-09-13	14:15:13	0.45528	1283.79	FALSE	103
2022-09-13	14:15:14	0.460216	1284.25	FALSE	103
2022-09-13	14:15:14	0.450598	1284.7	FALSE	103
2022-09-13	14:15:14	0.450751	1285.15	FALSE	103
2022-09-13	14:15:14	0.446374	1285.6	FALSE	103
2022-09-13	14:15:15	0.514517	1286.11	FALSE	103
2022-09-13	14:15:15	0.468359	1286.58	FALSE	103
2022-09-13	14:15:15	0.446272	1287.03	FALSE	103
2022-09-13	14:15:16	0.447748	1287.48	FALSE	103
2022-09-13	14:15:16	0.553041	1288.03	FALSE	103
2022-09-13	14:15:16	0.392634	1288.42	FALSE	103
2022-09-13	14:15:16	0.425916	1288.85	FALSE	103
2022-09-13	14:15:17	0.440929	1289.29	FALSE	103
2022-09-13	14:15:17	0.476247	1289.76	FALSE	103
2022-09-13	14:15:17	1.01518	1290.78	FALSE	103
2022-09-13	14:15:17	1.22958	1292.01	FALSE	103
2022-09-13	14:15:18	1.46592	1293.47	FALSE	103
2022-09-13	14:15:18	0.93589	1294.41	FALSE	103
2022-09-13	14:15:18	0.721641	1295.13	FALSE	103
2022-09-13	14:15:18	0.579606	1295.71	FALSE	103
2022-09-13	14:15:19	0.605712	1296.32	FALSE	103
2022-09-13	14:15:19	0.587086	1296.9	FALSE	103
2022-09-13	14:15:19	0.562557	1297.47	FALSE	103
2022-09-13	14:15:20	0.564796	1298.03	FALSE	103
2022-09-13	14:15:20	0.459198	1298.49	FALSE	103
2022-09-13	14:15:20	0.457367	1298.95	FALSE	103
2022-09-13	14:15:20	0.416756	1299.37	FALSE	103
2022-09-13	14:15:21	0.360725	1299.73	FALSE	103
2022-09-13	14:15:21	0.398995	1300.13	FALSE	103
2022-09-13	14:15:21	0.430191	1300.56	FALSE	103
2022-09-13	14:15:21	0.345662	1300.9	FALSE	103
2022-09-13	14:15:22	0.530547	1301.43	FALSE	103
2022-09-13	14:15:22	0.308104	1301.74	FALSE	103
2022-09-13	14:15:22	0.527188	1302.27	FALSE	103
2022-09-13	14:15:22	0.325967	1302.59	FALSE	103
2022-09-13	14:15:23	0.574873	1303.17	FALSE	103
2022-09-13	14:15:23	0.366629	1303.53	FALSE	103
2022-09-13	14:15:23	1.2679	1304.8	FALSE	103
2022-09-13	14:15:24	1.04388	1305.85	FALSE	103
2022-09-13	14:15:24	0.914211	1306.76	FALSE	103
2022-09-13	14:15:24	0.746119	1307.51	FALSE	103
2022-09-13	14:15:24	1.19828	1308.7	FALSE	103
2022-09-13	14:15:25	0.967036	1309.67	FALSE	103
2022-09-13	14:15:25	0.973193	1310.64	FALSE	103
2022-09-13	14:15:25	0.808002	1311.45	FALSE	103
2022-09-13	14:15:25	0.601692	1312.05	FALSE	103
2022-09-13	14:15:26	0.801641	1312.86	FALSE	103
2022-09-13	14:15:26	0.750751	1313.61	FALSE	103
2022-09-13	14:15:26	0.805814	1314.41	FALSE	103
2022-09-13	14:15:26	0.607188	1315.02	FALSE	103
2022-09-13	14:15:27	0.885356	1315.91	FALSE	103
2022-09-13	14:15:27	0.619249	1316.52	FALSE	103
2022-09-13	14:15:27	0.57243	1317.1	FALSE	103
2022-09-13	14:15:28	0.470802	1317.57	FALSE	103
2022-09-13	14:15:28	0.453041	1318.02	FALSE	103
2022-09-13	14:15:28	0.451209	1318.47	FALSE	103
2022-09-13	14:15:28	0.407545	1318.88	FALSE	103
2022-09-13	14:15:29	0.494567	1319.37	FALSE	103
2022-09-13	14:15:29	0.337723	1319.71	FALSE	103
2022-09-13	14:15:29	0.457977	1320.17	FALSE	103
2022-09-13	14:15:29	0.339046	1320.51	FALSE	103

## Sheet: Sulley_martin_202291314104
						**GoPro Fitting: 1359
2022-09-13	14:10:04	0.444084
2022-09-13	14:10:04	0.473499
2022-09-13	14:10:04	0.475331
2022-09-13	14:10:05	0.483982
2022-09-13	14:10:05	0.475026
2022-09-13	14:10:05	0.435585
2022-09-13	14:10:05	0.496552
2022-09-13	14:10:06	0.480776
2022-09-13	14:10:06	0.479504
2022-09-13	14:10:06	0.447799
2022-09-13	14:10:07	0.475433
2022-09-13	14:10:07	0.465
2022-09-13	14:10:07	0.463168
2022-09-13	14:10:07	0.468715
2022-09-13	14:10:08	0.46383
2022-09-13	14:10:08	0.45986
2022-09-13	14:10:08	0.465051
2022-09-13	14:10:08	0.476705
2022-09-13	14:10:09	0.458282
2022-09-13	14:10:09	0.472684
2022-09-13	14:10:09	0.435484
2022-09-13	14:10:09	0.448206
2022-09-13	14:10:10	0.466781
2022-09-13	14:10:10	0.445662
2022-09-13	14:10:10	0.467443
2022-09-13	14:10:11	0.465763
2022-09-13	14:10:11	0.494364
2022-09-13	14:10:11	0.467341
2022-09-13	14:10:11	0.446832
2022-09-13	14:10:12	0.488104
2022-09-13	14:10:12	0.477824
2022-09-13	14:10:12	0.483422
2022-09-13	14:10:12	0.486985
2022-09-13	14:10:13	0.463728
2022-09-13	14:10:13	0.491463
2022-09-13	14:10:13	0.44556
2022-09-13	14:10:13	0.436603
2022-09-13	14:10:14	0.485967
2022-09-13	14:10:14	0.352532
2022-09-13	14:10:14	0.230242
2022-09-13	14:10:14	0.101387
2022-09-13	14:10:15	0.372634
2022-09-13	14:10:15	0.271565
2022-09-13	14:10:15	0.24673
2022-09-13	14:10:16	0.362354
2022-09-13	14:10:16	0.508766
2022-09-13	14:10:16	0.239606
2022-09-13	14:10:16	1.48632
2022-09-13	14:10:17	2.52861
2022-09-13	14:10:17	4.34948
2022-09-13	14:10:17	3.93426
2022-09-13	14:10:17	0.79528
2022-09-13	14:10:18	0.528562
2022-09-13	14:10:18	0.333244
2022-09-13	14:10:18	0.348359
2022-09-13	14:10:18	0.0438806
2022-09-13	14:10:19	0.366476
2022-09-13	14:10:19	0.00611985
2022-09-13	14:10:19	0.225763
2022-09-13	14:10:20	0.493041
2022-09-13	14:10:20	2.58169
2022-09-13	14:10:20	3.34021
2022-09-13	14:10:20	5.05212
2022-09-13	14:10:21	6.09991
2022-09-13	14:10:21	4.84001
2022-09-13	14:10:21	5.25512
2022-09-13	14:10:21	2.64296
2022-09-13	14:10:22	1.52953
2022-09-13	14:10:22	0.0730409
2022-09-13	14:10:22	-0.209351
2022-09-13	14:10:22	0.274313
2022-09-13	14:10:23	0.840216
2022-09-13	14:10:23	1.67131
2022-09-13	14:10:23	1.42139
2022-09-13	14:10:24	2.88642
2022-09-13	14:10:24	2.08266
2022-09-13	14:10:24	2.40373
2022-09-13	14:10:24	1.47716
2022-09-13	14:10:25	0.66159
2022-09-13	14:10:25	1.1653
2022-09-13	14:10:25	0.393193
2022-09-13	14:10:25	0.711209
2022-09-13	14:10:26	0.366934
2022-09-13	14:10:26	0.38897
2022-09-13	14:10:26	0.53416
2022-09-13	14:10:26	0.263677
2022-09-13	14:10:27	0.684389
2022-09-13	14:10:27	0.319249
2022-09-13	14:10:27	0.501539
2022-09-13	14:10:28	0.173092
2022-09-13	14:10:28	0.358333
2022-09-13	14:10:28	0.129886
2022-09-13	14:10:28	0.121641
2022-09-13	14:10:29	0.0553819
2022-09-13	14:10:29	0.293397
2022-09-13	14:10:29	0.639453
2022-09-13	14:10:29	0.222456
2022-09-13	14:10:30	0.619758
2022-09-13	14:10:30	0.226171
2022-09-13	14:10:30	0.579198
2022-09-13	14:10:30	0.183728
2022-09-13	14:10:31	0.530802
2022-09-13	14:10:31	0.283117
2022-09-13	14:10:31	0.513143
2022-09-13	14:10:32	0.226883
2022-09-13	14:10:32	0.393346
2022-09-13	14:10:32	0.409529
2022-09-13	14:10:32	0.383321
2022-09-13	14:10:33	0.367443
2022-09-13	14:10:33	0.420064
2022-09-13	14:10:33	0.481641
2022-09-13	14:10:33	0.125509
2022-09-13	14:10:34	-0.110623
2022-09-13	14:10:34	0.207036
2022-09-13	14:10:34	0.538588
2022-09-13	14:10:34	0.388919
2022-09-13	14:10:35	0.577468
2022-09-13	14:10:35	0.299199
2022-09-13	14:10:35	0.509784
2022-09-13	14:10:36	0.208613
2022-09-13	14:10:36	0.504695
2022-09-13	14:10:36	0.254924
2022-09-13	14:10:36	0.390598
2022-09-13	14:10:37	0.2707
2022-09-13	14:10:37	0.399148
2022-09-13	14:10:37	1.28037
2022-09-13	14:10:37	3.79222
2022-09-13	14:10:38	6.90378
2022-09-13	14:10:38	5.86245
2022-09-13	14:10:38	8.83161
2022-09-13	14:10:38	3.97111
2022-09-13	14:10:39	10.0338
2022-09-13	14:10:39	5.43543
2022-09-13	14:10:39	3.44846
2022-09-13	14:10:40	3.42556
2022-09-13	14:10:40	0.980827
2022-09-13	14:10:40	1.21111
2022-09-13	14:10:40	1.15945
2022-09-13	14:10:41	0.952735
2022-09-13	14:10:41	2.34403
2022-09-13	14:10:41	0.921387
2022-09-13	14:10:41	2.66189
2022-09-13	14:10:42	1.99955
2022-09-13	14:10:42	1.44693
2022-09-13	14:10:42	0.872837
2022-09-13	14:10:42	0.686985
2022-09-13	14:10:43	0.632684
2022-09-13	14:10:43	0.419504
2022-09-13	14:10:43	0.731921
2022-09-13	14:10:44	0.965
2022-09-13	14:10:44	3.83823
2022-09-13	14:10:44	4.61731
2022-09-13	14:10:44	5.68352
2022-09-13	14:10:45	1.2392
2022-09-13	14:10:45	3.31273
2022-09-13	14:10:45	1.71095
2022-09-13	14:10:45	1.78709
2022-09-13	14:10:46	1.651
2022-09-13	14:10:46	0.524542
2022-09-13	14:10:46	0.867951
2022-09-13	14:10:47	0.741743
2022-09-13	14:10:47	1.16841
2022-09-13	14:10:47	0.674008
2022-09-13	14:10:47	0.706221
2022-09-13	14:10:48	0.607951
2022-09-13	14:10:48	0.608206
2022-09-13	14:10:48	0.633651
2022-09-13	14:10:48	0.278435
2022-09-13	14:10:49	0.820064
2022-09-13	14:10:49	0.264847
2022-09-13	14:10:49	0.74673
2022-09-13	14:10:49	0.416552
2022-09-13	14:10:50	0.544287
2022-09-13	14:10:50	0.397825
2022-09-13	14:10:50	0.418741
2022-09-13	14:10:50	0.653753
2022-09-13	14:10:51	0.301234
2022-09-13	14:10:51	0.597417
2022-09-13	14:10:51	0.279199
2022-09-13	14:10:52	0.567239
2022-09-13	14:10:52	0.19014
2022-09-13	14:10:52	0.536603
2022-09-13	14:10:52	0.242914
2022-09-13	14:10:53	0.133397
2022-09-13	14:10:53	-0.271437
2022-09-13	14:10:53	-0.264872
2022-09-13	14:10:53	-0.278358
2022-09-13	14:10:54	-0.248384
2022-09-13	14:10:54	-0.331743
2022-09-13	14:10:54	-0.207417
2022-09-13	14:10:54	-0.0134221
2022-09-13	14:10:55	-0.162531
2022-09-13	14:10:55	-0.106552
2022-09-13	14:10:55	-0.0720989
2022-09-13	14:10:56	-0.0140328
2022-09-13	14:10:56	-0.191946
2022-09-13	14:10:56	0.0508018
2022-09-13	14:10:56	-0.125229
2022-09-13	14:10:57	-0.00746796
2022-09-13	14:10:57	-0.233117
2022-09-13	14:10:57	-0.019071
2022-09-13	14:10:57	0.0514125
2022-09-13	14:10:58	0.153804
2022-09-13	14:10:58	0.127392
2022-09-13	14:10:58	0.149886
2022-09-13	14:10:58	0.407697
2022-09-13	14:10:59	0.164797
2022-09-13	14:10:59	0.350344
2022-09-13	14:10:59	0.235229
2022-09-13	14:11:00	0.589835
2022-09-13	14:11:00	0.467341
2022-09-13	14:11:00	0.497672
2022-09-13	14:11:00	0.533346
2022-09-13	14:11:01	0.657214
2022-09-13	14:11:01	0.984084
2022-09-13	14:11:01	0.698689
2022-09-13	14:11:01	0.899351
2022-09-13	14:11:02	1.47111
2022-09-13	14:11:02	2.13905
2022-09-13	14:11:02	2.71385
2022-09-13	14:11:02	3.17945
2022-09-13	14:11:03	2.65574
2022-09-13	14:11:03	5.01675
2022-09-13	14:11:03	4.34922
2022-09-13	14:11:04	6.85599
2022-09-13	14:11:04	6.21054
2022-09-13	14:11:04	6.38535
2022-09-13	14:11:04	11.3233
2022-09-13	14:11:05	5.81777
2022-09-13	14:11:05	10.3922
2022-09-13	14:11:05	9.65298
2022-09-13	14:11:05	7.7396
2022-09-13	14:11:06	15.806
2022-09-13	14:11:06	8.78683
2022-09-13	14:11:06	7.80708
2022-09-13	14:11:06	11.5071
2022-09-13	14:11:07	2.09319
2022-09-13	14:11:07	1.8338
2022-09-13	14:11:07	0.743117
2022-09-13	14:11:07	0.443626
2022-09-13	14:11:08	0.434313
2022-09-13	14:11:08	0.470802
2022-09-13	14:11:08	0.386476
2022-09-13	14:11:09	0.839758
2022-09-13	14:11:09	0.485255
2022-09-13	14:11:09	1.07879
2022-09-13	14:11:09	1.63828
2022-09-13	14:11:10	0.810191
2022-09-13	14:11:10	0.501183
2022-09-13	14:11:10	0.202812
2022-09-13	14:11:10	0.463117
2022-09-13	14:11:11	0.0413361
2022-09-13	14:11:11	0.317824
2022-09-13	14:11:11	0.130903
2022-09-13	14:11:11	0.350547
2022-09-13	14:11:12	1.41151
2022-09-13	14:11:12	4.07304
2022-09-13	14:11:12	5.32968
2022-09-13	14:11:13	2.11665
2022-09-13	14:11:13	1.95772
2022-09-13	14:11:13	0.678181
2022-09-13	14:11:13	1.33838
2022-09-13	14:11:14	0.609835
2022-09-13	14:11:14	0.413346
2022-09-13	14:11:14	0.914618
2022-09-13	14:11:15	0.808766
2022-09-13	14:11:15	0.40673
2022-09-13	14:11:15	0.55813
2022-09-13	14:11:15	0.558435
2022-09-13	14:11:15	1.11528
2022-09-13	14:11:16	2.51141
2022-09-13	14:11:16	4.35085
2022-09-13	14:11:16	4.11619
2022-09-13	14:11:17	3.10189
2022-09-13	14:11:17	1.84536
2022-09-13	14:11:17	2.45828
2022-09-13	14:11:17	1.49462
2022-09-13	14:11:18	1.53151
2022-09-13	14:11:18	2.11238
2022-09-13	14:11:18	0.930852
2022-09-13	14:11:18	1.36795
2022-09-13	14:11:19	0.910954
2022-09-13	14:11:19	1.06169
2022-09-13	14:11:19	1.16648
2022-09-13	14:11:19	0.52215
2022-09-13	14:11:20	0.872379
2022-09-13	14:11:20	0.564644
2022-09-13	14:11:20	0.733397
2022-09-13	14:11:21	0.656501
2022-09-13	14:11:21	1.21151
2022-09-13	14:11:21	2.78042
2022-09-13	14:11:21	4.49009
2022-09-13	14:11:22	4.09187
2022-09-13	14:11:22	2.93757
2022-09-13	14:11:22	0.955585
2022-09-13	14:11:22	0.273957
2022-09-13	14:11:23	0.536298
2022-09-13	14:11:23	0.198944
2022-09-13	14:11:23	-0.0905213
2022-09-13	14:11:23	-0.457137
2022-09-13	14:11:24	-0.838867
2022-09-13	14:11:24	-0.57673
2022-09-13	14:11:24	-0.157544
2022-09-13	14:11:25	0.293143
2022-09-13	14:11:25	0.422914
2022-09-13	14:11:25	0.167443
2022-09-13	14:11:25	0.0341606
2022-09-13	14:11:26	1.19299
2022-09-13	14:11:26	2.58744
2022-09-13	14:11:26	2.89019
2022-09-13	14:11:26	1.76821
2022-09-13	14:11:27	0.597316
2022-09-13	14:11:27	0.244339
2022-09-13	14:11:27	0.528715
2022-09-13	14:11:27	0.518435
2022-09-13	14:11:28	0.585509
2022-09-13	14:11:28	0.627443
2022-09-13	14:11:28	0.581285
2022-09-13	14:11:29	0.718537
2022-09-13	14:11:29	0.650394
2022-09-13	14:11:29	0.823117
2022-09-13	14:11:29	0.954415
2022-09-13	14:11:30	0.669682
2022-09-13	14:11:30	0.236603
2022-09-13	14:11:30	-0.058613
2022-09-13	14:11:30	-0.198715
2022-09-13	14:11:31	0.0324812
2022-09-13	14:11:31	0.443931
2022-09-13	14:11:31	0.492634
2022-09-13	14:11:31	0.326221
2022-09-13	14:11:32	0.314262
2022-09-13	14:11:32	0.0289188
2022-09-13	14:11:32	-0.116374
2022-09-13	14:11:33	-0.22472
2022-09-13	14:11:33	-0.301463
2022-09-13	14:11:33	-0.290827
2022-09-13	14:11:33	-0.0348471
2022-09-13	14:11:34	-0.0443127
2022-09-13	14:11:34	0.214669
2022-09-13	14:11:34	0.426629
2022-09-13	14:11:34	2.18179
2022-09-13	14:11:35	2.69853
2022-09-13	14:11:35	3.31706
2022-09-13	14:11:35	4.41207
2022-09-13	14:11:35	3.99411
2022-09-13	14:11:36	4.79782
2022-09-13	14:11:36	0.641794
2022-09-13	14:11:36	1.28042
2022-09-13	14:11:37	0.641947
2022-09-13	14:11:37	0.144593
2022-09-13	14:11:37	-0.0705214
2022-09-13	14:11:37	-0.471234
2022-09-13	14:11:38	-0.51617
2022-09-13	14:11:38	0.0180282
2022-09-13	14:11:38	0.526629
2022-09-13	14:11:38	0.461845
2022-09-13	14:11:39	0.45645
2022-09-13	14:11:39	0.31416
2022-09-13	14:11:39	0.288461
2022-09-13	14:11:39	0.341947
2022-09-13	14:11:40	0.348919
2022-09-13	14:11:40	0.300165
2022-09-13	14:11:40	0.369428
2022-09-13	14:11:41	0.339809
2022-09-13	14:11:41	0.372481
2022-09-13	14:11:41	0.390445
2022-09-13	14:11:41	0.298181
2022-09-13	14:11:42	0.511768
2022-09-13	14:11:42	0.490242
2022-09-13	14:11:42	0.456145
2022-09-13	14:11:42	0.422506
2022-09-13	14:11:43	0.461031
2022-09-13	14:11:43	0.38897
2022-09-13	14:11:43	0.40729
2022-09-13	14:11:43	0.421082
2022-09-13	14:11:44	0.479555
2022-09-13	14:11:44	0.445
2022-09-13	14:11:44	0.278333
2022-09-13	14:11:45	0.662863
2022-09-13	14:11:45	1.13594
2022-09-13	14:11:45	2.3852
2022-09-13	14:11:45	3.82357
2022-09-13	14:11:46	6.79797
2022-09-13	14:11:46	4.98072
2022-09-13	14:11:46	4.11253
2022-09-13	14:11:46	1.81752
2022-09-13	14:11:47	0.504186
2022-09-13	14:11:47	0.438079
2022-09-13	14:11:47	0.031158
2022-09-13	14:11:47	-0.0944399
2022-09-13	14:11:48	-0.324058
2022-09-13	14:11:48	-0.318867
2022-09-13	14:11:48	0.0405219
2022-09-13	14:11:49	0.42159
2022-09-13	14:11:49	0.641285
2022-09-13	14:11:49	1.02103
2022-09-13	14:11:49	0.9193
2022-09-13	14:11:50	1.37167
2022-09-13	14:11:50	1.81894
2022-09-13	14:11:50	1.95569
2022-09-13	14:11:50	2.27508
2022-09-13	14:11:51	1.63177
2022-09-13	14:11:51	1.5562
2022-09-13	14:11:51	1.28413
2022-09-13	14:11:51	1.46571
2022-09-13	14:11:52	2.14352
2022-09-13	14:11:52	3.00882
2022-09-13	14:11:52	3.0796
2022-09-13	14:11:53	0.558333
2022-09-13	14:11:53	0.158079
2022-09-13	14:11:53	0.107443
2022-09-13	14:11:53	-0.015356
2022-09-13	14:11:54	0.0139061
2022-09-13	14:11:54	0.153652
2022-09-13	14:11:54	0.144542
2022-09-13	14:11:54	0.0798094
2022-09-13	14:11:55	0.0110053
2022-09-13	14:11:55	-0.125585
2022-09-13	14:11:55	-0.193676
2022-09-13	14:11:55	-0.302888
2022-09-13	14:11:56	-0.438765
2022-09-13	14:11:56	-0.445229
2022-09-13	14:11:56	-0.411386
2022-09-13	14:11:57	-0.571132
2022-09-13	14:11:57	-0.48248
2022-09-13	14:11:57	-0.737544
2022-09-13	14:11:57	-0.783193
2022-09-13	14:11:58	-0.366399
2022-09-13	14:11:58	0.0182827
2022-09-13	14:11:58	0.370293
2022-09-13	14:11:58	0.373448
2022-09-13	14:11:59	0.450395
2022-09-13	14:11:59	0.643321
2022-09-13	14:11:59	0.566527
2022-09-13	14:11:59	0.662913
2022-09-13	14:12:00	0.798028
2022-09-13	14:12:00	0.510242
2022-09-13	14:12:00	0.312634
2022-09-13	14:12:01	0.394211
2022-09-13	14:12:01	0.425713
2022-09-13	14:12:01	0.400013
2022-09-13	14:12:01	0.419097
2022-09-13	14:12:02	0.396501
2022-09-13	14:12:02	0.391158
2022-09-13	14:12:02	0.407443
2022-09-13	14:12:02	0.444746
2022-09-13	14:12:03	0.430395
2022-09-13	14:12:03	0.562404
2022-09-13	14:12:03	0.373957
2022-09-13	14:12:03	0.520216
2022-09-13	14:12:04	0.528257
2022-09-13	14:12:04	0.514262
2022-09-13	14:12:04	0.865254
2022-09-13	14:12:05	0.455026
2022-09-13	14:12:05	0.275025
2022-09-13	14:12:05	0.583524
2022-09-13	14:12:05	0.337316
2022-09-13	14:12:06	0.528817
2022-09-13	14:12:06	0.260369
2022-09-13	14:12:06	0.202456
2022-09-13	14:12:06	0.246629
2022-09-13	14:12:07	0.287494
2022-09-13	14:12:07	0.361641
2022-09-13	14:12:07	0.209835
2022-09-13	14:12:07	0.34383
2022-09-13	14:12:08	0.122965
2022-09-13	14:12:08	0.321947
2022-09-13	14:12:08	0.049784
2022-09-13	14:12:08	0.185204
2022-09-13	14:12:09	0.100471
2022-09-13	14:12:09	0.517723
2022-09-13	14:12:09	0.733346
2022-09-13	14:12:10	0.772226
2022-09-13	14:12:10	0.781081
2022-09-13	14:12:10	0.663728
2022-09-13	14:12:10	0.617061
2022-09-13	14:12:11	0.56271
2022-09-13	14:12:11	0.802608
2022-09-13	14:12:11	0.894059
2022-09-13	14:12:11	0.61701
2022-09-13	14:12:12	0.585051
2022-09-13	14:12:12	0.950852
2022-09-13	14:12:12	0.500979
2022-09-13	14:12:12	0.383779
2022-09-13	14:12:13	0.480623
2022-09-13	14:12:13	0.38444
2022-09-13	14:12:13	0.438639
2022-09-13	14:12:14	0.301743
2022-09-13	14:12:14	0.543168
2022-09-13	14:12:14	0.405153
2022-09-13	14:12:14	0.418842
2022-09-13	14:12:15	0.586018
2022-09-13	14:12:15	0.473092
2022-09-13	14:12:15	0.58958
2022-09-13	14:12:15	0.757265
2022-09-13	14:12:16	0.373906
2022-09-13	14:12:16	0.509886
2022-09-13	14:12:16	0.574618
2022-09-13	14:12:16	0.621031
2022-09-13	14:12:17	0.643982
2022-09-13	14:12:17	0.585509
2022-09-13	14:12:17	0.570801
2022-09-13	14:12:18	0.687697
2022-09-13	14:12:18	0.523778
2022-09-13	14:12:18	0.681641
2022-09-13	14:12:18	0.592124
2022-09-13	14:12:19	0.535229
2022-09-13	14:12:19	0.55416
2022-09-13	14:12:19	0.597214
2022-09-13	14:12:19	0.576552
2022-09-13	14:12:20	0.631717
2022-09-13	14:12:20	0.692735
2022-09-13	14:12:20	0.901234
2022-09-13	14:12:20	0.788257
2022-09-13	14:12:21	0.729428
2022-09-13	14:12:21	1.03686
2022-09-13	14:12:21	0.452176
2022-09-13	14:12:22	0.609377
2022-09-13	14:12:22	0.471667
2022-09-13	14:12:22	0.365458
2022-09-13	14:12:22	0.571259
2022-09-13	14:12:23	0.889275
2022-09-13	14:12:23	2.74113
2022-09-13	14:12:23	3.20225
2022-09-13	14:12:23	2.3795
2022-09-13	14:12:24	1.78536
2022-09-13	14:12:24	0.581081
2022-09-13	14:12:24	0.526934
2022-09-13	14:12:24	0.446374
2022-09-13	14:12:25	0.401183
2022-09-13	14:12:25	0.329122
2022-09-13	14:12:25	0.466832
2022-09-13	14:12:26	0.420725
2022-09-13	14:12:26	0.492532
2022-09-13	14:12:26	1.06266
2022-09-13	14:12:26	1.72485
2022-09-13	14:12:27	3.70556
2022-09-13	14:12:27	3.12678
2022-09-13	14:12:27	2.37966
2022-09-13	14:12:27	1.02815
2022-09-13	14:12:28	0.628104
2022-09-13	14:12:28	0.291361
2022-09-13	14:12:28	0.352379
2022-09-13	14:12:28	0.369682
2022-09-13	14:12:29	0.375585
2022-09-13	14:12:29	0.268257
2022-09-13	14:12:29	0.401896
2022-09-13	14:12:30	0.429936
2022-09-13	14:12:30	0.484389
2022-09-13	14:12:30	0.307443
2022-09-13	14:12:30	0.402506
2022-09-13	14:12:31	0.36215
2022-09-13	14:12:31	0.796298
2022-09-13	14:12:31	1.49355
2022-09-13	14:12:31	0.969885
2022-09-13	14:12:32	1.2906
2022-09-13	14:12:32	1.2366
2022-09-13	14:12:32	0.677519
2022-09-13	14:12:32	0.648817
2022-09-13	14:12:33	0.615789
2022-09-13	14:12:33	0.457825
2022-09-13	14:12:33	0.506374
2022-09-13	14:12:34	0.361845
2022-09-13	14:12:34	0.530445
2022-09-13	14:12:34	0.399046
2022-09-13	14:12:34	0.394873
2022-09-13	14:12:35	0.369326
2022-09-13	14:12:35	0.514822
2022-09-13	14:12:35	0.396247
2022-09-13	14:12:35	0.458893
2022-09-13	14:12:36	0.395484
2022-09-13	14:12:36	0.472735
2022-09-13	14:12:36	0.408206
2022-09-13	14:12:36	0.395992
2022-09-13	14:12:37	0.434873
2022-09-13	14:12:37	0.392328
2022-09-13	14:12:37	0.384237
2022-09-13	14:12:38	0.34159
2022-09-13	14:12:38	0.480013
2022-09-13	14:12:38	0.391158
2022-09-13	14:12:38	0.555433
2022-09-13	14:12:39	0.304593
2022-09-13	14:12:39	0.592074
2022-09-13	14:12:39	0.390496
2022-09-13	14:12:39	0.647086
2022-09-13	14:12:40	0.282252
2022-09-13	14:12:40	0.495993
2022-09-13	14:12:40	0.468766
2022-09-13	14:12:40	0.544847
2022-09-13	14:12:41	0.174975
2022-09-13	14:12:41	-0.207621
2022-09-13	14:12:41	-0.311743
2022-09-13	14:12:42	-0.309656
2022-09-13	14:12:42	-0.299325
2022-09-13	14:12:42	-0.225483
2022-09-13	14:12:42	-0.14589
2022-09-13	14:12:43	0.0259162
2022-09-13	14:12:43	0.139453
2022-09-13	14:12:43	0.0562979
2022-09-13	14:12:43	0.102863
2022-09-13	14:12:44	0.228206
2022-09-13	14:12:44	0.283473
2022-09-13	14:12:44	0.402761
2022-09-13	14:12:44	0.44271
2022-09-13	14:12:45	0.419199
2022-09-13	14:12:45	0.366069
2022-09-13	14:12:45	0.643321
2022-09-13	14:12:46	0.297774
2022-09-13	14:12:46	0.670547
2022-09-13	14:12:46	0.475534
2022-09-13	14:12:46	0.414517
2022-09-13	14:12:47	0.230191
2022-09-13	14:12:47	0.441438
2022-09-13	14:12:47	0.200674
2022-09-13	14:12:47	0.233092
2022-09-13	14:12:48	0.443422
2022-09-13	14:12:48	0.193651
2022-09-13	14:12:48	0.229224
2022-09-13	14:12:48	0.221132
2022-09-13	14:12:49	0.313397
2022-09-13	14:12:49	0.08556
2022-09-13	14:12:49	0.250802
2022-09-13	14:12:50	0.111158
2022-09-13	14:12:50	0.17472
2022-09-13	14:12:50	0.0242877
2022-09-13	14:12:50	0.0870867
2022-09-13	14:12:51	0.0834226
2022-09-13	14:12:51	0.099962
2022-09-13	14:12:51	0.257621
2022-09-13	14:12:51	0.162812
2022-09-13	14:12:52	0.323473
2022-09-13	14:12:52	0.406221
2022-09-13	14:12:52	0.631463
2022-09-13	14:12:52	0.49986
2022-09-13	14:12:53	0.852278
2022-09-13	14:12:53	0.729428
2022-09-13	14:12:53	1.35548
2022-09-13	14:12:54	1.24296
2022-09-13	14:12:54	0.318384
2022-09-13	14:12:54	0.201998
2022-09-13	14:12:54	0.254618
2022-09-13	14:12:55	0.471667
2022-09-13	14:12:55	0.728562
2022-09-13	14:12:55	0.561081
2022-09-13	14:12:55	0.533397
2022-09-13	14:12:56	0.407188
2022-09-13	14:12:56	0.505967
2022-09-13	14:12:56	0.458791
2022-09-13	14:12:56	0.524236
2022-09-13	14:12:57	0.340623
2022-09-13	14:12:57	0.2993
2022-09-13	14:12:57	0.299809
2022-09-13	14:12:58	0.300267
2022-09-13	14:12:58	0.261234
2022-09-13	14:12:58	0.287952
2022-09-13	14:12:58	0.284237
2022-09-13	14:12:59	0.253295
2022-09-13	14:12:59	0.202405
2022-09-13	14:12:59	0.286883
2022-09-13	14:12:59	0.238079
2022-09-13	14:13:00	0.292176
2022-09-13	14:13:00	0.141845
2022-09-13	14:13:00	0.261896
2022-09-13	14:13:00	0.234262
2022-09-13	14:13:01	0.463728
2022-09-13	14:13:01	0.627901
2022-09-13	14:13:01	0.412634
2022-09-13	14:13:02	0.359199
2022-09-13	14:13:02	0.330954
2022-09-13	14:13:02	0.329479
2022-09-13	14:13:02	0.350649
2022-09-13	14:13:03	0.543779
2022-09-13	14:13:03	0.579555
2022-09-13	14:13:03	1.02581
2022-09-13	14:13:03	1.11528
2022-09-13	14:13:04	1.64744
2022-09-13	14:13:04	0.69925
2022-09-13	14:13:04	0.607239
2022-09-13	14:13:04	0.400166
2022-09-13	14:13:05	0.368664
2022-09-13	14:13:05	0.36729
2022-09-13	14:13:05	0.312328
2022-09-13	14:13:06	0.0369086
2022-09-13	14:13:06	0.086934
2022-09-13	14:13:06	0.243626
2022-09-13	14:13:06	0.234008
2022-09-13	14:13:07	0.119758
2022-09-13	14:13:07	0.0239824
2022-09-13	14:13:07	0.0882572
2022-09-13	14:13:07	0.192583
2022-09-13	14:13:08	0.26841
2022-09-13	14:13:08	0.324746
2022-09-13	14:13:08	0.277061
2022-09-13	14:13:08	0.319758
2022-09-13	14:13:09	0.22897
2022-09-13	14:13:09	0.188512
2022-09-13	14:13:09	0.069784
2022-09-13	14:13:10	0.0812343
2022-09-13	14:13:10	0.0811834
2022-09-13	14:13:10	-0.0225315
2022-09-13	14:13:10	-0.0904196
2022-09-13	14:13:11	-0.0416155
2022-09-13	14:13:11	-0.0695544
2022-09-13	14:13:11	-0.0531677
2022-09-13	14:13:11	-0.093473
2022-09-13	14:13:12	-0.120445
2022-09-13	14:13:12	-0.0268572
2022-09-13	14:13:12	-0.0354069
2022-09-13	14:13:12	-0.0659412
2022-09-13	14:13:13	-0.225381
2022-09-13	14:13:13	-0.568537
2022-09-13	14:13:13	-0.524618
2022-09-13	14:13:13	-0.0861956
2022-09-13	14:13:14	0.149224
2022-09-13	14:13:14	0.13299
2022-09-13	14:13:14	0.378181
2022-09-13	14:13:15	0.18785
2022-09-13	14:13:15	0.451718
2022-09-13	14:13:15	0.224797
2022-09-13	14:13:15	0.715992
2022-09-13	14:13:16	0.602099
2022-09-13	14:13:16	1.97055
2022-09-13	14:13:16	1.94485
2022-09-13	14:13:16	5.22184
2022-09-13	14:13:17	5.9136
2022-09-13	14:13:17	8.75924
2022-09-13	14:13:17	3.0222
2022-09-13	14:13:18	2.79039
2022-09-13	14:13:18	2.22027
2022-09-13	14:13:18	0.884542
2022-09-13	14:13:18	1.15406
2022-09-13	14:13:19	1.01889
2022-09-13	14:13:19	1.19304
2022-09-13	14:13:19	0.817875
2022-09-13	14:13:19	1.60357
2022-09-13	14:13:20	1.72149
2022-09-13	14:13:20	1.39935
2022-09-13	14:13:20	1.43523
2022-09-13	14:13:20	1.32561
2022-09-13	14:13:21	2.08067
2022-09-13	14:13:21	1.60724
2022-09-13	14:13:21	2.39452
2022-09-13	14:13:21	1.81614
2022-09-13	14:13:22	2.10775
2022-09-13	14:13:22	1.13859
2022-09-13	14:13:22	1.03869
2022-09-13	14:13:23	1.34805
2022-09-13	14:13:23	0.899249
2022-09-13	14:13:23	1.33314
2022-09-13	14:13:23	1.94225
2022-09-13	14:13:24	2.19635
2022-09-13	14:13:24	1.15462
2022-09-13	14:13:24	0.781794
2022-09-13	14:13:24	0.369224
2022-09-13	14:13:25	0.295433
2022-09-13	14:13:25	-0.0790201
2022-09-13	14:13:25	-0.264414
2022-09-13	14:13:26	-0.270063
2022-09-13	14:13:26	1.01029
2022-09-13	14:13:26	2.82612
2022-09-13	14:13:26	2.78317
2022-09-13	14:13:27	2.02032
2022-09-13	14:13:27	3.20413
2022-09-13	14:13:27	2.20826
2022-09-13	14:13:27	3.84271
2022-09-13	14:13:28	2.4165
2022-09-13	14:13:28	2.84149
2022-09-13	14:13:28	0.663931
2022-09-13	14:13:28	0.761132
2022-09-13	14:13:29	0.754211
2022-09-13	14:13:29	0.629936
2022-09-13	14:13:29	0.728512
2022-09-13	14:13:29	0.428359
2022-09-13	14:13:30	1.54057
2022-09-13	14:13:30	1.3109
2022-09-13	14:13:30	4.63945
2022-09-13	14:13:31	4.27604
2022-09-13	14:13:31	10.552
2022-09-13	14:13:31	2.42414
2022-09-13	14:13:31	4.0077
2022-09-13	14:13:32	0.813601
2022-09-13	14:13:32	0.143168
2022-09-13	14:13:32	0.120827
2022-09-13	14:13:32	-0.446806
2022-09-13	14:13:33	-1.02284
2022-09-13	14:13:33	-0.935101
2022-09-13	14:13:33	-0.899783
2022-09-13	14:13:33	-0.650419
2022-09-13	14:13:34	-0.552811
2022-09-13	14:13:34	-0.384211
2022-09-13	14:13:34	-0.0220735
2022-09-13	14:13:35	-0.0383585
2022-09-13	14:13:35	0.178486
2022-09-13	14:13:35	0.0708017
2022-09-13	14:13:35	0.461132
2022-09-13	14:13:36	0.399606
2022-09-13	14:13:36	0.635789
2022-09-13	14:13:36	0.269224
2022-09-13	14:13:36	0.352888
2022-09-13	14:13:37	0.252379
2022-09-13	14:13:37	0.252074
2022-09-13	14:13:37	0.105102
2022-09-13	14:13:37	0.25925
2022-09-13	14:13:38	0.230751
2022-09-13	14:13:38	1.5192
2022-09-13	14:13:38	3.65864
2022-09-13	14:13:39	4.10011
2022-09-13	14:13:39	5.01777
2022-09-13	14:13:39	2.11192
2022-09-13	14:13:39	2.62576
2022-09-13	14:13:40	0.789428
2022-09-13	14:13:40	1.16444
2022-09-13	14:13:40	0.868868
2022-09-13	14:13:40	0.792125
2022-09-13	14:13:41	0.654516
2022-09-13	14:13:41	0.979249
2022-09-13	14:13:41	1.64673
2022-09-13	14:13:41	0.695025
2022-09-13	14:13:42	1.90383
2022-09-13	14:13:42	1.30846
2022-09-13	14:13:42	1.7879
2022-09-13	14:13:43	0.94444
2022-09-13	14:13:43	1.44449
2022-09-13	14:13:43	0.945305
2022-09-13	14:13:43	0.913295
2022-09-13	14:13:44	1.10205
2022-09-13	14:13:44	0.831209
2022-09-13	14:13:44	1.06785
2022-09-13	14:13:44	0.439148
2022-09-13	14:13:45	0.812481
2022-09-13	14:13:45	0.567188
2022-09-13	14:13:45	0.852736
2022-09-13	14:13:45	0.354618
2022-09-13	14:13:46	0.74958
2022-09-13	14:13:46	0.314567
2022-09-13	14:13:46	0.573346
2022-09-13	14:13:47	0.432125
2022-09-13	14:13:47	0.410344
2022-09-13	14:13:47	0.315331
2022-09-13	14:13:47	0.418588
2022-09-13	14:13:48	0.50159
2022-09-13	14:13:48	0.418842
2022-09-13	14:13:48	0.609682
2022-09-13	14:13:48	0.637316
2022-09-13	14:13:49	1.05732
2022-09-13	14:13:49	1.8619
2022-09-13	14:13:49	1.77279
2022-09-13	14:13:49	1.81202
2022-09-13	14:13:50	1.74469
2022-09-13	14:13:50	1.17996
2022-09-13	14:13:50	1.0391
2022-09-13	14:13:51	0.540369
2022-09-13	14:13:51	0.697112
2022-09-13	14:13:51	0.217214
2022-09-13	14:13:51	0.558486
2022-09-13	14:13:52	0.325916
2022-09-13	14:13:52	0.850852
2022-09-13	14:13:52	0.92729
2022-09-13	14:13:52	1.4962
2022-09-13	14:13:53	1.74144
2022-09-13	14:13:53	2.30775
2022-09-13	14:13:53	1.1137
2022-09-13	14:13:53	2.21345
2022-09-13	14:13:54	1.0909
2022-09-13	14:13:54	1.75345
2022-09-13	14:13:54	0.617519
2022-09-13	14:13:55	0.664491
2022-09-13	14:13:55	0.511514
2022-09-13	14:13:55	0.490293
2022-09-13	14:13:55	0.299606
2022-09-13	14:13:56	0.43874
2022-09-13	14:13:56	0.453906
2022-09-13	14:13:56	1.0278
2022-09-13	14:13:56	1.41543
2022-09-13	14:13:57	1.48184
2022-09-13	14:13:57	1.17258
2022-09-13	14:13:57	1.06698
2022-09-13	14:13:57	0.32444
2022-09-13	14:13:58	0.638283
2022-09-13	14:13:58	0.332176
2022-09-13	14:13:58	0.530802
2022-09-13	14:13:59	0.332074
2022-09-13	14:13:59	0.811209
2022-09-13	14:13:59	0.950038
2022-09-13	14:13:59	2.87212
2022-09-13	14:14:00	3.13019
2022-09-13	14:14:00	3.45116
2022-09-13	14:14:00	2.32983
2022-09-13	14:14:00	3.46184
2022-09-13	14:14:01	0.877163
2022-09-13	14:14:01	1.85172
2022-09-13	14:14:01	1.19497
2022-09-13	14:14:01	1.49375
2022-09-13	14:14:02	1.38933
2022-09-13	14:14:02	2.07365
2022-09-13	14:14:02	1.00429
2022-09-13	14:14:03	1.66225
2022-09-13	14:14:03	0.913651
2022-09-13	14:14:03	1.14301
2022-09-13	14:14:03	0.787544
2022-09-13	14:14:04	1.25503
2022-09-13	14:14:04	0.57243
2022-09-13	14:14:04	1.01691
2022-09-13	14:14:04	1.12378
2022-09-13	14:14:05	2.47034
2022-09-13	14:14:05	2.70098
2022-09-13	14:14:05	1.58581
2022-09-13	14:14:05	1.14251
2022-09-13	14:14:06	0.410242
2022-09-13	14:14:06	0.358181
2022-09-13	14:14:06	0.178893
2022-09-13	14:14:07	0.282863
2022-09-13	14:14:07	0.40612
2022-09-13	14:14:07	0.34897
2022-09-13	14:14:07	0.288766
2022-09-13	14:14:08	0.623524
2022-09-13	14:14:08	0.609122
2022-09-13	14:14:08	0.66215
2022-09-13	14:14:08	0.545254
2022-09-13	14:14:09	0.490496
2022-09-13	14:14:09	0.440674
2022-09-13	14:14:09	0.40159
2022-09-13	14:14:09	0.513652
2022-09-13	14:14:10	1.72546
2022-09-13	14:14:10	2.74088
2022-09-13	14:14:10	3.41818
2022-09-13	14:14:11	3.43706
2022-09-13	14:14:11	2.73284
2022-09-13	14:14:11	2.21594
2022-09-13	14:14:11	2.1135
2022-09-13	14:14:12	2.03625
2022-09-13	14:14:12	1.6648
2022-09-13	14:14:12	1.71803
2022-09-13	14:14:12	0.790344
2022-09-13	14:14:13	0.611718
2022-09-13	14:14:13	1.09533
2022-09-13	14:14:13	1.66113
2022-09-13	14:14:13	1.18805
2022-09-13	14:14:14	0.920674
2022-09-13	14:14:14	0.319504
2022-09-13	14:14:14	0.326476
2022-09-13	14:14:15	0.370649
2022-09-13	14:14:15	1.89533
2022-09-13	14:14:15	2.00688
2022-09-13	14:14:15	1.89075
2022-09-13	14:14:16	1.73884
2022-09-13	14:14:16	0.919504
2022-09-13	14:14:16	0.738079
2022-09-13	14:14:16	0.827544
2022-09-13	14:14:17	0.89813
2022-09-13	14:14:17	0.905865
2022-09-13	14:14:17	0.829428
2022-09-13	14:14:17	0.884033
2022-09-13	14:14:18	0.709987
2022-09-13	14:14:18	0.476909
2022-09-13	14:14:18	0.43701
2022-09-13	14:14:19	0.49813
2022-09-13	14:14:19	0.338741
2022-09-13	14:14:19	0.334364
2022-09-13	14:14:19	0.249784
2022-09-13	14:14:20	0.261132
2022-09-13	14:14:20	0.190649
2022-09-13	14:14:20	0.127036
2022-09-13	14:14:20	0.087392
2022-09-13	14:14:21	-0.0337784
2022-09-13	14:14:21	-0.134338
2022-09-13	14:14:21	-0.238155
2022-09-13	14:14:21	-0.263651
2022-09-13	14:14:22	-0.147926
2022-09-13	14:14:22	-0.0796817
2022-09-13	14:14:22	0.258791
2022-09-13	14:14:23	1.21212
2022-09-13	14:14:23	4.49416
2022-09-13	14:14:23	3.54413
2022-09-13	14:14:23	3.60917
2022-09-13	14:14:24	2.39131
2022-09-13	14:14:24	4.4739
2022-09-13	14:14:24	1.20851
2022-09-13	14:14:24	2.21584
2022-09-13	14:14:25	1.29029
2022-09-13	14:14:25	1.15599
2022-09-13	14:14:25	0.521743
2022-09-13	14:14:25	0.448817
2022-09-13	14:14:26	0.513652
2022-09-13	14:14:26	0.88785
2022-09-13	14:14:26	1.39508
2022-09-13	14:14:27	-0.0224298
2022-09-13	14:14:27	0.203779
2022-09-13	14:14:27	0.477875
2022-09-13	14:14:27	0.422812
2022-09-13	14:14:28	0.226069
2022-09-13	14:14:28	0.650394
2022-09-13	14:14:28	0.206018
2022-09-13	14:14:28	0.196705
2022-09-13	14:14:29	0.219809
2022-09-13	14:14:29	0.210242
2022-09-13	14:14:29	0.165255
2022-09-13	14:14:29	0.146222
2022-09-13	14:14:30	1.9563
2022-09-13	14:14:30	2.63457
2022-09-13	14:14:30	2.32235
2022-09-13	14:14:31	0.605255
2022-09-13	14:14:31	0.401336
2022-09-13	14:14:31	0.379199
2022-09-13	14:14:31	0.392379
2022-09-13	14:14:32	0.410598
2022-09-13	14:14:32	0.796654
2022-09-13	14:14:32	1.48902
2022-09-13	14:14:32	1.39813
2022-09-13	14:14:33	1.38271
2022-09-13	14:14:33	1.92363
2022-09-13	14:14:33	1.54744
2022-09-13	14:14:33	2.43655
2022-09-13	14:14:34	2.46368
2022-09-13	14:14:34	2.64281
2022-09-13	14:14:34	3.48724
2022-09-13	14:14:35	1.05681
2022-09-13	14:14:35	2.1934
2022-09-13	14:14:35	1.50765
2022-09-13	14:14:35	1.26994
2022-09-13	14:14:36	1.02006
2022-09-13	14:14:36	2.46963
2022-09-13	14:14:36	0.408868
2022-09-13	14:14:36	0.629885
2022-09-13	14:14:37	0.386069
2022-09-13	14:14:37	0.36729
2022-09-13	14:14:37	0.298181
2022-09-13	14:14:37	0.389529
2022-09-13	14:14:38	0.833142
2022-09-13	14:14:38	0.702506
2022-09-13	14:14:38	1.15966
2022-09-13	14:14:38	1.18897
2022-09-13	14:14:39	0.881234
2022-09-13	14:14:39	1.04653
2022-09-13	14:14:39	1.03309
2022-09-13	14:14:40	0.613804
2022-09-13	14:14:40	0.506018
2022-09-13	14:14:40	0.432328
2022-09-13	14:14:40	0.337926
2022-09-13	14:14:41	0.434822
2022-09-13	14:14:41	0.661845
2022-09-13	14:14:41	0.912481
2022-09-13	14:14:41	2.77538
2022-09-13	14:14:42	3.85365
2022-09-13	14:14:42	3.15645
2022-09-13	14:14:42	2.7623
2022-09-13	14:14:43	0.613804
2022-09-13	14:14:43	0.383931
2022-09-13	14:14:43	0.336043
2022-09-13	14:14:43	0.378842
2022-09-13	14:14:44	0.541692
2022-09-13	14:14:44	1.04332
2022-09-13	14:14:44	0.91131
2022-09-13	14:14:44	1.01701
2022-09-13	14:14:45	0.765254
2022-09-13	14:14:45	0.97243
2022-09-13	14:14:45	1.06388
2022-09-13	14:14:45	0.561539
2022-09-13	14:14:46	0.319199
2022-09-13	14:14:46	0.127036
2022-09-13	14:14:46	0.120878
2022-09-13	14:14:46	-0.106959
2022-09-13	14:14:47	-0.131692
2022-09-13	14:14:47	-0.215152
2022-09-13	14:14:47	-0.261921
2022-09-13	14:14:48	-0.260089
2022-09-13	14:14:48	-0.25846
2022-09-13	14:14:48	-0.245178
2022-09-13	14:14:48	-0.245992
2022-09-13	14:14:49	-0.245788
2022-09-13	14:14:49	-0.206501
2022-09-13	14:14:49	0.121896
2022-09-13	14:14:49	1.91548
2022-09-13	14:14:50	6.23782
2022-09-13	14:14:50	12.0565
2022-09-13	14:14:50	11.2326
2022-09-13	14:14:50	12.9448
2022-09-13	14:14:51	1.82134
2022-09-13	14:14:51	5.25355
2022-09-13	14:14:51	2.41808
2022-09-13	14:14:52	2.99146
2022-09-13	14:14:52	7.52469
2022-09-13	14:14:52	8.06301
2022-09-13	14:14:52	7.64439
2022-09-13	14:14:53	3.57635
2022-09-13	14:14:53	1.84469
2022-09-13	14:14:53	1.69258
2022-09-13	14:14:53	0.823168
2022-09-13	14:14:54	0.768104
2022-09-13	14:14:54	0.306832
2022-09-13	14:14:54	0.362303
2022-09-13	14:14:54	0.269835
2022-09-13	14:14:55	0.273957
2022-09-13	14:14:55	0.296756
2022-09-13	14:14:55	0.343168
2022-09-13	14:14:56	0.715178
2022-09-13	14:14:56	0.82327
2022-09-13	14:14:56	2.79533
2022-09-13	14:14:56	3.37543
2022-09-13	14:14:57	2.62032
2022-09-13	14:14:57	2.42027
2022-09-13	14:14:57	1.2965
2022-09-13	14:14:57	1.40887
2022-09-13	14:14:58	1.19075
2022-09-13	14:14:58	3.28831
2022-09-13	14:14:58	3.62932
2022-09-13	14:14:58	3.23991
2022-09-13	14:14:59	3.08586
2022-09-13	14:14:59	2.54266
2022-09-13	14:14:59	2.73864
2022-09-13	14:15:00	1.55843
2022-09-13	14:15:00	5.13314
2022-09-13	14:15:00	3.15233
2022-09-13	14:15:00	3.45986
2022-09-13	14:15:01	3.28057
2022-09-13	14:15:01	2.23304
2022-09-13	14:15:01	0.966679
2022-09-13	14:15:01	1.06978
2022-09-13	14:15:02	1.25508
2022-09-13	14:15:02	1.18892
2022-09-13	14:15:02	1.50907
2022-09-13	14:15:02	3.36454
2022-09-13	14:15:03	4.04291
2022-09-13	14:15:03	2.91014
2022-09-13	14:15:03	3.2735
2022-09-13	14:15:04	5.67324
2022-09-13	14:15:04	3.12373
2022-09-13	14:15:04	1.41508
2022-09-13	14:15:04	0.609326
2022-09-13	14:15:05	0.456552
2022-09-13	14:15:05	0.541285
2022-09-13	14:15:05	0.300471
2022-09-13	14:15:05	0.30383
2022-09-13	14:15:06	0.385356
2022-09-13	14:15:06	0.283575
2022-09-13	14:15:06	0.283066
2022-09-13	14:15:06	0.425967
2022-09-13	14:15:07	0.215687
2022-09-13	14:15:07	0.321031
2022-09-13	14:15:07	0.296756
2022-09-13	14:15:08	0.419402
2022-09-13	14:15:08	0.391361
2022-09-13	14:15:08	0.446374
2022-09-13	14:15:08	0.346832
2022-09-13	14:15:09	0.350293
2022-09-13	14:15:09	0.424084
2022-09-13	14:15:09	0.262659
2022-09-13	14:15:09	0.415127
2022-09-13	14:15:10	0.388715
2022-09-13	14:15:10	0.510801
2022-09-13	14:15:10	0.630242
2022-09-13	14:15:10	1.05253
2022-09-13	14:15:11	0.92215
2022-09-13	14:15:11	0.920063
2022-09-13	14:15:11	0.679097
2022-09-13	14:15:12	0.64556
2022-09-13	14:15:12	0.597112
2022-09-13	14:15:12	0.634822
2022-09-13	14:15:12	0.605305
2022-09-13	14:15:13	0.505203
2022-09-13	14:15:13	0.496501
2022-09-13	14:15:13	0.448919
2022-09-13	14:15:13	0.45528
2022-09-13	14:15:14	0.460216
2022-09-13	14:15:14	0.450598
2022-09-13	14:15:14	0.450751
2022-09-13	14:15:14	0.446374
2022-09-13	14:15:15	0.514517
2022-09-13	14:15:15	0.468359
2022-09-13	14:15:15	0.446272
2022-09-13	14:15:16	0.447748
2022-09-13	14:15:16	0.553041
2022-09-13	14:15:16	0.392634
2022-09-13	14:15:16	0.425916
2022-09-13	14:15:17	0.440929
2022-09-13	14:15:17	0.476247
2022-09-13	14:15:17	1.01518
2022-09-13	14:15:17	1.22958
2022-09-13	14:15:18	1.46592
2022-09-13	14:15:18	0.93589
2022-09-13	14:15:18	0.721641
2022-09-13	14:15:18	0.579606
2022-09-13	14:15:19	0.605712
2022-09-13	14:15:19	0.587086
2022-09-13	14:15:19	0.562557
2022-09-13	14:15:20	0.564796
2022-09-13	14:15:20	0.459198
2022-09-13	14:15:20	0.457367
2022-09-13	14:15:20	0.416756
2022-09-13	14:15:21	0.360725
2022-09-13	14:15:21	0.398995
2022-09-13	14:15:21	0.430191
2022-09-13	14:15:21	0.345662
2022-09-13	14:15:22	0.530547
2022-09-13	14:15:22	0.308104
2022-09-13	14:15:22	0.527188
2022-09-13	14:15:22	0.325967
2022-09-13	14:15:23	0.574873
2022-09-13	14:15:23	0.366629
2022-09-13	14:15:23	1.2679
2022-09-13	14:15:24	1.04388
2022-09-13	14:15:24	0.914211
2022-09-13	14:15:24	0.746119
2022-09-13	14:15:24	1.19828
2022-09-13	14:15:25	0.967036
2022-09-13	14:15:25	0.973193
2022-09-13	14:15:25	0.808002
2022-09-13	14:15:25	0.601692
2022-09-13	14:15:26	0.801641
2022-09-13	14:15:26	0.750751
2022-09-13	14:15:26	0.805814
2022-09-13	14:15:26	0.607188
2022-09-13	14:15:27	0.885356
2022-09-13	14:15:27	0.619249
2022-09-13	14:15:27	0.57243
2022-09-13	14:15:28	0.470802
2022-09-13	14:15:28	0.453041
2022-09-13	14:15:28	0.451209
2022-09-13	14:15:28	0.407545
2022-09-13	14:15:29	0.494567
2022-09-13	14:15:29	0.337723
2022-09-13	14:15:29	0.457977
2022-09-13	14:15:29	0.339046
