# Supplementary material for: Comparing efficacy in reducing pulling and welfare impacts of four types of leash walking equipment
Source: PeerJ journal article supplement (doi:10.7717/peerj.18131), 2024-10-24
Supplement: Shelter1_Tension_files.zip [file Sulley_prong_2022913162242 copy.xlsx]

## Sheet: Averaged Newtons
Date	Time	Averaged Newtons	Impulse	Total steps
2022-09-13	16:22:51	1.41839	1.41839	0		Impulse newtons	855.686
2022-09-13	16:22:52	4.99093	6.40932	0		total steps	3
2022-09-13	16:22:53	2.49135	8.90067	0
2022-09-13	16:22:54	1.41097	10.3116	0
2022-09-13	16:22:55	0.917879	11.2295	0
2022-09-13	16:22:56	21.2115	32.441	1
2022-09-13	16:22:57	4.64944	37.0905	1
2022-09-13	16:22:58	-0.451629	37.0905	1
2022-09-13	16:22:59	0.0239966	37.1145	1
2022-09-13	16:23:00	1.3043	38.4188	1
2022-09-13	16:23:01	2.82529	41.2441	1
2022-09-13	16:23:02	3.52527	44.7693	1
2022-09-13	16:23:03	2.19326	46.9626	1
2022-09-13	16:23:04	1.98268	48.9453	1
2022-09-13	16:23:05	1.91335	50.8586	1
2022-09-13	16:23:06	1.8935	52.7521	1
2022-09-13	16:23:07	1.93831	54.6904	1
2022-09-13	16:23:08	1.9434	56.6338	1
2022-09-13	16:23:09	1.70441	58.3382	1
2022-09-13	16:23:10	2.93489	61.2731	1
2022-09-13	16:23:11	12.4499	73.723	1
2022-09-13	16:23:12	3.56433	77.2874	1
2022-09-13	16:23:13	2.2825	79.5699	1
2022-09-13	16:23:14	2.62529	82.1952	1
2022-09-13	16:23:15	1.55387	83.749	1
2022-09-13	16:23:16	1.74906	85.4981	1
2022-09-13	16:23:17	1.81912	87.3172	1
2022-09-13	16:23:18	1.81752	89.1347	1
2022-09-13	16:23:19	1.76994	90.9047	1
2022-09-13	16:23:20	1.82421	92.7289	1
2022-09-13	16:23:21	2.09524	94.8241	1
2022-09-13	16:23:22	0.887056	95.7112	1
2022-09-13	16:23:23	1.56106	97.2722	1
2022-09-13	16:23:24	1.76298	99.0352	1
2022-09-13	16:23:25	1.80961	100.845	1
2022-09-13	16:23:26	1.94815	102.793	1
2022-09-13	16:23:27	3.47357	106.267	1
2022-09-13	16:23:28	4.22743	110.494	1
2022-09-13	16:23:29	7.61275	118.107	1
2022-09-13	16:23:30	7.35023	125.457	1
2022-09-13	16:23:31	4.96537	130.422	1
2022-09-13	16:23:32	2.50554	132.928	1
2022-09-13	16:23:33	2.3095	135.237	1
2022-09-13	16:23:34	5.39251	140.63	1
2022-09-13	16:23:35	7.316	147.946	1
2022-09-13	16:23:36	4.39941	152.345	1
2022-09-13	16:23:37	2.78143	155.127	1
2022-09-13	16:23:38	1.92054	157.047	1
2022-09-13	16:23:39	1.72916	158.776	1
2022-09-13	16:23:40	1.98884	160.765	1
2022-09-13	16:23:41	1.88777	162.653	1
2022-09-13	16:23:42	1.13356	163.787	1
2022-09-13	16:23:43	0.283927	164.07	1
2022-09-13	16:23:44	0.238145	164.309	1
2022-09-13	16:23:45	0.610242	164.919	1
2022-09-13	16:23:46	2.98697	167.906	1
2022-09-13	16:23:47	2.06472	169.971	1
2022-09-13	16:23:48	1.53746	171.508	1
2022-09-13	16:23:49	1.73367	173.242	1
2022-09-13	16:23:50	1.58041	174.822	1
2022-09-13	16:23:51	1.08981	175.912	1
2022-09-13	16:23:52	1.29264	177.205	1
2022-09-13	16:23:53	1.31924	178.524	1
2022-09-13	16:23:54	0.36163	178.885	1
2022-09-13	16:23:55	0.7438	179.629	1
2022-09-13	16:23:56	7.49718	187.126	1
2022-09-13	16:23:57	9.98151	197.108	1
2022-09-13	16:23:58	3.00033	200.108	1
2022-09-13	16:23:59	2.03242	202.141	1
2022-09-13	16:24:00	3.20804	205.349	1
2022-09-13	16:24:01	6.19691	211.546	1
2022-09-13	16:24:02	12.6574	224.203	1
2022-09-13	16:24:03	2.2636	226.467	1
2022-09-13	16:24:04	3.50398	229.971	1
2022-09-13	16:24:05	7.47506	237.446	1
2022-09-13	16:24:06	6.79924	244.245	1
2022-09-13	16:24:07	3.81086	248.056	1
2022-09-13	16:24:08	2.46864	250.524	1
2022-09-13	16:24:09	1.84532	252.37	1
2022-09-13	16:24:10	1.51635	253.886	1
2022-09-13	16:24:11	0.747027	254.633	1
2022-09-13	16:24:12	2.02774	256.661	1
2022-09-13	16:24:13	5.35584	262.017	1
2022-09-13	16:24:14	2.06043	264.077	1
2022-09-13	16:24:15	2.00786	266.085	1
2022-09-13	16:24:16	-0.478718	266.085	1
2022-09-13	16:24:17	-0.03452	266.085	1
2022-09-13	16:24:18	1.74136	267.826	1
2022-09-13	16:24:19	0.675606	268.502	1
2022-09-13	16:24:20	-0.925876	268.502	1
2022-09-13	16:24:21	0.237181	268.739	1
2022-09-13	16:24:22	8.52327	277.262	1
2022-09-13	16:24:23	6.22427	283.487	1
2022-09-13	16:24:24	5.33257	288.819	1
2022-09-13	16:24:25	8.05065	296.87	1
2022-09-13	16:24:26	11.4193	308.289	1
2022-09-13	16:24:27	8.79273	317.082	1
2022-09-13	16:24:28	1.77006	318.852	1
2022-09-13	16:24:29	1.43027	320.282	1
2022-09-13	16:24:30	0.16978	320.452	1
2022-09-13	16:24:31	-1.6786	320.452	1
2022-09-13	16:24:32	-1.25291	320.452	1
2022-09-13	16:24:33	-0.564211	320.452	1
2022-09-13	16:24:34	-1.16796	320.452	1
2022-09-13	16:24:35	-0.959473	320.452	1
2022-09-13	16:24:36	-0.717427	320.452	1
2022-09-13	16:24:37	6.86787	327.32	1
2022-09-13	16:24:38	2.37413	329.694	1
2022-09-13	16:24:39	3.07079	332.765	1
2022-09-13	16:24:40	2.69948	335.464	1
2022-09-13	16:24:41	2.52727	337.992	1
2022-09-13	16:24:42	2.0988	340.09	1
2022-09-13	16:24:43	1.72812	341.818	1
2022-09-13	16:24:44	1.93372	343.752	1
2022-09-13	16:24:45	4.68882	348.441	1
2022-09-13	16:24:46	4.67819	353.119	1
2022-09-13	16:24:47	1.50781	354.627	1
2022-09-13	16:24:48	1.67532	356.302	1
2022-09-13	16:24:49	1.71708	358.019	1
2022-09-13	16:24:50	1.69762	359.717	1
2022-09-13	16:24:51	1.70311	361.42	1
2022-09-13	16:24:52	1.75789	363.178	1
2022-09-13	16:24:53	0.535048	363.713	1
2022-09-13	16:24:54	-1.4996	363.713	1
2022-09-13	16:24:55	-2.80134	363.713	1
2022-09-13	16:24:56	1.70237	365.415	1
2022-09-13	16:24:57	3.00955	368.425	1
2022-09-13	16:24:58	13.5851	382.01	2
2022-09-13	16:24:59	8.87473	390.885	2
2022-09-13	16:25:00	2.92778	393.813	2
2022-09-13	16:25:01	2.43287	396.245	2
2022-09-13	16:25:02	1.98209	398.228	2
2022-09-13	16:25:03	2.16983	400.397	2
2022-09-13	16:25:04	2.53847	402.936	2
2022-09-13	16:25:05	3.23853	406.174	2
2022-09-13	16:25:06	3.05826	409.233	2
2022-09-13	16:25:07	2.65505	411.888	2
2022-09-13	16:25:08	1.23848	413.126	2
2022-09-13	16:25:09	-1.64363	413.126	2
2022-09-13	16:25:10	1.67573	414.802	2
2022-09-13	16:25:11	1.7232	416.525	2
2022-09-13	16:25:12	1.74006	418.265	2
2022-09-13	16:25:13	1.59184	419.857	2
2022-09-13	16:25:14	1.55809	421.415	2
2022-09-13	16:25:15	0.795753	422.211	2
2022-09-13	16:25:16	0.979113	423.19	2
2022-09-13	16:25:17	2.91391	426.104	2
2022-09-13	16:25:18	2.7227	428.827	2
2022-09-13	16:25:19	1.30605	430.133	2
2022-09-13	16:25:20	1.03978	431.172	2
2022-09-13	16:25:21	-1.15234	431.172	2
2022-09-13	16:25:22	-2.0188	431.172	2
2022-09-13	16:25:23	-2.01471	431.172	2
2022-09-13	16:25:24	-2.50033	431.172	2
2022-09-13	16:25:25	-2.37005	431.172	2
2022-09-13	16:25:26	-1.94543	431.172	2
2022-09-13	16:25:27	-1.29894	431.172	2
2022-09-13	16:25:28	-1.25059	431.172	2
2022-09-13	16:25:29	-0.857155	431.172	2
2022-09-13	16:25:30	0.0279577	431.2	2
2022-09-13	16:25:31	0.652761	431.853	2
2022-09-13	16:25:32	0.630275	432.483	2
2022-09-13	16:25:33	0.189983	432.673	2
2022-09-13	16:25:34	0.551612	433.225	2
2022-09-13	16:25:35	1.9258	435.151	2
2022-09-13	16:25:36	3.99133	439.142	2
2022-09-13	16:25:37	10.6652	449.807	2
2022-09-13	16:25:38	2.19852	452.006	2
2022-09-13	16:25:39	0.860346	452.866	2
2022-09-13	16:25:40	3.85098	456.717	2
2022-09-13	16:25:41	4.97152	461.689	2
2022-09-13	16:25:42	1.46281	463.151	2
2022-09-13	16:25:43	0.247406	463.399	2
2022-09-13	16:25:44	-1.80599	463.399	2
2022-09-13	16:25:45	-0.449175	463.399	2
2022-09-13	16:25:46	2.05964	465.459	2
2022-09-13	16:25:47	2.03068	467.489	2
2022-09-13	16:25:48	1.85568	469.345	2
2022-09-13	16:25:49	1.72371	471.069	2
2022-09-13	16:25:50	3.16258	474.231	2
2022-09-13	16:25:51	12.0834	486.315	2
2022-09-13	16:25:52	2.95149	489.266	2
2022-09-13	16:25:53	2.17583	491.442	2
2022-09-13	16:25:54	1.88517	493.327	2
2022-09-13	16:25:55	1.86672	495.194	2
2022-09-13	16:25:56	2.14068	497.334	2
2022-09-13	16:25:57	2.0112	499.346	2
2022-09-13	16:25:58	2.20842	501.554	2
2022-09-13	16:25:59	1.88154	503.436	2
2022-09-13	16:26:00	1.95183	505.387	2
2022-09-13	16:26:01	1.9155	507.303	2
2022-09-13	16:26:02	1.73514	509.038	2
2022-09-13	16:26:03	1.77781	510.816	2
2022-09-13	16:26:04	1.72335	512.539	2
2022-09-13	16:26:05	1.71097	514.25	2
2022-09-13	16:26:06	1.9859	516.236	2
2022-09-13	16:26:07	2.03763	518.274	2
2022-09-13	16:26:08	1.90233	520.176	2
2022-09-13	16:26:09	1.50463	521.681	2
2022-09-13	16:26:10	4.56228	526.243	2
2022-09-13	16:26:11	3.47831	529.721	2
2022-09-13	16:26:12	1.72093	531.442	2
2022-09-13	16:26:13	1.67747	533.12	2
2022-09-13	16:26:14	31.8756	564.995	3
2022-09-13	16:26:15	12.5343	577.53	3
2022-09-13	16:26:16	1.90316	579.433	3
2022-09-13	16:26:17	1.80124	581.234	3
2022-09-13	16:26:18	1.62925	582.863	3
2022-09-13	16:26:19	1.27668	584.14	3
2022-09-13	16:26:20	0.608394	584.748	3
2022-09-13	16:26:21	1.24685	585.995	3
2022-09-13	16:26:22	1.38647	587.382	3
2022-09-13	16:26:23	1.48477	588.866	3
2022-09-13	16:26:24	1.52505	590.391	3
2022-09-13	16:26:25	1.70243	592.094	3
2022-09-13	16:26:26	2.35364	594.447	3
2022-09-13	16:26:27	3.35658	597.804	3
2022-09-13	16:26:28	2.18884	599.993	3
2022-09-13	16:26:29	2.68364	602.677	3
2022-09-13	16:26:30	8.11728	610.794	3
2022-09-13	16:26:31	8.59748	619.391	3
2022-09-13	16:26:32	7.93188	627.323	3
2022-09-13	16:26:33	6.95532	634.278	3
2022-09-13	16:26:34	6.42188	640.7	3
2022-09-13	16:26:35	6.46437	647.165	3
2022-09-13	16:26:36	6.74841	653.913	3
2022-09-13	16:26:37	8.83555	662.749	3
2022-09-13	16:26:38	6.99217	669.741	3
2022-09-13	16:26:39	0.780926	670.522	3
2022-09-13	16:26:40	1.08902	671.611	3
2022-09-13	16:26:41	0.284078	671.895	3
2022-09-13	16:26:42	-2.56128	671.895	3
2022-09-13	16:26:43	0.450537	672.345	3
2022-09-13	16:26:44	2.01578	674.361	3
2022-09-13	16:26:45	1.69218	676.053	3
2022-09-13	16:26:46	0.924954	676.978	3
2022-09-13	16:26:47	10.3267	687.305	3
2022-09-13	16:26:48	3.62008	690.925	3
2022-09-13	16:26:49	0.0194495	690.945	3
2022-09-13	16:26:50	2.49586	693.44	3
2022-09-13	16:26:51	-0.24397	693.44	3
2022-09-13	16:26:52	-0.220881	693.44	3
2022-09-13	16:26:53	2.00179	695.442	3
2022-09-13	16:26:54	1.40854	696.851	3
2022-09-13	16:26:55	1.97775	698.829	3
2022-09-13	16:26:56	4.82754	703.656	3
2022-09-13	16:26:57	1.41533	705.071	3
2022-09-13	16:26:58	1.26417	706.336	3
2022-09-13	16:26:59	1.27198	707.608	3
2022-09-13	16:27:00	1.63429	709.242	3
2022-09-13	16:27:01	1.66411	710.906	3
2022-09-13	16:27:02	2.25636	713.162	3
2022-09-13	16:27:03	1.22626	714.389	3
2022-09-13	16:27:04	1.38483	715.773	3
2022-09-13	16:27:05	1.14799	716.921	3
2022-09-13	16:27:06	2.56841	719.49	3
2022-09-13	16:27:07	3.70083	723.191	3
2022-09-13	16:27:08	2.85313	726.044	3
2022-09-13	16:27:09	3.35381	729.398	3
2022-09-13	16:27:10	2.0995	731.497	3
2022-09-13	16:27:11	1.86462	733.362	3
2022-09-13	16:27:12	1.91907	735.281	3
2022-09-13	16:27:13	1.84023	737.121	3
2022-09-13	16:27:14	1.94451	739.065	3
2022-09-13	16:27:15	1.71069	740.776	3
2022-09-13	16:27:16	1.63248	742.409	3
2022-09-13	16:27:17	1.61601	744.025	3
2022-09-13	16:27:18	2.25502	746.28	3
2022-09-13	16:27:19	2.18098	748.461	3
2022-09-13	16:27:20	1.28602	749.747	3
2022-09-13	16:27:21	1.99343	751.74	3
2022-09-13	16:27:22	3.52617	755.266	3
2022-09-13	16:27:23	6.13512	761.401	3
2022-09-13	16:27:24	0.588623	761.99	3
2022-09-13	16:27:25	4.08697	766.077	3
2022-09-13	16:27:26	5.42701	771.504	3
2022-09-13	16:27:27	10.0422	781.546	3
2022-09-13	16:27:28	5.38668	786.933	3
2022-09-13	16:27:29	1.18896	788.122	3
2022-09-13	16:27:30	1.03397	789.156	3
2022-09-13	16:27:31	1.76372	790.919	3
2022-09-13	16:27:32	1.53378	792.453	3
2022-09-13	16:27:33	1.26287	793.716	3
2022-09-13	16:27:34	1.1827	794.899	3
2022-09-13	16:27:35	0.744367	795.643	3
2022-09-13	16:27:36	1.05738	796.701	3
2022-09-13	16:27:37	7.1428	803.843	3
2022-09-13	16:27:38	7.97007	811.813	3
2022-09-13	16:27:39	0.597281	812.411	3
2022-09-13	16:27:40	0.778322	813.189	3
2022-09-13	16:27:41	3.31464	816.504	3
2022-09-13	16:27:42	11.6911	828.195	3
2022-09-13	16:27:43	6.93087	835.126	3
2022-09-13	16:27:44	5.14526	840.271	3
2022-09-13	16:27:45	4.3156	844.586	3
2022-09-13	16:27:46	2.38318	846.97	3
2022-09-13	16:27:47	1.87879	848.848	3
2022-09-13	16:27:48	1.76768	850.616	3
2022-09-13	16:27:49	2.00311	852.619	3
2022-09-13	16:27:50	1.66366	854.283	3
2022-09-13	16:27:51	1.40288	855.686	3

## Sheet: Sulley_prong_2022913162242 (4)
Date	Time	Lbs	Newtons	Averaged Newtons	Total force x time	total steps > 13.345		**GoPro Fitting: 1612
2022-09-13	16:22:51	0.414822	1.84521	1.41839	1.84521	FALSE	0
2022-09-13	16:22:51	0.31126	1.38455	1.41839	1.38455	FALSE	0
2022-09-13	16:22:51	0.290293	1.29128	1.41839	3.13649	FALSE	0
2022-09-13	16:22:51	0.259097	1.15252	1.41839	2.53706	FALSE	0
2022-09-13	16:22:52	0.485611	2.16009	4.99093	5.29659	FALSE	0
2022-09-13	16:22:52	0.906476	4.03219	4.99093	6.56925	FALSE	0
2022-09-13	16:22:52	1.42541	6.34051	4.99093	11.6371	FALSE	0
2022-09-13	16:22:52	1.67055	7.43094	4.99093	14.0002	FALSE	0
2022-09-13	16:22:53	0.478995	2.13067	2.49135	13.7678	FALSE	0
2022-09-13	16:22:53	0.720165	3.20344	2.49135	17.2036	FALSE	0
2022-09-13	16:22:53	0.481081	2.13994	2.49135	15.9077	FALSE	0
2022-09-13	16:22:54	0.339097	1.50837	1.41097	18.712	FALSE	0
2022-09-13	16:22:54	0.320929	1.42756	1.41097	17.3353	FALSE	0
2022-09-13	16:22:54	0.452023	2.01069	1.41097	20.7227	FALSE	0
2022-09-13	16:22:54	0.156756	0.697282	1.41097	18.0325	FALSE	0
2022-09-13	16:22:55	0.215687	0.959419	0.917879	21.6821	FALSE	0
2022-09-13	16:22:55	0.157519	0.700676	0.917879	18.7332	FALSE	0
2022-09-13	16:22:55	0.230496	1.02529	0.917879	22.7074	FALSE	0
2022-09-13	16:22:55	0.221692	0.98613	0.917879	19.7194	FALSE	0
2022-09-13	16:22:56	2.52709	11.241	21.2115	33.9484	FALSE	0
2022-09-13	16:22:56	6.50866	28.9518	21.2115	48.6712	1	1
2022-09-13	16:22:56	8.68576	38.636	21.2115	72.5844	1	2
2022-09-13	16:22:56	1.35274	6.01726	21.2115	54.6884	FALSE	2
2022-09-13	16:22:57	1.92078	8.54401	4.64944	81.1284	FALSE	2
2022-09-13	16:22:57	1.08408	4.8222	4.64944	59.5106	FALSE	2
2022-09-13	16:22:57	0.818486	3.64079	4.64944	84.7692	FALSE	2
2022-09-13	16:22:57	0.357621	1.59077	4.64944	61.1014	FALSE	2
2022-09-13	16:22:58	0.226934	1.00945	-0.451629	85.7786	FALSE	2
2022-09-13	16:22:58	-0.025127	-0.11177	-0.451629	61.1014	FALSE	2
2022-09-13	16:22:58	-0.506399	-2.25256	-0.451629	85.7786	FALSE	2
2022-09-13	16:22:59	-0.26472	-1.17753	0.0239966	61.1014	FALSE	2
2022-09-13	16:22:59	0.0285117	0.126826	0.0239966	85.9055	FALSE	2
2022-09-13	16:22:59	0.020471	0.0910591	0.0239966	61.1925	FALSE	2
2022-09-13	16:22:59	0.237316	1.05563	0.0239966	86.9611	FALSE	2
2022-09-13	16:23:00	0.247952	1.10294	1.3043	62.2954	FALSE	2
2022-09-13	16:23:00	0.369173	1.64216	1.3043	88.6033	FALSE	2
2022-09-13	16:23:00	0.251616	1.11924	1.3043	63.4146	FALSE	2
2022-09-13	16:23:00	0.304135	1.35285	1.3043	89.9561	FALSE	2
2022-09-13	16:23:01	0.290903	1.29399	2.82529	64.7086	FALSE	2
2022-09-13	16:23:01	0.65014	2.89195	2.82529	92.8481	FALSE	2
2022-09-13	16:23:01	0.831565	3.69897	2.82529	68.4076	FALSE	2
2022-09-13	16:23:01	0.768003	3.41623	2.82529	96.2643	FALSE	2
2022-09-13	16:23:02	0.993397	4.41883	3.52527	72.8264	FALSE	2
2022-09-13	16:23:02	0.883219	3.92873	3.52527	100.193	FALSE	2
2022-09-13	16:23:02	0.500929	2.22823	3.52527	75.0547	FALSE	2
2022-09-13	16:23:03	0.559148	2.4872	2.19326	102.68	FALSE	2
2022-09-13	16:23:03	0.483321	2.14991	2.19326	77.2046	FALSE	2
2022-09-13	16:23:03	0.500369	2.22574	2.19326	104.906	FALSE	2
2022-09-13	16:23:03	0.429428	1.91018	2.19326	79.1148	FALSE	2
2022-09-13	16:23:04	0.431514	1.91946	1.98268	106.825	FALSE	2
2022-09-13	16:23:04	0.462252	2.05619	1.98268	81.1709	FALSE	2
2022-09-13	16:23:04	0.452939	2.01476	1.98268	108.84	FALSE	2
2022-09-13	16:23:04	0.436196	1.94029	1.98268	83.1112	FALSE	2
2022-09-13	16:23:05	0.427596	1.90203	1.91335	110.742	FALSE	2
2022-09-13	16:23:05	0.413143	1.83774	1.91335	84.949	FALSE	2
2022-09-13	16:23:05	0.448817	1.99643	1.91335	112.739	FALSE	2
2022-09-13	16:23:05	0.431005	1.9172	1.91335	86.8662	FALSE	2
2022-09-13	16:23:06	0.443524	1.97288	1.8935	114.712	FALSE	2
2022-09-13	16:23:06	0.411921	1.83231	1.8935	88.6985	FALSE	2
2022-09-13	16:23:06	0.42159	1.87532	1.8935	116.587	FALSE	2
2022-09-13	16:23:07	0.517264	2.30089	1.93831	90.9994	FALSE	2
2022-09-13	16:23:07	0.394211	1.75353	1.93831	118.34	FALSE	2
2022-09-13	16:23:07	0.456094	2.0288	1.93831	93.0282	FALSE	2
2022-09-13	16:23:07	0.375433	1.67	1.93831	120.01	FALSE	2
2022-09-13	16:23:08	0.396756	1.76485	1.9434	94.793	FALSE	2
2022-09-13	16:23:08	0.508461	2.26174	1.9434	122.272	FALSE	2
2022-09-13	16:23:08	0.362659	1.61318	1.9434	96.4062	FALSE	2
2022-09-13	16:23:08	0.479707	2.13383	1.9434	124.406	FALSE	2
2022-09-13	16:23:09	0.290089	1.29037	1.70441	97.6966	FALSE	2
2022-09-13	16:23:09	0.57416	2.55398	1.70441	126.96	FALSE	2
2022-09-13	16:23:09	0.197621	0.879058	1.70441	98.5756	FALSE	2
2022-09-13	16:23:09	0.470802	2.09422	1.70441	129.054	FALSE	2
2022-09-13	16:23:10	0.256145	1.13938	2.93489	99.715	FALSE	2
2022-09-13	16:23:10	0.768257	3.41736	2.93489	132.472	FALSE	2
2022-09-13	16:23:10	0.954975	4.24792	2.93489	103.963	FALSE	2
2022-09-13	16:23:11	2.4338	10.826	12.4499	143.298	FALSE	2
2022-09-13	16:23:11	3.39696	15.1104	12.4499	119.073	1	3
2022-09-13	16:23:11	3.54362	15.7627	12.4499	159.06	1	4
2022-09-13	16:23:11	1.82108	8.10053	12.4499	127.174	FALSE	4
2022-09-13	16:23:12	0.801743	3.56631	3.56433	162.627	FALSE	4
2022-09-13	16:23:12	1.0964	4.87701	3.56433	132.051	FALSE	4
2022-09-13	16:23:12	0.503422	2.23932	3.56433	164.866	FALSE	4
2022-09-13	16:23:12	0.803626	3.57469	3.56433	135.626	FALSE	4
2022-09-13	16:23:13	0.427697	1.90248	2.2825	166.768	FALSE	4
2022-09-13	16:23:13	0.544287	2.4211	2.2825	138.047	FALSE	4
2022-09-13	16:23:13	0.663371	2.95081	2.2825	169.719	FALSE	4
2022-09-13	16:23:13	0.417163	1.85562	2.2825	139.902	FALSE	4
2022-09-13	16:23:14	0.810903	3.60706	2.62529	173.326	FALSE	4
2022-09-13	16:23:14	0.307748	1.36892	2.62529	141.271	FALSE	4
2022-09-13	16:23:14	0.651921	2.89987	2.62529	176.226	FALSE	4
2022-09-13	16:23:15	0.289682	1.28856	1.55387	142.56	FALSE	4
2022-09-13	16:23:15	0.430547	1.91516	1.55387	178.141	FALSE	4
2022-09-13	16:23:15	0.36042	1.60322	1.55387	144.163	FALSE	4
2022-09-13	16:23:15	0.316654	1.40854	1.55387	179.55	FALSE	4
2022-09-13	16:23:16	0.586527	2.60899	1.74906	146.772	FALSE	4
2022-09-13	16:23:16	0.248512	1.10543	1.74906	180.655	FALSE	4
2022-09-13	16:23:16	0.513804	2.2855	1.74906	149.057	FALSE	4
2022-09-13	16:23:16	0.223982	0.996317	1.74906	181.652	FALSE	4
2022-09-13	16:23:17	0.576705	2.5653	1.81912	151.623	FALSE	4
2022-09-13	16:23:17	0.206527	0.918673	1.81912	182.57	FALSE	4
2022-09-13	16:23:17	0.564287	2.51006	1.81912	154.133	FALSE	4
2022-09-13	16:23:17	0.288308	1.28245	1.81912	183.853	FALSE	4
2022-09-13	16:23:18	0.457417	2.03468	1.81752	156.167	FALSE	4
2022-09-13	16:23:18	0.335229	1.49117	1.81752	185.344	FALSE	4
2022-09-13	16:23:18	0.433143	1.92671	1.81752	158.094	FALSE	4
2022-09-13	16:23:19	0.506832	2.25449	1.76994	187.598	FALSE	4
2022-09-13	16:23:19	0.310751	1.38228	1.76994	159.476	FALSE	4
2022-09-13	16:23:19	0.477621	2.12455	1.76994	189.723	FALSE	4
2022-09-13	16:23:19	0.2964	1.31845	1.76994	160.795	FALSE	4
2022-09-13	16:23:20	0.56673	2.52093	1.82421	192.244	FALSE	4
2022-09-13	16:23:20	0.211005	0.938592	1.82421	161.734	FALSE	4
2022-09-13	16:23:20	0.568002	2.52659	1.82421	194.77	FALSE	4
2022-09-13	16:23:20	0.294669	1.31075	1.82421	163.044	FALSE	4
2022-09-13	16:23:21	0.479402	2.13248	2.09524	196.903	FALSE	4
2022-09-13	16:23:21	0.326476	1.45223	2.09524	164.496	FALSE	4
2022-09-13	16:23:21	0.495687	2.20491	2.09524	199.108	FALSE	4
2022-09-13	16:23:21	0.582557	2.59133	2.09524	167.088	FALSE	4
2022-09-13	16:23:22	0.202201	0.89943	0.887056	200.007	FALSE	4
2022-09-13	16:23:22	0.0844404	0.375608	0.887056	167.463	FALSE	4
2022-09-13	16:23:22	0.311616	1.38613	0.887056	201.393	FALSE	4
2022-09-13	16:23:23	0.435026	1.93508	1.56106	169.399	FALSE	4
2022-09-13	16:23:23	0.233957	1.04069	1.56106	202.434	FALSE	4
2022-09-13	16:23:23	0.504338	2.2434	1.56106	171.642	FALSE	4
2022-09-13	16:23:23	0.230446	1.02507	1.56106	203.459	FALSE	4
2022-09-13	16:23:24	0.416145	1.8511	1.76298	173.493	FALSE	4
2022-09-13	16:23:24	0.281082	1.25031	1.76298	204.709	FALSE	4
2022-09-13	16:23:24	0.472379	2.10124	1.76298	175.594	FALSE	4
2022-09-13	16:23:24	0.415738	1.84929	1.76298	206.559	FALSE	4
2022-09-13	16:23:25	0.363321	1.61612	1.80961	177.21	FALSE	4
2022-09-13	16:23:25	0.456298	2.0297	1.80961	208.588	FALSE	4
2022-09-13	16:23:25	0.23757	1.05676	1.80961	178.267	FALSE	4
2022-09-13	16:23:25	0.570089	2.53587	1.80961	211.124	FALSE	4
2022-09-13	16:23:26	0.160725	0.714937	1.94815	178.982	FALSE	4
2022-09-13	16:23:26	0.508715	2.26287	1.94815	213.387	FALSE	4
2022-09-13	16:23:26	0.307188	1.36643	1.94815	180.348	FALSE	4
2022-09-13	16:23:26	0.775229	3.44837	1.94815	216.836	FALSE	4
2022-09-13	16:23:27	1.13319	5.04066	3.47357	185.389	FALSE	4
2022-09-13	16:23:27	0.622863	2.77062	3.47357	219.606	FALSE	4
2022-09-13	16:23:27	0.586628	2.60944	3.47357	187.999	FALSE	4
2022-09-13	16:23:28	0.252735	1.12422	4.22743	220.73	FALSE	4
2022-09-13	16:23:28	0.324186	1.44204	4.22743	189.441	FALSE	4
2022-09-13	16:23:28	1.31533	5.85085	4.22743	226.581	FALSE	4
2022-09-13	16:23:28	1.90922	8.49259	4.22743	197.933	FALSE	4
2022-09-13	16:23:29	1.03899	4.62164	7.61275	231.203	FALSE	4
2022-09-13	16:23:29	1.72683	7.68129	7.61275	205.615	FALSE	4
2022-09-13	16:23:29	2.30123	10.2363	7.61275	241.439	FALSE	4
2022-09-13	16:23:29	1.77864	7.91175	7.61275	213.526	FALSE	4
2022-09-13	16:23:30	3.04698	13.5536	7.35023	254.993	1	5
2022-09-13	16:23:30	1.23045	5.47329	7.35023	219	FALSE	5
2022-09-13	16:23:30	0.795891	3.54028	7.35023	258.533	FALSE	5
2022-09-13	16:23:30	1.5363	6.83377	7.35023	225.833	FALSE	5
2022-09-13	16:23:31	1.47019	6.5397	4.96537	265.073	FALSE	5
2022-09-13	16:23:31	1.30887	5.82212	4.96537	231.655	FALSE	5
2022-09-13	16:23:31	0.569733	2.53429	4.96537	267.607	FALSE	5
2022-09-13	16:23:32	0.721692	3.21023	2.50554	234.866	FALSE	5
2022-09-13	16:23:32	0.682608	3.03638	2.50554	270.643	FALSE	5
2022-09-13	16:23:32	0.411463	1.83027	2.50554	236.696	FALSE	5
2022-09-13	16:23:32	0.437316	1.94527	2.50554	272.589	FALSE	5
2022-09-13	16:23:33	0.406018	1.80605	2.3095	238.502	FALSE	5
2022-09-13	16:23:33	0.592837	2.63706	2.3095	275.226	FALSE	5
2022-09-13	16:23:33	0.538282	2.39439	2.3095	240.896	FALSE	5
2022-09-13	16:23:33	0.539656	2.4005	2.3095	277.626	FALSE	5
2022-09-13	16:23:34	0.696043	3.09614	5.39251	243.992	FALSE	5
2022-09-13	16:23:34	0.788817	3.50882	5.39251	281.135	FALSE	5
2022-09-13	16:23:34	1.33844	5.95365	5.39251	249.946	FALSE	5
2022-09-13	16:23:34	2.02586	9.01143	5.39251	290.146	FALSE	5
2022-09-13	16:23:35	1.93329	8.59966	7.316	258.546	FALSE	5
2022-09-13	16:23:35	1.42261	6.32805	7.316	296.475	FALSE	5
2022-09-13	16:23:35	1.57823	7.02028	7.316	265.566	FALSE	5
2022-09-13	16:23:36	1.08627	4.83195	4.39941	301.306	FALSE	5
2022-09-13	16:23:36	0.970852	4.31854	4.39941	269.885	FALSE	5
2022-09-13	16:23:36	0.937621	4.17073	4.39941	305.477	FALSE	5
2022-09-13	16:23:36	0.961387	4.27644	4.39941	274.161	FALSE	5
2022-09-13	16:23:37	0.817723	3.6374	2.78143	309.115	FALSE	5
2022-09-13	16:23:37	0.653499	2.90689	2.78143	277.068	FALSE	5
2022-09-13	16:23:37	0.559351	2.48811	2.78143	311.603	FALSE	5
2022-09-13	16:23:37	0.470598	2.09331	2.78143	279.161	FALSE	5
2022-09-13	16:23:38	0.457519	2.03514	1.92054	313.638	FALSE	5
2022-09-13	16:23:38	0.44958	1.99982	1.92054	281.161	FALSE	5
2022-09-13	16:23:38	0.278079	1.23695	1.92054	314.875	FALSE	5
2022-09-13	16:23:38	0.541845	2.41023	1.92054	283.571	FALSE	5
2022-09-13	16:23:39	0.310649	1.38183	1.72916	316.257	FALSE	5
2022-09-13	16:23:39	0.605509	2.69343	1.72916	286.265	FALSE	5
2022-09-13	16:23:39	0.250038	1.11222	1.72916	317.369	FALSE	5
2022-09-13	16:23:40	0.543321	2.4168	1.98884	288.682	FALSE	5
2022-09-13	16:23:40	0.32729	1.45585	1.98884	318.825	FALSE	5
2022-09-13	16:23:40	0.563931	2.50848	1.98884	291.19	FALSE	5
2022-09-13	16:23:40	0.353906	1.57424	1.98884	320.399	FALSE	5
2022-09-13	16:23:41	0.494771	2.20084	1.88777	293.391	FALSE	5
2022-09-13	16:23:41	0.662812	2.94832	1.88777	323.347	FALSE	5
2022-09-13	16:23:41	0.450751	2.00503	1.88777	295.396	FALSE	5
2022-09-13	16:23:41	0.0892241	0.396887	1.88777	323.744	FALSE	5
2022-09-13	16:23:42	0.0631173	0.280758	1.13356	295.677	FALSE	5
2022-09-13	16:23:42	0.135433	0.602433	1.13356	324.347	FALSE	5
2022-09-13	16:23:42	0.709885	3.15771	1.13356	298.834	FALSE	5
2022-09-13	16:23:42	0.110904	0.493323	1.13356	324.84	FALSE	5
2022-09-13	16:23:43	0.0260689	0.11596	0.283927	298.95	FALSE	5
2022-09-13	16:23:43	0.193753	0.861852	0.283927	325.702	FALSE	5
2022-09-13	16:23:43	-0.0283331	-0.126031	0.283927	298.95	FALSE	5
2022-09-13	16:23:44	0.249886	1.11154	0.238145	326.813	FALSE	5
2022-09-13	16:23:44	0.0889697	0.395755	0.238145	299.346	FALSE	5
2022-09-13	16:23:44	0.0573666	0.255178	0.238145	327.068	FALSE	5
2022-09-13	16:23:44	-0.182073	-0.809897	0.238145	299.346	FALSE	5
2022-09-13	16:23:45	-0.240038	-1.06774	0.610242	327.068	FALSE	5
2022-09-13	16:23:45	0.146272	0.650647	0.610242	299.997	FALSE	5
2022-09-13	16:23:45	0.160471	0.713807	0.610242	327.782	FALSE	5
2022-09-13	16:23:45	0.482049	2.14425	0.610242	302.141	FALSE	5
2022-09-13	16:23:46	0.646679	2.87656	2.98697	330.659	FALSE	5
2022-09-13	16:23:46	0.869631	3.86829	2.98697	306.009	FALSE	5
2022-09-13	16:23:46	0.789631	3.51244	2.98697	334.171	FALSE	5
2022-09-13	16:23:46	0.380064	1.6906	2.98697	307.7	FALSE	5
2022-09-13	16:23:47	0.54383	2.41906	2.06472	336.59	FALSE	5
2022-09-13	16:23:47	0.287799	1.28019	2.06472	308.98	FALSE	5
2022-09-13	16:23:47	0.560878	2.4949	2.06472	339.085	FALSE	5
2022-09-13	16:23:48	0.196552	0.874303	1.53746	309.854	FALSE	5
2022-09-13	16:23:48	0.491361	2.18567	1.53746	341.271	FALSE	5
2022-09-13	16:23:48	0.21299	0.947422	1.53746	310.802	FALSE	5
2022-09-13	16:23:48	0.481641	2.14244	1.53746	343.413	FALSE	5
2022-09-13	16:23:49	0.375484	1.67023	1.73367	312.472	FALSE	5
2022-09-13	16:23:49	0.406832	1.80967	1.73367	345.223	FALSE	5
2022-09-13	16:23:49	0.360725	1.60458	1.73367	314.077	FALSE	5
2022-09-13	16:23:49	0.415942	1.85019	1.73367	347.073	FALSE	5
2022-09-13	16:23:50	0.548868	2.44147	1.58041	316.518	FALSE	5
2022-09-13	16:23:50	0.320573	1.42597	1.58041	348.499	FALSE	5
2022-09-13	16:23:50	0.364949	1.62337	1.58041	318.141	FALSE	5
2022-09-13	16:23:50	0.186781	0.830839	1.58041	349.33	FALSE	5
2022-09-13	16:23:51	0.312379	1.38952	1.08981	319.531	FALSE	5
2022-09-13	16:23:51	0.117621	0.523202	1.08981	349.853	FALSE	5
2022-09-13	16:23:51	0.305	1.3567	1.08981	320.888	FALSE	5
2022-09-13	16:23:52	0.175992	0.782848	1.29264	350.636	FALSE	5
2022-09-13	16:23:52	-0.011641	-0.0517815	1.29264	320.888	FALSE	5
2022-09-13	16:23:52	0.247596	1.10136	1.29264	351.737	FALSE	5
2022-09-13	16:23:52	0.750445	3.33813	1.29264	324.226	FALSE	5
2022-09-13	16:23:53	0.195738	0.870682	1.31924	352.608	FALSE	5
2022-09-13	16:23:53	0.505611	2.24906	1.31924	326.475	FALSE	5
2022-09-13	16:23:53	0.345356	1.53621	1.31924	354.144	FALSE	5
2022-09-13	16:23:53	0.139606	0.620995	1.31924	327.096	FALSE	5
2022-09-13	16:23:54	0.237214	1.05518	0.36163	355.2	FALSE	5
2022-09-13	16:23:54	-0.00965623	-0.0429528	0.36163	327.096	FALSE	5
2022-09-13	16:23:54	0.086934	0.3867	0.36163	355.586	FALSE	5
2022-09-13	16:23:54	0.0107	0.0475957	0.36163	327.143	FALSE	5
2022-09-13	16:23:55	0.162099	0.721049	0.7438	356.307	FALSE	5
2022-09-13	16:23:55	0.0348221	0.154896	0.7438	327.298	FALSE	5
2022-09-13	16:23:55	0.236959	1.05404	0.7438	357.361	FALSE	5
2022-09-13	16:23:55	0.234975	1.04522	0.7438	328.344	FALSE	5
2022-09-13	16:23:56	0.353651	1.57311	7.49718	358.934	FALSE	5
2022-09-13	16:23:56	1.28215	5.70326	7.49718	334.047	FALSE	5
2022-09-13	16:23:56	3.42052	15.2152	7.49718	374.15	1	6
2022-09-13	16:23:57	4.8506	21.5764	9.98151	355.623	1	7
2022-09-13	16:23:57	2.18296	9.71024	9.98151	383.86	FALSE	7
2022-09-13	16:23:57	1.38429	6.1576	9.98151	361.781	FALSE	7
2022-09-13	16:23:57	0.557926	2.48177	9.98151	386.342	FALSE	7
2022-09-13	16:23:58	0.987392	4.39212	3.00033	366.173	FALSE	7
2022-09-13	16:23:58	0.723524	3.21838	3.00033	389.56	FALSE	7
2022-09-13	16:23:58	0.26098	1.16089	3.00033	367.334	FALSE	7
2022-09-13	16:23:58	0.72612	3.22993	3.00033	392.79	FALSE	7
2022-09-13	16:23:59	0.231565	1.03005	2.03242	368.364	FALSE	7
2022-09-13	16:23:59	0.608766	2.70791	2.03242	395.498	FALSE	7
2022-09-13	16:23:59	0.363117	1.61522	2.03242	369.979	FALSE	7
2022-09-13	16:23:59	0.624186	2.7765	2.03242	398.274	FALSE	7
2022-09-13	16:24:00	0.518384	2.30588	3.20804	372.285	FALSE	7
2022-09-13	16:24:00	0.621692	2.76541	3.20804	401.04	FALSE	7
2022-09-13	16:24:00	1.02352	4.55282	3.20804	376.838	FALSE	7
2022-09-13	16:24:01	0.702659	3.12557	6.19691	404.165	FALSE	7
2022-09-13	16:24:01	1.47431	6.55803	6.19691	383.396	FALSE	7
2022-09-13	16:24:01	1.02927	4.5784	6.19691	408.744	FALSE	7
2022-09-13	16:24:01	2.36627	10.5256	6.19691	393.921	FALSE	7
2022-09-13	16:24:02	2.2335	9.93505	12.6574	418.679	FALSE	7
2022-09-13	16:24:02	5.26652	23.4265	12.6574	417.348	1	8
2022-09-13	16:24:02	1.47513	6.56167	12.6574	425.24	FALSE	8
2022-09-13	16:24:02	2.40688	10.7063	12.6574	428.054	FALSE	8
2022-09-13	16:24:03	0.937265	4.16914	2.2636	429.41	FALSE	8
2022-09-13	16:24:03	0.293753	1.30667	2.2636	429.361	FALSE	8
2022-09-13	16:24:03	0.60271	2.68097	2.2636	432.091	FALSE	8
2022-09-13	16:24:03	0.201794	0.89762	2.2636	430.259	FALSE	8
2022-09-13	16:24:04	0.518995	2.30859	3.50398	434.399	FALSE	8
2022-09-13	16:24:04	0.510445	2.27056	3.50398	432.529	FALSE	8
2022-09-13	16:24:04	1.33375	5.93279	3.50398	440.332	FALSE	8
2022-09-13	16:24:05	1.21721	5.41439	7.47506	437.944	FALSE	8
2022-09-13	16:24:05	2.28006	10.1422	7.47506	450.474	FALSE	8
2022-09-13	16:24:05	1.63833	7.28762	7.47506	445.231	FALSE	8
2022-09-13	16:24:05	1.58627	7.05605	7.47506	457.53	FALSE	8
2022-09-13	16:24:06	1.48393	6.60082	6.79924	451.832	FALSE	8
2022-09-13	16:24:06	1.77945	7.91535	6.79924	465.445	FALSE	8
2022-09-13	16:24:06	1.62022	7.20706	6.79924	459.039	FALSE	8
2022-09-13	16:24:06	1.23055	5.47373	6.79924	470.919	FALSE	8
2022-09-13	16:24:07	1.08704	4.83537	3.81086	463.874	FALSE	8
2022-09-13	16:24:07	1.12821	5.0185	3.81086	475.938	FALSE	8
2022-09-13	16:24:07	0.70841	3.15115	3.81086	467.026	FALSE	8
2022-09-13	16:24:07	0.503219	2.23842	3.81086	478.176	FALSE	8
2022-09-13	16:24:08	0.491972	2.18839	2.46864	469.214	FALSE	8
2022-09-13	16:24:08	0.62673	2.78782	2.46864	480.964	FALSE	8
2022-09-13	16:24:08	0.546221	2.4297	2.46864	471.644	FALSE	8
2022-09-13	16:24:09	0.489987	2.17956	1.84532	483.143	FALSE	8
2022-09-13	16:24:09	0.366222	1.62903	1.84532	473.273	FALSE	8
2022-09-13	16:24:09	0.408919	1.81895	1.84532	484.962	FALSE	8
2022-09-13	16:24:09	0.394262	1.75376	1.84532	475.026	FALSE	8
2022-09-13	16:24:10	0.371616	1.65302	1.51635	486.615	FALSE	8
2022-09-13	16:24:10	0.407392	1.81216	1.51635	476.839	FALSE	8
2022-09-13	16:24:10	0.339758	1.51131	1.51635	488.127	FALSE	8
2022-09-13	16:24:10	0.244797	1.08891	1.51635	477.928	FALSE	8
2022-09-13	16:24:11	0.117875	0.524332	0.747027	488.651	FALSE	8
2022-09-13	16:24:11	-0.0254323	-0.113128	0.747027	477.928	FALSE	8
2022-09-13	16:24:11	0.305662	1.35965	0.747027	490.011	FALSE	8
2022-09-13	16:24:11	0.273652	1.21726	0.747027	479.145	FALSE	8
2022-09-13	16:24:12	0.352481	1.56791	2.02774	491.579	FALSE	8
2022-09-13	16:24:12	0.331769	1.47577	2.02774	480.621	FALSE	8
2022-09-13	16:24:12	0.683321	3.03955	2.02774	494.618	FALSE	8
2022-09-13	16:24:13	2.28307	10.1556	5.35584	490.776	FALSE	8
2022-09-13	16:24:13	1.402	6.23638	5.35584	500.855	FALSE	8
2022-09-13	16:24:13	0.854313	3.80016	5.35584	494.576	FALSE	8
2022-09-13	16:24:13	0.276807	1.23129	5.35584	502.086	FALSE	8
2022-09-13	16:24:14	0.469275	2.08743	2.06043	496.664	FALSE	8
2022-09-13	16:24:14	0.296349	1.31822	2.06043	503.404	FALSE	8
2022-09-13	16:24:14	0.517977	2.30407	2.06043	498.968	FALSE	8
2022-09-13	16:24:14	0.569224	2.53202	2.06043	505.936	FALSE	8
2022-09-13	16:24:15	0.680674	3.02777	2.00786	501.996	FALSE	8
2022-09-13	16:24:15	0.439758	1.95613	2.00786	507.892	FALSE	8
2022-09-13	16:24:15	0.132481	0.589302	2.00786	502.585	FALSE	8
2022-09-13	16:24:15	0.552634	2.45823	2.00786	510.35	FALSE	8
2022-09-13	16:24:16	0.299402	1.3318	-0.478718	503.917	FALSE	8
2022-09-13	16:24:16	-0.277493	-1.23434	-0.478718	510.35	FALSE	8
2022-09-13	16:24:16	-0.344771	-1.53361	-0.478718	503.917	FALSE	8
2022-09-13	16:24:17	-0.173778	-0.772999	-0.03452	510.35	FALSE	8
2022-09-13	16:24:17	-0.0455341	-0.202545	-0.03452	503.917	FALSE	8
2022-09-13	16:24:17	0.0421503	0.187493	-0.03452	510.538	FALSE	8
2022-09-13	16:24:17	0.14612	0.649971	-0.03452	504.567	FALSE	8
2022-09-13	16:24:18	0.647392	2.87973	1.74136	513.418	FALSE	8
2022-09-13	16:24:18	0.366934	1.6322	1.74136	506.199	FALSE	8
2022-09-13	16:24:18	0.333397	1.48302	1.74136	514.901	FALSE	8
2022-09-13	16:24:18	0.218181	0.970513	1.74136	507.169	FALSE	8
2022-09-13	16:24:19	0.319249	1.42008	0.675606	516.321	FALSE	8
2022-09-13	16:24:19	0.0508018	0.225977	0.675606	507.395	FALSE	8
2022-09-13	16:24:19	0.169122	0.752288	0.675606	517.073	FALSE	8
2022-09-13	16:24:19	0.068359	0.304075	0.675606	507.699	FALSE	8
2022-09-13	16:24:20	0.0225066	0.100114	-0.925876	517.173	FALSE	8
2022-09-13	16:24:20	-0.284414	-1.26513	-0.925876	507.699	FALSE	8
2022-09-13	16:24:20	-0.362531	-1.61261	-0.925876	517.173	FALSE	8
2022-09-13	16:24:21	-0.198562	-0.883243	0.237181	507.699	FALSE	8
2022-09-13	16:24:21	-0.26014	-1.15715	0.237181	517.173	FALSE	8
2022-09-13	16:24:21	0.119453	0.531351	0.237181	508.231	FALSE	8
2022-09-13	16:24:21	0.552532	2.45777	0.237181	519.631	FALSE	8
2022-09-13	16:24:22	1.31411	5.84542	8.52327	514.076	FALSE	8
2022-09-13	16:24:22	1.91029	8.49735	8.52327	528.128	FALSE	8
2022-09-13	16:24:22	1.80174	8.0145	8.52327	522.091	FALSE	8
2022-09-13	16:24:22	2.63833	11.7358	8.52327	539.864	FALSE	8
2022-09-13	16:24:23	1.41477	6.29318	6.22427	528.384	FALSE	8
2022-09-13	16:24:23	1.14531	5.09457	6.22427	544.959	FALSE	8
2022-09-13	16:24:23	1.73396	7.713	6.22427	536.097	FALSE	8
2022-09-13	16:24:23	1.30307	5.79632	6.22427	550.755	FALSE	8
2022-09-13	16:24:24	1.36332	6.06432	5.33257	542.161	FALSE	8
2022-09-13	16:24:24	1.07879	4.79867	5.33257	555.554	FALSE	8
2022-09-13	16:24:24	1.35212	6.0145	5.33257	548.176	FALSE	8
2022-09-13	16:24:24	1.00103	4.45278	5.33257	560.006	FALSE	8
2022-09-13	16:24:25	1.09889	4.88808	8.05065	553.064	FALSE	8
2022-09-13	16:24:25	1.06464	4.73573	8.05065	564.742	FALSE	8
2022-09-13	16:24:25	3.26607	14.5281	8.05065	567.592	1	9
2022-09-13	16:24:26	1.4735	6.55442	11.4193	571.297	FALSE	9
2022-09-13	16:24:26	2.71156	12.0616	11.4193	579.653	FALSE	9
2022-09-13	16:24:26	2.98088	13.2596	11.4193	584.556	FALSE	9
2022-09-13	16:24:26	3.10276	13.8017	11.4193	593.455	1	10
2022-09-13	16:24:27	2.61289	11.6227	8.79273	596.179	FALSE	10
2022-09-13	16:24:27	3.05396	13.5846	8.79273	607.04	1	11
2022-09-13	16:24:27	1.55482	6.91615	8.79273	603.095	FALSE	11
2022-09-13	16:24:27	0.685102	3.04747	8.79273	610.087	FALSE	11
2022-09-13	16:24:28	0.378333	1.6829	1.77006	604.778	FALSE	11
2022-09-13	16:24:28	0.264746	1.17764	1.77006	611.265	FALSE	11
2022-09-13	16:24:28	0.568715	2.52976	1.77006	607.308	FALSE	11
2022-09-13	16:24:28	0.379911	1.68992	1.77006	612.955	FALSE	11
2022-09-13	16:24:29	0.287443	1.2786	1.43027	608.586	FALSE	11
2022-09-13	16:24:29	0.447392	1.99009	1.43027	614.945	FALSE	11
2022-09-13	16:24:29	0.229784	1.02213	1.43027	609.608	FALSE	11
2022-09-13	16:24:30	0.0691733	0.307697	0.16978	615.253	FALSE	11
2022-09-13	16:24:30	0.0629646	0.280079	0.16978	609.888	FALSE	11
2022-09-13	16:24:30	0.0646949	0.287776	0.16978	615.54	FALSE	11
2022-09-13	16:24:30	-0.04416	-0.196433	0.16978	609.888	FALSE	11
2022-09-13	16:24:31	-0.434338	-1.93202	-1.6786	615.54	FALSE	11
2022-09-13	16:24:31	-0.283193	-1.2597	-1.6786	609.888	FALSE	11
2022-09-13	16:24:31	-0.455916	-2.02801	-1.6786	615.54	FALSE	11
2022-09-13	16:24:31	-0.336017	-1.49467	-1.6786	609.888	FALSE	11
2022-09-13	16:24:32	-0.341157	-1.51753	-1.25291	615.54	FALSE	11
2022-09-13	16:24:32	-0.328079	-1.45936	-1.25291	609.888	FALSE	11
2022-09-13	16:24:32	-0.28187	-1.25381	-1.25291	615.54	FALSE	11
2022-09-13	16:24:32	-0.175559	-0.780922	-1.25291	609.888	FALSE	11
2022-09-13	16:24:33	-0.142023	-0.631747	-0.564211	615.54	FALSE	11
2022-09-13	16:24:33	-0.0340837	-0.151611	-0.564211	609.888	FALSE	11
2022-09-13	16:24:33	-0.204414	-0.909274	-0.564211	615.54	FALSE	11
2022-09-13	16:24:34	-0.345076	-1.53497	-1.16796	609.888	FALSE	11
2022-09-13	16:24:34	-0.330419	-1.46977	-1.16796	615.54	FALSE	11
2022-09-13	16:24:34	-0.204364	-0.909052	-1.16796	609.888	FALSE	11
2022-09-13	16:24:34	-0.17042	-0.758062	-1.16796	615.54	FALSE	11
2022-09-13	16:24:35	-0.192811	-0.857662	-0.959473	609.888	FALSE	11
2022-09-13	16:24:35	-0.198257	-0.881887	-0.959473	615.54	FALSE	11
2022-09-13	16:24:35	-0.222633	-0.990316	-0.959473	609.888	FALSE	11
2022-09-13	16:24:35	-0.249096	-1.10803	-0.959473	615.54	FALSE	11
2022-09-13	16:24:36	-0.39444	-1.75455	-0.717427	609.888	FALSE	11
2022-09-13	16:24:36	-0.604465	-2.68878	-0.717427	615.54	FALSE	11
2022-09-13	16:24:36	-0.467875	-2.0812	-0.717427	609.888	FALSE	11
2022-09-13	16:24:36	0.821641	3.65482	-0.717427	619.195	FALSE	11
2022-09-13	16:24:37	3.13986	13.9667	6.86787	623.855	1	12
2022-09-13	16:24:37	0.978384	4.35205	6.86787	623.547	FALSE	12
2022-09-13	16:24:37	0.513652	2.28483	6.86787	626.14	FALSE	12
2022-09-13	16:24:38	0.493499	2.19518	2.37413	625.742	FALSE	12
2022-09-13	16:24:38	0.534109	2.37582	2.37413	628.516	FALSE	12
2022-09-13	16:24:38	0.407341	1.81193	2.37413	627.554	FALSE	12
2022-09-13	16:24:38	0.699962	3.11357	2.37413	631.629	FALSE	12
2022-09-13	16:24:39	0.870293	3.87124	3.07079	631.426	FALSE	12
2022-09-13	16:24:39	0.773092	3.43887	3.07079	635.068	FALSE	12
2022-09-13	16:24:39	0.830191	3.69286	3.07079	635.118	FALSE	12
2022-09-13	16:24:39	0.287799	1.28019	3.07079	636.348	FALSE	12
2022-09-13	16:24:40	0.506221	2.25177	2.69948	637.37	FALSE	12
2022-09-13	16:24:40	0.627137	2.78963	2.69948	639.138	FALSE	12
2022-09-13	16:24:40	0.620115	2.7584	2.69948	640.129	FALSE	12
2022-09-13	16:24:40	0.674008	2.99812	2.69948	642.136	FALSE	12
2022-09-13	16:24:41	0.523219	2.32738	2.52727	642.456	FALSE	12
2022-09-13	16:24:41	0.568409	2.5284	2.52727	644.665	FALSE	12
2022-09-13	16:24:41	0.612837	2.72602	2.52727	645.182	FALSE	12
2022-09-13	16:24:42	0.636094	2.82947	2.0988	647.494	FALSE	12
2022-09-13	16:24:42	0.523626	2.32919	2.0988	647.511	FALSE	12
2022-09-13	16:24:42	0.355484	1.58126	2.0988	649.075	FALSE	12
2022-09-13	16:24:42	0.372125	1.65529	2.0988	649.166	FALSE	12
2022-09-13	16:24:43	0.395585	1.75964	1.72812	650.835	FALSE	12
2022-09-13	16:24:43	0.374415	1.66547	1.72812	650.832	FALSE	12
2022-09-13	16:24:43	0.278893	1.24057	1.72812	652.076	FALSE	12
2022-09-13	16:24:43	0.505102	2.24679	1.72812	653.079	FALSE	12
2022-09-13	16:24:44	0.305	1.3567	1.93372	653.432	FALSE	12
2022-09-13	16:24:44	0.451412	2.00797	1.93372	655.087	FALSE	12
2022-09-13	16:24:44	0.335789	1.49366	1.93372	654.926	FALSE	12
2022-09-13	16:24:44	0.646679	2.87656	1.93372	657.963	FALSE	12
2022-09-13	16:24:45	0.52332	2.32783	4.68882	657.254	FALSE	12
2022-09-13	16:24:45	1.38088	6.14243	4.68882	664.106	FALSE	12
2022-09-13	16:24:45	1.25808	5.59619	4.68882	662.85	FALSE	12
2022-09-13	16:24:46	1.47569	6.56416	4.67819	670.67	FALSE	12
2022-09-13	16:24:46	1.47599	6.5655	4.67819	669.415	FALSE	12
2022-09-13	16:24:46	0.609835	2.71267	4.67819	673.383	FALSE	12
2022-09-13	16:24:46	0.645305	2.87045	4.67819	672.286	FALSE	12
2022-09-13	16:24:47	0.205306	0.913242	1.50781	674.296	FALSE	12
2022-09-13	16:24:47	0.45757	2.03536	1.50781	674.321	FALSE	12
2022-09-13	16:24:47	0.262201	1.16632	1.50781	675.462	FALSE	12
2022-09-13	16:24:47	0.430802	1.91629	1.50781	676.238	FALSE	12
2022-09-13	16:24:48	0.279555	1.24352	1.67532	676.706	FALSE	12
2022-09-13	16:24:48	0.422099	1.87758	1.67532	678.115	FALSE	12
2022-09-13	16:24:48	0.390649	1.73768	1.67532	678.443	FALSE	12
2022-09-13	16:24:48	0.414211	1.84249	1.67532	679.958	FALSE	12
2022-09-13	16:24:49	0.385254	1.71369	1.71708	680.157	FALSE	12
2022-09-13	16:24:49	0.390547	1.73723	1.71708	681.695	FALSE	12
2022-09-13	16:24:49	0.382252	1.70033	1.71708	681.857	FALSE	12
2022-09-13	16:24:50	0.38383	1.70735	1.69762	683.402	FALSE	12
2022-09-13	16:24:50	0.379962	1.69015	1.69762	683.547	FALSE	12
2022-09-13	16:24:50	0.380776	1.69377	1.69762	685.096	FALSE	12
2022-09-13	16:24:50	0.381998	1.6992	1.69762	685.247	FALSE	12
2022-09-13	16:24:51	0.380471	1.69241	1.70311	686.788	FALSE	12
2022-09-13	16:24:51	0.382099	1.69965	1.70311	686.946	FALSE	12
2022-09-13	16:24:51	0.384288	1.70939	1.70311	688.498	FALSE	12
2022-09-13	16:24:51	0.384644	1.71097	1.70311	688.657	FALSE	12
2022-09-13	16:24:52	0.371412	1.65211	1.75789	690.15	FALSE	12
2022-09-13	16:24:52	0.407036	1.81058	1.75789	690.468	FALSE	12
2022-09-13	16:24:52	0.38159	1.69739	1.75789	691.847	FALSE	12
2022-09-13	16:24:52	0.420725	1.87147	1.75789	692.339	FALSE	12
2022-09-13	16:24:53	0.197468	0.878377	0.535048	692.726	FALSE	12
2022-09-13	16:24:53	0.0974175	0.433333	0.535048	692.773	FALSE	12
2022-09-13	16:24:53	0.0659671	0.293435	0.535048	693.019	FALSE	12
2022-09-13	16:24:54	-0.0236003	-0.104979	-1.4996	692.773	FALSE	12
2022-09-13	16:24:54	-0.277493	-1.23434	-1.4996	693.019	FALSE	12
2022-09-13	16:24:54	-0.432353	-1.92319	-1.4996	692.773	FALSE	12
2022-09-13	16:24:54	-0.61505	-2.73587	-1.4996	693.019	FALSE	12
2022-09-13	16:24:55	-0.866399	-3.85392	-2.80134	692.773	FALSE	12
2022-09-13	16:24:55	-0.849045	-3.77672	-2.80134	693.019	FALSE	12
2022-09-13	16:24:55	-0.673625	-2.99642	-2.80134	692.773	FALSE	12
2022-09-13	16:24:55	-0.130012	-0.578319	-2.80134	693.019	FALSE	12
2022-09-13	16:24:56	0.218283	0.970966	1.70237	693.744	FALSE	12
2022-09-13	16:24:56	0.42271	1.8803	1.70237	694.899	FALSE	12
2022-09-13	16:24:56	0.358435	1.59439	1.70237	695.338	FALSE	12
2022-09-13	16:24:56	0.531412	2.36383	1.70237	697.263	FALSE	12
2022-09-13	16:24:57	0.245305	1.09117	3.00955	696.429	FALSE	12
2022-09-13	16:24:57	0.322354	1.4339	3.00955	698.697	FALSE	12
2022-09-13	16:24:57	0.399809	1.77843	3.00955	698.208	FALSE	12
2022-09-13	16:24:57	1.73884	7.73471	3.00955	706.432	FALSE	12
2022-09-13	16:24:58	3.24261	14.4238	13.5851	712.631	1	13
2022-09-13	16:24:58	2.98724	13.2878	13.5851	719.72	FALSE	13
2022-09-13	16:24:58	2.93233	13.0436	13.5851	725.675	FALSE	13
2022-09-13	16:24:59	3.64546	16.2157	8.87473	735.935	1	14
2022-09-13	16:24:59	1.68261	7.48459	8.87473	733.16	FALSE	14
2022-09-13	16:24:59	2.09533	9.32045	8.87473	745.256	FALSE	14
2022-09-13	16:24:59	0.557112	2.47815	8.87473	735.638	FALSE	14
2022-09-13	16:25:00	0.825305	3.67112	2.92778	748.927	FALSE	14
2022-09-13	16:25:00	0.580827	2.58363	2.92778	738.221	FALSE	14
2022-09-13	16:25:00	0.495534	2.20423	2.92778	751.131	FALSE	14
2022-09-13	16:25:00	0.731107	3.25211	2.92778	741.473	FALSE	14
2022-09-13	16:25:01	0.448512	1.99507	2.43287	753.126	FALSE	14
2022-09-13	16:25:01	0.708918	3.15341	2.43287	744.627	FALSE	14
2022-09-13	16:25:01	0.249835	1.11132	2.43287	754.238	FALSE	14
2022-09-13	16:25:01	0.780471	3.47169	2.43287	748.099	FALSE	14
2022-09-13	16:25:02	0.355789	1.58262	1.98209	755.82	FALSE	14
2022-09-13	16:25:02	0.619657	2.75636	1.98209	750.855	FALSE	14
2022-09-13	16:25:02	0.361336	1.60729	1.98209	757.428	FALSE	14
2022-09-13	16:25:03	0.562048	2.5001	2.16983	753.355	FALSE	14
2022-09-13	16:25:03	0.321438	1.42982	2.16983	758.857	FALSE	14
2022-09-13	16:25:03	0.65584	2.91731	2.16983	756.272	FALSE	14
2022-09-13	16:25:03	0.41187	1.83208	2.16983	760.689	FALSE	14
2022-09-13	16:25:04	0.485713	2.16055	2.53847	758.433	FALSE	14
2022-09-13	16:25:04	0.588817	2.61918	2.53847	763.309	FALSE	14
2022-09-13	16:25:04	0.780929	3.47373	2.53847	761.907	FALSE	14
2022-09-13	16:25:04	0.427239	1.90044	2.53847	765.209	FALSE	14
2022-09-13	16:25:05	0.866221	3.85312	3.23853	765.76	FALSE	14
2022-09-13	16:25:05	0.454822	2.02314	3.23853	767.232	FALSE	14
2022-09-13	16:25:05	0.796858	3.54458	3.23853	769.304	FALSE	14
2022-09-13	16:25:05	0.794313	3.53326	3.23853	770.765	FALSE	14
2022-09-13	16:25:06	0.878791	3.90904	3.05826	773.213	FALSE	14
2022-09-13	16:25:06	0.317163	1.4108	3.05826	772.176	FALSE	14
2022-09-13	16:25:06	0.866628	3.85493	3.05826	777.068	FALSE	14
2022-09-13	16:25:07	0.56444	2.51074	2.65505	774.687	FALSE	14
2022-09-13	16:25:07	0.566781	2.52116	2.65505	779.589	FALSE	14
2022-09-13	16:25:07	0.543626	2.41816	2.65505	777.105	FALSE	14
2022-09-13	16:25:07	0.712685	3.17017	2.65505	782.76	FALSE	14
2022-09-13	16:25:08	0.461896	2.05461	1.23848	779.16	FALSE	14
2022-09-13	16:25:08	0.6164	2.74187	1.23848	785.501	FALSE	14
2022-09-13	16:25:08	0.0391987	0.174364	1.23848	779.334	FALSE	14
2022-09-13	16:25:08	-0.00380383	-0.0169202	1.23848	785.501	FALSE	14
2022-09-13	16:25:09	-0.251997	-1.12093	-1.64363	779.334	FALSE	14
2022-09-13	16:25:09	-0.546552	-2.43117	-1.64363	785.501	FALSE	14
2022-09-13	16:25:09	-0.534796	-2.37888	-1.64363	779.334	FALSE	14
2022-09-13	16:25:09	-0.144669	-0.643517	-1.64363	785.501	FALSE	14
2022-09-13	16:25:10	0.25925	1.1532	1.67573	780.487	FALSE	14
2022-09-13	16:25:10	0.565102	2.51369	1.67573	788.015	FALSE	14
2022-09-13	16:25:10	0.305814	1.36032	1.67573	781.848	FALSE	14
2022-09-13	16:25:11	0.536654	2.38714	1.7232	790.402	FALSE	14
2022-09-13	16:25:11	0.266781	1.1867	1.7232	783.034	FALSE	14
2022-09-13	16:25:11	0.506221	2.25177	1.7232	792.654	FALSE	14
2022-09-13	16:25:11	0.239911	1.06717	1.7232	784.101	FALSE	14
2022-09-13	16:25:12	0.483117	2.149	1.74006	794.803	FALSE	14
2022-09-13	16:25:12	0.290344	1.29151	1.74006	785.393	FALSE	14
2022-09-13	16:25:12	0.522506	2.32421	1.74006	797.127	FALSE	14
2022-09-13	16:25:12	0.268766	1.19552	1.74006	786.589	FALSE	14
2022-09-13	16:25:13	0.355992	1.58352	1.59184	798.711	FALSE	14
2022-09-13	16:25:13	0.334415	1.48754	1.59184	788.076	FALSE	14
2022-09-13	16:25:13	0.412379	1.83434	1.59184	800.545	FALSE	14
2022-09-13	16:25:13	0.328664	1.46196	1.59184	789.538	FALSE	14
2022-09-13	16:25:14	0.295025	1.31233	1.55809	801.857	FALSE	14
2022-09-13	16:25:14	0.40958	1.82189	1.55809	791.36	FALSE	14
2022-09-13	16:25:14	0.346221	1.54006	1.55809	803.398	FALSE	14
2022-09-13	16:25:15	0.398639	1.77323	0.795753	793.133	FALSE	14
2022-09-13	16:25:15	0.0628628	0.279626	0.795753	803.677	FALSE	14
2022-09-13	16:25:15	0.0468323	0.208319	0.795753	793.341	FALSE	14
2022-09-13	16:25:15	0.207239	0.921841	0.795753	804.599	FALSE	14
2022-09-13	16:25:16	0.253448	1.12739	0.979113	794.469	FALSE	14
2022-09-13	16:25:16	0.244593	1.088	0.979113	805.687	FALSE	14
2022-09-13	16:25:16	0.12444	0.553534	0.979113	795.022	FALSE	14
2022-09-13	16:25:16	0.257977	1.14753	0.979113	806.835	FALSE	14
2022-09-13	16:25:17	0.239911	1.06717	2.91391	796.09	FALSE	14
2022-09-13	16:25:17	0.458995	2.0417	2.91391	808.876	FALSE	14
2022-09-13	16:25:17	0.663066	2.94945	2.91391	799.039	FALSE	14
2022-09-13	16:25:17	1.25833	5.5973	2.91391	814.474	FALSE	14
2022-09-13	16:25:18	0.611412	2.71968	2.7227	801.759	FALSE	14
2022-09-13	16:25:18	0.941947	4.18997	2.7227	818.664	FALSE	14
2022-09-13	16:25:18	0.282914	1.25846	2.7227	803.017	FALSE	14
2022-09-13	16:25:19	0.525458	2.33734	1.30605	821.001	FALSE	14
2022-09-13	16:25:19	0.317672	1.41307	1.30605	804.43	FALSE	14
2022-09-13	16:25:19	0.333193	1.48211	1.30605	822.483	FALSE	14
2022-09-13	16:25:19	-0.00186998	-0.00831805	1.30605	804.43	FALSE	14
2022-09-13	16:25:20	0.305611	1.35942	1.03978	823.842	FALSE	14
2022-09-13	16:25:20	0.170751	0.759535	1.03978	805.19	FALSE	14
2022-09-13	16:25:20	0.343728	1.52897	1.03978	825.371	FALSE	14
2022-09-13	16:25:20	0.114924	0.511205	1.03978	805.701	FALSE	14
2022-09-13	16:25:21	-0.14187	-0.631066	-1.15234	825.371	FALSE	14
2022-09-13	16:25:21	-0.146399	-0.651212	-1.15234	805.701	FALSE	14
2022-09-13	16:25:21	-0.343295	-1.52704	-1.15234	825.371	FALSE	14
2022-09-13	16:25:21	-0.404669	-1.80005	-1.15234	805.701	FALSE	14
2022-09-13	16:25:22	-0.45561	-2.02664	-2.0188	825.371	FALSE	14
2022-09-13	16:25:22	-0.42243	-1.87905	-2.0188	805.701	FALSE	14
2022-09-13	16:25:22	-0.483498	-2.1507	-2.0188	825.371	FALSE	14
2022-09-13	16:25:23	-0.438867	-1.95217	-2.01471	805.701	FALSE	14
2022-09-13	16:25:23	-0.423804	-1.88516	-2.01471	825.371	FALSE	14
2022-09-13	16:25:23	-0.45271	-2.01374	-2.01471	805.701	FALSE	14
2022-09-13	16:25:23	-0.496323	-2.20774	-2.01471	825.371	FALSE	14
2022-09-13	16:25:24	-0.591335	-2.63038	-2.50033	805.701	FALSE	14
2022-09-13	16:25:24	-0.546755	-2.43208	-2.50033	825.371	FALSE	14
2022-09-13	16:25:24	-0.556373	-2.47486	-2.50033	805.701	FALSE	14
2022-09-13	16:25:24	-0.553931	-2.464	-2.50033	825.371	FALSE	14
2022-09-13	16:25:25	-0.546857	-2.43253	-2.37005	805.701	FALSE	14
2022-09-13	16:25:25	-0.529453	-2.35511	-2.37005	825.371	FALSE	14
2022-09-13	16:25:25	-0.524261	-2.33202	-2.37005	805.701	FALSE	14
2022-09-13	16:25:25	-0.530674	-2.36054	-2.37005	825.371	FALSE	14
2022-09-13	16:25:26	-0.543803	-2.41894	-1.94543	805.701	FALSE	14
2022-09-13	16:25:26	-0.476882	-2.12127	-1.94543	825.371	FALSE	14
2022-09-13	16:25:26	-0.376577	-1.67509	-1.94543	805.701	FALSE	14
2022-09-13	16:25:26	-0.35215	-1.56643	-1.94543	825.371	FALSE	14
2022-09-13	16:25:27	-0.27271	-1.21307	-1.29894	805.701	FALSE	14
2022-09-13	16:25:27	-0.309758	-1.37787	-1.29894	825.371	FALSE	14
2022-09-13	16:25:27	-0.293575	-1.30588	-1.29894	805.701	FALSE	14
2022-09-13	16:25:28	-0.29276	-1.30226	-1.25059	825.371	FALSE	14
2022-09-13	16:25:28	-0.304058	-1.35251	-1.25059	805.701	FALSE	14
2022-09-13	16:25:28	-0.305381	-1.3584	-1.25059	825.371	FALSE	14
2022-09-13	16:25:28	-0.222379	-0.989186	-1.25059	805.701	FALSE	14
2022-09-13	16:25:29	-0.208079	-0.925577	-0.857155	825.371	FALSE	14
2022-09-13	16:25:29	-0.214236	-0.952965	-0.857155	805.701	FALSE	14
2022-09-13	16:25:29	-0.195356	-0.868983	-0.857155	825.371	FALSE	14
2022-09-13	16:25:29	-0.153117	-0.681095	-0.857155	805.701	FALSE	14
2022-09-13	16:25:30	-0.113015	-0.502713	0.0279577	825.371	FALSE	14
2022-09-13	16:25:30	-0.0436002	-0.193942	0.0279577	805.701	FALSE	14
2022-09-13	16:25:30	0.0414379	0.184324	0.0279577	825.556	FALSE	14
2022-09-13	16:25:30	0.140318	0.624163	0.0279577	806.325	FALSE	14
2022-09-13	16:25:31	0.176959	0.787149	0.652761	826.343	FALSE	14
2022-09-13	16:25:31	0.147952	0.65812	0.652761	806.983	FALSE	14
2022-09-13	16:25:31	0.115331	0.513015	0.652761	826.856	FALSE	14
2022-09-13	16:25:32	0.144135	0.641141	0.630275	807.624	FALSE	14
2022-09-13	16:25:32	0.157774	0.70181	0.630275	827.558	FALSE	14
2022-09-13	16:25:32	0.144949	0.644762	0.630275	808.269	FALSE	14
2022-09-13	16:25:32	0.119911	0.533388	0.630275	828.091	FALSE	14
2022-09-13	16:25:33	0.0713615	0.31743	0.189983	808.587	FALSE	14
2022-09-13	16:25:33	0.0512089	0.227787	0.189983	828.319	FALSE	14
2022-09-13	16:25:33	-0.000292388	-0.0013006	0.189983	808.587	FALSE	14
2022-09-13	16:25:33	0.0485626	0.216016	0.189983	828.535	FALSE	14
2022-09-13	16:25:34	-0.116526	-0.518331	0.551612	808.587	FALSE	14
2022-09-13	16:25:34	-0.0346944	-0.154328	0.551612	828.535	FALSE	14
2022-09-13	16:25:34	0.131514	0.585001	0.551612	809.172	FALSE	14
2022-09-13	16:25:34	0.515738	2.29411	0.551612	830.829	FALSE	14
2022-09-13	16:25:35	0.430242	1.9138	1.9258	811.085	FALSE	14
2022-09-13	16:25:35	0.321132	1.42846	1.9258	832.257	FALSE	14
2022-09-13	16:25:35	0.547443	2.43514	1.9258	813.521	FALSE	14
2022-09-13	16:25:36	0.642405	2.85755	3.99133	835.115	FALSE	14
2022-09-13	16:25:36	0.555025	2.46886	3.99133	815.989	FALSE	14
2022-09-13	16:25:36	0.844084	3.75465	3.99133	838.87	FALSE	14
2022-09-13	16:25:36	1.54765	6.88426	3.99133	822.874	FALSE	14
2022-09-13	16:25:37	2.34861	10.4471	10.6652	849.317	FALSE	14
2022-09-13	16:25:37	2.71925	12.0958	10.6652	834.969	FALSE	14
2022-09-13	16:25:37	2.25538	10.0324	10.6652	859.349	FALSE	14
2022-09-13	16:25:37	2.26734	10.0856	10.6652	845.055	FALSE	14
2022-09-13	16:25:38	0.907901	4.03853	2.19852	863.388	FALSE	14
2022-09-13	16:25:38	0.329784	1.46695	2.19852	846.522	FALSE	14
2022-09-13	16:25:38	0.435076	1.93531	2.19852	865.323	FALSE	14
2022-09-13	16:25:38	0.304237	1.35331	2.19852	847.875	FALSE	14
2022-09-13	16:25:39	0.152634	0.678947	0.860346	866.002	FALSE	14
2022-09-13	16:25:39	0.279046	1.24125	0.860346	849.116	FALSE	14
2022-09-13	16:25:39	0.148563	0.660838	0.860346	866.663	FALSE	14
2022-09-13	16:25:40	0.342914	1.52535	3.85098	850.642	FALSE	14
2022-09-13	16:25:40	0.547494	2.43536	3.85098	869.098	FALSE	14
2022-09-13	16:25:40	1.40546	6.25177	3.85098	856.894	FALSE	14
2022-09-13	16:25:40	1.16709	5.19145	3.85098	874.29	FALSE	14
2022-09-13	16:25:41	1.75452	7.80446	4.97152	864.698	FALSE	14
2022-09-13	16:25:41	1.45457	6.47022	4.97152	880.76	FALSE	14
2022-09-13	16:25:41	0.500013	2.22416	4.97152	866.922	FALSE	14
2022-09-13	16:25:41	0.761488	3.38725	4.97152	884.147	FALSE	14
2022-09-13	16:25:42	0.466527	2.07521	1.46281	868.997	FALSE	14
2022-09-13	16:25:42	0.37131	1.65166	1.46281	885.799	FALSE	14
2022-09-13	16:25:42	0.223626	0.994733	1.46281	869.992	FALSE	14
2022-09-13	16:25:42	0.253957	1.12965	1.46281	886.928	FALSE	14
2022-09-13	16:25:43	0.0731936	0.32558	0.247406	870.318	FALSE	14
2022-09-13	16:25:43	0.115331	0.513015	0.247406	887.441	FALSE	14
2022-09-13	16:25:43	-0.0216664	-0.0963765	0.247406	870.318	FALSE	14
2022-09-13	16:25:44	-0.175509	-0.780699	-1.80599	887.441	FALSE	14
2022-09-13	16:25:44	-0.393727	-1.75138	-1.80599	870.318	FALSE	14
2022-09-13	16:25:44	-0.471081	-2.09546	-1.80599	887.441	FALSE	14
2022-09-13	16:25:44	-0.583702	-2.59642	-1.80599	870.318	FALSE	14
2022-09-13	16:25:45	-0.661106	-2.94073	-0.449175	887.441	FALSE	14
2022-09-13	16:25:45	-0.433218	-1.92704	-0.449175	870.318	FALSE	14
2022-09-13	16:25:45	0.233143	1.03707	-0.449175	888.478	FALSE	14
2022-09-13	16:25:45	0.457265	2.03401	-0.449175	872.352	FALSE	14
2022-09-13	16:25:46	0.461947	2.05483	2.05964	890.533	FALSE	14
2022-09-13	16:25:46	0.465611	2.07113	2.05964	874.423	FALSE	14
2022-09-13	16:25:46	0.490293	2.18092	2.05964	892.714	FALSE	14
2022-09-13	16:25:46	0.434262	1.93168	2.05964	876.355	FALSE	14
2022-09-13	16:25:47	0.451209	2.00707	2.03068	894.721	FALSE	14
2022-09-13	16:25:47	0.493041	2.19314	2.03068	878.548	FALSE	14
2022-09-13	16:25:47	0.425305	1.89184	2.03068	896.613	FALSE	14
2022-09-13	16:25:48	0.447799	1.9919	1.85568	880.54	FALSE	14
2022-09-13	16:25:48	0.411158	1.82891	1.85568	898.442	FALSE	14
2022-09-13	16:25:48	0.393753	1.75149	1.85568	882.291	FALSE	14
2022-09-13	16:25:48	0.415992	1.85042	1.85568	900.292	FALSE	14
2022-09-13	16:25:49	0.410649	1.82665	1.72371	884.118	FALSE	14
2022-09-13	16:25:49	0.43701	1.94391	1.72371	902.236	FALSE	14
2022-09-13	16:25:49	0.360216	1.60231	1.72371	885.72	FALSE	14
2022-09-13	16:25:49	0.34215	1.52195	1.72371	903.758	FALSE	14
2022-09-13	16:25:50	0.469835	2.08992	3.16258	887.81	FALSE	14
2022-09-13	16:25:50	0.354669	1.57764	3.16258	905.336	FALSE	14
2022-09-13	16:25:50	0.806628	3.58804	3.16258	891.398	FALSE	14
2022-09-13	16:25:50	1.21279	5.39473	3.16258	910.731	FALSE	14
2022-09-13	16:25:51	2.93462	13.0538	12.0834	904.452	FALSE	14
2022-09-13	16:25:51	2.30871	10.2696	12.0834	921	FALSE	14
2022-09-13	16:25:51	2.90607	12.9268	12.0834	917.379	FALSE	14
2022-09-13	16:25:52	0.633448	2.8177	2.95149	923.818	FALSE	14
2022-09-13	16:25:52	0.821641	3.65482	2.95149	921.033	FALSE	14
2022-09-13	16:25:52	0.717926	3.19348	2.95149	927.011	FALSE	14
2022-09-13	16:25:52	0.481081	2.13994	2.95149	923.173	FALSE	14
2022-09-13	16:25:53	0.741336	3.29761	2.17583	930.309	FALSE	14
2022-09-13	16:25:53	0.294975	1.31211	2.17583	924.485	FALSE	14
2022-09-13	16:25:53	0.607188	2.70089	2.17583	933.01	FALSE	14
2022-09-13	16:25:53	0.313092	1.3927	2.17583	925.878	FALSE	14
2022-09-13	16:25:54	0.512328	2.27894	1.88517	935.289	FALSE	14
2022-09-13	16:25:54	0.344491	1.53236	1.88517	927.411	FALSE	14
2022-09-13	16:25:54	0.47126	2.09626	1.88517	937.385	FALSE	14
2022-09-13	16:25:54	0.367138	1.6331	1.88517	929.044	FALSE	14
2022-09-13	16:25:55	0.392277	1.74493	1.86672	939.13	FALSE	14
2022-09-13	16:25:55	0.54103	2.40661	1.86672	931.45	FALSE	14
2022-09-13	16:25:55	0.325662	1.44861	1.86672	940.579	FALSE	14
2022-09-13	16:25:56	0.617112	2.74504	2.14068	934.195	FALSE	14
2022-09-13	16:25:56	0.326171	1.45087	2.14068	942.03	FALSE	14
2022-09-13	16:25:56	0.572328	2.54583	2.14068	936.741	FALSE	14
2022-09-13	16:25:56	0.409377	1.82099	2.14068	943.85	FALSE	14
2022-09-13	16:25:57	0.625305	2.78148	2.0112	939.523	FALSE	14
2022-09-13	16:25:57	0.260776	1.15998	2.0112	945.01	FALSE	14
2022-09-13	16:25:57	0.625051	2.78035	2.0112	942.303	FALSE	14
2022-09-13	16:25:57	0.297417	1.32297	2.0112	946.333	FALSE	14
2022-09-13	16:25:58	0.709478	3.1559	2.20842	945.459	FALSE	14
2022-09-13	16:25:58	0.35986	1.60073	2.20842	947.934	FALSE	14
2022-09-13	16:25:58	0.487545	2.1687	2.20842	947.628	FALSE	14
2022-09-13	16:25:58	0.42902	1.90837	2.20842	949.843	FALSE	14
2022-09-13	16:25:59	0.444338	1.9765	1.88154	949.604	FALSE	14
2022-09-13	16:25:59	0.400725	1.7825	1.88154	951.625	FALSE	14
2022-09-13	16:25:59	0.46612	2.07339	1.88154	951.677	FALSE	14
2022-09-13	16:25:59	0.380776	1.69377	1.88154	953.319	FALSE	14
2022-09-13	16:26:00	0.398435	1.77232	1.95183	953.45	FALSE	14
2022-09-13	16:26:00	0.475484	2.11505	1.95183	955.434	FALSE	14
2022-09-13	16:26:00	0.442456	1.96813	1.95183	955.418	FALSE	14
2022-09-13	16:26:01	0.462659	2.058	1.9155	957.492	FALSE	14
2022-09-13	16:26:01	0.38098	1.69468	1.9155	957.113	FALSE	14
2022-09-13	16:26:01	0.550089	2.44691	1.9155	959.939	FALSE	14
2022-09-13	16:26:01	0.328766	1.46242	1.9155	958.575	FALSE	14
2022-09-13	16:26:02	0.507748	2.25856	1.73514	962.197	FALSE	14
2022-09-13	16:26:02	0.2793	1.24238	1.73514	959.817	FALSE	14
2022-09-13	16:26:02	0.551921	2.45505	1.73514	964.652	FALSE	14
2022-09-13	16:26:02	0.221336	0.984547	1.73514	960.802	FALSE	14
2022-09-13	16:26:03	0.588104	2.616	1.77781	967.268	FALSE	14
2022-09-13	16:26:03	0.252023	1.12105	1.77781	961.923	FALSE	14
2022-09-13	16:26:03	0.517773	2.30316	1.77781	969.572	FALSE	14
2022-09-13	16:26:03	0.240776	1.07102	1.77781	962.994	FALSE	14
2022-09-13	16:26:04	0.545458	2.42631	1.72335	971.998	FALSE	14
2022-09-13	16:26:04	0.300165	1.33519	1.72335	964.329	FALSE	14
2022-09-13	16:26:04	0.316654	1.40854	1.72335	973.406	FALSE	14
2022-09-13	16:26:05	0.179809	0.799826	1.71097	965.129	FALSE	14
2022-09-13	16:26:05	0.385407	1.71437	1.71097	975.121	FALSE	14
2022-09-13	16:26:05	0.462863	2.05891	1.71097	967.188	FALSE	14
2022-09-13	16:26:05	0.510496	2.27079	1.71097	977.392	FALSE	14
2022-09-13	16:26:06	0.387137	1.72206	1.9859	968.91	FALSE	14
2022-09-13	16:26:06	0.512735	2.28075	1.9859	979.672	FALSE	14
2022-09-13	16:26:06	0.494109	2.1979	1.9859	971.108	FALSE	14
2022-09-13	16:26:06	0.391819	1.74289	1.9859	981.415	FALSE	14
2022-09-13	16:26:07	0.559148	2.4872	2.03763	973.595	FALSE	14
2022-09-13	16:26:07	0.346883	1.543	2.03763	982.958	FALSE	14
2022-09-13	16:26:07	0.569987	2.53542	2.03763	976.13	FALSE	14
2022-09-13	16:26:07	0.356298	1.58488	2.03763	984.543	FALSE	14
2022-09-13	16:26:08	0.48612	2.16236	1.90233	978.293	FALSE	14
2022-09-13	16:26:08	0.280318	1.24691	1.90233	985.79	FALSE	14
2022-09-13	16:26:08	0.516552	2.29773	1.90233	980.591	FALSE	14
2022-09-13	16:26:09	0.232888	1.03593	1.50463	986.826	FALSE	14
2022-09-13	16:26:09	0.406425	1.80786	1.50463	982.398	FALSE	14
2022-09-13	16:26:09	0.255331	1.13576	1.50463	987.962	FALSE	14
2022-09-13	16:26:09	0.458384	2.03898	1.50463	984.437	FALSE	14
2022-09-13	16:26:10	0.278384	1.23831	4.56228	989.2	FALSE	14
2022-09-13	16:26:10	0.525254	2.33643	4.56228	986.774	FALSE	14
2022-09-13	16:26:10	1.01487	4.51434	4.56228	993.714	FALSE	14
2022-09-13	16:26:10	2.28408	10.16	4.56228	996.934	FALSE	14
2022-09-13	16:26:11	1.44261	6.41702	3.47831	1000.13	FALSE	14
2022-09-13	16:26:11	0.959402	4.26761	3.47831	1001.2	FALSE	14
2022-09-13	16:26:11	0.373499	1.6614	3.47831	1001.79	FALSE	14
2022-09-13	16:26:11	0.352328	1.56723	3.47831	1002.77	FALSE	14
2022-09-13	16:26:12	0.360165	1.60209	1.72093	1003.39	FALSE	14
2022-09-13	16:26:12	0.294669	1.31075	1.72093	1004.08	FALSE	14
2022-09-13	16:26:12	0.505814	2.24996	1.72093	1005.64	FALSE	14
2022-09-13	16:26:13	0.314211	1.39767	1.67747	1005.48	FALSE	14
2022-09-13	16:26:13	0.380776	1.69377	1.67747	1007.34	FALSE	14
2022-09-13	16:26:13	0.279402	1.24284	1.67747	1006.72	FALSE	14
2022-09-13	16:26:13	0.534058	2.3756	1.67747	1009.71	FALSE	14
2022-09-13	16:26:14	0.713957	3.17582	31.8756	1009.9	FALSE	14
2022-09-13	16:26:14	5.53014	24.5992	31.8756	1034.31	1	15
2022-09-13	16:26:14	17.1096	76.1069	31.8756	1086	1	16
2022-09-13	16:26:14	5.31009	23.6203	31.8756	1057.93	1	17
2022-09-13	16:26:15	3.55859	15.8293	12.5343	1101.83	1	18
2022-09-13	16:26:15	4.802	21.3603	12.5343	1079.29	1	19
2022-09-13	16:26:15	2.20424	9.8049	12.5343	1111.64	FALSE	19
2022-09-13	16:26:15	0.706476	3.14255	12.5343	1082.44	FALSE	19
2022-09-13	16:26:16	0.48897	2.17504	1.90316	1113.81	FALSE	19
2022-09-13	16:26:16	0.303728	1.35104	1.90316	1083.79	FALSE	19
2022-09-13	16:26:16	0.490853	2.18341	1.90316	1116	FALSE	19
2022-09-13	16:26:17	0.34668	1.5421	1.80124	1085.33	FALSE	19
2022-09-13	16:26:17	0.480674	2.13813	1.80124	1118.13	FALSE	19
2022-09-13	16:26:17	0.358639	1.5953	1.80124	1086.92	FALSE	19
2022-09-13	16:26:17	0.433753	1.92942	1.80124	1120.06	FALSE	19
2022-09-13	16:26:18	0.392583	1.74629	1.62925	1088.67	FALSE	19
2022-09-13	16:26:18	0.460471	2.04827	1.62925	1122.11	FALSE	19
2022-09-13	16:26:18	0.231667	1.0305	1.62925	1089.7	FALSE	19
2022-09-13	16:26:18	0.380369	1.69196	1.62925	1123.8	FALSE	19
2022-09-13	16:26:19	0.382812	1.70282	1.27668	1091.4	FALSE	19
2022-09-13	16:26:19	0.252634	1.12377	1.27668	1124.93	FALSE	19
2022-09-13	16:26:19	0.287494	1.27883	1.27668	1092.68	FALSE	19
2022-09-13	16:26:19	0.225102	1.0013	1.27668	1125.93	FALSE	19
2022-09-13	16:26:20	0.17187	0.764512	0.608394	1093.45	FALSE	19
2022-09-13	16:26:20	0.113652	0.505547	0.608394	1126.43	FALSE	19
2022-09-13	16:26:20	0.124797	0.555122	0.608394	1094	FALSE	19
2022-09-13	16:26:21	0.140471	0.624843	1.24685	1127.06	FALSE	19
2022-09-13	16:26:21	0.191769	0.853027	1.24685	1094.86	FALSE	19
2022-09-13	16:26:21	0.418995	1.86377	1.24685	1128.92	FALSE	19
2022-09-13	16:26:21	0.369987	1.64578	1.24685	1096.5	FALSE	19
2022-09-13	16:26:22	0.251412	1.11833	1.38647	1130.04	FALSE	19
2022-09-13	16:26:22	0.350547	1.5593	1.38647	1098.06	FALSE	19
2022-09-13	16:26:22	0.298893	1.32954	1.38647	1131.37	FALSE	19
2022-09-13	16:26:22	0.345916	1.5387	1.38647	1099.6	FALSE	19
2022-09-13	16:26:23	0.303473	1.34991	1.48477	1132.72	FALSE	19
2022-09-13	16:26:23	0.248715	1.10633	1.48477	1100.71	FALSE	19
2022-09-13	16:26:23	0.430903	1.91674	1.48477	1134.64	FALSE	19
2022-09-13	16:26:23	0.352074	1.5661	1.48477	1102.27	FALSE	19
2022-09-13	16:26:24	0.378537	1.68381	1.52505	1136.32	FALSE	19
2022-09-13	16:26:24	0.324084	1.44159	1.52505	1103.71	FALSE	19
2022-09-13	16:26:24	0.325916	1.44974	1.52505	1137.77	FALSE	19
2022-09-13	16:26:25	0.472328	2.10101	1.70243	1105.81	FALSE	19
2022-09-13	16:26:25	0.35182	1.56497	1.70243	1139.34	FALSE	19
2022-09-13	16:26:25	0.394567	1.75511	1.70243	1107.57	FALSE	19
2022-09-13	16:26:25	0.312176	1.38862	1.70243	1140.72	FALSE	19
2022-09-13	16:26:26	0.28958	1.28811	2.35364	1108.86	FALSE	19
2022-09-13	16:26:26	0.498842	2.21895	2.35364	1142.94	FALSE	19
2022-09-13	16:26:26	0.417316	1.85631	2.35364	1110.71	FALSE	19
2022-09-13	16:26:26	0.910751	4.0512	2.35364	1146.99	FALSE	19
2022-09-13	16:26:27	0.777265	3.45743	3.35658	1114.17	FALSE	19
2022-09-13	16:26:27	0.753499	3.35171	3.35658	1150.35	FALSE	19
2022-09-13	16:26:27	0.989682	4.4023	3.35658	1118.57	FALSE	19
2022-09-13	16:26:27	0.497926	2.21487	3.35658	1152.56	FALSE	19
2022-09-13	16:26:28	0.594924	2.64634	2.18884	1121.22	FALSE	19
2022-09-13	16:26:28	0.383575	1.70622	2.18884	1154.27	FALSE	19
2022-09-13	16:26:28	0.497723	2.21397	2.18884	1123.43	FALSE	19
2022-09-13	16:26:29	0.341489	1.51901	2.68364	1155.79	FALSE	19
2022-09-13	16:26:29	0.445255	1.98058	2.68364	1125.42	FALSE	19
2022-09-13	16:26:29	0.660929	2.93994	2.68364	1158.73	FALSE	19
2022-09-13	16:26:29	0.96556	4.295	2.68364	1129.71	FALSE	19
2022-09-13	16:26:30	1.72154	7.65775	8.11728	1166.38	FALSE	19
2022-09-13	16:26:30	1.89085	8.41088	8.11728	1138.12	FALSE	19
2022-09-13	16:26:30	1.85726	8.26146	8.11728	1174.65	FALSE	19
2022-09-13	16:26:30	1.82973	8.139	8.11728	1146.26	FALSE	19
2022-09-13	16:26:31	1.5335	6.82131	8.59748	1181.47	FALSE	19
2022-09-13	16:26:31	1.82571	8.12112	8.59748	1154.38	FALSE	19
2022-09-13	16:26:31	2.11116	9.39086	8.59748	1190.86	FALSE	19
2022-09-13	16:26:31	2.26083	10.0566	8.59748	1164.44	FALSE	19
2022-09-13	16:26:32	1.78622	7.94546	7.93188	1198.8	FALSE	19
2022-09-13	16:26:32	1.81126	8.05685	7.93188	1172.49	FALSE	19
2022-09-13	16:26:32	1.75202	7.79334	7.93188	1206.6	FALSE	19
2022-09-13	16:26:33	1.60261	7.12873	6.95532	1179.62	FALSE	19
2022-09-13	16:26:33	1.61095	7.16583	6.95532	1213.76	FALSE	19
2022-09-13	16:26:33	1.56999	6.98363	6.95532	1186.61	FALSE	19
2022-09-13	16:26:33	1.47095	6.54308	6.95532	1220.31	FALSE	19
2022-09-13	16:26:34	1.4449	6.4272	6.42188	1193.03	FALSE	19
2022-09-13	16:26:34	1.43782	6.39571	6.42188	1226.7	FALSE	19
2022-09-13	16:26:34	1.4765	6.56777	6.42188	1199.6	FALSE	19
2022-09-13	16:26:34	1.41559	6.29683	6.42188	1233	FALSE	19
2022-09-13	16:26:35	1.38795	6.17388	6.46437	1205.78	FALSE	19
2022-09-13	16:26:35	1.4879	6.61848	6.46437	1239.62	FALSE	19
2022-09-13	16:26:35	1.44398	6.42311	6.46437	1212.2	FALSE	19
2022-09-13	16:26:35	1.49319	6.64201	6.46437	1246.26	FALSE	19
2022-09-13	16:26:36	1.53548	6.83012	6.74841	1219.03	FALSE	19
2022-09-13	16:26:36	1.49304	6.64134	6.74841	1252.9	FALSE	19
2022-09-13	16:26:36	1.5138	6.73369	6.74841	1225.76	FALSE	19
2022-09-13	16:26:36	1.52612	6.78849	6.74841	1259.69	FALSE	19
2022-09-13	16:26:37	1.57752	7.01712	8.83555	1232.78	FALSE	19
2022-09-13	16:26:37	1.70922	7.60295	8.83555	1267.29	FALSE	19
2022-09-13	16:26:37	2.67222	11.8866	8.83555	1244.67	FALSE	19
2022-09-13	16:26:38	4.81136	21.4019	6.99217	1288.69	1	20
2022-09-13	16:26:38	1.06419	4.73373	6.99217	1249.4	FALSE	20
2022-09-13	16:26:38	0.180267	0.801864	6.99217	1289.49	FALSE	20
2022-09-13	16:26:38	0.231819	1.03118	6.99217	1250.43	FALSE	20
2022-09-13	16:26:39	0.355331	1.58058	0.780926	1291.08	FALSE	20
2022-09-13	16:26:39	0.261794	1.16451	0.780926	1251.6	FALSE	20
2022-09-13	16:26:39	0.0336008	0.149463	0.780926	1291.22	FALSE	20
2022-09-13	16:26:39	0.0515142	0.229145	0.780926	1251.82	FALSE	20
2022-09-13	16:26:40	0.262557	1.16791	1.08902	1292.39	FALSE	20
2022-09-13	16:26:40	0.353957	1.57447	1.08902	1253.4	FALSE	20
2022-09-13	16:26:40	0.24327	1.08211	1.08902	1293.47	FALSE	20
2022-09-13	16:26:40	0.119504	0.531578	1.08902	1253.93	FALSE	20
2022-09-13	16:26:41	0.113397	0.504413	0.284078	1293.98	FALSE	20
2022-09-13	16:26:41	-0.00156464	-0.00695983	0.284078	1253.93	FALSE	20
2022-09-13	16:26:41	0.0797585	0.354782	0.284078	1294.33	FALSE	20
2022-09-13	16:26:42	-0.242328	-1.07792	-2.56128	1253.93	FALSE	20
2022-09-13	16:26:42	-0.622378	-2.76846	-2.56128	1294.33	FALSE	20
2022-09-13	16:26:42	-0.679681	-3.02336	-2.56128	1253.93	FALSE	20
2022-09-13	16:26:42	-0.758816	-3.37537	-2.56128	1294.33	FALSE	20
2022-09-13	16:26:43	-0.383142	-1.70429	0.450537	1253.93	FALSE	20
2022-09-13	16:26:43	-0.0636511	-0.283133	0.450537	1294.33	FALSE	20
2022-09-13	16:26:43	0.228919	1.01828	0.450537	1254.95	FALSE	20
2022-09-13	16:26:43	0.623015	2.7713	0.450537	1297.11	FALSE	20
2022-09-13	16:26:44	0.311921	1.38749	2.01578	1256.34	FALSE	20
2022-09-13	16:26:44	0.612939	2.72648	2.01578	1299.83	FALSE	20
2022-09-13	16:26:44	0.5993	2.66581	2.01578	1259	FALSE	20
2022-09-13	16:26:44	0.288512	1.28336	2.01578	1301.12	FALSE	20
2022-09-13	16:26:45	0.308512	1.37232	1.69218	1260.37	FALSE	20
2022-09-13	16:26:45	0.436603	1.9421	1.69218	1303.06	FALSE	20
2022-09-13	16:26:45	0.396145	1.76213	1.69218	1262.14	FALSE	20
2022-09-13	16:26:46	0.481387	2.14131	0.924954	1305.2	FALSE	20
2022-09-13	16:26:46	0.170038	0.756363	0.924954	1262.89	FALSE	20
2022-09-13	16:26:46	0.0140588	0.0625364	0.924954	1305.26	FALSE	20
2022-09-13	16:26:46	0.166272	0.739611	0.924954	1263.63	FALSE	20
2022-09-13	16:26:47	0.517366	2.30135	10.3267	1307.56	FALSE	20
2022-09-13	16:26:47	2.64006	11.7435	10.3267	1275.38	FALSE	20
2022-09-13	16:26:47	3.62586	16.1286	10.3267	1323.69	1	21
2022-09-13	16:26:47	2.50291	11.1334	10.3267	1286.51	FALSE	21
2022-09-13	16:26:48	2.7449	12.2099	3.62008	1335.9	FALSE	21
2022-09-13	16:26:48	0.283015	1.25891	3.62008	1287.77	FALSE	21
2022-09-13	16:26:48	0.0237279	0.105546	3.62008	1336.01	FALSE	21
2022-09-13	16:26:48	0.203677	0.905996	3.62008	1288.67	FALSE	21
2022-09-13	16:26:49	0.0440333	0.195869	0.0194495	1336.2	FALSE	21
2022-09-13	16:26:49	0.129987	0.578208	0.0194495	1289.25	FALSE	21
2022-09-13	16:26:49	-0.160903	-0.715729	0.0194495	1336.2	FALSE	21
2022-09-13	16:26:50	-0.156475	-0.696032	2.49586	1289.25	FALSE	21
2022-09-13	16:26:50	-0.130878	-0.582172	2.49586	1336.2	FALSE	21
2022-09-13	16:26:50	2.0278	9.02006	2.49586	1298.27	FALSE	21
2022-09-13	16:26:50	0.503931	2.24159	2.49586	1338.44	FALSE	21
2022-09-13	16:26:51	0.351158	1.56202	-0.24397	1299.84	FALSE	21
2022-09-13	16:26:51	-0.047926	-0.213184	-0.24397	1338.44	FALSE	21
2022-09-13	16:26:51	-0.270572	-1.20356	-0.24397	1299.84	FALSE	21
2022-09-13	16:26:51	-0.252048	-1.12116	-0.24397	1338.44	FALSE	21
2022-09-13	16:26:52	-0.294287	-1.30905	-0.220881	1299.84	FALSE	21
2022-09-13	16:26:52	-0.141361	-0.628802	-0.220881	1338.44	FALSE	21
2022-09-13	16:26:52	0.0637279	0.283474	-0.220881	1300.12	FALSE	21
2022-09-13	16:26:52	0.173295	0.770851	-0.220881	1339.21	FALSE	21
2022-09-13	16:26:53	0.52612	2.34029	2.00179	1302.46	FALSE	21
2022-09-13	16:26:53	0.495993	2.20628	2.00179	1341.42	FALSE	21
2022-09-13	16:26:53	0.327952	1.4588	2.00179	1303.92	FALSE	21
2022-09-13	16:26:54	0.266883	1.18715	1.40854	1342.61	FALSE	21
2022-09-13	16:26:54	0.433346	1.92761	1.40854	1305.85	FALSE	21
2022-09-13	16:26:54	0.358995	1.59688	1.40854	1344.2	FALSE	21
2022-09-13	16:26:54	0.207392	0.922521	1.40854	1306.77	FALSE	21
2022-09-13	16:26:55	0.299402	1.3318	1.97775	1345.54	FALSE	21
2022-09-13	16:26:55	0.177417	0.789186	1.97775	1307.56	FALSE	21
2022-09-13	16:26:55	0.477265	2.12297	1.97775	1347.66	FALSE	21
2022-09-13	16:26:55	0.824389	3.66705	1.97775	1311.22	FALSE	21
2022-09-13	16:26:56	2.82154	12.5508	4.82754	1360.21	FALSE	21
2022-09-13	16:26:56	0.775178	3.44815	4.82754	1314.67	FALSE	21
2022-09-13	16:26:56	0.43126	1.91833	4.82754	1362.13	FALSE	21
2022-09-13	16:26:56	0.313143	1.39292	4.82754	1316.07	FALSE	21
2022-09-13	16:26:57	0.418486	1.86151	1.41533	1363.99	FALSE	21
2022-09-13	16:26:57	0.202557	0.901014	1.41533	1316.97	FALSE	21
2022-09-13	16:26:57	0.333499	1.48347	1.41533	1365.47	FALSE	21
2022-09-13	16:26:58	0.135127	0.601072	1.26417	1317.57	FALSE	21
2022-09-13	16:26:58	0.425611	1.8932	1.26417	1367.37	FALSE	21
2022-09-13	16:26:58	0.160624	0.714488	1.26417	1318.28	FALSE	21
2022-09-13	16:26:58	0.415433	1.84793	1.26417	1369.21	FALSE	21
2022-09-13	16:26:59	0.192023	0.854157	1.27198	1319.14	FALSE	21
2022-09-13	16:26:59	0.364084	1.61952	1.27198	1370.83	FALSE	21
2022-09-13	16:26:59	0.217265	0.966438	1.27198	1320.1	FALSE	21
2022-09-13	16:26:59	0.370445	1.64781	1.27198	1372.48	FALSE	21
2022-09-13	16:27:00	0.262303	1.16678	1.63429	1321.27	FALSE	21
2022-09-13	16:27:00	0.492837	2.19224	1.63429	1374.67	FALSE	21
2022-09-13	16:27:00	0.278283	1.23786	1.63429	1322.51	FALSE	21
2022-09-13	16:27:00	0.436196	1.94029	1.63429	1376.61	FALSE	21
2022-09-13	16:27:01	0.356145	1.5842	1.66411	1324.09	FALSE	21
2022-09-13	16:27:01	0.456756	2.03174	1.66411	1378.65	FALSE	21
2022-09-13	16:27:01	0.309427	1.37639	1.66411	1325.47	FALSE	21
2022-09-13	16:27:02	0.45645	2.03038	2.25636	1380.68	FALSE	21
2022-09-13	16:27:02	0.483066	2.14877	2.25636	1327.62	FALSE	21
2022-09-13	16:27:02	0.478181	2.12704	2.25636	1382.8	FALSE	21
2022-09-13	16:27:02	0.61131	2.71923	2.25636	1330.34	FALSE	21
2022-09-13	16:27:03	0.295738	1.3155	1.22626	1384.12	FALSE	21
2022-09-13	16:27:03	0.418995	1.86377	1.22626	1332.2	FALSE	21
2022-09-13	16:27:03	0.177825	0.791001	1.22626	1384.91	FALSE	21
2022-09-13	16:27:03	0.21014	0.934745	1.22626	1333.13	FALSE	21
2022-09-13	16:27:04	0.345814	1.53825	1.38483	1386.45	FALSE	21
2022-09-13	16:27:04	0.426832	1.89863	1.38483	1335.03	FALSE	21
2022-09-13	16:27:04	0.153957	0.684832	1.38483	1387.13	FALSE	21
2022-09-13	16:27:04	0.31869	1.4176	1.38483	1336.45	FALSE	21
2022-09-13	16:27:05	0.116094	0.516409	1.14799	1387.65	FALSE	21
2022-09-13	16:27:05	0.403015	1.79269	1.14799	1338.24	FALSE	21
2022-09-13	16:27:05	0.255127	1.13486	1.14799	1388.78	FALSE	21
2022-09-13	16:27:06	0.376654	1.67543	2.56841	1339.92	FALSE	21
2022-09-13	16:27:06	0.335636	1.49298	2.56841	1390.28	FALSE	21
2022-09-13	16:27:06	0.692837	3.08188	2.56841	1343	FALSE	21
2022-09-13	16:27:06	0.904491	4.02336	2.56841	1394.3	FALSE	21
2022-09-13	16:27:07	1.06515	4.738	3.70083	1347.74	FALSE	21
2022-09-13	16:27:07	0.676908	3.01102	3.70083	1397.31	FALSE	21
2022-09-13	16:27:07	0.755789	3.3619	3.70083	1351.1	FALSE	21
2022-09-13	16:27:07	0.830089	3.6924	3.70083	1401	FALSE	21
2022-09-13	16:27:08	0.934313	4.15601	2.85313	1355.26	FALSE	21
2022-09-13	16:27:08	0.43528	1.93621	2.85313	1402.94	FALSE	21
2022-09-13	16:27:08	0.674109	2.99857	2.85313	1358.25	FALSE	21
2022-09-13	16:27:08	0.521947	2.32172	2.85313	1405.26	FALSE	21
2022-09-13	16:27:09	0.770038	3.42528	3.35381	1361.68	FALSE	21
2022-09-13	16:27:09	0.6936	3.08527	3.35381	1408.35	FALSE	21
2022-09-13	16:27:09	0.970954	4.319	3.35381	1366	FALSE	21
2022-09-13	16:27:09	0.581285	2.58567	3.35381	1410.93	FALSE	21
2022-09-13	16:27:10	0.535025	2.3799	2.0995	1368.38	FALSE	21
2022-09-13	16:27:10	0.447239	1.98941	2.0995	1412.92	FALSE	21
2022-09-13	16:27:10	0.433702	1.92919	2.0995	1370.31	FALSE	21
2022-09-13	16:27:11	0.360522	1.60367	1.86462	1414.53	FALSE	21
2022-09-13	16:27:11	0.363321	1.61612	1.86462	1371.92	FALSE	21
2022-09-13	16:27:11	0.485153	2.15806	1.86462	1416.68	FALSE	21
2022-09-13	16:27:11	0.467748	2.08064	1.86462	1374	FALSE	21
2022-09-13	16:27:12	0.462354	2.05664	1.91907	1418.74	FALSE	21
2022-09-13	16:27:12	0.403423	1.79451	1.91907	1375.8	FALSE	21
2022-09-13	16:27:12	0.540267	2.40322	1.91907	1421.14	FALSE	21
2022-09-13	16:27:12	0.319657	1.4219	1.91907	1377.22	FALSE	21
2022-09-13	16:27:13	0.408512	1.81714	1.84023	1422.96	FALSE	21
2022-09-13	16:27:13	0.371412	1.65211	1.84023	1378.87	FALSE	21
2022-09-13	16:27:13	0.520522	2.31539	1.84023	1425.28	FALSE	21
2022-09-13	16:27:13	0.354364	1.57628	1.84023	1380.45	FALSE	21
2022-09-13	16:27:14	0.433957	1.93033	1.94451	1427.21	FALSE	21
2022-09-13	16:27:14	0.344797	1.53373	1.94451	1381.98	FALSE	21
2022-09-13	16:27:14	0.532684	2.36948	1.94451	1429.58	FALSE	21
2022-09-13	16:27:15	0.256959	1.14301	1.71069	1383.13	FALSE	21
2022-09-13	16:27:15	0.420115	1.86876	1.71069	1431.45	FALSE	21
2022-09-13	16:27:15	0.314008	1.39677	1.71069	1384.52	FALSE	21
2022-09-13	16:27:15	0.547239	2.43423	1.71069	1433.88	FALSE	21
2022-09-13	16:27:16	0.292328	1.30033	1.63248	1385.82	FALSE	21
2022-09-13	16:27:16	0.394567	1.75511	1.63248	1435.63	FALSE	21
2022-09-13	16:27:16	0.302201	1.34425	1.63248	1387.17	FALSE	21
2022-09-13	16:27:16	0.478893	2.13021	1.63248	1437.77	FALSE	21
2022-09-13	16:27:17	0.328766	1.46242	1.61601	1388.63	FALSE	21
2022-09-13	16:27:17	0.3307	1.47102	1.61601	1439.24	FALSE	21
2022-09-13	16:27:17	0.347494	1.54572	1.61601	1390.18	FALSE	21
2022-09-13	16:27:17	0.446221	1.98488	1.61601	1441.22	FALSE	21
2022-09-13	16:27:18	0.349071	1.55274	2.25502	1391.73	FALSE	21
2022-09-13	16:27:18	0.761641	3.38793	2.25502	1444.61	FALSE	21
2022-09-13	16:27:18	0.41014	1.82438	2.25502	1393.55	FALSE	21
2022-09-13	16:27:19	0.517468	2.3018	2.18098	1446.91	FALSE	21
2022-09-13	16:27:19	0.569275	2.53225	2.18098	1396.09	FALSE	21
2022-09-13	16:27:19	0.409784	1.8228	2.18098	1448.73	FALSE	21
2022-09-13	16:27:19	0.464695	2.06706	2.18098	1398.15	FALSE	21
2022-09-13	16:27:20	0.402099	1.78862	1.28602	1450.52	FALSE	21
2022-09-13	16:27:20	0.338028	1.50362	1.28602	1399.66	FALSE	21
2022-09-13	16:27:20	0.446323	1.98533	1.28602	1452.51	FALSE	21
2022-09-13	16:27:20	-0.0300125	-0.133502	1.28602	1399.66	FALSE	21
2022-09-13	16:27:21	0.405967	1.80582	1.99343	1454.31	FALSE	21
2022-09-13	16:27:21	0.845509	3.76099	1.99343	1403.42	FALSE	21
2022-09-13	16:27:21	0.223473	0.994053	1.99343	1455.31	FALSE	21
2022-09-13	16:27:21	0.317621	1.41284	1.99343	1404.83	FALSE	21
2022-09-13	16:27:22	0.481896	2.14357	3.52617	1457.45	FALSE	21
2022-09-13	16:27:22	1.05116	4.67577	3.52617	1409.51	FALSE	21
2022-09-13	16:27:22	0.845102	3.75918	3.52617	1461.21	FALSE	21
2022-09-13	16:27:23	1.13711	5.05809	6.13512	1414.56	FALSE	21
2022-09-13	16:27:23	2.50892	11.1602	6.13512	1472.37	FALSE	21
2022-09-13	16:27:23	1.6224	7.21676	6.13512	1421.78	FALSE	21
2022-09-13	16:27:23	0.248512	1.10543	6.13512	1473.48	FALSE	21
2022-09-13	16:27:24	0.0412852	0.183645	0.588623	1421.96	FALSE	21
2022-09-13	16:27:24	0.152379	0.677812	0.588623	1474.15	FALSE	21
2022-09-13	16:27:24	0.121947	0.542445	0.588623	1422.51	FALSE	21
2022-09-13	16:27:24	0.213702	0.950589	0.588623	1475.1	FALSE	21
2022-09-13	16:27:25	0.261031	1.16112	4.08697	1423.67	FALSE	21
2022-09-13	16:27:25	0.364797	1.62269	4.08697	1476.73	FALSE	21
2022-09-13	16:27:25	0.746527	3.3207	4.08697	1426.99	FALSE	21
2022-09-13	16:27:25	2.30281	10.2434	4.08697	1486.97	FALSE	21
2022-09-13	16:27:26	2.17294	9.66567	5.42701	1436.65	FALSE	21
2022-09-13	16:27:26	0.654669	2.9121	5.42701	1489.88	FALSE	21
2022-09-13	16:27:26	0.832532	3.70327	5.42701	1440.36	FALSE	21
2022-09-13	16:27:27	3.16312	14.0702	10.0422	1503.95	1	22
2022-09-13	16:27:27	2.68327	11.9357	10.0422	1452.29	FALSE	22
2022-09-13	16:27:27	1.17925	5.24554	10.0422	1509.2	FALSE	22
2022-09-13	16:27:27	2.00469	8.91726	10.0422	1461.21	FALSE	22
2022-09-13	16:27:28	3.8192	16.9886	5.38668	1526.19	1	23
2022-09-13	16:27:28	0.479046	2.13089	5.38668	1463.34	FALSE	23
2022-09-13	16:27:28	0.257366	1.14482	5.38668	1527.33	FALSE	23
2022-09-13	16:27:28	0.288308	1.28245	5.38668	1464.62	FALSE	23
2022-09-13	16:27:29	0.360573	1.6039	1.18896	1528.94	FALSE	23
2022-09-13	16:27:29	0.233906	1.04046	1.18896	1465.66	FALSE	23
2022-09-13	16:27:29	0.253193	1.12625	1.18896	1530.06	FALSE	23
2022-09-13	16:27:29	0.221489	0.985227	1.18896	1466.65	FALSE	23
2022-09-13	16:27:30	0.228104	1.01465	1.03397	1531.08	FALSE	23
2022-09-13	16:27:30	0.186578	0.829936	1.03397	1467.48	FALSE	23
2022-09-13	16:27:30	0.282659	1.25732	1.03397	1532.33	FALSE	23
2022-09-13	16:27:31	0.364288	1.62043	1.76372	1469.1	FALSE	23
2022-09-13	16:27:31	0.409682	1.82235	1.76372	1534.16	FALSE	23
2022-09-13	16:27:31	0.384339	1.70962	1.76372	1470.81	FALSE	23
2022-09-13	16:27:31	0.427697	1.90248	1.76372	1536.06	FALSE	23
2022-09-13	16:27:32	0.346934	1.54323	1.53378	1472.35	FALSE	23
2022-09-13	16:27:32	0.464898	2.06796	1.53378	1538.13	FALSE	23
2022-09-13	16:27:32	0.319453	1.42099	1.53378	1473.77	FALSE	23
2022-09-13	16:27:32	0.247952	1.10294	1.53378	1539.23	FALSE	23
2022-09-13	16:27:33	0.332328	1.47826	1.26287	1475.25	FALSE	23
2022-09-13	16:27:33	0.284033	1.26344	1.26287	1540.49	FALSE	23
2022-09-13	16:27:33	0.325204	1.44657	1.26287	1476.7	FALSE	23
2022-09-13	16:27:33	0.194059	0.863213	1.26287	1541.36	FALSE	23
2022-09-13	16:27:34	0.272634	1.21273	1.1827	1477.91	FALSE	23
2022-09-13	16:27:34	0.206476	0.918447	1.1827	1542.27	FALSE	23
2022-09-13	16:27:34	0.318537	1.41692	1.1827	1479.33	FALSE	23
2022-09-13	16:27:35	0.118384	0.526596	0.744367	1542.8	FALSE	23
2022-09-13	16:27:35	0.227138	1.01036	0.744367	1480.34	FALSE	23
2022-09-13	16:27:35	0.107138	0.476571	0.744367	1543.28	FALSE	23
2022-09-13	16:27:35	0.216705	0.963947	0.744367	1481.3	FALSE	23
2022-09-13	16:27:36	0.351005	1.56134	1.05738	1544.84	FALSE	23
2022-09-13	16:27:36	0.291361	1.29603	1.05738	1482.6	FALSE	23
2022-09-13	16:27:36	-0.00380383	-0.0169202	1.05738	1544.84	FALSE	23
2022-09-13	16:27:36	0.312277	1.38907	1.05738	1483.99	FALSE	23
2022-09-13	16:27:37	0.00596716	0.0265431	7.1428	1544.87	FALSE	23
2022-09-13	16:27:37	0.635636	2.82744	7.1428	1486.81	FALSE	23
2022-09-13	16:27:37	1.19324	5.30777	7.1428	1550.17	FALSE	23
2022-09-13	16:27:37	4.58825	20.4095	7.1428	1507.22	1	24
2022-09-13	16:27:38	2.94398	13.0954	7.97007	1563.27	FALSE	24
2022-09-13	16:27:38	1.68485	7.49455	7.97007	1514.72	FALSE	24
2022-09-13	16:27:38	0.746425	3.32025	7.97007	1566.59	FALSE	24
2022-09-13	16:27:39	0.405254	1.80265	0.597281	1516.52	FALSE	24
2022-09-13	16:27:39	0.131005	0.582736	0.597281	1567.17	FALSE	24
2022-09-13	16:27:39	-0.0458903	-0.204129	0.597281	1516.52	FALSE	24
2022-09-13	16:27:39	0.0467305	0.207867	0.597281	1567.38	FALSE	24
2022-09-13	16:27:40	0.116552	0.518447	0.778322	1517.04	FALSE	24
2022-09-13	16:27:40	0.0988424	0.439671	0.778322	1567.82	FALSE	24
2022-09-13	16:27:40	0.247494	1.1009	0.778322	1518.14	FALSE	24
2022-09-13	16:27:40	0.23701	1.05427	0.778322	1568.87	FALSE	24
2022-09-13	16:27:41	0.456603	2.03106	3.31464	1520.17	FALSE	24
2022-09-13	16:27:41	0.328257	1.46015	3.31464	1570.33	FALSE	24
2022-09-13	16:27:41	1.38113	6.14354	3.31464	1526.32	FALSE	24
2022-09-13	16:27:41	0.814669	3.62381	3.31464	1573.96	FALSE	24
2022-09-13	16:27:42	2.54912	11.339	11.6911	1537.65	FALSE	24
2022-09-13	16:27:42	2.25508	10.031	11.6911	1583.99	FALSE	24
2022-09-13	16:27:42	3.31792	14.7588	11.6911	1552.41	1	25
2022-09-13	16:27:42	2.39095	10.6354	11.6911	1594.62	FALSE	25
2022-09-13	16:27:43	1.49879	6.66692	6.93087	1559.08	FALSE	25
2022-09-13	16:27:43	1.89024	8.40817	6.93087	1603.03	FALSE	25
2022-09-13	16:27:43	1.28536	5.71754	6.93087	1564.8	FALSE	25
2022-09-13	16:27:44	0.713448	3.17356	5.14526	1606.21	FALSE	25
2022-09-13	16:27:44	1.43523	6.38419	5.14526	1571.18	FALSE	25
2022-09-13	16:27:44	0.803982	3.57627	5.14526	1609.78	FALSE	25
2022-09-13	16:27:44	1.67416	7.447	5.14526	1578.63	FALSE	25
2022-09-13	16:27:45	1.34179	5.96855	4.3156	1615.75	FALSE	25
2022-09-13	16:27:45	1.07966	4.80254	4.3156	1583.43	FALSE	25
2022-09-13	16:27:45	0.886832	3.94481	4.3156	1619.7	FALSE	25
2022-09-13	16:27:45	0.572481	2.54651	4.3156	1585.98	FALSE	25
2022-09-13	16:27:46	0.833702	3.70847	2.38318	1623.4	FALSE	25
2022-09-13	16:27:46	0.197163	0.87702	2.38318	1586.85	FALSE	25
2022-09-13	16:27:46	0.802252	3.56858	2.38318	1626.97	FALSE	25
2022-09-13	16:27:46	0.309937	1.37866	2.38318	1588.23	FALSE	25
2022-09-13	16:27:47	0.523524	2.32874	1.87879	1629.3	FALSE	25
2022-09-13	16:27:47	0.280725	1.24872	1.87879	1589.48	FALSE	25
2022-09-13	16:27:47	0.462863	2.05891	1.87879	1631.36	FALSE	25
2022-09-13	16:27:48	0.310242	1.38002	1.76768	1590.86	FALSE	25
2022-09-13	16:27:48	0.432074	1.92195	1.76768	1633.28	FALSE	25
2022-09-13	16:27:48	0.303524	1.35014	1.76768	1592.21	FALSE	25
2022-09-13	16:27:48	0.543728	2.41861	1.76768	1635.7	FALSE	25
2022-09-13	16:27:49	0.49472	2.20061	2.00311	1594.41	FALSE	25
2022-09-13	16:27:49	0.530598	2.36021	2.00311	1638.06	FALSE	25
2022-09-13	16:27:49	0.457367	2.03446	2.00311	1596.45	FALSE	25
2022-09-13	16:27:49	0.318588	1.41714	2.00311	1639.48	FALSE	25
2022-09-13	16:27:50	0.534618	2.37809	1.66366	1598.83	FALSE	25
2022-09-13	16:27:50	0.272634	1.21273	1.66366	1640.69	FALSE	25
2022-09-13	16:27:50	0.487748	2.1696	1.66366	1601	FALSE	25
2022-09-13	16:27:50	0.201031	0.894226	1.66366	1641.58	FALSE	25
2022-09-13	16:27:51	0.437825	1.94753	1.40288	1602.94	FALSE	25
2022-09-13	16:27:51	0.292379	1.30056	1.40288	1642.89	FALSE	25
2022-09-13	16:27:51	0.215942	0.960553	1.40288	1603.9	FALSE	25

## Sheet: Sulley_prong_2022913162242 (3)
Date	Time	Lbs	Newtons	Total force x time	total steps > 13.345		**GoPro Fitting: 1612
2022-09-13	16:22:51	0.414822	1.84521	1.84521	FALSE	0
2022-09-13	16:22:51	0.31126	1.38455	1.38455	FALSE	0
2022-09-13	16:22:51	0.290293	1.29128	3.13649	FALSE	0
2022-09-13	16:22:51	0.259097	1.15252	2.53706	FALSE	0
2022-09-13	16:22:52	0.485611	2.16009	5.29659	FALSE	0
2022-09-13	16:22:52	0.906476	4.03219	6.56925	FALSE	0
2022-09-13	16:22:52	1.42541	6.34051	11.6371	FALSE	0
2022-09-13	16:22:52	1.67055	7.43094	14.0002	FALSE	0
2022-09-13	16:22:53	0.478995	2.13067	13.7678	FALSE	0
2022-09-13	16:22:53	0.720165	3.20344	17.2036	FALSE	0
2022-09-13	16:22:53	0.481081	2.13994	15.9077	FALSE	0
2022-09-13	16:22:54	0.339097	1.50837	18.712	FALSE	0
2022-09-13	16:22:54	0.320929	1.42756	17.3353	FALSE	0
2022-09-13	16:22:54	0.452023	2.01069	20.7227	FALSE	0
2022-09-13	16:22:54	0.156756	0.697282	18.0325	FALSE	0
2022-09-13	16:22:55	0.215687	0.959419	21.6821	FALSE	0
2022-09-13	16:22:55	0.157519	0.700676	18.7332	FALSE	0
2022-09-13	16:22:55	0.230496	1.02529	22.7074	FALSE	0
2022-09-13	16:22:55	0.221692	0.98613	19.7194	FALSE	0
2022-09-13	16:22:56	2.52709	11.241	33.9484	FALSE	0
2022-09-13	16:22:56	6.50866	28.9518	48.6712	1	1
2022-09-13	16:22:56	8.68576	38.636	72.5844	1	2
2022-09-13	16:22:56	1.35274	6.01726	54.6884	FALSE	2
2022-09-13	16:22:57	1.92078	8.54401	81.1284	FALSE	2
2022-09-13	16:22:57	1.08408	4.8222	59.5106	FALSE	2
2022-09-13	16:22:57	0.818486	3.64079	84.7692	FALSE	2
2022-09-13	16:22:57	0.357621	1.59077	61.1014	FALSE	2
2022-09-13	16:22:58	0.226934	1.00945	85.7786	FALSE	2
2022-09-13	16:22:58	-0.025127	-0.11177	61.1014	FALSE	2
2022-09-13	16:22:58	-0.506399	-2.25256	85.7786	FALSE	2
2022-09-13	16:22:59	-0.26472	-1.17753	61.1014	FALSE	2
2022-09-13	16:22:59	0.0285117	0.126826	85.9055	FALSE	2
2022-09-13	16:22:59	0.020471	0.0910591	61.1925	FALSE	2
2022-09-13	16:22:59	0.237316	1.05563	86.9611	FALSE	2
2022-09-13	16:23:00	0.247952	1.10294	62.2954	FALSE	2
2022-09-13	16:23:00	0.369173	1.64216	88.6033	FALSE	2
2022-09-13	16:23:00	0.251616	1.11924	63.4146	FALSE	2
2022-09-13	16:23:00	0.304135	1.35285	89.9561	FALSE	2
2022-09-13	16:23:01	0.290903	1.29399	64.7086	FALSE	2
2022-09-13	16:23:01	0.65014	2.89195	92.8481	FALSE	2
2022-09-13	16:23:01	0.831565	3.69897	68.4076	FALSE	2
2022-09-13	16:23:01	0.768003	3.41623	96.2643	FALSE	2
2022-09-13	16:23:02	0.993397	4.41883	72.8264	FALSE	2
2022-09-13	16:23:02	0.883219	3.92873	100.193	FALSE	2
2022-09-13	16:23:02	0.500929	2.22823	75.0547	FALSE	2
2022-09-13	16:23:03	0.559148	2.4872	102.68	FALSE	2
2022-09-13	16:23:03	0.483321	2.14991	77.2046	FALSE	2
2022-09-13	16:23:03	0.500369	2.22574	104.906	FALSE	2
2022-09-13	16:23:03	0.429428	1.91018	79.1148	FALSE	2
2022-09-13	16:23:04	0.431514	1.91946	106.825	FALSE	2
2022-09-13	16:23:04	0.462252	2.05619	81.1709	FALSE	2
2022-09-13	16:23:04	0.452939	2.01476	108.84	FALSE	2
2022-09-13	16:23:04	0.436196	1.94029	83.1112	FALSE	2
2022-09-13	16:23:05	0.427596	1.90203	110.742	FALSE	2
2022-09-13	16:23:05	0.413143	1.83774	84.949	FALSE	2
2022-09-13	16:23:05	0.448817	1.99643	112.739	FALSE	2
2022-09-13	16:23:05	0.431005	1.9172	86.8662	FALSE	2
2022-09-13	16:23:06	0.443524	1.97288	114.712	FALSE	2
2022-09-13	16:23:06	0.411921	1.83231	88.6985	FALSE	2
2022-09-13	16:23:06	0.42159	1.87532	116.587	FALSE	2
2022-09-13	16:23:07	0.517264	2.30089	90.9994	FALSE	2
2022-09-13	16:23:07	0.394211	1.75353	118.34	FALSE	2
2022-09-13	16:23:07	0.456094	2.0288	93.0282	FALSE	2
2022-09-13	16:23:07	0.375433	1.67	120.01	FALSE	2
2022-09-13	16:23:08	0.396756	1.76485	94.793	FALSE	2
2022-09-13	16:23:08	0.508461	2.26174	122.272	FALSE	2
2022-09-13	16:23:08	0.362659	1.61318	96.4062	FALSE	2
2022-09-13	16:23:08	0.479707	2.13383	124.406	FALSE	2
2022-09-13	16:23:09	0.290089	1.29037	97.6966	FALSE	2
2022-09-13	16:23:09	0.57416	2.55398	126.96	FALSE	2
2022-09-13	16:23:09	0.197621	0.879058	98.5756	FALSE	2
2022-09-13	16:23:09	0.470802	2.09422	129.054	FALSE	2
2022-09-13	16:23:10	0.256145	1.13938	99.715	FALSE	2
2022-09-13	16:23:10	0.768257	3.41736	132.472	FALSE	2
2022-09-13	16:23:10	0.954975	4.24792	103.963	FALSE	2
2022-09-13	16:23:11	2.4338	10.826	143.298	FALSE	2
2022-09-13	16:23:11	3.39696	15.1104	119.073	1	3
2022-09-13	16:23:11	3.54362	15.7627	159.06	1	4
2022-09-13	16:23:11	1.82108	8.10053	127.174	FALSE	4
2022-09-13	16:23:12	0.801743	3.56631	162.627	FALSE	4
2022-09-13	16:23:12	1.0964	4.87701	132.051	FALSE	4
2022-09-13	16:23:12	0.503422	2.23932	164.866	FALSE	4
2022-09-13	16:23:12	0.803626	3.57469	135.626	FALSE	4
2022-09-13	16:23:13	0.427697	1.90248	166.768	FALSE	4
2022-09-13	16:23:13	0.544287	2.4211	138.047	FALSE	4
2022-09-13	16:23:13	0.663371	2.95081	169.719	FALSE	4
2022-09-13	16:23:13	0.417163	1.85562	139.902	FALSE	4
2022-09-13	16:23:14	0.810903	3.60706	173.326	FALSE	4
2022-09-13	16:23:14	0.307748	1.36892	141.271	FALSE	4
2022-09-13	16:23:14	0.651921	2.89987	176.226	FALSE	4
2022-09-13	16:23:15	0.289682	1.28856	142.56	FALSE	4
2022-09-13	16:23:15	0.430547	1.91516	178.141	FALSE	4
2022-09-13	16:23:15	0.36042	1.60322	144.163	FALSE	4
2022-09-13	16:23:15	0.316654	1.40854	179.55	FALSE	4
2022-09-13	16:23:16	0.586527	2.60899	146.772	FALSE	4
2022-09-13	16:23:16	0.248512	1.10543	180.655	FALSE	4
2022-09-13	16:23:16	0.513804	2.2855	149.057	FALSE	4
2022-09-13	16:23:16	0.223982	0.996317	181.652	FALSE	4
2022-09-13	16:23:17	0.576705	2.5653	151.623	FALSE	4
2022-09-13	16:23:17	0.206527	0.918673	182.57	FALSE	4
2022-09-13	16:23:17	0.564287	2.51006	154.133	FALSE	4
2022-09-13	16:23:17	0.288308	1.28245	183.853	FALSE	4
2022-09-13	16:23:18	0.457417	2.03468	156.167	FALSE	4
2022-09-13	16:23:18	0.335229	1.49117	185.344	FALSE	4
2022-09-13	16:23:18	0.433143	1.92671	158.094	FALSE	4
2022-09-13	16:23:19	0.506832	2.25449	187.598	FALSE	4
2022-09-13	16:23:19	0.310751	1.38228	159.476	FALSE	4
2022-09-13	16:23:19	0.477621	2.12455	189.723	FALSE	4
2022-09-13	16:23:19	0.2964	1.31845	160.795	FALSE	4
2022-09-13	16:23:20	0.56673	2.52093	192.244	FALSE	4
2022-09-13	16:23:20	0.211005	0.938592	161.734	FALSE	4
2022-09-13	16:23:20	0.568002	2.52659	194.77	FALSE	4
2022-09-13	16:23:20	0.294669	1.31075	163.044	FALSE	4
2022-09-13	16:23:21	0.479402	2.13248	196.903	FALSE	4
2022-09-13	16:23:21	0.326476	1.45223	164.496	FALSE	4
2022-09-13	16:23:21	0.495687	2.20491	199.108	FALSE	4
2022-09-13	16:23:21	0.582557	2.59133	167.088	FALSE	4
2022-09-13	16:23:22	0.202201	0.89943	200.007	FALSE	4
2022-09-13	16:23:22	0.0844404	0.375608	167.463	FALSE	4
2022-09-13	16:23:22	0.311616	1.38613	201.393	FALSE	4
2022-09-13	16:23:23	0.435026	1.93508	169.399	FALSE	4
2022-09-13	16:23:23	0.233957	1.04069	202.434	FALSE	4
2022-09-13	16:23:23	0.504338	2.2434	171.642	FALSE	4
2022-09-13	16:23:23	0.230446	1.02507	203.459	FALSE	4
2022-09-13	16:23:24	0.416145	1.8511	173.493	FALSE	4
2022-09-13	16:23:24	0.281082	1.25031	204.709	FALSE	4
2022-09-13	16:23:24	0.472379	2.10124	175.594	FALSE	4
2022-09-13	16:23:24	0.415738	1.84929	206.559	FALSE	4
2022-09-13	16:23:25	0.363321	1.61612	177.21	FALSE	4
2022-09-13	16:23:25	0.456298	2.0297	208.588	FALSE	4
2022-09-13	16:23:25	0.23757	1.05676	178.267	FALSE	4
2022-09-13	16:23:25	0.570089	2.53587	211.124	FALSE	4
2022-09-13	16:23:26	0.160725	0.714937	178.982	FALSE	4
2022-09-13	16:23:26	0.508715	2.26287	213.387	FALSE	4
2022-09-13	16:23:26	0.307188	1.36643	180.348	FALSE	4
2022-09-13	16:23:26	0.775229	3.44837	216.836	FALSE	4
2022-09-13	16:23:27	1.13319	5.04066	185.389	FALSE	4
2022-09-13	16:23:27	0.622863	2.77062	219.606	FALSE	4
2022-09-13	16:23:27	0.586628	2.60944	187.999	FALSE	4
2022-09-13	16:23:28	0.252735	1.12422	220.73	FALSE	4
2022-09-13	16:23:28	0.324186	1.44204	189.441	FALSE	4
2022-09-13	16:23:28	1.31533	5.85085	226.581	FALSE	4
2022-09-13	16:23:28	1.90922	8.49259	197.933	FALSE	4
2022-09-13	16:23:29	1.03899	4.62164	231.203	FALSE	4
2022-09-13	16:23:29	1.72683	7.68129	205.615	FALSE	4
2022-09-13	16:23:29	2.30123	10.2363	241.439	FALSE	4
2022-09-13	16:23:29	1.77864	7.91175	213.526	FALSE	4
2022-09-13	16:23:30	3.04698	13.5536	254.993	1	5
2022-09-13	16:23:30	1.23045	5.47329	219	FALSE	5
2022-09-13	16:23:30	0.795891	3.54028	258.533	FALSE	5
2022-09-13	16:23:30	1.5363	6.83377	225.833	FALSE	5
2022-09-13	16:23:31	1.47019	6.5397	265.073	FALSE	5
2022-09-13	16:23:31	1.30887	5.82212	231.655	FALSE	5
2022-09-13	16:23:31	0.569733	2.53429	267.607	FALSE	5
2022-09-13	16:23:32	0.721692	3.21023	234.866	FALSE	5
2022-09-13	16:23:32	0.682608	3.03638	270.643	FALSE	5
2022-09-13	16:23:32	0.411463	1.83027	236.696	FALSE	5
2022-09-13	16:23:32	0.437316	1.94527	272.589	FALSE	5
2022-09-13	16:23:33	0.406018	1.80605	238.502	FALSE	5
2022-09-13	16:23:33	0.592837	2.63706	275.226	FALSE	5
2022-09-13	16:23:33	0.538282	2.39439	240.896	FALSE	5
2022-09-13	16:23:33	0.539656	2.4005	277.626	FALSE	5
2022-09-13	16:23:34	0.696043	3.09614	243.992	FALSE	5
2022-09-13	16:23:34	0.788817	3.50882	281.135	FALSE	5
2022-09-13	16:23:34	1.33844	5.95365	249.946	FALSE	5
2022-09-13	16:23:34	2.02586	9.01143	290.146	FALSE	5
2022-09-13	16:23:35	1.93329	8.59966	258.546	FALSE	5
2022-09-13	16:23:35	1.42261	6.32805	296.475	FALSE	5
2022-09-13	16:23:35	1.57823	7.02028	265.566	FALSE	5
2022-09-13	16:23:36	1.08627	4.83195	301.306	FALSE	5
2022-09-13	16:23:36	0.970852	4.31854	269.885	FALSE	5
2022-09-13	16:23:36	0.937621	4.17073	305.477	FALSE	5
2022-09-13	16:23:36	0.961387	4.27644	274.161	FALSE	5
2022-09-13	16:23:37	0.817723	3.6374	309.115	FALSE	5
2022-09-13	16:23:37	0.653499	2.90689	277.068	FALSE	5
2022-09-13	16:23:37	0.559351	2.48811	311.603	FALSE	5
2022-09-13	16:23:37	0.470598	2.09331	279.161	FALSE	5
2022-09-13	16:23:38	0.457519	2.03514	313.638	FALSE	5
2022-09-13	16:23:38	0.44958	1.99982	281.161	FALSE	5
2022-09-13	16:23:38	0.278079	1.23695	314.875	FALSE	5
2022-09-13	16:23:38	0.541845	2.41023	283.571	FALSE	5
2022-09-13	16:23:39	0.310649	1.38183	316.257	FALSE	5
2022-09-13	16:23:39	0.605509	2.69343	286.265	FALSE	5
2022-09-13	16:23:39	0.250038	1.11222	317.369	FALSE	5
2022-09-13	16:23:40	0.543321	2.4168	288.682	FALSE	5
2022-09-13	16:23:40	0.32729	1.45585	318.825	FALSE	5
2022-09-13	16:23:40	0.563931	2.50848	291.19	FALSE	5
2022-09-13	16:23:40	0.353906	1.57424	320.399	FALSE	5
2022-09-13	16:23:41	0.494771	2.20084	293.391	FALSE	5
2022-09-13	16:23:41	0.662812	2.94832	323.347	FALSE	5
2022-09-13	16:23:41	0.450751	2.00503	295.396	FALSE	5
2022-09-13	16:23:41	0.0892241	0.396887	323.744	FALSE	5
2022-09-13	16:23:42	0.0631173	0.280758	295.677	FALSE	5
2022-09-13	16:23:42	0.135433	0.602433	324.347	FALSE	5
2022-09-13	16:23:42	0.709885	3.15771	298.834	FALSE	5
2022-09-13	16:23:42	0.110904	0.493323	324.84	FALSE	5
2022-09-13	16:23:43	0.0260689	0.11596	298.95	FALSE	5
2022-09-13	16:23:43	0.193753	0.861852	325.702	FALSE	5
2022-09-13	16:23:43	-0.0283331	-0.126031	298.95	FALSE	5
2022-09-13	16:23:44	0.249886	1.11154	326.813	FALSE	5
2022-09-13	16:23:44	0.0889697	0.395755	299.346	FALSE	5
2022-09-13	16:23:44	0.0573666	0.255178	327.068	FALSE	5
2022-09-13	16:23:44	-0.182073	-0.809897	299.346	FALSE	5
2022-09-13	16:23:45	-0.240038	-1.06774	327.068	FALSE	5
2022-09-13	16:23:45	0.146272	0.650647	299.997	FALSE	5
2022-09-13	16:23:45	0.160471	0.713807	327.782	FALSE	5
2022-09-13	16:23:45	0.482049	2.14425	302.141	FALSE	5
2022-09-13	16:23:46	0.646679	2.87656	330.659	FALSE	5
2022-09-13	16:23:46	0.869631	3.86829	306.009	FALSE	5
2022-09-13	16:23:46	0.789631	3.51244	334.171	FALSE	5
2022-09-13	16:23:46	0.380064	1.6906	307.7	FALSE	5
2022-09-13	16:23:47	0.54383	2.41906	336.59	FALSE	5
2022-09-13	16:23:47	0.287799	1.28019	308.98	FALSE	5
2022-09-13	16:23:47	0.560878	2.4949	339.085	FALSE	5
2022-09-13	16:23:48	0.196552	0.874303	309.854	FALSE	5
2022-09-13	16:23:48	0.491361	2.18567	341.271	FALSE	5
2022-09-13	16:23:48	0.21299	0.947422	310.802	FALSE	5
2022-09-13	16:23:48	0.481641	2.14244	343.413	FALSE	5
2022-09-13	16:23:49	0.375484	1.67023	312.472	FALSE	5
2022-09-13	16:23:49	0.406832	1.80967	345.223	FALSE	5
2022-09-13	16:23:49	0.360725	1.60458	314.077	FALSE	5
2022-09-13	16:23:49	0.415942	1.85019	347.073	FALSE	5
2022-09-13	16:23:50	0.548868	2.44147	316.518	FALSE	5
2022-09-13	16:23:50	0.320573	1.42597	348.499	FALSE	5
2022-09-13	16:23:50	0.364949	1.62337	318.141	FALSE	5
2022-09-13	16:23:50	0.186781	0.830839	349.33	FALSE	5
2022-09-13	16:23:51	0.312379	1.38952	319.531	FALSE	5
2022-09-13	16:23:51	0.117621	0.523202	349.853	FALSE	5
2022-09-13	16:23:51	0.305	1.3567	320.888	FALSE	5
2022-09-13	16:23:52	0.175992	0.782848	350.636	FALSE	5
2022-09-13	16:23:52	-0.011641	-0.0517815	320.888	FALSE	5
2022-09-13	16:23:52	0.247596	1.10136	351.737	FALSE	5
2022-09-13	16:23:52	0.750445	3.33813	324.226	FALSE	5
2022-09-13	16:23:53	0.195738	0.870682	352.608	FALSE	5
2022-09-13	16:23:53	0.505611	2.24906	326.475	FALSE	5
2022-09-13	16:23:53	0.345356	1.53621	354.144	FALSE	5
2022-09-13	16:23:53	0.139606	0.620995	327.096	FALSE	5
2022-09-13	16:23:54	0.237214	1.05518	355.2	FALSE	5
2022-09-13	16:23:54	-0.00965623	-0.0429528	327.096	FALSE	5
2022-09-13	16:23:54	0.086934	0.3867	355.586	FALSE	5
2022-09-13	16:23:54	0.0107	0.0475957	327.143	FALSE	5
2022-09-13	16:23:55	0.162099	0.721049	356.307	FALSE	5
2022-09-13	16:23:55	0.0348221	0.154896	327.298	FALSE	5
2022-09-13	16:23:55	0.236959	1.05404	357.361	FALSE	5
2022-09-13	16:23:55	0.234975	1.04522	328.344	FALSE	5
2022-09-13	16:23:56	0.353651	1.57311	358.934	FALSE	5
2022-09-13	16:23:56	1.28215	5.70326	334.047	FALSE	5
2022-09-13	16:23:56	3.42052	15.2152	374.15	1	6
2022-09-13	16:23:57	4.8506	21.5764	355.623	1	7
2022-09-13	16:23:57	2.18296	9.71024	383.86	FALSE	7
2022-09-13	16:23:57	1.38429	6.1576	361.781	FALSE	7
2022-09-13	16:23:57	0.557926	2.48177	386.342	FALSE	7
2022-09-13	16:23:58	0.987392	4.39212	366.173	FALSE	7
2022-09-13	16:23:58	0.723524	3.21838	389.56	FALSE	7
2022-09-13	16:23:58	0.26098	1.16089	367.334	FALSE	7
2022-09-13	16:23:58	0.72612	3.22993	392.79	FALSE	7
2022-09-13	16:23:59	0.231565	1.03005	368.364	FALSE	7
2022-09-13	16:23:59	0.608766	2.70791	395.498	FALSE	7
2022-09-13	16:23:59	0.363117	1.61522	369.979	FALSE	7
2022-09-13	16:23:59	0.624186	2.7765	398.274	FALSE	7
2022-09-13	16:24:00	0.518384	2.30588	372.285	FALSE	7
2022-09-13	16:24:00	0.621692	2.76541	401.04	FALSE	7
2022-09-13	16:24:00	1.02352	4.55282	376.838	FALSE	7
2022-09-13	16:24:01	0.702659	3.12557	404.165	FALSE	7
2022-09-13	16:24:01	1.47431	6.55803	383.396	FALSE	7
2022-09-13	16:24:01	1.02927	4.5784	408.744	FALSE	7
2022-09-13	16:24:01	2.36627	10.5256	393.921	FALSE	7
2022-09-13	16:24:02	2.2335	9.93505	418.679	FALSE	7
2022-09-13	16:24:02	5.26652	23.4265	417.348	1	8
2022-09-13	16:24:02	1.47513	6.56167	425.24	FALSE	8
2022-09-13	16:24:02	2.40688	10.7063	428.054	FALSE	8
2022-09-13	16:24:03	0.937265	4.16914	429.41	FALSE	8
2022-09-13	16:24:03	0.293753	1.30667	429.361	FALSE	8
2022-09-13	16:24:03	0.60271	2.68097	432.091	FALSE	8
2022-09-13	16:24:03	0.201794	0.89762	430.259	FALSE	8
2022-09-13	16:24:04	0.518995	2.30859	434.399	FALSE	8
2022-09-13	16:24:04	0.510445	2.27056	432.529	FALSE	8
2022-09-13	16:24:04	1.33375	5.93279	440.332	FALSE	8
2022-09-13	16:24:05	1.21721	5.41439	437.944	FALSE	8
2022-09-13	16:24:05	2.28006	10.1422	450.474	FALSE	8
2022-09-13	16:24:05	1.63833	7.28762	445.231	FALSE	8
2022-09-13	16:24:05	1.58627	7.05605	457.53	FALSE	8
2022-09-13	16:24:06	1.48393	6.60082	451.832	FALSE	8
2022-09-13	16:24:06	1.77945	7.91535	465.445	FALSE	8
2022-09-13	16:24:06	1.62022	7.20706	459.039	FALSE	8
2022-09-13	16:24:06	1.23055	5.47373	470.919	FALSE	8
2022-09-13	16:24:07	1.08704	4.83537	463.874	FALSE	8
2022-09-13	16:24:07	1.12821	5.0185	475.938	FALSE	8
2022-09-13	16:24:07	0.70841	3.15115	467.026	FALSE	8
2022-09-13	16:24:07	0.503219	2.23842	478.176	FALSE	8
2022-09-13	16:24:08	0.491972	2.18839	469.214	FALSE	8
2022-09-13	16:24:08	0.62673	2.78782	480.964	FALSE	8
2022-09-13	16:24:08	0.546221	2.4297	471.644	FALSE	8
2022-09-13	16:24:09	0.489987	2.17956	483.143	FALSE	8
2022-09-13	16:24:09	0.366222	1.62903	473.273	FALSE	8
2022-09-13	16:24:09	0.408919	1.81895	484.962	FALSE	8
2022-09-13	16:24:09	0.394262	1.75376	475.026	FALSE	8
2022-09-13	16:24:10	0.371616	1.65302	486.615	FALSE	8
2022-09-13	16:24:10	0.407392	1.81216	476.839	FALSE	8
2022-09-13	16:24:10	0.339758	1.51131	488.127	FALSE	8
2022-09-13	16:24:10	0.244797	1.08891	477.928	FALSE	8
2022-09-13	16:24:11	0.117875	0.524332	488.651	FALSE	8
2022-09-13	16:24:11	-0.0254323	-0.113128	477.928	FALSE	8
2022-09-13	16:24:11	0.305662	1.35965	490.011	FALSE	8
2022-09-13	16:24:11	0.273652	1.21726	479.145	FALSE	8
2022-09-13	16:24:12	0.352481	1.56791	491.579	FALSE	8
2022-09-13	16:24:12	0.331769	1.47577	480.621	FALSE	8
2022-09-13	16:24:12	0.683321	3.03955	494.618	FALSE	8
2022-09-13	16:24:13	2.28307	10.1556	490.776	FALSE	8
2022-09-13	16:24:13	1.402	6.23638	500.855	FALSE	8
2022-09-13	16:24:13	0.854313	3.80016	494.576	FALSE	8
2022-09-13	16:24:13	0.276807	1.23129	502.086	FALSE	8
2022-09-13	16:24:14	0.469275	2.08743	496.664	FALSE	8
2022-09-13	16:24:14	0.296349	1.31822	503.404	FALSE	8
2022-09-13	16:24:14	0.517977	2.30407	498.968	FALSE	8
2022-09-13	16:24:14	0.569224	2.53202	505.936	FALSE	8
2022-09-13	16:24:15	0.680674	3.02777	501.996	FALSE	8
2022-09-13	16:24:15	0.439758	1.95613	507.892	FALSE	8
2022-09-13	16:24:15	0.132481	0.589302	502.585	FALSE	8
2022-09-13	16:24:15	0.552634	2.45823	510.35	FALSE	8
2022-09-13	16:24:16	0.299402	1.3318	503.917	FALSE	8
2022-09-13	16:24:16	-0.277493	-1.23434	510.35	FALSE	8
2022-09-13	16:24:16	-0.344771	-1.53361	503.917	FALSE	8
2022-09-13	16:24:17	-0.173778	-0.772999	510.35	FALSE	8
2022-09-13	16:24:17	-0.0455341	-0.202545	503.917	FALSE	8
2022-09-13	16:24:17	0.0421503	0.187493	510.538	FALSE	8
2022-09-13	16:24:17	0.14612	0.649971	504.567	FALSE	8
2022-09-13	16:24:18	0.647392	2.87973	513.418	FALSE	8
2022-09-13	16:24:18	0.366934	1.6322	506.199	FALSE	8
2022-09-13	16:24:18	0.333397	1.48302	514.901	FALSE	8
2022-09-13	16:24:18	0.218181	0.970513	507.169	FALSE	8
2022-09-13	16:24:19	0.319249	1.42008	516.321	FALSE	8
2022-09-13	16:24:19	0.0508018	0.225977	507.395	FALSE	8
2022-09-13	16:24:19	0.169122	0.752288	517.073	FALSE	8
2022-09-13	16:24:19	0.068359	0.304075	507.699	FALSE	8
2022-09-13	16:24:20	0.0225066	0.100114	517.173	FALSE	8
2022-09-13	16:24:20	-0.284414	-1.26513	507.699	FALSE	8
2022-09-13	16:24:20	-0.362531	-1.61261	517.173	FALSE	8
2022-09-13	16:24:21	-0.198562	-0.883243	507.699	FALSE	8
2022-09-13	16:24:21	-0.26014	-1.15715	517.173	FALSE	8
2022-09-13	16:24:21	0.119453	0.531351	508.231	FALSE	8
2022-09-13	16:24:21	0.552532	2.45777	519.631	FALSE	8
2022-09-13	16:24:22	1.31411	5.84542	514.076	FALSE	8
2022-09-13	16:24:22	1.91029	8.49735	528.128	FALSE	8
2022-09-13	16:24:22	1.80174	8.0145	522.091	FALSE	8
2022-09-13	16:24:22	2.63833	11.7358	539.864	FALSE	8
2022-09-13	16:24:23	1.41477	6.29318	528.384	FALSE	8
2022-09-13	16:24:23	1.14531	5.09457	544.959	FALSE	8
2022-09-13	16:24:23	1.73396	7.713	536.097	FALSE	8
2022-09-13	16:24:23	1.30307	5.79632	550.755	FALSE	8
2022-09-13	16:24:24	1.36332	6.06432	542.161	FALSE	8
2022-09-13	16:24:24	1.07879	4.79867	555.554	FALSE	8
2022-09-13	16:24:24	1.35212	6.0145	548.176	FALSE	8
2022-09-13	16:24:24	1.00103	4.45278	560.006	FALSE	8
2022-09-13	16:24:25	1.09889	4.88808	553.064	FALSE	8
2022-09-13	16:24:25	1.06464	4.73573	564.742	FALSE	8
2022-09-13	16:24:25	3.26607	14.5281	567.592	1	9
2022-09-13	16:24:26	1.4735	6.55442	571.297	FALSE	9
2022-09-13	16:24:26	2.71156	12.0616	579.653	FALSE	9
2022-09-13	16:24:26	2.98088	13.2596	584.556	FALSE	9
2022-09-13	16:24:26	3.10276	13.8017	593.455	1	10
2022-09-13	16:24:27	2.61289	11.6227	596.179	FALSE	10
2022-09-13	16:24:27	3.05396	13.5846	607.04	1	11
2022-09-13	16:24:27	1.55482	6.91615	603.095	FALSE	11
2022-09-13	16:24:27	0.685102	3.04747	610.087	FALSE	11
2022-09-13	16:24:28	0.378333	1.6829	604.778	FALSE	11
2022-09-13	16:24:28	0.264746	1.17764	611.265	FALSE	11
2022-09-13	16:24:28	0.568715	2.52976	607.308	FALSE	11
2022-09-13	16:24:28	0.379911	1.68992	612.955	FALSE	11
2022-09-13	16:24:29	0.287443	1.2786	608.586	FALSE	11
2022-09-13	16:24:29	0.447392	1.99009	614.945	FALSE	11
2022-09-13	16:24:29	0.229784	1.02213	609.608	FALSE	11
2022-09-13	16:24:30	0.0691733	0.307697	615.253	FALSE	11
2022-09-13	16:24:30	0.0629646	0.280079	609.888	FALSE	11
2022-09-13	16:24:30	0.0646949	0.287776	615.54	FALSE	11
2022-09-13	16:24:30	-0.04416	-0.196433	609.888	FALSE	11
2022-09-13	16:24:31	-0.434338	-1.93202	615.54	FALSE	11
2022-09-13	16:24:31	-0.283193	-1.2597	609.888	FALSE	11
2022-09-13	16:24:31	-0.455916	-2.02801	615.54	FALSE	11
2022-09-13	16:24:31	-0.336017	-1.49467	609.888	FALSE	11
2022-09-13	16:24:32	-0.341157	-1.51753	615.54	FALSE	11
2022-09-13	16:24:32	-0.328079	-1.45936	609.888	FALSE	11
2022-09-13	16:24:32	-0.28187	-1.25381	615.54	FALSE	11
2022-09-13	16:24:32	-0.175559	-0.780922	609.888	FALSE	11
2022-09-13	16:24:33	-0.142023	-0.631747	615.54	FALSE	11
2022-09-13	16:24:33	-0.0340837	-0.151611	609.888	FALSE	11
2022-09-13	16:24:33	-0.204414	-0.909274	615.54	FALSE	11
2022-09-13	16:24:34	-0.345076	-1.53497	609.888	FALSE	11
2022-09-13	16:24:34	-0.330419	-1.46977	615.54	FALSE	11
2022-09-13	16:24:34	-0.204364	-0.909052	609.888	FALSE	11
2022-09-13	16:24:34	-0.17042	-0.758062	615.54	FALSE	11
2022-09-13	16:24:35	-0.192811	-0.857662	609.888	FALSE	11
2022-09-13	16:24:35	-0.198257	-0.881887	615.54	FALSE	11
2022-09-13	16:24:35	-0.222633	-0.990316	609.888	FALSE	11
2022-09-13	16:24:35	-0.249096	-1.10803	615.54	FALSE	11
2022-09-13	16:24:36	-0.39444	-1.75455	609.888	FALSE	11
2022-09-13	16:24:36	-0.604465	-2.68878	615.54	FALSE	11
2022-09-13	16:24:36	-0.467875	-2.0812	609.888	FALSE	11
2022-09-13	16:24:36	0.821641	3.65482	619.195	FALSE	11
2022-09-13	16:24:37	3.13986	13.9667	623.855	1	12
2022-09-13	16:24:37	0.978384	4.35205	623.547	FALSE	12
2022-09-13	16:24:37	0.513652	2.28483	626.14	FALSE	12
2022-09-13	16:24:38	0.493499	2.19518	625.742	FALSE	12
2022-09-13	16:24:38	0.534109	2.37582	628.516	FALSE	12
2022-09-13	16:24:38	0.407341	1.81193	627.554	FALSE	12
2022-09-13	16:24:38	0.699962	3.11357	631.629	FALSE	12
2022-09-13	16:24:39	0.870293	3.87124	631.426	FALSE	12
2022-09-13	16:24:39	0.773092	3.43887	635.068	FALSE	12
2022-09-13	16:24:39	0.830191	3.69286	635.118	FALSE	12
2022-09-13	16:24:39	0.287799	1.28019	636.348	FALSE	12
2022-09-13	16:24:40	0.506221	2.25177	637.37	FALSE	12
2022-09-13	16:24:40	0.627137	2.78963	639.138	FALSE	12
2022-09-13	16:24:40	0.620115	2.7584	640.129	FALSE	12
2022-09-13	16:24:40	0.674008	2.99812	642.136	FALSE	12
2022-09-13	16:24:41	0.523219	2.32738	642.456	FALSE	12
2022-09-13	16:24:41	0.568409	2.5284	644.665	FALSE	12
2022-09-13	16:24:41	0.612837	2.72602	645.182	FALSE	12
2022-09-13	16:24:42	0.636094	2.82947	647.494	FALSE	12
2022-09-13	16:24:42	0.523626	2.32919	647.511	FALSE	12
2022-09-13	16:24:42	0.355484	1.58126	649.075	FALSE	12
2022-09-13	16:24:42	0.372125	1.65529	649.166	FALSE	12
2022-09-13	16:24:43	0.395585	1.75964	650.835	FALSE	12
2022-09-13	16:24:43	0.374415	1.66547	650.832	FALSE	12
2022-09-13	16:24:43	0.278893	1.24057	652.076	FALSE	12
2022-09-13	16:24:43	0.505102	2.24679	653.079	FALSE	12
2022-09-13	16:24:44	0.305	1.3567	653.432	FALSE	12
2022-09-13	16:24:44	0.451412	2.00797	655.087	FALSE	12
2022-09-13	16:24:44	0.335789	1.49366	654.926	FALSE	12
2022-09-13	16:24:44	0.646679	2.87656	657.963	FALSE	12
2022-09-13	16:24:45	0.52332	2.32783	657.254	FALSE	12
2022-09-13	16:24:45	1.38088	6.14243	664.106	FALSE	12
2022-09-13	16:24:45	1.25808	5.59619	662.85	FALSE	12
2022-09-13	16:24:46	1.47569	6.56416	670.67	FALSE	12
2022-09-13	16:24:46	1.47599	6.5655	669.415	FALSE	12
2022-09-13	16:24:46	0.609835	2.71267	673.383	FALSE	12
2022-09-13	16:24:46	0.645305	2.87045	672.286	FALSE	12
2022-09-13	16:24:47	0.205306	0.913242	674.296	FALSE	12
2022-09-13	16:24:47	0.45757	2.03536	674.321	FALSE	12
2022-09-13	16:24:47	0.262201	1.16632	675.462	FALSE	12
2022-09-13	16:24:47	0.430802	1.91629	676.238	FALSE	12
2022-09-13	16:24:48	0.279555	1.24352	676.706	FALSE	12
2022-09-13	16:24:48	0.422099	1.87758	678.115	FALSE	12
2022-09-13	16:24:48	0.390649	1.73768	678.443	FALSE	12
2022-09-13	16:24:48	0.414211	1.84249	679.958	FALSE	12
2022-09-13	16:24:49	0.385254	1.71369	680.157	FALSE	12
2022-09-13	16:24:49	0.390547	1.73723	681.695	FALSE	12
2022-09-13	16:24:49	0.382252	1.70033	681.857	FALSE	12
2022-09-13	16:24:50	0.38383	1.70735	683.402	FALSE	12
2022-09-13	16:24:50	0.379962	1.69015	683.547	FALSE	12
2022-09-13	16:24:50	0.380776	1.69377	685.096	FALSE	12
2022-09-13	16:24:50	0.381998	1.6992	685.247	FALSE	12
2022-09-13	16:24:51	0.380471	1.69241	686.788	FALSE	12
2022-09-13	16:24:51	0.382099	1.69965	686.946	FALSE	12
2022-09-13	16:24:51	0.384288	1.70939	688.498	FALSE	12
2022-09-13	16:24:51	0.384644	1.71097	688.657	FALSE	12
2022-09-13	16:24:52	0.371412	1.65211	690.15	FALSE	12
2022-09-13	16:24:52	0.407036	1.81058	690.468	FALSE	12
2022-09-13	16:24:52	0.38159	1.69739	691.847	FALSE	12
2022-09-13	16:24:52	0.420725	1.87147	692.339	FALSE	12
2022-09-13	16:24:53	0.197468	0.878377	692.726	FALSE	12
2022-09-13	16:24:53	0.0974175	0.433333	692.773	FALSE	12
2022-09-13	16:24:53	0.0659671	0.293435	693.019	FALSE	12
2022-09-13	16:24:54	-0.0236003	-0.104979	692.773	FALSE	12
2022-09-13	16:24:54	-0.277493	-1.23434	693.019	FALSE	12
2022-09-13	16:24:54	-0.432353	-1.92319	692.773	FALSE	12
2022-09-13	16:24:54	-0.61505	-2.73587	693.019	FALSE	12
2022-09-13	16:24:55	-0.866399	-3.85392	692.773	FALSE	12
2022-09-13	16:24:55	-0.849045	-3.77672	693.019	FALSE	12
2022-09-13	16:24:55	-0.673625	-2.99642	692.773	FALSE	12
2022-09-13	16:24:55	-0.130012	-0.578319	693.019	FALSE	12
2022-09-13	16:24:56	0.218283	0.970966	693.744	FALSE	12
2022-09-13	16:24:56	0.42271	1.8803	694.899	FALSE	12
2022-09-13	16:24:56	0.358435	1.59439	695.338	FALSE	12
2022-09-13	16:24:56	0.531412	2.36383	697.263	FALSE	12
2022-09-13	16:24:57	0.245305	1.09117	696.429	FALSE	12
2022-09-13	16:24:57	0.322354	1.4339	698.697	FALSE	12
2022-09-13	16:24:57	0.399809	1.77843	698.208	FALSE	12
2022-09-13	16:24:57	1.73884	7.73471	706.432	FALSE	12
2022-09-13	16:24:58	3.24261	14.4238	712.631	1	13
2022-09-13	16:24:58	2.98724	13.2878	719.72	FALSE	13
2022-09-13	16:24:58	2.93233	13.0436	725.675	FALSE	13
2022-09-13	16:24:59	3.64546	16.2157	735.935	1	14
2022-09-13	16:24:59	1.68261	7.48459	733.16	FALSE	14
2022-09-13	16:24:59	2.09533	9.32045	745.256	FALSE	14
2022-09-13	16:24:59	0.557112	2.47815	735.638	FALSE	14
2022-09-13	16:25:00	0.825305	3.67112	748.927	FALSE	14
2022-09-13	16:25:00	0.580827	2.58363	738.221	FALSE	14
2022-09-13	16:25:00	0.495534	2.20423	751.131	FALSE	14
2022-09-13	16:25:00	0.731107	3.25211	741.473	FALSE	14
2022-09-13	16:25:01	0.448512	1.99507	753.126	FALSE	14
2022-09-13	16:25:01	0.708918	3.15341	744.627	FALSE	14
2022-09-13	16:25:01	0.249835	1.11132	754.238	FALSE	14
2022-09-13	16:25:01	0.780471	3.47169	748.099	FALSE	14
2022-09-13	16:25:02	0.355789	1.58262	755.82	FALSE	14
2022-09-13	16:25:02	0.619657	2.75636	750.855	FALSE	14
2022-09-13	16:25:02	0.361336	1.60729	757.428	FALSE	14
2022-09-13	16:25:03	0.562048	2.5001	753.355	FALSE	14
2022-09-13	16:25:03	0.321438	1.42982	758.857	FALSE	14
2022-09-13	16:25:03	0.65584	2.91731	756.272	FALSE	14
2022-09-13	16:25:03	0.41187	1.83208	760.689	FALSE	14
2022-09-13	16:25:04	0.485713	2.16055	758.433	FALSE	14
2022-09-13	16:25:04	0.588817	2.61918	763.309	FALSE	14
2022-09-13	16:25:04	0.780929	3.47373	761.907	FALSE	14
2022-09-13	16:25:04	0.427239	1.90044	765.209	FALSE	14
2022-09-13	16:25:05	0.866221	3.85312	765.76	FALSE	14
2022-09-13	16:25:05	0.454822	2.02314	767.232	FALSE	14
2022-09-13	16:25:05	0.796858	3.54458	769.304	FALSE	14
2022-09-13	16:25:05	0.794313	3.53326	770.765	FALSE	14
2022-09-13	16:25:06	0.878791	3.90904	773.213	FALSE	14
2022-09-13	16:25:06	0.317163	1.4108	772.176	FALSE	14
2022-09-13	16:25:06	0.866628	3.85493	777.068	FALSE	14
2022-09-13	16:25:07	0.56444	2.51074	774.687	FALSE	14
2022-09-13	16:25:07	0.566781	2.52116	779.589	FALSE	14
2022-09-13	16:25:07	0.543626	2.41816	777.105	FALSE	14
2022-09-13	16:25:07	0.712685	3.17017	782.76	FALSE	14
2022-09-13	16:25:08	0.461896	2.05461	779.16	FALSE	14
2022-09-13	16:25:08	0.6164	2.74187	785.501	FALSE	14
2022-09-13	16:25:08	0.0391987	0.174364	779.334	FALSE	14
2022-09-13	16:25:08	-0.00380383	-0.0169202	785.501	FALSE	14
2022-09-13	16:25:09	-0.251997	-1.12093	779.334	FALSE	14
2022-09-13	16:25:09	-0.546552	-2.43117	785.501	FALSE	14
2022-09-13	16:25:09	-0.534796	-2.37888	779.334	FALSE	14
2022-09-13	16:25:09	-0.144669	-0.643517	785.501	FALSE	14
2022-09-13	16:25:10	0.25925	1.1532	780.487	FALSE	14
2022-09-13	16:25:10	0.565102	2.51369	788.015	FALSE	14
2022-09-13	16:25:10	0.305814	1.36032	781.848	FALSE	14
2022-09-13	16:25:11	0.536654	2.38714	790.402	FALSE	14
2022-09-13	16:25:11	0.266781	1.1867	783.034	FALSE	14
2022-09-13	16:25:11	0.506221	2.25177	792.654	FALSE	14
2022-09-13	16:25:11	0.239911	1.06717	784.101	FALSE	14
2022-09-13	16:25:12	0.483117	2.149	794.803	FALSE	14
2022-09-13	16:25:12	0.290344	1.29151	785.393	FALSE	14
2022-09-13	16:25:12	0.522506	2.32421	797.127	FALSE	14
2022-09-13	16:25:12	0.268766	1.19552	786.589	FALSE	14
2022-09-13	16:25:13	0.355992	1.58352	798.711	FALSE	14
2022-09-13	16:25:13	0.334415	1.48754	788.076	FALSE	14
2022-09-13	16:25:13	0.412379	1.83434	800.545	FALSE	14
2022-09-13	16:25:13	0.328664	1.46196	789.538	FALSE	14
2022-09-13	16:25:14	0.295025	1.31233	801.857	FALSE	14
2022-09-13	16:25:14	0.40958	1.82189	791.36	FALSE	14
2022-09-13	16:25:14	0.346221	1.54006	803.398	FALSE	14
2022-09-13	16:25:15	0.398639	1.77323	793.133	FALSE	14
2022-09-13	16:25:15	0.0628628	0.279626	803.677	FALSE	14
2022-09-13	16:25:15	0.0468323	0.208319	793.341	FALSE	14
2022-09-13	16:25:15	0.207239	0.921841	804.599	FALSE	14
2022-09-13	16:25:16	0.253448	1.12739	794.469	FALSE	14
2022-09-13	16:25:16	0.244593	1.088	805.687	FALSE	14
2022-09-13	16:25:16	0.12444	0.553534	795.022	FALSE	14
2022-09-13	16:25:16	0.257977	1.14753	806.835	FALSE	14
2022-09-13	16:25:17	0.239911	1.06717	796.09	FALSE	14
2022-09-13	16:25:17	0.458995	2.0417	808.876	FALSE	14
2022-09-13	16:25:17	0.663066	2.94945	799.039	FALSE	14
2022-09-13	16:25:17	1.25833	5.5973	814.474	FALSE	14
2022-09-13	16:25:18	0.611412	2.71968	801.759	FALSE	14
2022-09-13	16:25:18	0.941947	4.18997	818.664	FALSE	14
2022-09-13	16:25:18	0.282914	1.25846	803.017	FALSE	14
2022-09-13	16:25:19	0.525458	2.33734	821.001	FALSE	14
2022-09-13	16:25:19	0.317672	1.41307	804.43	FALSE	14
2022-09-13	16:25:19	0.333193	1.48211	822.483	FALSE	14
2022-09-13	16:25:19	-0.00186998	-0.00831805	804.43	FALSE	14
2022-09-13	16:25:20	0.305611	1.35942	823.842	FALSE	14
2022-09-13	16:25:20	0.170751	0.759535	805.19	FALSE	14
2022-09-13	16:25:20	0.343728	1.52897	825.371	FALSE	14
2022-09-13	16:25:20	0.114924	0.511205	805.701	FALSE	14
2022-09-13	16:25:21	-0.14187	-0.631066	825.371	FALSE	14
2022-09-13	16:25:21	-0.146399	-0.651212	805.701	FALSE	14
2022-09-13	16:25:21	-0.343295	-1.52704	825.371	FALSE	14
2022-09-13	16:25:21	-0.404669	-1.80005	805.701	FALSE	14
2022-09-13	16:25:22	-0.45561	-2.02664	825.371	FALSE	14
2022-09-13	16:25:22	-0.42243	-1.87905	805.701	FALSE	14
2022-09-13	16:25:22	-0.483498	-2.1507	825.371	FALSE	14
2022-09-13	16:25:23	-0.438867	-1.95217	805.701	FALSE	14
2022-09-13	16:25:23	-0.423804	-1.88516	825.371	FALSE	14
2022-09-13	16:25:23	-0.45271	-2.01374	805.701	FALSE	14
2022-09-13	16:25:23	-0.496323	-2.20774	825.371	FALSE	14
2022-09-13	16:25:24	-0.591335	-2.63038	805.701	FALSE	14
2022-09-13	16:25:24	-0.546755	-2.43208	825.371	FALSE	14
2022-09-13	16:25:24	-0.556373	-2.47486	805.701	FALSE	14
2022-09-13	16:25:24	-0.553931	-2.464	825.371	FALSE	14
2022-09-13	16:25:25	-0.546857	-2.43253	805.701	FALSE	14
2022-09-13	16:25:25	-0.529453	-2.35511	825.371	FALSE	14
2022-09-13	16:25:25	-0.524261	-2.33202	805.701	FALSE	14
2022-09-13	16:25:25	-0.530674	-2.36054	825.371	FALSE	14
2022-09-13	16:25:26	-0.543803	-2.41894	805.701	FALSE	14
2022-09-13	16:25:26	-0.476882	-2.12127	825.371	FALSE	14
2022-09-13	16:25:26	-0.376577	-1.67509	805.701	FALSE	14
2022-09-13	16:25:26	-0.35215	-1.56643	825.371	FALSE	14
2022-09-13	16:25:27	-0.27271	-1.21307	805.701	FALSE	14
2022-09-13	16:25:27	-0.309758	-1.37787	825.371	FALSE	14
2022-09-13	16:25:27	-0.293575	-1.30588	805.701	FALSE	14
2022-09-13	16:25:28	-0.29276	-1.30226	825.371	FALSE	14
2022-09-13	16:25:28	-0.304058	-1.35251	805.701	FALSE	14
2022-09-13	16:25:28	-0.305381	-1.3584	825.371	FALSE	14
2022-09-13	16:25:28	-0.222379	-0.989186	805.701	FALSE	14
2022-09-13	16:25:29	-0.208079	-0.925577	825.371	FALSE	14
2022-09-13	16:25:29	-0.214236	-0.952965	805.701	FALSE	14
2022-09-13	16:25:29	-0.195356	-0.868983	825.371	FALSE	14
2022-09-13	16:25:29	-0.153117	-0.681095	805.701	FALSE	14
2022-09-13	16:25:30	-0.113015	-0.502713	825.371	FALSE	14
2022-09-13	16:25:30	-0.0436002	-0.193942	805.701	FALSE	14
2022-09-13	16:25:30	0.0414379	0.184324	825.556	FALSE	14
2022-09-13	16:25:30	0.140318	0.624163	806.325	FALSE	14
2022-09-13	16:25:31	0.176959	0.787149	826.343	FALSE	14
2022-09-13	16:25:31	0.147952	0.65812	806.983	FALSE	14
2022-09-13	16:25:31	0.115331	0.513015	826.856	FALSE	14
2022-09-13	16:25:32	0.144135	0.641141	807.624	FALSE	14
2022-09-13	16:25:32	0.157774	0.70181	827.558	FALSE	14
2022-09-13	16:25:32	0.144949	0.644762	808.269	FALSE	14
2022-09-13	16:25:32	0.119911	0.533388	828.091	FALSE	14
2022-09-13	16:25:33	0.0713615	0.31743	808.587	FALSE	14
2022-09-13	16:25:33	0.0512089	0.227787	828.319	FALSE	14
2022-09-13	16:25:33	-0.000292388	-0.0013006	808.587	FALSE	14
2022-09-13	16:25:33	0.0485626	0.216016	828.535	FALSE	14
2022-09-13	16:25:34	-0.116526	-0.518331	808.587	FALSE	14
2022-09-13	16:25:34	-0.0346944	-0.154328	828.535	FALSE	14
2022-09-13	16:25:34	0.131514	0.585001	809.172	FALSE	14
2022-09-13	16:25:34	0.515738	2.29411	830.829	FALSE	14
2022-09-13	16:25:35	0.430242	1.9138	811.085	FALSE	14
2022-09-13	16:25:35	0.321132	1.42846	832.257	FALSE	14
2022-09-13	16:25:35	0.547443	2.43514	813.521	FALSE	14
2022-09-13	16:25:36	0.642405	2.85755	835.115	FALSE	14
2022-09-13	16:25:36	0.555025	2.46886	815.989	FALSE	14
2022-09-13	16:25:36	0.844084	3.75465	838.87	FALSE	14
2022-09-13	16:25:36	1.54765	6.88426	822.874	FALSE	14
2022-09-13	16:25:37	2.34861	10.4471	849.317	FALSE	14
2022-09-13	16:25:37	2.71925	12.0958	834.969	FALSE	14
2022-09-13	16:25:37	2.25538	10.0324	859.349	FALSE	14
2022-09-13	16:25:37	2.26734	10.0856	845.055	FALSE	14
2022-09-13	16:25:38	0.907901	4.03853	863.388	FALSE	14
2022-09-13	16:25:38	0.329784	1.46695	846.522	FALSE	14
2022-09-13	16:25:38	0.435076	1.93531	865.323	FALSE	14
2022-09-13	16:25:38	0.304237	1.35331	847.875	FALSE	14
2022-09-13	16:25:39	0.152634	0.678947	866.002	FALSE	14
2022-09-13	16:25:39	0.279046	1.24125	849.116	FALSE	14
2022-09-13	16:25:39	0.148563	0.660838	866.663	FALSE	14
2022-09-13	16:25:40	0.342914	1.52535	850.642	FALSE	14
2022-09-13	16:25:40	0.547494	2.43536	869.098	FALSE	14
2022-09-13	16:25:40	1.40546	6.25177	856.894	FALSE	14
2022-09-13	16:25:40	1.16709	5.19145	874.29	FALSE	14
2022-09-13	16:25:41	1.75452	7.80446	864.698	FALSE	14
2022-09-13	16:25:41	1.45457	6.47022	880.76	FALSE	14
2022-09-13	16:25:41	0.500013	2.22416	866.922	FALSE	14
2022-09-13	16:25:41	0.761488	3.38725	884.147	FALSE	14
2022-09-13	16:25:42	0.466527	2.07521	868.997	FALSE	14
2022-09-13	16:25:42	0.37131	1.65166	885.799	FALSE	14
2022-09-13	16:25:42	0.223626	0.994733	869.992	FALSE	14
2022-09-13	16:25:42	0.253957	1.12965	886.928	FALSE	14
2022-09-13	16:25:43	0.0731936	0.32558	870.318	FALSE	14
2022-09-13	16:25:43	0.115331	0.513015	887.441	FALSE	14
2022-09-13	16:25:43	-0.0216664	-0.0963765	870.318	FALSE	14
2022-09-13	16:25:44	-0.175509	-0.780699	887.441	FALSE	14
2022-09-13	16:25:44	-0.393727	-1.75138	870.318	FALSE	14
2022-09-13	16:25:44	-0.471081	-2.09546	887.441	FALSE	14
2022-09-13	16:25:44	-0.583702	-2.59642	870.318	FALSE	14
2022-09-13	16:25:45	-0.661106	-2.94073	887.441	FALSE	14
2022-09-13	16:25:45	-0.433218	-1.92704	870.318	FALSE	14
2022-09-13	16:25:45	0.233143	1.03707	888.478	FALSE	14
2022-09-13	16:25:45	0.457265	2.03401	872.352	FALSE	14
2022-09-13	16:25:46	0.461947	2.05483	890.533	FALSE	14
2022-09-13	16:25:46	0.465611	2.07113	874.423	FALSE	14
2022-09-13	16:25:46	0.490293	2.18092	892.714	FALSE	14
2022-09-13	16:25:46	0.434262	1.93168	876.355	FALSE	14
2022-09-13	16:25:47	0.451209	2.00707	894.721	FALSE	14
2022-09-13	16:25:47	0.493041	2.19314	878.548	FALSE	14
2022-09-13	16:25:47	0.425305	1.89184	896.613	FALSE	14
2022-09-13	16:25:48	0.447799	1.9919	880.54	FALSE	14
2022-09-13	16:25:48	0.411158	1.82891	898.442	FALSE	14
2022-09-13	16:25:48	0.393753	1.75149	882.291	FALSE	14
2022-09-13	16:25:48	0.415992	1.85042	900.292	FALSE	14
2022-09-13	16:25:49	0.410649	1.82665	884.118	FALSE	14
2022-09-13	16:25:49	0.43701	1.94391	902.236	FALSE	14
2022-09-13	16:25:49	0.360216	1.60231	885.72	FALSE	14
2022-09-13	16:25:49	0.34215	1.52195	903.758	FALSE	14
2022-09-13	16:25:50	0.469835	2.08992	887.81	FALSE	14
2022-09-13	16:25:50	0.354669	1.57764	905.336	FALSE	14
2022-09-13	16:25:50	0.806628	3.58804	891.398	FALSE	14
2022-09-13	16:25:50	1.21279	5.39473	910.731	FALSE	14
2022-09-13	16:25:51	2.93462	13.0538	904.452	FALSE	14
2022-09-13	16:25:51	2.30871	10.2696	921	FALSE	14
2022-09-13	16:25:51	2.90607	12.9268	917.379	FALSE	14
2022-09-13	16:25:52	0.633448	2.8177	923.818	FALSE	14
2022-09-13	16:25:52	0.821641	3.65482	921.033	FALSE	14
2022-09-13	16:25:52	0.717926	3.19348	927.011	FALSE	14
2022-09-13	16:25:52	0.481081	2.13994	923.173	FALSE	14
2022-09-13	16:25:53	0.741336	3.29761	930.309	FALSE	14
2022-09-13	16:25:53	0.294975	1.31211	924.485	FALSE	14
2022-09-13	16:25:53	0.607188	2.70089	933.01	FALSE	14
2022-09-13	16:25:53	0.313092	1.3927	925.878	FALSE	14
2022-09-13	16:25:54	0.512328	2.27894	935.289	FALSE	14
2022-09-13	16:25:54	0.344491	1.53236	927.411	FALSE	14
2022-09-13	16:25:54	0.47126	2.09626	937.385	FALSE	14
2022-09-13	16:25:54	0.367138	1.6331	929.044	FALSE	14
2022-09-13	16:25:55	0.392277	1.74493	939.13	FALSE	14
2022-09-13	16:25:55	0.54103	2.40661	931.45	FALSE	14
2022-09-13	16:25:55	0.325662	1.44861	940.579	FALSE	14
2022-09-13	16:25:56	0.617112	2.74504	934.195	FALSE	14
2022-09-13	16:25:56	0.326171	1.45087	942.03	FALSE	14
2022-09-13	16:25:56	0.572328	2.54583	936.741	FALSE	14
2022-09-13	16:25:56	0.409377	1.82099	943.85	FALSE	14
2022-09-13	16:25:57	0.625305	2.78148	939.523	FALSE	14
2022-09-13	16:25:57	0.260776	1.15998	945.01	FALSE	14
2022-09-13	16:25:57	0.625051	2.78035	942.303	FALSE	14
2022-09-13	16:25:57	0.297417	1.32297	946.333	FALSE	14
2022-09-13	16:25:58	0.709478	3.1559	945.459	FALSE	14
2022-09-13	16:25:58	0.35986	1.60073	947.934	FALSE	14
2022-09-13	16:25:58	0.487545	2.1687	947.628	FALSE	14
2022-09-13	16:25:58	0.42902	1.90837	949.843	FALSE	14
2022-09-13	16:25:59	0.444338	1.9765	949.604	FALSE	14
2022-09-13	16:25:59	0.400725	1.7825	951.625	FALSE	14
2022-09-13	16:25:59	0.46612	2.07339	951.677	FALSE	14
2022-09-13	16:25:59	0.380776	1.69377	953.319	FALSE	14
2022-09-13	16:26:00	0.398435	1.77232	953.45	FALSE	14
2022-09-13	16:26:00	0.475484	2.11505	955.434	FALSE	14
2022-09-13	16:26:00	0.442456	1.96813	955.418	FALSE	14
2022-09-13	16:26:01	0.462659	2.058	957.492	FALSE	14
2022-09-13	16:26:01	0.38098	1.69468	957.113	FALSE	14
2022-09-13	16:26:01	0.550089	2.44691	959.939	FALSE	14
2022-09-13	16:26:01	0.328766	1.46242	958.575	FALSE	14
2022-09-13	16:26:02	0.507748	2.25856	962.197	FALSE	14
2022-09-13	16:26:02	0.2793	1.24238	959.817	FALSE	14
2022-09-13	16:26:02	0.551921	2.45505	964.652	FALSE	14
2022-09-13	16:26:02	0.221336	0.984547	960.802	FALSE	14
2022-09-13	16:26:03	0.588104	2.616	967.268	FALSE	14
2022-09-13	16:26:03	0.252023	1.12105	961.923	FALSE	14
2022-09-13	16:26:03	0.517773	2.30316	969.572	FALSE	14
2022-09-13	16:26:03	0.240776	1.07102	962.994	FALSE	14
2022-09-13	16:26:04	0.545458	2.42631	971.998	FALSE	14
2022-09-13	16:26:04	0.300165	1.33519	964.329	FALSE	14
2022-09-13	16:26:04	0.316654	1.40854	973.406	FALSE	14
2022-09-13	16:26:05	0.179809	0.799826	965.129	FALSE	14
2022-09-13	16:26:05	0.385407	1.71437	975.121	FALSE	14
2022-09-13	16:26:05	0.462863	2.05891	967.188	FALSE	14
2022-09-13	16:26:05	0.510496	2.27079	977.392	FALSE	14
2022-09-13	16:26:06	0.387137	1.72206	968.91	FALSE	14
2022-09-13	16:26:06	0.512735	2.28075	979.672	FALSE	14
2022-09-13	16:26:06	0.494109	2.1979	971.108	FALSE	14
2022-09-13	16:26:06	0.391819	1.74289	981.415	FALSE	14
2022-09-13	16:26:07	0.559148	2.4872	973.595	FALSE	14
2022-09-13	16:26:07	0.346883	1.543	982.958	FALSE	14
2022-09-13	16:26:07	0.569987	2.53542	976.13	FALSE	14
2022-09-13	16:26:07	0.356298	1.58488	984.543	FALSE	14
2022-09-13	16:26:08	0.48612	2.16236	978.293	FALSE	14
2022-09-13	16:26:08	0.280318	1.24691	985.79	FALSE	14
2022-09-13	16:26:08	0.516552	2.29773	980.591	FALSE	14
2022-09-13	16:26:09	0.232888	1.03593	986.826	FALSE	14
2022-09-13	16:26:09	0.406425	1.80786	982.398	FALSE	14
2022-09-13	16:26:09	0.255331	1.13576	987.962	FALSE	14
2022-09-13	16:26:09	0.458384	2.03898	984.437	FALSE	14
2022-09-13	16:26:10	0.278384	1.23831	989.2	FALSE	14
2022-09-13	16:26:10	0.525254	2.33643	986.774	FALSE	14
2022-09-13	16:26:10	1.01487	4.51434	993.714	FALSE	14
2022-09-13	16:26:10	2.28408	10.16	996.934	FALSE	14
2022-09-13	16:26:11	1.44261	6.41702	1000.13	FALSE	14
2022-09-13	16:26:11	0.959402	4.26761	1001.2	FALSE	14
2022-09-13	16:26:11	0.373499	1.6614	1001.79	FALSE	14
2022-09-13	16:26:11	0.352328	1.56723	1002.77	FALSE	14
2022-09-13	16:26:12	0.360165	1.60209	1003.39	FALSE	14
2022-09-13	16:26:12	0.294669	1.31075	1004.08	FALSE	14
2022-09-13	16:26:12	0.505814	2.24996	1005.64	FALSE	14
2022-09-13	16:26:13	0.314211	1.39767	1005.48	FALSE	14
2022-09-13	16:26:13	0.380776	1.69377	1007.34	FALSE	14
2022-09-13	16:26:13	0.279402	1.24284	1006.72	FALSE	14
2022-09-13	16:26:13	0.534058	2.3756	1009.71	FALSE	14
2022-09-13	16:26:14	0.713957	3.17582	1009.9	FALSE	14
2022-09-13	16:26:14	5.53014	24.5992	1034.31	1	15
2022-09-13	16:26:14	17.1096	76.1069	1086	1	16
2022-09-13	16:26:14	5.31009	23.6203	1057.93	1	17
2022-09-13	16:26:15	3.55859	15.8293	1101.83	1	18
2022-09-13	16:26:15	4.802	21.3603	1079.29	1	19
2022-09-13	16:26:15	2.20424	9.8049	1111.64	FALSE	19
2022-09-13	16:26:15	0.706476	3.14255	1082.44	FALSE	19
2022-09-13	16:26:16	0.48897	2.17504	1113.81	FALSE	19
2022-09-13	16:26:16	0.303728	1.35104	1083.79	FALSE	19
2022-09-13	16:26:16	0.490853	2.18341	1116	FALSE	19
2022-09-13	16:26:17	0.34668	1.5421	1085.33	FALSE	19
2022-09-13	16:26:17	0.480674	2.13813	1118.13	FALSE	19
2022-09-13	16:26:17	0.358639	1.5953	1086.92	FALSE	19
2022-09-13	16:26:17	0.433753	1.92942	1120.06	FALSE	19
2022-09-13	16:26:18	0.392583	1.74629	1088.67	FALSE	19
2022-09-13	16:26:18	0.460471	2.04827	1122.11	FALSE	19
2022-09-13	16:26:18	0.231667	1.0305	1089.7	FALSE	19
2022-09-13	16:26:18	0.380369	1.69196	1123.8	FALSE	19
2022-09-13	16:26:19	0.382812	1.70282	1091.4	FALSE	19
2022-09-13	16:26:19	0.252634	1.12377	1124.93	FALSE	19
2022-09-13	16:26:19	0.287494	1.27883	1092.68	FALSE	19
2022-09-13	16:26:19	0.225102	1.0013	1125.93	FALSE	19
2022-09-13	16:26:20	0.17187	0.764512	1093.45	FALSE	19
2022-09-13	16:26:20	0.113652	0.505547	1126.43	FALSE	19
2022-09-13	16:26:20	0.124797	0.555122	1094	FALSE	19
2022-09-13	16:26:21	0.140471	0.624843	1127.06	FALSE	19
2022-09-13	16:26:21	0.191769	0.853027	1094.86	FALSE	19
2022-09-13	16:26:21	0.418995	1.86377	1128.92	FALSE	19
2022-09-13	16:26:21	0.369987	1.64578	1096.5	FALSE	19
2022-09-13	16:26:22	0.251412	1.11833	1130.04	FALSE	19
2022-09-13	16:26:22	0.350547	1.5593	1098.06	FALSE	19
2022-09-13	16:26:22	0.298893	1.32954	1131.37	FALSE	19
2022-09-13	16:26:22	0.345916	1.5387	1099.6	FALSE	19
2022-09-13	16:26:23	0.303473	1.34991	1132.72	FALSE	19
2022-09-13	16:26:23	0.248715	1.10633	1100.71	FALSE	19
2022-09-13	16:26:23	0.430903	1.91674	1134.64	FALSE	19
2022-09-13	16:26:23	0.352074	1.5661	1102.27	FALSE	19
2022-09-13	16:26:24	0.378537	1.68381	1136.32	FALSE	19
2022-09-13	16:26:24	0.324084	1.44159	1103.71	FALSE	19
2022-09-13	16:26:24	0.325916	1.44974	1137.77	FALSE	19
2022-09-13	16:26:25	0.472328	2.10101	1105.81	FALSE	19
2022-09-13	16:26:25	0.35182	1.56497	1139.34	FALSE	19
2022-09-13	16:26:25	0.394567	1.75511	1107.57	FALSE	19
2022-09-13	16:26:25	0.312176	1.38862	1140.72	FALSE	19
2022-09-13	16:26:26	0.28958	1.28811	1108.86	FALSE	19
2022-09-13	16:26:26	0.498842	2.21895	1142.94	FALSE	19
2022-09-13	16:26:26	0.417316	1.85631	1110.71	FALSE	19
2022-09-13	16:26:26	0.910751	4.0512	1146.99	FALSE	19
2022-09-13	16:26:27	0.777265	3.45743	1114.17	FALSE	19
2022-09-13	16:26:27	0.753499	3.35171	1150.35	FALSE	19
2022-09-13	16:26:27	0.989682	4.4023	1118.57	FALSE	19
2022-09-13	16:26:27	0.497926	2.21487	1152.56	FALSE	19
2022-09-13	16:26:28	0.594924	2.64634	1121.22	FALSE	19
2022-09-13	16:26:28	0.383575	1.70622	1154.27	FALSE	19
2022-09-13	16:26:28	0.497723	2.21397	1123.43	FALSE	19
2022-09-13	16:26:29	0.341489	1.51901	1155.79	FALSE	19
2022-09-13	16:26:29	0.445255	1.98058	1125.42	FALSE	19
2022-09-13	16:26:29	0.660929	2.93994	1158.73	FALSE	19
2022-09-13	16:26:29	0.96556	4.295	1129.71	FALSE	19
2022-09-13	16:26:30	1.72154	7.65775	1166.38	FALSE	19
2022-09-13	16:26:30	1.89085	8.41088	1138.12	FALSE	19
2022-09-13	16:26:30	1.85726	8.26146	1174.65	FALSE	19
2022-09-13	16:26:30	1.82973	8.139	1146.26	FALSE	19
2022-09-13	16:26:31	1.5335	6.82131	1181.47	FALSE	19
2022-09-13	16:26:31	1.82571	8.12112	1154.38	FALSE	19
2022-09-13	16:26:31	2.11116	9.39086	1190.86	FALSE	19
2022-09-13	16:26:31	2.26083	10.0566	1164.44	FALSE	19
2022-09-13	16:26:32	1.78622	7.94546	1198.8	FALSE	19
2022-09-13	16:26:32	1.81126	8.05685	1172.49	FALSE	19
2022-09-13	16:26:32	1.75202	7.79334	1206.6	FALSE	19
2022-09-13	16:26:33	1.60261	7.12873	1179.62	FALSE	19
2022-09-13	16:26:33	1.61095	7.16583	1213.76	FALSE	19
2022-09-13	16:26:33	1.56999	6.98363	1186.61	FALSE	19
2022-09-13	16:26:33	1.47095	6.54308	1220.31	FALSE	19
2022-09-13	16:26:34	1.4449	6.4272	1193.03	FALSE	19
2022-09-13	16:26:34	1.43782	6.39571	1226.7	FALSE	19
2022-09-13	16:26:34	1.4765	6.56777	1199.6	FALSE	19
2022-09-13	16:26:34	1.41559	6.29683	1233	FALSE	19
2022-09-13	16:26:35	1.38795	6.17388	1205.78	FALSE	19
2022-09-13	16:26:35	1.4879	6.61848	1239.62	FALSE	19
2022-09-13	16:26:35	1.44398	6.42311	1212.2	FALSE	19
2022-09-13	16:26:35	1.49319	6.64201	1246.26	FALSE	19
2022-09-13	16:26:36	1.53548	6.83012	1219.03	FALSE	19
2022-09-13	16:26:36	1.49304	6.64134	1252.9	FALSE	19
2022-09-13	16:26:36	1.5138	6.73369	1225.76	FALSE	19
2022-09-13	16:26:36	1.52612	6.78849	1259.69	FALSE	19
2022-09-13	16:26:37	1.57752	7.01712	1232.78	FALSE	19
2022-09-13	16:26:37	1.70922	7.60295	1267.29	FALSE	19
2022-09-13	16:26:37	2.67222	11.8866	1244.67	FALSE	19
2022-09-13	16:26:38	4.81136	21.4019	1288.69	1	20
2022-09-13	16:26:38	1.06419	4.73373	1249.4	FALSE	20
2022-09-13	16:26:38	0.180267	0.801864	1289.49	FALSE	20
2022-09-13	16:26:38	0.231819	1.03118	1250.43	FALSE	20
2022-09-13	16:26:39	0.355331	1.58058	1291.08	FALSE	20
2022-09-13	16:26:39	0.261794	1.16451	1251.6	FALSE	20
2022-09-13	16:26:39	0.0336008	0.149463	1291.22	FALSE	20
2022-09-13	16:26:39	0.0515142	0.229145	1251.82	FALSE	20
2022-09-13	16:26:40	0.262557	1.16791	1292.39	FALSE	20
2022-09-13	16:26:40	0.353957	1.57447	1253.4	FALSE	20
2022-09-13	16:26:40	0.24327	1.08211	1293.47	FALSE	20
2022-09-13	16:26:40	0.119504	0.531578	1253.93	FALSE	20
2022-09-13	16:26:41	0.113397	0.504413	1293.98	FALSE	20
2022-09-13	16:26:41	-0.00156464	-0.00695983	1253.93	FALSE	20
2022-09-13	16:26:41	0.0797585	0.354782	1294.33	FALSE	20
2022-09-13	16:26:42	-0.242328	-1.07792	1253.93	FALSE	20
2022-09-13	16:26:42	-0.622378	-2.76846	1294.33	FALSE	20
2022-09-13	16:26:42	-0.679681	-3.02336	1253.93	FALSE	20
2022-09-13	16:26:42	-0.758816	-3.37537	1294.33	FALSE	20
2022-09-13	16:26:43	-0.383142	-1.70429	1253.93	FALSE	20
2022-09-13	16:26:43	-0.0636511	-0.283133	1294.33	FALSE	20
2022-09-13	16:26:43	0.228919	1.01828	1254.95	FALSE	20
2022-09-13	16:26:43	0.623015	2.7713	1297.11	FALSE	20
2022-09-13	16:26:44	0.311921	1.38749	1256.34	FALSE	20
2022-09-13	16:26:44	0.612939	2.72648	1299.83	FALSE	20
2022-09-13	16:26:44	0.5993	2.66581	1259	FALSE	20
2022-09-13	16:26:44	0.288512	1.28336	1301.12	FALSE	20
2022-09-13	16:26:45	0.308512	1.37232	1260.37	FALSE	20
2022-09-13	16:26:45	0.436603	1.9421	1303.06	FALSE	20
2022-09-13	16:26:45	0.396145	1.76213	1262.14	FALSE	20
2022-09-13	16:26:46	0.481387	2.14131	1305.2	FALSE	20
2022-09-13	16:26:46	0.170038	0.756363	1262.89	FALSE	20
2022-09-13	16:26:46	0.0140588	0.0625364	1305.26	FALSE	20
2022-09-13	16:26:46	0.166272	0.739611	1263.63	FALSE	20
2022-09-13	16:26:47	0.517366	2.30135	1307.56	FALSE	20
2022-09-13	16:26:47	2.64006	11.7435	1275.38	FALSE	20
2022-09-13	16:26:47	3.62586	16.1286	1323.69	1	21
2022-09-13	16:26:47	2.50291	11.1334	1286.51	FALSE	21
2022-09-13	16:26:48	2.7449	12.2099	1335.9	FALSE	21
2022-09-13	16:26:48	0.283015	1.25891	1287.77	FALSE	21
2022-09-13	16:26:48	0.0237279	0.105546	1336.01	FALSE	21
2022-09-13	16:26:48	0.203677	0.905996	1288.67	FALSE	21
2022-09-13	16:26:49	0.0440333	0.195869	1336.2	FALSE	21
2022-09-13	16:26:49	0.129987	0.578208	1289.25	FALSE	21
2022-09-13	16:26:49	-0.160903	-0.715729	1336.2	FALSE	21
2022-09-13	16:26:50	-0.156475	-0.696032	1289.25	FALSE	21
2022-09-13	16:26:50	-0.130878	-0.582172	1336.2	FALSE	21
2022-09-13	16:26:50	2.0278	9.02006	1298.27	FALSE	21
2022-09-13	16:26:50	0.503931	2.24159	1338.44	FALSE	21
2022-09-13	16:26:51	0.351158	1.56202	1299.84	FALSE	21
2022-09-13	16:26:51	-0.047926	-0.213184	1338.44	FALSE	21
2022-09-13	16:26:51	-0.270572	-1.20356	1299.84	FALSE	21
2022-09-13	16:26:51	-0.252048	-1.12116	1338.44	FALSE	21
2022-09-13	16:26:52	-0.294287	-1.30905	1299.84	FALSE	21
2022-09-13	16:26:52	-0.141361	-0.628802	1338.44	FALSE	21
2022-09-13	16:26:52	0.0637279	0.283474	1300.12	FALSE	21
2022-09-13	16:26:52	0.173295	0.770851	1339.21	FALSE	21
2022-09-13	16:26:53	0.52612	2.34029	1302.46	FALSE	21
2022-09-13	16:26:53	0.495993	2.20628	1341.42	FALSE	21
2022-09-13	16:26:53	0.327952	1.4588	1303.92	FALSE	21
2022-09-13	16:26:54	0.266883	1.18715	1342.61	FALSE	21
2022-09-13	16:26:54	0.433346	1.92761	1305.85	FALSE	21
2022-09-13	16:26:54	0.358995	1.59688	1344.2	FALSE	21
2022-09-13	16:26:54	0.207392	0.922521	1306.77	FALSE	21
2022-09-13	16:26:55	0.299402	1.3318	1345.54	FALSE	21
2022-09-13	16:26:55	0.177417	0.789186	1307.56	FALSE	21
2022-09-13	16:26:55	0.477265	2.12297	1347.66	FALSE	21
2022-09-13	16:26:55	0.824389	3.66705	1311.22	FALSE	21
2022-09-13	16:26:56	2.82154	12.5508	1360.21	FALSE	21
2022-09-13	16:26:56	0.775178	3.44815	1314.67	FALSE	21
2022-09-13	16:26:56	0.43126	1.91833	1362.13	FALSE	21
2022-09-13	16:26:56	0.313143	1.39292	1316.07	FALSE	21
2022-09-13	16:26:57	0.418486	1.86151	1363.99	FALSE	21
2022-09-13	16:26:57	0.202557	0.901014	1316.97	FALSE	21
2022-09-13	16:26:57	0.333499	1.48347	1365.47	FALSE	21
2022-09-13	16:26:58	0.135127	0.601072	1317.57	FALSE	21
2022-09-13	16:26:58	0.425611	1.8932	1367.37	FALSE	21
2022-09-13	16:26:58	0.160624	0.714488	1318.28	FALSE	21
2022-09-13	16:26:58	0.415433	1.84793	1369.21	FALSE	21
2022-09-13	16:26:59	0.192023	0.854157	1319.14	FALSE	21
2022-09-13	16:26:59	0.364084	1.61952	1370.83	FALSE	21
2022-09-13	16:26:59	0.217265	0.966438	1320.1	FALSE	21
2022-09-13	16:26:59	0.370445	1.64781	1372.48	FALSE	21
2022-09-13	16:27:00	0.262303	1.16678	1321.27	FALSE	21
2022-09-13	16:27:00	0.492837	2.19224	1374.67	FALSE	21
2022-09-13	16:27:00	0.278283	1.23786	1322.51	FALSE	21
2022-09-13	16:27:00	0.436196	1.94029	1376.61	FALSE	21
2022-09-13	16:27:01	0.356145	1.5842	1324.09	FALSE	21
2022-09-13	16:27:01	0.456756	2.03174	1378.65	FALSE	21
2022-09-13	16:27:01	0.309427	1.37639	1325.47	FALSE	21
2022-09-13	16:27:02	0.45645	2.03038	1380.68	FALSE	21
2022-09-13	16:27:02	0.483066	2.14877	1327.62	FALSE	21
2022-09-13	16:27:02	0.478181	2.12704	1382.8	FALSE	21
2022-09-13	16:27:02	0.61131	2.71923	1330.34	FALSE	21
2022-09-13	16:27:03	0.295738	1.3155	1384.12	FALSE	21
2022-09-13	16:27:03	0.418995	1.86377	1332.2	FALSE	21
2022-09-13	16:27:03	0.177825	0.791001	1384.91	FALSE	21
2022-09-13	16:27:03	0.21014	0.934745	1333.13	FALSE	21
2022-09-13	16:27:04	0.345814	1.53825	1386.45	FALSE	21
2022-09-13	16:27:04	0.426832	1.89863	1335.03	FALSE	21
2022-09-13	16:27:04	0.153957	0.684832	1387.13	FALSE	21
2022-09-13	16:27:04	0.31869	1.4176	1336.45	FALSE	21
2022-09-13	16:27:05	0.116094	0.516409	1387.65	FALSE	21
2022-09-13	16:27:05	0.403015	1.79269	1338.24	FALSE	21
2022-09-13	16:27:05	0.255127	1.13486	1388.78	FALSE	21
2022-09-13	16:27:06	0.376654	1.67543	1339.92	FALSE	21
2022-09-13	16:27:06	0.335636	1.49298	1390.28	FALSE	21
2022-09-13	16:27:06	0.692837	3.08188	1343	FALSE	21
2022-09-13	16:27:06	0.904491	4.02336	1394.3	FALSE	21
2022-09-13	16:27:07	1.06515	4.738	1347.74	FALSE	21
2022-09-13	16:27:07	0.676908	3.01102	1397.31	FALSE	21
2022-09-13	16:27:07	0.755789	3.3619	1351.1	FALSE	21
2022-09-13	16:27:07	0.830089	3.6924	1401	FALSE	21
2022-09-13	16:27:08	0.934313	4.15601	1355.26	FALSE	21
2022-09-13	16:27:08	0.43528	1.93621	1402.94	FALSE	21
2022-09-13	16:27:08	0.674109	2.99857	1358.25	FALSE	21
2022-09-13	16:27:08	0.521947	2.32172	1405.26	FALSE	21
2022-09-13	16:27:09	0.770038	3.42528	1361.68	FALSE	21
2022-09-13	16:27:09	0.6936	3.08527	1408.35	FALSE	21
2022-09-13	16:27:09	0.970954	4.319	1366	FALSE	21
2022-09-13	16:27:09	0.581285	2.58567	1410.93	FALSE	21
2022-09-13	16:27:10	0.535025	2.3799	1368.38	FALSE	21
2022-09-13	16:27:10	0.447239	1.98941	1412.92	FALSE	21
2022-09-13	16:27:10	0.433702	1.92919	1370.31	FALSE	21
2022-09-13	16:27:11	0.360522	1.60367	1414.53	FALSE	21
2022-09-13	16:27:11	0.363321	1.61612	1371.92	FALSE	21
2022-09-13	16:27:11	0.485153	2.15806	1416.68	FALSE	21
2022-09-13	16:27:11	0.467748	2.08064	1374	FALSE	21
2022-09-13	16:27:12	0.462354	2.05664	1418.74	FALSE	21
2022-09-13	16:27:12	0.403423	1.79451	1375.8	FALSE	21
2022-09-13	16:27:12	0.540267	2.40322	1421.14	FALSE	21
2022-09-13	16:27:12	0.319657	1.4219	1377.22	FALSE	21
2022-09-13	16:27:13	0.408512	1.81714	1422.96	FALSE	21
2022-09-13	16:27:13	0.371412	1.65211	1378.87	FALSE	21
2022-09-13	16:27:13	0.520522	2.31539	1425.28	FALSE	21
2022-09-13	16:27:13	0.354364	1.57628	1380.45	FALSE	21
2022-09-13	16:27:14	0.433957	1.93033	1427.21	FALSE	21
2022-09-13	16:27:14	0.344797	1.53373	1381.98	FALSE	21
2022-09-13	16:27:14	0.532684	2.36948	1429.58	FALSE	21
2022-09-13	16:27:15	0.256959	1.14301	1383.13	FALSE	21
2022-09-13	16:27:15	0.420115	1.86876	1431.45	FALSE	21
2022-09-13	16:27:15	0.314008	1.39677	1384.52	FALSE	21
2022-09-13	16:27:15	0.547239	2.43423	1433.88	FALSE	21
2022-09-13	16:27:16	0.292328	1.30033	1385.82	FALSE	21
2022-09-13	16:27:16	0.394567	1.75511	1435.63	FALSE	21
2022-09-13	16:27:16	0.302201	1.34425	1387.17	FALSE	21
2022-09-13	16:27:16	0.478893	2.13021	1437.77	FALSE	21
2022-09-13	16:27:17	0.328766	1.46242	1388.63	FALSE	21
2022-09-13	16:27:17	0.3307	1.47102	1439.24	FALSE	21
2022-09-13	16:27:17	0.347494	1.54572	1390.18	FALSE	21
2022-09-13	16:27:17	0.446221	1.98488	1441.22	FALSE	21
2022-09-13	16:27:18	0.349071	1.55274	1391.73	FALSE	21
2022-09-13	16:27:18	0.761641	3.38793	1444.61	FALSE	21
2022-09-13	16:27:18	0.41014	1.82438	1393.55	FALSE	21
2022-09-13	16:27:19	0.517468	2.3018	1446.91	FALSE	21
2022-09-13	16:27:19	0.569275	2.53225	1396.09	FALSE	21
2022-09-13	16:27:19	0.409784	1.8228	1448.73	FALSE	21
2022-09-13	16:27:19	0.464695	2.06706	1398.15	FALSE	21
2022-09-13	16:27:20	0.402099	1.78862	1450.52	FALSE	21
2022-09-13	16:27:20	0.338028	1.50362	1399.66	FALSE	21
2022-09-13	16:27:20	0.446323	1.98533	1452.51	FALSE	21
2022-09-13	16:27:20	-0.0300125	-0.133502	1399.66	FALSE	21
2022-09-13	16:27:21	0.405967	1.80582	1454.31	FALSE	21
2022-09-13	16:27:21	0.845509	3.76099	1403.42	FALSE	21
2022-09-13	16:27:21	0.223473	0.994053	1455.31	FALSE	21
2022-09-13	16:27:21	0.317621	1.41284	1404.83	FALSE	21
2022-09-13	16:27:22	0.481896	2.14357	1457.45	FALSE	21
2022-09-13	16:27:22	1.05116	4.67577	1409.51	FALSE	21
2022-09-13	16:27:22	0.845102	3.75918	1461.21	FALSE	21
2022-09-13	16:27:23	1.13711	5.05809	1414.56	FALSE	21
2022-09-13	16:27:23	2.50892	11.1602	1472.37	FALSE	21
2022-09-13	16:27:23	1.6224	7.21676	1421.78	FALSE	21
2022-09-13	16:27:23	0.248512	1.10543	1473.48	FALSE	21
2022-09-13	16:27:24	0.0412852	0.183645	1421.96	FALSE	21
2022-09-13	16:27:24	0.152379	0.677812	1474.15	FALSE	21
2022-09-13	16:27:24	0.121947	0.542445	1422.51	FALSE	21
2022-09-13	16:27:24	0.213702	0.950589	1475.1	FALSE	21
2022-09-13	16:27:25	0.261031	1.16112	1423.67	FALSE	21
2022-09-13	16:27:25	0.364797	1.62269	1476.73	FALSE	21
2022-09-13	16:27:25	0.746527	3.3207	1426.99	FALSE	21
2022-09-13	16:27:25	2.30281	10.2434	1486.97	FALSE	21
2022-09-13	16:27:26	2.17294	9.66567	1436.65	FALSE	21
2022-09-13	16:27:26	0.654669	2.9121	1489.88	FALSE	21
2022-09-13	16:27:26	0.832532	3.70327	1440.36	FALSE	21
2022-09-13	16:27:27	3.16312	14.0702	1503.95	1	22
2022-09-13	16:27:27	2.68327	11.9357	1452.29	FALSE	22
2022-09-13	16:27:27	1.17925	5.24554	1509.2	FALSE	22
2022-09-13	16:27:27	2.00469	8.91726	1461.21	FALSE	22
2022-09-13	16:27:28	3.8192	16.9886	1526.19	1	23
2022-09-13	16:27:28	0.479046	2.13089	1463.34	FALSE	23
2022-09-13	16:27:28	0.257366	1.14482	1527.33	FALSE	23
2022-09-13	16:27:28	0.288308	1.28245	1464.62	FALSE	23
2022-09-13	16:27:29	0.360573	1.6039	1528.94	FALSE	23
2022-09-13	16:27:29	0.233906	1.04046	1465.66	FALSE	23
2022-09-13	16:27:29	0.253193	1.12625	1530.06	FALSE	23
2022-09-13	16:27:29	0.221489	0.985227	1466.65	FALSE	23
2022-09-13	16:27:30	0.228104	1.01465	1531.08	FALSE	23
2022-09-13	16:27:30	0.186578	0.829936	1467.48	FALSE	23
2022-09-13	16:27:30	0.282659	1.25732	1532.33	FALSE	23
2022-09-13	16:27:31	0.364288	1.62043	1469.1	FALSE	23
2022-09-13	16:27:31	0.409682	1.82235	1534.16	FALSE	23
2022-09-13	16:27:31	0.384339	1.70962	1470.81	FALSE	23
2022-09-13	16:27:31	0.427697	1.90248	1536.06	FALSE	23
2022-09-13	16:27:32	0.346934	1.54323	1472.35	FALSE	23
2022-09-13	16:27:32	0.464898	2.06796	1538.13	FALSE	23
2022-09-13	16:27:32	0.319453	1.42099	1473.77	FALSE	23
2022-09-13	16:27:32	0.247952	1.10294	1539.23	FALSE	23
2022-09-13	16:27:33	0.332328	1.47826	1475.25	FALSE	23
2022-09-13	16:27:33	0.284033	1.26344	1540.49	FALSE	23
2022-09-13	16:27:33	0.325204	1.44657	1476.7	FALSE	23
2022-09-13	16:27:33	0.194059	0.863213	1541.36	FALSE	23
2022-09-13	16:27:34	0.272634	1.21273	1477.91	FALSE	23
2022-09-13	16:27:34	0.206476	0.918447	1542.27	FALSE	23
2022-09-13	16:27:34	0.318537	1.41692	1479.33	FALSE	23
2022-09-13	16:27:35	0.118384	0.526596	1542.8	FALSE	23
2022-09-13	16:27:35	0.227138	1.01036	1480.34	FALSE	23
2022-09-13	16:27:35	0.107138	0.476571	1543.28	FALSE	23
2022-09-13	16:27:35	0.216705	0.963947	1481.3	FALSE	23
2022-09-13	16:27:36	0.351005	1.56134	1544.84	FALSE	23
2022-09-13	16:27:36	0.291361	1.29603	1482.6	FALSE	23
2022-09-13	16:27:36	-0.00380383	-0.0169202	1544.84	FALSE	23
2022-09-13	16:27:36	0.312277	1.38907	1483.99	FALSE	23
2022-09-13	16:27:37	0.00596716	0.0265431	1544.87	FALSE	23
2022-09-13	16:27:37	0.635636	2.82744	1486.81	FALSE	23
2022-09-13	16:27:37	1.19324	5.30777	1550.17	FALSE	23
2022-09-13	16:27:37	4.58825	20.4095	1507.22	1	24
2022-09-13	16:27:38	2.94398	13.0954	1563.27	FALSE	24
2022-09-13	16:27:38	1.68485	7.49455	1514.72	FALSE	24
2022-09-13	16:27:38	0.746425	3.32025	1566.59	FALSE	24
2022-09-13	16:27:39	0.405254	1.80265	1516.52	FALSE	24
2022-09-13	16:27:39	0.131005	0.582736	1567.17	FALSE	24
2022-09-13	16:27:39	-0.0458903	-0.204129	1516.52	FALSE	24
2022-09-13	16:27:39	0.0467305	0.207867	1567.38	FALSE	24
2022-09-13	16:27:40	0.116552	0.518447	1517.04	FALSE	24
2022-09-13	16:27:40	0.0988424	0.439671	1567.82	FALSE	24
2022-09-13	16:27:40	0.247494	1.1009	1518.14	FALSE	24
2022-09-13	16:27:40	0.23701	1.05427	1568.87	FALSE	24
2022-09-13	16:27:41	0.456603	2.03106	1520.17	FALSE	24
2022-09-13	16:27:41	0.328257	1.46015	1570.33	FALSE	24
2022-09-13	16:27:41	1.38113	6.14354	1526.32	FALSE	24
2022-09-13	16:27:41	0.814669	3.62381	1573.96	FALSE	24
2022-09-13	16:27:42	2.54912	11.339	1537.65	FALSE	24
2022-09-13	16:27:42	2.25508	10.031	1583.99	FALSE	24
2022-09-13	16:27:42	3.31792	14.7588	1552.41	1	25
2022-09-13	16:27:42	2.39095	10.6354	1594.62	FALSE	25
2022-09-13	16:27:43	1.49879	6.66692	1559.08	FALSE	25
2022-09-13	16:27:43	1.89024	8.40817	1603.03	FALSE	25
2022-09-13	16:27:43	1.28536	5.71754	1564.8	FALSE	25
2022-09-13	16:27:44	0.713448	3.17356	1606.21	FALSE	25
2022-09-13	16:27:44	1.43523	6.38419	1571.18	FALSE	25
2022-09-13	16:27:44	0.803982	3.57627	1609.78	FALSE	25
2022-09-13	16:27:44	1.67416	7.447	1578.63	FALSE	25
2022-09-13	16:27:45	1.34179	5.96855	1615.75	FALSE	25
2022-09-13	16:27:45	1.07966	4.80254	1583.43	FALSE	25
2022-09-13	16:27:45	0.886832	3.94481	1619.7	FALSE	25
2022-09-13	16:27:45	0.572481	2.54651	1585.98	FALSE	25
2022-09-13	16:27:46	0.833702	3.70847	1623.4	FALSE	25
2022-09-13	16:27:46	0.197163	0.87702	1586.85	FALSE	25
2022-09-13	16:27:46	0.802252	3.56858	1626.97	FALSE	25
2022-09-13	16:27:46	0.309937	1.37866	1588.23	FALSE	25
2022-09-13	16:27:47	0.523524	2.32874	1629.3	FALSE	25
2022-09-13	16:27:47	0.280725	1.24872	1589.48	FALSE	25
2022-09-13	16:27:47	0.462863	2.05891	1631.36	FALSE	25
2022-09-13	16:27:48	0.310242	1.38002	1590.86	FALSE	25
2022-09-13	16:27:48	0.432074	1.92195	1633.28	FALSE	25
2022-09-13	16:27:48	0.303524	1.35014	1592.21	FALSE	25
2022-09-13	16:27:48	0.543728	2.41861	1635.7	FALSE	25
2022-09-13	16:27:49	0.49472	2.20061	1594.41	FALSE	25
2022-09-13	16:27:49	0.530598	2.36021	1638.06	FALSE	25
2022-09-13	16:27:49	0.457367	2.03446	1596.45	FALSE	25
2022-09-13	16:27:49	0.318588	1.41714	1639.48	FALSE	25
2022-09-13	16:27:50	0.534618	2.37809	1598.83	FALSE	25
2022-09-13	16:27:50	0.272634	1.21273	1640.69	FALSE	25
2022-09-13	16:27:50	0.487748	2.1696	1601	FALSE	25
2022-09-13	16:27:50	0.201031	0.894226	1641.58	FALSE	25
2022-09-13	16:27:51	0.437825	1.94753	1602.94	FALSE	25
2022-09-13	16:27:51	0.292379	1.30056	1642.89	FALSE	25
2022-09-13	16:27:51	0.215942	0.960553	1603.9	FALSE	25

## Sheet: Sulley_prong_2022913162242 (2)
Date	Time	Lbs	Total force x time			**GoPro Fitting: 1612
2022-09-13	16:22:42	0.145713	0.145713	FALSE	0
2022-09-13	16:22:42	0.13243	0.278143	FALSE	0
2022-09-13	16:22:42	0.143982	0.422125	FALSE	0
2022-09-13	16:22:43	0.140369	0.562494	FALSE	0
2022-09-13	16:22:43	0.144237	0.706731	FALSE	0
2022-09-13	16:22:43	0.14958	0.856311	FALSE	0
2022-09-13	16:22:43	0.138842	0.995153	FALSE	0
2022-09-13	16:22:44	0.141489	1.13664	FALSE	0
2022-09-13	16:22:44	0.152786	1.28943	FALSE	0
2022-09-13	16:22:44	0.158792	1.44822	FALSE	0
2022-09-13	16:22:44	0.142812	1.59103	FALSE	0
2022-09-13	16:22:45	0.167799	1.75883	FALSE	0
2022-09-13	16:22:45	0.19472	1.95355	FALSE	0
2022-09-13	16:22:45	0.17813	2.13168	FALSE	0
2022-09-13	16:22:46	0.185967	2.31765	FALSE	0
2022-09-13	16:22:46	0.118334	2.43598	FALSE	0
2022-09-13	16:22:46	0.216807	2.65279	FALSE	0
2022-09-13	16:22:46	0.233041	2.88583	FALSE	0
2022-09-13	16:22:47	0.399657	3.28549	FALSE	0
2022-09-13	16:22:47	0.215331	3.50082	FALSE	0
2022-09-13	16:22:47	0.162914	3.66373	FALSE	0
2022-09-13	16:22:47	0.209478	3.87321	FALSE	0
2022-09-13	16:22:48	0.180013	4.05322	FALSE	0
2022-09-13	16:22:48	0.221132	4.27435	FALSE	0
2022-09-13	16:22:48	0.132277	4.40663	FALSE	0
2022-09-13	16:22:48	0.292379	4.69901	FALSE	0
2022-09-13	16:22:49	0.520929	5.21994	FALSE	0
2022-09-13	16:22:49	0.315433	5.53537	FALSE	0
2022-09-13	16:22:49	0.221081	5.75645	FALSE	0
2022-09-13	16:22:50	0.404746	6.1612	FALSE	0
2022-09-13	16:22:50	0.191209	6.35241	FALSE	0
2022-09-13	16:22:50	0.168919	6.52133	FALSE	0
2022-09-13	16:22:50	0.330598	6.85193	FALSE	0
2022-09-13	16:22:51	0.414822	7.26675	FALSE	0
2022-09-13	16:22:51	0.31126	7.57801	FALSE	0
2022-09-13	16:22:51	0.290293	7.8683	FALSE	0
2022-09-13	16:22:51	0.259097	8.1274	FALSE	0
2022-09-13	16:22:52	0.485611	8.61301	FALSE	0
2022-09-13	16:22:52	0.906476	9.51948	FALSE	0
2022-09-13	16:22:52	1.42541	10.9449	FALSE	0
2022-09-13	16:22:52	1.67055	12.6154	FALSE	0
2022-09-13	16:22:53	0.478995	13.0944	FALSE	0
2022-09-13	16:22:53	0.720165	13.8146	FALSE	0
2022-09-13	16:22:53	0.481081	14.2957	FALSE	0
2022-09-13	16:22:54	0.339097	14.6348	FALSE	0
2022-09-13	16:22:54	0.320929	14.9557	FALSE	0
2022-09-13	16:22:54	0.452023	15.4077	FALSE	0
2022-09-13	16:22:54	0.156756	15.5645	FALSE	0
2022-09-13	16:22:55	0.215687	15.7802	FALSE	0
2022-09-13	16:22:55	0.157519	15.9377	FALSE	0
2022-09-13	16:22:55	0.230496	16.1682	FALSE	0
2022-09-13	16:22:55	0.221692	16.3899	FALSE	0
2022-09-13	16:22:56	2.52709	18.917	FALSE	0
2022-09-13	16:22:56	6.50866	25.4256	1	1
2022-09-13	16:22:56	8.68576	34.1114	1	2
2022-09-13	16:22:56	1.35274	35.4641	FALSE	2
2022-09-13	16:22:57	1.92078	37.3849	FALSE	2
2022-09-13	16:22:57	1.08408	38.469	FALSE	2
2022-09-13	16:22:57	0.818486	39.2875	FALSE	2
2022-09-13	16:22:57	0.357621	39.6451	FALSE	2
2022-09-13	16:22:58	0.226934	39.872	FALSE	2
2022-09-13	16:22:58	-0.025127	39.872	FALSE	2
2022-09-13	16:22:58	-0.506399	39.872	FALSE	2
2022-09-13	16:22:59	-0.26472	39.872	FALSE	2
2022-09-13	16:22:59	0.0285117	39.9005	FALSE	2
2022-09-13	16:22:59	0.020471	39.921	FALSE	2
2022-09-13	16:22:59	0.237316	40.1583	FALSE	2
2022-09-13	16:23:00	0.247952	40.4063	FALSE	2
2022-09-13	16:23:00	0.369173	40.7755	FALSE	2
2022-09-13	16:23:00	0.251616	41.0271	FALSE	2
2022-09-13	16:23:00	0.304135	41.3312	FALSE	2
2022-09-13	16:23:01	0.290903	41.6221	FALSE	2
2022-09-13	16:23:01	0.65014	42.2723	FALSE	2
2022-09-13	16:23:01	0.831565	43.1038	FALSE	2
2022-09-13	16:23:01	0.768003	43.8718	FALSE	2
2022-09-13	16:23:02	0.993397	44.8652	FALSE	2
2022-09-13	16:23:02	0.883219	45.7484	FALSE	2
2022-09-13	16:23:02	0.500929	46.2494	FALSE	2
2022-09-13	16:23:03	0.559148	46.8085	FALSE	2
2022-09-13	16:23:03	0.483321	47.2918	FALSE	2
2022-09-13	16:23:03	0.500369	47.7922	FALSE	2
2022-09-13	16:23:03	0.429428	48.2216	FALSE	2
2022-09-13	16:23:04	0.431514	48.6531	FALSE	2
2022-09-13	16:23:04	0.462252	49.1154	FALSE	2
2022-09-13	16:23:04	0.452939	49.5683	FALSE	2
2022-09-13	16:23:04	0.436196	50.0045	FALSE	2
2022-09-13	16:23:05	0.427596	50.4321	FALSE	2
2022-09-13	16:23:05	0.413143	50.8453	FALSE	2
2022-09-13	16:23:05	0.448817	51.2941	FALSE	2
2022-09-13	16:23:05	0.431005	51.7251	FALSE	2
2022-09-13	16:23:06	0.443524	52.1686	FALSE	2
2022-09-13	16:23:06	0.411921	52.5805	FALSE	2
2022-09-13	16:23:06	0.42159	53.0021	FALSE	2
2022-09-13	16:23:07	0.517264	53.5194	FALSE	2
2022-09-13	16:23:07	0.394211	53.9136	FALSE	2
2022-09-13	16:23:07	0.456094	54.3697	FALSE	2
2022-09-13	16:23:07	0.375433	54.7451	FALSE	2
2022-09-13	16:23:08	0.396756	55.1419	FALSE	2
2022-09-13	16:23:08	0.508461	55.6503	FALSE	2
2022-09-13	16:23:08	0.362659	56.013	FALSE	2
2022-09-13	16:23:08	0.479707	56.4927	FALSE	2
2022-09-13	16:23:09	0.290089	56.7828	FALSE	2
2022-09-13	16:23:09	0.57416	57.357	FALSE	2
2022-09-13	16:23:09	0.197621	57.5546	FALSE	2
2022-09-13	16:23:09	0.470802	58.0254	FALSE	2
2022-09-13	16:23:10	0.256145	58.2815	FALSE	2
2022-09-13	16:23:10	0.768257	59.0498	FALSE	2
2022-09-13	16:23:10	0.954975	60.0048	FALSE	2
2022-09-13	16:23:11	2.4338	62.4386	FALSE	2
2022-09-13	16:23:11	3.39696	65.8355	1	3
2022-09-13	16:23:11	3.54362	69.3791	1	4
2022-09-13	16:23:11	1.82108	71.2002	FALSE	4
2022-09-13	16:23:12	0.801743	72.002	FALSE	4
2022-09-13	16:23:12	1.0964	73.0984	FALSE	4
2022-09-13	16:23:12	0.503422	73.6018	FALSE	4
2022-09-13	16:23:12	0.803626	74.4054	FALSE	4
2022-09-13	16:23:13	0.427697	74.8331	FALSE	4
2022-09-13	16:23:13	0.544287	75.3774	FALSE	4
2022-09-13	16:23:13	0.663371	76.0408	FALSE	4
2022-09-13	16:23:13	0.417163	76.4579	FALSE	4
2022-09-13	16:23:14	0.810903	77.2688	FALSE	4
2022-09-13	16:23:14	0.307748	77.5766	FALSE	4
2022-09-13	16:23:14	0.651921	78.2285	FALSE	4
2022-09-13	16:23:15	0.289682	78.5182	FALSE	4
2022-09-13	16:23:15	0.430547	78.9487	FALSE	4
2022-09-13	16:23:15	0.36042	79.3092	FALSE	4
2022-09-13	16:23:15	0.316654	79.6258	FALSE	4
2022-09-13	16:23:16	0.586527	80.2123	FALSE	4
2022-09-13	16:23:16	0.248512	80.4608	FALSE	4
2022-09-13	16:23:16	0.513804	80.9747	FALSE	4
2022-09-13	16:23:16	0.223982	81.1986	FALSE	4
2022-09-13	16:23:17	0.576705	81.7753	FALSE	4
2022-09-13	16:23:17	0.206527	81.9819	FALSE	4
2022-09-13	16:23:17	0.564287	82.5462	FALSE	4
2022-09-13	16:23:17	0.288308	82.8345	FALSE	4
2022-09-13	16:23:18	0.457417	83.2919	FALSE	4
2022-09-13	16:23:18	0.335229	83.6271	FALSE	4
2022-09-13	16:23:18	0.433143	84.0602	FALSE	4
2022-09-13	16:23:19	0.506832	84.5671	FALSE	4
2022-09-13	16:23:19	0.310751	84.8778	FALSE	4
2022-09-13	16:23:19	0.477621	85.3555	FALSE	4
2022-09-13	16:23:19	0.2964	85.6519	FALSE	4
2022-09-13	16:23:20	0.56673	86.2186	FALSE	4
2022-09-13	16:23:20	0.211005	86.4296	FALSE	4
2022-09-13	16:23:20	0.568002	86.9976	FALSE	4
2022-09-13	16:23:20	0.294669	87.2923	FALSE	4
2022-09-13	16:23:21	0.479402	87.7717	FALSE	4
2022-09-13	16:23:21	0.326476	88.0981	FALSE	4
2022-09-13	16:23:21	0.495687	88.5938	FALSE	4
2022-09-13	16:23:21	0.582557	89.1764	FALSE	4
2022-09-13	16:23:22	0.202201	89.3786	FALSE	4
2022-09-13	16:23:22	0.0844404	89.463	FALSE	4
2022-09-13	16:23:22	0.311616	89.7746	FALSE	4
2022-09-13	16:23:23	0.435026	90.2097	FALSE	4
2022-09-13	16:23:23	0.233957	90.4436	FALSE	4
2022-09-13	16:23:23	0.504338	90.948	FALSE	4
2022-09-13	16:23:23	0.230446	91.1784	FALSE	4
2022-09-13	16:23:24	0.416145	91.5946	FALSE	4
2022-09-13	16:23:24	0.281082	91.8756	FALSE	4
2022-09-13	16:23:24	0.472379	92.348	FALSE	4
2022-09-13	16:23:24	0.415738	92.7637	FALSE	4
2022-09-13	16:23:25	0.363321	93.1271	FALSE	4
2022-09-13	16:23:25	0.456298	93.5834	FALSE	4
2022-09-13	16:23:25	0.23757	93.8209	FALSE	4
2022-09-13	16:23:25	0.570089	94.391	FALSE	4
2022-09-13	16:23:26	0.160725	94.5518	FALSE	4
2022-09-13	16:23:26	0.508715	95.0605	FALSE	4
2022-09-13	16:23:26	0.307188	95.3677	FALSE	4
2022-09-13	16:23:26	0.775229	96.1429	FALSE	4
2022-09-13	16:23:27	1.13319	97.2761	FALSE	4
2022-09-13	16:23:27	0.622863	97.8989	FALSE	4
2022-09-13	16:23:27	0.586628	98.4856	FALSE	4
2022-09-13	16:23:28	0.252735	98.7383	FALSE	4
2022-09-13	16:23:28	0.324186	99.0625	FALSE	4
2022-09-13	16:23:28	1.31533	100.378	FALSE	4
2022-09-13	16:23:28	1.90922	102.287	FALSE	4
2022-09-13	16:23:29	1.03899	103.326	FALSE	4
2022-09-13	16:23:29	1.72683	105.053	FALSE	4
2022-09-13	16:23:29	2.30123	107.354	FALSE	4
2022-09-13	16:23:29	1.77864	109.133	FALSE	4
2022-09-13	16:23:30	3.04698	112.18	1	5
2022-09-13	16:23:30	1.23045	113.41	FALSE	5
2022-09-13	16:23:30	0.795891	114.206	FALSE	5
2022-09-13	16:23:30	1.5363	115.742	FALSE	5
2022-09-13	16:23:31	1.47019	117.213	FALSE	5
2022-09-13	16:23:31	1.30887	118.521	FALSE	5
2022-09-13	16:23:31	0.569733	119.091	FALSE	5
2022-09-13	16:23:32	0.721692	119.813	FALSE	5
2022-09-13	16:23:32	0.682608	120.495	FALSE	5
2022-09-13	16:23:32	0.411463	120.907	FALSE	5
2022-09-13	16:23:32	0.437316	121.344	FALSE	5
2022-09-13	16:23:33	0.406018	121.75	FALSE	5
2022-09-13	16:23:33	0.592837	122.343	FALSE	5
2022-09-13	16:23:33	0.538282	122.881	FALSE	5
2022-09-13	16:23:33	0.539656	123.421	FALSE	5
2022-09-13	16:23:34	0.696043	124.117	FALSE	5
2022-09-13	16:23:34	0.788817	124.906	FALSE	5
2022-09-13	16:23:34	1.33844	126.244	FALSE	5
2022-09-13	16:23:34	2.02586	128.27	FALSE	5
2022-09-13	16:23:35	1.93329	130.203	FALSE	5
2022-09-13	16:23:35	1.42261	131.626	FALSE	5
2022-09-13	16:23:35	1.57823	133.204	FALSE	5
2022-09-13	16:23:36	1.08627	134.291	FALSE	5
2022-09-13	16:23:36	0.970852	135.261	FALSE	5
2022-09-13	16:23:36	0.937621	136.199	FALSE	5
2022-09-13	16:23:36	0.961387	137.16	FALSE	5
2022-09-13	16:23:37	0.817723	137.978	FALSE	5
2022-09-13	16:23:37	0.653499	138.632	FALSE	5
2022-09-13	16:23:37	0.559351	139.191	FALSE	5
2022-09-13	16:23:37	0.470598	139.662	FALSE	5
2022-09-13	16:23:38	0.457519	140.119	FALSE	5
2022-09-13	16:23:38	0.44958	140.569	FALSE	5
2022-09-13	16:23:38	0.278079	140.847	FALSE	5
2022-09-13	16:23:38	0.541845	141.389	FALSE	5
2022-09-13	16:23:39	0.310649	141.699	FALSE	5
2022-09-13	16:23:39	0.605509	142.305	FALSE	5
2022-09-13	16:23:39	0.250038	142.555	FALSE	5
2022-09-13	16:23:40	0.543321	143.098	FALSE	5
2022-09-13	16:23:40	0.32729	143.425	FALSE	5
2022-09-13	16:23:40	0.563931	143.989	FALSE	5
2022-09-13	16:23:40	0.353906	144.343	FALSE	5
2022-09-13	16:23:41	0.494771	144.838	FALSE	5
2022-09-13	16:23:41	0.662812	145.501	FALSE	5
2022-09-13	16:23:41	0.450751	145.952	FALSE	5
2022-09-13	16:23:41	0.0892241	146.041	FALSE	5
2022-09-13	16:23:42	0.0631173	146.104	FALSE	5
2022-09-13	16:23:42	0.135433	146.239	FALSE	5
2022-09-13	16:23:42	0.709885	146.949	FALSE	5
2022-09-13	16:23:42	0.110904	147.06	FALSE	5
2022-09-13	16:23:43	0.0260689	147.086	FALSE	5
2022-09-13	16:23:43	0.193753	147.28	FALSE	5
2022-09-13	16:23:43	-0.0283331	147.28	FALSE	5
2022-09-13	16:23:44	0.249886	147.53	FALSE	5
2022-09-13	16:23:44	0.0889697	147.619	FALSE	5
2022-09-13	16:23:44	0.0573666	147.676	FALSE	5
2022-09-13	16:23:44	-0.182073	147.676	FALSE	5
2022-09-13	16:23:45	-0.240038	147.676	FALSE	5
2022-09-13	16:23:45	0.146272	147.822	FALSE	5
2022-09-13	16:23:45	0.160471	147.983	FALSE	5
2022-09-13	16:23:45	0.482049	148.465	FALSE	5
2022-09-13	16:23:46	0.646679	149.112	FALSE	5
2022-09-13	16:23:46	0.869631	149.981	FALSE	5
2022-09-13	16:23:46	0.789631	150.771	FALSE	5
2022-09-13	16:23:46	0.380064	151.151	FALSE	5
2022-09-13	16:23:47	0.54383	151.695	FALSE	5
2022-09-13	16:23:47	0.287799	151.983	FALSE	5
2022-09-13	16:23:47	0.560878	152.544	FALSE	5
2022-09-13	16:23:48	0.196552	152.74	FALSE	5
2022-09-13	16:23:48	0.491361	153.231	FALSE	5
2022-09-13	16:23:48	0.21299	153.444	FALSE	5
2022-09-13	16:23:48	0.481641	153.926	FALSE	5
2022-09-13	16:23:49	0.375484	154.302	FALSE	5
2022-09-13	16:23:49	0.406832	154.708	FALSE	5
2022-09-13	16:23:49	0.360725	155.069	FALSE	5
2022-09-13	16:23:49	0.415942	155.485	FALSE	5
2022-09-13	16:23:50	0.548868	156.034	FALSE	5
2022-09-13	16:23:50	0.320573	156.354	FALSE	5
2022-09-13	16:23:50	0.364949	156.719	FALSE	5
2022-09-13	16:23:50	0.186781	156.906	FALSE	5
2022-09-13	16:23:51	0.312379	157.219	FALSE	5
2022-09-13	16:23:51	0.117621	157.336	FALSE	5
2022-09-13	16:23:51	0.305	157.641	FALSE	5
2022-09-13	16:23:52	0.175992	157.817	FALSE	5
2022-09-13	16:23:52	-0.011641	157.817	FALSE	5
2022-09-13	16:23:52	0.247596	158.065	FALSE	5
2022-09-13	16:23:52	0.750445	158.815	FALSE	5
2022-09-13	16:23:53	0.195738	159.011	FALSE	5
2022-09-13	16:23:53	0.505611	159.517	FALSE	5
2022-09-13	16:23:53	0.345356	159.862	FALSE	5
2022-09-13	16:23:53	0.139606	160.002	FALSE	5
2022-09-13	16:23:54	0.237214	160.239	FALSE	5
2022-09-13	16:23:54	-0.00965623	160.239	FALSE	5
2022-09-13	16:23:54	0.086934	160.326	FALSE	5
2022-09-13	16:23:54	0.0107	160.336	FALSE	5
2022-09-13	16:23:55	0.162099	160.499	FALSE	5
2022-09-13	16:23:55	0.0348221	160.533	FALSE	5
2022-09-13	16:23:55	0.236959	160.77	FALSE	5
2022-09-13	16:23:55	0.234975	161.005	FALSE	5
2022-09-13	16:23:56	0.353651	161.359	FALSE	5
2022-09-13	16:23:56	1.28215	162.641	FALSE	5
2022-09-13	16:23:56	3.42052	166.062	1	6
2022-09-13	16:23:57	4.8506	170.912	1	7
2022-09-13	16:23:57	2.18296	173.095	FALSE	7
2022-09-13	16:23:57	1.38429	174.479	FALSE	7
2022-09-13	16:23:57	0.557926	175.037	FALSE	7
2022-09-13	16:23:58	0.987392	176.025	FALSE	7
2022-09-13	16:23:58	0.723524	176.748	FALSE	7
2022-09-13	16:23:58	0.26098	177.009	FALSE	7
2022-09-13	16:23:58	0.72612	177.735	FALSE	7
2022-09-13	16:23:59	0.231565	177.967	FALSE	7
2022-09-13	16:23:59	0.608766	178.576	FALSE	7
2022-09-13	16:23:59	0.363117	178.939	FALSE	7
2022-09-13	16:23:59	0.624186	179.563	FALSE	7
2022-09-13	16:24:00	0.518384	180.081	FALSE	7
2022-09-13	16:24:00	0.621692	180.703	FALSE	7
2022-09-13	16:24:00	1.02352	181.727	FALSE	7
2022-09-13	16:24:01	0.702659	182.429	FALSE	7
2022-09-13	16:24:01	1.47431	183.904	FALSE	7
2022-09-13	16:24:01	1.02927	184.933	FALSE	7
2022-09-13	16:24:01	2.36627	187.299	FALSE	7
2022-09-13	16:24:02	2.2335	189.533	FALSE	7
2022-09-13	16:24:02	5.26652	194.799	1	8
2022-09-13	16:24:02	1.47513	196.274	FALSE	8
2022-09-13	16:24:02	2.40688	198.681	FALSE	8
2022-09-13	16:24:03	0.937265	199.618	FALSE	8
2022-09-13	16:24:03	0.293753	199.912	FALSE	8
2022-09-13	16:24:03	0.60271	200.515	FALSE	8
2022-09-13	16:24:03	0.201794	200.717	FALSE	8
2022-09-13	16:24:04	0.518995	201.236	FALSE	8
2022-09-13	16:24:04	0.510445	201.746	FALSE	8
2022-09-13	16:24:04	1.33375	203.08	FALSE	8
2022-09-13	16:24:05	1.21721	204.297	FALSE	8
2022-09-13	16:24:05	2.28006	206.577	FALSE	8
2022-09-13	16:24:05	1.63833	208.215	FALSE	8
2022-09-13	16:24:05	1.58627	209.802	FALSE	8
2022-09-13	16:24:06	1.48393	211.286	FALSE	8
2022-09-13	16:24:06	1.77945	213.065	FALSE	8
2022-09-13	16:24:06	1.62022	214.685	FALSE	8
2022-09-13	16:24:06	1.23055	215.916	FALSE	8
2022-09-13	16:24:07	1.08704	217.003	FALSE	8
2022-09-13	16:24:07	1.12821	218.131	FALSE	8
2022-09-13	16:24:07	0.70841	218.84	FALSE	8
2022-09-13	16:24:07	0.503219	219.343	FALSE	8
2022-09-13	16:24:08	0.491972	219.835	FALSE	8
2022-09-13	16:24:08	0.62673	220.461	FALSE	8
2022-09-13	16:24:08	0.546221	221.008	FALSE	8
2022-09-13	16:24:09	0.489987	221.498	FALSE	8
2022-09-13	16:24:09	0.366222	221.864	FALSE	8
2022-09-13	16:24:09	0.408919	222.273	FALSE	8
2022-09-13	16:24:09	0.394262	222.667	FALSE	8
2022-09-13	16:24:10	0.371616	223.039	FALSE	8
2022-09-13	16:24:10	0.407392	223.446	FALSE	8
2022-09-13	16:24:10	0.339758	223.786	FALSE	8
2022-09-13	16:24:10	0.244797	224.031	FALSE	8
2022-09-13	16:24:11	0.117875	224.149	FALSE	8
2022-09-13	16:24:11	-0.0254323	224.149	FALSE	8
2022-09-13	16:24:11	0.305662	224.454	FALSE	8
2022-09-13	16:24:11	0.273652	224.728	FALSE	8
2022-09-13	16:24:12	0.352481	225.08	FALSE	8
2022-09-13	16:24:12	0.331769	225.412	FALSE	8
2022-09-13	16:24:12	0.683321	226.095	FALSE	8
2022-09-13	16:24:13	2.28307	228.378	FALSE	8
2022-09-13	16:24:13	1.402	229.78	FALSE	8
2022-09-13	16:24:13	0.854313	230.635	FALSE	8
2022-09-13	16:24:13	0.276807	230.912	FALSE	8
2022-09-13	16:24:14	0.469275	231.381	FALSE	8
2022-09-13	16:24:14	0.296349	231.677	FALSE	8
2022-09-13	16:24:14	0.517977	232.195	FALSE	8
2022-09-13	16:24:14	0.569224	232.764	FALSE	8
2022-09-13	16:24:15	0.680674	233.445	FALSE	8
2022-09-13	16:24:15	0.439758	233.885	FALSE	8
2022-09-13	16:24:15	0.132481	234.017	FALSE	8
2022-09-13	16:24:15	0.552634	234.57	FALSE	8
2022-09-13	16:24:16	0.299402	234.869	FALSE	8
2022-09-13	16:24:16	-0.277493	234.869	FALSE	8
2022-09-13	16:24:16	-0.344771	234.869	FALSE	8
2022-09-13	16:24:17	-0.173778	234.869	FALSE	8
2022-09-13	16:24:17	-0.0455341	234.869	FALSE	8
2022-09-13	16:24:17	0.0421503	234.912	FALSE	8
2022-09-13	16:24:17	0.14612	235.058	FALSE	8
2022-09-13	16:24:18	0.647392	235.705	FALSE	8
2022-09-13	16:24:18	0.366934	236.072	FALSE	8
2022-09-13	16:24:18	0.333397	236.405	FALSE	8
2022-09-13	16:24:18	0.218181	236.624	FALSE	8
2022-09-13	16:24:19	0.319249	236.943	FALSE	8
2022-09-13	16:24:19	0.0508018	236.994	FALSE	8
2022-09-13	16:24:19	0.169122	237.163	FALSE	8
2022-09-13	16:24:19	0.068359	237.231	FALSE	8
2022-09-13	16:24:20	0.0225066	237.254	FALSE	8
2022-09-13	16:24:20	-0.284414	237.254	FALSE	8
2022-09-13	16:24:20	-0.362531	237.254	FALSE	8
2022-09-13	16:24:21	-0.198562	237.254	FALSE	8
2022-09-13	16:24:21	-0.26014	237.254	FALSE	8
2022-09-13	16:24:21	0.119453	237.373	FALSE	8
2022-09-13	16:24:21	0.552532	237.926	FALSE	8
2022-09-13	16:24:22	1.31411	239.24	FALSE	8
2022-09-13	16:24:22	1.91029	241.15	FALSE	8
2022-09-13	16:24:22	1.80174	242.952	FALSE	8
2022-09-13	16:24:22	2.63833	245.59	FALSE	8
2022-09-13	16:24:23	1.41477	247.005	FALSE	8
2022-09-13	16:24:23	1.14531	248.15	FALSE	8
2022-09-13	16:24:23	1.73396	249.884	FALSE	8
2022-09-13	16:24:23	1.30307	251.187	FALSE	8
2022-09-13	16:24:24	1.36332	252.55	FALSE	8
2022-09-13	16:24:24	1.07879	253.629	FALSE	8
2022-09-13	16:24:24	1.35212	254.981	FALSE	8
2022-09-13	16:24:24	1.00103	255.982	FALSE	8
2022-09-13	16:24:25	1.09889	257.081	FALSE	8
2022-09-13	16:24:25	1.06464	258.146	FALSE	8
2022-09-13	16:24:25	3.26607	261.412	1	9
2022-09-13	16:24:26	1.4735	262.885	FALSE	9
2022-09-13	16:24:26	2.71156	265.597	FALSE	9
2022-09-13	16:24:26	2.98088	268.578	FALSE	9
2022-09-13	16:24:26	3.10276	271.681	1	10
2022-09-13	16:24:27	2.61289	274.294	FALSE	10
2022-09-13	16:24:27	3.05396	277.348	1	11
2022-09-13	16:24:27	1.55482	278.902	FALSE	11
2022-09-13	16:24:27	0.685102	279.587	FALSE	11
2022-09-13	16:24:28	0.378333	279.966	FALSE	11
2022-09-13	16:24:28	0.264746	280.231	FALSE	11
2022-09-13	16:24:28	0.568715	280.799	FALSE	11
2022-09-13	16:24:28	0.379911	281.179	FALSE	11
2022-09-13	16:24:29	0.287443	281.467	FALSE	11
2022-09-13	16:24:29	0.447392	281.914	FALSE	11
2022-09-13	16:24:29	0.229784	282.144	FALSE	11
2022-09-13	16:24:30	0.0691733	282.213	FALSE	11
2022-09-13	16:24:30	0.0629646	282.276	FALSE	11
2022-09-13	16:24:30	0.0646949	282.341	FALSE	11
2022-09-13	16:24:30	-0.04416	282.341	FALSE	11
2022-09-13	16:24:31	-0.434338	282.341	FALSE	11
2022-09-13	16:24:31	-0.283193	282.341	FALSE	11
2022-09-13	16:24:31	-0.455916	282.341	FALSE	11
2022-09-13	16:24:31	-0.336017	282.341	FALSE	11
2022-09-13	16:24:32	-0.341157	282.341	FALSE	11
2022-09-13	16:24:32	-0.328079	282.341	FALSE	11
2022-09-13	16:24:32	-0.28187	282.341	FALSE	11
2022-09-13	16:24:32	-0.175559	282.341	FALSE	11
2022-09-13	16:24:33	-0.142023	282.341	FALSE	11
2022-09-13	16:24:33	-0.0340837	282.341	FALSE	11
2022-09-13	16:24:33	-0.204414	282.341	FALSE	11
2022-09-13	16:24:34	-0.345076	282.341	FALSE	11
2022-09-13	16:24:34	-0.330419	282.341	FALSE	11
2022-09-13	16:24:34	-0.204364	282.341	FALSE	11
2022-09-13	16:24:34	-0.17042	282.341	FALSE	11
2022-09-13	16:24:35	-0.192811	282.341	FALSE	11
2022-09-13	16:24:35	-0.198257	282.341	FALSE	11
2022-09-13	16:24:35	-0.222633	282.341	FALSE	11
2022-09-13	16:24:35	-0.249096	282.341	FALSE	11
2022-09-13	16:24:36	-0.39444	282.341	FALSE	11
2022-09-13	16:24:36	-0.604465	282.341	FALSE	11
2022-09-13	16:24:36	-0.467875	282.341	FALSE	11
2022-09-13	16:24:36	0.821641	283.162	FALSE	11
2022-09-13	16:24:37	3.13986	286.302	1	12
2022-09-13	16:24:37	0.978384	287.281	FALSE	12
2022-09-13	16:24:37	0.513652	287.794	FALSE	12
2022-09-13	16:24:38	0.493499	288.288	FALSE	12
2022-09-13	16:24:38	0.534109	288.822	FALSE	12
2022-09-13	16:24:38	0.407341	289.229	FALSE	12
2022-09-13	16:24:38	0.699962	289.929	FALSE	12
2022-09-13	16:24:39	0.870293	290.799	FALSE	12
2022-09-13	16:24:39	0.773092	291.572	FALSE	12
2022-09-13	16:24:39	0.830191	292.403	FALSE	12
2022-09-13	16:24:39	0.287799	292.69	FALSE	12
2022-09-13	16:24:40	0.506221	293.197	FALSE	12
2022-09-13	16:24:40	0.627137	293.824	FALSE	12
2022-09-13	16:24:40	0.620115	294.444	FALSE	12
2022-09-13	16:24:40	0.674008	295.118	FALSE	12
2022-09-13	16:24:41	0.523219	295.641	FALSE	12
2022-09-13	16:24:41	0.568409	296.21	FALSE	12
2022-09-13	16:24:41	0.612837	296.822	FALSE	12
2022-09-13	16:24:42	0.636094	297.458	FALSE	12
2022-09-13	16:24:42	0.523626	297.982	FALSE	12
2022-09-13	16:24:42	0.355484	298.338	FALSE	12
2022-09-13	16:24:42	0.372125	298.71	FALSE	12
2022-09-13	16:24:43	0.395585	299.105	FALSE	12
2022-09-13	16:24:43	0.374415	299.48	FALSE	12
2022-09-13	16:24:43	0.278893	299.759	FALSE	12
2022-09-13	16:24:43	0.505102	300.264	FALSE	12
2022-09-13	16:24:44	0.305	300.569	FALSE	12
2022-09-13	16:24:44	0.451412	301.02	FALSE	12
2022-09-13	16:24:44	0.335789	301.356	FALSE	12
2022-09-13	16:24:44	0.646679	302.003	FALSE	12
2022-09-13	16:24:45	0.52332	302.526	FALSE	12
2022-09-13	16:24:45	1.38088	303.907	FALSE	12
2022-09-13	16:24:45	1.25808	305.165	FALSE	12
2022-09-13	16:24:46	1.47569	306.641	FALSE	12
2022-09-13	16:24:46	1.47599	308.117	FALSE	12
2022-09-13	16:24:46	0.609835	308.726	FALSE	12
2022-09-13	16:24:46	0.645305	309.372	FALSE	12
2022-09-13	16:24:47	0.205306	309.577	FALSE	12
2022-09-13	16:24:47	0.45757	310.035	FALSE	12
2022-09-13	16:24:47	0.262201	310.297	FALSE	12
2022-09-13	16:24:47	0.430802	310.728	FALSE	12
2022-09-13	16:24:48	0.279555	311.007	FALSE	12
2022-09-13	16:24:48	0.422099	311.429	FALSE	12
2022-09-13	16:24:48	0.390649	311.82	FALSE	12
2022-09-13	16:24:48	0.414211	312.234	FALSE	12
2022-09-13	16:24:49	0.385254	312.619	FALSE	12
2022-09-13	16:24:49	0.390547	313.01	FALSE	12
2022-09-13	16:24:49	0.382252	313.392	FALSE	12
2022-09-13	16:24:50	0.38383	313.776	FALSE	12
2022-09-13	16:24:50	0.379962	314.156	FALSE	12
2022-09-13	16:24:50	0.380776	314.537	FALSE	12
2022-09-13	16:24:50	0.381998	314.919	FALSE	12
2022-09-13	16:24:51	0.380471	315.299	FALSE	12
2022-09-13	16:24:51	0.382099	315.681	FALSE	12
2022-09-13	16:24:51	0.384288	316.066	FALSE	12
2022-09-13	16:24:51	0.384644	316.45	FALSE	12
2022-09-13	16:24:52	0.371412	316.822	FALSE	12
2022-09-13	16:24:52	0.407036	317.229	FALSE	12
2022-09-13	16:24:52	0.38159	317.61	FALSE	12
2022-09-13	16:24:52	0.420725	318.031	FALSE	12
2022-09-13	16:24:53	0.197468	318.228	FALSE	12
2022-09-13	16:24:53	0.0974175	318.326	FALSE	12
2022-09-13	16:24:53	0.0659671	318.392	FALSE	12
2022-09-13	16:24:54	-0.0236003	318.392	FALSE	12
2022-09-13	16:24:54	-0.277493	318.392	FALSE	12
2022-09-13	16:24:54	-0.432353	318.392	FALSE	12
2022-09-13	16:24:54	-0.61505	318.392	FALSE	12
2022-09-13	16:24:55	-0.866399	318.392	FALSE	12
2022-09-13	16:24:55	-0.849045	318.392	FALSE	12
2022-09-13	16:24:55	-0.673625	318.392	FALSE	12
2022-09-13	16:24:55	-0.130012	318.392	FALSE	12
2022-09-13	16:24:56	0.218283	318.61	FALSE	12
2022-09-13	16:24:56	0.42271	319.033	FALSE	12
2022-09-13	16:24:56	0.358435	319.391	FALSE	12
2022-09-13	16:24:56	0.531412	319.923	FALSE	12
2022-09-13	16:24:57	0.245305	320.168	FALSE	12
2022-09-13	16:24:57	0.322354	320.49	FALSE	12
2022-09-13	16:24:57	0.399809	320.89	FALSE	12
2022-09-13	16:24:57	1.73884	322.629	FALSE	12
2022-09-13	16:24:58	3.24261	325.872	1	13
2022-09-13	16:24:58	2.98724	328.859	FALSE	13
2022-09-13	16:24:58	2.93233	331.791	FALSE	13
2022-09-13	16:24:59	3.64546	335.437	1	14
2022-09-13	16:24:59	1.68261	337.119	FALSE	14
2022-09-13	16:24:59	2.09533	339.215	FALSE	14
2022-09-13	16:24:59	0.557112	339.772	FALSE	14
2022-09-13	16:25:00	0.825305	340.597	FALSE	14
2022-09-13	16:25:00	0.580827	341.178	FALSE	14
2022-09-13	16:25:00	0.495534	341.673	FALSE	14
2022-09-13	16:25:00	0.731107	342.404	FALSE	14
2022-09-13	16:25:01	0.448512	342.853	FALSE	14
2022-09-13	16:25:01	0.708918	343.562	FALSE	14
2022-09-13	16:25:01	0.249835	343.812	FALSE	14
2022-09-13	16:25:01	0.780471	344.592	FALSE	14
2022-09-13	16:25:02	0.355789	344.948	FALSE	14
2022-09-13	16:25:02	0.619657	345.568	FALSE	14
2022-09-13	16:25:02	0.361336	345.929	FALSE	14
2022-09-13	16:25:03	0.562048	346.491	FALSE	14
2022-09-13	16:25:03	0.321438	346.812	FALSE	14
2022-09-13	16:25:03	0.65584	347.468	FALSE	14
2022-09-13	16:25:03	0.41187	347.88	FALSE	14
2022-09-13	16:25:04	0.485713	348.366	FALSE	14
2022-09-13	16:25:04	0.588817	348.955	FALSE	14
2022-09-13	16:25:04	0.780929	349.736	FALSE	14
2022-09-13	16:25:04	0.427239	350.163	FALSE	14
2022-09-13	16:25:05	0.866221	351.029	FALSE	14
2022-09-13	16:25:05	0.454822	351.484	FALSE	14
2022-09-13	16:25:05	0.796858	352.281	FALSE	14
2022-09-13	16:25:05	0.794313	353.075	FALSE	14
2022-09-13	16:25:06	0.878791	353.954	FALSE	14
2022-09-13	16:25:06	0.317163	354.271	FALSE	14
2022-09-13	16:25:06	0.866628	355.138	FALSE	14
2022-09-13	16:25:07	0.56444	355.702	FALSE	14
2022-09-13	16:25:07	0.566781	356.269	FALSE	14
2022-09-13	16:25:07	0.543626	356.812	FALSE	14
2022-09-13	16:25:07	0.712685	357.525	FALSE	14
2022-09-13	16:25:08	0.461896	357.987	FALSE	14
2022-09-13	16:25:08	0.6164	358.603	FALSE	14
2022-09-13	16:25:08	0.0391987	358.643	FALSE	14
2022-09-13	16:25:08	-0.00380383	358.643	FALSE	14
2022-09-13	16:25:09	-0.251997	358.643	FALSE	14
2022-09-13	16:25:09	-0.546552	358.643	FALSE	14
2022-09-13	16:25:09	-0.534796	358.643	FALSE	14
2022-09-13	16:25:09	-0.144669	358.643	FALSE	14
2022-09-13	16:25:10	0.25925	358.902	FALSE	14
2022-09-13	16:25:10	0.565102	359.467	FALSE	14
2022-09-13	16:25:10	0.305814	359.773	FALSE	14
2022-09-13	16:25:11	0.536654	360.309	FALSE	14
2022-09-13	16:25:11	0.266781	360.576	FALSE	14
2022-09-13	16:25:11	0.506221	361.082	FALSE	14
2022-09-13	16:25:11	0.239911	361.322	FALSE	14
2022-09-13	16:25:12	0.483117	361.806	FALSE	14
2022-09-13	16:25:12	0.290344	362.096	FALSE	14
2022-09-13	16:25:12	0.522506	362.618	FALSE	14
2022-09-13	16:25:12	0.268766	362.887	FALSE	14
2022-09-13	16:25:13	0.355992	363.243	FALSE	14
2022-09-13	16:25:13	0.334415	363.578	FALSE	14
2022-09-13	16:25:13	0.412379	363.99	FALSE	14
2022-09-13	16:25:13	0.328664	364.319	FALSE	14
2022-09-13	16:25:14	0.295025	364.614	FALSE	14
2022-09-13	16:25:14	0.40958	365.023	FALSE	14
2022-09-13	16:25:14	0.346221	365.369	FALSE	14
2022-09-13	16:25:15	0.398639	365.768	FALSE	14
2022-09-13	16:25:15	0.0628628	365.831	FALSE	14
2022-09-13	16:25:15	0.0468323	365.878	FALSE	14
2022-09-13	16:25:15	0.207239	366.085	FALSE	14
2022-09-13	16:25:16	0.253448	366.338	FALSE	14
2022-09-13	16:25:16	0.244593	366.583	FALSE	14
2022-09-13	16:25:16	0.12444	366.707	FALSE	14
2022-09-13	16:25:16	0.257977	366.965	FALSE	14
2022-09-13	16:25:17	0.239911	367.205	FALSE	14
2022-09-13	16:25:17	0.458995	367.664	FALSE	14
2022-09-13	16:25:17	0.663066	368.327	FALSE	14
2022-09-13	16:25:17	1.25833	369.586	FALSE	14
2022-09-13	16:25:18	0.611412	370.197	FALSE	14
2022-09-13	16:25:18	0.941947	371.139	FALSE	14
2022-09-13	16:25:18	0.282914	371.422	FALSE	14
2022-09-13	16:25:19	0.525458	371.947	FALSE	14
2022-09-13	16:25:19	0.317672	372.265	FALSE	14
2022-09-13	16:25:19	0.333193	372.598	FALSE	14
2022-09-13	16:25:19	-0.00186998	372.598	FALSE	14
2022-09-13	16:25:20	0.305611	372.904	FALSE	14
2022-09-13	16:25:20	0.170751	373.075	FALSE	14
2022-09-13	16:25:20	0.343728	373.418	FALSE	14
2022-09-13	16:25:20	0.114924	373.533	FALSE	14
2022-09-13	16:25:21	-0.14187	373.533	FALSE	14
2022-09-13	16:25:21	-0.146399	373.533	FALSE	14
2022-09-13	16:25:21	-0.343295	373.533	FALSE	14
2022-09-13	16:25:21	-0.404669	373.533	FALSE	14
2022-09-13	16:25:22	-0.45561	373.533	FALSE	14
2022-09-13	16:25:22	-0.42243	373.533	FALSE	14
2022-09-13	16:25:22	-0.483498	373.533	FALSE	14
2022-09-13	16:25:23	-0.438867	373.533	FALSE	14
2022-09-13	16:25:23	-0.423804	373.533	FALSE	14
2022-09-13	16:25:23	-0.45271	373.533	FALSE	14
2022-09-13	16:25:23	-0.496323	373.533	FALSE	14
2022-09-13	16:25:24	-0.591335	373.533	FALSE	14
2022-09-13	16:25:24	-0.546755	373.533	FALSE	14
2022-09-13	16:25:24	-0.556373	373.533	FALSE	14
2022-09-13	16:25:24	-0.553931	373.533	FALSE	14
2022-09-13	16:25:25	-0.546857	373.533	FALSE	14
2022-09-13	16:25:25	-0.529453	373.533	FALSE	14
2022-09-13	16:25:25	-0.524261	373.533	FALSE	14
2022-09-13	16:25:25	-0.530674	373.533	FALSE	14
2022-09-13	16:25:26	-0.543803	373.533	FALSE	14
2022-09-13	16:25:26	-0.476882	373.533	FALSE	14
2022-09-13	16:25:26	-0.376577	373.533	FALSE	14
2022-09-13	16:25:26	-0.35215	373.533	FALSE	14
2022-09-13	16:25:27	-0.27271	373.533	FALSE	14
2022-09-13	16:25:27	-0.309758	373.533	FALSE	14
2022-09-13	16:25:27	-0.293575	373.533	FALSE	14
2022-09-13	16:25:28	-0.29276	373.533	FALSE	14
2022-09-13	16:25:28	-0.304058	373.533	FALSE	14
2022-09-13	16:25:28	-0.305381	373.533	FALSE	14
2022-09-13	16:25:28	-0.222379	373.533	FALSE	14
2022-09-13	16:25:29	-0.208079	373.533	FALSE	14
2022-09-13	16:25:29	-0.214236	373.533	FALSE	14
2022-09-13	16:25:29	-0.195356	373.533	FALSE	14
2022-09-13	16:25:29	-0.153117	373.533	FALSE	14
2022-09-13	16:25:30	-0.113015	373.533	FALSE	14
2022-09-13	16:25:30	-0.0436002	373.533	FALSE	14
2022-09-13	16:25:30	0.0414379	373.575	FALSE	14
2022-09-13	16:25:30	0.140318	373.715	FALSE	14
2022-09-13	16:25:31	0.176959	373.892	FALSE	14
2022-09-13	16:25:31	0.147952	374.04	FALSE	14
2022-09-13	16:25:31	0.115331	374.155	FALSE	14
2022-09-13	16:25:32	0.144135	374.299	FALSE	14
2022-09-13	16:25:32	0.157774	374.457	FALSE	14
2022-09-13	16:25:32	0.144949	374.602	FALSE	14
2022-09-13	16:25:32	0.119911	374.722	FALSE	14
2022-09-13	16:25:33	0.0713615	374.793	FALSE	14
2022-09-13	16:25:33	0.0512089	374.845	FALSE	14
2022-09-13	16:25:33	-0.000292388	374.845	FALSE	14
2022-09-13	16:25:33	0.0485626	374.893	FALSE	14
2022-09-13	16:25:34	-0.116526	374.893	FALSE	14
2022-09-13	16:25:34	-0.0346944	374.893	FALSE	14
2022-09-13	16:25:34	0.131514	375.025	FALSE	14
2022-09-13	16:25:34	0.515738	375.541	FALSE	14
2022-09-13	16:25:35	0.430242	375.971	FALSE	14
2022-09-13	16:25:35	0.321132	376.292	FALSE	14
2022-09-13	16:25:35	0.547443	376.839	FALSE	14
2022-09-13	16:25:36	0.642405	377.482	FALSE	14
2022-09-13	16:25:36	0.555025	378.037	FALSE	14
2022-09-13	16:25:36	0.844084	378.881	FALSE	14
2022-09-13	16:25:36	1.54765	380.428	FALSE	14
2022-09-13	16:25:37	2.34861	382.777	FALSE	14
2022-09-13	16:25:37	2.71925	385.496	FALSE	14
2022-09-13	16:25:37	2.25538	387.752	FALSE	14
2022-09-13	16:25:37	2.26734	390.019	FALSE	14
2022-09-13	16:25:38	0.907901	390.927	FALSE	14
2022-09-13	16:25:38	0.329784	391.257	FALSE	14
2022-09-13	16:25:38	0.435076	391.692	FALSE	14
2022-09-13	16:25:38	0.304237	391.996	FALSE	14
2022-09-13	16:25:39	0.152634	392.149	FALSE	14
2022-09-13	16:25:39	0.279046	392.428	FALSE	14
2022-09-13	16:25:39	0.148563	392.576	FALSE	14
2022-09-13	16:25:40	0.342914	392.919	FALSE	14
2022-09-13	16:25:40	0.547494	393.467	FALSE	14
2022-09-13	16:25:40	1.40546	394.872	FALSE	14
2022-09-13	16:25:40	1.16709	396.039	FALSE	14
2022-09-13	16:25:41	1.75452	397.794	FALSE	14
2022-09-13	16:25:41	1.45457	399.248	FALSE	14
2022-09-13	16:25:41	0.500013	399.748	FALSE	14
2022-09-13	16:25:41	0.761488	400.51	FALSE	14
2022-09-13	16:25:42	0.466527	400.976	FALSE	14
2022-09-13	16:25:42	0.37131	401.348	FALSE	14
2022-09-13	16:25:42	0.223626	401.571	FALSE	14
2022-09-13	16:25:42	0.253957	401.825	FALSE	14
2022-09-13	16:25:43	0.0731936	401.898	FALSE	14
2022-09-13	16:25:43	0.115331	402.014	FALSE	14
2022-09-13	16:25:43	-0.0216664	402.014	FALSE	14
2022-09-13	16:25:44	-0.175509	402.014	FALSE	14
2022-09-13	16:25:44	-0.393727	402.014	FALSE	14
2022-09-13	16:25:44	-0.471081	402.014	FALSE	14
2022-09-13	16:25:44	-0.583702	402.014	FALSE	14
2022-09-13	16:25:45	-0.661106	402.014	FALSE	14
2022-09-13	16:25:45	-0.433218	402.014	FALSE	14
2022-09-13	16:25:45	0.233143	402.247	FALSE	14
2022-09-13	16:25:45	0.457265	402.704	FALSE	14
2022-09-13	16:25:46	0.461947	403.166	FALSE	14
2022-09-13	16:25:46	0.465611	403.632	FALSE	14
2022-09-13	16:25:46	0.490293	404.122	FALSE	14
2022-09-13	16:25:46	0.434262	404.556	FALSE	14
2022-09-13	16:25:47	0.451209	405.008	FALSE	14
2022-09-13	16:25:47	0.493041	405.501	FALSE	14
2022-09-13	16:25:47	0.425305	405.926	FALSE	14
2022-09-13	16:25:48	0.447799	406.374	FALSE	14
2022-09-13	16:25:48	0.411158	406.785	FALSE	14
2022-09-13	16:25:48	0.393753	407.179	FALSE	14
2022-09-13	16:25:48	0.415992	407.595	FALSE	14
2022-09-13	16:25:49	0.410649	408.005	FALSE	14
2022-09-13	16:25:49	0.43701	408.442	FALSE	14
2022-09-13	16:25:49	0.360216	408.802	FALSE	14
2022-09-13	16:25:49	0.34215	409.145	FALSE	14
2022-09-13	16:25:50	0.469835	409.614	FALSE	14
2022-09-13	16:25:50	0.354669	409.969	FALSE	14
2022-09-13	16:25:50	0.806628	410.776	FALSE	14
2022-09-13	16:25:50	1.21279	411.989	FALSE	14
2022-09-13	16:25:51	2.93462	414.923	FALSE	14
2022-09-13	16:25:51	2.30871	417.232	FALSE	14
2022-09-13	16:25:51	2.90607	420.138	FALSE	14
2022-09-13	16:25:52	0.633448	420.771	FALSE	14
2022-09-13	16:25:52	0.821641	421.593	FALSE	14
2022-09-13	16:25:52	0.717926	422.311	FALSE	14
2022-09-13	16:25:52	0.481081	422.792	FALSE	14
2022-09-13	16:25:53	0.741336	423.533	FALSE	14
2022-09-13	16:25:53	0.294975	423.828	FALSE	14
2022-09-13	16:25:53	0.607188	424.436	FALSE	14
2022-09-13	16:25:53	0.313092	424.749	FALSE	14
2022-09-13	16:25:54	0.512328	425.261	FALSE	14
2022-09-13	16:25:54	0.344491	425.605	FALSE	14
2022-09-13	16:25:54	0.47126	426.077	FALSE	14
2022-09-13	16:25:54	0.367138	426.444	FALSE	14
2022-09-13	16:25:55	0.392277	426.836	FALSE	14
2022-09-13	16:25:55	0.54103	427.377	FALSE	14
2022-09-13	16:25:55	0.325662	427.703	FALSE	14
2022-09-13	16:25:56	0.617112	428.32	FALSE	14
2022-09-13	16:25:56	0.326171	428.646	FALSE	14
2022-09-13	16:25:56	0.572328	429.218	FALSE	14
2022-09-13	16:25:56	0.409377	429.628	FALSE	14
2022-09-13	16:25:57	0.625305	430.253	FALSE	14
2022-09-13	16:25:57	0.260776	430.514	FALSE	14
2022-09-13	16:25:57	0.625051	431.139	FALSE	14
2022-09-13	16:25:57	0.297417	431.436	FALSE	14
2022-09-13	16:25:58	0.709478	432.146	FALSE	14
2022-09-13	16:25:58	0.35986	432.506	FALSE	14
2022-09-13	16:25:58	0.487545	432.993	FALSE	14
2022-09-13	16:25:58	0.42902	433.422	FALSE	14
2022-09-13	16:25:59	0.444338	433.867	FALSE	14
2022-09-13	16:25:59	0.400725	434.267	FALSE	14
2022-09-13	16:25:59	0.46612	434.733	FALSE	14
2022-09-13	16:25:59	0.380776	435.114	FALSE	14
2022-09-13	16:26:00	0.398435	435.513	FALSE	14
2022-09-13	16:26:00	0.475484	435.988	FALSE	14
2022-09-13	16:26:00	0.442456	436.431	FALSE	14
2022-09-13	16:26:01	0.462659	436.893	FALSE	14
2022-09-13	16:26:01	0.38098	437.274	FALSE	14
2022-09-13	16:26:01	0.550089	437.824	FALSE	14
2022-09-13	16:26:01	0.328766	438.153	FALSE	14
2022-09-13	16:26:02	0.507748	438.661	FALSE	14
2022-09-13	16:26:02	0.2793	438.94	FALSE	14
2022-09-13	16:26:02	0.551921	439.492	FALSE	14
2022-09-13	16:26:02	0.221336	439.713	FALSE	14
2022-09-13	16:26:03	0.588104	440.301	FALSE	14
2022-09-13	16:26:03	0.252023	440.554	FALSE	14
2022-09-13	16:26:03	0.517773	441.071	FALSE	14
2022-09-13	16:26:03	0.240776	441.312	FALSE	14
2022-09-13	16:26:04	0.545458	441.858	FALSE	14
2022-09-13	16:26:04	0.300165	442.158	FALSE	14
2022-09-13	16:26:04	0.316654	442.474	FALSE	14
2022-09-13	16:26:05	0.179809	442.654	FALSE	14
2022-09-13	16:26:05	0.385407	443.04	FALSE	14
2022-09-13	16:26:05	0.462863	443.502	FALSE	14
2022-09-13	16:26:05	0.510496	444.013	FALSE	14
2022-09-13	16:26:06	0.387137	444.4	FALSE	14
2022-09-13	16:26:06	0.512735	444.913	FALSE	14
2022-09-13	16:26:06	0.494109	445.407	FALSE	14
2022-09-13	16:26:06	0.391819	445.799	FALSE	14
2022-09-13	16:26:07	0.559148	446.358	FALSE	14
2022-09-13	16:26:07	0.346883	446.705	FALSE	14
2022-09-13	16:26:07	0.569987	447.275	FALSE	14
2022-09-13	16:26:07	0.356298	447.631	FALSE	14
2022-09-13	16:26:08	0.48612	448.117	FALSE	14
2022-09-13	16:26:08	0.280318	448.397	FALSE	14
2022-09-13	16:26:08	0.516552	448.914	FALSE	14
2022-09-13	16:26:09	0.232888	449.147	FALSE	14
2022-09-13	16:26:09	0.406425	449.553	FALSE	14
2022-09-13	16:26:09	0.255331	449.809	FALSE	14
2022-09-13	16:26:09	0.458384	450.267	FALSE	14
2022-09-13	16:26:10	0.278384	450.545	FALSE	14
2022-09-13	16:26:10	0.525254	451.071	FALSE	14
2022-09-13	16:26:10	1.01487	452.086	FALSE	14
2022-09-13	16:26:10	2.28408	454.37	FALSE	14
2022-09-13	16:26:11	1.44261	455.812	FALSE	14
2022-09-13	16:26:11	0.959402	456.772	FALSE	14
2022-09-13	16:26:11	0.373499	457.145	FALSE	14
2022-09-13	16:26:11	0.352328	457.497	FALSE	14
2022-09-13	16:26:12	0.360165	457.858	FALSE	14
2022-09-13	16:26:12	0.294669	458.152	FALSE	14
2022-09-13	16:26:12	0.505814	458.658	FALSE	14
2022-09-13	16:26:13	0.314211	458.972	FALSE	14
2022-09-13	16:26:13	0.380776	459.353	FALSE	14
2022-09-13	16:26:13	0.279402	459.633	FALSE	14
2022-09-13	16:26:13	0.534058	460.167	FALSE	14
2022-09-13	16:26:14	0.713957	460.881	FALSE	14
2022-09-13	16:26:14	5.53014	466.411	1	15
2022-09-13	16:26:14	17.1096	483.52	1	16
2022-09-13	16:26:14	5.31009	488.83	1	17
2022-09-13	16:26:15	3.55859	492.389	1	18
2022-09-13	16:26:15	4.802	497.191	1	19
2022-09-13	16:26:15	2.20424	499.395	FALSE	19
2022-09-13	16:26:15	0.706476	500.102	FALSE	19
2022-09-13	16:26:16	0.48897	500.591	FALSE	19
2022-09-13	16:26:16	0.303728	500.894	FALSE	19
2022-09-13	16:26:16	0.490853	501.385	FALSE	19
2022-09-13	16:26:17	0.34668	501.732	FALSE	19
2022-09-13	16:26:17	0.480674	502.213	FALSE	19
2022-09-13	16:26:17	0.358639	502.571	FALSE	19
2022-09-13	16:26:17	0.433753	503.005	FALSE	19
2022-09-13	16:26:18	0.392583	503.398	FALSE	19
2022-09-13	16:26:18	0.460471	503.858	FALSE	19
2022-09-13	16:26:18	0.231667	504.09	FALSE	19
2022-09-13	16:26:18	0.380369	504.47	FALSE	19
2022-09-13	16:26:19	0.382812	504.853	FALSE	19
2022-09-13	16:26:19	0.252634	505.105	FALSE	19
2022-09-13	16:26:19	0.287494	505.393	FALSE	19
2022-09-13	16:26:19	0.225102	505.618	FALSE	19
2022-09-13	16:26:20	0.17187	505.79	FALSE	19
2022-09-13	16:26:20	0.113652	505.904	FALSE	19
2022-09-13	16:26:20	0.124797	506.028	FALSE	19
2022-09-13	16:26:21	0.140471	506.169	FALSE	19
2022-09-13	16:26:21	0.191769	506.361	FALSE	19
2022-09-13	16:26:21	0.418995	506.78	FALSE	19
2022-09-13	16:26:21	0.369987	507.15	FALSE	19
2022-09-13	16:26:22	0.251412	507.401	FALSE	19
2022-09-13	16:26:22	0.350547	507.752	FALSE	19
2022-09-13	16:26:22	0.298893	508.05	FALSE	19
2022-09-13	16:26:22	0.345916	508.396	FALSE	19
2022-09-13	16:26:23	0.303473	508.7	FALSE	19
2022-09-13	16:26:23	0.248715	508.949	FALSE	19
2022-09-13	16:26:23	0.430903	509.379	FALSE	19
2022-09-13	16:26:23	0.352074	509.732	FALSE	19
2022-09-13	16:26:24	0.378537	510.11	FALSE	19
2022-09-13	16:26:24	0.324084	510.434	FALSE	19
2022-09-13	16:26:24	0.325916	510.76	FALSE	19
2022-09-13	16:26:25	0.472328	511.232	FALSE	19
2022-09-13	16:26:25	0.35182	511.584	FALSE	19
2022-09-13	16:26:25	0.394567	511.979	FALSE	19
2022-09-13	16:26:25	0.312176	512.291	FALSE	19
2022-09-13	16:26:26	0.28958	512.581	FALSE	19
2022-09-13	16:26:26	0.498842	513.079	FALSE	19
2022-09-13	16:26:26	0.417316	513.497	FALSE	19
2022-09-13	16:26:26	0.910751	514.407	FALSE	19
2022-09-13	16:26:27	0.777265	515.185	FALSE	19
2022-09-13	16:26:27	0.753499	515.938	FALSE	19
2022-09-13	16:26:27	0.989682	516.928	FALSE	19
2022-09-13	16:26:27	0.497926	517.426	FALSE	19
2022-09-13	16:26:28	0.594924	518.021	FALSE	19
2022-09-13	16:26:28	0.383575	518.404	FALSE	19
2022-09-13	16:26:28	0.497723	518.902	FALSE	19
2022-09-13	16:26:29	0.341489	519.244	FALSE	19
2022-09-13	16:26:29	0.445255	519.689	FALSE	19
2022-09-13	16:26:29	0.660929	520.35	FALSE	19
2022-09-13	16:26:29	0.96556	521.315	FALSE	19
2022-09-13	16:26:30	1.72154	523.037	FALSE	19
2022-09-13	16:26:30	1.89085	524.928	FALSE	19
2022-09-13	16:26:30	1.85726	526.785	FALSE	19
2022-09-13	16:26:30	1.82973	528.615	FALSE	19
2022-09-13	16:26:31	1.5335	530.148	FALSE	19
2022-09-13	16:26:31	1.82571	531.974	FALSE	19
2022-09-13	16:26:31	2.11116	534.085	FALSE	19
2022-09-13	16:26:31	2.26083	536.346	FALSE	19
2022-09-13	16:26:32	1.78622	538.132	FALSE	19
2022-09-13	16:26:32	1.81126	539.943	FALSE	19
2022-09-13	16:26:32	1.75202	541.695	FALSE	19
2022-09-13	16:26:33	1.60261	543.298	FALSE	19
2022-09-13	16:26:33	1.61095	544.909	FALSE	19
2022-09-13	16:26:33	1.56999	546.479	FALSE	19
2022-09-13	16:26:33	1.47095	547.95	FALSE	19
2022-09-13	16:26:34	1.4449	549.395	FALSE	19
2022-09-13	16:26:34	1.43782	550.833	FALSE	19
2022-09-13	16:26:34	1.4765	552.309	FALSE	19
2022-09-13	16:26:34	1.41559	553.725	FALSE	19
2022-09-13	16:26:35	1.38795	555.113	FALSE	19
2022-09-13	16:26:35	1.4879	556.601	FALSE	19
2022-09-13	16:26:35	1.44398	558.045	FALSE	19
2022-09-13	16:26:35	1.49319	559.538	FALSE	19
2022-09-13	16:26:36	1.53548	561.073	FALSE	19
2022-09-13	16:26:36	1.49304	562.566	FALSE	19
2022-09-13	16:26:36	1.5138	564.08	FALSE	19
2022-09-13	16:26:36	1.52612	565.606	FALSE	19
2022-09-13	16:26:37	1.57752	567.184	FALSE	19
2022-09-13	16:26:37	1.70922	568.893	FALSE	19
2022-09-13	16:26:37	2.67222	571.565	FALSE	19
2022-09-13	16:26:38	4.81136	576.376	1	20
2022-09-13	16:26:38	1.06419	577.441	FALSE	20
2022-09-13	16:26:38	0.180267	577.621	FALSE	20
2022-09-13	16:26:38	0.231819	577.853	FALSE	20
2022-09-13	16:26:39	0.355331	578.208	FALSE	20
2022-09-13	16:26:39	0.261794	578.47	FALSE	20
2022-09-13	16:26:39	0.0336008	578.503	FALSE	20
2022-09-13	16:26:39	0.0515142	578.555	FALSE	20
2022-09-13	16:26:40	0.262557	578.818	FALSE	20
2022-09-13	16:26:40	0.353957	579.171	FALSE	20
2022-09-13	16:26:40	0.24327	579.415	FALSE	20
2022-09-13	16:26:40	0.119504	579.534	FALSE	20
2022-09-13	16:26:41	0.113397	579.648	FALSE	20
2022-09-13	16:26:41	-0.00156464	579.648	FALSE	20
2022-09-13	16:26:41	0.0797585	579.727	FALSE	20
2022-09-13	16:26:42	-0.242328	579.727	FALSE	20
2022-09-13	16:26:42	-0.622378	579.727	FALSE	20
2022-09-13	16:26:42	-0.679681	579.727	FALSE	20
2022-09-13	16:26:42	-0.758816	579.727	FALSE	20
2022-09-13	16:26:43	-0.383142	579.727	FALSE	20
2022-09-13	16:26:43	-0.0636511	579.727	FALSE	20
2022-09-13	16:26:43	0.228919	579.956	FALSE	20
2022-09-13	16:26:43	0.623015	580.579	FALSE	20
2022-09-13	16:26:44	0.311921	580.891	FALSE	20
2022-09-13	16:26:44	0.612939	581.504	FALSE	20
2022-09-13	16:26:44	0.5993	582.104	FALSE	20
2022-09-13	16:26:44	0.288512	582.392	FALSE	20
2022-09-13	16:26:45	0.308512	582.701	FALSE	20
2022-09-13	16:26:45	0.436603	583.137	FALSE	20
2022-09-13	16:26:45	0.396145	583.533	FALSE	20
2022-09-13	16:26:46	0.481387	584.015	FALSE	20
2022-09-13	16:26:46	0.170038	584.185	FALSE	20
2022-09-13	16:26:46	0.0140588	584.199	FALSE	20
2022-09-13	16:26:46	0.166272	584.365	FALSE	20
2022-09-13	16:26:47	0.517366	584.882	FALSE	20
2022-09-13	16:26:47	2.64006	587.522	FALSE	20
2022-09-13	16:26:47	3.62586	591.148	1	21
2022-09-13	16:26:47	2.50291	593.651	FALSE	21
2022-09-13	16:26:48	2.7449	596.396	FALSE	21
2022-09-13	16:26:48	0.283015	596.679	FALSE	21
2022-09-13	16:26:48	0.0237279	596.703	FALSE	21
2022-09-13	16:26:48	0.203677	596.907	FALSE	21
2022-09-13	16:26:49	0.0440333	596.951	FALSE	21
2022-09-13	16:26:49	0.129987	597.081	FALSE	21
2022-09-13	16:26:49	-0.160903	597.081	FALSE	21
2022-09-13	16:26:50	-0.156475	597.081	FALSE	21
2022-09-13	16:26:50	-0.130878	597.081	FALSE	21
2022-09-13	16:26:50	2.0278	599.108	FALSE	21
2022-09-13	16:26:50	0.503931	599.612	FALSE	21
2022-09-13	16:26:51	0.351158	599.963	FALSE	21
2022-09-13	16:26:51	-0.047926	599.963	FALSE	21
2022-09-13	16:26:51	-0.270572	599.963	FALSE	21
2022-09-13	16:26:51	-0.252048	599.963	FALSE	21
2022-09-13	16:26:52	-0.294287	599.963	FALSE	21
2022-09-13	16:26:52	-0.141361	599.963	FALSE	21
2022-09-13	16:26:52	0.0637279	600.027	FALSE	21
2022-09-13	16:26:52	0.173295	600.2	FALSE	21
2022-09-13	16:26:53	0.52612	600.727	FALSE	21
2022-09-13	16:26:53	0.495993	601.223	FALSE	21
2022-09-13	16:26:53	0.327952	601.551	FALSE	21
2022-09-13	16:26:54	0.266883	601.817	FALSE	21
2022-09-13	16:26:54	0.433346	602.251	FALSE	21
2022-09-13	16:26:54	0.358995	602.61	FALSE	21
2022-09-13	16:26:54	0.207392	602.817	FALSE	21
2022-09-13	16:26:55	0.299402	603.117	FALSE	21
2022-09-13	16:26:55	0.177417	603.294	FALSE	21
2022-09-13	16:26:55	0.477265	603.771	FALSE	21
2022-09-13	16:26:55	0.824389	604.596	FALSE	21
2022-09-13	16:26:56	2.82154	607.417	FALSE	21
2022-09-13	16:26:56	0.775178	608.192	FALSE	21
2022-09-13	16:26:56	0.43126	608.624	FALSE	21
2022-09-13	16:26:56	0.313143	608.937	FALSE	21
2022-09-13	16:26:57	0.418486	609.355	FALSE	21
2022-09-13	16:26:57	0.202557	609.558	FALSE	21
2022-09-13	16:26:57	0.333499	609.891	FALSE	21
2022-09-13	16:26:58	0.135127	610.026	FALSE	21
2022-09-13	16:26:58	0.425611	610.452	FALSE	21
2022-09-13	16:26:58	0.160624	610.613	FALSE	21
2022-09-13	16:26:58	0.415433	611.028	FALSE	21
2022-09-13	16:26:59	0.192023	611.22	FALSE	21
2022-09-13	16:26:59	0.364084	611.584	FALSE	21
2022-09-13	16:26:59	0.217265	611.801	FALSE	21
2022-09-13	16:26:59	0.370445	612.172	FALSE	21
2022-09-13	16:27:00	0.262303	612.434	FALSE	21
2022-09-13	16:27:00	0.492837	612.927	FALSE	21
2022-09-13	16:27:00	0.278283	613.205	FALSE	21
2022-09-13	16:27:00	0.436196	613.642	FALSE	21
2022-09-13	16:27:01	0.356145	613.998	FALSE	21
2022-09-13	16:27:01	0.456756	614.454	FALSE	21
2022-09-13	16:27:01	0.309427	614.764	FALSE	21
2022-09-13	16:27:02	0.45645	615.22	FALSE	21
2022-09-13	16:27:02	0.483066	615.703	FALSE	21
2022-09-13	16:27:02	0.478181	616.182	FALSE	21
2022-09-13	16:27:02	0.61131	616.793	FALSE	21
2022-09-13	16:27:03	0.295738	617.089	FALSE	21
2022-09-13	16:27:03	0.418995	617.508	FALSE	21
2022-09-13	16:27:03	0.177825	617.685	FALSE	21
2022-09-13	16:27:03	0.21014	617.896	FALSE	21
2022-09-13	16:27:04	0.345814	618.241	FALSE	21
2022-09-13	16:27:04	0.426832	618.668	FALSE	21
2022-09-13	16:27:04	0.153957	618.822	FALSE	21
2022-09-13	16:27:04	0.31869	619.141	FALSE	21
2022-09-13	16:27:05	0.116094	619.257	FALSE	21
2022-09-13	16:27:05	0.403015	619.66	FALSE	21
2022-09-13	16:27:05	0.255127	619.915	FALSE	21
2022-09-13	16:27:06	0.376654	620.292	FALSE	21
2022-09-13	16:27:06	0.335636	620.627	FALSE	21
2022-09-13	16:27:06	0.692837	621.32	FALSE	21
2022-09-13	16:27:06	0.904491	622.225	FALSE	21
2022-09-13	16:27:07	1.06515	623.29	FALSE	21
2022-09-13	16:27:07	0.676908	623.967	FALSE	21
2022-09-13	16:27:07	0.755789	624.723	FALSE	21
2022-09-13	16:27:07	0.830089	625.553	FALSE	21
2022-09-13	16:27:08	0.934313	626.487	FALSE	21
2022-09-13	16:27:08	0.43528	626.922	FALSE	21
2022-09-13	16:27:08	0.674109	627.596	FALSE	21
2022-09-13	16:27:08	0.521947	628.118	FALSE	21
2022-09-13	16:27:09	0.770038	628.888	FALSE	21
2022-09-13	16:27:09	0.6936	629.582	FALSE	21
2022-09-13	16:27:09	0.970954	630.553	FALSE	21
2022-09-13	16:27:09	0.581285	631.134	FALSE	21
2022-09-13	16:27:10	0.535025	631.669	FALSE	21
2022-09-13	16:27:10	0.447239	632.116	FALSE	21
2022-09-13	16:27:10	0.433702	632.55	FALSE	21
2022-09-13	16:27:11	0.360522	632.911	FALSE	21
2022-09-13	16:27:11	0.363321	633.274	FALSE	21
2022-09-13	16:27:11	0.485153	633.759	FALSE	21
2022-09-13	16:27:11	0.467748	634.227	FALSE	21
2022-09-13	16:27:12	0.462354	634.689	FALSE	21
2022-09-13	16:27:12	0.403423	635.093	FALSE	21
2022-09-13	16:27:12	0.540267	635.633	FALSE	21
2022-09-13	16:27:12	0.319657	635.953	FALSE	21
2022-09-13	16:27:13	0.408512	636.361	FALSE	21
2022-09-13	16:27:13	0.371412	636.733	FALSE	21
2022-09-13	16:27:13	0.520522	637.253	FALSE	21
2022-09-13	16:27:13	0.354364	637.607	FALSE	21
2022-09-13	16:27:14	0.433957	638.041	FALSE	21
2022-09-13	16:27:14	0.344797	638.386	FALSE	21
2022-09-13	16:27:14	0.532684	638.919	FALSE	21
2022-09-13	16:27:15	0.256959	639.176	FALSE	21
2022-09-13	16:27:15	0.420115	639.596	FALSE	21
2022-09-13	16:27:15	0.314008	639.91	FALSE	21
2022-09-13	16:27:15	0.547239	640.457	FALSE	21
2022-09-13	16:27:16	0.292328	640.749	FALSE	21
2022-09-13	16:27:16	0.394567	641.144	FALSE	21
2022-09-13	16:27:16	0.302201	641.446	FALSE	21
2022-09-13	16:27:16	0.478893	641.925	FALSE	21
2022-09-13	16:27:17	0.328766	642.254	FALSE	21
2022-09-13	16:27:17	0.3307	642.585	FALSE	21
2022-09-13	16:27:17	0.347494	642.932	FALSE	21
2022-09-13	16:27:17	0.446221	643.378	FALSE	21
2022-09-13	16:27:18	0.349071	643.727	FALSE	21
2022-09-13	16:27:18	0.761641	644.489	FALSE	21
2022-09-13	16:27:18	0.41014	644.899	FALSE	21
2022-09-13	16:27:19	0.517468	645.417	FALSE	21
2022-09-13	16:27:19	0.569275	645.986	FALSE	21
2022-09-13	16:27:19	0.409784	646.396	FALSE	21
2022-09-13	16:27:19	0.464695	646.86	FALSE	21
2022-09-13	16:27:20	0.402099	647.263	FALSE	21
2022-09-13	16:27:20	0.338028	647.601	FALSE	21
2022-09-13	16:27:20	0.446323	648.047	FALSE	21
2022-09-13	16:27:20	-0.0300125	648.047	FALSE	21
2022-09-13	16:27:21	0.405967	648.453	FALSE	21
2022-09-13	16:27:21	0.845509	649.298	FALSE	21
2022-09-13	16:27:21	0.223473	649.522	FALSE	21
2022-09-13	16:27:21	0.317621	649.839	FALSE	21
2022-09-13	16:27:22	0.481896	650.321	FALSE	21
2022-09-13	16:27:22	1.05116	651.372	FALSE	21
2022-09-13	16:27:22	0.845102	652.218	FALSE	21
2022-09-13	16:27:23	1.13711	653.355	FALSE	21
2022-09-13	16:27:23	2.50892	655.864	FALSE	21
2022-09-13	16:27:23	1.6224	657.486	FALSE	21
2022-09-13	16:27:23	0.248512	657.735	FALSE	21
2022-09-13	16:27:24	0.0412852	657.776	FALSE	21
2022-09-13	16:27:24	0.152379	657.928	FALSE	21
2022-09-13	16:27:24	0.121947	658.05	FALSE	21
2022-09-13	16:27:24	0.213702	658.264	FALSE	21
2022-09-13	16:27:25	0.261031	658.525	FALSE	21
2022-09-13	16:27:25	0.364797	658.89	FALSE	21
2022-09-13	16:27:25	0.746527	659.636	FALSE	21
2022-09-13	16:27:25	2.30281	661.939	FALSE	21
2022-09-13	16:27:26	2.17294	664.112	FALSE	21
2022-09-13	16:27:26	0.654669	664.767	FALSE	21
2022-09-13	16:27:26	0.832532	665.599	FALSE	21
2022-09-13	16:27:27	3.16312	668.762	1	22
2022-09-13	16:27:27	2.68327	671.446	FALSE	22
2022-09-13	16:27:27	1.17925	672.625	FALSE	22
2022-09-13	16:27:27	2.00469	674.629	FALSE	22
2022-09-13	16:27:28	3.8192	678.449	1	23
2022-09-13	16:27:28	0.479046	678.928	FALSE	23
2022-09-13	16:27:28	0.257366	679.185	FALSE	23
2022-09-13	16:27:28	0.288308	679.473	FALSE	23
2022-09-13	16:27:29	0.360573	679.834	FALSE	23
2022-09-13	16:27:29	0.233906	680.068	FALSE	23
2022-09-13	16:27:29	0.253193	680.321	FALSE	23
2022-09-13	16:27:29	0.221489	680.543	FALSE	23
2022-09-13	16:27:30	0.228104	680.771	FALSE	23
2022-09-13	16:27:30	0.186578	680.957	FALSE	23
2022-09-13	16:27:30	0.282659	681.24	FALSE	23
2022-09-13	16:27:31	0.364288	681.604	FALSE	23
2022-09-13	16:27:31	0.409682	682.014	FALSE	23
2022-09-13	16:27:31	0.384339	682.398	FALSE	23
2022-09-13	16:27:31	0.427697	682.826	FALSE	23
2022-09-13	16:27:32	0.346934	683.173	FALSE	23
2022-09-13	16:27:32	0.464898	683.638	FALSE	23
2022-09-13	16:27:32	0.319453	683.957	FALSE	23
2022-09-13	16:27:32	0.247952	684.205	FALSE	23
2022-09-13	16:27:33	0.332328	684.537	FALSE	23
2022-09-13	16:27:33	0.284033	684.822	FALSE	23
2022-09-13	16:27:33	0.325204	685.147	FALSE	23
2022-09-13	16:27:33	0.194059	685.341	FALSE	23
2022-09-13	16:27:34	0.272634	685.613	FALSE	23
2022-09-13	16:27:34	0.206476	685.82	FALSE	23
2022-09-13	16:27:34	0.318537	686.138	FALSE	23
2022-09-13	16:27:35	0.118384	686.257	FALSE	23
2022-09-13	16:27:35	0.227138	686.484	FALSE	23
2022-09-13	16:27:35	0.107138	686.591	FALSE	23
2022-09-13	16:27:35	0.216705	686.808	FALSE	23
2022-09-13	16:27:36	0.351005	687.159	FALSE	23
2022-09-13	16:27:36	0.291361	687.45	FALSE	23
2022-09-13	16:27:36	-0.00380383	687.45	FALSE	23
2022-09-13	16:27:36	0.312277	687.762	FALSE	23
2022-09-13	16:27:37	0.00596716	687.768	FALSE	23
2022-09-13	16:27:37	0.635636	688.404	FALSE	23
2022-09-13	16:27:37	1.19324	689.597	FALSE	23
2022-09-13	16:27:37	4.58825	694.186	1	24
2022-09-13	16:27:38	2.94398	697.129	FALSE	24
2022-09-13	16:27:38	1.68485	698.814	FALSE	24
2022-09-13	16:27:38	0.746425	699.561	FALSE	24
2022-09-13	16:27:39	0.405254	699.966	FALSE	24
2022-09-13	16:27:39	0.131005	700.097	FALSE	24
2022-09-13	16:27:39	-0.0458903	700.097	FALSE	24
2022-09-13	16:27:39	0.0467305	700.144	FALSE	24
2022-09-13	16:27:40	0.116552	700.26	FALSE	24
2022-09-13	16:27:40	0.0988424	700.359	FALSE	24
2022-09-13	16:27:40	0.247494	700.607	FALSE	24
2022-09-13	16:27:40	0.23701	700.844	FALSE	24
2022-09-13	16:27:41	0.456603	701.3	FALSE	24
2022-09-13	16:27:41	0.328257	701.629	FALSE	24
2022-09-13	16:27:41	1.38113	703.01	FALSE	24
2022-09-13	16:27:41	0.814669	703.824	FALSE	24
2022-09-13	16:27:42	2.54912	706.373	FALSE	24
2022-09-13	16:27:42	2.25508	708.629	FALSE	24
2022-09-13	16:27:42	3.31792	711.946	1	25
2022-09-13	16:27:42	2.39095	714.337	FALSE	25
2022-09-13	16:27:43	1.49879	715.836	FALSE	25
2022-09-13	16:27:43	1.89024	717.726	FALSE	25
2022-09-13	16:27:43	1.28536	719.012	FALSE	25
2022-09-13	16:27:44	0.713448	719.725	FALSE	25
2022-09-13	16:27:44	1.43523	721.16	FALSE	25
2022-09-13	16:27:44	0.803982	721.964	FALSE	25
2022-09-13	16:27:44	1.67416	723.639	FALSE	25
2022-09-13	16:27:45	1.34179	724.98	FALSE	25
2022-09-13	16:27:45	1.07966	726.06	FALSE	25
2022-09-13	16:27:45	0.886832	726.947	FALSE	25
2022-09-13	16:27:45	0.572481	727.519	FALSE	25
2022-09-13	16:27:46	0.833702	728.353	FALSE	25
2022-09-13	16:27:46	0.197163	728.55	FALSE	25
2022-09-13	16:27:46	0.802252	729.352	FALSE	25
2022-09-13	16:27:46	0.309937	729.662	FALSE	25
2022-09-13	16:27:47	0.523524	730.186	FALSE	25
2022-09-13	16:27:47	0.280725	730.467	FALSE	25
2022-09-13	16:27:47	0.462863	730.93	FALSE	25
2022-09-13	16:27:48	0.310242	731.24	FALSE	25
2022-09-13	16:27:48	0.432074	731.672	FALSE	25
2022-09-13	16:27:48	0.303524	731.975	FALSE	25
2022-09-13	16:27:48	0.543728	732.519	FALSE	25
2022-09-13	16:27:49	0.49472	733.014	FALSE	25
2022-09-13	16:27:49	0.530598	733.544	FALSE	25
2022-09-13	16:27:49	0.457367	734.002	FALSE	25
2022-09-13	16:27:49	0.318588	734.32	FALSE	25
2022-09-13	16:27:50	0.534618	734.855	FALSE	25
2022-09-13	16:27:50	0.272634	735.128	FALSE	25
2022-09-13	16:27:50	0.487748	735.615	FALSE	25
2022-09-13	16:27:50	0.201031	735.816	FALSE	25
2022-09-13	16:27:51	0.437825	736.254	FALSE	25
2022-09-13	16:27:51	0.292379	736.547	FALSE	25
2022-09-13	16:27:51	0.215942	736.763	FALSE	25
2022-09-13	16:27:52	-0.0774425	736.763	FALSE	25
2022-09-13	16:27:52	0.133652	736.896	FALSE	25
2022-09-13	16:27:52	0.0115651	736.908	FALSE	25
2022-09-13	16:27:52	0.268919	737.177	FALSE	25
2022-09-13	16:27:53	-0.0210048	737.177	FALSE	25
2022-09-13	16:27:53	0.174059	737.351	FALSE	25
2022-09-13	16:27:53	0.0709036	737.422	FALSE	25
2022-09-13	16:27:53	0.510598	737.932	FALSE	25
2022-09-13	16:27:54	0.394161	738.326	FALSE	25
2022-09-13	16:27:54	0.465611	738.792	FALSE	25
2022-09-13	16:27:54	0.685916	739.478	FALSE	25
2022-09-13	16:27:54	0.671005	740.149	FALSE	25
2022-09-13	16:27:55	0.530802	740.68	FALSE	25
2022-09-13	16:27:55	1.01945	741.699	FALSE	25
2022-09-13	16:27:55	1.14927	742.848	FALSE	25
2022-09-13	16:27:56	0.667188	743.516	FALSE	25
2022-09-13	16:27:56	1.04571	744.561	FALSE	25
2022-09-13	16:27:56	0.565458	745.127	FALSE	25
2022-09-13	16:27:56	0.627443	745.754	FALSE	25
2022-09-13	16:27:57	0.401692	746.156	FALSE	25
2022-09-13	16:27:57	0.686018	746.842	FALSE	25
2022-09-13	16:27:57	0.521896	747.364	FALSE	25
2022-09-13	16:27:57	0.70729	748.071	FALSE	25
2022-09-13	16:27:58	0.821896	748.893	FALSE	25
2022-09-13	16:27:58	1.50734	750.4	FALSE	25
2022-09-13	16:27:58	0.644389	751.045	FALSE	25
2022-09-13	16:27:58	0.841692	751.886	FALSE	25
2022-09-13	16:27:59	0.65813	752.545	FALSE	25
2022-09-13	16:27:59	1.02475	753.569	FALSE	25
2022-09-13	16:27:59	0.677875	754.247	FALSE	25
2022-09-13	16:28:00	0.76841	755.016	FALSE	25
2022-09-13	16:28:00	0.303168	755.319	FALSE	25
2022-09-13	16:28:00	0.410394	755.729	FALSE	25
2022-09-13	16:28:00	0.0843895	755.814	FALSE	25
2022-09-13	16:28:01	0.263219	756.077	FALSE	25

## Sheet: Sulley_prong_2022913162242
						**GoPro Fitting: 1612
2022-09-13	16:22:42	0.145713
2022-09-13	16:22:42	0.13243
2022-09-13	16:22:42	0.143982
2022-09-13	16:22:43	0.140369
2022-09-13	16:22:43	0.144237
2022-09-13	16:22:43	0.14958
2022-09-13	16:22:43	0.138842
2022-09-13	16:22:44	0.141489
2022-09-13	16:22:44	0.152786
2022-09-13	16:22:44	0.158792
2022-09-13	16:22:44	0.142812
2022-09-13	16:22:45	0.167799
2022-09-13	16:22:45	0.19472
2022-09-13	16:22:45	0.17813
2022-09-13	16:22:46	0.185967
2022-09-13	16:22:46	0.118334
2022-09-13	16:22:46	0.216807
2022-09-13	16:22:46	0.233041
2022-09-13	16:22:47	0.399657
2022-09-13	16:22:47	0.215331
2022-09-13	16:22:47	0.162914
2022-09-13	16:22:47	0.209478
2022-09-13	16:22:48	0.180013
2022-09-13	16:22:48	0.221132
2022-09-13	16:22:48	0.132277
2022-09-13	16:22:48	0.292379
2022-09-13	16:22:49	0.520929
2022-09-13	16:22:49	0.315433
2022-09-13	16:22:49	0.221081
2022-09-13	16:22:50	0.404746
2022-09-13	16:22:50	0.191209
2022-09-13	16:22:50	0.168919
2022-09-13	16:22:50	0.330598
2022-09-13	16:22:51	0.414822
2022-09-13	16:22:51	0.31126
2022-09-13	16:22:51	0.290293
2022-09-13	16:22:51	0.259097
2022-09-13	16:22:52	0.485611
2022-09-13	16:22:52	0.906476
2022-09-13	16:22:52	1.42541
2022-09-13	16:22:52	1.67055
2022-09-13	16:22:53	0.478995
2022-09-13	16:22:53	0.720165
2022-09-13	16:22:53	0.481081
2022-09-13	16:22:54	0.339097
2022-09-13	16:22:54	0.320929
2022-09-13	16:22:54	0.452023
2022-09-13	16:22:54	0.156756
2022-09-13	16:22:55	0.215687
2022-09-13	16:22:55	0.157519
2022-09-13	16:22:55	0.230496
2022-09-13	16:22:55	0.221692
2022-09-13	16:22:56	2.52709
2022-09-13	16:22:56	6.50866
2022-09-13	16:22:56	8.68576
2022-09-13	16:22:56	1.35274
2022-09-13	16:22:57	1.92078
2022-09-13	16:22:57	1.08408
2022-09-13	16:22:57	0.818486
2022-09-13	16:22:57	0.357621
2022-09-13	16:22:58	0.226934
2022-09-13	16:22:58	-0.025127
2022-09-13	16:22:58	-0.506399
2022-09-13	16:22:59	-0.26472
2022-09-13	16:22:59	0.0285117
2022-09-13	16:22:59	0.020471
2022-09-13	16:22:59	0.237316
2022-09-13	16:23:00	0.247952
2022-09-13	16:23:00	0.369173
2022-09-13	16:23:00	0.251616
2022-09-13	16:23:00	0.304135
2022-09-13	16:23:01	0.290903
2022-09-13	16:23:01	0.65014
2022-09-13	16:23:01	0.831565
2022-09-13	16:23:01	0.768003
2022-09-13	16:23:02	0.993397
2022-09-13	16:23:02	0.883219
2022-09-13	16:23:02	0.500929
2022-09-13	16:23:03	0.559148
2022-09-13	16:23:03	0.483321
2022-09-13	16:23:03	0.500369
2022-09-13	16:23:03	0.429428
2022-09-13	16:23:04	0.431514
2022-09-13	16:23:04	0.462252
2022-09-13	16:23:04	0.452939
2022-09-13	16:23:04	0.436196
2022-09-13	16:23:05	0.427596
2022-09-13	16:23:05	0.413143
2022-09-13	16:23:05	0.448817
2022-09-13	16:23:05	0.431005
2022-09-13	16:23:06	0.443524
2022-09-13	16:23:06	0.411921
2022-09-13	16:23:06	0.42159
2022-09-13	16:23:07	0.517264
2022-09-13	16:23:07	0.394211
2022-09-13	16:23:07	0.456094
2022-09-13	16:23:07	0.375433
2022-09-13	16:23:08	0.396756
2022-09-13	16:23:08	0.508461
2022-09-13	16:23:08	0.362659
2022-09-13	16:23:08	0.479707
2022-09-13	16:23:09	0.290089
2022-09-13	16:23:09	0.57416
2022-09-13	16:23:09	0.197621
2022-09-13	16:23:09	0.470802
2022-09-13	16:23:10	0.256145
2022-09-13	16:23:10	0.768257
2022-09-13	16:23:10	0.954975
2022-09-13	16:23:11	2.4338
2022-09-13	16:23:11	3.39696
2022-09-13	16:23:11	3.54362
2022-09-13	16:23:11	1.82108
2022-09-13	16:23:12	0.801743
2022-09-13	16:23:12	1.0964
2022-09-13	16:23:12	0.503422
2022-09-13	16:23:12	0.803626
2022-09-13	16:23:13	0.427697
2022-09-13	16:23:13	0.544287
2022-09-13	16:23:13	0.663371
2022-09-13	16:23:13	0.417163
2022-09-13	16:23:14	0.810903
2022-09-13	16:23:14	0.307748
2022-09-13	16:23:14	0.651921
2022-09-13	16:23:15	0.289682
2022-09-13	16:23:15	0.430547
2022-09-13	16:23:15	0.36042
2022-09-13	16:23:15	0.316654
2022-09-13	16:23:16	0.586527
2022-09-13	16:23:16	0.248512
2022-09-13	16:23:16	0.513804
2022-09-13	16:23:16	0.223982
2022-09-13	16:23:17	0.576705
2022-09-13	16:23:17	0.206527
2022-09-13	16:23:17	0.564287
2022-09-13	16:23:17	0.288308
2022-09-13	16:23:18	0.457417
2022-09-13	16:23:18	0.335229
2022-09-13	16:23:18	0.433143
2022-09-13	16:23:19	0.506832
2022-09-13	16:23:19	0.310751
2022-09-13	16:23:19	0.477621
2022-09-13	16:23:19	0.2964
2022-09-13	16:23:20	0.56673
2022-09-13	16:23:20	0.211005
2022-09-13	16:23:20	0.568002
2022-09-13	16:23:20	0.294669
2022-09-13	16:23:21	0.479402
2022-09-13	16:23:21	0.326476
2022-09-13	16:23:21	0.495687
2022-09-13	16:23:21	0.582557
2022-09-13	16:23:22	0.202201
2022-09-13	16:23:22	0.0844404
2022-09-13	16:23:22	0.311616
2022-09-13	16:23:23	0.435026
2022-09-13	16:23:23	0.233957
2022-09-13	16:23:23	0.504338
2022-09-13	16:23:23	0.230446
2022-09-13	16:23:24	0.416145
2022-09-13	16:23:24	0.281082
2022-09-13	16:23:24	0.472379
2022-09-13	16:23:24	0.415738
2022-09-13	16:23:25	0.363321
2022-09-13	16:23:25	0.456298
2022-09-13	16:23:25	0.23757
2022-09-13	16:23:25	0.570089
2022-09-13	16:23:26	0.160725
2022-09-13	16:23:26	0.508715
2022-09-13	16:23:26	0.307188
2022-09-13	16:23:26	0.775229
2022-09-13	16:23:27	1.13319
2022-09-13	16:23:27	0.622863
2022-09-13	16:23:27	0.586628
2022-09-13	16:23:28	0.252735
2022-09-13	16:23:28	0.324186
2022-09-13	16:23:28	1.31533
2022-09-13	16:23:28	1.90922
2022-09-13	16:23:29	1.03899
2022-09-13	16:23:29	1.72683
2022-09-13	16:23:29	2.30123
2022-09-13	16:23:29	1.77864
2022-09-13	16:23:30	3.04698
2022-09-13	16:23:30	1.23045
2022-09-13	16:23:30	0.795891
2022-09-13	16:23:30	1.5363
2022-09-13	16:23:31	1.47019
2022-09-13	16:23:31	1.30887
2022-09-13	16:23:31	0.569733
2022-09-13	16:23:32	0.721692
2022-09-13	16:23:32	0.682608
2022-09-13	16:23:32	0.411463
2022-09-13	16:23:32	0.437316
2022-09-13	16:23:33	0.406018
2022-09-13	16:23:33	0.592837
2022-09-13	16:23:33	0.538282
2022-09-13	16:23:33	0.539656
2022-09-13	16:23:34	0.696043
2022-09-13	16:23:34	0.788817
2022-09-13	16:23:34	1.33844
2022-09-13	16:23:34	2.02586
2022-09-13	16:23:35	1.93329
2022-09-13	16:23:35	1.42261
2022-09-13	16:23:35	1.57823
2022-09-13	16:23:36	1.08627
2022-09-13	16:23:36	0.970852
2022-09-13	16:23:36	0.937621
2022-09-13	16:23:36	0.961387
2022-09-13	16:23:37	0.817723
2022-09-13	16:23:37	0.653499
2022-09-13	16:23:37	0.559351
2022-09-13	16:23:37	0.470598
2022-09-13	16:23:38	0.457519
2022-09-13	16:23:38	0.44958
2022-09-13	16:23:38	0.278079
2022-09-13	16:23:38	0.541845
2022-09-13	16:23:39	0.310649
2022-09-13	16:23:39	0.605509
2022-09-13	16:23:39	0.250038
2022-09-13	16:23:40	0.543321
2022-09-13	16:23:40	0.32729
2022-09-13	16:23:40	0.563931
2022-09-13	16:23:40	0.353906
2022-09-13	16:23:41	0.494771
2022-09-13	16:23:41	0.662812
2022-09-13	16:23:41	0.450751
2022-09-13	16:23:41	0.0892241
2022-09-13	16:23:42	0.0631173
2022-09-13	16:23:42	0.135433
2022-09-13	16:23:42	0.709885
2022-09-13	16:23:42	0.110904
2022-09-13	16:23:43	0.0260689
2022-09-13	16:23:43	0.193753
2022-09-13	16:23:43	-0.0283331
2022-09-13	16:23:44	0.249886
2022-09-13	16:23:44	0.0889697
2022-09-13	16:23:44	0.0573666
2022-09-13	16:23:44	-0.182073
2022-09-13	16:23:45	-0.240038
2022-09-13	16:23:45	0.146272
2022-09-13	16:23:45	0.160471
2022-09-13	16:23:45	0.482049
2022-09-13	16:23:46	0.646679
2022-09-13	16:23:46	0.869631
2022-09-13	16:23:46	0.789631
2022-09-13	16:23:46	0.380064
2022-09-13	16:23:47	0.54383
2022-09-13	16:23:47	0.287799
2022-09-13	16:23:47	0.560878
2022-09-13	16:23:48	0.196552
2022-09-13	16:23:48	0.491361
2022-09-13	16:23:48	0.21299
2022-09-13	16:23:48	0.481641
2022-09-13	16:23:49	0.375484
2022-09-13	16:23:49	0.406832
2022-09-13	16:23:49	0.360725
2022-09-13	16:23:49	0.415942
2022-09-13	16:23:50	0.548868
2022-09-13	16:23:50	0.320573
2022-09-13	16:23:50	0.364949
2022-09-13	16:23:50	0.186781
2022-09-13	16:23:51	0.312379
2022-09-13	16:23:51	0.117621
2022-09-13	16:23:51	0.305
2022-09-13	16:23:52	0.175992
2022-09-13	16:23:52	-0.011641
2022-09-13	16:23:52	0.247596
2022-09-13	16:23:52	0.750445
2022-09-13	16:23:53	0.195738
2022-09-13	16:23:53	0.505611
2022-09-13	16:23:53	0.345356
2022-09-13	16:23:53	0.139606
2022-09-13	16:23:54	0.237214
2022-09-13	16:23:54	-0.00965623
2022-09-13	16:23:54	0.086934
2022-09-13	16:23:54	0.0107
2022-09-13	16:23:55	0.162099
2022-09-13	16:23:55	0.0348221
2022-09-13	16:23:55	0.236959
2022-09-13	16:23:55	0.234975
2022-09-13	16:23:56	0.353651
2022-09-13	16:23:56	1.28215
2022-09-13	16:23:56	3.42052
2022-09-13	16:23:57	4.8506
2022-09-13	16:23:57	2.18296
2022-09-13	16:23:57	1.38429
2022-09-13	16:23:57	0.557926
2022-09-13	16:23:58	0.987392
2022-09-13	16:23:58	0.723524
2022-09-13	16:23:58	0.26098
2022-09-13	16:23:58	0.72612
2022-09-13	16:23:59	0.231565
2022-09-13	16:23:59	0.608766
2022-09-13	16:23:59	0.363117
2022-09-13	16:23:59	0.624186
2022-09-13	16:24:00	0.518384
2022-09-13	16:24:00	0.621692
2022-09-13	16:24:00	1.02352
2022-09-13	16:24:01	0.702659
2022-09-13	16:24:01	1.47431
2022-09-13	16:24:01	1.02927
2022-09-13	16:24:01	2.36627
2022-09-13	16:24:02	2.2335
2022-09-13	16:24:02	5.26652
2022-09-13	16:24:02	1.47513
2022-09-13	16:24:02	2.40688
2022-09-13	16:24:03	0.937265
2022-09-13	16:24:03	0.293753
2022-09-13	16:24:03	0.60271
2022-09-13	16:24:03	0.201794
2022-09-13	16:24:04	0.518995
2022-09-13	16:24:04	0.510445
2022-09-13	16:24:04	1.33375
2022-09-13	16:24:05	1.21721
2022-09-13	16:24:05	2.28006
2022-09-13	16:24:05	1.63833
2022-09-13	16:24:05	1.58627
2022-09-13	16:24:06	1.48393
2022-09-13	16:24:06	1.77945
2022-09-13	16:24:06	1.62022
2022-09-13	16:24:06	1.23055
2022-09-13	16:24:07	1.08704
2022-09-13	16:24:07	1.12821
2022-09-13	16:24:07	0.70841
2022-09-13	16:24:07	0.503219
2022-09-13	16:24:08	0.491972
2022-09-13	16:24:08	0.62673
2022-09-13	16:24:08	0.546221
2022-09-13	16:24:09	0.489987
2022-09-13	16:24:09	0.366222
2022-09-13	16:24:09	0.408919
2022-09-13	16:24:09	0.394262
2022-09-13	16:24:10	0.371616
2022-09-13	16:24:10	0.407392
2022-09-13	16:24:10	0.339758
2022-09-13	16:24:10	0.244797
2022-09-13	16:24:11	0.117875
2022-09-13	16:24:11	-0.0254323
2022-09-13	16:24:11	0.305662
2022-09-13	16:24:11	0.273652
2022-09-13	16:24:12	0.352481
2022-09-13	16:24:12	0.331769
2022-09-13	16:24:12	0.683321
2022-09-13	16:24:13	2.28307
2022-09-13	16:24:13	1.402
2022-09-13	16:24:13	0.854313
2022-09-13	16:24:13	0.276807
2022-09-13	16:24:14	0.469275
2022-09-13	16:24:14	0.296349
2022-09-13	16:24:14	0.517977
2022-09-13	16:24:14	0.569224
2022-09-13	16:24:15	0.680674
2022-09-13	16:24:15	0.439758
2022-09-13	16:24:15	0.132481
2022-09-13	16:24:15	0.552634
2022-09-13	16:24:16	0.299402
2022-09-13	16:24:16	-0.277493
2022-09-13	16:24:16	-0.344771
2022-09-13	16:24:17	-0.173778
2022-09-13	16:24:17	-0.0455341
2022-09-13	16:24:17	0.0421503
2022-09-13	16:24:17	0.14612
2022-09-13	16:24:18	0.647392
2022-09-13	16:24:18	0.366934
2022-09-13	16:24:18	0.333397
2022-09-13	16:24:18	0.218181
2022-09-13	16:24:19	0.319249
2022-09-13	16:24:19	0.0508018
2022-09-13	16:24:19	0.169122
2022-09-13	16:24:19	0.068359
2022-09-13	16:24:20	0.0225066
2022-09-13	16:24:20	-0.284414
2022-09-13	16:24:20	-0.362531
2022-09-13	16:24:21	-0.198562
2022-09-13	16:24:21	-0.26014
2022-09-13	16:24:21	0.119453
2022-09-13	16:24:21	0.552532
2022-09-13	16:24:22	1.31411
2022-09-13	16:24:22	1.91029
2022-09-13	16:24:22	1.80174
2022-09-13	16:24:22	2.63833
2022-09-13	16:24:23	1.41477
2022-09-13	16:24:23	1.14531
2022-09-13	16:24:23	1.73396
2022-09-13	16:24:23	1.30307
2022-09-13	16:24:24	1.36332
2022-09-13	16:24:24	1.07879
2022-09-13	16:24:24	1.35212
2022-09-13	16:24:24	1.00103
2022-09-13	16:24:25	1.09889
2022-09-13	16:24:25	1.06464
2022-09-13	16:24:25	3.26607
2022-09-13	16:24:26	1.4735
2022-09-13	16:24:26	2.71156
2022-09-13	16:24:26	2.98088
2022-09-13	16:24:26	3.10276
2022-09-13	16:24:27	2.61289
2022-09-13	16:24:27	3.05396
2022-09-13	16:24:27	1.55482
2022-09-13	16:24:27	0.685102
2022-09-13	16:24:28	0.378333
2022-09-13	16:24:28	0.264746
2022-09-13	16:24:28	0.568715
2022-09-13	16:24:28	0.379911
2022-09-13	16:24:29	0.287443
2022-09-13	16:24:29	0.447392
2022-09-13	16:24:29	0.229784
2022-09-13	16:24:30	0.0691733
2022-09-13	16:24:30	0.0629646
2022-09-13	16:24:30	0.0646949
2022-09-13	16:24:30	-0.04416
2022-09-13	16:24:31	-0.434338
2022-09-13	16:24:31	-0.283193
2022-09-13	16:24:31	-0.455916
2022-09-13	16:24:31	-0.336017
2022-09-13	16:24:32	-0.341157
2022-09-13	16:24:32	-0.328079
2022-09-13	16:24:32	-0.28187
2022-09-13	16:24:32	-0.175559
2022-09-13	16:24:33	-0.142023
2022-09-13	16:24:33	-0.0340837
2022-09-13	16:24:33	-0.204414
2022-09-13	16:24:34	-0.345076
2022-09-13	16:24:34	-0.330419
2022-09-13	16:24:34	-0.204364
2022-09-13	16:24:34	-0.17042
2022-09-13	16:24:35	-0.192811
2022-09-13	16:24:35	-0.198257
2022-09-13	16:24:35	-0.222633
2022-09-13	16:24:35	-0.249096
2022-09-13	16:24:36	-0.39444
2022-09-13	16:24:36	-0.604465
2022-09-13	16:24:36	-0.467875
2022-09-13	16:24:36	0.821641
2022-09-13	16:24:37	3.13986
2022-09-13	16:24:37	0.978384
2022-09-13	16:24:37	0.513652
2022-09-13	16:24:38	0.493499
2022-09-13	16:24:38	0.534109
2022-09-13	16:24:38	0.407341
2022-09-13	16:24:38	0.699962
2022-09-13	16:24:39	0.870293
2022-09-13	16:24:39	0.773092
2022-09-13	16:24:39	0.830191
2022-09-13	16:24:39	0.287799
2022-09-13	16:24:40	0.506221
2022-09-13	16:24:40	0.627137
2022-09-13	16:24:40	0.620115
2022-09-13	16:24:40	0.674008
2022-09-13	16:24:41	0.523219
2022-09-13	16:24:41	0.568409
2022-09-13	16:24:41	0.612837
2022-09-13	16:24:42	0.636094
2022-09-13	16:24:42	0.523626
2022-09-13	16:24:42	0.355484
2022-09-13	16:24:42	0.372125
2022-09-13	16:24:43	0.395585
2022-09-13	16:24:43	0.374415
2022-09-13	16:24:43	0.278893
2022-09-13	16:24:43	0.505102
2022-09-13	16:24:44	0.305
2022-09-13	16:24:44	0.451412
2022-09-13	16:24:44	0.335789
2022-09-13	16:24:44	0.646679
2022-09-13	16:24:45	0.52332
2022-09-13	16:24:45	1.38088
2022-09-13	16:24:45	1.25808
2022-09-13	16:24:46	1.47569
2022-09-13	16:24:46	1.47599
2022-09-13	16:24:46	0.609835
2022-09-13	16:24:46	0.645305
2022-09-13	16:24:47	0.205306
2022-09-13	16:24:47	0.45757
2022-09-13	16:24:47	0.262201
2022-09-13	16:24:47	0.430802
2022-09-13	16:24:48	0.279555
2022-09-13	16:24:48	0.422099
2022-09-13	16:24:48	0.390649
2022-09-13	16:24:48	0.414211
2022-09-13	16:24:49	0.385254
2022-09-13	16:24:49	0.390547
2022-09-13	16:24:49	0.382252
2022-09-13	16:24:50	0.38383
2022-09-13	16:24:50	0.379962
2022-09-13	16:24:50	0.380776
2022-09-13	16:24:50	0.381998
2022-09-13	16:24:51	0.380471
2022-09-13	16:24:51	0.382099
2022-09-13	16:24:51	0.384288
2022-09-13	16:24:51	0.384644
2022-09-13	16:24:52	0.371412
2022-09-13	16:24:52	0.407036
2022-09-13	16:24:52	0.38159
2022-09-13	16:24:52	0.420725
2022-09-13	16:24:53	0.197468
2022-09-13	16:24:53	0.0974175
2022-09-13	16:24:53	0.0659671
2022-09-13	16:24:54	-0.0236003
2022-09-13	16:24:54	-0.277493
2022-09-13	16:24:54	-0.432353
2022-09-13	16:24:54	-0.61505
2022-09-13	16:24:55	-0.866399
2022-09-13	16:24:55	-0.849045
2022-09-13	16:24:55	-0.673625
2022-09-13	16:24:55	-0.130012
2022-09-13	16:24:56	0.218283
2022-09-13	16:24:56	0.42271
2022-09-13	16:24:56	0.358435
2022-09-13	16:24:56	0.531412
2022-09-13	16:24:57	0.245305
2022-09-13	16:24:57	0.322354
2022-09-13	16:24:57	0.399809
2022-09-13	16:24:57	1.73884
2022-09-13	16:24:58	3.24261
2022-09-13	16:24:58	2.98724
2022-09-13	16:24:58	2.93233
2022-09-13	16:24:59	3.64546
2022-09-13	16:24:59	1.68261
2022-09-13	16:24:59	2.09533
2022-09-13	16:24:59	0.557112
2022-09-13	16:25:00	0.825305
2022-09-13	16:25:00	0.580827
2022-09-13	16:25:00	0.495534
2022-09-13	16:25:00	0.731107
2022-09-13	16:25:01	0.448512
2022-09-13	16:25:01	0.708918
2022-09-13	16:25:01	0.249835
2022-09-13	16:25:01	0.780471
2022-09-13	16:25:02	0.355789
2022-09-13	16:25:02	0.619657
2022-09-13	16:25:02	0.361336
2022-09-13	16:25:03	0.562048
2022-09-13	16:25:03	0.321438
2022-09-13	16:25:03	0.65584
2022-09-13	16:25:03	0.41187
2022-09-13	16:25:04	0.485713
2022-09-13	16:25:04	0.588817
2022-09-13	16:25:04	0.780929
2022-09-13	16:25:04	0.427239
2022-09-13	16:25:05	0.866221
2022-09-13	16:25:05	0.454822
2022-09-13	16:25:05	0.796858
2022-09-13	16:25:05	0.794313
2022-09-13	16:25:06	0.878791
2022-09-13	16:25:06	0.317163
2022-09-13	16:25:06	0.866628
2022-09-13	16:25:07	0.56444
2022-09-13	16:25:07	0.566781
2022-09-13	16:25:07	0.543626
2022-09-13	16:25:07	0.712685
2022-09-13	16:25:08	0.461896
2022-09-13	16:25:08	0.6164
2022-09-13	16:25:08	0.0391987
2022-09-13	16:25:08	-0.00380383
2022-09-13	16:25:09	-0.251997
2022-09-13	16:25:09	-0.546552
2022-09-13	16:25:09	-0.534796
2022-09-13	16:25:09	-0.144669
2022-09-13	16:25:10	0.25925
2022-09-13	16:25:10	0.565102
2022-09-13	16:25:10	0.305814
2022-09-13	16:25:11	0.536654
2022-09-13	16:25:11	0.266781
2022-09-13	16:25:11	0.506221
2022-09-13	16:25:11	0.239911
2022-09-13	16:25:12	0.483117
2022-09-13	16:25:12	0.290344
2022-09-13	16:25:12	0.522506
2022-09-13	16:25:12	0.268766
2022-09-13	16:25:13	0.355992
2022-09-13	16:25:13	0.334415
2022-09-13	16:25:13	0.412379
2022-09-13	16:25:13	0.328664
2022-09-13	16:25:14	0.295025
2022-09-13	16:25:14	0.40958
2022-09-13	16:25:14	0.346221
2022-09-13	16:25:15	0.398639
2022-09-13	16:25:15	0.0628628
2022-09-13	16:25:15	0.0468323
2022-09-13	16:25:15	0.207239
2022-09-13	16:25:16	0.253448
2022-09-13	16:25:16	0.244593
2022-09-13	16:25:16	0.12444
2022-09-13	16:25:16	0.257977
2022-09-13	16:25:17	0.239911
2022-09-13	16:25:17	0.458995
2022-09-13	16:25:17	0.663066
2022-09-13	16:25:17	1.25833
2022-09-13	16:25:18	0.611412
2022-09-13	16:25:18	0.941947
2022-09-13	16:25:18	0.282914
2022-09-13	16:25:19	0.525458
2022-09-13	16:25:19	0.317672
2022-09-13	16:25:19	0.333193
2022-09-13	16:25:19	-0.00186998
2022-09-13	16:25:20	0.305611
2022-09-13	16:25:20	0.170751
2022-09-13	16:25:20	0.343728
2022-09-13	16:25:20	0.114924
2022-09-13	16:25:21	-0.14187
2022-09-13	16:25:21	-0.146399
2022-09-13	16:25:21	-0.343295
2022-09-13	16:25:21	-0.404669
2022-09-13	16:25:22	-0.45561
2022-09-13	16:25:22	-0.42243
2022-09-13	16:25:22	-0.483498
2022-09-13	16:25:23	-0.438867
2022-09-13	16:25:23	-0.423804
2022-09-13	16:25:23	-0.45271
2022-09-13	16:25:23	-0.496323
2022-09-13	16:25:24	-0.591335
2022-09-13	16:25:24	-0.546755
2022-09-13	16:25:24	-0.556373
2022-09-13	16:25:24	-0.553931
2022-09-13	16:25:25	-0.546857
2022-09-13	16:25:25	-0.529453
2022-09-13	16:25:25	-0.524261
2022-09-13	16:25:25	-0.530674
2022-09-13	16:25:26	-0.543803
2022-09-13	16:25:26	-0.476882
2022-09-13	16:25:26	-0.376577
2022-09-13	16:25:26	-0.35215
2022-09-13	16:25:27	-0.27271
2022-09-13	16:25:27	-0.309758
2022-09-13	16:25:27	-0.293575
2022-09-13	16:25:28	-0.29276
2022-09-13	16:25:28	-0.304058
2022-09-13	16:25:28	-0.305381
2022-09-13	16:25:28	-0.222379
2022-09-13	16:25:29	-0.208079
2022-09-13	16:25:29	-0.214236
2022-09-13	16:25:29	-0.195356
2022-09-13	16:25:29	-0.153117
2022-09-13	16:25:30	-0.113015
2022-09-13	16:25:30	-0.0436002
2022-09-13	16:25:30	0.0414379
2022-09-13	16:25:30	0.140318
2022-09-13	16:25:31	0.176959
2022-09-13	16:25:31	0.147952
2022-09-13	16:25:31	0.115331
2022-09-13	16:25:32	0.144135
2022-09-13	16:25:32	0.157774
2022-09-13	16:25:32	0.144949
2022-09-13	16:25:32	0.119911
2022-09-13	16:25:33	0.0713615
2022-09-13	16:25:33	0.0512089
2022-09-13	16:25:33	-0.000292388
2022-09-13	16:25:33	0.0485626
2022-09-13	16:25:34	-0.116526
2022-09-13	16:25:34	-0.0346944
2022-09-13	16:25:34	0.131514
2022-09-13	16:25:34	0.515738
2022-09-13	16:25:35	0.430242
2022-09-13	16:25:35	0.321132
2022-09-13	16:25:35	0.547443
2022-09-13	16:25:36	0.642405
2022-09-13	16:25:36	0.555025
2022-09-13	16:25:36	0.844084
2022-09-13	16:25:36	1.54765
2022-09-13	16:25:37	2.34861
2022-09-13	16:25:37	2.71925
2022-09-13	16:25:37	2.25538
2022-09-13	16:25:37	2.26734
2022-09-13	16:25:38	0.907901
2022-09-13	16:25:38	0.329784
2022-09-13	16:25:38	0.435076
2022-09-13	16:25:38	0.304237
2022-09-13	16:25:39	0.152634
2022-09-13	16:25:39	0.279046
2022-09-13	16:25:39	0.148563
2022-09-13	16:25:40	0.342914
2022-09-13	16:25:40	0.547494
2022-09-13	16:25:40	1.40546
2022-09-13	16:25:40	1.16709
2022-09-13	16:25:41	1.75452
2022-09-13	16:25:41	1.45457
2022-09-13	16:25:41	0.500013
2022-09-13	16:25:41	0.761488
2022-09-13	16:25:42	0.466527
2022-09-13	16:25:42	0.37131
2022-09-13	16:25:42	0.223626
2022-09-13	16:25:42	0.253957
2022-09-13	16:25:43	0.0731936
2022-09-13	16:25:43	0.115331
2022-09-13	16:25:43	-0.0216664
2022-09-13	16:25:44	-0.175509
2022-09-13	16:25:44	-0.393727
2022-09-13	16:25:44	-0.471081
2022-09-13	16:25:44	-0.583702
2022-09-13	16:25:45	-0.661106
2022-09-13	16:25:45	-0.433218
2022-09-13	16:25:45	0.233143
2022-09-13	16:25:45	0.457265
2022-09-13	16:25:46	0.461947
2022-09-13	16:25:46	0.465611
2022-09-13	16:25:46	0.490293
2022-09-13	16:25:46	0.434262
2022-09-13	16:25:47	0.451209
2022-09-13	16:25:47	0.493041
2022-09-13	16:25:47	0.425305
2022-09-13	16:25:48	0.447799
2022-09-13	16:25:48	0.411158
2022-09-13	16:25:48	0.393753
2022-09-13	16:25:48	0.415992
2022-09-13	16:25:49	0.410649
2022-09-13	16:25:49	0.43701
2022-09-13	16:25:49	0.360216
2022-09-13	16:25:49	0.34215
2022-09-13	16:25:50	0.469835
2022-09-13	16:25:50	0.354669
2022-09-13	16:25:50	0.806628
2022-09-13	16:25:50	1.21279
2022-09-13	16:25:51	2.93462
2022-09-13	16:25:51	2.30871
2022-09-13	16:25:51	2.90607
2022-09-13	16:25:52	0.633448
2022-09-13	16:25:52	0.821641
2022-09-13	16:25:52	0.717926
2022-09-13	16:25:52	0.481081
2022-09-13	16:25:53	0.741336
2022-09-13	16:25:53	0.294975
2022-09-13	16:25:53	0.607188
2022-09-13	16:25:53	0.313092
2022-09-13	16:25:54	0.512328
2022-09-13	16:25:54	0.344491
2022-09-13	16:25:54	0.47126
2022-09-13	16:25:54	0.367138
2022-09-13	16:25:55	0.392277
2022-09-13	16:25:55	0.54103
2022-09-13	16:25:55	0.325662
2022-09-13	16:25:56	0.617112
2022-09-13	16:25:56	0.326171
2022-09-13	16:25:56	0.572328
2022-09-13	16:25:56	0.409377
2022-09-13	16:25:57	0.625305
2022-09-13	16:25:57	0.260776
2022-09-13	16:25:57	0.625051
2022-09-13	16:25:57	0.297417
2022-09-13	16:25:58	0.709478
2022-09-13	16:25:58	0.35986
2022-09-13	16:25:58	0.487545
2022-09-13	16:25:58	0.42902
2022-09-13	16:25:59	0.444338
2022-09-13	16:25:59	0.400725
2022-09-13	16:25:59	0.46612
2022-09-13	16:25:59	0.380776
2022-09-13	16:26:00	0.398435
2022-09-13	16:26:00	0.475484
2022-09-13	16:26:00	0.442456
2022-09-13	16:26:01	0.462659
2022-09-13	16:26:01	0.38098
2022-09-13	16:26:01	0.550089
2022-09-13	16:26:01	0.328766
2022-09-13	16:26:02	0.507748
2022-09-13	16:26:02	0.2793
2022-09-13	16:26:02	0.551921
2022-09-13	16:26:02	0.221336
2022-09-13	16:26:03	0.588104
2022-09-13	16:26:03	0.252023
2022-09-13	16:26:03	0.517773
2022-09-13	16:26:03	0.240776
2022-09-13	16:26:04	0.545458
2022-09-13	16:26:04	0.300165
2022-09-13	16:26:04	0.316654
2022-09-13	16:26:05	0.179809
2022-09-13	16:26:05	0.385407
2022-09-13	16:26:05	0.462863
2022-09-13	16:26:05	0.510496
2022-09-13	16:26:06	0.387137
2022-09-13	16:26:06	0.512735
2022-09-13	16:26:06	0.494109
2022-09-13	16:26:06	0.391819
2022-09-13	16:26:07	0.559148
2022-09-13	16:26:07	0.346883
2022-09-13	16:26:07	0.569987
2022-09-13	16:26:07	0.356298
2022-09-13	16:26:08	0.48612
2022-09-13	16:26:08	0.280318
2022-09-13	16:26:08	0.516552
2022-09-13	16:26:09	0.232888
2022-09-13	16:26:09	0.406425
2022-09-13	16:26:09	0.255331
2022-09-13	16:26:09	0.458384
2022-09-13	16:26:10	0.278384
2022-09-13	16:26:10	0.525254
2022-09-13	16:26:10	1.01487
2022-09-13	16:26:10	2.28408
2022-09-13	16:26:11	1.44261
2022-09-13	16:26:11	0.959402
2022-09-13	16:26:11	0.373499
2022-09-13	16:26:11	0.352328
2022-09-13	16:26:12	0.360165
2022-09-13	16:26:12	0.294669
2022-09-13	16:26:12	0.505814
2022-09-13	16:26:13	0.314211
2022-09-13	16:26:13	0.380776
2022-09-13	16:26:13	0.279402
2022-09-13	16:26:13	0.534058
2022-09-13	16:26:14	0.713957
2022-09-13	16:26:14	5.53014
2022-09-13	16:26:14	17.1096
2022-09-13	16:26:14	5.31009
2022-09-13	16:26:15	3.55859
2022-09-13	16:26:15	4.802
2022-09-13	16:26:15	2.20424
2022-09-13	16:26:15	0.706476
2022-09-13	16:26:16	0.48897
2022-09-13	16:26:16	0.303728
2022-09-13	16:26:16	0.490853
2022-09-13	16:26:17	0.34668
2022-09-13	16:26:17	0.480674
2022-09-13	16:26:17	0.358639
2022-09-13	16:26:17	0.433753
2022-09-13	16:26:18	0.392583
2022-09-13	16:26:18	0.460471
2022-09-13	16:26:18	0.231667
2022-09-13	16:26:18	0.380369
2022-09-13	16:26:19	0.382812
2022-09-13	16:26:19	0.252634
2022-09-13	16:26:19	0.287494
2022-09-13	16:26:19	0.225102
2022-09-13	16:26:20	0.17187
2022-09-13	16:26:20	0.113652
2022-09-13	16:26:20	0.124797
2022-09-13	16:26:21	0.140471
2022-09-13	16:26:21	0.191769
2022-09-13	16:26:21	0.418995
2022-09-13	16:26:21	0.369987
2022-09-13	16:26:22	0.251412
2022-09-13	16:26:22	0.350547
2022-09-13	16:26:22	0.298893
2022-09-13	16:26:22	0.345916
2022-09-13	16:26:23	0.303473
2022-09-13	16:26:23	0.248715
2022-09-13	16:26:23	0.430903
2022-09-13	16:26:23	0.352074
2022-09-13	16:26:24	0.378537
2022-09-13	16:26:24	0.324084
2022-09-13	16:26:24	0.325916
2022-09-13	16:26:25	0.472328
2022-09-13	16:26:25	0.35182
2022-09-13	16:26:25	0.394567
2022-09-13	16:26:25	0.312176
2022-09-13	16:26:26	0.28958
2022-09-13	16:26:26	0.498842
2022-09-13	16:26:26	0.417316
2022-09-13	16:26:26	0.910751
2022-09-13	16:26:27	0.777265
2022-09-13	16:26:27	0.753499
2022-09-13	16:26:27	0.989682
2022-09-13	16:26:27	0.497926
2022-09-13	16:26:28	0.594924
2022-09-13	16:26:28	0.383575
2022-09-13	16:26:28	0.497723
2022-09-13	16:26:29	0.341489
2022-09-13	16:26:29	0.445255
2022-09-13	16:26:29	0.660929
2022-09-13	16:26:29	0.96556
2022-09-13	16:26:30	1.72154
2022-09-13	16:26:30	1.89085
2022-09-13	16:26:30	1.85726
2022-09-13	16:26:30	1.82973
2022-09-13	16:26:31	1.5335
2022-09-13	16:26:31	1.82571
2022-09-13	16:26:31	2.11116
2022-09-13	16:26:31	2.26083
2022-09-13	16:26:32	1.78622
2022-09-13	16:26:32	1.81126
2022-09-13	16:26:32	1.75202
2022-09-13	16:26:33	1.60261
2022-09-13	16:26:33	1.61095
2022-09-13	16:26:33	1.56999
2022-09-13	16:26:33	1.47095
2022-09-13	16:26:34	1.4449
2022-09-13	16:26:34	1.43782
2022-09-13	16:26:34	1.4765
2022-09-13	16:26:34	1.41559
2022-09-13	16:26:35	1.38795
2022-09-13	16:26:35	1.4879
2022-09-13	16:26:35	1.44398
2022-09-13	16:26:35	1.49319
2022-09-13	16:26:36	1.53548
2022-09-13	16:26:36	1.49304
2022-09-13	16:26:36	1.5138
2022-09-13	16:26:36	1.52612
2022-09-13	16:26:37	1.57752
2022-09-13	16:26:37	1.70922
2022-09-13	16:26:37	2.67222
2022-09-13	16:26:38	4.81136
2022-09-13	16:26:38	1.06419
2022-09-13	16:26:38	0.180267
2022-09-13	16:26:38	0.231819
2022-09-13	16:26:39	0.355331
2022-09-13	16:26:39	0.261794
2022-09-13	16:26:39	0.0336008
2022-09-13	16:26:39	0.0515142
2022-09-13	16:26:40	0.262557
2022-09-13	16:26:40	0.353957
2022-09-13	16:26:40	0.24327
2022-09-13	16:26:40	0.119504
2022-09-13	16:26:41	0.113397
2022-09-13	16:26:41	-0.00156464
2022-09-13	16:26:41	0.0797585
2022-09-13	16:26:42	-0.242328
2022-09-13	16:26:42	-0.622378
2022-09-13	16:26:42	-0.679681
2022-09-13	16:26:42	-0.758816
2022-09-13	16:26:43	-0.383142
2022-09-13	16:26:43	-0.0636511
2022-09-13	16:26:43	0.228919
2022-09-13	16:26:43	0.623015
2022-09-13	16:26:44	0.311921
2022-09-13	16:26:44	0.612939
2022-09-13	16:26:44	0.5993
2022-09-13	16:26:44	0.288512
2022-09-13	16:26:45	0.308512
2022-09-13	16:26:45	0.436603
2022-09-13	16:26:45	0.396145
2022-09-13	16:26:46	0.481387
2022-09-13	16:26:46	0.170038
2022-09-13	16:26:46	0.0140588
2022-09-13	16:26:46	0.166272
2022-09-13	16:26:47	0.517366
2022-09-13	16:26:47	2.64006
2022-09-13	16:26:47	3.62586
2022-09-13	16:26:47	2.50291
2022-09-13	16:26:48	2.7449
2022-09-13	16:26:48	0.283015
2022-09-13	16:26:48	0.0237279
2022-09-13	16:26:48	0.203677
2022-09-13	16:26:49	0.0440333
2022-09-13	16:26:49	0.129987
2022-09-13	16:26:49	-0.160903
2022-09-13	16:26:50	-0.156475
2022-09-13	16:26:50	-0.130878
2022-09-13	16:26:50	2.0278
2022-09-13	16:26:50	0.503931
2022-09-13	16:26:51	0.351158
2022-09-13	16:26:51	-0.047926
2022-09-13	16:26:51	-0.270572
2022-09-13	16:26:51	-0.252048
2022-09-13	16:26:52	-0.294287
2022-09-13	16:26:52	-0.141361
2022-09-13	16:26:52	0.0637279
2022-09-13	16:26:52	0.173295
2022-09-13	16:26:53	0.52612
2022-09-13	16:26:53	0.495993
2022-09-13	16:26:53	0.327952
2022-09-13	16:26:54	0.266883
2022-09-13	16:26:54	0.433346
2022-09-13	16:26:54	0.358995
2022-09-13	16:26:54	0.207392
2022-09-13	16:26:55	0.299402
2022-09-13	16:26:55	0.177417
2022-09-13	16:26:55	0.477265
2022-09-13	16:26:55	0.824389
2022-09-13	16:26:56	2.82154
2022-09-13	16:26:56	0.775178
2022-09-13	16:26:56	0.43126
2022-09-13	16:26:56	0.313143
2022-09-13	16:26:57	0.418486
2022-09-13	16:26:57	0.202557
2022-09-13	16:26:57	0.333499
2022-09-13	16:26:58	0.135127
2022-09-13	16:26:58	0.425611
2022-09-13	16:26:58	0.160624
2022-09-13	16:26:58	0.415433
2022-09-13	16:26:59	0.192023
2022-09-13	16:26:59	0.364084
2022-09-13	16:26:59	0.217265
2022-09-13	16:26:59	0.370445
2022-09-13	16:27:00	0.262303
2022-09-13	16:27:00	0.492837
2022-09-13	16:27:00	0.278283
2022-09-13	16:27:00	0.436196
2022-09-13	16:27:01	0.356145
2022-09-13	16:27:01	0.456756
2022-09-13	16:27:01	0.309427
2022-09-13	16:27:02	0.45645
2022-09-13	16:27:02	0.483066
2022-09-13	16:27:02	0.478181
2022-09-13	16:27:02	0.61131
2022-09-13	16:27:03	0.295738
2022-09-13	16:27:03	0.418995
2022-09-13	16:27:03	0.177825
2022-09-13	16:27:03	0.21014
2022-09-13	16:27:04	0.345814
2022-09-13	16:27:04	0.426832
2022-09-13	16:27:04	0.153957
2022-09-13	16:27:04	0.31869
2022-09-13	16:27:05	0.116094
2022-09-13	16:27:05	0.403015
2022-09-13	16:27:05	0.255127
2022-09-13	16:27:06	0.376654
2022-09-13	16:27:06	0.335636
2022-09-13	16:27:06	0.692837
2022-09-13	16:27:06	0.904491
2022-09-13	16:27:07	1.06515
2022-09-13	16:27:07	0.676908
2022-09-13	16:27:07	0.755789
2022-09-13	16:27:07	0.830089
2022-09-13	16:27:08	0.934313
2022-09-13	16:27:08	0.43528
2022-09-13	16:27:08	0.674109
2022-09-13	16:27:08	0.521947
2022-09-13	16:27:09	0.770038
2022-09-13	16:27:09	0.6936
2022-09-13	16:27:09	0.970954
2022-09-13	16:27:09	0.581285
2022-09-13	16:27:10	0.535025
2022-09-13	16:27:10	0.447239
2022-09-13	16:27:10	0.433702
2022-09-13	16:27:11	0.360522
2022-09-13	16:27:11	0.363321
2022-09-13	16:27:11	0.485153
2022-09-13	16:27:11	0.467748
2022-09-13	16:27:12	0.462354
2022-09-13	16:27:12	0.403423
2022-09-13	16:27:12	0.540267
2022-09-13	16:27:12	0.319657
2022-09-13	16:27:13	0.408512
2022-09-13	16:27:13	0.371412
2022-09-13	16:27:13	0.520522
2022-09-13	16:27:13	0.354364
2022-09-13	16:27:14	0.433957
2022-09-13	16:27:14	0.344797
2022-09-13	16:27:14	0.532684
2022-09-13	16:27:15	0.256959
2022-09-13	16:27:15	0.420115
2022-09-13	16:27:15	0.314008
2022-09-13	16:27:15	0.547239
2022-09-13	16:27:16	0.292328
2022-09-13	16:27:16	0.394567
2022-09-13	16:27:16	0.302201
2022-09-13	16:27:16	0.478893
2022-09-13	16:27:17	0.328766
2022-09-13	16:27:17	0.3307
2022-09-13	16:27:17	0.347494
2022-09-13	16:27:17	0.446221
2022-09-13	16:27:18	0.349071
2022-09-13	16:27:18	0.761641
2022-09-13	16:27:18	0.41014
2022-09-13	16:27:19	0.517468
2022-09-13	16:27:19	0.569275
2022-09-13	16:27:19	0.409784
2022-09-13	16:27:19	0.464695
2022-09-13	16:27:20	0.402099
2022-09-13	16:27:20	0.338028
2022-09-13	16:27:20	0.446323
2022-09-13	16:27:20	-0.0300125
2022-09-13	16:27:21	0.405967
2022-09-13	16:27:21	0.845509
2022-09-13	16:27:21	0.223473
2022-09-13	16:27:21	0.317621
2022-09-13	16:27:22	0.481896
2022-09-13	16:27:22	1.05116
2022-09-13	16:27:22	0.845102
2022-09-13	16:27:23	1.13711
2022-09-13	16:27:23	2.50892
2022-09-13	16:27:23	1.6224
2022-09-13	16:27:23	0.248512
2022-09-13	16:27:24	0.0412852
2022-09-13	16:27:24	0.152379
2022-09-13	16:27:24	0.121947
2022-09-13	16:27:24	0.213702
2022-09-13	16:27:25	0.261031
2022-09-13	16:27:25	0.364797
2022-09-13	16:27:25	0.746527
2022-09-13	16:27:25	2.30281
2022-09-13	16:27:26	2.17294
2022-09-13	16:27:26	0.654669
2022-09-13	16:27:26	0.832532
2022-09-13	16:27:27	3.16312
2022-09-13	16:27:27	2.68327
2022-09-13	16:27:27	1.17925
2022-09-13	16:27:27	2.00469
2022-09-13	16:27:28	3.8192
2022-09-13	16:27:28	0.479046
2022-09-13	16:27:28	0.257366
2022-09-13	16:27:28	0.288308
2022-09-13	16:27:29	0.360573
2022-09-13	16:27:29	0.233906
2022-09-13	16:27:29	0.253193
2022-09-13	16:27:29	0.221489
2022-09-13	16:27:30	0.228104
2022-09-13	16:27:30	0.186578
2022-09-13	16:27:30	0.282659
2022-09-13	16:27:31	0.364288
2022-09-13	16:27:31	0.409682
2022-09-13	16:27:31	0.384339
2022-09-13	16:27:31	0.427697
2022-09-13	16:27:32	0.346934
2022-09-13	16:27:32	0.464898
2022-09-13	16:27:32	0.319453
2022-09-13	16:27:32	0.247952
2022-09-13	16:27:33	0.332328
2022-09-13	16:27:33	0.284033
2022-09-13	16:27:33	0.325204
2022-09-13	16:27:33	0.194059
2022-09-13	16:27:34	0.272634
2022-09-13	16:27:34	0.206476
2022-09-13	16:27:34	0.318537
2022-09-13	16:27:35	0.118384
2022-09-13	16:27:35	0.227138
2022-09-13	16:27:35	0.107138
2022-09-13	16:27:35	0.216705
2022-09-13	16:27:36	0.351005
2022-09-13	16:27:36	0.291361
2022-09-13	16:27:36	-0.00380383
2022-09-13	16:27:36	0.312277
2022-09-13	16:27:37	0.00596716
2022-09-13	16:27:37	0.635636
2022-09-13	16:27:37	1.19324
2022-09-13	16:27:37	4.58825
2022-09-13	16:27:38	2.94398
2022-09-13	16:27:38	1.68485
2022-09-13	16:27:38	0.746425
2022-09-13	16:27:39	0.405254
2022-09-13	16:27:39	0.131005
2022-09-13	16:27:39	-0.0458903
2022-09-13	16:27:39	0.0467305
2022-09-13	16:27:40	0.116552
2022-09-13	16:27:40	0.0988424
2022-09-13	16:27:40	0.247494
2022-09-13	16:27:40	0.23701
2022-09-13	16:27:41	0.456603
2022-09-13	16:27:41	0.328257
2022-09-13	16:27:41	1.38113
2022-09-13	16:27:41	0.814669
2022-09-13	16:27:42	2.54912
2022-09-13	16:27:42	2.25508
2022-09-13	16:27:42	3.31792
2022-09-13	16:27:42	2.39095
2022-09-13	16:27:43	1.49879
2022-09-13	16:27:43	1.89024
2022-09-13	16:27:43	1.28536
2022-09-13	16:27:44	0.713448
2022-09-13	16:27:44	1.43523
2022-09-13	16:27:44	0.803982
2022-09-13	16:27:44	1.67416
2022-09-13	16:27:45	1.34179
2022-09-13	16:27:45	1.07966
2022-09-13	16:27:45	0.886832
2022-09-13	16:27:45	0.572481
2022-09-13	16:27:46	0.833702
2022-09-13	16:27:46	0.197163
2022-09-13	16:27:46	0.802252
2022-09-13	16:27:46	0.309937
2022-09-13	16:27:47	0.523524
2022-09-13	16:27:47	0.280725
2022-09-13	16:27:47	0.462863
2022-09-13	16:27:48	0.310242
2022-09-13	16:27:48	0.432074
2022-09-13	16:27:48	0.303524
2022-09-13	16:27:48	0.543728
2022-09-13	16:27:49	0.49472
2022-09-13	16:27:49	0.530598
2022-09-13	16:27:49	0.457367
2022-09-13	16:27:49	0.318588
2022-09-13	16:27:50	0.534618
2022-09-13	16:27:50	0.272634
2022-09-13	16:27:50	0.487748
2022-09-13	16:27:50	0.201031
2022-09-13	16:27:51	0.437825
2022-09-13	16:27:51	0.292379
2022-09-13	16:27:51	0.215942
2022-09-13	16:27:52	-0.0774425
2022-09-13	16:27:52	0.133652
2022-09-13	16:27:52	0.0115651
2022-09-13	16:27:52	0.268919
2022-09-13	16:27:53	-0.0210048
2022-09-13	16:27:53	0.174059
2022-09-13	16:27:53	0.0709036
2022-09-13	16:27:53	0.510598
2022-09-13	16:27:54	0.394161
2022-09-13	16:27:54	0.465611
2022-09-13	16:27:54	0.685916
2022-09-13	16:27:54	0.671005
2022-09-13	16:27:55	0.530802
2022-09-13	16:27:55	1.01945
2022-09-13	16:27:55	1.14927
2022-09-13	16:27:56	0.667188
2022-09-13	16:27:56	1.04571
2022-09-13	16:27:56	0.565458
2022-09-13	16:27:56	0.627443
2022-09-13	16:27:57	0.401692
2022-09-13	16:27:57	0.686018
2022-09-13	16:27:57	0.521896
2022-09-13	16:27:57	0.70729
2022-09-13	16:27:58	0.821896
2022-09-13	16:27:58	1.50734
2022-09-13	16:27:58	0.644389
2022-09-13	16:27:58	0.841692
2022-09-13	16:27:59	0.65813
2022-09-13	16:27:59	1.02475
2022-09-13	16:27:59	0.677875
2022-09-13	16:28:00	0.76841
2022-09-13	16:28:00	0.303168
2022-09-13	16:28:00	0.410394
2022-09-13	16:28:00	0.0843895
2022-09-13	16:28:01	0.263219
