# Supplementary material for: Comparing efficacy in reducing pulling and welfare impacts of four types of leash walking equipment
Source: PeerJ journal article supplement (doi:10.7717/peerj.18131), 2024-10-24
Supplement: Shelter1_Tension_files.zip [file Sulley_star_202291315462 copy.xlsx]

## Sheet: Averaged Newtons
Date	Time	Averaged Newtons	Impulse	Total steps
2022-09-13	15:46:03	1.41997	1.41997	0		Impulse Newtons	1327.42
2022-09-13	15:46:04	1.66083	3.0808	0		Total steps	23
2022-09-13	15:46:05	1.70045	4.78125	0		# > 5 sec	1
2022-09-13	15:46:06	1.65427	6.43552	0
2022-09-13	15:46:07	1.69384	8.12936	0
2022-09-13	15:46:08	1.7181	9.84747	0
2022-09-13	15:46:09	1.73638	11.5838	0
2022-09-13	15:46:10	1.75042	13.3343	0
2022-09-13	15:46:11	1.94625	15.2805	0
2022-09-13	15:46:12	1.72456	17.0051	0
2022-09-13	15:46:13	1.46876	18.4738	0
2022-09-13	15:46:14	0.869662	19.3435	0
2022-09-13	15:46:15	1.78945	21.1329	0
2022-09-13	15:46:16	10.526	31.6589	0
2022-09-13	15:46:17	0.783415	32.4423	0
2022-09-13	15:46:18	9.03862	41.481	0
2022-09-13	15:46:19	7.88737	49.3683	0
2022-09-13	15:46:20	2.49846	51.8668	0
2022-09-13	15:46:21	4.93547	56.8023	0
2022-09-13	15:46:22	14.9437	71.7459	1
2022-09-13	15:46:23	5.2272	76.9731	1
2022-09-13	15:46:24	0.434295	77.4074	1
2022-09-13	15:46:25	-0.148668	77.4074	1
2022-09-13	15:46:26	0.100737	77.5082	1
2022-09-13	15:46:27	0.548896	78.0571	1
2022-09-13	15:46:28	0.663024	78.7201	1
2022-09-13	15:46:29	2.81408	81.5342	1
2022-09-13	15:46:30	2.31753	83.8517	1
2022-09-13	15:46:31	2.54023	86.3919	1
2022-09-13	15:46:32	4.9637	91.3556	1
2022-09-13	15:46:33	3.69235	95.048	1
2022-09-13	15:46:34	2.30016	97.3481	1
2022-09-13	15:46:35	1.03124	98.3794	1
2022-09-13	15:46:36	1.65514	100.035	1
2022-09-13	15:46:37	1.95155	101.986	1
2022-09-13	15:46:38	1.95823	103.944	1
2022-09-13	15:46:39	11.0889	115.033	1
2022-09-13	15:46:40	22.4936	137.527	2
2022-09-13	15:46:41	21.7183	159.245	3
2022-09-13	15:46:42	9.08637	168.332	3
2022-09-13	15:46:43	5.63943	173.971	3
2022-09-13	15:46:44	4.51466	178.486	3
2022-09-13	15:46:45	4.83909	183.325	3
2022-09-13	15:46:46	7.30206	190.627	3
2022-09-13	15:46:47	22.8755	213.502	4
2022-09-13	15:46:48	24.0475	237.55	5
2022-09-13	15:46:49	8.37138	245.921	5
2022-09-13	15:46:50	5.84694	251.768	5
2022-09-13	15:46:51	4.9169	256.685	5
2022-09-13	15:46:52	4.85579	261.541	5
2022-09-13	15:46:53	4.69393	266.235	5
2022-09-13	15:46:54	2.60593	268.841	5
2022-09-13	15:46:55	4.59743	273.438	5
2022-09-13	15:46:56	5.49446	278.933	5
2022-09-13	15:46:57	8.88118	287.814	5
2022-09-13	15:46:58	7.14931	294.963	5
2022-09-13	15:46:59	3.15211	298.115	5
2022-09-13	15:47:00	2.86781	300.983	5
2022-09-13	15:47:01	2.83502	303.818	5
2022-09-13	15:47:02	3.84645	307.664	5
2022-09-13	15:47:03	7.81984	315.484	5
2022-09-13	15:47:04	15.1516	330.636	6
2022-09-13	15:47:05	-2.74039	330.636	6
2022-09-13	15:47:06	-2.69744	330.636	6
2022-09-13	15:47:07	-1.49575	330.636	6
2022-09-13	15:47:08	-0.773736	330.636	6
2022-09-13	15:47:09	-0.422729	330.636	6
2022-09-13	15:47:10	0.262988	330.899	6
2022-09-13	15:47:11	-0.0160718	330.899	6
2022-09-13	15:47:12	14.0578	344.957	7
2022-09-13	15:47:13	15.5205	360.477	8
2022-09-13	15:47:14	8.37264	368.85	8
2022-09-13	15:47:15	8.31158	377.161	8
2022-09-13	15:47:16	7.56954	384.731	8
2022-09-13	15:47:17	4.04743	388.778	8
2022-09-13	15:47:18	2.65081	391.429	8
2022-09-13	15:47:19	3.34051	394.77	8
2022-09-13	15:47:20	4.12268	398.892	8
2022-09-13	15:47:21	10.5343	409.427	8
2022-09-13	15:47:22	23.0444	432.471	9
2022-09-13	15:47:23	6.14253	438.614	9
2022-09-13	15:47:24	2.54266	441.156	9
2022-09-13	15:47:25	3.51447	444.671	9
2022-09-13	15:47:26	3.55952	448.23	9
2022-09-13	15:47:27	2.68092	450.911	9
2022-09-13	15:47:28	3.40497	454.316	9
2022-09-13	15:47:29	4.19956	458.516	9
2022-09-13	15:47:30	4.9877	463.503	9
2022-09-13	15:47:31	1.88918	465.393	9
2022-09-13	15:47:32	1.75025	467.143	9
2022-09-13	15:47:33	2.00563	469.149	9
2022-09-13	15:47:34	0.899148	470.048	9
2022-09-13	15:47:35	0.117091	470.165	9
2022-09-13	15:47:36	-0.270966	470.165	9
2022-09-13	15:47:37	-2.82144	470.165	9
2022-09-13	15:47:38	-2.00927	470.165	9
2022-09-13	15:47:39	9.31241	479.477	9
2022-09-13	15:47:40	16.0423	495.519	10
2022-09-13	15:47:41	3.01254	498.532	10
2022-09-13	15:47:42	2.37181	500.904	10
2022-09-13	15:47:43	3.22868	504.132	10
2022-09-13	15:47:44	2.68318	506.816	10
2022-09-13	15:47:45	6.08801	512.904	10
2022-09-13	15:47:46	2.88561	515.789	10
2022-09-13	15:47:47	9.27545	525.065	10
2022-09-13	15:47:48	9.77467	534.839	10
2022-09-13	15:47:49	4.55436	539.394	10
2022-09-13	15:47:50	7.71223	547.106	10
2022-09-13	15:47:51	9.88327	556.989	10
2022-09-13	15:47:52	12.1442	569.133	10
2022-09-13	15:47:53	9.77178	578.905	10
2022-09-13	15:47:54	5.74054	584.646	10
2022-09-13	15:47:55	1.03605	585.682	10
2022-09-13	15:47:56	0.695584	586.377	10
2022-09-13	15:47:57	7.57592	593.953	10
2022-09-13	15:47:58	32.7336	626.687	11
2022-09-13	15:47:59	14.6208	641.308	12
2022-09-13	15:48:00	16.3813	657.689	13
2022-09-13	15:48:01	21.0459	678.735	14
2022-09-13	15:48:02	16.5045	695.239	15
2022-09-13	15:48:03	13.8255	709.065	16
2022-09-13	15:48:04	16.4023	725.467	17
2022-09-13	15:48:05	14.206	739.673	18
2022-09-13	15:48:06	5.32536	744.999	18
2022-09-13	15:48:07	11.6672	756.666	18
2022-09-13	15:48:08	37.6705	794.336	19
2022-09-13	15:48:09	39.8192	834.156	20
2022-09-13	15:48:10	23.443	857.599	21
2022-09-13	15:48:11	5.16936	862.768	21
2022-09-13	15:48:12	3.19789	865.966	21
2022-09-13	15:48:13	22.1275	888.093	22
2022-09-13	15:48:14	8.07383	896.167	22
2022-09-13	15:48:15	1.87656	898.044	22
2022-09-13	15:48:16	2.13683	900.181	22
2022-09-13	15:48:17	2.14561	902.326	22
2022-09-13	15:48:18	2.12493	904.451	22
2022-09-13	15:48:19	4.71248	909.164	22
2022-09-13	15:48:20	8.68441	917.848	22
2022-09-13	15:48:21	11.0026	928.851	22
2022-09-13	15:48:22	9.99224	938.843	22
2022-09-13	15:48:23	3.66099	942.504	22
2022-09-13	15:48:24	7.06255	949.566	22
2022-09-13	15:48:25	5.39246	954.959	22
2022-09-13	15:48:26	5.03712	959.996	22
2022-09-13	15:48:27	3.58205	963.578	22
2022-09-13	15:48:28	3.93072	967.509	22
2022-09-13	15:48:29	1.53553	969.044	22
2022-09-13	15:48:30	1.14701	970.191	22
2022-09-13	15:48:31	1.08919	971.28	22
2022-09-13	15:48:32	1.82427	973.105	22
2022-09-13	15:48:33	2.12048	975.225	22
2022-09-13	15:48:34	1.6082	976.833	22
2022-09-13	15:48:35	3.02008	979.853	22
2022-09-13	15:48:36	4.29269	984.146	22
2022-09-13	15:48:37	1.63587	985.782	22
2022-09-13	15:48:38	1.33288	987.115	22
2022-09-13	15:48:39	1.16693	988.282	22
2022-09-13	15:48:40	1.25461	989.536	22
2022-09-13	15:48:41	1.30158	990.838	22
2022-09-13	15:48:42	1.2601	992.098	22
2022-09-13	15:48:43	1.03699	993.135	22
2022-09-13	15:48:44	0.772663	993.908	22
2022-09-13	15:48:45	-0.466268	993.908	22
2022-09-13	15:48:46	4.54616	998.454	22
2022-09-13	15:48:47	1.24782	999.702	22
2022-09-13	15:48:48	-0.586357	999.702	22
2022-09-13	15:48:49	0.0885127	999.79	22
2022-09-13	15:48:50	1.10667	1000.9	22
2022-09-13	15:48:51	1.30879	1002.21	22
2022-09-13	15:48:52	1.43016	1003.64	22
2022-09-13	15:48:53	1.40792	1005.04	22
2022-09-13	15:48:54	1.5893	1006.63	22
2022-09-13	15:48:55	1.51131	1008.14	22
2022-09-13	15:48:56	1.39298	1009.54	22
2022-09-13	15:48:57	1.47255	1011.01	22
2022-09-13	15:48:58	1.36032	1012.37	22
2022-09-13	15:48:59	1.302	1013.67	22
2022-09-13	15:49:00	1.30067	1014.97	22
2022-09-13	15:49:01	1.2962	1016.27	22
2022-09-13	15:49:02	1.33378	1017.6	22
2022-09-13	15:49:03	1.35142	1018.95	22
2022-09-13	15:49:04	1.35563	1020.31	22
2022-09-13	15:49:05	1.30826	1021.62	22
2022-09-13	15:49:06	1.74747	1023.37	22
2022-09-13	15:49:07	1.78583	1025.15	22
2022-09-13	15:49:08	1.88715	1027.04	22
2022-09-13	15:49:09	1.89926	1028.94	22
2022-09-13	15:49:10	1.96553	1030.9	22
2022-09-13	15:49:11	2.02467	1032.93	22
2022-09-13	15:49:12	2.12003	1035.05	22
2022-09-13	15:49:13	2.24527	1037.29	22
2022-09-13	15:49:14	2.24068	1039.53	22
2022-09-13	15:49:15	2.45766	1041.99	22
2022-09-13	15:49:16	2.4214	1044.41	22
2022-09-13	15:49:17	1.97554	1046.39	22
2022-09-13	15:49:18	1.89971	1048.29	22
2022-09-13	15:49:19	1.91408	1050.2	22
2022-09-13	15:49:20	1.79111	1051.99	22
2022-09-13	15:49:21	1.68845	1053.68	22
2022-09-13	15:49:22	1.66508	1055.35	22
2022-09-13	15:49:23	1.79462	1057.14	22
2022-09-13	15:49:24	1.73912	1058.88	22
2022-09-13	15:49:25	1.56174	1060.44	22
2022-09-13	15:49:26	1.40424	1061.85	22
2022-09-13	15:49:27	2.77095	1064.62	22
2022-09-13	15:49:28	2.90417	1067.52	22
2022-09-13	15:49:29	4.00598	1071.53	22
2022-09-13	15:49:30	6.19754	1077.73	22
2022-09-13	15:49:31	2.70327	1080.43	22
2022-09-13	15:49:32	2.24861	1082.68	22
2022-09-13	15:49:33	2.04051	1084.72	22
2022-09-13	15:49:34	2.00458	1086.72	22
2022-09-13	15:49:35	1.85721	1088.58	22
2022-09-13	15:49:36	2.00012	1090.58	22
2022-09-13	15:49:37	1.85942	1092.44	22
2022-09-13	15:49:38	2.64702	1095.09	22
2022-09-13	15:49:39	2.38397	1097.47	22
2022-09-13	15:49:40	2.5447	1100.01	22
2022-09-13	15:49:41	3.72732	1103.74	22
2022-09-13	15:49:42	3.0108	1106.75	22
2022-09-13	15:49:43	2.5872	1109.34	22
2022-09-13	15:49:44	2.00903	1111.35	22
2022-09-13	15:49:45	2.10293	1113.45	22
2022-09-13	15:49:46	2.66343	1116.12	22
2022-09-13	15:49:47	2.26021	1118.38	22
2022-09-13	15:49:48	2.65879	1121.03	22
2022-09-13	15:49:49	2.69608	1123.73	22
2022-09-13	15:49:50	1.98964	1125.72	22
2022-09-13	15:49:51	1.68075	1127.4	22
2022-09-13	15:49:52	1.65679	1129.06	22
2022-09-13	15:49:53	1.76621	1130.82	22
2022-09-13	15:49:54	1.60469	1132.43	22
2022-09-13	15:49:55	1.9245	1134.35	22
2022-09-13	15:49:56	2.09912	1136.45	22
2022-09-13	15:49:57	6.17616	1142.63	22
2022-09-13	15:49:58	4.32708	1146.96	22
2022-09-13	15:49:59	5.52042	1152.48	22
2022-09-13	15:50:00	3.95567	1156.43	22
2022-09-13	15:50:01	3.83321	1160.26	22
2022-09-13	15:50:02	2.6941	1162.96	22
2022-09-13	15:50:03	4.31838	1167.28	22
2022-09-13	15:50:04	5.02862	1172.31	22
2022-09-13	15:50:05	2.89014	1175.2	22
2022-09-13	15:50:06	2.04453	1177.24	22
2022-09-13	15:50:07	2.31725	1179.56	22
2022-09-13	15:50:08	2.35574	1181.91	22
2022-09-13	15:50:09	2.05377	1183.97	22
2022-09-13	15:50:10	1.80577	1185.77	22
2022-09-13	15:50:11	1.71341	1187.49	22
2022-09-13	15:50:12	1.86134	1189.35	22
2022-09-13	15:50:13	2.65841	1192.01	22
2022-09-13	15:50:14	2.22291	1194.23	22
2022-09-13	15:50:15	1.87226	1196.1	22
2022-09-13	15:50:16	1.90927	1198.01	22
2022-09-13	15:50:17	2.08765	1200.1	22
2022-09-13	15:50:18	2.36451	1202.46	22
2022-09-13	15:50:19	2.41765	1204.88	22
2022-09-13	15:50:20	2.74668	1207.63	22
2022-09-13	15:50:21	2.90591	1210.53	22
2022-09-13	15:50:22	1.94329	1212.48	22
2022-09-13	15:50:23	2.02755	1214.5	22
2022-09-13	15:50:24	-0.198017	1214.5	22
2022-09-13	15:50:25	-0.00356434	1214.5	22
2022-09-13	15:50:26	0.483247	1214.99	22
2022-09-13	15:50:27	1.19649	1216.18	22
2022-09-13	15:50:28	1.8138	1218	22
2022-09-13	15:50:29	1.39149	1219.39	22
2022-09-13	15:50:30	1.1236	1220.51	22
2022-09-13	15:50:31	1.02258	1221.54	22
2022-09-13	15:50:32	1.4048	1222.94	22
2022-09-13	15:50:33	6.55434	1229.49	22
2022-09-13	15:50:34	3.00553	1232.5	22
2022-09-13	15:50:35	3.8018	1236.3	22
2022-09-13	15:50:36	2.42715	1238.73	22
2022-09-13	15:50:37	1.14474	1239.87	22
2022-09-13	15:50:38	7.22097	1247.09	22
2022-09-13	15:50:39	21.7896	1268.88	23
2022-09-13	15:50:40	10.3394	1279.22	23
2022-09-13	15:50:41	5.86956	1285.09	23
2022-09-13	15:50:42	3.87254	1288.97	23
2022-09-13	15:50:43	2.12959	1291.1	23
2022-09-13	15:50:44	2.02138	1293.12	23
2022-09-13	15:50:45	2.76247	1295.88	23
2022-09-13	15:50:46	2.93513	1298.81	23
2022-09-13	15:50:47	2.86739	1301.68	23
2022-09-13	15:50:48	2.93785	1304.62	23
2022-09-13	15:50:49	2.25851	1306.88	23
2022-09-13	15:50:50	1.90746	1308.79	23
2022-09-13	15:50:51	1.56377	1310.35	23
2022-09-13	15:50:52	1.86485	1312.21	23
2022-09-13	15:50:53	1.47108	1313.69	23
2022-09-13	15:50:54	1.61001	1315.3	23
2022-09-13	15:50:55	1.61963	1316.91	23
2022-09-13	15:50:56	1.14165	1318.06	23
2022-09-13	15:50:57	1.28189	1319.34	23
2022-09-13	15:50:58	1.10135	1320.44	23
2022-09-13	15:50:59	0.630899	1321.07	23
2022-09-13	15:51:00	2.48969	1323.56	23
2022-09-13	15:51:01	1.63718	1325.2	23
2022-09-13	15:51:02	1.23491	1326.43	23
2022-09-13	15:51:03	0.991282	1327.42	23

## Sheet: Sulley_star_202291315462 (4)
Date	Time	Lbs	Newtons	Averaged Newtons	Total force x time	total steps > 13.345		**GoPro Fitting: 1534
2022-09-13	15:46:03	0.320929	1.42756	1.41997	1.42756	FALSE	0
2022-09-13	15:46:03	0.327036	1.45472	1.41997	1.45472	FALSE	0
2022-09-13	15:46:03	0.322863	1.43616	1.41997	2.86372	FALSE	0
2022-09-13	15:46:03	0.306069	1.36146	1.41997	2.81618	FALSE	0
2022-09-13	15:46:04	0.353499	1.57243	1.66083	4.43615	FALSE	0
2022-09-13	15:46:04	0.360216	1.60231	1.66083	4.41849	FALSE	0
2022-09-13	15:46:04	0.39187	1.74312	1.66083	6.17927	FALSE	0
2022-09-13	15:46:04	0.387901	1.72546	1.66083	6.14395	FALSE	0
2022-09-13	15:46:05	0.387036	1.72161	1.70045	7.90088	FALSE	0
2022-09-13	15:46:05	0.390038	1.73497	1.70045	7.87892	FALSE	0
2022-09-13	15:46:05	0.376705	1.67566	1.70045	9.57654	FALSE	0
2022-09-13	15:46:05	0.375331	1.66955	1.70045	9.54847	FALSE	0
2022-09-13	15:46:06	0.365305	1.62495	1.65427	11.2015	FALSE	0
2022-09-13	15:46:06	0.370496	1.64804	1.65427	11.1965	FALSE	0
2022-09-13	15:46:06	0.375942	1.67227	1.65427	12.8738	FALSE	0
2022-09-13	15:46:06	0.37584	1.67181	1.65427	12.8683	FALSE	0
2022-09-13	15:46:07	0.369275	1.64261	1.69384	14.5164	FALSE	0
2022-09-13	15:46:07	0.389987	1.73474	1.69384	14.6031	FALSE	0
2022-09-13	15:46:07	0.383117	1.70418	1.69384	16.2205	FALSE	0
2022-09-13	15:46:08	0.388003	1.72591	1.7181	16.329	FALSE	0
2022-09-13	15:46:08	0.385967	1.71686	1.7181	17.9374	FALSE	0
2022-09-13	15:46:08	0.385204	1.71346	1.7181	18.0424	FALSE	0
2022-09-13	15:46:08	0.385814	1.71618	1.7181	19.6536	FALSE	0
2022-09-13	15:46:09	0.380827	1.69399	1.73638	19.7364	FALSE	0
2022-09-13	15:46:09	0.392634	1.74651	1.73638	21.4001	FALSE	0
2022-09-13	15:46:09	0.41584	1.84974	1.73638	21.5862	FALSE	0
2022-09-13	15:46:09	0.372125	1.65529	1.73638	23.0554	FALSE	0
2022-09-13	15:46:10	0.38215	1.69988	1.75042	23.2861	FALSE	0
2022-09-13	15:46:10	0.327188	1.4554	1.75042	24.5108	FALSE	0
2022-09-13	15:46:10	0.437316	1.94527	1.75042	25.2313	FALSE	0
2022-09-13	15:46:10	0.427392	1.90113	1.75042	26.4119	FALSE	0
2022-09-13	15:46:11	0.404491	1.79926	1.94625	27.0306	FALSE	0
2022-09-13	15:46:11	0.512023	2.27758	1.94625	28.6895	FALSE	0
2022-09-13	15:46:11	0.396094	1.76191	1.94625	28.7925	FALSE	0
2022-09-13	15:46:12	0.41869	1.86242	1.72456	30.5519	FALSE	0
2022-09-13	15:46:12	0.434059	1.93078	1.72456	30.7233	FALSE	0
2022-09-13	15:46:12	0.383677	1.70667	1.72456	32.2586	FALSE	0
2022-09-13	15:46:12	0.314364	1.39835	1.72456	32.1216	FALSE	0
2022-09-13	15:46:13	0.387188	1.72229	1.46876	33.9809	FALSE	0
2022-09-13	15:46:13	0.338181	1.5043	1.46876	33.6259	FALSE	0
2022-09-13	15:46:13	0.314313	1.39813	1.46876	35.379	FALSE	0
2022-09-13	15:46:13	0.281082	1.25031	1.46876	34.8762	FALSE	0
2022-09-13	15:46:14	0.334109	1.48618	0.869662	36.8652	FALSE	0
2022-09-13	15:46:14	0.251463	1.11856	0.869662	35.9948	FALSE	0
2022-09-13	15:46:14	0.0584353	0.259932	0.869662	37.1251	FALSE	0
2022-09-13	15:46:14	0.138028	0.613976	0.869662	36.6088	FALSE	0
2022-09-13	15:46:15	0.200624	0.892416	1.78945	38.0175	FALSE	0
2022-09-13	15:46:15	0.295636	1.31505	1.78945	37.9238	FALSE	0
2022-09-13	15:46:15	0.710598	3.16088	1.78945	41.1784	FALSE	0
2022-09-13	15:46:16	3.31258	14.735	10.526	52.6588	1	1
2022-09-13	15:46:16	4.2336	18.8319	10.526	60.0103	1	2
2022-09-13	15:46:16	1.44159	6.41248	10.526	59.0713	FALSE	2
2022-09-13	15:46:16	0.477621	2.12455	10.526	62.1349	FALSE	2
2022-09-13	15:46:17	0.334822	1.48936	0.783415	60.5607	FALSE	2
2022-09-13	15:46:17	0.325712	1.44883	0.783415	63.5837	FALSE	2
2022-09-13	15:46:17	-0.000953954	-0.00424338	0.783415	60.5607	FALSE	2
2022-09-13	15:46:17	0.0448984	0.199717	0.783415	63.7834	FALSE	2
2022-09-13	15:46:18	0.0375193	0.166893	9.03862	60.7276	FALSE	2
2022-09-13	15:46:18	0.157977	0.702713	9.03862	64.4861	FALSE	2
2022-09-13	15:46:18	3.26057	14.5037	9.03862	75.2312	1	3
2022-09-13	15:46:18	4.67182	20.7812	9.03862	85.2673	1	4
2022-09-13	15:46:19	2.1591	9.60411	7.88737	84.8353	FALSE	4
2022-09-13	15:46:19	2.34393	10.4263	7.88737	95.6936	FALSE	4
2022-09-13	15:46:19	0.81645	3.63173	7.88737	88.4671	FALSE	4
2022-09-13	15:46:20	0.258842	1.15138	2.49846	96.845	FALSE	4
2022-09-13	15:46:20	0.948919	4.22098	2.49846	92.688	FALSE	4
2022-09-13	15:46:20	0.622863	2.77062	2.49846	99.6156	FALSE	4
2022-09-13	15:46:20	0.416094	1.85087	2.49846	94.5389	FALSE	4
2022-09-13	15:46:21	0.29126	1.29558	4.93547	100.911	FALSE	4
2022-09-13	15:46:21	0.720369	3.20435	4.93547	97.7433	FALSE	4
2022-09-13	15:46:21	1.08047	4.80615	4.93547	105.717	FALSE	4
2022-09-13	15:46:21	2.34607	10.4358	4.93547	108.179	FALSE	4
2022-09-13	15:46:22	4.47935	19.925	14.9437	125.642	1	5
2022-09-13	15:46:22	3.41716	15.2002	14.9437	123.379	1	6
2022-09-13	15:46:22	3.90363	17.3641	14.9437	143.006	1	7
2022-09-13	15:46:22	1.63782	7.28535	14.9437	130.665	FALSE	7
2022-09-13	15:46:23	1.9221	8.54989	5.2272	151.556	FALSE	7
2022-09-13	15:46:23	0.916349	4.0761	5.2272	134.741	FALSE	7
2022-09-13	15:46:23	0.686934	3.05562	5.2272	154.612	FALSE	7
2022-09-13	15:46:24	0.345458	1.53667	0.434295	136.277	FALSE	7
2022-09-13	15:46:24	-0.0131677	-0.0585726	0.434295	154.612	FALSE	7
2022-09-13	15:46:24	0.0673921	0.299774	0.434295	136.577	FALSE	7
2022-09-13	15:46:24	-0.00914732	-0.0406891	0.434295	154.612	FALSE	7
2022-09-13	15:46:25	0.0417941	0.185909	-0.148668	136.763	FALSE	7
2022-09-13	15:46:25	-0.131081	-0.583075	-0.148668	154.612	FALSE	7
2022-09-13	15:46:25	-0.0170863	-0.0760033	-0.148668	136.763	FALSE	7
2022-09-13	15:46:25	-0.0273153	-0.121504	-0.148668	154.612	FALSE	7
2022-09-13	15:46:26	-0.133829	-0.595298	0.100737	136.763	FALSE	7
2022-09-13	15:46:26	0.0399112	0.177533	0.100737	154.79	FALSE	7
2022-09-13	15:46:26	0.0338552	0.150595	0.100737	136.914	FALSE	7
2022-09-13	15:46:26	0.150649	0.670117	0.100737	155.46	FALSE	7
2022-09-13	15:46:27	0.0545676	0.242728	0.548896	137.156	FALSE	7
2022-09-13	15:46:27	0.273652	1.21726	0.548896	156.677	FALSE	7
2022-09-13	15:46:27	0.0963488	0.428579	0.548896	137.585	FALSE	7
2022-09-13	15:46:27	0.0690206	0.307017	0.548896	156.984	FALSE	7
2022-09-13	15:46:28	0.104695	0.465704	0.663024	138.051	FALSE	7
2022-09-13	15:46:28	0.0421503	0.187493	0.663024	157.171	FALSE	7
2022-09-13	15:46:28	0.300318	1.33587	0.663024	139.387	FALSE	7
2022-09-13	15:46:29	0.388817	1.72954	2.81408	158.901	FALSE	7
2022-09-13	15:46:29	0.662964	2.949	2.81408	142.336	FALSE	7
2022-09-13	15:46:29	0.558079	2.48245	2.81408	161.383	FALSE	7
2022-09-13	15:46:29	0.920674	4.09534	2.81408	146.431	FALSE	7
2022-09-13	15:46:30	0.962812	4.28278	2.31753	165.666	FALSE	7
2022-09-13	15:46:30	0.671921	2.98884	2.31753	149.42	FALSE	7
2022-09-13	15:46:30	0.34673	1.54232	2.31753	167.208	FALSE	7
2022-09-13	15:46:30	0.102557	0.456194	2.31753	149.876	FALSE	7
2022-09-13	15:46:31	0.339453	1.50995	2.54023	168.718	FALSE	7
2022-09-13	15:46:31	0.167748	0.746177	2.54023	150.622	FALSE	7
2022-09-13	15:46:31	1.32943	5.91357	2.54023	174.632	FALSE	7
2022-09-13	15:46:31	0.447647	1.99122	2.54023	152.613	FALSE	7
2022-09-13	15:46:32	1.08922	4.84507	4.9637	179.477	FALSE	7
2022-09-13	15:46:32	1.23467	5.49206	4.9637	158.105	FALSE	7
2022-09-13	15:46:32	1.02378	4.55398	4.9637	184.031	FALSE	7
2022-09-13	15:46:33	1.39075	6.18633	3.69235	164.292	FALSE	7
2022-09-13	15:46:33	0.596959	2.65539	3.69235	186.686	FALSE	7
2022-09-13	15:46:33	0.903423	4.01861	3.69235	168.31	FALSE	7
2022-09-13	15:46:33	0.429173	1.90905	3.69235	188.596	FALSE	7
2022-09-13	15:46:34	0.493499	2.19518	2.30016	170.505	FALSE	7
2022-09-13	15:46:34	0.987697	4.39347	2.30016	192.989	FALSE	7
2022-09-13	15:46:34	0.155585	0.692073	2.30016	171.198	FALSE	7
2022-09-13	15:46:34	0.431616	1.91991	2.30016	194.909	FALSE	7
2022-09-13	15:46:35	0.111056	0.493999	1.03124	171.692	FALSE	7
2022-09-13	15:46:35	0.330852	1.4717	1.03124	196.381	FALSE	7
2022-09-13	15:46:35	0.204288	0.908714	1.03124	172.6	FALSE	7
2022-09-13	15:46:35	0.281132	1.25053	1.03124	197.631	FALSE	7
2022-09-13	15:46:36	0.424288	1.88732	1.65514	174.488	FALSE	7
2022-09-13	15:46:36	0.226272	1.0065	1.65514	198.638	FALSE	7
2022-09-13	15:46:36	0.465713	2.07158	1.65514	176.559	FALSE	7
2022-09-13	15:46:37	0.222405	0.989302	1.95155	199.627	FALSE	7
2022-09-13	15:46:37	0.853092	3.79472	1.95155	180.354	FALSE	7
2022-09-13	15:46:37	0.16215	0.721276	1.95155	200.348	FALSE	7
2022-09-13	15:46:37	0.517264	2.30089	1.95155	182.655	FALSE	7
2022-09-13	15:46:38	0.471616	2.09784	1.95823	202.446	FALSE	7
2022-09-13	15:46:38	0.372379	1.65642	1.95823	184.311	FALSE	7
2022-09-13	15:46:38	0.646425	2.87543	1.95823	205.321	FALSE	7
2022-09-13	15:46:38	0.270496	1.20322	1.95823	185.514	FALSE	7
2022-09-13	15:46:39	0.636451	2.83106	11.0889	208.153	FALSE	7
2022-09-13	15:46:39	0.577621	2.56937	11.0889	188.084	FALSE	7
2022-09-13	15:46:39	3.23004	14.3679	11.0889	222.52	1	8
2022-09-13	15:46:39	5.52749	24.5874	11.0889	212.671	1	9
2022-09-13	15:46:40	6.22891	27.7074	22.4936	250.228	1	10
2022-09-13	15:46:40	5.75701	25.6083	22.4936	238.28	1	11
2022-09-13	15:46:40	3.18444	14.165	22.4936	264.393	1	12
2022-09-13	15:46:41	6.78505	30.1813	21.7183	268.461	1	13
2022-09-13	15:46:41	2.97894	13.2509	21.7183	277.644	FALSE	13
2022-09-13	15:46:41	4.06128	18.0654	21.7183	286.526	1	14
2022-09-13	15:46:41	5.70474	25.3758	21.7183	303.02	1	15
2022-09-13	15:46:42	2.18637	9.72541	9.08637	296.252	FALSE	15
2022-09-13	15:46:42	3.72164	16.5546	9.08637	319.574	1	16
2022-09-13	15:46:42	1.61599	7.18825	9.08637	303.44	FALSE	16
2022-09-13	15:46:42	0.646832	2.87724	9.08637	322.451	FALSE	16
2022-09-13	15:46:43	1.91569	8.52137	5.63943	311.961	FALSE	16
2022-09-13	15:46:43	0.645509	2.87135	5.63943	325.323	FALSE	16
2022-09-13	15:46:43	1.45569	6.4752	5.63943	318.436	FALSE	16
2022-09-13	15:46:43	1.05431	4.68978	5.63943	330.013	FALSE	16
2022-09-13	15:46:44	0.935687	4.16212	4.51466	322.599	FALSE	16
2022-09-13	15:46:44	1.37538	6.11797	4.51466	336.131	FALSE	16
2022-09-13	15:46:44	0.733753	3.26388	4.51466	325.862	FALSE	16
2022-09-13	15:46:45	1.48673	6.61327	4.83909	342.744	FALSE	16
2022-09-13	15:46:45	0.563015	2.5044	4.83909	328.367	FALSE	16
2022-09-13	15:46:45	0.94159	4.18838	4.83909	346.932	FALSE	16
2022-09-13	15:46:45	1.36017	6.05031	4.83909	334.417	FALSE	16
2022-09-13	15:46:46	1.12301	4.99537	7.30206	351.928	FALSE	16
2022-09-13	15:46:46	2.45039	10.8998	7.30206	345.317	FALSE	16
2022-09-13	15:46:46	0.826221	3.6752	7.30206	355.603	FALSE	16
2022-09-13	15:46:46	2.16668	9.63783	7.30206	354.955	FALSE	16
2022-09-13	15:46:47	2.1223	9.44041	22.8755	365.043	FALSE	16
2022-09-13	15:46:47	5.12464	22.7954	22.8755	377.75	1	17
2022-09-13	15:46:47	6.37365	28.3513	22.8755	393.394	1	18
2022-09-13	15:46:47	6.94998	30.9149	22.8755	408.665	1	19
2022-09-13	15:46:48	10.3605	46.0856	24.0475	439.48	1	20
2022-09-13	15:46:48	1.75304	7.79787	24.0475	416.463	FALSE	20
2022-09-13	15:46:48	4.10485	18.2592	24.0475	457.739	1	21
2022-09-13	15:46:49	2.60698	11.5964	8.37138	428.059	FALSE	21
2022-09-13	15:46:49	1.06897	4.75499	8.37138	462.494	FALSE	21
2022-09-13	15:46:49	3.18189	14.1537	8.37138	442.213	1	22
2022-09-13	15:46:49	0.670038	2.98046	8.37138	465.475	FALSE	22
2022-09-13	15:46:50	1.49645	6.65651	5.84694	448.87	FALSE	22
2022-09-13	15:46:50	1.54581	6.87607	5.84694	472.351	FALSE	22
2022-09-13	15:46:50	0.814313	3.62223	5.84694	452.492	FALSE	22
2022-09-13	15:46:50	1.40123	6.23295	5.84694	478.584	FALSE	22
2022-09-13	15:46:51	0.632277	2.81249	4.9169	455.304	FALSE	22
2022-09-13	15:46:51	1.37879	6.13313	4.9169	484.717	FALSE	22
2022-09-13	15:46:51	1.242	5.52466	4.9169	460.829	FALSE	22
2022-09-13	15:46:51	1.16841	5.19732	4.9169	489.914	FALSE	22
2022-09-13	15:46:52	0.945254	4.20468	4.85579	465.034	FALSE	22
2022-09-13	15:46:52	0.99014	4.40434	4.85579	494.318	FALSE	22
2022-09-13	15:46:52	1.3395	5.95836	4.85579	470.992	FALSE	22
2022-09-13	15:46:53	0.744135	3.31006	4.69393	497.629	FALSE	22
2022-09-13	15:46:53	1.72139	7.65709	4.69393	478.649	FALSE	22
2022-09-13	15:46:53	0.661183	2.94107	4.69393	500.57	FALSE	22
2022-09-13	15:46:53	1.09426	4.86749	4.69393	483.517	FALSE	22
2022-09-13	15:46:54	0.444033	1.97515	2.60593	502.545	FALSE	22
2022-09-13	15:46:54	0.420827	1.87192	2.60593	485.388	FALSE	22
2022-09-13	15:46:54	0.913957	4.06546	2.60593	506.61	FALSE	22
2022-09-13	15:46:54	0.564542	2.5112	2.60593	487.9	FALSE	22
2022-09-13	15:46:55	1.14307	5.0846	4.59743	511.695	FALSE	22
2022-09-13	15:46:55	0.539147	2.39823	4.59743	490.298	FALSE	22
2022-09-13	15:46:55	1.3567	6.03487	4.59743	517.73	FALSE	22
2022-09-13	15:46:55	1.09528	4.87202	4.59743	495.17	FALSE	22
2022-09-13	15:46:56	1.48225	6.59334	5.49446	524.323	FALSE	22
2022-09-13	15:46:56	1.48744	6.61643	5.49446	501.786	FALSE	22
2022-09-13	15:46:56	0.735941	3.27361	5.49446	527.597	FALSE	22
2022-09-13	15:46:57	2.41009	10.7206	8.88118	512.507	FALSE	22
2022-09-13	15:46:57	1.16642	5.18847	8.88118	532.785	FALSE	22
2022-09-13	15:46:57	3.1793	14.1422	8.88118	526.649	1	23
2022-09-13	15:46:57	1.2305	5.47351	8.88118	538.259	FALSE	23
2022-09-13	15:46:58	1.57319	6.99786	7.14931	533.647	FALSE	23
2022-09-13	15:46:58	1.98047	8.80953	7.14931	547.068	FALSE	23
2022-09-13	15:46:58	0.89014	3.95952	7.14931	537.606	FALSE	23
2022-09-13	15:46:58	1.98515	8.83034	7.14931	555.899	FALSE	23
2022-09-13	15:46:59	0.398435	1.77232	3.15211	539.379	FALSE	23
2022-09-13	15:46:59	0.966476	4.29908	3.15211	560.198	FALSE	23
2022-09-13	15:46:59	0.822303	3.65777	3.15211	543.037	FALSE	23
2022-09-13	15:46:59	0.64729	2.87928	3.15211	563.077	FALSE	23
2022-09-13	15:47:00	0.757519	3.3696	2.86781	546.406	FALSE	23
2022-09-13	15:47:00	0.416756	1.85381	2.86781	564.931	FALSE	23
2022-09-13	15:47:00	0.75986	3.38001	2.86781	549.786	FALSE	23
2022-09-13	15:47:01	0.492532	2.19088	2.83502	567.122	FALSE	23
2022-09-13	15:47:01	0.822557	3.6589	2.83502	553.445	FALSE	23
2022-09-13	15:47:01	0.426323	1.89637	2.83502	569.018	FALSE	23
2022-09-13	15:47:01	0.807952	3.59393	2.83502	557.039	FALSE	23
2022-09-13	15:47:02	0.71243	3.16903	3.84645	572.187	FALSE	23
2022-09-13	15:47:02	0.900165	4.00411	3.84645	561.043	FALSE	23
2022-09-13	15:47:02	0.873753	3.88663	3.84645	576.074	FALSE	23
2022-09-13	15:47:02	0.972532	4.32602	3.84645	565.369	FALSE	23
2022-09-13	15:47:03	1.58072	7.03136	7.81984	583.105	FALSE	23
2022-09-13	15:47:03	1.55767	6.92883	7.81984	572.298	FALSE	23
2022-09-13	15:47:03	2.11045	9.3877	7.81984	592.493	FALSE	23
2022-09-13	15:47:03	1.78307	7.93145	7.81984	580.229	FALSE	23
2022-09-13	15:47:04	3.71976	16.5462	15.1516	609.039	1	24
2022-09-13	15:47:04	2.34704	10.4401	15.1516	590.669	FALSE	24
2022-09-13	15:47:04	4.15192	18.4686	15.1516	627.507	1	25
2022-09-13	15:47:05	2.05294	9.13189	-2.74039	599.801	FALSE	25
2022-09-13	15:47:05	2.19915	9.78226	-2.74039	637.29	FALSE	25
2022-09-13	15:47:05	0.209835	0.933388	-2.74039	600.735	FALSE	25
2022-09-13	15:47:05	-6.92619	-30.8091	-2.74039	637.29	FALSE	25
2022-09-13	15:47:06	-0.106399	-0.473284	-2.69744	600.735	FALSE	25
2022-09-13	15:47:06	-0.639172	-2.84316	-2.69744	637.29	FALSE	25
2022-09-13	15:47:06	-0.836475	-3.72081	-2.69744	600.735	FALSE	25
2022-09-13	15:47:06	-0.8436	-3.7525	-2.69744	637.29	FALSE	25
2022-09-13	15:47:07	-0.636729	-2.8323	-1.49575	600.735	FALSE	25
2022-09-13	15:47:07	-0.514847	-2.29014	-1.49575	637.29	FALSE	25
2022-09-13	15:47:07	-0.103295	-0.459477	-1.49575	600.735	FALSE	25
2022-09-13	15:47:07	-0.0901651	-0.401072	-1.49575	637.29	FALSE	25
2022-09-13	15:47:08	-0.158715	-0.705996	-0.773736	600.735	FALSE	25
2022-09-13	15:47:08	-0.0801905	-0.356703	-0.773736	637.29	FALSE	25
2022-09-13	15:47:08	-0.0989692	-0.440235	-0.773736	600.735	FALSE	25
2022-09-13	15:47:08	-0.3579	-1.59201	-0.773736	637.29	FALSE	25
2022-09-13	15:47:09	-0.299529	-1.33236	-0.422729	600.735	FALSE	25
2022-09-13	15:47:09	-0.166196	-0.739273	-0.422729	637.29	FALSE	25
2022-09-13	15:47:09	0.180624	0.803452	-0.422729	601.538	FALSE	25
2022-09-13	15:47:10	0.183575	0.816578	0.262988	638.106	FALSE	25
2022-09-13	15:47:10	0.0272903	0.121393	0.262988	601.66	FALSE	25
2022-09-13	15:47:10	0.169326	0.753196	0.262988	638.86	FALSE	25
2022-09-13	15:47:10	-0.143702	-0.639215	0.262988	601.66	FALSE	25
2022-09-13	15:47:11	0.111412	0.495583	-0.0160718	639.355	FALSE	25
2022-09-13	15:47:11	-0.0988165	-0.439556	-0.0160718	601.66	FALSE	25
2022-09-13	15:47:11	0.0546694	0.24318	-0.0160718	639.598	FALSE	25
2022-09-13	15:47:11	-0.0817173	-0.363495	-0.0160718	601.66	FALSE	25
2022-09-13	15:47:12	0.0166033	0.0738548	14.0578	639.672	FALSE	25
2022-09-13	15:47:12	0.457316	2.03423	14.0578	603.694	FALSE	25
2022-09-13	15:47:12	4.68149	20.8242	14.0578	660.496	1	26
2022-09-13	15:47:12	7.48591	33.2988	14.0578	636.993	1	27
2022-09-13	15:47:13	4.00841	17.8302	15.5205	678.327	1	28
2022-09-13	15:47:13	4.71416	20.9695	15.5205	657.962	1	29
2022-09-13	15:47:13	1.74495	7.76189	15.5205	686.088	FALSE	29
2022-09-13	15:47:14	1.53793	6.84102	8.37264	664.803	FALSE	29
2022-09-13	15:47:14	1.79228	7.97242	8.37264	694.061	FALSE	29
2022-09-13	15:47:14	1.62688	7.23669	8.37264	672.04	FALSE	29
2022-09-13	15:47:14	2.57192	11.4404	8.37264	705.501	FALSE	29
2022-09-13	15:47:15	1.49045	6.62982	8.31158	678.67	FALSE	29
2022-09-13	15:47:15	2.82653	12.573	8.31158	718.074	FALSE	29
2022-09-13	15:47:15	1.7535	7.79992	8.31158	686.47	FALSE	29
2022-09-13	15:47:15	1.40363	6.24363	8.31158	724.318	FALSE	29
2022-09-13	15:47:16	2.55793	11.3782	7.56954	697.848	FALSE	29
2022-09-13	15:47:16	1.33625	5.94391	7.56954	730.262	FALSE	29
2022-09-13	15:47:16	2.10989	9.38521	7.56954	707.233	FALSE	29
2022-09-13	15:47:16	0.802761	3.57084	7.56954	733.833	FALSE	29
2022-09-13	15:47:17	1.3565	6.03398	4.04743	713.267	FALSE	29
2022-09-13	15:47:17	0.874415	3.88957	4.04743	737.722	FALSE	29
2022-09-13	15:47:17	0.498791	2.21872	4.04743	715.486	FALSE	29
2022-09-13	15:47:18	0.763728	3.39721	2.65081	741.119	FALSE	29
2022-09-13	15:47:18	0.361132	1.60639	2.65081	717.092	FALSE	29
2022-09-13	15:47:18	0.807494	3.59189	2.65081	744.711	FALSE	29
2022-09-13	15:47:18	0.451361	2.00774	2.65081	719.1	FALSE	29
2022-09-13	15:47:19	0.84444	3.75624	3.34051	748.468	FALSE	29
2022-09-13	15:47:19	0.7593	3.37752	3.34051	722.477	FALSE	29
2022-09-13	15:47:19	0.767901	3.41578	3.34051	751.883	FALSE	29
2022-09-13	15:47:19	0.632277	2.81249	3.34051	725.29	FALSE	29
2022-09-13	15:47:20	0.451056	2.00639	4.12268	753.89	FALSE	29
2022-09-13	15:47:20	0.688562	3.06286	4.12268	728.353	FALSE	29
2022-09-13	15:47:20	0.459402	2.04351	4.12268	755.933	FALSE	29
2022-09-13	15:47:20	2.10826	9.37796	4.12268	737.731	FALSE	29
2022-09-13	15:47:21	0.888817	3.95364	10.5343	759.887	FALSE	29
2022-09-13	15:47:21	2.49457	11.0963	10.5343	748.827	FALSE	29
2022-09-13	15:47:21	3.72123	16.5528	10.5343	776.44	1	30
2022-09-13	15:47:22	7.54011	33.5399	23.0444	782.367	1	31
2022-09-13	15:47:22	3.76103	16.7298	23.0444	793.169	1	32
2022-09-13	15:47:22	6.33757	28.1908	23.0444	810.558	1	33
2022-09-13	15:47:22	3.08378	13.7173	23.0444	806.887	1	34
2022-09-13	15:47:23	2.67243	11.8875	6.14253	822.445	FALSE	34
2022-09-13	15:47:23	1.25889	5.59979	6.14253	812.486	FALSE	34
2022-09-13	15:47:23	0.853041	3.7945	6.14253	826.24	FALSE	34
2022-09-13	15:47:23	0.739249	3.28833	6.14253	815.775	FALSE	34
2022-09-13	15:47:24	0.286425	1.27408	2.54266	827.514	FALSE	34
2022-09-13	15:47:24	0.63355	2.81816	2.54266	818.593	FALSE	34
2022-09-13	15:47:24	0.552125	2.45596	2.54266	829.97	FALSE	34
2022-09-13	15:47:24	0.814364	3.62245	2.54266	822.215	FALSE	34
2022-09-13	15:47:25	0.836298	3.72002	3.51447	833.69	FALSE	34
2022-09-13	15:47:25	0.58388	2.59722	3.51447	824.813	FALSE	34
2022-09-13	15:47:25	0.950089	4.22619	3.51447	837.916	FALSE	34
2022-09-13	15:47:26	0.689784	3.0683	3.55952	827.881	FALSE	34
2022-09-13	15:47:26	1.1738	5.2213	3.55952	843.137	FALSE	34
2022-09-13	15:47:26	0.373601	1.66185	3.55952	829.543	FALSE	34
2022-09-13	15:47:26	0.963677	4.28663	3.55952	847.424	FALSE	34
2022-09-13	15:47:27	0.425204	1.89139	2.68092	831.434	FALSE	34
2022-09-13	15:47:27	0.802863	3.5713	2.68092	850.995	FALSE	34
2022-09-13	15:47:27	0.427748	1.90271	2.68092	833.337	FALSE	34
2022-09-13	15:47:27	0.754974	3.35828	2.68092	854.353	FALSE	34
2022-09-13	15:47:28	0.631005	2.80684	3.40497	836.144	FALSE	34
2022-09-13	15:47:28	0.814008	3.62087	3.40497	857.974	FALSE	34
2022-09-13	15:47:28	0.865407	3.8495	3.40497	839.993	FALSE	34
2022-09-13	15:47:28	0.751463	3.34266	3.40497	861.317	FALSE	34
2022-09-13	15:47:29	1.2134	5.39745	4.19956	845.391	FALSE	34
2022-09-13	15:47:29	0.337468	1.50113	4.19956	862.818	FALSE	34
2022-09-13	15:47:29	1.28144	5.7001	4.19956	851.091	FALSE	34
2022-09-13	15:47:30	0.623677	2.77424	4.9877	865.592	FALSE	34
2022-09-13	15:47:30	1.99599	8.87856	4.9877	859.969	FALSE	34
2022-09-13	15:47:30	0.650751	2.89467	4.9877	868.487	FALSE	34
2022-09-13	15:47:30	1.21472	5.40332	4.9877	865.373	FALSE	34
2022-09-13	15:47:31	0.494008	2.19745	1.88918	870.684	FALSE	34
2022-09-13	15:47:31	0.337977	1.50339	1.88918	866.876	FALSE	34
2022-09-13	15:47:31	0.555178	2.46954	1.88918	873.154	FALSE	34
2022-09-13	15:47:31	0.311667	1.38636	1.88918	868.262	FALSE	34
2022-09-13	15:47:32	0.477977	2.12614	1.75025	875.28	FALSE	34
2022-09-13	15:47:32	0.280725	1.24872	1.75025	869.511	FALSE	34
2022-09-13	15:47:32	0.613906	2.73078	1.75025	878.011	FALSE	34
2022-09-13	15:47:32	0.201285	0.895356	1.75025	870.406	FALSE	34
2022-09-13	15:47:33	0.509682	2.26717	2.00563	880.278	FALSE	34
2022-09-13	15:47:33	0.332074	1.47713	2.00563	871.884	FALSE	34
2022-09-13	15:47:33	0.510903	2.2726	2.00563	882.551	FALSE	34
2022-09-13	15:47:34	0.187595	0.83446	0.899148	872.718	FALSE	34
2022-09-13	15:47:34	0.23584	1.04906	0.899148	883.6	FALSE	34
2022-09-13	15:47:34	0.216909	0.964855	0.899148	873.683	FALSE	34
2022-09-13	15:47:34	0.168206	0.748214	0.899148	884.348	FALSE	34
2022-09-13	15:47:35	0.112328	0.499657	0.117091	874.183	FALSE	34
2022-09-13	15:47:35	-0.0477733	-0.212505	0.117091	884.348	FALSE	34
2022-09-13	15:47:35	0.0355346	0.158065	0.117091	874.341	FALSE	34
2022-09-13	15:47:35	0.00520383	0.0231477	0.117091	884.371	FALSE	34
2022-09-13	15:47:36	0.0110562	0.0491802	-0.270966	874.39	FALSE	34
2022-09-13	15:47:36	-0.113168	-0.503394	-0.270966	884.371	FALSE	34
2022-09-13	15:47:36	0.0290715	0.129316	-0.270966	874.519	FALSE	34
2022-09-13	15:47:36	-0.170623	-0.758965	-0.270966	884.371	FALSE	34
2022-09-13	15:47:37	-0.395458	-1.75908	-2.82144	874.519	FALSE	34
2022-09-13	15:47:37	-0.702429	-3.12454	-2.82144	884.371	FALSE	34
2022-09-13	15:47:37	-0.804974	-3.58069	-2.82144	874.519	FALSE	34
2022-09-13	15:47:38	-0.71846	-3.19585	-2.00927	884.371	FALSE	34
2022-09-13	15:47:38	-0.647875	-2.88188	-2.00927	874.519	FALSE	34
2022-09-13	15:47:38	-0.368842	-1.64068	-2.00927	884.371	FALSE	34
2022-09-13	15:47:38	-0.0716409	-0.318673	-2.00927	874.519	FALSE	34
2022-09-13	15:47:39	-0.0324043	-0.144141	9.31241	884.371	FALSE	34
2022-09-13	15:47:39	0.220064	0.978889	9.31241	875.498	FALSE	34
2022-09-13	15:47:39	4.08474	18.1697	9.31241	902.541	1	35
2022-09-13	15:47:39	4.10169	18.2451	9.31241	893.743	1	36
2022-09-13	15:47:40	4.03533	17.95	16.0423	920.491	1	37
2022-09-13	15:47:40	4.14281	18.428	16.0423	912.171	1	38
2022-09-13	15:47:40	4.33782	19.2955	16.0423	939.786	1	39
2022-09-13	15:47:40	1.90994	8.4958	16.0423	920.667	FALSE	39
2022-09-13	15:47:41	1.2191	5.4228	3.01254	945.209	FALSE	39
2022-09-13	15:47:41	0.312685	1.39089	3.01254	922.058	FALSE	39
2022-09-13	15:47:41	0.499962	2.22393	3.01254	947.433	FALSE	39
2022-09-13	15:47:42	0.281387	1.25167	2.37181	923.31	FALSE	39
2022-09-13	15:47:42	0.554466	2.46638	2.37181	949.899	FALSE	39
2022-09-13	15:47:42	0.59355	2.64023	2.37181	925.95	FALSE	39
2022-09-13	15:47:42	0.703422	3.12896	2.37181	953.028	FALSE	39
2022-09-13	15:47:43	0.764084	3.3988	3.22868	929.349	FALSE	39
2022-09-13	15:47:43	0.672685	2.99224	3.22868	956.021	FALSE	39
2022-09-13	15:47:43	1.01034	4.49419	3.22868	933.843	FALSE	39
2022-09-13	15:47:43	0.456247	2.02948	3.22868	958.05	FALSE	39
2022-09-13	15:47:44	0.668562	2.9739	2.68318	936.817	FALSE	39
2022-09-13	15:47:44	0.688562	3.06286	2.68318	961.113	FALSE	39
2022-09-13	15:47:44	0.55126	2.45211	2.68318	939.269	FALSE	39
2022-09-13	15:47:44	0.50444	2.24385	2.68318	963.357	FALSE	39
2022-09-13	15:47:45	0.987799	4.39393	6.08801	943.663	FALSE	39
2022-09-13	15:47:45	1.345	5.98283	6.08801	969.34	FALSE	39
2022-09-13	15:47:45	1.77314	7.88728	6.08801	951.55	FALSE	39
2022-09-13	15:47:46	0.851005	3.78544	2.88561	973.125	FALSE	39
2022-09-13	15:47:46	0.657723	2.92568	2.88561	954.476	FALSE	39
2022-09-13	15:47:46	0.576959	2.56643	2.88561	975.692	FALSE	39
2022-09-13	15:47:46	0.509173	2.2649	2.88561	956.741	FALSE	39
2022-09-13	15:47:47	0.752939	3.34922	9.27545	979.041	FALSE	39
2022-09-13	15:47:47	1.3049	5.80446	9.27545	962.545	FALSE	39
2022-09-13	15:47:47	1.87614	8.34545	9.27545	987.386	FALSE	39
2022-09-13	15:47:47	4.40688	19.6027	9.27545	982.148	1	40
2022-09-13	15:47:48	4.71289	20.9639	9.77467	1008.35	1	41
2022-09-13	15:47:48	2.09574	9.32227	9.77467	991.47	FALSE	41
2022-09-13	15:47:48	1.21533	5.40603	9.77467	1013.76	FALSE	41
2022-09-13	15:47:48	0.765814	3.40649	9.77467	994.877	FALSE	41
2022-09-13	15:47:49	0.651768	2.89919	4.55436	1016.66	FALSE	41
2022-09-13	15:47:49	0.631514	2.8091	4.55436	997.686	FALSE	41
2022-09-13	15:47:49	0.738995	3.2872	4.55436	1019.94	FALSE	41
2022-09-13	15:47:49	2.07319	9.22196	4.55436	1006.91	FALSE	41
2022-09-13	15:47:50	2.52485	11.231	7.71223	1031.17	FALSE	41
2022-09-13	15:47:50	1.57243	6.99448	7.71223	1013.9	FALSE	41
2022-09-13	15:47:50	1.10408	4.91117	7.71223	1036.08	FALSE	41
2022-09-13	15:47:51	1.43538	6.38486	9.88327	1020.29	FALSE	41
2022-09-13	15:47:51	2.01177	8.94876	9.88327	1045.03	FALSE	41
2022-09-13	15:47:51	2.4594	10.9399	9.88327	1031.23	FALSE	41
2022-09-13	15:47:51	2.98088	13.2596	9.88327	1058.29	FALSE	41
2022-09-13	15:47:52	3.25095	14.4609	12.1442	1045.69	1	42
2022-09-13	15:47:52	2.83762	12.6223	12.1442	1070.92	FALSE	42
2022-09-13	15:47:52	2.46647	10.9714	12.1442	1056.66	FALSE	42
2022-09-13	15:47:52	2.36551	10.5223	12.1442	1081.44	FALSE	42
2022-09-13	15:47:53	2.29976	10.2298	9.77178	1066.89	FALSE	42
2022-09-13	15:47:53	2.23187	9.9278	9.77178	1091.37	FALSE	42
2022-09-13	15:47:53	2.15513	9.58645	9.77178	1076.48	FALSE	42
2022-09-13	15:47:53	2.10042	9.34309	9.77178	1100.71	FALSE	42
2022-09-13	15:47:54	2.6679	11.8674	5.74054	1088.34	FALSE	42
2022-09-13	15:47:54	0.897621	3.9928	5.74054	1104.7	FALSE	42
2022-09-13	15:47:54	0.306069	1.36146	5.74054	1089.7	FALSE	42
2022-09-13	15:47:55	0.289733	1.28879	1.03605	1105.99	FALSE	42
2022-09-13	15:47:55	0.301183	1.33972	1.03605	1091.04	FALSE	42
2022-09-13	15:47:55	0.204237	0.908487	1.03605	1106.9	FALSE	42
2022-09-13	15:47:55	0.136501	0.607184	1.03605	1091.65	FALSE	42
2022-09-13	15:47:56	0.371056	1.65053	0.695584	1108.55	FALSE	42
2022-09-13	15:47:56	0.212125	0.943574	0.695584	1092.59	FALSE	42
2022-09-13	15:47:56	0.0963997	0.428805	0.695584	1108.98	FALSE	42
2022-09-13	15:47:56	-0.0540837	-0.240575	0.695584	1092.59	FALSE	42
2022-09-13	15:47:57	-0.399732	-1.77809	7.57592	1108.98	FALSE	42
2022-09-13	15:47:57	0.0744659	0.331239	7.57592	1092.93	FALSE	42
2022-09-13	15:47:57	0.216909	0.964855	7.57592	1109.94	FALSE	42
2022-09-13	15:47:57	6.92093	30.7857	7.57592	1123.71	1	43
2022-09-13	15:47:58	10.6929	47.5642	32.7336	1157.51	1	44
2022-09-13	15:47:58	7.42057	33.0082	32.7336	1156.72	1	45
2022-09-13	15:47:58	3.96307	17.6285	32.7336	1175.14	1	46
2022-09-13	15:47:59	3.4622	15.4006	14.6208	1172.12	1	47
2022-09-13	15:47:59	3.27645	14.5743	14.6208	1189.71	1	48
2022-09-13	15:47:59	3.88357	17.2749	14.6208	1189.4	1	49
2022-09-13	15:47:59	2.52541	11.2335	14.6208	1200.94	FALSE	49
2022-09-13	15:48:00	3.49777	15.5588	16.3813	1204.95	1	50
2022-09-13	15:48:00	3.50225	15.5787	16.3813	1216.52	1	51
2022-09-13	15:48:00	3.27599	14.5723	16.3813	1219.53	1	52
2022-09-13	15:48:00	4.45467	19.8153	16.3813	1236.34	1	53
2022-09-13	15:48:01	9.62968	42.8347	21.0459	1262.36	1	54
2022-09-13	15:48:01	3.07874	13.6949	21.0459	1250.03	1	55
2022-09-13	15:48:01	4.305	19.1495	21.0459	1281.51	1	56
2022-09-13	15:48:01	1.91192	8.5046	21.0459	1258.54	FALSE	56
2022-09-13	15:48:02	1.51798	6.75228	16.5045	1288.26	FALSE	56
2022-09-13	15:48:02	6.57248	29.2357	16.5045	1287.77	1	57
2022-09-13	15:48:02	3.04067	13.5255	16.5045	1301.79	1	58
2022-09-13	15:48:03	4.10423	18.2564	13.8255	1306.03	1	59
2022-09-13	15:48:03	3.62154	16.1093	13.8255	1317.9	1	60
2022-09-13	15:48:03	2.52001	11.2095	13.8255	1317.24	FALSE	60
2022-09-13	15:48:03	2.18668	9.72679	13.8255	1327.62	FALSE	60
2022-09-13	15:48:04	3.30734	14.7117	16.4023	1331.95	1	61
2022-09-13	15:48:04	2.59024	11.5219	16.4023	1339.15	FALSE	61
2022-09-13	15:48:04	3.11737	13.8667	16.4023	1345.82	1	62
2022-09-13	15:48:04	5.73462	25.5087	16.4023	1364.65	1	63
2022-09-13	15:48:05	4.89111	21.7566	14.206	1367.57	1	64
2022-09-13	15:48:05	3.7853	16.8378	14.206	1381.49	1	65
2022-09-13	15:48:05	2.94235	13.0882	14.206	1380.66	FALSE	65
2022-09-13	15:48:05	1.15584	5.14141	14.206	1386.63	FALSE	65
2022-09-13	15:48:06	1.32739	5.9045	5.32536	1386.57	FALSE	65
2022-09-13	15:48:06	0.750395	3.33791	5.32536	1389.97	FALSE	65
2022-09-13	15:48:06	1.5138	6.73369	5.32536	1393.3	FALSE	65
2022-09-13	15:48:07	1.0078	4.4829	11.6672	1394.45	FALSE	65
2022-09-13	15:48:07	1.47268	6.55078	11.6672	1399.85	FALSE	65
2022-09-13	15:48:07	2.25925	10.0496	11.6672	1404.5	FALSE	65
2022-09-13	15:48:07	5.75192	25.5857	11.6672	1425.44	1	66
2022-09-13	15:48:08	9.46968	42.123	37.6705	1446.63	1	67
2022-09-13	15:48:08	10.4632	46.5424	37.6705	1471.98	1	68
2022-09-13	15:48:08	6.89604	30.675	37.6705	1477.3	1	69
2022-09-13	15:48:08	7.04591	31.3416	37.6705	1503.32	1	70
2022-09-13	15:48:09	10.3744	46.1474	39.8192	1523.45	1	71
2022-09-13	15:48:09	11.6736	51.9265	39.8192	1555.25	1	72
2022-09-13	15:48:09	4.80724	21.3836	39.8192	1544.83	1	73
2022-09-13	15:48:10	6.54607	29.1182	23.443	1584.36	1	74
2022-09-13	15:48:10	4.01563	17.8623	23.443	1562.7	1	75
2022-09-13	15:48:10	5.16423	22.9715	23.443	1607.34	1	76
2022-09-13	15:48:10	5.35497	23.82	23.443	1586.52	1	77
2022-09-13	15:48:11	3.55925	15.8323	5.16936	1623.17	1	78
2022-09-13	15:48:11	0.545712	2.42744	5.16936	1588.94	FALSE	78
2022-09-13	15:48:11	0.230802	1.02665	5.16936	1624.2	FALSE	78
2022-09-13	15:48:11	0.312736	1.39111	5.16936	1590.33	FALSE	78
2022-09-13	15:48:12	0.694567	3.08957	3.19789	1627.28	FALSE	78
2022-09-13	15:48:12	0.434466	1.93259	3.19789	1592.27	FALSE	78
2022-09-13	15:48:12	0.494618	2.20016	3.19789	1629.49	FALSE	78
2022-09-13	15:48:12	1.25202	5.56924	3.19789	1597.84	FALSE	78
2022-09-13	15:48:13	1.24983	5.55949	22.1275	1635.04	FALSE	78
2022-09-13	15:48:13	4.97319	22.1217	22.1275	1619.96	1	79
2022-09-13	15:48:13	8.14846	36.246	22.1275	1671.29	1	80
2022-09-13	15:48:13	5.52647	24.5828	22.1275	1644.54	1	81
2022-09-13	15:48:14	3.13401	13.9407	8.07383	1685.23	1	82
2022-09-13	15:48:14	1.61533	7.18531	8.07383	1651.73	FALSE	82
2022-09-13	15:48:14	0.695891	3.09546	8.07383	1688.33	FALSE	82
2022-09-13	15:48:15	0.351667	1.56429	1.87656	1653.29	FALSE	82
2022-09-13	15:48:15	0.529325	2.35454	1.87656	1690.68	FALSE	82
2022-09-13	15:48:15	0.390293	1.7361	1.87656	1655.03	FALSE	82
2022-09-13	15:48:15	0.416196	1.85132	1.87656	1692.53	FALSE	82
2022-09-13	15:48:16	0.322048	1.43253	2.13683	1656.46	FALSE	82
2022-09-13	15:48:16	0.426476	1.89705	2.13683	1694.43	FALSE	82
2022-09-13	15:48:16	0.575382	2.55941	2.13683	1659.02	FALSE	82
2022-09-13	15:48:16	0.597621	2.65834	2.13683	1697.09	FALSE	82
2022-09-13	15:48:17	0.511005	2.27305	2.14561	1661.29	FALSE	82
2022-09-13	15:48:17	0.469936	2.09037	2.14561	1699.18	FALSE	82
2022-09-13	15:48:17	0.509428	2.26604	2.14561	1663.56	FALSE	82
2022-09-13	15:48:17	0.439046	1.95296	2.14561	1701.13	FALSE	82
2022-09-13	15:48:18	0.399657	1.77775	2.12493	1665.34	FALSE	82
2022-09-13	15:48:18	0.436094	1.93983	2.12493	1703.07	FALSE	82
2022-09-13	15:48:18	0.597366	2.6572	2.12493	1667.99	FALSE	82
2022-09-13	15:48:19	0.68673	3.05471	4.71248	1706.13	FALSE	82
2022-09-13	15:48:19	0.907952	4.03875	4.71248	1672.03	FALSE	82
2022-09-13	15:48:19	1.09497	4.87065	4.71248	1711	FALSE	82
2022-09-13	15:48:19	1.548	6.88581	4.71248	1678.92	FALSE	82
2022-09-13	15:48:20	1.84195	8.19336	8.68441	1719.19	FALSE	82
2022-09-13	15:48:20	1.94113	8.63453	8.68441	1687.55	FALSE	82
2022-09-13	15:48:20	1.76933	7.87033	8.68441	1727.06	FALSE	82
2022-09-13	15:48:20	2.25696	10.0394	8.68441	1697.59	FALSE	82
2022-09-13	15:48:21	2.43955	10.8516	11.0026	1737.91	FALSE	82
2022-09-13	15:48:21	2.2221	9.88435	11.0026	1707.48	FALSE	82
2022-09-13	15:48:21	2.52933	11.251	11.0026	1749.16	FALSE	82
2022-09-13	15:48:21	2.70301	12.0235	11.0026	1719.5	FALSE	82
2022-09-13	15:48:22	2.58759	11.5101	9.99224	1760.67	FALSE	82
2022-09-13	15:48:22	2.48373	11.0481	9.99224	1730.55	FALSE	82
2022-09-13	15:48:22	1.66775	7.41849	9.99224	1768.09	FALSE	82
2022-09-13	15:48:23	1.32042	5.87349	3.66099	1736.42	FALSE	82
2022-09-13	15:48:23	0.879046	3.91017	3.66099	1772	FALSE	82
2022-09-13	15:48:23	0.599962	2.66875	3.66099	1739.09	FALSE	82
2022-09-13	15:48:23	0.492685	2.19156	3.66099	1774.19	FALSE	82
2022-09-13	15:48:24	1.11538	4.96143	7.06255	1744.05	FALSE	82
2022-09-13	15:48:24	1.31482	5.84858	7.06255	1780.04	FALSE	82
2022-09-13	15:48:24	2.46235	10.953	7.06255	1755	FALSE	82
2022-09-13	15:48:24	1.45838	6.48717	7.06255	1786.53	FALSE	82
2022-09-13	15:48:25	1.1476	5.10475	5.39246	1760.11	FALSE	82
2022-09-13	15:48:25	0.904135	4.02177	5.39246	1790.55	FALSE	82
2022-09-13	15:48:25	1.32622	5.89929	5.39246	1766.01	FALSE	82
2022-09-13	15:48:25	1.47116	6.54401	5.39246	1797.09	FALSE	82
2022-09-13	15:48:26	1.2822	5.70348	5.03712	1771.71	FALSE	82
2022-09-13	15:48:26	1.24464	5.53641	5.03712	1802.63	FALSE	82
2022-09-13	15:48:26	0.870344	3.87146	5.03712	1775.58	FALSE	82
2022-09-13	15:48:27	0.787952	3.50497	3.58205	1806.14	FALSE	82
2022-09-13	15:48:27	0.718537	3.1962	3.58205	1778.78	FALSE	82
2022-09-13	15:48:27	0.842863	3.74922	3.58205	1809.89	FALSE	82
2022-09-13	15:48:27	0.871768	3.8778	3.58205	1782.66	FALSE	82
2022-09-13	15:48:28	0.986018	4.38601	3.93072	1814.27	FALSE	82
2022-09-13	15:48:28	1.11172	4.94515	3.93072	1787.6	FALSE	82
2022-09-13	15:48:28	0.923779	4.10915	3.93072	1818.38	FALSE	82
2022-09-13	15:48:28	0.513143	2.28256	3.93072	1789.88	FALSE	82
2022-09-13	15:48:29	0.426883	1.89886	1.53553	1820.28	FALSE	82
2022-09-13	15:48:29	0.409122	1.81986	1.53553	1791.7	FALSE	82
2022-09-13	15:48:29	0.259351	1.15365	1.53553	1821.43	FALSE	82
2022-09-13	15:48:29	0.285458	1.26977	1.53553	1792.97	FALSE	82
2022-09-13	15:48:30	0.242761	1.07985	1.14701	1822.51	FALSE	82
2022-09-13	15:48:30	0.263982	1.17424	1.14701	1794.15	FALSE	82
2022-09-13	15:48:30	0.266832	1.18692	1.14701	1823.7	FALSE	82
2022-09-13	15:48:31	0.13584	0.604243	1.08919	1794.75	FALSE	82
2022-09-13	15:48:31	0.260674	1.15953	1.08919	1824.86	FALSE	82
2022-09-13	15:48:31	0.162557	0.723086	1.08919	1795.48	FALSE	82
2022-09-13	15:48:31	0.420369	1.86989	1.08919	1826.73	FALSE	82
2022-09-13	15:48:32	0.173855	0.773342	1.82427	1796.25	FALSE	82
2022-09-13	15:48:32	0.406323	1.80741	1.82427	1828.54	FALSE	82
2022-09-13	15:48:32	0.465916	2.07249	1.82427	1798.32	FALSE	82
2022-09-13	15:48:32	0.594364	2.64385	1.82427	1831.18	FALSE	82
2022-09-13	15:48:33	0.577926	2.57073	2.12048	1800.89	FALSE	82
2022-09-13	15:48:33	0.479402	2.13248	2.12048	1833.31	FALSE	82
2022-09-13	15:48:33	0.481031	2.13972	2.12048	1803.03	FALSE	82
2022-09-13	15:48:33	0.368461	1.63899	2.12048	1834.95	FALSE	82
2022-09-13	15:48:34	0.472379	2.10124	1.6082	1805.13	FALSE	82
2022-09-13	15:48:34	0.266934	1.18738	1.6082	1836.14	FALSE	82
2022-09-13	15:48:34	0.36327	1.6159	1.6082	1806.75	FALSE	82
2022-09-13	15:48:34	0.343575	1.52829	1.6082	1837.67	FALSE	82
2022-09-13	15:48:35	0.544949	2.42404	3.02008	1809.17	FALSE	82
2022-09-13	15:48:35	0.819809	3.64667	3.02008	1841.31	FALSE	82
2022-09-13	15:48:35	0.672074	2.98952	3.02008	1812.16	FALSE	82
2022-09-13	15:48:36	1.12078	4.98545	4.29269	1846.3	FALSE	82
2022-09-13	15:48:36	1.35681	6.03536	4.29269	1818.2	FALSE	82
2022-09-13	15:48:36	0.887443	3.94752	4.29269	1850.25	FALSE	82
2022-09-13	15:48:36	0.495127	2.20242	4.29269	1820.4	FALSE	82
2022-09-13	15:48:37	0.460064	2.04646	1.63587	1852.29	FALSE	82
2022-09-13	15:48:37	0.332786	1.4803	1.63587	1821.88	FALSE	82
2022-09-13	15:48:37	0.267799	1.19122	1.63587	1853.48	FALSE	82
2022-09-13	15:48:37	0.410394	1.82551	1.63587	1823.71	FALSE	82
2022-09-13	15:48:38	0.186985	0.831747	1.33288	1854.32	FALSE	82
2022-09-13	15:48:38	0.404288	1.79835	1.33288	1825.5	FALSE	82
2022-09-13	15:48:38	0.19355	0.860949	1.33288	1855.18	FALSE	82
2022-09-13	15:48:38	0.413753	1.84046	1.33288	1827.34	FALSE	82
2022-09-13	15:48:39	0.231107	1.02801	1.16693	1856.21	FALSE	82
2022-09-13	15:48:39	0.329071	1.46377	1.16693	1828.81	FALSE	82
2022-09-13	15:48:39	0.226832	1.00899	1.16693	1857.21	FALSE	82
2022-09-13	15:48:40	0.40958	1.82189	1.25461	1830.63	FALSE	82
2022-09-13	15:48:40	0.145662	0.647934	1.25461	1857.86	FALSE	82
2022-09-13	15:48:40	0.35416	1.57537	1.25461	1832.21	FALSE	82
2022-09-13	15:48:40	0.218791	0.973226	1.25461	1858.84	FALSE	82
2022-09-13	15:48:41	0.409326	1.82076	1.30158	1834.03	FALSE	82
2022-09-13	15:48:41	0.189682	0.843743	1.30158	1859.68	FALSE	82
2022-09-13	15:48:41	0.332125	1.47736	1.30158	1835.5	FALSE	82
2022-09-13	15:48:41	0.2393	1.06445	1.30158	1860.74	FALSE	82
2022-09-13	15:48:42	0.363219	1.61567	1.2601	1837.12	FALSE	82
2022-09-13	15:48:42	0.249529	1.10995	1.2601	1861.85	FALSE	82
2022-09-13	15:48:42	0.211056	0.938819	1.2601	1838.06	FALSE	82
2022-09-13	15:48:42	0.309326	1.37594	1.2601	1863.23	FALSE	82
2022-09-13	15:48:43	0.206985	0.920711	1.03699	1838.98	FALSE	82
2022-09-13	15:48:43	0.310496	1.38115	1.03699	1864.61	FALSE	82
2022-09-13	15:48:43	0.181896	0.80911	1.03699	1839.79	FALSE	82
2022-09-13	15:48:44	0.34668	1.5421	0.772663	1866.15	FALSE	82
2022-09-13	15:48:44	0.170445	0.758173	0.772663	1840.55	FALSE	82
2022-09-13	15:48:44	0.233855	1.04023	0.772663	1867.19	FALSE	82
2022-09-13	15:48:44	-0.0561702	-0.249856	0.772663	1840.55	FALSE	82
2022-09-13	15:48:45	0.0004201	0.00186869	-0.466268	1867.2	FALSE	82
2022-09-13	15:48:45	-0.089758	-0.399262	-0.466268	1840.55	FALSE	82
2022-09-13	15:48:45	-0.22014	-0.979227	-0.466268	1867.2	FALSE	82
2022-09-13	15:48:45	-0.109809	-0.488452	-0.466268	1840.55	FALSE	82
2022-09-13	15:48:46	0.20271	0.901695	4.54616	1868.1	FALSE	82
2022-09-13	15:48:46	1.10235	4.90347	4.54616	1845.45	FALSE	82
2022-09-13	15:48:46	1.62322	7.22041	4.54616	1875.32	FALSE	82
2022-09-13	15:48:46	1.15981	5.15907	4.54616	1850.61	FALSE	82
2022-09-13	15:48:47	0.5764	2.56394	1.24782	1877.88	FALSE	82
2022-09-13	15:48:47	0.188308	0.837632	1.24782	1851.45	FALSE	82
2022-09-13	15:48:47	0.0768577	0.341878	1.24782	1878.22	FALSE	82
2022-09-13	15:48:48	0.0747712	0.332597	-0.586357	1851.78	FALSE	82
2022-09-13	15:48:48	-0.0520481	-0.23152	-0.586357	1878.22	FALSE	82
2022-09-13	15:48:48	-0.31159	-1.38601	-0.586357	1851.78	FALSE	82
2022-09-13	15:48:48	-0.238409	-1.06049	-0.586357	1878.22	FALSE	82
2022-09-13	15:48:49	-0.197544	-0.878715	0.0885127	1851.78	FALSE	82
2022-09-13	15:48:49	0.0414379	0.184324	0.0885127	1878.41	FALSE	82
2022-09-13	15:48:49	0.0156363	0.0695534	0.0885127	1851.85	FALSE	82
2022-09-13	15:48:49	0.220064	0.978889	0.0885127	1879.39	FALSE	82
2022-09-13	15:48:50	0.280929	1.24963	1.10667	1853.1	FALSE	82
2022-09-13	15:48:50	0.302303	1.3447	1.10667	1880.73	FALSE	82
2022-09-13	15:48:50	0.187799	0.835368	1.10667	1853.93	FALSE	82
2022-09-13	15:48:50	0.224135	0.996997	1.10667	1881.73	FALSE	82
2022-09-13	15:48:51	0.28841	1.28291	1.30879	1855.22	FALSE	82
2022-09-13	15:48:51	0.257875	1.14708	1.30879	1882.88	FALSE	82
2022-09-13	15:48:51	0.3364	1.49637	1.30879	1856.71	FALSE	82
2022-09-13	15:48:52	0.281438	1.25189	1.43016	1884.13	FALSE	82
2022-09-13	15:48:52	0.278333	1.23808	1.43016	1857.95	FALSE	82
2022-09-13	15:48:52	0.362659	1.61318	1.43016	1885.74	FALSE	82
2022-09-13	15:48:52	0.363626	1.61748	1.43016	1859.57	FALSE	82
2022-09-13	15:48:53	0.277621	1.23491	1.40792	1886.98	FALSE	82
2022-09-13	15:48:53	0.313499	1.39451	1.40792	1860.96	FALSE	82
2022-09-13	15:48:53	0.331412	1.47419	1.40792	1888.45	FALSE	82
2022-09-13	15:48:53	0.343524	1.52806	1.40792	1862.49	FALSE	82
2022-09-13	15:48:54	0.347901	1.54753	1.5893	1890	FALSE	82
2022-09-13	15:48:54	0.35986	1.60073	1.5893	1864.09	FALSE	82
2022-09-13	15:48:54	0.359249	1.59801	1.5893	1891.59	FALSE	82
2022-09-13	15:48:54	0.36215	1.61092	1.5893	1865.7	FALSE	82
2022-09-13	15:48:55	0.359555	1.59937	1.51131	1893.19	FALSE	82
2022-09-13	15:48:55	0.333346	1.48279	1.51131	1867.19	FALSE	82
2022-09-13	15:48:55	0.326374	1.45178	1.51131	1894.65	FALSE	82
2022-09-13	15:48:56	0.304593	1.35489	1.39298	1868.54	FALSE	82
2022-09-13	15:48:56	0.310496	1.38115	1.39298	1896.03	FALSE	82
2022-09-13	15:48:56	0.320624	1.4262	1.39298	1869.97	FALSE	82
2022-09-13	15:48:56	0.316908	1.40967	1.39298	1897.44	FALSE	82
2022-09-13	15:48:57	0.359097	1.59734	1.47255	1871.56	FALSE	82
2022-09-13	15:48:57	0.304644	1.35512	1.47255	1898.79	FALSE	82
2022-09-13	15:48:57	0.336552	1.49705	1.47255	1873.06	FALSE	82
2022-09-13	15:48:57	0.323881	1.44069	1.47255	1900.23	FALSE	82
2022-09-13	15:48:58	0.305305	1.35806	1.36032	1874.42	FALSE	82
2022-09-13	15:48:58	0.31584	1.40492	1.36032	1901.64	FALSE	82
2022-09-13	15:48:58	0.305458	1.35874	1.36032	1875.78	FALSE	82
2022-09-13	15:48:58	0.296654	1.31958	1.36032	1902.96	FALSE	82
2022-09-13	15:48:59	0.293499	1.30554	1.302	1877.08	FALSE	82
2022-09-13	15:48:59	0.291311	1.29581	1.302	1904.25	FALSE	82
2022-09-13	15:48:59	0.293295	1.30463	1.302	1878.39	FALSE	82
2022-09-13	15:49:00	0.294517	1.31007	1.30067	1905.56	FALSE	82
2022-09-13	15:49:00	0.29472	1.31097	1.30067	1879.7	FALSE	82
2022-09-13	15:49:00	0.295738	1.3155	1.30067	1906.88	FALSE	82
2022-09-13	15:49:00	0.284644	1.26615	1.30067	1880.97	FALSE	82
2022-09-13	15:49:01	0.292837	1.3026	1.2962	1908.18	FALSE	82
2022-09-13	15:49:01	0.286628	1.27498	1.2962	1882.24	FALSE	82
2022-09-13	15:49:01	0.291361	1.29603	1.2962	1909.48	FALSE	82
2022-09-13	15:49:01	0.294771	1.3112	1.2962	1883.55	FALSE	82
2022-09-13	15:49:02	0.298741	1.32886	1.33378	1910.81	FALSE	82
2022-09-13	15:49:02	0.293295	1.30463	1.33378	1884.86	FALSE	82
2022-09-13	15:49:02	0.301234	1.33995	1.33378	1912.15	FALSE	82
2022-09-13	15:49:02	0.30612	1.36168	1.33378	1886.22	FALSE	82
2022-09-13	15:49:03	0.314008	1.39677	1.35142	1913.54	FALSE	82
2022-09-13	15:49:03	0.299962	1.33429	1.35142	1887.55	FALSE	82
2022-09-13	15:49:03	0.297468	1.3232	1.35142	1914.87	FALSE	82
2022-09-13	15:49:04	0.303321	1.34923	1.35563	1888.9	FALSE	82
2022-09-13	15:49:04	0.300471	1.33656	1.35563	1916.2	FALSE	82
2022-09-13	15:49:04	0.303473	1.34991	1.35563	1890.25	FALSE	82
2022-09-13	15:49:04	0.311769	1.38681	1.35563	1917.59	FALSE	82
2022-09-13	15:49:05	0.325611	1.44838	1.30826	1891.7	FALSE	82
2022-09-13	15:49:05	0.326272	1.45132	1.30826	1919.04	FALSE	82
2022-09-13	15:49:05	0.253041	1.12558	1.30826	1892.83	FALSE	82
2022-09-13	15:49:05	0.271514	1.20775	1.30826	1920.25	FALSE	82
2022-09-13	15:49:06	0.333295	1.48256	1.74747	1894.31	FALSE	82
2022-09-13	15:49:06	0.443524	1.97288	1.74747	1922.22	FALSE	82
2022-09-13	15:49:06	0.428715	1.90701	1.74747	1896.21	FALSE	82
2022-09-13	15:49:06	0.365865	1.62744	1.74747	1923.85	FALSE	82
2022-09-13	15:49:07	0.39126	1.7404	1.78583	1897.96	FALSE	82
2022-09-13	15:49:07	0.405204	1.80243	1.78583	1925.65	FALSE	82
2022-09-13	15:49:07	0.407952	1.81465	1.78583	1899.77	FALSE	82
2022-09-13	15:49:08	0.406527	1.80831	1.88715	1927.46	FALSE	82
2022-09-13	15:49:08	0.43187	1.92104	1.88715	1901.69	FALSE	82
2022-09-13	15:49:08	0.442863	1.96994	1.88715	1929.43	FALSE	82
2022-09-13	15:49:08	0.415738	1.84929	1.88715	1903.54	FALSE	82
2022-09-13	15:49:09	0.416756	1.85381	1.89926	1931.28	FALSE	82
2022-09-13	15:49:09	0.425102	1.89094	1.89926	1905.43	FALSE	82
2022-09-13	15:49:09	0.428613	1.90656	1.89926	1933.19	FALSE	82
2022-09-13	15:49:09	0.437417	1.94572	1.89926	1907.38	FALSE	82
2022-09-13	15:49:10	0.441896	1.96564	1.96553	1935.16	FALSE	82
2022-09-13	15:49:10	0.439046	1.95296	1.96553	1909.33	FALSE	82
2022-09-13	15:49:10	0.443931	1.97469	1.96553	1937.13	FALSE	82
2022-09-13	15:49:10	0.442608	1.96881	1.96553	1911.3	FALSE	82
2022-09-13	15:49:11	0.449987	2.00163	2.02467	1939.13	FALSE	82
2022-09-13	15:49:11	0.44897	1.99711	2.02467	1913.3	FALSE	82
2022-09-13	15:49:11	0.4593	2.04306	2.02467	1941.17	FALSE	82
2022-09-13	15:49:11	0.462405	2.05687	2.02467	1915.35	FALSE	82
2022-09-13	15:49:12	0.464746	2.06728	2.12003	1943.24	FALSE	82
2022-09-13	15:49:12	0.477824	2.12546	2.12003	1917.48	FALSE	82
2022-09-13	15:49:12	0.487239	2.16734	2.12003	1945.41	FALSE	82
2022-09-13	15:49:13	0.494313	2.1988	2.24527	1919.68	FALSE	82
2022-09-13	15:49:13	0.504949	2.24611	2.24527	1947.66	FALSE	82
2022-09-13	15:49:13	0.491921	2.18816	2.24527	1921.87	FALSE	82
2022-09-13	15:49:13	0.52785	2.34798	2.24527	1950	FALSE	82
2022-09-13	15:49:14	0.504593	2.24453	2.24068	1924.11	FALSE	82
2022-09-13	15:49:14	0.549936	2.44623	2.24068	1952.45	FALSE	82
2022-09-13	15:49:14	0.512939	2.28166	2.24068	1926.39	FALSE	82
2022-09-13	15:49:14	0.447443	1.99032	2.24068	1954.44	FALSE	82
2022-09-13	15:49:15	0.550903	2.45053	2.45766	1928.84	FALSE	82
2022-09-13	15:49:15	0.519809	2.31221	2.45766	1956.75	FALSE	82
2022-09-13	15:49:15	0.530751	2.36089	2.45766	1931.2	FALSE	82
2022-09-13	15:49:15	0.608562	2.70701	2.45766	1959.46	FALSE	82
2022-09-13	15:49:16	0.582964	2.59314	2.4214	1933.8	FALSE	82
2022-09-13	15:49:16	0.546985	2.4331	2.4214	1961.89	FALSE	82
2022-09-13	15:49:16	0.503117	2.23797	2.4214	1936.03	FALSE	82
2022-09-13	15:49:17	0.465763	2.07181	1.97554	1963.96	FALSE	82
2022-09-13	15:49:17	0.440929	1.96134	1.97554	1938	FALSE	82
2022-09-13	15:49:17	0.429682	1.91131	1.97554	1965.88	FALSE	82
2022-09-13	15:49:17	0.440115	1.95772	1.97554	1939.95	FALSE	82
2022-09-13	15:49:18	0.429478	1.9104	1.89971	1967.79	FALSE	82
2022-09-13	15:49:18	0.423066	1.88188	1.89971	1941.83	FALSE	82
2022-09-13	15:49:18	0.432227	1.92263	1.89971	1969.71	FALSE	82
2022-09-13	15:49:18	0.423524	1.88392	1.89971	1943.72	FALSE	82
2022-09-13	15:49:19	0.43472	1.93372	1.91408	1971.64	FALSE	82
2022-09-13	15:49:19	0.444593	1.97764	1.91408	1945.7	FALSE	82
2022-09-13	15:49:19	0.425713	1.89366	1.91408	1973.54	FALSE	82
2022-09-13	15:49:19	0.416196	1.85132	1.91408	1947.55	FALSE	82
2022-09-13	15:49:20	0.413855	1.84091	1.79111	1975.38	FALSE	82
2022-09-13	15:49:20	0.398537	1.77277	1.79111	1949.32	FALSE	82
2022-09-13	15:49:20	0.395585	1.75964	1.79111	1977.14	FALSE	82
2022-09-13	15:49:21	0.395789	1.76055	1.68845	1951.08	FALSE	82
2022-09-13	15:49:21	0.38042	1.69218	1.68845	1978.83	FALSE	82
2022-09-13	15:49:21	0.380064	1.6906	1.68845	1952.77	FALSE	82
2022-09-13	15:49:21	0.362048	1.61046	1.68845	1980.44	FALSE	82
2022-09-13	15:49:22	0.370242	1.64691	1.66508	1954.42	FALSE	82
2022-09-13	15:49:22	0.374619	1.66638	1.66508	1982.11	FALSE	82
2022-09-13	15:49:22	0.36729	1.63378	1.66508	1956.05	FALSE	82
2022-09-13	15:49:22	0.385153	1.71324	1.66508	1983.82	FALSE	82
2022-09-13	15:49:23	0.398028	1.77051	1.79462	1957.82	FALSE	82
2022-09-13	15:49:23	0.432125	1.92218	1.79462	1985.74	FALSE	82
2022-09-13	15:49:23	0.402456	1.7902	1.79462	1959.61	FALSE	82
2022-09-13	15:49:23	0.381183	1.69558	1.79462	1987.44	FALSE	82
2022-09-13	15:49:24	0.404084	1.79745	1.73912	1961.41	FALSE	82
2022-09-13	15:49:24	0.422965	1.88143	1.73912	1989.32	FALSE	82
2022-09-13	15:49:24	0.345865	1.53848	1.73912	1962.95	FALSE	82
2022-09-13	15:49:25	0.234568	1.04341	1.56174	1990.36	FALSE	82
2022-09-13	15:49:25	0.422608	1.87984	1.56174	1964.83	FALSE	82
2022-09-13	15:49:25	0.317519	1.41239	1.56174	1991.77	FALSE	82
2022-09-13	15:49:25	0.429682	1.91131	1.56174	1966.74	FALSE	82
2022-09-13	15:49:26	0.284389	1.26502	1.40424	1993.04	FALSE	82
2022-09-13	15:49:26	0.208562	0.927725	1.40424	1967.67	FALSE	82
2022-09-13	15:49:26	0.393346	1.74968	1.40424	1994.79	FALSE	82
2022-09-13	15:49:26	0.37645	1.67452	1.40424	1969.34	FALSE	82
2022-09-13	15:49:27	0.312837	1.39156	2.77095	1996.18	FALSE	82
2022-09-13	15:49:27	0.449886	2.00118	2.77095	1971.34	FALSE	82
2022-09-13	15:49:27	0.68785	3.05969	2.77095	1999.24	FALSE	82
2022-09-13	15:49:27	1.04118	4.63138	2.77095	1975.97	FALSE	82
2022-09-13	15:49:28	0.514618	2.28912	2.90417	2001.53	FALSE	82
2022-09-13	15:49:28	0.980623	4.36201	2.90417	1980.34	FALSE	82
2022-09-13	15:49:28	0.463422	2.06139	2.90417	2003.59	FALSE	82
2022-09-13	15:49:29	0.86841	3.86286	4.00598	1984.2	FALSE	82
2022-09-13	15:49:29	0.509071	2.26445	4.00598	2005.85	FALSE	82
2022-09-13	15:49:29	1.42612	6.34367	4.00598	1990.54	FALSE	82
2022-09-13	15:49:29	0.79874	3.55296	4.00598	2009.41	FALSE	82
2022-09-13	15:49:30	1.7677	7.86308	6.19754	1998.41	FALSE	82
2022-09-13	15:49:30	1.40118	6.23273	6.19754	2015.64	FALSE	82
2022-09-13	15:49:30	1.30113	5.78769	6.19754	2004.19	FALSE	82
2022-09-13	15:49:30	1.10307	4.90668	6.19754	2020.55	FALSE	82
2022-09-13	15:49:31	0.476959	2.12161	2.70327	2006.32	FALSE	82
2022-09-13	15:49:31	0.853957	3.79857	2.70327	2024.35	FALSE	82
2022-09-13	15:49:31	0.404288	1.79835	2.70327	2008.11	FALSE	82
2022-09-13	15:49:31	0.695687	3.09455	2.70327	2027.44	FALSE	82
2022-09-13	15:49:32	0.415433	1.84793	2.24861	2009.96	FALSE	82
2022-09-13	15:49:32	0.631208	2.80774	2.24861	2030.25	FALSE	82
2022-09-13	15:49:32	0.469886	2.09015	2.24861	2012.05	FALSE	82
2022-09-13	15:49:33	0.437316	1.94527	2.04051	2032.19	FALSE	82
2022-09-13	15:49:33	0.467799	2.08086	2.04051	2014.13	FALSE	82
2022-09-13	15:49:33	0.399199	1.77572	2.04051	2033.97	FALSE	82
2022-09-13	15:49:33	0.530598	2.36021	2.04051	2016.49	FALSE	82
2022-09-13	15:49:34	0.304033	1.3524	2.00458	2035.32	FALSE	82
2022-09-13	15:49:34	0.546527	2.43106	2.00458	2018.92	FALSE	82
2022-09-13	15:49:34	0.339809	1.51154	2.00458	2036.83	FALSE	82
2022-09-13	15:49:34	0.612226	2.7233	2.00458	2021.65	FALSE	82
2022-09-13	15:49:35	0.292379	1.30056	1.85721	2038.13	FALSE	82
2022-09-13	15:49:35	0.551718	2.45415	1.85721	2024.1	FALSE	82
2022-09-13	15:49:35	0.301336	1.3404	1.85721	2039.47	FALSE	82
2022-09-13	15:49:35	0.524644	2.33372	1.85721	2026.44	FALSE	82
2022-09-13	15:49:36	0.375076	1.66841	2.00012	2041.14	FALSE	82
2022-09-13	15:49:36	0.564237	2.50984	2.00012	2028.95	FALSE	82
2022-09-13	15:49:36	0.409631	1.82212	2.00012	2042.96	FALSE	82
2022-09-13	15:49:37	0.467188	2.07815	1.85942	2031.02	FALSE	82
2022-09-13	15:49:37	0.323321	1.4382	1.85942	2044.4	FALSE	82
2022-09-13	15:49:37	0.387392	1.7232	1.85942	2032.75	FALSE	82
2022-09-13	15:49:37	0.49416	2.19812	1.85942	2046.6	FALSE	82
2022-09-13	15:49:38	0.496451	2.20831	2.64702	2034.95	FALSE	82
2022-09-13	15:49:38	0.581489	2.58658	2.64702	2049.19	FALSE	82
2022-09-13	15:49:38	0.491311	2.18545	2.64702	2037.14	FALSE	82
2022-09-13	15:49:38	0.811056	3.60774	2.64702	2052.79	FALSE	82
2022-09-13	15:49:39	0.428868	1.90769	2.38397	2039.05	FALSE	82
2022-09-13	15:49:39	0.716603	3.18759	2.38397	2055.98	FALSE	82
2022-09-13	15:49:39	0.297621	1.32388	2.38397	2040.37	FALSE	82
2022-09-13	15:49:39	0.700674	3.11674	2.38397	2059.1	FALSE	82
2022-09-13	15:49:40	0.458384	2.03898	2.5447	2042.41	FALSE	82
2022-09-13	15:49:40	0.764796	3.40197	2.5447	2062.5	FALSE	82
2022-09-13	15:49:40	0.493041	2.19314	2.5447	2044.6	FALSE	82
2022-09-13	15:49:41	0.872023	3.87893	3.72732	2066.38	FALSE	82
2022-09-13	15:49:41	0.706221	3.14141	3.72732	2047.75	FALSE	82
2022-09-13	15:49:41	1.04765	4.66016	3.72732	2071.04	FALSE	82
2022-09-13	15:49:41	0.725865	3.22879	3.72732	2050.97	FALSE	82
2022-09-13	15:49:42	0.712277	3.16835	3.0108	2074.21	FALSE	82
2022-09-13	15:49:42	0.762099	3.38997	3.0108	2054.36	FALSE	82
2022-09-13	15:49:42	0.359402	1.59869	3.0108	2075.81	FALSE	82
2022-09-13	15:49:42	0.873652	3.88618	3.0108	2058.25	FALSE	82
2022-09-13	15:49:43	0.411107	1.82869	2.5872	2077.64	FALSE	82
2022-09-13	15:49:43	0.866425	3.85403	2.5872	2062.1	FALSE	82
2022-09-13	15:49:43	0.414109	1.84204	2.5872	2079.48	FALSE	82
2022-09-13	15:49:43	0.634873	2.82404	2.5872	2064.93	FALSE	82
2022-09-13	15:49:44	0.40327	1.79383	2.00903	2081.27	FALSE	82
2022-09-13	15:49:44	0.486272	2.16304	2.00903	2067.09	FALSE	82
2022-09-13	15:49:44	0.465407	2.07022	2.00903	2083.34	FALSE	82
2022-09-13	15:49:45	0.302557	1.34583	2.10293	2068.44	FALSE	82
2022-09-13	15:49:45	0.392277	1.74493	2.10293	2085.09	FALSE	82
2022-09-13	15:49:45	0.40042	1.78115	2.10293	2070.22	FALSE	82
2022-09-13	15:49:45	0.795789	3.53983	2.10293	2088.63	FALSE	82
2022-09-13	15:49:46	0.523371	2.32806	2.66343	2072.55	FALSE	82
2022-09-13	15:49:46	0.709682	3.15681	2.66343	2091.78	FALSE	82
2022-09-13	15:49:46	0.776603	3.45449	2.66343	2076	FALSE	82
2022-09-13	15:49:46	0.385407	1.71437	2.66343	2093.5	FALSE	82
2022-09-13	15:49:47	0.623371	2.77288	2.26021	2078.77	FALSE	82
2022-09-13	15:49:47	0.412277	1.83389	2.26021	2095.33	FALSE	82
2022-09-13	15:49:47	0.554364	2.46592	2.26021	2081.24	FALSE	82
2022-09-13	15:49:47	0.442456	1.96813	2.26021	2097.3	FALSE	82
2022-09-13	15:49:48	0.728613	3.24102	2.65879	2084.48	FALSE	82
2022-09-13	15:49:48	0.488715	2.1739	2.65879	2099.47	FALSE	82
2022-09-13	15:49:48	0.57584	2.56145	2.65879	2087.04	FALSE	82
2022-09-13	15:49:49	0.58729	2.61238	2.69608	2102.09	FALSE	82
2022-09-13	15:49:49	0.723473	3.21815	2.69608	2090.26	FALSE	82
2022-09-13	15:49:49	0.432328	1.92308	2.69608	2104.01	FALSE	82
2022-09-13	15:49:49	0.681336	3.03072	2.69608	2093.29	FALSE	82
2022-09-13	15:49:50	0.381082	1.69513	1.98964	2105.7	FALSE	82
2022-09-13	15:49:50	0.538282	2.39439	1.98964	2095.69	FALSE	82
2022-09-13	15:49:50	0.409631	1.82212	1.98964	2107.53	FALSE	82
2022-09-13	15:49:50	0.460166	2.04691	1.98964	2097.73	FALSE	82
2022-09-13	15:49:51	0.368664	1.63989	1.68075	2109.17	FALSE	82
2022-09-13	15:49:51	0.370191	1.64668	1.68075	2099.38	FALSE	82
2022-09-13	15:49:51	0.373397	1.66094	1.68075	2110.83	FALSE	82
2022-09-13	15:49:51	0.399148	1.77549	1.68075	2101.15	FALSE	82
2022-09-13	15:49:52	0.364949	1.62337	1.65679	2112.45	FALSE	82
2022-09-13	15:49:52	0.376959	1.67679	1.65679	2102.83	FALSE	82
2022-09-13	15:49:52	0.375484	1.67023	1.65679	2114.12	FALSE	82
2022-09-13	15:49:53	0.489173	2.17594	1.76621	2105.01	FALSE	82
2022-09-13	15:49:53	0.326679	1.45313	1.76621	2115.57	FALSE	82
2022-09-13	15:49:53	0.345153	1.53531	1.76621	2106.54	FALSE	82
2022-09-13	15:49:53	0.427239	1.90044	1.76621	2117.47	FALSE	82
2022-09-13	15:49:54	0.385407	1.71437	1.60469	2108.26	FALSE	82
2022-09-13	15:49:54	0.364797	1.62269	1.60469	2119.1	FALSE	82
2022-09-13	15:49:54	0.418283	1.86061	1.60469	2110.12	FALSE	82
2022-09-13	15:49:54	0.274517	1.22111	1.60469	2120.32	FALSE	82
2022-09-13	15:49:55	0.541947	2.41069	1.9245	2112.53	FALSE	82
2022-09-13	15:49:55	0.308613	1.37277	1.9245	2121.69	FALSE	82
2022-09-13	15:49:55	0.578944	2.57526	1.9245	2115.1	FALSE	82
2022-09-13	15:49:55	0.301082	1.33927	1.9245	2123.03	FALSE	82
2022-09-13	15:49:56	0.547341	2.43468	2.09912	2117.54	FALSE	82
2022-09-13	15:49:56	0.272379	1.2116	2.09912	2124.24	FALSE	82
2022-09-13	15:49:56	0.595992	2.65109	2.09912	2120.19	FALSE	82
2022-09-13	15:49:57	0.611209	2.71878	6.17616	2126.96	FALSE	82
2022-09-13	15:49:57	1.36378	6.06637	6.17616	2126.26	FALSE	82
2022-09-13	15:49:57	1.31681	5.85743	6.17616	2132.82	FALSE	82
2022-09-13	15:49:57	2.26205	10.0621	6.17616	2136.32	FALSE	82
2022-09-13	15:49:58	0.793041	3.5276	4.32708	2136.35	FALSE	82
2022-09-13	15:49:58	1.24001	5.51581	4.32708	2141.83	FALSE	82
2022-09-13	15:49:58	0.701997	3.12262	4.32708	2139.47	FALSE	82
2022-09-13	15:49:58	1.15604	5.1423	4.32708	2146.98	FALSE	82
2022-09-13	15:49:59	0.954313	4.24498	5.52042	2143.71	FALSE	82
2022-09-13	15:49:59	1.17625	5.2322	5.52042	2152.21	FALSE	82
2022-09-13	15:49:59	1.76027	7.83003	5.52042	2151.54	FALSE	82
2022-09-13	15:49:59	1.07335	4.77448	5.52042	2156.98	FALSE	82
2022-09-13	15:50:00	1.03966	4.62462	3.95567	2156.17	FALSE	82
2022-09-13	15:50:00	0.732532	3.25845	3.95567	2160.24	FALSE	82
2022-09-13	15:50:00	1.35777	6.03963	3.95567	2162.21	FALSE	82
2022-09-13	15:50:00	0.427137	1.89999	3.95567	2162.14	FALSE	82
2022-09-13	15:50:01	1.26312	5.61861	3.83321	2167.83	FALSE	82
2022-09-13	15:50:01	0.481132	2.14017	3.83321	2164.28	FALSE	82
2022-09-13	15:50:01	0.84098	3.74085	3.83321	2171.57	FALSE	82
2022-09-13	15:50:02	0.500725	2.22732	2.6941	2166.51	FALSE	82
2022-09-13	15:50:02	0.726527	3.23174	2.6941	2174.8	FALSE	82
2022-09-13	15:50:02	0.47584	2.11663	2.6941	2168.63	FALSE	82
2022-09-13	15:50:02	0.719555	3.20072	2.6941	2178	FALSE	82
2022-09-13	15:50:03	0.799962	3.55839	4.31838	2172.18	FALSE	82
2022-09-13	15:50:03	0.940165	4.18204	4.31838	2182.18	FALSE	82
2022-09-13	15:50:03	0.91925	4.08901	4.31838	2176.27	FALSE	82
2022-09-13	15:50:03	1.22388	5.44406	4.31838	2187.63	FALSE	82
2022-09-13	15:50:04	1.25676	5.59032	5.02862	2181.86	FALSE	82
2022-09-13	15:50:04	0.984898	4.38102	5.02862	2192.01	FALSE	82
2022-09-13	15:50:04	1.03508	4.60424	5.02862	2186.47	FALSE	82
2022-09-13	15:50:04	1.2452	5.5389	5.02862	2197.55	FALSE	82
2022-09-13	15:50:05	0.520776	2.31652	2.89014	2188.78	FALSE	82
2022-09-13	15:50:05	0.796298	3.54209	2.89014	2201.09	FALSE	82
2022-09-13	15:50:05	0.632125	2.81182	2.89014	2191.6	FALSE	82
2022-09-13	15:50:06	0.401743	1.78703	2.04453	2202.87	FALSE	82
2022-09-13	15:50:06	0.487545	2.1687	2.04453	2193.76	FALSE	82
2022-09-13	15:50:06	0.345662	1.53757	2.04453	2204.41	FALSE	82
2022-09-13	15:50:06	0.603575	2.68482	2.04453	2196.45	FALSE	82
2022-09-13	15:50:07	0.419555	1.86626	2.31725	2206.28	FALSE	82
2022-09-13	15:50:07	0.570242	2.53655	2.31725	2198.99	FALSE	82
2022-09-13	15:50:07	0.43472	1.93372	2.31725	2208.21	FALSE	82
2022-09-13	15:50:07	0.659249	2.93247	2.31725	2201.92	FALSE	82
2022-09-13	15:50:08	0.46215	2.05574	2.35574	2210.27	FALSE	82
2022-09-13	15:50:08	0.560878	2.4949	2.35574	2204.41	FALSE	82
2022-09-13	15:50:08	0.399657	1.77775	2.35574	2212.05	FALSE	82
2022-09-13	15:50:08	0.695687	3.09455	2.35574	2207.51	FALSE	82
2022-09-13	15:50:09	0.488308	2.17209	2.05377	2214.22	FALSE	82
2022-09-13	15:50:09	0.569071	2.53134	2.05377	2210.04	FALSE	82
2022-09-13	15:50:09	0.327748	1.45789	2.05377	2215.68	FALSE	82
2022-09-13	15:50:10	0.562303	2.50124	1.80577	2212.54	FALSE	82
2022-09-13	15:50:10	0.266221	1.1842	1.80577	2216.86	FALSE	82
2022-09-13	15:50:10	0.469326	2.08766	1.80577	2214.63	FALSE	82
2022-09-13	15:50:10	0.325967	1.44997	1.80577	2218.31	FALSE	82
2022-09-13	15:50:11	0.538282	2.39439	1.71341	2217.02	FALSE	82
2022-09-13	15:50:11	0.267697	1.19077	1.71341	2219.5	FALSE	82
2022-09-13	15:50:11	0.416043	1.85064	1.71341	2218.87	FALSE	82
2022-09-13	15:50:11	0.318741	1.41782	1.71341	2220.92	FALSE	82
2022-09-13	15:50:12	0.522964	2.32625	1.86134	2221.2	FALSE	82
2022-09-13	15:50:12	0.311209	1.38432	1.86134	2222.3	FALSE	82
2022-09-13	15:50:12	0.431972	1.9215	1.86134	2223.12	FALSE	82
2022-09-13	15:50:12	0.407646	1.81329	1.86134	2224.12	FALSE	82
2022-09-13	15:50:13	0.544389	2.42155	2.65841	2225.54	FALSE	82
2022-09-13	15:50:13	0.687646	3.05879	2.65841	2227.17	FALSE	82
2022-09-13	15:50:13	0.560878	2.4949	2.65841	2228.04	FALSE	82
2022-09-13	15:50:14	0.471616	2.09784	2.22291	2229.27	FALSE	82
2022-09-13	15:50:14	0.570496	2.53768	2.22291	2230.57	FALSE	82
2022-09-13	15:50:14	0.393397	1.74991	2.22291	2231.02	FALSE	82
2022-09-13	15:50:14	0.563422	2.50621	2.22291	2233.08	FALSE	82
2022-09-13	15:50:15	0.294567	1.31029	1.87226	2232.33	FALSE	82
2022-09-13	15:50:15	0.548155	2.4383	1.87226	2235.52	FALSE	82
2022-09-13	15:50:15	0.314618	1.39948	1.87226	2233.73	FALSE	82
2022-09-13	15:50:15	0.526272	2.34096	1.87226	2237.86	FALSE	82
2022-09-13	15:50:16	0.305916	1.36078	1.90927	2235.09	FALSE	82
2022-09-13	15:50:16	0.581489	2.58658	1.90927	2240.45	FALSE	82
2022-09-13	15:50:16	0.333753	1.4846	1.90927	2236.58	FALSE	82
2022-09-13	15:50:16	0.495738	2.20514	1.90927	2242.65	FALSE	82
2022-09-13	15:50:17	0.354618	1.57741	2.08765	2238.16	FALSE	82
2022-09-13	15:50:17	0.537774	2.39213	2.08765	2245.04	FALSE	82
2022-09-13	15:50:17	0.515585	2.29343	2.08765	2240.45	FALSE	82
2022-09-13	15:50:18	0.649529	2.88923	2.36451	2247.93	FALSE	82
2022-09-13	15:50:18	0.342964	1.52557	2.36451	2241.97	FALSE	82
2022-09-13	15:50:18	0.559707	2.48969	2.36451	2250.42	FALSE	82
2022-09-13	15:50:18	0.574059	2.55353	2.36451	2244.53	FALSE	82
2022-09-13	15:50:19	0.637774	2.83695	2.41765	2253.26	FALSE	82
2022-09-13	15:50:19	0.387341	1.72297	2.41765	2246.25	FALSE	82
2022-09-13	15:50:19	0.619046	2.75364	2.41765	2256.01	FALSE	82
2022-09-13	15:50:19	0.529886	2.35704	2.41765	2248.61	FALSE	82
2022-09-13	15:50:20	0.752634	3.34787	2.74668	2259.36	FALSE	82
2022-09-13	15:50:20	0.391972	1.74357	2.74668	2250.35	FALSE	82
2022-09-13	15:50:20	0.83472	3.713	2.74668	2263.07	FALSE	82
2022-09-13	15:50:20	0.490598	2.18228	2.74668	2252.53	FALSE	82
2022-09-13	15:50:21	0.857774	3.81555	2.90591	2266.89	FALSE	82
2022-09-13	15:50:21	0.343066	1.52603	2.90591	2254.06	FALSE	82
2022-09-13	15:50:21	0.758995	3.37616	2.90591	2270.27	FALSE	82
2022-09-13	15:50:22	0.355636	1.58194	1.94329	2255.64	FALSE	82
2022-09-13	15:50:22	0.569479	2.53316	1.94329	2272.8	FALSE	82
2022-09-13	15:50:22	0.267799	1.19122	1.94329	2256.83	FALSE	82
2022-09-13	15:50:22	0.554567	2.46682	1.94329	2275.27	FALSE	82
2022-09-13	15:50:23	0.248054	1.10339	2.02755	2257.94	FALSE	82
2022-09-13	15:50:23	0.594567	2.64475	2.02755	2277.91	FALSE	82
2022-09-13	15:50:23	0.289987	1.28992	2.02755	2259.23	FALSE	82
2022-09-13	15:50:23	0.690649	3.07214	2.02755	2280.98	FALSE	82
2022-09-13	15:50:24	0.355331	1.58058	-0.198017	2260.81	FALSE	82
2022-09-13	15:50:24	-0.0889437	-0.395639	-0.198017	2280.98	FALSE	82
2022-09-13	15:50:24	-0.229249	-1.01975	-0.198017	2260.81	FALSE	82
2022-09-13	15:50:24	-0.215203	-0.957266	-0.198017	2280.98	FALSE	82
2022-09-13	15:50:25	-0.0735239	-0.327049	-0.00356434	2260.81	FALSE	82
2022-09-13	15:50:25	-0.0109285	-0.0486122	-0.00356434	2280.98	FALSE	82
2022-09-13	15:50:25	0.0820485	0.364968	-0.00356434	2261.17	FALSE	82
2022-09-13	15:50:26	0.18841	0.838085	0.483247	2281.82	FALSE	82
2022-09-13	15:50:26	0.052074	0.231636	0.483247	2261.4	FALSE	82
2022-09-13	15:50:26	0.143524	0.638423	0.483247	2282.46	FALSE	82
2022-09-13	15:50:26	0.0505473	0.224844	0.483247	2261.63	FALSE	82
2022-09-13	15:50:27	0.141743	0.630501	1.19649	2283.09	FALSE	82
2022-09-13	15:50:27	0.0546185	0.242954	1.19649	2261.87	FALSE	82
2022-09-13	15:50:27	0.28215	1.25506	1.19649	2284.34	FALSE	82
2022-09-13	15:50:27	0.597417	2.65743	1.19649	2264.53	FALSE	82
2022-09-13	15:50:28	0.344898	1.53418	1.8138	2285.88	FALSE	82
2022-09-13	15:50:28	0.613295	2.72806	1.8138	2267.26	FALSE	82
2022-09-13	15:50:28	0.368868	1.6408	1.8138	2287.52	FALSE	82
2022-09-13	15:50:28	0.303982	1.35217	1.8138	2268.61	FALSE	82
2022-09-13	15:50:29	0.358486	1.59462	1.39149	2289.11	FALSE	82
2022-09-13	15:50:29	0.308104	1.37051	1.39149	2269.98	FALSE	82
2022-09-13	15:50:29	0.27187	1.20933	1.39149	2290.32	FALSE	82
2022-09-13	15:50:30	0.219657	0.977078	1.1236	2270.96	FALSE	82
2022-09-13	15:50:30	0.31243	1.38975	1.1236	2291.71	FALSE	82
2022-09-13	15:50:30	0.213041	0.947649	1.1236	2271.9	FALSE	82
2022-09-13	15:50:30	0.265255	1.17991	1.1236	2292.89	FALSE	82
2022-09-13	15:50:31	0.156094	0.694337	1.02258	2272.6	FALSE	82
2022-09-13	15:50:31	0.34215	1.52195	1.02258	2294.42	FALSE	82
2022-09-13	15:50:31	0.156756	0.697282	1.02258	2273.3	FALSE	82
2022-09-13	15:50:31	0.264542	1.17674	1.02258	2295.59	FALSE	82
2022-09-13	15:50:32	0.166985	0.742783	1.4048	2274.04	FALSE	82
2022-09-13	15:50:32	0.335585	1.49275	1.4048	2297.08	FALSE	82
2022-09-13	15:50:32	0.330242	1.46898	1.4048	2275.51	FALSE	82
2022-09-13	15:50:32	0.430445	1.91471	1.4048	2299	FALSE	82
2022-09-13	15:50:33	0.997875	4.43875	6.55434	2279.95	FALSE	82
2022-09-13	15:50:33	1.89879	8.4462	6.55434	2307.45	FALSE	82
2022-09-13	15:50:33	1.52378	6.77808	6.55434	2286.72	FALSE	82
2022-09-13	15:50:34	1.11416	4.95601	3.00553	2312.4	FALSE	82
2022-09-13	15:50:34	0.956603	4.25516	3.00553	2290.98	FALSE	82
2022-09-13	15:50:34	0.325458	1.4477	3.00553	2313.85	FALSE	82
2022-09-13	15:50:34	0.306476	1.36327	3.00553	2292.34	FALSE	82
2022-09-13	15:50:35	0.410852	1.82755	3.8018	2315.68	FALSE	82
2022-09-13	15:50:35	0.538232	2.39416	3.8018	2294.74	FALSE	82
2022-09-13	15:50:35	1.07233	4.76994	3.8018	2320.45	FALSE	82
2022-09-13	15:50:35	1.39732	6.21556	3.8018	2300.95	FALSE	82
2022-09-13	15:50:36	0.997417	4.43671	2.42715	2324.88	FALSE	82
2022-09-13	15:50:36	0.436145	1.94006	2.42715	2302.89	FALSE	82
2022-09-13	15:50:36	0.358333	1.59394	2.42715	2326.48	FALSE	82
2022-09-13	15:50:36	0.3907	1.73791	2.42715	2304.63	FALSE	82
2022-09-13	15:50:37	0.273601	1.21703	1.14474	2327.69	FALSE	82
2022-09-13	15:50:37	0.316196	1.4065	1.14474	2306.04	FALSE	82
2022-09-13	15:50:37	0.182252	0.810693	1.14474	2328.51	FALSE	82
2022-09-13	15:50:38	0.356908	1.5876	7.22097	2307.62	FALSE	82
2022-09-13	15:50:38	0.109784	0.488341	7.22097	2328.99	FALSE	82
2022-09-13	15:50:38	2.08861	9.29056	7.22097	2316.92	FALSE	82
2022-09-13	15:50:38	3.93808	17.5174	7.22097	2346.51	1	83
2022-09-13	15:50:39	6.36087	28.2944	21.7896	2345.21	1	84
2022-09-13	15:50:39	4.44653	19.7791	21.7896	2366.29	1	85
2022-09-13	15:50:39	5.52062	24.5568	21.7896	2369.77	1	86
2022-09-13	15:50:39	3.26602	14.5279	21.7896	2380.82	1	87
2022-09-13	15:50:40	3.81904	16.9879	10.3394	2386.75	1	88
2022-09-13	15:50:40	2.09737	9.32952	10.3394	2390.15	FALSE	88
2022-09-13	15:50:40	1.36271	6.06161	10.3394	2392.82	FALSE	88
2022-09-13	15:50:40	2.01849	8.97865	10.3394	2399.13	FALSE	88
2022-09-13	15:50:41	1.36276	6.06183	5.86956	2398.88	FALSE	88
2022-09-13	15:50:41	1.64927	7.33628	5.86956	2406.46	FALSE	88
2022-09-13	15:50:41	0.946578	4.21057	5.86956	2403.09	FALSE	88
2022-09-13	15:50:42	1.22546	5.45109	3.87254	2411.91	FALSE	88
2022-09-13	15:50:42	0.777773	3.45969	3.87254	2406.55	FALSE	88
2022-09-13	15:50:42	0.904949	4.02539	3.87254	2415.94	FALSE	88
2022-09-13	15:50:42	0.57416	2.55398	3.87254	2409.1	FALSE	88
2022-09-13	15:50:43	0.74785	3.32659	2.12959	2419.27	FALSE	88
2022-09-13	15:50:43	0.246527	1.0966	2.12959	2410.2	FALSE	88
2022-09-13	15:50:43	0.474771	2.11188	2.12959	2421.38	FALSE	88
2022-09-13	15:50:43	0.445865	1.9833	2.12959	2412.18	FALSE	88
2022-09-13	15:50:44	0.428461	1.90588	2.02138	2423.28	FALSE	88
2022-09-13	15:50:44	0.385356	1.71414	2.02138	2413.9	FALSE	88
2022-09-13	15:50:44	0.425916	1.89456	2.02138	2425.18	FALSE	88
2022-09-13	15:50:44	0.577977	2.57096	2.02138	2416.47	FALSE	88
2022-09-13	15:50:45	0.607799	2.70361	2.76247	2427.88	FALSE	88
2022-09-13	15:50:45	0.522048	2.32217	2.76247	2418.79	FALSE	88
2022-09-13	15:50:45	0.733244	3.26162	2.76247	2431.14	FALSE	88
2022-09-13	15:50:46	0.609784	2.71244	2.93513	2421.5	FALSE	88
2022-09-13	15:50:46	0.794517	3.53417	2.93513	2434.68	FALSE	88
2022-09-13	15:50:46	0.584186	2.59858	2.93513	2424.1	FALSE	88
2022-09-13	15:50:46	0.650903	2.89535	2.93513	2437.57	FALSE	88
2022-09-13	15:50:47	0.733753	3.26388	2.86739	2427.36	FALSE	88
2022-09-13	15:50:47	0.492176	2.1893	2.86739	2439.76	FALSE	88
2022-09-13	15:50:47	0.563473	2.50644	2.86739	2429.87	FALSE	88
2022-09-13	15:50:47	0.789071	3.50995	2.86739	2443.27	FALSE	88
2022-09-13	15:50:48	0.711565	3.16518	2.93785	2433.04	FALSE	88
2022-09-13	15:50:48	0.69299	3.08256	2.93785	2446.35	FALSE	88
2022-09-13	15:50:48	0.792074	3.5233	2.93785	2436.56	FALSE	88
2022-09-13	15:50:48	0.445204	1.98036	2.93785	2448.33	FALSE	88
2022-09-13	15:50:49	0.69187	3.07758	2.25851	2439.64	FALSE	88
2022-09-13	15:50:49	0.439656	1.95568	2.25851	2450.29	FALSE	88
2022-09-13	15:50:49	0.619097	2.75387	2.25851	2442.39	FALSE	88
2022-09-13	15:50:49	0.280318	1.24691	2.25851	2451.54	FALSE	88
2022-09-13	15:50:50	0.564644	2.51165	1.90746	2444.9	FALSE	88
2022-09-13	15:50:50	0.226272	1.0065	1.90746	2452.54	FALSE	88
2022-09-13	15:50:50	0.495534	2.20423	1.90746	2447.11	FALSE	88
2022-09-13	15:50:51	0.242049	1.07668	1.56377	2453.62	FALSE	88
2022-09-13	15:50:51	0.488817	2.17436	1.56377	2449.28	FALSE	88
2022-09-13	15:50:51	0.265356	1.18036	1.56377	2454.8	FALSE	88
2022-09-13	15:50:51	0.409987	1.8237	1.56377	2451.1	FALSE	88
2022-09-13	15:50:52	0.30271	1.34651	1.86485	2456.15	FALSE	88
2022-09-13	15:50:52	0.520827	2.31674	1.86485	2453.42	FALSE	88
2022-09-13	15:50:52	0.41869	1.86242	1.86485	2458.01	FALSE	88
2022-09-13	15:50:52	0.43472	1.93372	1.86485	2455.35	FALSE	88
2022-09-13	15:50:53	0.354008	1.5747	1.47108	2459.58	FALSE	88
2022-09-13	15:50:53	0.403015	1.79269	1.47108	2457.15	FALSE	88
2022-09-13	15:50:53	0.28215	1.25506	1.47108	2460.84	FALSE	88
2022-09-13	15:50:53	0.283677	1.26185	1.47108	2458.41	FALSE	88
2022-09-13	15:50:54	0.384237	1.70916	1.61001	2462.55	FALSE	88
2022-09-13	15:50:54	0.343219	1.52671	1.61001	2459.94	FALSE	88
2022-09-13	15:50:54	0.358384	1.59416	1.61001	2464.14	FALSE	88
2022-09-13	15:50:55	0.256298	1.14006	1.61963	2461.08	FALSE	88
2022-09-13	15:50:55	0.500725	2.22732	1.61963	2466.37	FALSE	88
2022-09-13	15:50:55	0.299148	1.33067	1.61963	2462.41	FALSE	88
2022-09-13	15:50:55	0.400267	1.78047	1.61963	2468.15	FALSE	88
2022-09-13	15:50:56	0.192735	0.857324	1.14165	2463.26	FALSE	88
2022-09-13	15:50:56	0.351005	1.56134	1.14165	2469.71	FALSE	88
2022-09-13	15:50:56	0.296959	1.32093	1.14165	2464.58	FALSE	88
2022-09-13	15:50:56	0.185916	0.826992	1.14165	2470.54	FALSE	88
2022-09-13	15:50:57	0.255585	1.13689	1.28189	2465.72	FALSE	88
2022-09-13	15:50:57	0.224237	0.997451	1.28189	2471.54	FALSE	88
2022-09-13	15:50:57	0.459097	2.04216	1.28189	2467.76	FALSE	88
2022-09-13	15:50:57	0.213804	0.951043	1.28189	2472.49	FALSE	88
2022-09-13	15:50:58	0.337621	1.50181	1.10135	2469.27	FALSE	88
2022-09-13	15:50:58	0.0819977	0.364742	1.10135	2472.85	FALSE	88
2022-09-13	15:50:58	0.323168	1.43752	1.10135	2470.7	FALSE	88
2022-09-13	15:50:59	0.116451	0.517997	0.630899	2473.37	FALSE	88
2022-09-13	15:50:59	0.383117	1.70418	0.630899	2472.41	FALSE	88
2022-09-13	15:50:59	0.0246949	0.109848	0.630899	2473.48	FALSE	88
2022-09-13	15:50:59	0.0430664	0.191568	0.630899	2472.6	FALSE	88
2022-09-13	15:51:00	0.122812	0.546292	2.48969	2474.03	FALSE	88
2022-09-13	15:51:00	0.487596	2.16892	2.48969	2474.77	FALSE	88
2022-09-13	15:51:00	1.14342	5.08616	2.48969	2479.11	FALSE	88
2022-09-13	15:51:00	0.485	2.15738	2.48969	2476.93	FALSE	88
2022-09-13	15:51:01	0.405764	1.80492	1.63718	2480.92	FALSE	88
2022-09-13	15:51:01	0.45355	2.01748	1.63718	2478.94	FALSE	88
2022-09-13	15:51:01	0.25757	1.14572	1.63718	2482.06	FALSE	88
2022-09-13	15:51:01	0.355331	1.58058	1.63718	2480.52	FALSE	88
2022-09-13	15:51:02	0.214313	0.953307	1.23491	2483.02	FALSE	88
2022-09-13	15:51:02	0.416959	1.85472	1.23491	2482.38	FALSE	88
2022-09-13	15:51:02	0.20159	0.896713	1.23491	2483.91	FALSE	88
2022-09-13	15:51:03	0.276451	1.22971	0.991282	2483.61	FALSE	88
2022-09-13	15:51:03	0.200471	0.891735	0.991282	2484.81	FALSE	88
2022-09-13	15:51:03	0.336807	1.49818	0.991282	2485.11	FALSE	88
2022-09-13	15:51:03	0.0776719	0.3455	0.991282	2485.15	FALSE	88

## Sheet: Sulley_star_202291315462 (3)
Date	Time	Lbs	Newtons	Total force x time	total steps > 13.345		**GoPro Fitting: 1534
2022-09-13	15:46:03	0.320929	1.42756	1.42756	FALSE	0
2022-09-13	15:46:03	0.327036	1.45472	1.45472	FALSE	0
2022-09-13	15:46:03	0.322863	1.43616	2.86372	FALSE	0
2022-09-13	15:46:03	0.306069	1.36146	2.81618	FALSE	0
2022-09-13	15:46:04	0.353499	1.57243	4.43615	FALSE	0
2022-09-13	15:46:04	0.360216	1.60231	4.41849	FALSE	0
2022-09-13	15:46:04	0.39187	1.74312	6.17927	FALSE	0
2022-09-13	15:46:04	0.387901	1.72546	6.14395	FALSE	0
2022-09-13	15:46:05	0.387036	1.72161	7.90088	FALSE	0
2022-09-13	15:46:05	0.390038	1.73497	7.87892	FALSE	0
2022-09-13	15:46:05	0.376705	1.67566	9.57654	FALSE	0
2022-09-13	15:46:05	0.375331	1.66955	9.54847	FALSE	0
2022-09-13	15:46:06	0.365305	1.62495	11.2015	FALSE	0
2022-09-13	15:46:06	0.370496	1.64804	11.1965	FALSE	0
2022-09-13	15:46:06	0.375942	1.67227	12.8738	FALSE	0
2022-09-13	15:46:06	0.37584	1.67181	12.8683	FALSE	0
2022-09-13	15:46:07	0.369275	1.64261	14.5164	FALSE	0
2022-09-13	15:46:07	0.389987	1.73474	14.6031	FALSE	0
2022-09-13	15:46:07	0.383117	1.70418	16.2205	FALSE	0
2022-09-13	15:46:08	0.388003	1.72591	16.329	FALSE	0
2022-09-13	15:46:08	0.385967	1.71686	17.9374	FALSE	0
2022-09-13	15:46:08	0.385204	1.71346	18.0424	FALSE	0
2022-09-13	15:46:08	0.385814	1.71618	19.6536	FALSE	0
2022-09-13	15:46:09	0.380827	1.69399	19.7364	FALSE	0
2022-09-13	15:46:09	0.392634	1.74651	21.4001	FALSE	0
2022-09-13	15:46:09	0.41584	1.84974	21.5862	FALSE	0
2022-09-13	15:46:09	0.372125	1.65529	23.0554	FALSE	0
2022-09-13	15:46:10	0.38215	1.69988	23.2861	FALSE	0
2022-09-13	15:46:10	0.327188	1.4554	24.5108	FALSE	0
2022-09-13	15:46:10	0.437316	1.94527	25.2313	FALSE	0
2022-09-13	15:46:10	0.427392	1.90113	26.4119	FALSE	0
2022-09-13	15:46:11	0.404491	1.79926	27.0306	FALSE	0
2022-09-13	15:46:11	0.512023	2.27758	28.6895	FALSE	0
2022-09-13	15:46:11	0.396094	1.76191	28.7925	FALSE	0
2022-09-13	15:46:12	0.41869	1.86242	30.5519	FALSE	0
2022-09-13	15:46:12	0.434059	1.93078	30.7233	FALSE	0
2022-09-13	15:46:12	0.383677	1.70667	32.2586	FALSE	0
2022-09-13	15:46:12	0.314364	1.39835	32.1216	FALSE	0
2022-09-13	15:46:13	0.387188	1.72229	33.9809	FALSE	0
2022-09-13	15:46:13	0.338181	1.5043	33.6259	FALSE	0
2022-09-13	15:46:13	0.314313	1.39813	35.379	FALSE	0
2022-09-13	15:46:13	0.281082	1.25031	34.8762	FALSE	0
2022-09-13	15:46:14	0.334109	1.48618	36.8652	FALSE	0
2022-09-13	15:46:14	0.251463	1.11856	35.9948	FALSE	0
2022-09-13	15:46:14	0.0584353	0.259932	37.1251	FALSE	0
2022-09-13	15:46:14	0.138028	0.613976	36.6088	FALSE	0
2022-09-13	15:46:15	0.200624	0.892416	38.0175	FALSE	0
2022-09-13	15:46:15	0.295636	1.31505	37.9238	FALSE	0
2022-09-13	15:46:15	0.710598	3.16088	41.1784	FALSE	0
2022-09-13	15:46:16	3.31258	14.735	52.6588	1	1
2022-09-13	15:46:16	4.2336	18.8319	60.0103	1	2
2022-09-13	15:46:16	1.44159	6.41248	59.0713	FALSE	2
2022-09-13	15:46:16	0.477621	2.12455	62.1349	FALSE	2
2022-09-13	15:46:17	0.334822	1.48936	60.5607	FALSE	2
2022-09-13	15:46:17	0.325712	1.44883	63.5837	FALSE	2
2022-09-13	15:46:17	-0.000953954	-0.00424338	60.5607	FALSE	2
2022-09-13	15:46:17	0.0448984	0.199717	63.7834	FALSE	2
2022-09-13	15:46:18	0.0375193	0.166893	60.7276	FALSE	2
2022-09-13	15:46:18	0.157977	0.702713	64.4861	FALSE	2
2022-09-13	15:46:18	3.26057	14.5037	75.2312	1	3
2022-09-13	15:46:18	4.67182	20.7812	85.2673	1	4
2022-09-13	15:46:19	2.1591	9.60411	84.8353	FALSE	4
2022-09-13	15:46:19	2.34393	10.4263	95.6936	FALSE	4
2022-09-13	15:46:19	0.81645	3.63173	88.4671	FALSE	4
2022-09-13	15:46:20	0.258842	1.15138	96.845	FALSE	4
2022-09-13	15:46:20	0.948919	4.22098	92.688	FALSE	4
2022-09-13	15:46:20	0.622863	2.77062	99.6156	FALSE	4
2022-09-13	15:46:20	0.416094	1.85087	94.5389	FALSE	4
2022-09-13	15:46:21	0.29126	1.29558	100.911	FALSE	4
2022-09-13	15:46:21	0.720369	3.20435	97.7433	FALSE	4
2022-09-13	15:46:21	1.08047	4.80615	105.717	FALSE	4
2022-09-13	15:46:21	2.34607	10.4358	108.179	FALSE	4
2022-09-13	15:46:22	4.47935	19.925	125.642	1	5
2022-09-13	15:46:22	3.41716	15.2002	123.379	1	6
2022-09-13	15:46:22	3.90363	17.3641	143.006	1	7
2022-09-13	15:46:22	1.63782	7.28535	130.665	FALSE	7
2022-09-13	15:46:23	1.9221	8.54989	151.556	FALSE	7
2022-09-13	15:46:23	0.916349	4.0761	134.741	FALSE	7
2022-09-13	15:46:23	0.686934	3.05562	154.612	FALSE	7
2022-09-13	15:46:24	0.345458	1.53667	136.277	FALSE	7
2022-09-13	15:46:24	-0.0131677	-0.0585726	154.612	FALSE	7
2022-09-13	15:46:24	0.0673921	0.299774	136.577	FALSE	7
2022-09-13	15:46:24	-0.00914732	-0.0406891	154.612	FALSE	7
2022-09-13	15:46:25	0.0417941	0.185909	136.763	FALSE	7
2022-09-13	15:46:25	-0.131081	-0.583075	154.612	FALSE	7
2022-09-13	15:46:25	-0.0170863	-0.0760033	136.763	FALSE	7
2022-09-13	15:46:25	-0.0273153	-0.121504	154.612	FALSE	7
2022-09-13	15:46:26	-0.133829	-0.595298	136.763	FALSE	7
2022-09-13	15:46:26	0.0399112	0.177533	154.79	FALSE	7
2022-09-13	15:46:26	0.0338552	0.150595	136.914	FALSE	7
2022-09-13	15:46:26	0.150649	0.670117	155.46	FALSE	7
2022-09-13	15:46:27	0.0545676	0.242728	137.156	FALSE	7
2022-09-13	15:46:27	0.273652	1.21726	156.677	FALSE	7
2022-09-13	15:46:27	0.0963488	0.428579	137.585	FALSE	7
2022-09-13	15:46:27	0.0690206	0.307017	156.984	FALSE	7
2022-09-13	15:46:28	0.104695	0.465704	138.051	FALSE	7
2022-09-13	15:46:28	0.0421503	0.187493	157.171	FALSE	7
2022-09-13	15:46:28	0.300318	1.33587	139.387	FALSE	7
2022-09-13	15:46:29	0.388817	1.72954	158.901	FALSE	7
2022-09-13	15:46:29	0.662964	2.949	142.336	FALSE	7
2022-09-13	15:46:29	0.558079	2.48245	161.383	FALSE	7
2022-09-13	15:46:29	0.920674	4.09534	146.431	FALSE	7
2022-09-13	15:46:30	0.962812	4.28278	165.666	FALSE	7
2022-09-13	15:46:30	0.671921	2.98884	149.42	FALSE	7
2022-09-13	15:46:30	0.34673	1.54232	167.208	FALSE	7
2022-09-13	15:46:30	0.102557	0.456194	149.876	FALSE	7
2022-09-13	15:46:31	0.339453	1.50995	168.718	FALSE	7
2022-09-13	15:46:31	0.167748	0.746177	150.622	FALSE	7
2022-09-13	15:46:31	1.32943	5.91357	174.632	FALSE	7
2022-09-13	15:46:31	0.447647	1.99122	152.613	FALSE	7
2022-09-13	15:46:32	1.08922	4.84507	179.477	FALSE	7
2022-09-13	15:46:32	1.23467	5.49206	158.105	FALSE	7
2022-09-13	15:46:32	1.02378	4.55398	184.031	FALSE	7
2022-09-13	15:46:33	1.39075	6.18633	164.292	FALSE	7
2022-09-13	15:46:33	0.596959	2.65539	186.686	FALSE	7
2022-09-13	15:46:33	0.903423	4.01861	168.31	FALSE	7
2022-09-13	15:46:33	0.429173	1.90905	188.596	FALSE	7
2022-09-13	15:46:34	0.493499	2.19518	170.505	FALSE	7
2022-09-13	15:46:34	0.987697	4.39347	192.989	FALSE	7
2022-09-13	15:46:34	0.155585	0.692073	171.198	FALSE	7
2022-09-13	15:46:34	0.431616	1.91991	194.909	FALSE	7
2022-09-13	15:46:35	0.111056	0.493999	171.692	FALSE	7
2022-09-13	15:46:35	0.330852	1.4717	196.381	FALSE	7
2022-09-13	15:46:35	0.204288	0.908714	172.6	FALSE	7
2022-09-13	15:46:35	0.281132	1.25053	197.631	FALSE	7
2022-09-13	15:46:36	0.424288	1.88732	174.488	FALSE	7
2022-09-13	15:46:36	0.226272	1.0065	198.638	FALSE	7
2022-09-13	15:46:36	0.465713	2.07158	176.559	FALSE	7
2022-09-13	15:46:37	0.222405	0.989302	199.627	FALSE	7
2022-09-13	15:46:37	0.853092	3.79472	180.354	FALSE	7
2022-09-13	15:46:37	0.16215	0.721276	200.348	FALSE	7
2022-09-13	15:46:37	0.517264	2.30089	182.655	FALSE	7
2022-09-13	15:46:38	0.471616	2.09784	202.446	FALSE	7
2022-09-13	15:46:38	0.372379	1.65642	184.311	FALSE	7
2022-09-13	15:46:38	0.646425	2.87543	205.321	FALSE	7
2022-09-13	15:46:38	0.270496	1.20322	185.514	FALSE	7
2022-09-13	15:46:39	0.636451	2.83106	208.153	FALSE	7
2022-09-13	15:46:39	0.577621	2.56937	188.084	FALSE	7
2022-09-13	15:46:39	3.23004	14.3679	222.52	1	8
2022-09-13	15:46:39	5.52749	24.5874	212.671	1	9
2022-09-13	15:46:40	6.22891	27.7074	250.228	1	10
2022-09-13	15:46:40	5.75701	25.6083	238.28	1	11
2022-09-13	15:46:40	3.18444	14.165	264.393	1	12
2022-09-13	15:46:41	6.78505	30.1813	268.461	1	13
2022-09-13	15:46:41	2.97894	13.2509	277.644	FALSE	13
2022-09-13	15:46:41	4.06128	18.0654	286.526	1	14
2022-09-13	15:46:41	5.70474	25.3758	303.02	1	15
2022-09-13	15:46:42	2.18637	9.72541	296.252	FALSE	15
2022-09-13	15:46:42	3.72164	16.5546	319.574	1	16
2022-09-13	15:46:42	1.61599	7.18825	303.44	FALSE	16
2022-09-13	15:46:42	0.646832	2.87724	322.451	FALSE	16
2022-09-13	15:46:43	1.91569	8.52137	311.961	FALSE	16
2022-09-13	15:46:43	0.645509	2.87135	325.323	FALSE	16
2022-09-13	15:46:43	1.45569	6.4752	318.436	FALSE	16
2022-09-13	15:46:43	1.05431	4.68978	330.013	FALSE	16
2022-09-13	15:46:44	0.935687	4.16212	322.599	FALSE	16
2022-09-13	15:46:44	1.37538	6.11797	336.131	FALSE	16
2022-09-13	15:46:44	0.733753	3.26388	325.862	FALSE	16
2022-09-13	15:46:45	1.48673	6.61327	342.744	FALSE	16
2022-09-13	15:46:45	0.563015	2.5044	328.367	FALSE	16
2022-09-13	15:46:45	0.94159	4.18838	346.932	FALSE	16
2022-09-13	15:46:45	1.36017	6.05031	334.417	FALSE	16
2022-09-13	15:46:46	1.12301	4.99537	351.928	FALSE	16
2022-09-13	15:46:46	2.45039	10.8998	345.317	FALSE	16
2022-09-13	15:46:46	0.826221	3.6752	355.603	FALSE	16
2022-09-13	15:46:46	2.16668	9.63783	354.955	FALSE	16
2022-09-13	15:46:47	2.1223	9.44041	365.043	FALSE	16
2022-09-13	15:46:47	5.12464	22.7954	377.75	1	17
2022-09-13	15:46:47	6.37365	28.3513	393.394	1	18
2022-09-13	15:46:47	6.94998	30.9149	408.665	1	19
2022-09-13	15:46:48	10.3605	46.0856	439.48	1	20
2022-09-13	15:46:48	1.75304	7.79787	416.463	FALSE	20
2022-09-13	15:46:48	4.10485	18.2592	457.739	1	21
2022-09-13	15:46:49	2.60698	11.5964	428.059	FALSE	21
2022-09-13	15:46:49	1.06897	4.75499	462.494	FALSE	21
2022-09-13	15:46:49	3.18189	14.1537	442.213	1	22
2022-09-13	15:46:49	0.670038	2.98046	465.475	FALSE	22
2022-09-13	15:46:50	1.49645	6.65651	448.87	FALSE	22
2022-09-13	15:46:50	1.54581	6.87607	472.351	FALSE	22
2022-09-13	15:46:50	0.814313	3.62223	452.492	FALSE	22
2022-09-13	15:46:50	1.40123	6.23295	478.584	FALSE	22
2022-09-13	15:46:51	0.632277	2.81249	455.304	FALSE	22
2022-09-13	15:46:51	1.37879	6.13313	484.717	FALSE	22
2022-09-13	15:46:51	1.242	5.52466	460.829	FALSE	22
2022-09-13	15:46:51	1.16841	5.19732	489.914	FALSE	22
2022-09-13	15:46:52	0.945254	4.20468	465.034	FALSE	22
2022-09-13	15:46:52	0.99014	4.40434	494.318	FALSE	22
2022-09-13	15:46:52	1.3395	5.95836	470.992	FALSE	22
2022-09-13	15:46:53	0.744135	3.31006	497.629	FALSE	22
2022-09-13	15:46:53	1.72139	7.65709	478.649	FALSE	22
2022-09-13	15:46:53	0.661183	2.94107	500.57	FALSE	22
2022-09-13	15:46:53	1.09426	4.86749	483.517	FALSE	22
2022-09-13	15:46:54	0.444033	1.97515	502.545	FALSE	22
2022-09-13	15:46:54	0.420827	1.87192	485.388	FALSE	22
2022-09-13	15:46:54	0.913957	4.06546	506.61	FALSE	22
2022-09-13	15:46:54	0.564542	2.5112	487.9	FALSE	22
2022-09-13	15:46:55	1.14307	5.0846	511.695	FALSE	22
2022-09-13	15:46:55	0.539147	2.39823	490.298	FALSE	22
2022-09-13	15:46:55	1.3567	6.03487	517.73	FALSE	22
2022-09-13	15:46:55	1.09528	4.87202	495.17	FALSE	22
2022-09-13	15:46:56	1.48225	6.59334	524.323	FALSE	22
2022-09-13	15:46:56	1.48744	6.61643	501.786	FALSE	22
2022-09-13	15:46:56	0.735941	3.27361	527.597	FALSE	22
2022-09-13	15:46:57	2.41009	10.7206	512.507	FALSE	22
2022-09-13	15:46:57	1.16642	5.18847	532.785	FALSE	22
2022-09-13	15:46:57	3.1793	14.1422	526.649	1	23
2022-09-13	15:46:57	1.2305	5.47351	538.259	FALSE	23
2022-09-13	15:46:58	1.57319	6.99786	533.647	FALSE	23
2022-09-13	15:46:58	1.98047	8.80953	547.068	FALSE	23
2022-09-13	15:46:58	0.89014	3.95952	537.606	FALSE	23
2022-09-13	15:46:58	1.98515	8.83034	555.899	FALSE	23
2022-09-13	15:46:59	0.398435	1.77232	539.379	FALSE	23
2022-09-13	15:46:59	0.966476	4.29908	560.198	FALSE	23
2022-09-13	15:46:59	0.822303	3.65777	543.037	FALSE	23
2022-09-13	15:46:59	0.64729	2.87928	563.077	FALSE	23
2022-09-13	15:47:00	0.757519	3.3696	546.406	FALSE	23
2022-09-13	15:47:00	0.416756	1.85381	564.931	FALSE	23
2022-09-13	15:47:00	0.75986	3.38001	549.786	FALSE	23
2022-09-13	15:47:01	0.492532	2.19088	567.122	FALSE	23
2022-09-13	15:47:01	0.822557	3.6589	553.445	FALSE	23
2022-09-13	15:47:01	0.426323	1.89637	569.018	FALSE	23
2022-09-13	15:47:01	0.807952	3.59393	557.039	FALSE	23
2022-09-13	15:47:02	0.71243	3.16903	572.187	FALSE	23
2022-09-13	15:47:02	0.900165	4.00411	561.043	FALSE	23
2022-09-13	15:47:02	0.873753	3.88663	576.074	FALSE	23
2022-09-13	15:47:02	0.972532	4.32602	565.369	FALSE	23
2022-09-13	15:47:03	1.58072	7.03136	583.105	FALSE	23
2022-09-13	15:47:03	1.55767	6.92883	572.298	FALSE	23
2022-09-13	15:47:03	2.11045	9.3877	592.493	FALSE	23
2022-09-13	15:47:03	1.78307	7.93145	580.229	FALSE	23
2022-09-13	15:47:04	3.71976	16.5462	609.039	1	24
2022-09-13	15:47:04	2.34704	10.4401	590.669	FALSE	24
2022-09-13	15:47:04	4.15192	18.4686	627.507	1	25
2022-09-13	15:47:05	2.05294	9.13189	599.801	FALSE	25
2022-09-13	15:47:05	2.19915	9.78226	637.29	FALSE	25
2022-09-13	15:47:05	0.209835	0.933388	600.735	FALSE	25
2022-09-13	15:47:05	-6.92619	-30.8091	637.29	FALSE	25
2022-09-13	15:47:06	-0.106399	-0.473284	600.735	FALSE	25
2022-09-13	15:47:06	-0.639172	-2.84316	637.29	FALSE	25
2022-09-13	15:47:06	-0.836475	-3.72081	600.735	FALSE	25
2022-09-13	15:47:06	-0.8436	-3.7525	637.29	FALSE	25
2022-09-13	15:47:07	-0.636729	-2.8323	600.735	FALSE	25
2022-09-13	15:47:07	-0.514847	-2.29014	637.29	FALSE	25
2022-09-13	15:47:07	-0.103295	-0.459477	600.735	FALSE	25
2022-09-13	15:47:07	-0.0901651	-0.401072	637.29	FALSE	25
2022-09-13	15:47:08	-0.158715	-0.705996	600.735	FALSE	25
2022-09-13	15:47:08	-0.0801905	-0.356703	637.29	FALSE	25
2022-09-13	15:47:08	-0.0989692	-0.440235	600.735	FALSE	25
2022-09-13	15:47:08	-0.3579	-1.59201	637.29	FALSE	25
2022-09-13	15:47:09	-0.299529	-1.33236	600.735	FALSE	25
2022-09-13	15:47:09	-0.166196	-0.739273	637.29	FALSE	25
2022-09-13	15:47:09	0.180624	0.803452	601.538	FALSE	25
2022-09-13	15:47:10	0.183575	0.816578	638.106	FALSE	25
2022-09-13	15:47:10	0.0272903	0.121393	601.66	FALSE	25
2022-09-13	15:47:10	0.169326	0.753196	638.86	FALSE	25
2022-09-13	15:47:10	-0.143702	-0.639215	601.66	FALSE	25
2022-09-13	15:47:11	0.111412	0.495583	639.355	FALSE	25
2022-09-13	15:47:11	-0.0988165	-0.439556	601.66	FALSE	25
2022-09-13	15:47:11	0.0546694	0.24318	639.598	FALSE	25
2022-09-13	15:47:11	-0.0817173	-0.363495	601.66	FALSE	25
2022-09-13	15:47:12	0.0166033	0.0738548	639.672	FALSE	25
2022-09-13	15:47:12	0.457316	2.03423	603.694	FALSE	25
2022-09-13	15:47:12	4.68149	20.8242	660.496	1	26
2022-09-13	15:47:12	7.48591	33.2988	636.993	1	27
2022-09-13	15:47:13	4.00841	17.8302	678.327	1	28
2022-09-13	15:47:13	4.71416	20.9695	657.962	1	29
2022-09-13	15:47:13	1.74495	7.76189	686.088	FALSE	29
2022-09-13	15:47:14	1.53793	6.84102	664.803	FALSE	29
2022-09-13	15:47:14	1.79228	7.97242	694.061	FALSE	29
2022-09-13	15:47:14	1.62688	7.23669	672.04	FALSE	29
2022-09-13	15:47:14	2.57192	11.4404	705.501	FALSE	29
2022-09-13	15:47:15	1.49045	6.62982	678.67	FALSE	29
2022-09-13	15:47:15	2.82653	12.573	718.074	FALSE	29
2022-09-13	15:47:15	1.7535	7.79992	686.47	FALSE	29
2022-09-13	15:47:15	1.40363	6.24363	724.318	FALSE	29
2022-09-13	15:47:16	2.55793	11.3782	697.848	FALSE	29
2022-09-13	15:47:16	1.33625	5.94391	730.262	FALSE	29
2022-09-13	15:47:16	2.10989	9.38521	707.233	FALSE	29
2022-09-13	15:47:16	0.802761	3.57084	733.833	FALSE	29
2022-09-13	15:47:17	1.3565	6.03398	713.267	FALSE	29
2022-09-13	15:47:17	0.874415	3.88957	737.722	FALSE	29
2022-09-13	15:47:17	0.498791	2.21872	715.486	FALSE	29
2022-09-13	15:47:18	0.763728	3.39721	741.119	FALSE	29
2022-09-13	15:47:18	0.361132	1.60639	717.092	FALSE	29
2022-09-13	15:47:18	0.807494	3.59189	744.711	FALSE	29
2022-09-13	15:47:18	0.451361	2.00774	719.1	FALSE	29
2022-09-13	15:47:19	0.84444	3.75624	748.468	FALSE	29
2022-09-13	15:47:19	0.7593	3.37752	722.477	FALSE	29
2022-09-13	15:47:19	0.767901	3.41578	751.883	FALSE	29
2022-09-13	15:47:19	0.632277	2.81249	725.29	FALSE	29
2022-09-13	15:47:20	0.451056	2.00639	753.89	FALSE	29
2022-09-13	15:47:20	0.688562	3.06286	728.353	FALSE	29
2022-09-13	15:47:20	0.459402	2.04351	755.933	FALSE	29
2022-09-13	15:47:20	2.10826	9.37796	737.731	FALSE	29
2022-09-13	15:47:21	0.888817	3.95364	759.887	FALSE	29
2022-09-13	15:47:21	2.49457	11.0963	748.827	FALSE	29
2022-09-13	15:47:21	3.72123	16.5528	776.44	1	30
2022-09-13	15:47:22	7.54011	33.5399	782.367	1	31
2022-09-13	15:47:22	3.76103	16.7298	793.169	1	32
2022-09-13	15:47:22	6.33757	28.1908	810.558	1	33
2022-09-13	15:47:22	3.08378	13.7173	806.887	1	34
2022-09-13	15:47:23	2.67243	11.8875	822.445	FALSE	34
2022-09-13	15:47:23	1.25889	5.59979	812.486	FALSE	34
2022-09-13	15:47:23	0.853041	3.7945	826.24	FALSE	34
2022-09-13	15:47:23	0.739249	3.28833	815.775	FALSE	34
2022-09-13	15:47:24	0.286425	1.27408	827.514	FALSE	34
2022-09-13	15:47:24	0.63355	2.81816	818.593	FALSE	34
2022-09-13	15:47:24	0.552125	2.45596	829.97	FALSE	34
2022-09-13	15:47:24	0.814364	3.62245	822.215	FALSE	34
2022-09-13	15:47:25	0.836298	3.72002	833.69	FALSE	34
2022-09-13	15:47:25	0.58388	2.59722	824.813	FALSE	34
2022-09-13	15:47:25	0.950089	4.22619	837.916	FALSE	34
2022-09-13	15:47:26	0.689784	3.0683	827.881	FALSE	34
2022-09-13	15:47:26	1.1738	5.2213	843.137	FALSE	34
2022-09-13	15:47:26	0.373601	1.66185	829.543	FALSE	34
2022-09-13	15:47:26	0.963677	4.28663	847.424	FALSE	34
2022-09-13	15:47:27	0.425204	1.89139	831.434	FALSE	34
2022-09-13	15:47:27	0.802863	3.5713	850.995	FALSE	34
2022-09-13	15:47:27	0.427748	1.90271	833.337	FALSE	34
2022-09-13	15:47:27	0.754974	3.35828	854.353	FALSE	34
2022-09-13	15:47:28	0.631005	2.80684	836.144	FALSE	34
2022-09-13	15:47:28	0.814008	3.62087	857.974	FALSE	34
2022-09-13	15:47:28	0.865407	3.8495	839.993	FALSE	34
2022-09-13	15:47:28	0.751463	3.34266	861.317	FALSE	34
2022-09-13	15:47:29	1.2134	5.39745	845.391	FALSE	34
2022-09-13	15:47:29	0.337468	1.50113	862.818	FALSE	34
2022-09-13	15:47:29	1.28144	5.7001	851.091	FALSE	34
2022-09-13	15:47:30	0.623677	2.77424	865.592	FALSE	34
2022-09-13	15:47:30	1.99599	8.87856	859.969	FALSE	34
2022-09-13	15:47:30	0.650751	2.89467	868.487	FALSE	34
2022-09-13	15:47:30	1.21472	5.40332	865.373	FALSE	34
2022-09-13	15:47:31	0.494008	2.19745	870.684	FALSE	34
2022-09-13	15:47:31	0.337977	1.50339	866.876	FALSE	34
2022-09-13	15:47:31	0.555178	2.46954	873.154	FALSE	34
2022-09-13	15:47:31	0.311667	1.38636	868.262	FALSE	34
2022-09-13	15:47:32	0.477977	2.12614	875.28	FALSE	34
2022-09-13	15:47:32	0.280725	1.24872	869.511	FALSE	34
2022-09-13	15:47:32	0.613906	2.73078	878.011	FALSE	34
2022-09-13	15:47:32	0.201285	0.895356	870.406	FALSE	34
2022-09-13	15:47:33	0.509682	2.26717	880.278	FALSE	34
2022-09-13	15:47:33	0.332074	1.47713	871.884	FALSE	34
2022-09-13	15:47:33	0.510903	2.2726	882.551	FALSE	34
2022-09-13	15:47:34	0.187595	0.83446	872.718	FALSE	34
2022-09-13	15:47:34	0.23584	1.04906	883.6	FALSE	34
2022-09-13	15:47:34	0.216909	0.964855	873.683	FALSE	34
2022-09-13	15:47:34	0.168206	0.748214	884.348	FALSE	34
2022-09-13	15:47:35	0.112328	0.499657	874.183	FALSE	34
2022-09-13	15:47:35	-0.0477733	-0.212505	884.348	FALSE	34
2022-09-13	15:47:35	0.0355346	0.158065	874.341	FALSE	34
2022-09-13	15:47:35	0.00520383	0.0231477	884.371	FALSE	34
2022-09-13	15:47:36	0.0110562	0.0491802	874.39	FALSE	34
2022-09-13	15:47:36	-0.113168	-0.503394	884.371	FALSE	34
2022-09-13	15:47:36	0.0290715	0.129316	874.519	FALSE	34
2022-09-13	15:47:36	-0.170623	-0.758965	884.371	FALSE	34
2022-09-13	15:47:37	-0.395458	-1.75908	874.519	FALSE	34
2022-09-13	15:47:37	-0.702429	-3.12454	884.371	FALSE	34
2022-09-13	15:47:37	-0.804974	-3.58069	874.519	FALSE	34
2022-09-13	15:47:38	-0.71846	-3.19585	884.371	FALSE	34
2022-09-13	15:47:38	-0.647875	-2.88188	874.519	FALSE	34
2022-09-13	15:47:38	-0.368842	-1.64068	884.371	FALSE	34
2022-09-13	15:47:38	-0.0716409	-0.318673	874.519	FALSE	34
2022-09-13	15:47:39	-0.0324043	-0.144141	884.371	FALSE	34
2022-09-13	15:47:39	0.220064	0.978889	875.498	FALSE	34
2022-09-13	15:47:39	4.08474	18.1697	902.541	1	35
2022-09-13	15:47:39	4.10169	18.2451	893.743	1	36
2022-09-13	15:47:40	4.03533	17.95	920.491	1	37
2022-09-13	15:47:40	4.14281	18.428	912.171	1	38
2022-09-13	15:47:40	4.33782	19.2955	939.786	1	39
2022-09-13	15:47:40	1.90994	8.4958	920.667	FALSE	39
2022-09-13	15:47:41	1.2191	5.4228	945.209	FALSE	39
2022-09-13	15:47:41	0.312685	1.39089	922.058	FALSE	39
2022-09-13	15:47:41	0.499962	2.22393	947.433	FALSE	39
2022-09-13	15:47:42	0.281387	1.25167	923.31	FALSE	39
2022-09-13	15:47:42	0.554466	2.46638	949.899	FALSE	39
2022-09-13	15:47:42	0.59355	2.64023	925.95	FALSE	39
2022-09-13	15:47:42	0.703422	3.12896	953.028	FALSE	39
2022-09-13	15:47:43	0.764084	3.3988	929.349	FALSE	39
2022-09-13	15:47:43	0.672685	2.99224	956.021	FALSE	39
2022-09-13	15:47:43	1.01034	4.49419	933.843	FALSE	39
2022-09-13	15:47:43	0.456247	2.02948	958.05	FALSE	39
2022-09-13	15:47:44	0.668562	2.9739	936.817	FALSE	39
2022-09-13	15:47:44	0.688562	3.06286	961.113	FALSE	39
2022-09-13	15:47:44	0.55126	2.45211	939.269	FALSE	39
2022-09-13	15:47:44	0.50444	2.24385	963.357	FALSE	39
2022-09-13	15:47:45	0.987799	4.39393	943.663	FALSE	39
2022-09-13	15:47:45	1.345	5.98283	969.34	FALSE	39
2022-09-13	15:47:45	1.77314	7.88728	951.55	FALSE	39
2022-09-13	15:47:46	0.851005	3.78544	973.125	FALSE	39
2022-09-13	15:47:46	0.657723	2.92568	954.476	FALSE	39
2022-09-13	15:47:46	0.576959	2.56643	975.692	FALSE	39
2022-09-13	15:47:46	0.509173	2.2649	956.741	FALSE	39
2022-09-13	15:47:47	0.752939	3.34922	979.041	FALSE	39
2022-09-13	15:47:47	1.3049	5.80446	962.545	FALSE	39
2022-09-13	15:47:47	1.87614	8.34545	987.386	FALSE	39
2022-09-13	15:47:47	4.40688	19.6027	982.148	1	40
2022-09-13	15:47:48	4.71289	20.9639	1008.35	1	41
2022-09-13	15:47:48	2.09574	9.32227	991.47	FALSE	41
2022-09-13	15:47:48	1.21533	5.40603	1013.76	FALSE	41
2022-09-13	15:47:48	0.765814	3.40649	994.877	FALSE	41
2022-09-13	15:47:49	0.651768	2.89919	1016.66	FALSE	41
2022-09-13	15:47:49	0.631514	2.8091	997.686	FALSE	41
2022-09-13	15:47:49	0.738995	3.2872	1019.94	FALSE	41
2022-09-13	15:47:49	2.07319	9.22196	1006.91	FALSE	41
2022-09-13	15:47:50	2.52485	11.231	1031.17	FALSE	41
2022-09-13	15:47:50	1.57243	6.99448	1013.9	FALSE	41
2022-09-13	15:47:50	1.10408	4.91117	1036.08	FALSE	41
2022-09-13	15:47:51	1.43538	6.38486	1020.29	FALSE	41
2022-09-13	15:47:51	2.01177	8.94876	1045.03	FALSE	41
2022-09-13	15:47:51	2.4594	10.9399	1031.23	FALSE	41
2022-09-13	15:47:51	2.98088	13.2596	1058.29	FALSE	41
2022-09-13	15:47:52	3.25095	14.4609	1045.69	1	42
2022-09-13	15:47:52	2.83762	12.6223	1070.92	FALSE	42
2022-09-13	15:47:52	2.46647	10.9714	1056.66	FALSE	42
2022-09-13	15:47:52	2.36551	10.5223	1081.44	FALSE	42
2022-09-13	15:47:53	2.29976	10.2298	1066.89	FALSE	42
2022-09-13	15:47:53	2.23187	9.9278	1091.37	FALSE	42
2022-09-13	15:47:53	2.15513	9.58645	1076.48	FALSE	42
2022-09-13	15:47:53	2.10042	9.34309	1100.71	FALSE	42
2022-09-13	15:47:54	2.6679	11.8674	1088.34	FALSE	42
2022-09-13	15:47:54	0.897621	3.9928	1104.7	FALSE	42
2022-09-13	15:47:54	0.306069	1.36146	1089.7	FALSE	42
2022-09-13	15:47:55	0.289733	1.28879	1105.99	FALSE	42
2022-09-13	15:47:55	0.301183	1.33972	1091.04	FALSE	42
2022-09-13	15:47:55	0.204237	0.908487	1106.9	FALSE	42
2022-09-13	15:47:55	0.136501	0.607184	1091.65	FALSE	42
2022-09-13	15:47:56	0.371056	1.65053	1108.55	FALSE	42
2022-09-13	15:47:56	0.212125	0.943574	1092.59	FALSE	42
2022-09-13	15:47:56	0.0963997	0.428805	1108.98	FALSE	42
2022-09-13	15:47:56	-0.0540837	-0.240575	1092.59	FALSE	42
2022-09-13	15:47:57	-0.399732	-1.77809	1108.98	FALSE	42
2022-09-13	15:47:57	0.0744659	0.331239	1092.93	FALSE	42
2022-09-13	15:47:57	0.216909	0.964855	1109.94	FALSE	42
2022-09-13	15:47:57	6.92093	30.7857	1123.71	1	43
2022-09-13	15:47:58	10.6929	47.5642	1157.51	1	44
2022-09-13	15:47:58	7.42057	33.0082	1156.72	1	45
2022-09-13	15:47:58	3.96307	17.6285	1175.14	1	46
2022-09-13	15:47:59	3.4622	15.4006	1172.12	1	47
2022-09-13	15:47:59	3.27645	14.5743	1189.71	1	48
2022-09-13	15:47:59	3.88357	17.2749	1189.4	1	49
2022-09-13	15:47:59	2.52541	11.2335	1200.94	FALSE	49
2022-09-13	15:48:00	3.49777	15.5588	1204.95	1	50
2022-09-13	15:48:00	3.50225	15.5787	1216.52	1	51
2022-09-13	15:48:00	3.27599	14.5723	1219.53	1	52
2022-09-13	15:48:00	4.45467	19.8153	1236.34	1	53
2022-09-13	15:48:01	9.62968	42.8347	1262.36	1	54
2022-09-13	15:48:01	3.07874	13.6949	1250.03	1	55
2022-09-13	15:48:01	4.305	19.1495	1281.51	1	56
2022-09-13	15:48:01	1.91192	8.5046	1258.54	FALSE	56
2022-09-13	15:48:02	1.51798	6.75228	1288.26	FALSE	56
2022-09-13	15:48:02	6.57248	29.2357	1287.77	1	57
2022-09-13	15:48:02	3.04067	13.5255	1301.79	1	58
2022-09-13	15:48:03	4.10423	18.2564	1306.03	1	59
2022-09-13	15:48:03	3.62154	16.1093	1317.9	1	60
2022-09-13	15:48:03	2.52001	11.2095	1317.24	FALSE	60
2022-09-13	15:48:03	2.18668	9.72679	1327.62	FALSE	60
2022-09-13	15:48:04	3.30734	14.7117	1331.95	1	61
2022-09-13	15:48:04	2.59024	11.5219	1339.15	FALSE	61
2022-09-13	15:48:04	3.11737	13.8667	1345.82	1	62
2022-09-13	15:48:04	5.73462	25.5087	1364.65	1	63
2022-09-13	15:48:05	4.89111	21.7566	1367.57	1	64
2022-09-13	15:48:05	3.7853	16.8378	1381.49	1	65
2022-09-13	15:48:05	2.94235	13.0882	1380.66	FALSE	65
2022-09-13	15:48:05	1.15584	5.14141	1386.63	FALSE	65
2022-09-13	15:48:06	1.32739	5.9045	1386.57	FALSE	65
2022-09-13	15:48:06	0.750395	3.33791	1389.97	FALSE	65
2022-09-13	15:48:06	1.5138	6.73369	1393.3	FALSE	65
2022-09-13	15:48:07	1.0078	4.4829	1394.45	FALSE	65
2022-09-13	15:48:07	1.47268	6.55078	1399.85	FALSE	65
2022-09-13	15:48:07	2.25925	10.0496	1404.5	FALSE	65
2022-09-13	15:48:07	5.75192	25.5857	1425.44	1	66
2022-09-13	15:48:08	9.46968	42.123	1446.63	1	67
2022-09-13	15:48:08	10.4632	46.5424	1471.98	1	68
2022-09-13	15:48:08	6.89604	30.675	1477.3	1	69
2022-09-13	15:48:08	7.04591	31.3416	1503.32	1	70
2022-09-13	15:48:09	10.3744	46.1474	1523.45	1	71
2022-09-13	15:48:09	11.6736	51.9265	1555.25	1	72
2022-09-13	15:48:09	4.80724	21.3836	1544.83	1	73
2022-09-13	15:48:10	6.54607	29.1182	1584.36	1	74
2022-09-13	15:48:10	4.01563	17.8623	1562.7	1	75
2022-09-13	15:48:10	5.16423	22.9715	1607.34	1	76
2022-09-13	15:48:10	5.35497	23.82	1586.52	1	77
2022-09-13	15:48:11	3.55925	15.8323	1623.17	1	78
2022-09-13	15:48:11	0.545712	2.42744	1588.94	FALSE	78
2022-09-13	15:48:11	0.230802	1.02665	1624.2	FALSE	78
2022-09-13	15:48:11	0.312736	1.39111	1590.33	FALSE	78
2022-09-13	15:48:12	0.694567	3.08957	1627.28	FALSE	78
2022-09-13	15:48:12	0.434466	1.93259	1592.27	FALSE	78
2022-09-13	15:48:12	0.494618	2.20016	1629.49	FALSE	78
2022-09-13	15:48:12	1.25202	5.56924	1597.84	FALSE	78
2022-09-13	15:48:13	1.24983	5.55949	1635.04	FALSE	78
2022-09-13	15:48:13	4.97319	22.1217	1619.96	1	79
2022-09-13	15:48:13	8.14846	36.246	1671.29	1	80
2022-09-13	15:48:13	5.52647	24.5828	1644.54	1	81
2022-09-13	15:48:14	3.13401	13.9407	1685.23	1	82
2022-09-13	15:48:14	1.61533	7.18531	1651.73	FALSE	82
2022-09-13	15:48:14	0.695891	3.09546	1688.33	FALSE	82
2022-09-13	15:48:15	0.351667	1.56429	1653.29	FALSE	82
2022-09-13	15:48:15	0.529325	2.35454	1690.68	FALSE	82
2022-09-13	15:48:15	0.390293	1.7361	1655.03	FALSE	82
2022-09-13	15:48:15	0.416196	1.85132	1692.53	FALSE	82
2022-09-13	15:48:16	0.322048	1.43253	1656.46	FALSE	82
2022-09-13	15:48:16	0.426476	1.89705	1694.43	FALSE	82
2022-09-13	15:48:16	0.575382	2.55941	1659.02	FALSE	82
2022-09-13	15:48:16	0.597621	2.65834	1697.09	FALSE	82
2022-09-13	15:48:17	0.511005	2.27305	1661.29	FALSE	82
2022-09-13	15:48:17	0.469936	2.09037	1699.18	FALSE	82
2022-09-13	15:48:17	0.509428	2.26604	1663.56	FALSE	82
2022-09-13	15:48:17	0.439046	1.95296	1701.13	FALSE	82
2022-09-13	15:48:18	0.399657	1.77775	1665.34	FALSE	82
2022-09-13	15:48:18	0.436094	1.93983	1703.07	FALSE	82
2022-09-13	15:48:18	0.597366	2.6572	1667.99	FALSE	82
2022-09-13	15:48:19	0.68673	3.05471	1706.13	FALSE	82
2022-09-13	15:48:19	0.907952	4.03875	1672.03	FALSE	82
2022-09-13	15:48:19	1.09497	4.87065	1711	FALSE	82
2022-09-13	15:48:19	1.548	6.88581	1678.92	FALSE	82
2022-09-13	15:48:20	1.84195	8.19336	1719.19	FALSE	82
2022-09-13	15:48:20	1.94113	8.63453	1687.55	FALSE	82
2022-09-13	15:48:20	1.76933	7.87033	1727.06	FALSE	82
2022-09-13	15:48:20	2.25696	10.0394	1697.59	FALSE	82
2022-09-13	15:48:21	2.43955	10.8516	1737.91	FALSE	82
2022-09-13	15:48:21	2.2221	9.88435	1707.48	FALSE	82
2022-09-13	15:48:21	2.52933	11.251	1749.16	FALSE	82
2022-09-13	15:48:21	2.70301	12.0235	1719.5	FALSE	82
2022-09-13	15:48:22	2.58759	11.5101	1760.67	FALSE	82
2022-09-13	15:48:22	2.48373	11.0481	1730.55	FALSE	82
2022-09-13	15:48:22	1.66775	7.41849	1768.09	FALSE	82
2022-09-13	15:48:23	1.32042	5.87349	1736.42	FALSE	82
2022-09-13	15:48:23	0.879046	3.91017	1772	FALSE	82
2022-09-13	15:48:23	0.599962	2.66875	1739.09	FALSE	82
2022-09-13	15:48:23	0.492685	2.19156	1774.19	FALSE	82
2022-09-13	15:48:24	1.11538	4.96143	1744.05	FALSE	82
2022-09-13	15:48:24	1.31482	5.84858	1780.04	FALSE	82
2022-09-13	15:48:24	2.46235	10.953	1755	FALSE	82
2022-09-13	15:48:24	1.45838	6.48717	1786.53	FALSE	82
2022-09-13	15:48:25	1.1476	5.10475	1760.11	FALSE	82
2022-09-13	15:48:25	0.904135	4.02177	1790.55	FALSE	82
2022-09-13	15:48:25	1.32622	5.89929	1766.01	FALSE	82
2022-09-13	15:48:25	1.47116	6.54401	1797.09	FALSE	82
2022-09-13	15:48:26	1.2822	5.70348	1771.71	FALSE	82
2022-09-13	15:48:26	1.24464	5.53641	1802.63	FALSE	82
2022-09-13	15:48:26	0.870344	3.87146	1775.58	FALSE	82
2022-09-13	15:48:27	0.787952	3.50497	1806.14	FALSE	82
2022-09-13	15:48:27	0.718537	3.1962	1778.78	FALSE	82
2022-09-13	15:48:27	0.842863	3.74922	1809.89	FALSE	82
2022-09-13	15:48:27	0.871768	3.8778	1782.66	FALSE	82
2022-09-13	15:48:28	0.986018	4.38601	1814.27	FALSE	82
2022-09-13	15:48:28	1.11172	4.94515	1787.6	FALSE	82
2022-09-13	15:48:28	0.923779	4.10915	1818.38	FALSE	82
2022-09-13	15:48:28	0.513143	2.28256	1789.88	FALSE	82
2022-09-13	15:48:29	0.426883	1.89886	1820.28	FALSE	82
2022-09-13	15:48:29	0.409122	1.81986	1791.7	FALSE	82
2022-09-13	15:48:29	0.259351	1.15365	1821.43	FALSE	82
2022-09-13	15:48:29	0.285458	1.26977	1792.97	FALSE	82
2022-09-13	15:48:30	0.242761	1.07985	1822.51	FALSE	82
2022-09-13	15:48:30	0.263982	1.17424	1794.15	FALSE	82
2022-09-13	15:48:30	0.266832	1.18692	1823.7	FALSE	82
2022-09-13	15:48:31	0.13584	0.604243	1794.75	FALSE	82
2022-09-13	15:48:31	0.260674	1.15953	1824.86	FALSE	82
2022-09-13	15:48:31	0.162557	0.723086	1795.48	FALSE	82
2022-09-13	15:48:31	0.420369	1.86989	1826.73	FALSE	82
2022-09-13	15:48:32	0.173855	0.773342	1796.25	FALSE	82
2022-09-13	15:48:32	0.406323	1.80741	1828.54	FALSE	82
2022-09-13	15:48:32	0.465916	2.07249	1798.32	FALSE	82
2022-09-13	15:48:32	0.594364	2.64385	1831.18	FALSE	82
2022-09-13	15:48:33	0.577926	2.57073	1800.89	FALSE	82
2022-09-13	15:48:33	0.479402	2.13248	1833.31	FALSE	82
2022-09-13	15:48:33	0.481031	2.13972	1803.03	FALSE	82
2022-09-13	15:48:33	0.368461	1.63899	1834.95	FALSE	82
2022-09-13	15:48:34	0.472379	2.10124	1805.13	FALSE	82
2022-09-13	15:48:34	0.266934	1.18738	1836.14	FALSE	82
2022-09-13	15:48:34	0.36327	1.6159	1806.75	FALSE	82
2022-09-13	15:48:34	0.343575	1.52829	1837.67	FALSE	82
2022-09-13	15:48:35	0.544949	2.42404	1809.17	FALSE	82
2022-09-13	15:48:35	0.819809	3.64667	1841.31	FALSE	82
2022-09-13	15:48:35	0.672074	2.98952	1812.16	FALSE	82
2022-09-13	15:48:36	1.12078	4.98545	1846.3	FALSE	82
2022-09-13	15:48:36	1.35681	6.03536	1818.2	FALSE	82
2022-09-13	15:48:36	0.887443	3.94752	1850.25	FALSE	82
2022-09-13	15:48:36	0.495127	2.20242	1820.4	FALSE	82
2022-09-13	15:48:37	0.460064	2.04646	1852.29	FALSE	82
2022-09-13	15:48:37	0.332786	1.4803	1821.88	FALSE	82
2022-09-13	15:48:37	0.267799	1.19122	1853.48	FALSE	82
2022-09-13	15:48:37	0.410394	1.82551	1823.71	FALSE	82
2022-09-13	15:48:38	0.186985	0.831747	1854.32	FALSE	82
2022-09-13	15:48:38	0.404288	1.79835	1825.5	FALSE	82
2022-09-13	15:48:38	0.19355	0.860949	1855.18	FALSE	82
2022-09-13	15:48:38	0.413753	1.84046	1827.34	FALSE	82
2022-09-13	15:48:39	0.231107	1.02801	1856.21	FALSE	82
2022-09-13	15:48:39	0.329071	1.46377	1828.81	FALSE	82
2022-09-13	15:48:39	0.226832	1.00899	1857.21	FALSE	82
2022-09-13	15:48:40	0.40958	1.82189	1830.63	FALSE	82
2022-09-13	15:48:40	0.145662	0.647934	1857.86	FALSE	82
2022-09-13	15:48:40	0.35416	1.57537	1832.21	FALSE	82
2022-09-13	15:48:40	0.218791	0.973226	1858.84	FALSE	82
2022-09-13	15:48:41	0.409326	1.82076	1834.03	FALSE	82
2022-09-13	15:48:41	0.189682	0.843743	1859.68	FALSE	82
2022-09-13	15:48:41	0.332125	1.47736	1835.5	FALSE	82
2022-09-13	15:48:41	0.2393	1.06445	1860.74	FALSE	82
2022-09-13	15:48:42	0.363219	1.61567	1837.12	FALSE	82
2022-09-13	15:48:42	0.249529	1.10995	1861.85	FALSE	82
2022-09-13	15:48:42	0.211056	0.938819	1838.06	FALSE	82
2022-09-13	15:48:42	0.309326	1.37594	1863.23	FALSE	82
2022-09-13	15:48:43	0.206985	0.920711	1838.98	FALSE	82
2022-09-13	15:48:43	0.310496	1.38115	1864.61	FALSE	82
2022-09-13	15:48:43	0.181896	0.80911	1839.79	FALSE	82
2022-09-13	15:48:44	0.34668	1.5421	1866.15	FALSE	82
2022-09-13	15:48:44	0.170445	0.758173	1840.55	FALSE	82
2022-09-13	15:48:44	0.233855	1.04023	1867.19	FALSE	82
2022-09-13	15:48:44	-0.0561702	-0.249856	1840.55	FALSE	82
2022-09-13	15:48:45	0.0004201	0.00186869	1867.2	FALSE	82
2022-09-13	15:48:45	-0.089758	-0.399262	1840.55	FALSE	82
2022-09-13	15:48:45	-0.22014	-0.979227	1867.2	FALSE	82
2022-09-13	15:48:45	-0.109809	-0.488452	1840.55	FALSE	82
2022-09-13	15:48:46	0.20271	0.901695	1868.1	FALSE	82
2022-09-13	15:48:46	1.10235	4.90347	1845.45	FALSE	82
2022-09-13	15:48:46	1.62322	7.22041	1875.32	FALSE	82
2022-09-13	15:48:46	1.15981	5.15907	1850.61	FALSE	82
2022-09-13	15:48:47	0.5764	2.56394	1877.88	FALSE	82
2022-09-13	15:48:47	0.188308	0.837632	1851.45	FALSE	82
2022-09-13	15:48:47	0.0768577	0.341878	1878.22	FALSE	82
2022-09-13	15:48:48	0.0747712	0.332597	1851.78	FALSE	82
2022-09-13	15:48:48	-0.0520481	-0.23152	1878.22	FALSE	82
2022-09-13	15:48:48	-0.31159	-1.38601	1851.78	FALSE	82
2022-09-13	15:48:48	-0.238409	-1.06049	1878.22	FALSE	82
2022-09-13	15:48:49	-0.197544	-0.878715	1851.78	FALSE	82
2022-09-13	15:48:49	0.0414379	0.184324	1878.41	FALSE	82
2022-09-13	15:48:49	0.0156363	0.0695534	1851.85	FALSE	82
2022-09-13	15:48:49	0.220064	0.978889	1879.39	FALSE	82
2022-09-13	15:48:50	0.280929	1.24963	1853.1	FALSE	82
2022-09-13	15:48:50	0.302303	1.3447	1880.73	FALSE	82
2022-09-13	15:48:50	0.187799	0.835368	1853.93	FALSE	82
2022-09-13	15:48:50	0.224135	0.996997	1881.73	FALSE	82
2022-09-13	15:48:51	0.28841	1.28291	1855.22	FALSE	82
2022-09-13	15:48:51	0.257875	1.14708	1882.88	FALSE	82
2022-09-13	15:48:51	0.3364	1.49637	1856.71	FALSE	82
2022-09-13	15:48:52	0.281438	1.25189	1884.13	FALSE	82
2022-09-13	15:48:52	0.278333	1.23808	1857.95	FALSE	82
2022-09-13	15:48:52	0.362659	1.61318	1885.74	FALSE	82
2022-09-13	15:48:52	0.363626	1.61748	1859.57	FALSE	82
2022-09-13	15:48:53	0.277621	1.23491	1886.98	FALSE	82
2022-09-13	15:48:53	0.313499	1.39451	1860.96	FALSE	82
2022-09-13	15:48:53	0.331412	1.47419	1888.45	FALSE	82
2022-09-13	15:48:53	0.343524	1.52806	1862.49	FALSE	82
2022-09-13	15:48:54	0.347901	1.54753	1890	FALSE	82
2022-09-13	15:48:54	0.35986	1.60073	1864.09	FALSE	82
2022-09-13	15:48:54	0.359249	1.59801	1891.59	FALSE	82
2022-09-13	15:48:54	0.36215	1.61092	1865.7	FALSE	82
2022-09-13	15:48:55	0.359555	1.59937	1893.19	FALSE	82
2022-09-13	15:48:55	0.333346	1.48279	1867.19	FALSE	82
2022-09-13	15:48:55	0.326374	1.45178	1894.65	FALSE	82
2022-09-13	15:48:56	0.304593	1.35489	1868.54	FALSE	82
2022-09-13	15:48:56	0.310496	1.38115	1896.03	FALSE	82
2022-09-13	15:48:56	0.320624	1.4262	1869.97	FALSE	82
2022-09-13	15:48:56	0.316908	1.40967	1897.44	FALSE	82
2022-09-13	15:48:57	0.359097	1.59734	1871.56	FALSE	82
2022-09-13	15:48:57	0.304644	1.35512	1898.79	FALSE	82
2022-09-13	15:48:57	0.336552	1.49705	1873.06	FALSE	82
2022-09-13	15:48:57	0.323881	1.44069	1900.23	FALSE	82
2022-09-13	15:48:58	0.305305	1.35806	1874.42	FALSE	82
2022-09-13	15:48:58	0.31584	1.40492	1901.64	FALSE	82
2022-09-13	15:48:58	0.305458	1.35874	1875.78	FALSE	82
2022-09-13	15:48:58	0.296654	1.31958	1902.96	FALSE	82
2022-09-13	15:48:59	0.293499	1.30554	1877.08	FALSE	82
2022-09-13	15:48:59	0.291311	1.29581	1904.25	FALSE	82
2022-09-13	15:48:59	0.293295	1.30463	1878.39	FALSE	82
2022-09-13	15:49:00	0.294517	1.31007	1905.56	FALSE	82
2022-09-13	15:49:00	0.29472	1.31097	1879.7	FALSE	82
2022-09-13	15:49:00	0.295738	1.3155	1906.88	FALSE	82
2022-09-13	15:49:00	0.284644	1.26615	1880.97	FALSE	82
2022-09-13	15:49:01	0.292837	1.3026	1908.18	FALSE	82
2022-09-13	15:49:01	0.286628	1.27498	1882.24	FALSE	82
2022-09-13	15:49:01	0.291361	1.29603	1909.48	FALSE	82
2022-09-13	15:49:01	0.294771	1.3112	1883.55	FALSE	82
2022-09-13	15:49:02	0.298741	1.32886	1910.81	FALSE	82
2022-09-13	15:49:02	0.293295	1.30463	1884.86	FALSE	82
2022-09-13	15:49:02	0.301234	1.33995	1912.15	FALSE	82
2022-09-13	15:49:02	0.30612	1.36168	1886.22	FALSE	82
2022-09-13	15:49:03	0.314008	1.39677	1913.54	FALSE	82
2022-09-13	15:49:03	0.299962	1.33429	1887.55	FALSE	82
2022-09-13	15:49:03	0.297468	1.3232	1914.87	FALSE	82
2022-09-13	15:49:04	0.303321	1.34923	1888.9	FALSE	82
2022-09-13	15:49:04	0.300471	1.33656	1916.2	FALSE	82
2022-09-13	15:49:04	0.303473	1.34991	1890.25	FALSE	82
2022-09-13	15:49:04	0.311769	1.38681	1917.59	FALSE	82
2022-09-13	15:49:05	0.325611	1.44838	1891.7	FALSE	82
2022-09-13	15:49:05	0.326272	1.45132	1919.04	FALSE	82
2022-09-13	15:49:05	0.253041	1.12558	1892.83	FALSE	82
2022-09-13	15:49:05	0.271514	1.20775	1920.25	FALSE	82
2022-09-13	15:49:06	0.333295	1.48256	1894.31	FALSE	82
2022-09-13	15:49:06	0.443524	1.97288	1922.22	FALSE	82
2022-09-13	15:49:06	0.428715	1.90701	1896.21	FALSE	82
2022-09-13	15:49:06	0.365865	1.62744	1923.85	FALSE	82
2022-09-13	15:49:07	0.39126	1.7404	1897.96	FALSE	82
2022-09-13	15:49:07	0.405204	1.80243	1925.65	FALSE	82
2022-09-13	15:49:07	0.407952	1.81465	1899.77	FALSE	82
2022-09-13	15:49:08	0.406527	1.80831	1927.46	FALSE	82
2022-09-13	15:49:08	0.43187	1.92104	1901.69	FALSE	82
2022-09-13	15:49:08	0.442863	1.96994	1929.43	FALSE	82
2022-09-13	15:49:08	0.415738	1.84929	1903.54	FALSE	82
2022-09-13	15:49:09	0.416756	1.85381	1931.28	FALSE	82
2022-09-13	15:49:09	0.425102	1.89094	1905.43	FALSE	82
2022-09-13	15:49:09	0.428613	1.90656	1933.19	FALSE	82
2022-09-13	15:49:09	0.437417	1.94572	1907.38	FALSE	82
2022-09-13	15:49:10	0.441896	1.96564	1935.16	FALSE	82
2022-09-13	15:49:10	0.439046	1.95296	1909.33	FALSE	82
2022-09-13	15:49:10	0.443931	1.97469	1937.13	FALSE	82
2022-09-13	15:49:10	0.442608	1.96881	1911.3	FALSE	82
2022-09-13	15:49:11	0.449987	2.00163	1939.13	FALSE	82
2022-09-13	15:49:11	0.44897	1.99711	1913.3	FALSE	82
2022-09-13	15:49:11	0.4593	2.04306	1941.17	FALSE	82
2022-09-13	15:49:11	0.462405	2.05687	1915.35	FALSE	82
2022-09-13	15:49:12	0.464746	2.06728	1943.24	FALSE	82
2022-09-13	15:49:12	0.477824	2.12546	1917.48	FALSE	82
2022-09-13	15:49:12	0.487239	2.16734	1945.41	FALSE	82
2022-09-13	15:49:13	0.494313	2.1988	1919.68	FALSE	82
2022-09-13	15:49:13	0.504949	2.24611	1947.66	FALSE	82
2022-09-13	15:49:13	0.491921	2.18816	1921.87	FALSE	82
2022-09-13	15:49:13	0.52785	2.34798	1950	FALSE	82
2022-09-13	15:49:14	0.504593	2.24453	1924.11	FALSE	82
2022-09-13	15:49:14	0.549936	2.44623	1952.45	FALSE	82
2022-09-13	15:49:14	0.512939	2.28166	1926.39	FALSE	82
2022-09-13	15:49:14	0.447443	1.99032	1954.44	FALSE	82
2022-09-13	15:49:15	0.550903	2.45053	1928.84	FALSE	82
2022-09-13	15:49:15	0.519809	2.31221	1956.75	FALSE	82
2022-09-13	15:49:15	0.530751	2.36089	1931.2	FALSE	82
2022-09-13	15:49:15	0.608562	2.70701	1959.46	FALSE	82
2022-09-13	15:49:16	0.582964	2.59314	1933.8	FALSE	82
2022-09-13	15:49:16	0.546985	2.4331	1961.89	FALSE	82
2022-09-13	15:49:16	0.503117	2.23797	1936.03	FALSE	82
2022-09-13	15:49:17	0.465763	2.07181	1963.96	FALSE	82
2022-09-13	15:49:17	0.440929	1.96134	1938	FALSE	82
2022-09-13	15:49:17	0.429682	1.91131	1965.88	FALSE	82
2022-09-13	15:49:17	0.440115	1.95772	1939.95	FALSE	82
2022-09-13	15:49:18	0.429478	1.9104	1967.79	FALSE	82
2022-09-13	15:49:18	0.423066	1.88188	1941.83	FALSE	82
2022-09-13	15:49:18	0.432227	1.92263	1969.71	FALSE	82
2022-09-13	15:49:18	0.423524	1.88392	1943.72	FALSE	82
2022-09-13	15:49:19	0.43472	1.93372	1971.64	FALSE	82
2022-09-13	15:49:19	0.444593	1.97764	1945.7	FALSE	82
2022-09-13	15:49:19	0.425713	1.89366	1973.54	FALSE	82
2022-09-13	15:49:19	0.416196	1.85132	1947.55	FALSE	82
2022-09-13	15:49:20	0.413855	1.84091	1975.38	FALSE	82
2022-09-13	15:49:20	0.398537	1.77277	1949.32	FALSE	82
2022-09-13	15:49:20	0.395585	1.75964	1977.14	FALSE	82
2022-09-13	15:49:21	0.395789	1.76055	1951.08	FALSE	82
2022-09-13	15:49:21	0.38042	1.69218	1978.83	FALSE	82
2022-09-13	15:49:21	0.380064	1.6906	1952.77	FALSE	82
2022-09-13	15:49:21	0.362048	1.61046	1980.44	FALSE	82
2022-09-13	15:49:22	0.370242	1.64691	1954.42	FALSE	82
2022-09-13	15:49:22	0.374619	1.66638	1982.11	FALSE	82
2022-09-13	15:49:22	0.36729	1.63378	1956.05	FALSE	82
2022-09-13	15:49:22	0.385153	1.71324	1983.82	FALSE	82
2022-09-13	15:49:23	0.398028	1.77051	1957.82	FALSE	82
2022-09-13	15:49:23	0.432125	1.92218	1985.74	FALSE	82
2022-09-13	15:49:23	0.402456	1.7902	1959.61	FALSE	82
2022-09-13	15:49:23	0.381183	1.69558	1987.44	FALSE	82
2022-09-13	15:49:24	0.404084	1.79745	1961.41	FALSE	82
2022-09-13	15:49:24	0.422965	1.88143	1989.32	FALSE	82
2022-09-13	15:49:24	0.345865	1.53848	1962.95	FALSE	82
2022-09-13	15:49:25	0.234568	1.04341	1990.36	FALSE	82
2022-09-13	15:49:25	0.422608	1.87984	1964.83	FALSE	82
2022-09-13	15:49:25	0.317519	1.41239	1991.77	FALSE	82
2022-09-13	15:49:25	0.429682	1.91131	1966.74	FALSE	82
2022-09-13	15:49:26	0.284389	1.26502	1993.04	FALSE	82
2022-09-13	15:49:26	0.208562	0.927725	1967.67	FALSE	82
2022-09-13	15:49:26	0.393346	1.74968	1994.79	FALSE	82
2022-09-13	15:49:26	0.37645	1.67452	1969.34	FALSE	82
2022-09-13	15:49:27	0.312837	1.39156	1996.18	FALSE	82
2022-09-13	15:49:27	0.449886	2.00118	1971.34	FALSE	82
2022-09-13	15:49:27	0.68785	3.05969	1999.24	FALSE	82
2022-09-13	15:49:27	1.04118	4.63138	1975.97	FALSE	82
2022-09-13	15:49:28	0.514618	2.28912	2001.53	FALSE	82
2022-09-13	15:49:28	0.980623	4.36201	1980.34	FALSE	82
2022-09-13	15:49:28	0.463422	2.06139	2003.59	FALSE	82
2022-09-13	15:49:29	0.86841	3.86286	1984.2	FALSE	82
2022-09-13	15:49:29	0.509071	2.26445	2005.85	FALSE	82
2022-09-13	15:49:29	1.42612	6.34367	1990.54	FALSE	82
2022-09-13	15:49:29	0.79874	3.55296	2009.41	FALSE	82
2022-09-13	15:49:30	1.7677	7.86308	1998.41	FALSE	82
2022-09-13	15:49:30	1.40118	6.23273	2015.64	FALSE	82
2022-09-13	15:49:30	1.30113	5.78769	2004.19	FALSE	82
2022-09-13	15:49:30	1.10307	4.90668	2020.55	FALSE	82
2022-09-13	15:49:31	0.476959	2.12161	2006.32	FALSE	82
2022-09-13	15:49:31	0.853957	3.79857	2024.35	FALSE	82
2022-09-13	15:49:31	0.404288	1.79835	2008.11	FALSE	82
2022-09-13	15:49:31	0.695687	3.09455	2027.44	FALSE	82
2022-09-13	15:49:32	0.415433	1.84793	2009.96	FALSE	82
2022-09-13	15:49:32	0.631208	2.80774	2030.25	FALSE	82
2022-09-13	15:49:32	0.469886	2.09015	2012.05	FALSE	82
2022-09-13	15:49:33	0.437316	1.94527	2032.19	FALSE	82
2022-09-13	15:49:33	0.467799	2.08086	2014.13	FALSE	82
2022-09-13	15:49:33	0.399199	1.77572	2033.97	FALSE	82
2022-09-13	15:49:33	0.530598	2.36021	2016.49	FALSE	82
2022-09-13	15:49:34	0.304033	1.3524	2035.32	FALSE	82
2022-09-13	15:49:34	0.546527	2.43106	2018.92	FALSE	82
2022-09-13	15:49:34	0.339809	1.51154	2036.83	FALSE	82
2022-09-13	15:49:34	0.612226	2.7233	2021.65	FALSE	82
2022-09-13	15:49:35	0.292379	1.30056	2038.13	FALSE	82
2022-09-13	15:49:35	0.551718	2.45415	2024.1	FALSE	82
2022-09-13	15:49:35	0.301336	1.3404	2039.47	FALSE	82
2022-09-13	15:49:35	0.524644	2.33372	2026.44	FALSE	82
2022-09-13	15:49:36	0.375076	1.66841	2041.14	FALSE	82
2022-09-13	15:49:36	0.564237	2.50984	2028.95	FALSE	82
2022-09-13	15:49:36	0.409631	1.82212	2042.96	FALSE	82
2022-09-13	15:49:37	0.467188	2.07815	2031.02	FALSE	82
2022-09-13	15:49:37	0.323321	1.4382	2044.4	FALSE	82
2022-09-13	15:49:37	0.387392	1.7232	2032.75	FALSE	82
2022-09-13	15:49:37	0.49416	2.19812	2046.6	FALSE	82
2022-09-13	15:49:38	0.496451	2.20831	2034.95	FALSE	82
2022-09-13	15:49:38	0.581489	2.58658	2049.19	FALSE	82
2022-09-13	15:49:38	0.491311	2.18545	2037.14	FALSE	82
2022-09-13	15:49:38	0.811056	3.60774	2052.79	FALSE	82
2022-09-13	15:49:39	0.428868	1.90769	2039.05	FALSE	82
2022-09-13	15:49:39	0.716603	3.18759	2055.98	FALSE	82
2022-09-13	15:49:39	0.297621	1.32388	2040.37	FALSE	82
2022-09-13	15:49:39	0.700674	3.11674	2059.1	FALSE	82
2022-09-13	15:49:40	0.458384	2.03898	2042.41	FALSE	82
2022-09-13	15:49:40	0.764796	3.40197	2062.5	FALSE	82
2022-09-13	15:49:40	0.493041	2.19314	2044.6	FALSE	82
2022-09-13	15:49:41	0.872023	3.87893	2066.38	FALSE	82
2022-09-13	15:49:41	0.706221	3.14141	2047.75	FALSE	82
2022-09-13	15:49:41	1.04765	4.66016	2071.04	FALSE	82
2022-09-13	15:49:41	0.725865	3.22879	2050.97	FALSE	82
2022-09-13	15:49:42	0.712277	3.16835	2074.21	FALSE	82
2022-09-13	15:49:42	0.762099	3.38997	2054.36	FALSE	82
2022-09-13	15:49:42	0.359402	1.59869	2075.81	FALSE	82
2022-09-13	15:49:42	0.873652	3.88618	2058.25	FALSE	82
2022-09-13	15:49:43	0.411107	1.82869	2077.64	FALSE	82
2022-09-13	15:49:43	0.866425	3.85403	2062.1	FALSE	82
2022-09-13	15:49:43	0.414109	1.84204	2079.48	FALSE	82
2022-09-13	15:49:43	0.634873	2.82404	2064.93	FALSE	82
2022-09-13	15:49:44	0.40327	1.79383	2081.27	FALSE	82
2022-09-13	15:49:44	0.486272	2.16304	2067.09	FALSE	82
2022-09-13	15:49:44	0.465407	2.07022	2083.34	FALSE	82
2022-09-13	15:49:45	0.302557	1.34583	2068.44	FALSE	82
2022-09-13	15:49:45	0.392277	1.74493	2085.09	FALSE	82
2022-09-13	15:49:45	0.40042	1.78115	2070.22	FALSE	82
2022-09-13	15:49:45	0.795789	3.53983	2088.63	FALSE	82
2022-09-13	15:49:46	0.523371	2.32806	2072.55	FALSE	82
2022-09-13	15:49:46	0.709682	3.15681	2091.78	FALSE	82
2022-09-13	15:49:46	0.776603	3.45449	2076	FALSE	82
2022-09-13	15:49:46	0.385407	1.71437	2093.5	FALSE	82
2022-09-13	15:49:47	0.623371	2.77288	2078.77	FALSE	82
2022-09-13	15:49:47	0.412277	1.83389	2095.33	FALSE	82
2022-09-13	15:49:47	0.554364	2.46592	2081.24	FALSE	82
2022-09-13	15:49:47	0.442456	1.96813	2097.3	FALSE	82
2022-09-13	15:49:48	0.728613	3.24102	2084.48	FALSE	82
2022-09-13	15:49:48	0.488715	2.1739	2099.47	FALSE	82
2022-09-13	15:49:48	0.57584	2.56145	2087.04	FALSE	82
2022-09-13	15:49:49	0.58729	2.61238	2102.09	FALSE	82
2022-09-13	15:49:49	0.723473	3.21815	2090.26	FALSE	82
2022-09-13	15:49:49	0.432328	1.92308	2104.01	FALSE	82
2022-09-13	15:49:49	0.681336	3.03072	2093.29	FALSE	82
2022-09-13	15:49:50	0.381082	1.69513	2105.7	FALSE	82
2022-09-13	15:49:50	0.538282	2.39439	2095.69	FALSE	82
2022-09-13	15:49:50	0.409631	1.82212	2107.53	FALSE	82
2022-09-13	15:49:50	0.460166	2.04691	2097.73	FALSE	82
2022-09-13	15:49:51	0.368664	1.63989	2109.17	FALSE	82
2022-09-13	15:49:51	0.370191	1.64668	2099.38	FALSE	82
2022-09-13	15:49:51	0.373397	1.66094	2110.83	FALSE	82
2022-09-13	15:49:51	0.399148	1.77549	2101.15	FALSE	82
2022-09-13	15:49:52	0.364949	1.62337	2112.45	FALSE	82
2022-09-13	15:49:52	0.376959	1.67679	2102.83	FALSE	82
2022-09-13	15:49:52	0.375484	1.67023	2114.12	FALSE	82
2022-09-13	15:49:53	0.489173	2.17594	2105.01	FALSE	82
2022-09-13	15:49:53	0.326679	1.45313	2115.57	FALSE	82
2022-09-13	15:49:53	0.345153	1.53531	2106.54	FALSE	82
2022-09-13	15:49:53	0.427239	1.90044	2117.47	FALSE	82
2022-09-13	15:49:54	0.385407	1.71437	2108.26	FALSE	82
2022-09-13	15:49:54	0.364797	1.62269	2119.1	FALSE	82
2022-09-13	15:49:54	0.418283	1.86061	2110.12	FALSE	82
2022-09-13	15:49:54	0.274517	1.22111	2120.32	FALSE	82
2022-09-13	15:49:55	0.541947	2.41069	2112.53	FALSE	82
2022-09-13	15:49:55	0.308613	1.37277	2121.69	FALSE	82
2022-09-13	15:49:55	0.578944	2.57526	2115.1	FALSE	82
2022-09-13	15:49:55	0.301082	1.33927	2123.03	FALSE	82
2022-09-13	15:49:56	0.547341	2.43468	2117.54	FALSE	82
2022-09-13	15:49:56	0.272379	1.2116	2124.24	FALSE	82
2022-09-13	15:49:56	0.595992	2.65109	2120.19	FALSE	82
2022-09-13	15:49:57	0.611209	2.71878	2126.96	FALSE	82
2022-09-13	15:49:57	1.36378	6.06637	2126.26	FALSE	82
2022-09-13	15:49:57	1.31681	5.85743	2132.82	FALSE	82
2022-09-13	15:49:57	2.26205	10.0621	2136.32	FALSE	82
2022-09-13	15:49:58	0.793041	3.5276	2136.35	FALSE	82
2022-09-13	15:49:58	1.24001	5.51581	2141.83	FALSE	82
2022-09-13	15:49:58	0.701997	3.12262	2139.47	FALSE	82
2022-09-13	15:49:58	1.15604	5.1423	2146.98	FALSE	82
2022-09-13	15:49:59	0.954313	4.24498	2143.71	FALSE	82
2022-09-13	15:49:59	1.17625	5.2322	2152.21	FALSE	82
2022-09-13	15:49:59	1.76027	7.83003	2151.54	FALSE	82
2022-09-13	15:49:59	1.07335	4.77448	2156.98	FALSE	82
2022-09-13	15:50:00	1.03966	4.62462	2156.17	FALSE	82
2022-09-13	15:50:00	0.732532	3.25845	2160.24	FALSE	82
2022-09-13	15:50:00	1.35777	6.03963	2162.21	FALSE	82
2022-09-13	15:50:00	0.427137	1.89999	2162.14	FALSE	82
2022-09-13	15:50:01	1.26312	5.61861	2167.83	FALSE	82
2022-09-13	15:50:01	0.481132	2.14017	2164.28	FALSE	82
2022-09-13	15:50:01	0.84098	3.74085	2171.57	FALSE	82
2022-09-13	15:50:02	0.500725	2.22732	2166.51	FALSE	82
2022-09-13	15:50:02	0.726527	3.23174	2174.8	FALSE	82
2022-09-13	15:50:02	0.47584	2.11663	2168.63	FALSE	82
2022-09-13	15:50:02	0.719555	3.20072	2178	FALSE	82
2022-09-13	15:50:03	0.799962	3.55839	2172.18	FALSE	82
2022-09-13	15:50:03	0.940165	4.18204	2182.18	FALSE	82
2022-09-13	15:50:03	0.91925	4.08901	2176.27	FALSE	82
2022-09-13	15:50:03	1.22388	5.44406	2187.63	FALSE	82
2022-09-13	15:50:04	1.25676	5.59032	2181.86	FALSE	82
2022-09-13	15:50:04	0.984898	4.38102	2192.01	FALSE	82
2022-09-13	15:50:04	1.03508	4.60424	2186.47	FALSE	82
2022-09-13	15:50:04	1.2452	5.5389	2197.55	FALSE	82
2022-09-13	15:50:05	0.520776	2.31652	2188.78	FALSE	82
2022-09-13	15:50:05	0.796298	3.54209	2201.09	FALSE	82
2022-09-13	15:50:05	0.632125	2.81182	2191.6	FALSE	82
2022-09-13	15:50:06	0.401743	1.78703	2202.87	FALSE	82
2022-09-13	15:50:06	0.487545	2.1687	2193.76	FALSE	82
2022-09-13	15:50:06	0.345662	1.53757	2204.41	FALSE	82
2022-09-13	15:50:06	0.603575	2.68482	2196.45	FALSE	82
2022-09-13	15:50:07	0.419555	1.86626	2206.28	FALSE	82
2022-09-13	15:50:07	0.570242	2.53655	2198.99	FALSE	82
2022-09-13	15:50:07	0.43472	1.93372	2208.21	FALSE	82
2022-09-13	15:50:07	0.659249	2.93247	2201.92	FALSE	82
2022-09-13	15:50:08	0.46215	2.05574	2210.27	FALSE	82
2022-09-13	15:50:08	0.560878	2.4949	2204.41	FALSE	82
2022-09-13	15:50:08	0.399657	1.77775	2212.05	FALSE	82
2022-09-13	15:50:08	0.695687	3.09455	2207.51	FALSE	82
2022-09-13	15:50:09	0.488308	2.17209	2214.22	FALSE	82
2022-09-13	15:50:09	0.569071	2.53134	2210.04	FALSE	82
2022-09-13	15:50:09	0.327748	1.45789	2215.68	FALSE	82
2022-09-13	15:50:10	0.562303	2.50124	2212.54	FALSE	82
2022-09-13	15:50:10	0.266221	1.1842	2216.86	FALSE	82
2022-09-13	15:50:10	0.469326	2.08766	2214.63	FALSE	82
2022-09-13	15:50:10	0.325967	1.44997	2218.31	FALSE	82
2022-09-13	15:50:11	0.538282	2.39439	2217.02	FALSE	82
2022-09-13	15:50:11	0.267697	1.19077	2219.5	FALSE	82
2022-09-13	15:50:11	0.416043	1.85064	2218.87	FALSE	82
2022-09-13	15:50:11	0.318741	1.41782	2220.92	FALSE	82
2022-09-13	15:50:12	0.522964	2.32625	2221.2	FALSE	82
2022-09-13	15:50:12	0.311209	1.38432	2222.3	FALSE	82
2022-09-13	15:50:12	0.431972	1.9215	2223.12	FALSE	82
2022-09-13	15:50:12	0.407646	1.81329	2224.12	FALSE	82
2022-09-13	15:50:13	0.544389	2.42155	2225.54	FALSE	82
2022-09-13	15:50:13	0.687646	3.05879	2227.17	FALSE	82
2022-09-13	15:50:13	0.560878	2.4949	2228.04	FALSE	82
2022-09-13	15:50:14	0.471616	2.09784	2229.27	FALSE	82
2022-09-13	15:50:14	0.570496	2.53768	2230.57	FALSE	82
2022-09-13	15:50:14	0.393397	1.74991	2231.02	FALSE	82
2022-09-13	15:50:14	0.563422	2.50621	2233.08	FALSE	82
2022-09-13	15:50:15	0.294567	1.31029	2232.33	FALSE	82
2022-09-13	15:50:15	0.548155	2.4383	2235.52	FALSE	82
2022-09-13	15:50:15	0.314618	1.39948	2233.73	FALSE	82
2022-09-13	15:50:15	0.526272	2.34096	2237.86	FALSE	82
2022-09-13	15:50:16	0.305916	1.36078	2235.09	FALSE	82
2022-09-13	15:50:16	0.581489	2.58658	2240.45	FALSE	82
2022-09-13	15:50:16	0.333753	1.4846	2236.58	FALSE	82
2022-09-13	15:50:16	0.495738	2.20514	2242.65	FALSE	82
2022-09-13	15:50:17	0.354618	1.57741	2238.16	FALSE	82
2022-09-13	15:50:17	0.537774	2.39213	2245.04	FALSE	82
2022-09-13	15:50:17	0.515585	2.29343	2240.45	FALSE	82
2022-09-13	15:50:18	0.649529	2.88923	2247.93	FALSE	82
2022-09-13	15:50:18	0.342964	1.52557	2241.97	FALSE	82
2022-09-13	15:50:18	0.559707	2.48969	2250.42	FALSE	82
2022-09-13	15:50:18	0.574059	2.55353	2244.53	FALSE	82
2022-09-13	15:50:19	0.637774	2.83695	2253.26	FALSE	82
2022-09-13	15:50:19	0.387341	1.72297	2246.25	FALSE	82
2022-09-13	15:50:19	0.619046	2.75364	2256.01	FALSE	82
2022-09-13	15:50:19	0.529886	2.35704	2248.61	FALSE	82
2022-09-13	15:50:20	0.752634	3.34787	2259.36	FALSE	82
2022-09-13	15:50:20	0.391972	1.74357	2250.35	FALSE	82
2022-09-13	15:50:20	0.83472	3.713	2263.07	FALSE	82
2022-09-13	15:50:20	0.490598	2.18228	2252.53	FALSE	82
2022-09-13	15:50:21	0.857774	3.81555	2266.89	FALSE	82
2022-09-13	15:50:21	0.343066	1.52603	2254.06	FALSE	82
2022-09-13	15:50:21	0.758995	3.37616	2270.27	FALSE	82
2022-09-13	15:50:22	0.355636	1.58194	2255.64	FALSE	82
2022-09-13	15:50:22	0.569479	2.53316	2272.8	FALSE	82
2022-09-13	15:50:22	0.267799	1.19122	2256.83	FALSE	82
2022-09-13	15:50:22	0.554567	2.46682	2275.27	FALSE	82
2022-09-13	15:50:23	0.248054	1.10339	2257.94	FALSE	82
2022-09-13	15:50:23	0.594567	2.64475	2277.91	FALSE	82
2022-09-13	15:50:23	0.289987	1.28992	2259.23	FALSE	82
2022-09-13	15:50:23	0.690649	3.07214	2280.98	FALSE	82
2022-09-13	15:50:24	0.355331	1.58058	2260.81	FALSE	82
2022-09-13	15:50:24	-0.0889437	-0.395639	2280.98	FALSE	82
2022-09-13	15:50:24	-0.229249	-1.01975	2260.81	FALSE	82
2022-09-13	15:50:24	-0.215203	-0.957266	2280.98	FALSE	82
2022-09-13	15:50:25	-0.0735239	-0.327049	2260.81	FALSE	82
2022-09-13	15:50:25	-0.0109285	-0.0486122	2280.98	FALSE	82
2022-09-13	15:50:25	0.0820485	0.364968	2261.17	FALSE	82
2022-09-13	15:50:26	0.18841	0.838085	2281.82	FALSE	82
2022-09-13	15:50:26	0.052074	0.231636	2261.4	FALSE	82
2022-09-13	15:50:26	0.143524	0.638423	2282.46	FALSE	82
2022-09-13	15:50:26	0.0505473	0.224844	2261.63	FALSE	82
2022-09-13	15:50:27	0.141743	0.630501	2283.09	FALSE	82
2022-09-13	15:50:27	0.0546185	0.242954	2261.87	FALSE	82
2022-09-13	15:50:27	0.28215	1.25506	2284.34	FALSE	82
2022-09-13	15:50:27	0.597417	2.65743	2264.53	FALSE	82
2022-09-13	15:50:28	0.344898	1.53418	2285.88	FALSE	82
2022-09-13	15:50:28	0.613295	2.72806	2267.26	FALSE	82
2022-09-13	15:50:28	0.368868	1.6408	2287.52	FALSE	82
2022-09-13	15:50:28	0.303982	1.35217	2268.61	FALSE	82
2022-09-13	15:50:29	0.358486	1.59462	2289.11	FALSE	82
2022-09-13	15:50:29	0.308104	1.37051	2269.98	FALSE	82
2022-09-13	15:50:29	0.27187	1.20933	2290.32	FALSE	82
2022-09-13	15:50:30	0.219657	0.977078	2270.96	FALSE	82
2022-09-13	15:50:30	0.31243	1.38975	2291.71	FALSE	82
2022-09-13	15:50:30	0.213041	0.947649	2271.9	FALSE	82
2022-09-13	15:50:30	0.265255	1.17991	2292.89	FALSE	82
2022-09-13	15:50:31	0.156094	0.694337	2272.6	FALSE	82
2022-09-13	15:50:31	0.34215	1.52195	2294.42	FALSE	82
2022-09-13	15:50:31	0.156756	0.697282	2273.3	FALSE	82
2022-09-13	15:50:31	0.264542	1.17674	2295.59	FALSE	82
2022-09-13	15:50:32	0.166985	0.742783	2274.04	FALSE	82
2022-09-13	15:50:32	0.335585	1.49275	2297.08	FALSE	82
2022-09-13	15:50:32	0.330242	1.46898	2275.51	FALSE	82
2022-09-13	15:50:32	0.430445	1.91471	2299	FALSE	82
2022-09-13	15:50:33	0.997875	4.43875	2279.95	FALSE	82
2022-09-13	15:50:33	1.89879	8.4462	2307.45	FALSE	82
2022-09-13	15:50:33	1.52378	6.77808	2286.72	FALSE	82
2022-09-13	15:50:34	1.11416	4.95601	2312.4	FALSE	82
2022-09-13	15:50:34	0.956603	4.25516	2290.98	FALSE	82
2022-09-13	15:50:34	0.325458	1.4477	2313.85	FALSE	82
2022-09-13	15:50:34	0.306476	1.36327	2292.34	FALSE	82
2022-09-13	15:50:35	0.410852	1.82755	2315.68	FALSE	82
2022-09-13	15:50:35	0.538232	2.39416	2294.74	FALSE	82
2022-09-13	15:50:35	1.07233	4.76994	2320.45	FALSE	82
2022-09-13	15:50:35	1.39732	6.21556	2300.95	FALSE	82
2022-09-13	15:50:36	0.997417	4.43671	2324.88	FALSE	82
2022-09-13	15:50:36	0.436145	1.94006	2302.89	FALSE	82
2022-09-13	15:50:36	0.358333	1.59394	2326.48	FALSE	82
2022-09-13	15:50:36	0.3907	1.73791	2304.63	FALSE	82
2022-09-13	15:50:37	0.273601	1.21703	2327.69	FALSE	82
2022-09-13	15:50:37	0.316196	1.4065	2306.04	FALSE	82
2022-09-13	15:50:37	0.182252	0.810693	2328.51	FALSE	82
2022-09-13	15:50:38	0.356908	1.5876	2307.62	FALSE	82
2022-09-13	15:50:38	0.109784	0.488341	2328.99	FALSE	82
2022-09-13	15:50:38	2.08861	9.29056	2316.92	FALSE	82
2022-09-13	15:50:38	3.93808	17.5174	2346.51	1	83
2022-09-13	15:50:39	6.36087	28.2944	2345.21	1	84
2022-09-13	15:50:39	4.44653	19.7791	2366.29	1	85
2022-09-13	15:50:39	5.52062	24.5568	2369.77	1	86
2022-09-13	15:50:39	3.26602	14.5279	2380.82	1	87
2022-09-13	15:50:40	3.81904	16.9879	2386.75	1	88
2022-09-13	15:50:40	2.09737	9.32952	2390.15	FALSE	88
2022-09-13	15:50:40	1.36271	6.06161	2392.82	FALSE	88
2022-09-13	15:50:40	2.01849	8.97865	2399.13	FALSE	88
2022-09-13	15:50:41	1.36276	6.06183	2398.88	FALSE	88
2022-09-13	15:50:41	1.64927	7.33628	2406.46	FALSE	88
2022-09-13	15:50:41	0.946578	4.21057	2403.09	FALSE	88
2022-09-13	15:50:42	1.22546	5.45109	2411.91	FALSE	88
2022-09-13	15:50:42	0.777773	3.45969	2406.55	FALSE	88
2022-09-13	15:50:42	0.904949	4.02539	2415.94	FALSE	88
2022-09-13	15:50:42	0.57416	2.55398	2409.1	FALSE	88
2022-09-13	15:50:43	0.74785	3.32659	2419.27	FALSE	88
2022-09-13	15:50:43	0.246527	1.0966	2410.2	FALSE	88
2022-09-13	15:50:43	0.474771	2.11188	2421.38	FALSE	88
2022-09-13	15:50:43	0.445865	1.9833	2412.18	FALSE	88
2022-09-13	15:50:44	0.428461	1.90588	2423.28	FALSE	88
2022-09-13	15:50:44	0.385356	1.71414	2413.9	FALSE	88
2022-09-13	15:50:44	0.425916	1.89456	2425.18	FALSE	88
2022-09-13	15:50:44	0.577977	2.57096	2416.47	FALSE	88
2022-09-13	15:50:45	0.607799	2.70361	2427.88	FALSE	88
2022-09-13	15:50:45	0.522048	2.32217	2418.79	FALSE	88
2022-09-13	15:50:45	0.733244	3.26162	2431.14	FALSE	88
2022-09-13	15:50:46	0.609784	2.71244	2421.5	FALSE	88
2022-09-13	15:50:46	0.794517	3.53417	2434.68	FALSE	88
2022-09-13	15:50:46	0.584186	2.59858	2424.1	FALSE	88
2022-09-13	15:50:46	0.650903	2.89535	2437.57	FALSE	88
2022-09-13	15:50:47	0.733753	3.26388	2427.36	FALSE	88
2022-09-13	15:50:47	0.492176	2.1893	2439.76	FALSE	88
2022-09-13	15:50:47	0.563473	2.50644	2429.87	FALSE	88
2022-09-13	15:50:47	0.789071	3.50995	2443.27	FALSE	88
2022-09-13	15:50:48	0.711565	3.16518	2433.04	FALSE	88
2022-09-13	15:50:48	0.69299	3.08256	2446.35	FALSE	88
2022-09-13	15:50:48	0.792074	3.5233	2436.56	FALSE	88
2022-09-13	15:50:48	0.445204	1.98036	2448.33	FALSE	88
2022-09-13	15:50:49	0.69187	3.07758	2439.64	FALSE	88
2022-09-13	15:50:49	0.439656	1.95568	2450.29	FALSE	88
2022-09-13	15:50:49	0.619097	2.75387	2442.39	FALSE	88
2022-09-13	15:50:49	0.280318	1.24691	2451.54	FALSE	88
2022-09-13	15:50:50	0.564644	2.51165	2444.9	FALSE	88
2022-09-13	15:50:50	0.226272	1.0065	2452.54	FALSE	88
2022-09-13	15:50:50	0.495534	2.20423	2447.11	FALSE	88
2022-09-13	15:50:51	0.242049	1.07668	2453.62	FALSE	88
2022-09-13	15:50:51	0.488817	2.17436	2449.28	FALSE	88
2022-09-13	15:50:51	0.265356	1.18036	2454.8	FALSE	88
2022-09-13	15:50:51	0.409987	1.8237	2451.1	FALSE	88
2022-09-13	15:50:52	0.30271	1.34651	2456.15	FALSE	88
2022-09-13	15:50:52	0.520827	2.31674	2453.42	FALSE	88
2022-09-13	15:50:52	0.41869	1.86242	2458.01	FALSE	88
2022-09-13	15:50:52	0.43472	1.93372	2455.35	FALSE	88
2022-09-13	15:50:53	0.354008	1.5747	2459.58	FALSE	88
2022-09-13	15:50:53	0.403015	1.79269	2457.15	FALSE	88
2022-09-13	15:50:53	0.28215	1.25506	2460.84	FALSE	88
2022-09-13	15:50:53	0.283677	1.26185	2458.41	FALSE	88
2022-09-13	15:50:54	0.384237	1.70916	2462.55	FALSE	88
2022-09-13	15:50:54	0.343219	1.52671	2459.94	FALSE	88
2022-09-13	15:50:54	0.358384	1.59416	2464.14	FALSE	88
2022-09-13	15:50:55	0.256298	1.14006	2461.08	FALSE	88
2022-09-13	15:50:55	0.500725	2.22732	2466.37	FALSE	88
2022-09-13	15:50:55	0.299148	1.33067	2462.41	FALSE	88
2022-09-13	15:50:55	0.400267	1.78047	2468.15	FALSE	88
2022-09-13	15:50:56	0.192735	0.857324	2463.26	FALSE	88
2022-09-13	15:50:56	0.351005	1.56134	2469.71	FALSE	88
2022-09-13	15:50:56	0.296959	1.32093	2464.58	FALSE	88
2022-09-13	15:50:56	0.185916	0.826992	2470.54	FALSE	88
2022-09-13	15:50:57	0.255585	1.13689	2465.72	FALSE	88
2022-09-13	15:50:57	0.224237	0.997451	2471.54	FALSE	88
2022-09-13	15:50:57	0.459097	2.04216	2467.76	FALSE	88
2022-09-13	15:50:57	0.213804	0.951043	2472.49	FALSE	88
2022-09-13	15:50:58	0.337621	1.50181	2469.27	FALSE	88
2022-09-13	15:50:58	0.0819977	0.364742	2472.85	FALSE	88
2022-09-13	15:50:58	0.323168	1.43752	2470.7	FALSE	88
2022-09-13	15:50:59	0.116451	0.517997	2473.37	FALSE	88
2022-09-13	15:50:59	0.383117	1.70418	2472.41	FALSE	88
2022-09-13	15:50:59	0.0246949	0.109848	2473.48	FALSE	88
2022-09-13	15:50:59	0.0430664	0.191568	2472.6	FALSE	88
2022-09-13	15:51:00	0.122812	0.546292	2474.03	FALSE	88
2022-09-13	15:51:00	0.487596	2.16892	2474.77	FALSE	88
2022-09-13	15:51:00	1.14342	5.08616	2479.11	FALSE	88
2022-09-13	15:51:00	0.485	2.15738	2476.93	FALSE	88
2022-09-13	15:51:01	0.405764	1.80492	2480.92	FALSE	88
2022-09-13	15:51:01	0.45355	2.01748	2478.94	FALSE	88
2022-09-13	15:51:01	0.25757	1.14572	2482.06	FALSE	88
2022-09-13	15:51:01	0.355331	1.58058	2480.52	FALSE	88
2022-09-13	15:51:02	0.214313	0.953307	2483.02	FALSE	88
2022-09-13	15:51:02	0.416959	1.85472	2482.38	FALSE	88
2022-09-13	15:51:02	0.20159	0.896713	2483.91	FALSE	88
2022-09-13	15:51:03	0.276451	1.22971	2483.61	FALSE	88
2022-09-13	15:51:03	0.200471	0.891735	2484.81	FALSE	88
2022-09-13	15:51:03	0.336807	1.49818	2485.11	FALSE	88
2022-09-13	15:51:03	0.0776719	0.3455	2485.15	FALSE	88

## Sheet: Sulley_star_202291315462 (2)
Date	Time	Lbs	Total force x time			**GoPro Fitting: 1534
2022-09-13	15:46:03	0.320929	0.320929	FALSE	0
2022-09-13	15:46:03	0.327036	0.647965	FALSE	0
2022-09-13	15:46:03	0.322863	0.970828	FALSE	0
2022-09-13	15:46:03	0.306069	1.2769	FALSE	0
2022-09-13	15:46:04	0.353499	1.6304	FALSE	0
2022-09-13	15:46:04	0.360216	1.99061	FALSE	0
2022-09-13	15:46:04	0.39187	2.38248	FALSE	0
2022-09-13	15:46:04	0.387901	2.77038	FALSE	0
2022-09-13	15:46:05	0.387036	3.15742	FALSE	0
2022-09-13	15:46:05	0.390038	3.54746	FALSE	0
2022-09-13	15:46:05	0.376705	3.92416	FALSE	0
2022-09-13	15:46:05	0.375331	4.29949	FALSE	0
2022-09-13	15:46:06	0.365305	4.6648	FALSE	0
2022-09-13	15:46:06	0.370496	5.03529	FALSE	0
2022-09-13	15:46:06	0.375942	5.41124	FALSE	0
2022-09-13	15:46:06	0.37584	5.78708	FALSE	0
2022-09-13	15:46:07	0.369275	6.15635	FALSE	0
2022-09-13	15:46:07	0.389987	6.54634	FALSE	0
2022-09-13	15:46:07	0.383117	6.92946	FALSE	0
2022-09-13	15:46:08	0.388003	7.31746	FALSE	0
2022-09-13	15:46:08	0.385967	7.70343	FALSE	0
2022-09-13	15:46:08	0.385204	8.08863	FALSE	0
2022-09-13	15:46:08	0.385814	8.47444	FALSE	0
2022-09-13	15:46:09	0.380827	8.85527	FALSE	0
2022-09-13	15:46:09	0.392634	9.2479	FALSE	0
2022-09-13	15:46:09	0.41584	9.66374	FALSE	0
2022-09-13	15:46:09	0.372125	10.0359	FALSE	0
2022-09-13	15:46:10	0.38215	10.418	FALSE	0
2022-09-13	15:46:10	0.327188	10.7452	FALSE	0
2022-09-13	15:46:10	0.437316	11.1825	FALSE	0
2022-09-13	15:46:10	0.427392	11.6099	FALSE	0
2022-09-13	15:46:11	0.404491	12.0144	FALSE	0
2022-09-13	15:46:11	0.512023	12.5264	FALSE	0
2022-09-13	15:46:11	0.396094	12.9225	FALSE	0
2022-09-13	15:46:12	0.41869	13.3412	FALSE	0
2022-09-13	15:46:12	0.434059	13.7753	FALSE	0
2022-09-13	15:46:12	0.383677	14.1589	FALSE	0
2022-09-13	15:46:12	0.314364	14.4733	FALSE	0
2022-09-13	15:46:13	0.387188	14.8605	FALSE	0
2022-09-13	15:46:13	0.338181	15.1987	FALSE	0
2022-09-13	15:46:13	0.314313	15.513	FALSE	0
2022-09-13	15:46:13	0.281082	15.7941	FALSE	0
2022-09-13	15:46:14	0.334109	16.1282	FALSE	0
2022-09-13	15:46:14	0.251463	16.3796	FALSE	0
2022-09-13	15:46:14	0.0584353	16.4381	FALSE	0
2022-09-13	15:46:14	0.138028	16.5761	FALSE	0
2022-09-13	15:46:15	0.200624	16.7767	FALSE	0
2022-09-13	15:46:15	0.295636	17.0724	FALSE	0
2022-09-13	15:46:15	0.710598	17.783	FALSE	0
2022-09-13	15:46:16	3.31258	21.0956	1	1
2022-09-13	15:46:16	4.2336	25.3292	1	2
2022-09-13	15:46:16	1.44159	26.7707	FALSE	2
2022-09-13	15:46:16	0.477621	27.2484	FALSE	2
2022-09-13	15:46:17	0.334822	27.5832	FALSE	2
2022-09-13	15:46:17	0.325712	27.9089	FALSE	2
2022-09-13	15:46:17	-0.000953954	27.9089	FALSE	2
2022-09-13	15:46:17	0.0448984	27.9538	FALSE	2
2022-09-13	15:46:18	0.0375193	27.9913	FALSE	2
2022-09-13	15:46:18	0.157977	28.1493	FALSE	2
2022-09-13	15:46:18	3.26057	31.4099	1	3
2022-09-13	15:46:18	4.67182	36.0817	1	4
2022-09-13	15:46:19	2.1591	38.2408	FALSE	4
2022-09-13	15:46:19	2.34393	40.5847	FALSE	4
2022-09-13	15:46:19	0.81645	41.4012	FALSE	4
2022-09-13	15:46:20	0.258842	41.66	FALSE	4
2022-09-13	15:46:20	0.948919	42.6089	FALSE	4
2022-09-13	15:46:20	0.622863	43.2318	FALSE	4
2022-09-13	15:46:20	0.416094	43.6479	FALSE	4
2022-09-13	15:46:21	0.29126	43.9391	FALSE	4
2022-09-13	15:46:21	0.720369	44.6595	FALSE	4
2022-09-13	15:46:21	1.08047	45.74	FALSE	4
2022-09-13	15:46:21	2.34607	48.086	FALSE	4
2022-09-13	15:46:22	4.47935	52.5654	1	5
2022-09-13	15:46:22	3.41716	55.9826	1	6
2022-09-13	15:46:22	3.90363	59.8862	1	7
2022-09-13	15:46:22	1.63782	61.524	FALSE	7
2022-09-13	15:46:23	1.9221	63.4461	FALSE	7
2022-09-13	15:46:23	0.916349	64.3625	FALSE	7
2022-09-13	15:46:23	0.686934	65.0494	FALSE	7
2022-09-13	15:46:24	0.345458	65.3948	FALSE	7
2022-09-13	15:46:24	-0.0131677	65.3948	FALSE	7
2022-09-13	15:46:24	0.0673921	65.4622	FALSE	7
2022-09-13	15:46:24	-0.00914732	65.4622	FALSE	7
2022-09-13	15:46:25	0.0417941	65.504	FALSE	7
2022-09-13	15:46:25	-0.131081	65.504	FALSE	7
2022-09-13	15:46:25	-0.0170863	65.504	FALSE	7
2022-09-13	15:46:25	-0.0273153	65.504	FALSE	7
2022-09-13	15:46:26	-0.133829	65.504	FALSE	7
2022-09-13	15:46:26	0.0399112	65.5439	FALSE	7
2022-09-13	15:46:26	0.0338552	65.5778	FALSE	7
2022-09-13	15:46:26	0.150649	65.7284	FALSE	7
2022-09-13	15:46:27	0.0545676	65.783	FALSE	7
2022-09-13	15:46:27	0.273652	66.0567	FALSE	7
2022-09-13	15:46:27	0.0963488	66.153	FALSE	7
2022-09-13	15:46:27	0.0690206	66.222	FALSE	7
2022-09-13	15:46:28	0.104695	66.3267	FALSE	7
2022-09-13	15:46:28	0.0421503	66.3689	FALSE	7
2022-09-13	15:46:28	0.300318	66.6692	FALSE	7
2022-09-13	15:46:29	0.388817	67.058	FALSE	7
2022-09-13	15:46:29	0.662964	67.721	FALSE	7
2022-09-13	15:46:29	0.558079	68.2791	FALSE	7
2022-09-13	15:46:29	0.920674	69.1997	FALSE	7
2022-09-13	15:46:30	0.962812	70.1625	FALSE	7
2022-09-13	15:46:30	0.671921	70.8345	FALSE	7
2022-09-13	15:46:30	0.34673	71.1812	FALSE	7
2022-09-13	15:46:30	0.102557	71.2838	FALSE	7
2022-09-13	15:46:31	0.339453	71.6232	FALSE	7
2022-09-13	15:46:31	0.167748	71.791	FALSE	7
2022-09-13	15:46:31	1.32943	73.1204	FALSE	7
2022-09-13	15:46:31	0.447647	73.568	FALSE	7
2022-09-13	15:46:32	1.08922	74.6573	FALSE	7
2022-09-13	15:46:32	1.23467	75.8919	FALSE	7
2022-09-13	15:46:32	1.02378	76.9157	FALSE	7
2022-09-13	15:46:33	1.39075	78.3065	FALSE	7
2022-09-13	15:46:33	0.596959	78.9034	FALSE	7
2022-09-13	15:46:33	0.903423	79.8068	FALSE	7
2022-09-13	15:46:33	0.429173	80.236	FALSE	7
2022-09-13	15:46:34	0.493499	80.7295	FALSE	7
2022-09-13	15:46:34	0.987697	81.7172	FALSE	7
2022-09-13	15:46:34	0.155585	81.8728	FALSE	7
2022-09-13	15:46:34	0.431616	82.3044	FALSE	7
2022-09-13	15:46:35	0.111056	82.4155	FALSE	7
2022-09-13	15:46:35	0.330852	82.7463	FALSE	7
2022-09-13	15:46:35	0.204288	82.9506	FALSE	7
2022-09-13	15:46:35	0.281132	83.2317	FALSE	7
2022-09-13	15:46:36	0.424288	83.656	FALSE	7
2022-09-13	15:46:36	0.226272	83.8823	FALSE	7
2022-09-13	15:46:36	0.465713	84.348	FALSE	7
2022-09-13	15:46:37	0.222405	84.5704	FALSE	7
2022-09-13	15:46:37	0.853092	85.4235	FALSE	7
2022-09-13	15:46:37	0.16215	85.5857	FALSE	7
2022-09-13	15:46:37	0.517264	86.1029	FALSE	7
2022-09-13	15:46:38	0.471616	86.5745	FALSE	7
2022-09-13	15:46:38	0.372379	86.9469	FALSE	7
2022-09-13	15:46:38	0.646425	87.5933	FALSE	7
2022-09-13	15:46:38	0.270496	87.8638	FALSE	7
2022-09-13	15:46:39	0.636451	88.5003	FALSE	7
2022-09-13	15:46:39	0.577621	89.0779	FALSE	7
2022-09-13	15:46:39	3.23004	92.3079	1	8
2022-09-13	15:46:39	5.52749	97.8354	1	9
2022-09-13	15:46:40	6.22891	104.064	1	10
2022-09-13	15:46:40	5.75701	109.821	1	11
2022-09-13	15:46:40	3.18444	113.006	1	12
2022-09-13	15:46:41	6.78505	119.791	1	13
2022-09-13	15:46:41	2.97894	122.77	FALSE	13
2022-09-13	15:46:41	4.06128	126.831	1	14
2022-09-13	15:46:41	5.70474	132.536	1	15
2022-09-13	15:46:42	2.18637	134.722	FALSE	15
2022-09-13	15:46:42	3.72164	138.444	1	16
2022-09-13	15:46:42	1.61599	140.06	FALSE	16
2022-09-13	15:46:42	0.646832	140.707	FALSE	16
2022-09-13	15:46:43	1.91569	142.622	FALSE	16
2022-09-13	15:46:43	0.645509	143.268	FALSE	16
2022-09-13	15:46:43	1.45569	144.724	FALSE	16
2022-09-13	15:46:43	1.05431	145.778	FALSE	16
2022-09-13	15:46:44	0.935687	146.714	FALSE	16
2022-09-13	15:46:44	1.37538	148.089	FALSE	16
2022-09-13	15:46:44	0.733753	148.823	FALSE	16
2022-09-13	15:46:45	1.48673	150.309	FALSE	16
2022-09-13	15:46:45	0.563015	150.872	FALSE	16
2022-09-13	15:46:45	0.94159	151.814	FALSE	16
2022-09-13	15:46:45	1.36017	153.174	FALSE	16
2022-09-13	15:46:46	1.12301	154.297	FALSE	16
2022-09-13	15:46:46	2.45039	156.748	FALSE	16
2022-09-13	15:46:46	0.826221	157.574	FALSE	16
2022-09-13	15:46:46	2.16668	159.74	FALSE	16
2022-09-13	15:46:47	2.1223	161.863	FALSE	16
2022-09-13	15:46:47	5.12464	166.987	1	17
2022-09-13	15:46:47	6.37365	173.361	1	18
2022-09-13	15:46:47	6.94998	180.311	1	19
2022-09-13	15:46:48	10.3605	190.672	1	20
2022-09-13	15:46:48	1.75304	192.425	FALSE	20
2022-09-13	15:46:48	4.10485	196.529	1	21
2022-09-13	15:46:49	2.60698	199.136	FALSE	21
2022-09-13	15:46:49	1.06897	200.205	FALSE	21
2022-09-13	15:46:49	3.18189	203.387	1	22
2022-09-13	15:46:49	0.670038	204.057	FALSE	22
2022-09-13	15:46:50	1.49645	205.554	FALSE	22
2022-09-13	15:46:50	1.54581	207.1	FALSE	22
2022-09-13	15:46:50	0.814313	207.914	FALSE	22
2022-09-13	15:46:50	1.40123	209.315	FALSE	22
2022-09-13	15:46:51	0.632277	209.947	FALSE	22
2022-09-13	15:46:51	1.37879	211.326	FALSE	22
2022-09-13	15:46:51	1.242	212.568	FALSE	22
2022-09-13	15:46:51	1.16841	213.737	FALSE	22
2022-09-13	15:46:52	0.945254	214.682	FALSE	22
2022-09-13	15:46:52	0.99014	215.672	FALSE	22
2022-09-13	15:46:52	1.3395	217.011	FALSE	22
2022-09-13	15:46:53	0.744135	217.756	FALSE	22
2022-09-13	15:46:53	1.72139	219.477	FALSE	22
2022-09-13	15:46:53	0.661183	220.138	FALSE	22
2022-09-13	15:46:53	1.09426	221.232	FALSE	22
2022-09-13	15:46:54	0.444033	221.676	FALSE	22
2022-09-13	15:46:54	0.420827	222.097	FALSE	22
2022-09-13	15:46:54	0.913957	223.011	FALSE	22
2022-09-13	15:46:54	0.564542	223.576	FALSE	22
2022-09-13	15:46:55	1.14307	224.719	FALSE	22
2022-09-13	15:46:55	0.539147	225.258	FALSE	22
2022-09-13	15:46:55	1.3567	226.615	FALSE	22
2022-09-13	15:46:55	1.09528	227.71	FALSE	22
2022-09-13	15:46:56	1.48225	229.192	FALSE	22
2022-09-13	15:46:56	1.48744	230.68	FALSE	22
2022-09-13	15:46:56	0.735941	231.416	FALSE	22
2022-09-13	15:46:57	2.41009	233.826	FALSE	22
2022-09-13	15:46:57	1.16642	234.992	FALSE	22
2022-09-13	15:46:57	3.1793	238.171	1	23
2022-09-13	15:46:57	1.2305	239.402	FALSE	23
2022-09-13	15:46:58	1.57319	240.975	FALSE	23
2022-09-13	15:46:58	1.98047	242.956	FALSE	23
2022-09-13	15:46:58	0.89014	243.846	FALSE	23
2022-09-13	15:46:58	1.98515	245.831	FALSE	23
2022-09-13	15:46:59	0.398435	246.229	FALSE	23
2022-09-13	15:46:59	0.966476	247.196	FALSE	23
2022-09-13	15:46:59	0.822303	248.018	FALSE	23
2022-09-13	15:46:59	0.64729	248.665	FALSE	23
2022-09-13	15:47:00	0.757519	249.423	FALSE	23
2022-09-13	15:47:00	0.416756	249.84	FALSE	23
2022-09-13	15:47:00	0.75986	250.6	FALSE	23
2022-09-13	15:47:01	0.492532	251.092	FALSE	23
2022-09-13	15:47:01	0.822557	251.915	FALSE	23
2022-09-13	15:47:01	0.426323	252.341	FALSE	23
2022-09-13	15:47:01	0.807952	253.149	FALSE	23
2022-09-13	15:47:02	0.71243	253.861	FALSE	23
2022-09-13	15:47:02	0.900165	254.761	FALSE	23
2022-09-13	15:47:02	0.873753	255.635	FALSE	23
2022-09-13	15:47:02	0.972532	256.608	FALSE	23
2022-09-13	15:47:03	1.58072	258.188	FALSE	23
2022-09-13	15:47:03	1.55767	259.746	FALSE	23
2022-09-13	15:47:03	2.11045	261.857	FALSE	23
2022-09-13	15:47:03	1.78307	263.64	FALSE	23
2022-09-13	15:47:04	3.71976	267.359	1	24
2022-09-13	15:47:04	2.34704	269.706	FALSE	24
2022-09-13	15:47:04	4.15192	273.858	1	25
2022-09-13	15:47:05	2.05294	275.911	FALSE	25
2022-09-13	15:47:05	2.19915	278.11	FALSE	25
2022-09-13	15:47:05	0.209835	278.32	FALSE	25
2022-09-13	15:47:05	-6.92619	278.32	FALSE	25
2022-09-13	15:47:06	-0.106399	278.32	FALSE	25
2022-09-13	15:47:06	-0.639172	278.32	FALSE	25
2022-09-13	15:47:06	-0.836475	278.32	FALSE	25
2022-09-13	15:47:06	-0.8436	278.32	FALSE	25
2022-09-13	15:47:07	-0.636729	278.32	FALSE	25
2022-09-13	15:47:07	-0.514847	278.32	FALSE	25
2022-09-13	15:47:07	-0.103295	278.32	FALSE	25
2022-09-13	15:47:07	-0.0901651	278.32	FALSE	25
2022-09-13	15:47:08	-0.158715	278.32	FALSE	25
2022-09-13	15:47:08	-0.0801905	278.32	FALSE	25
2022-09-13	15:47:08	-0.0989692	278.32	FALSE	25
2022-09-13	15:47:08	-0.3579	278.32	FALSE	25
2022-09-13	15:47:09	-0.299529	278.32	FALSE	25
2022-09-13	15:47:09	-0.166196	278.32	FALSE	25
2022-09-13	15:47:09	0.180624	278.501	FALSE	25
2022-09-13	15:47:10	0.183575	278.685	FALSE	25
2022-09-13	15:47:10	0.0272903	278.712	FALSE	25
2022-09-13	15:47:10	0.169326	278.881	FALSE	25
2022-09-13	15:47:10	-0.143702	278.881	FALSE	25
2022-09-13	15:47:11	0.111412	278.993	FALSE	25
2022-09-13	15:47:11	-0.0988165	278.993	FALSE	25
2022-09-13	15:47:11	0.0546694	279.047	FALSE	25
2022-09-13	15:47:11	-0.0817173	279.047	FALSE	25
2022-09-13	15:47:12	0.0166033	279.064	FALSE	25
2022-09-13	15:47:12	0.457316	279.521	FALSE	25
2022-09-13	15:47:12	4.68149	284.203	1	26
2022-09-13	15:47:12	7.48591	291.689	1	27
2022-09-13	15:47:13	4.00841	295.697	1	28
2022-09-13	15:47:13	4.71416	300.411	1	29
2022-09-13	15:47:13	1.74495	302.156	FALSE	29
2022-09-13	15:47:14	1.53793	303.694	FALSE	29
2022-09-13	15:47:14	1.79228	305.486	FALSE	29
2022-09-13	15:47:14	1.62688	307.113	FALSE	29
2022-09-13	15:47:14	2.57192	309.685	FALSE	29
2022-09-13	15:47:15	1.49045	311.176	FALSE	29
2022-09-13	15:47:15	2.82653	314.002	FALSE	29
2022-09-13	15:47:15	1.7535	315.756	FALSE	29
2022-09-13	15:47:15	1.40363	317.159	FALSE	29
2022-09-13	15:47:16	2.55793	319.717	FALSE	29
2022-09-13	15:47:16	1.33625	321.053	FALSE	29
2022-09-13	15:47:16	2.10989	323.163	FALSE	29
2022-09-13	15:47:16	0.802761	323.966	FALSE	29
2022-09-13	15:47:17	1.3565	325.323	FALSE	29
2022-09-13	15:47:17	0.874415	326.197	FALSE	29
2022-09-13	15:47:17	0.498791	326.696	FALSE	29
2022-09-13	15:47:18	0.763728	327.459	FALSE	29
2022-09-13	15:47:18	0.361132	327.821	FALSE	29
2022-09-13	15:47:18	0.807494	328.628	FALSE	29
2022-09-13	15:47:18	0.451361	329.079	FALSE	29
2022-09-13	15:47:19	0.84444	329.924	FALSE	29
2022-09-13	15:47:19	0.7593	330.683	FALSE	29
2022-09-13	15:47:19	0.767901	331.451	FALSE	29
2022-09-13	15:47:19	0.632277	332.083	FALSE	29
2022-09-13	15:47:20	0.451056	332.534	FALSE	29
2022-09-13	15:47:20	0.688562	333.223	FALSE	29
2022-09-13	15:47:20	0.459402	333.682	FALSE	29
2022-09-13	15:47:20	2.10826	335.791	FALSE	29
2022-09-13	15:47:21	0.888817	336.679	FALSE	29
2022-09-13	15:47:21	2.49457	339.174	FALSE	29
2022-09-13	15:47:21	3.72123	342.895	1	30
2022-09-13	15:47:22	7.54011	350.435	1	31
2022-09-13	15:47:22	3.76103	354.196	1	32
2022-09-13	15:47:22	6.33757	360.534	1	33
2022-09-13	15:47:22	3.08378	363.618	1	34
2022-09-13	15:47:23	2.67243	366.29	FALSE	34
2022-09-13	15:47:23	1.25889	367.549	FALSE	34
2022-09-13	15:47:23	0.853041	368.402	FALSE	34
2022-09-13	15:47:23	0.739249	369.141	FALSE	34
2022-09-13	15:47:24	0.286425	369.428	FALSE	34
2022-09-13	15:47:24	0.63355	370.061	FALSE	34
2022-09-13	15:47:24	0.552125	370.613	FALSE	34
2022-09-13	15:47:24	0.814364	371.428	FALSE	34
2022-09-13	15:47:25	0.836298	372.264	FALSE	34
2022-09-13	15:47:25	0.58388	372.848	FALSE	34
2022-09-13	15:47:25	0.950089	373.798	FALSE	34
2022-09-13	15:47:26	0.689784	374.488	FALSE	34
2022-09-13	15:47:26	1.1738	375.662	FALSE	34
2022-09-13	15:47:26	0.373601	376.035	FALSE	34
2022-09-13	15:47:26	0.963677	376.999	FALSE	34
2022-09-13	15:47:27	0.425204	377.424	FALSE	34
2022-09-13	15:47:27	0.802863	378.227	FALSE	34
2022-09-13	15:47:27	0.427748	378.655	FALSE	34
2022-09-13	15:47:27	0.754974	379.41	FALSE	34
2022-09-13	15:47:28	0.631005	380.041	FALSE	34
2022-09-13	15:47:28	0.814008	380.855	FALSE	34
2022-09-13	15:47:28	0.865407	381.72	FALSE	34
2022-09-13	15:47:28	0.751463	382.472	FALSE	34
2022-09-13	15:47:29	1.2134	383.685	FALSE	34
2022-09-13	15:47:29	0.337468	384.022	FALSE	34
2022-09-13	15:47:29	1.28144	385.304	FALSE	34
2022-09-13	15:47:30	0.623677	385.928	FALSE	34
2022-09-13	15:47:30	1.99599	387.924	FALSE	34
2022-09-13	15:47:30	0.650751	388.574	FALSE	34
2022-09-13	15:47:30	1.21472	389.789	FALSE	34
2022-09-13	15:47:31	0.494008	390.283	FALSE	34
2022-09-13	15:47:31	0.337977	390.621	FALSE	34
2022-09-13	15:47:31	0.555178	391.176	FALSE	34
2022-09-13	15:47:31	0.311667	391.488	FALSE	34
2022-09-13	15:47:32	0.477977	391.966	FALSE	34
2022-09-13	15:47:32	0.280725	392.247	FALSE	34
2022-09-13	15:47:32	0.613906	392.86	FALSE	34
2022-09-13	15:47:32	0.201285	393.062	FALSE	34
2022-09-13	15:47:33	0.509682	393.571	FALSE	34
2022-09-13	15:47:33	0.332074	393.904	FALSE	34
2022-09-13	15:47:33	0.510903	394.414	FALSE	34
2022-09-13	15:47:34	0.187595	394.602	FALSE	34
2022-09-13	15:47:34	0.23584	394.838	FALSE	34
2022-09-13	15:47:34	0.216909	395.055	FALSE	34
2022-09-13	15:47:34	0.168206	395.223	FALSE	34
2022-09-13	15:47:35	0.112328	395.335	FALSE	34
2022-09-13	15:47:35	-0.0477733	395.335	FALSE	34
2022-09-13	15:47:35	0.0355346	395.371	FALSE	34
2022-09-13	15:47:35	0.00520383	395.376	FALSE	34
2022-09-13	15:47:36	0.0110562	395.387	FALSE	34
2022-09-13	15:47:36	-0.113168	395.387	FALSE	34
2022-09-13	15:47:36	0.0290715	395.416	FALSE	34
2022-09-13	15:47:36	-0.170623	395.416	FALSE	34
2022-09-13	15:47:37	-0.395458	395.416	FALSE	34
2022-09-13	15:47:37	-0.702429	395.416	FALSE	34
2022-09-13	15:47:37	-0.804974	395.416	FALSE	34
2022-09-13	15:47:38	-0.71846	395.416	FALSE	34
2022-09-13	15:47:38	-0.647875	395.416	FALSE	34
2022-09-13	15:47:38	-0.368842	395.416	FALSE	34
2022-09-13	15:47:38	-0.0716409	395.416	FALSE	34
2022-09-13	15:47:39	-0.0324043	395.416	FALSE	34
2022-09-13	15:47:39	0.220064	395.636	FALSE	34
2022-09-13	15:47:39	4.08474	399.721	1	35
2022-09-13	15:47:39	4.10169	403.823	1	36
2022-09-13	15:47:40	4.03533	407.858	1	37
2022-09-13	15:47:40	4.14281	412.001	1	38
2022-09-13	15:47:40	4.33782	416.339	1	39
2022-09-13	15:47:40	1.90994	418.249	FALSE	39
2022-09-13	15:47:41	1.2191	419.468	FALSE	39
2022-09-13	15:47:41	0.312685	419.78	FALSE	39
2022-09-13	15:47:41	0.499962	420.28	FALSE	39
2022-09-13	15:47:42	0.281387	420.562	FALSE	39
2022-09-13	15:47:42	0.554466	421.116	FALSE	39
2022-09-13	15:47:42	0.59355	421.71	FALSE	39
2022-09-13	15:47:42	0.703422	422.413	FALSE	39
2022-09-13	15:47:43	0.764084	423.177	FALSE	39
2022-09-13	15:47:43	0.672685	423.85	FALSE	39
2022-09-13	15:47:43	1.01034	424.86	FALSE	39
2022-09-13	15:47:43	0.456247	425.317	FALSE	39
2022-09-13	15:47:44	0.668562	425.985	FALSE	39
2022-09-13	15:47:44	0.688562	426.674	FALSE	39
2022-09-13	15:47:44	0.55126	427.225	FALSE	39
2022-09-13	15:47:44	0.50444	427.729	FALSE	39
2022-09-13	15:47:45	0.987799	428.717	FALSE	39
2022-09-13	15:47:45	1.345	430.062	FALSE	39
2022-09-13	15:47:45	1.77314	431.835	FALSE	39
2022-09-13	15:47:46	0.851005	432.686	FALSE	39
2022-09-13	15:47:46	0.657723	433.344	FALSE	39
2022-09-13	15:47:46	0.576959	433.921	FALSE	39
2022-09-13	15:47:46	0.509173	434.43	FALSE	39
2022-09-13	15:47:47	0.752939	435.183	FALSE	39
2022-09-13	15:47:47	1.3049	436.488	FALSE	39
2022-09-13	15:47:47	1.87614	438.364	FALSE	39
2022-09-13	15:47:47	4.40688	442.771	1	40
2022-09-13	15:47:48	4.71289	447.484	1	41
2022-09-13	15:47:48	2.09574	449.58	FALSE	41
2022-09-13	15:47:48	1.21533	450.795	FALSE	41
2022-09-13	15:47:48	0.765814	451.561	FALSE	41
2022-09-13	15:47:49	0.651768	452.213	FALSE	41
2022-09-13	15:47:49	0.631514	452.844	FALSE	41
2022-09-13	15:47:49	0.738995	453.583	FALSE	41
2022-09-13	15:47:49	2.07319	455.656	FALSE	41
2022-09-13	15:47:50	2.52485	458.181	FALSE	41
2022-09-13	15:47:50	1.57243	459.754	FALSE	41
2022-09-13	15:47:50	1.10408	460.858	FALSE	41
2022-09-13	15:47:51	1.43538	462.293	FALSE	41
2022-09-13	15:47:51	2.01177	464.305	FALSE	41
2022-09-13	15:47:51	2.4594	466.764	FALSE	41
2022-09-13	15:47:51	2.98088	469.745	FALSE	41
2022-09-13	15:47:52	3.25095	472.996	1	42
2022-09-13	15:47:52	2.83762	475.834	FALSE	42
2022-09-13	15:47:52	2.46647	478.3	FALSE	42
2022-09-13	15:47:52	2.36551	480.666	FALSE	42
2022-09-13	15:47:53	2.29976	482.965	FALSE	42
2022-09-13	15:47:53	2.23187	485.197	FALSE	42
2022-09-13	15:47:53	2.15513	487.352	FALSE	42
2022-09-13	15:47:53	2.10042	489.453	FALSE	42
2022-09-13	15:47:54	2.6679	492.121	FALSE	42
2022-09-13	15:47:54	0.897621	493.018	FALSE	42
2022-09-13	15:47:54	0.306069	493.324	FALSE	42
2022-09-13	15:47:55	0.289733	493.614	FALSE	42
2022-09-13	15:47:55	0.301183	493.915	FALSE	42
2022-09-13	15:47:55	0.204237	494.119	FALSE	42
2022-09-13	15:47:55	0.136501	494.256	FALSE	42
2022-09-13	15:47:56	0.371056	494.627	FALSE	42
2022-09-13	15:47:56	0.212125	494.839	FALSE	42
2022-09-13	15:47:56	0.0963997	494.936	FALSE	42
2022-09-13	15:47:56	-0.0540837	494.936	FALSE	42
2022-09-13	15:47:57	-0.399732	494.936	FALSE	42
2022-09-13	15:47:57	0.0744659	495.01	FALSE	42
2022-09-13	15:47:57	0.216909	495.227	FALSE	42
2022-09-13	15:47:57	6.92093	502.148	1	43
2022-09-13	15:47:58	10.6929	512.841	1	44
2022-09-13	15:47:58	7.42057	520.261	1	45
2022-09-13	15:47:58	3.96307	524.224	1	46
2022-09-13	15:47:59	3.4622	527.687	1	47
2022-09-13	15:47:59	3.27645	530.963	1	48
2022-09-13	15:47:59	3.88357	534.847	1	49
2022-09-13	15:47:59	2.52541	537.372	FALSE	49
2022-09-13	15:48:00	3.49777	540.87	1	50
2022-09-13	15:48:00	3.50225	544.372	1	51
2022-09-13	15:48:00	3.27599	547.648	1	52
2022-09-13	15:48:00	4.45467	552.103	1	53
2022-09-13	15:48:01	9.62968	561.732	1	54
2022-09-13	15:48:01	3.07874	564.811	1	55
2022-09-13	15:48:01	4.305	569.116	1	56
2022-09-13	15:48:01	1.91192	571.028	FALSE	56
2022-09-13	15:48:02	1.51798	572.546	FALSE	56
2022-09-13	15:48:02	6.57248	579.119	1	57
2022-09-13	15:48:02	3.04067	582.159	1	58
2022-09-13	15:48:03	4.10423	586.263	1	59
2022-09-13	15:48:03	3.62154	589.885	1	60
2022-09-13	15:48:03	2.52001	592.405	FALSE	60
2022-09-13	15:48:03	2.18668	594.592	FALSE	60
2022-09-13	15:48:04	3.30734	597.899	1	61
2022-09-13	15:48:04	2.59024	600.489	FALSE	61
2022-09-13	15:48:04	3.11737	603.607	1	62
2022-09-13	15:48:04	5.73462	609.341	1	63
2022-09-13	15:48:05	4.89111	614.232	1	64
2022-09-13	15:48:05	3.7853	618.018	1	65
2022-09-13	15:48:05	2.94235	620.96	FALSE	65
2022-09-13	15:48:05	1.15584	622.116	FALSE	65
2022-09-13	15:48:06	1.32739	623.443	FALSE	65
2022-09-13	15:48:06	0.750395	624.194	FALSE	65
2022-09-13	15:48:06	1.5138	625.707	FALSE	65
2022-09-13	15:48:07	1.0078	626.715	FALSE	65
2022-09-13	15:48:07	1.47268	628.188	FALSE	65
2022-09-13	15:48:07	2.25925	630.447	FALSE	65
2022-09-13	15:48:07	5.75192	636.199	1	66
2022-09-13	15:48:08	9.46968	645.669	1	67
2022-09-13	15:48:08	10.4632	656.132	1	68
2022-09-13	15:48:08	6.89604	663.028	1	69
2022-09-13	15:48:08	7.04591	670.074	1	70
2022-09-13	15:48:09	10.3744	680.448	1	71
2022-09-13	15:48:09	11.6736	692.122	1	72
2022-09-13	15:48:09	4.80724	696.929	1	73
2022-09-13	15:48:10	6.54607	703.475	1	74
2022-09-13	15:48:10	4.01563	707.491	1	75
2022-09-13	15:48:10	5.16423	712.655	1	76
2022-09-13	15:48:10	5.35497	718.01	1	77
2022-09-13	15:48:11	3.55925	721.569	1	78
2022-09-13	15:48:11	0.545712	722.115	FALSE	78
2022-09-13	15:48:11	0.230802	722.346	FALSE	78
2022-09-13	15:48:11	0.312736	722.659	FALSE	78
2022-09-13	15:48:12	0.694567	723.353	FALSE	78
2022-09-13	15:48:12	0.434466	723.788	FALSE	78
2022-09-13	15:48:12	0.494618	724.282	FALSE	78
2022-09-13	15:48:12	1.25202	725.534	FALSE	78
2022-09-13	15:48:13	1.24983	726.784	FALSE	78
2022-09-13	15:48:13	4.97319	731.757	1	79
2022-09-13	15:48:13	8.14846	739.906	1	80
2022-09-13	15:48:13	5.52647	745.432	1	81
2022-09-13	15:48:14	3.13401	748.566	1	82
2022-09-13	15:48:14	1.61533	750.181	FALSE	82
2022-09-13	15:48:14	0.695891	750.877	FALSE	82
2022-09-13	15:48:15	0.351667	751.229	FALSE	82
2022-09-13	15:48:15	0.529325	751.758	FALSE	82
2022-09-13	15:48:15	0.390293	752.149	FALSE	82
2022-09-13	15:48:15	0.416196	752.565	FALSE	82
2022-09-13	15:48:16	0.322048	752.887	FALSE	82
2022-09-13	15:48:16	0.426476	753.313	FALSE	82
2022-09-13	15:48:16	0.575382	753.889	FALSE	82
2022-09-13	15:48:16	0.597621	754.486	FALSE	82
2022-09-13	15:48:17	0.511005	754.997	FALSE	82
2022-09-13	15:48:17	0.469936	755.467	FALSE	82
2022-09-13	15:48:17	0.509428	755.977	FALSE	82
2022-09-13	15:48:17	0.439046	756.416	FALSE	82
2022-09-13	15:48:18	0.399657	756.815	FALSE	82
2022-09-13	15:48:18	0.436094	757.252	FALSE	82
2022-09-13	15:48:18	0.597366	757.849	FALSE	82
2022-09-13	15:48:19	0.68673	758.536	FALSE	82
2022-09-13	15:48:19	0.907952	759.444	FALSE	82
2022-09-13	15:48:19	1.09497	760.539	FALSE	82
2022-09-13	15:48:19	1.548	762.087	FALSE	82
2022-09-13	15:48:20	1.84195	763.929	FALSE	82
2022-09-13	15:48:20	1.94113	765.87	FALSE	82
2022-09-13	15:48:20	1.76933	767.639	FALSE	82
2022-09-13	15:48:20	2.25696	769.896	FALSE	82
2022-09-13	15:48:21	2.43955	772.336	FALSE	82
2022-09-13	15:48:21	2.2221	774.558	FALSE	82
2022-09-13	15:48:21	2.52933	777.087	FALSE	82
2022-09-13	15:48:21	2.70301	779.79	FALSE	82
2022-09-13	15:48:22	2.58759	782.378	FALSE	82
2022-09-13	15:48:22	2.48373	784.861	FALSE	82
2022-09-13	15:48:22	1.66775	786.529	FALSE	82
2022-09-13	15:48:23	1.32042	787.849	FALSE	82
2022-09-13	15:48:23	0.879046	788.728	FALSE	82
2022-09-13	15:48:23	0.599962	789.328	FALSE	82
2022-09-13	15:48:23	0.492685	789.821	FALSE	82
2022-09-13	15:48:24	1.11538	790.937	FALSE	82
2022-09-13	15:48:24	1.31482	792.251	FALSE	82
2022-09-13	15:48:24	2.46235	794.714	FALSE	82
2022-09-13	15:48:24	1.45838	796.172	FALSE	82
2022-09-13	15:48:25	1.1476	797.32	FALSE	82
2022-09-13	15:48:25	0.904135	798.224	FALSE	82
2022-09-13	15:48:25	1.32622	799.55	FALSE	82
2022-09-13	15:48:25	1.47116	801.021	FALSE	82
2022-09-13	15:48:26	1.2822	802.303	FALSE	82
2022-09-13	15:48:26	1.24464	803.548	FALSE	82
2022-09-13	15:48:26	0.870344	804.418	FALSE	82
2022-09-13	15:48:27	0.787952	805.206	FALSE	82
2022-09-13	15:48:27	0.718537	805.925	FALSE	82
2022-09-13	15:48:27	0.842863	806.768	FALSE	82
2022-09-13	15:48:27	0.871768	807.639	FALSE	82
2022-09-13	15:48:28	0.986018	808.625	FALSE	82
2022-09-13	15:48:28	1.11172	809.737	FALSE	82
2022-09-13	15:48:28	0.923779	810.661	FALSE	82
2022-09-13	15:48:28	0.513143	811.174	FALSE	82
2022-09-13	15:48:29	0.426883	811.601	FALSE	82
2022-09-13	15:48:29	0.409122	812.01	FALSE	82
2022-09-13	15:48:29	0.259351	812.269	FALSE	82
2022-09-13	15:48:29	0.285458	812.555	FALSE	82
2022-09-13	15:48:30	0.242761	812.798	FALSE	82
2022-09-13	15:48:30	0.263982	813.062	FALSE	82
2022-09-13	15:48:30	0.266832	813.329	FALSE	82
2022-09-13	15:48:31	0.13584	813.464	FALSE	82
2022-09-13	15:48:31	0.260674	813.725	FALSE	82
2022-09-13	15:48:31	0.162557	813.888	FALSE	82
2022-09-13	15:48:31	0.420369	814.308	FALSE	82
2022-09-13	15:48:32	0.173855	814.482	FALSE	82
2022-09-13	15:48:32	0.406323	814.888	FALSE	82
2022-09-13	15:48:32	0.465916	815.354	FALSE	82
2022-09-13	15:48:32	0.594364	815.948	FALSE	82
2022-09-13	15:48:33	0.577926	816.526	FALSE	82
2022-09-13	15:48:33	0.479402	817.006	FALSE	82
2022-09-13	15:48:33	0.481031	817.487	FALSE	82
2022-09-13	15:48:33	0.368461	817.855	FALSE	82
2022-09-13	15:48:34	0.472379	818.328	FALSE	82
2022-09-13	15:48:34	0.266934	818.595	FALSE	82
2022-09-13	15:48:34	0.36327	818.958	FALSE	82
2022-09-13	15:48:34	0.343575	819.301	FALSE	82
2022-09-13	15:48:35	0.544949	819.846	FALSE	82
2022-09-13	15:48:35	0.819809	820.666	FALSE	82
2022-09-13	15:48:35	0.672074	821.338	FALSE	82
2022-09-13	15:48:36	1.12078	822.459	FALSE	82
2022-09-13	15:48:36	1.35681	823.816	FALSE	82
2022-09-13	15:48:36	0.887443	824.703	FALSE	82
2022-09-13	15:48:36	0.495127	825.198	FALSE	82
2022-09-13	15:48:37	0.460064	825.658	FALSE	82
2022-09-13	15:48:37	0.332786	825.991	FALSE	82
2022-09-13	15:48:37	0.267799	826.259	FALSE	82
2022-09-13	15:48:37	0.410394	826.669	FALSE	82
2022-09-13	15:48:38	0.186985	826.856	FALSE	82
2022-09-13	15:48:38	0.404288	827.261	FALSE	82
2022-09-13	15:48:38	0.19355	827.454	FALSE	82
2022-09-13	15:48:38	0.413753	827.868	FALSE	82
2022-09-13	15:48:39	0.231107	828.099	FALSE	82
2022-09-13	15:48:39	0.329071	828.428	FALSE	82
2022-09-13	15:48:39	0.226832	828.655	FALSE	82
2022-09-13	15:48:40	0.40958	829.065	FALSE	82
2022-09-13	15:48:40	0.145662	829.21	FALSE	82
2022-09-13	15:48:40	0.35416	829.564	FALSE	82
2022-09-13	15:48:40	0.218791	829.783	FALSE	82
2022-09-13	15:48:41	0.409326	830.193	FALSE	82
2022-09-13	15:48:41	0.189682	830.382	FALSE	82
2022-09-13	15:48:41	0.332125	830.714	FALSE	82
2022-09-13	15:48:41	0.2393	830.954	FALSE	82
2022-09-13	15:48:42	0.363219	831.317	FALSE	82
2022-09-13	15:48:42	0.249529	831.566	FALSE	82
2022-09-13	15:48:42	0.211056	831.777	FALSE	82
2022-09-13	15:48:42	0.309326	832.087	FALSE	82
2022-09-13	15:48:43	0.206985	832.294	FALSE	82
2022-09-13	15:48:43	0.310496	832.604	FALSE	82
2022-09-13	15:48:43	0.181896	832.786	FALSE	82
2022-09-13	15:48:44	0.34668	833.133	FALSE	82
2022-09-13	15:48:44	0.170445	833.303	FALSE	82
2022-09-13	15:48:44	0.233855	833.537	FALSE	82
2022-09-13	15:48:44	-0.0561702	833.537	FALSE	82
2022-09-13	15:48:45	0.0004201	833.538	FALSE	82
2022-09-13	15:48:45	-0.089758	833.538	FALSE	82
2022-09-13	15:48:45	-0.22014	833.538	FALSE	82
2022-09-13	15:48:45	-0.109809	833.538	FALSE	82
2022-09-13	15:48:46	0.20271	833.74	FALSE	82
2022-09-13	15:48:46	1.10235	834.843	FALSE	82
2022-09-13	15:48:46	1.62322	836.466	FALSE	82
2022-09-13	15:48:46	1.15981	837.626	FALSE	82
2022-09-13	15:48:47	0.5764	838.202	FALSE	82
2022-09-13	15:48:47	0.188308	838.39	FALSE	82
2022-09-13	15:48:47	0.0768577	838.467	FALSE	82
2022-09-13	15:48:48	0.0747712	838.542	FALSE	82
2022-09-13	15:48:48	-0.0520481	838.542	FALSE	82
2022-09-13	15:48:48	-0.31159	838.542	FALSE	82
2022-09-13	15:48:48	-0.238409	838.542	FALSE	82
2022-09-13	15:48:49	-0.197544	838.542	FALSE	82
2022-09-13	15:48:49	0.0414379	838.583	FALSE	82
2022-09-13	15:48:49	0.0156363	838.599	FALSE	82
2022-09-13	15:48:49	0.220064	838.819	FALSE	82
2022-09-13	15:48:50	0.280929	839.1	FALSE	82
2022-09-13	15:48:50	0.302303	839.402	FALSE	82
2022-09-13	15:48:50	0.187799	839.59	FALSE	82
2022-09-13	15:48:50	0.224135	839.814	FALSE	82
2022-09-13	15:48:51	0.28841	840.103	FALSE	82
2022-09-13	15:48:51	0.257875	840.361	FALSE	82
2022-09-13	15:48:51	0.3364	840.697	FALSE	82
2022-09-13	15:48:52	0.281438	840.978	FALSE	82
2022-09-13	15:48:52	0.278333	841.257	FALSE	82
2022-09-13	15:48:52	0.362659	841.619	FALSE	82
2022-09-13	15:48:52	0.363626	841.983	FALSE	82
2022-09-13	15:48:53	0.277621	842.261	FALSE	82
2022-09-13	15:48:53	0.313499	842.574	FALSE	82
2022-09-13	15:48:53	0.331412	842.906	FALSE	82
2022-09-13	15:48:53	0.343524	843.249	FALSE	82
2022-09-13	15:48:54	0.347901	843.597	FALSE	82
2022-09-13	15:48:54	0.35986	843.957	FALSE	82
2022-09-13	15:48:54	0.359249	844.316	FALSE	82
2022-09-13	15:48:54	0.36215	844.678	FALSE	82
2022-09-13	15:48:55	0.359555	845.038	FALSE	82
2022-09-13	15:48:55	0.333346	845.371	FALSE	82
2022-09-13	15:48:55	0.326374	845.698	FALSE	82
2022-09-13	15:48:56	0.304593	846.002	FALSE	82
2022-09-13	15:48:56	0.310496	846.313	FALSE	82
2022-09-13	15:48:56	0.320624	846.633	FALSE	82
2022-09-13	15:48:56	0.316908	846.95	FALSE	82
2022-09-13	15:48:57	0.359097	847.309	FALSE	82
2022-09-13	15:48:57	0.304644	847.614	FALSE	82
2022-09-13	15:48:57	0.336552	847.95	FALSE	82
2022-09-13	15:48:57	0.323881	848.274	FALSE	82
2022-09-13	15:48:58	0.305305	848.58	FALSE	82
2022-09-13	15:48:58	0.31584	848.895	FALSE	82
2022-09-13	15:48:58	0.305458	849.201	FALSE	82
2022-09-13	15:48:58	0.296654	849.498	FALSE	82
2022-09-13	15:48:59	0.293499	849.791	FALSE	82
2022-09-13	15:48:59	0.291311	850.082	FALSE	82
2022-09-13	15:48:59	0.293295	850.376	FALSE	82
2022-09-13	15:49:00	0.294517	850.67	FALSE	82
2022-09-13	15:49:00	0.29472	850.965	FALSE	82
2022-09-13	15:49:00	0.295738	851.261	FALSE	82
2022-09-13	15:49:00	0.284644	851.545	FALSE	82
2022-09-13	15:49:01	0.292837	851.838	FALSE	82
2022-09-13	15:49:01	0.286628	852.125	FALSE	82
2022-09-13	15:49:01	0.291361	852.416	FALSE	82
2022-09-13	15:49:01	0.294771	852.711	FALSE	82
2022-09-13	15:49:02	0.298741	853.01	FALSE	82
2022-09-13	15:49:02	0.293295	853.303	FALSE	82
2022-09-13	15:49:02	0.301234	853.604	FALSE	82
2022-09-13	15:49:02	0.30612	853.91	FALSE	82
2022-09-13	15:49:03	0.314008	854.224	FALSE	82
2022-09-13	15:49:03	0.299962	854.524	FALSE	82
2022-09-13	15:49:03	0.297468	854.822	FALSE	82
2022-09-13	15:49:04	0.303321	855.125	FALSE	82
2022-09-13	15:49:04	0.300471	855.426	FALSE	82
2022-09-13	15:49:04	0.303473	855.729	FALSE	82
2022-09-13	15:49:04	0.311769	856.041	FALSE	82
2022-09-13	15:49:05	0.325611	856.366	FALSE	82
2022-09-13	15:49:05	0.326272	856.693	FALSE	82
2022-09-13	15:49:05	0.253041	856.946	FALSE	82
2022-09-13	15:49:05	0.271514	857.217	FALSE	82
2022-09-13	15:49:06	0.333295	857.55	FALSE	82
2022-09-13	15:49:06	0.443524	857.994	FALSE	82
2022-09-13	15:49:06	0.428715	858.423	FALSE	82
2022-09-13	15:49:06	0.365865	858.789	FALSE	82
2022-09-13	15:49:07	0.39126	859.18	FALSE	82
2022-09-13	15:49:07	0.405204	859.585	FALSE	82
2022-09-13	15:49:07	0.407952	859.993	FALSE	82
2022-09-13	15:49:08	0.406527	860.4	FALSE	82
2022-09-13	15:49:08	0.43187	860.831	FALSE	82
2022-09-13	15:49:08	0.442863	861.274	FALSE	82
2022-09-13	15:49:08	0.415738	861.69	FALSE	82
2022-09-13	15:49:09	0.416756	862.107	FALSE	82
2022-09-13	15:49:09	0.425102	862.532	FALSE	82
2022-09-13	15:49:09	0.428613	862.96	FALSE	82
2022-09-13	15:49:09	0.437417	863.398	FALSE	82
2022-09-13	15:49:10	0.441896	863.84	FALSE	82
2022-09-13	15:49:10	0.439046	864.279	FALSE	82
2022-09-13	15:49:10	0.443931	864.723	FALSE	82
2022-09-13	15:49:10	0.442608	865.165	FALSE	82
2022-09-13	15:49:11	0.449987	865.615	FALSE	82
2022-09-13	15:49:11	0.44897	866.064	FALSE	82
2022-09-13	15:49:11	0.4593	866.524	FALSE	82
2022-09-13	15:49:11	0.462405	866.986	FALSE	82
2022-09-13	15:49:12	0.464746	867.451	FALSE	82
2022-09-13	15:49:12	0.477824	867.929	FALSE	82
2022-09-13	15:49:12	0.487239	868.416	FALSE	82
2022-09-13	15:49:13	0.494313	868.91	FALSE	82
2022-09-13	15:49:13	0.504949	869.415	FALSE	82
2022-09-13	15:49:13	0.491921	869.907	FALSE	82
2022-09-13	15:49:13	0.52785	870.435	FALSE	82
2022-09-13	15:49:14	0.504593	870.939	FALSE	82
2022-09-13	15:49:14	0.549936	871.489	FALSE	82
2022-09-13	15:49:14	0.512939	872.002	FALSE	82
2022-09-13	15:49:14	0.447443	872.45	FALSE	82
2022-09-13	15:49:15	0.550903	873.001	FALSE	82
2022-09-13	15:49:15	0.519809	873.52	FALSE	82
2022-09-13	15:49:15	0.530751	874.051	FALSE	82
2022-09-13	15:49:15	0.608562	874.66	FALSE	82
2022-09-13	15:49:16	0.582964	875.243	FALSE	82
2022-09-13	15:49:16	0.546985	875.79	FALSE	82
2022-09-13	15:49:16	0.503117	876.293	FALSE	82
2022-09-13	15:49:17	0.465763	876.759	FALSE	82
2022-09-13	15:49:17	0.440929	877.2	FALSE	82
2022-09-13	15:49:17	0.429682	877.629	FALSE	82
2022-09-13	15:49:17	0.440115	878.069	FALSE	82
2022-09-13	15:49:18	0.429478	878.499	FALSE	82
2022-09-13	15:49:18	0.423066	878.922	FALSE	82
2022-09-13	15:49:18	0.432227	879.354	FALSE	82
2022-09-13	15:49:18	0.423524	879.778	FALSE	82
2022-09-13	15:49:19	0.43472	880.212	FALSE	82
2022-09-13	15:49:19	0.444593	880.657	FALSE	82
2022-09-13	15:49:19	0.425713	881.083	FALSE	82
2022-09-13	15:49:19	0.416196	881.499	FALSE	82
2022-09-13	15:49:20	0.413855	881.913	FALSE	82
2022-09-13	15:49:20	0.398537	882.311	FALSE	82
2022-09-13	15:49:20	0.395585	882.707	FALSE	82
2022-09-13	15:49:21	0.395789	883.103	FALSE	82
2022-09-13	15:49:21	0.38042	883.483	FALSE	82
2022-09-13	15:49:21	0.380064	883.863	FALSE	82
2022-09-13	15:49:21	0.362048	884.225	FALSE	82
2022-09-13	15:49:22	0.370242	884.595	FALSE	82
2022-09-13	15:49:22	0.374619	884.97	FALSE	82
2022-09-13	15:49:22	0.36729	885.337	FALSE	82
2022-09-13	15:49:22	0.385153	885.722	FALSE	82
2022-09-13	15:49:23	0.398028	886.121	FALSE	82
2022-09-13	15:49:23	0.432125	886.553	FALSE	82
2022-09-13	15:49:23	0.402456	886.955	FALSE	82
2022-09-13	15:49:23	0.381183	887.336	FALSE	82
2022-09-13	15:49:24	0.404084	887.74	FALSE	82
2022-09-13	15:49:24	0.422965	888.163	FALSE	82
2022-09-13	15:49:24	0.345865	888.509	FALSE	82
2022-09-13	15:49:25	0.234568	888.744	FALSE	82
2022-09-13	15:49:25	0.422608	889.166	FALSE	82
2022-09-13	15:49:25	0.317519	889.484	FALSE	82
2022-09-13	15:49:25	0.429682	889.914	FALSE	82
2022-09-13	15:49:26	0.284389	890.198	FALSE	82
2022-09-13	15:49:26	0.208562	890.407	FALSE	82
2022-09-13	15:49:26	0.393346	890.8	FALSE	82
2022-09-13	15:49:26	0.37645	891.176	FALSE	82
2022-09-13	15:49:27	0.312837	891.489	FALSE	82
2022-09-13	15:49:27	0.449886	891.939	FALSE	82
2022-09-13	15:49:27	0.68785	892.627	FALSE	82
2022-09-13	15:49:27	1.04118	893.668	FALSE	82
2022-09-13	15:49:28	0.514618	894.183	FALSE	82
2022-09-13	15:49:28	0.980623	895.163	FALSE	82
2022-09-13	15:49:28	0.463422	895.627	FALSE	82
2022-09-13	15:49:29	0.86841	896.495	FALSE	82
2022-09-13	15:49:29	0.509071	897.004	FALSE	82
2022-09-13	15:49:29	1.42612	898.43	FALSE	82
2022-09-13	15:49:29	0.79874	899.229	FALSE	82
2022-09-13	15:49:30	1.7677	900.997	FALSE	82
2022-09-13	15:49:30	1.40118	902.398	FALSE	82
2022-09-13	15:49:30	1.30113	903.699	FALSE	82
2022-09-13	15:49:30	1.10307	904.802	FALSE	82
2022-09-13	15:49:31	0.476959	905.279	FALSE	82
2022-09-13	15:49:31	0.853957	906.133	FALSE	82
2022-09-13	15:49:31	0.404288	906.537	FALSE	82
2022-09-13	15:49:31	0.695687	907.233	FALSE	82
2022-09-13	15:49:32	0.415433	907.648	FALSE	82
2022-09-13	15:49:32	0.631208	908.28	FALSE	82
2022-09-13	15:49:32	0.469886	908.75	FALSE	82
2022-09-13	15:49:33	0.437316	909.187	FALSE	82
2022-09-13	15:49:33	0.467799	909.655	FALSE	82
2022-09-13	15:49:33	0.399199	910.054	FALSE	82
2022-09-13	15:49:33	0.530598	910.584	FALSE	82
2022-09-13	15:49:34	0.304033	910.889	FALSE	82
2022-09-13	15:49:34	0.546527	911.435	FALSE	82
2022-09-13	15:49:34	0.339809	911.775	FALSE	82
2022-09-13	15:49:34	0.612226	912.387	FALSE	82
2022-09-13	15:49:35	0.292379	912.679	FALSE	82
2022-09-13	15:49:35	0.551718	913.231	FALSE	82
2022-09-13	15:49:35	0.301336	913.533	FALSE	82
2022-09-13	15:49:35	0.524644	914.057	FALSE	82
2022-09-13	15:49:36	0.375076	914.432	FALSE	82
2022-09-13	15:49:36	0.564237	914.996	FALSE	82
2022-09-13	15:49:36	0.409631	915.406	FALSE	82
2022-09-13	15:49:37	0.467188	915.873	FALSE	82
2022-09-13	15:49:37	0.323321	916.197	FALSE	82
2022-09-13	15:49:37	0.387392	916.584	FALSE	82
2022-09-13	15:49:37	0.49416	917.078	FALSE	82
2022-09-13	15:49:38	0.496451	917.575	FALSE	82
2022-09-13	15:49:38	0.581489	918.156	FALSE	82
2022-09-13	15:49:38	0.491311	918.647	FALSE	82
2022-09-13	15:49:38	0.811056	919.458	FALSE	82
2022-09-13	15:49:39	0.428868	919.887	FALSE	82
2022-09-13	15:49:39	0.716603	920.604	FALSE	82
2022-09-13	15:49:39	0.297621	920.902	FALSE	82
2022-09-13	15:49:39	0.700674	921.602	FALSE	82
2022-09-13	15:49:40	0.458384	922.061	FALSE	82
2022-09-13	15:49:40	0.764796	922.825	FALSE	82
2022-09-13	15:49:40	0.493041	923.318	FALSE	82
2022-09-13	15:49:41	0.872023	924.19	FALSE	82
2022-09-13	15:49:41	0.706221	924.897	FALSE	82
2022-09-13	15:49:41	1.04765	925.944	FALSE	82
2022-09-13	15:49:41	0.725865	926.67	FALSE	82
2022-09-13	15:49:42	0.712277	927.382	FALSE	82
2022-09-13	15:49:42	0.762099	928.145	FALSE	82
2022-09-13	15:49:42	0.359402	928.504	FALSE	82
2022-09-13	15:49:42	0.873652	929.378	FALSE	82
2022-09-13	15:49:43	0.411107	929.789	FALSE	82
2022-09-13	15:49:43	0.866425	930.655	FALSE	82
2022-09-13	15:49:43	0.414109	931.069	FALSE	82
2022-09-13	15:49:43	0.634873	931.704	FALSE	82
2022-09-13	15:49:44	0.40327	932.107	FALSE	82
2022-09-13	15:49:44	0.486272	932.594	FALSE	82
2022-09-13	15:49:44	0.465407	933.059	FALSE	82
2022-09-13	15:49:45	0.302557	933.362	FALSE	82
2022-09-13	15:49:45	0.392277	933.754	FALSE	82
2022-09-13	15:49:45	0.40042	934.154	FALSE	82
2022-09-13	15:49:45	0.795789	934.95	FALSE	82
2022-09-13	15:49:46	0.523371	935.474	FALSE	82
2022-09-13	15:49:46	0.709682	936.183	FALSE	82
2022-09-13	15:49:46	0.776603	936.96	FALSE	82
2022-09-13	15:49:46	0.385407	937.345	FALSE	82
2022-09-13	15:49:47	0.623371	937.969	FALSE	82
2022-09-13	15:49:47	0.412277	938.381	FALSE	82
2022-09-13	15:49:47	0.554364	938.935	FALSE	82
2022-09-13	15:49:47	0.442456	939.378	FALSE	82
2022-09-13	15:49:48	0.728613	940.106	FALSE	82
2022-09-13	15:49:48	0.488715	940.595	FALSE	82
2022-09-13	15:49:48	0.57584	941.171	FALSE	82
2022-09-13	15:49:49	0.58729	941.758	FALSE	82
2022-09-13	15:49:49	0.723473	942.482	FALSE	82
2022-09-13	15:49:49	0.432328	942.914	FALSE	82
2022-09-13	15:49:49	0.681336	943.595	FALSE	82
2022-09-13	15:49:50	0.381082	943.976	FALSE	82
2022-09-13	15:49:50	0.538282	944.515	FALSE	82
2022-09-13	15:49:50	0.409631	944.924	FALSE	82
2022-09-13	15:49:50	0.460166	945.384	FALSE	82
2022-09-13	15:49:51	0.368664	945.753	FALSE	82
2022-09-13	15:49:51	0.370191	946.123	FALSE	82
2022-09-13	15:49:51	0.373397	946.497	FALSE	82
2022-09-13	15:49:51	0.399148	946.896	FALSE	82
2022-09-13	15:49:52	0.364949	947.261	FALSE	82
2022-09-13	15:49:52	0.376959	947.638	FALSE	82
2022-09-13	15:49:52	0.375484	948.013	FALSE	82
2022-09-13	15:49:53	0.489173	948.502	FALSE	82
2022-09-13	15:49:53	0.326679	948.829	FALSE	82
2022-09-13	15:49:53	0.345153	949.174	FALSE	82
2022-09-13	15:49:53	0.427239	949.601	FALSE	82
2022-09-13	15:49:54	0.385407	949.987	FALSE	82
2022-09-13	15:49:54	0.364797	950.352	FALSE	82
2022-09-13	15:49:54	0.418283	950.77	FALSE	82
2022-09-13	15:49:54	0.274517	951.044	FALSE	82
2022-09-13	15:49:55	0.541947	951.586	FALSE	82
2022-09-13	15:49:55	0.308613	951.895	FALSE	82
2022-09-13	15:49:55	0.578944	952.474	FALSE	82
2022-09-13	15:49:55	0.301082	952.775	FALSE	82
2022-09-13	15:49:56	0.547341	953.322	FALSE	82
2022-09-13	15:49:56	0.272379	953.595	FALSE	82
2022-09-13	15:49:56	0.595992	954.191	FALSE	82
2022-09-13	15:49:57	0.611209	954.802	FALSE	82
2022-09-13	15:49:57	1.36378	956.166	FALSE	82
2022-09-13	15:49:57	1.31681	957.483	FALSE	82
2022-09-13	15:49:57	2.26205	959.745	FALSE	82
2022-09-13	15:49:58	0.793041	960.538	FALSE	82
2022-09-13	15:49:58	1.24001	961.778	FALSE	82
2022-09-13	15:49:58	0.701997	962.48	FALSE	82
2022-09-13	15:49:58	1.15604	963.636	FALSE	82
2022-09-13	15:49:59	0.954313	964.59	FALSE	82
2022-09-13	15:49:59	1.17625	965.766	FALSE	82
2022-09-13	15:49:59	1.76027	967.527	FALSE	82
2022-09-13	15:49:59	1.07335	968.6	FALSE	82
2022-09-13	15:50:00	1.03966	969.64	FALSE	82
2022-09-13	15:50:00	0.732532	970.372	FALSE	82
2022-09-13	15:50:00	1.35777	971.73	FALSE	82
2022-09-13	15:50:00	0.427137	972.157	FALSE	82
2022-09-13	15:50:01	1.26312	973.42	FALSE	82
2022-09-13	15:50:01	0.481132	973.901	FALSE	82
2022-09-13	15:50:01	0.84098	974.742	FALSE	82
2022-09-13	15:50:02	0.500725	975.243	FALSE	82
2022-09-13	15:50:02	0.726527	975.969	FALSE	82
2022-09-13	15:50:02	0.47584	976.445	FALSE	82
2022-09-13	15:50:02	0.719555	977.165	FALSE	82
2022-09-13	15:50:03	0.799962	977.965	FALSE	82
2022-09-13	15:50:03	0.940165	978.905	FALSE	82
2022-09-13	15:50:03	0.91925	979.824	FALSE	82
2022-09-13	15:50:03	1.22388	981.048	FALSE	82
2022-09-13	15:50:04	1.25676	982.305	FALSE	82
2022-09-13	15:50:04	0.984898	983.29	FALSE	82
2022-09-13	15:50:04	1.03508	984.325	FALSE	82
2022-09-13	15:50:04	1.2452	985.57	FALSE	82
2022-09-13	15:50:05	0.520776	986.091	FALSE	82
2022-09-13	15:50:05	0.796298	986.887	FALSE	82
2022-09-13	15:50:05	0.632125	987.519	FALSE	82
2022-09-13	15:50:06	0.401743	987.921	FALSE	82
2022-09-13	15:50:06	0.487545	988.409	FALSE	82
2022-09-13	15:50:06	0.345662	988.754	FALSE	82
2022-09-13	15:50:06	0.603575	989.358	FALSE	82
2022-09-13	15:50:07	0.419555	989.777	FALSE	82
2022-09-13	15:50:07	0.570242	990.348	FALSE	82
2022-09-13	15:50:07	0.43472	990.782	FALSE	82
2022-09-13	15:50:07	0.659249	991.442	FALSE	82
2022-09-13	15:50:08	0.46215	991.904	FALSE	82
2022-09-13	15:50:08	0.560878	992.465	FALSE	82
2022-09-13	15:50:08	0.399657	992.864	FALSE	82
2022-09-13	15:50:08	0.695687	993.56	FALSE	82
2022-09-13	15:50:09	0.488308	994.048	FALSE	82
2022-09-13	15:50:09	0.569071	994.617	FALSE	82
2022-09-13	15:50:09	0.327748	994.945	FALSE	82
2022-09-13	15:50:10	0.562303	995.507	FALSE	82
2022-09-13	15:50:10	0.266221	995.774	FALSE	82
2022-09-13	15:50:10	0.469326	996.243	FALSE	82
2022-09-13	15:50:10	0.325967	996.569	FALSE	82
2022-09-13	15:50:11	0.538282	997.107	FALSE	82
2022-09-13	15:50:11	0.267697	997.375	FALSE	82
2022-09-13	15:50:11	0.416043	997.791	FALSE	82
2022-09-13	15:50:11	0.318741	998.11	FALSE	82
2022-09-13	15:50:12	0.522964	998.633	FALSE	82
2022-09-13	15:50:12	0.311209	998.944	FALSE	82
2022-09-13	15:50:12	0.431972	999.376	FALSE	82
2022-09-13	15:50:12	0.407646	999.783	FALSE	82
2022-09-13	15:50:13	0.544389	1000.33	FALSE	82
2022-09-13	15:50:13	0.687646	1001.02	FALSE	82
2022-09-13	15:50:13	0.560878	1001.58	FALSE	82
2022-09-13	15:50:14	0.471616	1002.05	FALSE	82
2022-09-13	15:50:14	0.570496	1002.62	FALSE	82
2022-09-13	15:50:14	0.393397	1003.01	FALSE	82
2022-09-13	15:50:14	0.563422	1003.58	FALSE	82
2022-09-13	15:50:15	0.294567	1003.87	FALSE	82
2022-09-13	15:50:15	0.548155	1004.42	FALSE	82
2022-09-13	15:50:15	0.314618	1004.73	FALSE	82
2022-09-13	15:50:15	0.526272	1005.26	FALSE	82
2022-09-13	15:50:16	0.305916	1005.56	FALSE	82
2022-09-13	15:50:16	0.581489	1006.15	FALSE	82
2022-09-13	15:50:16	0.333753	1006.48	FALSE	82
2022-09-13	15:50:16	0.495738	1006.98	FALSE	82
2022-09-13	15:50:17	0.354618	1007.33	FALSE	82
2022-09-13	15:50:17	0.537774	1007.87	FALSE	82
2022-09-13	15:50:17	0.515585	1008.38	FALSE	82
2022-09-13	15:50:18	0.649529	1009.03	FALSE	82
2022-09-13	15:50:18	0.342964	1009.38	FALSE	82
2022-09-13	15:50:18	0.559707	1009.94	FALSE	82
2022-09-13	15:50:18	0.574059	1010.51	FALSE	82
2022-09-13	15:50:19	0.637774	1011.15	FALSE	82
2022-09-13	15:50:19	0.387341	1011.54	FALSE	82
2022-09-13	15:50:19	0.619046	1012.15	FALSE	82
2022-09-13	15:50:19	0.529886	1012.68	FALSE	82
2022-09-13	15:50:20	0.752634	1013.44	FALSE	82
2022-09-13	15:50:20	0.391972	1013.83	FALSE	82
2022-09-13	15:50:20	0.83472	1014.66	FALSE	82
2022-09-13	15:50:20	0.490598	1015.15	FALSE	82
2022-09-13	15:50:21	0.857774	1016.01	FALSE	82
2022-09-13	15:50:21	0.343066	1016.35	FALSE	82
2022-09-13	15:50:21	0.758995	1017.11	FALSE	82
2022-09-13	15:50:22	0.355636	1017.47	FALSE	82
2022-09-13	15:50:22	0.569479	1018.04	FALSE	82
2022-09-13	15:50:22	0.267799	1018.31	FALSE	82
2022-09-13	15:50:22	0.554567	1018.86	FALSE	82
2022-09-13	15:50:23	0.248054	1019.11	FALSE	82
2022-09-13	15:50:23	0.594567	1019.7	FALSE	82
2022-09-13	15:50:23	0.289987	1019.99	FALSE	82
2022-09-13	15:50:23	0.690649	1020.68	FALSE	82
2022-09-13	15:50:24	0.355331	1021.04	FALSE	82
2022-09-13	15:50:24	-0.0889437	1021.04	FALSE	82
2022-09-13	15:50:24	-0.229249	1021.04	FALSE	82
2022-09-13	15:50:24	-0.215203	1021.04	FALSE	82
2022-09-13	15:50:25	-0.0735239	1021.04	FALSE	82
2022-09-13	15:50:25	-0.0109285	1021.04	FALSE	82
2022-09-13	15:50:25	0.0820485	1021.12	FALSE	82
2022-09-13	15:50:26	0.18841	1021.31	FALSE	82
2022-09-13	15:50:26	0.052074	1021.36	FALSE	82
2022-09-13	15:50:26	0.143524	1021.51	FALSE	82
2022-09-13	15:50:26	0.0505473	1021.56	FALSE	82
2022-09-13	15:50:27	0.141743	1021.7	FALSE	82
2022-09-13	15:50:27	0.0546185	1021.75	FALSE	82
2022-09-13	15:50:27	0.28215	1022.04	FALSE	82
2022-09-13	15:50:27	0.597417	1022.63	FALSE	82
2022-09-13	15:50:28	0.344898	1022.98	FALSE	82
2022-09-13	15:50:28	0.613295	1023.59	FALSE	82
2022-09-13	15:50:28	0.368868	1023.96	FALSE	82
2022-09-13	15:50:28	0.303982	1024.26	FALSE	82
2022-09-13	15:50:29	0.358486	1024.62	FALSE	82
2022-09-13	15:50:29	0.308104	1024.93	FALSE	82
2022-09-13	15:50:29	0.27187	1025.2	FALSE	82
2022-09-13	15:50:30	0.219657	1025.42	FALSE	82
2022-09-13	15:50:30	0.31243	1025.73	FALSE	82
2022-09-13	15:50:30	0.213041	1025.95	FALSE	82
2022-09-13	15:50:30	0.265255	1026.21	FALSE	82
2022-09-13	15:50:31	0.156094	1026.37	FALSE	82
2022-09-13	15:50:31	0.34215	1026.71	FALSE	82
2022-09-13	15:50:31	0.156756	1026.87	FALSE	82
2022-09-13	15:50:31	0.264542	1027.13	FALSE	82
2022-09-13	15:50:32	0.166985	1027.3	FALSE	82
2022-09-13	15:50:32	0.335585	1027.63	FALSE	82
2022-09-13	15:50:32	0.330242	1027.96	FALSE	82
2022-09-13	15:50:32	0.430445	1028.4	FALSE	82
2022-09-13	15:50:33	0.997875	1029.39	FALSE	82
2022-09-13	15:50:33	1.89879	1031.29	FALSE	82
2022-09-13	15:50:33	1.52378	1032.82	FALSE	82
2022-09-13	15:50:34	1.11416	1033.93	FALSE	82
2022-09-13	15:50:34	0.956603	1034.89	FALSE	82
2022-09-13	15:50:34	0.325458	1035.21	FALSE	82
2022-09-13	15:50:34	0.306476	1035.52	FALSE	82
2022-09-13	15:50:35	0.410852	1035.93	FALSE	82
2022-09-13	15:50:35	0.538232	1036.47	FALSE	82
2022-09-13	15:50:35	1.07233	1037.54	FALSE	82
2022-09-13	15:50:35	1.39732	1038.94	FALSE	82
2022-09-13	15:50:36	0.997417	1039.93	FALSE	82
2022-09-13	15:50:36	0.436145	1040.37	FALSE	82
2022-09-13	15:50:36	0.358333	1040.73	FALSE	82
2022-09-13	15:50:36	0.3907	1041.12	FALSE	82
2022-09-13	15:50:37	0.273601	1041.39	FALSE	82
2022-09-13	15:50:37	0.316196	1041.71	FALSE	82
2022-09-13	15:50:37	0.182252	1041.89	FALSE	82
2022-09-13	15:50:38	0.356908	1042.25	FALSE	82
2022-09-13	15:50:38	0.109784	1042.36	FALSE	82
2022-09-13	15:50:38	2.08861	1044.45	FALSE	82
2022-09-13	15:50:38	3.93808	1048.39	1	83
2022-09-13	15:50:39	6.36087	1054.75	1	84
2022-09-13	15:50:39	4.44653	1059.19	1	85
2022-09-13	15:50:39	5.52062	1064.71	1	86
2022-09-13	15:50:39	3.26602	1067.98	1	87
2022-09-13	15:50:40	3.81904	1071.8	1	88
2022-09-13	15:50:40	2.09737	1073.9	FALSE	88
2022-09-13	15:50:40	1.36271	1075.26	FALSE	88
2022-09-13	15:50:40	2.01849	1077.28	FALSE	88
2022-09-13	15:50:41	1.36276	1078.64	FALSE	88
2022-09-13	15:50:41	1.64927	1080.29	FALSE	88
2022-09-13	15:50:41	0.946578	1081.24	FALSE	88
2022-09-13	15:50:42	1.22546	1082.46	FALSE	88
2022-09-13	15:50:42	0.777773	1083.24	FALSE	88
2022-09-13	15:50:42	0.904949	1084.14	FALSE	88
2022-09-13	15:50:42	0.57416	1084.72	FALSE	88
2022-09-13	15:50:43	0.74785	1085.47	FALSE	88
2022-09-13	15:50:43	0.246527	1085.71	FALSE	88
2022-09-13	15:50:43	0.474771	1086.19	FALSE	88
2022-09-13	15:50:43	0.445865	1086.63	FALSE	88
2022-09-13	15:50:44	0.428461	1087.06	FALSE	88
2022-09-13	15:50:44	0.385356	1087.45	FALSE	88
2022-09-13	15:50:44	0.425916	1087.87	FALSE	88
2022-09-13	15:50:44	0.577977	1088.45	FALSE	88
2022-09-13	15:50:45	0.607799	1089.06	FALSE	88
2022-09-13	15:50:45	0.522048	1089.58	FALSE	88
2022-09-13	15:50:45	0.733244	1090.31	FALSE	88
2022-09-13	15:50:46	0.609784	1090.92	FALSE	88
2022-09-13	15:50:46	0.794517	1091.72	FALSE	88
2022-09-13	15:50:46	0.584186	1092.3	FALSE	88
2022-09-13	15:50:46	0.650903	1092.95	FALSE	88
2022-09-13	15:50:47	0.733753	1093.69	FALSE	88
2022-09-13	15:50:47	0.492176	1094.18	FALSE	88
2022-09-13	15:50:47	0.563473	1094.74	FALSE	88
2022-09-13	15:50:47	0.789071	1095.53	FALSE	88
2022-09-13	15:50:48	0.711565	1096.24	FALSE	88
2022-09-13	15:50:48	0.69299	1096.94	FALSE	88
2022-09-13	15:50:48	0.792074	1097.73	FALSE	88
2022-09-13	15:50:48	0.445204	1098.17	FALSE	88
2022-09-13	15:50:49	0.69187	1098.86	FALSE	88
2022-09-13	15:50:49	0.439656	1099.3	FALSE	88
2022-09-13	15:50:49	0.619097	1099.92	FALSE	88
2022-09-13	15:50:49	0.280318	1100.2	FALSE	88
2022-09-13	15:50:50	0.564644	1100.77	FALSE	88
2022-09-13	15:50:50	0.226272	1100.99	FALSE	88
2022-09-13	15:50:50	0.495534	1101.49	FALSE	88
2022-09-13	15:50:51	0.242049	1101.73	FALSE	88
2022-09-13	15:50:51	0.488817	1102.22	FALSE	88
2022-09-13	15:50:51	0.265356	1102.49	FALSE	88
2022-09-13	15:50:51	0.409987	1102.9	FALSE	88
2022-09-13	15:50:52	0.30271	1103.2	FALSE	88
2022-09-13	15:50:52	0.520827	1103.72	FALSE	88
2022-09-13	15:50:52	0.41869	1104.14	FALSE	88
2022-09-13	15:50:52	0.43472	1104.57	FALSE	88
2022-09-13	15:50:53	0.354008	1104.93	FALSE	88
2022-09-13	15:50:53	0.403015	1105.33	FALSE	88
2022-09-13	15:50:53	0.28215	1105.61	FALSE	88
2022-09-13	15:50:53	0.283677	1105.9	FALSE	88
2022-09-13	15:50:54	0.384237	1106.28	FALSE	88
2022-09-13	15:50:54	0.343219	1106.62	FALSE	88
2022-09-13	15:50:54	0.358384	1106.98	FALSE	88
2022-09-13	15:50:55	0.256298	1107.24	FALSE	88
2022-09-13	15:50:55	0.500725	1107.74	FALSE	88
2022-09-13	15:50:55	0.299148	1108.04	FALSE	88
2022-09-13	15:50:55	0.400267	1108.44	FALSE	88
2022-09-13	15:50:56	0.192735	1108.63	FALSE	88
2022-09-13	15:50:56	0.351005	1108.98	FALSE	88
2022-09-13	15:50:56	0.296959	1109.28	FALSE	88
2022-09-13	15:50:56	0.185916	1109.47	FALSE	88
2022-09-13	15:50:57	0.255585	1109.72	FALSE	88
2022-09-13	15:50:57	0.224237	1109.95	FALSE	88
2022-09-13	15:50:57	0.459097	1110.4	FALSE	88
2022-09-13	15:50:57	0.213804	1110.62	FALSE	88
2022-09-13	15:50:58	0.337621	1110.96	FALSE	88
2022-09-13	15:50:58	0.0819977	1111.04	FALSE	88
2022-09-13	15:50:58	0.323168	1111.36	FALSE	88
2022-09-13	15:50:59	0.116451	1111.48	FALSE	88
2022-09-13	15:50:59	0.383117	1111.86	FALSE	88
2022-09-13	15:50:59	0.0246949	1111.89	FALSE	88
2022-09-13	15:50:59	0.0430664	1111.93	FALSE	88
2022-09-13	15:51:00	0.122812	1112.05	FALSE	88
2022-09-13	15:51:00	0.487596	1112.54	FALSE	88
2022-09-13	15:51:00	1.14342	1113.68	FALSE	88
2022-09-13	15:51:00	0.485	1114.17	FALSE	88
2022-09-13	15:51:01	0.405764	1114.57	FALSE	88
2022-09-13	15:51:01	0.45355	1115.03	FALSE	88
2022-09-13	15:51:01	0.25757	1115.28	FALSE	88
2022-09-13	15:51:01	0.355331	1115.64	FALSE	88
2022-09-13	15:51:02	0.214313	1115.85	FALSE	88
2022-09-13	15:51:02	0.416959	1116.27	FALSE	88
2022-09-13	15:51:02	0.20159	1116.47	FALSE	88
2022-09-13	15:51:03	0.276451	1116.75	FALSE	88
2022-09-13	15:51:03	0.200471	1116.95	FALSE	88
2022-09-13	15:51:03	0.336807	1117.29	FALSE	88
2022-09-13	15:51:03	0.0776719	1117.36	FALSE	88
2022-09-13	15:51:04	0.226629	1117.59	FALSE	88
2022-09-13	15:51:04	0.223168	1117.81	FALSE	88
2022-09-13	15:51:04	0.34612	1118.16	FALSE	88
2022-09-13	15:51:04	0.228868	1118.39	FALSE	88
2022-09-13	15:51:05	0.28383	1118.67	FALSE	88
2022-09-13	15:51:05	0.297977	1118.97	FALSE	88
2022-09-13	15:51:05	0.35243	1119.32	FALSE	88
2022-09-13	15:51:05	0.41757	1119.74	FALSE	88
2022-09-13	15:51:06	0.506883	1120.25	FALSE	88
2022-09-13	15:51:06	0.801997	1121.05	FALSE	88
2022-09-13	15:51:06	1.07798	1122.13	FALSE	88
2022-09-13	15:51:07	1.86754	1123.99	FALSE	88
2022-09-13	15:51:07	1.12134	1125.12	FALSE	88
2022-09-13	15:51:07	1.6907	1126.81	FALSE	88
2022-09-13	15:51:07	0.980725	1127.79	FALSE	88
2022-09-13	15:51:08	0.945712	1128.73	FALSE	88
2022-09-13	15:51:08	0.786221	1129.52	FALSE	88
2022-09-13	15:51:08	0.735229	1130.25	FALSE	88
2022-09-13	15:51:08	0.827341	1131.08	FALSE	88
2022-09-13	15:51:09	0.816654	1131.9	FALSE	88
2022-09-13	15:51:09	0.601234	1132.5	FALSE	88
2022-09-13	15:51:09	0.934873	1133.43	FALSE	88
2022-09-13	15:51:10	0.6164	1134.05	FALSE	88
2022-09-13	15:51:10	0.831718	1134.88	FALSE	88
2022-09-13	15:51:10	0.906272	1135.79	FALSE	88
2022-09-13	15:51:10	1.22332	1137.01	FALSE	88
2022-09-13	15:51:11	1.13711	1138.15	FALSE	88
2022-09-13	15:51:11	0.968562	1139.12	FALSE	88
2022-09-13	15:51:11	0.440878	1139.56	FALSE	88
2022-09-13	15:51:11	0.981183	1140.54	FALSE	88
2022-09-13	15:51:12	0.672125	1141.21	FALSE	88
2022-09-13	15:51:12	1.07039	1142.28	FALSE	88
2022-09-13	15:51:12	0.861336	1143.14	FALSE	88
2022-09-13	15:51:12	1.47864	1144.62	FALSE	88
2022-09-13	15:51:13	1.70907	1146.33	FALSE	88
2022-09-13	15:51:13	2.57731	1148.91	FALSE	88
2022-09-13	15:51:13	2.86586	1151.77	FALSE	88
2022-09-13	15:51:13	2.52678	1154.3	FALSE	88
2022-09-13	15:51:14	1.83503	1156.14	FALSE	88
2022-09-13	15:51:14	1.25192	1157.39	FALSE	88
2022-09-13	15:51:14	0.66841	1158.06	FALSE	88
2022-09-13	15:51:15	0.763219	1158.82	FALSE	88
2022-09-13	15:51:15	0.472023	1159.29	FALSE	88
2022-09-13	15:51:15	0.669987	1159.96	FALSE	88
2022-09-13	15:51:15	0.4107	1160.37	FALSE	88
2022-09-13	15:51:16	0.681132	1161.05	FALSE	88
2022-09-13	15:51:16	0.506425	1161.56	FALSE	88
2022-09-13	15:51:16	0.632837	1162.19	FALSE	88
2022-09-13	15:51:16	0.467443	1162.66	FALSE	88
2022-09-13	15:51:17	0.663168	1163.32	FALSE	88
2022-09-13	15:51:17	0.411005	1163.73	FALSE	88
2022-09-13	15:51:17	0.648868	1164.38	FALSE	88
2022-09-13	15:51:17	0.467952	1164.85	FALSE	88
2022-09-13	15:51:18	0.324339	1165.18	FALSE	88
2022-09-13	15:51:18	0.241438	1165.42	FALSE	88
2022-09-13	15:51:18	0.477214	1165.89	FALSE	88
2022-09-13	15:51:19	0.35701	1166.25	FALSE	88
2022-09-13	15:51:19	0.604847	1166.86	FALSE	88
2022-09-13	15:51:19	0.750954	1167.61	FALSE	88
2022-09-13	15:51:19	1.35452	1168.96	FALSE	88
2022-09-13	15:51:20	0.614974	1169.58	FALSE	88
2022-09-13	15:51:20	1.64434	1171.22	FALSE	88
2022-09-13	15:51:20	1.11268	1172.33	FALSE	88
2022-09-13	15:51:20	1.96495	1174.3	FALSE	88
2022-09-13	15:51:21	1.46597	1175.76	FALSE	88
2022-09-13	15:51:21	3.04815	1178.81	1	89
2022-09-13	15:51:21	1.49019	1180.3	FALSE	89
2022-09-13	15:51:21	3.50826	1183.81	1	90
2022-09-13	15:51:22	1.30398	1185.12	FALSE	90
2022-09-13	15:51:22	1.93564	1187.05	FALSE	90
2022-09-13	15:51:22	0.700166	1187.75	FALSE	90
2022-09-13	15:51:23	1.10597	1188.86	FALSE	90
2022-09-13	15:51:23	0.63869	1189.5	FALSE	90
2022-09-13	15:51:23	0.846781	1190.34	FALSE	90
2022-09-13	15:51:23	0.517264	1190.86	FALSE	90
2022-09-13	15:51:24	0.706934	1191.57	FALSE	90
2022-09-13	15:51:24	0.381234	1191.95	FALSE	90
2022-09-13	15:51:24	0.606425	1192.55	FALSE	90
2022-09-13	15:51:24	0.368461	1192.92	FALSE	90
2022-09-13	15:51:25	0.52215	1193.45	FALSE	90
2022-09-13	15:51:25	0.155331	1193.6	FALSE	90
2022-09-13	15:51:25	0.375433	1193.98	FALSE	90
2022-09-13	15:51:25	0.108664	1194.08	FALSE	90
2022-09-13	15:51:26	0.208715	1194.29	FALSE	90
2022-09-13	15:51:26	-0.0358649	1194.29	FALSE	90
2022-09-13	15:51:26	0.237265	1194.53	FALSE	90
2022-09-13	15:51:27	0.832939	1195.36	FALSE	90
2022-09-13	15:51:27	1.32424	1196.69	FALSE	90
2022-09-13	15:51:27	0.742812	1197.43	FALSE	90
2022-09-13	15:51:27	0.510649	1197.94	FALSE	90
2022-09-13	15:51:28	0.251311	1198.19	FALSE	90
2022-09-13	15:51:28	0.349631	1198.54	FALSE	90
2022-09-13	15:51:28	0.138893	1198.68	FALSE	90

## Sheet: Sulley_star_202291315462
						**GoPro Fitting: 1534
2022-09-13	15:46:03	0.320929
2022-09-13	15:46:03	0.327036
2022-09-13	15:46:03	0.322863
2022-09-13	15:46:03	0.306069
2022-09-13	15:46:04	0.353499
2022-09-13	15:46:04	0.360216
2022-09-13	15:46:04	0.39187
2022-09-13	15:46:04	0.387901
2022-09-13	15:46:05	0.387036
2022-09-13	15:46:05	0.390038
2022-09-13	15:46:05	0.376705
2022-09-13	15:46:05	0.375331
2022-09-13	15:46:06	0.365305
2022-09-13	15:46:06	0.370496
2022-09-13	15:46:06	0.375942
2022-09-13	15:46:06	0.37584
2022-09-13	15:46:07	0.369275
2022-09-13	15:46:07	0.389987
2022-09-13	15:46:07	0.383117
2022-09-13	15:46:08	0.388003
2022-09-13	15:46:08	0.385967
2022-09-13	15:46:08	0.385204
2022-09-13	15:46:08	0.385814
2022-09-13	15:46:09	0.380827
2022-09-13	15:46:09	0.392634
2022-09-13	15:46:09	0.41584
2022-09-13	15:46:09	0.372125
2022-09-13	15:46:10	0.38215
2022-09-13	15:46:10	0.327188
2022-09-13	15:46:10	0.437316
2022-09-13	15:46:10	0.427392
2022-09-13	15:46:11	0.404491
2022-09-13	15:46:11	0.512023
2022-09-13	15:46:11	0.396094
2022-09-13	15:46:12	0.41869
2022-09-13	15:46:12	0.434059
2022-09-13	15:46:12	0.383677
2022-09-13	15:46:12	0.314364
2022-09-13	15:46:13	0.387188
2022-09-13	15:46:13	0.338181
2022-09-13	15:46:13	0.314313
2022-09-13	15:46:13	0.281082
2022-09-13	15:46:14	0.334109
2022-09-13	15:46:14	0.251463
2022-09-13	15:46:14	0.0584353
2022-09-13	15:46:14	0.138028
2022-09-13	15:46:15	0.200624
2022-09-13	15:46:15	0.295636
2022-09-13	15:46:15	0.710598
2022-09-13	15:46:16	3.31258
2022-09-13	15:46:16	4.2336
2022-09-13	15:46:16	1.44159
2022-09-13	15:46:16	0.477621
2022-09-13	15:46:17	0.334822
2022-09-13	15:46:17	0.325712
2022-09-13	15:46:17	-0.000953954
2022-09-13	15:46:17	0.0448984
2022-09-13	15:46:18	0.0375193
2022-09-13	15:46:18	0.157977
2022-09-13	15:46:18	3.26057
2022-09-13	15:46:18	4.67182
2022-09-13	15:46:19	2.1591
2022-09-13	15:46:19	2.34393
2022-09-13	15:46:19	0.81645
2022-09-13	15:46:20	0.258842
2022-09-13	15:46:20	0.948919
2022-09-13	15:46:20	0.622863
2022-09-13	15:46:20	0.416094
2022-09-13	15:46:21	0.29126
2022-09-13	15:46:21	0.720369
2022-09-13	15:46:21	1.08047
2022-09-13	15:46:21	2.34607
2022-09-13	15:46:22	4.47935
2022-09-13	15:46:22	3.41716
2022-09-13	15:46:22	3.90363
2022-09-13	15:46:22	1.63782
2022-09-13	15:46:23	1.9221
2022-09-13	15:46:23	0.916349
2022-09-13	15:46:23	0.686934
2022-09-13	15:46:24	0.345458
2022-09-13	15:46:24	-0.0131677
2022-09-13	15:46:24	0.0673921
2022-09-13	15:46:24	-0.00914732
2022-09-13	15:46:25	0.0417941
2022-09-13	15:46:25	-0.131081
2022-09-13	15:46:25	-0.0170863
2022-09-13	15:46:25	-0.0273153
2022-09-13	15:46:26	-0.133829
2022-09-13	15:46:26	0.0399112
2022-09-13	15:46:26	0.0338552
2022-09-13	15:46:26	0.150649
2022-09-13	15:46:27	0.0545676
2022-09-13	15:46:27	0.273652
2022-09-13	15:46:27	0.0963488
2022-09-13	15:46:27	0.0690206
2022-09-13	15:46:28	0.104695
2022-09-13	15:46:28	0.0421503
2022-09-13	15:46:28	0.300318
2022-09-13	15:46:29	0.388817
2022-09-13	15:46:29	0.662964
2022-09-13	15:46:29	0.558079
2022-09-13	15:46:29	0.920674
2022-09-13	15:46:30	0.962812
2022-09-13	15:46:30	0.671921
2022-09-13	15:46:30	0.34673
2022-09-13	15:46:30	0.102557
2022-09-13	15:46:31	0.339453
2022-09-13	15:46:31	0.167748
2022-09-13	15:46:31	1.32943
2022-09-13	15:46:31	0.447647
2022-09-13	15:46:32	1.08922
2022-09-13	15:46:32	1.23467
2022-09-13	15:46:32	1.02378
2022-09-13	15:46:33	1.39075
2022-09-13	15:46:33	0.596959
2022-09-13	15:46:33	0.903423
2022-09-13	15:46:33	0.429173
2022-09-13	15:46:34	0.493499
2022-09-13	15:46:34	0.987697
2022-09-13	15:46:34	0.155585
2022-09-13	15:46:34	0.431616
2022-09-13	15:46:35	0.111056
2022-09-13	15:46:35	0.330852
2022-09-13	15:46:35	0.204288
2022-09-13	15:46:35	0.281132
2022-09-13	15:46:36	0.424288
2022-09-13	15:46:36	0.226272
2022-09-13	15:46:36	0.465713
2022-09-13	15:46:37	0.222405
2022-09-13	15:46:37	0.853092
2022-09-13	15:46:37	0.16215
2022-09-13	15:46:37	0.517264
2022-09-13	15:46:38	0.471616
2022-09-13	15:46:38	0.372379
2022-09-13	15:46:38	0.646425
2022-09-13	15:46:38	0.270496
2022-09-13	15:46:39	0.636451
2022-09-13	15:46:39	0.577621
2022-09-13	15:46:39	3.23004
2022-09-13	15:46:39	5.52749
2022-09-13	15:46:40	6.22891
2022-09-13	15:46:40	5.75701
2022-09-13	15:46:40	3.18444
2022-09-13	15:46:41	6.78505
2022-09-13	15:46:41	2.97894
2022-09-13	15:46:41	4.06128
2022-09-13	15:46:41	5.70474
2022-09-13	15:46:42	2.18637
2022-09-13	15:46:42	3.72164
2022-09-13	15:46:42	1.61599
2022-09-13	15:46:42	0.646832
2022-09-13	15:46:43	1.91569
2022-09-13	15:46:43	0.645509
2022-09-13	15:46:43	1.45569
2022-09-13	15:46:43	1.05431
2022-09-13	15:46:44	0.935687
2022-09-13	15:46:44	1.37538
2022-09-13	15:46:44	0.733753
2022-09-13	15:46:45	1.48673
2022-09-13	15:46:45	0.563015
2022-09-13	15:46:45	0.94159
2022-09-13	15:46:45	1.36017
2022-09-13	15:46:46	1.12301
2022-09-13	15:46:46	2.45039
2022-09-13	15:46:46	0.826221
2022-09-13	15:46:46	2.16668
2022-09-13	15:46:47	2.1223
2022-09-13	15:46:47	5.12464
2022-09-13	15:46:47	6.37365
2022-09-13	15:46:47	6.94998
2022-09-13	15:46:48	10.3605
2022-09-13	15:46:48	1.75304
2022-09-13	15:46:48	4.10485
2022-09-13	15:46:49	2.60698
2022-09-13	15:46:49	1.06897
2022-09-13	15:46:49	3.18189
2022-09-13	15:46:49	0.670038
2022-09-13	15:46:50	1.49645
2022-09-13	15:46:50	1.54581
2022-09-13	15:46:50	0.814313
2022-09-13	15:46:50	1.40123
2022-09-13	15:46:51	0.632277
2022-09-13	15:46:51	1.37879
2022-09-13	15:46:51	1.242
2022-09-13	15:46:51	1.16841
2022-09-13	15:46:52	0.945254
2022-09-13	15:46:52	0.99014
2022-09-13	15:46:52	1.3395
2022-09-13	15:46:53	0.744135
2022-09-13	15:46:53	1.72139
2022-09-13	15:46:53	0.661183
2022-09-13	15:46:53	1.09426
2022-09-13	15:46:54	0.444033
2022-09-13	15:46:54	0.420827
2022-09-13	15:46:54	0.913957
2022-09-13	15:46:54	0.564542
2022-09-13	15:46:55	1.14307
2022-09-13	15:46:55	0.539147
2022-09-13	15:46:55	1.3567
2022-09-13	15:46:55	1.09528
2022-09-13	15:46:56	1.48225
2022-09-13	15:46:56	1.48744
2022-09-13	15:46:56	0.735941
2022-09-13	15:46:57	2.41009
2022-09-13	15:46:57	1.16642
2022-09-13	15:46:57	3.1793
2022-09-13	15:46:57	1.2305
2022-09-13	15:46:58	1.57319
2022-09-13	15:46:58	1.98047
2022-09-13	15:46:58	0.89014
2022-09-13	15:46:58	1.98515
2022-09-13	15:46:59	0.398435
2022-09-13	15:46:59	0.966476
2022-09-13	15:46:59	0.822303
2022-09-13	15:46:59	0.64729
2022-09-13	15:47:00	0.757519
2022-09-13	15:47:00	0.416756
2022-09-13	15:47:00	0.75986
2022-09-13	15:47:01	0.492532
2022-09-13	15:47:01	0.822557
2022-09-13	15:47:01	0.426323
2022-09-13	15:47:01	0.807952
2022-09-13	15:47:02	0.71243
2022-09-13	15:47:02	0.900165
2022-09-13	15:47:02	0.873753
2022-09-13	15:47:02	0.972532
2022-09-13	15:47:03	1.58072
2022-09-13	15:47:03	1.55767
2022-09-13	15:47:03	2.11045
2022-09-13	15:47:03	1.78307
2022-09-13	15:47:04	3.71976
2022-09-13	15:47:04	2.34704
2022-09-13	15:47:04	4.15192
2022-09-13	15:47:05	2.05294
2022-09-13	15:47:05	2.19915
2022-09-13	15:47:05	0.209835
2022-09-13	15:47:05	-6.92619
2022-09-13	15:47:06	-0.106399
2022-09-13	15:47:06	-0.639172
2022-09-13	15:47:06	-0.836475
2022-09-13	15:47:06	-0.8436
2022-09-13	15:47:07	-0.636729
2022-09-13	15:47:07	-0.514847
2022-09-13	15:47:07	-0.103295
2022-09-13	15:47:07	-0.0901651
2022-09-13	15:47:08	-0.158715
2022-09-13	15:47:08	-0.0801905
2022-09-13	15:47:08	-0.0989692
2022-09-13	15:47:08	-0.3579
2022-09-13	15:47:09	-0.299529
2022-09-13	15:47:09	-0.166196
2022-09-13	15:47:09	0.180624
2022-09-13	15:47:10	0.183575
2022-09-13	15:47:10	0.0272903
2022-09-13	15:47:10	0.169326
2022-09-13	15:47:10	-0.143702
2022-09-13	15:47:11	0.111412
2022-09-13	15:47:11	-0.0988165
2022-09-13	15:47:11	0.0546694
2022-09-13	15:47:11	-0.0817173
2022-09-13	15:47:12	0.0166033
2022-09-13	15:47:12	0.457316
2022-09-13	15:47:12	4.68149
2022-09-13	15:47:12	7.48591
2022-09-13	15:47:13	4.00841
2022-09-13	15:47:13	4.71416
2022-09-13	15:47:13	1.74495
2022-09-13	15:47:14	1.53793
2022-09-13	15:47:14	1.79228
2022-09-13	15:47:14	1.62688
2022-09-13	15:47:14	2.57192
2022-09-13	15:47:15	1.49045
2022-09-13	15:47:15	2.82653
2022-09-13	15:47:15	1.7535
2022-09-13	15:47:15	1.40363
2022-09-13	15:47:16	2.55793
2022-09-13	15:47:16	1.33625
2022-09-13	15:47:16	2.10989
2022-09-13	15:47:16	0.802761
2022-09-13	15:47:17	1.3565
2022-09-13	15:47:17	0.874415
2022-09-13	15:47:17	0.498791
2022-09-13	15:47:18	0.763728
2022-09-13	15:47:18	0.361132
2022-09-13	15:47:18	0.807494
2022-09-13	15:47:18	0.451361
2022-09-13	15:47:19	0.84444
2022-09-13	15:47:19	0.7593
2022-09-13	15:47:19	0.767901
2022-09-13	15:47:19	0.632277
2022-09-13	15:47:20	0.451056
2022-09-13	15:47:20	0.688562
2022-09-13	15:47:20	0.459402
2022-09-13	15:47:20	2.10826
2022-09-13	15:47:21	0.888817
2022-09-13	15:47:21	2.49457
2022-09-13	15:47:21	3.72123
2022-09-13	15:47:22	7.54011
2022-09-13	15:47:22	3.76103
2022-09-13	15:47:22	6.33757
2022-09-13	15:47:22	3.08378
2022-09-13	15:47:23	2.67243
2022-09-13	15:47:23	1.25889
2022-09-13	15:47:23	0.853041
2022-09-13	15:47:23	0.739249
2022-09-13	15:47:24	0.286425
2022-09-13	15:47:24	0.63355
2022-09-13	15:47:24	0.552125
2022-09-13	15:47:24	0.814364
2022-09-13	15:47:25	0.836298
2022-09-13	15:47:25	0.58388
2022-09-13	15:47:25	0.950089
2022-09-13	15:47:26	0.689784
2022-09-13	15:47:26	1.1738
2022-09-13	15:47:26	0.373601
2022-09-13	15:47:26	0.963677
2022-09-13	15:47:27	0.425204
2022-09-13	15:47:27	0.802863
2022-09-13	15:47:27	0.427748
2022-09-13	15:47:27	0.754974
2022-09-13	15:47:28	0.631005
2022-09-13	15:47:28	0.814008
2022-09-13	15:47:28	0.865407
2022-09-13	15:47:28	0.751463
2022-09-13	15:47:29	1.2134
2022-09-13	15:47:29	0.337468
2022-09-13	15:47:29	1.28144
2022-09-13	15:47:30	0.623677
2022-09-13	15:47:30	1.99599
2022-09-13	15:47:30	0.650751
2022-09-13	15:47:30	1.21472
2022-09-13	15:47:31	0.494008
2022-09-13	15:47:31	0.337977
2022-09-13	15:47:31	0.555178
2022-09-13	15:47:31	0.311667
2022-09-13	15:47:32	0.477977
2022-09-13	15:47:32	0.280725
2022-09-13	15:47:32	0.613906
2022-09-13	15:47:32	0.201285
2022-09-13	15:47:33	0.509682
2022-09-13	15:47:33	0.332074
2022-09-13	15:47:33	0.510903
2022-09-13	15:47:34	0.187595
2022-09-13	15:47:34	0.23584
2022-09-13	15:47:34	0.216909
2022-09-13	15:47:34	0.168206
2022-09-13	15:47:35	0.112328
2022-09-13	15:47:35	-0.0477733
2022-09-13	15:47:35	0.0355346
2022-09-13	15:47:35	0.00520383
2022-09-13	15:47:36	0.0110562
2022-09-13	15:47:36	-0.113168
2022-09-13	15:47:36	0.0290715
2022-09-13	15:47:36	-0.170623
2022-09-13	15:47:37	-0.395458
2022-09-13	15:47:37	-0.702429
2022-09-13	15:47:37	-0.804974
2022-09-13	15:47:38	-0.71846
2022-09-13	15:47:38	-0.647875
2022-09-13	15:47:38	-0.368842
2022-09-13	15:47:38	-0.0716409
2022-09-13	15:47:39	-0.0324043
2022-09-13	15:47:39	0.220064
2022-09-13	15:47:39	4.08474
2022-09-13	15:47:39	4.10169
2022-09-13	15:47:40	4.03533
2022-09-13	15:47:40	4.14281
2022-09-13	15:47:40	4.33782
2022-09-13	15:47:40	1.90994
2022-09-13	15:47:41	1.2191
2022-09-13	15:47:41	0.312685
2022-09-13	15:47:41	0.499962
2022-09-13	15:47:42	0.281387
2022-09-13	15:47:42	0.554466
2022-09-13	15:47:42	0.59355
2022-09-13	15:47:42	0.703422
2022-09-13	15:47:43	0.764084
2022-09-13	15:47:43	0.672685
2022-09-13	15:47:43	1.01034
2022-09-13	15:47:43	0.456247
2022-09-13	15:47:44	0.668562
2022-09-13	15:47:44	0.688562
2022-09-13	15:47:44	0.55126
2022-09-13	15:47:44	0.50444
2022-09-13	15:47:45	0.987799
2022-09-13	15:47:45	1.345
2022-09-13	15:47:45	1.77314
2022-09-13	15:47:46	0.851005
2022-09-13	15:47:46	0.657723
2022-09-13	15:47:46	0.576959
2022-09-13	15:47:46	0.509173
2022-09-13	15:47:47	0.752939
2022-09-13	15:47:47	1.3049
2022-09-13	15:47:47	1.87614
2022-09-13	15:47:47	4.40688
2022-09-13	15:47:48	4.71289
2022-09-13	15:47:48	2.09574
2022-09-13	15:47:48	1.21533
2022-09-13	15:47:48	0.765814
2022-09-13	15:47:49	0.651768
2022-09-13	15:47:49	0.631514
2022-09-13	15:47:49	0.738995
2022-09-13	15:47:49	2.07319
2022-09-13	15:47:50	2.52485
2022-09-13	15:47:50	1.57243
2022-09-13	15:47:50	1.10408
2022-09-13	15:47:51	1.43538
2022-09-13	15:47:51	2.01177
2022-09-13	15:47:51	2.4594
2022-09-13	15:47:51	2.98088
2022-09-13	15:47:52	3.25095
2022-09-13	15:47:52	2.83762
2022-09-13	15:47:52	2.46647
2022-09-13	15:47:52	2.36551
2022-09-13	15:47:53	2.29976
2022-09-13	15:47:53	2.23187
2022-09-13	15:47:53	2.15513
2022-09-13	15:47:53	2.10042
2022-09-13	15:47:54	2.6679
2022-09-13	15:47:54	0.897621
2022-09-13	15:47:54	0.306069
2022-09-13	15:47:55	0.289733
2022-09-13	15:47:55	0.301183
2022-09-13	15:47:55	0.204237
2022-09-13	15:47:55	0.136501
2022-09-13	15:47:56	0.371056
2022-09-13	15:47:56	0.212125
2022-09-13	15:47:56	0.0963997
2022-09-13	15:47:56	-0.0540837
2022-09-13	15:47:57	-0.399732
2022-09-13	15:47:57	0.0744659
2022-09-13	15:47:57	0.216909
2022-09-13	15:47:57	6.92093
2022-09-13	15:47:58	10.6929
2022-09-13	15:47:58	7.42057
2022-09-13	15:47:58	3.96307
2022-09-13	15:47:59	3.4622
2022-09-13	15:47:59	3.27645
2022-09-13	15:47:59	3.88357
2022-09-13	15:47:59	2.52541
2022-09-13	15:48:00	3.49777
2022-09-13	15:48:00	3.50225
2022-09-13	15:48:00	3.27599
2022-09-13	15:48:00	4.45467
2022-09-13	15:48:01	9.62968
2022-09-13	15:48:01	3.07874
2022-09-13	15:48:01	4.305
2022-09-13	15:48:01	1.91192
2022-09-13	15:48:02	1.51798
2022-09-13	15:48:02	6.57248
2022-09-13	15:48:02	3.04067
2022-09-13	15:48:03	4.10423
2022-09-13	15:48:03	3.62154
2022-09-13	15:48:03	2.52001
2022-09-13	15:48:03	2.18668
2022-09-13	15:48:04	3.30734
2022-09-13	15:48:04	2.59024
2022-09-13	15:48:04	3.11737
2022-09-13	15:48:04	5.73462
2022-09-13	15:48:05	4.89111
2022-09-13	15:48:05	3.7853
2022-09-13	15:48:05	2.94235
2022-09-13	15:48:05	1.15584
2022-09-13	15:48:06	1.32739
2022-09-13	15:48:06	0.750395
2022-09-13	15:48:06	1.5138
2022-09-13	15:48:07	1.0078
2022-09-13	15:48:07	1.47268
2022-09-13	15:48:07	2.25925
2022-09-13	15:48:07	5.75192
2022-09-13	15:48:08	9.46968
2022-09-13	15:48:08	10.4632
2022-09-13	15:48:08	6.89604
2022-09-13	15:48:08	7.04591
2022-09-13	15:48:09	10.3744
2022-09-13	15:48:09	11.6736
2022-09-13	15:48:09	4.80724
2022-09-13	15:48:10	6.54607
2022-09-13	15:48:10	4.01563
2022-09-13	15:48:10	5.16423
2022-09-13	15:48:10	5.35497
2022-09-13	15:48:11	3.55925
2022-09-13	15:48:11	0.545712
2022-09-13	15:48:11	0.230802
2022-09-13	15:48:11	0.312736
2022-09-13	15:48:12	0.694567
2022-09-13	15:48:12	0.434466
2022-09-13	15:48:12	0.494618
2022-09-13	15:48:12	1.25202
2022-09-13	15:48:13	1.24983
2022-09-13	15:48:13	4.97319
2022-09-13	15:48:13	8.14846
2022-09-13	15:48:13	5.52647
2022-09-13	15:48:14	3.13401
2022-09-13	15:48:14	1.61533
2022-09-13	15:48:14	0.695891
2022-09-13	15:48:15	0.351667
2022-09-13	15:48:15	0.529325
2022-09-13	15:48:15	0.390293
2022-09-13	15:48:15	0.416196
2022-09-13	15:48:16	0.322048
2022-09-13	15:48:16	0.426476
2022-09-13	15:48:16	0.575382
2022-09-13	15:48:16	0.597621
2022-09-13	15:48:17	0.511005
2022-09-13	15:48:17	0.469936
2022-09-13	15:48:17	0.509428
2022-09-13	15:48:17	0.439046
2022-09-13	15:48:18	0.399657
2022-09-13	15:48:18	0.436094
2022-09-13	15:48:18	0.597366
2022-09-13	15:48:19	0.68673
2022-09-13	15:48:19	0.907952
2022-09-13	15:48:19	1.09497
2022-09-13	15:48:19	1.548
2022-09-13	15:48:20	1.84195
2022-09-13	15:48:20	1.94113
2022-09-13	15:48:20	1.76933
2022-09-13	15:48:20	2.25696
2022-09-13	15:48:21	2.43955
2022-09-13	15:48:21	2.2221
2022-09-13	15:48:21	2.52933
2022-09-13	15:48:21	2.70301
2022-09-13	15:48:22	2.58759
2022-09-13	15:48:22	2.48373
2022-09-13	15:48:22	1.66775
2022-09-13	15:48:23	1.32042
2022-09-13	15:48:23	0.879046
2022-09-13	15:48:23	0.599962
2022-09-13	15:48:23	0.492685
2022-09-13	15:48:24	1.11538
2022-09-13	15:48:24	1.31482
2022-09-13	15:48:24	2.46235
2022-09-13	15:48:24	1.45838
2022-09-13	15:48:25	1.1476
2022-09-13	15:48:25	0.904135
2022-09-13	15:48:25	1.32622
2022-09-13	15:48:25	1.47116
2022-09-13	15:48:26	1.2822
2022-09-13	15:48:26	1.24464
2022-09-13	15:48:26	0.870344
2022-09-13	15:48:27	0.787952
2022-09-13	15:48:27	0.718537
2022-09-13	15:48:27	0.842863
2022-09-13	15:48:27	0.871768
2022-09-13	15:48:28	0.986018
2022-09-13	15:48:28	1.11172
2022-09-13	15:48:28	0.923779
2022-09-13	15:48:28	0.513143
2022-09-13	15:48:29	0.426883
2022-09-13	15:48:29	0.409122
2022-09-13	15:48:29	0.259351
2022-09-13	15:48:29	0.285458
2022-09-13	15:48:30	0.242761
2022-09-13	15:48:30	0.263982
2022-09-13	15:48:30	0.266832
2022-09-13	15:48:31	0.13584
2022-09-13	15:48:31	0.260674
2022-09-13	15:48:31	0.162557
2022-09-13	15:48:31	0.420369
2022-09-13	15:48:32	0.173855
2022-09-13	15:48:32	0.406323
2022-09-13	15:48:32	0.465916
2022-09-13	15:48:32	0.594364
2022-09-13	15:48:33	0.577926
2022-09-13	15:48:33	0.479402
2022-09-13	15:48:33	0.481031
2022-09-13	15:48:33	0.368461
2022-09-13	15:48:34	0.472379
2022-09-13	15:48:34	0.266934
2022-09-13	15:48:34	0.36327
2022-09-13	15:48:34	0.343575
2022-09-13	15:48:35	0.544949
2022-09-13	15:48:35	0.819809
2022-09-13	15:48:35	0.672074
2022-09-13	15:48:36	1.12078
2022-09-13	15:48:36	1.35681
2022-09-13	15:48:36	0.887443
2022-09-13	15:48:36	0.495127
2022-09-13	15:48:37	0.460064
2022-09-13	15:48:37	0.332786
2022-09-13	15:48:37	0.267799
2022-09-13	15:48:37	0.410394
2022-09-13	15:48:38	0.186985
2022-09-13	15:48:38	0.404288
2022-09-13	15:48:38	0.19355
2022-09-13	15:48:38	0.413753
2022-09-13	15:48:39	0.231107
2022-09-13	15:48:39	0.329071
2022-09-13	15:48:39	0.226832
2022-09-13	15:48:40	0.40958
2022-09-13	15:48:40	0.145662
2022-09-13	15:48:40	0.35416
2022-09-13	15:48:40	0.218791
2022-09-13	15:48:41	0.409326
2022-09-13	15:48:41	0.189682
2022-09-13	15:48:41	0.332125
2022-09-13	15:48:41	0.2393
2022-09-13	15:48:42	0.363219
2022-09-13	15:48:42	0.249529
2022-09-13	15:48:42	0.211056
2022-09-13	15:48:42	0.309326
2022-09-13	15:48:43	0.206985
2022-09-13	15:48:43	0.310496
2022-09-13	15:48:43	0.181896
2022-09-13	15:48:44	0.34668
2022-09-13	15:48:44	0.170445
2022-09-13	15:48:44	0.233855
2022-09-13	15:48:44	-0.0561702
2022-09-13	15:48:45	0.0004201
2022-09-13	15:48:45	-0.089758
2022-09-13	15:48:45	-0.22014
2022-09-13	15:48:45	-0.109809
2022-09-13	15:48:46	0.20271
2022-09-13	15:48:46	1.10235
2022-09-13	15:48:46	1.62322
2022-09-13	15:48:46	1.15981
2022-09-13	15:48:47	0.5764
2022-09-13	15:48:47	0.188308
2022-09-13	15:48:47	0.0768577
2022-09-13	15:48:48	0.0747712
2022-09-13	15:48:48	-0.0520481
2022-09-13	15:48:48	-0.31159
2022-09-13	15:48:48	-0.238409
2022-09-13	15:48:49	-0.197544
2022-09-13	15:48:49	0.0414379
2022-09-13	15:48:49	0.0156363
2022-09-13	15:48:49	0.220064
2022-09-13	15:48:50	0.280929
2022-09-13	15:48:50	0.302303
2022-09-13	15:48:50	0.187799
2022-09-13	15:48:50	0.224135
2022-09-13	15:48:51	0.28841
2022-09-13	15:48:51	0.257875
2022-09-13	15:48:51	0.3364
2022-09-13	15:48:52	0.281438
2022-09-13	15:48:52	0.278333
2022-09-13	15:48:52	0.362659
2022-09-13	15:48:52	0.363626
2022-09-13	15:48:53	0.277621
2022-09-13	15:48:53	0.313499
2022-09-13	15:48:53	0.331412
2022-09-13	15:48:53	0.343524
2022-09-13	15:48:54	0.347901
2022-09-13	15:48:54	0.35986
2022-09-13	15:48:54	0.359249
2022-09-13	15:48:54	0.36215
2022-09-13	15:48:55	0.359555
2022-09-13	15:48:55	0.333346
2022-09-13	15:48:55	0.326374
2022-09-13	15:48:56	0.304593
2022-09-13	15:48:56	0.310496
2022-09-13	15:48:56	0.320624
2022-09-13	15:48:56	0.316908
2022-09-13	15:48:57	0.359097
2022-09-13	15:48:57	0.304644
2022-09-13	15:48:57	0.336552
2022-09-13	15:48:57	0.323881
2022-09-13	15:48:58	0.305305
2022-09-13	15:48:58	0.31584
2022-09-13	15:48:58	0.305458
2022-09-13	15:48:58	0.296654
2022-09-13	15:48:59	0.293499
2022-09-13	15:48:59	0.291311
2022-09-13	15:48:59	0.293295
2022-09-13	15:49:00	0.294517
2022-09-13	15:49:00	0.29472
2022-09-13	15:49:00	0.295738
2022-09-13	15:49:00	0.284644
2022-09-13	15:49:01	0.292837
2022-09-13	15:49:01	0.286628
2022-09-13	15:49:01	0.291361
2022-09-13	15:49:01	0.294771
2022-09-13	15:49:02	0.298741
2022-09-13	15:49:02	0.293295
2022-09-13	15:49:02	0.301234
2022-09-13	15:49:02	0.30612
2022-09-13	15:49:03	0.314008
2022-09-13	15:49:03	0.299962
2022-09-13	15:49:03	0.297468
2022-09-13	15:49:04	0.303321
2022-09-13	15:49:04	0.300471
2022-09-13	15:49:04	0.303473
2022-09-13	15:49:04	0.311769
2022-09-13	15:49:05	0.325611
2022-09-13	15:49:05	0.326272
2022-09-13	15:49:05	0.253041
2022-09-13	15:49:05	0.271514
2022-09-13	15:49:06	0.333295
2022-09-13	15:49:06	0.443524
2022-09-13	15:49:06	0.428715
2022-09-13	15:49:06	0.365865
2022-09-13	15:49:07	0.39126
2022-09-13	15:49:07	0.405204
2022-09-13	15:49:07	0.407952
2022-09-13	15:49:08	0.406527
2022-09-13	15:49:08	0.43187
2022-09-13	15:49:08	0.442863
2022-09-13	15:49:08	0.415738
2022-09-13	15:49:09	0.416756
2022-09-13	15:49:09	0.425102
2022-09-13	15:49:09	0.428613
2022-09-13	15:49:09	0.437417
2022-09-13	15:49:10	0.441896
2022-09-13	15:49:10	0.439046
2022-09-13	15:49:10	0.443931
2022-09-13	15:49:10	0.442608
2022-09-13	15:49:11	0.449987
2022-09-13	15:49:11	0.44897
2022-09-13	15:49:11	0.4593
2022-09-13	15:49:11	0.462405
2022-09-13	15:49:12	0.464746
2022-09-13	15:49:12	0.477824
2022-09-13	15:49:12	0.487239
2022-09-13	15:49:13	0.494313
2022-09-13	15:49:13	0.504949
2022-09-13	15:49:13	0.491921
2022-09-13	15:49:13	0.52785
2022-09-13	15:49:14	0.504593
2022-09-13	15:49:14	0.549936
2022-09-13	15:49:14	0.512939
2022-09-13	15:49:14	0.447443
2022-09-13	15:49:15	0.550903
2022-09-13	15:49:15	0.519809
2022-09-13	15:49:15	0.530751
2022-09-13	15:49:15	0.608562
2022-09-13	15:49:16	0.582964
2022-09-13	15:49:16	0.546985
2022-09-13	15:49:16	0.503117
2022-09-13	15:49:17	0.465763
2022-09-13	15:49:17	0.440929
2022-09-13	15:49:17	0.429682
2022-09-13	15:49:17	0.440115
2022-09-13	15:49:18	0.429478
2022-09-13	15:49:18	0.423066
2022-09-13	15:49:18	0.432227
2022-09-13	15:49:18	0.423524
2022-09-13	15:49:19	0.43472
2022-09-13	15:49:19	0.444593
2022-09-13	15:49:19	0.425713
2022-09-13	15:49:19	0.416196
2022-09-13	15:49:20	0.413855
2022-09-13	15:49:20	0.398537
2022-09-13	15:49:20	0.395585
2022-09-13	15:49:21	0.395789
2022-09-13	15:49:21	0.38042
2022-09-13	15:49:21	0.380064
2022-09-13	15:49:21	0.362048
2022-09-13	15:49:22	0.370242
2022-09-13	15:49:22	0.374619
2022-09-13	15:49:22	0.36729
2022-09-13	15:49:22	0.385153
2022-09-13	15:49:23	0.398028
2022-09-13	15:49:23	0.432125
2022-09-13	15:49:23	0.402456
2022-09-13	15:49:23	0.381183
2022-09-13	15:49:24	0.404084
2022-09-13	15:49:24	0.422965
2022-09-13	15:49:24	0.345865
2022-09-13	15:49:25	0.234568
2022-09-13	15:49:25	0.422608
2022-09-13	15:49:25	0.317519
2022-09-13	15:49:25	0.429682
2022-09-13	15:49:26	0.284389
2022-09-13	15:49:26	0.208562
2022-09-13	15:49:26	0.393346
2022-09-13	15:49:26	0.37645
2022-09-13	15:49:27	0.312837
2022-09-13	15:49:27	0.449886
2022-09-13	15:49:27	0.68785
2022-09-13	15:49:27	1.04118
2022-09-13	15:49:28	0.514618
2022-09-13	15:49:28	0.980623
2022-09-13	15:49:28	0.463422
2022-09-13	15:49:29	0.86841
2022-09-13	15:49:29	0.509071
2022-09-13	15:49:29	1.42612
2022-09-13	15:49:29	0.79874
2022-09-13	15:49:30	1.7677
2022-09-13	15:49:30	1.40118
2022-09-13	15:49:30	1.30113
2022-09-13	15:49:30	1.10307
2022-09-13	15:49:31	0.476959
2022-09-13	15:49:31	0.853957
2022-09-13	15:49:31	0.404288
2022-09-13	15:49:31	0.695687
2022-09-13	15:49:32	0.415433
2022-09-13	15:49:32	0.631208
2022-09-13	15:49:32	0.469886
2022-09-13	15:49:33	0.437316
2022-09-13	15:49:33	0.467799
2022-09-13	15:49:33	0.399199
2022-09-13	15:49:33	0.530598
2022-09-13	15:49:34	0.304033
2022-09-13	15:49:34	0.546527
2022-09-13	15:49:34	0.339809
2022-09-13	15:49:34	0.612226
2022-09-13	15:49:35	0.292379
2022-09-13	15:49:35	0.551718
2022-09-13	15:49:35	0.301336
2022-09-13	15:49:35	0.524644
2022-09-13	15:49:36	0.375076
2022-09-13	15:49:36	0.564237
2022-09-13	15:49:36	0.409631
2022-09-13	15:49:37	0.467188
2022-09-13	15:49:37	0.323321
2022-09-13	15:49:37	0.387392
2022-09-13	15:49:37	0.49416
2022-09-13	15:49:38	0.496451
2022-09-13	15:49:38	0.581489
2022-09-13	15:49:38	0.491311
2022-09-13	15:49:38	0.811056
2022-09-13	15:49:39	0.428868
2022-09-13	15:49:39	0.716603
2022-09-13	15:49:39	0.297621
2022-09-13	15:49:39	0.700674
2022-09-13	15:49:40	0.458384
2022-09-13	15:49:40	0.764796
2022-09-13	15:49:40	0.493041
2022-09-13	15:49:41	0.872023
2022-09-13	15:49:41	0.706221
2022-09-13	15:49:41	1.04765
2022-09-13	15:49:41	0.725865
2022-09-13	15:49:42	0.712277
2022-09-13	15:49:42	0.762099
2022-09-13	15:49:42	0.359402
2022-09-13	15:49:42	0.873652
2022-09-13	15:49:43	0.411107
2022-09-13	15:49:43	0.866425
2022-09-13	15:49:43	0.414109
2022-09-13	15:49:43	0.634873
2022-09-13	15:49:44	0.40327
2022-09-13	15:49:44	0.486272
2022-09-13	15:49:44	0.465407
2022-09-13	15:49:45	0.302557
2022-09-13	15:49:45	0.392277
2022-09-13	15:49:45	0.40042
2022-09-13	15:49:45	0.795789
2022-09-13	15:49:46	0.523371
2022-09-13	15:49:46	0.709682
2022-09-13	15:49:46	0.776603
2022-09-13	15:49:46	0.385407
2022-09-13	15:49:47	0.623371
2022-09-13	15:49:47	0.412277
2022-09-13	15:49:47	0.554364
2022-09-13	15:49:47	0.442456
2022-09-13	15:49:48	0.728613
2022-09-13	15:49:48	0.488715
2022-09-13	15:49:48	0.57584
2022-09-13	15:49:49	0.58729
2022-09-13	15:49:49	0.723473
2022-09-13	15:49:49	0.432328
2022-09-13	15:49:49	0.681336
2022-09-13	15:49:50	0.381082
2022-09-13	15:49:50	0.538282
2022-09-13	15:49:50	0.409631
2022-09-13	15:49:50	0.460166
2022-09-13	15:49:51	0.368664
2022-09-13	15:49:51	0.370191
2022-09-13	15:49:51	0.373397
2022-09-13	15:49:51	0.399148
2022-09-13	15:49:52	0.364949
2022-09-13	15:49:52	0.376959
2022-09-13	15:49:52	0.375484
2022-09-13	15:49:53	0.489173
2022-09-13	15:49:53	0.326679
2022-09-13	15:49:53	0.345153
2022-09-13	15:49:53	0.427239
2022-09-13	15:49:54	0.385407
2022-09-13	15:49:54	0.364797
2022-09-13	15:49:54	0.418283
2022-09-13	15:49:54	0.274517
2022-09-13	15:49:55	0.541947
2022-09-13	15:49:55	0.308613
2022-09-13	15:49:55	0.578944
2022-09-13	15:49:55	0.301082
2022-09-13	15:49:56	0.547341
2022-09-13	15:49:56	0.272379
2022-09-13	15:49:56	0.595992
2022-09-13	15:49:57	0.611209
2022-09-13	15:49:57	1.36378
2022-09-13	15:49:57	1.31681
2022-09-13	15:49:57	2.26205
2022-09-13	15:49:58	0.793041
2022-09-13	15:49:58	1.24001
2022-09-13	15:49:58	0.701997
2022-09-13	15:49:58	1.15604
2022-09-13	15:49:59	0.954313
2022-09-13	15:49:59	1.17625
2022-09-13	15:49:59	1.76027
2022-09-13	15:49:59	1.07335
2022-09-13	15:50:00	1.03966
2022-09-13	15:50:00	0.732532
2022-09-13	15:50:00	1.35777
2022-09-13	15:50:00	0.427137
2022-09-13	15:50:01	1.26312
2022-09-13	15:50:01	0.481132
2022-09-13	15:50:01	0.84098
2022-09-13	15:50:02	0.500725
2022-09-13	15:50:02	0.726527
2022-09-13	15:50:02	0.47584
2022-09-13	15:50:02	0.719555
2022-09-13	15:50:03	0.799962
2022-09-13	15:50:03	0.940165
2022-09-13	15:50:03	0.91925
2022-09-13	15:50:03	1.22388
2022-09-13	15:50:04	1.25676
2022-09-13	15:50:04	0.984898
2022-09-13	15:50:04	1.03508
2022-09-13	15:50:04	1.2452
2022-09-13	15:50:05	0.520776
2022-09-13	15:50:05	0.796298
2022-09-13	15:50:05	0.632125
2022-09-13	15:50:06	0.401743
2022-09-13	15:50:06	0.487545
2022-09-13	15:50:06	0.345662
2022-09-13	15:50:06	0.603575
2022-09-13	15:50:07	0.419555
2022-09-13	15:50:07	0.570242
2022-09-13	15:50:07	0.43472
2022-09-13	15:50:07	0.659249
2022-09-13	15:50:08	0.46215
2022-09-13	15:50:08	0.560878
2022-09-13	15:50:08	0.399657
2022-09-13	15:50:08	0.695687
2022-09-13	15:50:09	0.488308
2022-09-13	15:50:09	0.569071
2022-09-13	15:50:09	0.327748
2022-09-13	15:50:10	0.562303
2022-09-13	15:50:10	0.266221
2022-09-13	15:50:10	0.469326
2022-09-13	15:50:10	0.325967
2022-09-13	15:50:11	0.538282
2022-09-13	15:50:11	0.267697
2022-09-13	15:50:11	0.416043
2022-09-13	15:50:11	0.318741
2022-09-13	15:50:12	0.522964
2022-09-13	15:50:12	0.311209
2022-09-13	15:50:12	0.431972
2022-09-13	15:50:12	0.407646
2022-09-13	15:50:13	0.544389
2022-09-13	15:50:13	0.687646
2022-09-13	15:50:13	0.560878
2022-09-13	15:50:14	0.471616
2022-09-13	15:50:14	0.570496
2022-09-13	15:50:14	0.393397
2022-09-13	15:50:14	0.563422
2022-09-13	15:50:15	0.294567
2022-09-13	15:50:15	0.548155
2022-09-13	15:50:15	0.314618
2022-09-13	15:50:15	0.526272
2022-09-13	15:50:16	0.305916
2022-09-13	15:50:16	0.581489
2022-09-13	15:50:16	0.333753
2022-09-13	15:50:16	0.495738
2022-09-13	15:50:17	0.354618
2022-09-13	15:50:17	0.537774
2022-09-13	15:50:17	0.515585
2022-09-13	15:50:18	0.649529
2022-09-13	15:50:18	0.342964
2022-09-13	15:50:18	0.559707
2022-09-13	15:50:18	0.574059
2022-09-13	15:50:19	0.637774
2022-09-13	15:50:19	0.387341
2022-09-13	15:50:19	0.619046
2022-09-13	15:50:19	0.529886
2022-09-13	15:50:20	0.752634
2022-09-13	15:50:20	0.391972
2022-09-13	15:50:20	0.83472
2022-09-13	15:50:20	0.490598
2022-09-13	15:50:21	0.857774
2022-09-13	15:50:21	0.343066
2022-09-13	15:50:21	0.758995
2022-09-13	15:50:22	0.355636
2022-09-13	15:50:22	0.569479
2022-09-13	15:50:22	0.267799
2022-09-13	15:50:22	0.554567
2022-09-13	15:50:23	0.248054
2022-09-13	15:50:23	0.594567
2022-09-13	15:50:23	0.289987
2022-09-13	15:50:23	0.690649
2022-09-13	15:50:24	0.355331
2022-09-13	15:50:24	-0.0889437
2022-09-13	15:50:24	-0.229249
2022-09-13	15:50:24	-0.215203
2022-09-13	15:50:25	-0.0735239
2022-09-13	15:50:25	-0.0109285
2022-09-13	15:50:25	0.0820485
2022-09-13	15:50:26	0.18841
2022-09-13	15:50:26	0.052074
2022-09-13	15:50:26	0.143524
2022-09-13	15:50:26	0.0505473
2022-09-13	15:50:27	0.141743
2022-09-13	15:50:27	0.0546185
2022-09-13	15:50:27	0.28215
2022-09-13	15:50:27	0.597417
2022-09-13	15:50:28	0.344898
2022-09-13	15:50:28	0.613295
2022-09-13	15:50:28	0.368868
2022-09-13	15:50:28	0.303982
2022-09-13	15:50:29	0.358486
2022-09-13	15:50:29	0.308104
2022-09-13	15:50:29	0.27187
2022-09-13	15:50:30	0.219657
2022-09-13	15:50:30	0.31243
2022-09-13	15:50:30	0.213041
2022-09-13	15:50:30	0.265255
2022-09-13	15:50:31	0.156094
2022-09-13	15:50:31	0.34215
2022-09-13	15:50:31	0.156756
2022-09-13	15:50:31	0.264542
2022-09-13	15:50:32	0.166985
2022-09-13	15:50:32	0.335585
2022-09-13	15:50:32	0.330242
2022-09-13	15:50:32	0.430445
2022-09-13	15:50:33	0.997875
2022-09-13	15:50:33	1.89879
2022-09-13	15:50:33	1.52378
2022-09-13	15:50:34	1.11416
2022-09-13	15:50:34	0.956603
2022-09-13	15:50:34	0.325458
2022-09-13	15:50:34	0.306476
2022-09-13	15:50:35	0.410852
2022-09-13	15:50:35	0.538232
2022-09-13	15:50:35	1.07233
2022-09-13	15:50:35	1.39732
2022-09-13	15:50:36	0.997417
2022-09-13	15:50:36	0.436145
2022-09-13	15:50:36	0.358333
2022-09-13	15:50:36	0.3907
2022-09-13	15:50:37	0.273601
2022-09-13	15:50:37	0.316196
2022-09-13	15:50:37	0.182252
2022-09-13	15:50:38	0.356908
2022-09-13	15:50:38	0.109784
2022-09-13	15:50:38	2.08861
2022-09-13	15:50:38	3.93808
2022-09-13	15:50:39	6.36087
2022-09-13	15:50:39	4.44653
2022-09-13	15:50:39	5.52062
2022-09-13	15:50:39	3.26602
2022-09-13	15:50:40	3.81904
2022-09-13	15:50:40	2.09737
2022-09-13	15:50:40	1.36271
2022-09-13	15:50:40	2.01849
2022-09-13	15:50:41	1.36276
2022-09-13	15:50:41	1.64927
2022-09-13	15:50:41	0.946578
2022-09-13	15:50:42	1.22546
2022-09-13	15:50:42	0.777773
2022-09-13	15:50:42	0.904949
2022-09-13	15:50:42	0.57416
2022-09-13	15:50:43	0.74785
2022-09-13	15:50:43	0.246527
2022-09-13	15:50:43	0.474771
2022-09-13	15:50:43	0.445865
2022-09-13	15:50:44	0.428461
2022-09-13	15:50:44	0.385356
2022-09-13	15:50:44	0.425916
2022-09-13	15:50:44	0.577977
2022-09-13	15:50:45	0.607799
2022-09-13	15:50:45	0.522048
2022-09-13	15:50:45	0.733244
2022-09-13	15:50:46	0.609784
2022-09-13	15:50:46	0.794517
2022-09-13	15:50:46	0.584186
2022-09-13	15:50:46	0.650903
2022-09-13	15:50:47	0.733753
2022-09-13	15:50:47	0.492176
2022-09-13	15:50:47	0.563473
2022-09-13	15:50:47	0.789071
2022-09-13	15:50:48	0.711565
2022-09-13	15:50:48	0.69299
2022-09-13	15:50:48	0.792074
2022-09-13	15:50:48	0.445204
2022-09-13	15:50:49	0.69187
2022-09-13	15:50:49	0.439656
2022-09-13	15:50:49	0.619097
2022-09-13	15:50:49	0.280318
2022-09-13	15:50:50	0.564644
2022-09-13	15:50:50	0.226272
2022-09-13	15:50:50	0.495534
2022-09-13	15:50:51	0.242049
2022-09-13	15:50:51	0.488817
2022-09-13	15:50:51	0.265356
2022-09-13	15:50:51	0.409987
2022-09-13	15:50:52	0.30271
2022-09-13	15:50:52	0.520827
2022-09-13	15:50:52	0.41869
2022-09-13	15:50:52	0.43472
2022-09-13	15:50:53	0.354008
2022-09-13	15:50:53	0.403015
2022-09-13	15:50:53	0.28215
2022-09-13	15:50:53	0.283677
2022-09-13	15:50:54	0.384237
2022-09-13	15:50:54	0.343219
2022-09-13	15:50:54	0.358384
2022-09-13	15:50:55	0.256298
2022-09-13	15:50:55	0.500725
2022-09-13	15:50:55	0.299148
2022-09-13	15:50:55	0.400267
2022-09-13	15:50:56	0.192735
2022-09-13	15:50:56	0.351005
2022-09-13	15:50:56	0.296959
2022-09-13	15:50:56	0.185916
2022-09-13	15:50:57	0.255585
2022-09-13	15:50:57	0.224237
2022-09-13	15:50:57	0.459097
2022-09-13	15:50:57	0.213804
2022-09-13	15:50:58	0.337621
2022-09-13	15:50:58	0.0819977
2022-09-13	15:50:58	0.323168
2022-09-13	15:50:59	0.116451
2022-09-13	15:50:59	0.383117
2022-09-13	15:50:59	0.0246949
2022-09-13	15:50:59	0.0430664
2022-09-13	15:51:00	0.122812
2022-09-13	15:51:00	0.487596
2022-09-13	15:51:00	1.14342
2022-09-13	15:51:00	0.485
2022-09-13	15:51:01	0.405764
2022-09-13	15:51:01	0.45355
2022-09-13	15:51:01	0.25757
2022-09-13	15:51:01	0.355331
2022-09-13	15:51:02	0.214313
2022-09-13	15:51:02	0.416959
2022-09-13	15:51:02	0.20159
2022-09-13	15:51:03	0.276451
2022-09-13	15:51:03	0.200471
2022-09-13	15:51:03	0.336807
2022-09-13	15:51:03	0.0776719
2022-09-13	15:51:04	0.226629
2022-09-13	15:51:04	0.223168
2022-09-13	15:51:04	0.34612
2022-09-13	15:51:04	0.228868
2022-09-13	15:51:05	0.28383
2022-09-13	15:51:05	0.297977
2022-09-13	15:51:05	0.35243
2022-09-13	15:51:05	0.41757
2022-09-13	15:51:06	0.506883
2022-09-13	15:51:06	0.801997
2022-09-13	15:51:06	1.07798
2022-09-13	15:51:07	1.86754
2022-09-13	15:51:07	1.12134
2022-09-13	15:51:07	1.6907
2022-09-13	15:51:07	0.980725
2022-09-13	15:51:08	0.945712
2022-09-13	15:51:08	0.786221
2022-09-13	15:51:08	0.735229
2022-09-13	15:51:08	0.827341
2022-09-13	15:51:09	0.816654
2022-09-13	15:51:09	0.601234
2022-09-13	15:51:09	0.934873
2022-09-13	15:51:10	0.6164
2022-09-13	15:51:10	0.831718
2022-09-13	15:51:10	0.906272
2022-09-13	15:51:10	1.22332
2022-09-13	15:51:11	1.13711
2022-09-13	15:51:11	0.968562
2022-09-13	15:51:11	0.440878
2022-09-13	15:51:11	0.981183
2022-09-13	15:51:12	0.672125
2022-09-13	15:51:12	1.07039
2022-09-13	15:51:12	0.861336
2022-09-13	15:51:12	1.47864
2022-09-13	15:51:13	1.70907
2022-09-13	15:51:13	2.57731
2022-09-13	15:51:13	2.86586
2022-09-13	15:51:13	2.52678
2022-09-13	15:51:14	1.83503
2022-09-13	15:51:14	1.25192
2022-09-13	15:51:14	0.66841
2022-09-13	15:51:15	0.763219
2022-09-13	15:51:15	0.472023
2022-09-13	15:51:15	0.669987
2022-09-13	15:51:15	0.4107
2022-09-13	15:51:16	0.681132
2022-09-13	15:51:16	0.506425
2022-09-13	15:51:16	0.632837
2022-09-13	15:51:16	0.467443
2022-09-13	15:51:17	0.663168
2022-09-13	15:51:17	0.411005
2022-09-13	15:51:17	0.648868
2022-09-13	15:51:17	0.467952
2022-09-13	15:51:18	0.324339
2022-09-13	15:51:18	0.241438
2022-09-13	15:51:18	0.477214
2022-09-13	15:51:19	0.35701
2022-09-13	15:51:19	0.604847
2022-09-13	15:51:19	0.750954
2022-09-13	15:51:19	1.35452
2022-09-13	15:51:20	0.614974
2022-09-13	15:51:20	1.64434
2022-09-13	15:51:20	1.11268
2022-09-13	15:51:20	1.96495
2022-09-13	15:51:21	1.46597
2022-09-13	15:51:21	3.04815
2022-09-13	15:51:21	1.49019
2022-09-13	15:51:21	3.50826
2022-09-13	15:51:22	1.30398
2022-09-13	15:51:22	1.93564
2022-09-13	15:51:22	0.700166
2022-09-13	15:51:23	1.10597
2022-09-13	15:51:23	0.63869
2022-09-13	15:51:23	0.846781
2022-09-13	15:51:23	0.517264
2022-09-13	15:51:24	0.706934
2022-09-13	15:51:24	0.381234
2022-09-13	15:51:24	0.606425
2022-09-13	15:51:24	0.368461
2022-09-13	15:51:25	0.52215
2022-09-13	15:51:25	0.155331
2022-09-13	15:51:25	0.375433
2022-09-13	15:51:25	0.108664
2022-09-13	15:51:26	0.208715
2022-09-13	15:51:26	-0.0358649
2022-09-13	15:51:26	0.237265
2022-09-13	15:51:27	0.832939
2022-09-13	15:51:27	1.32424
2022-09-13	15:51:27	0.742812
2022-09-13	15:51:27	0.510649
2022-09-13	15:51:28	0.251311
2022-09-13	15:51:28	0.349631
2022-09-13	15:51:28	0.138893
