# Supplementary material for: Comparing efficacy in reducing pulling and welfare impacts of four types of leash walking equipment
Source: PeerJ journal article supplement (doi:10.7717/peerj.18131), 2024-10-24
Supplement: Shelter1_Tension_files.zip [file Sunny_harness_2022912103439 copy.xlsx]

## Sheet: Averaged Newtons
Date	Time	Averaged Newtons	Impulse	Total steps
2022-09-12	10:35:10	3.54871	3.54871	0		Impulse	1100.32
2022-09-12	10:35:11	6.16364	9.71235	0		Total steps	23
2022-09-12	10:35:12	3.41736	13.1297	0		# > 5	2
2022-09-12	10:35:13	2.48448	15.6142	0
2022-09-12	10:35:14	4.85888	20.4731	0
2022-09-12	10:35:15	1.31884	21.7919	0
2022-09-12	10:35:16	1.06819	22.8601	0
2022-09-12	10:35:17	1.32541	24.1855	0
2022-09-12	10:35:18	1.0548	25.2403	0
2022-09-12	10:35:19	0.870682	26.111	0
2022-09-12	10:35:20	1.47889	27.5899	0
2022-09-12	10:35:21	2.29931	29.8892	0
2022-09-12	10:35:22	1.40967	31.2989	0
2022-09-12	10:35:23	2.54385	33.8427	0
2022-09-12	10:35:24	0.798979	34.6417	0
2022-09-12	10:35:25	0.0147718	34.6565	0
2022-09-12	10:35:26	-0.810503	34.6565	0
2022-09-12	10:35:27	-1.02937	34.6565	0
2022-09-12	10:35:28	-0.581603	34.6565	0
2022-09-12	10:35:29	-0.686583	34.6565	0
2022-09-12	10:35:30	-0.130031	34.6565	0
2022-09-12	10:35:31	4.92092	39.5774	0
2022-09-12	10:35:32	1.25778	40.8352	0
2022-09-12	10:35:33	1.25993	42.0951	0
2022-09-12	10:35:34	1.31114	43.4062	0
2022-09-12	10:35:35	2.50984	45.9161	0
2022-09-12	10:35:36	3.31628	49.2323	0
2022-09-12	10:35:37	4.22726	53.4596	0
2022-09-12	10:35:38	2.04487	55.5045	0
2022-09-12	10:35:39	2.44577	57.9502	0
2022-09-12	10:35:40	1.7717	59.7219	0
2022-09-12	10:35:41	1.91188	61.6338	0
2022-09-12	10:35:42	2.29512	63.9289	0
2022-09-12	10:35:43	2.33681	66.2658	0
2022-09-12	10:35:44	2.44606	68.7118	0
2022-09-12	10:35:45	2.08466	70.7965	0
2022-09-12	10:35:46	1.68477	72.4812	0
2022-09-12	10:35:47	1.70147	74.1827	0
2022-09-12	10:35:48	1.43967	75.6224	0
2022-09-12	10:35:49	1.3434	76.9658	0
2022-09-12	10:35:50	1.00809	77.9739	0
2022-09-12	10:35:51	1.06864	79.0425	0
2022-09-12	10:35:52	1.58564	80.6281	0
2022-09-12	10:35:53	1.26055	81.8887	0
2022-09-12	10:35:54	1.06163	82.9503	0
2022-09-12	10:35:55	1.44629	84.3966	0
2022-09-12	10:35:56	1.11335	85.51	0
2022-09-12	10:35:57	1.48285	86.9928	0
2022-09-12	10:35:58	1.99592	88.9887	0
2022-09-12	10:35:59	4.52227	93.511	0
2022-09-12	10:36:00	1.89396	95.405	0
2022-09-12	10:36:01	1.98471	97.3897	0
2022-09-12	10:36:02	2.01403	99.4037	0
2022-09-12	10:36:03	1.83706	101.241	0
2022-09-12	10:36:04	1.72282	102.964	0
2022-09-12	10:36:05	1.61103	104.575	0
2022-09-12	10:36:06	7.07071	111.645	0
2022-09-12	10:36:07	4.69523	116.341	0
2022-09-12	10:36:08	2.03106	118.372	0
2022-09-12	10:36:09	1.85804	120.23	0
2022-09-12	10:36:10	6.1886	126.418	0
2022-09-12	10:36:11	8.80535	135.224	0
2022-09-12	10:36:12	4.57383	139.797	0
2022-09-12	10:36:13	2.01378	141.811	0
2022-09-12	10:36:14	1.65976	143.471	0
2022-09-12	10:36:15	1.90033	145.371	0
2022-09-12	10:36:16	1.90939	147.281	0
2022-09-12	10:36:17	1.92422	149.205	0
2022-09-12	10:36:18	2.06496	151.27	0
2022-09-12	10:36:19	4.00474	155.275	0
2022-09-12	10:36:20	11.6796	166.954	0
2022-09-12	10:36:21	9.62144	176.576	0
2022-09-12	10:36:22	3.37119	179.947	0
2022-09-12	10:36:23	1.46394	181.411	0
2022-09-12	10:36:24	2.68477	184.096	0
2022-09-12	10:36:25	3.00152	187.097	0
2022-09-12	10:36:26	4.60226	191.699	0
2022-09-12	10:36:27	5.4898	197.189	0
2022-09-12	10:36:28	9.13307	206.322	0
2022-09-12	10:36:29	4.90423	211.226	0
2022-09-12	10:36:30	4.48591	215.712	0
2022-09-12	10:36:31	7.93131	223.644	0
2022-09-12	10:36:32	16.6373	240.281	1
2022-09-12	10:36:33	17.4843	257.765	2
2022-09-12	10:36:34	24.6689	282.434	3
2022-09-12	10:36:35	25.9748	308.409	4
2022-09-12	10:36:36	21.7536	330.162	5
2022-09-12	10:36:37	24.3126	354.475	6
2022-09-12	10:36:38	21.6458	376.121	7
2022-09-12	10:36:39	15.9122	392.033	8
2022-09-12	10:36:40	29.7354	421.768	9
2022-09-12	10:36:41	18.7369	440.505	10
2022-09-12	10:36:42	19.3661	459.871	11
2022-09-12	10:36:43	30.7585	490.63	12
2022-09-12	10:36:44	16.1355	506.765	13
2022-09-12	10:36:45	1.49179	508.257	13
2022-09-12	10:36:46	1.93434	510.192	13
2022-09-12	10:36:47	0.975944	511.167	13
2022-09-12	10:36:48	1.12535	512.293	13
2022-09-12	10:36:49	1.36785	513.661	13
2022-09-12	10:36:50	1.80056	515.461	13
2022-09-12	10:36:51	1.60277	517.064	13
2022-09-12	10:36:52	1.49903	518.563	13
2022-09-12	10:36:53	1.65115	520.214	13
2022-09-12	10:36:54	1.4507	521.665	13
2022-09-12	10:36:55	2.79801	524.463	13
2022-09-12	10:36:56	3.70264	528.166	13
2022-09-12	10:36:57	3.1345	531.3	13
2022-09-12	10:36:58	1.84731	533.147	13
2022-09-12	10:36:59	2.17647	535.324	13
2022-09-12	10:37:00	3.93638	539.26	13
2022-09-12	10:37:01	2.0936	541.354	13
2022-09-12	10:37:02	1.37809	542.732	13
2022-09-12	10:37:03	3.48086	546.213	13
2022-09-12	10:37:04	2.12448	548.337	13
2022-09-12	10:37:05	1.6245	549.962	13
2022-09-12	10:37:06	3.98628	553.948	13
2022-09-12	10:37:07	0.295642	554.244	13
2022-09-12	10:37:08	-0.0409911	554.244	13
2022-09-12	10:37:09	-0.947419	554.244	13
2022-09-12	10:37:10	-1.50899	554.244	13
2022-09-12	10:37:11	-0.416352	554.244	13
2022-09-12	10:37:12	-0.421824	554.244	13
2022-09-12	10:37:13	0.323599	554.567	13
2022-09-12	10:37:14	0.46095	555.028	13
2022-09-12	10:37:15	0.439953	555.468	13
2022-09-12	10:37:16	-0.075248	555.468	13
2022-09-12	10:37:17	0.258291	555.726	13
2022-09-12	10:37:18	0.909561	556.636	13
2022-09-12	10:37:19	1.09553	557.732	13
2022-09-12	10:37:20	1.13559	558.867	13
2022-09-12	10:37:21	1.13433	560.001	13
2022-09-12	10:37:22	1.2979	561.299	13
2022-09-12	10:37:23	1.31584	562.615	13
2022-09-12	10:37:24	1.54465	564.16	13
2022-09-12	10:37:25	1.41495	565.575	13
2022-09-12	10:37:26	1.47719	567.052	13
2022-09-12	10:37:27	1.655	568.707	13
2022-09-12	10:37:28	1.61086	570.318	13
2022-09-12	10:37:29	1.51079	571.829	13
2022-09-12	10:37:30	1.60673	573.435	13
2022-09-12	10:37:31	2.53423	575.97	13
2022-09-12	10:37:32	1.84221	577.812	13
2022-09-12	10:37:33	1.6451	579.457	13
2022-09-12	10:37:34	3.62942	583.086	13
2022-09-12	10:37:35	1.61363	584.7	13
2022-09-12	10:37:36	3.87746	588.577	13
2022-09-12	10:37:37	2.72868	591.306	13
2022-09-12	10:37:38	3.79592	595.102	13
2022-09-12	10:37:39	1.11845	596.22	13
2022-09-12	10:37:40	1.03237	597.253	13
2022-09-12	10:37:41	1.30962	598.562	13
2022-09-12	10:37:42	1.52686	600.089	13
2022-09-12	10:37:43	0.727275	600.817	13
2022-09-12	10:37:44	-0.894053	600.817	13
2022-09-12	10:37:45	0.800111	601.617	13
2022-09-12	10:37:46	0.983265	602.6	13
2022-09-12	10:37:47	0.353028	602.953	13
2022-09-12	10:37:48	0.445387	603.398	13
2022-09-12	10:37:49	0.192077	603.59	13
2022-09-12	10:37:50	0.530748	604.121	13
2022-09-12	10:37:51	0.560269	604.681	13
2022-09-12	10:37:52	0.62886	605.31	13
2022-09-12	10:37:53	1.00905	606.319	13
2022-09-12	10:37:54	0.757044	607.076	13
2022-09-12	10:37:55	0.873774	607.95	13
2022-09-12	10:37:56	1.88986	609.84	13
2022-09-12	10:37:57	2.2503	612.09	13
2022-09-12	10:37:58	7.68616	619.777	13
2022-09-12	10:37:59	5.52579	625.302	13
2022-09-12	10:38:00	3.51318	628.816	13
2022-09-12	10:38:01	2.66875	631.484	13
2022-09-12	10:38:02	2.05019	633.534	13
2022-09-12	10:38:03	2.24529	635.78	13
2022-09-12	10:38:04	2.33944	638.119	13
2022-09-12	10:38:05	2.17221	640.291	13
2022-09-12	10:38:06	2.32172	642.613	13
2022-09-12	10:38:07	10.442	653.055	13
2022-09-12	10:38:08	7.55226	660.607	13
2022-09-12	10:38:09	4.01555	664.623	13
2022-09-12	10:38:10	2.32591	666.949	13
2022-09-12	10:38:11	2.53074	669.48	13
2022-09-12	10:38:12	4.92901	674.409	13
2022-09-12	10:38:13	10.0892	684.498	13
2022-09-12	10:38:14	4.58272	689.08	13
2022-09-12	10:38:15	2.16564	691.246	13
2022-09-12	10:38:16	2.37922	693.625	13
2022-09-12	10:38:17	2.88522	696.511	13
2022-09-12	10:38:18	3.07498	699.586	13
2022-09-12	10:38:19	4.45143	704.037	13
2022-09-12	10:38:20	3.73482	707.772	13
2022-09-12	10:38:21	13.5153	721.287	14
2022-09-12	10:38:22	1.38885	722.676	14
2022-09-12	10:38:23	-0.649571	722.676	14
2022-09-12	10:38:24	-1.32874	722.676	14
2022-09-12	10:38:25	-0.0318617	722.676	14
2022-09-12	10:38:26	1.63446	724.31	14
2022-09-12	10:38:27	1.62088	725.931	14
2022-09-12	10:38:28	1.54678	727.478	14
2022-09-12	10:38:29	2.62993	730.108	14
2022-09-12	10:38:30	1.97	732.078	14
2022-09-12	10:38:31	2.87277	734.951	14
2022-09-12	10:38:32	1.02265	735.973	14
2022-09-12	10:38:33	2.07532	738.049	14
2022-09-12	10:38:34	16.0114	754.06	15
2022-09-12	10:38:35	24.9915	779.051	16
2022-09-12	10:38:36	3.27712	782.329	16
2022-09-12	10:38:37	2.30641	784.635	16
2022-09-12	10:38:38	2.37271	787.008	16
2022-09-12	10:38:39	2.25359	789.261	16
2022-09-12	10:38:40	2.59744	791.859	16
2022-09-12	10:38:41	3.69233	795.551	16
2022-09-12	10:38:42	2.05975	797.611	16
2022-09-12	10:38:43	1.98166	799.592	16
2022-09-12	10:38:44	1.94091	801.533	16
2022-09-12	10:38:45	1.93433	803.468	16
2022-09-12	10:38:46	7.99453	811.462	16
2022-09-12	10:38:47	15.4492	826.911	17
2022-09-12	10:38:48	25.8957	852.807	18
2022-09-12	10:38:49	18.3819	871.189	19
2022-09-12	10:38:50	27.1573	898.346	20
2022-09-12	10:38:51	16.9787	915.325	21
2022-09-12	10:38:52	2.6005	917.926	21
2022-09-12	10:38:53	1.93146	919.857	21
2022-09-12	10:38:54	1.82001	921.677	21
2022-09-12	10:38:55	1.79094	923.468	21
2022-09-12	10:38:56	1.26695	924.735	21
2022-09-12	10:38:57	2.152	926.887	21
2022-09-12	10:38:58	1.97311	928.86	21
2022-09-12	10:38:59	2.13016	930.99	21
2022-09-12	10:39:00	1.33208	932.322	21
2022-09-12	10:39:01	1.49784	933.82	21
2022-09-12	10:39:02	1.77217	935.592	21
2022-09-12	10:39:03	2.0142	937.607	21
2022-09-12	10:39:04	0.760438	938.367	21
2022-09-12	10:39:05	-0.215222	938.367	21
2022-09-12	10:39:06	0.00775309	938.375	21
2022-09-12	10:39:07	0.0386538	938.413	21
2022-09-12	10:39:08	1.09836	939.512	21
2022-09-12	10:39:09	0.600225	940.112	21
2022-09-12	10:39:10	4.60295	944.715	21
2022-09-12	10:39:11	17.2494	961.964	22
2022-09-12	10:39:12	2.20701	964.171	22
2022-09-12	10:39:13	9.41886	973.59	22
2022-09-12	10:39:14	13.0058	986.596	23
2022-09-12	10:39:15	2.22672	988.823	23
2022-09-12	10:39:16	2.13497	990.958	23
2022-09-12	10:39:17	1.45104	992.409	23
2022-09-12	10:39:18	11.2002	1003.61	23
2022-09-12	10:39:19	4.03648	1007.65	23
2022-09-12	10:39:20	1.20837	1008.85	23
2022-09-12	10:39:21	1.88522	1010.74	23
2022-09-12	10:39:22	0.442784	1011.18	23
2022-09-12	10:39:23	0.579946	1011.76	23
2022-09-12	10:39:24	1.64312	1013.4	23
2022-09-12	10:39:25	2.37498	1015.78	23
2022-09-12	10:39:26	1.3043	1017.08	23
2022-09-12	10:39:27	1.68381	1018.77	23
2022-09-12	10:39:28	0.992582	1019.76	23
2022-09-12	10:39:29	1.01692	1020.78	23
2022-09-12	10:39:30	0.792302	1021.57	23
2022-09-12	10:39:31	0.91505	1022.48	23
2022-09-12	10:39:32	1.52678	1024.01	23
2022-09-12	10:39:33	1.19734	1025.21	23
2022-09-12	10:39:34	0.573682	1025.78	23
2022-09-12	10:39:35	0.124109	1025.91	23
2022-09-12	10:39:36	0.669061	1026.58	23
2022-09-12	10:39:37	0.960098	1027.54	23
2022-09-12	10:39:38	1.05947	1028.6	23
2022-09-12	10:39:39	0.917201	1029.51	23
2022-09-12	10:39:40	1.38288	1030.9	23
2022-09-12	10:39:41	1.50979	1032.41	23
2022-09-12	10:39:42	0.487096	1032.89	23
2022-09-12	10:39:43	1.27979	1034.17	23
2022-09-12	10:39:44	1.58149	1035.75	23
2022-09-12	10:39:45	2.07956	1037.83	23
2022-09-12	10:39:46	2.0752	1039.91	23
2022-09-12	10:39:47	2.09841	1042.01	23
2022-09-12	10:39:48	2.86214	1044.87	23
2022-09-12	10:39:49	1.83927	1046.71	23
2022-09-12	10:39:50	1.94459	1048.65	23
2022-09-12	10:39:51	2.03627	1050.69	23
2022-09-12	10:39:52	1.89745	1052.59	23
2022-09-12	10:39:53	1.93222	1054.52	23
2022-09-12	10:39:54	2.54385	1057.06	23
2022-09-12	10:39:55	4.03049	1061.09	23
2022-09-12	10:39:56	8.93409	1070.03	23
2022-09-12	10:39:57	4.7436	1074.77	23
2022-09-12	10:39:58	3.7778	1078.55	23
2022-09-12	10:39:59	1.99467	1080.54	23
2022-09-12	10:40:00	2.03599	1082.58	23
2022-09-12	10:40:01	3.97914	1086.56	23
2022-09-12	10:40:02	3.19959	1089.76	23
2022-09-12	10:40:03	1.4627	1091.22	23
2022-09-12	10:40:04	1.3447	1092.57	23
2022-09-12	10:40:05	1.62352	1094.19	23
2022-09-12	10:40:06	1.50803	1095.7	23
2022-09-12	10:40:07	0.879737	1096.58	23
2022-09-12	10:40:08	1.22133	1097.8	23
2022-09-12	10:40:09	1.0099	1098.81	23
2022-09-12	10:40:10	1.50916	1100.32	23

## Sheet: Sunny_harness_2022912103439 (3)
Date	Time	Lbs	Newtons	Averaged Newtons	Total Force x time	Total Time Steps Force >3		**GoPro Fitting: 1023
2022-09-12	10:35:10	0.335484	1.4923	3.54871	1.4923	FALSE	0			Total force x time	2083.26
2022-09-12	10:35:10	0.976807	4.34503	3.54871	4.34503	FALSE	0			Total Time Steps Force >3	77
2022-09-12	10:35:10	1.68556	7.49771	3.54871	8.99001	FALSE	0
2022-09-12	10:35:10	0.193295	0.859815	3.54871	5.20485	FALSE	0
2022-09-12	10:35:11	1.43553	6.38552	6.16364	15.3755	FALSE	0
2022-09-12	10:35:11	0.399199	1.77572	6.16364	6.98056	FALSE	0
2022-09-12	10:35:11	1.21146	5.38882	6.16364	20.7643	FALSE	0
2022-09-12	10:35:11	2.4964	11.1045	6.16364	18.0851	FALSE	0
2022-09-12	10:35:12	0.459046	2.04193	3.41736	22.8063	FALSE	0
2022-09-12	10:35:12	0.471667	2.09807	3.41736	20.1831	FALSE	0
2022-09-12	10:35:12	1.71894	7.64619	3.41736	30.4525	FALSE	0
2022-09-12	10:35:12	0.423372	1.88324	3.41736	22.0664	FALSE	0
2022-09-12	10:35:13	0.55584	2.47249	2.48448	32.925	FALSE	0
2022-09-12	10:35:13	0.847697	3.77073	2.48448	25.8371	FALSE	0
2022-09-12	10:35:13	0.272074	1.21024	2.48448	34.1352	FALSE	0
2022-09-12	10:35:14	0.63986	2.84623	4.85888	28.6833	FALSE	0
2022-09-12	10:35:14	1.20123	5.34331	4.85888	39.4785	FALSE	0
2022-09-12	10:35:14	1.3081	5.81869	4.85888	34.502	FALSE	0
2022-09-12	10:35:14	1.22011	5.42729	4.85888	44.9058	FALSE	0
2022-09-12	10:35:15	0.333041	1.48143	1.31884	35.9834	FALSE	0
2022-09-12	10:35:15	0.284237	1.26434	1.31884	46.1701	FALSE	0
2022-09-12	10:35:15	0.407799	1.81397	1.31884	37.7974	FALSE	0
2022-09-12	10:35:15	0.160878	0.715618	1.31884	46.8858	FALSE	0
2022-09-12	10:35:16	0.186374	0.829029	1.06819	38.6264	FALSE	0
2022-09-12	10:35:16	0.0930918	0.414091	1.06819	47.2998	FALSE	0
2022-09-12	10:35:16	0.290547	1.29241	1.06819	39.9188	FALSE	0
2022-09-12	10:35:16	0.390547	1.73723	1.06819	49.0371	FALSE	0
2022-09-12	10:35:17	0.376807	1.67611	1.32541	41.595	FALSE	0
2022-09-12	10:35:17	0.306781	1.36462	1.32541	50.4017	FALSE	0
2022-09-12	10:35:17	0.261896	1.16497	1.32541	42.7599	FALSE	0
2022-09-12	10:35:17	0.246374	1.09592	1.32541	51.4976	FALSE	0
2022-09-12	10:35:18	0.226883	1.00922	1.0548	43.7691	FALSE	0
2022-09-12	10:35:18	0.243372	1.08257	1.0548	52.5802	FALSE	0
2022-09-12	10:35:18	0.241132	1.0726	1.0548	44.8418	FALSE	0
2022-09-12	10:35:19	0.204186	0.90826	0.870682	53.4885	FALSE	0
2022-09-12	10:35:19	0.176043	0.783074	0.870682	45.6248	FALSE	0
2022-09-12	10:35:19	0.233601	1.0391	0.870682	54.5276	FALSE	0
2022-09-12	10:35:19	0.169122	0.752288	0.870682	46.3771	FALSE	0
2022-09-12	10:35:20	0.242099	1.0769	1.47889	55.6045	FALSE	0
2022-09-12	10:35:20	0.296196	1.31754	1.47889	47.6947	FALSE	0
2022-09-12	10:35:20	0.362659	1.61318	1.47889	57.2176	FALSE	0
2022-09-12	10:35:20	0.428919	1.90792	1.47889	49.6026	FALSE	0
2022-09-12	10:35:21	0.547086	2.43355	2.29931	59.6512	FALSE	0
2022-09-12	10:35:21	0.574975	2.5576	2.29931	52.1602	FALSE	0
2022-09-12	10:35:21	0.521132	2.3181	2.29931	61.9693	FALSE	0
2022-09-12	10:35:21	0.42444	1.88799	2.29931	54.0482	FALSE	0
2022-09-12	10:35:22	0.358486	1.59462	1.40967	63.5639	FALSE	0
2022-09-12	10:35:22	0.30841	1.37187	1.40967	55.42	FALSE	0
2022-09-12	10:35:22	0.28383	1.26253	1.40967	64.8264	FALSE	0
2022-09-12	10:35:23	0.362761	1.61363	2.54385	57.0337	FALSE	0
2022-09-12	10:35:23	0.961896	4.27871	2.54385	69.1051	FALSE	0
2022-09-12	10:35:23	0.677468	3.01351	2.54385	60.0472	FALSE	0
2022-09-12	10:35:23	0.285407	1.26955	2.54385	70.3747	FALSE	0
2022-09-12	10:35:24	0.344186	1.53101	0.798979	61.5782	FALSE	0
2022-09-12	10:35:24	0.161794	0.719692	0.798979	71.0944	FALSE	0
2022-09-12	10:35:24	0.0978246	0.435143	0.798979	62.0133	FALSE	0
2022-09-12	10:35:24	0.114669	0.510071	0.798979	71.6045	FALSE	0
2022-09-12	10:35:25	-0.00609391	-0.0271069	0.0147718	62.0133	FALSE	0
2022-09-12	10:35:25	0.0311071	0.138371	0.0147718	71.7428	FALSE	0
2022-09-12	10:35:25	-0.0187657	-0.0834736	0.0147718	62.0133	FALSE	0
2022-09-12	10:35:25	0.00703587	0.031297	0.0147718	71.7741	FALSE	0
2022-09-12	10:35:26	-0.0507758	-0.225861	-0.810503	62.0133	FALSE	0
2022-09-12	10:35:26	-0.188333	-0.837743	-0.810503	71.7741	FALSE	0
2022-09-12	10:35:26	-0.307519	-1.36791	-0.810503	62.0133	FALSE	0
2022-09-12	10:35:27	-0.259783	-1.15557	-1.02937	71.7741	FALSE	0
2022-09-12	10:35:27	-0.265483	-1.18092	-1.02937	62.0133	FALSE	0
2022-09-12	10:35:27	-0.150012	-0.667283	-1.02937	71.7741	FALSE	0
2022-09-12	10:35:27	-0.250369	-1.11369	-1.02937	62.0133	FALSE	0
2022-09-12	10:35:28	-0.170928	-0.760322	-0.581603	71.7741	FALSE	0
2022-09-12	10:35:28	-0.10818	-0.481206	-0.581603	62.0133	FALSE	0
2022-09-12	10:35:28	-0.162837	-0.724332	-0.581603	71.7741	FALSE	0
2022-09-12	10:35:28	-0.0810557	-0.360552	-0.581603	62.0133	FALSE	0
2022-09-12	10:35:29	-0.146297	-0.650758	-0.686583	71.7741	FALSE	0
2022-09-12	10:35:29	-0.145178	-0.645781	-0.686583	62.0133	FALSE	0
2022-09-12	10:35:29	-0.160496	-0.713918	-0.686583	71.7741	FALSE	0
2022-09-12	10:35:29	-0.165432	-0.735875	-0.686583	62.0133	FALSE	0
2022-09-12	10:35:30	-0.0179005	-0.079625	-0.130031	71.7741	FALSE	0
2022-09-12	10:35:30	-0.0456359	-0.202998	-0.130031	62.0133	FALSE	0
2022-09-12	10:35:30	-0.0241601	-0.107469	-0.130031	71.7741	FALSE	0
2022-09-12	10:35:31	0.0411834	0.183192	4.92092	62.1965	FALSE	0
2022-09-12	10:35:31	0.228054	1.01443	4.92092	72.7886	FALSE	0
2022-09-12	10:35:31	3.06057	13.614	4.92092	75.8106	1	1
2022-09-12	10:35:31	1.09528	4.87202	4.92092	77.6606	FALSE	1
2022-09-12	10:35:32	0.321489	1.43005	1.25778	77.2406	FALSE	1
2022-09-12	10:35:32	0.275941	1.22744	1.25778	78.888	FALSE	1
2022-09-12	10:35:32	0.25299	1.12535	1.25778	78.366	FALSE	1
2022-09-12	10:35:32	0.280623	1.24827	1.25778	80.1363	FALSE	1
2022-09-12	10:35:33	0.247036	1.09887	1.25993	79.4648	FALSE	1
2022-09-12	10:35:33	0.277774	1.23559	1.25993	81.3719	FALSE	1
2022-09-12	10:35:33	0.286222	1.27317	1.25993	80.738	FALSE	1
2022-09-12	10:35:33	0.321947	1.43208	1.25993	82.804	FALSE	1
2022-09-12	10:35:34	0.307697	1.3687	1.31114	82.1067	FALSE	1
2022-09-12	10:35:34	0.302863	1.3472	1.31114	84.1512	FALSE	1
2022-09-12	10:35:34	0.299809	1.33361	1.31114	83.4403	FALSE	1
2022-09-12	10:35:34	0.268664	1.19507	1.31114	85.3462	FALSE	1
2022-09-12	10:35:35	0.394364	1.75421	2.50984	85.1945	FALSE	1
2022-09-12	10:35:35	0.456196	2.02925	2.50984	87.3755	FALSE	1
2022-09-12	10:35:35	0.84215	3.74605	2.50984	88.9406	FALSE	1
2022-09-12	10:35:36	0.57355	2.55127	3.31628	89.9267	FALSE	1
2022-09-12	10:35:36	1.87955	8.36061	3.31628	97.3012	FALSE	1
2022-09-12	10:35:36	0.29299	1.30328	3.31628	91.23	FALSE	1
2022-09-12	10:35:36	0.236043	1.04997	3.31628	98.3511	FALSE	1
2022-09-12	10:35:37	0.421082	1.87306	4.22726	93.1031	FALSE	1
2022-09-12	10:35:37	2.52958	11.2521	4.22726	109.603	FALSE	1
2022-09-12	10:35:37	0.401692	1.78681	4.22726	94.8899	FALSE	1
2022-09-12	10:35:37	0.44897	1.99711	4.22726	111.6	FALSE	1
2022-09-12	10:35:38	1.03558	4.60647	2.04487	99.4964	FALSE	1
2022-09-12	10:35:38	0.34327	1.52693	2.04487	113.127	FALSE	1
2022-09-12	10:35:38	0.214873	0.955798	2.04487	100.452	FALSE	1
2022-09-12	10:35:38	0.245102	1.09026	2.04487	114.218	FALSE	1
2022-09-12	10:35:39	0.859758	3.82438	2.44577	104.277	FALSE	1
2022-09-12	10:35:39	0.333092	1.48166	2.44577	115.699	FALSE	1
2022-09-12	10:35:39	0.456654	2.03129	2.44577	106.308	FALSE	1
2022-09-12	10:35:40	0.381998	1.6992	1.7717	117.398	FALSE	1
2022-09-12	10:35:40	0.38673	1.72025	1.7717	108.028	FALSE	1
2022-09-12	10:35:40	0.432277	1.92285	1.7717	119.321	FALSE	1
2022-09-12	10:35:40	0.392176	1.74448	1.7717	109.773	FALSE	1
2022-09-12	10:35:41	0.636552	2.83151	1.91188	122.153	FALSE	1
2022-09-12	10:35:41	0.358995	1.59688	1.91188	111.369	FALSE	1
2022-09-12	10:35:41	0.386323	1.71844	1.91188	123.871	FALSE	1
2022-09-12	10:35:41	0.337366	1.50067	1.91188	112.87	FALSE	1
2022-09-12	10:35:42	0.407392	1.81216	2.29512	125.683	FALSE	1
2022-09-12	10:35:42	0.487494	2.16847	2.29512	115.039	FALSE	1
2022-09-12	10:35:42	0.608257	2.70565	2.29512	128.389	FALSE	1
2022-09-12	10:35:42	0.560725	2.49422	2.29512	117.533	FALSE	1
2022-09-12	10:35:43	0.580776	2.58341	2.33681	130.972	FALSE	1
2022-09-12	10:35:43	0.504186	2.24272	2.33681	119.776	FALSE	1
2022-09-12	10:35:43	0.491056	2.18432	2.33681	133.157	FALSE	1
2022-09-12	10:35:44	0.503524	2.23978	2.44606	122.015	FALSE	1
2022-09-12	10:35:44	0.527748	2.34753	2.44606	135.504	FALSE	1
2022-09-12	10:35:44	0.625458	2.78216	2.44606	124.797	FALSE	1
2022-09-12	10:35:44	0.542863	2.41476	2.44606	137.919	FALSE	1
2022-09-12	10:35:45	0.540878	2.40593	2.08466	127.203	FALSE	1
2022-09-12	10:35:45	0.462049	2.05529	2.08466	139.974	FALSE	1
2022-09-12	10:35:45	0.452328	2.01205	2.08466	129.215	FALSE	1
2022-09-12	10:35:45	0.419351	1.86536	2.08466	141.84	FALSE	1
2022-09-12	10:35:46	0.399046	1.77504	1.68477	130.99	FALSE	1
2022-09-12	10:35:46	0.369886	1.64533	1.68477	143.485	FALSE	1
2022-09-12	10:35:46	0.383982	1.70803	1.68477	132.698	FALSE	1
2022-09-12	10:35:46	0.362099	1.61069	1.68477	145.096	FALSE	1
2022-09-12	10:35:47	0.389835	1.73406	1.70147	134.433	FALSE	1
2022-09-12	10:35:47	0.438079	1.94866	1.70147	147.044	FALSE	1
2022-09-12	10:35:47	0.319606	1.42167	1.70147	135.854	FALSE	1
2022-09-12	10:35:48	0.360573	1.6039	1.43967	148.648	FALSE	1
2022-09-12	10:35:48	0.297875	1.32501	1.43967	137.179	FALSE	1
2022-09-12	10:35:48	0.317468	1.41216	1.43967	150.06	FALSE	1
2022-09-12	10:35:48	0.31869	1.4176	1.43967	138.597	FALSE	1
2022-09-12	10:35:49	0.314669	1.39971	1.3434	151.46	FALSE	1
2022-09-12	10:35:49	0.328511	1.46128	1.3434	140.058	FALSE	1
2022-09-12	10:35:49	0.308155	1.37074	1.3434	152.831	FALSE	1
2022-09-12	10:35:49	0.256705	1.14188	1.3434	141.2	FALSE	1
2022-09-12	10:35:50	0.196501	0.874076	1.00809	153.705	FALSE	1
2022-09-12	10:35:50	0.222049	0.987718	1.00809	142.188	FALSE	1
2022-09-12	10:35:50	0.279046	1.24125	1.00809	154.946	FALSE	1
2022-09-12	10:35:50	0.208919	0.929313	1.00809	143.117	FALSE	1
2022-09-12	10:35:51	0.256705	1.14188	1.06864	156.088	FALSE	1
2022-09-12	10:35:51	0.169377	0.753423	1.06864	143.87	FALSE	1
2022-09-12	10:35:51	0.226323	1.00673	1.06864	157.095	FALSE	1
2022-09-12	10:35:51	0.308562	1.37255	1.06864	145.243	FALSE	1
2022-09-12	10:35:52	0.387952	1.72569	1.58564	158.82	FALSE	1
2022-09-12	10:35:52	0.357672	1.591	1.58564	146.834	FALSE	1
2022-09-12	10:35:52	0.323779	1.44023	1.58564	160.261	FALSE	1
2022-09-12	10:35:53	0.285255	1.26887	1.26055	148.103	FALSE	1
2022-09-12	10:35:53	0.287188	1.27747	1.26055	161.538	FALSE	1
2022-09-12	10:35:53	0.284542	1.2657	1.26055	149.369	FALSE	1
2022-09-12	10:35:53	0.276552	1.23016	1.26055	162.768	FALSE	1
2022-09-12	10:35:54	0.295942	1.31641	1.06163	150.685	FALSE	1
2022-09-12	10:35:54	0.23416	1.04159	1.06163	163.81	FALSE	1
2022-09-12	10:35:54	0.204186	0.90826	1.06163	151.593	FALSE	1
2022-09-12	10:35:54	0.220369	0.980245	1.06163	164.79	FALSE	1
2022-09-12	10:35:55	0.274771	1.22224	1.44629	152.815	FALSE	1
2022-09-12	10:35:55	0.380725	1.69354	1.44629	166.484	FALSE	1
2022-09-12	10:35:55	0.356298	1.58488	1.44629	154.4	FALSE	1
2022-09-12	10:35:55	0.288766	1.28449	1.44629	167.768	FALSE	1
2022-09-12	10:35:56	0.31014	1.37956	1.11335	155.78	FALSE	1
2022-09-12	10:35:56	0.211718	0.941764	1.11335	168.71	FALSE	1
2022-09-12	10:35:56	0.22902	1.01873	1.11335	156.799	FALSE	1
2022-09-12	10:35:57	0.190903	0.849175	1.48285	169.559	FALSE	1
2022-09-12	10:35:57	0.297621	1.32388	1.48285	158.123	FALSE	1
2022-09-12	10:35:57	0.405713	1.80469	1.48285	171.364	FALSE	1
2022-09-12	10:35:57	0.439198	1.95364	1.48285	160.076	FALSE	1
2022-09-12	10:35:58	0.401692	1.78681	1.99592	173.151	FALSE	1
2022-09-12	10:35:58	0.501336	2.23004	1.99592	162.306	FALSE	1
2022-09-12	10:35:58	0.420369	1.86989	1.99592	175.021	FALSE	1
2022-09-12	10:35:58	0.471412	2.09693	1.99592	164.403	FALSE	1
2022-09-12	10:35:59	0.456705	2.03152	4.52227	177.052	FALSE	1
2022-09-12	10:35:59	1.23879	5.51039	4.52227	169.914	FALSE	1
2022-09-12	10:35:59	1.80693	8.03759	4.52227	185.09	FALSE	1
2022-09-12	10:35:59	0.564186	2.50961	4.52227	172.423	FALSE	1
2022-09-12	10:36:00	0.443626	1.97334	1.89396	187.063	FALSE	1
2022-09-12	10:36:00	0.405509	1.80379	1.89396	174.227	FALSE	1
2022-09-12	10:36:00	0.428206	1.90475	1.89396	188.968	FALSE	1
2022-09-12	10:36:01	0.566934	2.52184	1.98471	176.749	FALSE	1
2022-09-12	10:36:01	0.433906	1.9301	1.98471	190.898	FALSE	1
2022-09-12	10:36:01	0.425662	1.89343	1.98471	178.642	FALSE	1
2022-09-12	10:36:01	0.358232	1.59349	1.98471	192.491	FALSE	1
2022-09-12	10:36:02	0.601743	2.67667	2.01403	181.319	FALSE	1
2022-09-12	10:36:02	0.332786	1.4803	2.01403	193.972	FALSE	1
2022-09-12	10:36:02	0.416552	1.85291	2.01403	183.172	FALSE	1
2022-09-12	10:36:02	0.460013	2.04623	2.01403	196.018	FALSE	1
2022-09-12	10:36:03	0.425254	1.89161	1.83706	185.063	FALSE	1
2022-09-12	10:36:03	0.397265	1.76711	1.83706	197.785	FALSE	1
2022-09-12	10:36:03	0.415636	1.84883	1.83706	186.912	FALSE	1
2022-09-12	10:36:03	0.413804	1.84068	1.83706	199.626	FALSE	1
2022-09-12	10:36:04	0.396196	1.76236	1.72282	188.675	FALSE	1
2022-09-12	10:36:04	0.398944	1.77458	1.72282	201.4	FALSE	1
2022-09-12	10:36:04	0.366781	1.63152	1.72282	190.306	FALSE	1
2022-09-12	10:36:05	0.415992	1.85042	1.61103	203.251	FALSE	1
2022-09-12	10:36:05	0.38271	1.70237	1.61103	192.008	FALSE	1
2022-09-12	10:36:05	0.311056	1.38364	1.61103	204.634	FALSE	1
2022-09-12	10:36:05	0.338944	1.50769	1.61103	193.516	FALSE	1
2022-09-12	10:36:06	0.298486	1.32773	7.07071	205.962	FALSE	1
2022-09-12	10:36:06	0.49243	2.19043	7.07071	195.707	FALSE	1
2022-09-12	10:36:06	1.90927	8.49281	7.07071	214.455	FALSE	1
2022-09-12	10:36:06	3.65808	16.2719	7.07071	211.978	1	2
2022-09-12	10:36:07	2.47569	11.0124	4.69523	225.467	FALSE	2
2022-09-12	10:36:07	1.07777	4.79414	4.69523	216.773	FALSE	2
2022-09-12	10:36:07	0.376043	1.67271	4.69523	227.14	FALSE	2
2022-09-12	10:36:07	0.292634	1.30169	4.69523	218.074	FALSE	2
2022-09-12	10:36:08	0.438232	1.94934	2.03106	229.089	FALSE	2
2022-09-12	10:36:08	0.456909	2.03242	2.03106	220.107	FALSE	2
2022-09-12	10:36:08	0.514771	2.2898	2.03106	231.379	FALSE	2
2022-09-12	10:36:08	0.416501	1.85268	2.03106	221.959	FALSE	2
2022-09-12	10:36:09	0.617875	2.74843	1.85804	234.127	FALSE	2
2022-09-12	10:36:09	0.344644	1.53305	1.85804	223.492	FALSE	2
2022-09-12	10:36:09	0.290598	1.29264	1.85804	235.42	FALSE	2
2022-09-12	10:36:10	0.165102	0.734407	6.1886	224.227	FALSE	2
2022-09-12	10:36:10	0.223982	0.996317	6.1886	236.416	FALSE	2
2022-09-12	10:36:10	2.19874	9.78044	6.1886	234.007	FALSE	2
2022-09-12	10:36:10	2.97721	13.2432	6.1886	249.66	FALSE	2
2022-09-12	10:36:11	1.99966	8.89489	8.80535	242.902	FALSE	2
2022-09-12	10:36:11	2.28088	10.1458	8.80535	259.805	FALSE	2
2022-09-12	10:36:11	1.51146	6.72328	8.80535	249.625	FALSE	2
2022-09-12	10:36:11	2.12612	9.45741	8.80535	269.263	FALSE	2
2022-09-12	10:36:12	0.676756	3.01035	4.57383	252.636	FALSE	2
2022-09-12	10:36:12	1.38449	6.15849	4.57383	275.421	FALSE	2
2022-09-12	10:36:12	1.39156	6.18994	4.57383	258.826	FALSE	2
2022-09-12	10:36:12	0.660166	2.93655	4.57383	278.358	FALSE	2
2022-09-12	10:36:13	0.489224	2.17617	2.01378	261.002	FALSE	2
2022-09-12	10:36:13	0.505051	2.24657	2.01378	280.604	FALSE	2
2022-09-12	10:36:13	0.363881	1.61862	2.01378	262.62	FALSE	2
2022-09-12	10:36:14	0.339097	1.50837	1.65976	282.113	FALSE	2
2022-09-12	10:36:14	0.376501	1.67475	1.65976	264.295	FALSE	2
2022-09-12	10:36:14	0.339097	1.50837	1.65976	283.621	FALSE	2
2022-09-12	10:36:14	0.437825	1.94753	1.65976	266.243	FALSE	2
2022-09-12	10:36:15	0.418283	1.86061	1.90033	285.482	FALSE	2
2022-09-12	10:36:15	0.407901	1.81443	1.90033	268.057	FALSE	2
2022-09-12	10:36:15	0.435178	1.93576	1.90033	287.418	FALSE	2
2022-09-12	10:36:15	0.447494	1.99054	1.90033	270.048	FALSE	2
2022-09-12	10:36:16	0.445916	1.98352	1.90939	289.401	FALSE	2
2022-09-12	10:36:16	0.430954	1.91697	1.90939	271.965	FALSE	2
2022-09-12	10:36:16	0.414466	1.84363	1.90939	291.245	FALSE	2
2022-09-12	10:36:16	0.425662	1.89343	1.90939	273.858	FALSE	2
2022-09-12	10:36:17	0.433957	1.93033	1.92422	293.175	FALSE	2
2022-09-12	10:36:17	0.420827	1.87192	1.92422	275.73	FALSE	2
2022-09-12	10:36:17	0.442965	1.9704	1.92422	295.145	FALSE	2
2022-09-12	10:36:18	0.472583	2.10214	2.06496	277.832	FALSE	2
2022-09-12	10:36:18	0.419097	1.86423	2.06496	297.01	FALSE	2
2022-09-12	10:36:18	0.334924	1.48981	2.06496	279.322	FALSE	2
2022-09-12	10:36:18	0.630292	2.80366	2.06496	299.813	FALSE	2
2022-09-12	10:36:19	0.629173	2.79869	4.00474	282.121	FALSE	2
2022-09-12	10:36:19	0.597061	2.65585	4.00474	302.469	FALSE	2
2022-09-12	10:36:19	0.657417	2.92432	4.00474	285.045	FALSE	2
2022-09-12	10:36:19	1.71757	7.64009	4.00474	310.109	FALSE	2
2022-09-12	10:36:20	1.77075	7.87665	11.6796	292.922	FALSE	2
2022-09-12	10:36:20	2.80378	12.4718	11.6796	322.581	FALSE	2
2022-09-12	10:36:20	3.74276	16.6485	11.6796	309.57	1	3
2022-09-12	10:36:20	2.18546	9.72136	11.6796	332.302	FALSE	3
2022-09-12	10:36:21	3.59487	15.9907	9.62144	325.561	1	4
2022-09-12	10:36:21	1.88541	8.38668	9.62144	340.689	FALSE	4
2022-09-12	10:36:21	1.00871	4.48694	9.62144	330.048	FALSE	4
2022-09-12	10:36:22	1.7962	7.98986	3.37119	348.679	FALSE	4
2022-09-12	10:36:22	0.453804	2.01861	3.37119	332.066	FALSE	4
2022-09-12	10:36:22	0.338537	1.50588	3.37119	350.185	FALSE	4
2022-09-12	10:36:22	0.442965	1.9704	3.37119	334.037	FALSE	4
2022-09-12	10:36:23	0.246629	1.09706	1.46394	351.282	FALSE	4
2022-09-12	10:36:23	0.345763	1.53802	1.46394	335.575	FALSE	4
2022-09-12	10:36:23	0.308003	1.37006	1.46394	352.652	FALSE	4
2022-09-12	10:36:23	0.416043	1.85064	1.46394	337.426	FALSE	4
2022-09-12	10:36:24	0.455178	2.02472	2.68477	354.677	FALSE	4
2022-09-12	10:36:24	0.539809	2.40118	2.68477	339.827	FALSE	4
2022-09-12	10:36:24	0.63299	2.81567	2.68477	357.492	FALSE	4
2022-09-12	10:36:24	0.786272	3.4975	2.68477	343.324	FALSE	4
2022-09-12	10:36:25	0.710089	3.15862	3.00152	360.651	FALSE	4
2022-09-12	10:36:25	0.757316	3.36869	3.00152	346.693	FALSE	4
2022-09-12	10:36:25	0.605204	2.69207	3.00152	363.343	FALSE	4
2022-09-12	10:36:25	0.626476	2.78669	3.00152	349.48	FALSE	4
2022-09-12	10:36:26	0.68556	3.04951	4.60226	366.393	FALSE	4
2022-09-12	10:36:26	1.34637	5.98892	4.60226	355.469	FALSE	4
2022-09-12	10:36:26	1.07197	4.76834	4.60226	371.161	FALSE	4
2022-09-12	10:36:27	1.11004	4.93768	5.4898	360.406	FALSE	4
2022-09-12	10:36:27	1.09732	4.8811	5.4898	376.042	FALSE	4
2022-09-12	10:36:27	1.29131	5.74401	5.4898	366.15	FALSE	4
2022-09-12	10:36:27	1.43798	6.39642	5.4898	382.438	FALSE	4
2022-09-12	10:36:28	1.4505	6.45211	9.13307	372.602	FALSE	4
2022-09-12	10:36:28	2.17543	9.67675	9.13307	392.115	FALSE	4
2022-09-12	10:36:28	2.26128	10.0586	9.13307	382.661	FALSE	4
2022-09-12	10:36:28	2.32561	10.3448	9.13307	402.46	FALSE	4
2022-09-12	10:36:29	1.77584	7.89929	4.90423	390.56	FALSE	4
2022-09-12	10:36:29	0.946679	4.21102	4.90423	406.671	FALSE	4
2022-09-12	10:36:29	0.83126	3.69761	4.90423	394.258	FALSE	4
2022-09-12	10:36:29	0.856298	3.80898	4.90423	410.48	FALSE	4
2022-09-12	10:36:30	0.840674	3.73949	4.48591	397.997	FALSE	4
2022-09-12	10:36:30	0.840827	3.74017	4.48591	414.22	FALSE	4
2022-09-12	10:36:30	1.34393	5.97807	4.48591	403.975	FALSE	4
2022-09-12	10:36:31	1.45385	6.46702	7.93131	420.687	FALSE	4
2022-09-12	10:36:31	2.06693	9.19412	7.93131	413.17	FALSE	4
2022-09-12	10:36:31	1.98581	8.83328	7.93131	429.52	FALSE	4
2022-09-12	10:36:31	1.62556	7.23082	7.93131	420.4	FALSE	4
2022-09-12	10:36:32	2.32851	10.3577	16.6373	439.878	FALSE	4
2022-09-12	10:36:32	3.50439	15.5882	16.6373	435.989	1	5
2022-09-12	10:36:32	4.2138	18.7438	16.6373	458.622	1	6
2022-09-12	10:36:32	4.91426	21.8596	16.6373	457.848	1	7
2022-09-12	10:36:33	4.25574	18.9304	17.4843	477.552	1	8
2022-09-12	10:36:33	4.38215	19.4927	17.4843	477.341	1	9
2022-09-12	10:36:33	3.11645	13.8626	17.4843	491.415	1	10
2022-09-12	10:36:33	3.9682	17.6513	17.4843	494.992	1	11
2022-09-12	10:36:34	3.43141	15.2636	24.6689	506.678	1	12
2022-09-12	10:36:34	5.26988	23.4415	24.6689	518.434	1	13
2022-09-12	10:36:34	7.93619	35.3018	24.6689	541.98	1	14
2022-09-12	10:36:35	7.50769	33.3957	25.9748	551.829	1	15
2022-09-12	10:36:35	5.94113	26.4273	25.9748	568.408	1	16
2022-09-12	10:36:35	5.08912	22.6374	25.9748	574.467	1	17
2022-09-12	10:36:35	4.8196	21.4385	25.9748	589.846	1	18
2022-09-12	10:36:36	4.16062	18.5073	21.7536	592.974	1	19
2022-09-12	10:36:36	3.11691	13.8646	21.7536	603.711	1	20
2022-09-12	10:36:36	5.28556	23.5112	21.7536	616.485	1	21
2022-09-12	10:36:36	6.99858	31.1311	21.7536	634.842	1	22
2022-09-12	10:36:37	6.44434	28.6657	24.3126	645.151	1	23
2022-09-12	10:36:37	4.49675	20.0024	24.3126	654.844	1	24
2022-09-12	10:36:37	5.20678	23.1608	24.3126	668.312	1	25
2022-09-12	10:36:37	5.71497	25.4213	24.3126	680.266	1	26
2022-09-12	10:36:38	6.07009	27.001	21.6458	695.313	1	27
2022-09-12	10:36:38	4.78184	21.2706	21.6458	701.536	1	28
2022-09-12	10:36:38	3.74668	16.666	21.6458	711.979	1	29
2022-09-12	10:36:39	3.3021	14.6884	15.9122	716.225	1	30
2022-09-12	10:36:39	4.55925	20.2805	15.9122	732.259	1	31
2022-09-12	10:36:39	4.70932	20.948	15.9122	737.173	1	32
2022-09-12	10:36:39	1.73818	7.73177	15.9122	739.991	FALSE	32
2022-09-12	10:36:40	1.80866	8.04528	29.7354	745.218	FALSE	32
2022-09-12	10:36:40	5.89248	26.2109	29.7354	766.202	1	33
2022-09-12	10:36:40	10.6412	47.3342	29.7354	792.552	1	34
2022-09-12	10:36:40	8.3969	37.3511	29.7354	803.553	1	35
2022-09-12	10:36:41	7.17741	31.9266	18.7369	824.479	1	36
2022-09-12	10:36:41	5.06973	22.5512	18.7369	826.104	1	37
2022-09-12	10:36:41	1.94933	8.67101	18.7369	833.15	FALSE	37
2022-09-12	10:36:41	2.65248	11.7988	18.7369	837.903	FALSE	37
2022-09-12	10:36:42	3.86729	17.2025	19.3661	850.352	1	38
2022-09-12	10:36:42	4.62205	20.5598	19.3661	858.463	1	39
2022-09-12	10:36:42	4.57177	20.3361	19.3661	870.688	1	40
2022-09-12	10:36:43	4.56495	20.3058	30.7585	878.769	1	41
2022-09-12	10:36:43	6.61441	29.4222	30.7585	900.11	1	42
2022-09-12	10:36:43	7.6797	34.1608	30.7585	912.929	1	43
2022-09-12	10:36:43	8.80021	39.1451	30.7585	939.256	1	44
2022-09-12	10:36:44	7.24423	32.2238	16.1355	945.153	1	45
2022-09-12	10:36:44	5.79752	25.7885	16.1355	965.044	1	46
2022-09-12	10:36:44	1.13996	5.07077	16.1355	950.224	FALSE	46
2022-09-12	10:36:44	0.328003	1.45902	16.1355	966.503	FALSE	46
2022-09-12	10:36:45	0.420471	1.87034	1.49179	952.094	FALSE	46
2022-09-12	10:36:45	0.178791	0.795298	1.49179	967.298	FALSE	46
2022-09-12	10:36:45	0.230853	1.02688	1.49179	953.121	FALSE	46
2022-09-12	10:36:45	0.511361	2.27464	1.49179	969.573	FALSE	46
2022-09-12	10:36:46	0.823015	3.66094	1.93434	956.782	FALSE	46
2022-09-12	10:36:46	0.387239	1.72252	1.93434	971.296	FALSE	46
2022-09-12	10:36:46	0.215382	0.958062	1.93434	957.74	FALSE	46
2022-09-12	10:36:46	0.313804	1.39586	1.93434	972.691	FALSE	46
2022-09-12	10:36:47	0.284338	1.26479	0.975944	959.005	FALSE	46
2022-09-12	10:36:47	0.269835	1.20028	0.975944	973.892	FALSE	46
2022-09-12	10:36:47	0.104033	0.46276	0.975944	959.468	FALSE	46
2022-09-12	10:36:48	0.0805218	0.358177	1.12535	974.25	FALSE	46
2022-09-12	10:36:48	0.375026	1.66819	1.12535	961.136	FALSE	46
2022-09-12	10:36:48	0.263728	1.17311	1.12535	975.423	FALSE	46
2022-09-12	10:36:48	0.292685	1.30192	1.12535	962.438	FALSE	46
2022-09-12	10:36:49	0.245509	1.09207	1.36785	976.515	FALSE	46
2022-09-12	10:36:49	0.460623	2.04894	1.36785	964.487	FALSE	46
2022-09-12	10:36:49	0.199809	0.88879	1.36785	977.404	FALSE	46
2022-09-12	10:36:49	0.324084	1.44159	1.36785	965.928	FALSE	46
2022-09-12	10:36:50	0.0375702	0.16712	1.80056	977.571	FALSE	46
2022-09-12	10:36:50	0.522862	2.32579	1.80056	968.254	FALSE	46
2022-09-12	10:36:50	0.241336	1.07351	1.80056	978.644	FALSE	46
2022-09-12	10:36:50	0.817366	3.63581	1.80056	971.89	FALSE	46
2022-09-12	10:36:51	0.341947	1.52105	1.60277	980.166	FALSE	46
2022-09-12	10:36:51	0.378028	1.68154	1.60277	973.572	FALSE	46
2022-09-12	10:36:51	0.36098	1.60571	1.60277	981.771	FALSE	46
2022-09-12	10:36:52	0.276501	1.22993	1.49903	974.801	FALSE	46
2022-09-12	10:36:52	0.393244	1.74923	1.49903	983.52	FALSE	46
2022-09-12	10:36:52	0.25014	1.11267	1.49903	975.914	FALSE	46
2022-09-12	10:36:52	0.428104	1.90429	1.49903	985.425	FALSE	46
2022-09-12	10:36:53	0.358588	1.59507	1.65115	977.509	FALSE	46
2022-09-12	10:36:53	0.43645	1.94142	1.65115	987.366	FALSE	46
2022-09-12	10:36:53	0.224746	0.999715	1.65115	978.509	FALSE	46
2022-09-12	10:36:53	0.465	2.06841	1.65115	989.435	FALSE	46
2022-09-12	10:36:54	0.272074	1.21024	1.4507	979.719	FALSE	46
2022-09-12	10:36:54	0.418893	1.86332	1.4507	991.298	FALSE	46
2022-09-12	10:36:54	0.228512	1.01647	1.4507	980.736	FALSE	46
2022-09-12	10:36:54	0.385051	1.71278	1.4507	993.011	FALSE	46
2022-09-12	10:36:55	0.21014	0.934745	2.79801	981.67	FALSE	46
2022-09-12	10:36:55	1.21172	5.38997	2.79801	998.401	FALSE	46
2022-09-12	10:36:55	0.465204	2.06932	2.79801	983.74	FALSE	46
2022-09-12	10:36:56	1.41701	6.30314	3.70264	1004.7	FALSE	46
2022-09-12	10:36:56	0.341743	1.52014	3.70264	985.26	FALSE	46
2022-09-12	10:36:56	1.25833	5.5973	3.70264	1010.3	FALSE	46
2022-09-12	10:36:56	0.312481	1.38998	3.70264	986.65	FALSE	46
2022-09-12	10:36:57	1.26586	5.6308	3.1345	1015.93	FALSE	46
2022-09-12	10:36:57	0.459911	2.04578	3.1345	988.696	FALSE	46
2022-09-12	10:36:57	0.812226	3.61294	3.1345	1019.54	FALSE	46
2022-09-12	10:36:57	0.280674	1.24849	3.1345	989.944	FALSE	46
2022-09-12	10:36:58	0.354975	1.579	1.84731	1021.12	FALSE	46
2022-09-12	10:36:58	0.605356	2.69274	1.84731	992.637	FALSE	46
2022-09-12	10:36:58	0.235891	1.04929	1.84731	1022.17	FALSE	46
2022-09-12	10:36:58	0.464949	2.06819	1.84731	994.705	FALSE	46
2022-09-12	10:36:59	0.494975	2.20175	2.17647	1024.37	FALSE	46
2022-09-12	10:36:59	0.458588	2.03989	2.17647	996.745	FALSE	46
2022-09-12	10:36:59	0.514313	2.28777	2.17647	1026.66	FALSE	46
2022-09-12	10:37:00	1.24419	5.53441	3.93638	1002.28	FALSE	46
2022-09-12	10:37:00	0.615331	2.73712	3.93638	1029.4	FALSE	46
2022-09-12	10:37:00	1.11243	4.94831	3.93638	1007.23	FALSE	46
2022-09-12	10:37:00	0.567799	2.52568	3.93638	1031.93	FALSE	46
2022-09-12	10:37:01	0.822557	3.6589	2.0936	1010.89	FALSE	46
2022-09-12	10:37:01	0.48897	2.17504	2.0936	1034.1	FALSE	46
2022-09-12	10:37:01	0.279148	1.24171	2.0936	1012.13	FALSE	46
2022-09-12	10:37:01	0.291972	1.29875	2.0936	1035.4	FALSE	46
2022-09-12	10:37:02	0.367952	1.63672	1.37809	1013.76	FALSE	46
2022-09-12	10:37:02	0.247799	1.10226	1.37809	1036.5	FALSE	46
2022-09-12	10:37:02	0.379606	1.68856	1.37809	1015.45	FALSE	46
2022-09-12	10:37:02	0.243881	1.08483	1.37809	1037.59	FALSE	46
2022-09-12	10:37:03	0.235127	1.04589	3.48086	1016.5	FALSE	46
2022-09-12	10:37:03	0.651667	2.89875	3.48086	1040.49	FALSE	46
2022-09-12	10:37:03	0.542303	2.41227	3.48086	1018.91	FALSE	46
2022-09-12	10:37:03	1.70103	7.56652	3.48086	1048.05	FALSE	46
2022-09-12	10:37:04	0.400573	1.78183	2.12448	1020.69	FALSE	46
2022-09-12	10:37:04	0.255076	1.13463	2.12448	1049.19	FALSE	46
2022-09-12	10:37:04	0.777163	3.45698	2.12448	1024.15	FALSE	46
2022-09-12	10:37:05	0.213295	0.948779	1.6245	1050.14	FALSE	46
2022-09-12	10:37:05	0.571972	2.54425	1.6245	1026.69	FALSE	46
2022-09-12	10:37:05	0.132634	0.589983	1.6245	1050.72	FALSE	46
2022-09-12	10:37:05	0.542914	2.41499	1.6245	1029.11	FALSE	46
2022-09-12	10:37:06	1.47884	6.57818	3.98628	1057.3	FALSE	46
2022-09-12	10:37:06	0.539046	2.39778	3.98628	1031.51	FALSE	46
2022-09-12	10:37:06	0.311769	1.38681	3.98628	1058.69	FALSE	46
2022-09-12	10:37:06	1.25497	5.58236	3.98628	1037.09	FALSE	46
2022-09-12	10:37:07	0.10729	0.477247	0.295642	1059.17	FALSE	46
2022-09-12	10:37:07	0.138486	0.616013	0.295642	1037.71	FALSE	46
2022-09-12	10:37:07	0.0917178	0.407979	0.295642	1059.58	FALSE	46
2022-09-12	10:37:07	-0.0716409	-0.318673	0.295642	1037.71	FALSE	46
2022-09-12	10:37:08	-0.0401906	-0.178776	-0.0409911	1059.58	FALSE	46
2022-09-12	10:37:08	-0.0324552	-0.144367	-0.0409911	1037.71	FALSE	46
2022-09-12	10:37:08	0.0450002	0.20017	-0.0409911	1059.78	FALSE	46
2022-09-12	10:37:09	-0.0612084	-0.272267	-0.947419	1037.71	FALSE	46
2022-09-12	10:37:09	-0.231132	-1.02812	-0.947419	1059.78	FALSE	46
2022-09-12	10:37:09	-0.309554	-1.37696	-0.947419	1037.71	FALSE	46
2022-09-12	10:37:09	-0.250063	-1.11233	-0.947419	1059.78	FALSE	46
2022-09-12	10:37:10	-0.482938	-2.1482	-1.50899	1037.71	FALSE	46
2022-09-12	10:37:10	-0.347926	-1.54764	-1.50899	1059.78	FALSE	46
2022-09-12	10:37:10	-0.346195	-1.53994	-1.50899	1037.71	FALSE	46
2022-09-12	10:37:10	-0.179885	-0.800164	-1.50899	1059.78	FALSE	46
2022-09-12	10:37:11	-0.0891982	-0.396771	-0.416352	1037.71	FALSE	46
2022-09-12	10:37:11	-0.0251779	-0.111996	-0.416352	1059.78	FALSE	46
2022-09-12	10:37:11	-0.192455	-0.856078	-0.416352	1037.71	FALSE	46
2022-09-12	10:37:11	-0.0675697	-0.300564	-0.416352	1059.78	FALSE	46
2022-09-12	10:37:12	-0.0755086	-0.335877	-0.421824	1037.71	FALSE	46
2022-09-12	10:37:12	-0.0669081	-0.297621	-0.421824	1059.78	FALSE	46
2022-09-12	10:37:12	-0.142074	-0.631974	-0.421824	1037.71	FALSE	46
2022-09-12	10:37:13	-0.0108776	-0.0483857	0.323599	1059.78	FALSE	46
2022-09-12	10:37:13	0.16383	0.728749	0.323599	1038.43	FALSE	46
2022-09-12	10:37:13	0.0560435	0.249293	0.323599	1060.02	FALSE	46
2022-09-12	10:37:13	0.0819977	0.364742	0.323599	1038.8	FALSE	46
2022-09-12	10:37:14	0.023219	0.103283	0.46095	1060.13	FALSE	46
2022-09-12	10:37:14	0.187494	0.834011	0.46095	1039.63	FALSE	46
2022-09-12	10:37:14	0.0085117	0.0378617	0.46095	1060.17	FALSE	46
2022-09-12	10:37:14	0.19528	0.868644	0.46095	1040.5	FALSE	46
2022-09-12	10:37:15	0.0137025	0.0609515	0.439953	1060.23	FALSE	46
2022-09-12	10:37:15	0.190038	0.845327	0.439953	1041.35	FALSE	46
2022-09-12	10:37:15	-0.0255341	-0.113581	0.439953	1060.23	FALSE	46
2022-09-12	10:37:15	0.217417	0.967114	0.439953	1042.31	FALSE	46
2022-09-12	10:37:16	0.135026	0.600623	-0.075248	1060.83	FALSE	46
2022-09-12	10:37:16	0.0178755	0.0795138	-0.075248	1042.39	FALSE	46
2022-09-12	10:37:16	-0.203651	-0.90588	-0.075248	1060.83	FALSE	46
2022-09-12	10:37:17	-0.0618191	-0.274984	0.258291	1042.39	FALSE	46
2022-09-12	10:37:17	0.0118196	0.0525759	0.258291	1060.88	FALSE	46
2022-09-12	10:37:17	0.251463	1.11856	0.258291	1043.51	FALSE	46
2022-09-12	10:37:17	0.0308018	0.137013	0.258291	1061.02	FALSE	46
2022-09-12	10:37:18	0.279606	1.24374	0.909561	1044.76	FALSE	46
2022-09-12	10:37:18	0.14785	0.657666	0.909561	1061.67	FALSE	46
2022-09-12	10:37:18	0.252532	1.12331	0.909561	1045.88	FALSE	46
2022-09-12	10:37:18	0.137926	0.613522	0.909561	1062.29	FALSE	46
2022-09-12	10:37:19	0.255891	1.13825	1.09553	1047.02	FALSE	46
2022-09-12	10:37:19	0.271107	1.20594	1.09553	1063.49	FALSE	46
2022-09-12	10:37:19	0.236705	1.05291	1.09553	1048.07	FALSE	46
2022-09-12	10:37:19	0.221438	0.985001	1.09553	1064.48	FALSE	46
2022-09-12	10:37:20	0.264033	1.17447	1.13559	1049.25	FALSE	46
2022-09-12	10:37:20	0.286628	1.27498	1.13559	1065.75	FALSE	46
2022-09-12	10:37:20	0.301489	1.34108	1.13559	1050.59	FALSE	46
2022-09-12	10:37:20	0.16902	0.751835	1.13559	1066.51	FALSE	46
2022-09-12	10:37:21	0.193855	0.862306	1.13433	1051.45	FALSE	46
2022-09-12	10:37:21	0.362405	1.61205	1.13433	1068.12	FALSE	46
2022-09-12	10:37:21	0.208766	0.928633	1.13433	1052.38	FALSE	46
2022-09-12	10:37:22	0.383626	1.70645	1.2979	1069.82	FALSE	46
2022-09-12	10:37:22	0.246832	1.09796	1.2979	1053.48	FALSE	46
2022-09-12	10:37:22	0.425967	1.89479	1.2979	1071.72	FALSE	46
2022-09-12	10:37:22	0.1107	0.492416	1.2979	1053.97	FALSE	46
2022-09-12	10:37:23	0.447596	1.991	1.31584	1073.71	FALSE	46
2022-09-12	10:37:23	0.170751	0.759535	1.31584	1054.73	FALSE	46
2022-09-12	10:37:23	0.332583	1.4794	1.31584	1075.19	FALSE	46
2022-09-12	10:37:23	0.232328	1.03344	1.31584	1055.76	FALSE	46
2022-09-12	10:37:24	0.334211	1.48664	1.54465	1076.68	FALSE	46
2022-09-12	10:37:24	0.358741	1.59575	1.54465	1057.36	FALSE	46
2022-09-12	10:37:24	0.257112	1.14369	1.54465	1077.82	FALSE	46
2022-09-12	10:37:24	0.438944	1.95251	1.54465	1059.31	FALSE	46
2022-09-12	10:37:25	0.285051	1.26796	1.41495	1079.09	FALSE	46
2022-09-12	10:37:25	0.470751	2.09399	1.41495	1061.4	FALSE	46
2022-09-12	10:37:25	0.198486	0.882905	1.41495	1079.97	FALSE	46
2022-09-12	10:37:26	0.477774	2.12523	1.47719	1063.53	FALSE	46
2022-09-12	10:37:26	0.199911	0.889244	1.47719	1080.86	FALSE	46
2022-09-12	10:37:26	0.494516	2.19971	1.47719	1065.73	FALSE	46
2022-09-12	10:37:26	0.156145	0.694564	1.47719	1081.55	FALSE	46
2022-09-12	10:37:27	0.493142	2.19359	1.655	1067.92	FALSE	46
2022-09-12	10:37:27	0.301794	1.34244	1.655	1082.9	FALSE	46
2022-09-12	10:37:27	0.40612	1.8065	1.655	1069.73	FALSE	46
2022-09-12	10:37:27	0.287188	1.27747	1.655	1084.17	FALSE	46
2022-09-12	10:37:28	0.34958	1.555	1.61086	1071.28	FALSE	46
2022-09-12	10:37:28	0.439555	1.95523	1.61086	1086.13	FALSE	46
2022-09-12	10:37:28	0.268308	1.19349	1.61086	1072.48	FALSE	46
2022-09-12	10:37:28	0.391107	1.73972	1.61086	1087.87	FALSE	46
2022-09-12	10:37:29	0.247596	1.10136	1.51079	1073.58	FALSE	46
2022-09-12	10:37:29	0.477723	2.12501	1.51079	1089.99	FALSE	46
2022-09-12	10:37:29	0.293601	1.306	1.51079	1074.88	FALSE	46
2022-09-12	10:37:30	0.428919	1.90792	1.60673	1091.9	FALSE	46
2022-09-12	10:37:30	0.207901	0.924785	1.60673	1075.81	FALSE	46
2022-09-12	10:37:30	0.6164	2.74187	1.60673	1094.64	FALSE	46
2022-09-12	10:37:30	0.191616	0.852346	1.60673	1076.66	FALSE	46
2022-09-12	10:37:31	0.73757	3.28086	2.53423	1097.93	FALSE	46
2022-09-12	10:37:31	0.241896	1.076	2.53423	1077.74	FALSE	46
2022-09-12	10:37:31	0.634008	2.82019	2.53423	1100.75	FALSE	46
2022-09-12	10:37:31	0.665407	2.95986	2.53423	1080.7	FALSE	46
2022-09-12	10:37:32	0.571158	2.54063	1.84221	1103.29	FALSE	46
2022-09-12	10:37:32	0.435433	1.93689	1.84221	1082.63	FALSE	46
2022-09-12	10:37:32	0.408715	1.81805	1.84221	1105.1	FALSE	46
2022-09-12	10:37:32	0.241285	1.07328	1.84221	1083.71	FALSE	46
2022-09-12	10:37:33	0.277672	1.23514	1.6451	1106.34	FALSE	46
2022-09-12	10:37:33	0.372634	1.65755	1.6451	1085.36	FALSE	46
2022-09-12	10:37:33	0.459198	2.0426	1.6451	1108.38	FALSE	46
2022-09-12	10:37:34	0.643168	2.86094	3.62942	1088.23	FALSE	46
2022-09-12	10:37:34	1.622	7.21498	3.62942	1115.6	FALSE	46
2022-09-12	10:37:34	0.533346	2.37243	3.62942	1090.6	FALSE	46
2022-09-12	10:37:34	0.465204	2.06932	3.62942	1117.67	FALSE	46
2022-09-12	10:37:35	0.465153	2.06909	1.61363	1092.67	FALSE	46
2022-09-12	10:37:35	0.257977	1.14753	1.61363	1118.81	FALSE	46
2022-09-12	10:37:35	0.529122	2.35364	1.61363	1095.02	FALSE	46
2022-09-12	10:37:35	0.198792	0.884267	1.61363	1119.7	FALSE	46
2022-09-12	10:37:36	0.502405	2.2348	3.87746	1097.26	FALSE	46
2022-09-12	10:37:36	0.332074	1.47713	3.87746	1121.17	FALSE	46
2022-09-12	10:37:36	0.405407	1.80333	3.87746	1099.06	FALSE	46
2022-09-12	10:37:36	2.24688	9.99457	3.87746	1131.17	FALSE	46
2022-09-12	10:37:37	0.478588	2.12886	2.72868	1101.19	FALSE	46
2022-09-12	10:37:37	0.972634	4.32647	2.72868	1135.5	FALSE	46
2022-09-12	10:37:37	0.367036	1.63265	2.72868	1102.82	FALSE	46
2022-09-12	10:37:37	0.635484	2.82676	2.72868	1138.32	FALSE	46
2022-09-12	10:37:38	0.345	1.53463	3.79592	1104.35	FALSE	46
2022-09-12	10:37:38	0.367595	1.63514	3.79592	1139.96	FALSE	46
2022-09-12	10:37:38	1.84749	8.21801	3.79592	1112.57	FALSE	46
2022-09-12	10:37:39	0.318486	1.41669	1.11845	1141.37	FALSE	46
2022-09-12	10:37:39	0.264949	1.17855	1.11845	1113.75	FALSE	46
2022-09-12	10:37:39	0.280522	1.24782	1.11845	1142.62	FALSE	46
2022-09-12	10:37:39	0.141794	0.630728	1.11845	1114.38	FALSE	46
2022-09-12	10:37:40	0.385102	1.71301	1.03237	1144.34	FALSE	46
2022-09-12	10:37:40	0.0941605	0.418845	1.03237	1114.8	FALSE	46
2022-09-12	10:37:40	0.35528	1.58036	1.03237	1145.92	FALSE	46
2022-09-12	10:37:40	0.0938042	0.41726	1.03237	1115.22	FALSE	46
2022-09-12	10:37:41	0.411718	1.8314	1.30962	1147.75	FALSE	46
2022-09-12	10:37:41	0.268817	1.19575	1.30962	1116.41	FALSE	46
2022-09-12	10:37:41	0.246781	1.09773	1.30962	1148.84	FALSE	46
2022-09-12	10:37:41	0.250344	1.11358	1.30962	1117.53	FALSE	46
2022-09-12	10:37:42	0.314771	1.40016	1.52686	1150.25	FALSE	46
2022-09-12	10:37:42	0.37584	1.67181	1.52686	1119.2	FALSE	46
2022-09-12	10:37:42	0.339148	1.5086	1.52686	1151.75	FALSE	46
2022-09-12	10:37:43	0.274771	1.22224	0.727275	1120.42	FALSE	46
2022-09-12	10:37:43	0.273193	1.21522	0.727275	1152.97	FALSE	46
2022-09-12	10:37:43	0.268715	1.1953	0.727275	1121.62	FALSE	46
2022-09-12	10:37:43	-0.162684	-0.723651	0.727275	1152.97	FALSE	46
2022-09-12	10:37:44	-0.191641	-0.852457	-0.894053	1121.62	FALSE	46
2022-09-12	10:37:44	-0.130216	-0.579227	-0.894053	1152.97	FALSE	46
2022-09-12	10:37:44	-0.280954	-1.24974	-0.894053	1121.62	FALSE	46
2022-09-12	10:37:44	-0.201157	-0.894787	-0.894053	1152.97	FALSE	46
2022-09-12	10:37:45	-0.039529	-0.175833	0.800111	1121.62	FALSE	46
2022-09-12	10:37:45	0.175585	0.781037	0.800111	1153.75	FALSE	46
2022-09-12	10:37:45	0.267138	1.18828	0.800111	1122.81	FALSE	46
2022-09-12	10:37:45	0.316298	1.40696	0.800111	1155.16	FALSE	46
2022-09-12	10:37:46	0.464593	2.0666	0.983265	1124.87	FALSE	46
2022-09-12	10:37:46	0.151209	0.672608	0.983265	1155.83	FALSE	46
2022-09-12	10:37:46	0.0473412	0.210583	0.983265	1125.08	FALSE	46
2022-09-12	10:37:47	0.0160435	0.0713647	0.353028	1155.9	FALSE	46
2022-09-12	10:37:47	0.0659671	0.293435	0.353028	1125.38	FALSE	46
2022-09-12	10:37:47	0.122863	0.546519	0.353028	1156.45	FALSE	46
2022-09-12	10:37:47	0.112583	0.500792	0.353028	1125.88	FALSE	46
2022-09-12	10:37:48	0.0295804	0.13158	0.445387	1156.58	FALSE	46
2022-09-12	10:37:48	0.169173	0.752515	0.445387	1126.63	FALSE	46
2022-09-12	10:37:48	0.164746	0.732823	0.445387	1157.31	FALSE	46
2022-09-12	10:37:48	0.0370104	0.16463	0.445387	1126.79	FALSE	46
2022-09-12	10:37:49	0.0138043	0.0614043	0.192077	1157.37	FALSE	46
2022-09-12	10:37:49	0.0839824	0.373571	0.192077	1127.17	FALSE	46
2022-09-12	10:37:49	0.0774175	0.344369	0.192077	1157.72	FALSE	46
2022-09-12	10:37:49	-0.00248066	-0.0110345	0.192077	1127.17	FALSE	46
2022-09-12	10:37:50	-0.0135748	-0.0603834	0.530748	1157.72	FALSE	46
2022-09-12	10:37:50	0.109479	0.486984	0.530748	1127.65	FALSE	46
2022-09-12	10:37:50	0.262048	1.16564	0.530748	1158.88	FALSE	46
2022-09-12	10:37:51	0.0893768	0.397566	0.560269	1128.05	FALSE	46
2022-09-12	10:37:51	0.109529	0.487207	0.560269	1159.37	FALSE	46
2022-09-12	10:37:51	0.1593	0.708598	0.560269	1128.76	FALSE	46
2022-09-12	10:37:51	0.145611	0.647707	0.560269	1160.02	FALSE	46
2022-09-12	10:37:52	0.0769086	0.342105	0.62886	1129.1	FALSE	46
2022-09-12	10:37:52	0.129631	0.576625	0.62886	1160.59	FALSE	46
2022-09-12	10:37:52	0.215127	0.956928	0.62886	1130.06	FALSE	46
2022-09-12	10:37:52	0.14383	0.639785	0.62886	1161.23	FALSE	46
2022-09-12	10:37:53	0.194669	0.865927	1.00905	1130.93	FALSE	46
2022-09-12	10:37:53	0.125713	0.559197	1.00905	1161.79	FALSE	46
2022-09-12	10:37:53	0.291005	1.29445	1.00905	1132.22	FALSE	46
2022-09-12	10:37:53	0.295992	1.31663	1.00905	1163.11	FALSE	46
2022-09-12	10:37:54	0.16271	0.723767	0.757044	1132.94	FALSE	46
2022-09-12	10:37:54	0.290649	1.29286	0.757044	1164.4	FALSE	46
2022-09-12	10:37:54	0.0900384	0.400509	0.757044	1133.34	FALSE	46
2022-09-12	10:37:54	0.137367	0.611036	0.757044	1165.01	FALSE	46
2022-09-12	10:37:55	0.0926338	0.412054	0.873774	1133.76	FALSE	46
2022-09-12	10:37:55	0.14673	0.652684	0.873774	1165.67	FALSE	46
2022-09-12	10:37:55	0.349936	1.55659	0.873774	1135.31	FALSE	46
2022-09-12	10:37:56	0.395127	1.7576	1.88986	1167.42	FALSE	46
2022-09-12	10:37:56	0.498893	2.21918	1.88986	1137.53	FALSE	46
2022-09-12	10:37:56	0.472176	2.10033	1.88986	1169.52	FALSE	46
2022-09-12	10:37:56	0.333244	1.48234	1.88986	1139.01	FALSE	46
2022-09-12	10:37:57	0.6193	2.75477	2.2503	1172.28	FALSE	46
2022-09-12	10:37:57	0.491056	2.18432	2.2503	1141.2	FALSE	46
2022-09-12	10:37:57	0.343066	1.52603	2.2503	1173.81	FALSE	46
2022-09-12	10:37:57	0.57014	2.5361	2.2503	1143.73	FALSE	46
2022-09-12	10:37:58	0.982862	4.37197	7.68616	1178.18	FALSE	46
2022-09-12	10:37:58	0.848868	3.77593	7.68616	1147.51	FALSE	46
2022-09-12	10:37:58	1.45787	6.4849	7.68616	1184.66	FALSE	46
2022-09-12	10:37:58	3.6221	16.1118	7.68616	1163.62	1	47
2022-09-12	10:37:59	2.80429	12.474	5.52579	1197.14	FALSE	47
2022-09-12	10:37:59	0.402506	1.79043	5.52579	1165.41	FALSE	47
2022-09-12	10:37:59	0.519962	2.31289	5.52579	1199.45	FALSE	47
2022-09-12	10:38:00	0.679911	3.02438	3.51318	1168.44	FALSE	47
2022-09-12	10:38:00	1.01961	4.53543	3.51318	1203.98	FALSE	47
2022-09-12	10:38:00	0.606985	2.69999	3.51318	1171.14	FALSE	47
2022-09-12	10:38:00	0.852684	3.79291	3.51318	1207.78	FALSE	47
2022-09-12	10:38:01	0.686679	3.05449	2.66875	1174.19	FALSE	47
2022-09-12	10:38:01	0.407697	1.81352	2.66875	1209.59	FALSE	47
2022-09-12	10:38:01	0.921641	4.09964	2.66875	1178.29	FALSE	47
2022-09-12	10:38:01	0.38383	1.70735	2.66875	1211.3	FALSE	47
2022-09-12	10:38:02	0.470089	2.09105	2.05019	1180.38	FALSE	47
2022-09-12	10:38:02	0.43243	1.92354	2.05019	1213.22	FALSE	47
2022-09-12	10:38:02	0.551107	2.45143	2.05019	1182.83	FALSE	47
2022-09-12	10:38:02	0.389987	1.73474	2.05019	1214.96	FALSE	47
2022-09-12	10:38:03	0.404033	1.79722	2.24529	1184.63	FALSE	47
2022-09-12	10:38:03	0.643423	2.86207	2.24529	1217.82	FALSE	47
2022-09-12	10:38:03	0.466832	2.07656	2.24529	1186.71	FALSE	47
2022-09-12	10:38:04	0.428715	1.90701	2.33944	1219.73	FALSE	47
2022-09-12	10:38:04	0.572176	2.54515	2.33944	1189.25	FALSE	47
2022-09-12	10:38:04	0.600623	2.67169	2.33944	1222.4	FALSE	47
2022-09-12	10:38:04	0.502201	2.23389	2.33944	1191.49	FALSE	47
2022-09-12	10:38:05	0.423423	1.88347	2.17221	1224.28	FALSE	47
2022-09-12	10:38:05	0.689224	3.06581	2.17221	1194.55	FALSE	47
2022-09-12	10:38:05	0.490751	2.18296	2.17221	1226.46	FALSE	47
2022-09-12	10:38:05	0.349936	1.55659	2.17221	1196.11	FALSE	47
2022-09-12	10:38:06	0.588969	2.61985	2.32172	1229.08	FALSE	47
2022-09-12	10:38:06	0.457774	2.03627	2.32172	1198.15	FALSE	47
2022-09-12	10:38:06	0.535636	2.38262	2.32172	1231.47	FALSE	47
2022-09-12	10:38:06	0.505407	2.24815	2.32172	1200.39	FALSE	47
2022-09-12	10:38:07	1.61711	7.19323	10.442	1238.66	FALSE	47
2022-09-12	10:38:07	2.66663	11.8617	10.442	1212.26	FALSE	47
2022-09-12	10:38:07	2.75869	12.2712	10.442	1250.93	FALSE	47
2022-09-12	10:38:08	2.55161	11.3501	7.55226	1223.61	FALSE	47
2022-09-12	10:38:08	2.07849	9.24554	7.55226	1260.18	FALSE	47
2022-09-12	10:38:08	1.31614	5.85445	7.55226	1229.46	FALSE	47
2022-09-12	10:38:08	0.845051	3.75896	7.55226	1263.94	FALSE	47
2022-09-12	10:38:09	0.977723	4.34911	4.01555	1233.81	FALSE	47
2022-09-12	10:38:09	0.922913	4.1053	4.01555	1268.04	FALSE	47
2022-09-12	10:38:09	0.871972	3.87871	4.01555	1237.69	FALSE	47
2022-09-12	10:38:09	0.838333	3.72907	4.01555	1271.77	FALSE	47
2022-09-12	10:38:10	0.282048	1.25461	2.32591	1238.94	FALSE	47
2022-09-12	10:38:10	0.814364	3.62245	2.32591	1275.39	FALSE	47
2022-09-12	10:38:10	0.498537	2.21759	2.32591	1241.16	FALSE	47
2022-09-12	10:38:10	0.496603	2.20899	2.32591	1277.6	FALSE	47
2022-09-12	10:38:11	0.585712	2.60536	2.53074	1243.77	FALSE	47
2022-09-12	10:38:11	0.514975	2.29071	2.53074	1279.89	FALSE	47
2022-09-12	10:38:11	0.60612	2.69614	2.53074	1246.46	FALSE	47
2022-09-12	10:38:12	0.722303	3.21295	4.92901	1283.11	FALSE	47
2022-09-12	10:38:12	0.847137	3.76823	4.92901	1250.23	FALSE	47
2022-09-12	10:38:12	1.19426	5.31231	4.92901	1288.42	FALSE	47
2022-09-12	10:38:12	1.66866	7.42253	4.92901	1257.65	FALSE	47
2022-09-12	10:38:13	1.40001	6.22752	10.0892	1294.64	FALSE	47
2022-09-12	10:38:13	1.97106	8.76767	10.0892	1266.42	FALSE	47
2022-09-12	10:38:13	1.4906	6.63049	10.0892	1301.28	FALSE	47
2022-09-12	10:38:13	4.2109	18.7309	10.0892	1285.15	1	48
2022-09-12	10:38:14	1.32022	5.8726	4.58272	1307.15	FALSE	48
2022-09-12	10:38:14	0.910903	4.05188	4.58272	1289.2	FALSE	48
2022-09-12	10:38:14	0.777824	3.45992	4.58272	1310.61	FALSE	48
2022-09-12	10:38:14	1.11202	4.94649	4.58272	1294.15	FALSE	48
2022-09-12	10:38:15	0.416705	1.85359	2.16564	1312.46	FALSE	48
2022-09-12	10:38:15	0.539351	2.39914	2.16564	1296.55	FALSE	48
2022-09-12	10:38:15	0.427137	1.89999	2.16564	1314.36	FALSE	48
2022-09-12	10:38:15	0.564237	2.50984	2.16564	1299.06	FALSE	48
2022-09-12	10:38:16	0.367952	1.63672	2.37922	1316	FALSE	48
2022-09-12	10:38:16	0.419555	1.86626	2.37922	1300.92	FALSE	48
2022-09-12	10:38:16	0.817112	3.63468	2.37922	1319.63	FALSE	48
2022-09-12	10:38:17	0.412023	1.83276	2.88522	1302.76	FALSE	48
2022-09-12	10:38:17	0.576705	2.5653	2.88522	1322.2	FALSE	48
2022-09-12	10:38:17	0.598486	2.66219	2.88522	1305.42	FALSE	48
2022-09-12	10:38:17	1.00729	4.48063	2.88522	1326.68	FALSE	48
2022-09-12	10:38:18	0.427748	1.90271	3.07498	1307.32	FALSE	48
2022-09-12	10:38:18	0.616501	2.74232	3.07498	1329.42	FALSE	48
2022-09-12	10:38:18	0.450242	2.00277	3.07498	1309.32	FALSE	48
2022-09-12	10:38:18	1.27065	5.65211	3.07498	1335.07	FALSE	48
2022-09-12	10:38:19	0.451667	2.00911	4.45143	1311.33	FALSE	48
2022-09-12	10:38:19	1.02897	4.57706	4.45143	1339.65	FALSE	48
2022-09-12	10:38:19	0.940216	4.18227	4.45143	1315.52	FALSE	48
2022-09-12	10:38:19	1.58205	7.03727	4.45143	1346.69	FALSE	48
2022-09-12	10:38:20	1.02129	4.5429	3.73482	1320.06	FALSE	48
2022-09-12	10:38:20	0.620115	2.7584	3.73482	1349.45	FALSE	48
2022-09-12	10:38:20	0.877468	3.90315	3.73482	1323.96	FALSE	48
2022-09-12	10:38:21	2.15457	9.58396	13.5153	1359.03	FALSE	48
2022-09-12	10:38:21	5.15833	22.9453	13.5153	1346.91	1	49
2022-09-12	10:38:21	4.03848	17.964	13.5153	1376.99	1	50
2022-09-12	10:38:21	0.802099	3.5679	13.5153	1350.48	FALSE	50
2022-09-12	10:38:22	0.418435	1.86128	1.38885	1378.86	FALSE	50
2022-09-12	10:38:22	0.528715	2.35183	1.38885	1352.83	FALSE	50
2022-09-12	10:38:22	0.187036	0.831974	1.38885	1379.69	FALSE	50
2022-09-12	10:38:22	0.11472	0.510298	1.38885	1353.34	FALSE	50
2022-09-12	10:38:23	0.0230664	0.102604	-0.649571	1379.79	FALSE	50
2022-09-12	10:38:23	-0.387417	-1.72331	-0.649571	1353.34	FALSE	50
2022-09-12	10:38:23	-0.125839	-0.559757	-0.649571	1379.79	FALSE	50
2022-09-12	10:38:23	-0.093931	-0.417824	-0.649571	1353.34	FALSE	50
2022-09-12	10:38:24	-0.314338	-1.39824	-1.32874	1379.79	FALSE	50
2022-09-12	10:38:24	-0.251386	-1.11822	-1.32874	1353.34	FALSE	50
2022-09-12	10:38:24	-0.330419	-1.46977	-1.32874	1379.79	FALSE	50
2022-09-12	10:38:25	-0.17785	-0.791112	-0.0318617	1353.34	FALSE	50
2022-09-12	10:38:25	-0.0946435	-0.420993	-0.0318617	1379.79	FALSE	50
2022-09-12	10:38:25	0.00734122	0.0326552	-0.0318617	1353.37	FALSE	50
2022-09-12	10:38:25	0.236501	1.052	-0.0318617	1380.84	FALSE	50
2022-09-12	10:38:26	0.353448	1.57221	1.63446	1354.94	FALSE	50
2022-09-12	10:38:26	0.393601	1.75082	1.63446	1382.59	FALSE	50
2022-09-12	10:38:26	0.393448	1.75014	1.63446	1356.69	FALSE	50
2022-09-12	10:38:26	0.329275	1.46468	1.63446	1384.06	FALSE	50
2022-09-12	10:38:27	0.26388	1.17379	1.62088	1357.87	FALSE	50
2022-09-12	10:38:27	0.387901	1.72546	1.62088	1385.78	FALSE	50
2022-09-12	10:38:27	0.440267	1.9584	1.62088	1359.82	FALSE	50
2022-09-12	10:38:27	0.365509	1.62586	1.62088	1387.41	FALSE	50
2022-09-12	10:38:28	0.378893	1.68539	1.54678	1361.51	FALSE	50
2022-09-12	10:38:28	0.34729	1.54482	1.54678	1388.95	FALSE	50
2022-09-12	10:38:28	0.31701	1.41012	1.54678	1362.92	FALSE	50
2022-09-12	10:38:29	0.326679	1.45313	2.62993	1390.41	FALSE	50
2022-09-12	10:38:29	0.360776	1.6048	2.62993	1364.52	FALSE	50
2022-09-12	10:38:29	0.885712	3.93982	2.62993	1394.35	FALSE	50
2022-09-12	10:38:29	0.791768	3.52194	2.62993	1368.05	FALSE	50
2022-09-12	10:38:30	0.565254	2.51436	1.97	1396.86	FALSE	50
2022-09-12	10:38:30	0.344949	1.5344	1.97	1369.58	FALSE	50
2022-09-12	10:38:30	0.357468	1.59009	1.97	1398.45	FALSE	50
2022-09-12	10:38:30	0.50383	2.24114	1.97	1371.82	FALSE	50
2022-09-12	10:38:31	1.08073	4.8073	2.87277	1403.26	FALSE	50
2022-09-12	10:38:31	0.543677	2.41838	2.87277	1374.24	FALSE	50
2022-09-12	10:38:31	0.575993	2.56213	2.87277	1405.82	FALSE	50
2022-09-12	10:38:31	0.382914	1.70328	2.87277	1375.94	FALSE	50
2022-09-12	10:38:32	0.278028	1.23672	1.02265	1407.06	FALSE	50
2022-09-12	10:38:32	0.104288	0.463894	1.02265	1376.41	FALSE	50
2022-09-12	10:38:32	0.307392	1.36734	1.02265	1408.42	FALSE	50
2022-09-12	10:38:33	0.100776	0.448272	2.07532	1376.86	FALSE	50
2022-09-12	10:38:33	0.305814	1.36032	2.07532	1409.78	FALSE	50
2022-09-12	10:38:33	0.268359	1.19371	2.07532	1378.05	FALSE	50
2022-09-12	10:38:33	1.19126	5.29896	2.07532	1415.08	FALSE	50
2022-09-12	10:38:34	2.37075	10.5456	16.0114	1388.6	FALSE	50
2022-09-12	10:38:34	1.87833	8.35519	16.0114	1423.44	FALSE	50
2022-09-12	10:38:34	4.734	21.0578	16.0114	1409.65	1	51
2022-09-12	10:38:34	5.41497	24.0869	16.0114	1447.53	1	52
2022-09-12	10:38:35	7.58897	33.7573	24.9915	1443.41	1	53
2022-09-12	10:38:35	8.17029	36.3431	24.9915	1483.87	1	54
2022-09-12	10:38:35	5.4051	24.043	24.9915	1467.45	1	55
2022-09-12	10:38:35	1.30897	5.82256	24.9915	1489.69	FALSE	55
2022-09-12	10:38:36	1.05548	4.69499	3.27712	1472.15	FALSE	55
2022-09-12	10:38:36	0.736247	3.27497	3.27712	1492.97	FALSE	55
2022-09-12	10:38:36	0.516603	2.29795	3.27712	1474.45	FALSE	55
2022-09-12	10:38:36	0.638588	2.84057	3.27712	1495.81	FALSE	55
2022-09-12	10:38:37	0.639707	2.84554	2.30641	1477.29	FALSE	55
2022-09-12	10:38:37	0.405204	1.80243	2.30641	1497.61	FALSE	55
2022-09-12	10:38:37	0.510598	2.27124	2.30641	1479.56	FALSE	55
2022-09-12	10:38:38	0.477468	2.12387	2.37271	1499.73	FALSE	55
2022-09-12	10:38:38	0.571565	2.54244	2.37271	1482.11	FALSE	55
2022-09-12	10:38:38	0.488308	2.17209	2.37271	1501.91	FALSE	55
2022-09-12	10:38:38	0.596298	2.65245	2.37271	1484.76	FALSE	55
2022-09-12	10:38:39	0.514517	2.28867	2.25359	1504.19	FALSE	55
2022-09-12	10:38:39	0.513957	2.28618	2.25359	1487.04	FALSE	55
2022-09-12	10:38:39	0.490344	2.18115	2.25359	1506.37	FALSE	55
2022-09-12	10:38:39	0.507697	2.25834	2.25359	1489.3	FALSE	55
2022-09-12	10:38:40	0.493041	2.19314	2.59744	1508.57	FALSE	55
2022-09-12	10:38:40	0.502659	2.23593	2.59744	1491.54	FALSE	55
2022-09-12	10:38:40	0.586628	2.60944	2.59744	1511.18	FALSE	55
2022-09-12	10:38:40	0.753397	3.35126	2.59744	1494.89	FALSE	55
2022-09-12	10:38:41	0.811107	3.60797	3.69233	1514.79	FALSE	55
2022-09-12	10:38:41	0.948613	4.21962	3.69233	1499.11	FALSE	55
2022-09-12	10:38:41	0.730496	3.24939	3.69233	1518.03	FALSE	55
2022-09-12	10:38:42	0.559453	2.48856	2.05975	1501.6	FALSE	55
2022-09-12	10:38:42	0.446374	1.98556	2.05975	1520.02	FALSE	55
2022-09-12	10:38:42	0.425713	1.89366	2.05975	1503.49	FALSE	55
2022-09-12	10:38:42	0.420674	1.87124	2.05975	1521.89	FALSE	55
2022-09-12	10:38:43	0.428563	1.90633	1.98166	1505.4	FALSE	55
2022-09-12	10:38:43	0.431056	1.91742	1.98166	1523.81	FALSE	55
2022-09-12	10:38:43	0.429987	1.91267	1.98166	1507.31	FALSE	55
2022-09-12	10:38:43	0.492379	2.1902	1.98166	1526	FALSE	55
2022-09-12	10:38:44	0.412685	1.83571	1.94091	1509.15	FALSE	55
2022-09-12	10:38:44	0.366476	1.63016	1.94091	1527.63	FALSE	55
2022-09-12	10:38:44	0.517977	2.30407	1.94091	1511.45	FALSE	55
2022-09-12	10:38:44	0.448206	1.99371	1.94091	1529.62	FALSE	55
2022-09-12	10:38:45	0.482354	2.14561	1.93433	1513.6	FALSE	55
2022-09-12	10:38:45	0.44841	1.99462	1.93433	1531.62	FALSE	55
2022-09-12	10:38:45	0.373804	1.66275	1.93433	1515.26	FALSE	55
2022-09-12	10:38:46	0.434059	1.93078	7.99453	1533.55	FALSE	55
2022-09-12	10:38:46	0.580216	2.58092	7.99453	1517.84	FALSE	55
2022-09-12	10:38:46	1.48627	6.61123	7.99453	1540.16	FALSE	55
2022-09-12	10:38:46	4.68846	20.8552	7.99453	1538.69	1	56
2022-09-12	10:38:47	5.25574	23.3786	15.4492	1563.54	1	57
2022-09-12	10:38:47	2.89558	12.8801	15.4492	1551.58	FALSE	57
2022-09-12	10:38:47	4.33879	19.2998	15.4492	1582.84	1	58
2022-09-12	10:38:47	1.40246	6.23842	15.4492	1557.81	FALSE	58
2022-09-12	10:38:48	3.82739	17.025	25.8957	1599.86	1	59
2022-09-12	10:38:48	4.91116	21.8458	25.8957	1579.66	1	60
2022-09-12	10:38:48	7.19513	32.0054	25.8957	1631.87	1	61
2022-09-12	10:38:48	7.35278	32.7066	25.8957	1612.37	1	62
2022-09-12	10:38:49	5.00388	22.2583	18.3819	1654.13	1	63
2022-09-12	10:38:49	4.46836	19.8762	18.3819	1632.24	1	64
2022-09-12	10:38:49	2.9251	13.0114	18.3819	1667.14	FALSE	64
2022-09-12	10:38:50	2.68892	11.9609	27.1573	1644.2	FALSE	64
2022-09-12	10:38:50	4.97024	22.1086	27.1573	1689.25	1	65
2022-09-12	10:38:50	8.39299	37.3337	27.1573	1681.54	1	66
2022-09-12	10:38:50	8.36881	37.2261	27.1573	1726.47	1	67
2022-09-12	10:38:51	5.6024	24.9206	16.9787	1706.46	1	68
2022-09-12	10:38:51	4.31182	19.1798	16.9787	1745.65	1	69
2022-09-12	10:38:51	4.11635	18.3103	16.9787	1724.77	1	70
2022-09-12	10:38:51	1.23737	5.50407	16.9787	1751.16	FALSE	70
2022-09-12	10:38:52	0.789173	3.5104	2.6005	1728.28	FALSE	70
2022-09-12	10:38:52	0.561946	2.49965	2.6005	1753.66	FALSE	70
2022-09-12	10:38:52	0.448053	1.99303	2.6005	1730.27	FALSE	70
2022-09-12	10:38:52	0.5393	2.39891	2.6005	1756.06	FALSE	70
2022-09-12	10:38:53	0.424898	1.89003	1.93146	1732.16	FALSE	70
2022-09-12	10:38:53	0.45187	2.01001	1.93146	1758.07	FALSE	70
2022-09-12	10:38:53	0.392227	1.7447	1.93146	1733.91	FALSE	70
2022-09-12	10:38:53	0.46785	2.08109	1.93146	1760.15	FALSE	70
2022-09-12	10:38:54	0.406781	1.80944	1.82001	1735.72	FALSE	70
2022-09-12	10:38:54	0.418384	1.86106	1.82001	1762.01	FALSE	70
2022-09-12	10:38:54	0.402303	1.78952	1.82001	1737.5	FALSE	70
2022-09-12	10:38:55	0.458944	2.04147	1.79094	1764.05	FALSE	70
2022-09-12	10:38:55	0.407087	1.8108	1.79094	1739.32	FALSE	70
2022-09-12	10:38:55	0.425662	1.89343	1.79094	1765.94	FALSE	70
2022-09-12	10:38:55	0.318791	1.41805	1.79094	1740.73	FALSE	70
2022-09-12	10:38:56	0.452786	2.01408	1.26695	1767.96	FALSE	70
2022-09-12	10:38:56	0.365102	1.62405	1.26695	1742.36	FALSE	70
2022-09-12	10:38:56	0.161031	0.716298	1.26695	1768.67	FALSE	70
2022-09-12	10:38:56	0.160369	0.713353	1.26695	1743.07	FALSE	70
2022-09-12	10:38:57	0.523066	2.3267	2.152	1771	FALSE	70
2022-09-12	10:38:57	0.455229	2.02495	2.152	1745.1	FALSE	70
2022-09-12	10:38:57	0.468461	2.08381	2.152	1773.08	FALSE	70
2022-09-12	10:38:57	0.48841	2.17255	2.152	1747.27	FALSE	70
2022-09-12	10:38:58	0.483728	2.15172	1.97311	1775.24	FALSE	70
2022-09-12	10:38:58	0.378893	1.68539	1.97311	1748.95	FALSE	70
2022-09-12	10:38:58	0.468104	2.08222	1.97311	1777.32	FALSE	70
2022-09-12	10:38:59	0.457468	2.03491	2.13016	1750.99	FALSE	70
2022-09-12	10:38:59	0.453753	2.01838	2.13016	1779.34	FALSE	70
2022-09-12	10:38:59	0.542099	2.41136	2.13016	1753.4	FALSE	70
2022-09-12	10:38:59	0.462201	2.05596	2.13016	1781.39	FALSE	70
2022-09-12	10:39:00	0.428919	1.90792	1.33208	1755.31	FALSE	70
2022-09-12	10:39:00	0.377519	1.67928	1.33208	1783.07	FALSE	70
2022-09-12	10:39:00	0.222201	0.988394	1.33208	1756.3	FALSE	70
2022-09-12	10:39:00	0.169224	0.752742	1.33208	1783.82	FALSE	70
2022-09-12	10:39:01	0.290903	1.29399	1.49784	1757.59	FALSE	70
2022-09-12	10:39:01	0.332023	1.4769	1.49784	1785.3	FALSE	70
2022-09-12	10:39:01	0.349377	1.5541	1.49784	1759.14	FALSE	70
2022-09-12	10:39:01	0.374619	1.66638	1.49784	1786.97	FALSE	70
2022-09-12	10:39:02	0.373295	1.66049	1.77217	1760.8	FALSE	70
2022-09-12	10:39:02	0.401387	1.78545	1.77217	1788.75	FALSE	70
2022-09-12	10:39:02	0.420522	1.87057	1.77217	1762.68	FALSE	70
2022-09-12	10:39:03	0.515331	2.2923	2.0142	1791.04	FALSE	70
2022-09-12	10:39:03	0.423982	1.88596	2.0142	1764.56	FALSE	70
2022-09-12	10:39:03	0.462659	2.058	2.0142	1793.1	FALSE	70
2022-09-12	10:39:03	0.409275	1.82054	2.0142	1766.38	FALSE	70
2022-09-12	10:39:04	0.397875	1.76983	0.760438	1794.87	FALSE	70
2022-09-12	10:39:04	0.181641	0.807975	0.760438	1767.19	FALSE	70
2022-09-12	10:39:04	0.0515142	0.229145	0.760438	1795.1	FALSE	70
2022-09-12	10:39:04	0.0527865	0.234805	0.760438	1767.42	FALSE	70
2022-09-12	10:39:05	0.0645422	0.287097	-0.215222	1795.39	FALSE	70
2022-09-12	10:39:05	-0.0496053	-0.220654	-0.215222	1767.42	FALSE	70
2022-09-12	10:39:05	-0.104109	-0.463098	-0.215222	1795.39	FALSE	70
2022-09-12	10:39:05	-0.104364	-0.464232	-0.215222	1767.42	FALSE	70
2022-09-12	10:39:06	-0.109962	-0.489133	0.00775309	1795.39	FALSE	70
2022-09-12	10:39:06	-0.00507608	-0.0225794	0.00775309	1767.42	FALSE	70
2022-09-12	10:39:06	0.120267	0.534972	0.00775309	1795.92	FALSE	70
2022-09-12	10:39:07	0.120318	0.535199	0.0386538	1767.96	FALSE	70
2022-09-12	10:39:07	-0.0266537	-0.118561	0.0386538	1795.92	FALSE	70
2022-09-12	10:39:07	-0.0596816	-0.265476	0.0386538	1767.96	FALSE	70
2022-09-12	10:39:07	0.000776325	0.00345325	0.0386538	1795.93	FALSE	70
2022-09-12	10:39:08	-0.0559157	-0.248724	1.09836	1767.96	FALSE	70
2022-09-12	10:39:08	0.524338	2.33236	1.09836	1798.26	FALSE	70
2022-09-12	10:39:08	0.271667	1.20843	1.09836	1769.17	FALSE	70
2022-09-12	10:39:08	0.247596	1.10136	1.09836	1799.36	FALSE	70
2022-09-12	10:39:09	0.193804	0.862079	0.600225	1770.03	FALSE	70
2022-09-12	10:39:09	0.0768577	0.341878	0.600225	1799.7	FALSE	70
2022-09-12	10:39:09	0.104339	0.464121	0.600225	1770.49	FALSE	70
2022-09-12	10:39:09	0.164746	0.732823	0.600225	1800.44	FALSE	70
2022-09-12	10:39:10	0.187545	0.834238	4.60295	1771.33	FALSE	70
2022-09-12	10:39:10	0.346323	1.54051	4.60295	1801.98	FALSE	70
2022-09-12	10:39:10	2.5705	11.4341	4.60295	1782.76	FALSE	70
2022-09-12	10:39:11	4.58464	20.3934	17.2494	1822.37	1	71
2022-09-12	10:39:11	5.51848	24.5473	17.2494	1807.31	1	72
2022-09-12	10:39:11	4.09752	18.2266	17.2494	1840.6	1	73
2022-09-12	10:39:11	1.3107	5.83026	17.2494	1813.14	FALSE	73
2022-09-12	10:39:12	0.28215	1.25506	2.20701	1841.85	FALSE	73
2022-09-12	10:39:12	0.665305	2.95941	2.20701	1816.1	FALSE	73
2022-09-12	10:39:12	0.583219	2.59427	2.20701	1844.45	FALSE	73
2022-09-12	10:39:12	0.453957	2.01929	2.20701	1818.12	FALSE	73
2022-09-12	10:39:13	0.405153	1.8022	9.41886	1846.25	FALSE	73
2022-09-12	10:39:13	0.482507	2.14629	9.41886	1820.27	FALSE	73
2022-09-12	10:39:13	3.0995	13.7872	9.41886	1860.03	1	74
2022-09-12	10:39:13	4.48266	19.9398	9.41886	1840.21	1	75
2022-09-12	10:39:14	2.94011	13.0782	13.0058	1873.11	FALSE	75
2022-09-12	10:39:14	4.52179	20.1138	13.0058	1860.32	1	76
2022-09-12	10:39:14	2.74078	12.1915	13.0058	1885.3	FALSE	76
2022-09-12	10:39:14	1.49263	6.63952	13.0058	1866.96	FALSE	76
2022-09-12	10:39:15	0.500725	2.22732	2.22672	1887.53	FALSE	76
2022-09-12	10:39:15	0.491412	2.1859	2.22672	1869.14	FALSE	76
2022-09-12	10:39:15	0.509631	2.26694	2.22672	1889.8	FALSE	76
2022-09-12	10:39:16	0.542914	2.41499	2.13497	1871.56	FALSE	76
2022-09-12	10:39:16	0.364949	1.62337	2.13497	1891.42	FALSE	76
2022-09-12	10:39:16	0.500471	2.2262	2.13497	1873.79	FALSE	76
2022-09-12	10:39:16	0.511514	2.27532	2.13497	1893.7	FALSE	76
2022-09-12	10:39:17	0.497926	2.21487	1.45104	1876	FALSE	76
2022-09-12	10:39:17	0.361489	1.60798	1.45104	1895.31	FALSE	76
2022-09-12	10:39:17	0.166578	0.740972	1.45104	1876.74	FALSE	76
2022-09-12	10:39:17	0.278842	1.24034	1.45104	1896.55	FALSE	76
2022-09-12	10:39:18	0.294211	1.30871	11.2002	1878.05	FALSE	76
2022-09-12	10:39:18	2.02286	8.99809	11.2002	1905.54	FALSE	76
2022-09-12	10:39:18	4.7968	21.3371	11.2002	1899.39	1	77
2022-09-12	10:39:18	2.95782	13.157	11.2002	1918.7	FALSE	77
2022-09-12	10:39:19	1.06403	4.73302	4.03648	1904.12	FALSE	77
2022-09-12	10:39:19	0.735229	3.27045	4.03648	1921.97	FALSE	77
2022-09-12	10:39:19	0.923066	4.10598	4.03648	1908.23	FALSE	77
2022-09-12	10:39:20	0.47411	2.10894	1.20837	1924.08	FALSE	77
2022-09-12	10:39:20	0.272837	1.21363	1.20837	1909.44	FALSE	77
2022-09-12	10:39:20	0.260471	1.15863	1.20837	1925.24	FALSE	77
2022-09-12	10:39:20	0.0791987	0.352292	1.20837	1909.79	FALSE	77
2022-09-12	10:39:21	0.396043	1.76168	1.88522	1927	FALSE	77
2022-09-12	10:39:21	0.322964	1.43661	1.88522	1911.23	FALSE	77
2022-09-12	10:39:21	0.732277	3.25731	1.88522	1930.26	FALSE	77
2022-09-12	10:39:21	0.243982	1.08528	1.88522	1912.31	FALSE	77
2022-09-12	10:39:22	0.206527	0.918673	0.442784	1931.18	FALSE	77
2022-09-12	10:39:22	0.0881555	0.392133	0.442784	1912.71	FALSE	77
2022-09-12	10:39:22	0.134924	0.600169	0.442784	1931.78	FALSE	77
2022-09-12	10:39:22	-0.0314374	-0.13984	0.442784	1912.71	FALSE	77
2022-09-12	10:39:23	0.183066	0.814314	0.579946	1932.59	FALSE	77
2022-09-12	10:39:23	0.145662	0.647934	0.579946	1913.35	FALSE	77
2022-09-12	10:39:23	0.0624048	0.277589	0.579946	1932.87	FALSE	77
2022-09-12	10:39:24	0.0884607	0.393491	1.64312	1913.75	FALSE	77
2022-09-12	10:39:24	0.582863	2.59269	1.64312	1935.46	FALSE	77
2022-09-12	10:39:24	0.562354	2.50146	1.64312	1916.25	FALSE	77
2022-09-12	10:39:24	0.243881	1.08483	1.64312	1936.55	FALSE	77
2022-09-12	10:39:25	0.353804	1.57379	2.37498	1917.82	FALSE	77
2022-09-12	10:39:25	1.20678	5.368	2.37498	1941.91	FALSE	77
2022-09-12	10:39:25	0.297519	1.32342	2.37498	1919.15	FALSE	77
2022-09-12	10:39:25	0.27757	1.23469	2.37498	1943.15	FALSE	77
2022-09-12	10:39:26	0.348868	1.55183	1.3043	1920.7	FALSE	77
2022-09-12	10:39:26	0.440725	1.96043	1.3043	1945.11	FALSE	77
2022-09-12	10:39:26	0.207748	0.924105	1.3043	1921.62	FALSE	77
2022-09-12	10:39:26	0.175534	0.78081	1.3043	1945.89	FALSE	77
2022-09-12	10:39:27	0.310242	1.38002	1.68381	1923	FALSE	77
2022-09-12	10:39:27	0.526425	2.34164	1.68381	1948.23	FALSE	77
2022-09-12	10:39:27	0.298944	1.32976	1.68381	1924.33	FALSE	77
2022-09-12	10:39:28	0.177316	0.788737	0.992582	1949.02	FALSE	77
2022-09-12	10:39:28	0.259453	1.1541	0.992582	1925.49	FALSE	77
2022-09-12	10:39:28	0.173193	0.770397	0.992582	1949.79	FALSE	77
2022-09-12	10:39:28	0.282608	1.2571	0.992582	1926.74	FALSE	77
2022-09-12	10:39:29	0.166323	0.739838	1.01692	1950.53	FALSE	77
2022-09-12	10:39:29	0.26388	1.17379	1.01692	1927.92	FALSE	77
2022-09-12	10:39:29	0.153346	0.682114	1.01692	1951.21	FALSE	77
2022-09-12	10:39:29	0.330903	1.47192	1.01692	1929.39	FALSE	77
2022-09-12	10:39:30	0.237316	1.05563	0.792302	1952.27	FALSE	77
2022-09-12	10:39:30	0.214568	0.954441	0.792302	1930.34	FALSE	77
2022-09-12	10:39:30	0.0983335	0.437407	0.792302	1952.71	FALSE	77
2022-09-12	10:39:30	0.162252	0.721729	0.792302	1931.07	FALSE	77
2022-09-12	10:39:31	0.163117	0.725577	0.91505	1953.43	FALSE	77
2022-09-12	10:39:31	0.168155	0.747987	0.91505	1931.81	FALSE	77
2022-09-12	10:39:31	0.248206	1.10407	0.91505	1954.54	FALSE	77
2022-09-12	10:39:31	0.243372	1.08257	0.91505	1932.9	FALSE	77
2022-09-12	10:39:32	0.35355	1.57266	1.52678	1956.11	FALSE	77
2022-09-12	10:39:32	0.270293	1.20232	1.52678	1934.1	FALSE	77
2022-09-12	10:39:32	0.405865	1.80537	1.52678	1957.91	FALSE	77
2022-09-12	10:39:33	0.271718	1.20866	1.19734	1935.31	FALSE	77
2022-09-12	10:39:33	0.307799	1.36915	1.19734	1959.28	FALSE	77
2022-09-12	10:39:33	0.179555	0.798697	1.19734	1936.11	FALSE	77
2022-09-12	10:39:33	0.317621	1.41284	1.19734	1960.7	FALSE	77
2022-09-12	10:39:34	0.246832	1.09796	0.573682	1937.2	FALSE	77
2022-09-12	10:39:34	0.0984862	0.438086	0.573682	1961.13	FALSE	77
2022-09-12	10:39:34	0.0521249	0.231862	0.573682	1937.44	FALSE	77
2022-09-12	10:39:34	0.118435	0.526823	0.573682	1961.66	FALSE	77
2022-09-12	10:39:35	0.07813	0.347538	0.124109	1937.78	FALSE	77
2022-09-12	10:39:35	0.0414379	0.184324	0.124109	1961.84	FALSE	77
2022-09-12	10:39:35	-0.0040074	-0.0178257	0.124109	1937.78	FALSE	77
2022-09-12	10:39:35	-0.00395648	-0.0175992	0.124109	1961.84	FALSE	77
2022-09-12	10:39:36	0.0628119	0.2794	0.669061	1938.06	FALSE	77
2022-09-12	10:39:36	0.185611	0.825635	0.669061	1962.67	FALSE	77
2022-09-12	10:39:36	0.202812	0.902148	0.669061	1938.96	FALSE	77
2022-09-12	10:39:37	0.0359417	0.159876	0.960098	1962.83	FALSE	77
2022-09-12	10:39:37	0.19014	0.845781	0.960098	1939.81	FALSE	77
2022-09-12	10:39:37	0.290038	1.29015	0.960098	1964.12	FALSE	77
2022-09-12	10:39:37	0.347239	1.54459	0.960098	1941.35	FALSE	77
2022-09-12	10:39:38	0.235992	1.04974	1.05947	1965.17	FALSE	77
2022-09-12	10:39:38	0.187748	0.835141	1.05947	1942.19	FALSE	77
2022-09-12	10:39:38	0.248817	1.10679	1.05947	1966.28	FALSE	77
2022-09-12	10:39:38	0.280165	1.24623	1.05947	1943.44	FALSE	77
2022-09-12	10:39:39	0.157265	0.699546	0.917201	1966.98	FALSE	77
2022-09-12	10:39:39	0.16729	0.744139	0.917201	1944.18	FALSE	77
2022-09-12	10:39:39	0.247799	1.10226	0.917201	1968.08	FALSE	77
2022-09-12	10:39:39	0.25243	1.12286	0.917201	1945.3	FALSE	77
2022-09-12	10:39:40	0.292888	1.30282	1.38288	1969.38	FALSE	77
2022-09-12	10:39:40	0.177519	0.78964	1.38288	1946.09	FALSE	77
2022-09-12	10:39:40	0.462252	2.05619	1.38288	1971.44	FALSE	77
2022-09-12	10:39:41	0.357112	1.58851	1.50979	1947.68	FALSE	77
2022-09-12	10:39:41	0.321845	1.43163	1.50979	1972.87	FALSE	77
2022-09-12	10:39:41	0.192685	0.857101	1.50979	1948.54	FALSE	77
2022-09-12	10:39:41	0.486018	2.16191	1.50979	1975.03	FALSE	77
2022-09-12	10:39:42	0.125611	0.558743	0.487096	1949.1	FALSE	77
2022-09-12	10:39:42	0.110395	0.491059	0.487096	1975.52	FALSE	77
2022-09-12	10:39:42	0.0839824	0.373571	0.487096	1949.47	FALSE	77
2022-09-12	10:39:42	0.118028	0.525012	0.487096	1976.05	FALSE	77
2022-09-12	10:39:43	0.268919	1.19621	1.27979	1950.67	FALSE	77
2022-09-12	10:39:43	0.243881	1.08483	1.27979	1977.13	FALSE	77
2022-09-12	10:39:43	0.377316	1.67838	1.27979	1952.35	FALSE	77
2022-09-12	10:39:43	0.260725	1.15976	1.27979	1978.29	FALSE	77
2022-09-12	10:39:44	0.295636	1.31505	1.58149	1953.66	FALSE	77
2022-09-12	10:39:44	0.373652	1.66208	1.58149	1979.95	FALSE	77
2022-09-12	10:39:44	0.397316	1.76734	1.58149	1955.43	FALSE	77
2022-09-12	10:39:45	0.400216	1.78024	2.07956	1981.73	FALSE	77
2022-09-12	10:39:45	0.48556	2.15987	2.07956	1957.59	FALSE	77
2022-09-12	10:39:45	0.510496	2.27079	2.07956	1984.01	FALSE	77
2022-09-12	10:39:45	0.473753	2.10735	2.07956	1959.69	FALSE	77
2022-09-12	10:39:46	0.456349	2.02993	2.0752	1986.04	FALSE	77
2022-09-12	10:39:46	0.473295	2.10531	2.0752	1961.8	FALSE	77
2022-09-12	10:39:46	0.473855	2.1078	2.0752	1988.14	FALSE	77
2022-09-12	10:39:46	0.462608	2.05777	2.0752	1963.86	FALSE	77
2022-09-12	10:39:47	0.460878	2.05008	2.09841	1990.19	FALSE	77
2022-09-12	10:39:47	0.457112	2.03333	2.09841	1965.89	FALSE	77
2022-09-12	10:39:47	0.480623	2.13791	2.09841	1992.33	FALSE	77
2022-09-12	10:39:47	0.488359	2.17232	2.09841	1968.06	FALSE	77
2022-09-12	10:39:48	0.496196	2.20718	2.86214	1994.54	FALSE	77
2022-09-12	10:39:48	1.11655	4.96664	2.86214	1973.03	FALSE	77
2022-09-12	10:39:48	0.31757	1.41261	2.86214	1995.95	FALSE	77
2022-09-12	10:39:49	0.384033	1.70826	1.83927	1974.74	FALSE	77
2022-09-12	10:39:49	0.393092	1.74855	1.83927	1997.7	FALSE	77
2022-09-12	10:39:49	0.378893	1.68539	1.83927	1976.42	FALSE	77
2022-09-12	10:39:49	0.497926	2.21487	1.83927	1999.91	FALSE	77
2022-09-12	10:39:50	0.536145	2.38488	1.94459	1978.81	FALSE	77
2022-09-12	10:39:50	0.316756	1.40899	1.94459	2001.32	FALSE	77
2022-09-12	10:39:50	0.556399	2.47497	1.94459	1981.28	FALSE	77
2022-09-12	10:39:50	0.339351	1.5095	1.94459	2002.83	FALSE	77
2022-09-12	10:39:51	0.628664	2.79642	2.03627	1984.08	FALSE	77
2022-09-12	10:39:51	0.346069	1.53938	2.03627	2004.37	FALSE	77
2022-09-12	10:39:51	0.424237	1.88709	2.03627	1985.97	FALSE	77
2022-09-12	10:39:51	0.432125	1.92218	2.03627	2006.29	FALSE	77
2022-09-12	10:39:52	0.550852	2.4503	1.89745	1988.42	FALSE	77
2022-09-12	10:39:52	0.314415	1.39858	1.89745	2007.69	FALSE	77
2022-09-12	10:39:52	0.466272	2.07407	1.89745	1990.49	FALSE	77
2022-09-12	10:39:52	0.37472	1.66683	1.89745	2009.36	FALSE	77
2022-09-12	10:39:53	0.454975	2.02382	1.93222	1992.52	FALSE	77
2022-09-12	10:39:53	0.438283	1.94957	1.93222	2011.31	FALSE	77
2022-09-12	10:39:53	0.409886	1.82325	1.93222	1994.34	FALSE	77
2022-09-12	10:39:54	0.499555	2.22212	2.54385	2013.53	FALSE	77
2022-09-12	10:39:54	0.444593	1.97764	2.54385	1996.32	FALSE	77
2022-09-12	10:39:54	0.509987	2.26852	2.54385	2015.8	FALSE	77
2022-09-12	10:39:54	0.833397	3.70712	2.54385	2000.02	FALSE	77
2022-09-12	10:39:55	0.834415	3.71164	4.03049	2019.51	FALSE	77
2022-09-12	10:39:55	0.474822	2.1121	4.03049	2002.14	FALSE	77
2022-09-12	10:39:55	0.731158	3.25234	4.03049	2022.76	FALSE	77
2022-09-12	10:39:55	1.58398	7.04586	4.03049	2009.18	FALSE	77
2022-09-12	10:39:56	0.676094	3.0074	8.93409	2025.77	FALSE	77
2022-09-12	10:39:56	2.37238	10.5528	8.93409	2019.73	FALSE	77
2022-09-12	10:39:56	2.78683	12.3964	8.93409	2038.17	FALSE	77
2022-09-12	10:39:56	2.19859	9.77977	8.93409	2029.51	FALSE	77
2022-09-12	10:39:57	1.24902	5.55589	4.7436	2043.72	FALSE	77
2022-09-12	10:39:57	0.913397	4.06297	4.7436	2033.58	FALSE	77
2022-09-12	10:39:57	1.03681	4.61194	4.7436	2048.34	FALSE	77
2022-09-12	10:39:58	1.02042	4.53903	3.7778	2038.12	FALSE	77
2022-09-12	10:39:58	1.06963	4.75793	3.7778	2053.09	FALSE	77
2022-09-12	10:39:58	0.872888	3.88278	3.7778	2042	FALSE	77
2022-09-12	10:39:58	0.434211	1.93146	3.7778	2055.02	FALSE	77
2022-09-12	10:39:59	0.484288	2.15421	1.99467	2044.15	FALSE	77
2022-09-12	10:39:59	0.477112	2.12229	1.99467	2057.15	FALSE	77
2022-09-12	10:39:59	0.387595	1.7241	1.99467	2045.88	FALSE	77
2022-09-12	10:39:59	0.444695	1.97809	1.99467	2059.13	FALSE	77
2022-09-12	10:40:00	0.476349	2.1189	2.03599	2048	FALSE	77
2022-09-12	10:40:00	0.485509	2.15964	2.03599	2061.28	FALSE	77
2022-09-12	10:40:00	0.391616	1.74199	2.03599	2049.74	FALSE	77
2022-09-12	10:40:00	0.477367	2.12342	2.03599	2063.41	FALSE	77
2022-09-12	10:40:01	0.702099	3.12308	3.97914	2052.86	FALSE	77
2022-09-12	10:40:01	0.644033	2.86479	3.97914	2066.27	FALSE	77
2022-09-12	10:40:01	1.33752	5.94956	3.97914	2058.81	FALSE	77
2022-09-12	10:40:02	1.36994	6.09377	3.19959	2072.37	FALSE	77
2022-09-12	10:40:02	0.72785	3.23762	3.19959	2062.05	FALSE	77
2022-09-12	10:40:02	0.396959	1.76575	3.19959	2074.13	FALSE	77
2022-09-12	10:40:02	0.382455	1.70124	3.19959	2063.75	FALSE	77
2022-09-12	10:40:03	0.370394	1.64759	1.4627	2075.78	FALSE	77
2022-09-12	10:40:03	0.33299	1.48121	1.4627	2065.23	FALSE	77
2022-09-12	10:40:03	0.40042	1.78115	1.4627	2077.56	FALSE	77
2022-09-12	10:40:03	0.211514	0.940857	1.4627	2066.17	FALSE	77
2022-09-12	10:40:04	0.255789	1.1378	1.3447	2078.7	FALSE	77
2022-09-12	10:40:04	0.328766	1.46242	1.3447	2067.63	FALSE	77
2022-09-12	10:40:04	0.299657	1.33293	1.3447	2080.03	FALSE	77
2022-09-12	10:40:04	0.325	1.44566	1.3447	2069.08	FALSE	77
2022-09-12	10:40:05	0.36612	1.62857	1.62352	2081.66	FALSE	77
2022-09-12	10:40:05	0.348868	1.55183	1.62352	2070.63	FALSE	77
2022-09-12	10:40:05	0.379962	1.69015	1.62352	2083.35	FALSE	77
2022-09-12	10:40:06	0.350954	1.56111	1.50803	2072.19	FALSE	77
2022-09-12	10:40:06	0.389326	1.7318	1.50803	2085.08	FALSE	77
2022-09-12	10:40:06	0.366578	1.63061	1.50803	2073.82	FALSE	77
2022-09-12	10:40:06	0.249224	1.1086	1.50803	2086.19	FALSE	77
2022-09-12	10:40:07	0.188461	0.838312	0.879737	2074.66	FALSE	77
2022-09-12	10:40:07	0.16841	0.749121	0.879737	2086.94	FALSE	77
2022-09-12	10:40:07	0.213804	0.951043	0.879737	2075.61	FALSE	77
2022-09-12	10:40:07	0.22042	0.980472	0.879737	2087.92	FALSE	77
2022-09-12	10:40:08	0.280165	1.24623	1.22133	2076.86	FALSE	77
2022-09-12	10:40:08	0.253957	1.12965	1.22133	2089.05	FALSE	77
2022-09-12	10:40:08	0.247596	1.10136	1.22133	2077.96	FALSE	77
2022-09-12	10:40:08	0.316552	1.40809	1.22133	2090.46	FALSE	77
2022-09-12	10:40:09	0.193346	0.860042	1.0099	2078.82	FALSE	77
2022-09-12	10:40:09	0.294822	1.31143	1.0099	2091.77	FALSE	77
2022-09-12	10:40:09	0.192939	0.858231	1.0099	2079.68	FALSE	77
2022-09-12	10:40:10	0.189682	0.843743	1.50916	2092.61	FALSE	77
2022-09-12	10:40:10	0.375433	1.67	1.50916	2081.35	FALSE	77
2022-09-12	10:40:10	0.363117	1.61522	1.50916	2094.23	FALSE	77
2022-09-12	10:40:10	0.428868	1.90769	1.50916	2083.26	FALSE	77

## Sheet: Sunny_harness_2022912103439 (2)
Date	Time	Lbs	Newtons	Total Force x time	Total Time Steps Force >3		**GoPro Fitting: 1023
2022-09-12	10:35:10	0.335484	1.4923	1.4923	FALSE	0			Total force x time	2083.26
2022-09-12	10:35:10	0.976807	4.34503	4.34503	FALSE	0			Total Time Steps Force >3	77
2022-09-12	10:35:10	1.68556	7.49771	8.99001	FALSE	0
2022-09-12	10:35:10	0.193295	0.859815	5.20485	FALSE	0
2022-09-12	10:35:11	1.43553	6.38552	15.3755	FALSE	0
2022-09-12	10:35:11	0.399199	1.77572	6.98056	FALSE	0
2022-09-12	10:35:11	1.21146	5.38882	20.7643	FALSE	0
2022-09-12	10:35:11	2.4964	11.1045	18.0851	FALSE	0
2022-09-12	10:35:12	0.459046	2.04193	22.8063	FALSE	0
2022-09-12	10:35:12	0.471667	2.09807	20.1831	FALSE	0
2022-09-12	10:35:12	1.71894	7.64619	30.4525	FALSE	0
2022-09-12	10:35:12	0.423372	1.88324	22.0664	FALSE	0
2022-09-12	10:35:13	0.55584	2.47249	32.925	FALSE	0
2022-09-12	10:35:13	0.847697	3.77073	25.8371	FALSE	0
2022-09-12	10:35:13	0.272074	1.21024	34.1352	FALSE	0
2022-09-12	10:35:14	0.63986	2.84623	28.6833	FALSE	0
2022-09-12	10:35:14	1.20123	5.34331	39.4785	FALSE	0
2022-09-12	10:35:14	1.3081	5.81869	34.502	FALSE	0
2022-09-12	10:35:14	1.22011	5.42729	44.9058	FALSE	0
2022-09-12	10:35:15	0.333041	1.48143	35.9834	FALSE	0
2022-09-12	10:35:15	0.284237	1.26434	46.1701	FALSE	0
2022-09-12	10:35:15	0.407799	1.81397	37.7974	FALSE	0
2022-09-12	10:35:15	0.160878	0.715618	46.8858	FALSE	0
2022-09-12	10:35:16	0.186374	0.829029	38.6264	FALSE	0
2022-09-12	10:35:16	0.0930918	0.414091	47.2998	FALSE	0
2022-09-12	10:35:16	0.290547	1.29241	39.9188	FALSE	0
2022-09-12	10:35:16	0.390547	1.73723	49.0371	FALSE	0
2022-09-12	10:35:17	0.376807	1.67611	41.595	FALSE	0
2022-09-12	10:35:17	0.306781	1.36462	50.4017	FALSE	0
2022-09-12	10:35:17	0.261896	1.16497	42.7599	FALSE	0
2022-09-12	10:35:17	0.246374	1.09592	51.4976	FALSE	0
2022-09-12	10:35:18	0.226883	1.00922	43.7691	FALSE	0
2022-09-12	10:35:18	0.243372	1.08257	52.5802	FALSE	0
2022-09-12	10:35:18	0.241132	1.0726	44.8418	FALSE	0
2022-09-12	10:35:19	0.204186	0.90826	53.4885	FALSE	0
2022-09-12	10:35:19	0.176043	0.783074	45.6248	FALSE	0
2022-09-12	10:35:19	0.233601	1.0391	54.5276	FALSE	0
2022-09-12	10:35:19	0.169122	0.752288	46.3771	FALSE	0
2022-09-12	10:35:20	0.242099	1.0769	55.6045	FALSE	0
2022-09-12	10:35:20	0.296196	1.31754	47.6947	FALSE	0
2022-09-12	10:35:20	0.362659	1.61318	57.2176	FALSE	0
2022-09-12	10:35:20	0.428919	1.90792	49.6026	FALSE	0
2022-09-12	10:35:21	0.547086	2.43355	59.6512	FALSE	0
2022-09-12	10:35:21	0.574975	2.5576	52.1602	FALSE	0
2022-09-12	10:35:21	0.521132	2.3181	61.9693	FALSE	0
2022-09-12	10:35:21	0.42444	1.88799	54.0482	FALSE	0
2022-09-12	10:35:22	0.358486	1.59462	63.5639	FALSE	0
2022-09-12	10:35:22	0.30841	1.37187	55.42	FALSE	0
2022-09-12	10:35:22	0.28383	1.26253	64.8264	FALSE	0
2022-09-12	10:35:23	0.362761	1.61363	57.0337	FALSE	0
2022-09-12	10:35:23	0.961896	4.27871	69.1051	FALSE	0
2022-09-12	10:35:23	0.677468	3.01351	60.0472	FALSE	0
2022-09-12	10:35:23	0.285407	1.26955	70.3747	FALSE	0
2022-09-12	10:35:24	0.344186	1.53101	61.5782	FALSE	0
2022-09-12	10:35:24	0.161794	0.719692	71.0944	FALSE	0
2022-09-12	10:35:24	0.0978246	0.435143	62.0133	FALSE	0
2022-09-12	10:35:24	0.114669	0.510071	71.6045	FALSE	0
2022-09-12	10:35:25	-0.00609391	-0.0271069	62.0133	FALSE	0
2022-09-12	10:35:25	0.0311071	0.138371	71.7428	FALSE	0
2022-09-12	10:35:25	-0.0187657	-0.0834736	62.0133	FALSE	0
2022-09-12	10:35:25	0.00703587	0.031297	71.7741	FALSE	0
2022-09-12	10:35:26	-0.0507758	-0.225861	62.0133	FALSE	0
2022-09-12	10:35:26	-0.188333	-0.837743	71.7741	FALSE	0
2022-09-12	10:35:26	-0.307519	-1.36791	62.0133	FALSE	0
2022-09-12	10:35:27	-0.259783	-1.15557	71.7741	FALSE	0
2022-09-12	10:35:27	-0.265483	-1.18092	62.0133	FALSE	0
2022-09-12	10:35:27	-0.150012	-0.667283	71.7741	FALSE	0
2022-09-12	10:35:27	-0.250369	-1.11369	62.0133	FALSE	0
2022-09-12	10:35:28	-0.170928	-0.760322	71.7741	FALSE	0
2022-09-12	10:35:28	-0.10818	-0.481206	62.0133	FALSE	0
2022-09-12	10:35:28	-0.162837	-0.724332	71.7741	FALSE	0
2022-09-12	10:35:28	-0.0810557	-0.360552	62.0133	FALSE	0
2022-09-12	10:35:29	-0.146297	-0.650758	71.7741	FALSE	0
2022-09-12	10:35:29	-0.145178	-0.645781	62.0133	FALSE	0
2022-09-12	10:35:29	-0.160496	-0.713918	71.7741	FALSE	0
2022-09-12	10:35:29	-0.165432	-0.735875	62.0133	FALSE	0
2022-09-12	10:35:30	-0.0179005	-0.079625	71.7741	FALSE	0
2022-09-12	10:35:30	-0.0456359	-0.202998	62.0133	FALSE	0
2022-09-12	10:35:30	-0.0241601	-0.107469	71.7741	FALSE	0
2022-09-12	10:35:31	0.0411834	0.183192	62.1965	FALSE	0
2022-09-12	10:35:31	0.228054	1.01443	72.7886	FALSE	0
2022-09-12	10:35:31	3.06057	13.614	75.8106	1	1
2022-09-12	10:35:31	1.09528	4.87202	77.6606	FALSE	1
2022-09-12	10:35:32	0.321489	1.43005	77.2406	FALSE	1
2022-09-12	10:35:32	0.275941	1.22744	78.888	FALSE	1
2022-09-12	10:35:32	0.25299	1.12535	78.366	FALSE	1
2022-09-12	10:35:32	0.280623	1.24827	80.1363	FALSE	1
2022-09-12	10:35:33	0.247036	1.09887	79.4648	FALSE	1
2022-09-12	10:35:33	0.277774	1.23559	81.3719	FALSE	1
2022-09-12	10:35:33	0.286222	1.27317	80.738	FALSE	1
2022-09-12	10:35:33	0.321947	1.43208	82.804	FALSE	1
2022-09-12	10:35:34	0.307697	1.3687	82.1067	FALSE	1
2022-09-12	10:35:34	0.302863	1.3472	84.1512	FALSE	1
2022-09-12	10:35:34	0.299809	1.33361	83.4403	FALSE	1
2022-09-12	10:35:34	0.268664	1.19507	85.3462	FALSE	1
2022-09-12	10:35:35	0.394364	1.75421	85.1945	FALSE	1
2022-09-12	10:35:35	0.456196	2.02925	87.3755	FALSE	1
2022-09-12	10:35:35	0.84215	3.74605	88.9406	FALSE	1
2022-09-12	10:35:36	0.57355	2.55127	89.9267	FALSE	1
2022-09-12	10:35:36	1.87955	8.36061	97.3012	FALSE	1
2022-09-12	10:35:36	0.29299	1.30328	91.23	FALSE	1
2022-09-12	10:35:36	0.236043	1.04997	98.3511	FALSE	1
2022-09-12	10:35:37	0.421082	1.87306	93.1031	FALSE	1
2022-09-12	10:35:37	2.52958	11.2521	109.603	FALSE	1
2022-09-12	10:35:37	0.401692	1.78681	94.8899	FALSE	1
2022-09-12	10:35:37	0.44897	1.99711	111.6	FALSE	1
2022-09-12	10:35:38	1.03558	4.60647	99.4964	FALSE	1
2022-09-12	10:35:38	0.34327	1.52693	113.127	FALSE	1
2022-09-12	10:35:38	0.214873	0.955798	100.452	FALSE	1
2022-09-12	10:35:38	0.245102	1.09026	114.218	FALSE	1
2022-09-12	10:35:39	0.859758	3.82438	104.277	FALSE	1
2022-09-12	10:35:39	0.333092	1.48166	115.699	FALSE	1
2022-09-12	10:35:39	0.456654	2.03129	106.308	FALSE	1
2022-09-12	10:35:40	0.381998	1.6992	117.398	FALSE	1
2022-09-12	10:35:40	0.38673	1.72025	108.028	FALSE	1
2022-09-12	10:35:40	0.432277	1.92285	119.321	FALSE	1
2022-09-12	10:35:40	0.392176	1.74448	109.773	FALSE	1
2022-09-12	10:35:41	0.636552	2.83151	122.153	FALSE	1
2022-09-12	10:35:41	0.358995	1.59688	111.369	FALSE	1
2022-09-12	10:35:41	0.386323	1.71844	123.871	FALSE	1
2022-09-12	10:35:41	0.337366	1.50067	112.87	FALSE	1
2022-09-12	10:35:42	0.407392	1.81216	125.683	FALSE	1
2022-09-12	10:35:42	0.487494	2.16847	115.039	FALSE	1
2022-09-12	10:35:42	0.608257	2.70565	128.389	FALSE	1
2022-09-12	10:35:42	0.560725	2.49422	117.533	FALSE	1
2022-09-12	10:35:43	0.580776	2.58341	130.972	FALSE	1
2022-09-12	10:35:43	0.504186	2.24272	119.776	FALSE	1
2022-09-12	10:35:43	0.491056	2.18432	133.157	FALSE	1
2022-09-12	10:35:44	0.503524	2.23978	122.015	FALSE	1
2022-09-12	10:35:44	0.527748	2.34753	135.504	FALSE	1
2022-09-12	10:35:44	0.625458	2.78216	124.797	FALSE	1
2022-09-12	10:35:44	0.542863	2.41476	137.919	FALSE	1
2022-09-12	10:35:45	0.540878	2.40593	127.203	FALSE	1
2022-09-12	10:35:45	0.462049	2.05529	139.974	FALSE	1
2022-09-12	10:35:45	0.452328	2.01205	129.215	FALSE	1
2022-09-12	10:35:45	0.419351	1.86536	141.84	FALSE	1
2022-09-12	10:35:46	0.399046	1.77504	130.99	FALSE	1
2022-09-12	10:35:46	0.369886	1.64533	143.485	FALSE	1
2022-09-12	10:35:46	0.383982	1.70803	132.698	FALSE	1
2022-09-12	10:35:46	0.362099	1.61069	145.096	FALSE	1
2022-09-12	10:35:47	0.389835	1.73406	134.433	FALSE	1
2022-09-12	10:35:47	0.438079	1.94866	147.044	FALSE	1
2022-09-12	10:35:47	0.319606	1.42167	135.854	FALSE	1
2022-09-12	10:35:48	0.360573	1.6039	148.648	FALSE	1
2022-09-12	10:35:48	0.297875	1.32501	137.179	FALSE	1
2022-09-12	10:35:48	0.317468	1.41216	150.06	FALSE	1
2022-09-12	10:35:48	0.31869	1.4176	138.597	FALSE	1
2022-09-12	10:35:49	0.314669	1.39971	151.46	FALSE	1
2022-09-12	10:35:49	0.328511	1.46128	140.058	FALSE	1
2022-09-12	10:35:49	0.308155	1.37074	152.831	FALSE	1
2022-09-12	10:35:49	0.256705	1.14188	141.2	FALSE	1
2022-09-12	10:35:50	0.196501	0.874076	153.705	FALSE	1
2022-09-12	10:35:50	0.222049	0.987718	142.188	FALSE	1
2022-09-12	10:35:50	0.279046	1.24125	154.946	FALSE	1
2022-09-12	10:35:50	0.208919	0.929313	143.117	FALSE	1
2022-09-12	10:35:51	0.256705	1.14188	156.088	FALSE	1
2022-09-12	10:35:51	0.169377	0.753423	143.87	FALSE	1
2022-09-12	10:35:51	0.226323	1.00673	157.095	FALSE	1
2022-09-12	10:35:51	0.308562	1.37255	145.243	FALSE	1
2022-09-12	10:35:52	0.387952	1.72569	158.82	FALSE	1
2022-09-12	10:35:52	0.357672	1.591	146.834	FALSE	1
2022-09-12	10:35:52	0.323779	1.44023	160.261	FALSE	1
2022-09-12	10:35:53	0.285255	1.26887	148.103	FALSE	1
2022-09-12	10:35:53	0.287188	1.27747	161.538	FALSE	1
2022-09-12	10:35:53	0.284542	1.2657	149.369	FALSE	1
2022-09-12	10:35:53	0.276552	1.23016	162.768	FALSE	1
2022-09-12	10:35:54	0.295942	1.31641	150.685	FALSE	1
2022-09-12	10:35:54	0.23416	1.04159	163.81	FALSE	1
2022-09-12	10:35:54	0.204186	0.90826	151.593	FALSE	1
2022-09-12	10:35:54	0.220369	0.980245	164.79	FALSE	1
2022-09-12	10:35:55	0.274771	1.22224	152.815	FALSE	1
2022-09-12	10:35:55	0.380725	1.69354	166.484	FALSE	1
2022-09-12	10:35:55	0.356298	1.58488	154.4	FALSE	1
2022-09-12	10:35:55	0.288766	1.28449	167.768	FALSE	1
2022-09-12	10:35:56	0.31014	1.37956	155.78	FALSE	1
2022-09-12	10:35:56	0.211718	0.941764	168.71	FALSE	1
2022-09-12	10:35:56	0.22902	1.01873	156.799	FALSE	1
2022-09-12	10:35:57	0.190903	0.849175	169.559	FALSE	1
2022-09-12	10:35:57	0.297621	1.32388	158.123	FALSE	1
2022-09-12	10:35:57	0.405713	1.80469	171.364	FALSE	1
2022-09-12	10:35:57	0.439198	1.95364	160.076	FALSE	1
2022-09-12	10:35:58	0.401692	1.78681	173.151	FALSE	1
2022-09-12	10:35:58	0.501336	2.23004	162.306	FALSE	1
2022-09-12	10:35:58	0.420369	1.86989	175.021	FALSE	1
2022-09-12	10:35:58	0.471412	2.09693	164.403	FALSE	1
2022-09-12	10:35:59	0.456705	2.03152	177.052	FALSE	1
2022-09-12	10:35:59	1.23879	5.51039	169.914	FALSE	1
2022-09-12	10:35:59	1.80693	8.03759	185.09	FALSE	1
2022-09-12	10:35:59	0.564186	2.50961	172.423	FALSE	1
2022-09-12	10:36:00	0.443626	1.97334	187.063	FALSE	1
2022-09-12	10:36:00	0.405509	1.80379	174.227	FALSE	1
2022-09-12	10:36:00	0.428206	1.90475	188.968	FALSE	1
2022-09-12	10:36:01	0.566934	2.52184	176.749	FALSE	1
2022-09-12	10:36:01	0.433906	1.9301	190.898	FALSE	1
2022-09-12	10:36:01	0.425662	1.89343	178.642	FALSE	1
2022-09-12	10:36:01	0.358232	1.59349	192.491	FALSE	1
2022-09-12	10:36:02	0.601743	2.67667	181.319	FALSE	1
2022-09-12	10:36:02	0.332786	1.4803	193.972	FALSE	1
2022-09-12	10:36:02	0.416552	1.85291	183.172	FALSE	1
2022-09-12	10:36:02	0.460013	2.04623	196.018	FALSE	1
2022-09-12	10:36:03	0.425254	1.89161	185.063	FALSE	1
2022-09-12	10:36:03	0.397265	1.76711	197.785	FALSE	1
2022-09-12	10:36:03	0.415636	1.84883	186.912	FALSE	1
2022-09-12	10:36:03	0.413804	1.84068	199.626	FALSE	1
2022-09-12	10:36:04	0.396196	1.76236	188.675	FALSE	1
2022-09-12	10:36:04	0.398944	1.77458	201.4	FALSE	1
2022-09-12	10:36:04	0.366781	1.63152	190.306	FALSE	1
2022-09-12	10:36:05	0.415992	1.85042	203.251	FALSE	1
2022-09-12	10:36:05	0.38271	1.70237	192.008	FALSE	1
2022-09-12	10:36:05	0.311056	1.38364	204.634	FALSE	1
2022-09-12	10:36:05	0.338944	1.50769	193.516	FALSE	1
2022-09-12	10:36:06	0.298486	1.32773	205.962	FALSE	1
2022-09-12	10:36:06	0.49243	2.19043	195.707	FALSE	1
2022-09-12	10:36:06	1.90927	8.49281	214.455	FALSE	1
2022-09-12	10:36:06	3.65808	16.2719	211.978	1	2
2022-09-12	10:36:07	2.47569	11.0124	225.467	FALSE	2
2022-09-12	10:36:07	1.07777	4.79414	216.773	FALSE	2
2022-09-12	10:36:07	0.376043	1.67271	227.14	FALSE	2
2022-09-12	10:36:07	0.292634	1.30169	218.074	FALSE	2
2022-09-12	10:36:08	0.438232	1.94934	229.089	FALSE	2
2022-09-12	10:36:08	0.456909	2.03242	220.107	FALSE	2
2022-09-12	10:36:08	0.514771	2.2898	231.379	FALSE	2
2022-09-12	10:36:08	0.416501	1.85268	221.959	FALSE	2
2022-09-12	10:36:09	0.617875	2.74843	234.127	FALSE	2
2022-09-12	10:36:09	0.344644	1.53305	223.492	FALSE	2
2022-09-12	10:36:09	0.290598	1.29264	235.42	FALSE	2
2022-09-12	10:36:10	0.165102	0.734407	224.227	FALSE	2
2022-09-12	10:36:10	0.223982	0.996317	236.416	FALSE	2
2022-09-12	10:36:10	2.19874	9.78044	234.007	FALSE	2
2022-09-12	10:36:10	2.97721	13.2432	249.66	FALSE	2
2022-09-12	10:36:11	1.99966	8.89489	242.902	FALSE	2
2022-09-12	10:36:11	2.28088	10.1458	259.805	FALSE	2
2022-09-12	10:36:11	1.51146	6.72328	249.625	FALSE	2
2022-09-12	10:36:11	2.12612	9.45741	269.263	FALSE	2
2022-09-12	10:36:12	0.676756	3.01035	252.636	FALSE	2
2022-09-12	10:36:12	1.38449	6.15849	275.421	FALSE	2
2022-09-12	10:36:12	1.39156	6.18994	258.826	FALSE	2
2022-09-12	10:36:12	0.660166	2.93655	278.358	FALSE	2
2022-09-12	10:36:13	0.489224	2.17617	261.002	FALSE	2
2022-09-12	10:36:13	0.505051	2.24657	280.604	FALSE	2
2022-09-12	10:36:13	0.363881	1.61862	262.62	FALSE	2
2022-09-12	10:36:14	0.339097	1.50837	282.113	FALSE	2
2022-09-12	10:36:14	0.376501	1.67475	264.295	FALSE	2
2022-09-12	10:36:14	0.339097	1.50837	283.621	FALSE	2
2022-09-12	10:36:14	0.437825	1.94753	266.243	FALSE	2
2022-09-12	10:36:15	0.418283	1.86061	285.482	FALSE	2
2022-09-12	10:36:15	0.407901	1.81443	268.057	FALSE	2
2022-09-12	10:36:15	0.435178	1.93576	287.418	FALSE	2
2022-09-12	10:36:15	0.447494	1.99054	270.048	FALSE	2
2022-09-12	10:36:16	0.445916	1.98352	289.401	FALSE	2
2022-09-12	10:36:16	0.430954	1.91697	271.965	FALSE	2
2022-09-12	10:36:16	0.414466	1.84363	291.245	FALSE	2
2022-09-12	10:36:16	0.425662	1.89343	273.858	FALSE	2
2022-09-12	10:36:17	0.433957	1.93033	293.175	FALSE	2
2022-09-12	10:36:17	0.420827	1.87192	275.73	FALSE	2
2022-09-12	10:36:17	0.442965	1.9704	295.145	FALSE	2
2022-09-12	10:36:18	0.472583	2.10214	277.832	FALSE	2
2022-09-12	10:36:18	0.419097	1.86423	297.01	FALSE	2
2022-09-12	10:36:18	0.334924	1.48981	279.322	FALSE	2
2022-09-12	10:36:18	0.630292	2.80366	299.813	FALSE	2
2022-09-12	10:36:19	0.629173	2.79869	282.121	FALSE	2
2022-09-12	10:36:19	0.597061	2.65585	302.469	FALSE	2
2022-09-12	10:36:19	0.657417	2.92432	285.045	FALSE	2
2022-09-12	10:36:19	1.71757	7.64009	310.109	FALSE	2
2022-09-12	10:36:20	1.77075	7.87665	292.922	FALSE	2
2022-09-12	10:36:20	2.80378	12.4718	322.581	FALSE	2
2022-09-12	10:36:20	3.74276	16.6485	309.57	1	3
2022-09-12	10:36:20	2.18546	9.72136	332.302	FALSE	3
2022-09-12	10:36:21	3.59487	15.9907	325.561	1	4
2022-09-12	10:36:21	1.88541	8.38668	340.689	FALSE	4
2022-09-12	10:36:21	1.00871	4.48694	330.048	FALSE	4
2022-09-12	10:36:22	1.7962	7.98986	348.679	FALSE	4
2022-09-12	10:36:22	0.453804	2.01861	332.066	FALSE	4
2022-09-12	10:36:22	0.338537	1.50588	350.185	FALSE	4
2022-09-12	10:36:22	0.442965	1.9704	334.037	FALSE	4
2022-09-12	10:36:23	0.246629	1.09706	351.282	FALSE	4
2022-09-12	10:36:23	0.345763	1.53802	335.575	FALSE	4
2022-09-12	10:36:23	0.308003	1.37006	352.652	FALSE	4
2022-09-12	10:36:23	0.416043	1.85064	337.426	FALSE	4
2022-09-12	10:36:24	0.455178	2.02472	354.677	FALSE	4
2022-09-12	10:36:24	0.539809	2.40118	339.827	FALSE	4
2022-09-12	10:36:24	0.63299	2.81567	357.492	FALSE	4
2022-09-12	10:36:24	0.786272	3.4975	343.324	FALSE	4
2022-09-12	10:36:25	0.710089	3.15862	360.651	FALSE	4
2022-09-12	10:36:25	0.757316	3.36869	346.693	FALSE	4
2022-09-12	10:36:25	0.605204	2.69207	363.343	FALSE	4
2022-09-12	10:36:25	0.626476	2.78669	349.48	FALSE	4
2022-09-12	10:36:26	0.68556	3.04951	366.393	FALSE	4
2022-09-12	10:36:26	1.34637	5.98892	355.469	FALSE	4
2022-09-12	10:36:26	1.07197	4.76834	371.161	FALSE	4
2022-09-12	10:36:27	1.11004	4.93768	360.406	FALSE	4
2022-09-12	10:36:27	1.09732	4.8811	376.042	FALSE	4
2022-09-12	10:36:27	1.29131	5.74401	366.15	FALSE	4
2022-09-12	10:36:27	1.43798	6.39642	382.438	FALSE	4
2022-09-12	10:36:28	1.4505	6.45211	372.602	FALSE	4
2022-09-12	10:36:28	2.17543	9.67675	392.115	FALSE	4
2022-09-12	10:36:28	2.26128	10.0586	382.661	FALSE	4
2022-09-12	10:36:28	2.32561	10.3448	402.46	FALSE	4
2022-09-12	10:36:29	1.77584	7.89929	390.56	FALSE	4
2022-09-12	10:36:29	0.946679	4.21102	406.671	FALSE	4
2022-09-12	10:36:29	0.83126	3.69761	394.258	FALSE	4
2022-09-12	10:36:29	0.856298	3.80898	410.48	FALSE	4
2022-09-12	10:36:30	0.840674	3.73949	397.997	FALSE	4
2022-09-12	10:36:30	0.840827	3.74017	414.22	FALSE	4
2022-09-12	10:36:30	1.34393	5.97807	403.975	FALSE	4
2022-09-12	10:36:31	1.45385	6.46702	420.687	FALSE	4
2022-09-12	10:36:31	2.06693	9.19412	413.17	FALSE	4
2022-09-12	10:36:31	1.98581	8.83328	429.52	FALSE	4
2022-09-12	10:36:31	1.62556	7.23082	420.4	FALSE	4
2022-09-12	10:36:32	2.32851	10.3577	439.878	FALSE	4
2022-09-12	10:36:32	3.50439	15.5882	435.989	1	5
2022-09-12	10:36:32	4.2138	18.7438	458.622	1	6
2022-09-12	10:36:32	4.91426	21.8596	457.848	1	7
2022-09-12	10:36:33	4.25574	18.9304	477.552	1	8
2022-09-12	10:36:33	4.38215	19.4927	477.341	1	9
2022-09-12	10:36:33	3.11645	13.8626	491.415	1	10
2022-09-12	10:36:33	3.9682	17.6513	494.992	1	11
2022-09-12	10:36:34	3.43141	15.2636	506.678	1	12
2022-09-12	10:36:34	5.26988	23.4415	518.434	1	13
2022-09-12	10:36:34	7.93619	35.3018	541.98	1	14
2022-09-12	10:36:35	7.50769	33.3957	551.829	1	15
2022-09-12	10:36:35	5.94113	26.4273	568.408	1	16
2022-09-12	10:36:35	5.08912	22.6374	574.467	1	17
2022-09-12	10:36:35	4.8196	21.4385	589.846	1	18
2022-09-12	10:36:36	4.16062	18.5073	592.974	1	19
2022-09-12	10:36:36	3.11691	13.8646	603.711	1	20
2022-09-12	10:36:36	5.28556	23.5112	616.485	1	21
2022-09-12	10:36:36	6.99858	31.1311	634.842	1	22
2022-09-12	10:36:37	6.44434	28.6657	645.151	1	23
2022-09-12	10:36:37	4.49675	20.0024	654.844	1	24
2022-09-12	10:36:37	5.20678	23.1608	668.312	1	25
2022-09-12	10:36:37	5.71497	25.4213	680.266	1	26
2022-09-12	10:36:38	6.07009	27.001	695.313	1	27
2022-09-12	10:36:38	4.78184	21.2706	701.536	1	28
2022-09-12	10:36:38	3.74668	16.666	711.979	1	29
2022-09-12	10:36:39	3.3021	14.6884	716.225	1	30
2022-09-12	10:36:39	4.55925	20.2805	732.259	1	31
2022-09-12	10:36:39	4.70932	20.948	737.173	1	32
2022-09-12	10:36:39	1.73818	7.73177	739.991	FALSE	32
2022-09-12	10:36:40	1.80866	8.04528	745.218	FALSE	32
2022-09-12	10:36:40	5.89248	26.2109	766.202	1	33
2022-09-12	10:36:40	10.6412	47.3342	792.552	1	34
2022-09-12	10:36:40	8.3969	37.3511	803.553	1	35
2022-09-12	10:36:41	7.17741	31.9266	824.479	1	36
2022-09-12	10:36:41	5.06973	22.5512	826.104	1	37
2022-09-12	10:36:41	1.94933	8.67101	833.15	FALSE	37
2022-09-12	10:36:41	2.65248	11.7988	837.903	FALSE	37
2022-09-12	10:36:42	3.86729	17.2025	850.352	1	38
2022-09-12	10:36:42	4.62205	20.5598	858.463	1	39
2022-09-12	10:36:42	4.57177	20.3361	870.688	1	40
2022-09-12	10:36:43	4.56495	20.3058	878.769	1	41
2022-09-12	10:36:43	6.61441	29.4222	900.11	1	42
2022-09-12	10:36:43	7.6797	34.1608	912.929	1	43
2022-09-12	10:36:43	8.80021	39.1451	939.256	1	44
2022-09-12	10:36:44	7.24423	32.2238	945.153	1	45
2022-09-12	10:36:44	5.79752	25.7885	965.044	1	46
2022-09-12	10:36:44	1.13996	5.07077	950.224	FALSE	46
2022-09-12	10:36:44	0.328003	1.45902	966.503	FALSE	46
2022-09-12	10:36:45	0.420471	1.87034	952.094	FALSE	46
2022-09-12	10:36:45	0.178791	0.795298	967.298	FALSE	46
2022-09-12	10:36:45	0.230853	1.02688	953.121	FALSE	46
2022-09-12	10:36:45	0.511361	2.27464	969.573	FALSE	46
2022-09-12	10:36:46	0.823015	3.66094	956.782	FALSE	46
2022-09-12	10:36:46	0.387239	1.72252	971.296	FALSE	46
2022-09-12	10:36:46	0.215382	0.958062	957.74	FALSE	46
2022-09-12	10:36:46	0.313804	1.39586	972.691	FALSE	46
2022-09-12	10:36:47	0.284338	1.26479	959.005	FALSE	46
2022-09-12	10:36:47	0.269835	1.20028	973.892	FALSE	46
2022-09-12	10:36:47	0.104033	0.46276	959.468	FALSE	46
2022-09-12	10:36:48	0.0805218	0.358177	974.25	FALSE	46
2022-09-12	10:36:48	0.375026	1.66819	961.136	FALSE	46
2022-09-12	10:36:48	0.263728	1.17311	975.423	FALSE	46
2022-09-12	10:36:48	0.292685	1.30192	962.438	FALSE	46
2022-09-12	10:36:49	0.245509	1.09207	976.515	FALSE	46
2022-09-12	10:36:49	0.460623	2.04894	964.487	FALSE	46
2022-09-12	10:36:49	0.199809	0.88879	977.404	FALSE	46
2022-09-12	10:36:49	0.324084	1.44159	965.928	FALSE	46
2022-09-12	10:36:50	0.0375702	0.16712	977.571	FALSE	46
2022-09-12	10:36:50	0.522862	2.32579	968.254	FALSE	46
2022-09-12	10:36:50	0.241336	1.07351	978.644	FALSE	46
2022-09-12	10:36:50	0.817366	3.63581	971.89	FALSE	46
2022-09-12	10:36:51	0.341947	1.52105	980.166	FALSE	46
2022-09-12	10:36:51	0.378028	1.68154	973.572	FALSE	46
2022-09-12	10:36:51	0.36098	1.60571	981.771	FALSE	46
2022-09-12	10:36:52	0.276501	1.22993	974.801	FALSE	46
2022-09-12	10:36:52	0.393244	1.74923	983.52	FALSE	46
2022-09-12	10:36:52	0.25014	1.11267	975.914	FALSE	46
2022-09-12	10:36:52	0.428104	1.90429	985.425	FALSE	46
2022-09-12	10:36:53	0.358588	1.59507	977.509	FALSE	46
2022-09-12	10:36:53	0.43645	1.94142	987.366	FALSE	46
2022-09-12	10:36:53	0.224746	0.999715	978.509	FALSE	46
2022-09-12	10:36:53	0.465	2.06841	989.435	FALSE	46
2022-09-12	10:36:54	0.272074	1.21024	979.719	FALSE	46
2022-09-12	10:36:54	0.418893	1.86332	991.298	FALSE	46
2022-09-12	10:36:54	0.228512	1.01647	980.736	FALSE	46
2022-09-12	10:36:54	0.385051	1.71278	993.011	FALSE	46
2022-09-12	10:36:55	0.21014	0.934745	981.67	FALSE	46
2022-09-12	10:36:55	1.21172	5.38997	998.401	FALSE	46
2022-09-12	10:36:55	0.465204	2.06932	983.74	FALSE	46
2022-09-12	10:36:56	1.41701	6.30314	1004.7	FALSE	46
2022-09-12	10:36:56	0.341743	1.52014	985.26	FALSE	46
2022-09-12	10:36:56	1.25833	5.5973	1010.3	FALSE	46
2022-09-12	10:36:56	0.312481	1.38998	986.65	FALSE	46
2022-09-12	10:36:57	1.26586	5.6308	1015.93	FALSE	46
2022-09-12	10:36:57	0.459911	2.04578	988.696	FALSE	46
2022-09-12	10:36:57	0.812226	3.61294	1019.54	FALSE	46
2022-09-12	10:36:57	0.280674	1.24849	989.944	FALSE	46
2022-09-12	10:36:58	0.354975	1.579	1021.12	FALSE	46
2022-09-12	10:36:58	0.605356	2.69274	992.637	FALSE	46
2022-09-12	10:36:58	0.235891	1.04929	1022.17	FALSE	46
2022-09-12	10:36:58	0.464949	2.06819	994.705	FALSE	46
2022-09-12	10:36:59	0.494975	2.20175	1024.37	FALSE	46
2022-09-12	10:36:59	0.458588	2.03989	996.745	FALSE	46
2022-09-12	10:36:59	0.514313	2.28777	1026.66	FALSE	46
2022-09-12	10:37:00	1.24419	5.53441	1002.28	FALSE	46
2022-09-12	10:37:00	0.615331	2.73712	1029.4	FALSE	46
2022-09-12	10:37:00	1.11243	4.94831	1007.23	FALSE	46
2022-09-12	10:37:00	0.567799	2.52568	1031.93	FALSE	46
2022-09-12	10:37:01	0.822557	3.6589	1010.89	FALSE	46
2022-09-12	10:37:01	0.48897	2.17504	1034.1	FALSE	46
2022-09-12	10:37:01	0.279148	1.24171	1012.13	FALSE	46
2022-09-12	10:37:01	0.291972	1.29875	1035.4	FALSE	46
2022-09-12	10:37:02	0.367952	1.63672	1013.76	FALSE	46
2022-09-12	10:37:02	0.247799	1.10226	1036.5	FALSE	46
2022-09-12	10:37:02	0.379606	1.68856	1015.45	FALSE	46
2022-09-12	10:37:02	0.243881	1.08483	1037.59	FALSE	46
2022-09-12	10:37:03	0.235127	1.04589	1016.5	FALSE	46
2022-09-12	10:37:03	0.651667	2.89875	1040.49	FALSE	46
2022-09-12	10:37:03	0.542303	2.41227	1018.91	FALSE	46
2022-09-12	10:37:03	1.70103	7.56652	1048.05	FALSE	46
2022-09-12	10:37:04	0.400573	1.78183	1020.69	FALSE	46
2022-09-12	10:37:04	0.255076	1.13463	1049.19	FALSE	46
2022-09-12	10:37:04	0.777163	3.45698	1024.15	FALSE	46
2022-09-12	10:37:05	0.213295	0.948779	1050.14	FALSE	46
2022-09-12	10:37:05	0.571972	2.54425	1026.69	FALSE	46
2022-09-12	10:37:05	0.132634	0.589983	1050.72	FALSE	46
2022-09-12	10:37:05	0.542914	2.41499	1029.11	FALSE	46
2022-09-12	10:37:06	1.47884	6.57818	1057.3	FALSE	46
2022-09-12	10:37:06	0.539046	2.39778	1031.51	FALSE	46
2022-09-12	10:37:06	0.311769	1.38681	1058.69	FALSE	46
2022-09-12	10:37:06	1.25497	5.58236	1037.09	FALSE	46
2022-09-12	10:37:07	0.10729	0.477247	1059.17	FALSE	46
2022-09-12	10:37:07	0.138486	0.616013	1037.71	FALSE	46
2022-09-12	10:37:07	0.0917178	0.407979	1059.58	FALSE	46
2022-09-12	10:37:07	-0.0716409	-0.318673	1037.71	FALSE	46
2022-09-12	10:37:08	-0.0401906	-0.178776	1059.58	FALSE	46
2022-09-12	10:37:08	-0.0324552	-0.144367	1037.71	FALSE	46
2022-09-12	10:37:08	0.0450002	0.20017	1059.78	FALSE	46
2022-09-12	10:37:09	-0.0612084	-0.272267	1037.71	FALSE	46
2022-09-12	10:37:09	-0.231132	-1.02812	1059.78	FALSE	46
2022-09-12	10:37:09	-0.309554	-1.37696	1037.71	FALSE	46
2022-09-12	10:37:09	-0.250063	-1.11233	1059.78	FALSE	46
2022-09-12	10:37:10	-0.482938	-2.1482	1037.71	FALSE	46
2022-09-12	10:37:10	-0.347926	-1.54764	1059.78	FALSE	46
2022-09-12	10:37:10	-0.346195	-1.53994	1037.71	FALSE	46
2022-09-12	10:37:10	-0.179885	-0.800164	1059.78	FALSE	46
2022-09-12	10:37:11	-0.0891982	-0.396771	1037.71	FALSE	46
2022-09-12	10:37:11	-0.0251779	-0.111996	1059.78	FALSE	46
2022-09-12	10:37:11	-0.192455	-0.856078	1037.71	FALSE	46
2022-09-12	10:37:11	-0.0675697	-0.300564	1059.78	FALSE	46
2022-09-12	10:37:12	-0.0755086	-0.335877	1037.71	FALSE	46
2022-09-12	10:37:12	-0.0669081	-0.297621	1059.78	FALSE	46
2022-09-12	10:37:12	-0.142074	-0.631974	1037.71	FALSE	46
2022-09-12	10:37:13	-0.0108776	-0.0483857	1059.78	FALSE	46
2022-09-12	10:37:13	0.16383	0.728749	1038.43	FALSE	46
2022-09-12	10:37:13	0.0560435	0.249293	1060.02	FALSE	46
2022-09-12	10:37:13	0.0819977	0.364742	1038.8	FALSE	46
2022-09-12	10:37:14	0.023219	0.103283	1060.13	FALSE	46
2022-09-12	10:37:14	0.187494	0.834011	1039.63	FALSE	46
2022-09-12	10:37:14	0.0085117	0.0378617	1060.17	FALSE	46
2022-09-12	10:37:14	0.19528	0.868644	1040.5	FALSE	46
2022-09-12	10:37:15	0.0137025	0.0609515	1060.23	FALSE	46
2022-09-12	10:37:15	0.190038	0.845327	1041.35	FALSE	46
2022-09-12	10:37:15	-0.0255341	-0.113581	1060.23	FALSE	46
2022-09-12	10:37:15	0.217417	0.967114	1042.31	FALSE	46
2022-09-12	10:37:16	0.135026	0.600623	1060.83	FALSE	46
2022-09-12	10:37:16	0.0178755	0.0795138	1042.39	FALSE	46
2022-09-12	10:37:16	-0.203651	-0.90588	1060.83	FALSE	46
2022-09-12	10:37:17	-0.0618191	-0.274984	1042.39	FALSE	46
2022-09-12	10:37:17	0.0118196	0.0525759	1060.88	FALSE	46
2022-09-12	10:37:17	0.251463	1.11856	1043.51	FALSE	46
2022-09-12	10:37:17	0.0308018	0.137013	1061.02	FALSE	46
2022-09-12	10:37:18	0.279606	1.24374	1044.76	FALSE	46
2022-09-12	10:37:18	0.14785	0.657666	1061.67	FALSE	46
2022-09-12	10:37:18	0.252532	1.12331	1045.88	FALSE	46
2022-09-12	10:37:18	0.137926	0.613522	1062.29	FALSE	46
2022-09-12	10:37:19	0.255891	1.13825	1047.02	FALSE	46
2022-09-12	10:37:19	0.271107	1.20594	1063.49	FALSE	46
2022-09-12	10:37:19	0.236705	1.05291	1048.07	FALSE	46
2022-09-12	10:37:19	0.221438	0.985001	1064.48	FALSE	46
2022-09-12	10:37:20	0.264033	1.17447	1049.25	FALSE	46
2022-09-12	10:37:20	0.286628	1.27498	1065.75	FALSE	46
2022-09-12	10:37:20	0.301489	1.34108	1050.59	FALSE	46
2022-09-12	10:37:20	0.16902	0.751835	1066.51	FALSE	46
2022-09-12	10:37:21	0.193855	0.862306	1051.45	FALSE	46
2022-09-12	10:37:21	0.362405	1.61205	1068.12	FALSE	46
2022-09-12	10:37:21	0.208766	0.928633	1052.38	FALSE	46
2022-09-12	10:37:22	0.383626	1.70645	1069.82	FALSE	46
2022-09-12	10:37:22	0.246832	1.09796	1053.48	FALSE	46
2022-09-12	10:37:22	0.425967	1.89479	1071.72	FALSE	46
2022-09-12	10:37:22	0.1107	0.492416	1053.97	FALSE	46
2022-09-12	10:37:23	0.447596	1.991	1073.71	FALSE	46
2022-09-12	10:37:23	0.170751	0.759535	1054.73	FALSE	46
2022-09-12	10:37:23	0.332583	1.4794	1075.19	FALSE	46
2022-09-12	10:37:23	0.232328	1.03344	1055.76	FALSE	46
2022-09-12	10:37:24	0.334211	1.48664	1076.68	FALSE	46
2022-09-12	10:37:24	0.358741	1.59575	1057.36	FALSE	46
2022-09-12	10:37:24	0.257112	1.14369	1077.82	FALSE	46
2022-09-12	10:37:24	0.438944	1.95251	1059.31	FALSE	46
2022-09-12	10:37:25	0.285051	1.26796	1079.09	FALSE	46
2022-09-12	10:37:25	0.470751	2.09399	1061.4	FALSE	46
2022-09-12	10:37:25	0.198486	0.882905	1079.97	FALSE	46
2022-09-12	10:37:26	0.477774	2.12523	1063.53	FALSE	46
2022-09-12	10:37:26	0.199911	0.889244	1080.86	FALSE	46
2022-09-12	10:37:26	0.494516	2.19971	1065.73	FALSE	46
2022-09-12	10:37:26	0.156145	0.694564	1081.55	FALSE	46
2022-09-12	10:37:27	0.493142	2.19359	1067.92	FALSE	46
2022-09-12	10:37:27	0.301794	1.34244	1082.9	FALSE	46
2022-09-12	10:37:27	0.40612	1.8065	1069.73	FALSE	46
2022-09-12	10:37:27	0.287188	1.27747	1084.17	FALSE	46
2022-09-12	10:37:28	0.34958	1.555	1071.28	FALSE	46
2022-09-12	10:37:28	0.439555	1.95523	1086.13	FALSE	46
2022-09-12	10:37:28	0.268308	1.19349	1072.48	FALSE	46
2022-09-12	10:37:28	0.391107	1.73972	1087.87	FALSE	46
2022-09-12	10:37:29	0.247596	1.10136	1073.58	FALSE	46
2022-09-12	10:37:29	0.477723	2.12501	1089.99	FALSE	46
2022-09-12	10:37:29	0.293601	1.306	1074.88	FALSE	46
2022-09-12	10:37:30	0.428919	1.90792	1091.9	FALSE	46
2022-09-12	10:37:30	0.207901	0.924785	1075.81	FALSE	46
2022-09-12	10:37:30	0.6164	2.74187	1094.64	FALSE	46
2022-09-12	10:37:30	0.191616	0.852346	1076.66	FALSE	46
2022-09-12	10:37:31	0.73757	3.28086	1097.93	FALSE	46
2022-09-12	10:37:31	0.241896	1.076	1077.74	FALSE	46
2022-09-12	10:37:31	0.634008	2.82019	1100.75	FALSE	46
2022-09-12	10:37:31	0.665407	2.95986	1080.7	FALSE	46
2022-09-12	10:37:32	0.571158	2.54063	1103.29	FALSE	46
2022-09-12	10:37:32	0.435433	1.93689	1082.63	FALSE	46
2022-09-12	10:37:32	0.408715	1.81805	1105.1	FALSE	46
2022-09-12	10:37:32	0.241285	1.07328	1083.71	FALSE	46
2022-09-12	10:37:33	0.277672	1.23514	1106.34	FALSE	46
2022-09-12	10:37:33	0.372634	1.65755	1085.36	FALSE	46
2022-09-12	10:37:33	0.459198	2.0426	1108.38	FALSE	46
2022-09-12	10:37:34	0.643168	2.86094	1088.23	FALSE	46
2022-09-12	10:37:34	1.622	7.21498	1115.6	FALSE	46
2022-09-12	10:37:34	0.533346	2.37243	1090.6	FALSE	46
2022-09-12	10:37:34	0.465204	2.06932	1117.67	FALSE	46
2022-09-12	10:37:35	0.465153	2.06909	1092.67	FALSE	46
2022-09-12	10:37:35	0.257977	1.14753	1118.81	FALSE	46
2022-09-12	10:37:35	0.529122	2.35364	1095.02	FALSE	46
2022-09-12	10:37:35	0.198792	0.884267	1119.7	FALSE	46
2022-09-12	10:37:36	0.502405	2.2348	1097.26	FALSE	46
2022-09-12	10:37:36	0.332074	1.47713	1121.17	FALSE	46
2022-09-12	10:37:36	0.405407	1.80333	1099.06	FALSE	46
2022-09-12	10:37:36	2.24688	9.99457	1131.17	FALSE	46
2022-09-12	10:37:37	0.478588	2.12886	1101.19	FALSE	46
2022-09-12	10:37:37	0.972634	4.32647	1135.5	FALSE	46
2022-09-12	10:37:37	0.367036	1.63265	1102.82	FALSE	46
2022-09-12	10:37:37	0.635484	2.82676	1138.32	FALSE	46
2022-09-12	10:37:38	0.345	1.53463	1104.35	FALSE	46
2022-09-12	10:37:38	0.367595	1.63514	1139.96	FALSE	46
2022-09-12	10:37:38	1.84749	8.21801	1112.57	FALSE	46
2022-09-12	10:37:39	0.318486	1.41669	1141.37	FALSE	46
2022-09-12	10:37:39	0.264949	1.17855	1113.75	FALSE	46
2022-09-12	10:37:39	0.280522	1.24782	1142.62	FALSE	46
2022-09-12	10:37:39	0.141794	0.630728	1114.38	FALSE	46
2022-09-12	10:37:40	0.385102	1.71301	1144.34	FALSE	46
2022-09-12	10:37:40	0.0941605	0.418845	1114.8	FALSE	46
2022-09-12	10:37:40	0.35528	1.58036	1145.92	FALSE	46
2022-09-12	10:37:40	0.0938042	0.41726	1115.22	FALSE	46
2022-09-12	10:37:41	0.411718	1.8314	1147.75	FALSE	46
2022-09-12	10:37:41	0.268817	1.19575	1116.41	FALSE	46
2022-09-12	10:37:41	0.246781	1.09773	1148.84	FALSE	46
2022-09-12	10:37:41	0.250344	1.11358	1117.53	FALSE	46
2022-09-12	10:37:42	0.314771	1.40016	1150.25	FALSE	46
2022-09-12	10:37:42	0.37584	1.67181	1119.2	FALSE	46
2022-09-12	10:37:42	0.339148	1.5086	1151.75	FALSE	46
2022-09-12	10:37:43	0.274771	1.22224	1120.42	FALSE	46
2022-09-12	10:37:43	0.273193	1.21522	1152.97	FALSE	46
2022-09-12	10:37:43	0.268715	1.1953	1121.62	FALSE	46
2022-09-12	10:37:43	-0.162684	-0.723651	1152.97	FALSE	46
2022-09-12	10:37:44	-0.191641	-0.852457	1121.62	FALSE	46
2022-09-12	10:37:44	-0.130216	-0.579227	1152.97	FALSE	46
2022-09-12	10:37:44	-0.280954	-1.24974	1121.62	FALSE	46
2022-09-12	10:37:44	-0.201157	-0.894787	1152.97	FALSE	46
2022-09-12	10:37:45	-0.039529	-0.175833	1121.62	FALSE	46
2022-09-12	10:37:45	0.175585	0.781037	1153.75	FALSE	46
2022-09-12	10:37:45	0.267138	1.18828	1122.81	FALSE	46
2022-09-12	10:37:45	0.316298	1.40696	1155.16	FALSE	46
2022-09-12	10:37:46	0.464593	2.0666	1124.87	FALSE	46
2022-09-12	10:37:46	0.151209	0.672608	1155.83	FALSE	46
2022-09-12	10:37:46	0.0473412	0.210583	1125.08	FALSE	46
2022-09-12	10:37:47	0.0160435	0.0713647	1155.9	FALSE	46
2022-09-12	10:37:47	0.0659671	0.293435	1125.38	FALSE	46
2022-09-12	10:37:47	0.122863	0.546519	1156.45	FALSE	46
2022-09-12	10:37:47	0.112583	0.500792	1125.88	FALSE	46
2022-09-12	10:37:48	0.0295804	0.13158	1156.58	FALSE	46
2022-09-12	10:37:48	0.169173	0.752515	1126.63	FALSE	46
2022-09-12	10:37:48	0.164746	0.732823	1157.31	FALSE	46
2022-09-12	10:37:48	0.0370104	0.16463	1126.79	FALSE	46
2022-09-12	10:37:49	0.0138043	0.0614043	1157.37	FALSE	46
2022-09-12	10:37:49	0.0839824	0.373571	1127.17	FALSE	46
2022-09-12	10:37:49	0.0774175	0.344369	1157.72	FALSE	46
2022-09-12	10:37:49	-0.00248066	-0.0110345	1127.17	FALSE	46
2022-09-12	10:37:50	-0.0135748	-0.0603834	1157.72	FALSE	46
2022-09-12	10:37:50	0.109479	0.486984	1127.65	FALSE	46
2022-09-12	10:37:50	0.262048	1.16564	1158.88	FALSE	46
2022-09-12	10:37:51	0.0893768	0.397566	1128.05	FALSE	46
2022-09-12	10:37:51	0.109529	0.487207	1159.37	FALSE	46
2022-09-12	10:37:51	0.1593	0.708598	1128.76	FALSE	46
2022-09-12	10:37:51	0.145611	0.647707	1160.02	FALSE	46
2022-09-12	10:37:52	0.0769086	0.342105	1129.1	FALSE	46
2022-09-12	10:37:52	0.129631	0.576625	1160.59	FALSE	46
2022-09-12	10:37:52	0.215127	0.956928	1130.06	FALSE	46
2022-09-12	10:37:52	0.14383	0.639785	1161.23	FALSE	46
2022-09-12	10:37:53	0.194669	0.865927	1130.93	FALSE	46
2022-09-12	10:37:53	0.125713	0.559197	1161.79	FALSE	46
2022-09-12	10:37:53	0.291005	1.29445	1132.22	FALSE	46
2022-09-12	10:37:53	0.295992	1.31663	1163.11	FALSE	46
2022-09-12	10:37:54	0.16271	0.723767	1132.94	FALSE	46
2022-09-12	10:37:54	0.290649	1.29286	1164.4	FALSE	46
2022-09-12	10:37:54	0.0900384	0.400509	1133.34	FALSE	46
2022-09-12	10:37:54	0.137367	0.611036	1165.01	FALSE	46
2022-09-12	10:37:55	0.0926338	0.412054	1133.76	FALSE	46
2022-09-12	10:37:55	0.14673	0.652684	1165.67	FALSE	46
2022-09-12	10:37:55	0.349936	1.55659	1135.31	FALSE	46
2022-09-12	10:37:56	0.395127	1.7576	1167.42	FALSE	46
2022-09-12	10:37:56	0.498893	2.21918	1137.53	FALSE	46
2022-09-12	10:37:56	0.472176	2.10033	1169.52	FALSE	46
2022-09-12	10:37:56	0.333244	1.48234	1139.01	FALSE	46
2022-09-12	10:37:57	0.6193	2.75477	1172.28	FALSE	46
2022-09-12	10:37:57	0.491056	2.18432	1141.2	FALSE	46
2022-09-12	10:37:57	0.343066	1.52603	1173.81	FALSE	46
2022-09-12	10:37:57	0.57014	2.5361	1143.73	FALSE	46
2022-09-12	10:37:58	0.982862	4.37197	1178.18	FALSE	46
2022-09-12	10:37:58	0.848868	3.77593	1147.51	FALSE	46
2022-09-12	10:37:58	1.45787	6.4849	1184.66	FALSE	46
2022-09-12	10:37:58	3.6221	16.1118	1163.62	1	47
2022-09-12	10:37:59	2.80429	12.474	1197.14	FALSE	47
2022-09-12	10:37:59	0.402506	1.79043	1165.41	FALSE	47
2022-09-12	10:37:59	0.519962	2.31289	1199.45	FALSE	47
2022-09-12	10:38:00	0.679911	3.02438	1168.44	FALSE	47
2022-09-12	10:38:00	1.01961	4.53543	1203.98	FALSE	47
2022-09-12	10:38:00	0.606985	2.69999	1171.14	FALSE	47
2022-09-12	10:38:00	0.852684	3.79291	1207.78	FALSE	47
2022-09-12	10:38:01	0.686679	3.05449	1174.19	FALSE	47
2022-09-12	10:38:01	0.407697	1.81352	1209.59	FALSE	47
2022-09-12	10:38:01	0.921641	4.09964	1178.29	FALSE	47
2022-09-12	10:38:01	0.38383	1.70735	1211.3	FALSE	47
2022-09-12	10:38:02	0.470089	2.09105	1180.38	FALSE	47
2022-09-12	10:38:02	0.43243	1.92354	1213.22	FALSE	47
2022-09-12	10:38:02	0.551107	2.45143	1182.83	FALSE	47
2022-09-12	10:38:02	0.389987	1.73474	1214.96	FALSE	47
2022-09-12	10:38:03	0.404033	1.79722	1184.63	FALSE	47
2022-09-12	10:38:03	0.643423	2.86207	1217.82	FALSE	47
2022-09-12	10:38:03	0.466832	2.07656	1186.71	FALSE	47
2022-09-12	10:38:04	0.428715	1.90701	1219.73	FALSE	47
2022-09-12	10:38:04	0.572176	2.54515	1189.25	FALSE	47
2022-09-12	10:38:04	0.600623	2.67169	1222.4	FALSE	47
2022-09-12	10:38:04	0.502201	2.23389	1191.49	FALSE	47
2022-09-12	10:38:05	0.423423	1.88347	1224.28	FALSE	47
2022-09-12	10:38:05	0.689224	3.06581	1194.55	FALSE	47
2022-09-12	10:38:05	0.490751	2.18296	1226.46	FALSE	47
2022-09-12	10:38:05	0.349936	1.55659	1196.11	FALSE	47
2022-09-12	10:38:06	0.588969	2.61985	1229.08	FALSE	47
2022-09-12	10:38:06	0.457774	2.03627	1198.15	FALSE	47
2022-09-12	10:38:06	0.535636	2.38262	1231.47	FALSE	47
2022-09-12	10:38:06	0.505407	2.24815	1200.39	FALSE	47
2022-09-12	10:38:07	1.61711	7.19323	1238.66	FALSE	47
2022-09-12	10:38:07	2.66663	11.8617	1212.26	FALSE	47
2022-09-12	10:38:07	2.75869	12.2712	1250.93	FALSE	47
2022-09-12	10:38:08	2.55161	11.3501	1223.61	FALSE	47
2022-09-12	10:38:08	2.07849	9.24554	1260.18	FALSE	47
2022-09-12	10:38:08	1.31614	5.85445	1229.46	FALSE	47
2022-09-12	10:38:08	0.845051	3.75896	1263.94	FALSE	47
2022-09-12	10:38:09	0.977723	4.34911	1233.81	FALSE	47
2022-09-12	10:38:09	0.922913	4.1053	1268.04	FALSE	47
2022-09-12	10:38:09	0.871972	3.87871	1237.69	FALSE	47
2022-09-12	10:38:09	0.838333	3.72907	1271.77	FALSE	47
2022-09-12	10:38:10	0.282048	1.25461	1238.94	FALSE	47
2022-09-12	10:38:10	0.814364	3.62245	1275.39	FALSE	47
2022-09-12	10:38:10	0.498537	2.21759	1241.16	FALSE	47
2022-09-12	10:38:10	0.496603	2.20899	1277.6	FALSE	47
2022-09-12	10:38:11	0.585712	2.60536	1243.77	FALSE	47
2022-09-12	10:38:11	0.514975	2.29071	1279.89	FALSE	47
2022-09-12	10:38:11	0.60612	2.69614	1246.46	FALSE	47
2022-09-12	10:38:12	0.722303	3.21295	1283.11	FALSE	47
2022-09-12	10:38:12	0.847137	3.76823	1250.23	FALSE	47
2022-09-12	10:38:12	1.19426	5.31231	1288.42	FALSE	47
2022-09-12	10:38:12	1.66866	7.42253	1257.65	FALSE	47
2022-09-12	10:38:13	1.40001	6.22752	1294.64	FALSE	47
2022-09-12	10:38:13	1.97106	8.76767	1266.42	FALSE	47
2022-09-12	10:38:13	1.4906	6.63049	1301.28	FALSE	47
2022-09-12	10:38:13	4.2109	18.7309	1285.15	1	48
2022-09-12	10:38:14	1.32022	5.8726	1307.15	FALSE	48
2022-09-12	10:38:14	0.910903	4.05188	1289.2	FALSE	48
2022-09-12	10:38:14	0.777824	3.45992	1310.61	FALSE	48
2022-09-12	10:38:14	1.11202	4.94649	1294.15	FALSE	48
2022-09-12	10:38:15	0.416705	1.85359	1312.46	FALSE	48
2022-09-12	10:38:15	0.539351	2.39914	1296.55	FALSE	48
2022-09-12	10:38:15	0.427137	1.89999	1314.36	FALSE	48
2022-09-12	10:38:15	0.564237	2.50984	1299.06	FALSE	48
2022-09-12	10:38:16	0.367952	1.63672	1316	FALSE	48
2022-09-12	10:38:16	0.419555	1.86626	1300.92	FALSE	48
2022-09-12	10:38:16	0.817112	3.63468	1319.63	FALSE	48
2022-09-12	10:38:17	0.412023	1.83276	1302.76	FALSE	48
2022-09-12	10:38:17	0.576705	2.5653	1322.2	FALSE	48
2022-09-12	10:38:17	0.598486	2.66219	1305.42	FALSE	48
2022-09-12	10:38:17	1.00729	4.48063	1326.68	FALSE	48
2022-09-12	10:38:18	0.427748	1.90271	1307.32	FALSE	48
2022-09-12	10:38:18	0.616501	2.74232	1329.42	FALSE	48
2022-09-12	10:38:18	0.450242	2.00277	1309.32	FALSE	48
2022-09-12	10:38:18	1.27065	5.65211	1335.07	FALSE	48
2022-09-12	10:38:19	0.451667	2.00911	1311.33	FALSE	48
2022-09-12	10:38:19	1.02897	4.57706	1339.65	FALSE	48
2022-09-12	10:38:19	0.940216	4.18227	1315.52	FALSE	48
2022-09-12	10:38:19	1.58205	7.03727	1346.69	FALSE	48
2022-09-12	10:38:20	1.02129	4.5429	1320.06	FALSE	48
2022-09-12	10:38:20	0.620115	2.7584	1349.45	FALSE	48
2022-09-12	10:38:20	0.877468	3.90315	1323.96	FALSE	48
2022-09-12	10:38:21	2.15457	9.58396	1359.03	FALSE	48
2022-09-12	10:38:21	5.15833	22.9453	1346.91	1	49
2022-09-12	10:38:21	4.03848	17.964	1376.99	1	50
2022-09-12	10:38:21	0.802099	3.5679	1350.48	FALSE	50
2022-09-12	10:38:22	0.418435	1.86128	1378.86	FALSE	50
2022-09-12	10:38:22	0.528715	2.35183	1352.83	FALSE	50
2022-09-12	10:38:22	0.187036	0.831974	1379.69	FALSE	50
2022-09-12	10:38:22	0.11472	0.510298	1353.34	FALSE	50
2022-09-12	10:38:23	0.0230664	0.102604	1379.79	FALSE	50
2022-09-12	10:38:23	-0.387417	-1.72331	1353.34	FALSE	50
2022-09-12	10:38:23	-0.125839	-0.559757	1379.79	FALSE	50
2022-09-12	10:38:23	-0.093931	-0.417824	1353.34	FALSE	50
2022-09-12	10:38:24	-0.314338	-1.39824	1379.79	FALSE	50
2022-09-12	10:38:24	-0.251386	-1.11822	1353.34	FALSE	50
2022-09-12	10:38:24	-0.330419	-1.46977	1379.79	FALSE	50
2022-09-12	10:38:25	-0.17785	-0.791112	1353.34	FALSE	50
2022-09-12	10:38:25	-0.0946435	-0.420993	1379.79	FALSE	50
2022-09-12	10:38:25	0.00734122	0.0326552	1353.37	FALSE	50
2022-09-12	10:38:25	0.236501	1.052	1380.84	FALSE	50
2022-09-12	10:38:26	0.353448	1.57221	1354.94	FALSE	50
2022-09-12	10:38:26	0.393601	1.75082	1382.59	FALSE	50
2022-09-12	10:38:26	0.393448	1.75014	1356.69	FALSE	50
2022-09-12	10:38:26	0.329275	1.46468	1384.06	FALSE	50
2022-09-12	10:38:27	0.26388	1.17379	1357.87	FALSE	50
2022-09-12	10:38:27	0.387901	1.72546	1385.78	FALSE	50
2022-09-12	10:38:27	0.440267	1.9584	1359.82	FALSE	50
2022-09-12	10:38:27	0.365509	1.62586	1387.41	FALSE	50
2022-09-12	10:38:28	0.378893	1.68539	1361.51	FALSE	50
2022-09-12	10:38:28	0.34729	1.54482	1388.95	FALSE	50
2022-09-12	10:38:28	0.31701	1.41012	1362.92	FALSE	50
2022-09-12	10:38:29	0.326679	1.45313	1390.41	FALSE	50
2022-09-12	10:38:29	0.360776	1.6048	1364.52	FALSE	50
2022-09-12	10:38:29	0.885712	3.93982	1394.35	FALSE	50
2022-09-12	10:38:29	0.791768	3.52194	1368.05	FALSE	50
2022-09-12	10:38:30	0.565254	2.51436	1396.86	FALSE	50
2022-09-12	10:38:30	0.344949	1.5344	1369.58	FALSE	50
2022-09-12	10:38:30	0.357468	1.59009	1398.45	FALSE	50
2022-09-12	10:38:30	0.50383	2.24114	1371.82	FALSE	50
2022-09-12	10:38:31	1.08073	4.8073	1403.26	FALSE	50
2022-09-12	10:38:31	0.543677	2.41838	1374.24	FALSE	50
2022-09-12	10:38:31	0.575993	2.56213	1405.82	FALSE	50
2022-09-12	10:38:31	0.382914	1.70328	1375.94	FALSE	50
2022-09-12	10:38:32	0.278028	1.23672	1407.06	FALSE	50
2022-09-12	10:38:32	0.104288	0.463894	1376.41	FALSE	50
2022-09-12	10:38:32	0.307392	1.36734	1408.42	FALSE	50
2022-09-12	10:38:33	0.100776	0.448272	1376.86	FALSE	50
2022-09-12	10:38:33	0.305814	1.36032	1409.78	FALSE	50
2022-09-12	10:38:33	0.268359	1.19371	1378.05	FALSE	50
2022-09-12	10:38:33	1.19126	5.29896	1415.08	FALSE	50
2022-09-12	10:38:34	2.37075	10.5456	1388.6	FALSE	50
2022-09-12	10:38:34	1.87833	8.35519	1423.44	FALSE	50
2022-09-12	10:38:34	4.734	21.0578	1409.65	1	51
2022-09-12	10:38:34	5.41497	24.0869	1447.53	1	52
2022-09-12	10:38:35	7.58897	33.7573	1443.41	1	53
2022-09-12	10:38:35	8.17029	36.3431	1483.87	1	54
2022-09-12	10:38:35	5.4051	24.043	1467.45	1	55
2022-09-12	10:38:35	1.30897	5.82256	1489.69	FALSE	55
2022-09-12	10:38:36	1.05548	4.69499	1472.15	FALSE	55
2022-09-12	10:38:36	0.736247	3.27497	1492.97	FALSE	55
2022-09-12	10:38:36	0.516603	2.29795	1474.45	FALSE	55
2022-09-12	10:38:36	0.638588	2.84057	1495.81	FALSE	55
2022-09-12	10:38:37	0.639707	2.84554	1477.29	FALSE	55
2022-09-12	10:38:37	0.405204	1.80243	1497.61	FALSE	55
2022-09-12	10:38:37	0.510598	2.27124	1479.56	FALSE	55
2022-09-12	10:38:38	0.477468	2.12387	1499.73	FALSE	55
2022-09-12	10:38:38	0.571565	2.54244	1482.11	FALSE	55
2022-09-12	10:38:38	0.488308	2.17209	1501.91	FALSE	55
2022-09-12	10:38:38	0.596298	2.65245	1484.76	FALSE	55
2022-09-12	10:38:39	0.514517	2.28867	1504.19	FALSE	55
2022-09-12	10:38:39	0.513957	2.28618	1487.04	FALSE	55
2022-09-12	10:38:39	0.490344	2.18115	1506.37	FALSE	55
2022-09-12	10:38:39	0.507697	2.25834	1489.3	FALSE	55
2022-09-12	10:38:40	0.493041	2.19314	1508.57	FALSE	55
2022-09-12	10:38:40	0.502659	2.23593	1491.54	FALSE	55
2022-09-12	10:38:40	0.586628	2.60944	1511.18	FALSE	55
2022-09-12	10:38:40	0.753397	3.35126	1494.89	FALSE	55
2022-09-12	10:38:41	0.811107	3.60797	1514.79	FALSE	55
2022-09-12	10:38:41	0.948613	4.21962	1499.11	FALSE	55
2022-09-12	10:38:41	0.730496	3.24939	1518.03	FALSE	55
2022-09-12	10:38:42	0.559453	2.48856	1501.6	FALSE	55
2022-09-12	10:38:42	0.446374	1.98556	1520.02	FALSE	55
2022-09-12	10:38:42	0.425713	1.89366	1503.49	FALSE	55
2022-09-12	10:38:42	0.420674	1.87124	1521.89	FALSE	55
2022-09-12	10:38:43	0.428563	1.90633	1505.4	FALSE	55
2022-09-12	10:38:43	0.431056	1.91742	1523.81	FALSE	55
2022-09-12	10:38:43	0.429987	1.91267	1507.31	FALSE	55
2022-09-12	10:38:43	0.492379	2.1902	1526	FALSE	55
2022-09-12	10:38:44	0.412685	1.83571	1509.15	FALSE	55
2022-09-12	10:38:44	0.366476	1.63016	1527.63	FALSE	55
2022-09-12	10:38:44	0.517977	2.30407	1511.45	FALSE	55
2022-09-12	10:38:44	0.448206	1.99371	1529.62	FALSE	55
2022-09-12	10:38:45	0.482354	2.14561	1513.6	FALSE	55
2022-09-12	10:38:45	0.44841	1.99462	1531.62	FALSE	55
2022-09-12	10:38:45	0.373804	1.66275	1515.26	FALSE	55
2022-09-12	10:38:46	0.434059	1.93078	1533.55	FALSE	55
2022-09-12	10:38:46	0.580216	2.58092	1517.84	FALSE	55
2022-09-12	10:38:46	1.48627	6.61123	1540.16	FALSE	55
2022-09-12	10:38:46	4.68846	20.8552	1538.69	1	56
2022-09-12	10:38:47	5.25574	23.3786	1563.54	1	57
2022-09-12	10:38:47	2.89558	12.8801	1551.58	FALSE	57
2022-09-12	10:38:47	4.33879	19.2998	1582.84	1	58
2022-09-12	10:38:47	1.40246	6.23842	1557.81	FALSE	58
2022-09-12	10:38:48	3.82739	17.025	1599.86	1	59
2022-09-12	10:38:48	4.91116	21.8458	1579.66	1	60
2022-09-12	10:38:48	7.19513	32.0054	1631.87	1	61
2022-09-12	10:38:48	7.35278	32.7066	1612.37	1	62
2022-09-12	10:38:49	5.00388	22.2583	1654.13	1	63
2022-09-12	10:38:49	4.46836	19.8762	1632.24	1	64
2022-09-12	10:38:49	2.9251	13.0114	1667.14	FALSE	64
2022-09-12	10:38:50	2.68892	11.9609	1644.2	FALSE	64
2022-09-12	10:38:50	4.97024	22.1086	1689.25	1	65
2022-09-12	10:38:50	8.39299	37.3337	1681.54	1	66
2022-09-12	10:38:50	8.36881	37.2261	1726.47	1	67
2022-09-12	10:38:51	5.6024	24.9206	1706.46	1	68
2022-09-12	10:38:51	4.31182	19.1798	1745.65	1	69
2022-09-12	10:38:51	4.11635	18.3103	1724.77	1	70
2022-09-12	10:38:51	1.23737	5.50407	1751.16	FALSE	70
2022-09-12	10:38:52	0.789173	3.5104	1728.28	FALSE	70
2022-09-12	10:38:52	0.561946	2.49965	1753.66	FALSE	70
2022-09-12	10:38:52	0.448053	1.99303	1730.27	FALSE	70
2022-09-12	10:38:52	0.5393	2.39891	1756.06	FALSE	70
2022-09-12	10:38:53	0.424898	1.89003	1732.16	FALSE	70
2022-09-12	10:38:53	0.45187	2.01001	1758.07	FALSE	70
2022-09-12	10:38:53	0.392227	1.7447	1733.91	FALSE	70
2022-09-12	10:38:53	0.46785	2.08109	1760.15	FALSE	70
2022-09-12	10:38:54	0.406781	1.80944	1735.72	FALSE	70
2022-09-12	10:38:54	0.418384	1.86106	1762.01	FALSE	70
2022-09-12	10:38:54	0.402303	1.78952	1737.5	FALSE	70
2022-09-12	10:38:55	0.458944	2.04147	1764.05	FALSE	70
2022-09-12	10:38:55	0.407087	1.8108	1739.32	FALSE	70
2022-09-12	10:38:55	0.425662	1.89343	1765.94	FALSE	70
2022-09-12	10:38:55	0.318791	1.41805	1740.73	FALSE	70
2022-09-12	10:38:56	0.452786	2.01408	1767.96	FALSE	70
2022-09-12	10:38:56	0.365102	1.62405	1742.36	FALSE	70
2022-09-12	10:38:56	0.161031	0.716298	1768.67	FALSE	70
2022-09-12	10:38:56	0.160369	0.713353	1743.07	FALSE	70
2022-09-12	10:38:57	0.523066	2.3267	1771	FALSE	70
2022-09-12	10:38:57	0.455229	2.02495	1745.1	FALSE	70
2022-09-12	10:38:57	0.468461	2.08381	1773.08	FALSE	70
2022-09-12	10:38:57	0.48841	2.17255	1747.27	FALSE	70
2022-09-12	10:38:58	0.483728	2.15172	1775.24	FALSE	70
2022-09-12	10:38:58	0.378893	1.68539	1748.95	FALSE	70
2022-09-12	10:38:58	0.468104	2.08222	1777.32	FALSE	70
2022-09-12	10:38:59	0.457468	2.03491	1750.99	FALSE	70
2022-09-12	10:38:59	0.453753	2.01838	1779.34	FALSE	70
2022-09-12	10:38:59	0.542099	2.41136	1753.4	FALSE	70
2022-09-12	10:38:59	0.462201	2.05596	1781.39	FALSE	70
2022-09-12	10:39:00	0.428919	1.90792	1755.31	FALSE	70
2022-09-12	10:39:00	0.377519	1.67928	1783.07	FALSE	70
2022-09-12	10:39:00	0.222201	0.988394	1756.3	FALSE	70
2022-09-12	10:39:00	0.169224	0.752742	1783.82	FALSE	70
2022-09-12	10:39:01	0.290903	1.29399	1757.59	FALSE	70
2022-09-12	10:39:01	0.332023	1.4769	1785.3	FALSE	70
2022-09-12	10:39:01	0.349377	1.5541	1759.14	FALSE	70
2022-09-12	10:39:01	0.374619	1.66638	1786.97	FALSE	70
2022-09-12	10:39:02	0.373295	1.66049	1760.8	FALSE	70
2022-09-12	10:39:02	0.401387	1.78545	1788.75	FALSE	70
2022-09-12	10:39:02	0.420522	1.87057	1762.68	FALSE	70
2022-09-12	10:39:03	0.515331	2.2923	1791.04	FALSE	70
2022-09-12	10:39:03	0.423982	1.88596	1764.56	FALSE	70
2022-09-12	10:39:03	0.462659	2.058	1793.1	FALSE	70
2022-09-12	10:39:03	0.409275	1.82054	1766.38	FALSE	70
2022-09-12	10:39:04	0.397875	1.76983	1794.87	FALSE	70
2022-09-12	10:39:04	0.181641	0.807975	1767.19	FALSE	70
2022-09-12	10:39:04	0.0515142	0.229145	1795.1	FALSE	70
2022-09-12	10:39:04	0.0527865	0.234805	1767.42	FALSE	70
2022-09-12	10:39:05	0.0645422	0.287097	1795.39	FALSE	70
2022-09-12	10:39:05	-0.0496053	-0.220654	1767.42	FALSE	70
2022-09-12	10:39:05	-0.104109	-0.463098	1795.39	FALSE	70
2022-09-12	10:39:05	-0.104364	-0.464232	1767.42	FALSE	70
2022-09-12	10:39:06	-0.109962	-0.489133	1795.39	FALSE	70
2022-09-12	10:39:06	-0.00507608	-0.0225794	1767.42	FALSE	70
2022-09-12	10:39:06	0.120267	0.534972	1795.92	FALSE	70
2022-09-12	10:39:07	0.120318	0.535199	1767.96	FALSE	70
2022-09-12	10:39:07	-0.0266537	-0.118561	1795.92	FALSE	70
2022-09-12	10:39:07	-0.0596816	-0.265476	1767.96	FALSE	70
2022-09-12	10:39:07	0.000776325	0.00345325	1795.93	FALSE	70
2022-09-12	10:39:08	-0.0559157	-0.248724	1767.96	FALSE	70
2022-09-12	10:39:08	0.524338	2.33236	1798.26	FALSE	70
2022-09-12	10:39:08	0.271667	1.20843	1769.17	FALSE	70
2022-09-12	10:39:08	0.247596	1.10136	1799.36	FALSE	70
2022-09-12	10:39:09	0.193804	0.862079	1770.03	FALSE	70
2022-09-12	10:39:09	0.0768577	0.341878	1799.7	FALSE	70
2022-09-12	10:39:09	0.104339	0.464121	1770.49	FALSE	70
2022-09-12	10:39:09	0.164746	0.732823	1800.44	FALSE	70
2022-09-12	10:39:10	0.187545	0.834238	1771.33	FALSE	70
2022-09-12	10:39:10	0.346323	1.54051	1801.98	FALSE	70
2022-09-12	10:39:10	2.5705	11.4341	1782.76	FALSE	70
2022-09-12	10:39:11	4.58464	20.3934	1822.37	1	71
2022-09-12	10:39:11	5.51848	24.5473	1807.31	1	72
2022-09-12	10:39:11	4.09752	18.2266	1840.6	1	73
2022-09-12	10:39:11	1.3107	5.83026	1813.14	FALSE	73
2022-09-12	10:39:12	0.28215	1.25506	1841.85	FALSE	73
2022-09-12	10:39:12	0.665305	2.95941	1816.1	FALSE	73
2022-09-12	10:39:12	0.583219	2.59427	1844.45	FALSE	73
2022-09-12	10:39:12	0.453957	2.01929	1818.12	FALSE	73
2022-09-12	10:39:13	0.405153	1.8022	1846.25	FALSE	73
2022-09-12	10:39:13	0.482507	2.14629	1820.27	FALSE	73
2022-09-12	10:39:13	3.0995	13.7872	1860.03	1	74
2022-09-12	10:39:13	4.48266	19.9398	1840.21	1	75
2022-09-12	10:39:14	2.94011	13.0782	1873.11	FALSE	75
2022-09-12	10:39:14	4.52179	20.1138	1860.32	1	76
2022-09-12	10:39:14	2.74078	12.1915	1885.3	FALSE	76
2022-09-12	10:39:14	1.49263	6.63952	1866.96	FALSE	76
2022-09-12	10:39:15	0.500725	2.22732	1887.53	FALSE	76
2022-09-12	10:39:15	0.491412	2.1859	1869.14	FALSE	76
2022-09-12	10:39:15	0.509631	2.26694	1889.8	FALSE	76
2022-09-12	10:39:16	0.542914	2.41499	1871.56	FALSE	76
2022-09-12	10:39:16	0.364949	1.62337	1891.42	FALSE	76
2022-09-12	10:39:16	0.500471	2.2262	1873.79	FALSE	76
2022-09-12	10:39:16	0.511514	2.27532	1893.7	FALSE	76
2022-09-12	10:39:17	0.497926	2.21487	1876	FALSE	76
2022-09-12	10:39:17	0.361489	1.60798	1895.31	FALSE	76
2022-09-12	10:39:17	0.166578	0.740972	1876.74	FALSE	76
2022-09-12	10:39:17	0.278842	1.24034	1896.55	FALSE	76
2022-09-12	10:39:18	0.294211	1.30871	1878.05	FALSE	76
2022-09-12	10:39:18	2.02286	8.99809	1905.54	FALSE	76
2022-09-12	10:39:18	4.7968	21.3371	1899.39	1	77
2022-09-12	10:39:18	2.95782	13.157	1918.7	FALSE	77
2022-09-12	10:39:19	1.06403	4.73302	1904.12	FALSE	77
2022-09-12	10:39:19	0.735229	3.27045	1921.97	FALSE	77
2022-09-12	10:39:19	0.923066	4.10598	1908.23	FALSE	77
2022-09-12	10:39:20	0.47411	2.10894	1924.08	FALSE	77
2022-09-12	10:39:20	0.272837	1.21363	1909.44	FALSE	77
2022-09-12	10:39:20	0.260471	1.15863	1925.24	FALSE	77
2022-09-12	10:39:20	0.0791987	0.352292	1909.79	FALSE	77
2022-09-12	10:39:21	0.396043	1.76168	1927	FALSE	77
2022-09-12	10:39:21	0.322964	1.43661	1911.23	FALSE	77
2022-09-12	10:39:21	0.732277	3.25731	1930.26	FALSE	77
2022-09-12	10:39:21	0.243982	1.08528	1912.31	FALSE	77
2022-09-12	10:39:22	0.206527	0.918673	1931.18	FALSE	77
2022-09-12	10:39:22	0.0881555	0.392133	1912.71	FALSE	77
2022-09-12	10:39:22	0.134924	0.600169	1931.78	FALSE	77
2022-09-12	10:39:22	-0.0314374	-0.13984	1912.71	FALSE	77
2022-09-12	10:39:23	0.183066	0.814314	1932.59	FALSE	77
2022-09-12	10:39:23	0.145662	0.647934	1913.35	FALSE	77
2022-09-12	10:39:23	0.0624048	0.277589	1932.87	FALSE	77
2022-09-12	10:39:24	0.0884607	0.393491	1913.75	FALSE	77
2022-09-12	10:39:24	0.582863	2.59269	1935.46	FALSE	77
2022-09-12	10:39:24	0.562354	2.50146	1916.25	FALSE	77
2022-09-12	10:39:24	0.243881	1.08483	1936.55	FALSE	77
2022-09-12	10:39:25	0.353804	1.57379	1917.82	FALSE	77
2022-09-12	10:39:25	1.20678	5.368	1941.91	FALSE	77
2022-09-12	10:39:25	0.297519	1.32342	1919.15	FALSE	77
2022-09-12	10:39:25	0.27757	1.23469	1943.15	FALSE	77
2022-09-12	10:39:26	0.348868	1.55183	1920.7	FALSE	77
2022-09-12	10:39:26	0.440725	1.96043	1945.11	FALSE	77
2022-09-12	10:39:26	0.207748	0.924105	1921.62	FALSE	77
2022-09-12	10:39:26	0.175534	0.78081	1945.89	FALSE	77
2022-09-12	10:39:27	0.310242	1.38002	1923	FALSE	77
2022-09-12	10:39:27	0.526425	2.34164	1948.23	FALSE	77
2022-09-12	10:39:27	0.298944	1.32976	1924.33	FALSE	77
2022-09-12	10:39:28	0.177316	0.788737	1949.02	FALSE	77
2022-09-12	10:39:28	0.259453	1.1541	1925.49	FALSE	77
2022-09-12	10:39:28	0.173193	0.770397	1949.79	FALSE	77
2022-09-12	10:39:28	0.282608	1.2571	1926.74	FALSE	77
2022-09-12	10:39:29	0.166323	0.739838	1950.53	FALSE	77
2022-09-12	10:39:29	0.26388	1.17379	1927.92	FALSE	77
2022-09-12	10:39:29	0.153346	0.682114	1951.21	FALSE	77
2022-09-12	10:39:29	0.330903	1.47192	1929.39	FALSE	77
2022-09-12	10:39:30	0.237316	1.05563	1952.27	FALSE	77
2022-09-12	10:39:30	0.214568	0.954441	1930.34	FALSE	77
2022-09-12	10:39:30	0.0983335	0.437407	1952.71	FALSE	77
2022-09-12	10:39:30	0.162252	0.721729	1931.07	FALSE	77
2022-09-12	10:39:31	0.163117	0.725577	1953.43	FALSE	77
2022-09-12	10:39:31	0.168155	0.747987	1931.81	FALSE	77
2022-09-12	10:39:31	0.248206	1.10407	1954.54	FALSE	77
2022-09-12	10:39:31	0.243372	1.08257	1932.9	FALSE	77
2022-09-12	10:39:32	0.35355	1.57266	1956.11	FALSE	77
2022-09-12	10:39:32	0.270293	1.20232	1934.1	FALSE	77
2022-09-12	10:39:32	0.405865	1.80537	1957.91	FALSE	77
2022-09-12	10:39:33	0.271718	1.20866	1935.31	FALSE	77
2022-09-12	10:39:33	0.307799	1.36915	1959.28	FALSE	77
2022-09-12	10:39:33	0.179555	0.798697	1936.11	FALSE	77
2022-09-12	10:39:33	0.317621	1.41284	1960.7	FALSE	77
2022-09-12	10:39:34	0.246832	1.09796	1937.2	FALSE	77
2022-09-12	10:39:34	0.0984862	0.438086	1961.13	FALSE	77
2022-09-12	10:39:34	0.0521249	0.231862	1937.44	FALSE	77
2022-09-12	10:39:34	0.118435	0.526823	1961.66	FALSE	77
2022-09-12	10:39:35	0.07813	0.347538	1937.78	FALSE	77
2022-09-12	10:39:35	0.0414379	0.184324	1961.84	FALSE	77
2022-09-12	10:39:35	-0.0040074	-0.0178257	1937.78	FALSE	77
2022-09-12	10:39:35	-0.00395648	-0.0175992	1961.84	FALSE	77
2022-09-12	10:39:36	0.0628119	0.2794	1938.06	FALSE	77
2022-09-12	10:39:36	0.185611	0.825635	1962.67	FALSE	77
2022-09-12	10:39:36	0.202812	0.902148	1938.96	FALSE	77
2022-09-12	10:39:37	0.0359417	0.159876	1962.83	FALSE	77
2022-09-12	10:39:37	0.19014	0.845781	1939.81	FALSE	77
2022-09-12	10:39:37	0.290038	1.29015	1964.12	FALSE	77
2022-09-12	10:39:37	0.347239	1.54459	1941.35	FALSE	77
2022-09-12	10:39:38	0.235992	1.04974	1965.17	FALSE	77
2022-09-12	10:39:38	0.187748	0.835141	1942.19	FALSE	77
2022-09-12	10:39:38	0.248817	1.10679	1966.28	FALSE	77
2022-09-12	10:39:38	0.280165	1.24623	1943.44	FALSE	77
2022-09-12	10:39:39	0.157265	0.699546	1966.98	FALSE	77
2022-09-12	10:39:39	0.16729	0.744139	1944.18	FALSE	77
2022-09-12	10:39:39	0.247799	1.10226	1968.08	FALSE	77
2022-09-12	10:39:39	0.25243	1.12286	1945.3	FALSE	77
2022-09-12	10:39:40	0.292888	1.30282	1969.38	FALSE	77
2022-09-12	10:39:40	0.177519	0.78964	1946.09	FALSE	77
2022-09-12	10:39:40	0.462252	2.05619	1971.44	FALSE	77
2022-09-12	10:39:41	0.357112	1.58851	1947.68	FALSE	77
2022-09-12	10:39:41	0.321845	1.43163	1972.87	FALSE	77
2022-09-12	10:39:41	0.192685	0.857101	1948.54	FALSE	77
2022-09-12	10:39:41	0.486018	2.16191	1975.03	FALSE	77
2022-09-12	10:39:42	0.125611	0.558743	1949.1	FALSE	77
2022-09-12	10:39:42	0.110395	0.491059	1975.52	FALSE	77
2022-09-12	10:39:42	0.0839824	0.373571	1949.47	FALSE	77
2022-09-12	10:39:42	0.118028	0.525012	1976.05	FALSE	77
2022-09-12	10:39:43	0.268919	1.19621	1950.67	FALSE	77
2022-09-12	10:39:43	0.243881	1.08483	1977.13	FALSE	77
2022-09-12	10:39:43	0.377316	1.67838	1952.35	FALSE	77
2022-09-12	10:39:43	0.260725	1.15976	1978.29	FALSE	77
2022-09-12	10:39:44	0.295636	1.31505	1953.66	FALSE	77
2022-09-12	10:39:44	0.373652	1.66208	1979.95	FALSE	77
2022-09-12	10:39:44	0.397316	1.76734	1955.43	FALSE	77
2022-09-12	10:39:45	0.400216	1.78024	1981.73	FALSE	77
2022-09-12	10:39:45	0.48556	2.15987	1957.59	FALSE	77
2022-09-12	10:39:45	0.510496	2.27079	1984.01	FALSE	77
2022-09-12	10:39:45	0.473753	2.10735	1959.69	FALSE	77
2022-09-12	10:39:46	0.456349	2.02993	1986.04	FALSE	77
2022-09-12	10:39:46	0.473295	2.10531	1961.8	FALSE	77
2022-09-12	10:39:46	0.473855	2.1078	1988.14	FALSE	77
2022-09-12	10:39:46	0.462608	2.05777	1963.86	FALSE	77
2022-09-12	10:39:47	0.460878	2.05008	1990.19	FALSE	77
2022-09-12	10:39:47	0.457112	2.03333	1965.89	FALSE	77
2022-09-12	10:39:47	0.480623	2.13791	1992.33	FALSE	77
2022-09-12	10:39:47	0.488359	2.17232	1968.06	FALSE	77
2022-09-12	10:39:48	0.496196	2.20718	1994.54	FALSE	77
2022-09-12	10:39:48	1.11655	4.96664	1973.03	FALSE	77
2022-09-12	10:39:48	0.31757	1.41261	1995.95	FALSE	77
2022-09-12	10:39:49	0.384033	1.70826	1974.74	FALSE	77
2022-09-12	10:39:49	0.393092	1.74855	1997.7	FALSE	77
2022-09-12	10:39:49	0.378893	1.68539	1976.42	FALSE	77
2022-09-12	10:39:49	0.497926	2.21487	1999.91	FALSE	77
2022-09-12	10:39:50	0.536145	2.38488	1978.81	FALSE	77
2022-09-12	10:39:50	0.316756	1.40899	2001.32	FALSE	77
2022-09-12	10:39:50	0.556399	2.47497	1981.28	FALSE	77
2022-09-12	10:39:50	0.339351	1.5095	2002.83	FALSE	77
2022-09-12	10:39:51	0.628664	2.79642	1984.08	FALSE	77
2022-09-12	10:39:51	0.346069	1.53938	2004.37	FALSE	77
2022-09-12	10:39:51	0.424237	1.88709	1985.97	FALSE	77
2022-09-12	10:39:51	0.432125	1.92218	2006.29	FALSE	77
2022-09-12	10:39:52	0.550852	2.4503	1988.42	FALSE	77
2022-09-12	10:39:52	0.314415	1.39858	2007.69	FALSE	77
2022-09-12	10:39:52	0.466272	2.07407	1990.49	FALSE	77
2022-09-12	10:39:52	0.37472	1.66683	2009.36	FALSE	77
2022-09-12	10:39:53	0.454975	2.02382	1992.52	FALSE	77
2022-09-12	10:39:53	0.438283	1.94957	2011.31	FALSE	77
2022-09-12	10:39:53	0.409886	1.82325	1994.34	FALSE	77
2022-09-12	10:39:54	0.499555	2.22212	2013.53	FALSE	77
2022-09-12	10:39:54	0.444593	1.97764	1996.32	FALSE	77
2022-09-12	10:39:54	0.509987	2.26852	2015.8	FALSE	77
2022-09-12	10:39:54	0.833397	3.70712	2000.02	FALSE	77
2022-09-12	10:39:55	0.834415	3.71164	2019.51	FALSE	77
2022-09-12	10:39:55	0.474822	2.1121	2002.14	FALSE	77
2022-09-12	10:39:55	0.731158	3.25234	2022.76	FALSE	77
2022-09-12	10:39:55	1.58398	7.04586	2009.18	FALSE	77
2022-09-12	10:39:56	0.676094	3.0074	2025.77	FALSE	77
2022-09-12	10:39:56	2.37238	10.5528	2019.73	FALSE	77
2022-09-12	10:39:56	2.78683	12.3964	2038.17	FALSE	77
2022-09-12	10:39:56	2.19859	9.77977	2029.51	FALSE	77
2022-09-12	10:39:57	1.24902	5.55589	2043.72	FALSE	77
2022-09-12	10:39:57	0.913397	4.06297	2033.58	FALSE	77
2022-09-12	10:39:57	1.03681	4.61194	2048.34	FALSE	77
2022-09-12	10:39:58	1.02042	4.53903	2038.12	FALSE	77
2022-09-12	10:39:58	1.06963	4.75793	2053.09	FALSE	77
2022-09-12	10:39:58	0.872888	3.88278	2042	FALSE	77
2022-09-12	10:39:58	0.434211	1.93146	2055.02	FALSE	77
2022-09-12	10:39:59	0.484288	2.15421	2044.15	FALSE	77
2022-09-12	10:39:59	0.477112	2.12229	2057.15	FALSE	77
2022-09-12	10:39:59	0.387595	1.7241	2045.88	FALSE	77
2022-09-12	10:39:59	0.444695	1.97809	2059.13	FALSE	77
2022-09-12	10:40:00	0.476349	2.1189	2048	FALSE	77
2022-09-12	10:40:00	0.485509	2.15964	2061.28	FALSE	77
2022-09-12	10:40:00	0.391616	1.74199	2049.74	FALSE	77
2022-09-12	10:40:00	0.477367	2.12342	2063.41	FALSE	77
2022-09-12	10:40:01	0.702099	3.12308	2052.86	FALSE	77
2022-09-12	10:40:01	0.644033	2.86479	2066.27	FALSE	77
2022-09-12	10:40:01	1.33752	5.94956	2058.81	FALSE	77
2022-09-12	10:40:02	1.36994	6.09377	2072.37	FALSE	77
2022-09-12	10:40:02	0.72785	3.23762	2062.05	FALSE	77
2022-09-12	10:40:02	0.396959	1.76575	2074.13	FALSE	77
2022-09-12	10:40:02	0.382455	1.70124	2063.75	FALSE	77
2022-09-12	10:40:03	0.370394	1.64759	2075.78	FALSE	77
2022-09-12	10:40:03	0.33299	1.48121	2065.23	FALSE	77
2022-09-12	10:40:03	0.40042	1.78115	2077.56	FALSE	77
2022-09-12	10:40:03	0.211514	0.940857	2066.17	FALSE	77
2022-09-12	10:40:04	0.255789	1.1378	2078.7	FALSE	77
2022-09-12	10:40:04	0.328766	1.46242	2067.63	FALSE	77
2022-09-12	10:40:04	0.299657	1.33293	2080.03	FALSE	77
2022-09-12	10:40:04	0.325	1.44566	2069.08	FALSE	77
2022-09-12	10:40:05	0.36612	1.62857	2081.66	FALSE	77
2022-09-12	10:40:05	0.348868	1.55183	2070.63	FALSE	77
2022-09-12	10:40:05	0.379962	1.69015	2083.35	FALSE	77
2022-09-12	10:40:06	0.350954	1.56111	2072.19	FALSE	77
2022-09-12	10:40:06	0.389326	1.7318	2085.08	FALSE	77
2022-09-12	10:40:06	0.366578	1.63061	2073.82	FALSE	77
2022-09-12	10:40:06	0.249224	1.1086	2086.19	FALSE	77
2022-09-12	10:40:07	0.188461	0.838312	2074.66	FALSE	77
2022-09-12	10:40:07	0.16841	0.749121	2086.94	FALSE	77
2022-09-12	10:40:07	0.213804	0.951043	2075.61	FALSE	77
2022-09-12	10:40:07	0.22042	0.980472	2087.92	FALSE	77
2022-09-12	10:40:08	0.280165	1.24623	2076.86	FALSE	77
2022-09-12	10:40:08	0.253957	1.12965	2089.05	FALSE	77
2022-09-12	10:40:08	0.247596	1.10136	2077.96	FALSE	77
2022-09-12	10:40:08	0.316552	1.40809	2090.46	FALSE	77
2022-09-12	10:40:09	0.193346	0.860042	2078.82	FALSE	77
2022-09-12	10:40:09	0.294822	1.31143	2091.77	FALSE	77
2022-09-12	10:40:09	0.192939	0.858231	2079.68	FALSE	77
2022-09-12	10:40:10	0.189682	0.843743	2092.61	FALSE	77
2022-09-12	10:40:10	0.375433	1.67	2081.35	FALSE	77
2022-09-12	10:40:10	0.363117	1.61522	2094.23	FALSE	77
2022-09-12	10:40:10	0.428868	1.90769	2083.26	FALSE	77

## Sheet: Sunny_harness_2022912103439 (E)
Date	Time	Lbs	Total Force x time	Total Time Steps Force >3		**GoPro Fitting: 1023
2022-09-12	10:35:10	0.335484	0.335484	FALSE	0			Total force x time	939.141
2022-09-12	10:35:10	0.976807	1.31229	FALSE	0			Total Time Steps Force >3	77
2022-09-12	10:35:10	1.68556	2.99785	FALSE	0
2022-09-12	10:35:10	0.193295	3.19115	FALSE	0
2022-09-12	10:35:11	1.43553	4.62668	FALSE	0
2022-09-12	10:35:11	0.399199	5.02588	FALSE	0
2022-09-12	10:35:11	1.21146	6.23733	FALSE	0
2022-09-12	10:35:11	2.4964	8.73373	FALSE	0
2022-09-12	10:35:12	0.459046	9.19278	FALSE	0
2022-09-12	10:35:12	0.471667	9.66445	FALSE	0
2022-09-12	10:35:12	1.71894	11.3834	FALSE	0
2022-09-12	10:35:12	0.423372	11.8068	FALSE	0
2022-09-12	10:35:13	0.55584	12.3626	FALSE	0
2022-09-12	10:35:13	0.847697	13.2103	FALSE	0
2022-09-12	10:35:13	0.272074	13.4824	FALSE	0
2022-09-12	10:35:14	0.63986	14.1222	FALSE	0
2022-09-12	10:35:14	1.20123	15.3235	FALSE	0
2022-09-12	10:35:14	1.3081	16.6316	FALSE	0
2022-09-12	10:35:14	1.22011	17.8517	FALSE	0
2022-09-12	10:35:15	0.333041	18.1847	FALSE	0
2022-09-12	10:35:15	0.284237	18.4689	FALSE	0
2022-09-12	10:35:15	0.407799	18.8767	FALSE	0
2022-09-12	10:35:15	0.160878	19.0376	FALSE	0
2022-09-12	10:35:16	0.186374	19.224	FALSE	0
2022-09-12	10:35:16	0.0930918	19.3171	FALSE	0
2022-09-12	10:35:16	0.290547	19.6076	FALSE	0
2022-09-12	10:35:16	0.390547	19.9982	FALSE	0
2022-09-12	10:35:17	0.376807	20.375	FALSE	0
2022-09-12	10:35:17	0.306781	20.6818	FALSE	0
2022-09-12	10:35:17	0.261896	20.9437	FALSE	0
2022-09-12	10:35:17	0.246374	21.19	FALSE	0
2022-09-12	10:35:18	0.226883	21.4169	FALSE	0
2022-09-12	10:35:18	0.243372	21.6603	FALSE	0
2022-09-12	10:35:18	0.241132	21.9014	FALSE	0
2022-09-12	10:35:19	0.204186	22.1056	FALSE	0
2022-09-12	10:35:19	0.176043	22.2817	FALSE	0
2022-09-12	10:35:19	0.233601	22.5153	FALSE	0
2022-09-12	10:35:19	0.169122	22.6844	FALSE	0
2022-09-12	10:35:20	0.242099	22.9265	FALSE	0
2022-09-12	10:35:20	0.296196	23.2227	FALSE	0
2022-09-12	10:35:20	0.362659	23.5853	FALSE	0
2022-09-12	10:35:20	0.428919	24.0143	FALSE	0
2022-09-12	10:35:21	0.547086	24.5613	FALSE	0
2022-09-12	10:35:21	0.574975	25.1363	FALSE	0
2022-09-12	10:35:21	0.521132	25.6574	FALSE	0
2022-09-12	10:35:21	0.42444	26.0819	FALSE	0
2022-09-12	10:35:22	0.358486	26.4404	FALSE	0
2022-09-12	10:35:22	0.30841	26.7488	FALSE	0
2022-09-12	10:35:22	0.28383	27.0326	FALSE	0
2022-09-12	10:35:23	0.362761	27.3954	FALSE	0
2022-09-12	10:35:23	0.961896	28.3573	FALSE	0
2022-09-12	10:35:23	0.677468	29.0347	FALSE	0
2022-09-12	10:35:23	0.285407	29.3201	FALSE	0
2022-09-12	10:35:24	0.344186	29.6643	FALSE	0
2022-09-12	10:35:24	0.161794	29.8261	FALSE	0
2022-09-12	10:35:24	0.0978246	29.924	FALSE	0
2022-09-12	10:35:24	0.114669	30.0386	FALSE	0
2022-09-12	10:35:25	-0.00609391	30.0386	FALSE	0
2022-09-12	10:35:25	0.0311071	30.0697	FALSE	0
2022-09-12	10:35:25	-0.0187657	30.0697	FALSE	0
2022-09-12	10:35:25	0.00703587	30.0768	FALSE	0
2022-09-12	10:35:26	-0.0507758	30.0768	FALSE	0
2022-09-12	10:35:26	-0.188333	30.0768	FALSE	0
2022-09-12	10:35:26	-0.307519	30.0768	FALSE	0
2022-09-12	10:35:27	-0.259783	30.0768	FALSE	0
2022-09-12	10:35:27	-0.265483	30.0768	FALSE	0
2022-09-12	10:35:27	-0.150012	30.0768	FALSE	0
2022-09-12	10:35:27	-0.250369	30.0768	FALSE	0
2022-09-12	10:35:28	-0.170928	30.0768	FALSE	0
2022-09-12	10:35:28	-0.10818	30.0768	FALSE	0
2022-09-12	10:35:28	-0.162837	30.0768	FALSE	0
2022-09-12	10:35:28	-0.0810557	30.0768	FALSE	0
2022-09-12	10:35:29	-0.146297	30.0768	FALSE	0
2022-09-12	10:35:29	-0.145178	30.0768	FALSE	0
2022-09-12	10:35:29	-0.160496	30.0768	FALSE	0
2022-09-12	10:35:29	-0.165432	30.0768	FALSE	0
2022-09-12	10:35:30	-0.0179005	30.0768	FALSE	0
2022-09-12	10:35:30	-0.0456359	30.0768	FALSE	0
2022-09-12	10:35:30	-0.0241601	30.0768	FALSE	0
2022-09-12	10:35:31	0.0411834	30.1179	FALSE	0
2022-09-12	10:35:31	0.228054	30.346	FALSE	0
2022-09-12	10:35:31	3.06057	33.4066	1	1
2022-09-12	10:35:31	1.09528	34.5019	FALSE	1
2022-09-12	10:35:32	0.321489	34.8233	FALSE	1
2022-09-12	10:35:32	0.275941	35.0993	FALSE	1
2022-09-12	10:35:32	0.25299	35.3523	FALSE	1
2022-09-12	10:35:32	0.280623	35.6329	FALSE	1
2022-09-12	10:35:33	0.247036	35.8799	FALSE	1
2022-09-12	10:35:33	0.277774	36.1577	FALSE	1
2022-09-12	10:35:33	0.286222	36.4439	FALSE	1
2022-09-12	10:35:33	0.321947	36.7659	FALSE	1
2022-09-12	10:35:34	0.307697	37.0736	FALSE	1
2022-09-12	10:35:34	0.302863	37.3764	FALSE	1
2022-09-12	10:35:34	0.299809	37.6762	FALSE	1
2022-09-12	10:35:34	0.268664	37.9449	FALSE	1
2022-09-12	10:35:35	0.394364	38.3393	FALSE	1
2022-09-12	10:35:35	0.456196	38.7955	FALSE	1
2022-09-12	10:35:35	0.84215	39.6376	FALSE	1
2022-09-12	10:35:36	0.57355	40.2112	FALSE	1
2022-09-12	10:35:36	1.87955	42.0907	FALSE	1
2022-09-12	10:35:36	0.29299	42.3837	FALSE	1
2022-09-12	10:35:36	0.236043	42.6197	FALSE	1
2022-09-12	10:35:37	0.421082	43.0408	FALSE	1
2022-09-12	10:35:37	2.52958	45.5704	FALSE	1
2022-09-12	10:35:37	0.401692	45.9721	FALSE	1
2022-09-12	10:35:37	0.44897	46.4211	FALSE	1
2022-09-12	10:35:38	1.03558	47.4567	FALSE	1
2022-09-12	10:35:38	0.34327	47.7999	FALSE	1
2022-09-12	10:35:38	0.214873	48.0148	FALSE	1
2022-09-12	10:35:38	0.245102	48.2599	FALSE	1
2022-09-12	10:35:39	0.859758	49.1197	FALSE	1
2022-09-12	10:35:39	0.333092	49.4527	FALSE	1
2022-09-12	10:35:39	0.456654	49.9094	FALSE	1
2022-09-12	10:35:40	0.381998	50.2914	FALSE	1
2022-09-12	10:35:40	0.38673	50.6781	FALSE	1
2022-09-12	10:35:40	0.432277	51.1104	FALSE	1
2022-09-12	10:35:40	0.392176	51.5026	FALSE	1
2022-09-12	10:35:41	0.636552	52.1391	FALSE	1
2022-09-12	10:35:41	0.358995	52.4981	FALSE	1
2022-09-12	10:35:41	0.386323	52.8845	FALSE	1
2022-09-12	10:35:41	0.337366	53.2218	FALSE	1
2022-09-12	10:35:42	0.407392	53.6292	FALSE	1
2022-09-12	10:35:42	0.487494	54.1167	FALSE	1
2022-09-12	10:35:42	0.608257	54.725	FALSE	1
2022-09-12	10:35:42	0.560725	55.2857	FALSE	1
2022-09-12	10:35:43	0.580776	55.8665	FALSE	1
2022-09-12	10:35:43	0.504186	56.3706	FALSE	1
2022-09-12	10:35:43	0.491056	56.8617	FALSE	1
2022-09-12	10:35:44	0.503524	57.3652	FALSE	1
2022-09-12	10:35:44	0.527748	57.893	FALSE	1
2022-09-12	10:35:44	0.625458	58.5184	FALSE	1
2022-09-12	10:35:44	0.542863	59.0613	FALSE	1
2022-09-12	10:35:45	0.540878	59.6022	FALSE	1
2022-09-12	10:35:45	0.462049	60.0642	FALSE	1
2022-09-12	10:35:45	0.452328	60.5166	FALSE	1
2022-09-12	10:35:45	0.419351	60.9359	FALSE	1
2022-09-12	10:35:46	0.399046	61.3349	FALSE	1
2022-09-12	10:35:46	0.369886	61.7048	FALSE	1
2022-09-12	10:35:46	0.383982	62.0888	FALSE	1
2022-09-12	10:35:46	0.362099	62.4509	FALSE	1
2022-09-12	10:35:47	0.389835	62.8408	FALSE	1
2022-09-12	10:35:47	0.438079	63.2788	FALSE	1
2022-09-12	10:35:47	0.319606	63.5984	FALSE	1
2022-09-12	10:35:48	0.360573	63.959	FALSE	1
2022-09-12	10:35:48	0.297875	64.2569	FALSE	1
2022-09-12	10:35:48	0.317468	64.5744	FALSE	1
2022-09-12	10:35:48	0.31869	64.893	FALSE	1
2022-09-12	10:35:49	0.314669	65.2077	FALSE	1
2022-09-12	10:35:49	0.328511	65.5362	FALSE	1
2022-09-12	10:35:49	0.308155	65.8444	FALSE	1
2022-09-12	10:35:49	0.256705	66.1011	FALSE	1
2022-09-12	10:35:50	0.196501	66.2976	FALSE	1
2022-09-12	10:35:50	0.222049	66.5196	FALSE	1
2022-09-12	10:35:50	0.279046	66.7987	FALSE	1
2022-09-12	10:35:50	0.208919	67.0076	FALSE	1
2022-09-12	10:35:51	0.256705	67.2643	FALSE	1
2022-09-12	10:35:51	0.169377	67.4337	FALSE	1
2022-09-12	10:35:51	0.226323	67.66	FALSE	1
2022-09-12	10:35:51	0.308562	67.9686	FALSE	1
2022-09-12	10:35:52	0.387952	68.3565	FALSE	1
2022-09-12	10:35:52	0.357672	68.7142	FALSE	1
2022-09-12	10:35:52	0.323779	69.038	FALSE	1
2022-09-12	10:35:53	0.285255	69.3232	FALSE	1
2022-09-12	10:35:53	0.287188	69.6104	FALSE	1
2022-09-12	10:35:53	0.284542	69.895	FALSE	1
2022-09-12	10:35:53	0.276552	70.1715	FALSE	1
2022-09-12	10:35:54	0.295942	70.4674	FALSE	1
2022-09-12	10:35:54	0.23416	70.7016	FALSE	1
2022-09-12	10:35:54	0.204186	70.9058	FALSE	1
2022-09-12	10:35:54	0.220369	71.1262	FALSE	1
2022-09-12	10:35:55	0.274771	71.4009	FALSE	1
2022-09-12	10:35:55	0.380725	71.7817	FALSE	1
2022-09-12	10:35:55	0.356298	72.138	FALSE	1
2022-09-12	10:35:55	0.288766	72.4267	FALSE	1
2022-09-12	10:35:56	0.31014	72.7369	FALSE	1
2022-09-12	10:35:56	0.211718	72.9486	FALSE	1
2022-09-12	10:35:56	0.22902	73.1776	FALSE	1
2022-09-12	10:35:57	0.190903	73.3685	FALSE	1
2022-09-12	10:35:57	0.297621	73.6661	FALSE	1
2022-09-12	10:35:57	0.405713	74.0718	FALSE	1
2022-09-12	10:35:57	0.439198	74.511	FALSE	1
2022-09-12	10:35:58	0.401692	74.9127	FALSE	1
2022-09-12	10:35:58	0.501336	75.4141	FALSE	1
2022-09-12	10:35:58	0.420369	75.8344	FALSE	1
2022-09-12	10:35:58	0.471412	76.3058	FALSE	1
2022-09-12	10:35:59	0.456705	76.7625	FALSE	1
2022-09-12	10:35:59	1.23879	78.0013	FALSE	1
2022-09-12	10:35:59	1.80693	79.8083	FALSE	1
2022-09-12	10:35:59	0.564186	80.3725	FALSE	1
2022-09-12	10:36:00	0.443626	80.8161	FALSE	1
2022-09-12	10:36:00	0.405509	81.2216	FALSE	1
2022-09-12	10:36:00	0.428206	81.6498	FALSE	1
2022-09-12	10:36:01	0.566934	82.2167	FALSE	1
2022-09-12	10:36:01	0.433906	82.6506	FALSE	1
2022-09-12	10:36:01	0.425662	83.0763	FALSE	1
2022-09-12	10:36:01	0.358232	83.4345	FALSE	1
2022-09-12	10:36:02	0.601743	84.0363	FALSE	1
2022-09-12	10:36:02	0.332786	84.3691	FALSE	1
2022-09-12	10:36:02	0.416552	84.7856	FALSE	1
2022-09-12	10:36:02	0.460013	85.2456	FALSE	1
2022-09-12	10:36:03	0.425254	85.6709	FALSE	1
2022-09-12	10:36:03	0.397265	86.0681	FALSE	1
2022-09-12	10:36:03	0.415636	86.4838	FALSE	1
2022-09-12	10:36:03	0.413804	86.8976	FALSE	1
2022-09-12	10:36:04	0.396196	87.2938	FALSE	1
2022-09-12	10:36:04	0.398944	87.6927	FALSE	1
2022-09-12	10:36:04	0.366781	88.0595	FALSE	1
2022-09-12	10:36:05	0.415992	88.4755	FALSE	1
2022-09-12	10:36:05	0.38271	88.8582	FALSE	1
2022-09-12	10:36:05	0.311056	89.1693	FALSE	1
2022-09-12	10:36:05	0.338944	89.5082	FALSE	1
2022-09-12	10:36:06	0.298486	89.8067	FALSE	1
2022-09-12	10:36:06	0.49243	90.2991	FALSE	1
2022-09-12	10:36:06	1.90927	92.2084	FALSE	1
2022-09-12	10:36:06	3.65808	95.8665	1	2
2022-09-12	10:36:07	2.47569	98.3422	FALSE	2
2022-09-12	10:36:07	1.07777	99.4199	FALSE	2
2022-09-12	10:36:07	0.376043	99.796	FALSE	2
2022-09-12	10:36:07	0.292634	100.089	FALSE	2
2022-09-12	10:36:08	0.438232	100.527	FALSE	2
2022-09-12	10:36:08	0.456909	100.984	FALSE	2
2022-09-12	10:36:08	0.514771	101.499	FALSE	2
2022-09-12	10:36:08	0.416501	101.915	FALSE	2
2022-09-12	10:36:09	0.617875	102.533	FALSE	2
2022-09-12	10:36:09	0.344644	102.878	FALSE	2
2022-09-12	10:36:09	0.290598	103.168	FALSE	2
2022-09-12	10:36:10	0.165102	103.333	FALSE	2
2022-09-12	10:36:10	0.223982	103.557	FALSE	2
2022-09-12	10:36:10	2.19874	105.756	FALSE	2
2022-09-12	10:36:10	2.97721	108.733	FALSE	2
2022-09-12	10:36:11	1.99966	110.733	FALSE	2
2022-09-12	10:36:11	2.28088	113.014	FALSE	2
2022-09-12	10:36:11	1.51146	114.525	FALSE	2
2022-09-12	10:36:11	2.12612	116.651	FALSE	2
2022-09-12	10:36:12	0.676756	117.328	FALSE	2
2022-09-12	10:36:12	1.38449	118.713	FALSE	2
2022-09-12	10:36:12	1.39156	120.104	FALSE	2
2022-09-12	10:36:12	0.660166	120.764	FALSE	2
2022-09-12	10:36:13	0.489224	121.253	FALSE	2
2022-09-12	10:36:13	0.505051	121.759	FALSE	2
2022-09-12	10:36:13	0.363881	122.122	FALSE	2
2022-09-12	10:36:14	0.339097	122.462	FALSE	2
2022-09-12	10:36:14	0.376501	122.838	FALSE	2
2022-09-12	10:36:14	0.339097	123.177	FALSE	2
2022-09-12	10:36:14	0.437825	123.615	FALSE	2
2022-09-12	10:36:15	0.418283	124.033	FALSE	2
2022-09-12	10:36:15	0.407901	124.441	FALSE	2
2022-09-12	10:36:15	0.435178	124.876	FALSE	2
2022-09-12	10:36:15	0.447494	125.324	FALSE	2
2022-09-12	10:36:16	0.445916	125.77	FALSE	2
2022-09-12	10:36:16	0.430954	126.201	FALSE	2
2022-09-12	10:36:16	0.414466	126.615	FALSE	2
2022-09-12	10:36:16	0.425662	127.041	FALSE	2
2022-09-12	10:36:17	0.433957	127.475	FALSE	2
2022-09-12	10:36:17	0.420827	127.896	FALSE	2
2022-09-12	10:36:17	0.442965	128.339	FALSE	2
2022-09-12	10:36:18	0.472583	128.811	FALSE	2
2022-09-12	10:36:18	0.419097	129.23	FALSE	2
2022-09-12	10:36:18	0.334924	129.565	FALSE	2
2022-09-12	10:36:18	0.630292	130.195	FALSE	2
2022-09-12	10:36:19	0.629173	130.825	FALSE	2
2022-09-12	10:36:19	0.597061	131.422	FALSE	2
2022-09-12	10:36:19	0.657417	132.079	FALSE	2
2022-09-12	10:36:19	1.71757	133.797	FALSE	2
2022-09-12	10:36:20	1.77075	135.567	FALSE	2
2022-09-12	10:36:20	2.80378	138.371	FALSE	2
2022-09-12	10:36:20	3.74276	142.114	1	3
2022-09-12	10:36:20	2.18546	144.299	FALSE	3
2022-09-12	10:36:21	3.59487	147.894	1	4
2022-09-12	10:36:21	1.88541	149.78	FALSE	4
2022-09-12	10:36:21	1.00871	150.788	FALSE	4
2022-09-12	10:36:22	1.7962	152.585	FALSE	4
2022-09-12	10:36:22	0.453804	153.038	FALSE	4
2022-09-12	10:36:22	0.338537	153.377	FALSE	4
2022-09-12	10:36:22	0.442965	153.82	FALSE	4
2022-09-12	10:36:23	0.246629	154.067	FALSE	4
2022-09-12	10:36:23	0.345763	154.412	FALSE	4
2022-09-12	10:36:23	0.308003	154.72	FALSE	4
2022-09-12	10:36:23	0.416043	155.136	FALSE	4
2022-09-12	10:36:24	0.455178	155.592	FALSE	4
2022-09-12	10:36:24	0.539809	156.131	FALSE	4
2022-09-12	10:36:24	0.63299	156.764	FALSE	4
2022-09-12	10:36:24	0.786272	157.551	FALSE	4
2022-09-12	10:36:25	0.710089	158.261	FALSE	4
2022-09-12	10:36:25	0.757316	159.018	FALSE	4
2022-09-12	10:36:25	0.605204	159.623	FALSE	4
2022-09-12	10:36:25	0.626476	160.25	FALSE	4
2022-09-12	10:36:26	0.68556	160.935	FALSE	4
2022-09-12	10:36:26	1.34637	162.282	FALSE	4
2022-09-12	10:36:26	1.07197	163.354	FALSE	4
2022-09-12	10:36:27	1.11004	164.464	FALSE	4
2022-09-12	10:36:27	1.09732	165.561	FALSE	4
2022-09-12	10:36:27	1.29131	166.852	FALSE	4
2022-09-12	10:36:27	1.43798	168.29	FALSE	4
2022-09-12	10:36:28	1.4505	169.741	FALSE	4
2022-09-12	10:36:28	2.17543	171.916	FALSE	4
2022-09-12	10:36:28	2.26128	174.177	FALSE	4
2022-09-12	10:36:28	2.32561	176.503	FALSE	4
2022-09-12	10:36:29	1.77584	178.279	FALSE	4
2022-09-12	10:36:29	0.946679	179.226	FALSE	4
2022-09-12	10:36:29	0.83126	180.057	FALSE	4
2022-09-12	10:36:29	0.856298	180.913	FALSE	4
2022-09-12	10:36:30	0.840674	181.754	FALSE	4
2022-09-12	10:36:30	0.840827	182.595	FALSE	4
2022-09-12	10:36:30	1.34393	183.939	FALSE	4
2022-09-12	10:36:31	1.45385	185.392	FALSE	4
2022-09-12	10:36:31	2.06693	187.459	FALSE	4
2022-09-12	10:36:31	1.98581	189.445	FALSE	4
2022-09-12	10:36:31	1.62556	191.071	FALSE	4
2022-09-12	10:36:32	2.32851	193.399	FALSE	4
2022-09-12	10:36:32	3.50439	196.904	1	5
2022-09-12	10:36:32	4.2138	201.117	1	6
2022-09-12	10:36:32	4.91426	206.032	1	7
2022-09-12	10:36:33	4.25574	210.287	1	8
2022-09-12	10:36:33	4.38215	214.67	1	9
2022-09-12	10:36:33	3.11645	217.786	1	10
2022-09-12	10:36:33	3.9682	221.754	1	11
2022-09-12	10:36:34	3.43141	225.186	1	12
2022-09-12	10:36:34	5.26988	230.455	1	13
2022-09-12	10:36:34	7.93619	238.392	1	14
2022-09-12	10:36:35	7.50769	245.899	1	15
2022-09-12	10:36:35	5.94113	251.841	1	16
2022-09-12	10:36:35	5.08912	256.93	1	17
2022-09-12	10:36:35	4.8196	261.749	1	18
2022-09-12	10:36:36	4.16062	265.91	1	19
2022-09-12	10:36:36	3.11691	269.027	1	20
2022-09-12	10:36:36	5.28556	274.312	1	21
2022-09-12	10:36:36	6.99858	281.311	1	22
2022-09-12	10:36:37	6.44434	287.755	1	23
2022-09-12	10:36:37	4.49675	292.252	1	24
2022-09-12	10:36:37	5.20678	297.459	1	25
2022-09-12	10:36:37	5.71497	303.174	1	26
2022-09-12	10:36:38	6.07009	309.244	1	27
2022-09-12	10:36:38	4.78184	314.026	1	28
2022-09-12	10:36:38	3.74668	317.772	1	29
2022-09-12	10:36:39	3.3021	321.074	1	30
2022-09-12	10:36:39	4.55925	325.634	1	31
2022-09-12	10:36:39	4.70932	330.343	1	32
2022-09-12	10:36:39	1.73818	332.081	FALSE	32
2022-09-12	10:36:40	1.80866	333.89	FALSE	32
2022-09-12	10:36:40	5.89248	339.782	1	33
2022-09-12	10:36:40	10.6412	350.424	1	34
2022-09-12	10:36:40	8.3969	358.82	1	35
2022-09-12	10:36:41	7.17741	365.998	1	36
2022-09-12	10:36:41	5.06973	371.068	1	37
2022-09-12	10:36:41	1.94933	373.017	FALSE	37
2022-09-12	10:36:41	2.65248	375.669	FALSE	37
2022-09-12	10:36:42	3.86729	379.537	1	38
2022-09-12	10:36:42	4.62205	384.159	1	39
2022-09-12	10:36:42	4.57177	388.73	1	40
2022-09-12	10:36:43	4.56495	393.295	1	41
2022-09-12	10:36:43	6.61441	399.91	1	42
2022-09-12	10:36:43	7.6797	407.59	1	43
2022-09-12	10:36:43	8.80021	416.39	1	44
2022-09-12	10:36:44	7.24423	423.634	1	45
2022-09-12	10:36:44	5.79752	429.432	1	46
2022-09-12	10:36:44	1.13996	430.571	FALSE	46
2022-09-12	10:36:44	0.328003	430.899	FALSE	46
2022-09-12	10:36:45	0.420471	431.32	FALSE	46
2022-09-12	10:36:45	0.178791	431.499	FALSE	46
2022-09-12	10:36:45	0.230853	431.73	FALSE	46
2022-09-12	10:36:45	0.511361	432.241	FALSE	46
2022-09-12	10:36:46	0.823015	433.064	FALSE	46
2022-09-12	10:36:46	0.387239	433.451	FALSE	46
2022-09-12	10:36:46	0.215382	433.667	FALSE	46
2022-09-12	10:36:46	0.313804	433.98	FALSE	46
2022-09-12	10:36:47	0.284338	434.265	FALSE	46
2022-09-12	10:36:47	0.269835	434.535	FALSE	46
2022-09-12	10:36:47	0.104033	434.639	FALSE	46
2022-09-12	10:36:48	0.0805218	434.719	FALSE	46
2022-09-12	10:36:48	0.375026	435.094	FALSE	46
2022-09-12	10:36:48	0.263728	435.358	FALSE	46
2022-09-12	10:36:48	0.292685	435.651	FALSE	46
2022-09-12	10:36:49	0.245509	435.896	FALSE	46
2022-09-12	10:36:49	0.460623	436.357	FALSE	46
2022-09-12	10:36:49	0.199809	436.557	FALSE	46
2022-09-12	10:36:49	0.324084	436.881	FALSE	46
2022-09-12	10:36:50	0.0375702	436.918	FALSE	46
2022-09-12	10:36:50	0.522862	437.441	FALSE	46
2022-09-12	10:36:50	0.241336	437.682	FALSE	46
2022-09-12	10:36:50	0.817366	438.5	FALSE	46
2022-09-12	10:36:51	0.341947	438.842	FALSE	46
2022-09-12	10:36:51	0.378028	439.22	FALSE	46
2022-09-12	10:36:51	0.36098	439.581	FALSE	46
2022-09-12	10:36:52	0.276501	439.857	FALSE	46
2022-09-12	10:36:52	0.393244	440.25	FALSE	46
2022-09-12	10:36:52	0.25014	440.501	FALSE	46
2022-09-12	10:36:52	0.428104	440.929	FALSE	46
2022-09-12	10:36:53	0.358588	441.287	FALSE	46
2022-09-12	10:36:53	0.43645	441.724	FALSE	46
2022-09-12	10:36:53	0.224746	441.948	FALSE	46
2022-09-12	10:36:53	0.465	442.413	FALSE	46
2022-09-12	10:36:54	0.272074	442.686	FALSE	46
2022-09-12	10:36:54	0.418893	443.104	FALSE	46
2022-09-12	10:36:54	0.228512	443.333	FALSE	46
2022-09-12	10:36:54	0.385051	443.718	FALSE	46
2022-09-12	10:36:55	0.21014	443.928	FALSE	46
2022-09-12	10:36:55	1.21172	445.14	FALSE	46
2022-09-12	10:36:55	0.465204	445.605	FALSE	46
2022-09-12	10:36:56	1.41701	447.022	FALSE	46
2022-09-12	10:36:56	0.341743	447.364	FALSE	46
2022-09-12	10:36:56	1.25833	448.622	FALSE	46
2022-09-12	10:36:56	0.312481	448.935	FALSE	46
2022-09-12	10:36:57	1.26586	450.2	FALSE	46
2022-09-12	10:36:57	0.459911	450.66	FALSE	46
2022-09-12	10:36:57	0.812226	451.473	FALSE	46
2022-09-12	10:36:57	0.280674	451.753	FALSE	46
2022-09-12	10:36:58	0.354975	452.108	FALSE	46
2022-09-12	10:36:58	0.605356	452.714	FALSE	46
2022-09-12	10:36:58	0.235891	452.95	FALSE	46
2022-09-12	10:36:58	0.464949	453.414	FALSE	46
2022-09-12	10:36:59	0.494975	453.909	FALSE	46
2022-09-12	10:36:59	0.458588	454.368	FALSE	46
2022-09-12	10:36:59	0.514313	454.882	FALSE	46
2022-09-12	10:37:00	1.24419	456.127	FALSE	46
2022-09-12	10:37:00	0.615331	456.742	FALSE	46
2022-09-12	10:37:00	1.11243	457.854	FALSE	46
2022-09-12	10:37:00	0.567799	458.422	FALSE	46
2022-09-12	10:37:01	0.822557	459.245	FALSE	46
2022-09-12	10:37:01	0.48897	459.734	FALSE	46
2022-09-12	10:37:01	0.279148	460.013	FALSE	46
2022-09-12	10:37:01	0.291972	460.305	FALSE	46
2022-09-12	10:37:02	0.367952	460.673	FALSE	46
2022-09-12	10:37:02	0.247799	460.92	FALSE	46
2022-09-12	10:37:02	0.379606	461.3	FALSE	46
2022-09-12	10:37:02	0.243881	461.544	FALSE	46
2022-09-12	10:37:03	0.235127	461.779	FALSE	46
2022-09-12	10:37:03	0.651667	462.431	FALSE	46
2022-09-12	10:37:03	0.542303	462.973	FALSE	46
2022-09-12	10:37:03	1.70103	464.674	FALSE	46
2022-09-12	10:37:04	0.400573	465.075	FALSE	46
2022-09-12	10:37:04	0.255076	465.33	FALSE	46
2022-09-12	10:37:04	0.777163	466.107	FALSE	46
2022-09-12	10:37:05	0.213295	466.32	FALSE	46
2022-09-12	10:37:05	0.571972	466.892	FALSE	46
2022-09-12	10:37:05	0.132634	467.025	FALSE	46
2022-09-12	10:37:05	0.542914	467.568	FALSE	46
2022-09-12	10:37:06	1.47884	469.047	FALSE	46
2022-09-12	10:37:06	0.539046	469.586	FALSE	46
2022-09-12	10:37:06	0.311769	469.897	FALSE	46
2022-09-12	10:37:06	1.25497	471.152	FALSE	46
2022-09-12	10:37:07	0.10729	471.26	FALSE	46
2022-09-12	10:37:07	0.138486	471.398	FALSE	46
2022-09-12	10:37:07	0.0917178	471.49	FALSE	46
2022-09-12	10:37:07	-0.0716409	471.49	FALSE	46
2022-09-12	10:37:08	-0.0401906	471.49	FALSE	46
2022-09-12	10:37:08	-0.0324552	471.49	FALSE	46
2022-09-12	10:37:08	0.0450002	471.535	FALSE	46
2022-09-12	10:37:09	-0.0612084	471.535	FALSE	46
2022-09-12	10:37:09	-0.231132	471.535	FALSE	46
2022-09-12	10:37:09	-0.309554	471.535	FALSE	46
2022-09-12	10:37:09	-0.250063	471.535	FALSE	46
2022-09-12	10:37:10	-0.482938	471.535	FALSE	46
2022-09-12	10:37:10	-0.347926	471.535	FALSE	46
2022-09-12	10:37:10	-0.346195	471.535	FALSE	46
2022-09-12	10:37:10	-0.179885	471.535	FALSE	46
2022-09-12	10:37:11	-0.0891982	471.535	FALSE	46
2022-09-12	10:37:11	-0.0251779	471.535	FALSE	46
2022-09-12	10:37:11	-0.192455	471.535	FALSE	46
2022-09-12	10:37:11	-0.0675697	471.535	FALSE	46
2022-09-12	10:37:12	-0.0755086	471.535	FALSE	46
2022-09-12	10:37:12	-0.0669081	471.535	FALSE	46
2022-09-12	10:37:12	-0.142074	471.535	FALSE	46
2022-09-12	10:37:13	-0.0108776	471.535	FALSE	46
2022-09-12	10:37:13	0.16383	471.699	FALSE	46
2022-09-12	10:37:13	0.0560435	471.755	FALSE	46
2022-09-12	10:37:13	0.0819977	471.837	FALSE	46
2022-09-12	10:37:14	0.023219	471.86	FALSE	46
2022-09-12	10:37:14	0.187494	472.047	FALSE	46
2022-09-12	10:37:14	0.0085117	472.056	FALSE	46
2022-09-12	10:37:14	0.19528	472.251	FALSE	46
2022-09-12	10:37:15	0.0137025	472.265	FALSE	46
2022-09-12	10:37:15	0.190038	472.455	FALSE	46
2022-09-12	10:37:15	-0.0255341	472.455	FALSE	46
2022-09-12	10:37:15	0.217417	472.672	FALSE	46
2022-09-12	10:37:16	0.135026	472.807	FALSE	46
2022-09-12	10:37:16	0.0178755	472.825	FALSE	46
2022-09-12	10:37:16	-0.203651	472.825	FALSE	46
2022-09-12	10:37:17	-0.0618191	472.825	FALSE	46
2022-09-12	10:37:17	0.0118196	472.837	FALSE	46
2022-09-12	10:37:17	0.251463	473.089	FALSE	46
2022-09-12	10:37:17	0.0308018	473.119	FALSE	46
2022-09-12	10:37:18	0.279606	473.399	FALSE	46
2022-09-12	10:37:18	0.14785	473.547	FALSE	46
2022-09-12	10:37:18	0.252532	473.799	FALSE	46
2022-09-12	10:37:18	0.137926	473.937	FALSE	46
2022-09-12	10:37:19	0.255891	474.193	FALSE	46
2022-09-12	10:37:19	0.271107	474.464	FALSE	46
2022-09-12	10:37:19	0.236705	474.701	FALSE	46
2022-09-12	10:37:19	0.221438	474.922	FALSE	46
2022-09-12	10:37:20	0.264033	475.186	FALSE	46
2022-09-12	10:37:20	0.286628	475.473	FALSE	46
2022-09-12	10:37:20	0.301489	475.775	FALSE	46
2022-09-12	10:37:20	0.16902	475.944	FALSE	46
2022-09-12	10:37:21	0.193855	476.137	FALSE	46
2022-09-12	10:37:21	0.362405	476.5	FALSE	46
2022-09-12	10:37:21	0.208766	476.709	FALSE	46
2022-09-12	10:37:22	0.383626	477.092	FALSE	46
2022-09-12	10:37:22	0.246832	477.339	FALSE	46
2022-09-12	10:37:22	0.425967	477.765	FALSE	46
2022-09-12	10:37:22	0.1107	477.876	FALSE	46
2022-09-12	10:37:23	0.447596	478.323	FALSE	46
2022-09-12	10:37:23	0.170751	478.494	FALSE	46
2022-09-12	10:37:23	0.332583	478.827	FALSE	46
2022-09-12	10:37:23	0.232328	479.059	FALSE	46
2022-09-12	10:37:24	0.334211	479.393	FALSE	46
2022-09-12	10:37:24	0.358741	479.752	FALSE	46
2022-09-12	10:37:24	0.257112	480.009	FALSE	46
2022-09-12	10:37:24	0.438944	480.448	FALSE	46
2022-09-12	10:37:25	0.285051	480.733	FALSE	46
2022-09-12	10:37:25	0.470751	481.204	FALSE	46
2022-09-12	10:37:25	0.198486	481.402	FALSE	46
2022-09-12	10:37:26	0.477774	481.88	FALSE	46
2022-09-12	10:37:26	0.199911	482.08	FALSE	46
2022-09-12	10:37:26	0.494516	482.574	FALSE	46
2022-09-12	10:37:26	0.156145	482.731	FALSE	46
2022-09-12	10:37:27	0.493142	483.224	FALSE	46
2022-09-12	10:37:27	0.301794	483.526	FALSE	46
2022-09-12	10:37:27	0.40612	483.932	FALSE	46
2022-09-12	10:37:27	0.287188	484.219	FALSE	46
2022-09-12	10:37:28	0.34958	484.568	FALSE	46
2022-09-12	10:37:28	0.439555	485.008	FALSE	46
2022-09-12	10:37:28	0.268308	485.276	FALSE	46
2022-09-12	10:37:28	0.391107	485.667	FALSE	46
2022-09-12	10:37:29	0.247596	485.915	FALSE	46
2022-09-12	10:37:29	0.477723	486.393	FALSE	46
2022-09-12	10:37:29	0.293601	486.686	FALSE	46
2022-09-12	10:37:30	0.428919	487.115	FALSE	46
2022-09-12	10:37:30	0.207901	487.323	FALSE	46
2022-09-12	10:37:30	0.6164	487.94	FALSE	46
2022-09-12	10:37:30	0.191616	488.131	FALSE	46
2022-09-12	10:37:31	0.73757	488.869	FALSE	46
2022-09-12	10:37:31	0.241896	489.111	FALSE	46
2022-09-12	10:37:31	0.634008	489.745	FALSE	46
2022-09-12	10:37:31	0.665407	490.41	FALSE	46
2022-09-12	10:37:32	0.571158	490.981	FALSE	46
2022-09-12	10:37:32	0.435433	491.417	FALSE	46
2022-09-12	10:37:32	0.408715	491.825	FALSE	46
2022-09-12	10:37:32	0.241285	492.067	FALSE	46
2022-09-12	10:37:33	0.277672	492.344	FALSE	46
2022-09-12	10:37:33	0.372634	492.717	FALSE	46
2022-09-12	10:37:33	0.459198	493.176	FALSE	46
2022-09-12	10:37:34	0.643168	493.819	FALSE	46
2022-09-12	10:37:34	1.622	495.441	FALSE	46
2022-09-12	10:37:34	0.533346	495.975	FALSE	46
2022-09-12	10:37:34	0.465204	496.44	FALSE	46
2022-09-12	10:37:35	0.465153	496.905	FALSE	46
2022-09-12	10:37:35	0.257977	497.163	FALSE	46
2022-09-12	10:37:35	0.529122	497.692	FALSE	46
2022-09-12	10:37:35	0.198792	497.891	FALSE	46
2022-09-12	10:37:36	0.502405	498.393	FALSE	46
2022-09-12	10:37:36	0.332074	498.725	FALSE	46
2022-09-12	10:37:36	0.405407	499.131	FALSE	46
2022-09-12	10:37:36	2.24688	501.378	FALSE	46
2022-09-12	10:37:37	0.478588	501.856	FALSE	46
2022-09-12	10:37:37	0.972634	502.829	FALSE	46
2022-09-12	10:37:37	0.367036	503.196	FALSE	46
2022-09-12	10:37:37	0.635484	503.831	FALSE	46
2022-09-12	10:37:38	0.345	504.176	FALSE	46
2022-09-12	10:37:38	0.367595	504.544	FALSE	46
2022-09-12	10:37:38	1.84749	506.392	FALSE	46
2022-09-12	10:37:39	0.318486	506.71	FALSE	46
2022-09-12	10:37:39	0.264949	506.975	FALSE	46
2022-09-12	10:37:39	0.280522	507.255	FALSE	46
2022-09-12	10:37:39	0.141794	507.397	FALSE	46
2022-09-12	10:37:40	0.385102	507.782	FALSE	46
2022-09-12	10:37:40	0.0941605	507.877	FALSE	46
2022-09-12	10:37:40	0.35528	508.232	FALSE	46
2022-09-12	10:37:40	0.0938042	508.326	FALSE	46
2022-09-12	10:37:41	0.411718	508.737	FALSE	46
2022-09-12	10:37:41	0.268817	509.006	FALSE	46
2022-09-12	10:37:41	0.246781	509.253	FALSE	46
2022-09-12	10:37:41	0.250344	509.503	FALSE	46
2022-09-12	10:37:42	0.314771	509.818	FALSE	46
2022-09-12	10:37:42	0.37584	510.194	FALSE	46
2022-09-12	10:37:42	0.339148	510.533	FALSE	46
2022-09-12	10:37:43	0.274771	510.808	FALSE	46
2022-09-12	10:37:43	0.273193	511.081	FALSE	46
2022-09-12	10:37:43	0.268715	511.35	FALSE	46
2022-09-12	10:37:43	-0.162684	511.35	FALSE	46
2022-09-12	10:37:44	-0.191641	511.35	FALSE	46
2022-09-12	10:37:44	-0.130216	511.35	FALSE	46
2022-09-12	10:37:44	-0.280954	511.35	FALSE	46
2022-09-12	10:37:44	-0.201157	511.35	FALSE	46
2022-09-12	10:37:45	-0.039529	511.35	FALSE	46
2022-09-12	10:37:45	0.175585	511.525	FALSE	46
2022-09-12	10:37:45	0.267138	511.792	FALSE	46
2022-09-12	10:37:45	0.316298	512.109	FALSE	46
2022-09-12	10:37:46	0.464593	512.573	FALSE	46
2022-09-12	10:37:46	0.151209	512.725	FALSE	46
2022-09-12	10:37:46	0.0473412	512.772	FALSE	46
2022-09-12	10:37:47	0.0160435	512.788	FALSE	46
2022-09-12	10:37:47	0.0659671	512.854	FALSE	46
2022-09-12	10:37:47	0.122863	512.977	FALSE	46
2022-09-12	10:37:47	0.112583	513.089	FALSE	46
2022-09-12	10:37:48	0.0295804	513.119	FALSE	46
2022-09-12	10:37:48	0.169173	513.288	FALSE	46
2022-09-12	10:37:48	0.164746	513.453	FALSE	46
2022-09-12	10:37:48	0.0370104	513.49	FALSE	46
2022-09-12	10:37:49	0.0138043	513.504	FALSE	46
2022-09-12	10:37:49	0.0839824	513.588	FALSE	46
2022-09-12	10:37:49	0.0774175	513.665	FALSE	46
2022-09-12	10:37:49	-0.00248066	513.665	FALSE	46
2022-09-12	10:37:50	-0.0135748	513.665	FALSE	46
2022-09-12	10:37:50	0.109479	513.775	FALSE	46
2022-09-12	10:37:50	0.262048	514.037	FALSE	46
2022-09-12	10:37:51	0.0893768	514.126	FALSE	46
2022-09-12	10:37:51	0.109529	514.235	FALSE	46
2022-09-12	10:37:51	0.1593	514.395	FALSE	46
2022-09-12	10:37:51	0.145611	514.54	FALSE	46
2022-09-12	10:37:52	0.0769086	514.617	FALSE	46
2022-09-12	10:37:52	0.129631	514.747	FALSE	46
2022-09-12	10:37:52	0.215127	514.962	FALSE	46
2022-09-12	10:37:52	0.14383	515.106	FALSE	46
2022-09-12	10:37:53	0.194669	515.301	FALSE	46
2022-09-12	10:37:53	0.125713	515.426	FALSE	46
2022-09-12	10:37:53	0.291005	515.717	FALSE	46
2022-09-12	10:37:53	0.295992	516.013	FALSE	46
2022-09-12	10:37:54	0.16271	516.176	FALSE	46
2022-09-12	10:37:54	0.290649	516.467	FALSE	46
2022-09-12	10:37:54	0.0900384	516.557	FALSE	46
2022-09-12	10:37:54	0.137367	516.694	FALSE	46
2022-09-12	10:37:55	0.0926338	516.787	FALSE	46
2022-09-12	10:37:55	0.14673	516.933	FALSE	46
2022-09-12	10:37:55	0.349936	517.283	FALSE	46
2022-09-12	10:37:56	0.395127	517.678	FALSE	46
2022-09-12	10:37:56	0.498893	518.177	FALSE	46
2022-09-12	10:37:56	0.472176	518.65	FALSE	46
2022-09-12	10:37:56	0.333244	518.983	FALSE	46
2022-09-12	10:37:57	0.6193	519.602	FALSE	46
2022-09-12	10:37:57	0.491056	520.093	FALSE	46
2022-09-12	10:37:57	0.343066	520.436	FALSE	46
2022-09-12	10:37:57	0.57014	521.006	FALSE	46
2022-09-12	10:37:58	0.982862	521.989	FALSE	46
2022-09-12	10:37:58	0.848868	522.838	FALSE	46
2022-09-12	10:37:58	1.45787	524.296	FALSE	46
2022-09-12	10:37:58	3.6221	527.918	1	47
2022-09-12	10:37:59	2.80429	530.722	FALSE	47
2022-09-12	10:37:59	0.402506	531.125	FALSE	47
2022-09-12	10:37:59	0.519962	531.645	FALSE	47
2022-09-12	10:38:00	0.679911	532.325	FALSE	47
2022-09-12	10:38:00	1.01961	533.344	FALSE	47
2022-09-12	10:38:00	0.606985	533.951	FALSE	47
2022-09-12	10:38:00	0.852684	534.804	FALSE	47
2022-09-12	10:38:01	0.686679	535.491	FALSE	47
2022-09-12	10:38:01	0.407697	535.898	FALSE	47
2022-09-12	10:38:01	0.921641	536.82	FALSE	47
2022-09-12	10:38:01	0.38383	537.204	FALSE	47
2022-09-12	10:38:02	0.470089	537.674	FALSE	47
2022-09-12	10:38:02	0.43243	538.106	FALSE	47
2022-09-12	10:38:02	0.551107	538.657	FALSE	47
2022-09-12	10:38:02	0.389987	539.047	FALSE	47
2022-09-12	10:38:03	0.404033	539.451	FALSE	47
2022-09-12	10:38:03	0.643423	540.095	FALSE	47
2022-09-12	10:38:03	0.466832	540.562	FALSE	47
2022-09-12	10:38:04	0.428715	540.99	FALSE	47
2022-09-12	10:38:04	0.572176	541.563	FALSE	47
2022-09-12	10:38:04	0.600623	542.163	FALSE	47
2022-09-12	10:38:04	0.502201	542.665	FALSE	47
2022-09-12	10:38:05	0.423423	543.089	FALSE	47
2022-09-12	10:38:05	0.689224	543.778	FALSE	47
2022-09-12	10:38:05	0.490751	544.269	FALSE	47
2022-09-12	10:38:05	0.349936	544.619	FALSE	47
2022-09-12	10:38:06	0.588969	545.208	FALSE	47
2022-09-12	10:38:06	0.457774	545.666	FALSE	47
2022-09-12	10:38:06	0.535636	546.201	FALSE	47
2022-09-12	10:38:06	0.505407	546.707	FALSE	47
2022-09-12	10:38:07	1.61711	548.324	FALSE	47
2022-09-12	10:38:07	2.66663	550.99	FALSE	47
2022-09-12	10:38:07	2.75869	553.749	FALSE	47
2022-09-12	10:38:08	2.55161	556.301	FALSE	47
2022-09-12	10:38:08	2.07849	558.379	FALSE	47
2022-09-12	10:38:08	1.31614	559.695	FALSE	47
2022-09-12	10:38:08	0.845051	560.54	FALSE	47
2022-09-12	10:38:09	0.977723	561.518	FALSE	47
2022-09-12	10:38:09	0.922913	562.441	FALSE	47
2022-09-12	10:38:09	0.871972	563.313	FALSE	47
2022-09-12	10:38:09	0.838333	564.151	FALSE	47
2022-09-12	10:38:10	0.282048	564.433	FALSE	47
2022-09-12	10:38:10	0.814364	565.248	FALSE	47
2022-09-12	10:38:10	0.498537	565.746	FALSE	47
2022-09-12	10:38:10	0.496603	566.243	FALSE	47
2022-09-12	10:38:11	0.585712	566.828	FALSE	47
2022-09-12	10:38:11	0.514975	567.343	FALSE	47
2022-09-12	10:38:11	0.60612	567.95	FALSE	47
2022-09-12	10:38:12	0.722303	568.672	FALSE	47
2022-09-12	10:38:12	0.847137	569.519	FALSE	47
2022-09-12	10:38:12	1.19426	570.713	FALSE	47
2022-09-12	10:38:12	1.66866	572.382	FALSE	47
2022-09-12	10:38:13	1.40001	573.782	FALSE	47
2022-09-12	10:38:13	1.97106	575.753	FALSE	47
2022-09-12	10:38:13	1.4906	577.244	FALSE	47
2022-09-12	10:38:13	4.2109	581.455	1	48
2022-09-12	10:38:14	1.32022	582.775	FALSE	48
2022-09-12	10:38:14	0.910903	583.686	FALSE	48
2022-09-12	10:38:14	0.777824	584.463	FALSE	48
2022-09-12	10:38:14	1.11202	585.575	FALSE	48
2022-09-12	10:38:15	0.416705	585.992	FALSE	48
2022-09-12	10:38:15	0.539351	586.532	FALSE	48
2022-09-12	10:38:15	0.427137	586.959	FALSE	48
2022-09-12	10:38:15	0.564237	587.523	FALSE	48
2022-09-12	10:38:16	0.367952	587.891	FALSE	48
2022-09-12	10:38:16	0.419555	588.31	FALSE	48
2022-09-12	10:38:16	0.817112	589.128	FALSE	48
2022-09-12	10:38:17	0.412023	589.54	FALSE	48
2022-09-12	10:38:17	0.576705	590.116	FALSE	48
2022-09-12	10:38:17	0.598486	590.715	FALSE	48
2022-09-12	10:38:17	1.00729	591.722	FALSE	48
2022-09-12	10:38:18	0.427748	592.15	FALSE	48
2022-09-12	10:38:18	0.616501	592.766	FALSE	48
2022-09-12	10:38:18	0.450242	593.217	FALSE	48
2022-09-12	10:38:18	1.27065	594.487	FALSE	48
2022-09-12	10:38:19	0.451667	594.939	FALSE	48
2022-09-12	10:38:19	1.02897	595.968	FALSE	48
2022-09-12	10:38:19	0.940216	596.908	FALSE	48
2022-09-12	10:38:19	1.58205	598.49	FALSE	48
2022-09-12	10:38:20	1.02129	599.511	FALSE	48
2022-09-12	10:38:20	0.620115	600.131	FALSE	48
2022-09-12	10:38:20	0.877468	601.009	FALSE	48
2022-09-12	10:38:21	2.15457	603.164	FALSE	48
2022-09-12	10:38:21	5.15833	608.322	1	49
2022-09-12	10:38:21	4.03848	612.36	1	50
2022-09-12	10:38:21	0.802099	613.162	FALSE	50
2022-09-12	10:38:22	0.418435	613.581	FALSE	50
2022-09-12	10:38:22	0.528715	614.11	FALSE	50
2022-09-12	10:38:22	0.187036	614.297	FALSE	50
2022-09-12	10:38:22	0.11472	614.411	FALSE	50
2022-09-12	10:38:23	0.0230664	614.434	FALSE	50
2022-09-12	10:38:23	-0.387417	614.434	FALSE	50
2022-09-12	10:38:23	-0.125839	614.434	FALSE	50
2022-09-12	10:38:23	-0.093931	614.434	FALSE	50
2022-09-12	10:38:24	-0.314338	614.434	FALSE	50
2022-09-12	10:38:24	-0.251386	614.434	FALSE	50
2022-09-12	10:38:24	-0.330419	614.434	FALSE	50
2022-09-12	10:38:25	-0.17785	614.434	FALSE	50
2022-09-12	10:38:25	-0.0946435	614.434	FALSE	50
2022-09-12	10:38:25	0.00734122	614.442	FALSE	50
2022-09-12	10:38:25	0.236501	614.678	FALSE	50
2022-09-12	10:38:26	0.353448	615.032	FALSE	50
2022-09-12	10:38:26	0.393601	615.425	FALSE	50
2022-09-12	10:38:26	0.393448	615.819	FALSE	50
2022-09-12	10:38:26	0.329275	616.148	FALSE	50
2022-09-12	10:38:27	0.26388	616.412	FALSE	50
2022-09-12	10:38:27	0.387901	616.8	FALSE	50
2022-09-12	10:38:27	0.440267	617.24	FALSE	50
2022-09-12	10:38:27	0.365509	617.606	FALSE	50
2022-09-12	10:38:28	0.378893	617.984	FALSE	50
2022-09-12	10:38:28	0.34729	618.332	FALSE	50
2022-09-12	10:38:28	0.31701	618.649	FALSE	50
2022-09-12	10:38:29	0.326679	618.975	FALSE	50
2022-09-12	10:38:29	0.360776	619.336	FALSE	50
2022-09-12	10:38:29	0.885712	620.222	FALSE	50
2022-09-12	10:38:29	0.791768	621.014	FALSE	50
2022-09-12	10:38:30	0.565254	621.579	FALSE	50
2022-09-12	10:38:30	0.344949	621.924	FALSE	50
2022-09-12	10:38:30	0.357468	622.281	FALSE	50
2022-09-12	10:38:30	0.50383	622.785	FALSE	50
2022-09-12	10:38:31	1.08073	623.866	FALSE	50
2022-09-12	10:38:31	0.543677	624.41	FALSE	50
2022-09-12	10:38:31	0.575993	624.986	FALSE	50
2022-09-12	10:38:31	0.382914	625.369	FALSE	50
2022-09-12	10:38:32	0.278028	625.647	FALSE	50
2022-09-12	10:38:32	0.104288	625.751	FALSE	50
2022-09-12	10:38:32	0.307392	626.058	FALSE	50
2022-09-12	10:38:33	0.100776	626.159	FALSE	50
2022-09-12	10:38:33	0.305814	626.465	FALSE	50
2022-09-12	10:38:33	0.268359	626.733	FALSE	50
2022-09-12	10:38:33	1.19126	627.924	FALSE	50
2022-09-12	10:38:34	2.37075	630.295	FALSE	50
2022-09-12	10:38:34	1.87833	632.174	FALSE	50
2022-09-12	10:38:34	4.734	636.908	1	51
2022-09-12	10:38:34	5.41497	642.322	1	52
2022-09-12	10:38:35	7.58897	649.911	1	53
2022-09-12	10:38:35	8.17029	658.082	1	54
2022-09-12	10:38:35	5.4051	663.487	1	55
2022-09-12	10:38:35	1.30897	664.796	FALSE	55
2022-09-12	10:38:36	1.05548	665.851	FALSE	55
2022-09-12	10:38:36	0.736247	666.588	FALSE	55
2022-09-12	10:38:36	0.516603	667.104	FALSE	55
2022-09-12	10:38:36	0.638588	667.743	FALSE	55
2022-09-12	10:38:37	0.639707	668.382	FALSE	55
2022-09-12	10:38:37	0.405204	668.788	FALSE	55
2022-09-12	10:38:37	0.510598	669.298	FALSE	55
2022-09-12	10:38:38	0.477468	669.776	FALSE	55
2022-09-12	10:38:38	0.571565	670.347	FALSE	55
2022-09-12	10:38:38	0.488308	670.836	FALSE	55
2022-09-12	10:38:38	0.596298	671.432	FALSE	55
2022-09-12	10:38:39	0.514517	671.946	FALSE	55
2022-09-12	10:38:39	0.513957	672.46	FALSE	55
2022-09-12	10:38:39	0.490344	672.951	FALSE	55
2022-09-12	10:38:39	0.507697	673.458	FALSE	55
2022-09-12	10:38:40	0.493041	673.951	FALSE	55
2022-09-12	10:38:40	0.502659	674.454	FALSE	55
2022-09-12	10:38:40	0.586628	675.041	FALSE	55
2022-09-12	10:38:40	0.753397	675.794	FALSE	55
2022-09-12	10:38:41	0.811107	676.605	FALSE	55
2022-09-12	10:38:41	0.948613	677.554	FALSE	55
2022-09-12	10:38:41	0.730496	678.284	FALSE	55
2022-09-12	10:38:42	0.559453	678.844	FALSE	55
2022-09-12	10:38:42	0.446374	679.29	FALSE	55
2022-09-12	10:38:42	0.425713	679.716	FALSE	55
2022-09-12	10:38:42	0.420674	680.137	FALSE	55
2022-09-12	10:38:43	0.428563	680.565	FALSE	55
2022-09-12	10:38:43	0.431056	680.996	FALSE	55
2022-09-12	10:38:43	0.429987	681.426	FALSE	55
2022-09-12	10:38:43	0.492379	681.919	FALSE	55
2022-09-12	10:38:44	0.412685	682.331	FALSE	55
2022-09-12	10:38:44	0.366476	682.698	FALSE	55
2022-09-12	10:38:44	0.517977	683.216	FALSE	55
2022-09-12	10:38:44	0.448206	683.664	FALSE	55
2022-09-12	10:38:45	0.482354	684.146	FALSE	55
2022-09-12	10:38:45	0.44841	684.595	FALSE	55
2022-09-12	10:38:45	0.373804	684.968	FALSE	55
2022-09-12	10:38:46	0.434059	685.402	FALSE	55
2022-09-12	10:38:46	0.580216	685.983	FALSE	55
2022-09-12	10:38:46	1.48627	687.469	FALSE	55
2022-09-12	10:38:46	4.68846	692.157	1	56
2022-09-12	10:38:47	5.25574	697.413	1	57
2022-09-12	10:38:47	2.89558	700.309	FALSE	57
2022-09-12	10:38:47	4.33879	704.648	1	58
2022-09-12	10:38:47	1.40246	706.05	FALSE	58
2022-09-12	10:38:48	3.82739	709.877	1	59
2022-09-12	10:38:48	4.91116	714.789	1	60
2022-09-12	10:38:48	7.19513	721.984	1	61
2022-09-12	10:38:48	7.35278	729.336	1	62
2022-09-12	10:38:49	5.00388	734.34	1	63
2022-09-12	10:38:49	4.46836	738.809	1	64
2022-09-12	10:38:49	2.9251	741.734	FALSE	64
2022-09-12	10:38:50	2.68892	744.423	FALSE	64
2022-09-12	10:38:50	4.97024	749.393	1	65
2022-09-12	10:38:50	8.39299	757.786	1	66
2022-09-12	10:38:50	8.36881	766.155	1	67
2022-09-12	10:38:51	5.6024	771.757	1	68
2022-09-12	10:38:51	4.31182	776.069	1	69
2022-09-12	10:38:51	4.11635	780.185	1	70
2022-09-12	10:38:51	1.23737	781.423	FALSE	70
2022-09-12	10:38:52	0.789173	782.212	FALSE	70
2022-09-12	10:38:52	0.561946	782.774	FALSE	70
2022-09-12	10:38:52	0.448053	783.222	FALSE	70
2022-09-12	10:38:52	0.5393	783.761	FALSE	70
2022-09-12	10:38:53	0.424898	784.186	FALSE	70
2022-09-12	10:38:53	0.45187	784.638	FALSE	70
2022-09-12	10:38:53	0.392227	785.03	FALSE	70
2022-09-12	10:38:53	0.46785	785.498	FALSE	70
2022-09-12	10:38:54	0.406781	785.905	FALSE	70
2022-09-12	10:38:54	0.418384	786.323	FALSE	70
2022-09-12	10:38:54	0.402303	786.726	FALSE	70
2022-09-12	10:38:55	0.458944	787.184	FALSE	70
2022-09-12	10:38:55	0.407087	787.592	FALSE	70
2022-09-12	10:38:55	0.425662	788.017	FALSE	70
2022-09-12	10:38:55	0.318791	788.336	FALSE	70
2022-09-12	10:38:56	0.452786	788.789	FALSE	70
2022-09-12	10:38:56	0.365102	789.154	FALSE	70
2022-09-12	10:38:56	0.161031	789.315	FALSE	70
2022-09-12	10:38:56	0.160369	789.475	FALSE	70
2022-09-12	10:38:57	0.523066	789.998	FALSE	70
2022-09-12	10:38:57	0.455229	790.454	FALSE	70
2022-09-12	10:38:57	0.468461	790.922	FALSE	70
2022-09-12	10:38:57	0.48841	791.41	FALSE	70
2022-09-12	10:38:58	0.483728	791.894	FALSE	70
2022-09-12	10:38:58	0.378893	792.273	FALSE	70
2022-09-12	10:38:58	0.468104	792.741	FALSE	70
2022-09-12	10:38:59	0.457468	793.199	FALSE	70
2022-09-12	10:38:59	0.453753	793.652	FALSE	70
2022-09-12	10:38:59	0.542099	794.194	FALSE	70
2022-09-12	10:38:59	0.462201	794.657	FALSE	70
2022-09-12	10:39:00	0.428919	795.086	FALSE	70
2022-09-12	10:39:00	0.377519	795.463	FALSE	70
2022-09-12	10:39:00	0.222201	795.685	FALSE	70
2022-09-12	10:39:00	0.169224	795.855	FALSE	70
2022-09-12	10:39:01	0.290903	796.145	FALSE	70
2022-09-12	10:39:01	0.332023	796.477	FALSE	70
2022-09-12	10:39:01	0.349377	796.827	FALSE	70
2022-09-12	10:39:01	0.374619	797.201	FALSE	70
2022-09-12	10:39:02	0.373295	797.575	FALSE	70
2022-09-12	10:39:02	0.401387	797.976	FALSE	70
2022-09-12	10:39:02	0.420522	798.397	FALSE	70
2022-09-12	10:39:03	0.515331	798.912	FALSE	70
2022-09-12	10:39:03	0.423982	799.336	FALSE	70
2022-09-12	10:39:03	0.462659	799.799	FALSE	70
2022-09-12	10:39:03	0.409275	800.208	FALSE	70
2022-09-12	10:39:04	0.397875	800.606	FALSE	70
2022-09-12	10:39:04	0.181641	800.787	FALSE	70
2022-09-12	10:39:04	0.0515142	800.839	FALSE	70
2022-09-12	10:39:04	0.0527865	800.892	FALSE	70
2022-09-12	10:39:05	0.0645422	800.956	FALSE	70
2022-09-12	10:39:05	-0.0496053	800.956	FALSE	70
2022-09-12	10:39:05	-0.104109	800.956	FALSE	70
2022-09-12	10:39:05	-0.104364	800.956	FALSE	70
2022-09-12	10:39:06	-0.109962	800.956	FALSE	70
2022-09-12	10:39:06	-0.00507608	800.956	FALSE	70
2022-09-12	10:39:06	0.120267	801.077	FALSE	70
2022-09-12	10:39:07	0.120318	801.197	FALSE	70
2022-09-12	10:39:07	-0.0266537	801.197	FALSE	70
2022-09-12	10:39:07	-0.0596816	801.197	FALSE	70
2022-09-12	10:39:07	0.000776325	801.198	FALSE	70
2022-09-12	10:39:08	-0.0559157	801.198	FALSE	70
2022-09-12	10:39:08	0.524338	801.722	FALSE	70
2022-09-12	10:39:08	0.271667	801.994	FALSE	70
2022-09-12	10:39:08	0.247596	802.241	FALSE	70
2022-09-12	10:39:09	0.193804	802.435	FALSE	70
2022-09-12	10:39:09	0.0768577	802.512	FALSE	70
2022-09-12	10:39:09	0.104339	802.616	FALSE	70
2022-09-12	10:39:09	0.164746	802.781	FALSE	70
2022-09-12	10:39:10	0.187545	802.969	FALSE	70
2022-09-12	10:39:10	0.346323	803.315	FALSE	70
2022-09-12	10:39:10	2.5705	805.885	FALSE	70
2022-09-12	10:39:11	4.58464	810.47	1	71
2022-09-12	10:39:11	5.51848	815.988	1	72
2022-09-12	10:39:11	4.09752	820.086	1	73
2022-09-12	10:39:11	1.3107	821.397	FALSE	73
2022-09-12	10:39:12	0.28215	821.679	FALSE	73
2022-09-12	10:39:12	0.665305	822.344	FALSE	73
2022-09-12	10:39:12	0.583219	822.927	FALSE	73
2022-09-12	10:39:12	0.453957	823.381	FALSE	73
2022-09-12	10:39:13	0.405153	823.786	FALSE	73
2022-09-12	10:39:13	0.482507	824.269	FALSE	73
2022-09-12	10:39:13	3.0995	827.368	1	74
2022-09-12	10:39:13	4.48266	831.851	1	75
2022-09-12	10:39:14	2.94011	834.791	FALSE	75
2022-09-12	10:39:14	4.52179	839.313	1	76
2022-09-12	10:39:14	2.74078	842.054	FALSE	76
2022-09-12	10:39:14	1.49263	843.546	FALSE	76
2022-09-12	10:39:15	0.500725	844.047	FALSE	76
2022-09-12	10:39:15	0.491412	844.539	FALSE	76
2022-09-12	10:39:15	0.509631	845.048	FALSE	76
2022-09-12	10:39:16	0.542914	845.591	FALSE	76
2022-09-12	10:39:16	0.364949	845.956	FALSE	76
2022-09-12	10:39:16	0.500471	846.457	FALSE	76
2022-09-12	10:39:16	0.511514	846.968	FALSE	76
2022-09-12	10:39:17	0.497926	847.466	FALSE	76
2022-09-12	10:39:17	0.361489	847.827	FALSE	76
2022-09-12	10:39:17	0.166578	847.994	FALSE	76
2022-09-12	10:39:17	0.278842	848.273	FALSE	76
2022-09-12	10:39:18	0.294211	848.567	FALSE	76
2022-09-12	10:39:18	2.02286	850.59	FALSE	76
2022-09-12	10:39:18	4.7968	855.387	1	77
2022-09-12	10:39:18	2.95782	858.345	FALSE	77
2022-09-12	10:39:19	1.06403	859.409	FALSE	77
2022-09-12	10:39:19	0.735229	860.144	FALSE	77
2022-09-12	10:39:19	0.923066	861.067	FALSE	77
2022-09-12	10:39:20	0.47411	861.541	FALSE	77
2022-09-12	10:39:20	0.272837	861.814	FALSE	77
2022-09-12	10:39:20	0.260471	862.074	FALSE	77
2022-09-12	10:39:20	0.0791987	862.154	FALSE	77
2022-09-12	10:39:21	0.396043	862.55	FALSE	77
2022-09-12	10:39:21	0.322964	862.873	FALSE	77
2022-09-12	10:39:21	0.732277	863.605	FALSE	77
2022-09-12	10:39:21	0.243982	863.849	FALSE	77
2022-09-12	10:39:22	0.206527	864.055	FALSE	77
2022-09-12	10:39:22	0.0881555	864.143	FALSE	77
2022-09-12	10:39:22	0.134924	864.278	FALSE	77
2022-09-12	10:39:22	-0.0314374	864.278	FALSE	77
2022-09-12	10:39:23	0.183066	864.461	FALSE	77
2022-09-12	10:39:23	0.145662	864.607	FALSE	77
2022-09-12	10:39:23	0.0624048	864.67	FALSE	77
2022-09-12	10:39:24	0.0884607	864.758	FALSE	77
2022-09-12	10:39:24	0.582863	865.341	FALSE	77
2022-09-12	10:39:24	0.562354	865.903	FALSE	77
2022-09-12	10:39:24	0.243881	866.147	FALSE	77
2022-09-12	10:39:25	0.353804	866.501	FALSE	77
2022-09-12	10:39:25	1.20678	867.708	FALSE	77
2022-09-12	10:39:25	0.297519	868.005	FALSE	77
2022-09-12	10:39:25	0.27757	868.283	FALSE	77
2022-09-12	10:39:26	0.348868	868.632	FALSE	77
2022-09-12	10:39:26	0.440725	869.072	FALSE	77
2022-09-12	10:39:26	0.207748	869.28	FALSE	77
2022-09-12	10:39:26	0.175534	869.456	FALSE	77
2022-09-12	10:39:27	0.310242	869.766	FALSE	77
2022-09-12	10:39:27	0.526425	870.292	FALSE	77
2022-09-12	10:39:27	0.298944	870.591	FALSE	77
2022-09-12	10:39:28	0.177316	870.769	FALSE	77
2022-09-12	10:39:28	0.259453	871.028	FALSE	77
2022-09-12	10:39:28	0.173193	871.201	FALSE	77
2022-09-12	10:39:28	0.282608	871.484	FALSE	77
2022-09-12	10:39:29	0.166323	871.65	FALSE	77
2022-09-12	10:39:29	0.26388	871.914	FALSE	77
2022-09-12	10:39:29	0.153346	872.067	FALSE	77
2022-09-12	10:39:29	0.330903	872.398	FALSE	77
2022-09-12	10:39:30	0.237316	872.636	FALSE	77
2022-09-12	10:39:30	0.214568	872.85	FALSE	77
2022-09-12	10:39:30	0.0983335	872.949	FALSE	77
2022-09-12	10:39:30	0.162252	873.111	FALSE	77
2022-09-12	10:39:31	0.163117	873.274	FALSE	77
2022-09-12	10:39:31	0.168155	873.442	FALSE	77
2022-09-12	10:39:31	0.248206	873.69	FALSE	77
2022-09-12	10:39:31	0.243372	873.934	FALSE	77
2022-09-12	10:39:32	0.35355	874.287	FALSE	77
2022-09-12	10:39:32	0.270293	874.557	FALSE	77
2022-09-12	10:39:32	0.405865	874.963	FALSE	77
2022-09-12	10:39:33	0.271718	875.235	FALSE	77
2022-09-12	10:39:33	0.307799	875.543	FALSE	77
2022-09-12	10:39:33	0.179555	875.722	FALSE	77
2022-09-12	10:39:33	0.317621	876.04	FALSE	77
2022-09-12	10:39:34	0.246832	876.287	FALSE	77
2022-09-12	10:39:34	0.0984862	876.385	FALSE	77
2022-09-12	10:39:34	0.0521249	876.437	FALSE	77
2022-09-12	10:39:34	0.118435	876.556	FALSE	77
2022-09-12	10:39:35	0.07813	876.634	FALSE	77
2022-09-12	10:39:35	0.0414379	876.675	FALSE	77
2022-09-12	10:39:35	-0.0040074	876.675	FALSE	77
2022-09-12	10:39:35	-0.00395648	876.675	FALSE	77
2022-09-12	10:39:36	0.0628119	876.738	FALSE	77
2022-09-12	10:39:36	0.185611	876.924	FALSE	77
2022-09-12	10:39:36	0.202812	877.127	FALSE	77
2022-09-12	10:39:37	0.0359417	877.163	FALSE	77
2022-09-12	10:39:37	0.19014	877.353	FALSE	77
2022-09-12	10:39:37	0.290038	877.643	FALSE	77
2022-09-12	10:39:37	0.347239	877.99	FALSE	77
2022-09-12	10:39:38	0.235992	878.226	FALSE	77
2022-09-12	10:39:38	0.187748	878.414	FALSE	77
2022-09-12	10:39:38	0.248817	878.663	FALSE	77
2022-09-12	10:39:38	0.280165	878.943	FALSE	77
2022-09-12	10:39:39	0.157265	879.1	FALSE	77
2022-09-12	10:39:39	0.16729	879.267	FALSE	77
2022-09-12	10:39:39	0.247799	879.515	FALSE	77
2022-09-12	10:39:39	0.25243	879.768	FALSE	77
2022-09-12	10:39:40	0.292888	880.06	FALSE	77
2022-09-12	10:39:40	0.177519	880.238	FALSE	77
2022-09-12	10:39:40	0.462252	880.7	FALSE	77
2022-09-12	10:39:41	0.357112	881.057	FALSE	77
2022-09-12	10:39:41	0.321845	881.379	FALSE	77
2022-09-12	10:39:41	0.192685	881.572	FALSE	77
2022-09-12	10:39:41	0.486018	882.058	FALSE	77
2022-09-12	10:39:42	0.125611	882.183	FALSE	77
2022-09-12	10:39:42	0.110395	882.294	FALSE	77
2022-09-12	10:39:42	0.0839824	882.378	FALSE	77
2022-09-12	10:39:42	0.118028	882.496	FALSE	77
2022-09-12	10:39:43	0.268919	882.765	FALSE	77
2022-09-12	10:39:43	0.243881	883.009	FALSE	77
2022-09-12	10:39:43	0.377316	883.386	FALSE	77
2022-09-12	10:39:43	0.260725	883.647	FALSE	77
2022-09-12	10:39:44	0.295636	883.942	FALSE	77
2022-09-12	10:39:44	0.373652	884.316	FALSE	77
2022-09-12	10:39:44	0.397316	884.713	FALSE	77
2022-09-12	10:39:45	0.400216	885.114	FALSE	77
2022-09-12	10:39:45	0.48556	885.599	FALSE	77
2022-09-12	10:39:45	0.510496	886.11	FALSE	77
2022-09-12	10:39:45	0.473753	886.583	FALSE	77
2022-09-12	10:39:46	0.456349	887.04	FALSE	77
2022-09-12	10:39:46	0.473295	887.513	FALSE	77
2022-09-12	10:39:46	0.473855	887.987	FALSE	77
2022-09-12	10:39:46	0.462608	888.449	FALSE	77
2022-09-12	10:39:47	0.460878	888.91	FALSE	77
2022-09-12	10:39:47	0.457112	889.367	FALSE	77
2022-09-12	10:39:47	0.480623	889.848	FALSE	77
2022-09-12	10:39:47	0.488359	890.336	FALSE	77
2022-09-12	10:39:48	0.496196	890.833	FALSE	77
2022-09-12	10:39:48	1.11655	891.949	FALSE	77
2022-09-12	10:39:48	0.31757	892.267	FALSE	77
2022-09-12	10:39:49	0.384033	892.651	FALSE	77
2022-09-12	10:39:49	0.393092	893.044	FALSE	77
2022-09-12	10:39:49	0.378893	893.423	FALSE	77
2022-09-12	10:39:49	0.497926	893.921	FALSE	77
2022-09-12	10:39:50	0.536145	894.457	FALSE	77
2022-09-12	10:39:50	0.316756	894.774	FALSE	77
2022-09-12	10:39:50	0.556399	895.33	FALSE	77
2022-09-12	10:39:50	0.339351	895.669	FALSE	77
2022-09-12	10:39:51	0.628664	896.298	FALSE	77
2022-09-12	10:39:51	0.346069	896.644	FALSE	77
2022-09-12	10:39:51	0.424237	897.068	FALSE	77
2022-09-12	10:39:51	0.432125	897.5	FALSE	77
2022-09-12	10:39:52	0.550852	898.051	FALSE	77
2022-09-12	10:39:52	0.314415	898.366	FALSE	77
2022-09-12	10:39:52	0.466272	898.832	FALSE	77
2022-09-12	10:39:52	0.37472	899.207	FALSE	77
2022-09-12	10:39:53	0.454975	899.662	FALSE	77
2022-09-12	10:39:53	0.438283	900.1	FALSE	77
2022-09-12	10:39:53	0.409886	900.51	FALSE	77
2022-09-12	10:39:54	0.499555	901.009	FALSE	77
2022-09-12	10:39:54	0.444593	901.454	FALSE	77
2022-09-12	10:39:54	0.509987	901.964	FALSE	77
2022-09-12	10:39:54	0.833397	902.797	FALSE	77
2022-09-12	10:39:55	0.834415	903.632	FALSE	77
2022-09-12	10:39:55	0.474822	904.107	FALSE	77
2022-09-12	10:39:55	0.731158	904.838	FALSE	77
2022-09-12	10:39:55	1.58398	906.422	FALSE	77
2022-09-12	10:39:56	0.676094	907.098	FALSE	77
2022-09-12	10:39:56	2.37238	909.47	FALSE	77
2022-09-12	10:39:56	2.78683	912.257	FALSE	77
2022-09-12	10:39:56	2.19859	914.456	FALSE	77
2022-09-12	10:39:57	1.24902	915.705	FALSE	77
2022-09-12	10:39:57	0.913397	916.618	FALSE	77
2022-09-12	10:39:57	1.03681	917.655	FALSE	77
2022-09-12	10:39:58	1.02042	918.675	FALSE	77
2022-09-12	10:39:58	1.06963	919.745	FALSE	77
2022-09-12	10:39:58	0.872888	920.618	FALSE	77
2022-09-12	10:39:58	0.434211	921.052	FALSE	77
2022-09-12	10:39:59	0.484288	921.536	FALSE	77
2022-09-12	10:39:59	0.477112	922.013	FALSE	77
2022-09-12	10:39:59	0.387595	922.401	FALSE	77
2022-09-12	10:39:59	0.444695	922.846	FALSE	77
2022-09-12	10:40:00	0.476349	923.322	FALSE	77
2022-09-12	10:40:00	0.485509	923.808	FALSE	77
2022-09-12	10:40:00	0.391616	924.199	FALSE	77
2022-09-12	10:40:00	0.477367	924.677	FALSE	77
2022-09-12	10:40:01	0.702099	925.379	FALSE	77
2022-09-12	10:40:01	0.644033	926.023	FALSE	77
2022-09-12	10:40:01	1.33752	927.36	FALSE	77
2022-09-12	10:40:02	1.36994	928.73	FALSE	77
2022-09-12	10:40:02	0.72785	929.458	FALSE	77
2022-09-12	10:40:02	0.396959	929.855	FALSE	77
2022-09-12	10:40:02	0.382455	930.237	FALSE	77
2022-09-12	10:40:03	0.370394	930.608	FALSE	77
2022-09-12	10:40:03	0.33299	930.941	FALSE	77
2022-09-12	10:40:03	0.40042	931.341	FALSE	77
2022-09-12	10:40:03	0.211514	931.553	FALSE	77
2022-09-12	10:40:04	0.255789	931.809	FALSE	77
2022-09-12	10:40:04	0.328766	932.137	FALSE	77
2022-09-12	10:40:04	0.299657	932.437	FALSE	77
2022-09-12	10:40:04	0.325	932.762	FALSE	77
2022-09-12	10:40:05	0.36612	933.128	FALSE	77
2022-09-12	10:40:05	0.348868	933.477	FALSE	77
2022-09-12	10:40:05	0.379962	933.857	FALSE	77
2022-09-12	10:40:06	0.350954	934.208	FALSE	77
2022-09-12	10:40:06	0.389326	934.597	FALSE	77
2022-09-12	10:40:06	0.366578	934.964	FALSE	77
2022-09-12	10:40:06	0.249224	935.213	FALSE	77
2022-09-12	10:40:07	0.188461	935.401	FALSE	77
2022-09-12	10:40:07	0.16841	935.57	FALSE	77
2022-09-12	10:40:07	0.213804	935.784	FALSE	77
2022-09-12	10:40:07	0.22042	936.004	FALSE	77
2022-09-12	10:40:08	0.280165	936.284	FALSE	77
2022-09-12	10:40:08	0.253957	936.538	FALSE	77
2022-09-12	10:40:08	0.247596	936.786	FALSE	77
2022-09-12	10:40:08	0.316552	937.102	FALSE	77
2022-09-12	10:40:09	0.193346	937.296	FALSE	77
2022-09-12	10:40:09	0.294822	937.591	FALSE	77
2022-09-12	10:40:09	0.192939	937.783	FALSE	77
2022-09-12	10:40:10	0.189682	937.973	FALSE	77
2022-09-12	10:40:10	0.375433	938.349	FALSE	77
2022-09-12	10:40:10	0.363117	938.712	FALSE	77
2022-09-12	10:40:10	0.428868	939.141	FALSE	77

## Sheet: Sunny_harness_2022912103439
						**GoPro Fitting: 1023
2022-09-12	10:34:39	0.138995
2022-09-12	10:34:40	0.151514
2022-09-12	10:34:40	0.113041
2022-09-12	10:34:40	0.10729
2022-09-12	10:34:40	0.102303
2022-09-12	10:34:41	0.113906
2022-09-12	10:34:41	0.168257
2022-09-12	10:34:41	0.170242
2022-09-12	10:34:41	0.18042
2022-09-12	10:34:42	0.171514
2022-09-12	10:34:42	0.173702
2022-09-12	10:34:42	0.186018
2022-09-12	10:34:42	0.204288
2022-09-12	10:34:43	0.212685
2022-09-12	10:34:43	0.220573
2022-09-12	10:34:43	0.22444
2022-09-12	10:34:43	0.229326
2022-09-12	10:34:44	0.212583
2022-09-12	10:34:44	0.222099
2022-09-12	10:34:44	0.245153
2022-09-12	10:34:45	0.233652
2022-09-12	10:34:45	0.227646
2022-09-12	10:34:45	0.243931
2022-09-12	10:34:45	0.233499
2022-09-12	10:34:46	0.16215
2022-09-12	10:34:46	0.269682
2022-09-12	10:34:46	0.225204
2022-09-12	10:34:46	0.241641
2022-09-12	10:34:47	0.22388
2022-09-12	10:34:47	0.215942
2022-09-12	10:34:47	0.192532
2022-09-12	10:34:47	0.411412
2022-09-12	10:34:48	0.426272
2022-09-12	10:34:48	0.366222
2022-09-12	10:34:48	0.28042
2022-09-12	10:34:49	0.277825
2022-09-12	10:34:49	0.421641
2022-09-12	10:34:49	0.41243
2022-09-12	10:34:49	0.362303
2022-09-12	10:34:50	0.509936
2022-09-12	10:34:50	0.671158
2022-09-12	10:34:50	2.70836
2022-09-12	10:34:50	0.5993
2022-09-12	10:34:51	1.18001
2022-09-12	10:34:51	0.638995
2022-09-12	10:34:51	1.51513
2022-09-12	10:34:51	1.21645
2022-09-12	10:34:52	0.301285
2022-09-12	10:34:52	0.355077
2022-09-12	10:34:52	0.384033
2022-09-12	10:34:53	0.265102
2022-09-12	10:34:53	0.328003
2022-09-12	10:34:53	0.192277
2022-09-12	10:34:53	0.221794
2022-09-12	10:34:54	0.252532
2022-09-12	10:34:54	0.120216
2022-09-12	10:34:54	0.275382
2022-09-12	10:34:54	0.317316
2022-09-12	10:34:55	1.87859
2022-09-12	10:34:55	0.177875
2022-09-12	10:34:55	0.390242
2022-09-12	10:34:55	0.182659
2022-09-12	10:34:56	0.297061
2022-09-12	10:34:56	0.435891
2022-09-12	10:34:56	0.245967
2022-09-12	10:34:57	0.0780791
2022-09-12	10:34:57	0.116349
2022-09-12	10:34:57	0.171667
2022-09-12	10:34:57	0.0216923
2022-09-12	10:34:58	0.277519
2022-09-12	10:34:58	0.0634226
2022-09-12	10:34:58	0.201285
2022-09-12	10:34:58	0.00876615
2022-09-12	10:34:59	0.215687
2022-09-12	10:34:59	-0.0281804
2022-09-12	10:34:59	-0.083702
2022-09-12	10:34:59	-0.169453
2022-09-12	10:35:00	-0.0545417
2022-09-12	10:35:00	-0.0708267
2022-09-12	10:35:00	-0.10701
2022-09-12	10:35:00	-0.0867554
2022-09-12	10:35:01	0.139708
2022-09-12	10:35:01	0.170089
2022-09-12	10:35:01	0.00545825
2022-09-12	10:35:02	-0.0318445
2022-09-12	10:35:02	-0.0878241
2022-09-12	10:35:02	-0.0857376
2022-09-12	10:35:02	-0.0664501
2022-09-12	10:35:03	-0.0853305
2022-09-12	10:35:03	0.0831681
2022-09-12	10:35:03	0.179555
2022-09-12	10:35:03	0.0473921
2022-09-12	10:35:04	0.00830812
2022-09-12	10:35:04	0.00790101
2022-09-12	10:35:04	0.022303
2022-09-12	10:35:04	0.11299
2022-09-12	10:35:05	0.0819468
2022-09-12	10:35:05	0.0184862
2022-09-12	10:35:05	0.150598
2022-09-12	10:35:06	0.0982317
2022-09-12	10:35:06	0.14673
2022-09-12	10:35:06	0.0766032
2022-09-12	10:35:06	-0.0110303
2022-09-12	10:35:07	0.0710053
2022-09-12	10:35:07	0.1707
2022-09-12	10:35:07	-0.0126079
2022-09-12	10:35:07	0.110598
2022-09-12	10:35:08	0.124237
2022-09-12	10:35:08	0.0968069
2022-09-12	10:35:08	0.0295804
2022-09-12	10:35:08	1.81691
2022-09-12	10:35:09	0.649478
2022-09-12	10:35:09	0.183982
2022-09-12	10:35:09	0.195636
2022-09-12	10:35:10	0.335484
2022-09-12	10:35:10	0.976807
2022-09-12	10:35:10	1.68556
2022-09-12	10:35:10	0.193295
2022-09-12	10:35:11	1.43553
2022-09-12	10:35:11	0.399199
2022-09-12	10:35:11	1.21146
2022-09-12	10:35:11	2.4964
2022-09-12	10:35:12	0.459046
2022-09-12	10:35:12	0.471667
2022-09-12	10:35:12	1.71894
2022-09-12	10:35:12	0.423372
2022-09-12	10:35:13	0.55584
2022-09-12	10:35:13	0.847697
2022-09-12	10:35:13	0.272074
2022-09-12	10:35:14	0.63986
2022-09-12	10:35:14	1.20123
2022-09-12	10:35:14	1.3081
2022-09-12	10:35:14	1.22011
2022-09-12	10:35:15	0.333041
2022-09-12	10:35:15	0.284237
2022-09-12	10:35:15	0.407799
2022-09-12	10:35:15	0.160878
2022-09-12	10:35:16	0.186374
2022-09-12	10:35:16	0.0930918
2022-09-12	10:35:16	0.290547
2022-09-12	10:35:16	0.390547
2022-09-12	10:35:17	0.376807
2022-09-12	10:35:17	0.306781
2022-09-12	10:35:17	0.261896
2022-09-12	10:35:17	0.246374
2022-09-12	10:35:18	0.226883
2022-09-12	10:35:18	0.243372
2022-09-12	10:35:18	0.241132
2022-09-12	10:35:19	0.204186
2022-09-12	10:35:19	0.176043
2022-09-12	10:35:19	0.233601
2022-09-12	10:35:19	0.169122
2022-09-12	10:35:20	0.242099
2022-09-12	10:35:20	0.296196
2022-09-12	10:35:20	0.362659
2022-09-12	10:35:20	0.428919
2022-09-12	10:35:21	0.547086
2022-09-12	10:35:21	0.574975
2022-09-12	10:35:21	0.521132
2022-09-12	10:35:21	0.42444
2022-09-12	10:35:22	0.358486
2022-09-12	10:35:22	0.30841
2022-09-12	10:35:22	0.28383
2022-09-12	10:35:23	0.362761
2022-09-12	10:35:23	0.961896
2022-09-12	10:35:23	0.677468
2022-09-12	10:35:23	0.285407
2022-09-12	10:35:24	0.344186
2022-09-12	10:35:24	0.161794
2022-09-12	10:35:24	0.0978246
2022-09-12	10:35:24	0.114669
2022-09-12	10:35:25	-0.00609391
2022-09-12	10:35:25	0.0311071
2022-09-12	10:35:25	-0.0187657
2022-09-12	10:35:25	0.00703587
2022-09-12	10:35:26	-0.0507758
2022-09-12	10:35:26	-0.188333
2022-09-12	10:35:26	-0.307519
2022-09-12	10:35:27	-0.259783
2022-09-12	10:35:27	-0.265483
2022-09-12	10:35:27	-0.150012
2022-09-12	10:35:27	-0.250369
2022-09-12	10:35:28	-0.170928
2022-09-12	10:35:28	-0.10818
2022-09-12	10:35:28	-0.162837
2022-09-12	10:35:28	-0.0810557
2022-09-12	10:35:29	-0.146297
2022-09-12	10:35:29	-0.145178
2022-09-12	10:35:29	-0.160496
2022-09-12	10:35:29	-0.165432
2022-09-12	10:35:30	-0.0179005
2022-09-12	10:35:30	-0.0456359
2022-09-12	10:35:30	-0.0241601
2022-09-12	10:35:31	0.0411834
2022-09-12	10:35:31	0.228054
2022-09-12	10:35:31	3.06057
2022-09-12	10:35:31	1.09528
2022-09-12	10:35:32	0.321489
2022-09-12	10:35:32	0.275941
2022-09-12	10:35:32	0.25299
2022-09-12	10:35:32	0.280623
2022-09-12	10:35:33	0.247036
2022-09-12	10:35:33	0.277774
2022-09-12	10:35:33	0.286222
2022-09-12	10:35:33	0.321947
2022-09-12	10:35:34	0.307697
2022-09-12	10:35:34	0.302863
2022-09-12	10:35:34	0.299809
2022-09-12	10:35:34	0.268664
2022-09-12	10:35:35	0.394364
2022-09-12	10:35:35	0.456196
2022-09-12	10:35:35	0.84215
2022-09-12	10:35:36	0.57355
2022-09-12	10:35:36	1.87955
2022-09-12	10:35:36	0.29299
2022-09-12	10:35:36	0.236043
2022-09-12	10:35:37	0.421082
2022-09-12	10:35:37	2.52958
2022-09-12	10:35:37	0.401692
2022-09-12	10:35:37	0.44897
2022-09-12	10:35:38	1.03558
2022-09-12	10:35:38	0.34327
2022-09-12	10:35:38	0.214873
2022-09-12	10:35:38	0.245102
2022-09-12	10:35:39	0.859758
2022-09-12	10:35:39	0.333092
2022-09-12	10:35:39	0.456654
2022-09-12	10:35:40	0.381998
2022-09-12	10:35:40	0.38673
2022-09-12	10:35:40	0.432277
2022-09-12	10:35:40	0.392176
2022-09-12	10:35:41	0.636552
2022-09-12	10:35:41	0.358995
2022-09-12	10:35:41	0.386323
2022-09-12	10:35:41	0.337366
2022-09-12	10:35:42	0.407392
2022-09-12	10:35:42	0.487494
2022-09-12	10:35:42	0.608257
2022-09-12	10:35:42	0.560725
2022-09-12	10:35:43	0.580776
2022-09-12	10:35:43	0.504186
2022-09-12	10:35:43	0.491056
2022-09-12	10:35:44	0.503524
2022-09-12	10:35:44	0.527748
2022-09-12	10:35:44	0.625458
2022-09-12	10:35:44	0.542863
2022-09-12	10:35:45	0.540878
2022-09-12	10:35:45	0.462049
2022-09-12	10:35:45	0.452328
2022-09-12	10:35:45	0.419351
2022-09-12	10:35:46	0.399046
2022-09-12	10:35:46	0.369886
2022-09-12	10:35:46	0.383982
2022-09-12	10:35:46	0.362099
2022-09-12	10:35:47	0.389835
2022-09-12	10:35:47	0.438079
2022-09-12	10:35:47	0.319606
2022-09-12	10:35:48	0.360573
2022-09-12	10:35:48	0.297875
2022-09-12	10:35:48	0.317468
2022-09-12	10:35:48	0.31869
2022-09-12	10:35:49	0.314669
2022-09-12	10:35:49	0.328511
2022-09-12	10:35:49	0.308155
2022-09-12	10:35:49	0.256705
2022-09-12	10:35:50	0.196501
2022-09-12	10:35:50	0.222049
2022-09-12	10:35:50	0.279046
2022-09-12	10:35:50	0.208919
2022-09-12	10:35:51	0.256705
2022-09-12	10:35:51	0.169377
2022-09-12	10:35:51	0.226323
2022-09-12	10:35:51	0.308562
2022-09-12	10:35:52	0.387952
2022-09-12	10:35:52	0.357672
2022-09-12	10:35:52	0.323779
2022-09-12	10:35:53	0.285255
2022-09-12	10:35:53	0.287188
2022-09-12	10:35:53	0.284542
2022-09-12	10:35:53	0.276552
2022-09-12	10:35:54	0.295942
2022-09-12	10:35:54	0.23416
2022-09-12	10:35:54	0.204186
2022-09-12	10:35:54	0.220369
2022-09-12	10:35:55	0.274771
2022-09-12	10:35:55	0.380725
2022-09-12	10:35:55	0.356298
2022-09-12	10:35:55	0.288766
2022-09-12	10:35:56	0.31014
2022-09-12	10:35:56	0.211718
2022-09-12	10:35:56	0.22902
2022-09-12	10:35:57	0.190903
2022-09-12	10:35:57	0.297621
2022-09-12	10:35:57	0.405713
2022-09-12	10:35:57	0.439198
2022-09-12	10:35:58	0.401692
2022-09-12	10:35:58	0.501336
2022-09-12	10:35:58	0.420369
2022-09-12	10:35:58	0.471412
2022-09-12	10:35:59	0.456705
2022-09-12	10:35:59	1.23879
2022-09-12	10:35:59	1.80693
2022-09-12	10:35:59	0.564186
2022-09-12	10:36:00	0.443626
2022-09-12	10:36:00	0.405509
2022-09-12	10:36:00	0.428206
2022-09-12	10:36:01	0.566934
2022-09-12	10:36:01	0.433906
2022-09-12	10:36:01	0.425662
2022-09-12	10:36:01	0.358232
2022-09-12	10:36:02	0.601743
2022-09-12	10:36:02	0.332786
2022-09-12	10:36:02	0.416552
2022-09-12	10:36:02	0.460013
2022-09-12	10:36:03	0.425254
2022-09-12	10:36:03	0.397265
2022-09-12	10:36:03	0.415636
2022-09-12	10:36:03	0.413804
2022-09-12	10:36:04	0.396196
2022-09-12	10:36:04	0.398944
2022-09-12	10:36:04	0.366781
2022-09-12	10:36:05	0.415992
2022-09-12	10:36:05	0.38271
2022-09-12	10:36:05	0.311056
2022-09-12	10:36:05	0.338944
2022-09-12	10:36:06	0.298486
2022-09-12	10:36:06	0.49243
2022-09-12	10:36:06	1.90927
2022-09-12	10:36:06	3.65808
2022-09-12	10:36:07	2.47569
2022-09-12	10:36:07	1.07777
2022-09-12	10:36:07	0.376043
2022-09-12	10:36:07	0.292634
2022-09-12	10:36:08	0.438232
2022-09-12	10:36:08	0.456909
2022-09-12	10:36:08	0.514771
2022-09-12	10:36:08	0.416501
2022-09-12	10:36:09	0.617875
2022-09-12	10:36:09	0.344644
2022-09-12	10:36:09	0.290598
2022-09-12	10:36:10	0.165102
2022-09-12	10:36:10	0.223982
2022-09-12	10:36:10	2.19874
2022-09-12	10:36:10	2.97721
2022-09-12	10:36:11	1.99966
2022-09-12	10:36:11	2.28088
2022-09-12	10:36:11	1.51146
2022-09-12	10:36:11	2.12612
2022-09-12	10:36:12	0.676756
2022-09-12	10:36:12	1.38449
2022-09-12	10:36:12	1.39156
2022-09-12	10:36:12	0.660166
2022-09-12	10:36:13	0.489224
2022-09-12	10:36:13	0.505051
2022-09-12	10:36:13	0.363881
2022-09-12	10:36:14	0.339097
2022-09-12	10:36:14	0.376501
2022-09-12	10:36:14	0.339097
2022-09-12	10:36:14	0.437825
2022-09-12	10:36:15	0.418283
2022-09-12	10:36:15	0.407901
2022-09-12	10:36:15	0.435178
2022-09-12	10:36:15	0.447494
2022-09-12	10:36:16	0.445916
2022-09-12	10:36:16	0.430954
2022-09-12	10:36:16	0.414466
2022-09-12	10:36:16	0.425662
2022-09-12	10:36:17	0.433957
2022-09-12	10:36:17	0.420827
2022-09-12	10:36:17	0.442965
2022-09-12	10:36:18	0.472583
2022-09-12	10:36:18	0.419097
2022-09-12	10:36:18	0.334924
2022-09-12	10:36:18	0.630292
2022-09-12	10:36:19	0.629173
2022-09-12	10:36:19	0.597061
2022-09-12	10:36:19	0.657417
2022-09-12	10:36:19	1.71757
2022-09-12	10:36:20	1.77075
2022-09-12	10:36:20	2.80378
2022-09-12	10:36:20	3.74276
2022-09-12	10:36:20	2.18546
2022-09-12	10:36:21	3.59487
2022-09-12	10:36:21	1.88541
2022-09-12	10:36:21	1.00871
2022-09-12	10:36:22	1.7962
2022-09-12	10:36:22	0.453804
2022-09-12	10:36:22	0.338537
2022-09-12	10:36:22	0.442965
2022-09-12	10:36:23	0.246629
2022-09-12	10:36:23	0.345763
2022-09-12	10:36:23	0.308003
2022-09-12	10:36:23	0.416043
2022-09-12	10:36:24	0.455178
2022-09-12	10:36:24	0.539809
2022-09-12	10:36:24	0.63299
2022-09-12	10:36:24	0.786272
2022-09-12	10:36:25	0.710089
2022-09-12	10:36:25	0.757316
2022-09-12	10:36:25	0.605204
2022-09-12	10:36:25	0.626476
2022-09-12	10:36:26	0.68556
2022-09-12	10:36:26	1.34637
2022-09-12	10:36:26	1.07197
2022-09-12	10:36:27	1.11004
2022-09-12	10:36:27	1.09732
2022-09-12	10:36:27	1.29131
2022-09-12	10:36:27	1.43798
2022-09-12	10:36:28	1.4505
2022-09-12	10:36:28	2.17543
2022-09-12	10:36:28	2.26128
2022-09-12	10:36:28	2.32561
2022-09-12	10:36:29	1.77584
2022-09-12	10:36:29	0.946679
2022-09-12	10:36:29	0.83126
2022-09-12	10:36:29	0.856298
2022-09-12	10:36:30	0.840674
2022-09-12	10:36:30	0.840827
2022-09-12	10:36:30	1.34393
2022-09-12	10:36:31	1.45385
2022-09-12	10:36:31	2.06693
2022-09-12	10:36:31	1.98581
2022-09-12	10:36:31	1.62556
2022-09-12	10:36:32	2.32851
2022-09-12	10:36:32	3.50439
2022-09-12	10:36:32	4.2138
2022-09-12	10:36:32	4.91426
2022-09-12	10:36:33	4.25574
2022-09-12	10:36:33	4.38215
2022-09-12	10:36:33	3.11645
2022-09-12	10:36:33	3.9682
2022-09-12	10:36:34	3.43141
2022-09-12	10:36:34	5.26988
2022-09-12	10:36:34	7.93619
2022-09-12	10:36:35	7.50769
2022-09-12	10:36:35	5.94113
2022-09-12	10:36:35	5.08912
2022-09-12	10:36:35	4.8196
2022-09-12	10:36:36	4.16062
2022-09-12	10:36:36	3.11691
2022-09-12	10:36:36	5.28556
2022-09-12	10:36:36	6.99858
2022-09-12	10:36:37	6.44434
2022-09-12	10:36:37	4.49675
2022-09-12	10:36:37	5.20678
2022-09-12	10:36:37	5.71497
2022-09-12	10:36:38	6.07009
2022-09-12	10:36:38	4.78184
2022-09-12	10:36:38	3.74668
2022-09-12	10:36:39	3.3021
2022-09-12	10:36:39	4.55925
2022-09-12	10:36:39	4.70932
2022-09-12	10:36:39	1.73818
2022-09-12	10:36:40	1.80866
2022-09-12	10:36:40	5.89248
2022-09-12	10:36:40	10.6412
2022-09-12	10:36:40	8.3969
2022-09-12	10:36:41	7.17741
2022-09-12	10:36:41	5.06973
2022-09-12	10:36:41	1.94933
2022-09-12	10:36:41	2.65248
2022-09-12	10:36:42	3.86729
2022-09-12	10:36:42	4.62205
2022-09-12	10:36:42	4.57177
2022-09-12	10:36:43	4.56495
2022-09-12	10:36:43	6.61441
2022-09-12	10:36:43	7.6797
2022-09-12	10:36:43	8.80021
2022-09-12	10:36:44	7.24423
2022-09-12	10:36:44	5.79752
2022-09-12	10:36:44	1.13996
2022-09-12	10:36:44	0.328003
2022-09-12	10:36:45	0.420471
2022-09-12	10:36:45	0.178791
2022-09-12	10:36:45	0.230853
2022-09-12	10:36:45	0.511361
2022-09-12	10:36:46	0.823015
2022-09-12	10:36:46	0.387239
2022-09-12	10:36:46	0.215382
2022-09-12	10:36:46	0.313804
2022-09-12	10:36:47	0.284338
2022-09-12	10:36:47	0.269835
2022-09-12	10:36:47	0.104033
2022-09-12	10:36:48	0.0805218
2022-09-12	10:36:48	0.375026
2022-09-12	10:36:48	0.263728
2022-09-12	10:36:48	0.292685
2022-09-12	10:36:49	0.245509
2022-09-12	10:36:49	0.460623
2022-09-12	10:36:49	0.199809
2022-09-12	10:36:49	0.324084
2022-09-12	10:36:50	0.0375702
2022-09-12	10:36:50	0.522862
2022-09-12	10:36:50	0.241336
2022-09-12	10:36:50	0.817366
2022-09-12	10:36:51	0.341947
2022-09-12	10:36:51	0.378028
2022-09-12	10:36:51	0.36098
2022-09-12	10:36:52	0.276501
2022-09-12	10:36:52	0.393244
2022-09-12	10:36:52	0.25014
2022-09-12	10:36:52	0.428104
2022-09-12	10:36:53	0.358588
2022-09-12	10:36:53	0.43645
2022-09-12	10:36:53	0.224746
2022-09-12	10:36:53	0.465
2022-09-12	10:36:54	0.272074
2022-09-12	10:36:54	0.418893
2022-09-12	10:36:54	0.228512
2022-09-12	10:36:54	0.385051
2022-09-12	10:36:55	0.21014
2022-09-12	10:36:55	1.21172
2022-09-12	10:36:55	0.465204
2022-09-12	10:36:56	1.41701
2022-09-12	10:36:56	0.341743
2022-09-12	10:36:56	1.25833
2022-09-12	10:36:56	0.312481
2022-09-12	10:36:57	1.26586
2022-09-12	10:36:57	0.459911
2022-09-12	10:36:57	0.812226
2022-09-12	10:36:57	0.280674
2022-09-12	10:36:58	0.354975
2022-09-12	10:36:58	0.605356
2022-09-12	10:36:58	0.235891
2022-09-12	10:36:58	0.464949
2022-09-12	10:36:59	0.494975
2022-09-12	10:36:59	0.458588
2022-09-12	10:36:59	0.514313
2022-09-12	10:37:00	1.24419
2022-09-12	10:37:00	0.615331
2022-09-12	10:37:00	1.11243
2022-09-12	10:37:00	0.567799
2022-09-12	10:37:01	0.822557
2022-09-12	10:37:01	0.48897
2022-09-12	10:37:01	0.279148
2022-09-12	10:37:01	0.291972
2022-09-12	10:37:02	0.367952
2022-09-12	10:37:02	0.247799
2022-09-12	10:37:02	0.379606
2022-09-12	10:37:02	0.243881
2022-09-12	10:37:03	0.235127
2022-09-12	10:37:03	0.651667
2022-09-12	10:37:03	0.542303
2022-09-12	10:37:03	1.70103
2022-09-12	10:37:04	0.400573
2022-09-12	10:37:04	0.255076
2022-09-12	10:37:04	0.777163
2022-09-12	10:37:05	0.213295
2022-09-12	10:37:05	0.571972
2022-09-12	10:37:05	0.132634
2022-09-12	10:37:05	0.542914
2022-09-12	10:37:06	1.47884
2022-09-12	10:37:06	0.539046
2022-09-12	10:37:06	0.311769
2022-09-12	10:37:06	1.25497
2022-09-12	10:37:07	0.10729
2022-09-12	10:37:07	0.138486
2022-09-12	10:37:07	0.0917178
2022-09-12	10:37:07	-0.0716409
2022-09-12	10:37:08	-0.0401906
2022-09-12	10:37:08	-0.0324552
2022-09-12	10:37:08	0.0450002
2022-09-12	10:37:09	-0.0612084
2022-09-12	10:37:09	-0.231132
2022-09-12	10:37:09	-0.309554
2022-09-12	10:37:09	-0.250063
2022-09-12	10:37:10	-0.482938
2022-09-12	10:37:10	-0.347926
2022-09-12	10:37:10	-0.346195
2022-09-12	10:37:10	-0.179885
2022-09-12	10:37:11	-0.0891982
2022-09-12	10:37:11	-0.0251779
2022-09-12	10:37:11	-0.192455
2022-09-12	10:37:11	-0.0675697
2022-09-12	10:37:12	-0.0755086
2022-09-12	10:37:12	-0.0669081
2022-09-12	10:37:12	-0.142074
2022-09-12	10:37:13	-0.0108776
2022-09-12	10:37:13	0.16383
2022-09-12	10:37:13	0.0560435
2022-09-12	10:37:13	0.0819977
2022-09-12	10:37:14	0.023219
2022-09-12	10:37:14	0.187494
2022-09-12	10:37:14	0.0085117
2022-09-12	10:37:14	0.19528
2022-09-12	10:37:15	0.0137025
2022-09-12	10:37:15	0.190038
2022-09-12	10:37:15	-0.0255341
2022-09-12	10:37:15	0.217417
2022-09-12	10:37:16	0.135026
2022-09-12	10:37:16	0.0178755
2022-09-12	10:37:16	-0.203651
2022-09-12	10:37:17	-0.0618191
2022-09-12	10:37:17	0.0118196
2022-09-12	10:37:17	0.251463
2022-09-12	10:37:17	0.0308018
2022-09-12	10:37:18	0.279606
2022-09-12	10:37:18	0.14785
2022-09-12	10:37:18	0.252532
2022-09-12	10:37:18	0.137926
2022-09-12	10:37:19	0.255891
2022-09-12	10:37:19	0.271107
2022-09-12	10:37:19	0.236705
2022-09-12	10:37:19	0.221438
2022-09-12	10:37:20	0.264033
2022-09-12	10:37:20	0.286628
2022-09-12	10:37:20	0.301489
2022-09-12	10:37:20	0.16902
2022-09-12	10:37:21	0.193855
2022-09-12	10:37:21	0.362405
2022-09-12	10:37:21	0.208766
2022-09-12	10:37:22	0.383626
2022-09-12	10:37:22	0.246832
2022-09-12	10:37:22	0.425967
2022-09-12	10:37:22	0.1107
2022-09-12	10:37:23	0.447596
2022-09-12	10:37:23	0.170751
2022-09-12	10:37:23	0.332583
2022-09-12	10:37:23	0.232328
2022-09-12	10:37:24	0.334211
2022-09-12	10:37:24	0.358741
2022-09-12	10:37:24	0.257112
2022-09-12	10:37:24	0.438944
2022-09-12	10:37:25	0.285051
2022-09-12	10:37:25	0.470751
2022-09-12	10:37:25	0.198486
2022-09-12	10:37:26	0.477774
2022-09-12	10:37:26	0.199911
2022-09-12	10:37:26	0.494516
2022-09-12	10:37:26	0.156145
2022-09-12	10:37:27	0.493142
2022-09-12	10:37:27	0.301794
2022-09-12	10:37:27	0.40612
2022-09-12	10:37:27	0.287188
2022-09-12	10:37:28	0.34958
2022-09-12	10:37:28	0.439555
2022-09-12	10:37:28	0.268308
2022-09-12	10:37:28	0.391107
2022-09-12	10:37:29	0.247596
2022-09-12	10:37:29	0.477723
2022-09-12	10:37:29	0.293601
2022-09-12	10:37:30	0.428919
2022-09-12	10:37:30	0.207901
2022-09-12	10:37:30	0.6164
2022-09-12	10:37:30	0.191616
2022-09-12	10:37:31	0.73757
2022-09-12	10:37:31	0.241896
2022-09-12	10:37:31	0.634008
2022-09-12	10:37:31	0.665407
2022-09-12	10:37:32	0.571158
2022-09-12	10:37:32	0.435433
2022-09-12	10:37:32	0.408715
2022-09-12	10:37:32	0.241285
2022-09-12	10:37:33	0.277672
2022-09-12	10:37:33	0.372634
2022-09-12	10:37:33	0.459198
2022-09-12	10:37:34	0.643168
2022-09-12	10:37:34	1.622
2022-09-12	10:37:34	0.533346
2022-09-12	10:37:34	0.465204
2022-09-12	10:37:35	0.465153
2022-09-12	10:37:35	0.257977
2022-09-12	10:37:35	0.529122
2022-09-12	10:37:35	0.198792
2022-09-12	10:37:36	0.502405
2022-09-12	10:37:36	0.332074
2022-09-12	10:37:36	0.405407
2022-09-12	10:37:36	2.24688
2022-09-12	10:37:37	0.478588
2022-09-12	10:37:37	0.972634
2022-09-12	10:37:37	0.367036
2022-09-12	10:37:37	0.635484
2022-09-12	10:37:38	0.345
2022-09-12	10:37:38	0.367595
2022-09-12	10:37:38	1.84749
2022-09-12	10:37:39	0.318486
2022-09-12	10:37:39	0.264949
2022-09-12	10:37:39	0.280522
2022-09-12	10:37:39	0.141794
2022-09-12	10:37:40	0.385102
2022-09-12	10:37:40	0.0941605
2022-09-12	10:37:40	0.35528
2022-09-12	10:37:40	0.0938042
2022-09-12	10:37:41	0.411718
2022-09-12	10:37:41	0.268817
2022-09-12	10:37:41	0.246781
2022-09-12	10:37:41	0.250344
2022-09-12	10:37:42	0.314771
2022-09-12	10:37:42	0.37584
2022-09-12	10:37:42	0.339148
2022-09-12	10:37:43	0.274771
2022-09-12	10:37:43	0.273193
2022-09-12	10:37:43	0.268715
2022-09-12	10:37:43	-0.162684
2022-09-12	10:37:44	-0.191641
2022-09-12	10:37:44	-0.130216
2022-09-12	10:37:44	-0.280954
2022-09-12	10:37:44	-0.201157
2022-09-12	10:37:45	-0.039529
2022-09-12	10:37:45	0.175585
2022-09-12	10:37:45	0.267138
2022-09-12	10:37:45	0.316298
2022-09-12	10:37:46	0.464593
2022-09-12	10:37:46	0.151209
2022-09-12	10:37:46	0.0473412
2022-09-12	10:37:47	0.0160435
2022-09-12	10:37:47	0.0659671
2022-09-12	10:37:47	0.122863
2022-09-12	10:37:47	0.112583
2022-09-12	10:37:48	0.0295804
2022-09-12	10:37:48	0.169173
2022-09-12	10:37:48	0.164746
2022-09-12	10:37:48	0.0370104
2022-09-12	10:37:49	0.0138043
2022-09-12	10:37:49	0.0839824
2022-09-12	10:37:49	0.0774175
2022-09-12	10:37:49	-0.00248066
2022-09-12	10:37:50	-0.0135748
2022-09-12	10:37:50	0.109479
2022-09-12	10:37:50	0.262048
2022-09-12	10:37:51	0.0893768
2022-09-12	10:37:51	0.109529
2022-09-12	10:37:51	0.1593
2022-09-12	10:37:51	0.145611
2022-09-12	10:37:52	0.0769086
2022-09-12	10:37:52	0.129631
2022-09-12	10:37:52	0.215127
2022-09-12	10:37:52	0.14383
2022-09-12	10:37:53	0.194669
2022-09-12	10:37:53	0.125713
2022-09-12	10:37:53	0.291005
2022-09-12	10:37:53	0.295992
2022-09-12	10:37:54	0.16271
2022-09-12	10:37:54	0.290649
2022-09-12	10:37:54	0.0900384
2022-09-12	10:37:54	0.137367
2022-09-12	10:37:55	0.0926338
2022-09-12	10:37:55	0.14673
2022-09-12	10:37:55	0.349936
2022-09-12	10:37:56	0.395127
2022-09-12	10:37:56	0.498893
2022-09-12	10:37:56	0.472176
2022-09-12	10:37:56	0.333244
2022-09-12	10:37:57	0.6193
2022-09-12	10:37:57	0.491056
2022-09-12	10:37:57	0.343066
2022-09-12	10:37:57	0.57014
2022-09-12	10:37:58	0.982862
2022-09-12	10:37:58	0.848868
2022-09-12	10:37:58	1.45787
2022-09-12	10:37:58	3.6221
2022-09-12	10:37:59	2.80429
2022-09-12	10:37:59	0.402506
2022-09-12	10:37:59	0.519962
2022-09-12	10:38:00	0.679911
2022-09-12	10:38:00	1.01961
2022-09-12	10:38:00	0.606985
2022-09-12	10:38:00	0.852684
2022-09-12	10:38:01	0.686679
2022-09-12	10:38:01	0.407697
2022-09-12	10:38:01	0.921641
2022-09-12	10:38:01	0.38383
2022-09-12	10:38:02	0.470089
2022-09-12	10:38:02	0.43243
2022-09-12	10:38:02	0.551107
2022-09-12	10:38:02	0.389987
2022-09-12	10:38:03	0.404033
2022-09-12	10:38:03	0.643423
2022-09-12	10:38:03	0.466832
2022-09-12	10:38:04	0.428715
2022-09-12	10:38:04	0.572176
2022-09-12	10:38:04	0.600623
2022-09-12	10:38:04	0.502201
2022-09-12	10:38:05	0.423423
2022-09-12	10:38:05	0.689224
2022-09-12	10:38:05	0.490751
2022-09-12	10:38:05	0.349936
2022-09-12	10:38:06	0.588969
2022-09-12	10:38:06	0.457774
2022-09-12	10:38:06	0.535636
2022-09-12	10:38:06	0.505407
2022-09-12	10:38:07	1.61711
2022-09-12	10:38:07	2.66663
2022-09-12	10:38:07	2.75869
2022-09-12	10:38:08	2.55161
2022-09-12	10:38:08	2.07849
2022-09-12	10:38:08	1.31614
2022-09-12	10:38:08	0.845051
2022-09-12	10:38:09	0.977723
2022-09-12	10:38:09	0.922913
2022-09-12	10:38:09	0.871972
2022-09-12	10:38:09	0.838333
2022-09-12	10:38:10	0.282048
2022-09-12	10:38:10	0.814364
2022-09-12	10:38:10	0.498537
2022-09-12	10:38:10	0.496603
2022-09-12	10:38:11	0.585712
2022-09-12	10:38:11	0.514975
2022-09-12	10:38:11	0.60612
2022-09-12	10:38:12	0.722303
2022-09-12	10:38:12	0.847137
2022-09-12	10:38:12	1.19426
2022-09-12	10:38:12	1.66866
2022-09-12	10:38:13	1.40001
2022-09-12	10:38:13	1.97106
2022-09-12	10:38:13	1.4906
2022-09-12	10:38:13	4.2109
2022-09-12	10:38:14	1.32022
2022-09-12	10:38:14	0.910903
2022-09-12	10:38:14	0.777824
2022-09-12	10:38:14	1.11202
2022-09-12	10:38:15	0.416705
2022-09-12	10:38:15	0.539351
2022-09-12	10:38:15	0.427137
2022-09-12	10:38:15	0.564237
2022-09-12	10:38:16	0.367952
2022-09-12	10:38:16	0.419555
2022-09-12	10:38:16	0.817112
2022-09-12	10:38:17	0.412023
2022-09-12	10:38:17	0.576705
2022-09-12	10:38:17	0.598486
2022-09-12	10:38:17	1.00729
2022-09-12	10:38:18	0.427748
2022-09-12	10:38:18	0.616501
2022-09-12	10:38:18	0.450242
2022-09-12	10:38:18	1.27065
2022-09-12	10:38:19	0.451667
2022-09-12	10:38:19	1.02897
2022-09-12	10:38:19	0.940216
2022-09-12	10:38:19	1.58205
2022-09-12	10:38:20	1.02129
2022-09-12	10:38:20	0.620115
2022-09-12	10:38:20	0.877468
2022-09-12	10:38:21	2.15457
2022-09-12	10:38:21	5.15833
2022-09-12	10:38:21	4.03848
2022-09-12	10:38:21	0.802099
2022-09-12	10:38:22	0.418435
2022-09-12	10:38:22	0.528715
2022-09-12	10:38:22	0.187036
2022-09-12	10:38:22	0.11472
2022-09-12	10:38:23	0.0230664
2022-09-12	10:38:23	-0.387417
2022-09-12	10:38:23	-0.125839
2022-09-12	10:38:23	-0.093931
2022-09-12	10:38:24	-0.314338
2022-09-12	10:38:24	-0.251386
2022-09-12	10:38:24	-0.330419
2022-09-12	10:38:25	-0.17785
2022-09-12	10:38:25	-0.0946435
2022-09-12	10:38:25	0.00734122
2022-09-12	10:38:25	0.236501
2022-09-12	10:38:26	0.353448
2022-09-12	10:38:26	0.393601
2022-09-12	10:38:26	0.393448
2022-09-12	10:38:26	0.329275
2022-09-12	10:38:27	0.26388
2022-09-12	10:38:27	0.387901
2022-09-12	10:38:27	0.440267
2022-09-12	10:38:27	0.365509
2022-09-12	10:38:28	0.378893
2022-09-12	10:38:28	0.34729
2022-09-12	10:38:28	0.31701
2022-09-12	10:38:29	0.326679
2022-09-12	10:38:29	0.360776
2022-09-12	10:38:29	0.885712
2022-09-12	10:38:29	0.791768
2022-09-12	10:38:30	0.565254
2022-09-12	10:38:30	0.344949
2022-09-12	10:38:30	0.357468
2022-09-12	10:38:30	0.50383
2022-09-12	10:38:31	1.08073
2022-09-12	10:38:31	0.543677
2022-09-12	10:38:31	0.575993
2022-09-12	10:38:31	0.382914
2022-09-12	10:38:32	0.278028
2022-09-12	10:38:32	0.104288
2022-09-12	10:38:32	0.307392
2022-09-12	10:38:33	0.100776
2022-09-12	10:38:33	0.305814
2022-09-12	10:38:33	0.268359
2022-09-12	10:38:33	1.19126
2022-09-12	10:38:34	2.37075
2022-09-12	10:38:34	1.87833
2022-09-12	10:38:34	4.734
2022-09-12	10:38:34	5.41497
2022-09-12	10:38:35	7.58897
2022-09-12	10:38:35	8.17029
2022-09-12	10:38:35	5.4051
2022-09-12	10:38:35	1.30897
2022-09-12	10:38:36	1.05548
2022-09-12	10:38:36	0.736247
2022-09-12	10:38:36	0.516603
2022-09-12	10:38:36	0.638588
2022-09-12	10:38:37	0.639707
2022-09-12	10:38:37	0.405204
2022-09-12	10:38:37	0.510598
2022-09-12	10:38:38	0.477468
2022-09-12	10:38:38	0.571565
2022-09-12	10:38:38	0.488308
2022-09-12	10:38:38	0.596298
2022-09-12	10:38:39	0.514517
2022-09-12	10:38:39	0.513957
2022-09-12	10:38:39	0.490344
2022-09-12	10:38:39	0.507697
2022-09-12	10:38:40	0.493041
2022-09-12	10:38:40	0.502659
2022-09-12	10:38:40	0.586628
2022-09-12	10:38:40	0.753397
2022-09-12	10:38:41	0.811107
2022-09-12	10:38:41	0.948613
2022-09-12	10:38:41	0.730496
2022-09-12	10:38:42	0.559453
2022-09-12	10:38:42	0.446374
2022-09-12	10:38:42	0.425713
2022-09-12	10:38:42	0.420674
2022-09-12	10:38:43	0.428563
2022-09-12	10:38:43	0.431056
2022-09-12	10:38:43	0.429987
2022-09-12	10:38:43	0.492379
2022-09-12	10:38:44	0.412685
2022-09-12	10:38:44	0.366476
2022-09-12	10:38:44	0.517977
2022-09-12	10:38:44	0.448206
2022-09-12	10:38:45	0.482354
2022-09-12	10:38:45	0.44841
2022-09-12	10:38:45	0.373804
2022-09-12	10:38:46	0.434059
2022-09-12	10:38:46	0.580216
2022-09-12	10:38:46	1.48627
2022-09-12	10:38:46	4.68846
2022-09-12	10:38:47	5.25574
2022-09-12	10:38:47	2.89558
2022-09-12	10:38:47	4.33879
2022-09-12	10:38:47	1.40246
2022-09-12	10:38:48	3.82739
2022-09-12	10:38:48	4.91116
2022-09-12	10:38:48	7.19513
2022-09-12	10:38:48	7.35278
2022-09-12	10:38:49	5.00388
2022-09-12	10:38:49	4.46836
2022-09-12	10:38:49	2.9251
2022-09-12	10:38:50	2.68892
2022-09-12	10:38:50	4.97024
2022-09-12	10:38:50	8.39299
2022-09-12	10:38:50	8.36881
2022-09-12	10:38:51	5.6024
2022-09-12	10:38:51	4.31182
2022-09-12	10:38:51	4.11635
2022-09-12	10:38:51	1.23737
2022-09-12	10:38:52	0.789173
2022-09-12	10:38:52	0.561946
2022-09-12	10:38:52	0.448053
2022-09-12	10:38:52	0.5393
2022-09-12	10:38:53	0.424898
2022-09-12	10:38:53	0.45187
2022-09-12	10:38:53	0.392227
2022-09-12	10:38:53	0.46785
2022-09-12	10:38:54	0.406781
2022-09-12	10:38:54	0.418384
2022-09-12	10:38:54	0.402303
2022-09-12	10:38:55	0.458944
2022-09-12	10:38:55	0.407087
2022-09-12	10:38:55	0.425662
2022-09-12	10:38:55	0.318791
2022-09-12	10:38:56	0.452786
2022-09-12	10:38:56	0.365102
2022-09-12	10:38:56	0.161031
2022-09-12	10:38:56	0.160369
2022-09-12	10:38:57	0.523066
2022-09-12	10:38:57	0.455229
2022-09-12	10:38:57	0.468461
2022-09-12	10:38:57	0.48841
2022-09-12	10:38:58	0.483728
2022-09-12	10:38:58	0.378893
2022-09-12	10:38:58	0.468104
2022-09-12	10:38:59	0.457468
2022-09-12	10:38:59	0.453753
2022-09-12	10:38:59	0.542099
2022-09-12	10:38:59	0.462201
2022-09-12	10:39:00	0.428919
2022-09-12	10:39:00	0.377519
2022-09-12	10:39:00	0.222201
2022-09-12	10:39:00	0.169224
2022-09-12	10:39:01	0.290903
2022-09-12	10:39:01	0.332023
2022-09-12	10:39:01	0.349377
2022-09-12	10:39:01	0.374619
2022-09-12	10:39:02	0.373295
2022-09-12	10:39:02	0.401387
2022-09-12	10:39:02	0.420522
2022-09-12	10:39:03	0.515331
2022-09-12	10:39:03	0.423982
2022-09-12	10:39:03	0.462659
2022-09-12	10:39:03	0.409275
2022-09-12	10:39:04	0.397875
2022-09-12	10:39:04	0.181641
2022-09-12	10:39:04	0.0515142
2022-09-12	10:39:04	0.0527865
2022-09-12	10:39:05	0.0645422
2022-09-12	10:39:05	-0.0496053
2022-09-12	10:39:05	-0.104109
2022-09-12	10:39:05	-0.104364
2022-09-12	10:39:06	-0.109962
2022-09-12	10:39:06	-0.00507608
2022-09-12	10:39:06	0.120267
2022-09-12	10:39:07	0.120318
2022-09-12	10:39:07	-0.0266537
2022-09-12	10:39:07	-0.0596816
2022-09-12	10:39:07	0.000776325
2022-09-12	10:39:08	-0.0559157
2022-09-12	10:39:08	0.524338
2022-09-12	10:39:08	0.271667
2022-09-12	10:39:08	0.247596
2022-09-12	10:39:09	0.193804
2022-09-12	10:39:09	0.0768577
2022-09-12	10:39:09	0.104339
2022-09-12	10:39:09	0.164746
2022-09-12	10:39:10	0.187545
2022-09-12	10:39:10	0.346323
2022-09-12	10:39:10	2.5705
2022-09-12	10:39:11	4.58464
2022-09-12	10:39:11	5.51848
2022-09-12	10:39:11	4.09752
2022-09-12	10:39:11	1.3107
2022-09-12	10:39:12	0.28215
2022-09-12	10:39:12	0.665305
2022-09-12	10:39:12	0.583219
2022-09-12	10:39:12	0.453957
2022-09-12	10:39:13	0.405153
2022-09-12	10:39:13	0.482507
2022-09-12	10:39:13	3.0995
2022-09-12	10:39:13	4.48266
2022-09-12	10:39:14	2.94011
2022-09-12	10:39:14	4.52179
2022-09-12	10:39:14	2.74078
2022-09-12	10:39:14	1.49263
2022-09-12	10:39:15	0.500725
2022-09-12	10:39:15	0.491412
2022-09-12	10:39:15	0.509631
2022-09-12	10:39:16	0.542914
2022-09-12	10:39:16	0.364949
2022-09-12	10:39:16	0.500471
2022-09-12	10:39:16	0.511514
2022-09-12	10:39:17	0.497926
2022-09-12	10:39:17	0.361489
2022-09-12	10:39:17	0.166578
2022-09-12	10:39:17	0.278842
2022-09-12	10:39:18	0.294211
2022-09-12	10:39:18	2.02286
2022-09-12	10:39:18	4.7968
2022-09-12	10:39:18	2.95782
2022-09-12	10:39:19	1.06403
2022-09-12	10:39:19	0.735229
2022-09-12	10:39:19	0.923066
2022-09-12	10:39:20	0.47411
2022-09-12	10:39:20	0.272837
2022-09-12	10:39:20	0.260471
2022-09-12	10:39:20	0.0791987
2022-09-12	10:39:21	0.396043
2022-09-12	10:39:21	0.322964
2022-09-12	10:39:21	0.732277
2022-09-12	10:39:21	0.243982
2022-09-12	10:39:22	0.206527
2022-09-12	10:39:22	0.0881555
2022-09-12	10:39:22	0.134924
2022-09-12	10:39:22	-0.0314374
2022-09-12	10:39:23	0.183066
2022-09-12	10:39:23	0.145662
2022-09-12	10:39:23	0.0624048
2022-09-12	10:39:24	0.0884607
2022-09-12	10:39:24	0.582863
2022-09-12	10:39:24	0.562354
2022-09-12	10:39:24	0.243881
2022-09-12	10:39:25	0.353804
2022-09-12	10:39:25	1.20678
2022-09-12	10:39:25	0.297519
2022-09-12	10:39:25	0.27757
2022-09-12	10:39:26	0.348868
2022-09-12	10:39:26	0.440725
2022-09-12	10:39:26	0.207748
2022-09-12	10:39:26	0.175534
2022-09-12	10:39:27	0.310242
2022-09-12	10:39:27	0.526425
2022-09-12	10:39:27	0.298944
2022-09-12	10:39:28	0.177316
2022-09-12	10:39:28	0.259453
2022-09-12	10:39:28	0.173193
2022-09-12	10:39:28	0.282608
2022-09-12	10:39:29	0.166323
2022-09-12	10:39:29	0.26388
2022-09-12	10:39:29	0.153346
2022-09-12	10:39:29	0.330903
2022-09-12	10:39:30	0.237316
2022-09-12	10:39:30	0.214568
2022-09-12	10:39:30	0.0983335
2022-09-12	10:39:30	0.162252
2022-09-12	10:39:31	0.163117
2022-09-12	10:39:31	0.168155
2022-09-12	10:39:31	0.248206
2022-09-12	10:39:31	0.243372
2022-09-12	10:39:32	0.35355
2022-09-12	10:39:32	0.270293
2022-09-12	10:39:32	0.405865
2022-09-12	10:39:33	0.271718
2022-09-12	10:39:33	0.307799
2022-09-12	10:39:33	0.179555
2022-09-12	10:39:33	0.317621
2022-09-12	10:39:34	0.246832
2022-09-12	10:39:34	0.0984862
2022-09-12	10:39:34	0.0521249
2022-09-12	10:39:34	0.118435
2022-09-12	10:39:35	0.07813
2022-09-12	10:39:35	0.0414379
2022-09-12	10:39:35	-0.0040074
2022-09-12	10:39:35	-0.00395648
2022-09-12	10:39:36	0.0628119
2022-09-12	10:39:36	0.185611
2022-09-12	10:39:36	0.202812
2022-09-12	10:39:37	0.0359417
2022-09-12	10:39:37	0.19014
2022-09-12	10:39:37	0.290038
2022-09-12	10:39:37	0.347239
2022-09-12	10:39:38	0.235992
2022-09-12	10:39:38	0.187748
2022-09-12	10:39:38	0.248817
2022-09-12	10:39:38	0.280165
2022-09-12	10:39:39	0.157265
2022-09-12	10:39:39	0.16729
2022-09-12	10:39:39	0.247799
2022-09-12	10:39:39	0.25243
2022-09-12	10:39:40	0.292888
2022-09-12	10:39:40	0.177519
2022-09-12	10:39:40	0.462252
2022-09-12	10:39:41	0.357112
2022-09-12	10:39:41	0.321845
2022-09-12	10:39:41	0.192685
2022-09-12	10:39:41	0.486018
2022-09-12	10:39:42	0.125611
2022-09-12	10:39:42	0.110395
2022-09-12	10:39:42	0.0839824
2022-09-12	10:39:42	0.118028
2022-09-12	10:39:43	0.268919
2022-09-12	10:39:43	0.243881
2022-09-12	10:39:43	0.377316
2022-09-12	10:39:43	0.260725
2022-09-12	10:39:44	0.295636
2022-09-12	10:39:44	0.373652
2022-09-12	10:39:44	0.397316
2022-09-12	10:39:45	0.400216
2022-09-12	10:39:45	0.48556
2022-09-12	10:39:45	0.510496
2022-09-12	10:39:45	0.473753
2022-09-12	10:39:46	0.456349
2022-09-12	10:39:46	0.473295
2022-09-12	10:39:46	0.473855
2022-09-12	10:39:46	0.462608
2022-09-12	10:39:47	0.460878
2022-09-12	10:39:47	0.457112
2022-09-12	10:39:47	0.480623
2022-09-12	10:39:47	0.488359
2022-09-12	10:39:48	0.496196
2022-09-12	10:39:48	1.11655
2022-09-12	10:39:48	0.31757
2022-09-12	10:39:49	0.384033
2022-09-12	10:39:49	0.393092
2022-09-12	10:39:49	0.378893
2022-09-12	10:39:49	0.497926
2022-09-12	10:39:50	0.536145
2022-09-12	10:39:50	0.316756
2022-09-12	10:39:50	0.556399
2022-09-12	10:39:50	0.339351
2022-09-12	10:39:51	0.628664
2022-09-12	10:39:51	0.346069
2022-09-12	10:39:51	0.424237
2022-09-12	10:39:51	0.432125
2022-09-12	10:39:52	0.550852
2022-09-12	10:39:52	0.314415
2022-09-12	10:39:52	0.466272
2022-09-12	10:39:52	0.37472
2022-09-12	10:39:53	0.454975
2022-09-12	10:39:53	0.438283
2022-09-12	10:39:53	0.409886
2022-09-12	10:39:54	0.499555
2022-09-12	10:39:54	0.444593
2022-09-12	10:39:54	0.509987
2022-09-12	10:39:54	0.833397
2022-09-12	10:39:55	0.834415
2022-09-12	10:39:55	0.474822
2022-09-12	10:39:55	0.731158
2022-09-12	10:39:55	1.58398
2022-09-12	10:39:56	0.676094
2022-09-12	10:39:56	2.37238
2022-09-12	10:39:56	2.78683
2022-09-12	10:39:56	2.19859
2022-09-12	10:39:57	1.24902
2022-09-12	10:39:57	0.913397
2022-09-12	10:39:57	1.03681
2022-09-12	10:39:58	1.02042
2022-09-12	10:39:58	1.06963
2022-09-12	10:39:58	0.872888
2022-09-12	10:39:58	0.434211
2022-09-12	10:39:59	0.484288
2022-09-12	10:39:59	0.477112
2022-09-12	10:39:59	0.387595
2022-09-12	10:39:59	0.444695
2022-09-12	10:40:00	0.476349
2022-09-12	10:40:00	0.485509
2022-09-12	10:40:00	0.391616
2022-09-12	10:40:00	0.477367
2022-09-12	10:40:01	0.702099
2022-09-12	10:40:01	0.644033
2022-09-12	10:40:01	1.33752
2022-09-12	10:40:02	1.36994
2022-09-12	10:40:02	0.72785
2022-09-12	10:40:02	0.396959
2022-09-12	10:40:02	0.382455
2022-09-12	10:40:03	0.370394
2022-09-12	10:40:03	0.33299
2022-09-12	10:40:03	0.40042
2022-09-12	10:40:03	0.211514
2022-09-12	10:40:04	0.255789
2022-09-12	10:40:04	0.328766
2022-09-12	10:40:04	0.299657
2022-09-12	10:40:04	0.325
2022-09-12	10:40:05	0.36612
2022-09-12	10:40:05	0.348868
2022-09-12	10:40:05	0.379962
2022-09-12	10:40:06	0.350954
2022-09-12	10:40:06	0.389326
2022-09-12	10:40:06	0.366578
2022-09-12	10:40:06	0.249224
2022-09-12	10:40:07	0.188461
2022-09-12	10:40:07	0.16841
2022-09-12	10:40:07	0.213804
2022-09-12	10:40:07	0.22042
2022-09-12	10:40:08	0.280165
2022-09-12	10:40:08	0.253957
2022-09-12	10:40:08	0.247596
2022-09-12	10:40:08	0.316552
2022-09-12	10:40:09	0.193346
2022-09-12	10:40:09	0.294822
2022-09-12	10:40:09	0.192939
2022-09-12	10:40:10	0.189682
2022-09-12	10:40:10	0.375433
2022-09-12	10:40:10	0.363117
2022-09-12	10:40:10	0.428868
2022-09-12	10:40:11	0.787748
2022-09-12	10:40:11	3.34714
2022-09-12	10:40:11	3.93009
2022-09-12	10:40:11	2.71294
2022-09-12	10:40:12	1.55024
2022-09-12	10:40:12	1.17971
2022-09-12	10:40:12	1.18627
2022-09-12	10:40:12	1.46042
2022-09-12	10:40:13	0.933804
2022-09-12	10:40:13	0.764288
2022-09-12	10:40:13	1.74678
2022-09-12	10:40:14	3.08144
2022-09-12	10:40:14	1.77752
2022-09-12	10:40:14	1.00062
2022-09-12	10:40:14	0.455992
2022-09-12	10:40:15	0.397367
