# Supplementary material for: Comparing efficacy in reducing pulling and welfare impacts of four types of leash walking equipment
Source: PeerJ journal article supplement (doi:10.7717/peerj.18131), 2024-10-24
Supplement: Shelter1_Tension_files.zip [file Sunny_martin_202291294640 copy.xlsx]

## Sheet: Averaged Newtons
Date	Time	Averaged Newtons
2022-09-12	09:46:50	1.98754	1.98754	0		Impulse	1978.6
2022-09-12	09:46:51	1.14165	3.12919	0		Total steps	47
2022-09-12	09:46:52	5.46121	8.5904	0		# >5 sec	2
2022-09-12	09:46:53	0.660533	9.25093	0
2022-09-12	09:46:54	0.386418	9.63735	0
2022-09-12	09:46:55	-3.56507	9.63735	0
2022-09-12	09:46:56	0.413921	10.0513	0
2022-09-12	09:46:57	2.97299	13.0243	0
2022-09-12	09:46:58	3.05479	16.0791	0
2022-09-12	09:46:59	2.78075	18.8598	0
2022-09-12	09:47:00	1.68279	20.5426	0
2022-09-12	09:47:01	1.36055	21.9031	0
2022-09-12	09:47:02	6.77226	28.6754	0
2022-09-12	09:47:03	2.02088	30.6963	0
2022-09-12	09:47:04	0.0715904	30.7679	0
2022-09-12	09:47:05	8.61683	39.3847	0
2022-09-12	09:47:06	6.08538	45.4701	0
2022-09-12	09:47:07	3.76247	49.2325	0
2022-09-12	09:47:08	3.72625	52.9588	0
2022-09-12	09:47:09	8.86804	61.8268	0
2022-09-12	09:47:10	2.05704	63.8839	0
2022-09-12	09:47:11	0.0519729	63.9358	0
2022-09-12	09:47:12	1.21522	65.1511	0
2022-09-12	09:47:13	3.08018	68.2312	0
2022-09-12	09:47:14	1.56372	69.795	0
2022-09-12	09:47:15	1.66857	71.4635	0
2022-09-12	09:47:16	1.43118	72.8947	0
2022-09-12	09:47:17	1.75381	74.6485	0
2022-09-12	09:47:18	3.49428	78.1428	0
2022-09-12	09:47:19	1.42808	79.5709	0
2022-09-12	09:47:20	1.30333	80.8742	0
2022-09-12	09:47:21	3.68346	84.5577	0
2022-09-12	09:47:22	14.277	98.8346	1
2022-09-12	09:47:23	3.42031	102.255	1
2022-09-12	09:47:24	1.17455	103.429	1
2022-09-12	09:47:25	1.5597	104.989	1
2022-09-12	09:47:26	0.727446	105.717	1
2022-09-12	09:47:27	-0.179964	105.717	1
2022-09-12	09:47:28	-1.34889	105.717	1
2022-09-12	09:47:29	2.81346	108.53	1
2022-09-12	09:47:30	9.9153	118.445	1
2022-09-12	09:47:31	5.00638	123.452	1
2022-09-12	09:47:32	4.89019	128.342	1
2022-09-12	09:47:33	1.08362	129.426	1
2022-09-12	09:47:34	1.55936	130.985	1
2022-09-12	09:47:35	3.47593	134.461	1
2022-09-12	09:47:36	3.40066	137.862	1
2022-09-12	09:47:37	4.24603	142.108	1
2022-09-12	09:47:38	9.29492	151.402	1
2022-09-12	09:47:39	13.5892	164.992	2
2022-09-12	09:47:40	5.96477	170.956	2
2022-09-12	09:47:41	6.12838	177.085	2
2022-09-12	09:47:42	4.20853	181.293	2
2022-09-12	09:47:43	1.23786	182.531	2
2022-09-12	09:47:44	0.682171	183.213	2
2022-09-12	09:47:45	0.271024	183.484	2
2022-09-12	09:47:46	0.67472	184.159	2
2022-09-12	09:47:47	29.0894	213.249	3
2022-09-12	09:47:48	23.8849	237.133	4
2022-09-12	09:47:49	7.15028	244.284	4
2022-09-12	09:47:50	6.68889	250.973	4
2022-09-12	09:47:51	6.22142	257.194	4
2022-09-12	09:47:52	4.09642	261.29	4
2022-09-12	09:47:53	19.7479	281.038	5
2022-09-12	09:47:54	36.9164	317.955	6
2022-09-12	09:47:55	3.95054	321.905	6
2022-09-12	09:47:56	13.1887	335.094	7
2022-09-12	09:47:57	41.7368	376.831	8
2022-09-12	09:47:58	35.4658	412.297	9
2022-09-12	09:47:59	13.9595	426.256	10
2022-09-12	09:48:00	5.11306	431.369	10
2022-09-12	09:48:01	15.4281	446.797	11
2022-09-12	09:48:02	32.3258	479.123	12
2022-09-12	09:48:03	12.7497	491.873	12
2022-09-12	09:48:04	16.9736	508.846	13
2022-09-12	09:48:05	12.7967	521.643	13
2022-09-12	09:48:06	23.64	545.283	14
2022-09-12	09:48:07	25.1895	570.473	15
2022-09-12	09:48:08	26.4454	596.918	16
2022-09-12	09:48:09	18.649	615.567	17
2022-09-12	09:48:10	7.56957	623.137	17
2022-09-12	09:48:11	12.7213	635.858	17
2022-09-12	09:48:12	5.65956	641.517	17
2022-09-12	09:48:13	0.59366	642.111	17
2022-09-12	09:48:14	-0.412843	642.111	17
2022-09-12	09:48:15	2.74481	644.856	17
2022-09-12	09:48:16	5.6216	650.477	17
2022-09-12	09:48:17	31.4938	681.971	18
2022-09-12	09:48:18	19.6932	701.665	19
2022-09-12	09:48:19	4.9109	706.575	19
2022-09-12	09:48:20	1.22858	707.804	19
2022-09-12	09:48:21	2.02835	709.832	19
2022-09-12	09:48:22	2.19513	712.027	19
2022-09-12	09:48:23	19.3014	731.329	20
2022-09-12	09:48:24	15.6895	747.018	21
2022-09-12	09:48:25	2.60091	749.619	21
2022-09-12	09:48:26	34.5976	784.217	22
2022-09-12	09:48:27	70.2122	854.429	23
2022-09-12	09:48:28	61.3506	915.78	24
2022-09-12	09:48:29	45.5042	961.284	25
2022-09-12	09:48:30	72.242	1033.53	26
2022-09-12	09:48:31	20.2546	1053.78	27
2022-09-12	09:48:32	14.8037	1068.58	28
2022-09-12	09:48:33	2.13751	1070.72	28
2022-09-12	09:48:34	1.30109	1072.02	28
2022-09-12	09:48:35	1.9464	1073.97	28
2022-09-12	09:48:36	2.47299	1076.44	28
2022-09-12	09:48:37	1.17889	1077.62	28
2022-09-12	09:48:38	1.01194	1078.63	28
2022-09-12	09:48:39	1.44951	1080.08	28
2022-09-12	09:48:40	2.17967	1082.26	28
2022-09-12	09:48:41	3.00157	1085.26	28
2022-09-12	09:48:42	5.22596	1090.49	28
2022-09-12	09:48:43	15.9751	1106.46	29
2022-09-12	09:48:44	14.1479	1120.61	30
2022-09-12	09:48:45	3.57209	1124.18	30
2022-09-12	09:48:46	15.0973	1139.28	31
2022-09-12	09:48:47	9.75176	1149.03	31
2022-09-12	09:48:48	0.665363	1149.7	31
2022-09-12	09:48:49	0.219695	1149.92	31
2022-09-12	09:48:50	1.1897	1151.11	31
2022-09-12	09:48:51	1.74878	1152.86	31
2022-09-12	09:48:52	1.64201	1154.5	31
2022-09-12	09:48:53	1.67956	1156.18	31
2022-09-12	09:48:54	1.95296	1158.13	31
2022-09-12	09:48:55	1.90656	1160.04	31
2022-09-12	09:48:56	1.89049	1161.93	31
2022-09-12	09:48:57	2.01533	1163.94	31
2022-09-12	09:48:58	1.14176	1165.09	31
2022-09-12	09:48:59	1.19179	1166.28	31
2022-09-12	09:49:00	1.13616	1167.41	31
2022-09-12	09:49:01	1.19326	1168.61	31
2022-09-12	09:49:02	1.2189	1169.83	31
2022-09-12	09:49:03	1.25348	1171.08	31
2022-09-12	09:49:04	1.2992	1172.38	31
2022-09-12	09:49:05	1.33738	1173.72	31
2022-09-12	09:49:06	1.47204	1175.19	31
2022-09-12	09:49:07	1.36236	1176.55	31
2022-09-12	09:49:08	1.39043	1177.94	31
2022-09-12	09:49:09	1.34946	1179.29	31
2022-09-12	09:49:10	1.32948	1180.62	31
2022-09-12	09:49:11	1.39836	1182.02	31
2022-09-12	09:49:12	1.42331	1183.44	31
2022-09-12	09:49:13	1.42648	1184.87	31
2022-09-12	09:49:14	1.43216	1186.3	31
2022-09-12	09:49:15	2.11986	1188.42	31
2022-09-12	09:49:16	8.48309	1196.9	31
2022-09-12	09:49:17	1.7524	1198.66	31
2022-09-12	09:49:18	1.58949	1200.25	31
2022-09-12	09:49:19	1.58573	1201.83	31
2022-09-12	09:49:20	1.48692	1203.32	31
2022-09-12	09:49:21	1.43305	1204.75	31
2022-09-12	09:49:22	1.55214	1206.3	31
2022-09-12	09:49:23	1.54385	1207.85	31
2022-09-12	09:49:24	1.48573	1209.33	31
2022-09-12	09:49:25	1.476	1210.81	31
2022-09-12	09:49:26	1.48245	1212.29	31
2022-09-12	09:49:27	1.48558	1213.78	31
2022-09-12	09:49:28	2.93094	1216.71	31
2022-09-12	09:49:29	4.27904	1220.99	31
2022-09-12	09:49:30	4.46393	1225.45	31
2022-09-12	09:49:31	1.2737	1226.72	31
2022-09-12	09:49:32	1.26926	1227.99	31
2022-09-12	09:49:33	1.35166	1229.35	31
2022-09-12	09:49:34	1.28851	1230.63	31
2022-09-12	09:49:35	1.29456	1231.93	31
2022-09-12	09:49:36	1.11878	1233.05	31
2022-09-12	09:49:37	1.22563	1234.27	31
2022-09-12	09:49:38	1.44108	1235.71	31
2022-09-12	09:49:39	1.36417	1237.08	31
2022-09-12	09:49:40	1.75579	1238.83	31
2022-09-12	09:49:41	1.58398	1240.42	31
2022-09-12	09:49:42	4.18804	1244.61	31
2022-09-12	09:49:43	2.05076	1246.66	31
2022-09-12	09:49:44	3.7668	1250.42	31
2022-09-12	09:49:45	1.46745	1251.89	31
2022-09-12	09:49:46	1.50622	1253.4	31
2022-09-12	09:49:47	1.44397	1254.84	31
2022-09-12	09:49:48	4.97434	1259.82	31
2022-09-12	09:49:49	2.61835	1262.43	31
2022-09-12	09:49:50	0.900619	1263.33	31
2022-09-12	09:49:51	1.00441	1264.34	31
2022-09-12	09:49:52	1.67838	1266.02	31
2022-09-12	09:49:53	2.91957	1268.94	31
2022-09-12	09:49:54	7.57682	1276.51	31
2022-09-12	09:49:55	7.21078	1283.72	31
2022-09-12	09:49:56	1.41743	1285.14	31
2022-09-12	09:49:57	0.579191	1285.72	31
2022-09-12	09:49:58	0.855119	1286.58	31
2022-09-12	09:49:59	1.60826	1288.18	31
2022-09-12	09:50:00	1.8764	1290.06	31
2022-09-12	09:50:01	1.65478	1291.72	31
2022-09-12	09:50:02	1.55719	1293.27	31
2022-09-12	09:50:03	1.33599	1294.61	31
2022-09-12	09:50:04	1.40175	1296.01	31
2022-09-12	09:50:05	1.40135	1297.41	31
2022-09-12	09:50:06	1.48264	1298.89	31
2022-09-12	09:50:07	1.54612	1300.44	31
2022-09-12	09:50:08	1.51194	1301.95	31
2022-09-12	09:50:09	1.43576	1303.39	31
2022-09-12	09:50:10	1.42439	1304.81	31
2022-09-12	09:50:11	1.88064	1306.69	31
2022-09-12	09:50:12	3.01453	1309.71	31
2022-09-12	09:50:13	3.95041	1313.66	31
2022-09-12	09:50:14	8.83715	1322.5	31
2022-09-12	09:50:15	8.38675	1330.88	31
2022-09-12	09:50:16	2.21125	1333.09	31
2022-09-12	09:50:17	2.58799	1335.68	31
2022-09-12	09:50:18	6.08312	1341.76	31
2022-09-12	09:50:19	12.1335	1353.9	31
2022-09-12	09:50:20	3.38533	1357.28	31
2022-09-12	09:50:21	0.976907	1358.26	31
2022-09-12	09:50:22	12.0078	1370.27	31
2022-09-12	09:50:23	3.22336	1373.49	31
2022-09-12	09:50:24	1.74063	1375.23	31
2022-09-12	09:50:25	4.62013	1379.85	31
2022-09-12	09:50:26	4.45697	1384.31	31
2022-09-12	09:50:27	3.70015	1388.01	31
2022-09-12	09:50:28	2.14591	1390.16	31
2022-09-12	09:50:29	13.2673	1403.42	32
2022-09-12	09:50:30	4.02177	1407.44	32
2022-09-12	09:50:31	23.877	1431.32	33
2022-09-12	09:50:32	5.87976	1437.2	33
2022-09-12	09:50:33	4.03587	1441.24	33
2022-09-12	09:50:34	5.64549	1446.88	33
2022-09-12	09:50:35	13.26	1460.14	34
2022-09-12	09:50:36	2.89936	1463.04	34
2022-09-12	09:50:37	5.851	1468.89	34
2022-09-12	09:50:38	4.50541	1473.4	34
2022-09-12	09:50:39	5.50813	1478.91	34
2022-09-12	09:50:40	8.11411	1487.02	34
2022-09-12	09:50:41	4.51994	1491.54	34
2022-09-12	09:50:42	9.18491	1500.73	34
2022-09-12	09:50:43	10.8335	1511.56	34
2022-09-12	09:50:44	8.19821	1519.76	34
2022-09-12	09:50:45	4.28685	1524.04	34
2022-09-12	09:50:46	2.41516	1526.46	34
2022-09-12	09:50:47	3.94084	1530.4	34
2022-09-12	09:50:48	8.74863	1539.15	34
2022-09-12	09:50:49	8.35662	1547.51	34
2022-09-12	09:50:50	7.20462	1554.71	34
2022-09-12	09:50:51	11.4427	1566.15	34
2022-09-12	09:50:52	26.184	1592.34	35
2022-09-12	09:50:53	19.1556	1611.49	36
2022-09-12	09:50:54	16.0625	1627.55	37
2022-09-12	09:50:55	8.97151	1636.53	37
2022-09-12	09:50:56	9.87715	1646.4	37
2022-09-12	09:50:57	15.069	1661.47	38
2022-09-12	09:50:58	15.0027	1676.47	39
2022-09-12	09:50:59	15.9687	1692.44	40
2022-09-12	09:51:00	14.8186	1707.26	41
2022-09-12	09:51:01	12.9371	1720.2	41
2022-09-12	09:51:02	7.46777	1727.67	41
2022-09-12	09:51:03	8.29017	1735.96	41
2022-09-12	09:51:04	17.7865	1753.74	42
2022-09-12	09:51:05	24.2634	1778.01	43
2022-09-12	09:51:06	11.4301	1789.44	43
2022-09-12	09:51:07	1.81925	1791.26	43
2022-09-12	09:51:08	0.941254	1792.2	43
2022-09-12	09:51:09	0.909845	1793.11	43
2022-09-12	09:51:10	0.97074	1794.08	43
2022-09-12	09:51:11	1.10271	1795.18	43
2022-09-12	09:51:12	1.53048	1796.71	43
2022-09-12	09:51:13	1.73214	1798.44	43
2022-09-12	09:51:14	1.86191	1800.31	43
2022-09-12	09:51:15	3.7791	1804.08	43
2022-09-12	09:51:16	-0.0225795	1804.08	43
2022-09-12	09:51:17	-1.00282	1804.08	43
2022-09-12	09:51:18	0.478946	1804.56	43
2022-09-12	09:51:19	1.33599	1805.9	43
2022-09-12	09:51:20	1.98179	1807.88	43
2022-09-12	09:51:21	3.82516	1811.71	43
2022-09-12	09:51:22	1.73033	1813.44	43
2022-09-12	09:51:23	1.57702	1815.01	43
2022-09-12	09:51:24	2.28743	1817.3	43
2022-09-12	09:51:25	21.1221	1838.42	44
2022-09-12	09:51:26	24.5888	1863.01	45
2022-09-12	09:51:27	20.3579	1883.37	46
2022-09-12	09:51:28	13.8333	1897.2	47
2022-09-12	09:51:29	9.81756	1907.02	47
2022-09-12	09:51:30	9.32939	1916.35	47
2022-09-12	09:51:31	8.47234	1924.82	47
2022-09-12	09:51:32	8.37806	1933.2	47
2022-09-12	09:51:33	5.04391	1938.24	47
2022-09-12	09:51:34	4.62731	1942.87	47
2022-09-12	09:51:35	4.29738	1947.17	47
2022-09-12	09:51:36	1.273	1948.44	47
2022-09-12	09:51:37	1.36972	1949.81	47
2022-09-12	09:51:38	1.52641	1951.34	47
2022-09-12	09:51:39	1.40933	1952.75	47
2022-09-12	09:51:40	1.13882	1953.89	47
2022-09-12	09:51:41	1.42603	1955.31	47
2022-09-12	09:51:42	1.7075	1957.02	47
2022-09-12	09:51:43	0.20781	1957.23	47
2022-09-12	09:51:44	1.37538	1958.6	47
2022-09-12	09:51:45	1.50062	1960.1	47
2022-09-12	09:51:46	1.67408	1961.78	47
2022-09-12	09:51:47	1.89756	1963.68	47
2022-09-12	09:51:48	2.10593	1965.78	47
2022-09-12	09:51:49	8.5707	1974.35	47
2022-09-12	09:51:50	4.24512	1978.6	47

## Sheet: Sunny_martin_202291294640 ( (3)
Date	Time	Lbs	Newtons	Averaged Newtons	Total Force x time	Total Time Steps Force >13.345		**GoPro Fitting: 936
2022-09-12	09:46:50	0.435891	1.93893	1.98754	1.93893	FALSE	0			Total force x time	3649.29
2022-09-12	09:46:50	0.462863	2.05891	1.98754	2.05891	FALSE	0			Total Time Steps Force >3	154
2022-09-12	09:46:50	0.448562	1.99529	1.98754	3.93422	FALSE	0
2022-09-12	09:46:50	0.439962	1.95704	1.98754	4.01595	FALSE	0
2022-09-12	09:46:51	0.432125	1.92218	1.14165	5.8564	FALSE	0
2022-09-12	09:46:51	0.477977	2.12614	1.14165	6.14208	FALSE	0
2022-09-12	09:46:51	0.029275	0.130221	1.14165	5.98662	FALSE	0
2022-09-12	09:46:51	0.0872394	0.388058	1.14165	6.53014	FALSE	0
2022-09-12	09:46:52	0.104288	0.463894	5.46121	6.45052	FALSE	0
2022-09-12	09:46:52	0.27126	1.20662	5.46121	7.73676	FALSE	0
2022-09-12	09:46:52	2.5167	11.1948	5.46121	17.6453	FALSE	0
2022-09-12	09:46:52	2.01869	8.97954	5.46121	16.7163	FALSE	0
2022-09-12	09:46:53	0.177468	0.789413	0.660533	18.4347	FALSE	0
2022-09-12	09:46:53	0.290954	1.29422	0.660533	18.0105	FALSE	0
2022-09-12	09:46:53	-0.0229387	-0.102036	0.660533	18.4347	FALSE	0
2022-09-12	09:46:54	0.236909	1.05382	0.386418	19.0643	FALSE	0
2022-09-12	09:46:54	0.262914	1.16949	0.386418	19.6042	FALSE	0
2022-09-12	09:46:54	0.22439	0.998132	0.386418	20.0625	FALSE	0
2022-09-12	09:46:54	-0.37673	-1.67577	0.386418	19.6042	FALSE	0
2022-09-12	09:46:55	-0.731081	-3.25199	-3.56507	20.0625	FALSE	0
2022-09-12	09:46:55	-0.856628	-3.81045	-3.56507	19.6042	FALSE	0
2022-09-12	09:46:55	-1.03159	-4.58872	-3.56507	20.0625	FALSE	0
2022-09-12	09:46:55	-0.586552	-2.6091	-3.56507	19.6042	FALSE	0
2022-09-12	09:46:56	-0.595101	-2.64713	0.413921	20.0625	FALSE	0
2022-09-12	09:46:56	0.052074	0.231636	0.413921	19.8358	FALSE	0
2022-09-12	09:46:56	0.444389	1.97673	0.413921	22.0392	FALSE	0
2022-09-12	09:46:56	0.470852	2.09444	0.413921	21.9303	FALSE	0
2022-09-12	09:46:57	0.543473	2.41748	2.97299	24.4567	FALSE	0
2022-09-12	09:46:57	0.614058	2.73145	2.97299	24.6617	FALSE	0
2022-09-12	09:46:57	0.752277	3.34628	2.97299	27.803	FALSE	0
2022-09-12	09:46:57	0.763626	3.39676	2.97299	28.0585	FALSE	0
2022-09-12	09:46:58	0.758079	3.37209	3.05479	31.175	FALSE	0
2022-09-12	09:46:58	0.669885	2.97978	3.05479	31.0383	FALSE	0
2022-09-12	09:46:58	0.632277	2.81249	3.05479	33.9875	FALSE	0
2022-09-12	09:46:59	0.665713	2.96122	2.78075	33.9995	FALSE	0
2022-09-12	09:46:59	0.655789	2.91708	2.78075	36.9046	FALSE	0
2022-09-12	09:46:59	0.611565	2.72036	2.78075	36.7199	FALSE	0
2022-09-12	09:46:59	0.567494	2.52433	2.78075	39.4289	FALSE	0
2022-09-12	09:47:00	0.425458	1.89252	1.68279	38.6124	FALSE	0
2022-09-12	09:47:00	0.322405	1.43412	1.68279	40.8631	FALSE	0
2022-09-12	09:47:00	0.358486	1.59462	1.68279	40.207	FALSE	0
2022-09-12	09:47:00	0.406883	1.8099	1.68279	42.673	FALSE	0
2022-09-12	09:47:01	0.45187	2.01001	1.36055	42.217	FALSE	0
2022-09-12	09:47:01	0.347188	1.54436	1.36055	44.2173	FALSE	0
2022-09-12	09:47:01	0.204491	0.909617	1.36055	43.1266	FALSE	0
2022-09-12	09:47:01	0.219911	0.978208	1.36055	45.1955	FALSE	0
2022-09-12	09:47:02	0.967036	4.30157	6.77226	47.4282	FALSE	0
2022-09-12	09:47:02	2.18739	9.72995	6.77226	54.9255	FALSE	0
2022-09-12	09:47:02	1.41299	6.28526	6.77226	53.7135	FALSE	0
2022-09-12	09:47:03	1.07864	4.79801	2.02088	59.7235	FALSE	0
2022-09-12	09:47:03	0.28098	1.24986	2.02088	54.9633	FALSE	0
2022-09-12	09:47:03	0.286985	1.27657	2.02088	61.0001	FALSE	0
2022-09-12	09:47:03	0.170649	0.759081	2.02088	55.7224	FALSE	0
2022-09-12	09:47:04	0.302608	1.34606	0.0715904	62.3461	FALSE	0
2022-09-12	09:47:04	0.144644	0.643405	0.0715904	56.3658	FALSE	0
2022-09-12	09:47:04	-0.24701	-1.09875	0.0715904	62.3461	FALSE	0
2022-09-12	09:47:04	-0.135865	-0.604355	0.0715904	56.3658	FALSE	0
2022-09-12	09:47:05	-0.363702	-1.61782	8.61683	62.3461	FALSE	0
2022-09-12	09:47:05	0.967748	4.30474	8.61683	60.6705	FALSE	0
2022-09-12	09:47:05	2.34067	10.4118	8.61683	72.7579	FALSE	0
2022-09-12	09:47:05	4.80388	21.3686	8.61683	82.0392	1	1
2022-09-12	09:47:06	1.34505	5.98305	6.08538	78.7409	FALSE	1
2022-09-12	09:47:06	1.90485	8.47315	6.08538	90.5123	FALSE	1
2022-09-12	09:47:06	0.854262	3.79993	6.08538	82.5409	FALSE	1
2022-09-12	09:47:07	0.203473	0.905089	3.76247	91.4174	FALSE	1
2022-09-12	09:47:07	1.28765	5.72772	3.76247	88.2686	FALSE	1
2022-09-12	09:47:07	0.306374	1.36281	3.76247	92.7802	FALSE	1
2022-09-12	09:47:07	1.58587	7.05427	3.76247	95.3229	FALSE	1
2022-09-12	09:47:08	0.48444	2.15489	3.72625	94.9351	FALSE	1
2022-09-12	09:47:08	0.904339	4.02268	3.72625	99.3455	FALSE	1
2022-09-12	09:47:08	0.740573	3.29422	3.72625	98.2293	FALSE	1
2022-09-12	09:47:08	1.22144	5.43321	3.72625	104.779	FALSE	1
2022-09-12	09:47:09	1.94688	8.66011	8.86804	106.889	FALSE	1
2022-09-12	09:47:09	0.884898	3.9362	8.86804	108.715	FALSE	1
2022-09-12	09:47:09	4.49212	19.9818	8.86804	126.871	1	2
2022-09-12	09:47:09	0.650598	2.89399	8.86804	111.609	FALSE	2
2022-09-12	09:47:10	0.31299	1.39224	2.05704	128.264	FALSE	2
2022-09-12	09:47:10	0.851005	3.78544	2.05704	115.394	FALSE	2
2022-09-12	09:47:10	0.379148	1.68653	2.05704	129.95	FALSE	2
2022-09-12	09:47:10	0.306629	1.36395	2.05704	116.758	FALSE	2
2022-09-12	09:47:11	0.0755855	0.336219	0.0519729	130.286	FALSE	2
2022-09-12	09:47:11	0.0731936	0.32558	0.0519729	117.084	FALSE	2
2022-09-12	09:47:11	-0.113727	-0.50588	0.0519729	130.286	FALSE	2
2022-09-12	09:47:12	-0.142175	-0.632423	1.21522	117.084	FALSE	2
2022-09-12	09:47:12	-0.0630913	-0.280643	1.21522	130.286	FALSE	2
2022-09-12	09:47:12	0.18215	0.81024	1.21522	117.894	FALSE	2
2022-09-12	09:47:12	1.11589	4.9637	1.21522	135.25	FALSE	2
2022-09-12	09:47:13	0.541132	2.40706	3.08018	120.301	FALSE	2
2022-09-12	09:47:13	0.265102	1.17923	3.08018	136.429	FALSE	2
2022-09-12	09:47:13	0.428359	1.90543	3.08018	122.207	FALSE	2
2022-09-12	09:47:13	1.53523	6.82901	3.08018	143.258	FALSE	2
2022-09-12	09:47:14	0.67584	3.00627	1.56372	125.213	FALSE	2
2022-09-12	09:47:14	0.225814	1.00447	1.56372	144.263	FALSE	2
2022-09-12	09:47:14	0.210954	0.938366	1.56372	126.151	FALSE	2
2022-09-12	09:47:14	0.29355	1.30577	1.56372	145.568	FALSE	2
2022-09-12	09:47:15	0.322608	1.43502	1.66857	127.586	FALSE	2
2022-09-12	09:47:15	0.314975	1.40107	1.66857	146.97	FALSE	2
2022-09-12	09:47:15	0.487748	2.1696	1.66857	129.756	FALSE	2
2022-09-12	09:47:16	0.525712	2.33847	1.43118	149.308	FALSE	2
2022-09-12	09:47:16	0.275025	1.22337	1.43118	130.979	FALSE	2
2022-09-12	09:47:16	0.244746	1.08868	1.43118	150.397	FALSE	2
2022-09-12	09:47:16	0.241489	1.07419	1.43118	132.053	FALSE	2
2022-09-12	09:47:17	0.218791	0.973226	1.75381	151.37	FALSE	2
2022-09-12	09:47:17	0.300725	1.33768	1.75381	133.391	FALSE	2
2022-09-12	09:47:17	0.337774	1.50249	1.75381	152.872	FALSE	2
2022-09-12	09:47:17	0.719809	3.20185	1.75381	136.593	FALSE	2
2022-09-12	09:47:18	0.847341	3.76914	3.49428	156.642	FALSE	2
2022-09-12	09:47:18	1.0362	4.60922	3.49428	141.202	FALSE	2
2022-09-12	09:47:18	0.867392	3.85833	3.49428	160.5	FALSE	2
2022-09-12	09:47:18	0.39126	1.7404	3.49428	142.943	FALSE	2
2022-09-12	09:47:19	0.328308	1.46038	1.42808	161.96	FALSE	2
2022-09-12	09:47:19	0.320674	1.42642	1.42808	144.369	FALSE	2
2022-09-12	09:47:19	0.31416	1.39745	1.42808	163.358	FALSE	2
2022-09-12	09:47:20	0.318232	1.41556	1.30333	145.785	FALSE	2
2022-09-12	09:47:20	0.301438	1.34086	1.30333	164.699	FALSE	2
2022-09-12	09:47:20	0.281336	1.25144	1.30333	147.036	FALSE	2
2022-09-12	09:47:20	0.271005	1.20548	1.30333	165.904	FALSE	2
2022-09-12	09:47:21	0.354211	1.5756	3.68346	148.612	FALSE	2
2022-09-12	09:47:21	1.41151	6.27868	3.68346	172.183	FALSE	2
2022-09-12	09:47:21	1.01681	4.52297	3.68346	153.135	FALSE	2
2022-09-12	09:47:21	0.529783	2.35658	3.68346	174.539	FALSE	2
2022-09-12	09:47:22	0.476501	2.11957	14.277	155.254	FALSE	2
2022-09-12	09:47:22	2.73436	12.163	14.277	186.702	FALSE	2
2022-09-12	09:47:22	4.82123	21.4458	14.277	176.7	1	3
2022-09-12	09:47:22	4.80632	21.3795	14.277	208.082	1	4
2022-09-12	09:47:23	2.27401	10.1153	3.42031	186.815	FALSE	4
2022-09-12	09:47:23	0.517417	2.30157	3.42031	210.383	FALSE	4
2022-09-12	09:47:23	0.211616	0.94131	3.42031	187.757	FALSE	4
2022-09-12	09:47:23	0.0726338	0.32309	3.42031	210.706	FALSE	4
2022-09-12	09:47:24	0.246578	1.09683	1.17455	188.853	FALSE	4
2022-09-12	09:47:24	0.256705	1.14188	1.17455	211.848	FALSE	4
2022-09-12	09:47:24	0.288868	1.28494	1.17455	190.138	FALSE	4
2022-09-12	09:47:25	0.289122	1.28607	1.5597	213.134	FALSE	4
2022-09-12	09:47:25	0.425204	1.89139	1.5597	192.03	FALSE	4
2022-09-12	09:47:25	0.389835	1.73406	1.5597	214.868	FALSE	4
2022-09-12	09:47:25	0.298384	1.32727	1.5597	193.357	FALSE	4
2022-09-12	09:47:26	0.224848	1.00017	0.727446	215.869	FALSE	4
2022-09-12	09:47:26	0.149682	0.665815	0.727446	194.023	FALSE	4
2022-09-12	09:47:26	0.216756	0.964174	0.727446	216.833	FALSE	4
2022-09-12	09:47:26	0.0628628	0.279626	0.727446	194.302	FALSE	4
2022-09-12	09:47:27	0.12215	0.543348	-0.179964	217.376	FALSE	4
2022-09-12	09:47:27	-0.0126588	-0.0563089	-0.179964	194.302	FALSE	4
2022-09-12	09:47:27	-0.137493	-0.611596	-0.179964	217.376	FALSE	4
2022-09-12	09:47:27	-0.133829	-0.595298	-0.179964	194.302	FALSE	4
2022-09-12	09:47:28	-0.38019	-1.69116	-1.34889	217.376	FALSE	4
2022-09-12	09:47:28	-0.396526	-1.76383	-1.34889	194.302	FALSE	4
2022-09-12	09:47:28	-0.133015	-0.591677	-1.34889	217.376	FALSE	4
2022-09-12	09:47:29	0.276451	1.22971	2.81346	195.532	FALSE	4
2022-09-12	09:47:29	0.279046	1.24125	2.81346	218.617	FALSE	4
2022-09-12	09:47:29	0.736196	3.27475	2.81346	198.807	FALSE	4
2022-09-12	09:47:29	1.23828	5.50812	2.81346	224.125	FALSE	4
2022-09-12	09:47:30	2.6621	11.8416	9.9153	210.648	FALSE	4
2022-09-12	09:47:30	3.38653	15.064	9.9153	239.189	1	5
2022-09-12	09:47:30	1.66042	7.38588	9.9153	218.034	FALSE	5
2022-09-12	09:47:30	1.20719	5.36982	9.9153	244.559	FALSE	5
2022-09-12	09:47:31	1.79676	7.99235	5.00638	226.027	FALSE	5
2022-09-12	09:47:31	0.871005	3.8744	5.00638	248.434	FALSE	5
2022-09-12	09:47:31	1.05553	4.69521	5.00638	230.722	FALSE	5
2022-09-12	09:47:31	0.778639	3.46354	5.00638	251.897	FALSE	5
2022-09-12	09:47:32	1.31406	5.8452	4.89019	236.567	FALSE	5
2022-09-12	09:47:32	1.77553	7.89791	4.89019	259.795	FALSE	5
2022-09-12	09:47:32	0.907494	4.03671	4.89019	240.604	FALSE	5
2022-09-12	09:47:32	0.400369	1.78092	4.89019	261.576	FALSE	5
2022-09-12	09:47:33	0.276094	1.22812	1.08362	241.832	FALSE	5
2022-09-12	09:47:33	0.247799	1.10226	1.08362	262.678	FALSE	5
2022-09-12	09:47:33	0.206934	0.920484	1.08362	242.752	FALSE	5
2022-09-12	09:47:34	0.209122	0.930216	1.55936	263.609	FALSE	5
2022-09-12	09:47:34	0.247392	1.10045	1.55936	243.853	FALSE	5
2022-09-12	09:47:34	0.243066	1.08121	1.55936	264.69	FALSE	5
2022-09-12	09:47:34	0.702659	3.12557	1.55936	246.978	FALSE	5
2022-09-12	09:47:35	0.998384	4.44101	3.47593	269.131	FALSE	5
2022-09-12	09:47:35	0.57528	2.55896	3.47593	249.537	FALSE	5
2022-09-12	09:47:35	0.797214	3.54617	3.47593	272.677	FALSE	5
2022-09-12	09:47:35	0.754822	3.3576	3.47593	252.895	FALSE	5
2022-09-12	09:47:36	0.629936	2.80208	3.40066	275.479	FALSE	5
2022-09-12	09:47:36	0.519758	2.31199	3.40066	255.207	FALSE	5
2022-09-12	09:47:36	0.720165	3.20344	3.40066	278.682	FALSE	5
2022-09-12	09:47:36	1.18815	5.28513	3.40066	260.492	FALSE	5
2022-09-12	09:47:37	0.810445	3.60502	4.24603	282.287	FALSE	5
2022-09-12	09:47:37	1.0651	4.73778	4.24603	265.23	FALSE	5
2022-09-12	09:47:37	0.988104	4.39528	4.24603	286.683	FALSE	5
2022-09-12	09:47:38	0.686679	3.05449	9.29492	268.284	FALSE	5
2022-09-12	09:47:38	0.866476	3.85426	9.29492	290.537	FALSE	5
2022-09-12	09:47:38	2.4279	10.7998	9.29492	279.084	FALSE	5
2022-09-12	09:47:38	4.37731	19.4712	9.29492	310.008	1	6
2022-09-12	09:47:39	4.10912	18.2782	13.5892	297.362	1	7
2022-09-12	09:47:39	3.16922	14.0973	13.5892	324.105	1	8
2022-09-12	09:47:39	3.06118	13.6167	13.5892	310.979	1	9
2022-09-12	09:47:39	1.88047	8.36471	13.5892	332.47	FALSE	9
2022-09-12	09:47:40	2.63889	11.7383	5.96477	322.717	FALSE	9
2022-09-12	09:47:40	1.0422	4.63591	5.96477	337.106	FALSE	9
2022-09-12	09:47:40	0.958842	4.26512	5.96477	326.982	FALSE	9
2022-09-12	09:47:40	0.72383	3.21974	5.96477	340.326	FALSE	9
2022-09-12	09:47:41	0.627748	2.79235	6.12838	329.775	FALSE	9
2022-09-12	09:47:41	1.16663	5.1894	6.12838	345.515	FALSE	9
2022-09-12	09:47:41	1.8736	8.33415	6.12838	338.109	FALSE	9
2022-09-12	09:47:41	1.84291	8.19763	6.12838	353.713	FALSE	9
2022-09-12	09:47:42	1.57625	7.01148	4.20853	345.12	FALSE	9
2022-09-12	09:47:42	0.709529	3.15613	4.20853	356.869	FALSE	9
2022-09-12	09:47:42	0.552583	2.458	4.20853	347.578	FALSE	9
2022-09-12	09:47:43	0.298842	1.32931	1.23786	358.198	FALSE	9
2022-09-12	09:47:43	0.210547	0.936555	1.23786	348.515	FALSE	9
2022-09-12	09:47:43	0.256909	1.14278	1.23786	359.341	FALSE	9
2022-09-12	09:47:43	0.346832	1.54278	1.23786	350.058	FALSE	9
2022-09-12	09:47:44	0.173906	0.773569	0.682171	360.115	FALSE	9
2022-09-12	09:47:44	0.264542	1.17674	0.682171	351.235	FALSE	9
2022-09-12	09:47:44	0.00164146	0.00730154	0.682171	360.122	FALSE	9
2022-09-12	09:47:44	0.173346	0.771078	0.682171	352.006	FALSE	9
2022-09-12	09:47:45	0.13243	0.589075	0.271024	360.711	FALSE	9
2022-09-12	09:47:45	0.0556872	0.247708	0.271024	352.253	FALSE	9
2022-09-12	09:47:45	-0.0965773	-0.429595	0.271024	360.711	FALSE	9
2022-09-12	09:47:45	0.152176	0.676909	0.271024	352.93	FALSE	9
2022-09-12	09:47:46	0.0168577	0.0749864	0.67472	360.786	FALSE	9
2022-09-12	09:47:46	0.15813	0.703394	0.67472	353.634	FALSE	9
2022-09-12	09:47:46	0.280064	1.24578	0.67472	362.032	FALSE	9
2022-09-12	09:47:47	2.97233	13.2215	29.0894	366.855	FALSE	9
2022-09-12	09:47:47	6.39965	28.4669	29.0894	390.499	1	10
2022-09-12	09:47:47	10.2577	45.6283	29.0894	412.483	1	11
2022-09-12	09:47:47	6.52866	29.0408	29.0894	419.539	1	12
2022-09-12	09:47:48	5.92362	26.3494	23.8849	438.833	1	13
2022-09-12	09:47:48	8.61345	38.3143	23.8849	457.854	1	14
2022-09-12	09:47:48	4.09991	18.2372	23.8849	457.07	1	15
2022-09-12	09:47:48	2.84128	12.6386	23.8849	470.492	FALSE	15
2022-09-12	09:47:49	3.53024	15.7032	7.15028	472.773	1	16
2022-09-12	09:47:49	0.513855	2.28573	7.15028	472.778	FALSE	16
2022-09-12	09:47:49	0.717112	3.18986	7.15028	475.963	FALSE	16
2022-09-12	09:47:49	1.66861	7.42231	7.15028	480.2	FALSE	16
2022-09-12	09:47:50	1.60144	7.12353	6.68889	483.087	FALSE	16
2022-09-12	09:47:50	1.68989	7.51697	6.68889	487.717	FALSE	16
2022-09-12	09:47:50	1.21986	5.42618	6.68889	488.513	FALSE	16
2022-09-12	09:47:51	1.87945	8.36017	6.22142	496.078	FALSE	16
2022-09-12	09:47:51	1.14103	5.07553	6.22142	493.588	FALSE	16
2022-09-12	09:47:51	1.71955	7.6489	6.22142	503.727	FALSE	16
2022-09-12	09:47:51	0.854517	3.80106	6.22142	497.389	FALSE	16
2022-09-12	09:47:52	0.600165	2.66965	4.09642	506.396	FALSE	16
2022-09-12	09:47:52	0.295229	1.31324	4.09642	498.703	FALSE	16
2022-09-12	09:47:52	1.51655	6.74592	4.09642	513.142	FALSE	16
2022-09-12	09:47:52	1.27172	5.65686	4.09642	504.36	FALSE	16
2022-09-12	09:47:53	2.00551	8.92091	19.7479	522.063	FALSE	16
2022-09-12	09:47:53	2.63334	11.7136	19.7479	516.073	FALSE	16
2022-09-12	09:47:53	4.75268	21.1409	19.7479	543.204	1	17
2022-09-12	09:47:53	8.36657	37.2162	19.7479	553.289	1	18
2022-09-12	09:47:54	7.68286	34.1749	36.9164	577.379	1	19
2022-09-12	09:47:54	11.502	51.1632	36.9164	604.453	1	20
2022-09-12	09:47:54	4.60108	20.4665	36.9164	597.845	1	21
2022-09-12	09:47:54	9.41075	41.8609	36.9164	646.313	1	22
2022-09-12	09:47:55	0.736705	3.27701	3.95054	601.122	FALSE	22
2022-09-12	09:47:55	1.47263	6.55055	3.95054	652.864	FALSE	22
2022-09-12	09:47:55	0.455026	2.02405	3.95054	603.146	FALSE	22
2022-09-12	09:47:56	0.00764656	0.0340134	13.1887	652.898	FALSE	22
2022-09-12	09:47:56	-0.0821244	-0.365306	13.1887	603.146	FALSE	22
2022-09-12	09:47:56	1.00073	4.45145	13.1887	657.349	FALSE	22
2022-09-12	09:47:56	10.9336	48.6348	13.1887	651.781	1	23
2022-09-12	09:47:57	13.4799	59.9613	41.7368	717.311	1	24
2022-09-12	09:47:57	13.048	58.0401	41.7368	709.821	1	25
2022-09-12	09:47:57	5.62225	25.0089	41.7368	742.32	1	26
2022-09-12	09:47:57	5.38128	23.937	41.7368	733.758	1	27
2022-09-12	09:47:58	9.74184	43.3337	35.4658	785.653	1	28
2022-09-12	09:47:58	6.23324	27.7267	35.4658	761.485	1	29
2022-09-12	09:47:58	9.60255	42.7141	35.4658	828.367	1	30
2022-09-12	09:47:58	6.31466	28.0889	35.4658	789.574	1	31
2022-09-12	09:47:59	5.13523	22.8425	13.9595	851.21	1	32
2022-09-12	09:47:59	3.62134	16.1084	13.9595	805.682	1	33
2022-09-12	09:47:59	0.65813	2.92749	13.9595	854.137	FALSE	33
2022-09-12	09:48:00	0.809224	3.59959	5.11306	809.282	FALSE	33
2022-09-12	09:48:00	0.630191	2.80322	5.11306	856.941	FALSE	33
2022-09-12	09:48:00	2.52256	11.2209	5.11306	820.503	FALSE	33
2022-09-12	09:48:00	0.63589	2.82857	5.11306	859.769	FALSE	33
2022-09-12	09:48:01	1.60001	7.11716	15.4281	827.62	FALSE	33
2022-09-12	09:48:01	2.30541	10.2549	15.4281	870.024	FALSE	33
2022-09-12	09:48:01	3.51034	15.6147	15.4281	843.235	1	34
2022-09-12	09:48:01	6.45782	28.7257	15.4281	898.75	1	35
2022-09-12	09:48:02	8.95039	39.8131	32.3258	883.048	1	36
2022-09-12	09:48:02	8.09212	35.9954	32.3258	934.745	1	37
2022-09-12	09:48:02	10.4139	46.3231	32.3258	929.371	1	38
2022-09-12	09:48:02	1.61223	7.17152	32.3258	941.917	FALSE	38
2022-09-12	09:48:03	4.27874	19.0327	12.7497	948.404	1	39
2022-09-12	09:48:03	1.50108	6.6771	12.7497	948.594	FALSE	39
2022-09-12	09:48:03	1.37355	6.10983	12.7497	954.513	FALSE	39
2022-09-12	09:48:03	4.31166	19.1791	12.7497	967.773	1	40
2022-09-12	09:48:04	2.9624	13.1773	16.9736	967.691	FALSE	40
2022-09-12	09:48:04	4.39986	19.5715	16.9736	987.344	1	41
2022-09-12	09:48:04	4.08525	18.172	16.9736	985.863	1	42
2022-09-12	09:48:05	2.81854	12.5374	12.7967	999.882	FALSE	42
2022-09-12	09:48:05	3.37406	15.0085	12.7967	1000.87	1	43
2022-09-12	09:48:05	2.37162	10.5494	12.7967	1010.43	FALSE	43
2022-09-12	09:48:05	2.94307	13.0914	12.7967	1013.96	FALSE	43
2022-09-12	09:48:06	1.2677	5.63898	23.64	1016.07	FALSE	43
2022-09-12	09:48:06	1.84897	8.22459	23.64	1022.19	FALSE	43
2022-09-12	09:48:06	9.98057	44.3956	23.64	1060.47	1	44
2022-09-12	09:48:06	8.16082	36.301	23.64	1058.49	1	45
2022-09-12	09:48:07	12.1321	53.966	25.1895	1114.43	1	46
2022-09-12	09:48:07	2.3196	10.318	25.1895	1068.81	FALSE	46
2022-09-12	09:48:07	2.82016	12.5446	25.1895	1126.98	FALSE	46
2022-09-12	09:48:07	5.37955	23.9293	25.1895	1092.74	1	47
2022-09-12	09:48:08	4.19212	18.6474	26.4454	1145.62	1	48
2022-09-12	09:48:08	8.31904	37.0048	26.4454	1129.74	1	49
2022-09-12	09:48:08	5.32439	23.684	26.4454	1169.31	1	50
2022-09-12	09:48:09	1.72525	7.67426	18.649	1137.41	FALSE	50
2022-09-12	09:48:09	7.35634	32.7225	18.649	1202.03	1	51
2022-09-12	09:48:09	2.27889	10.137	18.649	1147.55	FALSE	51
2022-09-12	09:48:09	5.40942	24.0622	18.649	1226.09	1	52
2022-09-12	09:48:10	1.50576	6.69792	7.56957	1154.25	FALSE	52
2022-09-12	09:48:10	1.66449	7.40398	7.56957	1233.5	FALSE	52
2022-09-12	09:48:10	1.45314	6.46386	7.56957	1160.71	FALSE	52
2022-09-12	09:48:10	2.18347	9.71251	7.56957	1243.21	FALSE	52
2022-09-12	09:48:11	4.69721	20.8941	12.7213	1181.61	1	53
2022-09-12	09:48:11	2.26805	10.0887	12.7213	1253.3	FALSE	53
2022-09-12	09:48:11	2.17574	9.67813	12.7213	1191.29	FALSE	53
2022-09-12	09:48:11	2.29849	10.2241	12.7213	1263.52	FALSE	53
2022-09-12	09:48:12	2.97894	13.2509	5.65956	1204.54	FALSE	53
2022-09-12	09:48:12	0.562659	2.50282	5.65956	1266.02	FALSE	53
2022-09-12	09:48:12	0.275382	1.22495	5.65956	1205.76	FALSE	53
2022-09-12	09:48:13	0.461641	2.05347	0.59366	1268.08	FALSE	53
2022-09-12	09:48:13	-0.037188	-0.16542	0.59366	1205.76	FALSE	53
2022-09-12	09:48:13	0.0601656	0.267629	0.59366	1268.35	FALSE	53
2022-09-12	09:48:13	0.0492242	0.218959	0.59366	1205.98	FALSE	53
2022-09-12	09:48:14	0.0145167	0.0645732	-0.412843	1268.41	FALSE	53
2022-09-12	09:48:14	-0.133778	-0.595071	-0.412843	1205.98	FALSE	53
2022-09-12	09:48:14	-0.237086	-1.05461	-0.412843	1268.41	FALSE	53
2022-09-12	09:48:14	-0.0148979	-0.0662688	-0.412843	1205.98	FALSE	53
2022-09-12	09:48:15	0.947494	4.21464	2.74481	1272.62	FALSE	53
2022-09-12	09:48:15	0.700267	3.11493	2.74481	1209.1	FALSE	53
2022-09-12	09:48:15	0.488919	2.17481	2.74481	1274.8	FALSE	53
2022-09-12	09:48:15	0.331565	1.47487	2.74481	1210.57	FALSE	53
2022-09-12	09:48:16	0.306832	1.36485	5.6216	1276.16	FALSE	53
2022-09-12	09:48:16	0.33014	1.46853	5.6216	1212.04	FALSE	53
2022-09-12	09:48:16	0.369173	1.64216	5.6216	1277.81	FALSE	53
2022-09-12	09:48:16	4.04902	18.0109	5.6216	1230.05	1	54
2022-09-12	09:48:17	7.43741	33.0831	31.4938	1310.89	1	55
2022-09-12	09:48:17	10.3526	46.0504	31.4938	1276.1	1	56
2022-09-12	09:48:17	3.45039	15.348	31.4938	1326.24	1	57
2022-09-12	09:48:18	10.7707	47.9102	19.6932	1324.01	1	58
2022-09-12	09:48:18	1.16408	5.17806	19.6932	1331.42	FALSE	58
2022-09-12	09:48:18	4.55849	20.2771	19.6932	1344.29	1	59
2022-09-12	09:48:18	1.21569	5.40763	19.6932	1336.82	FALSE	59
2022-09-12	09:48:19	1.92037	8.54219	4.9109	1352.83	FALSE	59
2022-09-12	09:48:19	1.50301	6.68569	4.9109	1343.51	FALSE	59
2022-09-12	09:48:19	0.494466	2.19948	4.9109	1355.03	FALSE	59
2022-09-12	09:48:19	0.498232	2.21624	4.9109	1345.73	FALSE	59
2022-09-12	09:48:20	0.267494	1.18987	1.22858	1356.22	FALSE	59
2022-09-12	09:48:20	0.304695	1.35534	1.22858	1347.08	FALSE	59
2022-09-12	09:48:20	0.267036	1.18783	1.22858	1357.41	FALSE	59
2022-09-12	09:48:20	0.26556	1.18126	1.22858	1348.26	FALSE	59
2022-09-12	09:48:21	0.445662	1.98239	2.02835	1359.39	FALSE	59
2022-09-12	09:48:21	0.396247	1.76259	2.02835	1350.02	FALSE	59
2022-09-12	09:48:21	0.526069	2.34006	2.02835	1361.73	FALSE	59
2022-09-12	09:48:22	0.54159	2.4091	2.19513	1352.43	FALSE	59
2022-09-12	09:48:22	0.580471	2.58205	2.19513	1364.31	FALSE	59
2022-09-12	09:48:22	0.490802	2.18319	2.19513	1354.62	FALSE	59
2022-09-12	09:48:22	0.361082	1.60616	2.19513	1365.92	FALSE	59
2022-09-12	09:48:23	0.408563	1.81737	19.3014	1356.43	FALSE	59
2022-09-12	09:48:23	1.17467	5.22517	19.3014	1371.14	FALSE	59
2022-09-12	09:48:23	9.24825	41.1381	19.3014	1397.57	1	60
2022-09-12	09:48:23	6.5251	29.0249	19.3014	1400.17	1	61
2022-09-12	09:48:24	5.19716	23.118	15.6895	1420.69	1	62
2022-09-12	09:48:24	4.36658	19.4234	15.6895	1419.59	1	63
2022-09-12	09:48:24	2.64235	11.7537	15.6895	1432.44	FALSE	63
2022-09-12	09:48:24	1.90256	8.46297	15.6895	1428.05	FALSE	63
2022-09-12	09:48:25	0.533651	2.37379	2.60091	1434.82	FALSE	63
2022-09-12	09:48:25	0.577977	2.57096	2.60091	1430.62	FALSE	63
2022-09-12	09:48:25	0.642506	2.858	2.60091	1437.68	FALSE	63
2022-09-12	09:48:26	3.21655	14.3079	34.5976	1444.93	1	64
2022-09-12	09:48:26	8.70591	38.7256	34.5976	1476.4	1	65
2022-09-12	09:48:26	6.75085	30.0291	34.5976	1474.96	1	66
2022-09-12	09:48:26	12.4382	55.3276	34.5976	1531.73	1	67
2022-09-12	09:48:27	13.1941	58.69	70.2122	1533.65	1	68
2022-09-12	09:48:27	25.2936	112.511	70.2122	1644.24	1	69
2022-09-12	09:48:27	7.39395	32.8898	70.2122	1566.54	1	70
2022-09-12	09:48:27	17.256	76.7581	70.2122	1721	1	71
2022-09-12	09:48:28	9.70316	43.1616	61.3506	1609.7	1	72
2022-09-12	09:48:28	19.2578	85.6625	61.3506	1806.66	1	73
2022-09-12	09:48:28	14.427	64.1742	61.3506	1673.88	1	74
2022-09-12	09:48:28	11.781	52.4042	61.3506	1859.07	1	75
2022-09-12	09:48:29	16.2973	72.4936	45.5042	1746.37	1	76
2022-09-12	09:48:29	12.2236	54.373	45.5042	1913.44	1	77
2022-09-12	09:48:29	5.73085	25.492	45.5042	1771.86	1	78
2022-09-12	09:48:29	6.66744	29.6581	45.5042	1943.1	1	79
2022-09-12	09:48:30	6.3138	28.085	72.242	1799.95	1	80
2022-09-12	09:48:30	22.2189	98.8341	72.242	2041.93	1	81
2022-09-12	09:48:30	20.1895	89.8069	72.242	1889.75	1	82
2022-09-12	09:48:31	8.84596	39.3486	20.2546	2081.28	1	83
2022-09-12	09:48:31	3.29945	14.6766	20.2546	1904.43	1	84
2022-09-12	09:48:31	2.76856	12.3151	20.2546	2093.59	FALSE	84
2022-09-12	09:48:31	3.29981	14.6782	20.2546	1919.11	1	85
2022-09-12	09:48:32	1.87279	8.33054	14.8037	2101.92	FALSE	85
2022-09-12	09:48:32	5.45802	24.2784	14.8037	1943.39	1	86
2022-09-12	09:48:32	4.48836	19.9651	14.8037	2121.89	1	87
2022-09-12	09:48:32	1.49294	6.6409	14.8037	1950.03	FALSE	87
2022-09-12	09:48:33	0.748511	3.32953	2.13751	2125.22	FALSE	87
2022-09-12	09:48:33	0.445713	1.98262	2.13751	1952.01	FALSE	87
2022-09-12	09:48:33	0.409886	1.82325	2.13751	2127.04	FALSE	87
2022-09-12	09:48:33	0.318028	1.41465	2.13751	1953.43	FALSE	87
2022-09-12	09:48:34	0.309275	1.37572	1.30109	2128.42	FALSE	87
2022-09-12	09:48:34	0.339911	1.51199	1.30109	1954.94	FALSE	87
2022-09-12	09:48:34	0.228308	1.01556	1.30109	2129.43	FALSE	87
2022-09-12	09:48:35	0.28388	1.26276	1.9464	1956.2	FALSE	87
2022-09-12	09:48:35	0.349784	1.55591	1.9464	2130.99	FALSE	87
2022-09-12	09:48:35	0.632735	2.81453	1.9464	1959.02	FALSE	87
2022-09-12	09:48:35	0.483881	2.1524	1.9464	2133.14	FALSE	87
2022-09-12	09:48:36	1.01319	4.50687	2.47299	1963.52	FALSE	87
2022-09-12	09:48:36	0.533142	2.37152	2.47299	2135.51	FALSE	87
2022-09-12	09:48:36	0.364898	1.62314	2.47299	1965.15	FALSE	87
2022-09-12	09:48:36	0.312583	1.39043	2.47299	2136.9	FALSE	87
2022-09-12	09:48:37	0.240674	1.07057	1.17889	1966.22	FALSE	87
2022-09-12	09:48:37	0.250445	1.11403	1.17889	2138.02	FALSE	87
2022-09-12	09:48:37	0.303015	1.34787	1.17889	1967.56	FALSE	87
2022-09-12	09:48:37	0.265967	1.18307	1.17889	2139.2	FALSE	87
2022-09-12	09:48:38	0.209886	0.933615	1.01194	1968.5	FALSE	87
2022-09-12	09:48:38	0.280165	1.24623	1.01194	2140.45	FALSE	87
2022-09-12	09:48:38	0.162863	0.724447	1.01194	1969.22	FALSE	87
2022-09-12	09:48:38	0.257061	1.14346	1.01194	2141.59	FALSE	87
2022-09-12	09:48:39	0.266374	1.18488	1.44951	1970.41	FALSE	87
2022-09-12	09:48:39	0.332685	1.47985	1.44951	2143.07	FALSE	87
2022-09-12	09:48:39	0.378537	1.68381	1.44951	1972.09	FALSE	87
2022-09-12	09:48:40	0.389936	1.73451	2.17967	2144.81	FALSE	87
2022-09-12	09:48:40	0.377774	1.68041	2.17967	1973.77	FALSE	87
2022-09-12	09:48:40	0.537824	2.39235	2.17967	2147.2	FALSE	87
2022-09-12	09:48:40	0.654516	2.91142	2.17967	1976.68	FALSE	87
2022-09-12	09:48:41	0.490903	2.18363	3.00157	2149.38	FALSE	87
2022-09-12	09:48:41	0.463372	2.06117	3.00157	1978.74	FALSE	87
2022-09-12	09:48:41	0.839249	3.73315	3.00157	2153.11	FALSE	87
2022-09-12	09:48:41	0.905611	4.02834	3.00157	1982.77	FALSE	87
2022-09-12	09:48:42	1.5819	7.03661	5.22596	2160.15	FALSE	87
2022-09-12	09:48:42	0.950191	4.22664	5.22596	1987	FALSE	87
2022-09-12	09:48:42	1.26261	5.61634	5.22596	2165.77	FALSE	87
2022-09-12	09:48:42	0.904695	4.02426	5.22596	1991.02	FALSE	87
2022-09-12	09:48:43	3.68378	16.3862	15.9751	2182.15	1	88
2022-09-12	09:48:43	2.3052	10.254	15.9751	2001.28	FALSE	88
2022-09-12	09:48:43	4.7851	21.2851	15.9751	2203.44	1	89
2022-09-12	09:48:44	4.34256	19.3166	14.1479	2020.59	1	90
2022-09-12	09:48:44	4.89116	21.7569	14.1479	2225.2	1	91
2022-09-12	09:48:44	2.831	12.5929	14.1479	2033.19	FALSE	91
2022-09-12	09:48:44	0.657672	2.92546	14.1479	2228.12	FALSE	91
2022-09-12	09:48:45	0.274262	1.21997	3.57209	2034.41	FALSE	91
2022-09-12	09:48:45	-0.0412084	-0.183303	3.57209	2228.12	FALSE	91
2022-09-12	09:48:45	0.114822	0.510751	3.57209	2034.92	FALSE	91
2022-09-12	09:48:45	2.86429	12.7409	3.57209	2240.86	FALSE	91
2022-09-12	09:48:46	4.04459	17.9911	15.0973	2052.91	1	92
2022-09-12	09:48:46	4.13457	18.3914	15.0973	2259.25	1	93
2022-09-12	09:48:46	3.33044	14.8145	15.0973	2067.72	1	94
2022-09-12	09:48:46	2.06653	9.19234	15.0973	2268.45	FALSE	94
2022-09-12	09:48:47	2.98037	13.2573	9.75176	2080.98	FALSE	94
2022-09-12	09:48:47	2.29584	10.2124	9.75176	2278.66	FALSE	94
2022-09-12	09:48:47	1.30067	5.78564	9.75176	2086.77	FALSE	94
2022-09-12	09:48:48	0.327646	1.45743	0.665363	2280.12	FALSE	94
2022-09-12	09:48:48	0.337519	1.50135	0.665363	2088.27	FALSE	94
2022-09-12	09:48:48	-0.0420226	-0.186925	0.665363	2280.12	FALSE	94
2022-09-12	09:48:48	-0.0248216	-0.110411	0.665363	2088.27	FALSE	94
2022-09-12	09:48:49	-0.0311829	-0.138708	0.219695	2280.12	FALSE	94
2022-09-12	09:48:49	-0.0200379	-0.0891326	0.219695	2088.27	FALSE	94
2022-09-12	09:48:49	0.0472903	0.210357	0.219695	2280.33	FALSE	94
2022-09-12	09:48:49	0.201489	0.896263	0.219695	2089.16	FALSE	94
2022-09-12	09:48:50	0.146832	0.653138	1.1897	2280.98	FALSE	94
2022-09-12	09:48:50	0.213906	0.951497	1.1897	2090.11	FALSE	94
2022-09-12	09:48:50	0.248868	1.10701	1.1897	2282.09	FALSE	94
2022-09-12	09:48:50	0.460216	2.04713	1.1897	2092.16	FALSE	94
2022-09-12	09:48:51	0.363779	1.61816	1.74878	2283.7	FALSE	94
2022-09-12	09:48:51	0.407494	1.81261	1.74878	2093.97	FALSE	94
2022-09-12	09:48:51	0.388868	1.72976	1.74878	2285.43	FALSE	94
2022-09-12	09:48:51	0.41243	1.83457	1.74878	2095.81	FALSE	94
2022-09-12	09:48:52	0.34841	1.5498	1.64201	2286.98	FALSE	94
2022-09-12	09:48:52	0.330751	1.47125	1.64201	2097.28	FALSE	94
2022-09-12	09:48:52	0.428257	1.90497	1.64201	2288.89	FALSE	94
2022-09-12	09:48:53	0.332379	1.47849	1.67956	2098.76	FALSE	94
2022-09-12	09:48:53	0.458079	2.03763	1.67956	2290.93	FALSE	94
2022-09-12	09:48:53	0.326985	1.45449	1.67956	2100.21	FALSE	94
2022-09-12	09:48:53	0.392888	1.74764	1.67956	2292.67	FALSE	94
2022-09-12	09:48:54	0.460318	2.04759	1.95296	2102.26	FALSE	94
2022-09-12	09:48:54	0.4564	2.03016	1.95296	2294.7	FALSE	94
2022-09-12	09:48:54	0.401031	1.78387	1.95296	2104.04	FALSE	94
2022-09-12	09:48:54	0.438435	1.95025	1.95296	2296.65	FALSE	94
2022-09-12	09:48:55	0.43584	1.9387	1.90656	2105.98	FALSE	94
2022-09-12	09:48:55	0.410802	1.82733	1.90656	2298.48	FALSE	94
2022-09-12	09:48:55	0.432481	1.92376	1.90656	2107.91	FALSE	94
2022-09-12	09:48:55	0.435331	1.93644	1.90656	2300.42	FALSE	94
2022-09-12	09:48:56	0.42612	1.89547	1.89049	2109.8	FALSE	94
2022-09-12	09:48:56	0.44042	1.95908	1.89049	2302.38	FALSE	94
2022-09-12	09:48:56	0.408461	1.81692	1.89049	2111.62	FALSE	94
2022-09-12	09:48:57	0.461285	2.05189	2.01533	2304.43	FALSE	94
2022-09-12	09:48:57	0.454364	2.0211	2.01533	2113.64	FALSE	94
2022-09-12	09:48:57	0.425	1.89048	2.01533	2306.32	FALSE	94
2022-09-12	09:48:57	0.471616	2.09784	2.01533	2115.74	FALSE	94
2022-09-12	09:48:58	0.289478	1.28766	1.14176	2307.61	FALSE	94
2022-09-12	09:48:58	0.205713	0.915053	1.14176	2116.65	FALSE	94
2022-09-12	09:48:58	0.260267	1.15772	1.14176	2308.76	FALSE	94
2022-09-12	09:48:58	0.27126	1.20662	1.14176	2117.86	FALSE	94
2022-09-12	09:48:59	0.31813	1.41511	1.19179	2310.18	FALSE	94
2022-09-12	09:48:59	0.20841	0.927049	1.19179	2118.79	FALSE	94
2022-09-12	09:48:59	0.268817	1.19575	1.19179	2311.38	FALSE	94
2022-09-12	09:48:59	0.276349	1.22926	1.19179	2120.02	FALSE	94
2022-09-12	09:49:00	0.242303	1.07781	1.13616	2312.45	FALSE	94
2022-09-12	09:49:00	0.254517	1.13214	1.13616	2121.15	FALSE	94
2022-09-12	09:49:00	0.262812	1.16904	1.13616	2313.62	FALSE	94
2022-09-12	09:49:00	0.262048	1.16564	1.13616	2122.31	FALSE	94
2022-09-12	09:49:01	0.275891	1.22722	1.19326	2314.85	FALSE	94
2022-09-12	09:49:01	0.260013	1.15659	1.19326	2123.47	FALSE	94
2022-09-12	09:49:01	0.268868	1.19598	1.19326	2316.05	FALSE	94
2022-09-12	09:49:02	0.271107	1.20594	1.2189	2124.68	FALSE	94
2022-09-12	09:49:02	0.271718	1.20866	1.2189	2317.25	FALSE	94
2022-09-12	09:49:02	0.275331	1.22473	1.2189	2125.9	FALSE	94
2022-09-12	09:49:02	0.277926	1.23627	1.2189	2318.49	FALSE	94
2022-09-12	09:49:03	0.275076	1.22359	1.25348	2127.13	FALSE	94
2022-09-12	09:49:03	0.280318	1.24691	1.25348	2319.74	FALSE	94
2022-09-12	09:49:03	0.27869	1.23967	1.25348	2128.36	FALSE	94
2022-09-12	09:49:03	0.293092	1.30373	1.25348	2321.04	FALSE	94
2022-09-12	09:49:04	0.286934	1.27634	1.2992	2129.64	FALSE	94
2022-09-12	09:49:04	0.293397	1.30509	1.2992	2322.35	FALSE	94
2022-09-12	09:49:04	0.29584	1.31596	1.2992	2130.96	FALSE	94
2022-09-12	09:49:04	0.292125	1.29943	1.2992	2323.65	FALSE	94
2022-09-12	09:49:05	0.299249	1.33112	1.33738	2132.29	FALSE	94
2022-09-12	09:49:05	0.304898	1.35625	1.33738	2325	FALSE	94
2022-09-12	09:49:05	0.297824	1.32478	1.33738	2133.61	FALSE	94
2022-09-12	09:49:06	0.358741	1.59575	1.47204	2326.6	FALSE	94
2022-09-12	09:49:06	0.345204	1.53554	1.47204	2135.15	FALSE	94
2022-09-12	09:49:06	0.320929	1.42756	1.47204	2328.03	FALSE	94
2022-09-12	09:49:06	0.298842	1.32931	1.47204	2136.48	FALSE	94
2022-09-12	09:49:07	0.31757	1.41261	1.36236	2329.44	FALSE	94
2022-09-12	09:49:07	0.306476	1.36327	1.36236	2137.84	FALSE	94
2022-09-12	09:49:07	0.305204	1.35761	1.36236	2330.8	FALSE	94
2022-09-12	09:49:07	0.29584	1.31596	1.36236	2139.16	FALSE	94
2022-09-12	09:49:08	0.279351	1.24261	1.39043	2332.04	FALSE	94
2022-09-12	09:49:08	0.328206	1.45993	1.39043	2140.62	FALSE	94
2022-09-12	09:49:08	0.319657	1.4219	1.39043	2333.46	FALSE	94
2022-09-12	09:49:08	0.323117	1.43729	1.39043	2142.05	FALSE	94
2022-09-12	09:49:09	0.307443	1.36757	1.34946	2334.83	FALSE	94
2022-09-12	09:49:09	0.297824	1.32478	1.34946	2143.38	FALSE	94
2022-09-12	09:49:09	0.304847	1.35602	1.34946	2336.18	FALSE	94
2022-09-12	09:49:10	0.300115	1.33497	1.32948	2144.71	FALSE	94
2022-09-12	09:49:10	0.297417	1.32297	1.32948	2337.51	FALSE	94
2022-09-12	09:49:10	0.295484	1.31437	1.32948	2146.03	FALSE	94
2022-09-12	09:49:10	0.302506	1.34561	1.32948	2338.85	FALSE	94
2022-09-12	09:49:11	0.310853	1.38274	1.39836	2147.41	FALSE	94
2022-09-12	09:49:11	0.311056	1.38364	1.39836	2340.24	FALSE	94
2022-09-12	09:49:11	0.315026	1.4013	1.39836	2148.81	FALSE	94
2022-09-12	09:49:11	0.320522	1.42575	1.39836	2341.66	FALSE	94
2022-09-12	09:49:12	0.318435	1.41646	1.42331	2150.23	FALSE	94
2022-09-12	09:49:12	0.312328	1.3893	1.42331	2343.05	FALSE	94
2022-09-12	09:49:12	0.326018	1.45019	1.42331	2151.68	FALSE	94
2022-09-12	09:49:12	0.323117	1.43729	1.42331	2344.49	FALSE	94
2022-09-12	09:49:13	0.323575	1.43933	1.42648	2153.12	FALSE	94
2022-09-12	09:49:13	0.319707	1.42212	1.42648	2345.91	FALSE	94
2022-09-12	09:49:13	0.317519	1.41239	1.42648	2154.53	FALSE	94
2022-09-12	09:49:13	0.321947	1.43208	1.42648	2347.34	FALSE	94
2022-09-12	09:49:14	0.321183	1.42869	1.43216	2155.96	FALSE	94
2022-09-12	09:49:14	0.320318	1.42484	1.43216	2348.77	FALSE	94
2022-09-12	09:49:14	0.324389	1.44295	1.43216	2157.4	FALSE	94
2022-09-12	09:49:15	0.322099	1.43276	2.11986	2350.2	FALSE	94
2022-09-12	09:49:15	0.326374	1.45178	2.11986	2158.85	FALSE	94
2022-09-12	09:49:15	0.340216	1.51335	2.11986	2351.71	FALSE	94
2022-09-12	09:49:15	0.91757	4.08153	2.11986	2162.94	FALSE	94
2022-09-12	09:49:16	3.25955	14.4991	8.48309	2366.21	1	95
2022-09-12	09:49:16	2.42754	10.7982	8.48309	2173.73	FALSE	95
2022-09-12	09:49:16	1.51131	6.72261	8.48309	2372.94	FALSE	95
2022-09-12	09:49:16	0.429936	1.91244	8.48309	2175.65	FALSE	95
2022-09-12	09:49:17	0.423626	1.88437	1.7524	2374.82	FALSE	95
2022-09-12	09:49:17	0.354466	1.57674	1.7524	2177.22	FALSE	95
2022-09-12	09:49:17	0.371361	1.65189	1.7524	2376.47	FALSE	95
2022-09-12	09:49:17	0.426374	1.8966	1.7524	2179.12	FALSE	95
2022-09-12	09:49:18	0.339097	1.50837	1.58949	2377.98	FALSE	95
2022-09-12	09:49:18	0.355484	1.58126	1.58949	2180.7	FALSE	95
2022-09-12	09:49:18	0.377417	1.67883	1.58949	2379.66	FALSE	95
2022-09-12	09:49:19	0.371107	1.65076	1.58573	2182.35	FALSE	95
2022-09-12	09:49:19	0.335891	1.49411	1.58573	2381.15	FALSE	95
2022-09-12	09:49:19	0.344389	1.53191	1.58573	2183.88	FALSE	95
2022-09-12	09:49:19	0.374568	1.66615	1.58573	2382.82	FALSE	95
2022-09-12	09:49:20	0.311056	1.38364	1.48692	2185.27	FALSE	95
2022-09-12	09:49:20	0.347392	1.54527	1.48692	2384.36	FALSE	95
2022-09-12	09:49:20	0.337316	1.50045	1.48692	2186.77	FALSE	95
2022-09-12	09:49:20	0.341336	1.51833	1.48692	2385.88	FALSE	95
2022-09-12	09:49:21	0.328817	1.46264	1.43305	2188.23	FALSE	95
2022-09-12	09:49:21	0.321082	1.42824	1.43305	2387.31	FALSE	95
2022-09-12	09:49:21	0.320471	1.42552	1.43305	2189.66	FALSE	95
2022-09-12	09:49:21	0.318282	1.41578	1.43305	2388.73	FALSE	95
2022-09-12	09:49:22	0.313194	1.39315	1.55214	2191.05	FALSE	95
2022-09-12	09:49:22	0.359148	1.59756	1.55214	2390.32	FALSE	95
2022-09-12	09:49:22	0.374466	1.6657	1.55214	2192.71	FALSE	95
2022-09-12	09:49:23	0.381183	1.69558	1.54385	2392.02	FALSE	95
2022-09-12	09:49:23	0.342201	1.52218	1.54385	2194.24	FALSE	95
2022-09-12	09:49:23	0.334771	1.48913	1.54385	2393.51	FALSE	95
2022-09-12	09:49:23	0.33014	1.46853	1.54385	2195.71	FALSE	95
2022-09-12	09:49:24	0.342201	1.52218	1.48573	2395.03	FALSE	95
2022-09-12	09:49:24	0.328766	1.46242	1.48573	2197.17	FALSE	95
2022-09-12	09:49:24	0.336247	1.49569	1.48573	2396.53	FALSE	95
2022-09-12	09:49:24	0.328817	1.46264	1.48573	2198.63	FALSE	95
2022-09-12	09:49:25	0.330649	1.47079	1.476	2398	FALSE	95
2022-09-12	09:49:25	0.334008	1.48573	1.476	2200.12	FALSE	95
2022-09-12	09:49:25	0.332583	1.4794	1.476	2399.48	FALSE	95
2022-09-12	09:49:25	0.330038	1.46808	1.476	2201.58	FALSE	95
2022-09-12	09:49:26	0.336298	1.49592	1.48245	2400.97	FALSE	95
2022-09-12	09:49:26	0.331158	1.47306	1.48245	2203.06	FALSE	95
2022-09-12	09:49:26	0.333855	1.48505	1.48245	2402.46	FALSE	95
2022-09-12	09:49:26	0.331769	1.47577	1.48245	2204.53	FALSE	95
2022-09-12	09:49:27	0.33584	1.49388	1.48558	2403.95	FALSE	95
2022-09-12	09:49:27	0.336501	1.49682	1.48558	2206.03	FALSE	95
2022-09-12	09:49:27	0.32958	1.46604	1.48558	2405.42	FALSE	95
2022-09-12	09:49:28	0.343881	1.52965	2.93094	2207.56	FALSE	95
2022-09-12	09:49:28	0.303321	1.34923	2.93094	2406.77	FALSE	95
2022-09-12	09:49:28	0.605509	2.69343	2.93094	2210.25	FALSE	95
2022-09-12	09:49:28	1.38291	6.15146	2.93094	2412.92	FALSE	95
2022-09-12	09:49:29	0.871921	3.87848	4.27904	2214.13	FALSE	95
2022-09-12	09:49:29	1.07762	4.79347	4.27904	2417.71	FALSE	95
2022-09-12	09:49:29	1.25665	5.58983	4.27904	2219.72	FALSE	95
2022-09-12	09:49:29	0.641692	2.85437	4.27904	2420.57	FALSE	95
2022-09-12	09:49:30	0.937468	4.17005	4.46393	2223.89	FALSE	95
2022-09-12	09:49:30	2.2166	9.85988	4.46393	2430.43	FALSE	95
2022-09-12	09:49:30	0.529987	2.35749	4.46393	2226.25	FALSE	95
2022-09-12	09:49:30	0.330089	1.4683	4.46393	2431.89	FALSE	95
2022-09-12	09:49:31	0.306679	1.36417	1.2737	2227.61	FALSE	95
2022-09-12	09:49:31	0.374364	1.66525	1.2737	2433.56	FALSE	95
2022-09-12	09:49:31	0.177977	0.791677	1.2737	2228.4	FALSE	95
2022-09-12	09:49:32	0.277519	1.23446	1.26926	2434.79	FALSE	95
2022-09-12	09:49:32	0.239402	1.06491	1.26926	2229.47	FALSE	95
2022-09-12	09:49:32	0.306679	1.36417	1.26926	2436.16	FALSE	95
2022-09-12	09:49:32	0.317774	1.41352	1.26926	2230.88	FALSE	95
2022-09-12	09:49:33	0.226374	1.00696	1.35166	2437.17	FALSE	95
2022-09-12	09:49:33	0.333041	1.48143	1.35166	2232.36	FALSE	95
2022-09-12	09:49:33	0.306069	1.36146	1.35166	2438.53	FALSE	95
2022-09-12	09:49:33	0.349987	1.55681	1.35166	2233.92	FALSE	95
2022-09-12	09:49:34	0.30042	1.33633	1.28851	2439.86	FALSE	95
2022-09-12	09:49:34	0.272634	1.21273	1.28851	2235.13	FALSE	95
2022-09-12	09:49:34	0.294364	1.30939	1.28851	2441.17	FALSE	95
2022-09-12	09:49:34	0.29126	1.29558	1.28851	2236.43	FALSE	95
2022-09-12	09:49:35	0.292125	1.29943	1.29456	2442.47	FALSE	95
2022-09-12	09:49:35	0.286323	1.27362	1.29456	2237.7	FALSE	95
2022-09-12	09:49:35	0.309275	1.37572	1.29456	2443.85	FALSE	95
2022-09-12	09:49:35	0.2764	1.22948	1.29456	2238.93	FALSE	95
2022-09-12	09:49:36	0.26388	1.17379	1.11878	2445.02	FALSE	95
2022-09-12	09:49:36	0.245662	1.09275	1.11878	2240.03	FALSE	95
2022-09-12	09:49:36	0.245	1.08981	1.11878	2446.11	FALSE	95
2022-09-12	09:49:37	0.267901	1.19168	1.22563	2241.22	FALSE	95
2022-09-12	09:49:37	0.279097	1.24148	1.22563	2447.35	FALSE	95
2022-09-12	09:49:37	0.315484	1.40334	1.22563	2242.62	FALSE	95
2022-09-12	09:49:37	0.239657	1.06604	1.22563	2448.42	FALSE	95
2022-09-12	09:49:38	0.277926	1.23627	1.44108	2243.86	FALSE	95
2022-09-12	09:49:38	0.397468	1.76802	1.44108	2450.19	FALSE	95
2022-09-12	09:49:38	0.230446	1.02507	1.44108	2244.88	FALSE	95
2022-09-12	09:49:38	0.390038	1.73497	1.44108	2451.92	FALSE	95
2022-09-12	09:49:39	0.300929	1.33859	1.36417	2246.22	FALSE	95
2022-09-12	09:49:39	0.2193	0.97549	1.36417	2452.9	FALSE	95
2022-09-12	09:49:39	0.393499	1.75036	1.36417	2247.97	FALSE	95
2022-09-12	09:49:39	0.31299	1.39224	1.36417	2454.29	FALSE	95
2022-09-12	09:49:40	0.306323	1.36259	1.75579	2249.33	FALSE	95
2022-09-12	09:49:40	0.417672	1.85789	1.75579	2456.15	FALSE	95
2022-09-12	09:49:40	0.460166	2.04691	1.75579	2251.38	FALSE	95
2022-09-12	09:49:41	0.325407	1.44748	1.58398	2457.59	FALSE	95
2022-09-12	09:49:41	0.416349	1.852	1.58398	2253.23	FALSE	95
2022-09-12	09:49:41	0.2907	1.29309	1.58398	2458.89	FALSE	95
2022-09-12	09:49:41	0.391921	1.74334	1.58398	2254.98	FALSE	95
2022-09-12	09:49:42	1.18871	5.28762	4.18804	2464.18	FALSE	95
2022-09-12	09:49:42	0.851056	3.78567	4.18804	2258.76	FALSE	95
2022-09-12	09:49:42	1.02363	4.55331	4.18804	2468.73	FALSE	95
2022-09-12	09:49:42	0.702659	3.12557	4.18804	2261.89	FALSE	95
2022-09-12	09:49:43	0.481692	2.14266	2.05076	2470.87	FALSE	95
2022-09-12	09:49:43	0.385611	1.71527	2.05076	2263.6	FALSE	95
2022-09-12	09:49:43	0.404542	1.79948	2.05076	2472.67	FALSE	95
2022-09-12	09:49:43	0.572277	2.5456	2.05076	2266.15	FALSE	95
2022-09-12	09:49:44	1.67899	7.46848	3.7668	2480.14	FALSE	95
2022-09-12	09:49:44	0.507647	2.25812	3.7668	2268.41	FALSE	95
2022-09-12	09:49:44	0.353804	1.57379	3.7668	2481.71	FALSE	95
2022-09-12	09:49:45	0.351107	1.56179	1.46745	2269.97	FALSE	95
2022-09-12	09:49:45	0.384186	1.70894	1.46745	2483.42	FALSE	95
2022-09-12	09:49:45	0.319657	1.4219	1.46745	2271.39	FALSE	95
2022-09-12	09:49:45	0.264644	1.17719	1.46745	2484.6	FALSE	95
2022-09-12	09:49:46	0.344084	1.53055	1.50622	2272.92	FALSE	95
2022-09-12	09:49:46	0.258232	1.14867	1.50622	2485.75	FALSE	95
2022-09-12	09:49:46	0.382455	1.70124	1.50622	2274.62	FALSE	95
2022-09-12	09:49:46	0.369682	1.64442	1.50622	2487.39	FALSE	95
2022-09-12	09:49:47	0.288104	1.28154	1.44397	2275.9	FALSE	95
2022-09-12	09:49:47	0.294567	1.31029	1.44397	2488.7	FALSE	95
2022-09-12	09:49:47	0.265102	1.17923	1.44397	2277.08	FALSE	95
2022-09-12	09:49:47	0.4507	2.0048	1.44397	2490.71	FALSE	95
2022-09-12	09:49:48	1.09309	4.86228	4.97434	2281.94	FALSE	95
2022-09-12	09:49:48	1.10698	4.92407	4.97434	2495.63	FALSE	95
2022-09-12	09:49:48	1.82215	8.10529	4.97434	2290.05	FALSE	95
2022-09-12	09:49:48	0.450903	2.00571	4.97434	2497.64	FALSE	95
2022-09-12	09:49:49	0.766171	3.40808	2.61835	2293.46	FALSE	95
2022-09-12	09:49:49	0.614771	2.73462	2.61835	2500.37	FALSE	95
2022-09-12	09:49:49	0.384949	1.71233	2.61835	2295.17	FALSE	95
2022-09-12	09:49:50	0.275483	1.2254	0.900619	2501.6	FALSE	95
2022-09-12	09:49:50	0.113295	0.503959	0.900619	2295.67	FALSE	95
2022-09-12	09:49:50	0.212125	0.943574	0.900619	2502.54	FALSE	95
2022-09-12	09:49:50	0.20897	0.92954	0.900619	2296.6	FALSE	95
2022-09-12	09:49:51	0.200827	0.893319	1.00441	2503.43	FALSE	95
2022-09-12	09:49:51	0.169122	0.752288	1.00441	2297.36	FALSE	95
2022-09-12	09:49:51	0.161896	0.720146	1.00441	2504.15	FALSE	95
2022-09-12	09:49:51	0.371361	1.65189	1.00441	2299.01	FALSE	95
2022-09-12	09:49:52	0.32271	1.43548	1.67838	2505.59	FALSE	95
2022-09-12	09:49:52	0.296603	1.31935	1.67838	2300.33	FALSE	95
2022-09-12	09:49:52	0.397316	1.76734	1.67838	2507.36	FALSE	95
2022-09-12	09:49:52	0.492634	2.19133	1.67838	2302.52	FALSE	95
2022-09-12	09:49:53	0.54215	2.41159	2.91957	2509.77	FALSE	95
2022-09-12	09:49:53	0.524848	2.33463	2.91957	2304.85	FALSE	95
2022-09-12	09:49:53	0.902048	4.01249	2.91957	2513.78	FALSE	95
2022-09-12	09:49:54	1.79279	7.97469	7.57682	2312.83	FALSE	95
2022-09-12	09:49:54	1.77543	7.89747	7.57682	2521.68	FALSE	95
2022-09-12	09:49:54	1.74047	7.74196	7.57682	2320.57	FALSE	95
2022-09-12	09:49:54	1.50469	6.69316	7.57682	2528.37	FALSE	95
2022-09-12	09:49:55	1.71228	7.61656	7.21078	2328.19	FALSE	95
2022-09-12	09:49:55	3.04744	13.5556	7.21078	2541.93	1	96
2022-09-12	09:49:55	0.929122	4.13292	7.21078	2332.32	FALSE	96
2022-09-12	09:49:55	0.795382	3.53802	7.21078	2545.47	FALSE	96
2022-09-12	09:49:56	0.532837	2.37017	1.41743	2334.69	FALSE	96
2022-09-12	09:49:56	0.40042	1.78115	1.41743	2547.25	FALSE	96
2022-09-12	09:49:56	0.241285	1.07328	1.41743	2335.76	FALSE	96
2022-09-12	09:49:56	0.100064	0.445105	1.41743	2547.69	FALSE	96
2022-09-12	09:49:57	0.0636771	0.283248	0.579191	2336.05	FALSE	96
2022-09-12	09:49:57	0.221387	0.984774	0.579191	2548.68	FALSE	96
2022-09-12	09:49:57	0.10556	0.469552	0.579191	2336.52	FALSE	96
2022-09-12	09:49:58	0.238842	1.06242	0.855119	2549.74	FALSE	96
2022-09-12	09:49:58	0.15126	0.672835	0.855119	2337.19	FALSE	96
2022-09-12	09:49:58	0.190242	0.846234	0.855119	2550.59	FALSE	96
2022-09-12	09:49:58	0.188613	0.838988	0.855119	2338.03	FALSE	96
2022-09-12	09:49:59	0.189071	0.841026	1.60826	2551.43	FALSE	96
2022-09-12	09:49:59	0.235789	1.04884	1.60826	2339.08	FALSE	96
2022-09-12	09:49:59	0.390954	1.73904	1.60826	2553.17	FALSE	96
2022-09-12	09:49:59	0.630394	2.80412	1.60826	2341.88	FALSE	96
2022-09-12	09:50:00	0.469479	2.08834	1.8764	2555.25	FALSE	96
2022-09-12	09:50:00	0.365255	1.62473	1.8764	2343.51	FALSE	96
2022-09-12	09:50:00	0.462965	2.05936	1.8764	2557.31	FALSE	96
2022-09-12	09:50:00	0.389631	1.73316	1.8764	2345.24	FALSE	96
2022-09-12	09:50:01	0.339809	1.51154	1.65478	2558.82	FALSE	96
2022-09-12	09:50:01	0.387443	1.72342	1.65478	2346.96	FALSE	96
2022-09-12	09:50:01	0.401387	1.78545	1.65478	2560.61	FALSE	96
2022-09-12	09:50:01	0.359402	1.59869	1.65478	2348.56	FALSE	96
2022-09-12	09:50:02	0.361641	1.60865	1.55719	2562.22	FALSE	96
2022-09-12	09:50:02	0.37416	1.66434	1.55719	2350.22	FALSE	96
2022-09-12	09:50:02	0.314415	1.39858	1.55719	2563.62	FALSE	96
2022-09-12	09:50:03	0.286476	1.2743	1.33599	2351.5	FALSE	96
2022-09-12	09:50:03	0.309377	1.37617	1.33599	2564.99	FALSE	96
2022-09-12	09:50:03	0.299351	1.33157	1.33599	2352.83	FALSE	96
2022-09-12	09:50:03	0.30617	1.36191	1.33599	2566.36	FALSE	96
2022-09-12	09:50:04	0.307901	1.36961	1.40175	2354.2	FALSE	96
2022-09-12	09:50:04	0.320115	1.42394	1.40175	2567.78	FALSE	96
2022-09-12	09:50:04	0.315433	1.40311	1.40175	2355.6	FALSE	96
2022-09-12	09:50:04	0.317061	1.41035	1.40175	2569.19	FALSE	96
2022-09-12	09:50:05	0.311565	1.3859	1.40135	2356.99	FALSE	96
2022-09-12	09:50:05	0.317621	1.41284	1.40135	2570.6	FALSE	96
2022-09-12	09:50:05	0.312532	1.3902	1.40135	2358.38	FALSE	96
2022-09-12	09:50:05	0.318435	1.41646	1.40135	2572.02	FALSE	96
2022-09-12	09:50:06	0.322812	1.43593	1.48264	2359.82	FALSE	96
2022-09-12	09:50:06	0.331972	1.47668	1.48264	2573.5	FALSE	96
2022-09-12	09:50:06	0.345153	1.53531	1.48264	2361.35	FALSE	96
2022-09-12	09:50:07	0.341947	1.52105	1.54612	2575.02	FALSE	96
2022-09-12	09:50:07	0.346985	1.54346	1.54612	2362.89	FALSE	96
2022-09-12	09:50:07	0.355026	1.57923	1.54612	2576.6	FALSE	96
2022-09-12	09:50:07	0.346374	1.54074	1.54612	2364.43	FALSE	96
2022-09-12	09:50:08	0.336705	1.49773	1.51194	2578.09	FALSE	96
2022-09-12	09:50:08	0.341641	1.51969	1.51194	2365.95	FALSE	96
2022-09-12	09:50:08	0.343372	1.52739	1.51194	2579.62	FALSE	96
2022-09-12	09:50:08	0.337875	1.50294	1.51194	2367.46	FALSE	96
2022-09-12	09:50:09	0.329326	1.46491	1.43576	2581.09	FALSE	96
2022-09-12	09:50:09	0.323066	1.43706	1.43576	2368.89	FALSE	96
2022-09-12	09:50:09	0.322914	1.43639	1.43576	2582.52	FALSE	96
2022-09-12	09:50:09	0.315789	1.40469	1.43576	2370.3	FALSE	96
2022-09-12	09:50:10	0.318282	1.41578	1.42439	2583.94	FALSE	96
2022-09-12	09:50:10	0.312685	1.39089	1.42439	2371.69	FALSE	96
2022-09-12	09:50:10	0.329682	1.46649	1.42439	2585.4	FALSE	96
2022-09-12	09:50:11	0.363015	1.61476	1.88064	2373.3	FALSE	96
2022-09-12	09:50:11	0.397417	1.76779	1.88064	2587.17	FALSE	96
2022-09-12	09:50:11	0.443728	1.97379	1.88064	2375.28	FALSE	96
2022-09-12	09:50:11	0.486985	2.16621	1.88064	2589.34	FALSE	96
2022-09-12	09:50:12	0.727952	3.23808	3.01453	2378.52	FALSE	96
2022-09-12	09:50:12	0.82098	3.65188	3.01453	2592.99	FALSE	96
2022-09-12	09:50:12	0.636755	2.83241	3.01453	2381.35	FALSE	96
2022-09-12	09:50:12	0.525102	2.33576	3.01453	2595.33	FALSE	96
2022-09-12	09:50:13	0.570191	2.53632	3.95041	2383.89	FALSE	96
2022-09-12	09:50:13	0.634974	2.82449	3.95041	2598.15	FALSE	96
2022-09-12	09:50:13	1.0535	4.68618	3.95041	2388.57	FALSE	96
2022-09-12	09:50:13	1.2937	5.75464	3.95041	2603.91	FALSE	96
2022-09-12	09:50:14	1.52006	6.76153	8.83715	2395.33	FALSE	96
2022-09-12	09:50:14	2.04419	9.09297	8.83715	2613	FALSE	96
2022-09-12	09:50:14	2.16266	9.61994	8.83715	2404.95	FALSE	96
2022-09-12	09:50:14	2.21981	9.87416	8.83715	2622.87	FALSE	96
2022-09-12	09:50:15	3.9277	17.4712	8.38675	2422.42	1	97
2022-09-12	09:50:15	0.881998	3.9233	8.38675	2626.8	FALSE	97
2022-09-12	09:50:15	0.846578	3.76575	8.38675	2426.19	FALSE	97
2022-09-12	09:50:16	0.581743	2.58771	2.21125	2629.38	FALSE	97
2022-09-12	09:50:16	0.459657	2.04465	2.21125	2428.23	FALSE	97
2022-09-12	09:50:16	0.398028	1.77051	2.21125	2631.15	FALSE	97
2022-09-12	09:50:16	0.54902	2.44215	2.21125	2430.68	FALSE	97
2022-09-12	09:50:17	0.58388	2.59722	2.58799	2633.75	FALSE	97
2022-09-12	09:50:17	0.547544	2.43559	2.58799	2433.11	FALSE	97
2022-09-12	09:50:17	0.564949	2.51301	2.58799	2636.26	FALSE	97
2022-09-12	09:50:17	0.630852	2.80616	2.58799	2435.92	FALSE	97
2022-09-12	09:50:18	0.690903	3.07327	6.08312	2639.34	FALSE	97
2022-09-12	09:50:18	1.26724	5.63694	6.08312	2441.56	FALSE	97
2022-09-12	09:50:18	1.74994	7.78408	6.08312	2647.12	FALSE	97
2022-09-12	09:50:18	1.7621	7.83817	6.08312	2449.39	FALSE	97
2022-09-12	09:50:19	2.09309	9.31048	12.1335	2656.43	FALSE	97
2022-09-12	09:50:19	4.03009	17.9266	12.1335	2467.32	1	98
2022-09-12	09:50:19	2.06001	9.16334	12.1335	2665.6	FALSE	98
2022-09-12	09:50:20	1.86368	8.29002	3.38533	2475.61	FALSE	98
2022-09-12	09:50:20	0.515229	2.29184	3.38533	2667.89	FALSE	98
2022-09-12	09:50:20	0.443931	1.97469	3.38533	2477.59	FALSE	98
2022-09-12	09:50:20	0.221387	0.984774	3.38533	2668.87	FALSE	98
2022-09-12	09:50:21	0.224491	0.998581	0.976907	2478.58	FALSE	98
2022-09-12	09:50:21	0.129326	0.575268	0.976907	2669.45	FALSE	98
2022-09-12	09:50:21	0.223321	0.993376	0.976907	2479.58	FALSE	98
2022-09-12	09:50:21	0.301336	1.3404	0.976907	2670.79	FALSE	98
2022-09-12	09:50:22	1.3479	5.99573	12.0078	2485.57	FALSE	98
2022-09-12	09:50:22	4.34739	19.3381	12.0078	2690.13	1	99
2022-09-12	09:50:22	3.43492	15.2792	12.0078	2500.85	1	100
2022-09-12	09:50:22	1.66765	7.41804	12.0078	2697.54	FALSE	100
2022-09-12	09:50:23	0.993804	4.42064	3.22336	2505.27	FALSE	100
2022-09-12	09:50:23	0.583473	2.5954	3.22336	2700.14	FALSE	100
2022-09-12	09:50:23	0.73131	3.25301	3.22336	2508.53	FALSE	100
2022-09-12	09:50:23	0.589987	2.62438	3.22336	2702.76	FALSE	100
2022-09-12	09:50:24	0.434415	1.93236	1.74063	2510.46	FALSE	100
2022-09-12	09:50:24	0.375534	1.67045	1.74063	2704.43	FALSE	100
2022-09-12	09:50:24	0.363982	1.61906	1.74063	2512.08	FALSE	100
2022-09-12	09:50:25	0.858639	3.8194	4.62013	2708.25	FALSE	100
2022-09-12	09:50:25	1.23421	5.49001	4.62013	2517.57	FALSE	100
2022-09-12	09:50:25	1.12917	5.02277	4.62013	2713.28	FALSE	100
2022-09-12	09:50:25	0.932583	4.14832	4.62013	2521.72	FALSE	100
2022-09-12	09:50:26	0.49126	2.18522	4.45697	2715.46	FALSE	100
2022-09-12	09:50:26	0.418639	1.86219	4.45697	2523.58	FALSE	100
2022-09-12	09:50:26	0.557468	2.47973	4.45697	2717.94	FALSE	100
2022-09-12	09:50:26	2.54052	11.3007	4.45697	2534.88	FALSE	100
2022-09-12	09:50:27	1.46006	6.49464	3.70015	2724.44	FALSE	100
2022-09-12	09:50:27	0.748664	3.33021	3.70015	2538.21	FALSE	100
2022-09-12	09:50:27	0.468461	2.08381	3.70015	2726.52	FALSE	100
2022-09-12	09:50:27	0.65014	2.89195	3.70015	2541.1	FALSE	100
2022-09-12	09:50:28	0.500521	2.22642	2.14591	2728.75	FALSE	100
2022-09-12	09:50:28	0.486374	2.16349	2.14591	2543.26	FALSE	100
2022-09-12	09:50:28	0.460369	2.04781	2.14591	2730.79	FALSE	100
2022-09-12	09:50:29	0.780522	3.47192	13.2673	2546.74	FALSE	100
2022-09-12	09:50:29	2.64469	11.7641	13.2673	2742.56	FALSE	100
2022-09-12	09:50:29	3.83146	17.0431	13.2673	2563.78	1	101
2022-09-12	09:50:29	4.6738	20.79	13.2673	2763.35	1	102
2022-09-12	09:50:30	0.797519	3.54752	4.02177	2567.33	FALSE	102
2022-09-12	09:50:30	0.613448	2.72874	4.02177	2766.08	FALSE	102
2022-09-12	09:50:30	0.594567	2.64475	4.02177	2569.97	FALSE	102
2022-09-12	09:50:30	1.611	7.16605	4.02177	2773.24	FALSE	102
2022-09-12	09:50:31	3.98128	17.7095	23.877	2587.68	1	103
2022-09-12	09:50:31	8.5252	37.9218	23.877	2811.16	1	104
2022-09-12	09:50:31	6.07986	27.0444	23.877	2614.73	1	105
2022-09-12	09:50:31	2.88485	12.8324	23.877	2824	FALSE	105
2022-09-12	09:50:32	1.42729	6.34887	5.87976	2621.07	FALSE	105
2022-09-12	09:50:32	1.27228	5.65936	5.87976	2829.66	FALSE	105
2022-09-12	09:50:32	1.26592	5.63107	5.87976	2626.71	FALSE	105
2022-09-12	09:50:33	1.24388	5.53303	4.03587	2835.19	FALSE	105
2022-09-12	09:50:33	0.830395	3.69376	4.03587	2630.4	FALSE	105
2022-09-12	09:50:33	0.85355	3.79676	4.03587	2838.99	FALSE	105
2022-09-12	09:50:33	0.701387	3.11991	4.03587	2633.52	FALSE	105
2022-09-12	09:50:34	1.01406	4.51074	5.64549	2843.5	FALSE	105
2022-09-12	09:50:34	0.601997	2.6778	5.64549	2636.2	FALSE	105
2022-09-12	09:50:34	1.53574	6.83128	5.64549	2850.33	FALSE	105
2022-09-12	09:50:34	1.92485	8.56212	5.64549	2644.76	FALSE	105
2022-09-12	09:50:35	3.63915	16.1877	13.26	2866.52	1	106
2022-09-12	09:50:35	3.06647	13.6403	13.26	2658.4	1	107
2022-09-12	09:50:35	2.93253	13.0445	13.26	2879.56	FALSE	107
2022-09-12	09:50:35	2.28581	10.1677	13.26	2668.57	FALSE	107
2022-09-12	09:50:36	1.16805	5.19572	2.89936	2884.76	FALSE	107
2022-09-12	09:50:36	0.436756	1.94278	2.89936	2670.51	FALSE	107
2022-09-12	09:50:36	0.410903	1.82778	2.89936	2886.58	FALSE	107
2022-09-12	09:50:36	0.591514	2.63117	2.89936	2673.14	FALSE	107
2022-09-12	09:50:37	1.07915	4.80028	5.851	2891.38	FALSE	107
2022-09-12	09:50:37	1.29253	5.74943	5.851	2678.89	FALSE	107
2022-09-12	09:50:37	1.57441	7.00329	5.851	2898.39	FALSE	107
2022-09-12	09:50:38	1.00001	4.44824	4.50541	2683.34	FALSE	107
2022-09-12	09:50:38	1.13289	5.03932	4.50541	2903.43	FALSE	107
2022-09-12	09:50:38	0.946323	4.20943	4.50541	2687.55	FALSE	107
2022-09-12	09:50:38	0.972227	4.32466	4.50541	2907.75	FALSE	107
2022-09-12	09:50:39	1.02271	4.54922	5.50813	2692.1	FALSE	107
2022-09-12	09:50:39	1.04373	4.64272	5.50813	2912.39	FALSE	107
2022-09-12	09:50:39	1.23365	5.48752	5.50813	2697.58	FALSE	107
2022-09-12	09:50:39	1.65304	7.35305	5.50813	2919.75	FALSE	107
2022-09-12	09:50:40	2.09243	9.30755	8.11411	2706.89	FALSE	107
2022-09-12	09:50:40	2.2593	10.0498	8.11411	2929.8	FALSE	107
2022-09-12	09:50:40	1.81782	8.08603	8.11411	2714.98	FALSE	107
2022-09-12	09:50:40	1.12698	5.01303	8.11411	2934.81	FALSE	107
2022-09-12	09:50:41	0.664746	2.95692	4.51994	2717.94	FALSE	107
2022-09-12	09:50:41	1.18317	5.26298	4.51994	2940.07	FALSE	107
2022-09-12	09:50:41	1.20047	5.33993	4.51994	2723.28	FALSE	107
2022-09-12	09:50:42	1.86332	8.28842	9.18491	2948.36	FALSE	107
2022-09-12	09:50:42	2.07345	9.22312	9.18491	2732.5	FALSE	107
2022-09-12	09:50:42	2.19874	9.78044	9.18491	2958.14	FALSE	107
2022-09-12	09:50:42	2.12393	9.44767	9.18491	2741.95	FALSE	107
2022-09-12	09:50:43	2.36912	10.5383	10.8335	2968.68	FALSE	107
2022-09-12	09:50:43	2.37803	10.578	10.8335	2752.52	FALSE	107
2022-09-12	09:50:43	2.46566	10.9677	10.8335	2979.65	FALSE	107
2022-09-12	09:50:43	2.52912	11.25	10.8335	2763.77	FALSE	107
2022-09-12	09:50:44	2.42347	10.7801	8.19821	2990.43	FALSE	107
2022-09-12	09:50:44	2.16434	9.62742	8.19821	2773.4	FALSE	107
2022-09-12	09:50:44	1.63691	7.2813	8.19821	2997.71	FALSE	107
2022-09-12	09:50:44	1.14744	5.10404	8.19821	2778.51	FALSE	107
2022-09-12	09:50:45	1.18062	5.25163	4.28685	3002.96	FALSE	107
2022-09-12	09:50:45	0.80958	3.60117	4.28685	2782.11	FALSE	107
2022-09-12	09:50:45	0.90098	4.00774	4.28685	3006.97	FALSE	107
2022-09-12	09:50:46	0.535585	2.38239	2.41516	2784.49	FALSE	107
2022-09-12	09:50:46	0.329224	1.46445	2.41516	3008.43	FALSE	107
2022-09-12	09:50:46	0.354211	1.5756	2.41516	2786.06	FALSE	107
2022-09-12	09:50:46	0.952786	4.23818	2.41516	3012.67	FALSE	107
2022-09-12	09:50:47	0.723015	3.21612	3.94084	2789.28	FALSE	107
2022-09-12	09:50:47	0.476451	2.11935	3.94084	3014.79	FALSE	107
2022-09-12	09:50:47	0.569326	2.53248	3.94084	2791.81	FALSE	107
2022-09-12	09:50:47	1.77497	7.89542	3.94084	3022.69	FALSE	107
2022-09-12	09:50:48	1.64693	7.32587	8.74863	2799.14	FALSE	107
2022-09-12	09:50:48	2.27472	10.1184	8.74863	3032.8	FALSE	107
2022-09-12	09:50:48	2.26856	10.091	8.74863	2809.23	FALSE	107
2022-09-12	09:50:48	1.67691	7.45923	8.74863	3040.26	FALSE	107
2022-09-12	09:50:49	1.52256	6.77265	8.35662	2816	FALSE	107
2022-09-12	09:50:49	1.33355	5.9319	8.35662	3046.2	FALSE	107
2022-09-12	09:50:49	2.97762	13.245	8.35662	2829.25	FALSE	107
2022-09-12	09:50:49	1.68088	7.47689	8.35662	3053.67	FALSE	107
2022-09-12	09:50:50	1.86861	8.31195	7.20462	2837.56	FALSE	107
2022-09-12	09:50:50	1.57655	7.01281	7.20462	3060.69	FALSE	107
2022-09-12	09:50:50	1.41385	6.28909	7.20462	2843.85	FALSE	107
2022-09-12	09:50:51	1.66637	7.41235	11.4427	3068.1	FALSE	107
2022-09-12	09:50:51	2.47085	10.9908	11.4427	2854.84	FALSE	107
2022-09-12	09:50:51	2.52734	11.2421	11.4427	3079.34	FALSE	107
2022-09-12	09:50:51	3.6252	16.1256	11.4427	2870.97	1	108
2022-09-12	09:50:52	4.10118	18.2429	26.184	3097.58	1	109
2022-09-12	09:50:52	5.89858	26.2381	26.184	2897.2	1	110
2022-09-12	09:50:52	6.35339	28.2611	26.184	3125.84	1	111
2022-09-12	09:50:52	7.19258	31.994	26.184	2929.2	1	112
2022-09-12	09:50:53	6.83411	30.3995	19.1556	3156.24	1	113
2022-09-12	09:50:53	4.75014	21.1296	19.1556	2950.33	1	114
2022-09-12	09:50:53	3.03457	13.4984	19.1556	3169.74	1	115
2022-09-12	09:50:53	2.60663	11.5948	19.1556	2961.92	FALSE	115
2022-09-12	09:50:54	3.07131	13.6618	16.0625	3183.4	1	116
2022-09-12	09:50:54	4.24052	18.8627	16.0625	2980.78	1	117
2022-09-12	09:50:54	3.52118	15.6629	16.0625	3199.07	1	118
2022-09-12	09:50:55	2.8163	12.5275	8.97151	2993.31	FALSE	118
2022-09-12	09:50:55	2.06373	9.17988	8.97151	3208.25	FALSE	118
2022-09-12	09:50:55	1.71732	7.63898	8.97151	3000.95	FALSE	118
2022-09-12	09:50:55	1.47019	6.5397	8.97151	3214.79	FALSE	118
2022-09-12	09:50:56	1.68368	7.48935	9.87715	3008.44	FALSE	118
2022-09-12	09:50:56	1.64301	7.30844	9.87715	3222.09	FALSE	118
2022-09-12	09:50:56	2.25721	10.0405	9.87715	3018.48	FALSE	118
2022-09-12	09:50:56	3.29803	14.6703	9.87715	3236.76	1	119
2022-09-12	09:50:57	3.48576	15.5054	15.069	3033.99	1	120
2022-09-12	09:50:57	3.11808	13.8698	15.069	3250.63	1	121
2022-09-12	09:50:57	3.25294	14.4697	15.069	3048.46	1	122
2022-09-12	09:50:57	3.69385	16.431	15.069	3267.07	1	123
2022-09-12	09:50:58	3.06067	13.6145	15.0027	3062.07	1	124
2022-09-12	09:50:58	3.53681	15.7324	15.0027	3282.8	1	125
2022-09-12	09:50:58	3.52077	15.6611	15.0027	3077.73	1	126
2022-09-12	09:50:59	3.52541	15.6817	15.9687	3298.48	1	127
2022-09-12	09:50:59	3.66693	16.3112	15.9687	3094.04	1	128
2022-09-12	09:50:59	3.49614	15.5515	15.9687	3314.03	1	129
2022-09-12	09:50:59	3.67126	16.3305	15.9687	3110.37	1	130
2022-09-12	09:51:00	4.18042	18.5953	14.8186	3332.63	1	131
2022-09-12	09:51:00	3.54133	15.7525	14.8186	3126.13	1	132
2022-09-12	09:51:00	2.98968	13.2987	14.8186	3345.92	FALSE	132
2022-09-12	09:51:00	2.61406	11.6279	14.8186	3137.75	FALSE	132
2022-09-12	09:51:01	2.73548	12.168	12.9371	3358.09	FALSE	132
2022-09-12	09:51:01	2.88831	12.8478	12.9371	3150.6	FALSE	132
2022-09-12	09:51:01	3.03105	13.4827	12.9371	3371.58	1	133
2022-09-12	09:51:01	2.97869	13.2498	12.9371	3163.85	FALSE	133
2022-09-12	09:51:02	2.44022	10.8546	7.46777	3382.43	FALSE	133
2022-09-12	09:51:02	2.6881	11.9572	7.46777	3175.81	FALSE	133
2022-09-12	09:51:02	0.740522	3.29399	7.46777	3385.72	FALSE	133
2022-09-12	09:51:02	0.846476	3.76529	7.46777	3179.57	FALSE	133
2022-09-12	09:51:03	1.22765	5.46083	8.29017	3391.19	FALSE	133
2022-09-12	09:51:03	1.76078	7.8323	8.29017	3187.41	FALSE	133
2022-09-12	09:51:03	2.60271	11.5774	8.29017	3402.76	FALSE	133
2022-09-12	09:51:04	3.47075	15.4386	17.7865	3202.84	1	134
2022-09-12	09:51:04	3.79614	16.886	17.7865	3419.65	1	135
2022-09-12	09:51:04	3.69843	16.4514	17.7865	3219.3	1	136
2022-09-12	09:51:04	5.02902	22.3701	17.7865	3442.02	1	137
2022-09-12	09:51:05	5.32194	23.6731	24.2634	3242.97	1	138
2022-09-12	09:51:05	5.01003	22.2856	24.2634	3464.3	1	139
2022-09-12	09:51:05	5.76764	25.6556	24.2634	3268.62	1	140
2022-09-12	09:51:05	5.71904	25.4394	24.2634	3489.74	1	141
2022-09-12	09:51:06	3.40276	15.1362	11.4301	3283.76	1	142
2022-09-12	09:51:06	2.86856	12.7599	11.4301	3502.5	FALSE	142
2022-09-12	09:51:06	2.46072	10.9458	11.4301	3294.71	FALSE	142
2022-09-12	09:51:06	1.54632	6.87834	11.4301	3509.38	FALSE	142
2022-09-12	09:51:07	0.44958	1.99982	1.81925	3296.71	FALSE	142
2022-09-12	09:51:07	0.395229	1.75806	1.81925	3511.14	FALSE	142
2022-09-12	09:51:07	0.38215	1.69988	1.81925	3298.41	FALSE	142
2022-09-12	09:51:08	0.36958	1.64397	0.941254	3512.78	FALSE	142
2022-09-12	09:51:08	0.15355	0.683021	0.941254	3299.09	FALSE	142
2022-09-12	09:51:08	0.201336	0.895583	0.941254	3513.68	FALSE	142
2022-09-12	09:51:08	0.121947	0.542445	0.941254	3299.63	FALSE	142
2022-09-12	09:51:09	0.078588	0.349575	0.909845	3514.03	FALSE	142
2022-09-12	09:51:09	0.229224	1.01963	0.909845	3300.65	FALSE	142
2022-09-12	09:51:09	0.256909	1.14278	0.909845	3515.17	FALSE	142
2022-09-12	09:51:09	0.253448	1.12739	0.909845	3301.78	FALSE	142
2022-09-12	09:51:10	0.231209	1.02846	0.97074	3516.2	FALSE	142
2022-09-12	09:51:10	0.213143	0.948103	0.97074	3302.73	FALSE	142
2022-09-12	09:51:10	0.205611	0.914599	0.97074	3517.11	FALSE	142
2022-09-12	09:51:10	0.222965	0.991793	0.97074	3303.72	FALSE	142
2022-09-12	09:51:11	0.237723	1.05744	1.10271	3518.17	FALSE	142
2022-09-12	09:51:11	0.299758	1.33338	1.10271	3305.05	FALSE	142
2022-09-12	09:51:11	0.254771	1.13327	1.10271	3519.31	FALSE	142
2022-09-12	09:51:11	0.199351	0.886753	1.10271	3305.94	FALSE	142
2022-09-12	09:51:12	0.317468	1.41216	1.53048	3520.72	FALSE	142
2022-09-12	09:51:12	0.316908	1.40967	1.53048	3307.35	FALSE	142
2022-09-12	09:51:12	0.397825	1.76961	1.53048	3522.49	FALSE	142
2022-09-12	09:51:13	0.491718	2.18726	1.73214	3309.54	FALSE	142
2022-09-12	09:51:13	0.440878	1.96111	1.73214	3524.45	FALSE	142
2022-09-12	09:51:13	0.249987	1.11199	1.73214	3310.65	FALSE	142
2022-09-12	09:51:13	0.375026	1.66819	1.73214	3526.12	FALSE	142
2022-09-12	09:51:14	0.365814	1.62721	1.86191	3312.27	FALSE	142
2022-09-12	09:51:14	0.422506	1.87939	1.86191	3528	FALSE	142
2022-09-12	09:51:14	0.469173	2.08698	1.86191	3314.36	FALSE	142
2022-09-12	09:51:14	0.416807	1.85404	1.86191	3529.85	FALSE	142
2022-09-12	09:51:15	0.728817	3.24192	3.7791	3317.6	FALSE	142
2022-09-12	09:51:15	1.01706	4.52409	3.7791	3534.37	FALSE	142
2022-09-12	09:51:15	0.760013	3.38069	3.7791	3320.98	FALSE	142
2022-09-12	09:51:15	0.89243	3.96971	3.7791	3538.34	FALSE	142
2022-09-12	09:51:16	0.0900893	0.400735	-0.0225795	3321.38	FALSE	142
2022-09-12	09:51:16	0.0648984	0.288681	-0.0225795	3538.63	FALSE	142
2022-09-12	09:51:16	-0.170216	-0.757155	-0.0225795	3321.38	FALSE	142
2022-09-12	09:51:17	-0.164262	-0.73067	-1.00282	3538.63	FALSE	142
2022-09-12	09:51:17	-0.367977	-1.63684	-1.00282	3321.38	FALSE	142
2022-09-12	09:51:17	-0.248689	-1.10622	-1.00282	3538.63	FALSE	142
2022-09-12	09:51:17	-0.120852	-0.537574	-1.00282	3321.38	FALSE	142
2022-09-12	09:51:18	-0.00482162	-0.0214475	0.478946	3538.63	FALSE	142
2022-09-12	09:51:18	0.064186	0.285512	0.478946	3321.67	FALSE	142
2022-09-12	09:51:18	-0.0123025	-0.054724	0.478946	3538.63	FALSE	142
2022-09-12	09:51:18	0.383626	1.70645	0.478946	3323.38	FALSE	142
2022-09-12	09:51:19	0.299453	1.33203	1.33599	3539.96	FALSE	142
2022-09-12	09:51:19	0.262761	1.16881	1.33599	3324.55	FALSE	142
2022-09-12	09:51:19	0.311158	1.38409	1.33599	3541.35	FALSE	142
2022-09-12	09:51:19	0.328003	1.45902	1.33599	3326	FALSE	142
2022-09-12	09:51:20	0.35131	1.5627	1.98179	3542.91	FALSE	142
2022-09-12	09:51:20	0.344847	1.53395	1.98179	3327.54	FALSE	142
2022-09-12	09:51:20	0.64042	2.84872	1.98179	3545.76	FALSE	142
2022-09-12	09:51:21	0.861234	3.83094	3.82516	3331.37	FALSE	142
2022-09-12	09:51:21	1.09212	4.85797	3.82516	3550.62	FALSE	142
2022-09-12	09:51:21	0.64215	2.85641	3.82516	3334.23	FALSE	142
2022-09-12	09:51:21	0.844237	3.75534	3.82516	3554.37	FALSE	142
2022-09-12	09:51:22	0.365	1.62359	1.73033	3335.85	FALSE	142
2022-09-12	09:51:22	0.439097	1.95319	1.73033	3556.33	FALSE	142
2022-09-12	09:51:22	0.308919	1.37413	1.73033	3337.22	FALSE	142
2022-09-12	09:51:22	0.442965	1.9704	1.73033	3558.3	FALSE	142
2022-09-12	09:51:23	0.356298	1.58488	1.57702	3338.81	FALSE	142
2022-09-12	09:51:23	0.401641	1.78658	1.57702	3560.08	FALSE	142
2022-09-12	09:51:23	0.301082	1.33927	1.57702	3340.15	FALSE	142
2022-09-12	09:51:23	0.359097	1.59734	1.57702	3561.68	FALSE	142
2022-09-12	09:51:24	0.344949	1.5344	2.28743	3341.68	FALSE	142
2022-09-12	09:51:24	0.510089	2.26898	2.28743	3563.95	FALSE	142
2022-09-12	09:51:24	0.337519	1.50135	2.28743	3343.18	FALSE	142
2022-09-12	09:51:24	0.864389	3.84498	2.28743	3567.79	FALSE	142
2022-09-12	09:51:25	1.43497	6.38303	21.1221	3349.57	FALSE	142
2022-09-12	09:51:25	5.51426	24.5285	21.1221	3592.32	1	143
2022-09-12	09:51:25	7.29614	32.4547	21.1221	3382.02	1	144
2022-09-12	09:51:26	10.2713	45.6888	24.5888	3638.01	1	145
2022-09-12	09:51:26	4.23263	18.8276	24.5888	3400.85	1	146
2022-09-12	09:51:26	3.45645	15.375	24.5888	3653.39	1	147
2022-09-12	09:51:26	4.1509	18.464	24.5888	3419.31	1	148
2022-09-12	09:51:27	2.92581	13.0146	20.3579	3666.4	FALSE	148
2022-09-12	09:51:27	5.05253	22.4747	20.3579	3441.79	1	149
2022-09-12	09:51:27	4.58729	20.4052	20.3579	3686.81	1	150
2022-09-12	09:51:27	5.74098	25.537	20.3579	3467.32	1	151
2022-09-12	09:51:28	3.95075	17.5737	13.8333	3704.38	1	152
2022-09-12	09:51:28	3.38174	15.0427	13.8333	3482.37	1	153
2022-09-12	09:51:28	2.06602	9.19007	13.8333	3713.57	FALSE	153
2022-09-12	09:51:28	3.04098	13.5269	13.8333	3495.89	1	154
2022-09-12	09:51:29	2.78668	12.3957	9.81756	3725.97	FALSE	154
2022-09-12	09:51:29	2.28612	10.1691	9.81756	3506.06	FALSE	154
2022-09-12	09:51:29	1.54846	6.88786	9.81756	3732.85	FALSE	154
2022-09-12	09:51:30	2.36703	10.529	9.32939	3516.59	FALSE	154
2022-09-12	09:51:30	2.662	11.8411	9.32939	3744.7	FALSE	154
2022-09-12	09:51:30	1.31971	5.87033	9.32939	3522.46	FALSE	154
2022-09-12	09:51:30	2.04062	9.07709	9.32939	3753.77	FALSE	154
2022-09-12	09:51:31	2.50515	11.1434	8.47234	3533.61	FALSE	154
2022-09-12	09:51:31	2.01014	8.9415	8.47234	3762.71	FALSE	154
2022-09-12	09:51:31	1.54337	6.86522	8.47234	3540.47	FALSE	154
2022-09-12	09:51:31	1.56001	6.93924	8.47234	3769.65	FALSE	154
2022-09-12	09:51:32	2.21625	9.85832	8.37806	3550.33	FALSE	154
2022-09-12	09:51:32	1.69523	7.54072	8.37806	3777.19	FALSE	154
2022-09-12	09:51:32	1.93782	8.61981	8.37806	3558.95	FALSE	154
2022-09-12	09:51:32	1.68459	7.49339	8.37806	3784.69	FALSE	154
2022-09-12	09:51:33	2.03197	9.03861	5.04391	3567.99	FALSE	154
2022-09-12	09:51:33	0.812277	3.61317	5.04391	3788.3	FALSE	154
2022-09-12	09:51:33	0.557519	2.47996	5.04391	3570.47	FALSE	154
2022-09-12	09:51:34	0.574313	2.55466	4.62731	3790.86	FALSE	154
2022-09-12	09:51:34	0.99472	4.42471	4.62731	3574.89	FALSE	154
2022-09-12	09:51:34	0.842812	3.749	4.62731	3794.6	FALSE	154
2022-09-12	09:51:34	1.74922	7.78088	4.62731	3582.67	FALSE	154
2022-09-12	09:51:35	1.88449	8.38259	4.29738	3802.99	FALSE	154
2022-09-12	09:51:35	1.02037	4.53881	4.29738	3587.21	FALSE	154
2022-09-12	09:51:35	0.577417	2.56847	4.29738	3805.56	FALSE	154
2022-09-12	09:51:35	0.382099	1.69965	4.29738	3588.91	FALSE	154
2022-09-12	09:51:36	0.372786	1.65823	1.273	3807.21	FALSE	154
2022-09-12	09:51:36	0.213143	0.948103	1.273	3589.86	FALSE	154
2022-09-12	09:51:36	0.303015	1.34787	1.273	3808.56	FALSE	154
2022-09-12	09:51:36	0.255789	1.1378	1.273	3591	FALSE	154
2022-09-12	09:51:37	0.264542	1.17674	1.36972	3809.74	FALSE	154
2022-09-12	09:51:37	0.318995	1.41895	1.36972	3592.42	FALSE	154
2022-09-12	09:51:37	0.304084	1.35263	1.36972	3811.09	FALSE	154
2022-09-12	09:51:37	0.344084	1.53055	1.36972	3593.95	FALSE	154
2022-09-12	09:51:38	0.332125	1.47736	1.52641	3812.57	FALSE	154
2022-09-12	09:51:38	0.354924	1.57877	1.52641	3595.53	FALSE	154
2022-09-12	09:51:38	0.342405	1.52309	1.52641	3814.09	FALSE	154
2022-09-12	09:51:39	0.362455	1.61227	1.40933	3597.14	FALSE	154
2022-09-12	09:51:39	0.332023	1.4769	1.40933	3815.57	FALSE	154
2022-09-12	09:51:39	0.283372	1.2605	1.40933	3598.4	FALSE	154
2022-09-12	09:51:39	0.289478	1.28766	1.40933	3816.86	FALSE	154
2022-09-12	09:51:40	0.264644	1.17719	1.13882	3599.58	FALSE	154
2022-09-12	09:51:40	0.253346	1.12693	1.13882	3817.98	FALSE	154
2022-09-12	09:51:40	0.269529	1.19892	1.13882	3600.78	FALSE	154
2022-09-12	09:51:40	0.236552	1.05223	1.13882	3819.03	FALSE	154
2022-09-12	09:51:41	0.197672	0.879285	1.42603	3601.65	FALSE	154
2022-09-12	09:51:41	0.281336	1.25144	1.42603	3820.29	FALSE	154
2022-09-12	09:51:41	0.280369	1.24714	1.42603	3602.9	FALSE	154
2022-09-12	09:51:41	0.522964	2.32625	1.42603	3822.61	FALSE	154
2022-09-12	09:51:42	0.489071	2.17549	1.7075	3605.08	FALSE	154
2022-09-12	09:51:42	0.369733	1.64465	1.7075	3824.26	FALSE	154
2022-09-12	09:51:42	0.292786	1.30237	1.7075	3606.38	FALSE	154
2022-09-12	09:51:43	0.129377	0.575495	0.20781	3824.83	FALSE	154
2022-09-12	09:51:43	0.0156363	0.0695534	0.20781	3606.45	FALSE	154
2022-09-12	09:51:43	-0.0138293	-0.0615155	0.20781	3824.83	FALSE	154
2022-09-12	09:51:43	0.0556872	0.247708	0.20781	3606.7	FALSE	154
2022-09-12	09:51:44	0.352685	1.56881	1.37538	3826.4	FALSE	154
2022-09-12	09:51:44	0.339453	1.50995	1.37538	3608.21	FALSE	154
2022-09-12	09:51:44	0.304593	1.35489	1.37538	3827.76	FALSE	154
2022-09-12	09:51:44	0.240064	1.06785	1.37538	3609.27	FALSE	154
2022-09-12	09:51:45	0.310954	1.38319	1.50062	3829.14	FALSE	154
2022-09-12	09:51:45	0.37126	1.65144	1.50062	3610.93	FALSE	154
2022-09-12	09:51:45	0.313295	1.3936	1.50062	3830.53	FALSE	154
2022-09-12	09:51:45	0.353906	1.57424	1.50062	3612.5	FALSE	154
2022-09-12	09:51:46	0.364339	1.62065	1.67408	3832.15	FALSE	154
2022-09-12	09:51:46	0.399504	1.77707	1.67408	3614.28	FALSE	154
2022-09-12	09:51:46	0.365204	1.6245	1.67408	3833.78	FALSE	154
2022-09-12	09:51:47	0.388257	1.72704	1.89756	3616	FALSE	154
2022-09-12	09:51:47	0.379809	1.68947	1.89756	3835.47	FALSE	154
2022-09-12	09:51:47	0.550598	2.44917	1.89756	3618.45	FALSE	154
2022-09-12	09:51:47	0.387697	1.72455	1.89756	3837.19	FALSE	154
2022-09-12	09:51:48	0.411921	1.83231	2.10593	3620.29	FALSE	154
2022-09-12	09:51:48	0.398486	1.77255	2.10593	3838.96	FALSE	154
2022-09-12	09:51:48	0.497468	2.21284	2.10593	3622.5	FALSE	154
2022-09-12	09:51:48	0.585865	2.60604	2.10593	3841.57	FALSE	154
2022-09-12	09:51:49	0.899148	3.99959	8.5707	3626.5	FALSE	154
2022-09-12	09:51:49	1.08454	4.82425	8.5707	3846.4	FALSE	154
2022-09-12	09:51:49	2.90434	12.9191	8.5707	3639.42	FALSE	154
2022-09-12	09:51:49	2.81909	12.5399	8.5707	3858.94	FALSE	154
2022-09-12	09:51:50	1.6194	7.20342	4.24512	3646.62	FALSE	154
2022-09-12	09:51:50	0.644644	2.86751	4.24512	3861.8	FALSE	154
2022-09-12	09:51:50	0.598995	2.66445	4.24512	3649.29	FALSE	154

## Sheet: Sunny_martin_202291294640 ( (2)
Date	Time	Lbs	Newtons	Total Force x time	Total Time Steps Force >13.345		**GoPro Fitting: 936
2022-09-12	09:46:50	0.435891	1.93893	1.93893	FALSE	0			Total force x time	3649.29
2022-09-12	09:46:50	0.462863	2.05891	2.05891	FALSE	0			Total Time Steps Force >3	154
2022-09-12	09:46:50	0.448562	1.99529	3.93422	FALSE	0
2022-09-12	09:46:50	0.439962	1.95704	4.01595	FALSE	0
2022-09-12	09:46:51	0.432125	1.92218	5.8564	FALSE	0
2022-09-12	09:46:51	0.477977	2.12614	6.14208	FALSE	0
2022-09-12	09:46:51	0.029275	0.130221	5.98662	FALSE	0
2022-09-12	09:46:51	0.0872394	0.388058	6.53014	FALSE	0
2022-09-12	09:46:52	0.104288	0.463894	6.45052	FALSE	0
2022-09-12	09:46:52	0.27126	1.20662	7.73676	FALSE	0
2022-09-12	09:46:52	2.5167	11.1948	17.6453	FALSE	0
2022-09-12	09:46:52	2.01869	8.97954	16.7163	FALSE	0
2022-09-12	09:46:53	0.177468	0.789413	18.4347	FALSE	0
2022-09-12	09:46:53	0.290954	1.29422	18.0105	FALSE	0
2022-09-12	09:46:53	-0.0229387	-0.102036	18.4347	FALSE	0
2022-09-12	09:46:54	0.236909	1.05382	19.0643	FALSE	0
2022-09-12	09:46:54	0.262914	1.16949	19.6042	FALSE	0
2022-09-12	09:46:54	0.22439	0.998132	20.0625	FALSE	0
2022-09-12	09:46:54	-0.37673	-1.67577	19.6042	FALSE	0
2022-09-12	09:46:55	-0.731081	-3.25199	20.0625	FALSE	0
2022-09-12	09:46:55	-0.856628	-3.81045	19.6042	FALSE	0
2022-09-12	09:46:55	-1.03159	-4.58872	20.0625	FALSE	0
2022-09-12	09:46:55	-0.586552	-2.6091	19.6042	FALSE	0
2022-09-12	09:46:56	-0.595101	-2.64713	20.0625	FALSE	0
2022-09-12	09:46:56	0.052074	0.231636	19.8358	FALSE	0
2022-09-12	09:46:56	0.444389	1.97673	22.0392	FALSE	0
2022-09-12	09:46:56	0.470852	2.09444	21.9303	FALSE	0
2022-09-12	09:46:57	0.543473	2.41748	24.4567	FALSE	0
2022-09-12	09:46:57	0.614058	2.73145	24.6617	FALSE	0
2022-09-12	09:46:57	0.752277	3.34628	27.803	FALSE	0
2022-09-12	09:46:57	0.763626	3.39676	28.0585	FALSE	0
2022-09-12	09:46:58	0.758079	3.37209	31.175	FALSE	0
2022-09-12	09:46:58	0.669885	2.97978	31.0383	FALSE	0
2022-09-12	09:46:58	0.632277	2.81249	33.9875	FALSE	0
2022-09-12	09:46:59	0.665713	2.96122	33.9995	FALSE	0
2022-09-12	09:46:59	0.655789	2.91708	36.9046	FALSE	0
2022-09-12	09:46:59	0.611565	2.72036	36.7199	FALSE	0
2022-09-12	09:46:59	0.567494	2.52433	39.4289	FALSE	0
2022-09-12	09:47:00	0.425458	1.89252	38.6124	FALSE	0
2022-09-12	09:47:00	0.322405	1.43412	40.8631	FALSE	0
2022-09-12	09:47:00	0.358486	1.59462	40.207	FALSE	0
2022-09-12	09:47:00	0.406883	1.8099	42.673	FALSE	0
2022-09-12	09:47:01	0.45187	2.01001	42.217	FALSE	0
2022-09-12	09:47:01	0.347188	1.54436	44.2173	FALSE	0
2022-09-12	09:47:01	0.204491	0.909617	43.1266	FALSE	0
2022-09-12	09:47:01	0.219911	0.978208	45.1955	FALSE	0
2022-09-12	09:47:02	0.967036	4.30157	47.4282	FALSE	0
2022-09-12	09:47:02	2.18739	9.72995	54.9255	FALSE	0
2022-09-12	09:47:02	1.41299	6.28526	53.7135	FALSE	0
2022-09-12	09:47:03	1.07864	4.79801	59.7235	FALSE	0
2022-09-12	09:47:03	0.28098	1.24986	54.9633	FALSE	0
2022-09-12	09:47:03	0.286985	1.27657	61.0001	FALSE	0
2022-09-12	09:47:03	0.170649	0.759081	55.7224	FALSE	0
2022-09-12	09:47:04	0.302608	1.34606	62.3461	FALSE	0
2022-09-12	09:47:04	0.144644	0.643405	56.3658	FALSE	0
2022-09-12	09:47:04	-0.24701	-1.09875	62.3461	FALSE	0
2022-09-12	09:47:04	-0.135865	-0.604355	56.3658	FALSE	0
2022-09-12	09:47:05	-0.363702	-1.61782	62.3461	FALSE	0
2022-09-12	09:47:05	0.967748	4.30474	60.6705	FALSE	0
2022-09-12	09:47:05	2.34067	10.4118	72.7579	FALSE	0
2022-09-12	09:47:05	4.80388	21.3686	82.0392	1	1
2022-09-12	09:47:06	1.34505	5.98305	78.7409	FALSE	1
2022-09-12	09:47:06	1.90485	8.47315	90.5123	FALSE	1
2022-09-12	09:47:06	0.854262	3.79993	82.5409	FALSE	1
2022-09-12	09:47:07	0.203473	0.905089	91.4174	FALSE	1
2022-09-12	09:47:07	1.28765	5.72772	88.2686	FALSE	1
2022-09-12	09:47:07	0.306374	1.36281	92.7802	FALSE	1
2022-09-12	09:47:07	1.58587	7.05427	95.3229	FALSE	1
2022-09-12	09:47:08	0.48444	2.15489	94.9351	FALSE	1
2022-09-12	09:47:08	0.904339	4.02268	99.3455	FALSE	1
2022-09-12	09:47:08	0.740573	3.29422	98.2293	FALSE	1
2022-09-12	09:47:08	1.22144	5.43321	104.779	FALSE	1
2022-09-12	09:47:09	1.94688	8.66011	106.889	FALSE	1
2022-09-12	09:47:09	0.884898	3.9362	108.715	FALSE	1
2022-09-12	09:47:09	4.49212	19.9818	126.871	1	2
2022-09-12	09:47:09	0.650598	2.89399	111.609	FALSE	2
2022-09-12	09:47:10	0.31299	1.39224	128.264	FALSE	2
2022-09-12	09:47:10	0.851005	3.78544	115.394	FALSE	2
2022-09-12	09:47:10	0.379148	1.68653	129.95	FALSE	2
2022-09-12	09:47:10	0.306629	1.36395	116.758	FALSE	2
2022-09-12	09:47:11	0.0755855	0.336219	130.286	FALSE	2
2022-09-12	09:47:11	0.0731936	0.32558	117.084	FALSE	2
2022-09-12	09:47:11	-0.113727	-0.50588	130.286	FALSE	2
2022-09-12	09:47:12	-0.142175	-0.632423	117.084	FALSE	2
2022-09-12	09:47:12	-0.0630913	-0.280643	130.286	FALSE	2
2022-09-12	09:47:12	0.18215	0.81024	117.894	FALSE	2
2022-09-12	09:47:12	1.11589	4.9637	135.25	FALSE	2
2022-09-12	09:47:13	0.541132	2.40706	120.301	FALSE	2
2022-09-12	09:47:13	0.265102	1.17923	136.429	FALSE	2
2022-09-12	09:47:13	0.428359	1.90543	122.207	FALSE	2
2022-09-12	09:47:13	1.53523	6.82901	143.258	FALSE	2
2022-09-12	09:47:14	0.67584	3.00627	125.213	FALSE	2
2022-09-12	09:47:14	0.225814	1.00447	144.263	FALSE	2
2022-09-12	09:47:14	0.210954	0.938366	126.151	FALSE	2
2022-09-12	09:47:14	0.29355	1.30577	145.568	FALSE	2
2022-09-12	09:47:15	0.322608	1.43502	127.586	FALSE	2
2022-09-12	09:47:15	0.314975	1.40107	146.97	FALSE	2
2022-09-12	09:47:15	0.487748	2.1696	129.756	FALSE	2
2022-09-12	09:47:16	0.525712	2.33847	149.308	FALSE	2
2022-09-12	09:47:16	0.275025	1.22337	130.979	FALSE	2
2022-09-12	09:47:16	0.244746	1.08868	150.397	FALSE	2
2022-09-12	09:47:16	0.241489	1.07419	132.053	FALSE	2
2022-09-12	09:47:17	0.218791	0.973226	151.37	FALSE	2
2022-09-12	09:47:17	0.300725	1.33768	133.391	FALSE	2
2022-09-12	09:47:17	0.337774	1.50249	152.872	FALSE	2
2022-09-12	09:47:17	0.719809	3.20185	136.593	FALSE	2
2022-09-12	09:47:18	0.847341	3.76914	156.642	FALSE	2
2022-09-12	09:47:18	1.0362	4.60922	141.202	FALSE	2
2022-09-12	09:47:18	0.867392	3.85833	160.5	FALSE	2
2022-09-12	09:47:18	0.39126	1.7404	142.943	FALSE	2
2022-09-12	09:47:19	0.328308	1.46038	161.96	FALSE	2
2022-09-12	09:47:19	0.320674	1.42642	144.369	FALSE	2
2022-09-12	09:47:19	0.31416	1.39745	163.358	FALSE	2
2022-09-12	09:47:20	0.318232	1.41556	145.785	FALSE	2
2022-09-12	09:47:20	0.301438	1.34086	164.699	FALSE	2
2022-09-12	09:47:20	0.281336	1.25144	147.036	FALSE	2
2022-09-12	09:47:20	0.271005	1.20548	165.904	FALSE	2
2022-09-12	09:47:21	0.354211	1.5756	148.612	FALSE	2
2022-09-12	09:47:21	1.41151	6.27868	172.183	FALSE	2
2022-09-12	09:47:21	1.01681	4.52297	153.135	FALSE	2
2022-09-12	09:47:21	0.529783	2.35658	174.539	FALSE	2
2022-09-12	09:47:22	0.476501	2.11957	155.254	FALSE	2
2022-09-12	09:47:22	2.73436	12.163	186.702	FALSE	2
2022-09-12	09:47:22	4.82123	21.4458	176.7	1	3
2022-09-12	09:47:22	4.80632	21.3795	208.082	1	4
2022-09-12	09:47:23	2.27401	10.1153	186.815	FALSE	4
2022-09-12	09:47:23	0.517417	2.30157	210.383	FALSE	4
2022-09-12	09:47:23	0.211616	0.94131	187.757	FALSE	4
2022-09-12	09:47:23	0.0726338	0.32309	210.706	FALSE	4
2022-09-12	09:47:24	0.246578	1.09683	188.853	FALSE	4
2022-09-12	09:47:24	0.256705	1.14188	211.848	FALSE	4
2022-09-12	09:47:24	0.288868	1.28494	190.138	FALSE	4
2022-09-12	09:47:25	0.289122	1.28607	213.134	FALSE	4
2022-09-12	09:47:25	0.425204	1.89139	192.03	FALSE	4
2022-09-12	09:47:25	0.389835	1.73406	214.868	FALSE	4
2022-09-12	09:47:25	0.298384	1.32727	193.357	FALSE	4
2022-09-12	09:47:26	0.224848	1.00017	215.869	FALSE	4
2022-09-12	09:47:26	0.149682	0.665815	194.023	FALSE	4
2022-09-12	09:47:26	0.216756	0.964174	216.833	FALSE	4
2022-09-12	09:47:26	0.0628628	0.279626	194.302	FALSE	4
2022-09-12	09:47:27	0.12215	0.543348	217.376	FALSE	4
2022-09-12	09:47:27	-0.0126588	-0.0563089	194.302	FALSE	4
2022-09-12	09:47:27	-0.137493	-0.611596	217.376	FALSE	4
2022-09-12	09:47:27	-0.133829	-0.595298	194.302	FALSE	4
2022-09-12	09:47:28	-0.38019	-1.69116	217.376	FALSE	4
2022-09-12	09:47:28	-0.396526	-1.76383	194.302	FALSE	4
2022-09-12	09:47:28	-0.133015	-0.591677	217.376	FALSE	4
2022-09-12	09:47:29	0.276451	1.22971	195.532	FALSE	4
2022-09-12	09:47:29	0.279046	1.24125	218.617	FALSE	4
2022-09-12	09:47:29	0.736196	3.27475	198.807	FALSE	4
2022-09-12	09:47:29	1.23828	5.50812	224.125	FALSE	4
2022-09-12	09:47:30	2.6621	11.8416	210.648	FALSE	4
2022-09-12	09:47:30	3.38653	15.064	239.189	1	5
2022-09-12	09:47:30	1.66042	7.38588	218.034	FALSE	5
2022-09-12	09:47:30	1.20719	5.36982	244.559	FALSE	5
2022-09-12	09:47:31	1.79676	7.99235	226.027	FALSE	5
2022-09-12	09:47:31	0.871005	3.8744	248.434	FALSE	5
2022-09-12	09:47:31	1.05553	4.69521	230.722	FALSE	5
2022-09-12	09:47:31	0.778639	3.46354	251.897	FALSE	5
2022-09-12	09:47:32	1.31406	5.8452	236.567	FALSE	5
2022-09-12	09:47:32	1.77553	7.89791	259.795	FALSE	5
2022-09-12	09:47:32	0.907494	4.03671	240.604	FALSE	5
2022-09-12	09:47:32	0.400369	1.78092	261.576	FALSE	5
2022-09-12	09:47:33	0.276094	1.22812	241.832	FALSE	5
2022-09-12	09:47:33	0.247799	1.10226	262.678	FALSE	5
2022-09-12	09:47:33	0.206934	0.920484	242.752	FALSE	5
2022-09-12	09:47:34	0.209122	0.930216	263.609	FALSE	5
2022-09-12	09:47:34	0.247392	1.10045	243.853	FALSE	5
2022-09-12	09:47:34	0.243066	1.08121	264.69	FALSE	5
2022-09-12	09:47:34	0.702659	3.12557	246.978	FALSE	5
2022-09-12	09:47:35	0.998384	4.44101	269.131	FALSE	5
2022-09-12	09:47:35	0.57528	2.55896	249.537	FALSE	5
2022-09-12	09:47:35	0.797214	3.54617	272.677	FALSE	5
2022-09-12	09:47:35	0.754822	3.3576	252.895	FALSE	5
2022-09-12	09:47:36	0.629936	2.80208	275.479	FALSE	5
2022-09-12	09:47:36	0.519758	2.31199	255.207	FALSE	5
2022-09-12	09:47:36	0.720165	3.20344	278.682	FALSE	5
2022-09-12	09:47:36	1.18815	5.28513	260.492	FALSE	5
2022-09-12	09:47:37	0.810445	3.60502	282.287	FALSE	5
2022-09-12	09:47:37	1.0651	4.73778	265.23	FALSE	5
2022-09-12	09:47:37	0.988104	4.39528	286.683	FALSE	5
2022-09-12	09:47:38	0.686679	3.05449	268.284	FALSE	5
2022-09-12	09:47:38	0.866476	3.85426	290.537	FALSE	5
2022-09-12	09:47:38	2.4279	10.7998	279.084	FALSE	5
2022-09-12	09:47:38	4.37731	19.4712	310.008	1	6
2022-09-12	09:47:39	4.10912	18.2782	297.362	1	7
2022-09-12	09:47:39	3.16922	14.0973	324.105	1	8
2022-09-12	09:47:39	3.06118	13.6167	310.979	1	9
2022-09-12	09:47:39	1.88047	8.36471	332.47	FALSE	9
2022-09-12	09:47:40	2.63889	11.7383	322.717	FALSE	9
2022-09-12	09:47:40	1.0422	4.63591	337.106	FALSE	9
2022-09-12	09:47:40	0.958842	4.26512	326.982	FALSE	9
2022-09-12	09:47:40	0.72383	3.21974	340.326	FALSE	9
2022-09-12	09:47:41	0.627748	2.79235	329.775	FALSE	9
2022-09-12	09:47:41	1.16663	5.1894	345.515	FALSE	9
2022-09-12	09:47:41	1.8736	8.33415	338.109	FALSE	9
2022-09-12	09:47:41	1.84291	8.19763	353.713	FALSE	9
2022-09-12	09:47:42	1.57625	7.01148	345.12	FALSE	9
2022-09-12	09:47:42	0.709529	3.15613	356.869	FALSE	9
2022-09-12	09:47:42	0.552583	2.458	347.578	FALSE	9
2022-09-12	09:47:43	0.298842	1.32931	358.198	FALSE	9
2022-09-12	09:47:43	0.210547	0.936555	348.515	FALSE	9
2022-09-12	09:47:43	0.256909	1.14278	359.341	FALSE	9
2022-09-12	09:47:43	0.346832	1.54278	350.058	FALSE	9
2022-09-12	09:47:44	0.173906	0.773569	360.115	FALSE	9
2022-09-12	09:47:44	0.264542	1.17674	351.235	FALSE	9
2022-09-12	09:47:44	0.00164146	0.00730154	360.122	FALSE	9
2022-09-12	09:47:44	0.173346	0.771078	352.006	FALSE	9
2022-09-12	09:47:45	0.13243	0.589075	360.711	FALSE	9
2022-09-12	09:47:45	0.0556872	0.247708	352.253	FALSE	9
2022-09-12	09:47:45	-0.0965773	-0.429595	360.711	FALSE	9
2022-09-12	09:47:45	0.152176	0.676909	352.93	FALSE	9
2022-09-12	09:47:46	0.0168577	0.0749864	360.786	FALSE	9
2022-09-12	09:47:46	0.15813	0.703394	353.634	FALSE	9
2022-09-12	09:47:46	0.280064	1.24578	362.032	FALSE	9
2022-09-12	09:47:47	2.97233	13.2215	366.855	FALSE	9
2022-09-12	09:47:47	6.39965	28.4669	390.499	1	10
2022-09-12	09:47:47	10.2577	45.6283	412.483	1	11
2022-09-12	09:47:47	6.52866	29.0408	419.539	1	12
2022-09-12	09:47:48	5.92362	26.3494	438.833	1	13
2022-09-12	09:47:48	8.61345	38.3143	457.854	1	14
2022-09-12	09:47:48	4.09991	18.2372	457.07	1	15
2022-09-12	09:47:48	2.84128	12.6386	470.492	FALSE	15
2022-09-12	09:47:49	3.53024	15.7032	472.773	1	16
2022-09-12	09:47:49	0.513855	2.28573	472.778	FALSE	16
2022-09-12	09:47:49	0.717112	3.18986	475.963	FALSE	16
2022-09-12	09:47:49	1.66861	7.42231	480.2	FALSE	16
2022-09-12	09:47:50	1.60144	7.12353	483.087	FALSE	16
2022-09-12	09:47:50	1.68989	7.51697	487.717	FALSE	16
2022-09-12	09:47:50	1.21986	5.42618	488.513	FALSE	16
2022-09-12	09:47:51	1.87945	8.36017	496.078	FALSE	16
2022-09-12	09:47:51	1.14103	5.07553	493.588	FALSE	16
2022-09-12	09:47:51	1.71955	7.6489	503.727	FALSE	16
2022-09-12	09:47:51	0.854517	3.80106	497.389	FALSE	16
2022-09-12	09:47:52	0.600165	2.66965	506.396	FALSE	16
2022-09-12	09:47:52	0.295229	1.31324	498.703	FALSE	16
2022-09-12	09:47:52	1.51655	6.74592	513.142	FALSE	16
2022-09-12	09:47:52	1.27172	5.65686	504.36	FALSE	16
2022-09-12	09:47:53	2.00551	8.92091	522.063	FALSE	16
2022-09-12	09:47:53	2.63334	11.7136	516.073	FALSE	16
2022-09-12	09:47:53	4.75268	21.1409	543.204	1	17
2022-09-12	09:47:53	8.36657	37.2162	553.289	1	18
2022-09-12	09:47:54	7.68286	34.1749	577.379	1	19
2022-09-12	09:47:54	11.502	51.1632	604.453	1	20
2022-09-12	09:47:54	4.60108	20.4665	597.845	1	21
2022-09-12	09:47:54	9.41075	41.8609	646.313	1	22
2022-09-12	09:47:55	0.736705	3.27701	601.122	FALSE	22
2022-09-12	09:47:55	1.47263	6.55055	652.864	FALSE	22
2022-09-12	09:47:55	0.455026	2.02405	603.146	FALSE	22
2022-09-12	09:47:56	0.00764656	0.0340134	652.898	FALSE	22
2022-09-12	09:47:56	-0.0821244	-0.365306	603.146	FALSE	22
2022-09-12	09:47:56	1.00073	4.45145	657.349	FALSE	22
2022-09-12	09:47:56	10.9336	48.6348	651.781	1	23
2022-09-12	09:47:57	13.4799	59.9613	717.311	1	24
2022-09-12	09:47:57	13.048	58.0401	709.821	1	25
2022-09-12	09:47:57	5.62225	25.0089	742.32	1	26
2022-09-12	09:47:57	5.38128	23.937	733.758	1	27
2022-09-12	09:47:58	9.74184	43.3337	785.653	1	28
2022-09-12	09:47:58	6.23324	27.7267	761.485	1	29
2022-09-12	09:47:58	9.60255	42.7141	828.367	1	30
2022-09-12	09:47:58	6.31466	28.0889	789.574	1	31
2022-09-12	09:47:59	5.13523	22.8425	851.21	1	32
2022-09-12	09:47:59	3.62134	16.1084	805.682	1	33
2022-09-12	09:47:59	0.65813	2.92749	854.137	FALSE	33
2022-09-12	09:48:00	0.809224	3.59959	809.282	FALSE	33
2022-09-12	09:48:00	0.630191	2.80322	856.941	FALSE	33
2022-09-12	09:48:00	2.52256	11.2209	820.503	FALSE	33
2022-09-12	09:48:00	0.63589	2.82857	859.769	FALSE	33
2022-09-12	09:48:01	1.60001	7.11716	827.62	FALSE	33
2022-09-12	09:48:01	2.30541	10.2549	870.024	FALSE	33
2022-09-12	09:48:01	3.51034	15.6147	843.235	1	34
2022-09-12	09:48:01	6.45782	28.7257	898.75	1	35
2022-09-12	09:48:02	8.95039	39.8131	883.048	1	36
2022-09-12	09:48:02	8.09212	35.9954	934.745	1	37
2022-09-12	09:48:02	10.4139	46.3231	929.371	1	38
2022-09-12	09:48:02	1.61223	7.17152	941.917	FALSE	38
2022-09-12	09:48:03	4.27874	19.0327	948.404	1	39
2022-09-12	09:48:03	1.50108	6.6771	948.594	FALSE	39
2022-09-12	09:48:03	1.37355	6.10983	954.513	FALSE	39
2022-09-12	09:48:03	4.31166	19.1791	967.773	1	40
2022-09-12	09:48:04	2.9624	13.1773	967.691	FALSE	40
2022-09-12	09:48:04	4.39986	19.5715	987.344	1	41
2022-09-12	09:48:04	4.08525	18.172	985.863	1	42
2022-09-12	09:48:05	2.81854	12.5374	999.882	FALSE	42
2022-09-12	09:48:05	3.37406	15.0085	1000.87	1	43
2022-09-12	09:48:05	2.37162	10.5494	1010.43	FALSE	43
2022-09-12	09:48:05	2.94307	13.0914	1013.96	FALSE	43
2022-09-12	09:48:06	1.2677	5.63898	1016.07	FALSE	43
2022-09-12	09:48:06	1.84897	8.22459	1022.19	FALSE	43
2022-09-12	09:48:06	9.98057	44.3956	1060.47	1	44
2022-09-12	09:48:06	8.16082	36.301	1058.49	1	45
2022-09-12	09:48:07	12.1321	53.966	1114.43	1	46
2022-09-12	09:48:07	2.3196	10.318	1068.81	FALSE	46
2022-09-12	09:48:07	2.82016	12.5446	1126.98	FALSE	46
2022-09-12	09:48:07	5.37955	23.9293	1092.74	1	47
2022-09-12	09:48:08	4.19212	18.6474	1145.62	1	48
2022-09-12	09:48:08	8.31904	37.0048	1129.74	1	49
2022-09-12	09:48:08	5.32439	23.684	1169.31	1	50
2022-09-12	09:48:09	1.72525	7.67426	1137.41	FALSE	50
2022-09-12	09:48:09	7.35634	32.7225	1202.03	1	51
2022-09-12	09:48:09	2.27889	10.137	1147.55	FALSE	51
2022-09-12	09:48:09	5.40942	24.0622	1226.09	1	52
2022-09-12	09:48:10	1.50576	6.69792	1154.25	FALSE	52
2022-09-12	09:48:10	1.66449	7.40398	1233.5	FALSE	52
2022-09-12	09:48:10	1.45314	6.46386	1160.71	FALSE	52
2022-09-12	09:48:10	2.18347	9.71251	1243.21	FALSE	52
2022-09-12	09:48:11	4.69721	20.8941	1181.61	1	53
2022-09-12	09:48:11	2.26805	10.0887	1253.3	FALSE	53
2022-09-12	09:48:11	2.17574	9.67813	1191.29	FALSE	53
2022-09-12	09:48:11	2.29849	10.2241	1263.52	FALSE	53
2022-09-12	09:48:12	2.97894	13.2509	1204.54	FALSE	53
2022-09-12	09:48:12	0.562659	2.50282	1266.02	FALSE	53
2022-09-12	09:48:12	0.275382	1.22495	1205.76	FALSE	53
2022-09-12	09:48:13	0.461641	2.05347	1268.08	FALSE	53
2022-09-12	09:48:13	-0.037188	-0.16542	1205.76	FALSE	53
2022-09-12	09:48:13	0.0601656	0.267629	1268.35	FALSE	53
2022-09-12	09:48:13	0.0492242	0.218959	1205.98	FALSE	53
2022-09-12	09:48:14	0.0145167	0.0645732	1268.41	FALSE	53
2022-09-12	09:48:14	-0.133778	-0.595071	1205.98	FALSE	53
2022-09-12	09:48:14	-0.237086	-1.05461	1268.41	FALSE	53
2022-09-12	09:48:14	-0.0148979	-0.0662688	1205.98	FALSE	53
2022-09-12	09:48:15	0.947494	4.21464	1272.62	FALSE	53
2022-09-12	09:48:15	0.700267	3.11493	1209.1	FALSE	53
2022-09-12	09:48:15	0.488919	2.17481	1274.8	FALSE	53
2022-09-12	09:48:15	0.331565	1.47487	1210.57	FALSE	53
2022-09-12	09:48:16	0.306832	1.36485	1276.16	FALSE	53
2022-09-12	09:48:16	0.33014	1.46853	1212.04	FALSE	53
2022-09-12	09:48:16	0.369173	1.64216	1277.81	FALSE	53
2022-09-12	09:48:16	4.04902	18.0109	1230.05	1	54
2022-09-12	09:48:17	7.43741	33.0831	1310.89	1	55
2022-09-12	09:48:17	10.3526	46.0504	1276.1	1	56
2022-09-12	09:48:17	3.45039	15.348	1326.24	1	57
2022-09-12	09:48:18	10.7707	47.9102	1324.01	1	58
2022-09-12	09:48:18	1.16408	5.17806	1331.42	FALSE	58
2022-09-12	09:48:18	4.55849	20.2771	1344.29	1	59
2022-09-12	09:48:18	1.21569	5.40763	1336.82	FALSE	59
2022-09-12	09:48:19	1.92037	8.54219	1352.83	FALSE	59
2022-09-12	09:48:19	1.50301	6.68569	1343.51	FALSE	59
2022-09-12	09:48:19	0.494466	2.19948	1355.03	FALSE	59
2022-09-12	09:48:19	0.498232	2.21624	1345.73	FALSE	59
2022-09-12	09:48:20	0.267494	1.18987	1356.22	FALSE	59
2022-09-12	09:48:20	0.304695	1.35534	1347.08	FALSE	59
2022-09-12	09:48:20	0.267036	1.18783	1357.41	FALSE	59
2022-09-12	09:48:20	0.26556	1.18126	1348.26	FALSE	59
2022-09-12	09:48:21	0.445662	1.98239	1359.39	FALSE	59
2022-09-12	09:48:21	0.396247	1.76259	1350.02	FALSE	59
2022-09-12	09:48:21	0.526069	2.34006	1361.73	FALSE	59
2022-09-12	09:48:22	0.54159	2.4091	1352.43	FALSE	59
2022-09-12	09:48:22	0.580471	2.58205	1364.31	FALSE	59
2022-09-12	09:48:22	0.490802	2.18319	1354.62	FALSE	59
2022-09-12	09:48:22	0.361082	1.60616	1365.92	FALSE	59
2022-09-12	09:48:23	0.408563	1.81737	1356.43	FALSE	59
2022-09-12	09:48:23	1.17467	5.22517	1371.14	FALSE	59
2022-09-12	09:48:23	9.24825	41.1381	1397.57	1	60
2022-09-12	09:48:23	6.5251	29.0249	1400.17	1	61
2022-09-12	09:48:24	5.19716	23.118	1420.69	1	62
2022-09-12	09:48:24	4.36658	19.4234	1419.59	1	63
2022-09-12	09:48:24	2.64235	11.7537	1432.44	FALSE	63
2022-09-12	09:48:24	1.90256	8.46297	1428.05	FALSE	63
2022-09-12	09:48:25	0.533651	2.37379	1434.82	FALSE	63
2022-09-12	09:48:25	0.577977	2.57096	1430.62	FALSE	63
2022-09-12	09:48:25	0.642506	2.858	1437.68	FALSE	63
2022-09-12	09:48:26	3.21655	14.3079	1444.93	1	64
2022-09-12	09:48:26	8.70591	38.7256	1476.4	1	65
2022-09-12	09:48:26	6.75085	30.0291	1474.96	1	66
2022-09-12	09:48:26	12.4382	55.3276	1531.73	1	67
2022-09-12	09:48:27	13.1941	58.69	1533.65	1	68
2022-09-12	09:48:27	25.2936	112.511	1644.24	1	69
2022-09-12	09:48:27	7.39395	32.8898	1566.54	1	70
2022-09-12	09:48:27	17.256	76.7581	1721	1	71
2022-09-12	09:48:28	9.70316	43.1616	1609.7	1	72
2022-09-12	09:48:28	19.2578	85.6625	1806.66	1	73
2022-09-12	09:48:28	14.427	64.1742	1673.88	1	74
2022-09-12	09:48:28	11.781	52.4042	1859.07	1	75
2022-09-12	09:48:29	16.2973	72.4936	1746.37	1	76
2022-09-12	09:48:29	12.2236	54.373	1913.44	1	77
2022-09-12	09:48:29	5.73085	25.492	1771.86	1	78
2022-09-12	09:48:29	6.66744	29.6581	1943.1	1	79
2022-09-12	09:48:30	6.3138	28.085	1799.95	1	80
2022-09-12	09:48:30	22.2189	98.8341	2041.93	1	81
2022-09-12	09:48:30	20.1895	89.8069	1889.75	1	82
2022-09-12	09:48:31	8.84596	39.3486	2081.28	1	83
2022-09-12	09:48:31	3.29945	14.6766	1904.43	1	84
2022-09-12	09:48:31	2.76856	12.3151	2093.59	FALSE	84
2022-09-12	09:48:31	3.29981	14.6782	1919.11	1	85
2022-09-12	09:48:32	1.87279	8.33054	2101.92	FALSE	85
2022-09-12	09:48:32	5.45802	24.2784	1943.39	1	86
2022-09-12	09:48:32	4.48836	19.9651	2121.89	1	87
2022-09-12	09:48:32	1.49294	6.6409	1950.03	FALSE	87
2022-09-12	09:48:33	0.748511	3.32953	2125.22	FALSE	87
2022-09-12	09:48:33	0.445713	1.98262	1952.01	FALSE	87
2022-09-12	09:48:33	0.409886	1.82325	2127.04	FALSE	87
2022-09-12	09:48:33	0.318028	1.41465	1953.43	FALSE	87
2022-09-12	09:48:34	0.309275	1.37572	2128.42	FALSE	87
2022-09-12	09:48:34	0.339911	1.51199	1954.94	FALSE	87
2022-09-12	09:48:34	0.228308	1.01556	2129.43	FALSE	87
2022-09-12	09:48:35	0.28388	1.26276	1956.2	FALSE	87
2022-09-12	09:48:35	0.349784	1.55591	2130.99	FALSE	87
2022-09-12	09:48:35	0.632735	2.81453	1959.02	FALSE	87
2022-09-12	09:48:35	0.483881	2.1524	2133.14	FALSE	87
2022-09-12	09:48:36	1.01319	4.50687	1963.52	FALSE	87
2022-09-12	09:48:36	0.533142	2.37152	2135.51	FALSE	87
2022-09-12	09:48:36	0.364898	1.62314	1965.15	FALSE	87
2022-09-12	09:48:36	0.312583	1.39043	2136.9	FALSE	87
2022-09-12	09:48:37	0.240674	1.07057	1966.22	FALSE	87
2022-09-12	09:48:37	0.250445	1.11403	2138.02	FALSE	87
2022-09-12	09:48:37	0.303015	1.34787	1967.56	FALSE	87
2022-09-12	09:48:37	0.265967	1.18307	2139.2	FALSE	87
2022-09-12	09:48:38	0.209886	0.933615	1968.5	FALSE	87
2022-09-12	09:48:38	0.280165	1.24623	2140.45	FALSE	87
2022-09-12	09:48:38	0.162863	0.724447	1969.22	FALSE	87
2022-09-12	09:48:38	0.257061	1.14346	2141.59	FALSE	87
2022-09-12	09:48:39	0.266374	1.18488	1970.41	FALSE	87
2022-09-12	09:48:39	0.332685	1.47985	2143.07	FALSE	87
2022-09-12	09:48:39	0.378537	1.68381	1972.09	FALSE	87
2022-09-12	09:48:40	0.389936	1.73451	2144.81	FALSE	87
2022-09-12	09:48:40	0.377774	1.68041	1973.77	FALSE	87
2022-09-12	09:48:40	0.537824	2.39235	2147.2	FALSE	87
2022-09-12	09:48:40	0.654516	2.91142	1976.68	FALSE	87
2022-09-12	09:48:41	0.490903	2.18363	2149.38	FALSE	87
2022-09-12	09:48:41	0.463372	2.06117	1978.74	FALSE	87
2022-09-12	09:48:41	0.839249	3.73315	2153.11	FALSE	87
2022-09-12	09:48:41	0.905611	4.02834	1982.77	FALSE	87
2022-09-12	09:48:42	1.5819	7.03661	2160.15	FALSE	87
2022-09-12	09:48:42	0.950191	4.22664	1987	FALSE	87
2022-09-12	09:48:42	1.26261	5.61634	2165.77	FALSE	87
2022-09-12	09:48:42	0.904695	4.02426	1991.02	FALSE	87
2022-09-12	09:48:43	3.68378	16.3862	2182.15	1	88
2022-09-12	09:48:43	2.3052	10.254	2001.28	FALSE	88
2022-09-12	09:48:43	4.7851	21.2851	2203.44	1	89
2022-09-12	09:48:44	4.34256	19.3166	2020.59	1	90
2022-09-12	09:48:44	4.89116	21.7569	2225.2	1	91
2022-09-12	09:48:44	2.831	12.5929	2033.19	FALSE	91
2022-09-12	09:48:44	0.657672	2.92546	2228.12	FALSE	91
2022-09-12	09:48:45	0.274262	1.21997	2034.41	FALSE	91
2022-09-12	09:48:45	-0.0412084	-0.183303	2228.12	FALSE	91
2022-09-12	09:48:45	0.114822	0.510751	2034.92	FALSE	91
2022-09-12	09:48:45	2.86429	12.7409	2240.86	FALSE	91
2022-09-12	09:48:46	4.04459	17.9911	2052.91	1	92
2022-09-12	09:48:46	4.13457	18.3914	2259.25	1	93
2022-09-12	09:48:46	3.33044	14.8145	2067.72	1	94
2022-09-12	09:48:46	2.06653	9.19234	2268.45	FALSE	94
2022-09-12	09:48:47	2.98037	13.2573	2080.98	FALSE	94
2022-09-12	09:48:47	2.29584	10.2124	2278.66	FALSE	94
2022-09-12	09:48:47	1.30067	5.78564	2086.77	FALSE	94
2022-09-12	09:48:48	0.327646	1.45743	2280.12	FALSE	94
2022-09-12	09:48:48	0.337519	1.50135	2088.27	FALSE	94
2022-09-12	09:48:48	-0.0420226	-0.186925	2280.12	FALSE	94
2022-09-12	09:48:48	-0.0248216	-0.110411	2088.27	FALSE	94
2022-09-12	09:48:49	-0.0311829	-0.138708	2280.12	FALSE	94
2022-09-12	09:48:49	-0.0200379	-0.0891326	2088.27	FALSE	94
2022-09-12	09:48:49	0.0472903	0.210357	2280.33	FALSE	94
2022-09-12	09:48:49	0.201489	0.896263	2089.16	FALSE	94
2022-09-12	09:48:50	0.146832	0.653138	2280.98	FALSE	94
2022-09-12	09:48:50	0.213906	0.951497	2090.11	FALSE	94
2022-09-12	09:48:50	0.248868	1.10701	2282.09	FALSE	94
2022-09-12	09:48:50	0.460216	2.04713	2092.16	FALSE	94
2022-09-12	09:48:51	0.363779	1.61816	2283.7	FALSE	94
2022-09-12	09:48:51	0.407494	1.81261	2093.97	FALSE	94
2022-09-12	09:48:51	0.388868	1.72976	2285.43	FALSE	94
2022-09-12	09:48:51	0.41243	1.83457	2095.81	FALSE	94
2022-09-12	09:48:52	0.34841	1.5498	2286.98	FALSE	94
2022-09-12	09:48:52	0.330751	1.47125	2097.28	FALSE	94
2022-09-12	09:48:52	0.428257	1.90497	2288.89	FALSE	94
2022-09-12	09:48:53	0.332379	1.47849	2098.76	FALSE	94
2022-09-12	09:48:53	0.458079	2.03763	2290.93	FALSE	94
2022-09-12	09:48:53	0.326985	1.45449	2100.21	FALSE	94
2022-09-12	09:48:53	0.392888	1.74764	2292.67	FALSE	94
2022-09-12	09:48:54	0.460318	2.04759	2102.26	FALSE	94
2022-09-12	09:48:54	0.4564	2.03016	2294.7	FALSE	94
2022-09-12	09:48:54	0.401031	1.78387	2104.04	FALSE	94
2022-09-12	09:48:54	0.438435	1.95025	2296.65	FALSE	94
2022-09-12	09:48:55	0.43584	1.9387	2105.98	FALSE	94
2022-09-12	09:48:55	0.410802	1.82733	2298.48	FALSE	94
2022-09-12	09:48:55	0.432481	1.92376	2107.91	FALSE	94
2022-09-12	09:48:55	0.435331	1.93644	2300.42	FALSE	94
2022-09-12	09:48:56	0.42612	1.89547	2109.8	FALSE	94
2022-09-12	09:48:56	0.44042	1.95908	2302.38	FALSE	94
2022-09-12	09:48:56	0.408461	1.81692	2111.62	FALSE	94
2022-09-12	09:48:57	0.461285	2.05189	2304.43	FALSE	94
2022-09-12	09:48:57	0.454364	2.0211	2113.64	FALSE	94
2022-09-12	09:48:57	0.425	1.89048	2306.32	FALSE	94
2022-09-12	09:48:57	0.471616	2.09784	2115.74	FALSE	94
2022-09-12	09:48:58	0.289478	1.28766	2307.61	FALSE	94
2022-09-12	09:48:58	0.205713	0.915053	2116.65	FALSE	94
2022-09-12	09:48:58	0.260267	1.15772	2308.76	FALSE	94
2022-09-12	09:48:58	0.27126	1.20662	2117.86	FALSE	94
2022-09-12	09:48:59	0.31813	1.41511	2310.18	FALSE	94
2022-09-12	09:48:59	0.20841	0.927049	2118.79	FALSE	94
2022-09-12	09:48:59	0.268817	1.19575	2311.38	FALSE	94
2022-09-12	09:48:59	0.276349	1.22926	2120.02	FALSE	94
2022-09-12	09:49:00	0.242303	1.07781	2312.45	FALSE	94
2022-09-12	09:49:00	0.254517	1.13214	2121.15	FALSE	94
2022-09-12	09:49:00	0.262812	1.16904	2313.62	FALSE	94
2022-09-12	09:49:00	0.262048	1.16564	2122.31	FALSE	94
2022-09-12	09:49:01	0.275891	1.22722	2314.85	FALSE	94
2022-09-12	09:49:01	0.260013	1.15659	2123.47	FALSE	94
2022-09-12	09:49:01	0.268868	1.19598	2316.05	FALSE	94
2022-09-12	09:49:02	0.271107	1.20594	2124.68	FALSE	94
2022-09-12	09:49:02	0.271718	1.20866	2317.25	FALSE	94
2022-09-12	09:49:02	0.275331	1.22473	2125.9	FALSE	94
2022-09-12	09:49:02	0.277926	1.23627	2318.49	FALSE	94
2022-09-12	09:49:03	0.275076	1.22359	2127.13	FALSE	94
2022-09-12	09:49:03	0.280318	1.24691	2319.74	FALSE	94
2022-09-12	09:49:03	0.27869	1.23967	2128.36	FALSE	94
2022-09-12	09:49:03	0.293092	1.30373	2321.04	FALSE	94
2022-09-12	09:49:04	0.286934	1.27634	2129.64	FALSE	94
2022-09-12	09:49:04	0.293397	1.30509	2322.35	FALSE	94
2022-09-12	09:49:04	0.29584	1.31596	2130.96	FALSE	94
2022-09-12	09:49:04	0.292125	1.29943	2323.65	FALSE	94
2022-09-12	09:49:05	0.299249	1.33112	2132.29	FALSE	94
2022-09-12	09:49:05	0.304898	1.35625	2325	FALSE	94
2022-09-12	09:49:05	0.297824	1.32478	2133.61	FALSE	94
2022-09-12	09:49:06	0.358741	1.59575	2326.6	FALSE	94
2022-09-12	09:49:06	0.345204	1.53554	2135.15	FALSE	94
2022-09-12	09:49:06	0.320929	1.42756	2328.03	FALSE	94
2022-09-12	09:49:06	0.298842	1.32931	2136.48	FALSE	94
2022-09-12	09:49:07	0.31757	1.41261	2329.44	FALSE	94
2022-09-12	09:49:07	0.306476	1.36327	2137.84	FALSE	94
2022-09-12	09:49:07	0.305204	1.35761	2330.8	FALSE	94
2022-09-12	09:49:07	0.29584	1.31596	2139.16	FALSE	94
2022-09-12	09:49:08	0.279351	1.24261	2332.04	FALSE	94
2022-09-12	09:49:08	0.328206	1.45993	2140.62	FALSE	94
2022-09-12	09:49:08	0.319657	1.4219	2333.46	FALSE	94
2022-09-12	09:49:08	0.323117	1.43729	2142.05	FALSE	94
2022-09-12	09:49:09	0.307443	1.36757	2334.83	FALSE	94
2022-09-12	09:49:09	0.297824	1.32478	2143.38	FALSE	94
2022-09-12	09:49:09	0.304847	1.35602	2336.18	FALSE	94
2022-09-12	09:49:10	0.300115	1.33497	2144.71	FALSE	94
2022-09-12	09:49:10	0.297417	1.32297	2337.51	FALSE	94
2022-09-12	09:49:10	0.295484	1.31437	2146.03	FALSE	94
2022-09-12	09:49:10	0.302506	1.34561	2338.85	FALSE	94
2022-09-12	09:49:11	0.310853	1.38274	2147.41	FALSE	94
2022-09-12	09:49:11	0.311056	1.38364	2340.24	FALSE	94
2022-09-12	09:49:11	0.315026	1.4013	2148.81	FALSE	94
2022-09-12	09:49:11	0.320522	1.42575	2341.66	FALSE	94
2022-09-12	09:49:12	0.318435	1.41646	2150.23	FALSE	94
2022-09-12	09:49:12	0.312328	1.3893	2343.05	FALSE	94
2022-09-12	09:49:12	0.326018	1.45019	2151.68	FALSE	94
2022-09-12	09:49:12	0.323117	1.43729	2344.49	FALSE	94
2022-09-12	09:49:13	0.323575	1.43933	2153.12	FALSE	94
2022-09-12	09:49:13	0.319707	1.42212	2345.91	FALSE	94
2022-09-12	09:49:13	0.317519	1.41239	2154.53	FALSE	94
2022-09-12	09:49:13	0.321947	1.43208	2347.34	FALSE	94
2022-09-12	09:49:14	0.321183	1.42869	2155.96	FALSE	94
2022-09-12	09:49:14	0.320318	1.42484	2348.77	FALSE	94
2022-09-12	09:49:14	0.324389	1.44295	2157.4	FALSE	94
2022-09-12	09:49:15	0.322099	1.43276	2350.2	FALSE	94
2022-09-12	09:49:15	0.326374	1.45178	2158.85	FALSE	94
2022-09-12	09:49:15	0.340216	1.51335	2351.71	FALSE	94
2022-09-12	09:49:15	0.91757	4.08153	2162.94	FALSE	94
2022-09-12	09:49:16	3.25955	14.4991	2366.21	1	95
2022-09-12	09:49:16	2.42754	10.7982	2173.73	FALSE	95
2022-09-12	09:49:16	1.51131	6.72261	2372.94	FALSE	95
2022-09-12	09:49:16	0.429936	1.91244	2175.65	FALSE	95
2022-09-12	09:49:17	0.423626	1.88437	2374.82	FALSE	95
2022-09-12	09:49:17	0.354466	1.57674	2177.22	FALSE	95
2022-09-12	09:49:17	0.371361	1.65189	2376.47	FALSE	95
2022-09-12	09:49:17	0.426374	1.8966	2179.12	FALSE	95
2022-09-12	09:49:18	0.339097	1.50837	2377.98	FALSE	95
2022-09-12	09:49:18	0.355484	1.58126	2180.7	FALSE	95
2022-09-12	09:49:18	0.377417	1.67883	2379.66	FALSE	95
2022-09-12	09:49:19	0.371107	1.65076	2182.35	FALSE	95
2022-09-12	09:49:19	0.335891	1.49411	2381.15	FALSE	95
2022-09-12	09:49:19	0.344389	1.53191	2183.88	FALSE	95
2022-09-12	09:49:19	0.374568	1.66615	2382.82	FALSE	95
2022-09-12	09:49:20	0.311056	1.38364	2185.27	FALSE	95
2022-09-12	09:49:20	0.347392	1.54527	2384.36	FALSE	95
2022-09-12	09:49:20	0.337316	1.50045	2186.77	FALSE	95
2022-09-12	09:49:20	0.341336	1.51833	2385.88	FALSE	95
2022-09-12	09:49:21	0.328817	1.46264	2188.23	FALSE	95
2022-09-12	09:49:21	0.321082	1.42824	2387.31	FALSE	95
2022-09-12	09:49:21	0.320471	1.42552	2189.66	FALSE	95
2022-09-12	09:49:21	0.318282	1.41578	2388.73	FALSE	95
2022-09-12	09:49:22	0.313194	1.39315	2191.05	FALSE	95
2022-09-12	09:49:22	0.359148	1.59756	2390.32	FALSE	95
2022-09-12	09:49:22	0.374466	1.6657	2192.71	FALSE	95
2022-09-12	09:49:23	0.381183	1.69558	2392.02	FALSE	95
2022-09-12	09:49:23	0.342201	1.52218	2194.24	FALSE	95
2022-09-12	09:49:23	0.334771	1.48913	2393.51	FALSE	95
2022-09-12	09:49:23	0.33014	1.46853	2195.71	FALSE	95
2022-09-12	09:49:24	0.342201	1.52218	2395.03	FALSE	95
2022-09-12	09:49:24	0.328766	1.46242	2197.17	FALSE	95
2022-09-12	09:49:24	0.336247	1.49569	2396.53	FALSE	95
2022-09-12	09:49:24	0.328817	1.46264	2198.63	FALSE	95
2022-09-12	09:49:25	0.330649	1.47079	2398	FALSE	95
2022-09-12	09:49:25	0.334008	1.48573	2200.12	FALSE	95
2022-09-12	09:49:25	0.332583	1.4794	2399.48	FALSE	95
2022-09-12	09:49:25	0.330038	1.46808	2201.58	FALSE	95
2022-09-12	09:49:26	0.336298	1.49592	2400.97	FALSE	95
2022-09-12	09:49:26	0.331158	1.47306	2203.06	FALSE	95
2022-09-12	09:49:26	0.333855	1.48505	2402.46	FALSE	95
2022-09-12	09:49:26	0.331769	1.47577	2204.53	FALSE	95
2022-09-12	09:49:27	0.33584	1.49388	2403.95	FALSE	95
2022-09-12	09:49:27	0.336501	1.49682	2206.03	FALSE	95
2022-09-12	09:49:27	0.32958	1.46604	2405.42	FALSE	95
2022-09-12	09:49:28	0.343881	1.52965	2207.56	FALSE	95
2022-09-12	09:49:28	0.303321	1.34923	2406.77	FALSE	95
2022-09-12	09:49:28	0.605509	2.69343	2210.25	FALSE	95
2022-09-12	09:49:28	1.38291	6.15146	2412.92	FALSE	95
2022-09-12	09:49:29	0.871921	3.87848	2214.13	FALSE	95
2022-09-12	09:49:29	1.07762	4.79347	2417.71	FALSE	95
2022-09-12	09:49:29	1.25665	5.58983	2219.72	FALSE	95
2022-09-12	09:49:29	0.641692	2.85437	2420.57	FALSE	95
2022-09-12	09:49:30	0.937468	4.17005	2223.89	FALSE	95
2022-09-12	09:49:30	2.2166	9.85988	2430.43	FALSE	95
2022-09-12	09:49:30	0.529987	2.35749	2226.25	FALSE	95
2022-09-12	09:49:30	0.330089	1.4683	2431.89	FALSE	95
2022-09-12	09:49:31	0.306679	1.36417	2227.61	FALSE	95
2022-09-12	09:49:31	0.374364	1.66525	2433.56	FALSE	95
2022-09-12	09:49:31	0.177977	0.791677	2228.4	FALSE	95
2022-09-12	09:49:32	0.277519	1.23446	2434.79	FALSE	95
2022-09-12	09:49:32	0.239402	1.06491	2229.47	FALSE	95
2022-09-12	09:49:32	0.306679	1.36417	2436.16	FALSE	95
2022-09-12	09:49:32	0.317774	1.41352	2230.88	FALSE	95
2022-09-12	09:49:33	0.226374	1.00696	2437.17	FALSE	95
2022-09-12	09:49:33	0.333041	1.48143	2232.36	FALSE	95
2022-09-12	09:49:33	0.306069	1.36146	2438.53	FALSE	95
2022-09-12	09:49:33	0.349987	1.55681	2233.92	FALSE	95
2022-09-12	09:49:34	0.30042	1.33633	2439.86	FALSE	95
2022-09-12	09:49:34	0.272634	1.21273	2235.13	FALSE	95
2022-09-12	09:49:34	0.294364	1.30939	2441.17	FALSE	95
2022-09-12	09:49:34	0.29126	1.29558	2236.43	FALSE	95
2022-09-12	09:49:35	0.292125	1.29943	2442.47	FALSE	95
2022-09-12	09:49:35	0.286323	1.27362	2237.7	FALSE	95
2022-09-12	09:49:35	0.309275	1.37572	2443.85	FALSE	95
2022-09-12	09:49:35	0.2764	1.22948	2238.93	FALSE	95
2022-09-12	09:49:36	0.26388	1.17379	2445.02	FALSE	95
2022-09-12	09:49:36	0.245662	1.09275	2240.03	FALSE	95
2022-09-12	09:49:36	0.245	1.08981	2446.11	FALSE	95
2022-09-12	09:49:37	0.267901	1.19168	2241.22	FALSE	95
2022-09-12	09:49:37	0.279097	1.24148	2447.35	FALSE	95
2022-09-12	09:49:37	0.315484	1.40334	2242.62	FALSE	95
2022-09-12	09:49:37	0.239657	1.06604	2448.42	FALSE	95
2022-09-12	09:49:38	0.277926	1.23627	2243.86	FALSE	95
2022-09-12	09:49:38	0.397468	1.76802	2450.19	FALSE	95
2022-09-12	09:49:38	0.230446	1.02507	2244.88	FALSE	95
2022-09-12	09:49:38	0.390038	1.73497	2451.92	FALSE	95
2022-09-12	09:49:39	0.300929	1.33859	2246.22	FALSE	95
2022-09-12	09:49:39	0.2193	0.97549	2452.9	FALSE	95
2022-09-12	09:49:39	0.393499	1.75036	2247.97	FALSE	95
2022-09-12	09:49:39	0.31299	1.39224	2454.29	FALSE	95
2022-09-12	09:49:40	0.306323	1.36259	2249.33	FALSE	95
2022-09-12	09:49:40	0.417672	1.85789	2456.15	FALSE	95
2022-09-12	09:49:40	0.460166	2.04691	2251.38	FALSE	95
2022-09-12	09:49:41	0.325407	1.44748	2457.59	FALSE	95
2022-09-12	09:49:41	0.416349	1.852	2253.23	FALSE	95
2022-09-12	09:49:41	0.2907	1.29309	2458.89	FALSE	95
2022-09-12	09:49:41	0.391921	1.74334	2254.98	FALSE	95
2022-09-12	09:49:42	1.18871	5.28762	2464.18	FALSE	95
2022-09-12	09:49:42	0.851056	3.78567	2258.76	FALSE	95
2022-09-12	09:49:42	1.02363	4.55331	2468.73	FALSE	95
2022-09-12	09:49:42	0.702659	3.12557	2261.89	FALSE	95
2022-09-12	09:49:43	0.481692	2.14266	2470.87	FALSE	95
2022-09-12	09:49:43	0.385611	1.71527	2263.6	FALSE	95
2022-09-12	09:49:43	0.404542	1.79948	2472.67	FALSE	95
2022-09-12	09:49:43	0.572277	2.5456	2266.15	FALSE	95
2022-09-12	09:49:44	1.67899	7.46848	2480.14	FALSE	95
2022-09-12	09:49:44	0.507647	2.25812	2268.41	FALSE	95
2022-09-12	09:49:44	0.353804	1.57379	2481.71	FALSE	95
2022-09-12	09:49:45	0.351107	1.56179	2269.97	FALSE	95
2022-09-12	09:49:45	0.384186	1.70894	2483.42	FALSE	95
2022-09-12	09:49:45	0.319657	1.4219	2271.39	FALSE	95
2022-09-12	09:49:45	0.264644	1.17719	2484.6	FALSE	95
2022-09-12	09:49:46	0.344084	1.53055	2272.92	FALSE	95
2022-09-12	09:49:46	0.258232	1.14867	2485.75	FALSE	95
2022-09-12	09:49:46	0.382455	1.70124	2274.62	FALSE	95
2022-09-12	09:49:46	0.369682	1.64442	2487.39	FALSE	95
2022-09-12	09:49:47	0.288104	1.28154	2275.9	FALSE	95
2022-09-12	09:49:47	0.294567	1.31029	2488.7	FALSE	95
2022-09-12	09:49:47	0.265102	1.17923	2277.08	FALSE	95
2022-09-12	09:49:47	0.4507	2.0048	2490.71	FALSE	95
2022-09-12	09:49:48	1.09309	4.86228	2281.94	FALSE	95
2022-09-12	09:49:48	1.10698	4.92407	2495.63	FALSE	95
2022-09-12	09:49:48	1.82215	8.10529	2290.05	FALSE	95
2022-09-12	09:49:48	0.450903	2.00571	2497.64	FALSE	95
2022-09-12	09:49:49	0.766171	3.40808	2293.46	FALSE	95
2022-09-12	09:49:49	0.614771	2.73462	2500.37	FALSE	95
2022-09-12	09:49:49	0.384949	1.71233	2295.17	FALSE	95
2022-09-12	09:49:50	0.275483	1.2254	2501.6	FALSE	95
2022-09-12	09:49:50	0.113295	0.503959	2295.67	FALSE	95
2022-09-12	09:49:50	0.212125	0.943574	2502.54	FALSE	95
2022-09-12	09:49:50	0.20897	0.92954	2296.6	FALSE	95
2022-09-12	09:49:51	0.200827	0.893319	2503.43	FALSE	95
2022-09-12	09:49:51	0.169122	0.752288	2297.36	FALSE	95
2022-09-12	09:49:51	0.161896	0.720146	2504.15	FALSE	95
2022-09-12	09:49:51	0.371361	1.65189	2299.01	FALSE	95
2022-09-12	09:49:52	0.32271	1.43548	2505.59	FALSE	95
2022-09-12	09:49:52	0.296603	1.31935	2300.33	FALSE	95
2022-09-12	09:49:52	0.397316	1.76734	2507.36	FALSE	95
2022-09-12	09:49:52	0.492634	2.19133	2302.52	FALSE	95
2022-09-12	09:49:53	0.54215	2.41159	2509.77	FALSE	95
2022-09-12	09:49:53	0.524848	2.33463	2304.85	FALSE	95
2022-09-12	09:49:53	0.902048	4.01249	2513.78	FALSE	95
2022-09-12	09:49:54	1.79279	7.97469	2312.83	FALSE	95
2022-09-12	09:49:54	1.77543	7.89747	2521.68	FALSE	95
2022-09-12	09:49:54	1.74047	7.74196	2320.57	FALSE	95
2022-09-12	09:49:54	1.50469	6.69316	2528.37	FALSE	95
2022-09-12	09:49:55	1.71228	7.61656	2328.19	FALSE	95
2022-09-12	09:49:55	3.04744	13.5556	2541.93	1	96
2022-09-12	09:49:55	0.929122	4.13292	2332.32	FALSE	96
2022-09-12	09:49:55	0.795382	3.53802	2545.47	FALSE	96
2022-09-12	09:49:56	0.532837	2.37017	2334.69	FALSE	96
2022-09-12	09:49:56	0.40042	1.78115	2547.25	FALSE	96
2022-09-12	09:49:56	0.241285	1.07328	2335.76	FALSE	96
2022-09-12	09:49:56	0.100064	0.445105	2547.69	FALSE	96
2022-09-12	09:49:57	0.0636771	0.283248	2336.05	FALSE	96
2022-09-12	09:49:57	0.221387	0.984774	2548.68	FALSE	96
2022-09-12	09:49:57	0.10556	0.469552	2336.52	FALSE	96
2022-09-12	09:49:58	0.238842	1.06242	2549.74	FALSE	96
2022-09-12	09:49:58	0.15126	0.672835	2337.19	FALSE	96
2022-09-12	09:49:58	0.190242	0.846234	2550.59	FALSE	96
2022-09-12	09:49:58	0.188613	0.838988	2338.03	FALSE	96
2022-09-12	09:49:59	0.189071	0.841026	2551.43	FALSE	96
2022-09-12	09:49:59	0.235789	1.04884	2339.08	FALSE	96
2022-09-12	09:49:59	0.390954	1.73904	2553.17	FALSE	96
2022-09-12	09:49:59	0.630394	2.80412	2341.88	FALSE	96
2022-09-12	09:50:00	0.469479	2.08834	2555.25	FALSE	96
2022-09-12	09:50:00	0.365255	1.62473	2343.51	FALSE	96
2022-09-12	09:50:00	0.462965	2.05936	2557.31	FALSE	96
2022-09-12	09:50:00	0.389631	1.73316	2345.24	FALSE	96
2022-09-12	09:50:01	0.339809	1.51154	2558.82	FALSE	96
2022-09-12	09:50:01	0.387443	1.72342	2346.96	FALSE	96
2022-09-12	09:50:01	0.401387	1.78545	2560.61	FALSE	96
2022-09-12	09:50:01	0.359402	1.59869	2348.56	FALSE	96
2022-09-12	09:50:02	0.361641	1.60865	2562.22	FALSE	96
2022-09-12	09:50:02	0.37416	1.66434	2350.22	FALSE	96
2022-09-12	09:50:02	0.314415	1.39858	2563.62	FALSE	96
2022-09-12	09:50:03	0.286476	1.2743	2351.5	FALSE	96
2022-09-12	09:50:03	0.309377	1.37617	2564.99	FALSE	96
2022-09-12	09:50:03	0.299351	1.33157	2352.83	FALSE	96
2022-09-12	09:50:03	0.30617	1.36191	2566.36	FALSE	96
2022-09-12	09:50:04	0.307901	1.36961	2354.2	FALSE	96
2022-09-12	09:50:04	0.320115	1.42394	2567.78	FALSE	96
2022-09-12	09:50:04	0.315433	1.40311	2355.6	FALSE	96
2022-09-12	09:50:04	0.317061	1.41035	2569.19	FALSE	96
2022-09-12	09:50:05	0.311565	1.3859	2356.99	FALSE	96
2022-09-12	09:50:05	0.317621	1.41284	2570.6	FALSE	96
2022-09-12	09:50:05	0.312532	1.3902	2358.38	FALSE	96
2022-09-12	09:50:05	0.318435	1.41646	2572.02	FALSE	96
2022-09-12	09:50:06	0.322812	1.43593	2359.82	FALSE	96
2022-09-12	09:50:06	0.331972	1.47668	2573.5	FALSE	96
2022-09-12	09:50:06	0.345153	1.53531	2361.35	FALSE	96
2022-09-12	09:50:07	0.341947	1.52105	2575.02	FALSE	96
2022-09-12	09:50:07	0.346985	1.54346	2362.89	FALSE	96
2022-09-12	09:50:07	0.355026	1.57923	2576.6	FALSE	96
2022-09-12	09:50:07	0.346374	1.54074	2364.43	FALSE	96
2022-09-12	09:50:08	0.336705	1.49773	2578.09	FALSE	96
2022-09-12	09:50:08	0.341641	1.51969	2365.95	FALSE	96
2022-09-12	09:50:08	0.343372	1.52739	2579.62	FALSE	96
2022-09-12	09:50:08	0.337875	1.50294	2367.46	FALSE	96
2022-09-12	09:50:09	0.329326	1.46491	2581.09	FALSE	96
2022-09-12	09:50:09	0.323066	1.43706	2368.89	FALSE	96
2022-09-12	09:50:09	0.322914	1.43639	2582.52	FALSE	96
2022-09-12	09:50:09	0.315789	1.40469	2370.3	FALSE	96
2022-09-12	09:50:10	0.318282	1.41578	2583.94	FALSE	96
2022-09-12	09:50:10	0.312685	1.39089	2371.69	FALSE	96
2022-09-12	09:50:10	0.329682	1.46649	2585.4	FALSE	96
2022-09-12	09:50:11	0.363015	1.61476	2373.3	FALSE	96
2022-09-12	09:50:11	0.397417	1.76779	2587.17	FALSE	96
2022-09-12	09:50:11	0.443728	1.97379	2375.28	FALSE	96
2022-09-12	09:50:11	0.486985	2.16621	2589.34	FALSE	96
2022-09-12	09:50:12	0.727952	3.23808	2378.52	FALSE	96
2022-09-12	09:50:12	0.82098	3.65188	2592.99	FALSE	96
2022-09-12	09:50:12	0.636755	2.83241	2381.35	FALSE	96
2022-09-12	09:50:12	0.525102	2.33576	2595.33	FALSE	96
2022-09-12	09:50:13	0.570191	2.53632	2383.89	FALSE	96
2022-09-12	09:50:13	0.634974	2.82449	2598.15	FALSE	96
2022-09-12	09:50:13	1.0535	4.68618	2388.57	FALSE	96
2022-09-12	09:50:13	1.2937	5.75464	2603.91	FALSE	96
2022-09-12	09:50:14	1.52006	6.76153	2395.33	FALSE	96
2022-09-12	09:50:14	2.04419	9.09297	2613	FALSE	96
2022-09-12	09:50:14	2.16266	9.61994	2404.95	FALSE	96
2022-09-12	09:50:14	2.21981	9.87416	2622.87	FALSE	96
2022-09-12	09:50:15	3.9277	17.4712	2422.42	1	97
2022-09-12	09:50:15	0.881998	3.9233	2626.8	FALSE	97
2022-09-12	09:50:15	0.846578	3.76575	2426.19	FALSE	97
2022-09-12	09:50:16	0.581743	2.58771	2629.38	FALSE	97
2022-09-12	09:50:16	0.459657	2.04465	2428.23	FALSE	97
2022-09-12	09:50:16	0.398028	1.77051	2631.15	FALSE	97
2022-09-12	09:50:16	0.54902	2.44215	2430.68	FALSE	97
2022-09-12	09:50:17	0.58388	2.59722	2633.75	FALSE	97
2022-09-12	09:50:17	0.547544	2.43559	2433.11	FALSE	97
2022-09-12	09:50:17	0.564949	2.51301	2636.26	FALSE	97
2022-09-12	09:50:17	0.630852	2.80616	2435.92	FALSE	97
2022-09-12	09:50:18	0.690903	3.07327	2639.34	FALSE	97
2022-09-12	09:50:18	1.26724	5.63694	2441.56	FALSE	97
2022-09-12	09:50:18	1.74994	7.78408	2647.12	FALSE	97
2022-09-12	09:50:18	1.7621	7.83817	2449.39	FALSE	97
2022-09-12	09:50:19	2.09309	9.31048	2656.43	FALSE	97
2022-09-12	09:50:19	4.03009	17.9266	2467.32	1	98
2022-09-12	09:50:19	2.06001	9.16334	2665.6	FALSE	98
2022-09-12	09:50:20	1.86368	8.29002	2475.61	FALSE	98
2022-09-12	09:50:20	0.515229	2.29184	2667.89	FALSE	98
2022-09-12	09:50:20	0.443931	1.97469	2477.59	FALSE	98
2022-09-12	09:50:20	0.221387	0.984774	2668.87	FALSE	98
2022-09-12	09:50:21	0.224491	0.998581	2478.58	FALSE	98
2022-09-12	09:50:21	0.129326	0.575268	2669.45	FALSE	98
2022-09-12	09:50:21	0.223321	0.993376	2479.58	FALSE	98
2022-09-12	09:50:21	0.301336	1.3404	2670.79	FALSE	98
2022-09-12	09:50:22	1.3479	5.99573	2485.57	FALSE	98
2022-09-12	09:50:22	4.34739	19.3381	2690.13	1	99
2022-09-12	09:50:22	3.43492	15.2792	2500.85	1	100
2022-09-12	09:50:22	1.66765	7.41804	2697.54	FALSE	100
2022-09-12	09:50:23	0.993804	4.42064	2505.27	FALSE	100
2022-09-12	09:50:23	0.583473	2.5954	2700.14	FALSE	100
2022-09-12	09:50:23	0.73131	3.25301	2508.53	FALSE	100
2022-09-12	09:50:23	0.589987	2.62438	2702.76	FALSE	100
2022-09-12	09:50:24	0.434415	1.93236	2510.46	FALSE	100
2022-09-12	09:50:24	0.375534	1.67045	2704.43	FALSE	100
2022-09-12	09:50:24	0.363982	1.61906	2512.08	FALSE	100
2022-09-12	09:50:25	0.858639	3.8194	2708.25	FALSE	100
2022-09-12	09:50:25	1.23421	5.49001	2517.57	FALSE	100
2022-09-12	09:50:25	1.12917	5.02277	2713.28	FALSE	100
2022-09-12	09:50:25	0.932583	4.14832	2521.72	FALSE	100
2022-09-12	09:50:26	0.49126	2.18522	2715.46	FALSE	100
2022-09-12	09:50:26	0.418639	1.86219	2523.58	FALSE	100
2022-09-12	09:50:26	0.557468	2.47973	2717.94	FALSE	100
2022-09-12	09:50:26	2.54052	11.3007	2534.88	FALSE	100
2022-09-12	09:50:27	1.46006	6.49464	2724.44	FALSE	100
2022-09-12	09:50:27	0.748664	3.33021	2538.21	FALSE	100
2022-09-12	09:50:27	0.468461	2.08381	2726.52	FALSE	100
2022-09-12	09:50:27	0.65014	2.89195	2541.1	FALSE	100
2022-09-12	09:50:28	0.500521	2.22642	2728.75	FALSE	100
2022-09-12	09:50:28	0.486374	2.16349	2543.26	FALSE	100
2022-09-12	09:50:28	0.460369	2.04781	2730.79	FALSE	100
2022-09-12	09:50:29	0.780522	3.47192	2546.74	FALSE	100
2022-09-12	09:50:29	2.64469	11.7641	2742.56	FALSE	100
2022-09-12	09:50:29	3.83146	17.0431	2563.78	1	101
2022-09-12	09:50:29	4.6738	20.79	2763.35	1	102
2022-09-12	09:50:30	0.797519	3.54752	2567.33	FALSE	102
2022-09-12	09:50:30	0.613448	2.72874	2766.08	FALSE	102
2022-09-12	09:50:30	0.594567	2.64475	2569.97	FALSE	102
2022-09-12	09:50:30	1.611	7.16605	2773.24	FALSE	102
2022-09-12	09:50:31	3.98128	17.7095	2587.68	1	103
2022-09-12	09:50:31	8.5252	37.9218	2811.16	1	104
2022-09-12	09:50:31	6.07986	27.0444	2614.73	1	105
2022-09-12	09:50:31	2.88485	12.8324	2824	FALSE	105
2022-09-12	09:50:32	1.42729	6.34887	2621.07	FALSE	105
2022-09-12	09:50:32	1.27228	5.65936	2829.66	FALSE	105
2022-09-12	09:50:32	1.26592	5.63107	2626.71	FALSE	105
2022-09-12	09:50:33	1.24388	5.53303	2835.19	FALSE	105
2022-09-12	09:50:33	0.830395	3.69376	2630.4	FALSE	105
2022-09-12	09:50:33	0.85355	3.79676	2838.99	FALSE	105
2022-09-12	09:50:33	0.701387	3.11991	2633.52	FALSE	105
2022-09-12	09:50:34	1.01406	4.51074	2843.5	FALSE	105
2022-09-12	09:50:34	0.601997	2.6778	2636.2	FALSE	105
2022-09-12	09:50:34	1.53574	6.83128	2850.33	FALSE	105
2022-09-12	09:50:34	1.92485	8.56212	2644.76	FALSE	105
2022-09-12	09:50:35	3.63915	16.1877	2866.52	1	106
2022-09-12	09:50:35	3.06647	13.6403	2658.4	1	107
2022-09-12	09:50:35	2.93253	13.0445	2879.56	FALSE	107
2022-09-12	09:50:35	2.28581	10.1677	2668.57	FALSE	107
2022-09-12	09:50:36	1.16805	5.19572	2884.76	FALSE	107
2022-09-12	09:50:36	0.436756	1.94278	2670.51	FALSE	107
2022-09-12	09:50:36	0.410903	1.82778	2886.58	FALSE	107
2022-09-12	09:50:36	0.591514	2.63117	2673.14	FALSE	107
2022-09-12	09:50:37	1.07915	4.80028	2891.38	FALSE	107
2022-09-12	09:50:37	1.29253	5.74943	2678.89	FALSE	107
2022-09-12	09:50:37	1.57441	7.00329	2898.39	FALSE	107
2022-09-12	09:50:38	1.00001	4.44824	2683.34	FALSE	107
2022-09-12	09:50:38	1.13289	5.03932	2903.43	FALSE	107
2022-09-12	09:50:38	0.946323	4.20943	2687.55	FALSE	107
2022-09-12	09:50:38	0.972227	4.32466	2907.75	FALSE	107
2022-09-12	09:50:39	1.02271	4.54922	2692.1	FALSE	107
2022-09-12	09:50:39	1.04373	4.64272	2912.39	FALSE	107
2022-09-12	09:50:39	1.23365	5.48752	2697.58	FALSE	107
2022-09-12	09:50:39	1.65304	7.35305	2919.75	FALSE	107
2022-09-12	09:50:40	2.09243	9.30755	2706.89	FALSE	107
2022-09-12	09:50:40	2.2593	10.0498	2929.8	FALSE	107
2022-09-12	09:50:40	1.81782	8.08603	2714.98	FALSE	107
2022-09-12	09:50:40	1.12698	5.01303	2934.81	FALSE	107
2022-09-12	09:50:41	0.664746	2.95692	2717.94	FALSE	107
2022-09-12	09:50:41	1.18317	5.26298	2940.07	FALSE	107
2022-09-12	09:50:41	1.20047	5.33993	2723.28	FALSE	107
2022-09-12	09:50:42	1.86332	8.28842	2948.36	FALSE	107
2022-09-12	09:50:42	2.07345	9.22312	2732.5	FALSE	107
2022-09-12	09:50:42	2.19874	9.78044	2958.14	FALSE	107
2022-09-12	09:50:42	2.12393	9.44767	2741.95	FALSE	107
2022-09-12	09:50:43	2.36912	10.5383	2968.68	FALSE	107
2022-09-12	09:50:43	2.37803	10.578	2752.52	FALSE	107
2022-09-12	09:50:43	2.46566	10.9677	2979.65	FALSE	107
2022-09-12	09:50:43	2.52912	11.25	2763.77	FALSE	107
2022-09-12	09:50:44	2.42347	10.7801	2990.43	FALSE	107
2022-09-12	09:50:44	2.16434	9.62742	2773.4	FALSE	107
2022-09-12	09:50:44	1.63691	7.2813	2997.71	FALSE	107
2022-09-12	09:50:44	1.14744	5.10404	2778.51	FALSE	107
2022-09-12	09:50:45	1.18062	5.25163	3002.96	FALSE	107
2022-09-12	09:50:45	0.80958	3.60117	2782.11	FALSE	107
2022-09-12	09:50:45	0.90098	4.00774	3006.97	FALSE	107
2022-09-12	09:50:46	0.535585	2.38239	2784.49	FALSE	107
2022-09-12	09:50:46	0.329224	1.46445	3008.43	FALSE	107
2022-09-12	09:50:46	0.354211	1.5756	2786.06	FALSE	107
2022-09-12	09:50:46	0.952786	4.23818	3012.67	FALSE	107
2022-09-12	09:50:47	0.723015	3.21612	2789.28	FALSE	107
2022-09-12	09:50:47	0.476451	2.11935	3014.79	FALSE	107
2022-09-12	09:50:47	0.569326	2.53248	2791.81	FALSE	107
2022-09-12	09:50:47	1.77497	7.89542	3022.69	FALSE	107
2022-09-12	09:50:48	1.64693	7.32587	2799.14	FALSE	107
2022-09-12	09:50:48	2.27472	10.1184	3032.8	FALSE	107
2022-09-12	09:50:48	2.26856	10.091	2809.23	FALSE	107
2022-09-12	09:50:48	1.67691	7.45923	3040.26	FALSE	107
2022-09-12	09:50:49	1.52256	6.77265	2816	FALSE	107
2022-09-12	09:50:49	1.33355	5.9319	3046.2	FALSE	107
2022-09-12	09:50:49	2.97762	13.245	2829.25	FALSE	107
2022-09-12	09:50:49	1.68088	7.47689	3053.67	FALSE	107
2022-09-12	09:50:50	1.86861	8.31195	2837.56	FALSE	107
2022-09-12	09:50:50	1.57655	7.01281	3060.69	FALSE	107
2022-09-12	09:50:50	1.41385	6.28909	2843.85	FALSE	107
2022-09-12	09:50:51	1.66637	7.41235	3068.1	FALSE	107
2022-09-12	09:50:51	2.47085	10.9908	2854.84	FALSE	107
2022-09-12	09:50:51	2.52734	11.2421	3079.34	FALSE	107
2022-09-12	09:50:51	3.6252	16.1256	2870.97	1	108
2022-09-12	09:50:52	4.10118	18.2429	3097.58	1	109
2022-09-12	09:50:52	5.89858	26.2381	2897.2	1	110
2022-09-12	09:50:52	6.35339	28.2611	3125.84	1	111
2022-09-12	09:50:52	7.19258	31.994	2929.2	1	112
2022-09-12	09:50:53	6.83411	30.3995	3156.24	1	113
2022-09-12	09:50:53	4.75014	21.1296	2950.33	1	114
2022-09-12	09:50:53	3.03457	13.4984	3169.74	1	115
2022-09-12	09:50:53	2.60663	11.5948	2961.92	FALSE	115
2022-09-12	09:50:54	3.07131	13.6618	3183.4	1	116
2022-09-12	09:50:54	4.24052	18.8627	2980.78	1	117
2022-09-12	09:50:54	3.52118	15.6629	3199.07	1	118
2022-09-12	09:50:55	2.8163	12.5275	2993.31	FALSE	118
2022-09-12	09:50:55	2.06373	9.17988	3208.25	FALSE	118
2022-09-12	09:50:55	1.71732	7.63898	3000.95	FALSE	118
2022-09-12	09:50:55	1.47019	6.5397	3214.79	FALSE	118
2022-09-12	09:50:56	1.68368	7.48935	3008.44	FALSE	118
2022-09-12	09:50:56	1.64301	7.30844	3222.09	FALSE	118
2022-09-12	09:50:56	2.25721	10.0405	3018.48	FALSE	118
2022-09-12	09:50:56	3.29803	14.6703	3236.76	1	119
2022-09-12	09:50:57	3.48576	15.5054	3033.99	1	120
2022-09-12	09:50:57	3.11808	13.8698	3250.63	1	121
2022-09-12	09:50:57	3.25294	14.4697	3048.46	1	122
2022-09-12	09:50:57	3.69385	16.431	3267.07	1	123
2022-09-12	09:50:58	3.06067	13.6145	3062.07	1	124
2022-09-12	09:50:58	3.53681	15.7324	3282.8	1	125
2022-09-12	09:50:58	3.52077	15.6611	3077.73	1	126
2022-09-12	09:50:59	3.52541	15.6817	3298.48	1	127
2022-09-12	09:50:59	3.66693	16.3112	3094.04	1	128
2022-09-12	09:50:59	3.49614	15.5515	3314.03	1	129
2022-09-12	09:50:59	3.67126	16.3305	3110.37	1	130
2022-09-12	09:51:00	4.18042	18.5953	3332.63	1	131
2022-09-12	09:51:00	3.54133	15.7525	3126.13	1	132
2022-09-12	09:51:00	2.98968	13.2987	3345.92	FALSE	132
2022-09-12	09:51:00	2.61406	11.6279	3137.75	FALSE	132
2022-09-12	09:51:01	2.73548	12.168	3358.09	FALSE	132
2022-09-12	09:51:01	2.88831	12.8478	3150.6	FALSE	132
2022-09-12	09:51:01	3.03105	13.4827	3371.58	1	133
2022-09-12	09:51:01	2.97869	13.2498	3163.85	FALSE	133
2022-09-12	09:51:02	2.44022	10.8546	3382.43	FALSE	133
2022-09-12	09:51:02	2.6881	11.9572	3175.81	FALSE	133
2022-09-12	09:51:02	0.740522	3.29399	3385.72	FALSE	133
2022-09-12	09:51:02	0.846476	3.76529	3179.57	FALSE	133
2022-09-12	09:51:03	1.22765	5.46083	3391.19	FALSE	133
2022-09-12	09:51:03	1.76078	7.8323	3187.41	FALSE	133
2022-09-12	09:51:03	2.60271	11.5774	3402.76	FALSE	133
2022-09-12	09:51:04	3.47075	15.4386	3202.84	1	134
2022-09-12	09:51:04	3.79614	16.886	3419.65	1	135
2022-09-12	09:51:04	3.69843	16.4514	3219.3	1	136
2022-09-12	09:51:04	5.02902	22.3701	3442.02	1	137
2022-09-12	09:51:05	5.32194	23.6731	3242.97	1	138
2022-09-12	09:51:05	5.01003	22.2856	3464.3	1	139
2022-09-12	09:51:05	5.76764	25.6556	3268.62	1	140
2022-09-12	09:51:05	5.71904	25.4394	3489.74	1	141
2022-09-12	09:51:06	3.40276	15.1362	3283.76	1	142
2022-09-12	09:51:06	2.86856	12.7599	3502.5	FALSE	142
2022-09-12	09:51:06	2.46072	10.9458	3294.71	FALSE	142
2022-09-12	09:51:06	1.54632	6.87834	3509.38	FALSE	142
2022-09-12	09:51:07	0.44958	1.99982	3296.71	FALSE	142
2022-09-12	09:51:07	0.395229	1.75806	3511.14	FALSE	142
2022-09-12	09:51:07	0.38215	1.69988	3298.41	FALSE	142
2022-09-12	09:51:08	0.36958	1.64397	3512.78	FALSE	142
2022-09-12	09:51:08	0.15355	0.683021	3299.09	FALSE	142
2022-09-12	09:51:08	0.201336	0.895583	3513.68	FALSE	142
2022-09-12	09:51:08	0.121947	0.542445	3299.63	FALSE	142
2022-09-12	09:51:09	0.078588	0.349575	3514.03	FALSE	142
2022-09-12	09:51:09	0.229224	1.01963	3300.65	FALSE	142
2022-09-12	09:51:09	0.256909	1.14278	3515.17	FALSE	142
2022-09-12	09:51:09	0.253448	1.12739	3301.78	FALSE	142
2022-09-12	09:51:10	0.231209	1.02846	3516.2	FALSE	142
2022-09-12	09:51:10	0.213143	0.948103	3302.73	FALSE	142
2022-09-12	09:51:10	0.205611	0.914599	3517.11	FALSE	142
2022-09-12	09:51:10	0.222965	0.991793	3303.72	FALSE	142
2022-09-12	09:51:11	0.237723	1.05744	3518.17	FALSE	142
2022-09-12	09:51:11	0.299758	1.33338	3305.05	FALSE	142
2022-09-12	09:51:11	0.254771	1.13327	3519.31	FALSE	142
2022-09-12	09:51:11	0.199351	0.886753	3305.94	FALSE	142
2022-09-12	09:51:12	0.317468	1.41216	3520.72	FALSE	142
2022-09-12	09:51:12	0.316908	1.40967	3307.35	FALSE	142
2022-09-12	09:51:12	0.397825	1.76961	3522.49	FALSE	142
2022-09-12	09:51:13	0.491718	2.18726	3309.54	FALSE	142
2022-09-12	09:51:13	0.440878	1.96111	3524.45	FALSE	142
2022-09-12	09:51:13	0.249987	1.11199	3310.65	FALSE	142
2022-09-12	09:51:13	0.375026	1.66819	3526.12	FALSE	142
2022-09-12	09:51:14	0.365814	1.62721	3312.27	FALSE	142
2022-09-12	09:51:14	0.422506	1.87939	3528	FALSE	142
2022-09-12	09:51:14	0.469173	2.08698	3314.36	FALSE	142
2022-09-12	09:51:14	0.416807	1.85404	3529.85	FALSE	142
2022-09-12	09:51:15	0.728817	3.24192	3317.6	FALSE	142
2022-09-12	09:51:15	1.01706	4.52409	3534.37	FALSE	142
2022-09-12	09:51:15	0.760013	3.38069	3320.98	FALSE	142
2022-09-12	09:51:15	0.89243	3.96971	3538.34	FALSE	142
2022-09-12	09:51:16	0.0900893	0.400735	3321.38	FALSE	142
2022-09-12	09:51:16	0.0648984	0.288681	3538.63	FALSE	142
2022-09-12	09:51:16	-0.170216	-0.757155	3321.38	FALSE	142
2022-09-12	09:51:17	-0.164262	-0.73067	3538.63	FALSE	142
2022-09-12	09:51:17	-0.367977	-1.63684	3321.38	FALSE	142
2022-09-12	09:51:17	-0.248689	-1.10622	3538.63	FALSE	142
2022-09-12	09:51:17	-0.120852	-0.537574	3321.38	FALSE	142
2022-09-12	09:51:18	-0.00482162	-0.0214475	3538.63	FALSE	142
2022-09-12	09:51:18	0.064186	0.285512	3321.67	FALSE	142
2022-09-12	09:51:18	-0.0123025	-0.054724	3538.63	FALSE	142
2022-09-12	09:51:18	0.383626	1.70645	3323.38	FALSE	142
2022-09-12	09:51:19	0.299453	1.33203	3539.96	FALSE	142
2022-09-12	09:51:19	0.262761	1.16881	3324.55	FALSE	142
2022-09-12	09:51:19	0.311158	1.38409	3541.35	FALSE	142
2022-09-12	09:51:19	0.328003	1.45902	3326	FALSE	142
2022-09-12	09:51:20	0.35131	1.5627	3542.91	FALSE	142
2022-09-12	09:51:20	0.344847	1.53395	3327.54	FALSE	142
2022-09-12	09:51:20	0.64042	2.84872	3545.76	FALSE	142
2022-09-12	09:51:21	0.861234	3.83094	3331.37	FALSE	142
2022-09-12	09:51:21	1.09212	4.85797	3550.62	FALSE	142
2022-09-12	09:51:21	0.64215	2.85641	3334.23	FALSE	142
2022-09-12	09:51:21	0.844237	3.75534	3554.37	FALSE	142
2022-09-12	09:51:22	0.365	1.62359	3335.85	FALSE	142
2022-09-12	09:51:22	0.439097	1.95319	3556.33	FALSE	142
2022-09-12	09:51:22	0.308919	1.37413	3337.22	FALSE	142
2022-09-12	09:51:22	0.442965	1.9704	3558.3	FALSE	142
2022-09-12	09:51:23	0.356298	1.58488	3338.81	FALSE	142
2022-09-12	09:51:23	0.401641	1.78658	3560.08	FALSE	142
2022-09-12	09:51:23	0.301082	1.33927	3340.15	FALSE	142
2022-09-12	09:51:23	0.359097	1.59734	3561.68	FALSE	142
2022-09-12	09:51:24	0.344949	1.5344	3341.68	FALSE	142
2022-09-12	09:51:24	0.510089	2.26898	3563.95	FALSE	142
2022-09-12	09:51:24	0.337519	1.50135	3343.18	FALSE	142
2022-09-12	09:51:24	0.864389	3.84498	3567.79	FALSE	142
2022-09-12	09:51:25	1.43497	6.38303	3349.57	FALSE	142
2022-09-12	09:51:25	5.51426	24.5285	3592.32	1	143
2022-09-12	09:51:25	7.29614	32.4547	3382.02	1	144
2022-09-12	09:51:26	10.2713	45.6888	3638.01	1	145
2022-09-12	09:51:26	4.23263	18.8276	3400.85	1	146
2022-09-12	09:51:26	3.45645	15.375	3653.39	1	147
2022-09-12	09:51:26	4.1509	18.464	3419.31	1	148
2022-09-12	09:51:27	2.92581	13.0146	3666.4	FALSE	148
2022-09-12	09:51:27	5.05253	22.4747	3441.79	1	149
2022-09-12	09:51:27	4.58729	20.4052	3686.81	1	150
2022-09-12	09:51:27	5.74098	25.537	3467.32	1	151
2022-09-12	09:51:28	3.95075	17.5737	3704.38	1	152
2022-09-12	09:51:28	3.38174	15.0427	3482.37	1	153
2022-09-12	09:51:28	2.06602	9.19007	3713.57	FALSE	153
2022-09-12	09:51:28	3.04098	13.5269	3495.89	1	154
2022-09-12	09:51:29	2.78668	12.3957	3725.97	FALSE	154
2022-09-12	09:51:29	2.28612	10.1691	3506.06	FALSE	154
2022-09-12	09:51:29	1.54846	6.88786	3732.85	FALSE	154
2022-09-12	09:51:30	2.36703	10.529	3516.59	FALSE	154
2022-09-12	09:51:30	2.662	11.8411	3744.7	FALSE	154
2022-09-12	09:51:30	1.31971	5.87033	3522.46	FALSE	154
2022-09-12	09:51:30	2.04062	9.07709	3753.77	FALSE	154
2022-09-12	09:51:31	2.50515	11.1434	3533.61	FALSE	154
2022-09-12	09:51:31	2.01014	8.9415	3762.71	FALSE	154
2022-09-12	09:51:31	1.54337	6.86522	3540.47	FALSE	154
2022-09-12	09:51:31	1.56001	6.93924	3769.65	FALSE	154
2022-09-12	09:51:32	2.21625	9.85832	3550.33	FALSE	154
2022-09-12	09:51:32	1.69523	7.54072	3777.19	FALSE	154
2022-09-12	09:51:32	1.93782	8.61981	3558.95	FALSE	154
2022-09-12	09:51:32	1.68459	7.49339	3784.69	FALSE	154
2022-09-12	09:51:33	2.03197	9.03861	3567.99	FALSE	154
2022-09-12	09:51:33	0.812277	3.61317	3788.3	FALSE	154
2022-09-12	09:51:33	0.557519	2.47996	3570.47	FALSE	154
2022-09-12	09:51:34	0.574313	2.55466	3790.86	FALSE	154
2022-09-12	09:51:34	0.99472	4.42471	3574.89	FALSE	154
2022-09-12	09:51:34	0.842812	3.749	3794.6	FALSE	154
2022-09-12	09:51:34	1.74922	7.78088	3582.67	FALSE	154
2022-09-12	09:51:35	1.88449	8.38259	3802.99	FALSE	154
2022-09-12	09:51:35	1.02037	4.53881	3587.21	FALSE	154
2022-09-12	09:51:35	0.577417	2.56847	3805.56	FALSE	154
2022-09-12	09:51:35	0.382099	1.69965	3588.91	FALSE	154
2022-09-12	09:51:36	0.372786	1.65823	3807.21	FALSE	154
2022-09-12	09:51:36	0.213143	0.948103	3589.86	FALSE	154
2022-09-12	09:51:36	0.303015	1.34787	3808.56	FALSE	154
2022-09-12	09:51:36	0.255789	1.1378	3591	FALSE	154
2022-09-12	09:51:37	0.264542	1.17674	3809.74	FALSE	154
2022-09-12	09:51:37	0.318995	1.41895	3592.42	FALSE	154
2022-09-12	09:51:37	0.304084	1.35263	3811.09	FALSE	154
2022-09-12	09:51:37	0.344084	1.53055	3593.95	FALSE	154
2022-09-12	09:51:38	0.332125	1.47736	3812.57	FALSE	154
2022-09-12	09:51:38	0.354924	1.57877	3595.53	FALSE	154
2022-09-12	09:51:38	0.342405	1.52309	3814.09	FALSE	154
2022-09-12	09:51:39	0.362455	1.61227	3597.14	FALSE	154
2022-09-12	09:51:39	0.332023	1.4769	3815.57	FALSE	154
2022-09-12	09:51:39	0.283372	1.2605	3598.4	FALSE	154
2022-09-12	09:51:39	0.289478	1.28766	3816.86	FALSE	154
2022-09-12	09:51:40	0.264644	1.17719	3599.58	FALSE	154
2022-09-12	09:51:40	0.253346	1.12693	3817.98	FALSE	154
2022-09-12	09:51:40	0.269529	1.19892	3600.78	FALSE	154
2022-09-12	09:51:40	0.236552	1.05223	3819.03	FALSE	154
2022-09-12	09:51:41	0.197672	0.879285	3601.65	FALSE	154
2022-09-12	09:51:41	0.281336	1.25144	3820.29	FALSE	154
2022-09-12	09:51:41	0.280369	1.24714	3602.9	FALSE	154
2022-09-12	09:51:41	0.522964	2.32625	3822.61	FALSE	154
2022-09-12	09:51:42	0.489071	2.17549	3605.08	FALSE	154
2022-09-12	09:51:42	0.369733	1.64465	3824.26	FALSE	154
2022-09-12	09:51:42	0.292786	1.30237	3606.38	FALSE	154
2022-09-12	09:51:43	0.129377	0.575495	3824.83	FALSE	154
2022-09-12	09:51:43	0.0156363	0.0695534	3606.45	FALSE	154
2022-09-12	09:51:43	-0.0138293	-0.0615155	3824.83	FALSE	154
2022-09-12	09:51:43	0.0556872	0.247708	3606.7	FALSE	154
2022-09-12	09:51:44	0.352685	1.56881	3826.4	FALSE	154
2022-09-12	09:51:44	0.339453	1.50995	3608.21	FALSE	154
2022-09-12	09:51:44	0.304593	1.35489	3827.76	FALSE	154
2022-09-12	09:51:44	0.240064	1.06785	3609.27	FALSE	154
2022-09-12	09:51:45	0.310954	1.38319	3829.14	FALSE	154
2022-09-12	09:51:45	0.37126	1.65144	3610.93	FALSE	154
2022-09-12	09:51:45	0.313295	1.3936	3830.53	FALSE	154
2022-09-12	09:51:45	0.353906	1.57424	3612.5	FALSE	154
2022-09-12	09:51:46	0.364339	1.62065	3832.15	FALSE	154
2022-09-12	09:51:46	0.399504	1.77707	3614.28	FALSE	154
2022-09-12	09:51:46	0.365204	1.6245	3833.78	FALSE	154
2022-09-12	09:51:47	0.388257	1.72704	3616	FALSE	154
2022-09-12	09:51:47	0.379809	1.68947	3835.47	FALSE	154
2022-09-12	09:51:47	0.550598	2.44917	3618.45	FALSE	154
2022-09-12	09:51:47	0.387697	1.72455	3837.19	FALSE	154
2022-09-12	09:51:48	0.411921	1.83231	3620.29	FALSE	154
2022-09-12	09:51:48	0.398486	1.77255	3838.96	FALSE	154
2022-09-12	09:51:48	0.497468	2.21284	3622.5	FALSE	154
2022-09-12	09:51:48	0.585865	2.60604	3841.57	FALSE	154
2022-09-12	09:51:49	0.899148	3.99959	3626.5	FALSE	154
2022-09-12	09:51:49	1.08454	4.82425	3846.4	FALSE	154
2022-09-12	09:51:49	2.90434	12.9191	3639.42	FALSE	154
2022-09-12	09:51:49	2.81909	12.5399	3858.94	FALSE	154
2022-09-12	09:51:50	1.6194	7.20342	3646.62	FALSE	154
2022-09-12	09:51:50	0.644644	2.86751	3861.8	FALSE	154
2022-09-12	09:51:50	0.598995	2.66445	3649.29	FALSE	154

## Sheet: Sunny_martin_202291294640 (Edi)
Date	Time	Lbs	Total Force x time	Total Time Steps Force >3		**GoPro Fitting: 936
2022-09-12	09:46:50	0.435891	0.435891	FALSE	0			Total force x time	1688.57
2022-09-12	09:46:50	0.462863	0.898754	FALSE	0			Total Time Steps Force >3	154
2022-09-12	09:46:50	0.448562	1.34732	FALSE	0
2022-09-12	09:46:50	0.439962	1.78728	FALSE	0
2022-09-12	09:46:51	0.432125	2.2194	FALSE	0
2022-09-12	09:46:51	0.477977	2.69738	FALSE	0
2022-09-12	09:46:51	0.029275	2.72666	FALSE	0
2022-09-12	09:46:51	0.0872394	2.81389	FALSE	0
2022-09-12	09:46:52	0.104288	2.91818	FALSE	0
2022-09-12	09:46:52	0.27126	3.18944	FALSE	0
2022-09-12	09:46:52	2.5167	5.70614	FALSE	0
2022-09-12	09:46:52	2.01869	7.72483	FALSE	0
2022-09-12	09:46:53	0.177468	7.9023	FALSE	0
2022-09-12	09:46:53	0.290954	8.19325	FALSE	0
2022-09-12	09:46:53	-0.0229387	8.19325	FALSE	0
2022-09-12	09:46:54	0.236909	8.43016	FALSE	0
2022-09-12	09:46:54	0.262914	8.69308	FALSE	0
2022-09-12	09:46:54	0.22439	8.91747	FALSE	0
2022-09-12	09:46:54	-0.37673	8.91747	FALSE	0
2022-09-12	09:46:55	-0.731081	8.91747	FALSE	0
2022-09-12	09:46:55	-0.856628	8.91747	FALSE	0
2022-09-12	09:46:55	-1.03159	8.91747	FALSE	0
2022-09-12	09:46:55	-0.586552	8.91747	FALSE	0
2022-09-12	09:46:56	-0.595101	8.91747	FALSE	0
2022-09-12	09:46:56	0.052074	8.96954	FALSE	0
2022-09-12	09:46:56	0.444389	9.41393	FALSE	0
2022-09-12	09:46:56	0.470852	9.88478	FALSE	0
2022-09-12	09:46:57	0.543473	10.4283	FALSE	0
2022-09-12	09:46:57	0.614058	11.0423	FALSE	0
2022-09-12	09:46:57	0.752277	11.7946	FALSE	0
2022-09-12	09:46:57	0.763626	12.5582	FALSE	0
2022-09-12	09:46:58	0.758079	13.3163	FALSE	0
2022-09-12	09:46:58	0.669885	13.9862	FALSE	0
2022-09-12	09:46:58	0.632277	14.6185	FALSE	0
2022-09-12	09:46:59	0.665713	15.2842	FALSE	0
2022-09-12	09:46:59	0.655789	15.94	FALSE	0
2022-09-12	09:46:59	0.611565	16.5515	FALSE	0
2022-09-12	09:46:59	0.567494	17.119	FALSE	0
2022-09-12	09:47:00	0.425458	17.5445	FALSE	0
2022-09-12	09:47:00	0.322405	17.8669	FALSE	0
2022-09-12	09:47:00	0.358486	18.2254	FALSE	0
2022-09-12	09:47:00	0.406883	18.6323	FALSE	0
2022-09-12	09:47:01	0.45187	19.0841	FALSE	0
2022-09-12	09:47:01	0.347188	19.4313	FALSE	0
2022-09-12	09:47:01	0.204491	19.6358	FALSE	0
2022-09-12	09:47:01	0.219911	19.8557	FALSE	0
2022-09-12	09:47:02	0.967036	20.8227	FALSE	0
2022-09-12	09:47:02	2.18739	23.0101	FALSE	0
2022-09-12	09:47:02	1.41299	24.4231	FALSE	0
2022-09-12	09:47:03	1.07864	25.5018	FALSE	0
2022-09-12	09:47:03	0.28098	25.7827	FALSE	0
2022-09-12	09:47:03	0.286985	26.0697	FALSE	0
2022-09-12	09:47:03	0.170649	26.2404	FALSE	0
2022-09-12	09:47:04	0.302608	26.543	FALSE	0
2022-09-12	09:47:04	0.144644	26.6876	FALSE	0
2022-09-12	09:47:04	-0.24701	26.6876	FALSE	0
2022-09-12	09:47:04	-0.135865	26.6876	FALSE	0
2022-09-12	09:47:05	-0.363702	26.6876	FALSE	0
2022-09-12	09:47:05	0.967748	27.6554	FALSE	0
2022-09-12	09:47:05	2.34067	29.9961	FALSE	0
2022-09-12	09:47:05	4.80388	34.7999	1	1
2022-09-12	09:47:06	1.34505	36.145	FALSE	1
2022-09-12	09:47:06	1.90485	38.0498	FALSE	1
2022-09-12	09:47:06	0.854262	38.9041	FALSE	1
2022-09-12	09:47:07	0.203473	39.1076	FALSE	1
2022-09-12	09:47:07	1.28765	40.3952	FALSE	1
2022-09-12	09:47:07	0.306374	40.7016	FALSE	1
2022-09-12	09:47:07	1.58587	42.2875	FALSE	1
2022-09-12	09:47:08	0.48444	42.7719	FALSE	1
2022-09-12	09:47:08	0.904339	43.6762	FALSE	1
2022-09-12	09:47:08	0.740573	44.4168	FALSE	1
2022-09-12	09:47:08	1.22144	45.6383	FALSE	1
2022-09-12	09:47:09	1.94688	47.5851	FALSE	1
2022-09-12	09:47:09	0.884898	48.47	FALSE	1
2022-09-12	09:47:09	4.49212	52.9621	1	2
2022-09-12	09:47:09	0.650598	53.6127	FALSE	2
2022-09-12	09:47:10	0.31299	53.9257	FALSE	2
2022-09-12	09:47:10	0.851005	54.7767	FALSE	2
2022-09-12	09:47:10	0.379148	55.1559	FALSE	2
2022-09-12	09:47:10	0.306629	55.4625	FALSE	2
2022-09-12	09:47:11	0.0755855	55.5381	FALSE	2
2022-09-12	09:47:11	0.0731936	55.6113	FALSE	2
2022-09-12	09:47:11	-0.113727	55.6113	FALSE	2
2022-09-12	09:47:12	-0.142175	55.6113	FALSE	2
2022-09-12	09:47:12	-0.0630913	55.6113	FALSE	2
2022-09-12	09:47:12	0.18215	55.7934	FALSE	2
2022-09-12	09:47:12	1.11589	56.9093	FALSE	2
2022-09-12	09:47:13	0.541132	57.4505	FALSE	2
2022-09-12	09:47:13	0.265102	57.7156	FALSE	2
2022-09-12	09:47:13	0.428359	58.1439	FALSE	2
2022-09-12	09:47:13	1.53523	59.6792	FALSE	2
2022-09-12	09:47:14	0.67584	60.355	FALSE	2
2022-09-12	09:47:14	0.225814	60.5808	FALSE	2
2022-09-12	09:47:14	0.210954	60.7918	FALSE	2
2022-09-12	09:47:14	0.29355	61.0853	FALSE	2
2022-09-12	09:47:15	0.322608	61.4079	FALSE	2
2022-09-12	09:47:15	0.314975	61.7229	FALSE	2
2022-09-12	09:47:15	0.487748	62.2107	FALSE	2
2022-09-12	09:47:16	0.525712	62.7364	FALSE	2
2022-09-12	09:47:16	0.275025	63.0114	FALSE	2
2022-09-12	09:47:16	0.244746	63.2561	FALSE	2
2022-09-12	09:47:16	0.241489	63.4976	FALSE	2
2022-09-12	09:47:17	0.218791	63.7164	FALSE	2
2022-09-12	09:47:17	0.300725	64.0171	FALSE	2
2022-09-12	09:47:17	0.337774	64.3549	FALSE	2
2022-09-12	09:47:17	0.719809	65.0747	FALSE	2
2022-09-12	09:47:18	0.847341	65.9221	FALSE	2
2022-09-12	09:47:18	1.0362	66.9583	FALSE	2
2022-09-12	09:47:18	0.867392	67.8257	FALSE	2
2022-09-12	09:47:18	0.39126	68.2169	FALSE	2
2022-09-12	09:47:19	0.328308	68.5452	FALSE	2
2022-09-12	09:47:19	0.320674	68.8659	FALSE	2
2022-09-12	09:47:19	0.31416	69.1801	FALSE	2
2022-09-12	09:47:20	0.318232	69.4983	FALSE	2
2022-09-12	09:47:20	0.301438	69.7997	FALSE	2
2022-09-12	09:47:20	0.281336	70.0811	FALSE	2
2022-09-12	09:47:20	0.271005	70.3521	FALSE	2
2022-09-12	09:47:21	0.354211	70.7063	FALSE	2
2022-09-12	09:47:21	1.41151	72.1178	FALSE	2
2022-09-12	09:47:21	1.01681	73.1346	FALSE	2
2022-09-12	09:47:21	0.529783	73.6644	FALSE	2
2022-09-12	09:47:22	0.476501	74.1409	FALSE	2
2022-09-12	09:47:22	2.73436	76.8752	FALSE	2
2022-09-12	09:47:22	4.82123	81.6965	1	3
2022-09-12	09:47:22	4.80632	86.5028	1	4
2022-09-12	09:47:23	2.27401	88.7768	FALSE	4
2022-09-12	09:47:23	0.517417	89.2942	FALSE	4
2022-09-12	09:47:23	0.211616	89.5058	FALSE	4
2022-09-12	09:47:23	0.0726338	89.5785	FALSE	4
2022-09-12	09:47:24	0.246578	89.825	FALSE	4
2022-09-12	09:47:24	0.256705	90.0818	FALSE	4
2022-09-12	09:47:24	0.288868	90.3706	FALSE	4
2022-09-12	09:47:25	0.289122	90.6597	FALSE	4
2022-09-12	09:47:25	0.425204	91.0849	FALSE	4
2022-09-12	09:47:25	0.389835	91.4748	FALSE	4
2022-09-12	09:47:25	0.298384	91.7732	FALSE	4
2022-09-12	09:47:26	0.224848	91.998	FALSE	4
2022-09-12	09:47:26	0.149682	92.1477	FALSE	4
2022-09-12	09:47:26	0.216756	92.3645	FALSE	4
2022-09-12	09:47:26	0.0628628	92.4273	FALSE	4
2022-09-12	09:47:27	0.12215	92.5495	FALSE	4
2022-09-12	09:47:27	-0.0126588	92.5495	FALSE	4
2022-09-12	09:47:27	-0.137493	92.5495	FALSE	4
2022-09-12	09:47:27	-0.133829	92.5495	FALSE	4
2022-09-12	09:47:28	-0.38019	92.5495	FALSE	4
2022-09-12	09:47:28	-0.396526	92.5495	FALSE	4
2022-09-12	09:47:28	-0.133015	92.5495	FALSE	4
2022-09-12	09:47:29	0.276451	92.8259	FALSE	4
2022-09-12	09:47:29	0.279046	93.105	FALSE	4
2022-09-12	09:47:29	0.736196	93.8412	FALSE	4
2022-09-12	09:47:29	1.23828	95.0794	FALSE	4
2022-09-12	09:47:30	2.6621	97.7415	FALSE	4
2022-09-12	09:47:30	3.38653	101.128	1	5
2022-09-12	09:47:30	1.66042	102.788	FALSE	5
2022-09-12	09:47:30	1.20719	103.996	FALSE	5
2022-09-12	09:47:31	1.79676	105.792	FALSE	5
2022-09-12	09:47:31	0.871005	106.663	FALSE	5
2022-09-12	09:47:31	1.05553	107.719	FALSE	5
2022-09-12	09:47:31	0.778639	108.498	FALSE	5
2022-09-12	09:47:32	1.31406	109.812	FALSE	5
2022-09-12	09:47:32	1.77553	111.587	FALSE	5
2022-09-12	09:47:32	0.907494	112.495	FALSE	5
2022-09-12	09:47:32	0.400369	112.895	FALSE	5
2022-09-12	09:47:33	0.276094	113.171	FALSE	5
2022-09-12	09:47:33	0.247799	113.419	FALSE	5
2022-09-12	09:47:33	0.206934	113.626	FALSE	5
2022-09-12	09:47:34	0.209122	113.835	FALSE	5
2022-09-12	09:47:34	0.247392	114.082	FALSE	5
2022-09-12	09:47:34	0.243066	114.325	FALSE	5
2022-09-12	09:47:34	0.702659	115.028	FALSE	5
2022-09-12	09:47:35	0.998384	116.027	FALSE	5
2022-09-12	09:47:35	0.57528	116.602	FALSE	5
2022-09-12	09:47:35	0.797214	117.399	FALSE	5
2022-09-12	09:47:35	0.754822	118.154	FALSE	5
2022-09-12	09:47:36	0.629936	118.784	FALSE	5
2022-09-12	09:47:36	0.519758	119.304	FALSE	5
2022-09-12	09:47:36	0.720165	120.024	FALSE	5
2022-09-12	09:47:36	1.18815	121.212	FALSE	5
2022-09-12	09:47:37	0.810445	122.022	FALSE	5
2022-09-12	09:47:37	1.0651	123.087	FALSE	5
2022-09-12	09:47:37	0.988104	124.075	FALSE	5
2022-09-12	09:47:38	0.686679	124.762	FALSE	5
2022-09-12	09:47:38	0.866476	125.629	FALSE	5
2022-09-12	09:47:38	2.4279	128.057	FALSE	5
2022-09-12	09:47:38	4.37731	132.434	1	6
2022-09-12	09:47:39	4.10912	136.543	1	7
2022-09-12	09:47:39	3.16922	139.712	1	8
2022-09-12	09:47:39	3.06118	142.773	1	9
2022-09-12	09:47:39	1.88047	144.654	FALSE	9
2022-09-12	09:47:40	2.63889	147.293	FALSE	9
2022-09-12	09:47:40	1.0422	148.335	FALSE	9
2022-09-12	09:47:40	0.958842	149.294	FALSE	9
2022-09-12	09:47:40	0.72383	150.018	FALSE	9
2022-09-12	09:47:41	0.627748	150.645	FALSE	9
2022-09-12	09:47:41	1.16663	151.812	FALSE	9
2022-09-12	09:47:41	1.8736	153.686	FALSE	9
2022-09-12	09:47:41	1.84291	155.528	FALSE	9
2022-09-12	09:47:42	1.57625	157.105	FALSE	9
2022-09-12	09:47:42	0.709529	157.814	FALSE	9
2022-09-12	09:47:42	0.552583	158.367	FALSE	9
2022-09-12	09:47:43	0.298842	158.666	FALSE	9
2022-09-12	09:47:43	0.210547	158.876	FALSE	9
2022-09-12	09:47:43	0.256909	159.133	FALSE	9
2022-09-12	09:47:43	0.346832	159.48	FALSE	9
2022-09-12	09:47:44	0.173906	159.654	FALSE	9
2022-09-12	09:47:44	0.264542	159.918	FALSE	9
2022-09-12	09:47:44	0.00164146	159.92	FALSE	9
2022-09-12	09:47:44	0.173346	160.093	FALSE	9
2022-09-12	09:47:45	0.13243	160.226	FALSE	9
2022-09-12	09:47:45	0.0556872	160.282	FALSE	9
2022-09-12	09:47:45	-0.0965773	160.282	FALSE	9
2022-09-12	09:47:45	0.152176	160.434	FALSE	9
2022-09-12	09:47:46	0.0168577	160.451	FALSE	9
2022-09-12	09:47:46	0.15813	160.609	FALSE	9
2022-09-12	09:47:46	0.280064	160.889	FALSE	9
2022-09-12	09:47:47	2.97233	163.861	FALSE	9
2022-09-12	09:47:47	6.39965	170.261	1	10
2022-09-12	09:47:47	10.2577	180.518	1	11
2022-09-12	09:47:47	6.52866	187.047	1	12
2022-09-12	09:47:48	5.92362	192.971	1	13
2022-09-12	09:47:48	8.61345	201.584	1	14
2022-09-12	09:47:48	4.09991	205.684	1	15
2022-09-12	09:47:48	2.84128	208.525	FALSE	15
2022-09-12	09:47:49	3.53024	212.056	1	16
2022-09-12	09:47:49	0.513855	212.569	FALSE	16
2022-09-12	09:47:49	0.717112	213.287	FALSE	16
2022-09-12	09:47:49	1.66861	214.955	FALSE	16
2022-09-12	09:47:50	1.60144	216.557	FALSE	16
2022-09-12	09:47:50	1.68989	218.247	FALSE	16
2022-09-12	09:47:50	1.21986	219.466	FALSE	16
2022-09-12	09:47:51	1.87945	221.346	FALSE	16
2022-09-12	09:47:51	1.14103	222.487	FALSE	16
2022-09-12	09:47:51	1.71955	224.206	FALSE	16
2022-09-12	09:47:51	0.854517	225.061	FALSE	16
2022-09-12	09:47:52	0.600165	225.661	FALSE	16
2022-09-12	09:47:52	0.295229	225.956	FALSE	16
2022-09-12	09:47:52	1.51655	227.473	FALSE	16
2022-09-12	09:47:52	1.27172	228.745	FALSE	16
2022-09-12	09:47:53	2.00551	230.75	FALSE	16
2022-09-12	09:47:53	2.63334	233.383	FALSE	16
2022-09-12	09:47:53	4.75268	238.136	1	17
2022-09-12	09:47:53	8.36657	246.503	1	18
2022-09-12	09:47:54	7.68286	254.186	1	19
2022-09-12	09:47:54	11.502	265.688	1	20
2022-09-12	09:47:54	4.60108	270.289	1	21
2022-09-12	09:47:54	9.41075	279.699	1	22
2022-09-12	09:47:55	0.736705	280.436	FALSE	22
2022-09-12	09:47:55	1.47263	281.909	FALSE	22
2022-09-12	09:47:55	0.455026	282.364	FALSE	22
2022-09-12	09:47:56	0.00764656	282.371	FALSE	22
2022-09-12	09:47:56	-0.0821244	282.371	FALSE	22
2022-09-12	09:47:56	1.00073	283.372	FALSE	22
2022-09-12	09:47:56	10.9336	294.306	1	23
2022-09-12	09:47:57	13.4799	307.786	1	24
2022-09-12	09:47:57	13.048	320.834	1	25
2022-09-12	09:47:57	5.62225	326.456	1	26
2022-09-12	09:47:57	5.38128	331.837	1	27
2022-09-12	09:47:58	9.74184	341.579	1	28
2022-09-12	09:47:58	6.23324	347.812	1	29
2022-09-12	09:47:58	9.60255	357.415	1	30
2022-09-12	09:47:58	6.31466	363.729	1	31
2022-09-12	09:47:59	5.13523	368.865	1	32
2022-09-12	09:47:59	3.62134	372.486	1	33
2022-09-12	09:47:59	0.65813	373.144	FALSE	33
2022-09-12	09:48:00	0.809224	373.953	FALSE	33
2022-09-12	09:48:00	0.630191	374.584	FALSE	33
2022-09-12	09:48:00	2.52256	377.106	FALSE	33
2022-09-12	09:48:00	0.63589	377.742	FALSE	33
2022-09-12	09:48:01	1.60001	379.342	FALSE	33
2022-09-12	09:48:01	2.30541	381.647	FALSE	33
2022-09-12	09:48:01	3.51034	385.158	1	34
2022-09-12	09:48:01	6.45782	391.616	1	35
2022-09-12	09:48:02	8.95039	400.566	1	36
2022-09-12	09:48:02	8.09212	408.658	1	37
2022-09-12	09:48:02	10.4139	419.072	1	38
2022-09-12	09:48:02	1.61223	420.684	FALSE	38
2022-09-12	09:48:03	4.27874	424.963	1	39
2022-09-12	09:48:03	1.50108	426.464	FALSE	39
2022-09-12	09:48:03	1.37355	427.838	FALSE	39
2022-09-12	09:48:03	4.31166	432.149	1	40
2022-09-12	09:48:04	2.9624	435.112	FALSE	40
2022-09-12	09:48:04	4.39986	439.512	1	41
2022-09-12	09:48:04	4.08525	443.597	1	42
2022-09-12	09:48:05	2.81854	446.415	FALSE	42
2022-09-12	09:48:05	3.37406	449.789	1	43
2022-09-12	09:48:05	2.37162	452.161	FALSE	43
2022-09-12	09:48:05	2.94307	455.104	FALSE	43
2022-09-12	09:48:06	1.2677	456.372	FALSE	43
2022-09-12	09:48:06	1.84897	458.221	FALSE	43
2022-09-12	09:48:06	9.98057	468.201	1	44
2022-09-12	09:48:06	8.16082	476.362	1	45
2022-09-12	09:48:07	12.1321	488.494	1	46
2022-09-12	09:48:07	2.3196	490.814	FALSE	46
2022-09-12	09:48:07	2.82016	493.634	FALSE	46
2022-09-12	09:48:07	5.37955	499.014	1	47
2022-09-12	09:48:08	4.19212	503.206	1	48
2022-09-12	09:48:08	8.31904	511.525	1	49
2022-09-12	09:48:08	5.32439	516.849	1	50
2022-09-12	09:48:09	1.72525	518.574	FALSE	50
2022-09-12	09:48:09	7.35634	525.931	1	51
2022-09-12	09:48:09	2.27889	528.21	FALSE	51
2022-09-12	09:48:09	5.40942	533.619	1	52
2022-09-12	09:48:10	1.50576	535.125	FALSE	52
2022-09-12	09:48:10	1.66449	536.789	FALSE	52
2022-09-12	09:48:10	1.45314	538.242	FALSE	52
2022-09-12	09:48:10	2.18347	540.426	FALSE	52
2022-09-12	09:48:11	4.69721	545.123	1	53
2022-09-12	09:48:11	2.26805	547.391	FALSE	53
2022-09-12	09:48:11	2.17574	549.567	FALSE	53
2022-09-12	09:48:11	2.29849	551.865	FALSE	53
2022-09-12	09:48:12	2.97894	554.844	FALSE	53
2022-09-12	09:48:12	0.562659	555.407	FALSE	53
2022-09-12	09:48:12	0.275382	555.682	FALSE	53
2022-09-12	09:48:13	0.461641	556.144	FALSE	53
2022-09-12	09:48:13	-0.037188	556.144	FALSE	53
2022-09-12	09:48:13	0.0601656	556.204	FALSE	53
2022-09-12	09:48:13	0.0492242	556.253	FALSE	53
2022-09-12	09:48:14	0.0145167	556.268	FALSE	53
2022-09-12	09:48:14	-0.133778	556.268	FALSE	53
2022-09-12	09:48:14	-0.237086	556.268	FALSE	53
2022-09-12	09:48:14	-0.0148979	556.268	FALSE	53
2022-09-12	09:48:15	0.947494	557.215	FALSE	53
2022-09-12	09:48:15	0.700267	557.916	FALSE	53
2022-09-12	09:48:15	0.488919	558.405	FALSE	53
2022-09-12	09:48:15	0.331565	558.736	FALSE	53
2022-09-12	09:48:16	0.306832	559.043	FALSE	53
2022-09-12	09:48:16	0.33014	559.373	FALSE	53
2022-09-12	09:48:16	0.369173	559.742	FALSE	53
2022-09-12	09:48:16	4.04902	563.791	1	54
2022-09-12	09:48:17	7.43741	571.229	1	55
2022-09-12	09:48:17	10.3526	581.581	1	56
2022-09-12	09:48:17	3.45039	585.032	1	57
2022-09-12	09:48:18	10.7707	595.802	1	58
2022-09-12	09:48:18	1.16408	596.966	FALSE	58
2022-09-12	09:48:18	4.55849	601.525	1	59
2022-09-12	09:48:18	1.21569	602.741	FALSE	59
2022-09-12	09:48:19	1.92037	604.661	FALSE	59
2022-09-12	09:48:19	1.50301	606.164	FALSE	59
2022-09-12	09:48:19	0.494466	606.658	FALSE	59
2022-09-12	09:48:19	0.498232	607.157	FALSE	59
2022-09-12	09:48:20	0.267494	607.424	FALSE	59
2022-09-12	09:48:20	0.304695	607.729	FALSE	59
2022-09-12	09:48:20	0.267036	607.996	FALSE	59
2022-09-12	09:48:20	0.26556	608.261	FALSE	59
2022-09-12	09:48:21	0.445662	608.707	FALSE	59
2022-09-12	09:48:21	0.396247	609.103	FALSE	59
2022-09-12	09:48:21	0.526069	609.629	FALSE	59
2022-09-12	09:48:22	0.54159	610.171	FALSE	59
2022-09-12	09:48:22	0.580471	610.752	FALSE	59
2022-09-12	09:48:22	0.490802	611.242	FALSE	59
2022-09-12	09:48:22	0.361082	611.603	FALSE	59
2022-09-12	09:48:23	0.408563	612.012	FALSE	59
2022-09-12	09:48:23	1.17467	613.187	FALSE	59
2022-09-12	09:48:23	9.24825	622.435	1	60
2022-09-12	09:48:23	6.5251	628.96	1	61
2022-09-12	09:48:24	5.19716	634.157	1	62
2022-09-12	09:48:24	4.36658	638.524	1	63
2022-09-12	09:48:24	2.64235	641.166	FALSE	63
2022-09-12	09:48:24	1.90256	643.069	FALSE	63
2022-09-12	09:48:25	0.533651	643.602	FALSE	63
2022-09-12	09:48:25	0.577977	644.18	FALSE	63
2022-09-12	09:48:25	0.642506	644.823	FALSE	63
2022-09-12	09:48:26	3.21655	648.039	1	64
2022-09-12	09:48:26	8.70591	656.745	1	65
2022-09-12	09:48:26	6.75085	663.496	1	66
2022-09-12	09:48:26	12.4382	675.934	1	67
2022-09-12	09:48:27	13.1941	689.128	1	68
2022-09-12	09:48:27	25.2936	714.422	1	69
2022-09-12	09:48:27	7.39395	721.816	1	70
2022-09-12	09:48:27	17.256	739.072	1	71
2022-09-12	09:48:28	9.70316	748.775	1	72
2022-09-12	09:48:28	19.2578	768.033	1	73
2022-09-12	09:48:28	14.427	782.46	1	74
2022-09-12	09:48:28	11.781	794.241	1	75
2022-09-12	09:48:29	16.2973	810.538	1	76
2022-09-12	09:48:29	12.2236	822.762	1	77
2022-09-12	09:48:29	5.73085	828.493	1	78
2022-09-12	09:48:29	6.66744	835.16	1	79
2022-09-12	09:48:30	6.3138	841.474	1	80
2022-09-12	09:48:30	22.2189	863.693	1	81
2022-09-12	09:48:30	20.1895	883.882	1	82
2022-09-12	09:48:31	8.84596	892.728	1	83
2022-09-12	09:48:31	3.29945	896.028	1	84
2022-09-12	09:48:31	2.76856	898.796	FALSE	84
2022-09-12	09:48:31	3.29981	902.096	1	85
2022-09-12	09:48:32	1.87279	903.969	FALSE	85
2022-09-12	09:48:32	5.45802	909.427	1	86
2022-09-12	09:48:32	4.48836	913.915	1	87
2022-09-12	09:48:32	1.49294	915.408	FALSE	87
2022-09-12	09:48:33	0.748511	916.157	FALSE	87
2022-09-12	09:48:33	0.445713	916.602	FALSE	87
2022-09-12	09:48:33	0.409886	917.012	FALSE	87
2022-09-12	09:48:33	0.318028	917.33	FALSE	87
2022-09-12	09:48:34	0.309275	917.64	FALSE	87
2022-09-12	09:48:34	0.339911	917.979	FALSE	87
2022-09-12	09:48:34	0.228308	918.208	FALSE	87
2022-09-12	09:48:35	0.28388	918.492	FALSE	87
2022-09-12	09:48:35	0.349784	918.841	FALSE	87
2022-09-12	09:48:35	0.632735	919.474	FALSE	87
2022-09-12	09:48:35	0.483881	919.958	FALSE	87
2022-09-12	09:48:36	1.01319	920.971	FALSE	87
2022-09-12	09:48:36	0.533142	921.504	FALSE	87
2022-09-12	09:48:36	0.364898	921.869	FALSE	87
2022-09-12	09:48:36	0.312583	922.182	FALSE	87
2022-09-12	09:48:37	0.240674	922.423	FALSE	87
2022-09-12	09:48:37	0.250445	922.673	FALSE	87
2022-09-12	09:48:37	0.303015	922.976	FALSE	87
2022-09-12	09:48:37	0.265967	923.242	FALSE	87
2022-09-12	09:48:38	0.209886	923.452	FALSE	87
2022-09-12	09:48:38	0.280165	923.732	FALSE	87
2022-09-12	09:48:38	0.162863	923.895	FALSE	87
2022-09-12	09:48:38	0.257061	924.152	FALSE	87
2022-09-12	09:48:39	0.266374	924.418	FALSE	87
2022-09-12	09:48:39	0.332685	924.751	FALSE	87
2022-09-12	09:48:39	0.378537	925.13	FALSE	87
2022-09-12	09:48:40	0.389936	925.52	FALSE	87
2022-09-12	09:48:40	0.377774	925.897	FALSE	87
2022-09-12	09:48:40	0.537824	926.435	FALSE	87
2022-09-12	09:48:40	0.654516	927.09	FALSE	87
2022-09-12	09:48:41	0.490903	927.581	FALSE	87
2022-09-12	09:48:41	0.463372	928.044	FALSE	87
2022-09-12	09:48:41	0.839249	928.883	FALSE	87
2022-09-12	09:48:41	0.905611	929.789	FALSE	87
2022-09-12	09:48:42	1.5819	931.371	FALSE	87
2022-09-12	09:48:42	0.950191	932.321	FALSE	87
2022-09-12	09:48:42	1.26261	933.583	FALSE	87
2022-09-12	09:48:42	0.904695	934.488	FALSE	87
2022-09-12	09:48:43	3.68378	938.172	1	88
2022-09-12	09:48:43	2.3052	940.477	FALSE	88
2022-09-12	09:48:43	4.7851	945.262	1	89
2022-09-12	09:48:44	4.34256	949.605	1	90
2022-09-12	09:48:44	4.89116	954.496	1	91
2022-09-12	09:48:44	2.831	957.327	FALSE	91
2022-09-12	09:48:44	0.657672	957.985	FALSE	91
2022-09-12	09:48:45	0.274262	958.259	FALSE	91
2022-09-12	09:48:45	-0.0412084	958.259	FALSE	91
2022-09-12	09:48:45	0.114822	958.374	FALSE	91
2022-09-12	09:48:45	2.86429	961.238	FALSE	91
2022-09-12	09:48:46	4.04459	965.283	1	92
2022-09-12	09:48:46	4.13457	969.417	1	93
2022-09-12	09:48:46	3.33044	972.748	1	94
2022-09-12	09:48:46	2.06653	974.814	FALSE	94
2022-09-12	09:48:47	2.98037	977.794	FALSE	94
2022-09-12	09:48:47	2.29584	980.09	FALSE	94
2022-09-12	09:48:47	1.30067	981.391	FALSE	94
2022-09-12	09:48:48	0.327646	981.719	FALSE	94
2022-09-12	09:48:48	0.337519	982.056	FALSE	94
2022-09-12	09:48:48	-0.0420226	982.056	FALSE	94
2022-09-12	09:48:48	-0.0248216	982.056	FALSE	94
2022-09-12	09:48:49	-0.0311829	982.056	FALSE	94
2022-09-12	09:48:49	-0.0200379	982.056	FALSE	94
2022-09-12	09:48:49	0.0472903	982.103	FALSE	94
2022-09-12	09:48:49	0.201489	982.305	FALSE	94
2022-09-12	09:48:50	0.146832	982.452	FALSE	94
2022-09-12	09:48:50	0.213906	982.666	FALSE	94
2022-09-12	09:48:50	0.248868	982.915	FALSE	94
2022-09-12	09:48:50	0.460216	983.375	FALSE	94
2022-09-12	09:48:51	0.363779	983.739	FALSE	94
2022-09-12	09:48:51	0.407494	984.146	FALSE	94
2022-09-12	09:48:51	0.388868	984.535	FALSE	94
2022-09-12	09:48:51	0.41243	984.947	FALSE	94
2022-09-12	09:48:52	0.34841	985.296	FALSE	94
2022-09-12	09:48:52	0.330751	985.626	FALSE	94
2022-09-12	09:48:52	0.428257	986.055	FALSE	94
2022-09-12	09:48:53	0.332379	986.387	FALSE	94
2022-09-12	09:48:53	0.458079	986.845	FALSE	94
2022-09-12	09:48:53	0.326985	987.172	FALSE	94
2022-09-12	09:48:53	0.392888	987.565	FALSE	94
2022-09-12	09:48:54	0.460318	988.025	FALSE	94
2022-09-12	09:48:54	0.4564	988.482	FALSE	94
2022-09-12	09:48:54	0.401031	988.883	FALSE	94
2022-09-12	09:48:54	0.438435	989.321	FALSE	94
2022-09-12	09:48:55	0.43584	989.757	FALSE	94
2022-09-12	09:48:55	0.410802	990.168	FALSE	94
2022-09-12	09:48:55	0.432481	990.6	FALSE	94
2022-09-12	09:48:55	0.435331	991.036	FALSE	94
2022-09-12	09:48:56	0.42612	991.462	FALSE	94
2022-09-12	09:48:56	0.44042	991.902	FALSE	94
2022-09-12	09:48:56	0.408461	992.311	FALSE	94
2022-09-12	09:48:57	0.461285	992.772	FALSE	94
2022-09-12	09:48:57	0.454364	993.226	FALSE	94
2022-09-12	09:48:57	0.425	993.651	FALSE	94
2022-09-12	09:48:57	0.471616	994.123	FALSE	94
2022-09-12	09:48:58	0.289478	994.412	FALSE	94
2022-09-12	09:48:58	0.205713	994.618	FALSE	94
2022-09-12	09:48:58	0.260267	994.878	FALSE	94
2022-09-12	09:48:58	0.27126	995.15	FALSE	94
2022-09-12	09:48:59	0.31813	995.468	FALSE	94
2022-09-12	09:48:59	0.20841	995.676	FALSE	94
2022-09-12	09:48:59	0.268817	995.945	FALSE	94
2022-09-12	09:48:59	0.276349	996.221	FALSE	94
2022-09-12	09:49:00	0.242303	996.464	FALSE	94
2022-09-12	09:49:00	0.254517	996.718	FALSE	94
2022-09-12	09:49:00	0.262812	996.981	FALSE	94
2022-09-12	09:49:00	0.262048	997.243	FALSE	94
2022-09-12	09:49:01	0.275891	997.519	FALSE	94
2022-09-12	09:49:01	0.260013	997.779	FALSE	94
2022-09-12	09:49:01	0.268868	998.048	FALSE	94
2022-09-12	09:49:02	0.271107	998.319	FALSE	94
2022-09-12	09:49:02	0.271718	998.591	FALSE	94
2022-09-12	09:49:02	0.275331	998.866	FALSE	94
2022-09-12	09:49:02	0.277926	999.144	FALSE	94
2022-09-12	09:49:03	0.275076	999.419	FALSE	94
2022-09-12	09:49:03	0.280318	999.699	FALSE	94
2022-09-12	09:49:03	0.27869	999.978	FALSE	94
2022-09-12	09:49:03	0.293092	1000.27	FALSE	94
2022-09-12	09:49:04	0.286934	1000.56	FALSE	94
2022-09-12	09:49:04	0.293397	1000.85	FALSE	94
2022-09-12	09:49:04	0.29584	1001.15	FALSE	94
2022-09-12	09:49:04	0.292125	1001.44	FALSE	94
2022-09-12	09:49:05	0.299249	1001.74	FALSE	94
2022-09-12	09:49:05	0.304898	1002.04	FALSE	94
2022-09-12	09:49:05	0.297824	1002.34	FALSE	94
2022-09-12	09:49:06	0.358741	1002.7	FALSE	94
2022-09-12	09:49:06	0.345204	1003.05	FALSE	94
2022-09-12	09:49:06	0.320929	1003.37	FALSE	94
2022-09-12	09:49:06	0.298842	1003.67	FALSE	94
2022-09-12	09:49:07	0.31757	1003.98	FALSE	94
2022-09-12	09:49:07	0.306476	1004.29	FALSE	94
2022-09-12	09:49:07	0.305204	1004.59	FALSE	94
2022-09-12	09:49:07	0.29584	1004.89	FALSE	94
2022-09-12	09:49:08	0.279351	1005.17	FALSE	94
2022-09-12	09:49:08	0.328206	1005.5	FALSE	94
2022-09-12	09:49:08	0.319657	1005.82	FALSE	94
2022-09-12	09:49:08	0.323117	1006.14	FALSE	94
2022-09-12	09:49:09	0.307443	1006.45	FALSE	94
2022-09-12	09:49:09	0.297824	1006.75	FALSE	94
2022-09-12	09:49:09	0.304847	1007.05	FALSE	94
2022-09-12	09:49:10	0.300115	1007.35	FALSE	94
2022-09-12	09:49:10	0.297417	1007.65	FALSE	94
2022-09-12	09:49:10	0.295484	1007.94	FALSE	94
2022-09-12	09:49:10	0.302506	1008.25	FALSE	94
2022-09-12	09:49:11	0.310853	1008.56	FALSE	94
2022-09-12	09:49:11	0.311056	1008.87	FALSE	94
2022-09-12	09:49:11	0.315026	1009.18	FALSE	94
2022-09-12	09:49:11	0.320522	1009.5	FALSE	94
2022-09-12	09:49:12	0.318435	1009.82	FALSE	94
2022-09-12	09:49:12	0.312328	1010.13	FALSE	94
2022-09-12	09:49:12	0.326018	1010.46	FALSE	94
2022-09-12	09:49:12	0.323117	1010.78	FALSE	94
2022-09-12	09:49:13	0.323575	1011.11	FALSE	94
2022-09-12	09:49:13	0.319707	1011.43	FALSE	94
2022-09-12	09:49:13	0.317519	1011.74	FALSE	94
2022-09-12	09:49:13	0.321947	1012.07	FALSE	94
2022-09-12	09:49:14	0.321183	1012.39	FALSE	94
2022-09-12	09:49:14	0.320318	1012.71	FALSE	94
2022-09-12	09:49:14	0.324389	1013.03	FALSE	94
2022-09-12	09:49:15	0.322099	1013.35	FALSE	94
2022-09-12	09:49:15	0.326374	1013.68	FALSE	94
2022-09-12	09:49:15	0.340216	1014.02	FALSE	94
2022-09-12	09:49:15	0.91757	1014.94	FALSE	94
2022-09-12	09:49:16	3.25955	1018.2	1	95
2022-09-12	09:49:16	2.42754	1020.63	FALSE	95
2022-09-12	09:49:16	1.51131	1022.14	FALSE	95
2022-09-12	09:49:16	0.429936	1022.57	FALSE	95
2022-09-12	09:49:17	0.423626	1022.99	FALSE	95
2022-09-12	09:49:17	0.354466	1023.34	FALSE	95
2022-09-12	09:49:17	0.371361	1023.72	FALSE	95
2022-09-12	09:49:17	0.426374	1024.14	FALSE	95
2022-09-12	09:49:18	0.339097	1024.48	FALSE	95
2022-09-12	09:49:18	0.355484	1024.84	FALSE	95
2022-09-12	09:49:18	0.377417	1025.21	FALSE	95
2022-09-12	09:49:19	0.371107	1025.59	FALSE	95
2022-09-12	09:49:19	0.335891	1025.92	FALSE	95
2022-09-12	09:49:19	0.344389	1026.27	FALSE	95
2022-09-12	09:49:19	0.374568	1026.64	FALSE	95
2022-09-12	09:49:20	0.311056	1026.95	FALSE	95
2022-09-12	09:49:20	0.347392	1027.3	FALSE	95
2022-09-12	09:49:20	0.337316	1027.64	FALSE	95
2022-09-12	09:49:20	0.341336	1027.98	FALSE	95
2022-09-12	09:49:21	0.328817	1028.31	FALSE	95
2022-09-12	09:49:21	0.321082	1028.63	FALSE	95
2022-09-12	09:49:21	0.320471	1028.95	FALSE	95
2022-09-12	09:49:21	0.318282	1029.27	FALSE	95
2022-09-12	09:49:22	0.313194	1029.58	FALSE	95
2022-09-12	09:49:22	0.359148	1029.94	FALSE	95
2022-09-12	09:49:22	0.374466	1030.31	FALSE	95
2022-09-12	09:49:23	0.381183	1030.69	FALSE	95
2022-09-12	09:49:23	0.342201	1031.04	FALSE	95
2022-09-12	09:49:23	0.334771	1031.37	FALSE	95
2022-09-12	09:49:23	0.33014	1031.7	FALSE	95
2022-09-12	09:49:24	0.342201	1032.04	FALSE	95
2022-09-12	09:49:24	0.328766	1032.37	FALSE	95
2022-09-12	09:49:24	0.336247	1032.71	FALSE	95
2022-09-12	09:49:24	0.328817	1033.04	FALSE	95
2022-09-12	09:49:25	0.330649	1033.37	FALSE	95
2022-09-12	09:49:25	0.334008	1033.7	FALSE	95
2022-09-12	09:49:25	0.332583	1034.03	FALSE	95
2022-09-12	09:49:25	0.330038	1034.36	FALSE	95
2022-09-12	09:49:26	0.336298	1034.7	FALSE	95
2022-09-12	09:49:26	0.331158	1035.03	FALSE	95
2022-09-12	09:49:26	0.333855	1035.37	FALSE	95
2022-09-12	09:49:26	0.331769	1035.7	FALSE	95
2022-09-12	09:49:27	0.33584	1036.03	FALSE	95
2022-09-12	09:49:27	0.336501	1036.37	FALSE	95
2022-09-12	09:49:27	0.32958	1036.7	FALSE	95
2022-09-12	09:49:28	0.343881	1037.04	FALSE	95
2022-09-12	09:49:28	0.303321	1037.35	FALSE	95
2022-09-12	09:49:28	0.605509	1037.95	FALSE	95
2022-09-12	09:49:28	1.38291	1039.34	FALSE	95
2022-09-12	09:49:29	0.871921	1040.21	FALSE	95
2022-09-12	09:49:29	1.07762	1041.28	FALSE	95
2022-09-12	09:49:29	1.25665	1042.54	FALSE	95
2022-09-12	09:49:29	0.641692	1043.18	FALSE	95
2022-09-12	09:49:30	0.937468	1044.12	FALSE	95
2022-09-12	09:49:30	2.2166	1046.34	FALSE	95
2022-09-12	09:49:30	0.529987	1046.87	FALSE	95
2022-09-12	09:49:30	0.330089	1047.2	FALSE	95
2022-09-12	09:49:31	0.306679	1047.5	FALSE	95
2022-09-12	09:49:31	0.374364	1047.88	FALSE	95
2022-09-12	09:49:31	0.177977	1048.06	FALSE	95
2022-09-12	09:49:32	0.277519	1048.33	FALSE	95
2022-09-12	09:49:32	0.239402	1048.57	FALSE	95
2022-09-12	09:49:32	0.306679	1048.88	FALSE	95
2022-09-12	09:49:32	0.317774	1049.2	FALSE	95
2022-09-12	09:49:33	0.226374	1049.42	FALSE	95
2022-09-12	09:49:33	0.333041	1049.76	FALSE	95
2022-09-12	09:49:33	0.306069	1050.06	FALSE	95
2022-09-12	09:49:33	0.349987	1050.41	FALSE	95
2022-09-12	09:49:34	0.30042	1050.71	FALSE	95
2022-09-12	09:49:34	0.272634	1050.99	FALSE	95
2022-09-12	09:49:34	0.294364	1051.28	FALSE	95
2022-09-12	09:49:34	0.29126	1051.57	FALSE	95
2022-09-12	09:49:35	0.292125	1051.86	FALSE	95
2022-09-12	09:49:35	0.286323	1052.15	FALSE	95
2022-09-12	09:49:35	0.309275	1052.46	FALSE	95
2022-09-12	09:49:35	0.2764	1052.74	FALSE	95
2022-09-12	09:49:36	0.26388	1053	FALSE	95
2022-09-12	09:49:36	0.245662	1053.25	FALSE	95
2022-09-12	09:49:36	0.245	1053.49	FALSE	95
2022-09-12	09:49:37	0.267901	1053.76	FALSE	95
2022-09-12	09:49:37	0.279097	1054.04	FALSE	95
2022-09-12	09:49:37	0.315484	1054.35	FALSE	95
2022-09-12	09:49:37	0.239657	1054.59	FALSE	95
2022-09-12	09:49:38	0.277926	1054.87	FALSE	95
2022-09-12	09:49:38	0.397468	1055.27	FALSE	95
2022-09-12	09:49:38	0.230446	1055.5	FALSE	95
2022-09-12	09:49:38	0.390038	1055.89	FALSE	95
2022-09-12	09:49:39	0.300929	1056.19	FALSE	95
2022-09-12	09:49:39	0.2193	1056.41	FALSE	95
2022-09-12	09:49:39	0.393499	1056.8	FALSE	95
2022-09-12	09:49:39	0.31299	1057.12	FALSE	95
2022-09-12	09:49:40	0.306323	1057.42	FALSE	95
2022-09-12	09:49:40	0.417672	1057.84	FALSE	95
2022-09-12	09:49:40	0.460166	1058.3	FALSE	95
2022-09-12	09:49:41	0.325407	1058.62	FALSE	95
2022-09-12	09:49:41	0.416349	1059.04	FALSE	95
2022-09-12	09:49:41	0.2907	1059.33	FALSE	95
2022-09-12	09:49:41	0.391921	1059.72	FALSE	95
2022-09-12	09:49:42	1.18871	1060.91	FALSE	95
2022-09-12	09:49:42	0.851056	1061.76	FALSE	95
2022-09-12	09:49:42	1.02363	1062.79	FALSE	95
2022-09-12	09:49:42	0.702659	1063.49	FALSE	95
2022-09-12	09:49:43	0.481692	1063.97	FALSE	95
2022-09-12	09:49:43	0.385611	1064.36	FALSE	95
2022-09-12	09:49:43	0.404542	1064.76	FALSE	95
2022-09-12	09:49:43	0.572277	1065.33	FALSE	95
2022-09-12	09:49:44	1.67899	1067.01	FALSE	95
2022-09-12	09:49:44	0.507647	1067.52	FALSE	95
2022-09-12	09:49:44	0.353804	1067.87	FALSE	95
2022-09-12	09:49:45	0.351107	1068.23	FALSE	95
2022-09-12	09:49:45	0.384186	1068.61	FALSE	95
2022-09-12	09:49:45	0.319657	1068.93	FALSE	95
2022-09-12	09:49:45	0.264644	1069.19	FALSE	95
2022-09-12	09:49:46	0.344084	1069.54	FALSE	95
2022-09-12	09:49:46	0.258232	1069.8	FALSE	95
2022-09-12	09:49:46	0.382455	1070.18	FALSE	95
2022-09-12	09:49:46	0.369682	1070.55	FALSE	95
2022-09-12	09:49:47	0.288104	1070.84	FALSE	95
2022-09-12	09:49:47	0.294567	1071.13	FALSE	95
2022-09-12	09:49:47	0.265102	1071.4	FALSE	95
2022-09-12	09:49:47	0.4507	1071.85	FALSE	95
2022-09-12	09:49:48	1.09309	1072.94	FALSE	95
2022-09-12	09:49:48	1.10698	1074.05	FALSE	95
2022-09-12	09:49:48	1.82215	1075.87	FALSE	95
2022-09-12	09:49:48	0.450903	1076.32	FALSE	95
2022-09-12	09:49:49	0.766171	1077.09	FALSE	95
2022-09-12	09:49:49	0.614771	1077.7	FALSE	95
2022-09-12	09:49:49	0.384949	1078.09	FALSE	95
2022-09-12	09:49:50	0.275483	1078.36	FALSE	95
2022-09-12	09:49:50	0.113295	1078.47	FALSE	95
2022-09-12	09:49:50	0.212125	1078.69	FALSE	95
2022-09-12	09:49:50	0.20897	1078.9	FALSE	95
2022-09-12	09:49:51	0.200827	1079.1	FALSE	95
2022-09-12	09:49:51	0.169122	1079.27	FALSE	95
2022-09-12	09:49:51	0.161896	1079.43	FALSE	95
2022-09-12	09:49:51	0.371361	1079.8	FALSE	95
2022-09-12	09:49:52	0.32271	1080.12	FALSE	95
2022-09-12	09:49:52	0.296603	1080.42	FALSE	95
2022-09-12	09:49:52	0.397316	1080.82	FALSE	95
2022-09-12	09:49:52	0.492634	1081.31	FALSE	95
2022-09-12	09:49:53	0.54215	1081.85	FALSE	95
2022-09-12	09:49:53	0.524848	1082.38	FALSE	95
2022-09-12	09:49:53	0.902048	1083.28	FALSE	95
2022-09-12	09:49:54	1.79279	1085.07	FALSE	95
2022-09-12	09:49:54	1.77543	1086.85	FALSE	95
2022-09-12	09:49:54	1.74047	1088.59	FALSE	95
2022-09-12	09:49:54	1.50469	1090.09	FALSE	95
2022-09-12	09:49:55	1.71228	1091.8	FALSE	95
2022-09-12	09:49:55	3.04744	1094.85	1	96
2022-09-12	09:49:55	0.929122	1095.78	FALSE	96
2022-09-12	09:49:55	0.795382	1096.57	FALSE	96
2022-09-12	09:49:56	0.532837	1097.11	FALSE	96
2022-09-12	09:49:56	0.40042	1097.51	FALSE	96
2022-09-12	09:49:56	0.241285	1097.75	FALSE	96
2022-09-12	09:49:56	0.100064	1097.85	FALSE	96
2022-09-12	09:49:57	0.0636771	1097.91	FALSE	96
2022-09-12	09:49:57	0.221387	1098.13	FALSE	96
2022-09-12	09:49:57	0.10556	1098.24	FALSE	96
2022-09-12	09:49:58	0.238842	1098.48	FALSE	96
2022-09-12	09:49:58	0.15126	1098.63	FALSE	96
2022-09-12	09:49:58	0.190242	1098.82	FALSE	96
2022-09-12	09:49:58	0.188613	1099.01	FALSE	96
2022-09-12	09:49:59	0.189071	1099.2	FALSE	96
2022-09-12	09:49:59	0.235789	1099.43	FALSE	96
2022-09-12	09:49:59	0.390954	1099.82	FALSE	96
2022-09-12	09:49:59	0.630394	1100.46	FALSE	96
2022-09-12	09:50:00	0.469479	1100.92	FALSE	96
2022-09-12	09:50:00	0.365255	1101.29	FALSE	96
2022-09-12	09:50:00	0.462965	1101.75	FALSE	96
2022-09-12	09:50:00	0.389631	1102.14	FALSE	96
2022-09-12	09:50:01	0.339809	1102.48	FALSE	96
2022-09-12	09:50:01	0.387443	1102.87	FALSE	96
2022-09-12	09:50:01	0.401387	1103.27	FALSE	96
2022-09-12	09:50:01	0.359402	1103.63	FALSE	96
2022-09-12	09:50:02	0.361641	1103.99	FALSE	96
2022-09-12	09:50:02	0.37416	1104.37	FALSE	96
2022-09-12	09:50:02	0.314415	1104.68	FALSE	96
2022-09-12	09:50:03	0.286476	1104.97	FALSE	96
2022-09-12	09:50:03	0.309377	1105.28	FALSE	96
2022-09-12	09:50:03	0.299351	1105.58	FALSE	96
2022-09-12	09:50:03	0.30617	1105.88	FALSE	96
2022-09-12	09:50:04	0.307901	1106.19	FALSE	96
2022-09-12	09:50:04	0.320115	1106.51	FALSE	96
2022-09-12	09:50:04	0.315433	1106.83	FALSE	96
2022-09-12	09:50:04	0.317061	1107.14	FALSE	96
2022-09-12	09:50:05	0.311565	1107.45	FALSE	96
2022-09-12	09:50:05	0.317621	1107.77	FALSE	96
2022-09-12	09:50:05	0.312532	1108.08	FALSE	96
2022-09-12	09:50:05	0.318435	1108.4	FALSE	96
2022-09-12	09:50:06	0.322812	1108.73	FALSE	96
2022-09-12	09:50:06	0.331972	1109.06	FALSE	96
2022-09-12	09:50:06	0.345153	1109.4	FALSE	96
2022-09-12	09:50:07	0.341947	1109.74	FALSE	96
2022-09-12	09:50:07	0.346985	1110.09	FALSE	96
2022-09-12	09:50:07	0.355026	1110.45	FALSE	96
2022-09-12	09:50:07	0.346374	1110.79	FALSE	96
2022-09-12	09:50:08	0.336705	1111.13	FALSE	96
2022-09-12	09:50:08	0.341641	1111.47	FALSE	96
2022-09-12	09:50:08	0.343372	1111.81	FALSE	96
2022-09-12	09:50:08	0.337875	1112.15	FALSE	96
2022-09-12	09:50:09	0.329326	1112.48	FALSE	96
2022-09-12	09:50:09	0.323066	1112.81	FALSE	96
2022-09-12	09:50:09	0.322914	1113.13	FALSE	96
2022-09-12	09:50:09	0.315789	1113.44	FALSE	96
2022-09-12	09:50:10	0.318282	1113.76	FALSE	96
2022-09-12	09:50:10	0.312685	1114.07	FALSE	96
2022-09-12	09:50:10	0.329682	1114.4	FALSE	96
2022-09-12	09:50:11	0.363015	1114.77	FALSE	96
2022-09-12	09:50:11	0.397417	1115.17	FALSE	96
2022-09-12	09:50:11	0.443728	1115.61	FALSE	96
2022-09-12	09:50:11	0.486985	1116.1	FALSE	96
2022-09-12	09:50:12	0.727952	1116.82	FALSE	96
2022-09-12	09:50:12	0.82098	1117.64	FALSE	96
2022-09-12	09:50:12	0.636755	1118.28	FALSE	96
2022-09-12	09:50:12	0.525102	1118.81	FALSE	96
2022-09-12	09:50:13	0.570191	1119.38	FALSE	96
2022-09-12	09:50:13	0.634974	1120.01	FALSE	96
2022-09-12	09:50:13	1.0535	1121.07	FALSE	96
2022-09-12	09:50:13	1.2937	1122.36	FALSE	96
2022-09-12	09:50:14	1.52006	1123.88	FALSE	96
2022-09-12	09:50:14	2.04419	1125.92	FALSE	96
2022-09-12	09:50:14	2.16266	1128.09	FALSE	96
2022-09-12	09:50:14	2.21981	1130.31	FALSE	96
2022-09-12	09:50:15	3.9277	1134.23	1	97
2022-09-12	09:50:15	0.881998	1135.12	FALSE	97
2022-09-12	09:50:15	0.846578	1135.96	FALSE	97
2022-09-12	09:50:16	0.581743	1136.54	FALSE	97
2022-09-12	09:50:16	0.459657	1137	FALSE	97
2022-09-12	09:50:16	0.398028	1137.4	FALSE	97
2022-09-12	09:50:16	0.54902	1137.95	FALSE	97
2022-09-12	09:50:17	0.58388	1138.53	FALSE	97
2022-09-12	09:50:17	0.547544	1139.08	FALSE	97
2022-09-12	09:50:17	0.564949	1139.65	FALSE	97
2022-09-12	09:50:17	0.630852	1140.28	FALSE	97
2022-09-12	09:50:18	0.690903	1140.97	FALSE	97
2022-09-12	09:50:18	1.26724	1142.24	FALSE	97
2022-09-12	09:50:18	1.74994	1143.99	FALSE	97
2022-09-12	09:50:18	1.7621	1145.75	FALSE	97
2022-09-12	09:50:19	2.09309	1147.84	FALSE	97
2022-09-12	09:50:19	4.03009	1151.87	1	98
2022-09-12	09:50:19	2.06001	1153.93	FALSE	98
2022-09-12	09:50:20	1.86368	1155.79	FALSE	98
2022-09-12	09:50:20	0.515229	1156.31	FALSE	98
2022-09-12	09:50:20	0.443931	1156.75	FALSE	98
2022-09-12	09:50:20	0.221387	1156.98	FALSE	98
2022-09-12	09:50:21	0.224491	1157.2	FALSE	98
2022-09-12	09:50:21	0.129326	1157.33	FALSE	98
2022-09-12	09:50:21	0.223321	1157.55	FALSE	98
2022-09-12	09:50:21	0.301336	1157.85	FALSE	98
2022-09-12	09:50:22	1.3479	1159.2	FALSE	98
2022-09-12	09:50:22	4.34739	1163.55	1	99
2022-09-12	09:50:22	3.43492	1166.98	1	100
2022-09-12	09:50:22	1.66765	1168.65	FALSE	100
2022-09-12	09:50:23	0.993804	1169.65	FALSE	100
2022-09-12	09:50:23	0.583473	1170.23	FALSE	100
2022-09-12	09:50:23	0.73131	1170.96	FALSE	100
2022-09-12	09:50:23	0.589987	1171.55	FALSE	100
2022-09-12	09:50:24	0.434415	1171.98	FALSE	100
2022-09-12	09:50:24	0.375534	1172.36	FALSE	100
2022-09-12	09:50:24	0.363982	1172.72	FALSE	100
2022-09-12	09:50:25	0.858639	1173.58	FALSE	100
2022-09-12	09:50:25	1.23421	1174.82	FALSE	100
2022-09-12	09:50:25	1.12917	1175.95	FALSE	100
2022-09-12	09:50:25	0.932583	1176.88	FALSE	100
2022-09-12	09:50:26	0.49126	1177.37	FALSE	100
2022-09-12	09:50:26	0.418639	1177.79	FALSE	100
2022-09-12	09:50:26	0.557468	1178.35	FALSE	100
2022-09-12	09:50:26	2.54052	1180.89	FALSE	100
2022-09-12	09:50:27	1.46006	1182.35	FALSE	100
2022-09-12	09:50:27	0.748664	1183.1	FALSE	100
2022-09-12	09:50:27	0.468461	1183.56	FALSE	100
2022-09-12	09:50:27	0.65014	1184.21	FALSE	100
2022-09-12	09:50:28	0.500521	1184.71	FALSE	100
2022-09-12	09:50:28	0.486374	1185.2	FALSE	100
2022-09-12	09:50:28	0.460369	1185.66	FALSE	100
2022-09-12	09:50:29	0.780522	1186.44	FALSE	100
2022-09-12	09:50:29	2.64469	1189.09	FALSE	100
2022-09-12	09:50:29	3.83146	1192.92	1	101
2022-09-12	09:50:29	4.6738	1197.59	1	102
2022-09-12	09:50:30	0.797519	1198.39	FALSE	102
2022-09-12	09:50:30	0.613448	1199	FALSE	102
2022-09-12	09:50:30	0.594567	1199.6	FALSE	102
2022-09-12	09:50:30	1.611	1201.21	FALSE	102
2022-09-12	09:50:31	3.98128	1205.19	1	103
2022-09-12	09:50:31	8.5252	1213.71	1	104
2022-09-12	09:50:31	6.07986	1219.79	1	105
2022-09-12	09:50:31	2.88485	1222.68	FALSE	105
2022-09-12	09:50:32	1.42729	1224.11	FALSE	105
2022-09-12	09:50:32	1.27228	1225.38	FALSE	105
2022-09-12	09:50:32	1.26592	1226.64	FALSE	105
2022-09-12	09:50:33	1.24388	1227.89	FALSE	105
2022-09-12	09:50:33	0.830395	1228.72	FALSE	105
2022-09-12	09:50:33	0.85355	1229.57	FALSE	105
2022-09-12	09:50:33	0.701387	1230.27	FALSE	105
2022-09-12	09:50:34	1.01406	1231.29	FALSE	105
2022-09-12	09:50:34	0.601997	1231.89	FALSE	105
2022-09-12	09:50:34	1.53574	1233.43	FALSE	105
2022-09-12	09:50:34	1.92485	1235.35	FALSE	105
2022-09-12	09:50:35	3.63915	1238.99	1	106
2022-09-12	09:50:35	3.06647	1242.06	1	107
2022-09-12	09:50:35	2.93253	1244.99	FALSE	107
2022-09-12	09:50:35	2.28581	1247.27	FALSE	107
2022-09-12	09:50:36	1.16805	1248.44	FALSE	107
2022-09-12	09:50:36	0.436756	1248.88	FALSE	107
2022-09-12	09:50:36	0.410903	1249.29	FALSE	107
2022-09-12	09:50:36	0.591514	1249.88	FALSE	107
2022-09-12	09:50:37	1.07915	1250.96	FALSE	107
2022-09-12	09:50:37	1.29253	1252.25	FALSE	107
2022-09-12	09:50:37	1.57441	1253.83	FALSE	107
2022-09-12	09:50:38	1.00001	1254.83	FALSE	107
2022-09-12	09:50:38	1.13289	1255.96	FALSE	107
2022-09-12	09:50:38	0.946323	1256.91	FALSE	107
2022-09-12	09:50:38	0.972227	1257.88	FALSE	107
2022-09-12	09:50:39	1.02271	1258.9	FALSE	107
2022-09-12	09:50:39	1.04373	1259.95	FALSE	107
2022-09-12	09:50:39	1.23365	1261.18	FALSE	107
2022-09-12	09:50:39	1.65304	1262.83	FALSE	107
2022-09-12	09:50:40	2.09243	1264.92	FALSE	107
2022-09-12	09:50:40	2.2593	1267.18	FALSE	107
2022-09-12	09:50:40	1.81782	1269	FALSE	107
2022-09-12	09:50:40	1.12698	1270.13	FALSE	107
2022-09-12	09:50:41	0.664746	1270.79	FALSE	107
2022-09-12	09:50:41	1.18317	1271.98	FALSE	107
2022-09-12	09:50:41	1.20047	1273.18	FALSE	107
2022-09-12	09:50:42	1.86332	1275.04	FALSE	107
2022-09-12	09:50:42	2.07345	1277.11	FALSE	107
2022-09-12	09:50:42	2.19874	1279.31	FALSE	107
2022-09-12	09:50:42	2.12393	1281.44	FALSE	107
2022-09-12	09:50:43	2.36912	1283.81	FALSE	107
2022-09-12	09:50:43	2.37803	1286.18	FALSE	107
2022-09-12	09:50:43	2.46566	1288.65	FALSE	107
2022-09-12	09:50:43	2.52912	1291.18	FALSE	107
2022-09-12	09:50:44	2.42347	1293.6	FALSE	107
2022-09-12	09:50:44	2.16434	1295.77	FALSE	107
2022-09-12	09:50:44	1.63691	1297.4	FALSE	107
2022-09-12	09:50:44	1.14744	1298.55	FALSE	107
2022-09-12	09:50:45	1.18062	1299.73	FALSE	107
2022-09-12	09:50:45	0.80958	1300.54	FALSE	107
2022-09-12	09:50:45	0.90098	1301.44	FALSE	107
2022-09-12	09:50:46	0.535585	1301.98	FALSE	107
2022-09-12	09:50:46	0.329224	1302.31	FALSE	107
2022-09-12	09:50:46	0.354211	1302.66	FALSE	107
2022-09-12	09:50:46	0.952786	1303.61	FALSE	107
2022-09-12	09:50:47	0.723015	1304.34	FALSE	107
2022-09-12	09:50:47	0.476451	1304.81	FALSE	107
2022-09-12	09:50:47	0.569326	1305.38	FALSE	107
2022-09-12	09:50:47	1.77497	1307.16	FALSE	107
2022-09-12	09:50:48	1.64693	1308.8	FALSE	107
2022-09-12	09:50:48	2.27472	1311.08	FALSE	107
2022-09-12	09:50:48	2.26856	1313.35	FALSE	107
2022-09-12	09:50:48	1.67691	1315.02	FALSE	107
2022-09-12	09:50:49	1.52256	1316.55	FALSE	107
2022-09-12	09:50:49	1.33355	1317.88	FALSE	107
2022-09-12	09:50:49	2.97762	1320.86	FALSE	107
2022-09-12	09:50:49	1.68088	1322.54	FALSE	107
2022-09-12	09:50:50	1.86861	1324.41	FALSE	107
2022-09-12	09:50:50	1.57655	1325.98	FALSE	107
2022-09-12	09:50:50	1.41385	1327.4	FALSE	107
2022-09-12	09:50:51	1.66637	1329.06	FALSE	107
2022-09-12	09:50:51	2.47085	1331.54	FALSE	107
2022-09-12	09:50:51	2.52734	1334.06	FALSE	107
2022-09-12	09:50:51	3.6252	1337.69	1	108
2022-09-12	09:50:52	4.10118	1341.79	1	109
2022-09-12	09:50:52	5.89858	1347.69	1	110
2022-09-12	09:50:52	6.35339	1354.04	1	111
2022-09-12	09:50:52	7.19258	1361.23	1	112
2022-09-12	09:50:53	6.83411	1368.07	1	113
2022-09-12	09:50:53	4.75014	1372.82	1	114
2022-09-12	09:50:53	3.03457	1375.85	1	115
2022-09-12	09:50:53	2.60663	1378.46	FALSE	115
2022-09-12	09:50:54	3.07131	1381.53	1	116
2022-09-12	09:50:54	4.24052	1385.77	1	117
2022-09-12	09:50:54	3.52118	1389.29	1	118
2022-09-12	09:50:55	2.8163	1392.11	FALSE	118
2022-09-12	09:50:55	2.06373	1394.17	FALSE	118
2022-09-12	09:50:55	1.71732	1395.89	FALSE	118
2022-09-12	09:50:55	1.47019	1397.36	FALSE	118
2022-09-12	09:50:56	1.68368	1399.04	FALSE	118
2022-09-12	09:50:56	1.64301	1400.69	FALSE	118
2022-09-12	09:50:56	2.25721	1402.94	FALSE	118
2022-09-12	09:50:56	3.29803	1406.24	1	119
2022-09-12	09:50:57	3.48576	1409.73	1	120
2022-09-12	09:50:57	3.11808	1412.85	1	121
2022-09-12	09:50:57	3.25294	1416.1	1	122
2022-09-12	09:50:57	3.69385	1419.79	1	123
2022-09-12	09:50:58	3.06067	1422.85	1	124
2022-09-12	09:50:58	3.53681	1426.39	1	125
2022-09-12	09:50:58	3.52077	1429.91	1	126
2022-09-12	09:50:59	3.52541	1433.44	1	127
2022-09-12	09:50:59	3.66693	1437.1	1	128
2022-09-12	09:50:59	3.49614	1440.6	1	129
2022-09-12	09:50:59	3.67126	1444.27	1	130
2022-09-12	09:51:00	4.18042	1448.45	1	131
2022-09-12	09:51:00	3.54133	1451.99	1	132
2022-09-12	09:51:00	2.98968	1454.98	FALSE	132
2022-09-12	09:51:00	2.61406	1457.6	FALSE	132
2022-09-12	09:51:01	2.73548	1460.33	FALSE	132
2022-09-12	09:51:01	2.88831	1463.22	FALSE	132
2022-09-12	09:51:01	3.03105	1466.25	1	133
2022-09-12	09:51:01	2.97869	1469.23	FALSE	133
2022-09-12	09:51:02	2.44022	1471.67	FALSE	133
2022-09-12	09:51:02	2.6881	1474.36	FALSE	133
2022-09-12	09:51:02	0.740522	1475.1	FALSE	133
2022-09-12	09:51:02	0.846476	1475.94	FALSE	133
2022-09-12	09:51:03	1.22765	1477.17	FALSE	133
2022-09-12	09:51:03	1.76078	1478.93	FALSE	133
2022-09-12	09:51:03	2.60271	1481.54	FALSE	133
2022-09-12	09:51:04	3.47075	1485.01	1	134
2022-09-12	09:51:04	3.79614	1488.8	1	135
2022-09-12	09:51:04	3.69843	1492.5	1	136
2022-09-12	09:51:04	5.02902	1497.53	1	137
2022-09-12	09:51:05	5.32194	1502.85	1	138
2022-09-12	09:51:05	5.01003	1507.86	1	139
2022-09-12	09:51:05	5.76764	1513.63	1	140
2022-09-12	09:51:05	5.71904	1519.35	1	141
2022-09-12	09:51:06	3.40276	1522.75	1	142
2022-09-12	09:51:06	2.86856	1525.62	FALSE	142
2022-09-12	09:51:06	2.46072	1528.08	FALSE	142
2022-09-12	09:51:06	1.54632	1529.63	FALSE	142
2022-09-12	09:51:07	0.44958	1530.08	FALSE	142
2022-09-12	09:51:07	0.395229	1530.47	FALSE	142
2022-09-12	09:51:07	0.38215	1530.85	FALSE	142
2022-09-12	09:51:08	0.36958	1531.22	FALSE	142
2022-09-12	09:51:08	0.15355	1531.38	FALSE	142
2022-09-12	09:51:08	0.201336	1531.58	FALSE	142
2022-09-12	09:51:08	0.121947	1531.7	FALSE	142
2022-09-12	09:51:09	0.078588	1531.78	FALSE	142
2022-09-12	09:51:09	0.229224	1532.01	FALSE	142
2022-09-12	09:51:09	0.256909	1532.27	FALSE	142
2022-09-12	09:51:09	0.253448	1532.52	FALSE	142
2022-09-12	09:51:10	0.231209	1532.75	FALSE	142
2022-09-12	09:51:10	0.213143	1532.96	FALSE	142
2022-09-12	09:51:10	0.205611	1533.17	FALSE	142
2022-09-12	09:51:10	0.222965	1533.39	FALSE	142
2022-09-12	09:51:11	0.237723	1533.63	FALSE	142
2022-09-12	09:51:11	0.299758	1533.93	FALSE	142
2022-09-12	09:51:11	0.254771	1534.18	FALSE	142
2022-09-12	09:51:11	0.199351	1534.38	FALSE	142
2022-09-12	09:51:12	0.317468	1534.7	FALSE	142
2022-09-12	09:51:12	0.316908	1535.02	FALSE	142
2022-09-12	09:51:12	0.397825	1535.42	FALSE	142
2022-09-12	09:51:13	0.491718	1535.91	FALSE	142
2022-09-12	09:51:13	0.440878	1536.35	FALSE	142
2022-09-12	09:51:13	0.249987	1536.6	FALSE	142
2022-09-12	09:51:13	0.375026	1536.97	FALSE	142
2022-09-12	09:51:14	0.365814	1537.34	FALSE	142
2022-09-12	09:51:14	0.422506	1537.76	FALSE	142
2022-09-12	09:51:14	0.469173	1538.23	FALSE	142
2022-09-12	09:51:14	0.416807	1538.65	FALSE	142
2022-09-12	09:51:15	0.728817	1539.38	FALSE	142
2022-09-12	09:51:15	1.01706	1540.39	FALSE	142
2022-09-12	09:51:15	0.760013	1541.15	FALSE	142
2022-09-12	09:51:15	0.89243	1542.05	FALSE	142
2022-09-12	09:51:16	0.0900893	1542.14	FALSE	142
2022-09-12	09:51:16	0.0648984	1542.2	FALSE	142
2022-09-12	09:51:16	-0.170216	1542.2	FALSE	142
2022-09-12	09:51:17	-0.164262	1542.2	FALSE	142
2022-09-12	09:51:17	-0.367977	1542.2	FALSE	142
2022-09-12	09:51:17	-0.248689	1542.2	FALSE	142
2022-09-12	09:51:17	-0.120852	1542.2	FALSE	142
2022-09-12	09:51:18	-0.00482162	1542.2	FALSE	142
2022-09-12	09:51:18	0.064186	1542.26	FALSE	142
2022-09-12	09:51:18	-0.0123025	1542.26	FALSE	142
2022-09-12	09:51:18	0.383626	1542.65	FALSE	142
2022-09-12	09:51:19	0.299453	1542.95	FALSE	142
2022-09-12	09:51:19	0.262761	1543.21	FALSE	142
2022-09-12	09:51:19	0.311158	1543.52	FALSE	142
2022-09-12	09:51:19	0.328003	1543.85	FALSE	142
2022-09-12	09:51:20	0.35131	1544.2	FALSE	142
2022-09-12	09:51:20	0.344847	1544.55	FALSE	142
2022-09-12	09:51:20	0.64042	1545.19	FALSE	142
2022-09-12	09:51:21	0.861234	1546.05	FALSE	142
2022-09-12	09:51:21	1.09212	1547.14	FALSE	142
2022-09-12	09:51:21	0.64215	1547.78	FALSE	142
2022-09-12	09:51:21	0.844237	1548.63	FALSE	142
2022-09-12	09:51:22	0.365	1548.99	FALSE	142
2022-09-12	09:51:22	0.439097	1549.43	FALSE	142
2022-09-12	09:51:22	0.308919	1549.74	FALSE	142
2022-09-12	09:51:22	0.442965	1550.18	FALSE	142
2022-09-12	09:51:23	0.356298	1550.54	FALSE	142
2022-09-12	09:51:23	0.401641	1550.94	FALSE	142
2022-09-12	09:51:23	0.301082	1551.24	FALSE	142
2022-09-12	09:51:23	0.359097	1551.6	FALSE	142
2022-09-12	09:51:24	0.344949	1551.95	FALSE	142
2022-09-12	09:51:24	0.510089	1552.46	FALSE	142
2022-09-12	09:51:24	0.337519	1552.79	FALSE	142
2022-09-12	09:51:24	0.864389	1553.66	FALSE	142
2022-09-12	09:51:25	1.43497	1555.09	FALSE	142
2022-09-12	09:51:25	5.51426	1560.61	1	143
2022-09-12	09:51:25	7.29614	1567.9	1	144
2022-09-12	09:51:26	10.2713	1578.17	1	145
2022-09-12	09:51:26	4.23263	1582.41	1	146
2022-09-12	09:51:26	3.45645	1585.86	1	147
2022-09-12	09:51:26	4.1509	1590.01	1	148
2022-09-12	09:51:27	2.92581	1592.94	FALSE	148
2022-09-12	09:51:27	5.05253	1597.99	1	149
2022-09-12	09:51:27	4.58729	1602.58	1	150
2022-09-12	09:51:27	5.74098	1608.32	1	151
2022-09-12	09:51:28	3.95075	1612.27	1	152
2022-09-12	09:51:28	3.38174	1615.65	1	153
2022-09-12	09:51:28	2.06602	1617.72	FALSE	153
2022-09-12	09:51:28	3.04098	1620.76	1	154
2022-09-12	09:51:29	2.78668	1623.55	FALSE	154
2022-09-12	09:51:29	2.28612	1625.83	FALSE	154
2022-09-12	09:51:29	1.54846	1627.38	FALSE	154
2022-09-12	09:51:30	2.36703	1629.75	FALSE	154
2022-09-12	09:51:30	2.662	1632.41	FALSE	154
2022-09-12	09:51:30	1.31971	1633.73	FALSE	154
2022-09-12	09:51:30	2.04062	1635.77	FALSE	154
2022-09-12	09:51:31	2.50515	1638.28	FALSE	154
2022-09-12	09:51:31	2.01014	1640.29	FALSE	154
2022-09-12	09:51:31	1.54337	1641.83	FALSE	154
2022-09-12	09:51:31	1.56001	1643.39	FALSE	154
2022-09-12	09:51:32	2.21625	1645.61	FALSE	154
2022-09-12	09:51:32	1.69523	1647.3	FALSE	154
2022-09-12	09:51:32	1.93782	1649.24	FALSE	154
2022-09-12	09:51:32	1.68459	1650.92	FALSE	154
2022-09-12	09:51:33	2.03197	1652.96	FALSE	154
2022-09-12	09:51:33	0.812277	1653.77	FALSE	154
2022-09-12	09:51:33	0.557519	1654.33	FALSE	154
2022-09-12	09:51:34	0.574313	1654.9	FALSE	154
2022-09-12	09:51:34	0.99472	1655.89	FALSE	154
2022-09-12	09:51:34	0.842812	1656.74	FALSE	154
2022-09-12	09:51:34	1.74922	1658.49	FALSE	154
2022-09-12	09:51:35	1.88449	1660.37	FALSE	154
2022-09-12	09:51:35	1.02037	1661.39	FALSE	154
2022-09-12	09:51:35	0.577417	1661.97	FALSE	154
2022-09-12	09:51:35	0.382099	1662.35	FALSE	154
2022-09-12	09:51:36	0.372786	1662.72	FALSE	154
2022-09-12	09:51:36	0.213143	1662.94	FALSE	154
2022-09-12	09:51:36	0.303015	1663.24	FALSE	154
2022-09-12	09:51:36	0.255789	1663.5	FALSE	154
2022-09-12	09:51:37	0.264542	1663.76	FALSE	154
2022-09-12	09:51:37	0.318995	1664.08	FALSE	154
2022-09-12	09:51:37	0.304084	1664.38	FALSE	154
2022-09-12	09:51:37	0.344084	1664.73	FALSE	154
2022-09-12	09:51:38	0.332125	1665.06	FALSE	154
2022-09-12	09:51:38	0.354924	1665.41	FALSE	154
2022-09-12	09:51:38	0.342405	1665.76	FALSE	154
2022-09-12	09:51:39	0.362455	1666.12	FALSE	154
2022-09-12	09:51:39	0.332023	1666.45	FALSE	154
2022-09-12	09:51:39	0.283372	1666.73	FALSE	154
2022-09-12	09:51:39	0.289478	1667.02	FALSE	154
2022-09-12	09:51:40	0.264644	1667.29	FALSE	154
2022-09-12	09:51:40	0.253346	1667.54	FALSE	154
2022-09-12	09:51:40	0.269529	1667.81	FALSE	154
2022-09-12	09:51:40	0.236552	1668.05	FALSE	154
2022-09-12	09:51:41	0.197672	1668.25	FALSE	154
2022-09-12	09:51:41	0.281336	1668.53	FALSE	154
2022-09-12	09:51:41	0.280369	1668.81	FALSE	154
2022-09-12	09:51:41	0.522964	1669.33	FALSE	154
2022-09-12	09:51:42	0.489071	1669.82	FALSE	154
2022-09-12	09:51:42	0.369733	1670.19	FALSE	154
2022-09-12	09:51:42	0.292786	1670.48	FALSE	154
2022-09-12	09:51:43	0.129377	1670.61	FALSE	154
2022-09-12	09:51:43	0.0156363	1670.63	FALSE	154
2022-09-12	09:51:43	-0.0138293	1670.63	FALSE	154
2022-09-12	09:51:43	0.0556872	1670.68	FALSE	154
2022-09-12	09:51:44	0.352685	1671.04	FALSE	154
2022-09-12	09:51:44	0.339453	1671.37	FALSE	154
2022-09-12	09:51:44	0.304593	1671.68	FALSE	154
2022-09-12	09:51:44	0.240064	1671.92	FALSE	154
2022-09-12	09:51:45	0.310954	1672.23	FALSE	154
2022-09-12	09:51:45	0.37126	1672.6	FALSE	154
2022-09-12	09:51:45	0.313295	1672.91	FALSE	154
2022-09-12	09:51:45	0.353906	1673.27	FALSE	154
2022-09-12	09:51:46	0.364339	1673.63	FALSE	154
2022-09-12	09:51:46	0.399504	1674.03	FALSE	154
2022-09-12	09:51:46	0.365204	1674.4	FALSE	154
2022-09-12	09:51:47	0.388257	1674.79	FALSE	154
2022-09-12	09:51:47	0.379809	1675.17	FALSE	154
2022-09-12	09:51:47	0.550598	1675.72	FALSE	154
2022-09-12	09:51:47	0.387697	1676.1	FALSE	154
2022-09-12	09:51:48	0.411921	1676.52	FALSE	154
2022-09-12	09:51:48	0.398486	1676.91	FALSE	154
2022-09-12	09:51:48	0.497468	1677.41	FALSE	154
2022-09-12	09:51:48	0.585865	1678	FALSE	154
2022-09-12	09:51:49	0.899148	1678.9	FALSE	154
2022-09-12	09:51:49	1.08454	1679.98	FALSE	154
2022-09-12	09:51:49	2.90434	1682.89	FALSE	154
2022-09-12	09:51:49	2.81909	1685.7	FALSE	154
2022-09-12	09:51:50	1.6194	1687.32	FALSE	154
2022-09-12	09:51:50	0.644644	1687.97	FALSE	154
2022-09-12	09:51:50	0.598995	1688.57	FALSE	154

## Sheet: Sunny_martin_202291294640
						**GoPro Fitting: 936
2022-09-12	09:46:40	0.295738
2022-09-12	09:46:41	0.283982
2022-09-12	09:46:41	0.282405
2022-09-12	09:46:41	0.292837
2022-09-12	09:46:41	0.303575
2022-09-12	09:46:42	0.299809
2022-09-12	09:46:42	0.321285
2022-09-12	09:46:42	0.3364
2022-09-12	09:46:42	0.370496
2022-09-12	09:46:43	0.365407
2022-09-12	09:46:43	0.366832
2022-09-12	09:46:43	0.367494
2022-09-12	09:46:43	0.360573
2022-09-12	09:46:44	0.365
2022-09-12	09:46:44	0.363626
2022-09-12	09:46:44	0.354975
2022-09-12	09:46:44	0.367799
2022-09-12	09:46:45	0.374313
2022-09-12	09:46:45	0.363779
2022-09-12	09:46:45	0.376908
2022-09-12	09:46:46	0.374466
2022-09-12	09:46:46	0.398232
2022-09-12	09:46:46	0.370445
2022-09-12	09:46:46	0.412074
2022-09-12	09:46:47	0.356043
2022-09-12	09:46:47	0.420115
2022-09-12	09:46:47	0.428104
2022-09-12	09:46:47	0.480471
2022-09-12	09:46:48	0.480064
2022-09-12	09:46:48	0.480674
2022-09-12	09:46:48	0.477977
2022-09-12	09:46:48	0.460369
2022-09-12	09:46:49	0.450903
2022-09-12	09:46:49	0.454313
2022-09-12	09:46:49	0.472888
2022-09-12	09:46:50	0.435891
2022-09-12	09:46:50	0.462863
2022-09-12	09:46:50	0.448562
2022-09-12	09:46:50	0.439962
2022-09-12	09:46:51	0.432125
2022-09-12	09:46:51	0.477977
2022-09-12	09:46:51	0.029275
2022-09-12	09:46:51	0.0872394
2022-09-12	09:46:52	0.104288
2022-09-12	09:46:52	0.27126
2022-09-12	09:46:52	2.5167
2022-09-12	09:46:52	2.01869
2022-09-12	09:46:53	0.177468
2022-09-12	09:46:53	0.290954
2022-09-12	09:46:53	-0.0229387
2022-09-12	09:46:54	0.236909
2022-09-12	09:46:54	0.262914
2022-09-12	09:46:54	0.22439
2022-09-12	09:46:54	-0.37673
2022-09-12	09:46:55	-0.731081
2022-09-12	09:46:55	-0.856628
2022-09-12	09:46:55	-1.03159
2022-09-12	09:46:55	-0.586552
2022-09-12	09:46:56	-0.595101
2022-09-12	09:46:56	0.052074
2022-09-12	09:46:56	0.444389
2022-09-12	09:46:56	0.470852
2022-09-12	09:46:57	0.543473
2022-09-12	09:46:57	0.614058
2022-09-12	09:46:57	0.752277
2022-09-12	09:46:57	0.763626
2022-09-12	09:46:58	0.758079
2022-09-12	09:46:58	0.669885
2022-09-12	09:46:58	0.632277
2022-09-12	09:46:59	0.665713
2022-09-12	09:46:59	0.655789
2022-09-12	09:46:59	0.611565
2022-09-12	09:46:59	0.567494
2022-09-12	09:47:00	0.425458
2022-09-12	09:47:00	0.322405
2022-09-12	09:47:00	0.358486
2022-09-12	09:47:00	0.406883
2022-09-12	09:47:01	0.45187
2022-09-12	09:47:01	0.347188
2022-09-12	09:47:01	0.204491
2022-09-12	09:47:01	0.219911
2022-09-12	09:47:02	0.967036
2022-09-12	09:47:02	2.18739
2022-09-12	09:47:02	1.41299
2022-09-12	09:47:03	1.07864
2022-09-12	09:47:03	0.28098
2022-09-12	09:47:03	0.286985
2022-09-12	09:47:03	0.170649
2022-09-12	09:47:04	0.302608
2022-09-12	09:47:04	0.144644
2022-09-12	09:47:04	-0.24701
2022-09-12	09:47:04	-0.135865
2022-09-12	09:47:05	-0.363702
2022-09-12	09:47:05	0.967748
2022-09-12	09:47:05	2.34067
2022-09-12	09:47:05	4.80388
2022-09-12	09:47:06	1.34505
2022-09-12	09:47:06	1.90485
2022-09-12	09:47:06	0.854262
2022-09-12	09:47:07	0.203473
2022-09-12	09:47:07	1.28765
2022-09-12	09:47:07	0.306374
2022-09-12	09:47:07	1.58587
2022-09-12	09:47:08	0.48444
2022-09-12	09:47:08	0.904339
2022-09-12	09:47:08	0.740573
2022-09-12	09:47:08	1.22144
2022-09-12	09:47:09	1.94688
2022-09-12	09:47:09	0.884898
2022-09-12	09:47:09	4.49212
2022-09-12	09:47:09	0.650598
2022-09-12	09:47:10	0.31299
2022-09-12	09:47:10	0.851005
2022-09-12	09:47:10	0.379148
2022-09-12	09:47:10	0.306629
2022-09-12	09:47:11	0.0755855
2022-09-12	09:47:11	0.0731936
2022-09-12	09:47:11	-0.113727
2022-09-12	09:47:12	-0.142175
2022-09-12	09:47:12	-0.0630913
2022-09-12	09:47:12	0.18215
2022-09-12	09:47:12	1.11589
2022-09-12	09:47:13	0.541132
2022-09-12	09:47:13	0.265102
2022-09-12	09:47:13	0.428359
2022-09-12	09:47:13	1.53523
2022-09-12	09:47:14	0.67584
2022-09-12	09:47:14	0.225814
2022-09-12	09:47:14	0.210954
2022-09-12	09:47:14	0.29355
2022-09-12	09:47:15	0.322608
2022-09-12	09:47:15	0.314975
2022-09-12	09:47:15	0.487748
2022-09-12	09:47:16	0.525712
2022-09-12	09:47:16	0.275025
2022-09-12	09:47:16	0.244746
2022-09-12	09:47:16	0.241489
2022-09-12	09:47:17	0.218791
2022-09-12	09:47:17	0.300725
2022-09-12	09:47:17	0.337774
2022-09-12	09:47:17	0.719809
2022-09-12	09:47:18	0.847341
2022-09-12	09:47:18	1.0362
2022-09-12	09:47:18	0.867392
2022-09-12	09:47:18	0.39126
2022-09-12	09:47:19	0.328308
2022-09-12	09:47:19	0.320674
2022-09-12	09:47:19	0.31416
2022-09-12	09:47:20	0.318232
2022-09-12	09:47:20	0.301438
2022-09-12	09:47:20	0.281336
2022-09-12	09:47:20	0.271005
2022-09-12	09:47:21	0.354211
2022-09-12	09:47:21	1.41151
2022-09-12	09:47:21	1.01681
2022-09-12	09:47:21	0.529783
2022-09-12	09:47:22	0.476501
2022-09-12	09:47:22	2.73436
2022-09-12	09:47:22	4.82123
2022-09-12	09:47:22	4.80632
2022-09-12	09:47:23	2.27401
2022-09-12	09:47:23	0.517417
2022-09-12	09:47:23	0.211616
2022-09-12	09:47:23	0.0726338
2022-09-12	09:47:24	0.246578
2022-09-12	09:47:24	0.256705
2022-09-12	09:47:24	0.288868
2022-09-12	09:47:25	0.289122
2022-09-12	09:47:25	0.425204
2022-09-12	09:47:25	0.389835
2022-09-12	09:47:25	0.298384
2022-09-12	09:47:26	0.224848
2022-09-12	09:47:26	0.149682
2022-09-12	09:47:26	0.216756
2022-09-12	09:47:26	0.0628628
2022-09-12	09:47:27	0.12215
2022-09-12	09:47:27	-0.0126588
2022-09-12	09:47:27	-0.137493
2022-09-12	09:47:27	-0.133829
2022-09-12	09:47:28	-0.38019
2022-09-12	09:47:28	-0.396526
2022-09-12	09:47:28	-0.133015
2022-09-12	09:47:29	0.276451
2022-09-12	09:47:29	0.279046
2022-09-12	09:47:29	0.736196
2022-09-12	09:47:29	1.23828
2022-09-12	09:47:30	2.6621
2022-09-12	09:47:30	3.38653
2022-09-12	09:47:30	1.66042
2022-09-12	09:47:30	1.20719
2022-09-12	09:47:31	1.79676
2022-09-12	09:47:31	0.871005
2022-09-12	09:47:31	1.05553
2022-09-12	09:47:31	0.778639
2022-09-12	09:47:32	1.31406
2022-09-12	09:47:32	1.77553
2022-09-12	09:47:32	0.907494
2022-09-12	09:47:32	0.400369
2022-09-12	09:47:33	0.276094
2022-09-12	09:47:33	0.247799
2022-09-12	09:47:33	0.206934
2022-09-12	09:47:34	0.209122
2022-09-12	09:47:34	0.247392
2022-09-12	09:47:34	0.243066
2022-09-12	09:47:34	0.702659
2022-09-12	09:47:35	0.998384
2022-09-12	09:47:35	0.57528
2022-09-12	09:47:35	0.797214
2022-09-12	09:47:35	0.754822
2022-09-12	09:47:36	0.629936
2022-09-12	09:47:36	0.519758
2022-09-12	09:47:36	0.720165
2022-09-12	09:47:36	1.18815
2022-09-12	09:47:37	0.810445
2022-09-12	09:47:37	1.0651
2022-09-12	09:47:37	0.988104
2022-09-12	09:47:38	0.686679
2022-09-12	09:47:38	0.866476
2022-09-12	09:47:38	2.4279
2022-09-12	09:47:38	4.37731
2022-09-12	09:47:39	4.10912
2022-09-12	09:47:39	3.16922
2022-09-12	09:47:39	3.06118
2022-09-12	09:47:39	1.88047
2022-09-12	09:47:40	2.63889
2022-09-12	09:47:40	1.0422
2022-09-12	09:47:40	0.958842
2022-09-12	09:47:40	0.72383
2022-09-12	09:47:41	0.627748
2022-09-12	09:47:41	1.16663
2022-09-12	09:47:41	1.8736
2022-09-12	09:47:41	1.84291
2022-09-12	09:47:42	1.57625
2022-09-12	09:47:42	0.709529
2022-09-12	09:47:42	0.552583
2022-09-12	09:47:43	0.298842
2022-09-12	09:47:43	0.210547
2022-09-12	09:47:43	0.256909
2022-09-12	09:47:43	0.346832
2022-09-12	09:47:44	0.173906
2022-09-12	09:47:44	0.264542
2022-09-12	09:47:44	0.00164146
2022-09-12	09:47:44	0.173346
2022-09-12	09:47:45	0.13243
2022-09-12	09:47:45	0.0556872
2022-09-12	09:47:45	-0.0965773
2022-09-12	09:47:45	0.152176
2022-09-12	09:47:46	0.0168577
2022-09-12	09:47:46	0.15813
2022-09-12	09:47:46	0.280064
2022-09-12	09:47:47	2.97233
2022-09-12	09:47:47	6.39965
2022-09-12	09:47:47	10.2577
2022-09-12	09:47:47	6.52866
2022-09-12	09:47:48	5.92362
2022-09-12	09:47:48	8.61345
2022-09-12	09:47:48	4.09991
2022-09-12	09:47:48	2.84128
2022-09-12	09:47:49	3.53024
2022-09-12	09:47:49	0.513855
2022-09-12	09:47:49	0.717112
2022-09-12	09:47:49	1.66861
2022-09-12	09:47:50	1.60144
2022-09-12	09:47:50	1.68989
2022-09-12	09:47:50	1.21986
2022-09-12	09:47:51	1.87945
2022-09-12	09:47:51	1.14103
2022-09-12	09:47:51	1.71955
2022-09-12	09:47:51	0.854517
2022-09-12	09:47:52	0.600165
2022-09-12	09:47:52	0.295229
2022-09-12	09:47:52	1.51655
2022-09-12	09:47:52	1.27172
2022-09-12	09:47:53	2.00551
2022-09-12	09:47:53	2.63334
2022-09-12	09:47:53	4.75268
2022-09-12	09:47:53	8.36657
2022-09-12	09:47:54	7.68286
2022-09-12	09:47:54	11.502
2022-09-12	09:47:54	4.60108
2022-09-12	09:47:54	9.41075
2022-09-12	09:47:55	0.736705
2022-09-12	09:47:55	1.47263
2022-09-12	09:47:55	0.455026
2022-09-12	09:47:56	0.00764656
2022-09-12	09:47:56	-0.0821244
2022-09-12	09:47:56	1.00073
2022-09-12	09:47:56	10.9336
2022-09-12	09:47:57	13.4799
2022-09-12	09:47:57	13.048
2022-09-12	09:47:57	5.62225
2022-09-12	09:47:57	5.38128
2022-09-12	09:47:58	9.74184
2022-09-12	09:47:58	6.23324
2022-09-12	09:47:58	9.60255
2022-09-12	09:47:58	6.31466
2022-09-12	09:47:59	5.13523
2022-09-12	09:47:59	3.62134
2022-09-12	09:47:59	0.65813
2022-09-12	09:48:00	0.809224
2022-09-12	09:48:00	0.630191
2022-09-12	09:48:00	2.52256
2022-09-12	09:48:00	0.63589
2022-09-12	09:48:01	1.60001
2022-09-12	09:48:01	2.30541
2022-09-12	09:48:01	3.51034
2022-09-12	09:48:01	6.45782
2022-09-12	09:48:02	8.95039
2022-09-12	09:48:02	8.09212
2022-09-12	09:48:02	10.4139
2022-09-12	09:48:02	1.61223
2022-09-12	09:48:03	4.27874
2022-09-12	09:48:03	1.50108
2022-09-12	09:48:03	1.37355
2022-09-12	09:48:03	4.31166
2022-09-12	09:48:04	2.9624
2022-09-12	09:48:04	4.39986
2022-09-12	09:48:04	4.08525
2022-09-12	09:48:05	2.81854
2022-09-12	09:48:05	3.37406
2022-09-12	09:48:05	2.37162
2022-09-12	09:48:05	2.94307
2022-09-12	09:48:06	1.2677
2022-09-12	09:48:06	1.84897
2022-09-12	09:48:06	9.98057
2022-09-12	09:48:06	8.16082
2022-09-12	09:48:07	12.1321
2022-09-12	09:48:07	2.3196
2022-09-12	09:48:07	2.82016
2022-09-12	09:48:07	5.37955
2022-09-12	09:48:08	4.19212
2022-09-12	09:48:08	8.31904
2022-09-12	09:48:08	5.32439
2022-09-12	09:48:09	1.72525
2022-09-12	09:48:09	7.35634
2022-09-12	09:48:09	2.27889
2022-09-12	09:48:09	5.40942
2022-09-12	09:48:10	1.50576
2022-09-12	09:48:10	1.66449
2022-09-12	09:48:10	1.45314
2022-09-12	09:48:10	2.18347
2022-09-12	09:48:11	4.69721
2022-09-12	09:48:11	2.26805
2022-09-12	09:48:11	2.17574
2022-09-12	09:48:11	2.29849
2022-09-12	09:48:12	2.97894
2022-09-12	09:48:12	0.562659
2022-09-12	09:48:12	0.275382
2022-09-12	09:48:13	0.461641
2022-09-12	09:48:13	-0.037188
2022-09-12	09:48:13	0.0601656
2022-09-12	09:48:13	0.0492242
2022-09-12	09:48:14	0.0145167
2022-09-12	09:48:14	-0.133778
2022-09-12	09:48:14	-0.237086
2022-09-12	09:48:14	-0.0148979
2022-09-12	09:48:15	0.947494
2022-09-12	09:48:15	0.700267
2022-09-12	09:48:15	0.488919
2022-09-12	09:48:15	0.331565
2022-09-12	09:48:16	0.306832
2022-09-12	09:48:16	0.33014
2022-09-12	09:48:16	0.369173
2022-09-12	09:48:16	4.04902
2022-09-12	09:48:17	7.43741
2022-09-12	09:48:17	10.3526
2022-09-12	09:48:17	3.45039
2022-09-12	09:48:18	10.7707
2022-09-12	09:48:18	1.16408
2022-09-12	09:48:18	4.55849
2022-09-12	09:48:18	1.21569
2022-09-12	09:48:19	1.92037
2022-09-12	09:48:19	1.50301
2022-09-12	09:48:19	0.494466
2022-09-12	09:48:19	0.498232
2022-09-12	09:48:20	0.267494
2022-09-12	09:48:20	0.304695
2022-09-12	09:48:20	0.267036
2022-09-12	09:48:20	0.26556
2022-09-12	09:48:21	0.445662
2022-09-12	09:48:21	0.396247
2022-09-12	09:48:21	0.526069
2022-09-12	09:48:22	0.54159
2022-09-12	09:48:22	0.580471
2022-09-12	09:48:22	0.490802
2022-09-12	09:48:22	0.361082
2022-09-12	09:48:23	0.408563
2022-09-12	09:48:23	1.17467
2022-09-12	09:48:23	9.24825
2022-09-12	09:48:23	6.5251
2022-09-12	09:48:24	5.19716
2022-09-12	09:48:24	4.36658
2022-09-12	09:48:24	2.64235
2022-09-12	09:48:24	1.90256
2022-09-12	09:48:25	0.533651
2022-09-12	09:48:25	0.577977
2022-09-12	09:48:25	0.642506
2022-09-12	09:48:26	3.21655
2022-09-12	09:48:26	8.70591
2022-09-12	09:48:26	6.75085
2022-09-12	09:48:26	12.4382
2022-09-12	09:48:27	13.1941
2022-09-12	09:48:27	25.2936
2022-09-12	09:48:27	7.39395
2022-09-12	09:48:27	17.256
2022-09-12	09:48:28	9.70316
2022-09-12	09:48:28	19.2578
2022-09-12	09:48:28	14.427
2022-09-12	09:48:28	11.781
2022-09-12	09:48:29	16.2973
2022-09-12	09:48:29	12.2236
2022-09-12	09:48:29	5.73085
2022-09-12	09:48:29	6.66744
2022-09-12	09:48:30	6.3138
2022-09-12	09:48:30	22.2189
2022-09-12	09:48:30	20.1895
2022-09-12	09:48:31	8.84596
2022-09-12	09:48:31	3.29945
2022-09-12	09:48:31	2.76856
2022-09-12	09:48:31	3.29981
2022-09-12	09:48:32	1.87279
2022-09-12	09:48:32	5.45802
2022-09-12	09:48:32	4.48836
2022-09-12	09:48:32	1.49294
2022-09-12	09:48:33	0.748511
2022-09-12	09:48:33	0.445713
2022-09-12	09:48:33	0.409886
2022-09-12	09:48:33	0.318028
2022-09-12	09:48:34	0.309275
2022-09-12	09:48:34	0.339911
2022-09-12	09:48:34	0.228308
2022-09-12	09:48:35	0.28388
2022-09-12	09:48:35	0.349784
2022-09-12	09:48:35	0.632735
2022-09-12	09:48:35	0.483881
2022-09-12	09:48:36	1.01319
2022-09-12	09:48:36	0.533142
2022-09-12	09:48:36	0.364898
2022-09-12	09:48:36	0.312583
2022-09-12	09:48:37	0.240674
2022-09-12	09:48:37	0.250445
2022-09-12	09:48:37	0.303015
2022-09-12	09:48:37	0.265967
2022-09-12	09:48:38	0.209886
2022-09-12	09:48:38	0.280165
2022-09-12	09:48:38	0.162863
2022-09-12	09:48:38	0.257061
2022-09-12	09:48:39	0.266374
2022-09-12	09:48:39	0.332685
2022-09-12	09:48:39	0.378537
2022-09-12	09:48:40	0.389936
2022-09-12	09:48:40	0.377774
2022-09-12	09:48:40	0.537824
2022-09-12	09:48:40	0.654516
2022-09-12	09:48:41	0.490903
2022-09-12	09:48:41	0.463372
2022-09-12	09:48:41	0.839249
2022-09-12	09:48:41	0.905611
2022-09-12	09:48:42	1.5819
2022-09-12	09:48:42	0.950191
2022-09-12	09:48:42	1.26261
2022-09-12	09:48:42	0.904695
2022-09-12	09:48:43	3.68378
2022-09-12	09:48:43	2.3052
2022-09-12	09:48:43	4.7851
2022-09-12	09:48:44	4.34256
2022-09-12	09:48:44	4.89116
2022-09-12	09:48:44	2.831
2022-09-12	09:48:44	0.657672
2022-09-12	09:48:45	0.274262
2022-09-12	09:48:45	-0.0412084
2022-09-12	09:48:45	0.114822
2022-09-12	09:48:45	2.86429
2022-09-12	09:48:46	4.04459
2022-09-12	09:48:46	4.13457
2022-09-12	09:48:46	3.33044
2022-09-12	09:48:46	2.06653
2022-09-12	09:48:47	2.98037
2022-09-12	09:48:47	2.29584
2022-09-12	09:48:47	1.30067
2022-09-12	09:48:48	0.327646
2022-09-12	09:48:48	0.337519
2022-09-12	09:48:48	-0.0420226
2022-09-12	09:48:48	-0.0248216
2022-09-12	09:48:49	-0.0311829
2022-09-12	09:48:49	-0.0200379
2022-09-12	09:48:49	0.0472903
2022-09-12	09:48:49	0.201489
2022-09-12	09:48:50	0.146832
2022-09-12	09:48:50	0.213906
2022-09-12	09:48:50	0.248868
2022-09-12	09:48:50	0.460216
2022-09-12	09:48:51	0.363779
2022-09-12	09:48:51	0.407494
2022-09-12	09:48:51	0.388868
2022-09-12	09:48:51	0.41243
2022-09-12	09:48:52	0.34841
2022-09-12	09:48:52	0.330751
2022-09-12	09:48:52	0.428257
2022-09-12	09:48:53	0.332379
2022-09-12	09:48:53	0.458079
2022-09-12	09:48:53	0.326985
2022-09-12	09:48:53	0.392888
2022-09-12	09:48:54	0.460318
2022-09-12	09:48:54	0.4564
2022-09-12	09:48:54	0.401031
2022-09-12	09:48:54	0.438435
2022-09-12	09:48:55	0.43584
2022-09-12	09:48:55	0.410802
2022-09-12	09:48:55	0.432481
2022-09-12	09:48:55	0.435331
2022-09-12	09:48:56	0.42612
2022-09-12	09:48:56	0.44042
2022-09-12	09:48:56	0.408461
2022-09-12	09:48:57	0.461285
2022-09-12	09:48:57	0.454364
2022-09-12	09:48:57	0.425
2022-09-12	09:48:57	0.471616
2022-09-12	09:48:58	0.289478
2022-09-12	09:48:58	0.205713
2022-09-12	09:48:58	0.260267
2022-09-12	09:48:58	0.27126
2022-09-12	09:48:59	0.31813
2022-09-12	09:48:59	0.20841
2022-09-12	09:48:59	0.268817
2022-09-12	09:48:59	0.276349
2022-09-12	09:49:00	0.242303
2022-09-12	09:49:00	0.254517
2022-09-12	09:49:00	0.262812
2022-09-12	09:49:00	0.262048
2022-09-12	09:49:01	0.275891
2022-09-12	09:49:01	0.260013
2022-09-12	09:49:01	0.268868
2022-09-12	09:49:02	0.271107
2022-09-12	09:49:02	0.271718
2022-09-12	09:49:02	0.275331
2022-09-12	09:49:02	0.277926
2022-09-12	09:49:03	0.275076
2022-09-12	09:49:03	0.280318
2022-09-12	09:49:03	0.27869
2022-09-12	09:49:03	0.293092
2022-09-12	09:49:04	0.286934
2022-09-12	09:49:04	0.293397
2022-09-12	09:49:04	0.29584
2022-09-12	09:49:04	0.292125
2022-09-12	09:49:05	0.299249
2022-09-12	09:49:05	0.304898
2022-09-12	09:49:05	0.297824
2022-09-12	09:49:06	0.358741
2022-09-12	09:49:06	0.345204
2022-09-12	09:49:06	0.320929
2022-09-12	09:49:06	0.298842
2022-09-12	09:49:07	0.31757
2022-09-12	09:49:07	0.306476
2022-09-12	09:49:07	0.305204
2022-09-12	09:49:07	0.29584
2022-09-12	09:49:08	0.279351
2022-09-12	09:49:08	0.328206
2022-09-12	09:49:08	0.319657
2022-09-12	09:49:08	0.323117
2022-09-12	09:49:09	0.307443
2022-09-12	09:49:09	0.297824
2022-09-12	09:49:09	0.304847
2022-09-12	09:49:10	0.300115
2022-09-12	09:49:10	0.297417
2022-09-12	09:49:10	0.295484
2022-09-12	09:49:10	0.302506
2022-09-12	09:49:11	0.310853
2022-09-12	09:49:11	0.311056
2022-09-12	09:49:11	0.315026
2022-09-12	09:49:11	0.320522
2022-09-12	09:49:12	0.318435
2022-09-12	09:49:12	0.312328
2022-09-12	09:49:12	0.326018
2022-09-12	09:49:12	0.323117
2022-09-12	09:49:13	0.323575
2022-09-12	09:49:13	0.319707
2022-09-12	09:49:13	0.317519
2022-09-12	09:49:13	0.321947
2022-09-12	09:49:14	0.321183
2022-09-12	09:49:14	0.320318
2022-09-12	09:49:14	0.324389
2022-09-12	09:49:15	0.322099
2022-09-12	09:49:15	0.326374
2022-09-12	09:49:15	0.340216
2022-09-12	09:49:15	0.91757
2022-09-12	09:49:16	3.25955
2022-09-12	09:49:16	2.42754
2022-09-12	09:49:16	1.51131
2022-09-12	09:49:16	0.429936
2022-09-12	09:49:17	0.423626
2022-09-12	09:49:17	0.354466
2022-09-12	09:49:17	0.371361
2022-09-12	09:49:17	0.426374
2022-09-12	09:49:18	0.339097
2022-09-12	09:49:18	0.355484
2022-09-12	09:49:18	0.377417
2022-09-12	09:49:19	0.371107
2022-09-12	09:49:19	0.335891
2022-09-12	09:49:19	0.344389
2022-09-12	09:49:19	0.374568
2022-09-12	09:49:20	0.311056
2022-09-12	09:49:20	0.347392
2022-09-12	09:49:20	0.337316
2022-09-12	09:49:20	0.341336
2022-09-12	09:49:21	0.328817
2022-09-12	09:49:21	0.321082
2022-09-12	09:49:21	0.320471
2022-09-12	09:49:21	0.318282
2022-09-12	09:49:22	0.313194
2022-09-12	09:49:22	0.359148
2022-09-12	09:49:22	0.374466
2022-09-12	09:49:23	0.381183
2022-09-12	09:49:23	0.342201
2022-09-12	09:49:23	0.334771
2022-09-12	09:49:23	0.33014
2022-09-12	09:49:24	0.342201
2022-09-12	09:49:24	0.328766
2022-09-12	09:49:24	0.336247
2022-09-12	09:49:24	0.328817
2022-09-12	09:49:25	0.330649
2022-09-12	09:49:25	0.334008
2022-09-12	09:49:25	0.332583
2022-09-12	09:49:25	0.330038
2022-09-12	09:49:26	0.336298
2022-09-12	09:49:26	0.331158
2022-09-12	09:49:26	0.333855
2022-09-12	09:49:26	0.331769
2022-09-12	09:49:27	0.33584
2022-09-12	09:49:27	0.336501
2022-09-12	09:49:27	0.32958
2022-09-12	09:49:28	0.343881
2022-09-12	09:49:28	0.303321
2022-09-12	09:49:28	0.605509
2022-09-12	09:49:28	1.38291
2022-09-12	09:49:29	0.871921
2022-09-12	09:49:29	1.07762
2022-09-12	09:49:29	1.25665
2022-09-12	09:49:29	0.641692
2022-09-12	09:49:30	0.937468
2022-09-12	09:49:30	2.2166
2022-09-12	09:49:30	0.529987
2022-09-12	09:49:30	0.330089
2022-09-12	09:49:31	0.306679
2022-09-12	09:49:31	0.374364
2022-09-12	09:49:31	0.177977
2022-09-12	09:49:32	0.277519
2022-09-12	09:49:32	0.239402
2022-09-12	09:49:32	0.306679
2022-09-12	09:49:32	0.317774
2022-09-12	09:49:33	0.226374
2022-09-12	09:49:33	0.333041
2022-09-12	09:49:33	0.306069
2022-09-12	09:49:33	0.349987
2022-09-12	09:49:34	0.30042
2022-09-12	09:49:34	0.272634
2022-09-12	09:49:34	0.294364
2022-09-12	09:49:34	0.29126
2022-09-12	09:49:35	0.292125
2022-09-12	09:49:35	0.286323
2022-09-12	09:49:35	0.309275
2022-09-12	09:49:35	0.2764
2022-09-12	09:49:36	0.26388
2022-09-12	09:49:36	0.245662
2022-09-12	09:49:36	0.245
2022-09-12	09:49:37	0.267901
2022-09-12	09:49:37	0.279097
2022-09-12	09:49:37	0.315484
2022-09-12	09:49:37	0.239657
2022-09-12	09:49:38	0.277926
2022-09-12	09:49:38	0.397468
2022-09-12	09:49:38	0.230446
2022-09-12	09:49:38	0.390038
2022-09-12	09:49:39	0.300929
2022-09-12	09:49:39	0.2193
2022-09-12	09:49:39	0.393499
2022-09-12	09:49:39	0.31299
2022-09-12	09:49:40	0.306323
2022-09-12	09:49:40	0.417672
2022-09-12	09:49:40	0.460166
2022-09-12	09:49:41	0.325407
2022-09-12	09:49:41	0.416349
2022-09-12	09:49:41	0.2907
2022-09-12	09:49:41	0.391921
2022-09-12	09:49:42	1.18871
2022-09-12	09:49:42	0.851056
2022-09-12	09:49:42	1.02363
2022-09-12	09:49:42	0.702659
2022-09-12	09:49:43	0.481692
2022-09-12	09:49:43	0.385611
2022-09-12	09:49:43	0.404542
2022-09-12	09:49:43	0.572277
2022-09-12	09:49:44	1.67899
2022-09-12	09:49:44	0.507647
2022-09-12	09:49:44	0.353804
2022-09-12	09:49:45	0.351107
2022-09-12	09:49:45	0.384186
2022-09-12	09:49:45	0.319657
2022-09-12	09:49:45	0.264644
2022-09-12	09:49:46	0.344084
2022-09-12	09:49:46	0.258232
2022-09-12	09:49:46	0.382455
2022-09-12	09:49:46	0.369682
2022-09-12	09:49:47	0.288104
2022-09-12	09:49:47	0.294567
2022-09-12	09:49:47	0.265102
2022-09-12	09:49:47	0.4507
2022-09-12	09:49:48	1.09309
2022-09-12	09:49:48	1.10698
2022-09-12	09:49:48	1.82215
2022-09-12	09:49:48	0.450903
2022-09-12	09:49:49	0.766171
2022-09-12	09:49:49	0.614771
2022-09-12	09:49:49	0.384949
2022-09-12	09:49:50	0.275483
2022-09-12	09:49:50	0.113295
2022-09-12	09:49:50	0.212125
2022-09-12	09:49:50	0.20897
2022-09-12	09:49:51	0.200827
2022-09-12	09:49:51	0.169122
2022-09-12	09:49:51	0.161896
2022-09-12	09:49:51	0.371361
2022-09-12	09:49:52	0.32271
2022-09-12	09:49:52	0.296603
2022-09-12	09:49:52	0.397316
2022-09-12	09:49:52	0.492634
2022-09-12	09:49:53	0.54215
2022-09-12	09:49:53	0.524848
2022-09-12	09:49:53	0.902048
2022-09-12	09:49:54	1.79279
2022-09-12	09:49:54	1.77543
2022-09-12	09:49:54	1.74047
2022-09-12	09:49:54	1.50469
2022-09-12	09:49:55	1.71228
2022-09-12	09:49:55	3.04744
2022-09-12	09:49:55	0.929122
2022-09-12	09:49:55	0.795382
2022-09-12	09:49:56	0.532837
2022-09-12	09:49:56	0.40042
2022-09-12	09:49:56	0.241285
2022-09-12	09:49:56	0.100064
2022-09-12	09:49:57	0.0636771
2022-09-12	09:49:57	0.221387
2022-09-12	09:49:57	0.10556
2022-09-12	09:49:58	0.238842
2022-09-12	09:49:58	0.15126
2022-09-12	09:49:58	0.190242
2022-09-12	09:49:58	0.188613
2022-09-12	09:49:59	0.189071
2022-09-12	09:49:59	0.235789
2022-09-12	09:49:59	0.390954
2022-09-12	09:49:59	0.630394
2022-09-12	09:50:00	0.469479
2022-09-12	09:50:00	0.365255
2022-09-12	09:50:00	0.462965
2022-09-12	09:50:00	0.389631
2022-09-12	09:50:01	0.339809
2022-09-12	09:50:01	0.387443
2022-09-12	09:50:01	0.401387
2022-09-12	09:50:01	0.359402
2022-09-12	09:50:02	0.361641
2022-09-12	09:50:02	0.37416
2022-09-12	09:50:02	0.314415
2022-09-12	09:50:03	0.286476
2022-09-12	09:50:03	0.309377
2022-09-12	09:50:03	0.299351
2022-09-12	09:50:03	0.30617
2022-09-12	09:50:04	0.307901
2022-09-12	09:50:04	0.320115
2022-09-12	09:50:04	0.315433
2022-09-12	09:50:04	0.317061
2022-09-12	09:50:05	0.311565
2022-09-12	09:50:05	0.317621
2022-09-12	09:50:05	0.312532
2022-09-12	09:50:05	0.318435
2022-09-12	09:50:06	0.322812
2022-09-12	09:50:06	0.331972
2022-09-12	09:50:06	0.345153
2022-09-12	09:50:07	0.341947
2022-09-12	09:50:07	0.346985
2022-09-12	09:50:07	0.355026
2022-09-12	09:50:07	0.346374
2022-09-12	09:50:08	0.336705
2022-09-12	09:50:08	0.341641
2022-09-12	09:50:08	0.343372
2022-09-12	09:50:08	0.337875
2022-09-12	09:50:09	0.329326
2022-09-12	09:50:09	0.323066
2022-09-12	09:50:09	0.322914
2022-09-12	09:50:09	0.315789
2022-09-12	09:50:10	0.318282
2022-09-12	09:50:10	0.312685
2022-09-12	09:50:10	0.329682
2022-09-12	09:50:11	0.363015
2022-09-12	09:50:11	0.397417
2022-09-12	09:50:11	0.443728
2022-09-12	09:50:11	0.486985
2022-09-12	09:50:12	0.727952
2022-09-12	09:50:12	0.82098
2022-09-12	09:50:12	0.636755
2022-09-12	09:50:12	0.525102
2022-09-12	09:50:13	0.570191
2022-09-12	09:50:13	0.634974
2022-09-12	09:50:13	1.0535
2022-09-12	09:50:13	1.2937
2022-09-12	09:50:14	1.52006
2022-09-12	09:50:14	2.04419
2022-09-12	09:50:14	2.16266
2022-09-12	09:50:14	2.21981
2022-09-12	09:50:15	3.9277
2022-09-12	09:50:15	0.881998
2022-09-12	09:50:15	0.846578
2022-09-12	09:50:16	0.581743
2022-09-12	09:50:16	0.459657
2022-09-12	09:50:16	0.398028
2022-09-12	09:50:16	0.54902
2022-09-12	09:50:17	0.58388
2022-09-12	09:50:17	0.547544
2022-09-12	09:50:17	0.564949
2022-09-12	09:50:17	0.630852
2022-09-12	09:50:18	0.690903
2022-09-12	09:50:18	1.26724
2022-09-12	09:50:18	1.74994
2022-09-12	09:50:18	1.7621
2022-09-12	09:50:19	2.09309
2022-09-12	09:50:19	4.03009
2022-09-12	09:50:19	2.06001
2022-09-12	09:50:20	1.86368
2022-09-12	09:50:20	0.515229
2022-09-12	09:50:20	0.443931
2022-09-12	09:50:20	0.221387
2022-09-12	09:50:21	0.224491
2022-09-12	09:50:21	0.129326
2022-09-12	09:50:21	0.223321
2022-09-12	09:50:21	0.301336
2022-09-12	09:50:22	1.3479
2022-09-12	09:50:22	4.34739
2022-09-12	09:50:22	3.43492
2022-09-12	09:50:22	1.66765
2022-09-12	09:50:23	0.993804
2022-09-12	09:50:23	0.583473
2022-09-12	09:50:23	0.73131
2022-09-12	09:50:23	0.589987
2022-09-12	09:50:24	0.434415
2022-09-12	09:50:24	0.375534
2022-09-12	09:50:24	0.363982
2022-09-12	09:50:25	0.858639
2022-09-12	09:50:25	1.23421
2022-09-12	09:50:25	1.12917
2022-09-12	09:50:25	0.932583
2022-09-12	09:50:26	0.49126
2022-09-12	09:50:26	0.418639
2022-09-12	09:50:26	0.557468
2022-09-12	09:50:26	2.54052
2022-09-12	09:50:27	1.46006
2022-09-12	09:50:27	0.748664
2022-09-12	09:50:27	0.468461
2022-09-12	09:50:27	0.65014
2022-09-12	09:50:28	0.500521
2022-09-12	09:50:28	0.486374
2022-09-12	09:50:28	0.460369
2022-09-12	09:50:29	0.780522
2022-09-12	09:50:29	2.64469
2022-09-12	09:50:29	3.83146
2022-09-12	09:50:29	4.6738
2022-09-12	09:50:30	0.797519
2022-09-12	09:50:30	0.613448
2022-09-12	09:50:30	0.594567
2022-09-12	09:50:30	1.611
2022-09-12	09:50:31	3.98128
2022-09-12	09:50:31	8.5252
2022-09-12	09:50:31	6.07986
2022-09-12	09:50:31	2.88485
2022-09-12	09:50:32	1.42729
2022-09-12	09:50:32	1.27228
2022-09-12	09:50:32	1.26592
2022-09-12	09:50:33	1.24388
2022-09-12	09:50:33	0.830395
2022-09-12	09:50:33	0.85355
2022-09-12	09:50:33	0.701387
2022-09-12	09:50:34	1.01406
2022-09-12	09:50:34	0.601997
2022-09-12	09:50:34	1.53574
2022-09-12	09:50:34	1.92485
2022-09-12	09:50:35	3.63915
2022-09-12	09:50:35	3.06647
2022-09-12	09:50:35	2.93253
2022-09-12	09:50:35	2.28581
2022-09-12	09:50:36	1.16805
2022-09-12	09:50:36	0.436756
2022-09-12	09:50:36	0.410903
2022-09-12	09:50:36	0.591514
2022-09-12	09:50:37	1.07915
2022-09-12	09:50:37	1.29253
2022-09-12	09:50:37	1.57441
2022-09-12	09:50:38	1.00001
2022-09-12	09:50:38	1.13289
2022-09-12	09:50:38	0.946323
2022-09-12	09:50:38	0.972227
2022-09-12	09:50:39	1.02271
2022-09-12	09:50:39	1.04373
2022-09-12	09:50:39	1.23365
2022-09-12	09:50:39	1.65304
2022-09-12	09:50:40	2.09243
2022-09-12	09:50:40	2.2593
2022-09-12	09:50:40	1.81782
2022-09-12	09:50:40	1.12698
2022-09-12	09:50:41	0.664746
2022-09-12	09:50:41	1.18317
2022-09-12	09:50:41	1.20047
2022-09-12	09:50:42	1.86332
2022-09-12	09:50:42	2.07345
2022-09-12	09:50:42	2.19874
2022-09-12	09:50:42	2.12393
2022-09-12	09:50:43	2.36912
2022-09-12	09:50:43	2.37803
2022-09-12	09:50:43	2.46566
2022-09-12	09:50:43	2.52912
2022-09-12	09:50:44	2.42347
2022-09-12	09:50:44	2.16434
2022-09-12	09:50:44	1.63691
2022-09-12	09:50:44	1.14744
2022-09-12	09:50:45	1.18062
2022-09-12	09:50:45	0.80958
2022-09-12	09:50:45	0.90098
2022-09-12	09:50:46	0.535585
2022-09-12	09:50:46	0.329224
2022-09-12	09:50:46	0.354211
2022-09-12	09:50:46	0.952786
2022-09-12	09:50:47	0.723015
2022-09-12	09:50:47	0.476451
2022-09-12	09:50:47	0.569326
2022-09-12	09:50:47	1.77497
2022-09-12	09:50:48	1.64693
2022-09-12	09:50:48	2.27472
2022-09-12	09:50:48	2.26856
2022-09-12	09:50:48	1.67691
2022-09-12	09:50:49	1.52256
2022-09-12	09:50:49	1.33355
2022-09-12	09:50:49	2.97762
2022-09-12	09:50:49	1.68088
2022-09-12	09:50:50	1.86861
2022-09-12	09:50:50	1.57655
2022-09-12	09:50:50	1.41385
2022-09-12	09:50:51	1.66637
2022-09-12	09:50:51	2.47085
2022-09-12	09:50:51	2.52734
2022-09-12	09:50:51	3.6252
2022-09-12	09:50:52	4.10118
2022-09-12	09:50:52	5.89858
2022-09-12	09:50:52	6.35339
2022-09-12	09:50:52	7.19258
2022-09-12	09:50:53	6.83411
2022-09-12	09:50:53	4.75014
2022-09-12	09:50:53	3.03457
2022-09-12	09:50:53	2.60663
2022-09-12	09:50:54	3.07131
2022-09-12	09:50:54	4.24052
2022-09-12	09:50:54	3.52118
2022-09-12	09:50:55	2.8163
2022-09-12	09:50:55	2.06373
2022-09-12	09:50:55	1.71732
2022-09-12	09:50:55	1.47019
2022-09-12	09:50:56	1.68368
2022-09-12	09:50:56	1.64301
2022-09-12	09:50:56	2.25721
2022-09-12	09:50:56	3.29803
2022-09-12	09:50:57	3.48576
2022-09-12	09:50:57	3.11808
2022-09-12	09:50:57	3.25294
2022-09-12	09:50:57	3.69385
2022-09-12	09:50:58	3.06067
2022-09-12	09:50:58	3.53681
2022-09-12	09:50:58	3.52077
2022-09-12	09:50:59	3.52541
2022-09-12	09:50:59	3.66693
2022-09-12	09:50:59	3.49614
2022-09-12	09:50:59	3.67126
2022-09-12	09:51:00	4.18042
2022-09-12	09:51:00	3.54133
2022-09-12	09:51:00	2.98968
2022-09-12	09:51:00	2.61406
2022-09-12	09:51:01	2.73548
2022-09-12	09:51:01	2.88831
2022-09-12	09:51:01	3.03105
2022-09-12	09:51:01	2.97869
2022-09-12	09:51:02	2.44022
2022-09-12	09:51:02	2.6881
2022-09-12	09:51:02	0.740522
2022-09-12	09:51:02	0.846476
2022-09-12	09:51:03	1.22765
2022-09-12	09:51:03	1.76078
2022-09-12	09:51:03	2.60271
2022-09-12	09:51:04	3.47075
2022-09-12	09:51:04	3.79614
2022-09-12	09:51:04	3.69843
2022-09-12	09:51:04	5.02902
2022-09-12	09:51:05	5.32194
2022-09-12	09:51:05	5.01003
2022-09-12	09:51:05	5.76764
2022-09-12	09:51:05	5.71904
2022-09-12	09:51:06	3.40276
2022-09-12	09:51:06	2.86856
2022-09-12	09:51:06	2.46072
2022-09-12	09:51:06	1.54632
2022-09-12	09:51:07	0.44958
2022-09-12	09:51:07	0.395229
2022-09-12	09:51:07	0.38215
2022-09-12	09:51:08	0.36958
2022-09-12	09:51:08	0.15355
2022-09-12	09:51:08	0.201336
2022-09-12	09:51:08	0.121947
2022-09-12	09:51:09	0.078588
2022-09-12	09:51:09	0.229224
2022-09-12	09:51:09	0.256909
2022-09-12	09:51:09	0.253448
2022-09-12	09:51:10	0.231209
2022-09-12	09:51:10	0.213143
2022-09-12	09:51:10	0.205611
2022-09-12	09:51:10	0.222965
2022-09-12	09:51:11	0.237723
2022-09-12	09:51:11	0.299758
2022-09-12	09:51:11	0.254771
2022-09-12	09:51:11	0.199351
2022-09-12	09:51:12	0.317468
2022-09-12	09:51:12	0.316908
2022-09-12	09:51:12	0.397825
2022-09-12	09:51:13	0.491718
2022-09-12	09:51:13	0.440878
2022-09-12	09:51:13	0.249987
2022-09-12	09:51:13	0.375026
2022-09-12	09:51:14	0.365814
2022-09-12	09:51:14	0.422506
2022-09-12	09:51:14	0.469173
2022-09-12	09:51:14	0.416807
2022-09-12	09:51:15	0.728817
2022-09-12	09:51:15	1.01706
2022-09-12	09:51:15	0.760013
2022-09-12	09:51:15	0.89243
2022-09-12	09:51:16	0.0900893
2022-09-12	09:51:16	0.0648984
2022-09-12	09:51:16	-0.170216
2022-09-12	09:51:17	-0.164262
2022-09-12	09:51:17	-0.367977
2022-09-12	09:51:17	-0.248689
2022-09-12	09:51:17	-0.120852
2022-09-12	09:51:18	-0.00482162
2022-09-12	09:51:18	0.064186
2022-09-12	09:51:18	-0.0123025
2022-09-12	09:51:18	0.383626
2022-09-12	09:51:19	0.299453
2022-09-12	09:51:19	0.262761
2022-09-12	09:51:19	0.311158
2022-09-12	09:51:19	0.328003
2022-09-12	09:51:20	0.35131
2022-09-12	09:51:20	0.344847
2022-09-12	09:51:20	0.64042
2022-09-12	09:51:21	0.861234
2022-09-12	09:51:21	1.09212
2022-09-12	09:51:21	0.64215
2022-09-12	09:51:21	0.844237
2022-09-12	09:51:22	0.365
2022-09-12	09:51:22	0.439097
2022-09-12	09:51:22	0.308919
2022-09-12	09:51:22	0.442965
2022-09-12	09:51:23	0.356298
2022-09-12	09:51:23	0.401641
2022-09-12	09:51:23	0.301082
2022-09-12	09:51:23	0.359097
2022-09-12	09:51:24	0.344949
2022-09-12	09:51:24	0.510089
2022-09-12	09:51:24	0.337519
2022-09-12	09:51:24	0.864389
2022-09-12	09:51:25	1.43497
2022-09-12	09:51:25	5.51426
2022-09-12	09:51:25	7.29614
2022-09-12	09:51:26	10.2713
2022-09-12	09:51:26	4.23263
2022-09-12	09:51:26	3.45645
2022-09-12	09:51:26	4.1509
2022-09-12	09:51:27	2.92581
2022-09-12	09:51:27	5.05253
2022-09-12	09:51:27	4.58729
2022-09-12	09:51:27	5.74098
2022-09-12	09:51:28	3.95075
2022-09-12	09:51:28	3.38174
2022-09-12	09:51:28	2.06602
2022-09-12	09:51:28	3.04098
2022-09-12	09:51:29	2.78668
2022-09-12	09:51:29	2.28612
2022-09-12	09:51:29	1.54846
2022-09-12	09:51:30	2.36703
2022-09-12	09:51:30	2.662
2022-09-12	09:51:30	1.31971
2022-09-12	09:51:30	2.04062
2022-09-12	09:51:31	2.50515
2022-09-12	09:51:31	2.01014
2022-09-12	09:51:31	1.54337
2022-09-12	09:51:31	1.56001
2022-09-12	09:51:32	2.21625
2022-09-12	09:51:32	1.69523
2022-09-12	09:51:32	1.93782
2022-09-12	09:51:32	1.68459
2022-09-12	09:51:33	2.03197
2022-09-12	09:51:33	0.812277
2022-09-12	09:51:33	0.557519
2022-09-12	09:51:34	0.574313
2022-09-12	09:51:34	0.99472
2022-09-12	09:51:34	0.842812
2022-09-12	09:51:34	1.74922
2022-09-12	09:51:35	1.88449
2022-09-12	09:51:35	1.02037
2022-09-12	09:51:35	0.577417
2022-09-12	09:51:35	0.382099
2022-09-12	09:51:36	0.372786
2022-09-12	09:51:36	0.213143
2022-09-12	09:51:36	0.303015
2022-09-12	09:51:36	0.255789
2022-09-12	09:51:37	0.264542
2022-09-12	09:51:37	0.318995
2022-09-12	09:51:37	0.304084
2022-09-12	09:51:37	0.344084
2022-09-12	09:51:38	0.332125
2022-09-12	09:51:38	0.354924
2022-09-12	09:51:38	0.342405
2022-09-12	09:51:39	0.362455
2022-09-12	09:51:39	0.332023
2022-09-12	09:51:39	0.283372
2022-09-12	09:51:39	0.289478
2022-09-12	09:51:40	0.264644
2022-09-12	09:51:40	0.253346
2022-09-12	09:51:40	0.269529
2022-09-12	09:51:40	0.236552
2022-09-12	09:51:41	0.197672
2022-09-12	09:51:41	0.281336
2022-09-12	09:51:41	0.280369
2022-09-12	09:51:41	0.522964
2022-09-12	09:51:42	0.489071
2022-09-12	09:51:42	0.369733
2022-09-12	09:51:42	0.292786
2022-09-12	09:51:43	0.129377
2022-09-12	09:51:43	0.0156363
2022-09-12	09:51:43	-0.0138293
2022-09-12	09:51:43	0.0556872
2022-09-12	09:51:44	0.352685
2022-09-12	09:51:44	0.339453
2022-09-12	09:51:44	0.304593
2022-09-12	09:51:44	0.240064
2022-09-12	09:51:45	0.310954
2022-09-12	09:51:45	0.37126
2022-09-12	09:51:45	0.313295
2022-09-12	09:51:45	0.353906
2022-09-12	09:51:46	0.364339
2022-09-12	09:51:46	0.399504
2022-09-12	09:51:46	0.365204
2022-09-12	09:51:47	0.388257
2022-09-12	09:51:47	0.379809
2022-09-12	09:51:47	0.550598
2022-09-12	09:51:47	0.387697
2022-09-12	09:51:48	0.411921
2022-09-12	09:51:48	0.398486
2022-09-12	09:51:48	0.497468
2022-09-12	09:51:48	0.585865
2022-09-12	09:51:49	0.899148
2022-09-12	09:51:49	1.08454
2022-09-12	09:51:49	2.90434
2022-09-12	09:51:49	2.81909
2022-09-12	09:51:50	1.6194
2022-09-12	09:51:50	0.644644
2022-09-12	09:51:50	0.598995
