# Supplementary material for: Comparing efficacy in reducing pulling and welfare impacts of four types of leash walking equipment
Source: PeerJ journal article supplement (doi:10.7717/peerj.18131), 2024-10-24
Supplement: Shelter1_Tension_files.zip [file Sunny_prong_2022912120359 copy.xlsx]

## Sheet: Averaged Newtons
Date	Time	Averaged Newtons	Impulse
2022-09-12	12:04:20	2.25208	2.25208	0	Impulse	1238.25
2022-09-12	12:04:21	3.73298	5.98506	0	Total steps	9
2022-09-12	12:04:22	1.04618	7.03124	0	# > 5sec	1
2022-09-12	12:04:23	1.43254	8.46377	0
2022-09-12	12:04:24	1.04378	9.50755	0
2022-09-12	12:04:25	0.296095	9.80365	0
2022-09-12	12:04:26	0.215054	10.0187	0
2022-09-12	12:04:27	1.26208	11.2808	0
2022-09-12	12:04:28	1.70064	12.9814	0
2022-09-12	12:04:29	1.34878	14.3302	0
2022-09-12	12:04:30	1.94034	16.2705	0
2022-09-12	12:04:31	4.86008	21.1306	0
2022-09-12	12:04:32	2.16451	23.2951	0
2022-09-12	12:04:33	3.91733	27.2125	0
2022-09-12	12:04:34	1.17747	28.3899	0
2022-09-12	12:04:35	0.956306	29.3462	0
2022-09-12	12:04:36	2.17345	31.5197	0
2022-09-12	12:04:37	1.22103	32.7407	0
2022-09-12	12:04:38	1.47447	34.2152	0
2022-09-12	12:04:39	1.25433	35.4695	0
2022-09-12	12:04:40	1.01935	36.4889	0
2022-09-12	12:04:41	0.61292	37.1018	0
2022-09-12	12:04:42	2.3915	39.4933	0
2022-09-12	12:04:43	2.649	42.1423	0
2022-09-12	12:04:44	1.63796	43.7803	0
2022-09-12	12:04:45	0.943649	44.7239	0
2022-09-12	12:04:46	1.95676	46.6807	0
2022-09-12	12:04:47	1.52009	48.2007	0
2022-09-12	12:04:48	0.636275	48.837	0
2022-09-12	12:04:49	0.336068	49.1731	0
2022-09-12	12:04:50	-0.81188	49.1731	0
2022-09-12	12:04:51	-0.215788	49.1731	0
2022-09-12	12:04:52	0.732935	49.906	0
2022-09-12	12:04:53	1.42484	51.3309	0
2022-09-12	12:04:54	1.26581	52.5967	0
2022-09-12	12:04:55	16.4419	69.0386	1
2022-09-12	12:04:56	2.95715	71.9957	1
2022-09-12	12:04:57	4.84697	76.8427	1
2022-09-12	12:04:58	1.87447	78.7172	1
2022-09-12	12:04:59	3.58075	82.2979	1
2022-09-12	12:05:00	4.74961	87.0475	1
2022-09-12	12:05:01	1.77147	88.819	1
2022-09-12	12:05:02	1.39088	90.2099	1
2022-09-12	12:05:03	2.03825	92.2481	1
2022-09-12	12:05:04	2.82291	95.0711	1
2022-09-12	12:05:05	2.21821	97.2893	1
2022-09-12	12:05:06	1.50686	98.7961	1
2022-09-12	12:05:07	9.05656	107.853	1
2022-09-12	12:05:08	2.81459	110.667	1
2022-09-12	12:05:09	5.12664	115.794	1
2022-09-12	12:05:10	8.65974	124.454	1
2022-09-12	12:05:11	12.2006	136.654	1
2022-09-12	12:05:12	2.14895	138.803	1
2022-09-12	12:05:13	10.8536	149.657	1
2022-09-12	12:05:14	3.67912	153.336	1
2022-09-12	12:05:15	1.78924	155.125	1
2022-09-12	12:05:16	6.11871	161.244	1
2022-09-12	12:05:17	3.14809	164.392	1
2022-09-12	12:05:18	1.86815	166.26	1
2022-09-12	12:05:19	1.3292	167.589	1
2022-09-12	12:05:20	1.32377	168.913	1
2022-09-12	12:05:21	1.60152	170.515	1
2022-09-12	12:05:22	2.25049	172.765	1
2022-09-12	12:05:23	5.19494	177.96	1
2022-09-12	12:05:24	4.52279	182.483	1
2022-09-12	12:05:25	2.77831	185.261	1
2022-09-12	12:05:26	1.62223	186.883	1
2022-09-12	12:05:27	1.29275	188.176	1
2022-09-12	12:05:28	1.15387	189.33	1
2022-09-12	12:05:29	0.88698	190.217	1
2022-09-12	12:05:30	2.2391	192.456	1
2022-09-12	12:05:31	2.15755	194.614	1
2022-09-12	12:05:32	7.53171	202.145	1
2022-09-12	12:05:33	4.24792	206.393	1
2022-09-12	12:05:34	3.32357	209.717	1
2022-09-12	12:05:35	1.46994	211.187	1
2022-09-12	12:05:36	3.21074	214.397	1
2022-09-12	12:05:37	2.08047	216.478	1
2022-09-12	12:05:38	3.67316	220.151	1
2022-09-12	12:05:39	5.73326	225.884	1
2022-09-12	12:05:40	8.78378	234.668	1
2022-09-12	12:05:41	9.70517	244.373	1
2022-09-12	12:05:42	6.97643	251.35	1
2022-09-12	12:05:43	5.34619	256.696	1
2022-09-12	12:05:44	11.2428	267.939	1
2022-09-12	12:05:45	2.79512	270.734	1
2022-09-12	12:05:46	6.47417	277.208	1
2022-09-12	12:05:47	1.72652	278.935	1
2022-09-12	12:05:48	2.35539	281.29	1
2022-09-12	12:05:49	1.2035	282.493	1
2022-09-12	12:05:50	1.38822	283.882	1
2022-09-12	12:05:51	4.48968	288.371	1
2022-09-12	12:05:52	4.12766	292.499	1
2022-09-12	12:05:53	4.35012	296.849	1
2022-09-12	12:05:54	2.73621	299.585	1
2022-09-12	12:05:55	1.26525	300.851	1
2022-09-12	12:05:56	0.417657	301.268	1
2022-09-12	12:05:57	0.324674	301.593	1
2022-09-12	12:05:58	0.275892	301.869	1
2022-09-12	12:05:59	0.19202	302.061	1
2022-09-12	12:06:00	0.475438	302.536	1
2022-09-12	12:06:01	0.773795	303.31	1
2022-09-12	12:06:02	0.996149	304.306	1
2022-09-12	12:06:03	3.34228	307.649	1
2022-09-12	12:06:04	3.92766	311.576	1
2022-09-12	12:06:05	7.88162	319.458	1
2022-09-12	12:06:06	8.87574	328.334	1
2022-09-12	12:06:07	7.76137	336.095	1
2022-09-12	12:06:08	5.80089	341.896	1
2022-09-12	12:06:09	10.2386	352.134	1
2022-09-12	12:06:10	6.30897	358.443	1
2022-09-12	12:06:11	2.11859	360.562	1
2022-09-12	12:06:12	1.25891	361.821	1
2022-09-12	12:06:13	1.0056	362.826	1
2022-09-12	12:06:14	1.1949	364.021	1
2022-09-12	12:06:15	1.33225	365.354	1
2022-09-12	12:06:16	1.2575	366.611	1
2022-09-12	12:06:17	1.22258	367.834	1
2022-09-12	12:06:18	1.23842	369.072	1
2022-09-12	12:06:19	1.27272	370.345	1
2022-09-12	12:06:20	1.08664	371.431	1
2022-09-12	12:06:21	2.60491	374.036	1
2022-09-12	12:06:22	4.79828	378.835	1
2022-09-12	12:06:23	1.22235	380.057	1
2022-09-12	12:06:24	1.75368	381.811	1
2022-09-12	12:06:25	2.18324	383.994	1
2022-09-12	12:06:26	1.78817	385.782	1
2022-09-12	12:06:27	1.69563	387.478	1
2022-09-12	12:06:28	1.65038	389.128	1
2022-09-12	12:06:29	1.62586	390.754	1
2022-09-12	12:06:30	1.65178	392.406	1
2022-09-12	12:06:31	1.65998	394.066	1
2022-09-12	12:06:32	1.67136	395.737	1
2022-09-12	12:06:33	1.66491	397.402	1
2022-09-12	12:06:34	1.66904	399.071	1
2022-09-12	12:06:35	1.63751	400.709	1
2022-09-12	12:06:36	1.58949	402.298	1
2022-09-12	12:06:37	3.83559	406.134	1
2022-09-12	12:06:38	6.49392	412.628	1
2022-09-12	12:06:39	4.64305	417.271	1
2022-09-12	12:06:40	9.31659	426.587	1
2022-09-12	12:06:41	7.33104	433.918	1
2022-09-12	12:06:42	6.26229	440.18	1
2022-09-12	12:06:43	5.7903	445.971	1
2022-09-12	12:06:44	11.0724	457.043	1
2022-09-12	12:06:45	7.61718	464.66	1
2022-09-12	12:06:46	2.22059	466.881	1
2022-09-12	12:06:47	3.37446	470.255	1
2022-09-12	12:06:48	1.74599	472.001	1
2022-09-12	12:06:49	1.8816	473.883	1
2022-09-12	12:06:50	2.44997	476.333	1
2022-09-12	12:06:51	1.49547	477.828	1
2022-09-12	12:06:52	1.24344	479.072	1
2022-09-12	12:06:53	1.3425	480.414	1
2022-09-12	12:06:54	1.7395	482.154	1
2022-09-12	12:06:55	1.80158	483.955	1
2022-09-12	12:06:56	2.27426	486.23	1
2022-09-12	12:06:57	1.78941	488.019	1
2022-09-12	12:06:58	1.08885	489.108	1
2022-09-12	12:06:59	1.42976	490.538	1
2022-09-12	12:07:00	0.906374	491.444	1
2022-09-12	12:07:01	1.05042	492.495	1
2022-09-12	12:07:02	1.18109	493.676	1
2022-09-12	12:07:03	1.167	494.843	1
2022-09-12	12:07:04	1.1674	496.01	1
2022-09-12	12:07:05	1.8228	497.833	1
2022-09-12	12:07:06	1.86915	499.702	1
2022-09-12	12:07:07	2.60271	502.305	1
2022-09-12	12:07:08	2.04957	504.354	1
2022-09-12	12:07:09	2.02653	506.381	1
2022-09-12	12:07:10	1.61103	507.992	1
2022-09-12	12:07:11	1.5387	509.531	1
2022-09-12	12:07:12	1.54142	511.072	1
2022-09-12	12:07:13	1.72154	512.793	1
2022-09-12	12:07:14	3.80009	516.594	1
2022-09-12	12:07:15	1.94329	518.537	1
2022-09-12	12:07:16	1.3957	519.933	1
2022-09-12	12:07:17	3.45841	523.391	1
2022-09-12	12:07:18	4.49506	527.886	1
2022-09-12	12:07:19	2.30112	530.187	1
2022-09-12	12:07:20	3.49422	533.681	1
2022-09-12	12:07:21	5.1116	538.793	1
2022-09-12	12:07:22	3.80712	542.6	1
2022-09-12	12:07:23	5.25601	547.856	1
2022-09-12	12:07:24	8.69079	556.547	1
2022-09-12	12:07:25	3.83646	560.383	1
2022-09-12	12:07:26	2.30967	562.693	1
2022-09-12	12:07:27	0.937064	563.63	1
2022-09-12	12:07:28	3.0452	566.675	1
2022-09-12	12:07:29	15.4043	582.08	2
2022-09-12	12:07:30	5.75714	587.837	2
2022-09-12	12:07:31	5.38334	593.22	2
2022-09-12	12:07:32	7.29081	600.511	2
2022-09-12	12:07:33	4.21463	604.725	2
2022-09-12	12:07:34	4.63977	609.365	2
2022-09-12	12:07:35	6.51825	615.883	2
2022-09-12	12:07:36	5.69731	621.581	2
2022-09-12	12:07:37	13.9874	635.568	3
2022-09-12	12:07:38	12.5189	648.087	3
2022-09-12	12:07:39	6.98604	655.073	3
2022-09-12	12:07:40	19.0581	674.131	4
2022-09-12	12:07:41	11.067	685.198	4
2022-09-12	12:07:42	9.57332	694.771	4
2022-09-12	12:07:43	16.6428	711.414	5
2022-09-12	12:07:44	20.9003	732.314	6
2022-09-12	12:07:45	13.599	745.913	7
2022-09-12	12:07:46	17.1024	763.016	8
2022-09-12	12:07:47	16.5983	779.614	9
2022-09-12	12:07:48	9.83409	789.448	9
2022-09-12	12:07:49	3.49735	792.946	9
2022-09-12	12:07:50	12.6848	805.63	9
2022-09-12	12:07:51	11.3067	816.937	9
2022-09-12	12:07:52	8.40794	825.345	9
2022-09-12	12:07:53	6.70315	832.048	9
2022-09-12	12:07:54	10.7655	842.814	9
2022-09-12	12:07:55	9.41297	852.227	9
2022-09-12	12:07:56	5.81356	858.04	9
2022-09-12	12:07:57	6.81428	864.855	9
2022-09-12	12:07:58	5.08119	869.936	9
2022-09-12	12:07:59	4.59879	874.535	9
2022-09-12	12:08:00	3.4907	878.025	9
2022-09-12	12:08:01	4.31068	882.336	9
2022-09-12	12:08:02	4.79793	887.134	9
2022-09-12	12:08:03	4.86654	892	9
2022-09-12	12:08:04	7.86426	899.865	9
2022-09-12	12:08:05	6.11395	905.979	9
2022-09-12	12:08:06	3.44143	909.42	9
2022-09-12	12:08:07	3.77062	913.191	9
2022-09-12	12:08:08	9.22697	922.418	9
2022-09-12	12:08:09	9.05605	931.474	9
2022-09-12	12:08:10	5.97565	937.449	9
2022-09-12	12:08:11	1.88856	939.338	9
2022-09-12	12:08:12	1.12597	940.464	9
2022-09-12	12:08:13	-0.0144865	940.464	9
2022-09-12	12:08:14	0.404734	940.869	9
2022-09-12	12:08:15	4.24441	945.113	9
2022-09-12	12:08:16	6.48102	951.594	9
2022-09-12	12:08:17	3.43519	955.029	9
2022-09-12	12:08:18	3.68945	958.719	9
2022-09-12	12:08:19	1.27679	959.995	9
2022-09-12	12:08:20	1.29745	961.293	9
2022-09-12	12:08:21	4.83993	966.133	9
2022-09-12	12:08:22	2.13134	968.264	9
2022-09-12	12:08:23	2.67526	970.939	9
2022-09-12	12:08:24	5.56468	976.504	9
2022-09-12	12:08:25	2.09807	978.602	9
2022-09-12	12:08:26	1.27038	979.873	9
2022-09-12	12:08:27	2.00418	981.877	9
2022-09-12	12:08:28	5.41481	987.292	9
2022-09-12	12:08:29	5.00853	992.3	9
2022-09-12	12:08:30	1.18406	993.484	9
2022-09-12	12:08:31	1.11245	994.597	9
2022-09-12	12:08:32	6.56891	1001.17	9
2022-09-12	12:08:33	1.56825	1002.73	9
2022-09-12	12:08:34	0.676455	1003.41	9
2022-09-12	12:08:35	1.28568	1004.7	9
2022-09-12	12:08:36	4.96591	1009.66	9
2022-09-12	12:08:37	7.37811	1017.04	9
2022-09-12	12:08:38	8.62514	1025.67	9
2022-09-12	12:08:39	3.44581	1029.11	9
2022-09-12	12:08:40	6.49285	1035.6	9
2022-09-12	12:08:41	8.61535	1044.22	9
2022-09-12	12:08:42	1.2631	1045.48	9
2022-09-12	12:08:43	11.0421	1056.52	9
2022-09-12	12:08:44	7.43036	1063.95	9
2022-09-12	12:08:45	9.75378	1073.71	9
2022-09-12	12:08:46	4.58731	1078.3	9
2022-09-12	12:08:47	1.28049	1079.58	9
2022-09-12	12:08:48	1.12909	1080.71	9
2022-09-12	12:08:49	4.52353	1085.23	9
2022-09-12	12:08:50	3.58997	1088.82	9
2022-09-12	12:08:51	2.88856	1091.71	9
2022-09-12	12:08:52	2.75421	1094.46	9
2022-09-12	12:08:53	2.98941	1097.45	9
2022-09-12	12:08:54	3.80576	1101.26	9
2022-09-12	12:08:55	2.57601	1103.83	9
2022-09-12	12:08:56	1.65115	1105.48	9
2022-09-12	12:08:57	3.50808	1108.99	9
2022-09-12	12:08:58	3.619	1112.61	9
2022-09-12	12:08:59	6.34531	1118.96	9
2022-09-12	12:09:00	4.37248	1123.33	9
2022-09-12	12:09:01	7.68616	1131.01	9
2022-09-12	12:09:02	5.59625	1136.61	9
2022-09-12	12:09:03	7.22085	1143.83	9
2022-09-12	12:09:04	6.71626	1150.55	9
2022-09-12	12:09:05	5.39132	1155.94	9
2022-09-12	12:09:06	6.38838	1162.33	9
2022-09-12	12:09:07	4.95834	1167.29	9
2022-09-12	12:09:08	4.91555	1172.2	9
2022-09-12	12:09:09	7.6045	1179.81	9
2022-09-12	12:09:10	10.3788	1190.19	9
2022-09-12	12:09:11	4.30964	1194.49	9
2022-09-12	12:09:12	6.27547	1200.77	9
2022-09-12	12:09:13	8.72804	1209.5	9
2022-09-12	12:09:14	5.51629	1215.01	9
2022-09-12	12:09:15	6.74451	1221.76	9
2022-09-12	12:09:16	7.92436	1229.68	9
2022-09-12	12:09:17	6.62997	1236.31	9
2022-09-12	12:09:18	0.919239	1237.23	9
2022-09-12	12:09:19	0.307168	1237.54	9
2022-09-12	12:09:19	0.710562	1238.25	9

## Sheet: Sunny_prong_2022912120359 ( (3)
Date	Time	Lbs	Newtons	Averaged Newtons	Total force x time	Total Time Steps Force >13.345		**GoPro Fitting: 1153
2022-09-12	12:04:19	0.513448	2.28392	2.25208
2022-09-12	12:04:19	0.682608	3.03638	2.25208	2.25208
2022-09-12	12:04:19	0.322812	1.43593	2.25208	4.50415
2022-09-12	12:04:20	0.829326	3.68901	3.73298	8.23714	FALSE	#REF!			Total force x time	2293
2022-09-12	12:04:20	1.69457	7.53779	3.73298	11.9701	FALSE	#REF!			Total Time Steps Force >3	43
2022-09-12	12:04:20	0.459453	2.04374	3.73298	15.7031	FALSE	#REF!
2022-09-12	12:04:20	0.373499	1.6614	3.73298	19.4361	FALSE	#REF!
2022-09-12	12:04:21	0.288512	1.28336	1.04618	20.4823	FALSE	#REF!
2022-09-12	12:04:21	0.318181	1.41533	1.04618	21.5284	FALSE	#REF!
2022-09-12	12:04:21	0.125407	0.557835	1.04618	22.5746	FALSE	#REF!
2022-09-12	12:04:21	0.208664	0.928179	1.04618	23.6208	FALSE	#REF!
2022-09-12	12:04:22	0.281743	1.25325	1.43254	25.0533	FALSE	#REF!
2022-09-12	12:04:22	0.204644	0.910297	1.43254	26.4859	FALSE	#REF!
2022-09-12	12:04:22	0.502863	2.23684	1.43254	27.9184	FALSE	#REF!
2022-09-12	12:04:22	0.298944	1.32976	1.43254	29.3509	FALSE	#REF!
2022-09-12	12:04:23	0.285	1.26774	1.04378	30.3947	FALSE	#REF!
2022-09-12	12:04:23	0.171412	0.762475	1.04378	31.4385	FALSE	#REF!
2022-09-12	12:04:23	0.247545	1.10113	1.04378	32.4823	FALSE	#REF!
2022-09-12	12:04:24	0.258028	1.14776	0.296095	32.7784	FALSE	#REF!
2022-09-12	12:04:24	0.0707508	0.314714	0.296095	33.0745	FALSE	#REF!
2022-09-12	12:04:24	0.0432699	0.192473	0.296095	33.3706	FALSE	#REF!
2022-09-12	12:04:24	-0.105788	-0.470566	0.296095	33.6667	FALSE	#REF!
2022-09-12	12:04:25	-0.0650761	-0.289472	0.215054	33.8817	FALSE	#REF!
2022-09-12	12:04:25	-0.0999361	-0.444536	0.215054	34.0968	FALSE	#REF!
2022-09-12	12:04:25	0.197926	0.880414	0.215054	34.3118	FALSE	#REF!
2022-09-12	12:04:25	0.160471	0.713807	0.215054	34.5269	FALSE	#REF!
2022-09-12	12:04:26	0.263066	1.17017	1.26208	35.789	FALSE	#REF!
2022-09-12	12:04:26	0.250344	1.11358	1.26208	37.051	FALSE	#REF!
2022-09-12	12:04:26	0.149428	0.664686	1.26208	38.3131	FALSE	#REF!
2022-09-12	12:04:26	0.472074	2.09988	1.26208	39.5752	FALSE	#REF!
2022-09-12	12:04:27	0.179708	0.799377	1.70064	41.2758	FALSE	#REF!
2022-09-12	12:04:27	0.658639	2.92976	1.70064	42.9765	FALSE	#REF!
2022-09-12	12:04:27	0.308613	1.37277	1.70064	44.6771	FALSE	#REF!
2022-09-12	12:04:28	0.35645	1.58556	1.34878	46.0259	FALSE	#REF!
2022-09-12	12:04:28	0.25986	1.15591	1.34878	47.3746	FALSE	#REF!
2022-09-12	12:04:28	0.218791	0.973226	1.34878	48.7234	FALSE	#REF!
2022-09-12	12:04:28	0.377774	1.68041	1.34878	50.0722	FALSE	#REF!
2022-09-12	12:04:29	0.12271	0.545839	1.94034	52.0125	FALSE	#REF!
2022-09-12	12:04:29	0.396298	1.76281	1.94034	53.9529	FALSE	#REF!
2022-09-12	12:04:29	0.565356	2.51482	1.94034	55.8932	FALSE	#REF!
2022-09-12	12:04:29	0.660471	2.93791	1.94034	57.8336	FALSE	#REF!
2022-09-12	12:04:30	0.310598	1.3816	4.86008	62.6937	FALSE	#REF!
2022-09-12	12:04:30	0.571565	2.54244	4.86008	67.5537	FALSE	#REF!
2022-09-12	12:04:30	1.22307	5.44046	4.86008	72.4138	FALSE	#REF!
2022-09-12	12:04:30	2.26515	10.0758	4.86008	77.2739	FALSE	#REF!
2022-09-12	12:04:31	0.699555	3.11176	2.16451	79.4384	FALSE	#REF!
2022-09-12	12:04:31	0.329835	1.46717	2.16451	81.6029	FALSE	#REF!
2022-09-12	12:04:31	0.587799	2.61465	2.16451	83.7674	FALSE	#REF!
2022-09-12	12:04:31	0.329224	1.46445	2.16451	85.932	FALSE	#REF!
2022-09-12	12:04:32	0.579504	2.57775	3.91733	89.8493	FALSE	#REF!
2022-09-12	12:04:32	0.436654	1.94232	3.91733	93.7666	FALSE	#REF!
2022-09-12	12:04:32	1.62581	7.23193	3.91733	97.684	FALSE	#REF!
2022-09-12	12:04:33	0.349529	1.55477	1.17747	98.8614	FALSE	#REF!
2022-09-12	12:04:33	0.247443	1.10068	1.17747	100.039	FALSE	#REF!
2022-09-12	12:04:33	0.3507	1.55998	1.17747	101.216	FALSE	#REF!
2022-09-12	12:04:33	0.111158	0.494453	1.17747	102.394	FALSE	#REF!
2022-09-12	12:04:34	0.34673	1.54232	0.956306	103.35	FALSE	#REF!
2022-09-12	12:04:34	0.170547	0.758627	0.956306	104.306	FALSE	#REF!
2022-09-12	12:04:34	0.193448	0.860495	0.956306	105.263	FALSE	#REF!
2022-09-12	12:04:34	0.149224	0.663778	0.956306	106.219	FALSE	#REF!
2022-09-12	12:04:35	0.22897	1.0185	2.17345	108.393	FALSE	#REF!
2022-09-12	12:04:35	0.499402	2.22144	2.17345	110.566	FALSE	#REF!
2022-09-12	12:04:35	0.818486	3.64079	2.17345	112.739	FALSE	#REF!
2022-09-12	12:04:35	0.407596	1.81307	2.17345	114.913	FALSE	#REF!
2022-09-12	12:04:36	0.202099	0.898977	1.22103	116.134	FALSE	#REF!
2022-09-12	12:04:36	0.356858	1.58738	1.22103	117.355	FALSE	#REF!
2022-09-12	12:04:36	0.264542	1.17674	1.22103	118.576	FALSE	#REF!
2022-09-12	12:04:37	0.17869	0.794849	1.47447	120.05	FALSE	#REF!
2022-09-12	12:04:37	0.315942	1.40537	1.47447	121.525	FALSE	#REF!
2022-09-12	12:04:37	0.495585	2.20446	1.47447	122.999	FALSE	#REF!
2022-09-12	12:04:37	0.335687	1.4932	1.47447	124.474	FALSE	#REF!
2022-09-12	12:04:38	0.49355	2.19541	1.25433	125.728	FALSE	#REF!
2022-09-12	12:04:38	0.270802	1.20458	1.25433	126.982	FALSE	#REF!
2022-09-12	12:04:38	0.271311	1.20685	1.25433	128.237	FALSE	#REF!
2022-09-12	12:04:38	0.0922776	0.410469	1.25433	129.491	FALSE	#REF!
2022-09-12	12:04:39	0.290293	1.29128	1.01935	130.511	FALSE	#REF!
2022-09-12	12:04:39	0.133397	0.593377	1.01935	131.53	FALSE	#REF!
2022-09-12	12:04:39	0.290598	1.29264	1.01935	132.549	FALSE	#REF!
2022-09-12	12:04:39	0.202354	0.900111	1.01935	133.569	FALSE	#REF!
2022-09-12	12:04:40	0.159911	0.711316	0.61292	134.181	FALSE	#REF!
2022-09-12	12:04:40	0.167697	0.74595	0.61292	134.794	FALSE	#REF!
2022-09-12	12:04:40	0.0857635	0.381493	0.61292	135.407	FALSE	#REF!
2022-09-12	12:04:41	0.269377	1.19824	2.3915	137.799	FALSE	#REF!
2022-09-12	12:04:41	0.203677	0.905996	2.3915	140.19	FALSE	#REF!
2022-09-12	12:04:41	0.932481	4.14786	2.3915	142.582	FALSE	#REF!
2022-09-12	12:04:41	0.745	3.31391	2.3915	144.973	FALSE	#REF!
2022-09-12	12:04:42	1.82632	8.12384	2.649	147.622	FALSE	#REF!
2022-09-12	12:04:42	0.240776	1.07102	2.649	150.271	FALSE	#REF!
2022-09-12	12:04:42	0.135942	0.604697	2.649	152.92	FALSE	#REF!
2022-09-12	12:04:42	0.179046	0.796432	2.649	155.569	FALSE	#REF!
2022-09-12	12:04:43	-0.038613	-0.171758	1.63796	157.207	FALSE	#REF!
2022-09-12	12:04:43	0.0617941	0.274873	1.63796	158.845	FALSE	#REF!
2022-09-12	12:04:43	0.113092	0.503056	1.63796	160.483	FALSE	#REF!
2022-09-12	12:04:43	1.33665	5.94569	1.63796	162.121	FALSE	#REF!
2022-09-12	12:04:44	0.18098	0.805035	0.943649	163.065	FALSE	#REF!
2022-09-12	12:04:44	0.268562	1.19462	0.943649	164.008	FALSE	#REF!
2022-09-12	12:04:44	0.186883	0.831293	0.943649	164.952	FALSE	#REF!
2022-09-12	12:04:45	0.265204	1.17968	1.95676	166.909	FALSE	#REF!
2022-09-12	12:04:45	0.359758	1.60028	1.95676	168.866	FALSE	#REF!
2022-09-12	12:04:45	0.359911	1.60096	1.95676	170.822	FALSE	#REF!
2022-09-12	12:04:45	0.77472	3.44611	1.95676	172.779	FALSE	#REF!
2022-09-12	12:04:46	0.101845	0.453027	1.52009	174.299	FALSE	#REF!
2022-09-12	12:04:46	0.760827	3.38431	1.52009	175.819	FALSE	#REF!
2022-09-12	12:04:46	0.358944	1.59665	1.52009	177.339	FALSE	#REF!
2022-09-12	12:04:46	0.145306	0.64635	1.52009	178.859	FALSE	#REF!
2022-09-12	12:04:47	0.00703587	0.031297	0.636275	179.496	FALSE	#REF!
2022-09-12	12:04:47	0.193753	0.861852	0.636275	180.132	FALSE	#REF!
2022-09-12	12:04:47	0.134924	0.600169	0.636275	180.768	FALSE	#REF!
2022-09-12	12:04:47	0.236451	1.05178	0.636275	181.405	FALSE	#REF!
2022-09-12	12:04:48	0.07813	0.347538	0.336068	181.741	FALSE	#REF!
2022-09-12	12:04:48	0.117672	0.523429	0.336068	182.077	FALSE	#REF!
2022-09-12	12:04:48	0.0308527	0.137239	0.336068	182.413	FALSE	#REF!
2022-09-12	12:04:49	-0.12701	-0.564966	-0.81188	182.413	FALSE	#REF!
2022-09-12	12:04:49	-0.198002	-0.880752	-0.81188	182.413	FALSE	#REF!
2022-09-12	12:04:49	-0.218562	-0.972207	-0.81188	182.413	FALSE	#REF!
2022-09-12	12:04:49	-0.186501	-0.829594	-0.81188	182.413	FALSE	#REF!
2022-09-12	12:04:50	-0.179071	-0.796544	-0.215788	182.413	FALSE	#REF!
2022-09-12	12:04:50	-0.00634836	-0.0282388	-0.215788	182.413	FALSE	#REF!
2022-09-12	12:04:50	-0.0718954	-0.319805	-0.215788	182.413	FALSE	#REF!
2022-09-12	12:04:50	0.0632699	0.281437	-0.215788	182.413	FALSE	#REF!
2022-09-12	12:04:51	-0.0285875	-0.127163	0.732935	183.146	FALSE	#REF!
2022-09-12	12:04:51	0.271361	1.20707	0.732935	183.879	FALSE	#REF!
2022-09-12	12:04:51	0.212634	0.945839	0.732935	184.612	FALSE	#REF!
2022-09-12	12:04:51	0.203677	0.905996	0.732935	185.345	FALSE	#REF!
2022-09-12	12:04:52	0.336247	1.49569	1.42484	186.769	FALSE	#REF!
2022-09-12	12:04:52	0.202252	0.899657	1.42484	188.194	FALSE	#REF!
2022-09-12	12:04:52	0.422456	1.87917	1.42484	189.619	FALSE	#REF!
2022-09-12	12:04:53	0.147138	0.654499	1.26581	190.885	FALSE	#REF!
2022-09-12	12:04:53	0.435484	1.93712	1.26581	192.151	FALSE	#REF!
2022-09-12	12:04:53	0.196349	0.8734	1.26581	193.416	FALSE	#REF!
2022-09-12	12:04:53	0.3593	1.59824	1.26581	194.682	FALSE	#REF!
2022-09-12	12:04:54	0.323982	1.44114	16.4419	211.124	FALSE	#REF!
2022-09-12	12:04:54	6.07792	27.0358	16.4419	227.566	1	#REF!
2022-09-12	12:04:54	7.54011	33.5399	16.4419	244.008	1	#REF!
2022-09-12	12:04:54	0.843219	3.75081	16.4419	260.45	FALSE	#REF!
2022-09-12	12:04:55	0.32383	1.44046	2.95715	263.407	FALSE	#REF!
2022-09-12	12:04:55	0.432786	1.92512	2.95715	266.364	FALSE	#REF!
2022-09-12	12:04:55	0.725814	3.22857	2.95715	269.321	FALSE	#REF!
2022-09-12	12:04:55	1.17676	5.23446	2.95715	272.279	FALSE	#REF!
2022-09-12	12:04:56	0.739911	3.29127	4.84697	277.126	FALSE	#REF!
2022-09-12	12:04:56	1.21991	5.4264	4.84697	281.973	FALSE	#REF!
2022-09-12	12:04:56	1.30912	5.82323	4.84697	286.819	FALSE	#REF!
2022-09-12	12:04:57	0.625051	2.78035	1.87447	288.694	FALSE	#REF!
2022-09-12	12:04:57	0.376094	1.67294	1.87447	290.568	FALSE	#REF!
2022-09-12	12:04:57	0.321031	1.42801	1.87447	292.443	FALSE	#REF!
2022-09-12	12:04:57	0.363423	1.61658	1.87447	294.317	FALSE	#REF!
2022-09-12	12:04:58	0.495483	2.20401	3.58075	297.898	FALSE	#REF!
2022-09-12	12:04:58	0.716196	3.18578	3.58075	301.479	FALSE	#REF!
2022-09-12	12:04:58	0.953753	4.24248	3.58075	305.06	FALSE	#REF!
2022-09-12	12:04:58	1.05452	4.69072	3.58075	308.64	FALSE	#REF!
2022-09-12	12:04:59	0.94617	4.20875	4.74961	313.39	FALSE	#REF!
2022-09-12	12:04:59	1.12663	5.01148	4.74961	318.14	FALSE	#REF!
2022-09-12	12:04:59	1.10505	4.91548	4.74961	322.889	FALSE	#REF!
2022-09-12	12:04:59	1.09319	4.86273	4.74961	327.639	FALSE	#REF!
2022-09-12	12:05:00	0.489478	2.1773	1.77147	329.41	FALSE	#REF!
2022-09-12	12:05:00	0.361183	1.60661	1.77147	331.182	FALSE	#REF!
2022-09-12	12:05:00	0.362659	1.61318	1.77147	332.953	FALSE	#REF!
2022-09-12	12:05:00	0.379657	1.68879	1.77147	334.725	FALSE	#REF!
2022-09-12	12:05:01	0.347799	1.54708	1.39088	336.116	FALSE	#REF!
2022-09-12	12:05:01	0.192786	0.857551	1.39088	337.506	FALSE	#REF!
2022-09-12	12:05:01	0.397468	1.76802	1.39088	338.897	FALSE	#REF!
2022-09-12	12:05:02	0.287443	1.2786	2.03825	340.936	FALSE	#REF!
2022-09-12	12:05:02	0.420013	1.8683	2.03825	342.974	FALSE	#REF!
2022-09-12	12:05:02	0.445611	1.98217	2.03825	345.012	FALSE	#REF!
2022-09-12	12:05:02	0.679809	3.02393	2.03825	347.05	FALSE	#REF!
2022-09-12	12:05:03	0.668003	2.97141	2.82291	349.873	FALSE	#REF!
2022-09-12	12:05:03	0.693295	3.08391	2.82291	352.696	FALSE	#REF!
2022-09-12	12:05:03	0.631463	2.80887	2.82291	355.519	FALSE	#REF!
2022-09-12	12:05:03	0.545712	2.42744	2.82291	358.342	FALSE	#REF!
2022-09-12	12:05:04	0.567137	2.52274	2.21821	360.56	FALSE	#REF!
2022-09-12	12:05:04	0.574211	2.55421	2.21821	362.778	FALSE	#REF!
2022-09-12	12:05:04	0.558842	2.48584	2.21821	364.997	FALSE	#REF!
2022-09-12	12:05:04	0.294517	1.31007	2.21821	367.215	FALSE	#REF!
2022-09-12	12:05:05	0.348104	1.54844	1.50686	368.722	FALSE	#REF!
2022-09-12	12:05:05	0.305204	1.35761	1.50686	370.229	FALSE	#REF!
2022-09-12	12:05:05	0.362965	1.61454	1.50686	371.735	FALSE	#REF!
2022-09-12	12:05:06	1.04622	4.6538	9.05656	380.792	FALSE	#REF!
2022-09-12	12:05:06	3.07925	13.6971	9.05656	389.849	1	#REF!
2022-09-12	12:05:06	3.02851	13.4714	9.05656	398.905	1	#REF!
2022-09-12	12:05:06	0.990038	4.40389	9.05656	407.962	FALSE	#REF!
2022-09-12	12:05:07	0.538435	2.39507	2.81459	410.776	FALSE	#REF!
2022-09-12	12:05:07	0.297926	1.32523	2.81459	413.591	FALSE	#REF!
2022-09-12	12:05:07	0.393041	1.74832	2.81459	416.405	FALSE	#REF!
2022-09-12	12:05:07	1.30159	5.78973	2.81459	419.22	FALSE	#REF!
2022-09-12	12:05:08	0.928817	4.13156	5.12664	424.347	FALSE	#REF!
2022-09-12	12:05:08	1.30413	5.80103	5.12664	429.473	FALSE	#REF!
2022-09-12	12:05:08	1.15289	5.12829	5.12664	434.6	FALSE	#REF!
2022-09-12	12:05:08	1.22424	5.44566	5.12664	439.727	FALSE	#REF!
2022-09-12	12:05:09	1.70943	7.60389	8.65974	448.386	FALSE	#REF!
2022-09-12	12:05:09	2.31884	10.3147	8.65974	457.046	FALSE	#REF!
2022-09-12	12:05:09	1.81212	8.06067	8.65974	465.706	FALSE	#REF!
2022-09-12	12:05:10	1.85553	8.25377	12.2006	477.906	FALSE	#REF!
2022-09-12	12:05:10	4.51273	20.0735	12.2006	490.107	1	#REF!
2022-09-12	12:05:10	3.0424	13.5332	12.2006	502.308	1	#REF!
2022-09-12	12:05:10	1.56062	6.94195	12.2006	514.508	FALSE	#REF!
2022-09-12	12:05:11	0.456807	2.03197	2.14895	516.657	FALSE	#REF!
2022-09-12	12:05:11	0.361743	1.60911	2.14895	518.806	FALSE	#REF!
2022-09-12	12:05:11	0.276603	1.23039	2.14895	520.955	FALSE	#REF!
2022-09-12	12:05:11	0.837265	3.72432	2.14895	523.104	FALSE	#REF!
2022-09-12	12:05:12	2.11039	9.38744	10.8536	533.958	FALSE	#REF!
2022-09-12	12:05:12	1.92724	8.57275	10.8536	544.811	FALSE	#REF!
2022-09-12	12:05:12	2.13971	9.51786	10.8536	555.665	FALSE	#REF!
2022-09-12	12:05:12	3.58261	15.9362	10.8536	566.518	1	#REF!
2022-09-12	12:05:13	1.42668	6.34616	3.67912	570.197	FALSE	#REF!
2022-09-12	12:05:13	0.711158	3.16337	3.67912	573.876	FALSE	#REF!
2022-09-12	12:05:13	0.343473	1.52784	3.67912	577.556	FALSE	#REF!
2022-09-12	12:05:14	0.530089	2.35794	1.78924	579.345	FALSE	#REF!
2022-09-12	12:05:14	0.343931	1.52987	1.78924	581.134	FALSE	#REF!
2022-09-12	12:05:14	0.311361	1.385	1.78924	582.923	FALSE	#REF!
2022-09-12	12:05:14	0.423575	1.88415	1.78924	584.713	FALSE	#REF!
2022-09-12	12:05:15	1.18714	5.28064	6.11871	590.831	FALSE	#REF!
2022-09-12	12:05:15	1.69889	7.557	6.11871	596.95	FALSE	#REF!
2022-09-12	12:05:15	1.25309	5.57399	6.11871	603.069	FALSE	#REF!
2022-09-12	12:05:15	1.36307	6.06321	6.11871	609.187	FALSE	#REF!
2022-09-12	12:05:16	1.01177	4.50056	3.14809	612.335	FALSE	#REF!
2022-09-12	12:05:16	0.729224	3.24373	3.14809	615.484	FALSE	#REF!
2022-09-12	12:05:16	0.542812	2.41454	3.14809	618.632	FALSE	#REF!
2022-09-12	12:05:16	0.547086	2.43355	3.14809	621.78	FALSE	#REF!
2022-09-12	12:05:17	0.469886	2.09015	1.86815	623.648	FALSE	#REF!
2022-09-12	12:05:17	0.361132	1.60639	1.86815	625.516	FALSE	#REF!
2022-09-12	12:05:17	0.428919	1.90792	1.86815	627.384	FALSE	#REF!
2022-09-12	12:05:18	0.240522	1.06989	1.3292	628.713	FALSE	#REF!
2022-09-12	12:05:18	0.322456	1.43435	1.3292	630.043	FALSE	#REF!
2022-09-12	12:05:18	0.16215	0.721276	1.3292	631.372	FALSE	#REF!
2022-09-12	12:05:18	0.47014	2.09128	1.3292	632.701	FALSE	#REF!
2022-09-12	12:05:19	0.180522	0.802998	1.32377	634.025	FALSE	#REF!
2022-09-12	12:05:19	0.379148	1.68653	1.32377	635.348	FALSE	#REF!
2022-09-12	12:05:19	0.22556	1.00334	1.32377	636.672	FALSE	#REF!
2022-09-12	12:05:19	0.405153	1.8022	1.32377	637.996	FALSE	#REF!
2022-09-12	12:05:20	0.169377	0.753423	1.60152	639.598	FALSE	#REF!
2022-09-12	12:05:20	0.37243	1.65664	1.60152	641.199	FALSE	#REF!
2022-09-12	12:05:20	0.351565	1.56383	1.60152	642.801	FALSE	#REF!
2022-09-12	12:05:20	0.546781	2.43219	1.60152	644.402	FALSE	#REF!
2022-09-12	12:05:21	0.432888	1.92557	2.25049	646.653	FALSE	#REF!
2022-09-12	12:05:21	0.421794	1.87622	2.25049	648.903	FALSE	#REF!
2022-09-12	12:05:21	0.663117	2.94968	2.25049	651.154	FALSE	#REF!
2022-09-12	12:05:22	1.03513	4.60447	5.19494	656.349	FALSE	#REF!
2022-09-12	12:05:22	0.860369	3.82709	5.19494	661.543	FALSE	#REF!
2022-09-12	12:05:22	1.15039	5.11716	5.19494	666.738	FALSE	#REF!
2022-09-12	12:05:22	1.62561	7.23104	5.19494	671.933	FALSE	#REF!
2022-09-12	12:05:23	0.882303	3.92466	4.52279	676.456	FALSE	#REF!
2022-09-12	12:05:23	1.13452	5.04657	4.52279	680.979	FALSE	#REF!
2022-09-12	12:05:23	1.01721	4.52475	4.52279	685.502	FALSE	#REF!
2022-09-12	12:05:23	1.03304	4.59517	4.52279	690.025	FALSE	#REF!
2022-09-12	12:05:24	1.06464	4.73573	2.77831	692.803	FALSE	#REF!
2022-09-12	12:05:24	0.695534	3.09387	2.77831	695.581	FALSE	#REF!
2022-09-12	12:05:24	0.424491	1.88822	2.77831	698.359	FALSE	#REF!
2022-09-12	12:05:24	0.313702	1.39541	2.77831	701.138	FALSE	#REF!
2022-09-12	12:05:25	0.39584	1.76078	1.62223	702.76	FALSE	#REF!
2022-09-12	12:05:25	0.407646	1.81329	1.62223	704.382	FALSE	#REF!
2022-09-12	12:05:25	0.290598	1.29264	1.62223	706.004	FALSE	#REF!
2022-09-12	12:05:26	0.352074	1.5661	1.29275	707.297	FALSE	#REF!
2022-09-12	12:05:26	0.144237	0.641595	1.29275	708.59	FALSE	#REF!
2022-09-12	12:05:26	0.472532	2.10192	1.29275	709.883	FALSE	#REF!
2022-09-12	12:05:26	0.193651	0.861398	1.29275	711.175	FALSE	#REF!
2022-09-12	12:05:27	0.42556	1.89298	1.15387	712.329	FALSE	#REF!
2022-09-12	12:05:27	0.249275	1.10883	1.15387	713.483	FALSE	#REF!
2022-09-12	12:05:27	0.167901	0.746857	1.15387	714.637	FALSE	#REF!
2022-09-12	12:05:27	0.194873	0.866834	1.15387	715.791	FALSE	#REF!
2022-09-12	12:05:28	0.142659	0.634576	0.88698	716.678	FALSE	#REF!
2022-09-12	12:05:28	0.345713	1.5378	0.88698	717.565	FALSE	#REF!
2022-09-12	12:05:28	0.0342114	0.152179	0.88698	718.452	FALSE	#REF!
2022-09-12	12:05:28	0.275025	1.22337	0.88698	719.339	FALSE	#REF!
2022-09-12	12:05:29	0.0855091	0.380362	2.2391	721.578	FALSE	#REF!
2022-09-12	12:05:29	0.487545	2.1687	2.2391	723.817	FALSE	#REF!
2022-09-12	12:05:29	0.937061	4.16823	2.2391	726.056	FALSE	#REF!
2022-09-12	12:05:30	0.299453	1.33203	2.15755	728.214	FALSE	#REF!
2022-09-12	12:05:30	0.333295	1.48256	2.15755	730.371	FALSE	#REF!
2022-09-12	12:05:30	0.497316	2.21216	2.15755	732.529	FALSE	#REF!
2022-09-12	12:05:30	0.810089	3.60344	2.15755	734.686	FALSE	#REF!
2022-09-12	12:05:31	2.1993	9.78293	7.53171	742.218	FALSE	#REF!
2022-09-12	12:05:31	2.11874	9.42458	7.53171	749.75	FALSE	#REF!
2022-09-12	12:05:31	1.06164	4.72239	7.53171	757.281	FALSE	#REF!
2022-09-12	12:05:31	1.39314	6.19697	7.53171	764.813	FALSE	#REF!
2022-09-12	12:05:32	1.58001	7.0282	4.24792	769.061	FALSE	#REF!
2022-09-12	12:05:32	0.976501	4.34367	4.24792	773.309	FALSE	#REF!
2022-09-12	12:05:32	0.466985	2.07724	4.24792	777.557	FALSE	#REF!
2022-09-12	12:05:32	0.7964	3.54255	4.24792	781.805	FALSE	#REF!
2022-09-12	12:05:33	0.727952	3.23808	3.32357	785.128	FALSE	#REF!
2022-09-12	12:05:33	0.661183	2.94107	3.32357	788.452	FALSE	#REF!
2022-09-12	12:05:33	0.852379	3.79155	3.32357	791.776	FALSE	#REF!
2022-09-12	12:05:34	0.282405	1.25619	1.46994	793.246	FALSE	#REF!
2022-09-12	12:05:34	0.462456	2.0571	1.46994	794.715	FALSE	#REF!
2022-09-12	12:05:34	0.242303	1.07781	1.46994	796.185	FALSE	#REF!
2022-09-12	12:05:34	0.334669	1.48867	1.46994	797.655	FALSE	#REF!
2022-09-12	12:05:35	0.507748	2.25856	3.21074	800.866	FALSE	#REF!
2022-09-12	12:05:35	0.902964	4.01656	3.21074	804.077	FALSE	#REF!
2022-09-12	12:05:35	0.992226	4.41362	3.21074	807.288	FALSE	#REF!
2022-09-12	12:05:35	0.484288	2.15421	3.21074	810.498	FALSE	#REF!
2022-09-12	12:05:36	0.652939	2.9044	2.08047	812.579	FALSE	#REF!
2022-09-12	12:05:36	0.476909	2.12139	2.08047	814.659	FALSE	#REF!
2022-09-12	12:05:36	0.478995	2.13067	2.08047	816.74	FALSE	#REF!
2022-09-12	12:05:36	0.261998	1.16542	2.08047	818.82	FALSE	#REF!
2022-09-12	12:05:37	0.670852	2.98408	3.67316	822.493	FALSE	#REF!
2022-09-12	12:05:37	0.89299	3.9722	3.67316	826.166	FALSE	#REF!
2022-09-12	12:05:37	0.913448	4.0632	3.67316	829.84	FALSE	#REF!
2022-09-12	12:05:38	0.757468	3.36937	5.73326	835.573	FALSE	#REF!
2022-09-12	12:05:38	2.29508	10.209	5.73326	841.306	FALSE	#REF!
2022-09-12	12:05:38	0.916908	4.07859	5.73326	847.039	FALSE	#REF!
2022-09-12	12:05:38	1.18612	5.2761	5.73326	852.773	FALSE	#REF!
2022-09-12	12:05:39	0.649071	2.8872	8.78378	861.556	FALSE	#REF!
2022-09-12	12:05:39	1.78149	7.92442	8.78378	870.34	FALSE	#REF!
2022-09-12	12:05:39	1.90083	8.45527	8.78378	879.124	FALSE	#REF!
2022-09-12	12:05:39	3.56734	15.8682	8.78378	887.908	1	#REF!
2022-09-12	12:05:40	2.59172	11.5285	9.70517	897.613	FALSE	#REF!
2022-09-12	12:05:40	1.4048	6.24883	9.70517	907.318	FALSE	#REF!
2022-09-12	12:05:40	2.56576	11.413	9.70517	917.023	FALSE	#REF!
2022-09-12	12:05:40	2.165	9.63035	9.70517	926.729	FALSE	#REF!
2022-09-12	12:05:41	3.95813	17.6066	6.97643	933.705	1	#REF!
2022-09-12	12:05:41	0.793244	3.52851	6.97643	940.681	FALSE	#REF!
2022-09-12	12:05:41	0.925204	4.11549	6.97643	947.658	FALSE	#REF!
2022-09-12	12:05:41	0.596908	2.65517	6.97643	954.634	FALSE	#REF!
2022-09-12	12:05:42	0.376247	1.67362	5.34619	959.98	FALSE	#REF!
2022-09-12	12:05:42	0.718944	3.19801	5.34619	965.327	FALSE	#REF!
2022-09-12	12:05:42	2.51044	11.1669	5.34619	970.673	FALSE	#REF!
2022-09-12	12:05:43	4.86342	21.6335	11.2428	981.916	1	#REF!
2022-09-12	12:05:43	3.71782	16.5376	11.2428	993.158	1	#REF!
2022-09-12	12:05:43	1.24261	5.52738	11.2428	1004.4	FALSE	#REF!
2022-09-12	12:05:43	0.286171	1.27295	11.2428	1015.64	FALSE	#REF!
2022-09-12	12:05:44	0.441387	1.96338	2.79512	1018.44	FALSE	#REF!
2022-09-12	12:05:44	0.41528	1.84725	2.79512	1021.23	FALSE	#REF!
2022-09-12	12:05:44	0.603117	2.68279	2.79512	1024.03	FALSE	#REF!
2022-09-12	12:05:44	1.0537	4.68707	2.79512	1026.82	FALSE	#REF!
2022-09-12	12:05:45	1.05314	4.68458	6.47417	1033.3	FALSE	#REF!
2022-09-12	12:05:45	1.57167	6.9911	6.47417	1039.77	FALSE	#REF!
2022-09-12	12:05:45	1.96897	8.75837	6.47417	1046.25	FALSE	#REF!
2022-09-12	12:05:45	1.22805	5.46261	6.47417	1052.72	FALSE	#REF!
2022-09-12	12:05:46	0.518333	2.30565	1.72652	1054.45	FALSE	#REF!
2022-09-12	12:05:46	0.359453	1.59892	1.72652	1056.17	FALSE	#REF!
2022-09-12	12:05:46	0.286628	1.27498	1.72652	1057.9	FALSE	#REF!
2022-09-12	12:05:47	1.08622	4.83172	2.35539	1060.26	FALSE	#REF!
2022-09-12	12:05:47	0.434873	1.9344	2.35539	1062.61	FALSE	#REF!
2022-09-12	12:05:47	0.400929	1.78341	2.35539	1064.97	FALSE	#REF!
2022-09-12	12:05:47	0.196043	0.872038	2.35539	1067.32	FALSE	#REF!
2022-09-12	12:05:48	0.259555	1.15455	1.2035	1068.53	FALSE	#REF!
2022-09-12	12:05:48	0.19299	0.858458	1.2035	1069.73	FALSE	#REF!
2022-09-12	12:05:48	0.260573	1.15908	1.2035	1070.93	FALSE	#REF!
2022-09-12	12:05:48	0.369122	1.64193	1.2035	1072.14	FALSE	#REF!
2022-09-12	12:05:49	0.48556	2.15987	1.38822	1073.52	FALSE	#REF!
2022-09-12	12:05:49	0.279046	1.24125	1.38822	1074.91	FALSE	#REF!
2022-09-12	12:05:49	0.303982	1.35217	1.38822	1076.3	FALSE	#REF!
2022-09-12	12:05:49	0.179758	0.7996	1.38822	1077.69	FALSE	#REF!
2022-09-12	12:05:50	1.00907	4.48855	4.48968	1082.18	FALSE	#REF!
2022-09-12	12:05:50	1.62948	7.24825	4.48968	1086.67	FALSE	#REF!
2022-09-12	12:05:50	0.389428	1.73225	4.48968	1091.16	FALSE	#REF!
2022-09-12	12:05:51	0.5764	2.56394	4.12766	1095.29	FALSE	#REF!
2022-09-12	12:05:51	0.656908	2.92206	4.12766	1099.41	FALSE	#REF!
2022-09-12	12:05:51	1.06271	4.72715	4.12766	1103.54	FALSE	#REF!
2022-09-12	12:05:51	1.41574	6.29749	4.12766	1107.67	FALSE	#REF!
2022-09-12	12:05:52	0.620929	2.76202	4.35012	1112.02	FALSE	#REF!
2022-09-12	12:05:52	2.22291	9.88795	4.35012	1116.37	FALSE	#REF!
2022-09-12	12:05:52	0.434059	1.93078	4.35012	1120.72	FALSE	#REF!
2022-09-12	12:05:52	0.633906	2.81974	4.35012	1125.07	FALSE	#REF!
2022-09-12	12:05:53	0.621641	2.76518	2.73621	1127.81	FALSE	#REF!
2022-09-12	12:05:53	1.00251	4.45936	2.73621	1130.54	FALSE	#REF!
2022-09-12	12:05:53	0.4993	2.22099	2.73621	1133.28	FALSE	#REF!
2022-09-12	12:05:53	0.337061	1.49931	2.73621	1136.01	FALSE	#REF!
2022-09-12	12:05:54	0.399249	1.77594	1.26525	1137.28	FALSE	#REF!
2022-09-12	12:05:54	0.145204	0.645896	1.26525	1138.54	FALSE	#REF!
2022-09-12	12:05:54	0.308868	1.37391	1.26525	1139.81	FALSE	#REF!
2022-09-12	12:05:55	0.35411	1.57515	0.417657	1140.23	FALSE	#REF!
2022-09-12	12:05:55	0.0930409	0.413865	0.417657	1140.65	FALSE	#REF!
2022-09-12	12:05:55	-0.0689946	-0.306902	0.417657	1141.06	FALSE	#REF!
2022-09-12	12:05:55	-0.00258246	-0.0114873	0.417657	1141.48	FALSE	#REF!
2022-09-12	12:05:56	0.0833717	0.370854	0.324674	1141.81	FALSE	#REF!
2022-09-12	12:05:56	0.0843895	0.375381	0.324674	1142.13	FALSE	#REF!
2022-09-12	12:05:56	0.0359417	0.159876	0.324674	1142.45	FALSE	#REF!
2022-09-12	12:05:56	0.0882572	0.392586	0.324674	1142.78	FALSE	#REF!
2022-09-12	12:05:57	0.0984353	0.43786	0.275892	1143.06	FALSE	#REF!
2022-09-12	12:05:57	-0.0330659	-0.147084	0.275892	1143.33	FALSE	#REF!
2022-09-12	12:05:57	0.188563	0.838766	0.275892	1143.61	FALSE	#REF!
2022-09-12	12:05:57	-0.00583945	-0.025975	0.275892	1143.88	FALSE	#REF!
2022-09-12	12:05:58	0.0873412	0.388511	0.19202	1144.08	FALSE	#REF!
2022-09-12	12:05:58	-0.0846689	-0.376624	0.19202	1144.27	FALSE	#REF!
2022-09-12	12:05:58	0.126832	0.564174	0.19202	1144.46	FALSE	#REF!
2022-09-12	12:05:59	0.0531936	0.236616	0.475438	1144.93	FALSE	#REF!
2022-09-12	12:05:59	0.120776	0.537236	0.475438	1145.41	FALSE	#REF!
2022-09-12	12:05:59	0.0590969	0.262875	0.475438	1145.89	FALSE	#REF!
2022-09-12	12:05:59	0.194466	0.865024	0.475438	1146.36	FALSE	#REF!
2022-09-12	12:06:00	0.14383	0.639785	0.773795	1147.13	FALSE	#REF!
2022-09-12	12:06:00	0.209071	0.92999	0.773795	1147.91	FALSE	#REF!
2022-09-12	12:06:00	0.0782826	0.348217	0.773795	1148.68	FALSE	#REF!
2022-09-12	12:06:00	0.264644	1.17719	0.773795	1149.46	FALSE	#REF!
2022-09-12	12:06:01	0.179148	0.796886	0.996149	1150.45	FALSE	#REF!
2022-09-12	12:06:01	0.326985	1.45449	0.996149	1151.45	FALSE	#REF!
2022-09-12	12:06:01	0.103575	0.460722	0.996149	1152.44	FALSE	#REF!
2022-09-12	12:06:01	0.286069	1.27249	0.996149	1153.44	FALSE	#REF!
2022-09-12	12:06:02	0.346832	1.54278	3.34228	1156.78	FALSE	#REF!
2022-09-12	12:06:02	1.12546	5.00627	3.34228	1160.13	FALSE	#REF!
2022-09-12	12:06:02	0.781845	3.4778	3.34228	1163.47	FALSE	#REF!
2022-09-12	12:06:03	1.15589	5.14163	3.92766	1167.4	FALSE	#REF!
2022-09-12	12:06:03	0.624338	2.77718	3.92766	1171.32	FALSE	#REF!
2022-09-12	12:06:03	0.843117	3.75035	3.92766	1175.25	FALSE	#REF!
2022-09-12	12:06:03	0.908562	4.04147	3.92766	1179.18	FALSE	#REF!
2022-09-12	12:06:04	1.16398	5.17762	7.88162	1187.06	FALSE	#REF!
2022-09-12	12:06:04	2.08693	9.28308	7.88162	1194.94	FALSE	#REF!
2022-09-12	12:06:04	1.54042	6.8521	7.88162	1202.82	FALSE	#REF!
2022-09-12	12:06:04	2.29614	10.2137	7.88162	1210.7	FALSE	#REF!
2022-09-12	12:06:05	1.525	6.7835	8.87574	1219.58	FALSE	#REF!
2022-09-12	12:06:05	2.57502	11.4542	8.87574	1228.46	FALSE	#REF!
2022-09-12	12:06:05	1.95696	8.70495	8.87574	1237.33	FALSE	#REF!
2022-09-12	12:06:05	1.92444	8.56029	8.87574	1246.21	FALSE	#REF!
2022-09-12	12:06:06	2.43218	10.8188	7.76137	1253.97	FALSE	#REF!
2022-09-12	12:06:06	1.21335	5.39722	7.76137	1261.73	FALSE	#REF!
2022-09-12	12:06:06	1.58897	7.06806	7.76137	1269.49	FALSE	#REF!
2022-09-12	12:06:07	1.25457	5.58058	5.80089	1275.29	FALSE	#REF!
2022-09-12	12:06:07	1.43116	6.36609	5.80089	1281.09	FALSE	#REF!
2022-09-12	12:06:07	1.44184	6.41359	5.80089	1286.89	FALSE	#REF!
2022-09-12	12:06:07	1.08882	4.84329	5.80089	1292.7	FALSE	#REF!
2022-09-12	12:06:08	2.20622	9.81371	10.2386	1302.93	FALSE	#REF!
2022-09-12	12:06:08	1.17248	5.21543	10.2386	1313.17	FALSE	#REF!
2022-09-12	12:06:08	3.39263	15.0911	10.2386	1323.41	1	#REF!
2022-09-12	12:06:08	2.43559	10.834	10.2386	1333.65	FALSE	#REF!
2022-09-12	12:06:09	1.37813	6.1302	6.30897	1339.96	FALSE	#REF!
2022-09-12	12:06:09	1.27782	5.684	6.30897	1346.27	FALSE	#REF!
2022-09-12	12:06:09	0.962862	4.283	6.30897	1352.58	FALSE	#REF!
2022-09-12	12:06:09	2.05447	9.13869	6.30897	1358.89	FALSE	#REF!
2022-09-12	12:06:10	0.466221	2.07384	2.11859	1361	FALSE	#REF!
2022-09-12	12:06:10	0.558842	2.48584	2.11859	1363.12	FALSE	#REF!
2022-09-12	12:06:10	0.403779	1.79609	2.11859	1365.24	FALSE	#REF!
2022-09-12	12:06:11	0.287545	1.27906	1.25891	1366.5	FALSE	#REF!
2022-09-12	12:06:11	0.368766	1.64034	1.25891	1367.76	FALSE	#REF!
2022-09-12	12:06:11	0.26785	1.19145	1.25891	1369.02	FALSE	#REF!
2022-09-12	12:06:11	0.207901	0.924785	1.25891	1370.28	FALSE	#REF!
2022-09-12	12:06:12	0.186374	0.829029	1.0056	1371.28	FALSE	#REF!
2022-09-12	12:06:12	0.22729	1.01103	1.0056	1372.29	FALSE	#REF!
2022-09-12	12:06:12	0.232328	1.03344	1.0056	1373.29	FALSE	#REF!
2022-09-12	12:06:12	0.258283	1.14889	1.0056	1374.3	FALSE	#REF!
2022-09-12	12:06:13	0.250445	1.11403	1.1949	1375.49	FALSE	#REF!
2022-09-12	12:06:13	0.2507	1.11516	1.1949	1376.69	FALSE	#REF!
2022-09-12	12:06:13	0.278486	1.23876	1.1949	1377.88	FALSE	#REF!
2022-09-12	12:06:13	0.294873	1.31165	1.1949	1379.08	FALSE	#REF!
2022-09-12	12:06:14	0.297774	1.32456	1.33225	1380.41	FALSE	#REF!
2022-09-12	12:06:14	0.301387	1.34063	1.33225	1381.74	FALSE	#REF!
2022-09-12	12:06:14	0.299351	1.33157	1.33225	1383.08	FALSE	#REF!
2022-09-12	12:06:15	0.295738	1.3155	1.2575	1384.33	FALSE	#REF!
2022-09-12	12:06:15	0.289835	1.28924	1.2575	1385.59	FALSE	#REF!
2022-09-12	12:06:15	0.274975	1.22314	1.2575	1386.85	FALSE	#REF!
2022-09-12	12:06:15	0.270242	1.20209	1.2575	1388.11	FALSE	#REF!
2022-09-12	12:06:16	0.269224	1.19756	1.22258	1389.33	FALSE	#REF!
2022-09-12	12:06:16	0.275483	1.2254	1.22258	1390.55	FALSE	#REF!
2022-09-12	12:06:16	0.276603	1.23039	1.22258	1391.77	FALSE	#REF!
2022-09-12	12:06:16	0.278079	1.23695	1.22258	1393	FALSE	#REF!
2022-09-12	12:06:17	0.274771	1.22224	1.23842	1394.23	FALSE	#REF!
2022-09-12	12:06:17	0.277265	1.23333	1.23842	1395.47	FALSE	#REF!
2022-09-12	12:06:17	0.281947	1.25416	1.23842	1396.71	FALSE	#REF!
2022-09-12	12:06:17	0.279657	1.24397	1.23842	1397.95	FALSE	#REF!
2022-09-12	12:06:18	0.272379	1.2116	1.27272	1399.22	FALSE	#REF!
2022-09-12	12:06:18	0.303219	1.34878	1.27272	1400.49	FALSE	#REF!
2022-09-12	12:06:18	0.282761	1.25778	1.27272	1401.77	FALSE	#REF!
2022-09-12	12:06:19	0.250242	1.11313	1.08664	1402.85	FALSE	#REF!
2022-09-12	12:06:19	0.248613	1.10588	1.08664	1403.94	FALSE	#REF!
2022-09-12	12:06:19	0.236705	1.05291	1.08664	1405.03	FALSE	#REF!
2022-09-12	12:06:19	0.24159	1.07464	1.08664	1406.11	FALSE	#REF!
2022-09-12	12:06:20	0.294822	1.31143	2.60491	1408.72	FALSE	#REF!
2022-09-12	12:06:20	0.363015	1.61476	2.60491	1411.32	FALSE	#REF!
2022-09-12	12:06:20	0.380013	1.69037	2.60491	1413.93	FALSE	#REF!
2022-09-12	12:06:20	1.30459	5.80308	2.60491	1416.53	FALSE	#REF!
2022-09-12	12:06:21	2.22281	9.8875	4.79828	1421.33	FALSE	#REF!
2022-09-12	12:06:21	1.42683	6.34683	4.79828	1426.13	FALSE	#REF!
2022-09-12	12:06:21	0.196756	0.87521	4.79828	1430.93	FALSE	#REF!
2022-09-12	12:06:21	0.46841	2.08358	4.79828	1435.73	FALSE	#REF!
2022-09-12	12:06:22	0.0854073	0.379909	1.22235	1436.95	FALSE	#REF!
2022-09-12	12:06:22	0.412176	1.83344	1.22235	1438.17	FALSE	#REF!
2022-09-12	12:06:22	0.141387	0.628918	1.22235	1439.39	FALSE	#REF!
2022-09-12	12:06:22	0.460216	2.04713	1.22235	1440.62	FALSE	#REF!
2022-09-12	12:06:23	0.335891	1.49411	1.75368	1442.37	FALSE	#REF!
2022-09-12	12:06:23	0.418181	1.86015	1.75368	1444.12	FALSE	#REF!
2022-09-12	12:06:23	0.428664	1.90678	1.75368	1445.88	FALSE	#REF!
2022-09-12	12:06:24	0.517112	2.30022	2.18324	1448.06	FALSE	#REF!
2022-09-12	12:06:24	0.430547	1.91516	2.18324	1450.24	FALSE	#REF!
2022-09-12	12:06:24	0.482659	2.14696	2.18324	1452.43	FALSE	#REF!
2022-09-12	12:06:24	0.532939	2.37062	2.18324	1454.61	FALSE	#REF!
2022-09-12	12:06:25	0.435687	1.93802	1.78817	1456.4	FALSE	#REF!
2022-09-12	12:06:25	0.370089	1.64623	1.78817	1458.19	FALSE	#REF!
2022-09-12	12:06:25	0.406425	1.80786	1.78817	1459.97	FALSE	#REF!
2022-09-12	12:06:25	0.395789	1.76055	1.78817	1461.76	FALSE	#REF!
2022-09-12	12:06:26	0.37472	1.66683	1.69563	1463.46	FALSE	#REF!
2022-09-12	12:06:26	0.381641	1.69762	1.69563	1465.15	FALSE	#REF!
2022-09-12	12:06:26	0.38444	1.71007	1.69563	1466.85	FALSE	#REF!
2022-09-12	12:06:26	0.383982	1.70803	1.69563	1468.55	FALSE	#REF!
2022-09-12	12:06:27	0.373499	1.6614	1.65038	1470.2	FALSE	#REF!
2022-09-12	12:06:27	0.372227	1.65574	1.65038	1471.85	FALSE	#REF!
2022-09-12	12:06:27	0.367341	1.63401	1.65038	1473.5	FALSE	#REF!
2022-09-12	12:06:28	0.369479	1.64352	1.62586	1475.12	FALSE	#REF!
2022-09-12	12:06:28	0.362761	1.61363	1.62586	1476.75	FALSE	#REF!
2022-09-12	12:06:28	0.362863	1.61409	1.62586	1478.37	FALSE	#REF!
2022-09-12	12:06:28	0.366934	1.6322	1.62586	1480	FALSE	#REF!
2022-09-12	12:06:29	0.367392	1.63423	1.65178	1481.65	FALSE	#REF!
2022-09-12	12:06:29	0.376145	1.67317	1.65178	1483.3	FALSE	#REF!
2022-09-12	12:06:29	0.37243	1.65664	1.65178	1484.96	FALSE	#REF!
2022-09-12	12:06:29	0.369377	1.64306	1.65178	1486.61	FALSE	#REF!
2022-09-12	12:06:30	0.372939	1.65891	1.65998	1488.27	FALSE	#REF!
2022-09-12	12:06:30	0.373244	1.66026	1.65998	1489.93	FALSE	#REF!
2022-09-12	12:06:30	0.370802	1.6494	1.65998	1491.59	FALSE	#REF!
2022-09-12	12:06:30	0.375738	1.67136	1.65998	1493.25	FALSE	#REF!
2022-09-12	12:06:31	0.380674	1.69331	1.67136	1494.92	FALSE	#REF!
2022-09-12	12:06:31	0.374619	1.66638	1.67136	1496.59	FALSE	#REF!
2022-09-12	12:06:31	0.371921	1.65438	1.67136	1498.26	FALSE	#REF!
2022-09-12	12:06:32	0.374313	1.66502	1.66491	1499.93	FALSE	#REF!
2022-09-12	12:06:32	0.371158	1.65099	1.66491	1501.59	FALSE	#REF!
2022-09-12	12:06:32	0.373448	1.66117	1.66491	1503.26	FALSE	#REF!
2022-09-12	12:06:32	0.378232	1.68245	1.66491	1504.92	FALSE	#REF!
2022-09-12	12:06:33	0.372481	1.65687	1.66904	1506.59	FALSE	#REF!
2022-09-12	12:06:33	0.374364	1.66525	1.66904	1508.26	FALSE	#REF!
2022-09-12	12:06:33	0.37416	1.66434	1.66904	1509.93	FALSE	#REF!
2022-09-12	12:06:33	0.37986	1.68969	1.66904	1511.6	FALSE	#REF!
2022-09-12	12:06:34	0.371158	1.65099	1.63751	1513.23	FALSE	#REF!
2022-09-12	12:06:34	0.369071	1.6417	1.63751	1514.87	FALSE	#REF!
2022-09-12	12:06:34	0.374822	1.66728	1.63751	1516.51	FALSE	#REF!
2022-09-12	12:06:34	0.357468	1.59009	1.63751	1518.15	FALSE	#REF!
2022-09-12	12:06:35	0.359606	1.5996	1.58949	1519.74	FALSE	#REF!
2022-09-12	12:06:35	0.370496	1.64804	1.58949	1521.33	FALSE	#REF!
2022-09-12	12:06:35	0.341896	1.52082	1.58949	1522.92	FALSE	#REF!
2022-09-12	12:06:36	0.453804	2.01861	3.83559	1526.75	FALSE	#REF!
2022-09-12	12:06:36	0.921132	4.09738	3.83559	1530.59	FALSE	#REF!
2022-09-12	12:06:36	1.00704	4.47952	3.83559	1534.42	FALSE	#REF!
2022-09-12	12:06:36	1.06714	4.74685	3.83559	1538.26	FALSE	#REF!
2022-09-12	12:06:37	1.39477	6.20422	6.49392	1544.75	FALSE	#REF!
2022-09-12	12:06:37	1.69421	7.53618	6.49392	1551.25	FALSE	#REF!
2022-09-12	12:06:37	1.42856	6.35452	6.49392	1557.74	FALSE	#REF!
2022-09-12	12:06:37	1.32205	5.88074	6.49392	1564.23	FALSE	#REF!
2022-09-12	12:06:38	0.586374	2.60831	4.64305	1568.88	FALSE	#REF!
2022-09-12	12:06:38	0.967443	4.30338	4.64305	1573.52	FALSE	#REF!
2022-09-12	12:06:38	0.994873	4.42539	4.64305	1578.16	FALSE	#REF!
2022-09-12	12:06:38	1.62653	7.23513	4.64305	1582.81	FALSE	#REF!
2022-09-12	12:06:39	1.32637	5.89996	9.31659	1592.12	FALSE	#REF!
2022-09-12	12:06:39	1.77431	7.89249	9.31659	1601.44	FALSE	#REF!
2022-09-12	12:06:39	3.18271	14.1573	9.31659	1610.76	1	#REF!
2022-09-12	12:06:40	1.70495	7.58396	7.33104	1618.09	FALSE	#REF!
2022-09-12	12:06:40	1.51955	6.75926	7.33104	1625.42	FALSE	#REF!
2022-09-12	12:06:40	0.992684	4.41566	7.33104	1632.75	FALSE	#REF!
2022-09-12	12:06:40	2.37518	10.5653	7.33104	1640.08	FALSE	#REF!
2022-09-12	12:06:41	1.60958	7.15973	6.26229	1646.34	FALSE	#REF!
2022-09-12	12:06:41	1.89808	8.44304	6.26229	1652.6	FALSE	#REF!
2022-09-12	12:06:41	1.0305	4.58387	6.26229	1658.87	FALSE	#REF!
2022-09-12	12:06:41	1.09314	4.86251	6.26229	1665.13	FALSE	#REF!
2022-09-12	12:06:42	0.57701	2.56666	5.7903	1670.92	FALSE	#REF!
2022-09-12	12:06:42	0.887646	3.94843	5.7903	1676.71	FALSE	#REF!
2022-09-12	12:06:42	1.82968	8.13878	5.7903	1682.5	FALSE	#REF!
2022-09-12	12:06:42	1.91253	8.50732	5.7903	1688.29	FALSE	#REF!
2022-09-12	12:06:43	2.2164	9.85899	11.0724	1699.36	FALSE	#REF!
2022-09-12	12:06:43	1.99207	8.86113	11.0724	1710.43	FALSE	#REF!
2022-09-12	12:06:43	3.2591	14.4971	11.0724	1721.51	1	#REF!
2022-09-12	12:06:44	1.78159	7.92487	7.61718	1729.12	FALSE	#REF!
2022-09-12	12:06:44	2.34205	10.4179	7.61718	1736.74	FALSE	#REF!
2022-09-12	12:06:44	1.25945	5.60229	7.61718	1744.36	FALSE	#REF!
2022-09-12	12:06:44	1.46658	6.52364	7.61718	1751.98	FALSE	#REF!
2022-09-12	12:06:45	0.407443	1.81239	2.22059	1754.2	FALSE	#REF!
2022-09-12	12:06:45	0.562659	2.50282	2.22059	1756.42	FALSE	#REF!
2022-09-12	12:06:45	0.573804	2.55239	2.22059	1758.64	FALSE	#REF!
2022-09-12	12:06:45	0.452939	2.01476	2.22059	1760.86	FALSE	#REF!
2022-09-12	12:06:46	0.576247	2.56326	3.37446	1764.23	FALSE	#REF!
2022-09-12	12:06:46	0.907646	4.03739	3.37446	1767.61	FALSE	#REF!
2022-09-12	12:06:46	0.793804	3.531	3.37446	1770.98	FALSE	#REF!
2022-09-12	12:06:46	0.756756	3.3662	3.37446	1774.36	FALSE	#REF!
2022-09-12	12:06:47	0.450242	2.00277	1.74599	1776.1	FALSE	#REF!
2022-09-12	12:06:47	0.351361	1.56292	1.74599	1777.85	FALSE	#REF!
2022-09-12	12:06:47	0.375942	1.67227	1.74599	1779.59	FALSE	#REF!
2022-09-12	12:06:48	0.494771	2.20084	1.8816	1781.48	FALSE	#REF!
2022-09-12	12:06:48	0.459097	2.04216	1.8816	1783.36	FALSE	#REF!
2022-09-12	12:06:48	0.347392	1.54527	1.8816	1785.24	FALSE	#REF!
2022-09-12	12:06:48	0.390751	1.73814	1.8816	1787.12	FALSE	#REF!
2022-09-12	12:06:49	0.341896	1.52082	2.44997	1789.57	FALSE	#REF!
2022-09-12	12:06:49	0.383881	1.70758	2.44997	1792.02	FALSE	#REF!
2022-09-12	12:06:49	1.02246	4.54811	2.44997	1794.47	FALSE	#REF!
2022-09-12	12:06:49	0.454873	2.02337	2.44997	1796.92	FALSE	#REF!
2022-09-12	12:06:50	0.304898	1.35625	1.49547	1798.42	FALSE	#REF!
2022-09-12	12:06:50	0.377468	1.67905	1.49547	1799.91	FALSE	#REF!
2022-09-12	12:06:50	0.315738	1.40447	1.49547	1801.41	FALSE	#REF!
2022-09-12	12:06:50	0.34668	1.5421	1.49547	1802.9	FALSE	#REF!
2022-09-12	12:06:51	0.314975	1.40107	1.24344	1804.15	FALSE	#REF!
2022-09-12	12:06:51	0.3107	1.38206	1.24344	1805.39	FALSE	#REF!
2022-09-12	12:06:51	0.212939	0.947195	1.24344	1806.63	FALSE	#REF!
2022-09-12	12:06:52	0.364186	1.61997	1.3425	1807.98	FALSE	#REF!
2022-09-12	12:06:52	0.254771	1.13327	1.3425	1809.32	FALSE	#REF!
2022-09-12	12:06:52	0.325305	1.44702	1.3425	1810.66	FALSE	#REF!
2022-09-12	12:06:52	0.262964	1.16972	1.3425	1812	FALSE	#REF!
2022-09-12	12:06:53	0.390038	1.73497	1.7395	1813.74	FALSE	#REF!
2022-09-12	12:06:53	0.342201	1.52218	1.7395	1815.48	FALSE	#REF!
2022-09-12	12:06:53	0.327443	1.45653	1.7395	1817.22	FALSE	#REF!
2022-09-12	12:06:53	0.504542	2.2443	1.7395	1818.96	FALSE	#REF!
2022-09-12	12:06:54	0.445611	1.98217	1.80158	1820.76	FALSE	#REF!
2022-09-12	12:06:54	0.448919	1.99688	1.80158	1822.56	FALSE	#REF!
2022-09-12	12:06:54	0.352023	1.56587	1.80158	1824.37	FALSE	#REF!
2022-09-12	12:06:54	0.373499	1.6614	1.80158	1826.17	FALSE	#REF!
2022-09-12	12:06:55	0.26439	1.17606	2.27426	1828.44	FALSE	#REF!
2022-09-12	12:06:55	0.816145	3.63038	2.27426	1830.72	FALSE	#REF!
2022-09-12	12:06:55	0.453295	2.01635	2.27426	1832.99	FALSE	#REF!
2022-09-12	12:06:56	0.697163	3.10112	1.78941	1834.78	FALSE	#REF!
2022-09-12	12:06:56	0.215127	0.956928	1.78941	1836.57	FALSE	#REF!
2022-09-12	12:06:56	0.417723	1.85812	1.78941	1838.36	FALSE	#REF!
2022-09-12	12:06:56	0.279097	1.24148	1.78941	1840.15	FALSE	#REF!
2022-09-12	12:06:57	0.376858	1.67634	1.08885	1841.24	FALSE	#REF!
2022-09-12	12:06:57	0.186679	0.830386	1.08885	1842.33	FALSE	#REF!
2022-09-12	12:06:57	0.185407	0.824727	1.08885	1843.41	FALSE	#REF!
2022-09-12	12:06:57	0.230191	1.02394	1.08885	1844.5	FALSE	#REF!
2022-09-12	12:06:58	0.538995	2.39756	1.42976	1845.93	FALSE	#REF!
2022-09-12	12:06:58	0.252735	1.12422	1.42976	1847.36	FALSE	#REF!
2022-09-12	12:06:58	0.0778756	0.346406	1.42976	1848.79	FALSE	#REF!
2022-09-12	12:06:58	0.416094	1.85087	1.42976	1850.22	FALSE	#REF!
2022-09-12	12:06:59	0.0787916	0.350481	0.906374	1851.13	FALSE	#REF!
2022-09-12	12:06:59	0.336603	1.49728	0.906374	1852.03	FALSE	#REF!
2022-09-12	12:06:59	0.195891	0.871362	0.906374	1852.94	FALSE	#REF!
2022-09-12	12:07:00	0.227748	1.01307	1.05042	1853.99	FALSE	#REF!
2022-09-12	12:07:00	0.186883	0.831293	1.05042	1855.04	FALSE	#REF!
2022-09-12	12:07:00	0.211514	0.940857	1.05042	1856.09	FALSE	#REF!
2022-09-12	12:07:00	0.318435	1.41646	1.05042	1857.14	FALSE	#REF!
2022-09-12	12:07:01	0.155891	0.693434	1.18109	1858.32	FALSE	#REF!
2022-09-12	12:07:01	0.403931	1.79677	1.18109	1859.5	FALSE	#REF!
2022-09-12	12:07:01	0.196756	0.87521	1.18109	1860.69	FALSE	#REF!
2022-09-12	12:07:01	0.305509	1.35897	1.18109	1861.87	FALSE	#REF!
2022-09-12	12:07:02	0.16383	0.728749	1.167	1863.03	FALSE	#REF!
2022-09-12	12:07:02	0.330395	1.46966	1.167	1864.2	FALSE	#REF!
2022-09-12	12:07:02	0.229173	1.01941	1.167	1865.37	FALSE	#REF!
2022-09-12	12:07:02	0.326018	1.45019	1.167	1866.53	FALSE	#REF!
2022-09-12	12:07:03	0.126731	0.563725	1.1674	1867.7	FALSE	#REF!
2022-09-12	12:07:03	0.363728	1.61793	1.1674	1868.87	FALSE	#REF!
2022-09-12	12:07:03	0.141082	0.627561	1.1674	1870.04	FALSE	#REF!
2022-09-12	12:07:03	0.418232	1.86038	1.1674	1871.2	FALSE	#REF!
2022-09-12	12:07:04	0.226679	1.00831	1.8228	1873.03	FALSE	#REF!
2022-09-12	12:07:04	0.484593	2.15557	1.8228	1874.85	FALSE	#REF!
2022-09-12	12:07:04	0.518079	2.30452	1.8228	1876.67	FALSE	#REF!
2022-09-12	12:07:05	0.466323	2.0743	1.86915	1878.54	FALSE	#REF!
2022-09-12	12:07:05	0.395484	1.75919	1.86915	1880.41	FALSE	#REF!
2022-09-12	12:07:05	0.412125	1.83321	1.86915	1882.28	FALSE	#REF!
2022-09-12	12:07:05	0.406883	1.8099	1.86915	1884.15	FALSE	#REF!
2022-09-12	12:07:06	0.525153	2.33599	2.60271	1886.75	FALSE	#REF!
2022-09-12	12:07:06	0.82042	3.64939	2.60271	1889.35	FALSE	#REF!
2022-09-12	12:07:06	0.510954	2.27283	2.60271	1891.96	FALSE	#REF!
2022-09-12	12:07:06	0.483931	2.15262	2.60271	1894.56	FALSE	#REF!
2022-09-12	12:07:07	0.502863	2.23684	2.04957	1896.61	FALSE	#REF!
2022-09-12	12:07:07	0.377316	1.67838	2.04957	1898.66	FALSE	#REF!
2022-09-12	12:07:07	0.586221	2.60763	2.04957	1900.71	FALSE	#REF!
2022-09-12	12:07:07	0.376654	1.67543	2.04957	1902.76	FALSE	#REF!
2022-09-12	12:07:08	0.551056	2.45121	2.02653	1904.79	FALSE	#REF!
2022-09-12	12:07:08	0.304084	1.35263	2.02653	1906.81	FALSE	#REF!
2022-09-12	12:07:08	0.511616	2.27577	2.02653	1908.84	FALSE	#REF!
2022-09-12	12:07:09	0.258384	1.14934	1.61103	1910.45	FALSE	#REF!
2022-09-12	12:07:09	0.505509	2.24861	1.61103	1912.06	FALSE	#REF!
2022-09-12	12:07:09	0.222303	0.988848	1.61103	1913.67	FALSE	#REF!
2022-09-12	12:07:09	0.462507	2.05732	1.61103	1915.28	FALSE	#REF!
2022-09-12	12:07:10	0.222557	0.989978	1.5387	1916.82	FALSE	#REF!
2022-09-12	12:07:10	0.469173	2.08698	1.5387	1918.36	FALSE	#REF!
2022-09-12	12:07:10	0.320776	1.42688	1.5387	1919.9	FALSE	#REF!
2022-09-12	12:07:10	0.371158	1.65099	1.5387	1921.44	FALSE	#REF!
2022-09-12	12:07:11	0.320776	1.42688	1.54142	1922.98	FALSE	#REF!
2022-09-12	12:07:11	0.352685	1.56881	1.54142	1924.52	FALSE	#REF!
2022-09-12	12:07:11	0.397316	1.76734	1.54142	1926.06	FALSE	#REF!
2022-09-12	12:07:11	0.315331	1.40266	1.54142	1927.6	FALSE	#REF!
2022-09-12	12:07:12	0.363626	1.61748	1.72154	1929.32	FALSE	#REF!
2022-09-12	12:07:12	0.200878	0.893546	1.72154	1931.05	FALSE	#REF!
2022-09-12	12:07:12	0.596552	2.65358	1.72154	1932.77	FALSE	#REF!
2022-09-12	12:07:13	0.854466	3.80084	3.80009	1936.57	FALSE	#REF!
2022-09-12	12:07:13	0.897112	3.99053	3.80009	1940.37	FALSE	#REF!
2022-09-12	12:07:13	0.554669	2.46728	3.80009	1944.17	FALSE	#REF!
2022-09-12	12:07:13	1.11095	4.94173	3.80009	1947.97	FALSE	#REF!
2022-09-12	12:07:14	0.535942	2.38398	1.94329	1949.91	FALSE	#REF!
2022-09-12	12:07:14	0.650802	2.8949	1.94329	1951.85	FALSE	#REF!
2022-09-12	12:07:14	0.447239	1.98941	1.94329	1953.8	FALSE	#REF!
2022-09-12	12:07:14	0.113499	0.504866	1.94329	1955.74	FALSE	#REF!
2022-09-12	12:07:15	0.505407	2.24815	1.3957	1957.14	FALSE	#REF!
2022-09-12	12:07:15	0.125764	0.559423	1.3957	1958.53	FALSE	#REF!
2022-09-12	12:07:15	0.389377	1.73203	1.3957	1959.93	FALSE	#REF!
2022-09-12	12:07:15	0.234517	1.04318	1.3957	1961.32	FALSE	#REF!
2022-09-12	12:07:16	0.541692	2.40955	3.45841	1964.78	FALSE	#REF!
2022-09-12	12:07:16	0.625814	2.78375	3.45841	1968.24	FALSE	#REF!
2022-09-12	12:07:16	1.16495	5.18193	3.45841	1971.7	FALSE	#REF!
2022-09-12	12:07:17	0.959198	4.2667	4.49506	1976.19	FALSE	#REF!
2022-09-12	12:07:17	1.95019	8.67484	4.49506	1980.69	FALSE	#REF!
2022-09-12	12:07:17	0.63472	2.82336	4.49506	1985.18	FALSE	#REF!
2022-09-12	12:07:17	0.498028	2.21533	4.49506	1989.68	FALSE	#REF!
2022-09-12	12:07:18	0.446272	1.98511	2.30112	1991.98	FALSE	#REF!
2022-09-12	12:07:18	0.87131	3.87576	2.30112	1994.28	FALSE	#REF!
2022-09-12	12:07:18	0.423575	1.88415	2.30112	1996.58	FALSE	#REF!
2022-09-12	12:07:18	0.328104	1.45947	2.30112	1998.88	FALSE	#REF!
2022-09-12	12:07:19	0.432328	1.92308	3.49422	2002.38	FALSE	#REF!
2022-09-12	12:07:19	0.30556	1.35919	3.49422	2005.87	FALSE	#REF!
2022-09-12	12:07:19	0.421082	1.87306	3.49422	2009.37	FALSE	#REF!
2022-09-12	12:07:19	1.98317	8.82154	3.49422	2012.86	FALSE	#REF!
2022-09-12	12:07:20	1.63396	7.26818	5.1116	2017.97	FALSE	#REF!
2022-09-12	12:07:20	0.719758	3.20163	5.1116	2023.08	FALSE	#REF!
2022-09-12	12:07:20	1.0937	4.865	5.1116	2028.2	FALSE	#REF!
2022-09-12	12:07:21	0.54159	2.4091	3.80712	2032	FALSE	#REF!
2022-09-12	12:07:21	1.00637	4.47654	3.80712	2035.81	FALSE	#REF!
2022-09-12	12:07:21	1.20531	5.36146	3.80712	2039.62	FALSE	#REF!
2022-09-12	12:07:21	0.670242	2.98137	3.80712	2043.42	FALSE	#REF!
2022-09-12	12:07:22	1.19777	5.32792	5.25601	2048.68	FALSE	#REF!
2022-09-12	12:07:22	0.962659	4.2821	5.25601	2053.94	FALSE	#REF!
2022-09-12	12:07:22	1.62368	7.22245	5.25601	2059.19	FALSE	#REF!
2022-09-12	12:07:22	0.942303	4.19155	5.25601	2064.45	FALSE	#REF!
2022-09-12	12:07:23	1.19686	5.32387	8.69079	2073.14	FALSE	#REF!
2022-09-12	12:07:23	2.4251	10.7873	8.69079	2081.83	FALSE	#REF!
2022-09-12	12:07:23	1.90561	8.47653	8.69079	2090.52	FALSE	#REF!
2022-09-12	12:07:23	2.28754	10.1754	8.69079	2099.21	FALSE	#REF!
2022-09-12	12:07:24	0.795229	3.53734	3.83646	2103.05	FALSE	#REF!
2022-09-12	12:07:24	1.24877	5.55478	3.83646	2106.88	FALSE	#REF!
2022-09-12	12:07:24	0.543422	2.41725	3.83646	2110.72	FALSE	#REF!
2022-09-12	12:07:25	1.05421	4.68934	2.30967	2113.03	FALSE	#REF!
2022-09-12	12:07:25	0.488613	2.17345	2.30967	2115.34	FALSE	#REF!
2022-09-12	12:07:25	0.185713	0.826089	2.30967	2117.65	FALSE	#REF!
2022-09-12	12:07:25	0.34841	1.5498	2.30967	2119.96	FALSE	#REF!
2022-09-12	12:07:26	0.274211	1.21975	0.937064	2120.9	FALSE	#REF!
2022-09-12	12:07:26	0.136247	0.606054	0.937064	2121.83	FALSE	#REF!
2022-09-12	12:07:26	0.311819	1.38703	0.937064	2122.77	FALSE	#REF!
2022-09-12	12:07:26	0.120369	0.535425	0.937064	2123.71	FALSE	#REF!
2022-09-12	12:07:27	0.310089	1.37934	3.0452	2126.75	FALSE	#REF!
2022-09-12	12:07:27	0.0975702	0.434012	3.0452	2129.8	FALSE	#REF!
2022-09-12	12:07:27	1.02205	4.54628	3.0452	2132.84	FALSE	#REF!
2022-09-12	12:07:27	1.30866	5.82118	3.0452	2135.89	FALSE	#REF!
2022-09-12	12:07:28	3.12454	13.8986	15.4043	2151.29	1	#REF!
2022-09-12	12:07:28	4.2965	19.1117	15.4043	2166.7	1	#REF!
2022-09-12	12:07:28	2.96805	13.2025	15.4043	2182.1	FALSE	#REF!
2022-09-12	12:07:29	2.1906	9.74423	5.75714	2187.86	FALSE	#REF!
2022-09-12	12:07:29	0.932685	4.14877	5.75714	2193.62	FALSE	#REF!
2022-09-12	12:07:29	1.37981	6.13767	5.75714	2199.37	FALSE	#REF!
2022-09-12	12:07:29	0.673957	2.9979	5.75714	2205.13	FALSE	#REF!
2022-09-12	12:07:30	1.79925	8.00342	5.38334	2210.51	FALSE	#REF!
2022-09-12	12:07:30	0.977417	4.34775	5.38334	2215.9	FALSE	#REF!
2022-09-12	12:07:30	1.22541	5.45087	5.38334	2221.28	FALSE	#REF!
2022-09-12	12:07:30	0.838842	3.73134	5.38334	2226.66	FALSE	#REF!
2022-09-12	12:07:31	2.83681	12.6187	7.29081	2233.95	FALSE	#REF!
2022-09-12	12:07:31	1.56307	6.95285	7.29081	2241.24	FALSE	#REF!
2022-09-12	12:07:31	1.38678	6.16867	7.29081	2248.54	FALSE	#REF!
2022-09-12	12:07:31	0.769529	3.42302	7.29081	2255.83	FALSE	#REF!
2022-09-12	12:07:32	1.04184	4.63431	4.21463	2260.04	FALSE	#REF!
2022-09-12	12:07:32	0.796552	3.54322	4.21463	2264.26	FALSE	#REF!
2022-09-12	12:07:32	1.00408	4.46635	4.21463	2268.47	FALSE	#REF!
2022-09-12	12:07:33	0.792837	3.5267	4.63977	2273.11	FALSE	#REF!
2022-09-12	12:07:33	0.495026	2.20197	4.63977	2277.75	FALSE	#REF!
2022-09-12	12:07:33	0.94785	4.21623	4.63977	2282.39	FALSE	#REF!
2022-09-12	12:07:33	1.93655	8.61416	4.63977	2287.03	FALSE	#REF!
2022-09-12	12:07:34	2.1733	9.66727	6.51825	2293.55	FALSE	#REF!
2022-09-12	12:07:34	1.3052	5.80579	6.51825	2300.07	FALSE	#REF!
2022-09-12	12:07:34	1.76164	7.83613	6.51825	2306.58	FALSE	#REF!
2022-09-12	12:07:34	0.621336	2.76383	6.51825	2313.1	FALSE	#REF!
2022-09-12	12:07:35	1.61431	7.18077	5.69731	2318.8	FALSE	#REF!
2022-09-12	12:07:35	0.84556	3.76122	5.69731	2324.5	FALSE	#REF!
2022-09-12	12:07:35	1.38123	6.14399	5.69731	2330.19	FALSE	#REF!
2022-09-12	12:07:35	1.28215	5.70326	5.69731	2335.89	FALSE	#REF!
2022-09-12	12:07:36	3.84301	17.0945	13.9874	2349.88	1	#REF!
2022-09-12	12:07:36	3.28724	14.6223	13.9874	2363.87	1	#REF!
2022-09-12	12:07:36	2.30327	10.2454	13.9874	2377.85	FALSE	#REF!
2022-09-12	12:07:37	1.85777	8.26373	12.5189	2390.37	FALSE	#REF!
2022-09-12	12:07:37	2.37945	10.5843	12.5189	2402.89	FALSE	#REF!
2022-09-12	12:07:37	3.33141	14.8188	12.5189	2415.41	1	#REF!
2022-09-12	12:07:37	3.68887	16.4088	12.5189	2427.93	1	#REF!
2022-09-12	12:07:38	0.702557	3.12511	6.98604	2434.92	FALSE	#REF!
2022-09-12	12:07:38	2.14067	9.52213	6.98604	2441.9	FALSE	#REF!
2022-09-12	12:07:38	1.64062	7.29781	6.98604	2448.89	FALSE	#REF!
2022-09-12	12:07:38	1.79828	7.99911	6.98604	2455.87	FALSE	#REF!
2022-09-12	12:07:39	3.25538	14.4806	19.0581	2474.93	1	#REF!
2022-09-12	12:07:39	1.69838	7.55473	19.0581	2493.99	FALSE	#REF!
2022-09-12	12:07:39	6.93278	30.8384	19.0581	2513.05	1	#REF!
2022-09-12	12:07:39	5.25126	23.3587	19.0581	2532.11	1	#REF!
2022-09-12	12:07:40	4.37395	19.4562	11.067	2543.17	1	#REF!
2022-09-12	12:07:40	1.16261	5.17152	11.067	2554.24	FALSE	#REF!
2022-09-12	12:07:40	1.92734	8.57319	11.067	2565.31	FALSE	#REF!
2022-09-12	12:07:41	1.97274	8.77514	9.57332	2574.88	FALSE	#REF!
2022-09-12	12:07:41	1.51528	6.74027	9.57332	2584.45	FALSE	#REF!
2022-09-12	12:07:41	1.5134	6.73191	9.57332	2594.03	FALSE	#REF!
2022-09-12	12:07:41	3.60729	16.0459	9.57332	2603.6	1	#REF!
2022-09-12	12:07:42	1.46327	6.50892	16.6428	2620.24	FALSE	#REF!
2022-09-12	12:07:42	2.84973	12.6762	16.6428	2636.89	FALSE	#REF!
2022-09-12	12:07:42	5.15034	22.9097	16.6428	2653.53	1	#REF!
2022-09-12	12:07:42	5.5025	24.4762	16.6428	2670.17	1	#REF!
2022-09-12	12:07:43	2.53106	11.2587	20.9003	2691.07	FALSE	#REF!
2022-09-12	12:07:43	2.40612	10.7029	20.9003	2711.97	FALSE	#REF!
2022-09-12	12:07:43	5.15151	22.9149	20.9003	2732.87	1	#REF!
2022-09-12	12:07:43	8.70566	38.7245	20.9003	2753.77	1	#REF!
2022-09-12	12:07:44	5.02785	22.3649	13.599	2767.37	1	#REF!
2022-09-12	12:07:44	3.39686	15.1099	13.599	2780.97	1	#REF!
2022-09-12	12:07:44	0.746832	3.32206	13.599	2794.57	FALSE	#REF!
2022-09-12	12:07:45	0.366883	1.63197	17.1024	2811.67	FALSE	#REF!
2022-09-12	12:07:45	0.764338	3.39993	17.1024	2828.77	FALSE	#REF!
2022-09-12	12:07:45	7.62464	33.9159	17.1024	2845.88	1	#REF!
2022-09-12	12:07:45	6.62332	29.4619	17.1024	2862.98	1	#REF!
2022-09-12	12:07:46	4.00515	17.8157	16.5983	2879.58	1	#REF!
2022-09-12	12:07:46	1.9078	8.48628	16.5983	2896.18	FALSE	#REF!
2022-09-12	12:07:46	2.97365	13.2274	16.5983	2912.77	FALSE	#REF!
2022-09-12	12:07:46	6.0393	26.864	16.5983	2929.37	1	#REF!
2022-09-12	12:07:47	4.62485	20.5723	9.83409	2939.21	1	#REF!
2022-09-12	12:07:47	1.84179	8.19265	9.83409	2949.04	FALSE	#REF!
2022-09-12	12:07:47	1.62704	7.2374	9.83409	2958.87	FALSE	#REF!
2022-09-12	12:07:47	0.749529	3.33405	9.83409	2968.71	FALSE	#REF!
2022-09-12	12:07:48	0.696807	3.09954	3.49735	2972.21	FALSE	#REF!
2022-09-12	12:07:48	0.924949	4.11436	3.49735	2975.7	FALSE	#REF!
2022-09-12	12:07:48	0.736959	3.27814	3.49735	2979.2	FALSE	#REF!
2022-09-12	12:07:49	0.514466	2.28845	12.6848	2991.89	FALSE	#REF!
2022-09-12	12:07:49	0.692074	3.07848	12.6848	3004.57	FALSE	#REF!
2022-09-12	12:07:49	2.93686	13.0637	12.6848	3017.25	FALSE	#REF!
2022-09-12	12:07:49	7.26332	32.3087	12.6848	3029.94	1	#REF!
2022-09-12	12:07:50	6.06438	26.9756	11.3067	3041.25	1	#REF!
2022-09-12	12:07:50	1.97716	8.7948	11.3067	3052.55	FALSE	#REF!
2022-09-12	12:07:50	0.929427	4.13428	11.3067	3063.86	FALSE	#REF!
2022-09-12	12:07:50	1.19645	5.32205	11.3067	3075.17	FALSE	#REF!
2022-09-12	12:07:51	1.40413	6.24585	8.40794	3083.57	FALSE	#REF!
2022-09-12	12:07:51	2.62312	11.6682	8.40794	3091.98	FALSE	#REF!
2022-09-12	12:07:51	2.09838	9.33401	8.40794	3100.39	FALSE	#REF!
2022-09-12	12:07:51	1.43513	6.38375	8.40794	3108.8	FALSE	#REF!
2022-09-12	12:07:52	1.73609	7.72248	6.70315	3115.5	FALSE	#REF!
2022-09-12	12:07:52	1.43742	6.39393	6.70315	3122.2	FALSE	#REF!
2022-09-12	12:07:52	1.10475	4.91415	6.70315	3128.91	FALSE	#REF!
2022-09-12	12:07:52	1.74948	7.78204	6.70315	3135.61	FALSE	#REF!
2022-09-12	12:07:53	1.50154	6.67915	10.7655	3146.38	FALSE	#REF!
2022-09-12	12:07:53	2.1905	9.74378	10.7655	3157.14	FALSE	#REF!
2022-09-12	12:07:53	3.56856	15.8737	10.7655	3167.91	1	#REF!
2022-09-12	12:07:54	2.50525	11.1439	9.41297	3177.32	FALSE	#REF!
2022-09-12	12:07:54	2.57156	11.4388	9.41297	3186.73	FALSE	#REF!
2022-09-12	12:07:54	2.22078	9.87847	9.41297	3196.15	FALSE	#REF!
2022-09-12	12:07:54	1.16693	5.19074	9.41297	3205.56	FALSE	#REF!
2022-09-12	12:07:55	1.69019	7.5183	5.81356	3211.37	FALSE	#REF!
2022-09-12	12:07:55	1.28424	5.71256	5.81356	3217.19	FALSE	#REF!
2022-09-12	12:07:55	0.749886	3.33564	5.81356	3223	FALSE	#REF!
2022-09-12	12:07:55	1.50347	6.68774	5.81356	3228.81	FALSE	#REF!
2022-09-12	12:07:56	1.99726	8.88421	6.81428	3235.63	FALSE	#REF!
2022-09-12	12:07:56	1.66907	7.42436	6.81428	3242.44	FALSE	#REF!
2022-09-12	12:07:56	1.46072	6.49757	6.81428	3249.26	FALSE	#REF!
2022-09-12	12:07:56	1.00062	4.45096	6.81428	3256.07	FALSE	#REF!
2022-09-12	12:07:57	1.00719	4.48018	5.08119	3261.15	FALSE	#REF!
2022-09-12	12:07:57	1.07681	4.78987	5.08119	3266.23	FALSE	#REF!
2022-09-12	12:07:57	1.34291	5.97353	5.08119	3271.31	FALSE	#REF!
2022-09-12	12:07:58	1.32281	5.88412	4.59879	3275.91	FALSE	#REF!
2022-09-12	12:07:58	1.24357	5.53165	4.59879	3280.51	FALSE	#REF!
2022-09-12	12:07:58	0.901743	4.01113	4.59879	3285.11	FALSE	#REF!
2022-09-12	12:07:58	0.66729	2.96824	4.59879	3289.71	FALSE	#REF!
2022-09-12	12:07:59	0.547035	2.43332	3.4907	3293.2	FALSE	#REF!
2022-09-12	12:07:59	0.754516	3.35624	3.4907	3296.69	FALSE	#REF!
2022-09-12	12:07:59	0.857163	3.81283	3.4907	3300.18	FALSE	#REF!
2022-09-12	12:07:59	0.980267	4.36042	3.4907	3303.67	FALSE	#REF!
2022-09-12	12:08:00	1.09004	4.84872	4.31068	3307.98	FALSE	#REF!
2022-09-12	12:08:00	1.09065	4.85143	4.31068	3312.29	FALSE	#REF!
2022-09-12	12:08:00	0.878944	3.90972	4.31068	3316.6	FALSE	#REF!
2022-09-12	12:08:00	0.816705	3.63287	4.31068	3320.91	FALSE	#REF!
2022-09-12	12:08:01	1.22709	5.45834	4.79793	3325.71	FALSE	#REF!
2022-09-12	12:08:01	0.975076	4.33733	4.79793	3330.51	FALSE	#REF!
2022-09-12	12:08:01	1.0337	4.5981	4.79793	3335.31	FALSE	#REF!
2022-09-12	12:08:02	1.1048	4.91437	4.86654	3340.18	FALSE	#REF!
2022-09-12	12:08:02	0.857926	3.81623	4.86654	3345.04	FALSE	#REF!
2022-09-12	12:08:02	1.22449	5.44678	4.86654	3349.91	FALSE	#REF!
2022-09-12	12:08:02	1.18897	5.28878	4.86654	3354.77	FALSE	#REF!
2022-09-12	12:08:03	1.69075	7.52079	7.86426	3362.64	FALSE	#REF!
2022-09-12	12:08:03	1.65564	7.36462	7.86426	3370.5	FALSE	#REF!
2022-09-12	12:08:03	1.79482	7.98372	7.86426	3378.37	FALSE	#REF!
2022-09-12	12:08:03	1.93065	8.58792	7.86426	3386.23	FALSE	#REF!
2022-09-12	12:08:04	1.52856	6.79934	6.11395	3392.35	FALSE	#REF!
2022-09-12	12:08:04	1.68449	7.49295	6.11395	3398.46	FALSE	#REF!
2022-09-12	12:08:04	1.23391	5.48868	6.11395	3404.57	FALSE	#REF!
2022-09-12	12:08:04	1.05095	4.67484	6.11395	3410.69	FALSE	#REF!
2022-09-12	12:08:05	0.929275	4.1336	3.44143	3414.13	FALSE	#REF!
2022-09-12	12:08:05	0.652379	2.90191	3.44143	3417.57	FALSE	#REF!
2022-09-12	12:08:05	0.739351	3.28878	3.44143	3421.01	FALSE	#REF!
2022-09-12	12:08:06	0.857875	3.816	3.77062	3424.78	FALSE	#REF!
2022-09-12	12:08:06	0.613957	2.731	3.77062	3428.55	FALSE	#REF!
2022-09-12	12:08:06	0.678588	3.0185	3.77062	3432.32	FALSE	#REF!
2022-09-12	12:08:06	1.24027	5.51697	3.77062	3436.09	FALSE	#REF!
2022-09-12	12:08:07	1.57615	7.01103	9.22697	3445.32	FALSE	#REF!
2022-09-12	12:08:07	1.64729	7.32748	9.22697	3454.55	FALSE	#REF!
2022-09-12	12:08:07	2.12658	9.45945	9.22697	3463.78	FALSE	#REF!
2022-09-12	12:08:07	2.94724	13.1099	9.22697	3473	FALSE	#REF!
2022-09-12	12:08:08	2.69594	11.9921	9.05605	3482.06	FALSE	#REF!
2022-09-12	12:08:08	1.99538	8.87585	9.05605	3491.11	FALSE	#REF!
2022-09-12	12:08:08	2.0764	9.23624	9.05605	3500.17	FALSE	#REF!
2022-09-12	12:08:08	1.37584	6.12001	9.05605	3509.23	FALSE	#REF!
2022-09-12	12:08:09	1.42856	6.35452	5.97565	3515.2	FALSE	#REF!
2022-09-12	12:08:09	0.94785	4.21623	5.97565	3521.18	FALSE	#REF!
2022-09-12	12:08:09	1.65375	7.35621	5.97565	3527.15	FALSE	#REF!
2022-09-12	12:08:10	0.897519	3.99234	1.88856	3529.04	FALSE	#REF!
2022-09-12	12:08:10	0.278283	1.23786	1.88856	3530.93	FALSE	#REF!
2022-09-12	12:08:10	0.300776	1.33791	1.88856	3532.82	FALSE	#REF!
2022-09-12	12:08:10	0.221692	0.98613	1.88856	3534.71	FALSE	#REF!
2022-09-12	12:08:11	0.309377	1.37617	1.12597	3535.83	FALSE	#REF!
2022-09-12	12:08:11	0.214822	0.955571	1.12597	3536.96	FALSE	#REF!
2022-09-12	12:08:11	0.357265	1.58919	1.12597	3538.09	FALSE	#REF!
2022-09-12	12:08:11	0.131056	0.582963	1.12597	3539.21	FALSE	#REF!
2022-09-12	12:08:12	0.0245931	0.109395	-0.0144865	3539.21	FALSE	#REF!
2022-09-12	12:08:12	0.101896	0.453254	-0.0144865	3539.21	FALSE	#REF!
2022-09-12	12:08:12	-0.0630913	-0.280643	-0.0144865	3539.21	FALSE	#REF!
2022-09-12	12:08:12	-0.0764246	-0.339952	-0.0144865	3539.21	FALSE	#REF!
2022-09-12	12:08:13	-0.0616155	-0.274078	0.404734	3539.62	FALSE	#REF!
2022-09-12	12:08:13	0.162252	0.721729	0.404734	3540.02	FALSE	#REF!
2022-09-12	12:08:13	0.172328	0.766549	0.404734	3540.43	FALSE	#REF!
2022-09-12	12:08:14	0.217672	0.968249	4.24441	3544.67	FALSE	#REF!
2022-09-12	12:08:14	0.30383	1.3515	4.24441	3548.91	FALSE	#REF!
2022-09-12	12:08:14	0.370038	1.646	4.24441	3553.16	FALSE	#REF!
2022-09-12	12:08:14	2.9252	13.0119	4.24441	3557.4	FALSE	#REF!
2022-09-12	12:08:15	1.46882	6.53361	6.48102	3563.88	FALSE	#REF!
2022-09-12	12:08:15	0.821132	3.65256	6.48102	3570.37	FALSE	#REF!
2022-09-12	12:08:15	1.78576	7.94342	6.48102	3576.85	FALSE	#REF!
2022-09-12	12:08:15	1.75228	7.79449	6.48102	3583.33	FALSE	#REF!
2022-09-12	12:08:16	0.63528	2.82585	3.43519	3586.76	FALSE	#REF!
2022-09-12	12:08:16	0.972074	4.32398	3.43519	3590.2	FALSE	#REF!
2022-09-12	12:08:16	0.490089	2.18001	3.43519	3593.63	FALSE	#REF!
2022-09-12	12:08:16	0.991616	4.41091	3.43519	3597.07	FALSE	#REF!
2022-09-12	12:08:17	0.889478	3.95658	3.68945	3600.76	FALSE	#REF!
2022-09-12	12:08:17	1.30459	5.80308	3.68945	3604.45	FALSE	#REF!
2022-09-12	12:08:17	0.294211	1.30871	3.68945	3608.14	FALSE	#REF!
2022-09-12	12:08:18	0.303575	1.35036	1.27679	3609.41	FALSE	#REF!
2022-09-12	12:08:18	0.231361	1.02914	1.27679	3610.69	FALSE	#REF!
2022-09-12	12:08:18	0.303982	1.35217	1.27679	3611.97	FALSE	#REF!
2022-09-12	12:08:18	0.309224	1.37549	1.27679	3613.24	FALSE	#REF!
2022-09-12	12:08:19	0.163931	0.729198	1.29745	3614.54	FALSE	#REF!
2022-09-12	12:08:19	0.22958	1.02122	1.29745	3615.84	FALSE	#REF!
2022-09-12	12:08:19	0.250445	1.11403	1.29745	3617.14	FALSE	#REF!
2022-09-12	12:08:19	0.522761	2.32535	1.29745	3618.43	FALSE	#REF!
2022-09-12	12:08:20	0.973295	4.32941	4.83993	3623.27	FALSE	#REF!
2022-09-12	12:08:20	1.00464	4.46884	4.83993	3628.11	FALSE	#REF!
2022-09-12	12:08:20	1.1366	5.05582	4.83993	3632.95	FALSE	#REF!
2022-09-12	12:08:20	1.23772	5.50563	4.83993	3637.79	FALSE	#REF!
2022-09-12	12:08:21	0.37472	1.66683	2.13134	3639.92	FALSE	#REF!
2022-09-12	12:08:21	0.772786	3.43751	2.13134	3642.06	FALSE	#REF!
2022-09-12	12:08:21	0.289937	1.2897	2.13134	3644.19	FALSE	#REF!
2022-09-12	12:08:22	0.690547	3.07169	2.67526	3646.86	FALSE	#REF!
2022-09-12	12:08:22	0.354466	1.57674	2.67526	3649.54	FALSE	#REF!
2022-09-12	12:08:22	0.679962	3.02461	2.67526	3652.21	FALSE	#REF!
2022-09-12	12:08:22	0.680725	3.028	2.67526	3654.89	FALSE	#REF!
2022-09-12	12:08:23	1.48256	6.59472	5.56468	3660.45	FALSE	#REF!
2022-09-12	12:08:23	1.10449	4.91299	5.56468	3666.02	FALSE	#REF!
2022-09-12	12:08:23	1.29447	5.75806	5.56468	3671.58	FALSE	#REF!
2022-09-12	12:08:23	1.12246	4.99293	5.56468	3677.15	FALSE	#REF!
2022-09-12	12:08:24	0.831921	3.70055	2.09807	3679.24	FALSE	#REF!
2022-09-12	12:08:24	0.39528	1.75828	2.09807	3681.34	FALSE	#REF!
2022-09-12	12:08:24	0.187087	0.8322	2.09807	3683.44	FALSE	#REF!
2022-09-12	12:08:24	0.472379	2.10124	2.09807	3685.54	FALSE	#REF!
2022-09-12	12:08:25	0.146272	0.650647	1.27038	3686.81	FALSE	#REF!
2022-09-12	12:08:25	0.453499	2.01725	1.27038	3688.08	FALSE	#REF!
2022-09-12	12:08:25	0.25701	1.14323	1.27038	3689.35	FALSE	#REF!
2022-09-12	12:08:26	0.543473	2.41748	2.00418	3691.35	FALSE	#REF!
2022-09-12	12:08:26	0.21299	0.947422	2.00418	3693.36	FALSE	#REF!
2022-09-12	12:08:26	0.705458	3.13802	2.00418	3695.36	FALSE	#REF!
2022-09-12	12:08:26	0.340318	1.5138	2.00418	3697.37	FALSE	#REF!
2022-09-12	12:08:27	0.597366	2.6572	5.41481	3702.78	FALSE	#REF!
2022-09-12	12:08:27	0.725712	3.22811	5.41481	3708.2	FALSE	#REF!
2022-09-12	12:08:27	1.2562	5.58783	5.41481	3713.61	FALSE	#REF!
2022-09-12	12:08:27	2.28994	10.1861	5.41481	3719.03	FALSE	#REF!
2022-09-12	12:08:28	2.70215	12.0197	5.00853	3724.03	FALSE	#REF!
2022-09-12	12:08:28	0.936094	4.16393	5.00853	3729.04	FALSE	#REF!
2022-09-12	12:08:28	0.619707	2.75658	5.00853	3734.05	FALSE	#REF!
2022-09-12	12:08:28	0.245916	1.09388	5.00853	3739.06	FALSE	#REF!
2022-09-12	12:08:29	0.226323	1.00673	1.18406	3740.24	FALSE	#REF!
2022-09-12	12:08:29	0.408461	1.81692	1.18406	3741.43	FALSE	#REF!
2022-09-12	12:08:29	0.163779	0.728522	1.18406	3742.61	FALSE	#REF!
2022-09-12	12:08:30	0.306679	1.36417	1.11245	3743.72	FALSE	#REF!
2022-09-12	12:08:30	0.139657	0.621222	1.11245	3744.84	FALSE	#REF!
2022-09-12	12:08:30	0.314262	1.3979	1.11245	3745.95	FALSE	#REF!
2022-09-12	12:08:30	0.239758	1.06649	1.11245	3747.06	FALSE	#REF!
2022-09-12	12:08:31	2.21223	9.84044	6.56891	3753.63	FALSE	#REF!
2022-09-12	12:08:31	2.38887	10.6262	6.56891	3760.2	FALSE	#REF!
2022-09-12	12:08:31	1.0651	4.73778	6.56891	3766.77	FALSE	#REF!
2022-09-12	12:08:31	0.240827	1.07125	6.56891	3773.34	FALSE	#REF!
2022-09-12	12:08:32	0.247545	1.10113	1.56825	3774.91	FALSE	#REF!
2022-09-12	12:08:32	0.467392	2.07905	1.56825	3776.47	FALSE	#REF!
2022-09-12	12:08:32	0.360827	1.60503	1.56825	3778.04	FALSE	#REF!
2022-09-12	12:08:32	0.334466	1.48777	1.56825	3779.61	FALSE	#REF!
2022-09-12	12:08:33	0.0679518	0.302263	0.676455	3780.29	FALSE	#REF!
2022-09-12	12:08:33	0.303524	1.35014	0.676455	3780.96	FALSE	#REF!
2022-09-12	12:08:33	0.0847458	0.376966	0.676455	3781.64	FALSE	#REF!
2022-09-12	12:08:34	0.383372	1.70532	1.28568	3782.93	FALSE	#REF!
2022-09-12	12:08:34	0.195229	0.868418	1.28568	3784.21	FALSE	#REF!
2022-09-12	12:08:34	0.342914	1.52535	1.28568	3785.5	FALSE	#REF!
2022-09-12	12:08:34	0.234618	1.04363	1.28568	3786.78	FALSE	#REF!
2022-09-12	12:08:35	0.297163	1.32184	4.96591	3791.75	FALSE	#REF!
2022-09-12	12:08:35	0.365509	1.62586	4.96591	3796.71	FALSE	#REF!
2022-09-12	12:08:35	2.24642	9.99253	4.96591	3801.68	FALSE	#REF!
2022-09-12	12:08:35	1.55645	6.9234	4.96591	3806.65	FALSE	#REF!
2022-09-12	12:08:36	1.82927	8.13696	7.37811	3814.02	FALSE	#REF!
2022-09-12	12:08:36	0.985916	4.38555	7.37811	3821.4	FALSE	#REF!
2022-09-12	12:08:36	1.50352	6.68796	7.37811	3828.78	FALSE	#REF!
2022-09-12	12:08:36	2.31599	10.302	7.37811	3836.16	FALSE	#REF!
2022-09-12	12:08:37	2.11955	9.42818	8.62514	3844.78	FALSE	#REF!
2022-09-12	12:08:37	2.91782	12.979	8.62514	3853.41	FALSE	#REF!
2022-09-12	12:08:37	1.27762	5.68311	8.62514	3862.03	FALSE	#REF!
2022-09-12	12:08:37	1.44108	6.41021	8.62514	3870.66	FALSE	#REF!
2022-09-12	12:08:38	0.694924	3.09116	3.44581	3874.11	FALSE	#REF!
2022-09-12	12:08:38	0.904746	4.02449	3.44581	3877.55	FALSE	#REF!
2022-09-12	12:08:38	0.724288	3.22178	3.44581	3881	FALSE	#REF!
2022-09-12	12:08:39	0.840471	3.73858	6.49285	3887.49	FALSE	#REF!
2022-09-12	12:08:39	1.45986	6.49375	6.49285	3893.98	FALSE	#REF!
2022-09-12	12:08:39	1.34658	5.98986	6.49285	3900.48	FALSE	#REF!
2022-09-12	12:08:39	2.19172	9.74921	6.49285	3906.97	FALSE	#REF!
2022-09-12	12:08:40	3.57813	15.9162	8.61535	3915.58	1	#REF!
2022-09-12	12:08:40	3.11044	13.8359	8.61535	3924.2	1	#REF!
2022-09-12	12:08:40	0.608562	2.70701	8.61535	3932.81	FALSE	#REF!
2022-09-12	12:08:40	0.45014	2.00231	8.61535	3941.43	FALSE	#REF!
2022-09-12	12:08:41	0.141082	0.627561	1.2631	3942.69	FALSE	#REF!
2022-09-12	12:08:41	0.295382	1.31392	1.2631	3943.96	FALSE	#REF!
2022-09-12	12:08:41	0.173499	0.771758	1.2631	3945.22	FALSE	#REF!
2022-09-12	12:08:41	0.525865	2.33915	1.2631	3946.48	FALSE	#REF!
2022-09-12	12:08:42	3.01609	13.4162	11.0421	3957.52	1	#REF!
2022-09-12	12:08:42	2.41645	10.7489	11.0421	3968.57	FALSE	#REF!
2022-09-12	12:08:42	2.01457	8.96121	11.0421	3979.61	FALSE	#REF!
2022-09-12	12:08:43	2.04413	9.0927	7.43036	3987.04	FALSE	#REF!
2022-09-12	12:08:43	1.18368	5.26525	7.43036	3994.47	FALSE	#REF!
2022-09-12	12:08:43	1.71523	7.62969	7.43036	4001.9	FALSE	#REF!
2022-09-12	12:08:43	1.73864	7.73382	7.43036	4009.33	FALSE	#REF!
2022-09-12	12:08:44	2.55095	11.3471	9.75378	4019.08	FALSE	#REF!
2022-09-12	12:08:44	1.43223	6.37085	9.75378	4028.84	FALSE	#REF!
2022-09-12	12:08:44	2.648	11.7788	9.75378	4038.59	FALSE	#REF!
2022-09-12	12:08:44	2.13981	9.5183	9.75378	4048.35	FALSE	#REF!
2022-09-12	12:08:45	1.69762	7.55135	4.58731	4052.93	FALSE	#REF!
2022-09-12	12:08:45	1.24098	5.52013	4.58731	4057.52	FALSE	#REF!
2022-09-12	12:08:45	0.809784	3.60208	4.58731	4062.11	FALSE	#REF!
2022-09-12	12:08:45	0.376705	1.67566	4.58731	4066.69	FALSE	#REF!
2022-09-12	12:08:46	0.264593	1.17696	1.28049	4067.97	FALSE	#REF!
2022-09-12	12:08:46	0.390954	1.73904	1.28049	4069.26	FALSE	#REF!
2022-09-12	12:08:46	0.208054	0.925466	1.28049	4070.54	FALSE	#REF!
2022-09-12	12:08:47	0.402863	1.79202	1.12909	4071.66	FALSE	#REF!
2022-09-12	12:08:47	0.175178	0.779227	1.12909	4072.79	FALSE	#REF!
2022-09-12	12:08:47	0.32327	1.43797	1.12909	4073.92	FALSE	#REF!
2022-09-12	12:08:47	0.114008	0.50713	1.12909	4075.05	FALSE	#REF!
2022-09-12	12:08:48	0.101336	0.450763	4.52353	4079.58	FALSE	#REF!
2022-09-12	12:08:48	2.43508	10.8317	4.52353	4084.1	FALSE	#REF!
2022-09-12	12:08:48	0.657315	2.92387	4.52353	4088.62	FALSE	#REF!
2022-09-12	12:08:48	0.874007	3.88776	4.52353	4093.15	FALSE	#REF!
2022-09-12	12:08:49	0.707595	3.14752	3.58997	4096.74	FALSE	#REF!
2022-09-12	12:08:49	0.715738	3.18375	3.58997	4100.33	FALSE	#REF!
2022-09-12	12:08:49	1.38149	6.14514	3.58997	4103.92	FALSE	#REF!
2022-09-12	12:08:49	0.423423	1.88347	3.58997	4107.51	FALSE	#REF!
2022-09-12	12:08:50	0.824695	3.66841	2.88856	4110.39	FALSE	#REF!
2022-09-12	12:08:50	0.397163	1.76666	2.88856	4113.28	FALSE	#REF!
2022-09-12	12:08:50	0.726272	3.2306	2.88856	4116.17	FALSE	#REF!
2022-09-12	12:08:51	0.806985	3.58963	2.75421	4118.93	FALSE	#REF!
2022-09-12	12:08:51	0.648715	2.88561	2.75421	4121.68	FALSE	#REF!
2022-09-12	12:08:51	0.482914	2.1481	2.75421	4124.43	FALSE	#REF!
2022-09-12	12:08:51	0.538079	2.39348	2.75421	4127.19	FALSE	#REF!
2022-09-12	12:08:52	0.685153	3.0477	2.98941	4130.18	FALSE	#REF!
2022-09-12	12:08:52	1.13849	5.06423	2.98941	4133.17	FALSE	#REF!
2022-09-12	12:08:52	0.348562	1.55047	2.98941	4136.16	FALSE	#REF!
2022-09-12	12:08:52	0.515992	2.29524	2.98941	4139.15	FALSE	#REF!
2022-09-12	12:08:53	0.767035	3.41193	3.80576	4142.95	FALSE	#REF!
2022-09-12	12:08:53	1.08495	4.82607	3.80576	4146.76	FALSE	#REF!
2022-09-12	12:08:53	0.815382	3.62698	3.80576	4150.56	FALSE	#REF!
2022-09-12	12:08:53	0.754924	3.35805	3.80576	4154.37	FALSE	#REF!
2022-09-12	12:08:54	0.716807	3.1885	2.57601	4156.95	FALSE	#REF!
2022-09-12	12:08:54	0.5993	2.66581	2.57601	4159.52	FALSE	#REF!
2022-09-12	12:08:54	0.421234	1.87373	2.57601	4162.1	FALSE	#REF!
2022-09-12	12:08:55	0.327188	1.4554	1.65115	4163.75	FALSE	#REF!
2022-09-12	12:08:55	0.41243	1.83457	1.65115	4165.4	FALSE	#REF!
2022-09-12	12:08:55	0.340776	1.51584	1.65115	4167.05	FALSE	#REF!
2022-09-12	12:08:55	0.404389	1.7988	1.65115	4168.7	FALSE	#REF!
2022-09-12	12:08:56	0.677773	3.01487	3.50808	4172.21	FALSE	#REF!
2022-09-12	12:08:56	0.685611	3.04973	3.50808	4175.72	FALSE	#REF!
2022-09-12	12:08:56	0.990649	4.4066	3.50808	4179.23	FALSE	#REF!
2022-09-12	12:08:56	0.800572	3.5611	3.50808	4182.73	FALSE	#REF!
2022-09-12	12:08:57	1.01223	4.5026	3.619	4186.35	FALSE	#REF!
2022-09-12	12:08:57	0.578384	2.57277	3.619	4189.97	FALSE	#REF!
2022-09-12	12:08:57	1.07604	4.78644	3.619	4193.59	FALSE	#REF!
2022-09-12	12:08:57	0.587697	2.61419	3.619	4197.21	FALSE	#REF!
2022-09-12	12:08:58	1.52576	6.78689	6.34531	4203.56	FALSE	#REF!
2022-09-12	12:08:58	0.966221	4.29794	6.34531	4209.9	FALSE	#REF!
2022-09-12	12:08:58	1.78749	7.95111	6.34531	4216.25	FALSE	#REF!
2022-09-12	12:08:59	0.469428	2.08811	4.37248	4220.62	FALSE	#REF!
2022-09-12	12:08:59	0.978995	4.35477	4.37248	4224.99	FALSE	#REF!
2022-09-12	12:08:59	1.10963	4.93586	4.37248	4229.36	FALSE	#REF!
2022-09-12	12:08:59	1.37386	6.1112	4.37248	4233.74	FALSE	#REF!
2022-09-12	12:09:00	1.14286	5.08367	7.68616	4241.42	FALSE	#REF!
2022-09-12	12:09:00	1.39497	6.20511	7.68616	4249.11	FALSE	#REF!
2022-09-12	12:09:00	2.50108	11.1253	7.68616	4256.79	FALSE	#REF!
2022-09-12	12:09:00	1.87279	8.33054	7.68616	4264.48	FALSE	#REF!
2022-09-12	12:09:01	1.39503	6.20537	5.59625	4270.08	FALSE	#REF!
2022-09-12	12:09:01	1.08414	4.82247	5.59625	4275.67	FALSE	#REF!
2022-09-12	12:09:01	1.04917	4.66692	5.59625	4281.27	FALSE	#REF!
2022-09-12	12:09:01	1.50403	6.69023	5.59625	4286.87	FALSE	#REF!
2022-09-12	12:09:02	1.3595	6.04733	7.22085	4294.09	FALSE	#REF!
2022-09-12	12:09:02	1.70368	7.57831	7.22085	4301.31	FALSE	#REF!
2022-09-12	12:09:02	1.80678	8.03692	7.22085	4308.53	FALSE	#REF!
2022-09-12	12:09:03	1.42128	6.32214	6.71626	4315.24	FALSE	#REF!
2022-09-12	12:09:03	1.46413	6.51274	6.71626	4321.96	FALSE	#REF!
2022-09-12	12:09:03	1.55457	6.91504	6.71626	4328.68	FALSE	#REF!
2022-09-12	12:09:03	1.59955	7.11512	6.71626	4335.39	FALSE	#REF!
2022-09-12	12:09:04	1.5477	6.88448	5.39132	4340.78	FALSE	#REF!
2022-09-12	12:09:04	1.63721	7.28264	5.39132	4346.18	FALSE	#REF!
2022-09-12	12:09:04	1.05243	4.68142	5.39132	4351.57	FALSE	#REF!
2022-09-12	12:09:04	0.610751	2.71674	5.39132	4356.96	FALSE	#REF!
2022-09-12	12:09:05	0.743015	3.30508	6.38838	4363.35	FALSE	#REF!
2022-09-12	12:09:05	0.716501	3.18714	6.38838	4369.74	FALSE	#REF!
2022-09-12	12:09:05	1.97457	8.78328	6.38838	4376.12	FALSE	#REF!
2022-09-12	12:09:05	2.3106	10.278	6.38838	4382.51	FALSE	#REF!
2022-09-12	12:09:06	1.89548	8.43147	4.95834	4387.47	FALSE	#REF!
2022-09-12	12:09:06	0.994924	4.42562	4.95834	4392.43	FALSE	#REF!
2022-09-12	12:09:06	0.453652	2.01793	4.95834	4397.39	FALSE	#REF!
2022-09-12	12:09:07	0.865102	3.84815	4.91555	4402.3	FALSE	#REF!
2022-09-12	12:09:07	0.993397	4.41883	4.91555	4407.22	FALSE	#REF!
2022-09-12	12:09:07	1.35645	6.03376	4.91555	4412.13	FALSE	#REF!
2022-09-12	12:09:07	1.20531	5.36146	4.91555	4417.05	FALSE	#REF!
2022-09-12	12:09:08	1.92948	8.58271	7.6045	4424.65	FALSE	#REF!
2022-09-12	12:09:08	1.4167	6.30176	7.6045	4432.26	FALSE	#REF!
2022-09-12	12:09:08	1.85645	8.25786	7.6045	4439.86	FALSE	#REF!
2022-09-12	12:09:08	1.63564	7.27565	7.6045	4447.47	FALSE	#REF!
2022-09-12	12:09:09	3.67497	16.347	10.3788	4457.85	1	#REF!
2022-09-12	12:09:09	1.37777	6.1286	10.3788	4468.22	FALSE	#REF!
2022-09-12	12:09:09	2.73248	12.1546	10.3788	4478.6	FALSE	#REF!
2022-09-12	12:09:09	1.5478	6.88492	10.3788	4488.98	FALSE	#REF!
2022-09-12	12:09:10	1.99197	8.86068	4.30964	4493.29	FALSE	#REF!
2022-09-12	12:09:10	0.457367	2.03446	4.30964	4497.6	FALSE	#REF!
2022-09-12	12:09:10	0.457214	2.03378	4.30964	4501.91	FALSE	#REF!
2022-09-12	12:09:11	2.27838	10.1347	6.27547	4508.19	FALSE	#REF!
2022-09-12	12:09:11	0.686119	3.05199	6.27547	4514.46	FALSE	#REF!
2022-09-12	12:09:11	1.89116	8.41226	6.27547	4520.74	FALSE	#REF!
2022-09-12	12:09:11	0.787494	3.50293	6.27547	4527.01	FALSE	#REF!
2022-09-12	12:09:12	2.62072	11.6575	8.72804	4535.74	FALSE	#REF!
2022-09-12	12:09:12	1.29401	5.75602	8.72804	4544.47	FALSE	#REF!
2022-09-12	12:09:12	2.44856	10.8917	8.72804	4553.2	FALSE	#REF!
2022-09-12	12:09:12	1.48531	6.60696	8.72804	4561.93	FALSE	#REF!
2022-09-12	12:09:13	1.0277	4.57142	5.51629	4567.44	FALSE	#REF!
2022-09-12	12:09:13	1.25691	5.59099	5.51629	4572.96	FALSE	#REF!
2022-09-12	12:09:13	1.43574	6.38646	5.51629	4578.47	FALSE	#REF!
2022-09-12	12:09:14	2.20734	9.81869	6.74451	4585.22	FALSE	#REF!
2022-09-12	12:09:14	0.815738	3.62857	6.74451	4591.96	FALSE	#REF!
2022-09-12	12:09:14	1.72358	7.66683	6.74451	4598.71	FALSE	#REF!
2022-09-12	12:09:14	1.31828	5.86397	6.74451	4605.45	FALSE	#REF!
2022-09-12	12:09:15	2.49961	11.1188	7.92436	4613.38	FALSE	#REF!
2022-09-12	12:09:15	1.07385	4.7767	7.92436	4621.3	FALSE	#REF!
2022-09-12	12:09:15	2.17314	9.66656	7.92436	4629.23	FALSE	#REF!
2022-09-12	12:09:15	1.3793	6.1354	7.92436	4637.15	FALSE	#REF!
2022-09-12	12:09:16	2.61558	11.6346	6.62997	4643.78	FALSE	#REF!
2022-09-12	12:09:16	1.11747	4.97073	6.62997	4650.41	FALSE	#REF!
2022-09-12	12:09:16	1.42933	6.35795	6.62997	4657.04	FALSE	#REF!
2022-09-12	12:09:16	0.799555	3.55658	6.62997	4663.67	FALSE	#REF!
2022-09-12	12:09:17	0.347545	1.54595	0.919239	4664.59	FALSE	#REF!
2022-09-12	12:09:17	0.205153	0.912562	0.919239	4665.51	FALSE	#REF!
2022-09-12	12:09:17	0.0573666	0.255178	0.919239	4666.43	FALSE	#REF!
2022-09-12	12:09:17	0.216552	0.963267	0.919239	4667.35	FALSE	#REF!
2022-09-12	12:09:18	-0.0765264	-0.340405	0.307168	4667.65	FALSE	#REF!
2022-09-12	12:09:18	0.309987	1.37888	0.307168	4667.96	FALSE	#REF!
2022-09-12	12:09:18	-0.0262975	-0.116977	0.307168	4668.27	FALSE	#REF!
2022-09-12	12:09:19	0.170751	0.759535	0.710562	4668.98	FALSE	#REF!
2022-09-12	12:09:19	-0.0219717	-0.0977345	0.710562		FALSE	#REF!
2022-09-12	12:09:19	0.330445	1.46989	0.710562		FALSE	#REF!

## Sheet: Sunny_prong_2022912120359 ( (2)
Date	Time	Lbs	Newtons	Total force x time	Total Time Steps Force >13.345		**GoPro Fitting: 1153
2022-09-12	12:04:19	0.513448	2.28392	2.28392		0
2022-09-12	12:04:19	0.682608	3.03638	3.03638		0
2022-09-12	12:04:19	0.322812	1.43593	3.71985		0
2022-09-12	12:04:20	0.829326	3.68901	6.72538	FALSE	0			Total force x time	2293.9
2022-09-12	12:04:20	1.69457	7.53779	11.2576	FALSE	0			Total Time Steps Force >3	43
2022-09-12	12:04:20	0.459453	2.04374	8.76912	FALSE	0
2022-09-12	12:04:20	0.373499	1.6614	12.919	FALSE	0
2022-09-12	12:04:21	0.288512	1.28336	10.0525	FALSE	0
2022-09-12	12:04:21	0.318181	1.41533	14.3344	FALSE	0
2022-09-12	12:04:21	0.125407	0.557835	10.6103	FALSE	0
2022-09-12	12:04:21	0.208664	0.928179	15.2625	FALSE	0
2022-09-12	12:04:22	0.281743	1.25325	11.8636	FALSE	0
2022-09-12	12:04:22	0.204644	0.910297	16.1728	FALSE	0
2022-09-12	12:04:22	0.502863	2.23684	14.1004	FALSE	0
2022-09-12	12:04:22	0.298944	1.32976	17.5026	FALSE	0
2022-09-12	12:04:23	0.285	1.26774	15.3681	FALSE	0
2022-09-12	12:04:23	0.171412	0.762475	18.2651	FALSE	0
2022-09-12	12:04:23	0.247545	1.10113	16.4693	FALSE	0
2022-09-12	12:04:24	0.258028	1.14776	19.4128	FALSE	0
2022-09-12	12:04:24	0.0707508	0.314714	16.784	FALSE	0
2022-09-12	12:04:24	0.0432699	0.192473	19.6053	FALSE	0
2022-09-12	12:04:24	-0.105788	-0.470566	16.784	FALSE	0
2022-09-12	12:04:25	-0.0650761	-0.289472	19.6053	FALSE	0
2022-09-12	12:04:25	-0.0999361	-0.444536	16.784	FALSE	0
2022-09-12	12:04:25	0.197926	0.880414	20.4857	FALSE	0
2022-09-12	12:04:25	0.160471	0.713807	17.4978	FALSE	0
2022-09-12	12:04:26	0.263066	1.17017	21.6559	FALSE	0
2022-09-12	12:04:26	0.250344	1.11358	18.6114	FALSE	0
2022-09-12	12:04:26	0.149428	0.664686	22.3206	FALSE	0
2022-09-12	12:04:26	0.472074	2.09988	20.7112	FALSE	0
2022-09-12	12:04:27	0.179708	0.799377	23.12	FALSE	0
2022-09-12	12:04:27	0.658639	2.92976	23.641	FALSE	0
2022-09-12	12:04:27	0.308613	1.37277	24.4927	FALSE	0
2022-09-12	12:04:28	0.35645	1.58556	25.2266	FALSE	0
2022-09-12	12:04:28	0.25986	1.15591	25.6486	FALSE	0
2022-09-12	12:04:28	0.218791	0.973226	26.1998	FALSE	0
2022-09-12	12:04:28	0.377774	1.68041	27.3291	FALSE	0
2022-09-12	12:04:29	0.12271	0.545839	26.7456	FALSE	0
2022-09-12	12:04:29	0.396298	1.76281	29.0919	FALSE	0
2022-09-12	12:04:29	0.565356	2.51482	29.2604	FALSE	0
2022-09-12	12:04:29	0.660471	2.93791	32.0298	FALSE	0
2022-09-12	12:04:30	0.310598	1.3816	30.6421	FALSE	0
2022-09-12	12:04:30	0.571565	2.54244	34.5722	FALSE	0
2022-09-12	12:04:30	1.22307	5.44046	36.0825	FALSE	0
2022-09-12	12:04:30	2.26515	10.0758	44.6481	FALSE	0
2022-09-12	12:04:31	0.699555	3.11176	39.1943	FALSE	0
2022-09-12	12:04:31	0.329835	1.46717	46.1152	FALSE	0
2022-09-12	12:04:31	0.587799	2.61465	41.8089	FALSE	0
2022-09-12	12:04:31	0.329224	1.46445	47.5797	FALSE	0
2022-09-12	12:04:32	0.579504	2.57775	44.3867	FALSE	0
2022-09-12	12:04:32	0.436654	1.94232	49.522	FALSE	0
2022-09-12	12:04:32	1.62581	7.23193	51.6186	FALSE	0
2022-09-12	12:04:33	0.349529	1.55477	51.0768	FALSE	0
2022-09-12	12:04:33	0.247443	1.10068	52.7193	FALSE	0
2022-09-12	12:04:33	0.3507	1.55998	52.6368	FALSE	0
2022-09-12	12:04:33	0.111158	0.494453	53.2137	FALSE	0
2022-09-12	12:04:34	0.34673	1.54232	54.1791	FALSE	0
2022-09-12	12:04:34	0.170547	0.758627	53.9724	FALSE	0
2022-09-12	12:04:34	0.193448	0.860495	55.0396	FALSE	0
2022-09-12	12:04:34	0.149224	0.663778	54.6361	FALSE	0
2022-09-12	12:04:35	0.22897	1.0185	56.0581	FALSE	0
2022-09-12	12:04:35	0.499402	2.22144	56.8576	FALSE	0
2022-09-12	12:04:35	0.818486	3.64079	59.6989	FALSE	0
2022-09-12	12:04:35	0.407596	1.81307	58.6706	FALSE	0
2022-09-12	12:04:36	0.202099	0.898977	60.5979	FALSE	0
2022-09-12	12:04:36	0.356858	1.58738	60.258	FALSE	0
2022-09-12	12:04:36	0.264542	1.17674	61.7746	FALSE	0
2022-09-12	12:04:37	0.17869	0.794849	61.0529	FALSE	0
2022-09-12	12:04:37	0.315942	1.40537	63.18	FALSE	0
2022-09-12	12:04:37	0.495585	2.20446	63.2573	FALSE	0
2022-09-12	12:04:37	0.335687	1.4932	64.6732	FALSE	0
2022-09-12	12:04:38	0.49355	2.19541	65.4527	FALSE	0
2022-09-12	12:04:38	0.270802	1.20458	65.8777	FALSE	0
2022-09-12	12:04:38	0.271311	1.20685	66.6596	FALSE	0
2022-09-12	12:04:38	0.0922776	0.410469	66.2882	FALSE	0
2022-09-12	12:04:39	0.290293	1.29128	67.9509	FALSE	0
2022-09-12	12:04:39	0.133397	0.593377	66.8816	FALSE	0
2022-09-12	12:04:39	0.290598	1.29264	69.2435	FALSE	0
2022-09-12	12:04:39	0.202354	0.900111	67.7817	FALSE	0
2022-09-12	12:04:40	0.159911	0.711316	69.9548	FALSE	0
2022-09-12	12:04:40	0.167697	0.74595	68.5277	FALSE	0
2022-09-12	12:04:40	0.0857635	0.381493	70.3363	FALSE	0
2022-09-12	12:04:41	0.269377	1.19824	69.7259	FALSE	0
2022-09-12	12:04:41	0.203677	0.905996	71.2423	FALSE	0
2022-09-12	12:04:41	0.932481	4.14786	73.8738	FALSE	0
2022-09-12	12:04:41	0.745	3.31391	74.5562	FALSE	0
2022-09-12	12:04:42	1.82632	8.12384	81.9976	FALSE	0
2022-09-12	12:04:42	0.240776	1.07102	75.6272	FALSE	0
2022-09-12	12:04:42	0.135942	0.604697	82.6023	FALSE	0
2022-09-12	12:04:42	0.179046	0.796432	76.4237	FALSE	0
2022-09-12	12:04:43	-0.038613	-0.171758	82.6023	FALSE	0
2022-09-12	12:04:43	0.0617941	0.274873	76.6985	FALSE	0
2022-09-12	12:04:43	0.113092	0.503056	83.1053	FALSE	0
2022-09-12	12:04:43	1.33665	5.94569	82.6442	FALSE	0
2022-09-12	12:04:44	0.18098	0.805035	83.9104	FALSE	0
2022-09-12	12:04:44	0.268562	1.19462	83.8388	FALSE	0
2022-09-12	12:04:44	0.186883	0.831293	84.7417	FALSE	0
2022-09-12	12:04:45	0.265204	1.17968	85.0185	FALSE	0
2022-09-12	12:04:45	0.359758	1.60028	86.342	FALSE	0
2022-09-12	12:04:45	0.359911	1.60096	86.6195	FALSE	0
2022-09-12	12:04:45	0.77472	3.44611	89.7881	FALSE	0
2022-09-12	12:04:46	0.101845	0.453027	87.0725	FALSE	0
2022-09-12	12:04:46	0.760827	3.38431	93.1724	FALSE	0
2022-09-12	12:04:46	0.358944	1.59665	88.6692	FALSE	0
2022-09-12	12:04:46	0.145306	0.64635	93.8187	FALSE	0
2022-09-12	12:04:47	0.00703587	0.031297	88.7005	FALSE	0
2022-09-12	12:04:47	0.193753	0.861852	94.6806	FALSE	0
2022-09-12	12:04:47	0.134924	0.600169	89.3006	FALSE	0
2022-09-12	12:04:47	0.236451	1.05178	95.7324	FALSE	0
2022-09-12	12:04:48	0.07813	0.347538	89.6482	FALSE	0
2022-09-12	12:04:48	0.117672	0.523429	96.2558	FALSE	0
2022-09-12	12:04:48	0.0308527	0.137239	89.7854	FALSE	0
2022-09-12	12:04:49	-0.12701	-0.564966	96.2558	FALSE	0
2022-09-12	12:04:49	-0.198002	-0.880752	89.7854	FALSE	0
2022-09-12	12:04:49	-0.218562	-0.972207	96.2558	FALSE	0
2022-09-12	12:04:49	-0.186501	-0.829594	89.7854	FALSE	0
2022-09-12	12:04:50	-0.179071	-0.796544	96.2558	FALSE	0
2022-09-12	12:04:50	-0.00634836	-0.0282388	89.7854	FALSE	0
2022-09-12	12:04:50	-0.0718954	-0.319805	96.2558	FALSE	0
2022-09-12	12:04:50	0.0632699	0.281437	90.0668	FALSE	0
2022-09-12	12:04:51	-0.0285875	-0.127163	96.2558	FALSE	0
2022-09-12	12:04:51	0.271361	1.20707	91.2739	FALSE	0
2022-09-12	12:04:51	0.212634	0.945839	97.2016	FALSE	0
2022-09-12	12:04:51	0.203677	0.905996	92.1799	FALSE	0
2022-09-12	12:04:52	0.336247	1.49569	98.6973	FALSE	0
2022-09-12	12:04:52	0.202252	0.899657	93.0796	FALSE	0
2022-09-12	12:04:52	0.422456	1.87917	100.576	FALSE	0
2022-09-12	12:04:53	0.147138	0.654499	93.7341	FALSE	0
2022-09-12	12:04:53	0.435484	1.93712	102.514	FALSE	0
2022-09-12	12:04:53	0.196349	0.8734	94.6075	FALSE	0
2022-09-12	12:04:53	0.3593	1.59824	104.112	FALSE	0
2022-09-12	12:04:54	0.323982	1.44114	96.0486	FALSE	0
2022-09-12	12:04:54	6.07792	27.0358	131.148	1	1
2022-09-12	12:04:54	7.54011	33.5399	129.589	1	2
2022-09-12	12:04:54	0.843219	3.75081	134.898	FALSE	2
2022-09-12	12:04:55	0.32383	1.44046	131.029	FALSE	2
2022-09-12	12:04:55	0.432786	1.92512	136.824	FALSE	2
2022-09-12	12:04:55	0.725814	3.22857	134.258	FALSE	2
2022-09-12	12:04:55	1.17676	5.23446	142.058	FALSE	2
2022-09-12	12:04:56	0.739911	3.29127	137.549	FALSE	2
2022-09-12	12:04:56	1.21991	5.4264	147.484	FALSE	2
2022-09-12	12:04:56	1.30912	5.82323	143.372	FALSE	2
2022-09-12	12:04:57	0.625051	2.78035	150.265	FALSE	2
2022-09-12	12:04:57	0.376094	1.67294	145.045	FALSE	2
2022-09-12	12:04:57	0.321031	1.42801	151.693	FALSE	2
2022-09-12	12:04:57	0.363423	1.61658	146.662	FALSE	2
2022-09-12	12:04:58	0.495483	2.20401	153.897	FALSE	2
2022-09-12	12:04:58	0.716196	3.18578	149.847	FALSE	2
2022-09-12	12:04:58	0.953753	4.24248	158.139	FALSE	2
2022-09-12	12:04:58	1.05452	4.69072	154.538	FALSE	2
2022-09-12	12:04:59	0.94617	4.20875	162.348	FALSE	2
2022-09-12	12:04:59	1.12663	5.01148	159.55	FALSE	2
2022-09-12	12:04:59	1.10505	4.91548	167.264	FALSE	2
2022-09-12	12:04:59	1.09319	4.86273	164.412	FALSE	2
2022-09-12	12:05:00	0.489478	2.1773	169.441	FALSE	2
2022-09-12	12:05:00	0.361183	1.60661	166.019	FALSE	2
2022-09-12	12:05:00	0.362659	1.61318	171.054	FALSE	2
2022-09-12	12:05:00	0.379657	1.68879	167.708	FALSE	2
2022-09-12	12:05:01	0.347799	1.54708	172.601	FALSE	2
2022-09-12	12:05:01	0.192786	0.857551	168.565	FALSE	2
2022-09-12	12:05:01	0.397468	1.76802	174.369	FALSE	2
2022-09-12	12:05:02	0.287443	1.2786	169.844	FALSE	2
2022-09-12	12:05:02	0.420013	1.8683	176.237	FALSE	2
2022-09-12	12:05:02	0.445611	1.98217	171.826	FALSE	2
2022-09-12	12:05:02	0.679809	3.02393	179.261	FALSE	2
2022-09-12	12:05:03	0.668003	2.97141	174.797	FALSE	2
2022-09-12	12:05:03	0.693295	3.08391	182.345	FALSE	2
2022-09-12	12:05:03	0.631463	2.80887	177.606	FALSE	2
2022-09-12	12:05:03	0.545712	2.42744	184.773	FALSE	2
2022-09-12	12:05:04	0.567137	2.52274	180.129	FALSE	2
2022-09-12	12:05:04	0.574211	2.55421	187.327	FALSE	2
2022-09-12	12:05:04	0.558842	2.48584	182.615	FALSE	2
2022-09-12	12:05:04	0.294517	1.31007	188.637	FALSE	2
2022-09-12	12:05:05	0.348104	1.54844	184.163	FALSE	2
2022-09-12	12:05:05	0.305204	1.35761	189.995	FALSE	2
2022-09-12	12:05:05	0.362965	1.61454	185.778	FALSE	2
2022-09-12	12:05:06	1.04622	4.6538	194.648	FALSE	2
2022-09-12	12:05:06	3.07925	13.6971	199.475	1	3
2022-09-12	12:05:06	3.02851	13.4714	208.12	1	4
2022-09-12	12:05:06	0.990038	4.40389	203.879	FALSE	4
2022-09-12	12:05:07	0.538435	2.39507	210.515	FALSE	4
2022-09-12	12:05:07	0.297926	1.32523	205.204	FALSE	4
2022-09-12	12:05:07	0.393041	1.74832	212.263	FALSE	4
2022-09-12	12:05:07	1.30159	5.78973	210.994	FALSE	4
2022-09-12	12:05:08	0.928817	4.13156	216.395	FALSE	4
2022-09-12	12:05:08	1.30413	5.80103	216.795	FALSE	4
2022-09-12	12:05:08	1.15289	5.12829	221.523	FALSE	4
2022-09-12	12:05:08	1.22424	5.44566	222.241	FALSE	4
2022-09-12	12:05:09	1.70943	7.60389	229.127	FALSE	4
2022-09-12	12:05:09	2.31884	10.3147	232.555	FALSE	4
2022-09-12	12:05:09	1.81212	8.06067	237.188	FALSE	4
2022-09-12	12:05:10	1.85553	8.25377	240.809	FALSE	4
2022-09-12	12:05:10	4.51273	20.0735	257.261	1	5
2022-09-12	12:05:10	3.0424	13.5332	254.342	1	6
2022-09-12	12:05:10	1.56062	6.94195	264.203	FALSE	6
2022-09-12	12:05:11	0.456807	2.03197	256.374	FALSE	6
2022-09-12	12:05:11	0.361743	1.60911	265.812	FALSE	6
2022-09-12	12:05:11	0.276603	1.23039	257.604	FALSE	6
2022-09-12	12:05:11	0.837265	3.72432	269.536	FALSE	6
2022-09-12	12:05:12	2.11039	9.38744	266.992	FALSE	6
2022-09-12	12:05:12	1.92724	8.57275	278.109	FALSE	6
2022-09-12	12:05:12	2.13971	9.51786	276.51	FALSE	6
2022-09-12	12:05:12	3.58261	15.9362	294.045	1	7
2022-09-12	12:05:13	1.42668	6.34616	282.856	FALSE	7
2022-09-12	12:05:13	0.711158	3.16337	297.209	FALSE	7
2022-09-12	12:05:13	0.343473	1.52784	284.384	FALSE	7
2022-09-12	12:05:14	0.530089	2.35794	299.567	FALSE	7
2022-09-12	12:05:14	0.343931	1.52987	285.914	FALSE	7
2022-09-12	12:05:14	0.311361	1.385	300.952	FALSE	7
2022-09-12	12:05:14	0.423575	1.88415	287.798	FALSE	7
2022-09-12	12:05:15	1.18714	5.28064	306.232	FALSE	7
2022-09-12	12:05:15	1.69889	7.557	295.355	FALSE	7
2022-09-12	12:05:15	1.25309	5.57399	311.806	FALSE	7
2022-09-12	12:05:15	1.36307	6.06321	301.418	FALSE	7
2022-09-12	12:05:16	1.01177	4.50056	316.307	FALSE	7
2022-09-12	12:05:16	0.729224	3.24373	304.662	FALSE	7
2022-09-12	12:05:16	0.542812	2.41454	318.721	FALSE	7
2022-09-12	12:05:16	0.547086	2.43355	307.095	FALSE	7
2022-09-12	12:05:17	0.469886	2.09015	320.812	FALSE	7
2022-09-12	12:05:17	0.361132	1.60639	308.702	FALSE	7
2022-09-12	12:05:17	0.428919	1.90792	322.719	FALSE	7
2022-09-12	12:05:18	0.240522	1.06989	309.772	FALSE	7
2022-09-12	12:05:18	0.322456	1.43435	324.154	FALSE	7
2022-09-12	12:05:18	0.16215	0.721276	310.493	FALSE	7
2022-09-12	12:05:18	0.47014	2.09128	326.245	FALSE	7
2022-09-12	12:05:19	0.180522	0.802998	311.296	FALSE	7
2022-09-12	12:05:19	0.379148	1.68653	327.932	FALSE	7
2022-09-12	12:05:19	0.22556	1.00334	312.299	FALSE	7
2022-09-12	12:05:19	0.405153	1.8022	329.734	FALSE	7
2022-09-12	12:05:20	0.169377	0.753423	313.053	FALSE	7
2022-09-12	12:05:20	0.37243	1.65664	331.39	FALSE	7
2022-09-12	12:05:20	0.351565	1.56383	314.616	FALSE	7
2022-09-12	12:05:20	0.546781	2.43219	333.823	FALSE	7
2022-09-12	12:05:21	0.432888	1.92557	316.542	FALSE	7
2022-09-12	12:05:21	0.421794	1.87622	335.699	FALSE	7
2022-09-12	12:05:21	0.663117	2.94968	319.492	FALSE	7
2022-09-12	12:05:22	1.03513	4.60447	340.303	FALSE	7
2022-09-12	12:05:22	0.860369	3.82709	323.319	FALSE	7
2022-09-12	12:05:22	1.15039	5.11716	345.421	FALSE	7
2022-09-12	12:05:22	1.62561	7.23104	330.55	FALSE	7
2022-09-12	12:05:23	0.882303	3.92466	349.345	FALSE	7
2022-09-12	12:05:23	1.13452	5.04657	335.596	FALSE	7
2022-09-12	12:05:23	1.01721	4.52475	353.87	FALSE	7
2022-09-12	12:05:23	1.03304	4.59517	340.192	FALSE	7
2022-09-12	12:05:24	1.06464	4.73573	358.606	FALSE	7
2022-09-12	12:05:24	0.695534	3.09387	343.285	FALSE	7
2022-09-12	12:05:24	0.424491	1.88822	360.494	FALSE	7
2022-09-12	12:05:24	0.313702	1.39541	344.681	FALSE	7
2022-09-12	12:05:25	0.39584	1.76078	362.255	FALSE	7
2022-09-12	12:05:25	0.407646	1.81329	346.494	FALSE	7
2022-09-12	12:05:25	0.290598	1.29264	363.547	FALSE	7
2022-09-12	12:05:26	0.352074	1.5661	348.06	FALSE	7
2022-09-12	12:05:26	0.144237	0.641595	364.189	FALSE	7
2022-09-12	12:05:26	0.472532	2.10192	350.162	FALSE	7
2022-09-12	12:05:26	0.193651	0.861398	365.05	FALSE	7
2022-09-12	12:05:27	0.42556	1.89298	352.055	FALSE	7
2022-09-12	12:05:27	0.249275	1.10883	366.159	FALSE	7
2022-09-12	12:05:27	0.167901	0.746857	352.802	FALSE	7
2022-09-12	12:05:27	0.194873	0.866834	367.026	FALSE	7
2022-09-12	12:05:28	0.142659	0.634576	353.437	FALSE	7
2022-09-12	12:05:28	0.345713	1.5378	368.564	FALSE	7
2022-09-12	12:05:28	0.0342114	0.152179	353.589	FALSE	7
2022-09-12	12:05:28	0.275025	1.22337	369.787	FALSE	7
2022-09-12	12:05:29	0.0855091	0.380362	353.969	FALSE	7
2022-09-12	12:05:29	0.487545	2.1687	371.956	FALSE	7
2022-09-12	12:05:29	0.937061	4.16823	358.137	FALSE	7
2022-09-12	12:05:30	0.299453	1.33203	373.288	FALSE	7
2022-09-12	12:05:30	0.333295	1.48256	359.62	FALSE	7
2022-09-12	12:05:30	0.497316	2.21216	375.5	FALSE	7
2022-09-12	12:05:30	0.810089	3.60344	363.223	FALSE	7
2022-09-12	12:05:31	2.1993	9.78293	385.283	FALSE	7
2022-09-12	12:05:31	2.11874	9.42458	372.648	FALSE	7
2022-09-12	12:05:31	1.06164	4.72239	390.005	FALSE	7
2022-09-12	12:05:31	1.39314	6.19697	378.845	FALSE	7
2022-09-12	12:05:32	1.58001	7.0282	397.034	FALSE	7
2022-09-12	12:05:32	0.976501	4.34367	383.189	FALSE	7
2022-09-12	12:05:32	0.466985	2.07724	399.111	FALSE	7
2022-09-12	12:05:32	0.7964	3.54255	386.731	FALSE	7
2022-09-12	12:05:33	0.727952	3.23808	402.349	FALSE	7
2022-09-12	12:05:33	0.661183	2.94107	389.672	FALSE	7
2022-09-12	12:05:33	0.852379	3.79155	406.14	FALSE	7
2022-09-12	12:05:34	0.282405	1.25619	390.928	FALSE	7
2022-09-12	12:05:34	0.462456	2.0571	408.198	FALSE	7
2022-09-12	12:05:34	0.242303	1.07781	392.006	FALSE	7
2022-09-12	12:05:34	0.334669	1.48867	409.686	FALSE	7
2022-09-12	12:05:35	0.507748	2.25856	394.265	FALSE	7
2022-09-12	12:05:35	0.902964	4.01656	413.703	FALSE	7
2022-09-12	12:05:35	0.992226	4.41362	398.678	FALSE	7
2022-09-12	12:05:35	0.484288	2.15421	415.857	FALSE	7
2022-09-12	12:05:36	0.652939	2.9044	401.583	FALSE	7
2022-09-12	12:05:36	0.476909	2.12139	417.978	FALSE	7
2022-09-12	12:05:36	0.478995	2.13067	403.713	FALSE	7
2022-09-12	12:05:36	0.261998	1.16542	419.144	FALSE	7
2022-09-12	12:05:37	0.670852	2.98408	406.698	FALSE	7
2022-09-12	12:05:37	0.89299	3.9722	423.116	FALSE	7
2022-09-12	12:05:37	0.913448	4.0632	410.761	FALSE	7
2022-09-12	12:05:38	0.757468	3.36937	426.485	FALSE	7
2022-09-12	12:05:38	2.29508	10.209	420.97	FALSE	7
2022-09-12	12:05:38	0.916908	4.07859	430.564	FALSE	7
2022-09-12	12:05:38	1.18612	5.2761	426.246	FALSE	7
2022-09-12	12:05:39	0.649071	2.8872	433.451	FALSE	7
2022-09-12	12:05:39	1.78149	7.92442	434.17	FALSE	7
2022-09-12	12:05:39	1.90083	8.45527	441.906	FALSE	7
2022-09-12	12:05:39	3.56734	15.8682	450.038	1	8
2022-09-12	12:05:40	2.59172	11.5285	453.435	FALSE	8
2022-09-12	12:05:40	1.4048	6.24883	456.287	FALSE	8
2022-09-12	12:05:40	2.56576	11.413	464.848	FALSE	8
2022-09-12	12:05:40	2.165	9.63035	465.918	FALSE	8
2022-09-12	12:05:41	3.95813	17.6066	482.454	1	9
2022-09-12	12:05:41	0.793244	3.52851	469.446	FALSE	9
2022-09-12	12:05:41	0.925204	4.11549	486.57	FALSE	9
2022-09-12	12:05:41	0.596908	2.65517	472.101	FALSE	9
2022-09-12	12:05:42	0.376247	1.67362	488.244	FALSE	9
2022-09-12	12:05:42	0.718944	3.19801	475.299	FALSE	9
2022-09-12	12:05:42	2.51044	11.1669	499.41	FALSE	9
2022-09-12	12:05:43	4.86342	21.6335	496.933	1	10
2022-09-12	12:05:43	3.71782	16.5376	515.948	1	11
2022-09-12	12:05:43	1.24261	5.52738	502.46	FALSE	11
2022-09-12	12:05:43	0.286171	1.27295	517.221	FALSE	11
2022-09-12	12:05:44	0.441387	1.96338	504.424	FALSE	11
2022-09-12	12:05:44	0.41528	1.84725	519.068	FALSE	11
2022-09-12	12:05:44	0.603117	2.68279	507.106	FALSE	11
2022-09-12	12:05:44	1.0537	4.68707	523.755	FALSE	11
2022-09-12	12:05:45	1.05314	4.68458	511.791	FALSE	11
2022-09-12	12:05:45	1.57167	6.9911	530.746	FALSE	11
2022-09-12	12:05:45	1.96897	8.75837	520.549	FALSE	11
2022-09-12	12:05:45	1.22805	5.46261	536.209	FALSE	11
2022-09-12	12:05:46	0.518333	2.30565	522.855	FALSE	11
2022-09-12	12:05:46	0.359453	1.59892	537.808	FALSE	11
2022-09-12	12:05:46	0.286628	1.27498	524.13	FALSE	11
2022-09-12	12:05:47	1.08622	4.83172	542.64	FALSE	11
2022-09-12	12:05:47	0.434873	1.9344	526.064	FALSE	11
2022-09-12	12:05:47	0.400929	1.78341	544.423	FALSE	11
2022-09-12	12:05:47	0.196043	0.872038	526.936	FALSE	11
2022-09-12	12:05:48	0.259555	1.15455	545.578	FALSE	11
2022-09-12	12:05:48	0.19299	0.858458	527.795	FALSE	11
2022-09-12	12:05:48	0.260573	1.15908	546.737	FALSE	11
2022-09-12	12:05:48	0.369122	1.64193	529.437	FALSE	11
2022-09-12	12:05:49	0.48556	2.15987	548.897	FALSE	11
2022-09-12	12:05:49	0.279046	1.24125	530.678	FALSE	11
2022-09-12	12:05:49	0.303982	1.35217	550.249	FALSE	11
2022-09-12	12:05:49	0.179758	0.7996	531.478	FALSE	11
2022-09-12	12:05:50	1.00907	4.48855	554.737	FALSE	11
2022-09-12	12:05:50	1.62948	7.24825	538.726	FALSE	11
2022-09-12	12:05:50	0.389428	1.73225	556.47	FALSE	11
2022-09-12	12:05:51	0.5764	2.56394	541.29	FALSE	11
2022-09-12	12:05:51	0.656908	2.92206	559.392	FALSE	11
2022-09-12	12:05:51	1.06271	4.72715	546.017	FALSE	11
2022-09-12	12:05:51	1.41574	6.29749	565.689	FALSE	11
2022-09-12	12:05:52	0.620929	2.76202	548.779	FALSE	11
2022-09-12	12:05:52	2.22291	9.88795	575.577	FALSE	11
2022-09-12	12:05:52	0.434059	1.93078	550.71	FALSE	11
2022-09-12	12:05:52	0.633906	2.81974	578.397	FALSE	11
2022-09-12	12:05:53	0.621641	2.76518	553.475	FALSE	11
2022-09-12	12:05:53	1.00251	4.45936	582.856	FALSE	11
2022-09-12	12:05:53	0.4993	2.22099	555.696	FALSE	11
2022-09-12	12:05:53	0.337061	1.49931	584.356	FALSE	11
2022-09-12	12:05:54	0.399249	1.77594	557.472	FALSE	11
2022-09-12	12:05:54	0.145204	0.645896	585.001	FALSE	11
2022-09-12	12:05:54	0.308868	1.37391	558.846	FALSE	11
2022-09-12	12:05:55	0.35411	1.57515	586.577	FALSE	11
2022-09-12	12:05:55	0.0930409	0.413865	559.26	FALSE	11
2022-09-12	12:05:55	-0.0689946	-0.306902	586.577	FALSE	11
2022-09-12	12:05:55	-0.00258246	-0.0114873	559.26	FALSE	11
2022-09-12	12:05:56	0.0833717	0.370854	586.947	FALSE	11
2022-09-12	12:05:56	0.0843895	0.375381	559.635	FALSE	11
2022-09-12	12:05:56	0.0359417	0.159876	587.107	FALSE	11
2022-09-12	12:05:56	0.0882572	0.392586	560.028	FALSE	11
2022-09-12	12:05:57	0.0984353	0.43786	587.545	FALSE	11
2022-09-12	12:05:57	-0.0330659	-0.147084	560.028	FALSE	11
2022-09-12	12:05:57	0.188563	0.838766	588.384	FALSE	11
2022-09-12	12:05:57	-0.00583945	-0.025975	560.028	FALSE	11
2022-09-12	12:05:58	0.0873412	0.388511	588.772	FALSE	11
2022-09-12	12:05:58	-0.0846689	-0.376624	560.028	FALSE	11
2022-09-12	12:05:58	0.126832	0.564174	589.337	FALSE	11
2022-09-12	12:05:59	0.0531936	0.236616	560.264	FALSE	11
2022-09-12	12:05:59	0.120776	0.537236	589.874	FALSE	11
2022-09-12	12:05:59	0.0590969	0.262875	560.527	FALSE	11
2022-09-12	12:05:59	0.194466	0.865024	590.739	FALSE	11
2022-09-12	12:06:00	0.14383	0.639785	561.167	FALSE	11
2022-09-12	12:06:00	0.209071	0.92999	591.669	FALSE	11
2022-09-12	12:06:00	0.0782826	0.348217	561.515	FALSE	11
2022-09-12	12:06:00	0.264644	1.17719	592.846	FALSE	11
2022-09-12	12:06:01	0.179148	0.796886	562.312	FALSE	11
2022-09-12	12:06:01	0.326985	1.45449	594.301	FALSE	11
2022-09-12	12:06:01	0.103575	0.460722	562.773	FALSE	11
2022-09-12	12:06:01	0.286069	1.27249	595.573	FALSE	11
2022-09-12	12:06:02	0.346832	1.54278	564.315	FALSE	11
2022-09-12	12:06:02	1.12546	5.00627	600.579	FALSE	11
2022-09-12	12:06:02	0.781845	3.4778	567.793	FALSE	11
2022-09-12	12:06:03	1.15589	5.14163	605.721	FALSE	11
2022-09-12	12:06:03	0.624338	2.77718	570.57	FALSE	11
2022-09-12	12:06:03	0.843117	3.75035	609.471	FALSE	11
2022-09-12	12:06:03	0.908562	4.04147	574.612	FALSE	11
2022-09-12	12:06:04	1.16398	5.17762	614.649	FALSE	11
2022-09-12	12:06:04	2.08693	9.28308	583.895	FALSE	11
2022-09-12	12:06:04	1.54042	6.8521	621.501	FALSE	11
2022-09-12	12:06:04	2.29614	10.2137	594.109	FALSE	11
2022-09-12	12:06:05	1.525	6.7835	628.285	FALSE	11
2022-09-12	12:06:05	2.57502	11.4542	605.563	FALSE	11
2022-09-12	12:06:05	1.95696	8.70495	636.989	FALSE	11
2022-09-12	12:06:05	1.92444	8.56029	614.123	FALSE	11
2022-09-12	12:06:06	2.43218	10.8188	647.808	FALSE	11
2022-09-12	12:06:06	1.21335	5.39722	619.52	FALSE	11
2022-09-12	12:06:06	1.58897	7.06806	654.876	FALSE	11
2022-09-12	12:06:07	1.25457	5.58058	625.101	FALSE	11
2022-09-12	12:06:07	1.43116	6.36609	661.242	FALSE	11
2022-09-12	12:06:07	1.44184	6.41359	631.515	FALSE	11
2022-09-12	12:06:07	1.08882	4.84329	666.086	FALSE	11
2022-09-12	12:06:08	2.20622	9.81371	641.328	FALSE	11
2022-09-12	12:06:08	1.17248	5.21543	671.301	FALSE	11
2022-09-12	12:06:08	3.39263	15.0911	656.419	1	12
2022-09-12	12:06:08	2.43559	10.834	682.135	FALSE	12
2022-09-12	12:06:09	1.37813	6.1302	662.55	FALSE	12
2022-09-12	12:06:09	1.27782	5.684	687.819	FALSE	12
2022-09-12	12:06:09	0.962862	4.283	666.833	FALSE	12
2022-09-12	12:06:09	2.05447	9.13869	696.958	FALSE	12
2022-09-12	12:06:10	0.466221	2.07384	668.906	FALSE	12
2022-09-12	12:06:10	0.558842	2.48584	699.444	FALSE	12
2022-09-12	12:06:10	0.403779	1.79609	670.702	FALSE	12
2022-09-12	12:06:11	0.287545	1.27906	700.723	FALSE	12
2022-09-12	12:06:11	0.368766	1.64034	672.343	FALSE	12
2022-09-12	12:06:11	0.26785	1.19145	701.914	FALSE	12
2022-09-12	12:06:11	0.207901	0.924785	673.268	FALSE	12
2022-09-12	12:06:12	0.186374	0.829029	702.743	FALSE	12
2022-09-12	12:06:12	0.22729	1.01103	674.279	FALSE	12
2022-09-12	12:06:12	0.232328	1.03344	703.777	FALSE	12
2022-09-12	12:06:12	0.258283	1.14889	675.428	FALSE	12
2022-09-12	12:06:13	0.250445	1.11403	704.891	FALSE	12
2022-09-12	12:06:13	0.2507	1.11516	676.543	FALSE	12
2022-09-12	12:06:13	0.278486	1.23876	706.129	FALSE	12
2022-09-12	12:06:13	0.294873	1.31165	677.854	FALSE	12
2022-09-12	12:06:14	0.297774	1.32456	707.454	FALSE	12
2022-09-12	12:06:14	0.301387	1.34063	679.195	FALSE	12
2022-09-12	12:06:14	0.299351	1.33157	708.786	FALSE	12
2022-09-12	12:06:15	0.295738	1.3155	680.51	FALSE	12
2022-09-12	12:06:15	0.289835	1.28924	710.075	FALSE	12
2022-09-12	12:06:15	0.274975	1.22314	681.734	FALSE	12
2022-09-12	12:06:15	0.270242	1.20209	711.277	FALSE	12
2022-09-12	12:06:16	0.269224	1.19756	682.931	FALSE	12
2022-09-12	12:06:16	0.275483	1.2254	712.502	FALSE	12
2022-09-12	12:06:16	0.276603	1.23039	684.162	FALSE	12
2022-09-12	12:06:16	0.278079	1.23695	713.739	FALSE	12
2022-09-12	12:06:17	0.274771	1.22224	685.384	FALSE	12
2022-09-12	12:06:17	0.277265	1.23333	714.973	FALSE	12
2022-09-12	12:06:17	0.281947	1.25416	686.638	FALSE	12
2022-09-12	12:06:17	0.279657	1.24397	716.217	FALSE	12
2022-09-12	12:06:18	0.272379	1.2116	687.85	FALSE	12
2022-09-12	12:06:18	0.303219	1.34878	717.565	FALSE	12
2022-09-12	12:06:18	0.282761	1.25778	689.107	FALSE	12
2022-09-12	12:06:19	0.250242	1.11313	718.678	FALSE	12
2022-09-12	12:06:19	0.248613	1.10588	690.213	FALSE	12
2022-09-12	12:06:19	0.236705	1.05291	719.731	FALSE	12
2022-09-12	12:06:19	0.24159	1.07464	691.288	FALSE	12
2022-09-12	12:06:20	0.294822	1.31143	721.043	FALSE	12
2022-09-12	12:06:20	0.363015	1.61476	692.903	FALSE	12
2022-09-12	12:06:20	0.380013	1.69037	722.733	FALSE	12
2022-09-12	12:06:20	1.30459	5.80308	698.706	FALSE	12
2022-09-12	12:06:21	2.22281	9.8875	732.621	FALSE	12
2022-09-12	12:06:21	1.42683	6.34683	705.053	FALSE	12
2022-09-12	12:06:21	0.196756	0.87521	733.496	FALSE	12
2022-09-12	12:06:21	0.46841	2.08358	707.136	FALSE	12
2022-09-12	12:06:22	0.0854073	0.379909	733.876	FALSE	12
2022-09-12	12:06:22	0.412176	1.83344	708.97	FALSE	12
2022-09-12	12:06:22	0.141387	0.628918	734.505	FALSE	12
2022-09-12	12:06:22	0.460216	2.04713	711.017	FALSE	12
2022-09-12	12:06:23	0.335891	1.49411	735.999	FALSE	12
2022-09-12	12:06:23	0.418181	1.86015	712.877	FALSE	12
2022-09-12	12:06:23	0.428664	1.90678	737.906	FALSE	12
2022-09-12	12:06:24	0.517112	2.30022	715.177	FALSE	12
2022-09-12	12:06:24	0.430547	1.91516	739.821	FALSE	12
2022-09-12	12:06:24	0.482659	2.14696	717.324	FALSE	12
2022-09-12	12:06:24	0.532939	2.37062	742.191	FALSE	12
2022-09-12	12:06:25	0.435687	1.93802	719.262	FALSE	12
2022-09-12	12:06:25	0.370089	1.64623	743.838	FALSE	12
2022-09-12	12:06:25	0.406425	1.80786	721.07	FALSE	12
2022-09-12	12:06:25	0.395789	1.76055	745.598	FALSE	12
2022-09-12	12:06:26	0.37472	1.66683	722.737	FALSE	12
2022-09-12	12:06:26	0.381641	1.69762	747.296	FALSE	12
2022-09-12	12:06:26	0.38444	1.71007	724.447	FALSE	12
2022-09-12	12:06:26	0.383982	1.70803	749.004	FALSE	12
2022-09-12	12:06:27	0.373499	1.6614	726.108	FALSE	12
2022-09-12	12:06:27	0.372227	1.65574	750.66	FALSE	12
2022-09-12	12:06:27	0.367341	1.63401	727.742	FALSE	12
2022-09-12	12:06:28	0.369479	1.64352	752.303	FALSE	12
2022-09-12	12:06:28	0.362761	1.61363	729.356	FALSE	12
2022-09-12	12:06:28	0.362863	1.61409	753.917	FALSE	12
2022-09-12	12:06:28	0.366934	1.6322	730.988	FALSE	12
2022-09-12	12:06:29	0.367392	1.63423	755.551	FALSE	12
2022-09-12	12:06:29	0.376145	1.67317	732.661	FALSE	12
2022-09-12	12:06:29	0.37243	1.65664	757.208	FALSE	12
2022-09-12	12:06:29	0.369377	1.64306	734.304	FALSE	12
2022-09-12	12:06:30	0.372939	1.65891	758.867	FALSE	12
2022-09-12	12:06:30	0.373244	1.66026	735.965	FALSE	12
2022-09-12	12:06:30	0.370802	1.6494	760.516	FALSE	12
2022-09-12	12:06:30	0.375738	1.67136	737.636	FALSE	12
2022-09-12	12:06:31	0.380674	1.69331	762.21	FALSE	12
2022-09-12	12:06:31	0.374619	1.66638	739.302	FALSE	12
2022-09-12	12:06:31	0.371921	1.65438	763.864	FALSE	12
2022-09-12	12:06:32	0.374313	1.66502	740.967	FALSE	12
2022-09-12	12:06:32	0.371158	1.65099	765.515	FALSE	12
2022-09-12	12:06:32	0.373448	1.66117	742.628	FALSE	12
2022-09-12	12:06:32	0.378232	1.68245	767.197	FALSE	12
2022-09-12	12:06:33	0.372481	1.65687	744.285	FALSE	12
2022-09-12	12:06:33	0.374364	1.66525	768.863	FALSE	12
2022-09-12	12:06:33	0.37416	1.66434	745.95	FALSE	12
2022-09-12	12:06:33	0.37986	1.68969	770.552	FALSE	12
2022-09-12	12:06:34	0.371158	1.65099	747.601	FALSE	12
2022-09-12	12:06:34	0.369071	1.6417	772.194	FALSE	12
2022-09-12	12:06:34	0.374822	1.66728	749.268	FALSE	12
2022-09-12	12:06:34	0.357468	1.59009	773.784	FALSE	12
2022-09-12	12:06:35	0.359606	1.5996	750.868	FALSE	12
2022-09-12	12:06:35	0.370496	1.64804	775.432	FALSE	12
2022-09-12	12:06:35	0.341896	1.52082	752.388	FALSE	12
2022-09-12	12:06:36	0.453804	2.01861	777.451	FALSE	12
2022-09-12	12:06:36	0.921132	4.09738	756.486	FALSE	12
2022-09-12	12:06:36	1.00704	4.47952	781.93	FALSE	12
2022-09-12	12:06:36	1.06714	4.74685	761.233	FALSE	12
2022-09-12	12:06:37	1.39477	6.20422	788.135	FALSE	12
2022-09-12	12:06:37	1.69421	7.53618	768.769	FALSE	12
2022-09-12	12:06:37	1.42856	6.35452	794.489	FALSE	12
2022-09-12	12:06:37	1.32205	5.88074	774.65	FALSE	12
2022-09-12	12:06:38	0.586374	2.60831	797.097	FALSE	12
2022-09-12	12:06:38	0.967443	4.30338	778.953	FALSE	12
2022-09-12	12:06:38	0.994873	4.42539	801.523	FALSE	12
2022-09-12	12:06:38	1.62653	7.23513	786.188	FALSE	12
2022-09-12	12:06:39	1.32637	5.89996	807.423	FALSE	12
2022-09-12	12:06:39	1.77431	7.89249	794.081	FALSE	12
2022-09-12	12:06:39	3.18271	14.1573	821.58	1	13
2022-09-12	12:06:40	1.70495	7.58396	801.664	FALSE	13
2022-09-12	12:06:40	1.51955	6.75926	828.339	FALSE	13
2022-09-12	12:06:40	0.992684	4.41566	806.08	FALSE	13
2022-09-12	12:06:40	2.37518	10.5653	838.905	FALSE	13
2022-09-12	12:06:41	1.60958	7.15973	813.24	FALSE	13
2022-09-12	12:06:41	1.89808	8.44304	847.348	FALSE	13
2022-09-12	12:06:41	1.0305	4.58387	817.824	FALSE	13
2022-09-12	12:06:41	1.09314	4.86251	852.21	FALSE	13
2022-09-12	12:06:42	0.57701	2.56666	820.39	FALSE	13
2022-09-12	12:06:42	0.887646	3.94843	856.159	FALSE	13
2022-09-12	12:06:42	1.82968	8.13878	828.529	FALSE	13
2022-09-12	12:06:42	1.91253	8.50732	864.666	FALSE	13
2022-09-12	12:06:43	2.2164	9.85899	838.388	FALSE	13
2022-09-12	12:06:43	1.99207	8.86113	873.527	FALSE	13
2022-09-12	12:06:43	3.2591	14.4971	852.885	1	14
2022-09-12	12:06:44	1.78159	7.92487	881.452	FALSE	14
2022-09-12	12:06:44	2.34205	10.4179	863.303	FALSE	14
2022-09-12	12:06:44	1.25945	5.60229	887.054	FALSE	14
2022-09-12	12:06:44	1.46658	6.52364	869.827	FALSE	14
2022-09-12	12:06:45	0.407443	1.81239	888.867	FALSE	14
2022-09-12	12:06:45	0.562659	2.50282	872.33	FALSE	14
2022-09-12	12:06:45	0.573804	2.55239	891.419	FALSE	14
2022-09-12	12:06:45	0.452939	2.01476	874.344	FALSE	14
2022-09-12	12:06:46	0.576247	2.56326	893.982	FALSE	14
2022-09-12	12:06:46	0.907646	4.03739	878.382	FALSE	14
2022-09-12	12:06:46	0.793804	3.531	897.513	FALSE	14
2022-09-12	12:06:46	0.756756	3.3662	881.748	FALSE	14
2022-09-12	12:06:47	0.450242	2.00277	899.516	FALSE	14
2022-09-12	12:06:47	0.351361	1.56292	883.311	FALSE	14
2022-09-12	12:06:47	0.375942	1.67227	901.188	FALSE	14
2022-09-12	12:06:48	0.494771	2.20084	885.512	FALSE	14
2022-09-12	12:06:48	0.459097	2.04216	903.23	FALSE	14
2022-09-12	12:06:48	0.347392	1.54527	887.057	FALSE	14
2022-09-12	12:06:48	0.390751	1.73814	904.969	FALSE	14
2022-09-12	12:06:49	0.341896	1.52082	888.578	FALSE	14
2022-09-12	12:06:49	0.383881	1.70758	906.676	FALSE	14
2022-09-12	12:06:49	1.02246	4.54811	893.126	FALSE	14
2022-09-12	12:06:49	0.454873	2.02337	908.7	FALSE	14
2022-09-12	12:06:50	0.304898	1.35625	894.482	FALSE	14
2022-09-12	12:06:50	0.377468	1.67905	910.379	FALSE	14
2022-09-12	12:06:50	0.315738	1.40447	895.887	FALSE	14
2022-09-12	12:06:50	0.34668	1.5421	911.921	FALSE	14
2022-09-12	12:06:51	0.314975	1.40107	897.288	FALSE	14
2022-09-12	12:06:51	0.3107	1.38206	913.303	FALSE	14
2022-09-12	12:06:51	0.212939	0.947195	898.235	FALSE	14
2022-09-12	12:06:52	0.364186	1.61997	914.923	FALSE	14
2022-09-12	12:06:52	0.254771	1.13327	899.368	FALSE	14
2022-09-12	12:06:52	0.325305	1.44702	916.37	FALSE	14
2022-09-12	12:06:52	0.262964	1.16972	900.538	FALSE	14
2022-09-12	12:06:53	0.390038	1.73497	918.105	FALSE	14
2022-09-12	12:06:53	0.342201	1.52218	902.06	FALSE	14
2022-09-12	12:06:53	0.327443	1.45653	919.561	FALSE	14
2022-09-12	12:06:53	0.504542	2.2443	904.304	FALSE	14
2022-09-12	12:06:54	0.445611	1.98217	921.543	FALSE	14
2022-09-12	12:06:54	0.448919	1.99688	906.301	FALSE	14
2022-09-12	12:06:54	0.352023	1.56587	923.109	FALSE	14
2022-09-12	12:06:54	0.373499	1.6614	907.963	FALSE	14
2022-09-12	12:06:55	0.26439	1.17606	924.285	FALSE	14
2022-09-12	12:06:55	0.816145	3.63038	911.593	FALSE	14
2022-09-12	12:06:55	0.453295	2.01635	926.302	FALSE	14
2022-09-12	12:06:56	0.697163	3.10112	914.694	FALSE	14
2022-09-12	12:06:56	0.215127	0.956928	927.259	FALSE	14
2022-09-12	12:06:56	0.417723	1.85812	916.552	FALSE	14
2022-09-12	12:06:56	0.279097	1.24148	928.5	FALSE	14
2022-09-12	12:06:57	0.376858	1.67634	918.229	FALSE	14
2022-09-12	12:06:57	0.186679	0.830386	929.33	FALSE	14
2022-09-12	12:06:57	0.185407	0.824727	919.053	FALSE	14
2022-09-12	12:06:57	0.230191	1.02394	930.354	FALSE	14
2022-09-12	12:06:58	0.538995	2.39756	921.451	FALSE	14
2022-09-12	12:06:58	0.252735	1.12422	931.479	FALSE	14
2022-09-12	12:06:58	0.0778756	0.346406	921.797	FALSE	14
2022-09-12	12:06:58	0.416094	1.85087	933.329	FALSE	14
2022-09-12	12:06:59	0.0787916	0.350481	922.148	FALSE	14
2022-09-12	12:06:59	0.336603	1.49728	934.827	FALSE	14
2022-09-12	12:06:59	0.195891	0.871362	923.019	FALSE	14
2022-09-12	12:07:00	0.227748	1.01307	935.84	FALSE	14
2022-09-12	12:07:00	0.186883	0.831293	923.85	FALSE	14
2022-09-12	12:07:00	0.211514	0.940857	936.781	FALSE	14
2022-09-12	12:07:00	0.318435	1.41646	925.267	FALSE	14
2022-09-12	12:07:01	0.155891	0.693434	937.474	FALSE	14
2022-09-12	12:07:01	0.403931	1.79677	927.064	FALSE	14
2022-09-12	12:07:01	0.196756	0.87521	938.349	FALSE	14
2022-09-12	12:07:01	0.305509	1.35897	928.423	FALSE	14
2022-09-12	12:07:02	0.16383	0.728749	939.078	FALSE	14
2022-09-12	12:07:02	0.330395	1.46966	929.892	FALSE	14
2022-09-12	12:07:02	0.229173	1.01941	940.097	FALSE	14
2022-09-12	12:07:02	0.326018	1.45019	931.343	FALSE	14
2022-09-12	12:07:03	0.126731	0.563725	940.661	FALSE	14
2022-09-12	12:07:03	0.363728	1.61793	932.96	FALSE	14
2022-09-12	12:07:03	0.141082	0.627561	941.289	FALSE	14
2022-09-12	12:07:03	0.418232	1.86038	934.821	FALSE	14
2022-09-12	12:07:04	0.226679	1.00831	942.297	FALSE	14
2022-09-12	12:07:04	0.484593	2.15557	936.976	FALSE	14
2022-09-12	12:07:04	0.518079	2.30452	944.602	FALSE	14
2022-09-12	12:07:05	0.466323	2.0743	939.051	FALSE	14
2022-09-12	12:07:05	0.395484	1.75919	946.361	FALSE	14
2022-09-12	12:07:05	0.412125	1.83321	940.884	FALSE	14
2022-09-12	12:07:05	0.406883	1.8099	948.171	FALSE	14
2022-09-12	12:07:06	0.525153	2.33599	943.22	FALSE	14
2022-09-12	12:07:06	0.82042	3.64939	951.82	FALSE	14
2022-09-12	12:07:06	0.510954	2.27283	945.493	FALSE	14
2022-09-12	12:07:06	0.483931	2.15262	953.973	FALSE	14
2022-09-12	12:07:07	0.502863	2.23684	947.73	FALSE	14
2022-09-12	12:07:07	0.377316	1.67838	955.651	FALSE	14
2022-09-12	12:07:07	0.586221	2.60763	950.337	FALSE	14
2022-09-12	12:07:07	0.376654	1.67543	957.327	FALSE	14
2022-09-12	12:07:08	0.551056	2.45121	952.788	FALSE	14
2022-09-12	12:07:08	0.304084	1.35263	958.679	FALSE	14
2022-09-12	12:07:08	0.511616	2.27577	955.064	FALSE	14
2022-09-12	12:07:09	0.258384	1.14934	959.828	FALSE	14
2022-09-12	12:07:09	0.505509	2.24861	957.313	FALSE	14
2022-09-12	12:07:09	0.222303	0.988848	960.817	FALSE	14
2022-09-12	12:07:09	0.462507	2.05732	959.37	FALSE	14
2022-09-12	12:07:10	0.222557	0.989978	961.807	FALSE	14
2022-09-12	12:07:10	0.469173	2.08698	961.457	FALSE	14
2022-09-12	12:07:10	0.320776	1.42688	963.234	FALSE	14
2022-09-12	12:07:10	0.371158	1.65099	963.108	FALSE	14
2022-09-12	12:07:11	0.320776	1.42688	964.661	FALSE	14
2022-09-12	12:07:11	0.352685	1.56881	964.677	FALSE	14
2022-09-12	12:07:11	0.397316	1.76734	966.428	FALSE	14
2022-09-12	12:07:11	0.315331	1.40266	966.08	FALSE	14
2022-09-12	12:07:12	0.363626	1.61748	968.046	FALSE	14
2022-09-12	12:07:12	0.200878	0.893546	966.973	FALSE	14
2022-09-12	12:07:12	0.596552	2.65358	970.699	FALSE	14
2022-09-12	12:07:13	0.854466	3.80084	970.774	FALSE	14
2022-09-12	12:07:13	0.897112	3.99053	974.69	FALSE	14
2022-09-12	12:07:13	0.554669	2.46728	973.241	FALSE	14
2022-09-12	12:07:13	1.11095	4.94173	979.632	FALSE	14
2022-09-12	12:07:14	0.535942	2.38398	975.625	FALSE	14
2022-09-12	12:07:14	0.650802	2.8949	982.527	FALSE	14
2022-09-12	12:07:14	0.447239	1.98941	977.615	FALSE	14
2022-09-12	12:07:14	0.113499	0.504866	983.031	FALSE	14
2022-09-12	12:07:15	0.505407	2.24815	979.863	FALSE	14
2022-09-12	12:07:15	0.125764	0.559423	983.591	FALSE	14
2022-09-12	12:07:15	0.389377	1.73203	981.595	FALSE	14
2022-09-12	12:07:15	0.234517	1.04318	984.634	FALSE	14
2022-09-12	12:07:16	0.541692	2.40955	984.004	FALSE	14
2022-09-12	12:07:16	0.625814	2.78375	987.418	FALSE	14
2022-09-12	12:07:16	1.16495	5.18193	989.186	FALSE	14
2022-09-12	12:07:17	0.959198	4.2667	991.685	FALSE	14
2022-09-12	12:07:17	1.95019	8.67484	997.861	FALSE	14
2022-09-12	12:07:17	0.63472	2.82336	994.508	FALSE	14
2022-09-12	12:07:17	0.498028	2.21533	1000.08	FALSE	14
2022-09-12	12:07:18	0.446272	1.98511	996.493	FALSE	14
2022-09-12	12:07:18	0.87131	3.87576	1003.95	FALSE	14
2022-09-12	12:07:18	0.423575	1.88415	998.377	FALSE	14
2022-09-12	12:07:18	0.328104	1.45947	1005.41	FALSE	14
2022-09-12	12:07:19	0.432328	1.92308	1000.3	FALSE	14
2022-09-12	12:07:19	0.30556	1.35919	1006.77	FALSE	14
2022-09-12	12:07:19	0.421082	1.87306	1002.17	FALSE	14
2022-09-12	12:07:19	1.98317	8.82154	1015.59	FALSE	14
2022-09-12	12:07:20	1.63396	7.26818	1009.44	FALSE	14
2022-09-12	12:07:20	0.719758	3.20163	1018.79	FALSE	14
2022-09-12	12:07:20	1.0937	4.865	1014.31	FALSE	14
2022-09-12	12:07:21	0.54159	2.4091	1021.2	FALSE	14
2022-09-12	12:07:21	1.00637	4.47654	1018.78	FALSE	14
2022-09-12	12:07:21	1.20531	5.36146	1026.56	FALSE	14
2022-09-12	12:07:21	0.670242	2.98137	1021.76	FALSE	14
2022-09-12	12:07:22	1.19777	5.32792	1031.89	FALSE	14
2022-09-12	12:07:22	0.962659	4.2821	1026.05	FALSE	14
2022-09-12	12:07:22	1.62368	7.22245	1039.11	FALSE	14
2022-09-12	12:07:22	0.942303	4.19155	1030.24	FALSE	14
2022-09-12	12:07:23	1.19686	5.32387	1044.44	FALSE	14
2022-09-12	12:07:23	2.4251	10.7873	1041.03	FALSE	14
2022-09-12	12:07:23	1.90561	8.47653	1052.92	FALSE	14
2022-09-12	12:07:23	2.28754	10.1754	1051.2	FALSE	14
2022-09-12	12:07:24	0.795229	3.53734	1056.45	FALSE	14
2022-09-12	12:07:24	1.24877	5.55478	1056.76	FALSE	14
2022-09-12	12:07:24	0.543422	2.41725	1058.87	FALSE	14
2022-09-12	12:07:25	1.05421	4.68934	1061.44	FALSE	14
2022-09-12	12:07:25	0.488613	2.17345	1061.04	FALSE	14
2022-09-12	12:07:25	0.185713	0.826089	1062.27	FALSE	14
2022-09-12	12:07:25	0.34841	1.5498	1062.59	FALSE	14
2022-09-12	12:07:26	0.274211	1.21975	1063.49	FALSE	14
2022-09-12	12:07:26	0.136247	0.606054	1063.2	FALSE	14
2022-09-12	12:07:26	0.311819	1.38703	1064.88	FALSE	14
2022-09-12	12:07:26	0.120369	0.535425	1063.73	FALSE	14
2022-09-12	12:07:27	0.310089	1.37934	1066.26	FALSE	14
2022-09-12	12:07:27	0.0975702	0.434012	1064.17	FALSE	14
2022-09-12	12:07:27	1.02205	4.54628	1070.8	FALSE	14
2022-09-12	12:07:27	1.30866	5.82118	1069.99	FALSE	14
2022-09-12	12:07:28	3.12454	13.8986	1084.7	1	15
2022-09-12	12:07:28	4.2965	19.1117	1089.1	1	16
2022-09-12	12:07:28	2.96805	13.2025	1097.9	FALSE	16
2022-09-12	12:07:29	2.1906	9.74423	1098.85	FALSE	16
2022-09-12	12:07:29	0.932685	4.14877	1102.05	FALSE	16
2022-09-12	12:07:29	1.37981	6.13767	1104.98	FALSE	16
2022-09-12	12:07:29	0.673957	2.9979	1105.05	FALSE	16
2022-09-12	12:07:30	1.79925	8.00342	1112.99	FALSE	16
2022-09-12	12:07:30	0.977417	4.34775	1109.4	FALSE	16
2022-09-12	12:07:30	1.22541	5.45087	1118.44	FALSE	16
2022-09-12	12:07:30	0.838842	3.73134	1113.13	FALSE	16
2022-09-12	12:07:31	2.83681	12.6187	1131.06	FALSE	16
2022-09-12	12:07:31	1.56307	6.95285	1120.08	FALSE	16
2022-09-12	12:07:31	1.38678	6.16867	1137.23	FALSE	16
2022-09-12	12:07:31	0.769529	3.42302	1123.51	FALSE	16
2022-09-12	12:07:32	1.04184	4.63431	1141.86	FALSE	16
2022-09-12	12:07:32	0.796552	3.54322	1127.05	FALSE	16
2022-09-12	12:07:32	1.00408	4.46635	1146.33	FALSE	16
2022-09-12	12:07:33	0.792837	3.5267	1130.58	FALSE	16
2022-09-12	12:07:33	0.495026	2.20197	1148.53	FALSE	16
2022-09-12	12:07:33	0.94785	4.21623	1134.79	FALSE	16
2022-09-12	12:07:33	1.93655	8.61416	1157.14	FALSE	16
2022-09-12	12:07:34	2.1733	9.66727	1144.46	FALSE	16
2022-09-12	12:07:34	1.3052	5.80579	1162.95	FALSE	16
2022-09-12	12:07:34	1.76164	7.83613	1152.3	FALSE	16
2022-09-12	12:07:34	0.621336	2.76383	1165.71	FALSE	16
2022-09-12	12:07:35	1.61431	7.18077	1159.48	FALSE	16
2022-09-12	12:07:35	0.84556	3.76122	1169.47	FALSE	16
2022-09-12	12:07:35	1.38123	6.14399	1165.62	FALSE	16
2022-09-12	12:07:35	1.28215	5.70326	1175.18	FALSE	16
2022-09-12	12:07:36	3.84301	17.0945	1182.71	1	17
2022-09-12	12:07:36	3.28724	14.6223	1189.8	1	18
2022-09-12	12:07:36	2.30327	10.2454	1192.96	FALSE	18
2022-09-12	12:07:37	1.85777	8.26373	1198.06	FALSE	18
2022-09-12	12:07:37	2.37945	10.5843	1203.54	FALSE	18
2022-09-12	12:07:37	3.33141	14.8188	1212.88	1	19
2022-09-12	12:07:37	3.68887	16.4088	1219.95	1	20
2022-09-12	12:07:38	0.702557	3.12511	1216.01	FALSE	20
2022-09-12	12:07:38	2.14067	9.52213	1229.48	FALSE	20
2022-09-12	12:07:38	1.64062	7.29781	1223.3	FALSE	20
2022-09-12	12:07:38	1.79828	7.99911	1237.47	FALSE	20
2022-09-12	12:07:39	3.25538	14.4806	1237.78	1	21
2022-09-12	12:07:39	1.69838	7.55473	1245.03	FALSE	21
2022-09-12	12:07:39	6.93278	30.8384	1268.62	1	22
2022-09-12	12:07:39	5.25126	23.3587	1268.39	1	23
2022-09-12	12:07:40	4.37395	19.4562	1288.08	1	24
2022-09-12	12:07:40	1.16261	5.17152	1273.56	FALSE	24
2022-09-12	12:07:40	1.92734	8.57319	1296.65	FALSE	24
2022-09-12	12:07:41	1.97274	8.77514	1282.33	FALSE	24
2022-09-12	12:07:41	1.51528	6.74027	1303.39	FALSE	24
2022-09-12	12:07:41	1.5134	6.73191	1289.07	FALSE	24
2022-09-12	12:07:41	3.60729	16.0459	1319.44	1	25
2022-09-12	12:07:42	1.46327	6.50892	1295.58	FALSE	25
2022-09-12	12:07:42	2.84973	12.6762	1332.11	FALSE	25
2022-09-12	12:07:42	5.15034	22.9097	1318.49	1	26
2022-09-12	12:07:42	5.5025	24.4762	1356.59	1	27
2022-09-12	12:07:43	2.53106	11.2587	1329.74	FALSE	27
2022-09-12	12:07:43	2.40612	10.7029	1367.29	FALSE	27
2022-09-12	12:07:43	5.15151	22.9149	1352.66	1	28
2022-09-12	12:07:43	8.70566	38.7245	1406.02	1	29
2022-09-12	12:07:44	5.02785	22.3649	1375.02	1	30
2022-09-12	12:07:44	3.39686	15.1099	1421.13	1	31
2022-09-12	12:07:44	0.746832	3.32206	1378.35	FALSE	31
2022-09-12	12:07:45	0.366883	1.63197	1422.76	FALSE	31
2022-09-12	12:07:45	0.764338	3.39993	1381.75	FALSE	31
2022-09-12	12:07:45	7.62464	33.9159	1456.68	1	32
2022-09-12	12:07:45	6.62332	29.4619	1411.21	1	33
2022-09-12	12:07:46	4.00515	17.8157	1474.49	1	34
2022-09-12	12:07:46	1.9078	8.48628	1419.69	FALSE	34
2022-09-12	12:07:46	2.97365	13.2274	1487.72	FALSE	34
2022-09-12	12:07:46	6.0393	26.864	1446.56	1	35
2022-09-12	12:07:47	4.62485	20.5723	1508.29	1	36
2022-09-12	12:07:47	1.84179	8.19265	1454.75	FALSE	36
2022-09-12	12:07:47	1.62704	7.2374	1515.53	FALSE	36
2022-09-12	12:07:47	0.749529	3.33405	1458.08	FALSE	36
2022-09-12	12:07:48	0.696807	3.09954	1518.63	FALSE	36
2022-09-12	12:07:48	0.924949	4.11436	1462.2	FALSE	36
2022-09-12	12:07:48	0.736959	3.27814	1521.91	FALSE	36
2022-09-12	12:07:49	0.514466	2.28845	1464.49	FALSE	36
2022-09-12	12:07:49	0.692074	3.07848	1524.98	FALSE	36
2022-09-12	12:07:49	2.93686	13.0637	1477.55	FALSE	36
2022-09-12	12:07:49	7.26332	32.3087	1557.29	1	37
2022-09-12	12:07:50	6.06438	26.9756	1504.53	1	38
2022-09-12	12:07:50	1.97716	8.7948	1566.09	FALSE	38
2022-09-12	12:07:50	0.929427	4.13428	1508.66	FALSE	38
2022-09-12	12:07:50	1.19645	5.32205	1571.41	FALSE	38
2022-09-12	12:07:51	1.40413	6.24585	1514.91	FALSE	38
2022-09-12	12:07:51	2.62312	11.6682	1583.08	FALSE	38
2022-09-12	12:07:51	2.09838	9.33401	1524.24	FALSE	38
2022-09-12	12:07:51	1.43513	6.38375	1589.46	FALSE	38
2022-09-12	12:07:52	1.73609	7.72248	1531.96	FALSE	38
2022-09-12	12:07:52	1.43742	6.39393	1595.86	FALSE	38
2022-09-12	12:07:52	1.10475	4.91415	1536.88	FALSE	38
2022-09-12	12:07:52	1.74948	7.78204	1603.64	FALSE	38
2022-09-12	12:07:53	1.50154	6.67915	1543.56	FALSE	38
2022-09-12	12:07:53	2.1905	9.74378	1613.38	FALSE	38
2022-09-12	12:07:53	3.56856	15.8737	1559.43	1	39
2022-09-12	12:07:54	2.50525	11.1439	1624.53	FALSE	39
2022-09-12	12:07:54	2.57156	11.4388	1570.87	FALSE	39
2022-09-12	12:07:54	2.22078	9.87847	1634.4	FALSE	39
2022-09-12	12:07:54	1.16693	5.19074	1576.06	FALSE	39
2022-09-12	12:07:55	1.69019	7.5183	1641.92	FALSE	39
2022-09-12	12:07:55	1.28424	5.71256	1581.77	FALSE	39
2022-09-12	12:07:55	0.749886	3.33564	1645.26	FALSE	39
2022-09-12	12:07:55	1.50347	6.68774	1588.46	FALSE	39
2022-09-12	12:07:56	1.99726	8.88421	1654.14	FALSE	39
2022-09-12	12:07:56	1.66907	7.42436	1595.88	FALSE	39
2022-09-12	12:07:56	1.46072	6.49757	1660.64	FALSE	39
2022-09-12	12:07:56	1.00062	4.45096	1600.34	FALSE	39
2022-09-12	12:07:57	1.00719	4.48018	1665.12	FALSE	39
2022-09-12	12:07:57	1.07681	4.78987	1605.13	FALSE	39
2022-09-12	12:07:57	1.34291	5.97353	1671.09	FALSE	39
2022-09-12	12:07:58	1.32281	5.88412	1611.01	FALSE	39
2022-09-12	12:07:58	1.24357	5.53165	1676.63	FALSE	39
2022-09-12	12:07:58	0.901743	4.01113	1615.02	FALSE	39
2022-09-12	12:07:58	0.66729	2.96824	1679.59	FALSE	39
2022-09-12	12:07:59	0.547035	2.43332	1617.45	FALSE	39
2022-09-12	12:07:59	0.754516	3.35624	1682.95	FALSE	39
2022-09-12	12:07:59	0.857163	3.81283	1621.27	FALSE	39
2022-09-12	12:07:59	0.980267	4.36042	1687.31	FALSE	39
2022-09-12	12:08:00	1.09004	4.84872	1626.12	FALSE	39
2022-09-12	12:08:00	1.09065	4.85143	1692.16	FALSE	39
2022-09-12	12:08:00	0.878944	3.90972	1630.03	FALSE	39
2022-09-12	12:08:00	0.816705	3.63287	1695.79	FALSE	39
2022-09-12	12:08:01	1.22709	5.45834	1635.48	FALSE	39
2022-09-12	12:08:01	0.975076	4.33733	1700.13	FALSE	39
2022-09-12	12:08:01	1.0337	4.5981	1640.08	FALSE	39
2022-09-12	12:08:02	1.1048	4.91437	1705.05	FALSE	39
2022-09-12	12:08:02	0.857926	3.81623	1643.9	FALSE	39
2022-09-12	12:08:02	1.22449	5.44678	1710.49	FALSE	39
2022-09-12	12:08:02	1.18897	5.28878	1649.19	FALSE	39
2022-09-12	12:08:03	1.69075	7.52079	1718.01	FALSE	39
2022-09-12	12:08:03	1.65564	7.36462	1656.55	FALSE	39
2022-09-12	12:08:03	1.79482	7.98372	1726	FALSE	39
2022-09-12	12:08:03	1.93065	8.58792	1665.14	FALSE	39
2022-09-12	12:08:04	1.52856	6.79934	1732.8	FALSE	39
2022-09-12	12:08:04	1.68449	7.49295	1672.63	FALSE	39
2022-09-12	12:08:04	1.23391	5.48868	1738.29	FALSE	39
2022-09-12	12:08:04	1.05095	4.67484	1677.31	FALSE	39
2022-09-12	12:08:05	0.929275	4.1336	1742.42	FALSE	39
2022-09-12	12:08:05	0.652379	2.90191	1680.21	FALSE	39
2022-09-12	12:08:05	0.739351	3.28878	1745.71	FALSE	39
2022-09-12	12:08:06	0.857875	3.816	1684.02	FALSE	39
2022-09-12	12:08:06	0.613957	2.731	1748.44	FALSE	39
2022-09-12	12:08:06	0.678588	3.0185	1687.04	FALSE	39
2022-09-12	12:08:06	1.24027	5.51697	1753.96	FALSE	39
2022-09-12	12:08:07	1.57615	7.01103	1694.05	FALSE	39
2022-09-12	12:08:07	1.64729	7.32748	1761.28	FALSE	39
2022-09-12	12:08:07	2.12658	9.45945	1703.51	FALSE	39
2022-09-12	12:08:07	2.94724	13.1099	1774.39	FALSE	39
2022-09-12	12:08:08	2.69594	11.9921	1715.51	FALSE	39
2022-09-12	12:08:08	1.99538	8.87585	1783.27	FALSE	39
2022-09-12	12:08:08	2.0764	9.23624	1724.74	FALSE	39
2022-09-12	12:08:08	1.37584	6.12001	1789.39	FALSE	39
2022-09-12	12:08:09	1.42856	6.35452	1731.1	FALSE	39
2022-09-12	12:08:09	0.94785	4.21623	1793.61	FALSE	39
2022-09-12	12:08:09	1.65375	7.35621	1738.45	FALSE	39
2022-09-12	12:08:10	0.897519	3.99234	1797.6	FALSE	39
2022-09-12	12:08:10	0.278283	1.23786	1739.69	FALSE	39
2022-09-12	12:08:10	0.300776	1.33791	1798.94	FALSE	39
2022-09-12	12:08:10	0.221692	0.98613	1740.68	FALSE	39
2022-09-12	12:08:11	0.309377	1.37617	1800.31	FALSE	39
2022-09-12	12:08:11	0.214822	0.955571	1741.63	FALSE	39
2022-09-12	12:08:11	0.357265	1.58919	1801.9	FALSE	39
2022-09-12	12:08:11	0.131056	0.582963	1742.22	FALSE	39
2022-09-12	12:08:12	0.0245931	0.109395	1802.01	FALSE	39
2022-09-12	12:08:12	0.101896	0.453254	1742.67	FALSE	39
2022-09-12	12:08:12	-0.0630913	-0.280643	1802.01	FALSE	39
2022-09-12	12:08:12	-0.0764246	-0.339952	1742.67	FALSE	39
2022-09-12	12:08:13	-0.0616155	-0.274078	1802.01	FALSE	39
2022-09-12	12:08:13	0.162252	0.721729	1743.39	FALSE	39
2022-09-12	12:08:13	0.172328	0.766549	1802.78	FALSE	39
2022-09-12	12:08:14	0.217672	0.968249	1744.36	FALSE	39
2022-09-12	12:08:14	0.30383	1.3515	1804.13	FALSE	39
2022-09-12	12:08:14	0.370038	1.646	1746	FALSE	39
2022-09-12	12:08:14	2.9252	13.0119	1817.14	FALSE	39
2022-09-12	12:08:15	1.46882	6.53361	1752.54	FALSE	39
2022-09-12	12:08:15	0.821132	3.65256	1820.79	FALSE	39
2022-09-12	12:08:15	1.78576	7.94342	1760.48	FALSE	39
2022-09-12	12:08:15	1.75228	7.79449	1828.59	FALSE	39
2022-09-12	12:08:16	0.63528	2.82585	1763.31	FALSE	39
2022-09-12	12:08:16	0.972074	4.32398	1832.91	FALSE	39
2022-09-12	12:08:16	0.490089	2.18001	1765.49	FALSE	39
2022-09-12	12:08:16	0.991616	4.41091	1837.32	FALSE	39
2022-09-12	12:08:17	0.889478	3.95658	1769.44	FALSE	39
2022-09-12	12:08:17	1.30459	5.80308	1843.13	FALSE	39
2022-09-12	12:08:17	0.294211	1.30871	1770.75	FALSE	39
2022-09-12	12:08:18	0.303575	1.35036	1844.48	FALSE	39
2022-09-12	12:08:18	0.231361	1.02914	1771.78	FALSE	39
2022-09-12	12:08:18	0.303982	1.35217	1845.83	FALSE	39
2022-09-12	12:08:18	0.309224	1.37549	1773.16	FALSE	39
2022-09-12	12:08:19	0.163931	0.729198	1846.56	FALSE	39
2022-09-12	12:08:19	0.22958	1.02122	1774.18	FALSE	39
2022-09-12	12:08:19	0.250445	1.11403	1847.67	FALSE	39
2022-09-12	12:08:19	0.522761	2.32535	1776.5	FALSE	39
2022-09-12	12:08:20	0.973295	4.32941	1852	FALSE	39
2022-09-12	12:08:20	1.00464	4.46884	1780.97	FALSE	39
2022-09-12	12:08:20	1.1366	5.05582	1857.06	FALSE	39
2022-09-12	12:08:20	1.23772	5.50563	1786.48	FALSE	39
2022-09-12	12:08:21	0.37472	1.66683	1858.72	FALSE	39
2022-09-12	12:08:21	0.772786	3.43751	1789.92	FALSE	39
2022-09-12	12:08:21	0.289937	1.2897	1860.01	FALSE	39
2022-09-12	12:08:22	0.690547	3.07169	1792.99	FALSE	39
2022-09-12	12:08:22	0.354466	1.57674	1861.59	FALSE	39
2022-09-12	12:08:22	0.679962	3.02461	1796.01	FALSE	39
2022-09-12	12:08:22	0.680725	3.028	1864.62	FALSE	39
2022-09-12	12:08:23	1.48256	6.59472	1802.61	FALSE	39
2022-09-12	12:08:23	1.10449	4.91299	1869.53	FALSE	39
2022-09-12	12:08:23	1.29447	5.75806	1808.37	FALSE	39
2022-09-12	12:08:23	1.12246	4.99293	1874.52	FALSE	39
2022-09-12	12:08:24	0.831921	3.70055	1812.07	FALSE	39
2022-09-12	12:08:24	0.39528	1.75828	1876.28	FALSE	39
2022-09-12	12:08:24	0.187087	0.8322	1812.9	FALSE	39
2022-09-12	12:08:24	0.472379	2.10124	1878.38	FALSE	39
2022-09-12	12:08:25	0.146272	0.650647	1813.55	FALSE	39
2022-09-12	12:08:25	0.453499	2.01725	1880.4	FALSE	39
2022-09-12	12:08:25	0.25701	1.14323	1814.69	FALSE	39
2022-09-12	12:08:26	0.543473	2.41748	1882.82	FALSE	39
2022-09-12	12:08:26	0.21299	0.947422	1815.64	FALSE	39
2022-09-12	12:08:26	0.705458	3.13802	1885.96	FALSE	39
2022-09-12	12:08:26	0.340318	1.5138	1817.15	FALSE	39
2022-09-12	12:08:27	0.597366	2.6572	1888.61	FALSE	39
2022-09-12	12:08:27	0.725712	3.22811	1820.38	FALSE	39
2022-09-12	12:08:27	1.2562	5.58783	1894.2	FALSE	39
2022-09-12	12:08:27	2.28994	10.1861	1830.57	FALSE	39
2022-09-12	12:08:28	2.70215	12.0197	1906.22	FALSE	39
2022-09-12	12:08:28	0.936094	4.16393	1834.73	FALSE	39
2022-09-12	12:08:28	0.619707	2.75658	1908.98	FALSE	39
2022-09-12	12:08:28	0.245916	1.09388	1835.82	FALSE	39
2022-09-12	12:08:29	0.226323	1.00673	1909.98	FALSE	39
2022-09-12	12:08:29	0.408461	1.81692	1837.64	FALSE	39
2022-09-12	12:08:29	0.163779	0.728522	1910.71	FALSE	39
2022-09-12	12:08:30	0.306679	1.36417	1839.01	FALSE	39
2022-09-12	12:08:30	0.139657	0.621222	1911.33	FALSE	39
2022-09-12	12:08:30	0.314262	1.3979	1840.4	FALSE	39
2022-09-12	12:08:30	0.239758	1.06649	1912.4	FALSE	39
2022-09-12	12:08:31	2.21223	9.84044	1850.24	FALSE	39
2022-09-12	12:08:31	2.38887	10.6262	1923.03	FALSE	39
2022-09-12	12:08:31	1.0651	4.73778	1854.98	FALSE	39
2022-09-12	12:08:31	0.240827	1.07125	1924.1	FALSE	39
2022-09-12	12:08:32	0.247545	1.10113	1856.08	FALSE	39
2022-09-12	12:08:32	0.467392	2.07905	1926.18	FALSE	39
2022-09-12	12:08:32	0.360827	1.60503	1857.69	FALSE	39
2022-09-12	12:08:32	0.334466	1.48777	1927.66	FALSE	39
2022-09-12	12:08:33	0.0679518	0.302263	1857.99	FALSE	39
2022-09-12	12:08:33	0.303524	1.35014	1929.01	FALSE	39
2022-09-12	12:08:33	0.0847458	0.376966	1858.37	FALSE	39
2022-09-12	12:08:34	0.383372	1.70532	1930.72	FALSE	39
2022-09-12	12:08:34	0.195229	0.868418	1859.24	FALSE	39
2022-09-12	12:08:34	0.342914	1.52535	1932.25	FALSE	39
2022-09-12	12:08:34	0.234618	1.04363	1860.28	FALSE	39
2022-09-12	12:08:35	0.297163	1.32184	1933.57	FALSE	39
2022-09-12	12:08:35	0.365509	1.62586	1861.91	FALSE	39
2022-09-12	12:08:35	2.24642	9.99253	1943.56	FALSE	39
2022-09-12	12:08:35	1.55645	6.9234	1868.83	FALSE	39
2022-09-12	12:08:36	1.82927	8.13696	1951.7	FALSE	39
2022-09-12	12:08:36	0.985916	4.38555	1873.21	FALSE	39
2022-09-12	12:08:36	1.50352	6.68796	1958.38	FALSE	39
2022-09-12	12:08:36	2.31599	10.302	1883.52	FALSE	39
2022-09-12	12:08:37	2.11955	9.42818	1967.81	FALSE	39
2022-09-12	12:08:37	2.91782	12.979	1896.5	FALSE	39
2022-09-12	12:08:37	1.27762	5.68311	1973.5	FALSE	39
2022-09-12	12:08:37	1.44108	6.41021	1902.91	FALSE	39
2022-09-12	12:08:38	0.694924	3.09116	1976.59	FALSE	39
2022-09-12	12:08:38	0.904746	4.02449	1906.93	FALSE	39
2022-09-12	12:08:38	0.724288	3.22178	1979.81	FALSE	39
2022-09-12	12:08:39	0.840471	3.73858	1910.67	FALSE	39
2022-09-12	12:08:39	1.45986	6.49375	1986.3	FALSE	39
2022-09-12	12:08:39	1.34658	5.98986	1916.66	FALSE	39
2022-09-12	12:08:39	2.19172	9.74921	1996.05	FALSE	39
2022-09-12	12:08:40	3.57813	15.9162	1932.57	1	40
2022-09-12	12:08:40	3.11044	13.8359	2009.89	1	41
2022-09-12	12:08:40	0.608562	2.70701	1935.28	FALSE	41
2022-09-12	12:08:40	0.45014	2.00231	2011.89	FALSE	41
2022-09-12	12:08:41	0.141082	0.627561	1935.91	FALSE	41
2022-09-12	12:08:41	0.295382	1.31392	2013.2	FALSE	41
2022-09-12	12:08:41	0.173499	0.771758	1936.68	FALSE	41
2022-09-12	12:08:41	0.525865	2.33915	2015.54	FALSE	41
2022-09-12	12:08:42	3.01609	13.4162	1950.1	1	42
2022-09-12	12:08:42	2.41645	10.7489	2026.29	FALSE	42
2022-09-12	12:08:42	2.01457	8.96121	1959.06	FALSE	42
2022-09-12	12:08:43	2.04413	9.0927	2035.38	FALSE	42
2022-09-12	12:08:43	1.18368	5.26525	1964.32	FALSE	42
2022-09-12	12:08:43	1.71523	7.62969	2043.01	FALSE	42
2022-09-12	12:08:43	1.73864	7.73382	1972.06	FALSE	42
2022-09-12	12:08:44	2.55095	11.3471	2054.36	FALSE	42
2022-09-12	12:08:44	1.43223	6.37085	1978.43	FALSE	42
2022-09-12	12:08:44	2.648	11.7788	2066.14	FALSE	42
2022-09-12	12:08:44	2.13981	9.5183	1987.95	FALSE	42
2022-09-12	12:08:45	1.69762	7.55135	2073.69	FALSE	42
2022-09-12	12:08:45	1.24098	5.52013	1993.47	FALSE	42
2022-09-12	12:08:45	0.809784	3.60208	2077.29	FALSE	42
2022-09-12	12:08:45	0.376705	1.67566	1995.14	FALSE	42
2022-09-12	12:08:46	0.264593	1.17696	2078.47	FALSE	42
2022-09-12	12:08:46	0.390954	1.73904	1996.88	FALSE	42
2022-09-12	12:08:46	0.208054	0.925466	2079.4	FALSE	42
2022-09-12	12:08:47	0.402863	1.79202	1998.67	FALSE	42
2022-09-12	12:08:47	0.175178	0.779227	2080.18	FALSE	42
2022-09-12	12:08:47	0.32327	1.43797	2000.11	FALSE	42
2022-09-12	12:08:47	0.114008	0.50713	2080.68	FALSE	42
2022-09-12	12:08:48	0.101336	0.450763	2000.56	FALSE	42
2022-09-12	12:08:48	2.43508	10.8317	2091.51	FALSE	42
2022-09-12	12:08:48	0.657315	2.92387	2003.49	FALSE	42
2022-09-12	12:08:48	0.874007	3.88776	2095.4	FALSE	42
2022-09-12	12:08:49	0.707595	3.14752	2006.63	FALSE	42
2022-09-12	12:08:49	0.715738	3.18375	2098.59	FALSE	42
2022-09-12	12:08:49	1.38149	6.14514	2012.78	FALSE	42
2022-09-12	12:08:49	0.423423	1.88347	2100.47	FALSE	42
2022-09-12	12:08:50	0.824695	3.66841	2016.45	FALSE	42
2022-09-12	12:08:50	0.397163	1.76666	2102.24	FALSE	42
2022-09-12	12:08:50	0.726272	3.2306	2019.68	FALSE	42
2022-09-12	12:08:51	0.806985	3.58963	2105.83	FALSE	42
2022-09-12	12:08:51	0.648715	2.88561	2022.56	FALSE	42
2022-09-12	12:08:51	0.482914	2.1481	2107.97	FALSE	42
2022-09-12	12:08:51	0.538079	2.39348	2024.96	FALSE	42
2022-09-12	12:08:52	0.685153	3.0477	2111.02	FALSE	42
2022-09-12	12:08:52	1.13849	5.06423	2030.02	FALSE	42
2022-09-12	12:08:52	0.348562	1.55047	2112.57	FALSE	42
2022-09-12	12:08:52	0.515992	2.29524	2032.32	FALSE	42
2022-09-12	12:08:53	0.767035	3.41193	2115.98	FALSE	42
2022-09-12	12:08:53	1.08495	4.82607	2037.14	FALSE	42
2022-09-12	12:08:53	0.815382	3.62698	2119.61	FALSE	42
2022-09-12	12:08:53	0.754924	3.35805	2040.5	FALSE	42
2022-09-12	12:08:54	0.716807	3.1885	2122.8	FALSE	42
2022-09-12	12:08:54	0.5993	2.66581	2043.17	FALSE	42
2022-09-12	12:08:54	0.421234	1.87373	2124.67	FALSE	42
2022-09-12	12:08:55	0.327188	1.4554	2044.62	FALSE	42
2022-09-12	12:08:55	0.41243	1.83457	2126.51	FALSE	42
2022-09-12	12:08:55	0.340776	1.51584	2046.14	FALSE	42
2022-09-12	12:08:55	0.404389	1.7988	2128.31	FALSE	42
2022-09-12	12:08:56	0.677773	3.01487	2049.15	FALSE	42
2022-09-12	12:08:56	0.685611	3.04973	2131.36	FALSE	42
2022-09-12	12:08:56	0.990649	4.4066	2053.56	FALSE	42
2022-09-12	12:08:56	0.800572	3.5611	2134.92	FALSE	42
2022-09-12	12:08:57	1.01223	4.5026	2058.06	FALSE	42
2022-09-12	12:08:57	0.578384	2.57277	2137.49	FALSE	42
2022-09-12	12:08:57	1.07604	4.78644	2062.85	FALSE	42
2022-09-12	12:08:57	0.587697	2.61419	2140.1	FALSE	42
2022-09-12	12:08:58	1.52576	6.78689	2069.63	FALSE	42
2022-09-12	12:08:58	0.966221	4.29794	2144.4	FALSE	42
2022-09-12	12:08:58	1.78749	7.95111	2077.59	FALSE	42
2022-09-12	12:08:59	0.469428	2.08811	2146.49	FALSE	42
2022-09-12	12:08:59	0.978995	4.35477	2081.94	FALSE	42
2022-09-12	12:08:59	1.10963	4.93586	2151.43	FALSE	42
2022-09-12	12:08:59	1.37386	6.1112	2088.05	FALSE	42
2022-09-12	12:09:00	1.14286	5.08367	2156.51	FALSE	42
2022-09-12	12:09:00	1.39497	6.20511	2094.26	FALSE	42
2022-09-12	12:09:00	2.50108	11.1253	2167.63	FALSE	42
2022-09-12	12:09:00	1.87279	8.33054	2102.59	FALSE	42
2022-09-12	12:09:01	1.39503	6.20537	2173.84	FALSE	42
2022-09-12	12:09:01	1.08414	4.82247	2107.41	FALSE	42
2022-09-12	12:09:01	1.04917	4.66692	2178.51	FALSE	42
2022-09-12	12:09:01	1.50403	6.69023	2114.1	FALSE	42
2022-09-12	12:09:02	1.3595	6.04733	2184.55	FALSE	42
2022-09-12	12:09:02	1.70368	7.57831	2121.68	FALSE	42
2022-09-12	12:09:02	1.80678	8.03692	2192.59	FALSE	42
2022-09-12	12:09:03	1.42128	6.32214	2128	FALSE	42
2022-09-12	12:09:03	1.46413	6.51274	2199.1	FALSE	42
2022-09-12	12:09:03	1.55457	6.91504	2134.92	FALSE	42
2022-09-12	12:09:03	1.59955	7.11512	2206.22	FALSE	42
2022-09-12	12:09:04	1.5477	6.88448	2141.8	FALSE	42
2022-09-12	12:09:04	1.63721	7.28264	2213.5	FALSE	42
2022-09-12	12:09:04	1.05243	4.68142	2146.48	FALSE	42
2022-09-12	12:09:04	0.610751	2.71674	2216.22	FALSE	42
2022-09-12	12:09:05	0.743015	3.30508	2149.79	FALSE	42
2022-09-12	12:09:05	0.716501	3.18714	2219.41	FALSE	42
2022-09-12	12:09:05	1.97457	8.78328	2158.57	FALSE	42
2022-09-12	12:09:05	2.3106	10.278	2229.68	FALSE	42
2022-09-12	12:09:06	1.89548	8.43147	2167	FALSE	42
2022-09-12	12:09:06	0.994924	4.42562	2234.11	FALSE	42
2022-09-12	12:09:06	0.453652	2.01793	2169.02	FALSE	42
2022-09-12	12:09:07	0.865102	3.84815	2237.96	FALSE	42
2022-09-12	12:09:07	0.993397	4.41883	2173.44	FALSE	42
2022-09-12	12:09:07	1.35645	6.03376	2243.99	FALSE	42
2022-09-12	12:09:07	1.20531	5.36146	2178.8	FALSE	42
2022-09-12	12:09:08	1.92948	8.58271	2252.57	FALSE	42
2022-09-12	12:09:08	1.4167	6.30176	2185.1	FALSE	42
2022-09-12	12:09:08	1.85645	8.25786	2260.83	FALSE	42
2022-09-12	12:09:08	1.63564	7.27565	2192.38	FALSE	42
2022-09-12	12:09:09	3.67497	16.347	2277.18	1	43
2022-09-12	12:09:09	1.37777	6.1286	2198.51	FALSE	43
2022-09-12	12:09:09	2.73248	12.1546	2289.33	FALSE	43
2022-09-12	12:09:09	1.5478	6.88492	2205.39	FALSE	43
2022-09-12	12:09:10	1.99197	8.86068	2298.19	FALSE	43
2022-09-12	12:09:10	0.457367	2.03446	2207.43	FALSE	43
2022-09-12	12:09:10	0.457214	2.03378	2300.23	FALSE	43
2022-09-12	12:09:11	2.27838	10.1347	2217.56	FALSE	43
2022-09-12	12:09:11	0.686119	3.05199	2303.28	FALSE	43
2022-09-12	12:09:11	1.89116	8.41226	2225.97	FALSE	43
2022-09-12	12:09:11	0.787494	3.50293	2306.78	FALSE	43
2022-09-12	12:09:12	2.62072	11.6575	2237.63	FALSE	43
2022-09-12	12:09:12	1.29401	5.75602	2312.54	FALSE	43
2022-09-12	12:09:12	2.44856	10.8917	2248.52	FALSE	43
2022-09-12	12:09:12	1.48531	6.60696	2319.15	FALSE	43
2022-09-12	12:09:13	1.0277	4.57142	2253.09	FALSE	43
2022-09-12	12:09:13	1.25691	5.59099	2324.74	FALSE	43
2022-09-12	12:09:13	1.43574	6.38646	2259.48	FALSE	43
2022-09-12	12:09:14	2.20734	9.81869	2334.56	FALSE	43
2022-09-12	12:09:14	0.815738	3.62857	2263.11	FALSE	43
2022-09-12	12:09:14	1.72358	7.66683	2342.22	FALSE	43
2022-09-12	12:09:14	1.31828	5.86397	2268.97	FALSE	43
2022-09-12	12:09:15	2.49961	11.1188	2353.34	FALSE	43
2022-09-12	12:09:15	1.07385	4.7767	2273.75	FALSE	43
2022-09-12	12:09:15	2.17314	9.66656	2363.01	FALSE	43
2022-09-12	12:09:15	1.3793	6.1354	2279.88	FALSE	43
2022-09-12	12:09:16	2.61558	11.6346	2374.64	FALSE	43
2022-09-12	12:09:16	1.11747	4.97073	2284.85	FALSE	43
2022-09-12	12:09:16	1.42933	6.35795	2381	FALSE	43
2022-09-12	12:09:16	0.799555	3.55658	2288.41	FALSE	43
2022-09-12	12:09:17	0.347545	1.54595	2382.55	FALSE	43
2022-09-12	12:09:17	0.205153	0.912562	2289.32	FALSE	43
2022-09-12	12:09:17	0.0573666	0.255178	2382.8	FALSE	43
2022-09-12	12:09:17	0.216552	0.963267	2290.29	FALSE	43
2022-09-12	12:09:18	-0.0765264	-0.340405	2382.8	FALSE	43
2022-09-12	12:09:18	0.309987	1.37888	2291.67	FALSE	43
2022-09-12	12:09:18	-0.0262975	-0.116977	2382.8	FALSE	43
2022-09-12	12:09:19	0.170751	0.759535	2292.43	FALSE	43
2022-09-12	12:09:19	-0.0219717	-0.0977345	2382.8	FALSE	43
2022-09-12	12:09:19	0.330445	1.46989	2293.9	FALSE	43

## Sheet: Sunny_prong_2022912120359 (E)
Date	Time	Lbs	Total force x time	Total Time Steps Force >3		**GoPro Fitting: 1153
2022-09-12	12:04:19	0.513448	0.513448
2022-09-12	12:04:19	0.682608	1.19606
2022-09-12	12:04:19	0.322812	1.51887
2022-09-12	12:04:20	0.829326	2.34819	FALSE	#REF!			Total force x time	1051.37
2022-09-12	12:04:20	1.69457	4.04276	FALSE	#REF!			Total Time Steps Force >3	43
2022-09-12	12:04:20	0.459453	4.50222	FALSE	#REF!
2022-09-12	12:04:20	0.373499	4.87572	FALSE	#REF!
2022-09-12	12:04:21	0.288512	5.16423	FALSE	#REF!
2022-09-12	12:04:21	0.318181	5.48241	FALSE	#REF!
2022-09-12	12:04:21	0.125407	5.60782	FALSE	#REF!
2022-09-12	12:04:21	0.208664	5.81648	FALSE	#REF!
2022-09-12	12:04:22	0.281743	6.09822	FALSE	#REF!
2022-09-12	12:04:22	0.204644	6.30287	FALSE	#REF!
2022-09-12	12:04:22	0.502863	6.80573	FALSE	#REF!
2022-09-12	12:04:22	0.298944	7.10467	FALSE	#REF!
2022-09-12	12:04:23	0.285	7.38967	FALSE	#REF!
2022-09-12	12:04:23	0.171412	7.56109	FALSE	#REF!
2022-09-12	12:04:23	0.247545	7.80863	FALSE	#REF!
2022-09-12	12:04:24	0.258028	8.06666	FALSE	#REF!
2022-09-12	12:04:24	0.0707508	8.13741	FALSE	#REF!
2022-09-12	12:04:24	0.0432699	8.18068	FALSE	#REF!
2022-09-12	12:04:24	-0.105788	8.18068	FALSE	#REF!
2022-09-12	12:04:25	-0.0650761	8.18068	FALSE	#REF!
2022-09-12	12:04:25	-0.0999361	8.18068	FALSE	#REF!
2022-09-12	12:04:25	0.197926	8.37861	FALSE	#REF!
2022-09-12	12:04:25	0.160471	8.53908	FALSE	#REF!
2022-09-12	12:04:26	0.263066	8.80214	FALSE	#REF!
2022-09-12	12:04:26	0.250344	9.05249	FALSE	#REF!
2022-09-12	12:04:26	0.149428	9.20191	FALSE	#REF!
2022-09-12	12:04:26	0.472074	9.67399	FALSE	#REF!
2022-09-12	12:04:27	0.179708	9.8537	FALSE	#REF!
2022-09-12	12:04:27	0.658639	10.5123	FALSE	#REF!
2022-09-12	12:04:27	0.308613	10.8209	FALSE	#REF!
2022-09-12	12:04:28	0.35645	11.1774	FALSE	#REF!
2022-09-12	12:04:28	0.25986	11.4373	FALSE	#REF!
2022-09-12	12:04:28	0.218791	11.656	FALSE	#REF!
2022-09-12	12:04:28	0.377774	12.0338	FALSE	#REF!
2022-09-12	12:04:29	0.12271	12.1565	FALSE	#REF!
2022-09-12	12:04:29	0.396298	12.5528	FALSE	#REF!
2022-09-12	12:04:29	0.565356	13.1182	FALSE	#REF!
2022-09-12	12:04:29	0.660471	13.7787	FALSE	#REF!
2022-09-12	12:04:30	0.310598	14.0893	FALSE	#REF!
2022-09-12	12:04:30	0.571565	14.6608	FALSE	#REF!
2022-09-12	12:04:30	1.22307	15.8839	FALSE	#REF!
2022-09-12	12:04:30	2.26515	18.149	FALSE	#REF!
2022-09-12	12:04:31	0.699555	18.8486	FALSE	#REF!
2022-09-12	12:04:31	0.329835	19.1784	FALSE	#REF!
2022-09-12	12:04:31	0.587799	19.7662	FALSE	#REF!
2022-09-12	12:04:31	0.329224	20.0955	FALSE	#REF!
2022-09-12	12:04:32	0.579504	20.675	FALSE	#REF!
2022-09-12	12:04:32	0.436654	21.1116	FALSE	#REF!
2022-09-12	12:04:32	1.62581	22.7374	FALSE	#REF!
2022-09-12	12:04:33	0.349529	23.087	FALSE	#REF!
2022-09-12	12:04:33	0.247443	23.3344	FALSE	#REF!
2022-09-12	12:04:33	0.3507	23.6851	FALSE	#REF!
2022-09-12	12:04:33	0.111158	23.7963	FALSE	#REF!
2022-09-12	12:04:34	0.34673	24.143	FALSE	#REF!
2022-09-12	12:04:34	0.170547	24.3135	FALSE	#REF!
2022-09-12	12:04:34	0.193448	24.507	FALSE	#REF!
2022-09-12	12:04:34	0.149224	24.6562	FALSE	#REF!
2022-09-12	12:04:35	0.22897	24.8852	FALSE	#REF!
2022-09-12	12:04:35	0.499402	25.3846	FALSE	#REF!
2022-09-12	12:04:35	0.818486	26.2031	FALSE	#REF!
2022-09-12	12:04:35	0.407596	26.6107	FALSE	#REF!
2022-09-12	12:04:36	0.202099	26.8128	FALSE	#REF!
2022-09-12	12:04:36	0.356858	27.1696	FALSE	#REF!
2022-09-12	12:04:36	0.264542	27.4342	FALSE	#REF!
2022-09-12	12:04:37	0.17869	27.6128	FALSE	#REF!
2022-09-12	12:04:37	0.315942	27.9288	FALSE	#REF!
2022-09-12	12:04:37	0.495585	28.4244	FALSE	#REF!
2022-09-12	12:04:37	0.335687	28.7601	FALSE	#REF!
2022-09-12	12:04:38	0.49355	29.2536	FALSE	#REF!
2022-09-12	12:04:38	0.270802	29.5244	FALSE	#REF!
2022-09-12	12:04:38	0.271311	29.7957	FALSE	#REF!
2022-09-12	12:04:38	0.0922776	29.888	FALSE	#REF!
2022-09-12	12:04:39	0.290293	30.1783	FALSE	#REF!
2022-09-12	12:04:39	0.133397	30.3117	FALSE	#REF!
2022-09-12	12:04:39	0.290598	30.6023	FALSE	#REF!
2022-09-12	12:04:39	0.202354	30.8046	FALSE	#REF!
2022-09-12	12:04:40	0.159911	30.9646	FALSE	#REF!
2022-09-12	12:04:40	0.167697	31.1322	FALSE	#REF!
2022-09-12	12:04:40	0.0857635	31.218	FALSE	#REF!
2022-09-12	12:04:41	0.269377	31.4874	FALSE	#REF!
2022-09-12	12:04:41	0.203677	31.6911	FALSE	#REF!
2022-09-12	12:04:41	0.932481	32.6235	FALSE	#REF!
2022-09-12	12:04:41	0.745	33.3685	FALSE	#REF!
2022-09-12	12:04:42	1.82632	35.1949	FALSE	#REF!
2022-09-12	12:04:42	0.240776	35.4356	FALSE	#REF!
2022-09-12	12:04:42	0.135942	35.5716	FALSE	#REF!
2022-09-12	12:04:42	0.179046	35.7506	FALSE	#REF!
2022-09-12	12:04:43	-0.038613	35.7506	FALSE	#REF!
2022-09-12	12:04:43	0.0617941	35.8124	FALSE	#REF!
2022-09-12	12:04:43	0.113092	35.9255	FALSE	#REF!
2022-09-12	12:04:43	1.33665	37.2622	FALSE	#REF!
2022-09-12	12:04:44	0.18098	37.4431	FALSE	#REF!
2022-09-12	12:04:44	0.268562	37.7117	FALSE	#REF!
2022-09-12	12:04:44	0.186883	37.8986	FALSE	#REF!
2022-09-12	12:04:45	0.265204	38.1638	FALSE	#REF!
2022-09-12	12:04:45	0.359758	38.5236	FALSE	#REF!
2022-09-12	12:04:45	0.359911	38.8835	FALSE	#REF!
2022-09-12	12:04:45	0.77472	39.6582	FALSE	#REF!
2022-09-12	12:04:46	0.101845	39.76	FALSE	#REF!
2022-09-12	12:04:46	0.760827	40.5209	FALSE	#REF!
2022-09-12	12:04:46	0.358944	40.8798	FALSE	#REF!
2022-09-12	12:04:46	0.145306	41.0251	FALSE	#REF!
2022-09-12	12:04:47	0.00703587	41.0321	FALSE	#REF!
2022-09-12	12:04:47	0.193753	41.2259	FALSE	#REF!
2022-09-12	12:04:47	0.134924	41.3608	FALSE	#REF!
2022-09-12	12:04:47	0.236451	41.5973	FALSE	#REF!
2022-09-12	12:04:48	0.07813	41.6754	FALSE	#REF!
2022-09-12	12:04:48	0.117672	41.7931	FALSE	#REF!
2022-09-12	12:04:48	0.0308527	41.8239	FALSE	#REF!
2022-09-12	12:04:49	-0.12701	41.8239	FALSE	#REF!
2022-09-12	12:04:49	-0.198002	41.8239	FALSE	#REF!
2022-09-12	12:04:49	-0.218562	41.8239	FALSE	#REF!
2022-09-12	12:04:49	-0.186501	41.8239	FALSE	#REF!
2022-09-12	12:04:50	-0.179071	41.8239	FALSE	#REF!
2022-09-12	12:04:50	-0.00634836	41.8239	FALSE	#REF!
2022-09-12	12:04:50	-0.0718954	41.8239	FALSE	#REF!
2022-09-12	12:04:50	0.0632699	41.8872	FALSE	#REF!
2022-09-12	12:04:51	-0.0285875	41.8872	FALSE	#REF!
2022-09-12	12:04:51	0.271361	42.1586	FALSE	#REF!
2022-09-12	12:04:51	0.212634	42.3712	FALSE	#REF!
2022-09-12	12:04:51	0.203677	42.5749	FALSE	#REF!
2022-09-12	12:04:52	0.336247	42.9111	FALSE	#REF!
2022-09-12	12:04:52	0.202252	43.1134	FALSE	#REF!
2022-09-12	12:04:52	0.422456	43.5358	FALSE	#REF!
2022-09-12	12:04:53	0.147138	43.683	FALSE	#REF!
2022-09-12	12:04:53	0.435484	44.1184	FALSE	#REF!
2022-09-12	12:04:53	0.196349	44.3148	FALSE	#REF!
2022-09-12	12:04:53	0.3593	44.6741	FALSE	#REF!
2022-09-12	12:04:54	0.323982	44.9981	FALSE	#REF!
2022-09-12	12:04:54	6.07792	51.076	1	#REF!
2022-09-12	12:04:54	7.54011	58.6161	1	#REF!
2022-09-12	12:04:54	0.843219	59.4593	FALSE	#REF!
2022-09-12	12:04:55	0.32383	59.7832	FALSE	#REF!
2022-09-12	12:04:55	0.432786	60.2159	FALSE	#REF!
2022-09-12	12:04:55	0.725814	60.9418	FALSE	#REF!
2022-09-12	12:04:55	1.17676	62.1185	FALSE	#REF!
2022-09-12	12:04:56	0.739911	62.8584	FALSE	#REF!
2022-09-12	12:04:56	1.21991	64.0783	FALSE	#REF!
2022-09-12	12:04:56	1.30912	65.3875	FALSE	#REF!
2022-09-12	12:04:57	0.625051	66.0125	FALSE	#REF!
2022-09-12	12:04:57	0.376094	66.3886	FALSE	#REF!
2022-09-12	12:04:57	0.321031	66.7096	FALSE	#REF!
2022-09-12	12:04:57	0.363423	67.0731	FALSE	#REF!
2022-09-12	12:04:58	0.495483	67.5685	FALSE	#REF!
2022-09-12	12:04:58	0.716196	68.2847	FALSE	#REF!
2022-09-12	12:04:58	0.953753	69.2385	FALSE	#REF!
2022-09-12	12:04:58	1.05452	70.293	FALSE	#REF!
2022-09-12	12:04:59	0.94617	71.2392	FALSE	#REF!
2022-09-12	12:04:59	1.12663	72.3658	FALSE	#REF!
2022-09-12	12:04:59	1.10505	73.4709	FALSE	#REF!
2022-09-12	12:04:59	1.09319	74.564	FALSE	#REF!
2022-09-12	12:05:00	0.489478	75.0535	FALSE	#REF!
2022-09-12	12:05:00	0.361183	75.4147	FALSE	#REF!
2022-09-12	12:05:00	0.362659	75.7774	FALSE	#REF!
2022-09-12	12:05:00	0.379657	76.157	FALSE	#REF!
2022-09-12	12:05:01	0.347799	76.5048	FALSE	#REF!
2022-09-12	12:05:01	0.192786	76.6976	FALSE	#REF!
2022-09-12	12:05:01	0.397468	77.0951	FALSE	#REF!
2022-09-12	12:05:02	0.287443	77.3825	FALSE	#REF!
2022-09-12	12:05:02	0.420013	77.8025	FALSE	#REF!
2022-09-12	12:05:02	0.445611	78.2481	FALSE	#REF!
2022-09-12	12:05:02	0.679809	78.928	FALSE	#REF!
2022-09-12	12:05:03	0.668003	79.596	FALSE	#REF!
2022-09-12	12:05:03	0.693295	80.2893	FALSE	#REF!
2022-09-12	12:05:03	0.631463	80.9207	FALSE	#REF!
2022-09-12	12:05:03	0.545712	81.4664	FALSE	#REF!
2022-09-12	12:05:04	0.567137	82.0336	FALSE	#REF!
2022-09-12	12:05:04	0.574211	82.6078	FALSE	#REF!
2022-09-12	12:05:04	0.558842	83.1666	FALSE	#REF!
2022-09-12	12:05:04	0.294517	83.4611	FALSE	#REF!
2022-09-12	12:05:05	0.348104	83.8092	FALSE	#REF!
2022-09-12	12:05:05	0.305204	84.1144	FALSE	#REF!
2022-09-12	12:05:05	0.362965	84.4774	FALSE	#REF!
2022-09-12	12:05:06	1.04622	85.5236	FALSE	#REF!
2022-09-12	12:05:06	3.07925	88.6029	1	#REF!
2022-09-12	12:05:06	3.02851	91.6314	1	#REF!
2022-09-12	12:05:06	0.990038	92.6214	FALSE	#REF!
2022-09-12	12:05:07	0.538435	93.1599	FALSE	#REF!
2022-09-12	12:05:07	0.297926	93.4578	FALSE	#REF!
2022-09-12	12:05:07	0.393041	93.8508	FALSE	#REF!
2022-09-12	12:05:07	1.30159	95.1524	FALSE	#REF!
2022-09-12	12:05:08	0.928817	96.0812	FALSE	#REF!
2022-09-12	12:05:08	1.30413	97.3854	FALSE	#REF!
2022-09-12	12:05:08	1.15289	98.5383	FALSE	#REF!
2022-09-12	12:05:08	1.22424	99.7625	FALSE	#REF!
2022-09-12	12:05:09	1.70943	101.472	FALSE	#REF!
2022-09-12	12:05:09	2.31884	103.791	FALSE	#REF!
2022-09-12	12:05:09	1.81212	105.603	FALSE	#REF!
2022-09-12	12:05:10	1.85553	107.458	FALSE	#REF!
2022-09-12	12:05:10	4.51273	111.971	1	#REF!
2022-09-12	12:05:10	3.0424	115.014	1	#REF!
2022-09-12	12:05:10	1.56062	116.574	FALSE	#REF!
2022-09-12	12:05:11	0.456807	117.031	FALSE	#REF!
2022-09-12	12:05:11	0.361743	117.393	FALSE	#REF!
2022-09-12	12:05:11	0.276603	117.669	FALSE	#REF!
2022-09-12	12:05:11	0.837265	118.507	FALSE	#REF!
2022-09-12	12:05:12	2.11039	120.617	FALSE	#REF!
2022-09-12	12:05:12	1.92724	122.544	FALSE	#REF!
2022-09-12	12:05:12	2.13971	124.684	FALSE	#REF!
2022-09-12	12:05:12	3.58261	128.267	1	#REF!
2022-09-12	12:05:13	1.42668	129.693	FALSE	#REF!
2022-09-12	12:05:13	0.711158	130.404	FALSE	#REF!
2022-09-12	12:05:13	0.343473	130.748	FALSE	#REF!
2022-09-12	12:05:14	0.530089	131.278	FALSE	#REF!
2022-09-12	12:05:14	0.343931	131.622	FALSE	#REF!
2022-09-12	12:05:14	0.311361	131.933	FALSE	#REF!
2022-09-12	12:05:14	0.423575	132.357	FALSE	#REF!
2022-09-12	12:05:15	1.18714	133.544	FALSE	#REF!
2022-09-12	12:05:15	1.69889	135.243	FALSE	#REF!
2022-09-12	12:05:15	1.25309	136.496	FALSE	#REF!
2022-09-12	12:05:15	1.36307	137.859	FALSE	#REF!
2022-09-12	12:05:16	1.01177	138.871	FALSE	#REF!
2022-09-12	12:05:16	0.729224	139.6	FALSE	#REF!
2022-09-12	12:05:16	0.542812	140.143	FALSE	#REF!
2022-09-12	12:05:16	0.547086	140.69	FALSE	#REF!
2022-09-12	12:05:17	0.469886	141.16	FALSE	#REF!
2022-09-12	12:05:17	0.361132	141.521	FALSE	#REF!
2022-09-12	12:05:17	0.428919	141.95	FALSE	#REF!
2022-09-12	12:05:18	0.240522	142.19	FALSE	#REF!
2022-09-12	12:05:18	0.322456	142.513	FALSE	#REF!
2022-09-12	12:05:18	0.16215	142.675	FALSE	#REF!
2022-09-12	12:05:18	0.47014	143.145	FALSE	#REF!
2022-09-12	12:05:19	0.180522	143.326	FALSE	#REF!
2022-09-12	12:05:19	0.379148	143.705	FALSE	#REF!
2022-09-12	12:05:19	0.22556	143.93	FALSE	#REF!
2022-09-12	12:05:19	0.405153	144.335	FALSE	#REF!
2022-09-12	12:05:20	0.169377	144.505	FALSE	#REF!
2022-09-12	12:05:20	0.37243	144.877	FALSE	#REF!
2022-09-12	12:05:20	0.351565	145.229	FALSE	#REF!
2022-09-12	12:05:20	0.546781	145.776	FALSE	#REF!
2022-09-12	12:05:21	0.432888	146.209	FALSE	#REF!
2022-09-12	12:05:21	0.421794	146.63	FALSE	#REF!
2022-09-12	12:05:21	0.663117	147.293	FALSE	#REF!
2022-09-12	12:05:22	1.03513	148.329	FALSE	#REF!
2022-09-12	12:05:22	0.860369	149.189	FALSE	#REF!
2022-09-12	12:05:22	1.15039	150.339	FALSE	#REF!
2022-09-12	12:05:22	1.62561	151.965	FALSE	#REF!
2022-09-12	12:05:23	0.882303	152.847	FALSE	#REF!
2022-09-12	12:05:23	1.13452	153.982	FALSE	#REF!
2022-09-12	12:05:23	1.01721	154.999	FALSE	#REF!
2022-09-12	12:05:23	1.03304	156.032	FALSE	#REF!
2022-09-12	12:05:24	1.06464	157.097	FALSE	#REF!
2022-09-12	12:05:24	0.695534	157.792	FALSE	#REF!
2022-09-12	12:05:24	0.424491	158.217	FALSE	#REF!
2022-09-12	12:05:24	0.313702	158.53	FALSE	#REF!
2022-09-12	12:05:25	0.39584	158.926	FALSE	#REF!
2022-09-12	12:05:25	0.407646	159.334	FALSE	#REF!
2022-09-12	12:05:25	0.290598	159.624	FALSE	#REF!
2022-09-12	12:05:26	0.352074	159.977	FALSE	#REF!
2022-09-12	12:05:26	0.144237	160.121	FALSE	#REF!
2022-09-12	12:05:26	0.472532	160.593	FALSE	#REF!
2022-09-12	12:05:26	0.193651	160.787	FALSE	#REF!
2022-09-12	12:05:27	0.42556	161.212	FALSE	#REF!
2022-09-12	12:05:27	0.249275	161.462	FALSE	#REF!
2022-09-12	12:05:27	0.167901	161.63	FALSE	#REF!
2022-09-12	12:05:27	0.194873	161.825	FALSE	#REF!
2022-09-12	12:05:28	0.142659	161.967	FALSE	#REF!
2022-09-12	12:05:28	0.345713	162.313	FALSE	#REF!
2022-09-12	12:05:28	0.0342114	162.347	FALSE	#REF!
2022-09-12	12:05:28	0.275025	162.622	FALSE	#REF!
2022-09-12	12:05:29	0.0855091	162.708	FALSE	#REF!
2022-09-12	12:05:29	0.487545	163.195	FALSE	#REF!
2022-09-12	12:05:29	0.937061	164.132	FALSE	#REF!
2022-09-12	12:05:30	0.299453	164.432	FALSE	#REF!
2022-09-12	12:05:30	0.333295	164.765	FALSE	#REF!
2022-09-12	12:05:30	0.497316	165.262	FALSE	#REF!
2022-09-12	12:05:30	0.810089	166.072	FALSE	#REF!
2022-09-12	12:05:31	2.1993	168.272	FALSE	#REF!
2022-09-12	12:05:31	2.11874	170.39	FALSE	#REF!
2022-09-12	12:05:31	1.06164	171.452	FALSE	#REF!
2022-09-12	12:05:31	1.39314	172.845	FALSE	#REF!
2022-09-12	12:05:32	1.58001	174.425	FALSE	#REF!
2022-09-12	12:05:32	0.976501	175.402	FALSE	#REF!
2022-09-12	12:05:32	0.466985	175.869	FALSE	#REF!
2022-09-12	12:05:32	0.7964	176.665	FALSE	#REF!
2022-09-12	12:05:33	0.727952	177.393	FALSE	#REF!
2022-09-12	12:05:33	0.661183	178.054	FALSE	#REF!
2022-09-12	12:05:33	0.852379	178.907	FALSE	#REF!
2022-09-12	12:05:34	0.282405	179.189	FALSE	#REF!
2022-09-12	12:05:34	0.462456	179.652	FALSE	#REF!
2022-09-12	12:05:34	0.242303	179.894	FALSE	#REF!
2022-09-12	12:05:34	0.334669	180.228	FALSE	#REF!
2022-09-12	12:05:35	0.507748	180.736	FALSE	#REF!
2022-09-12	12:05:35	0.902964	181.639	FALSE	#REF!
2022-09-12	12:05:35	0.992226	182.631	FALSE	#REF!
2022-09-12	12:05:35	0.484288	183.116	FALSE	#REF!
2022-09-12	12:05:36	0.652939	183.769	FALSE	#REF!
2022-09-12	12:05:36	0.476909	184.246	FALSE	#REF!
2022-09-12	12:05:36	0.478995	184.725	FALSE	#REF!
2022-09-12	12:05:36	0.261998	184.987	FALSE	#REF!
2022-09-12	12:05:37	0.670852	185.657	FALSE	#REF!
2022-09-12	12:05:37	0.89299	186.55	FALSE	#REF!
2022-09-12	12:05:37	0.913448	187.464	FALSE	#REF!
2022-09-12	12:05:38	0.757468	188.221	FALSE	#REF!
2022-09-12	12:05:38	2.29508	190.516	FALSE	#REF!
2022-09-12	12:05:38	0.916908	191.433	FALSE	#REF!
2022-09-12	12:05:38	1.18612	192.619	FALSE	#REF!
2022-09-12	12:05:39	0.649071	193.268	FALSE	#REF!
2022-09-12	12:05:39	1.78149	195.05	FALSE	#REF!
2022-09-12	12:05:39	1.90083	196.951	FALSE	#REF!
2022-09-12	12:05:39	3.56734	200.518	1	#REF!
2022-09-12	12:05:40	2.59172	203.11	FALSE	#REF!
2022-09-12	12:05:40	1.4048	204.515	FALSE	#REF!
2022-09-12	12:05:40	2.56576	207.08	FALSE	#REF!
2022-09-12	12:05:40	2.165	209.245	FALSE	#REF!
2022-09-12	12:05:41	3.95813	213.204	1	#REF!
2022-09-12	12:05:41	0.793244	213.997	FALSE	#REF!
2022-09-12	12:05:41	0.925204	214.922	FALSE	#REF!
2022-09-12	12:05:41	0.596908	215.519	FALSE	#REF!
2022-09-12	12:05:42	0.376247	215.895	FALSE	#REF!
2022-09-12	12:05:42	0.718944	216.614	FALSE	#REF!
2022-09-12	12:05:42	2.51044	219.125	FALSE	#REF!
2022-09-12	12:05:43	4.86342	223.988	1	#REF!
2022-09-12	12:05:43	3.71782	227.706	1	#REF!
2022-09-12	12:05:43	1.24261	228.948	FALSE	#REF!
2022-09-12	12:05:43	0.286171	229.235	FALSE	#REF!
2022-09-12	12:05:44	0.441387	229.676	FALSE	#REF!
2022-09-12	12:05:44	0.41528	230.091	FALSE	#REF!
2022-09-12	12:05:44	0.603117	230.694	FALSE	#REF!
2022-09-12	12:05:44	1.0537	231.748	FALSE	#REF!
2022-09-12	12:05:45	1.05314	232.801	FALSE	#REF!
2022-09-12	12:05:45	1.57167	234.373	FALSE	#REF!
2022-09-12	12:05:45	1.96897	236.342	FALSE	#REF!
2022-09-12	12:05:45	1.22805	237.57	FALSE	#REF!
2022-09-12	12:05:46	0.518333	238.088	FALSE	#REF!
2022-09-12	12:05:46	0.359453	238.448	FALSE	#REF!
2022-09-12	12:05:46	0.286628	238.734	FALSE	#REF!
2022-09-12	12:05:47	1.08622	239.821	FALSE	#REF!
2022-09-12	12:05:47	0.434873	240.255	FALSE	#REF!
2022-09-12	12:05:47	0.400929	240.656	FALSE	#REF!
2022-09-12	12:05:47	0.196043	240.852	FALSE	#REF!
2022-09-12	12:05:48	0.259555	241.112	FALSE	#REF!
2022-09-12	12:05:48	0.19299	241.305	FALSE	#REF!
2022-09-12	12:05:48	0.260573	241.565	FALSE	#REF!
2022-09-12	12:05:48	0.369122	241.935	FALSE	#REF!
2022-09-12	12:05:49	0.48556	242.42	FALSE	#REF!
2022-09-12	12:05:49	0.279046	242.699	FALSE	#REF!
2022-09-12	12:05:49	0.303982	243.003	FALSE	#REF!
2022-09-12	12:05:49	0.179758	243.183	FALSE	#REF!
2022-09-12	12:05:50	1.00907	244.192	FALSE	#REF!
2022-09-12	12:05:50	1.62948	245.821	FALSE	#REF!
2022-09-12	12:05:50	0.389428	246.211	FALSE	#REF!
2022-09-12	12:05:51	0.5764	246.787	FALSE	#REF!
2022-09-12	12:05:51	0.656908	247.444	FALSE	#REF!
2022-09-12	12:05:51	1.06271	248.507	FALSE	#REF!
2022-09-12	12:05:51	1.41574	249.923	FALSE	#REF!
2022-09-12	12:05:52	0.620929	250.544	FALSE	#REF!
2022-09-12	12:05:52	2.22291	252.767	FALSE	#REF!
2022-09-12	12:05:52	0.434059	253.201	FALSE	#REF!
2022-09-12	12:05:52	0.633906	253.834	FALSE	#REF!
2022-09-12	12:05:53	0.621641	254.456	FALSE	#REF!
2022-09-12	12:05:53	1.00251	255.459	FALSE	#REF!
2022-09-12	12:05:53	0.4993	255.958	FALSE	#REF!
2022-09-12	12:05:53	0.337061	256.295	FALSE	#REF!
2022-09-12	12:05:54	0.399249	256.694	FALSE	#REF!
2022-09-12	12:05:54	0.145204	256.839	FALSE	#REF!
2022-09-12	12:05:54	0.308868	257.148	FALSE	#REF!
2022-09-12	12:05:55	0.35411	257.502	FALSE	#REF!
2022-09-12	12:05:55	0.0930409	257.595	FALSE	#REF!
2022-09-12	12:05:55	-0.0689946	257.595	FALSE	#REF!
2022-09-12	12:05:55	-0.00258246	257.595	FALSE	#REF!
2022-09-12	12:05:56	0.0833717	257.679	FALSE	#REF!
2022-09-12	12:05:56	0.0843895	257.763	FALSE	#REF!
2022-09-12	12:05:56	0.0359417	257.799	FALSE	#REF!
2022-09-12	12:05:56	0.0882572	257.887	FALSE	#REF!
2022-09-12	12:05:57	0.0984353	257.986	FALSE	#REF!
2022-09-12	12:05:57	-0.0330659	257.986	FALSE	#REF!
2022-09-12	12:05:57	0.188563	258.174	FALSE	#REF!
2022-09-12	12:05:57	-0.00583945	258.174	FALSE	#REF!
2022-09-12	12:05:58	0.0873412	258.262	FALSE	#REF!
2022-09-12	12:05:58	-0.0846689	258.262	FALSE	#REF!
2022-09-12	12:05:58	0.126832	258.389	FALSE	#REF!
2022-09-12	12:05:59	0.0531936	258.442	FALSE	#REF!
2022-09-12	12:05:59	0.120776	258.563	FALSE	#REF!
2022-09-12	12:05:59	0.0590969	258.622	FALSE	#REF!
2022-09-12	12:05:59	0.194466	258.816	FALSE	#REF!
2022-09-12	12:06:00	0.14383	258.96	FALSE	#REF!
2022-09-12	12:06:00	0.209071	259.169	FALSE	#REF!
2022-09-12	12:06:00	0.0782826	259.247	FALSE	#REF!
2022-09-12	12:06:00	0.264644	259.512	FALSE	#REF!
2022-09-12	12:06:01	0.179148	259.691	FALSE	#REF!
2022-09-12	12:06:01	0.326985	260.018	FALSE	#REF!
2022-09-12	12:06:01	0.103575	260.122	FALSE	#REF!
2022-09-12	12:06:01	0.286069	260.408	FALSE	#REF!
2022-09-12	12:06:02	0.346832	260.755	FALSE	#REF!
2022-09-12	12:06:02	1.12546	261.88	FALSE	#REF!
2022-09-12	12:06:02	0.781845	262.662	FALSE	#REF!
2022-09-12	12:06:03	1.15589	263.818	FALSE	#REF!
2022-09-12	12:06:03	0.624338	264.442	FALSE	#REF!
2022-09-12	12:06:03	0.843117	265.285	FALSE	#REF!
2022-09-12	12:06:03	0.908562	266.194	FALSE	#REF!
2022-09-12	12:06:04	1.16398	267.358	FALSE	#REF!
2022-09-12	12:06:04	2.08693	269.445	FALSE	#REF!
2022-09-12	12:06:04	1.54042	270.985	FALSE	#REF!
2022-09-12	12:06:04	2.29614	273.281	FALSE	#REF!
2022-09-12	12:06:05	1.525	274.806	FALSE	#REF!
2022-09-12	12:06:05	2.57502	277.381	FALSE	#REF!
2022-09-12	12:06:05	1.95696	279.338	FALSE	#REF!
2022-09-12	12:06:05	1.92444	281.263	FALSE	#REF!
2022-09-12	12:06:06	2.43218	283.695	FALSE	#REF!
2022-09-12	12:06:06	1.21335	284.908	FALSE	#REF!
2022-09-12	12:06:06	1.58897	286.497	FALSE	#REF!
2022-09-12	12:06:07	1.25457	287.752	FALSE	#REF!
2022-09-12	12:06:07	1.43116	289.183	FALSE	#REF!
2022-09-12	12:06:07	1.44184	290.625	FALSE	#REF!
2022-09-12	12:06:07	1.08882	291.714	FALSE	#REF!
2022-09-12	12:06:08	2.20622	293.92	FALSE	#REF!
2022-09-12	12:06:08	1.17248	295.092	FALSE	#REF!
2022-09-12	12:06:08	3.39263	298.485	1	#REF!
2022-09-12	12:06:08	2.43559	300.92	FALSE	#REF!
2022-09-12	12:06:09	1.37813	302.299	FALSE	#REF!
2022-09-12	12:06:09	1.27782	303.576	FALSE	#REF!
2022-09-12	12:06:09	0.962862	304.539	FALSE	#REF!
2022-09-12	12:06:09	2.05447	306.594	FALSE	#REF!
2022-09-12	12:06:10	0.466221	307.06	FALSE	#REF!
2022-09-12	12:06:10	0.558842	307.619	FALSE	#REF!
2022-09-12	12:06:10	0.403779	308.023	FALSE	#REF!
2022-09-12	12:06:11	0.287545	308.31	FALSE	#REF!
2022-09-12	12:06:11	0.368766	308.679	FALSE	#REF!
2022-09-12	12:06:11	0.26785	308.947	FALSE	#REF!
2022-09-12	12:06:11	0.207901	309.155	FALSE	#REF!
2022-09-12	12:06:12	0.186374	309.341	FALSE	#REF!
2022-09-12	12:06:12	0.22729	309.568	FALSE	#REF!
2022-09-12	12:06:12	0.232328	309.801	FALSE	#REF!
2022-09-12	12:06:12	0.258283	310.059	FALSE	#REF!
2022-09-12	12:06:13	0.250445	310.309	FALSE	#REF!
2022-09-12	12:06:13	0.2507	310.56	FALSE	#REF!
2022-09-12	12:06:13	0.278486	310.839	FALSE	#REF!
2022-09-12	12:06:13	0.294873	311.133	FALSE	#REF!
2022-09-12	12:06:14	0.297774	311.431	FALSE	#REF!
2022-09-12	12:06:14	0.301387	311.733	FALSE	#REF!
2022-09-12	12:06:14	0.299351	312.032	FALSE	#REF!
2022-09-12	12:06:15	0.295738	312.328	FALSE	#REF!
2022-09-12	12:06:15	0.289835	312.618	FALSE	#REF!
2022-09-12	12:06:15	0.274975	312.893	FALSE	#REF!
2022-09-12	12:06:15	0.270242	313.163	FALSE	#REF!
2022-09-12	12:06:16	0.269224	313.432	FALSE	#REF!
2022-09-12	12:06:16	0.275483	313.707	FALSE	#REF!
2022-09-12	12:06:16	0.276603	313.984	FALSE	#REF!
2022-09-12	12:06:16	0.278079	314.262	FALSE	#REF!
2022-09-12	12:06:17	0.274771	314.537	FALSE	#REF!
2022-09-12	12:06:17	0.277265	314.814	FALSE	#REF!
2022-09-12	12:06:17	0.281947	315.096	FALSE	#REF!
2022-09-12	12:06:17	0.279657	315.376	FALSE	#REF!
2022-09-12	12:06:18	0.272379	315.648	FALSE	#REF!
2022-09-12	12:06:18	0.303219	315.951	FALSE	#REF!
2022-09-12	12:06:18	0.282761	316.234	FALSE	#REF!
2022-09-12	12:06:19	0.250242	316.484	FALSE	#REF!
2022-09-12	12:06:19	0.248613	316.733	FALSE	#REF!
2022-09-12	12:06:19	0.236705	316.97	FALSE	#REF!
2022-09-12	12:06:19	0.24159	317.211	FALSE	#REF!
2022-09-12	12:06:20	0.294822	317.506	FALSE	#REF!
2022-09-12	12:06:20	0.363015	317.869	FALSE	#REF!
2022-09-12	12:06:20	0.380013	318.249	FALSE	#REF!
2022-09-12	12:06:20	1.30459	319.554	FALSE	#REF!
2022-09-12	12:06:21	2.22281	321.777	FALSE	#REF!
2022-09-12	12:06:21	1.42683	323.203	FALSE	#REF!
2022-09-12	12:06:21	0.196756	323.4	FALSE	#REF!
2022-09-12	12:06:21	0.46841	323.869	FALSE	#REF!
2022-09-12	12:06:22	0.0854073	323.954	FALSE	#REF!
2022-09-12	12:06:22	0.412176	324.366	FALSE	#REF!
2022-09-12	12:06:22	0.141387	324.508	FALSE	#REF!
2022-09-12	12:06:22	0.460216	324.968	FALSE	#REF!
2022-09-12	12:06:23	0.335891	325.304	FALSE	#REF!
2022-09-12	12:06:23	0.418181	325.722	FALSE	#REF!
2022-09-12	12:06:23	0.428664	326.15	FALSE	#REF!
2022-09-12	12:06:24	0.517112	326.668	FALSE	#REF!
2022-09-12	12:06:24	0.430547	327.098	FALSE	#REF!
2022-09-12	12:06:24	0.482659	327.581	FALSE	#REF!
2022-09-12	12:06:24	0.532939	328.114	FALSE	#REF!
2022-09-12	12:06:25	0.435687	328.549	FALSE	#REF!
2022-09-12	12:06:25	0.370089	328.919	FALSE	#REF!
2022-09-12	12:06:25	0.406425	329.326	FALSE	#REF!
2022-09-12	12:06:25	0.395789	329.722	FALSE	#REF!
2022-09-12	12:06:26	0.37472	330.096	FALSE	#REF!
2022-09-12	12:06:26	0.381641	330.478	FALSE	#REF!
2022-09-12	12:06:26	0.38444	330.863	FALSE	#REF!
2022-09-12	12:06:26	0.383982	331.246	FALSE	#REF!
2022-09-12	12:06:27	0.373499	331.62	FALSE	#REF!
2022-09-12	12:06:27	0.372227	331.992	FALSE	#REF!
2022-09-12	12:06:27	0.367341	332.36	FALSE	#REF!
2022-09-12	12:06:28	0.369479	332.729	FALSE	#REF!
2022-09-12	12:06:28	0.362761	333.092	FALSE	#REF!
2022-09-12	12:06:28	0.362863	333.455	FALSE	#REF!
2022-09-12	12:06:28	0.366934	333.822	FALSE	#REF!
2022-09-12	12:06:29	0.367392	334.189	FALSE	#REF!
2022-09-12	12:06:29	0.376145	334.565	FALSE	#REF!
2022-09-12	12:06:29	0.37243	334.938	FALSE	#REF!
2022-09-12	12:06:29	0.369377	335.307	FALSE	#REF!
2022-09-12	12:06:30	0.372939	335.68	FALSE	#REF!
2022-09-12	12:06:30	0.373244	336.053	FALSE	#REF!
2022-09-12	12:06:30	0.370802	336.424	FALSE	#REF!
2022-09-12	12:06:30	0.375738	336.8	FALSE	#REF!
2022-09-12	12:06:31	0.380674	337.18	FALSE	#REF!
2022-09-12	12:06:31	0.374619	337.555	FALSE	#REF!
2022-09-12	12:06:31	0.371921	337.927	FALSE	#REF!
2022-09-12	12:06:32	0.374313	338.301	FALSE	#REF!
2022-09-12	12:06:32	0.371158	338.672	FALSE	#REF!
2022-09-12	12:06:32	0.373448	339.046	FALSE	#REF!
2022-09-12	12:06:32	0.378232	339.424	FALSE	#REF!
2022-09-12	12:06:33	0.372481	339.797	FALSE	#REF!
2022-09-12	12:06:33	0.374364	340.171	FALSE	#REF!
2022-09-12	12:06:33	0.37416	340.545	FALSE	#REF!
2022-09-12	12:06:33	0.37986	340.925	FALSE	#REF!
2022-09-12	12:06:34	0.371158	341.296	FALSE	#REF!
2022-09-12	12:06:34	0.369071	341.665	FALSE	#REF!
2022-09-12	12:06:34	0.374822	342.04	FALSE	#REF!
2022-09-12	12:06:34	0.357468	342.397	FALSE	#REF!
2022-09-12	12:06:35	0.359606	342.757	FALSE	#REF!
2022-09-12	12:06:35	0.370496	343.128	FALSE	#REF!
2022-09-12	12:06:35	0.341896	343.469	FALSE	#REF!
2022-09-12	12:06:36	0.453804	343.923	FALSE	#REF!
2022-09-12	12:06:36	0.921132	344.844	FALSE	#REF!
2022-09-12	12:06:36	1.00704	345.851	FALSE	#REF!
2022-09-12	12:06:36	1.06714	346.919	FALSE	#REF!
2022-09-12	12:06:37	1.39477	348.313	FALSE	#REF!
2022-09-12	12:06:37	1.69421	350.008	FALSE	#REF!
2022-09-12	12:06:37	1.42856	351.436	FALSE	#REF!
2022-09-12	12:06:37	1.32205	352.758	FALSE	#REF!
2022-09-12	12:06:38	0.586374	353.344	FALSE	#REF!
2022-09-12	12:06:38	0.967443	354.312	FALSE	#REF!
2022-09-12	12:06:38	0.994873	355.307	FALSE	#REF!
2022-09-12	12:06:38	1.62653	356.933	FALSE	#REF!
2022-09-12	12:06:39	1.32637	358.26	FALSE	#REF!
2022-09-12	12:06:39	1.77431	360.034	FALSE	#REF!
2022-09-12	12:06:39	3.18271	363.217	1	#REF!
2022-09-12	12:06:40	1.70495	364.922	FALSE	#REF!
2022-09-12	12:06:40	1.51955	366.441	FALSE	#REF!
2022-09-12	12:06:40	0.992684	367.434	FALSE	#REF!
2022-09-12	12:06:40	2.37518	369.809	FALSE	#REF!
2022-09-12	12:06:41	1.60958	371.419	FALSE	#REF!
2022-09-12	12:06:41	1.89808	373.317	FALSE	#REF!
2022-09-12	12:06:41	1.0305	374.347	FALSE	#REF!
2022-09-12	12:06:41	1.09314	375.44	FALSE	#REF!
2022-09-12	12:06:42	0.57701	376.017	FALSE	#REF!
2022-09-12	12:06:42	0.887646	376.905	FALSE	#REF!
2022-09-12	12:06:42	1.82968	378.735	FALSE	#REF!
2022-09-12	12:06:42	1.91253	380.647	FALSE	#REF!
2022-09-12	12:06:43	2.2164	382.864	FALSE	#REF!
2022-09-12	12:06:43	1.99207	384.856	FALSE	#REF!
2022-09-12	12:06:43	3.2591	388.115	1	#REF!
2022-09-12	12:06:44	1.78159	389.896	FALSE	#REF!
2022-09-12	12:06:44	2.34205	392.238	FALSE	#REF!
2022-09-12	12:06:44	1.25945	393.498	FALSE	#REF!
2022-09-12	12:06:44	1.46658	394.964	FALSE	#REF!
2022-09-12	12:06:45	0.407443	395.372	FALSE	#REF!
2022-09-12	12:06:45	0.562659	395.935	FALSE	#REF!
2022-09-12	12:06:45	0.573804	396.508	FALSE	#REF!
2022-09-12	12:06:45	0.452939	396.961	FALSE	#REF!
2022-09-12	12:06:46	0.576247	397.538	FALSE	#REF!
2022-09-12	12:06:46	0.907646	398.445	FALSE	#REF!
2022-09-12	12:06:46	0.793804	399.239	FALSE	#REF!
2022-09-12	12:06:46	0.756756	399.996	FALSE	#REF!
2022-09-12	12:06:47	0.450242	400.446	FALSE	#REF!
2022-09-12	12:06:47	0.351361	400.797	FALSE	#REF!
2022-09-12	12:06:47	0.375942	401.173	FALSE	#REF!
2022-09-12	12:06:48	0.494771	401.668	FALSE	#REF!
2022-09-12	12:06:48	0.459097	402.127	FALSE	#REF!
2022-09-12	12:06:48	0.347392	402.475	FALSE	#REF!
2022-09-12	12:06:48	0.390751	402.865	FALSE	#REF!
2022-09-12	12:06:49	0.341896	403.207	FALSE	#REF!
2022-09-12	12:06:49	0.383881	403.591	FALSE	#REF!
2022-09-12	12:06:49	1.02246	404.614	FALSE	#REF!
2022-09-12	12:06:49	0.454873	405.068	FALSE	#REF!
2022-09-12	12:06:50	0.304898	405.373	FALSE	#REF!
2022-09-12	12:06:50	0.377468	405.751	FALSE	#REF!
2022-09-12	12:06:50	0.315738	406.067	FALSE	#REF!
2022-09-12	12:06:50	0.34668	406.413	FALSE	#REF!
2022-09-12	12:06:51	0.314975	406.728	FALSE	#REF!
2022-09-12	12:06:51	0.3107	407.039	FALSE	#REF!
2022-09-12	12:06:51	0.212939	407.252	FALSE	#REF!
2022-09-12	12:06:52	0.364186	407.616	FALSE	#REF!
2022-09-12	12:06:52	0.254771	407.871	FALSE	#REF!
2022-09-12	12:06:52	0.325305	408.196	FALSE	#REF!
2022-09-12	12:06:52	0.262964	408.459	FALSE	#REF!
2022-09-12	12:06:53	0.390038	408.849	FALSE	#REF!
2022-09-12	12:06:53	0.342201	409.191	FALSE	#REF!
2022-09-12	12:06:53	0.327443	409.519	FALSE	#REF!
2022-09-12	12:06:53	0.504542	410.023	FALSE	#REF!
2022-09-12	12:06:54	0.445611	410.469	FALSE	#REF!
2022-09-12	12:06:54	0.448919	410.918	FALSE	#REF!
2022-09-12	12:06:54	0.352023	411.27	FALSE	#REF!
2022-09-12	12:06:54	0.373499	411.643	FALSE	#REF!
2022-09-12	12:06:55	0.26439	411.908	FALSE	#REF!
2022-09-12	12:06:55	0.816145	412.724	FALSE	#REF!
2022-09-12	12:06:55	0.453295	413.177	FALSE	#REF!
2022-09-12	12:06:56	0.697163	413.874	FALSE	#REF!
2022-09-12	12:06:56	0.215127	414.089	FALSE	#REF!
2022-09-12	12:06:56	0.417723	414.507	FALSE	#REF!
2022-09-12	12:06:56	0.279097	414.786	FALSE	#REF!
2022-09-12	12:06:57	0.376858	415.163	FALSE	#REF!
2022-09-12	12:06:57	0.186679	415.35	FALSE	#REF!
2022-09-12	12:06:57	0.185407	415.535	FALSE	#REF!
2022-09-12	12:06:57	0.230191	415.765	FALSE	#REF!
2022-09-12	12:06:58	0.538995	416.304	FALSE	#REF!
2022-09-12	12:06:58	0.252735	416.557	FALSE	#REF!
2022-09-12	12:06:58	0.0778756	416.635	FALSE	#REF!
2022-09-12	12:06:58	0.416094	417.051	FALSE	#REF!
2022-09-12	12:06:59	0.0787916	417.13	FALSE	#REF!
2022-09-12	12:06:59	0.336603	417.467	FALSE	#REF!
2022-09-12	12:06:59	0.195891	417.662	FALSE	#REF!
2022-09-12	12:07:00	0.227748	417.89	FALSE	#REF!
2022-09-12	12:07:00	0.186883	418.077	FALSE	#REF!
2022-09-12	12:07:00	0.211514	418.289	FALSE	#REF!
2022-09-12	12:07:00	0.318435	418.607	FALSE	#REF!
2022-09-12	12:07:01	0.155891	418.763	FALSE	#REF!
2022-09-12	12:07:01	0.403931	419.167	FALSE	#REF!
2022-09-12	12:07:01	0.196756	419.364	FALSE	#REF!
2022-09-12	12:07:01	0.305509	419.669	FALSE	#REF!
2022-09-12	12:07:02	0.16383	419.833	FALSE	#REF!
2022-09-12	12:07:02	0.330395	420.163	FALSE	#REF!
2022-09-12	12:07:02	0.229173	420.392	FALSE	#REF!
2022-09-12	12:07:02	0.326018	420.718	FALSE	#REF!
2022-09-12	12:07:03	0.126731	420.845	FALSE	#REF!
2022-09-12	12:07:03	0.363728	421.209	FALSE	#REF!
2022-09-12	12:07:03	0.141082	421.35	FALSE	#REF!
2022-09-12	12:07:03	0.418232	421.768	FALSE	#REF!
2022-09-12	12:07:04	0.226679	421.995	FALSE	#REF!
2022-09-12	12:07:04	0.484593	422.48	FALSE	#REF!
2022-09-12	12:07:04	0.518079	422.998	FALSE	#REF!
2022-09-12	12:07:05	0.466323	423.464	FALSE	#REF!
2022-09-12	12:07:05	0.395484	423.859	FALSE	#REF!
2022-09-12	12:07:05	0.412125	424.272	FALSE	#REF!
2022-09-12	12:07:05	0.406883	424.678	FALSE	#REF!
2022-09-12	12:07:06	0.525153	425.204	FALSE	#REF!
2022-09-12	12:07:06	0.82042	426.024	FALSE	#REF!
2022-09-12	12:07:06	0.510954	426.535	FALSE	#REF!
2022-09-12	12:07:06	0.483931	427.019	FALSE	#REF!
2022-09-12	12:07:07	0.502863	427.522	FALSE	#REF!
2022-09-12	12:07:07	0.377316	427.899	FALSE	#REF!
2022-09-12	12:07:07	0.586221	428.485	FALSE	#REF!
2022-09-12	12:07:07	0.376654	428.862	FALSE	#REF!
2022-09-12	12:07:08	0.551056	429.413	FALSE	#REF!
2022-09-12	12:07:08	0.304084	429.717	FALSE	#REF!
2022-09-12	12:07:08	0.511616	430.229	FALSE	#REF!
2022-09-12	12:07:09	0.258384	430.487	FALSE	#REF!
2022-09-12	12:07:09	0.505509	430.993	FALSE	#REF!
2022-09-12	12:07:09	0.222303	431.215	FALSE	#REF!
2022-09-12	12:07:09	0.462507	431.677	FALSE	#REF!
2022-09-12	12:07:10	0.222557	431.9	FALSE	#REF!
2022-09-12	12:07:10	0.469173	432.369	FALSE	#REF!
2022-09-12	12:07:10	0.320776	432.69	FALSE	#REF!
2022-09-12	12:07:10	0.371158	433.061	FALSE	#REF!
2022-09-12	12:07:11	0.320776	433.382	FALSE	#REF!
2022-09-12	12:07:11	0.352685	433.735	FALSE	#REF!
2022-09-12	12:07:11	0.397316	434.132	FALSE	#REF!
2022-09-12	12:07:11	0.315331	434.447	FALSE	#REF!
2022-09-12	12:07:12	0.363626	434.811	FALSE	#REF!
2022-09-12	12:07:12	0.200878	435.012	FALSE	#REF!
2022-09-12	12:07:12	0.596552	435.608	FALSE	#REF!
2022-09-12	12:07:13	0.854466	436.463	FALSE	#REF!
2022-09-12	12:07:13	0.897112	437.36	FALSE	#REF!
2022-09-12	12:07:13	0.554669	437.914	FALSE	#REF!
2022-09-12	12:07:13	1.11095	439.025	FALSE	#REF!
2022-09-12	12:07:14	0.535942	439.561	FALSE	#REF!
2022-09-12	12:07:14	0.650802	440.212	FALSE	#REF!
2022-09-12	12:07:14	0.447239	440.659	FALSE	#REF!
2022-09-12	12:07:14	0.113499	440.773	FALSE	#REF!
2022-09-12	12:07:15	0.505407	441.278	FALSE	#REF!
2022-09-12	12:07:15	0.125764	441.404	FALSE	#REF!
2022-09-12	12:07:15	0.389377	441.793	FALSE	#REF!
2022-09-12	12:07:15	0.234517	442.028	FALSE	#REF!
2022-09-12	12:07:16	0.541692	442.57	FALSE	#REF!
2022-09-12	12:07:16	0.625814	443.195	FALSE	#REF!
2022-09-12	12:07:16	1.16495	444.36	FALSE	#REF!
2022-09-12	12:07:17	0.959198	445.32	FALSE	#REF!
2022-09-12	12:07:17	1.95019	447.27	FALSE	#REF!
2022-09-12	12:07:17	0.63472	447.905	FALSE	#REF!
2022-09-12	12:07:17	0.498028	448.403	FALSE	#REF!
2022-09-12	12:07:18	0.446272	448.849	FALSE	#REF!
2022-09-12	12:07:18	0.87131	449.72	FALSE	#REF!
2022-09-12	12:07:18	0.423575	450.144	FALSE	#REF!
2022-09-12	12:07:18	0.328104	450.472	FALSE	#REF!
2022-09-12	12:07:19	0.432328	450.904	FALSE	#REF!
2022-09-12	12:07:19	0.30556	451.21	FALSE	#REF!
2022-09-12	12:07:19	0.421082	451.631	FALSE	#REF!
2022-09-12	12:07:19	1.98317	453.614	FALSE	#REF!
2022-09-12	12:07:20	1.63396	455.248	FALSE	#REF!
2022-09-12	12:07:20	0.719758	455.968	FALSE	#REF!
2022-09-12	12:07:20	1.0937	457.061	FALSE	#REF!
2022-09-12	12:07:21	0.54159	457.603	FALSE	#REF!
2022-09-12	12:07:21	1.00637	458.609	FALSE	#REF!
2022-09-12	12:07:21	1.20531	459.815	FALSE	#REF!
2022-09-12	12:07:21	0.670242	460.485	FALSE	#REF!
2022-09-12	12:07:22	1.19777	461.683	FALSE	#REF!
2022-09-12	12:07:22	0.962659	462.645	FALSE	#REF!
2022-09-12	12:07:22	1.62368	464.269	FALSE	#REF!
2022-09-12	12:07:22	0.942303	465.211	FALSE	#REF!
2022-09-12	12:07:23	1.19686	466.408	FALSE	#REF!
2022-09-12	12:07:23	2.4251	468.833	FALSE	#REF!
2022-09-12	12:07:23	1.90561	470.739	FALSE	#REF!
2022-09-12	12:07:23	2.28754	473.026	FALSE	#REF!
2022-09-12	12:07:24	0.795229	473.822	FALSE	#REF!
2022-09-12	12:07:24	1.24877	475.07	FALSE	#REF!
2022-09-12	12:07:24	0.543422	475.614	FALSE	#REF!
2022-09-12	12:07:25	1.05421	476.668	FALSE	#REF!
2022-09-12	12:07:25	0.488613	477.157	FALSE	#REF!
2022-09-12	12:07:25	0.185713	477.342	FALSE	#REF!
2022-09-12	12:07:25	0.34841	477.691	FALSE	#REF!
2022-09-12	12:07:26	0.274211	477.965	FALSE	#REF!
2022-09-12	12:07:26	0.136247	478.101	FALSE	#REF!
2022-09-12	12:07:26	0.311819	478.413	FALSE	#REF!
2022-09-12	12:07:26	0.120369	478.533	FALSE	#REF!
2022-09-12	12:07:27	0.310089	478.844	FALSE	#REF!
2022-09-12	12:07:27	0.0975702	478.941	FALSE	#REF!
2022-09-12	12:07:27	1.02205	479.963	FALSE	#REF!
2022-09-12	12:07:27	1.30866	481.272	FALSE	#REF!
2022-09-12	12:07:28	3.12454	484.396	1	#REF!
2022-09-12	12:07:28	4.2965	488.693	1	#REF!
2022-09-12	12:07:28	2.96805	491.661	FALSE	#REF!
2022-09-12	12:07:29	2.1906	493.851	FALSE	#REF!
2022-09-12	12:07:29	0.932685	494.784	FALSE	#REF!
2022-09-12	12:07:29	1.37981	496.164	FALSE	#REF!
2022-09-12	12:07:29	0.673957	496.838	FALSE	#REF!
2022-09-12	12:07:30	1.79925	498.637	FALSE	#REF!
2022-09-12	12:07:30	0.977417	499.615	FALSE	#REF!
2022-09-12	12:07:30	1.22541	500.84	FALSE	#REF!
2022-09-12	12:07:30	0.838842	501.679	FALSE	#REF!
2022-09-12	12:07:31	2.83681	504.516	FALSE	#REF!
2022-09-12	12:07:31	1.56307	506.079	FALSE	#REF!
2022-09-12	12:07:31	1.38678	507.466	FALSE	#REF!
2022-09-12	12:07:31	0.769529	508.235	FALSE	#REF!
2022-09-12	12:07:32	1.04184	509.277	FALSE	#REF!
2022-09-12	12:07:32	0.796552	510.073	FALSE	#REF!
2022-09-12	12:07:32	1.00408	511.078	FALSE	#REF!
2022-09-12	12:07:33	0.792837	511.87	FALSE	#REF!
2022-09-12	12:07:33	0.495026	512.365	FALSE	#REF!
2022-09-12	12:07:33	0.94785	513.313	FALSE	#REF!
2022-09-12	12:07:33	1.93655	515.25	FALSE	#REF!
2022-09-12	12:07:34	2.1733	517.423	FALSE	#REF!
2022-09-12	12:07:34	1.3052	518.728	FALSE	#REF!
2022-09-12	12:07:34	1.76164	520.49	FALSE	#REF!
2022-09-12	12:07:34	0.621336	521.111	FALSE	#REF!
2022-09-12	12:07:35	1.61431	522.726	FALSE	#REF!
2022-09-12	12:07:35	0.84556	523.571	FALSE	#REF!
2022-09-12	12:07:35	1.38123	524.952	FALSE	#REF!
2022-09-12	12:07:35	1.28215	526.235	FALSE	#REF!
2022-09-12	12:07:36	3.84301	530.078	1	#REF!
2022-09-12	12:07:36	3.28724	533.365	1	#REF!
2022-09-12	12:07:36	2.30327	535.668	FALSE	#REF!
2022-09-12	12:07:37	1.85777	537.526	FALSE	#REF!
2022-09-12	12:07:37	2.37945	539.905	FALSE	#REF!
2022-09-12	12:07:37	3.33141	543.237	1	#REF!
2022-09-12	12:07:37	3.68887	546.926	1	#REF!
2022-09-12	12:07:38	0.702557	547.628	FALSE	#REF!
2022-09-12	12:07:38	2.14067	549.769	FALSE	#REF!
2022-09-12	12:07:38	1.64062	551.409	FALSE	#REF!
2022-09-12	12:07:38	1.79828	553.208	FALSE	#REF!
2022-09-12	12:07:39	3.25538	556.463	1	#REF!
2022-09-12	12:07:39	1.69838	558.161	FALSE	#REF!
2022-09-12	12:07:39	6.93278	565.094	1	#REF!
2022-09-12	12:07:39	5.25126	570.345	1	#REF!
2022-09-12	12:07:40	4.37395	574.719	1	#REF!
2022-09-12	12:07:40	1.16261	575.882	FALSE	#REF!
2022-09-12	12:07:40	1.92734	577.809	FALSE	#REF!
2022-09-12	12:07:41	1.97274	579.782	FALSE	#REF!
2022-09-12	12:07:41	1.51528	581.297	FALSE	#REF!
2022-09-12	12:07:41	1.5134	582.811	FALSE	#REF!
2022-09-12	12:07:41	3.60729	586.418	1	#REF!
2022-09-12	12:07:42	1.46327	587.881	FALSE	#REF!
2022-09-12	12:07:42	2.84973	590.731	FALSE	#REF!
2022-09-12	12:07:42	5.15034	595.881	1	#REF!
2022-09-12	12:07:42	5.5025	601.384	1	#REF!
2022-09-12	12:07:43	2.53106	603.915	FALSE	#REF!
2022-09-12	12:07:43	2.40612	606.321	FALSE	#REF!
2022-09-12	12:07:43	5.15151	611.473	1	#REF!
2022-09-12	12:07:43	8.70566	620.178	1	#REF!
2022-09-12	12:07:44	5.02785	625.206	1	#REF!
2022-09-12	12:07:44	3.39686	628.603	1	#REF!
2022-09-12	12:07:44	0.746832	629.35	FALSE	#REF!
2022-09-12	12:07:45	0.366883	629.717	FALSE	#REF!
2022-09-12	12:07:45	0.764338	630.481	FALSE	#REF!
2022-09-12	12:07:45	7.62464	638.106	1	#REF!
2022-09-12	12:07:45	6.62332	644.729	1	#REF!
2022-09-12	12:07:46	4.00515	648.734	1	#REF!
2022-09-12	12:07:46	1.9078	650.642	FALSE	#REF!
2022-09-12	12:07:46	2.97365	653.616	FALSE	#REF!
2022-09-12	12:07:46	6.0393	659.655	1	#REF!
2022-09-12	12:07:47	4.62485	664.28	1	#REF!
2022-09-12	12:07:47	1.84179	666.122	FALSE	#REF!
2022-09-12	12:07:47	1.62704	667.749	FALSE	#REF!
2022-09-12	12:07:47	0.749529	668.498	FALSE	#REF!
2022-09-12	12:07:48	0.696807	669.195	FALSE	#REF!
2022-09-12	12:07:48	0.924949	670.12	FALSE	#REF!
2022-09-12	12:07:48	0.736959	670.857	FALSE	#REF!
2022-09-12	12:07:49	0.514466	671.371	FALSE	#REF!
2022-09-12	12:07:49	0.692074	672.063	FALSE	#REF!
2022-09-12	12:07:49	2.93686	675	FALSE	#REF!
2022-09-12	12:07:49	7.26332	682.264	1	#REF!
2022-09-12	12:07:50	6.06438	688.328	1	#REF!
2022-09-12	12:07:50	1.97716	690.305	FALSE	#REF!
2022-09-12	12:07:50	0.929427	691.234	FALSE	#REF!
2022-09-12	12:07:50	1.19645	692.431	FALSE	#REF!
2022-09-12	12:07:51	1.40413	693.835	FALSE	#REF!
2022-09-12	12:07:51	2.62312	696.458	FALSE	#REF!
2022-09-12	12:07:51	2.09838	698.557	FALSE	#REF!
2022-09-12	12:07:51	1.43513	699.992	FALSE	#REF!
2022-09-12	12:07:52	1.73609	701.728	FALSE	#REF!
2022-09-12	12:07:52	1.43742	703.165	FALSE	#REF!
2022-09-12	12:07:52	1.10475	704.27	FALSE	#REF!
2022-09-12	12:07:52	1.74948	706.019	FALSE	#REF!
2022-09-12	12:07:53	1.50154	707.521	FALSE	#REF!
2022-09-12	12:07:53	2.1905	709.711	FALSE	#REF!
2022-09-12	12:07:53	3.56856	713.28	1	#REF!
2022-09-12	12:07:54	2.50525	715.785	FALSE	#REF!
2022-09-12	12:07:54	2.57156	718.357	FALSE	#REF!
2022-09-12	12:07:54	2.22078	720.578	FALSE	#REF!
2022-09-12	12:07:54	1.16693	721.745	FALSE	#REF!
2022-09-12	12:07:55	1.69019	723.435	FALSE	#REF!
2022-09-12	12:07:55	1.28424	724.719	FALSE	#REF!
2022-09-12	12:07:55	0.749886	725.469	FALSE	#REF!
2022-09-12	12:07:55	1.50347	726.972	FALSE	#REF!
2022-09-12	12:07:56	1.99726	728.97	FALSE	#REF!
2022-09-12	12:07:56	1.66907	730.639	FALSE	#REF!
2022-09-12	12:07:56	1.46072	732.099	FALSE	#REF!
2022-09-12	12:07:56	1.00062	733.1	FALSE	#REF!
2022-09-12	12:07:57	1.00719	734.107	FALSE	#REF!
2022-09-12	12:07:57	1.07681	735.184	FALSE	#REF!
2022-09-12	12:07:57	1.34291	736.527	FALSE	#REF!
2022-09-12	12:07:58	1.32281	737.85	FALSE	#REF!
2022-09-12	12:07:58	1.24357	739.093	FALSE	#REF!
2022-09-12	12:07:58	0.901743	739.995	FALSE	#REF!
2022-09-12	12:07:58	0.66729	740.662	FALSE	#REF!
2022-09-12	12:07:59	0.547035	741.209	FALSE	#REF!
2022-09-12	12:07:59	0.754516	741.964	FALSE	#REF!
2022-09-12	12:07:59	0.857163	742.821	FALSE	#REF!
2022-09-12	12:07:59	0.980267	743.801	FALSE	#REF!
2022-09-12	12:08:00	1.09004	744.891	FALSE	#REF!
2022-09-12	12:08:00	1.09065	745.982	FALSE	#REF!
2022-09-12	12:08:00	0.878944	746.861	FALSE	#REF!
2022-09-12	12:08:00	0.816705	747.678	FALSE	#REF!
2022-09-12	12:08:01	1.22709	748.905	FALSE	#REF!
2022-09-12	12:08:01	0.975076	749.88	FALSE	#REF!
2022-09-12	12:08:01	1.0337	750.914	FALSE	#REF!
2022-09-12	12:08:02	1.1048	752.018	FALSE	#REF!
2022-09-12	12:08:02	0.857926	752.876	FALSE	#REF!
2022-09-12	12:08:02	1.22449	754.101	FALSE	#REF!
2022-09-12	12:08:02	1.18897	755.29	FALSE	#REF!
2022-09-12	12:08:03	1.69075	756.98	FALSE	#REF!
2022-09-12	12:08:03	1.65564	758.636	FALSE	#REF!
2022-09-12	12:08:03	1.79482	760.431	FALSE	#REF!
2022-09-12	12:08:03	1.93065	762.362	FALSE	#REF!
2022-09-12	12:08:04	1.52856	763.89	FALSE	#REF!
2022-09-12	12:08:04	1.68449	765.575	FALSE	#REF!
2022-09-12	12:08:04	1.23391	766.809	FALSE	#REF!
2022-09-12	12:08:04	1.05095	767.859	FALSE	#REF!
2022-09-12	12:08:05	0.929275	768.789	FALSE	#REF!
2022-09-12	12:08:05	0.652379	769.441	FALSE	#REF!
2022-09-12	12:08:05	0.739351	770.18	FALSE	#REF!
2022-09-12	12:08:06	0.857875	771.038	FALSE	#REF!
2022-09-12	12:08:06	0.613957	771.652	FALSE	#REF!
2022-09-12	12:08:06	0.678588	772.331	FALSE	#REF!
2022-09-12	12:08:06	1.24027	773.571	FALSE	#REF!
2022-09-12	12:08:07	1.57615	775.147	FALSE	#REF!
2022-09-12	12:08:07	1.64729	776.795	FALSE	#REF!
2022-09-12	12:08:07	2.12658	778.921	FALSE	#REF!
2022-09-12	12:08:07	2.94724	781.868	FALSE	#REF!
2022-09-12	12:08:08	2.69594	784.564	FALSE	#REF!
2022-09-12	12:08:08	1.99538	786.56	FALSE	#REF!
2022-09-12	12:08:08	2.0764	788.636	FALSE	#REF!
2022-09-12	12:08:08	1.37584	790.012	FALSE	#REF!
2022-09-12	12:08:09	1.42856	791.441	FALSE	#REF!
2022-09-12	12:08:09	0.94785	792.388	FALSE	#REF!
2022-09-12	12:08:09	1.65375	794.042	FALSE	#REF!
2022-09-12	12:08:10	0.897519	794.94	FALSE	#REF!
2022-09-12	12:08:10	0.278283	795.218	FALSE	#REF!
2022-09-12	12:08:10	0.300776	795.519	FALSE	#REF!
2022-09-12	12:08:10	0.221692	795.74	FALSE	#REF!
2022-09-12	12:08:11	0.309377	796.05	FALSE	#REF!
2022-09-12	12:08:11	0.214822	796.265	FALSE	#REF!
2022-09-12	12:08:11	0.357265	796.622	FALSE	#REF!
2022-09-12	12:08:11	0.131056	796.753	FALSE	#REF!
2022-09-12	12:08:12	0.0245931	796.778	FALSE	#REF!
2022-09-12	12:08:12	0.101896	796.879	FALSE	#REF!
2022-09-12	12:08:12	-0.0630913	796.879	FALSE	#REF!
2022-09-12	12:08:12	-0.0764246	796.879	FALSE	#REF!
2022-09-12	12:08:13	-0.0616155	796.879	FALSE	#REF!
2022-09-12	12:08:13	0.162252	797.042	FALSE	#REF!
2022-09-12	12:08:13	0.172328	797.214	FALSE	#REF!
2022-09-12	12:08:14	0.217672	797.432	FALSE	#REF!
2022-09-12	12:08:14	0.30383	797.736	FALSE	#REF!
2022-09-12	12:08:14	0.370038	798.106	FALSE	#REF!
2022-09-12	12:08:14	2.9252	801.031	FALSE	#REF!
2022-09-12	12:08:15	1.46882	802.5	FALSE	#REF!
2022-09-12	12:08:15	0.821132	803.321	FALSE	#REF!
2022-09-12	12:08:15	1.78576	805.106	FALSE	#REF!
2022-09-12	12:08:15	1.75228	806.859	FALSE	#REF!
2022-09-12	12:08:16	0.63528	807.494	FALSE	#REF!
2022-09-12	12:08:16	0.972074	808.466	FALSE	#REF!
2022-09-12	12:08:16	0.490089	808.956	FALSE	#REF!
2022-09-12	12:08:16	0.991616	809.948	FALSE	#REF!
2022-09-12	12:08:17	0.889478	810.837	FALSE	#REF!
2022-09-12	12:08:17	1.30459	812.142	FALSE	#REF!
2022-09-12	12:08:17	0.294211	812.436	FALSE	#REF!
2022-09-12	12:08:18	0.303575	812.74	FALSE	#REF!
2022-09-12	12:08:18	0.231361	812.971	FALSE	#REF!
2022-09-12	12:08:18	0.303982	813.275	FALSE	#REF!
2022-09-12	12:08:18	0.309224	813.584	FALSE	#REF!
2022-09-12	12:08:19	0.163931	813.748	FALSE	#REF!
2022-09-12	12:08:19	0.22958	813.978	FALSE	#REF!
2022-09-12	12:08:19	0.250445	814.228	FALSE	#REF!
2022-09-12	12:08:19	0.522761	814.751	FALSE	#REF!
2022-09-12	12:08:20	0.973295	815.724	FALSE	#REF!
2022-09-12	12:08:20	1.00464	816.729	FALSE	#REF!
2022-09-12	12:08:20	1.1366	817.865	FALSE	#REF!
2022-09-12	12:08:20	1.23772	819.103	FALSE	#REF!
2022-09-12	12:08:21	0.37472	819.478	FALSE	#REF!
2022-09-12	12:08:21	0.772786	820.251	FALSE	#REF!
2022-09-12	12:08:21	0.289937	820.541	FALSE	#REF!
2022-09-12	12:08:22	0.690547	821.231	FALSE	#REF!
2022-09-12	12:08:22	0.354466	821.586	FALSE	#REF!
2022-09-12	12:08:22	0.679962	822.266	FALSE	#REF!
2022-09-12	12:08:22	0.680725	822.946	FALSE	#REF!
2022-09-12	12:08:23	1.48256	824.429	FALSE	#REF!
2022-09-12	12:08:23	1.10449	825.533	FALSE	#REF!
2022-09-12	12:08:23	1.29447	826.828	FALSE	#REF!
2022-09-12	12:08:23	1.12246	827.95	FALSE	#REF!
2022-09-12	12:08:24	0.831921	828.782	FALSE	#REF!
2022-09-12	12:08:24	0.39528	829.178	FALSE	#REF!
2022-09-12	12:08:24	0.187087	829.365	FALSE	#REF!
2022-09-12	12:08:24	0.472379	829.837	FALSE	#REF!
2022-09-12	12:08:25	0.146272	829.983	FALSE	#REF!
2022-09-12	12:08:25	0.453499	830.437	FALSE	#REF!
2022-09-12	12:08:25	0.25701	830.694	FALSE	#REF!
2022-09-12	12:08:26	0.543473	831.237	FALSE	#REF!
2022-09-12	12:08:26	0.21299	831.45	FALSE	#REF!
2022-09-12	12:08:26	0.705458	832.156	FALSE	#REF!
2022-09-12	12:08:26	0.340318	832.496	FALSE	#REF!
2022-09-12	12:08:27	0.597366	833.093	FALSE	#REF!
2022-09-12	12:08:27	0.725712	833.819	FALSE	#REF!
2022-09-12	12:08:27	1.2562	835.075	FALSE	#REF!
2022-09-12	12:08:27	2.28994	837.365	FALSE	#REF!
2022-09-12	12:08:28	2.70215	840.067	FALSE	#REF!
2022-09-12	12:08:28	0.936094	841.003	FALSE	#REF!
2022-09-12	12:08:28	0.619707	841.623	FALSE	#REF!
2022-09-12	12:08:28	0.245916	841.869	FALSE	#REF!
2022-09-12	12:08:29	0.226323	842.095	FALSE	#REF!
2022-09-12	12:08:29	0.408461	842.504	FALSE	#REF!
2022-09-12	12:08:29	0.163779	842.668	FALSE	#REF!
2022-09-12	12:08:30	0.306679	842.974	FALSE	#REF!
2022-09-12	12:08:30	0.139657	843.114	FALSE	#REF!
2022-09-12	12:08:30	0.314262	843.428	FALSE	#REF!
2022-09-12	12:08:30	0.239758	843.668	FALSE	#REF!
2022-09-12	12:08:31	2.21223	845.88	FALSE	#REF!
2022-09-12	12:08:31	2.38887	848.269	FALSE	#REF!
2022-09-12	12:08:31	1.0651	849.334	FALSE	#REF!
2022-09-12	12:08:31	0.240827	849.575	FALSE	#REF!
2022-09-12	12:08:32	0.247545	849.823	FALSE	#REF!
2022-09-12	12:08:32	0.467392	850.29	FALSE	#REF!
2022-09-12	12:08:32	0.360827	850.651	FALSE	#REF!
2022-09-12	12:08:32	0.334466	850.985	FALSE	#REF!
2022-09-12	12:08:33	0.0679518	851.053	FALSE	#REF!
2022-09-12	12:08:33	0.303524	851.357	FALSE	#REF!
2022-09-12	12:08:33	0.0847458	851.442	FALSE	#REF!
2022-09-12	12:08:34	0.383372	851.825	FALSE	#REF!
2022-09-12	12:08:34	0.195229	852.02	FALSE	#REF!
2022-09-12	12:08:34	0.342914	852.363	FALSE	#REF!
2022-09-12	12:08:34	0.234618	852.598	FALSE	#REF!
2022-09-12	12:08:35	0.297163	852.895	FALSE	#REF!
2022-09-12	12:08:35	0.365509	853.26	FALSE	#REF!
2022-09-12	12:08:35	2.24642	855.507	FALSE	#REF!
2022-09-12	12:08:35	1.55645	857.063	FALSE	#REF!
2022-09-12	12:08:36	1.82927	858.892	FALSE	#REF!
2022-09-12	12:08:36	0.985916	859.878	FALSE	#REF!
2022-09-12	12:08:36	1.50352	861.382	FALSE	#REF!
2022-09-12	12:08:36	2.31599	863.698	FALSE	#REF!
2022-09-12	12:08:37	2.11955	865.817	FALSE	#REF!
2022-09-12	12:08:37	2.91782	868.735	FALSE	#REF!
2022-09-12	12:08:37	1.27762	870.013	FALSE	#REF!
2022-09-12	12:08:37	1.44108	871.454	FALSE	#REF!
2022-09-12	12:08:38	0.694924	872.149	FALSE	#REF!
2022-09-12	12:08:38	0.904746	873.054	FALSE	#REF!
2022-09-12	12:08:38	0.724288	873.778	FALSE	#REF!
2022-09-12	12:08:39	0.840471	874.618	FALSE	#REF!
2022-09-12	12:08:39	1.45986	876.078	FALSE	#REF!
2022-09-12	12:08:39	1.34658	877.425	FALSE	#REF!
2022-09-12	12:08:39	2.19172	879.617	FALSE	#REF!
2022-09-12	12:08:40	3.57813	883.195	1	#REF!
2022-09-12	12:08:40	3.11044	886.305	1	#REF!
2022-09-12	12:08:40	0.608562	886.914	FALSE	#REF!
2022-09-12	12:08:40	0.45014	887.364	FALSE	#REF!
2022-09-12	12:08:41	0.141082	887.505	FALSE	#REF!
2022-09-12	12:08:41	0.295382	887.8	FALSE	#REF!
2022-09-12	12:08:41	0.173499	887.974	FALSE	#REF!
2022-09-12	12:08:41	0.525865	888.5	FALSE	#REF!
2022-09-12	12:08:42	3.01609	891.516	1	#REF!
2022-09-12	12:08:42	2.41645	893.932	FALSE	#REF!
2022-09-12	12:08:42	2.01457	895.947	FALSE	#REF!
2022-09-12	12:08:43	2.04413	897.991	FALSE	#REF!
2022-09-12	12:08:43	1.18368	899.175	FALSE	#REF!
2022-09-12	12:08:43	1.71523	900.89	FALSE	#REF!
2022-09-12	12:08:43	1.73864	902.628	FALSE	#REF!
2022-09-12	12:08:44	2.55095	905.179	FALSE	#REF!
2022-09-12	12:08:44	1.43223	906.612	FALSE	#REF!
2022-09-12	12:08:44	2.648	909.26	FALSE	#REF!
2022-09-12	12:08:44	2.13981	911.399	FALSE	#REF!
2022-09-12	12:08:45	1.69762	913.097	FALSE	#REF!
2022-09-12	12:08:45	1.24098	914.338	FALSE	#REF!
2022-09-12	12:08:45	0.809784	915.148	FALSE	#REF!
2022-09-12	12:08:45	0.376705	915.524	FALSE	#REF!
2022-09-12	12:08:46	0.264593	915.789	FALSE	#REF!
2022-09-12	12:08:46	0.390954	916.18	FALSE	#REF!
2022-09-12	12:08:46	0.208054	916.388	FALSE	#REF!
2022-09-12	12:08:47	0.402863	916.791	FALSE	#REF!
2022-09-12	12:08:47	0.175178	916.966	FALSE	#REF!
2022-09-12	12:08:47	0.32327	917.289	FALSE	#REF!
2022-09-12	12:08:47	0.114008	917.403	FALSE	#REF!
2022-09-12	12:08:48	0.101336	917.505	FALSE	#REF!
2022-09-12	12:08:48	2.43508	919.94	FALSE	#REF!
2022-09-12	12:08:48	0.657315	920.597	FALSE	#REF!
2022-09-12	12:08:48	0.874007	921.471	FALSE	#REF!
2022-09-12	12:08:49	0.707595	922.179	FALSE	#REF!
2022-09-12	12:08:49	0.715738	922.894	FALSE	#REF!
2022-09-12	12:08:49	1.38149	924.276	FALSE	#REF!
2022-09-12	12:08:49	0.423423	924.699	FALSE	#REF!
2022-09-12	12:08:50	0.824695	925.524	FALSE	#REF!
2022-09-12	12:08:50	0.397163	925.921	FALSE	#REF!
2022-09-12	12:08:50	0.726272	926.648	FALSE	#REF!
2022-09-12	12:08:51	0.806985	927.455	FALSE	#REF!
2022-09-12	12:08:51	0.648715	928.103	FALSE	#REF!
2022-09-12	12:08:51	0.482914	928.586	FALSE	#REF!
2022-09-12	12:08:51	0.538079	929.124	FALSE	#REF!
2022-09-12	12:08:52	0.685153	929.809	FALSE	#REF!
2022-09-12	12:08:52	1.13849	930.948	FALSE	#REF!
2022-09-12	12:08:52	0.348562	931.296	FALSE	#REF!
2022-09-12	12:08:52	0.515992	931.812	FALSE	#REF!
2022-09-12	12:08:53	0.767035	932.579	FALSE	#REF!
2022-09-12	12:08:53	1.08495	933.664	FALSE	#REF!
2022-09-12	12:08:53	0.815382	934.48	FALSE	#REF!
2022-09-12	12:08:53	0.754924	935.235	FALSE	#REF!
2022-09-12	12:08:54	0.716807	935.952	FALSE	#REF!
2022-09-12	12:08:54	0.5993	936.551	FALSE	#REF!
2022-09-12	12:08:54	0.421234	936.972	FALSE	#REF!
2022-09-12	12:08:55	0.327188	937.299	FALSE	#REF!
2022-09-12	12:08:55	0.41243	937.712	FALSE	#REF!
2022-09-12	12:08:55	0.340776	938.052	FALSE	#REF!
2022-09-12	12:08:55	0.404389	938.457	FALSE	#REF!
2022-09-12	12:08:56	0.677773	939.135	FALSE	#REF!
2022-09-12	12:08:56	0.685611	939.82	FALSE	#REF!
2022-09-12	12:08:56	0.990649	940.811	FALSE	#REF!
2022-09-12	12:08:56	0.800572	941.611	FALSE	#REF!
2022-09-12	12:08:57	1.01223	942.624	FALSE	#REF!
2022-09-12	12:08:57	0.578384	943.202	FALSE	#REF!
2022-09-12	12:08:57	1.07604	944.278	FALSE	#REF!
2022-09-12	12:08:57	0.587697	944.866	FALSE	#REF!
2022-09-12	12:08:58	1.52576	946.392	FALSE	#REF!
2022-09-12	12:08:58	0.966221	947.358	FALSE	#REF!
2022-09-12	12:08:58	1.78749	949.145	FALSE	#REF!
2022-09-12	12:08:59	0.469428	949.615	FALSE	#REF!
2022-09-12	12:08:59	0.978995	950.594	FALSE	#REF!
2022-09-12	12:08:59	1.10963	951.703	FALSE	#REF!
2022-09-12	12:08:59	1.37386	953.077	FALSE	#REF!
2022-09-12	12:09:00	1.14286	954.22	FALSE	#REF!
2022-09-12	12:09:00	1.39497	955.615	FALSE	#REF!
2022-09-12	12:09:00	2.50108	958.116	FALSE	#REF!
2022-09-12	12:09:00	1.87279	959.989	FALSE	#REF!
2022-09-12	12:09:01	1.39503	961.384	FALSE	#REF!
2022-09-12	12:09:01	1.08414	962.468	FALSE	#REF!
2022-09-12	12:09:01	1.04917	963.517	FALSE	#REF!
2022-09-12	12:09:01	1.50403	965.021	FALSE	#REF!
2022-09-12	12:09:02	1.3595	966.381	FALSE	#REF!
2022-09-12	12:09:02	1.70368	968.084	FALSE	#REF!
2022-09-12	12:09:02	1.80678	969.891	FALSE	#REF!
2022-09-12	12:09:03	1.42128	971.312	FALSE	#REF!
2022-09-12	12:09:03	1.46413	972.777	FALSE	#REF!
2022-09-12	12:09:03	1.55457	974.331	FALSE	#REF!
2022-09-12	12:09:03	1.59955	975.931	FALSE	#REF!
2022-09-12	12:09:04	1.5477	977.478	FALSE	#REF!
2022-09-12	12:09:04	1.63721	979.116	FALSE	#REF!
2022-09-12	12:09:04	1.05243	980.168	FALSE	#REF!
2022-09-12	12:09:04	0.610751	980.779	FALSE	#REF!
2022-09-12	12:09:05	0.743015	981.522	FALSE	#REF!
2022-09-12	12:09:05	0.716501	982.238	FALSE	#REF!
2022-09-12	12:09:05	1.97457	984.213	FALSE	#REF!
2022-09-12	12:09:05	2.3106	986.524	FALSE	#REF!
2022-09-12	12:09:06	1.89548	988.419	FALSE	#REF!
2022-09-12	12:09:06	0.994924	989.414	FALSE	#REF!
2022-09-12	12:09:06	0.453652	989.868	FALSE	#REF!
2022-09-12	12:09:07	0.865102	990.733	FALSE	#REF!
2022-09-12	12:09:07	0.993397	991.726	FALSE	#REF!
2022-09-12	12:09:07	1.35645	993.083	FALSE	#REF!
2022-09-12	12:09:07	1.20531	994.288	FALSE	#REF!
2022-09-12	12:09:08	1.92948	996.217	FALSE	#REF!
2022-09-12	12:09:08	1.4167	997.634	FALSE	#REF!
2022-09-12	12:09:08	1.85645	999.49	FALSE	#REF!
2022-09-12	12:09:08	1.63564	1001.13	FALSE	#REF!
2022-09-12	12:09:09	3.67497	1004.8	1	#REF!
2022-09-12	12:09:09	1.37777	1006.18	FALSE	#REF!
2022-09-12	12:09:09	2.73248	1008.91	FALSE	#REF!
2022-09-12	12:09:09	1.5478	1010.46	FALSE	#REF!
2022-09-12	12:09:10	1.99197	1012.45	FALSE	#REF!
2022-09-12	12:09:10	0.457367	1012.91	FALSE	#REF!
2022-09-12	12:09:10	0.457214	1013.37	FALSE	#REF!
2022-09-12	12:09:11	2.27838	1015.64	FALSE	#REF!
2022-09-12	12:09:11	0.686119	1016.33	FALSE	#REF!
2022-09-12	12:09:11	1.89116	1018.22	FALSE	#REF!
2022-09-12	12:09:11	0.787494	1019.01	FALSE	#REF!
2022-09-12	12:09:12	2.62072	1021.63	FALSE	#REF!
2022-09-12	12:09:12	1.29401	1022.92	FALSE	#REF!
2022-09-12	12:09:12	2.44856	1025.37	FALSE	#REF!
2022-09-12	12:09:12	1.48531	1026.86	FALSE	#REF!
2022-09-12	12:09:13	1.0277	1027.89	FALSE	#REF!
2022-09-12	12:09:13	1.25691	1029.14	FALSE	#REF!
2022-09-12	12:09:13	1.43574	1030.58	FALSE	#REF!
2022-09-12	12:09:14	2.20734	1032.79	FALSE	#REF!
2022-09-12	12:09:14	0.815738	1033.6	FALSE	#REF!
2022-09-12	12:09:14	1.72358	1035.32	FALSE	#REF!
2022-09-12	12:09:14	1.31828	1036.64	FALSE	#REF!
2022-09-12	12:09:15	2.49961	1039.14	FALSE	#REF!
2022-09-12	12:09:15	1.07385	1040.22	FALSE	#REF!
2022-09-12	12:09:15	2.17314	1042.39	FALSE	#REF!
2022-09-12	12:09:15	1.3793	1043.77	FALSE	#REF!
2022-09-12	12:09:16	2.61558	1046.38	FALSE	#REF!
2022-09-12	12:09:16	1.11747	1047.5	FALSE	#REF!
2022-09-12	12:09:16	1.42933	1048.93	FALSE	#REF!
2022-09-12	12:09:16	0.799555	1049.73	FALSE	#REF!
2022-09-12	12:09:17	0.347545	1050.08	FALSE	#REF!
2022-09-12	12:09:17	0.205153	1050.28	FALSE	#REF!
2022-09-12	12:09:17	0.0573666	1050.34	FALSE	#REF!
2022-09-12	12:09:17	0.216552	1050.56	FALSE	#REF!
2022-09-12	12:09:18	-0.0765264	1050.56	FALSE	#REF!
2022-09-12	12:09:18	0.309987	1050.87	FALSE	#REF!
2022-09-12	12:09:18	-0.0262975	1050.87	FALSE	#REF!
2022-09-12	12:09:19	0.170751	1051.04	FALSE	#REF!
2022-09-12	12:09:19	-0.0219717	1051.04	FALSE	#REF!
2022-09-12	12:09:19	0.330445	1051.37	FALSE	#REF!

## Sheet: Sunny_prong_2022912120359
						**GoPro Fitting: 1153
2022-09-12	12:03:59	0.44444
2022-09-12	12:03:59	0.436247
2022-09-12	12:04:00	0.436043
2022-09-12	12:04:00	0.42902
2022-09-12	12:04:00	0.387595
2022-09-12	12:04:00	0.554771
2022-09-12	12:04:01	0.40729
2022-09-12	12:04:01	0.461896
2022-09-12	12:04:01	0.443677
2022-09-12	12:04:01	0.460674
2022-09-12	12:04:02	0.476807
2022-09-12	12:04:02	0.485916
2022-09-12	12:04:02	0.259606
2022-09-12	12:04:02	0.468766
2022-09-12	12:04:03	0.44159
2022-09-12	12:04:03	0.321183
2022-09-12	12:04:03	0.228919
2022-09-12	12:04:04	0.44042
2022-09-12	12:04:04	1.01207
2022-09-12	12:04:04	1.21111
2022-09-12	12:04:04	0.683524
2022-09-12	12:04:05	0.393804
2022-09-12	12:04:05	0.443677
2022-09-12	12:04:05	1.56205
2022-09-12	12:04:05	2.8737
2022-09-12	12:04:06	6.96505
2022-09-12	12:04:06	5.66785
2022-09-12	12:04:06	3.06042
2022-09-12	12:04:06	0.444847
2022-09-12	12:04:07	0.291718
2022-09-12	12:04:07	0.277723
2022-09-12	12:04:07	0.200878
2022-09-12	12:04:08	0.394873
2022-09-12	12:04:08	0.162863
2022-09-12	12:04:08	0.380776
2022-09-12	12:04:08	0.368308
2022-09-12	12:04:09	0.548054
2022-09-12	12:04:09	0.463982
2022-09-12	12:04:09	0.376094
2022-09-12	12:04:09	0.634822
2022-09-12	12:04:10	1.55375
2022-09-12	12:04:10	1.47925
2022-09-12	12:04:10	0.470089
2022-09-12	12:04:10	0.630496
2022-09-12	12:04:11	0.044186
2022-09-12	12:04:11	0.246425
2022-09-12	12:04:11	-0.0016664
2022-09-12	12:04:12	-0.0705214
2022-09-12	12:04:12	-0.0444654
2022-09-12	12:04:12	0.00189592
2022-09-12	12:04:12	-0.0552542
2022-09-12	12:04:13	-0.128995
2022-09-12	12:04:13	-0.0932694
2022-09-12	12:04:13	0.0986898
2022-09-12	12:04:13	0.147646
2022-09-12	12:04:14	0.541081
2022-09-12	12:04:14	0.367341
2022-09-12	12:04:14	0.236145
2022-09-12	12:04:14	0.258893
2022-09-12	12:04:15	0.257468
2022-09-12	12:04:15	0.142456
2022-09-12	12:04:15	0.246578
2022-09-12	12:04:16	0.180929
2022-09-12	12:04:16	0.172074
2022-09-12	12:04:16	0.265
2022-09-12	12:04:16	0.332736
2022-09-12	12:04:17	0.455636
2022-09-12	12:04:17	0.630394
2022-09-12	12:04:17	0.171209
2022-09-12	12:04:17	0.179962
2022-09-12	12:04:18	0.533346
2022-09-12	12:04:18	0.750954
2022-09-12	12:04:18	1.10464
2022-09-12	12:04:18	0.987596
2022-09-12	12:04:19	0.513448
2022-09-12	12:04:19	0.682608
2022-09-12	12:04:19	0.322812
2022-09-12	12:04:20	0.829326
2022-09-12	12:04:20	1.69457
2022-09-12	12:04:20	0.459453
2022-09-12	12:04:20	0.373499
2022-09-12	12:04:21	0.288512
2022-09-12	12:04:21	0.318181
2022-09-12	12:04:21	0.125407
2022-09-12	12:04:21	0.208664
2022-09-12	12:04:22	0.281743
2022-09-12	12:04:22	0.204644
2022-09-12	12:04:22	0.502863
2022-09-12	12:04:22	0.298944
2022-09-12	12:04:23	0.285
2022-09-12	12:04:23	0.171412
2022-09-12	12:04:23	0.247545
2022-09-12	12:04:24	0.258028
2022-09-12	12:04:24	0.0707508
2022-09-12	12:04:24	0.0432699
2022-09-12	12:04:24	-0.105788
2022-09-12	12:04:25	-0.0650761
2022-09-12	12:04:25	-0.0999361
2022-09-12	12:04:25	0.197926
2022-09-12	12:04:25	0.160471
2022-09-12	12:04:26	0.263066
2022-09-12	12:04:26	0.250344
2022-09-12	12:04:26	0.149428
2022-09-12	12:04:26	0.472074
2022-09-12	12:04:27	0.179708
2022-09-12	12:04:27	0.658639
2022-09-12	12:04:27	0.308613
2022-09-12	12:04:28	0.35645
2022-09-12	12:04:28	0.25986
2022-09-12	12:04:28	0.218791
2022-09-12	12:04:28	0.377774
2022-09-12	12:04:29	0.12271
2022-09-12	12:04:29	0.396298
2022-09-12	12:04:29	0.565356
2022-09-12	12:04:29	0.660471
2022-09-12	12:04:30	0.310598
2022-09-12	12:04:30	0.571565
2022-09-12	12:04:30	1.22307
2022-09-12	12:04:30	2.26515
2022-09-12	12:04:31	0.699555
2022-09-12	12:04:31	0.329835
2022-09-12	12:04:31	0.587799
2022-09-12	12:04:31	0.329224
2022-09-12	12:04:32	0.579504
2022-09-12	12:04:32	0.436654
2022-09-12	12:04:32	1.62581
2022-09-12	12:04:33	0.349529
2022-09-12	12:04:33	0.247443
2022-09-12	12:04:33	0.3507
2022-09-12	12:04:33	0.111158
2022-09-12	12:04:34	0.34673
2022-09-12	12:04:34	0.170547
2022-09-12	12:04:34	0.193448
2022-09-12	12:04:34	0.149224
2022-09-12	12:04:35	0.22897
2022-09-12	12:04:35	0.499402
2022-09-12	12:04:35	0.818486
2022-09-12	12:04:35	0.407596
2022-09-12	12:04:36	0.202099
2022-09-12	12:04:36	0.356858
2022-09-12	12:04:36	0.264542
2022-09-12	12:04:37	0.17869
2022-09-12	12:04:37	0.315942
2022-09-12	12:04:37	0.495585
2022-09-12	12:04:37	0.335687
2022-09-12	12:04:38	0.49355
2022-09-12	12:04:38	0.270802
2022-09-12	12:04:38	0.271311
2022-09-12	12:04:38	0.0922776
2022-09-12	12:04:39	0.290293
2022-09-12	12:04:39	0.133397
2022-09-12	12:04:39	0.290598
2022-09-12	12:04:39	0.202354
2022-09-12	12:04:40	0.159911
2022-09-12	12:04:40	0.167697
2022-09-12	12:04:40	0.0857635
2022-09-12	12:04:41	0.269377
2022-09-12	12:04:41	0.203677
2022-09-12	12:04:41	0.932481
2022-09-12	12:04:41	0.745
2022-09-12	12:04:42	1.82632
2022-09-12	12:04:42	0.240776
2022-09-12	12:04:42	0.135942
2022-09-12	12:04:42	0.179046
2022-09-12	12:04:43	-0.038613
2022-09-12	12:04:43	0.0617941
2022-09-12	12:04:43	0.113092
2022-09-12	12:04:43	1.33665
2022-09-12	12:04:44	0.18098
2022-09-12	12:04:44	0.268562
2022-09-12	12:04:44	0.186883
2022-09-12	12:04:45	0.265204
2022-09-12	12:04:45	0.359758
2022-09-12	12:04:45	0.359911
2022-09-12	12:04:45	0.77472
2022-09-12	12:04:46	0.101845
2022-09-12	12:04:46	0.760827
2022-09-12	12:04:46	0.358944
2022-09-12	12:04:46	0.145306
2022-09-12	12:04:47	0.00703587
2022-09-12	12:04:47	0.193753
2022-09-12	12:04:47	0.134924
2022-09-12	12:04:47	0.236451
2022-09-12	12:04:48	0.07813
2022-09-12	12:04:48	0.117672
2022-09-12	12:04:48	0.0308527
2022-09-12	12:04:49	-0.12701
2022-09-12	12:04:49	-0.198002
2022-09-12	12:04:49	-0.218562
2022-09-12	12:04:49	-0.186501
2022-09-12	12:04:50	-0.179071
2022-09-12	12:04:50	-0.00634836
2022-09-12	12:04:50	-0.0718954
2022-09-12	12:04:50	0.0632699
2022-09-12	12:04:51	-0.0285875
2022-09-12	12:04:51	0.271361
2022-09-12	12:04:51	0.212634
2022-09-12	12:04:51	0.203677
2022-09-12	12:04:52	0.336247
2022-09-12	12:04:52	0.202252
2022-09-12	12:04:52	0.422456
2022-09-12	12:04:53	0.147138
2022-09-12	12:04:53	0.435484
2022-09-12	12:04:53	0.196349
2022-09-12	12:04:53	0.3593
2022-09-12	12:04:54	0.323982
2022-09-12	12:04:54	6.07792
2022-09-12	12:04:54	7.54011
2022-09-12	12:04:54	0.843219
2022-09-12	12:04:55	0.32383
2022-09-12	12:04:55	0.432786
2022-09-12	12:04:55	0.725814
2022-09-12	12:04:55	1.17676
2022-09-12	12:04:56	0.739911
2022-09-12	12:04:56	1.21991
2022-09-12	12:04:56	1.30912
2022-09-12	12:04:57	0.625051
2022-09-12	12:04:57	0.376094
2022-09-12	12:04:57	0.321031
2022-09-12	12:04:57	0.363423
2022-09-12	12:04:58	0.495483
2022-09-12	12:04:58	0.716196
2022-09-12	12:04:58	0.953753
2022-09-12	12:04:58	1.05452
2022-09-12	12:04:59	0.94617
2022-09-12	12:04:59	1.12663
2022-09-12	12:04:59	1.10505
2022-09-12	12:04:59	1.09319
2022-09-12	12:05:00	0.489478
2022-09-12	12:05:00	0.361183
2022-09-12	12:05:00	0.362659
2022-09-12	12:05:00	0.379657
2022-09-12	12:05:01	0.347799
2022-09-12	12:05:01	0.192786
2022-09-12	12:05:01	0.397468
2022-09-12	12:05:02	0.287443
2022-09-12	12:05:02	0.420013
2022-09-12	12:05:02	0.445611
2022-09-12	12:05:02	0.679809
2022-09-12	12:05:03	0.668003
2022-09-12	12:05:03	0.693295
2022-09-12	12:05:03	0.631463
2022-09-12	12:05:03	0.545712
2022-09-12	12:05:04	0.567137
2022-09-12	12:05:04	0.574211
2022-09-12	12:05:04	0.558842
2022-09-12	12:05:04	0.294517
2022-09-12	12:05:05	0.348104
2022-09-12	12:05:05	0.305204
2022-09-12	12:05:05	0.362965
2022-09-12	12:05:06	1.04622
2022-09-12	12:05:06	3.07925
2022-09-12	12:05:06	3.02851
2022-09-12	12:05:06	0.990038
2022-09-12	12:05:07	0.538435
2022-09-12	12:05:07	0.297926
2022-09-12	12:05:07	0.393041
2022-09-12	12:05:07	1.30159
2022-09-12	12:05:08	0.928817
2022-09-12	12:05:08	1.30413
2022-09-12	12:05:08	1.15289
2022-09-12	12:05:08	1.22424
2022-09-12	12:05:09	1.70943
2022-09-12	12:05:09	2.31884
2022-09-12	12:05:09	1.81212
2022-09-12	12:05:10	1.85553
2022-09-12	12:05:10	4.51273
2022-09-12	12:05:10	3.0424
2022-09-12	12:05:10	1.56062
2022-09-12	12:05:11	0.456807
2022-09-12	12:05:11	0.361743
2022-09-12	12:05:11	0.276603
2022-09-12	12:05:11	0.837265
2022-09-12	12:05:12	2.11039
2022-09-12	12:05:12	1.92724
2022-09-12	12:05:12	2.13971
2022-09-12	12:05:12	3.58261
2022-09-12	12:05:13	1.42668
2022-09-12	12:05:13	0.711158
2022-09-12	12:05:13	0.343473
2022-09-12	12:05:14	0.530089
2022-09-12	12:05:14	0.343931
2022-09-12	12:05:14	0.311361
2022-09-12	12:05:14	0.423575
2022-09-12	12:05:15	1.18714
2022-09-12	12:05:15	1.69889
2022-09-12	12:05:15	1.25309
2022-09-12	12:05:15	1.36307
2022-09-12	12:05:16	1.01177
2022-09-12	12:05:16	0.729224
2022-09-12	12:05:16	0.542812
2022-09-12	12:05:16	0.547086
2022-09-12	12:05:17	0.469886
2022-09-12	12:05:17	0.361132
2022-09-12	12:05:17	0.428919
2022-09-12	12:05:18	0.240522
2022-09-12	12:05:18	0.322456
2022-09-12	12:05:18	0.16215
2022-09-12	12:05:18	0.47014
2022-09-12	12:05:19	0.180522
2022-09-12	12:05:19	0.379148
2022-09-12	12:05:19	0.22556
2022-09-12	12:05:19	0.405153
2022-09-12	12:05:20	0.169377
2022-09-12	12:05:20	0.37243
2022-09-12	12:05:20	0.351565
2022-09-12	12:05:20	0.546781
2022-09-12	12:05:21	0.432888
2022-09-12	12:05:21	0.421794
2022-09-12	12:05:21	0.663117
2022-09-12	12:05:22	1.03513
2022-09-12	12:05:22	0.860369
2022-09-12	12:05:22	1.15039
2022-09-12	12:05:22	1.62561
2022-09-12	12:05:23	0.882303
2022-09-12	12:05:23	1.13452
2022-09-12	12:05:23	1.01721
2022-09-12	12:05:23	1.03304
2022-09-12	12:05:24	1.06464
2022-09-12	12:05:24	0.695534
2022-09-12	12:05:24	0.424491
2022-09-12	12:05:24	0.313702
2022-09-12	12:05:25	0.39584
2022-09-12	12:05:25	0.407646
2022-09-12	12:05:25	0.290598
2022-09-12	12:05:26	0.352074
2022-09-12	12:05:26	0.144237
2022-09-12	12:05:26	0.472532
2022-09-12	12:05:26	0.193651
2022-09-12	12:05:27	0.42556
2022-09-12	12:05:27	0.249275
2022-09-12	12:05:27	0.167901
2022-09-12	12:05:27	0.194873
2022-09-12	12:05:28	0.142659
2022-09-12	12:05:28	0.345713
2022-09-12	12:05:28	0.0342114
2022-09-12	12:05:28	0.275025
2022-09-12	12:05:29	0.0855091
2022-09-12	12:05:29	0.487545
2022-09-12	12:05:29	0.937061
2022-09-12	12:05:30	0.299453
2022-09-12	12:05:30	0.333295
2022-09-12	12:05:30	0.497316
2022-09-12	12:05:30	0.810089
2022-09-12	12:05:31	2.1993
2022-09-12	12:05:31	2.11874
2022-09-12	12:05:31	1.06164
2022-09-12	12:05:31	1.39314
2022-09-12	12:05:32	1.58001
2022-09-12	12:05:32	0.976501
2022-09-12	12:05:32	0.466985
2022-09-12	12:05:32	0.7964
2022-09-12	12:05:33	0.727952
2022-09-12	12:05:33	0.661183
2022-09-12	12:05:33	0.852379
2022-09-12	12:05:34	0.282405
2022-09-12	12:05:34	0.462456
2022-09-12	12:05:34	0.242303
2022-09-12	12:05:34	0.334669
2022-09-12	12:05:35	0.507748
2022-09-12	12:05:35	0.902964
2022-09-12	12:05:35	0.992226
2022-09-12	12:05:35	0.484288
2022-09-12	12:05:36	0.652939
2022-09-12	12:05:36	0.476909
2022-09-12	12:05:36	0.478995
2022-09-12	12:05:36	0.261998
2022-09-12	12:05:37	0.670852
2022-09-12	12:05:37	0.89299
2022-09-12	12:05:37	0.913448
2022-09-12	12:05:38	0.757468
2022-09-12	12:05:38	2.29508
2022-09-12	12:05:38	0.916908
2022-09-12	12:05:38	1.18612
2022-09-12	12:05:39	0.649071
2022-09-12	12:05:39	1.78149
2022-09-12	12:05:39	1.90083
2022-09-12	12:05:39	3.56734
2022-09-12	12:05:40	2.59172
2022-09-12	12:05:40	1.4048
2022-09-12	12:05:40	2.56576
2022-09-12	12:05:40	2.165
2022-09-12	12:05:41	3.95813
2022-09-12	12:05:41	0.793244
2022-09-12	12:05:41	0.925204
2022-09-12	12:05:41	0.596908
2022-09-12	12:05:42	0.376247
2022-09-12	12:05:42	0.718944
2022-09-12	12:05:42	2.51044
2022-09-12	12:05:43	4.86342
2022-09-12	12:05:43	3.71782
2022-09-12	12:05:43	1.24261
2022-09-12	12:05:43	0.286171
2022-09-12	12:05:44	0.441387
2022-09-12	12:05:44	0.41528
2022-09-12	12:05:44	0.603117
2022-09-12	12:05:44	1.0537
2022-09-12	12:05:45	1.05314
2022-09-12	12:05:45	1.57167
2022-09-12	12:05:45	1.96897
2022-09-12	12:05:45	1.22805
2022-09-12	12:05:46	0.518333
2022-09-12	12:05:46	0.359453
2022-09-12	12:05:46	0.286628
2022-09-12	12:05:47	1.08622
2022-09-12	12:05:47	0.434873
2022-09-12	12:05:47	0.400929
2022-09-12	12:05:47	0.196043
2022-09-12	12:05:48	0.259555
2022-09-12	12:05:48	0.19299
2022-09-12	12:05:48	0.260573
2022-09-12	12:05:48	0.369122
2022-09-12	12:05:49	0.48556
2022-09-12	12:05:49	0.279046
2022-09-12	12:05:49	0.303982
2022-09-12	12:05:49	0.179758
2022-09-12	12:05:50	1.00907
2022-09-12	12:05:50	1.62948
2022-09-12	12:05:50	0.389428
2022-09-12	12:05:51	0.5764
2022-09-12	12:05:51	0.656908
2022-09-12	12:05:51	1.06271
2022-09-12	12:05:51	1.41574
2022-09-12	12:05:52	0.620929
2022-09-12	12:05:52	2.22291
2022-09-12	12:05:52	0.434059
2022-09-12	12:05:52	0.633906
2022-09-12	12:05:53	0.621641
2022-09-12	12:05:53	1.00251
2022-09-12	12:05:53	0.4993
2022-09-12	12:05:53	0.337061
2022-09-12	12:05:54	0.399249
2022-09-12	12:05:54	0.145204
2022-09-12	12:05:54	0.308868
2022-09-12	12:05:55	0.35411
2022-09-12	12:05:55	0.0930409
2022-09-12	12:05:55	-0.0689946
2022-09-12	12:05:55	-0.00258246
2022-09-12	12:05:56	0.0833717
2022-09-12	12:05:56	0.0843895
2022-09-12	12:05:56	0.0359417
2022-09-12	12:05:56	0.0882572
2022-09-12	12:05:57	0.0984353
2022-09-12	12:05:57	-0.0330659
2022-09-12	12:05:57	0.188563
2022-09-12	12:05:57	-0.00583945
2022-09-12	12:05:58	0.0873412
2022-09-12	12:05:58	-0.0846689
2022-09-12	12:05:58	0.126832
2022-09-12	12:05:59	0.0531936
2022-09-12	12:05:59	0.120776
2022-09-12	12:05:59	0.0590969
2022-09-12	12:05:59	0.194466
2022-09-12	12:06:00	0.14383
2022-09-12	12:06:00	0.209071
2022-09-12	12:06:00	0.0782826
2022-09-12	12:06:00	0.264644
2022-09-12	12:06:01	0.179148
2022-09-12	12:06:01	0.326985
2022-09-12	12:06:01	0.103575
2022-09-12	12:06:01	0.286069
2022-09-12	12:06:02	0.346832
2022-09-12	12:06:02	1.12546
2022-09-12	12:06:02	0.781845
2022-09-12	12:06:03	1.15589
2022-09-12	12:06:03	0.624338
2022-09-12	12:06:03	0.843117
2022-09-12	12:06:03	0.908562
2022-09-12	12:06:04	1.16398
2022-09-12	12:06:04	2.08693
2022-09-12	12:06:04	1.54042
2022-09-12	12:06:04	2.29614
2022-09-12	12:06:05	1.525
2022-09-12	12:06:05	2.57502
2022-09-12	12:06:05	1.95696
2022-09-12	12:06:05	1.92444
2022-09-12	12:06:06	2.43218
2022-09-12	12:06:06	1.21335
2022-09-12	12:06:06	1.58897
2022-09-12	12:06:07	1.25457
2022-09-12	12:06:07	1.43116
2022-09-12	12:06:07	1.44184
2022-09-12	12:06:07	1.08882
2022-09-12	12:06:08	2.20622
2022-09-12	12:06:08	1.17248
2022-09-12	12:06:08	3.39263
2022-09-12	12:06:08	2.43559
2022-09-12	12:06:09	1.37813
2022-09-12	12:06:09	1.27782
2022-09-12	12:06:09	0.962862
2022-09-12	12:06:09	2.05447
2022-09-12	12:06:10	0.466221
2022-09-12	12:06:10	0.558842
2022-09-12	12:06:10	0.403779
2022-09-12	12:06:11	0.287545
2022-09-12	12:06:11	0.368766
2022-09-12	12:06:11	0.26785
2022-09-12	12:06:11	0.207901
2022-09-12	12:06:12	0.186374
2022-09-12	12:06:12	0.22729
2022-09-12	12:06:12	0.232328
2022-09-12	12:06:12	0.258283
2022-09-12	12:06:13	0.250445
2022-09-12	12:06:13	0.2507
2022-09-12	12:06:13	0.278486
2022-09-12	12:06:13	0.294873
2022-09-12	12:06:14	0.297774
2022-09-12	12:06:14	0.301387
2022-09-12	12:06:14	0.299351
2022-09-12	12:06:15	0.295738
2022-09-12	12:06:15	0.289835
2022-09-12	12:06:15	0.274975
2022-09-12	12:06:15	0.270242
2022-09-12	12:06:16	0.269224
2022-09-12	12:06:16	0.275483
2022-09-12	12:06:16	0.276603
2022-09-12	12:06:16	0.278079
2022-09-12	12:06:17	0.274771
2022-09-12	12:06:17	0.277265
2022-09-12	12:06:17	0.281947
2022-09-12	12:06:17	0.279657
2022-09-12	12:06:18	0.272379
2022-09-12	12:06:18	0.303219
2022-09-12	12:06:18	0.282761
2022-09-12	12:06:19	0.250242
2022-09-12	12:06:19	0.248613
2022-09-12	12:06:19	0.236705
2022-09-12	12:06:19	0.24159
2022-09-12	12:06:20	0.294822
2022-09-12	12:06:20	0.363015
2022-09-12	12:06:20	0.380013
2022-09-12	12:06:20	1.30459
2022-09-12	12:06:21	2.22281
2022-09-12	12:06:21	1.42683
2022-09-12	12:06:21	0.196756
2022-09-12	12:06:21	0.46841
2022-09-12	12:06:22	0.0854073
2022-09-12	12:06:22	0.412176
2022-09-12	12:06:22	0.141387
2022-09-12	12:06:22	0.460216
2022-09-12	12:06:23	0.335891
2022-09-12	12:06:23	0.418181
2022-09-12	12:06:23	0.428664
2022-09-12	12:06:24	0.517112
2022-09-12	12:06:24	0.430547
2022-09-12	12:06:24	0.482659
2022-09-12	12:06:24	0.532939
2022-09-12	12:06:25	0.435687
2022-09-12	12:06:25	0.370089
2022-09-12	12:06:25	0.406425
2022-09-12	12:06:25	0.395789
2022-09-12	12:06:26	0.37472
2022-09-12	12:06:26	0.381641
2022-09-12	12:06:26	0.38444
2022-09-12	12:06:26	0.383982
2022-09-12	12:06:27	0.373499
2022-09-12	12:06:27	0.372227
2022-09-12	12:06:27	0.367341
2022-09-12	12:06:28	0.369479
2022-09-12	12:06:28	0.362761
2022-09-12	12:06:28	0.362863
2022-09-12	12:06:28	0.366934
2022-09-12	12:06:29	0.367392
2022-09-12	12:06:29	0.376145
2022-09-12	12:06:29	0.37243
2022-09-12	12:06:29	0.369377
2022-09-12	12:06:30	0.372939
2022-09-12	12:06:30	0.373244
2022-09-12	12:06:30	0.370802
2022-09-12	12:06:30	0.375738
2022-09-12	12:06:31	0.380674
2022-09-12	12:06:31	0.374619
2022-09-12	12:06:31	0.371921
2022-09-12	12:06:32	0.374313
2022-09-12	12:06:32	0.371158
2022-09-12	12:06:32	0.373448
2022-09-12	12:06:32	0.378232
2022-09-12	12:06:33	0.372481
2022-09-12	12:06:33	0.374364
2022-09-12	12:06:33	0.37416
2022-09-12	12:06:33	0.37986
2022-09-12	12:06:34	0.371158
2022-09-12	12:06:34	0.369071
2022-09-12	12:06:34	0.374822
2022-09-12	12:06:34	0.357468
2022-09-12	12:06:35	0.359606
2022-09-12	12:06:35	0.370496
2022-09-12	12:06:35	0.341896
2022-09-12	12:06:36	0.453804
2022-09-12	12:06:36	0.921132
2022-09-12	12:06:36	1.00704
2022-09-12	12:06:36	1.06714
2022-09-12	12:06:37	1.39477
2022-09-12	12:06:37	1.69421
2022-09-12	12:06:37	1.42856
2022-09-12	12:06:37	1.32205
2022-09-12	12:06:38	0.586374
2022-09-12	12:06:38	0.967443
2022-09-12	12:06:38	0.994873
2022-09-12	12:06:38	1.62653
2022-09-12	12:06:39	1.32637
2022-09-12	12:06:39	1.77431
2022-09-12	12:06:39	3.18271
2022-09-12	12:06:40	1.70495
2022-09-12	12:06:40	1.51955
2022-09-12	12:06:40	0.992684
2022-09-12	12:06:40	2.37518
2022-09-12	12:06:41	1.60958
2022-09-12	12:06:41	1.89808
2022-09-12	12:06:41	1.0305
2022-09-12	12:06:41	1.09314
2022-09-12	12:06:42	0.57701
2022-09-12	12:06:42	0.887646
2022-09-12	12:06:42	1.82968
2022-09-12	12:06:42	1.91253
2022-09-12	12:06:43	2.2164
2022-09-12	12:06:43	1.99207
2022-09-12	12:06:43	3.2591
2022-09-12	12:06:44	1.78159
2022-09-12	12:06:44	2.34205
2022-09-12	12:06:44	1.25945
2022-09-12	12:06:44	1.46658
2022-09-12	12:06:45	0.407443
2022-09-12	12:06:45	0.562659
2022-09-12	12:06:45	0.573804
2022-09-12	12:06:45	0.452939
2022-09-12	12:06:46	0.576247
2022-09-12	12:06:46	0.907646
2022-09-12	12:06:46	0.793804
2022-09-12	12:06:46	0.756756
2022-09-12	12:06:47	0.450242
2022-09-12	12:06:47	0.351361
2022-09-12	12:06:47	0.375942
2022-09-12	12:06:48	0.494771
2022-09-12	12:06:48	0.459097
2022-09-12	12:06:48	0.347392
2022-09-12	12:06:48	0.390751
2022-09-12	12:06:49	0.341896
2022-09-12	12:06:49	0.383881
2022-09-12	12:06:49	1.02246
2022-09-12	12:06:49	0.454873
2022-09-12	12:06:50	0.304898
2022-09-12	12:06:50	0.377468
2022-09-12	12:06:50	0.315738
2022-09-12	12:06:50	0.34668
2022-09-12	12:06:51	0.314975
2022-09-12	12:06:51	0.3107
2022-09-12	12:06:51	0.212939
2022-09-12	12:06:52	0.364186
2022-09-12	12:06:52	0.254771
2022-09-12	12:06:52	0.325305
2022-09-12	12:06:52	0.262964
2022-09-12	12:06:53	0.390038
2022-09-12	12:06:53	0.342201
2022-09-12	12:06:53	0.327443
2022-09-12	12:06:53	0.504542
2022-09-12	12:06:54	0.445611
2022-09-12	12:06:54	0.448919
2022-09-12	12:06:54	0.352023
2022-09-12	12:06:54	0.373499
2022-09-12	12:06:55	0.26439
2022-09-12	12:06:55	0.816145
2022-09-12	12:06:55	0.453295
2022-09-12	12:06:56	0.697163
2022-09-12	12:06:56	0.215127
2022-09-12	12:06:56	0.417723
2022-09-12	12:06:56	0.279097
2022-09-12	12:06:57	0.376858
2022-09-12	12:06:57	0.186679
2022-09-12	12:06:57	0.185407
2022-09-12	12:06:57	0.230191
2022-09-12	12:06:58	0.538995
2022-09-12	12:06:58	0.252735
2022-09-12	12:06:58	0.0778756
2022-09-12	12:06:58	0.416094
2022-09-12	12:06:59	0.0787916
2022-09-12	12:06:59	0.336603
2022-09-12	12:06:59	0.195891
2022-09-12	12:07:00	0.227748
2022-09-12	12:07:00	0.186883
2022-09-12	12:07:00	0.211514
2022-09-12	12:07:00	0.318435
2022-09-12	12:07:01	0.155891
2022-09-12	12:07:01	0.403931
2022-09-12	12:07:01	0.196756
2022-09-12	12:07:01	0.305509
2022-09-12	12:07:02	0.16383
2022-09-12	12:07:02	0.330395
2022-09-12	12:07:02	0.229173
2022-09-12	12:07:02	0.326018
2022-09-12	12:07:03	0.126731
2022-09-12	12:07:03	0.363728
2022-09-12	12:07:03	0.141082
2022-09-12	12:07:03	0.418232
2022-09-12	12:07:04	0.226679
2022-09-12	12:07:04	0.484593
2022-09-12	12:07:04	0.518079
2022-09-12	12:07:05	0.466323
2022-09-12	12:07:05	0.395484
2022-09-12	12:07:05	0.412125
2022-09-12	12:07:05	0.406883
2022-09-12	12:07:06	0.525153
2022-09-12	12:07:06	0.82042
2022-09-12	12:07:06	0.510954
2022-09-12	12:07:06	0.483931
2022-09-12	12:07:07	0.502863
2022-09-12	12:07:07	0.377316
2022-09-12	12:07:07	0.586221
2022-09-12	12:07:07	0.376654
2022-09-12	12:07:08	0.551056
2022-09-12	12:07:08	0.304084
2022-09-12	12:07:08	0.511616
2022-09-12	12:07:09	0.258384
2022-09-12	12:07:09	0.505509
2022-09-12	12:07:09	0.222303
2022-09-12	12:07:09	0.462507
2022-09-12	12:07:10	0.222557
2022-09-12	12:07:10	0.469173
2022-09-12	12:07:10	0.320776
2022-09-12	12:07:10	0.371158
2022-09-12	12:07:11	0.320776
2022-09-12	12:07:11	0.352685
2022-09-12	12:07:11	0.397316
2022-09-12	12:07:11	0.315331
2022-09-12	12:07:12	0.363626
2022-09-12	12:07:12	0.200878
2022-09-12	12:07:12	0.596552
2022-09-12	12:07:13	0.854466
2022-09-12	12:07:13	0.897112
2022-09-12	12:07:13	0.554669
2022-09-12	12:07:13	1.11095
2022-09-12	12:07:14	0.535942
2022-09-12	12:07:14	0.650802
2022-09-12	12:07:14	0.447239
2022-09-12	12:07:14	0.113499
2022-09-12	12:07:15	0.505407
2022-09-12	12:07:15	0.125764
2022-09-12	12:07:15	0.389377
2022-09-12	12:07:15	0.234517
2022-09-12	12:07:16	0.541692
2022-09-12	12:07:16	0.625814
2022-09-12	12:07:16	1.16495
2022-09-12	12:07:17	0.959198
2022-09-12	12:07:17	1.95019
2022-09-12	12:07:17	0.63472
2022-09-12	12:07:17	0.498028
2022-09-12	12:07:18	0.446272
2022-09-12	12:07:18	0.87131
2022-09-12	12:07:18	0.423575
2022-09-12	12:07:18	0.328104
2022-09-12	12:07:19	0.432328
2022-09-12	12:07:19	0.30556
2022-09-12	12:07:19	0.421082
2022-09-12	12:07:19	1.98317
2022-09-12	12:07:20	1.63396
2022-09-12	12:07:20	0.719758
2022-09-12	12:07:20	1.0937
2022-09-12	12:07:21	0.54159
2022-09-12	12:07:21	1.00637
2022-09-12	12:07:21	1.20531
2022-09-12	12:07:21	0.670242
2022-09-12	12:07:22	1.19777
2022-09-12	12:07:22	0.962659
2022-09-12	12:07:22	1.62368
2022-09-12	12:07:22	0.942303
2022-09-12	12:07:23	1.19686
2022-09-12	12:07:23	2.4251
2022-09-12	12:07:23	1.90561
2022-09-12	12:07:23	2.28754
2022-09-12	12:07:24	0.795229
2022-09-12	12:07:24	1.24877
2022-09-12	12:07:24	0.543422
2022-09-12	12:07:25	1.05421
2022-09-12	12:07:25	0.488613
2022-09-12	12:07:25	0.185713
2022-09-12	12:07:25	0.34841
2022-09-12	12:07:26	0.274211
2022-09-12	12:07:26	0.136247
2022-09-12	12:07:26	0.311819
2022-09-12	12:07:26	0.120369
2022-09-12	12:07:27	0.310089
2022-09-12	12:07:27	0.0975702
2022-09-12	12:07:27	1.02205
2022-09-12	12:07:27	1.30866
2022-09-12	12:07:28	3.12454
2022-09-12	12:07:28	4.2965
2022-09-12	12:07:28	2.96805
2022-09-12	12:07:29	2.1906
2022-09-12	12:07:29	0.932685
2022-09-12	12:07:29	1.37981
2022-09-12	12:07:29	0.673957
2022-09-12	12:07:30	1.79925
2022-09-12	12:07:30	0.977417
2022-09-12	12:07:30	1.22541
2022-09-12	12:07:30	0.838842
2022-09-12	12:07:31	2.83681
2022-09-12	12:07:31	1.56307
2022-09-12	12:07:31	1.38678
2022-09-12	12:07:31	0.769529
2022-09-12	12:07:32	1.04184
2022-09-12	12:07:32	0.796552
2022-09-12	12:07:32	1.00408
2022-09-12	12:07:33	0.792837
2022-09-12	12:07:33	0.495026
2022-09-12	12:07:33	0.94785
2022-09-12	12:07:33	1.93655
2022-09-12	12:07:34	2.1733
2022-09-12	12:07:34	1.3052
2022-09-12	12:07:34	1.76164
2022-09-12	12:07:34	0.621336
2022-09-12	12:07:35	1.61431
2022-09-12	12:07:35	0.84556
2022-09-12	12:07:35	1.38123
2022-09-12	12:07:35	1.28215
2022-09-12	12:07:36	3.84301
2022-09-12	12:07:36	3.28724
2022-09-12	12:07:36	2.30327
2022-09-12	12:07:37	1.85777
2022-09-12	12:07:37	2.37945
2022-09-12	12:07:37	3.33141
2022-09-12	12:07:37	3.68887
2022-09-12	12:07:38	0.702557
2022-09-12	12:07:38	2.14067
2022-09-12	12:07:38	1.64062
2022-09-12	12:07:38	1.79828
2022-09-12	12:07:39	3.25538
2022-09-12	12:07:39	1.69838
2022-09-12	12:07:39	6.93278
2022-09-12	12:07:39	5.25126
2022-09-12	12:07:40	4.37395
2022-09-12	12:07:40	1.16261
2022-09-12	12:07:40	1.92734
2022-09-12	12:07:41	1.97274
2022-09-12	12:07:41	1.51528
2022-09-12	12:07:41	1.5134
2022-09-12	12:07:41	3.60729
2022-09-12	12:07:42	1.46327
2022-09-12	12:07:42	2.84973
2022-09-12	12:07:42	5.15034
2022-09-12	12:07:42	5.5025
2022-09-12	12:07:43	2.53106
2022-09-12	12:07:43	2.40612
2022-09-12	12:07:43	5.15151
2022-09-12	12:07:43	8.70566
2022-09-12	12:07:44	5.02785
2022-09-12	12:07:44	3.39686
2022-09-12	12:07:44	0.746832
2022-09-12	12:07:45	0.366883
2022-09-12	12:07:45	0.764338
2022-09-12	12:07:45	7.62464
2022-09-12	12:07:45	6.62332
2022-09-12	12:07:46	4.00515
2022-09-12	12:07:46	1.9078
2022-09-12	12:07:46	2.97365
2022-09-12	12:07:46	6.0393
2022-09-12	12:07:47	4.62485
2022-09-12	12:07:47	1.84179
2022-09-12	12:07:47	1.62704
2022-09-12	12:07:47	0.749529
2022-09-12	12:07:48	0.696807
2022-09-12	12:07:48	0.924949
2022-09-12	12:07:48	0.736959
2022-09-12	12:07:49	0.514466
2022-09-12	12:07:49	0.692074
2022-09-12	12:07:49	2.93686
2022-09-12	12:07:49	7.26332
2022-09-12	12:07:50	6.06438
2022-09-12	12:07:50	1.97716
2022-09-12	12:07:50	0.929427
2022-09-12	12:07:50	1.19645
2022-09-12	12:07:51	1.40413
2022-09-12	12:07:51	2.62312
2022-09-12	12:07:51	2.09838
2022-09-12	12:07:51	1.43513
2022-09-12	12:07:52	1.73609
2022-09-12	12:07:52	1.43742
2022-09-12	12:07:52	1.10475
2022-09-12	12:07:52	1.74948
2022-09-12	12:07:53	1.50154
2022-09-12	12:07:53	2.1905
2022-09-12	12:07:53	3.56856
2022-09-12	12:07:54	2.50525
2022-09-12	12:07:54	2.57156
2022-09-12	12:07:54	2.22078
2022-09-12	12:07:54	1.16693
2022-09-12	12:07:55	1.69019
2022-09-12	12:07:55	1.28424
2022-09-12	12:07:55	0.749886
2022-09-12	12:07:55	1.50347
2022-09-12	12:07:56	1.99726
2022-09-12	12:07:56	1.66907
2022-09-12	12:07:56	1.46072
2022-09-12	12:07:56	1.00062
2022-09-12	12:07:57	1.00719
2022-09-12	12:07:57	1.07681
2022-09-12	12:07:57	1.34291
2022-09-12	12:07:58	1.32281
2022-09-12	12:07:58	1.24357
2022-09-12	12:07:58	0.901743
2022-09-12	12:07:58	0.66729
2022-09-12	12:07:59	0.547035
2022-09-12	12:07:59	0.754516
2022-09-12	12:07:59	0.857163
2022-09-12	12:07:59	0.980267
2022-09-12	12:08:00	1.09004
2022-09-12	12:08:00	1.09065
2022-09-12	12:08:00	0.878944
2022-09-12	12:08:00	0.816705
2022-09-12	12:08:01	1.22709
2022-09-12	12:08:01	0.975076
2022-09-12	12:08:01	1.0337
2022-09-12	12:08:02	1.1048
2022-09-12	12:08:02	0.857926
2022-09-12	12:08:02	1.22449
2022-09-12	12:08:02	1.18897
2022-09-12	12:08:03	1.69075
2022-09-12	12:08:03	1.65564
2022-09-12	12:08:03	1.79482
2022-09-12	12:08:03	1.93065
2022-09-12	12:08:04	1.52856
2022-09-12	12:08:04	1.68449
2022-09-12	12:08:04	1.23391
2022-09-12	12:08:04	1.05095
2022-09-12	12:08:05	0.929275
2022-09-12	12:08:05	0.652379
2022-09-12	12:08:05	0.739351
2022-09-12	12:08:06	0.857875
2022-09-12	12:08:06	0.613957
2022-09-12	12:08:06	0.678588
2022-09-12	12:08:06	1.24027
2022-09-12	12:08:07	1.57615
2022-09-12	12:08:07	1.64729
2022-09-12	12:08:07	2.12658
2022-09-12	12:08:07	2.94724
2022-09-12	12:08:08	2.69594
2022-09-12	12:08:08	1.99538
2022-09-12	12:08:08	2.0764
2022-09-12	12:08:08	1.37584
2022-09-12	12:08:09	1.42856
2022-09-12	12:08:09	0.94785
2022-09-12	12:08:09	1.65375
2022-09-12	12:08:10	0.897519
2022-09-12	12:08:10	0.278283
2022-09-12	12:08:10	0.300776
2022-09-12	12:08:10	0.221692
2022-09-12	12:08:11	0.309377
2022-09-12	12:08:11	0.214822
2022-09-12	12:08:11	0.357265
2022-09-12	12:08:11	0.131056
2022-09-12	12:08:12	0.0245931
2022-09-12	12:08:12	0.101896
2022-09-12	12:08:12	-0.0630913
2022-09-12	12:08:12	-0.0764246
2022-09-12	12:08:13	-0.0616155
2022-09-12	12:08:13	0.162252
2022-09-12	12:08:13	0.172328
2022-09-12	12:08:14	0.217672
2022-09-12	12:08:14	0.30383
2022-09-12	12:08:14	0.370038
2022-09-12	12:08:14	2.9252
2022-09-12	12:08:15	1.46882
2022-09-12	12:08:15	0.821132
2022-09-12	12:08:15	1.78576
2022-09-12	12:08:15	1.75228
2022-09-12	12:08:16	0.63528
2022-09-12	12:08:16	0.972074
2022-09-12	12:08:16	0.490089
2022-09-12	12:08:16	0.991616
2022-09-12	12:08:17	0.889478
2022-09-12	12:08:17	1.30459
2022-09-12	12:08:17	0.294211
2022-09-12	12:08:18	0.303575
2022-09-12	12:08:18	0.231361
2022-09-12	12:08:18	0.303982
2022-09-12	12:08:18	0.309224
2022-09-12	12:08:19	0.163931
2022-09-12	12:08:19	0.22958
2022-09-12	12:08:19	0.250445
2022-09-12	12:08:19	0.522761
2022-09-12	12:08:20	0.973295
2022-09-12	12:08:20	1.00464
2022-09-12	12:08:20	1.1366
2022-09-12	12:08:20	1.23772
2022-09-12	12:08:21	0.37472
2022-09-12	12:08:21	0.772786
2022-09-12	12:08:21	0.289937
2022-09-12	12:08:22	0.690547
2022-09-12	12:08:22	0.354466
2022-09-12	12:08:22	0.679962
2022-09-12	12:08:22	0.680725
2022-09-12	12:08:23	1.48256
2022-09-12	12:08:23	1.10449
2022-09-12	12:08:23	1.29447
2022-09-12	12:08:23	1.12246
2022-09-12	12:08:24	0.831921
2022-09-12	12:08:24	0.39528
2022-09-12	12:08:24	0.187087
2022-09-12	12:08:24	0.472379
2022-09-12	12:08:25	0.146272
2022-09-12	12:08:25	0.453499
2022-09-12	12:08:25	0.25701
2022-09-12	12:08:26	0.543473
2022-09-12	12:08:26	0.21299
2022-09-12	12:08:26	0.705458
2022-09-12	12:08:26	0.340318
2022-09-12	12:08:27	0.597366
2022-09-12	12:08:27	0.725712
2022-09-12	12:08:27	1.2562
2022-09-12	12:08:27	2.28994
2022-09-12	12:08:28	2.70215
2022-09-12	12:08:28	0.936094
2022-09-12	12:08:28	0.619707
2022-09-12	12:08:28	0.245916
2022-09-12	12:08:29	0.226323
2022-09-12	12:08:29	0.408461
2022-09-12	12:08:29	0.163779
2022-09-12	12:08:30	0.306679
2022-09-12	12:08:30	0.139657
2022-09-12	12:08:30	0.314262
2022-09-12	12:08:30	0.239758
2022-09-12	12:08:31	2.21223
2022-09-12	12:08:31	2.38887
2022-09-12	12:08:31	1.0651
2022-09-12	12:08:31	0.240827
2022-09-12	12:08:32	0.247545
2022-09-12	12:08:32	0.467392
2022-09-12	12:08:32	0.360827
2022-09-12	12:08:32	0.334466
2022-09-12	12:08:33	0.0679518
2022-09-12	12:08:33	0.303524
2022-09-12	12:08:33	0.0847458
2022-09-12	12:08:34	0.383372
2022-09-12	12:08:34	0.195229
2022-09-12	12:08:34	0.342914
2022-09-12	12:08:34	0.234618
2022-09-12	12:08:35	0.297163
2022-09-12	12:08:35	0.365509
2022-09-12	12:08:35	2.24642
2022-09-12	12:08:35	1.55645
2022-09-12	12:08:36	1.82927
2022-09-12	12:08:36	0.985916
2022-09-12	12:08:36	1.50352
2022-09-12	12:08:36	2.31599
2022-09-12	12:08:37	2.11955
2022-09-12	12:08:37	2.91782
2022-09-12	12:08:37	1.27762
2022-09-12	12:08:37	1.44108
2022-09-12	12:08:38	0.694924
2022-09-12	12:08:38	0.904746
2022-09-12	12:08:38	0.724288
2022-09-12	12:08:39	0.840471
2022-09-12	12:08:39	1.45986
2022-09-12	12:08:39	1.34658
2022-09-12	12:08:39	2.19172
2022-09-12	12:08:40	3.57813
2022-09-12	12:08:40	3.11044
2022-09-12	12:08:40	0.608562
2022-09-12	12:08:40	0.45014
2022-09-12	12:08:41	0.141082
2022-09-12	12:08:41	0.295382
2022-09-12	12:08:41	0.173499
2022-09-12	12:08:41	0.525865
2022-09-12	12:08:42	3.01609
2022-09-12	12:08:42	2.41645
2022-09-12	12:08:42	2.01457
2022-09-12	12:08:43	2.04413
2022-09-12	12:08:43	1.18368
2022-09-12	12:08:43	1.71523
2022-09-12	12:08:43	1.73864
2022-09-12	12:08:44	2.55095
2022-09-12	12:08:44	1.43223
2022-09-12	12:08:44	2.648
2022-09-12	12:08:44	2.13981
2022-09-12	12:08:45	1.69762
2022-09-12	12:08:45	1.24098
2022-09-12	12:08:45	0.809784
2022-09-12	12:08:45	0.376705
2022-09-12	12:08:46	0.264593
2022-09-12	12:08:46	0.390954
2022-09-12	12:08:46	0.208054
2022-09-12	12:08:47	0.402863
2022-09-12	12:08:47	0.175178
2022-09-12	12:08:47	0.32327
2022-09-12	12:08:47	0.114008
2022-09-12	12:08:48	0.101336
2022-09-12	12:08:48	2.43508
2022-09-12	12:08:48	0.657315
2022-09-12	12:08:48	0.874007
2022-09-12	12:08:49	0.707595
2022-09-12	12:08:49	0.715738
2022-09-12	12:08:49	1.38149
2022-09-12	12:08:49	0.423423
2022-09-12	12:08:50	0.824695
2022-09-12	12:08:50	0.397163
2022-09-12	12:08:50	0.726272
2022-09-12	12:08:51	0.806985
2022-09-12	12:08:51	0.648715
2022-09-12	12:08:51	0.482914
2022-09-12	12:08:51	0.538079
2022-09-12	12:08:52	0.685153
2022-09-12	12:08:52	1.13849
2022-09-12	12:08:52	0.348562
2022-09-12	12:08:52	0.515992
2022-09-12	12:08:53	0.767035
2022-09-12	12:08:53	1.08495
2022-09-12	12:08:53	0.815382
2022-09-12	12:08:53	0.754924
2022-09-12	12:08:54	0.716807
2022-09-12	12:08:54	0.5993
2022-09-12	12:08:54	0.421234
2022-09-12	12:08:55	0.327188
2022-09-12	12:08:55	0.41243
2022-09-12	12:08:55	0.340776
2022-09-12	12:08:55	0.404389
2022-09-12	12:08:56	0.677773
2022-09-12	12:08:56	0.685611
2022-09-12	12:08:56	0.990649
2022-09-12	12:08:56	0.800572
2022-09-12	12:08:57	1.01223
2022-09-12	12:08:57	0.578384
2022-09-12	12:08:57	1.07604
2022-09-12	12:08:57	0.587697
2022-09-12	12:08:58	1.52576
2022-09-12	12:08:58	0.966221
2022-09-12	12:08:58	1.78749
2022-09-12	12:08:59	0.469428
2022-09-12	12:08:59	0.978995
2022-09-12	12:08:59	1.10963
2022-09-12	12:08:59	1.37386
2022-09-12	12:09:00	1.14286
2022-09-12	12:09:00	1.39497
2022-09-12	12:09:00	2.50108
2022-09-12	12:09:00	1.87279
2022-09-12	12:09:01	1.39503
2022-09-12	12:09:01	1.08414
2022-09-12	12:09:01	1.04917
2022-09-12	12:09:01	1.50403
2022-09-12	12:09:02	1.3595
2022-09-12	12:09:02	1.70368
2022-09-12	12:09:02	1.80678
2022-09-12	12:09:03	1.42128
2022-09-12	12:09:03	1.46413
2022-09-12	12:09:03	1.55457
2022-09-12	12:09:03	1.59955
2022-09-12	12:09:04	1.5477
2022-09-12	12:09:04	1.63721
2022-09-12	12:09:04	1.05243
2022-09-12	12:09:04	0.610751
2022-09-12	12:09:05	0.743015
2022-09-12	12:09:05	0.716501
2022-09-12	12:09:05	1.97457
2022-09-12	12:09:05	2.3106
2022-09-12	12:09:06	1.89548
2022-09-12	12:09:06	0.994924
2022-09-12	12:09:06	0.453652
2022-09-12	12:09:07	0.865102
2022-09-12	12:09:07	0.993397
2022-09-12	12:09:07	1.35645
2022-09-12	12:09:07	1.20531
2022-09-12	12:09:08	1.92948
2022-09-12	12:09:08	1.4167
2022-09-12	12:09:08	1.85645
2022-09-12	12:09:08	1.63564
2022-09-12	12:09:09	3.67497
2022-09-12	12:09:09	1.37777
2022-09-12	12:09:09	2.73248
2022-09-12	12:09:09	1.5478
2022-09-12	12:09:10	1.99197
2022-09-12	12:09:10	0.457367
2022-09-12	12:09:10	0.457214
2022-09-12	12:09:11	2.27838
2022-09-12	12:09:11	0.686119
2022-09-12	12:09:11	1.89116
2022-09-12	12:09:11	0.787494
2022-09-12	12:09:12	2.62072
2022-09-12	12:09:12	1.29401
2022-09-12	12:09:12	2.44856
2022-09-12	12:09:12	1.48531
2022-09-12	12:09:13	1.0277
2022-09-12	12:09:13	1.25691
2022-09-12	12:09:13	1.43574
2022-09-12	12:09:14	2.20734
2022-09-12	12:09:14	0.815738
2022-09-12	12:09:14	1.72358
2022-09-12	12:09:14	1.31828
2022-09-12	12:09:15	2.49961
2022-09-12	12:09:15	1.07385
2022-09-12	12:09:15	2.17314
2022-09-12	12:09:15	1.3793
2022-09-12	12:09:16	2.61558
2022-09-12	12:09:16	1.11747
2022-09-12	12:09:16	1.42933
2022-09-12	12:09:16	0.799555
2022-09-12	12:09:17	0.347545
2022-09-12	12:09:17	0.205153
2022-09-12	12:09:17	0.0573666
2022-09-12	12:09:17	0.216552
2022-09-12	12:09:18	-0.0765264
2022-09-12	12:09:18	0.309987
2022-09-12	12:09:18	-0.0262975
2022-09-12	12:09:19	0.170751
2022-09-12	12:09:19	-0.0219717
2022-09-12	12:09:19	0.330445
