# Supplementary material for: Comparing efficacy in reducing pulling and welfare impacts of four types of leash walking equipment
Source: PeerJ journal article supplement (doi:10.7717/peerj.18131), 2024-10-24
Supplement: Shelter1_Tension_files.zip [file Sunny_star_2022912115450 copy.xlsx]

## Sheet: Averaged Newtons
Date	Time	Averaged newtons	Impulse	Total steps
2022-09-12	11:55:13	4.31849	4.31849	0		Impulse	2645.07
2022-09-12	11:55:14	0.592584	4.91107	0		Total steps	85
2022-09-12	11:55:15	1.22254	6.13361	0		# > 5 sec	4
2022-09-12	11:55:16	1.07917	7.21278	0
2022-09-12	11:55:17	6.72629	13.9391	0
2022-09-12	11:55:18	1.8709	15.81	0
2022-09-12	11:55:19	1.07427	16.8842	0
2022-09-12	11:55:20	1.2206	18.1048	0
2022-09-12	11:55:21	1.51296	19.6178	0
2022-09-12	11:55:22	1.03118	20.649	0
2022-09-12	11:55:23	-0.888979	20.649	0
2022-09-12	11:55:24	6.17401	26.823	0
2022-09-12	11:55:25	4.77236	31.5953	0
2022-09-12	11:55:26	1.59354	33.1889	0
2022-09-12	11:55:27	2.91067	36.0995	0
2022-09-12	11:55:28	10.3993	46.4989	0
2022-09-12	11:55:29	1.51001	48.0089	0
2022-09-12	11:55:30	8.50059	56.5095	0
2022-09-12	11:55:31	8.2977	64.8072	0
2022-09-12	11:55:32	2.08841	66.8956	0
2022-09-12	11:55:33	0.805035	67.7006	0
2022-09-12	11:55:34	0.640463	68.3411	0
2022-09-12	11:55:35	0.366893	68.708	0
2022-09-12	11:55:36	8.02817	76.7362	0
2022-09-12	11:55:37	1.41171	78.1479	0
2022-09-12	11:55:38	3.37995	81.5278	0
2022-09-12	11:55:39	24.2256	105.753	1
2022-09-12	11:55:40	41.5807	147.334	2
2022-09-12	11:55:41	24.3896	171.724	3
2022-09-12	11:55:42	30.5346	202.258	4
2022-09-12	11:55:43	14.9286	217.187	5
2022-09-12	11:55:44	16.7084	233.895	6
2022-09-12	11:55:45	23.9825	257.878	7
2022-09-12	11:55:46	22.6489	280.527	8
2022-09-12	11:55:47	16.7037	297.23	9
2022-09-12	11:55:48	20.5862	317.817	10
2022-09-12	11:55:49	22.8191	340.636	11
2022-09-12	11:55:50	23.2714	363.907	12
2022-09-12	11:55:51	3.57928	367.486	12
2022-09-12	11:55:52	1.09122	368.578	12
2022-09-12	11:55:53	0.114979	368.693	12
2022-09-12	11:55:54	1.58788	370.28	12
2022-09-12	11:55:55	22.8233	393.104	13
2022-09-12	11:55:56	14.048	407.152	14
2022-09-12	11:55:57	22.666	429.818	15
2022-09-12	11:55:58	14.9135	444.731	16
2022-09-12	11:55:59	1.87351	446.605	16
2022-09-12	11:56:00	0.300453	446.905	16
2022-09-12	11:56:01	0.938593	447.844	16
2022-09-12	11:56:02	2.56049	450.404	16
2022-09-12	11:56:03	1.16389	451.568	16
2022-09-12	11:56:04	1.59292	453.161	16
2022-09-12	11:56:05	1.91154	455.073	16
2022-09-12	11:56:06	1.68613	456.759	16
2022-09-12	11:56:07	3.3713	460.13	16
2022-09-12	11:56:08	17.4245	477.554	17
2022-09-12	11:56:09	27.3755	504.93	18
2022-09-12	11:56:10	15.3673	520.297	19
2022-09-12	11:56:11	5.52698	525.824	19
2022-09-12	11:56:12	10.7473	536.572	19
2022-09-12	11:56:13	8.44665	545.018	19
2022-09-12	11:56:14	12.751	557.769	19
2022-09-12	11:56:15	2.88245	560.652	19
2022-09-12	11:56:16	1.94742	562.599	19
2022-09-12	11:56:17	1.89173	564.491	19
2022-09-12	11:56:18	2.91806	567.409	19
2022-09-12	11:56:19	3.87962	571.288	19
2022-09-12	11:56:20	15.1152	586.404	20
2022-09-12	11:56:21	12.2447	598.648	20
2022-09-12	11:56:22	5.07394	603.722	20
2022-09-12	11:56:23	19.389	623.111	21
2022-09-12	11:56:24	2.84651	625.958	21
2022-09-12	11:56:25	4.22527	630.183	21
2022-09-12	11:56:26	14.0304	644.213	22
2022-09-12	11:56:27	20.3333	664.547	23
2022-09-12	11:56:28	19.0944	683.641	24
2022-09-12	11:56:29	5.67326	689.314	24
2022-09-12	11:56:30	8.25749	697.572	24
2022-09-12	11:56:31	1.90373	699.476	24
2022-09-12	11:56:32	1.9876	701.463	24
2022-09-12	11:56:33	1.86519	703.328	24
2022-09-12	11:56:34	2.21018	705.539	24
2022-09-12	11:56:35	2.28105	707.82	24
2022-09-12	11:56:36	2.18839	710.008	24
2022-09-12	11:56:37	3.19857	713.207	24
2022-09-12	11:56:38	2.66422	715.871	24
2022-09-12	11:56:39	2.58348	718.454	24
2022-09-12	11:56:40	2.04283	720.497	24
2022-09-12	11:56:41	1.85868	722.356	24
2022-09-12	11:56:42	1.99563	724.351	24
2022-09-12	11:56:43	2.73779	727.089	24
2022-09-12	11:56:44	5.08549	732.175	24
2022-09-12	11:56:45	5.39155	737.566	24
2022-09-12	11:56:46	7.25961	744.826	24
2022-09-12	11:56:47	4.33032	749.156	24
2022-09-12	11:56:48	0.883019	750.039	24
2022-09-12	11:56:49	12.3621	762.401	24
2022-09-12	11:56:50	11.3228	773.724	24
2022-09-12	11:56:51	3.08263	776.807	24
2022-09-12	11:56:52	2.79592	779.603	24
2022-09-12	11:56:53	3.10531	782.708	24
2022-09-12	11:56:54	25.0774	807.785	25
2022-09-12	11:56:55	13.9405	821.726	26
2022-09-12	11:56:56	20.1114	841.837	27
2022-09-12	11:56:57	13.324	855.161	28
2022-09-12	11:56:58	3.40587	858.567	28
2022-09-12	11:56:59	16.3945	874.962	29
2022-09-12	11:57:00	23.3687	898.33	30
2022-09-12	11:57:01	8.10851	906.439	30
2022-09-12	11:57:02	1.62688	908.066	30
2022-09-12	11:57:03	4.60185	912.668	30
2022-09-12	11:57:04	4.32858	916.996	30
2022-09-12	11:57:05	14.3206	931.317	31
2022-09-12	11:57:06	11.2413	942.558	31
2022-09-12	11:57:07	19.1228	961.681	32
2022-09-12	11:57:08	45.5103	1007.19	33
2022-09-12	11:57:09	25.1461	1032.34	34
2022-09-12	11:57:10	2.18562	1034.52	34
2022-09-12	11:57:11	0.992923	1035.52	34
2022-09-12	11:57:12	9.33222	1044.85	34
2022-09-12	11:57:13	4.19325	1049.04	34
2022-09-12	11:57:14	0.796659	1049.84	34
2022-09-12	11:57:15	-2.50044	1049.84	34
2022-09-12	11:57:16	-0.488057	1049.84	34
2022-09-12	11:57:17	20.5915	1070.43	35
2022-09-12	11:57:18	20.5881	1091.02	36
2022-09-12	11:57:19	23.9268	1114.94	37
2022-09-12	11:57:20	33.7149	1148.66	38
2022-09-12	11:57:21	1.61929	1150.28	38
2022-09-12	11:57:22	1.92263	1152.2	38
2022-09-12	11:57:23	2.74923	1154.95	38
2022-09-12	11:57:24	2.38183	1157.33	38
2022-09-12	11:57:25	16.931	1174.26	39
2022-09-12	11:57:26	14.8082	1189.07	40
2022-09-12	11:57:27	2.00254	1191.07	40
2022-09-12	11:57:28	0.847083	1191.92	40
2022-09-12	11:57:29	1.67604	1193.6	40
2022-09-12	11:57:30	8.44598	1202.04	40
2022-09-12	11:57:31	4.41237	1206.46	40
2022-09-12	11:57:32	28.3879	1234.84	41
2022-09-12	11:57:33	20.4064	1255.25	42
2022-09-12	11:57:34	13.6584	1268.91	43
2022-09-12	11:57:35	11.5078	1280.42	43
2022-09-12	11:57:36	4.7427	1285.16	43
2022-09-12	11:57:37	6.55471	1291.71	43
2022-09-12	11:57:38	17.4119	1309.13	44
2022-09-12	11:57:39	19.5596	1328.68	45
2022-09-12	11:57:40	11.0166	1339.7	45
2022-09-12	11:57:41	9.13109	1348.83	45
2022-09-12	11:57:42	11.936	1360.77	45
2022-09-12	11:57:43	7.70664	1368.48	45
2022-09-12	11:57:44	7.14412	1375.62	45
2022-09-12	11:57:45	29.056	1404.68	46
2022-09-12	11:57:46	1.8723	1406.55	46
2022-09-12	11:57:47	0.826201	1407.37	46
2022-09-12	11:57:48	2.43786	1409.81	46
2022-09-12	11:57:49	8.27439	1418.09	46
2022-09-12	11:57:50	16.0371	1434.12	47
2022-09-12	11:57:51	10.7398	1444.86	47
2022-09-12	11:57:52	0.778381	1445.64	47
2022-09-12	11:57:53	1.15704	1446.8	47
2022-09-12	11:57:54	5.17476	1451.97	47
2022-09-12	11:57:55	2.8992	1454.87	47
2022-09-12	11:57:56	5.39896	1460.27	47
2022-09-12	11:57:57	7.932	1468.2	47
2022-09-12	11:57:58	16.4504	1484.65	48
2022-09-12	11:57:59	10.8552	1495.51	48
2022-09-12	11:58:00	14.905	1510.41	49
2022-09-12	11:58:01	3.31091	1513.73	49
2022-09-12	11:58:02	2.3417	1516.07	49
2022-09-12	11:58:03	9.50895	1525.58	49
2022-09-12	11:58:04	18.9631	1544.54	50
2022-09-12	11:58:05	18.7681	1563.31	51
2022-09-12	11:58:06	21.733	1585.04	52
2022-09-12	11:58:07	14.3459	1599.39	53
2022-09-12	11:58:08	9.92895	1609.31	53
2022-09-12	11:58:09	17.1518	1626.47	54
2022-09-12	11:58:10	19.2413	1645.71	55
2022-09-12	11:58:11	19.4236	1665.13	56
2022-09-12	11:58:12	29.9076	1695.04	57
2022-09-12	11:58:13	35.8712	1730.91	58
2022-09-12	11:58:14	18.3931	1749.3	59
2022-09-12	11:58:15	9.90206	1759.21	59
2022-09-12	11:58:16	15.9594	1775.16	60
2022-09-12	11:58:17	33.0667	1808.23	61
2022-09-12	11:58:18	30.2189	1838.45	62
2022-09-12	11:58:19	14.8331	1853.28	63
2022-09-12	11:58:20	29.8478	1883.13	64
2022-09-12	11:58:21	28.7112	1911.84	65
2022-09-12	11:58:22	6.45522	1918.3	65
2022-09-12	11:58:23	6.13502	1924.43	65
2022-09-12	11:58:24	4.87429	1929.31	65
2022-09-12	11:58:25	4.46682	1933.77	65
2022-09-12	11:58:26	4.44707	1938.22	65
2022-09-12	11:58:27	2.61261	1940.83	65
2022-09-12	11:58:28	0.256763	1941.09	65
2022-09-12	11:58:29	-1.11465	1941.09	65
2022-09-12	11:58:30	-1.71029	1941.09	65
2022-09-12	11:58:31	3.71702	1944.81	65
2022-09-12	11:58:32	1.61152	1946.42	65
2022-09-12	11:58:33	0.89479	1947.31	65
2022-09-12	11:58:34	0.666609	1947.98	65
2022-09-12	11:58:35	1.65574	1949.64	65
2022-09-12	11:58:36	2.74813	1952.38	65
2022-09-12	11:58:37	4.61311	1957	65
2022-09-12	11:58:38	17.672	1974.67	66
2022-09-12	11:58:39	2.4198	1977.09	66
2022-09-12	11:58:40	2.71531	1979.8	66
2022-09-12	11:58:41	3.93145	1983.74	66
2022-09-12	11:58:42	-0.333897	1983.74	66
2022-09-12	11:58:43	-0.623257	1983.74	66
2022-09-12	11:58:44	-1.35485	1983.74	66
2022-09-12	11:58:45	-1.15715	1983.74	66
2022-09-12	11:58:46	2.61516	1986.35	66
2022-09-12	11:58:47	4.58679	1990.94	66
2022-09-12	11:58:48	1.31941	1992.26	66
2022-09-12	11:58:49	3.53183	1995.79	66
2022-09-12	11:58:50	14.8866	2010.68	67
2022-09-12	11:58:51	22.8174	2033.49	68
2022-09-12	11:58:52	3.48538	2036.98	68
2022-09-12	11:58:53	0.614354	2037.59	68
2022-09-12	11:58:54	-0.250479	2037.59	68
2022-09-12	11:58:55	0.817202	2038.41	68
2022-09-12	11:58:56	3.29693	2041.71	68
2022-09-12	11:58:57	1.28592	2042.99	68
2022-09-12	11:58:58	1.4657	2044.46	68
2022-09-12	11:58:59	2.35376	2046.81	68
2022-09-12	11:59:00	0.962079	2047.77	68
2022-09-12	11:59:01	-1.02533	2047.77	68
2022-09-12	11:59:02	8.40251	2056.18	68
2022-09-12	11:59:03	11.7252	2067.9	68
2022-09-12	11:59:04	11.3161	2079.22	68
2022-09-12	11:59:05	3.70735	2082.93	68
2022-09-12	11:59:06	1.991	2084.92	68
2022-09-12	11:59:07	0.639273	2085.56	68
2022-09-12	11:59:08	0.672607	2086.23	68
2022-09-12	11:59:09	0.907128	2087.14	68
2022-09-12	11:59:10	1.36202	2088.5	68
2022-09-12	11:59:11	0.15965	2088.66	68
2022-09-12	11:59:12	0.292417	2088.95	68
2022-09-12	11:59:13	0.607016	2089.56	68
2022-09-12	11:59:14	2.49942	2092.06	68
2022-09-12	11:59:15	3.58233	2095.64	68
2022-09-12	11:59:16	1.31584	2096.95	68
2022-09-12	11:59:17	11.215	2108.17	68
2022-09-12	11:59:18	5.96026	2114.13	68
2022-09-12	11:59:19	15.0922	2129.22	69
2022-09-12	11:59:20	8.60975	2137.83	69
2022-09-12	11:59:21	15.3169	2153.15	70
2022-09-12	11:59:22	4.26052	2157.41	70
2022-09-12	11:59:23	1.51556	2158.92	70
2022-09-12	11:59:24	1.75444	2160.68	70
2022-09-12	11:59:25	1.30865	2161.99	70
2022-09-12	11:59:26	1.08196	2163.07	70
2022-09-12	11:59:27	1.85166	2164.92	70
2022-09-12	11:59:28	2.93909	2167.86	70
2022-09-12	11:59:29	5.35227	2173.21	70
2022-09-12	11:59:30	3.25045	2176.46	70
2022-09-12	11:59:31	1.13423	2177.6	70
2022-09-12	11:59:32	1.27594	2178.87	70
2022-09-12	11:59:33	11.5743	2190.45	70
2022-09-12	11:59:34	11.3307	2201.78	70
2022-09-12	11:59:35	13.7613	2215.54	71
2022-09-12	11:59:36	9.32611	2224.87	71
2022-09-12	11:59:37	10.6311	2235.5	71
2022-09-12	11:59:38	1.60848	2237.1	71
2022-09-12	11:59:39	5.09522	2242.2	71
2022-09-12	11:59:40	1.58703	2243.79	71
2022-09-12	11:59:41	3.09376	2246.88	71
2022-09-12	11:59:42	4.69314	2251.57	71
2022-09-12	11:59:43	0.86774	2252.44	71
2022-09-12	11:59:44	0.614147	2253.06	71
2022-09-12	11:59:45	0.894734	2253.95	71
2022-09-12	11:59:46	1.68709	2255.64	71
2022-09-12	11:59:47	2.66211	2258.3	71
2022-09-12	11:59:48	3.94661	2262.25	71
2022-09-12	11:59:49	8.74915	2271	71
2022-09-12	11:59:50	4.28884	2275.28	71
2022-09-12	11:59:51	4.30202	2279.59	71
2022-09-12	11:59:52	6.7848	2286.37	71
2022-09-12	11:59:53	10.5565	2296.93	71
2022-09-12	11:59:54	9.44365	2306.37	71
2022-09-12	11:59:55	9.32905	2315.7	71
2022-09-12	11:59:56	15.939	2331.64	72
2022-09-12	11:59:57	17.4286	2349.07	73
2022-09-12	11:59:58	19.9997	2369.07	74
2022-09-12	11:59:59	25.34	2394.41	75
2022-09-12	12:00:00	14.6354	2409.04	76
2022-09-12	12:00:01	19.6193	2428.66	77
2022-09-12	12:00:02	25.9432	2454.61	78
2022-09-12	12:00:03	13.1238	2467.73	79
2022-09-12	12:00:04	13.4171	2481.15	80
2022-09-12	12:00:05	11.4382	2492.58	80
2022-09-12	12:00:06	19.1803	2511.76	81
2022-09-12	12:00:07	12.716	2524.48	81
2022-09-12	12:00:08	12.676	2537.16	81
2022-09-12	12:00:09	23.8314	2560.99	82
2022-09-12	12:00:10	31.6047	2592.59	83
2022-09-12	12:00:11	6.19516	2598.79	83
2022-09-12	12:00:12	24.5815	2623.37	84
2022-09-12	12:00:13	21.7033	2645.07	85

## Sheet: Sunny_star_2022912115450 (E (3)
Date	Time	Lbs	Newtons	Averaged newtons	Total force x time	Total Time Steps Force >3		**GoPro Fitting: 1144
2022-09-12	11:55:13	0.480115	2.13565	4.31849	2.13565	FALSE	0			Total force x time	5113.08
2022-09-12	11:55:13	0.659962	2.93564	4.31849	2.93564	FALSE	0			Total Time Steps Force >3	268
2022-09-12	11:55:13	2.42861	10.8029	4.31849	12.9386	FALSE	0
2022-09-12	11:55:13	0.314669	1.39971	4.31849	4.33535	FALSE	0
2022-09-12	11:55:14	0.222659	0.990432	0.592584	13.929	FALSE	0
2022-09-12	11:55:14	0.223524	0.994279	0.592584	5.32963	FALSE	0
2022-09-12	11:55:14	-0.0778496	-0.346291	0.592584	13.929	FALSE	0
2022-09-12	11:55:14	0.164542	0.731916	0.592584	6.06155	FALSE	0
2022-09-12	11:55:15	0.189987	0.8451	1.22254	14.7741	FALSE	0
2022-09-12	11:55:15	0.361336	1.60729	1.22254	7.66884	FALSE	0
2022-09-12	11:55:15	0.273193	1.21522	1.22254	15.9893	FALSE	0
2022-09-12	11:55:16	0.421285	1.87396	1.07917	9.5428	FALSE	0
2022-09-12	11:55:16	0.351921	1.56541	1.07917	17.5548	FALSE	0
2022-09-12	11:55:16	0.189224	0.841706	1.07917	10.3845	FALSE	0
2022-09-12	11:55:16	0.00800278	0.035598	1.07917	17.5904	FALSE	0
2022-09-12	11:55:17	0.16668	0.741426	6.72629	11.1259	FALSE	0
2022-09-12	11:55:17	1.00271	4.46025	6.72629	22.0506	FALSE	0
2022-09-12	11:55:17	2.98179	13.2636	6.72629	24.3895	FALSE	0
2022-09-12	11:55:17	1.89737	8.43988	6.72629	30.4905	FALSE	0
2022-09-12	11:55:18	0.567239	2.52319	1.8709	26.9127	FALSE	0
2022-09-12	11:55:18	0.409936	1.82348	1.8709	32.314	FALSE	0
2022-09-12	11:55:18	0.303779	1.35127	1.8709	28.264	FALSE	0
2022-09-12	11:55:18	0.401438	1.78568	1.8709	34.0996	FALSE	0
2022-09-12	11:55:19	0.239657	1.06604	1.07427	29.33	FALSE	0
2022-09-12	11:55:19	0.150038	0.667399	1.07427	34.767	FALSE	0
2022-09-12	11:55:19	0.334822	1.48936	1.07427	30.8194	FALSE	0
2022-09-12	11:55:20	0.183779	0.817486	1.2206	35.5845	FALSE	0
2022-09-12	11:55:20	0.426578	1.8975	1.2206	32.7169	FALSE	0
2022-09-12	11:55:20	0.149021	0.662875	1.2206	36.2474	FALSE	0
2022-09-12	11:55:20	0.338232	1.50452	1.2206	34.2214	FALSE	0
2022-09-12	11:55:21	0.435382	1.93667	1.51296	38.1841	FALSE	0
2022-09-12	11:55:21	0.327036	1.45472	1.51296	35.6761	FALSE	0
2022-09-12	11:55:21	0.389122	1.73089	1.51296	39.915	FALSE	0
2022-09-12	11:55:21	0.20897	0.92954	1.51296	36.6057	FALSE	0
2022-09-12	11:55:22	0.424186	1.88686	1.03118	41.8018	FALSE	0
2022-09-12	11:55:22	0.144033	0.640688	1.03118	37.2464	FALSE	0
2022-09-12	11:55:22	0.35355	1.57266	1.03118	43.3745	FALSE	0
2022-09-12	11:55:22	0.00550917	0.0245059	1.03118	37.2709	FALSE	0
2022-09-12	11:55:23	-0.324618	-1.44397	-0.888979	43.3745	FALSE	0
2022-09-12	11:55:23	-0.37159	-1.65291	-0.888979	37.2709	FALSE	0
2022-09-12	11:55:23	0.0966541	0.429937	-0.888979	43.8044	FALSE	0
2022-09-12	11:55:24	0.0909544	0.404583	6.17401	37.6755	FALSE	0
2022-09-12	11:55:24	0.581489	2.58658	6.17401	46.391	FALSE	0
2022-09-12	11:55:24	2.4962	11.1036	6.17401	48.7791	FALSE	0
2022-09-12	11:55:24	2.38327	10.6013	6.17401	56.9923	FALSE	0
2022-09-12	11:55:25	0.537061	2.38895	4.77236	51.168	FALSE	0
2022-09-12	11:55:25	2.49564	11.1011	4.77236	68.0934	FALSE	0
2022-09-12	11:55:25	1.01324	4.50709	4.77236	55.6751	FALSE	0
2022-09-12	11:55:25	0.24556	1.0923	4.77236	69.1857	FALSE	0
2022-09-12	11:55:26	0.136705	0.608091	1.59354	56.2832	FALSE	0
2022-09-12	11:55:26	0.114822	0.510751	1.59354	69.6964	FALSE	0
2022-09-12	11:55:26	0.376705	1.67566	1.59354	57.9589	FALSE	0
2022-09-12	11:55:26	0.804745	3.57967	1.59354	73.2761	FALSE	0
2022-09-12	11:55:27	0.578079	2.57141	2.91067	60.5303	FALSE	0
2022-09-12	11:55:27	0.605509	2.69343	2.91067	75.9695	FALSE	0
2022-09-12	11:55:27	0.779453	3.46716	2.91067	63.9974	FALSE	0
2022-09-12	11:55:28	1.06205	4.72421	10.3993	80.6937	FALSE	0
2022-09-12	11:55:28	2.75258	12.244	10.3993	76.2415	FALSE	0
2022-09-12	11:55:28	2.85284	12.69	10.3993	93.3837	FALSE	0
2022-09-12	11:55:28	2.68403	11.9391	10.3993	88.1806	FALSE	0
2022-09-12	11:55:29	0.642557	2.85822	1.51001	96.2419	FALSE	0
2022-09-12	11:55:29	0.440929	1.96134	1.51001	90.1419	FALSE	0
2022-09-12	11:55:29	0.206527	0.918673	1.51001	97.1606	FALSE	0
2022-09-12	11:55:29	0.0678501	0.301811	1.51001	90.4437	FALSE	0
2022-09-12	11:55:30	0.00428777	0.0190729	8.50059	97.1797	FALSE	0
2022-09-12	11:55:30	0.0928883	0.413186	8.50059	90.8569	FALSE	0
2022-09-12	11:55:30	2.59691	11.5516	8.50059	108.731	FALSE	0
2022-09-12	11:55:30	4.94999	22.0185	8.50059	112.875	1	1
2022-09-12	11:55:31	3.06174	13.6192	8.2977	122.351	1	2
2022-09-12	11:55:31	1.54327	6.86477	8.2977	119.74	FALSE	2
2022-09-12	11:55:31	2.24765	9.998	8.2977	132.348	FALSE	2
2022-09-12	11:55:31	0.608969	2.70882	8.2977	122.449	FALSE	2
2022-09-12	11:55:32	0.547901	2.43717	2.08841	134.786	FALSE	2
2022-09-12	11:55:32	0.697621	3.10316	2.08841	125.552	FALSE	2
2022-09-12	11:55:32	0.162965	0.724901	2.08841	135.511	FALSE	2
2022-09-12	11:55:33	0.39126	1.7404	0.805035	127.293	FALSE	2
2022-09-12	11:55:33	0.0633717	0.28189	0.805035	135.792	FALSE	2
2022-09-12	11:55:33	0.15355	0.683021	0.805035	127.976	FALSE	2
2022-09-12	11:55:33	0.115738	0.514826	0.805035	136.307	FALSE	2
2022-09-12	11:55:34	0.0741605	0.329881	0.640463	128.305	FALSE	2
2022-09-12	11:55:34	0.251158	1.1172	0.640463	137.424	FALSE	2
2022-09-12	11:55:34	0.0524811	0.233446	0.640463	128.539	FALSE	2
2022-09-12	11:55:34	0.19813	0.881322	0.640463	138.306	FALSE	2
2022-09-12	11:55:35	0.0591987	0.263328	0.366893	128.802	FALSE	2
2022-09-12	11:55:35	0.111921	0.497847	0.366893	138.804	FALSE	2
2022-09-12	11:55:35	-0.06416	-0.285397	0.366893	128.802	FALSE	2
2022-09-12	11:55:35	0.222965	0.991793	0.366893	139.795	FALSE	2
2022-09-12	11:55:36	2.44332	10.8684	8.02817	139.671	FALSE	2
2022-09-12	11:55:36	2.16342	9.62332	8.02817	149.419	FALSE	2
2022-09-12	11:55:36	0.807697	3.5928	8.02817	143.263	FALSE	2
2022-09-12	11:55:37	0.358791	1.59597	1.41171	151.015	FALSE	2
2022-09-12	11:55:37	0.566883	2.52161	1.41171	145.785	FALSE	2
2022-09-12	11:55:37	0.0530409	0.235937	1.41171	151.251	FALSE	2
2022-09-12	11:55:37	0.290751	1.29332	1.41171	147.078	FALSE	2
2022-09-12	11:55:38	0.279504	1.24329	3.37995	152.494	FALSE	2
2022-09-12	11:55:38	1.05253	4.68186	3.37995	151.76	FALSE	2
2022-09-12	11:55:38	1.30561	5.80761	3.37995	158.302	FALSE	2
2022-09-12	11:55:38	0.401743	1.78703	3.37995	153.547	FALSE	2
2022-09-12	11:55:39	0.314618	1.39948	24.2256	159.701	FALSE	2
2022-09-12	11:55:39	0.182557	0.81205	24.2256	154.359	FALSE	2
2022-09-12	11:55:39	0.806832	3.58895	24.2256	163.29	FALSE	2
2022-09-12	11:55:39	20.4806	91.1018	24.2256	245.461	1	3
2022-09-12	11:55:40	20.8866	92.9078	41.5807	256.198	1	4
2022-09-12	11:55:40	4.80963	21.3942	41.5807	266.855	1	5
2022-09-12	11:55:40	2.34704	10.4401	41.5807	266.638	FALSE	5
2022-09-12	11:55:41	2.6592	11.8287	24.3896	278.684	FALSE	5
2022-09-12	11:55:41	1.81793	8.08652	24.3896	274.724	FALSE	5
2022-09-12	11:55:41	8.44403	37.5607	24.3896	316.245	1	6
2022-09-12	11:55:41	9.01095	40.0825	24.3896	314.807	1	7
2022-09-12	11:55:42	10.7954	48.0201	30.5346	364.265	1	8
2022-09-12	11:55:42	5.31533	23.6437	30.5346	338.451	1	9
2022-09-12	11:55:42	3.51619	15.6407	30.5346	379.906	1	10
2022-09-12	11:55:42	7.83105	34.8341	30.5346	373.285	1	11
2022-09-12	11:55:43	5.20627	23.1585	14.9286	403.064	1	12
2022-09-12	11:55:43	5.17833	23.0342	14.9286	396.319	1	13
2022-09-12	11:55:43	1.95182	8.68209	14.9286	411.746	FALSE	13
2022-09-12	11:55:43	1.08795	4.83942	14.9286	401.158	FALSE	13
2022-09-12	11:55:44	2.14286	9.53187	16.7084	421.278	FALSE	13
2022-09-12	11:55:44	3.44759	15.3356	16.7084	416.494	1	14
2022-09-12	11:55:44	5.67818	25.2577	16.7084	446.536	1	15
2022-09-12	11:55:45	8.64749	38.4658	23.9825	454.96	1	16
2022-09-12	11:55:45	2.02266	8.9972	23.9825	455.533	FALSE	16
2022-09-12	11:55:45	3.12652	13.9074	23.9825	468.867	1	17
2022-09-12	11:55:45	7.76937	34.5597	23.9825	490.093	1	18
2022-09-12	11:55:46	5.37543	23.911	22.6489	492.778	1	19
2022-09-12	11:55:46	7.14693	31.791	22.6489	521.884	1	20
2022-09-12	11:55:46	4.84851	21.5671	22.6489	514.345	1	21
2022-09-12	11:55:46	2.99594	13.3265	22.6489	535.21	FALSE	21
2022-09-12	11:55:47	3.41782	15.2031	16.7037	529.548	1	22
2022-09-12	11:55:47	2.40963	10.7185	16.7037	545.929	FALSE	22
2022-09-12	11:55:47	5.3107	23.6231	16.7037	553.171	1	23
2022-09-12	11:55:47	3.88245	17.2699	16.7037	563.199	1	24
2022-09-12	11:55:48	3.74128	16.642	20.5862	569.813	1	25
2022-09-12	11:55:48	4.28159	19.0454	20.5862	582.244	1	26
2022-09-12	11:55:48	5.86108	26.0713	20.5862	595.885	1	27
2022-09-12	11:55:49	12.1592	54.0866	22.8191	636.33	1	28
2022-09-12	11:55:49	5.95054	26.4692	22.8191	622.354	1	29
2022-09-12	11:55:49	1.28525	5.71705	22.8191	642.048	FALSE	29
2022-09-12	11:55:49	1.1249	5.00378	22.8191	627.358	FALSE	29
2022-09-12	11:55:50	5.31029	23.6212	23.2714	665.669	1	30
2022-09-12	11:55:50	6.59909	29.3541	23.2714	656.712	1	31
2022-09-12	11:55:50	4.62729	20.5831	23.2714	686.252	1	32
2022-09-12	11:55:50	4.38988	19.5271	23.2714	676.239	1	33
2022-09-12	11:55:51	2.21793	9.8658	3.57928	696.118	FALSE	33
2022-09-12	11:55:51	0.339758	1.51131	3.57928	677.75	FALSE	33
2022-09-12	11:55:51	0.459555	2.04419	3.57928	698.162	FALSE	33
2022-09-12	11:55:51	0.201387	0.89581	3.57928	678.646	FALSE	33
2022-09-12	11:55:52	0.371514	1.65257	1.09122	699.814	FALSE	33
2022-09-12	11:55:52	0.144135	0.641141	1.09122	679.287	FALSE	33
2022-09-12	11:55:52	0.280369	1.24714	1.09122	701.062	FALSE	33
2022-09-12	11:55:52	0.185255	0.824051	1.09122	680.111	FALSE	33
2022-09-12	11:55:53	0.08556	0.380588	0.114979	701.442	FALSE	33
2022-09-12	11:55:53	0.030242	0.134522	0.114979	680.246	FALSE	33
2022-09-12	11:55:53	-0.0382568	-0.170174	0.114979	701.442	FALSE	33
2022-09-12	11:55:54	0.164644	0.732369	1.58788	680.978	FALSE	33
2022-09-12	11:55:54	0.269936	1.20073	1.58788	702.643	FALSE	33
2022-09-12	11:55:54	0.454822	2.02314	1.58788	683.001	FALSE	33
2022-09-12	11:55:54	0.538486	2.39529	1.58788	705.038	FALSE	33
2022-09-12	11:55:55	1.75487	7.80601	22.8233	690.807	FALSE	33
2022-09-12	11:55:55	4.89492	21.7736	22.8233	726.812	1	34
2022-09-12	11:55:55	7.39243	32.883	22.8233	723.69	1	35
2022-09-12	11:55:55	6.48138	28.8305	22.8233	755.642	1	36
2022-09-12	11:55:56	2.43436	10.8285	14.048	734.519	FALSE	36
2022-09-12	11:55:56	2.27141	10.1037	14.048	765.746	FALSE	36
2022-09-12	11:55:56	2.24052	9.96628	14.048	744.485	FALSE	36
2022-09-12	11:55:56	5.68627	25.2937	14.048	791.04	1	37
2022-09-12	11:55:57	6.4681	28.7714	22.666	773.256	1	38
2022-09-12	11:55:57	3.37121	14.9958	22.666	806.035	1	39
2022-09-12	11:55:57	5.44729	24.2306	22.666	797.487	1	40
2022-09-12	11:55:58	5.45446	24.2625	14.9135	830.298	1	41
2022-09-12	11:55:58	4.61095	20.5104	14.9135	817.997	1	42
2022-09-12	11:55:58	2.44306	10.8672	14.9135	841.165	FALSE	42
2022-09-12	11:55:58	0.902353	4.01385	14.9135	822.011	FALSE	42
2022-09-12	11:55:59	0.708104	3.14979	1.87351	844.315	FALSE	42
2022-09-12	11:55:59	0.239911	1.06717	1.87351	823.078	FALSE	42
2022-09-12	11:55:59	0.28902	1.28562	1.87351	845.601	FALSE	42
2022-09-12	11:55:59	0.447697	1.99145	1.87351	825.07	FALSE	42
2022-09-12	11:56:00	0.243066	1.08121	0.300453	846.682	FALSE	42
2022-09-12	11:56:00	-0.0587656	-0.261401	0.300453	825.07	FALSE	42
2022-09-12	11:56:00	-0.112913	-0.50226	0.300453	846.682	FALSE	42
2022-09-12	11:56:00	0.198792	0.884267	0.300453	825.954	FALSE	42
2022-09-12	11:56:01	0.0699366	0.311092	0.938593	846.993	FALSE	42
2022-09-12	11:56:01	0.14556	0.64748	0.938593	826.602	FALSE	42
2022-09-12	11:56:01	0.417519	1.85721	0.938593	848.85	FALSE	42
2022-09-12	11:56:02	1.44373	6.422	2.56049	833.024	FALSE	42
2022-09-12	11:56:02	0.52729	2.34549	2.56049	851.196	FALSE	42
2022-09-12	11:56:02	0.04556	0.20266	2.56049	833.226	FALSE	42
2022-09-12	11:56:02	0.285916	1.27181	2.56049	852.467	FALSE	42
2022-09-12	11:56:03	0.176552	0.785339	1.16389	834.012	FALSE	42
2022-09-12	11:56:03	0.31126	1.38455	1.16389	853.852	FALSE	42
2022-09-12	11:56:03	0.125204	0.556932	1.16389	834.568	FALSE	42
2022-09-12	11:56:03	0.433601	1.92874	1.16389	855.781	FALSE	42
2022-09-12	11:56:04	0.292023	1.29898	1.59292	835.867	FALSE	42
2022-09-12	11:56:04	0.443321	1.97198	1.59292	857.753	FALSE	42
2022-09-12	11:56:04	0.385356	1.71414	1.59292	837.582	FALSE	42
2022-09-12	11:56:04	0.311718	1.38658	1.59292	859.139	FALSE	42
2022-09-12	11:56:05	0.422557	1.87962	1.91154	839.461	FALSE	42
2022-09-12	11:56:05	0.470038	2.09082	1.91154	861.23	FALSE	42
2022-09-12	11:56:05	0.396603	1.76417	1.91154	841.225	FALSE	42
2022-09-12	11:56:06	0.472583	2.10214	1.68613	863.332	FALSE	42
2022-09-12	11:56:06	0.450649	2.00458	1.68613	843.23	FALSE	42
2022-09-12	11:56:06	0.293804	1.3069	1.68613	864.639	FALSE	42
2022-09-12	11:56:06	0.299199	1.3309	1.68613	844.561	FALSE	42
2022-09-12	11:56:07	0.383677	1.70667	3.3713	866.346	FALSE	42
2022-09-12	11:56:07	0.326832	1.45381	3.3713	846.015	FALSE	42
2022-09-12	11:56:07	0.226018	1.00537	3.3713	867.351	FALSE	42
2022-09-12	11:56:07	2.09508	9.31933	3.3713	855.334	FALSE	42
2022-09-12	11:56:08	3.38505	15.0574	17.4245	882.408	1	43
2022-09-12	11:56:08	5.11243	22.7411	17.4245	878.075	1	44
2022-09-12	11:56:08	2.87289	12.7792	17.4245	895.188	FALSE	44
2022-09-12	11:56:08	4.29843	19.1203	17.4245	897.195	1	45
2022-09-12	11:56:09	6.82718	30.3687	27.3755	925.556	1	46
2022-09-12	11:56:09	3.85884	17.1649	27.3755	914.36	1	47
2022-09-12	11:56:09	7.77685	34.593	27.3755	960.149	1	48
2022-09-12	11:56:10	6.55044	29.1377	15.3673	943.498	1	49
2022-09-12	11:56:10	2.82133	12.5498	15.3673	972.699	FALSE	49
2022-09-12	11:56:10	2.82184	12.5521	15.3673	956.05	FALSE	49
2022-09-12	11:56:10	1.62525	7.22944	15.3673	979.929	FALSE	49
2022-09-12	11:56:11	1.75798	7.81985	5.52698	963.87	FALSE	49
2022-09-12	11:56:11	2.15411	9.58191	5.52698	989.511	FALSE	49
2022-09-12	11:56:11	0.579911	2.57956	5.52698	966.449	FALSE	49
2022-09-12	11:56:11	0.478079	2.12659	5.52698	991.637	FALSE	49
2022-09-12	11:56:12	1.49513	6.65064	10.7473	973.1	FALSE	49
2022-09-12	11:56:12	2.69747	11.9989	10.7473	1003.64	FALSE	49
2022-09-12	11:56:12	2.60983	11.609	10.7473	984.709	FALSE	49
2022-09-12	11:56:12	2.86195	12.7305	10.7473	1016.37	FALSE	49
2022-09-12	11:56:13	0.281794	1.25348	8.44665	985.963	FALSE	49
2022-09-12	11:56:13	1.17742	5.2374	8.44665	1021.6	FALSE	49
2022-09-12	11:56:13	0.898486	3.99665	8.44665	989.959	FALSE	49
2022-09-12	11:56:13	5.23787	23.2991	8.44665	1044.9	1	50
2022-09-12	11:56:14	3.71798	16.5383	12.751	1006.5	1	51
2022-09-12	11:56:14	3.92016	17.4377	12.751	1062.34	1	52
2022-09-12	11:56:14	0.961489	4.2769	12.751	1010.77	FALSE	52
2022-09-12	11:56:15	1.24307	5.52942	2.88245	1067.87	FALSE	52
2022-09-12	11:56:15	0.604389	2.68844	2.88245	1013.46	FALSE	52
2022-09-12	11:56:15	0.30444	1.35421	2.88245	1069.22	FALSE	52
2022-09-12	11:56:15	0.440115	1.95772	2.88245	1015.42	FALSE	52
2022-09-12	11:56:16	0.49126	2.18522	1.94742	1071.41	FALSE	52
2022-09-12	11:56:16	0.528257	2.34979	1.94742	1017.77	FALSE	52
2022-09-12	11:56:16	0.320267	1.42461	1.94742	1072.83	FALSE	52
2022-09-12	11:56:16	0.411412	1.83004	1.94742	1019.6	FALSE	52
2022-09-12	11:56:17	0.498995	2.21963	1.89173	1075.05	FALSE	52
2022-09-12	11:56:17	0.317876	1.41398	1.89173	1021.01	FALSE	52
2022-09-12	11:56:17	0.484746	2.15625	1.89173	1077.21	FALSE	52
2022-09-12	11:56:17	0.399504	1.77707	1.89173	1022.79	FALSE	52
2022-09-12	11:56:18	0.363168	1.61544	2.91806	1078.83	FALSE	52
2022-09-12	11:56:18	1.2107	5.38544	2.91806	1028.18	FALSE	52
2022-09-12	11:56:18	0.394161	1.75331	2.91806	1080.58	FALSE	52
2022-09-12	11:56:19	0.620471	2.75998	3.87962	1030.94	FALSE	52
2022-09-12	11:56:19	0.828715	3.68629	3.87962	1084.27	FALSE	52
2022-09-12	11:56:19	1.08251	4.81522	3.87962	1035.75	FALSE	52
2022-09-12	11:56:19	0.95701	4.25697	3.87962	1088.52	FALSE	52
2022-09-12	11:56:20	2.8737	12.7828	15.1152	1048.53	FALSE	52
2022-09-12	11:56:20	2.29716	10.2182	15.1152	1098.74	FALSE	52
2022-09-12	11:56:20	3.90556	17.3727	15.1152	1065.91	1	53
2022-09-12	11:56:20	4.51574	20.0869	15.1152	1118.83	1	54
2022-09-12	11:56:21	3.83991	17.0807	12.2447	1082.99	1	55
2022-09-12	11:56:21	3.77375	16.7864	12.2447	1135.61	1	56
2022-09-12	11:56:21	1.23492	5.49317	12.2447	1088.48	FALSE	56
2022-09-12	11:56:21	2.16235	9.61857	12.2447	1145.23	FALSE	56
2022-09-12	11:56:22	0.597875	2.65947	5.07394	1091.14	FALSE	56
2022-09-12	11:56:22	1.53665	6.83533	5.07394	1152.07	FALSE	56
2022-09-12	11:56:22	1.28749	5.72701	5.07394	1096.87	FALSE	56
2022-09-12	11:56:23	3.86357	17.1859	19.389	1169.25	1	57
2022-09-12	11:56:23	5.72586	25.4698	19.389	1122.34	1	58
2022-09-12	11:56:23	6.19019	27.5352	19.389	1196.79	1	59
2022-09-12	11:56:23	1.65579	7.36529	19.389	1129.7	FALSE	59
2022-09-12	11:56:24	0.626985	2.78895	2.84651	1199.58	FALSE	59
2022-09-12	11:56:24	0.412176	1.83344	2.84651	1131.54	FALSE	59
2022-09-12	11:56:24	0.6993	3.11063	2.84651	1202.69	FALSE	59
2022-09-12	11:56:24	0.821234	3.65301	2.84651	1135.19	FALSE	59
2022-09-12	11:56:25	1.08693	4.83488	4.22527	1207.52	FALSE	59
2022-09-12	11:56:25	0.475687	2.11595	4.22527	1137.31	FALSE	59
2022-09-12	11:56:25	0.676908	3.01102	4.22527	1210.53	FALSE	59
2022-09-12	11:56:25	1.56001	6.93924	4.22527	1144.24	FALSE	59
2022-09-12	11:56:26	2.96057	13.1692	14.0304	1223.7	FALSE	59
2022-09-12	11:56:26	4.10688	18.2682	14.0304	1162.51	1	60
2022-09-12	11:56:26	2.39508	10.6538	14.0304	1234.36	FALSE	60
2022-09-12	11:56:27	1.14872	5.10974	20.3333	1167.62	FALSE	60
2022-09-12	11:56:27	3.10312	13.8033	20.3333	1248.16	1	61
2022-09-12	11:56:27	5.14291	22.8767	20.3333	1190.5	1	62
2022-09-12	11:56:27	8.88978	39.5435	20.3333	1287.7	1	63
2022-09-12	11:56:28	6.65421	29.5993	19.0944	1220.1	1	64
2022-09-12	11:56:28	3.86408	17.1882	19.0944	1304.89	1	65
2022-09-12	11:56:28	4.41833	19.6536	19.0944	1239.75	1	66
2022-09-12	11:56:28	2.2338	9.93639	19.0944	1314.83	FALSE	66
2022-09-12	11:56:29	1.49197	6.63658	5.67326	1246.39	FALSE	66
2022-09-12	11:56:29	0.99131	4.40955	5.67326	1319.24	FALSE	66
2022-09-12	11:56:29	1.09609	4.87563	5.67326	1251.26	FALSE	66
2022-09-12	11:56:29	1.52225	6.77127	5.67326	1326.01	FALSE	66
2022-09-12	11:56:30	2.42108	10.7694	8.25749	1262.03	FALSE	66
2022-09-12	11:56:30	2.42429	10.7837	8.25749	1336.79	FALSE	66
2022-09-12	11:56:30	0.723728	3.21929	8.25749	1265.25	FALSE	66
2022-09-12	11:56:31	0.468868	2.08562	1.90373	1338.88	FALSE	66
2022-09-12	11:56:31	0.32444	1.44317	1.90373	1266.7	FALSE	66
2022-09-12	11:56:31	0.408563	1.81737	1.90373	1340.7	FALSE	66
2022-09-12	11:56:31	0.510038	2.26875	1.90373	1268.97	FALSE	66
2022-09-12	11:56:32	0.462761	2.05845	1.9876	1342.75	FALSE	66
2022-09-12	11:56:32	0.371158	1.65099	1.9876	1270.62	FALSE	66
2022-09-12	11:56:32	0.448359	1.99439	1.9876	1344.75	FALSE	66
2022-09-12	11:56:32	0.505051	2.24657	1.9876	1272.86	FALSE	66
2022-09-12	11:56:33	0.402201	1.78907	1.86519	1346.54	FALSE	66
2022-09-12	11:56:33	0.416451	1.85246	1.86519	1274.72	FALSE	66
2022-09-12	11:56:33	0.391819	1.74289	1.86519	1348.28	FALSE	66
2022-09-12	11:56:33	0.466781	2.07634	1.86519	1276.79	FALSE	66
2022-09-12	11:56:34	0.578079	2.57141	2.21018	1350.85	FALSE	66
2022-09-12	11:56:34	0.360725	1.60458	2.21018	1278.4	FALSE	66
2022-09-12	11:56:34	0.513499	2.28415	2.21018	1353.14	FALSE	66
2022-09-12	11:56:34	0.535178	2.38058	2.21018	1280.78	FALSE	66
2022-09-12	11:56:35	0.504644	2.24476	2.28105	1355.38	FALSE	66
2022-09-12	11:56:35	0.601794	2.6769	2.28105	1283.45	FALSE	66
2022-09-12	11:56:35	0.431972	1.9215	2.28105	1357.3	FALSE	66
2022-09-12	11:56:36	0.43416	1.93123	2.18839	1285.38	FALSE	66
2022-09-12	11:56:36	0.447596	1.991	2.18839	1359.29	FALSE	66
2022-09-12	11:56:36	0.706883	3.14436	2.18839	1288.53	FALSE	66
2022-09-12	11:56:36	0.379249	1.68698	2.18839	1360.98	FALSE	66
2022-09-12	11:56:37	0.970751	4.31809	3.19857	1292.85	FALSE	66
2022-09-12	11:56:37	0.800929	3.56269	3.19857	1364.54	FALSE	66
2022-09-12	11:56:37	0.571972	2.54425	3.19857	1295.39	FALSE	66
2022-09-12	11:56:37	0.532634	2.36926	3.19857	1366.91	FALSE	66
2022-09-12	11:56:38	0.630089	2.80276	2.66422	1298.19	FALSE	66
2022-09-12	11:56:38	0.551361	2.45256	2.66422	1369.37	FALSE	66
2022-09-12	11:56:38	0.533906	2.37492	2.66422	1300.57	FALSE	66
2022-09-12	11:56:38	0.68042	3.02664	2.66422	1372.39	FALSE	66
2022-09-12	11:56:39	0.578486	2.57322	2.58348	1303.14	FALSE	66
2022-09-12	11:56:39	0.599707	2.66762	2.58348	1375.06	FALSE	66
2022-09-12	11:56:39	0.564186	2.50961	2.58348	1305.65	FALSE	66
2022-09-12	11:56:40	0.526476	2.34187	2.04283	1377.4	FALSE	66
2022-09-12	11:56:40	0.466476	2.07498	2.04283	1307.73	FALSE	66
2022-09-12	11:56:40	0.420013	1.8683	2.04283	1379.27	FALSE	66
2022-09-12	11:56:40	0.424033	1.88618	2.04283	1309.61	FALSE	66
2022-09-12	11:56:41	0.400369	1.78092	1.85868	1381.05	FALSE	66
2022-09-12	11:56:41	0.416654	1.85336	1.85868	1311.47	FALSE	66
2022-09-12	11:56:41	0.438079	1.94866	1.85868	1383	FALSE	66
2022-09-12	11:56:41	0.416298	1.85178	1.85868	1313.32	FALSE	66
2022-09-12	11:56:42	0.448664	1.99575	1.99563	1384.99	FALSE	66
2022-09-12	11:56:42	0.404695	1.80016	1.99563	1315.12	FALSE	66
2022-09-12	11:56:42	0.44098	1.96157	1.99563	1386.96	FALSE	66
2022-09-12	11:56:42	0.500216	2.22506	1.99563	1317.34	FALSE	66
2022-09-12	11:56:43	0.528257	2.34979	2.73779	1389.31	FALSE	66
2022-09-12	11:56:43	0.580725	2.58318	2.73779	1319.93	FALSE	66
2022-09-12	11:56:43	0.737468	3.28041	2.73779	1392.59	FALSE	66
2022-09-12	11:56:44	1.37436	6.11343	5.08549	1326.04	FALSE	66
2022-09-12	11:56:44	2.18826	9.73382	5.08549	1402.32	FALSE	66
2022-09-12	11:56:44	0.717621	3.19212	5.08549	1329.23	FALSE	66
2022-09-12	11:56:44	0.292837	1.3026	5.08549	1403.62	FALSE	66
2022-09-12	11:56:45	0.327545	1.45699	5.39155	1330.69	FALSE	66
2022-09-12	11:56:45	0.455229	2.02495	5.39155	1405.65	FALSE	66
2022-09-12	11:56:45	1.39762	6.21689	5.39155	1336.91	FALSE	66
2022-09-12	11:56:45	2.6679	11.8674	5.39155	1417.52	FALSE	66
2022-09-12	11:56:46	2.10586	9.36729	7.25961	1346.27	FALSE	66
2022-09-12	11:56:46	1.13273	5.03861	7.25961	1422.55	FALSE	66
2022-09-12	11:56:46	2.10612	9.36844	7.25961	1355.64	FALSE	66
2022-09-12	11:56:46	1.18342	5.26409	7.25961	1427.82	FALSE	66
2022-09-12	11:56:47	1.59248	7.08367	4.33032	1362.73	FALSE	66
2022-09-12	11:56:47	0.78098	3.47396	4.33032	1431.29	FALSE	66
2022-09-12	11:56:47	0.547035	2.43332	4.33032	1365.16	FALSE	66
2022-09-12	11:56:48	0.311361	1.385	0.883019	1432.68	FALSE	66
2022-09-12	11:56:48	0.267188	1.18851	0.883019	1366.35	FALSE	66
2022-09-12	11:56:48	0.260064	1.15682	0.883019	1433.83	FALSE	66
2022-09-12	11:56:48	-0.0445672	-0.198244	0.883019	1366.35	FALSE	66
2022-09-12	11:56:49	-0.0461448	-0.205261	12.3621	1433.83	FALSE	66
2022-09-12	11:56:49	1.03528	4.60513	12.3621	1370.95	FALSE	66
2022-09-12	11:56:49	5.47416	24.3502	12.3621	1458.18	1	67
2022-09-12	11:56:49	4.65324	20.6985	12.3621	1391.65	1	68
2022-09-12	11:56:50	5.28586	23.5126	11.3228	1481.7	1	69
2022-09-12	11:56:50	0.85528	3.80446	11.3228	1395.46	FALSE	69
2022-09-12	11:56:50	1.85833	8.26622	11.3228	1489.96	FALSE	69
2022-09-12	11:56:50	2.18246	9.70802	11.3228	1405.16	FALSE	69
2022-09-12	11:56:51	0.690496	3.07146	3.08263	1493.03	FALSE	69
2022-09-12	11:56:51	0.876705	3.89976	3.08263	1409.06	FALSE	69
2022-09-12	11:56:51	0.511819	2.27667	3.08263	1495.31	FALSE	69
2022-09-12	11:56:52	0.561031	2.49558	2.79592	1411.56	FALSE	69
2022-09-12	11:56:52	0.858283	3.81781	2.79592	1499.13	FALSE	69
2022-09-12	11:56:52	0.479809	2.13429	2.79592	1413.69	FALSE	69
2022-09-12	11:56:52	0.615077	2.73599	2.79592	1501.86	FALSE	69
2022-09-12	11:56:53	0.572786	2.54787	3.10531	1416.24	FALSE	69
2022-09-12	11:56:53	0.523982	2.33078	3.10531	1504.2	FALSE	69
2022-09-12	11:56:53	0.75874	3.37503	3.10531	1419.62	FALSE	69
2022-09-12	11:56:53	0.936909	4.16756	3.10531	1508.36	FALSE	69
2022-09-12	11:56:54	3.98586	17.7299	25.0774	1437.35	1	70
2022-09-12	11:56:54	3.5937	15.9855	25.0774	1524.35	1	71
2022-09-12	11:56:54	7.41289	32.974	25.0774	1470.32	1	72
2022-09-12	11:56:54	7.55818	33.6203	25.0774	1557.97	1	73
2022-09-12	11:56:55	3.49579	15.55	13.9405	1485.87	1	74
2022-09-12	11:56:55	3.26978	14.5446	13.9405	1572.51	1	75
2022-09-12	11:56:55	2.6453	11.7668	13.9405	1497.64	FALSE	75
2022-09-12	11:56:55	3.125	13.9006	13.9405	1586.41	1	76
2022-09-12	11:56:56	2.74128	12.1938	20.1114	1509.83	FALSE	76
2022-09-12	11:56:56	4.15762	18.4939	20.1114	1604.91	1	77
2022-09-12	11:56:56	6.66484	29.6465	20.1114	1539.48	1	78
2022-09-12	11:56:57	2.75548	12.2569	13.324	1617.16	FALSE	78
2022-09-12	11:56:57	1.90434	8.47089	13.324	1547.95	FALSE	78
2022-09-12	11:56:57	5.21864	23.2136	13.324	1640.38	1	79
2022-09-12	11:56:57	2.10301	9.35461	13.324	1557.3	FALSE	79
2022-09-12	11:56:58	0.917773	4.08244	3.40587	1644.46	FALSE	79
2022-09-12	11:56:58	0.513244	2.28301	3.40587	1559.59	FALSE	79
2022-09-12	11:56:58	0.158079	0.703167	3.40587	1645.16	FALSE	79
2022-09-12	11:56:58	1.4736	6.55487	3.40587	1566.14	FALSE	79
2022-09-12	11:56:59	2.83049	12.5906	16.3945	1657.75	FALSE	79
2022-09-12	11:56:59	4.17762	18.5829	16.3945	1584.72	1	80
2022-09-12	11:56:59	1.96332	8.73324	16.3945	1666.49	FALSE	80
2022-09-12	11:56:59	5.77115	25.6712	16.3945	1610.39	1	81
2022-09-12	11:57:00	8.51955	37.8967	23.3687	1704.38	1	82
2022-09-12	11:57:00	4.41217	19.6262	23.3687	1630.02	1	83
2022-09-12	11:57:00	2.82882	12.5832	23.3687	1716.97	FALSE	83
2022-09-12	11:57:01	1.64149	7.30168	8.10851	1637.32	FALSE	83
2022-09-12	11:57:01	2.76001	12.2771	8.10851	1729.24	FALSE	83
2022-09-12	11:57:01	1.12042	4.98385	8.10851	1642.31	FALSE	83
2022-09-12	11:57:01	1.76958	7.87145	8.10851	1737.12	FALSE	83
2022-09-12	11:57:02	0.420827	1.87192	1.62688	1644.18	FALSE	83
2022-09-12	11:57:02	0.393193	1.749	1.62688	1738.87	FALSE	83
2022-09-12	11:57:02	0.404135	1.79767	1.62688	1645.98	FALSE	83
2022-09-12	11:57:02	0.244797	1.08891	1.62688	1739.95	FALSE	83
2022-09-12	11:57:03	0.623219	2.7722	4.60185	1648.75	FALSE	83
2022-09-12	11:57:03	0.659351	2.93293	4.60185	1742.89	FALSE	83
2022-09-12	11:57:03	1.46017	6.49513	4.60185	1655.24	FALSE	83
2022-09-12	11:57:03	1.39543	6.20715	4.60185	1749.09	FALSE	83
2022-09-12	11:57:04	0.59355	2.64023	4.32858	1657.88	FALSE	83
2022-09-12	11:57:04	1.47324	6.55327	4.32858	1755.65	FALSE	83
2022-09-12	11:57:04	0.852532	3.79223	4.32858	1661.68	FALSE	83
2022-09-12	11:57:05	2.42393	10.7821	14.3206	1766.43	FALSE	83
2022-09-12	11:57:05	4.35757	19.3833	14.3206	1681.06	1	84
2022-09-12	11:57:05	3.06602	13.6383	14.3206	1780.07	1	85
2022-09-12	11:57:05	3.03014	13.4787	14.3206	1694.54	1	86
2022-09-12	11:57:06	2.0563	9.14683	11.2413	1789.21	FALSE	86
2022-09-12	11:57:06	5.67319	25.2355	11.2413	1719.77	1	87
2022-09-12	11:57:06	1.17874	5.24327	11.2413	1794.46	FALSE	87
2022-09-12	11:57:06	1.20042	5.33971	11.2413	1725.11	FALSE	87
2022-09-12	11:57:07	0.955178	4.24882	19.1228	1798.71	FALSE	87
2022-09-12	11:57:07	3.03854	13.516	19.1228	1738.63	1	88
2022-09-12	11:57:07	6.20296	27.592	19.1228	1826.3	1	89
2022-09-12	11:57:07	6.99935	31.1345	19.1228	1769.76	1	90
2022-09-12	11:57:08	16.1427	71.806	45.5103	1898.1	1	91
2022-09-12	11:57:08	6.87411	30.5774	45.5103	1800.34	1	92
2022-09-12	11:57:08	7.6767	34.1475	45.5103	1932.25	1	93
2022-09-12	11:57:09	8.17303	36.3553	25.1461	1836.7	1	94
2022-09-12	11:57:09	7.56398	33.6461	25.1461	1965.9	1	95
2022-09-12	11:57:09	3.06184	13.6197	25.1461	1850.32	1	96
2022-09-12	11:57:09	3.81355	16.9634	25.1461	1982.86	1	97
2022-09-12	11:57:10	0.467595	2.07996	2.18562	1852.4	FALSE	97
2022-09-12	11:57:10	0.696501	3.09818	2.18562	1985.96	FALSE	97
2022-09-12	11:57:10	0.345356	1.53621	2.18562	1853.93	FALSE	97
2022-09-12	11:57:10	0.455942	2.02812	2.18562	1987.99	FALSE	97
2022-09-12	11:57:11	0.253397	1.12716	0.992923	1855.06	FALSE	97
2022-09-12	11:57:11	0.32042	1.42529	0.992923	1989.41	FALSE	97
2022-09-12	11:57:11	0.194771	0.86638	0.992923	1855.93	FALSE	97
2022-09-12	11:57:11	0.124288	0.552858	0.992923	1989.97	FALSE	97
2022-09-12	11:57:12	1.72332	7.66567	9.33222	1863.59	FALSE	97
2022-09-12	11:57:12	3.1651	14.079	9.33222	2004.05	1	98
2022-09-12	11:57:12	1.40551	6.25199	9.33222	1869.84	FALSE	98
2022-09-12	11:57:13	1.28637	5.72203	4.19325	2009.77	FALSE	98
2022-09-12	11:57:13	1.16775	5.19439	4.19325	1875.04	FALSE	98
2022-09-12	11:57:13	0.795738	3.5396	4.19325	2013.31	FALSE	98
2022-09-12	11:57:13	0.520878	2.31697	4.19325	1877.35	FALSE	98
2022-09-12	11:57:14	0.342659	1.52422	0.796659	2014.83	FALSE	98
2022-09-12	11:57:14	0.127901	0.568929	0.796659	1877.92	FALSE	98
2022-09-12	11:57:14	0.311667	1.38636	0.796659	2016.22	FALSE	98
2022-09-12	11:57:14	-0.0658394	-0.292867	0.796659	1877.92	FALSE	98
2022-09-12	11:57:15	-0.338766	-1.5069	-2.50044	2016.22	FALSE	98
2022-09-12	11:57:15	-0.456577	-2.03095	-2.50044	1877.92	FALSE	98
2022-09-12	11:57:15	-0.771844	-3.43332	-2.50044	2016.22	FALSE	98
2022-09-12	11:57:15	-0.68131	-3.0306	-2.50044	1877.92	FALSE	98
2022-09-12	11:57:16	-0.602837	-2.68154	-0.488057	2016.22	FALSE	98
2022-09-12	11:57:16	-0.415457	-1.84804	-0.488057	1877.92	FALSE	98
2022-09-12	11:57:16	0.692175	3.07893	-0.488057	2019.3	FALSE	98
2022-09-12	11:57:16	-0.112761	-0.501583	-0.488057	1877.92	FALSE	98
2022-09-12	11:57:17	1.81691	8.08198	20.5915	2027.38	FALSE	98
2022-09-12	11:57:17	3.79212	16.8681	20.5915	1894.79	1	99
2022-09-12	11:57:17	8.27853	36.8246	20.5915	2064.2	1	100
2022-09-12	11:57:18	2.59589	11.547	20.5881	1906.34	FALSE	100
2022-09-12	11:57:18	5.32815	23.7007	20.5881	2087.9	1	101
2022-09-12	11:57:18	5.59543	24.8896	20.5881	1931.23	1	102
2022-09-12	11:57:18	4.99421	22.2152	20.5881	2110.12	1	103
2022-09-12	11:57:19	5.44769	24.2324	23.9268	1955.46	1	104
2022-09-12	11:57:19	2.77986	12.3654	23.9268	2122.48	FALSE	104
2022-09-12	11:57:19	3.54307	15.7603	23.9268	1971.22	1	105
2022-09-12	11:57:19	9.7453	43.349	23.9268	2165.83	1	106
2022-09-12	11:57:20	11.262	50.0956	33.7149	2021.32	1	107
2022-09-12	11:57:20	8.705	38.7216	33.7149	2204.55	1	108
2022-09-12	11:57:20	6.08113	27.0501	33.7149	2048.37	1	109
2022-09-12	11:57:20	4.26968	18.9924	33.7149	2223.55	1	110
2022-09-12	11:57:21	0.432227	1.92263	1.61929	2050.29	FALSE	110
2022-09-12	11:57:21	0.339453	1.50995	1.61929	2225.06	FALSE	110
2022-09-12	11:57:21	0.32042	1.42529	1.61929	2051.71	FALSE	110
2022-09-12	11:57:22	0.454924	2.02359	1.92263	2227.08	FALSE	110
2022-09-12	11:57:22	0.461234	2.05166	1.92263	2053.77	FALSE	110
2022-09-12	11:57:22	0.605916	2.69524	1.92263	2229.78	FALSE	110
2022-09-12	11:57:22	0.206832	0.92003	1.92263	2054.69	FALSE	110
2022-09-12	11:57:23	0.384949	1.71233	2.74923	2231.49	FALSE	110
2022-09-12	11:57:23	0.950598	4.22845	2.74923	2058.91	FALSE	110
2022-09-12	11:57:23	0.571921	2.54402	2.74923	2234.03	FALSE	110
2022-09-12	11:57:23	0.564746	2.5121	2.74923	2061.43	FALSE	110
2022-09-12	11:57:24	0.377367	1.6786	2.38183	2235.71	FALSE	110
2022-09-12	11:57:24	0.641489	2.85347	2.38183	2064.28	FALSE	110
2022-09-12	11:57:24	0.528817	2.35228	2.38183	2238.06	FALSE	110
2022-09-12	11:57:24	0.59416	2.64294	2.38183	2066.92	FALSE	110
2022-09-12	11:57:25	2.19441	9.76117	16.931	2247.82	FALSE	110
2022-09-12	11:57:25	3.35833	14.9385	16.931	2081.86	1	111
2022-09-12	11:57:25	5.86606	26.0934	16.931	2273.92	1	112
2022-09-12	11:57:26	6.21151	27.63	14.8082	2109.49	1	113
2022-09-12	11:57:26	3.02993	13.4777	14.8082	2287.4	1	114
2022-09-12	11:57:26	3.15457	14.0322	14.8082	2123.52	1	115
2022-09-12	11:57:26	0.920115	4.09286	14.8082	2291.49	FALSE	115
2022-09-12	11:57:27	0.657315	2.92387	2.00254	2126.45	FALSE	115
2022-09-12	11:57:27	0.350242	1.55795	2.00254	2293.05	FALSE	115
2022-09-12	11:57:27	0.450445	2.00367	2.00254	2128.45	FALSE	115
2022-09-12	11:57:27	0.342761	1.52467	2.00254	2294.57	FALSE	115
2022-09-12	11:57:28	0.250751	1.11539	0.847083	2129.57	FALSE	115
2022-09-12	11:57:28	0.108868	0.484267	0.847083	2295.06	FALSE	115
2022-09-12	11:57:28	0.248715	1.10633	0.847083	2130.67	FALSE	115
2022-09-12	11:57:28	0.153397	0.682341	0.847083	2295.74	FALSE	115
2022-09-12	11:57:29	0.0374175	0.166441	1.67604	2130.84	FALSE	115
2022-09-12	11:57:29	0.325356	1.44725	1.67604	2297.18	FALSE	115
2022-09-12	11:57:29	0.767596	3.41442	1.67604	2134.25	FALSE	115
2022-09-12	11:57:30	1.71991	7.6505	8.44598	2304.84	FALSE	115
2022-09-12	11:57:30	1.46017	6.49513	8.44598	2140.75	FALSE	115
2022-09-12	11:57:30	2.7453	12.2116	8.44598	2317.05	FALSE	115
2022-09-12	11:57:30	1.66958	7.42663	8.44598	2148.18	FALSE	115
2022-09-12	11:57:31	1.02627	4.56505	4.41237	2321.61	FALSE	115
2022-09-12	11:57:31	0.552379	2.45709	4.41237	2150.63	FALSE	115
2022-09-12	11:57:31	0.43126	1.91833	4.41237	2323.53	FALSE	115
2022-09-12	11:57:31	1.95787	8.709	4.41237	2159.34	FALSE	115
2022-09-12	11:57:32	3.13416	13.9414	28.3879	2337.47	1	116
2022-09-12	11:57:32	6.25548	27.8256	28.3879	2187.17	1	117
2022-09-12	11:57:32	6.5026	28.9249	28.3879	2366.4	1	118
2022-09-12	11:57:32	9.63528	42.8597	28.3879	2230.03	1	119
2022-09-12	11:57:33	3.79482	16.8801	20.4064	2383.28	1	120
2022-09-12	11:57:33	4.5366	20.1797	20.4064	2250.21	1	121
2022-09-12	11:57:33	5.43126	24.1593	20.4064	2407.44	1	122
2022-09-12	11:57:34	4.24083	18.8641	13.6584	2269.07	1	123
2022-09-12	11:57:34	2.21218	9.84022	13.6584	2417.28	FALSE	123
2022-09-12	11:57:34	4.67538	20.797	13.6584	2289.87	1	124
2022-09-12	11:57:34	1.15375	5.13211	13.6584	2422.41	FALSE	124
2022-09-12	11:57:35	3.12612	13.9056	11.5078	2303.77	1	125
2022-09-12	11:57:35	3.06159	13.6186	11.5078	2436.03	1	126
2022-09-12	11:57:35	1.61482	7.18304	11.5078	2310.96	FALSE	126
2022-09-12	11:57:35	2.54576	11.324	11.5078	2447.35	FALSE	126
2022-09-12	11:57:36	2.15436	9.58302	4.7427	2320.54	FALSE	126
2022-09-12	11:57:36	1.16408	5.17806	4.7427	2452.53	FALSE	126
2022-09-12	11:57:36	0.657519	2.92478	4.7427	2323.46	FALSE	126
2022-09-12	11:57:36	0.288868	1.28494	4.7427	2453.81	FALSE	126
2022-09-12	11:57:37	0.228054	1.01443	6.55471	2324.48	FALSE	126
2022-09-12	11:57:37	0.253092	1.1258	6.55471	2454.94	FALSE	126
2022-09-12	11:57:37	1.81559	8.07611	6.55471	2332.55	FALSE	126
2022-09-12	11:57:37	3.59752	16.0025	6.55471	2470.94	1	127
2022-09-12	11:57:38	5.25467	23.3738	17.4119	2355.93	1	128
2022-09-12	11:57:38	3.61095	16.0622	17.4119	2487	1	129
2022-09-12	11:57:38	2.87747	12.7996	17.4119	2368.73	FALSE	129
2022-09-12	11:57:39	2.33625	10.3921	19.5596	2497.4	FALSE	129
2022-09-12	11:57:39	3.10276	13.8017	19.5596	2382.53	1	130
2022-09-12	11:57:39	5.2452	23.3317	19.5596	2520.73	1	131
2022-09-12	11:57:39	6.90459	30.713	19.5596	2413.24	1	132
2022-09-12	11:57:40	5.16866	22.9912	11.0166	2543.72	1	133
2022-09-12	11:57:40	1.1192	4.97843	11.0166	2418.22	FALSE	133
2022-09-12	11:57:40	2.22775	9.90948	11.0166	2553.63	FALSE	133
2022-09-12	11:57:40	1.391	6.18745	11.0166	2424.41	FALSE	133
2022-09-12	11:57:41	0.968053	4.30609	9.13109	2557.94	FALSE	133
2022-09-12	11:57:41	2.24775	9.99844	9.13109	2434.41	FALSE	133
2022-09-12	11:57:41	2.58897	11.5163	9.13109	2569.45	FALSE	133
2022-09-12	11:57:41	2.40627	10.7036	9.13109	2445.11	FALSE	133
2022-09-12	11:57:42	3.86775	17.2045	11.936	2586.66	1	134
2022-09-12	11:57:42	1.61299	7.1749	11.936	2452.29	FALSE	134
2022-09-12	11:57:42	2.56927	11.4286	11.936	2598.08	FALSE	134
2022-09-12	11:57:43	1.50174	6.68004	7.70664	2458.97	FALSE	134
2022-09-12	11:57:43	1.21401	5.40016	7.70664	2603.48	FALSE	134
2022-09-12	11:57:43	1.608	7.15271	7.70664	2466.12	FALSE	134
2022-09-12	11:57:43	2.60637	11.5937	7.70664	2615.08	FALSE	134
2022-09-12	11:57:44	0.99472	4.42471	7.14412	2470.54	FALSE	134
2022-09-12	11:57:44	1.48322	6.59766	7.14412	2621.68	FALSE	134
2022-09-12	11:57:44	1.25462	5.5808	7.14412	2476.12	FALSE	134
2022-09-12	11:57:44	2.69172	11.9733	7.14412	2633.65	FALSE	134
2022-09-12	11:57:45	7.51706	33.4374	29.056	2509.56	1	135
2022-09-12	11:57:45	12.0223	53.4776	29.056	2687.13	1	136
2022-09-12	11:57:45	5.09004	22.6415	29.056	2532.2	1	137
2022-09-12	11:57:45	1.49889	6.66736	29.056	2693.79	FALSE	137
2022-09-12	11:57:46	0.539707	2.40072	1.8723	2534.6	FALSE	137
2022-09-12	11:57:46	0.447748	1.99167	1.8723	2695.79	FALSE	137
2022-09-12	11:57:46	0.27528	1.2245	1.8723	2535.83	FALSE	137
2022-09-12	11:57:47	0.164644	0.732369	0.826201	2696.52	FALSE	137
2022-09-12	11:57:47	0.196451	0.873853	0.826201	2536.7	FALSE	137
2022-09-12	11:57:47	0.0902419	0.401414	0.826201	2696.92	FALSE	137
2022-09-12	11:57:47	0.291616	1.29717	0.826201	2538	FALSE	137
2022-09-12	11:57:48	0.143626	0.638877	2.43786	2697.56	FALSE	137
2022-09-12	11:57:48	0.505713	2.24951	2.43786	2540.25	FALSE	137
2022-09-12	11:57:48	0.41299	1.83706	2.43786	2699.4	FALSE	137
2022-09-12	11:57:48	1.12989	5.02598	2.43786	2545.27	FALSE	137
2022-09-12	11:57:49	2.37569	10.5675	8.27439	2709.96	FALSE	137
2022-09-12	11:57:49	2.53319	11.2681	8.27439	2556.54	FALSE	137
2022-09-12	11:57:49	1.38963	6.18135	8.27439	2716.14	FALSE	137
2022-09-12	11:57:49	1.14215	5.08051	8.27439	2561.62	FALSE	137
2022-09-12	11:57:50	0.508664	2.26264	16.0371	2718.41	FALSE	137
2022-09-12	11:57:50	2.77258	12.333	16.0371	2573.96	FALSE	137
2022-09-12	11:57:50	7.53467	33.5157	16.0371	2751.92	1	138
2022-09-12	11:57:51	5.36464	23.863	10.7398	2597.82	1	139
2022-09-12	11:57:51	4.17044	18.551	10.7398	2770.47	1	140
2022-09-12	11:57:51	0.140929	0.62688	10.7398	2598.45	FALSE	140
2022-09-12	11:57:51	-0.0183076	-0.0814359	10.7398	2770.47	FALSE	140
2022-09-12	11:57:52	0.136909	0.608999	0.778381	2599.06	FALSE	140
2022-09-12	11:57:52	0.213652	0.950367	0.778381	2771.42	FALSE	140
2022-09-12	11:57:52	0.198028	0.880868	0.778381	2599.94	FALSE	140
2022-09-12	11:57:52	0.151362	0.673288	0.778381	2772.1	FALSE	140
2022-09-12	11:57:53	0.375992	1.67249	1.15704	2601.61	FALSE	140
2022-09-12	11:57:53	0.128003	0.569383	1.15704	2772.67	FALSE	140
2022-09-12	11:57:53	0.327799	1.45812	1.15704	2603.07	FALSE	140
2022-09-12	11:57:53	0.208664	0.928179	1.15704	2773.6	FALSE	140
2022-09-12	11:57:54	1.22256	5.43819	5.17476	2608.5	FALSE	140
2022-09-12	11:57:54	0.873041	3.88346	5.17476	2777.48	FALSE	140
2022-09-12	11:57:54	1.39441	6.20261	5.17476	2614.71	FALSE	140
2022-09-12	11:57:55	0.889122	3.95499	2.8992	2781.43	FALSE	140
2022-09-12	11:57:55	0.907494	4.03671	2.8992	2618.74	FALSE	140
2022-09-12	11:57:55	0.400929	1.78341	2.8992	2783.22	FALSE	140
2022-09-12	11:57:55	0.409529	1.82167	2.8992	2620.57	FALSE	140
2022-09-12	11:57:56	1.11757	4.97117	5.39896	2788.19	FALSE	140
2022-09-12	11:57:56	1.01385	4.50981	5.39896	2625.08	FALSE	140
2022-09-12	11:57:56	1.18994	5.29309	5.39896	2793.48	FALSE	140
2022-09-12	11:57:56	1.5336	6.82176	5.39896	2631.9	FALSE	140
2022-09-12	11:57:57	1.09375	4.86522	7.932	2798.35	FALSE	140
2022-09-12	11:57:57	1.92744	8.57364	7.932	2640.47	FALSE	140
2022-09-12	11:57:57	1.31976	5.87056	7.932	2804.22	FALSE	140
2022-09-12	11:57:57	2.79182	12.4186	7.932	2652.89	FALSE	140
2022-09-12	11:57:58	3.77014	16.7703	16.4504	2820.99	1	141
2022-09-12	11:57:58	3.30042	14.6809	16.4504	2667.57	1	142
2022-09-12	11:57:58	4.02408	17.8999	16.4504	2838.89	1	143
2022-09-12	11:57:59	2.34805	10.4446	10.8552	2678.02	FALSE	143
2022-09-12	11:57:59	2.19513	9.76438	10.8552	2848.65	FALSE	143
2022-09-12	11:57:59	2.31416	10.2938	10.8552	2688.31	FALSE	143
2022-09-12	11:57:59	2.90408	12.9179	10.8552	2861.57	FALSE	143
2022-09-12	11:58:00	3.52139	15.6638	14.905	2703.97	1	144
2022-09-12	11:58:00	2.5996	11.5635	14.905	2873.13	FALSE	144
2022-09-12	11:58:00	3.76785	16.7602	14.905	2720.73	1	145
2022-09-12	11:58:00	3.51436	15.6326	14.905	2888.77	1	146
2022-09-12	11:58:01	2.11167	9.39313	3.31091	2730.13	FALSE	146
2022-09-12	11:58:01	0.492888	2.19246	3.31091	2890.96	FALSE	146
2022-09-12	11:58:01	0.201387	0.89581	3.31091	2731.02	FALSE	146
2022-09-12	11:58:01	0.171361	0.762248	3.31091	2891.72	FALSE	146
2022-09-12	11:58:02	0.152888	0.680076	2.3417	2731.7	FALSE	146
2022-09-12	11:58:02	0.299097	1.33044	2.3417	2893.05	FALSE	146
2022-09-12	11:58:02	0.371616	1.65302	2.3417	2733.35	FALSE	146
2022-09-12	11:58:02	1.28215	5.70326	2.3417	2898.75	FALSE	146
2022-09-12	11:58:03	1.0334	4.59677	9.50895	2737.95	FALSE	146
2022-09-12	11:58:03	3.40754	15.1574	9.50895	2913.91	1	147
2022-09-12	11:58:03	1.97218	8.77265	9.50895	2746.72	FALSE	147
2022-09-12	11:58:04	3.05762	13.6009	18.9631	2927.51	1	148
2022-09-12	11:58:04	3.9535	17.586	18.9631	2764.31	1	149
2022-09-12	11:58:04	5.77818	25.7025	18.9631	2953.22	1	150
2022-09-12	11:58:05	5.0193	22.3269	18.7681	2786.64	1	151
2022-09-12	11:58:05	3.45141	15.3526	18.7681	2968.57	1	152
2022-09-12	11:58:05	6.13741	27.3004	18.7681	2813.94	1	153
2022-09-12	11:58:05	2.17838	9.68987	18.7681	2978.26	FALSE	153
2022-09-12	11:58:05	4.30978	19.1708	18.7681	2833.11	1	154
2022-09-12	11:58:06	6.39019	28.4248	21.733	3006.68	1	155
2022-09-12	11:58:06	3.14118	13.9726	21.733	2847.08	1	156
2022-09-12	11:58:06	6.68825	29.7507	21.733	3036.43	1	157
2022-09-12	11:58:06	3.32357	14.7839	21.733	2861.86	1	158
2022-09-12	11:58:07	4.22128	18.7771	14.3459	3055.21	1	159
2022-09-12	11:58:07	3.00291	13.3575	14.3459	2875.22	1	160
2022-09-12	11:58:07	2.45111	10.903	14.3459	3066.11	FALSE	160
2022-09-12	11:58:08	3.61055	16.0604	9.92895	2891.28	1	161
2022-09-12	11:58:08	1.81452	8.07135	9.92895	3074.18	FALSE	161
2022-09-12	11:58:08	2.31401	10.2932	9.92895	2901.58	FALSE	161
2022-09-12	11:58:08	1.18943	5.29082	9.92895	3079.48	FALSE	161
2022-09-12	11:58:09	1.44174	6.41315	17.1518	2907.99	FALSE	161
2022-09-12	11:58:09	2.60057	11.5679	17.1518	3091.04	FALSE	161
2022-09-12	11:58:09	4.98668	22.1817	17.1518	2930.17	1	162
2022-09-12	11:58:09	6.39457	28.4443	17.1518	3119.49	1	163
2022-09-12	11:58:10	2.54383	11.3155	19.2413	2941.49	FALSE	163
2022-09-12	11:58:10	4.41487	19.6382	19.2413	3139.13	1	164
2022-09-12	11:58:10	4.53401	20.1682	19.2413	2961.65	1	165
2022-09-12	11:58:10	5.80983	25.8433	19.2413	3164.97	1	166
2022-09-12	11:58:11	4.29024	19.0838	19.4236	2980.74	1	167
2022-09-12	11:58:11	4.39869	19.5663	19.4236	3184.54	1	168
2022-09-12	11:58:11	4.41095	19.6208	19.4236	3000.36	1	169
2022-09-12	11:58:12	4.90108	21.801	29.9076	3206.34	1	170
2022-09-12	11:58:12	7.13441	31.7353	29.9076	3032.09	1	171
2022-09-12	11:58:12	5.84912	26.0181	29.9076	3232.35	1	172
2022-09-12	11:58:12	9.00947	40.0759	29.9076	3072.17	1	173
2022-09-12	11:58:13	8.3509	37.1465	35.8712	3269.5	1	174
2022-09-12	11:58:13	8.89349	39.56	35.8712	3111.73	1	175
2022-09-12	11:58:13	5.97121	26.5611	35.8712	3296.06	1	176
2022-09-12	11:58:13	9.04123	40.2172	35.8712	3151.95	1	177
2022-09-12	11:58:14	6.42418	28.576	18.3931	3324.64	1	178
2022-09-12	11:58:14	6.27802	27.9259	18.3931	3179.87	1	179
2022-09-12	11:58:14	2.16637	9.63645	18.3931	3334.27	FALSE	179
2022-09-12	11:58:14	1.67121	7.43388	18.3931	3187.31	FALSE	179
2022-09-12	11:58:15	2.44306	10.8672	9.90206	3345.14	FALSE	179
2022-09-12	11:58:15	1.62022	7.20706	9.90206	3194.51	FALSE	179
2022-09-12	11:58:15	2.61497	11.6319	9.90206	3356.77	FALSE	179
2022-09-12	11:58:16	1.35335	6.01997	15.9594	3200.53	FALSE	179
2022-09-12	11:58:16	4.36001	19.3942	15.9594	3376.17	1	180
2022-09-12	11:58:16	4.23314	18.8299	15.9594	3219.36	1	181
2022-09-12	11:58:16	4.40479	19.5934	15.9594	3395.76	1	182
2022-09-12	11:58:17	4.50627	20.0448	33.0667	3239.41	1	183
2022-09-12	11:58:17	3.4767	15.4651	33.0667	3411.23	1	184
2022-09-12	11:58:17	10.8283	48.1664	33.0667	3287.58	1	185
2022-09-12	11:58:17	10.9236	48.5904	33.0667	3459.82	1	186
2022-09-12	11:58:18	11.9995	53.3762	30.2189	3340.95	1	187
2022-09-12	11:58:18	3.44022	15.3028	30.2189	3475.12	1	188
2022-09-12	11:58:18	4.002	17.8017	30.2189	3358.75	1	189
2022-09-12	11:58:18	7.73232	34.3949	30.2189	3509.51	1	190
2022-09-12	11:58:19	3.19757	14.2234	14.8331	3372.98	1	191
2022-09-12	11:58:19	3.96968	17.6579	14.8331	3527.17	1	192
2022-09-12	11:58:19	2.83665	12.618	14.8331	3385.59	FALSE	192
2022-09-12	11:58:20	4.90444	21.8159	29.8478	3548.99	1	193
2022-09-12	11:58:20	4.51044	20.0633	29.8478	3405.66	1	194
2022-09-12	11:58:20	8.49767	37.7993	29.8478	3586.79	1	195
2022-09-12	11:58:20	8.92775	39.7124	29.8478	3445.37	1	196
2022-09-12	11:58:21	14.1414	62.9038	28.7112	3649.69	1	197
2022-09-12	11:58:21	5.39762	24.0097	28.7112	3469.38	1	198
2022-09-12	11:58:21	4.07543	18.1283	28.7112	3667.82	1	199
2022-09-12	11:58:21	2.20383	9.80308	28.7112	3479.18	FALSE	199
2022-09-12	11:58:22	1.76281	7.84133	6.45522	3675.66	FALSE	199
2022-09-12	11:58:22	1.57854	7.02166	6.45522	3486.21	FALSE	199
2022-09-12	11:58:22	1.46363	6.51052	6.45522	3682.17	FALSE	199
2022-09-12	11:58:22	0.999809	4.44735	6.45522	3490.65	FALSE	199
2022-09-12	11:58:23	1.42698	6.34749	6.13502	3688.52	FALSE	199
2022-09-12	11:58:23	1.19889	5.3329	6.13502	3495.99	FALSE	199
2022-09-12	11:58:23	1.51177	6.72466	6.13502	3695.24	FALSE	199
2022-09-12	11:58:24	1.28317	5.7078	4.87429	3501.69	FALSE	199
2022-09-12	11:58:24	1.17843	5.24189	4.87429	3700.49	FALSE	199
2022-09-12	11:58:24	1.09045	4.85054	4.87429	3506.54	FALSE	199
2022-09-12	11:58:24	0.831107	3.69693	4.87429	3704.18	FALSE	199
2022-09-12	11:58:25	0.834771	3.71323	4.46682	3510.26	FALSE	199
2022-09-12	11:58:25	1.09772	4.88288	4.46682	3709.07	FALSE	199
2022-09-12	11:58:25	1.16098	5.16427	4.46682	3515.42	FALSE	199
2022-09-12	11:58:25	0.92327	4.10689	4.46682	3713.17	FALSE	199
2022-09-12	11:58:26	1.01034	4.49419	4.44707	3519.92	FALSE	199
2022-09-12	11:58:26	0.907595	4.03716	4.44707	3717.21	FALSE	199
2022-09-12	11:58:26	0.976807	4.34503	4.44707	3524.26	FALSE	199
2022-09-12	11:58:26	1.10424	4.91188	4.44707	3722.12	FALSE	199
2022-09-12	11:58:27	0.973092	4.32851	2.61261	3528.59	FALSE	199
2022-09-12	11:58:27	0.436908	1.94345	2.61261	3724.06	FALSE	199
2022-09-12	11:58:27	0.681183	3.03004	2.61261	3531.62	FALSE	199
2022-09-12	11:58:27	0.258181	1.14844	2.61261	3725.21	FALSE	199
2022-09-12	11:58:28	0.289173	1.2863	0.256763	3532.91	FALSE	199
2022-09-12	11:58:28	0.0509036	0.226429	0.256763	3725.44	FALSE	199
2022-09-12	11:58:28	-0.166908	-0.74244	0.256763	3532.91	FALSE	199
2022-09-12	11:58:29	-0.186297	-0.828686	-1.11465	3725.44	FALSE	199
2022-09-12	11:58:29	-0.214745	-0.955229	-1.11465	3532.91	FALSE	199
2022-09-12	11:58:29	-0.417137	-1.85551	-1.11465	3725.44	FALSE	199
2022-09-12	11:58:29	-0.18416	-0.819181	-1.11465	3532.91	FALSE	199
2022-09-12	11:58:30	-0.286755	-1.27554	-1.71029	3725.44	FALSE	199
2022-09-12	11:58:30	-0.339274	-1.50916	-1.71029	3532.91	FALSE	199
2022-09-12	11:58:30	-0.506348	-2.25234	-1.71029	3725.44	FALSE	199
2022-09-12	11:58:30	-0.405585	-1.80412	-1.71029	3532.91	FALSE	199
2022-09-12	11:58:31	-0.137951	-0.613634	3.71702	3725.44	FALSE	199
2022-09-12	11:58:31	0.958333	4.26286	3.71702	3537.17	FALSE	199
2022-09-12	11:58:31	1.81925	8.09239	3.71702	3733.53	FALSE	199
2022-09-12	11:58:31	0.702863	3.12648	3.71702	3540.29	FALSE	199
2022-09-12	11:58:32	0.363423	1.61658	1.61152	3735.15	FALSE	199
2022-09-12	11:58:32	0.4193	1.86513	1.61152	3542.16	FALSE	199
2022-09-12	11:58:32	0.304135	1.35285	1.61152	3736.5	FALSE	199
2022-09-12	11:58:33	0.234313	1.04227	0.89479	3543.2	FALSE	199
2022-09-12	11:58:33	0.140725	0.625973	0.89479	3737.13	FALSE	199
2022-09-12	11:58:33	0.142761	0.635029	0.89479	3543.84	FALSE	199
2022-09-12	11:58:33	0.286832	1.27589	0.89479	3738.4	FALSE	199
2022-09-12	11:58:34	0.193601	0.861176	0.666609	3544.7	FALSE	199
2022-09-12	11:58:34	0.320827	1.4271	0.666609	3739.83	FALSE	199
2022-09-12	11:58:34	0.091158	0.405489	0.666609	3545.1	FALSE	199
2022-09-12	11:58:34	-0.00614479	-0.0273333	0.666609	3739.83	FALSE	199
2022-09-12	11:58:35	0.386323	1.71844	1.65574	3546.82	FALSE	199
2022-09-12	11:58:35	0.379097	1.6863	1.65574	3741.52	FALSE	199
2022-09-12	11:58:35	0.314975	1.40107	1.65574	3548.22	FALSE	199
2022-09-12	11:58:35	0.408512	1.81714	1.65574	3743.33	FALSE	199
2022-09-12	11:58:36	0.484135	2.15353	2.74813	3550.38	FALSE	199
2022-09-12	11:58:36	0.794415	3.53372	2.74813	3746.87	FALSE	199
2022-09-12	11:58:36	0.574873	2.55715	2.74813	3552.93	FALSE	199
2022-09-12	11:58:37	0.582303	2.5902	4.61311	3749.46	FALSE	199
2022-09-12	11:58:37	0.901488	4.01	4.61311	3556.94	FALSE	199
2022-09-12	11:58:37	1.31477	5.84836	4.61311	3755.31	FALSE	199
2022-09-12	11:58:37	1.34973	6.00387	4.61311	3562.95	FALSE	199
2022-09-12	11:58:38	1.53258	6.81722	17.672	3762.12	FALSE	199
2022-09-12	11:58:38	5.54169	24.6505	17.672	3587.6	1	200
2022-09-12	11:58:38	5.83167	25.9404	17.672	3788.06	1	201
2022-09-12	11:58:38	2.98541	13.2797	17.672	3600.88	FALSE	201
2022-09-12	11:58:39	1.17737	5.23718	2.4198	3793.3	FALSE	201
2022-09-12	11:58:39	0.333143	1.48189	2.4198	3602.36	FALSE	201
2022-09-12	11:58:39	0.501539	2.23095	2.4198	3795.53	FALSE	201
2022-09-12	11:58:39	0.163931	0.729198	2.4198	3603.09	FALSE	201
2022-09-12	11:58:40	0.136705	0.608091	2.71531	3796.14	FALSE	201
2022-09-12	11:58:40	0.300573	1.33701	2.71531	3604.43	FALSE	201
2022-09-12	11:58:40	1.39401	6.20084	2.71531	3802.34	FALSE	201
2022-09-12	11:58:41	1.92052	8.54286	3.93145	3612.97	FALSE	201
2022-09-12	11:58:41	0.566781	2.52116	3.93145	3804.86	FALSE	201
2022-09-12	11:58:41	0.375636	1.6709	3.93145	3614.64	FALSE	201
2022-09-12	11:58:41	0.672379	2.99088	3.93145	3807.85	FALSE	201
2022-09-12	11:58:42	0.0616414	0.274193	-0.333897	3614.91	FALSE	201
2022-09-12	11:58:42	-0.115865	-0.515391	-0.333897	3807.85	FALSE	201
2022-09-12	11:58:42	-0.142633	-0.63446	-0.333897	3614.91	FALSE	201
2022-09-12	11:58:42	-0.103397	-0.459931	-0.333897	3807.85	FALSE	201
2022-09-12	11:58:43	-0.0599361	-0.266608	-0.623257	3614.91	FALSE	201
2022-09-12	11:58:43	-0.0909793	-0.404694	-0.623257	3807.85	FALSE	201
2022-09-12	11:58:43	-0.188537	-0.83865	-0.623257	3614.91	FALSE	201
2022-09-12	11:58:43	-0.221005	-0.983074	-0.623257	3807.85	FALSE	201
2022-09-12	11:58:44	-0.369758	-1.64476	-1.35485	3614.91	FALSE	201
2022-09-12	11:58:44	-0.444923	-1.97911	-1.35485	3807.85	FALSE	201
2022-09-12	11:58:44	-0.0990709	-0.440687	-1.35485	3614.91	FALSE	201
2022-09-12	11:58:45	-0.165636	-0.736782	-1.15715	3807.85	FALSE	201
2022-09-12	11:58:45	-0.133931	-0.595752	-1.15715	3614.91	FALSE	201
2022-09-12	11:58:45	-0.347468	-1.54561	-1.15715	3807.85	FALSE	201
2022-09-12	11:58:45	-0.393524	-1.75047	-1.15715	3614.91	FALSE	201
2022-09-12	11:58:46	-0.40589	-1.80548	2.61516	3807.85	FALSE	201
2022-09-12	11:58:46	-0.215254	-0.957493	2.61516	3614.91	FALSE	201
2022-09-12	11:58:46	-0.140801	-0.626311	2.61516	3807.85	FALSE	201
2022-09-12	11:58:46	3.1136	13.8499	2.61516	3628.76	1	202
2022-09-12	11:58:47	2.73996	12.1879	4.58679	3820.04	FALSE	202
2022-09-12	11:58:47	1.00907	4.48855	4.58679	3633.25	FALSE	202
2022-09-12	11:58:47	0.366476	1.63016	4.58679	3821.67	FALSE	202
2022-09-12	11:58:47	0.00912238	0.0405782	4.58679	3633.29	FALSE	202
2022-09-12	11:58:48	0.0388934	0.173006	1.31941	3821.84	FALSE	202
2022-09-12	11:58:48	0.0254073	0.113017	1.31941	3633.41	FALSE	202
2022-09-12	11:58:48	0.435687	1.93802	1.31941	3823.78	FALSE	202
2022-09-12	11:58:48	0.686476	3.05358	1.31941	3636.46	FALSE	202
2022-09-12	11:58:49	0.71645	3.18691	3.53183	3826.97	FALSE	202
2022-09-12	11:58:49	0.888715	3.95318	3.53183	3640.41	FALSE	202
2022-09-12	11:58:49	0.776806	3.45539	3.53183	3830.42	FALSE	202
2022-09-12	11:58:50	0.898283	3.99574	14.8866	3644.41	FALSE	202
2022-09-12	11:58:50	1.26637	5.63307	14.8866	3836.06	FALSE	202
2022-09-12	11:58:50	3.28088	14.594	14.8866	3659	1	203
2022-09-12	11:58:50	7.94108	35.3235	14.8866	3871.38	1	204
2022-09-12	11:58:51	5.19945	23.1282	22.8174	3682.13	1	205
2022-09-12	11:58:51	5.26082	23.4012	22.8174	3894.78	1	206
2022-09-12	11:58:51	4.13864	18.4095	22.8174	3700.54	1	207
2022-09-12	11:58:51	5.9194	26.3307	22.8174	3921.11	1	208
2022-09-12	11:58:52	1.27019	5.65006	3.48538	3706.19	FALSE	208
2022-09-12	11:58:52	0.662913	2.94877	3.48538	3924.06	FALSE	208
2022-09-12	11:58:52	0.705255	3.13712	3.48538	3709.33	FALSE	208
2022-09-12	11:58:52	0.49584	2.2056	3.48538	3926.27	FALSE	208
2022-09-12	11:58:53	0.287239	1.2777	0.614354	3710.61	FALSE	208
2022-09-12	11:58:53	-0.037188	-0.16542	0.614354	3926.27	FALSE	208
2022-09-12	11:58:53	0.164288	0.730786	0.614354	3711.34	FALSE	208
2022-09-12	11:58:54	0.0319723	0.142219	-0.250479	3926.41	FALSE	208
2022-09-12	11:58:54	-0.0899616	-0.400167	-0.250479	3711.34	FALSE	208
2022-09-12	11:58:54	-0.0774425	-0.34448	-0.250479	3926.41	FALSE	208
2022-09-12	11:58:54	-0.0898089	-0.399488	-0.250479	3711.34	FALSE	208
2022-09-12	11:58:55	-0.0216155	-0.0961501	0.817202	3926.41	FALSE	208
2022-09-12	11:58:55	0.127799	0.568476	0.817202	3711.9	FALSE	208
2022-09-12	11:58:55	0.269631	1.19937	0.817202	3927.61	FALSE	208
2022-09-12	11:58:55	0.359046	1.59711	0.817202	3713.5	FALSE	208
2022-09-12	11:58:56	0.480573	2.13768	3.29693	3929.75	FALSE	208
2022-09-12	11:58:56	1.18561	5.27383	3.29693	3718.78	FALSE	208
2022-09-12	11:58:56	0.797417	3.54707	3.29693	3933.29	FALSE	208
2022-09-12	11:58:56	0.501132	2.22914	3.29693	3721	FALSE	208
2022-09-12	11:58:57	0.220369	0.980245	1.28592	3934.27	FALSE	208
2022-09-12	11:58:57	0.33243	1.47872	1.28592	3722.48	FALSE	208
2022-09-12	11:58:57	0.314466	1.39881	1.28592	3935.67	FALSE	208
2022-09-12	11:58:58	0.372176	1.65551	1.4657	3724.14	FALSE	208
2022-09-12	11:58:58	0.281692	1.25302	1.4657	3936.93	FALSE	208
2022-09-12	11:58:58	0.284847	1.26706	1.4657	3725.41	FALSE	208
2022-09-12	11:58:58	0.3793	1.6872	1.4657	3938.61	FALSE	208
2022-09-12	11:58:59	0.298537	1.32795	2.35376	3726.73	FALSE	208
2022-09-12	11:58:59	0.218079	0.970059	2.35376	3939.58	FALSE	208
2022-09-12	11:58:59	1.02261	4.54877	2.35376	3731.28	FALSE	208
2022-09-12	11:58:59	0.577366	2.56824	2.35376	3942.15	FALSE	208
2022-09-12	11:59:00	0.388104	1.72636	0.962079	3733.01	FALSE	208
2022-09-12	11:59:00	0.27243	1.21182	0.962079	3943.36	FALSE	208
2022-09-12	11:59:00	0.165662	0.736898	0.962079	3733.75	FALSE	208
2022-09-12	11:59:00	0.0389443	0.173232	0.962079	3943.54	FALSE	208
2022-09-12	11:59:01	-0.341768	-1.52025	-1.02533	3733.75	FALSE	208
2022-09-12	11:59:01	-0.362481	-1.61239	-1.02533	3943.54	FALSE	208
2022-09-12	11:59:01	0.0127356	0.0566505	-1.02533	3733.8	FALSE	208
2022-09-12	11:59:02	0.231718	1.03073	8.40251	3944.57	FALSE	208
2022-09-12	11:59:02	2.09426	9.31569	8.40251	3743.12	FALSE	208
2022-09-12	11:59:02	2.58846	11.514	8.40251	3956.08	FALSE	208
2022-09-12	11:59:02	2.64144	11.7497	8.40251	3754.87	FALSE	208
2022-09-12	11:59:03	2.35843	10.4908	11.7252	3966.57	FALSE	208
2022-09-12	11:59:03	2.62607	11.6813	11.7252	3766.55	FALSE	208
2022-09-12	11:59:03	2.66418	11.8508	11.7252	3978.42	FALSE	208
2022-09-12	11:59:03	2.89513	12.8781	11.7252	3779.43	FALSE	208
2022-09-12	11:59:04	2.93024	13.0343	11.3161	3991.46	FALSE	208
2022-09-12	11:59:04	2.66057	11.8347	11.3161	3791.26	FALSE	208
2022-09-12	11:59:04	2.75039	12.2343	11.3161	4003.69	FALSE	208
2022-09-12	11:59:04	1.83467	8.16098	11.3161	3799.42	FALSE	208
2022-09-12	11:59:05	1.002	4.4571	3.70735	4008.15	FALSE	208
2022-09-12	11:59:05	0.619707	2.75658	3.70735	3802.18	FALSE	208
2022-09-12	11:59:05	0.878639	3.90836	3.70735	4012.06	FALSE	208
2022-09-12	11:59:06	1.13915	5.06717	1.991	3807.25	FALSE	208
2022-09-12	11:59:06	0.264796	1.17787	1.991	4013.23	FALSE	208
2022-09-12	11:59:06	0.208766	0.928633	1.991	3808.18	FALSE	208
2022-09-12	11:59:06	0.177672	0.790321	1.991	4014.02	FALSE	208
2022-09-12	11:59:07	0.107341	0.477474	0.639273	3808.65	FALSE	208
2022-09-12	11:59:07	0.157468	0.700449	0.639273	4014.72	FALSE	208
2022-09-12	11:59:07	0.209173	0.930443	0.639273	3809.58	FALSE	208
2022-09-12	11:59:07	0.100878	0.448726	0.639273	4015.17	FALSE	208
2022-09-12	11:59:08	0.11869	0.527957	0.672607	3810.11	FALSE	208
2022-09-12	11:59:08	0.11757	0.522975	0.672607	4015.7	FALSE	208
2022-09-12	11:59:08	0.284389	1.26502	0.672607	3811.38	FALSE	208
2022-09-12	11:59:08	0.084186	0.374476	0.672607	4016.07	FALSE	208
2022-09-12	11:59:09	0.266985	1.1876	0.907128	3812.56	FALSE	208
2022-09-12	11:59:09	0.0629137	0.279853	0.907128	4016.35	FALSE	208
2022-09-12	11:59:09	0.281896	1.25393	0.907128	3813.82	FALSE	208
2022-09-12	11:59:10	0.0615905	0.273967	1.36202	4016.62	FALSE	208
2022-09-12	11:59:10	0.37131	1.65166	1.36202	3815.47	FALSE	208
2022-09-12	11:59:10	0.436756	1.94278	1.36202	4018.57	FALSE	208
2022-09-12	11:59:10	0.355127	1.57968	1.36202	3817.05	FALSE	208
2022-09-12	11:59:11	-0.035814	-0.159308	0.15965	4018.57	FALSE	208
2022-09-12	11:59:11	0.0183844	0.0817775	0.15965	3817.13	FALSE	208
2022-09-12	11:59:11	0.0310562	0.138144	0.15965	4018.71	FALSE	208
2022-09-12	11:59:11	0.129937	0.577986	0.15965	3817.71	FALSE	208
2022-09-12	11:59:12	-0.0429895	-0.191226	0.292417	4018.71	FALSE	208
2022-09-12	11:59:12	0.109835	0.488568	0.292417	3818.2	FALSE	208
2022-09-12	11:59:12	0.115433	0.513469	0.292417	4019.22	FALSE	208
2022-09-12	11:59:12	0.0806745	0.358856	0.292417	3818.56	FALSE	208
2022-09-12	11:59:13	0.0922776	0.410469	0.607016	4019.63	FALSE	208
2022-09-12	11:59:13	0.0343132	0.152632	0.607016	3818.71	FALSE	208
2022-09-12	11:59:13	0.108613	0.483132	0.607016	4020.11	FALSE	208
2022-09-12	11:59:13	0.310649	1.38183	0.607016	3820.09	FALSE	208
2022-09-12	11:59:14	0.36841	1.63876	2.49942	4021.75	FALSE	208
2022-09-12	11:59:14	0.531514	2.36428	2.49942	3822.45	FALSE	208
2022-09-12	11:59:14	0.785763	3.49523	2.49942	4025.25	FALSE	208
2022-09-12	11:59:15	0.738231	3.2838	3.58233	3825.74	FALSE	208
2022-09-12	11:59:15	1.73279	7.7078	3.58233	4032.95	FALSE	208
2022-09-12	11:59:15	0.448868	1.99665	3.58233	3827.74	FALSE	208
2022-09-12	11:59:15	0.301489	1.34108	3.58233	4034.3	FALSE	208
2022-09-12	11:59:16	0.401997	1.78816	1.31584	3829.52	FALSE	208
2022-09-12	11:59:16	0.159758	0.710636	1.31584	4035.01	FALSE	208
2022-09-12	11:59:16	0.341845	1.52059	1.31584	3831.04	FALSE	208
2022-09-12	11:59:16	0.279657	1.24397	1.31584	4036.25	FALSE	208
2022-09-12	11:59:17	0.759962	3.38046	11.215	3834.42	FALSE	208
2022-09-12	11:59:17	2.58831	11.5133	11.215	4047.76	FALSE	208
2022-09-12	11:59:17	4.53701	20.1815	11.215	3854.61	1	209
2022-09-12	11:59:17	2.19966	9.78453	11.215	4057.55	FALSE	209
2022-09-12	11:59:18	1.80902	8.04688	5.96026	3862.65	FALSE	209
2022-09-12	11:59:18	0.98327	4.37378	5.96026	4061.92	FALSE	209
2022-09-12	11:59:18	1.22749	5.46012	5.96026	3868.11	FALSE	209
2022-09-12	11:59:19	2.60118	11.5706	15.0922	4073.49	FALSE	209
2022-09-12	11:59:19	2.92795	13.0241	15.0922	3881.14	FALSE	209
2022-09-12	11:59:19	3.58943	15.9665	15.0922	4089.46	1	210
2022-09-12	11:59:19	4.45294	19.8076	15.0922	3900.94	1	211
2022-09-12	11:59:20	3.41014	15.169	8.60975	4104.63	1	212
2022-09-12	11:59:20	1.26388	5.62199	8.60975	3906.57	FALSE	212
2022-09-12	11:59:20	2.22637	9.90334	8.60975	4114.53	FALSE	212
2022-09-12	11:59:20	0.841845	3.74469	8.60975	3910.31	FALSE	212
2022-09-12	11:59:21	3.56703	15.8669	15.3169	4130.4	1	213
2022-09-12	11:59:21	2.34709	10.4403	15.3169	3920.75	FALSE	213
2022-09-12	11:59:21	4.45395	19.8121	15.3169	4150.21	1	214
2022-09-12	11:59:21	3.40551	15.1484	15.3169	3935.9	1	215
2022-09-12	11:59:22	1.99182	8.86001	4.26052	4159.07	FALSE	215
2022-09-12	11:59:22	0.363015	1.61476	4.26052	3937.51	FALSE	215
2022-09-12	11:59:22	0.518588	2.30678	4.26052	4161.38	FALSE	215
2022-09-12	11:59:23	0.266934	1.18738	1.51556	3938.7	FALSE	215
2022-09-12	11:59:23	0.386527	1.71935	1.51556	4163.1	FALSE	215
2022-09-12	11:59:23	0.396043	1.76168	1.51556	3940.46	FALSE	215
2022-09-12	11:59:23	0.313346	1.39383	1.51556	4164.49	FALSE	215
2022-09-12	11:59:24	0.376043	1.67271	1.75444	3942.14	FALSE	215
2022-09-12	11:59:24	0.455687	2.02699	1.75444	4166.52	FALSE	215
2022-09-12	11:59:24	0.412939	1.83684	1.75444	3943.97	FALSE	215
2022-09-12	11:59:24	0.33299	1.48121	1.75444	4168	FALSE	215
2022-09-12	11:59:25	0.274771	1.22224	1.30865	3945.2	FALSE	215
2022-09-12	11:59:25	0.372125	1.65529	1.30865	4169.65	FALSE	215
2022-09-12	11:59:25	0.233499	1.03865	1.30865	3946.23	FALSE	215
2022-09-12	11:59:25	0.2964	1.31845	1.30865	4170.97	FALSE	215
2022-09-12	11:59:26	0.241947	1.07623	1.08196	3947.31	FALSE	215
2022-09-12	11:59:26	0.190089	0.845554	1.08196	4171.82	FALSE	215
2022-09-12	11:59:26	0.297672	1.3241	1.08196	3948.63	FALSE	215
2022-09-12	11:59:27	0.291972	1.29875	1.85166	4173.12	FALSE	215
2022-09-12	11:59:27	0.72841	3.24011	1.85166	3951.87	FALSE	215
2022-09-12	11:59:27	0.336552	1.49705	1.85166	4174.61	FALSE	215
2022-09-12	11:59:27	0.308155	1.37074	1.85166	3953.25	FALSE	215
2022-09-12	11:59:28	0.320115	1.42394	2.93909	4176.04	FALSE	215
2022-09-12	11:59:28	0.29584	1.31596	2.93909	3954.56	FALSE	215
2022-09-12	11:59:28	0.546527	2.43106	2.93909	4178.47	FALSE	215
2022-09-12	11:59:28	1.48047	6.58543	2.93909	3961.15	FALSE	215
2022-09-12	11:59:29	1.69263	7.52916	5.35227	4186	FALSE	215
2022-09-12	11:59:29	1.38383	6.15555	5.35227	3967.3	FALSE	215
2022-09-12	11:59:29	0.896043	3.98578	5.35227	4189.98	FALSE	215
2022-09-12	11:59:29	0.840471	3.73858	5.35227	3971.04	FALSE	215
2022-09-12	11:59:30	1.3735	6.1096	3.25045	4196.09	FALSE	215
2022-09-12	11:59:30	0.56785	2.52591	3.25045	3973.57	FALSE	215
2022-09-12	11:59:30	0.250853	1.11584	3.25045	4197.21	FALSE	215
2022-09-12	11:59:31	0.265458	1.18081	1.13423	3974.75	FALSE	215
2022-09-12	11:59:31	0.309071	1.37481	1.13423	4198.58	FALSE	215
2022-09-12	11:59:31	0.219402	0.975944	1.13423	3975.72	FALSE	215
2022-09-12	11:59:31	0.226018	1.00537	1.13423	4199.59	FALSE	215
2022-09-12	11:59:32	0.34154	1.51924	1.27594	3977.24	FALSE	215
2022-09-12	11:59:32	0.205407	0.913691	1.27594	4200.5	FALSE	215
2022-09-12	11:59:32	0.38327	1.70486	1.27594	3978.95	FALSE	215
2022-09-12	11:59:32	0.217163	0.965984	1.27594	4201.47	FALSE	215
2022-09-12	11:59:33	1.21823	5.41893	11.5743	3984.37	FALSE	215
2022-09-12	11:59:33	3.19472	14.2108	11.5743	4215.68	1	216
2022-09-12	11:59:33	4.03904	17.9665	11.5743	4002.33	1	217
2022-09-12	11:59:33	1.95609	8.70108	11.5743	4224.38	FALSE	217
2022-09-12	11:59:34	1.76882	7.86807	11.3307	4010.2	FALSE	217
2022-09-12	11:59:34	2.65095	11.792	11.3307	4236.17	FALSE	217
2022-09-12	11:59:34	3.99182	17.7564	11.3307	4027.96	1	218
2022-09-12	11:59:34	1.77747	7.90654	11.3307	4244.08	FALSE	218
2022-09-12	11:59:35	2.32434	10.3391	13.7613	4038.3	FALSE	218
2022-09-12	11:59:35	3.26439	14.5207	13.7613	4258.6	1	219
2022-09-12	11:59:35	3.69228	16.424	13.7613	4054.72	1	220
2022-09-12	11:59:36	4.76454	21.1936	9.32611	4279.79	1	221
2022-09-12	11:59:36	0.93986	4.18069	9.32611	4058.9	FALSE	221
2022-09-12	11:59:36	1.09258	4.86001	9.32611	4284.65	FALSE	221
2022-09-12	11:59:36	1.58943	7.0701	9.32611	4065.97	FALSE	221
2022-09-12	11:59:37	2.8452	12.656	10.6311	4297.31	FALSE	221
2022-09-12	11:59:37	3.21278	14.2911	10.6311	4080.26	1	222
2022-09-12	11:59:37	2.81334	12.5143	10.6311	4309.82	FALSE	222
2022-09-12	11:59:37	0.688562	3.06286	10.6311	4083.33	FALSE	222
2022-09-12	11:59:38	0.349936	1.55659	1.60848	4311.38	FALSE	222
2022-09-12	11:59:38	0.314415	1.39858	1.60848	4084.72	FALSE	222
2022-09-12	11:59:38	0.294211	1.30871	1.60848	4312.69	FALSE	222
2022-09-12	11:59:38	0.48785	2.17005	1.60848	4086.89	FALSE	222
2022-09-12	11:59:39	1.25472	5.58125	5.09522	4318.27	FALSE	222
2022-09-12	11:59:39	1.30581	5.8085	5.09522	4092.7	FALSE	222
2022-09-12	11:59:39	0.87584	3.89591	5.09522	4322.17	FALSE	222
2022-09-12	11:59:40	0.358028	1.59258	1.58703	4094.3	FALSE	222
2022-09-12	11:59:40	0.338944	1.50769	1.58703	4323.67	FALSE	222
2022-09-12	11:59:40	0.396247	1.76259	1.58703	4096.06	FALSE	222
2022-09-12	11:59:40	0.333906	1.48528	1.58703	4325.16	FALSE	222
2022-09-12	11:59:41	0.30383	1.3515	3.09376	4097.41	FALSE	222
2022-09-12	11:59:41	0.19472	0.866154	3.09376	4326.03	FALSE	222
2022-09-12	11:59:41	0.252176	1.12173	3.09376	4098.53	FALSE	222
2022-09-12	11:59:41	2.03131	9.03567	3.09376	4335.06	FALSE	222
2022-09-12	11:59:42	2.77971	12.3647	4.69314	4110.9	FALSE	222
2022-09-12	11:59:42	0.955585	4.25063	4.69314	4339.31	FALSE	222
2022-09-12	11:59:42	0.314109	1.39722	4.69314	4112.29	FALSE	222
2022-09-12	11:59:42	0.170853	0.759988	4.69314	4340.07	FALSE	222
2022-09-12	11:59:43	0.139199	0.619185	0.86774	4112.91	FALSE	222
2022-09-12	11:59:43	0.138232	0.614884	0.86774	4340.69	FALSE	222
2022-09-12	11:59:43	0.307799	1.36915	0.86774	4114.28	FALSE	222
2022-09-12	11:59:44	0.164084	0.729878	0.614147	4341.42	FALSE	222
2022-09-12	11:59:44	0.106629	0.474307	0.614147	4114.76	FALSE	222
2022-09-12	11:59:44	0.15411	0.685512	0.614147	4342.1	FALSE	222
2022-09-12	11:59:44	0.127443	0.566892	0.614147	4115.32	FALSE	222
2022-09-12	11:59:45	0.205356	0.913465	0.894734	4343.02	FALSE	222
2022-09-12	11:59:45	0.172481	0.76723	0.894734	4116.09	FALSE	222
2022-09-12	11:59:45	0.239657	1.06604	0.894734	4344.08	FALSE	222
2022-09-12	11:59:45	0.187087	0.8322	0.894734	4116.92	FALSE	222
2022-09-12	11:59:46	0.360216	1.60231	1.68709	4345.68	FALSE	222
2022-09-12	11:59:46	0.526985	2.34413	1.68709	4119.27	FALSE	222
2022-09-12	11:59:46	0.308257	1.37119	1.68709	4347.05	FALSE	222
2022-09-12	11:59:46	0.321641	1.43072	1.68709	4120.7	FALSE	222
2022-09-12	11:59:47	0.412634	1.83548	2.66211	4348.89	FALSE	222
2022-09-12	11:59:47	0.705662	3.13893	2.66211	4123.84	FALSE	222
2022-09-12	11:59:47	0.677112	3.01193	2.66211	4351.9	FALSE	222
2022-09-12	11:59:48	0.649835	2.8906	3.94661	4126.73	FALSE	222
2022-09-12	11:59:48	0.669427	2.97775	3.94661	4354.88	FALSE	222
2022-09-12	11:59:48	0.823321	3.6623	3.94661	4130.39	FALSE	222
2022-09-12	11:59:48	1.40637	6.25582	3.94661	4361.14	FALSE	222
2022-09-12	11:59:49	1.62826	7.24283	8.74915	4137.63	FALSE	222
2022-09-12	11:59:49	2.54846	11.3361	8.74915	4372.47	FALSE	222
2022-09-12	11:59:49	1.8049	8.02856	8.74915	4145.66	FALSE	222
2022-09-12	11:59:49	1.88597	8.38917	8.74915	4380.86	FALSE	222
2022-09-12	11:59:50	1.07569	4.78488	4.28884	4150.45	FALSE	222
2022-09-12	11:59:50	1.25177	5.56812	4.28884	4386.43	FALSE	222
2022-09-12	11:59:50	0.822913	3.66048	4.28884	4154.11	FALSE	222
2022-09-12	11:59:50	0.706323	3.14187	4.28884	4389.57	FALSE	222
2022-09-12	11:59:51	1.05019	4.67146	4.30202	4158.78	FALSE	222
2022-09-12	11:59:51	0.888359	3.9516	4.30202	4393.52	FALSE	222
2022-09-12	11:59:51	0.962862	4.283	4.30202	4163.06	FALSE	222
2022-09-12	11:59:52	0.903677	4.01974	6.7848	4397.54	FALSE	222
2022-09-12	11:59:52	1.06673	4.74503	6.7848	4167.8	FALSE	222
2022-09-12	11:59:52	1.17599	5.23104	6.7848	4402.77	FALSE	222
2022-09-12	11:59:52	2.95477	13.1434	6.7848	4180.95	FALSE	222
2022-09-12	11:59:53	4.19772	18.6723	10.5565	4421.45	1	223
2022-09-12	11:59:53	2.52632	11.2376	10.5565	4192.19	FALSE	223
2022-09-12	11:59:53	1.53085	6.80953	10.5565	4428.26	FALSE	223
2022-09-12	11:59:53	1.23798	5.50678	10.5565	4197.69	FALSE	223
2022-09-12	11:59:54	1.56729	6.97162	9.44365	4435.23	FALSE	223
2022-09-12	11:59:54	1.44953	6.4478	9.44365	4204.14	FALSE	223
2022-09-12	11:59:54	2.71049	12.0568	9.44365	4447.28	FALSE	223
2022-09-12	11:59:54	2.7648	12.2984	9.44365	4216.44	FALSE	223
2022-09-12	11:59:55	1.95513	8.69681	9.32905	4455.98	FALSE	223
2022-09-12	11:59:55	2.01777	8.97544	9.32905	4225.41	FALSE	223
2022-09-12	11:59:55	2.31889	10.3149	9.32905	4466.3	FALSE	223
2022-09-12	11:59:56	1.97467	8.78373	15.939	4234.2	FALSE	223
2022-09-12	11:59:56	2.02892	9.02504	15.939	4475.32	FALSE	223
2022-09-12	11:59:56	4.11635	18.3103	15.939	4252.51	1	224
2022-09-12	11:59:56	6.21309	27.6371	15.939	4502.96	1	225
2022-09-12	11:59:57	3.77477	16.7909	17.4286	4269.3	1	226
2022-09-12	11:59:57	3.38378	15.0517	17.4286	4518.01	1	227
2022-09-12	11:59:57	4.23024	18.817	17.4286	4288.12	1	228
2022-09-12	11:59:57	4.28367	19.0546	17.4286	4537.06	1	229
2022-09-12	11:59:58	3.02194	13.4422	19.9997	4301.56	1	230
2022-09-12	11:59:58	3.61904	16.0982	19.9997	4553.16	1	231
2022-09-12	11:59:58	5.44159	24.2053	19.9997	4325.76	1	232
2022-09-12	11:59:58	5.90194	26.253	19.9997	4579.41	1	233
2022-09-12	11:59:59	4.9392	21.9705	25.34	4347.73	1	234
2022-09-12	11:59:59	6.62235	29.4575	25.34	4608.87	1	235
2022-09-12	11:59:59	5.52851	24.5919	25.34	4372.33	1	236
2022-09-12	12:00:00	3.26897	14.541	14.6354	4623.41	1	237
2022-09-12	12:00:00	2.15665	9.59321	14.6354	4381.92	FALSE	237
2022-09-12	12:00:00	3.40362	15.14	14.6354	4638.55	1	238
2022-09-12	12:00:00	4.33151	19.2674	14.6354	4401.19	1	239
2022-09-12	12:00:01	4.95095	22.0228	19.6193	4660.58	1	240
2022-09-12	12:00:01	4.72831	21.0325	19.6193	4422.22	1	241
2022-09-12	12:00:01	4.86678	21.6484	19.6193	4682.22	1	242
2022-09-12	12:00:01	3.0964	13.7734	19.6193	4435.99	1	243
2022-09-12	12:00:02	5.95711	26.4984	25.9432	4708.72	1	244
2022-09-12	12:00:02	3.80836	16.9403	25.9432	4452.93	1	245
2022-09-12	12:00:02	8.11843	36.1124	25.9432	4744.84	1	246
2022-09-12	12:00:02	5.44525	24.2216	25.9432	4477.15	1	247
2022-09-12	12:00:03	4.74882	21.1237	13.1238	4765.96	1	248
2022-09-12	12:00:03	3.92805	17.4728	13.1238	4494.63	1	249
2022-09-12	12:00:03	1.89996	8.4514	13.1238	4774.41	FALSE	249
2022-09-12	12:00:03	1.22459	5.44722	13.1238	4500.07	FALSE	249
2022-09-12	12:00:04	1.79645	7.99097	13.4171	4782.4	FALSE	249
2022-09-12	12:00:04	3.33436	14.8319	13.4171	4514.91	1	250
2022-09-12	12:00:04	3.91808	17.4284	13.4171	4799.83	1	251
2022-09-12	12:00:05	2.72912	12.1397	11.4382	4527.05	FALSE	251
2022-09-12	12:00:05	2.33447	10.3842	11.4382	4810.21	FALSE	251
2022-09-12	12:00:05	2.94403	13.0956	11.4382	4540.14	FALSE	251
2022-09-12	12:00:05	2.27803	10.1331	11.4382	4820.35	FALSE	251
2022-09-12	12:00:06	2.83513	12.6112	19.1803	4552.75	FALSE	251
2022-09-12	12:00:06	6.49986	28.9127	19.1803	4849.26	1	252
2022-09-12	12:00:06	3.65431	16.2551	19.1803	4569.01	1	253
2022-09-12	12:00:06	4.25843	18.9423	19.1803	4868.2	1	254
2022-09-12	12:00:07	4.07457	18.1245	12.716	4587.13	1	255
2022-09-12	12:00:07	2.27599	10.1241	12.716	4878.33	FALSE	255
2022-09-12	12:00:07	2.60617	11.5928	12.716	4598.73	FALSE	255
2022-09-12	12:00:07	2.47803	11.0228	12.716	4889.35	FALSE	255
2022-09-12	12:00:08	4.88658	21.7365	12.676	4620.46	1	256
2022-09-12	12:00:08	1.61864	7.20003	12.676	4896.55	FALSE	256
2022-09-12	12:00:08	2.04383	9.09136	12.676	4629.55	FALSE	256
2022-09-12	12:00:09	1.85966	8.27214	23.8314	4904.82	FALSE	256
2022-09-12	12:00:09	5.59884	24.9048	23.8314	4654.46	1	257
2022-09-12	12:00:09	7.72037	34.3417	23.8314	4939.16	1	258
2022-09-12	12:00:09	6.25126	27.8069	23.8314	4682.26	1	259
2022-09-12	12:00:10	8.24632	36.6813	31.6047	4975.84	1	260
2022-09-12	12:00:10	6.04561	26.8921	31.6047	4709.16	1	261
2022-09-12	12:00:10	11.1158	49.4453	31.6047	5025.29	1	262
2022-09-12	12:00:10	3.01248	13.4001	31.6047	4722.56	1	263
2022-09-12	12:00:11	1.87268	8.33006	6.19516	5033.62	FALSE	263
2022-09-12	12:00:11	0.961539	4.27712	6.19516	4726.83	FALSE	263
2022-09-12	12:00:11	1.22103	5.43139	6.19516	5039.05	FALSE	263
2022-09-12	12:00:11	1.51569	6.74209	6.19516	4733.58	FALSE	263
2022-09-12	12:00:12	3.25716	14.4885	24.5815	5053.54	1	264
2022-09-12	12:00:12	4.32032	19.2176	24.5815	4752.79	1	265
2022-09-12	12:00:12	9.00103	40.0384	24.5815	5093.58	1	266
2022-09-12	12:00:13	5.3735	23.9024	21.7033	4776.7	1	267
2022-09-12	12:00:13	4.38474	19.5042	21.7033	5113.08	1	268

## Sheet: Sunny_star_2022912115450 (E (2)
Date	Time	Lbs	Newtons	Total force x time	Total Time Steps Force >3		**GoPro Fitting: 1144
2022-09-12	11:55:13	0.480115	2.13565	2.13565	FALSE	0			Total force x time	5113.08
2022-09-12	11:55:13	0.659962	2.93564	2.93564	FALSE	0			Total Time Steps Force >3	268
2022-09-12	11:55:13	2.42861	10.8029	12.9386	FALSE	0
2022-09-12	11:55:13	0.314669	1.39971	4.33535	FALSE	0
2022-09-12	11:55:14	0.222659	0.990432	13.929	FALSE	0
2022-09-12	11:55:14	0.223524	0.994279	5.32963	FALSE	0
2022-09-12	11:55:14	-0.0778496	-0.346291	13.929	FALSE	0
2022-09-12	11:55:14	0.164542	0.731916	6.06155	FALSE	0
2022-09-12	11:55:15	0.189987	0.8451	14.7741	FALSE	0
2022-09-12	11:55:15	0.361336	1.60729	7.66884	FALSE	0
2022-09-12	11:55:15	0.273193	1.21522	15.9893	FALSE	0
2022-09-12	11:55:16	0.421285	1.87396	9.5428	FALSE	0
2022-09-12	11:55:16	0.351921	1.56541	17.5548	FALSE	0
2022-09-12	11:55:16	0.189224	0.841706	10.3845	FALSE	0
2022-09-12	11:55:16	0.00800278	0.035598	17.5904	FALSE	0
2022-09-12	11:55:17	0.16668	0.741426	11.1259	FALSE	0
2022-09-12	11:55:17	1.00271	4.46025	22.0506	FALSE	0
2022-09-12	11:55:17	2.98179	13.2636	24.3895	FALSE	0
2022-09-12	11:55:17	1.89737	8.43988	30.4905	FALSE	0
2022-09-12	11:55:18	0.567239	2.52319	26.9127	FALSE	0
2022-09-12	11:55:18	0.409936	1.82348	32.314	FALSE	0
2022-09-12	11:55:18	0.303779	1.35127	28.264	FALSE	0
2022-09-12	11:55:18	0.401438	1.78568	34.0996	FALSE	0
2022-09-12	11:55:19	0.239657	1.06604	29.33	FALSE	0
2022-09-12	11:55:19	0.150038	0.667399	34.767	FALSE	0
2022-09-12	11:55:19	0.334822	1.48936	30.8194	FALSE	0
2022-09-12	11:55:20	0.183779	0.817486	35.5845	FALSE	0
2022-09-12	11:55:20	0.426578	1.8975	32.7169	FALSE	0
2022-09-12	11:55:20	0.149021	0.662875	36.2474	FALSE	0
2022-09-12	11:55:20	0.338232	1.50452	34.2214	FALSE	0
2022-09-12	11:55:21	0.435382	1.93667	38.1841	FALSE	0
2022-09-12	11:55:21	0.327036	1.45472	35.6761	FALSE	0
2022-09-12	11:55:21	0.389122	1.73089	39.915	FALSE	0
2022-09-12	11:55:21	0.20897	0.92954	36.6057	FALSE	0
2022-09-12	11:55:22	0.424186	1.88686	41.8018	FALSE	0
2022-09-12	11:55:22	0.144033	0.640688	37.2464	FALSE	0
2022-09-12	11:55:22	0.35355	1.57266	43.3745	FALSE	0
2022-09-12	11:55:22	0.00550917	0.0245059	37.2709	FALSE	0
2022-09-12	11:55:23	-0.324618	-1.44397	43.3745	FALSE	0
2022-09-12	11:55:23	-0.37159	-1.65291	37.2709	FALSE	0
2022-09-12	11:55:23	0.0966541	0.429937	43.8044	FALSE	0
2022-09-12	11:55:24	0.0909544	0.404583	37.6755	FALSE	0
2022-09-12	11:55:24	0.581489	2.58658	46.391	FALSE	0
2022-09-12	11:55:24	2.4962	11.1036	48.7791	FALSE	0
2022-09-12	11:55:24	2.38327	10.6013	56.9923	FALSE	0
2022-09-12	11:55:25	0.537061	2.38895	51.168	FALSE	0
2022-09-12	11:55:25	2.49564	11.1011	68.0934	FALSE	0
2022-09-12	11:55:25	1.01324	4.50709	55.6751	FALSE	0
2022-09-12	11:55:25	0.24556	1.0923	69.1857	FALSE	0
2022-09-12	11:55:26	0.136705	0.608091	56.2832	FALSE	0
2022-09-12	11:55:26	0.114822	0.510751	69.6964	FALSE	0
2022-09-12	11:55:26	0.376705	1.67566	57.9589	FALSE	0
2022-09-12	11:55:26	0.804745	3.57967	73.2761	FALSE	0
2022-09-12	11:55:27	0.578079	2.57141	60.5303	FALSE	0
2022-09-12	11:55:27	0.605509	2.69343	75.9695	FALSE	0
2022-09-12	11:55:27	0.779453	3.46716	63.9974	FALSE	0
2022-09-12	11:55:28	1.06205	4.72421	80.6937	FALSE	0
2022-09-12	11:55:28	2.75258	12.244	76.2415	FALSE	0
2022-09-12	11:55:28	2.85284	12.69	93.3837	FALSE	0
2022-09-12	11:55:28	2.68403	11.9391	88.1806	FALSE	0
2022-09-12	11:55:29	0.642557	2.85822	96.2419	FALSE	0
2022-09-12	11:55:29	0.440929	1.96134	90.1419	FALSE	0
2022-09-12	11:55:29	0.206527	0.918673	97.1606	FALSE	0
2022-09-12	11:55:29	0.0678501	0.301811	90.4437	FALSE	0
2022-09-12	11:55:30	0.00428777	0.0190729	97.1797	FALSE	0
2022-09-12	11:55:30	0.0928883	0.413186	90.8569	FALSE	0
2022-09-12	11:55:30	2.59691	11.5516	108.731	FALSE	0
2022-09-12	11:55:30	4.94999	22.0185	112.875	1	1
2022-09-12	11:55:31	3.06174	13.6192	122.351	1	2
2022-09-12	11:55:31	1.54327	6.86477	119.74	FALSE	2
2022-09-12	11:55:31	2.24765	9.998	132.348	FALSE	2
2022-09-12	11:55:31	0.608969	2.70882	122.449	FALSE	2
2022-09-12	11:55:32	0.547901	2.43717	134.786	FALSE	2
2022-09-12	11:55:32	0.697621	3.10316	125.552	FALSE	2
2022-09-12	11:55:32	0.162965	0.724901	135.511	FALSE	2
2022-09-12	11:55:33	0.39126	1.7404	127.293	FALSE	2
2022-09-12	11:55:33	0.0633717	0.28189	135.792	FALSE	2
2022-09-12	11:55:33	0.15355	0.683021	127.976	FALSE	2
2022-09-12	11:55:33	0.115738	0.514826	136.307	FALSE	2
2022-09-12	11:55:34	0.0741605	0.329881	128.305	FALSE	2
2022-09-12	11:55:34	0.251158	1.1172	137.424	FALSE	2
2022-09-12	11:55:34	0.0524811	0.233446	128.539	FALSE	2
2022-09-12	11:55:34	0.19813	0.881322	138.306	FALSE	2
2022-09-12	11:55:35	0.0591987	0.263328	128.802	FALSE	2
2022-09-12	11:55:35	0.111921	0.497847	138.804	FALSE	2
2022-09-12	11:55:35	-0.06416	-0.285397	128.802	FALSE	2
2022-09-12	11:55:35	0.222965	0.991793	139.795	FALSE	2
2022-09-12	11:55:36	2.44332	10.8684	139.671	FALSE	2
2022-09-12	11:55:36	2.16342	9.62332	149.419	FALSE	2
2022-09-12	11:55:36	0.807697	3.5928	143.263	FALSE	2
2022-09-12	11:55:37	0.358791	1.59597	151.015	FALSE	2
2022-09-12	11:55:37	0.566883	2.52161	145.785	FALSE	2
2022-09-12	11:55:37	0.0530409	0.235937	151.251	FALSE	2
2022-09-12	11:55:37	0.290751	1.29332	147.078	FALSE	2
2022-09-12	11:55:38	0.279504	1.24329	152.494	FALSE	2
2022-09-12	11:55:38	1.05253	4.68186	151.76	FALSE	2
2022-09-12	11:55:38	1.30561	5.80761	158.302	FALSE	2
2022-09-12	11:55:38	0.401743	1.78703	153.547	FALSE	2
2022-09-12	11:55:39	0.314618	1.39948	159.701	FALSE	2
2022-09-12	11:55:39	0.182557	0.81205	154.359	FALSE	2
2022-09-12	11:55:39	0.806832	3.58895	163.29	FALSE	2
2022-09-12	11:55:39	20.4806	91.1018	245.461	1	3
2022-09-12	11:55:40	20.8866	92.9078	256.198	1	4
2022-09-12	11:55:40	4.80963	21.3942	266.855	1	5
2022-09-12	11:55:40	2.34704	10.4401	266.638	FALSE	5
2022-09-12	11:55:41	2.6592	11.8287	278.684	FALSE	5
2022-09-12	11:55:41	1.81793	8.08652	274.724	FALSE	5
2022-09-12	11:55:41	8.44403	37.5607	316.245	1	6
2022-09-12	11:55:41	9.01095	40.0825	314.807	1	7
2022-09-12	11:55:42	10.7954	48.0201	364.265	1	8
2022-09-12	11:55:42	5.31533	23.6437	338.451	1	9
2022-09-12	11:55:42	3.51619	15.6407	379.906	1	10
2022-09-12	11:55:42	7.83105	34.8341	373.285	1	11
2022-09-12	11:55:43	5.20627	23.1585	403.064	1	12
2022-09-12	11:55:43	5.17833	23.0342	396.319	1	13
2022-09-12	11:55:43	1.95182	8.68209	411.746	FALSE	13
2022-09-12	11:55:43	1.08795	4.83942	401.158	FALSE	13
2022-09-12	11:55:44	2.14286	9.53187	421.278	FALSE	13
2022-09-12	11:55:44	3.44759	15.3356	416.494	1	14
2022-09-12	11:55:44	5.67818	25.2577	446.536	1	15
2022-09-12	11:55:45	8.64749	38.4658	454.96	1	16
2022-09-12	11:55:45	2.02266	8.9972	455.533	FALSE	16
2022-09-12	11:55:45	3.12652	13.9074	468.867	1	17
2022-09-12	11:55:45	7.76937	34.5597	490.093	1	18
2022-09-12	11:55:46	5.37543	23.911	492.778	1	19
2022-09-12	11:55:46	7.14693	31.791	521.884	1	20
2022-09-12	11:55:46	4.84851	21.5671	514.345	1	21
2022-09-12	11:55:46	2.99594	13.3265	535.21	FALSE	21
2022-09-12	11:55:47	3.41782	15.2031	529.548	1	22
2022-09-12	11:55:47	2.40963	10.7185	545.929	FALSE	22
2022-09-12	11:55:47	5.3107	23.6231	553.171	1	23
2022-09-12	11:55:47	3.88245	17.2699	563.199	1	24
2022-09-12	11:55:48	3.74128	16.642	569.813	1	25
2022-09-12	11:55:48	4.28159	19.0454	582.244	1	26
2022-09-12	11:55:48	5.86108	26.0713	595.885	1	27
2022-09-12	11:55:49	12.1592	54.0866	636.33	1	28
2022-09-12	11:55:49	5.95054	26.4692	622.354	1	29
2022-09-12	11:55:49	1.28525	5.71705	642.048	FALSE	29
2022-09-12	11:55:49	1.1249	5.00378	627.358	FALSE	29
2022-09-12	11:55:50	5.31029	23.6212	665.669	1	30
2022-09-12	11:55:50	6.59909	29.3541	656.712	1	31
2022-09-12	11:55:50	4.62729	20.5831	686.252	1	32
2022-09-12	11:55:50	4.38988	19.5271	676.239	1	33
2022-09-12	11:55:51	2.21793	9.8658	696.118	FALSE	33
2022-09-12	11:55:51	0.339758	1.51131	677.75	FALSE	33
2022-09-12	11:55:51	0.459555	2.04419	698.162	FALSE	33
2022-09-12	11:55:51	0.201387	0.89581	678.646	FALSE	33
2022-09-12	11:55:52	0.371514	1.65257	699.814	FALSE	33
2022-09-12	11:55:52	0.144135	0.641141	679.287	FALSE	33
2022-09-12	11:55:52	0.280369	1.24714	701.062	FALSE	33
2022-09-12	11:55:52	0.185255	0.824051	680.111	FALSE	33
2022-09-12	11:55:53	0.08556	0.380588	701.442	FALSE	33
2022-09-12	11:55:53	0.030242	0.134522	680.246	FALSE	33
2022-09-12	11:55:53	-0.0382568	-0.170174	701.442	FALSE	33
2022-09-12	11:55:54	0.164644	0.732369	680.978	FALSE	33
2022-09-12	11:55:54	0.269936	1.20073	702.643	FALSE	33
2022-09-12	11:55:54	0.454822	2.02314	683.001	FALSE	33
2022-09-12	11:55:54	0.538486	2.39529	705.038	FALSE	33
2022-09-12	11:55:55	1.75487	7.80601	690.807	FALSE	33
2022-09-12	11:55:55	4.89492	21.7736	726.812	1	34
2022-09-12	11:55:55	7.39243	32.883	723.69	1	35
2022-09-12	11:55:55	6.48138	28.8305	755.642	1	36
2022-09-12	11:55:56	2.43436	10.8285	734.519	FALSE	36
2022-09-12	11:55:56	2.27141	10.1037	765.746	FALSE	36
2022-09-12	11:55:56	2.24052	9.96628	744.485	FALSE	36
2022-09-12	11:55:56	5.68627	25.2937	791.04	1	37
2022-09-12	11:55:57	6.4681	28.7714	773.256	1	38
2022-09-12	11:55:57	3.37121	14.9958	806.035	1	39
2022-09-12	11:55:57	5.44729	24.2306	797.487	1	40
2022-09-12	11:55:58	5.45446	24.2625	830.298	1	41
2022-09-12	11:55:58	4.61095	20.5104	817.997	1	42
2022-09-12	11:55:58	2.44306	10.8672	841.165	FALSE	42
2022-09-12	11:55:58	0.902353	4.01385	822.011	FALSE	42
2022-09-12	11:55:59	0.708104	3.14979	844.315	FALSE	42
2022-09-12	11:55:59	0.239911	1.06717	823.078	FALSE	42
2022-09-12	11:55:59	0.28902	1.28562	845.601	FALSE	42
2022-09-12	11:55:59	0.447697	1.99145	825.07	FALSE	42
2022-09-12	11:56:00	0.243066	1.08121	846.682	FALSE	42
2022-09-12	11:56:00	-0.0587656	-0.261401	825.07	FALSE	42
2022-09-12	11:56:00	-0.112913	-0.50226	846.682	FALSE	42
2022-09-12	11:56:00	0.198792	0.884267	825.954	FALSE	42
2022-09-12	11:56:01	0.0699366	0.311092	846.993	FALSE	42
2022-09-12	11:56:01	0.14556	0.64748	826.602	FALSE	42
2022-09-12	11:56:01	0.417519	1.85721	848.85	FALSE	42
2022-09-12	11:56:02	1.44373	6.422	833.024	FALSE	42
2022-09-12	11:56:02	0.52729	2.34549	851.196	FALSE	42
2022-09-12	11:56:02	0.04556	0.20266	833.226	FALSE	42
2022-09-12	11:56:02	0.285916	1.27181	852.467	FALSE	42
2022-09-12	11:56:03	0.176552	0.785339	834.012	FALSE	42
2022-09-12	11:56:03	0.31126	1.38455	853.852	FALSE	42
2022-09-12	11:56:03	0.125204	0.556932	834.568	FALSE	42
2022-09-12	11:56:03	0.433601	1.92874	855.781	FALSE	42
2022-09-12	11:56:04	0.292023	1.29898	835.867	FALSE	42
2022-09-12	11:56:04	0.443321	1.97198	857.753	FALSE	42
2022-09-12	11:56:04	0.385356	1.71414	837.582	FALSE	42
2022-09-12	11:56:04	0.311718	1.38658	859.139	FALSE	42
2022-09-12	11:56:05	0.422557	1.87962	839.461	FALSE	42
2022-09-12	11:56:05	0.470038	2.09082	861.23	FALSE	42
2022-09-12	11:56:05	0.396603	1.76417	841.225	FALSE	42
2022-09-12	11:56:06	0.472583	2.10214	863.332	FALSE	42
2022-09-12	11:56:06	0.450649	2.00458	843.23	FALSE	42
2022-09-12	11:56:06	0.293804	1.3069	864.639	FALSE	42
2022-09-12	11:56:06	0.299199	1.3309	844.561	FALSE	42
2022-09-12	11:56:07	0.383677	1.70667	866.346	FALSE	42
2022-09-12	11:56:07	0.326832	1.45381	846.015	FALSE	42
2022-09-12	11:56:07	0.226018	1.00537	867.351	FALSE	42
2022-09-12	11:56:07	2.09508	9.31933	855.334	FALSE	42
2022-09-12	11:56:08	3.38505	15.0574	882.408	1	43
2022-09-12	11:56:08	5.11243	22.7411	878.075	1	44
2022-09-12	11:56:08	2.87289	12.7792	895.188	FALSE	44
2022-09-12	11:56:08	4.29843	19.1203	897.195	1	45
2022-09-12	11:56:09	6.82718	30.3687	925.556	1	46
2022-09-12	11:56:09	3.85884	17.1649	914.36	1	47
2022-09-12	11:56:09	7.77685	34.593	960.149	1	48
2022-09-12	11:56:10	6.55044	29.1377	943.498	1	49
2022-09-12	11:56:10	2.82133	12.5498	972.699	FALSE	49
2022-09-12	11:56:10	2.82184	12.5521	956.05	FALSE	49
2022-09-12	11:56:10	1.62525	7.22944	979.929	FALSE	49
2022-09-12	11:56:11	1.75798	7.81985	963.87	FALSE	49
2022-09-12	11:56:11	2.15411	9.58191	989.511	FALSE	49
2022-09-12	11:56:11	0.579911	2.57956	966.449	FALSE	49
2022-09-12	11:56:11	0.478079	2.12659	991.637	FALSE	49
2022-09-12	11:56:12	1.49513	6.65064	973.1	FALSE	49
2022-09-12	11:56:12	2.69747	11.9989	1003.64	FALSE	49
2022-09-12	11:56:12	2.60983	11.609	984.709	FALSE	49
2022-09-12	11:56:12	2.86195	12.7305	1016.37	FALSE	49
2022-09-12	11:56:13	0.281794	1.25348	985.963	FALSE	49
2022-09-12	11:56:13	1.17742	5.2374	1021.6	FALSE	49
2022-09-12	11:56:13	0.898486	3.99665	989.959	FALSE	49
2022-09-12	11:56:13	5.23787	23.2991	1044.9	1	50
2022-09-12	11:56:14	3.71798	16.5383	1006.5	1	51
2022-09-12	11:56:14	3.92016	17.4377	1062.34	1	52
2022-09-12	11:56:14	0.961489	4.2769	1010.77	FALSE	52
2022-09-12	11:56:15	1.24307	5.52942	1067.87	FALSE	52
2022-09-12	11:56:15	0.604389	2.68844	1013.46	FALSE	52
2022-09-12	11:56:15	0.30444	1.35421	1069.22	FALSE	52
2022-09-12	11:56:15	0.440115	1.95772	1015.42	FALSE	52
2022-09-12	11:56:16	0.49126	2.18522	1071.41	FALSE	52
2022-09-12	11:56:16	0.528257	2.34979	1017.77	FALSE	52
2022-09-12	11:56:16	0.320267	1.42461	1072.83	FALSE	52
2022-09-12	11:56:16	0.411412	1.83004	1019.6	FALSE	52
2022-09-12	11:56:17	0.498995	2.21963	1075.05	FALSE	52
2022-09-12	11:56:17	0.317876	1.41398	1021.01	FALSE	52
2022-09-12	11:56:17	0.484746	2.15625	1077.21	FALSE	52
2022-09-12	11:56:17	0.399504	1.77707	1022.79	FALSE	52
2022-09-12	11:56:18	0.363168	1.61544	1078.83	FALSE	52
2022-09-12	11:56:18	1.2107	5.38544	1028.18	FALSE	52
2022-09-12	11:56:18	0.394161	1.75331	1080.58	FALSE	52
2022-09-12	11:56:19	0.620471	2.75998	1030.94	FALSE	52
2022-09-12	11:56:19	0.828715	3.68629	1084.27	FALSE	52
2022-09-12	11:56:19	1.08251	4.81522	1035.75	FALSE	52
2022-09-12	11:56:19	0.95701	4.25697	1088.52	FALSE	52
2022-09-12	11:56:20	2.8737	12.7828	1048.53	FALSE	52
2022-09-12	11:56:20	2.29716	10.2182	1098.74	FALSE	52
2022-09-12	11:56:20	3.90556	17.3727	1065.91	1	53
2022-09-12	11:56:20	4.51574	20.0869	1118.83	1	54
2022-09-12	11:56:21	3.83991	17.0807	1082.99	1	55
2022-09-12	11:56:21	3.77375	16.7864	1135.61	1	56
2022-09-12	11:56:21	1.23492	5.49317	1088.48	FALSE	56
2022-09-12	11:56:21	2.16235	9.61857	1145.23	FALSE	56
2022-09-12	11:56:22	0.597875	2.65947	1091.14	FALSE	56
2022-09-12	11:56:22	1.53665	6.83533	1152.07	FALSE	56
2022-09-12	11:56:22	1.28749	5.72701	1096.87	FALSE	56
2022-09-12	11:56:23	3.86357	17.1859	1169.25	1	57
2022-09-12	11:56:23	5.72586	25.4698	1122.34	1	58
2022-09-12	11:56:23	6.19019	27.5352	1196.79	1	59
2022-09-12	11:56:23	1.65579	7.36529	1129.7	FALSE	59
2022-09-12	11:56:24	0.626985	2.78895	1199.58	FALSE	59
2022-09-12	11:56:24	0.412176	1.83344	1131.54	FALSE	59
2022-09-12	11:56:24	0.6993	3.11063	1202.69	FALSE	59
2022-09-12	11:56:24	0.821234	3.65301	1135.19	FALSE	59
2022-09-12	11:56:25	1.08693	4.83488	1207.52	FALSE	59
2022-09-12	11:56:25	0.475687	2.11595	1137.31	FALSE	59
2022-09-12	11:56:25	0.676908	3.01102	1210.53	FALSE	59
2022-09-12	11:56:25	1.56001	6.93924	1144.24	FALSE	59
2022-09-12	11:56:26	2.96057	13.1692	1223.7	FALSE	59
2022-09-12	11:56:26	4.10688	18.2682	1162.51	1	60
2022-09-12	11:56:26	2.39508	10.6538	1234.36	FALSE	60
2022-09-12	11:56:27	1.14872	5.10974	1167.62	FALSE	60
2022-09-12	11:56:27	3.10312	13.8033	1248.16	1	61
2022-09-12	11:56:27	5.14291	22.8767	1190.5	1	62
2022-09-12	11:56:27	8.88978	39.5435	1287.7	1	63
2022-09-12	11:56:28	6.65421	29.5993	1220.1	1	64
2022-09-12	11:56:28	3.86408	17.1882	1304.89	1	65
2022-09-12	11:56:28	4.41833	19.6536	1239.75	1	66
2022-09-12	11:56:28	2.2338	9.93639	1314.83	FALSE	66
2022-09-12	11:56:29	1.49197	6.63658	1246.39	FALSE	66
2022-09-12	11:56:29	0.99131	4.40955	1319.24	FALSE	66
2022-09-12	11:56:29	1.09609	4.87563	1251.26	FALSE	66
2022-09-12	11:56:29	1.52225	6.77127	1326.01	FALSE	66
2022-09-12	11:56:30	2.42108	10.7694	1262.03	FALSE	66
2022-09-12	11:56:30	2.42429	10.7837	1336.79	FALSE	66
2022-09-12	11:56:30	0.723728	3.21929	1265.25	FALSE	66
2022-09-12	11:56:31	0.468868	2.08562	1338.88	FALSE	66
2022-09-12	11:56:31	0.32444	1.44317	1266.7	FALSE	66
2022-09-12	11:56:31	0.408563	1.81737	1340.7	FALSE	66
2022-09-12	11:56:31	0.510038	2.26875	1268.97	FALSE	66
2022-09-12	11:56:32	0.462761	2.05845	1342.75	FALSE	66
2022-09-12	11:56:32	0.371158	1.65099	1270.62	FALSE	66
2022-09-12	11:56:32	0.448359	1.99439	1344.75	FALSE	66
2022-09-12	11:56:32	0.505051	2.24657	1272.86	FALSE	66
2022-09-12	11:56:33	0.402201	1.78907	1346.54	FALSE	66
2022-09-12	11:56:33	0.416451	1.85246	1274.72	FALSE	66
2022-09-12	11:56:33	0.391819	1.74289	1348.28	FALSE	66
2022-09-12	11:56:33	0.466781	2.07634	1276.79	FALSE	66
2022-09-12	11:56:34	0.578079	2.57141	1350.85	FALSE	66
2022-09-12	11:56:34	0.360725	1.60458	1278.4	FALSE	66
2022-09-12	11:56:34	0.513499	2.28415	1353.14	FALSE	66
2022-09-12	11:56:34	0.535178	2.38058	1280.78	FALSE	66
2022-09-12	11:56:35	0.504644	2.24476	1355.38	FALSE	66
2022-09-12	11:56:35	0.601794	2.6769	1283.45	FALSE	66
2022-09-12	11:56:35	0.431972	1.9215	1357.3	FALSE	66
2022-09-12	11:56:36	0.43416	1.93123	1285.38	FALSE	66
2022-09-12	11:56:36	0.447596	1.991	1359.29	FALSE	66
2022-09-12	11:56:36	0.706883	3.14436	1288.53	FALSE	66
2022-09-12	11:56:36	0.379249	1.68698	1360.98	FALSE	66
2022-09-12	11:56:37	0.970751	4.31809	1292.85	FALSE	66
2022-09-12	11:56:37	0.800929	3.56269	1364.54	FALSE	66
2022-09-12	11:56:37	0.571972	2.54425	1295.39	FALSE	66
2022-09-12	11:56:37	0.532634	2.36926	1366.91	FALSE	66
2022-09-12	11:56:38	0.630089	2.80276	1298.19	FALSE	66
2022-09-12	11:56:38	0.551361	2.45256	1369.37	FALSE	66
2022-09-12	11:56:38	0.533906	2.37492	1300.57	FALSE	66
2022-09-12	11:56:38	0.68042	3.02664	1372.39	FALSE	66
2022-09-12	11:56:39	0.578486	2.57322	1303.14	FALSE	66
2022-09-12	11:56:39	0.599707	2.66762	1375.06	FALSE	66
2022-09-12	11:56:39	0.564186	2.50961	1305.65	FALSE	66
2022-09-12	11:56:40	0.526476	2.34187	1377.4	FALSE	66
2022-09-12	11:56:40	0.466476	2.07498	1307.73	FALSE	66
2022-09-12	11:56:40	0.420013	1.8683	1379.27	FALSE	66
2022-09-12	11:56:40	0.424033	1.88618	1309.61	FALSE	66
2022-09-12	11:56:41	0.400369	1.78092	1381.05	FALSE	66
2022-09-12	11:56:41	0.416654	1.85336	1311.47	FALSE	66
2022-09-12	11:56:41	0.438079	1.94866	1383	FALSE	66
2022-09-12	11:56:41	0.416298	1.85178	1313.32	FALSE	66
2022-09-12	11:56:42	0.448664	1.99575	1384.99	FALSE	66
2022-09-12	11:56:42	0.404695	1.80016	1315.12	FALSE	66
2022-09-12	11:56:42	0.44098	1.96157	1386.96	FALSE	66
2022-09-12	11:56:42	0.500216	2.22506	1317.34	FALSE	66
2022-09-12	11:56:43	0.528257	2.34979	1389.31	FALSE	66
2022-09-12	11:56:43	0.580725	2.58318	1319.93	FALSE	66
2022-09-12	11:56:43	0.737468	3.28041	1392.59	FALSE	66
2022-09-12	11:56:44	1.37436	6.11343	1326.04	FALSE	66
2022-09-12	11:56:44	2.18826	9.73382	1402.32	FALSE	66
2022-09-12	11:56:44	0.717621	3.19212	1329.23	FALSE	66
2022-09-12	11:56:44	0.292837	1.3026	1403.62	FALSE	66
2022-09-12	11:56:45	0.327545	1.45699	1330.69	FALSE	66
2022-09-12	11:56:45	0.455229	2.02495	1405.65	FALSE	66
2022-09-12	11:56:45	1.39762	6.21689	1336.91	FALSE	66
2022-09-12	11:56:45	2.6679	11.8674	1417.52	FALSE	66
2022-09-12	11:56:46	2.10586	9.36729	1346.27	FALSE	66
2022-09-12	11:56:46	1.13273	5.03861	1422.55	FALSE	66
2022-09-12	11:56:46	2.10612	9.36844	1355.64	FALSE	66
2022-09-12	11:56:46	1.18342	5.26409	1427.82	FALSE	66
2022-09-12	11:56:47	1.59248	7.08367	1362.73	FALSE	66
2022-09-12	11:56:47	0.78098	3.47396	1431.29	FALSE	66
2022-09-12	11:56:47	0.547035	2.43332	1365.16	FALSE	66
2022-09-12	11:56:48	0.311361	1.385	1432.68	FALSE	66
2022-09-12	11:56:48	0.267188	1.18851	1366.35	FALSE	66
2022-09-12	11:56:48	0.260064	1.15682	1433.83	FALSE	66
2022-09-12	11:56:48	-0.0445672	-0.198244	1366.35	FALSE	66
2022-09-12	11:56:49	-0.0461448	-0.205261	1433.83	FALSE	66
2022-09-12	11:56:49	1.03528	4.60513	1370.95	FALSE	66
2022-09-12	11:56:49	5.47416	24.3502	1458.18	1	67
2022-09-12	11:56:49	4.65324	20.6985	1391.65	1	68
2022-09-12	11:56:50	5.28586	23.5126	1481.7	1	69
2022-09-12	11:56:50	0.85528	3.80446	1395.46	FALSE	69
2022-09-12	11:56:50	1.85833	8.26622	1489.96	FALSE	69
2022-09-12	11:56:50	2.18246	9.70802	1405.16	FALSE	69
2022-09-12	11:56:51	0.690496	3.07146	1493.03	FALSE	69
2022-09-12	11:56:51	0.876705	3.89976	1409.06	FALSE	69
2022-09-12	11:56:51	0.511819	2.27667	1495.31	FALSE	69
2022-09-12	11:56:52	0.561031	2.49558	1411.56	FALSE	69
2022-09-12	11:56:52	0.858283	3.81781	1499.13	FALSE	69
2022-09-12	11:56:52	0.479809	2.13429	1413.69	FALSE	69
2022-09-12	11:56:52	0.615077	2.73599	1501.86	FALSE	69
2022-09-12	11:56:53	0.572786	2.54787	1416.24	FALSE	69
2022-09-12	11:56:53	0.523982	2.33078	1504.2	FALSE	69
2022-09-12	11:56:53	0.75874	3.37503	1419.62	FALSE	69
2022-09-12	11:56:53	0.936909	4.16756	1508.36	FALSE	69
2022-09-12	11:56:54	3.98586	17.7299	1437.35	1	70
2022-09-12	11:56:54	3.5937	15.9855	1524.35	1	71
2022-09-12	11:56:54	7.41289	32.974	1470.32	1	72
2022-09-12	11:56:54	7.55818	33.6203	1557.97	1	73
2022-09-12	11:56:55	3.49579	15.55	1485.87	1	74
2022-09-12	11:56:55	3.26978	14.5446	1572.51	1	75
2022-09-12	11:56:55	2.6453	11.7668	1497.64	FALSE	75
2022-09-12	11:56:55	3.125	13.9006	1586.41	1	76
2022-09-12	11:56:56	2.74128	12.1938	1509.83	FALSE	76
2022-09-12	11:56:56	4.15762	18.4939	1604.91	1	77
2022-09-12	11:56:56	6.66484	29.6465	1539.48	1	78
2022-09-12	11:56:57	2.75548	12.2569	1617.16	FALSE	78
2022-09-12	11:56:57	1.90434	8.47089	1547.95	FALSE	78
2022-09-12	11:56:57	5.21864	23.2136	1640.38	1	79
2022-09-12	11:56:57	2.10301	9.35461	1557.3	FALSE	79
2022-09-12	11:56:58	0.917773	4.08244	1644.46	FALSE	79
2022-09-12	11:56:58	0.513244	2.28301	1559.59	FALSE	79
2022-09-12	11:56:58	0.158079	0.703167	1645.16	FALSE	79
2022-09-12	11:56:58	1.4736	6.55487	1566.14	FALSE	79
2022-09-12	11:56:59	2.83049	12.5906	1657.75	FALSE	79
2022-09-12	11:56:59	4.17762	18.5829	1584.72	1	80
2022-09-12	11:56:59	1.96332	8.73324	1666.49	FALSE	80
2022-09-12	11:56:59	5.77115	25.6712	1610.39	1	81
2022-09-12	11:57:00	8.51955	37.8967	1704.38	1	82
2022-09-12	11:57:00	4.41217	19.6262	1630.02	1	83
2022-09-12	11:57:00	2.82882	12.5832	1716.97	FALSE	83
2022-09-12	11:57:01	1.64149	7.30168	1637.32	FALSE	83
2022-09-12	11:57:01	2.76001	12.2771	1729.24	FALSE	83
2022-09-12	11:57:01	1.12042	4.98385	1642.31	FALSE	83
2022-09-12	11:57:01	1.76958	7.87145	1737.12	FALSE	83
2022-09-12	11:57:02	0.420827	1.87192	1644.18	FALSE	83
2022-09-12	11:57:02	0.393193	1.749	1738.87	FALSE	83
2022-09-12	11:57:02	0.404135	1.79767	1645.98	FALSE	83
2022-09-12	11:57:02	0.244797	1.08891	1739.95	FALSE	83
2022-09-12	11:57:03	0.623219	2.7722	1648.75	FALSE	83
2022-09-12	11:57:03	0.659351	2.93293	1742.89	FALSE	83
2022-09-12	11:57:03	1.46017	6.49513	1655.24	FALSE	83
2022-09-12	11:57:03	1.39543	6.20715	1749.09	FALSE	83
2022-09-12	11:57:04	0.59355	2.64023	1657.88	FALSE	83
2022-09-12	11:57:04	1.47324	6.55327	1755.65	FALSE	83
2022-09-12	11:57:04	0.852532	3.79223	1661.68	FALSE	83
2022-09-12	11:57:05	2.42393	10.7821	1766.43	FALSE	83
2022-09-12	11:57:05	4.35757	19.3833	1681.06	1	84
2022-09-12	11:57:05	3.06602	13.6383	1780.07	1	85
2022-09-12	11:57:05	3.03014	13.4787	1694.54	1	86
2022-09-12	11:57:06	2.0563	9.14683	1789.21	FALSE	86
2022-09-12	11:57:06	5.67319	25.2355	1719.77	1	87
2022-09-12	11:57:06	1.17874	5.24327	1794.46	FALSE	87
2022-09-12	11:57:06	1.20042	5.33971	1725.11	FALSE	87
2022-09-12	11:57:07	0.955178	4.24882	1798.71	FALSE	87
2022-09-12	11:57:07	3.03854	13.516	1738.63	1	88
2022-09-12	11:57:07	6.20296	27.592	1826.3	1	89
2022-09-12	11:57:07	6.99935	31.1345	1769.76	1	90
2022-09-12	11:57:08	16.1427	71.806	1898.1	1	91
2022-09-12	11:57:08	6.87411	30.5774	1800.34	1	92
2022-09-12	11:57:08	7.6767	34.1475	1932.25	1	93
2022-09-12	11:57:09	8.17303	36.3553	1836.7	1	94
2022-09-12	11:57:09	7.56398	33.6461	1965.9	1	95
2022-09-12	11:57:09	3.06184	13.6197	1850.32	1	96
2022-09-12	11:57:09	3.81355	16.9634	1982.86	1	97
2022-09-12	11:57:10	0.467595	2.07996	1852.4	FALSE	97
2022-09-12	11:57:10	0.696501	3.09818	1985.96	FALSE	97
2022-09-12	11:57:10	0.345356	1.53621	1853.93	FALSE	97
2022-09-12	11:57:10	0.455942	2.02812	1987.99	FALSE	97
2022-09-12	11:57:11	0.253397	1.12716	1855.06	FALSE	97
2022-09-12	11:57:11	0.32042	1.42529	1989.41	FALSE	97
2022-09-12	11:57:11	0.194771	0.86638	1855.93	FALSE	97
2022-09-12	11:57:11	0.124288	0.552858	1989.97	FALSE	97
2022-09-12	11:57:12	1.72332	7.66567	1863.59	FALSE	97
2022-09-12	11:57:12	3.1651	14.079	2004.05	1	98
2022-09-12	11:57:12	1.40551	6.25199	1869.84	FALSE	98
2022-09-12	11:57:13	1.28637	5.72203	2009.77	FALSE	98
2022-09-12	11:57:13	1.16775	5.19439	1875.04	FALSE	98
2022-09-12	11:57:13	0.795738	3.5396	2013.31	FALSE	98
2022-09-12	11:57:13	0.520878	2.31697	1877.35	FALSE	98
2022-09-12	11:57:14	0.342659	1.52422	2014.83	FALSE	98
2022-09-12	11:57:14	0.127901	0.568929	1877.92	FALSE	98
2022-09-12	11:57:14	0.311667	1.38636	2016.22	FALSE	98
2022-09-12	11:57:14	-0.0658394	-0.292867	1877.92	FALSE	98
2022-09-12	11:57:15	-0.338766	-1.5069	2016.22	FALSE	98
2022-09-12	11:57:15	-0.456577	-2.03095	1877.92	FALSE	98
2022-09-12	11:57:15	-0.771844	-3.43332	2016.22	FALSE	98
2022-09-12	11:57:15	-0.68131	-3.0306	1877.92	FALSE	98
2022-09-12	11:57:16	-0.602837	-2.68154	2016.22	FALSE	98
2022-09-12	11:57:16	-0.415457	-1.84804	1877.92	FALSE	98
2022-09-12	11:57:16	0.692175	3.07893	2019.3	FALSE	98
2022-09-12	11:57:16	-0.112761	-0.501583	1877.92	FALSE	98
2022-09-12	11:57:17	1.81691	8.08198	2027.38	FALSE	98
2022-09-12	11:57:17	3.79212	16.8681	1894.79	1	99
2022-09-12	11:57:17	8.27853	36.8246	2064.2	1	100
2022-09-12	11:57:18	2.59589	11.547	1906.34	FALSE	100
2022-09-12	11:57:18	5.32815	23.7007	2087.9	1	101
2022-09-12	11:57:18	5.59543	24.8896	1931.23	1	102
2022-09-12	11:57:18	4.99421	22.2152	2110.12	1	103
2022-09-12	11:57:19	5.44769	24.2324	1955.46	1	104
2022-09-12	11:57:19	2.77986	12.3654	2122.48	FALSE	104
2022-09-12	11:57:19	3.54307	15.7603	1971.22	1	105
2022-09-12	11:57:19	9.7453	43.349	2165.83	1	106
2022-09-12	11:57:20	11.262	50.0956	2021.32	1	107
2022-09-12	11:57:20	8.705	38.7216	2204.55	1	108
2022-09-12	11:57:20	6.08113	27.0501	2048.37	1	109
2022-09-12	11:57:20	4.26968	18.9924	2223.55	1	110
2022-09-12	11:57:21	0.432227	1.92263	2050.29	FALSE	110
2022-09-12	11:57:21	0.339453	1.50995	2225.06	FALSE	110
2022-09-12	11:57:21	0.32042	1.42529	2051.71	FALSE	110
2022-09-12	11:57:22	0.454924	2.02359	2227.08	FALSE	110
2022-09-12	11:57:22	0.461234	2.05166	2053.77	FALSE	110
2022-09-12	11:57:22	0.605916	2.69524	2229.78	FALSE	110
2022-09-12	11:57:22	0.206832	0.92003	2054.69	FALSE	110
2022-09-12	11:57:23	0.384949	1.71233	2231.49	FALSE	110
2022-09-12	11:57:23	0.950598	4.22845	2058.91	FALSE	110
2022-09-12	11:57:23	0.571921	2.54402	2234.03	FALSE	110
2022-09-12	11:57:23	0.564746	2.5121	2061.43	FALSE	110
2022-09-12	11:57:24	0.377367	1.6786	2235.71	FALSE	110
2022-09-12	11:57:24	0.641489	2.85347	2064.28	FALSE	110
2022-09-12	11:57:24	0.528817	2.35228	2238.06	FALSE	110
2022-09-12	11:57:24	0.59416	2.64294	2066.92	FALSE	110
2022-09-12	11:57:25	2.19441	9.76117	2247.82	FALSE	110
2022-09-12	11:57:25	3.35833	14.9385	2081.86	1	111
2022-09-12	11:57:25	5.86606	26.0934	2273.92	1	112
2022-09-12	11:57:26	6.21151	27.63	2109.49	1	113
2022-09-12	11:57:26	3.02993	13.4777	2287.4	1	114
2022-09-12	11:57:26	3.15457	14.0322	2123.52	1	115
2022-09-12	11:57:26	0.920115	4.09286	2291.49	FALSE	115
2022-09-12	11:57:27	0.657315	2.92387	2126.45	FALSE	115
2022-09-12	11:57:27	0.350242	1.55795	2293.05	FALSE	115
2022-09-12	11:57:27	0.450445	2.00367	2128.45	FALSE	115
2022-09-12	11:57:27	0.342761	1.52467	2294.57	FALSE	115
2022-09-12	11:57:28	0.250751	1.11539	2129.57	FALSE	115
2022-09-12	11:57:28	0.108868	0.484267	2295.06	FALSE	115
2022-09-12	11:57:28	0.248715	1.10633	2130.67	FALSE	115
2022-09-12	11:57:28	0.153397	0.682341	2295.74	FALSE	115
2022-09-12	11:57:29	0.0374175	0.166441	2130.84	FALSE	115
2022-09-12	11:57:29	0.325356	1.44725	2297.18	FALSE	115
2022-09-12	11:57:29	0.767596	3.41442	2134.25	FALSE	115
2022-09-12	11:57:30	1.71991	7.6505	2304.84	FALSE	115
2022-09-12	11:57:30	1.46017	6.49513	2140.75	FALSE	115
2022-09-12	11:57:30	2.7453	12.2116	2317.05	FALSE	115
2022-09-12	11:57:30	1.66958	7.42663	2148.18	FALSE	115
2022-09-12	11:57:31	1.02627	4.56505	2321.61	FALSE	115
2022-09-12	11:57:31	0.552379	2.45709	2150.63	FALSE	115
2022-09-12	11:57:31	0.43126	1.91833	2323.53	FALSE	115
2022-09-12	11:57:31	1.95787	8.709	2159.34	FALSE	115
2022-09-12	11:57:32	3.13416	13.9414	2337.47	1	116
2022-09-12	11:57:32	6.25548	27.8256	2187.17	1	117
2022-09-12	11:57:32	6.5026	28.9249	2366.4	1	118
2022-09-12	11:57:32	9.63528	42.8597	2230.03	1	119
2022-09-12	11:57:33	3.79482	16.8801	2383.28	1	120
2022-09-12	11:57:33	4.5366	20.1797	2250.21	1	121
2022-09-12	11:57:33	5.43126	24.1593	2407.44	1	122
2022-09-12	11:57:34	4.24083	18.8641	2269.07	1	123
2022-09-12	11:57:34	2.21218	9.84022	2417.28	FALSE	123
2022-09-12	11:57:34	4.67538	20.797	2289.87	1	124
2022-09-12	11:57:34	1.15375	5.13211	2422.41	FALSE	124
2022-09-12	11:57:35	3.12612	13.9056	2303.77	1	125
2022-09-12	11:57:35	3.06159	13.6186	2436.03	1	126
2022-09-12	11:57:35	1.61482	7.18304	2310.96	FALSE	126
2022-09-12	11:57:35	2.54576	11.324	2447.35	FALSE	126
2022-09-12	11:57:36	2.15436	9.58302	2320.54	FALSE	126
2022-09-12	11:57:36	1.16408	5.17806	2452.53	FALSE	126
2022-09-12	11:57:36	0.657519	2.92478	2323.46	FALSE	126
2022-09-12	11:57:36	0.288868	1.28494	2453.81	FALSE	126
2022-09-12	11:57:37	0.228054	1.01443	2324.48	FALSE	126
2022-09-12	11:57:37	0.253092	1.1258	2454.94	FALSE	126
2022-09-12	11:57:37	1.81559	8.07611	2332.55	FALSE	126
2022-09-12	11:57:37	3.59752	16.0025	2470.94	1	127
2022-09-12	11:57:38	5.25467	23.3738	2355.93	1	128
2022-09-12	11:57:38	3.61095	16.0622	2487	1	129
2022-09-12	11:57:38	2.87747	12.7996	2368.73	FALSE	129
2022-09-12	11:57:39	2.33625	10.3921	2497.4	FALSE	129
2022-09-12	11:57:39	3.10276	13.8017	2382.53	1	130
2022-09-12	11:57:39	5.2452	23.3317	2520.73	1	131
2022-09-12	11:57:39	6.90459	30.713	2413.24	1	132
2022-09-12	11:57:40	5.16866	22.9912	2543.72	1	133
2022-09-12	11:57:40	1.1192	4.97843	2418.22	FALSE	133
2022-09-12	11:57:40	2.22775	9.90948	2553.63	FALSE	133
2022-09-12	11:57:40	1.391	6.18745	2424.41	FALSE	133
2022-09-12	11:57:41	0.968053	4.30609	2557.94	FALSE	133
2022-09-12	11:57:41	2.24775	9.99844	2434.41	FALSE	133
2022-09-12	11:57:41	2.58897	11.5163	2569.45	FALSE	133
2022-09-12	11:57:41	2.40627	10.7036	2445.11	FALSE	133
2022-09-12	11:57:42	3.86775	17.2045	2586.66	1	134
2022-09-12	11:57:42	1.61299	7.1749	2452.29	FALSE	134
2022-09-12	11:57:42	2.56927	11.4286	2598.08	FALSE	134
2022-09-12	11:57:43	1.50174	6.68004	2458.97	FALSE	134
2022-09-12	11:57:43	1.21401	5.40016	2603.48	FALSE	134
2022-09-12	11:57:43	1.608	7.15271	2466.12	FALSE	134
2022-09-12	11:57:43	2.60637	11.5937	2615.08	FALSE	134
2022-09-12	11:57:44	0.99472	4.42471	2470.54	FALSE	134
2022-09-12	11:57:44	1.48322	6.59766	2621.68	FALSE	134
2022-09-12	11:57:44	1.25462	5.5808	2476.12	FALSE	134
2022-09-12	11:57:44	2.69172	11.9733	2633.65	FALSE	134
2022-09-12	11:57:45	7.51706	33.4374	2509.56	1	135
2022-09-12	11:57:45	12.0223	53.4776	2687.13	1	136
2022-09-12	11:57:45	5.09004	22.6415	2532.2	1	137
2022-09-12	11:57:45	1.49889	6.66736	2693.79	FALSE	137
2022-09-12	11:57:46	0.539707	2.40072	2534.6	FALSE	137
2022-09-12	11:57:46	0.447748	1.99167	2695.79	FALSE	137
2022-09-12	11:57:46	0.27528	1.2245	2535.83	FALSE	137
2022-09-12	11:57:47	0.164644	0.732369	2696.52	FALSE	137
2022-09-12	11:57:47	0.196451	0.873853	2536.7	FALSE	137
2022-09-12	11:57:47	0.0902419	0.401414	2696.92	FALSE	137
2022-09-12	11:57:47	0.291616	1.29717	2538	FALSE	137
2022-09-12	11:57:48	0.143626	0.638877	2697.56	FALSE	137
2022-09-12	11:57:48	0.505713	2.24951	2540.25	FALSE	137
2022-09-12	11:57:48	0.41299	1.83706	2699.4	FALSE	137
2022-09-12	11:57:48	1.12989	5.02598	2545.27	FALSE	137
2022-09-12	11:57:49	2.37569	10.5675	2709.96	FALSE	137
2022-09-12	11:57:49	2.53319	11.2681	2556.54	FALSE	137
2022-09-12	11:57:49	1.38963	6.18135	2716.14	FALSE	137
2022-09-12	11:57:49	1.14215	5.08051	2561.62	FALSE	137
2022-09-12	11:57:50	0.508664	2.26264	2718.41	FALSE	137
2022-09-12	11:57:50	2.77258	12.333	2573.96	FALSE	137
2022-09-12	11:57:50	7.53467	33.5157	2751.92	1	138
2022-09-12	11:57:51	5.36464	23.863	2597.82	1	139
2022-09-12	11:57:51	4.17044	18.551	2770.47	1	140
2022-09-12	11:57:51	0.140929	0.62688	2598.45	FALSE	140
2022-09-12	11:57:51	-0.0183076	-0.0814359	2770.47	FALSE	140
2022-09-12	11:57:52	0.136909	0.608999	2599.06	FALSE	140
2022-09-12	11:57:52	0.213652	0.950367	2771.42	FALSE	140
2022-09-12	11:57:52	0.198028	0.880868	2599.94	FALSE	140
2022-09-12	11:57:52	0.151362	0.673288	2772.1	FALSE	140
2022-09-12	11:57:53	0.375992	1.67249	2601.61	FALSE	140
2022-09-12	11:57:53	0.128003	0.569383	2772.67	FALSE	140
2022-09-12	11:57:53	0.327799	1.45812	2603.07	FALSE	140
2022-09-12	11:57:53	0.208664	0.928179	2773.6	FALSE	140
2022-09-12	11:57:54	1.22256	5.43819	2608.5	FALSE	140
2022-09-12	11:57:54	0.873041	3.88346	2777.48	FALSE	140
2022-09-12	11:57:54	1.39441	6.20261	2614.71	FALSE	140
2022-09-12	11:57:55	0.889122	3.95499	2781.43	FALSE	140
2022-09-12	11:57:55	0.907494	4.03671	2618.74	FALSE	140
2022-09-12	11:57:55	0.400929	1.78341	2783.22	FALSE	140
2022-09-12	11:57:55	0.409529	1.82167	2620.57	FALSE	140
2022-09-12	11:57:56	1.11757	4.97117	2788.19	FALSE	140
2022-09-12	11:57:56	1.01385	4.50981	2625.08	FALSE	140
2022-09-12	11:57:56	1.18994	5.29309	2793.48	FALSE	140
2022-09-12	11:57:56	1.5336	6.82176	2631.9	FALSE	140
2022-09-12	11:57:57	1.09375	4.86522	2798.35	FALSE	140
2022-09-12	11:57:57	1.92744	8.57364	2640.47	FALSE	140
2022-09-12	11:57:57	1.31976	5.87056	2804.22	FALSE	140
2022-09-12	11:57:57	2.79182	12.4186	2652.89	FALSE	140
2022-09-12	11:57:58	3.77014	16.7703	2820.99	1	141
2022-09-12	11:57:58	3.30042	14.6809	2667.57	1	142
2022-09-12	11:57:58	4.02408	17.8999	2838.89	1	143
2022-09-12	11:57:59	2.34805	10.4446	2678.02	FALSE	143
2022-09-12	11:57:59	2.19513	9.76438	2848.65	FALSE	143
2022-09-12	11:57:59	2.31416	10.2938	2688.31	FALSE	143
2022-09-12	11:57:59	2.90408	12.9179	2861.57	FALSE	143
2022-09-12	11:58:00	3.52139	15.6638	2703.97	1	144
2022-09-12	11:58:00	2.5996	11.5635	2873.13	FALSE	144
2022-09-12	11:58:00	3.76785	16.7602	2720.73	1	145
2022-09-12	11:58:00	3.51436	15.6326	2888.77	1	146
2022-09-12	11:58:01	2.11167	9.39313	2730.13	FALSE	146
2022-09-12	11:58:01	0.492888	2.19246	2890.96	FALSE	146
2022-09-12	11:58:01	0.201387	0.89581	2731.02	FALSE	146
2022-09-12	11:58:01	0.171361	0.762248	2891.72	FALSE	146
2022-09-12	11:58:02	0.152888	0.680076	2731.7	FALSE	146
2022-09-12	11:58:02	0.299097	1.33044	2893.05	FALSE	146
2022-09-12	11:58:02	0.371616	1.65302	2733.35	FALSE	146
2022-09-12	11:58:02	1.28215	5.70326	2898.75	FALSE	146
2022-09-12	11:58:03	1.0334	4.59677	2737.95	FALSE	146
2022-09-12	11:58:03	3.40754	15.1574	2913.91	1	147
2022-09-12	11:58:03	1.97218	8.77265	2746.72	FALSE	147
2022-09-12	11:58:04	3.05762	13.6009	2927.51	1	148
2022-09-12	11:58:04	3.9535	17.586	2764.31	1	149
2022-09-12	11:58:04	5.77818	25.7025	2953.22	1	150
2022-09-12	11:58:05	5.0193	22.3269	2786.64	1	151
2022-09-12	11:58:05	3.45141	15.3526	2968.57	1	152
2022-09-12	11:58:05	6.13741	27.3004	2813.94	1	153
2022-09-12	11:58:05	2.17838	9.68987	2978.26	FALSE	153
2022-09-12	11:58:05	4.30978	19.1708	2833.11	1	154
2022-09-12	11:58:06	6.39019	28.4248	3006.68	1	155
2022-09-12	11:58:06	3.14118	13.9726	2847.08	1	156
2022-09-12	11:58:06	6.68825	29.7507	3036.43	1	157
2022-09-12	11:58:06	3.32357	14.7839	2861.86	1	158
2022-09-12	11:58:07	4.22128	18.7771	3055.21	1	159
2022-09-12	11:58:07	3.00291	13.3575	2875.22	1	160
2022-09-12	11:58:07	2.45111	10.903	3066.11	FALSE	160
2022-09-12	11:58:08	3.61055	16.0604	2891.28	1	161
2022-09-12	11:58:08	1.81452	8.07135	3074.18	FALSE	161
2022-09-12	11:58:08	2.31401	10.2932	2901.58	FALSE	161
2022-09-12	11:58:08	1.18943	5.29082	3079.48	FALSE	161
2022-09-12	11:58:09	1.44174	6.41315	2907.99	FALSE	161
2022-09-12	11:58:09	2.60057	11.5679	3091.04	FALSE	161
2022-09-12	11:58:09	4.98668	22.1817	2930.17	1	162
2022-09-12	11:58:09	6.39457	28.4443	3119.49	1	163
2022-09-12	11:58:10	2.54383	11.3155	2941.49	FALSE	163
2022-09-12	11:58:10	4.41487	19.6382	3139.13	1	164
2022-09-12	11:58:10	4.53401	20.1682	2961.65	1	165
2022-09-12	11:58:10	5.80983	25.8433	3164.97	1	166
2022-09-12	11:58:11	4.29024	19.0838	2980.74	1	167
2022-09-12	11:58:11	4.39869	19.5663	3184.54	1	168
2022-09-12	11:58:11	4.41095	19.6208	3000.36	1	169
2022-09-12	11:58:12	4.90108	21.801	3206.34	1	170
2022-09-12	11:58:12	7.13441	31.7353	3032.09	1	171
2022-09-12	11:58:12	5.84912	26.0181	3232.35	1	172
2022-09-12	11:58:12	9.00947	40.0759	3072.17	1	173
2022-09-12	11:58:13	8.3509	37.1465	3269.5	1	174
2022-09-12	11:58:13	8.89349	39.56	3111.73	1	175
2022-09-12	11:58:13	5.97121	26.5611	3296.06	1	176
2022-09-12	11:58:13	9.04123	40.2172	3151.95	1	177
2022-09-12	11:58:14	6.42418	28.576	3324.64	1	178
2022-09-12	11:58:14	6.27802	27.9259	3179.87	1	179
2022-09-12	11:58:14	2.16637	9.63645	3334.27	FALSE	179
2022-09-12	11:58:14	1.67121	7.43388	3187.31	FALSE	179
2022-09-12	11:58:15	2.44306	10.8672	3345.14	FALSE	179
2022-09-12	11:58:15	1.62022	7.20706	3194.51	FALSE	179
2022-09-12	11:58:15	2.61497	11.6319	3356.77	FALSE	179
2022-09-12	11:58:16	1.35335	6.01997	3200.53	FALSE	179
2022-09-12	11:58:16	4.36001	19.3942	3376.17	1	180
2022-09-12	11:58:16	4.23314	18.8299	3219.36	1	181
2022-09-12	11:58:16	4.40479	19.5934	3395.76	1	182
2022-09-12	11:58:17	4.50627	20.0448	3239.41	1	183
2022-09-12	11:58:17	3.4767	15.4651	3411.23	1	184
2022-09-12	11:58:17	10.8283	48.1664	3287.58	1	185
2022-09-12	11:58:17	10.9236	48.5904	3459.82	1	186
2022-09-12	11:58:18	11.9995	53.3762	3340.95	1	187
2022-09-12	11:58:18	3.44022	15.3028	3475.12	1	188
2022-09-12	11:58:18	4.002	17.8017	3358.75	1	189
2022-09-12	11:58:18	7.73232	34.3949	3509.51	1	190
2022-09-12	11:58:19	3.19757	14.2234	3372.98	1	191
2022-09-12	11:58:19	3.96968	17.6579	3527.17	1	192
2022-09-12	11:58:19	2.83665	12.618	3385.59	FALSE	192
2022-09-12	11:58:20	4.90444	21.8159	3548.99	1	193
2022-09-12	11:58:20	4.51044	20.0633	3405.66	1	194
2022-09-12	11:58:20	8.49767	37.7993	3586.79	1	195
2022-09-12	11:58:20	8.92775	39.7124	3445.37	1	196
2022-09-12	11:58:21	14.1414	62.9038	3649.69	1	197
2022-09-12	11:58:21	5.39762	24.0097	3469.38	1	198
2022-09-12	11:58:21	4.07543	18.1283	3667.82	1	199
2022-09-12	11:58:21	2.20383	9.80308	3479.18	FALSE	199
2022-09-12	11:58:22	1.76281	7.84133	3675.66	FALSE	199
2022-09-12	11:58:22	1.57854	7.02166	3486.21	FALSE	199
2022-09-12	11:58:22	1.46363	6.51052	3682.17	FALSE	199
2022-09-12	11:58:22	0.999809	4.44735	3490.65	FALSE	199
2022-09-12	11:58:23	1.42698	6.34749	3688.52	FALSE	199
2022-09-12	11:58:23	1.19889	5.3329	3495.99	FALSE	199
2022-09-12	11:58:23	1.51177	6.72466	3695.24	FALSE	199
2022-09-12	11:58:24	1.28317	5.7078	3501.69	FALSE	199
2022-09-12	11:58:24	1.17843	5.24189	3700.49	FALSE	199
2022-09-12	11:58:24	1.09045	4.85054	3506.54	FALSE	199
2022-09-12	11:58:24	0.831107	3.69693	3704.18	FALSE	199
2022-09-12	11:58:25	0.834771	3.71323	3510.26	FALSE	199
2022-09-12	11:58:25	1.09772	4.88288	3709.07	FALSE	199
2022-09-12	11:58:25	1.16098	5.16427	3515.42	FALSE	199
2022-09-12	11:58:25	0.92327	4.10689	3713.17	FALSE	199
2022-09-12	11:58:26	1.01034	4.49419	3519.92	FALSE	199
2022-09-12	11:58:26	0.907595	4.03716	3717.21	FALSE	199
2022-09-12	11:58:26	0.976807	4.34503	3524.26	FALSE	199
2022-09-12	11:58:26	1.10424	4.91188	3722.12	FALSE	199
2022-09-12	11:58:27	0.973092	4.32851	3528.59	FALSE	199
2022-09-12	11:58:27	0.436908	1.94345	3724.06	FALSE	199
2022-09-12	11:58:27	0.681183	3.03004	3531.62	FALSE	199
2022-09-12	11:58:27	0.258181	1.14844	3725.21	FALSE	199
2022-09-12	11:58:28	0.289173	1.2863	3532.91	FALSE	199
2022-09-12	11:58:28	0.0509036	0.226429	3725.44	FALSE	199
2022-09-12	11:58:28	-0.166908	-0.74244	3532.91	FALSE	199
2022-09-12	11:58:29	-0.186297	-0.828686	3725.44	FALSE	199
2022-09-12	11:58:29	-0.214745	-0.955229	3532.91	FALSE	199
2022-09-12	11:58:29	-0.417137	-1.85551	3725.44	FALSE	199
2022-09-12	11:58:29	-0.18416	-0.819181	3532.91	FALSE	199
2022-09-12	11:58:30	-0.286755	-1.27554	3725.44	FALSE	199
2022-09-12	11:58:30	-0.339274	-1.50916	3532.91	FALSE	199
2022-09-12	11:58:30	-0.506348	-2.25234	3725.44	FALSE	199
2022-09-12	11:58:30	-0.405585	-1.80412	3532.91	FALSE	199
2022-09-12	11:58:31	-0.137951	-0.613634	3725.44	FALSE	199
2022-09-12	11:58:31	0.958333	4.26286	3537.17	FALSE	199
2022-09-12	11:58:31	1.81925	8.09239	3733.53	FALSE	199
2022-09-12	11:58:31	0.702863	3.12648	3540.29	FALSE	199
2022-09-12	11:58:32	0.363423	1.61658	3735.15	FALSE	199
2022-09-12	11:58:32	0.4193	1.86513	3542.16	FALSE	199
2022-09-12	11:58:32	0.304135	1.35285	3736.5	FALSE	199
2022-09-12	11:58:33	0.234313	1.04227	3543.2	FALSE	199
2022-09-12	11:58:33	0.140725	0.625973	3737.13	FALSE	199
2022-09-12	11:58:33	0.142761	0.635029	3543.84	FALSE	199
2022-09-12	11:58:33	0.286832	1.27589	3738.4	FALSE	199
2022-09-12	11:58:34	0.193601	0.861176	3544.7	FALSE	199
2022-09-12	11:58:34	0.320827	1.4271	3739.83	FALSE	199
2022-09-12	11:58:34	0.091158	0.405489	3545.1	FALSE	199
2022-09-12	11:58:34	-0.00614479	-0.0273333	3739.83	FALSE	199
2022-09-12	11:58:35	0.386323	1.71844	3546.82	FALSE	199
2022-09-12	11:58:35	0.379097	1.6863	3741.52	FALSE	199
2022-09-12	11:58:35	0.314975	1.40107	3548.22	FALSE	199
2022-09-12	11:58:35	0.408512	1.81714	3743.33	FALSE	199
2022-09-12	11:58:36	0.484135	2.15353	3550.38	FALSE	199
2022-09-12	11:58:36	0.794415	3.53372	3746.87	FALSE	199
2022-09-12	11:58:36	0.574873	2.55715	3552.93	FALSE	199
2022-09-12	11:58:37	0.582303	2.5902	3749.46	FALSE	199
2022-09-12	11:58:37	0.901488	4.01	3556.94	FALSE	199
2022-09-12	11:58:37	1.31477	5.84836	3755.31	FALSE	199
2022-09-12	11:58:37	1.34973	6.00387	3562.95	FALSE	199
2022-09-12	11:58:38	1.53258	6.81722	3762.12	FALSE	199
2022-09-12	11:58:38	5.54169	24.6505	3587.6	1	200
2022-09-12	11:58:38	5.83167	25.9404	3788.06	1	201
2022-09-12	11:58:38	2.98541	13.2797	3600.88	FALSE	201
2022-09-12	11:58:39	1.17737	5.23718	3793.3	FALSE	201
2022-09-12	11:58:39	0.333143	1.48189	3602.36	FALSE	201
2022-09-12	11:58:39	0.501539	2.23095	3795.53	FALSE	201
2022-09-12	11:58:39	0.163931	0.729198	3603.09	FALSE	201
2022-09-12	11:58:40	0.136705	0.608091	3796.14	FALSE	201
2022-09-12	11:58:40	0.300573	1.33701	3604.43	FALSE	201
2022-09-12	11:58:40	1.39401	6.20084	3802.34	FALSE	201
2022-09-12	11:58:41	1.92052	8.54286	3612.97	FALSE	201
2022-09-12	11:58:41	0.566781	2.52116	3804.86	FALSE	201
2022-09-12	11:58:41	0.375636	1.6709	3614.64	FALSE	201
2022-09-12	11:58:41	0.672379	2.99088	3807.85	FALSE	201
2022-09-12	11:58:42	0.0616414	0.274193	3614.91	FALSE	201
2022-09-12	11:58:42	-0.115865	-0.515391	3807.85	FALSE	201
2022-09-12	11:58:42	-0.142633	-0.63446	3614.91	FALSE	201
2022-09-12	11:58:42	-0.103397	-0.459931	3807.85	FALSE	201
2022-09-12	11:58:43	-0.0599361	-0.266608	3614.91	FALSE	201
2022-09-12	11:58:43	-0.0909793	-0.404694	3807.85	FALSE	201
2022-09-12	11:58:43	-0.188537	-0.83865	3614.91	FALSE	201
2022-09-12	11:58:43	-0.221005	-0.983074	3807.85	FALSE	201
2022-09-12	11:58:44	-0.369758	-1.64476	3614.91	FALSE	201
2022-09-12	11:58:44	-0.444923	-1.97911	3807.85	FALSE	201
2022-09-12	11:58:44	-0.0990709	-0.440687	3614.91	FALSE	201
2022-09-12	11:58:45	-0.165636	-0.736782	3807.85	FALSE	201
2022-09-12	11:58:45	-0.133931	-0.595752	3614.91	FALSE	201
2022-09-12	11:58:45	-0.347468	-1.54561	3807.85	FALSE	201
2022-09-12	11:58:45	-0.393524	-1.75047	3614.91	FALSE	201
2022-09-12	11:58:46	-0.40589	-1.80548	3807.85	FALSE	201
2022-09-12	11:58:46	-0.215254	-0.957493	3614.91	FALSE	201
2022-09-12	11:58:46	-0.140801	-0.626311	3807.85	FALSE	201
2022-09-12	11:58:46	3.1136	13.8499	3628.76	1	202
2022-09-12	11:58:47	2.73996	12.1879	3820.04	FALSE	202
2022-09-12	11:58:47	1.00907	4.48855	3633.25	FALSE	202
2022-09-12	11:58:47	0.366476	1.63016	3821.67	FALSE	202
2022-09-12	11:58:47	0.00912238	0.0405782	3633.29	FALSE	202
2022-09-12	11:58:48	0.0388934	0.173006	3821.84	FALSE	202
2022-09-12	11:58:48	0.0254073	0.113017	3633.41	FALSE	202
2022-09-12	11:58:48	0.435687	1.93802	3823.78	FALSE	202
2022-09-12	11:58:48	0.686476	3.05358	3636.46	FALSE	202
2022-09-12	11:58:49	0.71645	3.18691	3826.97	FALSE	202
2022-09-12	11:58:49	0.888715	3.95318	3640.41	FALSE	202
2022-09-12	11:58:49	0.776806	3.45539	3830.42	FALSE	202
2022-09-12	11:58:50	0.898283	3.99574	3644.41	FALSE	202
2022-09-12	11:58:50	1.26637	5.63307	3836.06	FALSE	202
2022-09-12	11:58:50	3.28088	14.594	3659	1	203
2022-09-12	11:58:50	7.94108	35.3235	3871.38	1	204
2022-09-12	11:58:51	5.19945	23.1282	3682.13	1	205
2022-09-12	11:58:51	5.26082	23.4012	3894.78	1	206
2022-09-12	11:58:51	4.13864	18.4095	3700.54	1	207
2022-09-12	11:58:51	5.9194	26.3307	3921.11	1	208
2022-09-12	11:58:52	1.27019	5.65006	3706.19	FALSE	208
2022-09-12	11:58:52	0.662913	2.94877	3924.06	FALSE	208
2022-09-12	11:58:52	0.705255	3.13712	3709.33	FALSE	208
2022-09-12	11:58:52	0.49584	2.2056	3926.27	FALSE	208
2022-09-12	11:58:53	0.287239	1.2777	3710.61	FALSE	208
2022-09-12	11:58:53	-0.037188	-0.16542	3926.27	FALSE	208
2022-09-12	11:58:53	0.164288	0.730786	3711.34	FALSE	208
2022-09-12	11:58:54	0.0319723	0.142219	3926.41	FALSE	208
2022-09-12	11:58:54	-0.0899616	-0.400167	3711.34	FALSE	208
2022-09-12	11:58:54	-0.0774425	-0.34448	3926.41	FALSE	208
2022-09-12	11:58:54	-0.0898089	-0.399488	3711.34	FALSE	208
2022-09-12	11:58:55	-0.0216155	-0.0961501	3926.41	FALSE	208
2022-09-12	11:58:55	0.127799	0.568476	3711.9	FALSE	208
2022-09-12	11:58:55	0.269631	1.19937	3927.61	FALSE	208
2022-09-12	11:58:55	0.359046	1.59711	3713.5	FALSE	208
2022-09-12	11:58:56	0.480573	2.13768	3929.75	FALSE	208
2022-09-12	11:58:56	1.18561	5.27383	3718.78	FALSE	208
2022-09-12	11:58:56	0.797417	3.54707	3933.29	FALSE	208
2022-09-12	11:58:56	0.501132	2.22914	3721	FALSE	208
2022-09-12	11:58:57	0.220369	0.980245	3934.27	FALSE	208
2022-09-12	11:58:57	0.33243	1.47872	3722.48	FALSE	208
2022-09-12	11:58:57	0.314466	1.39881	3935.67	FALSE	208
2022-09-12	11:58:58	0.372176	1.65551	3724.14	FALSE	208
2022-09-12	11:58:58	0.281692	1.25302	3936.93	FALSE	208
2022-09-12	11:58:58	0.284847	1.26706	3725.41	FALSE	208
2022-09-12	11:58:58	0.3793	1.6872	3938.61	FALSE	208
2022-09-12	11:58:59	0.298537	1.32795	3726.73	FALSE	208
2022-09-12	11:58:59	0.218079	0.970059	3939.58	FALSE	208
2022-09-12	11:58:59	1.02261	4.54877	3731.28	FALSE	208
2022-09-12	11:58:59	0.577366	2.56824	3942.15	FALSE	208
2022-09-12	11:59:00	0.388104	1.72636	3733.01	FALSE	208
2022-09-12	11:59:00	0.27243	1.21182	3943.36	FALSE	208
2022-09-12	11:59:00	0.165662	0.736898	3733.75	FALSE	208
2022-09-12	11:59:00	0.0389443	0.173232	3943.54	FALSE	208
2022-09-12	11:59:01	-0.341768	-1.52025	3733.75	FALSE	208
2022-09-12	11:59:01	-0.362481	-1.61239	3943.54	FALSE	208
2022-09-12	11:59:01	0.0127356	0.0566505	3733.8	FALSE	208
2022-09-12	11:59:02	0.231718	1.03073	3944.57	FALSE	208
2022-09-12	11:59:02	2.09426	9.31569	3743.12	FALSE	208
2022-09-12	11:59:02	2.58846	11.514	3956.08	FALSE	208
2022-09-12	11:59:02	2.64144	11.7497	3754.87	FALSE	208
2022-09-12	11:59:03	2.35843	10.4908	3966.57	FALSE	208
2022-09-12	11:59:03	2.62607	11.6813	3766.55	FALSE	208
2022-09-12	11:59:03	2.66418	11.8508	3978.42	FALSE	208
2022-09-12	11:59:03	2.89513	12.8781	3779.43	FALSE	208
2022-09-12	11:59:04	2.93024	13.0343	3991.46	FALSE	208
2022-09-12	11:59:04	2.66057	11.8347	3791.26	FALSE	208
2022-09-12	11:59:04	2.75039	12.2343	4003.69	FALSE	208
2022-09-12	11:59:04	1.83467	8.16098	3799.42	FALSE	208
2022-09-12	11:59:05	1.002	4.4571	4008.15	FALSE	208
2022-09-12	11:59:05	0.619707	2.75658	3802.18	FALSE	208
2022-09-12	11:59:05	0.878639	3.90836	4012.06	FALSE	208
2022-09-12	11:59:06	1.13915	5.06717	3807.25	FALSE	208
2022-09-12	11:59:06	0.264796	1.17787	4013.23	FALSE	208
2022-09-12	11:59:06	0.208766	0.928633	3808.18	FALSE	208
2022-09-12	11:59:06	0.177672	0.790321	4014.02	FALSE	208
2022-09-12	11:59:07	0.107341	0.477474	3808.65	FALSE	208
2022-09-12	11:59:07	0.157468	0.700449	4014.72	FALSE	208
2022-09-12	11:59:07	0.209173	0.930443	3809.58	FALSE	208
2022-09-12	11:59:07	0.100878	0.448726	4015.17	FALSE	208
2022-09-12	11:59:08	0.11869	0.527957	3810.11	FALSE	208
2022-09-12	11:59:08	0.11757	0.522975	4015.7	FALSE	208
2022-09-12	11:59:08	0.284389	1.26502	3811.38	FALSE	208
2022-09-12	11:59:08	0.084186	0.374476	4016.07	FALSE	208
2022-09-12	11:59:09	0.266985	1.1876	3812.56	FALSE	208
2022-09-12	11:59:09	0.0629137	0.279853	4016.35	FALSE	208
2022-09-12	11:59:09	0.281896	1.25393	3813.82	FALSE	208
2022-09-12	11:59:10	0.0615905	0.273967	4016.62	FALSE	208
2022-09-12	11:59:10	0.37131	1.65166	3815.47	FALSE	208
2022-09-12	11:59:10	0.436756	1.94278	4018.57	FALSE	208
2022-09-12	11:59:10	0.355127	1.57968	3817.05	FALSE	208
2022-09-12	11:59:11	-0.035814	-0.159308	4018.57	FALSE	208
2022-09-12	11:59:11	0.0183844	0.0817775	3817.13	FALSE	208
2022-09-12	11:59:11	0.0310562	0.138144	4018.71	FALSE	208
2022-09-12	11:59:11	0.129937	0.577986	3817.71	FALSE	208
2022-09-12	11:59:12	-0.0429895	-0.191226	4018.71	FALSE	208
2022-09-12	11:59:12	0.109835	0.488568	3818.2	FALSE	208
2022-09-12	11:59:12	0.115433	0.513469	4019.22	FALSE	208
2022-09-12	11:59:12	0.0806745	0.358856	3818.56	FALSE	208
2022-09-12	11:59:13	0.0922776	0.410469	4019.63	FALSE	208
2022-09-12	11:59:13	0.0343132	0.152632	3818.71	FALSE	208
2022-09-12	11:59:13	0.108613	0.483132	4020.11	FALSE	208
2022-09-12	11:59:13	0.310649	1.38183	3820.09	FALSE	208
2022-09-12	11:59:14	0.36841	1.63876	4021.75	FALSE	208
2022-09-12	11:59:14	0.531514	2.36428	3822.45	FALSE	208
2022-09-12	11:59:14	0.785763	3.49523	4025.25	FALSE	208
2022-09-12	11:59:15	0.738231	3.2838	3825.74	FALSE	208
2022-09-12	11:59:15	1.73279	7.7078	4032.95	FALSE	208
2022-09-12	11:59:15	0.448868	1.99665	3827.74	FALSE	208
2022-09-12	11:59:15	0.301489	1.34108	4034.3	FALSE	208
2022-09-12	11:59:16	0.401997	1.78816	3829.52	FALSE	208
2022-09-12	11:59:16	0.159758	0.710636	4035.01	FALSE	208
2022-09-12	11:59:16	0.341845	1.52059	3831.04	FALSE	208
2022-09-12	11:59:16	0.279657	1.24397	4036.25	FALSE	208
2022-09-12	11:59:17	0.759962	3.38046	3834.42	FALSE	208
2022-09-12	11:59:17	2.58831	11.5133	4047.76	FALSE	208
2022-09-12	11:59:17	4.53701	20.1815	3854.61	1	209
2022-09-12	11:59:17	2.19966	9.78453	4057.55	FALSE	209
2022-09-12	11:59:18	1.80902	8.04688	3862.65	FALSE	209
2022-09-12	11:59:18	0.98327	4.37378	4061.92	FALSE	209
2022-09-12	11:59:18	1.22749	5.46012	3868.11	FALSE	209
2022-09-12	11:59:19	2.60118	11.5706	4073.49	FALSE	209
2022-09-12	11:59:19	2.92795	13.0241	3881.14	FALSE	209
2022-09-12	11:59:19	3.58943	15.9665	4089.46	1	210
2022-09-12	11:59:19	4.45294	19.8076	3900.94	1	211
2022-09-12	11:59:20	3.41014	15.169	4104.63	1	212
2022-09-12	11:59:20	1.26388	5.62199	3906.57	FALSE	212
2022-09-12	11:59:20	2.22637	9.90334	4114.53	FALSE	212
2022-09-12	11:59:20	0.841845	3.74469	3910.31	FALSE	212
2022-09-12	11:59:21	3.56703	15.8669	4130.4	1	213
2022-09-12	11:59:21	2.34709	10.4403	3920.75	FALSE	213
2022-09-12	11:59:21	4.45395	19.8121	4150.21	1	214
2022-09-12	11:59:21	3.40551	15.1484	3935.9	1	215
2022-09-12	11:59:22	1.99182	8.86001	4159.07	FALSE	215
2022-09-12	11:59:22	0.363015	1.61476	3937.51	FALSE	215
2022-09-12	11:59:22	0.518588	2.30678	4161.38	FALSE	215
2022-09-12	11:59:23	0.266934	1.18738	3938.7	FALSE	215
2022-09-12	11:59:23	0.386527	1.71935	4163.1	FALSE	215
2022-09-12	11:59:23	0.396043	1.76168	3940.46	FALSE	215
2022-09-12	11:59:23	0.313346	1.39383	4164.49	FALSE	215
2022-09-12	11:59:24	0.376043	1.67271	3942.14	FALSE	215
2022-09-12	11:59:24	0.455687	2.02699	4166.52	FALSE	215
2022-09-12	11:59:24	0.412939	1.83684	3943.97	FALSE	215
2022-09-12	11:59:24	0.33299	1.48121	4168	FALSE	215
2022-09-12	11:59:25	0.274771	1.22224	3945.2	FALSE	215
2022-09-12	11:59:25	0.372125	1.65529	4169.65	FALSE	215
2022-09-12	11:59:25	0.233499	1.03865	3946.23	FALSE	215
2022-09-12	11:59:25	0.2964	1.31845	4170.97	FALSE	215
2022-09-12	11:59:26	0.241947	1.07623	3947.31	FALSE	215
2022-09-12	11:59:26	0.190089	0.845554	4171.82	FALSE	215
2022-09-12	11:59:26	0.297672	1.3241	3948.63	FALSE	215
2022-09-12	11:59:27	0.291972	1.29875	4173.12	FALSE	215
2022-09-12	11:59:27	0.72841	3.24011	3951.87	FALSE	215
2022-09-12	11:59:27	0.336552	1.49705	4174.61	FALSE	215
2022-09-12	11:59:27	0.308155	1.37074	3953.25	FALSE	215
2022-09-12	11:59:28	0.320115	1.42394	4176.04	FALSE	215
2022-09-12	11:59:28	0.29584	1.31596	3954.56	FALSE	215
2022-09-12	11:59:28	0.546527	2.43106	4178.47	FALSE	215
2022-09-12	11:59:28	1.48047	6.58543	3961.15	FALSE	215
2022-09-12	11:59:29	1.69263	7.52916	4186	FALSE	215
2022-09-12	11:59:29	1.38383	6.15555	3967.3	FALSE	215
2022-09-12	11:59:29	0.896043	3.98578	4189.98	FALSE	215
2022-09-12	11:59:29	0.840471	3.73858	3971.04	FALSE	215
2022-09-12	11:59:30	1.3735	6.1096	4196.09	FALSE	215
2022-09-12	11:59:30	0.56785	2.52591	3973.57	FALSE	215
2022-09-12	11:59:30	0.250853	1.11584	4197.21	FALSE	215
2022-09-12	11:59:31	0.265458	1.18081	3974.75	FALSE	215
2022-09-12	11:59:31	0.309071	1.37481	4198.58	FALSE	215
2022-09-12	11:59:31	0.219402	0.975944	3975.72	FALSE	215
2022-09-12	11:59:31	0.226018	1.00537	4199.59	FALSE	215
2022-09-12	11:59:32	0.34154	1.51924	3977.24	FALSE	215
2022-09-12	11:59:32	0.205407	0.913691	4200.5	FALSE	215
2022-09-12	11:59:32	0.38327	1.70486	3978.95	FALSE	215
2022-09-12	11:59:32	0.217163	0.965984	4201.47	FALSE	215
2022-09-12	11:59:33	1.21823	5.41893	3984.37	FALSE	215
2022-09-12	11:59:33	3.19472	14.2108	4215.68	1	216
2022-09-12	11:59:33	4.03904	17.9665	4002.33	1	217
2022-09-12	11:59:33	1.95609	8.70108	4224.38	FALSE	217
2022-09-12	11:59:34	1.76882	7.86807	4010.2	FALSE	217
2022-09-12	11:59:34	2.65095	11.792	4236.17	FALSE	217
2022-09-12	11:59:34	3.99182	17.7564	4027.96	1	218
2022-09-12	11:59:34	1.77747	7.90654	4244.08	FALSE	218
2022-09-12	11:59:35	2.32434	10.3391	4038.3	FALSE	218
2022-09-12	11:59:35	3.26439	14.5207	4258.6	1	219
2022-09-12	11:59:35	3.69228	16.424	4054.72	1	220
2022-09-12	11:59:36	4.76454	21.1936	4279.79	1	221
2022-09-12	11:59:36	0.93986	4.18069	4058.9	FALSE	221
2022-09-12	11:59:36	1.09258	4.86001	4284.65	FALSE	221
2022-09-12	11:59:36	1.58943	7.0701	4065.97	FALSE	221
2022-09-12	11:59:37	2.8452	12.656	4297.31	FALSE	221
2022-09-12	11:59:37	3.21278	14.2911	4080.26	1	222
2022-09-12	11:59:37	2.81334	12.5143	4309.82	FALSE	222
2022-09-12	11:59:37	0.688562	3.06286	4083.33	FALSE	222
2022-09-12	11:59:38	0.349936	1.55659	4311.38	FALSE	222
2022-09-12	11:59:38	0.314415	1.39858	4084.72	FALSE	222
2022-09-12	11:59:38	0.294211	1.30871	4312.69	FALSE	222
2022-09-12	11:59:38	0.48785	2.17005	4086.89	FALSE	222
2022-09-12	11:59:39	1.25472	5.58125	4318.27	FALSE	222
2022-09-12	11:59:39	1.30581	5.8085	4092.7	FALSE	222
2022-09-12	11:59:39	0.87584	3.89591	4322.17	FALSE	222
2022-09-12	11:59:40	0.358028	1.59258	4094.3	FALSE	222
2022-09-12	11:59:40	0.338944	1.50769	4323.67	FALSE	222
2022-09-12	11:59:40	0.396247	1.76259	4096.06	FALSE	222
2022-09-12	11:59:40	0.333906	1.48528	4325.16	FALSE	222
2022-09-12	11:59:41	0.30383	1.3515	4097.41	FALSE	222
2022-09-12	11:59:41	0.19472	0.866154	4326.03	FALSE	222
2022-09-12	11:59:41	0.252176	1.12173	4098.53	FALSE	222
2022-09-12	11:59:41	2.03131	9.03567	4335.06	FALSE	222
2022-09-12	11:59:42	2.77971	12.3647	4110.9	FALSE	222
2022-09-12	11:59:42	0.955585	4.25063	4339.31	FALSE	222
2022-09-12	11:59:42	0.314109	1.39722	4112.29	FALSE	222
2022-09-12	11:59:42	0.170853	0.759988	4340.07	FALSE	222
2022-09-12	11:59:43	0.139199	0.619185	4112.91	FALSE	222
2022-09-12	11:59:43	0.138232	0.614884	4340.69	FALSE	222
2022-09-12	11:59:43	0.307799	1.36915	4114.28	FALSE	222
2022-09-12	11:59:44	0.164084	0.729878	4341.42	FALSE	222
2022-09-12	11:59:44	0.106629	0.474307	4114.76	FALSE	222
2022-09-12	11:59:44	0.15411	0.685512	4342.1	FALSE	222
2022-09-12	11:59:44	0.127443	0.566892	4115.32	FALSE	222
2022-09-12	11:59:45	0.205356	0.913465	4343.02	FALSE	222
2022-09-12	11:59:45	0.172481	0.76723	4116.09	FALSE	222
2022-09-12	11:59:45	0.239657	1.06604	4344.08	FALSE	222
2022-09-12	11:59:45	0.187087	0.8322	4116.92	FALSE	222
2022-09-12	11:59:46	0.360216	1.60231	4345.68	FALSE	222
2022-09-12	11:59:46	0.526985	2.34413	4119.27	FALSE	222
2022-09-12	11:59:46	0.308257	1.37119	4347.05	FALSE	222
2022-09-12	11:59:46	0.321641	1.43072	4120.7	FALSE	222
2022-09-12	11:59:47	0.412634	1.83548	4348.89	FALSE	222
2022-09-12	11:59:47	0.705662	3.13893	4123.84	FALSE	222
2022-09-12	11:59:47	0.677112	3.01193	4351.9	FALSE	222
2022-09-12	11:59:48	0.649835	2.8906	4126.73	FALSE	222
2022-09-12	11:59:48	0.669427	2.97775	4354.88	FALSE	222
2022-09-12	11:59:48	0.823321	3.6623	4130.39	FALSE	222
2022-09-12	11:59:48	1.40637	6.25582	4361.14	FALSE	222
2022-09-12	11:59:49	1.62826	7.24283	4137.63	FALSE	222
2022-09-12	11:59:49	2.54846	11.3361	4372.47	FALSE	222
2022-09-12	11:59:49	1.8049	8.02856	4145.66	FALSE	222
2022-09-12	11:59:49	1.88597	8.38917	4380.86	FALSE	222
2022-09-12	11:59:50	1.07569	4.78488	4150.45	FALSE	222
2022-09-12	11:59:50	1.25177	5.56812	4386.43	FALSE	222
2022-09-12	11:59:50	0.822913	3.66048	4154.11	FALSE	222
2022-09-12	11:59:50	0.706323	3.14187	4389.57	FALSE	222
2022-09-12	11:59:51	1.05019	4.67146	4158.78	FALSE	222
2022-09-12	11:59:51	0.888359	3.9516	4393.52	FALSE	222
2022-09-12	11:59:51	0.962862	4.283	4163.06	FALSE	222
2022-09-12	11:59:52	0.903677	4.01974	4397.54	FALSE	222
2022-09-12	11:59:52	1.06673	4.74503	4167.8	FALSE	222
2022-09-12	11:59:52	1.17599	5.23104	4402.77	FALSE	222
2022-09-12	11:59:52	2.95477	13.1434	4180.95	FALSE	222
2022-09-12	11:59:53	4.19772	18.6723	4421.45	1	223
2022-09-12	11:59:53	2.52632	11.2376	4192.19	FALSE	223
2022-09-12	11:59:53	1.53085	6.80953	4428.26	FALSE	223
2022-09-12	11:59:53	1.23798	5.50678	4197.69	FALSE	223
2022-09-12	11:59:54	1.56729	6.97162	4435.23	FALSE	223
2022-09-12	11:59:54	1.44953	6.4478	4204.14	FALSE	223
2022-09-12	11:59:54	2.71049	12.0568	4447.28	FALSE	223
2022-09-12	11:59:54	2.7648	12.2984	4216.44	FALSE	223
2022-09-12	11:59:55	1.95513	8.69681	4455.98	FALSE	223
2022-09-12	11:59:55	2.01777	8.97544	4225.41	FALSE	223
2022-09-12	11:59:55	2.31889	10.3149	4466.3	FALSE	223
2022-09-12	11:59:56	1.97467	8.78373	4234.2	FALSE	223
2022-09-12	11:59:56	2.02892	9.02504	4475.32	FALSE	223
2022-09-12	11:59:56	4.11635	18.3103	4252.51	1	224
2022-09-12	11:59:56	6.21309	27.6371	4502.96	1	225
2022-09-12	11:59:57	3.77477	16.7909	4269.3	1	226
2022-09-12	11:59:57	3.38378	15.0517	4518.01	1	227
2022-09-12	11:59:57	4.23024	18.817	4288.12	1	228
2022-09-12	11:59:57	4.28367	19.0546	4537.06	1	229
2022-09-12	11:59:58	3.02194	13.4422	4301.56	1	230
2022-09-12	11:59:58	3.61904	16.0982	4553.16	1	231
2022-09-12	11:59:58	5.44159	24.2053	4325.76	1	232
2022-09-12	11:59:58	5.90194	26.253	4579.41	1	233
2022-09-12	11:59:59	4.9392	21.9705	4347.73	1	234
2022-09-12	11:59:59	6.62235	29.4575	4608.87	1	235
2022-09-12	11:59:59	5.52851	24.5919	4372.33	1	236
2022-09-12	12:00:00	3.26897	14.541	4623.41	1	237
2022-09-12	12:00:00	2.15665	9.59321	4381.92	FALSE	237
2022-09-12	12:00:00	3.40362	15.14	4638.55	1	238
2022-09-12	12:00:00	4.33151	19.2674	4401.19	1	239
2022-09-12	12:00:01	4.95095	22.0228	4660.58	1	240
2022-09-12	12:00:01	4.72831	21.0325	4422.22	1	241
2022-09-12	12:00:01	4.86678	21.6484	4682.22	1	242
2022-09-12	12:00:01	3.0964	13.7734	4435.99	1	243
2022-09-12	12:00:02	5.95711	26.4984	4708.72	1	244
2022-09-12	12:00:02	3.80836	16.9403	4452.93	1	245
2022-09-12	12:00:02	8.11843	36.1124	4744.84	1	246
2022-09-12	12:00:02	5.44525	24.2216	4477.15	1	247
2022-09-12	12:00:03	4.74882	21.1237	4765.96	1	248
2022-09-12	12:00:03	3.92805	17.4728	4494.63	1	249
2022-09-12	12:00:03	1.89996	8.4514	4774.41	FALSE	249
2022-09-12	12:00:03	1.22459	5.44722	4500.07	FALSE	249
2022-09-12	12:00:04	1.79645	7.99097	4782.4	FALSE	249
2022-09-12	12:00:04	3.33436	14.8319	4514.91	1	250
2022-09-12	12:00:04	3.91808	17.4284	4799.83	1	251
2022-09-12	12:00:05	2.72912	12.1397	4527.05	FALSE	251
2022-09-12	12:00:05	2.33447	10.3842	4810.21	FALSE	251
2022-09-12	12:00:05	2.94403	13.0956	4540.14	FALSE	251
2022-09-12	12:00:05	2.27803	10.1331	4820.35	FALSE	251
2022-09-12	12:00:06	2.83513	12.6112	4552.75	FALSE	251
2022-09-12	12:00:06	6.49986	28.9127	4849.26	1	252
2022-09-12	12:00:06	3.65431	16.2551	4569.01	1	253
2022-09-12	12:00:06	4.25843	18.9423	4868.2	1	254
2022-09-12	12:00:07	4.07457	18.1245	4587.13	1	255
2022-09-12	12:00:07	2.27599	10.1241	4878.33	FALSE	255
2022-09-12	12:00:07	2.60617	11.5928	4598.73	FALSE	255
2022-09-12	12:00:07	2.47803	11.0228	4889.35	FALSE	255
2022-09-12	12:00:08	4.88658	21.7365	4620.46	1	256
2022-09-12	12:00:08	1.61864	7.20003	4896.55	FALSE	256
2022-09-12	12:00:08	2.04383	9.09136	4629.55	FALSE	256
2022-09-12	12:00:09	1.85966	8.27214	4904.82	FALSE	256
2022-09-12	12:00:09	5.59884	24.9048	4654.46	1	257
2022-09-12	12:00:09	7.72037	34.3417	4939.16	1	258
2022-09-12	12:00:09	6.25126	27.8069	4682.26	1	259
2022-09-12	12:00:10	8.24632	36.6813	4975.84	1	260
2022-09-12	12:00:10	6.04561	26.8921	4709.16	1	261
2022-09-12	12:00:10	11.1158	49.4453	5025.29	1	262
2022-09-12	12:00:10	3.01248	13.4001	4722.56	1	263
2022-09-12	12:00:11	1.87268	8.33006	5033.62	FALSE	263
2022-09-12	12:00:11	0.961539	4.27712	4726.83	FALSE	263
2022-09-12	12:00:11	1.22103	5.43139	5039.05	FALSE	263
2022-09-12	12:00:11	1.51569	6.74209	4733.58	FALSE	263
2022-09-12	12:00:12	3.25716	14.4885	5053.54	1	264
2022-09-12	12:00:12	4.32032	19.2176	4752.79	1	265
2022-09-12	12:00:12	9.00103	40.0384	5093.58	1	266
2022-09-12	12:00:13	5.3735	23.9024	4776.7	1	267
2022-09-12	12:00:13	4.38474	19.5042	5113.08	1	268

## Sheet: Sunny_star_2022912115450 (E)
Date	Time	Lbs	Total force x time	Total Time Steps Force >3		**GoPro Fitting: 1144
2022-09-12	11:55:13	0.480115	0.480115	FALSE	0			Total force x time	2223.32
2022-09-12	11:55:13	0.659962	1.14008	FALSE	0			Total Time Steps Force >3	268
2022-09-12	11:55:13	2.42861	3.56869	FALSE	0
2022-09-12	11:55:13	0.314669	3.88336	FALSE	0
2022-09-12	11:55:14	0.222659	4.10601	FALSE	0
2022-09-12	11:55:14	0.223524	4.32954	FALSE	0
2022-09-12	11:55:14	-0.0778496	4.32954	FALSE	0
2022-09-12	11:55:14	0.164542	4.49408	FALSE	0
2022-09-12	11:55:15	0.189987	4.68407	FALSE	0
2022-09-12	11:55:15	0.361336	5.0454	FALSE	0
2022-09-12	11:55:15	0.273193	5.3186	FALSE	0
2022-09-12	11:55:16	0.421285	5.73988	FALSE	0
2022-09-12	11:55:16	0.351921	6.0918	FALSE	0
2022-09-12	11:55:16	0.189224	6.28103	FALSE	0
2022-09-12	11:55:16	0.00800278	6.28903	FALSE	0
2022-09-12	11:55:17	0.16668	6.45571	FALSE	0
2022-09-12	11:55:17	1.00271	7.45842	FALSE	0
2022-09-12	11:55:17	2.98179	10.4402	FALSE	0
2022-09-12	11:55:17	1.89737	12.3376	FALSE	0
2022-09-12	11:55:18	0.567239	12.9048	FALSE	0
2022-09-12	11:55:18	0.409936	13.3148	FALSE	0
2022-09-12	11:55:18	0.303779	13.6185	FALSE	0
2022-09-12	11:55:18	0.401438	14.02	FALSE	0
2022-09-12	11:55:19	0.239657	14.2596	FALSE	0
2022-09-12	11:55:19	0.150038	14.4097	FALSE	0
2022-09-12	11:55:19	0.334822	14.7445	FALSE	0
2022-09-12	11:55:20	0.183779	14.9283	FALSE	0
2022-09-12	11:55:20	0.426578	15.3548	FALSE	0
2022-09-12	11:55:20	0.149021	15.5039	FALSE	0
2022-09-12	11:55:20	0.338232	15.8421	FALSE	0
2022-09-12	11:55:21	0.435382	16.2775	FALSE	0
2022-09-12	11:55:21	0.327036	16.6045	FALSE	0
2022-09-12	11:55:21	0.389122	16.9936	FALSE	0
2022-09-12	11:55:21	0.20897	17.2026	FALSE	0
2022-09-12	11:55:22	0.424186	17.6268	FALSE	0
2022-09-12	11:55:22	0.144033	17.7708	FALSE	0
2022-09-12	11:55:22	0.35355	18.1244	FALSE	0
2022-09-12	11:55:22	0.00550917	18.1299	FALSE	0
2022-09-12	11:55:23	-0.324618	18.1299	FALSE	0
2022-09-12	11:55:23	-0.37159	18.1299	FALSE	0
2022-09-12	11:55:23	0.0966541	18.2265	FALSE	0
2022-09-12	11:55:24	0.0909544	18.3175	FALSE	0
2022-09-12	11:55:24	0.581489	18.899	FALSE	0
2022-09-12	11:55:24	2.4962	21.3952	FALSE	0
2022-09-12	11:55:24	2.38327	23.7785	FALSE	0
2022-09-12	11:55:25	0.537061	24.3155	FALSE	0
2022-09-12	11:55:25	2.49564	26.8112	FALSE	0
2022-09-12	11:55:25	1.01324	27.8244	FALSE	0
2022-09-12	11:55:25	0.24556	28.07	FALSE	0
2022-09-12	11:55:26	0.136705	28.2067	FALSE	0
2022-09-12	11:55:26	0.114822	28.3215	FALSE	0
2022-09-12	11:55:26	0.376705	28.6982	FALSE	0
2022-09-12	11:55:26	0.804745	29.5029	FALSE	0
2022-09-12	11:55:27	0.578079	30.081	FALSE	0
2022-09-12	11:55:27	0.605509	30.6865	FALSE	0
2022-09-12	11:55:27	0.779453	31.466	FALSE	0
2022-09-12	11:55:28	1.06205	32.528	FALSE	0
2022-09-12	11:55:28	2.75258	35.2806	FALSE	0
2022-09-12	11:55:28	2.85284	38.1334	FALSE	0
2022-09-12	11:55:28	2.68403	40.8175	FALSE	0
2022-09-12	11:55:29	0.642557	41.46	FALSE	0
2022-09-12	11:55:29	0.440929	41.901	FALSE	0
2022-09-12	11:55:29	0.206527	42.1075	FALSE	0
2022-09-12	11:55:29	0.0678501	42.1753	FALSE	0
2022-09-12	11:55:30	0.00428777	42.1796	FALSE	0
2022-09-12	11:55:30	0.0928883	42.2725	FALSE	0
2022-09-12	11:55:30	2.59691	44.8694	FALSE	0
2022-09-12	11:55:30	4.94999	49.8194	1	1
2022-09-12	11:55:31	3.06174	52.8812	1	2
2022-09-12	11:55:31	1.54327	54.4244	FALSE	2
2022-09-12	11:55:31	2.24765	56.6721	FALSE	2
2022-09-12	11:55:31	0.608969	57.281	FALSE	2
2022-09-12	11:55:32	0.547901	57.8289	FALSE	2
2022-09-12	11:55:32	0.697621	58.5266	FALSE	2
2022-09-12	11:55:32	0.162965	58.6895	FALSE	2
2022-09-12	11:55:33	0.39126	59.0808	FALSE	2
2022-09-12	11:55:33	0.0633717	59.1442	FALSE	2
2022-09-12	11:55:33	0.15355	59.2977	FALSE	2
2022-09-12	11:55:33	0.115738	59.4134	FALSE	2
2022-09-12	11:55:34	0.0741605	59.4876	FALSE	2
2022-09-12	11:55:34	0.251158	59.7388	FALSE	2
2022-09-12	11:55:34	0.0524811	59.7912	FALSE	2
2022-09-12	11:55:34	0.19813	59.9894	FALSE	2
2022-09-12	11:55:35	0.0591987	60.0486	FALSE	2
2022-09-12	11:55:35	0.111921	60.1605	FALSE	2
2022-09-12	11:55:35	-0.06416	60.1605	FALSE	2
2022-09-12	11:55:35	0.222965	60.3835	FALSE	2
2022-09-12	11:55:36	2.44332	62.8268	FALSE	2
2022-09-12	11:55:36	2.16342	64.9902	FALSE	2
2022-09-12	11:55:36	0.807697	65.7979	FALSE	2
2022-09-12	11:55:37	0.358791	66.1567	FALSE	2
2022-09-12	11:55:37	0.566883	66.7236	FALSE	2
2022-09-12	11:55:37	0.0530409	66.7766	FALSE	2
2022-09-12	11:55:37	0.290751	67.0674	FALSE	2
2022-09-12	11:55:38	0.279504	67.3469	FALSE	2
2022-09-12	11:55:38	1.05253	68.3994	FALSE	2
2022-09-12	11:55:38	1.30561	69.705	FALSE	2
2022-09-12	11:55:38	0.401743	70.1068	FALSE	2
2022-09-12	11:55:39	0.314618	70.4214	FALSE	2
2022-09-12	11:55:39	0.182557	70.6039	FALSE	2
2022-09-12	11:55:39	0.806832	71.4108	FALSE	2
2022-09-12	11:55:39	20.4806	91.8914	1	3
2022-09-12	11:55:40	20.8866	112.778	1	4
2022-09-12	11:55:40	4.80963	117.588	1	5
2022-09-12	11:55:40	2.34704	119.935	FALSE	5
2022-09-12	11:55:41	2.6592	122.594	FALSE	5
2022-09-12	11:55:41	1.81793	124.412	FALSE	5
2022-09-12	11:55:41	8.44403	132.856	1	6
2022-09-12	11:55:41	9.01095	141.867	1	7
2022-09-12	11:55:42	10.7954	152.662	1	8
2022-09-12	11:55:42	5.31533	157.977	1	9
2022-09-12	11:55:42	3.51619	161.494	1	10
2022-09-12	11:55:42	7.83105	169.325	1	11
2022-09-12	11:55:43	5.20627	174.531	1	12
2022-09-12	11:55:43	5.17833	179.709	1	13
2022-09-12	11:55:43	1.95182	181.661	FALSE	13
2022-09-12	11:55:43	1.08795	182.749	FALSE	13
2022-09-12	11:55:44	2.14286	184.892	FALSE	13
2022-09-12	11:55:44	3.44759	188.34	1	14
2022-09-12	11:55:44	5.67818	194.018	1	15
2022-09-12	11:55:45	8.64749	202.665	1	16
2022-09-12	11:55:45	2.02266	204.688	FALSE	16
2022-09-12	11:55:45	3.12652	207.814	1	17
2022-09-12	11:55:45	7.76937	215.584	1	18
2022-09-12	11:55:46	5.37543	220.959	1	19
2022-09-12	11:55:46	7.14693	228.106	1	20
2022-09-12	11:55:46	4.84851	232.955	1	21
2022-09-12	11:55:46	2.99594	235.951	FALSE	21
2022-09-12	11:55:47	3.41782	239.368	1	22
2022-09-12	11:55:47	2.40963	241.778	FALSE	22
2022-09-12	11:55:47	5.3107	247.089	1	23
2022-09-12	11:55:47	3.88245	250.971	1	24
2022-09-12	11:55:48	3.74128	254.712	1	25
2022-09-12	11:55:48	4.28159	258.994	1	26
2022-09-12	11:55:48	5.86108	264.855	1	27
2022-09-12	11:55:49	12.1592	277.014	1	28
2022-09-12	11:55:49	5.95054	282.965	1	29
2022-09-12	11:55:49	1.28525	284.25	FALSE	29
2022-09-12	11:55:49	1.1249	285.375	FALSE	29
2022-09-12	11:55:50	5.31029	290.685	1	30
2022-09-12	11:55:50	6.59909	297.284	1	31
2022-09-12	11:55:50	4.62729	301.912	1	32
2022-09-12	11:55:50	4.38988	306.302	1	33
2022-09-12	11:55:51	2.21793	308.519	FALSE	33
2022-09-12	11:55:51	0.339758	308.859	FALSE	33
2022-09-12	11:55:51	0.459555	309.319	FALSE	33
2022-09-12	11:55:51	0.201387	309.52	FALSE	33
2022-09-12	11:55:52	0.371514	309.892	FALSE	33
2022-09-12	11:55:52	0.144135	310.036	FALSE	33
2022-09-12	11:55:52	0.280369	310.316	FALSE	33
2022-09-12	11:55:52	0.185255	310.501	FALSE	33
2022-09-12	11:55:53	0.08556	310.587	FALSE	33
2022-09-12	11:55:53	0.030242	310.617	FALSE	33
2022-09-12	11:55:53	-0.0382568	310.617	FALSE	33
2022-09-12	11:55:54	0.164644	310.782	FALSE	33
2022-09-12	11:55:54	0.269936	311.052	FALSE	33
2022-09-12	11:55:54	0.454822	311.507	FALSE	33
2022-09-12	11:55:54	0.538486	312.045	FALSE	33
2022-09-12	11:55:55	1.75487	313.8	FALSE	33
2022-09-12	11:55:55	4.89492	318.695	1	34
2022-09-12	11:55:55	7.39243	326.087	1	35
2022-09-12	11:55:55	6.48138	332.569	1	36
2022-09-12	11:55:56	2.43436	335.003	FALSE	36
2022-09-12	11:55:56	2.27141	337.275	FALSE	36
2022-09-12	11:55:56	2.24052	339.515	FALSE	36
2022-09-12	11:55:56	5.68627	345.201	1	37
2022-09-12	11:55:57	6.4681	351.669	1	38
2022-09-12	11:55:57	3.37121	355.041	1	39
2022-09-12	11:55:57	5.44729	360.488	1	40
2022-09-12	11:55:58	5.45446	365.942	1	41
2022-09-12	11:55:58	4.61095	370.553	1	42
2022-09-12	11:55:58	2.44306	372.996	FALSE	42
2022-09-12	11:55:58	0.902353	373.899	FALSE	42
2022-09-12	11:55:59	0.708104	374.607	FALSE	42
2022-09-12	11:55:59	0.239911	374.847	FALSE	42
2022-09-12	11:55:59	0.28902	375.136	FALSE	42
2022-09-12	11:55:59	0.447697	375.583	FALSE	42
2022-09-12	11:56:00	0.243066	375.827	FALSE	42
2022-09-12	11:56:00	-0.0587656	375.827	FALSE	42
2022-09-12	11:56:00	-0.112913	375.827	FALSE	42
2022-09-12	11:56:00	0.198792	376.025	FALSE	42
2022-09-12	11:56:01	0.0699366	376.095	FALSE	42
2022-09-12	11:56:01	0.14556	376.241	FALSE	42
2022-09-12	11:56:01	0.417519	376.658	FALSE	42
2022-09-12	11:56:02	1.44373	378.102	FALSE	42
2022-09-12	11:56:02	0.52729	378.629	FALSE	42
2022-09-12	11:56:02	0.04556	378.675	FALSE	42
2022-09-12	11:56:02	0.285916	378.961	FALSE	42
2022-09-12	11:56:03	0.176552	379.137	FALSE	42
2022-09-12	11:56:03	0.31126	379.449	FALSE	42
2022-09-12	11:56:03	0.125204	379.574	FALSE	42
2022-09-12	11:56:03	0.433601	380.007	FALSE	42
2022-09-12	11:56:04	0.292023	380.299	FALSE	42
2022-09-12	11:56:04	0.443321	380.743	FALSE	42
2022-09-12	11:56:04	0.385356	381.128	FALSE	42
2022-09-12	11:56:04	0.311718	381.44	FALSE	42
2022-09-12	11:56:05	0.422557	381.862	FALSE	42
2022-09-12	11:56:05	0.470038	382.332	FALSE	42
2022-09-12	11:56:05	0.396603	382.729	FALSE	42
2022-09-12	11:56:06	0.472583	383.202	FALSE	42
2022-09-12	11:56:06	0.450649	383.652	FALSE	42
2022-09-12	11:56:06	0.293804	383.946	FALSE	42
2022-09-12	11:56:06	0.299199	384.245	FALSE	42
2022-09-12	11:56:07	0.383677	384.629	FALSE	42
2022-09-12	11:56:07	0.326832	384.956	FALSE	42
2022-09-12	11:56:07	0.226018	385.182	FALSE	42
2022-09-12	11:56:07	2.09508	387.277	FALSE	42
2022-09-12	11:56:08	3.38505	390.662	1	43
2022-09-12	11:56:08	5.11243	395.774	1	44
2022-09-12	11:56:08	2.87289	398.647	FALSE	44
2022-09-12	11:56:08	4.29843	402.946	1	45
2022-09-12	11:56:09	6.82718	409.773	1	46
2022-09-12	11:56:09	3.85884	413.632	1	47
2022-09-12	11:56:09	7.77685	421.409	1	48
2022-09-12	11:56:10	6.55044	427.959	1	49
2022-09-12	11:56:10	2.82133	430.78	FALSE	49
2022-09-12	11:56:10	2.82184	433.602	FALSE	49
2022-09-12	11:56:10	1.62525	435.227	FALSE	49
2022-09-12	11:56:11	1.75798	436.985	FALSE	49
2022-09-12	11:56:11	2.15411	439.14	FALSE	49
2022-09-12	11:56:11	0.579911	439.719	FALSE	49
2022-09-12	11:56:11	0.478079	440.198	FALSE	49
2022-09-12	11:56:12	1.49513	441.693	FALSE	49
2022-09-12	11:56:12	2.69747	444.39	FALSE	49
2022-09-12	11:56:12	2.60983	447	FALSE	49
2022-09-12	11:56:12	2.86195	449.862	FALSE	49
2022-09-12	11:56:13	0.281794	450.144	FALSE	49
2022-09-12	11:56:13	1.17742	451.321	FALSE	49
2022-09-12	11:56:13	0.898486	452.22	FALSE	49
2022-09-12	11:56:13	5.23787	457.457	1	50
2022-09-12	11:56:14	3.71798	461.175	1	51
2022-09-12	11:56:14	3.92016	465.096	1	52
2022-09-12	11:56:14	0.961489	466.057	FALSE	52
2022-09-12	11:56:15	1.24307	467.3	FALSE	52
2022-09-12	11:56:15	0.604389	467.905	FALSE	52
2022-09-12	11:56:15	0.30444	468.209	FALSE	52
2022-09-12	11:56:15	0.440115	468.649	FALSE	52
2022-09-12	11:56:16	0.49126	469.14	FALSE	52
2022-09-12	11:56:16	0.528257	469.669	FALSE	52
2022-09-12	11:56:16	0.320267	469.989	FALSE	52
2022-09-12	11:56:16	0.411412	470.4	FALSE	52
2022-09-12	11:56:17	0.498995	470.899	FALSE	52
2022-09-12	11:56:17	0.317876	471.217	FALSE	52
2022-09-12	11:56:17	0.484746	471.702	FALSE	52
2022-09-12	11:56:17	0.399504	472.101	FALSE	52
2022-09-12	11:56:18	0.363168	472.465	FALSE	52
2022-09-12	11:56:18	1.2107	473.675	FALSE	52
2022-09-12	11:56:18	0.394161	474.069	FALSE	52
2022-09-12	11:56:19	0.620471	474.69	FALSE	52
2022-09-12	11:56:19	0.828715	475.519	FALSE	52
2022-09-12	11:56:19	1.08251	476.601	FALSE	52
2022-09-12	11:56:19	0.95701	477.558	FALSE	52
2022-09-12	11:56:20	2.8737	480.432	FALSE	52
2022-09-12	11:56:20	2.29716	482.729	FALSE	52
2022-09-12	11:56:20	3.90556	486.635	1	53
2022-09-12	11:56:20	4.51574	491.15	1	54
2022-09-12	11:56:21	3.83991	494.99	1	55
2022-09-12	11:56:21	3.77375	498.764	1	56
2022-09-12	11:56:21	1.23492	499.999	FALSE	56
2022-09-12	11:56:21	2.16235	502.161	FALSE	56
2022-09-12	11:56:22	0.597875	502.759	FALSE	56
2022-09-12	11:56:22	1.53665	504.296	FALSE	56
2022-09-12	11:56:22	1.28749	505.583	FALSE	56
2022-09-12	11:56:23	3.86357	509.447	1	57
2022-09-12	11:56:23	5.72586	515.173	1	58
2022-09-12	11:56:23	6.19019	521.363	1	59
2022-09-12	11:56:23	1.65579	523.019	FALSE	59
2022-09-12	11:56:24	0.626985	523.646	FALSE	59
2022-09-12	11:56:24	0.412176	524.058	FALSE	59
2022-09-12	11:56:24	0.6993	524.757	FALSE	59
2022-09-12	11:56:24	0.821234	525.578	FALSE	59
2022-09-12	11:56:25	1.08693	526.665	FALSE	59
2022-09-12	11:56:25	0.475687	527.141	FALSE	59
2022-09-12	11:56:25	0.676908	527.818	FALSE	59
2022-09-12	11:56:25	1.56001	529.378	FALSE	59
2022-09-12	11:56:26	2.96057	532.338	FALSE	59
2022-09-12	11:56:26	4.10688	536.445	1	60
2022-09-12	11:56:26	2.39508	538.84	FALSE	60
2022-09-12	11:56:27	1.14872	539.989	FALSE	60
2022-09-12	11:56:27	3.10312	543.092	1	61
2022-09-12	11:56:27	5.14291	548.235	1	62
2022-09-12	11:56:27	8.88978	557.125	1	63
2022-09-12	11:56:28	6.65421	563.779	1	64
2022-09-12	11:56:28	3.86408	567.643	1	65
2022-09-12	11:56:28	4.41833	572.062	1	66
2022-09-12	11:56:28	2.2338	574.295	FALSE	66
2022-09-12	11:56:29	1.49197	575.787	FALSE	66
2022-09-12	11:56:29	0.99131	576.779	FALSE	66
2022-09-12	11:56:29	1.09609	577.875	FALSE	66
2022-09-12	11:56:29	1.52225	579.397	FALSE	66
2022-09-12	11:56:30	2.42108	581.818	FALSE	66
2022-09-12	11:56:30	2.42429	584.242	FALSE	66
2022-09-12	11:56:30	0.723728	584.966	FALSE	66
2022-09-12	11:56:31	0.468868	585.435	FALSE	66
2022-09-12	11:56:31	0.32444	585.759	FALSE	66
2022-09-12	11:56:31	0.408563	586.168	FALSE	66
2022-09-12	11:56:31	0.510038	586.678	FALSE	66
2022-09-12	11:56:32	0.462761	587.141	FALSE	66
2022-09-12	11:56:32	0.371158	587.512	FALSE	66
2022-09-12	11:56:32	0.448359	587.96	FALSE	66
2022-09-12	11:56:32	0.505051	588.465	FALSE	66
2022-09-12	11:56:33	0.402201	588.868	FALSE	66
2022-09-12	11:56:33	0.416451	589.284	FALSE	66
2022-09-12	11:56:33	0.391819	589.676	FALSE	66
2022-09-12	11:56:33	0.466781	590.143	FALSE	66
2022-09-12	11:56:34	0.578079	590.721	FALSE	66
2022-09-12	11:56:34	0.360725	591.081	FALSE	66
2022-09-12	11:56:34	0.513499	591.595	FALSE	66
2022-09-12	11:56:34	0.535178	592.13	FALSE	66
2022-09-12	11:56:35	0.504644	592.635	FALSE	66
2022-09-12	11:56:35	0.601794	593.237	FALSE	66
2022-09-12	11:56:35	0.431972	593.668	FALSE	66
2022-09-12	11:56:36	0.43416	594.103	FALSE	66
2022-09-12	11:56:36	0.447596	594.55	FALSE	66
2022-09-12	11:56:36	0.706883	595.257	FALSE	66
2022-09-12	11:56:36	0.379249	595.636	FALSE	66
2022-09-12	11:56:37	0.970751	596.607	FALSE	66
2022-09-12	11:56:37	0.800929	597.408	FALSE	66
2022-09-12	11:56:37	0.571972	597.98	FALSE	66
2022-09-12	11:56:37	0.532634	598.513	FALSE	66
2022-09-12	11:56:38	0.630089	599.143	FALSE	66
2022-09-12	11:56:38	0.551361	599.694	FALSE	66
2022-09-12	11:56:38	0.533906	600.228	FALSE	66
2022-09-12	11:56:38	0.68042	600.908	FALSE	66
2022-09-12	11:56:39	0.578486	601.487	FALSE	66
2022-09-12	11:56:39	0.599707	602.087	FALSE	66
2022-09-12	11:56:39	0.564186	602.651	FALSE	66
2022-09-12	11:56:40	0.526476	603.177	FALSE	66
2022-09-12	11:56:40	0.466476	603.644	FALSE	66
2022-09-12	11:56:40	0.420013	604.064	FALSE	66
2022-09-12	11:56:40	0.424033	604.488	FALSE	66
2022-09-12	11:56:41	0.400369	604.888	FALSE	66
2022-09-12	11:56:41	0.416654	605.305	FALSE	66
2022-09-12	11:56:41	0.438079	605.743	FALSE	66
2022-09-12	11:56:41	0.416298	606.159	FALSE	66
2022-09-12	11:56:42	0.448664	606.608	FALSE	66
2022-09-12	11:56:42	0.404695	607.013	FALSE	66
2022-09-12	11:56:42	0.44098	607.454	FALSE	66
2022-09-12	11:56:42	0.500216	607.954	FALSE	66
2022-09-12	11:56:43	0.528257	608.482	FALSE	66
2022-09-12	11:56:43	0.580725	609.063	FALSE	66
2022-09-12	11:56:43	0.737468	609.8	FALSE	66
2022-09-12	11:56:44	1.37436	611.175	FALSE	66
2022-09-12	11:56:44	2.18826	613.363	FALSE	66
2022-09-12	11:56:44	0.717621	614.08	FALSE	66
2022-09-12	11:56:44	0.292837	614.373	FALSE	66
2022-09-12	11:56:45	0.327545	614.701	FALSE	66
2022-09-12	11:56:45	0.455229	615.156	FALSE	66
2022-09-12	11:56:45	1.39762	616.554	FALSE	66
2022-09-12	11:56:45	2.6679	619.222	FALSE	66
2022-09-12	11:56:46	2.10586	621.327	FALSE	66
2022-09-12	11:56:46	1.13273	622.46	FALSE	66
2022-09-12	11:56:46	2.10612	624.566	FALSE	66
2022-09-12	11:56:46	1.18342	625.75	FALSE	66
2022-09-12	11:56:47	1.59248	627.342	FALSE	66
2022-09-12	11:56:47	0.78098	628.123	FALSE	66
2022-09-12	11:56:47	0.547035	628.67	FALSE	66
2022-09-12	11:56:48	0.311361	628.982	FALSE	66
2022-09-12	11:56:48	0.267188	629.249	FALSE	66
2022-09-12	11:56:48	0.260064	629.509	FALSE	66
2022-09-12	11:56:48	-0.0445672	629.509	FALSE	66
2022-09-12	11:56:49	-0.0461448	629.509	FALSE	66
2022-09-12	11:56:49	1.03528	630.544	FALSE	66
2022-09-12	11:56:49	5.47416	636.018	1	67
2022-09-12	11:56:49	4.65324	640.672	1	68
2022-09-12	11:56:50	5.28586	645.957	1	69
2022-09-12	11:56:50	0.85528	646.813	FALSE	69
2022-09-12	11:56:50	1.85833	648.671	FALSE	69
2022-09-12	11:56:50	2.18246	650.853	FALSE	69
2022-09-12	11:56:51	0.690496	651.544	FALSE	69
2022-09-12	11:56:51	0.876705	652.421	FALSE	69
2022-09-12	11:56:51	0.511819	652.932	FALSE	69
2022-09-12	11:56:52	0.561031	653.493	FALSE	69
2022-09-12	11:56:52	0.858283	654.352	FALSE	69
2022-09-12	11:56:52	0.479809	654.832	FALSE	69
2022-09-12	11:56:52	0.615077	655.447	FALSE	69
2022-09-12	11:56:53	0.572786	656.019	FALSE	69
2022-09-12	11:56:53	0.523982	656.543	FALSE	69
2022-09-12	11:56:53	0.75874	657.302	FALSE	69
2022-09-12	11:56:53	0.936909	658.239	FALSE	69
2022-09-12	11:56:54	3.98586	662.225	1	70
2022-09-12	11:56:54	3.5937	665.819	1	71
2022-09-12	11:56:54	7.41289	673.232	1	72
2022-09-12	11:56:54	7.55818	680.79	1	73
2022-09-12	11:56:55	3.49579	684.285	1	74
2022-09-12	11:56:55	3.26978	687.555	1	75
2022-09-12	11:56:55	2.6453	690.201	FALSE	75
2022-09-12	11:56:55	3.125	693.326	1	76
2022-09-12	11:56:56	2.74128	696.067	FALSE	76
2022-09-12	11:56:56	4.15762	700.224	1	77
2022-09-12	11:56:56	6.66484	706.889	1	78
2022-09-12	11:56:57	2.75548	709.645	FALSE	78
2022-09-12	11:56:57	1.90434	711.549	FALSE	78
2022-09-12	11:56:57	5.21864	716.768	1	79
2022-09-12	11:56:57	2.10301	718.871	FALSE	79
2022-09-12	11:56:58	0.917773	719.789	FALSE	79
2022-09-12	11:56:58	0.513244	720.302	FALSE	79
2022-09-12	11:56:58	0.158079	720.46	FALSE	79
2022-09-12	11:56:58	1.4736	721.933	FALSE	79
2022-09-12	11:56:59	2.83049	724.764	FALSE	79
2022-09-12	11:56:59	4.17762	728.942	1	80
2022-09-12	11:56:59	1.96332	730.905	FALSE	80
2022-09-12	11:56:59	5.77115	736.676	1	81
2022-09-12	11:57:00	8.51955	745.196	1	82
2022-09-12	11:57:00	4.41217	749.608	1	83
2022-09-12	11:57:00	2.82882	752.437	FALSE	83
2022-09-12	11:57:01	1.64149	754.078	FALSE	83
2022-09-12	11:57:01	2.76001	756.838	FALSE	83
2022-09-12	11:57:01	1.12042	757.959	FALSE	83
2022-09-12	11:57:01	1.76958	759.728	FALSE	83
2022-09-12	11:57:02	0.420827	760.149	FALSE	83
2022-09-12	11:57:02	0.393193	760.542	FALSE	83
2022-09-12	11:57:02	0.404135	760.946	FALSE	83
2022-09-12	11:57:02	0.244797	761.191	FALSE	83
2022-09-12	11:57:03	0.623219	761.814	FALSE	83
2022-09-12	11:57:03	0.659351	762.474	FALSE	83
2022-09-12	11:57:03	1.46017	763.934	FALSE	83
2022-09-12	11:57:03	1.39543	765.329	FALSE	83
2022-09-12	11:57:04	0.59355	765.923	FALSE	83
2022-09-12	11:57:04	1.47324	767.396	FALSE	83
2022-09-12	11:57:04	0.852532	768.249	FALSE	83
2022-09-12	11:57:05	2.42393	770.672	FALSE	83
2022-09-12	11:57:05	4.35757	775.03	1	84
2022-09-12	11:57:05	3.06602	778.096	1	85
2022-09-12	11:57:05	3.03014	781.126	1	86
2022-09-12	11:57:06	2.0563	783.183	FALSE	86
2022-09-12	11:57:06	5.67319	788.856	1	87
2022-09-12	11:57:06	1.17874	790.034	FALSE	87
2022-09-12	11:57:06	1.20042	791.235	FALSE	87
2022-09-12	11:57:07	0.955178	792.19	FALSE	87
2022-09-12	11:57:07	3.03854	795.229	1	88
2022-09-12	11:57:07	6.20296	801.432	1	89
2022-09-12	11:57:07	6.99935	808.431	1	90
2022-09-12	11:57:08	16.1427	824.574	1	91
2022-09-12	11:57:08	6.87411	831.448	1	92
2022-09-12	11:57:08	7.6767	839.124	1	93
2022-09-12	11:57:09	8.17303	847.297	1	94
2022-09-12	11:57:09	7.56398	854.861	1	95
2022-09-12	11:57:09	3.06184	857.923	1	96
2022-09-12	11:57:09	3.81355	861.737	1	97
2022-09-12	11:57:10	0.467595	862.204	FALSE	97
2022-09-12	11:57:10	0.696501	862.901	FALSE	97
2022-09-12	11:57:10	0.345356	863.246	FALSE	97
2022-09-12	11:57:10	0.455942	863.702	FALSE	97
2022-09-12	11:57:11	0.253397	863.956	FALSE	97
2022-09-12	11:57:11	0.32042	864.276	FALSE	97
2022-09-12	11:57:11	0.194771	864.471	FALSE	97
2022-09-12	11:57:11	0.124288	864.595	FALSE	97
2022-09-12	11:57:12	1.72332	866.318	FALSE	97
2022-09-12	11:57:12	3.1651	869.483	1	98
2022-09-12	11:57:12	1.40551	870.889	FALSE	98
2022-09-12	11:57:13	1.28637	872.175	FALSE	98
2022-09-12	11:57:13	1.16775	873.343	FALSE	98
2022-09-12	11:57:13	0.795738	874.139	FALSE	98
2022-09-12	11:57:13	0.520878	874.66	FALSE	98
2022-09-12	11:57:14	0.342659	875.002	FALSE	98
2022-09-12	11:57:14	0.127901	875.13	FALSE	98
2022-09-12	11:57:14	0.311667	875.442	FALSE	98
2022-09-12	11:57:14	-0.0658394	875.442	FALSE	98
2022-09-12	11:57:15	-0.338766	875.442	FALSE	98
2022-09-12	11:57:15	-0.456577	875.442	FALSE	98
2022-09-12	11:57:15	-0.771844	875.442	FALSE	98
2022-09-12	11:57:15	-0.68131	875.442	FALSE	98
2022-09-12	11:57:16	-0.602837	875.442	FALSE	98
2022-09-12	11:57:16	-0.415457	875.442	FALSE	98
2022-09-12	11:57:16	0.692175	876.134	FALSE	98
2022-09-12	11:57:16	-0.112761	876.134	FALSE	98
2022-09-12	11:57:17	1.81691	877.951	FALSE	98
2022-09-12	11:57:17	3.79212	881.743	1	99
2022-09-12	11:57:17	8.27853	890.022	1	100
2022-09-12	11:57:18	2.59589	892.618	FALSE	100
2022-09-12	11:57:18	5.32815	897.946	1	101
2022-09-12	11:57:18	5.59543	903.541	1	102
2022-09-12	11:57:18	4.99421	908.535	1	103
2022-09-12	11:57:19	5.44769	913.983	1	104
2022-09-12	11:57:19	2.77986	916.763	FALSE	104
2022-09-12	11:57:19	3.54307	920.306	1	105
2022-09-12	11:57:19	9.7453	930.051	1	106
2022-09-12	11:57:20	11.262	941.313	1	107
2022-09-12	11:57:20	8.705	950.018	1	108
2022-09-12	11:57:20	6.08113	956.099	1	109
2022-09-12	11:57:20	4.26968	960.369	1	110
2022-09-12	11:57:21	0.432227	960.801	FALSE	110
2022-09-12	11:57:21	0.339453	961.141	FALSE	110
2022-09-12	11:57:21	0.32042	961.461	FALSE	110
2022-09-12	11:57:22	0.454924	961.916	FALSE	110
2022-09-12	11:57:22	0.461234	962.377	FALSE	110
2022-09-12	11:57:22	0.605916	962.983	FALSE	110
2022-09-12	11:57:22	0.206832	963.19	FALSE	110
2022-09-12	11:57:23	0.384949	963.575	FALSE	110
2022-09-12	11:57:23	0.950598	964.526	FALSE	110
2022-09-12	11:57:23	0.571921	965.098	FALSE	110
2022-09-12	11:57:23	0.564746	965.662	FALSE	110
2022-09-12	11:57:24	0.377367	966.04	FALSE	110
2022-09-12	11:57:24	0.641489	966.681	FALSE	110
2022-09-12	11:57:24	0.528817	967.21	FALSE	110
2022-09-12	11:57:24	0.59416	967.804	FALSE	110
2022-09-12	11:57:25	2.19441	969.999	FALSE	110
2022-09-12	11:57:25	3.35833	973.357	1	111
2022-09-12	11:57:25	5.86606	979.223	1	112
2022-09-12	11:57:26	6.21151	985.434	1	113
2022-09-12	11:57:26	3.02993	988.464	1	114
2022-09-12	11:57:26	3.15457	991.619	1	115
2022-09-12	11:57:26	0.920115	992.539	FALSE	115
2022-09-12	11:57:27	0.657315	993.196	FALSE	115
2022-09-12	11:57:27	0.350242	993.547	FALSE	115
2022-09-12	11:57:27	0.450445	993.997	FALSE	115
2022-09-12	11:57:27	0.342761	994.34	FALSE	115
2022-09-12	11:57:28	0.250751	994.591	FALSE	115
2022-09-12	11:57:28	0.108868	994.699	FALSE	115
2022-09-12	11:57:28	0.248715	994.948	FALSE	115
2022-09-12	11:57:28	0.153397	995.102	FALSE	115
2022-09-12	11:57:29	0.0374175	995.139	FALSE	115
2022-09-12	11:57:29	0.325356	995.464	FALSE	115
2022-09-12	11:57:29	0.767596	996.232	FALSE	115
2022-09-12	11:57:30	1.71991	997.952	FALSE	115
2022-09-12	11:57:30	1.46017	999.412	FALSE	115
2022-09-12	11:57:30	2.7453	1002.16	FALSE	115
2022-09-12	11:57:30	1.66958	1003.83	FALSE	115
2022-09-12	11:57:31	1.02627	1004.85	FALSE	115
2022-09-12	11:57:31	0.552379	1005.41	FALSE	115
2022-09-12	11:57:31	0.43126	1005.84	FALSE	115
2022-09-12	11:57:31	1.95787	1007.79	FALSE	115
2022-09-12	11:57:32	3.13416	1010.93	1	116
2022-09-12	11:57:32	6.25548	1017.18	1	117
2022-09-12	11:57:32	6.5026	1023.69	1	118
2022-09-12	11:57:32	9.63528	1033.32	1	119
2022-09-12	11:57:33	3.79482	1037.12	1	120
2022-09-12	11:57:33	4.5366	1041.65	1	121
2022-09-12	11:57:33	5.43126	1047.08	1	122
2022-09-12	11:57:34	4.24083	1051.33	1	123
2022-09-12	11:57:34	2.21218	1053.54	FALSE	123
2022-09-12	11:57:34	4.67538	1058.21	1	124
2022-09-12	11:57:34	1.15375	1059.37	FALSE	124
2022-09-12	11:57:35	3.12612	1062.49	1	125
2022-09-12	11:57:35	3.06159	1065.55	1	126
2022-09-12	11:57:35	1.61482	1067.17	FALSE	126
2022-09-12	11:57:35	2.54576	1069.72	FALSE	126
2022-09-12	11:57:36	2.15436	1071.87	FALSE	126
2022-09-12	11:57:36	1.16408	1073.03	FALSE	126
2022-09-12	11:57:36	0.657519	1073.69	FALSE	126
2022-09-12	11:57:36	0.288868	1073.98	FALSE	126
2022-09-12	11:57:37	0.228054	1074.21	FALSE	126
2022-09-12	11:57:37	0.253092	1074.46	FALSE	126
2022-09-12	11:57:37	1.81559	1076.28	FALSE	126
2022-09-12	11:57:37	3.59752	1079.87	1	127
2022-09-12	11:57:38	5.25467	1085.13	1	128
2022-09-12	11:57:38	3.61095	1088.74	1	129
2022-09-12	11:57:38	2.87747	1091.62	FALSE	129
2022-09-12	11:57:39	2.33625	1093.95	FALSE	129
2022-09-12	11:57:39	3.10276	1097.06	1	130
2022-09-12	11:57:39	5.2452	1102.3	1	131
2022-09-12	11:57:39	6.90459	1109.21	1	132
2022-09-12	11:57:40	5.16866	1114.37	1	133
2022-09-12	11:57:40	1.1192	1115.49	FALSE	133
2022-09-12	11:57:40	2.22775	1117.72	FALSE	133
2022-09-12	11:57:40	1.391	1119.11	FALSE	133
2022-09-12	11:57:41	0.968053	1120.08	FALSE	133
2022-09-12	11:57:41	2.24775	1122.33	FALSE	133
2022-09-12	11:57:41	2.58897	1124.92	FALSE	133
2022-09-12	11:57:41	2.40627	1127.32	FALSE	133
2022-09-12	11:57:42	3.86775	1131.19	1	134
2022-09-12	11:57:42	1.61299	1132.8	FALSE	134
2022-09-12	11:57:42	2.56927	1135.37	FALSE	134
2022-09-12	11:57:43	1.50174	1136.88	FALSE	134
2022-09-12	11:57:43	1.21401	1138.09	FALSE	134
2022-09-12	11:57:43	1.608	1139.7	FALSE	134
2022-09-12	11:57:43	2.60637	1142.3	FALSE	134
2022-09-12	11:57:44	0.99472	1143.3	FALSE	134
2022-09-12	11:57:44	1.48322	1144.78	FALSE	134
2022-09-12	11:57:44	1.25462	1146.04	FALSE	134
2022-09-12	11:57:44	2.69172	1148.73	FALSE	134
2022-09-12	11:57:45	7.51706	1156.25	1	135
2022-09-12	11:57:45	12.0223	1168.27	1	136
2022-09-12	11:57:45	5.09004	1173.36	1	137
2022-09-12	11:57:45	1.49889	1174.86	FALSE	137
2022-09-12	11:57:46	0.539707	1175.4	FALSE	137
2022-09-12	11:57:46	0.447748	1175.84	FALSE	137
2022-09-12	11:57:46	0.27528	1176.12	FALSE	137
2022-09-12	11:57:47	0.164644	1176.28	FALSE	137
2022-09-12	11:57:47	0.196451	1176.48	FALSE	137
2022-09-12	11:57:47	0.0902419	1176.57	FALSE	137
2022-09-12	11:57:47	0.291616	1176.86	FALSE	137
2022-09-12	11:57:48	0.143626	1177.01	FALSE	137
2022-09-12	11:57:48	0.505713	1177.51	FALSE	137
2022-09-12	11:57:48	0.41299	1177.92	FALSE	137
2022-09-12	11:57:48	1.12989	1179.05	FALSE	137
2022-09-12	11:57:49	2.37569	1181.43	FALSE	137
2022-09-12	11:57:49	2.53319	1183.96	FALSE	137
2022-09-12	11:57:49	1.38963	1185.35	FALSE	137
2022-09-12	11:57:49	1.14215	1186.5	FALSE	137
2022-09-12	11:57:50	0.508664	1187	FALSE	137
2022-09-12	11:57:50	2.77258	1189.78	FALSE	137
2022-09-12	11:57:50	7.53467	1197.31	1	138
2022-09-12	11:57:51	5.36464	1202.68	1	139
2022-09-12	11:57:51	4.17044	1206.85	1	140
2022-09-12	11:57:51	0.140929	1206.99	FALSE	140
2022-09-12	11:57:51	-0.0183076	1206.99	FALSE	140
2022-09-12	11:57:52	0.136909	1207.12	FALSE	140
2022-09-12	11:57:52	0.213652	1207.34	FALSE	140
2022-09-12	11:57:52	0.198028	1207.54	FALSE	140
2022-09-12	11:57:52	0.151362	1207.69	FALSE	140
2022-09-12	11:57:53	0.375992	1208.06	FALSE	140
2022-09-12	11:57:53	0.128003	1208.19	FALSE	140
2022-09-12	11:57:53	0.327799	1208.52	FALSE	140
2022-09-12	11:57:53	0.208664	1208.73	FALSE	140
2022-09-12	11:57:54	1.22256	1209.95	FALSE	140
2022-09-12	11:57:54	0.873041	1210.82	FALSE	140
2022-09-12	11:57:54	1.39441	1212.22	FALSE	140
2022-09-12	11:57:55	0.889122	1213.11	FALSE	140
2022-09-12	11:57:55	0.907494	1214.01	FALSE	140
2022-09-12	11:57:55	0.400929	1214.42	FALSE	140
2022-09-12	11:57:55	0.409529	1214.82	FALSE	140
2022-09-12	11:57:56	1.11757	1215.94	FALSE	140
2022-09-12	11:57:56	1.01385	1216.96	FALSE	140
2022-09-12	11:57:56	1.18994	1218.15	FALSE	140
2022-09-12	11:57:56	1.5336	1219.68	FALSE	140
2022-09-12	11:57:57	1.09375	1220.77	FALSE	140
2022-09-12	11:57:57	1.92744	1222.7	FALSE	140
2022-09-12	11:57:57	1.31976	1224.02	FALSE	140
2022-09-12	11:57:57	2.79182	1226.81	FALSE	140
2022-09-12	11:57:58	3.77014	1230.58	1	141
2022-09-12	11:57:58	3.30042	1233.88	1	142
2022-09-12	11:57:58	4.02408	1237.91	1	143
2022-09-12	11:57:59	2.34805	1240.26	FALSE	143
2022-09-12	11:57:59	2.19513	1242.45	FALSE	143
2022-09-12	11:57:59	2.31416	1244.76	FALSE	143
2022-09-12	11:57:59	2.90408	1247.67	FALSE	143
2022-09-12	11:58:00	3.52139	1251.19	1	144
2022-09-12	11:58:00	2.5996	1253.79	FALSE	144
2022-09-12	11:58:00	3.76785	1257.56	1	145
2022-09-12	11:58:00	3.51436	1261.07	1	146
2022-09-12	11:58:01	2.11167	1263.18	FALSE	146
2022-09-12	11:58:01	0.492888	1263.68	FALSE	146
2022-09-12	11:58:01	0.201387	1263.88	FALSE	146
2022-09-12	11:58:01	0.171361	1264.05	FALSE	146
2022-09-12	11:58:02	0.152888	1264.2	FALSE	146
2022-09-12	11:58:02	0.299097	1264.5	FALSE	146
2022-09-12	11:58:02	0.371616	1264.87	FALSE	146
2022-09-12	11:58:02	1.28215	1266.15	FALSE	146
2022-09-12	11:58:03	1.0334	1267.19	FALSE	146
2022-09-12	11:58:03	3.40754	1270.6	1	147
2022-09-12	11:58:03	1.97218	1272.57	FALSE	147
2022-09-12	11:58:04	3.05762	1275.63	1	148
2022-09-12	11:58:04	3.9535	1279.58	1	149
2022-09-12	11:58:04	5.77818	1285.36	1	150
2022-09-12	11:58:05	5.0193	1290.38	1	151
2022-09-12	11:58:05	3.45141	1293.83	1	152
2022-09-12	11:58:05	6.13741	1299.97	1	153
2022-09-12	11:58:05	2.17838	1302.14	FALSE	153
2022-09-12	11:58:05	4.30978	1306.45	1	154
2022-09-12	11:58:06	6.39019	1312.84	1	155
2022-09-12	11:58:06	3.14118	1315.98	1	156
2022-09-12	11:58:06	6.68825	1322.67	1	157
2022-09-12	11:58:06	3.32357	1326	1	158
2022-09-12	11:58:07	4.22128	1330.22	1	159
2022-09-12	11:58:07	3.00291	1333.22	1	160
2022-09-12	11:58:07	2.45111	1335.67	FALSE	160
2022-09-12	11:58:08	3.61055	1339.28	1	161
2022-09-12	11:58:08	1.81452	1341.1	FALSE	161
2022-09-12	11:58:08	2.31401	1343.41	FALSE	161
2022-09-12	11:58:08	1.18943	1344.6	FALSE	161
2022-09-12	11:58:09	1.44174	1346.04	FALSE	161
2022-09-12	11:58:09	2.60057	1348.64	FALSE	161
2022-09-12	11:58:09	4.98668	1353.63	1	162
2022-09-12	11:58:09	6.39457	1360.02	1	163
2022-09-12	11:58:10	2.54383	1362.57	FALSE	163
2022-09-12	11:58:10	4.41487	1366.98	1	164
2022-09-12	11:58:10	4.53401	1371.52	1	165
2022-09-12	11:58:10	5.80983	1377.33	1	166
2022-09-12	11:58:11	4.29024	1381.62	1	167
2022-09-12	11:58:11	4.39869	1386.02	1	168
2022-09-12	11:58:11	4.41095	1390.43	1	169
2022-09-12	11:58:12	4.90108	1395.33	1	170
2022-09-12	11:58:12	7.13441	1402.46	1	171
2022-09-12	11:58:12	5.84912	1408.31	1	172
2022-09-12	11:58:12	9.00947	1417.32	1	173
2022-09-12	11:58:13	8.3509	1425.67	1	174
2022-09-12	11:58:13	8.89349	1434.56	1	175
2022-09-12	11:58:13	5.97121	1440.54	1	176
2022-09-12	11:58:13	9.04123	1449.58	1	177
2022-09-12	11:58:14	6.42418	1456	1	178
2022-09-12	11:58:14	6.27802	1462.28	1	179
2022-09-12	11:58:14	2.16637	1464.45	FALSE	179
2022-09-12	11:58:14	1.67121	1466.12	FALSE	179
2022-09-12	11:58:15	2.44306	1468.56	FALSE	179
2022-09-12	11:58:15	1.62022	1470.18	FALSE	179
2022-09-12	11:58:15	2.61497	1472.8	FALSE	179
2022-09-12	11:58:16	1.35335	1474.15	FALSE	179
2022-09-12	11:58:16	4.36001	1478.51	1	180
2022-09-12	11:58:16	4.23314	1482.74	1	181
2022-09-12	11:58:16	4.40479	1487.15	1	182
2022-09-12	11:58:17	4.50627	1491.65	1	183
2022-09-12	11:58:17	3.4767	1495.13	1	184
2022-09-12	11:58:17	10.8283	1505.96	1	185
2022-09-12	11:58:17	10.9236	1516.88	1	186
2022-09-12	11:58:18	11.9995	1528.88	1	187
2022-09-12	11:58:18	3.44022	1532.32	1	188
2022-09-12	11:58:18	4.002	1536.32	1	189
2022-09-12	11:58:18	7.73232	1544.06	1	190
2022-09-12	11:58:19	3.19757	1547.25	1	191
2022-09-12	11:58:19	3.96968	1551.22	1	192
2022-09-12	11:58:19	2.83665	1554.06	FALSE	192
2022-09-12	11:58:20	4.90444	1558.96	1	193
2022-09-12	11:58:20	4.51044	1563.47	1	194
2022-09-12	11:58:20	8.49767	1571.97	1	195
2022-09-12	11:58:20	8.92775	1580.9	1	196
2022-09-12	11:58:21	14.1414	1595.04	1	197
2022-09-12	11:58:21	5.39762	1600.44	1	198
2022-09-12	11:58:21	4.07543	1604.51	1	199
2022-09-12	11:58:21	2.20383	1606.72	FALSE	199
2022-09-12	11:58:22	1.76281	1608.48	FALSE	199
2022-09-12	11:58:22	1.57854	1610.06	FALSE	199
2022-09-12	11:58:22	1.46363	1611.52	FALSE	199
2022-09-12	11:58:22	0.999809	1612.52	FALSE	199
2022-09-12	11:58:23	1.42698	1613.95	FALSE	199
2022-09-12	11:58:23	1.19889	1615.15	FALSE	199
2022-09-12	11:58:23	1.51177	1616.66	FALSE	199
2022-09-12	11:58:24	1.28317	1617.94	FALSE	199
2022-09-12	11:58:24	1.17843	1619.12	FALSE	199
2022-09-12	11:58:24	1.09045	1620.21	FALSE	199
2022-09-12	11:58:24	0.831107	1621.04	FALSE	199
2022-09-12	11:58:25	0.834771	1621.88	FALSE	199
2022-09-12	11:58:25	1.09772	1622.98	FALSE	199
2022-09-12	11:58:25	1.16098	1624.14	FALSE	199
2022-09-12	11:58:25	0.92327	1625.06	FALSE	199
2022-09-12	11:58:26	1.01034	1626.07	FALSE	199
2022-09-12	11:58:26	0.907595	1626.98	FALSE	199
2022-09-12	11:58:26	0.976807	1627.96	FALSE	199
2022-09-12	11:58:26	1.10424	1629.06	FALSE	199
2022-09-12	11:58:27	0.973092	1630.03	FALSE	199
2022-09-12	11:58:27	0.436908	1630.47	FALSE	199
2022-09-12	11:58:27	0.681183	1631.15	FALSE	199
2022-09-12	11:58:27	0.258181	1631.41	FALSE	199
2022-09-12	11:58:28	0.289173	1631.7	FALSE	199
2022-09-12	11:58:28	0.0509036	1631.75	FALSE	199
2022-09-12	11:58:28	-0.166908	1631.75	FALSE	199
2022-09-12	11:58:29	-0.186297	1631.75	FALSE	199
2022-09-12	11:58:29	-0.214745	1631.75	FALSE	199
2022-09-12	11:58:29	-0.417137	1631.75	FALSE	199
2022-09-12	11:58:29	-0.18416	1631.75	FALSE	199
2022-09-12	11:58:30	-0.286755	1631.75	FALSE	199
2022-09-12	11:58:30	-0.339274	1631.75	FALSE	199
2022-09-12	11:58:30	-0.506348	1631.75	FALSE	199
2022-09-12	11:58:30	-0.405585	1631.75	FALSE	199
2022-09-12	11:58:31	-0.137951	1631.75	FALSE	199
2022-09-12	11:58:31	0.958333	1632.71	FALSE	199
2022-09-12	11:58:31	1.81925	1634.53	FALSE	199
2022-09-12	11:58:31	0.702863	1635.23	FALSE	199
2022-09-12	11:58:32	0.363423	1635.59	FALSE	199
2022-09-12	11:58:32	0.4193	1636.01	FALSE	199
2022-09-12	11:58:32	0.304135	1636.32	FALSE	199
2022-09-12	11:58:33	0.234313	1636.55	FALSE	199
2022-09-12	11:58:33	0.140725	1636.69	FALSE	199
2022-09-12	11:58:33	0.142761	1636.83	FALSE	199
2022-09-12	11:58:33	0.286832	1637.12	FALSE	199
2022-09-12	11:58:34	0.193601	1637.31	FALSE	199
2022-09-12	11:58:34	0.320827	1637.64	FALSE	199
2022-09-12	11:58:34	0.091158	1637.73	FALSE	199
2022-09-12	11:58:34	-0.00614479	1637.73	FALSE	199
2022-09-12	11:58:35	0.386323	1638.11	FALSE	199
2022-09-12	11:58:35	0.379097	1638.49	FALSE	199
2022-09-12	11:58:35	0.314975	1638.81	FALSE	199
2022-09-12	11:58:35	0.408512	1639.22	FALSE	199
2022-09-12	11:58:36	0.484135	1639.7	FALSE	199
2022-09-12	11:58:36	0.794415	1640.49	FALSE	199
2022-09-12	11:58:36	0.574873	1641.07	FALSE	199
2022-09-12	11:58:37	0.582303	1641.65	FALSE	199
2022-09-12	11:58:37	0.901488	1642.55	FALSE	199
2022-09-12	11:58:37	1.31477	1643.87	FALSE	199
2022-09-12	11:58:37	1.34973	1645.22	FALSE	199
2022-09-12	11:58:38	1.53258	1646.75	FALSE	199
2022-09-12	11:58:38	5.54169	1652.29	1	200
2022-09-12	11:58:38	5.83167	1658.12	1	201
2022-09-12	11:58:38	2.98541	1661.11	FALSE	201
2022-09-12	11:58:39	1.17737	1662.29	FALSE	201
2022-09-12	11:58:39	0.333143	1662.62	FALSE	201
2022-09-12	11:58:39	0.501539	1663.12	FALSE	201
2022-09-12	11:58:39	0.163931	1663.28	FALSE	201
2022-09-12	11:58:40	0.136705	1663.42	FALSE	201
2022-09-12	11:58:40	0.300573	1663.72	FALSE	201
2022-09-12	11:58:40	1.39401	1665.12	FALSE	201
2022-09-12	11:58:41	1.92052	1667.04	FALSE	201
2022-09-12	11:58:41	0.566781	1667.6	FALSE	201
2022-09-12	11:58:41	0.375636	1667.98	FALSE	201
2022-09-12	11:58:41	0.672379	1668.65	FALSE	201
2022-09-12	11:58:42	0.0616414	1668.71	FALSE	201
2022-09-12	11:58:42	-0.115865	1668.71	FALSE	201
2022-09-12	11:58:42	-0.142633	1668.71	FALSE	201
2022-09-12	11:58:42	-0.103397	1668.71	FALSE	201
2022-09-12	11:58:43	-0.0599361	1668.71	FALSE	201
2022-09-12	11:58:43	-0.0909793	1668.71	FALSE	201
2022-09-12	11:58:43	-0.188537	1668.71	FALSE	201
2022-09-12	11:58:43	-0.221005	1668.71	FALSE	201
2022-09-12	11:58:44	-0.369758	1668.71	FALSE	201
2022-09-12	11:58:44	-0.444923	1668.71	FALSE	201
2022-09-12	11:58:44	-0.0990709	1668.71	FALSE	201
2022-09-12	11:58:45	-0.165636	1668.71	FALSE	201
2022-09-12	11:58:45	-0.133931	1668.71	FALSE	201
2022-09-12	11:58:45	-0.347468	1668.71	FALSE	201
2022-09-12	11:58:45	-0.393524	1668.71	FALSE	201
2022-09-12	11:58:46	-0.40589	1668.71	FALSE	201
2022-09-12	11:58:46	-0.215254	1668.71	FALSE	201
2022-09-12	11:58:46	-0.140801	1668.71	FALSE	201
2022-09-12	11:58:46	3.1136	1671.83	1	202
2022-09-12	11:58:47	2.73996	1674.57	FALSE	202
2022-09-12	11:58:47	1.00907	1675.58	FALSE	202
2022-09-12	11:58:47	0.366476	1675.94	FALSE	202
2022-09-12	11:58:47	0.00912238	1675.95	FALSE	202
2022-09-12	11:58:48	0.0388934	1675.99	FALSE	202
2022-09-12	11:58:48	0.0254073	1676.01	FALSE	202
2022-09-12	11:58:48	0.435687	1676.45	FALSE	202
2022-09-12	11:58:48	0.686476	1677.14	FALSE	202
2022-09-12	11:58:49	0.71645	1677.85	FALSE	202
2022-09-12	11:58:49	0.888715	1678.74	FALSE	202
2022-09-12	11:58:49	0.776806	1679.52	FALSE	202
2022-09-12	11:58:50	0.898283	1680.42	FALSE	202
2022-09-12	11:58:50	1.26637	1681.68	FALSE	202
2022-09-12	11:58:50	3.28088	1684.96	1	203
2022-09-12	11:58:50	7.94108	1692.91	1	204
2022-09-12	11:58:51	5.19945	1698.11	1	205
2022-09-12	11:58:51	5.26082	1703.37	1	206
2022-09-12	11:58:51	4.13864	1707.5	1	207
2022-09-12	11:58:51	5.9194	1713.42	1	208
2022-09-12	11:58:52	1.27019	1714.69	FALSE	208
2022-09-12	11:58:52	0.662913	1715.36	FALSE	208
2022-09-12	11:58:52	0.705255	1716.06	FALSE	208
2022-09-12	11:58:52	0.49584	1716.56	FALSE	208
2022-09-12	11:58:53	0.287239	1716.85	FALSE	208
2022-09-12	11:58:53	-0.037188	1716.85	FALSE	208
2022-09-12	11:58:53	0.164288	1717.01	FALSE	208
2022-09-12	11:58:54	0.0319723	1717.04	FALSE	208
2022-09-12	11:58:54	-0.0899616	1717.04	FALSE	208
2022-09-12	11:58:54	-0.0774425	1717.04	FALSE	208
2022-09-12	11:58:54	-0.0898089	1717.04	FALSE	208
2022-09-12	11:58:55	-0.0216155	1717.04	FALSE	208
2022-09-12	11:58:55	0.127799	1717.17	FALSE	208
2022-09-12	11:58:55	0.269631	1717.44	FALSE	208
2022-09-12	11:58:55	0.359046	1717.8	FALSE	208
2022-09-12	11:58:56	0.480573	1718.28	FALSE	208
2022-09-12	11:58:56	1.18561	1719.46	FALSE	208
2022-09-12	11:58:56	0.797417	1720.26	FALSE	208
2022-09-12	11:58:56	0.501132	1720.76	FALSE	208
2022-09-12	11:58:57	0.220369	1720.98	FALSE	208
2022-09-12	11:58:57	0.33243	1721.32	FALSE	208
2022-09-12	11:58:57	0.314466	1721.63	FALSE	208
2022-09-12	11:58:58	0.372176	1722	FALSE	208
2022-09-12	11:58:58	0.281692	1722.28	FALSE	208
2022-09-12	11:58:58	0.284847	1722.57	FALSE	208
2022-09-12	11:58:58	0.3793	1722.95	FALSE	208
2022-09-12	11:58:59	0.298537	1723.25	FALSE	208
2022-09-12	11:58:59	0.218079	1723.46	FALSE	208
2022-09-12	11:58:59	1.02261	1724.49	FALSE	208
2022-09-12	11:58:59	0.577366	1725.06	FALSE	208
2022-09-12	11:59:00	0.388104	1725.45	FALSE	208
2022-09-12	11:59:00	0.27243	1725.73	FALSE	208
2022-09-12	11:59:00	0.165662	1725.89	FALSE	208
2022-09-12	11:59:00	0.0389443	1725.93	FALSE	208
2022-09-12	11:59:01	-0.341768	1725.93	FALSE	208
2022-09-12	11:59:01	-0.362481	1725.93	FALSE	208
2022-09-12	11:59:01	0.0127356	1725.94	FALSE	208
2022-09-12	11:59:02	0.231718	1726.17	FALSE	208
2022-09-12	11:59:02	2.09426	1728.27	FALSE	208
2022-09-12	11:59:02	2.58846	1730.86	FALSE	208
2022-09-12	11:59:02	2.64144	1733.5	FALSE	208
2022-09-12	11:59:03	2.35843	1735.86	FALSE	208
2022-09-12	11:59:03	2.62607	1738.48	FALSE	208
2022-09-12	11:59:03	2.66418	1741.15	FALSE	208
2022-09-12	11:59:03	2.89513	1744.04	FALSE	208
2022-09-12	11:59:04	2.93024	1746.97	FALSE	208
2022-09-12	11:59:04	2.66057	1749.63	FALSE	208
2022-09-12	11:59:04	2.75039	1752.38	FALSE	208
2022-09-12	11:59:04	1.83467	1754.22	FALSE	208
2022-09-12	11:59:05	1.002	1755.22	FALSE	208
2022-09-12	11:59:05	0.619707	1755.84	FALSE	208
2022-09-12	11:59:05	0.878639	1756.72	FALSE	208
2022-09-12	11:59:06	1.13915	1757.86	FALSE	208
2022-09-12	11:59:06	0.264796	1758.12	FALSE	208
2022-09-12	11:59:06	0.208766	1758.33	FALSE	208
2022-09-12	11:59:06	0.177672	1758.51	FALSE	208
2022-09-12	11:59:07	0.107341	1758.62	FALSE	208
2022-09-12	11:59:07	0.157468	1758.77	FALSE	208
2022-09-12	11:59:07	0.209173	1758.98	FALSE	208
2022-09-12	11:59:07	0.100878	1759.08	FALSE	208
2022-09-12	11:59:08	0.11869	1759.2	FALSE	208
2022-09-12	11:59:08	0.11757	1759.32	FALSE	208
2022-09-12	11:59:08	0.284389	1759.6	FALSE	208
2022-09-12	11:59:08	0.084186	1759.69	FALSE	208
2022-09-12	11:59:09	0.266985	1759.96	FALSE	208
2022-09-12	11:59:09	0.0629137	1760.02	FALSE	208
2022-09-12	11:59:09	0.281896	1760.3	FALSE	208
2022-09-12	11:59:10	0.0615905	1760.36	FALSE	208
2022-09-12	11:59:10	0.37131	1760.73	FALSE	208
2022-09-12	11:59:10	0.436756	1761.17	FALSE	208
2022-09-12	11:59:10	0.355127	1761.53	FALSE	208
2022-09-12	11:59:11	-0.035814	1761.53	FALSE	208
2022-09-12	11:59:11	0.0183844	1761.54	FALSE	208
2022-09-12	11:59:11	0.0310562	1761.57	FALSE	208
2022-09-12	11:59:11	0.129937	1761.7	FALSE	208
2022-09-12	11:59:12	-0.0429895	1761.7	FALSE	208
2022-09-12	11:59:12	0.109835	1761.81	FALSE	208
2022-09-12	11:59:12	0.115433	1761.93	FALSE	208
2022-09-12	11:59:12	0.0806745	1762.01	FALSE	208
2022-09-12	11:59:13	0.0922776	1762.1	FALSE	208
2022-09-12	11:59:13	0.0343132	1762.14	FALSE	208
2022-09-12	11:59:13	0.108613	1762.25	FALSE	208
2022-09-12	11:59:13	0.310649	1762.56	FALSE	208
2022-09-12	11:59:14	0.36841	1762.92	FALSE	208
2022-09-12	11:59:14	0.531514	1763.46	FALSE	208
2022-09-12	11:59:14	0.785763	1764.24	FALSE	208
2022-09-12	11:59:15	0.738231	1764.98	FALSE	208
2022-09-12	11:59:15	1.73279	1766.71	FALSE	208
2022-09-12	11:59:15	0.448868	1767.16	FALSE	208
2022-09-12	11:59:15	0.301489	1767.46	FALSE	208
2022-09-12	11:59:16	0.401997	1767.87	FALSE	208
2022-09-12	11:59:16	0.159758	1768.03	FALSE	208
2022-09-12	11:59:16	0.341845	1768.37	FALSE	208
2022-09-12	11:59:16	0.279657	1768.65	FALSE	208
2022-09-12	11:59:17	0.759962	1769.41	FALSE	208
2022-09-12	11:59:17	2.58831	1772	FALSE	208
2022-09-12	11:59:17	4.53701	1776.53	1	209
2022-09-12	11:59:17	2.19966	1778.73	FALSE	209
2022-09-12	11:59:18	1.80902	1780.54	FALSE	209
2022-09-12	11:59:18	0.98327	1781.52	FALSE	209
2022-09-12	11:59:18	1.22749	1782.75	FALSE	209
2022-09-12	11:59:19	2.60118	1785.35	FALSE	209
2022-09-12	11:59:19	2.92795	1788.28	FALSE	209
2022-09-12	11:59:19	3.58943	1791.87	1	210
2022-09-12	11:59:19	4.45294	1796.32	1	211
2022-09-12	11:59:20	3.41014	1799.73	1	212
2022-09-12	11:59:20	1.26388	1801	FALSE	212
2022-09-12	11:59:20	2.22637	1803.22	FALSE	212
2022-09-12	11:59:20	0.841845	1804.07	FALSE	212
2022-09-12	11:59:21	3.56703	1807.63	1	213
2022-09-12	11:59:21	2.34709	1809.98	FALSE	213
2022-09-12	11:59:21	4.45395	1814.43	1	214
2022-09-12	11:59:21	3.40551	1817.84	1	215
2022-09-12	11:59:22	1.99182	1819.83	FALSE	215
2022-09-12	11:59:22	0.363015	1820.19	FALSE	215
2022-09-12	11:59:22	0.518588	1820.71	FALSE	215
2022-09-12	11:59:23	0.266934	1820.98	FALSE	215
2022-09-12	11:59:23	0.386527	1821.37	FALSE	215
2022-09-12	11:59:23	0.396043	1821.76	FALSE	215
2022-09-12	11:59:23	0.313346	1822.08	FALSE	215
2022-09-12	11:59:24	0.376043	1822.45	FALSE	215
2022-09-12	11:59:24	0.455687	1822.91	FALSE	215
2022-09-12	11:59:24	0.412939	1823.32	FALSE	215
2022-09-12	11:59:24	0.33299	1823.65	FALSE	215
2022-09-12	11:59:25	0.274771	1823.93	FALSE	215
2022-09-12	11:59:25	0.372125	1824.3	FALSE	215
2022-09-12	11:59:25	0.233499	1824.53	FALSE	215
2022-09-12	11:59:25	0.2964	1824.83	FALSE	215
2022-09-12	11:59:26	0.241947	1825.07	FALSE	215
2022-09-12	11:59:26	0.190089	1825.26	FALSE	215
2022-09-12	11:59:26	0.297672	1825.56	FALSE	215
2022-09-12	11:59:27	0.291972	1825.85	FALSE	215
2022-09-12	11:59:27	0.72841	1826.58	FALSE	215
2022-09-12	11:59:27	0.336552	1826.92	FALSE	215
2022-09-12	11:59:27	0.308155	1827.22	FALSE	215
2022-09-12	11:59:28	0.320115	1827.54	FALSE	215
2022-09-12	11:59:28	0.29584	1827.84	FALSE	215
2022-09-12	11:59:28	0.546527	1828.39	FALSE	215
2022-09-12	11:59:28	1.48047	1829.87	FALSE	215
2022-09-12	11:59:29	1.69263	1831.56	FALSE	215
2022-09-12	11:59:29	1.38383	1832.94	FALSE	215
2022-09-12	11:59:29	0.896043	1833.84	FALSE	215
2022-09-12	11:59:29	0.840471	1834.68	FALSE	215
2022-09-12	11:59:30	1.3735	1836.05	FALSE	215
2022-09-12	11:59:30	0.56785	1836.62	FALSE	215
2022-09-12	11:59:30	0.250853	1836.87	FALSE	215
2022-09-12	11:59:31	0.265458	1837.14	FALSE	215
2022-09-12	11:59:31	0.309071	1837.45	FALSE	215
2022-09-12	11:59:31	0.219402	1837.67	FALSE	215
2022-09-12	11:59:31	0.226018	1837.89	FALSE	215
2022-09-12	11:59:32	0.34154	1838.23	FALSE	215
2022-09-12	11:59:32	0.205407	1838.44	FALSE	215
2022-09-12	11:59:32	0.38327	1838.82	FALSE	215
2022-09-12	11:59:32	0.217163	1839.04	FALSE	215
2022-09-12	11:59:33	1.21823	1840.26	FALSE	215
2022-09-12	11:59:33	3.19472	1843.45	1	216
2022-09-12	11:59:33	4.03904	1847.49	1	217
2022-09-12	11:59:33	1.95609	1849.45	FALSE	217
2022-09-12	11:59:34	1.76882	1851.22	FALSE	217
2022-09-12	11:59:34	2.65095	1853.87	FALSE	217
2022-09-12	11:59:34	3.99182	1857.86	1	218
2022-09-12	11:59:34	1.77747	1859.64	FALSE	218
2022-09-12	11:59:35	2.32434	1861.96	FALSE	218
2022-09-12	11:59:35	3.26439	1865.23	1	219
2022-09-12	11:59:35	3.69228	1868.92	1	220
2022-09-12	11:59:36	4.76454	1873.68	1	221
2022-09-12	11:59:36	0.93986	1874.62	FALSE	221
2022-09-12	11:59:36	1.09258	1875.71	FALSE	221
2022-09-12	11:59:36	1.58943	1877.3	FALSE	221
2022-09-12	11:59:37	2.8452	1880.15	FALSE	221
2022-09-12	11:59:37	3.21278	1883.36	1	222
2022-09-12	11:59:37	2.81334	1886.18	FALSE	222
2022-09-12	11:59:37	0.688562	1886.86	FALSE	222
2022-09-12	11:59:38	0.349936	1887.21	FALSE	222
2022-09-12	11:59:38	0.314415	1887.53	FALSE	222
2022-09-12	11:59:38	0.294211	1887.82	FALSE	222
2022-09-12	11:59:38	0.48785	1888.31	FALSE	222
2022-09-12	11:59:39	1.25472	1889.57	FALSE	222
2022-09-12	11:59:39	1.30581	1890.87	FALSE	222
2022-09-12	11:59:39	0.87584	1891.75	FALSE	222
2022-09-12	11:59:40	0.358028	1892.1	FALSE	222
2022-09-12	11:59:40	0.338944	1892.44	FALSE	222
2022-09-12	11:59:40	0.396247	1892.84	FALSE	222
2022-09-12	11:59:40	0.333906	1893.17	FALSE	222
2022-09-12	11:59:41	0.30383	1893.48	FALSE	222
2022-09-12	11:59:41	0.19472	1893.67	FALSE	222
2022-09-12	11:59:41	0.252176	1893.92	FALSE	222
2022-09-12	11:59:41	2.03131	1895.96	FALSE	222
2022-09-12	11:59:42	2.77971	1898.74	FALSE	222
2022-09-12	11:59:42	0.955585	1899.69	FALSE	222
2022-09-12	11:59:42	0.314109	1900.01	FALSE	222
2022-09-12	11:59:42	0.170853	1900.18	FALSE	222
2022-09-12	11:59:43	0.139199	1900.32	FALSE	222
2022-09-12	11:59:43	0.138232	1900.45	FALSE	222
2022-09-12	11:59:43	0.307799	1900.76	FALSE	222
2022-09-12	11:59:44	0.164084	1900.93	FALSE	222
2022-09-12	11:59:44	0.106629	1901.03	FALSE	222
2022-09-12	11:59:44	0.15411	1901.19	FALSE	222
2022-09-12	11:59:44	0.127443	1901.31	FALSE	222
2022-09-12	11:59:45	0.205356	1901.52	FALSE	222
2022-09-12	11:59:45	0.172481	1901.69	FALSE	222
2022-09-12	11:59:45	0.239657	1901.93	FALSE	222
2022-09-12	11:59:45	0.187087	1902.12	FALSE	222
2022-09-12	11:59:46	0.360216	1902.48	FALSE	222
2022-09-12	11:59:46	0.526985	1903.01	FALSE	222
2022-09-12	11:59:46	0.308257	1903.31	FALSE	222
2022-09-12	11:59:46	0.321641	1903.64	FALSE	222
2022-09-12	11:59:47	0.412634	1904.05	FALSE	222
2022-09-12	11:59:47	0.705662	1904.75	FALSE	222
2022-09-12	11:59:47	0.677112	1905.43	FALSE	222
2022-09-12	11:59:48	0.649835	1906.08	FALSE	222
2022-09-12	11:59:48	0.669427	1906.75	FALSE	222
2022-09-12	11:59:48	0.823321	1907.57	FALSE	222
2022-09-12	11:59:48	1.40637	1908.98	FALSE	222
2022-09-12	11:59:49	1.62826	1910.61	FALSE	222
2022-09-12	11:59:49	2.54846	1913.16	FALSE	222
2022-09-12	11:59:49	1.8049	1914.96	FALSE	222
2022-09-12	11:59:49	1.88597	1916.85	FALSE	222
2022-09-12	11:59:50	1.07569	1917.92	FALSE	222
2022-09-12	11:59:50	1.25177	1919.17	FALSE	222
2022-09-12	11:59:50	0.822913	1920	FALSE	222
2022-09-12	11:59:50	0.706323	1920.7	FALSE	222
2022-09-12	11:59:51	1.05019	1921.75	FALSE	222
2022-09-12	11:59:51	0.888359	1922.64	FALSE	222
2022-09-12	11:59:51	0.962862	1923.61	FALSE	222
2022-09-12	11:59:52	0.903677	1924.51	FALSE	222
2022-09-12	11:59:52	1.06673	1925.58	FALSE	222
2022-09-12	11:59:52	1.17599	1926.75	FALSE	222
2022-09-12	11:59:52	2.95477	1929.71	FALSE	222
2022-09-12	11:59:53	4.19772	1933.9	1	223
2022-09-12	11:59:53	2.52632	1936.43	FALSE	223
2022-09-12	11:59:53	1.53085	1937.96	FALSE	223
2022-09-12	11:59:53	1.23798	1939.2	FALSE	223
2022-09-12	11:59:54	1.56729	1940.77	FALSE	223
2022-09-12	11:59:54	1.44953	1942.22	FALSE	223
2022-09-12	11:59:54	2.71049	1944.93	FALSE	223
2022-09-12	11:59:54	2.7648	1947.69	FALSE	223
2022-09-12	11:59:55	1.95513	1949.65	FALSE	223
2022-09-12	11:59:55	2.01777	1951.66	FALSE	223
2022-09-12	11:59:55	2.31889	1953.98	FALSE	223
2022-09-12	11:59:56	1.97467	1955.96	FALSE	223
2022-09-12	11:59:56	2.02892	1957.99	FALSE	223
2022-09-12	11:59:56	4.11635	1962.1	1	224
2022-09-12	11:59:56	6.21309	1968.32	1	225
2022-09-12	11:59:57	3.77477	1972.09	1	226
2022-09-12	11:59:57	3.38378	1975.48	1	227
2022-09-12	11:59:57	4.23024	1979.71	1	228
2022-09-12	11:59:57	4.28367	1983.99	1	229
2022-09-12	11:59:58	3.02194	1987.01	1	230
2022-09-12	11:59:58	3.61904	1990.63	1	231
2022-09-12	11:59:58	5.44159	1996.07	1	232
2022-09-12	11:59:58	5.90194	2001.97	1	233
2022-09-12	11:59:59	4.9392	2006.91	1	234
2022-09-12	11:59:59	6.62235	2013.54	1	235
2022-09-12	11:59:59	5.52851	2019.06	1	236
2022-09-12	12:00:00	3.26897	2022.33	1	237
2022-09-12	12:00:00	2.15665	2024.49	FALSE	237
2022-09-12	12:00:00	3.40362	2027.89	1	238
2022-09-12	12:00:00	4.33151	2032.22	1	239
2022-09-12	12:00:01	4.95095	2037.18	1	240
2022-09-12	12:00:01	4.72831	2041.9	1	241
2022-09-12	12:00:01	4.86678	2046.77	1	242
2022-09-12	12:00:01	3.0964	2049.87	1	243
2022-09-12	12:00:02	5.95711	2055.82	1	244
2022-09-12	12:00:02	3.80836	2059.63	1	245
2022-09-12	12:00:02	8.11843	2067.75	1	246
2022-09-12	12:00:02	5.44525	2073.2	1	247
2022-09-12	12:00:03	4.74882	2077.94	1	248
2022-09-12	12:00:03	3.92805	2081.87	1	249
2022-09-12	12:00:03	1.89996	2083.77	FALSE	249
2022-09-12	12:00:03	1.22459	2085	FALSE	249
2022-09-12	12:00:04	1.79645	2086.79	FALSE	249
2022-09-12	12:00:04	3.33436	2090.13	1	250
2022-09-12	12:00:04	3.91808	2094.05	1	251
2022-09-12	12:00:05	2.72912	2096.78	FALSE	251
2022-09-12	12:00:05	2.33447	2099.11	FALSE	251
2022-09-12	12:00:05	2.94403	2102.05	FALSE	251
2022-09-12	12:00:05	2.27803	2104.33	FALSE	251
2022-09-12	12:00:06	2.83513	2107.17	FALSE	251
2022-09-12	12:00:06	6.49986	2113.67	1	252
2022-09-12	12:00:06	3.65431	2117.32	1	253
2022-09-12	12:00:06	4.25843	2121.58	1	254
2022-09-12	12:00:07	4.07457	2125.65	1	255
2022-09-12	12:00:07	2.27599	2127.93	FALSE	255
2022-09-12	12:00:07	2.60617	2130.54	FALSE	255
2022-09-12	12:00:07	2.47803	2133.01	FALSE	255
2022-09-12	12:00:08	4.88658	2137.9	1	256
2022-09-12	12:00:08	1.61864	2139.52	FALSE	256
2022-09-12	12:00:08	2.04383	2141.56	FALSE	256
2022-09-12	12:00:09	1.85966	2143.42	FALSE	256
2022-09-12	12:00:09	5.59884	2149.02	1	257
2022-09-12	12:00:09	7.72037	2156.74	1	258
2022-09-12	12:00:09	6.25126	2162.99	1	259
2022-09-12	12:00:10	8.24632	2171.24	1	260
2022-09-12	12:00:10	6.04561	2177.29	1	261
2022-09-12	12:00:10	11.1158	2188.4	1	262
2022-09-12	12:00:10	3.01248	2191.41	1	263
2022-09-12	12:00:11	1.87268	2193.29	FALSE	263
2022-09-12	12:00:11	0.961539	2194.25	FALSE	263
2022-09-12	12:00:11	1.22103	2195.47	FALSE	263
2022-09-12	12:00:11	1.51569	2196.98	FALSE	263
2022-09-12	12:00:12	3.25716	2200.24	1	264
2022-09-12	12:00:12	4.32032	2204.56	1	265
2022-09-12	12:00:12	9.00103	2213.56	1	266
2022-09-12	12:00:13	5.3735	2218.94	1	267
2022-09-12	12:00:13	4.38474	2223.32	1	268

## Sheet: Sunny_star_2022912115450
						**GoPro Fitting: 1144
2022-09-12	11:54:50	0.358181
2022-09-12	11:54:51	0.340827
2022-09-12	11:54:51	0.252328
2022-09-12	11:54:51	0.607748
2022-09-12	11:54:51	0.339555
2022-09-12	11:54:52	0.403168
2022-09-12	11:54:52	0.371972
2022-09-12	11:54:52	0.336349
2022-09-12	11:54:52	0.358333
2022-09-12	11:54:53	0.364746
2022-09-12	11:54:53	0.325509
2022-09-12	11:54:53	0.359606
2022-09-12	11:54:53	0.376247
2022-09-12	11:54:54	0.369428
2022-09-12	11:54:54	0.386832
2022-09-12	11:54:54	0.378995
2022-09-12	11:54:55	0.397061
2022-09-12	11:54:55	0.397977
2022-09-12	11:54:55	0.402914
2022-09-12	11:54:55	0.419249
2022-09-12	11:54:56	0.396603
2022-09-12	11:54:56	0.42159
2022-09-12	11:54:56	0.445611
2022-09-12	11:54:56	0.439708
2022-09-12	11:54:57	0.465763
2022-09-12	11:54:57	0.443168
2022-09-12	11:54:57	0.440725
2022-09-12	11:54:57	0.444542
2022-09-12	11:54:58	0.422863
2022-09-12	11:54:58	0.466832
2022-09-12	11:54:58	0.453397
2022-09-12	11:54:59	0.408817
2022-09-12	11:54:59	1.69905
2022-09-12	11:54:59	9.69136
2022-09-12	11:54:59	3.75345
2022-09-12	11:55:00	1.75019
2022-09-12	11:55:00	0.507188
2022-09-12	11:55:00	0.193702
2022-09-12	11:55:00	0.337519
2022-09-12	11:55:01	0.222252
2022-09-12	11:55:01	0.696552
2022-09-12	11:55:01	5.77864
2022-09-12	11:55:01	10.1166
2022-09-12	11:55:02	12.3957
2022-09-12	11:55:02	6.9226
2022-09-12	11:55:02	7.10337
2022-09-12	11:55:03	4.6739
2022-09-12	11:55:03	4.86515
2022-09-12	11:55:03	1.78047
2022-09-12	11:55:03	0.725865
2022-09-12	11:55:04	0.584745
2022-09-12	11:55:04	7.35813
2022-09-12	11:55:04	14.2751
2022-09-12	11:55:04	2.11772
2022-09-12	11:55:05	1.65009
2022-09-12	11:55:05	1.67884
2022-09-12	11:55:05	1.47976
2022-09-12	11:55:05	1.16795
2022-09-12	11:55:06	0.682353
2022-09-12	11:55:06	0.343626
2022-09-12	11:55:06	0.266374
2022-09-12	11:55:07	0.330954
2022-09-12	11:55:07	0.478639
2022-09-12	11:55:07	0.310954
2022-09-12	11:55:07	0.480623
2022-09-12	11:55:08	0.458995
2022-09-12	11:55:08	0.263372
2022-09-12	11:55:08	0.72388
2022-09-12	11:55:08	3.00744
2022-09-12	11:55:09	3.69284
2022-09-12	11:55:09	1.70602
2022-09-12	11:55:09	1.88302
2022-09-12	11:55:09	1.36734
2022-09-12	11:55:10	5.34673
2022-09-12	11:55:10	2.74103
2022-09-12	11:55:10	1.51335
2022-09-12	11:55:10	1.15864
2022-09-12	11:55:11	1.02312
2022-09-12	11:55:11	1.33202
2022-09-12	11:55:11	0.620471
2022-09-12	11:55:12	0.745407
2022-09-12	11:55:12	0.419402
2022-09-12	11:55:12	0.554822
2022-09-12	11:55:12	0.346171
2022-09-12	11:55:13	0.480115
2022-09-12	11:55:13	0.659962
2022-09-12	11:55:13	2.42861
2022-09-12	11:55:13	0.314669
2022-09-12	11:55:14	0.222659
2022-09-12	11:55:14	0.223524
2022-09-12	11:55:14	-0.0778496
2022-09-12	11:55:14	0.164542
2022-09-12	11:55:15	0.189987
2022-09-12	11:55:15	0.361336
2022-09-12	11:55:15	0.273193
2022-09-12	11:55:16	0.421285
2022-09-12	11:55:16	0.351921
2022-09-12	11:55:16	0.189224
2022-09-12	11:55:16	0.00800278
2022-09-12	11:55:17	0.16668
2022-09-12	11:55:17	1.00271
2022-09-12	11:55:17	2.98179
2022-09-12	11:55:17	1.89737
2022-09-12	11:55:18	0.567239
2022-09-12	11:55:18	0.409936
2022-09-12	11:55:18	0.303779
2022-09-12	11:55:18	0.401438
2022-09-12	11:55:19	0.239657
2022-09-12	11:55:19	0.150038
2022-09-12	11:55:19	0.334822
2022-09-12	11:55:20	0.183779
2022-09-12	11:55:20	0.426578
2022-09-12	11:55:20	0.149021
2022-09-12	11:55:20	0.338232
2022-09-12	11:55:21	0.435382
2022-09-12	11:55:21	0.327036
2022-09-12	11:55:21	0.389122
2022-09-12	11:55:21	0.20897
2022-09-12	11:55:22	0.424186
2022-09-12	11:55:22	0.144033
2022-09-12	11:55:22	0.35355
2022-09-12	11:55:22	0.00550917
2022-09-12	11:55:23	-0.324618
2022-09-12	11:55:23	-0.37159
2022-09-12	11:55:23	0.0966541
2022-09-12	11:55:24	0.0909544
2022-09-12	11:55:24	0.581489
2022-09-12	11:55:24	2.4962
2022-09-12	11:55:24	2.38327
2022-09-12	11:55:25	0.537061
2022-09-12	11:55:25	2.49564
2022-09-12	11:55:25	1.01324
2022-09-12	11:55:25	0.24556
2022-09-12	11:55:26	0.136705
2022-09-12	11:55:26	0.114822
2022-09-12	11:55:26	0.376705
2022-09-12	11:55:26	0.804745
2022-09-12	11:55:27	0.578079
2022-09-12	11:55:27	0.605509
2022-09-12	11:55:27	0.779453
2022-09-12	11:55:28	1.06205
2022-09-12	11:55:28	2.75258
2022-09-12	11:55:28	2.85284
2022-09-12	11:55:28	2.68403
2022-09-12	11:55:29	0.642557
2022-09-12	11:55:29	0.440929
2022-09-12	11:55:29	0.206527
2022-09-12	11:55:29	0.0678501
2022-09-12	11:55:30	0.00428777
2022-09-12	11:55:30	0.0928883
2022-09-12	11:55:30	2.59691
2022-09-12	11:55:30	4.94999
2022-09-12	11:55:31	3.06174
2022-09-12	11:55:31	1.54327
2022-09-12	11:55:31	2.24765
2022-09-12	11:55:31	0.608969
2022-09-12	11:55:32	0.547901
2022-09-12	11:55:32	0.697621
2022-09-12	11:55:32	0.162965
2022-09-12	11:55:33	0.39126
2022-09-12	11:55:33	0.0633717
2022-09-12	11:55:33	0.15355
2022-09-12	11:55:33	0.115738
2022-09-12	11:55:34	0.0741605
2022-09-12	11:55:34	0.251158
2022-09-12	11:55:34	0.0524811
2022-09-12	11:55:34	0.19813
2022-09-12	11:55:35	0.0591987
2022-09-12	11:55:35	0.111921
2022-09-12	11:55:35	-0.06416
2022-09-12	11:55:35	0.222965
2022-09-12	11:55:36	2.44332
2022-09-12	11:55:36	2.16342
2022-09-12	11:55:36	0.807697
2022-09-12	11:55:37	0.358791
2022-09-12	11:55:37	0.566883
2022-09-12	11:55:37	0.0530409
2022-09-12	11:55:37	0.290751
2022-09-12	11:55:38	0.279504
2022-09-12	11:55:38	1.05253
2022-09-12	11:55:38	1.30561
2022-09-12	11:55:38	0.401743
2022-09-12	11:55:39	0.314618
2022-09-12	11:55:39	0.182557
2022-09-12	11:55:39	0.806832
2022-09-12	11:55:39	20.4806
2022-09-12	11:55:40	20.8866
2022-09-12	11:55:40	4.80963
2022-09-12	11:55:40	2.34704
2022-09-12	11:55:41	2.6592
2022-09-12	11:55:41	1.81793
2022-09-12	11:55:41	8.44403
2022-09-12	11:55:41	9.01095
2022-09-12	11:55:42	10.7954
2022-09-12	11:55:42	5.31533
2022-09-12	11:55:42	3.51619
2022-09-12	11:55:42	7.83105
2022-09-12	11:55:43	5.20627
2022-09-12	11:55:43	5.17833
2022-09-12	11:55:43	1.95182
2022-09-12	11:55:43	1.08795
2022-09-12	11:55:44	2.14286
2022-09-12	11:55:44	3.44759
2022-09-12	11:55:44	5.67818
2022-09-12	11:55:45	8.64749
2022-09-12	11:55:45	2.02266
2022-09-12	11:55:45	3.12652
2022-09-12	11:55:45	7.76937
2022-09-12	11:55:46	5.37543
2022-09-12	11:55:46	7.14693
2022-09-12	11:55:46	4.84851
2022-09-12	11:55:46	2.99594
2022-09-12	11:55:47	3.41782
2022-09-12	11:55:47	2.40963
2022-09-12	11:55:47	5.3107
2022-09-12	11:55:47	3.88245
2022-09-12	11:55:48	3.74128
2022-09-12	11:55:48	4.28159
2022-09-12	11:55:48	5.86108
2022-09-12	11:55:49	12.1592
2022-09-12	11:55:49	5.95054
2022-09-12	11:55:49	1.28525
2022-09-12	11:55:49	1.1249
2022-09-12	11:55:50	5.31029
2022-09-12	11:55:50	6.59909
2022-09-12	11:55:50	4.62729
2022-09-12	11:55:50	4.38988
2022-09-12	11:55:51	2.21793
2022-09-12	11:55:51	0.339758
2022-09-12	11:55:51	0.459555
2022-09-12	11:55:51	0.201387
2022-09-12	11:55:52	0.371514
2022-09-12	11:55:52	0.144135
2022-09-12	11:55:52	0.280369
2022-09-12	11:55:52	0.185255
2022-09-12	11:55:53	0.08556
2022-09-12	11:55:53	0.030242
2022-09-12	11:55:53	-0.0382568
2022-09-12	11:55:54	0.164644
2022-09-12	11:55:54	0.269936
2022-09-12	11:55:54	0.454822
2022-09-12	11:55:54	0.538486
2022-09-12	11:55:55	1.75487
2022-09-12	11:55:55	4.89492
2022-09-12	11:55:55	7.39243
2022-09-12	11:55:55	6.48138
2022-09-12	11:55:56	2.43436
2022-09-12	11:55:56	2.27141
2022-09-12	11:55:56	2.24052
2022-09-12	11:55:56	5.68627
2022-09-12	11:55:57	6.4681
2022-09-12	11:55:57	3.37121
2022-09-12	11:55:57	5.44729
2022-09-12	11:55:58	5.45446
2022-09-12	11:55:58	4.61095
2022-09-12	11:55:58	2.44306
2022-09-12	11:55:58	0.902353
2022-09-12	11:55:59	0.708104
2022-09-12	11:55:59	0.239911
2022-09-12	11:55:59	0.28902
2022-09-12	11:55:59	0.447697
2022-09-12	11:56:00	0.243066
2022-09-12	11:56:00	-0.0587656
2022-09-12	11:56:00	-0.112913
2022-09-12	11:56:00	0.198792
2022-09-12	11:56:01	0.0699366
2022-09-12	11:56:01	0.14556
2022-09-12	11:56:01	0.417519
2022-09-12	11:56:02	1.44373
2022-09-12	11:56:02	0.52729
2022-09-12	11:56:02	0.04556
2022-09-12	11:56:02	0.285916
2022-09-12	11:56:03	0.176552
2022-09-12	11:56:03	0.31126
2022-09-12	11:56:03	0.125204
2022-09-12	11:56:03	0.433601
2022-09-12	11:56:04	0.292023
2022-09-12	11:56:04	0.443321
2022-09-12	11:56:04	0.385356
2022-09-12	11:56:04	0.311718
2022-09-12	11:56:05	0.422557
2022-09-12	11:56:05	0.470038
2022-09-12	11:56:05	0.396603
2022-09-12	11:56:06	0.472583
2022-09-12	11:56:06	0.450649
2022-09-12	11:56:06	0.293804
2022-09-12	11:56:06	0.299199
2022-09-12	11:56:07	0.383677
2022-09-12	11:56:07	0.326832
2022-09-12	11:56:07	0.226018
2022-09-12	11:56:07	2.09508
2022-09-12	11:56:08	3.38505
2022-09-12	11:56:08	5.11243
2022-09-12	11:56:08	2.87289
2022-09-12	11:56:08	4.29843
2022-09-12	11:56:09	6.82718
2022-09-12	11:56:09	3.85884
2022-09-12	11:56:09	7.77685
2022-09-12	11:56:10	6.55044
2022-09-12	11:56:10	2.82133
2022-09-12	11:56:10	2.82184
2022-09-12	11:56:10	1.62525
2022-09-12	11:56:11	1.75798
2022-09-12	11:56:11	2.15411
2022-09-12	11:56:11	0.579911
2022-09-12	11:56:11	0.478079
2022-09-12	11:56:12	1.49513
2022-09-12	11:56:12	2.69747
2022-09-12	11:56:12	2.60983
2022-09-12	11:56:12	2.86195
2022-09-12	11:56:13	0.281794
2022-09-12	11:56:13	1.17742
2022-09-12	11:56:13	0.898486
2022-09-12	11:56:13	5.23787
2022-09-12	11:56:14	3.71798
2022-09-12	11:56:14	3.92016
2022-09-12	11:56:14	0.961489
2022-09-12	11:56:15	1.24307
2022-09-12	11:56:15	0.604389
2022-09-12	11:56:15	0.30444
2022-09-12	11:56:15	0.440115
2022-09-12	11:56:16	0.49126
2022-09-12	11:56:16	0.528257
2022-09-12	11:56:16	0.320267
2022-09-12	11:56:16	0.411412
2022-09-12	11:56:17	0.498995
2022-09-12	11:56:17	0.317876
2022-09-12	11:56:17	0.484746
2022-09-12	11:56:17	0.399504
2022-09-12	11:56:18	0.363168
2022-09-12	11:56:18	1.2107
2022-09-12	11:56:18	0.394161
2022-09-12	11:56:19	0.620471
2022-09-12	11:56:19	0.828715
2022-09-12	11:56:19	1.08251
2022-09-12	11:56:19	0.95701
2022-09-12	11:56:20	2.8737
2022-09-12	11:56:20	2.29716
2022-09-12	11:56:20	3.90556
2022-09-12	11:56:20	4.51574
2022-09-12	11:56:21	3.83991
2022-09-12	11:56:21	3.77375
2022-09-12	11:56:21	1.23492
2022-09-12	11:56:21	2.16235
2022-09-12	11:56:22	0.597875
2022-09-12	11:56:22	1.53665
2022-09-12	11:56:22	1.28749
2022-09-12	11:56:23	3.86357
2022-09-12	11:56:23	5.72586
2022-09-12	11:56:23	6.19019
2022-09-12	11:56:23	1.65579
2022-09-12	11:56:24	0.626985
2022-09-12	11:56:24	0.412176
2022-09-12	11:56:24	0.6993
2022-09-12	11:56:24	0.821234
2022-09-12	11:56:25	1.08693
2022-09-12	11:56:25	0.475687
2022-09-12	11:56:25	0.676908
2022-09-12	11:56:25	1.56001
2022-09-12	11:56:26	2.96057
2022-09-12	11:56:26	4.10688
2022-09-12	11:56:26	2.39508
2022-09-12	11:56:27	1.14872
2022-09-12	11:56:27	3.10312
2022-09-12	11:56:27	5.14291
2022-09-12	11:56:27	8.88978
2022-09-12	11:56:28	6.65421
2022-09-12	11:56:28	3.86408
2022-09-12	11:56:28	4.41833
2022-09-12	11:56:28	2.2338
2022-09-12	11:56:29	1.49197
2022-09-12	11:56:29	0.99131
2022-09-12	11:56:29	1.09609
2022-09-12	11:56:29	1.52225
2022-09-12	11:56:30	2.42108
2022-09-12	11:56:30	2.42429
2022-09-12	11:56:30	0.723728
2022-09-12	11:56:31	0.468868
2022-09-12	11:56:31	0.32444
2022-09-12	11:56:31	0.408563
2022-09-12	11:56:31	0.510038
2022-09-12	11:56:32	0.462761
2022-09-12	11:56:32	0.371158
2022-09-12	11:56:32	0.448359
2022-09-12	11:56:32	0.505051
2022-09-12	11:56:33	0.402201
2022-09-12	11:56:33	0.416451
2022-09-12	11:56:33	0.391819
2022-09-12	11:56:33	0.466781
2022-09-12	11:56:34	0.578079
2022-09-12	11:56:34	0.360725
2022-09-12	11:56:34	0.513499
2022-09-12	11:56:34	0.535178
2022-09-12	11:56:35	0.504644
2022-09-12	11:56:35	0.601794
2022-09-12	11:56:35	0.431972
2022-09-12	11:56:36	0.43416
2022-09-12	11:56:36	0.447596
2022-09-12	11:56:36	0.706883
2022-09-12	11:56:36	0.379249
2022-09-12	11:56:37	0.970751
2022-09-12	11:56:37	0.800929
2022-09-12	11:56:37	0.571972
2022-09-12	11:56:37	0.532634
2022-09-12	11:56:38	0.630089
2022-09-12	11:56:38	0.551361
2022-09-12	11:56:38	0.533906
2022-09-12	11:56:38	0.68042
2022-09-12	11:56:39	0.578486
2022-09-12	11:56:39	0.599707
2022-09-12	11:56:39	0.564186
2022-09-12	11:56:40	0.526476
2022-09-12	11:56:40	0.466476
2022-09-12	11:56:40	0.420013
2022-09-12	11:56:40	0.424033
2022-09-12	11:56:41	0.400369
2022-09-12	11:56:41	0.416654
2022-09-12	11:56:41	0.438079
2022-09-12	11:56:41	0.416298
2022-09-12	11:56:42	0.448664
2022-09-12	11:56:42	0.404695
2022-09-12	11:56:42	0.44098
2022-09-12	11:56:42	0.500216
2022-09-12	11:56:43	0.528257
2022-09-12	11:56:43	0.580725
2022-09-12	11:56:43	0.737468
2022-09-12	11:56:44	1.37436
2022-09-12	11:56:44	2.18826
2022-09-12	11:56:44	0.717621
2022-09-12	11:56:44	0.292837
2022-09-12	11:56:45	0.327545
2022-09-12	11:56:45	0.455229
2022-09-12	11:56:45	1.39762
2022-09-12	11:56:45	2.6679
2022-09-12	11:56:46	2.10586
2022-09-12	11:56:46	1.13273
2022-09-12	11:56:46	2.10612
2022-09-12	11:56:46	1.18342
2022-09-12	11:56:47	1.59248
2022-09-12	11:56:47	0.78098
2022-09-12	11:56:47	0.547035
2022-09-12	11:56:48	0.311361
2022-09-12	11:56:48	0.267188
2022-09-12	11:56:48	0.260064
2022-09-12	11:56:48	-0.0445672
2022-09-12	11:56:49	-0.0461448
2022-09-12	11:56:49	1.03528
2022-09-12	11:56:49	5.47416
2022-09-12	11:56:49	4.65324
2022-09-12	11:56:50	5.28586
2022-09-12	11:56:50	0.85528
2022-09-12	11:56:50	1.85833
2022-09-12	11:56:50	2.18246
2022-09-12	11:56:51	0.690496
2022-09-12	11:56:51	0.876705
2022-09-12	11:56:51	0.511819
2022-09-12	11:56:52	0.561031
2022-09-12	11:56:52	0.858283
2022-09-12	11:56:52	0.479809
2022-09-12	11:56:52	0.615077
2022-09-12	11:56:53	0.572786
2022-09-12	11:56:53	0.523982
2022-09-12	11:56:53	0.75874
2022-09-12	11:56:53	0.936909
2022-09-12	11:56:54	3.98586
2022-09-12	11:56:54	3.5937
2022-09-12	11:56:54	7.41289
2022-09-12	11:56:54	7.55818
2022-09-12	11:56:55	3.49579
2022-09-12	11:56:55	3.26978
2022-09-12	11:56:55	2.6453
2022-09-12	11:56:55	3.125
2022-09-12	11:56:56	2.74128
2022-09-12	11:56:56	4.15762
2022-09-12	11:56:56	6.66484
2022-09-12	11:56:57	2.75548
2022-09-12	11:56:57	1.90434
2022-09-12	11:56:57	5.21864
2022-09-12	11:56:57	2.10301
2022-09-12	11:56:58	0.917773
2022-09-12	11:56:58	0.513244
2022-09-12	11:56:58	0.158079
2022-09-12	11:56:58	1.4736
2022-09-12	11:56:59	2.83049
2022-09-12	11:56:59	4.17762
2022-09-12	11:56:59	1.96332
2022-09-12	11:56:59	5.77115
2022-09-12	11:57:00	8.51955
2022-09-12	11:57:00	4.41217
2022-09-12	11:57:00	2.82882
2022-09-12	11:57:01	1.64149
2022-09-12	11:57:01	2.76001
2022-09-12	11:57:01	1.12042
2022-09-12	11:57:01	1.76958
2022-09-12	11:57:02	0.420827
2022-09-12	11:57:02	0.393193
2022-09-12	11:57:02	0.404135
2022-09-12	11:57:02	0.244797
2022-09-12	11:57:03	0.623219
2022-09-12	11:57:03	0.659351
2022-09-12	11:57:03	1.46017
2022-09-12	11:57:03	1.39543
2022-09-12	11:57:04	0.59355
2022-09-12	11:57:04	1.47324
2022-09-12	11:57:04	0.852532
2022-09-12	11:57:05	2.42393
2022-09-12	11:57:05	4.35757
2022-09-12	11:57:05	3.06602
2022-09-12	11:57:05	3.03014
2022-09-12	11:57:06	2.0563
2022-09-12	11:57:06	5.67319
2022-09-12	11:57:06	1.17874
2022-09-12	11:57:06	1.20042
2022-09-12	11:57:07	0.955178
2022-09-12	11:57:07	3.03854
2022-09-12	11:57:07	6.20296
2022-09-12	11:57:07	6.99935
2022-09-12	11:57:08	16.1427
2022-09-12	11:57:08	6.87411
2022-09-12	11:57:08	7.6767
2022-09-12	11:57:09	8.17303
2022-09-12	11:57:09	7.56398
2022-09-12	11:57:09	3.06184
2022-09-12	11:57:09	3.81355
2022-09-12	11:57:10	0.467595
2022-09-12	11:57:10	0.696501
2022-09-12	11:57:10	0.345356
2022-09-12	11:57:10	0.455942
2022-09-12	11:57:11	0.253397
2022-09-12	11:57:11	0.32042
2022-09-12	11:57:11	0.194771
2022-09-12	11:57:11	0.124288
2022-09-12	11:57:12	1.72332
2022-09-12	11:57:12	3.1651
2022-09-12	11:57:12	1.40551
2022-09-12	11:57:13	1.28637
2022-09-12	11:57:13	1.16775
2022-09-12	11:57:13	0.795738
2022-09-12	11:57:13	0.520878
2022-09-12	11:57:14	0.342659
2022-09-12	11:57:14	0.127901
2022-09-12	11:57:14	0.311667
2022-09-12	11:57:14	-0.0658394
2022-09-12	11:57:15	-0.338766
2022-09-12	11:57:15	-0.456577
2022-09-12	11:57:15	-0.771844
2022-09-12	11:57:15	-0.68131
2022-09-12	11:57:16	-0.602837
2022-09-12	11:57:16	-0.415457
2022-09-12	11:57:16	0.692175
2022-09-12	11:57:16	-0.112761
2022-09-12	11:57:17	1.81691
2022-09-12	11:57:17	3.79212
2022-09-12	11:57:17	8.27853
2022-09-12	11:57:18	2.59589
2022-09-12	11:57:18	5.32815
2022-09-12	11:57:18	5.59543
2022-09-12	11:57:18	4.99421
2022-09-12	11:57:19	5.44769
2022-09-12	11:57:19	2.77986
2022-09-12	11:57:19	3.54307
2022-09-12	11:57:19	9.7453
2022-09-12	11:57:20	11.262
2022-09-12	11:57:20	8.705
2022-09-12	11:57:20	6.08113
2022-09-12	11:57:20	4.26968
2022-09-12	11:57:21	0.432227
2022-09-12	11:57:21	0.339453
2022-09-12	11:57:21	0.32042
2022-09-12	11:57:22	0.454924
2022-09-12	11:57:22	0.461234
2022-09-12	11:57:22	0.605916
2022-09-12	11:57:22	0.206832
2022-09-12	11:57:23	0.384949
2022-09-12	11:57:23	0.950598
2022-09-12	11:57:23	0.571921
2022-09-12	11:57:23	0.564746
2022-09-12	11:57:24	0.377367
2022-09-12	11:57:24	0.641489
2022-09-12	11:57:24	0.528817
2022-09-12	11:57:24	0.59416
2022-09-12	11:57:25	2.19441
2022-09-12	11:57:25	3.35833
2022-09-12	11:57:25	5.86606
2022-09-12	11:57:26	6.21151
2022-09-12	11:57:26	3.02993
2022-09-12	11:57:26	3.15457
2022-09-12	11:57:26	0.920115
2022-09-12	11:57:27	0.657315
2022-09-12	11:57:27	0.350242
2022-09-12	11:57:27	0.450445
2022-09-12	11:57:27	0.342761
2022-09-12	11:57:28	0.250751
2022-09-12	11:57:28	0.108868
2022-09-12	11:57:28	0.248715
2022-09-12	11:57:28	0.153397
2022-09-12	11:57:29	0.0374175
2022-09-12	11:57:29	0.325356
2022-09-12	11:57:29	0.767596
2022-09-12	11:57:30	1.71991
2022-09-12	11:57:30	1.46017
2022-09-12	11:57:30	2.7453
2022-09-12	11:57:30	1.66958
2022-09-12	11:57:31	1.02627
2022-09-12	11:57:31	0.552379
2022-09-12	11:57:31	0.43126
2022-09-12	11:57:31	1.95787
2022-09-12	11:57:32	3.13416
2022-09-12	11:57:32	6.25548
2022-09-12	11:57:32	6.5026
2022-09-12	11:57:32	9.63528
2022-09-12	11:57:33	3.79482
2022-09-12	11:57:33	4.5366
2022-09-12	11:57:33	5.43126
2022-09-12	11:57:34	4.24083
2022-09-12	11:57:34	2.21218
2022-09-12	11:57:34	4.67538
2022-09-12	11:57:34	1.15375
2022-09-12	11:57:35	3.12612
2022-09-12	11:57:35	3.06159
2022-09-12	11:57:35	1.61482
2022-09-12	11:57:35	2.54576
2022-09-12	11:57:36	2.15436
2022-09-12	11:57:36	1.16408
2022-09-12	11:57:36	0.657519
2022-09-12	11:57:36	0.288868
2022-09-12	11:57:37	0.228054
2022-09-12	11:57:37	0.253092
2022-09-12	11:57:37	1.81559
2022-09-12	11:57:37	3.59752
2022-09-12	11:57:38	5.25467
2022-09-12	11:57:38	3.61095
2022-09-12	11:57:38	2.87747
2022-09-12	11:57:39	2.33625
2022-09-12	11:57:39	3.10276
2022-09-12	11:57:39	5.2452
2022-09-12	11:57:39	6.90459
2022-09-12	11:57:40	5.16866
2022-09-12	11:57:40	1.1192
2022-09-12	11:57:40	2.22775
2022-09-12	11:57:40	1.391
2022-09-12	11:57:41	0.968053
2022-09-12	11:57:41	2.24775
2022-09-12	11:57:41	2.58897
2022-09-12	11:57:41	2.40627
2022-09-12	11:57:42	3.86775
2022-09-12	11:57:42	1.61299
2022-09-12	11:57:42	2.56927
2022-09-12	11:57:43	1.50174
2022-09-12	11:57:43	1.21401
2022-09-12	11:57:43	1.608
2022-09-12	11:57:43	2.60637
2022-09-12	11:57:44	0.99472
2022-09-12	11:57:44	1.48322
2022-09-12	11:57:44	1.25462
2022-09-12	11:57:44	2.69172
2022-09-12	11:57:45	7.51706
2022-09-12	11:57:45	12.0223
2022-09-12	11:57:45	5.09004
2022-09-12	11:57:45	1.49889
2022-09-12	11:57:46	0.539707
2022-09-12	11:57:46	0.447748
2022-09-12	11:57:46	0.27528
2022-09-12	11:57:47	0.164644
2022-09-12	11:57:47	0.196451
2022-09-12	11:57:47	0.0902419
2022-09-12	11:57:47	0.291616
2022-09-12	11:57:48	0.143626
2022-09-12	11:57:48	0.505713
2022-09-12	11:57:48	0.41299
2022-09-12	11:57:48	1.12989
2022-09-12	11:57:49	2.37569
2022-09-12	11:57:49	2.53319
2022-09-12	11:57:49	1.38963
2022-09-12	11:57:49	1.14215
2022-09-12	11:57:50	0.508664
2022-09-12	11:57:50	2.77258
2022-09-12	11:57:50	7.53467
2022-09-12	11:57:51	5.36464
2022-09-12	11:57:51	4.17044
2022-09-12	11:57:51	0.140929
2022-09-12	11:57:51	-0.0183076
2022-09-12	11:57:52	0.136909
2022-09-12	11:57:52	0.213652
2022-09-12	11:57:52	0.198028
2022-09-12	11:57:52	0.151362
2022-09-12	11:57:53	0.375992
2022-09-12	11:57:53	0.128003
2022-09-12	11:57:53	0.327799
2022-09-12	11:57:53	0.208664
2022-09-12	11:57:54	1.22256
2022-09-12	11:57:54	0.873041
2022-09-12	11:57:54	1.39441
2022-09-12	11:57:55	0.889122
2022-09-12	11:57:55	0.907494
2022-09-12	11:57:55	0.400929
2022-09-12	11:57:55	0.409529
2022-09-12	11:57:56	1.11757
2022-09-12	11:57:56	1.01385
2022-09-12	11:57:56	1.18994
2022-09-12	11:57:56	1.5336
2022-09-12	11:57:57	1.09375
2022-09-12	11:57:57	1.92744
2022-09-12	11:57:57	1.31976
2022-09-12	11:57:57	2.79182
2022-09-12	11:57:58	3.77014
2022-09-12	11:57:58	3.30042
2022-09-12	11:57:58	4.02408
2022-09-12	11:57:59	2.34805
2022-09-12	11:57:59	2.19513
2022-09-12	11:57:59	2.31416
2022-09-12	11:57:59	2.90408
2022-09-12	11:58:00	3.52139
2022-09-12	11:58:00	2.5996
2022-09-12	11:58:00	3.76785
2022-09-12	11:58:00	3.51436
2022-09-12	11:58:01	2.11167
2022-09-12	11:58:01	0.492888
2022-09-12	11:58:01	0.201387
2022-09-12	11:58:01	0.171361
2022-09-12	11:58:02	0.152888
2022-09-12	11:58:02	0.299097
2022-09-12	11:58:02	0.371616
2022-09-12	11:58:02	1.28215
2022-09-12	11:58:03	1.0334
2022-09-12	11:58:03	3.40754
2022-09-12	11:58:03	1.97218
2022-09-12	11:58:04	3.05762
2022-09-12	11:58:04	3.9535
2022-09-12	11:58:04	5.77818
2022-09-12	11:58:05	5.0193
2022-09-12	11:58:05	3.45141
2022-09-12	11:58:05	6.13741
2022-09-12	11:58:05	2.17838
2022-09-12	11:58:05	4.30978
2022-09-12	11:58:06	6.39019
2022-09-12	11:58:06	3.14118
2022-09-12	11:58:06	6.68825
2022-09-12	11:58:06	3.32357
2022-09-12	11:58:07	4.22128
2022-09-12	11:58:07	3.00291
2022-09-12	11:58:07	2.45111
2022-09-12	11:58:08	3.61055
2022-09-12	11:58:08	1.81452
2022-09-12	11:58:08	2.31401
2022-09-12	11:58:08	1.18943
2022-09-12	11:58:09	1.44174
2022-09-12	11:58:09	2.60057
2022-09-12	11:58:09	4.98668
2022-09-12	11:58:09	6.39457
2022-09-12	11:58:10	2.54383
2022-09-12	11:58:10	4.41487
2022-09-12	11:58:10	4.53401
2022-09-12	11:58:10	5.80983
2022-09-12	11:58:11	4.29024
2022-09-12	11:58:11	4.39869
2022-09-12	11:58:11	4.41095
2022-09-12	11:58:12	4.90108
2022-09-12	11:58:12	7.13441
2022-09-12	11:58:12	5.84912
2022-09-12	11:58:12	9.00947
2022-09-12	11:58:13	8.3509
2022-09-12	11:58:13	8.89349
2022-09-12	11:58:13	5.97121
2022-09-12	11:58:13	9.04123
2022-09-12	11:58:14	6.42418
2022-09-12	11:58:14	6.27802
2022-09-12	11:58:14	2.16637
2022-09-12	11:58:14	1.67121
2022-09-12	11:58:15	2.44306
2022-09-12	11:58:15	1.62022
2022-09-12	11:58:15	2.61497
2022-09-12	11:58:16	1.35335
2022-09-12	11:58:16	4.36001
2022-09-12	11:58:16	4.23314
2022-09-12	11:58:16	4.40479
2022-09-12	11:58:17	4.50627
2022-09-12	11:58:17	3.4767
2022-09-12	11:58:17	10.8283
2022-09-12	11:58:17	10.9236
2022-09-12	11:58:18	11.9995
2022-09-12	11:58:18	3.44022
2022-09-12	11:58:18	4.002
2022-09-12	11:58:18	7.73232
2022-09-12	11:58:19	3.19757
2022-09-12	11:58:19	3.96968
2022-09-12	11:58:19	2.83665
2022-09-12	11:58:20	4.90444
2022-09-12	11:58:20	4.51044
2022-09-12	11:58:20	8.49767
2022-09-12	11:58:20	8.92775
2022-09-12	11:58:21	14.1414
2022-09-12	11:58:21	5.39762
2022-09-12	11:58:21	4.07543
2022-09-12	11:58:21	2.20383
2022-09-12	11:58:22	1.76281
2022-09-12	11:58:22	1.57854
2022-09-12	11:58:22	1.46363
2022-09-12	11:58:22	0.999809
2022-09-12	11:58:23	1.42698
2022-09-12	11:58:23	1.19889
2022-09-12	11:58:23	1.51177
2022-09-12	11:58:24	1.28317
2022-09-12	11:58:24	1.17843
2022-09-12	11:58:24	1.09045
2022-09-12	11:58:24	0.831107
2022-09-12	11:58:25	0.834771
2022-09-12	11:58:25	1.09772
2022-09-12	11:58:25	1.16098
2022-09-12	11:58:25	0.92327
2022-09-12	11:58:26	1.01034
2022-09-12	11:58:26	0.907595
2022-09-12	11:58:26	0.976807
2022-09-12	11:58:26	1.10424
2022-09-12	11:58:27	0.973092
2022-09-12	11:58:27	0.436908
2022-09-12	11:58:27	0.681183
2022-09-12	11:58:27	0.258181
2022-09-12	11:58:28	0.289173
2022-09-12	11:58:28	0.0509036
2022-09-12	11:58:28	-0.166908
2022-09-12	11:58:29	-0.186297
2022-09-12	11:58:29	-0.214745
2022-09-12	11:58:29	-0.417137
2022-09-12	11:58:29	-0.18416
2022-09-12	11:58:30	-0.286755
2022-09-12	11:58:30	-0.339274
2022-09-12	11:58:30	-0.506348
2022-09-12	11:58:30	-0.405585
2022-09-12	11:58:31	-0.137951
2022-09-12	11:58:31	0.958333
2022-09-12	11:58:31	1.81925
2022-09-12	11:58:31	0.702863
2022-09-12	11:58:32	0.363423
2022-09-12	11:58:32	0.4193
2022-09-12	11:58:32	0.304135
2022-09-12	11:58:33	0.234313
2022-09-12	11:58:33	0.140725
2022-09-12	11:58:33	0.142761
2022-09-12	11:58:33	0.286832
2022-09-12	11:58:34	0.193601
2022-09-12	11:58:34	0.320827
2022-09-12	11:58:34	0.091158
2022-09-12	11:58:34	-0.00614479
2022-09-12	11:58:35	0.386323
2022-09-12	11:58:35	0.379097
2022-09-12	11:58:35	0.314975
2022-09-12	11:58:35	0.408512
2022-09-12	11:58:36	0.484135
2022-09-12	11:58:36	0.794415
2022-09-12	11:58:36	0.574873
2022-09-12	11:58:37	0.582303
2022-09-12	11:58:37	0.901488
2022-09-12	11:58:37	1.31477
2022-09-12	11:58:37	1.34973
2022-09-12	11:58:38	1.53258
2022-09-12	11:58:38	5.54169
2022-09-12	11:58:38	5.83167
2022-09-12	11:58:38	2.98541
2022-09-12	11:58:39	1.17737
2022-09-12	11:58:39	0.333143
2022-09-12	11:58:39	0.501539
2022-09-12	11:58:39	0.163931
2022-09-12	11:58:40	0.136705
2022-09-12	11:58:40	0.300573
2022-09-12	11:58:40	1.39401
2022-09-12	11:58:41	1.92052
2022-09-12	11:58:41	0.566781
2022-09-12	11:58:41	0.375636
2022-09-12	11:58:41	0.672379
2022-09-12	11:58:42	0.0616414
2022-09-12	11:58:42	-0.115865
2022-09-12	11:58:42	-0.142633
2022-09-12	11:58:42	-0.103397
2022-09-12	11:58:43	-0.0599361
2022-09-12	11:58:43	-0.0909793
2022-09-12	11:58:43	-0.188537
2022-09-12	11:58:43	-0.221005
2022-09-12	11:58:44	-0.369758
2022-09-12	11:58:44	-0.444923
2022-09-12	11:58:44	-0.0990709
2022-09-12	11:58:45	-0.165636
2022-09-12	11:58:45	-0.133931
2022-09-12	11:58:45	-0.347468
2022-09-12	11:58:45	-0.393524
2022-09-12	11:58:46	-0.40589
2022-09-12	11:58:46	-0.215254
2022-09-12	11:58:46	-0.140801
2022-09-12	11:58:46	3.1136
2022-09-12	11:58:47	2.73996
2022-09-12	11:58:47	1.00907
2022-09-12	11:58:47	0.366476
2022-09-12	11:58:47	0.00912238
2022-09-12	11:58:48	0.0388934
2022-09-12	11:58:48	0.0254073
2022-09-12	11:58:48	0.435687
2022-09-12	11:58:48	0.686476
2022-09-12	11:58:49	0.71645
2022-09-12	11:58:49	0.888715
2022-09-12	11:58:49	0.776806
2022-09-12	11:58:50	0.898283
2022-09-12	11:58:50	1.26637
2022-09-12	11:58:50	3.28088
2022-09-12	11:58:50	7.94108
2022-09-12	11:58:51	5.19945
2022-09-12	11:58:51	5.26082
2022-09-12	11:58:51	4.13864
2022-09-12	11:58:51	5.9194
2022-09-12	11:58:52	1.27019
2022-09-12	11:58:52	0.662913
2022-09-12	11:58:52	0.705255
2022-09-12	11:58:52	0.49584
2022-09-12	11:58:53	0.287239
2022-09-12	11:58:53	-0.037188
2022-09-12	11:58:53	0.164288
2022-09-12	11:58:54	0.0319723
2022-09-12	11:58:54	-0.0899616
2022-09-12	11:58:54	-0.0774425
2022-09-12	11:58:54	-0.0898089
2022-09-12	11:58:55	-0.0216155
2022-09-12	11:58:55	0.127799
2022-09-12	11:58:55	0.269631
2022-09-12	11:58:55	0.359046
2022-09-12	11:58:56	0.480573
2022-09-12	11:58:56	1.18561
2022-09-12	11:58:56	0.797417
2022-09-12	11:58:56	0.501132
2022-09-12	11:58:57	0.220369
2022-09-12	11:58:57	0.33243
2022-09-12	11:58:57	0.314466
2022-09-12	11:58:58	0.372176
2022-09-12	11:58:58	0.281692
2022-09-12	11:58:58	0.284847
2022-09-12	11:58:58	0.3793
2022-09-12	11:58:59	0.298537
2022-09-12	11:58:59	0.218079
2022-09-12	11:58:59	1.02261
2022-09-12	11:58:59	0.577366
2022-09-12	11:59:00	0.388104
2022-09-12	11:59:00	0.27243
2022-09-12	11:59:00	0.165662
2022-09-12	11:59:00	0.0389443
2022-09-12	11:59:01	-0.341768
2022-09-12	11:59:01	-0.362481
2022-09-12	11:59:01	0.0127356
2022-09-12	11:59:02	0.231718
2022-09-12	11:59:02	2.09426
2022-09-12	11:59:02	2.58846
2022-09-12	11:59:02	2.64144
2022-09-12	11:59:03	2.35843
2022-09-12	11:59:03	2.62607
2022-09-12	11:59:03	2.66418
2022-09-12	11:59:03	2.89513
2022-09-12	11:59:04	2.93024
2022-09-12	11:59:04	2.66057
2022-09-12	11:59:04	2.75039
2022-09-12	11:59:04	1.83467
2022-09-12	11:59:05	1.002
2022-09-12	11:59:05	0.619707
2022-09-12	11:59:05	0.878639
2022-09-12	11:59:06	1.13915
2022-09-12	11:59:06	0.264796
2022-09-12	11:59:06	0.208766
2022-09-12	11:59:06	0.177672
2022-09-12	11:59:07	0.107341
2022-09-12	11:59:07	0.157468
2022-09-12	11:59:07	0.209173
2022-09-12	11:59:07	0.100878
2022-09-12	11:59:08	0.11869
2022-09-12	11:59:08	0.11757
2022-09-12	11:59:08	0.284389
2022-09-12	11:59:08	0.084186
2022-09-12	11:59:09	0.266985
2022-09-12	11:59:09	0.0629137
2022-09-12	11:59:09	0.281896
2022-09-12	11:59:10	0.0615905
2022-09-12	11:59:10	0.37131
2022-09-12	11:59:10	0.436756
2022-09-12	11:59:10	0.355127
2022-09-12	11:59:11	-0.035814
2022-09-12	11:59:11	0.0183844
2022-09-12	11:59:11	0.0310562
2022-09-12	11:59:11	0.129937
2022-09-12	11:59:12	-0.0429895
2022-09-12	11:59:12	0.109835
2022-09-12	11:59:12	0.115433
2022-09-12	11:59:12	0.0806745
2022-09-12	11:59:13	0.0922776
2022-09-12	11:59:13	0.0343132
2022-09-12	11:59:13	0.108613
2022-09-12	11:59:13	0.310649
2022-09-12	11:59:14	0.36841
2022-09-12	11:59:14	0.531514
2022-09-12	11:59:14	0.785763
2022-09-12	11:59:15	0.738231
2022-09-12	11:59:15	1.73279
2022-09-12	11:59:15	0.448868
2022-09-12	11:59:15	0.301489
2022-09-12	11:59:16	0.401997
2022-09-12	11:59:16	0.159758
2022-09-12	11:59:16	0.341845
2022-09-12	11:59:16	0.279657
2022-09-12	11:59:17	0.759962
2022-09-12	11:59:17	2.58831
2022-09-12	11:59:17	4.53701
2022-09-12	11:59:17	2.19966
2022-09-12	11:59:18	1.80902
2022-09-12	11:59:18	0.98327
2022-09-12	11:59:18	1.22749
2022-09-12	11:59:19	2.60118
2022-09-12	11:59:19	2.92795
2022-09-12	11:59:19	3.58943
2022-09-12	11:59:19	4.45294
2022-09-12	11:59:20	3.41014
2022-09-12	11:59:20	1.26388
2022-09-12	11:59:20	2.22637
2022-09-12	11:59:20	0.841845
2022-09-12	11:59:21	3.56703
2022-09-12	11:59:21	2.34709
2022-09-12	11:59:21	4.45395
2022-09-12	11:59:21	3.40551
2022-09-12	11:59:22	1.99182
2022-09-12	11:59:22	0.363015
2022-09-12	11:59:22	0.518588
2022-09-12	11:59:23	0.266934
2022-09-12	11:59:23	0.386527
2022-09-12	11:59:23	0.396043
2022-09-12	11:59:23	0.313346
2022-09-12	11:59:24	0.376043
2022-09-12	11:59:24	0.455687
2022-09-12	11:59:24	0.412939
2022-09-12	11:59:24	0.33299
2022-09-12	11:59:25	0.274771
2022-09-12	11:59:25	0.372125
2022-09-12	11:59:25	0.233499
2022-09-12	11:59:25	0.2964
2022-09-12	11:59:26	0.241947
2022-09-12	11:59:26	0.190089
2022-09-12	11:59:26	0.297672
2022-09-12	11:59:27	0.291972
2022-09-12	11:59:27	0.72841
2022-09-12	11:59:27	0.336552
2022-09-12	11:59:27	0.308155
2022-09-12	11:59:28	0.320115
2022-09-12	11:59:28	0.29584
2022-09-12	11:59:28	0.546527
2022-09-12	11:59:28	1.48047
2022-09-12	11:59:29	1.69263
2022-09-12	11:59:29	1.38383
2022-09-12	11:59:29	0.896043
2022-09-12	11:59:29	0.840471
2022-09-12	11:59:30	1.3735
2022-09-12	11:59:30	0.56785
2022-09-12	11:59:30	0.250853
2022-09-12	11:59:31	0.265458
2022-09-12	11:59:31	0.309071
2022-09-12	11:59:31	0.219402
2022-09-12	11:59:31	0.226018
2022-09-12	11:59:32	0.34154
2022-09-12	11:59:32	0.205407
2022-09-12	11:59:32	0.38327
2022-09-12	11:59:32	0.217163
2022-09-12	11:59:33	1.21823
2022-09-12	11:59:33	3.19472
2022-09-12	11:59:33	4.03904
2022-09-12	11:59:33	1.95609
2022-09-12	11:59:34	1.76882
2022-09-12	11:59:34	2.65095
2022-09-12	11:59:34	3.99182
2022-09-12	11:59:34	1.77747
2022-09-12	11:59:35	2.32434
2022-09-12	11:59:35	3.26439
2022-09-12	11:59:35	3.69228
2022-09-12	11:59:36	4.76454
2022-09-12	11:59:36	0.93986
2022-09-12	11:59:36	1.09258
2022-09-12	11:59:36	1.58943
2022-09-12	11:59:37	2.8452
2022-09-12	11:59:37	3.21278
2022-09-12	11:59:37	2.81334
2022-09-12	11:59:37	0.688562
2022-09-12	11:59:38	0.349936
2022-09-12	11:59:38	0.314415
2022-09-12	11:59:38	0.294211
2022-09-12	11:59:38	0.48785
2022-09-12	11:59:39	1.25472
2022-09-12	11:59:39	1.30581
2022-09-12	11:59:39	0.87584
2022-09-12	11:59:40	0.358028
2022-09-12	11:59:40	0.338944
2022-09-12	11:59:40	0.396247
2022-09-12	11:59:40	0.333906
2022-09-12	11:59:41	0.30383
2022-09-12	11:59:41	0.19472
2022-09-12	11:59:41	0.252176
2022-09-12	11:59:41	2.03131
2022-09-12	11:59:42	2.77971
2022-09-12	11:59:42	0.955585
2022-09-12	11:59:42	0.314109
2022-09-12	11:59:42	0.170853
2022-09-12	11:59:43	0.139199
2022-09-12	11:59:43	0.138232
2022-09-12	11:59:43	0.307799
2022-09-12	11:59:44	0.164084
2022-09-12	11:59:44	0.106629
2022-09-12	11:59:44	0.15411
2022-09-12	11:59:44	0.127443
2022-09-12	11:59:45	0.205356
2022-09-12	11:59:45	0.172481
2022-09-12	11:59:45	0.239657
2022-09-12	11:59:45	0.187087
2022-09-12	11:59:46	0.360216
2022-09-12	11:59:46	0.526985
2022-09-12	11:59:46	0.308257
2022-09-12	11:59:46	0.321641
2022-09-12	11:59:47	0.412634
2022-09-12	11:59:47	0.705662
2022-09-12	11:59:47	0.677112
2022-09-12	11:59:48	0.649835
2022-09-12	11:59:48	0.669427
2022-09-12	11:59:48	0.823321
2022-09-12	11:59:48	1.40637
2022-09-12	11:59:49	1.62826
2022-09-12	11:59:49	2.54846
2022-09-12	11:59:49	1.8049
2022-09-12	11:59:49	1.88597
2022-09-12	11:59:50	1.07569
2022-09-12	11:59:50	1.25177
2022-09-12	11:59:50	0.822913
2022-09-12	11:59:50	0.706323
2022-09-12	11:59:51	1.05019
2022-09-12	11:59:51	0.888359
2022-09-12	11:59:51	0.962862
2022-09-12	11:59:52	0.903677
2022-09-12	11:59:52	1.06673
2022-09-12	11:59:52	1.17599
2022-09-12	11:59:52	2.95477
2022-09-12	11:59:53	4.19772
2022-09-12	11:59:53	2.52632
2022-09-12	11:59:53	1.53085
2022-09-12	11:59:53	1.23798
2022-09-12	11:59:54	1.56729
2022-09-12	11:59:54	1.44953
2022-09-12	11:59:54	2.71049
2022-09-12	11:59:54	2.7648
2022-09-12	11:59:55	1.95513
2022-09-12	11:59:55	2.01777
2022-09-12	11:59:55	2.31889
2022-09-12	11:59:56	1.97467
2022-09-12	11:59:56	2.02892
2022-09-12	11:59:56	4.11635
2022-09-12	11:59:56	6.21309
2022-09-12	11:59:57	3.77477
2022-09-12	11:59:57	3.38378
2022-09-12	11:59:57	4.23024
2022-09-12	11:59:57	4.28367
2022-09-12	11:59:58	3.02194
2022-09-12	11:59:58	3.61904
2022-09-12	11:59:58	5.44159
2022-09-12	11:59:58	5.90194
2022-09-12	11:59:59	4.9392
2022-09-12	11:59:59	6.62235
2022-09-12	11:59:59	5.52851
2022-09-12	12:00:00	3.26897
2022-09-12	12:00:00	2.15665
2022-09-12	12:00:00	3.40362
2022-09-12	12:00:00	4.33151
2022-09-12	12:00:01	4.95095
2022-09-12	12:00:01	4.72831
2022-09-12	12:00:01	4.86678
2022-09-12	12:00:01	3.0964
2022-09-12	12:00:02	5.95711
2022-09-12	12:00:02	3.80836
2022-09-12	12:00:02	8.11843
2022-09-12	12:00:02	5.44525
2022-09-12	12:00:03	4.74882
2022-09-12	12:00:03	3.92805
2022-09-12	12:00:03	1.89996
2022-09-12	12:00:03	1.22459
2022-09-12	12:00:04	1.79645
2022-09-12	12:00:04	3.33436
2022-09-12	12:00:04	3.91808
2022-09-12	12:00:05	2.72912
2022-09-12	12:00:05	2.33447
2022-09-12	12:00:05	2.94403
2022-09-12	12:00:05	2.27803
2022-09-12	12:00:06	2.83513
2022-09-12	12:00:06	6.49986
2022-09-12	12:00:06	3.65431
2022-09-12	12:00:06	4.25843
2022-09-12	12:00:07	4.07457
2022-09-12	12:00:07	2.27599
2022-09-12	12:00:07	2.60617
2022-09-12	12:00:07	2.47803
2022-09-12	12:00:08	4.88658
2022-09-12	12:00:08	1.61864
2022-09-12	12:00:08	2.04383
2022-09-12	12:00:09	1.85966
2022-09-12	12:00:09	5.59884
2022-09-12	12:00:09	7.72037
2022-09-12	12:00:09	6.25126
2022-09-12	12:00:10	8.24632
2022-09-12	12:00:10	6.04561
2022-09-12	12:00:10	11.1158
2022-09-12	12:00:10	3.01248
2022-09-12	12:00:11	1.87268
2022-09-12	12:00:11	0.961539
2022-09-12	12:00:11	1.22103
2022-09-12	12:00:11	1.51569
2022-09-12	12:00:12	3.25716
2022-09-12	12:00:12	4.32032
2022-09-12	12:00:12	9.00103
2022-09-12	12:00:13	5.3735
2022-09-12	12:00:13	4.38474
