# Supplementary material for: Comparing efficacy in reducing pulling and welfare impacts of four types of leash walking equipment
Source: PeerJ journal article supplement (doi:10.7717/peerj.18131), 2024-10-24
Supplement: Shelter1_Tension_files.zip [file Unnamed_harness_2022913135236 copy.xlsx]

## Sheet: Averaged Newtons
Date	Times	Averaged Newtons	impulse	total steps
2022-09-13	13:52:44	2.33712	2.33712	0
2022-09-13	13:52:45	2.13497	4.47208	0		Impulse newtons	1708.09
2022-09-13	13:52:46	-0.585054	4.47208	0		Total steps	33
2022-09-13	13:52:47	-13.9101	4.47208	0		# > 5sec	1
2022-09-13	13:52:48	-15.9943	4.47208	0
2022-09-13	13:52:49	-16.9482	4.47208	0
2022-09-13	13:52:50	-0.969115	4.47208	0
2022-09-13	13:52:51	35.3518	39.8239	1
2022-09-13	13:52:52	27.8859	67.7098	2
2022-09-13	13:52:53	-0.264571	67.7098	2
2022-09-13	13:52:54	4.45172	72.1615	2
2022-09-13	13:52:55	3.07299	75.2345	2
2022-09-13	13:52:56	2.93185	78.1663	2
2022-09-13	13:52:57	1.28771	79.4541	2
2022-09-13	13:52:58	0.683774	80.1378	2
2022-09-13	13:52:59	-2.28952	80.1378	2
2022-09-13	13:53:00	-2.88986	80.1378	2
2022-09-13	13:53:01	1.10543	81.2433	2
2022-09-13	13:53:02	-0.187455	81.2433	2
2022-09-13	13:53:03	-2.73406	81.2433	2
2022-09-13	13:53:04	0.45265	81.6959	2
2022-09-13	13:53:05	12.7692	94.4651	2
2022-09-13	13:53:06	9.29238	103.757	2
2022-09-13	13:53:07	3.0241	106.782	2
2022-09-13	13:53:08	2.30599	109.088	2
2022-09-13	13:53:09	2.76524	111.853	2
2022-09-13	13:53:10	7.12637	118.979	2
2022-09-13	13:53:11	8.59918	127.578	2
2022-09-13	13:53:12	8.58695	136.165	2
2022-09-13	13:53:13	8.32822	144.494	2
2022-09-13	13:53:14	7.67141	152.165	2
2022-09-13	13:53:15	7.63273	159.798	2
2022-09-13	13:53:16	7.59391	167.392	2
2022-09-13	13:53:17	7.91915	175.311	2
2022-09-13	13:53:18	6.78109	182.092	2
2022-09-13	13:53:19	9.34099	191.433	2
2022-09-13	13:53:20	19.9066	211.339	3
2022-09-13	13:53:21	22.0117	233.351	4
2022-09-13	13:53:22	15.99	249.341	5
2022-09-13	13:53:23	16.8353	266.176	6
2022-09-13	13:53:24	11.8712	278.048	6
2022-09-13	13:53:25	11.799	289.847	6
2022-09-13	13:53:26	10.9779	300.824	6
2022-09-13	13:53:27	11.6428	312.467	6
2022-09-13	13:53:28	12.6089	325.076	6
2022-09-13	13:53:29	9.38196	334.458	6
2022-09-13	13:53:30	45.6603	380.118	7
2022-09-13	13:53:31	40.6214	420.74	8
2022-09-13	13:53:32	29.4962	450.236	9
2022-09-13	13:53:33	18.1332	468.369	10
2022-09-13	13:53:34	15.8063	484.176	11
2022-09-13	13:53:35	20.5126	504.688	12
2022-09-13	13:53:36	25.6522	530.34	13
2022-09-13	13:53:37	40.5272	570.868	14
2022-09-13	13:53:38	2.74896	573.617	14
2022-09-13	13:53:39	2.45104	576.068	14
2022-09-13	13:53:40	28.0402	604.108	15
2022-09-13	13:53:41	24.1739	628.282	16
2022-09-13	13:53:42	2.19684	630.479	16
2022-09-13	13:53:43	0.344482	630.823	16
2022-09-13	13:53:44	-3.76088	630.823	16
2022-09-13	13:53:45	-4.35397	630.823	16
2022-09-13	13:53:46	0.341652	631.165	16
2022-09-13	13:53:47	5.45731	636.622	16
2022-09-13	13:53:48	6.3396	642.962	16
2022-09-13	13:53:49	5.3865	648.348	16
2022-09-13	13:53:50	5.46662	653.815	16
2022-09-13	13:53:51	4.56608	658.381	16
2022-09-13	13:53:52	5.2539	663.635	16
2022-09-13	13:53:53	6.27151	669.906	16
2022-09-13	13:53:54	7.39924	677.305	16
2022-09-13	13:53:55	5.48282	682.788	16
2022-09-13	13:53:56	7.48967	690.278	16
2022-09-13	13:53:57	4.33592	694.614	16
2022-09-13	13:53:58	6.43179	701.046	16
2022-09-13	13:53:59	5.87078	706.916	16
2022-09-13	13:54:00	5.45436	712.371	16
2022-09-13	13:54:01	6.00043	718.371	16
2022-09-13	13:54:02	5.65707	724.028	16
2022-09-13	13:54:03	5.70909	729.737	16
2022-09-13	13:54:04	5.64445	735.382	16
2022-09-13	13:54:05	5.46233	740.844	16
2022-09-13	13:54:06	5.55877	746.403	16
2022-09-13	13:54:07	5.25697	751.66	16
2022-09-13	13:54:08	5.32523	756.985	16
2022-09-13	13:54:09	5.25991	762.245	16
2022-09-13	13:54:10	5.3548	767.6	16
2022-09-13	13:54:11	5.49257	773.092	16
2022-09-13	13:54:12	5.27746	778.37	16
2022-09-13	13:54:13	5.11854	783.488	16
2022-09-13	13:54:14	5.08165	788.57	16
2022-09-13	13:54:15	5.20993	793.78	16
2022-09-13	13:54:16	5.62612	799.406	16
2022-09-13	13:54:17	5.94304	805.349	16
2022-09-13	13:54:18	5.98759	811.337	16
2022-09-13	13:54:19	6.44996	817.787	16
2022-09-13	13:54:20	7.1487	824.935	16
2022-09-13	13:54:21	7.09352	832.029	16
2022-09-13	13:54:22	6.54318	838.572	16
2022-09-13	13:54:23	6.09884	844.671	16
2022-09-13	13:54:24	5.91417	850.585	16
2022-09-13	13:54:25	5.70682	856.292	16
2022-09-13	13:54:26	5.78045	862.072	16
2022-09-13	13:54:27	5.72985	867.802	16
2022-09-13	13:54:28	5.90869	873.711	16
2022-09-13	13:54:29	5.7989	879.51	16
2022-09-13	13:54:30	4.92801	884.438	16
2022-09-13	13:54:31	3.14804	887.586	16
2022-09-13	13:54:32	4.9087	892.495	16
2022-09-13	13:54:33	4.68974	897.184	16
2022-09-13	13:54:34	4.56794	901.752	16
2022-09-13	13:54:35	4.38798	906.14	16
2022-09-13	13:54:36	4.14729	910.288	16
2022-09-13	13:54:37	4.46919	914.757	16
2022-09-13	13:54:38	4.09497	918.852	16
2022-09-13	13:54:39	4.05369	922.905	16
2022-09-13	13:54:40	3.78951	926.695	16
2022-09-13	13:54:41	4.04633	930.741	16
2022-09-13	13:54:42	4.06191	934.803	16
2022-09-13	13:54:43	3.98663	938.79	16
2022-09-13	13:54:44	4.08352	942.873	16
2022-09-13	13:54:45	3.99461	946.868	16
2022-09-13	13:54:46	6.47995	953.348	16
2022-09-13	13:54:47	7.13511	960.483	16
2022-09-13	13:54:48	2.54538	963.028	16
2022-09-13	13:54:49	2.03395	965.062	16
2022-09-13	13:54:50	0.48487	965.547	16
2022-09-13	13:54:51	0.447028	965.994	16
2022-09-13	13:54:52	0.539388	966.534	16
2022-09-13	13:54:53	3.76106	970.295	16
2022-09-13	13:54:54	10.1261	980.421	16
2022-09-13	13:54:55	4.42868	984.849	16
2022-09-13	13:54:56	3.06054	987.91	16
2022-09-13	13:54:57	2.9168	990.827	16
2022-09-13	13:54:58	3.07901	993.906	16
2022-09-13	13:54:59	3.38295	997.289	16
2022-09-13	13:55:00	3.24956	1000.54	16
2022-09-13	13:55:01	3.02811	1003.57	16
2022-09-13	13:55:02	2.70097	1006.27	16
2022-09-13	13:55:03	2.26496	1008.53	16
2022-09-13	13:55:04	1.65568	1010.19	16
2022-09-13	13:55:05	1.16949	1011.36	16
2022-09-13	13:55:06	15.2653	1026.62	17
2022-09-13	13:55:07	8.68378	1035.31	17
2022-09-13	13:55:08	26.1455	1061.45	18
2022-09-13	13:55:09	5.66092	1067.11	18
2022-09-13	13:55:10	6.28746	1073.4	18
2022-09-13	13:55:11	21.331	1094.73	19
2022-09-13	13:55:12	2.02213	1096.75	19
2022-09-13	13:55:13	-0.306676	1096.75	19
2022-09-13	13:55:14	3.64578	1100.4	19
2022-09-13	13:55:15	5.55996	1105.96	19
2022-09-13	13:55:16	4.49682	1110.46	19
2022-09-13	13:55:17	8.30268	1118.76	19
2022-09-13	13:55:18	2.06743	1120.83	19
2022-09-13	13:55:19	-0.600449	1120.83	19
2022-09-13	13:55:20	-1.77249	1120.83	19
2022-09-13	13:55:21	18.8731	1139.7	20
2022-09-13	13:55:22	13.2087	1152.91	21
2022-09-13	13:55:23	7.19533	1160.1	21
2022-09-13	13:55:24	14.6532	1174.76	22
2022-09-13	13:55:25	6.45872	1181.22	22
2022-09-13	13:55:26	0.668986	1181.88	22
2022-09-13	13:55:27	-1.01873	1181.88	22
2022-09-13	13:55:28	-3.76637	1181.88	22
2022-09-13	13:55:29	-0.496318	1181.88	22
2022-09-13	13:55:30	2.72919	1184.61	22
2022-09-13	13:55:31	15.2468	1199.86	23
2022-09-13	13:55:32	0.861006	1200.72	23
2022-09-13	13:55:33	-1.4928	1200.72	23
2022-09-13	13:55:34	0.872869	1201.59	23
2022-09-13	13:55:35	1.59722	1203.19	23
2022-09-13	13:55:36	1.57447	1204.77	23
2022-09-13	13:55:37	1.69716	1206.46	23
2022-09-13	13:55:38	1.83155	1208.29	23
2022-09-13	13:55:39	1.6507	1209.95	23
2022-09-13	13:55:40	1.61391	1211.56	23
2022-09-13	13:55:41	1.72891	1213.29	23
2022-09-13	13:55:42	1.31588	1214.6	23
2022-09-13	13:55:43	0.991282	1215.6	23
2022-09-13	13:55:44	1.41239	1217.01	23
2022-09-13	13:55:45	1.31805	1218.33	23
2022-09-13	13:55:46	23.4346	1241.76	24
2022-09-13	13:55:47	15.6605	1257.42	25
2022-09-13	13:55:48	4.3885	1261.81	25
2022-09-13	13:55:49	2.05868	1263.87	25
2022-09-13	13:55:50	2.09595	1265.96	25
2022-09-13	13:55:51	12.7403	1278.7	25
2022-09-13	13:55:52	12.6673	1291.37	25
2022-09-13	13:55:53	10.301	1301.67	25
2022-09-13	13:55:54	3.34055	1305.01	25
2022-09-13	13:55:55	1.56417	1306.58	25
2022-09-13	13:55:56	8.36221	1314.94	25
2022-09-13	13:55:57	4.41997	1319.36	25
2022-09-13	13:55:58	2.41846	1321.78	25
2022-09-13	13:55:59	1.5241	1323.3	25
2022-09-13	13:56:00	0.285172	1323.59	25
2022-09-13	13:56:01	-0.0134675	1323.59	25
2022-09-13	13:56:02	1.42559	1325.01	25
2022-09-13	13:56:03	3.34724	1328.36	25
2022-09-13	13:56:04	18.4588	1346.82	26
2022-09-13	13:56:05	26.2342	1373.05	27
2022-09-13	13:56:06	28.6078	1401.66	28
2022-09-13	13:56:07	13.7612	1415.42	29
2022-09-13	13:56:08	27.2622	1442.68	30
2022-09-13	13:56:09	16.7918	1459.48	31
2022-09-13	13:56:10	1.32054	1460.8	31
2022-09-13	13:56:11	2.44521	1463.24	31
2022-09-13	13:56:12	1.46711	1464.71	31
2022-09-13	13:56:13	1.62903	1466.34	31
2022-09-13	13:56:14	1.77571	1468.11	31
2022-09-13	13:56:15	6.45428	1474.57	31
2022-09-13	13:56:16	6.24027	1480.81	31
2022-09-13	13:56:17	2.78228	1483.59	31
2022-09-13	13:56:18	1.58707	1485.18	31
2022-09-13	13:56:19	1.53005	1486.71	31
2022-09-13	13:56:20	1.86366	1488.57	31
2022-09-13	13:56:21	2.08964	1490.66	31
2022-09-13	13:56:22	2.32225	1492.98	31
2022-09-13	13:56:23	1.93191	1494.91	31
2022-09-13	13:56:24	1.94436	1496.86	31
2022-09-13	13:56:25	1.91584	1498.78	31
2022-09-13	13:56:26	1.99032	1500.77	31
2022-09-13	13:56:27	1.92897	1502.69	31
2022-09-13	13:56:28	1.66768	1504.36	31
2022-09-13	13:56:29	1.51816	1505.88	31
2022-09-13	13:56:30	1.37722	1507.26	31
2022-09-13	13:56:31	1.36813	1508.63	31
2022-09-13	13:56:32	1.78658	1510.41	31
2022-09-13	13:56:33	1.85693	1512.27	31
2022-09-13	13:56:34	1.02835	1513.3	31
2022-09-13	13:56:35	0.376438	1513.67	31
2022-09-13	13:56:36	3.46308	1517.14	31
2022-09-13	13:56:37	1.81765	1518.95	31
2022-09-13	13:56:38	2.03819	1520.99	31
2022-09-13	13:56:39	1.71769	1522.71	31
2022-09-13	13:56:40	1.74657	1524.46	31
2022-09-13	13:56:41	1.78726	1526.24	31
2022-09-13	13:56:42	1.79428	1528.04	31
2022-09-13	13:56:43	1.82227	1529.86	31
2022-09-13	13:56:44	1.85619	1531.72	31
2022-09-13	13:56:45	3.34311	1535.06	31
2022-09-13	13:56:46	1.47464	1536.53	31
2022-09-13	13:56:47	1.35874	1537.89	31
2022-09-13	13:56:48	1.78454	1539.68	31
2022-09-13	13:56:49	1.94895	1541.63	31
2022-09-13	13:56:50	1.3043	1542.93	31
2022-09-13	13:56:51	0.97255	1543.9	31
2022-09-13	13:56:52	1.35325	1545.26	31
2022-09-13	13:56:53	1.34035	1546.6	31
2022-09-13	13:56:54	1.20232	1547.8	31
2022-09-13	13:56:55	1.27311	1549.07	31
2022-09-13	13:56:56	1.37741	1550.45	31
2022-09-13	13:56:57	2.073	1552.52	31
2022-09-13	13:56:58	2.21086	1554.73	31
2022-09-13	13:56:59	2.20763	1556.94	31
2022-09-13	13:57:00	2.20412	1559.15	31
2022-09-13	13:57:01	2.01448	1561.16	31
2022-09-13	13:57:02	1.40169	1562.56	31
2022-09-13	13:57:03	1.40115	1563.96	31
2022-09-13	13:57:04	1.44261	1565.41	31
2022-09-13	13:57:05	1.5211	1566.93	31
2022-09-13	13:57:06	1.49275	1568.42	31
2022-09-13	13:57:07	1.63684	1570.06	31
2022-09-13	13:57:08	1.6168	1571.67	31
2022-09-13	13:57:09	1.58087	1573.25	31
2022-09-13	13:57:10	1.76847	1575.02	31
2022-09-13	13:57:11	1.83163	1576.85	31
2022-09-13	13:57:12	1.68047	1578.53	31
2022-09-13	13:57:13	1.68364	1580.22	31
2022-09-13	13:57:14	1.6239	1581.84	31
2022-09-13	13:57:15	1.83033	1583.67	31
2022-09-13	13:57:16	1.91097	1585.58	31
2022-09-13	13:57:17	1.91176	1587.5	31
2022-09-13	13:57:18	1.89682	1589.39	31
2022-09-13	13:57:19	1.31301	1590.71	31
2022-09-13	13:57:20	1.0009	1591.71	31
2022-09-13	13:57:21	2.93508	1594.64	31
2022-09-13	13:57:22	1.88884	1596.53	31
2022-09-13	13:57:23	2.22536	1598.76	31
2022-09-13	13:57:24	2.35738	1601.11	31
2022-09-13	13:57:25	2.6662	1603.78	31
2022-09-13	13:57:26	3.13542	1606.91	31
2022-09-13	13:57:27	-0.414126	1606.91	31
2022-09-13	13:57:28	-5.09697	1606.91	31
2022-09-13	13:57:29	-4.93597	1606.91	31
2022-09-13	13:57:30	0.616411	1607.53	31
2022-09-13	13:57:31	1.35655	1608.89	31
2022-09-13	13:57:32	0.975718	1609.86	31
2022-09-13	13:57:33	0.797791	1610.66	31
2022-09-13	13:57:34	1.0148	1611.68	31
2022-09-13	13:57:35	0.996431	1612.67	31
2022-09-13	13:57:36	1.59377	1614.27	31
2022-09-13	13:57:37	1.63927	1615.91	31
2022-09-13	13:57:38	3.4314	1619.34	31
2022-09-13	13:57:39	4.24868	1623.59	31
2022-09-13	13:57:40	9.99645	1633.58	31
2022-09-13	13:57:41	9.61768	1643.2	31
2022-09-13	13:57:42	27.55	1670.75	32
2022-09-13	13:57:43	26.0282	1696.78	33
2022-09-13	13:57:44	11.3075	1708.09	33

## Sheet: Unnamed_harness_20229131352 (4)
Date	Times	Lbs	Newtons	Averaged Newtons	Total force x time	total steps > 13.345		**GoPro Fitting: 1342
2022-09-13	13:52:44	0.53416	2.37605	2.33712	2.37605	FALSE	0			Total force x time	3203.52
2022-09-13	13:52:44	0.498791	2.21872	2.33712	2.21872	FALSE	0			Total steps	109
2022-09-13	13:52:44	0.404033	1.79722	2.33712	4.17327	FALSE	0
2022-09-13	13:52:44	0.664644	2.95647	2.33712	5.17519	FALSE	0
2022-09-13	13:52:45	0.408308	1.81624	2.13497	5.98951	FALSE	0
2022-09-13	13:52:45	0.466832	2.07656	2.13497	7.25175	FALSE	0
2022-09-13	13:52:45	0.564746	2.5121	2.13497	8.50161	FALSE	0
2022-09-13	13:52:46	0.564695	2.51188	-0.585054	9.76363	FALSE	0
2022-09-13	13:52:46	0.655585	2.91617	-0.585054	11.4178	FALSE	0
2022-09-13	13:52:46	0.556756	2.47656	-0.585054	12.2402	FALSE	0
2022-09-13	13:52:46	-2.30314	-10.2448	-0.585054	11.4178	FALSE	0
2022-09-13	13:52:47	-2.95352	-13.1378	-13.9101	12.2402	FALSE	0
2022-09-13	13:52:47	-3.0721	-13.6653	-13.9101	11.4178	FALSE	0
2022-09-13	13:52:47	-3.13541	-13.9469	-13.9101	12.2402	FALSE	0
2022-09-13	13:52:47	-3.34747	-14.8902	-13.9101	11.4178	FALSE	0
2022-09-13	13:52:48	-3.56838	-15.8729	-15.9943	12.2402	FALSE	0
2022-09-13	13:52:48	-3.75861	-16.719	-15.9943	11.4178	FALSE	0
2022-09-13	13:52:48	-3.54426	-15.7656	-15.9943	12.2402	FALSE	0
2022-09-13	13:52:48	-3.51144	-15.6196	-15.9943	11.4178	FALSE	0
2022-09-13	13:52:49	-3.56375	-15.8523	-16.9482	12.2402	FALSE	0
2022-09-13	13:52:49	-3.85673	-17.1555	-16.9482	11.4178	FALSE	0
2022-09-13	13:52:49	-3.86121	-17.1754	-16.9482	12.2402	FALSE	0
2022-09-13	13:52:49	-3.95881	-17.6096	-16.9482	11.4178	FALSE	0
2022-09-13	13:52:50	-4.28004	-19.0385	-0.969115	12.2402	FALSE	0
2022-09-13	13:52:50	-3.08619	-13.728	-0.969115	11.4178	FALSE	0
2022-09-13	13:52:50	6.71263	29.8591	-0.969115	42.0993	1	1
2022-09-13	13:52:51	12.3595	54.9775	35.3518	66.3953	1	2
2022-09-13	13:52:51	10.0232	44.5852	35.3518	86.6845	1	3
2022-09-13	13:52:51	4.44367	19.7663	35.3518	86.1616	1	4
2022-09-13	13:52:51	4.96342	22.0783	35.3518	108.763	1	5
2022-09-13	13:52:52	11.8582	52.7476	27.8859	138.909	1	6
2022-09-13	13:52:52	12.6657	56.3396	27.8859	165.102	1	7
2022-09-13	13:52:52	0.610191	2.71425	27.8859	141.624	FALSE	7
2022-09-13	13:52:52	-0.0580023	-0.258006	27.8859	165.102	FALSE	7
2022-09-13	13:52:53	-0.186654	-0.830274	-0.264571	141.624	FALSE	7
2022-09-13	13:52:53	-0.70706	-3.14514	-0.264571	165.102	FALSE	7
2022-09-13	13:52:53	-0.234084	-1.04125	-0.264571	141.624	FALSE	7
2022-09-13	13:52:53	0.889885	3.95839	-0.264571	169.061	FALSE	7
2022-09-13	13:52:54	1.12922	5.023	4.45172	146.647	FALSE	7
2022-09-13	13:52:54	0.951565	4.23275	4.45172	173.294	FALSE	7
2022-09-13	13:52:54	0.92159	4.09942	4.45172	150.746	FALSE	7
2022-09-13	13:52:55	0.845254	3.75986	3.07299	177.053	FALSE	7
2022-09-13	13:52:55	0.817672	3.63717	3.07299	154.383	FALSE	7
2022-09-13	13:52:55	0.453193	2.01589	3.07299	179.069	FALSE	7
2022-09-13	13:52:55	0.647239	2.87905	3.07299	157.262	FALSE	7
2022-09-13	13:52:56	0.603728	2.6855	2.93185	181.755	FALSE	7
2022-09-13	13:52:56	0.935789	4.16258	2.93185	161.425	FALSE	7
2022-09-13	13:52:56	0.59528	2.64792	2.93185	184.403	FALSE	7
2022-09-13	13:52:56	0.501641	2.2314	2.93185	163.656	FALSE	7
2022-09-13	13:52:57	0.311921	1.38749	1.28771	185.79	FALSE	7
2022-09-13	13:52:57	0.109377	0.486531	1.28771	164.143	FALSE	7
2022-09-13	13:52:57	0.409071	1.81963	1.28771	187.61	FALSE	7
2022-09-13	13:52:57	0.327596	1.45721	1.28771	165.6	FALSE	7
2022-09-13	13:52:58	0.254364	1.13146	0.683774	188.741	FALSE	7
2022-09-13	13:52:58	0.139453	0.620315	0.683774	166.22	FALSE	7
2022-09-13	13:52:58	0.0673411	0.299547	0.683774	189.041	FALSE	7
2022-09-13	13:52:59	-0.378155	-1.68211	-2.28952	166.22	FALSE	7
2022-09-13	13:52:59	-0.500648	-2.22698	-2.28952	189.041	FALSE	7
2022-09-13	13:52:59	-0.623244	-2.77231	-2.28952	166.22	FALSE	7
2022-09-13	13:52:59	-0.556781	-2.47667	-2.28952	189.041	FALSE	7
2022-09-13	13:53:00	-0.663294	-2.95046	-2.88986	166.22	FALSE	7
2022-09-13	13:53:00	-0.659376	-2.93304	-2.88986	189.041	FALSE	7
2022-09-13	13:53:00	-0.665483	-2.9602	-2.88986	166.22	FALSE	7
2022-09-13	13:53:00	-0.610521	-2.71572	-2.88986	189.041	FALSE	7
2022-09-13	13:53:01	-0.155814	-0.693092	1.10543	166.22	FALSE	7
2022-09-13	13:53:01	0.396196	1.76236	1.10543	190.803	FALSE	7
2022-09-13	13:53:01	0.417417	1.85675	1.10543	168.077	FALSE	7
2022-09-13	13:53:01	0.336247	1.49569	1.10543	192.299	FALSE	7
2022-09-13	13:53:02	0.170547	0.758627	-0.187455	168.836	FALSE	7
2022-09-13	13:53:02	-0.192659	-0.856986	-0.187455	192.299	FALSE	7
2022-09-13	13:53:02	-0.104313	-0.464005	-0.187455	168.836	FALSE	7
2022-09-13	13:53:03	-0.196425	-0.873738	-2.73406	192.299	FALSE	7
2022-09-13	13:53:03	-0.441259	-1.96281	-2.73406	168.836	FALSE	7
2022-09-13	13:53:03	-0.676882	-3.01091	-2.73406	192.299	FALSE	7
2022-09-13	13:53:03	-1.14401	-5.08879	-2.73406	168.836	FALSE	7
2022-09-13	13:53:04	-0.163549	-0.727499	0.45265	192.299	FALSE	7
2022-09-13	13:53:04	0.144033	0.640688	0.45265	169.476	FALSE	7
2022-09-13	13:53:04	0.324797	1.44476	0.45265	193.744	FALSE	7
2022-09-13	13:53:05	1.75813	7.82051	12.7692	177.297	FALSE	7
2022-09-13	13:53:05	2.59533	11.5445	12.7692	205.288	FALSE	7
2022-09-13	13:53:05	3.74368	16.6526	12.7692	193.949	1	8
2022-09-13	13:53:05	2.75981	12.2762	12.7692	217.564	FALSE	8
2022-09-13	13:53:05	3.49625	15.552	12.7692	209.501	1	9
2022-09-13	13:53:06	2.36235	10.5082	9.29238	228.073	FALSE	9
2022-09-13	13:53:06	2.24836	10.0012	9.29238	219.503	FALSE	9
2022-09-13	13:53:06	1.65635	7.36778	9.29238	235.44	FALSE	9
2022-09-13	13:53:07	0.953346	4.24067	3.0241	223.743	FALSE	9
2022-09-13	13:53:07	0.772226	3.43502	3.0241	238.875	FALSE	9
2022-09-13	13:53:07	0.475891	2.11686	3.0241	225.86	FALSE	9
2022-09-13	13:53:07	0.517926	2.30384	3.0241	241.179	FALSE	9
2022-09-13	13:53:08	0.619707	2.75658	2.30599	228.617	FALSE	9
2022-09-13	13:53:08	0.355992	1.58352	2.30599	242.763	FALSE	9
2022-09-13	13:53:08	0.526578	2.34232	2.30599	230.959	FALSE	9
2022-09-13	13:53:08	0.571361	2.54153	2.30599	245.304	FALSE	9
2022-09-13	13:53:09	0.328155	1.4597	2.76524	232.419	FALSE	9
2022-09-13	13:53:09	0.748766	3.33066	2.76524	248.635	FALSE	9
2022-09-13	13:53:09	0.493499	2.19518	2.76524	234.614	FALSE	9
2022-09-13	13:53:09	0.916196	4.07542	2.76524	252.71	FALSE	9
2022-09-13	13:53:10	1.27034	5.65073	7.12637	240.265	FALSE	9
2022-09-13	13:53:10	1.27492	5.6711	7.12637	258.381	FALSE	9
2022-09-13	13:53:10	2.26098	10.0573	7.12637	250.322	FALSE	9
2022-09-13	13:53:11	1.42795	6.35181	8.59918	264.733	FALSE	9
2022-09-13	13:53:11	1.9821	8.81678	8.59918	259.139	FALSE	9
2022-09-13	13:53:11	2.5162	11.1926	8.59918	275.926	FALSE	9
2022-09-13	13:53:11	1.80648	8.03558	8.59918	267.174	FALSE	9
2022-09-13	13:53:12	1.97345	8.7783	8.58695	284.704	FALSE	9
2022-09-13	13:53:12	1.8822	8.3724	8.58695	275.547	FALSE	9
2022-09-13	13:53:12	1.73833	7.73244	8.58695	292.437	FALSE	9
2022-09-13	13:53:12	2.12775	9.46466	8.58695	285.011	FALSE	9
2022-09-13	13:53:13	2.07905	9.24803	8.32822	301.685	FALSE	9
2022-09-13	13:53:13	1.97162	8.77016	8.32822	293.782	FALSE	9
2022-09-13	13:53:13	1.89294	8.42018	8.32822	310.105	FALSE	9
2022-09-13	13:53:13	1.54546	6.87452	8.32822	300.656	FALSE	9
2022-09-13	13:53:14	1.70907	7.60229	7.67141	317.707	FALSE	9
2022-09-13	13:53:14	1.86251	8.28482	7.67141	308.941	FALSE	9
2022-09-13	13:53:14	1.60225	7.12713	7.67141	324.834	FALSE	9
2022-09-13	13:53:15	1.72378	7.66772	7.63273	316.609	FALSE	9
2022-09-13	13:53:15	1.88866	8.40114	7.63273	333.235	FALSE	9
2022-09-13	13:53:15	1.63869	7.28922	7.63273	323.898	FALSE	9
2022-09-13	13:53:15	1.61253	7.17286	7.63273	340.408	FALSE	9
2022-09-13	13:53:16	1.96286	8.73119	7.59391	332.629	FALSE	9
2022-09-13	13:53:16	1.7334	7.71051	7.59391	348.119	FALSE	9
2022-09-13	13:53:16	1.58413	7.04653	7.59391	339.676	FALSE	9
2022-09-13	13:53:16	1.54836	6.88741	7.59391	355.006	FALSE	9
2022-09-13	13:53:17	1.63747	7.28379	7.91915	346.959	FALSE	9
2022-09-13	13:53:17	1.85447	8.24905	7.91915	363.255	FALSE	9
2022-09-13	13:53:17	1.68576	7.4986	7.91915	354.458	FALSE	9
2022-09-13	13:53:17	1.94352	8.64517	7.91915	371.9	FALSE	9
2022-09-13	13:53:18	1.80464	8.0274	6.78109	362.485	FALSE	9
2022-09-13	13:53:18	1.3249	5.89342	6.78109	377.794	FALSE	9
2022-09-13	13:53:18	1.44383	6.42244	6.78109	368.908	FALSE	9
2022-09-13	13:53:19	1.56164	6.94649	9.34099	384.74	FALSE	9
2022-09-13	13:53:19	2.38851	10.6246	9.34099	379.532	FALSE	9
2022-09-13	13:53:19	1.63146	7.25706	9.34099	391.997	FALSE	9
2022-09-13	13:53:19	2.81818	12.5358	9.34099	392.068	FALSE	9
2022-09-13	13:53:20	3.67874	16.3638	19.9066	408.361	1	10
2022-09-13	13:53:20	3.88627	17.2869	19.9066	409.355	1	11
2022-09-13	13:53:20	5.19375	23.1028	19.9066	431.464	1	12
2022-09-13	13:53:20	5.14205	22.8729	19.9066	432.228	1	13
2022-09-13	13:53:21	4.8139	21.4132	22.0117	452.877	1	14
2022-09-13	13:53:21	5.21685	23.2056	22.0117	455.434	1	15
2022-09-13	13:53:21	4.61711	20.5378	22.0117	473.415	1	16
2022-09-13	13:53:21	5.14596	22.8903	22.0117	478.324	1	17
2022-09-13	13:53:22	4.52566	20.131	15.99	493.546	1	18
2022-09-13	13:53:22	3.30597	14.7056	15.99	493.029	1	19
2022-09-13	13:53:22	2.95248	13.1332	15.99	506.679	FALSE	19
2022-09-13	13:53:23	2.93233	13.0436	16.8353	506.073	FALSE	19
2022-09-13	13:53:23	4.03874	17.9651	16.8353	524.644	1	20
2022-09-13	13:53:23	3.87945	17.2566	16.8353	523.33	1	21
2022-09-13	13:53:23	4.28846	19.0759	16.8353	543.72	1	22
2022-09-13	13:53:24	3.40515	15.1468	11.8712	538.476	1	23
2022-09-13	13:53:24	2.56474	11.4085	11.8712	555.129	FALSE	23
2022-09-13	13:53:24	2.66479	11.8535	11.8712	550.33	FALSE	23
2022-09-13	13:53:24	2.04042	9.0762	11.8712	564.205	FALSE	23
2022-09-13	13:53:25	2.24281	9.97647	11.799	560.306	FALSE	23
2022-09-13	13:53:25	2.68678	11.9513	11.799	576.156	FALSE	23
2022-09-13	13:53:25	2.86149	12.7285	11.799	573.035	FALSE	23
2022-09-13	13:53:25	2.81905	12.5397	11.799	588.696	FALSE	23
2022-09-13	13:53:26	2.17645	9.68128	10.9779	582.716	FALSE	23
2022-09-13	13:53:26	2.5739	11.4492	10.9779	600.145	FALSE	23
2022-09-13	13:53:26	2.65345	11.8031	10.9779	594.519	FALSE	23
2022-09-13	13:53:27	2.50668	11.1502	11.6428	611.295	FALSE	23
2022-09-13	13:53:27	2.71716	12.0865	11.6428	606.606	FALSE	23
2022-09-13	13:53:27	2.55426	11.3619	11.6428	622.657	FALSE	23
2022-09-13	13:53:27	2.69156	11.9726	11.6428	618.578	FALSE	23
2022-09-13	13:53:28	2.80332	12.4697	12.6089	635.127	FALSE	23
2022-09-13	13:53:28	2.59202	11.5298	12.6089	630.108	FALSE	23
2022-09-13	13:53:28	2.89314	12.8693	12.6089	647.996	FALSE	23
2022-09-13	13:53:28	3.04999	13.567	12.6089	643.675	1	24
2022-09-13	13:53:29	2.80785	12.4899	9.38196	660.486	FALSE	24
2022-09-13	13:53:29	3.38642	15.0635	9.38196	658.738	1	25
2022-09-13	13:53:29	0.995229	4.42698	9.38196	664.913	FALSE	25
2022-09-13	13:53:29	1.24714	5.54753	9.38196	664.286	FALSE	25
2022-09-13	13:53:30	5.32596	23.6909	45.6603	688.604	1	26
2022-09-13	13:53:30	10.0877	44.8721	45.6603	709.158	1	27
2022-09-13	13:53:30	15.381	68.4178	45.6603	757.022	1	28
2022-09-13	13:53:31	10.7754	47.9311	40.6214	757.089	1	29
2022-09-13	13:53:31	8.42703	37.4851	40.6214	794.507	1	30
2022-09-13	13:53:31	7.98856	35.5347	40.6214	792.624	1	31
2022-09-13	13:53:31	9.33741	41.5347	40.6214	836.042	1	32
2022-09-13	13:53:32	8.08917	35.9822	29.4962	828.606	1	33
2022-09-13	13:53:32	9.33228	41.5118	29.4962	877.553	1	34
2022-09-13	13:53:32	4.57416	20.3468	29.4962	848.953	1	35
2022-09-13	13:53:32	4.52856	20.1439	29.4962	897.697	1	36
2022-09-13	13:53:33	0.912633	4.05957	18.1332	853.013	FALSE	36
2022-09-13	13:53:33	3.01151	13.3958	18.1332	911.093	1	37
2022-09-13	13:53:33	6.09207	27.0987	18.1332	880.111	1	38
2022-09-13	13:53:33	6.28993	27.9789	18.1332	939.072	1	39
2022-09-13	13:53:34	5.14535	22.8875	15.8063	902.999	1	40
2022-09-13	13:53:34	3.98978	17.7473	15.8063	956.819	1	41
2022-09-13	13:53:34	1.5251	6.78395	15.8063	909.783	FALSE	41
2022-09-13	13:53:35	4.67029	20.7744	20.5126	977.594	1	42
2022-09-13	13:53:35	6.0397	26.8658	20.5126	936.649	1	43
2022-09-13	13:53:35	3.9966	17.7777	20.5126	995.371	1	44
2022-09-13	13:53:35	3.7392	16.6327	20.5126	953.281	1	45
2022-09-13	13:53:36	1.88576	8.38824	25.6522	1003.76	FALSE	45
2022-09-13	13:53:36	4.17151	18.5557	25.6522	971.837	1	46
2022-09-13	13:53:36	8.1083	36.0673	25.6522	1039.83	1	47
2022-09-13	13:53:36	8.90194	39.5976	25.6522	1011.43	1	48
2022-09-13	13:53:37	6.92576	30.8072	40.5272	1070.63	1	49
2022-09-13	13:53:37	10.1014	44.933	40.5272	1056.37	1	50
2022-09-13	13:53:37	14.4701	64.3659	40.5272	1135	1	51
2022-09-13	13:53:37	4.94647	22.0029	40.5272	1078.37	1	52
2022-09-13	13:53:38	0.76958	3.42325	2.74896	1138.42	FALSE	52
2022-09-13	13:53:38	0.789783	3.51311	2.74896	1081.88	FALSE	52
2022-09-13	13:53:38	0.294618	1.31052	2.74896	1139.73	FALSE	52
2022-09-13	13:53:39	0.31986	1.4228	2.45104	1083.31	FALSE	52
2022-09-13	13:53:39	0.254517	1.13214	2.45104	1140.87	FALSE	52
2022-09-13	13:53:39	0.817112	3.63468	2.45104	1086.94	FALSE	52
2022-09-13	13:53:39	0.812582	3.61453	2.45104	1144.48	FALSE	52
2022-09-13	13:53:40	4.32408	19.2344	28.0402	1106.18	1	53
2022-09-13	13:53:40	10.698	47.5868	28.0402	1192.07	1	54
2022-09-13	13:53:40	4.98149	22.1587	28.0402	1128.33	1	55
2022-09-13	13:53:40	5.21126	23.1807	28.0402	1215.25	1	56
2022-09-13	13:53:41	12.6564	56.2982	24.1739	1184.63	1	57
2022-09-13	13:53:41	5.37604	23.9137	24.1739	1239.16	1	58
2022-09-13	13:53:41	3.13518	13.9459	24.1739	1198.58	1	59
2022-09-13	13:53:41	0.570496	2.53768	24.1739	1241.7	FALSE	59
2022-09-13	13:53:42	0.931565	4.14379	2.19684	1202.72	FALSE	59
2022-09-13	13:53:42	0.446069	1.9842	2.19684	1243.68	FALSE	59
2022-09-13	13:53:42	0.103982	0.462533	2.19684	1203.18	FALSE	59
2022-09-13	13:53:43	0.679046	3.02053	0.344482	1246.7	FALSE	59
2022-09-13	13:53:43	0.121438	0.540181	0.344482	1203.72	FALSE	59
2022-09-13	13:53:43	-0.0727606	-0.323654	0.344482	1246.7	FALSE	59
2022-09-13	13:53:43	-0.417951	-1.85913	0.344482	1203.72	FALSE	59
2022-09-13	13:53:44	-0.527519	-2.34651	-3.76088	1246.7	FALSE	59
2022-09-13	13:53:44	-0.970572	-4.3173	-3.76088	1203.72	FALSE	59
2022-09-13	13:53:44	-0.903345	-4.01826	-3.76088	1246.7	FALSE	59
2022-09-13	13:53:44	-0.980495	-4.36144	-3.76088	1203.72	FALSE	59
2022-09-13	13:53:45	-1.03882	-4.62088	-4.35397	1246.7	FALSE	59
2022-09-13	13:53:45	-1.15235	-5.12588	-4.35397	1203.72	FALSE	59
2022-09-13	13:53:45	-1.01907	-4.53303	-4.35397	1246.7	FALSE	59
2022-09-13	13:53:45	-0.705024	-3.13609	-4.35397	1203.72	FALSE	59
2022-09-13	13:53:46	0.0395549	0.175948	0.341652	1246.88	FALSE	59
2022-09-13	13:53:46	0.209835	0.933388	0.341652	1204.66	FALSE	59
2022-09-13	13:53:46	-0.0189692	-0.0843788	0.341652	1246.88	FALSE	59
2022-09-13	13:53:47	0.619351	2.755	5.45731	1207.41	FALSE	59
2022-09-13	13:53:47	0.912277	4.05799	5.45731	1250.94	FALSE	59
2022-09-13	13:53:47	1.40912	6.26805	5.45731	1213.68	FALSE	59
2022-09-13	13:53:47	1.96668	8.74819	5.45731	1259.69	FALSE	59
2022-09-13	13:53:48	1.80118	8.01201	6.3396	1221.69	FALSE	59
2022-09-13	13:53:48	1.15732	5.14799	6.3396	1264.83	FALSE	59
2022-09-13	13:53:48	1.27182	5.65731	6.3396	1227.35	FALSE	59
2022-09-13	13:53:48	1.4705	6.54108	6.3396	1271.38	FALSE	59
2022-09-13	13:53:49	1.22805	5.46261	5.3865	1232.81	FALSE	59
2022-09-13	13:53:49	1.11518	4.96054	5.3865	1276.34	FALSE	59
2022-09-13	13:53:49	1.24301	5.52916	5.3865	1238.34	FALSE	59
2022-09-13	13:53:49	1.25752	5.5937	5.3865	1281.93	FALSE	59
2022-09-13	13:53:50	1.2824	5.70437	5.46662	1244.05	FALSE	59
2022-09-13	13:53:50	1.29589	5.76438	5.46662	1287.69	FALSE	59
2022-09-13	13:53:50	1.10856	4.9311	5.46662	1248.98	FALSE	59
2022-09-13	13:53:51	1.01156	4.49962	4.56608	1292.19	FALSE	59
2022-09-13	13:53:51	1.15767	5.14955	4.56608	1254.13	FALSE	59
2022-09-13	13:53:51	0.97701	4.34594	4.56608	1296.54	FALSE	59
2022-09-13	13:53:51	0.959758	4.2692	4.56608	1258.4	FALSE	59
2022-09-13	13:53:52	1.00571	4.4736	5.2539	1301.01	FALSE	59
2022-09-13	13:53:52	1.25721	5.59232	5.2539	1263.99	FALSE	59
2022-09-13	13:53:52	1.43497	6.38303	5.2539	1307.4	FALSE	59
2022-09-13	13:53:52	1.02663	4.56666	5.2539	1268.56	FALSE	59
2022-09-13	13:53:53	0.581285	2.58567	6.27151	1309.98	FALSE	59
2022-09-13	13:53:53	1.55416	6.91321	6.27151	1275.47	FALSE	59
2022-09-13	13:53:53	1.27477	5.67043	6.27151	1315.65	FALSE	59
2022-09-13	13:53:53	2.22938	9.91673	6.27151	1285.39	FALSE	59
2022-09-13	13:53:54	2.29457	10.2067	7.39924	1325.86	FALSE	59
2022-09-13	13:53:54	1.422	6.32534	7.39924	1291.71	FALSE	59
2022-09-13	13:53:54	1.2737	5.66567	7.39924	1331.52	FALSE	59
2022-09-13	13:53:55	1.4908	6.63138	5.48282	1298.34	FALSE	59
2022-09-13	13:53:55	1.09197	4.8573	5.48282	1336.38	FALSE	59
2022-09-13	13:53:55	0.845865	3.76258	5.48282	1302.1	FALSE	59
2022-09-13	13:53:55	1.50174	6.68004	5.48282	1343.06	FALSE	59
2022-09-13	13:53:56	1.65391	7.35692	7.48967	1309.46	FALSE	59
2022-09-13	13:53:56	1.8338	8.15711	7.48967	1351.22	FALSE	59
2022-09-13	13:53:56	1.73777	7.72995	7.48967	1317.19	FALSE	59
2022-09-13	13:53:56	1.50953	6.71469	7.48967	1357.93	FALSE	59
2022-09-13	13:53:57	1.18658	5.27815	4.33592	1322.47	FALSE	59
2022-09-13	13:53:57	1.07472	4.78057	4.33592	1362.71	FALSE	59
2022-09-13	13:53:57	0.856145	3.8083	4.33592	1326.28	FALSE	59
2022-09-13	13:53:57	0.78159	3.47667	4.33592	1366.19	FALSE	59
2022-09-13	13:53:58	1.71253	7.61768	6.43179	1333.9	FALSE	59
2022-09-13	13:53:58	1.30296	5.79583	6.43179	1371.99	FALSE	59
2022-09-13	13:53:58	1.3223	5.88185	6.43179	1339.78	FALSE	59
2022-09-13	13:53:59	1.3792	6.13496	5.87078	1378.12	FALSE	59
2022-09-13	13:53:59	1.2878	5.72839	5.87078	1345.51	FALSE	59
2022-09-13	13:53:59	1.34887	6.00004	5.87078	1384.12	FALSE	59
2022-09-13	13:53:59	1.26337	5.61972	5.87078	1351.13	FALSE	59
2022-09-13	13:54:00	1.24459	5.53619	5.45436	1389.66	FALSE	59
2022-09-13	13:54:00	1.1937	5.30982	5.45436	1356.44	FALSE	59
2022-09-13	13:54:00	1.21966	5.42529	5.45436	1395.08	FALSE	59
2022-09-13	13:54:00	1.24683	5.54615	5.45436	1361.98	FALSE	59
2022-09-13	13:54:01	1.4106	6.27463	6.00043	1401.36	FALSE	59
2022-09-13	13:54:01	1.34958	6.0032	6.00043	1367.98	FALSE	59
2022-09-13	13:54:01	1.3365	5.94502	6.00043	1407.3	FALSE	59
2022-09-13	13:54:01	1.29915	5.77888	6.00043	1373.76	FALSE	59
2022-09-13	13:54:02	1.29533	5.76189	5.65707	1413.06	FALSE	59
2022-09-13	13:54:02	1.23416	5.48979	5.65707	1379.25	FALSE	59
2022-09-13	13:54:02	1.28581	5.71954	5.65707	1418.78	FALSE	59
2022-09-13	13:54:03	1.30154	5.78951	5.70909	1385.04	FALSE	59
2022-09-13	13:54:03	1.32571	5.89702	5.70909	1424.68	FALSE	59
2022-09-13	13:54:03	1.23401	5.48912	5.70909	1390.53	FALSE	59
2022-09-13	13:54:03	1.27258	5.66069	5.70909	1430.34	FALSE	59
2022-09-13	13:54:04	1.2337	5.48774	5.64445	1396.02	FALSE	59
2022-09-13	13:54:04	1.2651	5.62742	5.64445	1435.97	FALSE	59
2022-09-13	13:54:04	1.31569	5.85245	5.64445	1401.87	FALSE	59
2022-09-13	13:54:04	1.26123	5.6102	5.64445	1441.58	FALSE	59
2022-09-13	13:54:05	1.21782	5.41711	5.46233	1407.29	FALSE	59
2022-09-13	13:54:05	1.2279	5.46194	5.46233	1447.04	FALSE	59
2022-09-13	13:54:05	1.21431	5.40149	5.46233	1412.69	FALSE	59
2022-09-13	13:54:05	1.25192	5.56879	5.46233	1452.61	FALSE	59
2022-09-13	13:54:06	1.2334	5.48641	5.55877	1418.18	FALSE	59
2022-09-13	13:54:06	1.26989	5.64872	5.55877	1458.26	FALSE	59
2022-09-13	13:54:06	1.24571	5.54117	5.55877	1423.72	FALSE	59
2022-09-13	13:54:07	1.21177	5.3902	5.25697	1463.65	FALSE	59
2022-09-13	13:54:07	1.17584	5.23037	5.25697	1428.95	FALSE	59
2022-09-13	13:54:07	1.19716	5.32521	5.25697	1468.97	FALSE	59
2022-09-13	13:54:07	1.14251	5.08211	5.25697	1434.03	FALSE	59
2022-09-13	13:54:08	1.21401	5.40016	5.32523	1474.37	FALSE	59
2022-09-13	13:54:08	1.18841	5.28629	5.32523	1439.32	FALSE	59
2022-09-13	13:54:08	1.15971	5.15862	5.32523	1479.53	FALSE	59
2022-09-13	13:54:08	1.22653	5.45585	5.32523	1444.77	FALSE	59
2022-09-13	13:54:09	1.0481	4.66216	5.25991	1484.2	FALSE	59
2022-09-13	13:54:09	1.18663	5.27837	5.25991	1450.05	FALSE	59
2022-09-13	13:54:09	1.26902	5.64485	5.25991	1489.84	FALSE	59
2022-09-13	13:54:09	1.22617	5.45425	5.25991	1455.51	FALSE	59
2022-09-13	13:54:10	0.978537	4.35273	5.3548	1494.19	FALSE	59
2022-09-13	13:54:10	1.42505	6.33891	5.3548	1461.84	FALSE	59
2022-09-13	13:54:10	1.20785	5.37276	5.3548	1499.57	FALSE	59
2022-09-13	13:54:11	1.3335	5.93167	5.49257	1467.78	FALSE	59
2022-09-13	13:54:11	1.1993	5.33473	5.49257	1504.9	FALSE	59
2022-09-13	13:54:11	1.22607	5.4538	5.49257	1473.23	FALSE	59
2022-09-13	13:54:11	1.18027	5.25008	5.49257	1510.15	FALSE	59
2022-09-13	13:54:12	1.20312	5.35172	5.27746	1478.58	FALSE	59
2022-09-13	13:54:12	1.17294	5.21747	5.27746	1515.37	FALSE	59
2022-09-13	13:54:12	1.18159	5.25595	5.27746	1483.84	FALSE	59
2022-09-13	13:54:12	1.18805	5.28468	5.27746	1520.65	FALSE	59
2022-09-13	13:54:13	1.15401	5.13327	5.11854	1488.97	FALSE	59
2022-09-13	13:54:13	1.17457	5.22472	5.11854	1525.88	FALSE	59
2022-09-13	13:54:13	1.11726	4.9698	5.11854	1493.94	FALSE	59
2022-09-13	13:54:13	1.15696	5.14639	5.11854	1531.02	FALSE	59
2022-09-13	13:54:14	1.11162	4.94471	5.08165	1498.89	FALSE	59
2022-09-13	13:54:14	1.29996	5.78248	5.08165	1536.81	FALSE	59
2022-09-13	13:54:14	1.01564	4.51777	5.08165	1503.4	FALSE	59
2022-09-13	13:54:15	1.15009	5.11583	5.20993	1541.92	FALSE	59
2022-09-13	13:54:15	1.11263	4.9492	5.20993	1508.35	FALSE	59
2022-09-13	13:54:15	1.12902	5.02211	5.20993	1546.94	FALSE	59
2022-09-13	13:54:15	1.29324	5.75259	5.20993	1514.11	FALSE	59
2022-09-13	13:54:16	1.3022	5.79245	5.62612	1552.74	FALSE	59
2022-09-13	13:54:16	1.26357	5.62061	5.62612	1519.73	FALSE	59
2022-09-13	13:54:16	1.21482	5.40376	5.62612	1558.14	FALSE	59
2022-09-13	13:54:16	1.27864	5.68765	5.62612	1525.41	FALSE	59
2022-09-13	13:54:17	1.38688	6.16912	5.94304	1564.31	FALSE	59
2022-09-13	13:54:17	1.34149	5.96722	5.94304	1531.38	FALSE	59
2022-09-13	13:54:17	1.27828	5.68605	5.94304	1570	FALSE	59
2022-09-13	13:54:17	1.33757	5.94978	5.94304	1537.33	FALSE	59
2022-09-13	13:54:18	1.36653	6.0786	5.98759	1576.07	FALSE	59
2022-09-13	13:54:18	1.36449	6.06952	5.98759	1543.4	FALSE	59
2022-09-13	13:54:18	1.30719	5.81464	5.98759	1581.89	FALSE	59
2022-09-13	13:54:19	1.40103	6.23206	6.44996	1549.63	FALSE	59
2022-09-13	13:54:19	1.43447	6.38081	6.44996	1588.27	FALSE	59
2022-09-13	13:54:19	1.44831	6.44237	6.44996	1556.07	FALSE	59
2022-09-13	13:54:19	1.51625	6.74458	6.44996	1595.01	FALSE	59
2022-09-13	13:54:20	1.70052	7.56425	7.1487	1563.64	FALSE	59
2022-09-13	13:54:20	1.59167	7.08007	7.1487	1602.09	FALSE	59
2022-09-13	13:54:20	1.57859	7.02188	7.1487	1570.66	FALSE	59
2022-09-13	13:54:20	1.55762	6.92861	7.1487	1609.02	FALSE	59
2022-09-13	13:54:21	1.54988	6.89418	7.09352	1577.55	FALSE	59
2022-09-13	13:54:21	1.55976	6.93812	7.09352	1615.96	FALSE	59
2022-09-13	13:54:21	1.61584	7.18758	7.09352	1584.74	FALSE	59
2022-09-13	13:54:21	1.6533	7.35421	7.09352	1623.32	FALSE	59
2022-09-13	13:54:22	1.53711	6.83737	6.54318	1591.58	FALSE	59
2022-09-13	13:54:22	1.44302	6.41884	6.54318	1629.73	FALSE	59
2022-09-13	13:54:22	1.43279	6.37334	6.54318	1597.95	FALSE	59
2022-09-13	13:54:23	1.39421	6.20172	6.09884	1635.94	FALSE	59
2022-09-13	13:54:23	1.38698	6.16956	6.09884	1604.12	FALSE	59
2022-09-13	13:54:23	1.3649	6.07135	6.09884	1642.01	FALSE	59
2022-09-13	13:54:23	1.33823	5.95271	6.09884	1610.08	FALSE	59
2022-09-13	13:54:24	1.348	5.99617	5.91417	1648	FALSE	59
2022-09-13	13:54:24	1.31482	5.84858	5.91417	1615.92	FALSE	59
2022-09-13	13:54:24	1.33553	5.9407	5.91417	1653.94	FALSE	59
2022-09-13	13:54:24	1.31991	5.87122	5.91417	1621.8	FALSE	59
2022-09-13	13:54:25	1.30398	5.80036	5.70682	1659.74	FALSE	59
2022-09-13	13:54:25	1.27004	5.64939	5.70682	1627.44	FALSE	59
2022-09-13	13:54:25	1.27955	5.69169	5.70682	1665.44	FALSE	59
2022-09-13	13:54:25	1.27823	5.68582	5.70682	1633.13	FALSE	59
2022-09-13	13:54:26	1.31899	5.86713	5.78045	1671.3	FALSE	59
2022-09-13	13:54:26	1.31574	5.85267	5.78045	1638.98	FALSE	59
2022-09-13	13:54:26	1.26378	5.62155	5.78045	1676.92	FALSE	59
2022-09-13	13:54:27	1.2878	5.72839	5.72985	1644.71	FALSE	59
2022-09-13	13:54:27	1.30001	5.7827	5.72985	1682.71	FALSE	59
2022-09-13	13:54:27	1.28627	5.72159	5.72985	1650.43	FALSE	59
2022-09-13	13:54:27	1.27843	5.68671	5.72985	1688.39	FALSE	59
2022-09-13	13:54:28	1.31375	5.84382	5.90869	1656.28	FALSE	59
2022-09-13	13:54:28	1.28495	5.71571	5.90869	1694.11	FALSE	59
2022-09-13	13:54:28	1.34795	5.99595	5.90869	1662.27	FALSE	59
2022-09-13	13:54:28	1.36668	6.07927	5.90869	1700.19	FALSE	59
2022-09-13	13:54:29	1.29899	5.77817	5.7989	1668.05	FALSE	59
2022-09-13	13:54:29	1.44388	6.42267	5.7989	1706.61	FALSE	59
2022-09-13	13:54:29	1.18413	5.26725	5.7989	1673.32	FALSE	59
2022-09-13	13:54:29	1.2876	5.7275	5.7989	1712.34	FALSE	59
2022-09-13	13:54:30	1.16164	5.16721	4.92801	1678.49	FALSE	59
2022-09-13	13:54:30	1.18836	5.28606	4.92801	1717.63	FALSE	59
2022-09-13	13:54:30	0.9736	4.33077	4.92801	1682.82	FALSE	59
2022-09-13	13:54:31	0.657265	2.92365	3.14804	1720.55	FALSE	59
2022-09-13	13:54:31	0.7907	3.51719	3.14804	1686.33	FALSE	59
2022-09-13	13:54:31	0.790293	3.51538	3.14804	1724.06	FALSE	59
2022-09-13	13:54:31	0.592583	2.63593	3.14804	1688.97	FALSE	59
2022-09-13	13:54:32	1.48027	6.58454	4.9087	1730.65	FALSE	59
2022-09-13	13:54:32	0.884338	3.93371	4.9087	1692.9	FALSE	59
2022-09-13	13:54:32	1.08414	4.82247	4.9087	1735.47	FALSE	59
2022-09-13	13:54:32	0.965356	4.2941	4.9087	1697.2	FALSE	59
2022-09-13	13:54:33	1.06093	4.71923	4.68974	1740.19	FALSE	59
2022-09-13	13:54:33	1.09579	4.87429	4.68974	1702.07	FALSE	59
2022-09-13	13:54:33	0.96673	4.30021	4.68974	1744.49	FALSE	59
2022-09-13	13:54:33	1.09375	4.86522	4.68974	1706.94	FALSE	59
2022-09-13	13:54:34	0.816094	3.63015	4.56794	1748.12	FALSE	59
2022-09-13	13:54:34	1.20073	5.34109	4.56794	1712.28	FALSE	59
2022-09-13	13:54:34	1.06393	4.73257	4.56794	1752.85	FALSE	59
2022-09-13	13:54:35	1.13014	5.02709	4.38798	1717.3	FALSE	59
2022-09-13	13:54:35	1.19248	5.30439	4.38798	1758.16	FALSE	59
2022-09-13	13:54:35	0.927901	4.12749	4.38798	1721.43	FALSE	59
2022-09-13	13:54:35	0.695331	3.09297	4.38798	1761.25	FALSE	59
2022-09-13	13:54:36	0.904542	4.02358	4.14729	1725.46	FALSE	59
2022-09-13	13:54:36	0.906577	4.03264	4.14729	1765.28	FALSE	59
2022-09-13	13:54:36	0.940318	4.18272	4.14729	1729.64	FALSE	59
2022-09-13	13:54:36	0.977977	4.35024	4.14729	1769.63	FALSE	59
2022-09-13	13:54:37	0.880929	3.91855	4.46919	1733.56	FALSE	59
2022-09-13	13:54:37	1.05009	4.67101	4.46919	1774.3	FALSE	59
2022-09-13	13:54:37	1.04734	4.65878	4.46919	1738.22	FALSE	59
2022-09-13	13:54:37	1.04052	4.62844	4.46919	1778.93	FALSE	59
2022-09-13	13:54:38	0.925814	4.11821	4.09497	1742.33	FALSE	59
2022-09-13	13:54:38	0.893651	3.97514	4.09497	1782.91	FALSE	59
2022-09-13	13:54:38	0.942303	4.19155	4.09497	1746.53	FALSE	59
2022-09-13	13:54:39	0.9307	4.13994	4.05369	1787.05	FALSE	59
2022-09-13	13:54:39	0.917977	4.08335	4.05369	1750.61	FALSE	59
2022-09-13	13:54:39	0.900776	4.00683	4.05369	1791.06	FALSE	59
2022-09-13	13:54:39	0.895789	3.98465	4.05369	1754.59	FALSE	59
2022-09-13	13:54:40	0.856908	3.8117	3.78951	1794.87	FALSE	59
2022-09-13	13:54:40	0.841285	3.7422	3.78951	1758.34	FALSE	59
2022-09-13	13:54:40	0.827086	3.67904	3.78951	1798.55	FALSE	59
2022-09-13	13:54:40	0.882405	3.92511	3.78951	1762.26	FALSE	59
2022-09-13	13:54:41	0.844695	3.75737	4.04633	1802.3	FALSE	59
2022-09-13	13:54:41	0.894262	3.97786	4.04633	1766.24	FALSE	59
2022-09-13	13:54:41	0.930089	4.13722	4.04633	1806.44	FALSE	59
2022-09-13	13:54:41	0.96958	4.31289	4.04633	1770.55	FALSE	59
2022-09-13	13:54:42	0.960114	4.27078	4.06191	1810.71	FALSE	59
2022-09-13	13:54:42	0.900623	4.00615	4.06191	1774.56	FALSE	59
2022-09-13	13:54:42	0.87874	3.90881	4.06191	1814.62	FALSE	59
2022-09-13	13:54:43	0.856196	3.80853	3.98663	1778.37	FALSE	59
2022-09-13	13:54:43	0.881692	3.92194	3.98663	1818.54	FALSE	59
2022-09-13	13:54:43	0.921489	4.09897	3.98663	1782.47	FALSE	59
2022-09-13	13:54:43	0.92556	4.11708	3.98663	1822.66	FALSE	59
2022-09-13	13:54:44	0.906527	4.03241	4.08352	1786.5	FALSE	59
2022-09-13	13:54:44	0.945611	4.20627	4.08352	1826.87	FALSE	59
2022-09-13	13:54:44	0.932837	4.14945	4.08352	1790.65	FALSE	59
2022-09-13	13:54:44	0.887087	3.94594	4.08352	1830.81	FALSE	59
2022-09-13	13:54:45	0.877723	3.90429	3.99461	1794.55	FALSE	59
2022-09-13	13:54:45	0.898079	3.99484	3.99461	1834.81	FALSE	59
2022-09-13	13:54:45	0.914516	4.06795	3.99461	1798.62	FALSE	59
2022-09-13	13:54:45	0.901794	4.01136	3.99461	1838.82	FALSE	59
2022-09-13	13:54:46	0.938893	4.17638	6.47995	1802.8	FALSE	59
2022-09-13	13:54:46	1.24373	5.53236	6.47995	1844.35	FALSE	59
2022-09-13	13:54:46	2.18765	9.7311	6.47995	1812.53	FALSE	59
2022-09-13	13:54:47	1.73752	7.72884	7.13511	1852.08	FALSE	59
2022-09-13	13:54:47	1.40866	6.266	7.13511	1818.79	FALSE	59
2022-09-13	13:54:47	1.70531	7.58556	7.13511	1859.66	FALSE	59
2022-09-13	13:54:47	1.56469	6.96005	7.13511	1825.75	FALSE	59
2022-09-13	13:54:48	0.95472	4.24679	2.54538	1863.91	FALSE	59
2022-09-13	13:54:48	0.368613	1.63966	2.54538	1827.39	FALSE	59
2022-09-13	13:54:48	0.573244	2.5499	2.54538	1866.46	FALSE	59
2022-09-13	13:54:48	0.392328	1.74515	2.54538	1829.14	FALSE	59
2022-09-13	13:54:49	0.535025	2.3799	2.03395	1868.84	FALSE	59
2022-09-13	13:54:49	0.607901	2.70407	2.03395	1831.84	FALSE	59
2022-09-13	13:54:49	0.408919	1.81895	2.03395	1870.66	FALSE	59
2022-09-13	13:54:49	0.277163	1.23288	2.03395	1833.07	FALSE	59
2022-09-13	13:54:50	0.342863	1.52512	0.48487	1872.19	FALSE	59
2022-09-13	13:54:50	-0.00863844	-0.0384255	0.48487	1833.07	FALSE	59
2022-09-13	13:54:50	-0.0072135	-0.0320871	0.48487	1872.19	FALSE	59
2022-09-13	13:54:51	0.128461	0.57142	0.447028	1833.65	FALSE	59
2022-09-13	13:54:51	0.247137	1.09931	0.447028	1873.28	FALSE	59
2022-09-13	13:54:51	-0.0485366	-0.215901	0.447028	1833.65	FALSE	59
2022-09-13	13:54:51	0.0749239	0.333276	0.447028	1873.62	FALSE	59
2022-09-13	13:54:52	0.134008	0.596094	0.539388	1834.24	FALSE	59
2022-09-13	13:54:52	0.142863	0.635483	0.539388	1874.25	FALSE	59
2022-09-13	13:54:52	0.0422013	0.18772	0.539388	1834.43	FALSE	59
2022-09-13	13:54:52	0.165967	0.738254	0.539388	1874.99	FALSE	59
2022-09-13	13:54:53	0.475789	2.1164	3.76106	1836.55	FALSE	59
2022-09-13	13:54:53	0.480573	2.13768	3.76106	1877.13	FALSE	59
2022-09-13	13:54:53	1.06765	4.74912	3.76106	1841.3	FALSE	59
2022-09-13	13:54:53	1.35808	6.04101	3.76106	1883.17	FALSE	59
2022-09-13	13:54:54	2.19162	9.74876	10.1261	1851.04	FALSE	59
2022-09-13	13:54:54	2.65497	11.8098	10.1261	1894.98	FALSE	59
2022-09-13	13:54:54	1.98276	8.81971	10.1261	1859.86	FALSE	59
2022-09-13	13:54:55	0.986018	4.38601	4.42868	1899.37	FALSE	59
2022-09-13	13:54:55	1.16536	5.18375	4.42868	1865.05	FALSE	59
2022-09-13	13:54:55	1.04062	4.62889	4.42868	1903.99	FALSE	59
2022-09-13	13:54:55	0.790445	3.51606	4.42868	1868.56	FALSE	59
2022-09-13	13:54:56	0.735534	3.2718	3.06054	1907.27	FALSE	59
2022-09-13	13:54:56	0.734466	3.26705	3.06054	1871.83	FALSE	59
2022-09-13	13:54:56	0.60556	2.69365	3.06054	1909.96	FALSE	59
2022-09-13	13:54:56	0.676603	3.00967	3.06054	1874.84	FALSE	59
2022-09-13	13:54:57	0.693855	3.08641	2.9168	1913.05	FALSE	59
2022-09-13	13:54:57	0.654007	2.90915	2.9168	1877.75	FALSE	59
2022-09-13	13:54:57	0.640929	2.85098	2.9168	1915.9	FALSE	59
2022-09-13	13:54:57	0.634109	2.82064	2.9168	1880.57	FALSE	59
2022-09-13	13:54:58	0.56098	2.49535	3.07901	1918.39	FALSE	59
2022-09-13	13:54:58	0.754415	3.35579	3.07901	1883.93	FALSE	59
2022-09-13	13:54:58	0.761183	3.38589	3.07901	1921.78	FALSE	59
2022-09-13	13:54:59	0.764491	3.40061	3.38295	1887.33	FALSE	59
2022-09-13	13:54:59	0.749071	3.33202	3.38295	1925.11	FALSE	59
2022-09-13	13:54:59	0.768512	3.4185	3.38295	1890.75	FALSE	59
2022-09-13	13:54:59	0.760013	3.38069	3.38295	1928.49	FALSE	59
2022-09-13	13:55:00	0.745051	3.31414	3.24956	1894.06	FALSE	59
2022-09-13	13:55:00	0.696196	3.09682	3.24956	1931.59	FALSE	59
2022-09-13	13:55:00	0.75874	3.37503	3.24956	1897.43	FALSE	59
2022-09-13	13:55:00	0.72215	3.21227	3.24956	1934.8	FALSE	59
2022-09-13	13:55:01	0.725	3.22494	3.02811	1900.66	FALSE	59
2022-09-13	13:55:01	0.712888	3.17107	3.02811	1937.97	FALSE	59
2022-09-13	13:55:01	0.677875	3.01532	3.02811	1903.67	FALSE	59
2022-09-13	13:55:01	0.607239	2.70112	3.02811	1940.67	FALSE	59
2022-09-13	13:55:02	0.594873	2.64611	2.70097	1906.32	FALSE	59
2022-09-13	13:55:02	0.600572	2.67146	2.70097	1943.34	FALSE	59
2022-09-13	13:55:02	0.62617	2.78533	2.70097	1909.11	FALSE	59
2022-09-13	13:55:03	0.576247	2.56326	2.26496	1945.91	FALSE	59
2022-09-13	13:55:03	0.521132	2.3181	2.26496	1911.42	FALSE	59
2022-09-13	13:55:03	0.508003	2.2597	2.26496	1948.17	FALSE	59
2022-09-13	13:55:03	0.431361	1.91878	2.26496	1913.34	FALSE	59
2022-09-13	13:55:04	0.408715	1.81805	1.65568	1949.99	FALSE	59
2022-09-13	13:55:04	0.391209	1.74018	1.65568	1915.08	FALSE	59
2022-09-13	13:55:04	0.37355	1.66163	1.65568	1951.65	FALSE	59
2022-09-13	13:55:04	0.315382	1.40288	1.65568	1916.49	FALSE	59
2022-09-13	13:55:05	0.265865	1.18262	1.16949	1952.83	FALSE	59
2022-09-13	13:55:05	0.117621	0.523202	1.16949	1917.01	FALSE	59
2022-09-13	13:55:05	0.0728374	0.323995	1.16949	1953.15	FALSE	59
2022-09-13	13:55:05	0.595331	2.64815	1.16949	1919.66	FALSE	59
2022-09-13	13:55:06	2.8707	12.7694	15.2653	1965.92	FALSE	59
2022-09-13	13:55:06	4.80754	21.3849	15.2653	1941.04	1	60
2022-09-13	13:55:06	2.61711	11.6414	15.2653	1977.56	FALSE	60
2022-09-13	13:55:07	2.43207	10.8183	8.68378	1951.86	FALSE	60
2022-09-13	13:55:07	1.8248	8.11708	8.68378	1985.68	FALSE	60
2022-09-13	13:55:07	1.89075	8.41043	8.68378	1960.27	FALSE	60
2022-09-13	13:55:07	1.66118	7.38926	8.68378	1993.07	FALSE	60
2022-09-13	13:55:08	3.3392	14.8534	26.1455	1975.12	1	61
2022-09-13	13:55:08	5.1878	23.0764	26.1455	2016.15	1	62
2022-09-13	13:55:08	9.37741	41.7126	26.1455	2016.84	1	63
2022-09-13	13:55:08	5.60668	24.9396	26.1455	2041.09	1	64
2022-09-13	13:55:09	2.62749	11.6876	5.66092	2028.52	FALSE	64
2022-09-13	13:55:09	0.898283	3.99574	5.66092	2045.08	FALSE	64
2022-09-13	13:55:09	0.535636	2.38262	5.66092	2030.91	FALSE	64
2022-09-13	13:55:09	1.02912	4.57773	5.66092	2049.66	FALSE	64
2022-09-13	13:55:10	0.878639	3.90836	6.28746	2034.82	FALSE	64
2022-09-13	13:55:10	1.31411	5.84542	6.28746	2055.51	FALSE	64
2022-09-13	13:55:10	2.0477	9.10858	6.28746	2043.92	FALSE	64
2022-09-13	13:55:11	6.02932	26.8196	21.331	2082.33	1	65
2022-09-13	13:55:11	4.57691	20.359	21.331	2064.28	1	66
2022-09-13	13:55:11	4.27731	19.0263	21.331	2101.35	1	67
2022-09-13	13:55:11	4.29813	19.1189	21.331	2083.4	1	68
2022-09-13	13:55:12	1.3276	5.90543	2.02213	2107.26	FALSE	68
2022-09-13	13:55:12	0.276298	1.22903	2.02213	2084.63	FALSE	68
2022-09-13	13:55:12	0.256705	1.14188	2.02213	2108.4	FALSE	68
2022-09-13	13:55:12	-0.0422262	-0.187831	2.02213	2084.63	FALSE	68
2022-09-13	13:55:13	-0.263651	-1.17277	-0.306676	2108.4	FALSE	68
2022-09-13	13:55:13	-0.11271	-0.501357	-0.306676	2084.63	FALSE	68
2022-09-13	13:55:13	-0.0779005	-0.346517	-0.306676	2108.4	FALSE	68
2022-09-13	13:55:13	0.178486	0.793941	-0.306676	2085.43	FALSE	68
2022-09-13	13:55:14	0.136451	0.606961	3.64578	2109.01	FALSE	68
2022-09-13	13:55:14	0.74729	3.3241	3.64578	2088.75	FALSE	68
2022-09-13	13:55:14	1.57508	7.00627	3.64578	2116.01	FALSE	68
2022-09-13	13:55:15	2.0138	8.95779	5.55996	2097.71	FALSE	68
2022-09-13	13:55:15	1.41391	6.28935	5.55996	2122.3	FALSE	68
2022-09-13	13:55:15	0.524542	2.33327	5.55996	2100.04	FALSE	68
2022-09-13	13:55:15	1.04749	4.65945	5.55996	2126.96	FALSE	68
2022-09-13	13:55:16	2.00541	8.92046	4.49682	2108.96	FALSE	68
2022-09-13	13:55:16	0.588359	2.61714	4.49682	2129.58	FALSE	68
2022-09-13	13:55:16	0.535891	2.38375	4.49682	2111.34	FALSE	68
2022-09-13	13:55:16	0.914058	4.06591	4.49682	2133.64	FALSE	68
2022-09-13	13:55:17	1.39401	6.20084	8.30268	2117.55	FALSE	68
2022-09-13	13:55:17	2.24245	9.97487	8.30268	2143.62	FALSE	68
2022-09-13	13:55:17	2.55599	11.3696	8.30268	2128.91	FALSE	68
2022-09-13	13:55:17	1.27365	5.66545	8.30268	2149.28	FALSE	68
2022-09-13	13:55:18	0.637468	2.83559	2.06743	2131.75	FALSE	68
2022-09-13	13:55:18	0.406272	1.80718	2.06743	2151.09	FALSE	68
2022-09-13	13:55:18	0.350598	1.55953	2.06743	2133.31	FALSE	68
2022-09-13	13:55:19	0.205509	0.914145	-0.600449	2152.01	FALSE	68
2022-09-13	13:55:19	0.0561962	0.249972	-0.600449	2133.56	FALSE	68
2022-09-13	13:55:19	-0.329198	-1.46434	-0.600449	2152.01	FALSE	68
2022-09-13	13:55:19	-0.472455	-2.10157	-0.600449	2133.56	FALSE	68
2022-09-13	13:55:20	-0.618409	-2.75081	-1.77249	2152.01	FALSE	68
2022-09-13	13:55:20	-0.539732	-2.40084	-1.77249	2133.56	FALSE	68
2022-09-13	13:55:20	-0.398816	-1.77401	-1.77249	2152.01	FALSE	68
2022-09-13	13:55:20	-0.0369336	-0.164288	-1.77249	2133.56	FALSE	68
2022-09-13	13:55:21	2.83589	12.6146	18.8731	2164.62	FALSE	68
2022-09-13	13:55:21	4.38912	19.5237	18.8731	2153.08	1	69
2022-09-13	13:55:21	6.35975	28.2894	18.8731	2192.91	1	70
2022-09-13	13:55:21	3.38668	15.0646	18.8731	2168.15	1	71
2022-09-13	13:55:22	5.36428	23.8614	13.2087	2216.77	1	72
2022-09-13	13:55:22	0.714567	3.17854	13.2087	2171.33	FALSE	72
2022-09-13	13:55:22	2.82948	12.5861	13.2087	2229.36	FALSE	72
2022-09-13	13:55:23	1.41457	6.29229	7.19533	2177.62	FALSE	72
2022-09-13	13:55:23	0.954008	4.24362	7.19533	2233.6	FALSE	72
2022-09-13	13:55:23	2.74912	12.2286	7.19533	2189.85	FALSE	72
2022-09-13	13:55:23	1.35263	6.01677	7.19533	2239.62	FALSE	72
2022-09-13	13:55:24	4.75406	21.147	14.6532	2210.99	1	73
2022-09-13	13:55:24	2.28729	10.1743	14.6532	2249.79	FALSE	73
2022-09-13	13:55:24	3.48179	15.4877	14.6532	2226.48	1	74
2022-09-13	13:55:24	2.6536	11.8037	14.6532	2261.6	FALSE	74
2022-09-13	13:55:25	1.96683	8.74885	6.45872	2235.23	FALSE	74
2022-09-13	13:55:25	2.49111	11.081	6.45872	2272.68	FALSE	74
2022-09-13	13:55:25	0.55243	2.45732	6.45872	2237.69	FALSE	74
2022-09-13	13:55:25	0.79757	3.54775	6.45872	2276.22	FALSE	74
2022-09-13	13:55:26	0.211158	0.939273	0.668986	2238.63	FALSE	74
2022-09-13	13:55:26	0.192227	0.855064	0.668986	2277.08	FALSE	74
2022-09-13	13:55:26	0.0477992	0.21262	0.668986	2238.84	FALSE	74
2022-09-13	13:55:27	-0.214643	-0.954775	-1.01873	2277.08	FALSE	74
2022-09-13	13:55:27	-0.095814	-0.4262	-1.01873	2238.84	FALSE	74
2022-09-13	13:55:27	-0.245585	-1.09241	-1.01873	2277.08	FALSE	74
2022-09-13	13:55:27	-0.360038	-1.60152	-1.01873	2238.84	FALSE	74
2022-09-13	13:55:28	-0.76136	-3.38668	-3.76637	2277.08	FALSE	74
2022-09-13	13:55:28	-0.769707	-3.42381	-3.76637	2238.84	FALSE	74
2022-09-13	13:55:28	-0.992811	-4.41622	-3.76637	2277.08	FALSE	74
2022-09-13	13:55:28	-0.862989	-3.83875	-3.76637	2238.84	FALSE	74
2022-09-13	13:55:29	-0.600089	-2.66932	-0.496318	2277.08	FALSE	74
2022-09-13	13:55:29	-0.181921	-0.809221	-0.496318	2238.84	FALSE	74
2022-09-13	13:55:29	0.277825	1.23582	-0.496318	2278.32	FALSE	74
2022-09-13	13:55:29	0.0578756	0.257442	-0.496318	2239.1	FALSE	74
2022-09-13	13:55:30	0.272837	1.21363	2.72919	2279.53	FALSE	74
2022-09-13	13:55:30	0.456552	2.03083	2.72919	2241.13	FALSE	74
2022-09-13	13:55:30	1.11126	4.94311	2.72919	2284.47	FALSE	74
2022-09-13	13:55:31	3.22037	14.3248	15.2468	2255.45	1	75
2022-09-13	13:55:31	4.70128	20.9122	15.2468	2305.38	1	76
2022-09-13	13:55:31	3.20927	14.2755	15.2468	2269.73	1	77
2022-09-13	13:55:31	2.57965	11.4748	15.2468	2316.86	FALSE	77
2022-09-13	13:55:32	1.01696	4.52364	0.861006	2274.25	FALSE	77
2022-09-13	13:55:32	-0.0379005	-0.168589	0.861006	2316.86	FALSE	77
2022-09-13	13:55:32	-0.0592237	-0.263439	0.861006	2274.25	FALSE	77
2022-09-13	13:55:32	-0.145585	-0.647591	0.861006	2316.86	FALSE	77
2022-09-13	13:55:33	-0.402989	-1.79258	-1.4928	2274.25	FALSE	77
2022-09-13	13:55:33	-0.377798	-1.68052	-1.4928	2316.86	FALSE	77
2022-09-13	13:55:33	-0.397798	-1.76949	-1.4928	2274.25	FALSE	77
2022-09-13	13:55:33	-0.163804	-0.728633	-1.4928	2316.86	FALSE	77
2022-09-13	13:55:34	0.255585	1.13689	0.872869	2275.39	FALSE	77
2022-09-13	13:55:34	0.1193	0.53067	0.872869	2317.39	FALSE	77
2022-09-13	13:55:34	0.213804	0.951043	0.872869	2276.34	FALSE	77
2022-09-13	13:55:35	0.0240842	0.107131	1.59722	2317.5	FALSE	77
2022-09-13	13:55:35	0.496654	2.20922	1.59722	2278.55	FALSE	77
2022-09-13	13:55:35	0.38215	1.69988	1.59722	2319.2	FALSE	77
2022-09-13	13:55:35	0.533397	2.37266	1.59722	2280.92	FALSE	77
2022-09-13	13:55:36	0.411361	1.82982	1.57447	2321.03	FALSE	77
2022-09-13	13:55:36	0.385967	1.71686	1.57447	2282.64	FALSE	77
2022-09-13	13:55:36	0.212735	0.946288	1.57447	2321.97	FALSE	77
2022-09-13	13:55:36	0.405764	1.80492	1.57447	2284.44	FALSE	77
2022-09-13	13:55:37	0.223422	0.993826	1.69716	2322.97	FALSE	77
2022-09-13	13:55:37	0.584135	2.59835	1.69716	2287.04	FALSE	77
2022-09-13	13:55:37	0.27299	1.21431	1.69716	2324.18	FALSE	77
2022-09-13	13:55:37	0.445611	1.98217	1.69716	2289.02	FALSE	77
2022-09-13	13:55:38	0.297672	1.3241	1.83155	2325.51	FALSE	77
2022-09-13	13:55:38	0.478282	2.12749	1.83155	2291.15	FALSE	77
2022-09-13	13:55:38	0.4593	2.04306	1.83155	2327.55	FALSE	77
2022-09-13	13:55:39	0.313244	1.39337	1.6507	2292.55	FALSE	77
2022-09-13	13:55:39	0.384033	1.70826	1.6507	2329.26	FALSE	77
2022-09-13	13:55:39	0.336959	1.49886	1.6507	2294.04	FALSE	77
2022-09-13	13:55:39	0.45014	2.00231	1.6507	2331.26	FALSE	77
2022-09-13	13:55:40	0.293244	1.30441	1.61391	2295.35	FALSE	77
2022-09-13	13:55:40	0.349682	1.55546	1.61391	2332.81	FALSE	77
2022-09-13	13:55:40	0.307341	1.36711	1.61391	2296.72	FALSE	77
2022-09-13	13:55:40	0.50103	2.22868	1.61391	2335.04	FALSE	77
2022-09-13	13:55:41	0.243117	1.08143	1.72891	2297.8	FALSE	77
2022-09-13	13:55:41	0.514771	2.2898	1.72891	2337.33	FALSE	77
2022-09-13	13:55:41	0.272939	1.21409	1.72891	2299.01	FALSE	77
2022-09-13	13:55:41	0.52388	2.33032	1.72891	2339.66	FALSE	77
2022-09-13	13:55:42	0.166476	0.740519	1.31588	2299.75	FALSE	77
2022-09-13	13:55:42	0.501285	2.22982	1.31588	2341.89	FALSE	77
2022-09-13	13:55:42	0.219708	0.977305	1.31588	2300.73	FALSE	77
2022-09-13	13:55:43	0.160318	0.713127	0.991282	2342.61	FALSE	77
2022-09-13	13:55:43	0.151311	0.673062	0.991282	2301.4	FALSE	77
2022-09-13	13:55:43	0.320064	1.42371	0.991282	2344.03	FALSE	77
2022-09-13	13:55:43	0.259708	1.15523	0.991282	2302.56	FALSE	77
2022-09-13	13:55:44	0.293601	1.306	1.41239	2345.34	FALSE	77
2022-09-13	13:55:44	0.293652	1.30622	1.41239	2303.86	FALSE	77
2022-09-13	13:55:44	0.290751	1.29332	1.41239	2346.63	FALSE	77
2022-09-13	13:55:44	0.392074	1.74402	1.41239	2305.61	FALSE	77
2022-09-13	13:55:45	0.0730918	0.325127	1.31805	2346.95	FALSE	77
2022-09-13	13:55:45	0.417875	1.85879	1.31805	2307.47	FALSE	77
2022-09-13	13:55:45	0.11187	0.49762	1.31805	2347.45	FALSE	77
2022-09-13	13:55:45	0.582405	2.59065	1.31805	2310.06	FALSE	77
2022-09-13	13:55:46	1.19207	5.30257	23.4346	2352.75	FALSE	77
2022-09-13	13:55:46	8.27054	36.789	23.4346	2346.85	1	78
2022-09-13	13:55:46	6.3424	28.2123	23.4346	2380.97	1	79
2022-09-13	13:55:47	8.92556	39.7027	15.6605	2386.55	1	80
2022-09-13	13:55:47	1.27584	5.67519	15.6605	2386.64	FALSE	80
2022-09-13	13:55:47	2.35233	10.4636	15.6605	2397.01	FALSE	80
2022-09-13	13:55:47	1.52882	6.8005	15.6605	2393.44	FALSE	80
2022-09-13	13:55:48	0.360878	1.60526	4.3885	2398.62	FALSE	80
2022-09-13	13:55:48	1.1077	4.92727	4.3885	2398.37	FALSE	80
2022-09-13	13:55:48	0.374008	1.66366	4.3885	2400.28	FALSE	80
2022-09-13	13:55:48	2.10373	9.35781	4.3885	2407.73	FALSE	80
2022-09-13	13:55:49	0.320522	1.42575	2.05868	2401.71	FALSE	80
2022-09-13	13:55:49	0.273295	1.21567	2.05868	2408.94	FALSE	80
2022-09-13	13:55:49	0.988766	4.39823	2.05868	2406.11	FALSE	80
2022-09-13	13:55:49	0.268664	1.19507	2.05868	2410.14	FALSE	80
2022-09-13	13:55:50	0.585203	2.6031	2.09595	2408.71	FALSE	80
2022-09-13	13:55:50	0.233499	1.03865	2.09595	2411.18	FALSE	80
2022-09-13	13:55:50	0.594873	2.64611	2.09595	2411.35	FALSE	80
2022-09-13	13:55:51	0.975992	4.34141	12.7403	2415.52	FALSE	80
2022-09-13	13:55:51	2.16551	9.63262	12.7403	2420.99	FALSE	80
2022-09-13	13:55:51	3.48536	15.5036	12.7403	2431.02	1	81
2022-09-13	13:55:51	4.82973	21.4836	12.7403	2442.47	1	82
2022-09-13	13:55:52	4.4738	19.9004	12.6673	2450.92	1	83
2022-09-13	13:55:52	2.48525	11.0549	12.6673	2453.53	FALSE	83
2022-09-13	13:55:52	3.68617	16.3968	12.6673	2467.32	1	84
2022-09-13	13:55:52	0.745763	3.3173	12.6673	2456.84	FALSE	84
2022-09-13	13:55:53	3.93497	17.5035	10.301	2484.82	1	85
2022-09-13	13:55:53	1.15116	5.12059	10.301	2461.96	FALSE	85
2022-09-13	13:55:53	2.79406	12.4285	10.301	2497.25	FALSE	85
2022-09-13	13:55:53	1.38286	6.15124	10.301	2468.12	FALSE	85
2022-09-13	13:55:54	0.880929	3.91855	3.34055	2501.17	FALSE	85
2022-09-13	13:55:54	1.1019	4.90147	3.34055	2473.02	FALSE	85
2022-09-13	13:55:54	0.27014	1.20164	3.34055	2502.37	FALSE	85
2022-09-13	13:55:55	0.353855	1.57402	1.56417	2474.59	FALSE	85
2022-09-13	13:55:55	0.326425	1.452	1.56417	2503.82	FALSE	85
2022-09-13	13:55:55	0.271005	1.20548	1.56417	2475.8	FALSE	85
2022-09-13	13:55:55	0.45528	2.02518	1.56417	2505.85	FALSE	85
2022-09-13	13:55:56	2.77202	12.3305	8.36221	2488.13	FALSE	85
2022-09-13	13:55:56	0.621896	2.76632	8.36221	2508.61	FALSE	85
2022-09-13	13:55:56	2.60556	11.5901	8.36221	2499.72	FALSE	85
2022-09-13	13:55:56	1.52016	6.76198	8.36221	2515.38	FALSE	85
2022-09-13	13:55:57	1.2762	5.67679	4.41997	2505.39	FALSE	85
2022-09-13	13:55:57	2.00785	8.93132	4.41997	2524.31	FALSE	85
2022-09-13	13:55:57	0.38785	1.72523	4.41997	2507.12	FALSE	85
2022-09-13	13:55:57	0.30271	1.34651	4.41997	2525.65	FALSE	85
2022-09-13	13:55:58	0.867901	3.8606	2.41846	2510.98	FALSE	85
2022-09-13	13:55:58	0.429275	1.9095	2.41846	2527.56	FALSE	85
2022-09-13	13:55:58	0.333906	1.48528	2.41846	2512.46	FALSE	85
2022-09-13	13:55:59	0.628155	2.79416	1.5241	2530.36	FALSE	85
2022-09-13	13:55:59	0.234059	1.04114	1.5241	2513.51	FALSE	85
2022-09-13	13:55:59	0.399758	1.7782	1.5241	2532.14	FALSE	85
2022-09-13	13:55:59	0.108563	0.48291	1.5241	2513.99	FALSE	85
2022-09-13	13:56:00	0.197875	0.880188	0.285172	2533.02	FALSE	85
2022-09-13	13:56:00	0.0533972	0.237521	0.285172	2514.23	FALSE	85
2022-09-13	13:56:00	0.0937534	0.417034	0.285172	2533.43	FALSE	85
2022-09-13	13:56:00	-0.0885875	-0.394055	0.285172	2514.23	FALSE	85
2022-09-13	13:56:01	0.107138	0.476571	-0.0134675	2533.91	FALSE	85
2022-09-13	13:56:01	0.00118347	0.00526431	-0.0134675	2514.23	FALSE	85
2022-09-13	13:56:01	-0.0712847	-0.317089	-0.0134675	2533.91	FALSE	85
2022-09-13	13:56:01	-0.0491473	-0.218617	-0.0134675	2514.23	FALSE	85
2022-09-13	13:56:02	0.466883	2.07679	1.42559	2535.99	FALSE	85
2022-09-13	13:56:02	0.293295	1.30463	1.42559	2515.54	FALSE	85
2022-09-13	13:56:02	0.201285	0.895356	1.42559	2536.88	FALSE	85
2022-09-13	13:56:03	0.653397	2.90644	3.34724	2518.44	FALSE	85
2022-09-13	13:56:03	0.382608	1.70192	3.34724	2538.58	FALSE	85
2022-09-13	13:56:03	0.290802	1.29355	3.34724	2519.74	FALSE	85
2022-09-13	13:56:03	1.68317	7.48708	3.34724	2546.07	FALSE	85
2022-09-13	13:56:04	1.85732	8.26173	18.4588	2528	FALSE	85
2022-09-13	13:56:04	5.81177	25.8519	18.4588	2571.92	1	86
2022-09-13	13:56:04	4.78006	21.2627	18.4588	2549.26	1	87
2022-09-13	13:56:05	7.89589	35.1225	26.2342	2607.05	1	88
2022-09-13	13:56:05	4.13284	18.3837	26.2342	2567.64	1	89
2022-09-13	13:56:05	6.80566	30.2729	26.2342	2637.32	1	90
2022-09-13	13:56:05	2.81355	12.5152	26.2342	2580.16	FALSE	90
2022-09-13	13:56:05	7.84057	34.8764	26.2342	2672.19	1	91
2022-09-13	13:56:06	4.18154	18.6003	28.6078	2598.76	1	92
2022-09-13	13:56:06	7.50082	33.3651	28.6078	2705.56	1	93
2022-09-13	13:56:06	7.61161	33.858	28.6078	2632.62	1	94
2022-09-13	13:56:07	2.62622	11.682	13.7612	2717.24	FALSE	94
2022-09-13	13:56:07	4.16688	18.5351	13.7612	2651.15	1	95
2022-09-13	13:56:07	1.78363	7.93394	13.7612	2725.18	FALSE	95
2022-09-13	13:56:07	3.79792	16.8939	13.7612	2668.05	1	96
2022-09-13	13:56:08	5.76668	25.6513	27.2622	2750.83	1	97
2022-09-13	13:56:08	6.7796	30.157	27.2622	2698.2	1	98
2022-09-13	13:56:08	8.99131	39.9951	27.2622	2790.82	1	99
2022-09-13	13:56:08	2.97767	13.2453	27.2622	2711.45	FALSE	99
2022-09-13	13:56:09	7.27629	32.3664	16.7918	2823.19	1	100
2022-09-13	13:56:09	2.50861	11.1588	16.7918	2722.61	FALSE	100
2022-09-13	13:56:09	1.54001	6.85027	16.7918	2830.04	FALSE	100
2022-09-13	13:56:10	0.4993	2.22099	1.32054	2724.83	FALSE	100
2022-09-13	13:56:10	0.32958	1.46604	1.32054	2831.51	FALSE	100
2022-09-13	13:56:10	0.226527	1.00764	1.32054	2725.84	FALSE	100
2022-09-13	13:56:10	0.132074	0.587492	1.32054	2832.09	FALSE	100
2022-09-13	13:56:11	0.165814	0.737574	2.44521	2726.57	FALSE	100
2022-09-13	13:56:11	0.659657	2.93429	2.44521	2835.03	FALSE	100
2022-09-13	13:56:11	0.523117	2.32693	2.44521	2728.9	FALSE	100
2022-09-13	13:56:11	0.850242	3.78205	2.44521	2838.81	FALSE	100
2022-09-13	13:56:12	0.345713	1.5378	1.46711	2730.44	FALSE	100
2022-09-13	13:56:12	0.286781	1.27566	1.46711	2840.08	FALSE	100
2022-09-13	13:56:12	0.339758	1.51131	1.46711	2731.95	FALSE	100
2022-09-13	13:56:12	0.347036	1.54369	1.46711	2841.63	FALSE	100
2022-09-13	13:56:13	0.343626	1.52852	1.62903	2733.48	FALSE	100
2022-09-13	13:56:13	0.331209	1.47328	1.62903	2843.1	FALSE	100
2022-09-13	13:56:13	0.345458	1.53667	1.62903	2735.02	FALSE	100
2022-09-13	13:56:13	0.444593	1.97764	1.62903	2845.08	FALSE	100
2022-09-13	13:56:14	0.422048	1.87735	1.77571	2736.89	FALSE	100
2022-09-13	13:56:14	0.353855	1.57402	1.77571	2846.65	FALSE	100
2022-09-13	13:56:14	0.392735	1.74696	1.77571	2738.64	FALSE	100
2022-09-13	13:56:14	0.428155	1.90452	1.77571	2848.56	FALSE	100
2022-09-13	13:56:15	0.659962	2.93564	6.45428	2741.58	FALSE	100
2022-09-13	13:56:15	1.3622	6.05934	6.45428	2854.62	FALSE	100
2022-09-13	13:56:15	2.3308	10.3679	6.45428	2751.94	FALSE	100
2022-09-13	13:56:16	1.81925	8.09239	6.24027	2862.71	FALSE	100
2022-09-13	13:56:16	1.67223	7.43841	6.24027	2759.38	FALSE	100
2022-09-13	13:56:16	1.11828	4.97433	6.24027	2867.68	FALSE	100
2022-09-13	13:56:16	1.00174	4.45594	6.24027	2763.84	FALSE	100
2022-09-13	13:56:17	0.68327	3.03932	2.78228	2870.72	FALSE	100
2022-09-13	13:56:17	0.699708	3.11244	2.78228	2766.95	FALSE	100
2022-09-13	13:56:17	0.624287	2.77695	2.78228	2873.5	FALSE	100
2022-09-13	13:56:17	0.494669	2.20039	2.78228	2769.15	FALSE	100
2022-09-13	13:56:18	0.351209	1.56225	1.58707	2875.06	FALSE	100
2022-09-13	13:56:18	0.363626	1.61748	1.58707	2770.77	FALSE	100
2022-09-13	13:56:18	0.355534	1.58149	1.58707	2876.64	FALSE	100
2022-09-13	13:56:19	0.363881	1.61862	1.53005	2772.39	FALSE	100
2022-09-13	13:56:19	0.299809	1.33361	1.53005	2877.98	FALSE	100
2022-09-13	13:56:19	0.382048	1.69943	1.53005	2774.09	FALSE	100
2022-09-13	13:56:19	0.33014	1.46853	1.53005	2879.45	FALSE	100
2022-09-13	13:56:20	0.422506	1.87939	1.86366	2775.97	FALSE	100
2022-09-13	13:56:20	0.408817	1.8185	1.86366	2881.26	FALSE	100
2022-09-13	13:56:20	0.423015	1.88166	1.86366	2777.85	FALSE	100
2022-09-13	13:56:20	0.421539	1.87509	1.86366	2883.14	FALSE	100
2022-09-13	13:56:21	0.421845	1.87645	2.08964	2779.72	FALSE	100
2022-09-13	13:56:21	0.43986	1.95659	2.08964	2885.1	FALSE	100
2022-09-13	13:56:21	0.494771	2.20084	2.08964	2781.92	FALSE	100
2022-09-13	13:56:21	0.522608	2.32466	2.08964	2887.42	FALSE	100
2022-09-13	13:56:22	0.515025	2.29093	2.32225	2784.21	FALSE	100
2022-09-13	13:56:22	0.557366	2.47928	2.32225	2889.9	FALSE	100
2022-09-13	13:56:22	0.493804	2.19654	2.32225	2786.41	FALSE	100
2022-09-13	13:56:23	0.448257	1.99394	1.93191	2891.89	FALSE	100
2022-09-13	13:56:23	0.426781	1.89841	1.93191	2788.31	FALSE	100
2022-09-13	13:56:23	0.422456	1.87917	1.93191	2893.77	FALSE	100
2022-09-13	13:56:23	0.439758	1.95613	1.93191	2790.27	FALSE	100
2022-09-13	13:56:24	0.440064	1.95749	1.94436	2895.73	FALSE	100
2022-09-13	13:56:24	0.442303	1.96745	1.94436	2792.23	FALSE	100
2022-09-13	13:56:24	0.428155	1.90452	1.94436	2897.64	FALSE	100
2022-09-13	13:56:24	0.437926	1.94798	1.94436	2794.18	FALSE	100
2022-09-13	13:56:25	0.433295	1.92738	1.91584	2899.56	FALSE	100
2022-09-13	13:56:25	0.415789	1.84951	1.91584	2796.03	FALSE	100
2022-09-13	13:56:25	0.429733	1.91154	1.91584	2901.47	FALSE	100
2022-09-13	13:56:25	0.443982	1.97492	1.91584	2798.01	FALSE	100
2022-09-13	13:56:26	0.430344	1.91426	1.99032	2903.39	FALSE	100
2022-09-13	13:56:26	0.427901	1.90339	1.99032	2799.91	FALSE	100
2022-09-13	13:56:26	0.447799	1.9919	1.99032	2905.38	FALSE	100
2022-09-13	13:56:26	0.483728	2.15172	1.99032	2802.06	FALSE	100
2022-09-13	13:56:27	0.458791	2.04079	1.92897	2907.42	FALSE	100
2022-09-13	13:56:27	0.434262	1.93168	1.92897	2803.99	FALSE	100
2022-09-13	13:56:27	0.407901	1.81443	1.92897	2909.24	FALSE	100
2022-09-13	13:56:28	0.372837	1.65845	1.66768	2805.65	FALSE	100
2022-09-13	13:56:28	0.364389	1.62088	1.66768	2910.86	FALSE	100
2022-09-13	13:56:28	0.386425	1.7189	1.66768	2807.37	FALSE	100
2022-09-13	13:56:28	0.375992	1.67249	1.66768	2912.53	FALSE	100
2022-09-13	13:56:29	0.355484	1.58126	1.51816	2808.95	FALSE	100
2022-09-13	13:56:29	0.339504	1.51018	1.51816	2914.04	FALSE	100
2022-09-13	13:56:29	0.333244	1.48234	1.51816	2810.43	FALSE	100
2022-09-13	13:56:29	0.336959	1.49886	1.51816	2915.54	FALSE	100
2022-09-13	13:56:30	0.367188	1.63333	1.37722	2812.07	FALSE	100
2022-09-13	13:56:30	0.317214	1.41103	1.37722	2916.95	FALSE	100
2022-09-13	13:56:30	0.24444	1.08732	1.37722	2813.15	FALSE	100
2022-09-13	13:56:31	0.322863	1.43616	1.36813	2918.39	FALSE	100
2022-09-13	13:56:31	0.211565	0.941083	1.36813	2814.1	FALSE	100
2022-09-13	13:56:31	0.447697	1.99145	1.36813	2920.38	FALSE	100
2022-09-13	13:56:31	0.248155	1.10384	1.36813	2815.2	FALSE	100
2022-09-13	13:56:32	0.391718	1.74244	1.78658	2922.12	FALSE	100
2022-09-13	13:56:32	0.353346	1.57175	1.78658	2816.77	FALSE	100
2022-09-13	13:56:32	0.416451	1.85246	1.78658	2923.97	FALSE	100
2022-09-13	13:56:32	0.445051	1.97968	1.78658	2818.75	FALSE	100
2022-09-13	13:56:33	0.372583	1.65732	1.85693	2925.63	FALSE	100
2022-09-13	13:56:33	0.460064	2.04646	1.85693	2820.8	FALSE	100
2022-09-13	13:56:33	0.392939	1.74787	1.85693	2927.38	FALSE	100
2022-09-13	13:56:33	0.444237	1.97606	1.85693	2822.77	FALSE	100
2022-09-13	13:56:34	0.450496	2.0039	1.02835	2929.38	FALSE	100
2022-09-13	13:56:34	0.236807	1.05336	1.02835	2823.83	FALSE	100
2022-09-13	13:56:34	0.194466	0.865024	1.02835	2930.25	FALSE	100
2022-09-13	13:56:34	0.0429646	0.191115	1.02835	2824.02	FALSE	100
2022-09-13	13:56:35	-0.020445	-0.0909434	0.376438	2930.25	FALSE	100
2022-09-13	13:56:35	0.0202674	0.0901534	0.376438	2824.11	FALSE	100
2022-09-13	13:56:35	0.254059	1.13011	0.376438	2931.38	FALSE	100
2022-09-13	13:56:36	1.00057	4.45074	3.46308	2828.56	FALSE	100
2022-09-13	13:56:36	0.542557	2.4134	3.46308	2933.79	FALSE	100
2022-09-13	13:56:36	1.27991	5.6933	3.46308	2834.25	FALSE	100
2022-09-13	13:56:36	0.291107	1.2949	3.46308	2935.08	FALSE	100
2022-09-13	13:56:37	0.492939	2.19269	1.81765	2836.44	FALSE	100
2022-09-13	13:56:37	0.319402	1.42076	1.81765	2936.5	FALSE	100
2022-09-13	13:56:37	0.475738	2.11618	1.81765	2838.56	FALSE	100
2022-09-13	13:56:37	0.346425	1.54097	1.81765	2938.05	FALSE	100
2022-09-13	13:56:38	0.610293	2.71471	2.03819	2841.28	FALSE	100
2022-09-13	13:56:38	0.416451	1.85246	2.03819	2939.9	FALSE	100
2022-09-13	13:56:38	0.391667	1.74221	2.03819	2843.02	FALSE	100
2022-09-13	13:56:38	0.414415	1.8434	2.03819	2941.74	FALSE	100
2022-09-13	13:56:39	0.386018	1.71709	1.71769	2844.73	FALSE	100
2022-09-13	13:56:39	0.412023	1.83276	1.71769	2943.57	FALSE	100
2022-09-13	13:56:39	0.36042	1.60322	1.71769	2846.34	FALSE	100
2022-09-13	13:56:40	0.442048	1.96632	1.74657	2945.54	FALSE	100
2022-09-13	13:56:40	0.357112	1.58851	1.74657	2847.93	FALSE	100
2022-09-13	13:56:40	0.366222	1.62903	1.74657	2947.17	FALSE	100
2022-09-13	13:56:40	0.405204	1.80243	1.74657	2849.73	FALSE	100
2022-09-13	13:56:41	0.410394	1.82551	1.78726	2949	FALSE	100
2022-09-13	13:56:41	0.405	1.80152	1.78726	2851.53	FALSE	100
2022-09-13	13:56:41	0.394822	1.75625	1.78726	2950.75	FALSE	100
2022-09-13	13:56:41	0.396959	1.76575	1.78726	2853.3	FALSE	100
2022-09-13	13:56:42	0.384389	1.70984	1.79428	2952.46	FALSE	100
2022-09-13	13:56:42	0.390496	1.737	1.79428	2855.03	FALSE	100
2022-09-13	13:56:42	0.421845	1.87645	1.79428	2954.34	FALSE	100
2022-09-13	13:56:42	0.416756	1.85381	1.79428	2856.89	FALSE	100
2022-09-13	13:56:43	0.409326	1.82076	1.82227	2956.16	FALSE	100
2022-09-13	13:56:43	0.41701	1.85494	1.82227	2858.74	FALSE	100
2022-09-13	13:56:43	0.402659	1.79111	1.82227	2957.95	FALSE	100
2022-09-13	13:56:44	0.386171	1.71777	1.85619	2860.46	FALSE	100
2022-09-13	13:56:44	0.374975	1.66796	1.85619	2959.62	FALSE	100
2022-09-13	13:56:44	0.405967	1.80582	1.85619	2862.27	FALSE	100
2022-09-13	13:56:44	0.502048	2.23321	1.85619	2961.85	FALSE	100
2022-09-13	13:56:45	0.775891	3.45132	3.34311	2865.72	FALSE	100
2022-09-13	13:56:45	1.16154	5.16676	3.34311	2967.02	FALSE	100
2022-09-13	13:56:45	0.829275	3.68878	3.34311	2869.41	FALSE	100
2022-09-13	13:56:45	0.239555	1.06559	3.34311	2968.08	FALSE	100
2022-09-13	13:56:46	0.465356	2.07	1.47464	2871.48	FALSE	100
2022-09-13	13:56:46	0.305153	1.35738	1.47464	2969.44	FALSE	100
2022-09-13	13:56:46	0.264237	1.17538	1.47464	2872.65	FALSE	100
2022-09-13	13:56:46	0.291311	1.29581	1.47464	2970.74	FALSE	100
2022-09-13	13:56:47	0.284695	1.26638	1.35874	2873.92	FALSE	100
2022-09-13	13:56:47	0.309937	1.37866	1.35874	2972.12	FALSE	100
2022-09-13	13:56:47	0.321743	1.43118	1.35874	2875.35	FALSE	100
2022-09-13	13:56:48	0.315331	1.40266	1.78454	2973.52	FALSE	100
2022-09-13	13:56:48	0.278486	1.23876	1.78454	2876.59	FALSE	100
2022-09-13	13:56:48	0.436858	1.94323	1.78454	2975.46	FALSE	100
2022-09-13	13:56:48	0.574059	2.55353	1.78454	2879.14	FALSE	100
2022-09-13	13:56:49	0.610445	2.71538	1.94895	2978.18	FALSE	100
2022-09-13	13:56:49	0.390496	1.737	1.94895	2880.88	FALSE	100
2022-09-13	13:56:49	0.433295	1.92738	1.94895	2980.1	FALSE	100
2022-09-13	13:56:49	0.318334	1.41601	1.94895	2882.29	FALSE	100
2022-09-13	13:56:50	0.299809	1.33361	1.3043	2981.44	FALSE	100
2022-09-13	13:56:50	0.270038	1.20118	1.3043	2883.49	FALSE	100
2022-09-13	13:56:50	0.282506	1.25664	1.3043	2982.69	FALSE	100
2022-09-13	13:56:50	0.320522	1.42575	1.3043	2884.92	FALSE	100
2022-09-13	13:56:51	0.232583	1.03458	0.97255	2983.73	FALSE	100
2022-09-13	13:56:51	0.272023	1.21001	0.97255	2886.13	FALSE	100
2022-09-13	13:56:51	0.151311	0.673062	0.97255	2984.4	FALSE	100
2022-09-13	13:56:52	0.328919	1.4631	1.35325	2887.59	FALSE	100
2022-09-13	13:56:52	0.268613	1.19484	1.35325	2985.6	FALSE	100
2022-09-13	13:56:52	0.333193	1.48211	1.35325	2889.08	FALSE	100
2022-09-13	13:56:52	0.286171	1.27295	1.35325	2986.87	FALSE	100
2022-09-13	13:56:53	0.253143	1.12603	1.34035	2890.2	FALSE	100
2022-09-13	13:56:53	0.295076	1.31256	1.34035	2988.18	FALSE	100
2022-09-13	13:56:53	0.347341	1.54504	1.34035	2891.75	FALSE	100
2022-09-13	13:56:53	0.309733	1.37775	1.34035	2989.56	FALSE	100
2022-09-13	13:56:54	0.305814	1.36032	1.20232	2893.11	FALSE	100
2022-09-13	13:56:54	0.267138	1.18828	1.20232	2990.75	FALSE	100
2022-09-13	13:56:54	0.237926	1.05834	1.20232	2894.17	FALSE	100
2022-09-13	13:56:55	0.279657	1.24397	1.27311	2991.99	FALSE	100
2022-09-13	13:56:55	0.308206	1.37096	1.27311	2895.54	FALSE	100
2022-09-13	13:56:55	0.298741	1.32886	1.27311	2993.32	FALSE	100
2022-09-13	13:56:55	0.258232	1.14867	1.27311	2896.69	FALSE	100
2022-09-13	13:56:56	0.226934	1.00945	1.37741	2994.33	FALSE	100
2022-09-13	13:56:56	0.192277	0.855287	1.37741	2897.54	FALSE	100
2022-09-13	13:56:56	0.441031	1.96179	1.37741	2996.29	FALSE	100
2022-09-13	13:56:56	0.378384	1.68313	1.37741	2899.22	FALSE	100
2022-09-13	13:56:57	0.431972	1.9215	2.073	2998.21	FALSE	100
2022-09-13	13:56:57	0.441845	1.96541	2.073	2901.19	FALSE	100
2022-09-13	13:56:57	0.490496	2.18182	2.073	3000.4	FALSE	100
2022-09-13	13:56:57	0.499809	2.22325	2.073	2903.41	FALSE	100
2022-09-13	13:56:58	0.451056	2.00639	2.21086	3002.4	FALSE	100
2022-09-13	13:56:58	0.528461	2.3507	2.21086	2905.76	FALSE	100
2022-09-13	13:56:58	0.494822	2.20107	2.21086	3004.6	FALSE	100
2022-09-13	13:56:58	0.513753	2.28528	2.21086	2908.05	FALSE	100
2022-09-13	13:56:59	0.486832	2.16553	2.20763	3006.77	FALSE	100
2022-09-13	13:56:59	0.510394	2.27033	2.20763	2910.32	FALSE	100
2022-09-13	13:56:59	0.491667	2.18703	2.20763	3008.96	FALSE	100
2022-09-13	13:57:00	0.497163	2.21148	2.20412	2912.53	FALSE	100
2022-09-13	13:57:00	0.496654	2.20922	2.20412	3011.16	FALSE	100
2022-09-13	13:57:00	0.504644	2.24476	2.20412	2914.77	FALSE	100
2022-09-13	13:57:00	0.483575	2.15104	2.20412	3013.32	FALSE	100
2022-09-13	13:57:01	0.506323	2.25223	2.01448	2917.03	FALSE	100
2022-09-13	13:57:01	0.540878	2.40593	2.01448	3015.72	FALSE	100
2022-09-13	13:57:01	0.461692	2.0537	2.01448	2919.08	FALSE	100
2022-09-13	13:57:01	0.302608	1.34606	2.01448	3017.07	FALSE	100
2022-09-13	13:57:02	0.327545	1.45699	1.40169	2920.54	FALSE	100
2022-09-13	13:57:02	0.304033	1.3524	1.40169	3018.42	FALSE	100
2022-09-13	13:57:02	0.321183	1.42869	1.40169	2921.97	FALSE	100
2022-09-13	13:57:02	0.307697	1.3687	1.40169	3019.79	FALSE	100
2022-09-13	13:57:03	0.310293	1.38025	1.40115	2923.35	FALSE	100
2022-09-13	13:57:03	0.310547	1.38138	1.40115	3021.17	FALSE	100
2022-09-13	13:57:03	0.324135	1.44182	1.40115	2924.79	FALSE	100
2022-09-13	13:57:04	0.323168	1.43752	1.44261	3022.61	FALSE	100
2022-09-13	13:57:04	0.307901	1.36961	1.44261	2926.16	FALSE	100
2022-09-13	13:57:04	0.340267	1.51358	1.44261	3024.12	FALSE	100
2022-09-13	13:57:04	0.325916	1.44974	1.44261	2927.61	FALSE	100
2022-09-13	13:57:05	0.337417	1.5009	1.5211	3025.62	FALSE	100
2022-09-13	13:57:05	0.35813	1.59303	1.5211	2929.2	FALSE	100
2022-09-13	13:57:05	0.338283	1.50475	1.5211	3027.13	FALSE	100
2022-09-13	13:57:05	0.334008	1.48573	1.5211	2930.69	FALSE	100
2022-09-13	13:57:06	0.321234	1.42891	1.49275	3028.56	FALSE	100
2022-09-13	13:57:06	0.335229	1.49117	1.49275	2932.18	FALSE	100
2022-09-13	13:57:06	0.350293	1.55817	1.49275	3030.11	FALSE	100
2022-09-13	13:57:07	0.360013	1.60141	1.63684	2933.78	FALSE	100
2022-09-13	13:57:07	0.359097	1.59734	1.63684	3031.71	FALSE	100
2022-09-13	13:57:07	0.374517	1.66593	1.63684	2935.45	FALSE	100
2022-09-13	13:57:07	0.378283	1.68268	1.63684	3033.39	FALSE	100
2022-09-13	13:57:08	0.358486	1.59462	1.6168	2937.04	FALSE	100
2022-09-13	13:57:08	0.353601	1.57289	1.6168	3034.97	FALSE	100
2022-09-13	13:57:08	0.372837	1.65845	1.6168	2938.7	FALSE	100
2022-09-13	13:57:08	0.36897	1.64125	1.6168	3036.61	FALSE	100
2022-09-13	13:57:09	0.366578	1.63061	1.58087	2940.33	FALSE	100
2022-09-13	13:57:09	0.342201	1.52218	1.58087	3038.13	FALSE	100
2022-09-13	13:57:09	0.349784	1.55591	1.58087	2941.88	FALSE	100
2022-09-13	13:57:09	0.363015	1.61476	1.58087	3039.75	FALSE	100
2022-09-13	13:57:10	0.424695	1.88913	1.76847	2943.77	FALSE	100
2022-09-13	13:57:10	0.394567	1.75511	1.76847	3041.5	FALSE	100
2022-09-13	13:57:10	0.374313	1.66502	1.76847	2945.44	FALSE	100
2022-09-13	13:57:10	0.396705	1.76462	1.76847	3043.26	FALSE	100
2022-09-13	13:57:11	0.449428	1.99915	1.83163	2947.44	FALSE	100
2022-09-13	13:57:11	0.394415	1.75444	1.83163	3045.02	FALSE	100
2022-09-13	13:57:11	0.391463	1.74131	1.83163	2949.18	FALSE	100
2022-09-13	13:57:12	0.348613	1.5507	1.68047	3046.57	FALSE	100
2022-09-13	13:57:12	0.359402	1.59869	1.68047	2950.78	FALSE	100
2022-09-13	13:57:12	0.41355	1.83955	1.68047	3048.41	FALSE	100
2022-09-13	13:57:12	0.38958	1.73293	1.68047	2952.51	FALSE	100
2022-09-13	13:57:13	0.351158	1.56202	1.68364	3049.97	FALSE	100
2022-09-13	13:57:13	0.358079	1.59281	1.68364	2954.1	FALSE	100
2022-09-13	13:57:13	0.414618	1.8443	1.68364	3051.82	FALSE	100
2022-09-13	13:57:13	0.39014	1.73542	1.68364	2955.84	FALSE	100
2022-09-13	13:57:14	0.384644	1.71097	1.6239	3053.53	FALSE	100
2022-09-13	13:57:14	0.326476	1.45223	1.6239	2957.29	FALSE	100
2022-09-13	13:57:14	0.384084	1.70848	1.6239	3055.24	FALSE	100
2022-09-13	13:57:15	0.439656	1.95568	1.83033	2959.25	FALSE	100
2022-09-13	13:57:15	0.406018	1.80605	1.83033	3057.04	FALSE	100
2022-09-13	13:57:15	0.417519	1.85721	1.83033	2961.1	FALSE	100
2022-09-13	13:57:15	0.38271	1.70237	1.83033	3058.74	FALSE	100
2022-09-13	13:57:16	0.456858	2.0322	1.91097	2963.14	FALSE	100
2022-09-13	13:57:16	0.413753	1.84046	1.91097	3060.58	FALSE	100
2022-09-13	13:57:16	0.411056	1.82846	1.91097	2964.97	FALSE	100
2022-09-13	13:57:16	0.436756	1.94278	1.91097	3062.53	FALSE	100
2022-09-13	13:57:17	0.428563	1.90633	1.91176	2966.87	FALSE	100
2022-09-13	13:57:17	0.433397	1.92784	1.91176	3064.45	FALSE	100
2022-09-13	13:57:17	0.43187	1.92104	1.91176	2968.79	FALSE	100
2022-09-13	13:57:17	0.425305	1.89184	1.91176	3066.35	FALSE	100
2022-09-13	13:57:18	0.423117	1.88211	1.89682	2970.67	FALSE	100
2022-09-13	13:57:18	0.426578	1.8975	1.89682	3068.24	FALSE	100
2022-09-13	13:57:18	0.430853	1.91652	1.89682	2972.59	FALSE	100
2022-09-13	13:57:18	0.425153	1.89117	1.89682	3070.14	FALSE	100
2022-09-13	13:57:19	0.374771	1.66706	1.31301	2974.26	FALSE	100
2022-09-13	13:57:19	0.288155	1.28177	1.31301	3071.42	FALSE	100
2022-09-13	13:57:19	0.222608	0.990205	1.31301	2975.25	FALSE	100
2022-09-13	13:57:20	0.1507	0.670344	1.0009	3072.09	FALSE	100
2022-09-13	13:57:20	0.162507	0.722864	1.0009	2975.97	FALSE	100
2022-09-13	13:57:20	0.190751	0.848499	1.0009	3072.94	FALSE	100
2022-09-13	13:57:20	0.396094	1.76191	1.0009	2977.73	FALSE	100
2022-09-13	13:57:21	0.492277	2.18975	2.93508	3075.13	FALSE	100
2022-09-13	13:57:21	1.03732	4.61421	2.93508	2982.35	FALSE	100
2022-09-13	13:57:21	0.523932	2.33055	2.93508	3077.46	FALSE	100
2022-09-13	13:57:21	0.585814	2.60582	2.93508	2984.95	FALSE	100
2022-09-13	13:57:22	0.54444	2.42178	1.88884	3079.88	FALSE	100
2022-09-13	13:57:22	0.401997	1.78816	1.88884	2986.74	FALSE	100
2022-09-13	13:57:22	0.413193	1.83797	1.88884	3081.72	FALSE	100
2022-09-13	13:57:22	0.338893	1.50746	1.88884	2988.25	FALSE	100
2022-09-13	13:57:23	0.60098	2.67328	2.22536	3084.39	FALSE	100
2022-09-13	13:57:23	0.427697	1.90248	2.22536	2990.15	FALSE	100
2022-09-13	13:57:23	0.472176	2.10033	2.22536	3086.49	FALSE	100
2022-09-13	13:57:24	0.465407	2.07022	2.35738	2992.22	FALSE	100
2022-09-13	13:57:24	0.492634	2.19133	2.35738	3088.68	FALSE	100
2022-09-13	13:57:24	0.61813	2.74957	2.35738	2994.97	FALSE	100
2022-09-13	13:57:24	0.543677	2.41838	2.35738	3091.1	FALSE	100
2022-09-13	13:57:25	0.57584	2.56145	2.6662	2997.53	FALSE	100
2022-09-13	13:57:25	0.545305	2.42563	2.6662	3093.52	FALSE	100
2022-09-13	13:57:25	0.548919	2.4417	2.6662	2999.97	FALSE	100
2022-09-13	13:57:25	0.727494	3.23604	2.6662	3096.76	FALSE	100
2022-09-13	13:57:26	1.06653	4.74414	3.13542	3004.72	FALSE	100
2022-09-13	13:57:26	0.985916	4.38555	3.13542	3101.15	FALSE	100
2022-09-13	13:57:26	0.679555	3.0228	3.13542	3007.74	FALSE	100
2022-09-13	13:57:26	0.0874938	0.38919	3.13542	3101.54	FALSE	100
2022-09-13	13:57:27	0.0705473	0.313808	-0.414126	3008.05	FALSE	100
2022-09-13	13:57:27	-0.0924552	-0.411259	-0.414126	3101.54	FALSE	100
2022-09-13	13:57:27	-0.257391	-1.14493	-0.414126	3008.05	FALSE	100
2022-09-13	13:57:28	-0.487264	-2.16745	-5.09697	3101.54	FALSE	100
2022-09-13	13:57:28	-1.33322	-5.93043	-5.09697	3008.05	FALSE	100
2022-09-13	13:57:28	-1.37454	-6.11423	-5.09697	3101.54	FALSE	100
2022-09-13	13:57:28	-1.38838	-6.17579	-5.09697	3008.05	FALSE	100
2022-09-13	13:57:29	-1.50365	-6.68854	-4.93597	3101.54	FALSE	100
2022-09-13	13:57:29	-1.11393	-4.95498	-4.93597	3008.05	FALSE	100
2022-09-13	13:57:29	-1.25673	-5.59019	-4.93597	3101.54	FALSE	100
2022-09-13	13:57:29	-0.564312	-2.51017	-4.93597	3008.05	FALSE	100
2022-09-13	13:57:30	-0.143498	-0.638308	0.616411	3101.54	FALSE	100
2022-09-13	13:57:30	0.0895804	0.398472	0.616411	3008.45	FALSE	100
2022-09-13	13:57:30	0.296603	1.31935	0.616411	3102.85	FALSE	100
2022-09-13	13:57:30	0.311616	1.38613	0.616411	3009.84	FALSE	100
2022-09-13	13:57:31	0.182557	0.81205	1.35655	3103.67	FALSE	100
2022-09-13	13:57:31	0.316145	1.40628	1.35655	3011.25	FALSE	100
2022-09-13	13:57:31	0.416196	1.85132	1.35655	3105.52	FALSE	100
2022-09-13	13:57:32	0.225458	1.00288	0.975718	3012.25	FALSE	100
2022-09-13	13:57:32	0.215687	0.959419	0.975718	3106.48	FALSE	100
2022-09-13	13:57:32	0.233194	1.03729	0.975718	3013.29	FALSE	100
2022-09-13	13:57:32	0.203066	0.903278	0.975718	3107.38	FALSE	100
2022-09-13	13:57:33	0.188257	0.837405	0.797791	3014.12	FALSE	100
2022-09-13	13:57:33	0.148919	0.662421	0.797791	3108.04	FALSE	100
2022-09-13	13:57:33	0.144746	0.643859	0.797791	3014.77	FALSE	100
2022-09-13	13:57:33	0.235484	1.04748	0.797791	3109.09	FALSE	100
2022-09-13	13:57:34	0.205153	0.912562	1.0148	3015.68	FALSE	100
2022-09-13	13:57:34	0.206883	0.920257	1.0148	3110.01	FALSE	100
2022-09-13	13:57:34	0.272379	1.2116	1.0148	3016.89	FALSE	100
2022-09-13	13:57:35	0.198028	0.880868	0.996431	3110.89	FALSE	100
2022-09-13	13:57:35	0.188359	0.837859	0.996431	3017.73	FALSE	100
2022-09-13	13:57:35	0.246934	1.09841	0.996431	3111.99	FALSE	100
2022-09-13	13:57:35	0.26271	1.16859	0.996431	3018.9	FALSE	100
2022-09-13	13:57:36	0.273295	1.21567	1.59377	3113.21	FALSE	100
2022-09-13	13:57:36	0.585916	2.60627	1.59377	3021.5	FALSE	100
2022-09-13	13:57:36	0.367697	1.63559	1.59377	3114.84	FALSE	100
2022-09-13	13:57:36	0.206272	0.917539	1.59377	3022.42	FALSE	100
2022-09-13	13:57:37	0.271107	1.20594	1.63927	3116.05	FALSE	100
2022-09-13	13:57:37	0.498435	2.21714	1.63927	3024.64	FALSE	100
2022-09-13	13:57:37	0.356756	1.58692	1.63927	3117.63	FALSE	100
2022-09-13	13:57:37	0.347799	1.54708	1.63927	3026.19	FALSE	100
2022-09-13	13:57:38	1.58658	7.05743	3.4314	3124.69	FALSE	100
2022-09-13	13:57:38	0.236552	1.05223	3.4314	3027.24	FALSE	100
2022-09-13	13:57:38	0.586323	2.60808	3.4314	3127.3	FALSE	100
2022-09-13	13:57:38	0.676196	3.00786	3.4314	3030.25	FALSE	100
2022-09-13	13:57:39	1.16032	5.16134	4.24868	3132.46	FALSE	100
2022-09-13	13:57:39	0.901947	4.01204	4.24868	3034.26	FALSE	100
2022-09-13	13:57:39	0.803168	3.57265	4.24868	3136.03	FALSE	100
2022-09-13	13:57:40	2.50312	11.1344	9.99645	3045.39	FALSE	100
2022-09-13	13:57:40	2.37436	10.5616	9.99645	3146.6	FALSE	100
2022-09-13	13:57:40	2.92347	13.0042	9.99645	3058.4	FALSE	100
2022-09-13	13:57:40	1.18826	5.28562	9.99645	3151.88	FALSE	100
2022-09-13	13:57:41	1.60271	7.12917	9.61768	3065.53	FALSE	100
2022-09-13	13:57:41	1.86877	8.31266	9.61768	3160.19	FALSE	100
2022-09-13	13:57:41	1.94413	8.64788	9.61768	3074.17	FALSE	100
2022-09-13	13:57:41	3.23299	14.381	9.61768	3174.58	1	101
2022-09-13	13:57:42	5.84754	26.011	27.55	3100.18	1	102
2022-09-13	13:57:42	3.68627	16.3973	27.55	3190.97	1	103
2022-09-13	13:57:42	4.46235	19.8494	27.55	3120.03	1	104
2022-09-13	13:57:42	10.7779	47.9423	27.55	3238.91	1	105
2022-09-13	13:57:43	8.33609	37.0806	26.0282	3157.11	1	106
2022-09-13	13:57:43	3.72627	16.5752	26.0282	3255.49	1	107
2022-09-13	13:57:43	5.49182	24.4287	26.0282	3181.54	1	108
2022-09-13	13:57:44	3.99044	17.7503	11.3075	3273.24	1	109
2022-09-13	13:57:44	2.59599	11.5475	11.3075	3193.09	FALSE	109
2022-09-13	13:57:44	1.23604	5.49815	11.3075	3278.74	FALSE	109
2022-09-13	13:57:44	2.34566	10.434	11.3075	3203.52	FALSE	109

## Sheet: Unnamed_harness_20229131352 (3)
Date	Times	Lbs	Newtons	Total force x time	total steps > 13.345		**GoPro Fitting: 1342
2022-09-13	13:52:44	0.53416	2.37605	2.37605	FALSE	0			Total force x time	3203.52
2022-09-13	13:52:44	0.498791	2.21872	2.21872	FALSE	0			Total steps	109
2022-09-13	13:52:44	0.404033	1.79722	4.17327	FALSE	0
2022-09-13	13:52:44	0.664644	2.95647	5.17519	FALSE	0
2022-09-13	13:52:45	0.408308	1.81624	5.98951	FALSE	0
2022-09-13	13:52:45	0.466832	2.07656	7.25175	FALSE	0
2022-09-13	13:52:45	0.564746	2.5121	8.50161	FALSE	0
2022-09-13	13:52:46	0.564695	2.51188	9.76363	FALSE	0
2022-09-13	13:52:46	0.655585	2.91617	11.4178	FALSE	0
2022-09-13	13:52:46	0.556756	2.47656	12.2402	FALSE	0
2022-09-13	13:52:46	-2.30314	-10.2448	11.4178	FALSE	0
2022-09-13	13:52:47	-2.95352	-13.1378	12.2402	FALSE	0
2022-09-13	13:52:47	-3.0721	-13.6653	11.4178	FALSE	0
2022-09-13	13:52:47	-3.13541	-13.9469	12.2402	FALSE	0
2022-09-13	13:52:47	-3.34747	-14.8902	11.4178	FALSE	0
2022-09-13	13:52:48	-3.56838	-15.8729	12.2402	FALSE	0
2022-09-13	13:52:48	-3.75861	-16.719	11.4178	FALSE	0
2022-09-13	13:52:48	-3.54426	-15.7656	12.2402	FALSE	0
2022-09-13	13:52:48	-3.51144	-15.6196	11.4178	FALSE	0
2022-09-13	13:52:49	-3.56375	-15.8523	12.2402	FALSE	0
2022-09-13	13:52:49	-3.85673	-17.1555	11.4178	FALSE	0
2022-09-13	13:52:49	-3.86121	-17.1754	12.2402	FALSE	0
2022-09-13	13:52:49	-3.95881	-17.6096	11.4178	FALSE	0
2022-09-13	13:52:50	-4.28004	-19.0385	12.2402	FALSE	0
2022-09-13	13:52:50	-3.08619	-13.728	11.4178	FALSE	0
2022-09-13	13:52:50	6.71263	29.8591	42.0993	1	1
2022-09-13	13:52:51	12.3595	54.9775	66.3953	1	2
2022-09-13	13:52:51	10.0232	44.5852	86.6845	1	3
2022-09-13	13:52:51	4.44367	19.7663	86.1616	1	4
2022-09-13	13:52:51	4.96342	22.0783	108.763	1	5
2022-09-13	13:52:52	11.8582	52.7476	138.909	1	6
2022-09-13	13:52:52	12.6657	56.3396	165.102	1	7
2022-09-13	13:52:52	0.610191	2.71425	141.624	FALSE	7
2022-09-13	13:52:52	-0.0580023	-0.258006	165.102	FALSE	7
2022-09-13	13:52:53	-0.186654	-0.830274	141.624	FALSE	7
2022-09-13	13:52:53	-0.70706	-3.14514	165.102	FALSE	7
2022-09-13	13:52:53	-0.234084	-1.04125	141.624	FALSE	7
2022-09-13	13:52:53	0.889885	3.95839	169.061	FALSE	7
2022-09-13	13:52:54	1.12922	5.023	146.647	FALSE	7
2022-09-13	13:52:54	0.951565	4.23275	173.294	FALSE	7
2022-09-13	13:52:54	0.92159	4.09942	150.746	FALSE	7
2022-09-13	13:52:55	0.845254	3.75986	177.053	FALSE	7
2022-09-13	13:52:55	0.817672	3.63717	154.383	FALSE	7
2022-09-13	13:52:55	0.453193	2.01589	179.069	FALSE	7
2022-09-13	13:52:55	0.647239	2.87905	157.262	FALSE	7
2022-09-13	13:52:56	0.603728	2.6855	181.755	FALSE	7
2022-09-13	13:52:56	0.935789	4.16258	161.425	FALSE	7
2022-09-13	13:52:56	0.59528	2.64792	184.403	FALSE	7
2022-09-13	13:52:56	0.501641	2.2314	163.656	FALSE	7
2022-09-13	13:52:57	0.311921	1.38749	185.79	FALSE	7
2022-09-13	13:52:57	0.109377	0.486531	164.143	FALSE	7
2022-09-13	13:52:57	0.409071	1.81963	187.61	FALSE	7
2022-09-13	13:52:57	0.327596	1.45721	165.6	FALSE	7
2022-09-13	13:52:58	0.254364	1.13146	188.741	FALSE	7
2022-09-13	13:52:58	0.139453	0.620315	166.22	FALSE	7
2022-09-13	13:52:58	0.0673411	0.299547	189.041	FALSE	7
2022-09-13	13:52:59	-0.378155	-1.68211	166.22	FALSE	7
2022-09-13	13:52:59	-0.500648	-2.22698	189.041	FALSE	7
2022-09-13	13:52:59	-0.623244	-2.77231	166.22	FALSE	7
2022-09-13	13:52:59	-0.556781	-2.47667	189.041	FALSE	7
2022-09-13	13:53:00	-0.663294	-2.95046	166.22	FALSE	7
2022-09-13	13:53:00	-0.659376	-2.93304	189.041	FALSE	7
2022-09-13	13:53:00	-0.665483	-2.9602	166.22	FALSE	7
2022-09-13	13:53:00	-0.610521	-2.71572	189.041	FALSE	7
2022-09-13	13:53:01	-0.155814	-0.693092	166.22	FALSE	7
2022-09-13	13:53:01	0.396196	1.76236	190.803	FALSE	7
2022-09-13	13:53:01	0.417417	1.85675	168.077	FALSE	7
2022-09-13	13:53:01	0.336247	1.49569	192.299	FALSE	7
2022-09-13	13:53:02	0.170547	0.758627	168.836	FALSE	7
2022-09-13	13:53:02	-0.192659	-0.856986	192.299	FALSE	7
2022-09-13	13:53:02	-0.104313	-0.464005	168.836	FALSE	7
2022-09-13	13:53:03	-0.196425	-0.873738	192.299	FALSE	7
2022-09-13	13:53:03	-0.441259	-1.96281	168.836	FALSE	7
2022-09-13	13:53:03	-0.676882	-3.01091	192.299	FALSE	7
2022-09-13	13:53:03	-1.14401	-5.08879	168.836	FALSE	7
2022-09-13	13:53:04	-0.163549	-0.727499	192.299	FALSE	7
2022-09-13	13:53:04	0.144033	0.640688	169.476	FALSE	7
2022-09-13	13:53:04	0.324797	1.44476	193.744	FALSE	7
2022-09-13	13:53:05	1.75813	7.82051	177.297	FALSE	7
2022-09-13	13:53:05	2.59533	11.5445	205.288	FALSE	7
2022-09-13	13:53:05	3.74368	16.6526	193.949	1	8
2022-09-13	13:53:05	2.75981	12.2762	217.564	FALSE	8
2022-09-13	13:53:05	3.49625	15.552	209.501	1	9
2022-09-13	13:53:06	2.36235	10.5082	228.073	FALSE	9
2022-09-13	13:53:06	2.24836	10.0012	219.503	FALSE	9
2022-09-13	13:53:06	1.65635	7.36778	235.44	FALSE	9
2022-09-13	13:53:07	0.953346	4.24067	223.743	FALSE	9
2022-09-13	13:53:07	0.772226	3.43502	238.875	FALSE	9
2022-09-13	13:53:07	0.475891	2.11686	225.86	FALSE	9
2022-09-13	13:53:07	0.517926	2.30384	241.179	FALSE	9
2022-09-13	13:53:08	0.619707	2.75658	228.617	FALSE	9
2022-09-13	13:53:08	0.355992	1.58352	242.763	FALSE	9
2022-09-13	13:53:08	0.526578	2.34232	230.959	FALSE	9
2022-09-13	13:53:08	0.571361	2.54153	245.304	FALSE	9
2022-09-13	13:53:09	0.328155	1.4597	232.419	FALSE	9
2022-09-13	13:53:09	0.748766	3.33066	248.635	FALSE	9
2022-09-13	13:53:09	0.493499	2.19518	234.614	FALSE	9
2022-09-13	13:53:09	0.916196	4.07542	252.71	FALSE	9
2022-09-13	13:53:10	1.27034	5.65073	240.265	FALSE	9
2022-09-13	13:53:10	1.27492	5.6711	258.381	FALSE	9
2022-09-13	13:53:10	2.26098	10.0573	250.322	FALSE	9
2022-09-13	13:53:11	1.42795	6.35181	264.733	FALSE	9
2022-09-13	13:53:11	1.9821	8.81678	259.139	FALSE	9
2022-09-13	13:53:11	2.5162	11.1926	275.926	FALSE	9
2022-09-13	13:53:11	1.80648	8.03558	267.174	FALSE	9
2022-09-13	13:53:12	1.97345	8.7783	284.704	FALSE	9
2022-09-13	13:53:12	1.8822	8.3724	275.547	FALSE	9
2022-09-13	13:53:12	1.73833	7.73244	292.437	FALSE	9
2022-09-13	13:53:12	2.12775	9.46466	285.011	FALSE	9
2022-09-13	13:53:13	2.07905	9.24803	301.685	FALSE	9
2022-09-13	13:53:13	1.97162	8.77016	293.782	FALSE	9
2022-09-13	13:53:13	1.89294	8.42018	310.105	FALSE	9
2022-09-13	13:53:13	1.54546	6.87452	300.656	FALSE	9
2022-09-13	13:53:14	1.70907	7.60229	317.707	FALSE	9
2022-09-13	13:53:14	1.86251	8.28482	308.941	FALSE	9
2022-09-13	13:53:14	1.60225	7.12713	324.834	FALSE	9
2022-09-13	13:53:15	1.72378	7.66772	316.609	FALSE	9
2022-09-13	13:53:15	1.88866	8.40114	333.235	FALSE	9
2022-09-13	13:53:15	1.63869	7.28922	323.898	FALSE	9
2022-09-13	13:53:15	1.61253	7.17286	340.408	FALSE	9
2022-09-13	13:53:16	1.96286	8.73119	332.629	FALSE	9
2022-09-13	13:53:16	1.7334	7.71051	348.119	FALSE	9
2022-09-13	13:53:16	1.58413	7.04653	339.676	FALSE	9
2022-09-13	13:53:16	1.54836	6.88741	355.006	FALSE	9
2022-09-13	13:53:17	1.63747	7.28379	346.959	FALSE	9
2022-09-13	13:53:17	1.85447	8.24905	363.255	FALSE	9
2022-09-13	13:53:17	1.68576	7.4986	354.458	FALSE	9
2022-09-13	13:53:17	1.94352	8.64517	371.9	FALSE	9
2022-09-13	13:53:18	1.80464	8.0274	362.485	FALSE	9
2022-09-13	13:53:18	1.3249	5.89342	377.794	FALSE	9
2022-09-13	13:53:18	1.44383	6.42244	368.908	FALSE	9
2022-09-13	13:53:19	1.56164	6.94649	384.74	FALSE	9
2022-09-13	13:53:19	2.38851	10.6246	379.532	FALSE	9
2022-09-13	13:53:19	1.63146	7.25706	391.997	FALSE	9
2022-09-13	13:53:19	2.81818	12.5358	392.068	FALSE	9
2022-09-13	13:53:20	3.67874	16.3638	408.361	1	10
2022-09-13	13:53:20	3.88627	17.2869	409.355	1	11
2022-09-13	13:53:20	5.19375	23.1028	431.464	1	12
2022-09-13	13:53:20	5.14205	22.8729	432.228	1	13
2022-09-13	13:53:21	4.8139	21.4132	452.877	1	14
2022-09-13	13:53:21	5.21685	23.2056	455.434	1	15
2022-09-13	13:53:21	4.61711	20.5378	473.415	1	16
2022-09-13	13:53:21	5.14596	22.8903	478.324	1	17
2022-09-13	13:53:22	4.52566	20.131	493.546	1	18
2022-09-13	13:53:22	3.30597	14.7056	493.029	1	19
2022-09-13	13:53:22	2.95248	13.1332	506.679	FALSE	19
2022-09-13	13:53:23	2.93233	13.0436	506.073	FALSE	19
2022-09-13	13:53:23	4.03874	17.9651	524.644	1	20
2022-09-13	13:53:23	3.87945	17.2566	523.33	1	21
2022-09-13	13:53:23	4.28846	19.0759	543.72	1	22
2022-09-13	13:53:24	3.40515	15.1468	538.476	1	23
2022-09-13	13:53:24	2.56474	11.4085	555.129	FALSE	23
2022-09-13	13:53:24	2.66479	11.8535	550.33	FALSE	23
2022-09-13	13:53:24	2.04042	9.0762	564.205	FALSE	23
2022-09-13	13:53:25	2.24281	9.97647	560.306	FALSE	23
2022-09-13	13:53:25	2.68678	11.9513	576.156	FALSE	23
2022-09-13	13:53:25	2.86149	12.7285	573.035	FALSE	23
2022-09-13	13:53:25	2.81905	12.5397	588.696	FALSE	23
2022-09-13	13:53:26	2.17645	9.68128	582.716	FALSE	23
2022-09-13	13:53:26	2.5739	11.4492	600.145	FALSE	23
2022-09-13	13:53:26	2.65345	11.8031	594.519	FALSE	23
2022-09-13	13:53:27	2.50668	11.1502	611.295	FALSE	23
2022-09-13	13:53:27	2.71716	12.0865	606.606	FALSE	23
2022-09-13	13:53:27	2.55426	11.3619	622.657	FALSE	23
2022-09-13	13:53:27	2.69156	11.9726	618.578	FALSE	23
2022-09-13	13:53:28	2.80332	12.4697	635.127	FALSE	23
2022-09-13	13:53:28	2.59202	11.5298	630.108	FALSE	23
2022-09-13	13:53:28	2.89314	12.8693	647.996	FALSE	23
2022-09-13	13:53:28	3.04999	13.567	643.675	1	24
2022-09-13	13:53:29	2.80785	12.4899	660.486	FALSE	24
2022-09-13	13:53:29	3.38642	15.0635	658.738	1	25
2022-09-13	13:53:29	0.995229	4.42698	664.913	FALSE	25
2022-09-13	13:53:29	1.24714	5.54753	664.286	FALSE	25
2022-09-13	13:53:30	5.32596	23.6909	688.604	1	26
2022-09-13	13:53:30	10.0877	44.8721	709.158	1	27
2022-09-13	13:53:30	15.381	68.4178	757.022	1	28
2022-09-13	13:53:31	10.7754	47.9311	757.089	1	29
2022-09-13	13:53:31	8.42703	37.4851	794.507	1	30
2022-09-13	13:53:31	7.98856	35.5347	792.624	1	31
2022-09-13	13:53:31	9.33741	41.5347	836.042	1	32
2022-09-13	13:53:32	8.08917	35.9822	828.606	1	33
2022-09-13	13:53:32	9.33228	41.5118	877.553	1	34
2022-09-13	13:53:32	4.57416	20.3468	848.953	1	35
2022-09-13	13:53:32	4.52856	20.1439	897.697	1	36
2022-09-13	13:53:33	0.912633	4.05957	853.013	FALSE	36
2022-09-13	13:53:33	3.01151	13.3958	911.093	1	37
2022-09-13	13:53:33	6.09207	27.0987	880.111	1	38
2022-09-13	13:53:33	6.28993	27.9789	939.072	1	39
2022-09-13	13:53:34	5.14535	22.8875	902.999	1	40
2022-09-13	13:53:34	3.98978	17.7473	956.819	1	41
2022-09-13	13:53:34	1.5251	6.78395	909.783	FALSE	41
2022-09-13	13:53:35	4.67029	20.7744	977.594	1	42
2022-09-13	13:53:35	6.0397	26.8658	936.649	1	43
2022-09-13	13:53:35	3.9966	17.7777	995.371	1	44
2022-09-13	13:53:35	3.7392	16.6327	953.281	1	45
2022-09-13	13:53:36	1.88576	8.38824	1003.76	FALSE	45
2022-09-13	13:53:36	4.17151	18.5557	971.837	1	46
2022-09-13	13:53:36	8.1083	36.0673	1039.83	1	47
2022-09-13	13:53:36	8.90194	39.5976	1011.43	1	48
2022-09-13	13:53:37	6.92576	30.8072	1070.63	1	49
2022-09-13	13:53:37	10.1014	44.933	1056.37	1	50
2022-09-13	13:53:37	14.4701	64.3659	1135	1	51
2022-09-13	13:53:37	4.94647	22.0029	1078.37	1	52
2022-09-13	13:53:38	0.76958	3.42325	1138.42	FALSE	52
2022-09-13	13:53:38	0.789783	3.51311	1081.88	FALSE	52
2022-09-13	13:53:38	0.294618	1.31052	1139.73	FALSE	52
2022-09-13	13:53:39	0.31986	1.4228	1083.31	FALSE	52
2022-09-13	13:53:39	0.254517	1.13214	1140.87	FALSE	52
2022-09-13	13:53:39	0.817112	3.63468	1086.94	FALSE	52
2022-09-13	13:53:39	0.812582	3.61453	1144.48	FALSE	52
2022-09-13	13:53:40	4.32408	19.2344	1106.18	1	53
2022-09-13	13:53:40	10.698	47.5868	1192.07	1	54
2022-09-13	13:53:40	4.98149	22.1587	1128.33	1	55
2022-09-13	13:53:40	5.21126	23.1807	1215.25	1	56
2022-09-13	13:53:41	12.6564	56.2982	1184.63	1	57
2022-09-13	13:53:41	5.37604	23.9137	1239.16	1	58
2022-09-13	13:53:41	3.13518	13.9459	1198.58	1	59
2022-09-13	13:53:41	0.570496	2.53768	1241.7	FALSE	59
2022-09-13	13:53:42	0.931565	4.14379	1202.72	FALSE	59
2022-09-13	13:53:42	0.446069	1.9842	1243.68	FALSE	59
2022-09-13	13:53:42	0.103982	0.462533	1203.18	FALSE	59
2022-09-13	13:53:43	0.679046	3.02053	1246.7	FALSE	59
2022-09-13	13:53:43	0.121438	0.540181	1203.72	FALSE	59
2022-09-13	13:53:43	-0.0727606	-0.323654	1246.7	FALSE	59
2022-09-13	13:53:43	-0.417951	-1.85913	1203.72	FALSE	59
2022-09-13	13:53:44	-0.527519	-2.34651	1246.7	FALSE	59
2022-09-13	13:53:44	-0.970572	-4.3173	1203.72	FALSE	59
2022-09-13	13:53:44	-0.903345	-4.01826	1246.7	FALSE	59
2022-09-13	13:53:44	-0.980495	-4.36144	1203.72	FALSE	59
2022-09-13	13:53:45	-1.03882	-4.62088	1246.7	FALSE	59
2022-09-13	13:53:45	-1.15235	-5.12588	1203.72	FALSE	59
2022-09-13	13:53:45	-1.01907	-4.53303	1246.7	FALSE	59
2022-09-13	13:53:45	-0.705024	-3.13609	1203.72	FALSE	59
2022-09-13	13:53:46	0.0395549	0.175948	1246.88	FALSE	59
2022-09-13	13:53:46	0.209835	0.933388	1204.66	FALSE	59
2022-09-13	13:53:46	-0.0189692	-0.0843788	1246.88	FALSE	59
2022-09-13	13:53:47	0.619351	2.755	1207.41	FALSE	59
2022-09-13	13:53:47	0.912277	4.05799	1250.94	FALSE	59
2022-09-13	13:53:47	1.40912	6.26805	1213.68	FALSE	59
2022-09-13	13:53:47	1.96668	8.74819	1259.69	FALSE	59
2022-09-13	13:53:48	1.80118	8.01201	1221.69	FALSE	59
2022-09-13	13:53:48	1.15732	5.14799	1264.83	FALSE	59
2022-09-13	13:53:48	1.27182	5.65731	1227.35	FALSE	59
2022-09-13	13:53:48	1.4705	6.54108	1271.38	FALSE	59
2022-09-13	13:53:49	1.22805	5.46261	1232.81	FALSE	59
2022-09-13	13:53:49	1.11518	4.96054	1276.34	FALSE	59
2022-09-13	13:53:49	1.24301	5.52916	1238.34	FALSE	59
2022-09-13	13:53:49	1.25752	5.5937	1281.93	FALSE	59
2022-09-13	13:53:50	1.2824	5.70437	1244.05	FALSE	59
2022-09-13	13:53:50	1.29589	5.76438	1287.69	FALSE	59
2022-09-13	13:53:50	1.10856	4.9311	1248.98	FALSE	59
2022-09-13	13:53:51	1.01156	4.49962	1292.19	FALSE	59
2022-09-13	13:53:51	1.15767	5.14955	1254.13	FALSE	59
2022-09-13	13:53:51	0.97701	4.34594	1296.54	FALSE	59
2022-09-13	13:53:51	0.959758	4.2692	1258.4	FALSE	59
2022-09-13	13:53:52	1.00571	4.4736	1301.01	FALSE	59
2022-09-13	13:53:52	1.25721	5.59232	1263.99	FALSE	59
2022-09-13	13:53:52	1.43497	6.38303	1307.4	FALSE	59
2022-09-13	13:53:52	1.02663	4.56666	1268.56	FALSE	59
2022-09-13	13:53:53	0.581285	2.58567	1309.98	FALSE	59
2022-09-13	13:53:53	1.55416	6.91321	1275.47	FALSE	59
2022-09-13	13:53:53	1.27477	5.67043	1315.65	FALSE	59
2022-09-13	13:53:53	2.22938	9.91673	1285.39	FALSE	59
2022-09-13	13:53:54	2.29457	10.2067	1325.86	FALSE	59
2022-09-13	13:53:54	1.422	6.32534	1291.71	FALSE	59
2022-09-13	13:53:54	1.2737	5.66567	1331.52	FALSE	59
2022-09-13	13:53:55	1.4908	6.63138	1298.34	FALSE	59
2022-09-13	13:53:55	1.09197	4.8573	1336.38	FALSE	59
2022-09-13	13:53:55	0.845865	3.76258	1302.1	FALSE	59
2022-09-13	13:53:55	1.50174	6.68004	1343.06	FALSE	59
2022-09-13	13:53:56	1.65391	7.35692	1309.46	FALSE	59
2022-09-13	13:53:56	1.8338	8.15711	1351.22	FALSE	59
2022-09-13	13:53:56	1.73777	7.72995	1317.19	FALSE	59
2022-09-13	13:53:56	1.50953	6.71469	1357.93	FALSE	59
2022-09-13	13:53:57	1.18658	5.27815	1322.47	FALSE	59
2022-09-13	13:53:57	1.07472	4.78057	1362.71	FALSE	59
2022-09-13	13:53:57	0.856145	3.8083	1326.28	FALSE	59
2022-09-13	13:53:57	0.78159	3.47667	1366.19	FALSE	59
2022-09-13	13:53:58	1.71253	7.61768	1333.9	FALSE	59
2022-09-13	13:53:58	1.30296	5.79583	1371.99	FALSE	59
2022-09-13	13:53:58	1.3223	5.88185	1339.78	FALSE	59
2022-09-13	13:53:59	1.3792	6.13496	1378.12	FALSE	59
2022-09-13	13:53:59	1.2878	5.72839	1345.51	FALSE	59
2022-09-13	13:53:59	1.34887	6.00004	1384.12	FALSE	59
2022-09-13	13:53:59	1.26337	5.61972	1351.13	FALSE	59
2022-09-13	13:54:00	1.24459	5.53619	1389.66	FALSE	59
2022-09-13	13:54:00	1.1937	5.30982	1356.44	FALSE	59
2022-09-13	13:54:00	1.21966	5.42529	1395.08	FALSE	59
2022-09-13	13:54:00	1.24683	5.54615	1361.98	FALSE	59
2022-09-13	13:54:01	1.4106	6.27463	1401.36	FALSE	59
2022-09-13	13:54:01	1.34958	6.0032	1367.98	FALSE	59
2022-09-13	13:54:01	1.3365	5.94502	1407.3	FALSE	59
2022-09-13	13:54:01	1.29915	5.77888	1373.76	FALSE	59
2022-09-13	13:54:02	1.29533	5.76189	1413.06	FALSE	59
2022-09-13	13:54:02	1.23416	5.48979	1379.25	FALSE	59
2022-09-13	13:54:02	1.28581	5.71954	1418.78	FALSE	59
2022-09-13	13:54:03	1.30154	5.78951	1385.04	FALSE	59
2022-09-13	13:54:03	1.32571	5.89702	1424.68	FALSE	59
2022-09-13	13:54:03	1.23401	5.48912	1390.53	FALSE	59
2022-09-13	13:54:03	1.27258	5.66069	1430.34	FALSE	59
2022-09-13	13:54:04	1.2337	5.48774	1396.02	FALSE	59
2022-09-13	13:54:04	1.2651	5.62742	1435.97	FALSE	59
2022-09-13	13:54:04	1.31569	5.85245	1401.87	FALSE	59
2022-09-13	13:54:04	1.26123	5.6102	1441.58	FALSE	59
2022-09-13	13:54:05	1.21782	5.41711	1407.29	FALSE	59
2022-09-13	13:54:05	1.2279	5.46194	1447.04	FALSE	59
2022-09-13	13:54:05	1.21431	5.40149	1412.69	FALSE	59
2022-09-13	13:54:05	1.25192	5.56879	1452.61	FALSE	59
2022-09-13	13:54:06	1.2334	5.48641	1418.18	FALSE	59
2022-09-13	13:54:06	1.26989	5.64872	1458.26	FALSE	59
2022-09-13	13:54:06	1.24571	5.54117	1423.72	FALSE	59
2022-09-13	13:54:07	1.21177	5.3902	1463.65	FALSE	59
2022-09-13	13:54:07	1.17584	5.23037	1428.95	FALSE	59
2022-09-13	13:54:07	1.19716	5.32521	1468.97	FALSE	59
2022-09-13	13:54:07	1.14251	5.08211	1434.03	FALSE	59
2022-09-13	13:54:08	1.21401	5.40016	1474.37	FALSE	59
2022-09-13	13:54:08	1.18841	5.28629	1439.32	FALSE	59
2022-09-13	13:54:08	1.15971	5.15862	1479.53	FALSE	59
2022-09-13	13:54:08	1.22653	5.45585	1444.77	FALSE	59
2022-09-13	13:54:09	1.0481	4.66216	1484.2	FALSE	59
2022-09-13	13:54:09	1.18663	5.27837	1450.05	FALSE	59
2022-09-13	13:54:09	1.26902	5.64485	1489.84	FALSE	59
2022-09-13	13:54:09	1.22617	5.45425	1455.51	FALSE	59
2022-09-13	13:54:10	0.978537	4.35273	1494.19	FALSE	59
2022-09-13	13:54:10	1.42505	6.33891	1461.84	FALSE	59
2022-09-13	13:54:10	1.20785	5.37276	1499.57	FALSE	59
2022-09-13	13:54:11	1.3335	5.93167	1467.78	FALSE	59
2022-09-13	13:54:11	1.1993	5.33473	1504.9	FALSE	59
2022-09-13	13:54:11	1.22607	5.4538	1473.23	FALSE	59
2022-09-13	13:54:11	1.18027	5.25008	1510.15	FALSE	59
2022-09-13	13:54:12	1.20312	5.35172	1478.58	FALSE	59
2022-09-13	13:54:12	1.17294	5.21747	1515.37	FALSE	59
2022-09-13	13:54:12	1.18159	5.25595	1483.84	FALSE	59
2022-09-13	13:54:12	1.18805	5.28468	1520.65	FALSE	59
2022-09-13	13:54:13	1.15401	5.13327	1488.97	FALSE	59
2022-09-13	13:54:13	1.17457	5.22472	1525.88	FALSE	59
2022-09-13	13:54:13	1.11726	4.9698	1493.94	FALSE	59
2022-09-13	13:54:13	1.15696	5.14639	1531.02	FALSE	59
2022-09-13	13:54:14	1.11162	4.94471	1498.89	FALSE	59
2022-09-13	13:54:14	1.29996	5.78248	1536.81	FALSE	59
2022-09-13	13:54:14	1.01564	4.51777	1503.4	FALSE	59
2022-09-13	13:54:15	1.15009	5.11583	1541.92	FALSE	59
2022-09-13	13:54:15	1.11263	4.9492	1508.35	FALSE	59
2022-09-13	13:54:15	1.12902	5.02211	1546.94	FALSE	59
2022-09-13	13:54:15	1.29324	5.75259	1514.11	FALSE	59
2022-09-13	13:54:16	1.3022	5.79245	1552.74	FALSE	59
2022-09-13	13:54:16	1.26357	5.62061	1519.73	FALSE	59
2022-09-13	13:54:16	1.21482	5.40376	1558.14	FALSE	59
2022-09-13	13:54:16	1.27864	5.68765	1525.41	FALSE	59
2022-09-13	13:54:17	1.38688	6.16912	1564.31	FALSE	59
2022-09-13	13:54:17	1.34149	5.96722	1531.38	FALSE	59
2022-09-13	13:54:17	1.27828	5.68605	1570	FALSE	59
2022-09-13	13:54:17	1.33757	5.94978	1537.33	FALSE	59
2022-09-13	13:54:18	1.36653	6.0786	1576.07	FALSE	59
2022-09-13	13:54:18	1.36449	6.06952	1543.4	FALSE	59
2022-09-13	13:54:18	1.30719	5.81464	1581.89	FALSE	59
2022-09-13	13:54:19	1.40103	6.23206	1549.63	FALSE	59
2022-09-13	13:54:19	1.43447	6.38081	1588.27	FALSE	59
2022-09-13	13:54:19	1.44831	6.44237	1556.07	FALSE	59
2022-09-13	13:54:19	1.51625	6.74458	1595.01	FALSE	59
2022-09-13	13:54:20	1.70052	7.56425	1563.64	FALSE	59
2022-09-13	13:54:20	1.59167	7.08007	1602.09	FALSE	59
2022-09-13	13:54:20	1.57859	7.02188	1570.66	FALSE	59
2022-09-13	13:54:20	1.55762	6.92861	1609.02	FALSE	59
2022-09-13	13:54:21	1.54988	6.89418	1577.55	FALSE	59
2022-09-13	13:54:21	1.55976	6.93812	1615.96	FALSE	59
2022-09-13	13:54:21	1.61584	7.18758	1584.74	FALSE	59
2022-09-13	13:54:21	1.6533	7.35421	1623.32	FALSE	59
2022-09-13	13:54:22	1.53711	6.83737	1591.58	FALSE	59
2022-09-13	13:54:22	1.44302	6.41884	1629.73	FALSE	59
2022-09-13	13:54:22	1.43279	6.37334	1597.95	FALSE	59
2022-09-13	13:54:23	1.39421	6.20172	1635.94	FALSE	59
2022-09-13	13:54:23	1.38698	6.16956	1604.12	FALSE	59
2022-09-13	13:54:23	1.3649	6.07135	1642.01	FALSE	59
2022-09-13	13:54:23	1.33823	5.95271	1610.08	FALSE	59
2022-09-13	13:54:24	1.348	5.99617	1648	FALSE	59
2022-09-13	13:54:24	1.31482	5.84858	1615.92	FALSE	59
2022-09-13	13:54:24	1.33553	5.9407	1653.94	FALSE	59
2022-09-13	13:54:24	1.31991	5.87122	1621.8	FALSE	59
2022-09-13	13:54:25	1.30398	5.80036	1659.74	FALSE	59
2022-09-13	13:54:25	1.27004	5.64939	1627.44	FALSE	59
2022-09-13	13:54:25	1.27955	5.69169	1665.44	FALSE	59
2022-09-13	13:54:25	1.27823	5.68582	1633.13	FALSE	59
2022-09-13	13:54:26	1.31899	5.86713	1671.3	FALSE	59
2022-09-13	13:54:26	1.31574	5.85267	1638.98	FALSE	59
2022-09-13	13:54:26	1.26378	5.62155	1676.92	FALSE	59
2022-09-13	13:54:27	1.2878	5.72839	1644.71	FALSE	59
2022-09-13	13:54:27	1.30001	5.7827	1682.71	FALSE	59
2022-09-13	13:54:27	1.28627	5.72159	1650.43	FALSE	59
2022-09-13	13:54:27	1.27843	5.68671	1688.39	FALSE	59
2022-09-13	13:54:28	1.31375	5.84382	1656.28	FALSE	59
2022-09-13	13:54:28	1.28495	5.71571	1694.11	FALSE	59
2022-09-13	13:54:28	1.34795	5.99595	1662.27	FALSE	59
2022-09-13	13:54:28	1.36668	6.07927	1700.19	FALSE	59
2022-09-13	13:54:29	1.29899	5.77817	1668.05	FALSE	59
2022-09-13	13:54:29	1.44388	6.42267	1706.61	FALSE	59
2022-09-13	13:54:29	1.18413	5.26725	1673.32	FALSE	59
2022-09-13	13:54:29	1.2876	5.7275	1712.34	FALSE	59
2022-09-13	13:54:30	1.16164	5.16721	1678.49	FALSE	59
2022-09-13	13:54:30	1.18836	5.28606	1717.63	FALSE	59
2022-09-13	13:54:30	0.9736	4.33077	1682.82	FALSE	59
2022-09-13	13:54:31	0.657265	2.92365	1720.55	FALSE	59
2022-09-13	13:54:31	0.7907	3.51719	1686.33	FALSE	59
2022-09-13	13:54:31	0.790293	3.51538	1724.06	FALSE	59
2022-09-13	13:54:31	0.592583	2.63593	1688.97	FALSE	59
2022-09-13	13:54:32	1.48027	6.58454	1730.65	FALSE	59
2022-09-13	13:54:32	0.884338	3.93371	1692.9	FALSE	59
2022-09-13	13:54:32	1.08414	4.82247	1735.47	FALSE	59
2022-09-13	13:54:32	0.965356	4.2941	1697.2	FALSE	59
2022-09-13	13:54:33	1.06093	4.71923	1740.19	FALSE	59
2022-09-13	13:54:33	1.09579	4.87429	1702.07	FALSE	59
2022-09-13	13:54:33	0.96673	4.30021	1744.49	FALSE	59
2022-09-13	13:54:33	1.09375	4.86522	1706.94	FALSE	59
2022-09-13	13:54:34	0.816094	3.63015	1748.12	FALSE	59
2022-09-13	13:54:34	1.20073	5.34109	1712.28	FALSE	59
2022-09-13	13:54:34	1.06393	4.73257	1752.85	FALSE	59
2022-09-13	13:54:35	1.13014	5.02709	1717.3	FALSE	59
2022-09-13	13:54:35	1.19248	5.30439	1758.16	FALSE	59
2022-09-13	13:54:35	0.927901	4.12749	1721.43	FALSE	59
2022-09-13	13:54:35	0.695331	3.09297	1761.25	FALSE	59
2022-09-13	13:54:36	0.904542	4.02358	1725.46	FALSE	59
2022-09-13	13:54:36	0.906577	4.03264	1765.28	FALSE	59
2022-09-13	13:54:36	0.940318	4.18272	1729.64	FALSE	59
2022-09-13	13:54:36	0.977977	4.35024	1769.63	FALSE	59
2022-09-13	13:54:37	0.880929	3.91855	1733.56	FALSE	59
2022-09-13	13:54:37	1.05009	4.67101	1774.3	FALSE	59
2022-09-13	13:54:37	1.04734	4.65878	1738.22	FALSE	59
2022-09-13	13:54:37	1.04052	4.62844	1778.93	FALSE	59
2022-09-13	13:54:38	0.925814	4.11821	1742.33	FALSE	59
2022-09-13	13:54:38	0.893651	3.97514	1782.91	FALSE	59
2022-09-13	13:54:38	0.942303	4.19155	1746.53	FALSE	59
2022-09-13	13:54:39	0.9307	4.13994	1787.05	FALSE	59
2022-09-13	13:54:39	0.917977	4.08335	1750.61	FALSE	59
2022-09-13	13:54:39	0.900776	4.00683	1791.06	FALSE	59
2022-09-13	13:54:39	0.895789	3.98465	1754.59	FALSE	59
2022-09-13	13:54:40	0.856908	3.8117	1794.87	FALSE	59
2022-09-13	13:54:40	0.841285	3.7422	1758.34	FALSE	59
2022-09-13	13:54:40	0.827086	3.67904	1798.55	FALSE	59
2022-09-13	13:54:40	0.882405	3.92511	1762.26	FALSE	59
2022-09-13	13:54:41	0.844695	3.75737	1802.3	FALSE	59
2022-09-13	13:54:41	0.894262	3.97786	1766.24	FALSE	59
2022-09-13	13:54:41	0.930089	4.13722	1806.44	FALSE	59
2022-09-13	13:54:41	0.96958	4.31289	1770.55	FALSE	59
2022-09-13	13:54:42	0.960114	4.27078	1810.71	FALSE	59
2022-09-13	13:54:42	0.900623	4.00615	1774.56	FALSE	59
2022-09-13	13:54:42	0.87874	3.90881	1814.62	FALSE	59
2022-09-13	13:54:43	0.856196	3.80853	1778.37	FALSE	59
2022-09-13	13:54:43	0.881692	3.92194	1818.54	FALSE	59
2022-09-13	13:54:43	0.921489	4.09897	1782.47	FALSE	59
2022-09-13	13:54:43	0.92556	4.11708	1822.66	FALSE	59
2022-09-13	13:54:44	0.906527	4.03241	1786.5	FALSE	59
2022-09-13	13:54:44	0.945611	4.20627	1826.87	FALSE	59
2022-09-13	13:54:44	0.932837	4.14945	1790.65	FALSE	59
2022-09-13	13:54:44	0.887087	3.94594	1830.81	FALSE	59
2022-09-13	13:54:45	0.877723	3.90429	1794.55	FALSE	59
2022-09-13	13:54:45	0.898079	3.99484	1834.81	FALSE	59
2022-09-13	13:54:45	0.914516	4.06795	1798.62	FALSE	59
2022-09-13	13:54:45	0.901794	4.01136	1838.82	FALSE	59
2022-09-13	13:54:46	0.938893	4.17638	1802.8	FALSE	59
2022-09-13	13:54:46	1.24373	5.53236	1844.35	FALSE	59
2022-09-13	13:54:46	2.18765	9.7311	1812.53	FALSE	59
2022-09-13	13:54:47	1.73752	7.72884	1852.08	FALSE	59
2022-09-13	13:54:47	1.40866	6.266	1818.79	FALSE	59
2022-09-13	13:54:47	1.70531	7.58556	1859.66	FALSE	59
2022-09-13	13:54:47	1.56469	6.96005	1825.75	FALSE	59
2022-09-13	13:54:48	0.95472	4.24679	1863.91	FALSE	59
2022-09-13	13:54:48	0.368613	1.63966	1827.39	FALSE	59
2022-09-13	13:54:48	0.573244	2.5499	1866.46	FALSE	59
2022-09-13	13:54:48	0.392328	1.74515	1829.14	FALSE	59
2022-09-13	13:54:49	0.535025	2.3799	1868.84	FALSE	59
2022-09-13	13:54:49	0.607901	2.70407	1831.84	FALSE	59
2022-09-13	13:54:49	0.408919	1.81895	1870.66	FALSE	59
2022-09-13	13:54:49	0.277163	1.23288	1833.07	FALSE	59
2022-09-13	13:54:50	0.342863	1.52512	1872.19	FALSE	59
2022-09-13	13:54:50	-0.00863844	-0.0384255	1833.07	FALSE	59
2022-09-13	13:54:50	-0.0072135	-0.0320871	1872.19	FALSE	59
2022-09-13	13:54:51	0.128461	0.57142	1833.65	FALSE	59
2022-09-13	13:54:51	0.247137	1.09931	1873.28	FALSE	59
2022-09-13	13:54:51	-0.0485366	-0.215901	1833.65	FALSE	59
2022-09-13	13:54:51	0.0749239	0.333276	1873.62	FALSE	59
2022-09-13	13:54:52	0.134008	0.596094	1834.24	FALSE	59
2022-09-13	13:54:52	0.142863	0.635483	1874.25	FALSE	59
2022-09-13	13:54:52	0.0422013	0.18772	1834.43	FALSE	59
2022-09-13	13:54:52	0.165967	0.738254	1874.99	FALSE	59
2022-09-13	13:54:53	0.475789	2.1164	1836.55	FALSE	59
2022-09-13	13:54:53	0.480573	2.13768	1877.13	FALSE	59
2022-09-13	13:54:53	1.06765	4.74912	1841.3	FALSE	59
2022-09-13	13:54:53	1.35808	6.04101	1883.17	FALSE	59
2022-09-13	13:54:54	2.19162	9.74876	1851.04	FALSE	59
2022-09-13	13:54:54	2.65497	11.8098	1894.98	FALSE	59
2022-09-13	13:54:54	1.98276	8.81971	1859.86	FALSE	59
2022-09-13	13:54:55	0.986018	4.38601	1899.37	FALSE	59
2022-09-13	13:54:55	1.16536	5.18375	1865.05	FALSE	59
2022-09-13	13:54:55	1.04062	4.62889	1903.99	FALSE	59
2022-09-13	13:54:55	0.790445	3.51606	1868.56	FALSE	59
2022-09-13	13:54:56	0.735534	3.2718	1907.27	FALSE	59
2022-09-13	13:54:56	0.734466	3.26705	1871.83	FALSE	59
2022-09-13	13:54:56	0.60556	2.69365	1909.96	FALSE	59
2022-09-13	13:54:56	0.676603	3.00967	1874.84	FALSE	59
2022-09-13	13:54:57	0.693855	3.08641	1913.05	FALSE	59
2022-09-13	13:54:57	0.654007	2.90915	1877.75	FALSE	59
2022-09-13	13:54:57	0.640929	2.85098	1915.9	FALSE	59
2022-09-13	13:54:57	0.634109	2.82064	1880.57	FALSE	59
2022-09-13	13:54:58	0.56098	2.49535	1918.39	FALSE	59
2022-09-13	13:54:58	0.754415	3.35579	1883.93	FALSE	59
2022-09-13	13:54:58	0.761183	3.38589	1921.78	FALSE	59
2022-09-13	13:54:59	0.764491	3.40061	1887.33	FALSE	59
2022-09-13	13:54:59	0.749071	3.33202	1925.11	FALSE	59
2022-09-13	13:54:59	0.768512	3.4185	1890.75	FALSE	59
2022-09-13	13:54:59	0.760013	3.38069	1928.49	FALSE	59
2022-09-13	13:55:00	0.745051	3.31414	1894.06	FALSE	59
2022-09-13	13:55:00	0.696196	3.09682	1931.59	FALSE	59
2022-09-13	13:55:00	0.75874	3.37503	1897.43	FALSE	59
2022-09-13	13:55:00	0.72215	3.21227	1934.8	FALSE	59
2022-09-13	13:55:01	0.725	3.22494	1900.66	FALSE	59
2022-09-13	13:55:01	0.712888	3.17107	1937.97	FALSE	59
2022-09-13	13:55:01	0.677875	3.01532	1903.67	FALSE	59
2022-09-13	13:55:01	0.607239	2.70112	1940.67	FALSE	59
2022-09-13	13:55:02	0.594873	2.64611	1906.32	FALSE	59
2022-09-13	13:55:02	0.600572	2.67146	1943.34	FALSE	59
2022-09-13	13:55:02	0.62617	2.78533	1909.11	FALSE	59
2022-09-13	13:55:03	0.576247	2.56326	1945.91	FALSE	59
2022-09-13	13:55:03	0.521132	2.3181	1911.42	FALSE	59
2022-09-13	13:55:03	0.508003	2.2597	1948.17	FALSE	59
2022-09-13	13:55:03	0.431361	1.91878	1913.34	FALSE	59
2022-09-13	13:55:04	0.408715	1.81805	1949.99	FALSE	59
2022-09-13	13:55:04	0.391209	1.74018	1915.08	FALSE	59
2022-09-13	13:55:04	0.37355	1.66163	1951.65	FALSE	59
2022-09-13	13:55:04	0.315382	1.40288	1916.49	FALSE	59
2022-09-13	13:55:05	0.265865	1.18262	1952.83	FALSE	59
2022-09-13	13:55:05	0.117621	0.523202	1917.01	FALSE	59
2022-09-13	13:55:05	0.0728374	0.323995	1953.15	FALSE	59
2022-09-13	13:55:05	0.595331	2.64815	1919.66	FALSE	59
2022-09-13	13:55:06	2.8707	12.7694	1965.92	FALSE	59
2022-09-13	13:55:06	4.80754	21.3849	1941.04	1	60
2022-09-13	13:55:06	2.61711	11.6414	1977.56	FALSE	60
2022-09-13	13:55:07	2.43207	10.8183	1951.86	FALSE	60
2022-09-13	13:55:07	1.8248	8.11708	1985.68	FALSE	60
2022-09-13	13:55:07	1.89075	8.41043	1960.27	FALSE	60
2022-09-13	13:55:07	1.66118	7.38926	1993.07	FALSE	60
2022-09-13	13:55:08	3.3392	14.8534	1975.12	1	61
2022-09-13	13:55:08	5.1878	23.0764	2016.15	1	62
2022-09-13	13:55:08	9.37741	41.7126	2016.84	1	63
2022-09-13	13:55:08	5.60668	24.9396	2041.09	1	64
2022-09-13	13:55:09	2.62749	11.6876	2028.52	FALSE	64
2022-09-13	13:55:09	0.898283	3.99574	2045.08	FALSE	64
2022-09-13	13:55:09	0.535636	2.38262	2030.91	FALSE	64
2022-09-13	13:55:09	1.02912	4.57773	2049.66	FALSE	64
2022-09-13	13:55:10	0.878639	3.90836	2034.82	FALSE	64
2022-09-13	13:55:10	1.31411	5.84542	2055.51	FALSE	64
2022-09-13	13:55:10	2.0477	9.10858	2043.92	FALSE	64
2022-09-13	13:55:11	6.02932	26.8196	2082.33	1	65
2022-09-13	13:55:11	4.57691	20.359	2064.28	1	66
2022-09-13	13:55:11	4.27731	19.0263	2101.35	1	67
2022-09-13	13:55:11	4.29813	19.1189	2083.4	1	68
2022-09-13	13:55:12	1.3276	5.90543	2107.26	FALSE	68
2022-09-13	13:55:12	0.276298	1.22903	2084.63	FALSE	68
2022-09-13	13:55:12	0.256705	1.14188	2108.4	FALSE	68
2022-09-13	13:55:12	-0.0422262	-0.187831	2084.63	FALSE	68
2022-09-13	13:55:13	-0.263651	-1.17277	2108.4	FALSE	68
2022-09-13	13:55:13	-0.11271	-0.501357	2084.63	FALSE	68
2022-09-13	13:55:13	-0.0779005	-0.346517	2108.4	FALSE	68
2022-09-13	13:55:13	0.178486	0.793941	2085.43	FALSE	68
2022-09-13	13:55:14	0.136451	0.606961	2109.01	FALSE	68
2022-09-13	13:55:14	0.74729	3.3241	2088.75	FALSE	68
2022-09-13	13:55:14	1.57508	7.00627	2116.01	FALSE	68
2022-09-13	13:55:15	2.0138	8.95779	2097.71	FALSE	68
2022-09-13	13:55:15	1.41391	6.28935	2122.3	FALSE	68
2022-09-13	13:55:15	0.524542	2.33327	2100.04	FALSE	68
2022-09-13	13:55:15	1.04749	4.65945	2126.96	FALSE	68
2022-09-13	13:55:16	2.00541	8.92046	2108.96	FALSE	68
2022-09-13	13:55:16	0.588359	2.61714	2129.58	FALSE	68
2022-09-13	13:55:16	0.535891	2.38375	2111.34	FALSE	68
2022-09-13	13:55:16	0.914058	4.06591	2133.64	FALSE	68
2022-09-13	13:55:17	1.39401	6.20084	2117.55	FALSE	68
2022-09-13	13:55:17	2.24245	9.97487	2143.62	FALSE	68
2022-09-13	13:55:17	2.55599	11.3696	2128.91	FALSE	68
2022-09-13	13:55:17	1.27365	5.66545	2149.28	FALSE	68
2022-09-13	13:55:18	0.637468	2.83559	2131.75	FALSE	68
2022-09-13	13:55:18	0.406272	1.80718	2151.09	FALSE	68
2022-09-13	13:55:18	0.350598	1.55953	2133.31	FALSE	68
2022-09-13	13:55:19	0.205509	0.914145	2152.01	FALSE	68
2022-09-13	13:55:19	0.0561962	0.249972	2133.56	FALSE	68
2022-09-13	13:55:19	-0.329198	-1.46434	2152.01	FALSE	68
2022-09-13	13:55:19	-0.472455	-2.10157	2133.56	FALSE	68
2022-09-13	13:55:20	-0.618409	-2.75081	2152.01	FALSE	68
2022-09-13	13:55:20	-0.539732	-2.40084	2133.56	FALSE	68
2022-09-13	13:55:20	-0.398816	-1.77401	2152.01	FALSE	68
2022-09-13	13:55:20	-0.0369336	-0.164288	2133.56	FALSE	68
2022-09-13	13:55:21	2.83589	12.6146	2164.62	FALSE	68
2022-09-13	13:55:21	4.38912	19.5237	2153.08	1	69
2022-09-13	13:55:21	6.35975	28.2894	2192.91	1	70
2022-09-13	13:55:21	3.38668	15.0646	2168.15	1	71
2022-09-13	13:55:22	5.36428	23.8614	2216.77	1	72
2022-09-13	13:55:22	0.714567	3.17854	2171.33	FALSE	72
2022-09-13	13:55:22	2.82948	12.5861	2229.36	FALSE	72
2022-09-13	13:55:23	1.41457	6.29229	2177.62	FALSE	72
2022-09-13	13:55:23	0.954008	4.24362	2233.6	FALSE	72
2022-09-13	13:55:23	2.74912	12.2286	2189.85	FALSE	72
2022-09-13	13:55:23	1.35263	6.01677	2239.62	FALSE	72
2022-09-13	13:55:24	4.75406	21.147	2210.99	1	73
2022-09-13	13:55:24	2.28729	10.1743	2249.79	FALSE	73
2022-09-13	13:55:24	3.48179	15.4877	2226.48	1	74
2022-09-13	13:55:24	2.6536	11.8037	2261.6	FALSE	74
2022-09-13	13:55:25	1.96683	8.74885	2235.23	FALSE	74
2022-09-13	13:55:25	2.49111	11.081	2272.68	FALSE	74
2022-09-13	13:55:25	0.55243	2.45732	2237.69	FALSE	74
2022-09-13	13:55:25	0.79757	3.54775	2276.22	FALSE	74
2022-09-13	13:55:26	0.211158	0.939273	2238.63	FALSE	74
2022-09-13	13:55:26	0.192227	0.855064	2277.08	FALSE	74
2022-09-13	13:55:26	0.0477992	0.21262	2238.84	FALSE	74
2022-09-13	13:55:27	-0.214643	-0.954775	2277.08	FALSE	74
2022-09-13	13:55:27	-0.095814	-0.4262	2238.84	FALSE	74
2022-09-13	13:55:27	-0.245585	-1.09241	2277.08	FALSE	74
2022-09-13	13:55:27	-0.360038	-1.60152	2238.84	FALSE	74
2022-09-13	13:55:28	-0.76136	-3.38668	2277.08	FALSE	74
2022-09-13	13:55:28	-0.769707	-3.42381	2238.84	FALSE	74
2022-09-13	13:55:28	-0.992811	-4.41622	2277.08	FALSE	74
2022-09-13	13:55:28	-0.862989	-3.83875	2238.84	FALSE	74
2022-09-13	13:55:29	-0.600089	-2.66932	2277.08	FALSE	74
2022-09-13	13:55:29	-0.181921	-0.809221	2238.84	FALSE	74
2022-09-13	13:55:29	0.277825	1.23582	2278.32	FALSE	74
2022-09-13	13:55:29	0.0578756	0.257442	2239.1	FALSE	74
2022-09-13	13:55:30	0.272837	1.21363	2279.53	FALSE	74
2022-09-13	13:55:30	0.456552	2.03083	2241.13	FALSE	74
2022-09-13	13:55:30	1.11126	4.94311	2284.47	FALSE	74
2022-09-13	13:55:31	3.22037	14.3248	2255.45	1	75
2022-09-13	13:55:31	4.70128	20.9122	2305.38	1	76
2022-09-13	13:55:31	3.20927	14.2755	2269.73	1	77
2022-09-13	13:55:31	2.57965	11.4748	2316.86	FALSE	77
2022-09-13	13:55:32	1.01696	4.52364	2274.25	FALSE	77
2022-09-13	13:55:32	-0.0379005	-0.168589	2316.86	FALSE	77
2022-09-13	13:55:32	-0.0592237	-0.263439	2274.25	FALSE	77
2022-09-13	13:55:32	-0.145585	-0.647591	2316.86	FALSE	77
2022-09-13	13:55:33	-0.402989	-1.79258	2274.25	FALSE	77
2022-09-13	13:55:33	-0.377798	-1.68052	2316.86	FALSE	77
2022-09-13	13:55:33	-0.397798	-1.76949	2274.25	FALSE	77
2022-09-13	13:55:33	-0.163804	-0.728633	2316.86	FALSE	77
2022-09-13	13:55:34	0.255585	1.13689	2275.39	FALSE	77
2022-09-13	13:55:34	0.1193	0.53067	2317.39	FALSE	77
2022-09-13	13:55:34	0.213804	0.951043	2276.34	FALSE	77
2022-09-13	13:55:35	0.0240842	0.107131	2317.5	FALSE	77
2022-09-13	13:55:35	0.496654	2.20922	2278.55	FALSE	77
2022-09-13	13:55:35	0.38215	1.69988	2319.2	FALSE	77
2022-09-13	13:55:35	0.533397	2.37266	2280.92	FALSE	77
2022-09-13	13:55:36	0.411361	1.82982	2321.03	FALSE	77
2022-09-13	13:55:36	0.385967	1.71686	2282.64	FALSE	77
2022-09-13	13:55:36	0.212735	0.946288	2321.97	FALSE	77
2022-09-13	13:55:36	0.405764	1.80492	2284.44	FALSE	77
2022-09-13	13:55:37	0.223422	0.993826	2322.97	FALSE	77
2022-09-13	13:55:37	0.584135	2.59835	2287.04	FALSE	77
2022-09-13	13:55:37	0.27299	1.21431	2324.18	FALSE	77
2022-09-13	13:55:37	0.445611	1.98217	2289.02	FALSE	77
2022-09-13	13:55:38	0.297672	1.3241	2325.51	FALSE	77
2022-09-13	13:55:38	0.478282	2.12749	2291.15	FALSE	77
2022-09-13	13:55:38	0.4593	2.04306	2327.55	FALSE	77
2022-09-13	13:55:39	0.313244	1.39337	2292.55	FALSE	77
2022-09-13	13:55:39	0.384033	1.70826	2329.26	FALSE	77
2022-09-13	13:55:39	0.336959	1.49886	2294.04	FALSE	77
2022-09-13	13:55:39	0.45014	2.00231	2331.26	FALSE	77
2022-09-13	13:55:40	0.293244	1.30441	2295.35	FALSE	77
2022-09-13	13:55:40	0.349682	1.55546	2332.81	FALSE	77
2022-09-13	13:55:40	0.307341	1.36711	2296.72	FALSE	77
2022-09-13	13:55:40	0.50103	2.22868	2335.04	FALSE	77
2022-09-13	13:55:41	0.243117	1.08143	2297.8	FALSE	77
2022-09-13	13:55:41	0.514771	2.2898	2337.33	FALSE	77
2022-09-13	13:55:41	0.272939	1.21409	2299.01	FALSE	77
2022-09-13	13:55:41	0.52388	2.33032	2339.66	FALSE	77
2022-09-13	13:55:42	0.166476	0.740519	2299.75	FALSE	77
2022-09-13	13:55:42	0.501285	2.22982	2341.89	FALSE	77
2022-09-13	13:55:42	0.219708	0.977305	2300.73	FALSE	77
2022-09-13	13:55:43	0.160318	0.713127	2342.61	FALSE	77
2022-09-13	13:55:43	0.151311	0.673062	2301.4	FALSE	77
2022-09-13	13:55:43	0.320064	1.42371	2344.03	FALSE	77
2022-09-13	13:55:43	0.259708	1.15523	2302.56	FALSE	77
2022-09-13	13:55:44	0.293601	1.306	2345.34	FALSE	77
2022-09-13	13:55:44	0.293652	1.30622	2303.86	FALSE	77
2022-09-13	13:55:44	0.290751	1.29332	2346.63	FALSE	77
2022-09-13	13:55:44	0.392074	1.74402	2305.61	FALSE	77
2022-09-13	13:55:45	0.0730918	0.325127	2346.95	FALSE	77
2022-09-13	13:55:45	0.417875	1.85879	2307.47	FALSE	77
2022-09-13	13:55:45	0.11187	0.49762	2347.45	FALSE	77
2022-09-13	13:55:45	0.582405	2.59065	2310.06	FALSE	77
2022-09-13	13:55:46	1.19207	5.30257	2352.75	FALSE	77
2022-09-13	13:55:46	8.27054	36.789	2346.85	1	78
2022-09-13	13:55:46	6.3424	28.2123	2380.97	1	79
2022-09-13	13:55:47	8.92556	39.7027	2386.55	1	80
2022-09-13	13:55:47	1.27584	5.67519	2386.64	FALSE	80
2022-09-13	13:55:47	2.35233	10.4636	2397.01	FALSE	80
2022-09-13	13:55:47	1.52882	6.8005	2393.44	FALSE	80
2022-09-13	13:55:48	0.360878	1.60526	2398.62	FALSE	80
2022-09-13	13:55:48	1.1077	4.92727	2398.37	FALSE	80
2022-09-13	13:55:48	0.374008	1.66366	2400.28	FALSE	80
2022-09-13	13:55:48	2.10373	9.35781	2407.73	FALSE	80
2022-09-13	13:55:49	0.320522	1.42575	2401.71	FALSE	80
2022-09-13	13:55:49	0.273295	1.21567	2408.94	FALSE	80
2022-09-13	13:55:49	0.988766	4.39823	2406.11	FALSE	80
2022-09-13	13:55:49	0.268664	1.19507	2410.14	FALSE	80
2022-09-13	13:55:50	0.585203	2.6031	2408.71	FALSE	80
2022-09-13	13:55:50	0.233499	1.03865	2411.18	FALSE	80
2022-09-13	13:55:50	0.594873	2.64611	2411.35	FALSE	80
2022-09-13	13:55:51	0.975992	4.34141	2415.52	FALSE	80
2022-09-13	13:55:51	2.16551	9.63262	2420.99	FALSE	80
2022-09-13	13:55:51	3.48536	15.5036	2431.02	1	81
2022-09-13	13:55:51	4.82973	21.4836	2442.47	1	82
2022-09-13	13:55:52	4.4738	19.9004	2450.92	1	83
2022-09-13	13:55:52	2.48525	11.0549	2453.53	FALSE	83
2022-09-13	13:55:52	3.68617	16.3968	2467.32	1	84
2022-09-13	13:55:52	0.745763	3.3173	2456.84	FALSE	84
2022-09-13	13:55:53	3.93497	17.5035	2484.82	1	85
2022-09-13	13:55:53	1.15116	5.12059	2461.96	FALSE	85
2022-09-13	13:55:53	2.79406	12.4285	2497.25	FALSE	85
2022-09-13	13:55:53	1.38286	6.15124	2468.12	FALSE	85
2022-09-13	13:55:54	0.880929	3.91855	2501.17	FALSE	85
2022-09-13	13:55:54	1.1019	4.90147	2473.02	FALSE	85
2022-09-13	13:55:54	0.27014	1.20164	2502.37	FALSE	85
2022-09-13	13:55:55	0.353855	1.57402	2474.59	FALSE	85
2022-09-13	13:55:55	0.326425	1.452	2503.82	FALSE	85
2022-09-13	13:55:55	0.271005	1.20548	2475.8	FALSE	85
2022-09-13	13:55:55	0.45528	2.02518	2505.85	FALSE	85
2022-09-13	13:55:56	2.77202	12.3305	2488.13	FALSE	85
2022-09-13	13:55:56	0.621896	2.76632	2508.61	FALSE	85
2022-09-13	13:55:56	2.60556	11.5901	2499.72	FALSE	85
2022-09-13	13:55:56	1.52016	6.76198	2515.38	FALSE	85
2022-09-13	13:55:57	1.2762	5.67679	2505.39	FALSE	85
2022-09-13	13:55:57	2.00785	8.93132	2524.31	FALSE	85
2022-09-13	13:55:57	0.38785	1.72523	2507.12	FALSE	85
2022-09-13	13:55:57	0.30271	1.34651	2525.65	FALSE	85
2022-09-13	13:55:58	0.867901	3.8606	2510.98	FALSE	85
2022-09-13	13:55:58	0.429275	1.9095	2527.56	FALSE	85
2022-09-13	13:55:58	0.333906	1.48528	2512.46	FALSE	85
2022-09-13	13:55:59	0.628155	2.79416	2530.36	FALSE	85
2022-09-13	13:55:59	0.234059	1.04114	2513.51	FALSE	85
2022-09-13	13:55:59	0.399758	1.7782	2532.14	FALSE	85
2022-09-13	13:55:59	0.108563	0.48291	2513.99	FALSE	85
2022-09-13	13:56:00	0.197875	0.880188	2533.02	FALSE	85
2022-09-13	13:56:00	0.0533972	0.237521	2514.23	FALSE	85
2022-09-13	13:56:00	0.0937534	0.417034	2533.43	FALSE	85
2022-09-13	13:56:00	-0.0885875	-0.394055	2514.23	FALSE	85
2022-09-13	13:56:01	0.107138	0.476571	2533.91	FALSE	85
2022-09-13	13:56:01	0.00118347	0.00526431	2514.23	FALSE	85
2022-09-13	13:56:01	-0.0712847	-0.317089	2533.91	FALSE	85
2022-09-13	13:56:01	-0.0491473	-0.218617	2514.23	FALSE	85
2022-09-13	13:56:02	0.466883	2.07679	2535.99	FALSE	85
2022-09-13	13:56:02	0.293295	1.30463	2515.54	FALSE	85
2022-09-13	13:56:02	0.201285	0.895356	2536.88	FALSE	85
2022-09-13	13:56:03	0.653397	2.90644	2518.44	FALSE	85
2022-09-13	13:56:03	0.382608	1.70192	2538.58	FALSE	85
2022-09-13	13:56:03	0.290802	1.29355	2519.74	FALSE	85
2022-09-13	13:56:03	1.68317	7.48708	2546.07	FALSE	85
2022-09-13	13:56:04	1.85732	8.26173	2528	FALSE	85
2022-09-13	13:56:04	5.81177	25.8519	2571.92	1	86
2022-09-13	13:56:04	4.78006	21.2627	2549.26	1	87
2022-09-13	13:56:05	7.89589	35.1225	2607.05	1	88
2022-09-13	13:56:05	4.13284	18.3837	2567.64	1	89
2022-09-13	13:56:05	6.80566	30.2729	2637.32	1	90
2022-09-13	13:56:05	2.81355	12.5152	2580.16	FALSE	90
2022-09-13	13:56:05	7.84057	34.8764	2672.19	1	91
2022-09-13	13:56:06	4.18154	18.6003	2598.76	1	92
2022-09-13	13:56:06	7.50082	33.3651	2705.56	1	93
2022-09-13	13:56:06	7.61161	33.858	2632.62	1	94
2022-09-13	13:56:07	2.62622	11.682	2717.24	FALSE	94
2022-09-13	13:56:07	4.16688	18.5351	2651.15	1	95
2022-09-13	13:56:07	1.78363	7.93394	2725.18	FALSE	95
2022-09-13	13:56:07	3.79792	16.8939	2668.05	1	96
2022-09-13	13:56:08	5.76668	25.6513	2750.83	1	97
2022-09-13	13:56:08	6.7796	30.157	2698.2	1	98
2022-09-13	13:56:08	8.99131	39.9951	2790.82	1	99
2022-09-13	13:56:08	2.97767	13.2453	2711.45	FALSE	99
2022-09-13	13:56:09	7.27629	32.3664	2823.19	1	100
2022-09-13	13:56:09	2.50861	11.1588	2722.61	FALSE	100
2022-09-13	13:56:09	1.54001	6.85027	2830.04	FALSE	100
2022-09-13	13:56:10	0.4993	2.22099	2724.83	FALSE	100
2022-09-13	13:56:10	0.32958	1.46604	2831.51	FALSE	100
2022-09-13	13:56:10	0.226527	1.00764	2725.84	FALSE	100
2022-09-13	13:56:10	0.132074	0.587492	2832.09	FALSE	100
2022-09-13	13:56:11	0.165814	0.737574	2726.57	FALSE	100
2022-09-13	13:56:11	0.659657	2.93429	2835.03	FALSE	100
2022-09-13	13:56:11	0.523117	2.32693	2728.9	FALSE	100
2022-09-13	13:56:11	0.850242	3.78205	2838.81	FALSE	100
2022-09-13	13:56:12	0.345713	1.5378	2730.44	FALSE	100
2022-09-13	13:56:12	0.286781	1.27566	2840.08	FALSE	100
2022-09-13	13:56:12	0.339758	1.51131	2731.95	FALSE	100
2022-09-13	13:56:12	0.347036	1.54369	2841.63	FALSE	100
2022-09-13	13:56:13	0.343626	1.52852	2733.48	FALSE	100
2022-09-13	13:56:13	0.331209	1.47328	2843.1	FALSE	100
2022-09-13	13:56:13	0.345458	1.53667	2735.02	FALSE	100
2022-09-13	13:56:13	0.444593	1.97764	2845.08	FALSE	100
2022-09-13	13:56:14	0.422048	1.87735	2736.89	FALSE	100
2022-09-13	13:56:14	0.353855	1.57402	2846.65	FALSE	100
2022-09-13	13:56:14	0.392735	1.74696	2738.64	FALSE	100
2022-09-13	13:56:14	0.428155	1.90452	2848.56	FALSE	100
2022-09-13	13:56:15	0.659962	2.93564	2741.58	FALSE	100
2022-09-13	13:56:15	1.3622	6.05934	2854.62	FALSE	100
2022-09-13	13:56:15	2.3308	10.3679	2751.94	FALSE	100
2022-09-13	13:56:16	1.81925	8.09239	2862.71	FALSE	100
2022-09-13	13:56:16	1.67223	7.43841	2759.38	FALSE	100
2022-09-13	13:56:16	1.11828	4.97433	2867.68	FALSE	100
2022-09-13	13:56:16	1.00174	4.45594	2763.84	FALSE	100
2022-09-13	13:56:17	0.68327	3.03932	2870.72	FALSE	100
2022-09-13	13:56:17	0.699708	3.11244	2766.95	FALSE	100
2022-09-13	13:56:17	0.624287	2.77695	2873.5	FALSE	100
2022-09-13	13:56:17	0.494669	2.20039	2769.15	FALSE	100
2022-09-13	13:56:18	0.351209	1.56225	2875.06	FALSE	100
2022-09-13	13:56:18	0.363626	1.61748	2770.77	FALSE	100
2022-09-13	13:56:18	0.355534	1.58149	2876.64	FALSE	100
2022-09-13	13:56:19	0.363881	1.61862	2772.39	FALSE	100
2022-09-13	13:56:19	0.299809	1.33361	2877.98	FALSE	100
2022-09-13	13:56:19	0.382048	1.69943	2774.09	FALSE	100
2022-09-13	13:56:19	0.33014	1.46853	2879.45	FALSE	100
2022-09-13	13:56:20	0.422506	1.87939	2775.97	FALSE	100
2022-09-13	13:56:20	0.408817	1.8185	2881.26	FALSE	100
2022-09-13	13:56:20	0.423015	1.88166	2777.85	FALSE	100
2022-09-13	13:56:20	0.421539	1.87509	2883.14	FALSE	100
2022-09-13	13:56:21	0.421845	1.87645	2779.72	FALSE	100
2022-09-13	13:56:21	0.43986	1.95659	2885.1	FALSE	100
2022-09-13	13:56:21	0.494771	2.20084	2781.92	FALSE	100
2022-09-13	13:56:21	0.522608	2.32466	2887.42	FALSE	100
2022-09-13	13:56:22	0.515025	2.29093	2784.21	FALSE	100
2022-09-13	13:56:22	0.557366	2.47928	2889.9	FALSE	100
2022-09-13	13:56:22	0.493804	2.19654	2786.41	FALSE	100
2022-09-13	13:56:23	0.448257	1.99394	2891.89	FALSE	100
2022-09-13	13:56:23	0.426781	1.89841	2788.31	FALSE	100
2022-09-13	13:56:23	0.422456	1.87917	2893.77	FALSE	100
2022-09-13	13:56:23	0.439758	1.95613	2790.27	FALSE	100
2022-09-13	13:56:24	0.440064	1.95749	2895.73	FALSE	100
2022-09-13	13:56:24	0.442303	1.96745	2792.23	FALSE	100
2022-09-13	13:56:24	0.428155	1.90452	2897.64	FALSE	100
2022-09-13	13:56:24	0.437926	1.94798	2794.18	FALSE	100
2022-09-13	13:56:25	0.433295	1.92738	2899.56	FALSE	100
2022-09-13	13:56:25	0.415789	1.84951	2796.03	FALSE	100
2022-09-13	13:56:25	0.429733	1.91154	2901.47	FALSE	100
2022-09-13	13:56:25	0.443982	1.97492	2798.01	FALSE	100
2022-09-13	13:56:26	0.430344	1.91426	2903.39	FALSE	100
2022-09-13	13:56:26	0.427901	1.90339	2799.91	FALSE	100
2022-09-13	13:56:26	0.447799	1.9919	2905.38	FALSE	100
2022-09-13	13:56:26	0.483728	2.15172	2802.06	FALSE	100
2022-09-13	13:56:27	0.458791	2.04079	2907.42	FALSE	100
2022-09-13	13:56:27	0.434262	1.93168	2803.99	FALSE	100
2022-09-13	13:56:27	0.407901	1.81443	2909.24	FALSE	100
2022-09-13	13:56:28	0.372837	1.65845	2805.65	FALSE	100
2022-09-13	13:56:28	0.364389	1.62088	2910.86	FALSE	100
2022-09-13	13:56:28	0.386425	1.7189	2807.37	FALSE	100
2022-09-13	13:56:28	0.375992	1.67249	2912.53	FALSE	100
2022-09-13	13:56:29	0.355484	1.58126	2808.95	FALSE	100
2022-09-13	13:56:29	0.339504	1.51018	2914.04	FALSE	100
2022-09-13	13:56:29	0.333244	1.48234	2810.43	FALSE	100
2022-09-13	13:56:29	0.336959	1.49886	2915.54	FALSE	100
2022-09-13	13:56:30	0.367188	1.63333	2812.07	FALSE	100
2022-09-13	13:56:30	0.317214	1.41103	2916.95	FALSE	100
2022-09-13	13:56:30	0.24444	1.08732	2813.15	FALSE	100
2022-09-13	13:56:31	0.322863	1.43616	2918.39	FALSE	100
2022-09-13	13:56:31	0.211565	0.941083	2814.1	FALSE	100
2022-09-13	13:56:31	0.447697	1.99145	2920.38	FALSE	100
2022-09-13	13:56:31	0.248155	1.10384	2815.2	FALSE	100
2022-09-13	13:56:32	0.391718	1.74244	2922.12	FALSE	100
2022-09-13	13:56:32	0.353346	1.57175	2816.77	FALSE	100
2022-09-13	13:56:32	0.416451	1.85246	2923.97	FALSE	100
2022-09-13	13:56:32	0.445051	1.97968	2818.75	FALSE	100
2022-09-13	13:56:33	0.372583	1.65732	2925.63	FALSE	100
2022-09-13	13:56:33	0.460064	2.04646	2820.8	FALSE	100
2022-09-13	13:56:33	0.392939	1.74787	2927.38	FALSE	100
2022-09-13	13:56:33	0.444237	1.97606	2822.77	FALSE	100
2022-09-13	13:56:34	0.450496	2.0039	2929.38	FALSE	100
2022-09-13	13:56:34	0.236807	1.05336	2823.83	FALSE	100
2022-09-13	13:56:34	0.194466	0.865024	2930.25	FALSE	100
2022-09-13	13:56:34	0.0429646	0.191115	2824.02	FALSE	100
2022-09-13	13:56:35	-0.020445	-0.0909434	2930.25	FALSE	100
2022-09-13	13:56:35	0.0202674	0.0901534	2824.11	FALSE	100
2022-09-13	13:56:35	0.254059	1.13011	2931.38	FALSE	100
2022-09-13	13:56:36	1.00057	4.45074	2828.56	FALSE	100
2022-09-13	13:56:36	0.542557	2.4134	2933.79	FALSE	100
2022-09-13	13:56:36	1.27991	5.6933	2834.25	FALSE	100
2022-09-13	13:56:36	0.291107	1.2949	2935.08	FALSE	100
2022-09-13	13:56:37	0.492939	2.19269	2836.44	FALSE	100
2022-09-13	13:56:37	0.319402	1.42076	2936.5	FALSE	100
2022-09-13	13:56:37	0.475738	2.11618	2838.56	FALSE	100
2022-09-13	13:56:37	0.346425	1.54097	2938.05	FALSE	100
2022-09-13	13:56:38	0.610293	2.71471	2841.28	FALSE	100
2022-09-13	13:56:38	0.416451	1.85246	2939.9	FALSE	100
2022-09-13	13:56:38	0.391667	1.74221	2843.02	FALSE	100
2022-09-13	13:56:38	0.414415	1.8434	2941.74	FALSE	100
2022-09-13	13:56:39	0.386018	1.71709	2844.73	FALSE	100
2022-09-13	13:56:39	0.412023	1.83276	2943.57	FALSE	100
2022-09-13	13:56:39	0.36042	1.60322	2846.34	FALSE	100
2022-09-13	13:56:40	0.442048	1.96632	2945.54	FALSE	100
2022-09-13	13:56:40	0.357112	1.58851	2847.93	FALSE	100
2022-09-13	13:56:40	0.366222	1.62903	2947.17	FALSE	100
2022-09-13	13:56:40	0.405204	1.80243	2849.73	FALSE	100
2022-09-13	13:56:41	0.410394	1.82551	2949	FALSE	100
2022-09-13	13:56:41	0.405	1.80152	2851.53	FALSE	100
2022-09-13	13:56:41	0.394822	1.75625	2950.75	FALSE	100
2022-09-13	13:56:41	0.396959	1.76575	2853.3	FALSE	100
2022-09-13	13:56:42	0.384389	1.70984	2952.46	FALSE	100
2022-09-13	13:56:42	0.390496	1.737	2855.03	FALSE	100
2022-09-13	13:56:42	0.421845	1.87645	2954.34	FALSE	100
2022-09-13	13:56:42	0.416756	1.85381	2856.89	FALSE	100
2022-09-13	13:56:43	0.409326	1.82076	2956.16	FALSE	100
2022-09-13	13:56:43	0.41701	1.85494	2858.74	FALSE	100
2022-09-13	13:56:43	0.402659	1.79111	2957.95	FALSE	100
2022-09-13	13:56:44	0.386171	1.71777	2860.46	FALSE	100
2022-09-13	13:56:44	0.374975	1.66796	2959.62	FALSE	100
2022-09-13	13:56:44	0.405967	1.80582	2862.27	FALSE	100
2022-09-13	13:56:44	0.502048	2.23321	2961.85	FALSE	100
2022-09-13	13:56:45	0.775891	3.45132	2865.72	FALSE	100
2022-09-13	13:56:45	1.16154	5.16676	2967.02	FALSE	100
2022-09-13	13:56:45	0.829275	3.68878	2869.41	FALSE	100
2022-09-13	13:56:45	0.239555	1.06559	2968.08	FALSE	100
2022-09-13	13:56:46	0.465356	2.07	2871.48	FALSE	100
2022-09-13	13:56:46	0.305153	1.35738	2969.44	FALSE	100
2022-09-13	13:56:46	0.264237	1.17538	2872.65	FALSE	100
2022-09-13	13:56:46	0.291311	1.29581	2970.74	FALSE	100
2022-09-13	13:56:47	0.284695	1.26638	2873.92	FALSE	100
2022-09-13	13:56:47	0.309937	1.37866	2972.12	FALSE	100
2022-09-13	13:56:47	0.321743	1.43118	2875.35	FALSE	100
2022-09-13	13:56:48	0.315331	1.40266	2973.52	FALSE	100
2022-09-13	13:56:48	0.278486	1.23876	2876.59	FALSE	100
2022-09-13	13:56:48	0.436858	1.94323	2975.46	FALSE	100
2022-09-13	13:56:48	0.574059	2.55353	2879.14	FALSE	100
2022-09-13	13:56:49	0.610445	2.71538	2978.18	FALSE	100
2022-09-13	13:56:49	0.390496	1.737	2880.88	FALSE	100
2022-09-13	13:56:49	0.433295	1.92738	2980.1	FALSE	100
2022-09-13	13:56:49	0.318334	1.41601	2882.29	FALSE	100
2022-09-13	13:56:50	0.299809	1.33361	2981.44	FALSE	100
2022-09-13	13:56:50	0.270038	1.20118	2883.49	FALSE	100
2022-09-13	13:56:50	0.282506	1.25664	2982.69	FALSE	100
2022-09-13	13:56:50	0.320522	1.42575	2884.92	FALSE	100
2022-09-13	13:56:51	0.232583	1.03458	2983.73	FALSE	100
2022-09-13	13:56:51	0.272023	1.21001	2886.13	FALSE	100
2022-09-13	13:56:51	0.151311	0.673062	2984.4	FALSE	100
2022-09-13	13:56:52	0.328919	1.4631	2887.59	FALSE	100
2022-09-13	13:56:52	0.268613	1.19484	2985.6	FALSE	100
2022-09-13	13:56:52	0.333193	1.48211	2889.08	FALSE	100
2022-09-13	13:56:52	0.286171	1.27295	2986.87	FALSE	100
2022-09-13	13:56:53	0.253143	1.12603	2890.2	FALSE	100
2022-09-13	13:56:53	0.295076	1.31256	2988.18	FALSE	100
2022-09-13	13:56:53	0.347341	1.54504	2891.75	FALSE	100
2022-09-13	13:56:53	0.309733	1.37775	2989.56	FALSE	100
2022-09-13	13:56:54	0.305814	1.36032	2893.11	FALSE	100
2022-09-13	13:56:54	0.267138	1.18828	2990.75	FALSE	100
2022-09-13	13:56:54	0.237926	1.05834	2894.17	FALSE	100
2022-09-13	13:56:55	0.279657	1.24397	2991.99	FALSE	100
2022-09-13	13:56:55	0.308206	1.37096	2895.54	FALSE	100
2022-09-13	13:56:55	0.298741	1.32886	2993.32	FALSE	100
2022-09-13	13:56:55	0.258232	1.14867	2896.69	FALSE	100
2022-09-13	13:56:56	0.226934	1.00945	2994.33	FALSE	100
2022-09-13	13:56:56	0.192277	0.855287	2897.54	FALSE	100
2022-09-13	13:56:56	0.441031	1.96179	2996.29	FALSE	100
2022-09-13	13:56:56	0.378384	1.68313	2899.22	FALSE	100
2022-09-13	13:56:57	0.431972	1.9215	2998.21	FALSE	100
2022-09-13	13:56:57	0.441845	1.96541	2901.19	FALSE	100
2022-09-13	13:56:57	0.490496	2.18182	3000.4	FALSE	100
2022-09-13	13:56:57	0.499809	2.22325	2903.41	FALSE	100
2022-09-13	13:56:58	0.451056	2.00639	3002.4	FALSE	100
2022-09-13	13:56:58	0.528461	2.3507	2905.76	FALSE	100
2022-09-13	13:56:58	0.494822	2.20107	3004.6	FALSE	100
2022-09-13	13:56:58	0.513753	2.28528	2908.05	FALSE	100
2022-09-13	13:56:59	0.486832	2.16553	3006.77	FALSE	100
2022-09-13	13:56:59	0.510394	2.27033	2910.32	FALSE	100
2022-09-13	13:56:59	0.491667	2.18703	3008.96	FALSE	100
2022-09-13	13:57:00	0.497163	2.21148	2912.53	FALSE	100
2022-09-13	13:57:00	0.496654	2.20922	3011.16	FALSE	100
2022-09-13	13:57:00	0.504644	2.24476	2914.77	FALSE	100
2022-09-13	13:57:00	0.483575	2.15104	3013.32	FALSE	100
2022-09-13	13:57:01	0.506323	2.25223	2917.03	FALSE	100
2022-09-13	13:57:01	0.540878	2.40593	3015.72	FALSE	100
2022-09-13	13:57:01	0.461692	2.0537	2919.08	FALSE	100
2022-09-13	13:57:01	0.302608	1.34606	3017.07	FALSE	100
2022-09-13	13:57:02	0.327545	1.45699	2920.54	FALSE	100
2022-09-13	13:57:02	0.304033	1.3524	3018.42	FALSE	100
2022-09-13	13:57:02	0.321183	1.42869	2921.97	FALSE	100
2022-09-13	13:57:02	0.307697	1.3687	3019.79	FALSE	100
2022-09-13	13:57:03	0.310293	1.38025	2923.35	FALSE	100
2022-09-13	13:57:03	0.310547	1.38138	3021.17	FALSE	100
2022-09-13	13:57:03	0.324135	1.44182	2924.79	FALSE	100
2022-09-13	13:57:04	0.323168	1.43752	3022.61	FALSE	100
2022-09-13	13:57:04	0.307901	1.36961	2926.16	FALSE	100
2022-09-13	13:57:04	0.340267	1.51358	3024.12	FALSE	100
2022-09-13	13:57:04	0.325916	1.44974	2927.61	FALSE	100
2022-09-13	13:57:05	0.337417	1.5009	3025.62	FALSE	100
2022-09-13	13:57:05	0.35813	1.59303	2929.2	FALSE	100
2022-09-13	13:57:05	0.338283	1.50475	3027.13	FALSE	100
2022-09-13	13:57:05	0.334008	1.48573	2930.69	FALSE	100
2022-09-13	13:57:06	0.321234	1.42891	3028.56	FALSE	100
2022-09-13	13:57:06	0.335229	1.49117	2932.18	FALSE	100
2022-09-13	13:57:06	0.350293	1.55817	3030.11	FALSE	100
2022-09-13	13:57:07	0.360013	1.60141	2933.78	FALSE	100
2022-09-13	13:57:07	0.359097	1.59734	3031.71	FALSE	100
2022-09-13	13:57:07	0.374517	1.66593	2935.45	FALSE	100
2022-09-13	13:57:07	0.378283	1.68268	3033.39	FALSE	100
2022-09-13	13:57:08	0.358486	1.59462	2937.04	FALSE	100
2022-09-13	13:57:08	0.353601	1.57289	3034.97	FALSE	100
2022-09-13	13:57:08	0.372837	1.65845	2938.7	FALSE	100
2022-09-13	13:57:08	0.36897	1.64125	3036.61	FALSE	100
2022-09-13	13:57:09	0.366578	1.63061	2940.33	FALSE	100
2022-09-13	13:57:09	0.342201	1.52218	3038.13	FALSE	100
2022-09-13	13:57:09	0.349784	1.55591	2941.88	FALSE	100
2022-09-13	13:57:09	0.363015	1.61476	3039.75	FALSE	100
2022-09-13	13:57:10	0.424695	1.88913	2943.77	FALSE	100
2022-09-13	13:57:10	0.394567	1.75511	3041.5	FALSE	100
2022-09-13	13:57:10	0.374313	1.66502	2945.44	FALSE	100
2022-09-13	13:57:10	0.396705	1.76462	3043.26	FALSE	100
2022-09-13	13:57:11	0.449428	1.99915	2947.44	FALSE	100
2022-09-13	13:57:11	0.394415	1.75444	3045.02	FALSE	100
2022-09-13	13:57:11	0.391463	1.74131	2949.18	FALSE	100
2022-09-13	13:57:12	0.348613	1.5507	3046.57	FALSE	100
2022-09-13	13:57:12	0.359402	1.59869	2950.78	FALSE	100
2022-09-13	13:57:12	0.41355	1.83955	3048.41	FALSE	100
2022-09-13	13:57:12	0.38958	1.73293	2952.51	FALSE	100
2022-09-13	13:57:13	0.351158	1.56202	3049.97	FALSE	100
2022-09-13	13:57:13	0.358079	1.59281	2954.1	FALSE	100
2022-09-13	13:57:13	0.414618	1.8443	3051.82	FALSE	100
2022-09-13	13:57:13	0.39014	1.73542	2955.84	FALSE	100
2022-09-13	13:57:14	0.384644	1.71097	3053.53	FALSE	100
2022-09-13	13:57:14	0.326476	1.45223	2957.29	FALSE	100
2022-09-13	13:57:14	0.384084	1.70848	3055.24	FALSE	100
2022-09-13	13:57:15	0.439656	1.95568	2959.25	FALSE	100
2022-09-13	13:57:15	0.406018	1.80605	3057.04	FALSE	100
2022-09-13	13:57:15	0.417519	1.85721	2961.1	FALSE	100
2022-09-13	13:57:15	0.38271	1.70237	3058.74	FALSE	100
2022-09-13	13:57:16	0.456858	2.0322	2963.14	FALSE	100
2022-09-13	13:57:16	0.413753	1.84046	3060.58	FALSE	100
2022-09-13	13:57:16	0.411056	1.82846	2964.97	FALSE	100
2022-09-13	13:57:16	0.436756	1.94278	3062.53	FALSE	100
2022-09-13	13:57:17	0.428563	1.90633	2966.87	FALSE	100
2022-09-13	13:57:17	0.433397	1.92784	3064.45	FALSE	100
2022-09-13	13:57:17	0.43187	1.92104	2968.79	FALSE	100
2022-09-13	13:57:17	0.425305	1.89184	3066.35	FALSE	100
2022-09-13	13:57:18	0.423117	1.88211	2970.67	FALSE	100
2022-09-13	13:57:18	0.426578	1.8975	3068.24	FALSE	100
2022-09-13	13:57:18	0.430853	1.91652	2972.59	FALSE	100
2022-09-13	13:57:18	0.425153	1.89117	3070.14	FALSE	100
2022-09-13	13:57:19	0.374771	1.66706	2974.26	FALSE	100
2022-09-13	13:57:19	0.288155	1.28177	3071.42	FALSE	100
2022-09-13	13:57:19	0.222608	0.990205	2975.25	FALSE	100
2022-09-13	13:57:20	0.1507	0.670344	3072.09	FALSE	100
2022-09-13	13:57:20	0.162507	0.722864	2975.97	FALSE	100
2022-09-13	13:57:20	0.190751	0.848499	3072.94	FALSE	100
2022-09-13	13:57:20	0.396094	1.76191	2977.73	FALSE	100
2022-09-13	13:57:21	0.492277	2.18975	3075.13	FALSE	100
2022-09-13	13:57:21	1.03732	4.61421	2982.35	FALSE	100
2022-09-13	13:57:21	0.523932	2.33055	3077.46	FALSE	100
2022-09-13	13:57:21	0.585814	2.60582	2984.95	FALSE	100
2022-09-13	13:57:22	0.54444	2.42178	3079.88	FALSE	100
2022-09-13	13:57:22	0.401997	1.78816	2986.74	FALSE	100
2022-09-13	13:57:22	0.413193	1.83797	3081.72	FALSE	100
2022-09-13	13:57:22	0.338893	1.50746	2988.25	FALSE	100
2022-09-13	13:57:23	0.60098	2.67328	3084.39	FALSE	100
2022-09-13	13:57:23	0.427697	1.90248	2990.15	FALSE	100
2022-09-13	13:57:23	0.472176	2.10033	3086.49	FALSE	100
2022-09-13	13:57:24	0.465407	2.07022	2992.22	FALSE	100
2022-09-13	13:57:24	0.492634	2.19133	3088.68	FALSE	100
2022-09-13	13:57:24	0.61813	2.74957	2994.97	FALSE	100
2022-09-13	13:57:24	0.543677	2.41838	3091.1	FALSE	100
2022-09-13	13:57:25	0.57584	2.56145	2997.53	FALSE	100
2022-09-13	13:57:25	0.545305	2.42563	3093.52	FALSE	100
2022-09-13	13:57:25	0.548919	2.4417	2999.97	FALSE	100
2022-09-13	13:57:25	0.727494	3.23604	3096.76	FALSE	100
2022-09-13	13:57:26	1.06653	4.74414	3004.72	FALSE	100
2022-09-13	13:57:26	0.985916	4.38555	3101.15	FALSE	100
2022-09-13	13:57:26	0.679555	3.0228	3007.74	FALSE	100
2022-09-13	13:57:26	0.0874938	0.38919	3101.54	FALSE	100
2022-09-13	13:57:27	0.0705473	0.313808	3008.05	FALSE	100
2022-09-13	13:57:27	-0.0924552	-0.411259	3101.54	FALSE	100
2022-09-13	13:57:27	-0.257391	-1.14493	3008.05	FALSE	100
2022-09-13	13:57:28	-0.487264	-2.16745	3101.54	FALSE	100
2022-09-13	13:57:28	-1.33322	-5.93043	3008.05	FALSE	100
2022-09-13	13:57:28	-1.37454	-6.11423	3101.54	FALSE	100
2022-09-13	13:57:28	-1.38838	-6.17579	3008.05	FALSE	100
2022-09-13	13:57:29	-1.50365	-6.68854	3101.54	FALSE	100
2022-09-13	13:57:29	-1.11393	-4.95498	3008.05	FALSE	100
2022-09-13	13:57:29	-1.25673	-5.59019	3101.54	FALSE	100
2022-09-13	13:57:29	-0.564312	-2.51017	3008.05	FALSE	100
2022-09-13	13:57:30	-0.143498	-0.638308	3101.54	FALSE	100
2022-09-13	13:57:30	0.0895804	0.398472	3008.45	FALSE	100
2022-09-13	13:57:30	0.296603	1.31935	3102.85	FALSE	100
2022-09-13	13:57:30	0.311616	1.38613	3009.84	FALSE	100
2022-09-13	13:57:31	0.182557	0.81205	3103.67	FALSE	100
2022-09-13	13:57:31	0.316145	1.40628	3011.25	FALSE	100
2022-09-13	13:57:31	0.416196	1.85132	3105.52	FALSE	100
2022-09-13	13:57:32	0.225458	1.00288	3012.25	FALSE	100
2022-09-13	13:57:32	0.215687	0.959419	3106.48	FALSE	100
2022-09-13	13:57:32	0.233194	1.03729	3013.29	FALSE	100
2022-09-13	13:57:32	0.203066	0.903278	3107.38	FALSE	100
2022-09-13	13:57:33	0.188257	0.837405	3014.12	FALSE	100
2022-09-13	13:57:33	0.148919	0.662421	3108.04	FALSE	100
2022-09-13	13:57:33	0.144746	0.643859	3014.77	FALSE	100
2022-09-13	13:57:33	0.235484	1.04748	3109.09	FALSE	100
2022-09-13	13:57:34	0.205153	0.912562	3015.68	FALSE	100
2022-09-13	13:57:34	0.206883	0.920257	3110.01	FALSE	100
2022-09-13	13:57:34	0.272379	1.2116	3016.89	FALSE	100
2022-09-13	13:57:35	0.198028	0.880868	3110.89	FALSE	100
2022-09-13	13:57:35	0.188359	0.837859	3017.73	FALSE	100
2022-09-13	13:57:35	0.246934	1.09841	3111.99	FALSE	100
2022-09-13	13:57:35	0.26271	1.16859	3018.9	FALSE	100
2022-09-13	13:57:36	0.273295	1.21567	3113.21	FALSE	100
2022-09-13	13:57:36	0.585916	2.60627	3021.5	FALSE	100
2022-09-13	13:57:36	0.367697	1.63559	3114.84	FALSE	100
2022-09-13	13:57:36	0.206272	0.917539	3022.42	FALSE	100
2022-09-13	13:57:37	0.271107	1.20594	3116.05	FALSE	100
2022-09-13	13:57:37	0.498435	2.21714	3024.64	FALSE	100
2022-09-13	13:57:37	0.356756	1.58692	3117.63	FALSE	100
2022-09-13	13:57:37	0.347799	1.54708	3026.19	FALSE	100
2022-09-13	13:57:38	1.58658	7.05743	3124.69	FALSE	100
2022-09-13	13:57:38	0.236552	1.05223	3027.24	FALSE	100
2022-09-13	13:57:38	0.586323	2.60808	3127.3	FALSE	100
2022-09-13	13:57:38	0.676196	3.00786	3030.25	FALSE	100
2022-09-13	13:57:39	1.16032	5.16134	3132.46	FALSE	100
2022-09-13	13:57:39	0.901947	4.01204	3034.26	FALSE	100
2022-09-13	13:57:39	0.803168	3.57265	3136.03	FALSE	100
2022-09-13	13:57:40	2.50312	11.1344	3045.39	FALSE	100
2022-09-13	13:57:40	2.37436	10.5616	3146.6	FALSE	100
2022-09-13	13:57:40	2.92347	13.0042	3058.4	FALSE	100
2022-09-13	13:57:40	1.18826	5.28562	3151.88	FALSE	100
2022-09-13	13:57:41	1.60271	7.12917	3065.53	FALSE	100
2022-09-13	13:57:41	1.86877	8.31266	3160.19	FALSE	100
2022-09-13	13:57:41	1.94413	8.64788	3074.17	FALSE	100
2022-09-13	13:57:41	3.23299	14.381	3174.58	1	101
2022-09-13	13:57:42	5.84754	26.011	3100.18	1	102
2022-09-13	13:57:42	3.68627	16.3973	3190.97	1	103
2022-09-13	13:57:42	4.46235	19.8494	3120.03	1	104
2022-09-13	13:57:42	10.7779	47.9423	3238.91	1	105
2022-09-13	13:57:43	8.33609	37.0806	3157.11	1	106
2022-09-13	13:57:43	3.72627	16.5752	3255.49	1	107
2022-09-13	13:57:43	5.49182	24.4287	3181.54	1	108
2022-09-13	13:57:44	3.99044	17.7503	3273.24	1	109
2022-09-13	13:57:44	2.59599	11.5475	3193.09	FALSE	109
2022-09-13	13:57:44	1.23604	5.49815	3278.74	FALSE	109
2022-09-13	13:57:44	2.34566	10.434	3203.52	FALSE	109

## Sheet: Unnamed_harness_20229131352 (2)
Date	Times	Lbs	Total force x time			**GoPro Fitting: 1342
2022-09-13	13:52:44	0.53416	0.53416	FALSE	0			Total force x time	1457.28
2022-09-13	13:52:44	0.498791	1.03295	FALSE	0			Total steps	109
2022-09-13	13:52:44	0.404033	1.43698	FALSE	0
2022-09-13	13:52:44	0.664644	2.10163	FALSE	0
2022-09-13	13:52:45	0.408308	2.50994	FALSE	0
2022-09-13	13:52:45	0.466832	2.97677	FALSE	0
2022-09-13	13:52:45	0.564746	3.54151	FALSE	0
2022-09-13	13:52:46	0.564695	4.10621	FALSE	0
2022-09-13	13:52:46	0.655585	4.76179	FALSE	0
2022-09-13	13:52:46	0.556756	5.31855	FALSE	0
2022-09-13	13:52:46	-2.30314	5.31855	FALSE	0
2022-09-13	13:52:47	-2.95352	5.31855	FALSE	0
2022-09-13	13:52:47	-3.0721	5.31855	FALSE	0
2022-09-13	13:52:47	-3.13541	5.31855	FALSE	0
2022-09-13	13:52:47	-3.34747	5.31855	FALSE	0
2022-09-13	13:52:48	-3.56838	5.31855	FALSE	0
2022-09-13	13:52:48	-3.75861	5.31855	FALSE	0
2022-09-13	13:52:48	-3.54426	5.31855	FALSE	0
2022-09-13	13:52:48	-3.51144	5.31855	FALSE	0
2022-09-13	13:52:49	-3.56375	5.31855	FALSE	0
2022-09-13	13:52:49	-3.85673	5.31855	FALSE	0
2022-09-13	13:52:49	-3.86121	5.31855	FALSE	0
2022-09-13	13:52:49	-3.95881	5.31855	FALSE	0
2022-09-13	13:52:50	-4.28004	5.31855	FALSE	0
2022-09-13	13:52:50	-3.08619	5.31855	FALSE	0
2022-09-13	13:52:50	6.71263	12.0312	1	1
2022-09-13	13:52:51	12.3595	24.3907	1	2
2022-09-13	13:52:51	10.0232	34.4139	1	3
2022-09-13	13:52:51	4.44367	38.8575	1	4
2022-09-13	13:52:51	4.96342	43.821	1	5
2022-09-13	13:52:52	11.8582	55.6792	1	6
2022-09-13	13:52:52	12.6657	68.3449	1	7
2022-09-13	13:52:52	0.610191	68.9551	FALSE	7
2022-09-13	13:52:52	-0.0580023	68.9551	FALSE	7
2022-09-13	13:52:53	-0.186654	68.9551	FALSE	7
2022-09-13	13:52:53	-0.70706	68.9551	FALSE	7
2022-09-13	13:52:53	-0.234084	68.9551	FALSE	7
2022-09-13	13:52:53	0.889885	69.8449	FALSE	7
2022-09-13	13:52:54	1.12922	70.9742	FALSE	7
2022-09-13	13:52:54	0.951565	71.9257	FALSE	7
2022-09-13	13:52:54	0.92159	72.8473	FALSE	7
2022-09-13	13:52:55	0.845254	73.6926	FALSE	7
2022-09-13	13:52:55	0.817672	74.5102	FALSE	7
2022-09-13	13:52:55	0.453193	74.9634	FALSE	7
2022-09-13	13:52:55	0.647239	75.6107	FALSE	7
2022-09-13	13:52:56	0.603728	76.2144	FALSE	7
2022-09-13	13:52:56	0.935789	77.1502	FALSE	7
2022-09-13	13:52:56	0.59528	77.7455	FALSE	7
2022-09-13	13:52:56	0.501641	78.2471	FALSE	7
2022-09-13	13:52:57	0.311921	78.559	FALSE	7
2022-09-13	13:52:57	0.109377	78.6684	FALSE	7
2022-09-13	13:52:57	0.409071	79.0775	FALSE	7
2022-09-13	13:52:57	0.327596	79.4051	FALSE	7
2022-09-13	13:52:58	0.254364	79.6594	FALSE	7
2022-09-13	13:52:58	0.139453	79.7989	FALSE	7
2022-09-13	13:52:58	0.0673411	79.8662	FALSE	7
2022-09-13	13:52:59	-0.378155	79.8662	FALSE	7
2022-09-13	13:52:59	-0.500648	79.8662	FALSE	7
2022-09-13	13:52:59	-0.623244	79.8662	FALSE	7
2022-09-13	13:52:59	-0.556781	79.8662	FALSE	7
2022-09-13	13:53:00	-0.663294	79.8662	FALSE	7
2022-09-13	13:53:00	-0.659376	79.8662	FALSE	7
2022-09-13	13:53:00	-0.665483	79.8662	FALSE	7
2022-09-13	13:53:00	-0.610521	79.8662	FALSE	7
2022-09-13	13:53:01	-0.155814	79.8662	FALSE	7
2022-09-13	13:53:01	0.396196	80.2624	FALSE	7
2022-09-13	13:53:01	0.417417	80.6799	FALSE	7
2022-09-13	13:53:01	0.336247	81.0161	FALSE	7
2022-09-13	13:53:02	0.170547	81.1866	FALSE	7
2022-09-13	13:53:02	-0.192659	81.1866	FALSE	7
2022-09-13	13:53:02	-0.104313	81.1866	FALSE	7
2022-09-13	13:53:03	-0.196425	81.1866	FALSE	7
2022-09-13	13:53:03	-0.441259	81.1866	FALSE	7
2022-09-13	13:53:03	-0.676882	81.1866	FALSE	7
2022-09-13	13:53:03	-1.14401	81.1866	FALSE	7
2022-09-13	13:53:04	-0.163549	81.1866	FALSE	7
2022-09-13	13:53:04	0.144033	81.3307	FALSE	7
2022-09-13	13:53:04	0.324797	81.6555	FALSE	7
2022-09-13	13:53:05	1.75813	83.4136	FALSE	7
2022-09-13	13:53:05	2.59533	86.0089	FALSE	7
2022-09-13	13:53:05	3.74368	89.7526	1	8
2022-09-13	13:53:05	2.75981	92.5124	FALSE	8
2022-09-13	13:53:05	3.49625	96.0087	1	9
2022-09-13	13:53:06	2.36235	98.371	FALSE	9
2022-09-13	13:53:06	2.24836	100.619	FALSE	9
2022-09-13	13:53:06	1.65635	102.276	FALSE	9
2022-09-13	13:53:07	0.953346	103.229	FALSE	9
2022-09-13	13:53:07	0.772226	104.001	FALSE	9
2022-09-13	13:53:07	0.475891	104.477	FALSE	9
2022-09-13	13:53:07	0.517926	104.995	FALSE	9
2022-09-13	13:53:08	0.619707	105.615	FALSE	9
2022-09-13	13:53:08	0.355992	105.971	FALSE	9
2022-09-13	13:53:08	0.526578	106.497	FALSE	9
2022-09-13	13:53:08	0.571361	107.069	FALSE	9
2022-09-13	13:53:09	0.328155	107.397	FALSE	9
2022-09-13	13:53:09	0.748766	108.146	FALSE	9
2022-09-13	13:53:09	0.493499	108.639	FALSE	9
2022-09-13	13:53:09	0.916196	109.555	FALSE	9
2022-09-13	13:53:10	1.27034	110.826	FALSE	9
2022-09-13	13:53:10	1.27492	112.101	FALSE	9
2022-09-13	13:53:10	2.26098	114.362	FALSE	9
2022-09-13	13:53:11	1.42795	115.79	FALSE	9
2022-09-13	13:53:11	1.9821	117.772	FALSE	9
2022-09-13	13:53:11	2.5162	120.288	FALSE	9
2022-09-13	13:53:11	1.80648	122.094	FALSE	9
2022-09-13	13:53:12	1.97345	124.068	FALSE	9
2022-09-13	13:53:12	1.8822	125.95	FALSE	9
2022-09-13	13:53:12	1.73833	127.688	FALSE	9
2022-09-13	13:53:12	2.12775	129.816	FALSE	9
2022-09-13	13:53:13	2.07905	131.895	FALSE	9
2022-09-13	13:53:13	1.97162	133.867	FALSE	9
2022-09-13	13:53:13	1.89294	135.76	FALSE	9
2022-09-13	13:53:13	1.54546	137.305	FALSE	9
2022-09-13	13:53:14	1.70907	139.014	FALSE	9
2022-09-13	13:53:14	1.86251	140.877	FALSE	9
2022-09-13	13:53:14	1.60225	142.479	FALSE	9
2022-09-13	13:53:15	1.72378	144.203	FALSE	9
2022-09-13	13:53:15	1.88866	146.091	FALSE	9
2022-09-13	13:53:15	1.63869	147.73	FALSE	9
2022-09-13	13:53:15	1.61253	149.343	FALSE	9
2022-09-13	13:53:16	1.96286	151.306	FALSE	9
2022-09-13	13:53:16	1.7334	153.039	FALSE	9
2022-09-13	13:53:16	1.58413	154.623	FALSE	9
2022-09-13	13:53:16	1.54836	156.171	FALSE	9
2022-09-13	13:53:17	1.63747	157.809	FALSE	9
2022-09-13	13:53:17	1.85447	159.663	FALSE	9
2022-09-13	13:53:17	1.68576	161.349	FALSE	9
2022-09-13	13:53:17	1.94352	163.293	FALSE	9
2022-09-13	13:53:18	1.80464	165.097	FALSE	9
2022-09-13	13:53:18	1.3249	166.422	FALSE	9
2022-09-13	13:53:18	1.44383	167.866	FALSE	9
2022-09-13	13:53:19	1.56164	169.428	FALSE	9
2022-09-13	13:53:19	2.38851	171.816	FALSE	9
2022-09-13	13:53:19	1.63146	173.448	FALSE	9
2022-09-13	13:53:19	2.81818	176.266	FALSE	9
2022-09-13	13:53:20	3.67874	179.945	1	10
2022-09-13	13:53:20	3.88627	183.831	1	11
2022-09-13	13:53:20	5.19375	189.025	1	12
2022-09-13	13:53:20	5.14205	194.167	1	13
2022-09-13	13:53:21	4.8139	198.98	1	14
2022-09-13	13:53:21	5.21685	204.197	1	15
2022-09-13	13:53:21	4.61711	208.814	1	16
2022-09-13	13:53:21	5.14596	213.96	1	17
2022-09-13	13:53:22	4.52566	218.486	1	18
2022-09-13	13:53:22	3.30597	221.792	1	19
2022-09-13	13:53:22	2.95248	224.745	FALSE	19
2022-09-13	13:53:23	2.93233	227.677	FALSE	19
2022-09-13	13:53:23	4.03874	231.716	1	20
2022-09-13	13:53:23	3.87945	235.595	1	21
2022-09-13	13:53:23	4.28846	239.883	1	22
2022-09-13	13:53:24	3.40515	243.289	1	23
2022-09-13	13:53:24	2.56474	245.853	FALSE	23
2022-09-13	13:53:24	2.66479	248.518	FALSE	23
2022-09-13	13:53:24	2.04042	250.559	FALSE	23
2022-09-13	13:53:25	2.24281	252.801	FALSE	23
2022-09-13	13:53:25	2.68678	255.488	FALSE	23
2022-09-13	13:53:25	2.86149	258.35	FALSE	23
2022-09-13	13:53:25	2.81905	261.169	FALSE	23
2022-09-13	13:53:26	2.17645	263.345	FALSE	23
2022-09-13	13:53:26	2.5739	265.919	FALSE	23
2022-09-13	13:53:26	2.65345	268.573	FALSE	23
2022-09-13	13:53:27	2.50668	271.079	FALSE	23
2022-09-13	13:53:27	2.71716	273.796	FALSE	23
2022-09-13	13:53:27	2.55426	276.351	FALSE	23
2022-09-13	13:53:27	2.69156	279.042	FALSE	23
2022-09-13	13:53:28	2.80332	281.846	FALSE	23
2022-09-13	13:53:28	2.59202	284.438	FALSE	23
2022-09-13	13:53:28	2.89314	287.331	FALSE	23
2022-09-13	13:53:28	3.04999	290.381	1	24
2022-09-13	13:53:29	2.80785	293.189	FALSE	24
2022-09-13	13:53:29	3.38642	296.575	1	25
2022-09-13	13:53:29	0.995229	297.57	FALSE	25
2022-09-13	13:53:29	1.24714	298.817	FALSE	25
2022-09-13	13:53:30	5.32596	304.143	1	26
2022-09-13	13:53:30	10.0877	314.231	1	27
2022-09-13	13:53:30	15.381	329.612	1	28
2022-09-13	13:53:31	10.7754	340.387	1	29
2022-09-13	13:53:31	8.42703	348.814	1	30
2022-09-13	13:53:31	7.98856	356.803	1	31
2022-09-13	13:53:31	9.33741	366.14	1	32
2022-09-13	13:53:32	8.08917	374.23	1	33
2022-09-13	13:53:32	9.33228	383.562	1	34
2022-09-13	13:53:32	4.57416	388.136	1	35
2022-09-13	13:53:32	4.52856	392.665	1	36
2022-09-13	13:53:33	0.912633	393.577	FALSE	36
2022-09-13	13:53:33	3.01151	396.589	1	37
2022-09-13	13:53:33	6.09207	402.681	1	38
2022-09-13	13:53:33	6.28993	408.971	1	39
2022-09-13	13:53:34	5.14535	414.116	1	40
2022-09-13	13:53:34	3.98978	418.106	1	41
2022-09-13	13:53:34	1.5251	419.631	FALSE	41
2022-09-13	13:53:35	4.67029	424.301	1	42
2022-09-13	13:53:35	6.0397	430.341	1	43
2022-09-13	13:53:35	3.9966	434.337	1	44
2022-09-13	13:53:35	3.7392	438.077	1	45
2022-09-13	13:53:36	1.88576	439.962	FALSE	45
2022-09-13	13:53:36	4.17151	444.134	1	46
2022-09-13	13:53:36	8.1083	452.242	1	47
2022-09-13	13:53:36	8.90194	461.144	1	48
2022-09-13	13:53:37	6.92576	468.07	1	49
2022-09-13	13:53:37	10.1014	478.171	1	50
2022-09-13	13:53:37	14.4701	492.641	1	51
2022-09-13	13:53:37	4.94647	497.588	1	52
2022-09-13	13:53:38	0.76958	498.358	FALSE	52
2022-09-13	13:53:38	0.789783	499.147	FALSE	52
2022-09-13	13:53:38	0.294618	499.442	FALSE	52
2022-09-13	13:53:39	0.31986	499.762	FALSE	52
2022-09-13	13:53:39	0.254517	500.016	FALSE	52
2022-09-13	13:53:39	0.817112	500.833	FALSE	52
2022-09-13	13:53:39	0.812582	501.646	FALSE	52
2022-09-13	13:53:40	4.32408	505.97	1	53
2022-09-13	13:53:40	10.698	516.668	1	54
2022-09-13	13:53:40	4.98149	521.65	1	55
2022-09-13	13:53:40	5.21126	526.861	1	56
2022-09-13	13:53:41	12.6564	539.517	1	57
2022-09-13	13:53:41	5.37604	544.893	1	58
2022-09-13	13:53:41	3.13518	548.028	1	59
2022-09-13	13:53:41	0.570496	548.599	FALSE	59
2022-09-13	13:53:42	0.931565	549.53	FALSE	59
2022-09-13	13:53:42	0.446069	549.977	FALSE	59
2022-09-13	13:53:42	0.103982	550.081	FALSE	59
2022-09-13	13:53:43	0.679046	550.76	FALSE	59
2022-09-13	13:53:43	0.121438	550.881	FALSE	59
2022-09-13	13:53:43	-0.0727606	550.881	FALSE	59
2022-09-13	13:53:43	-0.417951	550.881	FALSE	59
2022-09-13	13:53:44	-0.527519	550.881	FALSE	59
2022-09-13	13:53:44	-0.970572	550.881	FALSE	59
2022-09-13	13:53:44	-0.903345	550.881	FALSE	59
2022-09-13	13:53:44	-0.980495	550.881	FALSE	59
2022-09-13	13:53:45	-1.03882	550.881	FALSE	59
2022-09-13	13:53:45	-1.15235	550.881	FALSE	59
2022-09-13	13:53:45	-1.01907	550.881	FALSE	59
2022-09-13	13:53:45	-0.705024	550.881	FALSE	59
2022-09-13	13:53:46	0.0395549	550.921	FALSE	59
2022-09-13	13:53:46	0.209835	551.13	FALSE	59
2022-09-13	13:53:46	-0.0189692	551.13	FALSE	59
2022-09-13	13:53:47	0.619351	551.75	FALSE	59
2022-09-13	13:53:47	0.912277	552.662	FALSE	59
2022-09-13	13:53:47	1.40912	554.071	FALSE	59
2022-09-13	13:53:47	1.96668	556.038	FALSE	59
2022-09-13	13:53:48	1.80118	557.839	FALSE	59
2022-09-13	13:53:48	1.15732	558.996	FALSE	59
2022-09-13	13:53:48	1.27182	560.268	FALSE	59
2022-09-13	13:53:48	1.4705	561.739	FALSE	59
2022-09-13	13:53:49	1.22805	562.967	FALSE	59
2022-09-13	13:53:49	1.11518	564.082	FALSE	59
2022-09-13	13:53:49	1.24301	565.325	FALSE	59
2022-09-13	13:53:49	1.25752	566.582	FALSE	59
2022-09-13	13:53:50	1.2824	567.865	FALSE	59
2022-09-13	13:53:50	1.29589	569.161	FALSE	59
2022-09-13	13:53:50	1.10856	570.269	FALSE	59
2022-09-13	13:53:51	1.01156	571.281	FALSE	59
2022-09-13	13:53:51	1.15767	572.438	FALSE	59
2022-09-13	13:53:51	0.97701	573.416	FALSE	59
2022-09-13	13:53:51	0.959758	574.375	FALSE	59
2022-09-13	13:53:52	1.00571	575.381	FALSE	59
2022-09-13	13:53:52	1.25721	576.638	FALSE	59
2022-09-13	13:53:52	1.43497	578.073	FALSE	59
2022-09-13	13:53:52	1.02663	579.1	FALSE	59
2022-09-13	13:53:53	0.581285	579.681	FALSE	59
2022-09-13	13:53:53	1.55416	581.235	FALSE	59
2022-09-13	13:53:53	1.27477	582.51	FALSE	59
2022-09-13	13:53:53	2.22938	584.739	FALSE	59
2022-09-13	13:53:54	2.29457	587.034	FALSE	59
2022-09-13	13:53:54	1.422	588.456	FALSE	59
2022-09-13	13:53:54	1.2737	589.73	FALSE	59
2022-09-13	13:53:55	1.4908	591.22	FALSE	59
2022-09-13	13:53:55	1.09197	592.312	FALSE	59
2022-09-13	13:53:55	0.845865	593.158	FALSE	59
2022-09-13	13:53:55	1.50174	594.66	FALSE	59
2022-09-13	13:53:56	1.65391	596.314	FALSE	59
2022-09-13	13:53:56	1.8338	598.148	FALSE	59
2022-09-13	13:53:56	1.73777	599.886	FALSE	59
2022-09-13	13:53:56	1.50953	601.395	FALSE	59
2022-09-13	13:53:57	1.18658	602.582	FALSE	59
2022-09-13	13:53:57	1.07472	603.656	FALSE	59
2022-09-13	13:53:57	0.856145	604.512	FALSE	59
2022-09-13	13:53:57	0.78159	605.294	FALSE	59
2022-09-13	13:53:58	1.71253	607.007	FALSE	59
2022-09-13	13:53:58	1.30296	608.31	FALSE	59
2022-09-13	13:53:58	1.3223	609.632	FALSE	59
2022-09-13	13:53:59	1.3792	611.011	FALSE	59
2022-09-13	13:53:59	1.2878	612.299	FALSE	59
2022-09-13	13:53:59	1.34887	613.648	FALSE	59
2022-09-13	13:53:59	1.26337	614.911	FALSE	59
2022-09-13	13:54:00	1.24459	616.156	FALSE	59
2022-09-13	13:54:00	1.1937	617.349	FALSE	59
2022-09-13	13:54:00	1.21966	618.569	FALSE	59
2022-09-13	13:54:00	1.24683	619.816	FALSE	59
2022-09-13	13:54:01	1.4106	621.226	FALSE	59
2022-09-13	13:54:01	1.34958	622.576	FALSE	59
2022-09-13	13:54:01	1.3365	623.913	FALSE	59
2022-09-13	13:54:01	1.29915	625.212	FALSE	59
2022-09-13	13:54:02	1.29533	626.507	FALSE	59
2022-09-13	13:54:02	1.23416	627.741	FALSE	59
2022-09-13	13:54:02	1.28581	629.027	FALSE	59
2022-09-13	13:54:03	1.30154	630.329	FALSE	59
2022-09-13	13:54:03	1.32571	631.654	FALSE	59
2022-09-13	13:54:03	1.23401	632.888	FALSE	59
2022-09-13	13:54:03	1.27258	634.161	FALSE	59
2022-09-13	13:54:04	1.2337	635.395	FALSE	59
2022-09-13	13:54:04	1.2651	636.66	FALSE	59
2022-09-13	13:54:04	1.31569	637.975	FALSE	59
2022-09-13	13:54:04	1.26123	639.237	FALSE	59
2022-09-13	13:54:05	1.21782	640.454	FALSE	59
2022-09-13	13:54:05	1.2279	641.682	FALSE	59
2022-09-13	13:54:05	1.21431	642.897	FALSE	59
2022-09-13	13:54:05	1.25192	644.149	FALSE	59
2022-09-13	13:54:06	1.2334	645.382	FALSE	59
2022-09-13	13:54:06	1.26989	646.652	FALSE	59
2022-09-13	13:54:06	1.24571	647.898	FALSE	59
2022-09-13	13:54:07	1.21177	649.109	FALSE	59
2022-09-13	13:54:07	1.17584	650.285	FALSE	59
2022-09-13	13:54:07	1.19716	651.482	FALSE	59
2022-09-13	13:54:07	1.14251	652.625	FALSE	59
2022-09-13	13:54:08	1.21401	653.839	FALSE	59
2022-09-13	13:54:08	1.18841	655.027	FALSE	59
2022-09-13	13:54:08	1.15971	656.187	FALSE	59
2022-09-13	13:54:08	1.22653	657.413	FALSE	59
2022-09-13	13:54:09	1.0481	658.462	FALSE	59
2022-09-13	13:54:09	1.18663	659.648	FALSE	59
2022-09-13	13:54:09	1.26902	660.917	FALSE	59
2022-09-13	13:54:09	1.22617	662.143	FALSE	59
2022-09-13	13:54:10	0.978537	663.122	FALSE	59
2022-09-13	13:54:10	1.42505	664.547	FALSE	59
2022-09-13	13:54:10	1.20785	665.755	FALSE	59
2022-09-13	13:54:11	1.3335	667.088	FALSE	59
2022-09-13	13:54:11	1.1993	668.288	FALSE	59
2022-09-13	13:54:11	1.22607	669.514	FALSE	59
2022-09-13	13:54:11	1.18027	670.694	FALSE	59
2022-09-13	13:54:12	1.20312	671.897	FALSE	59
2022-09-13	13:54:12	1.17294	673.07	FALSE	59
2022-09-13	13:54:12	1.18159	674.252	FALSE	59
2022-09-13	13:54:12	1.18805	675.44	FALSE	59
2022-09-13	13:54:13	1.15401	676.594	FALSE	59
2022-09-13	13:54:13	1.17457	677.768	FALSE	59
2022-09-13	13:54:13	1.11726	678.885	FALSE	59
2022-09-13	13:54:13	1.15696	680.042	FALSE	59
2022-09-13	13:54:14	1.11162	681.154	FALSE	59
2022-09-13	13:54:14	1.29996	682.454	FALSE	59
2022-09-13	13:54:14	1.01564	683.47	FALSE	59
2022-09-13	13:54:15	1.15009	684.62	FALSE	59
2022-09-13	13:54:15	1.11263	685.732	FALSE	59
2022-09-13	13:54:15	1.12902	686.861	FALSE	59
2022-09-13	13:54:15	1.29324	688.155	FALSE	59
2022-09-13	13:54:16	1.3022	689.457	FALSE	59
2022-09-13	13:54:16	1.26357	690.72	FALSE	59
2022-09-13	13:54:16	1.21482	691.935	FALSE	59
2022-09-13	13:54:16	1.27864	693.214	FALSE	59
2022-09-13	13:54:17	1.38688	694.601	FALSE	59
2022-09-13	13:54:17	1.34149	695.942	FALSE	59
2022-09-13	13:54:17	1.27828	697.221	FALSE	59
2022-09-13	13:54:17	1.33757	698.558	FALSE	59
2022-09-13	13:54:18	1.36653	699.925	FALSE	59
2022-09-13	13:54:18	1.36449	701.289	FALSE	59
2022-09-13	13:54:18	1.30719	702.596	FALSE	59
2022-09-13	13:54:19	1.40103	703.997	FALSE	59
2022-09-13	13:54:19	1.43447	705.432	FALSE	59
2022-09-13	13:54:19	1.44831	706.88	FALSE	59
2022-09-13	13:54:19	1.51625	708.396	FALSE	59
2022-09-13	13:54:20	1.70052	710.097	FALSE	59
2022-09-13	13:54:20	1.59167	711.689	FALSE	59
2022-09-13	13:54:20	1.57859	713.267	FALSE	59
2022-09-13	13:54:20	1.55762	714.825	FALSE	59
2022-09-13	13:54:21	1.54988	716.375	FALSE	59
2022-09-13	13:54:21	1.55976	717.934	FALSE	59
2022-09-13	13:54:21	1.61584	719.55	FALSE	59
2022-09-13	13:54:21	1.6533	721.204	FALSE	59
2022-09-13	13:54:22	1.53711	722.741	FALSE	59
2022-09-13	13:54:22	1.44302	724.184	FALSE	59
2022-09-13	13:54:22	1.43279	725.616	FALSE	59
2022-09-13	13:54:23	1.39421	727.011	FALSE	59
2022-09-13	13:54:23	1.38698	728.398	FALSE	59
2022-09-13	13:54:23	1.3649	729.763	FALSE	59
2022-09-13	13:54:23	1.33823	731.101	FALSE	59
2022-09-13	13:54:24	1.348	732.449	FALSE	59
2022-09-13	13:54:24	1.31482	733.764	FALSE	59
2022-09-13	13:54:24	1.33553	735.099	FALSE	59
2022-09-13	13:54:24	1.31991	736.419	FALSE	59
2022-09-13	13:54:25	1.30398	737.723	FALSE	59
2022-09-13	13:54:25	1.27004	738.993	FALSE	59
2022-09-13	13:54:25	1.27955	740.273	FALSE	59
2022-09-13	13:54:25	1.27823	741.551	FALSE	59
2022-09-13	13:54:26	1.31899	742.87	FALSE	59
2022-09-13	13:54:26	1.31574	744.186	FALSE	59
2022-09-13	13:54:26	1.26378	745.449	FALSE	59
2022-09-13	13:54:27	1.2878	746.737	FALSE	59
2022-09-13	13:54:27	1.30001	748.037	FALSE	59
2022-09-13	13:54:27	1.28627	749.323	FALSE	59
2022-09-13	13:54:27	1.27843	750.602	FALSE	59
2022-09-13	13:54:28	1.31375	751.916	FALSE	59
2022-09-13	13:54:28	1.28495	753.201	FALSE	59
2022-09-13	13:54:28	1.34795	754.549	FALSE	59
2022-09-13	13:54:28	1.36668	755.915	FALSE	59
2022-09-13	13:54:29	1.29899	757.214	FALSE	59
2022-09-13	13:54:29	1.44388	758.658	FALSE	59
2022-09-13	13:54:29	1.18413	759.842	FALSE	59
2022-09-13	13:54:29	1.2876	761.13	FALSE	59
2022-09-13	13:54:30	1.16164	762.291	FALSE	59
2022-09-13	13:54:30	1.18836	763.48	FALSE	59
2022-09-13	13:54:30	0.9736	764.453	FALSE	59
2022-09-13	13:54:31	0.657265	765.111	FALSE	59
2022-09-13	13:54:31	0.7907	765.901	FALSE	59
2022-09-13	13:54:31	0.790293	766.692	FALSE	59
2022-09-13	13:54:31	0.592583	767.284	FALSE	59
2022-09-13	13:54:32	1.48027	768.765	FALSE	59
2022-09-13	13:54:32	0.884338	769.649	FALSE	59
2022-09-13	13:54:32	1.08414	770.733	FALSE	59
2022-09-13	13:54:32	0.965356	771.698	FALSE	59
2022-09-13	13:54:33	1.06093	772.759	FALSE	59
2022-09-13	13:54:33	1.09579	773.855	FALSE	59
2022-09-13	13:54:33	0.96673	774.822	FALSE	59
2022-09-13	13:54:33	1.09375	775.916	FALSE	59
2022-09-13	13:54:34	0.816094	776.732	FALSE	59
2022-09-13	13:54:34	1.20073	777.932	FALSE	59
2022-09-13	13:54:34	1.06393	778.996	FALSE	59
2022-09-13	13:54:35	1.13014	780.126	FALSE	59
2022-09-13	13:54:35	1.19248	781.319	FALSE	59
2022-09-13	13:54:35	0.927901	782.247	FALSE	59
2022-09-13	13:54:35	0.695331	782.942	FALSE	59
2022-09-13	13:54:36	0.904542	783.847	FALSE	59
2022-09-13	13:54:36	0.906577	784.753	FALSE	59
2022-09-13	13:54:36	0.940318	785.694	FALSE	59
2022-09-13	13:54:36	0.977977	786.672	FALSE	59
2022-09-13	13:54:37	0.880929	787.553	FALSE	59
2022-09-13	13:54:37	1.05009	788.603	FALSE	59
2022-09-13	13:54:37	1.04734	789.65	FALSE	59
2022-09-13	13:54:37	1.04052	790.69	FALSE	59
2022-09-13	13:54:38	0.925814	791.616	FALSE	59
2022-09-13	13:54:38	0.893651	792.51	FALSE	59
2022-09-13	13:54:38	0.942303	793.452	FALSE	59
2022-09-13	13:54:39	0.9307	794.383	FALSE	59
2022-09-13	13:54:39	0.917977	795.301	FALSE	59
2022-09-13	13:54:39	0.900776	796.202	FALSE	59
2022-09-13	13:54:39	0.895789	797.097	FALSE	59
2022-09-13	13:54:40	0.856908	797.954	FALSE	59
2022-09-13	13:54:40	0.841285	798.796	FALSE	59
2022-09-13	13:54:40	0.827086	799.623	FALSE	59
2022-09-13	13:54:40	0.882405	800.505	FALSE	59
2022-09-13	13:54:41	0.844695	801.35	FALSE	59
2022-09-13	13:54:41	0.894262	802.244	FALSE	59
2022-09-13	13:54:41	0.930089	803.174	FALSE	59
2022-09-13	13:54:41	0.96958	804.144	FALSE	59
2022-09-13	13:54:42	0.960114	805.104	FALSE	59
2022-09-13	13:54:42	0.900623	806.005	FALSE	59
2022-09-13	13:54:42	0.87874	806.883	FALSE	59
2022-09-13	13:54:43	0.856196	807.739	FALSE	59
2022-09-13	13:54:43	0.881692	808.621	FALSE	59
2022-09-13	13:54:43	0.921489	809.543	FALSE	59
2022-09-13	13:54:43	0.92556	810.468	FALSE	59
2022-09-13	13:54:44	0.906527	811.375	FALSE	59
2022-09-13	13:54:44	0.945611	812.32	FALSE	59
2022-09-13	13:54:44	0.932837	813.253	FALSE	59
2022-09-13	13:54:44	0.887087	814.14	FALSE	59
2022-09-13	13:54:45	0.877723	815.018	FALSE	59
2022-09-13	13:54:45	0.898079	815.916	FALSE	59
2022-09-13	13:54:45	0.914516	816.831	FALSE	59
2022-09-13	13:54:45	0.901794	817.732	FALSE	59
2022-09-13	13:54:46	0.938893	818.671	FALSE	59
2022-09-13	13:54:46	1.24373	819.915	FALSE	59
2022-09-13	13:54:46	2.18765	822.103	FALSE	59
2022-09-13	13:54:47	1.73752	823.84	FALSE	59
2022-09-13	13:54:47	1.40866	825.249	FALSE	59
2022-09-13	13:54:47	1.70531	826.954	FALSE	59
2022-09-13	13:54:47	1.56469	828.519	FALSE	59
2022-09-13	13:54:48	0.95472	829.474	FALSE	59
2022-09-13	13:54:48	0.368613	829.842	FALSE	59
2022-09-13	13:54:48	0.573244	830.415	FALSE	59
2022-09-13	13:54:48	0.392328	830.808	FALSE	59
2022-09-13	13:54:49	0.535025	831.343	FALSE	59
2022-09-13	13:54:49	0.607901	831.951	FALSE	59
2022-09-13	13:54:49	0.408919	832.36	FALSE	59
2022-09-13	13:54:49	0.277163	832.637	FALSE	59
2022-09-13	13:54:50	0.342863	832.98	FALSE	59
2022-09-13	13:54:50	-0.00863844	832.98	FALSE	59
2022-09-13	13:54:50	-0.0072135	832.98	FALSE	59
2022-09-13	13:54:51	0.128461	833.108	FALSE	59
2022-09-13	13:54:51	0.247137	833.355	FALSE	59
2022-09-13	13:54:51	-0.0485366	833.355	FALSE	59
2022-09-13	13:54:51	0.0749239	833.43	FALSE	59
2022-09-13	13:54:52	0.134008	833.564	FALSE	59
2022-09-13	13:54:52	0.142863	833.707	FALSE	59
2022-09-13	13:54:52	0.0422013	833.749	FALSE	59
2022-09-13	13:54:52	0.165967	833.915	FALSE	59
2022-09-13	13:54:53	0.475789	834.391	FALSE	59
2022-09-13	13:54:53	0.480573	834.872	FALSE	59
2022-09-13	13:54:53	1.06765	835.939	FALSE	59
2022-09-13	13:54:53	1.35808	837.297	FALSE	59
2022-09-13	13:54:54	2.19162	839.489	FALSE	59
2022-09-13	13:54:54	2.65497	842.144	FALSE	59
2022-09-13	13:54:54	1.98276	844.127	FALSE	59
2022-09-13	13:54:55	0.986018	845.113	FALSE	59
2022-09-13	13:54:55	1.16536	846.278	FALSE	59
2022-09-13	13:54:55	1.04062	847.319	FALSE	59
2022-09-13	13:54:55	0.790445	848.109	FALSE	59
2022-09-13	13:54:56	0.735534	848.845	FALSE	59
2022-09-13	13:54:56	0.734466	849.579	FALSE	59
2022-09-13	13:54:56	0.60556	850.185	FALSE	59
2022-09-13	13:54:56	0.676603	850.861	FALSE	59
2022-09-13	13:54:57	0.693855	851.555	FALSE	59
2022-09-13	13:54:57	0.654007	852.209	FALSE	59
2022-09-13	13:54:57	0.640929	852.85	FALSE	59
2022-09-13	13:54:57	0.634109	853.484	FALSE	59
2022-09-13	13:54:58	0.56098	854.045	FALSE	59
2022-09-13	13:54:58	0.754415	854.799	FALSE	59
2022-09-13	13:54:58	0.761183	855.561	FALSE	59
2022-09-13	13:54:59	0.764491	856.325	FALSE	59
2022-09-13	13:54:59	0.749071	857.074	FALSE	59
2022-09-13	13:54:59	0.768512	857.843	FALSE	59
2022-09-13	13:54:59	0.760013	858.603	FALSE	59
2022-09-13	13:55:00	0.745051	859.348	FALSE	59
2022-09-13	13:55:00	0.696196	860.044	FALSE	59
2022-09-13	13:55:00	0.75874	860.803	FALSE	59
2022-09-13	13:55:00	0.72215	861.525	FALSE	59
2022-09-13	13:55:01	0.725	862.25	FALSE	59
2022-09-13	13:55:01	0.712888	862.963	FALSE	59
2022-09-13	13:55:01	0.677875	863.641	FALSE	59
2022-09-13	13:55:01	0.607239	864.248	FALSE	59
2022-09-13	13:55:02	0.594873	864.843	FALSE	59
2022-09-13	13:55:02	0.600572	865.443	FALSE	59
2022-09-13	13:55:02	0.62617	866.07	FALSE	59
2022-09-13	13:55:03	0.576247	866.646	FALSE	59
2022-09-13	13:55:03	0.521132	867.167	FALSE	59
2022-09-13	13:55:03	0.508003	867.675	FALSE	59
2022-09-13	13:55:03	0.431361	868.106	FALSE	59
2022-09-13	13:55:04	0.408715	868.515	FALSE	59
2022-09-13	13:55:04	0.391209	868.906	FALSE	59
2022-09-13	13:55:04	0.37355	869.28	FALSE	59
2022-09-13	13:55:04	0.315382	869.595	FALSE	59
2022-09-13	13:55:05	0.265865	869.861	FALSE	59
2022-09-13	13:55:05	0.117621	869.979	FALSE	59
2022-09-13	13:55:05	0.0728374	870.051	FALSE	59
2022-09-13	13:55:05	0.595331	870.647	FALSE	59
2022-09-13	13:55:06	2.8707	873.517	FALSE	59
2022-09-13	13:55:06	4.80754	878.325	1	60
2022-09-13	13:55:06	2.61711	880.942	FALSE	60
2022-09-13	13:55:07	2.43207	883.374	FALSE	60
2022-09-13	13:55:07	1.8248	885.199	FALSE	60
2022-09-13	13:55:07	1.89075	887.09	FALSE	60
2022-09-13	13:55:07	1.66118	888.751	FALSE	60
2022-09-13	13:55:08	3.3392	892.09	1	61
2022-09-13	13:55:08	5.1878	897.278	1	62
2022-09-13	13:55:08	9.37741	906.655	1	63
2022-09-13	13:55:08	5.60668	912.262	1	64
2022-09-13	13:55:09	2.62749	914.89	FALSE	64
2022-09-13	13:55:09	0.898283	915.788	FALSE	64
2022-09-13	13:55:09	0.535636	916.323	FALSE	64
2022-09-13	13:55:09	1.02912	917.353	FALSE	64
2022-09-13	13:55:10	0.878639	918.231	FALSE	64
2022-09-13	13:55:10	1.31411	919.545	FALSE	64
2022-09-13	13:55:10	2.0477	921.593	FALSE	64
2022-09-13	13:55:11	6.02932	927.622	1	65
2022-09-13	13:55:11	4.57691	932.199	1	66
2022-09-13	13:55:11	4.27731	936.477	1	67
2022-09-13	13:55:11	4.29813	940.775	1	68
2022-09-13	13:55:12	1.3276	942.102	FALSE	68
2022-09-13	13:55:12	0.276298	942.379	FALSE	68
2022-09-13	13:55:12	0.256705	942.635	FALSE	68
2022-09-13	13:55:12	-0.0422262	942.635	FALSE	68
2022-09-13	13:55:13	-0.263651	942.635	FALSE	68
2022-09-13	13:55:13	-0.11271	942.635	FALSE	68
2022-09-13	13:55:13	-0.0779005	942.635	FALSE	68
2022-09-13	13:55:13	0.178486	942.814	FALSE	68
2022-09-13	13:55:14	0.136451	942.95	FALSE	68
2022-09-13	13:55:14	0.74729	943.697	FALSE	68
2022-09-13	13:55:14	1.57508	945.273	FALSE	68
2022-09-13	13:55:15	2.0138	947.286	FALSE	68
2022-09-13	13:55:15	1.41391	948.7	FALSE	68
2022-09-13	13:55:15	0.524542	949.225	FALSE	68
2022-09-13	13:55:15	1.04749	950.272	FALSE	68
2022-09-13	13:55:16	2.00541	952.278	FALSE	68
2022-09-13	13:55:16	0.588359	952.866	FALSE	68
2022-09-13	13:55:16	0.535891	953.402	FALSE	68
2022-09-13	13:55:16	0.914058	954.316	FALSE	68
2022-09-13	13:55:17	1.39401	955.71	FALSE	68
2022-09-13	13:55:17	2.24245	957.952	FALSE	68
2022-09-13	13:55:17	2.55599	960.508	FALSE	68
2022-09-13	13:55:17	1.27365	961.782	FALSE	68
2022-09-13	13:55:18	0.637468	962.42	FALSE	68
2022-09-13	13:55:18	0.406272	962.826	FALSE	68
2022-09-13	13:55:18	0.350598	963.176	FALSE	68
2022-09-13	13:55:19	0.205509	963.382	FALSE	68
2022-09-13	13:55:19	0.0561962	963.438	FALSE	68
2022-09-13	13:55:19	-0.329198	963.438	FALSE	68
2022-09-13	13:55:19	-0.472455	963.438	FALSE	68
2022-09-13	13:55:20	-0.618409	963.438	FALSE	68
2022-09-13	13:55:20	-0.539732	963.438	FALSE	68
2022-09-13	13:55:20	-0.398816	963.438	FALSE	68
2022-09-13	13:55:20	-0.0369336	963.438	FALSE	68
2022-09-13	13:55:21	2.83589	966.274	FALSE	68
2022-09-13	13:55:21	4.38912	970.663	1	69
2022-09-13	13:55:21	6.35975	977.023	1	70
2022-09-13	13:55:21	3.38668	980.41	1	71
2022-09-13	13:55:22	5.36428	985.774	1	72
2022-09-13	13:55:22	0.714567	986.488	FALSE	72
2022-09-13	13:55:22	2.82948	989.318	FALSE	72
2022-09-13	13:55:23	1.41457	990.733	FALSE	72
2022-09-13	13:55:23	0.954008	991.687	FALSE	72
2022-09-13	13:55:23	2.74912	994.436	FALSE	72
2022-09-13	13:55:23	1.35263	995.788	FALSE	72
2022-09-13	13:55:24	4.75406	1000.54	1	73
2022-09-13	13:55:24	2.28729	1002.83	FALSE	73
2022-09-13	13:55:24	3.48179	1006.31	1	74
2022-09-13	13:55:24	2.6536	1008.97	FALSE	74
2022-09-13	13:55:25	1.96683	1010.93	FALSE	74
2022-09-13	13:55:25	2.49111	1013.42	FALSE	74
2022-09-13	13:55:25	0.55243	1013.98	FALSE	74
2022-09-13	13:55:25	0.79757	1014.77	FALSE	74
2022-09-13	13:55:26	0.211158	1014.98	FALSE	74
2022-09-13	13:55:26	0.192227	1015.18	FALSE	74
2022-09-13	13:55:26	0.0477992	1015.22	FALSE	74
2022-09-13	13:55:27	-0.214643	1015.22	FALSE	74
2022-09-13	13:55:27	-0.095814	1015.22	FALSE	74
2022-09-13	13:55:27	-0.245585	1015.22	FALSE	74
2022-09-13	13:55:27	-0.360038	1015.22	FALSE	74
2022-09-13	13:55:28	-0.76136	1015.22	FALSE	74
2022-09-13	13:55:28	-0.769707	1015.22	FALSE	74
2022-09-13	13:55:28	-0.992811	1015.22	FALSE	74
2022-09-13	13:55:28	-0.862989	1015.22	FALSE	74
2022-09-13	13:55:29	-0.600089	1015.22	FALSE	74
2022-09-13	13:55:29	-0.181921	1015.22	FALSE	74
2022-09-13	13:55:29	0.277825	1015.5	FALSE	74
2022-09-13	13:55:29	0.0578756	1015.56	FALSE	74
2022-09-13	13:55:30	0.272837	1015.83	FALSE	74
2022-09-13	13:55:30	0.456552	1016.29	FALSE	74
2022-09-13	13:55:30	1.11126	1017.4	FALSE	74
2022-09-13	13:55:31	3.22037	1020.62	1	75
2022-09-13	13:55:31	4.70128	1025.32	1	76
2022-09-13	13:55:31	3.20927	1028.53	1	77
2022-09-13	13:55:31	2.57965	1031.11	FALSE	77
2022-09-13	13:55:32	1.01696	1032.13	FALSE	77
2022-09-13	13:55:32	-0.0379005	1032.13	FALSE	77
2022-09-13	13:55:32	-0.0592237	1032.13	FALSE	77
2022-09-13	13:55:32	-0.145585	1032.13	FALSE	77
2022-09-13	13:55:33	-0.402989	1032.13	FALSE	77
2022-09-13	13:55:33	-0.377798	1032.13	FALSE	77
2022-09-13	13:55:33	-0.397798	1032.13	FALSE	77
2022-09-13	13:55:33	-0.163804	1032.13	FALSE	77
2022-09-13	13:55:34	0.255585	1032.38	FALSE	77
2022-09-13	13:55:34	0.1193	1032.5	FALSE	77
2022-09-13	13:55:34	0.213804	1032.72	FALSE	77
2022-09-13	13:55:35	0.0240842	1032.74	FALSE	77
2022-09-13	13:55:35	0.496654	1033.24	FALSE	77
2022-09-13	13:55:35	0.38215	1033.62	FALSE	77
2022-09-13	13:55:35	0.533397	1034.15	FALSE	77
2022-09-13	13:55:36	0.411361	1034.56	FALSE	77
2022-09-13	13:55:36	0.385967	1034.95	FALSE	77
2022-09-13	13:55:36	0.212735	1035.16	FALSE	77
2022-09-13	13:55:36	0.405764	1035.57	FALSE	77
2022-09-13	13:55:37	0.223422	1035.79	FALSE	77
2022-09-13	13:55:37	0.584135	1036.38	FALSE	77
2022-09-13	13:55:37	0.27299	1036.65	FALSE	77
2022-09-13	13:55:37	0.445611	1037.09	FALSE	77
2022-09-13	13:55:38	0.297672	1037.39	FALSE	77
2022-09-13	13:55:38	0.478282	1037.87	FALSE	77
2022-09-13	13:55:38	0.4593	1038.33	FALSE	77
2022-09-13	13:55:39	0.313244	1038.64	FALSE	77
2022-09-13	13:55:39	0.384033	1039.03	FALSE	77
2022-09-13	13:55:39	0.336959	1039.36	FALSE	77
2022-09-13	13:55:39	0.45014	1039.81	FALSE	77
2022-09-13	13:55:40	0.293244	1040.11	FALSE	77
2022-09-13	13:55:40	0.349682	1040.46	FALSE	77
2022-09-13	13:55:40	0.307341	1040.76	FALSE	77
2022-09-13	13:55:40	0.50103	1041.27	FALSE	77
2022-09-13	13:55:41	0.243117	1041.51	FALSE	77
2022-09-13	13:55:41	0.514771	1042.02	FALSE	77
2022-09-13	13:55:41	0.272939	1042.3	FALSE	77
2022-09-13	13:55:41	0.52388	1042.82	FALSE	77
2022-09-13	13:55:42	0.166476	1042.99	FALSE	77
2022-09-13	13:55:42	0.501285	1043.49	FALSE	77
2022-09-13	13:55:42	0.219708	1043.71	FALSE	77
2022-09-13	13:55:43	0.160318	1043.87	FALSE	77
2022-09-13	13:55:43	0.151311	1044.02	FALSE	77
2022-09-13	13:55:43	0.320064	1044.34	FALSE	77
2022-09-13	13:55:43	0.259708	1044.6	FALSE	77
2022-09-13	13:55:44	0.293601	1044.89	FALSE	77
2022-09-13	13:55:44	0.293652	1045.19	FALSE	77
2022-09-13	13:55:44	0.290751	1045.48	FALSE	77
2022-09-13	13:55:44	0.392074	1045.87	FALSE	77
2022-09-13	13:55:45	0.0730918	1045.94	FALSE	77
2022-09-13	13:55:45	0.417875	1046.36	FALSE	77
2022-09-13	13:55:45	0.11187	1046.47	FALSE	77
2022-09-13	13:55:45	0.582405	1047.05	FALSE	77
2022-09-13	13:55:46	1.19207	1048.25	FALSE	77
2022-09-13	13:55:46	8.27054	1056.52	1	78
2022-09-13	13:55:46	6.3424	1062.86	1	79
2022-09-13	13:55:47	8.92556	1071.79	1	80
2022-09-13	13:55:47	1.27584	1073.06	FALSE	80
2022-09-13	13:55:47	2.35233	1075.41	FALSE	80
2022-09-13	13:55:47	1.52882	1076.94	FALSE	80
2022-09-13	13:55:48	0.360878	1077.3	FALSE	80
2022-09-13	13:55:48	1.1077	1078.41	FALSE	80
2022-09-13	13:55:48	0.374008	1078.78	FALSE	80
2022-09-13	13:55:48	2.10373	1080.89	FALSE	80
2022-09-13	13:55:49	0.320522	1081.21	FALSE	80
2022-09-13	13:55:49	0.273295	1081.48	FALSE	80
2022-09-13	13:55:49	0.988766	1082.47	FALSE	80
2022-09-13	13:55:49	0.268664	1082.74	FALSE	80
2022-09-13	13:55:50	0.585203	1083.33	FALSE	80
2022-09-13	13:55:50	0.233499	1083.56	FALSE	80
2022-09-13	13:55:50	0.594873	1084.15	FALSE	80
2022-09-13	13:55:51	0.975992	1085.13	FALSE	80
2022-09-13	13:55:51	2.16551	1087.29	FALSE	80
2022-09-13	13:55:51	3.48536	1090.78	1	81
2022-09-13	13:55:51	4.82973	1095.61	1	82
2022-09-13	13:55:52	4.4738	1100.08	1	83
2022-09-13	13:55:52	2.48525	1102.57	FALSE	83
2022-09-13	13:55:52	3.68617	1106.26	1	84
2022-09-13	13:55:52	0.745763	1107	FALSE	84
2022-09-13	13:55:53	3.93497	1110.94	1	85
2022-09-13	13:55:53	1.15116	1112.09	FALSE	85
2022-09-13	13:55:53	2.79406	1114.88	FALSE	85
2022-09-13	13:55:53	1.38286	1116.26	FALSE	85
2022-09-13	13:55:54	0.880929	1117.15	FALSE	85
2022-09-13	13:55:54	1.1019	1118.25	FALSE	85
2022-09-13	13:55:54	0.27014	1118.52	FALSE	85
2022-09-13	13:55:55	0.353855	1118.87	FALSE	85
2022-09-13	13:55:55	0.326425	1119.2	FALSE	85
2022-09-13	13:55:55	0.271005	1119.47	FALSE	85
2022-09-13	13:55:55	0.45528	1119.92	FALSE	85
2022-09-13	13:55:56	2.77202	1122.7	FALSE	85
2022-09-13	13:55:56	0.621896	1123.32	FALSE	85
2022-09-13	13:55:56	2.60556	1125.92	FALSE	85
2022-09-13	13:55:56	1.52016	1127.44	FALSE	85
2022-09-13	13:55:57	1.2762	1128.72	FALSE	85
2022-09-13	13:55:57	2.00785	1130.73	FALSE	85
2022-09-13	13:55:57	0.38785	1131.12	FALSE	85
2022-09-13	13:55:57	0.30271	1131.42	FALSE	85
2022-09-13	13:55:58	0.867901	1132.29	FALSE	85
2022-09-13	13:55:58	0.429275	1132.72	FALSE	85
2022-09-13	13:55:58	0.333906	1133.05	FALSE	85
2022-09-13	13:55:59	0.628155	1133.68	FALSE	85
2022-09-13	13:55:59	0.234059	1133.91	FALSE	85
2022-09-13	13:55:59	0.399758	1134.31	FALSE	85
2022-09-13	13:55:59	0.108563	1134.42	FALSE	85
2022-09-13	13:56:00	0.197875	1134.62	FALSE	85
2022-09-13	13:56:00	0.0533972	1134.67	FALSE	85
2022-09-13	13:56:00	0.0937534	1134.76	FALSE	85
2022-09-13	13:56:00	-0.0885875	1134.76	FALSE	85
2022-09-13	13:56:01	0.107138	1134.87	FALSE	85
2022-09-13	13:56:01	0.00118347	1134.87	FALSE	85
2022-09-13	13:56:01	-0.0712847	1134.87	FALSE	85
2022-09-13	13:56:01	-0.0491473	1134.87	FALSE	85
2022-09-13	13:56:02	0.466883	1135.34	FALSE	85
2022-09-13	13:56:02	0.293295	1135.63	FALSE	85
2022-09-13	13:56:02	0.201285	1135.83	FALSE	85
2022-09-13	13:56:03	0.653397	1136.49	FALSE	85
2022-09-13	13:56:03	0.382608	1136.87	FALSE	85
2022-09-13	13:56:03	0.290802	1137.16	FALSE	85
2022-09-13	13:56:03	1.68317	1138.84	FALSE	85
2022-09-13	13:56:04	1.85732	1140.7	FALSE	85
2022-09-13	13:56:04	5.81177	1146.51	1	86
2022-09-13	13:56:04	4.78006	1151.29	1	87
2022-09-13	13:56:05	7.89589	1159.19	1	88
2022-09-13	13:56:05	4.13284	1163.32	1	89
2022-09-13	13:56:05	6.80566	1170.13	1	90
2022-09-13	13:56:05	2.81355	1172.94	FALSE	90
2022-09-13	13:56:05	7.84057	1180.78	1	91
2022-09-13	13:56:06	4.18154	1184.96	1	92
2022-09-13	13:56:06	7.50082	1192.46	1	93
2022-09-13	13:56:06	7.61161	1200.08	1	94
2022-09-13	13:56:07	2.62622	1202.7	FALSE	94
2022-09-13	13:56:07	4.16688	1206.87	1	95
2022-09-13	13:56:07	1.78363	1208.65	FALSE	95
2022-09-13	13:56:07	3.79792	1212.45	1	96
2022-09-13	13:56:08	5.76668	1218.22	1	97
2022-09-13	13:56:08	6.7796	1225	1	98
2022-09-13	13:56:08	8.99131	1233.99	1	99
2022-09-13	13:56:08	2.97767	1236.97	FALSE	99
2022-09-13	13:56:09	7.27629	1244.24	1	100
2022-09-13	13:56:09	2.50861	1246.75	FALSE	100
2022-09-13	13:56:09	1.54001	1248.29	FALSE	100
2022-09-13	13:56:10	0.4993	1248.79	FALSE	100
2022-09-13	13:56:10	0.32958	1249.12	FALSE	100
2022-09-13	13:56:10	0.226527	1249.35	FALSE	100
2022-09-13	13:56:10	0.132074	1249.48	FALSE	100
2022-09-13	13:56:11	0.165814	1249.64	FALSE	100
2022-09-13	13:56:11	0.659657	1250.3	FALSE	100
2022-09-13	13:56:11	0.523117	1250.83	FALSE	100
2022-09-13	13:56:11	0.850242	1251.68	FALSE	100
2022-09-13	13:56:12	0.345713	1252.02	FALSE	100
2022-09-13	13:56:12	0.286781	1252.31	FALSE	100
2022-09-13	13:56:12	0.339758	1252.65	FALSE	100
2022-09-13	13:56:12	0.347036	1253	FALSE	100
2022-09-13	13:56:13	0.343626	1253.34	FALSE	100
2022-09-13	13:56:13	0.331209	1253.67	FALSE	100
2022-09-13	13:56:13	0.345458	1254.02	FALSE	100
2022-09-13	13:56:13	0.444593	1254.46	FALSE	100
2022-09-13	13:56:14	0.422048	1254.88	FALSE	100
2022-09-13	13:56:14	0.353855	1255.24	FALSE	100
2022-09-13	13:56:14	0.392735	1255.63	FALSE	100
2022-09-13	13:56:14	0.428155	1256.06	FALSE	100
2022-09-13	13:56:15	0.659962	1256.72	FALSE	100
2022-09-13	13:56:15	1.3622	1258.08	FALSE	100
2022-09-13	13:56:15	2.3308	1260.41	FALSE	100
2022-09-13	13:56:16	1.81925	1262.23	FALSE	100
2022-09-13	13:56:16	1.67223	1263.9	FALSE	100
2022-09-13	13:56:16	1.11828	1265.02	FALSE	100
2022-09-13	13:56:16	1.00174	1266.02	FALSE	100
2022-09-13	13:56:17	0.68327	1266.71	FALSE	100
2022-09-13	13:56:17	0.699708	1267.41	FALSE	100
2022-09-13	13:56:17	0.624287	1268.03	FALSE	100
2022-09-13	13:56:17	0.494669	1268.52	FALSE	100
2022-09-13	13:56:18	0.351209	1268.88	FALSE	100
2022-09-13	13:56:18	0.363626	1269.24	FALSE	100
2022-09-13	13:56:18	0.355534	1269.59	FALSE	100
2022-09-13	13:56:19	0.363881	1269.96	FALSE	100
2022-09-13	13:56:19	0.299809	1270.26	FALSE	100
2022-09-13	13:56:19	0.382048	1270.64	FALSE	100
2022-09-13	13:56:19	0.33014	1270.97	FALSE	100
2022-09-13	13:56:20	0.422506	1271.39	FALSE	100
2022-09-13	13:56:20	0.408817	1271.8	FALSE	100
2022-09-13	13:56:20	0.423015	1272.23	FALSE	100
2022-09-13	13:56:20	0.421539	1272.65	FALSE	100
2022-09-13	13:56:21	0.421845	1273.07	FALSE	100
2022-09-13	13:56:21	0.43986	1273.51	FALSE	100
2022-09-13	13:56:21	0.494771	1274	FALSE	100
2022-09-13	13:56:21	0.522608	1274.53	FALSE	100
2022-09-13	13:56:22	0.515025	1275.04	FALSE	100
2022-09-13	13:56:22	0.557366	1275.6	FALSE	100
2022-09-13	13:56:22	0.493804	1276.09	FALSE	100
2022-09-13	13:56:23	0.448257	1276.54	FALSE	100
2022-09-13	13:56:23	0.426781	1276.97	FALSE	100
2022-09-13	13:56:23	0.422456	1277.39	FALSE	100
2022-09-13	13:56:23	0.439758	1277.83	FALSE	100
2022-09-13	13:56:24	0.440064	1278.27	FALSE	100
2022-09-13	13:56:24	0.442303	1278.71	FALSE	100
2022-09-13	13:56:24	0.428155	1279.14	FALSE	100
2022-09-13	13:56:24	0.437926	1279.58	FALSE	100
2022-09-13	13:56:25	0.433295	1280.01	FALSE	100
2022-09-13	13:56:25	0.415789	1280.43	FALSE	100
2022-09-13	13:56:25	0.429733	1280.86	FALSE	100
2022-09-13	13:56:25	0.443982	1281.3	FALSE	100
2022-09-13	13:56:26	0.430344	1281.73	FALSE	100
2022-09-13	13:56:26	0.427901	1282.16	FALSE	100
2022-09-13	13:56:26	0.447799	1282.61	FALSE	100
2022-09-13	13:56:26	0.483728	1283.09	FALSE	100
2022-09-13	13:56:27	0.458791	1283.55	FALSE	100
2022-09-13	13:56:27	0.434262	1283.98	FALSE	100
2022-09-13	13:56:27	0.407901	1284.39	FALSE	100
2022-09-13	13:56:28	0.372837	1284.76	FALSE	100
2022-09-13	13:56:28	0.364389	1285.13	FALSE	100
2022-09-13	13:56:28	0.386425	1285.51	FALSE	100
2022-09-13	13:56:28	0.375992	1285.89	FALSE	100
2022-09-13	13:56:29	0.355484	1286.25	FALSE	100
2022-09-13	13:56:29	0.339504	1286.59	FALSE	100
2022-09-13	13:56:29	0.333244	1286.92	FALSE	100
2022-09-13	13:56:29	0.336959	1287.26	FALSE	100
2022-09-13	13:56:30	0.367188	1287.62	FALSE	100
2022-09-13	13:56:30	0.317214	1287.94	FALSE	100
2022-09-13	13:56:30	0.24444	1288.18	FALSE	100
2022-09-13	13:56:31	0.322863	1288.51	FALSE	100
2022-09-13	13:56:31	0.211565	1288.72	FALSE	100
2022-09-13	13:56:31	0.447697	1289.17	FALSE	100
2022-09-13	13:56:31	0.248155	1289.42	FALSE	100
2022-09-13	13:56:32	0.391718	1289.81	FALSE	100
2022-09-13	13:56:32	0.353346	1290.16	FALSE	100
2022-09-13	13:56:32	0.416451	1290.58	FALSE	100
2022-09-13	13:56:32	0.445051	1291.02	FALSE	100
2022-09-13	13:56:33	0.372583	1291.39	FALSE	100
2022-09-13	13:56:33	0.460064	1291.85	FALSE	100
2022-09-13	13:56:33	0.392939	1292.25	FALSE	100
2022-09-13	13:56:33	0.444237	1292.69	FALSE	100
2022-09-13	13:56:34	0.450496	1293.14	FALSE	100
2022-09-13	13:56:34	0.236807	1293.38	FALSE	100
2022-09-13	13:56:34	0.194466	1293.57	FALSE	100
2022-09-13	13:56:34	0.0429646	1293.62	FALSE	100
2022-09-13	13:56:35	-0.020445	1293.62	FALSE	100
2022-09-13	13:56:35	0.0202674	1293.64	FALSE	100
2022-09-13	13:56:35	0.254059	1293.89	FALSE	100
2022-09-13	13:56:36	1.00057	1294.89	FALSE	100
2022-09-13	13:56:36	0.542557	1295.43	FALSE	100
2022-09-13	13:56:36	1.27991	1296.71	FALSE	100
2022-09-13	13:56:36	0.291107	1297	FALSE	100
2022-09-13	13:56:37	0.492939	1297.5	FALSE	100
2022-09-13	13:56:37	0.319402	1297.82	FALSE	100
2022-09-13	13:56:37	0.475738	1298.29	FALSE	100
2022-09-13	13:56:37	0.346425	1298.64	FALSE	100
2022-09-13	13:56:38	0.610293	1299.25	FALSE	100
2022-09-13	13:56:38	0.416451	1299.67	FALSE	100
2022-09-13	13:56:38	0.391667	1300.06	FALSE	100
2022-09-13	13:56:38	0.414415	1300.47	FALSE	100
2022-09-13	13:56:39	0.386018	1300.86	FALSE	100
2022-09-13	13:56:39	0.412023	1301.27	FALSE	100
2022-09-13	13:56:39	0.36042	1301.63	FALSE	100
2022-09-13	13:56:40	0.442048	1302.07	FALSE	100
2022-09-13	13:56:40	0.357112	1302.43	FALSE	100
2022-09-13	13:56:40	0.366222	1302.8	FALSE	100
2022-09-13	13:56:40	0.405204	1303.2	FALSE	100
2022-09-13	13:56:41	0.410394	1303.61	FALSE	100
2022-09-13	13:56:41	0.405	1304.02	FALSE	100
2022-09-13	13:56:41	0.394822	1304.41	FALSE	100
2022-09-13	13:56:41	0.396959	1304.81	FALSE	100
2022-09-13	13:56:42	0.384389	1305.19	FALSE	100
2022-09-13	13:56:42	0.390496	1305.58	FALSE	100
2022-09-13	13:56:42	0.421845	1306	FALSE	100
2022-09-13	13:56:42	0.416756	1306.42	FALSE	100
2022-09-13	13:56:43	0.409326	1306.83	FALSE	100
2022-09-13	13:56:43	0.41701	1307.25	FALSE	100
2022-09-13	13:56:43	0.402659	1307.65	FALSE	100
2022-09-13	13:56:44	0.386171	1308.04	FALSE	100
2022-09-13	13:56:44	0.374975	1308.41	FALSE	100
2022-09-13	13:56:44	0.405967	1308.82	FALSE	100
2022-09-13	13:56:44	0.502048	1309.32	FALSE	100
2022-09-13	13:56:45	0.775891	1310.1	FALSE	100
2022-09-13	13:56:45	1.16154	1311.26	FALSE	100
2022-09-13	13:56:45	0.829275	1312.09	FALSE	100
2022-09-13	13:56:45	0.239555	1312.33	FALSE	100
2022-09-13	13:56:46	0.465356	1312.79	FALSE	100
2022-09-13	13:56:46	0.305153	1313.1	FALSE	100
2022-09-13	13:56:46	0.264237	1313.36	FALSE	100
2022-09-13	13:56:46	0.291311	1313.65	FALSE	100
2022-09-13	13:56:47	0.284695	1313.94	FALSE	100
2022-09-13	13:56:47	0.309937	1314.25	FALSE	100
2022-09-13	13:56:47	0.321743	1314.57	FALSE	100
2022-09-13	13:56:48	0.315331	1314.88	FALSE	100
2022-09-13	13:56:48	0.278486	1315.16	FALSE	100
2022-09-13	13:56:48	0.436858	1315.6	FALSE	100
2022-09-13	13:56:48	0.574059	1316.17	FALSE	100
2022-09-13	13:56:49	0.610445	1316.78	FALSE	100
2022-09-13	13:56:49	0.390496	1317.17	FALSE	100
2022-09-13	13:56:49	0.433295	1317.61	FALSE	100
2022-09-13	13:56:49	0.318334	1317.93	FALSE	100
2022-09-13	13:56:50	0.299809	1318.23	FALSE	100
2022-09-13	13:56:50	0.270038	1318.5	FALSE	100
2022-09-13	13:56:50	0.282506	1318.78	FALSE	100
2022-09-13	13:56:50	0.320522	1319.1	FALSE	100
2022-09-13	13:56:51	0.232583	1319.33	FALSE	100
2022-09-13	13:56:51	0.272023	1319.6	FALSE	100
2022-09-13	13:56:51	0.151311	1319.75	FALSE	100
2022-09-13	13:56:52	0.328919	1320.08	FALSE	100
2022-09-13	13:56:52	0.268613	1320.35	FALSE	100
2022-09-13	13:56:52	0.333193	1320.69	FALSE	100
2022-09-13	13:56:52	0.286171	1320.97	FALSE	100
2022-09-13	13:56:53	0.253143	1321.22	FALSE	100
2022-09-13	13:56:53	0.295076	1321.52	FALSE	100
2022-09-13	13:56:53	0.347341	1321.87	FALSE	100
2022-09-13	13:56:53	0.309733	1322.18	FALSE	100
2022-09-13	13:56:54	0.305814	1322.48	FALSE	100
2022-09-13	13:56:54	0.267138	1322.75	FALSE	100
2022-09-13	13:56:54	0.237926	1322.99	FALSE	100
2022-09-13	13:56:55	0.279657	1323.27	FALSE	100
2022-09-13	13:56:55	0.308206	1323.58	FALSE	100
2022-09-13	13:56:55	0.298741	1323.87	FALSE	100
2022-09-13	13:56:55	0.258232	1324.13	FALSE	100
2022-09-13	13:56:56	0.226934	1324.36	FALSE	100
2022-09-13	13:56:56	0.192277	1324.55	FALSE	100
2022-09-13	13:56:56	0.441031	1324.99	FALSE	100
2022-09-13	13:56:56	0.378384	1325.37	FALSE	100
2022-09-13	13:56:57	0.431972	1325.8	FALSE	100
2022-09-13	13:56:57	0.441845	1326.24	FALSE	100
2022-09-13	13:56:57	0.490496	1326.74	FALSE	100
2022-09-13	13:56:57	0.499809	1327.24	FALSE	100
2022-09-13	13:56:58	0.451056	1327.69	FALSE	100
2022-09-13	13:56:58	0.528461	1328.21	FALSE	100
2022-09-13	13:56:58	0.494822	1328.71	FALSE	100
2022-09-13	13:56:58	0.513753	1329.22	FALSE	100
2022-09-13	13:56:59	0.486832	1329.71	FALSE	100
2022-09-13	13:56:59	0.510394	1330.22	FALSE	100
2022-09-13	13:56:59	0.491667	1330.71	FALSE	100
2022-09-13	13:57:00	0.497163	1331.21	FALSE	100
2022-09-13	13:57:00	0.496654	1331.71	FALSE	100
2022-09-13	13:57:00	0.504644	1332.21	FALSE	100
2022-09-13	13:57:00	0.483575	1332.69	FALSE	100
2022-09-13	13:57:01	0.506323	1333.2	FALSE	100
2022-09-13	13:57:01	0.540878	1333.74	FALSE	100
2022-09-13	13:57:01	0.461692	1334.2	FALSE	100
2022-09-13	13:57:01	0.302608	1334.51	FALSE	100
2022-09-13	13:57:02	0.327545	1334.83	FALSE	100
2022-09-13	13:57:02	0.304033	1335.14	FALSE	100
2022-09-13	13:57:02	0.321183	1335.46	FALSE	100
2022-09-13	13:57:02	0.307697	1335.77	FALSE	100
2022-09-13	13:57:03	0.310293	1336.08	FALSE	100
2022-09-13	13:57:03	0.310547	1336.39	FALSE	100
2022-09-13	13:57:03	0.324135	1336.71	FALSE	100
2022-09-13	13:57:04	0.323168	1337.03	FALSE	100
2022-09-13	13:57:04	0.307901	1337.34	FALSE	100
2022-09-13	13:57:04	0.340267	1337.68	FALSE	100
2022-09-13	13:57:04	0.325916	1338.01	FALSE	100
2022-09-13	13:57:05	0.337417	1338.35	FALSE	100
2022-09-13	13:57:05	0.35813	1338.7	FALSE	100
2022-09-13	13:57:05	0.338283	1339.04	FALSE	100
2022-09-13	13:57:05	0.334008	1339.38	FALSE	100
2022-09-13	13:57:06	0.321234	1339.7	FALSE	100
2022-09-13	13:57:06	0.335229	1340.03	FALSE	100
2022-09-13	13:57:06	0.350293	1340.38	FALSE	100
2022-09-13	13:57:07	0.360013	1340.74	FALSE	100
2022-09-13	13:57:07	0.359097	1341.1	FALSE	100
2022-09-13	13:57:07	0.374517	1341.48	FALSE	100
2022-09-13	13:57:07	0.378283	1341.85	FALSE	100
2022-09-13	13:57:08	0.358486	1342.21	FALSE	100
2022-09-13	13:57:08	0.353601	1342.57	FALSE	100
2022-09-13	13:57:08	0.372837	1342.94	FALSE	100
2022-09-13	13:57:08	0.36897	1343.31	FALSE	100
2022-09-13	13:57:09	0.366578	1343.68	FALSE	100
2022-09-13	13:57:09	0.342201	1344.02	FALSE	100
2022-09-13	13:57:09	0.349784	1344.37	FALSE	100
2022-09-13	13:57:09	0.363015	1344.73	FALSE	100
2022-09-13	13:57:10	0.424695	1345.16	FALSE	100
2022-09-13	13:57:10	0.394567	1345.55	FALSE	100
2022-09-13	13:57:10	0.374313	1345.92	FALSE	100
2022-09-13	13:57:10	0.396705	1346.32	FALSE	100
2022-09-13	13:57:11	0.449428	1346.77	FALSE	100
2022-09-13	13:57:11	0.394415	1347.16	FALSE	100
2022-09-13	13:57:11	0.391463	1347.56	FALSE	100
2022-09-13	13:57:12	0.348613	1347.9	FALSE	100
2022-09-13	13:57:12	0.359402	1348.26	FALSE	100
2022-09-13	13:57:12	0.41355	1348.68	FALSE	100
2022-09-13	13:57:12	0.38958	1349.07	FALSE	100
2022-09-13	13:57:13	0.351158	1349.42	FALSE	100
2022-09-13	13:57:13	0.358079	1349.78	FALSE	100
2022-09-13	13:57:13	0.414618	1350.19	FALSE	100
2022-09-13	13:57:13	0.39014	1350.58	FALSE	100
2022-09-13	13:57:14	0.384644	1350.97	FALSE	100
2022-09-13	13:57:14	0.326476	1351.29	FALSE	100
2022-09-13	13:57:14	0.384084	1351.68	FALSE	100
2022-09-13	13:57:15	0.439656	1352.12	FALSE	100
2022-09-13	13:57:15	0.406018	1352.52	FALSE	100
2022-09-13	13:57:15	0.417519	1352.94	FALSE	100
2022-09-13	13:57:15	0.38271	1353.32	FALSE	100
2022-09-13	13:57:16	0.456858	1353.78	FALSE	100
2022-09-13	13:57:16	0.413753	1354.19	FALSE	100
2022-09-13	13:57:16	0.411056	1354.6	FALSE	100
2022-09-13	13:57:16	0.436756	1355.04	FALSE	100
2022-09-13	13:57:17	0.428563	1355.47	FALSE	100
2022-09-13	13:57:17	0.433397	1355.9	FALSE	100
2022-09-13	13:57:17	0.43187	1356.33	FALSE	100
2022-09-13	13:57:17	0.425305	1356.76	FALSE	100
2022-09-13	13:57:18	0.423117	1357.18	FALSE	100
2022-09-13	13:57:18	0.426578	1357.61	FALSE	100
2022-09-13	13:57:18	0.430853	1358.04	FALSE	100
2022-09-13	13:57:18	0.425153	1358.47	FALSE	100
2022-09-13	13:57:19	0.374771	1358.84	FALSE	100
2022-09-13	13:57:19	0.288155	1359.13	FALSE	100
2022-09-13	13:57:19	0.222608	1359.35	FALSE	100
2022-09-13	13:57:20	0.1507	1359.5	FALSE	100
2022-09-13	13:57:20	0.162507	1359.66	FALSE	100
2022-09-13	13:57:20	0.190751	1359.86	FALSE	100
2022-09-13	13:57:20	0.396094	1360.25	FALSE	100
2022-09-13	13:57:21	0.492277	1360.74	FALSE	100
2022-09-13	13:57:21	1.03732	1361.78	FALSE	100
2022-09-13	13:57:21	0.523932	1362.3	FALSE	100
2022-09-13	13:57:21	0.585814	1362.89	FALSE	100
2022-09-13	13:57:22	0.54444	1363.43	FALSE	100
2022-09-13	13:57:22	0.401997	1363.84	FALSE	100
2022-09-13	13:57:22	0.413193	1364.25	FALSE	100
2022-09-13	13:57:22	0.338893	1364.59	FALSE	100
2022-09-13	13:57:23	0.60098	1365.19	FALSE	100
2022-09-13	13:57:23	0.427697	1365.62	FALSE	100
2022-09-13	13:57:23	0.472176	1366.09	FALSE	100
2022-09-13	13:57:24	0.465407	1366.56	FALSE	100
2022-09-13	13:57:24	0.492634	1367.05	FALSE	100
2022-09-13	13:57:24	0.61813	1367.67	FALSE	100
2022-09-13	13:57:24	0.543677	1368.21	FALSE	100
2022-09-13	13:57:25	0.57584	1368.79	FALSE	100
2022-09-13	13:57:25	0.545305	1369.33	FALSE	100
2022-09-13	13:57:25	0.548919	1369.88	FALSE	100
2022-09-13	13:57:25	0.727494	1370.61	FALSE	100
2022-09-13	13:57:26	1.06653	1371.67	FALSE	100
2022-09-13	13:57:26	0.985916	1372.66	FALSE	100
2022-09-13	13:57:26	0.679555	1373.34	FALSE	100
2022-09-13	13:57:26	0.0874938	1373.43	FALSE	100
2022-09-13	13:57:27	0.0705473	1373.5	FALSE	100
2022-09-13	13:57:27	-0.0924552	1373.5	FALSE	100
2022-09-13	13:57:27	-0.257391	1373.5	FALSE	100
2022-09-13	13:57:28	-0.487264	1373.5	FALSE	100
2022-09-13	13:57:28	-1.33322	1373.5	FALSE	100
2022-09-13	13:57:28	-1.37454	1373.5	FALSE	100
2022-09-13	13:57:28	-1.38838	1373.5	FALSE	100
2022-09-13	13:57:29	-1.50365	1373.5	FALSE	100
2022-09-13	13:57:29	-1.11393	1373.5	FALSE	100
2022-09-13	13:57:29	-1.25673	1373.5	FALSE	100
2022-09-13	13:57:29	-0.564312	1373.5	FALSE	100
2022-09-13	13:57:30	-0.143498	1373.5	FALSE	100
2022-09-13	13:57:30	0.0895804	1373.59	FALSE	100
2022-09-13	13:57:30	0.296603	1373.88	FALSE	100
2022-09-13	13:57:30	0.311616	1374.2	FALSE	100
2022-09-13	13:57:31	0.182557	1374.38	FALSE	100
2022-09-13	13:57:31	0.316145	1374.69	FALSE	100
2022-09-13	13:57:31	0.416196	1375.11	FALSE	100
2022-09-13	13:57:32	0.225458	1375.34	FALSE	100
2022-09-13	13:57:32	0.215687	1375.55	FALSE	100
2022-09-13	13:57:32	0.233194	1375.78	FALSE	100
2022-09-13	13:57:32	0.203066	1375.99	FALSE	100
2022-09-13	13:57:33	0.188257	1376.18	FALSE	100
2022-09-13	13:57:33	0.148919	1376.32	FALSE	100
2022-09-13	13:57:33	0.144746	1376.47	FALSE	100
2022-09-13	13:57:33	0.235484	1376.7	FALSE	100
2022-09-13	13:57:34	0.205153	1376.91	FALSE	100
2022-09-13	13:57:34	0.206883	1377.12	FALSE	100
2022-09-13	13:57:34	0.272379	1377.39	FALSE	100
2022-09-13	13:57:35	0.198028	1377.59	FALSE	100
2022-09-13	13:57:35	0.188359	1377.78	FALSE	100
2022-09-13	13:57:35	0.246934	1378.02	FALSE	100
2022-09-13	13:57:35	0.26271	1378.29	FALSE	100
2022-09-13	13:57:36	0.273295	1378.56	FALSE	100
2022-09-13	13:57:36	0.585916	1379.14	FALSE	100
2022-09-13	13:57:36	0.367697	1379.51	FALSE	100
2022-09-13	13:57:36	0.206272	1379.72	FALSE	100
2022-09-13	13:57:37	0.271107	1379.99	FALSE	100
2022-09-13	13:57:37	0.498435	1380.49	FALSE	100
2022-09-13	13:57:37	0.356756	1380.84	FALSE	100
2022-09-13	13:57:37	0.347799	1381.19	FALSE	100
2022-09-13	13:57:38	1.58658	1382.78	FALSE	100
2022-09-13	13:57:38	0.236552	1383.02	FALSE	100
2022-09-13	13:57:38	0.586323	1383.6	FALSE	100
2022-09-13	13:57:38	0.676196	1384.28	FALSE	100
2022-09-13	13:57:39	1.16032	1385.44	FALSE	100
2022-09-13	13:57:39	0.901947	1386.34	FALSE	100
2022-09-13	13:57:39	0.803168	1387.14	FALSE	100
2022-09-13	13:57:40	2.50312	1389.65	FALSE	100
2022-09-13	13:57:40	2.37436	1392.02	FALSE	100
2022-09-13	13:57:40	2.92347	1394.94	FALSE	100
2022-09-13	13:57:40	1.18826	1396.13	FALSE	100
2022-09-13	13:57:41	1.60271	1397.74	FALSE	100
2022-09-13	13:57:41	1.86877	1399.6	FALSE	100
2022-09-13	13:57:41	1.94413	1401.55	FALSE	100
2022-09-13	13:57:41	3.23299	1404.78	1	101
2022-09-13	13:57:42	5.84754	1410.63	1	102
2022-09-13	13:57:42	3.68627	1414.32	1	103
2022-09-13	13:57:42	4.46235	1418.78	1	104
2022-09-13	13:57:42	10.7779	1429.56	1	105
2022-09-13	13:57:43	8.33609	1437.89	1	106
2022-09-13	13:57:43	3.72627	1441.62	1	107
2022-09-13	13:57:43	5.49182	1447.11	1	108
2022-09-13	13:57:44	3.99044	1451.1	1	109
2022-09-13	13:57:44	2.59599	1453.7	FALSE	109
2022-09-13	13:57:44	1.23604	1454.93	FALSE	109
2022-09-13	13:57:44	2.34566	1457.28	FALSE	109

## Sheet: Unnamed_harness_2022913135236
						**GoPro Fitting: 1342
2022-09-13	13:52:37	0.52958
2022-09-13	13:52:37	0.495789
2022-09-13	13:52:37	0.448206
2022-09-13	13:52:38	0.526272
2022-09-13	13:52:38	0.427494
2022-09-13	13:52:38	0.459249
2022-09-13	13:52:38	0.554211
2022-09-13	13:52:39	0.395992
2022-09-13	13:52:39	0.424644
2022-09-13	13:52:39	0.419962
2022-09-13	13:52:39	0.469886
2022-09-13	13:52:40	0.454415
2022-09-13	13:52:40	0.46098
2022-09-13	13:52:40	0.47869
2022-09-13	13:52:40	0.465611
2022-09-13	13:52:41	0.485967
2022-09-13	13:52:41	0.463931
2022-09-13	13:52:41	0.488003
2022-09-13	13:52:41	0.457926
2022-09-13	13:52:42	0.488054
2022-09-13	13:52:42	0.464135
2022-09-13	13:52:42	0.490598
2022-09-13	13:52:43	0.486679
2022-09-13	13:52:43	0.473855
2022-09-13	13:52:43	0.498435
2022-09-13	13:52:43	0.464593
2022-09-13	13:52:44	0.53416
2022-09-13	13:52:44	0.498791
2022-09-13	13:52:44	0.404033
2022-09-13	13:52:44	0.664644
2022-09-13	13:52:45	0.408308
2022-09-13	13:52:45	0.466832
2022-09-13	13:52:45	0.564746
2022-09-13	13:52:46	0.564695
2022-09-13	13:52:46	0.655585
2022-09-13	13:52:46	0.556756
2022-09-13	13:52:46	-2.30314
2022-09-13	13:52:47	-2.95352
2022-09-13	13:52:47	-3.0721
2022-09-13	13:52:47	-3.13541
2022-09-13	13:52:47	-3.34747
2022-09-13	13:52:48	-3.56838
2022-09-13	13:52:48	-3.75861
2022-09-13	13:52:48	-3.54426
2022-09-13	13:52:48	-3.51144
2022-09-13	13:52:49	-3.56375
2022-09-13	13:52:49	-3.85673
2022-09-13	13:52:49	-3.86121
2022-09-13	13:52:49	-3.95881
2022-09-13	13:52:50	-4.28004
2022-09-13	13:52:50	-3.08619
2022-09-13	13:52:50	6.71263
2022-09-13	13:52:51	12.3595
2022-09-13	13:52:51	10.0232
2022-09-13	13:52:51	4.44367
2022-09-13	13:52:51	4.96342
2022-09-13	13:52:52	11.8582
2022-09-13	13:52:52	12.6657
2022-09-13	13:52:52	0.610191
2022-09-13	13:52:52	-0.0580023
2022-09-13	13:52:53	-0.186654
2022-09-13	13:52:53	-0.70706
2022-09-13	13:52:53	-0.234084
2022-09-13	13:52:53	0.889885
2022-09-13	13:52:54	1.12922
2022-09-13	13:52:54	0.951565
2022-09-13	13:52:54	0.92159
2022-09-13	13:52:55	0.845254
2022-09-13	13:52:55	0.817672
2022-09-13	13:52:55	0.453193
2022-09-13	13:52:55	0.647239
2022-09-13	13:52:56	0.603728
2022-09-13	13:52:56	0.935789
2022-09-13	13:52:56	0.59528
2022-09-13	13:52:56	0.501641
2022-09-13	13:52:57	0.311921
2022-09-13	13:52:57	0.109377
2022-09-13	13:52:57	0.409071
2022-09-13	13:52:57	0.327596
2022-09-13	13:52:58	0.254364
2022-09-13	13:52:58	0.139453
2022-09-13	13:52:58	0.0673411
2022-09-13	13:52:59	-0.378155
2022-09-13	13:52:59	-0.500648
2022-09-13	13:52:59	-0.623244
2022-09-13	13:52:59	-0.556781
2022-09-13	13:53:00	-0.663294
2022-09-13	13:53:00	-0.659376
2022-09-13	13:53:00	-0.665483
2022-09-13	13:53:00	-0.610521
2022-09-13	13:53:01	-0.155814
2022-09-13	13:53:01	0.396196
2022-09-13	13:53:01	0.417417
2022-09-13	13:53:01	0.336247
2022-09-13	13:53:02	0.170547
2022-09-13	13:53:02	-0.192659
2022-09-13	13:53:02	-0.104313
2022-09-13	13:53:03	-0.196425
2022-09-13	13:53:03	-0.441259
2022-09-13	13:53:03	-0.676882
2022-09-13	13:53:03	-1.14401
2022-09-13	13:53:04	-0.163549
2022-09-13	13:53:04	0.144033
2022-09-13	13:53:04	0.324797
2022-09-13	13:53:05	1.75813
2022-09-13	13:53:05	2.59533
2022-09-13	13:53:05	3.74368
2022-09-13	13:53:05	2.75981
2022-09-13	13:53:05	3.49625
2022-09-13	13:53:06	2.36235
2022-09-13	13:53:06	2.24836
2022-09-13	13:53:06	1.65635
2022-09-13	13:53:07	0.953346
2022-09-13	13:53:07	0.772226
2022-09-13	13:53:07	0.475891
2022-09-13	13:53:07	0.517926
2022-09-13	13:53:08	0.619707
2022-09-13	13:53:08	0.355992
2022-09-13	13:53:08	0.526578
2022-09-13	13:53:08	0.571361
2022-09-13	13:53:09	0.328155
2022-09-13	13:53:09	0.748766
2022-09-13	13:53:09	0.493499
2022-09-13	13:53:09	0.916196
2022-09-13	13:53:10	1.27034
2022-09-13	13:53:10	1.27492
2022-09-13	13:53:10	2.26098
2022-09-13	13:53:11	1.42795
2022-09-13	13:53:11	1.9821
2022-09-13	13:53:11	2.5162
2022-09-13	13:53:11	1.80648
2022-09-13	13:53:12	1.97345
2022-09-13	13:53:12	1.8822
2022-09-13	13:53:12	1.73833
2022-09-13	13:53:12	2.12775
2022-09-13	13:53:13	2.07905
2022-09-13	13:53:13	1.97162
2022-09-13	13:53:13	1.89294
2022-09-13	13:53:13	1.54546
2022-09-13	13:53:14	1.70907
2022-09-13	13:53:14	1.86251
2022-09-13	13:53:14	1.60225
2022-09-13	13:53:15	1.72378
2022-09-13	13:53:15	1.88866
2022-09-13	13:53:15	1.63869
2022-09-13	13:53:15	1.61253
2022-09-13	13:53:16	1.96286
2022-09-13	13:53:16	1.7334
2022-09-13	13:53:16	1.58413
2022-09-13	13:53:16	1.54836
2022-09-13	13:53:17	1.63747
2022-09-13	13:53:17	1.85447
2022-09-13	13:53:17	1.68576
2022-09-13	13:53:17	1.94352
2022-09-13	13:53:18	1.80464
2022-09-13	13:53:18	1.3249
2022-09-13	13:53:18	1.44383
2022-09-13	13:53:19	1.56164
2022-09-13	13:53:19	2.38851
2022-09-13	13:53:19	1.63146
2022-09-13	13:53:19	2.81818
2022-09-13	13:53:20	3.67874
2022-09-13	13:53:20	3.88627
2022-09-13	13:53:20	5.19375
2022-09-13	13:53:20	5.14205
2022-09-13	13:53:21	4.8139
2022-09-13	13:53:21	5.21685
2022-09-13	13:53:21	4.61711
2022-09-13	13:53:21	5.14596
2022-09-13	13:53:22	4.52566
2022-09-13	13:53:22	3.30597
2022-09-13	13:53:22	2.95248
2022-09-13	13:53:23	2.93233
2022-09-13	13:53:23	4.03874
2022-09-13	13:53:23	3.87945
2022-09-13	13:53:23	4.28846
2022-09-13	13:53:24	3.40515
2022-09-13	13:53:24	2.56474
2022-09-13	13:53:24	2.66479
2022-09-13	13:53:24	2.04042
2022-09-13	13:53:25	2.24281
2022-09-13	13:53:25	2.68678
2022-09-13	13:53:25	2.86149
2022-09-13	13:53:25	2.81905
2022-09-13	13:53:26	2.17645
2022-09-13	13:53:26	2.5739
2022-09-13	13:53:26	2.65345
2022-09-13	13:53:27	2.50668
2022-09-13	13:53:27	2.71716
2022-09-13	13:53:27	2.55426
2022-09-13	13:53:27	2.69156
2022-09-13	13:53:28	2.80332
2022-09-13	13:53:28	2.59202
2022-09-13	13:53:28	2.89314
2022-09-13	13:53:28	3.04999
2022-09-13	13:53:29	2.80785
2022-09-13	13:53:29	3.38642
2022-09-13	13:53:29	0.995229
2022-09-13	13:53:29	1.24714
2022-09-13	13:53:30	5.32596
2022-09-13	13:53:30	10.0877
2022-09-13	13:53:30	15.381
2022-09-13	13:53:31	10.7754
2022-09-13	13:53:31	8.42703
2022-09-13	13:53:31	7.98856
2022-09-13	13:53:31	9.33741
2022-09-13	13:53:32	8.08917
2022-09-13	13:53:32	9.33228
2022-09-13	13:53:32	4.57416
2022-09-13	13:53:32	4.52856
2022-09-13	13:53:33	0.912633
2022-09-13	13:53:33	3.01151
2022-09-13	13:53:33	6.09207
2022-09-13	13:53:33	6.28993
2022-09-13	13:53:34	5.14535
2022-09-13	13:53:34	3.98978
2022-09-13	13:53:34	1.5251
2022-09-13	13:53:35	4.67029
2022-09-13	13:53:35	6.0397
2022-09-13	13:53:35	3.9966
2022-09-13	13:53:35	3.7392
2022-09-13	13:53:36	1.88576
2022-09-13	13:53:36	4.17151
2022-09-13	13:53:36	8.1083
2022-09-13	13:53:36	8.90194
2022-09-13	13:53:37	6.92576
2022-09-13	13:53:37	10.1014
2022-09-13	13:53:37	14.4701
2022-09-13	13:53:37	4.94647
2022-09-13	13:53:38	0.76958
2022-09-13	13:53:38	0.789783
2022-09-13	13:53:38	0.294618
2022-09-13	13:53:39	0.31986
2022-09-13	13:53:39	0.254517
2022-09-13	13:53:39	0.817112
2022-09-13	13:53:39	0.812582
2022-09-13	13:53:40	4.32408
2022-09-13	13:53:40	10.698
2022-09-13	13:53:40	4.98149
2022-09-13	13:53:40	5.21126
2022-09-13	13:53:41	12.6564
2022-09-13	13:53:41	5.37604
2022-09-13	13:53:41	3.13518
2022-09-13	13:53:41	0.570496
2022-09-13	13:53:42	0.931565
2022-09-13	13:53:42	0.446069
2022-09-13	13:53:42	0.103982
2022-09-13	13:53:43	0.679046
2022-09-13	13:53:43	0.121438
2022-09-13	13:53:43	-0.0727606
2022-09-13	13:53:43	-0.417951
2022-09-13	13:53:44	-0.527519
2022-09-13	13:53:44	-0.970572
2022-09-13	13:53:44	-0.903345
2022-09-13	13:53:44	-0.980495
2022-09-13	13:53:45	-1.03882
2022-09-13	13:53:45	-1.15235
2022-09-13	13:53:45	-1.01907
2022-09-13	13:53:45	-0.705024
2022-09-13	13:53:46	0.0395549
2022-09-13	13:53:46	0.209835
2022-09-13	13:53:46	-0.0189692
2022-09-13	13:53:47	0.619351
2022-09-13	13:53:47	0.912277
2022-09-13	13:53:47	1.40912
2022-09-13	13:53:47	1.96668
2022-09-13	13:53:48	1.80118
2022-09-13	13:53:48	1.15732
2022-09-13	13:53:48	1.27182
2022-09-13	13:53:48	1.4705
2022-09-13	13:53:49	1.22805
2022-09-13	13:53:49	1.11518
2022-09-13	13:53:49	1.24301
2022-09-13	13:53:49	1.25752
2022-09-13	13:53:50	1.2824
2022-09-13	13:53:50	1.29589
2022-09-13	13:53:50	1.10856
2022-09-13	13:53:51	1.01156
2022-09-13	13:53:51	1.15767
2022-09-13	13:53:51	0.97701
2022-09-13	13:53:51	0.959758
2022-09-13	13:53:52	1.00571
2022-09-13	13:53:52	1.25721
2022-09-13	13:53:52	1.43497
2022-09-13	13:53:52	1.02663
2022-09-13	13:53:53	0.581285
2022-09-13	13:53:53	1.55416
2022-09-13	13:53:53	1.27477
2022-09-13	13:53:53	2.22938
2022-09-13	13:53:54	2.29457
2022-09-13	13:53:54	1.422
2022-09-13	13:53:54	1.2737
2022-09-13	13:53:55	1.4908
2022-09-13	13:53:55	1.09197
2022-09-13	13:53:55	0.845865
2022-09-13	13:53:55	1.50174
2022-09-13	13:53:56	1.65391
2022-09-13	13:53:56	1.8338
2022-09-13	13:53:56	1.73777
2022-09-13	13:53:56	1.50953
2022-09-13	13:53:57	1.18658
2022-09-13	13:53:57	1.07472
2022-09-13	13:53:57	0.856145
2022-09-13	13:53:57	0.78159
2022-09-13	13:53:58	1.71253
2022-09-13	13:53:58	1.30296
2022-09-13	13:53:58	1.3223
2022-09-13	13:53:59	1.3792
2022-09-13	13:53:59	1.2878
2022-09-13	13:53:59	1.34887
2022-09-13	13:53:59	1.26337
2022-09-13	13:54:00	1.24459
2022-09-13	13:54:00	1.1937
2022-09-13	13:54:00	1.21966
2022-09-13	13:54:00	1.24683
2022-09-13	13:54:01	1.4106
2022-09-13	13:54:01	1.34958
2022-09-13	13:54:01	1.3365
2022-09-13	13:54:01	1.29915
2022-09-13	13:54:02	1.29533
2022-09-13	13:54:02	1.23416
2022-09-13	13:54:02	1.28581
2022-09-13	13:54:03	1.30154
2022-09-13	13:54:03	1.32571
2022-09-13	13:54:03	1.23401
2022-09-13	13:54:03	1.27258
2022-09-13	13:54:04	1.2337
2022-09-13	13:54:04	1.2651
2022-09-13	13:54:04	1.31569
2022-09-13	13:54:04	1.26123
2022-09-13	13:54:05	1.21782
2022-09-13	13:54:05	1.2279
2022-09-13	13:54:05	1.21431
2022-09-13	13:54:05	1.25192
2022-09-13	13:54:06	1.2334
2022-09-13	13:54:06	1.26989
2022-09-13	13:54:06	1.24571
2022-09-13	13:54:07	1.21177
2022-09-13	13:54:07	1.17584
2022-09-13	13:54:07	1.19716
2022-09-13	13:54:07	1.14251
2022-09-13	13:54:08	1.21401
2022-09-13	13:54:08	1.18841
2022-09-13	13:54:08	1.15971
2022-09-13	13:54:08	1.22653
2022-09-13	13:54:09	1.0481
2022-09-13	13:54:09	1.18663
2022-09-13	13:54:09	1.26902
2022-09-13	13:54:09	1.22617
2022-09-13	13:54:10	0.978537
2022-09-13	13:54:10	1.42505
2022-09-13	13:54:10	1.20785
2022-09-13	13:54:11	1.3335
2022-09-13	13:54:11	1.1993
2022-09-13	13:54:11	1.22607
2022-09-13	13:54:11	1.18027
2022-09-13	13:54:12	1.20312
2022-09-13	13:54:12	1.17294
2022-09-13	13:54:12	1.18159
2022-09-13	13:54:12	1.18805
2022-09-13	13:54:13	1.15401
2022-09-13	13:54:13	1.17457
2022-09-13	13:54:13	1.11726
2022-09-13	13:54:13	1.15696
2022-09-13	13:54:14	1.11162
2022-09-13	13:54:14	1.29996
2022-09-13	13:54:14	1.01564
2022-09-13	13:54:15	1.15009
2022-09-13	13:54:15	1.11263
2022-09-13	13:54:15	1.12902
2022-09-13	13:54:15	1.29324
2022-09-13	13:54:16	1.3022
2022-09-13	13:54:16	1.26357
2022-09-13	13:54:16	1.21482
2022-09-13	13:54:16	1.27864
2022-09-13	13:54:17	1.38688
2022-09-13	13:54:17	1.34149
2022-09-13	13:54:17	1.27828
2022-09-13	13:54:17	1.33757
2022-09-13	13:54:18	1.36653
2022-09-13	13:54:18	1.36449
2022-09-13	13:54:18	1.30719
2022-09-13	13:54:19	1.40103
2022-09-13	13:54:19	1.43447
2022-09-13	13:54:19	1.44831
2022-09-13	13:54:19	1.51625
2022-09-13	13:54:20	1.70052
2022-09-13	13:54:20	1.59167
2022-09-13	13:54:20	1.57859
2022-09-13	13:54:20	1.55762
2022-09-13	13:54:21	1.54988
2022-09-13	13:54:21	1.55976
2022-09-13	13:54:21	1.61584
2022-09-13	13:54:21	1.6533
2022-09-13	13:54:22	1.53711
2022-09-13	13:54:22	1.44302
2022-09-13	13:54:22	1.43279
2022-09-13	13:54:23	1.39421
2022-09-13	13:54:23	1.38698
2022-09-13	13:54:23	1.3649
2022-09-13	13:54:23	1.33823
2022-09-13	13:54:24	1.348
2022-09-13	13:54:24	1.31482
2022-09-13	13:54:24	1.33553
2022-09-13	13:54:24	1.31991
2022-09-13	13:54:25	1.30398
2022-09-13	13:54:25	1.27004
2022-09-13	13:54:25	1.27955
2022-09-13	13:54:25	1.27823
2022-09-13	13:54:26	1.31899
2022-09-13	13:54:26	1.31574
2022-09-13	13:54:26	1.26378
2022-09-13	13:54:27	1.2878
2022-09-13	13:54:27	1.30001
2022-09-13	13:54:27	1.28627
2022-09-13	13:54:27	1.27843
2022-09-13	13:54:28	1.31375
2022-09-13	13:54:28	1.28495
2022-09-13	13:54:28	1.34795
2022-09-13	13:54:28	1.36668
2022-09-13	13:54:29	1.29899
2022-09-13	13:54:29	1.44388
2022-09-13	13:54:29	1.18413
2022-09-13	13:54:29	1.2876
2022-09-13	13:54:30	1.16164
2022-09-13	13:54:30	1.18836
2022-09-13	13:54:30	0.9736
2022-09-13	13:54:31	0.657265
2022-09-13	13:54:31	0.7907
2022-09-13	13:54:31	0.790293
2022-09-13	13:54:31	0.592583
2022-09-13	13:54:32	1.48027
2022-09-13	13:54:32	0.884338
2022-09-13	13:54:32	1.08414
2022-09-13	13:54:32	0.965356
2022-09-13	13:54:33	1.06093
2022-09-13	13:54:33	1.09579
2022-09-13	13:54:33	0.96673
2022-09-13	13:54:33	1.09375
2022-09-13	13:54:34	0.816094
2022-09-13	13:54:34	1.20073
2022-09-13	13:54:34	1.06393
2022-09-13	13:54:35	1.13014
2022-09-13	13:54:35	1.19248
2022-09-13	13:54:35	0.927901
2022-09-13	13:54:35	0.695331
2022-09-13	13:54:36	0.904542
2022-09-13	13:54:36	0.906577
2022-09-13	13:54:36	0.940318
2022-09-13	13:54:36	0.977977
2022-09-13	13:54:37	0.880929
2022-09-13	13:54:37	1.05009
2022-09-13	13:54:37	1.04734
2022-09-13	13:54:37	1.04052
2022-09-13	13:54:38	0.925814
2022-09-13	13:54:38	0.893651
2022-09-13	13:54:38	0.942303
2022-09-13	13:54:39	0.9307
2022-09-13	13:54:39	0.917977
2022-09-13	13:54:39	0.900776
2022-09-13	13:54:39	0.895789
2022-09-13	13:54:40	0.856908
2022-09-13	13:54:40	0.841285
2022-09-13	13:54:40	0.827086
2022-09-13	13:54:40	0.882405
2022-09-13	13:54:41	0.844695
2022-09-13	13:54:41	0.894262
2022-09-13	13:54:41	0.930089
2022-09-13	13:54:41	0.96958
2022-09-13	13:54:42	0.960114
2022-09-13	13:54:42	0.900623
2022-09-13	13:54:42	0.87874
2022-09-13	13:54:43	0.856196
2022-09-13	13:54:43	0.881692
2022-09-13	13:54:43	0.921489
2022-09-13	13:54:43	0.92556
2022-09-13	13:54:44	0.906527
2022-09-13	13:54:44	0.945611
2022-09-13	13:54:44	0.932837
2022-09-13	13:54:44	0.887087
2022-09-13	13:54:45	0.877723
2022-09-13	13:54:45	0.898079
2022-09-13	13:54:45	0.914516
2022-09-13	13:54:45	0.901794
2022-09-13	13:54:46	0.938893
2022-09-13	13:54:46	1.24373
2022-09-13	13:54:46	2.18765
2022-09-13	13:54:47	1.73752
2022-09-13	13:54:47	1.40866
2022-09-13	13:54:47	1.70531
2022-09-13	13:54:47	1.56469
2022-09-13	13:54:48	0.95472
2022-09-13	13:54:48	0.368613
2022-09-13	13:54:48	0.573244
2022-09-13	13:54:48	0.392328
2022-09-13	13:54:49	0.535025
2022-09-13	13:54:49	0.607901
2022-09-13	13:54:49	0.408919
2022-09-13	13:54:49	0.277163
2022-09-13	13:54:50	0.342863
2022-09-13	13:54:50	-0.00863844
2022-09-13	13:54:50	-0.0072135
2022-09-13	13:54:51	0.128461
2022-09-13	13:54:51	0.247137
2022-09-13	13:54:51	-0.0485366
2022-09-13	13:54:51	0.0749239
2022-09-13	13:54:52	0.134008
2022-09-13	13:54:52	0.142863
2022-09-13	13:54:52	0.0422013
2022-09-13	13:54:52	0.165967
2022-09-13	13:54:53	0.475789
2022-09-13	13:54:53	0.480573
2022-09-13	13:54:53	1.06765
2022-09-13	13:54:53	1.35808
2022-09-13	13:54:54	2.19162
2022-09-13	13:54:54	2.65497
2022-09-13	13:54:54	1.98276
2022-09-13	13:54:55	0.986018
2022-09-13	13:54:55	1.16536
2022-09-13	13:54:55	1.04062
2022-09-13	13:54:55	0.790445
2022-09-13	13:54:56	0.735534
2022-09-13	13:54:56	0.734466
2022-09-13	13:54:56	0.60556
2022-09-13	13:54:56	0.676603
2022-09-13	13:54:57	0.693855
2022-09-13	13:54:57	0.654007
2022-09-13	13:54:57	0.640929
2022-09-13	13:54:57	0.634109
2022-09-13	13:54:58	0.56098
2022-09-13	13:54:58	0.754415
2022-09-13	13:54:58	0.761183
2022-09-13	13:54:59	0.764491
2022-09-13	13:54:59	0.749071
2022-09-13	13:54:59	0.768512
2022-09-13	13:54:59	0.760013
2022-09-13	13:55:00	0.745051
2022-09-13	13:55:00	0.696196
2022-09-13	13:55:00	0.75874
2022-09-13	13:55:00	0.72215
2022-09-13	13:55:01	0.725
2022-09-13	13:55:01	0.712888
2022-09-13	13:55:01	0.677875
2022-09-13	13:55:01	0.607239
2022-09-13	13:55:02	0.594873
2022-09-13	13:55:02	0.600572
2022-09-13	13:55:02	0.62617
2022-09-13	13:55:03	0.576247
2022-09-13	13:55:03	0.521132
2022-09-13	13:55:03	0.508003
2022-09-13	13:55:03	0.431361
2022-09-13	13:55:04	0.408715
2022-09-13	13:55:04	0.391209
2022-09-13	13:55:04	0.37355
2022-09-13	13:55:04	0.315382
2022-09-13	13:55:05	0.265865
2022-09-13	13:55:05	0.117621
2022-09-13	13:55:05	0.0728374
2022-09-13	13:55:05	0.595331
2022-09-13	13:55:06	2.8707
2022-09-13	13:55:06	4.80754
2022-09-13	13:55:06	2.61711
2022-09-13	13:55:07	2.43207
2022-09-13	13:55:07	1.8248
2022-09-13	13:55:07	1.89075
2022-09-13	13:55:07	1.66118
2022-09-13	13:55:08	3.3392
2022-09-13	13:55:08	5.1878
2022-09-13	13:55:08	9.37741
2022-09-13	13:55:08	5.60668
2022-09-13	13:55:09	2.62749
2022-09-13	13:55:09	0.898283
2022-09-13	13:55:09	0.535636
2022-09-13	13:55:09	1.02912
2022-09-13	13:55:10	0.878639
2022-09-13	13:55:10	1.31411
2022-09-13	13:55:10	2.0477
2022-09-13	13:55:11	6.02932
2022-09-13	13:55:11	4.57691
2022-09-13	13:55:11	4.27731
2022-09-13	13:55:11	4.29813
2022-09-13	13:55:12	1.3276
2022-09-13	13:55:12	0.276298
2022-09-13	13:55:12	0.256705
2022-09-13	13:55:12	-0.0422262
2022-09-13	13:55:13	-0.263651
2022-09-13	13:55:13	-0.11271
2022-09-13	13:55:13	-0.0779005
2022-09-13	13:55:13	0.178486
2022-09-13	13:55:14	0.136451
2022-09-13	13:55:14	0.74729
2022-09-13	13:55:14	1.57508
2022-09-13	13:55:15	2.0138
2022-09-13	13:55:15	1.41391
2022-09-13	13:55:15	0.524542
2022-09-13	13:55:15	1.04749
2022-09-13	13:55:16	2.00541
2022-09-13	13:55:16	0.588359
2022-09-13	13:55:16	0.535891
2022-09-13	13:55:16	0.914058
2022-09-13	13:55:17	1.39401
2022-09-13	13:55:17	2.24245
2022-09-13	13:55:17	2.55599
2022-09-13	13:55:17	1.27365
2022-09-13	13:55:18	0.637468
2022-09-13	13:55:18	0.406272
2022-09-13	13:55:18	0.350598
2022-09-13	13:55:19	0.205509
2022-09-13	13:55:19	0.0561962
2022-09-13	13:55:19	-0.329198
2022-09-13	13:55:19	-0.472455
2022-09-13	13:55:20	-0.618409
2022-09-13	13:55:20	-0.539732
2022-09-13	13:55:20	-0.398816
2022-09-13	13:55:20	-0.0369336
2022-09-13	13:55:21	2.83589
2022-09-13	13:55:21	4.38912
2022-09-13	13:55:21	6.35975
2022-09-13	13:55:21	3.38668
2022-09-13	13:55:22	5.36428
2022-09-13	13:55:22	0.714567
2022-09-13	13:55:22	2.82948
2022-09-13	13:55:23	1.41457
2022-09-13	13:55:23	0.954008
2022-09-13	13:55:23	2.74912
2022-09-13	13:55:23	1.35263
2022-09-13	13:55:24	4.75406
2022-09-13	13:55:24	2.28729
2022-09-13	13:55:24	3.48179
2022-09-13	13:55:24	2.6536
2022-09-13	13:55:25	1.96683
2022-09-13	13:55:25	2.49111
2022-09-13	13:55:25	0.55243
2022-09-13	13:55:25	0.79757
2022-09-13	13:55:26	0.211158
2022-09-13	13:55:26	0.192227
2022-09-13	13:55:26	0.0477992
2022-09-13	13:55:27	-0.214643
2022-09-13	13:55:27	-0.095814
2022-09-13	13:55:27	-0.245585
2022-09-13	13:55:27	-0.360038
2022-09-13	13:55:28	-0.76136
2022-09-13	13:55:28	-0.769707
2022-09-13	13:55:28	-0.992811
2022-09-13	13:55:28	-0.862989
2022-09-13	13:55:29	-0.600089
2022-09-13	13:55:29	-0.181921
2022-09-13	13:55:29	0.277825
2022-09-13	13:55:29	0.0578756
2022-09-13	13:55:30	0.272837
2022-09-13	13:55:30	0.456552
2022-09-13	13:55:30	1.11126
2022-09-13	13:55:31	3.22037
2022-09-13	13:55:31	4.70128
2022-09-13	13:55:31	3.20927
2022-09-13	13:55:31	2.57965
2022-09-13	13:55:32	1.01696
2022-09-13	13:55:32	-0.0379005
2022-09-13	13:55:32	-0.0592237
2022-09-13	13:55:32	-0.145585
2022-09-13	13:55:33	-0.402989
2022-09-13	13:55:33	-0.377798
2022-09-13	13:55:33	-0.397798
2022-09-13	13:55:33	-0.163804
2022-09-13	13:55:34	0.255585
2022-09-13	13:55:34	0.1193
2022-09-13	13:55:34	0.213804
2022-09-13	13:55:35	0.0240842
2022-09-13	13:55:35	0.496654
2022-09-13	13:55:35	0.38215
2022-09-13	13:55:35	0.533397
2022-09-13	13:55:36	0.411361
2022-09-13	13:55:36	0.385967
2022-09-13	13:55:36	0.212735
2022-09-13	13:55:36	0.405764
2022-09-13	13:55:37	0.223422
2022-09-13	13:55:37	0.584135
2022-09-13	13:55:37	0.27299
2022-09-13	13:55:37	0.445611
2022-09-13	13:55:38	0.297672
2022-09-13	13:55:38	0.478282
2022-09-13	13:55:38	0.4593
2022-09-13	13:55:39	0.313244
2022-09-13	13:55:39	0.384033
2022-09-13	13:55:39	0.336959
2022-09-13	13:55:39	0.45014
2022-09-13	13:55:40	0.293244
2022-09-13	13:55:40	0.349682
2022-09-13	13:55:40	0.307341
2022-09-13	13:55:40	0.50103
2022-09-13	13:55:41	0.243117
2022-09-13	13:55:41	0.514771
2022-09-13	13:55:41	0.272939
2022-09-13	13:55:41	0.52388
2022-09-13	13:55:42	0.166476
2022-09-13	13:55:42	0.501285
2022-09-13	13:55:42	0.219708
2022-09-13	13:55:43	0.160318
2022-09-13	13:55:43	0.151311
2022-09-13	13:55:43	0.320064
2022-09-13	13:55:43	0.259708
2022-09-13	13:55:44	0.293601
2022-09-13	13:55:44	0.293652
2022-09-13	13:55:44	0.290751
2022-09-13	13:55:44	0.392074
2022-09-13	13:55:45	0.0730918
2022-09-13	13:55:45	0.417875
2022-09-13	13:55:45	0.11187
2022-09-13	13:55:45	0.582405
2022-09-13	13:55:46	1.19207
2022-09-13	13:55:46	8.27054
2022-09-13	13:55:46	6.3424
2022-09-13	13:55:47	8.92556
2022-09-13	13:55:47	1.27584
2022-09-13	13:55:47	2.35233
2022-09-13	13:55:47	1.52882
2022-09-13	13:55:48	0.360878
2022-09-13	13:55:48	1.1077
2022-09-13	13:55:48	0.374008
2022-09-13	13:55:48	2.10373
2022-09-13	13:55:49	0.320522
2022-09-13	13:55:49	0.273295
2022-09-13	13:55:49	0.988766
2022-09-13	13:55:49	0.268664
2022-09-13	13:55:50	0.585203
2022-09-13	13:55:50	0.233499
2022-09-13	13:55:50	0.594873
2022-09-13	13:55:51	0.975992
2022-09-13	13:55:51	2.16551
2022-09-13	13:55:51	3.48536
2022-09-13	13:55:51	4.82973
2022-09-13	13:55:52	4.4738
2022-09-13	13:55:52	2.48525
2022-09-13	13:55:52	3.68617
2022-09-13	13:55:52	0.745763
2022-09-13	13:55:53	3.93497
2022-09-13	13:55:53	1.15116
2022-09-13	13:55:53	2.79406
2022-09-13	13:55:53	1.38286
2022-09-13	13:55:54	0.880929
2022-09-13	13:55:54	1.1019
2022-09-13	13:55:54	0.27014
2022-09-13	13:55:55	0.353855
2022-09-13	13:55:55	0.326425
2022-09-13	13:55:55	0.271005
2022-09-13	13:55:55	0.45528
2022-09-13	13:55:56	2.77202
2022-09-13	13:55:56	0.621896
2022-09-13	13:55:56	2.60556
2022-09-13	13:55:56	1.52016
2022-09-13	13:55:57	1.2762
2022-09-13	13:55:57	2.00785
2022-09-13	13:55:57	0.38785
2022-09-13	13:55:57	0.30271
2022-09-13	13:55:58	0.867901
2022-09-13	13:55:58	0.429275
2022-09-13	13:55:58	0.333906
2022-09-13	13:55:59	0.628155
2022-09-13	13:55:59	0.234059
2022-09-13	13:55:59	0.399758
2022-09-13	13:55:59	0.108563
2022-09-13	13:56:00	0.197875
2022-09-13	13:56:00	0.0533972
2022-09-13	13:56:00	0.0937534
2022-09-13	13:56:00	-0.0885875
2022-09-13	13:56:01	0.107138
2022-09-13	13:56:01	0.00118347
2022-09-13	13:56:01	-0.0712847
2022-09-13	13:56:01	-0.0491473
2022-09-13	13:56:02	0.466883
2022-09-13	13:56:02	0.293295
2022-09-13	13:56:02	0.201285
2022-09-13	13:56:03	0.653397
2022-09-13	13:56:03	0.382608
2022-09-13	13:56:03	0.290802
2022-09-13	13:56:03	1.68317
2022-09-13	13:56:04	1.85732
2022-09-13	13:56:04	5.81177
2022-09-13	13:56:04	4.78006
2022-09-13	13:56:05	7.89589
2022-09-13	13:56:05	4.13284
2022-09-13	13:56:05	6.80566
2022-09-13	13:56:05	2.81355
2022-09-13	13:56:05	7.84057
2022-09-13	13:56:06	4.18154
2022-09-13	13:56:06	7.50082
2022-09-13	13:56:06	7.61161
2022-09-13	13:56:07	2.62622
2022-09-13	13:56:07	4.16688
2022-09-13	13:56:07	1.78363
2022-09-13	13:56:07	3.79792
2022-09-13	13:56:08	5.76668
2022-09-13	13:56:08	6.7796
2022-09-13	13:56:08	8.99131
2022-09-13	13:56:08	2.97767
2022-09-13	13:56:09	7.27629
2022-09-13	13:56:09	2.50861
2022-09-13	13:56:09	1.54001
2022-09-13	13:56:10	0.4993
2022-09-13	13:56:10	0.32958
2022-09-13	13:56:10	0.226527
2022-09-13	13:56:10	0.132074
2022-09-13	13:56:11	0.165814
2022-09-13	13:56:11	0.659657
2022-09-13	13:56:11	0.523117
2022-09-13	13:56:11	0.850242
2022-09-13	13:56:12	0.345713
2022-09-13	13:56:12	0.286781
2022-09-13	13:56:12	0.339758
2022-09-13	13:56:12	0.347036
2022-09-13	13:56:13	0.343626
2022-09-13	13:56:13	0.331209
2022-09-13	13:56:13	0.345458
2022-09-13	13:56:13	0.444593
2022-09-13	13:56:14	0.422048
2022-09-13	13:56:14	0.353855
2022-09-13	13:56:14	0.392735
2022-09-13	13:56:14	0.428155
2022-09-13	13:56:15	0.659962
2022-09-13	13:56:15	1.3622
2022-09-13	13:56:15	2.3308
2022-09-13	13:56:16	1.81925
2022-09-13	13:56:16	1.67223
2022-09-13	13:56:16	1.11828
2022-09-13	13:56:16	1.00174
2022-09-13	13:56:17	0.68327
2022-09-13	13:56:17	0.699708
2022-09-13	13:56:17	0.624287
2022-09-13	13:56:17	0.494669
2022-09-13	13:56:18	0.351209
2022-09-13	13:56:18	0.363626
2022-09-13	13:56:18	0.355534
2022-09-13	13:56:19	0.363881
2022-09-13	13:56:19	0.299809
2022-09-13	13:56:19	0.382048
2022-09-13	13:56:19	0.33014
2022-09-13	13:56:20	0.422506
2022-09-13	13:56:20	0.408817
2022-09-13	13:56:20	0.423015
2022-09-13	13:56:20	0.421539
2022-09-13	13:56:21	0.421845
2022-09-13	13:56:21	0.43986
2022-09-13	13:56:21	0.494771
2022-09-13	13:56:21	0.522608
2022-09-13	13:56:22	0.515025
2022-09-13	13:56:22	0.557366
2022-09-13	13:56:22	0.493804
2022-09-13	13:56:23	0.448257
2022-09-13	13:56:23	0.426781
2022-09-13	13:56:23	0.422456
2022-09-13	13:56:23	0.439758
2022-09-13	13:56:24	0.440064
2022-09-13	13:56:24	0.442303
2022-09-13	13:56:24	0.428155
2022-09-13	13:56:24	0.437926
2022-09-13	13:56:25	0.433295
2022-09-13	13:56:25	0.415789
2022-09-13	13:56:25	0.429733
2022-09-13	13:56:25	0.443982
2022-09-13	13:56:26	0.430344
2022-09-13	13:56:26	0.427901
2022-09-13	13:56:26	0.447799
2022-09-13	13:56:26	0.483728
2022-09-13	13:56:27	0.458791
2022-09-13	13:56:27	0.434262
2022-09-13	13:56:27	0.407901
2022-09-13	13:56:28	0.372837
2022-09-13	13:56:28	0.364389
2022-09-13	13:56:28	0.386425
2022-09-13	13:56:28	0.375992
2022-09-13	13:56:29	0.355484
2022-09-13	13:56:29	0.339504
2022-09-13	13:56:29	0.333244
2022-09-13	13:56:29	0.336959
2022-09-13	13:56:30	0.367188
2022-09-13	13:56:30	0.317214
2022-09-13	13:56:30	0.24444
2022-09-13	13:56:31	0.322863
2022-09-13	13:56:31	0.211565
2022-09-13	13:56:31	0.447697
2022-09-13	13:56:31	0.248155
2022-09-13	13:56:32	0.391718
2022-09-13	13:56:32	0.353346
2022-09-13	13:56:32	0.416451
2022-09-13	13:56:32	0.445051
2022-09-13	13:56:33	0.372583
2022-09-13	13:56:33	0.460064
2022-09-13	13:56:33	0.392939
2022-09-13	13:56:33	0.444237
2022-09-13	13:56:34	0.450496
2022-09-13	13:56:34	0.236807
2022-09-13	13:56:34	0.194466
2022-09-13	13:56:34	0.0429646
2022-09-13	13:56:35	-0.020445
2022-09-13	13:56:35	0.0202674
2022-09-13	13:56:35	0.254059
2022-09-13	13:56:36	1.00057
2022-09-13	13:56:36	0.542557
2022-09-13	13:56:36	1.27991
2022-09-13	13:56:36	0.291107
2022-09-13	13:56:37	0.492939
2022-09-13	13:56:37	0.319402
2022-09-13	13:56:37	0.475738
2022-09-13	13:56:37	0.346425
2022-09-13	13:56:38	0.610293
2022-09-13	13:56:38	0.416451
2022-09-13	13:56:38	0.391667
2022-09-13	13:56:38	0.414415
2022-09-13	13:56:39	0.386018
2022-09-13	13:56:39	0.412023
2022-09-13	13:56:39	0.36042
2022-09-13	13:56:40	0.442048
2022-09-13	13:56:40	0.357112
2022-09-13	13:56:40	0.366222
2022-09-13	13:56:40	0.405204
2022-09-13	13:56:41	0.410394
2022-09-13	13:56:41	0.405
2022-09-13	13:56:41	0.394822
2022-09-13	13:56:41	0.396959
2022-09-13	13:56:42	0.384389
2022-09-13	13:56:42	0.390496
2022-09-13	13:56:42	0.421845
2022-09-13	13:56:42	0.416756
2022-09-13	13:56:43	0.409326
2022-09-13	13:56:43	0.41701
2022-09-13	13:56:43	0.402659
2022-09-13	13:56:44	0.386171
2022-09-13	13:56:44	0.374975
2022-09-13	13:56:44	0.405967
2022-09-13	13:56:44	0.502048
2022-09-13	13:56:45	0.775891
2022-09-13	13:56:45	1.16154
2022-09-13	13:56:45	0.829275
2022-09-13	13:56:45	0.239555
2022-09-13	13:56:46	0.465356
2022-09-13	13:56:46	0.305153
2022-09-13	13:56:46	0.264237
2022-09-13	13:56:46	0.291311
2022-09-13	13:56:47	0.284695
2022-09-13	13:56:47	0.309937
2022-09-13	13:56:47	0.321743
2022-09-13	13:56:48	0.315331
2022-09-13	13:56:48	0.278486
2022-09-13	13:56:48	0.436858
2022-09-13	13:56:48	0.574059
2022-09-13	13:56:49	0.610445
2022-09-13	13:56:49	0.390496
2022-09-13	13:56:49	0.433295
2022-09-13	13:56:49	0.318334
2022-09-13	13:56:50	0.299809
2022-09-13	13:56:50	0.270038
2022-09-13	13:56:50	0.282506
2022-09-13	13:56:50	0.320522
2022-09-13	13:56:51	0.232583
2022-09-13	13:56:51	0.272023
2022-09-13	13:56:51	0.151311
2022-09-13	13:56:52	0.328919
2022-09-13	13:56:52	0.268613
2022-09-13	13:56:52	0.333193
2022-09-13	13:56:52	0.286171
2022-09-13	13:56:53	0.253143
2022-09-13	13:56:53	0.295076
2022-09-13	13:56:53	0.347341
2022-09-13	13:56:53	0.309733
2022-09-13	13:56:54	0.305814
2022-09-13	13:56:54	0.267138
2022-09-13	13:56:54	0.237926
2022-09-13	13:56:55	0.279657
2022-09-13	13:56:55	0.308206
2022-09-13	13:56:55	0.298741
2022-09-13	13:56:55	0.258232
2022-09-13	13:56:56	0.226934
2022-09-13	13:56:56	0.192277
2022-09-13	13:56:56	0.441031
2022-09-13	13:56:56	0.378384
2022-09-13	13:56:57	0.431972
2022-09-13	13:56:57	0.441845
2022-09-13	13:56:57	0.490496
2022-09-13	13:56:57	0.499809
2022-09-13	13:56:58	0.451056
2022-09-13	13:56:58	0.528461
2022-09-13	13:56:58	0.494822
2022-09-13	13:56:58	0.513753
2022-09-13	13:56:59	0.486832
2022-09-13	13:56:59	0.510394
2022-09-13	13:56:59	0.491667
2022-09-13	13:57:00	0.497163
2022-09-13	13:57:00	0.496654
2022-09-13	13:57:00	0.504644
2022-09-13	13:57:00	0.483575
2022-09-13	13:57:01	0.506323
2022-09-13	13:57:01	0.540878
2022-09-13	13:57:01	0.461692
2022-09-13	13:57:01	0.302608
2022-09-13	13:57:02	0.327545
2022-09-13	13:57:02	0.304033
2022-09-13	13:57:02	0.321183
2022-09-13	13:57:02	0.307697
2022-09-13	13:57:03	0.310293
2022-09-13	13:57:03	0.310547
2022-09-13	13:57:03	0.324135
2022-09-13	13:57:04	0.323168
2022-09-13	13:57:04	0.307901
2022-09-13	13:57:04	0.340267
2022-09-13	13:57:04	0.325916
2022-09-13	13:57:05	0.337417
2022-09-13	13:57:05	0.35813
2022-09-13	13:57:05	0.338283
2022-09-13	13:57:05	0.334008
2022-09-13	13:57:06	0.321234
2022-09-13	13:57:06	0.335229
2022-09-13	13:57:06	0.350293
2022-09-13	13:57:07	0.360013
2022-09-13	13:57:07	0.359097
2022-09-13	13:57:07	0.374517
2022-09-13	13:57:07	0.378283
2022-09-13	13:57:08	0.358486
2022-09-13	13:57:08	0.353601
2022-09-13	13:57:08	0.372837
2022-09-13	13:57:08	0.36897
2022-09-13	13:57:09	0.366578
2022-09-13	13:57:09	0.342201
2022-09-13	13:57:09	0.349784
2022-09-13	13:57:09	0.363015
2022-09-13	13:57:10	0.424695
2022-09-13	13:57:10	0.394567
2022-09-13	13:57:10	0.374313
2022-09-13	13:57:10	0.396705
2022-09-13	13:57:11	0.449428
2022-09-13	13:57:11	0.394415
2022-09-13	13:57:11	0.391463
2022-09-13	13:57:12	0.348613
2022-09-13	13:57:12	0.359402
2022-09-13	13:57:12	0.41355
2022-09-13	13:57:12	0.38958
2022-09-13	13:57:13	0.351158
2022-09-13	13:57:13	0.358079
2022-09-13	13:57:13	0.414618
2022-09-13	13:57:13	0.39014
2022-09-13	13:57:14	0.384644
2022-09-13	13:57:14	0.326476
2022-09-13	13:57:14	0.384084
2022-09-13	13:57:15	0.439656
2022-09-13	13:57:15	0.406018
2022-09-13	13:57:15	0.417519
2022-09-13	13:57:15	0.38271
2022-09-13	13:57:16	0.456858
2022-09-13	13:57:16	0.413753
2022-09-13	13:57:16	0.411056
2022-09-13	13:57:16	0.436756
2022-09-13	13:57:17	0.428563
2022-09-13	13:57:17	0.433397
2022-09-13	13:57:17	0.43187
2022-09-13	13:57:17	0.425305
2022-09-13	13:57:18	0.423117
2022-09-13	13:57:18	0.426578
2022-09-13	13:57:18	0.430853
2022-09-13	13:57:18	0.425153
2022-09-13	13:57:19	0.374771
2022-09-13	13:57:19	0.288155
2022-09-13	13:57:19	0.222608
2022-09-13	13:57:20	0.1507
2022-09-13	13:57:20	0.162507
2022-09-13	13:57:20	0.190751
2022-09-13	13:57:20	0.396094
2022-09-13	13:57:21	0.492277
2022-09-13	13:57:21	1.03732
2022-09-13	13:57:21	0.523932
2022-09-13	13:57:21	0.585814
2022-09-13	13:57:22	0.54444
2022-09-13	13:57:22	0.401997
2022-09-13	13:57:22	0.413193
2022-09-13	13:57:22	0.338893
2022-09-13	13:57:23	0.60098
2022-09-13	13:57:23	0.427697
2022-09-13	13:57:23	0.472176
2022-09-13	13:57:24	0.465407
2022-09-13	13:57:24	0.492634
2022-09-13	13:57:24	0.61813
2022-09-13	13:57:24	0.543677
2022-09-13	13:57:25	0.57584
2022-09-13	13:57:25	0.545305
2022-09-13	13:57:25	0.548919
2022-09-13	13:57:25	0.727494
2022-09-13	13:57:26	1.06653
2022-09-13	13:57:26	0.985916
2022-09-13	13:57:26	0.679555
2022-09-13	13:57:26	0.0874938
2022-09-13	13:57:27	0.0705473
2022-09-13	13:57:27	-0.0924552
2022-09-13	13:57:27	-0.257391
2022-09-13	13:57:28	-0.487264
2022-09-13	13:57:28	-1.33322
2022-09-13	13:57:28	-1.37454
2022-09-13	13:57:28	-1.38838
2022-09-13	13:57:29	-1.50365
2022-09-13	13:57:29	-1.11393
2022-09-13	13:57:29	-1.25673
2022-09-13	13:57:29	-0.564312
2022-09-13	13:57:30	-0.143498
2022-09-13	13:57:30	0.0895804
2022-09-13	13:57:30	0.296603
2022-09-13	13:57:30	0.311616
2022-09-13	13:57:31	0.182557
2022-09-13	13:57:31	0.316145
2022-09-13	13:57:31	0.416196
2022-09-13	13:57:32	0.225458
2022-09-13	13:57:32	0.215687
2022-09-13	13:57:32	0.233194
2022-09-13	13:57:32	0.203066
2022-09-13	13:57:33	0.188257
2022-09-13	13:57:33	0.148919
2022-09-13	13:57:33	0.144746
2022-09-13	13:57:33	0.235484
2022-09-13	13:57:34	0.205153
2022-09-13	13:57:34	0.206883
2022-09-13	13:57:34	0.272379
2022-09-13	13:57:35	0.198028
2022-09-13	13:57:35	0.188359
2022-09-13	13:57:35	0.246934
2022-09-13	13:57:35	0.26271
2022-09-13	13:57:36	0.273295
2022-09-13	13:57:36	0.585916
2022-09-13	13:57:36	0.367697
2022-09-13	13:57:36	0.206272
2022-09-13	13:57:37	0.271107
2022-09-13	13:57:37	0.498435
2022-09-13	13:57:37	0.356756
2022-09-13	13:57:37	0.347799
2022-09-13	13:57:38	1.58658
2022-09-13	13:57:38	0.236552
2022-09-13	13:57:38	0.586323
2022-09-13	13:57:38	0.676196
2022-09-13	13:57:39	1.16032
2022-09-13	13:57:39	0.901947
2022-09-13	13:57:39	0.803168
2022-09-13	13:57:40	2.50312
2022-09-13	13:57:40	2.37436
2022-09-13	13:57:40	2.92347
2022-09-13	13:57:40	1.18826
2022-09-13	13:57:41	1.60271
2022-09-13	13:57:41	1.86877
2022-09-13	13:57:41	1.94413
2022-09-13	13:57:41	3.23299
2022-09-13	13:57:42	5.84754
2022-09-13	13:57:42	3.68627
2022-09-13	13:57:42	4.46235
2022-09-13	13:57:42	10.7779
2022-09-13	13:57:43	8.33609
2022-09-13	13:57:43	3.72627
2022-09-13	13:57:43	5.49182
2022-09-13	13:57:44	3.99044
2022-09-13	13:57:44	2.59599
2022-09-13	13:57:44	1.23604
2022-09-13	13:57:44	2.34566
2022-09-13	13:57:45	1.69238
2022-09-13	13:57:45	0.811769
2022-09-13	13:57:45	0.650242
2022-09-13	13:57:45	0.698689
2022-09-13	13:57:46	0.670547
2022-09-13	13:57:46	1.23497
2022-09-13	13:57:46	4.71217
2022-09-13	13:57:46	4.64276
2022-09-13	13:57:47	3.32581
2022-09-13	13:57:47	3.29681
2022-09-13	13:57:47	1.82434
2022-09-13	13:57:48	1.4764
2022-09-13	13:57:48	1.51121
2022-09-13	13:57:48	1.36052
2022-09-13	13:57:48	0.794058
2022-09-13	13:57:49	0.508257
2022-09-13	13:57:49	0.48042
2022-09-13	13:57:49	0.492837
2022-09-13	13:57:49	0.478486
2022-09-13	13:57:50	0.488512
2022-09-13	13:57:50	0.480013
2022-09-13	13:57:50	0.480165
2022-09-13	13:57:50	0.473855
2022-09-13	13:57:51	0.485814
2022-09-13	13:57:51	0.479707
2022-09-13	13:57:51	0.495127
2022-09-13	13:57:52	0.501336
2022-09-13	13:57:52	0.499809
2022-09-13	13:57:52	0.495585
2022-09-13	13:57:52	0.486476
2022-09-13	13:57:53	0.479911
2022-09-13	13:57:53	0.481845
2022-09-13	13:57:53	0.45126
2022-09-13	13:57:53	0.365509
2022-09-13	13:57:54	0.530954
2022-09-13	13:57:54	0.583066
2022-09-13	13:57:54	0.467545
2022-09-13	13:57:54	0.582201
2022-09-13	13:57:55	0.383982
2022-09-13	13:57:55	0.610496
2022-09-13	13:57:55	0.475178
2022-09-13	13:57:56	0.561183
2022-09-13	13:57:56	0.654567
2022-09-13	13:57:56	0.727545
2022-09-13	13:57:56	0.748766
2022-09-13	13:57:57	0.792328
2022-09-13	13:57:57	0.652125
2022-09-13	13:57:57	0.680725
2022-09-13	13:57:57	0.703422
2022-09-13	13:57:58	0.713041
2022-09-13	13:57:58	0.700776
2022-09-13	13:57:58	0.777519
2022-09-13	13:57:58	0.739555
2022-09-13	13:57:59	0.762557
2022-09-13	13:57:59	0.714873
2022-09-13	13:57:59	0.613855
2022-09-13	13:58:00	0.728766
2022-09-13	13:58:00	0.662608
2022-09-13	13:58:00	0.538588
2022-09-13	13:58:00	0.473397
2022-09-13	13:58:01	0.487697
2022-09-13	13:58:01	0.491514
2022-09-13	13:58:01	0.45472
2022-09-13	13:58:01	0.487596
2022-09-13	13:58:02	0.484746
2022-09-13	13:58:02	0.514008
2022-09-13	13:58:02	0.472532
2022-09-13	13:58:02	0.480013
2022-09-13	13:58:03	0.477468
2022-09-13	13:58:03	0.488613
2022-09-13	13:58:03	0.479962
2022-09-13	13:58:04	0.562099
2022-09-13	13:58:04	0.938995
2022-09-13	13:58:04	3.00357
2022-09-13	13:58:04	5.40337
2022-09-13	13:58:05	2.945
2022-09-13	13:58:05	2.14724
2022-09-13	13:58:05	3.06495
2022-09-13	13:58:05	6.62942
2022-09-13	13:58:06	2.03518
2022-09-13	13:58:06	3.06139
2022-09-13	13:58:06	5.51126
2022-09-13	13:58:06	4.57757
2022-09-13	13:58:07	3.91711
