# Supplementary material for: Comparing efficacy in reducing pulling and welfare impacts of four types of leash walking equipment
Source: PeerJ journal article supplement (doi:10.7717/peerj.18131), 2024-10-24
Supplement: Shelter1_Tension_files.zip [file Unnamed_martin_2022913131252 copy.xlsx]

## Sheet: Averaged Newtons
Date	Time	Averaged Newtons	Impulse	Total steps
2022-09-13	13:13:01	1.70243	1.70243	0
2022-09-13	13:13:02	1.82184	3.52426	0		Impulse	1425.82
2022-09-13	13:13:03	6.86335	10.3876	0		Total steps	26
2022-09-13	13:13:04	-2.24996	10.3876	0		# > 5 sec	2
2022-09-13	13:13:05	42.0708	52.4584	1
2022-09-13	13:13:06	40.9367	93.3952	2
2022-09-13	13:13:07	14.8356	108.231	3
2022-09-13	13:13:08	8.23754	116.468	3
2022-09-13	13:13:09	-3.86592	116.468	3
2022-09-13	13:13:10	-0.940741	116.468	3
2022-09-13	13:13:11	1.61115	118.079	3
2022-09-13	13:13:12	40.7158	158.795	4
2022-09-13	13:13:13	16.4353	175.231	5
2022-09-13	13:13:14	19.8346	195.065	6
2022-09-13	13:13:15	0.105207	195.17	6
2022-09-13	13:13:16	-3.34452	195.17	6
2022-09-13	13:13:17	-2.73368	195.17	6
2022-09-13	13:13:18	-1.68545	195.17	6
2022-09-13	13:13:19	0.834066	196.004	6
2022-09-13	13:13:20	0.878322	196.883	6
2022-09-13	13:13:21	-3.06486	196.883	6
2022-09-13	13:13:22	-3.6684	196.883	6
2022-09-13	13:13:23	-3.95697	196.883	6
2022-09-13	13:13:24	-4.83184	196.883	6
2022-09-13	13:13:25	-3.91979	196.883	6
2022-09-13	13:13:26	-3.73462	196.883	6
2022-09-13	13:13:27	-3.48012	196.883	6
2022-09-13	13:13:28	-1.28709	196.883	6
2022-09-13	13:13:29	0.9684	197.851	6
2022-09-13	13:13:30	-0.150253	197.851	6
2022-09-13	13:13:31	-0.903315	197.851	6
2022-09-13	13:13:32	-0.86768	197.851	6
2022-09-13	13:13:33	0.53254	198.384	6
2022-09-13	13:13:34	1.75381	200.137	6
2022-09-13	13:13:35	2.46886	202.606	6
2022-09-13	13:13:36	-3.07968	202.606	6
2022-09-13	13:13:37	-5.54797	202.606	6
2022-09-13	13:13:38	-4.25579	202.606	6
2022-09-13	13:13:39	-3.3396	202.606	6
2022-09-13	13:13:40	-1.47264	202.606	6
2022-09-13	13:13:41	-0.17668	202.606	6
2022-09-13	13:13:42	-0.0630437	202.606	6
2022-09-13	13:13:43	1.26055	203.867	6
2022-09-13	13:13:44	0.455743	204.323	6
2022-09-13	13:13:45	-1.63412	204.323	6
2022-09-13	13:13:46	-1.21652	204.323	6
2022-09-13	13:13:47	-1.34374	204.323	6
2022-09-13	13:13:48	-0.222089	204.323	6
2022-09-13	13:13:49	1.53989	205.863	6
2022-09-13	13:13:50	10.2066	216.069	6
2022-09-13	13:13:51	4.75346	220.823	6
2022-09-13	13:13:52	-1.66958	220.823	6
2022-09-13	13:13:53	-2.45392	220.823	6
2022-09-13	13:13:54	-2.47843	220.823	6
2022-09-13	13:13:55	-1.13208	220.823	6
2022-09-13	13:13:56	4.68504	225.508	6
2022-09-13	13:13:57	6.99137	232.499	6
2022-09-13	13:13:58	5.07547	237.574	6
2022-09-13	13:13:59	1.89631	239.471	6
2022-09-13	13:14:00	8.98806	248.459	6
2022-09-13	13:14:01	24.8127	273.272	7
2022-09-13	13:14:02	4.58103	277.853	7
2022-09-13	13:14:03	1.71929	279.572	7
2022-09-13	13:14:04	9.72709	289.299	7
2022-09-13	13:14:05	11.1694	300.468	7
2022-09-13	13:14:06	4.71005	305.178	7
2022-09-13	13:14:07	-1.62138	305.178	7
2022-09-13	13:14:08	-3.81611	305.178	7
2022-09-13	13:14:09	-4.8272	305.178	7
2022-09-13	13:14:10	-3.15573	305.178	7
2022-09-13	13:14:11	1.19666	306.375	7
2022-09-13	13:14:12	1.92523	308.3	7
2022-09-13	13:14:13	18.1388	326.439	8
2022-09-13	13:14:14	4.40819	330.847	8
2022-09-13	13:14:15	1.07747	331.925	8
2022-09-13	13:14:16	2.51946	334.444	8
2022-09-13	13:14:17	0.0378616	334.482	8
2022-09-13	13:14:18	1.47187	335.954	8
2022-09-13	13:14:19	1.74855	337.703	8
2022-09-13	13:14:20	0.968249	338.671	8
2022-09-13	13:14:21	0.139501	338.81	8
2022-09-13	13:14:22	-0.832932	338.81	8
2022-09-13	13:14:23	-2.13536	338.81	8
2022-09-13	13:14:24	-1.75585	338.81	8
2022-09-13	13:14:25	-1.3962	338.81	8
2022-09-13	13:14:26	0.167459	338.978	8
2022-09-13	13:14:27	-0.60209	338.978	8
2022-09-13	13:14:28	-2.82087	338.978	8
2022-09-13	13:14:29	-1.71863	338.978	8
2022-09-13	13:14:30	6.31944	345.297	8
2022-09-13	13:14:31	5.0341	350.331	8
2022-09-13	13:14:32	12.1624	362.494	8
2022-09-13	13:14:33	5.75109	368.245	8
2022-09-13	13:14:34	3.18861	371.433	8
2022-09-13	13:14:35	2.23989	373.673	8
2022-09-13	13:14:36	-0.52852	373.673	8
2022-09-13	13:14:37	-0.525727	373.673	8
2022-09-13	13:14:38	-0.529029	373.673	8
2022-09-13	13:14:39	-2.75132	373.673	8
2022-09-13	13:14:40	1.80537	375.479	8
2022-09-13	13:14:41	9.53421	385.013	8
2022-09-13	13:14:42	2.58856	387.601	8
2022-09-13	13:14:43	1.24912	388.851	8
2022-09-13	13:14:44	0.616806	389.467	8
2022-09-13	13:14:45	0.352518	389.82	8
2022-09-13	13:14:46	1.98364	391.804	8
2022-09-13	13:14:47	2.39959	394.203	8
2022-09-13	13:14:48	0.838536	395.042	8
2022-09-13	13:14:49	0.559987	395.602	8
2022-09-13	13:14:50	3.8898	399.491	8
2022-09-13	13:14:51	1.14533	400.637	8
2022-09-13	13:14:52	6.63246	407.269	8
2022-09-13	13:14:53	3.14984	410.419	8
2022-09-13	13:14:54	0.424126	410.843	8
2022-09-13	13:14:55	0.949403	411.793	8
2022-09-13	13:14:56	1.91697	413.71	8
2022-09-13	13:14:57	1.54063	415.25	8
2022-09-13	13:14:58	1.91531	417.165	8
2022-09-13	13:14:59	1.7966	418.962	8
2022-09-13	13:15:00	1.88607	420.848	8
2022-09-13	13:15:01	2.01007	422.858	8
2022-09-13	13:15:02	2.34949	425.208	8
2022-09-13	13:15:03	-0.5953	425.208	8
2022-09-13	13:15:04	-2.47656	425.208	8
2022-09-13	13:15:05	-3.6207	425.208	8
2022-09-13	13:15:06	-3.6126	425.208	8
2022-09-13	13:15:07	-3.21617	425.208	8
2022-09-13	13:15:08	-3.26591	425.208	8
2022-09-13	13:15:09	16.9504	442.158	9
2022-09-13	13:15:10	13.5548	455.713	10
2022-09-13	13:15:11	17.3108	473.024	11
2022-09-13	13:15:12	37.7924	510.816	12
2022-09-13	13:15:13	39.0428	549.859	13
2022-09-13	13:15:14	56.8513	606.71	14
2022-09-13	13:15:15	38.2299	644.94	15
2022-09-13	13:15:16	28.35	673.29	16
2022-09-13	13:15:17	25.0943	698.384	17
2022-09-13	13:15:18	35.891	734.275	18
2022-09-13	13:15:19	26.3298	760.605	19
2022-09-13	13:15:20	9.63153	770.237	19
2022-09-13	13:15:21	5.06427	775.301	19
2022-09-13	13:15:22	2.87332	778.174	19
2022-09-13	13:15:23	3.26988	781.444	19
2022-09-13	13:15:24	8.7179	790.162	19
2022-09-13	13:15:25	11.9778	802.14	19
2022-09-13	13:15:26	6.19176	808.332	19
2022-09-13	13:15:27	4.02178	812.353	19
2022-09-13	13:15:28	2.8387	815.192	19
2022-09-13	13:15:29	3.28889	818.481	19
2022-09-13	13:15:30	3.19523	821.676	19
2022-09-13	13:15:31	3.12164	824.798	19
2022-09-13	13:15:32	3.26841	828.066	19
2022-09-13	13:15:33	3.26133	831.328	19
2022-09-13	13:15:34	3.27361	834.601	19
2022-09-13	13:15:35	3.27943	837.881	19
2022-09-13	13:15:36	3.26784	841.149	19
2022-09-13	13:15:37	3.26965	844.418	19
2022-09-13	13:15:38	3.26778	847.686	19
2022-09-13	13:15:39	3.26577	850.952	19
2022-09-13	13:15:40	3.26784	854.22	19
2022-09-13	13:15:41	3.26167	857.481	19
2022-09-13	13:15:42	3.26994	860.751	19
2022-09-13	13:15:43	3.27686	864.028	19
2022-09-13	13:15:44	3.26824	867.296	19
2022-09-13	13:15:45	3.27965	870.576	19
2022-09-13	13:15:46	3.26904	873.845	19
2022-09-13	13:15:47	3.2829	877.128	19
2022-09-13	13:15:48	3.26552	880.393	19
2022-09-13	13:15:49	3.26416	883.658	19
2022-09-13	13:15:50	3.28618	886.944	19
2022-09-13	13:15:51	3.27573	890.219	19
2022-09-13	13:15:52	3.26207	893.482	19
2022-09-13	13:15:53	3.27169	896.753	19
2022-09-13	13:15:54	3.26648	900.02	19
2022-09-13	13:15:55	3.2749	903.295	19
2022-09-13	13:15:56	3.27056	906.565	19
2022-09-13	13:15:57	3.27407	909.839	19
2022-09-13	13:15:58	3.27407	913.113	19
2022-09-13	13:15:59	3.26252	916.376	19
2022-09-13	13:16:00	3.27367	919.649	19
2022-09-13	13:16:01	3.20118	922.851	19
2022-09-13	13:16:02	3.11482	925.965	19
2022-09-13	13:16:03	3.01721	928.983	19
2022-09-13	13:16:04	3.00072	931.983	19
2022-09-13	13:16:05	2.76468	934.748	19
2022-09-13	13:16:06	1.36683	936.115	19
2022-09-13	13:16:07	1.60005	937.715	19
2022-09-13	13:16:08	2.50984	940.225	19
2022-09-13	13:16:09	1.66338	941.888	19
2022-09-13	13:16:10	1.17555	943.064	19
2022-09-13	13:16:11	0.880813	943.945	19
2022-09-13	13:16:12	-1.49173	943.945	19
2022-09-13	13:16:13	-2.73111	943.945	19
2022-09-13	13:16:14	2.46915	946.414	19
2022-09-13	13:16:15	7.90118	954.315	19
2022-09-13	13:16:16	26.2614	980.576	20
2022-09-13	13:16:17	28.0364	1008.61	21
2022-09-13	13:16:18	23.9933	1032.61	22
2022-09-13	13:16:19	21.2736	1053.88	23
2022-09-13	13:16:20	28.3218	1082.2	24
2022-09-13	13:16:21	16.1795	1098.38	25
2022-09-13	13:16:22	2.67537	1101.06	25
2022-09-13	13:16:23	1.28981	1102.35	25
2022-09-13	13:16:24	-2.4446	1102.35	25
2022-09-13	13:16:25	-1.57566	1102.35	25
2022-09-13	13:16:26	-1.77786	1102.35	25
2022-09-13	13:16:27	-1.83542	1102.35	25
2022-09-13	13:16:28	0.327994	1102.67	25
2022-09-13	13:16:29	1.49049	1104.16	25
2022-09-13	13:16:30	3.28125	1107.45	25
2022-09-13	13:16:31	3.26778	1110.71	25
2022-09-13	13:16:32	3.28591	1114	25
2022-09-13	13:16:33	3.27531	1117.27	25
2022-09-13	13:16:34	3.25664	1120.53	25
2022-09-13	13:16:35	3.26665	1123.8	25
2022-09-13	13:16:36	3.25566	1127.05	25
2022-09-13	13:16:37	3.26394	1130.32	25
2022-09-13	13:16:38	3.26637	1133.58	25
2022-09-13	13:16:39	3.26173	1136.85	25
2022-09-13	13:16:40	3.2746	1140.12	25
2022-09-13	13:16:41	3.25516	1143.38	25
2022-09-13	13:16:42	3.25528	1146.63	25
2022-09-13	13:16:43	3.25279	1149.88	25
2022-09-13	13:16:44	3.26199	1153.15	25
2022-09-13	13:16:45	3.27548	1156.42	25
2022-09-13	13:16:46	3.2628	1159.68	25
2022-09-13	13:16:47	3.27475	1162.96	25
2022-09-13	13:16:48	3.27005	1166.23	25
2022-09-13	13:16:49	3.26116	1169.49	25
2022-09-13	13:16:50	3.26546	1172.76	25
2022-09-13	13:16:51	3.26694	1176.02	25
2022-09-13	13:16:52	3.27045	1179.29	25
2022-09-13	13:16:53	3.27097	1182.56	25
2022-09-13	13:16:54	3.25986	1185.82	25
2022-09-13	13:16:55	3.28125	1189.1	25
2022-09-13	13:16:56	3.27588	1192.38	25
2022-09-13	13:16:57	3.27927	1195.66	25
2022-09-13	13:16:58	3.27695	1198.94	25
2022-09-13	13:16:59	3.25732	1202.19	25
2022-09-13	13:17:00	3.26632	1205.46	25
2022-09-13	13:17:01	3.25935	1208.72	25
2022-09-13	13:17:02	3.26082	1211.98	25
2022-09-13	13:17:03	3.26416	1215.24	25
2022-09-13	13:17:04	3.26139	1218.51	25
2022-09-13	13:17:05	3.29376	1221.8	25
2022-09-13	13:17:06	3.27033	1225.07	25
2022-09-13	13:17:07	3.2696	1228.34	25
2022-09-13	13:17:08	3.26592	1231.61	25
2022-09-13	13:17:09	3.2789	1234.88	25
2022-09-13	13:17:10	3.25862	1238.14	25
2022-09-13	13:17:11	3.27147	1241.41	25
2022-09-13	13:17:12	3.25053	1244.67	25
2022-09-13	13:17:13	3.27029	1247.94	25
2022-09-13	13:17:14	3.2585	1251.19	25
2022-09-13	13:17:15	3.25845	1254.45	25
2022-09-13	13:17:16	3.26671	1257.72	25
2022-09-13	13:17:17	3.27543	1260.99	25
2022-09-13	13:17:18	3.26948	1264.26	25
2022-09-13	13:17:19	3.2632	1267.53	25
2022-09-13	13:17:20	3.25573	1270.78	25
2022-09-13	13:17:21	3.23989	1274.02	25
2022-09-13	13:17:22	3.26083	1277.28	25
2022-09-13	13:17:23	3.26349	1280.55	25
2022-09-13	13:17:24	3.26648	1283.81	25
2022-09-13	13:17:25	3.26411	1287.08	25
2022-09-13	13:17:26	3.26916	1290.35	25
2022-09-13	13:17:27	3.27401	1293.62	25
2022-09-13	13:17:28	3.26213	1296.88	25
2022-09-13	13:17:29	3.26886	1300.15	25
2022-09-13	13:17:30	3.27241	1303.42	25
2022-09-13	13:17:31	3.26071	1306.69	25
2022-09-13	13:17:32	3.26173	1309.95	25
2022-09-13	13:17:33	3.25726	1313.2	25
2022-09-13	13:17:34	3.26041	1316.46	25
2022-09-13	13:17:35	3.25505	1319.72	25
2022-09-13	13:17:36	3.29829	1323.02	25
2022-09-13	13:17:37	3.26167	1326.28	25
2022-09-13	13:17:38	3.25256	1329.53	25
2022-09-13	13:17:39	3.9653	1333.5	25
2022-09-13	13:17:40	3.26643	1336.76	25
2022-09-13	13:17:41	3.25681	1340.02	25
2022-09-13	13:17:42	1.95168	1341.97	25
2022-09-13	13:17:43	3.27288	1345.25	25
2022-09-13	13:17:44	3.25788	1348.5	25
2022-09-13	13:17:45	3.27158	1351.77	25
2022-09-13	13:17:46	3.27165	1355.05	25
2022-09-13	13:17:47	3.26224	1358.31	25
2022-09-13	13:17:48	3.26286	1361.57	25
2022-09-13	13:17:49	3.27339	1364.84	25
2022-09-13	13:17:50	5.52095	1370.37	25
2022-09-13	13:17:51	3.30236	1373.67	25
2022-09-13	13:17:52	3.29201	1376.96	25
2022-09-13	13:17:53	8.86765	1385.83	25
2022-09-13	13:17:54	3.24472	1389.07	25
2022-09-13	13:17:55	3.28516	1392.36	25
2022-09-13	13:17:56	3.2649	1395.62	25
2022-09-13	13:17:57	3.2593	1398.88	25
2022-09-13	13:17:58	3.2663	1402.15	25
2022-09-13	13:17:59	3.24554	1405.39	25
2022-09-13	13:18:00	3.26009	1408.65	25
2022-09-13	13:18:01	17.1676	1425.82	26

## Sheet: Unnamed_martin_202291313125 (4)
Date	Time	Lbs	Newtons	Averaged Newtons	Total force x time	total steps > 13.345		**GoPro Fitting: 1302
2022-09-13	13:13:01	0.585865	2.60604	1.70243	2.60604	FALSE	0			Total force x time	2685.51
2022-09-13	13:13:01	0.460776	2.04962	1.70243	2.04962	FALSE	0			Total steps	86
2022-09-13	13:13:01	0.264033	1.17447	1.70243	3.78052	FALSE	0
2022-09-13	13:13:01	0.220216	0.979565	1.70243	3.02919	FALSE	0
2022-09-13	13:13:02	0.379555	1.68834	1.82184	5.46885	FALSE	0
2022-09-13	13:13:02	0.441183	1.96247	1.82184	4.99166	FALSE	0
2022-09-13	13:13:02	0.415127	1.84657	1.82184	7.31542	FALSE	0
2022-09-13	13:13:02	0.402405	1.78998	1.82184	6.78164	FALSE	0
2022-09-13	13:13:03	1.25009	5.56065	6.86335	12.8761	FALSE	0
2022-09-13	13:13:03	3.13731	13.9554	6.86335	20.737	1	1
2022-09-13	13:13:03	1.28062	5.69645	6.86335	18.5725	FALSE	1
2022-09-13	13:13:03	0.503779	2.24091	6.86335	22.9779	FALSE	1
2022-09-13	13:13:04	-0.238664	-1.06163	-2.24996	18.5725	FALSE	1
2022-09-13	13:13:04	-0.480801	-2.1387	-2.24996	22.9779	FALSE	1
2022-09-13	13:13:04	-0.7436	-3.30768	-2.24996	18.5725	FALSE	1
2022-09-13	13:13:04	-0.56019	-2.49184	-2.24996	22.9779	FALSE	1
2022-09-13	13:13:05	0.155433	0.691397	42.0708	19.2639	FALSE	1
2022-09-13	13:13:05	12.8273	57.0584	42.0708	80.0363	1	2
2022-09-13	13:13:05	15.3911	68.4627	42.0708	87.7266	1	3
2022-09-13	13:13:06	11.5497	51.3754	40.9367	131.412	1	4
2022-09-13	13:13:06	10.4972	46.6936	40.9367	134.42	1	5
2022-09-13	13:13:06	9.59278	42.6706	40.9367	174.082	1	6
2022-09-13	13:13:06	5.17228	23.0073	40.9367	157.428	1	7
2022-09-13	13:13:07	0.645509	2.87135	14.8356	176.954	FALSE	7
2022-09-13	13:13:07	0.896094	3.98601	14.8356	161.414	FALSE	7
2022-09-13	13:13:07	2.51258	11.1765	14.8356	188.13	FALSE	7
2022-09-13	13:13:07	9.28657	41.3085	14.8356	202.722	1	8
2022-09-13	13:13:08	4.78362	21.2785	8.23754	209.409	1	9
2022-09-13	13:13:08	1.97279	8.77536	8.23754	211.497	FALSE	9
2022-09-13	13:13:08	0.44154	1.96406	8.23754	211.373	FALSE	9
2022-09-13	13:13:08	0.20958	0.932254	8.23754	212.43	FALSE	9
2022-09-13	13:13:09	-0.391488	-1.74142	-3.86592	211.373	FALSE	9
2022-09-13	13:13:09	-0.562735	-2.50316	-3.86592	212.43	FALSE	9
2022-09-13	13:13:09	-1.65307	-7.35319	-3.86592	211.373	FALSE	9
2022-09-13	13:13:10	-0.364923	-1.62325	-0.940741	212.43	FALSE	9
2022-09-13	13:13:10	-0.231743	-1.03084	-0.940741	211.373	FALSE	9
2022-09-13	13:13:10	-0.308587	-1.37266	-0.940741	212.43	FALSE	9
2022-09-13	13:13:10	0.0593005	0.26378	-0.940741	211.636	FALSE	9
2022-09-13	13:13:11	-0.069758	-0.310298	1.61115	212.43	FALSE	9
2022-09-13	13:13:11	-0.0112847	-0.0501966	1.61115	211.636	FALSE	9
2022-09-13	13:13:11	0.125051	0.556252	1.61115	212.986	FALSE	9
2022-09-13	13:13:11	1.4048	6.24883	1.61115	217.885	FALSE	9
2022-09-13	13:13:12	13.1378	58.4396	40.7158	271.426	1	10
2022-09-13	13:13:12	13.0356	57.985	40.7158	275.87	1	11
2022-09-13	13:13:12	7.63177	33.9476	40.7158	305.373	1	12
2022-09-13	13:13:12	2.8081	12.491	40.7158	288.361	FALSE	12
2022-09-13	13:13:13	4.01701	17.8685	16.4353	323.242	1	13
2022-09-13	13:13:13	3.15971	14.055	16.4353	302.416	1	14
2022-09-13	13:13:13	3.90775	17.3825	16.4353	340.624	1	15
2022-09-13	13:13:14	13.5927	60.463	19.8346	362.879	1	16
2022-09-13	13:13:14	2.0994	9.33855	19.8346	349.963	FALSE	16
2022-09-13	13:13:14	1.24083	5.51946	19.8346	368.399	FALSE	16
2022-09-13	13:13:14	0.903117	4.01725	19.8346	353.98	FALSE	16
2022-09-13	13:13:15	0.240674	1.07057	0.105207	369.469	FALSE	16
2022-09-13	13:13:15	0.0838297	0.372891	0.105207	354.353	FALSE	16
2022-09-13	13:13:15	0.0987915	0.439444	0.105207	369.909	FALSE	16
2022-09-13	13:13:15	-0.328689	-1.46207	0.105207	354.353	FALSE	16
2022-09-13	13:13:16	-0.57276	-2.54775	-3.34452	369.909	FALSE	16
2022-09-13	13:13:16	-0.879325	-3.91141	-3.34452	354.353	FALSE	16
2022-09-13	13:13:16	-0.786297	-3.49761	-3.34452	369.909	FALSE	16
2022-09-13	13:13:16	-0.769147	-3.42132	-3.34452	354.353	FALSE	16
2022-09-13	13:13:17	-0.750419	-3.33801	-2.73368	369.909	FALSE	16
2022-09-13	13:13:17	-0.663498	-2.95137	-2.73368	354.353	FALSE	16
2022-09-13	13:13:17	-0.429758	-1.91165	-2.73368	369.909	FALSE	16
2022-09-13	13:13:18	-0.344058	-1.53044	-1.68545	354.353	FALSE	16
2022-09-13	13:13:18	-1.08533	-4.82776	-1.68545	369.909	FALSE	16
2022-09-13	13:13:18	-0.464313	-2.06536	-1.68545	354.353	FALSE	16
2022-09-13	13:13:18	0.378079	1.68177	-1.68545	371.591	FALSE	16
2022-09-13	13:13:19	0.1507	0.670344	0.834066	355.023	FALSE	16
2022-09-13	13:13:19	0.159555	0.709733	0.834066	372.3	FALSE	16
2022-09-13	13:13:19	0.299911	1.33406	0.834066	356.357	FALSE	16
2022-09-13	13:13:19	0.13986	0.622125	0.834066	372.922	FALSE	16
2022-09-13	13:13:20	0.33701	1.49909	0.878322	357.856	FALSE	16
2022-09-13	13:13:20	0.174517	0.776287	0.878322	373.699	FALSE	16
2022-09-13	13:13:20	0.556145	2.47384	0.878322	360.33	FALSE	16
2022-09-13	13:13:20	-0.27785	-1.23593	0.878322	373.699	FALSE	16
2022-09-13	13:13:21	-0.636984	-2.83343	-3.06486	360.33	FALSE	16
2022-09-13	13:13:21	-0.698256	-3.10598	-3.06486	373.699	FALSE	16
2022-09-13	13:13:21	-0.731793	-3.25516	-3.06486	360.33	FALSE	16
2022-09-13	13:13:22	-0.756781	-3.36631	-3.6684	373.699	FALSE	16
2022-09-13	13:13:22	-0.909758	-4.04679	-3.6684	360.33	FALSE	16
2022-09-13	13:13:22	-0.810317	-3.60445	-3.6684	373.699	FALSE	16
2022-09-13	13:13:22	-0.82192	-3.65606	-3.6684	360.33	FALSE	16
2022-09-13	13:13:23	-1.15627	-5.14332	-3.95697	373.699	FALSE	16
2022-09-13	13:13:23	-0.924058	-4.11039	-3.95697	360.33	FALSE	16
2022-09-13	13:13:23	-0.734694	-3.26807	-3.95697	373.699	FALSE	16
2022-09-13	13:13:23	-0.743243	-3.30609	-3.95697	360.33	FALSE	16
2022-09-13	13:13:24	-1.59464	-7.09328	-4.83184	373.699	FALSE	16
2022-09-13	13:13:24	-0.841819	-3.74458	-4.83184	360.33	FALSE	16
2022-09-13	13:13:24	-0.961004	-4.27474	-4.83184	373.699	FALSE	16
2022-09-13	13:13:24	-0.947518	-4.21475	-4.83184	360.33	FALSE	16
2022-09-13	13:13:25	-0.83907	-3.73235	-3.91979	373.699	FALSE	16
2022-09-13	13:13:25	-0.878816	-3.90915	-3.91979	360.33	FALSE	16
2022-09-13	13:13:25	-0.816475	-3.63184	-3.91979	373.699	FALSE	16
2022-09-13	13:13:25	-0.99047	-4.40581	-3.91979	360.33	FALSE	16
2022-09-13	13:13:26	-0.915305	-4.07146	-3.73462	373.699	FALSE	16
2022-09-13	13:13:26	-0.835356	-3.71583	-3.73462	360.33	FALSE	16
2022-09-13	13:13:26	-0.768078	-3.41656	-3.73462	373.699	FALSE	16
2022-09-13	13:13:27	-0.801513	-3.56529	-3.48012	360.33	FALSE	16
2022-09-13	13:13:27	-0.74935	-3.33326	-3.48012	373.699	FALSE	16
2022-09-13	13:13:27	-0.855966	-3.80751	-3.48012	360.33	FALSE	16
2022-09-13	13:13:27	-0.722633	-3.21442	-3.48012	373.699	FALSE	16
2022-09-13	13:13:28	-0.706552	-3.14288	-1.28709	360.33	FALSE	16
2022-09-13	13:13:28	-0.20014	-0.890263	-1.28709	373.699	FALSE	16
2022-09-13	13:13:28	0.0386389	0.171874	-1.28709	360.502	FALSE	16
2022-09-13	13:13:29	0.147952	0.65812	0.9684	374.357	FALSE	16
2022-09-13	13:13:29	0.378028	1.68154	0.9684	362.184	FALSE	16
2022-09-13	13:13:29	0.127138	0.565535	0.9684	374.922	FALSE	16
2022-09-13	13:13:30	-0.0812083	-0.361231	-0.150253	362.184	FALSE	16
2022-09-13	13:13:30	0.0298348	0.132711	-0.150253	375.055	FALSE	16
2022-09-13	13:13:30	-0.0499616	-0.222239	-0.150253	362.184	FALSE	16
2022-09-13	13:13:31	-0.32874	-1.4623	-0.903315	375.055	FALSE	16
2022-09-13	13:13:31	-0.148435	-0.660269	-0.903315	362.184	FALSE	16
2022-09-13	13:13:31	-0.132048	-0.587376	-0.903315	375.055	FALSE	16
2022-09-13	13:13:32	-0.233524	-1.03876	-0.86768	362.184	FALSE	16
2022-09-13	13:13:32	-0.232913	-1.03604	-0.86768	375.055	FALSE	16
2022-09-13	13:13:32	-0.178867	-0.795636	-0.86768	362.184	FALSE	16
2022-09-13	13:13:32	-0.134949	-0.60028	-0.86768	375.055	FALSE	16
2022-09-13	13:13:33	-0.155	-0.689471	0.53254	362.184	FALSE	16
2022-09-13	13:13:33	0.0150765	0.0670633	0.53254	375.122	FALSE	16
2022-09-13	13:13:33	0.145611	0.647707	0.53254	362.831	FALSE	16
2022-09-13	13:13:33	0.473194	2.10486	0.53254	377.227	FALSE	16
2022-09-13	13:13:34	0.414466	1.84363	1.75381	364.675	FALSE	16
2022-09-13	13:13:34	0.538079	2.39348	1.75381	379.62	FALSE	16
2022-09-13	13:13:34	0.33869	1.50656	1.75381	366.181	FALSE	16
2022-09-13	13:13:34	0.285865	1.27158	1.75381	380.892	FALSE	16
2022-09-13	13:13:35	0.204186	0.90826	2.46886	367.09	FALSE	16
2022-09-13	13:13:35	0.739147	3.28787	2.46886	384.18	FALSE	16
2022-09-13	13:13:35	0.721743	3.21046	2.46886	370.3	FALSE	16
2022-09-13	13:13:36	0.516349	2.29682	-3.07968	386.477	FALSE	16
2022-09-13	13:13:36	-0.323549	-1.43921	-3.07968	370.3	FALSE	16
2022-09-13	13:13:36	-1.03312	-4.59552	-3.07968	386.477	FALSE	16
2022-09-13	13:13:36	-1.92905	-8.5808	-3.07968	370.3	FALSE	16
2022-09-13	13:13:37	-2.49851	-11.1139	-5.54797	386.477	FALSE	16
2022-09-13	13:13:37	-0.881921	-3.92296	-5.54797	370.3	FALSE	16
2022-09-13	13:13:37	-0.790164	-3.51481	-5.54797	386.477	FALSE	16
2022-09-13	13:13:37	-0.818358	-3.64022	-5.54797	370.3	FALSE	16
2022-09-13	13:13:38	-0.724414	-3.22234	-4.25579	386.477	FALSE	16
2022-09-13	13:13:38	-1.06401	-4.73293	-4.25579	370.3	FALSE	16
2022-09-13	13:13:38	-1.11027	-4.9387	-4.25579	386.477	FALSE	16
2022-09-13	13:13:38	-0.928282	-4.12918	-4.25579	370.3	FALSE	16
2022-09-13	13:13:39	-0.842073	-3.74571	-3.3396	386.477	FALSE	16
2022-09-13	13:13:39	-0.835508	-3.71651	-3.3396	370.3	FALSE	16
2022-09-13	13:13:39	-0.742277	-3.3018	-3.3396	386.477	FALSE	16
2022-09-13	13:13:39	-0.583244	-2.59439	-3.3396	370.3	FALSE	16
2022-09-13	13:13:40	-0.583498	-2.59552	-1.47264	386.477	FALSE	16
2022-09-13	13:13:40	-0.41846	-1.86139	-1.47264	370.3	FALSE	16
2022-09-13	13:13:40	0.00876615	0.0389936	-1.47264	386.516	FALSE	16
2022-09-13	13:13:41	0.192583	0.856648	-0.17668	371.157	FALSE	16
2022-09-13	13:13:41	-0.34533	-1.5361	-0.17668	386.516	FALSE	16
2022-09-13	13:13:41	-0.118816	-0.528517	-0.17668	371.157	FALSE	16
2022-09-13	13:13:41	0.112685	0.501245	-0.17668	387.017	FALSE	16
2022-09-13	13:13:42	-0.0630913	-0.280643	-0.0630437	371.157	FALSE	16
2022-09-13	13:13:42	0.0642369	0.285739	-0.0630437	387.303	FALSE	16
2022-09-13	13:13:42	-0.158308	-0.704186	-0.0630437	371.157	FALSE	16
2022-09-13	13:13:42	0.100471	0.446915	-0.0630437	387.75	FALSE	16
2022-09-13	13:13:43	0.102914	0.457782	1.26055	371.615	FALSE	16
2022-09-13	13:13:43	0.41014	1.82438	1.26055	389.574	FALSE	16
2022-09-13	13:13:43	0.335178	1.49094	1.26055	373.106	FALSE	16
2022-09-13	13:13:43	0.285305	1.26909	1.26055	390.843	FALSE	16
2022-09-13	13:13:44	0.29986	1.33384	0.455743	374.439	FALSE	16
2022-09-13	13:13:44	0.13472	0.599262	0.455743	391.442	FALSE	16
2022-09-13	13:13:44	-0.127213	-0.565869	0.455743	374.439	FALSE	16
2022-09-13	13:13:45	-0.28757	-1.27917	-1.63412	391.442	FALSE	16
2022-09-13	13:13:45	-0.370267	-1.64702	-1.63412	374.439	FALSE	16
2022-09-13	13:13:45	-0.384516	-1.7104	-1.63412	391.442	FALSE	16
2022-09-13	13:13:45	-0.427112	-1.89988	-1.63412	374.439	FALSE	16
2022-09-13	13:13:46	-0.270216	-1.20197	-1.21652	391.442	FALSE	16
2022-09-13	13:13:46	-0.176018	-0.782963	-1.21652	374.439	FALSE	16
2022-09-13	13:13:46	-0.267671	-1.19065	-1.21652	391.442	FALSE	16
2022-09-13	13:13:46	-0.380038	-1.69049	-1.21652	374.439	FALSE	16
2022-09-13	13:13:47	-0.326704	-1.45324	-1.34374	391.442	FALSE	16
2022-09-13	13:13:47	-0.281615	-1.25268	-1.34374	374.439	FALSE	16
2022-09-13	13:13:47	-0.393524	-1.75047	-1.34374	391.442	FALSE	16
2022-09-13	13:13:47	-0.206501	-0.918558	-1.34374	374.439	FALSE	16
2022-09-13	13:13:48	-0.0127606	-0.0567617	-0.222089	391.442	FALSE	16
2022-09-13	13:13:48	0.0221504	0.0985294	-0.222089	374.538	FALSE	16
2022-09-13	13:13:48	-0.159173	-0.708033	-0.222089	391.442	FALSE	16
2022-09-13	13:13:49	0.189428	0.842614	1.53989	375.381	FALSE	16
2022-09-13	13:13:49	0.0698349	0.31064	1.53989	391.753	FALSE	16
2022-09-13	13:13:49	0.303321	1.34923	1.53989	376.73	FALSE	16
2022-09-13	13:13:49	0.82215	3.65709	1.53989	395.41	FALSE	16
2022-09-13	13:13:50	1.28017	5.69445	10.2066	382.424	FALSE	16
2022-09-13	13:13:50	1.68301	7.48637	10.2066	402.896	FALSE	16
2022-09-13	13:13:50	1.50505	6.69476	10.2066	389.119	FALSE	16
2022-09-13	13:13:50	4.70993	20.9507	10.2066	423.847	1	17
2022-09-13	13:13:51	2.63894	11.7385	4.75346	400.857	FALSE	17
2022-09-13	13:13:51	1.28653	5.72274	4.75346	429.57	FALSE	17
2022-09-13	13:13:51	0.0584353	0.259932	4.75346	401.117	FALSE	17
2022-09-13	13:13:51	0.290598	1.29264	4.75346	430.863	FALSE	17
2022-09-13	13:13:52	-0.127926	-0.56904	-1.66958	401.117	FALSE	17
2022-09-13	13:13:52	-0.350928	-1.561	-1.66958	430.863	FALSE	17
2022-09-13	13:13:52	-0.647162	-2.87871	-1.66958	401.117	FALSE	17
2022-09-13	13:13:53	-0.605432	-2.69308	-2.45392	430.863	FALSE	17
2022-09-13	13:13:53	-0.522175	-2.32274	-2.45392	401.117	FALSE	17
2022-09-13	13:13:53	-0.553727	-2.46309	-2.45392	430.863	FALSE	17
2022-09-13	13:13:53	-0.52533	-2.33677	-2.45392	401.117	FALSE	17
2022-09-13	13:13:54	-0.413727	-1.84034	-2.47843	430.863	FALSE	17
2022-09-13	13:13:54	-0.598867	-2.66388	-2.47843	401.117	FALSE	17
2022-09-13	13:13:54	-0.57902	-2.5756	-2.47843	430.863	FALSE	17
2022-09-13	13:13:54	-0.637086	-2.83389	-2.47843	401.117	FALSE	17
2022-09-13	13:13:55	-0.507824	-2.2589	-1.13208	430.863	FALSE	17
2022-09-13	13:13:55	-0.407773	-1.81386	-1.13208	401.117	FALSE	17
2022-09-13	13:13:55	-0.291997	-1.29886	-1.13208	430.863	FALSE	17
2022-09-13	13:13:55	0.18958	0.84329	-1.13208	401.961	FALSE	17
2022-09-13	13:13:56	0.369479	1.64352	4.68504	432.506	FALSE	17
2022-09-13	13:13:56	1.60296	7.13029	4.68504	409.091	FALSE	17
2022-09-13	13:13:56	1.18729	5.2813	4.68504	437.787	FALSE	17
2022-09-13	13:13:57	2.83533	12.6121	6.99137	421.703	FALSE	17
2022-09-13	13:13:57	0.834109	3.71028	6.99137	441.498	FALSE	17
2022-09-13	13:13:57	1.18597	5.27543	6.99137	426.979	FALSE	17
2022-09-13	13:13:57	1.43151	6.36764	6.99137	447.865	FALSE	17
2022-09-13	13:13:58	1.74062	7.74263	5.07547	434.721	FALSE	17
2022-09-13	13:13:58	1.55803	6.93043	5.07547	454.796	FALSE	17
2022-09-13	13:13:58	0.589427	2.62189	5.07547	437.343	FALSE	17
2022-09-13	13:13:58	0.675992	3.00695	5.07547	457.803	FALSE	17
2022-09-13	13:13:59	0.294466	1.30984	1.89631	438.653	FALSE	17
2022-09-13	13:13:59	0.263626	1.17266	1.89631	458.975	FALSE	17
2022-09-13	13:13:59	0.41416	1.84227	1.89631	440.495	FALSE	17
2022-09-13	13:13:59	0.73299	3.26049	1.89631	462.236	FALSE	17
2022-09-13	13:14:00	2.07309	9.22152	8.98806	449.717	FALSE	17
2022-09-13	13:14:00	1.61523	7.18487	8.98806	469.421	FALSE	17
2022-09-13	13:14:00	2.3735	10.5578	8.98806	460.274	FALSE	17
2022-09-13	13:14:01	4.04683	18.0011	24.8127	487.422	1	18
2022-09-13	13:14:01	6.82678	30.3669	24.8127	490.641	1	19
2022-09-13	13:14:01	6.97518	31.027	24.8127	518.449	1	20
2022-09-13	13:14:01	4.46383	19.856	24.8127	510.497	1	21
2022-09-13	13:14:02	1.62429	7.22517	4.58103	525.674	FALSE	21
2022-09-13	13:14:02	0.91869	4.08652	4.58103	514.584	FALSE	21
2022-09-13	13:14:02	0.583779	2.59677	4.58103	528.271	FALSE	21
2022-09-13	13:14:02	0.992684	4.41566	4.58103	519	FALSE	21
2022-09-13	13:14:03	0.43528	1.93621	1.71929	530.207	FALSE	21
2022-09-13	13:14:03	0.430751	1.91607	1.71929	520.916	FALSE	21
2022-09-13	13:14:03	0.145051	0.645216	1.71929	530.852	FALSE	21
2022-09-13	13:14:03	0.534975	2.37968	1.71929	523.295	FALSE	21
2022-09-13	13:14:04	0.615789	2.73915	9.72709	533.591	FALSE	21
2022-09-13	13:14:04	2.94011	13.0782	9.72709	536.374	FALSE	21
2022-09-13	13:14:04	3.00434	13.3639	9.72709	546.955	1	22
2022-09-13	13:14:05	2.47009	10.9875	11.1694	547.361	FALSE	22
2022-09-13	13:14:05	2.87156	12.7733	11.1694	559.728	FALSE	22
2022-09-13	13:14:05	1.65197	7.34829	11.1694	554.709	FALSE	22
2022-09-13	13:14:05	3.05034	13.5685	11.1694	573.297	1	23
2022-09-13	13:14:06	2.97935	13.2527	4.71005	567.962	FALSE	23
2022-09-13	13:14:06	0.540165	2.40276	4.71005	575.7	FALSE	23
2022-09-13	13:14:06	0.194059	0.863213	4.71005	568.825	FALSE	23
2022-09-13	13:14:06	0.521896	2.3215	4.71005	578.021	FALSE	23
2022-09-13	13:14:07	0.100929	0.448952	-1.62138	569.274	FALSE	23
2022-09-13	13:14:07	-0.286145	-1.27283	-1.62138	578.021	FALSE	23
2022-09-13	13:14:07	-0.520546	-2.31549	-1.62138	569.274	FALSE	23
2022-09-13	13:14:07	-0.752251	-3.34616	-1.62138	578.021	FALSE	23
2022-09-13	13:14:08	-0.814898	-3.62483	-3.81611	569.274	FALSE	23
2022-09-13	13:14:08	-0.854999	-3.80321	-3.81611	578.021	FALSE	23
2022-09-13	13:14:08	-0.903804	-4.0203	-3.81611	569.274	FALSE	23
2022-09-13	13:14:09	-1.03383	-4.59868	-4.8272	578.021	FALSE	23
2022-09-13	13:14:09	-1.25393	-5.57773	-4.8272	569.274	FALSE	23
2022-09-13	13:14:09	-1.05765	-4.70464	-4.8272	578.021	FALSE	23
2022-09-13	13:14:09	-0.995406	-4.42776	-4.8272	569.274	FALSE	23
2022-09-13	13:14:10	-1.21739	-5.41519	-3.15573	578.021	FALSE	23
2022-09-13	13:14:10	-0.997493	-4.43705	-3.15573	569.274	FALSE	23
2022-09-13	13:14:10	-0.705127	-3.13655	-3.15573	578.021	FALSE	23
2022-09-13	13:14:10	0.0822521	0.365874	-3.15573	569.64	FALSE	23
2022-09-13	13:14:11	0.421845	1.87645	1.19666	579.898	FALSE	23
2022-09-13	13:14:11	0.146425	0.651328	1.19666	570.291	FALSE	23
2022-09-13	13:14:11	0.351209	1.56225	1.19666	581.46	FALSE	23
2022-09-13	13:14:11	0.156603	0.696601	1.19666	570.988	FALSE	23
2022-09-13	13:14:12	0.329122	1.464	1.92523	582.924	FALSE	23
2022-09-13	13:14:12	0.103626	0.460949	1.92523	571.449	FALSE	23
2022-09-13	13:14:12	0.329784	1.46695	1.92523	584.391	FALSE	23
2022-09-13	13:14:12	0.968715	4.30904	1.92523	575.758	FALSE	23
2022-09-13	13:14:13	3.55441	15.8107	18.1388	600.202	1	24
2022-09-13	13:14:13	5.0996	22.684	18.1388	598.442	1	25
2022-09-13	13:14:13	3.57935	15.9217	18.1388	616.123	1	26
2022-09-13	13:14:14	2.06205	9.17241	4.40819	607.614	FALSE	26
2022-09-13	13:14:14	0.783015	3.48301	4.40819	619.606	FALSE	26
2022-09-13	13:14:14	0.707952	3.14911	4.40819	610.764	FALSE	26
2022-09-13	13:14:14	0.411005	1.82823	4.40819	621.435	FALSE	26
2022-09-13	13:14:15	0.275178	1.22405	1.07747	611.988	FALSE	26
2022-09-13	13:14:15	0.138384	0.61556	1.07747	622.05	FALSE	26
2022-09-13	13:14:15	0.369071	1.6417	1.07747	613.629	FALSE	26
2022-09-13	13:14:15	0.186272	0.828575	1.07747	622.879	FALSE	26
2022-09-13	13:14:16	0.252888	1.1249	2.51946	614.754	FALSE	26
2022-09-13	13:14:16	0.256298	1.14006	2.51946	624.019	FALSE	26
2022-09-13	13:14:16	1.06933	4.75659	2.51946	619.511	FALSE	26
2022-09-13	13:14:16	0.687086	3.0563	2.51946	627.075	FALSE	26
2022-09-13	13:14:17	0.202863	0.902375	0.0378616	620.413	FALSE	26
2022-09-13	13:14:17	-0.168486	-0.749459	0.0378616	627.075	FALSE	26
2022-09-13	13:14:17	-0.00884198	-0.0393309	0.0378616	620.413	FALSE	26
2022-09-13	13:14:18	-0.0364247	-0.162024	1.47187	627.075	FALSE	26
2022-09-13	13:14:18	0.035331	0.157159	1.47187	620.57	FALSE	26
2022-09-13	13:14:18	0.280165	1.24623	1.47187	628.321	FALSE	26
2022-09-13	13:14:18	1.04449	4.6461	1.47187	625.216	FALSE	26
2022-09-13	13:14:19	0.675076	3.00287	1.74855	631.324	FALSE	26
2022-09-13	13:14:19	0.248155	1.10384	1.74855	626.32	FALSE	26
2022-09-13	13:14:19	0.261743	1.16429	1.74855	632.488	FALSE	26
2022-09-13	13:14:19	0.387392	1.7232	1.74855	628.043	FALSE	26
2022-09-13	13:14:20	0.286222	1.27317	0.968249	633.762	FALSE	26
2022-09-13	13:14:20	0.274873	1.22269	0.968249	629.266	FALSE	26
2022-09-13	13:14:20	0.122303	0.544028	0.968249	634.306	FALSE	26
2022-09-13	13:14:20	0.18729	0.833103	0.968249	630.099	FALSE	26
2022-09-13	13:14:21	0.128613	0.572096	0.139501	634.878	FALSE	26
2022-09-13	13:14:21	0.0856109	0.380814	0.139501	630.48	FALSE	26
2022-09-13	13:14:21	-0.12014	-0.534407	0.139501	634.878	FALSE	26
2022-09-13	13:14:22	-0.158155	-0.703505	-0.832932	630.48	FALSE	26
2022-09-13	13:14:22	-0.197544	-0.878715	-0.832932	634.878	FALSE	26
2022-09-13	13:14:22	-0.160903	-0.715729	-0.832932	630.48	FALSE	26
2022-09-13	13:14:22	-0.232404	-1.03378	-0.832932	634.878	FALSE	26
2022-09-13	13:14:23	-0.37673	-1.67577	-2.13536	630.48	FALSE	26
2022-09-13	13:14:23	-0.48874	-2.17401	-2.13536	634.878	FALSE	26
2022-09-13	13:14:23	-0.556221	-2.47418	-2.13536	630.48	FALSE	26
2022-09-13	13:14:23	-0.498511	-2.21748	-2.13536	634.878	FALSE	26
2022-09-13	13:14:24	-0.391793	-1.74277	-1.75585	630.48	FALSE	26
2022-09-13	13:14:24	-0.382226	-1.70022	-1.75585	634.878	FALSE	26
2022-09-13	13:14:24	-0.447264	-1.98952	-1.75585	630.48	FALSE	26
2022-09-13	13:14:24	-0.357646	-1.59088	-1.75585	634.878	FALSE	26
2022-09-13	13:14:25	-0.514745	-2.28969	-1.3962	630.48	FALSE	26
2022-09-13	13:14:25	-0.371488	-1.65245	-1.3962	634.878	FALSE	26
2022-09-13	13:14:25	-0.0554069	-0.246461	-1.3962	630.48	FALSE	26
2022-09-13	13:14:26	-0.0867554	-0.385905	0.167459	634.878	FALSE	26
2022-09-13	13:14:26	0.046476	0.206735	0.167459	630.687	FALSE	26
2022-09-13	13:14:26	0.148613	0.66106	0.167459	635.539	FALSE	26
2022-09-13	13:14:26	0.0422522	0.187946	0.167459	630.875	FALSE	26
2022-09-13	13:14:27	0.221387	0.984774	-0.60209	636.524	FALSE	26
2022-09-13	13:14:27	0.0540078	0.240237	-0.60209	631.115	FALSE	26
2022-09-13	13:14:27	-0.328638	-1.46185	-0.60209	636.524	FALSE	26
2022-09-13	13:14:27	-0.48818	-2.17152	-0.60209	631.115	FALSE	26
2022-09-13	13:14:28	-0.588384	-2.61725	-2.82087	636.524	FALSE	26
2022-09-13	13:14:28	-0.531539	-2.36439	-2.82087	631.115	FALSE	26
2022-09-13	13:14:28	-0.708434	-3.15126	-2.82087	636.524	FALSE	26
2022-09-13	13:14:28	-0.708282	-3.15058	-2.82087	631.115	FALSE	26
2022-09-13	13:14:29	-0.607926	-2.70418	-1.71863	636.524	FALSE	26
2022-09-13	13:14:29	-0.474185	-2.10927	-1.71863	631.115	FALSE	26
2022-09-13	13:14:29	-0.0769844	-0.342442	-1.71863	636.524	FALSE	26
2022-09-13	13:14:30	0.786272	3.4975	6.31944	634.612	FALSE	26
2022-09-13	13:14:30	2.10927	9.38245	6.31944	645.906	FALSE	26
2022-09-13	13:14:30	1.53864	6.84418	6.31944	641.457	FALSE	26
2022-09-13	13:14:30	1.24851	5.55362	6.31944	651.46	FALSE	26
2022-09-13	13:14:31	0.762812	3.39314	5.0341	644.85	FALSE	26
2022-09-13	13:14:31	1.68836	7.51016	5.0341	658.97	FALSE	26
2022-09-13	13:14:31	0.664695	2.9567	5.0341	647.806	FALSE	26
2022-09-13	13:14:31	1.411	6.27641	5.0341	665.246	FALSE	26
2022-09-13	13:14:32	3.41772	15.2027	12.1624	663.009	1	27
2022-09-13	13:14:32	2.84632	12.661	12.1624	677.907	FALSE	27
2022-09-13	13:14:32	3.33772	14.8468	12.1624	677.856	1	28
2022-09-13	13:14:32	1.33518	5.93915	12.1624	683.846	FALSE	28
2022-09-13	13:14:33	1.61365	7.17784	5.75109	685.034	FALSE	28
2022-09-13	13:14:33	1.43894	6.40069	5.75109	690.247	FALSE	28
2022-09-13	13:14:33	0.82612	3.67475	5.75109	688.709	FALSE	28
2022-09-13	13:14:34	1.0707	4.76269	3.18861	695.01	FALSE	28
2022-09-13	13:14:34	0.498995	2.21963	3.18861	690.928	FALSE	28
2022-09-13	13:14:34	0.562404	2.50169	3.18861	697.511	FALSE	28
2022-09-13	13:14:34	0.735229	3.27045	3.18861	694.199	FALSE	28
2022-09-13	13:14:35	0.731005	3.25166	2.23989	700.763	FALSE	28
2022-09-13	13:14:35	0.379097	1.6863	2.23989	695.885	FALSE	28
2022-09-13	13:14:35	0.732735	3.25935	2.23989	704.022	FALSE	28
2022-09-13	13:14:35	0.171361	0.762248	2.23989	696.647	FALSE	28
2022-09-13	13:14:36	0.0164506	0.0731756	-0.52852	704.096	FALSE	28
2022-09-13	13:14:36	-0.113982	-0.507015	-0.52852	696.647	FALSE	28
2022-09-13	13:14:36	-0.206654	-0.919238	-0.52852	704.096	FALSE	28
2022-09-13	13:14:36	-0.171081	-0.761003	-0.52852	696.647	FALSE	28
2022-09-13	13:14:37	-0.157086	-0.69875	-0.525727	704.096	FALSE	28
2022-09-13	13:14:37	-0.15047	-0.669321	-0.525727	696.647	FALSE	28
2022-09-13	13:14:37	-0.0470099	-0.209109	-0.525727	704.096	FALSE	28
2022-09-13	13:14:38	-0.151234	-0.672719	-0.529029	696.647	FALSE	28
2022-09-13	13:14:38	-0.0496053	-0.220654	-0.529029	704.096	FALSE	28
2022-09-13	13:14:38	-0.148944	-0.662533	-0.529029	696.647	FALSE	28
2022-09-13	13:14:38	-0.125941	-0.560211	-0.529029	704.096	FALSE	28
2022-09-13	13:14:39	-0.381157	-1.69546	-2.75132	696.647	FALSE	28
2022-09-13	13:14:39	-0.718358	-3.1954	-2.75132	704.096	FALSE	28
2022-09-13	13:14:39	-0.716831	-3.18861	-2.75132	696.647	FALSE	28
2022-09-13	13:14:39	-0.657747	-2.92579	-2.75132	704.096	FALSE	28
2022-09-13	13:14:40	-0.530674	-2.36054	1.80537	696.647	FALSE	28
2022-09-13	13:14:40	-0.278053	-1.23684	1.80537	704.096	FALSE	28
2022-09-13	13:14:40	0.921692	4.09987	1.80537	700.747	FALSE	28
2022-09-13	13:14:40	1.5105	6.71901	1.80537	710.815	FALSE	28
2022-09-13	13:14:41	2.7596	12.2753	9.53421	713.022	FALSE	28
2022-09-13	13:14:41	1.8963	8.43512	9.53421	719.25	FALSE	28
2022-09-13	13:14:41	1.77426	7.89226	9.53421	720.915	FALSE	28
2022-09-13	13:14:42	0.820216	3.64848	2.58856	722.898	FALSE	28
2022-09-13	13:14:42	0.797774	3.54866	2.58856	724.463	FALSE	28
2022-09-13	13:14:42	0.260725	1.15976	2.58856	724.058	FALSE	28
2022-09-13	13:14:42	0.44902	1.99733	2.58856	726.461	FALSE	28
2022-09-13	13:14:43	0.272939	1.21409	1.24912	725.272	FALSE	28
2022-09-13	13:14:43	0.32215	1.43299	1.24912	727.894	FALSE	28
2022-09-13	13:14:43	0.283677	1.26185	1.24912	726.534	FALSE	28
2022-09-13	13:14:43	0.244491	1.08754	1.24912	728.981	FALSE	28
2022-09-13	13:14:44	0.334924	1.48981	0.616806	728.024	FALSE	28
2022-09-13	13:14:44	0.156043	0.69411	0.616806	729.675	FALSE	28
2022-09-13	13:14:44	0.0403692	0.17957	0.616806	728.203	FALSE	28
2022-09-13	13:14:44	0.0233209	0.103736	0.616806	729.779	FALSE	28
2022-09-13	13:14:45	-0.138511	-0.616125	0.352518	728.203	FALSE	28
2022-09-13	13:14:45	0.0563997	0.250877	0.352518	730.03	FALSE	28
2022-09-13	13:14:45	0.31986	1.4228	0.352518	729.626	FALSE	28
2022-09-13	13:14:46	0.320827	1.4271	1.98364	731.457	FALSE	28
2022-09-13	13:14:46	0.580165	2.58069	1.98364	732.207	FALSE	28
2022-09-13	13:14:46	0.152888	0.680076	1.98364	732.137	FALSE	28
2022-09-13	13:14:46	0.729886	3.24668	1.98364	735.453	FALSE	28
2022-09-13	13:14:47	0.744949	3.31368	2.39959	735.451	FALSE	28
2022-09-13	13:14:47	0.448308	1.99416	2.39959	737.448	FALSE	28
2022-09-13	13:14:47	0.544593	2.42246	2.39959	737.873	FALSE	28
2022-09-13	13:14:47	0.419962	1.86807	2.39959	739.316	FALSE	28
2022-09-13	13:14:48	0.186883	0.831293	0.838536	738.704	FALSE	28
2022-09-13	13:14:48	0.235992	1.04974	0.838536	740.365	FALSE	28
2022-09-13	13:14:48	0.172735	0.76836	0.838536	739.473	FALSE	28
2022-09-13	13:14:48	0.158435	0.704751	0.838536	741.07	FALSE	28
2022-09-13	13:14:49	-0.0123535	-0.0549508	0.559987	739.473	FALSE	28
2022-09-13	13:14:49	-0.0119972	-0.0533659	0.559987	741.07	FALSE	28
2022-09-13	13:14:49	-0.0138802	-0.0617419	0.559987	739.473	FALSE	28
2022-09-13	13:14:49	0.541794	2.41001	0.559987	743.48	FALSE	28
2022-09-13	13:14:50	1.11192	4.94604	3.8898	744.419	FALSE	28
2022-09-13	13:14:50	0.935432	4.16099	3.8898	747.641	FALSE	28
2022-09-13	13:14:50	0.576043	2.56235	3.8898	746.981	FALSE	28
2022-09-13	13:14:51	0.217468	0.967341	1.14533	748.609	FALSE	28
2022-09-13	13:14:51	0.214008	0.95195	1.14533	747.933	FALSE	28
2022-09-13	13:14:51	0.245814	1.09343	1.14533	749.702	FALSE	28
2022-09-13	13:14:51	0.352634	1.56859	1.14533	749.502	FALSE	28
2022-09-13	13:14:52	0.99986	4.44758	6.63246	754.15	FALSE	28
2022-09-13	13:14:52	1.04093	4.63026	6.63246	754.132	FALSE	28
2022-09-13	13:14:52	1.79355	7.97807	6.63246	762.128	FALSE	28
2022-09-13	13:14:52	2.12983	9.47391	6.63246	763.606	FALSE	28
2022-09-13	13:14:53	1.61202	7.17059	3.14984	769.298	FALSE	28
2022-09-13	13:14:53	0.820369	3.64917	3.14984	767.255	FALSE	28
2022-09-13	13:14:53	0.321489	1.43005	3.14984	770.728	FALSE	28
2022-09-13	13:14:53	0.078588	0.349575	3.14984	767.605	FALSE	28
2022-09-13	13:14:54	0.0982317	0.436954	0.424126	771.165	FALSE	28
2022-09-13	13:14:54	0.220725	0.981829	0.424126	768.587	FALSE	28
2022-09-13	13:14:54	-0.0329132	-0.146404	0.424126	771.165	FALSE	28
2022-09-13	13:14:55	0.262252	1.16655	0.949403	769.753	FALSE	28
2022-09-13	13:14:55	0.212837	0.946742	0.949403	772.112	FALSE	28
2022-09-13	13:14:55	0.287952	1.28087	0.949403	771.034	FALSE	28
2022-09-13	13:14:55	0.0906999	0.403451	0.949403	772.515	FALSE	28
2022-09-13	13:14:56	0.242812	1.08008	1.91697	772.114	FALSE	28
2022-09-13	13:14:56	0.145306	0.64635	1.91697	773.162	FALSE	28
2022-09-13	13:14:56	0.936909	4.16756	1.91697	776.282	FALSE	28
2022-09-13	13:14:56	0.398791	1.7739	1.91697	774.936	FALSE	28
2022-09-13	13:14:57	0.24327	1.08211	1.54063	777.364	FALSE	28
2022-09-13	13:14:57	0.27416	1.21952	1.54063	776.155	FALSE	28
2022-09-13	13:14:57	0.409021	1.81941	1.54063	779.183	FALSE	28
2022-09-13	13:14:57	0.458944	2.04147	1.54063	778.197	FALSE	28
2022-09-13	13:14:58	0.44729	1.98964	1.91531	781.173	FALSE	28
2022-09-13	13:14:58	0.415687	1.84906	1.91531	780.046	FALSE	28
2022-09-13	13:14:58	0.428766	1.90724	1.91531	783.08	FALSE	28
2022-09-13	13:14:59	0.419911	1.86785	1.7966	781.914	FALSE	28
2022-09-13	13:14:59	0.393855	1.75195	1.7966	784.832	FALSE	28
2022-09-13	13:14:59	0.394008	1.75263	1.7966	783.666	FALSE	28
2022-09-13	13:14:59	0.407799	1.81397	1.7966	786.646	FALSE	28
2022-09-13	13:15:00	0.421692	1.87577	1.88607	785.542	FALSE	28
2022-09-13	13:15:00	0.424389	1.88777	1.88607	788.534	FALSE	28
2022-09-13	13:15:00	0.425204	1.89139	1.88607	787.433	FALSE	28
2022-09-13	13:15:00	0.424746	1.88936	1.88607	790.423	FALSE	28
2022-09-13	13:15:01	0.427799	1.90294	2.01007	789.336	FALSE	28
2022-09-13	13:15:01	0.434008	1.93055	2.01007	792.354	FALSE	28
2022-09-13	13:15:01	0.445102	1.9799	2.01007	791.316	FALSE	28
2022-09-13	13:15:01	0.500623	2.22687	2.01007	794.58	FALSE	28
2022-09-13	13:15:02	0.65645	2.92002	2.34949	794.236	FALSE	28
2022-09-13	13:15:02	0.593804	2.64136	2.34949	797.222	FALSE	28
2022-09-13	13:15:02	0.334313	1.48709	2.34949	795.723	FALSE	28
2022-09-13	13:15:03	0.178384	0.793488	-0.5953	798.015	FALSE	28
2022-09-13	13:15:03	-0.0728114	-0.32388	-0.5953	795.723	FALSE	28
2022-09-13	13:15:03	-0.277239	-1.23321	-0.5953	798.015	FALSE	28
2022-09-13	13:15:03	-0.363651	-1.61759	-0.5953	795.723	FALSE	28
2022-09-13	13:15:04	-0.527569	-2.34673	-2.47656	798.015	FALSE	28
2022-09-13	13:15:04	-0.541463	-2.40854	-2.47656	795.723	FALSE	28
2022-09-13	13:15:04	-0.571386	-2.54164	-2.47656	798.015	FALSE	28
2022-09-13	13:15:04	-0.586603	-2.60933	-2.47656	795.723	FALSE	28
2022-09-13	13:15:05	-0.716373	-3.18657	-3.6207	798.015	FALSE	28
2022-09-13	13:15:05	-0.790776	-3.51753	-3.6207	795.723	FALSE	28
2022-09-13	13:15:05	-0.917391	-4.08074	-3.6207	798.015	FALSE	28
2022-09-13	13:15:05	-0.831335	-3.69794	-3.6207	795.723	FALSE	28
2022-09-13	13:15:06	-0.869554	-3.86795	-3.6126	798.015	FALSE	28
2022-09-13	13:15:06	-0.898409	-3.9963	-3.6126	795.723	FALSE	28
2022-09-13	13:15:06	-0.668485	-2.97355	-3.6126	798.015	FALSE	28
2022-09-13	13:15:07	-0.720953	-3.20694	-3.21617	795.723	FALSE	28
2022-09-13	13:15:07	-0.683091	-3.03853	-3.21617	798.015	FALSE	28
2022-09-13	13:15:07	-0.803091	-3.57231	-3.21617	795.723	FALSE	28
2022-09-13	13:15:07	-0.684974	-3.0469	-3.21617	798.015	FALSE	28
2022-09-13	13:15:08	-0.744617	-3.31221	-3.26591	795.723	FALSE	28
2022-09-13	13:15:08	-0.795712	-3.53949	-3.26591	798.015	FALSE	28
2022-09-13	13:15:08	-0.698256	-3.10598	-3.26591	795.723	FALSE	28
2022-09-13	13:15:08	-0.698256	-3.10598	-3.26591	798.015	FALSE	28
2022-09-13	13:15:09	0.0310053	0.137918	16.9504	795.861	FALSE	28
2022-09-13	13:15:09	3.63838	16.1842	16.9504	814.2	1	29
2022-09-13	13:15:09	6.72505	29.9144	16.9504	825.776	1	30
2022-09-13	13:15:09	4.84805	21.5651	16.9504	835.765	1	31
2022-09-13	13:15:10	5.43019	24.1546	13.5548	849.93	1	32
2022-09-13	13:15:10	3.08108	13.7053	13.5548	849.47	1	33
2022-09-13	13:15:10	0.630496	2.80457	13.5548	852.735	FALSE	33
2022-09-13	13:15:11	2.04719	9.10631	17.3108	858.576	FALSE	33
2022-09-13	13:15:11	2.06342	9.1785	17.3108	861.913	FALSE	33
2022-09-13	13:15:11	4.38301	19.4965	17.3108	878.073	1	34
2022-09-13	13:15:11	7.07294	31.4619	17.3108	893.375	1	35
2022-09-13	13:15:12	10.5965	47.1354	37.7924	925.208	1	36
2022-09-13	13:15:12	13.8717	61.7041	37.7924	955.079	1	37
2022-09-13	13:15:12	3.5481	15.7827	37.7924	940.991	1	38
2022-09-13	13:15:12	5.9681	26.5473	37.7924	981.626	1	39
2022-09-13	13:15:13	8.30138	36.9262	39.0428	977.917	1	40
2022-09-13	13:15:13	4.27915	19.0345	39.0428	1000.66	1	41
2022-09-13	13:15:13	8.56042	38.0785	39.0428	1016	1	42
2022-09-13	13:15:13	13.9679	62.132	39.0428	1062.79	1	43
2022-09-13	13:15:14	6.94312	30.8844	56.8513	1046.88	1	44
2022-09-13	13:15:14	13.3686	59.4662	56.8513	1122.26	1	45
2022-09-13	13:15:14	18.0305	80.2033	56.8513	1127.08	1	46
2022-09-13	13:15:15	6.84072	30.4289	38.2299	1152.69	1	47
2022-09-13	13:15:15	8.64082	38.4361	38.2299	1165.52	1	48
2022-09-13	13:15:15	14.3021	63.6186	38.2299	1216.31	1	49
2022-09-13	13:15:15	4.59426	20.4362	38.2299	1185.96	1	50
2022-09-13	13:15:16	8.11349	36.0904	28.35	1252.4	1	51
2022-09-13	13:15:16	11.6338	51.7495	28.35	1237.7	1	52
2022-09-13	13:15:16	3.49314	15.5382	28.35	1267.94	1	53
2022-09-13	13:15:16	2.25304	10.022	28.35	1247.73	FALSE	53
2022-09-13	13:15:17	2.68067	11.9242	25.0943	1279.86	FALSE	53
2022-09-13	13:15:17	1.80933	8.04826	25.0943	1255.77	FALSE	53
2022-09-13	13:15:17	5.15421	22.927	25.0943	1302.79	1	54
2022-09-13	13:15:17	12.9216	57.4779	25.0943	1313.25	1	55
2022-09-13	13:15:18	7.24881	32.2442	35.891	1335.03	1	56
2022-09-13	13:15:18	10.2232	45.4748	35.891	1358.73	1	57
2022-09-13	13:15:18	6.73395	29.954	35.891	1364.98	1	58
2022-09-13	13:15:19	3.13986	13.9667	26.3298	1372.69	1	59
2022-09-13	13:15:19	7.04683	31.3457	26.3298	1396.33	1	60
2022-09-13	13:15:19	8.54551	38.0121	26.3298	1410.71	1	61
2022-09-13	13:15:19	4.94464	21.9947	26.3298	1418.32	1	62
2022-09-13	13:15:20	2.77991	12.3656	9.63153	1423.07	FALSE	62
2022-09-13	13:15:20	1.64515	7.31796	9.63153	1425.64	FALSE	62
2022-09-13	13:15:20	2.84525	12.6562	9.63153	1435.73	FALSE	62
2022-09-13	13:15:20	1.39075	6.18633	9.63153	1431.83	FALSE	62
2022-09-13	13:15:21	2.02332	9.00013	5.06427	1444.73	FALSE	62
2022-09-13	13:15:21	1.45798	6.48539	5.06427	1438.31	FALSE	62
2022-09-13	13:15:21	0.352685	1.56881	5.06427	1446.3	FALSE	62
2022-09-13	13:15:21	0.720013	3.20276	5.06427	1441.52	FALSE	62
2022-09-13	13:15:22	0.742354	3.30214	2.87332	1449.6	FALSE	62
2022-09-13	13:15:22	0.481031	2.13972	2.87332	1443.66	FALSE	62
2022-09-13	13:15:22	0.714466	3.17809	2.87332	1452.78	FALSE	62
2022-09-13	13:15:23	0.731463	3.25369	3.26988	1446.91	FALSE	62
2022-09-13	13:15:23	0.735026	3.26954	3.26988	1456.05	FALSE	62
2022-09-13	13:15:23	0.739707	3.29036	3.26988	1450.2	FALSE	62
2022-09-13	13:15:23	0.734211	3.26592	3.26988	1459.31	FALSE	62
2022-09-13	13:15:24	0.727188	3.23468	8.7179	1453.44	FALSE	62
2022-09-13	13:15:24	0.873295	3.88459	8.7179	1463.2	FALSE	62
2022-09-13	13:15:24	2.65375	11.8044	8.7179	1465.24	FALSE	62
2022-09-13	13:15:24	3.58525	15.9479	8.7179	1479.15	1	63
2022-09-13	13:15:25	3.92943	17.4789	11.9778	1482.72	1	64
2022-09-13	13:15:25	2.48693	11.0624	11.9778	1490.21	FALSE	64
2022-09-13	13:15:25	2.59553	11.5454	11.9778	1494.26	FALSE	64
2022-09-13	13:15:25	1.75899	7.82434	11.9778	1498.03	FALSE	64
2022-09-13	13:15:26	1.83777	8.17477	6.19176	1502.44	FALSE	64
2022-09-13	13:15:26	1.35172	6.01272	6.19176	1504.04	FALSE	64
2022-09-13	13:15:26	1.01197	4.50144	6.19176	1506.94	FALSE	64
2022-09-13	13:15:26	1.36642	6.07811	6.19176	1510.12	FALSE	64
2022-09-13	13:15:27	1.16663	5.1894	4.02178	1512.13	FALSE	64
2022-09-13	13:15:27	0.79869	3.55273	4.02178	1513.68	FALSE	64
2022-09-13	13:15:27	0.747087	3.32319	4.02178	1515.45	FALSE	64
2022-09-13	13:15:28	0.428766	1.90724	2.8387	1515.58	FALSE	64
2022-09-13	13:15:28	0.723575	3.21861	2.8387	1518.67	FALSE	64
2022-09-13	13:15:28	0.731717	3.25482	2.8387	1518.84	FALSE	64
2022-09-13	13:15:28	0.668613	2.97412	2.8387	1521.65	FALSE	64
2022-09-13	13:15:29	0.669529	2.9782	3.28889	1521.82	FALSE	64
2022-09-13	13:15:29	0.74327	3.30621	3.28889	1524.95	FALSE	64
2022-09-13	13:15:29	0.762659	3.39246	3.28889	1525.21	FALSE	64
2022-09-13	13:15:29	0.782048	3.47871	3.28889	1528.43	FALSE	64
2022-09-13	13:15:30	0.760165	3.38137	3.19523	1528.59	FALSE	64
2022-09-13	13:15:30	0.738842	3.28652	3.19523	1531.72	FALSE	64
2022-09-13	13:15:30	0.741539	3.29851	3.19523	1531.89	FALSE	64
2022-09-13	13:15:30	0.632735	2.81453	3.19523	1534.53	FALSE	64
2022-09-13	13:15:31	0.619453	2.75545	3.12164	1534.64	FALSE	64
2022-09-13	13:15:31	0.746119	3.31889	3.12164	1537.85	FALSE	64
2022-09-13	13:15:31	0.739758	3.29059	3.12164	1537.93	FALSE	64
2022-09-13	13:15:32	0.736501	3.2761	3.26841	1541.13	FALSE	64
2022-09-13	13:15:32	0.732226	3.25709	3.26841	1541.19	FALSE	64
2022-09-13	13:15:32	0.735483	3.27158	3.26841	1544.4	FALSE	64
2022-09-13	13:15:32	0.734873	3.26886	3.26841	1544.46	FALSE	64
2022-09-13	13:15:33	0.734059	3.26524	3.26133	1547.66	FALSE	64
2022-09-13	13:15:33	0.728766	3.2417	3.26133	1547.7	FALSE	64
2022-09-13	13:15:33	0.735178	3.27022	3.26133	1550.93	FALSE	64
2022-09-13	13:15:33	0.73472	3.26818	3.26133	1550.97	FALSE	64
2022-09-13	13:15:34	0.737315	3.27972	3.27361	1554.21	FALSE	64
2022-09-13	13:15:34	0.735483	3.27158	3.27361	1554.24	FALSE	64
2022-09-13	13:15:34	0.735331	3.2709	3.27361	1557.48	FALSE	64
2022-09-13	13:15:34	0.735636	3.27226	3.27361	1557.51	FALSE	64
2022-09-13	13:15:35	0.740369	3.29331	3.27943	1560.78	FALSE	64
2022-09-13	13:15:35	0.735534	3.2718	3.27943	1560.79	FALSE	64
2022-09-13	13:15:35	0.73584	3.27316	3.27943	1564.05	FALSE	64
2022-09-13	13:15:36	0.735534	3.2718	3.26784	1564.06	FALSE	64
2022-09-13	13:15:36	0.73243	3.258	3.26784	1567.31	FALSE	64
2022-09-13	13:15:36	0.733244	3.26162	3.26784	1567.32	FALSE	64
2022-09-13	13:15:36	0.737366	3.27995	3.26784	1570.59	FALSE	64
2022-09-13	13:15:37	0.738537	3.28516	3.26965	1570.6	FALSE	64
2022-09-13	13:15:37	0.732226	3.25709	3.26965	1573.85	FALSE	64
2022-09-13	13:15:37	0.731819	3.25528	3.26965	1573.86	FALSE	64
2022-09-13	13:15:37	0.737621	3.28109	3.26965	1577.13	FALSE	64
2022-09-13	13:15:38	0.734262	3.26614	3.26778	1577.13	FALSE	64
2022-09-13	13:15:38	0.732786	3.25958	3.26778	1580.39	FALSE	64
2022-09-13	13:15:38	0.738231	3.2838	3.26778	1580.41	FALSE	64
2022-09-13	13:15:38	0.733244	3.26162	3.26778	1583.65	FALSE	64
2022-09-13	13:15:39	0.733702	3.26365	3.26577	1583.67	FALSE	64
2022-09-13	13:15:39	0.731412	3.25347	3.26577	1586.9	FALSE	64
2022-09-13	13:15:39	0.737417	3.28018	3.26577	1586.95	FALSE	64
2022-09-13	13:15:40	0.740318	3.29308	3.26784	1590.2	FALSE	64
2022-09-13	13:15:40	0.731361	3.25324	3.26784	1590.21	FALSE	64
2022-09-13	13:15:40	0.732328	3.25754	3.26784	1593.45	FALSE	64
2022-09-13	13:15:40	0.734568	3.26751	3.26784	1593.47	FALSE	64
2022-09-13	13:15:41	0.733702	3.26365	3.26167	1596.72	FALSE	64
2022-09-13	13:15:41	0.736756	3.27724	3.26167	1596.75	FALSE	64
2022-09-13	13:15:41	0.72897	3.2426	3.26167	1599.96	FALSE	64
2022-09-13	13:15:41	0.733601	3.2632	3.26167	1600.01	FALSE	64
2022-09-13	13:15:42	0.734415	3.26682	3.26994	1603.23	FALSE	64
2022-09-13	13:15:42	0.733346	3.26207	3.26994	1603.28	FALSE	64
2022-09-13	13:15:42	0.734364	3.2666	3.26994	1606.49	FALSE	64
2022-09-13	13:15:42	0.738333	3.28425	3.26994	1606.56	FALSE	64
2022-09-13	13:15:43	0.734975	3.26932	3.27686	1609.76	FALSE	64
2022-09-13	13:15:43	0.736959	3.27814	3.27686	1609.84	FALSE	64
2022-09-13	13:15:43	0.738079	3.28312	3.27686	1613.04	FALSE	64
2022-09-13	13:15:44	0.736349	3.27543	3.26824	1613.11	FALSE	64
2022-09-13	13:15:44	0.732074	3.25641	3.26824	1616.3	FALSE	64
2022-09-13	13:15:44	0.732277	3.25731	3.26824	1616.37	FALSE	64
2022-09-13	13:15:44	0.738231	3.2838	3.26824	1619.58	FALSE	64
2022-09-13	13:15:45	0.742252	3.30169	3.27965	1619.67	FALSE	64
2022-09-13	13:15:45	0.732175	3.25686	3.27965	1622.84	FALSE	64
2022-09-13	13:15:45	0.737468	3.28041	3.27965	1622.95	FALSE	64
2022-09-13	13:15:46	0.739707	3.29036	3.26904	1626.13	FALSE	64
2022-09-13	13:15:46	0.737672	3.28131	3.26904	1626.24	FALSE	64
2022-09-13	13:15:46	0.739147	3.28787	3.26904	1629.42	FALSE	64
2022-09-13	13:15:46	0.734008	3.26501	3.26904	1629.5	FALSE	64
2022-09-13	13:15:46	0.724033	3.22064	3.26904	1632.64	FALSE	64
2022-09-13	13:15:47	0.739402	3.28901	3.2829	1632.79	FALSE	64
2022-09-13	13:15:47	0.733601	3.2632	3.2829	1635.9	FALSE	64
2022-09-13	13:15:47	0.741081	3.29648	3.2829	1636.09	FALSE	64
2022-09-13	13:15:48	0.73813	3.28335	3.26552	1639.19	FALSE	64
2022-09-13	13:15:48	0.732634	3.2589	3.26552	1639.34	FALSE	64
2022-09-13	13:15:48	0.733601	3.2632	3.26552	1642.45	FALSE	64
2022-09-13	13:15:48	0.732125	3.25664	3.26552	1642.6	FALSE	64
2022-09-13	13:15:49	0.72958	3.24532	3.26416	1645.7	FALSE	64
2022-09-13	13:15:49	0.734059	3.26524	3.26416	1645.87	FALSE	64
2022-09-13	13:15:49	0.734618	3.26773	3.26416	1648.96	FALSE	64
2022-09-13	13:15:49	0.73701	3.27837	3.26416	1649.14	FALSE	64
2022-09-13	13:15:50	0.74215	3.30123	3.28618	1652.26	FALSE	64
2022-09-13	13:15:50	0.733346	3.26207	3.28618	1652.41	FALSE	64
2022-09-13	13:15:50	0.73986	3.29105	3.28618	1655.56	FALSE	64
2022-09-13	13:15:50	0.739707	3.29036	3.28618	1655.7	FALSE	64
2022-09-13	13:15:51	0.737163	3.27905	3.27573	1658.83	FALSE	64
2022-09-13	13:15:51	0.739351	3.28878	3.27573	1658.99	FALSE	64
2022-09-13	13:15:51	0.732735	3.25935	3.27573	1662.09	FALSE	64
2022-09-13	13:15:52	0.735585	3.27203	3.26207	1662.26	FALSE	64
2022-09-13	13:15:52	0.726323	3.23083	3.26207	1665.33	FALSE	64
2022-09-13	13:15:52	0.733346	3.26207	3.26207	1665.52	FALSE	64
2022-09-13	13:15:52	0.73813	3.28335	3.26207	1668.61	FALSE	64
2022-09-13	13:15:53	0.737112	3.27882	3.27169	1668.8	FALSE	64
2022-09-13	13:15:53	0.734618	3.26773	3.27169	1671.88	FALSE	64
2022-09-13	13:15:53	0.729224	3.24373	3.27169	1672.04	FALSE	64
2022-09-13	13:15:53	0.741081	3.29648	3.27169	1675.17	FALSE	64
2022-09-13	13:15:54	0.735789	3.27294	3.26648	1675.32	FALSE	64
2022-09-13	13:15:54	0.732532	3.25845	3.26648	1678.43	FALSE	64
2022-09-13	13:15:54	0.733397	3.2623	3.26648	1678.58	FALSE	64
2022-09-13	13:15:54	0.735636	3.27226	3.26648	1681.7	FALSE	64
2022-09-13	13:15:55	0.735382	3.27113	3.2749	1681.85	FALSE	64
2022-09-13	13:15:55	0.738028	3.2829	3.2749	1684.99	FALSE	64
2022-09-13	13:15:55	0.73528	3.27067	3.2749	1685.12	FALSE	64
2022-09-13	13:15:56	0.73528	3.27067	3.27056	1688.26	FALSE	64
2022-09-13	13:15:56	0.737519	3.28063	3.27056	1688.4	FALSE	64
2022-09-13	13:15:56	0.736501	3.2761	3.27056	1691.53	FALSE	64
2022-09-13	13:15:56	0.731717	3.25482	3.27056	1691.66	FALSE	64
2022-09-13	13:15:57	0.738842	3.28652	3.27407	1694.82	FALSE	64
2022-09-13	13:15:57	0.735941	3.27361	3.27407	1694.93	FALSE	64
2022-09-13	13:15:57	0.735433	3.27135	3.27407	1698.09	FALSE	64
2022-09-13	13:15:57	0.733957	3.26479	3.27407	1698.19	FALSE	64
2022-09-13	13:15:58	0.74332	3.30644	3.27407	1701.4	FALSE	64
2022-09-13	13:15:58	0.737112	3.27882	3.27407	1701.47	FALSE	64
2022-09-13	13:15:58	0.731819	3.25528	3.27407	1704.65	FALSE	64
2022-09-13	13:15:58	0.731921	3.25573	3.27407	1704.73	FALSE	64
2022-09-13	13:15:59	0.734262	3.26614	3.26252	1707.92	FALSE	64
2022-09-13	13:15:59	0.731056	3.25188	3.26252	1707.98	FALSE	64
2022-09-13	13:15:59	0.735026	3.26954	3.26252	1711.19	FALSE	64
2022-09-13	13:16:00	0.735433	3.27135	3.27367	1711.25	FALSE	64
2022-09-13	13:16:00	0.739707	3.29036	3.27367	1714.48	FALSE	64
2022-09-13	13:16:00	0.734517	3.26728	3.27367	1714.52	FALSE	64
2022-09-13	13:16:00	0.73416	3.26569	3.27367	1717.74	FALSE	64
2022-09-13	13:16:01	0.734313	3.26637	3.20118	1717.79	FALSE	64
2022-09-13	13:16:01	0.726679	3.23241	3.20118	1720.98	FALSE	64
2022-09-13	13:16:01	0.729835	3.24645	3.20118	1721.03	FALSE	64
2022-09-13	13:16:01	0.687799	3.05947	3.20118	1724.04	FALSE	64
2022-09-13	13:16:02	0.703372	3.12874	3.11482	1724.16	FALSE	64
2022-09-13	13:16:02	0.700674	3.11674	3.11482	1727.15	FALSE	64
2022-09-13	13:16:02	0.710445	3.1602	3.11482	1727.32	FALSE	64
2022-09-13	13:16:02	0.686476	3.05358	3.11482	1730.21	FALSE	64
2022-09-13	13:16:03	0.675076	3.00287	3.01721	1730.32	FALSE	64
2022-09-13	13:16:03	0.687086	3.0563	3.01721	1733.26	FALSE	64
2022-09-13	13:16:03	0.672735	2.99246	3.01721	1733.32	FALSE	64
2022-09-13	13:16:04	0.675636	3.00536	3.00072	1736.27	FALSE	64
2022-09-13	13:16:04	0.671616	2.98748	3.00072	1736.3	FALSE	64
2022-09-13	13:16:04	0.675483	3.00468	3.00072	1739.27	FALSE	64
2022-09-13	13:16:04	0.675636	3.00536	3.00072	1739.31	FALSE	64
2022-09-13	13:16:05	0.665865	2.9619	2.76468	1742.23	FALSE	64
2022-09-13	13:16:05	0.663779	2.95262	2.76468	1742.26	FALSE	64
2022-09-13	13:16:05	0.668308	2.97277	2.76468	1745.21	FALSE	64
2022-09-13	13:16:05	0.488155	2.17141	2.76468	1744.43	FALSE	64
2022-09-13	13:16:06	0.401336	1.78522	1.36683	1746.99	FALSE	64
2022-09-13	13:16:06	0.234822	1.04454	1.36683	1745.48	FALSE	64
2022-09-13	13:16:06	0.224593	0.999035	1.36683	1747.99	FALSE	64
2022-09-13	13:16:06	0.368359	1.63853	1.36683	1747.12	FALSE	64
2022-09-13	13:16:07	0.386323	1.71844	1.60005	1749.71	FALSE	64
2022-09-13	13:16:07	0.346069	1.53938	1.60005	1748.66	FALSE	64
2022-09-13	13:16:07	0.343219	1.52671	1.60005	1751.24	FALSE	64
2022-09-13	13:16:07	0.363219	1.61567	1.60005	1750.27	FALSE	64
2022-09-13	13:16:08	0.409733	1.82257	2.50984	1753.06	FALSE	64
2022-09-13	13:16:08	0.606069	2.69592	2.50984	1752.97	FALSE	64
2022-09-13	13:16:08	0.676908	3.01102	2.50984	1756.07	FALSE	64
2022-09-13	13:16:09	0.461132	2.05121	1.66338	1755.02	FALSE	64
2022-09-13	13:16:09	0.433143	1.92671	1.66338	1758	FALSE	64
2022-09-13	13:16:09	0.30327	1.34901	1.66338	1756.37	FALSE	64
2022-09-13	13:16:09	0.298232	1.3266	1.66338	1759.32	FALSE	64
2022-09-13	13:16:10	0.290089	1.29037	1.17555	1757.66	FALSE	64
2022-09-13	13:16:10	0.260115	1.15704	1.17555	1760.48	FALSE	64
2022-09-13	13:16:10	0.26444	1.17628	1.17555	1758.83	FALSE	64
2022-09-13	13:16:10	0.242456	1.07849	1.17555	1761.56	FALSE	64
2022-09-13	13:16:11	0.240573	1.07012	0.880813	1759.9	FALSE	64
2022-09-13	13:16:11	0.524491	2.33304	0.880813	1763.89	FALSE	64
2022-09-13	13:16:11	0.149682	0.665815	0.880813	1760.57	FALSE	64
2022-09-13	13:16:11	-0.122684	-0.545723	0.880813	1763.89	FALSE	64
2022-09-13	13:16:12	-0.224618	-0.999146	-1.49173	1760.57	FALSE	64
2022-09-13	13:16:12	-0.331895	-1.47634	-1.49173	1763.89	FALSE	64
2022-09-13	13:16:12	-0.449554	-1.99971	-1.49173	1760.57	FALSE	64
2022-09-13	13:16:13	-0.535	-2.37979	-2.73111	1763.89	FALSE	64
2022-09-13	13:16:13	-0.613168	-2.72749	-2.73111	1760.57	FALSE	64
2022-09-13	13:16:13	-0.688434	-3.06229	-2.73111	1763.89	FALSE	64
2022-09-13	13:16:13	-0.619325	-2.75488	-2.73111	1760.57	FALSE	64
2022-09-13	13:16:14	-0.547519	-2.43547	2.46915	1763.89	FALSE	64
2022-09-13	13:16:14	-0.231794	-1.03107	2.46915	1760.57	FALSE	64
2022-09-13	13:16:14	1.67742	7.4615	2.46915	1771.35	FALSE	64
2022-09-13	13:16:14	1.32225	5.88163	2.46915	1766.45	FALSE	64
2022-09-13	13:16:15	0.892634	3.97061	7.90118	1775.32	FALSE	64
2022-09-13	13:16:15	2.02765	9.01939	7.90118	1775.47	FALSE	64
2022-09-13	13:16:15	2.40851	10.7135	7.90118	1786.04	FALSE	64
2022-09-13	13:16:16	2.82556	12.5687	26.2614	1788.04	FALSE	64
2022-09-13	13:16:16	6.94805	30.9063	26.2614	1816.94	1	65
2022-09-13	13:16:16	3.82189	17.0005	26.2614	1805.04	1	66
2022-09-13	13:16:16	10.0198	44.5701	26.2614	1861.51	1	67
2022-09-13	13:16:17	7.35268	32.7062	28.0364	1837.75	1	68
2022-09-13	13:16:17	3.05472	13.588	28.0364	1875.1	1	69
2022-09-13	13:16:17	4.66805	20.7644	28.0364	1858.51	1	70
2022-09-13	13:16:17	10.136	45.087	28.0364	1920.19	1	71
2022-09-13	13:16:18	4.2422	18.8702	23.9933	1877.38	1	72
2022-09-13	13:16:18	7.07044	31.4507	23.9933	1951.64	1	73
2022-09-13	13:16:18	6.94174	30.8782	23.9933	1908.26	1	74
2022-09-13	13:16:18	3.32133	14.7739	23.9933	1966.41	1	75
2022-09-13	13:16:19	1.90388	8.46884	21.2736	1916.73	FALSE	75
2022-09-13	13:16:19	7.06499	31.4265	21.2736	1997.84	1	76
2022-09-13	13:16:19	5.39237	23.9863	21.2736	1940.71	1	77
2022-09-13	13:16:19	4.76887	21.2129	21.2736	2019.05	1	78
2022-09-13	13:16:20	9.50281	42.2704	28.3218	1982.98	1	79
2022-09-13	13:16:20	4.54205	20.2039	28.3218	2039.26	1	80
2022-09-13	13:16:20	5.05619	22.4909	28.3218	2005.48	1	81
2022-09-13	13:16:21	4.67523	20.7964	16.1795	2060.05	1	82
2022-09-13	13:16:21	4.68184	20.8258	16.1795	2026.3	1	83
2022-09-13	13:16:21	1.53258	6.81722	16.1795	2066.87	FALSE	83
2022-09-13	13:16:21	3.65961	16.2787	16.1795	2042.58	1	84
2022-09-13	13:16:22	0.992328	4.41407	2.67537	2071.29	FALSE	84
2022-09-13	13:16:22	0.502812	2.23661	2.67537	2044.82	FALSE	84
2022-09-13	13:16:22	0.798639	3.55251	2.67537	2074.84	FALSE	84
2022-09-13	13:16:22	0.112023	0.498301	2.67537	2045.31	FALSE	84
2022-09-13	13:16:23	0.71355	3.17401	1.28981	2078.01	FALSE	84
2022-09-13	13:16:23	0.727596	3.23649	1.28981	2048.55	FALSE	84
2022-09-13	13:16:23	0.10729	0.477247	1.28981	2078.49	FALSE	84
2022-09-13	13:16:23	-0.388587	-1.72851	1.28981	2048.55	FALSE	84
2022-09-13	13:16:24	-0.540292	-2.40333	-2.4446	2078.49	FALSE	84
2022-09-13	13:16:24	-0.580445	-2.58194	-2.4446	2048.55	FALSE	84
2022-09-13	13:16:24	-0.527977	-2.34855	-2.4446	2078.49	FALSE	84
2022-09-13	13:16:25	-0.390928	-1.73893	-1.57566	2048.55	FALSE	84
2022-09-13	13:16:25	-0.278918	-1.24068	-1.57566	2078.49	FALSE	84
2022-09-13	13:16:25	-0.326297	-1.45143	-1.57566	2048.55	FALSE	84
2022-09-13	13:16:25	-0.42075	-1.87158	-1.57566	2078.49	FALSE	84
2022-09-13	13:16:26	-0.209198	-0.930555	-1.77786	2048.55	FALSE	84
2022-09-13	13:16:26	-0.424669	-1.88901	-1.77786	2078.49	FALSE	84
2022-09-13	13:16:26	-0.468028	-2.08188	-1.77786	2048.55	FALSE	84
2022-09-13	13:16:26	-0.496832	-2.21001	-1.77786	2078.49	FALSE	84
2022-09-13	13:16:27	-0.446501	-1.98613	-1.83542	2048.55	FALSE	84
2022-09-13	13:16:27	-0.446603	-1.98658	-1.83542	2078.49	FALSE	84
2022-09-13	13:16:27	-0.389707	-1.73349	-1.83542	2048.55	FALSE	84
2022-09-13	13:16:27	-0.367671	-1.63547	-1.83542	2078.49	FALSE	84
2022-09-13	13:16:28	-0.218969	-0.974018	0.327994	2048.55	FALSE	84
2022-09-13	13:16:28	0.0711071	0.316299	0.327994	2078.81	FALSE	84
2022-09-13	13:16:28	0.369071	1.6417	0.327994	2050.19	FALSE	84
2022-09-13	13:16:29	-0.0398853	-0.177418	1.49049	2078.81	FALSE	84
2022-09-13	13:16:29	-0.0588165	-0.261628	1.49049	2050.19	FALSE	84
2022-09-13	13:16:29	0.703677	3.1301	1.49049	2081.94	FALSE	84
2022-09-13	13:16:29	0.735331	3.2709	1.49049	2053.46	FALSE	84
2022-09-13	13:16:30	0.736756	3.27724	3.28125	2085.21	FALSE	84
2022-09-13	13:16:30	0.739147	3.28787	3.28125	2056.75	FALSE	84
2022-09-13	13:16:30	0.737366	3.27995	3.28125	2088.49	FALSE	84
2022-09-13	13:16:30	0.737366	3.27995	3.28125	2060.03	FALSE	84
2022-09-13	13:16:31	0.73187	3.2555	3.26778	2091.75	FALSE	84
2022-09-13	13:16:31	0.735585	3.27203	3.26778	2063.3	FALSE	84
2022-09-13	13:16:31	0.733651	3.26343	3.26778	2095.01	FALSE	84
2022-09-13	13:16:31	0.737417	3.28018	3.26778	2066.58	FALSE	84
2022-09-13	13:16:32	0.738842	3.28652	3.28591	2098.3	FALSE	84
2022-09-13	13:16:32	0.735229	3.27045	3.28591	2069.85	FALSE	84
2022-09-13	13:16:32	0.742048	3.30078	3.28591	2101.6	FALSE	84
2022-09-13	13:16:33	0.735534	3.2718	3.27531	2073.13	FALSE	84
2022-09-13	13:16:33	0.732481	3.25822	3.27531	2104.86	FALSE	84
2022-09-13	13:16:33	0.740318	3.29308	3.27531	2076.42	FALSE	84
2022-09-13	13:16:33	0.736959	3.27814	3.27531	2108.13	FALSE	84
2022-09-13	13:16:34	0.730445	3.24917	3.25664	2079.67	FALSE	84
2022-09-13	13:16:34	0.734313	3.26637	3.25664	2111.4	FALSE	84
2022-09-13	13:16:34	0.72841	3.24011	3.25664	2082.91	FALSE	84
2022-09-13	13:16:34	0.735331	3.2709	3.25664	2114.67	FALSE	84
2022-09-13	13:16:35	0.736857	3.27769	3.26665	2086.19	FALSE	84
2022-09-13	13:16:35	0.73299	3.26049	3.26665	2117.93	FALSE	84
2022-09-13	13:16:35	0.737672	3.28131	3.26665	2089.47	FALSE	84
2022-09-13	13:16:35	0.729987	3.24713	3.26665	2121.18	FALSE	84
2022-09-13	13:16:36	0.731616	3.25437	3.25566	2092.72	FALSE	84
2022-09-13	13:16:36	0.730801	3.25075	3.25566	2124.43	FALSE	84
2022-09-13	13:16:36	0.733295	3.26184	3.25566	2095.98	FALSE	84
2022-09-13	13:16:37	0.730191	3.24804	3.26394	2127.68	FALSE	84
2022-09-13	13:16:37	0.732939	3.26026	3.26394	2099.24	FALSE	84
2022-09-13	13:16:37	0.735636	3.27226	3.26394	2130.95	FALSE	84
2022-09-13	13:16:37	0.736298	3.2752	3.26394	2102.52	FALSE	84
2022-09-13	13:16:38	0.729224	3.24373	3.26637	2134.19	FALSE	84
2022-09-13	13:16:38	0.738079	3.28312	3.26637	2105.8	FALSE	84
2022-09-13	13:16:38	0.735433	3.27135	3.26637	2137.47	FALSE	84
2022-09-13	13:16:38	0.734517	3.26728	3.26637	2109.07	FALSE	84
2022-09-13	13:16:39	0.734313	3.26637	3.26173	2140.73	FALSE	84
2022-09-13	13:16:39	0.732379	3.25777	3.26173	2112.33	FALSE	84
2022-09-13	13:16:39	0.736399	3.27565	3.26173	2144.01	FALSE	84
2022-09-13	13:16:39	0.729987	3.24713	3.26173	2115.57	FALSE	84
2022-09-13	13:16:40	0.731514	3.25392	3.2746	2147.26	FALSE	84
2022-09-13	13:16:40	0.74098	3.29603	3.2746	2118.87	FALSE	84
2022-09-13	13:16:40	0.735992	3.27384	3.2746	2150.54	FALSE	84
2022-09-13	13:16:41	0.732328	3.25754	3.25516	2122.13	FALSE	84
2022-09-13	13:16:41	0.731819	3.25528	3.25516	2153.79	FALSE	84
2022-09-13	13:16:41	0.729122	3.24328	3.25516	2125.37	FALSE	84
2022-09-13	13:16:41	0.733906	3.26456	3.25516	2157.06	FALSE	84
2022-09-13	13:16:42	0.731717	3.25482	3.25528	2128.63	FALSE	84
2022-09-13	13:16:42	0.734669	3.26795	3.25528	2160.32	FALSE	84
2022-09-13	13:16:42	0.732175	3.25686	3.25528	2131.88	FALSE	84
2022-09-13	13:16:42	0.728715	3.24147	3.25528	2163.57	FALSE	84
2022-09-13	13:16:43	0.732837	3.25981	3.25279	2135.14	FALSE	84
2022-09-13	13:16:43	0.732837	3.25981	3.25279	2166.82	FALSE	84
2022-09-13	13:16:43	0.729122	3.24328	3.25279	2138.39	FALSE	84
2022-09-13	13:16:43	0.730242	3.24826	3.25279	2170.07	FALSE	84
2022-09-13	13:16:44	0.733092	3.26094	3.26199	2141.65	FALSE	84
2022-09-13	13:16:44	0.733651	3.26343	3.26199	2173.34	FALSE	84
2022-09-13	13:16:44	0.733244	3.26162	3.26199	2144.91	FALSE	84
2022-09-13	13:16:45	0.745356	3.31549	3.27548	2176.65	FALSE	84
2022-09-13	13:16:45	0.731209	3.25256	3.27548	2148.16	FALSE	84
2022-09-13	13:16:45	0.738181	3.28358	3.27548	2179.94	FALSE	84
2022-09-13	13:16:45	0.7307	3.2503	3.27548	2151.41	FALSE	84
2022-09-13	13:16:46	0.724796	3.22404	3.2628	2183.16	FALSE	84
2022-09-13	13:16:46	0.739097	3.28765	3.2628	2154.7	FALSE	84
2022-09-13	13:16:46	0.733193	3.26139	3.2628	2186.42	FALSE	84
2022-09-13	13:16:46	0.736959	3.27814	3.2628	2157.98	FALSE	84
2022-09-13	13:16:47	0.738384	3.28448	3.27475	2189.71	FALSE	84
2022-09-13	13:16:47	0.736654	3.27678	3.27475	2161.25	FALSE	84
2022-09-13	13:16:47	0.735076	3.26977	3.27475	2192.98	FALSE	84
2022-09-13	13:16:47	0.734669	3.26795	3.27475	2164.52	FALSE	84
2022-09-13	13:16:48	0.733295	3.26184	3.27005	2196.24	FALSE	84
2022-09-13	13:16:48	0.737112	3.27882	3.27005	2167.8	FALSE	84
2022-09-13	13:16:48	0.735687	3.27248	3.27005	2199.51	FALSE	84
2022-09-13	13:16:48	0.734466	3.26705	3.27005	2171.07	FALSE	84
2022-09-13	13:16:49	0.732226	3.25709	3.26116	2202.77	FALSE	84
2022-09-13	13:16:49	0.730394	3.24894	3.26116	2174.32	FALSE	84
2022-09-13	13:16:49	0.736807	3.27746	3.26116	2206.04	FALSE	84
2022-09-13	13:16:50	0.72617	3.23015	3.26546	2177.55	FALSE	84
2022-09-13	13:16:50	0.741947	3.30033	3.26546	2209.34	FALSE	84
2022-09-13	13:16:50	0.730343	3.24871	3.26546	2180.8	FALSE	84
2022-09-13	13:16:50	0.737977	3.28267	3.26546	2212.63	FALSE	84
2022-09-13	13:16:51	0.734873	3.26886	3.26694	2184.06	FALSE	84
2022-09-13	13:16:51	0.732277	3.25731	3.26694	2215.88	FALSE	84
2022-09-13	13:16:51	0.734059	3.26524	3.26694	2187.33	FALSE	84
2022-09-13	13:16:51	0.736552	3.27633	3.26694	2219.16	FALSE	84
2022-09-13	13:16:52	0.737315	3.27972	3.27045	2190.61	FALSE	84
2022-09-13	13:16:52	0.729478	3.24486	3.27045	2222.41	FALSE	84
2022-09-13	13:16:52	0.734517	3.26728	3.27045	2193.88	FALSE	84
2022-09-13	13:16:52	0.739606	3.28992	3.27045	2225.7	FALSE	84
2022-09-13	13:16:53	0.733092	3.26094	3.27097	2197.14	FALSE	84
2022-09-13	13:16:53	0.733855	3.26433	3.27097	2228.96	FALSE	84
2022-09-13	13:16:53	0.739097	3.28765	3.27097	2200.43	FALSE	84
2022-09-13	13:16:54	0.737773	3.28176	3.25986	2232.24	FALSE	84
2022-09-13	13:16:54	0.731667	3.2546	3.25986	2203.68	FALSE	84
2022-09-13	13:16:54	0.72612	3.22993	3.25986	2235.47	FALSE	84
2022-09-13	13:16:54	0.73584	3.27316	3.25986	2206.95	FALSE	84
2022-09-13	13:16:55	0.73701	3.27837	3.28125	2238.75	FALSE	84
2022-09-13	13:16:55	0.733804	3.26411	3.28125	2210.22	FALSE	84
2022-09-13	13:16:55	0.741234	3.29716	3.28125	2242.05	FALSE	84
2022-09-13	13:16:55	0.738588	3.28539	3.28125	2213.5	FALSE	84
2022-09-13	13:16:56	0.735941	3.27361	3.27588	2245.32	FALSE	84
2022-09-13	13:16:56	0.734975	3.26932	3.27588	2216.77	FALSE	84
2022-09-13	13:16:56	0.73584	3.27316	3.27588	2248.59	FALSE	84
2022-09-13	13:16:56	0.739046	3.28742	3.27588	2220.06	FALSE	84
2022-09-13	13:16:57	0.738842	3.28652	3.27927	2251.88	FALSE	84
2022-09-13	13:16:57	0.734517	3.26728	3.27927	2223.33	FALSE	84
2022-09-13	13:16:57	0.738282	3.28403	3.27927	2255.16	FALSE	84
2022-09-13	13:16:58	0.733346	3.26207	3.27695	2226.59	FALSE	84
2022-09-13	13:16:58	0.736807	3.27746	3.27695	2258.44	FALSE	84
2022-09-13	13:16:58	0.742201	3.30146	3.27695	2229.89	FALSE	84
2022-09-13	13:16:58	0.734415	3.26682	3.27695	2261.71	FALSE	84
2022-09-13	13:16:59	0.729631	3.24554	3.25732	2233.14	FALSE	84
2022-09-13	13:16:59	0.735331	3.2709	3.25732	2264.98	FALSE	84
2022-09-13	13:16:59	0.732125	3.25664	3.25732	2236.39	FALSE	84
2022-09-13	13:16:59	0.732023	3.25618	3.25732	2268.24	FALSE	84
2022-09-13	13:17:00	0.733397	3.2623	3.26632	2239.65	FALSE	84
2022-09-13	13:17:00	0.734059	3.26524	3.26632	2271.5	FALSE	84
2022-09-13	13:17:00	0.730649	3.25007	3.26632	2242.9	FALSE	84
2022-09-13	13:17:00	0.739097	3.28765	3.26632	2274.79	FALSE	84
2022-09-13	13:17:01	0.730751	3.25053	3.25935	2246.16	FALSE	84
2022-09-13	13:17:01	0.729071	3.24305	3.25935	2278.03	FALSE	84
2022-09-13	13:17:01	0.738384	3.28448	3.25935	2249.44	FALSE	84
2022-09-13	13:17:02	0.735687	3.27248	3.26082	2281.3	FALSE	84
2022-09-13	13:17:02	0.731361	3.25324	3.26082	2252.69	FALSE	84
2022-09-13	13:17:02	0.733244	3.26162	3.26082	2284.57	FALSE	84
2022-09-13	13:17:02	0.731972	3.25596	3.26082	2255.95	FALSE	84
2022-09-13	13:17:03	0.732786	3.25958	3.26416	2287.83	FALSE	84
2022-09-13	13:17:03	0.732532	3.25845	3.26416	2259.21	FALSE	84
2022-09-13	13:17:03	0.735789	3.27294	3.26416	2291.1	FALSE	84
2022-09-13	13:17:03	0.73416	3.26569	3.26416	2262.47	FALSE	84
2022-09-13	13:17:04	0.735789	3.27294	3.26139	2294.37	FALSE	84
2022-09-13	13:17:04	0.733957	3.26479	3.26139	2265.74	FALSE	84
2022-09-13	13:17:04	0.727036	3.234	3.26139	2297.61	FALSE	84
2022-09-13	13:17:04	0.735992	3.27384	3.26139	2269.01	FALSE	84
2022-09-13	13:17:05	0.740064	3.29195	3.29376	2300.9	FALSE	84
2022-09-13	13:17:05	0.737417	3.28018	3.29376	2272.29	FALSE	84
2022-09-13	13:17:05	0.743931	3.30915	3.29376	2304.21	FALSE	84
2022-09-13	13:17:06	0.734262	3.26614	3.27033	2275.56	FALSE	84
2022-09-13	13:17:06	0.733804	3.26411	3.27033	2307.47	FALSE	84
2022-09-13	13:17:06	0.737977	3.28267	3.27033	2278.84	FALSE	84
2022-09-13	13:17:06	0.734771	3.26841	3.27033	2310.74	FALSE	84
2022-09-13	13:17:07	0.72958	3.24532	3.2696	2282.09	FALSE	84
2022-09-13	13:17:07	0.732074	3.25641	3.2696	2314	FALSE	84
2022-09-13	13:17:07	0.739962	3.2915	3.2696	2285.38	FALSE	84
2022-09-13	13:17:07	0.738537	3.28516	3.2696	2317.28	FALSE	84
2022-09-13	13:17:08	0.737672	3.28131	3.26592	2288.66	FALSE	84
2022-09-13	13:17:08	0.731158	3.25234	3.26592	2320.53	FALSE	84
2022-09-13	13:17:08	0.731463	3.25369	3.26592	2291.91	FALSE	84
2022-09-13	13:17:08	0.736552	3.27633	3.26592	2323.81	FALSE	84
2022-09-13	13:17:09	0.738181	3.28358	3.2789	2295.2	FALSE	84
2022-09-13	13:17:09	0.738995	3.2872	3.2789	2327.1	FALSE	84
2022-09-13	13:17:09	0.734211	3.26592	3.2789	2298.46	FALSE	84
2022-09-13	13:17:10	0.728155	3.23898	3.25862	2330.34	FALSE	84
2022-09-13	13:17:10	0.73645	3.27588	3.25862	2301.74	FALSE	84
2022-09-13	13:17:10	0.733397	3.2623	3.25862	2333.6	FALSE	84
2022-09-13	13:17:10	0.732277	3.25731	3.25862	2305	FALSE	84
2022-09-13	13:17:11	0.737214	3.27928	3.27147	2336.88	FALSE	84
2022-09-13	13:17:11	0.733041	3.26071	3.27147	2308.26	FALSE	84
2022-09-13	13:17:11	0.732634	3.2589	3.27147	2340.14	FALSE	84
2022-09-13	13:17:11	0.738944	3.28697	3.27147	2311.54	FALSE	84
2022-09-13	13:17:12	0.735127	3.26999	3.25053	2343.41	FALSE	84
2022-09-13	13:17:12	0.726578	3.23196	3.25053	2314.77	FALSE	84
2022-09-13	13:17:12	0.733601	3.2632	3.25053	2346.67	FALSE	84
2022-09-13	13:17:12	0.727697	3.23694	3.25053	2318.01	FALSE	84
2022-09-13	13:17:13	0.737468	3.28041	3.27029	2349.95	FALSE	84
2022-09-13	13:17:13	0.732684	3.25912	3.27029	2321.27	FALSE	84
2022-09-13	13:17:13	0.735433	3.27135	3.27029	2353.22	FALSE	84
2022-09-13	13:17:14	0.732226	3.25709	3.2585	2324.53	FALSE	84
2022-09-13	13:17:14	0.735178	3.27022	3.2585	2356.49	FALSE	84
2022-09-13	13:17:14	0.736603	3.27656	3.2585	2327.8	FALSE	84
2022-09-13	13:17:14	0.72617	3.23015	3.2585	2359.72	FALSE	84
2022-09-13	13:17:15	0.733957	3.26479	3.25845	2331.07	FALSE	84
2022-09-13	13:17:15	0.729784	3.24623	3.25845	2362.97	FALSE	84
2022-09-13	13:17:15	0.732532	3.25845	3.25845	2334.33	FALSE	84
2022-09-13	13:17:15	0.733855	3.26433	3.25845	2366.23	FALSE	84
2022-09-13	13:17:16	0.736705	3.27701	3.26671	2337.6	FALSE	84
2022-09-13	13:17:16	0.734313	3.26637	3.26671	2369.5	FALSE	84
2022-09-13	13:17:16	0.731921	3.25573	3.26671	2340.86	FALSE	84
2022-09-13	13:17:16	0.734618	3.26773	3.26671	2372.77	FALSE	84
2022-09-13	13:17:17	0.736756	3.27724	3.27543	2344.14	FALSE	84
2022-09-13	13:17:17	0.73813	3.28335	3.27543	2376.05	FALSE	84
2022-09-13	13:17:17	0.73416	3.26569	3.27543	2347.4	FALSE	84
2022-09-13	13:17:18	0.730394	3.24894	3.26948	2379.3	FALSE	84
2022-09-13	13:17:18	0.738333	3.28425	3.26948	2350.69	FALSE	84
2022-09-13	13:17:18	0.735331	3.2709	3.26948	2382.57	FALSE	84
2022-09-13	13:17:18	0.735992	3.27384	3.26948	2353.96	FALSE	84
2022-09-13	13:17:19	0.732786	3.25958	3.2632	2385.83	FALSE	84
2022-09-13	13:17:19	0.73813	3.28335	3.2632	2357.24	FALSE	84
2022-09-13	13:17:19	0.728664	3.24124	3.2632	2389.07	FALSE	84
2022-09-13	13:17:19	0.734822	3.26864	3.2632	2360.51	FALSE	84
2022-09-13	13:17:20	0.72902	3.24283	3.25573	2392.31	FALSE	84
2022-09-13	13:17:20	0.732277	3.25731	3.25573	2363.77	FALSE	84
2022-09-13	13:17:20	0.729478	3.24486	3.25573	2395.56	FALSE	84
2022-09-13	13:17:20	0.736908	3.27791	3.25573	2367.05	FALSE	84
2022-09-13	13:17:21	0.727952	3.23808	3.23989	2398.8	FALSE	84
2022-09-13	13:17:21	0.733957	3.26479	3.23989	2370.31	FALSE	84
2022-09-13	13:17:21	0.723168	3.2168	3.23989	2402.01	FALSE	84
2022-09-13	13:17:22	0.738893	3.28674	3.26083	2373.6	FALSE	84
2022-09-13	13:17:22	0.735178	3.27022	3.26083	2405.28	FALSE	84
2022-09-13	13:17:22	0.733092	3.26094	3.26083	2376.86	FALSE	84
2022-09-13	13:17:22	0.725102	3.2254	3.26083	2408.51	FALSE	84
2022-09-13	13:17:23	0.735331	3.2709	3.26349	2380.13	FALSE	84
2022-09-13	13:17:23	0.737112	3.27882	3.26349	2411.79	FALSE	84
2022-09-13	13:17:23	0.730547	3.24962	3.26349	2383.38	FALSE	84
2022-09-13	13:17:23	0.731667	3.2546	3.26349	2415.04	FALSE	84
2022-09-13	13:17:24	0.73014	3.24781	3.26648	2386.63	FALSE	84
2022-09-13	13:17:24	0.736857	3.27769	3.26648	2418.32	FALSE	84
2022-09-13	13:17:24	0.733397	3.2623	3.26648	2389.89	FALSE	84
2022-09-13	13:17:24	0.736959	3.27814	3.26648	2421.6	FALSE	84
2022-09-13	13:17:25	0.729784	3.24623	3.26411	2393.14	FALSE	84
2022-09-13	13:17:25	0.732277	3.25731	3.26411	2424.85	FALSE	84
2022-09-13	13:17:25	0.73528	3.27067	3.26411	2396.41	FALSE	84
2022-09-13	13:17:25	0.737875	3.28222	3.26411	2428.14	FALSE	84
2022-09-13	13:17:26	0.734924	3.26909	3.26916	2399.68	FALSE	84
2022-09-13	13:17:26	0.73131	3.25301	3.26916	2431.39	FALSE	84
2022-09-13	13:17:26	0.738588	3.28539	3.26916	2402.96	FALSE	84
2022-09-13	13:17:27	0.736959	3.27814	3.27401	2434.67	FALSE	84
2022-09-13	13:17:27	0.735076	3.26977	3.27401	2406.23	FALSE	84
2022-09-13	13:17:27	0.738893	3.28674	3.27401	2437.95	FALSE	84
2022-09-13	13:17:27	0.733193	3.26139	3.27401	2409.49	FALSE	84
2022-09-13	13:17:28	0.735687	3.27248	3.26213	2441.23	FALSE	84
2022-09-13	13:17:28	0.731972	3.25596	3.26213	2412.75	FALSE	84
2022-09-13	13:17:28	0.733092	3.26094	3.26213	2444.49	FALSE	84
2022-09-13	13:17:28	0.732684	3.25912	3.26213	2416.01	FALSE	84
2022-09-13	13:17:29	0.734415	3.26682	3.26886	2447.75	FALSE	84
2022-09-13	13:17:29	0.732684	3.25912	3.26886	2419.27	FALSE	84
2022-09-13	13:17:29	0.738028	3.2829	3.26886	2451.04	FALSE	84
2022-09-13	13:17:29	0.734364	3.2666	3.26886	2422.54	FALSE	84
2022-09-13	13:17:30	0.733601	3.2632	3.27241	2454.3	FALSE	84
2022-09-13	13:17:30	0.736908	3.27791	3.27241	2425.81	FALSE	84
2022-09-13	13:17:30	0.736501	3.2761	3.27241	2457.58	FALSE	84
2022-09-13	13:17:31	0.734211	3.26592	3.26071	2429.08	FALSE	84
2022-09-13	13:17:31	0.735382	3.27113	3.26071	2460.85	FALSE	84
2022-09-13	13:17:31	0.731616	3.25437	3.26071	2432.33	FALSE	84
2022-09-13	13:17:31	0.730954	3.25143	3.26071	2464.1	FALSE	84
2022-09-13	13:17:32	0.730445	3.24917	3.26173	2435.58	FALSE	84
2022-09-13	13:17:32	0.733804	3.26411	3.26173	2467.36	FALSE	84
2022-09-13	13:17:32	0.734059	3.26524	3.26173	2438.85	FALSE	84
2022-09-13	13:17:32	0.734771	3.26841	3.26173	2470.63	FALSE	84
2022-09-13	13:17:33	0.738333	3.28425	3.25726	2442.13	FALSE	84
2022-09-13	13:17:33	0.726985	3.23377	3.25726	2473.87	FALSE	84
2022-09-13	13:17:33	0.730089	3.24758	3.25726	2445.38	FALSE	84
2022-09-13	13:17:33	0.733651	3.26343	3.25726	2477.13	FALSE	84
2022-09-13	13:17:34	0.732125	3.25664	3.26041	2448.64	FALSE	84
2022-09-13	13:17:34	0.73355	3.26298	3.26041	2480.39	FALSE	84
2022-09-13	13:17:34	0.733244	3.26162	3.26041	2451.9	FALSE	84
2022-09-13	13:17:35	0.735585	3.27203	3.25505	2483.66	FALSE	84
2022-09-13	13:17:35	0.731717	3.25482	3.25505	2455.15	FALSE	84
2022-09-13	13:17:35	0.732277	3.25731	3.25505	2486.92	FALSE	84
2022-09-13	13:17:35	0.727494	3.23604	3.25505	2458.39	FALSE	84
2022-09-13	13:17:36	0.734313	3.26637	3.29829	2490.19	FALSE	84
2022-09-13	13:17:36	0.741031	3.29625	3.29829	2461.68	FALSE	84
2022-09-13	13:17:36	0.758181	3.37254	3.29829	2493.56	FALSE	84
2022-09-13	13:17:36	0.73243	3.258	3.29829	2464.94	FALSE	84
2022-09-13	13:17:37	0.730496	3.24939	3.26167	2496.81	FALSE	84
2022-09-13	13:17:37	0.73131	3.25301	3.26167	2468.2	FALSE	84
2022-09-13	13:17:37	0.739147	3.28787	3.26167	2500.1	FALSE	84
2022-09-13	13:17:37	0.732074	3.25641	3.26167	2471.45	FALSE	84
2022-09-13	13:17:38	0.730547	3.24962	3.25256	2503.35	FALSE	84
2022-09-13	13:17:38	0.731819	3.25528	3.25256	2474.71	FALSE	84
2022-09-13	13:17:38	0.731259	3.25279	3.25256	2506.6	FALSE	84
2022-09-13	13:17:39	0.73187	3.2555	3.9653	2477.96	FALSE	84
2022-09-13	13:17:39	0.726476	3.23151	3.9653	2509.83	FALSE	84
2022-09-13	13:17:39	1.48373	6.59993	3.9653	2484.56	FALSE	84
2022-09-13	13:17:39	0.623677	2.77424	3.9653	2512.61	FALSE	84
2022-09-13	13:17:40	0.736552	3.27633	3.26643	2487.84	FALSE	84
2022-09-13	13:17:40	0.736247	3.27497	3.26643	2515.88	FALSE	84
2022-09-13	13:17:40	0.729733	3.246	3.26643	2491.09	FALSE	84
2022-09-13	13:17:40	0.734771	3.26841	3.26643	2519.15	FALSE	84
2022-09-13	13:17:41	0.736145	3.27452	3.25681	2494.36	FALSE	84
2022-09-13	13:17:41	0.728766	3.2417	3.25681	2522.39	FALSE	84
2022-09-13	13:17:41	0.734109	3.26546	3.25681	2497.63	FALSE	84
2022-09-13	13:17:41	0.729631	3.24554	3.25681	2525.64	FALSE	84
2022-09-13	13:17:42	0.748664	3.33021	1.95168	2500.96	FALSE	84
2022-09-13	13:17:42	0.725712	3.22811	1.95168	2528.86	FALSE	84
2022-09-13	13:17:42	-0.158104	-0.703278	1.95168	2500.96	FALSE	84
2022-09-13	13:17:43	0.730496	3.24939	3.27288	2532.11	FALSE	84
2022-09-13	13:17:43	0.733855	3.26433	3.27288	2504.22	FALSE	84
2022-09-13	13:17:43	0.737773	3.28176	3.27288	2535.4	FALSE	84
2022-09-13	13:17:43	0.74098	3.29603	3.27288	2507.52	FALSE	84
2022-09-13	13:17:44	0.74159	3.29874	3.25788	2538.69	FALSE	84
2022-09-13	13:17:44	0.727188	3.23468	3.25788	2510.75	FALSE	84
2022-09-13	13:17:44	0.727494	3.23604	3.25788	2541.93	FALSE	84
2022-09-13	13:17:44	0.733346	3.26207	3.25788	2514.01	FALSE	84
2022-09-13	13:17:45	0.737926	3.28244	3.27158	2545.21	FALSE	84
2022-09-13	13:17:45	0.734211	3.26592	3.27158	2517.28	FALSE	84
2022-09-13	13:17:45	0.736298	3.2752	3.27158	2548.49	FALSE	84
2022-09-13	13:17:45	0.733499	3.26275	3.27158	2520.54	FALSE	84
2022-09-13	13:17:46	0.733193	3.26139	3.27165	2551.75	FALSE	84
2022-09-13	13:17:46	0.740522	3.29399	3.27165	2523.84	FALSE	84
2022-09-13	13:17:46	0.732786	3.25958	3.27165	2555.01	FALSE	84
2022-09-13	13:17:47	0.732684	3.25912	3.26224	2527.09	FALSE	84
2022-09-13	13:17:47	0.728512	3.24057	3.26224	2558.25	FALSE	84
2022-09-13	13:17:47	0.737773	3.28176	3.26224	2530.38	FALSE	84
2022-09-13	13:17:47	0.734568	3.26751	3.26224	2561.52	FALSE	84
2022-09-13	13:17:48	0.731107	3.25211	3.26286	2533.63	FALSE	84
2022-09-13	13:17:48	0.733804	3.26411	3.26286	2564.78	FALSE	84
2022-09-13	13:17:48	0.73645	3.27588	3.26286	2536.9	FALSE	84
2022-09-13	13:17:48	0.732735	3.25935	3.26286	2568.04	FALSE	84
2022-09-13	13:17:49	0.731819	3.25528	3.27339	2540.16	FALSE	84
2022-09-13	13:17:49	0.739809	3.29082	3.27339	2571.33	FALSE	84
2022-09-13	13:17:49	0.736959	3.27814	3.27339	2543.44	FALSE	84
2022-09-13	13:17:49	0.734975	3.26932	3.27339	2574.6	FALSE	84
2022-09-13	13:17:50	0.738893	3.28674	5.52095	2546.72	FALSE	84
2022-09-13	13:17:50	0.853244	3.7954	5.52095	2578.4	FALSE	84
2022-09-13	13:17:50	2.13136	9.48072	5.52095	2556.21	FALSE	84
2022-09-13	13:17:51	0.753906	3.35352	3.30236	2581.75	FALSE	84
2022-09-13	13:17:51	0.747799	3.32636	3.30236	2559.53	FALSE	84
2022-09-13	13:17:51	0.735534	3.2718	3.30236	2585.02	FALSE	84
2022-09-13	13:17:51	0.732379	3.25777	3.30236	2562.79	FALSE	84
2022-09-13	13:17:52	0.73874	3.28606	3.29201	2588.31	FALSE	84
2022-09-13	13:17:52	0.737824	3.28199	3.29201	2566.07	FALSE	84
2022-09-13	13:17:52	0.748359	3.32885	3.29201	2591.64	FALSE	84
2022-09-13	13:17:52	0.735382	3.27113	3.29201	2569.34	FALSE	84
2022-09-13	13:17:53	0.744644	3.31233	8.86765	2594.95	FALSE	84
2022-09-13	13:17:53	1.67543	7.45265	8.86765	2576.8	FALSE	84
2022-09-13	13:17:53	4.765	21.1957	8.86765	2616.14	1	85
2022-09-13	13:17:53	0.789071	3.50995	8.86765	2580.31	FALSE	85
2022-09-13	13:17:54	0.729784	3.24623	3.24472	2619.39	FALSE	85
2022-09-13	13:17:54	0.72958	3.24532	3.24472	2583.55	FALSE	85
2022-09-13	13:17:54	0.72897	3.2426	3.24472	2622.63	FALSE	85
2022-09-13	13:17:55	0.733295	3.26184	3.28516	2586.81	FALSE	85
2022-09-13	13:17:55	0.740929	3.2958	3.28516	2625.93	FALSE	85
2022-09-13	13:17:55	0.741896	3.3001	3.28516	2590.11	FALSE	85
2022-09-13	13:17:55	0.738028	3.2829	3.28516	2629.21	FALSE	85
2022-09-13	13:17:56	0.741234	3.29716	3.2649	2593.41	FALSE	85
2022-09-13	13:17:56	0.729835	3.24645	3.2649	2632.46	FALSE	85
2022-09-13	13:17:56	0.731514	3.25392	3.2649	2596.66	FALSE	85
2022-09-13	13:17:56	0.733346	3.26207	3.2649	2635.72	FALSE	85
2022-09-13	13:17:57	0.736807	3.27746	3.2593	2599.94	FALSE	85
2022-09-13	13:17:57	0.729733	3.246	3.2593	2638.97	FALSE	85
2022-09-13	13:17:57	0.733499	3.26275	3.2593	2603.2	FALSE	85
2022-09-13	13:17:57	0.730852	3.25098	3.2593	2642.22	FALSE	85
2022-09-13	13:17:58	0.735382	3.27113	3.2663	2606.47	FALSE	85
2022-09-13	13:17:58	0.732277	3.25731	3.2663	2645.47	FALSE	85
2022-09-13	13:17:58	0.735229	3.27045	3.2663	2609.75	FALSE	85
2022-09-13	13:17:59	0.734211	3.26592	3.24554	2648.74	FALSE	85
2022-09-13	13:17:59	0.733193	3.26139	3.24554	2613.01	FALSE	85
2022-09-13	13:17:59	0.726527	3.23174	3.24554	2651.97	FALSE	85
2022-09-13	13:17:59	0.724593	3.22313	3.24554	2616.23	FALSE	85
2022-09-13	13:18:00	0.729478	3.24486	3.26009	2655.22	FALSE	85
2022-09-13	13:18:00	0.735229	3.27045	3.26009	2619.5	FALSE	85
2022-09-13	13:18:00	0.739758	3.29059	3.26009	2658.51	FALSE	85
2022-09-13	13:18:00	0.727137	3.23445	3.26009	2622.73	FALSE	85
2022-09-13	13:18:01	0.732125	3.25664	17.1676	2661.76	FALSE	85
2022-09-13	13:18:01	13.7014	60.9466	17.1676	2683.68	1	86
2022-09-13	13:18:01	0.593702	2.64091	17.1676	2664.41	FALSE	86
2022-09-13	13:18:01	0.410547	1.8262	17.1676	2685.51	FALSE	86

## Sheet: Unnamed_martin_202291313125 (3)
Date	Time	Lbs	Newtons	Total force x time	total steps > 13.345		**GoPro Fitting: 1302
2022-09-13	13:13:01	0.585865	2.60604	2.60604	FALSE	0			Total force x time	2685.51
2022-09-13	13:13:01	0.460776	2.04962	2.04962	FALSE	0			Total steps	86
2022-09-13	13:13:01	0.264033	1.17447	3.78052	FALSE	0
2022-09-13	13:13:01	0.220216	0.979565	3.02919	FALSE	0
2022-09-13	13:13:02	0.379555	1.68834	5.46885	FALSE	0
2022-09-13	13:13:02	0.441183	1.96247	4.99166	FALSE	0
2022-09-13	13:13:02	0.415127	1.84657	7.31542	FALSE	0
2022-09-13	13:13:02	0.402405	1.78998	6.78164	FALSE	0
2022-09-13	13:13:03	1.25009	5.56065	12.8761	FALSE	0
2022-09-13	13:13:03	3.13731	13.9554	20.737	1	1
2022-09-13	13:13:03	1.28062	5.69645	18.5725	FALSE	1
2022-09-13	13:13:03	0.503779	2.24091	22.9779	FALSE	1
2022-09-13	13:13:04	-0.238664	-1.06163	18.5725	FALSE	1
2022-09-13	13:13:04	-0.480801	-2.1387	22.9779	FALSE	1
2022-09-13	13:13:04	-0.7436	-3.30768	18.5725	FALSE	1
2022-09-13	13:13:04	-0.56019	-2.49184	22.9779	FALSE	1
2022-09-13	13:13:05	0.155433	0.691397	19.2639	FALSE	1
2022-09-13	13:13:05	12.8273	57.0584	80.0363	1	2
2022-09-13	13:13:05	15.3911	68.4627	87.7266	1	3
2022-09-13	13:13:06	11.5497	51.3754	131.412	1	4
2022-09-13	13:13:06	10.4972	46.6936	134.42	1	5
2022-09-13	13:13:06	9.59278	42.6706	174.082	1	6
2022-09-13	13:13:06	5.17228	23.0073	157.428	1	7
2022-09-13	13:13:07	0.645509	2.87135	176.954	FALSE	7
2022-09-13	13:13:07	0.896094	3.98601	161.414	FALSE	7
2022-09-13	13:13:07	2.51258	11.1765	188.13	FALSE	7
2022-09-13	13:13:07	9.28657	41.3085	202.722	1	8
2022-09-13	13:13:08	4.78362	21.2785	209.409	1	9
2022-09-13	13:13:08	1.97279	8.77536	211.497	FALSE	9
2022-09-13	13:13:08	0.44154	1.96406	211.373	FALSE	9
2022-09-13	13:13:08	0.20958	0.932254	212.43	FALSE	9
2022-09-13	13:13:09	-0.391488	-1.74142	211.373	FALSE	9
2022-09-13	13:13:09	-0.562735	-2.50316	212.43	FALSE	9
2022-09-13	13:13:09	-1.65307	-7.35319	211.373	FALSE	9
2022-09-13	13:13:10	-0.364923	-1.62325	212.43	FALSE	9
2022-09-13	13:13:10	-0.231743	-1.03084	211.373	FALSE	9
2022-09-13	13:13:10	-0.308587	-1.37266	212.43	FALSE	9
2022-09-13	13:13:10	0.0593005	0.26378	211.636	FALSE	9
2022-09-13	13:13:11	-0.069758	-0.310298	212.43	FALSE	9
2022-09-13	13:13:11	-0.0112847	-0.0501966	211.636	FALSE	9
2022-09-13	13:13:11	0.125051	0.556252	212.986	FALSE	9
2022-09-13	13:13:11	1.4048	6.24883	217.885	FALSE	9
2022-09-13	13:13:12	13.1378	58.4396	271.426	1	10
2022-09-13	13:13:12	13.0356	57.985	275.87	1	11
2022-09-13	13:13:12	7.63177	33.9476	305.373	1	12
2022-09-13	13:13:12	2.8081	12.491	288.361	FALSE	12
2022-09-13	13:13:13	4.01701	17.8685	323.242	1	13
2022-09-13	13:13:13	3.15971	14.055	302.416	1	14
2022-09-13	13:13:13	3.90775	17.3825	340.624	1	15
2022-09-13	13:13:14	13.5927	60.463	362.879	1	16
2022-09-13	13:13:14	2.0994	9.33855	349.963	FALSE	16
2022-09-13	13:13:14	1.24083	5.51946	368.399	FALSE	16
2022-09-13	13:13:14	0.903117	4.01725	353.98	FALSE	16
2022-09-13	13:13:15	0.240674	1.07057	369.469	FALSE	16
2022-09-13	13:13:15	0.0838297	0.372891	354.353	FALSE	16
2022-09-13	13:13:15	0.0987915	0.439444	369.909	FALSE	16
2022-09-13	13:13:15	-0.328689	-1.46207	354.353	FALSE	16
2022-09-13	13:13:16	-0.57276	-2.54775	369.909	FALSE	16
2022-09-13	13:13:16	-0.879325	-3.91141	354.353	FALSE	16
2022-09-13	13:13:16	-0.786297	-3.49761	369.909	FALSE	16
2022-09-13	13:13:16	-0.769147	-3.42132	354.353	FALSE	16
2022-09-13	13:13:17	-0.750419	-3.33801	369.909	FALSE	16
2022-09-13	13:13:17	-0.663498	-2.95137	354.353	FALSE	16
2022-09-13	13:13:17	-0.429758	-1.91165	369.909	FALSE	16
2022-09-13	13:13:18	-0.344058	-1.53044	354.353	FALSE	16
2022-09-13	13:13:18	-1.08533	-4.82776	369.909	FALSE	16
2022-09-13	13:13:18	-0.464313	-2.06536	354.353	FALSE	16
2022-09-13	13:13:18	0.378079	1.68177	371.591	FALSE	16
2022-09-13	13:13:19	0.1507	0.670344	355.023	FALSE	16
2022-09-13	13:13:19	0.159555	0.709733	372.3	FALSE	16
2022-09-13	13:13:19	0.299911	1.33406	356.357	FALSE	16
2022-09-13	13:13:19	0.13986	0.622125	372.922	FALSE	16
2022-09-13	13:13:20	0.33701	1.49909	357.856	FALSE	16
2022-09-13	13:13:20	0.174517	0.776287	373.699	FALSE	16
2022-09-13	13:13:20	0.556145	2.47384	360.33	FALSE	16
2022-09-13	13:13:20	-0.27785	-1.23593	373.699	FALSE	16
2022-09-13	13:13:21	-0.636984	-2.83343	360.33	FALSE	16
2022-09-13	13:13:21	-0.698256	-3.10598	373.699	FALSE	16
2022-09-13	13:13:21	-0.731793	-3.25516	360.33	FALSE	16
2022-09-13	13:13:22	-0.756781	-3.36631	373.699	FALSE	16
2022-09-13	13:13:22	-0.909758	-4.04679	360.33	FALSE	16
2022-09-13	13:13:22	-0.810317	-3.60445	373.699	FALSE	16
2022-09-13	13:13:22	-0.82192	-3.65606	360.33	FALSE	16
2022-09-13	13:13:23	-1.15627	-5.14332	373.699	FALSE	16
2022-09-13	13:13:23	-0.924058	-4.11039	360.33	FALSE	16
2022-09-13	13:13:23	-0.734694	-3.26807	373.699	FALSE	16
2022-09-13	13:13:23	-0.743243	-3.30609	360.33	FALSE	16
2022-09-13	13:13:24	-1.59464	-7.09328	373.699	FALSE	16
2022-09-13	13:13:24	-0.841819	-3.74458	360.33	FALSE	16
2022-09-13	13:13:24	-0.961004	-4.27474	373.699	FALSE	16
2022-09-13	13:13:24	-0.947518	-4.21475	360.33	FALSE	16
2022-09-13	13:13:25	-0.83907	-3.73235	373.699	FALSE	16
2022-09-13	13:13:25	-0.878816	-3.90915	360.33	FALSE	16
2022-09-13	13:13:25	-0.816475	-3.63184	373.699	FALSE	16
2022-09-13	13:13:25	-0.99047	-4.40581	360.33	FALSE	16
2022-09-13	13:13:26	-0.915305	-4.07146	373.699	FALSE	16
2022-09-13	13:13:26	-0.835356	-3.71583	360.33	FALSE	16
2022-09-13	13:13:26	-0.768078	-3.41656	373.699	FALSE	16
2022-09-13	13:13:27	-0.801513	-3.56529	360.33	FALSE	16
2022-09-13	13:13:27	-0.74935	-3.33326	373.699	FALSE	16
2022-09-13	13:13:27	-0.855966	-3.80751	360.33	FALSE	16
2022-09-13	13:13:27	-0.722633	-3.21442	373.699	FALSE	16
2022-09-13	13:13:28	-0.706552	-3.14288	360.33	FALSE	16
2022-09-13	13:13:28	-0.20014	-0.890263	373.699	FALSE	16
2022-09-13	13:13:28	0.0386389	0.171874	360.502	FALSE	16
2022-09-13	13:13:29	0.147952	0.65812	374.357	FALSE	16
2022-09-13	13:13:29	0.378028	1.68154	362.184	FALSE	16
2022-09-13	13:13:29	0.127138	0.565535	374.922	FALSE	16
2022-09-13	13:13:30	-0.0812083	-0.361231	362.184	FALSE	16
2022-09-13	13:13:30	0.0298348	0.132711	375.055	FALSE	16
2022-09-13	13:13:30	-0.0499616	-0.222239	362.184	FALSE	16
2022-09-13	13:13:31	-0.32874	-1.4623	375.055	FALSE	16
2022-09-13	13:13:31	-0.148435	-0.660269	362.184	FALSE	16
2022-09-13	13:13:31	-0.132048	-0.587376	375.055	FALSE	16
2022-09-13	13:13:32	-0.233524	-1.03876	362.184	FALSE	16
2022-09-13	13:13:32	-0.232913	-1.03604	375.055	FALSE	16
2022-09-13	13:13:32	-0.178867	-0.795636	362.184	FALSE	16
2022-09-13	13:13:32	-0.134949	-0.60028	375.055	FALSE	16
2022-09-13	13:13:33	-0.155	-0.689471	362.184	FALSE	16
2022-09-13	13:13:33	0.0150765	0.0670633	375.122	FALSE	16
2022-09-13	13:13:33	0.145611	0.647707	362.831	FALSE	16
2022-09-13	13:13:33	0.473194	2.10486	377.227	FALSE	16
2022-09-13	13:13:34	0.414466	1.84363	364.675	FALSE	16
2022-09-13	13:13:34	0.538079	2.39348	379.62	FALSE	16
2022-09-13	13:13:34	0.33869	1.50656	366.181	FALSE	16
2022-09-13	13:13:34	0.285865	1.27158	380.892	FALSE	16
2022-09-13	13:13:35	0.204186	0.90826	367.09	FALSE	16
2022-09-13	13:13:35	0.739147	3.28787	384.18	FALSE	16
2022-09-13	13:13:35	0.721743	3.21046	370.3	FALSE	16
2022-09-13	13:13:36	0.516349	2.29682	386.477	FALSE	16
2022-09-13	13:13:36	-0.323549	-1.43921	370.3	FALSE	16
2022-09-13	13:13:36	-1.03312	-4.59552	386.477	FALSE	16
2022-09-13	13:13:36	-1.92905	-8.5808	370.3	FALSE	16
2022-09-13	13:13:37	-2.49851	-11.1139	386.477	FALSE	16
2022-09-13	13:13:37	-0.881921	-3.92296	370.3	FALSE	16
2022-09-13	13:13:37	-0.790164	-3.51481	386.477	FALSE	16
2022-09-13	13:13:37	-0.818358	-3.64022	370.3	FALSE	16
2022-09-13	13:13:38	-0.724414	-3.22234	386.477	FALSE	16
2022-09-13	13:13:38	-1.06401	-4.73293	370.3	FALSE	16
2022-09-13	13:13:38	-1.11027	-4.9387	386.477	FALSE	16
2022-09-13	13:13:38	-0.928282	-4.12918	370.3	FALSE	16
2022-09-13	13:13:39	-0.842073	-3.74571	386.477	FALSE	16
2022-09-13	13:13:39	-0.835508	-3.71651	370.3	FALSE	16
2022-09-13	13:13:39	-0.742277	-3.3018	386.477	FALSE	16
2022-09-13	13:13:39	-0.583244	-2.59439	370.3	FALSE	16
2022-09-13	13:13:40	-0.583498	-2.59552	386.477	FALSE	16
2022-09-13	13:13:40	-0.41846	-1.86139	370.3	FALSE	16
2022-09-13	13:13:40	0.00876615	0.0389936	386.516	FALSE	16
2022-09-13	13:13:41	0.192583	0.856648	371.157	FALSE	16
2022-09-13	13:13:41	-0.34533	-1.5361	386.516	FALSE	16
2022-09-13	13:13:41	-0.118816	-0.528517	371.157	FALSE	16
2022-09-13	13:13:41	0.112685	0.501245	387.017	FALSE	16
2022-09-13	13:13:42	-0.0630913	-0.280643	371.157	FALSE	16
2022-09-13	13:13:42	0.0642369	0.285739	387.303	FALSE	16
2022-09-13	13:13:42	-0.158308	-0.704186	371.157	FALSE	16
2022-09-13	13:13:42	0.100471	0.446915	387.75	FALSE	16
2022-09-13	13:13:43	0.102914	0.457782	371.615	FALSE	16
2022-09-13	13:13:43	0.41014	1.82438	389.574	FALSE	16
2022-09-13	13:13:43	0.335178	1.49094	373.106	FALSE	16
2022-09-13	13:13:43	0.285305	1.26909	390.843	FALSE	16
2022-09-13	13:13:44	0.29986	1.33384	374.439	FALSE	16
2022-09-13	13:13:44	0.13472	0.599262	391.442	FALSE	16
2022-09-13	13:13:44	-0.127213	-0.565869	374.439	FALSE	16
2022-09-13	13:13:45	-0.28757	-1.27917	391.442	FALSE	16
2022-09-13	13:13:45	-0.370267	-1.64702	374.439	FALSE	16
2022-09-13	13:13:45	-0.384516	-1.7104	391.442	FALSE	16
2022-09-13	13:13:45	-0.427112	-1.89988	374.439	FALSE	16
2022-09-13	13:13:46	-0.270216	-1.20197	391.442	FALSE	16
2022-09-13	13:13:46	-0.176018	-0.782963	374.439	FALSE	16
2022-09-13	13:13:46	-0.267671	-1.19065	391.442	FALSE	16
2022-09-13	13:13:46	-0.380038	-1.69049	374.439	FALSE	16
2022-09-13	13:13:47	-0.326704	-1.45324	391.442	FALSE	16
2022-09-13	13:13:47	-0.281615	-1.25268	374.439	FALSE	16
2022-09-13	13:13:47	-0.393524	-1.75047	391.442	FALSE	16
2022-09-13	13:13:47	-0.206501	-0.918558	374.439	FALSE	16
2022-09-13	13:13:48	-0.0127606	-0.0567617	391.442	FALSE	16
2022-09-13	13:13:48	0.0221504	0.0985294	374.538	FALSE	16
2022-09-13	13:13:48	-0.159173	-0.708033	391.442	FALSE	16
2022-09-13	13:13:49	0.189428	0.842614	375.381	FALSE	16
2022-09-13	13:13:49	0.0698349	0.31064	391.753	FALSE	16
2022-09-13	13:13:49	0.303321	1.34923	376.73	FALSE	16
2022-09-13	13:13:49	0.82215	3.65709	395.41	FALSE	16
2022-09-13	13:13:50	1.28017	5.69445	382.424	FALSE	16
2022-09-13	13:13:50	1.68301	7.48637	402.896	FALSE	16
2022-09-13	13:13:50	1.50505	6.69476	389.119	FALSE	16
2022-09-13	13:13:50	4.70993	20.9507	423.847	1	17
2022-09-13	13:13:51	2.63894	11.7385	400.857	FALSE	17
2022-09-13	13:13:51	1.28653	5.72274	429.57	FALSE	17
2022-09-13	13:13:51	0.0584353	0.259932	401.117	FALSE	17
2022-09-13	13:13:51	0.290598	1.29264	430.863	FALSE	17
2022-09-13	13:13:52	-0.127926	-0.56904	401.117	FALSE	17
2022-09-13	13:13:52	-0.350928	-1.561	430.863	FALSE	17
2022-09-13	13:13:52	-0.647162	-2.87871	401.117	FALSE	17
2022-09-13	13:13:53	-0.605432	-2.69308	430.863	FALSE	17
2022-09-13	13:13:53	-0.522175	-2.32274	401.117	FALSE	17
2022-09-13	13:13:53	-0.553727	-2.46309	430.863	FALSE	17
2022-09-13	13:13:53	-0.52533	-2.33677	401.117	FALSE	17
2022-09-13	13:13:54	-0.413727	-1.84034	430.863	FALSE	17
2022-09-13	13:13:54	-0.598867	-2.66388	401.117	FALSE	17
2022-09-13	13:13:54	-0.57902	-2.5756	430.863	FALSE	17
2022-09-13	13:13:54	-0.637086	-2.83389	401.117	FALSE	17
2022-09-13	13:13:55	-0.507824	-2.2589	430.863	FALSE	17
2022-09-13	13:13:55	-0.407773	-1.81386	401.117	FALSE	17
2022-09-13	13:13:55	-0.291997	-1.29886	430.863	FALSE	17
2022-09-13	13:13:55	0.18958	0.84329	401.961	FALSE	17
2022-09-13	13:13:56	0.369479	1.64352	432.506	FALSE	17
2022-09-13	13:13:56	1.60296	7.13029	409.091	FALSE	17
2022-09-13	13:13:56	1.18729	5.2813	437.787	FALSE	17
2022-09-13	13:13:57	2.83533	12.6121	421.703	FALSE	17
2022-09-13	13:13:57	0.834109	3.71028	441.498	FALSE	17
2022-09-13	13:13:57	1.18597	5.27543	426.979	FALSE	17
2022-09-13	13:13:57	1.43151	6.36764	447.865	FALSE	17
2022-09-13	13:13:58	1.74062	7.74263	434.721	FALSE	17
2022-09-13	13:13:58	1.55803	6.93043	454.796	FALSE	17
2022-09-13	13:13:58	0.589427	2.62189	437.343	FALSE	17
2022-09-13	13:13:58	0.675992	3.00695	457.803	FALSE	17
2022-09-13	13:13:59	0.294466	1.30984	438.653	FALSE	17
2022-09-13	13:13:59	0.263626	1.17266	458.975	FALSE	17
2022-09-13	13:13:59	0.41416	1.84227	440.495	FALSE	17
2022-09-13	13:13:59	0.73299	3.26049	462.236	FALSE	17
2022-09-13	13:14:00	2.07309	9.22152	449.717	FALSE	17
2022-09-13	13:14:00	1.61523	7.18487	469.421	FALSE	17
2022-09-13	13:14:00	2.3735	10.5578	460.274	FALSE	17
2022-09-13	13:14:01	4.04683	18.0011	487.422	1	18
2022-09-13	13:14:01	6.82678	30.3669	490.641	1	19
2022-09-13	13:14:01	6.97518	31.027	518.449	1	20
2022-09-13	13:14:01	4.46383	19.856	510.497	1	21
2022-09-13	13:14:02	1.62429	7.22517	525.674	FALSE	21
2022-09-13	13:14:02	0.91869	4.08652	514.584	FALSE	21
2022-09-13	13:14:02	0.583779	2.59677	528.271	FALSE	21
2022-09-13	13:14:02	0.992684	4.41566	519	FALSE	21
2022-09-13	13:14:03	0.43528	1.93621	530.207	FALSE	21
2022-09-13	13:14:03	0.430751	1.91607	520.916	FALSE	21
2022-09-13	13:14:03	0.145051	0.645216	530.852	FALSE	21
2022-09-13	13:14:03	0.534975	2.37968	523.295	FALSE	21
2022-09-13	13:14:04	0.615789	2.73915	533.591	FALSE	21
2022-09-13	13:14:04	2.94011	13.0782	536.374	FALSE	21
2022-09-13	13:14:04	3.00434	13.3639	546.955	1	22
2022-09-13	13:14:05	2.47009	10.9875	547.361	FALSE	22
2022-09-13	13:14:05	2.87156	12.7733	559.728	FALSE	22
2022-09-13	13:14:05	1.65197	7.34829	554.709	FALSE	22
2022-09-13	13:14:05	3.05034	13.5685	573.297	1	23
2022-09-13	13:14:06	2.97935	13.2527	567.962	FALSE	23
2022-09-13	13:14:06	0.540165	2.40276	575.7	FALSE	23
2022-09-13	13:14:06	0.194059	0.863213	568.825	FALSE	23
2022-09-13	13:14:06	0.521896	2.3215	578.021	FALSE	23
2022-09-13	13:14:07	0.100929	0.448952	569.274	FALSE	23
2022-09-13	13:14:07	-0.286145	-1.27283	578.021	FALSE	23
2022-09-13	13:14:07	-0.520546	-2.31549	569.274	FALSE	23
2022-09-13	13:14:07	-0.752251	-3.34616	578.021	FALSE	23
2022-09-13	13:14:08	-0.814898	-3.62483	569.274	FALSE	23
2022-09-13	13:14:08	-0.854999	-3.80321	578.021	FALSE	23
2022-09-13	13:14:08	-0.903804	-4.0203	569.274	FALSE	23
2022-09-13	13:14:09	-1.03383	-4.59868	578.021	FALSE	23
2022-09-13	13:14:09	-1.25393	-5.57773	569.274	FALSE	23
2022-09-13	13:14:09	-1.05765	-4.70464	578.021	FALSE	23
2022-09-13	13:14:09	-0.995406	-4.42776	569.274	FALSE	23
2022-09-13	13:14:10	-1.21739	-5.41519	578.021	FALSE	23
2022-09-13	13:14:10	-0.997493	-4.43705	569.274	FALSE	23
2022-09-13	13:14:10	-0.705127	-3.13655	578.021	FALSE	23
2022-09-13	13:14:10	0.0822521	0.365874	569.64	FALSE	23
2022-09-13	13:14:11	0.421845	1.87645	579.898	FALSE	23
2022-09-13	13:14:11	0.146425	0.651328	570.291	FALSE	23
2022-09-13	13:14:11	0.351209	1.56225	581.46	FALSE	23
2022-09-13	13:14:11	0.156603	0.696601	570.988	FALSE	23
2022-09-13	13:14:12	0.329122	1.464	582.924	FALSE	23
2022-09-13	13:14:12	0.103626	0.460949	571.449	FALSE	23
2022-09-13	13:14:12	0.329784	1.46695	584.391	FALSE	23
2022-09-13	13:14:12	0.968715	4.30904	575.758	FALSE	23
2022-09-13	13:14:13	3.55441	15.8107	600.202	1	24
2022-09-13	13:14:13	5.0996	22.684	598.442	1	25
2022-09-13	13:14:13	3.57935	15.9217	616.123	1	26
2022-09-13	13:14:14	2.06205	9.17241	607.614	FALSE	26
2022-09-13	13:14:14	0.783015	3.48301	619.606	FALSE	26
2022-09-13	13:14:14	0.707952	3.14911	610.764	FALSE	26
2022-09-13	13:14:14	0.411005	1.82823	621.435	FALSE	26
2022-09-13	13:14:15	0.275178	1.22405	611.988	FALSE	26
2022-09-13	13:14:15	0.138384	0.61556	622.05	FALSE	26
2022-09-13	13:14:15	0.369071	1.6417	613.629	FALSE	26
2022-09-13	13:14:15	0.186272	0.828575	622.879	FALSE	26
2022-09-13	13:14:16	0.252888	1.1249	614.754	FALSE	26
2022-09-13	13:14:16	0.256298	1.14006	624.019	FALSE	26
2022-09-13	13:14:16	1.06933	4.75659	619.511	FALSE	26
2022-09-13	13:14:16	0.687086	3.0563	627.075	FALSE	26
2022-09-13	13:14:17	0.202863	0.902375	620.413	FALSE	26
2022-09-13	13:14:17	-0.168486	-0.749459	627.075	FALSE	26
2022-09-13	13:14:17	-0.00884198	-0.0393309	620.413	FALSE	26
2022-09-13	13:14:18	-0.0364247	-0.162024	627.075	FALSE	26
2022-09-13	13:14:18	0.035331	0.157159	620.57	FALSE	26
2022-09-13	13:14:18	0.280165	1.24623	628.321	FALSE	26
2022-09-13	13:14:18	1.04449	4.6461	625.216	FALSE	26
2022-09-13	13:14:19	0.675076	3.00287	631.324	FALSE	26
2022-09-13	13:14:19	0.248155	1.10384	626.32	FALSE	26
2022-09-13	13:14:19	0.261743	1.16429	632.488	FALSE	26
2022-09-13	13:14:19	0.387392	1.7232	628.043	FALSE	26
2022-09-13	13:14:20	0.286222	1.27317	633.762	FALSE	26
2022-09-13	13:14:20	0.274873	1.22269	629.266	FALSE	26
2022-09-13	13:14:20	0.122303	0.544028	634.306	FALSE	26
2022-09-13	13:14:20	0.18729	0.833103	630.099	FALSE	26
2022-09-13	13:14:21	0.128613	0.572096	634.878	FALSE	26
2022-09-13	13:14:21	0.0856109	0.380814	630.48	FALSE	26
2022-09-13	13:14:21	-0.12014	-0.534407	634.878	FALSE	26
2022-09-13	13:14:22	-0.158155	-0.703505	630.48	FALSE	26
2022-09-13	13:14:22	-0.197544	-0.878715	634.878	FALSE	26
2022-09-13	13:14:22	-0.160903	-0.715729	630.48	FALSE	26
2022-09-13	13:14:22	-0.232404	-1.03378	634.878	FALSE	26
2022-09-13	13:14:23	-0.37673	-1.67577	630.48	FALSE	26
2022-09-13	13:14:23	-0.48874	-2.17401	634.878	FALSE	26
2022-09-13	13:14:23	-0.556221	-2.47418	630.48	FALSE	26
2022-09-13	13:14:23	-0.498511	-2.21748	634.878	FALSE	26
2022-09-13	13:14:24	-0.391793	-1.74277	630.48	FALSE	26
2022-09-13	13:14:24	-0.382226	-1.70022	634.878	FALSE	26
2022-09-13	13:14:24	-0.447264	-1.98952	630.48	FALSE	26
2022-09-13	13:14:24	-0.357646	-1.59088	634.878	FALSE	26
2022-09-13	13:14:25	-0.514745	-2.28969	630.48	FALSE	26
2022-09-13	13:14:25	-0.371488	-1.65245	634.878	FALSE	26
2022-09-13	13:14:25	-0.0554069	-0.246461	630.48	FALSE	26
2022-09-13	13:14:26	-0.0867554	-0.385905	634.878	FALSE	26
2022-09-13	13:14:26	0.046476	0.206735	630.687	FALSE	26
2022-09-13	13:14:26	0.148613	0.66106	635.539	FALSE	26
2022-09-13	13:14:26	0.0422522	0.187946	630.875	FALSE	26
2022-09-13	13:14:27	0.221387	0.984774	636.524	FALSE	26
2022-09-13	13:14:27	0.0540078	0.240237	631.115	FALSE	26
2022-09-13	13:14:27	-0.328638	-1.46185	636.524	FALSE	26
2022-09-13	13:14:27	-0.48818	-2.17152	631.115	FALSE	26
2022-09-13	13:14:28	-0.588384	-2.61725	636.524	FALSE	26
2022-09-13	13:14:28	-0.531539	-2.36439	631.115	FALSE	26
2022-09-13	13:14:28	-0.708434	-3.15126	636.524	FALSE	26
2022-09-13	13:14:28	-0.708282	-3.15058	631.115	FALSE	26
2022-09-13	13:14:29	-0.607926	-2.70418	636.524	FALSE	26
2022-09-13	13:14:29	-0.474185	-2.10927	631.115	FALSE	26
2022-09-13	13:14:29	-0.0769844	-0.342442	636.524	FALSE	26
2022-09-13	13:14:30	0.786272	3.4975	634.612	FALSE	26
2022-09-13	13:14:30	2.10927	9.38245	645.906	FALSE	26
2022-09-13	13:14:30	1.53864	6.84418	641.457	FALSE	26
2022-09-13	13:14:30	1.24851	5.55362	651.46	FALSE	26
2022-09-13	13:14:31	0.762812	3.39314	644.85	FALSE	26
2022-09-13	13:14:31	1.68836	7.51016	658.97	FALSE	26
2022-09-13	13:14:31	0.664695	2.9567	647.806	FALSE	26
2022-09-13	13:14:31	1.411	6.27641	665.246	FALSE	26
2022-09-13	13:14:32	3.41772	15.2027	663.009	1	27
2022-09-13	13:14:32	2.84632	12.661	677.907	FALSE	27
2022-09-13	13:14:32	3.33772	14.8468	677.856	1	28
2022-09-13	13:14:32	1.33518	5.93915	683.846	FALSE	28
2022-09-13	13:14:33	1.61365	7.17784	685.034	FALSE	28
2022-09-13	13:14:33	1.43894	6.40069	690.247	FALSE	28
2022-09-13	13:14:33	0.82612	3.67475	688.709	FALSE	28
2022-09-13	13:14:34	1.0707	4.76269	695.01	FALSE	28
2022-09-13	13:14:34	0.498995	2.21963	690.928	FALSE	28
2022-09-13	13:14:34	0.562404	2.50169	697.511	FALSE	28
2022-09-13	13:14:34	0.735229	3.27045	694.199	FALSE	28
2022-09-13	13:14:35	0.731005	3.25166	700.763	FALSE	28
2022-09-13	13:14:35	0.379097	1.6863	695.885	FALSE	28
2022-09-13	13:14:35	0.732735	3.25935	704.022	FALSE	28
2022-09-13	13:14:35	0.171361	0.762248	696.647	FALSE	28
2022-09-13	13:14:36	0.0164506	0.0731756	704.096	FALSE	28
2022-09-13	13:14:36	-0.113982	-0.507015	696.647	FALSE	28
2022-09-13	13:14:36	-0.206654	-0.919238	704.096	FALSE	28
2022-09-13	13:14:36	-0.171081	-0.761003	696.647	FALSE	28
2022-09-13	13:14:37	-0.157086	-0.69875	704.096	FALSE	28
2022-09-13	13:14:37	-0.15047	-0.669321	696.647	FALSE	28
2022-09-13	13:14:37	-0.0470099	-0.209109	704.096	FALSE	28
2022-09-13	13:14:38	-0.151234	-0.672719	696.647	FALSE	28
2022-09-13	13:14:38	-0.0496053	-0.220654	704.096	FALSE	28
2022-09-13	13:14:38	-0.148944	-0.662533	696.647	FALSE	28
2022-09-13	13:14:38	-0.125941	-0.560211	704.096	FALSE	28
2022-09-13	13:14:39	-0.381157	-1.69546	696.647	FALSE	28
2022-09-13	13:14:39	-0.718358	-3.1954	704.096	FALSE	28
2022-09-13	13:14:39	-0.716831	-3.18861	696.647	FALSE	28
2022-09-13	13:14:39	-0.657747	-2.92579	704.096	FALSE	28
2022-09-13	13:14:40	-0.530674	-2.36054	696.647	FALSE	28
2022-09-13	13:14:40	-0.278053	-1.23684	704.096	FALSE	28
2022-09-13	13:14:40	0.921692	4.09987	700.747	FALSE	28
2022-09-13	13:14:40	1.5105	6.71901	710.815	FALSE	28
2022-09-13	13:14:41	2.7596	12.2753	713.022	FALSE	28
2022-09-13	13:14:41	1.8963	8.43512	719.25	FALSE	28
2022-09-13	13:14:41	1.77426	7.89226	720.915	FALSE	28
2022-09-13	13:14:42	0.820216	3.64848	722.898	FALSE	28
2022-09-13	13:14:42	0.797774	3.54866	724.463	FALSE	28
2022-09-13	13:14:42	0.260725	1.15976	724.058	FALSE	28
2022-09-13	13:14:42	0.44902	1.99733	726.461	FALSE	28
2022-09-13	13:14:43	0.272939	1.21409	725.272	FALSE	28
2022-09-13	13:14:43	0.32215	1.43299	727.894	FALSE	28
2022-09-13	13:14:43	0.283677	1.26185	726.534	FALSE	28
2022-09-13	13:14:43	0.244491	1.08754	728.981	FALSE	28
2022-09-13	13:14:44	0.334924	1.48981	728.024	FALSE	28
2022-09-13	13:14:44	0.156043	0.69411	729.675	FALSE	28
2022-09-13	13:14:44	0.0403692	0.17957	728.203	FALSE	28
2022-09-13	13:14:44	0.0233209	0.103736	729.779	FALSE	28
2022-09-13	13:14:45	-0.138511	-0.616125	728.203	FALSE	28
2022-09-13	13:14:45	0.0563997	0.250877	730.03	FALSE	28
2022-09-13	13:14:45	0.31986	1.4228	729.626	FALSE	28
2022-09-13	13:14:46	0.320827	1.4271	731.457	FALSE	28
2022-09-13	13:14:46	0.580165	2.58069	732.207	FALSE	28
2022-09-13	13:14:46	0.152888	0.680076	732.137	FALSE	28
2022-09-13	13:14:46	0.729886	3.24668	735.453	FALSE	28
2022-09-13	13:14:47	0.744949	3.31368	735.451	FALSE	28
2022-09-13	13:14:47	0.448308	1.99416	737.448	FALSE	28
2022-09-13	13:14:47	0.544593	2.42246	737.873	FALSE	28
2022-09-13	13:14:47	0.419962	1.86807	739.316	FALSE	28
2022-09-13	13:14:48	0.186883	0.831293	738.704	FALSE	28
2022-09-13	13:14:48	0.235992	1.04974	740.365	FALSE	28
2022-09-13	13:14:48	0.172735	0.76836	739.473	FALSE	28
2022-09-13	13:14:48	0.158435	0.704751	741.07	FALSE	28
2022-09-13	13:14:49	-0.0123535	-0.0549508	739.473	FALSE	28
2022-09-13	13:14:49	-0.0119972	-0.0533659	741.07	FALSE	28
2022-09-13	13:14:49	-0.0138802	-0.0617419	739.473	FALSE	28
2022-09-13	13:14:49	0.541794	2.41001	743.48	FALSE	28
2022-09-13	13:14:50	1.11192	4.94604	744.419	FALSE	28
2022-09-13	13:14:50	0.935432	4.16099	747.641	FALSE	28
2022-09-13	13:14:50	0.576043	2.56235	746.981	FALSE	28
2022-09-13	13:14:51	0.217468	0.967341	748.609	FALSE	28
2022-09-13	13:14:51	0.214008	0.95195	747.933	FALSE	28
2022-09-13	13:14:51	0.245814	1.09343	749.702	FALSE	28
2022-09-13	13:14:51	0.352634	1.56859	749.502	FALSE	28
2022-09-13	13:14:52	0.99986	4.44758	754.15	FALSE	28
2022-09-13	13:14:52	1.04093	4.63026	754.132	FALSE	28
2022-09-13	13:14:52	1.79355	7.97807	762.128	FALSE	28
2022-09-13	13:14:52	2.12983	9.47391	763.606	FALSE	28
2022-09-13	13:14:53	1.61202	7.17059	769.298	FALSE	28
2022-09-13	13:14:53	0.820369	3.64917	767.255	FALSE	28
2022-09-13	13:14:53	0.321489	1.43005	770.728	FALSE	28
2022-09-13	13:14:53	0.078588	0.349575	767.605	FALSE	28
2022-09-13	13:14:54	0.0982317	0.436954	771.165	FALSE	28
2022-09-13	13:14:54	0.220725	0.981829	768.587	FALSE	28
2022-09-13	13:14:54	-0.0329132	-0.146404	771.165	FALSE	28
2022-09-13	13:14:55	0.262252	1.16655	769.753	FALSE	28
2022-09-13	13:14:55	0.212837	0.946742	772.112	FALSE	28
2022-09-13	13:14:55	0.287952	1.28087	771.034	FALSE	28
2022-09-13	13:14:55	0.0906999	0.403451	772.515	FALSE	28
2022-09-13	13:14:56	0.242812	1.08008	772.114	FALSE	28
2022-09-13	13:14:56	0.145306	0.64635	773.162	FALSE	28
2022-09-13	13:14:56	0.936909	4.16756	776.282	FALSE	28
2022-09-13	13:14:56	0.398791	1.7739	774.936	FALSE	28
2022-09-13	13:14:57	0.24327	1.08211	777.364	FALSE	28
2022-09-13	13:14:57	0.27416	1.21952	776.155	FALSE	28
2022-09-13	13:14:57	0.409021	1.81941	779.183	FALSE	28
2022-09-13	13:14:57	0.458944	2.04147	778.197	FALSE	28
2022-09-13	13:14:58	0.44729	1.98964	781.173	FALSE	28
2022-09-13	13:14:58	0.415687	1.84906	780.046	FALSE	28
2022-09-13	13:14:58	0.428766	1.90724	783.08	FALSE	28
2022-09-13	13:14:59	0.419911	1.86785	781.914	FALSE	28
2022-09-13	13:14:59	0.393855	1.75195	784.832	FALSE	28
2022-09-13	13:14:59	0.394008	1.75263	783.666	FALSE	28
2022-09-13	13:14:59	0.407799	1.81397	786.646	FALSE	28
2022-09-13	13:15:00	0.421692	1.87577	785.542	FALSE	28
2022-09-13	13:15:00	0.424389	1.88777	788.534	FALSE	28
2022-09-13	13:15:00	0.425204	1.89139	787.433	FALSE	28
2022-09-13	13:15:00	0.424746	1.88936	790.423	FALSE	28
2022-09-13	13:15:01	0.427799	1.90294	789.336	FALSE	28
2022-09-13	13:15:01	0.434008	1.93055	792.354	FALSE	28
2022-09-13	13:15:01	0.445102	1.9799	791.316	FALSE	28
2022-09-13	13:15:01	0.500623	2.22687	794.58	FALSE	28
2022-09-13	13:15:02	0.65645	2.92002	794.236	FALSE	28
2022-09-13	13:15:02	0.593804	2.64136	797.222	FALSE	28
2022-09-13	13:15:02	0.334313	1.48709	795.723	FALSE	28
2022-09-13	13:15:03	0.178384	0.793488	798.015	FALSE	28
2022-09-13	13:15:03	-0.0728114	-0.32388	795.723	FALSE	28
2022-09-13	13:15:03	-0.277239	-1.23321	798.015	FALSE	28
2022-09-13	13:15:03	-0.363651	-1.61759	795.723	FALSE	28
2022-09-13	13:15:04	-0.527569	-2.34673	798.015	FALSE	28
2022-09-13	13:15:04	-0.541463	-2.40854	795.723	FALSE	28
2022-09-13	13:15:04	-0.571386	-2.54164	798.015	FALSE	28
2022-09-13	13:15:04	-0.586603	-2.60933	795.723	FALSE	28
2022-09-13	13:15:05	-0.716373	-3.18657	798.015	FALSE	28
2022-09-13	13:15:05	-0.790776	-3.51753	795.723	FALSE	28
2022-09-13	13:15:05	-0.917391	-4.08074	798.015	FALSE	28
2022-09-13	13:15:05	-0.831335	-3.69794	795.723	FALSE	28
2022-09-13	13:15:06	-0.869554	-3.86795	798.015	FALSE	28
2022-09-13	13:15:06	-0.898409	-3.9963	795.723	FALSE	28
2022-09-13	13:15:06	-0.668485	-2.97355	798.015	FALSE	28
2022-09-13	13:15:07	-0.720953	-3.20694	795.723	FALSE	28
2022-09-13	13:15:07	-0.683091	-3.03853	798.015	FALSE	28
2022-09-13	13:15:07	-0.803091	-3.57231	795.723	FALSE	28
2022-09-13	13:15:07	-0.684974	-3.0469	798.015	FALSE	28
2022-09-13	13:15:08	-0.744617	-3.31221	795.723	FALSE	28
2022-09-13	13:15:08	-0.795712	-3.53949	798.015	FALSE	28
2022-09-13	13:15:08	-0.698256	-3.10598	795.723	FALSE	28
2022-09-13	13:15:08	-0.698256	-3.10598	798.015	FALSE	28
2022-09-13	13:15:09	0.0310053	0.137918	795.861	FALSE	28
2022-09-13	13:15:09	3.63838	16.1842	814.2	1	29
2022-09-13	13:15:09	6.72505	29.9144	825.776	1	30
2022-09-13	13:15:09	4.84805	21.5651	835.765	1	31
2022-09-13	13:15:10	5.43019	24.1546	849.93	1	32
2022-09-13	13:15:10	3.08108	13.7053	849.47	1	33
2022-09-13	13:15:10	0.630496	2.80457	852.735	FALSE	33
2022-09-13	13:15:11	2.04719	9.10631	858.576	FALSE	33
2022-09-13	13:15:11	2.06342	9.1785	861.913	FALSE	33
2022-09-13	13:15:11	4.38301	19.4965	878.073	1	34
2022-09-13	13:15:11	7.07294	31.4619	893.375	1	35
2022-09-13	13:15:12	10.5965	47.1354	925.208	1	36
2022-09-13	13:15:12	13.8717	61.7041	955.079	1	37
2022-09-13	13:15:12	3.5481	15.7827	940.991	1	38
2022-09-13	13:15:12	5.9681	26.5473	981.626	1	39
2022-09-13	13:15:13	8.30138	36.9262	977.917	1	40
2022-09-13	13:15:13	4.27915	19.0345	1000.66	1	41
2022-09-13	13:15:13	8.56042	38.0785	1016	1	42
2022-09-13	13:15:13	13.9679	62.132	1062.79	1	43
2022-09-13	13:15:14	6.94312	30.8844	1046.88	1	44
2022-09-13	13:15:14	13.3686	59.4662	1122.26	1	45
2022-09-13	13:15:14	18.0305	80.2033	1127.08	1	46
2022-09-13	13:15:15	6.84072	30.4289	1152.69	1	47
2022-09-13	13:15:15	8.64082	38.4361	1165.52	1	48
2022-09-13	13:15:15	14.3021	63.6186	1216.31	1	49
2022-09-13	13:15:15	4.59426	20.4362	1185.96	1	50
2022-09-13	13:15:16	8.11349	36.0904	1252.4	1	51
2022-09-13	13:15:16	11.6338	51.7495	1237.7	1	52
2022-09-13	13:15:16	3.49314	15.5382	1267.94	1	53
2022-09-13	13:15:16	2.25304	10.022	1247.73	FALSE	53
2022-09-13	13:15:17	2.68067	11.9242	1279.86	FALSE	53
2022-09-13	13:15:17	1.80933	8.04826	1255.77	FALSE	53
2022-09-13	13:15:17	5.15421	22.927	1302.79	1	54
2022-09-13	13:15:17	12.9216	57.4779	1313.25	1	55
2022-09-13	13:15:18	7.24881	32.2442	1335.03	1	56
2022-09-13	13:15:18	10.2232	45.4748	1358.73	1	57
2022-09-13	13:15:18	6.73395	29.954	1364.98	1	58
2022-09-13	13:15:19	3.13986	13.9667	1372.69	1	59
2022-09-13	13:15:19	7.04683	31.3457	1396.33	1	60
2022-09-13	13:15:19	8.54551	38.0121	1410.71	1	61
2022-09-13	13:15:19	4.94464	21.9947	1418.32	1	62
2022-09-13	13:15:20	2.77991	12.3656	1423.07	FALSE	62
2022-09-13	13:15:20	1.64515	7.31796	1425.64	FALSE	62
2022-09-13	13:15:20	2.84525	12.6562	1435.73	FALSE	62
2022-09-13	13:15:20	1.39075	6.18633	1431.83	FALSE	62
2022-09-13	13:15:21	2.02332	9.00013	1444.73	FALSE	62
2022-09-13	13:15:21	1.45798	6.48539	1438.31	FALSE	62
2022-09-13	13:15:21	0.352685	1.56881	1446.3	FALSE	62
2022-09-13	13:15:21	0.720013	3.20276	1441.52	FALSE	62
2022-09-13	13:15:22	0.742354	3.30214	1449.6	FALSE	62
2022-09-13	13:15:22	0.481031	2.13972	1443.66	FALSE	62
2022-09-13	13:15:22	0.714466	3.17809	1452.78	FALSE	62
2022-09-13	13:15:23	0.731463	3.25369	1446.91	FALSE	62
2022-09-13	13:15:23	0.735026	3.26954	1456.05	FALSE	62
2022-09-13	13:15:23	0.739707	3.29036	1450.2	FALSE	62
2022-09-13	13:15:23	0.734211	3.26592	1459.31	FALSE	62
2022-09-13	13:15:24	0.727188	3.23468	1453.44	FALSE	62
2022-09-13	13:15:24	0.873295	3.88459	1463.2	FALSE	62
2022-09-13	13:15:24	2.65375	11.8044	1465.24	FALSE	62
2022-09-13	13:15:24	3.58525	15.9479	1479.15	1	63
2022-09-13	13:15:25	3.92943	17.4789	1482.72	1	64
2022-09-13	13:15:25	2.48693	11.0624	1490.21	FALSE	64
2022-09-13	13:15:25	2.59553	11.5454	1494.26	FALSE	64
2022-09-13	13:15:25	1.75899	7.82434	1498.03	FALSE	64
2022-09-13	13:15:26	1.83777	8.17477	1502.44	FALSE	64
2022-09-13	13:15:26	1.35172	6.01272	1504.04	FALSE	64
2022-09-13	13:15:26	1.01197	4.50144	1506.94	FALSE	64
2022-09-13	13:15:26	1.36642	6.07811	1510.12	FALSE	64
2022-09-13	13:15:27	1.16663	5.1894	1512.13	FALSE	64
2022-09-13	13:15:27	0.79869	3.55273	1513.68	FALSE	64
2022-09-13	13:15:27	0.747087	3.32319	1515.45	FALSE	64
2022-09-13	13:15:28	0.428766	1.90724	1515.58	FALSE	64
2022-09-13	13:15:28	0.723575	3.21861	1518.67	FALSE	64
2022-09-13	13:15:28	0.731717	3.25482	1518.84	FALSE	64
2022-09-13	13:15:28	0.668613	2.97412	1521.65	FALSE	64
2022-09-13	13:15:29	0.669529	2.9782	1521.82	FALSE	64
2022-09-13	13:15:29	0.74327	3.30621	1524.95	FALSE	64
2022-09-13	13:15:29	0.762659	3.39246	1525.21	FALSE	64
2022-09-13	13:15:29	0.782048	3.47871	1528.43	FALSE	64
2022-09-13	13:15:30	0.760165	3.38137	1528.59	FALSE	64
2022-09-13	13:15:30	0.738842	3.28652	1531.72	FALSE	64
2022-09-13	13:15:30	0.741539	3.29851	1531.89	FALSE	64
2022-09-13	13:15:30	0.632735	2.81453	1534.53	FALSE	64
2022-09-13	13:15:31	0.619453	2.75545	1534.64	FALSE	64
2022-09-13	13:15:31	0.746119	3.31889	1537.85	FALSE	64
2022-09-13	13:15:31	0.739758	3.29059	1537.93	FALSE	64
2022-09-13	13:15:32	0.736501	3.2761	1541.13	FALSE	64
2022-09-13	13:15:32	0.732226	3.25709	1541.19	FALSE	64
2022-09-13	13:15:32	0.735483	3.27158	1544.4	FALSE	64
2022-09-13	13:15:32	0.734873	3.26886	1544.46	FALSE	64
2022-09-13	13:15:33	0.734059	3.26524	1547.66	FALSE	64
2022-09-13	13:15:33	0.728766	3.2417	1547.7	FALSE	64
2022-09-13	13:15:33	0.735178	3.27022	1550.93	FALSE	64
2022-09-13	13:15:33	0.73472	3.26818	1550.97	FALSE	64
2022-09-13	13:15:34	0.737315	3.27972	1554.21	FALSE	64
2022-09-13	13:15:34	0.735483	3.27158	1554.24	FALSE	64
2022-09-13	13:15:34	0.735331	3.2709	1557.48	FALSE	64
2022-09-13	13:15:34	0.735636	3.27226	1557.51	FALSE	64
2022-09-13	13:15:35	0.740369	3.29331	1560.78	FALSE	64
2022-09-13	13:15:35	0.735534	3.2718	1560.79	FALSE	64
2022-09-13	13:15:35	0.73584	3.27316	1564.05	FALSE	64
2022-09-13	13:15:36	0.735534	3.2718	1564.06	FALSE	64
2022-09-13	13:15:36	0.73243	3.258	1567.31	FALSE	64
2022-09-13	13:15:36	0.733244	3.26162	1567.32	FALSE	64
2022-09-13	13:15:36	0.737366	3.27995	1570.59	FALSE	64
2022-09-13	13:15:37	0.738537	3.28516	1570.6	FALSE	64
2022-09-13	13:15:37	0.732226	3.25709	1573.85	FALSE	64
2022-09-13	13:15:37	0.731819	3.25528	1573.86	FALSE	64
2022-09-13	13:15:37	0.737621	3.28109	1577.13	FALSE	64
2022-09-13	13:15:38	0.734262	3.26614	1577.13	FALSE	64
2022-09-13	13:15:38	0.732786	3.25958	1580.39	FALSE	64
2022-09-13	13:15:38	0.738231	3.2838	1580.41	FALSE	64
2022-09-13	13:15:38	0.733244	3.26162	1583.65	FALSE	64
2022-09-13	13:15:39	0.733702	3.26365	1583.67	FALSE	64
2022-09-13	13:15:39	0.731412	3.25347	1586.9	FALSE	64
2022-09-13	13:15:39	0.737417	3.28018	1586.95	FALSE	64
2022-09-13	13:15:40	0.740318	3.29308	1590.2	FALSE	64
2022-09-13	13:15:40	0.731361	3.25324	1590.21	FALSE	64
2022-09-13	13:15:40	0.732328	3.25754	1593.45	FALSE	64
2022-09-13	13:15:40	0.734568	3.26751	1593.47	FALSE	64
2022-09-13	13:15:41	0.733702	3.26365	1596.72	FALSE	64
2022-09-13	13:15:41	0.736756	3.27724	1596.75	FALSE	64
2022-09-13	13:15:41	0.72897	3.2426	1599.96	FALSE	64
2022-09-13	13:15:41	0.733601	3.2632	1600.01	FALSE	64
2022-09-13	13:15:42	0.734415	3.26682	1603.23	FALSE	64
2022-09-13	13:15:42	0.733346	3.26207	1603.28	FALSE	64
2022-09-13	13:15:42	0.734364	3.2666	1606.49	FALSE	64
2022-09-13	13:15:42	0.738333	3.28425	1606.56	FALSE	64
2022-09-13	13:15:43	0.734975	3.26932	1609.76	FALSE	64
2022-09-13	13:15:43	0.736959	3.27814	1609.84	FALSE	64
2022-09-13	13:15:43	0.738079	3.28312	1613.04	FALSE	64
2022-09-13	13:15:44	0.736349	3.27543	1613.11	FALSE	64
2022-09-13	13:15:44	0.732074	3.25641	1616.3	FALSE	64
2022-09-13	13:15:44	0.732277	3.25731	1616.37	FALSE	64
2022-09-13	13:15:44	0.738231	3.2838	1619.58	FALSE	64
2022-09-13	13:15:45	0.742252	3.30169	1619.67	FALSE	64
2022-09-13	13:15:45	0.732175	3.25686	1622.84	FALSE	64
2022-09-13	13:15:45	0.737468	3.28041	1622.95	FALSE	64
2022-09-13	13:15:46	0.739707	3.29036	1626.13	FALSE	64
2022-09-13	13:15:46	0.737672	3.28131	1626.24	FALSE	64
2022-09-13	13:15:46	0.739147	3.28787	1629.42	FALSE	64
2022-09-13	13:15:46	0.734008	3.26501	1629.5	FALSE	64
2022-09-13	13:15:46	0.724033	3.22064	1632.64	FALSE	64
2022-09-13	13:15:47	0.739402	3.28901	1632.79	FALSE	64
2022-09-13	13:15:47	0.733601	3.2632	1635.9	FALSE	64
2022-09-13	13:15:47	0.741081	3.29648	1636.09	FALSE	64
2022-09-13	13:15:48	0.73813	3.28335	1639.19	FALSE	64
2022-09-13	13:15:48	0.732634	3.2589	1639.34	FALSE	64
2022-09-13	13:15:48	0.733601	3.2632	1642.45	FALSE	64
2022-09-13	13:15:48	0.732125	3.25664	1642.6	FALSE	64
2022-09-13	13:15:49	0.72958	3.24532	1645.7	FALSE	64
2022-09-13	13:15:49	0.734059	3.26524	1645.87	FALSE	64
2022-09-13	13:15:49	0.734618	3.26773	1648.96	FALSE	64
2022-09-13	13:15:49	0.73701	3.27837	1649.14	FALSE	64
2022-09-13	13:15:50	0.74215	3.30123	1652.26	FALSE	64
2022-09-13	13:15:50	0.733346	3.26207	1652.41	FALSE	64
2022-09-13	13:15:50	0.73986	3.29105	1655.56	FALSE	64
2022-09-13	13:15:50	0.739707	3.29036	1655.7	FALSE	64
2022-09-13	13:15:51	0.737163	3.27905	1658.83	FALSE	64
2022-09-13	13:15:51	0.739351	3.28878	1658.99	FALSE	64
2022-09-13	13:15:51	0.732735	3.25935	1662.09	FALSE	64
2022-09-13	13:15:52	0.735585	3.27203	1662.26	FALSE	64
2022-09-13	13:15:52	0.726323	3.23083	1665.33	FALSE	64
2022-09-13	13:15:52	0.733346	3.26207	1665.52	FALSE	64
2022-09-13	13:15:52	0.73813	3.28335	1668.61	FALSE	64
2022-09-13	13:15:53	0.737112	3.27882	1668.8	FALSE	64
2022-09-13	13:15:53	0.734618	3.26773	1671.88	FALSE	64
2022-09-13	13:15:53	0.729224	3.24373	1672.04	FALSE	64
2022-09-13	13:15:53	0.741081	3.29648	1675.17	FALSE	64
2022-09-13	13:15:54	0.735789	3.27294	1675.32	FALSE	64
2022-09-13	13:15:54	0.732532	3.25845	1678.43	FALSE	64
2022-09-13	13:15:54	0.733397	3.2623	1678.58	FALSE	64
2022-09-13	13:15:54	0.735636	3.27226	1681.7	FALSE	64
2022-09-13	13:15:55	0.735382	3.27113	1681.85	FALSE	64
2022-09-13	13:15:55	0.738028	3.2829	1684.99	FALSE	64
2022-09-13	13:15:55	0.73528	3.27067	1685.12	FALSE	64
2022-09-13	13:15:56	0.73528	3.27067	1688.26	FALSE	64
2022-09-13	13:15:56	0.737519	3.28063	1688.4	FALSE	64
2022-09-13	13:15:56	0.736501	3.2761	1691.53	FALSE	64
2022-09-13	13:15:56	0.731717	3.25482	1691.66	FALSE	64
2022-09-13	13:15:57	0.738842	3.28652	1694.82	FALSE	64
2022-09-13	13:15:57	0.735941	3.27361	1694.93	FALSE	64
2022-09-13	13:15:57	0.735433	3.27135	1698.09	FALSE	64
2022-09-13	13:15:57	0.733957	3.26479	1698.19	FALSE	64
2022-09-13	13:15:58	0.74332	3.30644	1701.4	FALSE	64
2022-09-13	13:15:58	0.737112	3.27882	1701.47	FALSE	64
2022-09-13	13:15:58	0.731819	3.25528	1704.65	FALSE	64
2022-09-13	13:15:58	0.731921	3.25573	1704.73	FALSE	64
2022-09-13	13:15:59	0.734262	3.26614	1707.92	FALSE	64
2022-09-13	13:15:59	0.731056	3.25188	1707.98	FALSE	64
2022-09-13	13:15:59	0.735026	3.26954	1711.19	FALSE	64
2022-09-13	13:16:00	0.735433	3.27135	1711.25	FALSE	64
2022-09-13	13:16:00	0.739707	3.29036	1714.48	FALSE	64
2022-09-13	13:16:00	0.734517	3.26728	1714.52	FALSE	64
2022-09-13	13:16:00	0.73416	3.26569	1717.74	FALSE	64
2022-09-13	13:16:01	0.734313	3.26637	1717.79	FALSE	64
2022-09-13	13:16:01	0.726679	3.23241	1720.98	FALSE	64
2022-09-13	13:16:01	0.729835	3.24645	1721.03	FALSE	64
2022-09-13	13:16:01	0.687799	3.05947	1724.04	FALSE	64
2022-09-13	13:16:02	0.703372	3.12874	1724.16	FALSE	64
2022-09-13	13:16:02	0.700674	3.11674	1727.15	FALSE	64
2022-09-13	13:16:02	0.710445	3.1602	1727.32	FALSE	64
2022-09-13	13:16:02	0.686476	3.05358	1730.21	FALSE	64
2022-09-13	13:16:03	0.675076	3.00287	1730.32	FALSE	64
2022-09-13	13:16:03	0.687086	3.0563	1733.26	FALSE	64
2022-09-13	13:16:03	0.672735	2.99246	1733.32	FALSE	64
2022-09-13	13:16:04	0.675636	3.00536	1736.27	FALSE	64
2022-09-13	13:16:04	0.671616	2.98748	1736.3	FALSE	64
2022-09-13	13:16:04	0.675483	3.00468	1739.27	FALSE	64
2022-09-13	13:16:04	0.675636	3.00536	1739.31	FALSE	64
2022-09-13	13:16:05	0.665865	2.9619	1742.23	FALSE	64
2022-09-13	13:16:05	0.663779	2.95262	1742.26	FALSE	64
2022-09-13	13:16:05	0.668308	2.97277	1745.21	FALSE	64
2022-09-13	13:16:05	0.488155	2.17141	1744.43	FALSE	64
2022-09-13	13:16:06	0.401336	1.78522	1746.99	FALSE	64
2022-09-13	13:16:06	0.234822	1.04454	1745.48	FALSE	64
2022-09-13	13:16:06	0.224593	0.999035	1747.99	FALSE	64
2022-09-13	13:16:06	0.368359	1.63853	1747.12	FALSE	64
2022-09-13	13:16:07	0.386323	1.71844	1749.71	FALSE	64
2022-09-13	13:16:07	0.346069	1.53938	1748.66	FALSE	64
2022-09-13	13:16:07	0.343219	1.52671	1751.24	FALSE	64
2022-09-13	13:16:07	0.363219	1.61567	1750.27	FALSE	64
2022-09-13	13:16:08	0.409733	1.82257	1753.06	FALSE	64
2022-09-13	13:16:08	0.606069	2.69592	1752.97	FALSE	64
2022-09-13	13:16:08	0.676908	3.01102	1756.07	FALSE	64
2022-09-13	13:16:09	0.461132	2.05121	1755.02	FALSE	64
2022-09-13	13:16:09	0.433143	1.92671	1758	FALSE	64
2022-09-13	13:16:09	0.30327	1.34901	1756.37	FALSE	64
2022-09-13	13:16:09	0.298232	1.3266	1759.32	FALSE	64
2022-09-13	13:16:10	0.290089	1.29037	1757.66	FALSE	64
2022-09-13	13:16:10	0.260115	1.15704	1760.48	FALSE	64
2022-09-13	13:16:10	0.26444	1.17628	1758.83	FALSE	64
2022-09-13	13:16:10	0.242456	1.07849	1761.56	FALSE	64
2022-09-13	13:16:11	0.240573	1.07012	1759.9	FALSE	64
2022-09-13	13:16:11	0.524491	2.33304	1763.89	FALSE	64
2022-09-13	13:16:11	0.149682	0.665815	1760.57	FALSE	64
2022-09-13	13:16:11	-0.122684	-0.545723	1763.89	FALSE	64
2022-09-13	13:16:12	-0.224618	-0.999146	1760.57	FALSE	64
2022-09-13	13:16:12	-0.331895	-1.47634	1763.89	FALSE	64
2022-09-13	13:16:12	-0.449554	-1.99971	1760.57	FALSE	64
2022-09-13	13:16:13	-0.535	-2.37979	1763.89	FALSE	64
2022-09-13	13:16:13	-0.613168	-2.72749	1760.57	FALSE	64
2022-09-13	13:16:13	-0.688434	-3.06229	1763.89	FALSE	64
2022-09-13	13:16:13	-0.619325	-2.75488	1760.57	FALSE	64
2022-09-13	13:16:14	-0.547519	-2.43547	1763.89	FALSE	64
2022-09-13	13:16:14	-0.231794	-1.03107	1760.57	FALSE	64
2022-09-13	13:16:14	1.67742	7.4615	1771.35	FALSE	64
2022-09-13	13:16:14	1.32225	5.88163	1766.45	FALSE	64
2022-09-13	13:16:15	0.892634	3.97061	1775.32	FALSE	64
2022-09-13	13:16:15	2.02765	9.01939	1775.47	FALSE	64
2022-09-13	13:16:15	2.40851	10.7135	1786.04	FALSE	64
2022-09-13	13:16:16	2.82556	12.5687	1788.04	FALSE	64
2022-09-13	13:16:16	6.94805	30.9063	1816.94	1	65
2022-09-13	13:16:16	3.82189	17.0005	1805.04	1	66
2022-09-13	13:16:16	10.0198	44.5701	1861.51	1	67
2022-09-13	13:16:17	7.35268	32.7062	1837.75	1	68
2022-09-13	13:16:17	3.05472	13.588	1875.1	1	69
2022-09-13	13:16:17	4.66805	20.7644	1858.51	1	70
2022-09-13	13:16:17	10.136	45.087	1920.19	1	71
2022-09-13	13:16:18	4.2422	18.8702	1877.38	1	72
2022-09-13	13:16:18	7.07044	31.4507	1951.64	1	73
2022-09-13	13:16:18	6.94174	30.8782	1908.26	1	74
2022-09-13	13:16:18	3.32133	14.7739	1966.41	1	75
2022-09-13	13:16:19	1.90388	8.46884	1916.73	FALSE	75
2022-09-13	13:16:19	7.06499	31.4265	1997.84	1	76
2022-09-13	13:16:19	5.39237	23.9863	1940.71	1	77
2022-09-13	13:16:19	4.76887	21.2129	2019.05	1	78
2022-09-13	13:16:20	9.50281	42.2704	1982.98	1	79
2022-09-13	13:16:20	4.54205	20.2039	2039.26	1	80
2022-09-13	13:16:20	5.05619	22.4909	2005.48	1	81
2022-09-13	13:16:21	4.67523	20.7964	2060.05	1	82
2022-09-13	13:16:21	4.68184	20.8258	2026.3	1	83
2022-09-13	13:16:21	1.53258	6.81722	2066.87	FALSE	83
2022-09-13	13:16:21	3.65961	16.2787	2042.58	1	84
2022-09-13	13:16:22	0.992328	4.41407	2071.29	FALSE	84
2022-09-13	13:16:22	0.502812	2.23661	2044.82	FALSE	84
2022-09-13	13:16:22	0.798639	3.55251	2074.84	FALSE	84
2022-09-13	13:16:22	0.112023	0.498301	2045.31	FALSE	84
2022-09-13	13:16:23	0.71355	3.17401	2078.01	FALSE	84
2022-09-13	13:16:23	0.727596	3.23649	2048.55	FALSE	84
2022-09-13	13:16:23	0.10729	0.477247	2078.49	FALSE	84
2022-09-13	13:16:23	-0.388587	-1.72851	2048.55	FALSE	84
2022-09-13	13:16:24	-0.540292	-2.40333	2078.49	FALSE	84
2022-09-13	13:16:24	-0.580445	-2.58194	2048.55	FALSE	84
2022-09-13	13:16:24	-0.527977	-2.34855	2078.49	FALSE	84
2022-09-13	13:16:25	-0.390928	-1.73893	2048.55	FALSE	84
2022-09-13	13:16:25	-0.278918	-1.24068	2078.49	FALSE	84
2022-09-13	13:16:25	-0.326297	-1.45143	2048.55	FALSE	84
2022-09-13	13:16:25	-0.42075	-1.87158	2078.49	FALSE	84
2022-09-13	13:16:26	-0.209198	-0.930555	2048.55	FALSE	84
2022-09-13	13:16:26	-0.424669	-1.88901	2078.49	FALSE	84
2022-09-13	13:16:26	-0.468028	-2.08188	2048.55	FALSE	84
2022-09-13	13:16:26	-0.496832	-2.21001	2078.49	FALSE	84
2022-09-13	13:16:27	-0.446501	-1.98613	2048.55	FALSE	84
2022-09-13	13:16:27	-0.446603	-1.98658	2078.49	FALSE	84
2022-09-13	13:16:27	-0.389707	-1.73349	2048.55	FALSE	84
2022-09-13	13:16:27	-0.367671	-1.63547	2078.49	FALSE	84
2022-09-13	13:16:28	-0.218969	-0.974018	2048.55	FALSE	84
2022-09-13	13:16:28	0.0711071	0.316299	2078.81	FALSE	84
2022-09-13	13:16:28	0.369071	1.6417	2050.19	FALSE	84
2022-09-13	13:16:29	-0.0398853	-0.177418	2078.81	FALSE	84
2022-09-13	13:16:29	-0.0588165	-0.261628	2050.19	FALSE	84
2022-09-13	13:16:29	0.703677	3.1301	2081.94	FALSE	84
2022-09-13	13:16:29	0.735331	3.2709	2053.46	FALSE	84
2022-09-13	13:16:30	0.736756	3.27724	2085.21	FALSE	84
2022-09-13	13:16:30	0.739147	3.28787	2056.75	FALSE	84
2022-09-13	13:16:30	0.737366	3.27995	2088.49	FALSE	84
2022-09-13	13:16:30	0.737366	3.27995	2060.03	FALSE	84
2022-09-13	13:16:31	0.73187	3.2555	2091.75	FALSE	84
2022-09-13	13:16:31	0.735585	3.27203	2063.3	FALSE	84
2022-09-13	13:16:31	0.733651	3.26343	2095.01	FALSE	84
2022-09-13	13:16:31	0.737417	3.28018	2066.58	FALSE	84
2022-09-13	13:16:32	0.738842	3.28652	2098.3	FALSE	84
2022-09-13	13:16:32	0.735229	3.27045	2069.85	FALSE	84
2022-09-13	13:16:32	0.742048	3.30078	2101.6	FALSE	84
2022-09-13	13:16:33	0.735534	3.2718	2073.13	FALSE	84
2022-09-13	13:16:33	0.732481	3.25822	2104.86	FALSE	84
2022-09-13	13:16:33	0.740318	3.29308	2076.42	FALSE	84
2022-09-13	13:16:33	0.736959	3.27814	2108.13	FALSE	84
2022-09-13	13:16:34	0.730445	3.24917	2079.67	FALSE	84
2022-09-13	13:16:34	0.734313	3.26637	2111.4	FALSE	84
2022-09-13	13:16:34	0.72841	3.24011	2082.91	FALSE	84
2022-09-13	13:16:34	0.735331	3.2709	2114.67	FALSE	84
2022-09-13	13:16:35	0.736857	3.27769	2086.19	FALSE	84
2022-09-13	13:16:35	0.73299	3.26049	2117.93	FALSE	84
2022-09-13	13:16:35	0.737672	3.28131	2089.47	FALSE	84
2022-09-13	13:16:35	0.729987	3.24713	2121.18	FALSE	84
2022-09-13	13:16:36	0.731616	3.25437	2092.72	FALSE	84
2022-09-13	13:16:36	0.730801	3.25075	2124.43	FALSE	84
2022-09-13	13:16:36	0.733295	3.26184	2095.98	FALSE	84
2022-09-13	13:16:37	0.730191	3.24804	2127.68	FALSE	84
2022-09-13	13:16:37	0.732939	3.26026	2099.24	FALSE	84
2022-09-13	13:16:37	0.735636	3.27226	2130.95	FALSE	84
2022-09-13	13:16:37	0.736298	3.2752	2102.52	FALSE	84
2022-09-13	13:16:38	0.729224	3.24373	2134.19	FALSE	84
2022-09-13	13:16:38	0.738079	3.28312	2105.8	FALSE	84
2022-09-13	13:16:38	0.735433	3.27135	2137.47	FALSE	84
2022-09-13	13:16:38	0.734517	3.26728	2109.07	FALSE	84
2022-09-13	13:16:39	0.734313	3.26637	2140.73	FALSE	84
2022-09-13	13:16:39	0.732379	3.25777	2112.33	FALSE	84
2022-09-13	13:16:39	0.736399	3.27565	2144.01	FALSE	84
2022-09-13	13:16:39	0.729987	3.24713	2115.57	FALSE	84
2022-09-13	13:16:40	0.731514	3.25392	2147.26	FALSE	84
2022-09-13	13:16:40	0.74098	3.29603	2118.87	FALSE	84
2022-09-13	13:16:40	0.735992	3.27384	2150.54	FALSE	84
2022-09-13	13:16:41	0.732328	3.25754	2122.13	FALSE	84
2022-09-13	13:16:41	0.731819	3.25528	2153.79	FALSE	84
2022-09-13	13:16:41	0.729122	3.24328	2125.37	FALSE	84
2022-09-13	13:16:41	0.733906	3.26456	2157.06	FALSE	84
2022-09-13	13:16:42	0.731717	3.25482	2128.63	FALSE	84
2022-09-13	13:16:42	0.734669	3.26795	2160.32	FALSE	84
2022-09-13	13:16:42	0.732175	3.25686	2131.88	FALSE	84
2022-09-13	13:16:42	0.728715	3.24147	2163.57	FALSE	84
2022-09-13	13:16:43	0.732837	3.25981	2135.14	FALSE	84
2022-09-13	13:16:43	0.732837	3.25981	2166.82	FALSE	84
2022-09-13	13:16:43	0.729122	3.24328	2138.39	FALSE	84
2022-09-13	13:16:43	0.730242	3.24826	2170.07	FALSE	84
2022-09-13	13:16:44	0.733092	3.26094	2141.65	FALSE	84
2022-09-13	13:16:44	0.733651	3.26343	2173.34	FALSE	84
2022-09-13	13:16:44	0.733244	3.26162	2144.91	FALSE	84
2022-09-13	13:16:45	0.745356	3.31549	2176.65	FALSE	84
2022-09-13	13:16:45	0.731209	3.25256	2148.16	FALSE	84
2022-09-13	13:16:45	0.738181	3.28358	2179.94	FALSE	84
2022-09-13	13:16:45	0.7307	3.2503	2151.41	FALSE	84
2022-09-13	13:16:46	0.724796	3.22404	2183.16	FALSE	84
2022-09-13	13:16:46	0.739097	3.28765	2154.7	FALSE	84
2022-09-13	13:16:46	0.733193	3.26139	2186.42	FALSE	84
2022-09-13	13:16:46	0.736959	3.27814	2157.98	FALSE	84
2022-09-13	13:16:47	0.738384	3.28448	2189.71	FALSE	84
2022-09-13	13:16:47	0.736654	3.27678	2161.25	FALSE	84
2022-09-13	13:16:47	0.735076	3.26977	2192.98	FALSE	84
2022-09-13	13:16:47	0.734669	3.26795	2164.52	FALSE	84
2022-09-13	13:16:48	0.733295	3.26184	2196.24	FALSE	84
2022-09-13	13:16:48	0.737112	3.27882	2167.8	FALSE	84
2022-09-13	13:16:48	0.735687	3.27248	2199.51	FALSE	84
2022-09-13	13:16:48	0.734466	3.26705	2171.07	FALSE	84
2022-09-13	13:16:49	0.732226	3.25709	2202.77	FALSE	84
2022-09-13	13:16:49	0.730394	3.24894	2174.32	FALSE	84
2022-09-13	13:16:49	0.736807	3.27746	2206.04	FALSE	84
2022-09-13	13:16:50	0.72617	3.23015	2177.55	FALSE	84
2022-09-13	13:16:50	0.741947	3.30033	2209.34	FALSE	84
2022-09-13	13:16:50	0.730343	3.24871	2180.8	FALSE	84
2022-09-13	13:16:50	0.737977	3.28267	2212.63	FALSE	84
2022-09-13	13:16:51	0.734873	3.26886	2184.06	FALSE	84
2022-09-13	13:16:51	0.732277	3.25731	2215.88	FALSE	84
2022-09-13	13:16:51	0.734059	3.26524	2187.33	FALSE	84
2022-09-13	13:16:51	0.736552	3.27633	2219.16	FALSE	84
2022-09-13	13:16:52	0.737315	3.27972	2190.61	FALSE	84
2022-09-13	13:16:52	0.729478	3.24486	2222.41	FALSE	84
2022-09-13	13:16:52	0.734517	3.26728	2193.88	FALSE	84
2022-09-13	13:16:52	0.739606	3.28992	2225.7	FALSE	84
2022-09-13	13:16:53	0.733092	3.26094	2197.14	FALSE	84
2022-09-13	13:16:53	0.733855	3.26433	2228.96	FALSE	84
2022-09-13	13:16:53	0.739097	3.28765	2200.43	FALSE	84
2022-09-13	13:16:54	0.737773	3.28176	2232.24	FALSE	84
2022-09-13	13:16:54	0.731667	3.2546	2203.68	FALSE	84
2022-09-13	13:16:54	0.72612	3.22993	2235.47	FALSE	84
2022-09-13	13:16:54	0.73584	3.27316	2206.95	FALSE	84
2022-09-13	13:16:55	0.73701	3.27837	2238.75	FALSE	84
2022-09-13	13:16:55	0.733804	3.26411	2210.22	FALSE	84
2022-09-13	13:16:55	0.741234	3.29716	2242.05	FALSE	84
2022-09-13	13:16:55	0.738588	3.28539	2213.5	FALSE	84
2022-09-13	13:16:56	0.735941	3.27361	2245.32	FALSE	84
2022-09-13	13:16:56	0.734975	3.26932	2216.77	FALSE	84
2022-09-13	13:16:56	0.73584	3.27316	2248.59	FALSE	84
2022-09-13	13:16:56	0.739046	3.28742	2220.06	FALSE	84
2022-09-13	13:16:57	0.738842	3.28652	2251.88	FALSE	84
2022-09-13	13:16:57	0.734517	3.26728	2223.33	FALSE	84
2022-09-13	13:16:57	0.738282	3.28403	2255.16	FALSE	84
2022-09-13	13:16:58	0.733346	3.26207	2226.59	FALSE	84
2022-09-13	13:16:58	0.736807	3.27746	2258.44	FALSE	84
2022-09-13	13:16:58	0.742201	3.30146	2229.89	FALSE	84
2022-09-13	13:16:58	0.734415	3.26682	2261.71	FALSE	84
2022-09-13	13:16:59	0.729631	3.24554	2233.14	FALSE	84
2022-09-13	13:16:59	0.735331	3.2709	2264.98	FALSE	84
2022-09-13	13:16:59	0.732125	3.25664	2236.39	FALSE	84
2022-09-13	13:16:59	0.732023	3.25618	2268.24	FALSE	84
2022-09-13	13:17:00	0.733397	3.2623	2239.65	FALSE	84
2022-09-13	13:17:00	0.734059	3.26524	2271.5	FALSE	84
2022-09-13	13:17:00	0.730649	3.25007	2242.9	FALSE	84
2022-09-13	13:17:00	0.739097	3.28765	2274.79	FALSE	84
2022-09-13	13:17:01	0.730751	3.25053	2246.16	FALSE	84
2022-09-13	13:17:01	0.729071	3.24305	2278.03	FALSE	84
2022-09-13	13:17:01	0.738384	3.28448	2249.44	FALSE	84
2022-09-13	13:17:02	0.735687	3.27248	2281.3	FALSE	84
2022-09-13	13:17:02	0.731361	3.25324	2252.69	FALSE	84
2022-09-13	13:17:02	0.733244	3.26162	2284.57	FALSE	84
2022-09-13	13:17:02	0.731972	3.25596	2255.95	FALSE	84
2022-09-13	13:17:03	0.732786	3.25958	2287.83	FALSE	84
2022-09-13	13:17:03	0.732532	3.25845	2259.21	FALSE	84
2022-09-13	13:17:03	0.735789	3.27294	2291.1	FALSE	84
2022-09-13	13:17:03	0.73416	3.26569	2262.47	FALSE	84
2022-09-13	13:17:04	0.735789	3.27294	2294.37	FALSE	84
2022-09-13	13:17:04	0.733957	3.26479	2265.74	FALSE	84
2022-09-13	13:17:04	0.727036	3.234	2297.61	FALSE	84
2022-09-13	13:17:04	0.735992	3.27384	2269.01	FALSE	84
2022-09-13	13:17:05	0.740064	3.29195	2300.9	FALSE	84
2022-09-13	13:17:05	0.737417	3.28018	2272.29	FALSE	84
2022-09-13	13:17:05	0.743931	3.30915	2304.21	FALSE	84
2022-09-13	13:17:06	0.734262	3.26614	2275.56	FALSE	84
2022-09-13	13:17:06	0.733804	3.26411	2307.47	FALSE	84
2022-09-13	13:17:06	0.737977	3.28267	2278.84	FALSE	84
2022-09-13	13:17:06	0.734771	3.26841	2310.74	FALSE	84
2022-09-13	13:17:07	0.72958	3.24532	2282.09	FALSE	84
2022-09-13	13:17:07	0.732074	3.25641	2314	FALSE	84
2022-09-13	13:17:07	0.739962	3.2915	2285.38	FALSE	84
2022-09-13	13:17:07	0.738537	3.28516	2317.28	FALSE	84
2022-09-13	13:17:08	0.737672	3.28131	2288.66	FALSE	84
2022-09-13	13:17:08	0.731158	3.25234	2320.53	FALSE	84
2022-09-13	13:17:08	0.731463	3.25369	2291.91	FALSE	84
2022-09-13	13:17:08	0.736552	3.27633	2323.81	FALSE	84
2022-09-13	13:17:09	0.738181	3.28358	2295.2	FALSE	84
2022-09-13	13:17:09	0.738995	3.2872	2327.1	FALSE	84
2022-09-13	13:17:09	0.734211	3.26592	2298.46	FALSE	84
2022-09-13	13:17:10	0.728155	3.23898	2330.34	FALSE	84
2022-09-13	13:17:10	0.73645	3.27588	2301.74	FALSE	84
2022-09-13	13:17:10	0.733397	3.2623	2333.6	FALSE	84
2022-09-13	13:17:10	0.732277	3.25731	2305	FALSE	84
2022-09-13	13:17:11	0.737214	3.27928	2336.88	FALSE	84
2022-09-13	13:17:11	0.733041	3.26071	2308.26	FALSE	84
2022-09-13	13:17:11	0.732634	3.2589	2340.14	FALSE	84
2022-09-13	13:17:11	0.738944	3.28697	2311.54	FALSE	84
2022-09-13	13:17:12	0.735127	3.26999	2343.41	FALSE	84
2022-09-13	13:17:12	0.726578	3.23196	2314.77	FALSE	84
2022-09-13	13:17:12	0.733601	3.2632	2346.67	FALSE	84
2022-09-13	13:17:12	0.727697	3.23694	2318.01	FALSE	84
2022-09-13	13:17:13	0.737468	3.28041	2349.95	FALSE	84
2022-09-13	13:17:13	0.732684	3.25912	2321.27	FALSE	84
2022-09-13	13:17:13	0.735433	3.27135	2353.22	FALSE	84
2022-09-13	13:17:14	0.732226	3.25709	2324.53	FALSE	84
2022-09-13	13:17:14	0.735178	3.27022	2356.49	FALSE	84
2022-09-13	13:17:14	0.736603	3.27656	2327.8	FALSE	84
2022-09-13	13:17:14	0.72617	3.23015	2359.72	FALSE	84
2022-09-13	13:17:15	0.733957	3.26479	2331.07	FALSE	84
2022-09-13	13:17:15	0.729784	3.24623	2362.97	FALSE	84
2022-09-13	13:17:15	0.732532	3.25845	2334.33	FALSE	84
2022-09-13	13:17:15	0.733855	3.26433	2366.23	FALSE	84
2022-09-13	13:17:16	0.736705	3.27701	2337.6	FALSE	84
2022-09-13	13:17:16	0.734313	3.26637	2369.5	FALSE	84
2022-09-13	13:17:16	0.731921	3.25573	2340.86	FALSE	84
2022-09-13	13:17:16	0.734618	3.26773	2372.77	FALSE	84
2022-09-13	13:17:17	0.736756	3.27724	2344.14	FALSE	84
2022-09-13	13:17:17	0.73813	3.28335	2376.05	FALSE	84
2022-09-13	13:17:17	0.73416	3.26569	2347.4	FALSE	84
2022-09-13	13:17:18	0.730394	3.24894	2379.3	FALSE	84
2022-09-13	13:17:18	0.738333	3.28425	2350.69	FALSE	84
2022-09-13	13:17:18	0.735331	3.2709	2382.57	FALSE	84
2022-09-13	13:17:18	0.735992	3.27384	2353.96	FALSE	84
2022-09-13	13:17:19	0.732786	3.25958	2385.83	FALSE	84
2022-09-13	13:17:19	0.73813	3.28335	2357.24	FALSE	84
2022-09-13	13:17:19	0.728664	3.24124	2389.07	FALSE	84
2022-09-13	13:17:19	0.734822	3.26864	2360.51	FALSE	84
2022-09-13	13:17:20	0.72902	3.24283	2392.31	FALSE	84
2022-09-13	13:17:20	0.732277	3.25731	2363.77	FALSE	84
2022-09-13	13:17:20	0.729478	3.24486	2395.56	FALSE	84
2022-09-13	13:17:20	0.736908	3.27791	2367.05	FALSE	84
2022-09-13	13:17:21	0.727952	3.23808	2398.8	FALSE	84
2022-09-13	13:17:21	0.733957	3.26479	2370.31	FALSE	84
2022-09-13	13:17:21	0.723168	3.2168	2402.01	FALSE	84
2022-09-13	13:17:22	0.738893	3.28674	2373.6	FALSE	84
2022-09-13	13:17:22	0.735178	3.27022	2405.28	FALSE	84
2022-09-13	13:17:22	0.733092	3.26094	2376.86	FALSE	84
2022-09-13	13:17:22	0.725102	3.2254	2408.51	FALSE	84
2022-09-13	13:17:23	0.735331	3.2709	2380.13	FALSE	84
2022-09-13	13:17:23	0.737112	3.27882	2411.79	FALSE	84
2022-09-13	13:17:23	0.730547	3.24962	2383.38	FALSE	84
2022-09-13	13:17:23	0.731667	3.2546	2415.04	FALSE	84
2022-09-13	13:17:24	0.73014	3.24781	2386.63	FALSE	84
2022-09-13	13:17:24	0.736857	3.27769	2418.32	FALSE	84
2022-09-13	13:17:24	0.733397	3.2623	2389.89	FALSE	84
2022-09-13	13:17:24	0.736959	3.27814	2421.6	FALSE	84
2022-09-13	13:17:25	0.729784	3.24623	2393.14	FALSE	84
2022-09-13	13:17:25	0.732277	3.25731	2424.85	FALSE	84
2022-09-13	13:17:25	0.73528	3.27067	2396.41	FALSE	84
2022-09-13	13:17:25	0.737875	3.28222	2428.14	FALSE	84
2022-09-13	13:17:26	0.734924	3.26909	2399.68	FALSE	84
2022-09-13	13:17:26	0.73131	3.25301	2431.39	FALSE	84
2022-09-13	13:17:26	0.738588	3.28539	2402.96	FALSE	84
2022-09-13	13:17:27	0.736959	3.27814	2434.67	FALSE	84
2022-09-13	13:17:27	0.735076	3.26977	2406.23	FALSE	84
2022-09-13	13:17:27	0.738893	3.28674	2437.95	FALSE	84
2022-09-13	13:17:27	0.733193	3.26139	2409.49	FALSE	84
2022-09-13	13:17:28	0.735687	3.27248	2441.23	FALSE	84
2022-09-13	13:17:28	0.731972	3.25596	2412.75	FALSE	84
2022-09-13	13:17:28	0.733092	3.26094	2444.49	FALSE	84
2022-09-13	13:17:28	0.732684	3.25912	2416.01	FALSE	84
2022-09-13	13:17:29	0.734415	3.26682	2447.75	FALSE	84
2022-09-13	13:17:29	0.732684	3.25912	2419.27	FALSE	84
2022-09-13	13:17:29	0.738028	3.2829	2451.04	FALSE	84
2022-09-13	13:17:29	0.734364	3.2666	2422.54	FALSE	84
2022-09-13	13:17:30	0.733601	3.2632	2454.3	FALSE	84
2022-09-13	13:17:30	0.736908	3.27791	2425.81	FALSE	84
2022-09-13	13:17:30	0.736501	3.2761	2457.58	FALSE	84
2022-09-13	13:17:31	0.734211	3.26592	2429.08	FALSE	84
2022-09-13	13:17:31	0.735382	3.27113	2460.85	FALSE	84
2022-09-13	13:17:31	0.731616	3.25437	2432.33	FALSE	84
2022-09-13	13:17:31	0.730954	3.25143	2464.1	FALSE	84
2022-09-13	13:17:32	0.730445	3.24917	2435.58	FALSE	84
2022-09-13	13:17:32	0.733804	3.26411	2467.36	FALSE	84
2022-09-13	13:17:32	0.734059	3.26524	2438.85	FALSE	84
2022-09-13	13:17:32	0.734771	3.26841	2470.63	FALSE	84
2022-09-13	13:17:33	0.738333	3.28425	2442.13	FALSE	84
2022-09-13	13:17:33	0.726985	3.23377	2473.87	FALSE	84
2022-09-13	13:17:33	0.730089	3.24758	2445.38	FALSE	84
2022-09-13	13:17:33	0.733651	3.26343	2477.13	FALSE	84
2022-09-13	13:17:34	0.732125	3.25664	2448.64	FALSE	84
2022-09-13	13:17:34	0.73355	3.26298	2480.39	FALSE	84
2022-09-13	13:17:34	0.733244	3.26162	2451.9	FALSE	84
2022-09-13	13:17:35	0.735585	3.27203	2483.66	FALSE	84
2022-09-13	13:17:35	0.731717	3.25482	2455.15	FALSE	84
2022-09-13	13:17:35	0.732277	3.25731	2486.92	FALSE	84
2022-09-13	13:17:35	0.727494	3.23604	2458.39	FALSE	84
2022-09-13	13:17:36	0.734313	3.26637	2490.19	FALSE	84
2022-09-13	13:17:36	0.741031	3.29625	2461.68	FALSE	84
2022-09-13	13:17:36	0.758181	3.37254	2493.56	FALSE	84
2022-09-13	13:17:36	0.73243	3.258	2464.94	FALSE	84
2022-09-13	13:17:37	0.730496	3.24939	2496.81	FALSE	84
2022-09-13	13:17:37	0.73131	3.25301	2468.2	FALSE	84
2022-09-13	13:17:37	0.739147	3.28787	2500.1	FALSE	84
2022-09-13	13:17:37	0.732074	3.25641	2471.45	FALSE	84
2022-09-13	13:17:38	0.730547	3.24962	2503.35	FALSE	84
2022-09-13	13:17:38	0.731819	3.25528	2474.71	FALSE	84
2022-09-13	13:17:38	0.731259	3.25279	2506.6	FALSE	84
2022-09-13	13:17:39	0.73187	3.2555	2477.96	FALSE	84
2022-09-13	13:17:39	0.726476	3.23151	2509.83	FALSE	84
2022-09-13	13:17:39	1.48373	6.59993	2484.56	FALSE	84
2022-09-13	13:17:39	0.623677	2.77424	2512.61	FALSE	84
2022-09-13	13:17:40	0.736552	3.27633	2487.84	FALSE	84
2022-09-13	13:17:40	0.736247	3.27497	2515.88	FALSE	84
2022-09-13	13:17:40	0.729733	3.246	2491.09	FALSE	84
2022-09-13	13:17:40	0.734771	3.26841	2519.15	FALSE	84
2022-09-13	13:17:41	0.736145	3.27452	2494.36	FALSE	84
2022-09-13	13:17:41	0.728766	3.2417	2522.39	FALSE	84
2022-09-13	13:17:41	0.734109	3.26546	2497.63	FALSE	84
2022-09-13	13:17:41	0.729631	3.24554	2525.64	FALSE	84
2022-09-13	13:17:42	0.748664	3.33021	2500.96	FALSE	84
2022-09-13	13:17:42	0.725712	3.22811	2528.86	FALSE	84
2022-09-13	13:17:42	-0.158104	-0.703278	2500.96	FALSE	84
2022-09-13	13:17:43	0.730496	3.24939	2532.11	FALSE	84
2022-09-13	13:17:43	0.733855	3.26433	2504.22	FALSE	84
2022-09-13	13:17:43	0.737773	3.28176	2535.4	FALSE	84
2022-09-13	13:17:43	0.74098	3.29603	2507.52	FALSE	84
2022-09-13	13:17:44	0.74159	3.29874	2538.69	FALSE	84
2022-09-13	13:17:44	0.727188	3.23468	2510.75	FALSE	84
2022-09-13	13:17:44	0.727494	3.23604	2541.93	FALSE	84
2022-09-13	13:17:44	0.733346	3.26207	2514.01	FALSE	84
2022-09-13	13:17:45	0.737926	3.28244	2545.21	FALSE	84
2022-09-13	13:17:45	0.734211	3.26592	2517.28	FALSE	84
2022-09-13	13:17:45	0.736298	3.2752	2548.49	FALSE	84
2022-09-13	13:17:45	0.733499	3.26275	2520.54	FALSE	84
2022-09-13	13:17:46	0.733193	3.26139	2551.75	FALSE	84
2022-09-13	13:17:46	0.740522	3.29399	2523.84	FALSE	84
2022-09-13	13:17:46	0.732786	3.25958	2555.01	FALSE	84
2022-09-13	13:17:47	0.732684	3.25912	2527.09	FALSE	84
2022-09-13	13:17:47	0.728512	3.24057	2558.25	FALSE	84
2022-09-13	13:17:47	0.737773	3.28176	2530.38	FALSE	84
2022-09-13	13:17:47	0.734568	3.26751	2561.52	FALSE	84
2022-09-13	13:17:48	0.731107	3.25211	2533.63	FALSE	84
2022-09-13	13:17:48	0.733804	3.26411	2564.78	FALSE	84
2022-09-13	13:17:48	0.73645	3.27588	2536.9	FALSE	84
2022-09-13	13:17:48	0.732735	3.25935	2568.04	FALSE	84
2022-09-13	13:17:49	0.731819	3.25528	2540.16	FALSE	84
2022-09-13	13:17:49	0.739809	3.29082	2571.33	FALSE	84
2022-09-13	13:17:49	0.736959	3.27814	2543.44	FALSE	84
2022-09-13	13:17:49	0.734975	3.26932	2574.6	FALSE	84
2022-09-13	13:17:50	0.738893	3.28674	2546.72	FALSE	84
2022-09-13	13:17:50	0.853244	3.7954	2578.4	FALSE	84
2022-09-13	13:17:50	2.13136	9.48072	2556.21	FALSE	84
2022-09-13	13:17:51	0.753906	3.35352	2581.75	FALSE	84
2022-09-13	13:17:51	0.747799	3.32636	2559.53	FALSE	84
2022-09-13	13:17:51	0.735534	3.2718	2585.02	FALSE	84
2022-09-13	13:17:51	0.732379	3.25777	2562.79	FALSE	84
2022-09-13	13:17:52	0.73874	3.28606	2588.31	FALSE	84
2022-09-13	13:17:52	0.737824	3.28199	2566.07	FALSE	84
2022-09-13	13:17:52	0.748359	3.32885	2591.64	FALSE	84
2022-09-13	13:17:52	0.735382	3.27113	2569.34	FALSE	84
2022-09-13	13:17:53	0.744644	3.31233	2594.95	FALSE	84
2022-09-13	13:17:53	1.67543	7.45265	2576.8	FALSE	84
2022-09-13	13:17:53	4.765	21.1957	2616.14	1	85
2022-09-13	13:17:53	0.789071	3.50995	2580.31	FALSE	85
2022-09-13	13:17:54	0.729784	3.24623	2619.39	FALSE	85
2022-09-13	13:17:54	0.72958	3.24532	2583.55	FALSE	85
2022-09-13	13:17:54	0.72897	3.2426	2622.63	FALSE	85
2022-09-13	13:17:55	0.733295	3.26184	2586.81	FALSE	85
2022-09-13	13:17:55	0.740929	3.2958	2625.93	FALSE	85
2022-09-13	13:17:55	0.741896	3.3001	2590.11	FALSE	85
2022-09-13	13:17:55	0.738028	3.2829	2629.21	FALSE	85
2022-09-13	13:17:56	0.741234	3.29716	2593.41	FALSE	85
2022-09-13	13:17:56	0.729835	3.24645	2632.46	FALSE	85
2022-09-13	13:17:56	0.731514	3.25392	2596.66	FALSE	85
2022-09-13	13:17:56	0.733346	3.26207	2635.72	FALSE	85
2022-09-13	13:17:57	0.736807	3.27746	2599.94	FALSE	85
2022-09-13	13:17:57	0.729733	3.246	2638.97	FALSE	85
2022-09-13	13:17:57	0.733499	3.26275	2603.2	FALSE	85
2022-09-13	13:17:57	0.730852	3.25098	2642.22	FALSE	85
2022-09-13	13:17:58	0.735382	3.27113	2606.47	FALSE	85
2022-09-13	13:17:58	0.732277	3.25731	2645.47	FALSE	85
2022-09-13	13:17:58	0.735229	3.27045	2609.75	FALSE	85
2022-09-13	13:17:59	0.734211	3.26592	2648.74	FALSE	85
2022-09-13	13:17:59	0.733193	3.26139	2613.01	FALSE	85
2022-09-13	13:17:59	0.726527	3.23174	2651.97	FALSE	85
2022-09-13	13:17:59	0.724593	3.22313	2616.23	FALSE	85
2022-09-13	13:18:00	0.729478	3.24486	2655.22	FALSE	85
2022-09-13	13:18:00	0.735229	3.27045	2619.5	FALSE	85
2022-09-13	13:18:00	0.739758	3.29059	2658.51	FALSE	85
2022-09-13	13:18:00	0.727137	3.23445	2622.73	FALSE	85
2022-09-13	13:18:01	0.732125	3.25664	2661.76	FALSE	85
2022-09-13	13:18:01	13.7014	60.9466	2683.68	1	86
2022-09-13	13:18:01	0.593702	2.64091	2664.41	FALSE	86
2022-09-13	13:18:01	0.410547	1.8262	2685.51	FALSE	86

## Sheet: Unnamed_martin_202291313125 (2)
Date	Time	Lbs	Total force x time			**GoPro Fitting: 1302
2022-09-13	13:13:01	0.585865	0.585865	FALSE	0			Total force x time	1202.71
2022-09-13	13:13:01	0.460776	1.04664	FALSE	0			Total steps	86
2022-09-13	13:13:01	0.264033	1.31067	FALSE	0
2022-09-13	13:13:01	0.220216	1.53089	FALSE	0
2022-09-13	13:13:02	0.379555	1.91044	FALSE	0
2022-09-13	13:13:02	0.441183	2.35163	FALSE	0
2022-09-13	13:13:02	0.415127	2.76675	FALSE	0
2022-09-13	13:13:02	0.402405	3.16916	FALSE	0
2022-09-13	13:13:03	1.25009	4.41925	FALSE	0
2022-09-13	13:13:03	3.13731	7.55656	1	1
2022-09-13	13:13:03	1.28062	8.83718	FALSE	1
2022-09-13	13:13:03	0.503779	9.34096	FALSE	1
2022-09-13	13:13:04	-0.238664	9.34096	FALSE	1
2022-09-13	13:13:04	-0.480801	9.34096	FALSE	1
2022-09-13	13:13:04	-0.7436	9.34096	FALSE	1
2022-09-13	13:13:04	-0.56019	9.34096	FALSE	1
2022-09-13	13:13:05	0.155433	9.49639	FALSE	1
2022-09-13	13:13:05	12.8273	22.3237	1	2
2022-09-13	13:13:05	15.3911	37.7148	1	3
2022-09-13	13:13:06	11.5497	49.2645	1	4
2022-09-13	13:13:06	10.4972	59.7617	1	5
2022-09-13	13:13:06	9.59278	69.3545	1	6
2022-09-13	13:13:06	5.17228	74.5268	1	7
2022-09-13	13:13:07	0.645509	75.1723	FALSE	7
2022-09-13	13:13:07	0.896094	76.0684	FALSE	7
2022-09-13	13:13:07	2.51258	78.5809	FALSE	7
2022-09-13	13:13:07	9.28657	87.8675	1	8
2022-09-13	13:13:08	4.78362	92.6511	1	9
2022-09-13	13:13:08	1.97279	94.6239	FALSE	9
2022-09-13	13:13:08	0.44154	95.0655	FALSE	9
2022-09-13	13:13:08	0.20958	95.275	FALSE	9
2022-09-13	13:13:09	-0.391488	95.275	FALSE	9
2022-09-13	13:13:09	-0.562735	95.275	FALSE	9
2022-09-13	13:13:09	-1.65307	95.275	FALSE	9
2022-09-13	13:13:10	-0.364923	95.275	FALSE	9
2022-09-13	13:13:10	-0.231743	95.275	FALSE	9
2022-09-13	13:13:10	-0.308587	95.275	FALSE	9
2022-09-13	13:13:10	0.0593005	95.3343	FALSE	9
2022-09-13	13:13:11	-0.069758	95.3343	FALSE	9
2022-09-13	13:13:11	-0.0112847	95.3343	FALSE	9
2022-09-13	13:13:11	0.125051	95.4594	FALSE	9
2022-09-13	13:13:11	1.4048	96.8642	FALSE	9
2022-09-13	13:13:12	13.1378	110.002	1	10
2022-09-13	13:13:12	13.0356	123.038	1	11
2022-09-13	13:13:12	7.63177	130.669	1	12
2022-09-13	13:13:12	2.8081	133.477	FALSE	12
2022-09-13	13:13:13	4.01701	137.494	1	13
2022-09-13	13:13:13	3.15971	140.654	1	14
2022-09-13	13:13:13	3.90775	144.562	1	15
2022-09-13	13:13:14	13.5927	158.155	1	16
2022-09-13	13:13:14	2.0994	160.254	FALSE	16
2022-09-13	13:13:14	1.24083	161.495	FALSE	16
2022-09-13	13:13:14	0.903117	162.398	FALSE	16
2022-09-13	13:13:15	0.240674	162.639	FALSE	16
2022-09-13	13:13:15	0.0838297	162.722	FALSE	16
2022-09-13	13:13:15	0.0987915	162.821	FALSE	16
2022-09-13	13:13:15	-0.328689	162.821	FALSE	16
2022-09-13	13:13:16	-0.57276	162.821	FALSE	16
2022-09-13	13:13:16	-0.879325	162.821	FALSE	16
2022-09-13	13:13:16	-0.786297	162.821	FALSE	16
2022-09-13	13:13:16	-0.769147	162.821	FALSE	16
2022-09-13	13:13:17	-0.750419	162.821	FALSE	16
2022-09-13	13:13:17	-0.663498	162.821	FALSE	16
2022-09-13	13:13:17	-0.429758	162.821	FALSE	16
2022-09-13	13:13:18	-0.344058	162.821	FALSE	16
2022-09-13	13:13:18	-1.08533	162.821	FALSE	16
2022-09-13	13:13:18	-0.464313	162.821	FALSE	16
2022-09-13	13:13:18	0.378079	163.199	FALSE	16
2022-09-13	13:13:19	0.1507	163.35	FALSE	16
2022-09-13	13:13:19	0.159555	163.51	FALSE	16
2022-09-13	13:13:19	0.299911	163.81	FALSE	16
2022-09-13	13:13:19	0.13986	163.949	FALSE	16
2022-09-13	13:13:20	0.33701	164.286	FALSE	16
2022-09-13	13:13:20	0.174517	164.461	FALSE	16
2022-09-13	13:13:20	0.556145	165.017	FALSE	16
2022-09-13	13:13:20	-0.27785	165.017	FALSE	16
2022-09-13	13:13:21	-0.636984	165.017	FALSE	16
2022-09-13	13:13:21	-0.698256	165.017	FALSE	16
2022-09-13	13:13:21	-0.731793	165.017	FALSE	16
2022-09-13	13:13:22	-0.756781	165.017	FALSE	16
2022-09-13	13:13:22	-0.909758	165.017	FALSE	16
2022-09-13	13:13:22	-0.810317	165.017	FALSE	16
2022-09-13	13:13:22	-0.82192	165.017	FALSE	16
2022-09-13	13:13:23	-1.15627	165.017	FALSE	16
2022-09-13	13:13:23	-0.924058	165.017	FALSE	16
2022-09-13	13:13:23	-0.734694	165.017	FALSE	16
2022-09-13	13:13:23	-0.743243	165.017	FALSE	16
2022-09-13	13:13:24	-1.59464	165.017	FALSE	16
2022-09-13	13:13:24	-0.841819	165.017	FALSE	16
2022-09-13	13:13:24	-0.961004	165.017	FALSE	16
2022-09-13	13:13:24	-0.947518	165.017	FALSE	16
2022-09-13	13:13:25	-0.83907	165.017	FALSE	16
2022-09-13	13:13:25	-0.878816	165.017	FALSE	16
2022-09-13	13:13:25	-0.816475	165.017	FALSE	16
2022-09-13	13:13:25	-0.99047	165.017	FALSE	16
2022-09-13	13:13:26	-0.915305	165.017	FALSE	16
2022-09-13	13:13:26	-0.835356	165.017	FALSE	16
2022-09-13	13:13:26	-0.768078	165.017	FALSE	16
2022-09-13	13:13:27	-0.801513	165.017	FALSE	16
2022-09-13	13:13:27	-0.74935	165.017	FALSE	16
2022-09-13	13:13:27	-0.855966	165.017	FALSE	16
2022-09-13	13:13:27	-0.722633	165.017	FALSE	16
2022-09-13	13:13:28	-0.706552	165.017	FALSE	16
2022-09-13	13:13:28	-0.20014	165.017	FALSE	16
2022-09-13	13:13:28	0.0386389	165.056	FALSE	16
2022-09-13	13:13:29	0.147952	165.204	FALSE	16
2022-09-13	13:13:29	0.378028	165.582	FALSE	16
2022-09-13	13:13:29	0.127138	165.709	FALSE	16
2022-09-13	13:13:30	-0.0812083	165.709	FALSE	16
2022-09-13	13:13:30	0.0298348	165.739	FALSE	16
2022-09-13	13:13:30	-0.0499616	165.739	FALSE	16
2022-09-13	13:13:31	-0.32874	165.739	FALSE	16
2022-09-13	13:13:31	-0.148435	165.739	FALSE	16
2022-09-13	13:13:31	-0.132048	165.739	FALSE	16
2022-09-13	13:13:32	-0.233524	165.739	FALSE	16
2022-09-13	13:13:32	-0.232913	165.739	FALSE	16
2022-09-13	13:13:32	-0.178867	165.739	FALSE	16
2022-09-13	13:13:32	-0.134949	165.739	FALSE	16
2022-09-13	13:13:33	-0.155	165.739	FALSE	16
2022-09-13	13:13:33	0.0150765	165.754	FALSE	16
2022-09-13	13:13:33	0.145611	165.899	FALSE	16
2022-09-13	13:13:33	0.473194	166.373	FALSE	16
2022-09-13	13:13:34	0.414466	166.787	FALSE	16
2022-09-13	13:13:34	0.538079	167.325	FALSE	16
2022-09-13	13:13:34	0.33869	167.664	FALSE	16
2022-09-13	13:13:34	0.285865	167.95	FALSE	16
2022-09-13	13:13:35	0.204186	168.154	FALSE	16
2022-09-13	13:13:35	0.739147	168.893	FALSE	16
2022-09-13	13:13:35	0.721743	169.615	FALSE	16
2022-09-13	13:13:36	0.516349	170.131	FALSE	16
2022-09-13	13:13:36	-0.323549	170.131	FALSE	16
2022-09-13	13:13:36	-1.03312	170.131	FALSE	16
2022-09-13	13:13:36	-1.92905	170.131	FALSE	16
2022-09-13	13:13:37	-2.49851	170.131	FALSE	16
2022-09-13	13:13:37	-0.881921	170.131	FALSE	16
2022-09-13	13:13:37	-0.790164	170.131	FALSE	16
2022-09-13	13:13:37	-0.818358	170.131	FALSE	16
2022-09-13	13:13:38	-0.724414	170.131	FALSE	16
2022-09-13	13:13:38	-1.06401	170.131	FALSE	16
2022-09-13	13:13:38	-1.11027	170.131	FALSE	16
2022-09-13	13:13:38	-0.928282	170.131	FALSE	16
2022-09-13	13:13:39	-0.842073	170.131	FALSE	16
2022-09-13	13:13:39	-0.835508	170.131	FALSE	16
2022-09-13	13:13:39	-0.742277	170.131	FALSE	16
2022-09-13	13:13:39	-0.583244	170.131	FALSE	16
2022-09-13	13:13:40	-0.583498	170.131	FALSE	16
2022-09-13	13:13:40	-0.41846	170.131	FALSE	16
2022-09-13	13:13:40	0.00876615	170.14	FALSE	16
2022-09-13	13:13:41	0.192583	170.332	FALSE	16
2022-09-13	13:13:41	-0.34533	170.332	FALSE	16
2022-09-13	13:13:41	-0.118816	170.332	FALSE	16
2022-09-13	13:13:41	0.112685	170.445	FALSE	16
2022-09-13	13:13:42	-0.0630913	170.445	FALSE	16
2022-09-13	13:13:42	0.0642369	170.509	FALSE	16
2022-09-13	13:13:42	-0.158308	170.509	FALSE	16
2022-09-13	13:13:42	0.100471	170.61	FALSE	16
2022-09-13	13:13:43	0.102914	170.713	FALSE	16
2022-09-13	13:13:43	0.41014	171.123	FALSE	16
2022-09-13	13:13:43	0.335178	171.458	FALSE	16
2022-09-13	13:13:43	0.285305	171.743	FALSE	16
2022-09-13	13:13:44	0.29986	172.043	FALSE	16
2022-09-13	13:13:44	0.13472	172.178	FALSE	16
2022-09-13	13:13:44	-0.127213	172.178	FALSE	16
2022-09-13	13:13:45	-0.28757	172.178	FALSE	16
2022-09-13	13:13:45	-0.370267	172.178	FALSE	16
2022-09-13	13:13:45	-0.384516	172.178	FALSE	16
2022-09-13	13:13:45	-0.427112	172.178	FALSE	16
2022-09-13	13:13:46	-0.270216	172.178	FALSE	16
2022-09-13	13:13:46	-0.176018	172.178	FALSE	16
2022-09-13	13:13:46	-0.267671	172.178	FALSE	16
2022-09-13	13:13:46	-0.380038	172.178	FALSE	16
2022-09-13	13:13:47	-0.326704	172.178	FALSE	16
2022-09-13	13:13:47	-0.281615	172.178	FALSE	16
2022-09-13	13:13:47	-0.393524	172.178	FALSE	16
2022-09-13	13:13:47	-0.206501	172.178	FALSE	16
2022-09-13	13:13:48	-0.0127606	172.178	FALSE	16
2022-09-13	13:13:48	0.0221504	172.2	FALSE	16
2022-09-13	13:13:48	-0.159173	172.2	FALSE	16
2022-09-13	13:13:49	0.189428	172.389	FALSE	16
2022-09-13	13:13:49	0.0698349	172.459	FALSE	16
2022-09-13	13:13:49	0.303321	172.763	FALSE	16
2022-09-13	13:13:49	0.82215	173.585	FALSE	16
2022-09-13	13:13:50	1.28017	174.865	FALSE	16
2022-09-13	13:13:50	1.68301	176.548	FALSE	16
2022-09-13	13:13:50	1.50505	178.053	FALSE	16
2022-09-13	13:13:50	4.70993	182.763	1	17
2022-09-13	13:13:51	2.63894	185.402	FALSE	17
2022-09-13	13:13:51	1.28653	186.688	FALSE	17
2022-09-13	13:13:51	0.0584353	186.747	FALSE	17
2022-09-13	13:13:51	0.290598	187.037	FALSE	17
2022-09-13	13:13:52	-0.127926	187.037	FALSE	17
2022-09-13	13:13:52	-0.350928	187.037	FALSE	17
2022-09-13	13:13:52	-0.647162	187.037	FALSE	17
2022-09-13	13:13:53	-0.605432	187.037	FALSE	17
2022-09-13	13:13:53	-0.522175	187.037	FALSE	17
2022-09-13	13:13:53	-0.553727	187.037	FALSE	17
2022-09-13	13:13:53	-0.52533	187.037	FALSE	17
2022-09-13	13:13:54	-0.413727	187.037	FALSE	17
2022-09-13	13:13:54	-0.598867	187.037	FALSE	17
2022-09-13	13:13:54	-0.57902	187.037	FALSE	17
2022-09-13	13:13:54	-0.637086	187.037	FALSE	17
2022-09-13	13:13:55	-0.507824	187.037	FALSE	17
2022-09-13	13:13:55	-0.407773	187.037	FALSE	17
2022-09-13	13:13:55	-0.291997	187.037	FALSE	17
2022-09-13	13:13:55	0.18958	187.227	FALSE	17
2022-09-13	13:13:56	0.369479	187.597	FALSE	17
2022-09-13	13:13:56	1.60296	189.199	FALSE	17
2022-09-13	13:13:56	1.18729	190.387	FALSE	17
2022-09-13	13:13:57	2.83533	193.222	FALSE	17
2022-09-13	13:13:57	0.834109	194.056	FALSE	17
2022-09-13	13:13:57	1.18597	195.242	FALSE	17
2022-09-13	13:13:57	1.43151	196.674	FALSE	17
2022-09-13	13:13:58	1.74062	198.414	FALSE	17
2022-09-13	13:13:58	1.55803	199.972	FALSE	17
2022-09-13	13:13:58	0.589427	200.562	FALSE	17
2022-09-13	13:13:58	0.675992	201.238	FALSE	17
2022-09-13	13:13:59	0.294466	201.532	FALSE	17
2022-09-13	13:13:59	0.263626	201.796	FALSE	17
2022-09-13	13:13:59	0.41416	202.21	FALSE	17
2022-09-13	13:13:59	0.73299	202.943	FALSE	17
2022-09-13	13:14:00	2.07309	205.016	FALSE	17
2022-09-13	13:14:00	1.61523	206.631	FALSE	17
2022-09-13	13:14:00	2.3735	209.005	FALSE	17
2022-09-13	13:14:01	4.04683	213.052	1	18
2022-09-13	13:14:01	6.82678	219.878	1	19
2022-09-13	13:14:01	6.97518	226.854	1	20
2022-09-13	13:14:01	4.46383	231.317	1	21
2022-09-13	13:14:02	1.62429	232.942	FALSE	21
2022-09-13	13:14:02	0.91869	233.86	FALSE	21
2022-09-13	13:14:02	0.583779	234.444	FALSE	21
2022-09-13	13:14:02	0.992684	235.437	FALSE	21
2022-09-13	13:14:03	0.43528	235.872	FALSE	21
2022-09-13	13:14:03	0.430751	236.303	FALSE	21
2022-09-13	13:14:03	0.145051	236.448	FALSE	21
2022-09-13	13:14:03	0.534975	236.983	FALSE	21
2022-09-13	13:14:04	0.615789	237.599	FALSE	21
2022-09-13	13:14:04	2.94011	240.539	FALSE	21
2022-09-13	13:14:04	3.00434	243.543	1	22
2022-09-13	13:14:05	2.47009	246.013	FALSE	22
2022-09-13	13:14:05	2.87156	248.885	FALSE	22
2022-09-13	13:14:05	1.65197	250.537	FALSE	22
2022-09-13	13:14:05	3.05034	253.587	1	23
2022-09-13	13:14:06	2.97935	256.566	FALSE	23
2022-09-13	13:14:06	0.540165	257.107	FALSE	23
2022-09-13	13:14:06	0.194059	257.301	FALSE	23
2022-09-13	13:14:06	0.521896	257.823	FALSE	23
2022-09-13	13:14:07	0.100929	257.924	FALSE	23
2022-09-13	13:14:07	-0.286145	257.924	FALSE	23
2022-09-13	13:14:07	-0.520546	257.924	FALSE	23
2022-09-13	13:14:07	-0.752251	257.924	FALSE	23
2022-09-13	13:14:08	-0.814898	257.924	FALSE	23
2022-09-13	13:14:08	-0.854999	257.924	FALSE	23
2022-09-13	13:14:08	-0.903804	257.924	FALSE	23
2022-09-13	13:14:09	-1.03383	257.924	FALSE	23
2022-09-13	13:14:09	-1.25393	257.924	FALSE	23
2022-09-13	13:14:09	-1.05765	257.924	FALSE	23
2022-09-13	13:14:09	-0.995406	257.924	FALSE	23
2022-09-13	13:14:10	-1.21739	257.924	FALSE	23
2022-09-13	13:14:10	-0.997493	257.924	FALSE	23
2022-09-13	13:14:10	-0.705127	257.924	FALSE	23
2022-09-13	13:14:10	0.0822521	258.006	FALSE	23
2022-09-13	13:14:11	0.421845	258.428	FALSE	23
2022-09-13	13:14:11	0.146425	258.574	FALSE	23
2022-09-13	13:14:11	0.351209	258.925	FALSE	23
2022-09-13	13:14:11	0.156603	259.082	FALSE	23
2022-09-13	13:14:12	0.329122	259.411	FALSE	23
2022-09-13	13:14:12	0.103626	259.515	FALSE	23
2022-09-13	13:14:12	0.329784	259.844	FALSE	23
2022-09-13	13:14:12	0.968715	260.813	FALSE	23
2022-09-13	13:14:13	3.55441	264.368	1	24
2022-09-13	13:14:13	5.0996	269.467	1	25
2022-09-13	13:14:13	3.57935	273.046	1	26
2022-09-13	13:14:14	2.06205	275.109	FALSE	26
2022-09-13	13:14:14	0.783015	275.892	FALSE	26
2022-09-13	13:14:14	0.707952	276.599	FALSE	26
2022-09-13	13:14:14	0.411005	277.01	FALSE	26
2022-09-13	13:14:15	0.275178	277.286	FALSE	26
2022-09-13	13:14:15	0.138384	277.424	FALSE	26
2022-09-13	13:14:15	0.369071	277.793	FALSE	26
2022-09-13	13:14:15	0.186272	277.979	FALSE	26
2022-09-13	13:14:16	0.252888	278.232	FALSE	26
2022-09-13	13:14:16	0.256298	278.489	FALSE	26
2022-09-13	13:14:16	1.06933	279.558	FALSE	26
2022-09-13	13:14:16	0.687086	280.245	FALSE	26
2022-09-13	13:14:17	0.202863	280.448	FALSE	26
2022-09-13	13:14:17	-0.168486	280.448	FALSE	26
2022-09-13	13:14:17	-0.00884198	280.448	FALSE	26
2022-09-13	13:14:18	-0.0364247	280.448	FALSE	26
2022-09-13	13:14:18	0.035331	280.483	FALSE	26
2022-09-13	13:14:18	0.280165	280.763	FALSE	26
2022-09-13	13:14:18	1.04449	281.808	FALSE	26
2022-09-13	13:14:19	0.675076	282.483	FALSE	26
2022-09-13	13:14:19	0.248155	282.731	FALSE	26
2022-09-13	13:14:19	0.261743	282.993	FALSE	26
2022-09-13	13:14:19	0.387392	283.38	FALSE	26
2022-09-13	13:14:20	0.286222	283.666	FALSE	26
2022-09-13	13:14:20	0.274873	283.941	FALSE	26
2022-09-13	13:14:20	0.122303	284.064	FALSE	26
2022-09-13	13:14:20	0.18729	284.251	FALSE	26
2022-09-13	13:14:21	0.128613	284.38	FALSE	26
2022-09-13	13:14:21	0.0856109	284.465	FALSE	26
2022-09-13	13:14:21	-0.12014	284.465	FALSE	26
2022-09-13	13:14:22	-0.158155	284.465	FALSE	26
2022-09-13	13:14:22	-0.197544	284.465	FALSE	26
2022-09-13	13:14:22	-0.160903	284.465	FALSE	26
2022-09-13	13:14:22	-0.232404	284.465	FALSE	26
2022-09-13	13:14:23	-0.37673	284.465	FALSE	26
2022-09-13	13:14:23	-0.48874	284.465	FALSE	26
2022-09-13	13:14:23	-0.556221	284.465	FALSE	26
2022-09-13	13:14:23	-0.498511	284.465	FALSE	26
2022-09-13	13:14:24	-0.391793	284.465	FALSE	26
2022-09-13	13:14:24	-0.382226	284.465	FALSE	26
2022-09-13	13:14:24	-0.447264	284.465	FALSE	26
2022-09-13	13:14:24	-0.357646	284.465	FALSE	26
2022-09-13	13:14:25	-0.514745	284.465	FALSE	26
2022-09-13	13:14:25	-0.371488	284.465	FALSE	26
2022-09-13	13:14:25	-0.0554069	284.465	FALSE	26
2022-09-13	13:14:26	-0.0867554	284.465	FALSE	26
2022-09-13	13:14:26	0.046476	284.512	FALSE	26
2022-09-13	13:14:26	0.148613	284.66	FALSE	26
2022-09-13	13:14:26	0.0422522	284.702	FALSE	26
2022-09-13	13:14:27	0.221387	284.924	FALSE	26
2022-09-13	13:14:27	0.0540078	284.978	FALSE	26
2022-09-13	13:14:27	-0.328638	284.978	FALSE	26
2022-09-13	13:14:27	-0.48818	284.978	FALSE	26
2022-09-13	13:14:28	-0.588384	284.978	FALSE	26
2022-09-13	13:14:28	-0.531539	284.978	FALSE	26
2022-09-13	13:14:28	-0.708434	284.978	FALSE	26
2022-09-13	13:14:28	-0.708282	284.978	FALSE	26
2022-09-13	13:14:29	-0.607926	284.978	FALSE	26
2022-09-13	13:14:29	-0.474185	284.978	FALSE	26
2022-09-13	13:14:29	-0.0769844	284.978	FALSE	26
2022-09-13	13:14:30	0.786272	285.764	FALSE	26
2022-09-13	13:14:30	2.10927	287.873	FALSE	26
2022-09-13	13:14:30	1.53864	289.412	FALSE	26
2022-09-13	13:14:30	1.24851	290.661	FALSE	26
2022-09-13	13:14:31	0.762812	291.423	FALSE	26
2022-09-13	13:14:31	1.68836	293.112	FALSE	26
2022-09-13	13:14:31	0.664695	293.776	FALSE	26
2022-09-13	13:14:31	1.411	295.187	FALSE	26
2022-09-13	13:14:32	3.41772	298.605	1	27
2022-09-13	13:14:32	2.84632	301.451	FALSE	27
2022-09-13	13:14:32	3.33772	304.789	1	28
2022-09-13	13:14:32	1.33518	306.124	FALSE	28
2022-09-13	13:14:33	1.61365	307.738	FALSE	28
2022-09-13	13:14:33	1.43894	309.177	FALSE	28
2022-09-13	13:14:33	0.82612	310.003	FALSE	28
2022-09-13	13:14:34	1.0707	311.074	FALSE	28
2022-09-13	13:14:34	0.498995	311.573	FALSE	28
2022-09-13	13:14:34	0.562404	312.135	FALSE	28
2022-09-13	13:14:34	0.735229	312.87	FALSE	28
2022-09-13	13:14:35	0.731005	313.601	FALSE	28
2022-09-13	13:14:35	0.379097	313.98	FALSE	28
2022-09-13	13:14:35	0.732735	314.713	FALSE	28
2022-09-13	13:14:35	0.171361	314.885	FALSE	28
2022-09-13	13:14:36	0.0164506	314.901	FALSE	28
2022-09-13	13:14:36	-0.113982	314.901	FALSE	28
2022-09-13	13:14:36	-0.206654	314.901	FALSE	28
2022-09-13	13:14:36	-0.171081	314.901	FALSE	28
2022-09-13	13:14:37	-0.157086	314.901	FALSE	28
2022-09-13	13:14:37	-0.15047	314.901	FALSE	28
2022-09-13	13:14:37	-0.0470099	314.901	FALSE	28
2022-09-13	13:14:38	-0.151234	314.901	FALSE	28
2022-09-13	13:14:38	-0.0496053	314.901	FALSE	28
2022-09-13	13:14:38	-0.148944	314.901	FALSE	28
2022-09-13	13:14:38	-0.125941	314.901	FALSE	28
2022-09-13	13:14:39	-0.381157	314.901	FALSE	28
2022-09-13	13:14:39	-0.718358	314.901	FALSE	28
2022-09-13	13:14:39	-0.716831	314.901	FALSE	28
2022-09-13	13:14:39	-0.657747	314.901	FALSE	28
2022-09-13	13:14:40	-0.530674	314.901	FALSE	28
2022-09-13	13:14:40	-0.278053	314.901	FALSE	28
2022-09-13	13:14:40	0.921692	315.823	FALSE	28
2022-09-13	13:14:40	1.5105	317.333	FALSE	28
2022-09-13	13:14:41	2.7596	320.093	FALSE	28
2022-09-13	13:14:41	1.8963	321.989	FALSE	28
2022-09-13	13:14:41	1.77426	323.763	FALSE	28
2022-09-13	13:14:42	0.820216	324.584	FALSE	28
2022-09-13	13:14:42	0.797774	325.381	FALSE	28
2022-09-13	13:14:42	0.260725	325.642	FALSE	28
2022-09-13	13:14:42	0.44902	326.091	FALSE	28
2022-09-13	13:14:43	0.272939	326.364	FALSE	28
2022-09-13	13:14:43	0.32215	326.686	FALSE	28
2022-09-13	13:14:43	0.283677	326.97	FALSE	28
2022-09-13	13:14:43	0.244491	327.214	FALSE	28
2022-09-13	13:14:44	0.334924	327.549	FALSE	28
2022-09-13	13:14:44	0.156043	327.705	FALSE	28
2022-09-13	13:14:44	0.0403692	327.746	FALSE	28
2022-09-13	13:14:44	0.0233209	327.769	FALSE	28
2022-09-13	13:14:45	-0.138511	327.769	FALSE	28
2022-09-13	13:14:45	0.0563997	327.825	FALSE	28
2022-09-13	13:14:45	0.31986	328.145	FALSE	28
2022-09-13	13:14:46	0.320827	328.466	FALSE	28
2022-09-13	13:14:46	0.580165	329.046	FALSE	28
2022-09-13	13:14:46	0.152888	329.199	FALSE	28
2022-09-13	13:14:46	0.729886	329.929	FALSE	28
2022-09-13	13:14:47	0.744949	330.674	FALSE	28
2022-09-13	13:14:47	0.448308	331.122	FALSE	28
2022-09-13	13:14:47	0.544593	331.667	FALSE	28
2022-09-13	13:14:47	0.419962	332.087	FALSE	28
2022-09-13	13:14:48	0.186883	332.274	FALSE	28
2022-09-13	13:14:48	0.235992	332.51	FALSE	28
2022-09-13	13:14:48	0.172735	332.682	FALSE	28
2022-09-13	13:14:48	0.158435	332.841	FALSE	28
2022-09-13	13:14:49	-0.0123535	332.841	FALSE	28
2022-09-13	13:14:49	-0.0119972	332.841	FALSE	28
2022-09-13	13:14:49	-0.0138802	332.841	FALSE	28
2022-09-13	13:14:49	0.541794	333.383	FALSE	28
2022-09-13	13:14:50	1.11192	334.495	FALSE	28
2022-09-13	13:14:50	0.935432	335.43	FALSE	28
2022-09-13	13:14:50	0.576043	336.006	FALSE	28
2022-09-13	13:14:51	0.217468	336.224	FALSE	28
2022-09-13	13:14:51	0.214008	336.438	FALSE	28
2022-09-13	13:14:51	0.245814	336.683	FALSE	28
2022-09-13	13:14:51	0.352634	337.036	FALSE	28
2022-09-13	13:14:52	0.99986	338.036	FALSE	28
2022-09-13	13:14:52	1.04093	339.077	FALSE	28
2022-09-13	13:14:52	1.79355	340.87	FALSE	28
2022-09-13	13:14:52	2.12983	343	FALSE	28
2022-09-13	13:14:53	1.61202	344.612	FALSE	28
2022-09-13	13:14:53	0.820369	345.433	FALSE	28
2022-09-13	13:14:53	0.321489	345.754	FALSE	28
2022-09-13	13:14:53	0.078588	345.833	FALSE	28
2022-09-13	13:14:54	0.0982317	345.931	FALSE	28
2022-09-13	13:14:54	0.220725	346.152	FALSE	28
2022-09-13	13:14:54	-0.0329132	346.152	FALSE	28
2022-09-13	13:14:55	0.262252	346.414	FALSE	28
2022-09-13	13:14:55	0.212837	346.627	FALSE	28
2022-09-13	13:14:55	0.287952	346.915	FALSE	28
2022-09-13	13:14:55	0.0906999	347.005	FALSE	28
2022-09-13	13:14:56	0.242812	347.248	FALSE	28
2022-09-13	13:14:56	0.145306	347.393	FALSE	28
2022-09-13	13:14:56	0.936909	348.33	FALSE	28
2022-09-13	13:14:56	0.398791	348.729	FALSE	28
2022-09-13	13:14:57	0.24327	348.972	FALSE	28
2022-09-13	13:14:57	0.27416	349.247	FALSE	28
2022-09-13	13:14:57	0.409021	349.656	FALSE	28
2022-09-13	13:14:57	0.458944	350.115	FALSE	28
2022-09-13	13:14:58	0.44729	350.562	FALSE	28
2022-09-13	13:14:58	0.415687	350.978	FALSE	28
2022-09-13	13:14:58	0.428766	351.406	FALSE	28
2022-09-13	13:14:59	0.419911	351.826	FALSE	28
2022-09-13	13:14:59	0.393855	352.22	FALSE	28
2022-09-13	13:14:59	0.394008	352.614	FALSE	28
2022-09-13	13:14:59	0.407799	353.022	FALSE	28
2022-09-13	13:15:00	0.421692	353.444	FALSE	28
2022-09-13	13:15:00	0.424389	353.868	FALSE	28
2022-09-13	13:15:00	0.425204	354.293	FALSE	28
2022-09-13	13:15:00	0.424746	354.718	FALSE	28
2022-09-13	13:15:01	0.427799	355.146	FALSE	28
2022-09-13	13:15:01	0.434008	355.58	FALSE	28
2022-09-13	13:15:01	0.445102	356.025	FALSE	28
2022-09-13	13:15:01	0.500623	356.525	FALSE	28
2022-09-13	13:15:02	0.65645	357.182	FALSE	28
2022-09-13	13:15:02	0.593804	357.776	FALSE	28
2022-09-13	13:15:02	0.334313	358.11	FALSE	28
2022-09-13	13:15:03	0.178384	358.288	FALSE	28
2022-09-13	13:15:03	-0.0728114	358.288	FALSE	28
2022-09-13	13:15:03	-0.277239	358.288	FALSE	28
2022-09-13	13:15:03	-0.363651	358.288	FALSE	28
2022-09-13	13:15:04	-0.527569	358.288	FALSE	28
2022-09-13	13:15:04	-0.541463	358.288	FALSE	28
2022-09-13	13:15:04	-0.571386	358.288	FALSE	28
2022-09-13	13:15:04	-0.586603	358.288	FALSE	28
2022-09-13	13:15:05	-0.716373	358.288	FALSE	28
2022-09-13	13:15:05	-0.790776	358.288	FALSE	28
2022-09-13	13:15:05	-0.917391	358.288	FALSE	28
2022-09-13	13:15:05	-0.831335	358.288	FALSE	28
2022-09-13	13:15:06	-0.869554	358.288	FALSE	28
2022-09-13	13:15:06	-0.898409	358.288	FALSE	28
2022-09-13	13:15:06	-0.668485	358.288	FALSE	28
2022-09-13	13:15:07	-0.720953	358.288	FALSE	28
2022-09-13	13:15:07	-0.683091	358.288	FALSE	28
2022-09-13	13:15:07	-0.803091	358.288	FALSE	28
2022-09-13	13:15:07	-0.684974	358.288	FALSE	28
2022-09-13	13:15:08	-0.744617	358.288	FALSE	28
2022-09-13	13:15:08	-0.795712	358.288	FALSE	28
2022-09-13	13:15:08	-0.698256	358.288	FALSE	28
2022-09-13	13:15:08	-0.698256	358.288	FALSE	28
2022-09-13	13:15:09	0.0310053	358.319	FALSE	28
2022-09-13	13:15:09	3.63838	361.958	1	29
2022-09-13	13:15:09	6.72505	368.683	1	30
2022-09-13	13:15:09	4.84805	373.531	1	31
2022-09-13	13:15:10	5.43019	378.961	1	32
2022-09-13	13:15:10	3.08108	382.042	1	33
2022-09-13	13:15:10	0.630496	382.673	FALSE	33
2022-09-13	13:15:11	2.04719	384.72	FALSE	33
2022-09-13	13:15:11	2.06342	386.783	FALSE	33
2022-09-13	13:15:11	4.38301	391.166	1	34
2022-09-13	13:15:11	7.07294	398.239	1	35
2022-09-13	13:15:12	10.5965	408.836	1	36
2022-09-13	13:15:12	13.8717	422.707	1	37
2022-09-13	13:15:12	3.5481	426.256	1	38
2022-09-13	13:15:12	5.9681	432.224	1	39
2022-09-13	13:15:13	8.30138	440.525	1	40
2022-09-13	13:15:13	4.27915	444.804	1	41
2022-09-13	13:15:13	8.56042	453.365	1	42
2022-09-13	13:15:13	13.9679	467.332	1	43
2022-09-13	13:15:14	6.94312	474.276	1	44
2022-09-13	13:15:14	13.3686	487.644	1	45
2022-09-13	13:15:14	18.0305	505.675	1	46
2022-09-13	13:15:15	6.84072	512.515	1	47
2022-09-13	13:15:15	8.64082	521.156	1	48
2022-09-13	13:15:15	14.3021	535.458	1	49
2022-09-13	13:15:15	4.59426	540.053	1	50
2022-09-13	13:15:16	8.11349	548.166	1	51
2022-09-13	13:15:16	11.6338	559.8	1	52
2022-09-13	13:15:16	3.49314	563.293	1	53
2022-09-13	13:15:16	2.25304	565.546	FALSE	53
2022-09-13	13:15:17	2.68067	568.227	FALSE	53
2022-09-13	13:15:17	1.80933	570.036	FALSE	53
2022-09-13	13:15:17	5.15421	575.19	1	54
2022-09-13	13:15:17	12.9216	588.112	1	55
2022-09-13	13:15:18	7.24881	595.361	1	56
2022-09-13	13:15:18	10.2232	605.584	1	57
2022-09-13	13:15:18	6.73395	612.318	1	58
2022-09-13	13:15:19	3.13986	615.458	1	59
2022-09-13	13:15:19	7.04683	622.505	1	60
2022-09-13	13:15:19	8.54551	631.05	1	61
2022-09-13	13:15:19	4.94464	635.995	1	62
2022-09-13	13:15:20	2.77991	638.775	FALSE	62
2022-09-13	13:15:20	1.64515	640.42	FALSE	62
2022-09-13	13:15:20	2.84525	643.265	FALSE	62
2022-09-13	13:15:20	1.39075	644.656	FALSE	62
2022-09-13	13:15:21	2.02332	646.679	FALSE	62
2022-09-13	13:15:21	1.45798	648.137	FALSE	62
2022-09-13	13:15:21	0.352685	648.49	FALSE	62
2022-09-13	13:15:21	0.720013	649.21	FALSE	62
2022-09-13	13:15:22	0.742354	649.952	FALSE	62
2022-09-13	13:15:22	0.481031	650.433	FALSE	62
2022-09-13	13:15:22	0.714466	651.148	FALSE	62
2022-09-13	13:15:23	0.731463	651.879	FALSE	62
2022-09-13	13:15:23	0.735026	652.614	FALSE	62
2022-09-13	13:15:23	0.739707	653.354	FALSE	62
2022-09-13	13:15:23	0.734211	654.088	FALSE	62
2022-09-13	13:15:24	0.727188	654.815	FALSE	62
2022-09-13	13:15:24	0.873295	655.688	FALSE	62
2022-09-13	13:15:24	2.65375	658.342	FALSE	62
2022-09-13	13:15:24	3.58525	661.927	1	63
2022-09-13	13:15:25	3.92943	665.857	1	64
2022-09-13	13:15:25	2.48693	668.344	FALSE	64
2022-09-13	13:15:25	2.59553	670.939	FALSE	64
2022-09-13	13:15:25	1.75899	672.698	FALSE	64
2022-09-13	13:15:26	1.83777	674.536	FALSE	64
2022-09-13	13:15:26	1.35172	675.888	FALSE	64
2022-09-13	13:15:26	1.01197	676.9	FALSE	64
2022-09-13	13:15:26	1.36642	678.266	FALSE	64
2022-09-13	13:15:27	1.16663	679.433	FALSE	64
2022-09-13	13:15:27	0.79869	680.232	FALSE	64
2022-09-13	13:15:27	0.747087	680.979	FALSE	64
2022-09-13	13:15:28	0.428766	681.407	FALSE	64
2022-09-13	13:15:28	0.723575	682.131	FALSE	64
2022-09-13	13:15:28	0.731717	682.863	FALSE	64
2022-09-13	13:15:28	0.668613	683.531	FALSE	64
2022-09-13	13:15:29	0.669529	684.201	FALSE	64
2022-09-13	13:15:29	0.74327	684.944	FALSE	64
2022-09-13	13:15:29	0.762659	685.707	FALSE	64
2022-09-13	13:15:29	0.782048	686.489	FALSE	64
2022-09-13	13:15:30	0.760165	687.249	FALSE	64
2022-09-13	13:15:30	0.738842	687.988	FALSE	64
2022-09-13	13:15:30	0.741539	688.729	FALSE	64
2022-09-13	13:15:30	0.632735	689.362	FALSE	64
2022-09-13	13:15:31	0.619453	689.982	FALSE	64
2022-09-13	13:15:31	0.746119	690.728	FALSE	64
2022-09-13	13:15:31	0.739758	691.467	FALSE	64
2022-09-13	13:15:32	0.736501	692.204	FALSE	64
2022-09-13	13:15:32	0.732226	692.936	FALSE	64
2022-09-13	13:15:32	0.735483	693.672	FALSE	64
2022-09-13	13:15:32	0.734873	694.407	FALSE	64
2022-09-13	13:15:33	0.734059	695.141	FALSE	64
2022-09-13	13:15:33	0.728766	695.869	FALSE	64
2022-09-13	13:15:33	0.735178	696.605	FALSE	64
2022-09-13	13:15:33	0.73472	697.339	FALSE	64
2022-09-13	13:15:34	0.737315	698.077	FALSE	64
2022-09-13	13:15:34	0.735483	698.812	FALSE	64
2022-09-13	13:15:34	0.735331	699.547	FALSE	64
2022-09-13	13:15:34	0.735636	700.283	FALSE	64
2022-09-13	13:15:35	0.740369	701.023	FALSE	64
2022-09-13	13:15:35	0.735534	701.759	FALSE	64
2022-09-13	13:15:35	0.73584	702.495	FALSE	64
2022-09-13	13:15:36	0.735534	703.23	FALSE	64
2022-09-13	13:15:36	0.73243	703.963	FALSE	64
2022-09-13	13:15:36	0.733244	704.696	FALSE	64
2022-09-13	13:15:36	0.737366	705.433	FALSE	64
2022-09-13	13:15:37	0.738537	706.172	FALSE	64
2022-09-13	13:15:37	0.732226	706.904	FALSE	64
2022-09-13	13:15:37	0.731819	707.636	FALSE	64
2022-09-13	13:15:37	0.737621	708.374	FALSE	64
2022-09-13	13:15:38	0.734262	709.108	FALSE	64
2022-09-13	13:15:38	0.732786	709.841	FALSE	64
2022-09-13	13:15:38	0.738231	710.579	FALSE	64
2022-09-13	13:15:38	0.733244	711.312	FALSE	64
2022-09-13	13:15:39	0.733702	712.046	FALSE	64
2022-09-13	13:15:39	0.731412	712.777	FALSE	64
2022-09-13	13:15:39	0.737417	713.515	FALSE	64
2022-09-13	13:15:40	0.740318	714.255	FALSE	64
2022-09-13	13:15:40	0.731361	714.986	FALSE	64
2022-09-13	13:15:40	0.732328	715.719	FALSE	64
2022-09-13	13:15:40	0.734568	716.453	FALSE	64
2022-09-13	13:15:41	0.733702	717.187	FALSE	64
2022-09-13	13:15:41	0.736756	717.924	FALSE	64
2022-09-13	13:15:41	0.72897	718.653	FALSE	64
2022-09-13	13:15:41	0.733601	719.386	FALSE	64
2022-09-13	13:15:42	0.734415	720.121	FALSE	64
2022-09-13	13:15:42	0.733346	720.854	FALSE	64
2022-09-13	13:15:42	0.734364	721.588	FALSE	64
2022-09-13	13:15:42	0.738333	722.327	FALSE	64
2022-09-13	13:15:43	0.734975	723.062	FALSE	64
2022-09-13	13:15:43	0.736959	723.799	FALSE	64
2022-09-13	13:15:43	0.738079	724.537	FALSE	64
2022-09-13	13:15:44	0.736349	725.273	FALSE	64
2022-09-13	13:15:44	0.732074	726.005	FALSE	64
2022-09-13	13:15:44	0.732277	726.737	FALSE	64
2022-09-13	13:15:44	0.738231	727.476	FALSE	64
2022-09-13	13:15:45	0.742252	728.218	FALSE	64
2022-09-13	13:15:45	0.732175	728.95	FALSE	64
2022-09-13	13:15:45	0.737468	729.687	FALSE	64
2022-09-13	13:15:46	0.739707	730.427	FALSE	64
2022-09-13	13:15:46	0.737672	731.165	FALSE	64
2022-09-13	13:15:46	0.739147	731.904	FALSE	64
2022-09-13	13:15:46	0.734008	732.638	FALSE	64
2022-09-13	13:15:46	0.724033	733.362	FALSE	64
2022-09-13	13:15:47	0.739402	734.101	FALSE	64
2022-09-13	13:15:47	0.733601	734.835	FALSE	64
2022-09-13	13:15:47	0.741081	735.576	FALSE	64
2022-09-13	13:15:48	0.73813	736.314	FALSE	64
2022-09-13	13:15:48	0.732634	737.047	FALSE	64
2022-09-13	13:15:48	0.733601	737.78	FALSE	64
2022-09-13	13:15:48	0.732125	738.513	FALSE	64
2022-09-13	13:15:49	0.72958	739.242	FALSE	64
2022-09-13	13:15:49	0.734059	739.976	FALSE	64
2022-09-13	13:15:49	0.734618	740.711	FALSE	64
2022-09-13	13:15:49	0.73701	741.448	FALSE	64
2022-09-13	13:15:50	0.74215	742.19	FALSE	64
2022-09-13	13:15:50	0.733346	742.923	FALSE	64
2022-09-13	13:15:50	0.73986	743.663	FALSE	64
2022-09-13	13:15:50	0.739707	744.403	FALSE	64
2022-09-13	13:15:51	0.737163	745.14	FALSE	64
2022-09-13	13:15:51	0.739351	745.879	FALSE	64
2022-09-13	13:15:51	0.732735	746.612	FALSE	64
2022-09-13	13:15:52	0.735585	747.348	FALSE	64
2022-09-13	13:15:52	0.726323	748.074	FALSE	64
2022-09-13	13:15:52	0.733346	748.807	FALSE	64
2022-09-13	13:15:52	0.73813	749.546	FALSE	64
2022-09-13	13:15:53	0.737112	750.283	FALSE	64
2022-09-13	13:15:53	0.734618	751.017	FALSE	64
2022-09-13	13:15:53	0.729224	751.747	FALSE	64
2022-09-13	13:15:53	0.741081	752.488	FALSE	64
2022-09-13	13:15:54	0.735789	753.223	FALSE	64
2022-09-13	13:15:54	0.732532	753.956	FALSE	64
2022-09-13	13:15:54	0.733397	754.689	FALSE	64
2022-09-13	13:15:54	0.735636	755.425	FALSE	64
2022-09-13	13:15:55	0.735382	756.16	FALSE	64
2022-09-13	13:15:55	0.738028	756.898	FALSE	64
2022-09-13	13:15:55	0.73528	757.634	FALSE	64
2022-09-13	13:15:56	0.73528	758.369	FALSE	64
2022-09-13	13:15:56	0.737519	759.106	FALSE	64
2022-09-13	13:15:56	0.736501	759.843	FALSE	64
2022-09-13	13:15:56	0.731717	760.575	FALSE	64
2022-09-13	13:15:57	0.738842	761.314	FALSE	64
2022-09-13	13:15:57	0.735941	762.049	FALSE	64
2022-09-13	13:15:57	0.735433	762.785	FALSE	64
2022-09-13	13:15:57	0.733957	763.519	FALSE	64
2022-09-13	13:15:58	0.74332	764.262	FALSE	64
2022-09-13	13:15:58	0.737112	764.999	FALSE	64
2022-09-13	13:15:58	0.731819	765.731	FALSE	64
2022-09-13	13:15:58	0.731921	766.463	FALSE	64
2022-09-13	13:15:59	0.734262	767.197	FALSE	64
2022-09-13	13:15:59	0.731056	767.928	FALSE	64
2022-09-13	13:15:59	0.735026	768.663	FALSE	64
2022-09-13	13:16:00	0.735433	769.399	FALSE	64
2022-09-13	13:16:00	0.739707	770.139	FALSE	64
2022-09-13	13:16:00	0.734517	770.873	FALSE	64
2022-09-13	13:16:00	0.73416	771.607	FALSE	64
2022-09-13	13:16:01	0.734313	772.341	FALSE	64
2022-09-13	13:16:01	0.726679	773.068	FALSE	64
2022-09-13	13:16:01	0.729835	773.798	FALSE	64
2022-09-13	13:16:01	0.687799	774.486	FALSE	64
2022-09-13	13:16:02	0.703372	775.189	FALSE	64
2022-09-13	13:16:02	0.700674	775.89	FALSE	64
2022-09-13	13:16:02	0.710445	776.6	FALSE	64
2022-09-13	13:16:02	0.686476	777.287	FALSE	64
2022-09-13	13:16:03	0.675076	777.962	FALSE	64
2022-09-13	13:16:03	0.687086	778.649	FALSE	64
2022-09-13	13:16:03	0.672735	779.322	FALSE	64
2022-09-13	13:16:04	0.675636	779.997	FALSE	64
2022-09-13	13:16:04	0.671616	780.669	FALSE	64
2022-09-13	13:16:04	0.675483	781.344	FALSE	64
2022-09-13	13:16:04	0.675636	782.02	FALSE	64
2022-09-13	13:16:05	0.665865	782.686	FALSE	64
2022-09-13	13:16:05	0.663779	783.35	FALSE	64
2022-09-13	13:16:05	0.668308	784.018	FALSE	64
2022-09-13	13:16:05	0.488155	784.506	FALSE	64
2022-09-13	13:16:06	0.401336	784.907	FALSE	64
2022-09-13	13:16:06	0.234822	785.142	FALSE	64
2022-09-13	13:16:06	0.224593	785.367	FALSE	64
2022-09-13	13:16:06	0.368359	785.735	FALSE	64
2022-09-13	13:16:07	0.386323	786.122	FALSE	64
2022-09-13	13:16:07	0.346069	786.468	FALSE	64
2022-09-13	13:16:07	0.343219	786.811	FALSE	64
2022-09-13	13:16:07	0.363219	787.174	FALSE	64
2022-09-13	13:16:08	0.409733	787.584	FALSE	64
2022-09-13	13:16:08	0.606069	788.19	FALSE	64
2022-09-13	13:16:08	0.676908	788.867	FALSE	64
2022-09-13	13:16:09	0.461132	789.328	FALSE	64
2022-09-13	13:16:09	0.433143	789.761	FALSE	64
2022-09-13	13:16:09	0.30327	790.064	FALSE	64
2022-09-13	13:16:09	0.298232	790.363	FALSE	64
2022-09-13	13:16:10	0.290089	790.653	FALSE	64
2022-09-13	13:16:10	0.260115	790.913	FALSE	64
2022-09-13	13:16:10	0.26444	791.177	FALSE	64
2022-09-13	13:16:10	0.242456	791.42	FALSE	64
2022-09-13	13:16:11	0.240573	791.66	FALSE	64
2022-09-13	13:16:11	0.524491	792.185	FALSE	64
2022-09-13	13:16:11	0.149682	792.334	FALSE	64
2022-09-13	13:16:11	-0.122684	792.334	FALSE	64
2022-09-13	13:16:12	-0.224618	792.334	FALSE	64
2022-09-13	13:16:12	-0.331895	792.334	FALSE	64
2022-09-13	13:16:12	-0.449554	792.334	FALSE	64
2022-09-13	13:16:13	-0.535	792.334	FALSE	64
2022-09-13	13:16:13	-0.613168	792.334	FALSE	64
2022-09-13	13:16:13	-0.688434	792.334	FALSE	64
2022-09-13	13:16:13	-0.619325	792.334	FALSE	64
2022-09-13	13:16:14	-0.547519	792.334	FALSE	64
2022-09-13	13:16:14	-0.231794	792.334	FALSE	64
2022-09-13	13:16:14	1.67742	794.012	FALSE	64
2022-09-13	13:16:14	1.32225	795.334	FALSE	64
2022-09-13	13:16:15	0.892634	796.227	FALSE	64
2022-09-13	13:16:15	2.02765	798.254	FALSE	64
2022-09-13	13:16:15	2.40851	800.663	FALSE	64
2022-09-13	13:16:16	2.82556	803.488	FALSE	64
2022-09-13	13:16:16	6.94805	810.437	1	65
2022-09-13	13:16:16	3.82189	814.258	1	66
2022-09-13	13:16:16	10.0198	824.278	1	67
2022-09-13	13:16:17	7.35268	831.631	1	68
2022-09-13	13:16:17	3.05472	834.686	1	69
2022-09-13	13:16:17	4.66805	839.354	1	70
2022-09-13	13:16:17	10.136	849.49	1	71
2022-09-13	13:16:18	4.2422	853.732	1	72
2022-09-13	13:16:18	7.07044	860.802	1	73
2022-09-13	13:16:18	6.94174	867.744	1	74
2022-09-13	13:16:18	3.32133	871.065	1	75
2022-09-13	13:16:19	1.90388	872.969	FALSE	75
2022-09-13	13:16:19	7.06499	880.034	1	76
2022-09-13	13:16:19	5.39237	885.427	1	77
2022-09-13	13:16:19	4.76887	890.195	1	78
2022-09-13	13:16:20	9.50281	899.698	1	79
2022-09-13	13:16:20	4.54205	904.24	1	80
2022-09-13	13:16:20	5.05619	909.297	1	81
2022-09-13	13:16:21	4.67523	913.972	1	82
2022-09-13	13:16:21	4.68184	918.654	1	83
2022-09-13	13:16:21	1.53258	920.186	FALSE	83
2022-09-13	13:16:21	3.65961	923.846	1	84
2022-09-13	13:16:22	0.992328	924.838	FALSE	84
2022-09-13	13:16:22	0.502812	925.341	FALSE	84
2022-09-13	13:16:22	0.798639	926.14	FALSE	84
2022-09-13	13:16:22	0.112023	926.252	FALSE	84
2022-09-13	13:16:23	0.71355	926.965	FALSE	84
2022-09-13	13:16:23	0.727596	927.693	FALSE	84
2022-09-13	13:16:23	0.10729	927.8	FALSE	84
2022-09-13	13:16:23	-0.388587	927.8	FALSE	84
2022-09-13	13:16:24	-0.540292	927.8	FALSE	84
2022-09-13	13:16:24	-0.580445	927.8	FALSE	84
2022-09-13	13:16:24	-0.527977	927.8	FALSE	84
2022-09-13	13:16:25	-0.390928	927.8	FALSE	84
2022-09-13	13:16:25	-0.278918	927.8	FALSE	84
2022-09-13	13:16:25	-0.326297	927.8	FALSE	84
2022-09-13	13:16:25	-0.42075	927.8	FALSE	84
2022-09-13	13:16:26	-0.209198	927.8	FALSE	84
2022-09-13	13:16:26	-0.424669	927.8	FALSE	84
2022-09-13	13:16:26	-0.468028	927.8	FALSE	84
2022-09-13	13:16:26	-0.496832	927.8	FALSE	84
2022-09-13	13:16:27	-0.446501	927.8	FALSE	84
2022-09-13	13:16:27	-0.446603	927.8	FALSE	84
2022-09-13	13:16:27	-0.389707	927.8	FALSE	84
2022-09-13	13:16:27	-0.367671	927.8	FALSE	84
2022-09-13	13:16:28	-0.218969	927.8	FALSE	84
2022-09-13	13:16:28	0.0711071	927.871	FALSE	84
2022-09-13	13:16:28	0.369071	928.24	FALSE	84
2022-09-13	13:16:29	-0.0398853	928.24	FALSE	84
2022-09-13	13:16:29	-0.0588165	928.24	FALSE	84
2022-09-13	13:16:29	0.703677	928.944	FALSE	84
2022-09-13	13:16:29	0.735331	929.679	FALSE	84
2022-09-13	13:16:30	0.736756	930.416	FALSE	84
2022-09-13	13:16:30	0.739147	931.155	FALSE	84
2022-09-13	13:16:30	0.737366	931.892	FALSE	84
2022-09-13	13:16:30	0.737366	932.63	FALSE	84
2022-09-13	13:16:31	0.73187	933.362	FALSE	84
2022-09-13	13:16:31	0.735585	934.097	FALSE	84
2022-09-13	13:16:31	0.733651	934.831	FALSE	84
2022-09-13	13:16:31	0.737417	935.568	FALSE	84
2022-09-13	13:16:32	0.738842	936.307	FALSE	84
2022-09-13	13:16:32	0.735229	937.042	FALSE	84
2022-09-13	13:16:32	0.742048	937.784	FALSE	84
2022-09-13	13:16:33	0.735534	938.52	FALSE	84
2022-09-13	13:16:33	0.732481	939.252	FALSE	84
2022-09-13	13:16:33	0.740318	939.993	FALSE	84
2022-09-13	13:16:33	0.736959	940.73	FALSE	84
2022-09-13	13:16:34	0.730445	941.46	FALSE	84
2022-09-13	13:16:34	0.734313	942.195	FALSE	84
2022-09-13	13:16:34	0.72841	942.923	FALSE	84
2022-09-13	13:16:34	0.735331	943.658	FALSE	84
2022-09-13	13:16:35	0.736857	944.395	FALSE	84
2022-09-13	13:16:35	0.73299	945.128	FALSE	84
2022-09-13	13:16:35	0.737672	945.866	FALSE	84
2022-09-13	13:16:35	0.729987	946.596	FALSE	84
2022-09-13	13:16:36	0.731616	947.327	FALSE	84
2022-09-13	13:16:36	0.730801	948.058	FALSE	84
2022-09-13	13:16:36	0.733295	948.791	FALSE	84
2022-09-13	13:16:37	0.730191	949.522	FALSE	84
2022-09-13	13:16:37	0.732939	950.255	FALSE	84
2022-09-13	13:16:37	0.735636	950.99	FALSE	84
2022-09-13	13:16:37	0.736298	951.727	FALSE	84
2022-09-13	13:16:38	0.729224	952.456	FALSE	84
2022-09-13	13:16:38	0.738079	953.194	FALSE	84
2022-09-13	13:16:38	0.735433	953.929	FALSE	84
2022-09-13	13:16:38	0.734517	954.664	FALSE	84
2022-09-13	13:16:39	0.734313	955.398	FALSE	84
2022-09-13	13:16:39	0.732379	956.13	FALSE	84
2022-09-13	13:16:39	0.736399	956.867	FALSE	84
2022-09-13	13:16:39	0.729987	957.597	FALSE	84
2022-09-13	13:16:40	0.731514	958.328	FALSE	84
2022-09-13	13:16:40	0.74098	959.069	FALSE	84
2022-09-13	13:16:40	0.735992	959.805	FALSE	84
2022-09-13	13:16:41	0.732328	960.538	FALSE	84
2022-09-13	13:16:41	0.731819	961.27	FALSE	84
2022-09-13	13:16:41	0.729122	961.999	FALSE	84
2022-09-13	13:16:41	0.733906	962.733	FALSE	84
2022-09-13	13:16:42	0.731717	963.464	FALSE	84
2022-09-13	13:16:42	0.734669	964.199	FALSE	84
2022-09-13	13:16:42	0.732175	964.931	FALSE	84
2022-09-13	13:16:42	0.728715	965.66	FALSE	84
2022-09-13	13:16:43	0.732837	966.393	FALSE	84
2022-09-13	13:16:43	0.732837	967.125	FALSE	84
2022-09-13	13:16:43	0.729122	967.855	FALSE	84
2022-09-13	13:16:43	0.730242	968.585	FALSE	84
2022-09-13	13:16:44	0.733092	969.318	FALSE	84
2022-09-13	13:16:44	0.733651	970.052	FALSE	84
2022-09-13	13:16:44	0.733244	970.785	FALSE	84
2022-09-13	13:16:45	0.745356	971.53	FALSE	84
2022-09-13	13:16:45	0.731209	972.261	FALSE	84
2022-09-13	13:16:45	0.738181	973	FALSE	84
2022-09-13	13:16:45	0.7307	973.73	FALSE	84
2022-09-13	13:16:46	0.724796	974.455	FALSE	84
2022-09-13	13:16:46	0.739097	975.194	FALSE	84
2022-09-13	13:16:46	0.733193	975.927	FALSE	84
2022-09-13	13:16:46	0.736959	976.664	FALSE	84
2022-09-13	13:16:47	0.738384	977.403	FALSE	84
2022-09-13	13:16:47	0.736654	978.139	FALSE	84
2022-09-13	13:16:47	0.735076	978.874	FALSE	84
2022-09-13	13:16:47	0.734669	979.609	FALSE	84
2022-09-13	13:16:48	0.733295	980.342	FALSE	84
2022-09-13	13:16:48	0.737112	981.08	FALSE	84
2022-09-13	13:16:48	0.735687	981.815	FALSE	84
2022-09-13	13:16:48	0.734466	982.55	FALSE	84
2022-09-13	13:16:49	0.732226	983.282	FALSE	84
2022-09-13	13:16:49	0.730394	984.012	FALSE	84
2022-09-13	13:16:49	0.736807	984.749	FALSE	84
2022-09-13	13:16:50	0.72617	985.475	FALSE	84
2022-09-13	13:16:50	0.741947	986.217	FALSE	84
2022-09-13	13:16:50	0.730343	986.948	FALSE	84
2022-09-13	13:16:50	0.737977	987.686	FALSE	84
2022-09-13	13:16:51	0.734873	988.42	FALSE	84
2022-09-13	13:16:51	0.732277	989.153	FALSE	84
2022-09-13	13:16:51	0.734059	989.887	FALSE	84
2022-09-13	13:16:51	0.736552	990.623	FALSE	84
2022-09-13	13:16:52	0.737315	991.361	FALSE	84
2022-09-13	13:16:52	0.729478	992.09	FALSE	84
2022-09-13	13:16:52	0.734517	992.825	FALSE	84
2022-09-13	13:16:52	0.739606	993.564	FALSE	84
2022-09-13	13:16:53	0.733092	994.297	FALSE	84
2022-09-13	13:16:53	0.733855	995.031	FALSE	84
2022-09-13	13:16:53	0.739097	995.77	FALSE	84
2022-09-13	13:16:54	0.737773	996.508	FALSE	84
2022-09-13	13:16:54	0.731667	997.24	FALSE	84
2022-09-13	13:16:54	0.72612	997.966	FALSE	84
2022-09-13	13:16:54	0.73584	998.702	FALSE	84
2022-09-13	13:16:55	0.73701	999.439	FALSE	84
2022-09-13	13:16:55	0.733804	1000.17	FALSE	84
2022-09-13	13:16:55	0.741234	1000.91	FALSE	84
2022-09-13	13:16:55	0.738588	1001.65	FALSE	84
2022-09-13	13:16:56	0.735941	1002.39	FALSE	84
2022-09-13	13:16:56	0.734975	1003.12	FALSE	84
2022-09-13	13:16:56	0.73584	1003.86	FALSE	84
2022-09-13	13:16:56	0.739046	1004.6	FALSE	84
2022-09-13	13:16:57	0.738842	1005.34	FALSE	84
2022-09-13	13:16:57	0.734517	1006.07	FALSE	84
2022-09-13	13:16:57	0.738282	1006.81	FALSE	84
2022-09-13	13:16:58	0.733346	1007.54	FALSE	84
2022-09-13	13:16:58	0.736807	1008.28	FALSE	84
2022-09-13	13:16:58	0.742201	1009.02	FALSE	84
2022-09-13	13:16:58	0.734415	1009.76	FALSE	84
2022-09-13	13:16:59	0.729631	1010.49	FALSE	84
2022-09-13	13:16:59	0.735331	1011.22	FALSE	84
2022-09-13	13:16:59	0.732125	1011.95	FALSE	84
2022-09-13	13:16:59	0.732023	1012.69	FALSE	84
2022-09-13	13:17:00	0.733397	1013.42	FALSE	84
2022-09-13	13:17:00	0.734059	1014.15	FALSE	84
2022-09-13	13:17:00	0.730649	1014.88	FALSE	84
2022-09-13	13:17:00	0.739097	1015.62	FALSE	84
2022-09-13	13:17:01	0.730751	1016.35	FALSE	84
2022-09-13	13:17:01	0.729071	1017.08	FALSE	84
2022-09-13	13:17:01	0.738384	1017.82	FALSE	84
2022-09-13	13:17:02	0.735687	1018.56	FALSE	84
2022-09-13	13:17:02	0.731361	1019.29	FALSE	84
2022-09-13	13:17:02	0.733244	1020.02	FALSE	84
2022-09-13	13:17:02	0.731972	1020.75	FALSE	84
2022-09-13	13:17:03	0.732786	1021.49	FALSE	84
2022-09-13	13:17:03	0.732532	1022.22	FALSE	84
2022-09-13	13:17:03	0.735789	1022.95	FALSE	84
2022-09-13	13:17:03	0.73416	1023.69	FALSE	84
2022-09-13	13:17:04	0.735789	1024.42	FALSE	84
2022-09-13	13:17:04	0.733957	1025.16	FALSE	84
2022-09-13	13:17:04	0.727036	1025.89	FALSE	84
2022-09-13	13:17:04	0.735992	1026.62	FALSE	84
2022-09-13	13:17:05	0.740064	1027.36	FALSE	84
2022-09-13	13:17:05	0.737417	1028.1	FALSE	84
2022-09-13	13:17:05	0.743931	1028.84	FALSE	84
2022-09-13	13:17:06	0.734262	1029.58	FALSE	84
2022-09-13	13:17:06	0.733804	1030.31	FALSE	84
2022-09-13	13:17:06	0.737977	1031.05	FALSE	84
2022-09-13	13:17:06	0.734771	1031.78	FALSE	84
2022-09-13	13:17:07	0.72958	1032.51	FALSE	84
2022-09-13	13:17:07	0.732074	1033.25	FALSE	84
2022-09-13	13:17:07	0.739962	1033.99	FALSE	84
2022-09-13	13:17:07	0.738537	1034.72	FALSE	84
2022-09-13	13:17:08	0.737672	1035.46	FALSE	84
2022-09-13	13:17:08	0.731158	1036.19	FALSE	84
2022-09-13	13:17:08	0.731463	1036.92	FALSE	84
2022-09-13	13:17:08	0.736552	1037.66	FALSE	84
2022-09-13	13:17:09	0.738181	1038.4	FALSE	84
2022-09-13	13:17:09	0.738995	1039.14	FALSE	84
2022-09-13	13:17:09	0.734211	1039.87	FALSE	84
2022-09-13	13:17:10	0.728155	1040.6	FALSE	84
2022-09-13	13:17:10	0.73645	1041.34	FALSE	84
2022-09-13	13:17:10	0.733397	1042.07	FALSE	84
2022-09-13	13:17:10	0.732277	1042.8	FALSE	84
2022-09-13	13:17:11	0.737214	1043.54	FALSE	84
2022-09-13	13:17:11	0.733041	1044.27	FALSE	84
2022-09-13	13:17:11	0.732634	1045.01	FALSE	84
2022-09-13	13:17:11	0.738944	1045.74	FALSE	84
2022-09-13	13:17:12	0.735127	1046.48	FALSE	84
2022-09-13	13:17:12	0.726578	1047.21	FALSE	84
2022-09-13	13:17:12	0.733601	1047.94	FALSE	84
2022-09-13	13:17:12	0.727697	1048.67	FALSE	84
2022-09-13	13:17:13	0.737468	1049.4	FALSE	84
2022-09-13	13:17:13	0.732684	1050.14	FALSE	84
2022-09-13	13:17:13	0.735433	1050.87	FALSE	84
2022-09-13	13:17:14	0.732226	1051.6	FALSE	84
2022-09-13	13:17:14	0.735178	1052.34	FALSE	84
2022-09-13	13:17:14	0.736603	1053.08	FALSE	84
2022-09-13	13:17:14	0.72617	1053.8	FALSE	84
2022-09-13	13:17:15	0.733957	1054.54	FALSE	84
2022-09-13	13:17:15	0.729784	1055.27	FALSE	84
2022-09-13	13:17:15	0.732532	1056	FALSE	84
2022-09-13	13:17:15	0.733855	1056.73	FALSE	84
2022-09-13	13:17:16	0.736705	1057.47	FALSE	84
2022-09-13	13:17:16	0.734313	1058.2	FALSE	84
2022-09-13	13:17:16	0.731921	1058.94	FALSE	84
2022-09-13	13:17:16	0.734618	1059.67	FALSE	84
2022-09-13	13:17:17	0.736756	1060.41	FALSE	84
2022-09-13	13:17:17	0.73813	1061.15	FALSE	84
2022-09-13	13:17:17	0.73416	1061.88	FALSE	84
2022-09-13	13:17:18	0.730394	1062.61	FALSE	84
2022-09-13	13:17:18	0.738333	1063.35	FALSE	84
2022-09-13	13:17:18	0.735331	1064.08	FALSE	84
2022-09-13	13:17:18	0.735992	1064.82	FALSE	84
2022-09-13	13:17:19	0.732786	1065.55	FALSE	84
2022-09-13	13:17:19	0.73813	1066.29	FALSE	84
2022-09-13	13:17:19	0.728664	1067.02	FALSE	84
2022-09-13	13:17:19	0.734822	1067.75	FALSE	84
2022-09-13	13:17:20	0.72902	1068.48	FALSE	84
2022-09-13	13:17:20	0.732277	1069.22	FALSE	84
2022-09-13	13:17:20	0.729478	1069.94	FALSE	84
2022-09-13	13:17:20	0.736908	1070.68	FALSE	84
2022-09-13	13:17:21	0.727952	1071.41	FALSE	84
2022-09-13	13:17:21	0.733957	1072.14	FALSE	84
2022-09-13	13:17:21	0.723168	1072.87	FALSE	84
2022-09-13	13:17:22	0.738893	1073.61	FALSE	84
2022-09-13	13:17:22	0.735178	1074.34	FALSE	84
2022-09-13	13:17:22	0.733092	1075.07	FALSE	84
2022-09-13	13:17:22	0.725102	1075.8	FALSE	84
2022-09-13	13:17:23	0.735331	1076.53	FALSE	84
2022-09-13	13:17:23	0.737112	1077.27	FALSE	84
2022-09-13	13:17:23	0.730547	1078	FALSE	84
2022-09-13	13:17:23	0.731667	1078.73	FALSE	84
2022-09-13	13:17:24	0.73014	1079.46	FALSE	84
2022-09-13	13:17:24	0.736857	1080.2	FALSE	84
2022-09-13	13:17:24	0.733397	1080.93	FALSE	84
2022-09-13	13:17:24	0.736959	1081.67	FALSE	84
2022-09-13	13:17:25	0.729784	1082.4	FALSE	84
2022-09-13	13:17:25	0.732277	1083.13	FALSE	84
2022-09-13	13:17:25	0.73528	1083.87	FALSE	84
2022-09-13	13:17:25	0.737875	1084.61	FALSE	84
2022-09-13	13:17:26	0.734924	1085.34	FALSE	84
2022-09-13	13:17:26	0.73131	1086.07	FALSE	84
2022-09-13	13:17:26	0.738588	1086.81	FALSE	84
2022-09-13	13:17:27	0.736959	1087.55	FALSE	84
2022-09-13	13:17:27	0.735076	1088.28	FALSE	84
2022-09-13	13:17:27	0.738893	1089.02	FALSE	84
2022-09-13	13:17:27	0.733193	1089.76	FALSE	84
2022-09-13	13:17:28	0.735687	1090.49	FALSE	84
2022-09-13	13:17:28	0.731972	1091.22	FALSE	84
2022-09-13	13:17:28	0.733092	1091.96	FALSE	84
2022-09-13	13:17:28	0.732684	1092.69	FALSE	84
2022-09-13	13:17:29	0.734415	1093.42	FALSE	84
2022-09-13	13:17:29	0.732684	1094.16	FALSE	84
2022-09-13	13:17:29	0.738028	1094.89	FALSE	84
2022-09-13	13:17:29	0.734364	1095.63	FALSE	84
2022-09-13	13:17:30	0.733601	1096.36	FALSE	84
2022-09-13	13:17:30	0.736908	1097.1	FALSE	84
2022-09-13	13:17:30	0.736501	1097.84	FALSE	84
2022-09-13	13:17:31	0.734211	1098.57	FALSE	84
2022-09-13	13:17:31	0.735382	1099.3	FALSE	84
2022-09-13	13:17:31	0.731616	1100.04	FALSE	84
2022-09-13	13:17:31	0.730954	1100.77	FALSE	84
2022-09-13	13:17:32	0.730445	1101.5	FALSE	84
2022-09-13	13:17:32	0.733804	1102.23	FALSE	84
2022-09-13	13:17:32	0.734059	1102.97	FALSE	84
2022-09-13	13:17:32	0.734771	1103.7	FALSE	84
2022-09-13	13:17:33	0.738333	1104.44	FALSE	84
2022-09-13	13:17:33	0.726985	1105.17	FALSE	84
2022-09-13	13:17:33	0.730089	1105.9	FALSE	84
2022-09-13	13:17:33	0.733651	1106.63	FALSE	84
2022-09-13	13:17:34	0.732125	1107.36	FALSE	84
2022-09-13	13:17:34	0.73355	1108.1	FALSE	84
2022-09-13	13:17:34	0.733244	1108.83	FALSE	84
2022-09-13	13:17:35	0.735585	1109.56	FALSE	84
2022-09-13	13:17:35	0.731717	1110.3	FALSE	84
2022-09-13	13:17:35	0.732277	1111.03	FALSE	84
2022-09-13	13:17:35	0.727494	1111.76	FALSE	84
2022-09-13	13:17:36	0.734313	1112.49	FALSE	84
2022-09-13	13:17:36	0.741031	1113.23	FALSE	84
2022-09-13	13:17:36	0.758181	1113.99	FALSE	84
2022-09-13	13:17:36	0.73243	1114.72	FALSE	84
2022-09-13	13:17:37	0.730496	1115.45	FALSE	84
2022-09-13	13:17:37	0.73131	1116.18	FALSE	84
2022-09-13	13:17:37	0.739147	1116.92	FALSE	84
2022-09-13	13:17:37	0.732074	1117.65	FALSE	84
2022-09-13	13:17:38	0.730547	1118.38	FALSE	84
2022-09-13	13:17:38	0.731819	1119.12	FALSE	84
2022-09-13	13:17:38	0.731259	1119.85	FALSE	84
2022-09-13	13:17:39	0.73187	1120.58	FALSE	84
2022-09-13	13:17:39	0.726476	1121.31	FALSE	84
2022-09-13	13:17:39	1.48373	1122.79	FALSE	84
2022-09-13	13:17:39	0.623677	1123.41	FALSE	84
2022-09-13	13:17:40	0.736552	1124.15	FALSE	84
2022-09-13	13:17:40	0.736247	1124.89	FALSE	84
2022-09-13	13:17:40	0.729733	1125.62	FALSE	84
2022-09-13	13:17:40	0.734771	1126.35	FALSE	84
2022-09-13	13:17:41	0.736145	1127.09	FALSE	84
2022-09-13	13:17:41	0.728766	1127.82	FALSE	84
2022-09-13	13:17:41	0.734109	1128.55	FALSE	84
2022-09-13	13:17:41	0.729631	1129.28	FALSE	84
2022-09-13	13:17:42	0.748664	1130.03	FALSE	84
2022-09-13	13:17:42	0.725712	1130.75	FALSE	84
2022-09-13	13:17:42	-0.158104	1130.75	FALSE	84
2022-09-13	13:17:43	0.730496	1131.48	FALSE	84
2022-09-13	13:17:43	0.733855	1132.22	FALSE	84
2022-09-13	13:17:43	0.737773	1132.96	FALSE	84
2022-09-13	13:17:43	0.74098	1133.7	FALSE	84
2022-09-13	13:17:44	0.74159	1134.44	FALSE	84
2022-09-13	13:17:44	0.727188	1135.17	FALSE	84
2022-09-13	13:17:44	0.727494	1135.89	FALSE	84
2022-09-13	13:17:44	0.733346	1136.63	FALSE	84
2022-09-13	13:17:45	0.737926	1137.36	FALSE	84
2022-09-13	13:17:45	0.734211	1138.1	FALSE	84
2022-09-13	13:17:45	0.736298	1138.84	FALSE	84
2022-09-13	13:17:45	0.733499	1139.57	FALSE	84
2022-09-13	13:17:46	0.733193	1140.3	FALSE	84
2022-09-13	13:17:46	0.740522	1141.04	FALSE	84
2022-09-13	13:17:46	0.732786	1141.78	FALSE	84
2022-09-13	13:17:47	0.732684	1142.51	FALSE	84
2022-09-13	13:17:47	0.728512	1143.24	FALSE	84
2022-09-13	13:17:47	0.737773	1143.97	FALSE	84
2022-09-13	13:17:47	0.734568	1144.71	FALSE	84
2022-09-13	13:17:48	0.731107	1145.44	FALSE	84
2022-09-13	13:17:48	0.733804	1146.17	FALSE	84
2022-09-13	13:17:48	0.73645	1146.91	FALSE	84
2022-09-13	13:17:48	0.732735	1147.64	FALSE	84
2022-09-13	13:17:49	0.731819	1148.37	FALSE	84
2022-09-13	13:17:49	0.739809	1149.11	FALSE	84
2022-09-13	13:17:49	0.736959	1149.85	FALSE	84
2022-09-13	13:17:49	0.734975	1150.59	FALSE	84
2022-09-13	13:17:50	0.738893	1151.33	FALSE	84
2022-09-13	13:17:50	0.853244	1152.18	FALSE	84
2022-09-13	13:17:50	2.13136	1154.31	FALSE	84
2022-09-13	13:17:51	0.753906	1155.06	FALSE	84
2022-09-13	13:17:51	0.747799	1155.81	FALSE	84
2022-09-13	13:17:51	0.735534	1156.55	FALSE	84
2022-09-13	13:17:51	0.732379	1157.28	FALSE	84
2022-09-13	13:17:52	0.73874	1158.02	FALSE	84
2022-09-13	13:17:52	0.737824	1158.76	FALSE	84
2022-09-13	13:17:52	0.748359	1159.5	FALSE	84
2022-09-13	13:17:52	0.735382	1160.24	FALSE	84
2022-09-13	13:17:53	0.744644	1160.98	FALSE	84
2022-09-13	13:17:53	1.67543	1162.66	FALSE	84
2022-09-13	13:17:53	4.765	1167.42	1	85
2022-09-13	13:17:53	0.789071	1168.21	FALSE	85
2022-09-13	13:17:54	0.729784	1168.94	FALSE	85
2022-09-13	13:17:54	0.72958	1169.67	FALSE	85
2022-09-13	13:17:54	0.72897	1170.4	FALSE	85
2022-09-13	13:17:55	0.733295	1171.14	FALSE	85
2022-09-13	13:17:55	0.740929	1171.88	FALSE	85
2022-09-13	13:17:55	0.741896	1172.62	FALSE	85
2022-09-13	13:17:55	0.738028	1173.36	FALSE	85
2022-09-13	13:17:56	0.741234	1174.1	FALSE	85
2022-09-13	13:17:56	0.729835	1174.83	FALSE	85
2022-09-13	13:17:56	0.731514	1175.56	FALSE	85
2022-09-13	13:17:56	0.733346	1176.29	FALSE	85
2022-09-13	13:17:57	0.736807	1177.03	FALSE	85
2022-09-13	13:17:57	0.729733	1177.76	FALSE	85
2022-09-13	13:17:57	0.733499	1178.49	FALSE	85
2022-09-13	13:17:57	0.730852	1179.22	FALSE	85
2022-09-13	13:17:58	0.735382	1179.96	FALSE	85
2022-09-13	13:17:58	0.732277	1180.69	FALSE	85
2022-09-13	13:17:58	0.735229	1181.43	FALSE	85
2022-09-13	13:17:59	0.734211	1182.16	FALSE	85
2022-09-13	13:17:59	0.733193	1182.89	FALSE	85
2022-09-13	13:17:59	0.726527	1183.62	FALSE	85
2022-09-13	13:17:59	0.724593	1184.34	FALSE	85
2022-09-13	13:18:00	0.729478	1185.07	FALSE	85
2022-09-13	13:18:00	0.735229	1185.81	FALSE	85
2022-09-13	13:18:00	0.739758	1186.55	FALSE	85
2022-09-13	13:18:00	0.727137	1187.28	FALSE	85
2022-09-13	13:18:01	0.732125	1188.01	FALSE	85
2022-09-13	13:18:01	13.7014	1201.71	1	86
2022-09-13	13:18:01	0.593702	1202.3	FALSE	86
2022-09-13	13:18:01	0.410547	1202.71	FALSE	86

## Sheet: Unnamed_martin_2022913131252
						**GoPro Fitting: 1302
2022-09-13	13:12:52	-1.86971
2022-09-13	13:12:52	-0.365585
2022-09-13	13:12:52	-0.298358
2022-09-13	13:12:53	0.12327
2022-09-13	13:12:53	0.110038
2022-09-13	13:12:53	0.237214
2022-09-13	13:12:53	-1.1581
2022-09-13	13:12:54	-2.77525
2022-09-13	13:12:54	0.0570104
2022-09-13	13:12:54	0.0677992
2022-09-13	13:12:54	0.0747203
2022-09-13	13:12:55	0.0736007
2022-09-13	13:12:55	0.0932954
2022-09-13	13:12:55	0.073957
2022-09-13	13:12:55	0.0484608
2022-09-13	13:12:56	0.0872394
2022-09-13	13:12:56	0.09813
2022-09-13	13:12:56	0.0969086
2022-09-13	13:12:56	0.0994531
2022-09-13	13:12:57	0.105356
2022-09-13	13:12:57	0.095789
2022-09-13	13:12:57	0.142608
2022-09-13	13:12:58	0.281285
2022-09-13	13:12:58	0.195636
2022-09-13	13:12:58	0.157672
2022-09-13	13:12:58	0.175026
2022-09-13	13:12:59	0.00520383
2022-09-13	13:12:59	0.100624
2022-09-13	13:12:59	0.168104
2022-09-13	13:12:59	0.12958
2022-09-13	13:13:00	0.0421503
2022-09-13	13:13:00	0.00622162
2022-09-13	13:13:00	0.29701
2022-09-13	13:13:01	0.585865
2022-09-13	13:13:01	0.460776
2022-09-13	13:13:01	0.264033
2022-09-13	13:13:01	0.220216
2022-09-13	13:13:02	0.379555
2022-09-13	13:13:02	0.441183
2022-09-13	13:13:02	0.415127
2022-09-13	13:13:02	0.402405
2022-09-13	13:13:03	1.25009
2022-09-13	13:13:03	3.13731
2022-09-13	13:13:03	1.28062
2022-09-13	13:13:03	0.503779
2022-09-13	13:13:04	-0.238664
2022-09-13	13:13:04	-0.480801
2022-09-13	13:13:04	-0.7436
2022-09-13	13:13:04	-0.56019
2022-09-13	13:13:05	0.155433
2022-09-13	13:13:05	12.8273
2022-09-13	13:13:05	15.3911
2022-09-13	13:13:06	11.5497
2022-09-13	13:13:06	10.4972
2022-09-13	13:13:06	9.59278
2022-09-13	13:13:06	5.17228
2022-09-13	13:13:07	0.645509
2022-09-13	13:13:07	0.896094
2022-09-13	13:13:07	2.51258
2022-09-13	13:13:07	9.28657
2022-09-13	13:13:08	4.78362
2022-09-13	13:13:08	1.97279
2022-09-13	13:13:08	0.44154
2022-09-13	13:13:08	0.20958
2022-09-13	13:13:09	-0.391488
2022-09-13	13:13:09	-0.562735
2022-09-13	13:13:09	-1.65307
2022-09-13	13:13:10	-0.364923
2022-09-13	13:13:10	-0.231743
2022-09-13	13:13:10	-0.308587
2022-09-13	13:13:10	0.0593005
2022-09-13	13:13:11	-0.069758
2022-09-13	13:13:11	-0.0112847
2022-09-13	13:13:11	0.125051
2022-09-13	13:13:11	1.4048
2022-09-13	13:13:12	13.1378
2022-09-13	13:13:12	13.0356
2022-09-13	13:13:12	7.63177
2022-09-13	13:13:12	2.8081
2022-09-13	13:13:13	4.01701
2022-09-13	13:13:13	3.15971
2022-09-13	13:13:13	3.90775
2022-09-13	13:13:14	13.5927
2022-09-13	13:13:14	2.0994
2022-09-13	13:13:14	1.24083
2022-09-13	13:13:14	0.903117
2022-09-13	13:13:15	0.240674
2022-09-13	13:13:15	0.0838297
2022-09-13	13:13:15	0.0987915
2022-09-13	13:13:15	-0.328689
2022-09-13	13:13:16	-0.57276
2022-09-13	13:13:16	-0.879325
2022-09-13	13:13:16	-0.786297
2022-09-13	13:13:16	-0.769147
2022-09-13	13:13:17	-0.750419
2022-09-13	13:13:17	-0.663498
2022-09-13	13:13:17	-0.429758
2022-09-13	13:13:18	-0.344058
2022-09-13	13:13:18	-1.08533
2022-09-13	13:13:18	-0.464313
2022-09-13	13:13:18	0.378079
2022-09-13	13:13:19	0.1507
2022-09-13	13:13:19	0.159555
2022-09-13	13:13:19	0.299911
2022-09-13	13:13:19	0.13986
2022-09-13	13:13:20	0.33701
2022-09-13	13:13:20	0.174517
2022-09-13	13:13:20	0.556145
2022-09-13	13:13:20	-0.27785
2022-09-13	13:13:21	-0.636984
2022-09-13	13:13:21	-0.698256
2022-09-13	13:13:21	-0.731793
2022-09-13	13:13:22	-0.756781
2022-09-13	13:13:22	-0.909758
2022-09-13	13:13:22	-0.810317
2022-09-13	13:13:22	-0.82192
2022-09-13	13:13:23	-1.15627
2022-09-13	13:13:23	-0.924058
2022-09-13	13:13:23	-0.734694
2022-09-13	13:13:23	-0.743243
2022-09-13	13:13:24	-1.59464
2022-09-13	13:13:24	-0.841819
2022-09-13	13:13:24	-0.961004
2022-09-13	13:13:24	-0.947518
2022-09-13	13:13:25	-0.83907
2022-09-13	13:13:25	-0.878816
2022-09-13	13:13:25	-0.816475
2022-09-13	13:13:25	-0.99047
2022-09-13	13:13:26	-0.915305
2022-09-13	13:13:26	-0.835356
2022-09-13	13:13:26	-0.768078
2022-09-13	13:13:27	-0.801513
2022-09-13	13:13:27	-0.74935
2022-09-13	13:13:27	-0.855966
2022-09-13	13:13:27	-0.722633
2022-09-13	13:13:28	-0.706552
2022-09-13	13:13:28	-0.20014
2022-09-13	13:13:28	0.0386389
2022-09-13	13:13:29	0.147952
2022-09-13	13:13:29	0.378028
2022-09-13	13:13:29	0.127138
2022-09-13	13:13:30	-0.0812083
2022-09-13	13:13:30	0.0298348
2022-09-13	13:13:30	-0.0499616
2022-09-13	13:13:31	-0.32874
2022-09-13	13:13:31	-0.148435
2022-09-13	13:13:31	-0.132048
2022-09-13	13:13:32	-0.233524
2022-09-13	13:13:32	-0.232913
2022-09-13	13:13:32	-0.178867
2022-09-13	13:13:32	-0.134949
2022-09-13	13:13:33	-0.155
2022-09-13	13:13:33	0.0150765
2022-09-13	13:13:33	0.145611
2022-09-13	13:13:33	0.473194
2022-09-13	13:13:34	0.414466
2022-09-13	13:13:34	0.538079
2022-09-13	13:13:34	0.33869
2022-09-13	13:13:34	0.285865
2022-09-13	13:13:35	0.204186
2022-09-13	13:13:35	0.739147
2022-09-13	13:13:35	0.721743
2022-09-13	13:13:36	0.516349
2022-09-13	13:13:36	-0.323549
2022-09-13	13:13:36	-1.03312
2022-09-13	13:13:36	-1.92905
2022-09-13	13:13:37	-2.49851
2022-09-13	13:13:37	-0.881921
2022-09-13	13:13:37	-0.790164
2022-09-13	13:13:37	-0.818358
2022-09-13	13:13:38	-0.724414
2022-09-13	13:13:38	-1.06401
2022-09-13	13:13:38	-1.11027
2022-09-13	13:13:38	-0.928282
2022-09-13	13:13:39	-0.842073
2022-09-13	13:13:39	-0.835508
2022-09-13	13:13:39	-0.742277
2022-09-13	13:13:39	-0.583244
2022-09-13	13:13:40	-0.583498
2022-09-13	13:13:40	-0.41846
2022-09-13	13:13:40	0.00876615
2022-09-13	13:13:41	0.192583
2022-09-13	13:13:41	-0.34533
2022-09-13	13:13:41	-0.118816
2022-09-13	13:13:41	0.112685
2022-09-13	13:13:42	-0.0630913
2022-09-13	13:13:42	0.0642369
2022-09-13	13:13:42	-0.158308
2022-09-13	13:13:42	0.100471
2022-09-13	13:13:43	0.102914
2022-09-13	13:13:43	0.41014
2022-09-13	13:13:43	0.335178
2022-09-13	13:13:43	0.285305
2022-09-13	13:13:44	0.29986
2022-09-13	13:13:44	0.13472
2022-09-13	13:13:44	-0.127213
2022-09-13	13:13:45	-0.28757
2022-09-13	13:13:45	-0.370267
2022-09-13	13:13:45	-0.384516
2022-09-13	13:13:45	-0.427112
2022-09-13	13:13:46	-0.270216
2022-09-13	13:13:46	-0.176018
2022-09-13	13:13:46	-0.267671
2022-09-13	13:13:46	-0.380038
2022-09-13	13:13:47	-0.326704
2022-09-13	13:13:47	-0.281615
2022-09-13	13:13:47	-0.393524
2022-09-13	13:13:47	-0.206501
2022-09-13	13:13:48	-0.0127606
2022-09-13	13:13:48	0.0221504
2022-09-13	13:13:48	-0.159173
2022-09-13	13:13:49	0.189428
2022-09-13	13:13:49	0.0698349
2022-09-13	13:13:49	0.303321
2022-09-13	13:13:49	0.82215
2022-09-13	13:13:50	1.28017
2022-09-13	13:13:50	1.68301
2022-09-13	13:13:50	1.50505
2022-09-13	13:13:50	4.70993
2022-09-13	13:13:51	2.63894
2022-09-13	13:13:51	1.28653
2022-09-13	13:13:51	0.0584353
2022-09-13	13:13:51	0.290598
2022-09-13	13:13:52	-0.127926
2022-09-13	13:13:52	-0.350928
2022-09-13	13:13:52	-0.647162
2022-09-13	13:13:53	-0.605432
2022-09-13	13:13:53	-0.522175
2022-09-13	13:13:53	-0.553727
2022-09-13	13:13:53	-0.52533
2022-09-13	13:13:54	-0.413727
2022-09-13	13:13:54	-0.598867
2022-09-13	13:13:54	-0.57902
2022-09-13	13:13:54	-0.637086
2022-09-13	13:13:55	-0.507824
2022-09-13	13:13:55	-0.407773
2022-09-13	13:13:55	-0.291997
2022-09-13	13:13:55	0.18958
2022-09-13	13:13:56	0.369479
2022-09-13	13:13:56	1.60296
2022-09-13	13:13:56	1.18729
2022-09-13	13:13:57	2.83533
2022-09-13	13:13:57	0.834109
2022-09-13	13:13:57	1.18597
2022-09-13	13:13:57	1.43151
2022-09-13	13:13:58	1.74062
2022-09-13	13:13:58	1.55803
2022-09-13	13:13:58	0.589427
2022-09-13	13:13:58	0.675992
2022-09-13	13:13:59	0.294466
2022-09-13	13:13:59	0.263626
2022-09-13	13:13:59	0.41416
2022-09-13	13:13:59	0.73299
2022-09-13	13:14:00	2.07309
2022-09-13	13:14:00	1.61523
2022-09-13	13:14:00	2.3735
2022-09-13	13:14:01	4.04683
2022-09-13	13:14:01	6.82678
2022-09-13	13:14:01	6.97518
2022-09-13	13:14:01	4.46383
2022-09-13	13:14:02	1.62429
2022-09-13	13:14:02	0.91869
2022-09-13	13:14:02	0.583779
2022-09-13	13:14:02	0.992684
2022-09-13	13:14:03	0.43528
2022-09-13	13:14:03	0.430751
2022-09-13	13:14:03	0.145051
2022-09-13	13:14:03	0.534975
2022-09-13	13:14:04	0.615789
2022-09-13	13:14:04	2.94011
2022-09-13	13:14:04	3.00434
2022-09-13	13:14:05	2.47009
2022-09-13	13:14:05	2.87156
2022-09-13	13:14:05	1.65197
2022-09-13	13:14:05	3.05034
2022-09-13	13:14:06	2.97935
2022-09-13	13:14:06	0.540165
2022-09-13	13:14:06	0.194059
2022-09-13	13:14:06	0.521896
2022-09-13	13:14:07	0.100929
2022-09-13	13:14:07	-0.286145
2022-09-13	13:14:07	-0.520546
2022-09-13	13:14:07	-0.752251
2022-09-13	13:14:08	-0.814898
2022-09-13	13:14:08	-0.854999
2022-09-13	13:14:08	-0.903804
2022-09-13	13:14:09	-1.03383
2022-09-13	13:14:09	-1.25393
2022-09-13	13:14:09	-1.05765
2022-09-13	13:14:09	-0.995406
2022-09-13	13:14:10	-1.21739
2022-09-13	13:14:10	-0.997493
2022-09-13	13:14:10	-0.705127
2022-09-13	13:14:10	0.0822521
2022-09-13	13:14:11	0.421845
2022-09-13	13:14:11	0.146425
2022-09-13	13:14:11	0.351209
2022-09-13	13:14:11	0.156603
2022-09-13	13:14:12	0.329122
2022-09-13	13:14:12	0.103626
2022-09-13	13:14:12	0.329784
2022-09-13	13:14:12	0.968715
2022-09-13	13:14:13	3.55441
2022-09-13	13:14:13	5.0996
2022-09-13	13:14:13	3.57935
2022-09-13	13:14:14	2.06205
2022-09-13	13:14:14	0.783015
2022-09-13	13:14:14	0.707952
2022-09-13	13:14:14	0.411005
2022-09-13	13:14:15	0.275178
2022-09-13	13:14:15	0.138384
2022-09-13	13:14:15	0.369071
2022-09-13	13:14:15	0.186272
2022-09-13	13:14:16	0.252888
2022-09-13	13:14:16	0.256298
2022-09-13	13:14:16	1.06933
2022-09-13	13:14:16	0.687086
2022-09-13	13:14:17	0.202863
2022-09-13	13:14:17	-0.168486
2022-09-13	13:14:17	-0.00884198
2022-09-13	13:14:18	-0.0364247
2022-09-13	13:14:18	0.035331
2022-09-13	13:14:18	0.280165
2022-09-13	13:14:18	1.04449
2022-09-13	13:14:19	0.675076
2022-09-13	13:14:19	0.248155
2022-09-13	13:14:19	0.261743
2022-09-13	13:14:19	0.387392
2022-09-13	13:14:20	0.286222
2022-09-13	13:14:20	0.274873
2022-09-13	13:14:20	0.122303
2022-09-13	13:14:20	0.18729
2022-09-13	13:14:21	0.128613
2022-09-13	13:14:21	0.0856109
2022-09-13	13:14:21	-0.12014
2022-09-13	13:14:22	-0.158155
2022-09-13	13:14:22	-0.197544
2022-09-13	13:14:22	-0.160903
2022-09-13	13:14:22	-0.232404
2022-09-13	13:14:23	-0.37673
2022-09-13	13:14:23	-0.48874
2022-09-13	13:14:23	-0.556221
2022-09-13	13:14:23	-0.498511
2022-09-13	13:14:24	-0.391793
2022-09-13	13:14:24	-0.382226
2022-09-13	13:14:24	-0.447264
2022-09-13	13:14:24	-0.357646
2022-09-13	13:14:25	-0.514745
2022-09-13	13:14:25	-0.371488
2022-09-13	13:14:25	-0.0554069
2022-09-13	13:14:26	-0.0867554
2022-09-13	13:14:26	0.046476
2022-09-13	13:14:26	0.148613
2022-09-13	13:14:26	0.0422522
2022-09-13	13:14:27	0.221387
2022-09-13	13:14:27	0.0540078
2022-09-13	13:14:27	-0.328638
2022-09-13	13:14:27	-0.48818
2022-09-13	13:14:28	-0.588384
2022-09-13	13:14:28	-0.531539
2022-09-13	13:14:28	-0.708434
2022-09-13	13:14:28	-0.708282
2022-09-13	13:14:29	-0.607926
2022-09-13	13:14:29	-0.474185
2022-09-13	13:14:29	-0.0769844
2022-09-13	13:14:30	0.786272
2022-09-13	13:14:30	2.10927
2022-09-13	13:14:30	1.53864
2022-09-13	13:14:30	1.24851
2022-09-13	13:14:31	0.762812
2022-09-13	13:14:31	1.68836
2022-09-13	13:14:31	0.664695
2022-09-13	13:14:31	1.411
2022-09-13	13:14:32	3.41772
2022-09-13	13:14:32	2.84632
2022-09-13	13:14:32	3.33772
2022-09-13	13:14:32	1.33518
2022-09-13	13:14:33	1.61365
2022-09-13	13:14:33	1.43894
2022-09-13	13:14:33	0.82612
2022-09-13	13:14:34	1.0707
2022-09-13	13:14:34	0.498995
2022-09-13	13:14:34	0.562404
2022-09-13	13:14:34	0.735229
2022-09-13	13:14:35	0.731005
2022-09-13	13:14:35	0.379097
2022-09-13	13:14:35	0.732735
2022-09-13	13:14:35	0.171361
2022-09-13	13:14:36	0.0164506
2022-09-13	13:14:36	-0.113982
2022-09-13	13:14:36	-0.206654
2022-09-13	13:14:36	-0.171081
2022-09-13	13:14:37	-0.157086
2022-09-13	13:14:37	-0.15047
2022-09-13	13:14:37	-0.0470099
2022-09-13	13:14:38	-0.151234
2022-09-13	13:14:38	-0.0496053
2022-09-13	13:14:38	-0.148944
2022-09-13	13:14:38	-0.125941
2022-09-13	13:14:39	-0.381157
2022-09-13	13:14:39	-0.718358
2022-09-13	13:14:39	-0.716831
2022-09-13	13:14:39	-0.657747
2022-09-13	13:14:40	-0.530674
2022-09-13	13:14:40	-0.278053
2022-09-13	13:14:40	0.921692
2022-09-13	13:14:40	1.5105
2022-09-13	13:14:41	2.7596
2022-09-13	13:14:41	1.8963
2022-09-13	13:14:41	1.77426
2022-09-13	13:14:42	0.820216
2022-09-13	13:14:42	0.797774
2022-09-13	13:14:42	0.260725
2022-09-13	13:14:42	0.44902
2022-09-13	13:14:43	0.272939
2022-09-13	13:14:43	0.32215
2022-09-13	13:14:43	0.283677
2022-09-13	13:14:43	0.244491
2022-09-13	13:14:44	0.334924
2022-09-13	13:14:44	0.156043
2022-09-13	13:14:44	0.0403692
2022-09-13	13:14:44	0.0233209
2022-09-13	13:14:45	-0.138511
2022-09-13	13:14:45	0.0563997
2022-09-13	13:14:45	0.31986
2022-09-13	13:14:46	0.320827
2022-09-13	13:14:46	0.580165
2022-09-13	13:14:46	0.152888
2022-09-13	13:14:46	0.729886
2022-09-13	13:14:47	0.744949
2022-09-13	13:14:47	0.448308
2022-09-13	13:14:47	0.544593
2022-09-13	13:14:47	0.419962
2022-09-13	13:14:48	0.186883
2022-09-13	13:14:48	0.235992
2022-09-13	13:14:48	0.172735
2022-09-13	13:14:48	0.158435
2022-09-13	13:14:49	-0.0123535
2022-09-13	13:14:49	-0.0119972
2022-09-13	13:14:49	-0.0138802
2022-09-13	13:14:49	0.541794
2022-09-13	13:14:50	1.11192
2022-09-13	13:14:50	0.935432
2022-09-13	13:14:50	0.576043
2022-09-13	13:14:51	0.217468
2022-09-13	13:14:51	0.214008
2022-09-13	13:14:51	0.245814
2022-09-13	13:14:51	0.352634
2022-09-13	13:14:52	0.99986
2022-09-13	13:14:52	1.04093
2022-09-13	13:14:52	1.79355
2022-09-13	13:14:52	2.12983
2022-09-13	13:14:53	1.61202
2022-09-13	13:14:53	0.820369
2022-09-13	13:14:53	0.321489
2022-09-13	13:14:53	0.078588
2022-09-13	13:14:54	0.0982317
2022-09-13	13:14:54	0.220725
2022-09-13	13:14:54	-0.0329132
2022-09-13	13:14:55	0.262252
2022-09-13	13:14:55	0.212837
2022-09-13	13:14:55	0.287952
2022-09-13	13:14:55	0.0906999
2022-09-13	13:14:56	0.242812
2022-09-13	13:14:56	0.145306
2022-09-13	13:14:56	0.936909
2022-09-13	13:14:56	0.398791
2022-09-13	13:14:57	0.24327
2022-09-13	13:14:57	0.27416
2022-09-13	13:14:57	0.409021
2022-09-13	13:14:57	0.458944
2022-09-13	13:14:58	0.44729
2022-09-13	13:14:58	0.415687
2022-09-13	13:14:58	0.428766
2022-09-13	13:14:59	0.419911
2022-09-13	13:14:59	0.393855
2022-09-13	13:14:59	0.394008
2022-09-13	13:14:59	0.407799
2022-09-13	13:15:00	0.421692
2022-09-13	13:15:00	0.424389
2022-09-13	13:15:00	0.425204
2022-09-13	13:15:00	0.424746
2022-09-13	13:15:01	0.427799
2022-09-13	13:15:01	0.434008
2022-09-13	13:15:01	0.445102
2022-09-13	13:15:01	0.500623
2022-09-13	13:15:02	0.65645
2022-09-13	13:15:02	0.593804
2022-09-13	13:15:02	0.334313
2022-09-13	13:15:03	0.178384
2022-09-13	13:15:03	-0.0728114
2022-09-13	13:15:03	-0.277239
2022-09-13	13:15:03	-0.363651
2022-09-13	13:15:04	-0.527569
2022-09-13	13:15:04	-0.541463
2022-09-13	13:15:04	-0.571386
2022-09-13	13:15:04	-0.586603
2022-09-13	13:15:05	-0.716373
2022-09-13	13:15:05	-0.790776
2022-09-13	13:15:05	-0.917391
2022-09-13	13:15:05	-0.831335
2022-09-13	13:15:06	-0.869554
2022-09-13	13:15:06	-0.898409
2022-09-13	13:15:06	-0.668485
2022-09-13	13:15:07	-0.720953
2022-09-13	13:15:07	-0.683091
2022-09-13	13:15:07	-0.803091
2022-09-13	13:15:07	-0.684974
2022-09-13	13:15:08	-0.744617
2022-09-13	13:15:08	-0.795712
2022-09-13	13:15:08	-0.698256
2022-09-13	13:15:08	-0.698256
2022-09-13	13:15:09	0.0310053
2022-09-13	13:15:09	3.63838
2022-09-13	13:15:09	6.72505
2022-09-13	13:15:09	4.84805
2022-09-13	13:15:10	5.43019
2022-09-13	13:15:10	3.08108
2022-09-13	13:15:10	0.630496
2022-09-13	13:15:11	2.04719
2022-09-13	13:15:11	2.06342
2022-09-13	13:15:11	4.38301
2022-09-13	13:15:11	7.07294
2022-09-13	13:15:12	10.5965
2022-09-13	13:15:12	13.8717
2022-09-13	13:15:12	3.5481
2022-09-13	13:15:12	5.9681
2022-09-13	13:15:13	8.30138
2022-09-13	13:15:13	4.27915
2022-09-13	13:15:13	8.56042
2022-09-13	13:15:13	13.9679
2022-09-13	13:15:14	6.94312
2022-09-13	13:15:14	13.3686
2022-09-13	13:15:14	18.0305
2022-09-13	13:15:15	6.84072
2022-09-13	13:15:15	8.64082
2022-09-13	13:15:15	14.3021
2022-09-13	13:15:15	4.59426
2022-09-13	13:15:16	8.11349
2022-09-13	13:15:16	11.6338
2022-09-13	13:15:16	3.49314
2022-09-13	13:15:16	2.25304
2022-09-13	13:15:17	2.68067
2022-09-13	13:15:17	1.80933
2022-09-13	13:15:17	5.15421
2022-09-13	13:15:17	12.9216
2022-09-13	13:15:18	7.24881
2022-09-13	13:15:18	10.2232
2022-09-13	13:15:18	6.73395
2022-09-13	13:15:19	3.13986
2022-09-13	13:15:19	7.04683
2022-09-13	13:15:19	8.54551
2022-09-13	13:15:19	4.94464
2022-09-13	13:15:20	2.77991
2022-09-13	13:15:20	1.64515
2022-09-13	13:15:20	2.84525
2022-09-13	13:15:20	1.39075
2022-09-13	13:15:21	2.02332
2022-09-13	13:15:21	1.45798
2022-09-13	13:15:21	0.352685
2022-09-13	13:15:21	0.720013
2022-09-13	13:15:22	0.742354
2022-09-13	13:15:22	0.481031
2022-09-13	13:15:22	0.714466
2022-09-13	13:15:23	0.731463
2022-09-13	13:15:23	0.735026
2022-09-13	13:15:23	0.739707
2022-09-13	13:15:23	0.734211
2022-09-13	13:15:24	0.727188
2022-09-13	13:15:24	0.873295
2022-09-13	13:15:24	2.65375
2022-09-13	13:15:24	3.58525
2022-09-13	13:15:25	3.92943
2022-09-13	13:15:25	2.48693
2022-09-13	13:15:25	2.59553
2022-09-13	13:15:25	1.75899
2022-09-13	13:15:26	1.83777
2022-09-13	13:15:26	1.35172
2022-09-13	13:15:26	1.01197
2022-09-13	13:15:26	1.36642
2022-09-13	13:15:27	1.16663
2022-09-13	13:15:27	0.79869
2022-09-13	13:15:27	0.747087
2022-09-13	13:15:28	0.428766
2022-09-13	13:15:28	0.723575
2022-09-13	13:15:28	0.731717
2022-09-13	13:15:28	0.668613
2022-09-13	13:15:29	0.669529
2022-09-13	13:15:29	0.74327
2022-09-13	13:15:29	0.762659
2022-09-13	13:15:29	0.782048
2022-09-13	13:15:30	0.760165
2022-09-13	13:15:30	0.738842
2022-09-13	13:15:30	0.741539
2022-09-13	13:15:30	0.632735
2022-09-13	13:15:31	0.619453
2022-09-13	13:15:31	0.746119
2022-09-13	13:15:31	0.739758
2022-09-13	13:15:32	0.736501
2022-09-13	13:15:32	0.732226
2022-09-13	13:15:32	0.735483
2022-09-13	13:15:32	0.734873
2022-09-13	13:15:33	0.734059
2022-09-13	13:15:33	0.728766
2022-09-13	13:15:33	0.735178
2022-09-13	13:15:33	0.73472
2022-09-13	13:15:34	0.737315
2022-09-13	13:15:34	0.735483
2022-09-13	13:15:34	0.735331
2022-09-13	13:15:34	0.735636
2022-09-13	13:15:35	0.740369
2022-09-13	13:15:35	0.735534
2022-09-13	13:15:35	0.73584
2022-09-13	13:15:36	0.735534
2022-09-13	13:15:36	0.73243
2022-09-13	13:15:36	0.733244
2022-09-13	13:15:36	0.737366
2022-09-13	13:15:37	0.738537
2022-09-13	13:15:37	0.732226
2022-09-13	13:15:37	0.731819
2022-09-13	13:15:37	0.737621
2022-09-13	13:15:38	0.734262
2022-09-13	13:15:38	0.732786
2022-09-13	13:15:38	0.738231
2022-09-13	13:15:38	0.733244
2022-09-13	13:15:39	0.733702
2022-09-13	13:15:39	0.731412
2022-09-13	13:15:39	0.737417
2022-09-13	13:15:40	0.740318
2022-09-13	13:15:40	0.731361
2022-09-13	13:15:40	0.732328
2022-09-13	13:15:40	0.734568
2022-09-13	13:15:41	0.733702
2022-09-13	13:15:41	0.736756
2022-09-13	13:15:41	0.72897
2022-09-13	13:15:41	0.733601
2022-09-13	13:15:42	0.734415
2022-09-13	13:15:42	0.733346
2022-09-13	13:15:42	0.734364
2022-09-13	13:15:42	0.738333
2022-09-13	13:15:43	0.734975
2022-09-13	13:15:43	0.736959
2022-09-13	13:15:43	0.738079
2022-09-13	13:15:44	0.736349
2022-09-13	13:15:44	0.732074
2022-09-13	13:15:44	0.732277
2022-09-13	13:15:44	0.738231
2022-09-13	13:15:45	0.742252
2022-09-13	13:15:45	0.732175
2022-09-13	13:15:45	0.737468
2022-09-13	13:15:46	0.739707
2022-09-13	13:15:46	0.737672
2022-09-13	13:15:46	0.739147
2022-09-13	13:15:46	0.734008
2022-09-13	13:15:46	0.724033
2022-09-13	13:15:47	0.739402
2022-09-13	13:15:47	0.733601
2022-09-13	13:15:47	0.741081
2022-09-13	13:15:48	0.73813
2022-09-13	13:15:48	0.732634
2022-09-13	13:15:48	0.733601
2022-09-13	13:15:48	0.732125
2022-09-13	13:15:49	0.72958
2022-09-13	13:15:49	0.734059
2022-09-13	13:15:49	0.734618
2022-09-13	13:15:49	0.73701
2022-09-13	13:15:50	0.74215
2022-09-13	13:15:50	0.733346
2022-09-13	13:15:50	0.73986
2022-09-13	13:15:50	0.739707
2022-09-13	13:15:51	0.737163
2022-09-13	13:15:51	0.739351
2022-09-13	13:15:51	0.732735
2022-09-13	13:15:52	0.735585
2022-09-13	13:15:52	0.726323
2022-09-13	13:15:52	0.733346
2022-09-13	13:15:52	0.73813
2022-09-13	13:15:53	0.737112
2022-09-13	13:15:53	0.734618
2022-09-13	13:15:53	0.729224
2022-09-13	13:15:53	0.741081
2022-09-13	13:15:54	0.735789
2022-09-13	13:15:54	0.732532
2022-09-13	13:15:54	0.733397
2022-09-13	13:15:54	0.735636
2022-09-13	13:15:55	0.735382
2022-09-13	13:15:55	0.738028
2022-09-13	13:15:55	0.73528
2022-09-13	13:15:56	0.73528
2022-09-13	13:15:56	0.737519
2022-09-13	13:15:56	0.736501
2022-09-13	13:15:56	0.731717
2022-09-13	13:15:57	0.738842
2022-09-13	13:15:57	0.735941
2022-09-13	13:15:57	0.735433
2022-09-13	13:15:57	0.733957
2022-09-13	13:15:58	0.74332
2022-09-13	13:15:58	0.737112
2022-09-13	13:15:58	0.731819
2022-09-13	13:15:58	0.731921
2022-09-13	13:15:59	0.734262
2022-09-13	13:15:59	0.731056
2022-09-13	13:15:59	0.735026
2022-09-13	13:16:00	0.735433
2022-09-13	13:16:00	0.739707
2022-09-13	13:16:00	0.734517
2022-09-13	13:16:00	0.73416
2022-09-13	13:16:01	0.734313
2022-09-13	13:16:01	0.726679
2022-09-13	13:16:01	0.729835
2022-09-13	13:16:01	0.687799
2022-09-13	13:16:02	0.703372
2022-09-13	13:16:02	0.700674
2022-09-13	13:16:02	0.710445
2022-09-13	13:16:02	0.686476
2022-09-13	13:16:03	0.675076
2022-09-13	13:16:03	0.687086
2022-09-13	13:16:03	0.672735
2022-09-13	13:16:04	0.675636
2022-09-13	13:16:04	0.671616
2022-09-13	13:16:04	0.675483
2022-09-13	13:16:04	0.675636
2022-09-13	13:16:05	0.665865
2022-09-13	13:16:05	0.663779
2022-09-13	13:16:05	0.668308
2022-09-13	13:16:05	0.488155
2022-09-13	13:16:06	0.401336
2022-09-13	13:16:06	0.234822
2022-09-13	13:16:06	0.224593
2022-09-13	13:16:06	0.368359
2022-09-13	13:16:07	0.386323
2022-09-13	13:16:07	0.346069
2022-09-13	13:16:07	0.343219
2022-09-13	13:16:07	0.363219
2022-09-13	13:16:08	0.409733
2022-09-13	13:16:08	0.606069
2022-09-13	13:16:08	0.676908
2022-09-13	13:16:09	0.461132
2022-09-13	13:16:09	0.433143
2022-09-13	13:16:09	0.30327
2022-09-13	13:16:09	0.298232
2022-09-13	13:16:10	0.290089
2022-09-13	13:16:10	0.260115
2022-09-13	13:16:10	0.26444
2022-09-13	13:16:10	0.242456
2022-09-13	13:16:11	0.240573
2022-09-13	13:16:11	0.524491
2022-09-13	13:16:11	0.149682
2022-09-13	13:16:11	-0.122684
2022-09-13	13:16:12	-0.224618
2022-09-13	13:16:12	-0.331895
2022-09-13	13:16:12	-0.449554
2022-09-13	13:16:13	-0.535
2022-09-13	13:16:13	-0.613168
2022-09-13	13:16:13	-0.688434
2022-09-13	13:16:13	-0.619325
2022-09-13	13:16:14	-0.547519
2022-09-13	13:16:14	-0.231794
2022-09-13	13:16:14	1.67742
2022-09-13	13:16:14	1.32225
2022-09-13	13:16:15	0.892634
2022-09-13	13:16:15	2.02765
2022-09-13	13:16:15	2.40851
2022-09-13	13:16:16	2.82556
2022-09-13	13:16:16	6.94805
2022-09-13	13:16:16	3.82189
2022-09-13	13:16:16	10.0198
2022-09-13	13:16:17	7.35268
2022-09-13	13:16:17	3.05472
2022-09-13	13:16:17	4.66805
2022-09-13	13:16:17	10.136
2022-09-13	13:16:18	4.2422
2022-09-13	13:16:18	7.07044
2022-09-13	13:16:18	6.94174
2022-09-13	13:16:18	3.32133
2022-09-13	13:16:19	1.90388
2022-09-13	13:16:19	7.06499
2022-09-13	13:16:19	5.39237
2022-09-13	13:16:19	4.76887
2022-09-13	13:16:20	9.50281
2022-09-13	13:16:20	4.54205
2022-09-13	13:16:20	5.05619
2022-09-13	13:16:21	4.67523
2022-09-13	13:16:21	4.68184
2022-09-13	13:16:21	1.53258
2022-09-13	13:16:21	3.65961
2022-09-13	13:16:22	0.992328
2022-09-13	13:16:22	0.502812
2022-09-13	13:16:22	0.798639
2022-09-13	13:16:22	0.112023
2022-09-13	13:16:23	0.71355
2022-09-13	13:16:23	0.727596
2022-09-13	13:16:23	0.10729
2022-09-13	13:16:23	-0.388587
2022-09-13	13:16:24	-0.540292
2022-09-13	13:16:24	-0.580445
2022-09-13	13:16:24	-0.527977
2022-09-13	13:16:25	-0.390928
2022-09-13	13:16:25	-0.278918
2022-09-13	13:16:25	-0.326297
2022-09-13	13:16:25	-0.42075
2022-09-13	13:16:26	-0.209198
2022-09-13	13:16:26	-0.424669
2022-09-13	13:16:26	-0.468028
2022-09-13	13:16:26	-0.496832
2022-09-13	13:16:27	-0.446501
2022-09-13	13:16:27	-0.446603
2022-09-13	13:16:27	-0.389707
2022-09-13	13:16:27	-0.367671
2022-09-13	13:16:28	-0.218969
2022-09-13	13:16:28	0.0711071
2022-09-13	13:16:28	0.369071
2022-09-13	13:16:29	-0.0398853
2022-09-13	13:16:29	-0.0588165
2022-09-13	13:16:29	0.703677
2022-09-13	13:16:29	0.735331
2022-09-13	13:16:30	0.736756
2022-09-13	13:16:30	0.739147
2022-09-13	13:16:30	0.737366
2022-09-13	13:16:30	0.737366
2022-09-13	13:16:31	0.73187
2022-09-13	13:16:31	0.735585
2022-09-13	13:16:31	0.733651
2022-09-13	13:16:31	0.737417
2022-09-13	13:16:32	0.738842
2022-09-13	13:16:32	0.735229
2022-09-13	13:16:32	0.742048
2022-09-13	13:16:33	0.735534
2022-09-13	13:16:33	0.732481
2022-09-13	13:16:33	0.740318
2022-09-13	13:16:33	0.736959
2022-09-13	13:16:34	0.730445
2022-09-13	13:16:34	0.734313
2022-09-13	13:16:34	0.72841
2022-09-13	13:16:34	0.735331
2022-09-13	13:16:35	0.736857
2022-09-13	13:16:35	0.73299
2022-09-13	13:16:35	0.737672
2022-09-13	13:16:35	0.729987
2022-09-13	13:16:36	0.731616
2022-09-13	13:16:36	0.730801
2022-09-13	13:16:36	0.733295
2022-09-13	13:16:37	0.730191
2022-09-13	13:16:37	0.732939
2022-09-13	13:16:37	0.735636
2022-09-13	13:16:37	0.736298
2022-09-13	13:16:38	0.729224
2022-09-13	13:16:38	0.738079
2022-09-13	13:16:38	0.735433
2022-09-13	13:16:38	0.734517
2022-09-13	13:16:39	0.734313
2022-09-13	13:16:39	0.732379
2022-09-13	13:16:39	0.736399
2022-09-13	13:16:39	0.729987
2022-09-13	13:16:40	0.731514
2022-09-13	13:16:40	0.74098
2022-09-13	13:16:40	0.735992
2022-09-13	13:16:41	0.732328
2022-09-13	13:16:41	0.731819
2022-09-13	13:16:41	0.729122
2022-09-13	13:16:41	0.733906
2022-09-13	13:16:42	0.731717
2022-09-13	13:16:42	0.734669
2022-09-13	13:16:42	0.732175
2022-09-13	13:16:42	0.728715
2022-09-13	13:16:43	0.732837
2022-09-13	13:16:43	0.732837
2022-09-13	13:16:43	0.729122
2022-09-13	13:16:43	0.730242
2022-09-13	13:16:44	0.733092
2022-09-13	13:16:44	0.733651
2022-09-13	13:16:44	0.733244
2022-09-13	13:16:45	0.745356
2022-09-13	13:16:45	0.731209
2022-09-13	13:16:45	0.738181
2022-09-13	13:16:45	0.7307
2022-09-13	13:16:46	0.724796
2022-09-13	13:16:46	0.739097
2022-09-13	13:16:46	0.733193
2022-09-13	13:16:46	0.736959
2022-09-13	13:16:47	0.738384
2022-09-13	13:16:47	0.736654
2022-09-13	13:16:47	0.735076
2022-09-13	13:16:47	0.734669
2022-09-13	13:16:48	0.733295
2022-09-13	13:16:48	0.737112
2022-09-13	13:16:48	0.735687
2022-09-13	13:16:48	0.734466
2022-09-13	13:16:49	0.732226
2022-09-13	13:16:49	0.730394
2022-09-13	13:16:49	0.736807
2022-09-13	13:16:50	0.72617
2022-09-13	13:16:50	0.741947
2022-09-13	13:16:50	0.730343
2022-09-13	13:16:50	0.737977
2022-09-13	13:16:51	0.734873
2022-09-13	13:16:51	0.732277
2022-09-13	13:16:51	0.734059
2022-09-13	13:16:51	0.736552
2022-09-13	13:16:52	0.737315
2022-09-13	13:16:52	0.729478
2022-09-13	13:16:52	0.734517
2022-09-13	13:16:52	0.739606
2022-09-13	13:16:53	0.733092
2022-09-13	13:16:53	0.733855
2022-09-13	13:16:53	0.739097
2022-09-13	13:16:54	0.737773
2022-09-13	13:16:54	0.731667
2022-09-13	13:16:54	0.72612
2022-09-13	13:16:54	0.73584
2022-09-13	13:16:55	0.73701
2022-09-13	13:16:55	0.733804
2022-09-13	13:16:55	0.741234
2022-09-13	13:16:55	0.738588
2022-09-13	13:16:56	0.735941
2022-09-13	13:16:56	0.734975
2022-09-13	13:16:56	0.73584
2022-09-13	13:16:56	0.739046
2022-09-13	13:16:57	0.738842
2022-09-13	13:16:57	0.734517
2022-09-13	13:16:57	0.738282
2022-09-13	13:16:58	0.733346
2022-09-13	13:16:58	0.736807
2022-09-13	13:16:58	0.742201
2022-09-13	13:16:58	0.734415
2022-09-13	13:16:59	0.729631
2022-09-13	13:16:59	0.735331
2022-09-13	13:16:59	0.732125
2022-09-13	13:16:59	0.732023
2022-09-13	13:17:00	0.733397
2022-09-13	13:17:00	0.734059
2022-09-13	13:17:00	0.730649
2022-09-13	13:17:00	0.739097
2022-09-13	13:17:01	0.730751
2022-09-13	13:17:01	0.729071
2022-09-13	13:17:01	0.738384
2022-09-13	13:17:02	0.735687
2022-09-13	13:17:02	0.731361
2022-09-13	13:17:02	0.733244
2022-09-13	13:17:02	0.731972
2022-09-13	13:17:03	0.732786
2022-09-13	13:17:03	0.732532
2022-09-13	13:17:03	0.735789
2022-09-13	13:17:03	0.73416
2022-09-13	13:17:04	0.735789
2022-09-13	13:17:04	0.733957
2022-09-13	13:17:04	0.727036
2022-09-13	13:17:04	0.735992
2022-09-13	13:17:05	0.740064
2022-09-13	13:17:05	0.737417
2022-09-13	13:17:05	0.743931
2022-09-13	13:17:06	0.734262
2022-09-13	13:17:06	0.733804
2022-09-13	13:17:06	0.737977
2022-09-13	13:17:06	0.734771
2022-09-13	13:17:07	0.72958
2022-09-13	13:17:07	0.732074
2022-09-13	13:17:07	0.739962
2022-09-13	13:17:07	0.738537
2022-09-13	13:17:08	0.737672
2022-09-13	13:17:08	0.731158
2022-09-13	13:17:08	0.731463
2022-09-13	13:17:08	0.736552
2022-09-13	13:17:09	0.738181
2022-09-13	13:17:09	0.738995
2022-09-13	13:17:09	0.734211
2022-09-13	13:17:10	0.728155
2022-09-13	13:17:10	0.73645
2022-09-13	13:17:10	0.733397
2022-09-13	13:17:10	0.732277
2022-09-13	13:17:11	0.737214
2022-09-13	13:17:11	0.733041
2022-09-13	13:17:11	0.732634
2022-09-13	13:17:11	0.738944
2022-09-13	13:17:12	0.735127
2022-09-13	13:17:12	0.726578
2022-09-13	13:17:12	0.733601
2022-09-13	13:17:12	0.727697
2022-09-13	13:17:13	0.737468
2022-09-13	13:17:13	0.732684
2022-09-13	13:17:13	0.735433
2022-09-13	13:17:14	0.732226
2022-09-13	13:17:14	0.735178
2022-09-13	13:17:14	0.736603
2022-09-13	13:17:14	0.72617
2022-09-13	13:17:15	0.733957
2022-09-13	13:17:15	0.729784
2022-09-13	13:17:15	0.732532
2022-09-13	13:17:15	0.733855
2022-09-13	13:17:16	0.736705
2022-09-13	13:17:16	0.734313
2022-09-13	13:17:16	0.731921
2022-09-13	13:17:16	0.734618
2022-09-13	13:17:17	0.736756
2022-09-13	13:17:17	0.73813
2022-09-13	13:17:17	0.73416
2022-09-13	13:17:18	0.730394
2022-09-13	13:17:18	0.738333
2022-09-13	13:17:18	0.735331
2022-09-13	13:17:18	0.735992
2022-09-13	13:17:19	0.732786
2022-09-13	13:17:19	0.73813
2022-09-13	13:17:19	0.728664
2022-09-13	13:17:19	0.734822
2022-09-13	13:17:20	0.72902
2022-09-13	13:17:20	0.732277
2022-09-13	13:17:20	0.729478
2022-09-13	13:17:20	0.736908
2022-09-13	13:17:21	0.727952
2022-09-13	13:17:21	0.733957
2022-09-13	13:17:21	0.723168
2022-09-13	13:17:22	0.738893
2022-09-13	13:17:22	0.735178
2022-09-13	13:17:22	0.733092
2022-09-13	13:17:22	0.725102
2022-09-13	13:17:23	0.735331
2022-09-13	13:17:23	0.737112
2022-09-13	13:17:23	0.730547
2022-09-13	13:17:23	0.731667
2022-09-13	13:17:24	0.73014
2022-09-13	13:17:24	0.736857
2022-09-13	13:17:24	0.733397
2022-09-13	13:17:24	0.736959
2022-09-13	13:17:25	0.729784
2022-09-13	13:17:25	0.732277
2022-09-13	13:17:25	0.73528
2022-09-13	13:17:25	0.737875
2022-09-13	13:17:26	0.734924
2022-09-13	13:17:26	0.73131
2022-09-13	13:17:26	0.738588
2022-09-13	13:17:27	0.736959
2022-09-13	13:17:27	0.735076
2022-09-13	13:17:27	0.738893
2022-09-13	13:17:27	0.733193
2022-09-13	13:17:28	0.735687
2022-09-13	13:17:28	0.731972
2022-09-13	13:17:28	0.733092
2022-09-13	13:17:28	0.732684
2022-09-13	13:17:29	0.734415
2022-09-13	13:17:29	0.732684
2022-09-13	13:17:29	0.738028
2022-09-13	13:17:29	0.734364
2022-09-13	13:17:30	0.733601
2022-09-13	13:17:30	0.736908
2022-09-13	13:17:30	0.736501
2022-09-13	13:17:31	0.734211
2022-09-13	13:17:31	0.735382
2022-09-13	13:17:31	0.731616
2022-09-13	13:17:31	0.730954
2022-09-13	13:17:32	0.730445
2022-09-13	13:17:32	0.733804
2022-09-13	13:17:32	0.734059
2022-09-13	13:17:32	0.734771
2022-09-13	13:17:33	0.738333
2022-09-13	13:17:33	0.726985
2022-09-13	13:17:33	0.730089
2022-09-13	13:17:33	0.733651
2022-09-13	13:17:34	0.732125
2022-09-13	13:17:34	0.73355
2022-09-13	13:17:34	0.733244
2022-09-13	13:17:35	0.735585
2022-09-13	13:17:35	0.731717
2022-09-13	13:17:35	0.732277
2022-09-13	13:17:35	0.727494
2022-09-13	13:17:36	0.734313
2022-09-13	13:17:36	0.741031
2022-09-13	13:17:36	0.758181
2022-09-13	13:17:36	0.73243
2022-09-13	13:17:37	0.730496
2022-09-13	13:17:37	0.73131
2022-09-13	13:17:37	0.739147
2022-09-13	13:17:37	0.732074
2022-09-13	13:17:38	0.730547
2022-09-13	13:17:38	0.731819
2022-09-13	13:17:38	0.731259
2022-09-13	13:17:39	0.73187
2022-09-13	13:17:39	0.726476
2022-09-13	13:17:39	1.48373
2022-09-13	13:17:39	0.623677
2022-09-13	13:17:40	0.736552
2022-09-13	13:17:40	0.736247
2022-09-13	13:17:40	0.729733
2022-09-13	13:17:40	0.734771
2022-09-13	13:17:41	0.736145
2022-09-13	13:17:41	0.728766
2022-09-13	13:17:41	0.734109
2022-09-13	13:17:41	0.729631
2022-09-13	13:17:42	0.748664
2022-09-13	13:17:42	0.725712
2022-09-13	13:17:42	-0.158104
2022-09-13	13:17:43	0.730496
2022-09-13	13:17:43	0.733855
2022-09-13	13:17:43	0.737773
2022-09-13	13:17:43	0.74098
2022-09-13	13:17:44	0.74159
2022-09-13	13:17:44	0.727188
2022-09-13	13:17:44	0.727494
2022-09-13	13:17:44	0.733346
2022-09-13	13:17:45	0.737926
2022-09-13	13:17:45	0.734211
2022-09-13	13:17:45	0.736298
2022-09-13	13:17:45	0.733499
2022-09-13	13:17:46	0.733193
2022-09-13	13:17:46	0.740522
2022-09-13	13:17:46	0.732786
2022-09-13	13:17:47	0.732684
2022-09-13	13:17:47	0.728512
2022-09-13	13:17:47	0.737773
2022-09-13	13:17:47	0.734568
2022-09-13	13:17:48	0.731107
2022-09-13	13:17:48	0.733804
2022-09-13	13:17:48	0.73645
2022-09-13	13:17:48	0.732735
2022-09-13	13:17:49	0.731819
2022-09-13	13:17:49	0.739809
2022-09-13	13:17:49	0.736959
2022-09-13	13:17:49	0.734975
2022-09-13	13:17:50	0.738893
2022-09-13	13:17:50	0.853244
2022-09-13	13:17:50	2.13136
2022-09-13	13:17:51	0.753906
2022-09-13	13:17:51	0.747799
2022-09-13	13:17:51	0.735534
2022-09-13	13:17:51	0.732379
2022-09-13	13:17:52	0.73874
2022-09-13	13:17:52	0.737824
2022-09-13	13:17:52	0.748359
2022-09-13	13:17:52	0.735382
2022-09-13	13:17:53	0.744644
2022-09-13	13:17:53	1.67543
2022-09-13	13:17:53	4.765
2022-09-13	13:17:53	0.789071
2022-09-13	13:17:54	0.729784
2022-09-13	13:17:54	0.72958
2022-09-13	13:17:54	0.72897
2022-09-13	13:17:55	0.733295
2022-09-13	13:17:55	0.740929
2022-09-13	13:17:55	0.741896
2022-09-13	13:17:55	0.738028
2022-09-13	13:17:56	0.741234
2022-09-13	13:17:56	0.729835
2022-09-13	13:17:56	0.731514
2022-09-13	13:17:56	0.733346
2022-09-13	13:17:57	0.736807
2022-09-13	13:17:57	0.729733
2022-09-13	13:17:57	0.733499
2022-09-13	13:17:57	0.730852
2022-09-13	13:17:58	0.735382
2022-09-13	13:17:58	0.732277
2022-09-13	13:17:58	0.735229
2022-09-13	13:17:59	0.734211
2022-09-13	13:17:59	0.733193
2022-09-13	13:17:59	0.726527
2022-09-13	13:17:59	0.724593
2022-09-13	13:18:00	0.729478
2022-09-13	13:18:00	0.735229
2022-09-13	13:18:00	0.739758
2022-09-13	13:18:00	0.727137
2022-09-13	13:18:01	0.732125
2022-09-13	13:18:01	13.7014
2022-09-13	13:18:01	0.593702
2022-09-13	13:18:01	0.410547
2022-09-13	13:18:02	0.538282
2022-09-13	13:18:02	0.715483
2022-09-13	13:18:02	0.701794
2022-09-13	13:18:02	0.732583
2022-09-13	13:18:03	0.728003
2022-09-13	13:18:03	0.733601
2022-09-13	13:18:03	0.730547
2022-09-13	13:18:04	0.741794
2022-09-13	13:18:04	0.734364
2022-09-13	13:18:04	0.738333
2022-09-13	13:18:04	0.724033
2022-09-13	13:18:05	0.739249
2022-09-13	13:18:05	0.728664
2022-09-13	13:18:05	0.731565
2022-09-13	13:18:05	0.735433
2022-09-13	13:18:06	0.732532
2022-09-13	13:18:06	0.729886
2022-09-13	13:18:06	0.729275
2022-09-13	13:18:06	0.734669
2022-09-13	13:18:07	0.726221
2022-09-13	13:18:07	0.733601
2022-09-13	13:18:07	0.724644
2022-09-13	13:18:08	0.734211
2022-09-13	13:18:08	0.736094
2022-09-13	13:18:08	0.727494
2022-09-13	13:18:08	0.73472
2022-09-13	13:18:09	0.736349
2022-09-13	13:18:09	0.732583
2022-09-13	13:18:09	0.725509
2022-09-13	13:18:09	0.733804
2022-09-13	13:18:10	0.72785
2022-09-13	13:18:10	0.728104
2022-09-13	13:18:10	0.729936
2022-09-13	13:18:10	0.72902
2022-09-13	13:18:11	0.728664
2022-09-13	13:18:11	0.731107
2022-09-13	13:18:11	0.734924
2022-09-13	13:18:12	0.729326
2022-09-13	13:18:12	0.722252
2022-09-13	13:18:12	0.734466
2022-09-13	13:18:12	0.745916
2022-09-13	13:18:13	0.731565
2022-09-13	13:18:13	0.733906
2022-09-13	13:18:13	0.726527
2022-09-13	13:18:13	0.729071
2022-09-13	13:18:14	0.732023
2022-09-13	13:18:14	0.731616
2022-09-13	13:18:14	0.738231
2022-09-13	13:18:14	0.738028
2022-09-13	13:18:15	0.738486
2022-09-13	13:18:15	0.730598
2022-09-13	13:18:15	0.726527
2022-09-13	13:18:16	0.735992
2022-09-13	13:18:16	0.732888
2022-09-13	13:18:16	0.725865
2022-09-13	13:18:16	0.736908
2022-09-13	13:18:17	0.726629
2022-09-13	13:18:17	0.738282
2022-09-13	13:18:17	0.733092
2022-09-13	13:18:17	0.727596
2022-09-13	13:18:18	0.731463
2022-09-13	13:18:18	0.738995
2022-09-13	13:18:18	0.728613
2022-09-13	13:18:18	0.728868
2022-09-13	13:18:19	0.730242
2022-09-13	13:18:19	0.73187
2022-09-13	13:18:19	0.727239
2022-09-13	13:18:20	0.729733
2022-09-13	13:18:20	0.738639
2022-09-13	13:18:20	0.734822
2022-09-13	13:18:20	0.728003
