# Supplementary material for: Comparing efficacy in reducing pulling and welfare impacts of four types of leash walking equipment
Source: PeerJ journal article supplement (doi:10.7717/peerj.18131), 2024-10-24
Supplement: Shelter1_Tension_files.zip [file Unnamed_prong_2022913153136 copy.xlsx]

## Sheet: Averaged Newtons
Date	Time	Averaged Newtons
2022-09-13	15:31:51	1.02469	1.02469	0		Impulse	1213.42
2022-09-13	15:31:52	26.1961	27.2208	1		Total steps	17
2022-09-13	15:31:53	13.7923	41.0131	2		# > 5 sec	0
2022-09-13	15:31:54	11.0571	52.0702	2
2022-09-13	15:31:55	6.97208	59.0423	2
2022-09-13	15:31:56	8.23511	67.2774	2
2022-09-13	15:31:57	6.26132	73.5387	2
2022-09-13	15:31:58	5.04213	78.5808	2
2022-09-13	15:31:59	4.672	83.2528	2
2022-09-13	15:32:00	5.42679	88.6796	2
2022-09-13	15:32:01	6.03156	94.7112	2
2022-09-13	15:32:02	6.15797	100.869	2
2022-09-13	15:32:03	6.14301	107.012	2
2022-09-13	15:32:04	6.0032	113.015	2
2022-09-13	15:32:05	6.54389	119.559	2
2022-09-13	15:32:06	6.74352	126.303	2
2022-09-13	15:32:07	6.10388	132.407	2
2022-09-13	15:32:08	5.4825	137.889	2
2022-09-13	15:32:09	6.319	144.208	2
2022-09-13	15:32:10	6.25312	150.461	2
2022-09-13	15:32:11	6.67727	157.139	2
2022-09-13	15:32:12	5.60128	162.74	2
2022-09-13	15:32:13	8.53091	171.271	2
2022-09-13	15:32:14	6.56517	177.836	2
2022-09-13	15:32:15	5.05751	182.893	2
2022-09-13	15:32:16	3.81894	186.712	2
2022-09-13	15:32:17	4.58691	191.299	2
2022-09-13	15:32:18	4.31967	195.619	2
2022-09-13	15:32:19	5.22607	200.845	2
2022-09-13	15:32:20	5.05741	205.902	2
2022-09-13	15:32:21	4.66467	210.567	2
2022-09-13	15:32:22	4.70105	215.268	2
2022-09-13	15:32:23	5.00557	220.274	2
2022-09-13	15:32:24	4.98578	225.259	2
2022-09-13	15:32:25	4.53123	229.791	2
2022-09-13	15:32:26	3.55296	233.344	2
2022-09-13	15:32:27	4.39285	237.737	2
2022-09-13	15:32:28	4.25576	241.992	2
2022-09-13	15:32:29	4.52975	246.522	2
2022-09-13	15:32:30	4.58691	251.109	2
2022-09-13	15:32:31	9.1247	260.234	2
2022-09-13	15:32:32	7.1577	267.391	2
2022-09-13	15:32:33	2.34323	269.735	2
2022-09-13	15:32:34	4.6615	274.396	2
2022-09-13	15:32:35	3.06224	277.458	2
2022-09-13	15:32:36	2.35221	279.811	2
2022-09-13	15:32:37	1.85512	281.666	2
2022-09-13	15:32:38	2.36106	284.027	2
2022-09-13	15:32:39	2.06847	286.095	2
2022-09-13	15:32:40	1.09592	287.191	2
2022-09-13	15:32:41	0.829199	288.02	2
2022-09-13	15:32:42	0.436444	288.457	2
2022-09-13	15:32:43	-0.32422	288.457	2
2022-09-13	15:32:44	-2.76311	288.457	2
2022-09-13	15:32:45	-3.12324	288.457	2
2022-09-13	15:32:46	-1.36191	288.457	2
2022-09-13	15:32:47	-1.20067	288.457	2
2022-09-13	15:32:48	-3.26248	288.457	2
2022-09-13	15:32:49	7.00071	295.457	2
2022-09-13	15:32:50	19.323	314.78	3
2022-09-13	15:32:51	9.73624	324.517	3
2022-09-13	15:32:52	3.62291	328.14	3
2022-09-13	15:32:53	0.591509	328.731	3
2022-09-13	15:32:54	-0.134861	328.731	3
2022-09-13	15:32:55	-1.30469	328.731	3
2022-09-13	15:32:56	0.715014	329.446	3
2022-09-13	15:32:57	5.38674	334.833	3
2022-09-13	15:32:58	4.80394	339.637	3
2022-09-13	15:32:59	2.30412	341.941	3
2022-09-13	15:33:00	0.363081	342.304	3
2022-09-13	15:33:01	-0.66338	342.304	3
2022-09-13	15:33:02	-3.30004	342.304	3
2022-09-13	15:33:03	-1.27305	342.304	3
2022-09-13	15:33:04	6.87722	349.181	3
2022-09-13	15:33:05	21.7324	370.914	4
2022-09-13	15:33:06	2.23479	373.148	4
2022-09-13	15:33:07	9.78542	382.934	4
2022-09-13	15:33:08	5.85319	388.787	4
2022-09-13	15:33:09	2.0245	390.812	4
2022-09-13	15:33:10	2.14136	392.953	4
2022-09-13	15:33:11	2.06066	395.014	4
2022-09-13	15:33:12	0.631031	395.645	4
2022-09-13	15:33:13	1.75291	397.397	4
2022-09-13	15:33:14	7.40122	404.799	4
2022-09-13	15:33:15	5.75567	410.554	4
2022-09-13	15:33:16	1.56632	412.121	4
2022-09-13	15:33:17	1.24799	413.369	4
2022-09-13	15:33:18	2.20905	415.578	4
2022-09-13	15:33:19	2.11442	417.692	4
2022-09-13	15:33:20	1.18934	418.881	4
2022-09-13	15:33:21	2.04289	420.924	4
2022-09-13	15:33:22	4.57151	425.496	4
2022-09-13	15:33:23	1.39598	426.892	4
2022-09-13	15:33:24	1.65838	428.55	4
2022-09-13	15:33:25	1.44052	429.991	4
2022-09-13	15:33:26	0.760213	430.751	4
2022-09-13	15:33:27	30.7534	461.504	5
2022-09-13	15:33:28	16.7597	478.264	6
2022-09-13	15:33:29	7.78977	486.054	6
2022-09-13	15:33:30	0.765477	486.819	6
2022-09-13	15:33:31	2.10531	488.925	6
2022-09-13	15:33:32	3.25377	492.178	6
2022-09-13	15:33:33	2.60961	494.788	6
2022-09-13	15:33:34	2.80689	497.595	6
2022-09-13	15:33:35	3.21164	500.807	6
2022-09-13	15:33:36	3.30991	504.116	6
2022-09-13	15:33:37	2.94345	507.06	6
2022-09-13	15:33:38	2.80944	509.869	6
2022-09-13	15:33:39	2.89337	512.763	6
2022-09-13	15:33:40	2.49278	515.256	6
2022-09-13	15:33:41	2.38805	517.644	6
2022-09-13	15:33:42	2.21901	519.863	6
2022-09-13	15:33:43	2.44277	522.305	6
2022-09-13	15:33:44	2.46751	524.773	6
2022-09-13	15:33:45	2.77612	527.549	6
2022-09-13	15:33:46	2.59541	530.144	6
2022-09-13	15:33:47	2.70491	532.849	6
2022-09-13	15:33:48	2.63898	535.488	6
2022-09-13	15:33:49	2.75243	538.241	6
2022-09-13	15:33:50	2.98844	541.229	6
2022-09-13	15:33:51	2.94504	544.174	6
2022-09-13	15:33:52	3.04956	547.224	6
2022-09-13	15:33:53	2.90123	550.125	6
2022-09-13	15:33:54	2.79478	552.92	6
2022-09-13	15:33:55	2.65443	555.574	6
2022-09-13	15:33:56	2.57503	558.149	6
2022-09-13	15:33:57	2.58748	560.737	6
2022-09-13	15:33:58	2.34674	563.083	6
2022-09-13	15:33:59	2.24866	565.332	6
2022-09-13	15:34:00	2.03853	567.371	6
2022-09-13	15:34:01	1.99597	569.367	6
2022-09-13	15:34:02	1.96162	571.328	6
2022-09-13	15:34:03	2.00446	573.333	6
2022-09-13	15:34:04	2.06524	575.398	6
2022-09-13	15:34:05	2.05528	577.453	6
2022-09-13	15:34:06	2.00027	579.454	6
2022-09-13	15:34:07	2.03242	581.486	6
2022-09-13	15:34:08	2.04255	583.528	6
2022-09-13	15:34:09	2.06924	585.598	6
2022-09-13	15:34:10	2.12472	587.722	6
2022-09-13	15:34:11	2.20322	589.926	6
2022-09-13	15:34:12	1.96926	591.895	6
2022-09-13	15:34:13	1.83895	593.734	6
2022-09-13	15:34:14	2.25777	595.992	6
2022-09-13	15:34:15	2.83315	598.825	6
2022-09-13	15:34:16	2.38839	601.213	6
2022-09-13	15:34:17	2.40812	603.621	6
2022-09-13	15:34:18	1.90192	605.523	6
2022-09-13	15:34:19	-0.38585	605.523	6
2022-09-13	15:34:20	-3.32347	605.523	6
2022-09-13	15:34:21	-3.54582	605.523	6
2022-09-13	15:34:22	-1.68686	605.523	6
2022-09-13	15:34:23	0.853704	606.377	6
2022-09-13	15:34:24	1.14021	607.517	6
2022-09-13	15:34:25	1.03367	608.551	6
2022-09-13	15:34:26	0.601979	609.153	6
2022-09-13	15:34:27	-0.801977	609.153	6
2022-09-13	15:34:28	-3.28465	609.153	6
2022-09-13	15:34:29	-3.65441	609.153	6
2022-09-13	15:34:30	-2.75969	609.153	6
2022-09-13	15:34:31	3.0593	612.212	6
2022-09-13	15:34:32	0.914881	613.127	6
2022-09-13	15:34:33	1.07276	614.2	6
2022-09-13	15:34:34	1.17158	615.371	6
2022-09-13	15:34:35	1.70226	617.074	6
2022-09-13	15:34:36	3.00735	620.081	6
2022-09-13	15:34:37	7.45787	627.539	6
2022-09-13	15:34:38	13.9907	641.529	7
2022-09-13	15:34:39	5.41175	646.941	7
2022-09-13	15:34:40	1.39722	648.338	7
2022-09-13	15:34:41	1.62699	649.965	7
2022-09-13	15:34:42	1.40339	651.369	7
2022-09-13	15:34:43	1.21035	652.579	7
2022-09-13	15:34:44	1.68624	654.265	7
2022-09-13	15:34:45	10.1469	664.412	7
2022-09-13	15:34:46	13.5196	677.932	8
2022-09-13	15:34:47	3.22675	681.159	8
2022-09-13	15:34:48	5.63608	686.795	8
2022-09-13	15:34:49	2.98197	689.777	8
2022-09-13	15:34:50	1.94951	691.726	8
2022-09-13	15:34:51	3.19444	694.921	8
2022-09-13	15:34:52	1.54465	696.465	8
2022-09-13	15:34:53	0.774248	697.24	8
2022-09-13	15:34:54	2.93338	700.173	8
2022-09-13	15:34:55	4.07649	704.249	8
2022-09-13	15:34:56	1.91799	706.167	8
2022-09-13	15:34:57	3.48753	709.655	8
2022-09-13	15:34:58	3.17862	712.834	8
2022-09-13	15:34:59	-0.365871	712.834	8
2022-09-13	15:35:00	-2.83049	712.834	8
2022-09-13	15:35:01	-0.711824	712.834	8
2022-09-13	15:35:02	6.41316	719.247	8
2022-09-13	15:35:03	7.6543	726.901	8
2022-09-13	15:35:04	3.62047	730.521	8
2022-09-13	15:35:05	9.61371	740.135	8
2022-09-13	15:35:06	23.9865	764.122	9
2022-09-13	15:35:07	11.4877	775.609	9
2022-09-13	15:35:08	2.70044	778.31	9
2022-09-13	15:35:09	2.8516	781.161	9
2022-09-13	15:35:10	21.5776	802.739	10
2022-09-13	15:35:11	11.4242	814.163	10
2022-09-13	15:35:12	6.34354	820.507	10
2022-09-13	15:35:13	23.1672	843.674	11
2022-09-13	15:35:14	15.9686	859.643	12
2022-09-13	15:35:15	11.5069	871.149	12
2022-09-13	15:35:16	1.67973	872.829	12
2022-09-13	15:35:17	0.135598	872.965	12
2022-09-13	15:35:18	-0.996354	872.965	12
2022-09-13	15:35:19	1.01567	873.98	12
2022-09-13	15:35:20	6.55595	880.536	12
2022-09-13	15:35:21	1.84414	882.381	12
2022-09-13	15:35:22	1.57689	883.957	12
2022-09-13	15:35:23	1.63599	885.593	12
2022-09-13	15:35:24	2.83038	888.424	12
2022-09-13	15:35:25	5.089	893.513	12
2022-09-13	15:35:26	3.83131	897.344	12
2022-09-13	15:35:27	2.83242	900.177	12
2022-09-13	15:35:28	2.32885	902.505	12
2022-09-13	15:35:29	2.01182	904.517	12
2022-09-13	15:35:30	1.87004	906.387	12
2022-09-13	15:35:31	1.89852	908.286	12
2022-09-13	15:35:32	1.88166	910.167	12
2022-09-13	15:35:33	1.84838	912.016	12
2022-09-13	15:35:34	1.96391	913.98	12
2022-09-13	15:35:35	3.31465	917.294	12
2022-09-13	15:35:36	11.3644	928.659	12
2022-09-13	15:35:37	7.67937	936.338	12
2022-09-13	15:35:38	5.77412	942.112	12
2022-09-13	15:35:39	3.63722	945.749	12
2022-09-13	15:35:40	3.92064	949.67	12
2022-09-13	15:35:41	3.28261	952.953	12
2022-09-13	15:35:42	3.08542	956.038	12
2022-09-13	15:35:43	2.17085	958.209	12
2022-09-13	15:35:44	1.78443	959.993	12
2022-09-13	15:35:45	3.15845	963.152	12
2022-09-13	15:35:46	3.22977	966.382	12
2022-09-13	15:35:47	2.28607	968.668	12
2022-09-13	15:35:48	2.21301	970.881	12
2022-09-13	15:35:49	2.22902	973.11	12
2022-09-13	15:35:50	2.1939	975.304	12
2022-09-13	15:35:51	2.15817	977.462	12
2022-09-13	15:35:52	2.20073	979.662	12
2022-09-13	15:35:53	2.2061	981.869	12
2022-09-13	15:35:54	2.2437	984.112	12
2022-09-13	15:35:55	2.28613	986.398	12
2022-09-13	15:35:56	2.1391	988.538	12
2022-09-13	15:35:57	2.11589	990.653	12
2022-09-13	15:35:58	2.21555	992.869	12
2022-09-13	15:35:59	2.11403	994.983	12
2022-09-13	15:36:00	1.78002	996.763	12
2022-09-13	15:36:01	5.38928	1002.15	12
2022-09-13	15:36:02	6.02765	1008.18	12
2022-09-13	15:36:03	3.92709	1012.11	12
2022-09-13	15:36:04	2.21108	1014.32	12
2022-09-13	15:36:05	1.88285	1016.2	12
2022-09-13	15:36:06	1.93131	1018.13	12
2022-09-13	15:36:07	1.97373	1020.11	12
2022-09-13	15:36:08	1.91295	1022.02	12
2022-09-13	15:36:09	1.92144	1023.94	12
2022-09-13	15:36:10	1.67853	1025.62	12
2022-09-13	15:36:11	2.05415	1027.67	12
2022-09-13	15:36:12	2.79473	1030.47	12
2022-09-13	15:36:13	1.61873	1032.09	12
2022-09-13	15:36:14	1.5009	1033.59	12
2022-09-13	15:36:15	1.53878	1035.13	12
2022-09-13	15:36:16	1.79931	1036.93	12
2022-09-13	15:36:17	1.82687	1038.75	12
2022-09-13	15:36:18	1.60147	1040.35	12
2022-09-13	15:36:19	1.65619	1042.01	12
2022-09-13	15:36:20	1.63106	1043.64	12
2022-09-13	15:36:21	1.62048	1045.26	12
2022-09-13	15:36:22	1.6404	1046.9	12
2022-09-13	15:36:23	1.65974	1048.56	12
2022-09-13	15:36:24	1.53333	1050.1	12
2022-09-13	15:36:25	1.73763	1051.83	12
2022-09-13	15:36:26	1.80537	1053.64	12
2022-09-13	15:36:27	1.17402	1054.81	12
2022-09-13	15:36:28	0.767908	1055.58	12
2022-09-13	15:36:29	1.49847	1057.08	12
2022-09-13	15:36:30	4.03524	1061.11	12
2022-09-13	15:36:31	4.47716	1065.59	12
2022-09-13	15:36:32	2.64034	1068.23	12
2022-09-13	15:36:33	6.79285	1075.02	12
2022-09-13	15:36:34	16.4676	1091.49	13
2022-09-13	15:36:35	19.641	1111.13	14
2022-09-13	15:36:36	19.2003	1130.33	15
2022-09-13	15:36:37	18.5188	1148.85	16
2022-09-13	15:36:38	11.8049	1160.66	16
2022-09-13	15:36:39	7.34724	1168	16
2022-09-13	15:36:40	1.4215	1169.43	16
2022-09-13	15:36:41	1.54227	1170.97	16
2022-09-13	15:36:42	1.71833	1172.69	16
2022-09-13	15:36:43	2.29531	1174.98	16
2022-09-13	15:36:44	2.243	1177.22	16
2022-09-13	15:36:45	2.12619	1179.35	16
2022-09-13	15:36:46	2.10526	1181.46	16
2022-09-13	15:36:47	2.07234	1183.53	16
2022-09-13	15:36:48	3.97848	1187.51	16
2022-09-13	15:36:49	4.63417	1192.14	16
2022-09-13	15:36:50	6.99415	1199.13	16
2022-09-13	15:36:51	14.2817	1213.42	17

## Sheet: Unnamed_prong_2022913153136 (4)
Date	Time	Lbs	newtons	Averaged Newtons	Total force x time	total steps > 13.345		**GoPro Fitting: 1521
2022-09-13	15:31:51	0.209478	0.9318	1.02469	0.9318	FALSE	0
2022-09-13	15:31:51	0.319555	1.42144	1.02469	1.42144	FALSE	0
2022-09-13	15:31:51	0.162048	0.720822	1.02469	1.65262	FALSE	0
2022-09-13	15:31:52	1.33258	5.92758	26.1961	7.34903	FALSE	0
2022-09-13	15:31:52	6.50978	28.9568	26.1961	30.6094	1	1
2022-09-13	15:31:52	9.82026	43.6825	26.1961	51.0315	1	2
2022-09-13	15:31:52	5.89395	26.2175	26.1961	56.8269	1	3
2022-09-13	15:31:53	4.96378	22.0799	13.7923	73.1114	1	4
2022-09-13	15:31:53	4.35823	19.3863	13.7923	76.2132	1	5
2022-09-13	15:31:53	1.70383	7.57898	13.7923	80.6904	FALSE	5
2022-09-13	15:31:53	1.37676	6.1241	13.7923	82.3373	FALSE	5
2022-09-13	15:31:54	2.35314	10.4672	11.0571	91.1576	FALSE	5
2022-09-13	15:31:54	3.19162	14.197	11.0571	96.5342	1	6
2022-09-13	15:31:54	2.51335	11.1799	11.0571	102.337	FALSE	6
2022-09-13	15:31:54	1.8849	8.38441	11.0571	104.919	FALSE	6
2022-09-13	15:31:55	1.38449	6.15849	6.97208	108.496	FALSE	6
2022-09-13	15:31:55	1.34429	5.97967	6.97208	110.898	FALSE	6
2022-09-13	15:31:55	1.9734	8.77808	6.97208	117.274	FALSE	6
2022-09-13	15:31:56	1.97431	8.78213	8.23511	119.68	FALSE	6
2022-09-13	15:31:56	1.92449	8.56052	8.23511	125.835	FALSE	6
2022-09-13	15:31:56	1.8052	8.02989	8.23511	127.71	FALSE	6
2022-09-13	15:31:56	1.70134	7.5679	8.23511	133.402	FALSE	6
2022-09-13	15:31:57	1.45304	6.46341	6.26132	134.174	FALSE	6
2022-09-13	15:31:57	1.60454	7.13731	6.26132	140.54	FALSE	6
2022-09-13	15:31:57	1.18917	5.28967	6.26132	139.463	FALSE	6
2022-09-13	15:31:57	1.38368	6.15489	6.26132	146.695	FALSE	6
2022-09-13	15:31:58	1.32795	5.90699	5.04213	145.37	FALSE	6
2022-09-13	15:31:58	1.07411	4.77786	5.04213	151.473	FALSE	6
2022-09-13	15:31:58	1.08276	4.81633	5.04213	150.187	FALSE	6
2022-09-13	15:31:58	1.04927	4.66736	5.04213	156.14	FALSE	6
2022-09-13	15:31:59	1.09274	4.86073	4.672	155.047	FALSE	6
2022-09-13	15:31:59	0.967545	4.30383	4.672	160.444	FALSE	6
2022-09-13	15:31:59	1.09065	4.85143	4.672	159.899	FALSE	6
2022-09-13	15:32:00	0.890191	3.95975	5.42679	164.403	FALSE	6
2022-09-13	15:32:00	1.37309	6.10778	5.42679	166.007	FALSE	6
2022-09-13	15:32:00	1.26128	5.61043	5.42679	170.014	FALSE	6
2022-09-13	15:32:00	1.35543	6.02922	5.42679	172.036	FALSE	6
2022-09-13	15:32:01	1.35574	6.0306	6.03156	176.045	FALSE	6
2022-09-13	15:32:01	1.36144	6.05596	6.03156	178.092	FALSE	6
2022-09-13	15:32:01	1.3453	5.98416	6.03156	182.029	FALSE	6
2022-09-13	15:32:01	1.36134	6.05551	6.03156	184.147	FALSE	6
2022-09-13	15:32:02	1.34586	5.98665	6.15797	188.015	FALSE	6
2022-09-13	15:32:02	1.38515	6.16142	6.15797	190.309	FALSE	6
2022-09-13	15:32:02	1.38408	6.15666	6.15797	194.172	FALSE	6
2022-09-13	15:32:02	1.4224	6.32712	6.15797	196.636	FALSE	6
2022-09-13	15:32:03	1.41156	6.2789	6.14301	200.451	FALSE	6
2022-09-13	15:32:03	1.36006	6.04982	6.14301	202.686	FALSE	6
2022-09-13	15:32:03	1.37141	6.10031	6.14301	206.551	FALSE	6
2022-09-13	15:32:04	1.35289	6.01793	6.0032	208.704	FALSE	6
2022-09-13	15:32:04	1.31905	5.8674	6.0032	212.419	FALSE	6
2022-09-13	15:32:04	1.32118	5.87687	6.0032	214.581	FALSE	6
2022-09-13	15:32:04	1.4052	6.25061	6.0032	218.669	FALSE	6
2022-09-13	15:32:05	1.41284	6.28459	6.54389	220.865	FALSE	6
2022-09-13	15:32:05	1.45182	6.45799	6.54389	225.127	FALSE	6
2022-09-13	15:32:05	1.46556	6.5191	6.54389	227.384	FALSE	6
2022-09-13	15:32:05	1.55431	6.91388	6.54389	232.041	FALSE	6
2022-09-13	15:32:06	1.53172	6.8134	6.74352	234.198	FALSE	6
2022-09-13	15:32:06	1.54083	6.85392	6.74352	238.895	FALSE	6
2022-09-13	15:32:06	1.47548	6.56323	6.74352	240.761	FALSE	6
2022-09-13	15:32:07	1.39665	6.21258	6.10388	245.108	FALSE	6
2022-09-13	15:32:07	1.38576	6.16414	6.10388	246.925	FALSE	6
2022-09-13	15:32:07	1.35426	6.02402	6.10388	251.132	FALSE	6
2022-09-13	15:32:07	1.35218	6.01477	6.10388	252.94	FALSE	6
2022-09-13	15:32:08	1.18571	5.27428	5.4825	256.406	FALSE	6
2022-09-13	15:32:08	1.17233	5.21476	5.4825	258.155	FALSE	6
2022-09-13	15:32:08	1.11503	4.95988	5.4825	261.366	FALSE	6
2022-09-13	15:32:08	1.45701	6.48107	5.4825	264.636	FALSE	6
2022-09-13	15:32:09	1.34566	5.98576	6.319	267.352	FALSE	6
2022-09-13	15:32:09	1.47681	6.56915	6.319	271.205	FALSE	6
2022-09-13	15:32:09	1.46139	6.50055	6.319	273.852	FALSE	6
2022-09-13	15:32:09	1.39844	6.22054	6.319	277.425	FALSE	6
2022-09-13	15:32:10	1.39635	6.21124	6.25312	280.063	FALSE	6
2022-09-13	15:32:10	1.42271	6.3285	6.25312	283.754	FALSE	6
2022-09-13	15:32:10	1.34322	5.97491	6.25312	286.038	FALSE	6
2022-09-13	15:32:10	1.46078	6.49784	6.25312	290.252	FALSE	6
2022-09-13	15:32:11	1.45905	6.49015	6.67727	292.528	FALSE	6
2022-09-13	15:32:11	1.55284	6.90734	6.67727	297.159	FALSE	6
2022-09-13	15:32:11	1.49146	6.63431	6.67727	299.163	FALSE	6
2022-09-13	15:32:12	1.49294	6.6409	5.60128	303.8	FALSE	6
2022-09-13	15:32:12	1.37777	6.1286	5.60128	305.291	FALSE	6
2022-09-13	15:32:12	1.20307	5.3515	5.60128	309.151	FALSE	6
2022-09-13	15:32:12	0.963117	4.28414	5.60128	309.575	FALSE	6
2022-09-13	15:32:13	1.22739	5.45968	8.53091	314.611	FALSE	6
2022-09-13	15:32:13	1.94856	8.66758	8.53091	318.243	FALSE	6
2022-09-13	15:32:13	2.47762	11.0209	8.53091	325.632	FALSE	6
2022-09-13	15:32:13	2.01777	8.97544	8.53091	327.218	FALSE	6
2022-09-13	15:32:14	1.97324	8.77737	6.56517	334.409	FALSE	6
2022-09-13	15:32:14	1.36495	6.07157	6.56517	333.29	FALSE	6
2022-09-13	15:32:14	1.23009	5.47169	6.56517	339.881	FALSE	6
2022-09-13	15:32:14	1.33538	5.94004	6.56517	339.23	FALSE	6
2022-09-13	15:32:15	1.41223	6.28188	5.05751	346.163	FALSE	6
2022-09-13	15:32:15	0.991005	4.40819	5.05751	343.638	FALSE	6
2022-09-13	15:32:15	1.0077	4.48245	5.05751	350.645	FALSE	6
2022-09-13	15:32:16	0.664695	2.9567	3.81894	346.595	FALSE	6
2022-09-13	15:32:16	0.718282	3.19506	3.81894	353.84	FALSE	6
2022-09-13	15:32:16	1.151	5.11988	3.81894	351.715	FALSE	6
2022-09-13	15:32:16	0.900165	4.00411	3.81894	357.845	FALSE	6
2022-09-13	15:32:17	1.03701	4.61283	4.58691	356.328	FALSE	6
2022-09-13	15:32:17	1.01711	4.52431	4.58691	362.369	FALSE	6
2022-09-13	15:32:17	1.00897	4.4881	4.58691	360.816	FALSE	6
2022-09-13	15:32:17	1.06164	4.72239	4.58691	367.091	FALSE	6
2022-09-13	15:32:18	0.978181	4.35114	4.31967	365.167	FALSE	6
2022-09-13	15:32:18	0.925407	4.1164	4.31967	371.208	FALSE	6
2022-09-13	15:32:18	0.976145	4.34209	4.31967	369.509	FALSE	6
2022-09-13	15:32:18	1.00469	4.46906	4.31967	375.677	FALSE	6
2022-09-13	15:32:19	1.08067	4.80704	5.22607	374.316	FALSE	6
2022-09-13	15:32:19	1.2534	5.57537	5.22607	381.252	FALSE	6
2022-09-13	15:32:19	1.19055	5.2958	5.22607	379.612	FALSE	6
2022-09-13	15:32:20	1.15482	5.13687	5.05741	386.389	FALSE	6
2022-09-13	15:32:20	1.18581	5.27472	5.05741	384.887	FALSE	6
2022-09-13	15:32:20	1.11589	4.9637	5.05741	391.353	FALSE	6
2022-09-13	15:32:20	1.09131	4.85437	5.05741	389.741	FALSE	6
2022-09-13	15:32:21	1.08307	4.81771	4.66467	396.17	FALSE	6
2022-09-13	15:32:21	1.01391	4.51007	4.66467	394.251	FALSE	6
2022-09-13	15:32:21	1.04337	4.64112	4.66467	400.811	FALSE	6
2022-09-13	15:32:21	1.05431	4.68978	4.66467	398.941	FALSE	6
2022-09-13	15:32:22	1.02464	4.5578	4.70105	405.369	FALSE	6
2022-09-13	15:32:22	1.04205	4.63525	4.70105	403.576	FALSE	6
2022-09-13	15:32:22	1.0709	4.76358	4.70105	410.133	FALSE	6
2022-09-13	15:32:22	1.08978	4.84756	4.70105	408.424	FALSE	6
2022-09-13	15:32:23	1.08449	4.82403	5.00557	414.957	FALSE	6
2022-09-13	15:32:23	1.13431	5.04564	5.00557	413.469	FALSE	6
2022-09-13	15:32:23	1.15711	5.14706	5.00557	420.104	FALSE	6
2022-09-13	15:32:24	1.17869	5.24305	4.98578	418.712	FALSE	6
2022-09-13	15:32:24	1.13594	5.05289	4.98578	425.157	FALSE	6
2022-09-13	15:32:24	1.06246	4.72603	4.98578	423.438	FALSE	6
2022-09-13	15:32:24	1.10632	4.92113	4.98578	430.078	FALSE	6
2022-09-13	15:32:25	1.09869	4.88719	4.53123	428.325	FALSE	6
2022-09-13	15:32:25	1.2848	5.71505	4.53123	435.793	FALSE	6
2022-09-13	15:32:25	0.899199	3.99982	4.53123	432.325	FALSE	6
2022-09-13	15:32:25	0.791972	3.52285	4.53123	439.316	FALSE	6
2022-09-13	15:32:26	0.743117	3.30553	3.55296	435.631	FALSE	6
2022-09-13	15:32:26	0.689631	3.06762	3.55296	442.383	FALSE	6
2022-09-13	15:32:26	0.823321	3.6623	3.55296	439.293	FALSE	6
2022-09-13	15:32:26	0.938893	4.17638	3.55296	446.56	FALSE	6
2022-09-13	15:32:27	0.983829	4.37627	4.39285	443.669	FALSE	6
2022-09-13	15:32:27	1.00754	4.48174	4.39285	451.042	FALSE	6
2022-09-13	15:32:27	0.977875	4.34978	4.39285	448.019	FALSE	6
2022-09-13	15:32:27	0.980979	4.36359	4.39285	455.405	FALSE	6
2022-09-13	15:32:28	0.959097	4.26626	4.25576	452.285	FALSE	6
2022-09-13	15:32:28	0.941692	4.18883	4.25576	459.594	FALSE	6
2022-09-13	15:32:28	0.969427	4.31221	4.25576	456.598	FALSE	6
2022-09-13	15:32:29	0.999453	4.44577	4.52975	464.04	FALSE	6
2022-09-13	15:32:29	1.03696	4.61261	4.52975	461.21	FALSE	6
2022-09-13	15:32:29	1.07635	4.78782	4.52975	468.828	FALSE	6
2022-09-13	15:32:29	0.960572	4.27282	4.52975	465.483	FALSE	6
2022-09-13	15:32:30	0.77757	3.45879	4.58691	472.286	FALSE	6
2022-09-13	15:32:30	0.736552	3.27633	4.58691	468.759	FALSE	6
2022-09-13	15:32:30	1.02775	4.57164	4.58691	476.858	FALSE	6
2022-09-13	15:32:30	1.58286	7.04088	4.58691	475.8	FALSE	6
2022-09-13	15:32:31	1.97798	8.79845	9.1247	485.656	FALSE	6
2022-09-13	15:32:31	2.3019	10.2393	9.1247	486.04	FALSE	6
2022-09-13	15:32:31	1.8733	8.33281	9.1247	493.989	FALSE	6
2022-09-13	15:32:31	2.05212	9.12824	9.1247	495.168	FALSE	6
2022-09-13	15:32:32	1.60332	7.13189	7.1577	501.121	FALSE	6
2022-09-13	15:32:32	1.80205	8.01588	7.1577	503.184	FALSE	6
2022-09-13	15:32:32	1.422	6.32534	7.1577	507.447	FALSE	6
2022-09-13	15:32:33	0.823117	3.66139	2.34323	506.845	FALSE	6
2022-09-13	15:32:33	0.496756	2.20967	2.34323	509.656	FALSE	6
2022-09-13	15:32:33	0.408919	1.81895	2.34323	508.664	FALSE	6
2022-09-13	15:32:33	0.378333	1.6829	2.34323	511.339	FALSE	6
2022-09-13	15:32:34	0.504746	2.24521	4.6615	510.909	FALSE	6
2022-09-13	15:32:34	0.856298	3.80898	4.6615	515.148	FALSE	6
2022-09-13	15:32:34	1.27426	5.66816	4.6615	516.577	FALSE	6
2022-09-13	15:32:34	1.5565	6.92362	4.6615	522.072	FALSE	6
2022-09-13	15:32:35	1.38149	6.14514	3.06224	522.723	FALSE	6
2022-09-13	15:32:35	0.334822	1.48936	3.06224	523.561	FALSE	6
2022-09-13	15:32:35	0.536858	2.38805	3.06224	525.111	FALSE	6
2022-09-13	15:32:35	0.500521	2.22642	3.06224	525.787	FALSE	6
2022-09-13	15:32:36	0.464084	2.06434	2.35221	527.175	FALSE	6
2022-09-13	15:32:36	0.640318	2.84826	2.35221	528.636	FALSE	6
2022-09-13	15:32:36	0.481997	2.14402	2.35221	529.319	FALSE	6
2022-09-13	15:32:37	0.550496	2.44872	1.85512	531.084	FALSE	6
2022-09-13	15:32:37	0.333651	1.48415	1.85512	530.803	FALSE	6
2022-09-13	15:32:37	0.355077	1.57945	1.85512	532.664	FALSE	6
2022-09-13	15:32:37	0.42897	1.90814	1.85512	532.711	FALSE	6
2022-09-13	15:32:38	0.407036	1.81058	2.36106	534.474	FALSE	6
2022-09-13	15:32:38	0.522761	2.32535	2.36106	535.037	FALSE	6
2022-09-13	15:32:38	0.705458	3.13802	2.36106	537.612	FALSE	6
2022-09-13	15:32:38	0.487901	2.17028	2.36106	537.207	FALSE	6
2022-09-13	15:32:39	0.576756	2.56553	2.06847	540.178	FALSE	6
2022-09-13	15:32:39	0.707697	3.14798	2.06847	540.355	FALSE	6
2022-09-13	15:32:39	0.281641	1.2528	2.06847	541.431	FALSE	6
2022-09-13	15:32:39	0.293957	1.30758	2.06847	541.662	FALSE	6
2022-09-13	15:32:40	0.23925	1.06423	1.09592	542.495	FALSE	6
2022-09-13	15:32:40	0.243117	1.08143	1.09592	542.744	FALSE	6
2022-09-13	15:32:40	0.256756	1.1421	1.09592	543.637	FALSE	6
2022-09-13	15:32:41	0.252481	1.12309	0.829199	543.867	FALSE	6
2022-09-13	15:32:41	0.291972	1.29875	0.829199	544.936	FALSE	6
2022-09-13	15:32:41	0.066985	0.297963	0.829199	544.165	FALSE	6
2022-09-13	15:32:41	0.134211	0.596997	0.829199	545.533	FALSE	6
2022-09-13	15:32:42	0.205	0.911881	0.436444	545.077	FALSE	6
2022-09-13	15:32:42	0.142303	0.632992	0.436444	546.166	FALSE	6
2022-09-13	15:32:42	0.117926	0.524558	0.436444	545.601	FALSE	6
2022-09-13	15:32:42	-0.0727606	-0.323654	0.436444	546.166	FALSE	6
2022-09-13	15:32:43	-0.0467554	-0.207977	-0.32422	545.601	FALSE	6
2022-09-13	15:32:43	0.0386898	0.1721	-0.32422	546.338	FALSE	6
2022-09-13	15:32:43	-0.0619208	-0.275436	-0.32422	545.601	FALSE	6
2022-09-13	15:32:43	-0.221565	-0.985565	-0.32422	546.338	FALSE	6
2022-09-13	15:32:44	-0.505636	-2.24917	-2.76311	545.601	FALSE	6
2022-09-13	15:32:44	-0.571183	-2.54074	-2.76311	546.338	FALSE	6
2022-09-13	15:32:44	-0.786704	-3.49942	-2.76311	545.601	FALSE	6
2022-09-13	15:32:45	-0.648027	-2.88255	-3.12324	546.338	FALSE	6
2022-09-13	15:32:45	-0.739325	-3.28867	-3.12324	545.601	FALSE	6
2022-09-13	15:32:45	-0.786755	-3.49964	-3.12324	546.338	FALSE	6
2022-09-13	15:32:45	-0.634439	-2.82211	-3.12324	545.601	FALSE	6
2022-09-13	15:32:46	-0.502328	-2.23446	-1.36191	546.338	FALSE	6
2022-09-13	15:32:46	-0.408078	-1.81521	-1.36191	545.601	FALSE	6
2022-09-13	15:32:46	-0.246196	-1.09513	-1.36191	546.338	FALSE	6
2022-09-13	15:32:46	-0.0680786	-0.302827	-1.36191	545.601	FALSE	6
2022-09-13	15:32:47	-0.111081	-0.494111	-1.20067	546.338	FALSE	6
2022-09-13	15:32:47	-0.173575	-0.772096	-1.20067	545.601	FALSE	6
2022-09-13	15:32:47	-0.274847	-1.22257	-1.20067	546.338	FALSE	6
2022-09-13	15:32:47	-0.52019	-2.31391	-1.20067	545.601	FALSE	6
2022-09-13	15:32:48	-0.790521	-3.5164	-3.26248	546.338	FALSE	6
2022-09-13	15:32:48	-1.32665	-5.9012	-3.26248	545.601	FALSE	6
2022-09-13	15:32:48	-0.0831422	-0.369833	-3.26248	546.338	FALSE	6
2022-09-13	15:32:49	-0.053931	-0.239896	7.00071	545.601	FALSE	6
2022-09-13	15:32:49	0.0623031	0.277137	7.00071	546.615	FALSE	6
2022-09-13	15:32:49	0.509886	2.26807	7.00071	547.869	FALSE	6
2022-09-13	15:32:49	5.77706	25.6975	7.00071	572.313	1	7
2022-09-13	15:32:50	7.94291	35.3317	19.323	583.201	1	8
2022-09-13	15:32:50	3.94556	17.5506	19.323	589.863	1	9
2022-09-13	15:32:50	2.74312	12.2019	19.323	595.403	FALSE	9
2022-09-13	15:32:50	2.74439	12.2076	19.323	602.071	FALSE	9
2022-09-13	15:32:51	2.68383	11.9382	9.73624	607.341	FALSE	9
2022-09-13	15:32:51	2.06129	9.16903	9.73624	611.24	FALSE	9
2022-09-13	15:32:51	1.62627	7.23397	9.73624	614.575	FALSE	9
2022-09-13	15:32:51	2.38383	10.6038	9.73624	621.844	FALSE	9
2022-09-13	15:32:52	1.59162	7.07984	3.62291	621.655	FALSE	9
2022-09-13	15:32:52	0.391158	1.73995	3.62291	623.584	FALSE	9
2022-09-13	15:32:52	0.460623	2.04894	3.62291	623.704	FALSE	9
2022-09-13	15:32:53	0.20841	0.927049	0.591509	624.511	FALSE	9
2022-09-13	15:32:53	-0.0278242	-0.123768	0.591509	623.704	FALSE	9
2022-09-13	15:32:53	0.090191	0.401188	0.591509	624.912	FALSE	9
2022-09-13	15:32:53	0.261132	1.16157	0.591509	624.866	FALSE	9
2022-09-13	15:32:54	0.174618	0.776736	-0.134861	625.689	FALSE	9
2022-09-13	15:32:54	0.120522	0.536106	-0.134861	625.402	FALSE	9
2022-09-13	15:32:54	-0.136883	-0.608883	-0.134861	625.689	FALSE	9
2022-09-13	15:32:54	-0.279529	-1.2434	-0.134861	625.402	FALSE	9
2022-09-13	15:32:55	-0.354898	-1.57866	-1.30469	625.689	FALSE	9
2022-09-13	15:32:55	-0.381513	-1.69705	-1.30469	625.402	FALSE	9
2022-09-13	15:32:55	-0.327519	-1.45687	-1.30469	625.689	FALSE	9
2022-09-13	15:32:55	-0.1093	-0.486188	-1.30469	625.402	FALSE	9
2022-09-13	15:32:56	0.0432699	0.192473	0.715014	625.881	FALSE	9
2022-09-13	15:32:56	0.150395	0.668987	0.715014	626.071	FALSE	9
2022-09-13	15:32:56	0.288562	1.28358	0.715014	627.165	FALSE	9
2022-09-13	15:32:57	0.97589	4.34095	5.38674	630.412	FALSE	9
2022-09-13	15:32:57	1.1564	5.1439	5.38674	632.309	FALSE	9
2022-09-13	15:32:57	1.13401	5.0443	5.38674	635.456	FALSE	9
2022-09-13	15:32:57	1.57767	7.01779	5.38674	639.326	FALSE	9
2022-09-13	15:32:58	1.46327	6.50892	4.80394	641.965	FALSE	9
2022-09-13	15:32:58	1.2852	5.71683	4.80394	645.043	FALSE	9
2022-09-13	15:32:58	0.734873	3.26886	4.80394	645.234	FALSE	9
2022-09-13	15:32:58	0.836552	3.72115	4.80394	648.764	FALSE	9
2022-09-13	15:32:59	1.0593	4.71198	2.30412	649.946	FALSE	9
2022-09-13	15:32:59	0.51014	2.2692	2.30412	651.034	FALSE	9
2022-09-13	15:32:59	0.279911	1.2451	2.30412	651.191	FALSE	9
2022-09-13	15:32:59	0.222608	0.990205	2.30412	652.024	FALSE	9
2022-09-13	15:33:00	0.185865	0.826765	0.363081	652.018	FALSE	9
2022-09-13	15:33:00	0.136196	0.605827	0.363081	652.63	FALSE	9
2022-09-13	15:33:00	-0.077188	-0.343348	0.363081	652.018	FALSE	9
2022-09-13	15:33:01	-0.0583076	-0.259364	-0.66338	652.63	FALSE	9
2022-09-13	15:33:01	-0.0472135	-0.210015	-0.66338	652.018	FALSE	9
2022-09-13	15:33:01	-0.252964	-1.12523	-0.66338	652.63	FALSE	9
2022-09-13	15:33:01	-0.238053	-1.05891	-0.66338	652.018	FALSE	9
2022-09-13	15:33:02	-0.730012	-3.24724	-3.30004	652.63	FALSE	9
2022-09-13	15:33:02	-0.771946	-3.43377	-3.30004	652.018	FALSE	9
2022-09-13	15:33:02	-0.788689	-3.50825	-3.30004	652.63	FALSE	9
2022-09-13	15:33:02	-0.676882	-3.01091	-3.30004	652.018	FALSE	9
2022-09-13	15:33:03	-0.682429	-3.03558	-1.27305	652.63	FALSE	9
2022-09-13	15:33:03	-0.467213	-2.07826	-1.27305	652.018	FALSE	9
2022-09-13	15:33:03	-0.183855	-0.817824	-1.27305	652.63	FALSE	9
2022-09-13	15:33:03	0.188715	0.839442	-1.27305	652.857	FALSE	9
2022-09-13	15:33:04	0.807646	3.59257	6.87722	656.222	FALSE	9
2022-09-13	15:33:04	1.24541	5.53983	6.87722	658.397	FALSE	9
2022-09-13	15:33:04	2.58515	11.4993	6.87722	667.721	FALSE	9
2022-09-13	15:33:05	3.64556	16.2162	21.7324	674.613	1	10
2022-09-13	15:33:05	6.71614	29.8747	21.7324	697.596	1	11
2022-09-13	15:33:05	6.63273	29.5037	21.7324	704.117	1	12
2022-09-13	15:33:05	2.54826	11.3352	21.7324	708.931	FALSE	12
2022-09-13	15:33:06	0.448817	1.99643	2.23479	706.113	FALSE	12
2022-09-13	15:33:06	0.243524	1.08324	2.23479	710.015	FALSE	12
2022-09-13	15:33:06	0.186476	0.829483	2.23479	706.943	FALSE	12
2022-09-13	15:33:06	1.1308	5.03002	2.23479	715.045	FALSE	12
2022-09-13	15:33:07	2.73686	12.1741	9.78542	719.117	FALSE	12
2022-09-13	15:33:07	2.94729	13.1101	9.78542	728.155	FALSE	12
2022-09-13	15:33:07	0.962303	4.28052	9.78542	723.397	FALSE	12
2022-09-13	15:33:07	2.15299	9.57693	9.78542	737.732	FALSE	12
2022-09-13	15:33:08	2.19899	9.78155	5.85319	733.179	FALSE	12
2022-09-13	15:33:08	1.18017	5.24963	5.85319	742.981	FALSE	12
2022-09-13	15:33:08	0.568409	2.5284	5.85319	735.707	FALSE	12
2022-09-13	15:33:09	0.58841	2.61737	2.0245	745.599	FALSE	12
2022-09-13	15:33:09	0.39014	1.73542	2.0245	737.443	FALSE	12
2022-09-13	15:33:09	0.447341	1.98986	2.0245	747.588	FALSE	12
2022-09-13	15:33:09	0.394618	1.75534	2.0245	739.198	FALSE	12
2022-09-13	15:33:10	0.459758	2.0451	2.14136	749.634	FALSE	12
2022-09-13	15:33:10	0.296349	1.31822	2.14136	740.516	FALSE	12
2022-09-13	15:33:10	0.569631	2.53383	2.14136	752.167	FALSE	12
2022-09-13	15:33:10	0.59986	2.6683	2.14136	743.184	FALSE	12
2022-09-13	15:33:11	0.358537	1.59484	2.06066	753.762	FALSE	12
2022-09-13	15:33:11	0.461132	2.05121	2.06066	745.236	FALSE	12
2022-09-13	15:33:11	0.535585	2.38239	2.06066	756.145	FALSE	12
2022-09-13	15:33:11	0.497774	2.2142	2.06066	747.45	FALSE	12
2022-09-13	15:33:12	0.167087	0.743236	0.631031	756.888	FALSE	12
2022-09-13	15:33:12	0.101489	0.451443	0.631031	747.901	FALSE	12
2022-09-13	15:33:12	0.15701	0.698412	0.631031	757.586	FALSE	12
2022-09-13	15:33:13	0.0451529	0.200849	1.75291	748.102	FALSE	12
2022-09-13	15:33:13	0.286781	1.27566	1.75291	758.862	FALSE	12
2022-09-13	15:33:13	0.522354	2.32354	1.75291	750.426	FALSE	12
2022-09-13	15:33:13	0.721997	3.21159	1.75291	762.074	FALSE	12
2022-09-13	15:33:14	0.697824	3.10406	7.40122	753.53	FALSE	12
2022-09-13	15:33:14	1.36195	6.05823	7.40122	768.132	FALSE	12
2022-09-13	15:33:14	2.52831	11.2464	7.40122	764.776	FALSE	12
2022-09-13	15:33:14	2.06739	9.19616	7.40122	777.328	FALSE	12
2022-09-13	15:33:15	1.7505	7.78657	5.75567	772.563	FALSE	12
2022-09-13	15:33:15	2.06327	9.17784	5.75567	786.506	FALSE	12
2022-09-13	15:33:15	0.641489	2.85347	5.75567	775.416	FALSE	12
2022-09-13	15:33:15	0.720471	3.2048	5.75567	789.711	FALSE	12
2022-09-13	15:33:16	0.361845	1.60956	1.56632	777.026	FALSE	12
2022-09-13	15:33:16	0.336654	1.4975	1.56632	791.208	FALSE	12
2022-09-13	15:33:16	0.357875	1.5919	1.56632	778.618	FALSE	12
2022-09-13	15:33:17	0.247137	1.09931	1.24799	792.307	FALSE	12
2022-09-13	15:33:17	0.26897	1.19643	1.24799	779.814	FALSE	12
2022-09-13	15:33:17	0.305	1.3567	1.24799	793.664	FALSE	12
2022-09-13	15:33:17	0.301132	1.3395	1.24799	781.154	FALSE	12
2022-09-13	15:33:18	0.429682	1.91131	2.20905	795.575	FALSE	12
2022-09-13	15:33:18	0.315433	1.40311	2.20905	782.557	FALSE	12
2022-09-13	15:33:18	0.52327	2.32761	2.20905	797.903	FALSE	12
2022-09-13	15:33:18	0.718079	3.19416	2.20905	785.751	FALSE	12
2022-09-13	15:33:19	0.533142	2.37152	2.11442	800.275	FALSE	12
2022-09-13	15:33:19	0.72617	3.23015	2.11442	788.981	FALSE	12
2022-09-13	15:33:19	0.391107	1.73972	2.11442	802.014	FALSE	12
2022-09-13	15:33:19	0.250954	1.11629	2.11442	790.097	FALSE	12
2022-09-13	15:33:20	0.248512	1.10543	1.18934	803.12	FALSE	12
2022-09-13	15:33:20	0.236705	1.05291	1.18934	791.15	FALSE	12
2022-09-13	15:33:20	0.316908	1.40967	1.18934	804.529	FALSE	12
2022-09-13	15:33:21	0.303066	1.3481	2.04289	792.498	FALSE	12
2022-09-13	15:33:21	0.228512	1.01647	2.04289	805.546	FALSE	12
2022-09-13	15:33:21	0.568104	2.52704	2.04289	795.025	FALSE	12
2022-09-13	15:33:21	0.737366	3.27995	2.04289	808.826	FALSE	12
2022-09-13	15:33:22	1.33034	5.91762	4.57151	800.943	FALSE	12
2022-09-13	15:33:22	1.5195	6.75904	4.57151	815.585	FALSE	12
2022-09-13	15:33:22	0.998181	4.44011	4.57151	805.383	FALSE	12
2022-09-13	15:33:22	0.262863	1.16927	4.57151	816.754	FALSE	12
2022-09-13	15:33:23	0.302456	1.34538	1.39598	806.728	FALSE	12
2022-09-13	15:33:23	0.175026	0.778551	1.39598	817.533	FALSE	12
2022-09-13	15:33:23	0.421845	1.87645	1.39598	808.605	FALSE	12
2022-09-13	15:33:23	0.355992	1.58352	1.39598	819.116	FALSE	12
2022-09-13	15:33:24	0.442456	1.96813	1.65838	810.573	FALSE	12
2022-09-13	15:33:24	0.316705	1.40877	1.65838	820.525	FALSE	12
2022-09-13	15:33:24	0.3593	1.59824	1.65838	812.171	FALSE	12
2022-09-13	15:33:25	0.391056	1.7395	1.44052	822.264	FALSE	12
2022-09-13	15:33:25	0.418639	1.86219	1.44052	814.033	FALSE	12
2022-09-13	15:33:25	0.312176	1.38862	1.44052	823.653	FALSE	12
2022-09-13	15:33:25	0.173499	0.771758	1.44052	814.805	FALSE	12
2022-09-13	15:33:26	0.117519	0.522748	0.760213	824.176	FALSE	12
2022-09-13	15:33:26	0.182049	0.80979	0.760213	815.615	FALSE	12
2022-09-13	15:33:26	0.0342114	0.152179	0.760213	824.328	FALSE	12
2022-09-13	15:33:26	0.349835	1.55614	0.760213	817.171	FALSE	12
2022-09-13	15:33:27	9.8166	43.6662	30.7534	867.994	1	13
2022-09-13	15:33:27	10.4733	46.5873	30.7534	863.759	1	14
2022-09-13	15:33:27	4.7536	21.145	30.7534	889.139	1	15
2022-09-13	15:33:27	2.61121	11.6152	30.7534	875.374	FALSE	15
2022-09-13	15:33:28	2.27248	10.1084	16.7597	899.248	FALSE	15
2022-09-13	15:33:28	6.19645	27.563	16.7597	902.937	1	16
2022-09-13	15:33:28	2.83431	12.6076	16.7597	911.855	FALSE	16
2022-09-13	15:33:29	0.756603	3.36552	7.78977	906.302	FALSE	16
2022-09-13	15:33:29	3.39736	15.1121	7.78977	926.967	1	17
2022-09-13	15:33:29	2.72413	12.1175	7.78977	918.42	FALSE	17
2022-09-13	15:33:29	0.126781	0.563947	7.78977	927.531	FALSE	17
2022-09-13	15:33:30	0.0638297	0.283927	0.765477	918.704	FALSE	17
2022-09-13	15:33:30	0.0740587	0.329428	0.765477	927.861	FALSE	17
2022-09-13	15:33:30	0.31126	1.38455	0.765477	920.088	FALSE	17
2022-09-13	15:33:30	0.239199	1.064	0.765477	928.925	FALSE	17
2022-09-13	15:33:31	0.47869	2.12931	2.10531	922.218	FALSE	17
2022-09-13	15:33:31	0.351616	1.56406	2.10531	930.489	FALSE	17
2022-09-13	15:33:31	0.512634	2.2803	2.10531	924.498	FALSE	17
2022-09-13	15:33:31	0.550242	2.44759	2.10531	932.936	FALSE	17
2022-09-13	15:33:32	0.564033	2.50893	3.25377	927.007	FALSE	17
2022-09-13	15:33:32	0.841794	3.74447	3.25377	936.681	FALSE	17
2022-09-13	15:33:32	0.788613	3.50791	3.25377	930.515	FALSE	17
2022-09-13	15:33:33	0.697875	3.10429	2.60961	939.785	FALSE	17
2022-09-13	15:33:33	0.541081	2.40684	2.60961	932.922	FALSE	17
2022-09-13	15:33:33	0.624084	2.77605	2.60961	942.561	FALSE	17
2022-09-13	15:33:33	0.483626	2.15127	2.60961	935.073	FALSE	17
2022-09-13	15:33:34	0.442914	1.97017	2.80689	944.531	FALSE	17
2022-09-13	15:33:34	0.571158	2.54063	2.80689	937.613	FALSE	17
2022-09-13	15:33:34	0.579453	2.57752	2.80689	947.109	FALSE	17
2022-09-13	15:33:34	0.930547	4.13926	2.80689	941.753	FALSE	17
2022-09-13	15:33:35	0.698486	3.10701	3.21164	950.216	FALSE	17
2022-09-13	15:33:35	0.70729	3.14617	3.21164	944.899	FALSE	17
2022-09-13	15:33:35	0.73645	3.27588	3.21164	953.492	FALSE	17
2022-09-13	15:33:35	0.745814	3.31753	3.21164	948.216	FALSE	17
2022-09-13	15:33:36	0.750038	3.33632	3.30991	956.828	FALSE	17
2022-09-13	15:33:36	0.741336	3.29761	3.30991	951.514	FALSE	17
2022-09-13	15:33:36	0.740929	3.2958	3.30991	960.124	FALSE	17
2022-09-13	15:33:37	0.712532	3.16948	2.94345	954.683	FALSE	17
2022-09-13	15:33:37	0.649784	2.89037	2.94345	963.014	FALSE	17
2022-09-13	15:33:37	0.652532	2.90259	2.94345	957.586	FALSE	17
2022-09-13	15:33:37	0.632023	2.81136	2.94345	965.826	FALSE	17
2022-09-13	15:33:38	0.61584	2.73938	2.80944	960.325	FALSE	17
2022-09-13	15:33:38	0.615891	2.73961	2.80944	968.565	FALSE	17
2022-09-13	15:33:38	0.645305	2.87045	2.80944	963.196	FALSE	17
2022-09-13	15:33:38	0.649326	2.88833	2.80944	971.453	FALSE	17
2022-09-13	15:33:39	0.679453	3.02234	2.89337	966.218	FALSE	17
2022-09-13	15:33:39	0.624135	2.77628	2.89337	974.23	FALSE	17
2022-09-13	15:33:39	0.645	2.86909	2.89337	969.087	FALSE	17
2022-09-13	15:33:39	0.653244	2.90576	2.89337	977.136	FALSE	17
2022-09-13	15:33:40	0.636298	2.83038	2.49278	971.918	FALSE	17
2022-09-13	15:33:40	0.497367	2.21239	2.49278	979.348	FALSE	17
2022-09-13	15:33:40	0.547544	2.43559	2.49278	974.353	FALSE	17
2022-09-13	15:33:41	0.552227	2.45642	2.38805	981.804	FALSE	17
2022-09-13	15:33:41	0.540114	2.40254	2.38805	976.756	FALSE	17
2022-09-13	15:33:41	0.510394	2.27033	2.38805	984.075	FALSE	17
2022-09-13	15:33:41	0.544695	2.42291	2.38805	979.179	FALSE	17
2022-09-13	15:33:42	0.493244	2.19405	2.21901	986.269	FALSE	17
2022-09-13	15:33:42	0.487036	2.16643	2.21901	981.345	FALSE	17
2022-09-13	15:33:42	0.494109	2.1979	2.21901	988.467	FALSE	17
2022-09-13	15:33:42	0.521031	2.31765	2.21901	983.663	FALSE	17
2022-09-13	15:33:43	0.545458	2.42631	2.44277	990.893	FALSE	17
2022-09-13	15:33:43	0.54785	2.43695	2.44277	986.1	FALSE	17
2022-09-13	15:33:43	0.559453	2.48856	2.44277	993.381	FALSE	17
2022-09-13	15:33:43	0.54388	2.41929	2.44277	988.519	FALSE	17
2022-09-13	15:33:44	0.497214	2.21171	2.46751	995.593	FALSE	17
2022-09-13	15:33:44	0.517061	2.29999	2.46751	990.819	FALSE	17
2022-09-13	15:33:44	0.592736	2.63661	2.46751	998.23	FALSE	17
2022-09-13	15:33:44	0.61187	2.72172	2.46751	993.541	FALSE	17
2022-09-13	15:33:45	0.647341	2.8795	2.77612	1001.11	FALSE	17
2022-09-13	15:33:45	0.645712	2.87226	2.77612	996.413	FALSE	17
2022-09-13	15:33:45	0.579249	2.57662	2.77612	1003.69	FALSE	17
2022-09-13	15:33:46	0.548206	2.43853	2.59541	998.852	FALSE	17
2022-09-13	15:33:46	0.549275	2.44329	2.59541	1006.13	FALSE	17
2022-09-13	15:33:46	0.611463	2.71991	2.59541	1001.57	FALSE	17
2022-09-13	15:33:46	0.624949	2.7799	2.59541	1008.91	FALSE	17
2022-09-13	15:33:47	0.649784	2.89037	2.70491	1004.46	FALSE	17
2022-09-13	15:33:47	0.618639	2.75183	2.70491	1011.66	FALSE	17
2022-09-13	15:33:47	0.601438	2.67532	2.70491	1007.14	FALSE	17
2022-09-13	15:33:47	0.562506	2.50214	2.70491	1014.16	FALSE	17
2022-09-13	15:33:48	0.56271	2.50305	2.63898	1009.64	FALSE	17
2022-09-13	15:33:48	0.561692	2.49852	2.63898	1016.66	FALSE	17
2022-09-13	15:33:48	0.600572	2.67146	2.63898	1012.31	FALSE	17
2022-09-13	15:33:48	0.648104	2.8829	2.63898	1019.54	FALSE	17
2022-09-13	15:33:49	0.597417	2.65743	2.75243	1014.97	FALSE	17
2022-09-13	15:33:49	0.61701	2.74458	2.75243	1022.29	FALSE	17
2022-09-13	15:33:49	0.641896	2.85528	2.75243	1017.82	FALSE	17
2022-09-13	15:33:50	0.649529	2.88923	2.98844	1025.18	FALSE	17
2022-09-13	15:33:50	0.664593	2.95624	2.98844	1020.78	FALSE	17
2022-09-13	15:33:50	0.685153	3.0477	2.98844	1028.23	FALSE	17
2022-09-13	15:33:50	0.688053	3.0606	2.98844	1023.84	FALSE	17
2022-09-13	15:33:51	0.674008	2.99812	2.94504	1031.22	FALSE	17
2022-09-13	15:33:51	0.654109	2.90961	2.94504	1026.75	FALSE	17
2022-09-13	15:33:51	0.650344	2.89286	2.94504	1034.12	FALSE	17
2022-09-13	15:33:51	0.669834	2.97956	2.94504	1029.73	FALSE	17
2022-09-13	15:33:52	0.681845	3.03298	3.04956	1037.15	FALSE	17
2022-09-13	15:33:52	0.707697	3.14798	3.04956	1032.88	FALSE	17
2022-09-13	15:33:52	0.689478	3.06694	3.04956	1040.22	FALSE	17
2022-09-13	15:33:52	0.66327	2.95036	3.04956	1035.83	FALSE	17
2022-09-13	15:33:53	0.65131	2.89716	2.90123	1043.11	FALSE	17
2022-09-13	15:33:53	0.649835	2.8906	2.90123	1038.72	FALSE	17
2022-09-13	15:33:53	0.655534	2.91595	2.90123	1046.03	FALSE	17
2022-09-13	15:33:54	0.643779	2.86366	2.79478	1041.58	FALSE	17
2022-09-13	15:33:54	0.637977	2.83785	2.79478	1048.87	FALSE	17
2022-09-13	15:33:54	0.620267	2.75907	2.79478	1044.34	FALSE	17
2022-09-13	15:33:54	0.611158	2.71855	2.79478	1051.59	FALSE	17
2022-09-13	15:33:55	0.616858	2.74391	2.65443	1047.09	FALSE	17
2022-09-13	15:33:55	0.598639	2.66287	2.65443	1054.25	FALSE	17
2022-09-13	15:33:55	0.586018	2.60673	2.65443	1049.69	FALSE	17
2022-09-13	15:33:55	0.585458	2.60423	2.65443	1056.85	FALSE	17
2022-09-13	15:33:56	0.572939	2.54855	2.57503	1052.24	FALSE	17
2022-09-13	15:33:56	0.582812	2.59246	2.57503	1059.45	FALSE	17
2022-09-13	15:33:56	0.580216	2.58092	2.57503	1054.82	FALSE	17
2022-09-13	15:33:56	0.579606	2.5782	2.57503	1062.02	FALSE	17
2022-09-13	15:33:57	0.588868	2.6194	2.58748	1057.44	FALSE	17
2022-09-13	15:33:57	0.595941	2.65086	2.58748	1064.68	FALSE	17
2022-09-13	15:33:57	0.560267	2.49218	2.58748	1059.93	FALSE	17
2022-09-13	15:33:58	0.52388	2.33032	2.34674	1067.01	FALSE	17
2022-09-13	15:33:58	0.529325	2.35454	2.34674	1062.29	FALSE	17
2022-09-13	15:33:58	0.532023	2.36654	2.34674	1069.37	FALSE	17
2022-09-13	15:33:58	0.525051	2.33553	2.34674	1064.62	FALSE	17
2022-09-13	15:33:59	0.540776	2.40548	2.24866	1071.78	FALSE	17
2022-09-13	15:33:59	0.520929	2.3172	2.24866	1066.94	FALSE	17
2022-09-13	15:33:59	0.500827	2.22778	2.24866	1074.01	FALSE	17
2022-09-13	15:33:59	0.459555	2.04419	2.24866	1068.99	FALSE	17
2022-09-13	15:34:00	0.463219	2.06049	2.03853	1076.07	FALSE	17
2022-09-13	15:34:00	0.458639	2.04012	2.03853	1071.03	FALSE	17
2022-09-13	15:34:00	0.457367	2.03446	2.03853	1078.1	FALSE	17
2022-09-13	15:34:00	0.453906	2.01906	2.03853	1073.04	FALSE	17
2022-09-13	15:34:01	0.446832	1.9876	1.99597	1080.09	FALSE	17
2022-09-13	15:34:01	0.445967	1.98375	1.99597	1075.03	FALSE	17
2022-09-13	15:34:01	0.453346	2.01657	1.99597	1082.1	FALSE	17
2022-09-13	15:34:02	0.452379	2.01227	1.96162	1077.04	FALSE	17
2022-09-13	15:34:02	0.440471	1.9593	1.96162	1084.06	FALSE	17
2022-09-13	15:34:02	0.428104	1.90429	1.96162	1078.94	FALSE	17
2022-09-13	15:34:02	0.443015	1.97062	1.96162	1086.03	FALSE	17
2022-09-13	15:34:03	0.448308	1.99416	2.00446	1080.94	FALSE	17
2022-09-13	15:34:03	0.445102	1.9799	2.00446	1088.01	FALSE	17
2022-09-13	15:34:03	0.45355	2.01748	2.00446	1082.96	FALSE	17
2022-09-13	15:34:03	0.455534	2.02631	2.00446	1090.04	FALSE	17
2022-09-13	15:34:04	0.457926	2.03695	2.06524	1084.99	FALSE	17
2022-09-13	15:34:04	0.457621	2.03559	2.06524	1092.08	FALSE	17
2022-09-13	15:34:04	0.466018	2.07294	2.06524	1087.07	FALSE	17
2022-09-13	15:34:04	0.475585	2.1155	2.06524	1094.19	FALSE	17
2022-09-13	15:34:05	0.461743	2.05393	2.05528	1089.12	FALSE	17
2022-09-13	15:34:05	0.457977	2.03717	2.05528	1096.23	FALSE	17
2022-09-13	15:34:05	0.466425	2.07475	2.05528	1091.19	FALSE	17
2022-09-13	15:34:06	0.453906	2.01906	2.00027	1098.25	FALSE	17
2022-09-13	15:34:06	0.448206	1.99371	2.00027	1093.19	FALSE	17
2022-09-13	15:34:06	0.446679	1.98692	2.00027	1100.23	FALSE	17
2022-09-13	15:34:06	0.449936	2.00141	2.00027	1095.19	FALSE	17
2022-09-13	15:34:07	0.461896	2.05461	2.03242	1102.29	FALSE	17
2022-09-13	15:34:07	0.461285	2.05189	2.03242	1097.24	FALSE	17
2022-09-13	15:34:07	0.459657	2.04465	2.03242	1104.33	FALSE	17
2022-09-13	15:34:07	0.444796	1.97854	2.03242	1099.22	FALSE	17
2022-09-13	15:34:08	0.44159	1.96428	2.04255	1106.3	FALSE	17
2022-09-13	15:34:08	0.463626	2.0623	2.04255	1101.28	FALSE	17
2022-09-13	15:34:08	0.468257	2.0829	2.04255	1108.38	FALSE	17
2022-09-13	15:34:08	0.46327	2.06072	2.04255	1103.34	FALSE	17
2022-09-13	15:34:09	0.461438	2.05257	2.06924	1110.43	FALSE	17
2022-09-13	15:34:09	0.459097	2.04216	2.06924	1105.39	FALSE	17
2022-09-13	15:34:09	0.475026	2.11301	2.06924	1112.55	FALSE	17
2022-09-13	15:34:10	0.474517	2.11075	2.12472	1107.5	FALSE	17
2022-09-13	15:34:10	0.474924	2.11256	2.12472	1114.66	FALSE	17
2022-09-13	15:34:10	0.481539	2.14198	2.12472	1109.64	FALSE	17
2022-09-13	15:34:10	0.479657	2.13361	2.12472	1116.79	FALSE	17
2022-09-13	15:34:11	0.495636	2.20469	2.20322	1111.84	FALSE	17
2022-09-13	15:34:11	0.494516	2.19971	2.20322	1118.99	FALSE	17
2022-09-13	15:34:11	0.489936	2.17933	2.20322	1114.02	FALSE	17
2022-09-13	15:34:11	0.501132	2.22914	2.20322	1121.22	FALSE	17
2022-09-13	15:34:12	0.492277	2.18975	1.96926	1116.21	FALSE	17
2022-09-13	15:34:12	0.460115	2.04668	1.96926	1123.27	FALSE	17
2022-09-13	15:34:12	0.423931	1.88573	1.96926	1118.1	FALSE	17
2022-09-13	15:34:12	0.394517	1.75489	1.96926	1125.02	FALSE	17
2022-09-13	15:34:13	0.389326	1.7318	1.83895	1119.83	FALSE	17
2022-09-13	15:34:13	0.556654	2.47611	1.83895	1127.5	FALSE	17
2022-09-13	15:34:13	0.294262	1.30894	1.83895	1121.14	FALSE	17
2022-09-13	15:34:14	0.679758	3.0237	2.25777	1130.52	FALSE	17
2022-09-13	15:34:14	0.390954	1.73904	2.25777	1122.88	FALSE	17
2022-09-13	15:34:14	0.535891	2.38375	2.25777	1132.91	FALSE	17
2022-09-13	15:34:14	0.423677	1.8846	2.25777	1124.76	FALSE	17
2022-09-13	15:34:15	0.614822	2.73485	2.83315	1135.64	FALSE	17
2022-09-13	15:34:15	0.513804	2.2855	2.83315	1127.05	FALSE	17
2022-09-13	15:34:15	0.709478	3.1559	2.83315	1138.8	FALSE	17
2022-09-13	15:34:15	0.70958	3.15635	2.83315	1130.2	FALSE	17
2022-09-13	15:34:16	0.531819	2.36564	2.38839	1141.16	FALSE	17
2022-09-13	15:34:16	0.520674	2.31606	2.38839	1132.52	FALSE	17
2022-09-13	15:34:16	0.581336	2.5859	2.38839	1143.75	FALSE	17
2022-09-13	15:34:16	0.513906	2.28596	2.38839	1134.81	FALSE	17
2022-09-13	15:34:17	0.585407	2.60401	2.40812	1146.35	FALSE	17
2022-09-13	15:34:17	0.51299	2.28188	2.40812	1137.09	FALSE	17
2022-09-13	15:34:17	0.525712	2.33847	2.40812	1148.69	FALSE	17
2022-09-13	15:34:18	0.366222	1.62903	1.90192	1138.72	FALSE	17
2022-09-13	15:34:18	0.467545	2.07973	1.90192	1150.77	FALSE	17
2022-09-13	15:34:18	0.438537	1.9507	1.90192	1140.67	FALSE	17
2022-09-13	15:34:18	0.437977	1.94821	1.90192	1152.72	FALSE	17
2022-09-13	15:34:19	0.326679	1.45313	-0.38585	1142.12	FALSE	17
2022-09-13	15:34:19	0.200827	0.893319	-0.38585	1153.61	FALSE	17
2022-09-13	15:34:19	-0.254084	-1.13022	-0.38585	1142.12	FALSE	17
2022-09-13	15:34:19	-0.620394	-2.75964	-0.38585	1153.61	FALSE	17
2022-09-13	15:34:20	-0.788027	-3.5053	-3.32347	1142.12	FALSE	17
2022-09-13	15:34:20	-0.764668	-3.4014	-3.32347	1153.61	FALSE	17
2022-09-13	15:34:20	-0.704211	-3.13247	-3.32347	1142.12	FALSE	17
2022-09-13	15:34:20	-0.731691	-3.25471	-3.32347	1153.61	FALSE	17
2022-09-13	15:34:21	-0.780496	-3.4718	-3.54582	1142.12	FALSE	17
2022-09-13	15:34:21	-0.782989	-3.48289	-3.54582	1153.61	FALSE	17
2022-09-13	15:34:21	-0.827925	-3.68278	-3.54582	1142.12	FALSE	17
2022-09-13	15:34:22	-0.884363	-3.93382	-1.68686	1153.61	FALSE	17
2022-09-13	15:34:22	-0.510012	-2.26864	-1.68686	1142.12	FALSE	17
2022-09-13	15:34:22	-0.049758	-0.221334	-1.68686	1153.61	FALSE	17
2022-09-13	15:34:22	-0.0727606	-0.323654	-1.68686	1142.12	FALSE	17
2022-09-13	15:34:23	0.161489	0.718335	0.853704	1154.33	FALSE	17
2022-09-13	15:34:23	0.107341	0.477474	0.853704	1142.6	FALSE	17
2022-09-13	15:34:23	0.280623	1.24827	0.853704	1155.58	FALSE	17
2022-09-13	15:34:23	0.218232	0.97074	0.853704	1143.57	FALSE	17
2022-09-13	15:34:24	0.277468	1.23423	1.14021	1156.81	FALSE	17
2022-09-13	15:34:24	0.267952	1.1919	1.14021	1144.76	FALSE	17
2022-09-13	15:34:24	0.223575	0.994506	1.14021	1157.81	FALSE	17
2022-09-13	15:34:25	0.278333	1.23808	1.03367	1146	FALSE	17
2022-09-13	15:34:25	0.18098	0.805035	1.03367	1158.61	FALSE	17
2022-09-13	15:34:25	0.395942	1.76123	1.03367	1147.76	FALSE	17
2022-09-13	15:34:25	0.0742623	0.330334	1.03367	1158.94	FALSE	17
2022-09-13	15:34:26	0.0623539	0.277363	0.601979	1148.04	FALSE	17
2022-09-13	15:34:26	0.142914	0.63571	0.601979	1159.58	FALSE	17
2022-09-13	15:34:26	0.154517	0.687323	0.601979	1148.72	FALSE	17
2022-09-13	15:34:26	0.181539	0.807522	0.601979	1160.39	FALSE	17
2022-09-13	15:34:27	0.0342114	0.152179	-0.801977	1148.88	FALSE	17
2022-09-13	15:34:27	-0.121412	-0.540065	-0.801977	1160.39	FALSE	17
2022-09-13	15:34:27	-0.138155	-0.614541	-0.801977	1148.88	FALSE	17
2022-09-13	15:34:27	-0.495814	-2.20548	-0.801977	1160.39	FALSE	17
2022-09-13	15:34:28	-0.735101	-3.26988	-3.28465	1148.88	FALSE	17
2022-09-13	15:34:28	-0.800394	-3.56031	-3.28465	1160.39	FALSE	17
2022-09-13	15:34:28	-0.76533	-3.40434	-3.28465	1148.88	FALSE	17
2022-09-13	15:34:28	-0.652862	-2.90406	-3.28465	1160.39	FALSE	17
2022-09-13	15:34:29	-0.801106	-3.56348	-3.65441	1148.88	FALSE	17
2022-09-13	15:34:29	-0.754541	-3.35635	-3.65441	1160.39	FALSE	17
2022-09-13	15:34:29	-0.908994	-4.04339	-3.65441	1148.88	FALSE	17
2022-09-13	15:34:30	-0.843854	-3.75363	-2.75969	1160.39	FALSE	17
2022-09-13	15:34:30	-0.790318	-3.51549	-2.75969	1148.88	FALSE	17
2022-09-13	15:34:30	-0.550318	-2.44792	-2.75969	1160.39	FALSE	17
2022-09-13	15:34:30	-0.297137	-1.32172	-2.75969	1148.88	FALSE	17
2022-09-13	15:34:31	0.33757	1.50158	3.0593	1161.89	FALSE	17
2022-09-13	15:34:31	0.999148	4.44441	3.0593	1153.32	FALSE	17
2022-09-13	15:34:31	1.11772	4.97184	3.0593	1166.86	FALSE	17
2022-09-13	15:34:31	0.296603	1.31935	3.0593	1154.64	FALSE	17
2022-09-13	15:34:32	0.231667	1.0305	0.914881	1167.89	FALSE	17
2022-09-13	15:34:32	0.139962	0.622579	0.914881	1155.26	FALSE	17
2022-09-13	15:34:32	0.200369	0.891281	0.914881	1168.78	FALSE	17
2022-09-13	15:34:32	0.2507	1.11516	0.914881	1156.38	FALSE	17
2022-09-13	15:34:33	0.272837	1.21363	1.07276	1170	FALSE	17
2022-09-13	15:34:33	0.189173	0.841479	1.07276	1157.22	FALSE	17
2022-09-13	15:34:33	0.261489	1.16316	1.07276	1171.16	FALSE	17
2022-09-13	15:34:34	0.272226	1.21092	1.17158	1158.43	FALSE	17
2022-09-13	15:34:34	0.274567	1.22133	1.17158	1172.38	FALSE	17
2022-09-13	15:34:34	0.266832	1.18692	1.17158	1159.62	FALSE	17
2022-09-13	15:34:34	0.239911	1.06717	1.17158	1173.45	FALSE	17
2022-09-13	15:34:35	0.284033	1.26344	1.70226	1160.88	FALSE	17
2022-09-13	15:34:35	0.399097	1.77526	1.70226	1175.22	FALSE	17
2022-09-13	15:34:35	0.441692	1.96473	1.70226	1162.85	FALSE	17
2022-09-13	15:34:35	0.405916	1.8056	1.70226	1177.03	FALSE	17
2022-09-13	15:34:36	0.430751	1.91607	3.00735	1164.76	FALSE	17
2022-09-13	15:34:36	0.501946	2.23276	3.00735	1179.26	FALSE	17
2022-09-13	15:34:36	0.674822	3.00174	3.00735	1167.76	FALSE	17
2022-09-13	15:34:36	1.09681	4.87883	3.00735	1184.14	FALSE	17
2022-09-13	15:34:37	1.77004	7.87349	7.45787	1175.64	FALSE	17
2022-09-13	15:34:37	1.71564	7.63151	7.45787	1191.77	FALSE	17
2022-09-13	15:34:37	1.54413	6.8686	7.45787	1182.51	FALSE	17
2022-09-13	15:34:38	1.57716	7.01552	13.9907	1198.79	FALSE	17
2022-09-13	15:34:38	3.15487	14.0335	13.9907	1196.54	1	18
2022-09-13	15:34:38	5.63014	25.044	13.9907	1223.83	1	19
2022-09-13	15:34:38	2.21884	9.86984	13.9907	1206.41	FALSE	19
2022-09-13	15:34:39	0.883728	3.931	5.41175	1227.76	FALSE	19
2022-09-13	15:34:39	1.40897	6.26738	5.41175	1212.68	FALSE	19
2022-09-13	15:34:39	2.25971	10.0516	5.41175	1237.81	FALSE	19
2022-09-13	15:34:39	0.314059	1.397	5.41175	1214.07	FALSE	19
2022-09-13	15:34:40	0.333906	1.48528	1.39722	1239.3	FALSE	19
2022-09-13	15:34:40	0.39187	1.74312	1.39722	1215.82	FALSE	19
2022-09-13	15:34:40	0.25528	1.13554	1.39722	1240.43	FALSE	19
2022-09-13	15:34:40	0.275382	1.22495	1.39722	1217.04	FALSE	19
2022-09-13	15:34:41	0.334211	1.48664	1.62699	1241.92	FALSE	19
2022-09-13	15:34:41	0.468155	2.08245	1.62699	1219.12	FALSE	19
2022-09-13	15:34:41	0.294924	1.31188	1.62699	1243.23	FALSE	19
2022-09-13	15:34:42	0.525814	2.33893	1.40339	1221.46	FALSE	19
2022-09-13	15:34:42	0.259911	1.15614	1.40339	1244.39	FALSE	19
2022-09-13	15:34:42	0.230089	1.02348	1.40339	1222.49	FALSE	19
2022-09-13	15:34:42	0.246171	1.09502	1.40339	1245.48	FALSE	19
2022-09-13	15:34:43	0.256603	1.14142	1.21035	1223.63	FALSE	19
2022-09-13	15:34:43	0.28897	1.2854	1.21035	1246.77	FALSE	19
2022-09-13	15:34:43	0.240115	1.06808	1.21035	1224.7	FALSE	19
2022-09-13	15:34:43	0.30271	1.34651	1.21035	1248.12	FALSE	19
2022-09-13	15:34:44	0.353753	1.57356	1.68624	1226.27	FALSE	19
2022-09-13	15:34:44	0.420318	1.86966	1.68624	1249.99	FALSE	19
2022-09-13	15:34:44	0.366934	1.6322	1.68624	1227.9	FALSE	19
2022-09-13	15:34:44	0.375331	1.66955	1.68624	1251.65	FALSE	19
2022-09-13	15:34:45	0.644084	2.86501	10.1469	1230.77	FALSE	19
2022-09-13	15:34:45	2.98892	13.2953	10.1469	1264.95	FALSE	19
2022-09-13	15:34:45	3.21034	14.2802	10.1469	1245.05	1	20
2022-09-13	15:34:46	5.4482	24.2347	13.5196	1289.18	1	21
2022-09-13	15:34:46	3.60174	16.0213	13.5196	1261.07	1	22
2022-09-13	15:34:46	2.02083	8.98906	13.5196	1298.17	FALSE	22
2022-09-13	15:34:46	1.08658	4.83333	13.5196	1265.9	FALSE	22
2022-09-13	15:34:47	2.28459	10.1623	3.22675	1308.34	FALSE	22
2022-09-13	15:34:47	0.260623	1.1593	3.22675	1267.06	FALSE	22
2022-09-13	15:34:47	0.0137534	0.0611779	3.22675	1308.4	FALSE	22
2022-09-13	15:34:47	0.342659	1.52422	3.22675	1268.59	FALSE	22
2022-09-13	15:34:48	0.296043	1.31686	5.63608	1309.71	FALSE	22
2022-09-13	15:34:48	1.82749	8.12904	5.63608	1276.71	FALSE	22
2022-09-13	15:34:48	1.03869	4.6203	5.63608	1314.33	FALSE	22
2022-09-13	15:34:48	1.90597	8.47814	5.63608	1285.19	FALSE	22
2022-09-13	15:34:49	0.858537	3.81894	2.98197	1318.15	FALSE	22
2022-09-13	15:34:49	0.772735	3.43728	2.98197	1288.63	FALSE	22
2022-09-13	15:34:49	0.37986	1.68969	2.98197	1319.84	FALSE	22
2022-09-13	15:34:50	0.479097	2.13112	1.94951	1290.76	FALSE	22
2022-09-13	15:34:50	0.340725	1.51561	1.94951	1321.36	FALSE	22
2022-09-13	15:34:50	0.516349	2.29682	1.94951	1293.06	FALSE	22
2022-09-13	15:34:50	0.416909	1.85449	1.94951	1323.21	FALSE	22
2022-09-13	15:34:51	1.05141	4.67688	3.19444	1297.73	FALSE	22
2022-09-13	15:34:51	0.851412	3.78725	3.19444	1327	FALSE	22
2022-09-13	15:34:51	0.487799	2.16983	3.19444	1299.9	FALSE	22
2022-09-13	15:34:51	0.481947	2.1438	3.19444	1329.14	FALSE	22
2022-09-13	15:34:52	0.359249	1.59801	1.54465	1301.5	FALSE	22
2022-09-13	15:34:52	0.531667	2.36496	1.54465	1331.51	FALSE	22
2022-09-13	15:34:52	0.396501	1.76372	1.54465	1303.27	FALSE	22
2022-09-13	15:34:52	0.101591	0.451897	1.54465	1331.96	FALSE	22
2022-09-13	15:34:53	0.152481	0.678266	0.774248	1303.94	FALSE	22
2022-09-13	15:34:53	0.143881	0.640011	0.774248	1332.6	FALSE	22
2022-09-13	15:34:53	0.225814	1.00447	0.774248	1304.95	FALSE	22
2022-09-13	15:34:54	0.244898	1.08936	2.93338	1333.69	FALSE	22
2022-09-13	15:34:54	0.280776	1.24895	2.93338	1306.2	FALSE	22
2022-09-13	15:34:54	0.581489	2.58658	2.93338	1336.28	FALSE	22
2022-09-13	15:34:54	1.53065	6.80864	2.93338	1313.01	FALSE	22
2022-09-13	15:34:55	1.47263	6.55055	4.07649	1342.83	FALSE	22
2022-09-13	15:34:55	1.16734	5.19256	4.07649	1318.2	FALSE	22
2022-09-13	15:34:55	0.591412	2.63072	4.07649	1345.46	FALSE	22
2022-09-13	15:34:55	0.434364	1.93214	4.07649	1320.13	FALSE	22
2022-09-13	15:34:56	0.401387	1.78545	1.91799	1347.24	FALSE	22
2022-09-13	15:34:56	0.431005	1.9172	1.91799	1322.05	FALSE	22
2022-09-13	15:34:56	0.417977	1.85925	1.91799	1349.1	FALSE	22
2022-09-13	15:34:56	0.474364	2.11007	1.91799	1324.16	FALSE	22
2022-09-13	15:34:57	0.887595	3.9482	3.48753	1353.05	FALSE	22
2022-09-13	15:34:57	1.09253	4.85979	3.48753	1329.02	FALSE	22
2022-09-13	15:34:57	0.558944	2.48629	3.48753	1355.54	FALSE	22
2022-09-13	15:34:57	0.597061	2.65585	3.48753	1331.67	FALSE	22
2022-09-13	15:34:58	1.16775	5.19439	3.17862	1360.73	FALSE	22
2022-09-13	15:34:58	0.675382	3.00423	3.17862	1334.68	FALSE	22
2022-09-13	15:34:58	0.300624	1.33724	3.17862	1362.07	FALSE	22
2022-09-13	15:34:59	0.244135	1.08596	-0.365871	1335.76	FALSE	22
2022-09-13	15:34:59	0.068359	0.304075	-0.365871	1362.37	FALSE	22
2022-09-13	15:34:59	-0.234185	-1.0417	-0.365871	1335.76	FALSE	22
2022-09-13	15:34:59	-0.407315	-1.81182	-0.365871	1362.37	FALSE	22
2022-09-13	15:35:00	-0.587468	-2.61318	-2.83049	1335.76	FALSE	22
2022-09-13	15:35:00	-0.600343	-2.67045	-2.83049	1362.37	FALSE	22
2022-09-13	15:35:00	-0.647213	-2.87893	-2.83049	1335.76	FALSE	22
2022-09-13	15:35:00	-0.710266	-3.15941	-2.83049	1362.37	FALSE	22
2022-09-13	15:35:01	-0.344567	-1.5327	-0.711824	1335.76	FALSE	22
2022-09-13	15:35:01	-0.187875	-0.835706	-0.711824	1362.37	FALSE	22
2022-09-13	15:35:01	-0.0634476	-0.282228	-0.711824	1335.76	FALSE	22
2022-09-13	15:35:01	-0.0442109	-0.196659	-0.711824	1362.37	FALSE	22
2022-09-13	15:35:02	-0.36874	-1.64023	6.41316	1335.76	FALSE	22
2022-09-13	15:35:02	0.71416	3.17673	6.41316	1365.55	FALSE	22
2022-09-13	15:35:02	3.97981	17.703	6.41316	1353.47	1	23
2022-09-13	15:35:03	2.85848	12.7151	7.6543	1378.27	FALSE	23
2022-09-13	15:35:03	1.23742	5.50429	7.6543	1358.97	FALSE	23
2022-09-13	15:35:03	1.6449	7.31684	7.6543	1385.58	FALSE	23
2022-09-13	15:35:03	1.14225	5.08096	7.6543	1364.05	FALSE	23
2022-09-13	15:35:04	1.47192	6.54739	3.62047	1392.13	FALSE	23
2022-09-13	15:35:04	0.632888	2.81521	3.62047	1366.87	FALSE	23
2022-09-13	15:35:04	0.488766	2.17413	3.62047	1394.3	FALSE	23
2022-09-13	15:35:04	0.662099	2.94515	3.62047	1369.81	FALSE	23
2022-09-13	15:35:05	1.33324	5.93052	9.61371	1400.23	FALSE	23
2022-09-13	15:35:05	1.68373	7.48957	9.61371	1377.3	FALSE	23
2022-09-13	15:35:05	1.66561	7.40897	9.61371	1407.64	FALSE	23
2022-09-13	15:35:05	3.96245	17.6258	9.61371	1394.93	1	24
2022-09-13	15:35:06	5.86133	26.0724	23.9865	1433.72	1	25
2022-09-13	15:35:06	6.73543	29.9605	23.9865	1424.89	1	26
2022-09-13	15:35:06	3.58047	15.9266	23.9865	1449.64	1	27
2022-09-13	15:35:07	2.60586	11.5914	11.4877	1436.48	FALSE	27
2022-09-13	15:35:07	3.02917	13.4744	11.4877	1463.12	1	28
2022-09-13	15:35:07	3.84261	17.0927	11.4877	1453.57	1	29
2022-09-13	15:35:07	0.852583	3.79246	11.4877	1466.91	FALSE	29
2022-09-13	15:35:08	0.475636	2.11572	2.70044	1455.69	FALSE	29
2022-09-13	15:35:08	0.613193	2.72761	2.70044	1469.64	FALSE	29
2022-09-13	15:35:08	0.54785	2.43695	2.70044	1458.13	FALSE	29
2022-09-13	15:35:08	0.791667	3.52149	2.70044	1473.16	FALSE	29
2022-09-13	15:35:09	0.604084	2.68709	2.8516	1460.81	FALSE	29
2022-09-13	15:35:09	0.533346	2.37243	2.8516	1475.53	FALSE	29
2022-09-13	15:35:09	0.628155	2.79416	2.8516	1463.61	FALSE	29
2022-09-13	15:35:09	0.79869	3.55273	2.8516	1479.08	FALSE	29
2022-09-13	15:35:10	4.22973	18.8147	21.5776	1482.42	1	30
2022-09-13	15:35:10	4.61686	20.5367	21.5776	1499.62	1	31
2022-09-13	15:35:10	5.70596	25.3813	21.5776	1507.8	1	32
2022-09-13	15:35:11	3.75365	16.697	11.4242	1516.32	1	33
2022-09-13	15:35:11	3.00495	13.3666	11.4242	1521.17	1	34
2022-09-13	15:35:11	1.88698	8.39366	11.4242	1524.71	FALSE	34
2022-09-13	15:35:11	1.62754	7.23962	11.4242	1528.41	FALSE	34
2022-09-13	15:35:12	1.7938	7.97918	6.34354	1532.69	FALSE	34
2022-09-13	15:35:12	1.10515	4.91593	6.34354	1533.32	FALSE	34
2022-09-13	15:35:12	1.3506	6.00774	6.34354	1538.7	FALSE	34
2022-09-13	15:35:12	1.45482	6.47133	6.34354	1539.8	FALSE	34
2022-09-13	15:35:13	3.41436	15.1878	23.1672	1553.89	1	35
2022-09-13	15:35:13	7.66815	34.1095	23.1672	1573.91	1	36
2022-09-13	15:35:13	6.73126	29.942	23.1672	1583.83	1	37
2022-09-13	15:35:13	3.0191	13.4296	23.1672	1587.34	1	38
2022-09-13	15:35:14	3.71004	16.503	15.9686	1600.33	1	39
2022-09-13	15:35:14	3.06052	13.6138	15.9686	1600.95	1	40
2022-09-13	15:35:14	3.99915	17.789	15.9686	1618.12	1	41
2022-09-13	15:35:15	4.72383	21.0125	11.5069	1621.96	1	42
2022-09-13	15:35:15	4.24561	18.8853	11.5069	1637	1	43
2022-09-13	15:35:15	0.870191	3.87078	11.5069	1625.83	FALSE	43
2022-09-13	15:35:15	0.507799	2.25879	11.5069	1639.26	FALSE	43
2022-09-13	15:35:16	0.418995	1.86377	1.67973	1627.7	FALSE	43
2022-09-13	15:35:16	0.395178	1.75783	1.67973	1641.02	FALSE	43
2022-09-13	15:35:16	0.425102	1.89094	1.67973	1629.59	FALSE	43
2022-09-13	15:35:16	0.271209	1.20639	1.67973	1642.23	FALSE	43
2022-09-13	15:35:17	0.151769	0.675099	0.135598	1630.26	FALSE	43
2022-09-13	15:35:17	0.144898	0.644535	0.135598	1642.87	FALSE	43
2022-09-13	15:35:17	-0.032557	-0.14482	0.135598	1630.26	FALSE	43
2022-09-13	15:35:17	-0.142175	-0.632423	0.135598	1642.87	FALSE	43
2022-09-13	15:35:18	-0.325788	-1.44917	-0.996354	1630.26	FALSE	43
2022-09-13	15:35:18	-0.235509	-1.04759	-0.996354	1642.87	FALSE	43
2022-09-13	15:35:18	-0.110674	-0.4923	-0.996354	1630.26	FALSE	43
2022-09-13	15:35:19	-0.249605	-1.11029	1.01567	1642.87	FALSE	43
2022-09-13	15:35:19	0.0573666	0.255178	1.01567	1630.52	FALSE	43
2022-09-13	15:35:19	0.507545	2.25766	1.01567	1645.13	FALSE	43
2022-09-13	15:35:19	0.598028	2.66015	1.01567	1633.18	FALSE	43
2022-09-13	15:35:20	1.37879	6.13313	6.55595	1651.26	FALSE	43
2022-09-13	15:35:20	1.74475	7.761	6.55595	1640.94	FALSE	43
2022-09-13	15:35:20	1.67981	7.47213	6.55595	1658.74	FALSE	43
2022-09-13	15:35:20	1.09202	4.85752	6.55595	1645.8	FALSE	43
2022-09-13	15:35:21	0.52897	2.35296	1.84414	1661.09	FALSE	43
2022-09-13	15:35:21	0.504644	2.24476	1.84414	1648.04	FALSE	43
2022-09-13	15:35:21	0.279504	1.24329	1.84414	1662.33	FALSE	43
2022-09-13	15:35:21	0.345204	1.53554	1.84414	1649.58	FALSE	43
2022-09-13	15:35:22	0.393957	1.7524	1.57689	1664.08	FALSE	43
2022-09-13	15:35:22	0.368104	1.6374	1.57689	1651.21	FALSE	43
2022-09-13	15:35:22	0.301438	1.34086	1.57689	1665.42	FALSE	43
2022-09-13	15:35:23	0.265763	1.18217	1.63599	1652.4	FALSE	43
2022-09-13	15:35:23	0.477112	2.12229	1.63599	1667.55	FALSE	43
2022-09-13	15:35:23	0.423321	1.88302	1.63599	1654.28	FALSE	43
2022-09-13	15:35:23	0.304949	1.35647	1.63599	1668.9	FALSE	43
2022-09-13	15:35:24	0.476043	2.11753	2.83038	1656.4	FALSE	43
2022-09-13	15:35:24	0.484847	2.1567	2.83038	1671.06	FALSE	43
2022-09-13	15:35:24	0.671718	2.98794	2.83038	1659.38	FALSE	43
2022-09-13	15:35:24	0.912583	4.05935	2.83038	1675.12	FALSE	43
2022-09-13	15:35:25	0.729784	3.24623	5.089	1662.63	FALSE	43
2022-09-13	15:35:25	0.972837	4.32737	5.089	1679.45	FALSE	43
2022-09-13	15:35:25	1.21492	5.40421	5.089	1668.03	FALSE	43
2022-09-13	15:35:25	1.65869	7.37818	5.089	1686.82	FALSE	43
2022-09-13	15:35:26	1.34291	5.97353	3.83131	1674.01	FALSE	43
2022-09-13	15:35:26	0.741896	3.3001	3.83131	1690.13	FALSE	43
2022-09-13	15:35:26	0.499148	2.22031	3.83131	1676.23	FALSE	43
2022-09-13	15:35:27	0.531819	2.36564	2.83242	1692.49	FALSE	43
2022-09-13	15:35:27	0.512379	2.27916	2.83242	1678.51	FALSE	43
2022-09-13	15:35:27	0.718028	3.19393	2.83242	1695.68	FALSE	43
2022-09-13	15:35:27	0.784796	3.49093	2.83242	1682	FALSE	43
2022-09-13	15:35:28	0.622354	2.76836	2.32885	1698.45	FALSE	43
2022-09-13	15:35:28	0.54897	2.44193	2.32885	1684.44	FALSE	43
2022-09-13	15:35:28	0.495585	2.20446	2.32885	1700.66	FALSE	43
2022-09-13	15:35:28	0.42729	1.90067	2.32885	1686.34	FALSE	43
2022-09-13	15:35:29	0.450903	2.00571	2.01182	1702.66	FALSE	43
2022-09-13	15:35:29	0.458435	2.03921	2.01182	1688.38	FALSE	43
2022-09-13	15:35:29	0.452176	2.01137	2.01182	1704.67	FALSE	43
2022-09-13	15:35:29	0.447596	1.991	2.01182	1690.37	FALSE	43
2022-09-13	15:35:30	0.424593	1.88867	1.87004	1706.56	FALSE	43
2022-09-13	15:35:30	0.425407	1.8923	1.87004	1692.26	FALSE	43
2022-09-13	15:35:30	0.411209	1.82914	1.87004	1708.39	FALSE	43
2022-09-13	15:35:31	0.413804	1.84068	1.89852	1694.1	FALSE	43
2022-09-13	15:35:31	0.430903	1.91674	1.89852	1710.31	FALSE	43
2022-09-13	15:35:31	0.431005	1.9172	1.89852	1696.02	FALSE	43
2022-09-13	15:35:31	0.431514	1.91946	1.89852	1712.23	FALSE	43
2022-09-13	15:35:32	0.426476	1.89705	1.88166	1697.92	FALSE	43
2022-09-13	15:35:32	0.427036	1.89954	1.88166	1714.13	FALSE	43
2022-09-13	15:35:32	0.427697	1.90248	1.88166	1699.82	FALSE	43
2022-09-13	15:35:32	0.410852	1.82755	1.88166	1715.96	FALSE	43
2022-09-13	15:35:33	0.398893	1.77436	1.84838	1701.6	FALSE	43
2022-09-13	15:35:33	0.416909	1.85449	1.84838	1717.81	FALSE	43
2022-09-13	15:35:33	0.416043	1.85064	1.84838	1703.45	FALSE	43
2022-09-13	15:35:33	0.430293	1.91403	1.84838	1719.72	FALSE	43
2022-09-13	15:35:34	0.427799	1.90294	1.96391	1705.35	FALSE	43
2022-09-13	15:35:34	0.454517	2.02178	1.96391	1721.75	FALSE	43
2022-09-13	15:35:34	0.442201	1.967	1.96391	1707.32	FALSE	43
2022-09-13	15:35:35	0.480623	2.13791	3.31465	1723.88	FALSE	43
2022-09-13	15:35:35	0.532226	2.36745	3.31465	1709.68	FALSE	43
2022-09-13	15:35:35	0.788766	3.50859	3.31465	1727.39	FALSE	43
2022-09-13	15:35:35	1.17905	5.24465	3.31465	1714.93	FALSE	43
2022-09-13	15:35:36	1.88357	8.3785	11.3644	1735.77	FALSE	43
2022-09-13	15:35:36	2.0567	9.14861	11.3644	1724.08	FALSE	43
2022-09-13	15:35:36	2.94149	13.0843	11.3644	1748.86	FALSE	43
2022-09-13	15:35:36	3.33752	14.846	11.3644	1738.92	1	44
2022-09-13	15:35:37	2.56846	11.425	7.67937	1760.28	FALSE	44
2022-09-13	15:35:37	1.71584	7.6324	7.67937	1746.56	FALSE	44
2022-09-13	15:35:37	1.17075	5.20773	7.67937	1765.49	FALSE	44
2022-09-13	15:35:37	1.45055	6.45234	7.67937	1753.01	FALSE	44
2022-09-13	15:35:38	1.4679	6.52951	5.77412	1772.02	FALSE	44
2022-09-13	15:35:38	1.3849	6.16031	5.77412	1759.17	FALSE	44
2022-09-13	15:35:38	1.04144	4.63253	5.77412	1776.65	FALSE	44
2022-09-13	15:35:39	0.836043	3.71889	3.63722	1762.89	FALSE	44
2022-09-13	15:35:39	0.831209	3.69738	3.63722	1780.35	FALSE	44
2022-09-13	15:35:39	0.778079	3.46105	3.63722	1766.35	FALSE	44
2022-09-13	15:35:39	0.825407	3.67158	3.63722	1784.02	FALSE	44
2022-09-13	15:35:40	0.881387	3.92059	3.92064	1770.27	FALSE	44
2022-09-13	15:35:40	0.968359	4.30745	3.92064	1788.33	FALSE	44
2022-09-13	15:35:40	0.88042	3.91628	3.92064	1774.18	FALSE	44
2022-09-13	15:35:40	0.795433	3.53825	3.92064	1791.86	FALSE	44
2022-09-13	15:35:41	0.770903	3.42913	3.28261	1777.61	FALSE	44
2022-09-13	15:35:41	0.753346	3.35103	3.28261	1795.22	FALSE	44
2022-09-13	15:35:41	0.726374	3.23106	3.28261	1780.84	FALSE	44
2022-09-13	15:35:41	0.701234	3.11923	3.28261	1798.33	FALSE	44
2022-09-13	15:35:42	0.71187	3.16654	3.08542	1784.01	FALSE	44
2022-09-13	15:35:42	0.707239	3.14594	3.08542	1801.48	FALSE	44
2022-09-13	15:35:42	0.661794	2.94379	3.08542	1786.96	FALSE	44
2022-09-13	15:35:43	0.572786	2.54787	2.17085	1804.03	FALSE	44
2022-09-13	15:35:43	0.507443	2.25721	2.17085	1789.21	FALSE	44
2022-09-13	15:35:43	0.413193	1.83797	2.17085	1805.87	FALSE	44
2022-09-13	15:35:43	0.45869	2.04034	2.17085	1791.25	FALSE	44
2022-09-13	15:35:44	0.407697	1.81352	1.78443	1807.68	FALSE	44
2022-09-13	15:35:44	0.441896	1.96564	1.78443	1793.22	FALSE	44
2022-09-13	15:35:44	0.352074	1.5661	1.78443	1809.25	FALSE	44
2022-09-13	15:35:44	0.402964	1.79246	1.78443	1795.01	FALSE	44
2022-09-13	15:35:45	0.490191	2.18047	3.15845	1811.43	FALSE	44
2022-09-13	15:35:45	0.668766	2.9748	3.15845	1797.99	FALSE	44
2022-09-13	15:35:45	0.747799	3.32636	3.15845	1814.75	FALSE	44
2022-09-13	15:35:45	0.933448	4.15216	3.15845	1802.14	FALSE	44
2022-09-13	15:35:46	0.887239	3.94662	3.22977	1818.7	FALSE	44
2022-09-13	15:35:46	0.688206	3.06128	3.22977	1805.2	FALSE	44
2022-09-13	15:35:46	0.602812	2.68143	3.22977	1821.38	FALSE	44
2022-09-13	15:35:47	0.536909	2.38828	2.28607	1807.59	FALSE	44
2022-09-13	15:35:47	0.513855	2.28573	2.28607	1823.67	FALSE	44
2022-09-13	15:35:47	0.505458	2.24838	2.28607	1809.84	FALSE	44
2022-09-13	15:35:47	0.499504	2.22189	2.28607	1825.89	FALSE	44
2022-09-13	15:35:48	0.50215	2.23366	2.21301	1812.07	FALSE	44
2022-09-13	15:35:48	0.498842	2.21895	2.21301	1828.11	FALSE	44
2022-09-13	15:35:48	0.491667	2.18703	2.21301	1814.26	FALSE	44
2022-09-13	15:35:48	0.497367	2.21239	2.21301	1830.32	FALSE	44
2022-09-13	15:35:49	0.500063	2.22438	2.22902	1816.48	FALSE	44
2022-09-13	15:35:49	0.503371	2.23909	2.22902	1832.56	FALSE	44
2022-09-13	15:35:49	0.501336	2.23004	2.22902	1818.71	FALSE	44
2022-09-13	15:35:49	0.499656	2.22257	2.22902	1834.78	FALSE	44
2022-09-13	15:35:50	0.492837	2.19224	2.1939	1820.9	FALSE	44
2022-09-13	15:35:50	0.489733	2.17843	2.1939	1836.96	FALSE	44
2022-09-13	15:35:50	0.497061	2.21103	2.1939	1823.11	FALSE	44
2022-09-13	15:35:51	0.484949	2.15715	2.15817	1839.12	FALSE	44
2022-09-13	15:35:51	0.484339	2.15444	2.15817	1825.27	FALSE	44
2022-09-13	15:35:51	0.47757	2.12433	2.15817	1841.24	FALSE	44
2022-09-13	15:35:51	0.493855	2.19677	2.15817	1827.47	FALSE	44
2022-09-13	15:35:52	0.495178	2.20265	2.20073	1843.44	FALSE	44
2022-09-13	15:35:52	0.496399	2.20808	2.20073	1829.67	FALSE	44
2022-09-13	15:35:52	0.495687	2.20491	2.20073	1845.65	FALSE	44
2022-09-13	15:35:52	0.491718	2.18726	2.20073	1831.86	FALSE	44
2022-09-13	15:35:53	0.490038	2.17979	2.2061	1847.83	FALSE	44
2022-09-13	15:35:53	0.497723	2.21397	2.2061	1834.07	FALSE	44
2022-09-13	15:35:53	0.4993	2.22099	2.2061	1850.05	FALSE	44
2022-09-13	15:35:53	0.496756	2.20967	2.2061	1836.28	FALSE	44
2022-09-13	15:35:54	0.490903	2.18363	2.2437	1852.23	FALSE	44
2022-09-13	15:35:54	0.502099	2.23344	2.2437	1838.52	FALSE	44
2022-09-13	15:35:54	0.520216	2.31402	2.2437	1854.55	FALSE	44
2022-09-13	15:35:55	0.511667	2.276	2.28613	1840.79	FALSE	44
2022-09-13	15:35:55	0.507901	2.25925	2.28613	1856.81	FALSE	44
2022-09-13	15:35:55	0.511412	2.27486	2.28613	1843.07	FALSE	44
2022-09-13	15:35:55	0.524796	2.3344	2.28613	1859.14	FALSE	44
2022-09-13	15:35:56	0.50103	2.22868	2.1391	1845.3	FALSE	44
2022-09-13	15:35:56	0.485407	2.15919	2.1391	1861.3	FALSE	44
2022-09-13	15:35:56	0.467036	2.07747	2.1391	1847.37	FALSE	44
2022-09-13	15:35:56	0.470089	2.09105	2.1391	1863.39	FALSE	44
2022-09-13	15:35:57	0.476043	2.11753	2.11589	1849.49	FALSE	44
2022-09-13	15:35:57	0.477977	2.12614	2.11589	1865.52	FALSE	44
2022-09-13	15:35:57	0.468359	2.08335	2.11589	1851.58	FALSE	44
2022-09-13	15:35:57	0.480318	2.13655	2.11589	1867.65	FALSE	44
2022-09-13	15:35:58	0.48673	2.16507	2.21555	1853.74	FALSE	44
2022-09-13	15:35:58	0.482303	2.14538	2.21555	1869.8	FALSE	44
2022-09-13	15:35:58	0.525203	2.33621	2.21555	1856.08	FALSE	44
2022-09-13	15:35:59	0.531209	2.36292	2.11403	1872.16	FALSE	44
2022-09-13	15:35:59	0.512634	2.2803	2.11403	1858.36	FALSE	44
2022-09-13	15:35:59	0.473041	2.10418	2.11403	1874.27	FALSE	44
2022-09-13	15:35:59	0.384135	1.70871	2.11403	1860.07	FALSE	44
2022-09-13	15:36:00	0.370852	1.64962	1.78002	1875.92	FALSE	44
2022-09-13	15:36:00	0.382608	1.70192	1.78002	1861.77	FALSE	44
2022-09-13	15:36:00	0.378283	1.68268	1.78002	1877.6	FALSE	44
2022-09-13	15:36:00	0.468919	2.08585	1.78002	1863.85	FALSE	44
2022-09-13	15:36:01	0.551463	2.45302	5.38928	1880.05	FALSE	44
2022-09-13	15:36:01	0.845	3.75873	5.38928	1867.61	FALSE	44
2022-09-13	15:36:01	1.76291	7.84178	5.38928	1887.89	FALSE	44
2022-09-13	15:36:01	1.68688	7.50358	5.38928	1875.12	FALSE	44
2022-09-13	15:36:02	1.43645	6.38962	6.02765	1894.28	FALSE	44
2022-09-13	15:36:02	1.26322	5.61906	6.02765	1880.73	FALSE	44
2022-09-13	15:36:02	1.36556	6.07428	6.02765	1900.36	FALSE	44
2022-09-13	15:36:03	1.08159	4.81113	3.92709	1885.55	FALSE	44
2022-09-13	15:36:03	0.889122	3.95499	3.92709	1904.31	FALSE	44
2022-09-13	15:36:03	0.865	3.84769	3.92709	1889.39	FALSE	44
2022-09-13	15:36:03	0.695687	3.09455	3.92709	1907.41	FALSE	44
2022-09-13	15:36:04	0.531921	2.36609	2.21108	1891.76	FALSE	44
2022-09-13	15:36:04	0.564135	2.50939	2.21108	1909.92	FALSE	44
2022-09-13	15:36:04	0.482914	2.1481	2.21108	1893.91	FALSE	44
2022-09-13	15:36:04	0.409326	1.82076	2.21108	1911.74	FALSE	44
2022-09-13	15:36:05	0.431921	1.92127	1.88285	1895.83	FALSE	44
2022-09-13	15:36:05	0.41701	1.85494	1.88285	1913.59	FALSE	44
2022-09-13	15:36:05	0.41299	1.83706	1.88285	1897.67	FALSE	44
2022-09-13	15:36:05	0.431209	1.9181	1.88285	1915.51	FALSE	44
2022-09-13	15:36:06	0.433753	1.92942	1.93131	1899.6	FALSE	44
2022-09-13	15:36:06	0.431107	1.91765	1.93131	1917.43	FALSE	44
2022-09-13	15:36:06	0.437672	1.94685	1.93131	1901.54	FALSE	44
2022-09-13	15:36:07	0.444542	1.97741	1.97373	1919.41	FALSE	44
2022-09-13	15:36:07	0.438283	1.94957	1.97373	1903.49	FALSE	44
2022-09-13	15:36:07	0.453295	2.01635	1.97373	1921.42	FALSE	44
2022-09-13	15:36:07	0.43874	1.9516	1.97373	1905.44	FALSE	44
2022-09-13	15:36:08	0.429987	1.91267	1.91295	1923.33	FALSE	44
2022-09-13	15:36:08	0.417875	1.85879	1.91295	1907.3	FALSE	44
2022-09-13	15:36:08	0.435738	1.93825	1.91295	1925.27	FALSE	44
2022-09-13	15:36:08	0.436603	1.9421	1.91295	1909.24	FALSE	44
2022-09-13	15:36:09	0.398995	1.77481	1.92144	1927.05	FALSE	44
2022-09-13	15:36:09	0.473092	2.10441	1.92144	1911.35	FALSE	44
2022-09-13	15:36:09	0.405764	1.80492	1.92144	1928.85	FALSE	44
2022-09-13	15:36:09	0.449987	2.00163	1.92144	1913.35	FALSE	44
2022-09-13	15:36:10	0.377621	1.67973	1.67853	1930.53	FALSE	44
2022-09-13	15:36:10	0.389886	1.73429	1.67853	1915.09	FALSE	44
2022-09-13	15:36:10	0.364542	1.62156	1.67853	1932.15	FALSE	44
2022-09-13	15:36:11	0.430089	1.91312	2.05415	1917	FALSE	44
2022-09-13	15:36:11	0.436807	1.943	2.05415	1934.1	FALSE	44
2022-09-13	15:36:11	0.489936	2.17933	2.05415	1919.18	FALSE	44
2022-09-13	15:36:11	0.490344	2.18115	2.05415	1936.28	FALSE	44
2022-09-13	15:36:12	0.646527	2.87588	2.79473	1922.05	FALSE	44
2022-09-13	15:36:12	0.675941	3.00672	2.79473	1939.28	FALSE	44
2022-09-13	15:36:12	0.641845	2.85505	2.79473	1924.91	FALSE	44
2022-09-13	15:36:12	0.548817	2.44125	2.79473	1941.73	FALSE	44
2022-09-13	15:36:13	0.461438	2.05257	1.61873	1926.96	FALSE	44
2022-09-13	15:36:13	0.382863	1.70305	1.61873	1943.43	FALSE	44
2022-09-13	15:36:13	0.31131	1.38477	1.61873	1928.35	FALSE	44
2022-09-13	15:36:13	0.300013	1.33452	1.61873	1944.76	FALSE	44
2022-09-13	15:36:14	0.315738	1.40447	1.5009	1929.75	FALSE	44
2022-09-13	15:36:14	0.345916	1.5387	1.5009	1946.3	FALSE	44
2022-09-13	15:36:14	0.354415	1.57651	1.5009	1931.33	FALSE	44
2022-09-13	15:36:14	0.333601	1.48392	1.5009	1947.79	FALSE	44
2022-09-13	15:36:15	0.345102	1.53508	1.53878	1932.86	FALSE	44
2022-09-13	15:36:15	0.34612	1.53961	1.53878	1949.33	FALSE	44
2022-09-13	15:36:15	0.346578	1.54165	1.53878	1934.4	FALSE	44
2022-09-13	15:36:16	0.359606	1.5996	1.79931	1950.93	FALSE	44
2022-09-13	15:36:16	0.385611	1.71527	1.79931	1936.12	FALSE	44
2022-09-13	15:36:16	0.434008	1.93055	1.79931	1952.86	FALSE	44
2022-09-13	15:36:16	0.438791	1.95183	1.79931	1938.07	FALSE	44
2022-09-13	15:36:17	0.452735	2.01386	1.82687	1954.87	FALSE	44
2022-09-13	15:36:17	0.429631	1.91108	1.82687	1939.98	FALSE	44
2022-09-13	15:36:17	0.384644	1.71097	1.82687	1956.58	FALSE	44
2022-09-13	15:36:17	0.375789	1.67158	1.82687	1941.65	FALSE	44
2022-09-13	15:36:18	0.361031	1.60594	1.60147	1958.19	FALSE	44
2022-09-13	15:36:18	0.353753	1.57356	1.60147	1943.23	FALSE	44
2022-09-13	15:36:18	0.365814	1.62721	1.60147	1959.81	FALSE	44
2022-09-13	15:36:18	0.359504	1.59915	1.60147	1944.83	FALSE	44
2022-09-13	15:36:19	0.379504	1.68811	1.65619	1961.5	FALSE	44
2022-09-13	15:36:19	0.368868	1.6408	1.65619	1946.47	FALSE	44
2022-09-13	15:36:19	0.368613	1.63966	1.65619	1963.14	FALSE	44
2022-09-13	15:36:20	0.364695	1.62224	1.63106	1948.09	FALSE	44
2022-09-13	15:36:20	0.359199	1.59779	1.63106	1964.74	FALSE	44
2022-09-13	15:36:20	0.371056	1.65053	1.63106	1949.74	FALSE	44
2022-09-13	15:36:20	0.371768	1.6537	1.63106	1966.39	FALSE	44
2022-09-13	15:36:21	0.36098	1.60571	1.62048	1951.35	FALSE	44
2022-09-13	15:36:21	0.368562	1.63944	1.62048	1968.03	FALSE	44
2022-09-13	15:36:21	0.376349	1.67408	1.62048	1953.02	FALSE	44
2022-09-13	15:36:21	0.35131	1.5627	1.62048	1969.6	FALSE	44
2022-09-13	15:36:22	0.359657	1.59983	1.6404	1954.62	FALSE	44
2022-09-13	15:36:22	0.383117	1.70418	1.6404	1971.3	FALSE	44
2022-09-13	15:36:22	0.362965	1.61454	1.6404	1956.23	FALSE	44
2022-09-13	15:36:22	0.369377	1.64306	1.6404	1972.94	FALSE	44
2022-09-13	15:36:23	0.383779	1.70713	1.65974	1957.94	FALSE	44
2022-09-13	15:36:23	0.372685	1.65778	1.65974	1974.6	FALSE	44
2022-09-13	15:36:23	0.362913	1.61431	1.65974	1959.56	FALSE	44
2022-09-13	15:36:24	0.324847	1.44498	1.53333	1976.05	FALSE	44
2022-09-13	15:36:24	0.348359	1.54957	1.53333	1961.1	FALSE	44
2022-09-13	15:36:24	0.384542	1.71052	1.53333	1977.76	FALSE	44
2022-09-13	15:36:24	0.321082	1.42824	1.53333	1962.53	FALSE	44
2022-09-13	15:36:25	0.350903	1.56089	1.73763	1979.32	FALSE	44
2022-09-13	15:36:25	0.370191	1.64668	1.73763	1964.18	FALSE	44
2022-09-13	15:36:25	0.416451	1.85246	1.73763	1981.17	FALSE	44
2022-09-13	15:36:25	0.425	1.89048	1.73763	1966.07	FALSE	44
2022-09-13	15:36:26	0.39299	1.7481	1.80537	1982.92	FALSE	44
2022-09-13	15:36:26	0.38841	1.72773	1.80537	1967.8	FALSE	44
2022-09-13	15:36:26	0.423575	1.88415	1.80537	1984.8	FALSE	44
2022-09-13	15:36:26	0.418486	1.86151	1.80537	1969.66	FALSE	44
2022-09-13	15:36:27	0.276705	1.23084	1.17402	1986.03	FALSE	44
2022-09-13	15:36:27	0.228054	1.01443	1.17402	1970.67	FALSE	44
2022-09-13	15:36:27	0.287036	1.27679	1.17402	1987.31	FALSE	44
2022-09-13	15:36:28	0.189682	0.843743	0.767908	1971.52	FALSE	44
2022-09-13	15:36:28	0.145356	0.646573	0.767908	1987.96	FALSE	44
2022-09-13	15:36:28	0.248257	1.1043	0.767908	1972.62	FALSE	44
2022-09-13	15:36:28	0.107239	0.477021	0.767908	1988.43	FALSE	44
2022-09-13	15:36:29	0.232736	1.03526	1.49847	1973.66	FALSE	44
2022-09-13	15:36:29	0.276043	1.22789	1.49847	1989.66	FALSE	44
2022-09-13	15:36:29	0.325407	1.44748	1.49847	1975.1	FALSE	44
2022-09-13	15:36:29	0.513295	2.28324	1.49847	1991.94	FALSE	44
2022-09-13	15:36:30	0.51416	2.28709	4.03524	1977.39	FALSE	44
2022-09-13	15:36:30	1.22159	5.43388	4.03524	1997.38	FALSE	44
2022-09-13	15:36:30	0.648053	2.88267	4.03524	1980.27	FALSE	44
2022-09-13	15:36:30	1.24485	5.53734	4.03524	2002.92	FALSE	44
2022-09-13	15:36:31	1.8021	8.0161	4.47716	1988.29	FALSE	44
2022-09-13	15:36:31	0.719707	3.2014	4.47716	2006.12	FALSE	44
2022-09-13	15:36:31	0.497723	2.21397	4.47716	1990.5	FALSE	44
2022-09-13	15:36:32	0.598232	2.66106	2.64034	2008.78	FALSE	44
2022-09-13	15:36:32	0.405102	1.80197	2.64034	1992.31	FALSE	44
2022-09-13	15:36:32	0.611005	2.71787	2.64034	2011.5	FALSE	44
2022-09-13	15:36:32	0.759962	3.38046	2.64034	1995.69	FALSE	44
2022-09-13	15:36:33	1.00836	4.48539	6.79285	2015.98	FALSE	44
2022-09-13	15:36:33	1.58261	7.03977	6.79285	2002.73	FALSE	44
2022-09-13	15:36:33	1.60291	7.13006	6.79285	2023.11	FALSE	44
2022-09-13	15:36:33	1.91452	8.51617	6.79285	2011.24	FALSE	44
2022-09-13	15:36:34	2.81604	12.5263	16.4676	2035.64	FALSE	44
2022-09-13	15:36:34	2.89116	12.8605	16.4676	2024.1	FALSE	44
2022-09-13	15:36:34	3.79772	16.893	16.4676	2052.53	1	45
2022-09-13	15:36:34	5.30337	23.5905	16.4676	2047.69	1	46
2022-09-13	15:36:35	4.56922	20.3248	19.641	2072.85	1	47
2022-09-13	15:36:35	3.57874	15.919	19.641	2063.61	1	48
2022-09-13	15:36:35	5.09853	22.6793	19.641	2095.53	1	49
2022-09-13	15:36:36	7.23848	32.1982	19.2003	2095.81	1	50
2022-09-13	15:36:36	5.46093	24.2913	19.2003	2119.83	1	51
2022-09-13	15:36:36	2.768	12.3126	19.2003	2108.12	FALSE	51
2022-09-13	15:36:36	1.79828	7.99911	19.2003	2127.82	FALSE	51
2022-09-13	15:36:37	2.72734	12.1318	18.5188	2120.26	FALSE	51
2022-09-13	15:36:37	5.90169	26.2519	18.5188	2154.08	1	52
2022-09-13	15:36:37	5.67166	25.2287	18.5188	2145.48	1	53
2022-09-13	15:36:37	2.35218	10.463	18.5188	2164.54	FALSE	53
2022-09-13	15:36:38	1.13065	5.02936	11.8049	2150.51	FALSE	53
2022-09-13	15:36:38	1.87523	8.3414	11.8049	2172.88	FALSE	53
2022-09-13	15:36:38	3.47421	15.454	11.8049	2165.97	1	54
2022-09-13	15:36:38	4.13538	18.395	11.8049	2191.28	1	55
2022-09-13	15:36:39	3.53945	15.7442	7.34724	2181.71	1	56
2022-09-13	15:36:39	1.07889	4.79912	7.34724	2196.08	FALSE	56
2022-09-13	15:36:39	0.336858	1.49841	7.34724	2183.21	FALSE	56
2022-09-13	15:36:40	0.335535	1.49253	1.4215	2197.57	FALSE	56
2022-09-13	15:36:40	0.27014	1.20164	1.4215	2184.41	FALSE	56
2022-09-13	15:36:40	0.31701	1.41012	1.4215	2198.98	FALSE	56
2022-09-13	15:36:40	0.355585	1.58171	1.4215	2185.99	FALSE	56
2022-09-13	15:36:41	0.347646	1.5464	1.54227	2200.52	FALSE	56
2022-09-13	15:36:41	0.337316	1.50045	1.54227	2187.49	FALSE	56
2022-09-13	15:36:41	0.345051	1.53486	1.54227	2202.06	FALSE	56
2022-09-13	15:36:41	0.356858	1.58738	1.54227	2189.08	FALSE	56
2022-09-13	15:36:42	0.346221	1.54006	1.71833	2203.6	FALSE	56
2022-09-13	15:36:42	0.347341	1.54504	1.71833	2190.63	FALSE	56
2022-09-13	15:36:42	0.459046	2.04193	1.71833	2205.64	FALSE	56
2022-09-13	15:36:42	0.392583	1.74629	1.71833	2192.37	FALSE	56
2022-09-13	15:36:43	0.449936	2.00141	2.29531	2207.64	FALSE	56
2022-09-13	15:36:43	0.500572	2.22664	2.29531	2194.6	FALSE	56
2022-09-13	15:36:43	0.597519	2.65788	2.29531	2210.3	FALSE	56
2022-09-13	15:36:44	0.563779	2.5078	2.243	2197.11	FALSE	56
2022-09-13	15:36:44	0.494924	2.20152	2.243	2212.5	FALSE	56
2022-09-13	15:36:44	0.491107	2.18454	2.243	2199.29	FALSE	56
2022-09-13	15:36:44	0.467188	2.07815	2.243	2214.58	FALSE	56
2022-09-13	15:36:45	0.493092	2.19337	2.12619	2201.48	FALSE	56
2022-09-13	15:36:45	0.463117	2.06004	2.12619	2216.64	FALSE	56
2022-09-13	15:36:45	0.4736	2.10667	2.12619	2203.59	FALSE	56
2022-09-13	15:36:45	0.48215	2.1447	2.12619	2218.78	FALSE	56
2022-09-13	15:36:46	0.468512	2.08404	2.10526	2205.68	FALSE	56
2022-09-13	15:36:46	0.465967	2.07271	2.10526	2220.86	FALSE	56
2022-09-13	15:36:46	0.467188	2.07815	2.10526	2207.75	FALSE	56
2022-09-13	15:36:46	0.491463	2.18613	2.10526	2223.04	FALSE	56
2022-09-13	15:36:47	0.482252	2.14515	2.07234	2209.9	FALSE	56
2022-09-13	15:36:47	0.42958	1.91086	2.07234	2224.95	FALSE	56
2022-09-13	15:36:47	0.485814	2.161	2.07234	2212.06	FALSE	56
2022-09-13	15:36:48	1.86897	8.31355	3.97848	2233.27	FALSE	56
2022-09-13	15:36:48	0.558741	2.48539	3.97848	2214.54	FALSE	56
2022-09-13	15:36:48	0.515331	2.2923	3.97848	2235.56	FALSE	56
2022-09-13	15:36:48	0.634567	2.82268	3.97848	2217.37	FALSE	56
2022-09-13	15:36:49	0.530649	2.36043	4.63417	2237.92	FALSE	56
2022-09-13	15:36:49	1.08419	4.82269	4.63417	2222.19	FALSE	56
2022-09-13	15:36:49	0.952735	4.23796	4.63417	2242.16	FALSE	56
2022-09-13	15:36:49	1.59966	7.11561	4.63417	2229.31	FALSE	56
2022-09-13	15:36:50	2.19172	9.74921	6.99415	2251.91	FALSE	56
2022-09-13	15:36:50	1.73818	7.73177	6.99415	2237.04	FALSE	56
2022-09-13	15:36:50	1.42083	6.32014	6.99415	2258.23	FALSE	56
2022-09-13	15:36:50	0.93869	4.17548	6.99415	2241.21	FALSE	56
2022-09-13	15:36:51	1.13584	5.05244	14.2817	2263.28	FALSE	56
2022-09-13	15:36:51	4.54683	20.2252	14.2817	2261.44	1	57
2022-09-13	15:36:51	3.94932	17.5674	14.2817	2280.85	1	58

## Sheet: Unnamed_prong_2022913153136 (3)
Date	Time	Lbs	newtons	Total force x time	total steps > 13.345		**GoPro Fitting: 1521
2022-09-13	15:31:51	0.209478	0.9318	0.9318	FALSE	0
2022-09-13	15:31:51	0.319555	1.42144	1.42144	FALSE	0
2022-09-13	15:31:51	0.162048	0.720822	1.65262	FALSE	0
2022-09-13	15:31:52	1.33258	5.92758	7.34903	FALSE	0
2022-09-13	15:31:52	6.50978	28.9568	30.6094	1	1
2022-09-13	15:31:52	9.82026	43.6825	51.0315	1	2
2022-09-13	15:31:52	5.89395	26.2175	56.8269	1	3
2022-09-13	15:31:53	4.96378	22.0799	73.1114	1	4
2022-09-13	15:31:53	4.35823	19.3863	76.2132	1	5
2022-09-13	15:31:53	1.70383	7.57898	80.6904	FALSE	5
2022-09-13	15:31:53	1.37676	6.1241	82.3373	FALSE	5
2022-09-13	15:31:54	2.35314	10.4672	91.1576	FALSE	5
2022-09-13	15:31:54	3.19162	14.197	96.5342	1	6
2022-09-13	15:31:54	2.51335	11.1799	102.337	FALSE	6
2022-09-13	15:31:54	1.8849	8.38441	104.919	FALSE	6
2022-09-13	15:31:55	1.38449	6.15849	108.496	FALSE	6
2022-09-13	15:31:55	1.34429	5.97967	110.898	FALSE	6
2022-09-13	15:31:55	1.9734	8.77808	117.274	FALSE	6
2022-09-13	15:31:56	1.97431	8.78213	119.68	FALSE	6
2022-09-13	15:31:56	1.92449	8.56052	125.835	FALSE	6
2022-09-13	15:31:56	1.8052	8.02989	127.71	FALSE	6
2022-09-13	15:31:56	1.70134	7.5679	133.402	FALSE	6
2022-09-13	15:31:57	1.45304	6.46341	134.174	FALSE	6
2022-09-13	15:31:57	1.60454	7.13731	140.54	FALSE	6
2022-09-13	15:31:57	1.18917	5.28967	139.463	FALSE	6
2022-09-13	15:31:57	1.38368	6.15489	146.695	FALSE	6
2022-09-13	15:31:58	1.32795	5.90699	145.37	FALSE	6
2022-09-13	15:31:58	1.07411	4.77786	151.473	FALSE	6
2022-09-13	15:31:58	1.08276	4.81633	150.187	FALSE	6
2022-09-13	15:31:58	1.04927	4.66736	156.14	FALSE	6
2022-09-13	15:31:59	1.09274	4.86073	155.047	FALSE	6
2022-09-13	15:31:59	0.967545	4.30383	160.444	FALSE	6
2022-09-13	15:31:59	1.09065	4.85143	159.899	FALSE	6
2022-09-13	15:32:00	0.890191	3.95975	164.403	FALSE	6
2022-09-13	15:32:00	1.37309	6.10778	166.007	FALSE	6
2022-09-13	15:32:00	1.26128	5.61043	170.014	FALSE	6
2022-09-13	15:32:00	1.35543	6.02922	172.036	FALSE	6
2022-09-13	15:32:01	1.35574	6.0306	176.045	FALSE	6
2022-09-13	15:32:01	1.36144	6.05596	178.092	FALSE	6
2022-09-13	15:32:01	1.3453	5.98416	182.029	FALSE	6
2022-09-13	15:32:01	1.36134	6.05551	184.147	FALSE	6
2022-09-13	15:32:02	1.34586	5.98665	188.015	FALSE	6
2022-09-13	15:32:02	1.38515	6.16142	190.309	FALSE	6
2022-09-13	15:32:02	1.38408	6.15666	194.172	FALSE	6
2022-09-13	15:32:02	1.4224	6.32712	196.636	FALSE	6
2022-09-13	15:32:03	1.41156	6.2789	200.451	FALSE	6
2022-09-13	15:32:03	1.36006	6.04982	202.686	FALSE	6
2022-09-13	15:32:03	1.37141	6.10031	206.551	FALSE	6
2022-09-13	15:32:04	1.35289	6.01793	208.704	FALSE	6
2022-09-13	15:32:04	1.31905	5.8674	212.419	FALSE	6
2022-09-13	15:32:04	1.32118	5.87687	214.581	FALSE	6
2022-09-13	15:32:04	1.4052	6.25061	218.669	FALSE	6
2022-09-13	15:32:05	1.41284	6.28459	220.865	FALSE	6
2022-09-13	15:32:05	1.45182	6.45799	225.127	FALSE	6
2022-09-13	15:32:05	1.46556	6.5191	227.384	FALSE	6
2022-09-13	15:32:05	1.55431	6.91388	232.041	FALSE	6
2022-09-13	15:32:06	1.53172	6.8134	234.198	FALSE	6
2022-09-13	15:32:06	1.54083	6.85392	238.895	FALSE	6
2022-09-13	15:32:06	1.47548	6.56323	240.761	FALSE	6
2022-09-13	15:32:07	1.39665	6.21258	245.108	FALSE	6
2022-09-13	15:32:07	1.38576	6.16414	246.925	FALSE	6
2022-09-13	15:32:07	1.35426	6.02402	251.132	FALSE	6
2022-09-13	15:32:07	1.35218	6.01477	252.94	FALSE	6
2022-09-13	15:32:08	1.18571	5.27428	256.406	FALSE	6
2022-09-13	15:32:08	1.17233	5.21476	258.155	FALSE	6
2022-09-13	15:32:08	1.11503	4.95988	261.366	FALSE	6
2022-09-13	15:32:08	1.45701	6.48107	264.636	FALSE	6
2022-09-13	15:32:09	1.34566	5.98576	267.352	FALSE	6
2022-09-13	15:32:09	1.47681	6.56915	271.205	FALSE	6
2022-09-13	15:32:09	1.46139	6.50055	273.852	FALSE	6
2022-09-13	15:32:09	1.39844	6.22054	277.425	FALSE	6
2022-09-13	15:32:10	1.39635	6.21124	280.063	FALSE	6
2022-09-13	15:32:10	1.42271	6.3285	283.754	FALSE	6
2022-09-13	15:32:10	1.34322	5.97491	286.038	FALSE	6
2022-09-13	15:32:10	1.46078	6.49784	290.252	FALSE	6
2022-09-13	15:32:11	1.45905	6.49015	292.528	FALSE	6
2022-09-13	15:32:11	1.55284	6.90734	297.159	FALSE	6
2022-09-13	15:32:11	1.49146	6.63431	299.163	FALSE	6
2022-09-13	15:32:12	1.49294	6.6409	303.8	FALSE	6
2022-09-13	15:32:12	1.37777	6.1286	305.291	FALSE	6
2022-09-13	15:32:12	1.20307	5.3515	309.151	FALSE	6
2022-09-13	15:32:12	0.963117	4.28414	309.575	FALSE	6
2022-09-13	15:32:13	1.22739	5.45968	314.611	FALSE	6
2022-09-13	15:32:13	1.94856	8.66758	318.243	FALSE	6
2022-09-13	15:32:13	2.47762	11.0209	325.632	FALSE	6
2022-09-13	15:32:13	2.01777	8.97544	327.218	FALSE	6
2022-09-13	15:32:14	1.97324	8.77737	334.409	FALSE	6
2022-09-13	15:32:14	1.36495	6.07157	333.29	FALSE	6
2022-09-13	15:32:14	1.23009	5.47169	339.881	FALSE	6
2022-09-13	15:32:14	1.33538	5.94004	339.23	FALSE	6
2022-09-13	15:32:15	1.41223	6.28188	346.163	FALSE	6
2022-09-13	15:32:15	0.991005	4.40819	343.638	FALSE	6
2022-09-13	15:32:15	1.0077	4.48245	350.645	FALSE	6
2022-09-13	15:32:16	0.664695	2.9567	346.595	FALSE	6
2022-09-13	15:32:16	0.718282	3.19506	353.84	FALSE	6
2022-09-13	15:32:16	1.151	5.11988	351.715	FALSE	6
2022-09-13	15:32:16	0.900165	4.00411	357.845	FALSE	6
2022-09-13	15:32:17	1.03701	4.61283	356.328	FALSE	6
2022-09-13	15:32:17	1.01711	4.52431	362.369	FALSE	6
2022-09-13	15:32:17	1.00897	4.4881	360.816	FALSE	6
2022-09-13	15:32:17	1.06164	4.72239	367.091	FALSE	6
2022-09-13	15:32:18	0.978181	4.35114	365.167	FALSE	6
2022-09-13	15:32:18	0.925407	4.1164	371.208	FALSE	6
2022-09-13	15:32:18	0.976145	4.34209	369.509	FALSE	6
2022-09-13	15:32:18	1.00469	4.46906	375.677	FALSE	6
2022-09-13	15:32:19	1.08067	4.80704	374.316	FALSE	6
2022-09-13	15:32:19	1.2534	5.57537	381.252	FALSE	6
2022-09-13	15:32:19	1.19055	5.2958	379.612	FALSE	6
2022-09-13	15:32:20	1.15482	5.13687	386.389	FALSE	6
2022-09-13	15:32:20	1.18581	5.27472	384.887	FALSE	6
2022-09-13	15:32:20	1.11589	4.9637	391.353	FALSE	6
2022-09-13	15:32:20	1.09131	4.85437	389.741	FALSE	6
2022-09-13	15:32:21	1.08307	4.81771	396.17	FALSE	6
2022-09-13	15:32:21	1.01391	4.51007	394.251	FALSE	6
2022-09-13	15:32:21	1.04337	4.64112	400.811	FALSE	6
2022-09-13	15:32:21	1.05431	4.68978	398.941	FALSE	6
2022-09-13	15:32:22	1.02464	4.5578	405.369	FALSE	6
2022-09-13	15:32:22	1.04205	4.63525	403.576	FALSE	6
2022-09-13	15:32:22	1.0709	4.76358	410.133	FALSE	6
2022-09-13	15:32:22	1.08978	4.84756	408.424	FALSE	6
2022-09-13	15:32:23	1.08449	4.82403	414.957	FALSE	6
2022-09-13	15:32:23	1.13431	5.04564	413.469	FALSE	6
2022-09-13	15:32:23	1.15711	5.14706	420.104	FALSE	6
2022-09-13	15:32:24	1.17869	5.24305	418.712	FALSE	6
2022-09-13	15:32:24	1.13594	5.05289	425.157	FALSE	6
2022-09-13	15:32:24	1.06246	4.72603	423.438	FALSE	6
2022-09-13	15:32:24	1.10632	4.92113	430.078	FALSE	6
2022-09-13	15:32:25	1.09869	4.88719	428.325	FALSE	6
2022-09-13	15:32:25	1.2848	5.71505	435.793	FALSE	6
2022-09-13	15:32:25	0.899199	3.99982	432.325	FALSE	6
2022-09-13	15:32:25	0.791972	3.52285	439.316	FALSE	6
2022-09-13	15:32:26	0.743117	3.30553	435.631	FALSE	6
2022-09-13	15:32:26	0.689631	3.06762	442.383	FALSE	6
2022-09-13	15:32:26	0.823321	3.6623	439.293	FALSE	6
2022-09-13	15:32:26	0.938893	4.17638	446.56	FALSE	6
2022-09-13	15:32:27	0.983829	4.37627	443.669	FALSE	6
2022-09-13	15:32:27	1.00754	4.48174	451.042	FALSE	6
2022-09-13	15:32:27	0.977875	4.34978	448.019	FALSE	6
2022-09-13	15:32:27	0.980979	4.36359	455.405	FALSE	6
2022-09-13	15:32:28	0.959097	4.26626	452.285	FALSE	6
2022-09-13	15:32:28	0.941692	4.18883	459.594	FALSE	6
2022-09-13	15:32:28	0.969427	4.31221	456.598	FALSE	6
2022-09-13	15:32:29	0.999453	4.44577	464.04	FALSE	6
2022-09-13	15:32:29	1.03696	4.61261	461.21	FALSE	6
2022-09-13	15:32:29	1.07635	4.78782	468.828	FALSE	6
2022-09-13	15:32:29	0.960572	4.27282	465.483	FALSE	6
2022-09-13	15:32:30	0.77757	3.45879	472.286	FALSE	6
2022-09-13	15:32:30	0.736552	3.27633	468.759	FALSE	6
2022-09-13	15:32:30	1.02775	4.57164	476.858	FALSE	6
2022-09-13	15:32:30	1.58286	7.04088	475.8	FALSE	6
2022-09-13	15:32:31	1.97798	8.79845	485.656	FALSE	6
2022-09-13	15:32:31	2.3019	10.2393	486.04	FALSE	6
2022-09-13	15:32:31	1.8733	8.33281	493.989	FALSE	6
2022-09-13	15:32:31	2.05212	9.12824	495.168	FALSE	6
2022-09-13	15:32:32	1.60332	7.13189	501.121	FALSE	6
2022-09-13	15:32:32	1.80205	8.01588	503.184	FALSE	6
2022-09-13	15:32:32	1.422	6.32534	507.447	FALSE	6
2022-09-13	15:32:33	0.823117	3.66139	506.845	FALSE	6
2022-09-13	15:32:33	0.496756	2.20967	509.656	FALSE	6
2022-09-13	15:32:33	0.408919	1.81895	508.664	FALSE	6
2022-09-13	15:32:33	0.378333	1.6829	511.339	FALSE	6
2022-09-13	15:32:34	0.504746	2.24521	510.909	FALSE	6
2022-09-13	15:32:34	0.856298	3.80898	515.148	FALSE	6
2022-09-13	15:32:34	1.27426	5.66816	516.577	FALSE	6
2022-09-13	15:32:34	1.5565	6.92362	522.072	FALSE	6
2022-09-13	15:32:35	1.38149	6.14514	522.723	FALSE	6
2022-09-13	15:32:35	0.334822	1.48936	523.561	FALSE	6
2022-09-13	15:32:35	0.536858	2.38805	525.111	FALSE	6
2022-09-13	15:32:35	0.500521	2.22642	525.787	FALSE	6
2022-09-13	15:32:36	0.464084	2.06434	527.175	FALSE	6
2022-09-13	15:32:36	0.640318	2.84826	528.636	FALSE	6
2022-09-13	15:32:36	0.481997	2.14402	529.319	FALSE	6
2022-09-13	15:32:37	0.550496	2.44872	531.084	FALSE	6
2022-09-13	15:32:37	0.333651	1.48415	530.803	FALSE	6
2022-09-13	15:32:37	0.355077	1.57945	532.664	FALSE	6
2022-09-13	15:32:37	0.42897	1.90814	532.711	FALSE	6
2022-09-13	15:32:38	0.407036	1.81058	534.474	FALSE	6
2022-09-13	15:32:38	0.522761	2.32535	535.037	FALSE	6
2022-09-13	15:32:38	0.705458	3.13802	537.612	FALSE	6
2022-09-13	15:32:38	0.487901	2.17028	537.207	FALSE	6
2022-09-13	15:32:39	0.576756	2.56553	540.178	FALSE	6
2022-09-13	15:32:39	0.707697	3.14798	540.355	FALSE	6
2022-09-13	15:32:39	0.281641	1.2528	541.431	FALSE	6
2022-09-13	15:32:39	0.293957	1.30758	541.662	FALSE	6
2022-09-13	15:32:40	0.23925	1.06423	542.495	FALSE	6
2022-09-13	15:32:40	0.243117	1.08143	542.744	FALSE	6
2022-09-13	15:32:40	0.256756	1.1421	543.637	FALSE	6
2022-09-13	15:32:41	0.252481	1.12309	543.867	FALSE	6
2022-09-13	15:32:41	0.291972	1.29875	544.936	FALSE	6
2022-09-13	15:32:41	0.066985	0.297963	544.165	FALSE	6
2022-09-13	15:32:41	0.134211	0.596997	545.533	FALSE	6
2022-09-13	15:32:42	0.205	0.911881	545.077	FALSE	6
2022-09-13	15:32:42	0.142303	0.632992	546.166	FALSE	6
2022-09-13	15:32:42	0.117926	0.524558	545.601	FALSE	6
2022-09-13	15:32:42	-0.0727606	-0.323654	546.166	FALSE	6
2022-09-13	15:32:43	-0.0467554	-0.207977	545.601	FALSE	6
2022-09-13	15:32:43	0.0386898	0.1721	546.338	FALSE	6
2022-09-13	15:32:43	-0.0619208	-0.275436	545.601	FALSE	6
2022-09-13	15:32:43	-0.221565	-0.985565	546.338	FALSE	6
2022-09-13	15:32:44	-0.505636	-2.24917	545.601	FALSE	6
2022-09-13	15:32:44	-0.571183	-2.54074	546.338	FALSE	6
2022-09-13	15:32:44	-0.786704	-3.49942	545.601	FALSE	6
2022-09-13	15:32:45	-0.648027	-2.88255	546.338	FALSE	6
2022-09-13	15:32:45	-0.739325	-3.28867	545.601	FALSE	6
2022-09-13	15:32:45	-0.786755	-3.49964	546.338	FALSE	6
2022-09-13	15:32:45	-0.634439	-2.82211	545.601	FALSE	6
2022-09-13	15:32:46	-0.502328	-2.23446	546.338	FALSE	6
2022-09-13	15:32:46	-0.408078	-1.81521	545.601	FALSE	6
2022-09-13	15:32:46	-0.246196	-1.09513	546.338	FALSE	6
2022-09-13	15:32:46	-0.0680786	-0.302827	545.601	FALSE	6
2022-09-13	15:32:47	-0.111081	-0.494111	546.338	FALSE	6
2022-09-13	15:32:47	-0.173575	-0.772096	545.601	FALSE	6
2022-09-13	15:32:47	-0.274847	-1.22257	546.338	FALSE	6
2022-09-13	15:32:47	-0.52019	-2.31391	545.601	FALSE	6
2022-09-13	15:32:48	-0.790521	-3.5164	546.338	FALSE	6
2022-09-13	15:32:48	-1.32665	-5.9012	545.601	FALSE	6
2022-09-13	15:32:48	-0.0831422	-0.369833	546.338	FALSE	6
2022-09-13	15:32:49	-0.053931	-0.239896	545.601	FALSE	6
2022-09-13	15:32:49	0.0623031	0.277137	546.615	FALSE	6
2022-09-13	15:32:49	0.509886	2.26807	547.869	FALSE	6
2022-09-13	15:32:49	5.77706	25.6975	572.313	1	7
2022-09-13	15:32:50	7.94291	35.3317	583.201	1	8
2022-09-13	15:32:50	3.94556	17.5506	589.863	1	9
2022-09-13	15:32:50	2.74312	12.2019	595.403	FALSE	9
2022-09-13	15:32:50	2.74439	12.2076	602.071	FALSE	9
2022-09-13	15:32:51	2.68383	11.9382	607.341	FALSE	9
2022-09-13	15:32:51	2.06129	9.16903	611.24	FALSE	9
2022-09-13	15:32:51	1.62627	7.23397	614.575	FALSE	9
2022-09-13	15:32:51	2.38383	10.6038	621.844	FALSE	9
2022-09-13	15:32:52	1.59162	7.07984	621.655	FALSE	9
2022-09-13	15:32:52	0.391158	1.73995	623.584	FALSE	9
2022-09-13	15:32:52	0.460623	2.04894	623.704	FALSE	9
2022-09-13	15:32:53	0.20841	0.927049	624.511	FALSE	9
2022-09-13	15:32:53	-0.0278242	-0.123768	623.704	FALSE	9
2022-09-13	15:32:53	0.090191	0.401188	624.912	FALSE	9
2022-09-13	15:32:53	0.261132	1.16157	624.866	FALSE	9
2022-09-13	15:32:54	0.174618	0.776736	625.689	FALSE	9
2022-09-13	15:32:54	0.120522	0.536106	625.402	FALSE	9
2022-09-13	15:32:54	-0.136883	-0.608883	625.689	FALSE	9
2022-09-13	15:32:54	-0.279529	-1.2434	625.402	FALSE	9
2022-09-13	15:32:55	-0.354898	-1.57866	625.689	FALSE	9
2022-09-13	15:32:55	-0.381513	-1.69705	625.402	FALSE	9
2022-09-13	15:32:55	-0.327519	-1.45687	625.689	FALSE	9
2022-09-13	15:32:55	-0.1093	-0.486188	625.402	FALSE	9
2022-09-13	15:32:56	0.0432699	0.192473	625.881	FALSE	9
2022-09-13	15:32:56	0.150395	0.668987	626.071	FALSE	9
2022-09-13	15:32:56	0.288562	1.28358	627.165	FALSE	9
2022-09-13	15:32:57	0.97589	4.34095	630.412	FALSE	9
2022-09-13	15:32:57	1.1564	5.1439	632.309	FALSE	9
2022-09-13	15:32:57	1.13401	5.0443	635.456	FALSE	9
2022-09-13	15:32:57	1.57767	7.01779	639.326	FALSE	9
2022-09-13	15:32:58	1.46327	6.50892	641.965	FALSE	9
2022-09-13	15:32:58	1.2852	5.71683	645.043	FALSE	9
2022-09-13	15:32:58	0.734873	3.26886	645.234	FALSE	9
2022-09-13	15:32:58	0.836552	3.72115	648.764	FALSE	9
2022-09-13	15:32:59	1.0593	4.71198	649.946	FALSE	9
2022-09-13	15:32:59	0.51014	2.2692	651.034	FALSE	9
2022-09-13	15:32:59	0.279911	1.2451	651.191	FALSE	9
2022-09-13	15:32:59	0.222608	0.990205	652.024	FALSE	9
2022-09-13	15:33:00	0.185865	0.826765	652.018	FALSE	9
2022-09-13	15:33:00	0.136196	0.605827	652.63	FALSE	9
2022-09-13	15:33:00	-0.077188	-0.343348	652.018	FALSE	9
2022-09-13	15:33:01	-0.0583076	-0.259364	652.63	FALSE	9
2022-09-13	15:33:01	-0.0472135	-0.210015	652.018	FALSE	9
2022-09-13	15:33:01	-0.252964	-1.12523	652.63	FALSE	9
2022-09-13	15:33:01	-0.238053	-1.05891	652.018	FALSE	9
2022-09-13	15:33:02	-0.730012	-3.24724	652.63	FALSE	9
2022-09-13	15:33:02	-0.771946	-3.43377	652.018	FALSE	9
2022-09-13	15:33:02	-0.788689	-3.50825	652.63	FALSE	9
2022-09-13	15:33:02	-0.676882	-3.01091	652.018	FALSE	9
2022-09-13	15:33:03	-0.682429	-3.03558	652.63	FALSE	9
2022-09-13	15:33:03	-0.467213	-2.07826	652.018	FALSE	9
2022-09-13	15:33:03	-0.183855	-0.817824	652.63	FALSE	9
2022-09-13	15:33:03	0.188715	0.839442	652.857	FALSE	9
2022-09-13	15:33:04	0.807646	3.59257	656.222	FALSE	9
2022-09-13	15:33:04	1.24541	5.53983	658.397	FALSE	9
2022-09-13	15:33:04	2.58515	11.4993	667.721	FALSE	9
2022-09-13	15:33:05	3.64556	16.2162	674.613	1	10
2022-09-13	15:33:05	6.71614	29.8747	697.596	1	11
2022-09-13	15:33:05	6.63273	29.5037	704.117	1	12
2022-09-13	15:33:05	2.54826	11.3352	708.931	FALSE	12
2022-09-13	15:33:06	0.448817	1.99643	706.113	FALSE	12
2022-09-13	15:33:06	0.243524	1.08324	710.015	FALSE	12
2022-09-13	15:33:06	0.186476	0.829483	706.943	FALSE	12
2022-09-13	15:33:06	1.1308	5.03002	715.045	FALSE	12
2022-09-13	15:33:07	2.73686	12.1741	719.117	FALSE	12
2022-09-13	15:33:07	2.94729	13.1101	728.155	FALSE	12
2022-09-13	15:33:07	0.962303	4.28052	723.397	FALSE	12
2022-09-13	15:33:07	2.15299	9.57693	737.732	FALSE	12
2022-09-13	15:33:08	2.19899	9.78155	733.179	FALSE	12
2022-09-13	15:33:08	1.18017	5.24963	742.981	FALSE	12
2022-09-13	15:33:08	0.568409	2.5284	735.707	FALSE	12
2022-09-13	15:33:09	0.58841	2.61737	745.599	FALSE	12
2022-09-13	15:33:09	0.39014	1.73542	737.443	FALSE	12
2022-09-13	15:33:09	0.447341	1.98986	747.588	FALSE	12
2022-09-13	15:33:09	0.394618	1.75534	739.198	FALSE	12
2022-09-13	15:33:10	0.459758	2.0451	749.634	FALSE	12
2022-09-13	15:33:10	0.296349	1.31822	740.516	FALSE	12
2022-09-13	15:33:10	0.569631	2.53383	752.167	FALSE	12
2022-09-13	15:33:10	0.59986	2.6683	743.184	FALSE	12
2022-09-13	15:33:11	0.358537	1.59484	753.762	FALSE	12
2022-09-13	15:33:11	0.461132	2.05121	745.236	FALSE	12
2022-09-13	15:33:11	0.535585	2.38239	756.145	FALSE	12
2022-09-13	15:33:11	0.497774	2.2142	747.45	FALSE	12
2022-09-13	15:33:12	0.167087	0.743236	756.888	FALSE	12
2022-09-13	15:33:12	0.101489	0.451443	747.901	FALSE	12
2022-09-13	15:33:12	0.15701	0.698412	757.586	FALSE	12
2022-09-13	15:33:13	0.0451529	0.200849	748.102	FALSE	12
2022-09-13	15:33:13	0.286781	1.27566	758.862	FALSE	12
2022-09-13	15:33:13	0.522354	2.32354	750.426	FALSE	12
2022-09-13	15:33:13	0.721997	3.21159	762.074	FALSE	12
2022-09-13	15:33:14	0.697824	3.10406	753.53	FALSE	12
2022-09-13	15:33:14	1.36195	6.05823	768.132	FALSE	12
2022-09-13	15:33:14	2.52831	11.2464	764.776	FALSE	12
2022-09-13	15:33:14	2.06739	9.19616	777.328	FALSE	12
2022-09-13	15:33:15	1.7505	7.78657	772.563	FALSE	12
2022-09-13	15:33:15	2.06327	9.17784	786.506	FALSE	12
2022-09-13	15:33:15	0.641489	2.85347	775.416	FALSE	12
2022-09-13	15:33:15	0.720471	3.2048	789.711	FALSE	12
2022-09-13	15:33:16	0.361845	1.60956	777.026	FALSE	12
2022-09-13	15:33:16	0.336654	1.4975	791.208	FALSE	12
2022-09-13	15:33:16	0.357875	1.5919	778.618	FALSE	12
2022-09-13	15:33:17	0.247137	1.09931	792.307	FALSE	12
2022-09-13	15:33:17	0.26897	1.19643	779.814	FALSE	12
2022-09-13	15:33:17	0.305	1.3567	793.664	FALSE	12
2022-09-13	15:33:17	0.301132	1.3395	781.154	FALSE	12
2022-09-13	15:33:18	0.429682	1.91131	795.575	FALSE	12
2022-09-13	15:33:18	0.315433	1.40311	782.557	FALSE	12
2022-09-13	15:33:18	0.52327	2.32761	797.903	FALSE	12
2022-09-13	15:33:18	0.718079	3.19416	785.751	FALSE	12
2022-09-13	15:33:19	0.533142	2.37152	800.275	FALSE	12
2022-09-13	15:33:19	0.72617	3.23015	788.981	FALSE	12
2022-09-13	15:33:19	0.391107	1.73972	802.014	FALSE	12
2022-09-13	15:33:19	0.250954	1.11629	790.097	FALSE	12
2022-09-13	15:33:20	0.248512	1.10543	803.12	FALSE	12
2022-09-13	15:33:20	0.236705	1.05291	791.15	FALSE	12
2022-09-13	15:33:20	0.316908	1.40967	804.529	FALSE	12
2022-09-13	15:33:21	0.303066	1.3481	792.498	FALSE	12
2022-09-13	15:33:21	0.228512	1.01647	805.546	FALSE	12
2022-09-13	15:33:21	0.568104	2.52704	795.025	FALSE	12
2022-09-13	15:33:21	0.737366	3.27995	808.826	FALSE	12
2022-09-13	15:33:22	1.33034	5.91762	800.943	FALSE	12
2022-09-13	15:33:22	1.5195	6.75904	815.585	FALSE	12
2022-09-13	15:33:22	0.998181	4.44011	805.383	FALSE	12
2022-09-13	15:33:22	0.262863	1.16927	816.754	FALSE	12
2022-09-13	15:33:23	0.302456	1.34538	806.728	FALSE	12
2022-09-13	15:33:23	0.175026	0.778551	817.533	FALSE	12
2022-09-13	15:33:23	0.421845	1.87645	808.605	FALSE	12
2022-09-13	15:33:23	0.355992	1.58352	819.116	FALSE	12
2022-09-13	15:33:24	0.442456	1.96813	810.573	FALSE	12
2022-09-13	15:33:24	0.316705	1.40877	820.525	FALSE	12
2022-09-13	15:33:24	0.3593	1.59824	812.171	FALSE	12
2022-09-13	15:33:25	0.391056	1.7395	822.264	FALSE	12
2022-09-13	15:33:25	0.418639	1.86219	814.033	FALSE	12
2022-09-13	15:33:25	0.312176	1.38862	823.653	FALSE	12
2022-09-13	15:33:25	0.173499	0.771758	814.805	FALSE	12
2022-09-13	15:33:26	0.117519	0.522748	824.176	FALSE	12
2022-09-13	15:33:26	0.182049	0.80979	815.615	FALSE	12
2022-09-13	15:33:26	0.0342114	0.152179	824.328	FALSE	12
2022-09-13	15:33:26	0.349835	1.55614	817.171	FALSE	12
2022-09-13	15:33:27	9.8166	43.6662	867.994	1	13
2022-09-13	15:33:27	10.4733	46.5873	863.759	1	14
2022-09-13	15:33:27	4.7536	21.145	889.139	1	15
2022-09-13	15:33:27	2.61121	11.6152	875.374	FALSE	15
2022-09-13	15:33:28	2.27248	10.1084	899.248	FALSE	15
2022-09-13	15:33:28	6.19645	27.563	902.937	1	16
2022-09-13	15:33:28	2.83431	12.6076	911.855	FALSE	16
2022-09-13	15:33:29	0.756603	3.36552	906.302	FALSE	16
2022-09-13	15:33:29	3.39736	15.1121	926.967	1	17
2022-09-13	15:33:29	2.72413	12.1175	918.42	FALSE	17
2022-09-13	15:33:29	0.126781	0.563947	927.531	FALSE	17
2022-09-13	15:33:30	0.0638297	0.283927	918.704	FALSE	17
2022-09-13	15:33:30	0.0740587	0.329428	927.861	FALSE	17
2022-09-13	15:33:30	0.31126	1.38455	920.088	FALSE	17
2022-09-13	15:33:30	0.239199	1.064	928.925	FALSE	17
2022-09-13	15:33:31	0.47869	2.12931	922.218	FALSE	17
2022-09-13	15:33:31	0.351616	1.56406	930.489	FALSE	17
2022-09-13	15:33:31	0.512634	2.2803	924.498	FALSE	17
2022-09-13	15:33:31	0.550242	2.44759	932.936	FALSE	17
2022-09-13	15:33:32	0.564033	2.50893	927.007	FALSE	17
2022-09-13	15:33:32	0.841794	3.74447	936.681	FALSE	17
2022-09-13	15:33:32	0.788613	3.50791	930.515	FALSE	17
2022-09-13	15:33:33	0.697875	3.10429	939.785	FALSE	17
2022-09-13	15:33:33	0.541081	2.40684	932.922	FALSE	17
2022-09-13	15:33:33	0.624084	2.77605	942.561	FALSE	17
2022-09-13	15:33:33	0.483626	2.15127	935.073	FALSE	17
2022-09-13	15:33:34	0.442914	1.97017	944.531	FALSE	17
2022-09-13	15:33:34	0.571158	2.54063	937.613	FALSE	17
2022-09-13	15:33:34	0.579453	2.57752	947.109	FALSE	17
2022-09-13	15:33:34	0.930547	4.13926	941.753	FALSE	17
2022-09-13	15:33:35	0.698486	3.10701	950.216	FALSE	17
2022-09-13	15:33:35	0.70729	3.14617	944.899	FALSE	17
2022-09-13	15:33:35	0.73645	3.27588	953.492	FALSE	17
2022-09-13	15:33:35	0.745814	3.31753	948.216	FALSE	17
2022-09-13	15:33:36	0.750038	3.33632	956.828	FALSE	17
2022-09-13	15:33:36	0.741336	3.29761	951.514	FALSE	17
2022-09-13	15:33:36	0.740929	3.2958	960.124	FALSE	17
2022-09-13	15:33:37	0.712532	3.16948	954.683	FALSE	17
2022-09-13	15:33:37	0.649784	2.89037	963.014	FALSE	17
2022-09-13	15:33:37	0.652532	2.90259	957.586	FALSE	17
2022-09-13	15:33:37	0.632023	2.81136	965.826	FALSE	17
2022-09-13	15:33:38	0.61584	2.73938	960.325	FALSE	17
2022-09-13	15:33:38	0.615891	2.73961	968.565	FALSE	17
2022-09-13	15:33:38	0.645305	2.87045	963.196	FALSE	17
2022-09-13	15:33:38	0.649326	2.88833	971.453	FALSE	17
2022-09-13	15:33:39	0.679453	3.02234	966.218	FALSE	17
2022-09-13	15:33:39	0.624135	2.77628	974.23	FALSE	17
2022-09-13	15:33:39	0.645	2.86909	969.087	FALSE	17
2022-09-13	15:33:39	0.653244	2.90576	977.136	FALSE	17
2022-09-13	15:33:40	0.636298	2.83038	971.918	FALSE	17
2022-09-13	15:33:40	0.497367	2.21239	979.348	FALSE	17
2022-09-13	15:33:40	0.547544	2.43559	974.353	FALSE	17
2022-09-13	15:33:41	0.552227	2.45642	981.804	FALSE	17
2022-09-13	15:33:41	0.540114	2.40254	976.756	FALSE	17
2022-09-13	15:33:41	0.510394	2.27033	984.075	FALSE	17
2022-09-13	15:33:41	0.544695	2.42291	979.179	FALSE	17
2022-09-13	15:33:42	0.493244	2.19405	986.269	FALSE	17
2022-09-13	15:33:42	0.487036	2.16643	981.345	FALSE	17
2022-09-13	15:33:42	0.494109	2.1979	988.467	FALSE	17
2022-09-13	15:33:42	0.521031	2.31765	983.663	FALSE	17
2022-09-13	15:33:43	0.545458	2.42631	990.893	FALSE	17
2022-09-13	15:33:43	0.54785	2.43695	986.1	FALSE	17
2022-09-13	15:33:43	0.559453	2.48856	993.381	FALSE	17
2022-09-13	15:33:43	0.54388	2.41929	988.519	FALSE	17
2022-09-13	15:33:44	0.497214	2.21171	995.593	FALSE	17
2022-09-13	15:33:44	0.517061	2.29999	990.819	FALSE	17
2022-09-13	15:33:44	0.592736	2.63661	998.23	FALSE	17
2022-09-13	15:33:44	0.61187	2.72172	993.541	FALSE	17
2022-09-13	15:33:45	0.647341	2.8795	1001.11	FALSE	17
2022-09-13	15:33:45	0.645712	2.87226	996.413	FALSE	17
2022-09-13	15:33:45	0.579249	2.57662	1003.69	FALSE	17
2022-09-13	15:33:46	0.548206	2.43853	998.852	FALSE	17
2022-09-13	15:33:46	0.549275	2.44329	1006.13	FALSE	17
2022-09-13	15:33:46	0.611463	2.71991	1001.57	FALSE	17
2022-09-13	15:33:46	0.624949	2.7799	1008.91	FALSE	17
2022-09-13	15:33:47	0.649784	2.89037	1004.46	FALSE	17
2022-09-13	15:33:47	0.618639	2.75183	1011.66	FALSE	17
2022-09-13	15:33:47	0.601438	2.67532	1007.14	FALSE	17
2022-09-13	15:33:47	0.562506	2.50214	1014.16	FALSE	17
2022-09-13	15:33:48	0.56271	2.50305	1009.64	FALSE	17
2022-09-13	15:33:48	0.561692	2.49852	1016.66	FALSE	17
2022-09-13	15:33:48	0.600572	2.67146	1012.31	FALSE	17
2022-09-13	15:33:48	0.648104	2.8829	1019.54	FALSE	17
2022-09-13	15:33:49	0.597417	2.65743	1014.97	FALSE	17
2022-09-13	15:33:49	0.61701	2.74458	1022.29	FALSE	17
2022-09-13	15:33:49	0.641896	2.85528	1017.82	FALSE	17
2022-09-13	15:33:50	0.649529	2.88923	1025.18	FALSE	17
2022-09-13	15:33:50	0.664593	2.95624	1020.78	FALSE	17
2022-09-13	15:33:50	0.685153	3.0477	1028.23	FALSE	17
2022-09-13	15:33:50	0.688053	3.0606	1023.84	FALSE	17
2022-09-13	15:33:51	0.674008	2.99812	1031.22	FALSE	17
2022-09-13	15:33:51	0.654109	2.90961	1026.75	FALSE	17
2022-09-13	15:33:51	0.650344	2.89286	1034.12	FALSE	17
2022-09-13	15:33:51	0.669834	2.97956	1029.73	FALSE	17
2022-09-13	15:33:52	0.681845	3.03298	1037.15	FALSE	17
2022-09-13	15:33:52	0.707697	3.14798	1032.88	FALSE	17
2022-09-13	15:33:52	0.689478	3.06694	1040.22	FALSE	17
2022-09-13	15:33:52	0.66327	2.95036	1035.83	FALSE	17
2022-09-13	15:33:53	0.65131	2.89716	1043.11	FALSE	17
2022-09-13	15:33:53	0.649835	2.8906	1038.72	FALSE	17
2022-09-13	15:33:53	0.655534	2.91595	1046.03	FALSE	17
2022-09-13	15:33:54	0.643779	2.86366	1041.58	FALSE	17
2022-09-13	15:33:54	0.637977	2.83785	1048.87	FALSE	17
2022-09-13	15:33:54	0.620267	2.75907	1044.34	FALSE	17
2022-09-13	15:33:54	0.611158	2.71855	1051.59	FALSE	17
2022-09-13	15:33:55	0.616858	2.74391	1047.09	FALSE	17
2022-09-13	15:33:55	0.598639	2.66287	1054.25	FALSE	17
2022-09-13	15:33:55	0.586018	2.60673	1049.69	FALSE	17
2022-09-13	15:33:55	0.585458	2.60423	1056.85	FALSE	17
2022-09-13	15:33:56	0.572939	2.54855	1052.24	FALSE	17
2022-09-13	15:33:56	0.582812	2.59246	1059.45	FALSE	17
2022-09-13	15:33:56	0.580216	2.58092	1054.82	FALSE	17
2022-09-13	15:33:56	0.579606	2.5782	1062.02	FALSE	17
2022-09-13	15:33:57	0.588868	2.6194	1057.44	FALSE	17
2022-09-13	15:33:57	0.595941	2.65086	1064.68	FALSE	17
2022-09-13	15:33:57	0.560267	2.49218	1059.93	FALSE	17
2022-09-13	15:33:58	0.52388	2.33032	1067.01	FALSE	17
2022-09-13	15:33:58	0.529325	2.35454	1062.29	FALSE	17
2022-09-13	15:33:58	0.532023	2.36654	1069.37	FALSE	17
2022-09-13	15:33:58	0.525051	2.33553	1064.62	FALSE	17
2022-09-13	15:33:59	0.540776	2.40548	1071.78	FALSE	17
2022-09-13	15:33:59	0.520929	2.3172	1066.94	FALSE	17
2022-09-13	15:33:59	0.500827	2.22778	1074.01	FALSE	17
2022-09-13	15:33:59	0.459555	2.04419	1068.99	FALSE	17
2022-09-13	15:34:00	0.463219	2.06049	1076.07	FALSE	17
2022-09-13	15:34:00	0.458639	2.04012	1071.03	FALSE	17
2022-09-13	15:34:00	0.457367	2.03446	1078.1	FALSE	17
2022-09-13	15:34:00	0.453906	2.01906	1073.04	FALSE	17
2022-09-13	15:34:01	0.446832	1.9876	1080.09	FALSE	17
2022-09-13	15:34:01	0.445967	1.98375	1075.03	FALSE	17
2022-09-13	15:34:01	0.453346	2.01657	1082.1	FALSE	17
2022-09-13	15:34:02	0.452379	2.01227	1077.04	FALSE	17
2022-09-13	15:34:02	0.440471	1.9593	1084.06	FALSE	17
2022-09-13	15:34:02	0.428104	1.90429	1078.94	FALSE	17
2022-09-13	15:34:02	0.443015	1.97062	1086.03	FALSE	17
2022-09-13	15:34:03	0.448308	1.99416	1080.94	FALSE	17
2022-09-13	15:34:03	0.445102	1.9799	1088.01	FALSE	17
2022-09-13	15:34:03	0.45355	2.01748	1082.96	FALSE	17
2022-09-13	15:34:03	0.455534	2.02631	1090.04	FALSE	17
2022-09-13	15:34:04	0.457926	2.03695	1084.99	FALSE	17
2022-09-13	15:34:04	0.457621	2.03559	1092.08	FALSE	17
2022-09-13	15:34:04	0.466018	2.07294	1087.07	FALSE	17
2022-09-13	15:34:04	0.475585	2.1155	1094.19	FALSE	17
2022-09-13	15:34:05	0.461743	2.05393	1089.12	FALSE	17
2022-09-13	15:34:05	0.457977	2.03717	1096.23	FALSE	17
2022-09-13	15:34:05	0.466425	2.07475	1091.19	FALSE	17
2022-09-13	15:34:06	0.453906	2.01906	1098.25	FALSE	17
2022-09-13	15:34:06	0.448206	1.99371	1093.19	FALSE	17
2022-09-13	15:34:06	0.446679	1.98692	1100.23	FALSE	17
2022-09-13	15:34:06	0.449936	2.00141	1095.19	FALSE	17
2022-09-13	15:34:07	0.461896	2.05461	1102.29	FALSE	17
2022-09-13	15:34:07	0.461285	2.05189	1097.24	FALSE	17
2022-09-13	15:34:07	0.459657	2.04465	1104.33	FALSE	17
2022-09-13	15:34:07	0.444796	1.97854	1099.22	FALSE	17
2022-09-13	15:34:08	0.44159	1.96428	1106.3	FALSE	17
2022-09-13	15:34:08	0.463626	2.0623	1101.28	FALSE	17
2022-09-13	15:34:08	0.468257	2.0829	1108.38	FALSE	17
2022-09-13	15:34:08	0.46327	2.06072	1103.34	FALSE	17
2022-09-13	15:34:09	0.461438	2.05257	1110.43	FALSE	17
2022-09-13	15:34:09	0.459097	2.04216	1105.39	FALSE	17
2022-09-13	15:34:09	0.475026	2.11301	1112.55	FALSE	17
2022-09-13	15:34:10	0.474517	2.11075	1107.5	FALSE	17
2022-09-13	15:34:10	0.474924	2.11256	1114.66	FALSE	17
2022-09-13	15:34:10	0.481539	2.14198	1109.64	FALSE	17
2022-09-13	15:34:10	0.479657	2.13361	1116.79	FALSE	17
2022-09-13	15:34:11	0.495636	2.20469	1111.84	FALSE	17
2022-09-13	15:34:11	0.494516	2.19971	1118.99	FALSE	17
2022-09-13	15:34:11	0.489936	2.17933	1114.02	FALSE	17
2022-09-13	15:34:11	0.501132	2.22914	1121.22	FALSE	17
2022-09-13	15:34:12	0.492277	2.18975	1116.21	FALSE	17
2022-09-13	15:34:12	0.460115	2.04668	1123.27	FALSE	17
2022-09-13	15:34:12	0.423931	1.88573	1118.1	FALSE	17
2022-09-13	15:34:12	0.394517	1.75489	1125.02	FALSE	17
2022-09-13	15:34:13	0.389326	1.7318	1119.83	FALSE	17
2022-09-13	15:34:13	0.556654	2.47611	1127.5	FALSE	17
2022-09-13	15:34:13	0.294262	1.30894	1121.14	FALSE	17
2022-09-13	15:34:14	0.679758	3.0237	1130.52	FALSE	17
2022-09-13	15:34:14	0.390954	1.73904	1122.88	FALSE	17
2022-09-13	15:34:14	0.535891	2.38375	1132.91	FALSE	17
2022-09-13	15:34:14	0.423677	1.8846	1124.76	FALSE	17
2022-09-13	15:34:15	0.614822	2.73485	1135.64	FALSE	17
2022-09-13	15:34:15	0.513804	2.2855	1127.05	FALSE	17
2022-09-13	15:34:15	0.709478	3.1559	1138.8	FALSE	17
2022-09-13	15:34:15	0.70958	3.15635	1130.2	FALSE	17
2022-09-13	15:34:16	0.531819	2.36564	1141.16	FALSE	17
2022-09-13	15:34:16	0.520674	2.31606	1132.52	FALSE	17
2022-09-13	15:34:16	0.581336	2.5859	1143.75	FALSE	17
2022-09-13	15:34:16	0.513906	2.28596	1134.81	FALSE	17
2022-09-13	15:34:17	0.585407	2.60401	1146.35	FALSE	17
2022-09-13	15:34:17	0.51299	2.28188	1137.09	FALSE	17
2022-09-13	15:34:17	0.525712	2.33847	1148.69	FALSE	17
2022-09-13	15:34:18	0.366222	1.62903	1138.72	FALSE	17
2022-09-13	15:34:18	0.467545	2.07973	1150.77	FALSE	17
2022-09-13	15:34:18	0.438537	1.9507	1140.67	FALSE	17
2022-09-13	15:34:18	0.437977	1.94821	1152.72	FALSE	17
2022-09-13	15:34:19	0.326679	1.45313	1142.12	FALSE	17
2022-09-13	15:34:19	0.200827	0.893319	1153.61	FALSE	17
2022-09-13	15:34:19	-0.254084	-1.13022	1142.12	FALSE	17
2022-09-13	15:34:19	-0.620394	-2.75964	1153.61	FALSE	17
2022-09-13	15:34:20	-0.788027	-3.5053	1142.12	FALSE	17
2022-09-13	15:34:20	-0.764668	-3.4014	1153.61	FALSE	17
2022-09-13	15:34:20	-0.704211	-3.13247	1142.12	FALSE	17
2022-09-13	15:34:20	-0.731691	-3.25471	1153.61	FALSE	17
2022-09-13	15:34:21	-0.780496	-3.4718	1142.12	FALSE	17
2022-09-13	15:34:21	-0.782989	-3.48289	1153.61	FALSE	17
2022-09-13	15:34:21	-0.827925	-3.68278	1142.12	FALSE	17
2022-09-13	15:34:22	-0.884363	-3.93382	1153.61	FALSE	17
2022-09-13	15:34:22	-0.510012	-2.26864	1142.12	FALSE	17
2022-09-13	15:34:22	-0.049758	-0.221334	1153.61	FALSE	17
2022-09-13	15:34:22	-0.0727606	-0.323654	1142.12	FALSE	17
2022-09-13	15:34:23	0.161489	0.718335	1154.33	FALSE	17
2022-09-13	15:34:23	0.107341	0.477474	1142.6	FALSE	17
2022-09-13	15:34:23	0.280623	1.24827	1155.58	FALSE	17
2022-09-13	15:34:23	0.218232	0.97074	1143.57	FALSE	17
2022-09-13	15:34:24	0.277468	1.23423	1156.81	FALSE	17
2022-09-13	15:34:24	0.267952	1.1919	1144.76	FALSE	17
2022-09-13	15:34:24	0.223575	0.994506	1157.81	FALSE	17
2022-09-13	15:34:25	0.278333	1.23808	1146	FALSE	17
2022-09-13	15:34:25	0.18098	0.805035	1158.61	FALSE	17
2022-09-13	15:34:25	0.395942	1.76123	1147.76	FALSE	17
2022-09-13	15:34:25	0.0742623	0.330334	1158.94	FALSE	17
2022-09-13	15:34:26	0.0623539	0.277363	1148.04	FALSE	17
2022-09-13	15:34:26	0.142914	0.63571	1159.58	FALSE	17
2022-09-13	15:34:26	0.154517	0.687323	1148.72	FALSE	17
2022-09-13	15:34:26	0.181539	0.807522	1160.39	FALSE	17
2022-09-13	15:34:27	0.0342114	0.152179	1148.88	FALSE	17
2022-09-13	15:34:27	-0.121412	-0.540065	1160.39	FALSE	17
2022-09-13	15:34:27	-0.138155	-0.614541	1148.88	FALSE	17
2022-09-13	15:34:27	-0.495814	-2.20548	1160.39	FALSE	17
2022-09-13	15:34:28	-0.735101	-3.26988	1148.88	FALSE	17
2022-09-13	15:34:28	-0.800394	-3.56031	1160.39	FALSE	17
2022-09-13	15:34:28	-0.76533	-3.40434	1148.88	FALSE	17
2022-09-13	15:34:28	-0.652862	-2.90406	1160.39	FALSE	17
2022-09-13	15:34:29	-0.801106	-3.56348	1148.88	FALSE	17
2022-09-13	15:34:29	-0.754541	-3.35635	1160.39	FALSE	17
2022-09-13	15:34:29	-0.908994	-4.04339	1148.88	FALSE	17
2022-09-13	15:34:30	-0.843854	-3.75363	1160.39	FALSE	17
2022-09-13	15:34:30	-0.790318	-3.51549	1148.88	FALSE	17
2022-09-13	15:34:30	-0.550318	-2.44792	1160.39	FALSE	17
2022-09-13	15:34:30	-0.297137	-1.32172	1148.88	FALSE	17
2022-09-13	15:34:31	0.33757	1.50158	1161.89	FALSE	17
2022-09-13	15:34:31	0.999148	4.44441	1153.32	FALSE	17
2022-09-13	15:34:31	1.11772	4.97184	1166.86	FALSE	17
2022-09-13	15:34:31	0.296603	1.31935	1154.64	FALSE	17
2022-09-13	15:34:32	0.231667	1.0305	1167.89	FALSE	17
2022-09-13	15:34:32	0.139962	0.622579	1155.26	FALSE	17
2022-09-13	15:34:32	0.200369	0.891281	1168.78	FALSE	17
2022-09-13	15:34:32	0.2507	1.11516	1156.38	FALSE	17
2022-09-13	15:34:33	0.272837	1.21363	1170	FALSE	17
2022-09-13	15:34:33	0.189173	0.841479	1157.22	FALSE	17
2022-09-13	15:34:33	0.261489	1.16316	1171.16	FALSE	17
2022-09-13	15:34:34	0.272226	1.21092	1158.43	FALSE	17
2022-09-13	15:34:34	0.274567	1.22133	1172.38	FALSE	17
2022-09-13	15:34:34	0.266832	1.18692	1159.62	FALSE	17
2022-09-13	15:34:34	0.239911	1.06717	1173.45	FALSE	17
2022-09-13	15:34:35	0.284033	1.26344	1160.88	FALSE	17
2022-09-13	15:34:35	0.399097	1.77526	1175.22	FALSE	17
2022-09-13	15:34:35	0.441692	1.96473	1162.85	FALSE	17
2022-09-13	15:34:35	0.405916	1.8056	1177.03	FALSE	17
2022-09-13	15:34:36	0.430751	1.91607	1164.76	FALSE	17
2022-09-13	15:34:36	0.501946	2.23276	1179.26	FALSE	17
2022-09-13	15:34:36	0.674822	3.00174	1167.76	FALSE	17
2022-09-13	15:34:36	1.09681	4.87883	1184.14	FALSE	17
2022-09-13	15:34:37	1.77004	7.87349	1175.64	FALSE	17
2022-09-13	15:34:37	1.71564	7.63151	1191.77	FALSE	17
2022-09-13	15:34:37	1.54413	6.8686	1182.51	FALSE	17
2022-09-13	15:34:38	1.57716	7.01552	1198.79	FALSE	17
2022-09-13	15:34:38	3.15487	14.0335	1196.54	1	18
2022-09-13	15:34:38	5.63014	25.044	1223.83	1	19
2022-09-13	15:34:38	2.21884	9.86984	1206.41	FALSE	19
2022-09-13	15:34:39	0.883728	3.931	1227.76	FALSE	19
2022-09-13	15:34:39	1.40897	6.26738	1212.68	FALSE	19
2022-09-13	15:34:39	2.25971	10.0516	1237.81	FALSE	19
2022-09-13	15:34:39	0.314059	1.397	1214.07	FALSE	19
2022-09-13	15:34:40	0.333906	1.48528	1239.3	FALSE	19
2022-09-13	15:34:40	0.39187	1.74312	1215.82	FALSE	19
2022-09-13	15:34:40	0.25528	1.13554	1240.43	FALSE	19
2022-09-13	15:34:40	0.275382	1.22495	1217.04	FALSE	19
2022-09-13	15:34:41	0.334211	1.48664	1241.92	FALSE	19
2022-09-13	15:34:41	0.468155	2.08245	1219.12	FALSE	19
2022-09-13	15:34:41	0.294924	1.31188	1243.23	FALSE	19
2022-09-13	15:34:42	0.525814	2.33893	1221.46	FALSE	19
2022-09-13	15:34:42	0.259911	1.15614	1244.39	FALSE	19
2022-09-13	15:34:42	0.230089	1.02348	1222.49	FALSE	19
2022-09-13	15:34:42	0.246171	1.09502	1245.48	FALSE	19
2022-09-13	15:34:43	0.256603	1.14142	1223.63	FALSE	19
2022-09-13	15:34:43	0.28897	1.2854	1246.77	FALSE	19
2022-09-13	15:34:43	0.240115	1.06808	1224.7	FALSE	19
2022-09-13	15:34:43	0.30271	1.34651	1248.12	FALSE	19
2022-09-13	15:34:44	0.353753	1.57356	1226.27	FALSE	19
2022-09-13	15:34:44	0.420318	1.86966	1249.99	FALSE	19
2022-09-13	15:34:44	0.366934	1.6322	1227.9	FALSE	19
2022-09-13	15:34:44	0.375331	1.66955	1251.65	FALSE	19
2022-09-13	15:34:45	0.644084	2.86501	1230.77	FALSE	19
2022-09-13	15:34:45	2.98892	13.2953	1264.95	FALSE	19
2022-09-13	15:34:45	3.21034	14.2802	1245.05	1	20
2022-09-13	15:34:46	5.4482	24.2347	1289.18	1	21
2022-09-13	15:34:46	3.60174	16.0213	1261.07	1	22
2022-09-13	15:34:46	2.02083	8.98906	1298.17	FALSE	22
2022-09-13	15:34:46	1.08658	4.83333	1265.9	FALSE	22
2022-09-13	15:34:47	2.28459	10.1623	1308.34	FALSE	22
2022-09-13	15:34:47	0.260623	1.1593	1267.06	FALSE	22
2022-09-13	15:34:47	0.0137534	0.0611779	1308.4	FALSE	22
2022-09-13	15:34:47	0.342659	1.52422	1268.59	FALSE	22
2022-09-13	15:34:48	0.296043	1.31686	1309.71	FALSE	22
2022-09-13	15:34:48	1.82749	8.12904	1276.71	FALSE	22
2022-09-13	15:34:48	1.03869	4.6203	1314.33	FALSE	22
2022-09-13	15:34:48	1.90597	8.47814	1285.19	FALSE	22
2022-09-13	15:34:49	0.858537	3.81894	1318.15	FALSE	22
2022-09-13	15:34:49	0.772735	3.43728	1288.63	FALSE	22
2022-09-13	15:34:49	0.37986	1.68969	1319.84	FALSE	22
2022-09-13	15:34:50	0.479097	2.13112	1290.76	FALSE	22
2022-09-13	15:34:50	0.340725	1.51561	1321.36	FALSE	22
2022-09-13	15:34:50	0.516349	2.29682	1293.06	FALSE	22
2022-09-13	15:34:50	0.416909	1.85449	1323.21	FALSE	22
2022-09-13	15:34:51	1.05141	4.67688	1297.73	FALSE	22
2022-09-13	15:34:51	0.851412	3.78725	1327	FALSE	22
2022-09-13	15:34:51	0.487799	2.16983	1299.9	FALSE	22
2022-09-13	15:34:51	0.481947	2.1438	1329.14	FALSE	22
2022-09-13	15:34:52	0.359249	1.59801	1301.5	FALSE	22
2022-09-13	15:34:52	0.531667	2.36496	1331.51	FALSE	22
2022-09-13	15:34:52	0.396501	1.76372	1303.27	FALSE	22
2022-09-13	15:34:52	0.101591	0.451897	1331.96	FALSE	22
2022-09-13	15:34:53	0.152481	0.678266	1303.94	FALSE	22
2022-09-13	15:34:53	0.143881	0.640011	1332.6	FALSE	22
2022-09-13	15:34:53	0.225814	1.00447	1304.95	FALSE	22
2022-09-13	15:34:54	0.244898	1.08936	1333.69	FALSE	22
2022-09-13	15:34:54	0.280776	1.24895	1306.2	FALSE	22
2022-09-13	15:34:54	0.581489	2.58658	1336.28	FALSE	22
2022-09-13	15:34:54	1.53065	6.80864	1313.01	FALSE	22
2022-09-13	15:34:55	1.47263	6.55055	1342.83	FALSE	22
2022-09-13	15:34:55	1.16734	5.19256	1318.2	FALSE	22
2022-09-13	15:34:55	0.591412	2.63072	1345.46	FALSE	22
2022-09-13	15:34:55	0.434364	1.93214	1320.13	FALSE	22
2022-09-13	15:34:56	0.401387	1.78545	1347.24	FALSE	22
2022-09-13	15:34:56	0.431005	1.9172	1322.05	FALSE	22
2022-09-13	15:34:56	0.417977	1.85925	1349.1	FALSE	22
2022-09-13	15:34:56	0.474364	2.11007	1324.16	FALSE	22
2022-09-13	15:34:57	0.887595	3.9482	1353.05	FALSE	22
2022-09-13	15:34:57	1.09253	4.85979	1329.02	FALSE	22
2022-09-13	15:34:57	0.558944	2.48629	1355.54	FALSE	22
2022-09-13	15:34:57	0.597061	2.65585	1331.67	FALSE	22
2022-09-13	15:34:58	1.16775	5.19439	1360.73	FALSE	22
2022-09-13	15:34:58	0.675382	3.00423	1334.68	FALSE	22
2022-09-13	15:34:58	0.300624	1.33724	1362.07	FALSE	22
2022-09-13	15:34:59	0.244135	1.08596	1335.76	FALSE	22
2022-09-13	15:34:59	0.068359	0.304075	1362.37	FALSE	22
2022-09-13	15:34:59	-0.234185	-1.0417	1335.76	FALSE	22
2022-09-13	15:34:59	-0.407315	-1.81182	1362.37	FALSE	22
2022-09-13	15:35:00	-0.587468	-2.61318	1335.76	FALSE	22
2022-09-13	15:35:00	-0.600343	-2.67045	1362.37	FALSE	22
2022-09-13	15:35:00	-0.647213	-2.87893	1335.76	FALSE	22
2022-09-13	15:35:00	-0.710266	-3.15941	1362.37	FALSE	22
2022-09-13	15:35:01	-0.344567	-1.5327	1335.76	FALSE	22
2022-09-13	15:35:01	-0.187875	-0.835706	1362.37	FALSE	22
2022-09-13	15:35:01	-0.0634476	-0.282228	1335.76	FALSE	22
2022-09-13	15:35:01	-0.0442109	-0.196659	1362.37	FALSE	22
2022-09-13	15:35:02	-0.36874	-1.64023	1335.76	FALSE	22
2022-09-13	15:35:02	0.71416	3.17673	1365.55	FALSE	22
2022-09-13	15:35:02	3.97981	17.703	1353.47	1	23
2022-09-13	15:35:03	2.85848	12.7151	1378.27	FALSE	23
2022-09-13	15:35:03	1.23742	5.50429	1358.97	FALSE	23
2022-09-13	15:35:03	1.6449	7.31684	1385.58	FALSE	23
2022-09-13	15:35:03	1.14225	5.08096	1364.05	FALSE	23
2022-09-13	15:35:04	1.47192	6.54739	1392.13	FALSE	23
2022-09-13	15:35:04	0.632888	2.81521	1366.87	FALSE	23
2022-09-13	15:35:04	0.488766	2.17413	1394.3	FALSE	23
2022-09-13	15:35:04	0.662099	2.94515	1369.81	FALSE	23
2022-09-13	15:35:05	1.33324	5.93052	1400.23	FALSE	23
2022-09-13	15:35:05	1.68373	7.48957	1377.3	FALSE	23
2022-09-13	15:35:05	1.66561	7.40897	1407.64	FALSE	23
2022-09-13	15:35:05	3.96245	17.6258	1394.93	1	24
2022-09-13	15:35:06	5.86133	26.0724	1433.72	1	25
2022-09-13	15:35:06	6.73543	29.9605	1424.89	1	26
2022-09-13	15:35:06	3.58047	15.9266	1449.64	1	27
2022-09-13	15:35:07	2.60586	11.5914	1436.48	FALSE	27
2022-09-13	15:35:07	3.02917	13.4744	1463.12	1	28
2022-09-13	15:35:07	3.84261	17.0927	1453.57	1	29
2022-09-13	15:35:07	0.852583	3.79246	1466.91	FALSE	29
2022-09-13	15:35:08	0.475636	2.11572	1455.69	FALSE	29
2022-09-13	15:35:08	0.613193	2.72761	1469.64	FALSE	29
2022-09-13	15:35:08	0.54785	2.43695	1458.13	FALSE	29
2022-09-13	15:35:08	0.791667	3.52149	1473.16	FALSE	29
2022-09-13	15:35:09	0.604084	2.68709	1460.81	FALSE	29
2022-09-13	15:35:09	0.533346	2.37243	1475.53	FALSE	29
2022-09-13	15:35:09	0.628155	2.79416	1463.61	FALSE	29
2022-09-13	15:35:09	0.79869	3.55273	1479.08	FALSE	29
2022-09-13	15:35:10	4.22973	18.8147	1482.42	1	30
2022-09-13	15:35:10	4.61686	20.5367	1499.62	1	31
2022-09-13	15:35:10	5.70596	25.3813	1507.8	1	32
2022-09-13	15:35:11	3.75365	16.697	1516.32	1	33
2022-09-13	15:35:11	3.00495	13.3666	1521.17	1	34
2022-09-13	15:35:11	1.88698	8.39366	1524.71	FALSE	34
2022-09-13	15:35:11	1.62754	7.23962	1528.41	FALSE	34
2022-09-13	15:35:12	1.7938	7.97918	1532.69	FALSE	34
2022-09-13	15:35:12	1.10515	4.91593	1533.32	FALSE	34
2022-09-13	15:35:12	1.3506	6.00774	1538.7	FALSE	34
2022-09-13	15:35:12	1.45482	6.47133	1539.8	FALSE	34
2022-09-13	15:35:13	3.41436	15.1878	1553.89	1	35
2022-09-13	15:35:13	7.66815	34.1095	1573.91	1	36
2022-09-13	15:35:13	6.73126	29.942	1583.83	1	37
2022-09-13	15:35:13	3.0191	13.4296	1587.34	1	38
2022-09-13	15:35:14	3.71004	16.503	1600.33	1	39
2022-09-13	15:35:14	3.06052	13.6138	1600.95	1	40
2022-09-13	15:35:14	3.99915	17.789	1618.12	1	41
2022-09-13	15:35:15	4.72383	21.0125	1621.96	1	42
2022-09-13	15:35:15	4.24561	18.8853	1637	1	43
2022-09-13	15:35:15	0.870191	3.87078	1625.83	FALSE	43
2022-09-13	15:35:15	0.507799	2.25879	1639.26	FALSE	43
2022-09-13	15:35:16	0.418995	1.86377	1627.7	FALSE	43
2022-09-13	15:35:16	0.395178	1.75783	1641.02	FALSE	43
2022-09-13	15:35:16	0.425102	1.89094	1629.59	FALSE	43
2022-09-13	15:35:16	0.271209	1.20639	1642.23	FALSE	43
2022-09-13	15:35:17	0.151769	0.675099	1630.26	FALSE	43
2022-09-13	15:35:17	0.144898	0.644535	1642.87	FALSE	43
2022-09-13	15:35:17	-0.032557	-0.14482	1630.26	FALSE	43
2022-09-13	15:35:17	-0.142175	-0.632423	1642.87	FALSE	43
2022-09-13	15:35:18	-0.325788	-1.44917	1630.26	FALSE	43
2022-09-13	15:35:18	-0.235509	-1.04759	1642.87	FALSE	43
2022-09-13	15:35:18	-0.110674	-0.4923	1630.26	FALSE	43
2022-09-13	15:35:19	-0.249605	-1.11029	1642.87	FALSE	43
2022-09-13	15:35:19	0.0573666	0.255178	1630.52	FALSE	43
2022-09-13	15:35:19	0.507545	2.25766	1645.13	FALSE	43
2022-09-13	15:35:19	0.598028	2.66015	1633.18	FALSE	43
2022-09-13	15:35:20	1.37879	6.13313	1651.26	FALSE	43
2022-09-13	15:35:20	1.74475	7.761	1640.94	FALSE	43
2022-09-13	15:35:20	1.67981	7.47213	1658.74	FALSE	43
2022-09-13	15:35:20	1.09202	4.85752	1645.8	FALSE	43
2022-09-13	15:35:21	0.52897	2.35296	1661.09	FALSE	43
2022-09-13	15:35:21	0.504644	2.24476	1648.04	FALSE	43
2022-09-13	15:35:21	0.279504	1.24329	1662.33	FALSE	43
2022-09-13	15:35:21	0.345204	1.53554	1649.58	FALSE	43
2022-09-13	15:35:22	0.393957	1.7524	1664.08	FALSE	43
2022-09-13	15:35:22	0.368104	1.6374	1651.21	FALSE	43
2022-09-13	15:35:22	0.301438	1.34086	1665.42	FALSE	43
2022-09-13	15:35:23	0.265763	1.18217	1652.4	FALSE	43
2022-09-13	15:35:23	0.477112	2.12229	1667.55	FALSE	43
2022-09-13	15:35:23	0.423321	1.88302	1654.28	FALSE	43
2022-09-13	15:35:23	0.304949	1.35647	1668.9	FALSE	43
2022-09-13	15:35:24	0.476043	2.11753	1656.4	FALSE	43
2022-09-13	15:35:24	0.484847	2.1567	1671.06	FALSE	43
2022-09-13	15:35:24	0.671718	2.98794	1659.38	FALSE	43
2022-09-13	15:35:24	0.912583	4.05935	1675.12	FALSE	43
2022-09-13	15:35:25	0.729784	3.24623	1662.63	FALSE	43
2022-09-13	15:35:25	0.972837	4.32737	1679.45	FALSE	43
2022-09-13	15:35:25	1.21492	5.40421	1668.03	FALSE	43
2022-09-13	15:35:25	1.65869	7.37818	1686.82	FALSE	43
2022-09-13	15:35:26	1.34291	5.97353	1674.01	FALSE	43
2022-09-13	15:35:26	0.741896	3.3001	1690.13	FALSE	43
2022-09-13	15:35:26	0.499148	2.22031	1676.23	FALSE	43
2022-09-13	15:35:27	0.531819	2.36564	1692.49	FALSE	43
2022-09-13	15:35:27	0.512379	2.27916	1678.51	FALSE	43
2022-09-13	15:35:27	0.718028	3.19393	1695.68	FALSE	43
2022-09-13	15:35:27	0.784796	3.49093	1682	FALSE	43
2022-09-13	15:35:28	0.622354	2.76836	1698.45	FALSE	43
2022-09-13	15:35:28	0.54897	2.44193	1684.44	FALSE	43
2022-09-13	15:35:28	0.495585	2.20446	1700.66	FALSE	43
2022-09-13	15:35:28	0.42729	1.90067	1686.34	FALSE	43
2022-09-13	15:35:29	0.450903	2.00571	1702.66	FALSE	43
2022-09-13	15:35:29	0.458435	2.03921	1688.38	FALSE	43
2022-09-13	15:35:29	0.452176	2.01137	1704.67	FALSE	43
2022-09-13	15:35:29	0.447596	1.991	1690.37	FALSE	43
2022-09-13	15:35:30	0.424593	1.88867	1706.56	FALSE	43
2022-09-13	15:35:30	0.425407	1.8923	1692.26	FALSE	43
2022-09-13	15:35:30	0.411209	1.82914	1708.39	FALSE	43
2022-09-13	15:35:31	0.413804	1.84068	1694.1	FALSE	43
2022-09-13	15:35:31	0.430903	1.91674	1710.31	FALSE	43
2022-09-13	15:35:31	0.431005	1.9172	1696.02	FALSE	43
2022-09-13	15:35:31	0.431514	1.91946	1712.23	FALSE	43
2022-09-13	15:35:32	0.426476	1.89705	1697.92	FALSE	43
2022-09-13	15:35:32	0.427036	1.89954	1714.13	FALSE	43
2022-09-13	15:35:32	0.427697	1.90248	1699.82	FALSE	43
2022-09-13	15:35:32	0.410852	1.82755	1715.96	FALSE	43
2022-09-13	15:35:33	0.398893	1.77436	1701.6	FALSE	43
2022-09-13	15:35:33	0.416909	1.85449	1717.81	FALSE	43
2022-09-13	15:35:33	0.416043	1.85064	1703.45	FALSE	43
2022-09-13	15:35:33	0.430293	1.91403	1719.72	FALSE	43
2022-09-13	15:35:34	0.427799	1.90294	1705.35	FALSE	43
2022-09-13	15:35:34	0.454517	2.02178	1721.75	FALSE	43
2022-09-13	15:35:34	0.442201	1.967	1707.32	FALSE	43
2022-09-13	15:35:35	0.480623	2.13791	1723.88	FALSE	43
2022-09-13	15:35:35	0.532226	2.36745	1709.68	FALSE	43
2022-09-13	15:35:35	0.788766	3.50859	1727.39	FALSE	43
2022-09-13	15:35:35	1.17905	5.24465	1714.93	FALSE	43
2022-09-13	15:35:36	1.88357	8.3785	1735.77	FALSE	43
2022-09-13	15:35:36	2.0567	9.14861	1724.08	FALSE	43
2022-09-13	15:35:36	2.94149	13.0843	1748.86	FALSE	43
2022-09-13	15:35:36	3.33752	14.846	1738.92	1	44
2022-09-13	15:35:37	2.56846	11.425	1760.28	FALSE	44
2022-09-13	15:35:37	1.71584	7.6324	1746.56	FALSE	44
2022-09-13	15:35:37	1.17075	5.20773	1765.49	FALSE	44
2022-09-13	15:35:37	1.45055	6.45234	1753.01	FALSE	44
2022-09-13	15:35:38	1.4679	6.52951	1772.02	FALSE	44
2022-09-13	15:35:38	1.3849	6.16031	1759.17	FALSE	44
2022-09-13	15:35:38	1.04144	4.63253	1776.65	FALSE	44
2022-09-13	15:35:39	0.836043	3.71889	1762.89	FALSE	44
2022-09-13	15:35:39	0.831209	3.69738	1780.35	FALSE	44
2022-09-13	15:35:39	0.778079	3.46105	1766.35	FALSE	44
2022-09-13	15:35:39	0.825407	3.67158	1784.02	FALSE	44
2022-09-13	15:35:40	0.881387	3.92059	1770.27	FALSE	44
2022-09-13	15:35:40	0.968359	4.30745	1788.33	FALSE	44
2022-09-13	15:35:40	0.88042	3.91628	1774.18	FALSE	44
2022-09-13	15:35:40	0.795433	3.53825	1791.86	FALSE	44
2022-09-13	15:35:41	0.770903	3.42913	1777.61	FALSE	44
2022-09-13	15:35:41	0.753346	3.35103	1795.22	FALSE	44
2022-09-13	15:35:41	0.726374	3.23106	1780.84	FALSE	44
2022-09-13	15:35:41	0.701234	3.11923	1798.33	FALSE	44
2022-09-13	15:35:42	0.71187	3.16654	1784.01	FALSE	44
2022-09-13	15:35:42	0.707239	3.14594	1801.48	FALSE	44
2022-09-13	15:35:42	0.661794	2.94379	1786.96	FALSE	44
2022-09-13	15:35:43	0.572786	2.54787	1804.03	FALSE	44
2022-09-13	15:35:43	0.507443	2.25721	1789.21	FALSE	44
2022-09-13	15:35:43	0.413193	1.83797	1805.87	FALSE	44
2022-09-13	15:35:43	0.45869	2.04034	1791.25	FALSE	44
2022-09-13	15:35:44	0.407697	1.81352	1807.68	FALSE	44
2022-09-13	15:35:44	0.441896	1.96564	1793.22	FALSE	44
2022-09-13	15:35:44	0.352074	1.5661	1809.25	FALSE	44
2022-09-13	15:35:44	0.402964	1.79246	1795.01	FALSE	44
2022-09-13	15:35:45	0.490191	2.18047	1811.43	FALSE	44
2022-09-13	15:35:45	0.668766	2.9748	1797.99	FALSE	44
2022-09-13	15:35:45	0.747799	3.32636	1814.75	FALSE	44
2022-09-13	15:35:45	0.933448	4.15216	1802.14	FALSE	44
2022-09-13	15:35:46	0.887239	3.94662	1818.7	FALSE	44
2022-09-13	15:35:46	0.688206	3.06128	1805.2	FALSE	44
2022-09-13	15:35:46	0.602812	2.68143	1821.38	FALSE	44
2022-09-13	15:35:47	0.536909	2.38828	1807.59	FALSE	44
2022-09-13	15:35:47	0.513855	2.28573	1823.67	FALSE	44
2022-09-13	15:35:47	0.505458	2.24838	1809.84	FALSE	44
2022-09-13	15:35:47	0.499504	2.22189	1825.89	FALSE	44
2022-09-13	15:35:48	0.50215	2.23366	1812.07	FALSE	44
2022-09-13	15:35:48	0.498842	2.21895	1828.11	FALSE	44
2022-09-13	15:35:48	0.491667	2.18703	1814.26	FALSE	44
2022-09-13	15:35:48	0.497367	2.21239	1830.32	FALSE	44
2022-09-13	15:35:49	0.500063	2.22438	1816.48	FALSE	44
2022-09-13	15:35:49	0.503371	2.23909	1832.56	FALSE	44
2022-09-13	15:35:49	0.501336	2.23004	1818.71	FALSE	44
2022-09-13	15:35:49	0.499656	2.22257	1834.78	FALSE	44
2022-09-13	15:35:50	0.492837	2.19224	1820.9	FALSE	44
2022-09-13	15:35:50	0.489733	2.17843	1836.96	FALSE	44
2022-09-13	15:35:50	0.497061	2.21103	1823.11	FALSE	44
2022-09-13	15:35:51	0.484949	2.15715	1839.12	FALSE	44
2022-09-13	15:35:51	0.484339	2.15444	1825.27	FALSE	44
2022-09-13	15:35:51	0.47757	2.12433	1841.24	FALSE	44
2022-09-13	15:35:51	0.493855	2.19677	1827.47	FALSE	44
2022-09-13	15:35:52	0.495178	2.20265	1843.44	FALSE	44
2022-09-13	15:35:52	0.496399	2.20808	1829.67	FALSE	44
2022-09-13	15:35:52	0.495687	2.20491	1845.65	FALSE	44
2022-09-13	15:35:52	0.491718	2.18726	1831.86	FALSE	44
2022-09-13	15:35:53	0.490038	2.17979	1847.83	FALSE	44
2022-09-13	15:35:53	0.497723	2.21397	1834.07	FALSE	44
2022-09-13	15:35:53	0.4993	2.22099	1850.05	FALSE	44
2022-09-13	15:35:53	0.496756	2.20967	1836.28	FALSE	44
2022-09-13	15:35:54	0.490903	2.18363	1852.23	FALSE	44
2022-09-13	15:35:54	0.502099	2.23344	1838.52	FALSE	44
2022-09-13	15:35:54	0.520216	2.31402	1854.55	FALSE	44
2022-09-13	15:35:55	0.511667	2.276	1840.79	FALSE	44
2022-09-13	15:35:55	0.507901	2.25925	1856.81	FALSE	44
2022-09-13	15:35:55	0.511412	2.27486	1843.07	FALSE	44
2022-09-13	15:35:55	0.524796	2.3344	1859.14	FALSE	44
2022-09-13	15:35:56	0.50103	2.22868	1845.3	FALSE	44
2022-09-13	15:35:56	0.485407	2.15919	1861.3	FALSE	44
2022-09-13	15:35:56	0.467036	2.07747	1847.37	FALSE	44
2022-09-13	15:35:56	0.470089	2.09105	1863.39	FALSE	44
2022-09-13	15:35:57	0.476043	2.11753	1849.49	FALSE	44
2022-09-13	15:35:57	0.477977	2.12614	1865.52	FALSE	44
2022-09-13	15:35:57	0.468359	2.08335	1851.58	FALSE	44
2022-09-13	15:35:57	0.480318	2.13655	1867.65	FALSE	44
2022-09-13	15:35:58	0.48673	2.16507	1853.74	FALSE	44
2022-09-13	15:35:58	0.482303	2.14538	1869.8	FALSE	44
2022-09-13	15:35:58	0.525203	2.33621	1856.08	FALSE	44
2022-09-13	15:35:59	0.531209	2.36292	1872.16	FALSE	44
2022-09-13	15:35:59	0.512634	2.2803	1858.36	FALSE	44
2022-09-13	15:35:59	0.473041	2.10418	1874.27	FALSE	44
2022-09-13	15:35:59	0.384135	1.70871	1860.07	FALSE	44
2022-09-13	15:36:00	0.370852	1.64962	1875.92	FALSE	44
2022-09-13	15:36:00	0.382608	1.70192	1861.77	FALSE	44
2022-09-13	15:36:00	0.378283	1.68268	1877.6	FALSE	44
2022-09-13	15:36:00	0.468919	2.08585	1863.85	FALSE	44
2022-09-13	15:36:01	0.551463	2.45302	1880.05	FALSE	44
2022-09-13	15:36:01	0.845	3.75873	1867.61	FALSE	44
2022-09-13	15:36:01	1.76291	7.84178	1887.89	FALSE	44
2022-09-13	15:36:01	1.68688	7.50358	1875.12	FALSE	44
2022-09-13	15:36:02	1.43645	6.38962	1894.28	FALSE	44
2022-09-13	15:36:02	1.26322	5.61906	1880.73	FALSE	44
2022-09-13	15:36:02	1.36556	6.07428	1900.36	FALSE	44
2022-09-13	15:36:03	1.08159	4.81113	1885.55	FALSE	44
2022-09-13	15:36:03	0.889122	3.95499	1904.31	FALSE	44
2022-09-13	15:36:03	0.865	3.84769	1889.39	FALSE	44
2022-09-13	15:36:03	0.695687	3.09455	1907.41	FALSE	44
2022-09-13	15:36:04	0.531921	2.36609	1891.76	FALSE	44
2022-09-13	15:36:04	0.564135	2.50939	1909.92	FALSE	44
2022-09-13	15:36:04	0.482914	2.1481	1893.91	FALSE	44
2022-09-13	15:36:04	0.409326	1.82076	1911.74	FALSE	44
2022-09-13	15:36:05	0.431921	1.92127	1895.83	FALSE	44
2022-09-13	15:36:05	0.41701	1.85494	1913.59	FALSE	44
2022-09-13	15:36:05	0.41299	1.83706	1897.67	FALSE	44
2022-09-13	15:36:05	0.431209	1.9181	1915.51	FALSE	44
2022-09-13	15:36:06	0.433753	1.92942	1899.6	FALSE	44
2022-09-13	15:36:06	0.431107	1.91765	1917.43	FALSE	44
2022-09-13	15:36:06	0.437672	1.94685	1901.54	FALSE	44
2022-09-13	15:36:07	0.444542	1.97741	1919.41	FALSE	44
2022-09-13	15:36:07	0.438283	1.94957	1903.49	FALSE	44
2022-09-13	15:36:07	0.453295	2.01635	1921.42	FALSE	44
2022-09-13	15:36:07	0.43874	1.9516	1905.44	FALSE	44
2022-09-13	15:36:08	0.429987	1.91267	1923.33	FALSE	44
2022-09-13	15:36:08	0.417875	1.85879	1907.3	FALSE	44
2022-09-13	15:36:08	0.435738	1.93825	1925.27	FALSE	44
2022-09-13	15:36:08	0.436603	1.9421	1909.24	FALSE	44
2022-09-13	15:36:09	0.398995	1.77481	1927.05	FALSE	44
2022-09-13	15:36:09	0.473092	2.10441	1911.35	FALSE	44
2022-09-13	15:36:09	0.405764	1.80492	1928.85	FALSE	44
2022-09-13	15:36:09	0.449987	2.00163	1913.35	FALSE	44
2022-09-13	15:36:10	0.377621	1.67973	1930.53	FALSE	44
2022-09-13	15:36:10	0.389886	1.73429	1915.09	FALSE	44
2022-09-13	15:36:10	0.364542	1.62156	1932.15	FALSE	44
2022-09-13	15:36:11	0.430089	1.91312	1917	FALSE	44
2022-09-13	15:36:11	0.436807	1.943	1934.1	FALSE	44
2022-09-13	15:36:11	0.489936	2.17933	1919.18	FALSE	44
2022-09-13	15:36:11	0.490344	2.18115	1936.28	FALSE	44
2022-09-13	15:36:12	0.646527	2.87588	1922.05	FALSE	44
2022-09-13	15:36:12	0.675941	3.00672	1939.28	FALSE	44
2022-09-13	15:36:12	0.641845	2.85505	1924.91	FALSE	44
2022-09-13	15:36:12	0.548817	2.44125	1941.73	FALSE	44
2022-09-13	15:36:13	0.461438	2.05257	1926.96	FALSE	44
2022-09-13	15:36:13	0.382863	1.70305	1943.43	FALSE	44
2022-09-13	15:36:13	0.31131	1.38477	1928.35	FALSE	44
2022-09-13	15:36:13	0.300013	1.33452	1944.76	FALSE	44
2022-09-13	15:36:14	0.315738	1.40447	1929.75	FALSE	44
2022-09-13	15:36:14	0.345916	1.5387	1946.3	FALSE	44
2022-09-13	15:36:14	0.354415	1.57651	1931.33	FALSE	44
2022-09-13	15:36:14	0.333601	1.48392	1947.79	FALSE	44
2022-09-13	15:36:15	0.345102	1.53508	1932.86	FALSE	44
2022-09-13	15:36:15	0.34612	1.53961	1949.33	FALSE	44
2022-09-13	15:36:15	0.346578	1.54165	1934.4	FALSE	44
2022-09-13	15:36:16	0.359606	1.5996	1950.93	FALSE	44
2022-09-13	15:36:16	0.385611	1.71527	1936.12	FALSE	44
2022-09-13	15:36:16	0.434008	1.93055	1952.86	FALSE	44
2022-09-13	15:36:16	0.438791	1.95183	1938.07	FALSE	44
2022-09-13	15:36:17	0.452735	2.01386	1954.87	FALSE	44
2022-09-13	15:36:17	0.429631	1.91108	1939.98	FALSE	44
2022-09-13	15:36:17	0.384644	1.71097	1956.58	FALSE	44
2022-09-13	15:36:17	0.375789	1.67158	1941.65	FALSE	44
2022-09-13	15:36:18	0.361031	1.60594	1958.19	FALSE	44
2022-09-13	15:36:18	0.353753	1.57356	1943.23	FALSE	44
2022-09-13	15:36:18	0.365814	1.62721	1959.81	FALSE	44
2022-09-13	15:36:18	0.359504	1.59915	1944.83	FALSE	44
2022-09-13	15:36:19	0.379504	1.68811	1961.5	FALSE	44
2022-09-13	15:36:19	0.368868	1.6408	1946.47	FALSE	44
2022-09-13	15:36:19	0.368613	1.63966	1963.14	FALSE	44
2022-09-13	15:36:20	0.364695	1.62224	1948.09	FALSE	44
2022-09-13	15:36:20	0.359199	1.59779	1964.74	FALSE	44
2022-09-13	15:36:20	0.371056	1.65053	1949.74	FALSE	44
2022-09-13	15:36:20	0.371768	1.6537	1966.39	FALSE	44
2022-09-13	15:36:21	0.36098	1.60571	1951.35	FALSE	44
2022-09-13	15:36:21	0.368562	1.63944	1968.03	FALSE	44
2022-09-13	15:36:21	0.376349	1.67408	1953.02	FALSE	44
2022-09-13	15:36:21	0.35131	1.5627	1969.6	FALSE	44
2022-09-13	15:36:22	0.359657	1.59983	1954.62	FALSE	44
2022-09-13	15:36:22	0.383117	1.70418	1971.3	FALSE	44
2022-09-13	15:36:22	0.362965	1.61454	1956.23	FALSE	44
2022-09-13	15:36:22	0.369377	1.64306	1972.94	FALSE	44
2022-09-13	15:36:23	0.383779	1.70713	1957.94	FALSE	44
2022-09-13	15:36:23	0.372685	1.65778	1974.6	FALSE	44
2022-09-13	15:36:23	0.362913	1.61431	1959.56	FALSE	44
2022-09-13	15:36:24	0.324847	1.44498	1976.05	FALSE	44
2022-09-13	15:36:24	0.348359	1.54957	1961.1	FALSE	44
2022-09-13	15:36:24	0.384542	1.71052	1977.76	FALSE	44
2022-09-13	15:36:24	0.321082	1.42824	1962.53	FALSE	44
2022-09-13	15:36:25	0.350903	1.56089	1979.32	FALSE	44
2022-09-13	15:36:25	0.370191	1.64668	1964.18	FALSE	44
2022-09-13	15:36:25	0.416451	1.85246	1981.17	FALSE	44
2022-09-13	15:36:25	0.425	1.89048	1966.07	FALSE	44
2022-09-13	15:36:26	0.39299	1.7481	1982.92	FALSE	44
2022-09-13	15:36:26	0.38841	1.72773	1967.8	FALSE	44
2022-09-13	15:36:26	0.423575	1.88415	1984.8	FALSE	44
2022-09-13	15:36:26	0.418486	1.86151	1969.66	FALSE	44
2022-09-13	15:36:27	0.276705	1.23084	1986.03	FALSE	44
2022-09-13	15:36:27	0.228054	1.01443	1970.67	FALSE	44
2022-09-13	15:36:27	0.287036	1.27679	1987.31	FALSE	44
2022-09-13	15:36:28	0.189682	0.843743	1971.52	FALSE	44
2022-09-13	15:36:28	0.145356	0.646573	1987.96	FALSE	44
2022-09-13	15:36:28	0.248257	1.1043	1972.62	FALSE	44
2022-09-13	15:36:28	0.107239	0.477021	1988.43	FALSE	44
2022-09-13	15:36:29	0.232736	1.03526	1973.66	FALSE	44
2022-09-13	15:36:29	0.276043	1.22789	1989.66	FALSE	44
2022-09-13	15:36:29	0.325407	1.44748	1975.1	FALSE	44
2022-09-13	15:36:29	0.513295	2.28324	1991.94	FALSE	44
2022-09-13	15:36:30	0.51416	2.28709	1977.39	FALSE	44
2022-09-13	15:36:30	1.22159	5.43388	1997.38	FALSE	44
2022-09-13	15:36:30	0.648053	2.88267	1980.27	FALSE	44
2022-09-13	15:36:30	1.24485	5.53734	2002.92	FALSE	44
2022-09-13	15:36:31	1.8021	8.0161	1988.29	FALSE	44
2022-09-13	15:36:31	0.719707	3.2014	2006.12	FALSE	44
2022-09-13	15:36:31	0.497723	2.21397	1990.5	FALSE	44
2022-09-13	15:36:32	0.598232	2.66106	2008.78	FALSE	44
2022-09-13	15:36:32	0.405102	1.80197	1992.31	FALSE	44
2022-09-13	15:36:32	0.611005	2.71787	2011.5	FALSE	44
2022-09-13	15:36:32	0.759962	3.38046	1995.69	FALSE	44
2022-09-13	15:36:33	1.00836	4.48539	2015.98	FALSE	44
2022-09-13	15:36:33	1.58261	7.03977	2002.73	FALSE	44
2022-09-13	15:36:33	1.60291	7.13006	2023.11	FALSE	44
2022-09-13	15:36:33	1.91452	8.51617	2011.24	FALSE	44
2022-09-13	15:36:34	2.81604	12.5263	2035.64	FALSE	44
2022-09-13	15:36:34	2.89116	12.8605	2024.1	FALSE	44
2022-09-13	15:36:34	3.79772	16.893	2052.53	1	45
2022-09-13	15:36:34	5.30337	23.5905	2047.69	1	46
2022-09-13	15:36:35	4.56922	20.3248	2072.85	1	47
2022-09-13	15:36:35	3.57874	15.919	2063.61	1	48
2022-09-13	15:36:35	5.09853	22.6793	2095.53	1	49
2022-09-13	15:36:36	7.23848	32.1982	2095.81	1	50
2022-09-13	15:36:36	5.46093	24.2913	2119.83	1	51
2022-09-13	15:36:36	2.768	12.3126	2108.12	FALSE	51
2022-09-13	15:36:36	1.79828	7.99911	2127.82	FALSE	51
2022-09-13	15:36:37	2.72734	12.1318	2120.26	FALSE	51
2022-09-13	15:36:37	5.90169	26.2519	2154.08	1	52
2022-09-13	15:36:37	5.67166	25.2287	2145.48	1	53
2022-09-13	15:36:37	2.35218	10.463	2164.54	FALSE	53
2022-09-13	15:36:38	1.13065	5.02936	2150.51	FALSE	53
2022-09-13	15:36:38	1.87523	8.3414	2172.88	FALSE	53
2022-09-13	15:36:38	3.47421	15.454	2165.97	1	54
2022-09-13	15:36:38	4.13538	18.395	2191.28	1	55
2022-09-13	15:36:39	3.53945	15.7442	2181.71	1	56
2022-09-13	15:36:39	1.07889	4.79912	2196.08	FALSE	56
2022-09-13	15:36:39	0.336858	1.49841	2183.21	FALSE	56
2022-09-13	15:36:40	0.335535	1.49253	2197.57	FALSE	56
2022-09-13	15:36:40	0.27014	1.20164	2184.41	FALSE	56
2022-09-13	15:36:40	0.31701	1.41012	2198.98	FALSE	56
2022-09-13	15:36:40	0.355585	1.58171	2185.99	FALSE	56
2022-09-13	15:36:41	0.347646	1.5464	2200.52	FALSE	56
2022-09-13	15:36:41	0.337316	1.50045	2187.49	FALSE	56
2022-09-13	15:36:41	0.345051	1.53486	2202.06	FALSE	56
2022-09-13	15:36:41	0.356858	1.58738	2189.08	FALSE	56
2022-09-13	15:36:42	0.346221	1.54006	2203.6	FALSE	56
2022-09-13	15:36:42	0.347341	1.54504	2190.63	FALSE	56
2022-09-13	15:36:42	0.459046	2.04193	2205.64	FALSE	56
2022-09-13	15:36:42	0.392583	1.74629	2192.37	FALSE	56
2022-09-13	15:36:43	0.449936	2.00141	2207.64	FALSE	56
2022-09-13	15:36:43	0.500572	2.22664	2194.6	FALSE	56
2022-09-13	15:36:43	0.597519	2.65788	2210.3	FALSE	56
2022-09-13	15:36:44	0.563779	2.5078	2197.11	FALSE	56
2022-09-13	15:36:44	0.494924	2.20152	2212.5	FALSE	56
2022-09-13	15:36:44	0.491107	2.18454	2199.29	FALSE	56
2022-09-13	15:36:44	0.467188	2.07815	2214.58	FALSE	56
2022-09-13	15:36:45	0.493092	2.19337	2201.48	FALSE	56
2022-09-13	15:36:45	0.463117	2.06004	2216.64	FALSE	56
2022-09-13	15:36:45	0.4736	2.10667	2203.59	FALSE	56
2022-09-13	15:36:45	0.48215	2.1447	2218.78	FALSE	56
2022-09-13	15:36:46	0.468512	2.08404	2205.68	FALSE	56
2022-09-13	15:36:46	0.465967	2.07271	2220.86	FALSE	56
2022-09-13	15:36:46	0.467188	2.07815	2207.75	FALSE	56
2022-09-13	15:36:46	0.491463	2.18613	2223.04	FALSE	56
2022-09-13	15:36:47	0.482252	2.14515	2209.9	FALSE	56
2022-09-13	15:36:47	0.42958	1.91086	2224.95	FALSE	56
2022-09-13	15:36:47	0.485814	2.161	2212.06	FALSE	56
2022-09-13	15:36:48	1.86897	8.31355	2233.27	FALSE	56
2022-09-13	15:36:48	0.558741	2.48539	2214.54	FALSE	56
2022-09-13	15:36:48	0.515331	2.2923	2235.56	FALSE	56
2022-09-13	15:36:48	0.634567	2.82268	2217.37	FALSE	56
2022-09-13	15:36:49	0.530649	2.36043	2237.92	FALSE	56
2022-09-13	15:36:49	1.08419	4.82269	2222.19	FALSE	56
2022-09-13	15:36:49	0.952735	4.23796	2242.16	FALSE	56
2022-09-13	15:36:49	1.59966	7.11561	2229.31	FALSE	56
2022-09-13	15:36:50	2.19172	9.74921	2251.91	FALSE	56
2022-09-13	15:36:50	1.73818	7.73177	2237.04	FALSE	56
2022-09-13	15:36:50	1.42083	6.32014	2258.23	FALSE	56
2022-09-13	15:36:50	0.93869	4.17548	2241.21	FALSE	56
2022-09-13	15:36:51	1.13584	5.05244	2263.28	FALSE	56
2022-09-13	15:36:51	4.54683	20.2252	2261.44	1	57
2022-09-13	15:36:51	3.94932	17.5674	2280.85	1	58

## Sheet: Unnamed_prong_2022913153136 (2)
Date	Time	Lbs	Total force x time			**GoPro Fitting: 1521
2022-09-13	15:31:37	0.272023	0.272023	FALSE	0
2022-09-13	15:31:37	0.28444	0.556463	FALSE	0
2022-09-13	15:31:37	0.292888	0.849351	FALSE	0
2022-09-13	15:31:37	0.280827	1.13018	FALSE	0
2022-09-13	15:31:38	0.332837	1.46301	FALSE	0
2022-09-13	15:31:38	0.316145	1.77916	FALSE	0
2022-09-13	15:31:38	0.311412	2.09057	FALSE	0
2022-09-13	15:31:38	0.338435	2.42901	FALSE	0
2022-09-13	15:31:39	0.337316	2.76632	FALSE	0
2022-09-13	15:31:39	0.336959	3.10328	FALSE	0
2022-09-13	15:31:39	0.335636	3.43892	FALSE	0
2022-09-13	15:31:40	0.337672	3.77659	FALSE	0
2022-09-13	15:31:40	0.328613	4.1052	FALSE	0
2022-09-13	15:31:40	0.366629	4.47183	FALSE	0
2022-09-13	15:31:40	0.399657	4.87149	FALSE	0
2022-09-13	15:31:41	0.375942	5.24743	FALSE	0
2022-09-13	15:31:41	0.281743	5.52917	FALSE	0
2022-09-13	15:31:41	0.35645	5.88562	FALSE	0
2022-09-13	15:31:41	0.384135	6.26976	FALSE	0
2022-09-13	15:31:42	0.294109	6.56387	FALSE	0
2022-09-13	15:31:42	0.317163	6.88103	FALSE	0
2022-09-13	15:31:42	0.114669	6.9957	FALSE	0
2022-09-13	15:31:42	0.518842	7.51454	FALSE	0
2022-09-13	15:31:43	0.206425	7.72097	FALSE	0
2022-09-13	15:31:43	0.876603	8.59757	FALSE	0
2022-09-13	15:31:43	4.37966	12.9772	1	1
2022-09-13	15:31:44	3.84235	16.8196	1	2
2022-09-13	15:31:44	0.562761	17.3823	FALSE	2
2022-09-13	15:31:44	0.476654	17.859	FALSE	2
2022-09-13	15:31:44	0.125102	17.9841	FALSE	2
2022-09-13	15:31:45	0.31645	18.3005	FALSE	2
2022-09-13	15:31:45	0.246883	18.5474	FALSE	2
2022-09-13	15:31:45	0.424338	18.9718	FALSE	2
2022-09-13	15:31:45	0.569071	19.5408	FALSE	2
2022-09-13	15:31:46	0.414822	19.9557	FALSE	2
2022-09-13	15:31:46	1.03177	20.9874	FALSE	2
2022-09-13	15:31:46	4.31054	25.298	1	3
2022-09-13	15:31:46	1.5249	26.8229	FALSE	3
2022-09-13	15:31:47	0.223575	27.0464	FALSE	3
2022-09-13	15:31:47	0.300674	27.3471	FALSE	3
2022-09-13	15:31:47	0.313448	27.6606	FALSE	3
2022-09-13	15:31:48	0.00138701	27.662	FALSE	3
2022-09-13	15:31:48	-0.511488	27.662	FALSE	3
2022-09-13	15:31:48	-0.447671	27.662	FALSE	3
2022-09-13	15:31:48	-0.399173	27.662	FALSE	3
2022-09-13	15:31:49	0.0982826	27.7602	FALSE	3
2022-09-13	15:31:49	0.36897	28.1292	FALSE	3
2022-09-13	15:31:49	0.116705	28.2459	FALSE	3
2022-09-13	15:31:49	0.149987	28.3959	FALSE	3
2022-09-13	15:31:50	0.462405	28.8583	FALSE	3
2022-09-13	15:31:50	0.330598	29.1889	FALSE	3
2022-09-13	15:31:50	0.352888	29.5418	FALSE	3
2022-09-13	15:31:50	0.292125	29.8339	FALSE	3
2022-09-13	15:31:51	0.209478	30.0434	FALSE	3
2022-09-13	15:31:51	0.319555	30.3629	FALSE	3
2022-09-13	15:31:51	0.162048	30.525	FALSE	3
2022-09-13	15:31:52	1.33258	31.8576	FALSE	3
2022-09-13	15:31:52	6.50978	38.3674	1	4
2022-09-13	15:31:52	9.82026	48.1876	1	5
2022-09-13	15:31:52	5.89395	54.0816	1	6
2022-09-13	15:31:53	4.96378	59.0453	1	7
2022-09-13	15:31:53	4.35823	63.4036	1	8
2022-09-13	15:31:53	1.70383	65.1074	FALSE	8
2022-09-13	15:31:53	1.37676	66.4842	FALSE	8
2022-09-13	15:31:54	2.35314	68.8373	FALSE	8
2022-09-13	15:31:54	3.19162	72.0289	1	9
2022-09-13	15:31:54	2.51335	74.5423	FALSE	9
2022-09-13	15:31:54	1.8849	76.4272	FALSE	9
2022-09-13	15:31:55	1.38449	77.8117	FALSE	9
2022-09-13	15:31:55	1.34429	79.156	FALSE	9
2022-09-13	15:31:55	1.9734	81.1294	FALSE	9
2022-09-13	15:31:56	1.97431	83.1037	FALSE	9
2022-09-13	15:31:56	1.92449	85.0282	FALSE	9
2022-09-13	15:31:56	1.8052	86.8334	FALSE	9
2022-09-13	15:31:56	1.70134	88.5347	FALSE	9
2022-09-13	15:31:57	1.45304	89.9877	FALSE	9
2022-09-13	15:31:57	1.60454	91.5923	FALSE	9
2022-09-13	15:31:57	1.18917	92.7814	FALSE	9
2022-09-13	15:31:57	1.38368	94.1651	FALSE	9
2022-09-13	15:31:58	1.32795	95.4931	FALSE	9
2022-09-13	15:31:58	1.07411	96.5672	FALSE	9
2022-09-13	15:31:58	1.08276	97.6499	FALSE	9
2022-09-13	15:31:58	1.04927	98.6992	FALSE	9
2022-09-13	15:31:59	1.09274	99.792	FALSE	9
2022-09-13	15:31:59	0.967545	100.76	FALSE	9
2022-09-13	15:31:59	1.09065	101.85	FALSE	9
2022-09-13	15:32:00	0.890191	102.74	FALSE	9
2022-09-13	15:32:00	1.37309	104.113	FALSE	9
2022-09-13	15:32:00	1.26128	105.375	FALSE	9
2022-09-13	15:32:00	1.35543	106.73	FALSE	9
2022-09-13	15:32:01	1.35574	108.086	FALSE	9
2022-09-13	15:32:01	1.36144	109.447	FALSE	9
2022-09-13	15:32:01	1.3453	110.793	FALSE	9
2022-09-13	15:32:01	1.36134	112.154	FALSE	9
2022-09-13	15:32:02	1.34586	113.5	FALSE	9
2022-09-13	15:32:02	1.38515	114.885	FALSE	9
2022-09-13	15:32:02	1.38408	116.269	FALSE	9
2022-09-13	15:32:02	1.4224	117.691	FALSE	9
2022-09-13	15:32:03	1.41156	119.103	FALSE	9
2022-09-13	15:32:03	1.36006	120.463	FALSE	9
2022-09-13	15:32:03	1.37141	121.834	FALSE	9
2022-09-13	15:32:04	1.35289	123.187	FALSE	9
2022-09-13	15:32:04	1.31905	124.506	FALSE	9
2022-09-13	15:32:04	1.32118	125.828	FALSE	9
2022-09-13	15:32:04	1.4052	127.233	FALSE	9
2022-09-13	15:32:05	1.41284	128.646	FALSE	9
2022-09-13	15:32:05	1.45182	130.097	FALSE	9
2022-09-13	15:32:05	1.46556	131.563	FALSE	9
2022-09-13	15:32:05	1.55431	133.117	FALSE	9
2022-09-13	15:32:06	1.53172	134.649	FALSE	9
2022-09-13	15:32:06	1.54083	136.19	FALSE	9
2022-09-13	15:32:06	1.47548	137.665	FALSE	9
2022-09-13	15:32:07	1.39665	139.062	FALSE	9
2022-09-13	15:32:07	1.38576	140.448	FALSE	9
2022-09-13	15:32:07	1.35426	141.802	FALSE	9
2022-09-13	15:32:07	1.35218	143.154	FALSE	9
2022-09-13	15:32:08	1.18571	144.34	FALSE	9
2022-09-13	15:32:08	1.17233	145.512	FALSE	9
2022-09-13	15:32:08	1.11503	146.627	FALSE	9
2022-09-13	15:32:08	1.45701	148.084	FALSE	9
2022-09-13	15:32:09	1.34566	149.43	FALSE	9
2022-09-13	15:32:09	1.47681	150.907	FALSE	9
2022-09-13	15:32:09	1.46139	152.368	FALSE	9
2022-09-13	15:32:09	1.39844	153.767	FALSE	9
2022-09-13	15:32:10	1.39635	155.163	FALSE	9
2022-09-13	15:32:10	1.42271	156.586	FALSE	9
2022-09-13	15:32:10	1.34322	157.929	FALSE	9
2022-09-13	15:32:10	1.46078	159.39	FALSE	9
2022-09-13	15:32:11	1.45905	160.849	FALSE	9
2022-09-13	15:32:11	1.55284	162.402	FALSE	9
2022-09-13	15:32:11	1.49146	163.893	FALSE	9
2022-09-13	15:32:12	1.49294	165.386	FALSE	9
2022-09-13	15:32:12	1.37777	166.764	FALSE	9
2022-09-13	15:32:12	1.20307	167.967	FALSE	9
2022-09-13	15:32:12	0.963117	168.93	FALSE	9
2022-09-13	15:32:13	1.22739	170.157	FALSE	9
2022-09-13	15:32:13	1.94856	172.106	FALSE	9
2022-09-13	15:32:13	2.47762	174.583	FALSE	9
2022-09-13	15:32:13	2.01777	176.601	FALSE	9
2022-09-13	15:32:14	1.97324	178.574	FALSE	9
2022-09-13	15:32:14	1.36495	179.939	FALSE	9
2022-09-13	15:32:14	1.23009	181.17	FALSE	9
2022-09-13	15:32:14	1.33538	182.505	FALSE	9
2022-09-13	15:32:15	1.41223	183.917	FALSE	9
2022-09-13	15:32:15	0.991005	184.908	FALSE	9
2022-09-13	15:32:15	1.0077	185.916	FALSE	9
2022-09-13	15:32:16	0.664695	186.581	FALSE	9
2022-09-13	15:32:16	0.718282	187.299	FALSE	9
2022-09-13	15:32:16	1.151	188.45	FALSE	9
2022-09-13	15:32:16	0.900165	189.35	FALSE	9
2022-09-13	15:32:17	1.03701	190.387	FALSE	9
2022-09-13	15:32:17	1.01711	191.404	FALSE	9
2022-09-13	15:32:17	1.00897	192.413	FALSE	9
2022-09-13	15:32:17	1.06164	193.475	FALSE	9
2022-09-13	15:32:18	0.978181	194.453	FALSE	9
2022-09-13	15:32:18	0.925407	195.378	FALSE	9
2022-09-13	15:32:18	0.976145	196.354	FALSE	9
2022-09-13	15:32:18	1.00469	197.359	FALSE	9
2022-09-13	15:32:19	1.08067	198.44	FALSE	9
2022-09-13	15:32:19	1.2534	199.693	FALSE	9
2022-09-13	15:32:19	1.19055	200.884	FALSE	9
2022-09-13	15:32:20	1.15482	202.039	FALSE	9
2022-09-13	15:32:20	1.18581	203.224	FALSE	9
2022-09-13	15:32:20	1.11589	204.34	FALSE	9
2022-09-13	15:32:20	1.09131	205.432	FALSE	9
2022-09-13	15:32:21	1.08307	206.515	FALSE	9
2022-09-13	15:32:21	1.01391	207.529	FALSE	9
2022-09-13	15:32:21	1.04337	208.572	FALSE	9
2022-09-13	15:32:21	1.05431	209.626	FALSE	9
2022-09-13	15:32:22	1.02464	210.651	FALSE	9
2022-09-13	15:32:22	1.04205	211.693	FALSE	9
2022-09-13	15:32:22	1.0709	212.764	FALSE	9
2022-09-13	15:32:22	1.08978	213.854	FALSE	9
2022-09-13	15:32:23	1.08449	214.938	FALSE	9
2022-09-13	15:32:23	1.13431	216.072	FALSE	9
2022-09-13	15:32:23	1.15711	217.23	FALSE	9
2022-09-13	15:32:24	1.17869	218.408	FALSE	9
2022-09-13	15:32:24	1.13594	219.544	FALSE	9
2022-09-13	15:32:24	1.06246	220.607	FALSE	9
2022-09-13	15:32:24	1.10632	221.713	FALSE	9
2022-09-13	15:32:25	1.09869	222.812	FALSE	9
2022-09-13	15:32:25	1.2848	224.096	FALSE	9
2022-09-13	15:32:25	0.899199	224.996	FALSE	9
2022-09-13	15:32:25	0.791972	225.788	FALSE	9
2022-09-13	15:32:26	0.743117	226.531	FALSE	9
2022-09-13	15:32:26	0.689631	227.22	FALSE	9
2022-09-13	15:32:26	0.823321	228.044	FALSE	9
2022-09-13	15:32:26	0.938893	228.983	FALSE	9
2022-09-13	15:32:27	0.983829	229.966	FALSE	9
2022-09-13	15:32:27	1.00754	230.974	FALSE	9
2022-09-13	15:32:27	0.977875	231.952	FALSE	9
2022-09-13	15:32:27	0.980979	232.933	FALSE	9
2022-09-13	15:32:28	0.959097	233.892	FALSE	9
2022-09-13	15:32:28	0.941692	234.834	FALSE	9
2022-09-13	15:32:28	0.969427	235.803	FALSE	9
2022-09-13	15:32:29	0.999453	236.802	FALSE	9
2022-09-13	15:32:29	1.03696	237.839	FALSE	9
2022-09-13	15:32:29	1.07635	238.916	FALSE	9
2022-09-13	15:32:29	0.960572	239.876	FALSE	9
2022-09-13	15:32:30	0.77757	240.654	FALSE	9
2022-09-13	15:32:30	0.736552	241.39	FALSE	9
2022-09-13	15:32:30	1.02775	242.418	FALSE	9
2022-09-13	15:32:30	1.58286	244.001	FALSE	9
2022-09-13	15:32:31	1.97798	245.979	FALSE	9
2022-09-13	15:32:31	2.3019	248.281	FALSE	9
2022-09-13	15:32:31	1.8733	250.154	FALSE	9
2022-09-13	15:32:31	2.05212	252.206	FALSE	9
2022-09-13	15:32:32	1.60332	253.81	FALSE	9
2022-09-13	15:32:32	1.80205	255.612	FALSE	9
2022-09-13	15:32:32	1.422	257.034	FALSE	9
2022-09-13	15:32:33	0.823117	257.857	FALSE	9
2022-09-13	15:32:33	0.496756	258.354	FALSE	9
2022-09-13	15:32:33	0.408919	258.763	FALSE	9
2022-09-13	15:32:33	0.378333	259.141	FALSE	9
2022-09-13	15:32:34	0.504746	259.646	FALSE	9
2022-09-13	15:32:34	0.856298	260.502	FALSE	9
2022-09-13	15:32:34	1.27426	261.776	FALSE	9
2022-09-13	15:32:34	1.5565	263.333	FALSE	9
2022-09-13	15:32:35	1.38149	264.714	FALSE	9
2022-09-13	15:32:35	0.334822	265.049	FALSE	9
2022-09-13	15:32:35	0.536858	265.586	FALSE	9
2022-09-13	15:32:35	0.500521	266.086	FALSE	9
2022-09-13	15:32:36	0.464084	266.55	FALSE	9
2022-09-13	15:32:36	0.640318	267.191	FALSE	9
2022-09-13	15:32:36	0.481997	267.673	FALSE	9
2022-09-13	15:32:37	0.550496	268.223	FALSE	9
2022-09-13	15:32:37	0.333651	268.557	FALSE	9
2022-09-13	15:32:37	0.355077	268.912	FALSE	9
2022-09-13	15:32:37	0.42897	269.341	FALSE	9
2022-09-13	15:32:38	0.407036	269.748	FALSE	9
2022-09-13	15:32:38	0.522761	270.271	FALSE	9
2022-09-13	15:32:38	0.705458	270.976	FALSE	9
2022-09-13	15:32:38	0.487901	271.464	FALSE	9
2022-09-13	15:32:39	0.576756	272.041	FALSE	9
2022-09-13	15:32:39	0.707697	272.749	FALSE	9
2022-09-13	15:32:39	0.281641	273.03	FALSE	9
2022-09-13	15:32:39	0.293957	273.324	FALSE	9
2022-09-13	15:32:40	0.23925	273.563	FALSE	9
2022-09-13	15:32:40	0.243117	273.807	FALSE	9
2022-09-13	15:32:40	0.256756	274.063	FALSE	9
2022-09-13	15:32:41	0.252481	274.316	FALSE	9
2022-09-13	15:32:41	0.291972	274.608	FALSE	9
2022-09-13	15:32:41	0.066985	274.675	FALSE	9
2022-09-13	15:32:41	0.134211	274.809	FALSE	9
2022-09-13	15:32:42	0.205	275.014	FALSE	9
2022-09-13	15:32:42	0.142303	275.156	FALSE	9
2022-09-13	15:32:42	0.117926	275.274	FALSE	9
2022-09-13	15:32:42	-0.0727606	275.274	FALSE	9
2022-09-13	15:32:43	-0.0467554	275.274	FALSE	9
2022-09-13	15:32:43	0.0386898	275.313	FALSE	9
2022-09-13	15:32:43	-0.0619208	275.313	FALSE	9
2022-09-13	15:32:43	-0.221565	275.313	FALSE	9
2022-09-13	15:32:44	-0.505636	275.313	FALSE	9
2022-09-13	15:32:44	-0.571183	275.313	FALSE	9
2022-09-13	15:32:44	-0.786704	275.313	FALSE	9
2022-09-13	15:32:45	-0.648027	275.313	FALSE	9
2022-09-13	15:32:45	-0.739325	275.313	FALSE	9
2022-09-13	15:32:45	-0.786755	275.313	FALSE	9
2022-09-13	15:32:45	-0.634439	275.313	FALSE	9
2022-09-13	15:32:46	-0.502328	275.313	FALSE	9
2022-09-13	15:32:46	-0.408078	275.313	FALSE	9
2022-09-13	15:32:46	-0.246196	275.313	FALSE	9
2022-09-13	15:32:46	-0.0680786	275.313	FALSE	9
2022-09-13	15:32:47	-0.111081	275.313	FALSE	9
2022-09-13	15:32:47	-0.173575	275.313	FALSE	9
2022-09-13	15:32:47	-0.274847	275.313	FALSE	9
2022-09-13	15:32:47	-0.52019	275.313	FALSE	9
2022-09-13	15:32:48	-0.790521	275.313	FALSE	9
2022-09-13	15:32:48	-1.32665	275.313	FALSE	9
2022-09-13	15:32:48	-0.0831422	275.313	FALSE	9
2022-09-13	15:32:49	-0.053931	275.313	FALSE	9
2022-09-13	15:32:49	0.0623031	275.375	FALSE	9
2022-09-13	15:32:49	0.509886	275.885	FALSE	9
2022-09-13	15:32:49	5.77706	281.662	1	10
2022-09-13	15:32:50	7.94291	289.605	1	11
2022-09-13	15:32:50	3.94556	293.551	1	12
2022-09-13	15:32:50	2.74312	296.294	FALSE	12
2022-09-13	15:32:50	2.74439	299.038	FALSE	12
2022-09-13	15:32:51	2.68383	301.722	FALSE	12
2022-09-13	15:32:51	2.06129	303.783	FALSE	12
2022-09-13	15:32:51	1.62627	305.409	FALSE	12
2022-09-13	15:32:51	2.38383	307.793	FALSE	12
2022-09-13	15:32:52	1.59162	309.385	FALSE	12
2022-09-13	15:32:52	0.391158	309.776	FALSE	12
2022-09-13	15:32:52	0.460623	310.237	FALSE	12
2022-09-13	15:32:53	0.20841	310.445	FALSE	12
2022-09-13	15:32:53	-0.0278242	310.445	FALSE	12
2022-09-13	15:32:53	0.090191	310.535	FALSE	12
2022-09-13	15:32:53	0.261132	310.796	FALSE	12
2022-09-13	15:32:54	0.174618	310.971	FALSE	12
2022-09-13	15:32:54	0.120522	311.092	FALSE	12
2022-09-13	15:32:54	-0.136883	311.092	FALSE	12
2022-09-13	15:32:54	-0.279529	311.092	FALSE	12
2022-09-13	15:32:55	-0.354898	311.092	FALSE	12
2022-09-13	15:32:55	-0.381513	311.092	FALSE	12
2022-09-13	15:32:55	-0.327519	311.092	FALSE	12
2022-09-13	15:32:55	-0.1093	311.092	FALSE	12
2022-09-13	15:32:56	0.0432699	311.135	FALSE	12
2022-09-13	15:32:56	0.150395	311.285	FALSE	12
2022-09-13	15:32:56	0.288562	311.574	FALSE	12
2022-09-13	15:32:57	0.97589	312.55	FALSE	12
2022-09-13	15:32:57	1.1564	313.706	FALSE	12
2022-09-13	15:32:57	1.13401	314.84	FALSE	12
2022-09-13	15:32:57	1.57767	316.418	FALSE	12
2022-09-13	15:32:58	1.46327	317.881	FALSE	12
2022-09-13	15:32:58	1.2852	319.166	FALSE	12
2022-09-13	15:32:58	0.734873	319.901	FALSE	12
2022-09-13	15:32:58	0.836552	320.738	FALSE	12
2022-09-13	15:32:59	1.0593	321.797	FALSE	12
2022-09-13	15:32:59	0.51014	322.307	FALSE	12
2022-09-13	15:32:59	0.279911	322.587	FALSE	12
2022-09-13	15:32:59	0.222608	322.81	FALSE	12
2022-09-13	15:33:00	0.185865	322.995	FALSE	12
2022-09-13	15:33:00	0.136196	323.132	FALSE	12
2022-09-13	15:33:00	-0.077188	323.132	FALSE	12
2022-09-13	15:33:01	-0.0583076	323.132	FALSE	12
2022-09-13	15:33:01	-0.0472135	323.132	FALSE	12
2022-09-13	15:33:01	-0.252964	323.132	FALSE	12
2022-09-13	15:33:01	-0.238053	323.132	FALSE	12
2022-09-13	15:33:02	-0.730012	323.132	FALSE	12
2022-09-13	15:33:02	-0.771946	323.132	FALSE	12
2022-09-13	15:33:02	-0.788689	323.132	FALSE	12
2022-09-13	15:33:02	-0.676882	323.132	FALSE	12
2022-09-13	15:33:03	-0.682429	323.132	FALSE	12
2022-09-13	15:33:03	-0.467213	323.132	FALSE	12
2022-09-13	15:33:03	-0.183855	323.132	FALSE	12
2022-09-13	15:33:03	0.188715	323.32	FALSE	12
2022-09-13	15:33:04	0.807646	324.128	FALSE	12
2022-09-13	15:33:04	1.24541	325.373	FALSE	12
2022-09-13	15:33:04	2.58515	327.959	FALSE	12
2022-09-13	15:33:05	3.64556	331.604	1	13
2022-09-13	15:33:05	6.71614	338.32	1	14
2022-09-13	15:33:05	6.63273	344.953	1	15
2022-09-13	15:33:05	2.54826	347.501	FALSE	15
2022-09-13	15:33:06	0.448817	347.95	FALSE	15
2022-09-13	15:33:06	0.243524	348.194	FALSE	15
2022-09-13	15:33:06	0.186476	348.38	FALSE	15
2022-09-13	15:33:06	1.1308	349.511	FALSE	15
2022-09-13	15:33:07	2.73686	352.248	FALSE	15
2022-09-13	15:33:07	2.94729	355.195	FALSE	15
2022-09-13	15:33:07	0.962303	356.157	FALSE	15
2022-09-13	15:33:07	2.15299	358.31	FALSE	15
2022-09-13	15:33:08	2.19899	360.509	FALSE	15
2022-09-13	15:33:08	1.18017	361.69	FALSE	15
2022-09-13	15:33:08	0.568409	362.258	FALSE	15
2022-09-13	15:33:09	0.58841	362.846	FALSE	15
2022-09-13	15:33:09	0.39014	363.236	FALSE	15
2022-09-13	15:33:09	0.447341	363.684	FALSE	15
2022-09-13	15:33:09	0.394618	364.078	FALSE	15
2022-09-13	15:33:10	0.459758	364.538	FALSE	15
2022-09-13	15:33:10	0.296349	364.835	FALSE	15
2022-09-13	15:33:10	0.569631	365.404	FALSE	15
2022-09-13	15:33:10	0.59986	366.004	FALSE	15
2022-09-13	15:33:11	0.358537	366.363	FALSE	15
2022-09-13	15:33:11	0.461132	366.824	FALSE	15
2022-09-13	15:33:11	0.535585	367.359	FALSE	15
2022-09-13	15:33:11	0.497774	367.857	FALSE	15
2022-09-13	15:33:12	0.167087	368.024	FALSE	15
2022-09-13	15:33:12	0.101489	368.126	FALSE	15
2022-09-13	15:33:12	0.15701	368.283	FALSE	15
2022-09-13	15:33:13	0.0451529	368.328	FALSE	15
2022-09-13	15:33:13	0.286781	368.615	FALSE	15
2022-09-13	15:33:13	0.522354	369.137	FALSE	15
2022-09-13	15:33:13	0.721997	369.859	FALSE	15
2022-09-13	15:33:14	0.697824	370.557	FALSE	15
2022-09-13	15:33:14	1.36195	371.919	FALSE	15
2022-09-13	15:33:14	2.52831	374.447	FALSE	15
2022-09-13	15:33:14	2.06739	376.514	FALSE	15
2022-09-13	15:33:15	1.7505	378.265	FALSE	15
2022-09-13	15:33:15	2.06327	380.328	FALSE	15
2022-09-13	15:33:15	0.641489	380.97	FALSE	15
2022-09-13	15:33:15	0.720471	381.69	FALSE	15
2022-09-13	15:33:16	0.361845	382.052	FALSE	15
2022-09-13	15:33:16	0.336654	382.389	FALSE	15
2022-09-13	15:33:16	0.357875	382.746	FALSE	15
2022-09-13	15:33:17	0.247137	382.994	FALSE	15
2022-09-13	15:33:17	0.26897	383.263	FALSE	15
2022-09-13	15:33:17	0.305	383.568	FALSE	15
2022-09-13	15:33:17	0.301132	383.869	FALSE	15
2022-09-13	15:33:18	0.429682	384.298	FALSE	15
2022-09-13	15:33:18	0.315433	384.614	FALSE	15
2022-09-13	15:33:18	0.52327	385.137	FALSE	15
2022-09-13	15:33:18	0.718079	385.855	FALSE	15
2022-09-13	15:33:19	0.533142	386.388	FALSE	15
2022-09-13	15:33:19	0.72617	387.115	FALSE	15
2022-09-13	15:33:19	0.391107	387.506	FALSE	15
2022-09-13	15:33:19	0.250954	387.757	FALSE	15
2022-09-13	15:33:20	0.248512	388.005	FALSE	15
2022-09-13	15:33:20	0.236705	388.242	FALSE	15
2022-09-13	15:33:20	0.316908	388.559	FALSE	15
2022-09-13	15:33:21	0.303066	388.862	FALSE	15
2022-09-13	15:33:21	0.228512	389.09	FALSE	15
2022-09-13	15:33:21	0.568104	389.658	FALSE	15
2022-09-13	15:33:21	0.737366	390.396	FALSE	15
2022-09-13	15:33:22	1.33034	391.726	FALSE	15
2022-09-13	15:33:22	1.5195	393.246	FALSE	15
2022-09-13	15:33:22	0.998181	394.244	FALSE	15
2022-09-13	15:33:22	0.262863	394.507	FALSE	15
2022-09-13	15:33:23	0.302456	394.809	FALSE	15
2022-09-13	15:33:23	0.175026	394.984	FALSE	15
2022-09-13	15:33:23	0.421845	395.406	FALSE	15
2022-09-13	15:33:23	0.355992	395.762	FALSE	15
2022-09-13	15:33:24	0.442456	396.204	FALSE	15
2022-09-13	15:33:24	0.316705	396.521	FALSE	15
2022-09-13	15:33:24	0.3593	396.88	FALSE	15
2022-09-13	15:33:25	0.391056	397.271	FALSE	15
2022-09-13	15:33:25	0.418639	397.69	FALSE	15
2022-09-13	15:33:25	0.312176	398.002	FALSE	15
2022-09-13	15:33:25	0.173499	398.176	FALSE	15
2022-09-13	15:33:26	0.117519	398.293	FALSE	15
2022-09-13	15:33:26	0.182049	398.475	FALSE	15
2022-09-13	15:33:26	0.0342114	398.51	FALSE	15
2022-09-13	15:33:26	0.349835	398.859	FALSE	15
2022-09-13	15:33:27	9.8166	408.676	1	16
2022-09-13	15:33:27	10.4733	419.149	1	17
2022-09-13	15:33:27	4.7536	423.903	1	18
2022-09-13	15:33:27	2.61121	426.514	FALSE	18
2022-09-13	15:33:28	2.27248	428.787	FALSE	18
2022-09-13	15:33:28	6.19645	434.983	1	19
2022-09-13	15:33:28	2.83431	437.817	FALSE	19
2022-09-13	15:33:29	0.756603	438.574	FALSE	19
2022-09-13	15:33:29	3.39736	441.971	1	20
2022-09-13	15:33:29	2.72413	444.695	FALSE	20
2022-09-13	15:33:29	0.126781	444.822	FALSE	20
2022-09-13	15:33:30	0.0638297	444.886	FALSE	20
2022-09-13	15:33:30	0.0740587	444.96	FALSE	20
2022-09-13	15:33:30	0.31126	445.271	FALSE	20
2022-09-13	15:33:30	0.239199	445.511	FALSE	20
2022-09-13	15:33:31	0.47869	445.989	FALSE	20
2022-09-13	15:33:31	0.351616	446.341	FALSE	20
2022-09-13	15:33:31	0.512634	446.854	FALSE	20
2022-09-13	15:33:31	0.550242	447.404	FALSE	20
2022-09-13	15:33:32	0.564033	447.968	FALSE	20
2022-09-13	15:33:32	0.841794	448.81	FALSE	20
2022-09-13	15:33:32	0.788613	449.598	FALSE	20
2022-09-13	15:33:33	0.697875	450.296	FALSE	20
2022-09-13	15:33:33	0.541081	450.837	FALSE	20
2022-09-13	15:33:33	0.624084	451.461	FALSE	20
2022-09-13	15:33:33	0.483626	451.945	FALSE	20
2022-09-13	15:33:34	0.442914	452.388	FALSE	20
2022-09-13	15:33:34	0.571158	452.959	FALSE	20
2022-09-13	15:33:34	0.579453	453.538	FALSE	20
2022-09-13	15:33:34	0.930547	454.469	FALSE	20
2022-09-13	15:33:35	0.698486	455.167	FALSE	20
2022-09-13	15:33:35	0.70729	455.875	FALSE	20
2022-09-13	15:33:35	0.73645	456.611	FALSE	20
2022-09-13	15:33:35	0.745814	457.357	FALSE	20
2022-09-13	15:33:36	0.750038	458.107	FALSE	20
2022-09-13	15:33:36	0.741336	458.848	FALSE	20
2022-09-13	15:33:36	0.740929	459.589	FALSE	20
2022-09-13	15:33:37	0.712532	460.302	FALSE	20
2022-09-13	15:33:37	0.649784	460.952	FALSE	20
2022-09-13	15:33:37	0.652532	461.604	FALSE	20
2022-09-13	15:33:37	0.632023	462.236	FALSE	20
2022-09-13	15:33:38	0.61584	462.852	FALSE	20
2022-09-13	15:33:38	0.615891	463.468	FALSE	20
2022-09-13	15:33:38	0.645305	464.113	FALSE	20
2022-09-13	15:33:38	0.649326	464.763	FALSE	20
2022-09-13	15:33:39	0.679453	465.442	FALSE	20
2022-09-13	15:33:39	0.624135	466.066	FALSE	20
2022-09-13	15:33:39	0.645	466.711	FALSE	20
2022-09-13	15:33:39	0.653244	467.364	FALSE	20
2022-09-13	15:33:40	0.636298	468.001	FALSE	20
2022-09-13	15:33:40	0.497367	468.498	FALSE	20
2022-09-13	15:33:40	0.547544	469.046	FALSE	20
2022-09-13	15:33:41	0.552227	469.598	FALSE	20
2022-09-13	15:33:41	0.540114	470.138	FALSE	20
2022-09-13	15:33:41	0.510394	470.648	FALSE	20
2022-09-13	15:33:41	0.544695	471.193	FALSE	20
2022-09-13	15:33:42	0.493244	471.686	FALSE	20
2022-09-13	15:33:42	0.487036	472.173	FALSE	20
2022-09-13	15:33:42	0.494109	472.667	FALSE	20
2022-09-13	15:33:42	0.521031	473.188	FALSE	20
2022-09-13	15:33:43	0.545458	473.734	FALSE	20
2022-09-13	15:33:43	0.54785	474.282	FALSE	20
2022-09-13	15:33:43	0.559453	474.841	FALSE	20
2022-09-13	15:33:43	0.54388	475.385	FALSE	20
2022-09-13	15:33:44	0.497214	475.882	FALSE	20
2022-09-13	15:33:44	0.517061	476.399	FALSE	20
2022-09-13	15:33:44	0.592736	476.992	FALSE	20
2022-09-13	15:33:44	0.61187	477.604	FALSE	20
2022-09-13	15:33:45	0.647341	478.251	FALSE	20
2022-09-13	15:33:45	0.645712	478.897	FALSE	20
2022-09-13	15:33:45	0.579249	479.476	FALSE	20
2022-09-13	15:33:46	0.548206	480.024	FALSE	20
2022-09-13	15:33:46	0.549275	480.574	FALSE	20
2022-09-13	15:33:46	0.611463	481.185	FALSE	20
2022-09-13	15:33:46	0.624949	481.81	FALSE	20
2022-09-13	15:33:47	0.649784	482.46	FALSE	20
2022-09-13	15:33:47	0.618639	483.079	FALSE	20
2022-09-13	15:33:47	0.601438	483.68	FALSE	20
2022-09-13	15:33:47	0.562506	484.242	FALSE	20
2022-09-13	15:33:48	0.56271	484.805	FALSE	20
2022-09-13	15:33:48	0.561692	485.367	FALSE	20
2022-09-13	15:33:48	0.600572	485.967	FALSE	20
2022-09-13	15:33:48	0.648104	486.616	FALSE	20
2022-09-13	15:33:49	0.597417	487.213	FALSE	20
2022-09-13	15:33:49	0.61701	487.83	FALSE	20
2022-09-13	15:33:49	0.641896	488.472	FALSE	20
2022-09-13	15:33:50	0.649529	489.121	FALSE	20
2022-09-13	15:33:50	0.664593	489.786	FALSE	20
2022-09-13	15:33:50	0.685153	490.471	FALSE	20
2022-09-13	15:33:50	0.688053	491.159	FALSE	20
2022-09-13	15:33:51	0.674008	491.833	FALSE	20
2022-09-13	15:33:51	0.654109	492.487	FALSE	20
2022-09-13	15:33:51	0.650344	493.138	FALSE	20
2022-09-13	15:33:51	0.669834	493.808	FALSE	20
2022-09-13	15:33:52	0.681845	494.489	FALSE	20
2022-09-13	15:33:52	0.707697	495.197	FALSE	20
2022-09-13	15:33:52	0.689478	495.887	FALSE	20
2022-09-13	15:33:52	0.66327	496.55	FALSE	20
2022-09-13	15:33:53	0.65131	497.201	FALSE	20
2022-09-13	15:33:53	0.649835	497.851	FALSE	20
2022-09-13	15:33:53	0.655534	498.506	FALSE	20
2022-09-13	15:33:54	0.643779	499.15	FALSE	20
2022-09-13	15:33:54	0.637977	499.788	FALSE	20
2022-09-13	15:33:54	0.620267	500.408	FALSE	20
2022-09-13	15:33:54	0.611158	501.02	FALSE	20
2022-09-13	15:33:55	0.616858	501.637	FALSE	20
2022-09-13	15:33:55	0.598639	502.235	FALSE	20
2022-09-13	15:33:55	0.586018	502.821	FALSE	20
2022-09-13	15:33:55	0.585458	503.407	FALSE	20
2022-09-13	15:33:56	0.572939	503.98	FALSE	20
2022-09-13	15:33:56	0.582812	504.562	FALSE	20
2022-09-13	15:33:56	0.580216	505.143	FALSE	20
2022-09-13	15:33:56	0.579606	505.722	FALSE	20
2022-09-13	15:33:57	0.588868	506.311	FALSE	20
2022-09-13	15:33:57	0.595941	506.907	FALSE	20
2022-09-13	15:33:57	0.560267	507.467	FALSE	20
2022-09-13	15:33:58	0.52388	507.991	FALSE	20
2022-09-13	15:33:58	0.529325	508.52	FALSE	20
2022-09-13	15:33:58	0.532023	509.053	FALSE	20
2022-09-13	15:33:58	0.525051	509.578	FALSE	20
2022-09-13	15:33:59	0.540776	510.118	FALSE	20
2022-09-13	15:33:59	0.520929	510.639	FALSE	20
2022-09-13	15:33:59	0.500827	511.14	FALSE	20
2022-09-13	15:33:59	0.459555	511.6	FALSE	20
2022-09-13	15:34:00	0.463219	512.063	FALSE	20
2022-09-13	15:34:00	0.458639	512.521	FALSE	20
2022-09-13	15:34:00	0.457367	512.979	FALSE	20
2022-09-13	15:34:00	0.453906	513.433	FALSE	20
2022-09-13	15:34:01	0.446832	513.88	FALSE	20
2022-09-13	15:34:01	0.445967	514.326	FALSE	20
2022-09-13	15:34:01	0.453346	514.779	FALSE	20
2022-09-13	15:34:02	0.452379	515.231	FALSE	20
2022-09-13	15:34:02	0.440471	515.672	FALSE	20
2022-09-13	15:34:02	0.428104	516.1	FALSE	20
2022-09-13	15:34:02	0.443015	516.543	FALSE	20
2022-09-13	15:34:03	0.448308	516.991	FALSE	20
2022-09-13	15:34:03	0.445102	517.436	FALSE	20
2022-09-13	15:34:03	0.45355	517.89	FALSE	20
2022-09-13	15:34:03	0.455534	518.345	FALSE	20
2022-09-13	15:34:04	0.457926	518.803	FALSE	20
2022-09-13	15:34:04	0.457621	519.261	FALSE	20
2022-09-13	15:34:04	0.466018	519.727	FALSE	20
2022-09-13	15:34:04	0.475585	520.203	FALSE	20
2022-09-13	15:34:05	0.461743	520.664	FALSE	20
2022-09-13	15:34:05	0.457977	521.122	FALSE	20
2022-09-13	15:34:05	0.466425	521.589	FALSE	20
2022-09-13	15:34:06	0.453906	522.043	FALSE	20
2022-09-13	15:34:06	0.448206	522.491	FALSE	20
2022-09-13	15:34:06	0.446679	522.937	FALSE	20
2022-09-13	15:34:06	0.449936	523.387	FALSE	20
2022-09-13	15:34:07	0.461896	523.849	FALSE	20
2022-09-13	15:34:07	0.461285	524.311	FALSE	20
2022-09-13	15:34:07	0.459657	524.77	FALSE	20
2022-09-13	15:34:07	0.444796	525.215	FALSE	20
2022-09-13	15:34:08	0.44159	525.657	FALSE	20
2022-09-13	15:34:08	0.463626	526.12	FALSE	20
2022-09-13	15:34:08	0.468257	526.589	FALSE	20
2022-09-13	15:34:08	0.46327	527.052	FALSE	20
2022-09-13	15:34:09	0.461438	527.513	FALSE	20
2022-09-13	15:34:09	0.459097	527.972	FALSE	20
2022-09-13	15:34:09	0.475026	528.447	FALSE	20
2022-09-13	15:34:10	0.474517	528.922	FALSE	20
2022-09-13	15:34:10	0.474924	529.397	FALSE	20
2022-09-13	15:34:10	0.481539	529.878	FALSE	20
2022-09-13	15:34:10	0.479657	530.358	FALSE	20
2022-09-13	15:34:11	0.495636	530.854	FALSE	20
2022-09-13	15:34:11	0.494516	531.348	FALSE	20
2022-09-13	15:34:11	0.489936	531.838	FALSE	20
2022-09-13	15:34:11	0.501132	532.339	FALSE	20
2022-09-13	15:34:12	0.492277	532.831	FALSE	20
2022-09-13	15:34:12	0.460115	533.292	FALSE	20
2022-09-13	15:34:12	0.423931	533.716	FALSE	20
2022-09-13	15:34:12	0.394517	534.11	FALSE	20
2022-09-13	15:34:13	0.389326	534.499	FALSE	20
2022-09-13	15:34:13	0.556654	535.056	FALSE	20
2022-09-13	15:34:13	0.294262	535.35	FALSE	20
2022-09-13	15:34:14	0.679758	536.03	FALSE	20
2022-09-13	15:34:14	0.390954	536.421	FALSE	20
2022-09-13	15:34:14	0.535891	536.957	FALSE	20
2022-09-13	15:34:14	0.423677	537.381	FALSE	20
2022-09-13	15:34:15	0.614822	537.995	FALSE	20
2022-09-13	15:34:15	0.513804	538.509	FALSE	20
2022-09-13	15:34:15	0.709478	539.219	FALSE	20
2022-09-13	15:34:15	0.70958	539.928	FALSE	20
2022-09-13	15:34:16	0.531819	540.46	FALSE	20
2022-09-13	15:34:16	0.520674	540.981	FALSE	20
2022-09-13	15:34:16	0.581336	541.562	FALSE	20
2022-09-13	15:34:16	0.513906	542.076	FALSE	20
2022-09-13	15:34:17	0.585407	542.661	FALSE	20
2022-09-13	15:34:17	0.51299	543.174	FALSE	20
2022-09-13	15:34:17	0.525712	543.7	FALSE	20
2022-09-13	15:34:18	0.366222	544.066	FALSE	20
2022-09-13	15:34:18	0.467545	544.534	FALSE	20
2022-09-13	15:34:18	0.438537	544.972	FALSE	20
2022-09-13	15:34:18	0.437977	545.41	FALSE	20
2022-09-13	15:34:19	0.326679	545.737	FALSE	20
2022-09-13	15:34:19	0.200827	545.938	FALSE	20
2022-09-13	15:34:19	-0.254084	545.938	FALSE	20
2022-09-13	15:34:19	-0.620394	545.938	FALSE	20
2022-09-13	15:34:20	-0.788027	545.938	FALSE	20
2022-09-13	15:34:20	-0.764668	545.938	FALSE	20
2022-09-13	15:34:20	-0.704211	545.938	FALSE	20
2022-09-13	15:34:20	-0.731691	545.938	FALSE	20
2022-09-13	15:34:21	-0.780496	545.938	FALSE	20
2022-09-13	15:34:21	-0.782989	545.938	FALSE	20
2022-09-13	15:34:21	-0.827925	545.938	FALSE	20
2022-09-13	15:34:22	-0.884363	545.938	FALSE	20
2022-09-13	15:34:22	-0.510012	545.938	FALSE	20
2022-09-13	15:34:22	-0.049758	545.938	FALSE	20
2022-09-13	15:34:22	-0.0727606	545.938	FALSE	20
2022-09-13	15:34:23	0.161489	546.099	FALSE	20
2022-09-13	15:34:23	0.107341	546.207	FALSE	20
2022-09-13	15:34:23	0.280623	546.487	FALSE	20
2022-09-13	15:34:23	0.218232	546.706	FALSE	20
2022-09-13	15:34:24	0.277468	546.983	FALSE	20
2022-09-13	15:34:24	0.267952	547.251	FALSE	20
2022-09-13	15:34:24	0.223575	547.475	FALSE	20
2022-09-13	15:34:25	0.278333	547.753	FALSE	20
2022-09-13	15:34:25	0.18098	547.934	FALSE	20
2022-09-13	15:34:25	0.395942	548.33	FALSE	20
2022-09-13	15:34:25	0.0742623	548.404	FALSE	20
2022-09-13	15:34:26	0.0623539	548.466	FALSE	20
2022-09-13	15:34:26	0.142914	548.609	FALSE	20
2022-09-13	15:34:26	0.154517	548.764	FALSE	20
2022-09-13	15:34:26	0.181539	548.945	FALSE	20
2022-09-13	15:34:27	0.0342114	548.98	FALSE	20
2022-09-13	15:34:27	-0.121412	548.98	FALSE	20
2022-09-13	15:34:27	-0.138155	548.98	FALSE	20
2022-09-13	15:34:27	-0.495814	548.98	FALSE	20
2022-09-13	15:34:28	-0.735101	548.98	FALSE	20
2022-09-13	15:34:28	-0.800394	548.98	FALSE	20
2022-09-13	15:34:28	-0.76533	548.98	FALSE	20
2022-09-13	15:34:28	-0.652862	548.98	FALSE	20
2022-09-13	15:34:29	-0.801106	548.98	FALSE	20
2022-09-13	15:34:29	-0.754541	548.98	FALSE	20
2022-09-13	15:34:29	-0.908994	548.98	FALSE	20
2022-09-13	15:34:30	-0.843854	548.98	FALSE	20
2022-09-13	15:34:30	-0.790318	548.98	FALSE	20
2022-09-13	15:34:30	-0.550318	548.98	FALSE	20
2022-09-13	15:34:30	-0.297137	548.98	FALSE	20
2022-09-13	15:34:31	0.33757	549.317	FALSE	20
2022-09-13	15:34:31	0.999148	550.316	FALSE	20
2022-09-13	15:34:31	1.11772	551.434	FALSE	20
2022-09-13	15:34:31	0.296603	551.731	FALSE	20
2022-09-13	15:34:32	0.231667	551.962	FALSE	20
2022-09-13	15:34:32	0.139962	552.102	FALSE	20
2022-09-13	15:34:32	0.200369	552.303	FALSE	20
2022-09-13	15:34:32	0.2507	552.553	FALSE	20
2022-09-13	15:34:33	0.272837	552.826	FALSE	20
2022-09-13	15:34:33	0.189173	553.015	FALSE	20
2022-09-13	15:34:33	0.261489	553.277	FALSE	20
2022-09-13	15:34:34	0.272226	553.549	FALSE	20
2022-09-13	15:34:34	0.274567	553.824	FALSE	20
2022-09-13	15:34:34	0.266832	554.09	FALSE	20
2022-09-13	15:34:34	0.239911	554.33	FALSE	20
2022-09-13	15:34:35	0.284033	554.614	FALSE	20
2022-09-13	15:34:35	0.399097	555.014	FALSE	20
2022-09-13	15:34:35	0.441692	555.455	FALSE	20
2022-09-13	15:34:35	0.405916	555.861	FALSE	20
2022-09-13	15:34:36	0.430751	556.292	FALSE	20
2022-09-13	15:34:36	0.501946	556.794	FALSE	20
2022-09-13	15:34:36	0.674822	557.469	FALSE	20
2022-09-13	15:34:36	1.09681	558.565	FALSE	20
2022-09-13	15:34:37	1.77004	560.335	FALSE	20
2022-09-13	15:34:37	1.71564	562.051	FALSE	20
2022-09-13	15:34:37	1.54413	563.595	FALSE	20
2022-09-13	15:34:38	1.57716	565.172	FALSE	20
2022-09-13	15:34:38	3.15487	568.327	1	21
2022-09-13	15:34:38	5.63014	573.957	1	22
2022-09-13	15:34:38	2.21884	576.176	FALSE	22
2022-09-13	15:34:39	0.883728	577.06	FALSE	22
2022-09-13	15:34:39	1.40897	578.469	FALSE	22
2022-09-13	15:34:39	2.25971	580.729	FALSE	22
2022-09-13	15:34:39	0.314059	581.043	FALSE	22
2022-09-13	15:34:40	0.333906	581.377	FALSE	22
2022-09-13	15:34:40	0.39187	581.769	FALSE	22
2022-09-13	15:34:40	0.25528	582.024	FALSE	22
2022-09-13	15:34:40	0.275382	582.299	FALSE	22
2022-09-13	15:34:41	0.334211	582.633	FALSE	22
2022-09-13	15:34:41	0.468155	583.102	FALSE	22
2022-09-13	15:34:41	0.294924	583.396	FALSE	22
2022-09-13	15:34:42	0.525814	583.922	FALSE	22
2022-09-13	15:34:42	0.259911	584.182	FALSE	22
2022-09-13	15:34:42	0.230089	584.412	FALSE	22
2022-09-13	15:34:42	0.246171	584.658	FALSE	22
2022-09-13	15:34:43	0.256603	584.915	FALSE	22
2022-09-13	15:34:43	0.28897	585.204	FALSE	22
2022-09-13	15:34:43	0.240115	585.444	FALSE	22
2022-09-13	15:34:43	0.30271	585.747	FALSE	22
2022-09-13	15:34:44	0.353753	586.101	FALSE	22
2022-09-13	15:34:44	0.420318	586.521	FALSE	22
2022-09-13	15:34:44	0.366934	586.888	FALSE	22
2022-09-13	15:34:44	0.375331	587.263	FALSE	22
2022-09-13	15:34:45	0.644084	587.907	FALSE	22
2022-09-13	15:34:45	2.98892	590.896	FALSE	22
2022-09-13	15:34:45	3.21034	594.107	1	23
2022-09-13	15:34:46	5.4482	599.555	1	24
2022-09-13	15:34:46	3.60174	603.156	1	25
2022-09-13	15:34:46	2.02083	605.177	FALSE	25
2022-09-13	15:34:46	1.08658	606.264	FALSE	25
2022-09-13	15:34:47	2.28459	608.548	FALSE	25
2022-09-13	15:34:47	0.260623	608.809	FALSE	25
2022-09-13	15:34:47	0.0137534	608.823	FALSE	25
2022-09-13	15:34:47	0.342659	609.166	FALSE	25
2022-09-13	15:34:48	0.296043	609.462	FALSE	25
2022-09-13	15:34:48	1.82749	611.289	FALSE	25
2022-09-13	15:34:48	1.03869	612.328	FALSE	25
2022-09-13	15:34:48	1.90597	614.234	FALSE	25
2022-09-13	15:34:49	0.858537	615.092	FALSE	25
2022-09-13	15:34:49	0.772735	615.865	FALSE	25
2022-09-13	15:34:49	0.37986	616.245	FALSE	25
2022-09-13	15:34:50	0.479097	616.724	FALSE	25
2022-09-13	15:34:50	0.340725	617.065	FALSE	25
2022-09-13	15:34:50	0.516349	617.581	FALSE	25
2022-09-13	15:34:50	0.416909	617.998	FALSE	25
2022-09-13	15:34:51	1.05141	619.049	FALSE	25
2022-09-13	15:34:51	0.851412	619.901	FALSE	25
2022-09-13	15:34:51	0.487799	620.389	FALSE	25
2022-09-13	15:34:51	0.481947	620.87	FALSE	25
2022-09-13	15:34:52	0.359249	621.23	FALSE	25
2022-09-13	15:34:52	0.531667	621.761	FALSE	25
2022-09-13	15:34:52	0.396501	622.158	FALSE	25
2022-09-13	15:34:52	0.101591	622.259	FALSE	25
2022-09-13	15:34:53	0.152481	622.412	FALSE	25
2022-09-13	15:34:53	0.143881	622.556	FALSE	25
2022-09-13	15:34:53	0.225814	622.782	FALSE	25
2022-09-13	15:34:54	0.244898	623.027	FALSE	25
2022-09-13	15:34:54	0.280776	623.307	FALSE	25
2022-09-13	15:34:54	0.581489	623.889	FALSE	25
2022-09-13	15:34:54	1.53065	625.419	FALSE	25
2022-09-13	15:34:55	1.47263	626.892	FALSE	25
2022-09-13	15:34:55	1.16734	628.059	FALSE	25
2022-09-13	15:34:55	0.591412	628.651	FALSE	25
2022-09-13	15:34:55	0.434364	629.085	FALSE	25
2022-09-13	15:34:56	0.401387	629.487	FALSE	25
2022-09-13	15:34:56	0.431005	629.918	FALSE	25
2022-09-13	15:34:56	0.417977	630.336	FALSE	25
2022-09-13	15:34:56	0.474364	630.81	FALSE	25
2022-09-13	15:34:57	0.887595	631.698	FALSE	25
2022-09-13	15:34:57	1.09253	632.79	FALSE	25
2022-09-13	15:34:57	0.558944	633.349	FALSE	25
2022-09-13	15:34:57	0.597061	633.946	FALSE	25
2022-09-13	15:34:58	1.16775	635.114	FALSE	25
2022-09-13	15:34:58	0.675382	635.789	FALSE	25
2022-09-13	15:34:58	0.300624	636.09	FALSE	25
2022-09-13	15:34:59	0.244135	636.334	FALSE	25
2022-09-13	15:34:59	0.068359	636.402	FALSE	25
2022-09-13	15:34:59	-0.234185	636.402	FALSE	25
2022-09-13	15:34:59	-0.407315	636.402	FALSE	25
2022-09-13	15:35:00	-0.587468	636.402	FALSE	25
2022-09-13	15:35:00	-0.600343	636.402	FALSE	25
2022-09-13	15:35:00	-0.647213	636.402	FALSE	25
2022-09-13	15:35:00	-0.710266	636.402	FALSE	25
2022-09-13	15:35:01	-0.344567	636.402	FALSE	25
2022-09-13	15:35:01	-0.187875	636.402	FALSE	25
2022-09-13	15:35:01	-0.0634476	636.402	FALSE	25
2022-09-13	15:35:01	-0.0442109	636.402	FALSE	25
2022-09-13	15:35:02	-0.36874	636.402	FALSE	25
2022-09-13	15:35:02	0.71416	637.116	FALSE	25
2022-09-13	15:35:02	3.97981	641.096	1	26
2022-09-13	15:35:03	2.85848	643.955	FALSE	26
2022-09-13	15:35:03	1.23742	645.192	FALSE	26
2022-09-13	15:35:03	1.6449	646.837	FALSE	26
2022-09-13	15:35:03	1.14225	647.979	FALSE	26
2022-09-13	15:35:04	1.47192	649.451	FALSE	26
2022-09-13	15:35:04	0.632888	650.084	FALSE	26
2022-09-13	15:35:04	0.488766	650.573	FALSE	26
2022-09-13	15:35:04	0.662099	651.235	FALSE	26
2022-09-13	15:35:05	1.33324	652.568	FALSE	26
2022-09-13	15:35:05	1.68373	654.252	FALSE	26
2022-09-13	15:35:05	1.66561	655.918	FALSE	26
2022-09-13	15:35:05	3.96245	659.88	1	27
2022-09-13	15:35:06	5.86133	665.741	1	28
2022-09-13	15:35:06	6.73543	672.477	1	29
2022-09-13	15:35:06	3.58047	676.057	1	30
2022-09-13	15:35:07	2.60586	678.663	FALSE	30
2022-09-13	15:35:07	3.02917	681.692	1	31
2022-09-13	15:35:07	3.84261	685.535	1	32
2022-09-13	15:35:07	0.852583	686.388	FALSE	32
2022-09-13	15:35:08	0.475636	686.863	FALSE	32
2022-09-13	15:35:08	0.613193	687.476	FALSE	32
2022-09-13	15:35:08	0.54785	688.024	FALSE	32
2022-09-13	15:35:08	0.791667	688.816	FALSE	32
2022-09-13	15:35:09	0.604084	689.42	FALSE	32
2022-09-13	15:35:09	0.533346	689.953	FALSE	32
2022-09-13	15:35:09	0.628155	690.581	FALSE	32
2022-09-13	15:35:09	0.79869	691.38	FALSE	32
2022-09-13	15:35:10	4.22973	695.61	1	33
2022-09-13	15:35:10	4.61686	700.227	1	34
2022-09-13	15:35:10	5.70596	705.933	1	35
2022-09-13	15:35:11	3.75365	709.686	1	36
2022-09-13	15:35:11	3.00495	712.691	1	37
2022-09-13	15:35:11	1.88698	714.578	FALSE	37
2022-09-13	15:35:11	1.62754	716.206	FALSE	37
2022-09-13	15:35:12	1.7938	718	FALSE	37
2022-09-13	15:35:12	1.10515	719.105	FALSE	37
2022-09-13	15:35:12	1.3506	720.455	FALSE	37
2022-09-13	15:35:12	1.45482	721.91	FALSE	37
2022-09-13	15:35:13	3.41436	725.325	1	38
2022-09-13	15:35:13	7.66815	732.993	1	39
2022-09-13	15:35:13	6.73126	739.724	1	40
2022-09-13	15:35:13	3.0191	742.743	1	41
2022-09-13	15:35:14	3.71004	746.453	1	42
2022-09-13	15:35:14	3.06052	749.514	1	43
2022-09-13	15:35:14	3.99915	753.513	1	44
2022-09-13	15:35:15	4.72383	758.237	1	45
2022-09-13	15:35:15	4.24561	762.482	1	46
2022-09-13	15:35:15	0.870191	763.352	FALSE	46
2022-09-13	15:35:15	0.507799	763.86	FALSE	46
2022-09-13	15:35:16	0.418995	764.279	FALSE	46
2022-09-13	15:35:16	0.395178	764.674	FALSE	46
2022-09-13	15:35:16	0.425102	765.099	FALSE	46
2022-09-13	15:35:16	0.271209	765.371	FALSE	46
2022-09-13	15:35:17	0.151769	765.522	FALSE	46
2022-09-13	15:35:17	0.144898	765.667	FALSE	46
2022-09-13	15:35:17	-0.032557	765.667	FALSE	46
2022-09-13	15:35:17	-0.142175	765.667	FALSE	46
2022-09-13	15:35:18	-0.325788	765.667	FALSE	46
2022-09-13	15:35:18	-0.235509	765.667	FALSE	46
2022-09-13	15:35:18	-0.110674	765.667	FALSE	46
2022-09-13	15:35:19	-0.249605	765.667	FALSE	46
2022-09-13	15:35:19	0.0573666	765.725	FALSE	46
2022-09-13	15:35:19	0.507545	766.232	FALSE	46
2022-09-13	15:35:19	0.598028	766.83	FALSE	46
2022-09-13	15:35:20	1.37879	768.209	FALSE	46
2022-09-13	15:35:20	1.74475	769.954	FALSE	46
2022-09-13	15:35:20	1.67981	771.634	FALSE	46
2022-09-13	15:35:20	1.09202	772.726	FALSE	46
2022-09-13	15:35:21	0.52897	773.255	FALSE	46
2022-09-13	15:35:21	0.504644	773.759	FALSE	46
2022-09-13	15:35:21	0.279504	774.039	FALSE	46
2022-09-13	15:35:21	0.345204	774.384	FALSE	46
2022-09-13	15:35:22	0.393957	774.778	FALSE	46
2022-09-13	15:35:22	0.368104	775.146	FALSE	46
2022-09-13	15:35:22	0.301438	775.447	FALSE	46
2022-09-13	15:35:23	0.265763	775.713	FALSE	46
2022-09-13	15:35:23	0.477112	776.19	FALSE	46
2022-09-13	15:35:23	0.423321	776.614	FALSE	46
2022-09-13	15:35:23	0.304949	776.919	FALSE	46
2022-09-13	15:35:24	0.476043	777.395	FALSE	46
2022-09-13	15:35:24	0.484847	777.879	FALSE	46
2022-09-13	15:35:24	0.671718	778.551	FALSE	46
2022-09-13	15:35:24	0.912583	779.464	FALSE	46
2022-09-13	15:35:25	0.729784	780.194	FALSE	46
2022-09-13	15:35:25	0.972837	781.166	FALSE	46
2022-09-13	15:35:25	1.21492	782.381	FALSE	46
2022-09-13	15:35:25	1.65869	784.04	FALSE	46
2022-09-13	15:35:26	1.34291	785.383	FALSE	46
2022-09-13	15:35:26	0.741896	786.125	FALSE	46
2022-09-13	15:35:26	0.499148	786.624	FALSE	46
2022-09-13	15:35:27	0.531819	787.156	FALSE	46
2022-09-13	15:35:27	0.512379	787.668	FALSE	46
2022-09-13	15:35:27	0.718028	788.386	FALSE	46
2022-09-13	15:35:27	0.784796	789.171	FALSE	46
2022-09-13	15:35:28	0.622354	789.793	FALSE	46
2022-09-13	15:35:28	0.54897	790.342	FALSE	46
2022-09-13	15:35:28	0.495585	790.838	FALSE	46
2022-09-13	15:35:28	0.42729	791.265	FALSE	46
2022-09-13	15:35:29	0.450903	791.716	FALSE	46
2022-09-13	15:35:29	0.458435	792.175	FALSE	46
2022-09-13	15:35:29	0.452176	792.627	FALSE	46
2022-09-13	15:35:29	0.447596	793.074	FALSE	46
2022-09-13	15:35:30	0.424593	793.499	FALSE	46
2022-09-13	15:35:30	0.425407	793.924	FALSE	46
2022-09-13	15:35:30	0.411209	794.336	FALSE	46
2022-09-13	15:35:31	0.413804	794.749	FALSE	46
2022-09-13	15:35:31	0.430903	795.18	FALSE	46
2022-09-13	15:35:31	0.431005	795.611	FALSE	46
2022-09-13	15:35:31	0.431514	796.043	FALSE	46
2022-09-13	15:35:32	0.426476	796.469	FALSE	46
2022-09-13	15:35:32	0.427036	796.896	FALSE	46
2022-09-13	15:35:32	0.427697	797.324	FALSE	46
2022-09-13	15:35:32	0.410852	797.735	FALSE	46
2022-09-13	15:35:33	0.398893	798.134	FALSE	46
2022-09-13	15:35:33	0.416909	798.551	FALSE	46
2022-09-13	15:35:33	0.416043	798.967	FALSE	46
2022-09-13	15:35:33	0.430293	799.397	FALSE	46
2022-09-13	15:35:34	0.427799	799.825	FALSE	46
2022-09-13	15:35:34	0.454517	800.279	FALSE	46
2022-09-13	15:35:34	0.442201	800.721	FALSE	46
2022-09-13	15:35:35	0.480623	801.202	FALSE	46
2022-09-13	15:35:35	0.532226	801.734	FALSE	46
2022-09-13	15:35:35	0.788766	802.523	FALSE	46
2022-09-13	15:35:35	1.17905	803.702	FALSE	46
2022-09-13	15:35:36	1.88357	805.586	FALSE	46
2022-09-13	15:35:36	2.0567	807.642	FALSE	46
2022-09-13	15:35:36	2.94149	810.584	FALSE	46
2022-09-13	15:35:36	3.33752	813.921	1	47
2022-09-13	15:35:37	2.56846	816.49	FALSE	47
2022-09-13	15:35:37	1.71584	818.206	FALSE	47
2022-09-13	15:35:37	1.17075	819.376	FALSE	47
2022-09-13	15:35:37	1.45055	820.827	FALSE	47
2022-09-13	15:35:38	1.4679	822.295	FALSE	47
2022-09-13	15:35:38	1.3849	823.68	FALSE	47
2022-09-13	15:35:38	1.04144	824.721	FALSE	47
2022-09-13	15:35:39	0.836043	825.557	FALSE	47
2022-09-13	15:35:39	0.831209	826.388	FALSE	47
2022-09-13	15:35:39	0.778079	827.167	FALSE	47
2022-09-13	15:35:39	0.825407	827.992	FALSE	47
2022-09-13	15:35:40	0.881387	828.873	FALSE	47
2022-09-13	15:35:40	0.968359	829.842	FALSE	47
2022-09-13	15:35:40	0.88042	830.722	FALSE	47
2022-09-13	15:35:40	0.795433	831.518	FALSE	47
2022-09-13	15:35:41	0.770903	832.288	FALSE	47
2022-09-13	15:35:41	0.753346	833.042	FALSE	47
2022-09-13	15:35:41	0.726374	833.768	FALSE	47
2022-09-13	15:35:41	0.701234	834.469	FALSE	47
2022-09-13	15:35:42	0.71187	835.181	FALSE	47
2022-09-13	15:35:42	0.707239	835.889	FALSE	47
2022-09-13	15:35:42	0.661794	836.55	FALSE	47
2022-09-13	15:35:43	0.572786	837.123	FALSE	47
2022-09-13	15:35:43	0.507443	837.631	FALSE	47
2022-09-13	15:35:43	0.413193	838.044	FALSE	47
2022-09-13	15:35:43	0.45869	838.502	FALSE	47
2022-09-13	15:35:44	0.407697	838.91	FALSE	47
2022-09-13	15:35:44	0.441896	839.352	FALSE	47
2022-09-13	15:35:44	0.352074	839.704	FALSE	47
2022-09-13	15:35:44	0.402964	840.107	FALSE	47
2022-09-13	15:35:45	0.490191	840.597	FALSE	47
2022-09-13	15:35:45	0.668766	841.266	FALSE	47
2022-09-13	15:35:45	0.747799	842.014	FALSE	47
2022-09-13	15:35:45	0.933448	842.947	FALSE	47
2022-09-13	15:35:46	0.887239	843.835	FALSE	47
2022-09-13	15:35:46	0.688206	844.523	FALSE	47
2022-09-13	15:35:46	0.602812	845.126	FALSE	47
2022-09-13	15:35:47	0.536909	845.662	FALSE	47
2022-09-13	15:35:47	0.513855	846.176	FALSE	47
2022-09-13	15:35:47	0.505458	846.682	FALSE	47
2022-09-13	15:35:47	0.499504	847.181	FALSE	47
2022-09-13	15:35:48	0.50215	847.683	FALSE	47
2022-09-13	15:35:48	0.498842	848.182	FALSE	47
2022-09-13	15:35:48	0.491667	848.674	FALSE	47
2022-09-13	15:35:48	0.497367	849.171	FALSE	47
2022-09-13	15:35:49	0.500063	849.671	FALSE	47
2022-09-13	15:35:49	0.503371	850.175	FALSE	47
2022-09-13	15:35:49	0.501336	850.676	FALSE	47
2022-09-13	15:35:49	0.499656	851.176	FALSE	47
2022-09-13	15:35:50	0.492837	851.669	FALSE	47
2022-09-13	15:35:50	0.489733	852.158	FALSE	47
2022-09-13	15:35:50	0.497061	852.655	FALSE	47
2022-09-13	15:35:51	0.484949	853.14	FALSE	47
2022-09-13	15:35:51	0.484339	853.625	FALSE	47
2022-09-13	15:35:51	0.47757	854.102	FALSE	47
2022-09-13	15:35:51	0.493855	854.596	FALSE	47
2022-09-13	15:35:52	0.495178	855.091	FALSE	47
2022-09-13	15:35:52	0.496399	855.588	FALSE	47
2022-09-13	15:35:52	0.495687	856.083	FALSE	47
2022-09-13	15:35:52	0.491718	856.575	FALSE	47
2022-09-13	15:35:53	0.490038	857.065	FALSE	47
2022-09-13	15:35:53	0.497723	857.563	FALSE	47
2022-09-13	15:35:53	0.4993	858.062	FALSE	47
2022-09-13	15:35:53	0.496756	858.559	FALSE	47
2022-09-13	15:35:54	0.490903	859.05	FALSE	47
2022-09-13	15:35:54	0.502099	859.552	FALSE	47
2022-09-13	15:35:54	0.520216	860.072	FALSE	47
2022-09-13	15:35:55	0.511667	860.584	FALSE	47
2022-09-13	15:35:55	0.507901	861.092	FALSE	47
2022-09-13	15:35:55	0.511412	861.603	FALSE	47
2022-09-13	15:35:55	0.524796	862.128	FALSE	47
2022-09-13	15:35:56	0.50103	862.629	FALSE	47
2022-09-13	15:35:56	0.485407	863.114	FALSE	47
2022-09-13	15:35:56	0.467036	863.581	FALSE	47
2022-09-13	15:35:56	0.470089	864.051	FALSE	47
2022-09-13	15:35:57	0.476043	864.527	FALSE	47
2022-09-13	15:35:57	0.477977	865.005	FALSE	47
2022-09-13	15:35:57	0.468359	865.474	FALSE	47
2022-09-13	15:35:57	0.480318	865.954	FALSE	47
2022-09-13	15:35:58	0.48673	866.441	FALSE	47
2022-09-13	15:35:58	0.482303	866.923	FALSE	47
2022-09-13	15:35:58	0.525203	867.448	FALSE	47
2022-09-13	15:35:59	0.531209	867.98	FALSE	47
2022-09-13	15:35:59	0.512634	868.492	FALSE	47
2022-09-13	15:35:59	0.473041	868.965	FALSE	47
2022-09-13	15:35:59	0.384135	869.349	FALSE	47
2022-09-13	15:36:00	0.370852	869.72	FALSE	47
2022-09-13	15:36:00	0.382608	870.103	FALSE	47
2022-09-13	15:36:00	0.378283	870.481	FALSE	47
2022-09-13	15:36:00	0.468919	870.95	FALSE	47
2022-09-13	15:36:01	0.551463	871.502	FALSE	47
2022-09-13	15:36:01	0.845	872.347	FALSE	47
2022-09-13	15:36:01	1.76291	874.109	FALSE	47
2022-09-13	15:36:01	1.68688	875.796	FALSE	47
2022-09-13	15:36:02	1.43645	877.233	FALSE	47
2022-09-13	15:36:02	1.26322	878.496	FALSE	47
2022-09-13	15:36:02	1.36556	879.862	FALSE	47
2022-09-13	15:36:03	1.08159	880.943	FALSE	47
2022-09-13	15:36:03	0.889122	881.832	FALSE	47
2022-09-13	15:36:03	0.865	882.697	FALSE	47
2022-09-13	15:36:03	0.695687	883.393	FALSE	47
2022-09-13	15:36:04	0.531921	883.925	FALSE	47
2022-09-13	15:36:04	0.564135	884.489	FALSE	47
2022-09-13	15:36:04	0.482914	884.972	FALSE	47
2022-09-13	15:36:04	0.409326	885.381	FALSE	47
2022-09-13	15:36:05	0.431921	885.813	FALSE	47
2022-09-13	15:36:05	0.41701	886.23	FALSE	47
2022-09-13	15:36:05	0.41299	886.643	FALSE	47
2022-09-13	15:36:05	0.431209	887.074	FALSE	47
2022-09-13	15:36:06	0.433753	887.508	FALSE	47
2022-09-13	15:36:06	0.431107	887.939	FALSE	47
2022-09-13	15:36:06	0.437672	888.377	FALSE	47
2022-09-13	15:36:07	0.444542	888.821	FALSE	47
2022-09-13	15:36:07	0.438283	889.26	FALSE	47
2022-09-13	15:36:07	0.453295	889.713	FALSE	47
2022-09-13	15:36:07	0.43874	890.152	FALSE	47
2022-09-13	15:36:08	0.429987	890.582	FALSE	47
2022-09-13	15:36:08	0.417875	891	FALSE	47
2022-09-13	15:36:08	0.435738	891.435	FALSE	47
2022-09-13	15:36:08	0.436603	891.872	FALSE	47
2022-09-13	15:36:09	0.398995	892.271	FALSE	47
2022-09-13	15:36:09	0.473092	892.744	FALSE	47
2022-09-13	15:36:09	0.405764	893.15	FALSE	47
2022-09-13	15:36:09	0.449987	893.6	FALSE	47
2022-09-13	15:36:10	0.377621	893.977	FALSE	47
2022-09-13	15:36:10	0.389886	894.367	FALSE	47
2022-09-13	15:36:10	0.364542	894.732	FALSE	47
2022-09-13	15:36:11	0.430089	895.162	FALSE	47
2022-09-13	15:36:11	0.436807	895.599	FALSE	47
2022-09-13	15:36:11	0.489936	896.089	FALSE	47
2022-09-13	15:36:11	0.490344	896.579	FALSE	47
2022-09-13	15:36:12	0.646527	897.226	FALSE	47
2022-09-13	15:36:12	0.675941	897.901	FALSE	47
2022-09-13	15:36:12	0.641845	898.543	FALSE	47
2022-09-13	15:36:12	0.548817	899.092	FALSE	47
2022-09-13	15:36:13	0.461438	899.554	FALSE	47
2022-09-13	15:36:13	0.382863	899.936	FALSE	47
2022-09-13	15:36:13	0.31131	900.248	FALSE	47
2022-09-13	15:36:13	0.300013	900.548	FALSE	47
2022-09-13	15:36:14	0.315738	900.863	FALSE	47
2022-09-13	15:36:14	0.345916	901.209	FALSE	47
2022-09-13	15:36:14	0.354415	901.564	FALSE	47
2022-09-13	15:36:14	0.333601	901.897	FALSE	47
2022-09-13	15:36:15	0.345102	902.243	FALSE	47
2022-09-13	15:36:15	0.34612	902.589	FALSE	47
2022-09-13	15:36:15	0.346578	902.935	FALSE	47
2022-09-13	15:36:16	0.359606	903.295	FALSE	47
2022-09-13	15:36:16	0.385611	903.68	FALSE	47
2022-09-13	15:36:16	0.434008	904.114	FALSE	47
2022-09-13	15:36:16	0.438791	904.553	FALSE	47
2022-09-13	15:36:17	0.452735	905.006	FALSE	47
2022-09-13	15:36:17	0.429631	905.436	FALSE	47
2022-09-13	15:36:17	0.384644	905.82	FALSE	47
2022-09-13	15:36:17	0.375789	906.196	FALSE	47
2022-09-13	15:36:18	0.361031	906.557	FALSE	47
2022-09-13	15:36:18	0.353753	906.911	FALSE	47
2022-09-13	15:36:18	0.365814	907.277	FALSE	47
2022-09-13	15:36:18	0.359504	907.636	FALSE	47
2022-09-13	15:36:19	0.379504	908.016	FALSE	47
2022-09-13	15:36:19	0.368868	908.385	FALSE	47
2022-09-13	15:36:19	0.368613	908.753	FALSE	47
2022-09-13	15:36:20	0.364695	909.118	FALSE	47
2022-09-13	15:36:20	0.359199	909.477	FALSE	47
2022-09-13	15:36:20	0.371056	909.848	FALSE	47
2022-09-13	15:36:20	0.371768	910.22	FALSE	47
2022-09-13	15:36:21	0.36098	910.581	FALSE	47
2022-09-13	15:36:21	0.368562	910.949	FALSE	47
2022-09-13	15:36:21	0.376349	911.326	FALSE	47
2022-09-13	15:36:21	0.35131	911.677	FALSE	47
2022-09-13	15:36:22	0.359657	912.037	FALSE	47
2022-09-13	15:36:22	0.383117	912.42	FALSE	47
2022-09-13	15:36:22	0.362965	912.783	FALSE	47
2022-09-13	15:36:22	0.369377	913.152	FALSE	47
2022-09-13	15:36:23	0.383779	913.536	FALSE	47
2022-09-13	15:36:23	0.372685	913.909	FALSE	47
2022-09-13	15:36:23	0.362913	914.272	FALSE	47
2022-09-13	15:36:24	0.324847	914.596	FALSE	47
2022-09-13	15:36:24	0.348359	914.945	FALSE	47
2022-09-13	15:36:24	0.384542	915.329	FALSE	47
2022-09-13	15:36:24	0.321082	915.65	FALSE	47
2022-09-13	15:36:25	0.350903	916.001	FALSE	47
2022-09-13	15:36:25	0.370191	916.371	FALSE	47
2022-09-13	15:36:25	0.416451	916.788	FALSE	47
2022-09-13	15:36:25	0.425	917.213	FALSE	47
2022-09-13	15:36:26	0.39299	917.606	FALSE	47
2022-09-13	15:36:26	0.38841	917.994	FALSE	47
2022-09-13	15:36:26	0.423575	918.418	FALSE	47
2022-09-13	15:36:26	0.418486	918.836	FALSE	47
2022-09-13	15:36:27	0.276705	919.113	FALSE	47
2022-09-13	15:36:27	0.228054	919.341	FALSE	47
2022-09-13	15:36:27	0.287036	919.628	FALSE	47
2022-09-13	15:36:28	0.189682	919.818	FALSE	47
2022-09-13	15:36:28	0.145356	919.963	FALSE	47
2022-09-13	15:36:28	0.248257	920.211	FALSE	47
2022-09-13	15:36:28	0.107239	920.319	FALSE	47
2022-09-13	15:36:29	0.232736	920.551	FALSE	47
2022-09-13	15:36:29	0.276043	920.827	FALSE	47
2022-09-13	15:36:29	0.325407	921.153	FALSE	47
2022-09-13	15:36:29	0.513295	921.666	FALSE	47
2022-09-13	15:36:30	0.51416	922.18	FALSE	47
2022-09-13	15:36:30	1.22159	923.402	FALSE	47
2022-09-13	15:36:30	0.648053	924.05	FALSE	47
2022-09-13	15:36:30	1.24485	925.295	FALSE	47
2022-09-13	15:36:31	1.8021	927.097	FALSE	47
2022-09-13	15:36:31	0.719707	927.817	FALSE	47
2022-09-13	15:36:31	0.497723	928.314	FALSE	47
2022-09-13	15:36:32	0.598232	928.913	FALSE	47
2022-09-13	15:36:32	0.405102	929.318	FALSE	47
2022-09-13	15:36:32	0.611005	929.929	FALSE	47
2022-09-13	15:36:32	0.759962	930.689	FALSE	47
2022-09-13	15:36:33	1.00836	931.697	FALSE	47
2022-09-13	15:36:33	1.58261	933.28	FALSE	47
2022-09-13	15:36:33	1.60291	934.883	FALSE	47
2022-09-13	15:36:33	1.91452	936.797	FALSE	47
2022-09-13	15:36:34	2.81604	939.613	FALSE	47
2022-09-13	15:36:34	2.89116	942.504	FALSE	47
2022-09-13	15:36:34	3.79772	946.302	1	48
2022-09-13	15:36:34	5.30337	951.605	1	49
2022-09-13	15:36:35	4.56922	956.175	1	50
2022-09-13	15:36:35	3.57874	959.753	1	51
2022-09-13	15:36:35	5.09853	964.852	1	52
2022-09-13	15:36:36	7.23848	972.09	1	53
2022-09-13	15:36:36	5.46093	977.551	1	54
2022-09-13	15:36:36	2.768	980.319	FALSE	54
2022-09-13	15:36:36	1.79828	982.118	FALSE	54
2022-09-13	15:36:37	2.72734	984.845	FALSE	54
2022-09-13	15:36:37	5.90169	990.747	1	55
2022-09-13	15:36:37	5.67166	996.418	1	56
2022-09-13	15:36:37	2.35218	998.77	FALSE	56
2022-09-13	15:36:38	1.13065	999.901	FALSE	56
2022-09-13	15:36:38	1.87523	1001.78	FALSE	56
2022-09-13	15:36:38	3.47421	1005.25	1	57
2022-09-13	15:36:38	4.13538	1009.39	1	58
2022-09-13	15:36:39	3.53945	1012.93	1	59
2022-09-13	15:36:39	1.07889	1014	FALSE	59
2022-09-13	15:36:39	0.336858	1014.34	FALSE	59
2022-09-13	15:36:40	0.335535	1014.68	FALSE	59
2022-09-13	15:36:40	0.27014	1014.95	FALSE	59
2022-09-13	15:36:40	0.31701	1015.26	FALSE	59
2022-09-13	15:36:40	0.355585	1015.62	FALSE	59
2022-09-13	15:36:41	0.347646	1015.97	FALSE	59
2022-09-13	15:36:41	0.337316	1016.3	FALSE	59
2022-09-13	15:36:41	0.345051	1016.65	FALSE	59
2022-09-13	15:36:41	0.356858	1017.01	FALSE	59
2022-09-13	15:36:42	0.346221	1017.35	FALSE	59
2022-09-13	15:36:42	0.347341	1017.7	FALSE	59
2022-09-13	15:36:42	0.459046	1018.16	FALSE	59
2022-09-13	15:36:42	0.392583	1018.55	FALSE	59
2022-09-13	15:36:43	0.449936	1019	FALSE	59
2022-09-13	15:36:43	0.500572	1019.5	FALSE	59
2022-09-13	15:36:43	0.597519	1020.1	FALSE	59
2022-09-13	15:36:44	0.563779	1020.66	FALSE	59
2022-09-13	15:36:44	0.494924	1021.16	FALSE	59
2022-09-13	15:36:44	0.491107	1021.65	FALSE	59
2022-09-13	15:36:44	0.467188	1022.12	FALSE	59
2022-09-13	15:36:45	0.493092	1022.61	FALSE	59
2022-09-13	15:36:45	0.463117	1023.07	FALSE	59
2022-09-13	15:36:45	0.4736	1023.55	FALSE	59
2022-09-13	15:36:45	0.48215	1024.03	FALSE	59
2022-09-13	15:36:46	0.468512	1024.5	FALSE	59
2022-09-13	15:36:46	0.465967	1024.96	FALSE	59
2022-09-13	15:36:46	0.467188	1025.43	FALSE	59
2022-09-13	15:36:46	0.491463	1025.92	FALSE	59
2022-09-13	15:36:47	0.482252	1026.4	FALSE	59
2022-09-13	15:36:47	0.42958	1026.83	FALSE	59
2022-09-13	15:36:47	0.485814	1027.32	FALSE	59
2022-09-13	15:36:48	1.86897	1029.19	FALSE	59
2022-09-13	15:36:48	0.558741	1029.75	FALSE	59
2022-09-13	15:36:48	0.515331	1030.26	FALSE	59
2022-09-13	15:36:48	0.634567	1030.9	FALSE	59
2022-09-13	15:36:49	0.530649	1031.43	FALSE	59
2022-09-13	15:36:49	1.08419	1032.51	FALSE	59
2022-09-13	15:36:49	0.952735	1033.46	FALSE	59
2022-09-13	15:36:49	1.59966	1035.06	FALSE	59
2022-09-13	15:36:50	2.19172	1037.26	FALSE	59
2022-09-13	15:36:50	1.73818	1038.99	FALSE	59
2022-09-13	15:36:50	1.42083	1040.41	FALSE	59
2022-09-13	15:36:50	0.93869	1041.35	FALSE	59
2022-09-13	15:36:51	1.13584	1042.49	FALSE	59
2022-09-13	15:36:51	4.54683	1047.04	1	60
2022-09-13	15:36:51	3.94932	1050.99	1	61
2022-09-13	15:36:52	1.02296	1052.01	FALSE	61
2022-09-13	15:36:52	0.661387	1052.67	FALSE	61
2022-09-13	15:36:52	0.863117	1053.53	FALSE	61
2022-09-13	15:36:52	0.481641	1054.01	FALSE	61
2022-09-13	15:36:53	0.530038	1054.54	FALSE	61
2022-09-13	15:36:53	0.478333	1055.02	FALSE	61
2022-09-13	15:36:53	0.984338	1056.01	FALSE	61
2022-09-13	15:36:53	1.70149	1057.71	FALSE	61
2022-09-13	15:36:54	1.64419	1059.35	FALSE	61
2022-09-13	15:36:54	0.970547	1060.32	FALSE	61
2022-09-13	15:36:54	0.662506	1060.99	FALSE	61
2022-09-13	15:36:54	0.541081	1061.53	FALSE	61
2022-09-13	15:36:55	0.52444	1062.05	FALSE	61
2022-09-13	15:36:55	0.589377	1062.64	FALSE	61
2022-09-13	15:36:55	0.809936	1063.45	FALSE	61
2022-09-13	15:36:56	0.714618	1064.17	FALSE	61

## Sheet: Unnamed_prong_2022913153136
						**GoPro Fitting: 1521
2022-09-13	15:31:37	0.272023
2022-09-13	15:31:37	0.28444
2022-09-13	15:31:37	0.292888
2022-09-13	15:31:37	0.280827
2022-09-13	15:31:38	0.332837
2022-09-13	15:31:38	0.316145
2022-09-13	15:31:38	0.311412
2022-09-13	15:31:38	0.338435
2022-09-13	15:31:39	0.337316
2022-09-13	15:31:39	0.336959
2022-09-13	15:31:39	0.335636
2022-09-13	15:31:40	0.337672
2022-09-13	15:31:40	0.328613
2022-09-13	15:31:40	0.366629
2022-09-13	15:31:40	0.399657
2022-09-13	15:31:41	0.375942
2022-09-13	15:31:41	0.281743
2022-09-13	15:31:41	0.35645
2022-09-13	15:31:41	0.384135
2022-09-13	15:31:42	0.294109
2022-09-13	15:31:42	0.317163
2022-09-13	15:31:42	0.114669
2022-09-13	15:31:42	0.518842
2022-09-13	15:31:43	0.206425
2022-09-13	15:31:43	0.876603
2022-09-13	15:31:43	4.37966
2022-09-13	15:31:44	3.84235
2022-09-13	15:31:44	0.562761
2022-09-13	15:31:44	0.476654
2022-09-13	15:31:44	0.125102
2022-09-13	15:31:45	0.31645
2022-09-13	15:31:45	0.246883
2022-09-13	15:31:45	0.424338
2022-09-13	15:31:45	0.569071
2022-09-13	15:31:46	0.414822
2022-09-13	15:31:46	1.03177
2022-09-13	15:31:46	4.31054
2022-09-13	15:31:46	1.5249
2022-09-13	15:31:47	0.223575
2022-09-13	15:31:47	0.300674
2022-09-13	15:31:47	0.313448
2022-09-13	15:31:48	0.00138701
2022-09-13	15:31:48	-0.511488
2022-09-13	15:31:48	-0.447671
2022-09-13	15:31:48	-0.399173
2022-09-13	15:31:49	0.0982826
2022-09-13	15:31:49	0.36897
2022-09-13	15:31:49	0.116705
2022-09-13	15:31:49	0.149987
2022-09-13	15:31:50	0.462405
2022-09-13	15:31:50	0.330598
2022-09-13	15:31:50	0.352888
2022-09-13	15:31:50	0.292125
2022-09-13	15:31:51	0.209478
2022-09-13	15:31:51	0.319555
2022-09-13	15:31:51	0.162048
2022-09-13	15:31:52	1.33258
2022-09-13	15:31:52	6.50978
2022-09-13	15:31:52	9.82026
2022-09-13	15:31:52	5.89395
2022-09-13	15:31:53	4.96378
2022-09-13	15:31:53	4.35823
2022-09-13	15:31:53	1.70383
2022-09-13	15:31:53	1.37676
2022-09-13	15:31:54	2.35314
2022-09-13	15:31:54	3.19162
2022-09-13	15:31:54	2.51335
2022-09-13	15:31:54	1.8849
2022-09-13	15:31:55	1.38449
2022-09-13	15:31:55	1.34429
2022-09-13	15:31:55	1.9734
2022-09-13	15:31:56	1.97431
2022-09-13	15:31:56	1.92449
2022-09-13	15:31:56	1.8052
2022-09-13	15:31:56	1.70134
2022-09-13	15:31:57	1.45304
2022-09-13	15:31:57	1.60454
2022-09-13	15:31:57	1.18917
2022-09-13	15:31:57	1.38368
2022-09-13	15:31:58	1.32795
2022-09-13	15:31:58	1.07411
2022-09-13	15:31:58	1.08276
2022-09-13	15:31:58	1.04927
2022-09-13	15:31:59	1.09274
2022-09-13	15:31:59	0.967545
2022-09-13	15:31:59	1.09065
2022-09-13	15:32:00	0.890191
2022-09-13	15:32:00	1.37309
2022-09-13	15:32:00	1.26128
2022-09-13	15:32:00	1.35543
2022-09-13	15:32:01	1.35574
2022-09-13	15:32:01	1.36144
2022-09-13	15:32:01	1.3453
2022-09-13	15:32:01	1.36134
2022-09-13	15:32:02	1.34586
2022-09-13	15:32:02	1.38515
2022-09-13	15:32:02	1.38408
2022-09-13	15:32:02	1.4224
2022-09-13	15:32:03	1.41156
2022-09-13	15:32:03	1.36006
2022-09-13	15:32:03	1.37141
2022-09-13	15:32:04	1.35289
2022-09-13	15:32:04	1.31905
2022-09-13	15:32:04	1.32118
2022-09-13	15:32:04	1.4052
2022-09-13	15:32:05	1.41284
2022-09-13	15:32:05	1.45182
2022-09-13	15:32:05	1.46556
2022-09-13	15:32:05	1.55431
2022-09-13	15:32:06	1.53172
2022-09-13	15:32:06	1.54083
2022-09-13	15:32:06	1.47548
2022-09-13	15:32:07	1.39665
2022-09-13	15:32:07	1.38576
2022-09-13	15:32:07	1.35426
2022-09-13	15:32:07	1.35218
2022-09-13	15:32:08	1.18571
2022-09-13	15:32:08	1.17233
2022-09-13	15:32:08	1.11503
2022-09-13	15:32:08	1.45701
2022-09-13	15:32:09	1.34566
2022-09-13	15:32:09	1.47681
2022-09-13	15:32:09	1.46139
2022-09-13	15:32:09	1.39844
2022-09-13	15:32:10	1.39635
2022-09-13	15:32:10	1.42271
2022-09-13	15:32:10	1.34322
2022-09-13	15:32:10	1.46078
2022-09-13	15:32:11	1.45905
2022-09-13	15:32:11	1.55284
2022-09-13	15:32:11	1.49146
2022-09-13	15:32:12	1.49294
2022-09-13	15:32:12	1.37777
2022-09-13	15:32:12	1.20307
2022-09-13	15:32:12	0.963117
2022-09-13	15:32:13	1.22739
2022-09-13	15:32:13	1.94856
2022-09-13	15:32:13	2.47762
2022-09-13	15:32:13	2.01777
2022-09-13	15:32:14	1.97324
2022-09-13	15:32:14	1.36495
2022-09-13	15:32:14	1.23009
2022-09-13	15:32:14	1.33538
2022-09-13	15:32:15	1.41223
2022-09-13	15:32:15	0.991005
2022-09-13	15:32:15	1.0077
2022-09-13	15:32:16	0.664695
2022-09-13	15:32:16	0.718282
2022-09-13	15:32:16	1.151
2022-09-13	15:32:16	0.900165
2022-09-13	15:32:17	1.03701
2022-09-13	15:32:17	1.01711
2022-09-13	15:32:17	1.00897
2022-09-13	15:32:17	1.06164
2022-09-13	15:32:18	0.978181
2022-09-13	15:32:18	0.925407
2022-09-13	15:32:18	0.976145
2022-09-13	15:32:18	1.00469
2022-09-13	15:32:19	1.08067
2022-09-13	15:32:19	1.2534
2022-09-13	15:32:19	1.19055
2022-09-13	15:32:20	1.15482
2022-09-13	15:32:20	1.18581
2022-09-13	15:32:20	1.11589
2022-09-13	15:32:20	1.09131
2022-09-13	15:32:21	1.08307
2022-09-13	15:32:21	1.01391
2022-09-13	15:32:21	1.04337
2022-09-13	15:32:21	1.05431
2022-09-13	15:32:22	1.02464
2022-09-13	15:32:22	1.04205
2022-09-13	15:32:22	1.0709
2022-09-13	15:32:22	1.08978
2022-09-13	15:32:23	1.08449
2022-09-13	15:32:23	1.13431
2022-09-13	15:32:23	1.15711
2022-09-13	15:32:24	1.17869
2022-09-13	15:32:24	1.13594
2022-09-13	15:32:24	1.06246
2022-09-13	15:32:24	1.10632
2022-09-13	15:32:25	1.09869
2022-09-13	15:32:25	1.2848
2022-09-13	15:32:25	0.899199
2022-09-13	15:32:25	0.791972
2022-09-13	15:32:26	0.743117
2022-09-13	15:32:26	0.689631
2022-09-13	15:32:26	0.823321
2022-09-13	15:32:26	0.938893
2022-09-13	15:32:27	0.983829
2022-09-13	15:32:27	1.00754
2022-09-13	15:32:27	0.977875
2022-09-13	15:32:27	0.980979
2022-09-13	15:32:28	0.959097
2022-09-13	15:32:28	0.941692
2022-09-13	15:32:28	0.969427
2022-09-13	15:32:29	0.999453
2022-09-13	15:32:29	1.03696
2022-09-13	15:32:29	1.07635
2022-09-13	15:32:29	0.960572
2022-09-13	15:32:30	0.77757
2022-09-13	15:32:30	0.736552
2022-09-13	15:32:30	1.02775
2022-09-13	15:32:30	1.58286
2022-09-13	15:32:31	1.97798
2022-09-13	15:32:31	2.3019
2022-09-13	15:32:31	1.8733
2022-09-13	15:32:31	2.05212
2022-09-13	15:32:32	1.60332
2022-09-13	15:32:32	1.80205
2022-09-13	15:32:32	1.422
2022-09-13	15:32:33	0.823117
2022-09-13	15:32:33	0.496756
2022-09-13	15:32:33	0.408919
2022-09-13	15:32:33	0.378333
2022-09-13	15:32:34	0.504746
2022-09-13	15:32:34	0.856298
2022-09-13	15:32:34	1.27426
2022-09-13	15:32:34	1.5565
2022-09-13	15:32:35	1.38149
2022-09-13	15:32:35	0.334822
2022-09-13	15:32:35	0.536858
2022-09-13	15:32:35	0.500521
2022-09-13	15:32:36	0.464084
2022-09-13	15:32:36	0.640318
2022-09-13	15:32:36	0.481997
2022-09-13	15:32:37	0.550496
2022-09-13	15:32:37	0.333651
2022-09-13	15:32:37	0.355077
2022-09-13	15:32:37	0.42897
2022-09-13	15:32:38	0.407036
2022-09-13	15:32:38	0.522761
2022-09-13	15:32:38	0.705458
2022-09-13	15:32:38	0.487901
2022-09-13	15:32:39	0.576756
2022-09-13	15:32:39	0.707697
2022-09-13	15:32:39	0.281641
2022-09-13	15:32:39	0.293957
2022-09-13	15:32:40	0.23925
2022-09-13	15:32:40	0.243117
2022-09-13	15:32:40	0.256756
2022-09-13	15:32:41	0.252481
2022-09-13	15:32:41	0.291972
2022-09-13	15:32:41	0.066985
2022-09-13	15:32:41	0.134211
2022-09-13	15:32:42	0.205
2022-09-13	15:32:42	0.142303
2022-09-13	15:32:42	0.117926
2022-09-13	15:32:42	-0.0727606
2022-09-13	15:32:43	-0.0467554
2022-09-13	15:32:43	0.0386898
2022-09-13	15:32:43	-0.0619208
2022-09-13	15:32:43	-0.221565
2022-09-13	15:32:44	-0.505636
2022-09-13	15:32:44	-0.571183
2022-09-13	15:32:44	-0.786704
2022-09-13	15:32:45	-0.648027
2022-09-13	15:32:45	-0.739325
2022-09-13	15:32:45	-0.786755
2022-09-13	15:32:45	-0.634439
2022-09-13	15:32:46	-0.502328
2022-09-13	15:32:46	-0.408078
2022-09-13	15:32:46	-0.246196
2022-09-13	15:32:46	-0.0680786
2022-09-13	15:32:47	-0.111081
2022-09-13	15:32:47	-0.173575
2022-09-13	15:32:47	-0.274847
2022-09-13	15:32:47	-0.52019
2022-09-13	15:32:48	-0.790521
2022-09-13	15:32:48	-1.32665
2022-09-13	15:32:48	-0.0831422
2022-09-13	15:32:49	-0.053931
2022-09-13	15:32:49	0.0623031
2022-09-13	15:32:49	0.509886
2022-09-13	15:32:49	5.77706
2022-09-13	15:32:50	7.94291
2022-09-13	15:32:50	3.94556
2022-09-13	15:32:50	2.74312
2022-09-13	15:32:50	2.74439
2022-09-13	15:32:51	2.68383
2022-09-13	15:32:51	2.06129
2022-09-13	15:32:51	1.62627
2022-09-13	15:32:51	2.38383
2022-09-13	15:32:52	1.59162
2022-09-13	15:32:52	0.391158
2022-09-13	15:32:52	0.460623
2022-09-13	15:32:53	0.20841
2022-09-13	15:32:53	-0.0278242
2022-09-13	15:32:53	0.090191
2022-09-13	15:32:53	0.261132
2022-09-13	15:32:54	0.174618
2022-09-13	15:32:54	0.120522
2022-09-13	15:32:54	-0.136883
2022-09-13	15:32:54	-0.279529
2022-09-13	15:32:55	-0.354898
2022-09-13	15:32:55	-0.381513
2022-09-13	15:32:55	-0.327519
2022-09-13	15:32:55	-0.1093
2022-09-13	15:32:56	0.0432699
2022-09-13	15:32:56	0.150395
2022-09-13	15:32:56	0.288562
2022-09-13	15:32:57	0.97589
2022-09-13	15:32:57	1.1564
2022-09-13	15:32:57	1.13401
2022-09-13	15:32:57	1.57767
2022-09-13	15:32:58	1.46327
2022-09-13	15:32:58	1.2852
2022-09-13	15:32:58	0.734873
2022-09-13	15:32:58	0.836552
2022-09-13	15:32:59	1.0593
2022-09-13	15:32:59	0.51014
2022-09-13	15:32:59	0.279911
2022-09-13	15:32:59	0.222608
2022-09-13	15:33:00	0.185865
2022-09-13	15:33:00	0.136196
2022-09-13	15:33:00	-0.077188
2022-09-13	15:33:01	-0.0583076
2022-09-13	15:33:01	-0.0472135
2022-09-13	15:33:01	-0.252964
2022-09-13	15:33:01	-0.238053
2022-09-13	15:33:02	-0.730012
2022-09-13	15:33:02	-0.771946
2022-09-13	15:33:02	-0.788689
2022-09-13	15:33:02	-0.676882
2022-09-13	15:33:03	-0.682429
2022-09-13	15:33:03	-0.467213
2022-09-13	15:33:03	-0.183855
2022-09-13	15:33:03	0.188715
2022-09-13	15:33:04	0.807646
2022-09-13	15:33:04	1.24541
2022-09-13	15:33:04	2.58515
2022-09-13	15:33:05	3.64556
2022-09-13	15:33:05	6.71614
2022-09-13	15:33:05	6.63273
2022-09-13	15:33:05	2.54826
2022-09-13	15:33:06	0.448817
2022-09-13	15:33:06	0.243524
2022-09-13	15:33:06	0.186476
2022-09-13	15:33:06	1.1308
2022-09-13	15:33:07	2.73686
2022-09-13	15:33:07	2.94729
2022-09-13	15:33:07	0.962303
2022-09-13	15:33:07	2.15299
2022-09-13	15:33:08	2.19899
2022-09-13	15:33:08	1.18017
2022-09-13	15:33:08	0.568409
2022-09-13	15:33:09	0.58841
2022-09-13	15:33:09	0.39014
2022-09-13	15:33:09	0.447341
2022-09-13	15:33:09	0.394618
2022-09-13	15:33:10	0.459758
2022-09-13	15:33:10	0.296349
2022-09-13	15:33:10	0.569631
2022-09-13	15:33:10	0.59986
2022-09-13	15:33:11	0.358537
2022-09-13	15:33:11	0.461132
2022-09-13	15:33:11	0.535585
2022-09-13	15:33:11	0.497774
2022-09-13	15:33:12	0.167087
2022-09-13	15:33:12	0.101489
2022-09-13	15:33:12	0.15701
2022-09-13	15:33:13	0.0451529
2022-09-13	15:33:13	0.286781
2022-09-13	15:33:13	0.522354
2022-09-13	15:33:13	0.721997
2022-09-13	15:33:14	0.697824
2022-09-13	15:33:14	1.36195
2022-09-13	15:33:14	2.52831
2022-09-13	15:33:14	2.06739
2022-09-13	15:33:15	1.7505
2022-09-13	15:33:15	2.06327
2022-09-13	15:33:15	0.641489
2022-09-13	15:33:15	0.720471
2022-09-13	15:33:16	0.361845
2022-09-13	15:33:16	0.336654
2022-09-13	15:33:16	0.357875
2022-09-13	15:33:17	0.247137
2022-09-13	15:33:17	0.26897
2022-09-13	15:33:17	0.305
2022-09-13	15:33:17	0.301132
2022-09-13	15:33:18	0.429682
2022-09-13	15:33:18	0.315433
2022-09-13	15:33:18	0.52327
2022-09-13	15:33:18	0.718079
2022-09-13	15:33:19	0.533142
2022-09-13	15:33:19	0.72617
2022-09-13	15:33:19	0.391107
2022-09-13	15:33:19	0.250954
2022-09-13	15:33:20	0.248512
2022-09-13	15:33:20	0.236705
2022-09-13	15:33:20	0.316908
2022-09-13	15:33:21	0.303066
2022-09-13	15:33:21	0.228512
2022-09-13	15:33:21	0.568104
2022-09-13	15:33:21	0.737366
2022-09-13	15:33:22	1.33034
2022-09-13	15:33:22	1.5195
2022-09-13	15:33:22	0.998181
2022-09-13	15:33:22	0.262863
2022-09-13	15:33:23	0.302456
2022-09-13	15:33:23	0.175026
2022-09-13	15:33:23	0.421845
2022-09-13	15:33:23	0.355992
2022-09-13	15:33:24	0.442456
2022-09-13	15:33:24	0.316705
2022-09-13	15:33:24	0.3593
2022-09-13	15:33:25	0.391056
2022-09-13	15:33:25	0.418639
2022-09-13	15:33:25	0.312176
2022-09-13	15:33:25	0.173499
2022-09-13	15:33:26	0.117519
2022-09-13	15:33:26	0.182049
2022-09-13	15:33:26	0.0342114
2022-09-13	15:33:26	0.349835
2022-09-13	15:33:27	9.8166
2022-09-13	15:33:27	10.4733
2022-09-13	15:33:27	4.7536
2022-09-13	15:33:27	2.61121
2022-09-13	15:33:28	2.27248
2022-09-13	15:33:28	6.19645
2022-09-13	15:33:28	2.83431
2022-09-13	15:33:29	0.756603
2022-09-13	15:33:29	3.39736
2022-09-13	15:33:29	2.72413
2022-09-13	15:33:29	0.126781
2022-09-13	15:33:30	0.0638297
2022-09-13	15:33:30	0.0740587
2022-09-13	15:33:30	0.31126
2022-09-13	15:33:30	0.239199
2022-09-13	15:33:31	0.47869
2022-09-13	15:33:31	0.351616
2022-09-13	15:33:31	0.512634
2022-09-13	15:33:31	0.550242
2022-09-13	15:33:32	0.564033
2022-09-13	15:33:32	0.841794
2022-09-13	15:33:32	0.788613
2022-09-13	15:33:33	0.697875
2022-09-13	15:33:33	0.541081
2022-09-13	15:33:33	0.624084
2022-09-13	15:33:33	0.483626
2022-09-13	15:33:34	0.442914
2022-09-13	15:33:34	0.571158
2022-09-13	15:33:34	0.579453
2022-09-13	15:33:34	0.930547
2022-09-13	15:33:35	0.698486
2022-09-13	15:33:35	0.70729
2022-09-13	15:33:35	0.73645
2022-09-13	15:33:35	0.745814
2022-09-13	15:33:36	0.750038
2022-09-13	15:33:36	0.741336
2022-09-13	15:33:36	0.740929
2022-09-13	15:33:37	0.712532
2022-09-13	15:33:37	0.649784
2022-09-13	15:33:37	0.652532
2022-09-13	15:33:37	0.632023
2022-09-13	15:33:38	0.61584
2022-09-13	15:33:38	0.615891
2022-09-13	15:33:38	0.645305
2022-09-13	15:33:38	0.649326
2022-09-13	15:33:39	0.679453
2022-09-13	15:33:39	0.624135
2022-09-13	15:33:39	0.645
2022-09-13	15:33:39	0.653244
2022-09-13	15:33:40	0.636298
2022-09-13	15:33:40	0.497367
2022-09-13	15:33:40	0.547544
2022-09-13	15:33:41	0.552227
2022-09-13	15:33:41	0.540114
2022-09-13	15:33:41	0.510394
2022-09-13	15:33:41	0.544695
2022-09-13	15:33:42	0.493244
2022-09-13	15:33:42	0.487036
2022-09-13	15:33:42	0.494109
2022-09-13	15:33:42	0.521031
2022-09-13	15:33:43	0.545458
2022-09-13	15:33:43	0.54785
2022-09-13	15:33:43	0.559453
2022-09-13	15:33:43	0.54388
2022-09-13	15:33:44	0.497214
2022-09-13	15:33:44	0.517061
2022-09-13	15:33:44	0.592736
2022-09-13	15:33:44	0.61187
2022-09-13	15:33:45	0.647341
2022-09-13	15:33:45	0.645712
2022-09-13	15:33:45	0.579249
2022-09-13	15:33:46	0.548206
2022-09-13	15:33:46	0.549275
2022-09-13	15:33:46	0.611463
2022-09-13	15:33:46	0.624949
2022-09-13	15:33:47	0.649784
2022-09-13	15:33:47	0.618639
2022-09-13	15:33:47	0.601438
2022-09-13	15:33:47	0.562506
2022-09-13	15:33:48	0.56271
2022-09-13	15:33:48	0.561692
2022-09-13	15:33:48	0.600572
2022-09-13	15:33:48	0.648104
2022-09-13	15:33:49	0.597417
2022-09-13	15:33:49	0.61701
2022-09-13	15:33:49	0.641896
2022-09-13	15:33:50	0.649529
2022-09-13	15:33:50	0.664593
2022-09-13	15:33:50	0.685153
2022-09-13	15:33:50	0.688053
2022-09-13	15:33:51	0.674008
2022-09-13	15:33:51	0.654109
2022-09-13	15:33:51	0.650344
2022-09-13	15:33:51	0.669834
2022-09-13	15:33:52	0.681845
2022-09-13	15:33:52	0.707697
2022-09-13	15:33:52	0.689478
2022-09-13	15:33:52	0.66327
2022-09-13	15:33:53	0.65131
2022-09-13	15:33:53	0.649835
2022-09-13	15:33:53	0.655534
2022-09-13	15:33:54	0.643779
2022-09-13	15:33:54	0.637977
2022-09-13	15:33:54	0.620267
2022-09-13	15:33:54	0.611158
2022-09-13	15:33:55	0.616858
2022-09-13	15:33:55	0.598639
2022-09-13	15:33:55	0.586018
2022-09-13	15:33:55	0.585458
2022-09-13	15:33:56	0.572939
2022-09-13	15:33:56	0.582812
2022-09-13	15:33:56	0.580216
2022-09-13	15:33:56	0.579606
2022-09-13	15:33:57	0.588868
2022-09-13	15:33:57	0.595941
2022-09-13	15:33:57	0.560267
2022-09-13	15:33:58	0.52388
2022-09-13	15:33:58	0.529325
2022-09-13	15:33:58	0.532023
2022-09-13	15:33:58	0.525051
2022-09-13	15:33:59	0.540776
2022-09-13	15:33:59	0.520929
2022-09-13	15:33:59	0.500827
2022-09-13	15:33:59	0.459555
2022-09-13	15:34:00	0.463219
2022-09-13	15:34:00	0.458639
2022-09-13	15:34:00	0.457367
2022-09-13	15:34:00	0.453906
2022-09-13	15:34:01	0.446832
2022-09-13	15:34:01	0.445967
2022-09-13	15:34:01	0.453346
2022-09-13	15:34:02	0.452379
2022-09-13	15:34:02	0.440471
2022-09-13	15:34:02	0.428104
2022-09-13	15:34:02	0.443015
2022-09-13	15:34:03	0.448308
2022-09-13	15:34:03	0.445102
2022-09-13	15:34:03	0.45355
2022-09-13	15:34:03	0.455534
2022-09-13	15:34:04	0.457926
2022-09-13	15:34:04	0.457621
2022-09-13	15:34:04	0.466018
2022-09-13	15:34:04	0.475585
2022-09-13	15:34:05	0.461743
2022-09-13	15:34:05	0.457977
2022-09-13	15:34:05	0.466425
2022-09-13	15:34:06	0.453906
2022-09-13	15:34:06	0.448206
2022-09-13	15:34:06	0.446679
2022-09-13	15:34:06	0.449936
2022-09-13	15:34:07	0.461896
2022-09-13	15:34:07	0.461285
2022-09-13	15:34:07	0.459657
2022-09-13	15:34:07	0.444796
2022-09-13	15:34:08	0.44159
2022-09-13	15:34:08	0.463626
2022-09-13	15:34:08	0.468257
2022-09-13	15:34:08	0.46327
2022-09-13	15:34:09	0.461438
2022-09-13	15:34:09	0.459097
2022-09-13	15:34:09	0.475026
2022-09-13	15:34:10	0.474517
2022-09-13	15:34:10	0.474924
2022-09-13	15:34:10	0.481539
2022-09-13	15:34:10	0.479657
2022-09-13	15:34:11	0.495636
2022-09-13	15:34:11	0.494516
2022-09-13	15:34:11	0.489936
2022-09-13	15:34:11	0.501132
2022-09-13	15:34:12	0.492277
2022-09-13	15:34:12	0.460115
2022-09-13	15:34:12	0.423931
2022-09-13	15:34:12	0.394517
2022-09-13	15:34:13	0.389326
2022-09-13	15:34:13	0.556654
2022-09-13	15:34:13	0.294262
2022-09-13	15:34:14	0.679758
2022-09-13	15:34:14	0.390954
2022-09-13	15:34:14	0.535891
2022-09-13	15:34:14	0.423677
2022-09-13	15:34:15	0.614822
2022-09-13	15:34:15	0.513804
2022-09-13	15:34:15	0.709478
2022-09-13	15:34:15	0.70958
2022-09-13	15:34:16	0.531819
2022-09-13	15:34:16	0.520674
2022-09-13	15:34:16	0.581336
2022-09-13	15:34:16	0.513906
2022-09-13	15:34:17	0.585407
2022-09-13	15:34:17	0.51299
2022-09-13	15:34:17	0.525712
2022-09-13	15:34:18	0.366222
2022-09-13	15:34:18	0.467545
2022-09-13	15:34:18	0.438537
2022-09-13	15:34:18	0.437977
2022-09-13	15:34:19	0.326679
2022-09-13	15:34:19	0.200827
2022-09-13	15:34:19	-0.254084
2022-09-13	15:34:19	-0.620394
2022-09-13	15:34:20	-0.788027
2022-09-13	15:34:20	-0.764668
2022-09-13	15:34:20	-0.704211
2022-09-13	15:34:20	-0.731691
2022-09-13	15:34:21	-0.780496
2022-09-13	15:34:21	-0.782989
2022-09-13	15:34:21	-0.827925
2022-09-13	15:34:22	-0.884363
2022-09-13	15:34:22	-0.510012
2022-09-13	15:34:22	-0.049758
2022-09-13	15:34:22	-0.0727606
2022-09-13	15:34:23	0.161489
2022-09-13	15:34:23	0.107341
2022-09-13	15:34:23	0.280623
2022-09-13	15:34:23	0.218232
2022-09-13	15:34:24	0.277468
2022-09-13	15:34:24	0.267952
2022-09-13	15:34:24	0.223575
2022-09-13	15:34:25	0.278333
2022-09-13	15:34:25	0.18098
2022-09-13	15:34:25	0.395942
2022-09-13	15:34:25	0.0742623
2022-09-13	15:34:26	0.0623539
2022-09-13	15:34:26	0.142914
2022-09-13	15:34:26	0.154517
2022-09-13	15:34:26	0.181539
2022-09-13	15:34:27	0.0342114
2022-09-13	15:34:27	-0.121412
2022-09-13	15:34:27	-0.138155
2022-09-13	15:34:27	-0.495814
2022-09-13	15:34:28	-0.735101
2022-09-13	15:34:28	-0.800394
2022-09-13	15:34:28	-0.76533
2022-09-13	15:34:28	-0.652862
2022-09-13	15:34:29	-0.801106
2022-09-13	15:34:29	-0.754541
2022-09-13	15:34:29	-0.908994
2022-09-13	15:34:30	-0.843854
2022-09-13	15:34:30	-0.790318
2022-09-13	15:34:30	-0.550318
2022-09-13	15:34:30	-0.297137
2022-09-13	15:34:31	0.33757
2022-09-13	15:34:31	0.999148
2022-09-13	15:34:31	1.11772
2022-09-13	15:34:31	0.296603
2022-09-13	15:34:32	0.231667
2022-09-13	15:34:32	0.139962
2022-09-13	15:34:32	0.200369
2022-09-13	15:34:32	0.2507
2022-09-13	15:34:33	0.272837
2022-09-13	15:34:33	0.189173
2022-09-13	15:34:33	0.261489
2022-09-13	15:34:34	0.272226
2022-09-13	15:34:34	0.274567
2022-09-13	15:34:34	0.266832
2022-09-13	15:34:34	0.239911
2022-09-13	15:34:35	0.284033
2022-09-13	15:34:35	0.399097
2022-09-13	15:34:35	0.441692
2022-09-13	15:34:35	0.405916
2022-09-13	15:34:36	0.430751
2022-09-13	15:34:36	0.501946
2022-09-13	15:34:36	0.674822
2022-09-13	15:34:36	1.09681
2022-09-13	15:34:37	1.77004
2022-09-13	15:34:37	1.71564
2022-09-13	15:34:37	1.54413
2022-09-13	15:34:38	1.57716
2022-09-13	15:34:38	3.15487
2022-09-13	15:34:38	5.63014
2022-09-13	15:34:38	2.21884
2022-09-13	15:34:39	0.883728
2022-09-13	15:34:39	1.40897
2022-09-13	15:34:39	2.25971
2022-09-13	15:34:39	0.314059
2022-09-13	15:34:40	0.333906
2022-09-13	15:34:40	0.39187
2022-09-13	15:34:40	0.25528
2022-09-13	15:34:40	0.275382
2022-09-13	15:34:41	0.334211
2022-09-13	15:34:41	0.468155
2022-09-13	15:34:41	0.294924
2022-09-13	15:34:42	0.525814
2022-09-13	15:34:42	0.259911
2022-09-13	15:34:42	0.230089
2022-09-13	15:34:42	0.246171
2022-09-13	15:34:43	0.256603
2022-09-13	15:34:43	0.28897
2022-09-13	15:34:43	0.240115
2022-09-13	15:34:43	0.30271
2022-09-13	15:34:44	0.353753
2022-09-13	15:34:44	0.420318
2022-09-13	15:34:44	0.366934
2022-09-13	15:34:44	0.375331
2022-09-13	15:34:45	0.644084
2022-09-13	15:34:45	2.98892
2022-09-13	15:34:45	3.21034
2022-09-13	15:34:46	5.4482
2022-09-13	15:34:46	3.60174
2022-09-13	15:34:46	2.02083
2022-09-13	15:34:46	1.08658
2022-09-13	15:34:47	2.28459
2022-09-13	15:34:47	0.260623
2022-09-13	15:34:47	0.0137534
2022-09-13	15:34:47	0.342659
2022-09-13	15:34:48	0.296043
2022-09-13	15:34:48	1.82749
2022-09-13	15:34:48	1.03869
2022-09-13	15:34:48	1.90597
2022-09-13	15:34:49	0.858537
2022-09-13	15:34:49	0.772735
2022-09-13	15:34:49	0.37986
2022-09-13	15:34:50	0.479097
2022-09-13	15:34:50	0.340725
2022-09-13	15:34:50	0.516349
2022-09-13	15:34:50	0.416909
2022-09-13	15:34:51	1.05141
2022-09-13	15:34:51	0.851412
2022-09-13	15:34:51	0.487799
2022-09-13	15:34:51	0.481947
2022-09-13	15:34:52	0.359249
2022-09-13	15:34:52	0.531667
2022-09-13	15:34:52	0.396501
2022-09-13	15:34:52	0.101591
2022-09-13	15:34:53	0.152481
2022-09-13	15:34:53	0.143881
2022-09-13	15:34:53	0.225814
2022-09-13	15:34:54	0.244898
2022-09-13	15:34:54	0.280776
2022-09-13	15:34:54	0.581489
2022-09-13	15:34:54	1.53065
2022-09-13	15:34:55	1.47263
2022-09-13	15:34:55	1.16734
2022-09-13	15:34:55	0.591412
2022-09-13	15:34:55	0.434364
2022-09-13	15:34:56	0.401387
2022-09-13	15:34:56	0.431005
2022-09-13	15:34:56	0.417977
2022-09-13	15:34:56	0.474364
2022-09-13	15:34:57	0.887595
2022-09-13	15:34:57	1.09253
2022-09-13	15:34:57	0.558944
2022-09-13	15:34:57	0.597061
2022-09-13	15:34:58	1.16775
2022-09-13	15:34:58	0.675382
2022-09-13	15:34:58	0.300624
2022-09-13	15:34:59	0.244135
2022-09-13	15:34:59	0.068359
2022-09-13	15:34:59	-0.234185
2022-09-13	15:34:59	-0.407315
2022-09-13	15:35:00	-0.587468
2022-09-13	15:35:00	-0.600343
2022-09-13	15:35:00	-0.647213
2022-09-13	15:35:00	-0.710266
2022-09-13	15:35:01	-0.344567
2022-09-13	15:35:01	-0.187875
2022-09-13	15:35:01	-0.0634476
2022-09-13	15:35:01	-0.0442109
2022-09-13	15:35:02	-0.36874
2022-09-13	15:35:02	0.71416
2022-09-13	15:35:02	3.97981
2022-09-13	15:35:03	2.85848
2022-09-13	15:35:03	1.23742
2022-09-13	15:35:03	1.6449
2022-09-13	15:35:03	1.14225
2022-09-13	15:35:04	1.47192
2022-09-13	15:35:04	0.632888
2022-09-13	15:35:04	0.488766
2022-09-13	15:35:04	0.662099
2022-09-13	15:35:05	1.33324
2022-09-13	15:35:05	1.68373
2022-09-13	15:35:05	1.66561
2022-09-13	15:35:05	3.96245
2022-09-13	15:35:06	5.86133
2022-09-13	15:35:06	6.73543
2022-09-13	15:35:06	3.58047
2022-09-13	15:35:07	2.60586
2022-09-13	15:35:07	3.02917
2022-09-13	15:35:07	3.84261
2022-09-13	15:35:07	0.852583
2022-09-13	15:35:08	0.475636
2022-09-13	15:35:08	0.613193
2022-09-13	15:35:08	0.54785
2022-09-13	15:35:08	0.791667
2022-09-13	15:35:09	0.604084
2022-09-13	15:35:09	0.533346
2022-09-13	15:35:09	0.628155
2022-09-13	15:35:09	0.79869
2022-09-13	15:35:10	4.22973
2022-09-13	15:35:10	4.61686
2022-09-13	15:35:10	5.70596
2022-09-13	15:35:11	3.75365
2022-09-13	15:35:11	3.00495
2022-09-13	15:35:11	1.88698
2022-09-13	15:35:11	1.62754
2022-09-13	15:35:12	1.7938
2022-09-13	15:35:12	1.10515
2022-09-13	15:35:12	1.3506
2022-09-13	15:35:12	1.45482
2022-09-13	15:35:13	3.41436
2022-09-13	15:35:13	7.66815
2022-09-13	15:35:13	6.73126
2022-09-13	15:35:13	3.0191
2022-09-13	15:35:14	3.71004
2022-09-13	15:35:14	3.06052
2022-09-13	15:35:14	3.99915
2022-09-13	15:35:15	4.72383
2022-09-13	15:35:15	4.24561
2022-09-13	15:35:15	0.870191
2022-09-13	15:35:15	0.507799
2022-09-13	15:35:16	0.418995
2022-09-13	15:35:16	0.395178
2022-09-13	15:35:16	0.425102
2022-09-13	15:35:16	0.271209
2022-09-13	15:35:17	0.151769
2022-09-13	15:35:17	0.144898
2022-09-13	15:35:17	-0.032557
2022-09-13	15:35:17	-0.142175
2022-09-13	15:35:18	-0.325788
2022-09-13	15:35:18	-0.235509
2022-09-13	15:35:18	-0.110674
2022-09-13	15:35:19	-0.249605
2022-09-13	15:35:19	0.0573666
2022-09-13	15:35:19	0.507545
2022-09-13	15:35:19	0.598028
2022-09-13	15:35:20	1.37879
2022-09-13	15:35:20	1.74475
2022-09-13	15:35:20	1.67981
2022-09-13	15:35:20	1.09202
2022-09-13	15:35:21	0.52897
2022-09-13	15:35:21	0.504644
2022-09-13	15:35:21	0.279504
2022-09-13	15:35:21	0.345204
2022-09-13	15:35:22	0.393957
2022-09-13	15:35:22	0.368104
2022-09-13	15:35:22	0.301438
2022-09-13	15:35:23	0.265763
2022-09-13	15:35:23	0.477112
2022-09-13	15:35:23	0.423321
2022-09-13	15:35:23	0.304949
2022-09-13	15:35:24	0.476043
2022-09-13	15:35:24	0.484847
2022-09-13	15:35:24	0.671718
2022-09-13	15:35:24	0.912583
2022-09-13	15:35:25	0.729784
2022-09-13	15:35:25	0.972837
2022-09-13	15:35:25	1.21492
2022-09-13	15:35:25	1.65869
2022-09-13	15:35:26	1.34291
2022-09-13	15:35:26	0.741896
2022-09-13	15:35:26	0.499148
2022-09-13	15:35:27	0.531819
2022-09-13	15:35:27	0.512379
2022-09-13	15:35:27	0.718028
2022-09-13	15:35:27	0.784796
2022-09-13	15:35:28	0.622354
2022-09-13	15:35:28	0.54897
2022-09-13	15:35:28	0.495585
2022-09-13	15:35:28	0.42729
2022-09-13	15:35:29	0.450903
2022-09-13	15:35:29	0.458435
2022-09-13	15:35:29	0.452176
2022-09-13	15:35:29	0.447596
2022-09-13	15:35:30	0.424593
2022-09-13	15:35:30	0.425407
2022-09-13	15:35:30	0.411209
2022-09-13	15:35:31	0.413804
2022-09-13	15:35:31	0.430903
2022-09-13	15:35:31	0.431005
2022-09-13	15:35:31	0.431514
2022-09-13	15:35:32	0.426476
2022-09-13	15:35:32	0.427036
2022-09-13	15:35:32	0.427697
2022-09-13	15:35:32	0.410852
2022-09-13	15:35:33	0.398893
2022-09-13	15:35:33	0.416909
2022-09-13	15:35:33	0.416043
2022-09-13	15:35:33	0.430293
2022-09-13	15:35:34	0.427799
2022-09-13	15:35:34	0.454517
2022-09-13	15:35:34	0.442201
2022-09-13	15:35:35	0.480623
2022-09-13	15:35:35	0.532226
2022-09-13	15:35:35	0.788766
2022-09-13	15:35:35	1.17905
2022-09-13	15:35:36	1.88357
2022-09-13	15:35:36	2.0567
2022-09-13	15:35:36	2.94149
2022-09-13	15:35:36	3.33752
2022-09-13	15:35:37	2.56846
2022-09-13	15:35:37	1.71584
2022-09-13	15:35:37	1.17075
2022-09-13	15:35:37	1.45055
2022-09-13	15:35:38	1.4679
2022-09-13	15:35:38	1.3849
2022-09-13	15:35:38	1.04144
2022-09-13	15:35:39	0.836043
2022-09-13	15:35:39	0.831209
2022-09-13	15:35:39	0.778079
2022-09-13	15:35:39	0.825407
2022-09-13	15:35:40	0.881387
2022-09-13	15:35:40	0.968359
2022-09-13	15:35:40	0.88042
2022-09-13	15:35:40	0.795433
2022-09-13	15:35:41	0.770903
2022-09-13	15:35:41	0.753346
2022-09-13	15:35:41	0.726374
2022-09-13	15:35:41	0.701234
2022-09-13	15:35:42	0.71187
2022-09-13	15:35:42	0.707239
2022-09-13	15:35:42	0.661794
2022-09-13	15:35:43	0.572786
2022-09-13	15:35:43	0.507443
2022-09-13	15:35:43	0.413193
2022-09-13	15:35:43	0.45869
2022-09-13	15:35:44	0.407697
2022-09-13	15:35:44	0.441896
2022-09-13	15:35:44	0.352074
2022-09-13	15:35:44	0.402964
2022-09-13	15:35:45	0.490191
2022-09-13	15:35:45	0.668766
2022-09-13	15:35:45	0.747799
2022-09-13	15:35:45	0.933448
2022-09-13	15:35:46	0.887239
2022-09-13	15:35:46	0.688206
2022-09-13	15:35:46	0.602812
2022-09-13	15:35:47	0.536909
2022-09-13	15:35:47	0.513855
2022-09-13	15:35:47	0.505458
2022-09-13	15:35:47	0.499504
2022-09-13	15:35:48	0.50215
2022-09-13	15:35:48	0.498842
2022-09-13	15:35:48	0.491667
2022-09-13	15:35:48	0.497367
2022-09-13	15:35:49	0.500063
2022-09-13	15:35:49	0.503371
2022-09-13	15:35:49	0.501336
2022-09-13	15:35:49	0.499656
2022-09-13	15:35:50	0.492837
2022-09-13	15:35:50	0.489733
2022-09-13	15:35:50	0.497061
2022-09-13	15:35:51	0.484949
2022-09-13	15:35:51	0.484339
2022-09-13	15:35:51	0.47757
2022-09-13	15:35:51	0.493855
2022-09-13	15:35:52	0.495178
2022-09-13	15:35:52	0.496399
2022-09-13	15:35:52	0.495687
2022-09-13	15:35:52	0.491718
2022-09-13	15:35:53	0.490038
2022-09-13	15:35:53	0.497723
2022-09-13	15:35:53	0.4993
2022-09-13	15:35:53	0.496756
2022-09-13	15:35:54	0.490903
2022-09-13	15:35:54	0.502099
2022-09-13	15:35:54	0.520216
2022-09-13	15:35:55	0.511667
2022-09-13	15:35:55	0.507901
2022-09-13	15:35:55	0.511412
2022-09-13	15:35:55	0.524796
2022-09-13	15:35:56	0.50103
2022-09-13	15:35:56	0.485407
2022-09-13	15:35:56	0.467036
2022-09-13	15:35:56	0.470089
2022-09-13	15:35:57	0.476043
2022-09-13	15:35:57	0.477977
2022-09-13	15:35:57	0.468359
2022-09-13	15:35:57	0.480318
2022-09-13	15:35:58	0.48673
2022-09-13	15:35:58	0.482303
2022-09-13	15:35:58	0.525203
2022-09-13	15:35:59	0.531209
2022-09-13	15:35:59	0.512634
2022-09-13	15:35:59	0.473041
2022-09-13	15:35:59	0.384135
2022-09-13	15:36:00	0.370852
2022-09-13	15:36:00	0.382608
2022-09-13	15:36:00	0.378283
2022-09-13	15:36:00	0.468919
2022-09-13	15:36:01	0.551463
2022-09-13	15:36:01	0.845
2022-09-13	15:36:01	1.76291
2022-09-13	15:36:01	1.68688
2022-09-13	15:36:02	1.43645
2022-09-13	15:36:02	1.26322
2022-09-13	15:36:02	1.36556
2022-09-13	15:36:03	1.08159
2022-09-13	15:36:03	0.889122
2022-09-13	15:36:03	0.865
2022-09-13	15:36:03	0.695687
2022-09-13	15:36:04	0.531921
2022-09-13	15:36:04	0.564135
2022-09-13	15:36:04	0.482914
2022-09-13	15:36:04	0.409326
2022-09-13	15:36:05	0.431921
2022-09-13	15:36:05	0.41701
2022-09-13	15:36:05	0.41299
2022-09-13	15:36:05	0.431209
2022-09-13	15:36:06	0.433753
2022-09-13	15:36:06	0.431107
2022-09-13	15:36:06	0.437672
2022-09-13	15:36:07	0.444542
2022-09-13	15:36:07	0.438283
2022-09-13	15:36:07	0.453295
2022-09-13	15:36:07	0.43874
2022-09-13	15:36:08	0.429987
2022-09-13	15:36:08	0.417875
2022-09-13	15:36:08	0.435738
2022-09-13	15:36:08	0.436603
2022-09-13	15:36:09	0.398995
2022-09-13	15:36:09	0.473092
2022-09-13	15:36:09	0.405764
2022-09-13	15:36:09	0.449987
2022-09-13	15:36:10	0.377621
2022-09-13	15:36:10	0.389886
2022-09-13	15:36:10	0.364542
2022-09-13	15:36:11	0.430089
2022-09-13	15:36:11	0.436807
2022-09-13	15:36:11	0.489936
2022-09-13	15:36:11	0.490344
2022-09-13	15:36:12	0.646527
2022-09-13	15:36:12	0.675941
2022-09-13	15:36:12	0.641845
2022-09-13	15:36:12	0.548817
2022-09-13	15:36:13	0.461438
2022-09-13	15:36:13	0.382863
2022-09-13	15:36:13	0.31131
2022-09-13	15:36:13	0.300013
2022-09-13	15:36:14	0.315738
2022-09-13	15:36:14	0.345916
2022-09-13	15:36:14	0.354415
2022-09-13	15:36:14	0.333601
2022-09-13	15:36:15	0.345102
2022-09-13	15:36:15	0.34612
2022-09-13	15:36:15	0.346578
2022-09-13	15:36:16	0.359606
2022-09-13	15:36:16	0.385611
2022-09-13	15:36:16	0.434008
2022-09-13	15:36:16	0.438791
2022-09-13	15:36:17	0.452735
2022-09-13	15:36:17	0.429631
2022-09-13	15:36:17	0.384644
2022-09-13	15:36:17	0.375789
2022-09-13	15:36:18	0.361031
2022-09-13	15:36:18	0.353753
2022-09-13	15:36:18	0.365814
2022-09-13	15:36:18	0.359504
2022-09-13	15:36:19	0.379504
2022-09-13	15:36:19	0.368868
2022-09-13	15:36:19	0.368613
2022-09-13	15:36:20	0.364695
2022-09-13	15:36:20	0.359199
2022-09-13	15:36:20	0.371056
2022-09-13	15:36:20	0.371768
2022-09-13	15:36:21	0.36098
2022-09-13	15:36:21	0.368562
2022-09-13	15:36:21	0.376349
2022-09-13	15:36:21	0.35131
2022-09-13	15:36:22	0.359657
2022-09-13	15:36:22	0.383117
2022-09-13	15:36:22	0.362965
2022-09-13	15:36:22	0.369377
2022-09-13	15:36:23	0.383779
2022-09-13	15:36:23	0.372685
2022-09-13	15:36:23	0.362913
2022-09-13	15:36:24	0.324847
2022-09-13	15:36:24	0.348359
2022-09-13	15:36:24	0.384542
2022-09-13	15:36:24	0.321082
2022-09-13	15:36:25	0.350903
2022-09-13	15:36:25	0.370191
2022-09-13	15:36:25	0.416451
2022-09-13	15:36:25	0.425
2022-09-13	15:36:26	0.39299
2022-09-13	15:36:26	0.38841
2022-09-13	15:36:26	0.423575
2022-09-13	15:36:26	0.418486
2022-09-13	15:36:27	0.276705
2022-09-13	15:36:27	0.228054
2022-09-13	15:36:27	0.287036
2022-09-13	15:36:28	0.189682
2022-09-13	15:36:28	0.145356
2022-09-13	15:36:28	0.248257
2022-09-13	15:36:28	0.107239
2022-09-13	15:36:29	0.232736
2022-09-13	15:36:29	0.276043
2022-09-13	15:36:29	0.325407
2022-09-13	15:36:29	0.513295
2022-09-13	15:36:30	0.51416
2022-09-13	15:36:30	1.22159
2022-09-13	15:36:30	0.648053
2022-09-13	15:36:30	1.24485
2022-09-13	15:36:31	1.8021
2022-09-13	15:36:31	0.719707
2022-09-13	15:36:31	0.497723
2022-09-13	15:36:32	0.598232
2022-09-13	15:36:32	0.405102
2022-09-13	15:36:32	0.611005
2022-09-13	15:36:32	0.759962
2022-09-13	15:36:33	1.00836
2022-09-13	15:36:33	1.58261
2022-09-13	15:36:33	1.60291
2022-09-13	15:36:33	1.91452
2022-09-13	15:36:34	2.81604
2022-09-13	15:36:34	2.89116
2022-09-13	15:36:34	3.79772
2022-09-13	15:36:34	5.30337
2022-09-13	15:36:35	4.56922
2022-09-13	15:36:35	3.57874
2022-09-13	15:36:35	5.09853
2022-09-13	15:36:36	7.23848
2022-09-13	15:36:36	5.46093
2022-09-13	15:36:36	2.768
2022-09-13	15:36:36	1.79828
2022-09-13	15:36:37	2.72734
2022-09-13	15:36:37	5.90169
2022-09-13	15:36:37	5.67166
2022-09-13	15:36:37	2.35218
2022-09-13	15:36:38	1.13065
2022-09-13	15:36:38	1.87523
2022-09-13	15:36:38	3.47421
2022-09-13	15:36:38	4.13538
2022-09-13	15:36:39	3.53945
2022-09-13	15:36:39	1.07889
2022-09-13	15:36:39	0.336858
2022-09-13	15:36:40	0.335535
2022-09-13	15:36:40	0.27014
2022-09-13	15:36:40	0.31701
2022-09-13	15:36:40	0.355585
2022-09-13	15:36:41	0.347646
2022-09-13	15:36:41	0.337316
2022-09-13	15:36:41	0.345051
2022-09-13	15:36:41	0.356858
2022-09-13	15:36:42	0.346221
2022-09-13	15:36:42	0.347341
2022-09-13	15:36:42	0.459046
2022-09-13	15:36:42	0.392583
2022-09-13	15:36:43	0.449936
2022-09-13	15:36:43	0.500572
2022-09-13	15:36:43	0.597519
2022-09-13	15:36:44	0.563779
2022-09-13	15:36:44	0.494924
2022-09-13	15:36:44	0.491107
2022-09-13	15:36:44	0.467188
2022-09-13	15:36:45	0.493092
2022-09-13	15:36:45	0.463117
2022-09-13	15:36:45	0.4736
2022-09-13	15:36:45	0.48215
2022-09-13	15:36:46	0.468512
2022-09-13	15:36:46	0.465967
2022-09-13	15:36:46	0.467188
2022-09-13	15:36:46	0.491463
2022-09-13	15:36:47	0.482252
2022-09-13	15:36:47	0.42958
2022-09-13	15:36:47	0.485814
2022-09-13	15:36:48	1.86897
2022-09-13	15:36:48	0.558741
2022-09-13	15:36:48	0.515331
2022-09-13	15:36:48	0.634567
2022-09-13	15:36:49	0.530649
2022-09-13	15:36:49	1.08419
2022-09-13	15:36:49	0.952735
2022-09-13	15:36:49	1.59966
2022-09-13	15:36:50	2.19172
2022-09-13	15:36:50	1.73818
2022-09-13	15:36:50	1.42083
2022-09-13	15:36:50	0.93869
2022-09-13	15:36:51	1.13584
2022-09-13	15:36:51	4.54683
2022-09-13	15:36:51	3.94932
2022-09-13	15:36:52	1.02296
2022-09-13	15:36:52	0.661387
2022-09-13	15:36:52	0.863117
2022-09-13	15:36:52	0.481641
2022-09-13	15:36:53	0.530038
2022-09-13	15:36:53	0.478333
2022-09-13	15:36:53	0.984338
2022-09-13	15:36:53	1.70149
2022-09-13	15:36:54	1.64419
2022-09-13	15:36:54	0.970547
2022-09-13	15:36:54	0.662506
2022-09-13	15:36:54	0.541081
2022-09-13	15:36:55	0.52444
2022-09-13	15:36:55	0.589377
2022-09-13	15:36:55	0.809936
2022-09-13	15:36:56	0.714618
