# Supplementary material for: Comparing efficacy in reducing pulling and welfare impacts of four types of leash walking equipment
Source: PeerJ journal article supplement (doi:10.7717/peerj.18131), 2024-10-24
Supplement: Shelter1_Tension_files.zip [file Unnamed_star_2022913144724 copy.xlsx]

## Sheet: Averaged Newtons
Date	Time	Averaged Newtons
2022-09-13	14:47:34	0.585906	0.585906	0		Impulse	1128.36
2022-09-13	14:47:35	1.00141	1.58732	0		Total steps	18
2022-09-13	14:47:36	0.692527	2.27984	0		# > 5 sec	0
2022-09-13	14:47:37	1.65693	3.93677	0
2022-09-13	14:47:38	1.19515	5.13192	0
2022-09-13	14:47:39	1.8275	6.95942	0
2022-09-13	14:47:40	0.198528	7.15794	0
2022-09-13	14:47:41	2.08924	9.24718	0
2022-09-13	14:47:42	1.44853	10.6957	0
2022-09-13	14:47:43	1.99518	12.6909	0
2022-09-13	14:47:44	2.14108	14.832	0
2022-09-13	14:47:45	2.84989	17.6819	0
2022-09-13	14:47:46	0.358555	18.0404	0
2022-09-13	14:47:47	0.20832	18.2487	0
2022-09-13	14:47:48	3.50694	21.7557	0
2022-09-13	14:47:49	2.80485	24.5605	0
2022-09-13	14:47:50	5.75544	30.316	0
2022-09-13	14:47:51	1.78183	32.0978	0
2022-09-13	14:47:52	1.64187	33.7397	0
2022-09-13	14:47:53	1.28845	35.0281	0
2022-09-13	14:47:54	0.835141	35.8633	0
2022-09-13	14:47:55	1.24344	37.1067	0
2022-09-13	14:47:56	3.63219	40.7389	0
2022-09-13	14:47:57	1.91369	42.6526	0
2022-09-13	14:47:58	2.13559	44.7882	0
2022-09-13	14:47:59	1.60352	46.3917	0
2022-09-13	14:48:00	1.2073	47.599	0
2022-09-13	14:48:01	1.60611	49.2051	0
2022-09-13	14:48:02	1.65274	50.8578	0
2022-09-13	14:48:03	1.82318	52.681	0
2022-09-13	14:48:04	3.61646	56.2975	0
2022-09-13	14:48:05	4.78357	61.081	0
2022-09-13	14:48:06	4.59726	65.6783	0
2022-09-13	14:48:07	3.80732	69.4856	0
2022-09-13	14:48:08	3.6044	73.09	0
2022-09-13	14:48:09	3.72873	76.8188	0
2022-09-13	14:48:10	3.70666	80.5254	0
2022-09-13	14:48:11	3.68357	84.209	0
2022-09-13	14:48:12	3.6761	87.8851	0
2022-09-13	14:48:13	3.64788	91.533	0
2022-09-13	14:48:14	3.67139	95.2044	0
2022-09-13	14:48:15	3.51138	98.7158	0
2022-09-13	14:48:16	3.18431	101.9	0
2022-09-13	14:48:17	2.8979	104.798	0
2022-09-13	14:48:18	3.92619	108.724	0
2022-09-13	14:48:19	8.93922	117.663	0
2022-09-13	14:48:20	6.22975	123.893	0
2022-09-13	14:48:21	15.32	139.213	1
2022-09-13	14:48:22	7.57173	146.785	1
2022-09-13	14:48:23	4.19155	150.976	1
2022-09-13	14:48:24	4.1705	155.147	1
2022-09-13	14:48:25	5.51939	160.666	1
2022-09-13	14:48:26	4.17673	164.843	1
2022-09-13	14:48:27	3.37767	168.221	1
2022-09-13	14:48:28	2.83598	171.057	1
2022-09-13	14:48:29	2.80225	173.859	1
2022-09-13	14:48:30	2.68782	176.547	1
2022-09-13	14:48:31	2.73923	179.286	1
2022-09-13	14:48:32	2.72184	182.008	1
2022-09-13	14:48:33	2.96207	184.97	1
2022-09-13	14:48:34	3.02761	187.997	1
2022-09-13	14:48:35	3.32183	191.319	1
2022-09-13	14:48:36	3.12857	194.448	1
2022-09-13	14:48:37	3.19393	197.642	1
2022-09-13	14:48:38	3.03508	200.677	1
2022-09-13	14:48:39	2.93587	203.613	1
2022-09-13	14:48:40	3.16892	206.782	1
2022-09-13	14:48:41	10.9974	217.779	1
2022-09-13	14:48:42	36.6389	254.418	2
2022-09-13	14:48:43	34.138	288.556	3
2022-09-13	14:48:44	11.1135	299.669	3
2022-09-13	14:48:45	14.725	314.394	4
2022-09-13	14:48:46	10.8588	325.253	4
2022-09-13	14:48:47	10.5034	335.757	4
2022-09-13	14:48:48	28.0069	363.763	5
2022-09-13	14:48:49	3.59654	367.36	5
2022-09-13	14:48:50	2.6443	370.004	5
2022-09-13	14:48:51	3.49101	373.495	5
2022-09-13	14:48:52	2.60372	376.099	5
2022-09-13	14:48:53	2.59722	378.696	5
2022-09-13	14:48:54	2.01374	380.71	5
2022-09-13	14:48:55	0.321128	381.031	5
2022-09-13	14:48:56	-1.72795	381.031	5
2022-09-13	14:48:57	-3.66314	381.031	5
2022-09-13	14:48:58	-3.77214	381.031	5
2022-09-13	14:48:59	1.31679	382.348	5
2022-09-13	14:49:00	5.07463	387.422	5
2022-09-13	14:49:01	0.731803	388.154	5
2022-09-13	14:49:02	-0.549176	388.154	5
2022-09-13	14:49:03	-1.85702	388.154	5
2022-09-13	14:49:04	-2.15155	388.154	5
2022-09-13	14:49:05	0.631011	388.785	5
2022-09-13	14:49:06	1.71873	390.504	5
2022-09-13	14:49:07	2.20295	392.707	5
2022-09-13	14:49:08	1.81318	394.52	5
2022-09-13	14:49:09	2.6353	397.155	5
2022-09-13	14:49:10	13.6767	410.832	6
2022-09-13	14:49:11	2.44457	413.277	6
2022-09-13	14:49:12	2.83524	416.112	6
2022-09-13	14:49:13	-3.35177	416.112	6
2022-09-13	14:49:14	-4.20728	416.112	6
2022-09-13	14:49:15	-2.45101	416.112	6
2022-09-13	14:49:16	3.2018	419.314	6
2022-09-13	14:49:17	4.70955	424.023	6
2022-09-13	14:49:18	-0.462306	424.023	6
2022-09-13	14:49:19	1.76719	425.791	6
2022-09-13	14:49:20	6.83358	432.624	6
2022-09-13	14:49:21	2.48001	435.104	6
2022-09-13	14:49:22	2.96264	438.067	6
2022-09-13	14:49:23	1.07193	439.139	6
2022-09-13	14:49:24	6.53875	445.677	6
2022-09-13	14:49:25	14.1239	459.801	7
2022-09-13	14:49:26	2.19937	462.001	7
2022-09-13	14:49:27	1.48053	463.481	7
2022-09-13	14:49:28	1.40718	464.888	7
2022-09-13	14:49:29	1.47611	466.365	7
2022-09-13	14:49:30	2.02031	468.385	7
2022-09-13	14:49:31	1.49305	469.878	7
2022-09-13	14:49:32	1.32931	471.207	7
2022-09-13	14:49:33	1.32393	472.531	7
2022-09-13	14:49:34	1.5932	474.124	7
2022-09-13	14:49:35	1.48083	475.605	7
2022-09-13	14:49:36	1.56027	477.165	7
2022-09-13	14:49:37	1.57255	478.738	7
2022-09-13	14:49:38	1.60605	480.344	7
2022-09-13	14:49:39	1.66366	482.008	7
2022-09-13	14:49:40	1.67068	483.678	7
2022-09-13	14:49:41	1.73282	485.411	7
2022-09-13	14:49:42	2.06009	487.471	7
2022-09-13	14:49:43	2.71267	490.184	7
2022-09-13	14:49:44	3.25171	493.436	7
2022-09-13	14:49:45	3.25935	496.695	7
2022-09-13	14:49:46	3.25024	499.945	7
2022-09-13	14:49:47	3.34304	503.288	7
2022-09-13	14:49:48	2.03333	505.322	7
2022-09-13	14:49:49	1.48273	506.804	7
2022-09-13	14:49:50	3.87825	510.683	7
2022-09-13	14:49:51	21.0212	531.704	8
2022-09-13	14:49:52	15.2817	546.985	9
2022-09-13	14:49:53	5.12261	552.108	9
2022-09-13	14:49:54	3.32653	555.435	9
2022-09-13	14:49:55	5.98803	561.423	9
2022-09-13	14:49:56	3.03655	564.459	9
2022-09-13	14:49:57	1.84476	566.304	9
2022-09-13	14:49:58	2.04646	568.35	9
2022-09-13	14:49:59	2.00639	570.357	9
2022-09-13	14:50:00	2.00944	572.366	9
2022-09-13	14:50:01	2.0078	574.374	9
2022-09-13	14:50:02	2.0434	576.417	9
2022-09-13	14:50:03	2.07419	578.492	9
2022-09-13	14:50:04	2.07196	580.564	9
2022-09-13	14:50:05	2.07317	582.637	9
2022-09-13	14:50:06	2.0889	584.726	9
2022-09-13	14:50:07	2.30514	587.031	9
2022-09-13	14:50:08	2.67109	589.702	9
2022-09-13	14:50:09	2.62319	592.325	9
2022-09-13	14:50:10	2.65885	594.984	9
2022-09-13	14:50:11	2.23782	597.222	9
2022-09-13	14:50:12	2.20158	599.423	9
2022-09-13	14:50:13	6.64184	606.065	9
2022-09-13	14:50:14	4.343	610.408	9
2022-09-13	14:50:15	2.13072	612.539	9
2022-09-13	14:50:16	2.89829	615.437	9
2022-09-13	14:50:17	2.06609	617.503	9
2022-09-13	14:50:18	2.68488	620.188	9
2022-09-13	14:50:19	1.34538	621.534	9
2022-09-13	14:50:20	1.32931	622.863	9
2022-09-13	14:50:21	1.33208	624.195	9
2022-09-13	14:50:22	1.63672	625.832	9
2022-09-13	14:50:23	1.19122	627.023	9
2022-09-13	14:50:24	1.75866	628.782	9
2022-09-13	14:50:25	2.05925	630.841	9
2022-09-13	14:50:26	1.34261	632.183	9
2022-09-13	14:50:27	1.93961	634.123	9
2022-09-13	14:50:28	1.88588	636.009	9
2022-09-13	14:50:29	1.7769	637.786	9
2022-09-13	14:50:30	1.93095	639.717	9
2022-09-13	14:50:31	2.15121	641.868	9
2022-09-13	14:50:32	2.20333	644.071	9
2022-09-13	14:50:33	1.77843	645.85	9
2022-09-13	14:50:34	1.67973	647.529	9
2022-09-13	14:50:35	1.77481	649.304	9
2022-09-13	14:50:36	1.77519	651.079	9
2022-09-13	14:50:37	1.7996	652.879	9
2022-09-13	14:50:38	1.75959	654.639	9
2022-09-13	14:50:39	1.71012	656.349	9
2022-09-13	14:50:40	1.82801	658.177	9
2022-09-13	14:50:41	1.87679	660.054	9
2022-09-13	14:50:42	1.85393	661.907	9
2022-09-13	14:50:43	1.7773	663.685	9
2022-09-13	14:50:44	1.9833	665.668	9
2022-09-13	14:50:45	1.979	667.647	9
2022-09-13	14:50:46	5.03365	672.681	9
2022-09-13	14:50:47	2.1185	674.799	9
2022-09-13	14:50:48	-1.10735	674.799	9
2022-09-13	14:50:49	-1.11652	674.799	9
2022-09-13	14:50:50	-0.58981	674.799	9
2022-09-13	14:50:51	0.336955	675.136	9
2022-09-13	14:50:52	0.00315066	675.139	9
2022-09-13	14:50:53	0.130108	675.269	9
2022-09-13	14:50:54	0.580134	675.85	9
2022-09-13	14:50:55	3.31787	679.167	9
2022-09-13	14:50:56	4.54937	683.717	9
2022-09-13	14:50:57	1.93214	685.649	9
2022-09-13	14:50:58	1.41562	687.065	9
2022-09-13	14:50:59	1.34482	688.409	9
2022-09-13	14:51:00	1.30501	689.714	9
2022-09-13	14:51:01	1.34861	691.063	9
2022-09-13	14:51:02	1.34453	692.408	9
2022-09-13	14:51:03	1.55195	693.959	9
2022-09-13	14:51:04	1.58624	695.546	9
2022-09-13	14:51:05	1.46196	697.008	9
2022-09-13	14:51:06	1.45698	698.465	9
2022-09-13	14:51:07	1.35608	699.821	9
2022-09-13	14:51:08	1.4754	701.296	9
2022-09-13	14:51:09	1.48268	702.779	9
2022-09-13	14:51:10	2.2773	705.056	9
2022-09-13	14:51:11	1.94397	707	9
2022-09-13	14:51:12	1.40726	708.407	9
2022-09-13	14:51:13	1.24453	709.652	9
2022-09-13	14:51:14	1.23412	710.886	9
2022-09-13	14:51:15	1.22818	712.114	9
2022-09-13	14:51:16	0.231636	712.346	9
2022-09-13	14:51:17	2.07385	714.42	9
2022-09-13	14:51:18	4.24532	718.665	9
2022-09-13	14:51:19	3.20548	721.87	9
2022-09-13	14:51:20	3.56368	725.434	9
2022-09-13	14:51:21	4.28628	729.72	9
2022-09-13	14:51:22	0.811711	730.532	9
2022-09-13	14:51:23	-1.53921	730.532	9
2022-09-13	14:51:24	-2.93681	730.532	9
2022-09-13	14:51:25	0.241936	730.774	9
2022-09-13	14:51:26	1.35082	732.125	9
2022-09-13	14:51:27	1.38556	733.51	9
2022-09-13	14:51:28	2.65509	736.166	9
2022-09-13	14:51:29	1.46949	737.635	9
2022-09-13	14:51:30	2.26094	739.896	9
2022-09-13	14:51:31	2.27622	742.172	9
2022-09-13	14:51:32	2.15874	744.331	9
2022-09-13	14:51:33	1.45082	745.782	9
2022-09-13	14:51:34	1.98918	747.771	9
2022-09-13	14:51:35	1.95534	749.726	9
2022-09-13	14:51:36	1.12769	750.854	9
2022-09-13	14:51:37	-0.559306	750.854	9
2022-09-13	14:51:38	-1.51301	750.854	9
2022-09-13	14:51:39	-2.6859	750.854	9
2022-09-13	14:51:40	-2.67392	750.854	9
2022-09-13	14:51:41	-1.70277	750.854	9
2022-09-13	14:51:42	0.864401	751.718	9
2022-09-13	14:51:43	2.24193	753.96	9
2022-09-13	14:51:44	2.37552	756.336	9
2022-09-13	14:51:45	4.81367	761.149	9
2022-09-13	14:51:46	11.6999	772.849	9
2022-09-13	14:51:47	9.00731	781.857	9
2022-09-13	14:51:48	1.48928	783.346	9
2022-09-13	14:51:49	13.0632	796.409	10
2022-09-13	14:51:50	19.9117	816.321	11
2022-09-13	14:51:51	6.64933	822.97	11
2022-09-13	14:51:52	35.4171	858.387	12
2022-09-13	14:51:53	43.9004	902.288	13
2022-09-13	14:51:54	24.9824	927.27	14
2022-09-13	14:51:55	17.2954	944.565	15
2022-09-13	14:51:56	7.28837	951.854	15
2022-09-13	14:51:57	3.46326	955.317	15
2022-09-13	14:51:58	11.7308	967.048	15
2022-09-13	14:51:59	8.57264	975.621	15
2022-09-13	14:52:00	3.7856	979.406	15
2022-09-13	14:52:01	2.46507	981.871	15
2022-09-13	14:52:02	2.2095	984.081	15
2022-09-13	14:52:03	5.07388	989.155	15
2022-09-13	14:52:04	4.9096	994.064	15
2022-09-13	14:52:05	2.4185	996.483	15
2022-09-13	14:52:06	1.72037	998.203	15
2022-09-13	14:52:07	0.958797	999.162	15
2022-09-13	14:52:08	2.38511	1001.55	15
2022-09-13	14:52:09	16.2234	1017.77	16
2022-09-13	14:52:10	46.4017	1064.17	17
2022-09-13	14:52:11	14.6688	1078.84	18
2022-09-13	14:52:12	1.58994	1080.43	18
2022-09-13	14:52:13	1.83169	1082.26	18
2022-09-13	14:52:14	1.59168	1083.85	18
2022-09-13	14:52:15	1.70548	1085.56	18
2022-09-13	14:52:16	0.570966	1086.13	18
2022-09-13	14:52:17	-1.21459	1086.13	18
2022-09-13	14:52:18	1.43837	1087.57	18
2022-09-13	14:52:19	2.07996	1089.65	18
2022-09-13	14:52:20	2.1192	1091.77	18
2022-09-13	14:52:21	2.86682	1094.64	18
2022-09-13	14:52:22	2.77995	1097.41	18
2022-09-13	14:52:23	3.12896	1100.54	18
2022-09-13	14:52:24	3.29467	1103.84	18
2022-09-13	14:52:25	3.19535	1107.03	18
2022-09-13	14:52:26	3.22376	1110.26	18
2022-09-13	14:52:27	2.90825	1113.17	18
2022-09-13	14:52:28	2.2025	1115.37	18
2022-09-13	14:52:29	2.16689	1117.54	18
2022-09-13	14:52:30	2.16462	1119.7	18
2022-09-13	14:52:31	2.14561	1121.85	18
2022-09-13	14:52:32	2.15602	1124	18
2022-09-13	14:52:33	2.158	1126.16	18
2022-09-13	14:52:34	2.20509	1128.36	18

## Sheet: Unnamed_star_2022913144724 (4)
Date	Time	Lbs	Newtons	Averaged Newtons	Total force x time	total steps > 13.345		**GoPro Fitting: 1435
2022-09-13	14:47:34	0.137468	0.611485	0.585906	0.611485	FALSE	0
2022-09-13	14:47:34	0.163524	0.727387	0.585906	0.727387	FALSE	0
2022-09-13	14:47:34	0.0941605	0.418845	0.585906	1.03033	FALSE	0
2022-09-13	14:47:35	0.242252	1.07759	1.00141	1.80497	FALSE	0
2022-09-13	14:47:35	0.194822	0.866607	1.00141	1.89694	FALSE	0
2022-09-13	14:47:35	0.232634	1.0348	1.00141	2.83978	FALSE	0
2022-09-13	14:47:35	0.230802	1.02665	1.00141	2.92359	FALSE	0
2022-09-13	14:47:36	0.115229	0.512562	0.692527	3.35234	FALSE	0
2022-09-13	14:47:36	0.160522	0.714034	0.692527	3.63762	FALSE	0
2022-09-13	14:47:36	0.151819	0.675321	0.692527	4.02766	FALSE	0
2022-09-13	14:47:36	0.195178	0.868191	0.692527	4.50582	FALSE	0
2022-09-13	14:47:37	0.280573	1.24804	1.65693	5.2757	FALSE	0
2022-09-13	14:47:37	0.213092	0.947876	1.65693	5.45369	FALSE	0
2022-09-13	14:47:37	0.520929	2.3172	1.65693	7.5929	FALSE	0
2022-09-13	14:47:37	0.475382	2.11459	1.65693	7.56829	FALSE	0
2022-09-13	14:47:38	0.343931	1.52987	1.19515	9.12277	FALSE	0
2022-09-13	14:47:38	0.266985	1.1876	1.19515	8.75589	FALSE	0
2022-09-13	14:47:38	0.195127	0.867964	1.19515	9.99074	FALSE	0
2022-09-13	14:47:39	0.529783	2.35658	1.8275	11.1125	FALSE	0
2022-09-13	14:47:39	0.398181	1.77119	1.8275	11.7619	FALSE	0
2022-09-13	14:47:39	0.300878	1.33837	1.8275	12.4508	FALSE	0
2022-09-13	14:47:39	0.414517	1.84385	1.8275	13.6058	FALSE	0
2022-09-13	14:47:40	0.343524	1.52806	0.198528	13.9789	FALSE	0
2022-09-13	14:47:40	0.16159	0.718785	0.198528	14.3246	FALSE	0
2022-09-13	14:47:40	-0.215916	-0.960438	0.198528	13.9789	FALSE	0
2022-09-13	14:47:40	-0.110674	-0.4923	0.198528	14.3246	FALSE	0
2022-09-13	14:47:41	0.477316	2.1232	2.08924	16.1021	FALSE	0
2022-09-13	14:47:41	0.645305	2.87045	2.08924	17.195	FALSE	0
2022-09-13	14:47:41	0.443626	1.97334	2.08924	18.0754	FALSE	0
2022-09-13	14:47:41	0.312481	1.38998	2.08924	18.585	FALSE	0
2022-09-13	14:47:42	0.270089	1.20141	1.44853	19.2768	FALSE	0
2022-09-13	14:47:42	0.214568	0.954441	1.44853	19.5394	FALSE	0
2022-09-13	14:47:42	0.492277	2.18975	1.44853	21.4666	FALSE	0
2022-09-13	14:47:43	0.45416	2.02019	1.99518	21.5596	FALSE	0
2022-09-13	14:47:43	0.465051	2.06864	1.99518	23.5352	FALSE	0
2022-09-13	14:47:43	0.426679	1.89795	1.99518	23.4576	FALSE	0
2022-09-13	14:47:43	0.448257	1.99394	1.99518	25.5292	FALSE	0
2022-09-13	14:47:44	0.468308	2.08313	2.14108	25.5407	FALSE	0
2022-09-13	14:47:44	0.477061	2.12206	2.14108	27.6512	FALSE	0
2022-09-13	14:47:44	0.498639	2.21805	2.14108	27.7588	FALSE	0
2022-09-13	14:47:45	0.488206	2.17164	2.84989	29.8229	FALSE	0
2022-09-13	14:47:45	0.428155	1.90452	2.84989	29.6633	FALSE	0
2022-09-13	14:47:45	0.468257	2.0829	2.84989	31.9058	FALSE	0
2022-09-13	14:47:45	1.35075	6.00841	2.84989	35.6717	FALSE	0
2022-09-13	14:47:45	0.468054	2.082	2.84989	33.9878	FALSE	0
2022-09-13	14:47:46	0.135077	0.60085	0.358555	36.2725	FALSE	0
2022-09-13	14:47:46	-0.018155	-0.0807571	0.358555	33.9878	FALSE	0
2022-09-13	14:47:46	0.124898	0.555571	0.358555	36.8281	FALSE	0
2022-09-13	14:47:47	0.0454582	0.202207	0.20832	34.19	FALSE	0
2022-09-13	14:47:47	-0.0708776	-0.315278	0.20832	36.8281	FALSE	0
2022-09-13	14:47:47	0.0265778	0.118223	0.20832	34.3082	FALSE	0
2022-09-13	14:47:47	0.186171	0.828126	0.20832	37.6562	FALSE	0
2022-09-13	14:47:48	0.46729	2.0786	3.50694	36.3868	FALSE	0
2022-09-13	14:47:48	0.624542	2.77809	3.50694	40.4343	FALSE	0
2022-09-13	14:47:48	0.861641	3.83275	3.50694	40.2195	FALSE	0
2022-09-13	14:47:48	1.20011	5.33833	3.50694	45.7726	FALSE	0
2022-09-13	14:47:49	0.341489	1.51901	2.80485	41.7386	FALSE	0
2022-09-13	14:47:49	0.590801	2.628	2.80485	48.4006	FALSE	0
2022-09-13	14:47:49	0.392837	1.74742	2.80485	43.486	FALSE	0
2022-09-13	14:47:49	1.19711	5.32498	2.80485	53.7256	FALSE	0
2022-09-13	14:47:50	1.50022	6.67328	5.75544	50.1593	FALSE	0
2022-09-13	14:47:50	2.31645	10.304	5.75544	64.0297	FALSE	0
2022-09-13	14:47:50	1.01782	4.52747	5.75544	54.6867	FALSE	0
2022-09-13	14:47:50	0.341031	1.51697	5.75544	65.5466	FALSE	0
2022-09-13	14:47:51	0.260318	1.15795	1.78183	55.8447	FALSE	0
2022-09-13	14:47:51	0.413855	1.84091	1.78183	67.3875	FALSE	0
2022-09-13	14:47:51	0.527544	2.34662	1.78183	58.1913	FALSE	0
2022-09-13	14:47:52	0.557672	2.48064	1.64187	69.8682	FALSE	0
2022-09-13	14:47:52	0.32098	1.42778	1.64187	59.6191	FALSE	0
2022-09-13	14:47:52	0.157977	0.702713	1.64187	70.5709	FALSE	0
2022-09-13	14:47:52	0.439809	1.95636	1.64187	61.5754	FALSE	0
2022-09-13	14:47:53	0.176349	0.784436	1.28845	71.3553	FALSE	0
2022-09-13	14:47:53	0.304186	1.35308	1.28845	62.9285	FALSE	0
2022-09-13	14:47:53	0.352685	1.56881	1.28845	72.9241	FALSE	0
2022-09-13	14:47:53	0.325407	1.44748	1.28845	64.376	FALSE	0
2022-09-13	14:47:54	0.269173	1.19734	0.835141	74.1215	FALSE	0
2022-09-13	14:47:54	0.378435	1.68335	0.835141	66.0593	FALSE	0
2022-09-13	14:47:54	0.0396058	0.176175	0.835141	74.2977	FALSE	0
2022-09-13	14:47:54	0.0637788	0.283701	0.835141	66.343	FALSE	0
2022-09-13	14:47:55	0.241438	1.07396	1.24344	75.3716	FALSE	0
2022-09-13	14:47:55	0.231158	1.02824	1.24344	67.3713	FALSE	0
2022-09-13	14:47:55	0.366018	1.62812	1.24344	76.9997	FALSE	0
2022-09-13	14:47:56	1.12373	4.99858	3.63219	72.3699	FALSE	0
2022-09-13	14:47:56	1.01406	4.51074	3.63219	81.5105	FALSE	0
2022-09-13	14:47:56	0.65299	2.90463	3.63219	75.2745	FALSE	0
2022-09-13	14:47:56	0.475433	2.11482	3.63219	83.6253	FALSE	0
2022-09-13	14:47:57	0.525712	2.33847	1.91369	77.613	FALSE	0
2022-09-13	14:47:57	0.422303	1.87849	1.91369	85.5038	FALSE	0
2022-09-13	14:47:57	0.423372	1.88324	1.91369	79.4962	FALSE	0
2022-09-13	14:47:57	0.349478	1.55455	1.91369	87.0583	FALSE	0
2022-09-13	14:47:58	0.389529	1.7327	2.13559	81.2289	FALSE	0
2022-09-13	14:47:58	0.439555	1.95523	2.13559	89.0136	FALSE	0
2022-09-13	14:47:58	0.577723	2.56983	2.13559	83.7987	FALSE	0
2022-09-13	14:47:58	0.513601	2.2846	2.13559	91.2982	FALSE	0
2022-09-13	14:47:59	0.505967	2.25064	1.60352	86.0494	FALSE	0
2022-09-13	14:47:59	0.321896	1.43186	1.60352	92.73	FALSE	0
2022-09-13	14:47:59	0.253601	1.12807	1.60352	87.1774	FALSE	0
2022-09-13	14:48:00	0.176909	0.786927	1.2073	93.5169	FALSE	0
2022-09-13	14:48:00	0.222252	0.988621	1.2073	88.1661	FALSE	0
2022-09-13	14:48:00	0.343626	1.52852	1.2073	95.0455	FALSE	0
2022-09-13	14:48:00	0.342863	1.52512	1.2073	89.6912	FALSE	0
2022-09-13	14:48:01	0.333499	1.48347	1.60611	96.5289	FALSE	0
2022-09-13	14:48:01	0.305458	1.35874	1.60611	91.0499	FALSE	0
2022-09-13	14:48:01	0.411667	1.83118	1.60611	98.3601	FALSE	0
2022-09-13	14:48:01	0.393651	1.75104	1.60611	92.801	FALSE	0
2022-09-13	14:48:02	0.353906	1.57424	1.65274	99.9344	FALSE	0
2022-09-13	14:48:02	0.365305	1.62495	1.65274	94.4259	FALSE	0
2022-09-13	14:48:02	0.366476	1.63016	1.65274	101.565	FALSE	0
2022-09-13	14:48:02	0.400522	1.7816	1.65274	96.2075	FALSE	0
2022-09-13	14:48:03	0.388715	1.72908	1.82318	103.294	FALSE	0
2022-09-13	14:48:03	0.403473	1.79473	1.82318	98.0022	FALSE	0
2022-09-13	14:48:03	0.437417	1.94572	1.82318	105.239	FALSE	0
2022-09-13	14:48:04	0.495331	2.20333	3.61646	100.206	FALSE	0
2022-09-13	14:48:04	0.626934	2.78873	3.61646	108.028	FALSE	0
2022-09-13	14:48:04	0.904847	4.02494	3.61646	104.231	FALSE	0
2022-09-13	14:48:04	1.22495	5.44882	3.61646	113.477	FALSE	0
2022-09-13	14:48:05	1.06994	4.75931	4.78357	108.99	FALSE	0
2022-09-13	14:48:05	1.17553	5.22899	4.78357	118.706	FALSE	0
2022-09-13	14:48:05	0.9907	4.40683	4.78357	113.397	FALSE	0
2022-09-13	14:48:05	1.06541	4.73916	4.78357	123.445	FALSE	0
2022-09-13	14:48:06	1.06332	4.72986	4.59726	118.127	FALSE	0
2022-09-13	14:48:06	1.04841	4.66354	4.59726	128.109	FALSE	0
2022-09-13	14:48:06	1.00159	4.45527	4.59726	122.582	FALSE	0
2022-09-13	14:48:06	1.02072	4.54037	4.59726	132.649	FALSE	0
2022-09-13	14:48:07	0.897774	3.99348	3.80732	126.575	FALSE	0
2022-09-13	14:48:07	0.876094	3.89704	3.80732	136.546	FALSE	0
2022-09-13	14:48:07	0.793906	3.53145	3.80732	130.107	FALSE	0
2022-09-13	14:48:08	0.802303	3.5688	3.6044	140.115	FALSE	0
2022-09-13	14:48:08	0.881947	3.92308	3.6044	134.03	FALSE	0
2022-09-13	14:48:08	0.784389	3.48912	3.6044	143.604	FALSE	0
2022-09-13	14:48:08	0.772583	3.4366	3.6044	137.466	FALSE	0
2022-09-13	14:48:09	0.826476	3.67633	3.72873	147.28	FALSE	0
2022-09-13	14:48:09	0.809122	3.59914	3.72873	141.066	FALSE	0
2022-09-13	14:48:09	0.866476	3.85426	3.72873	151.134	FALSE	0
2022-09-13	14:48:09	0.850954	3.78521	3.72873	144.851	FALSE	0
2022-09-13	14:48:10	0.797519	3.54752	3.70666	154.682	FALSE	0
2022-09-13	14:48:10	0.817366	3.63581	3.70666	148.487	FALSE	0
2022-09-13	14:48:10	0.845661	3.76167	3.70666	158.444	FALSE	0
2022-09-13	14:48:10	0.872633	3.88165	3.70666	152.368	FALSE	0
2022-09-13	14:48:11	0.855941	3.8074	3.68357	162.251	FALSE	0
2022-09-13	14:48:11	0.784593	3.49003	3.68357	155.858	FALSE	0
2022-09-13	14:48:11	0.843779	3.7533	3.68357	166.004	FALSE	0
2022-09-13	14:48:12	0.869122	3.86603	3.6761	159.724	FALSE	0
2022-09-13	14:48:12	0.812277	3.61317	3.6761	169.618	FALSE	0
2022-09-13	14:48:12	0.789783	3.51311	3.6761	163.237	FALSE	0
2022-09-13	14:48:12	0.834517	3.7121	3.6761	173.33	FALSE	0
2022-09-13	14:48:13	0.830191	3.69286	3.64788	166.93	FALSE	0
2022-09-13	14:48:13	0.78215	3.47916	3.64788	176.809	FALSE	0
2022-09-13	14:48:13	0.847901	3.77163	3.64788	170.702	FALSE	0
2022-09-13	14:48:14	0.875636	3.895	3.67139	180.704	FALSE	0
2022-09-13	14:48:14	0.827392	3.68041	3.67139	174.382	FALSE	0
2022-09-13	14:48:14	0.840878	3.74039	3.67139	184.444	FALSE	0
2022-09-13	14:48:14	0.770649	3.428	3.67139	177.81	FALSE	0
2022-09-13	14:48:14	0.812277	3.61317	3.67139	188.057	FALSE	0
2022-09-13	14:48:15	0.821794	3.6555	3.51138	181.466	FALSE	0
2022-09-13	14:48:15	0.80668	3.58827	3.51138	191.646	FALSE	0
2022-09-13	14:48:15	0.739707	3.29036	3.51138	184.756	FALSE	0
2022-09-13	14:48:16	0.743015	3.30508	3.18431	194.951	FALSE	0
2022-09-13	14:48:16	0.716196	3.18578	3.18431	187.942	FALSE	0
2022-09-13	14:48:16	0.726476	3.23151	3.18431	198.182	FALSE	0
2022-09-13	14:48:16	0.677773	3.01487	3.18431	190.957	FALSE	0
2022-09-13	14:48:17	0.634364	2.82178	2.8979	201.004	FALSE	0
2022-09-13	14:48:17	0.670293	2.9816	2.8979	193.938	FALSE	0
2022-09-13	14:48:17	0.656349	2.91957	2.8979	203.924	FALSE	0
2022-09-13	14:48:17	0.644898	2.86864	2.8979	196.807	FALSE	0
2022-09-13	14:48:18	0.658384	2.92862	3.92619	206.852	FALSE	0
2022-09-13	14:48:18	0.643677	2.8632	3.92619	199.67	FALSE	0
2022-09-13	14:48:18	0.998384	4.44101	3.92619	211.293	FALSE	0
2022-09-13	14:48:18	1.23014	5.47191	3.92619	205.142	FALSE	0
2022-09-13	14:48:19	1.55319	6.9089	8.93922	218.202	FALSE	0
2022-09-13	14:48:19	2.16189	9.61652	8.93922	214.759	FALSE	0
2022-09-13	14:48:19	2.3138	10.2922	8.93922	228.494	FALSE	0
2022-09-13	14:48:20	1.3763	6.12206	6.22975	220.881	FALSE	0
2022-09-13	14:48:20	1.19523	5.31662	6.22975	233.811	FALSE	0
2022-09-13	14:48:20	1.28159	5.70077	6.22975	226.581	FALSE	0
2022-09-13	14:48:20	1.74892	7.77955	6.22975	241.591	FALSE	0
2022-09-13	14:48:21	1.82011	8.09621	15.32	234.678	FALSE	0
2022-09-13	14:48:21	2.32164	10.3271	15.32	251.918	FALSE	0
2022-09-13	14:48:21	4.20739	18.7153	15.32	253.393	1	1
2022-09-13	14:48:21	5.42719	24.1412	15.32	276.059	1	2
2022-09-13	14:48:22	4.03304	17.9398	7.57173	271.333	1	3
2022-09-13	14:48:22	1.09864	4.88697	7.57173	280.946	FALSE	3
2022-09-13	14:48:22	0.61243	2.72421	7.57173	274.057	FALSE	3
2022-09-13	14:48:22	1.06469	4.73595	7.57173	285.682	FALSE	3
2022-09-13	14:48:23	1.07701	4.79076	4.19155	278.848	FALSE	3
2022-09-13	14:48:23	0.755331	3.35986	4.19155	289.042	FALSE	3
2022-09-13	14:48:23	0.994568	4.42404	4.19155	283.272	FALSE	3
2022-09-13	14:48:24	0.907392	4.03626	4.1705	293.078	FALSE	3
2022-09-13	14:48:24	0.907086	4.0349	4.1705	287.307	FALSE	3
2022-09-13	14:48:24	0.970903	4.31877	4.1705	297.397	FALSE	3
2022-09-13	14:48:24	0.964898	4.29206	4.1705	291.599	FALSE	3
2022-09-13	14:48:25	1.05935	4.7122	5.51939	302.109	FALSE	3
2022-09-13	14:48:25	1.2308	5.47484	5.51939	297.074	FALSE	3
2022-09-13	14:48:25	1.44495	6.42743	5.51939	308.536	FALSE	3
2022-09-13	14:48:25	1.22816	5.4631	5.51939	302.537	FALSE	3
2022-09-13	14:48:26	0.907443	4.03649	4.17673	312.573	FALSE	3
2022-09-13	14:48:26	1.03294	4.59472	4.17673	307.131	FALSE	3
2022-09-13	14:48:26	0.886578	3.94368	4.17673	316.516	FALSE	3
2022-09-13	14:48:26	0.928918	4.13201	4.17673	311.263	FALSE	3
2022-09-13	14:48:27	0.839249	3.73315	3.37767	320.25	FALSE	3
2022-09-13	14:48:27	0.745458	3.31595	3.37767	314.579	FALSE	3
2022-09-13	14:48:27	0.693295	3.08391	3.37767	323.334	FALSE	3
2022-09-13	14:48:28	0.690293	3.07056	2.83598	317.65	FALSE	3
2022-09-13	14:48:28	0.633448	2.8177	2.83598	326.151	FALSE	3
2022-09-13	14:48:28	0.628868	2.79733	2.83598	320.447	FALSE	3
2022-09-13	14:48:28	0.597621	2.65834	2.83598	328.81	FALSE	3
2022-09-13	14:48:29	0.651056	2.89603	2.80225	323.343	FALSE	3
2022-09-13	14:48:29	0.672023	2.98929	2.80225	331.799	FALSE	3
2022-09-13	14:48:29	0.617061	2.74481	2.80225	326.088	FALSE	3
2022-09-13	14:48:29	0.579758	2.57888	2.80225	334.378	FALSE	3
2022-09-13	14:48:30	0.58841	2.61737	2.68782	328.705	FALSE	3
2022-09-13	14:48:30	0.609529	2.71131	2.68782	337.089	FALSE	3
2022-09-13	14:48:30	0.608257	2.70565	2.68782	331.411	FALSE	3
2022-09-13	14:48:30	0.610802	2.71697	2.68782	339.806	FALSE	3
2022-09-13	14:48:31	0.628155	2.79416	2.73923	334.205	FALSE	3
2022-09-13	14:48:31	0.604797	2.69026	2.73923	342.496	FALSE	3
2022-09-13	14:48:31	0.614465	2.73326	2.73923	336.939	FALSE	3
2022-09-13	14:48:32	0.656349	2.91957	2.72184	345.416	FALSE	3
2022-09-13	14:48:32	0.623219	2.7722	2.72184	339.711	FALSE	3
2022-09-13	14:48:32	0.576705	2.5653	2.72184	347.981	FALSE	3
2022-09-13	14:48:32	0.591311	2.63027	2.72184	342.341	FALSE	3
2022-09-13	14:48:33	0.651361	2.89738	2.96207	350.879	FALSE	3
2022-09-13	14:48:33	0.723372	3.2177	2.96207	345.559	FALSE	3
2022-09-13	14:48:33	0.665	2.95805	2.96207	353.837	FALSE	3
2022-09-13	14:48:33	0.62388	2.77514	2.96207	348.334	FALSE	3
2022-09-13	14:48:34	0.639707	2.84554	3.02761	356.682	FALSE	3
2022-09-13	14:48:34	0.640013	2.84691	3.02761	351.181	FALSE	3
2022-09-13	14:48:34	0.687494	3.05811	3.02761	359.74	FALSE	3
2022-09-13	14:48:34	0.755331	3.35986	3.02761	354.541	FALSE	3
2022-09-13	14:48:35	0.775076	3.44769	3.32183	363.188	FALSE	3
2022-09-13	14:48:35	0.742812	3.30418	3.32183	357.845	FALSE	3
2022-09-13	14:48:35	0.722456	3.21363	3.32183	366.402	FALSE	3
2022-09-13	14:48:36	0.71645	3.18691	3.12857	361.032	FALSE	3
2022-09-13	14:48:36	0.713702	3.17469	3.12857	369.576	FALSE	3
2022-09-13	14:48:36	0.689173	3.06558	3.12857	364.097	FALSE	3
2022-09-13	14:48:36	0.694008	3.08709	3.12857	372.663	FALSE	3
2022-09-13	14:48:37	0.689173	3.06558	3.19393	367.163	FALSE	3
2022-09-13	14:48:37	0.717265	3.19054	3.19393	375.854	FALSE	3
2022-09-13	14:48:37	0.759911	3.38024	3.19393	370.543	FALSE	3
2022-09-13	14:48:37	0.705764	3.13938	3.19393	378.993	FALSE	3
2022-09-13	14:48:38	0.697672	3.10338	3.03508	373.646	FALSE	3
2022-09-13	14:48:38	0.678232	3.01691	3.03508	382.01	FALSE	3
2022-09-13	14:48:38	0.687494	3.05811	3.03508	376.705	FALSE	3
2022-09-13	14:48:38	0.665865	2.9619	3.03508	384.972	FALSE	3
2022-09-13	14:48:39	0.67696	3.01125	2.93587	379.716	FALSE	3
2022-09-13	14:48:39	0.660725	2.93904	2.93587	387.911	FALSE	3
2022-09-13	14:48:39	0.642354	2.85732	2.93587	382.573	FALSE	3
2022-09-13	14:48:40	0.663779	2.95262	3.16892	390.864	FALSE	3
2022-09-13	14:48:40	0.726832	3.23309	3.16892	385.806	FALSE	3
2022-09-13	14:48:40	0.741234	3.29716	3.16892	394.161	FALSE	3
2022-09-13	14:48:40	0.717774	3.1928	3.16892	388.999	FALSE	3
2022-09-13	14:48:41	0.846578	3.76575	10.9974	397.927	FALSE	3
2022-09-13	14:48:41	1.55279	6.90712	10.9974	395.906	FALSE	3
2022-09-13	14:48:41	2.26256	10.0643	10.9974	407.991	FALSE	3
2022-09-13	14:48:41	5.22734	23.2523	10.9974	419.158	1	4
2022-09-13	14:48:42	5.20413	23.149	36.6389	431.14	1	5
2022-09-13	14:48:42	7.70184	34.2593	36.6389	453.418	1	6
2022-09-13	14:48:42	7.66876	34.1122	36.6389	465.252	1	7
2022-09-13	14:48:42	12.3724	55.0349	36.6389	508.453	1	8
2022-09-13	14:48:43	12.8395	57.1127	34.138	522.365	1	9
2022-09-13	14:48:43	7.66103	34.0778	34.138	542.53	1	10
2022-09-13	14:48:43	2.52317	11.2236	34.138	533.588	FALSE	10
2022-09-13	14:48:44	2.80388	12.4722	11.1135	555.003	FALSE	10
2022-09-13	14:48:44	2.49701	11.1072	11.1135	544.696	FALSE	10
2022-09-13	14:48:44	2.37711	10.5739	11.1135	565.577	FALSE	10
2022-09-13	14:48:44	2.31569	10.3007	11.1135	554.996	FALSE	10
2022-09-13	14:48:45	2.63187	11.7071	14.725	577.284	FALSE	10
2022-09-13	14:48:45	3.96673	17.6448	14.725	572.641	1	11
2022-09-13	14:48:45	3.7737	16.7862	14.725	594.07	1	12
2022-09-13	14:48:45	2.86902	12.762	14.725	585.403	FALSE	12
2022-09-13	14:48:46	2.35625	10.4811	10.8588	604.551	FALSE	12
2022-09-13	14:48:46	2.4481	10.8896	10.8588	596.293	FALSE	12
2022-09-13	14:48:46	2.30017	10.2316	10.8588	614.782	FALSE	12
2022-09-13	14:48:46	2.66011	11.8327	10.8588	608.125	FALSE	12
2022-09-13	14:48:47	1.80714	8.03852	10.5034	622.821	FALSE	12
2022-09-13	14:48:47	2.45772	10.9324	10.5034	619.058	FALSE	12
2022-09-13	14:48:47	2.81894	12.5392	10.5034	635.36	FALSE	12
2022-09-13	14:48:48	6.17635	27.4736	28.0069	646.531	1	13
2022-09-13	14:48:48	9.68489	43.0803	28.0069	678.441	1	14
2022-09-13	14:48:48	6.98617	31.0759	28.0069	677.607	1	15
2022-09-13	14:48:48	2.33752	10.3978	28.0069	688.838	FALSE	15
2022-09-13	14:48:49	1.36485	6.07113	3.59654	683.678	FALSE	15
2022-09-13	14:48:49	0.503677	2.24046	3.59654	691.079	FALSE	15
2022-09-13	14:48:49	0.798232	3.5507	3.59654	687.229	FALSE	15
2022-09-13	14:48:49	0.567392	2.52387	3.59654	693.603	FALSE	15
2022-09-13	14:48:50	0.493753	2.19631	2.6443	689.425	FALSE	15
2022-09-13	14:48:50	0.531616	2.36473	2.6443	695.967	FALSE	15
2022-09-13	14:48:50	0.610496	2.71561	2.6443	692.141	FALSE	15
2022-09-13	14:48:50	0.741997	3.30055	2.6443	699.268	FALSE	15
2022-09-13	14:48:51	0.858435	3.81849	3.49101	695.96	FALSE	15
2022-09-13	14:48:51	0.824898	3.66931	3.49101	702.937	FALSE	15
2022-09-13	14:48:51	0.671107	2.98522	3.49101	698.945	FALSE	15
2022-09-13	14:48:52	0.589427	2.62189	2.60372	705.559	FALSE	15
2022-09-13	14:48:52	0.60042	2.67079	2.60372	701.616	FALSE	15
2022-09-13	14:48:52	0.585865	2.60604	2.60372	708.165	FALSE	15
2022-09-13	14:48:52	0.565662	2.51618	2.60372	704.132	FALSE	15
2022-09-13	14:48:53	0.580725	2.58318	2.59722	710.748	FALSE	15
2022-09-13	14:48:53	0.656145	2.91866	2.59722	707.05	FALSE	15
2022-09-13	14:48:53	0.567595	2.52478	2.59722	713.273	FALSE	15
2022-09-13	14:48:53	0.531056	2.36224	2.59722	709.413	FALSE	15
2022-09-13	14:48:54	0.514669	2.28935	2.01374	715.562	FALSE	15
2022-09-13	14:48:54	0.509987	2.26852	2.01374	711.681	FALSE	15
2022-09-13	14:48:54	0.445	1.97945	2.01374	717.542	FALSE	15
2022-09-13	14:48:54	0.341183	1.51765	2.01374	713.199	FALSE	15
2022-09-13	14:48:55	0.182761	0.812957	0.321128	718.355	FALSE	15
2022-09-13	14:48:55	-0.0151524	-0.0674009	0.321128	713.199	FALSE	15
2022-09-13	14:48:55	0.0489697	0.217827	0.321128	718.573	FALSE	15
2022-09-13	14:48:56	-0.119427	-0.531235	-1.72795	713.199	FALSE	15
2022-09-13	14:48:56	-0.376323	-1.67396	-1.72795	718.573	FALSE	15
2022-09-13	14:48:56	-0.438104	-1.94877	-1.72795	713.199	FALSE	15
2022-09-13	14:48:56	-0.619987	-2.75783	-1.72795	718.573	FALSE	15
2022-09-13	14:48:57	-0.830114	-3.69251	-3.66314	713.199	FALSE	15
2022-09-13	14:48:57	-0.743956	-3.30927	-3.66314	718.573	FALSE	15
2022-09-13	14:48:57	-0.884058	-3.93247	-3.66314	713.199	FALSE	15
2022-09-13	14:48:57	-0.835916	-3.71832	-3.66314	718.573	FALSE	15
2022-09-13	14:48:58	-0.907875	-4.03841	-3.77214	713.199	FALSE	15
2022-09-13	14:48:58	-0.937646	-4.17084	-3.77214	718.573	FALSE	15
2022-09-13	14:48:58	-0.843549	-3.75227	-3.77214	713.199	FALSE	15
2022-09-13	14:48:58	-0.702989	-3.12704	-3.77214	718.573	FALSE	15
2022-09-13	14:48:59	-0.697798	-3.10395	1.31679	713.199	FALSE	15
2022-09-13	14:48:59	-0.136679	-0.607976	1.31679	718.573	FALSE	15
2022-09-13	14:48:59	1.72256	7.66229	1.31679	720.861	FALSE	15
2022-09-13	14:49:00	2.61238	11.6204	5.07463	730.193	FALSE	15
2022-09-13	14:49:00	1.55477	6.91593	5.07463	727.777	FALSE	15
2022-09-13	14:49:00	0.23813	1.05925	5.07463	731.252	FALSE	15
2022-09-13	14:49:00	0.158028	0.70294	5.07463	728.48	FALSE	15
2022-09-13	14:49:01	0.168613	0.750024	0.731803	732.002	FALSE	15
2022-09-13	14:49:01	0.12042	0.535652	0.731803	729.016	FALSE	15
2022-09-13	14:49:01	0.129326	0.575268	0.731803	732.578	FALSE	15
2022-09-13	14:49:01	0.239708	1.06627	0.731803	730.082	FALSE	15
2022-09-13	14:49:02	-0.118155	-0.525577	-0.549176	732.578	FALSE	15
2022-09-13	14:49:02	-0.0486893	-0.21658	-0.549176	730.082	FALSE	15
2022-09-13	14:49:02	-0.176272	-0.784093	-0.549176	732.578	FALSE	15
2022-09-13	14:49:02	-0.150725	-0.670455	-0.549176	730.082	FALSE	15
2022-09-13	14:49:03	-0.333117	-1.48177	-1.85702	732.578	FALSE	15
2022-09-13	14:49:03	-0.454083	-2.01985	-1.85702	730.082	FALSE	15
2022-09-13	14:49:03	-0.465229	-2.06943	-1.85702	732.578	FALSE	15
2022-09-13	14:49:04	-0.603244	-2.68335	-2.15155	730.082	FALSE	15
2022-09-13	14:49:04	-0.81103	-3.60762	-2.15155	732.578	FALSE	15
2022-09-13	14:49:04	-0.290267	-1.29117	-2.15155	730.082	FALSE	15
2022-09-13	14:49:04	-0.230216	-1.02405	-2.15155	732.578	FALSE	15
2022-09-13	14:49:05	0.0178246	0.0792874	0.631011	730.161	FALSE	15
2022-09-13	14:49:05	0.228155	1.01488	0.631011	733.593	FALSE	15
2022-09-13	14:49:05	0.0822012	0.365647	0.631011	730.527	FALSE	15
2022-09-13	14:49:05	0.23925	1.06423	0.631011	734.657	FALSE	15
2022-09-13	14:49:06	0.322048	1.43253	1.71873	731.959	FALSE	15
2022-09-13	14:49:06	0.319148	1.41963	1.71873	736.076	FALSE	15
2022-09-13	14:49:06	0.348104	1.54844	1.71873	733.508	FALSE	15
2022-09-13	14:49:06	0.556247	2.4743	1.71873	738.551	FALSE	15
2022-09-13	14:49:07	0.509886	2.26807	2.20295	735.776	FALSE	15
2022-09-13	14:49:07	0.38159	1.69739	2.20295	740.248	FALSE	15
2022-09-13	14:49:07	0.594262	2.6434	2.20295	738.419	FALSE	15
2022-09-13	14:49:08	0.597112	2.65607	1.81318	742.904	FALSE	15
2022-09-13	14:49:08	0.459758	2.0451	1.81318	740.464	FALSE	15
2022-09-13	14:49:08	0.292125	1.29943	1.81318	744.204	FALSE	15
2022-09-13	14:49:08	0.281489	1.25212	1.81318	741.716	FALSE	15
2022-09-13	14:49:09	0.492277	2.18975	2.6353	746.393	FALSE	15
2022-09-13	14:49:09	0.472125	2.10011	2.6353	743.817	FALSE	15
2022-09-13	14:49:09	0.663779	2.95262	2.6353	749.346	FALSE	15
2022-09-13	14:49:09	0.74159	3.29874	2.6353	747.115	FALSE	15
2022-09-13	14:49:10	2.13905	9.51492	13.6767	758.861	FALSE	15
2022-09-13	14:49:10	4.64098	20.644	13.6767	767.759	1	16
2022-09-13	14:49:10	4.91787	21.8757	13.6767	780.737	1	17
2022-09-13	14:49:10	0.600776	2.67237	13.6767	770.432	FALSE	17
2022-09-13	14:49:11	0.341794	1.52037	2.44457	782.257	FALSE	17
2022-09-13	14:49:11	0.17243	0.767003	2.44457	771.199	FALSE	17
2022-09-13	14:49:11	1.13447	5.04635	2.44457	787.303	FALSE	17
2022-09-13	14:49:12	2.12184	9.43837	2.83524	780.637	FALSE	17
2022-09-13	14:49:12	0.523982	2.33078	2.83524	789.634	FALSE	17
2022-09-13	14:49:12	0.163117	0.725577	2.83524	781.363	FALSE	17
2022-09-13	14:49:12	-0.259376	-1.15376	2.83524	789.634	FALSE	17
2022-09-13	14:49:13	-0.478562	-2.12874	-3.35177	781.363	FALSE	17
2022-09-13	14:49:13	-0.735915	-3.2735	-3.35177	789.634	FALSE	17
2022-09-13	14:49:13	-0.804668	-3.57932	-3.35177	781.363	FALSE	17
2022-09-13	14:49:13	-0.994898	-4.42551	-3.35177	789.634	FALSE	17
2022-09-13	14:49:14	-1.15581	-5.14127	-4.20728	781.363	FALSE	17
2022-09-13	14:49:14	-0.923091	-4.10609	-4.20728	789.634	FALSE	17
2022-09-13	14:49:14	-0.944363	-4.20072	-4.20728	781.363	FALSE	17
2022-09-13	14:49:14	-0.760088	-3.38102	-4.20728	789.634	FALSE	17
2022-09-13	14:49:15	-0.65963	-2.93417	-2.45101	781.363	FALSE	17
2022-09-13	14:49:15	-0.501513	-2.23083	-2.45101	789.634	FALSE	17
2022-09-13	14:49:15	-0.491895	-2.18805	-2.45101	781.363	FALSE	17
2022-09-13	14:49:16	-0.425279	-1.89173	3.2018	789.634	FALSE	17
2022-09-13	14:49:16	-0.244007	-1.08539	3.2018	781.363	FALSE	17
2022-09-13	14:49:16	0.630089	2.80276	3.2018	792.437	FALSE	17
2022-09-13	14:49:16	2.91838	12.9815	3.2018	794.344	FALSE	17
2022-09-13	14:49:17	3.61248	16.069	4.70955	808.506	1	18
2022-09-13	14:49:17	0.589377	2.62167	4.70955	796.966	FALSE	18
2022-09-13	14:49:17	0.0325829	0.144935	4.70955	808.651	FALSE	18
2022-09-13	14:49:17	0.000572752	0.00254772	4.70955	796.968	FALSE	18
2022-09-13	14:49:18	-0.0760175	-0.338141	-0.462306	808.651	FALSE	18
2022-09-13	14:49:18	-0.167875	-0.746742	-0.462306	796.968	FALSE	18
2022-09-13	14:49:18	-0.130572	-0.58081	-0.462306	808.651	FALSE	18
2022-09-13	14:49:18	-0.0412593	-0.18353	-0.462306	796.968	FALSE	18
2022-09-13	14:49:19	-0.023244	-0.103394	1.76719	808.651	FALSE	18
2022-09-13	14:49:19	0.0659671	0.293435	1.76719	797.262	FALSE	18
2022-09-13	14:49:19	1.14912	5.11152	1.76719	813.762	FALSE	18
2022-09-13	14:49:20	2.20347	9.80148	6.83358	807.063	FALSE	18
2022-09-13	14:49:20	2.3736	10.5582	6.83358	824.321	FALSE	18
2022-09-13	14:49:20	0.42897	1.90814	6.83358	808.971	FALSE	18
2022-09-13	14:49:20	1.13899	5.06646	6.83358	829.387	FALSE	18
2022-09-13	14:49:21	0.481794	2.14312	2.48001	811.115	FALSE	18
2022-09-13	14:49:21	0.671616	2.98748	2.48001	832.374	FALSE	18
2022-09-13	14:49:21	0.73243	3.258	2.48001	814.373	FALSE	18
2022-09-13	14:49:21	0.344288	1.53146	2.48001	833.906	FALSE	18
2022-09-13	14:49:22	0.179097	0.796659	2.96264	815.169	FALSE	18
2022-09-13	14:49:22	0.334873	1.48958	2.96264	835.395	FALSE	18
2022-09-13	14:49:22	0.986221	4.38691	2.96264	819.556	FALSE	18
2022-09-13	14:49:22	1.16393	5.17739	2.96264	840.573	FALSE	18
2022-09-13	14:49:23	0.451921	2.01023	1.07193	821.566	FALSE	18
2022-09-13	14:49:23	0.185865	0.826765	1.07193	841.4	FALSE	18
2022-09-13	14:49:23	0.0851528	0.378777	1.07193	821.945	FALSE	18
2022-09-13	14:49:24	0.126781	0.563947	6.53875	841.964	FALSE	18
2022-09-13	14:49:24	0.0794531	0.353423	6.53875	822.299	FALSE	18
2022-09-13	14:49:24	1.06826	4.75183	6.53875	846.715	FALSE	18
2022-09-13	14:49:24	4.60541	20.4858	6.53875	842.784	1	19
2022-09-13	14:49:25	4.5563	20.2673	14.1239	866.983	1	20
2022-09-13	14:49:25	4.36301	19.4075	14.1239	862.192	1	21
2022-09-13	14:49:25	2.62373	11.6709	14.1239	878.654	FALSE	21
2022-09-13	14:49:25	1.15772	5.14977	14.1239	867.342	FALSE	21
2022-09-13	14:49:26	0.701285	3.11946	2.19937	881.773	FALSE	21
2022-09-13	14:49:26	0.575484	2.55987	2.19937	869.902	FALSE	21
2022-09-13	14:49:26	0.367799	1.63604	2.19937	883.409	FALSE	21
2022-09-13	14:49:26	0.333193	1.48211	2.19937	871.384	FALSE	21
2022-09-13	14:49:27	0.332481	1.47894	1.48053	884.888	FALSE	21
2022-09-13	14:49:27	0.328461	1.46106	1.48053	872.845	FALSE	21
2022-09-13	14:49:27	0.33757	1.50158	1.48053	886.39	FALSE	21
2022-09-13	14:49:28	0.278842	1.24034	1.40718	874.085	FALSE	21
2022-09-13	14:49:28	0.298486	1.32773	1.40718	887.717	FALSE	21
2022-09-13	14:49:28	0.349631	1.55523	1.40718	875.64	FALSE	21
2022-09-13	14:49:28	0.338435	1.50543	1.40718	889.223	FALSE	21
2022-09-13	14:49:29	0.310954	1.38319	1.47611	877.023	FALSE	21
2022-09-13	14:49:29	0.31813	1.41511	1.47611	890.638	FALSE	21
2022-09-13	14:49:29	0.335382	1.49185	1.47611	878.515	FALSE	21
2022-09-13	14:49:29	0.362913	1.61431	1.47611	892.252	FALSE	21
2022-09-13	14:49:30	0.368461	1.63899	2.02031	880.154	FALSE	21
2022-09-13	14:49:30	0.410242	1.82484	2.02031	894.077	FALSE	21
2022-09-13	14:49:30	0.49528	2.2031	2.02031	882.357	FALSE	21
2022-09-13	14:49:30	0.542761	2.41431	2.02031	896.491	FALSE	21
2022-09-13	14:49:31	0.374364	1.66525	1.49305	884.023	FALSE	21
2022-09-13	14:49:31	0.325814	1.44929	1.49305	897.941	FALSE	21
2022-09-13	14:49:31	0.306781	1.36462	1.49305	885.387	FALSE	21
2022-09-13	14:49:32	0.301031	1.33905	1.32931	899.28	FALSE	21
2022-09-13	14:49:32	0.304033	1.3524	1.32931	886.74	FALSE	21
2022-09-13	14:49:32	0.301285	1.34018	1.32931	900.62	FALSE	21
2022-09-13	14:49:32	0.28902	1.28562	1.32931	888.025	FALSE	21
2022-09-13	14:49:33	0.286832	1.27589	1.32393	901.896	FALSE	21
2022-09-13	14:49:33	0.302048	1.34357	1.32393	889.369	FALSE	21
2022-09-13	14:49:33	0.305051	1.35693	1.32393	903.253	FALSE	21
2022-09-13	14:49:33	0.296603	1.31935	1.32393	890.688	FALSE	21
2022-09-13	14:49:34	0.307494	1.36779	1.5932	904.621	FALSE	21
2022-09-13	14:49:34	0.347239	1.54459	1.5932	892.233	FALSE	21
2022-09-13	14:49:34	0.413295	1.83842	1.5932	906.459	FALSE	21
2022-09-13	14:49:34	0.364644	1.62201	1.5932	893.855	FALSE	21
2022-09-13	14:49:35	0.329631	1.46626	1.48083	907.925	FALSE	21
2022-09-13	14:49:35	0.327901	1.45857	1.48083	895.313	FALSE	21
2022-09-13	14:49:35	0.341183	1.51765	1.48083	909.443	FALSE	21
2022-09-13	14:49:36	0.343015	1.5258	1.56027	896.839	FALSE	21
2022-09-13	14:49:36	0.35299	1.57017	1.56027	911.013	FALSE	21
2022-09-13	14:49:36	0.352328	1.56723	1.56027	898.406	FALSE	21
2022-09-13	14:49:36	0.35472	1.57787	1.56027	912.591	FALSE	21
2022-09-13	14:49:37	0.34958	1.555	1.57255	899.961	FALSE	21
2022-09-13	14:49:37	0.336959	1.49886	1.57255	914.09	FALSE	21
2022-09-13	14:49:37	0.3564	1.58534	1.57255	901.547	FALSE	21
2022-09-13	14:49:37	0.371158	1.65099	1.57255	915.741	FALSE	21
2022-09-13	14:49:38	0.36042	1.60322	1.60605	903.15	FALSE	21
2022-09-13	14:49:38	0.358639	1.5953	1.60605	917.336	FALSE	21
2022-09-13	14:49:38	0.360064	1.60164	1.60605	904.752	FALSE	21
2022-09-13	14:49:38	0.365102	1.62405	1.60605	918.96	FALSE	21
2022-09-13	14:49:39	0.373346	1.66072	1.66366	906.412	FALSE	21
2022-09-13	14:49:39	0.367239	1.63355	1.66366	920.594	FALSE	21
2022-09-13	14:49:39	0.381438	1.69671	1.66366	908.109	FALSE	21
2022-09-13	14:49:40	0.380318	1.69173	1.67068	922.285	FALSE	21
2022-09-13	14:49:40	0.363015	1.61476	1.67068	909.724	FALSE	21
2022-09-13	14:49:40	0.366171	1.6288	1.67068	923.914	FALSE	21
2022-09-13	14:49:40	0.392837	1.74742	1.67068	911.471	FALSE	21
2022-09-13	14:49:41	0.403982	1.79699	1.73282	925.711	FALSE	21
2022-09-13	14:49:41	0.368613	1.63966	1.73282	913.111	FALSE	21
2022-09-13	14:49:41	0.381336	1.69626	1.73282	927.407	FALSE	21
2022-09-13	14:49:41	0.404288	1.79835	1.73282	914.909	FALSE	21
2022-09-13	14:49:42	0.414008	1.84159	2.06009	929.249	FALSE	21
2022-09-13	14:49:42	0.458181	2.03808	2.06009	916.947	FALSE	21
2022-09-13	14:49:42	0.465407	2.07022	2.06009	931.319	FALSE	21
2022-09-13	14:49:42	0.514924	2.29048	2.06009	919.238	FALSE	21
2022-09-13	14:49:43	0.616501	2.74232	2.71267	934.062	FALSE	21
2022-09-13	14:49:43	0.478944	2.13044	2.71267	921.368	FALSE	21
2022-09-13	14:49:43	0.734059	3.26524	2.71267	937.327	FALSE	21
2022-09-13	14:49:44	0.731819	3.25528	3.25171	924.624	FALSE	21
2022-09-13	14:49:44	0.731616	3.25437	3.25171	940.581	FALSE	21
2022-09-13	14:49:44	0.731209	3.25256	3.25171	927.876	FALSE	21
2022-09-13	14:49:44	0.729428	3.24464	3.25171	943.826	FALSE	21
2022-09-13	14:49:45	0.734313	3.26637	3.25935	931.142	FALSE	21
2022-09-13	14:49:45	0.731412	3.25347	3.25935	947.079	FALSE	21
2022-09-13	14:49:45	0.730191	3.24804	3.25935	934.39	FALSE	21
2022-09-13	14:49:45	0.735026	3.26954	3.25935	950.349	FALSE	21
2022-09-13	14:49:46	0.728868	3.24215	3.25024	937.633	FALSE	21
2022-09-13	14:49:46	0.731514	3.25392	3.25024	953.603	FALSE	21
2022-09-13	14:49:46	0.731717	3.25482	3.25024	940.887	FALSE	21
2022-09-13	14:49:46	0.730649	3.25007	3.25024	956.853	FALSE	21
2022-09-13	14:49:47	0.730038	3.24736	3.34304	944.135	FALSE	21
2022-09-13	14:49:47	0.950547	4.22822	3.34304	961.081	FALSE	21
2022-09-13	14:49:47	0.574059	2.55353	3.34304	946.688	FALSE	21
2022-09-13	14:49:48	0.679402	3.02212	2.03333	964.103	FALSE	21
2022-09-13	14:49:48	0.42841	1.90565	2.03333	948.594	FALSE	21
2022-09-13	14:49:48	0.357163	1.58873	2.03333	965.692	FALSE	21
2022-09-13	14:49:48	0.363473	1.6168	2.03333	950.211	FALSE	21
2022-09-13	14:49:49	0.336196	1.49547	1.48273	967.187	FALSE	21
2022-09-13	14:49:49	0.323321	1.4382	1.48273	951.649	FALSE	21
2022-09-13	14:49:49	0.341896	1.52082	1.48273	968.708	FALSE	21
2022-09-13	14:49:49	0.331921	1.47645	1.48273	953.125	FALSE	21
2022-09-13	14:49:50	0.348155	1.54866	3.87825	970.257	FALSE	21
2022-09-13	14:49:50	0.498333	2.21668	3.87825	955.342	FALSE	21
2022-09-13	14:49:50	1.15996	5.15973	3.87825	975.417	FALSE	21
2022-09-13	14:49:50	1.48103	6.58792	3.87825	961.93	FALSE	21
2022-09-13	14:49:51	3.42291	15.2258	21.0212	990.642	1	22
2022-09-13	14:49:51	6.0507	26.9147	21.0212	988.845	1	23
2022-09-13	14:49:51	4.70373	20.9231	21.0212	1011.57	1	24
2022-09-13	14:49:52	4.64602	20.6664	15.2817	1009.51	1	25
2022-09-13	14:49:52	4.81742	21.4288	15.2817	1032.99	1	26
2022-09-13	14:49:52	2.58988	11.5203	15.2817	1021.03	FALSE	26
2022-09-13	14:49:52	1.68856	7.51105	15.2817	1040.51	FALSE	26
2022-09-13	14:49:53	1.48454	6.60353	5.12261	1027.64	FALSE	26
2022-09-13	14:49:53	1.6394	7.29238	5.12261	1047.8	FALSE	26
2022-09-13	14:49:53	0.904847	4.02494	5.12261	1031.66	FALSE	26
2022-09-13	14:49:53	0.577672	2.5696	5.12261	1050.37	FALSE	26
2022-09-13	14:49:54	0.427545	1.90181	3.32653	1033.56	FALSE	26
2022-09-13	14:49:54	0.886374	3.94277	3.32653	1054.31	FALSE	26
2022-09-13	14:49:54	0.654313	2.91052	3.32653	1036.47	FALSE	26
2022-09-13	14:49:54	1.02312	4.55104	3.32653	1058.86	FALSE	26
2022-09-13	14:49:55	1.23905	5.51154	5.98803	1041.98	FALSE	26
2022-09-13	14:49:55	1.41655	6.3011	5.98803	1065.16	FALSE	26
2022-09-13	14:49:55	1.38291	6.15146	5.98803	1048.14	FALSE	26
2022-09-13	14:49:56	1.25075	5.56359	3.03655	1070.73	FALSE	26
2022-09-13	14:49:56	0.663015	2.94922	3.03655	1051.08	FALSE	26
2022-09-13	14:49:56	0.419708	1.86695	3.03655	1072.59	FALSE	26
2022-09-13	14:49:56	0.397112	1.76643	3.03655	1052.85	FALSE	26
2022-09-13	14:49:57	0.507697	2.25834	1.84476	1074.85	FALSE	26
2022-09-13	14:49:57	0.355585	1.58171	1.84476	1054.43	FALSE	26
2022-09-13	14:49:57	0.39986	1.77866	1.84476	1076.63	FALSE	26
2022-09-13	14:49:57	0.395738	1.76032	1.84476	1056.19	FALSE	26
2022-09-13	14:49:58	0.457468	2.03491	2.04646	1078.66	FALSE	26
2022-09-13	14:49:58	0.460573	2.04872	2.04646	1058.24	FALSE	26
2022-09-13	14:49:58	0.467901	2.08132	2.04646	1080.75	FALSE	26
2022-09-13	14:49:58	0.454313	2.02088	2.04646	1060.26	FALSE	26
2022-09-13	14:49:59	0.456247	2.02948	2.00639	1082.78	FALSE	26
2022-09-13	14:49:59	0.449784	2.00073	2.00639	1062.26	FALSE	26
2022-09-13	14:49:59	0.447137	1.98895	2.00639	1084.76	FALSE	26
2022-09-13	14:50:00	0.45472	2.02269	2.00944	1064.29	FALSE	26
2022-09-13	14:50:00	0.457977	2.03717	2.00944	1086.8	FALSE	26
2022-09-13	14:50:00	0.455942	2.02812	2.00944	1066.31	FALSE	26
2022-09-13	14:50:00	0.438333	1.94979	2.00944	1088.75	FALSE	26
2022-09-13	14:50:01	0.439911	1.95681	2.0078	1068.27	FALSE	26
2022-09-13	14:50:01	0.443066	1.97085	2.0078	1090.72	FALSE	26
2022-09-13	14:50:01	0.457774	2.03627	2.0078	1070.31	FALSE	26
2022-09-13	14:50:01	0.464746	2.06728	2.0078	1092.79	FALSE	26
2022-09-13	14:50:02	0.459046	2.04193	2.0434	1072.35	FALSE	26
2022-09-13	14:50:02	0.457367	2.03446	2.0434	1094.82	FALSE	26
2022-09-13	14:50:02	0.459097	2.04216	2.0434	1074.39	FALSE	26
2022-09-13	14:50:02	0.461998	2.05506	2.0434	1096.88	FALSE	26
2022-09-13	14:50:03	0.465814	2.07203	2.07419	1076.46	FALSE	26
2022-09-13	14:50:03	0.46785	2.08109	2.07419	1098.96	FALSE	26
2022-09-13	14:50:03	0.466578	2.07543	2.07419	1078.54	FALSE	26
2022-09-13	14:50:03	0.464949	2.06819	2.07419	1101.03	FALSE	26
2022-09-13	14:50:04	0.469479	2.08834	2.07196	1080.63	FALSE	26
2022-09-13	14:50:04	0.465662	2.07136	2.07196	1103.1	FALSE	26
2022-09-13	14:50:04	0.462252	2.05619	2.07196	1082.68	FALSE	26
2022-09-13	14:50:05	0.466069	2.07317	2.07317	1105.17	FALSE	26
2022-09-13	14:50:05	0.467697	2.08041	2.07317	1084.76	FALSE	26
2022-09-13	14:50:05	0.465204	2.06932	2.07317	1107.24	FALSE	26
2022-09-13	14:50:05	0.465305	2.06977	2.07317	1086.83	FALSE	26
2022-09-13	14:50:06	0.463015	2.05958	2.0889	1109.3	FALSE	26
2022-09-13	14:50:06	0.462405	2.05687	2.0889	1088.89	FALSE	26
2022-09-13	14:50:06	0.472074	2.09988	2.0889	1111.4	FALSE	26
2022-09-13	14:50:06	0.480929	2.13927	2.0889	1091.03	FALSE	26
2022-09-13	14:50:07	0.493906	2.19699	2.30514	1113.6	FALSE	26
2022-09-13	14:50:07	0.475942	2.11709	2.30514	1093.15	FALSE	26
2022-09-13	14:50:07	0.485305	2.15873	2.30514	1115.76	FALSE	26
2022-09-13	14:50:07	0.617723	2.74776	2.30514	1095.89	FALSE	26
2022-09-13	14:50:08	0.774313	3.4443	2.67109	1119.2	FALSE	26
2022-09-13	14:50:08	0.55243	2.45732	2.67109	1098.35	FALSE	26
2022-09-13	14:50:08	0.47472	2.11165	2.67109	1121.31	FALSE	26
2022-09-13	14:50:09	0.615891	2.73961	2.62319	1101.09	FALSE	26
2022-09-13	14:50:09	0.582354	2.59043	2.62319	1123.9	FALSE	26
2022-09-13	14:50:09	0.604491	2.6889	2.62319	1103.78	FALSE	26
2022-09-13	14:50:09	0.556145	2.47384	2.62319	1126.38	FALSE	26
2022-09-13	14:50:10	0.589377	2.62167	2.65885	1106.4	FALSE	26
2022-09-13	14:50:10	0.581641	2.58726	2.65885	1128.96	FALSE	26
2022-09-13	14:50:10	0.622812	2.77039	2.65885	1109.17	FALSE	26
2022-09-13	14:50:10	0.597112	2.65607	2.65885	1131.62	FALSE	26
2022-09-13	14:50:11	0.599199	2.66536	2.23782	1111.84	FALSE	26
2022-09-13	14:50:11	0.456501	2.03061	2.23782	1133.65	FALSE	26
2022-09-13	14:50:11	0.45355	2.01748	2.23782	1113.86	FALSE	26
2022-09-13	14:50:12	0.460064	2.04646	2.20158	1135.7	FALSE	26
2022-09-13	14:50:12	0.476298	2.11867	2.20158	1115.97	FALSE	26
2022-09-13	14:50:12	0.467341	2.07883	2.20158	1137.78	FALSE	26
2022-09-13	14:50:12	0.576043	2.56235	2.20158	1118.54	FALSE	26
2022-09-13	14:50:13	1.53268	6.81767	6.64184	1144.59	FALSE	26
2022-09-13	14:50:13	1.56576	6.96481	6.64184	1125.5	FALSE	26
2022-09-13	14:50:13	1.74413	7.75824	6.64184	1152.35	FALSE	26
2022-09-13	14:50:13	1.13004	5.02664	6.64184	1130.53	FALSE	26
2022-09-13	14:50:14	0.90902	4.0435	4.343	1156.4	FALSE	26
2022-09-13	14:50:14	1.27106	5.65393	4.343	1136.18	FALSE	26
2022-09-13	14:50:14	1.39279	6.19541	4.343	1162.59	FALSE	26
2022-09-13	14:50:14	0.332532	1.47917	4.343	1137.66	FALSE	26
2022-09-13	14:50:15	0.489784	2.17866	2.13072	1164.77	FALSE	26
2022-09-13	14:50:15	0.476094	2.11776	2.13072	1139.78	FALSE	26
2022-09-13	14:50:15	0.505509	2.24861	2.13072	1167.02	FALSE	26
2022-09-13	14:50:15	0.444644	1.97787	2.13072	1141.76	FALSE	26
2022-09-13	14:50:16	0.666629	2.9653	2.89829	1169.98	FALSE	26
2022-09-13	14:50:16	0.571056	2.54017	2.89829	1144.3	FALSE	26
2022-09-13	14:50:16	0.71701	3.1894	2.89829	1173.17	FALSE	26
2022-09-13	14:50:17	0.522404	2.32376	2.06609	1146.62	FALSE	26
2022-09-13	14:50:17	0.50668	2.25381	2.06609	1175.43	FALSE	26
2022-09-13	14:50:17	0.426272	1.89614	2.06609	1148.52	FALSE	26
2022-09-13	14:50:17	0.402557	1.79065	2.06609	1177.22	FALSE	26
2022-09-13	14:50:18	0.400166	1.78002	2.68488	1150.3	FALSE	26
2022-09-13	14:50:18	0.428664	1.90678	2.68488	1179.12	FALSE	26
2022-09-13	14:50:18	1.08307	4.81771	2.68488	1155.11	FALSE	26
2022-09-13	14:50:18	0.502455	2.23502	2.68488	1181.36	FALSE	26
2022-09-13	14:50:19	0.333957	1.48551	1.34538	1156.6	FALSE	26
2022-09-13	14:50:19	0.303473	1.34991	1.34538	1182.71	FALSE	26
2022-09-13	14:50:19	0.281489	1.25212	1.34538	1157.85	FALSE	26
2022-09-13	14:50:19	0.290903	1.29399	1.34538	1184	FALSE	26
2022-09-13	14:50:20	0.291158	1.29513	1.32931	1159.15	FALSE	26
2022-09-13	14:50:20	0.317621	1.41284	1.32931	1185.42	FALSE	26
2022-09-13	14:50:20	0.287748	1.27996	1.32931	1160.43	FALSE	26
2022-09-13	14:50:21	0.312176	1.38862	1.33208	1186.81	FALSE	26
2022-09-13	14:50:21	0.29757	1.32365	1.33208	1161.75	FALSE	26
2022-09-13	14:50:21	0.290598	1.29264	1.33208	1188.1	FALSE	26
2022-09-13	14:50:21	0.297519	1.32342	1.33208	1163.07	FALSE	26
2022-09-13	14:50:22	0.324491	1.4434	1.63672	1189.54	FALSE	26
2022-09-13	14:50:22	0.371819	1.65393	1.63672	1164.73	FALSE	26
2022-09-13	14:50:22	0.591463	2.63095	1.63672	1192.17	FALSE	26
2022-09-13	14:50:22	0.184033	0.818616	1.63672	1165.55	FALSE	26
2022-09-13	14:50:23	0.241132	1.0726	1.19122	1193.24	FALSE	26
2022-09-13	14:50:23	0.273652	1.21726	1.19122	1166.76	FALSE	26
2022-09-13	14:50:23	0.278232	1.23763	1.19122	1194.48	FALSE	26
2022-09-13	14:50:23	0.278181	1.2374	1.19122	1168	FALSE	26
2022-09-13	14:50:24	0.286425	1.27408	1.75866	1195.76	FALSE	26
2022-09-13	14:50:24	0.439911	1.95681	1.75866	1169.96	FALSE	26
2022-09-13	14:50:24	0.459758	2.0451	1.75866	1197.8	FALSE	26
2022-09-13	14:50:25	0.712634	3.16994	2.05925	1173.13	FALSE	26
2022-09-13	14:50:25	0.530293	2.35885	2.05925	1200.16	FALSE	26
2022-09-13	14:50:25	0.326527	1.45246	2.05925	1174.58	FALSE	26
2022-09-13	14:50:25	0.282303	1.25574	2.05925	1201.42	FALSE	26
2022-09-13	14:50:26	0.302303	1.3447	1.34261	1175.93	FALSE	26
2022-09-13	14:50:26	0.300522	1.33678	1.34261	1202.75	FALSE	26
2022-09-13	14:50:26	0.299758	1.33338	1.34261	1177.26	FALSE	26
2022-09-13	14:50:26	0.304746	1.35557	1.34261	1204.11	FALSE	26
2022-09-13	14:50:27	0.352125	1.56632	1.93961	1178.82	FALSE	26
2022-09-13	14:50:27	0.386883	1.72093	1.93961	1205.83	FALSE	26
2022-09-13	14:50:27	0.443982	1.97492	1.93961	1180.8	FALSE	26
2022-09-13	14:50:27	0.561183	2.49625	1.93961	1208.33	FALSE	26
2022-09-13	14:50:28	0.404898	1.80107	1.88588	1182.6	FALSE	26
2022-09-13	14:50:28	0.441489	1.96383	1.88588	1210.29	FALSE	26
2022-09-13	14:50:28	0.425509	1.89275	1.88588	1184.49	FALSE	26
2022-09-13	14:50:29	0.408308	1.81624	1.7769	1212.11	FALSE	26
2022-09-13	14:50:29	0.388919	1.72999	1.7769	1186.22	FALSE	26
2022-09-13	14:50:29	0.395433	1.75897	1.7769	1213.86	FALSE	26
2022-09-13	14:50:29	0.405204	1.80243	1.7769	1188.03	FALSE	26
2022-09-13	14:50:30	0.436043	1.93961	1.93095	1215.8	FALSE	26
2022-09-13	14:50:30	0.446883	1.98782	1.93095	1190.01	FALSE	26
2022-09-13	14:50:30	0.430954	1.91697	1.93095	1217.72	FALSE	26
2022-09-13	14:50:30	0.422506	1.87939	1.93095	1191.89	FALSE	26
2022-09-13	14:50:31	0.452074	2.01092	2.15121	1219.73	FALSE	26
2022-09-13	14:50:31	0.476298	2.11867	2.15121	1194.01	FALSE	26
2022-09-13	14:50:31	0.53584	2.38352	2.15121	1222.12	FALSE	26
2022-09-13	14:50:31	0.470242	2.09173	2.15121	1196.1	FALSE	26
2022-09-13	14:50:32	0.51014	2.2692	2.20333	1224.39	FALSE	26
2022-09-13	14:50:32	0.506883	2.25472	2.20333	1198.36	FALSE	26
2022-09-13	14:50:32	0.46897	2.08607	2.20333	1226.47	FALSE	26
2022-09-13	14:50:33	0.433753	1.92942	1.77843	1200.29	FALSE	26
2022-09-13	14:50:33	0.399249	1.77594	1.77843	1228.25	FALSE	26
2022-09-13	14:50:33	0.387087	1.72184	1.77843	1202.01	FALSE	26
2022-09-13	14:50:33	0.379148	1.68653	1.77843	1229.93	FALSE	26
2022-09-13	14:50:34	0.375738	1.67136	1.67973	1203.68	FALSE	26
2022-09-13	14:50:34	0.375687	1.67113	1.67973	1231.6	FALSE	26
2022-09-13	14:50:34	0.370751	1.64917	1.67973	1205.33	FALSE	26
2022-09-13	14:50:34	0.388308	1.72727	1.67973	1233.33	FALSE	26
2022-09-13	14:50:35	0.406679	1.80899	1.77481	1207.14	FALSE	26
2022-09-13	14:50:35	0.400471	1.78138	1.77481	1235.11	FALSE	26
2022-09-13	14:50:35	0.395891	1.761	1.77481	1208.9	FALSE	26
2022-09-13	14:50:35	0.392939	1.74787	1.77481	1236.86	FALSE	26
2022-09-13	14:50:36	0.399758	1.7782	1.77519	1210.68	FALSE	26
2022-09-13	14:50:36	0.400166	1.78002	1.77519	1238.64	FALSE	26
2022-09-13	14:50:36	0.397316	1.76734	1.77519	1212.45	FALSE	26
2022-09-13	14:50:37	0.405204	1.80243	1.7996	1240.44	FALSE	26
2022-09-13	14:50:37	0.409682	1.82235	1.7996	1214.27	FALSE	26
2022-09-13	14:50:37	0.403575	1.79518	1.7996	1242.24	FALSE	26
2022-09-13	14:50:37	0.399809	1.77843	1.7996	1216.05	FALSE	26
2022-09-13	14:50:38	0.399504	1.77707	1.75959	1244.02	FALSE	26
2022-09-13	14:50:38	0.400013	1.77934	1.75959	1217.83	FALSE	26
2022-09-13	14:50:38	0.398537	1.77277	1.75959	1245.79	FALSE	26
2022-09-13	14:50:38	0.384237	1.70916	1.75959	1219.53	FALSE	26
2022-09-13	14:50:39	0.369987	1.64578	1.71012	1247.43	FALSE	26
2022-09-13	14:50:39	0.383015	1.70373	1.71012	1221.24	FALSE	26
2022-09-13	14:50:39	0.392074	1.74402	1.71012	1249.18	FALSE	26
2022-09-13	14:50:39	0.392735	1.74696	1.71012	1222.99	FALSE	26
2022-09-13	14:50:40	0.405713	1.80469	1.82801	1250.98	FALSE	26
2022-09-13	14:50:40	0.410394	1.82551	1.82801	1224.81	FALSE	26
2022-09-13	14:50:40	0.416756	1.85381	1.82801	1252.84	FALSE	26
2022-09-13	14:50:41	0.425662	1.89343	1.87679	1226.7	FALSE	26
2022-09-13	14:50:41	0.422965	1.88143	1.87679	1254.72	FALSE	26
2022-09-13	14:50:41	0.42042	1.87011	1.87679	1228.57	FALSE	26
2022-09-13	14:50:41	0.418639	1.86219	1.87679	1256.58	FALSE	26
2022-09-13	14:50:42	0.427341	1.9009	1.85393	1230.48	FALSE	26
2022-09-13	14:50:42	0.429326	1.90973	1.85393	1258.49	FALSE	26
2022-09-13	14:50:42	0.404135	1.79767	1.85393	1232.27	FALSE	26
2022-09-13	14:50:42	0.406323	1.80741	1.85393	1260.3	FALSE	26
2022-09-13	14:50:43	0.362354	1.61182	1.7773	1233.89	FALSE	26
2022-09-13	14:50:43	0.442201	1.967	1.7773	1262.26	FALSE	26
2022-09-13	14:50:43	0.46673	2.07611	1.7773	1235.96	FALSE	26
2022-09-13	14:50:43	0.326934	1.45427	1.7773	1263.72	FALSE	26
2022-09-13	14:50:44	0.404186	1.7979	1.9833	1237.76	FALSE	26
2022-09-13	14:50:44	0.406527	1.80831	1.9833	1265.53	FALSE	26
2022-09-13	14:50:44	0.526883	2.34368	1.9833	1240.1	FALSE	26
2022-09-13	14:50:45	0.450344	2.00322	1.979	1267.53	FALSE	26
2022-09-13	14:50:45	0.413753	1.84046	1.979	1241.94	FALSE	26
2022-09-13	14:50:45	0.432481	1.92376	1.979	1269.45	FALSE	26
2022-09-13	14:50:45	0.483015	2.14855	1.979	1244.09	FALSE	26
2022-09-13	14:50:46	1.29543	5.76233	5.03365	1275.22	FALSE	26
2022-09-13	14:50:46	0.563168	2.50508	5.03365	1246.6	FALSE	26
2022-09-13	14:50:46	2.25223	10.0184	5.03365	1285.23	FALSE	26
2022-09-13	14:50:46	0.415636	1.84883	5.03365	1248.45	FALSE	26
2022-09-13	14:50:47	0.27584	1.22699	2.1185	1286.46	FALSE	26
2022-09-13	14:50:47	0.360623	1.60412	2.1185	1250.05	FALSE	26
2022-09-13	14:50:47	0.555331	2.47022	2.1185	1288.93	FALSE	26
2022-09-13	14:50:47	0.713244	3.17265	2.1185	1253.22	FALSE	26
2022-09-13	14:50:48	0.0819468	0.364516	-1.10735	1289.3	FALSE	26
2022-09-13	14:50:48	-0.431895	-1.92116	-1.10735	1253.22	FALSE	26
2022-09-13	14:50:48	-0.396883	-1.76541	-1.10735	1289.3	FALSE	26
2022-09-13	14:50:49	-0.243651	-1.08381	-1.11652	1253.22	FALSE	26
2022-09-13	14:50:49	-0.255814	-1.13791	-1.11652	1289.3	FALSE	26
2022-09-13	14:50:49	-0.319376	-1.42065	-1.11652	1253.22	FALSE	26
2022-09-13	14:50:49	-0.185178	-0.823709	-1.11652	1289.3	FALSE	26
2022-09-13	14:50:50	-0.197493	-0.878488	-0.58981	1253.22	FALSE	26
2022-09-13	14:50:50	-0.171997	-0.765077	-0.58981	1289.3	FALSE	26
2022-09-13	14:50:50	-0.113168	-0.503394	-0.58981	1253.22	FALSE	26
2022-09-13	14:50:50	-0.0477224	-0.212279	-0.58981	1289.3	FALSE	26
2022-09-13	14:50:51	0.153194	0.681438	0.336955	1253.9	FALSE	26
2022-09-13	14:50:51	0.201641	0.896939	0.336955	1290.19	FALSE	26
2022-09-13	14:50:51	-0.0355086	-0.157949	0.336955	1253.9	FALSE	26
2022-09-13	14:50:51	-0.0163229	-0.0726075	0.336955	1290.19	FALSE	26
2022-09-13	14:50:52	0.147697	0.656986	0.00315066	1254.56	FALSE	26
2022-09-13	14:50:52	0.0581809	0.2588	0.00315066	1290.45	FALSE	26
2022-09-13	14:50:52	-0.203753	-0.906334	0.00315066	1254.56	FALSE	26
2022-09-13	14:50:53	-0.127621	-0.567684	0.130108	1290.45	FALSE	26
2022-09-13	14:50:53	0.0103437	0.0460108	0.130108	1254.61	FALSE	26
2022-09-13	14:50:53	0.0965523	0.429484	0.130108	1290.88	FALSE	26
2022-09-13	14:50:53	0.137723	0.612619	0.130108	1255.22	FALSE	26
2022-09-13	14:50:54	0.116247	0.51709	0.580134	1291.4	FALSE	26
2022-09-13	14:50:54	0.102812	0.457328	0.580134	1255.68	FALSE	26
2022-09-13	14:50:54	0.184033	0.818616	0.580134	1292.22	FALSE	26
2022-09-13	14:50:54	0.118588	0.527503	0.580134	1256.2	FALSE	26
2022-09-13	14:50:55	0.178486	0.793941	3.31787	1293.01	FALSE	26
2022-09-13	14:50:55	0.557723	2.48086	3.31787	1258.69	FALSE	26
2022-09-13	14:50:55	0.982507	4.37039	3.31787	1297.38	FALSE	26
2022-09-13	14:50:55	1.26485	5.62631	3.31787	1264.31	FALSE	26
2022-09-13	14:50:56	1.44597	6.43196	4.54937	1303.81	FALSE	26
2022-09-13	14:50:56	0.918486	4.08561	4.54937	1268.4	FALSE	26
2022-09-13	14:50:56	0.703779	3.13055	4.54937	1306.94	FALSE	26
2022-09-13	14:50:57	0.527697	2.3473	1.93214	1270.74	FALSE	26
2022-09-13	14:50:57	0.468104	2.08222	1.93214	1309.03	FALSE	26
2022-09-13	14:50:57	0.346832	1.54278	1.93214	1272.29	FALSE	26
2022-09-13	14:50:57	0.394822	1.75625	1.93214	1310.78	FALSE	26
2022-09-13	14:50:58	0.313143	1.39292	1.41562	1273.68	FALSE	26
2022-09-13	14:50:58	0.302506	1.34561	1.41562	1312.13	FALSE	26
2022-09-13	14:50:58	0.329784	1.46695	1.41562	1275.15	FALSE	26
2022-09-13	14:50:58	0.327545	1.45699	1.41562	1313.59	FALSE	26
2022-09-13	14:50:59	0.313957	1.39654	1.34482	1276.54	FALSE	26
2022-09-13	14:50:59	0.303066	1.3481	1.34482	1314.93	FALSE	26
2022-09-13	14:50:59	0.296145	1.31731	1.34482	1277.86	FALSE	26
2022-09-13	14:50:59	0.296145	1.31731	1.34482	1316.25	FALSE	26
2022-09-13	14:51:00	0.28902	1.28562	1.30501	1279.15	FALSE	26
2022-09-13	14:51:00	0.294466	1.30984	1.30501	1317.56	FALSE	26
2022-09-13	14:51:00	0.296654	1.31958	1.30501	1280.47	FALSE	26
2022-09-13	14:51:01	0.299707	1.33316	1.34861	1318.89	FALSE	26
2022-09-13	14:51:01	0.30383	1.3515	1.34861	1281.82	FALSE	26
2022-09-13	14:51:01	0.30556	1.35919	1.34861	1320.25	FALSE	26
2022-09-13	14:51:01	0.303626	1.35059	1.34861	1283.17	FALSE	26
2022-09-13	14:51:02	0.301947	1.34312	1.34453	1321.6	FALSE	26
2022-09-13	14:51:02	0.295738	1.3155	1.34453	1284.48	FALSE	26
2022-09-13	14:51:02	0.299504	1.33225	1.34453	1322.93	FALSE	26
2022-09-13	14:51:02	0.31187	1.38726	1.34453	1285.87	FALSE	26
2022-09-13	14:51:03	0.327443	1.45653	1.55195	1324.39	FALSE	26
2022-09-13	14:51:03	0.341285	1.5181	1.55195	1287.39	FALSE	26
2022-09-13	14:51:03	0.356094	1.58398	1.55195	1325.97	FALSE	26
2022-09-13	14:51:03	0.370751	1.64917	1.55195	1289.04	FALSE	26
2022-09-13	14:51:04	0.365	1.62359	1.58624	1327.59	FALSE	26
2022-09-13	14:51:04	0.358842	1.5962	1.58624	1290.63	FALSE	26
2022-09-13	14:51:04	0.345967	1.53893	1.58624	1329.13	FALSE	26
2022-09-13	14:51:05	0.331412	1.47419	1.46196	1292.11	FALSE	26
2022-09-13	14:51:05	0.346883	1.543	1.46196	1330.67	FALSE	26
2022-09-13	14:51:05	0.321896	1.43186	1.46196	1293.54	FALSE	26
2022-09-13	14:51:05	0.314466	1.39881	1.46196	1332.07	FALSE	26
2022-09-13	14:51:06	0.339758	1.51131	1.45698	1295.05	FALSE	26
2022-09-13	14:51:06	0.326069	1.45042	1.45698	1333.52	FALSE	26
2022-09-13	14:51:06	0.330395	1.46966	1.45698	1296.52	FALSE	26
2022-09-13	14:51:06	0.313957	1.39654	1.45698	1334.92	FALSE	26
2022-09-13	14:51:07	0.308003	1.37006	1.35608	1297.89	FALSE	26
2022-09-13	14:51:07	0.299758	1.33338	1.35608	1336.25	FALSE	26
2022-09-13	14:51:07	0.305916	1.36078	1.35608	1299.25	FALSE	26
2022-09-13	14:51:07	0.305763	1.36009	1.35608	1337.61	FALSE	26
2022-09-13	14:51:08	0.331158	1.47306	1.4754	1300.73	FALSE	26
2022-09-13	14:51:08	0.331463	1.47441	1.4754	1339.09	FALSE	26
2022-09-13	14:51:08	0.33243	1.47872	1.4754	1302.2	FALSE	26
2022-09-13	14:51:09	0.327188	1.4554	1.48268	1340.54	FALSE	26
2022-09-13	14:51:09	0.323575	1.43933	1.48268	1303.64	FALSE	26
2022-09-13	14:51:09	0.34271	1.52444	1.48268	1342.07	FALSE	26
2022-09-13	14:51:09	0.339809	1.51154	1.48268	1305.15	FALSE	26
2022-09-13	14:51:10	0.390191	1.73565	2.2773	1343.8	FALSE	26
2022-09-13	14:51:10	0.559504	2.48879	2.2773	1307.64	FALSE	26
2022-09-13	14:51:10	0.558842	2.48584	2.2773	1346.29	FALSE	26
2022-09-13	14:51:10	0.5393	2.39891	2.2773	1310.04	FALSE	26
2022-09-13	14:51:11	0.513957	2.28618	1.94397	1348.58	FALSE	26
2022-09-13	14:51:11	0.478181	2.12704	1.94397	1312.17	FALSE	26
2022-09-13	14:51:11	0.41355	1.83955	1.94397	1350.42	FALSE	26
2022-09-13	14:51:11	0.342405	1.52309	1.94397	1313.69	FALSE	26
2022-09-13	14:51:12	0.325407	1.44748	1.40726	1351.86	FALSE	26
2022-09-13	14:51:12	0.319402	1.42076	1.40726	1315.11	FALSE	26
2022-09-13	14:51:12	0.304288	1.35353	1.40726	1353.22	FALSE	26
2022-09-13	14:51:13	0.286425	1.27408	1.24453	1316.39	FALSE	26
2022-09-13	14:51:13	0.283473	1.26094	1.24453	1354.48	FALSE	26
2022-09-13	14:51:13	0.275535	1.22563	1.24453	1317.61	FALSE	26
2022-09-13	14:51:13	0.273702	1.21748	1.24453	1355.69	FALSE	26
2022-09-13	14:51:14	0.277417	1.23401	1.23412	1318.85	FALSE	26
2022-09-13	14:51:14	0.282048	1.25461	1.23412	1356.95	FALSE	26
2022-09-13	14:51:14	0.275433	1.22518	1.23412	1320.07	FALSE	26
2022-09-13	14:51:14	0.274873	1.22269	1.23412	1358.17	FALSE	26
2022-09-13	14:51:15	0.273906	1.21839	1.22818	1321.29	FALSE	26
2022-09-13	14:51:15	0.269682	1.1996	1.22818	1359.37	FALSE	26
2022-09-13	14:51:15	0.317824	1.41374	1.22818	1322.7	FALSE	26
2022-09-13	14:51:15	0.243015	1.08098	1.22818	1360.45	FALSE	26
2022-09-13	14:51:16	0.128308	0.57074	0.231636	1323.28	FALSE	26
2022-09-13	14:51:16	0.0560435	0.249293	0.231636	1360.7	FALSE	26
2022-09-13	14:51:16	-0.0281295	-0.125126	0.231636	1323.28	FALSE	26
2022-09-13	14:51:17	0.00785013	0.0349189	2.07385	1360.74	FALSE	26
2022-09-13	14:51:17	0.444338	1.9765	2.07385	1325.25	FALSE	26
2022-09-13	14:51:17	0.564084	2.50916	2.07385	1363.25	FALSE	26
2022-09-13	14:51:17	0.848613	3.7748	2.07385	1329.03	FALSE	26
2022-09-13	14:51:18	1.06678	4.74525	4.24532	1367.99	FALSE	26
2022-09-13	14:51:18	0.75813	3.37231	4.24532	1332.4	FALSE	26
2022-09-13	14:51:18	1.05849	4.70838	4.24532	1372.7	FALSE	26
2022-09-13	14:51:18	0.93416	4.15533	4.24532	1336.55	FALSE	26
2022-09-13	14:51:19	1.17528	5.22788	3.20548	1377.93	FALSE	26
2022-09-13	14:51:19	0.743015	3.30508	3.20548	1339.86	FALSE	26
2022-09-13	14:51:19	0.353143	1.57085	3.20548	1379.5	FALSE	26
2022-09-13	14:51:19	0.611056	2.7181	3.20548	1342.58	FALSE	26
2022-09-13	14:51:20	0.332786	1.4803	3.56368	1380.98	FALSE	26
2022-09-13	14:51:20	0.941336	4.18725	3.56368	1346.76	FALSE	26
2022-09-13	14:51:20	1.12933	5.02349	3.56368	1386	FALSE	26
2022-09-13	14:51:21	0.603524	2.6846	4.28628	1349.45	FALSE	26
2022-09-13	14:51:21	1.38973	6.1818	4.28628	1392.18	FALSE	26
2022-09-13	14:51:21	0.745763	3.3173	4.28628	1352.77	FALSE	26
2022-09-13	14:51:21	1.11538	4.96143	4.28628	1397.15	FALSE	26
2022-09-13	14:51:22	0.215687	0.959419	0.811711	1353.73	FALSE	26
2022-09-13	14:51:22	0.293244	1.30441	0.811711	1398.45	FALSE	26
2022-09-13	14:51:22	0.106272	0.472719	0.811711	1354.2	FALSE	26
2022-09-13	14:51:22	0.11472	0.510298	0.811711	1398.96	FALSE	26
2022-09-13	14:51:23	-0.159427	-0.709163	-1.53921	1354.2	FALSE	26
2022-09-13	14:51:23	-0.285738	-1.27102	-1.53921	1398.96	FALSE	26
2022-09-13	14:51:23	-0.342175	-1.52206	-1.53921	1354.2	FALSE	26
2022-09-13	14:51:23	-0.596781	-2.6546	-1.53921	1398.96	FALSE	26
2022-09-13	14:51:24	-0.690165	-3.06999	-2.93681	1354.2	FALSE	26
2022-09-13	14:51:24	-0.698256	-3.10598	-2.93681	1398.96	FALSE	26
2022-09-13	14:51:24	-0.592251	-2.63445	-2.93681	1354.2	FALSE	26
2022-09-13	14:51:25	-0.515508	-2.29308	0.241936	1398.96	FALSE	26
2022-09-13	14:51:25	-0.286806	-1.27577	0.241936	1354.2	FALSE	26
2022-09-13	14:51:25	0.656247	2.91912	0.241936	1401.88	FALSE	26
2022-09-13	14:51:25	0.363626	1.61748	0.241936	1355.82	FALSE	26
2022-09-13	14:51:26	0.340013	1.51245	1.35082	1403.39	FALSE	26
2022-09-13	14:51:26	0.366323	1.62948	1.35082	1357.45	FALSE	26
2022-09-13	14:51:26	0.298741	1.32886	1.35082	1404.72	FALSE	26
2022-09-13	14:51:26	0.209631	0.932481	1.35082	1358.38	FALSE	26
2022-09-13	14:51:27	0.213041	0.947649	1.38556	1405.67	FALSE	26
2022-09-13	14:51:27	0.182557	0.81205	1.38556	1359.19	FALSE	26
2022-09-13	14:51:27	0.629936	2.80208	1.38556	1408.47	FALSE	26
2022-09-13	14:51:27	0.22042	0.980472	1.38556	1360.17	FALSE	26
2022-09-13	14:51:28	0.53187	2.36586	2.65509	1410.84	FALSE	26
2022-09-13	14:51:28	0.651056	2.89603	2.65509	1363.07	FALSE	26
2022-09-13	14:51:28	0.607748	2.70338	2.65509	1413.54	FALSE	26
2022-09-13	14:51:29	0.378333	1.6829	1.46949	1364.75	FALSE	26
2022-09-13	14:51:29	0.349886	1.55636	1.46949	1415.1	FALSE	26
2022-09-13	14:51:29	0.22673	1.00854	1.46949	1365.76	FALSE	26
2022-09-13	14:51:29	0.366476	1.63016	1.46949	1416.73	FALSE	26
2022-09-13	14:51:30	0.551005	2.45098	2.26094	1368.21	FALSE	26
2022-09-13	14:51:30	0.498588	2.21782	2.26094	1418.94	FALSE	26
2022-09-13	14:51:30	0.468868	2.08562	2.26094	1370.29	FALSE	26
2022-09-13	14:51:30	0.514669	2.28935	2.26094	1421.23	FALSE	26
2022-09-13	14:51:31	0.504491	2.24408	2.27622	1372.54	FALSE	26
2022-09-13	14:51:31	0.523524	2.32874	2.27622	1423.56	FALSE	26
2022-09-13	14:51:31	0.52897	2.35296	2.27622	1374.89	FALSE	26
2022-09-13	14:51:31	0.489886	2.17911	2.27622	1425.74	FALSE	26
2022-09-13	14:51:32	0.52902	2.35319	2.15874	1377.24	FALSE	26
2022-09-13	14:51:32	0.493092	2.19337	2.15874	1427.93	FALSE	26
2022-09-13	14:51:32	0.433804	1.92965	2.15874	1379.17	FALSE	26
2022-09-13	14:51:33	0.585661	2.60514	1.45082	1430.54	FALSE	26
2022-09-13	14:51:33	0.278283	1.23786	1.45082	1380.41	FALSE	26
2022-09-13	14:51:33	0.221031	0.98319	1.45082	1431.52	FALSE	26
2022-09-13	14:51:33	0.219657	0.977078	1.45082	1381.39	FALSE	26
2022-09-13	14:51:34	0.293906	1.30735	1.98918	1432.83	FALSE	26
2022-09-13	14:51:34	0.349326	1.55387	1.98918	1382.94	FALSE	26
2022-09-13	14:51:34	0.534466	2.37741	1.98918	1435.21	FALSE	26
2022-09-13	14:51:34	0.611056	2.7181	1.98918	1385.66	FALSE	26
2022-09-13	14:51:35	0.658537	2.9293	1.95534	1438.14	FALSE	26
2022-09-13	14:51:35	0.32215	1.43299	1.95534	1387.09	FALSE	26
2022-09-13	14:51:35	0.396501	1.76372	1.95534	1439.9	FALSE	26
2022-09-13	14:51:35	0.381132	1.69535	1.95534	1388.79	FALSE	26
2022-09-13	14:51:36	0.303473	1.34991	1.12769	1441.25	FALSE	26
2022-09-13	14:51:36	0.131972	0.587038	1.12769	1389.38	FALSE	26
2022-09-13	14:51:36	0.325102	1.44612	1.12769	1442.7	FALSE	26
2022-09-13	14:51:37	0.688257	3.0615	-0.559306	1392.44	FALSE	26
2022-09-13	14:51:37	-0.0148471	-0.0660429	-0.559306	1442.7	FALSE	26
2022-09-13	14:51:37	-0.539936	-2.40174	-0.559306	1392.44	FALSE	26
2022-09-13	14:51:37	-0.636424	-2.83094	-0.559306	1442.7	FALSE	26
2022-09-13	14:51:38	-0.345585	-1.53723	-1.51301	1392.44	FALSE	26
2022-09-13	14:51:38	-0.216374	-0.962475	-1.51301	1442.7	FALSE	26
2022-09-13	14:51:38	-0.24874	-1.10645	-1.51301	1392.44	FALSE	26
2022-09-13	14:51:38	-0.54986	-2.44589	-1.51301	1442.7	FALSE	26
2022-09-13	14:51:39	-0.630877	-2.80627	-2.6859	1392.44	FALSE	26
2022-09-13	14:51:39	-0.669707	-2.97899	-2.6859	1442.7	FALSE	26
2022-09-13	14:51:39	-0.57444	-2.55522	-2.6859	1392.44	FALSE	26
2022-09-13	14:51:39	-0.540241	-2.4031	-2.6859	1442.7	FALSE	26
2022-09-13	14:51:40	-0.621055	-2.76258	-2.67392	1392.44	FALSE	26
2022-09-13	14:51:40	-0.617341	-2.74606	-2.67392	1442.7	FALSE	26
2022-09-13	14:51:40	-0.564974	-2.51312	-2.67392	1392.44	FALSE	26
2022-09-13	14:51:41	-0.546094	-2.42914	-1.70277	1442.7	FALSE	26
2022-09-13	14:51:41	-0.438206	-1.94923	-1.70277	1392.44	FALSE	26
2022-09-13	14:51:41	-0.302989	-1.34776	-1.70277	1442.7	FALSE	26
2022-09-13	14:51:41	-0.243906	-1.08494	-1.70277	1392.44	FALSE	26
2022-09-13	14:51:42	-0.0952542	-0.42371	0.864401	1442.7	FALSE	26
2022-09-13	14:51:42	0.320776	1.42688	0.864401	1393.87	FALSE	26
2022-09-13	14:51:42	0.324288	1.4425	0.864401	1444.14	FALSE	26
2022-09-13	14:51:42	0.227494	1.01194	0.864401	1394.88	FALSE	26
2022-09-13	14:51:43	0.605	2.69116	2.24193	1446.83	FALSE	26
2022-09-13	14:51:43	0.43925	1.95387	2.24193	1396.83	FALSE	26
2022-09-13	14:51:43	0.526527	2.3421	2.24193	1449.17	FALSE	26
2022-09-13	14:51:43	0.445255	1.98058	2.24193	1398.81	FALSE	26
2022-09-13	14:51:44	0.441031	1.96179	2.37552	1451.13	FALSE	26
2022-09-13	14:51:44	0.424796	1.88958	2.37552	1400.7	FALSE	26
2022-09-13	14:51:44	0.736298	3.2752	2.37552	1454.41	FALSE	26
2022-09-13	14:51:45	0.835229	3.71527	4.81367	1404.42	FALSE	26
2022-09-13	14:51:45	1.12118	4.98723	4.81367	1459.4	FALSE	26
2022-09-13	14:51:45	1.20851	5.37569	4.81367	1409.79	FALSE	26
2022-09-13	14:51:45	1.16373	5.1765	4.81367	1464.57	FALSE	26
2022-09-13	14:51:46	1.16139	5.16609	11.6999	1414.96	FALSE	26
2022-09-13	14:51:46	2.09716	9.32859	11.6999	1473.9	FALSE	26
2022-09-13	14:51:46	3.76525	16.7486	11.6999	1431.71	1	27
2022-09-13	14:51:46	3.49721	15.5563	11.6999	1489.46	1	28
2022-09-13	14:51:47	3.1824	14.156	9.00731	1445.86	1	29
2022-09-13	14:51:47	2.34739	10.4417	9.00731	1499.9	FALSE	29
2022-09-13	14:51:47	1.61019	7.16245	9.00731	1453.03	FALSE	29
2022-09-13	14:51:47	0.959758	4.2692	9.00731	1504.17	FALSE	29
2022-09-13	14:51:48	0.347697	1.54663	1.48928	1454.57	FALSE	29
2022-09-13	14:51:48	0.400013	1.77934	1.48928	1505.95	FALSE	29
2022-09-13	14:51:48	0.256705	1.14188	1.48928	1455.71	FALSE	29
2022-09-13	14:51:49	0.308969	1.37436	13.0632	1507.32	FALSE	29
2022-09-13	14:51:49	1.00495	4.47022	13.0632	1460.18	FALSE	29
2022-09-13	14:51:49	3.48597	15.5063	13.0632	1522.83	1	30
2022-09-13	14:51:49	6.94708	30.902	13.0632	1491.09	1	31
2022-09-13	14:51:50	10.3798	46.1714	19.9117	1569	1	32
2022-09-13	14:51:50	1.9908	8.85548	19.9117	1499.94	FALSE	32
2022-09-13	14:51:50	3.33482	14.8339	19.9117	1583.83	1	33
2022-09-13	14:51:50	2.20001	9.78608	19.9117	1509.73	FALSE	33
2022-09-13	14:51:51	1.67452	7.4486	6.64933	1591.28	FALSE	33
2022-09-13	14:51:51	1.05996	4.71491	6.64933	1514.44	FALSE	33
2022-09-13	14:51:51	1.32225	5.88163	6.64933	1597.16	FALSE	33
2022-09-13	14:51:51	1.92261	8.55215	6.64933	1522.99	FALSE	33
2022-09-13	14:51:52	3.67548	16.3493	35.4171	1613.51	1	34
2022-09-13	14:51:52	7.24749	32.2383	35.4171	1555.23	1	35
2022-09-13	14:51:52	12.9634	57.6638	35.4171	1671.18	1	36
2022-09-13	14:51:53	10.3228	45.9179	43.9004	1601.15	1	37
2022-09-13	14:51:53	6.88719	30.6356	43.9004	1701.81	1	38
2022-09-13	14:51:53	11.6079	51.6343	43.9004	1652.79	1	39
2022-09-13	14:51:53	10.6591	47.4138	43.9004	1749.23	1	40
2022-09-13	14:51:54	8.23131	36.6145	24.9824	1689.4	1	41
2022-09-13	14:51:54	5.52225	24.5641	24.9824	1773.79	1	42
2022-09-13	14:51:54	4.62317	20.5648	24.9824	1709.96	1	43
2022-09-13	14:51:54	4.08841	18.1861	24.9824	1791.98	1	44
2022-09-13	14:51:55	3.90815	17.3842	17.2954	1727.35	1	45
2022-09-13	14:51:55	3.93396	17.499	17.2954	1809.48	1	46
2022-09-13	14:51:55	3.8224	17.0028	17.2954	1744.35	1	47
2022-09-13	14:51:56	2.95436	13.1416	7.28837	1822.62	FALSE	47
2022-09-13	14:51:56	2.03701	9.06103	7.28837	1753.41	FALSE	47
2022-09-13	14:51:56	0.967697	4.30451	7.28837	1826.92	FALSE	47
2022-09-13	14:51:56	0.594924	2.64634	7.28837	1756.06	FALSE	47
2022-09-13	14:51:57	0.518893	2.30814	3.46326	1829.23	FALSE	47
2022-09-13	14:51:57	0.447647	1.99122	3.46326	1758.05	FALSE	47
2022-09-13	14:51:57	0.779758	3.46852	3.46326	1832.7	FALSE	47
2022-09-13	14:51:57	1.368	6.08514	3.46326	1764.14	FALSE	47
2022-09-13	14:51:58	1.52744	6.79436	11.7308	1839.49	FALSE	47
2022-09-13	14:51:58	2.77182	12.3296	11.7308	1776.46	FALSE	47
2022-09-13	14:51:58	3.1566	14.0412	11.7308	1853.53	1	48
2022-09-13	14:51:58	3.09299	13.7582	11.7308	1790.22	1	49
2022-09-13	14:51:59	1.98658	8.83671	8.57264	1862.37	FALSE	49
2022-09-13	14:51:59	2.58831	11.5133	8.57264	1801.74	FALSE	49
2022-09-13	14:51:59	1.33039	5.91784	8.57264	1868.29	FALSE	49
2022-09-13	14:51:59	1.80358	8.02268	8.57264	1809.76	FALSE	49
2022-09-13	14:52:00	1.0105	4.49491	3.7856	1872.78	FALSE	49
2022-09-13	14:52:00	0.927646	4.12635	3.7856	1813.89	FALSE	49
2022-09-13	14:52:00	0.614974	2.73553	3.7856	1875.52	FALSE	49
2022-09-13	14:52:01	0.511107	2.27351	2.46507	1816.16	FALSE	49
2022-09-13	14:52:01	0.481031	2.13972	2.46507	1877.66	FALSE	49
2022-09-13	14:52:01	0.662608	2.94741	2.46507	1819.11	FALSE	49
2022-09-13	14:52:01	0.561946	2.49965	2.46507	1880.16	FALSE	49
2022-09-13	14:52:02	0.494975	2.20175	2.2095	1821.31	FALSE	49
2022-09-13	14:52:02	0.419657	1.86672	2.2095	1882.03	FALSE	49
2022-09-13	14:52:02	0.481896	2.14357	2.2095	1823.45	FALSE	49
2022-09-13	14:52:02	0.590343	2.62596	2.2095	1884.65	FALSE	49
2022-09-13	14:52:03	0.78159	3.47667	5.07388	1826.93	FALSE	49
2022-09-13	14:52:03	1.07833	4.79663	5.07388	1889.45	FALSE	49
2022-09-13	14:52:03	1.21411	5.4006	5.07388	1832.33	FALSE	49
2022-09-13	14:52:03	1.48861	6.62164	5.07388	1896.07	FALSE	49
2022-09-13	14:52:04	1.50154	6.67915	4.9096	1839.01	FALSE	49
2022-09-13	14:52:04	1.25594	5.58667	4.9096	1901.66	FALSE	49
2022-09-13	14:52:04	0.553702	2.46298	4.9096	1841.47	FALSE	49
2022-09-13	14:52:05	0.398639	1.77323	2.4185	1903.43	FALSE	49
2022-09-13	14:52:05	0.50444	2.24385	2.4185	1843.71	FALSE	49
2022-09-13	14:52:05	0.621234	2.76337	2.4185	1906.19	FALSE	49
2022-09-13	14:52:05	0.650496	2.89354	2.4185	1846.61	FALSE	49
2022-09-13	14:52:06	0.585916	2.60627	1.72037	1908.8	FALSE	49
2022-09-13	14:52:06	0.417825	1.85857	1.72037	1848.47	FALSE	49
2022-09-13	14:52:06	0.388919	1.72999	1.72037	1910.53	FALSE	49
2022-09-13	14:52:06	0.154364	0.686642	1.72037	1849.15	FALSE	49
2022-09-13	14:52:07	0.146934	0.653592	0.958797	1911.18	FALSE	49
2022-09-13	14:52:07	0.207494	0.922975	0.958797	1850.08	FALSE	49
2022-09-13	14:52:07	0.233194	1.03729	0.958797	1912.22	FALSE	49
2022-09-13	14:52:07	0.274567	1.22133	0.958797	1851.3	FALSE	49
2022-09-13	14:52:08	0.249733	1.11086	2.38511	1913.33	FALSE	49
2022-09-13	14:52:08	0.94897	4.22121	2.38511	1855.52	FALSE	49
2022-09-13	14:52:08	0.409886	1.82325	2.38511	1915.15	FALSE	49
2022-09-13	14:52:09	1.73905	7.73564	16.2234	1863.25	FALSE	49
2022-09-13	14:52:09	2.08118	9.2575	16.2234	1924.41	FALSE	49
2022-09-13	14:52:09	4.83207	21.494	16.2234	1884.75	1	50
2022-09-13	14:52:09	5.93645	26.4065	16.2234	1950.82	1	51
2022-09-13	14:52:10	15.006	66.7497	46.4017	1951.5	1	52
2022-09-13	14:52:10	12.3545	54.9553	46.4017	2005.77	1	53
2022-09-13	14:52:10	8.22779	36.5989	46.4017	1988.1	1	54
2022-09-13	14:52:10	6.13802	27.3031	46.4017	2033.08	1	55
2022-09-13	14:52:11	6.55116	29.1409	14.6688	2017.24	1	56
2022-09-13	14:52:11	4.7624	21.1841	14.6688	2054.26	1	57
2022-09-13	14:52:11	0.871667	3.87735	14.6688	2021.12	FALSE	57
2022-09-13	14:52:11	1.00551	4.47271	14.6688	2058.73	FALSE	57
2022-09-13	14:52:12	0.288715	1.28426	1.58994	2022.4	FALSE	57
2022-09-13	14:52:12	0.278995	1.24103	1.58994	2059.97	FALSE	57
2022-09-13	14:52:12	0.504593	2.24453	1.58994	2024.64	FALSE	57
2022-09-13	14:52:13	0.317977	1.41443	1.83169	2061.39	FALSE	57
2022-09-13	14:52:13	0.373804	1.66275	1.83169	2026.31	FALSE	57
2022-09-13	14:52:13	0.546883	2.43264	1.83169	2063.82	FALSE	57
2022-09-13	14:52:13	0.408461	1.81692	1.83169	2028.12	FALSE	57
2022-09-13	14:52:14	0.352023	1.56587	1.59168	2065.39	FALSE	57
2022-09-13	14:52:14	0.375026	1.66819	1.59168	2029.79	FALSE	57
2022-09-13	14:52:14	0.352278	1.567	1.59168	2066.95	FALSE	57
2022-09-13	14:52:14	0.351972	1.56564	1.59168	2031.36	FALSE	57
2022-09-13	14:52:15	0.365509	1.62586	1.70548	2068.58	FALSE	57
2022-09-13	14:52:15	0.418944	1.86355	1.70548	2033.22	FALSE	57
2022-09-13	14:52:15	0.473906	2.10803	1.70548	2070.69	FALSE	57
2022-09-13	14:52:15	0.27528	1.2245	1.70548	2034.45	FALSE	57
2022-09-13	14:52:16	0.216196	0.961683	0.570966	2071.65	FALSE	57
2022-09-13	14:52:16	-0.0737783	-0.328181	0.570966	2034.45	FALSE	57
2022-09-13	14:52:16	0.242659	1.0794	0.570966	2072.73	FALSE	57
2022-09-13	14:52:17	0.0344659	0.153311	-1.21459	2034.6	FALSE	57
2022-09-13	14:52:17	-0.374287	-1.6649	-1.21459	2072.73	FALSE	57
2022-09-13	14:52:17	-0.445381	-1.98114	-1.21459	2034.6	FALSE	57
2022-09-13	14:52:17	-0.30701	-1.36564	-1.21459	2072.73	FALSE	57
2022-09-13	14:52:18	0.0383336	0.170516	1.43837	2034.77	FALSE	57
2022-09-13	14:52:18	0.475433	2.11482	1.43837	2074.84	FALSE	57
2022-09-13	14:52:18	0.318181	1.41533	1.43837	2036.18	FALSE	57
2022-09-13	14:52:18	0.461489	2.0528	1.43837	2076.9	FALSE	57
2022-09-13	14:52:19	0.423728	1.88483	2.07996	2038.07	FALSE	57
2022-09-13	14:52:19	0.484339	2.15444	2.07996	2079.05	FALSE	57
2022-09-13	14:52:19	0.46383	2.06321	2.07996	2040.13	FALSE	57
2022-09-13	14:52:19	0.498486	2.21737	2.07996	2081.27	FALSE	57
2022-09-13	14:52:20	0.512735	2.28075	2.1192	2042.41	FALSE	57
2022-09-13	14:52:20	0.392939	1.74787	2.1192	2083.02	FALSE	57
2022-09-13	14:52:20	0.523575	2.32897	2.1192	2044.74	FALSE	57
2022-09-13	14:52:21	0.643931	2.86433	2.86682	2085.88	FALSE	57
2022-09-13	14:52:21	0.636501	2.83128	2.86682	2047.57	FALSE	57
2022-09-13	14:52:21	0.66388	2.95307	2.86682	2088.83	FALSE	57
2022-09-13	14:52:21	0.633651	2.81861	2.86682	2050.39	FALSE	57
2022-09-13	14:52:22	0.627646	2.79189	2.77995	2091.63	FALSE	57
2022-09-13	14:52:22	0.617621	2.7473	2.77995	2053.14	FALSE	57
2022-09-13	14:52:22	0.593855	2.64159	2.77995	2094.27	FALSE	57
2022-09-13	14:52:22	0.660725	2.93904	2.77995	2056.08	FALSE	57
2022-09-13	14:52:23	0.630852	2.80616	3.12896	2097.07	FALSE	57
2022-09-13	14:52:23	0.677672	3.01442	3.12896	2059.09	FALSE	57
2022-09-13	14:52:23	0.687545	3.05834	3.12896	2100.13	FALSE	57
2022-09-13	14:52:23	0.817621	3.63694	3.12896	2062.73	FALSE	57
2022-09-13	14:52:24	0.805407	3.58261	3.29467	2103.71	FALSE	57
2022-09-13	14:52:24	0.692226	3.07916	3.29467	2065.81	FALSE	57
2022-09-13	14:52:24	0.724389	3.22223	3.29467	2106.94	FALSE	57
2022-09-13	14:52:25	0.687646	3.05879	3.19535	2068.87	FALSE	57
2022-09-13	14:52:25	0.702964	3.12692	3.19535	2110.06	FALSE	57
2022-09-13	14:52:25	0.80103	3.56314	3.19535	2072.43	FALSE	57
2022-09-13	14:52:25	0.681743	3.03253	3.19535	2113.1	FALSE	57
2022-09-13	14:52:26	0.692125	3.07871	3.22376	2075.51	FALSE	57
2022-09-13	14:52:26	0.952583	4.23728	3.22376	2117.33	FALSE	57
2022-09-13	14:52:26	0.677112	3.01193	3.22376	2078.52	FALSE	57
2022-09-13	14:52:26	0.577112	2.56711	3.22376	2119.9	FALSE	57
2022-09-13	14:52:27	0.538842	2.39688	2.90825	2080.92	FALSE	57
2022-09-13	14:52:27	0.527036	2.34436	2.90825	2122.25	FALSE	57
2022-09-13	14:52:27	1.02576	4.56279	2.90825	2085.48	FALSE	57
2022-09-13	14:52:27	0.523575	2.32897	2.90825	2124.57	FALSE	57
2022-09-13	14:52:28	0.494008	2.19745	2.2025	2087.68	FALSE	57
2022-09-13	14:52:28	0.515534	2.2932	2.2025	2126.87	FALSE	57
2022-09-13	14:52:28	0.475891	2.11686	2.2025	2089.8	FALSE	57
2022-09-13	14:52:29	0.480776	2.13859	2.16689	2129.01	FALSE	57
2022-09-13	14:52:29	0.492277	2.18975	2.16689	2091.99	FALSE	57
2022-09-13	14:52:29	0.490751	2.18296	2.16689	2131.19	FALSE	57
2022-09-13	14:52:29	0.484746	2.15625	2.16689	2094.14	FALSE	57
2022-09-13	14:52:30	0.492837	2.19224	2.16462	2133.38	FALSE	57
2022-09-13	14:52:30	0.48673	2.16507	2.16462	2096.31	FALSE	57
2022-09-13	14:52:30	0.484389	2.15466	2.16462	2135.54	FALSE	57
2022-09-13	14:52:30	0.482557	2.14651	2.16462	2098.45	FALSE	57
2022-09-13	14:52:31	0.488715	2.1739	2.14561	2137.71	FALSE	57
2022-09-13	14:52:31	0.482863	2.14787	2.14561	2100.6	FALSE	57
2022-09-13	14:52:31	0.492125	2.18907	2.14561	2139.9	FALSE	57
2022-09-13	14:52:31	0.465713	2.07158	2.14561	2102.67	FALSE	57
2022-09-13	14:52:32	0.477367	2.12342	2.15602	2142.02	FALSE	57
2022-09-13	14:52:32	0.48271	2.14719	2.15602	2104.82	FALSE	57
2022-09-13	14:52:32	0.494008	2.19745	2.15602	2144.22	FALSE	57
2022-09-13	14:52:33	0.463372	2.06117	2.158	2106.88	FALSE	57
2022-09-13	14:52:33	0.499148	2.22031	2.158	2146.44	FALSE	57
2022-09-13	14:52:33	0.488003	2.17073	2.158	2109.05	FALSE	57
2022-09-13	14:52:33	0.490038	2.17979	2.158	2148.62	FALSE	57
2022-09-13	14:52:34	0.503626	2.24023	2.20509	2111.29	FALSE	57
2022-09-13	14:52:34	0.492583	2.19111	2.20509	2150.81	FALSE	57
2022-09-13	14:52:34	0.496705	2.20944	2.20509	2113.5	FALSE	57
2022-09-13	14:52:34	0.489987	2.17956	2.20509	2152.99	FALSE	57

## Sheet: Unnamed_star_2022913144724 (3)
Date	Time	Lbs	Newtons	Total force x time	total steps > 13.345		**GoPro Fitting: 1435
2022-09-13	14:47:34	0.137468	0.611485	0.611485	FALSE	0
2022-09-13	14:47:34	0.163524	0.727387	0.727387	FALSE	0
2022-09-13	14:47:34	0.0941605	0.418845	1.03033	FALSE	0
2022-09-13	14:47:35	0.242252	1.07759	1.80497	FALSE	0
2022-09-13	14:47:35	0.194822	0.866607	1.89694	FALSE	0
2022-09-13	14:47:35	0.232634	1.0348	2.83978	FALSE	0
2022-09-13	14:47:35	0.230802	1.02665	2.92359	FALSE	0
2022-09-13	14:47:36	0.115229	0.512562	3.35234	FALSE	0
2022-09-13	14:47:36	0.160522	0.714034	3.63762	FALSE	0
2022-09-13	14:47:36	0.151819	0.675321	4.02766	FALSE	0
2022-09-13	14:47:36	0.195178	0.868191	4.50582	FALSE	0
2022-09-13	14:47:37	0.280573	1.24804	5.2757	FALSE	0
2022-09-13	14:47:37	0.213092	0.947876	5.45369	FALSE	0
2022-09-13	14:47:37	0.520929	2.3172	7.5929	FALSE	0
2022-09-13	14:47:37	0.475382	2.11459	7.56829	FALSE	0
2022-09-13	14:47:38	0.343931	1.52987	9.12277	FALSE	0
2022-09-13	14:47:38	0.266985	1.1876	8.75589	FALSE	0
2022-09-13	14:47:38	0.195127	0.867964	9.99074	FALSE	0
2022-09-13	14:47:39	0.529783	2.35658	11.1125	FALSE	0
2022-09-13	14:47:39	0.398181	1.77119	11.7619	FALSE	0
2022-09-13	14:47:39	0.300878	1.33837	12.4508	FALSE	0
2022-09-13	14:47:39	0.414517	1.84385	13.6058	FALSE	0
2022-09-13	14:47:40	0.343524	1.52806	13.9789	FALSE	0
2022-09-13	14:47:40	0.16159	0.718785	14.3246	FALSE	0
2022-09-13	14:47:40	-0.215916	-0.960438	13.9789	FALSE	0
2022-09-13	14:47:40	-0.110674	-0.4923	14.3246	FALSE	0
2022-09-13	14:47:41	0.477316	2.1232	16.1021	FALSE	0
2022-09-13	14:47:41	0.645305	2.87045	17.195	FALSE	0
2022-09-13	14:47:41	0.443626	1.97334	18.0754	FALSE	0
2022-09-13	14:47:41	0.312481	1.38998	18.585	FALSE	0
2022-09-13	14:47:42	0.270089	1.20141	19.2768	FALSE	0
2022-09-13	14:47:42	0.214568	0.954441	19.5394	FALSE	0
2022-09-13	14:47:42	0.492277	2.18975	21.4666	FALSE	0
2022-09-13	14:47:43	0.45416	2.02019	21.5596	FALSE	0
2022-09-13	14:47:43	0.465051	2.06864	23.5352	FALSE	0
2022-09-13	14:47:43	0.426679	1.89795	23.4576	FALSE	0
2022-09-13	14:47:43	0.448257	1.99394	25.5292	FALSE	0
2022-09-13	14:47:44	0.468308	2.08313	25.5407	FALSE	0
2022-09-13	14:47:44	0.477061	2.12206	27.6512	FALSE	0
2022-09-13	14:47:44	0.498639	2.21805	27.7588	FALSE	0
2022-09-13	14:47:45	0.488206	2.17164	29.8229	FALSE	0
2022-09-13	14:47:45	0.428155	1.90452	29.6633	FALSE	0
2022-09-13	14:47:45	0.468257	2.0829	31.9058	FALSE	0
2022-09-13	14:47:45	1.35075	6.00841	35.6717	FALSE	0
2022-09-13	14:47:45	0.468054	2.082	33.9878	FALSE	0
2022-09-13	14:47:46	0.135077	0.60085	36.2725	FALSE	0
2022-09-13	14:47:46	-0.018155	-0.0807571	33.9878	FALSE	0
2022-09-13	14:47:46	0.124898	0.555571	36.8281	FALSE	0
2022-09-13	14:47:47	0.0454582	0.202207	34.19	FALSE	0
2022-09-13	14:47:47	-0.0708776	-0.315278	36.8281	FALSE	0
2022-09-13	14:47:47	0.0265778	0.118223	34.3082	FALSE	0
2022-09-13	14:47:47	0.186171	0.828126	37.6562	FALSE	0
2022-09-13	14:47:48	0.46729	2.0786	36.3868	FALSE	0
2022-09-13	14:47:48	0.624542	2.77809	40.4343	FALSE	0
2022-09-13	14:47:48	0.861641	3.83275	40.2195	FALSE	0
2022-09-13	14:47:48	1.20011	5.33833	45.7726	FALSE	0
2022-09-13	14:47:49	0.341489	1.51901	41.7386	FALSE	0
2022-09-13	14:47:49	0.590801	2.628	48.4006	FALSE	0
2022-09-13	14:47:49	0.392837	1.74742	43.486	FALSE	0
2022-09-13	14:47:49	1.19711	5.32498	53.7256	FALSE	0
2022-09-13	14:47:50	1.50022	6.67328	50.1593	FALSE	0
2022-09-13	14:47:50	2.31645	10.304	64.0297	FALSE	0
2022-09-13	14:47:50	1.01782	4.52747	54.6867	FALSE	0
2022-09-13	14:47:50	0.341031	1.51697	65.5466	FALSE	0
2022-09-13	14:47:51	0.260318	1.15795	55.8447	FALSE	0
2022-09-13	14:47:51	0.413855	1.84091	67.3875	FALSE	0
2022-09-13	14:47:51	0.527544	2.34662	58.1913	FALSE	0
2022-09-13	14:47:52	0.557672	2.48064	69.8682	FALSE	0
2022-09-13	14:47:52	0.32098	1.42778	59.6191	FALSE	0
2022-09-13	14:47:52	0.157977	0.702713	70.5709	FALSE	0
2022-09-13	14:47:52	0.439809	1.95636	61.5754	FALSE	0
2022-09-13	14:47:53	0.176349	0.784436	71.3553	FALSE	0
2022-09-13	14:47:53	0.304186	1.35308	62.9285	FALSE	0
2022-09-13	14:47:53	0.352685	1.56881	72.9241	FALSE	0
2022-09-13	14:47:53	0.325407	1.44748	64.376	FALSE	0
2022-09-13	14:47:54	0.269173	1.19734	74.1215	FALSE	0
2022-09-13	14:47:54	0.378435	1.68335	66.0593	FALSE	0
2022-09-13	14:47:54	0.0396058	0.176175	74.2977	FALSE	0
2022-09-13	14:47:54	0.0637788	0.283701	66.343	FALSE	0
2022-09-13	14:47:55	0.241438	1.07396	75.3716	FALSE	0
2022-09-13	14:47:55	0.231158	1.02824	67.3713	FALSE	0
2022-09-13	14:47:55	0.366018	1.62812	76.9997	FALSE	0
2022-09-13	14:47:56	1.12373	4.99858	72.3699	FALSE	0
2022-09-13	14:47:56	1.01406	4.51074	81.5105	FALSE	0
2022-09-13	14:47:56	0.65299	2.90463	75.2745	FALSE	0
2022-09-13	14:47:56	0.475433	2.11482	83.6253	FALSE	0
2022-09-13	14:47:57	0.525712	2.33847	77.613	FALSE	0
2022-09-13	14:47:57	0.422303	1.87849	85.5038	FALSE	0
2022-09-13	14:47:57	0.423372	1.88324	79.4962	FALSE	0
2022-09-13	14:47:57	0.349478	1.55455	87.0583	FALSE	0
2022-09-13	14:47:58	0.389529	1.7327	81.2289	FALSE	0
2022-09-13	14:47:58	0.439555	1.95523	89.0136	FALSE	0
2022-09-13	14:47:58	0.577723	2.56983	83.7987	FALSE	0
2022-09-13	14:47:58	0.513601	2.2846	91.2982	FALSE	0
2022-09-13	14:47:59	0.505967	2.25064	86.0494	FALSE	0
2022-09-13	14:47:59	0.321896	1.43186	92.73	FALSE	0
2022-09-13	14:47:59	0.253601	1.12807	87.1774	FALSE	0
2022-09-13	14:48:00	0.176909	0.786927	93.5169	FALSE	0
2022-09-13	14:48:00	0.222252	0.988621	88.1661	FALSE	0
2022-09-13	14:48:00	0.343626	1.52852	95.0455	FALSE	0
2022-09-13	14:48:00	0.342863	1.52512	89.6912	FALSE	0
2022-09-13	14:48:01	0.333499	1.48347	96.5289	FALSE	0
2022-09-13	14:48:01	0.305458	1.35874	91.0499	FALSE	0
2022-09-13	14:48:01	0.411667	1.83118	98.3601	FALSE	0
2022-09-13	14:48:01	0.393651	1.75104	92.801	FALSE	0
2022-09-13	14:48:02	0.353906	1.57424	99.9344	FALSE	0
2022-09-13	14:48:02	0.365305	1.62495	94.4259	FALSE	0
2022-09-13	14:48:02	0.366476	1.63016	101.565	FALSE	0
2022-09-13	14:48:02	0.400522	1.7816	96.2075	FALSE	0
2022-09-13	14:48:03	0.388715	1.72908	103.294	FALSE	0
2022-09-13	14:48:03	0.403473	1.79473	98.0022	FALSE	0
2022-09-13	14:48:03	0.437417	1.94572	105.239	FALSE	0
2022-09-13	14:48:04	0.495331	2.20333	100.206	FALSE	0
2022-09-13	14:48:04	0.626934	2.78873	108.028	FALSE	0
2022-09-13	14:48:04	0.904847	4.02494	104.231	FALSE	0
2022-09-13	14:48:04	1.22495	5.44882	113.477	FALSE	0
2022-09-13	14:48:05	1.06994	4.75931	108.99	FALSE	0
2022-09-13	14:48:05	1.17553	5.22899	118.706	FALSE	0
2022-09-13	14:48:05	0.9907	4.40683	113.397	FALSE	0
2022-09-13	14:48:05	1.06541	4.73916	123.445	FALSE	0
2022-09-13	14:48:06	1.06332	4.72986	118.127	FALSE	0
2022-09-13	14:48:06	1.04841	4.66354	128.109	FALSE	0
2022-09-13	14:48:06	1.00159	4.45527	122.582	FALSE	0
2022-09-13	14:48:06	1.02072	4.54037	132.649	FALSE	0
2022-09-13	14:48:07	0.897774	3.99348	126.575	FALSE	0
2022-09-13	14:48:07	0.876094	3.89704	136.546	FALSE	0
2022-09-13	14:48:07	0.793906	3.53145	130.107	FALSE	0
2022-09-13	14:48:08	0.802303	3.5688	140.115	FALSE	0
2022-09-13	14:48:08	0.881947	3.92308	134.03	FALSE	0
2022-09-13	14:48:08	0.784389	3.48912	143.604	FALSE	0
2022-09-13	14:48:08	0.772583	3.4366	137.466	FALSE	0
2022-09-13	14:48:09	0.826476	3.67633	147.28	FALSE	0
2022-09-13	14:48:09	0.809122	3.59914	141.066	FALSE	0
2022-09-13	14:48:09	0.866476	3.85426	151.134	FALSE	0
2022-09-13	14:48:09	0.850954	3.78521	144.851	FALSE	0
2022-09-13	14:48:10	0.797519	3.54752	154.682	FALSE	0
2022-09-13	14:48:10	0.817366	3.63581	148.487	FALSE	0
2022-09-13	14:48:10	0.845661	3.76167	158.444	FALSE	0
2022-09-13	14:48:10	0.872633	3.88165	152.368	FALSE	0
2022-09-13	14:48:11	0.855941	3.8074	162.251	FALSE	0
2022-09-13	14:48:11	0.784593	3.49003	155.858	FALSE	0
2022-09-13	14:48:11	0.843779	3.7533	166.004	FALSE	0
2022-09-13	14:48:12	0.869122	3.86603	159.724	FALSE	0
2022-09-13	14:48:12	0.812277	3.61317	169.618	FALSE	0
2022-09-13	14:48:12	0.789783	3.51311	163.237	FALSE	0
2022-09-13	14:48:12	0.834517	3.7121	173.33	FALSE	0
2022-09-13	14:48:13	0.830191	3.69286	166.93	FALSE	0
2022-09-13	14:48:13	0.78215	3.47916	176.809	FALSE	0
2022-09-13	14:48:13	0.847901	3.77163	170.702	FALSE	0
2022-09-13	14:48:14	0.875636	3.895	180.704	FALSE	0
2022-09-13	14:48:14	0.827392	3.68041	174.382	FALSE	0
2022-09-13	14:48:14	0.840878	3.74039	184.444	FALSE	0
2022-09-13	14:48:14	0.770649	3.428	177.81	FALSE	0
2022-09-13	14:48:14	0.812277	3.61317	188.057	FALSE	0
2022-09-13	14:48:15	0.821794	3.6555	181.466	FALSE	0
2022-09-13	14:48:15	0.80668	3.58827	191.646	FALSE	0
2022-09-13	14:48:15	0.739707	3.29036	184.756	FALSE	0
2022-09-13	14:48:16	0.743015	3.30508	194.951	FALSE	0
2022-09-13	14:48:16	0.716196	3.18578	187.942	FALSE	0
2022-09-13	14:48:16	0.726476	3.23151	198.182	FALSE	0
2022-09-13	14:48:16	0.677773	3.01487	190.957	FALSE	0
2022-09-13	14:48:17	0.634364	2.82178	201.004	FALSE	0
2022-09-13	14:48:17	0.670293	2.9816	193.938	FALSE	0
2022-09-13	14:48:17	0.656349	2.91957	203.924	FALSE	0
2022-09-13	14:48:17	0.644898	2.86864	196.807	FALSE	0
2022-09-13	14:48:18	0.658384	2.92862	206.852	FALSE	0
2022-09-13	14:48:18	0.643677	2.8632	199.67	FALSE	0
2022-09-13	14:48:18	0.998384	4.44101	211.293	FALSE	0
2022-09-13	14:48:18	1.23014	5.47191	205.142	FALSE	0
2022-09-13	14:48:19	1.55319	6.9089	218.202	FALSE	0
2022-09-13	14:48:19	2.16189	9.61652	214.759	FALSE	0
2022-09-13	14:48:19	2.3138	10.2922	228.494	FALSE	0
2022-09-13	14:48:20	1.3763	6.12206	220.881	FALSE	0
2022-09-13	14:48:20	1.19523	5.31662	233.811	FALSE	0
2022-09-13	14:48:20	1.28159	5.70077	226.581	FALSE	0
2022-09-13	14:48:20	1.74892	7.77955	241.591	FALSE	0
2022-09-13	14:48:21	1.82011	8.09621	234.678	FALSE	0
2022-09-13	14:48:21	2.32164	10.3271	251.918	FALSE	0
2022-09-13	14:48:21	4.20739	18.7153	253.393	1	1
2022-09-13	14:48:21	5.42719	24.1412	276.059	1	2
2022-09-13	14:48:22	4.03304	17.9398	271.333	1	3
2022-09-13	14:48:22	1.09864	4.88697	280.946	FALSE	3
2022-09-13	14:48:22	0.61243	2.72421	274.057	FALSE	3
2022-09-13	14:48:22	1.06469	4.73595	285.682	FALSE	3
2022-09-13	14:48:23	1.07701	4.79076	278.848	FALSE	3
2022-09-13	14:48:23	0.755331	3.35986	289.042	FALSE	3
2022-09-13	14:48:23	0.994568	4.42404	283.272	FALSE	3
2022-09-13	14:48:24	0.907392	4.03626	293.078	FALSE	3
2022-09-13	14:48:24	0.907086	4.0349	287.307	FALSE	3
2022-09-13	14:48:24	0.970903	4.31877	297.397	FALSE	3
2022-09-13	14:48:24	0.964898	4.29206	291.599	FALSE	3
2022-09-13	14:48:25	1.05935	4.7122	302.109	FALSE	3
2022-09-13	14:48:25	1.2308	5.47484	297.074	FALSE	3
2022-09-13	14:48:25	1.44495	6.42743	308.536	FALSE	3
2022-09-13	14:48:25	1.22816	5.4631	302.537	FALSE	3
2022-09-13	14:48:26	0.907443	4.03649	312.573	FALSE	3
2022-09-13	14:48:26	1.03294	4.59472	307.131	FALSE	3
2022-09-13	14:48:26	0.886578	3.94368	316.516	FALSE	3
2022-09-13	14:48:26	0.928918	4.13201	311.263	FALSE	3
2022-09-13	14:48:27	0.839249	3.73315	320.25	FALSE	3
2022-09-13	14:48:27	0.745458	3.31595	314.579	FALSE	3
2022-09-13	14:48:27	0.693295	3.08391	323.334	FALSE	3
2022-09-13	14:48:28	0.690293	3.07056	317.65	FALSE	3
2022-09-13	14:48:28	0.633448	2.8177	326.151	FALSE	3
2022-09-13	14:48:28	0.628868	2.79733	320.447	FALSE	3
2022-09-13	14:48:28	0.597621	2.65834	328.81	FALSE	3
2022-09-13	14:48:29	0.651056	2.89603	323.343	FALSE	3
2022-09-13	14:48:29	0.672023	2.98929	331.799	FALSE	3
2022-09-13	14:48:29	0.617061	2.74481	326.088	FALSE	3
2022-09-13	14:48:29	0.579758	2.57888	334.378	FALSE	3
2022-09-13	14:48:30	0.58841	2.61737	328.705	FALSE	3
2022-09-13	14:48:30	0.609529	2.71131	337.089	FALSE	3
2022-09-13	14:48:30	0.608257	2.70565	331.411	FALSE	3
2022-09-13	14:48:30	0.610802	2.71697	339.806	FALSE	3
2022-09-13	14:48:31	0.628155	2.79416	334.205	FALSE	3
2022-09-13	14:48:31	0.604797	2.69026	342.496	FALSE	3
2022-09-13	14:48:31	0.614465	2.73326	336.939	FALSE	3
2022-09-13	14:48:32	0.656349	2.91957	345.416	FALSE	3
2022-09-13	14:48:32	0.623219	2.7722	339.711	FALSE	3
2022-09-13	14:48:32	0.576705	2.5653	347.981	FALSE	3
2022-09-13	14:48:32	0.591311	2.63027	342.341	FALSE	3
2022-09-13	14:48:33	0.651361	2.89738	350.879	FALSE	3
2022-09-13	14:48:33	0.723372	3.2177	345.559	FALSE	3
2022-09-13	14:48:33	0.665	2.95805	353.837	FALSE	3
2022-09-13	14:48:33	0.62388	2.77514	348.334	FALSE	3
2022-09-13	14:48:34	0.639707	2.84554	356.682	FALSE	3
2022-09-13	14:48:34	0.640013	2.84691	351.181	FALSE	3
2022-09-13	14:48:34	0.687494	3.05811	359.74	FALSE	3
2022-09-13	14:48:34	0.755331	3.35986	354.541	FALSE	3
2022-09-13	14:48:35	0.775076	3.44769	363.188	FALSE	3
2022-09-13	14:48:35	0.742812	3.30418	357.845	FALSE	3
2022-09-13	14:48:35	0.722456	3.21363	366.402	FALSE	3
2022-09-13	14:48:36	0.71645	3.18691	361.032	FALSE	3
2022-09-13	14:48:36	0.713702	3.17469	369.576	FALSE	3
2022-09-13	14:48:36	0.689173	3.06558	364.097	FALSE	3
2022-09-13	14:48:36	0.694008	3.08709	372.663	FALSE	3
2022-09-13	14:48:37	0.689173	3.06558	367.163	FALSE	3
2022-09-13	14:48:37	0.717265	3.19054	375.854	FALSE	3
2022-09-13	14:48:37	0.759911	3.38024	370.543	FALSE	3
2022-09-13	14:48:37	0.705764	3.13938	378.993	FALSE	3
2022-09-13	14:48:38	0.697672	3.10338	373.646	FALSE	3
2022-09-13	14:48:38	0.678232	3.01691	382.01	FALSE	3
2022-09-13	14:48:38	0.687494	3.05811	376.705	FALSE	3
2022-09-13	14:48:38	0.665865	2.9619	384.972	FALSE	3
2022-09-13	14:48:39	0.67696	3.01125	379.716	FALSE	3
2022-09-13	14:48:39	0.660725	2.93904	387.911	FALSE	3
2022-09-13	14:48:39	0.642354	2.85732	382.573	FALSE	3
2022-09-13	14:48:40	0.663779	2.95262	390.864	FALSE	3
2022-09-13	14:48:40	0.726832	3.23309	385.806	FALSE	3
2022-09-13	14:48:40	0.741234	3.29716	394.161	FALSE	3
2022-09-13	14:48:40	0.717774	3.1928	388.999	FALSE	3
2022-09-13	14:48:41	0.846578	3.76575	397.927	FALSE	3
2022-09-13	14:48:41	1.55279	6.90712	395.906	FALSE	3
2022-09-13	14:48:41	2.26256	10.0643	407.991	FALSE	3
2022-09-13	14:48:41	5.22734	23.2523	419.158	1	4
2022-09-13	14:48:42	5.20413	23.149	431.14	1	5
2022-09-13	14:48:42	7.70184	34.2593	453.418	1	6
2022-09-13	14:48:42	7.66876	34.1122	465.252	1	7
2022-09-13	14:48:42	12.3724	55.0349	508.453	1	8
2022-09-13	14:48:43	12.8395	57.1127	522.365	1	9
2022-09-13	14:48:43	7.66103	34.0778	542.53	1	10
2022-09-13	14:48:43	2.52317	11.2236	533.588	FALSE	10
2022-09-13	14:48:44	2.80388	12.4722	555.003	FALSE	10
2022-09-13	14:48:44	2.49701	11.1072	544.696	FALSE	10
2022-09-13	14:48:44	2.37711	10.5739	565.577	FALSE	10
2022-09-13	14:48:44	2.31569	10.3007	554.996	FALSE	10
2022-09-13	14:48:45	2.63187	11.7071	577.284	FALSE	10
2022-09-13	14:48:45	3.96673	17.6448	572.641	1	11
2022-09-13	14:48:45	3.7737	16.7862	594.07	1	12
2022-09-13	14:48:45	2.86902	12.762	585.403	FALSE	12
2022-09-13	14:48:46	2.35625	10.4811	604.551	FALSE	12
2022-09-13	14:48:46	2.4481	10.8896	596.293	FALSE	12
2022-09-13	14:48:46	2.30017	10.2316	614.782	FALSE	12
2022-09-13	14:48:46	2.66011	11.8327	608.125	FALSE	12
2022-09-13	14:48:47	1.80714	8.03852	622.821	FALSE	12
2022-09-13	14:48:47	2.45772	10.9324	619.058	FALSE	12
2022-09-13	14:48:47	2.81894	12.5392	635.36	FALSE	12
2022-09-13	14:48:48	6.17635	27.4736	646.531	1	13
2022-09-13	14:48:48	9.68489	43.0803	678.441	1	14
2022-09-13	14:48:48	6.98617	31.0759	677.607	1	15
2022-09-13	14:48:48	2.33752	10.3978	688.838	FALSE	15
2022-09-13	14:48:49	1.36485	6.07113	683.678	FALSE	15
2022-09-13	14:48:49	0.503677	2.24046	691.079	FALSE	15
2022-09-13	14:48:49	0.798232	3.5507	687.229	FALSE	15
2022-09-13	14:48:49	0.567392	2.52387	693.603	FALSE	15
2022-09-13	14:48:50	0.493753	2.19631	689.425	FALSE	15
2022-09-13	14:48:50	0.531616	2.36473	695.967	FALSE	15
2022-09-13	14:48:50	0.610496	2.71561	692.141	FALSE	15
2022-09-13	14:48:50	0.741997	3.30055	699.268	FALSE	15
2022-09-13	14:48:51	0.858435	3.81849	695.96	FALSE	15
2022-09-13	14:48:51	0.824898	3.66931	702.937	FALSE	15
2022-09-13	14:48:51	0.671107	2.98522	698.945	FALSE	15
2022-09-13	14:48:52	0.589427	2.62189	705.559	FALSE	15
2022-09-13	14:48:52	0.60042	2.67079	701.616	FALSE	15
2022-09-13	14:48:52	0.585865	2.60604	708.165	FALSE	15
2022-09-13	14:48:52	0.565662	2.51618	704.132	FALSE	15
2022-09-13	14:48:53	0.580725	2.58318	710.748	FALSE	15
2022-09-13	14:48:53	0.656145	2.91866	707.05	FALSE	15
2022-09-13	14:48:53	0.567595	2.52478	713.273	FALSE	15
2022-09-13	14:48:53	0.531056	2.36224	709.413	FALSE	15
2022-09-13	14:48:54	0.514669	2.28935	715.562	FALSE	15
2022-09-13	14:48:54	0.509987	2.26852	711.681	FALSE	15
2022-09-13	14:48:54	0.445	1.97945	717.542	FALSE	15
2022-09-13	14:48:54	0.341183	1.51765	713.199	FALSE	15
2022-09-13	14:48:55	0.182761	0.812957	718.355	FALSE	15
2022-09-13	14:48:55	-0.0151524	-0.0674009	713.199	FALSE	15
2022-09-13	14:48:55	0.0489697	0.217827	718.573	FALSE	15
2022-09-13	14:48:56	-0.119427	-0.531235	713.199	FALSE	15
2022-09-13	14:48:56	-0.376323	-1.67396	718.573	FALSE	15
2022-09-13	14:48:56	-0.438104	-1.94877	713.199	FALSE	15
2022-09-13	14:48:56	-0.619987	-2.75783	718.573	FALSE	15
2022-09-13	14:48:57	-0.830114	-3.69251	713.199	FALSE	15
2022-09-13	14:48:57	-0.743956	-3.30927	718.573	FALSE	15
2022-09-13	14:48:57	-0.884058	-3.93247	713.199	FALSE	15
2022-09-13	14:48:57	-0.835916	-3.71832	718.573	FALSE	15
2022-09-13	14:48:58	-0.907875	-4.03841	713.199	FALSE	15
2022-09-13	14:48:58	-0.937646	-4.17084	718.573	FALSE	15
2022-09-13	14:48:58	-0.843549	-3.75227	713.199	FALSE	15
2022-09-13	14:48:58	-0.702989	-3.12704	718.573	FALSE	15
2022-09-13	14:48:59	-0.697798	-3.10395	713.199	FALSE	15
2022-09-13	14:48:59	-0.136679	-0.607976	718.573	FALSE	15
2022-09-13	14:48:59	1.72256	7.66229	720.861	FALSE	15
2022-09-13	14:49:00	2.61238	11.6204	730.193	FALSE	15
2022-09-13	14:49:00	1.55477	6.91593	727.777	FALSE	15
2022-09-13	14:49:00	0.23813	1.05925	731.252	FALSE	15
2022-09-13	14:49:00	0.158028	0.70294	728.48	FALSE	15
2022-09-13	14:49:01	0.168613	0.750024	732.002	FALSE	15
2022-09-13	14:49:01	0.12042	0.535652	729.016	FALSE	15
2022-09-13	14:49:01	0.129326	0.575268	732.578	FALSE	15
2022-09-13	14:49:01	0.239708	1.06627	730.082	FALSE	15
2022-09-13	14:49:02	-0.118155	-0.525577	732.578	FALSE	15
2022-09-13	14:49:02	-0.0486893	-0.21658	730.082	FALSE	15
2022-09-13	14:49:02	-0.176272	-0.784093	732.578	FALSE	15
2022-09-13	14:49:02	-0.150725	-0.670455	730.082	FALSE	15
2022-09-13	14:49:03	-0.333117	-1.48177	732.578	FALSE	15
2022-09-13	14:49:03	-0.454083	-2.01985	730.082	FALSE	15
2022-09-13	14:49:03	-0.465229	-2.06943	732.578	FALSE	15
2022-09-13	14:49:04	-0.603244	-2.68335	730.082	FALSE	15
2022-09-13	14:49:04	-0.81103	-3.60762	732.578	FALSE	15
2022-09-13	14:49:04	-0.290267	-1.29117	730.082	FALSE	15
2022-09-13	14:49:04	-0.230216	-1.02405	732.578	FALSE	15
2022-09-13	14:49:05	0.0178246	0.0792874	730.161	FALSE	15
2022-09-13	14:49:05	0.228155	1.01488	733.593	FALSE	15
2022-09-13	14:49:05	0.0822012	0.365647	730.527	FALSE	15
2022-09-13	14:49:05	0.23925	1.06423	734.657	FALSE	15
2022-09-13	14:49:06	0.322048	1.43253	731.959	FALSE	15
2022-09-13	14:49:06	0.319148	1.41963	736.076	FALSE	15
2022-09-13	14:49:06	0.348104	1.54844	733.508	FALSE	15
2022-09-13	14:49:06	0.556247	2.4743	738.551	FALSE	15
2022-09-13	14:49:07	0.509886	2.26807	735.776	FALSE	15
2022-09-13	14:49:07	0.38159	1.69739	740.248	FALSE	15
2022-09-13	14:49:07	0.594262	2.6434	738.419	FALSE	15
2022-09-13	14:49:08	0.597112	2.65607	742.904	FALSE	15
2022-09-13	14:49:08	0.459758	2.0451	740.464	FALSE	15
2022-09-13	14:49:08	0.292125	1.29943	744.204	FALSE	15
2022-09-13	14:49:08	0.281489	1.25212	741.716	FALSE	15
2022-09-13	14:49:09	0.492277	2.18975	746.393	FALSE	15
2022-09-13	14:49:09	0.472125	2.10011	743.817	FALSE	15
2022-09-13	14:49:09	0.663779	2.95262	749.346	FALSE	15
2022-09-13	14:49:09	0.74159	3.29874	747.115	FALSE	15
2022-09-13	14:49:10	2.13905	9.51492	758.861	FALSE	15
2022-09-13	14:49:10	4.64098	20.644	767.759	1	16
2022-09-13	14:49:10	4.91787	21.8757	780.737	1	17
2022-09-13	14:49:10	0.600776	2.67237	770.432	FALSE	17
2022-09-13	14:49:11	0.341794	1.52037	782.257	FALSE	17
2022-09-13	14:49:11	0.17243	0.767003	771.199	FALSE	17
2022-09-13	14:49:11	1.13447	5.04635	787.303	FALSE	17
2022-09-13	14:49:12	2.12184	9.43837	780.637	FALSE	17
2022-09-13	14:49:12	0.523982	2.33078	789.634	FALSE	17
2022-09-13	14:49:12	0.163117	0.725577	781.363	FALSE	17
2022-09-13	14:49:12	-0.259376	-1.15376	789.634	FALSE	17
2022-09-13	14:49:13	-0.478562	-2.12874	781.363	FALSE	17
2022-09-13	14:49:13	-0.735915	-3.2735	789.634	FALSE	17
2022-09-13	14:49:13	-0.804668	-3.57932	781.363	FALSE	17
2022-09-13	14:49:13	-0.994898	-4.42551	789.634	FALSE	17
2022-09-13	14:49:14	-1.15581	-5.14127	781.363	FALSE	17
2022-09-13	14:49:14	-0.923091	-4.10609	789.634	FALSE	17
2022-09-13	14:49:14	-0.944363	-4.20072	781.363	FALSE	17
2022-09-13	14:49:14	-0.760088	-3.38102	789.634	FALSE	17
2022-09-13	14:49:15	-0.65963	-2.93417	781.363	FALSE	17
2022-09-13	14:49:15	-0.501513	-2.23083	789.634	FALSE	17
2022-09-13	14:49:15	-0.491895	-2.18805	781.363	FALSE	17
2022-09-13	14:49:16	-0.425279	-1.89173	789.634	FALSE	17
2022-09-13	14:49:16	-0.244007	-1.08539	781.363	FALSE	17
2022-09-13	14:49:16	0.630089	2.80276	792.437	FALSE	17
2022-09-13	14:49:16	2.91838	12.9815	794.344	FALSE	17
2022-09-13	14:49:17	3.61248	16.069	808.506	1	18
2022-09-13	14:49:17	0.589377	2.62167	796.966	FALSE	18
2022-09-13	14:49:17	0.0325829	0.144935	808.651	FALSE	18
2022-09-13	14:49:17	0.000572752	0.00254772	796.968	FALSE	18
2022-09-13	14:49:18	-0.0760175	-0.338141	808.651	FALSE	18
2022-09-13	14:49:18	-0.167875	-0.746742	796.968	FALSE	18
2022-09-13	14:49:18	-0.130572	-0.58081	808.651	FALSE	18
2022-09-13	14:49:18	-0.0412593	-0.18353	796.968	FALSE	18
2022-09-13	14:49:19	-0.023244	-0.103394	808.651	FALSE	18
2022-09-13	14:49:19	0.0659671	0.293435	797.262	FALSE	18
2022-09-13	14:49:19	1.14912	5.11152	813.762	FALSE	18
2022-09-13	14:49:20	2.20347	9.80148	807.063	FALSE	18
2022-09-13	14:49:20	2.3736	10.5582	824.321	FALSE	18
2022-09-13	14:49:20	0.42897	1.90814	808.971	FALSE	18
2022-09-13	14:49:20	1.13899	5.06646	829.387	FALSE	18
2022-09-13	14:49:21	0.481794	2.14312	811.115	FALSE	18
2022-09-13	14:49:21	0.671616	2.98748	832.374	FALSE	18
2022-09-13	14:49:21	0.73243	3.258	814.373	FALSE	18
2022-09-13	14:49:21	0.344288	1.53146	833.906	FALSE	18
2022-09-13	14:49:22	0.179097	0.796659	815.169	FALSE	18
2022-09-13	14:49:22	0.334873	1.48958	835.395	FALSE	18
2022-09-13	14:49:22	0.986221	4.38691	819.556	FALSE	18
2022-09-13	14:49:22	1.16393	5.17739	840.573	FALSE	18
2022-09-13	14:49:23	0.451921	2.01023	821.566	FALSE	18
2022-09-13	14:49:23	0.185865	0.826765	841.4	FALSE	18
2022-09-13	14:49:23	0.0851528	0.378777	821.945	FALSE	18
2022-09-13	14:49:24	0.126781	0.563947	841.964	FALSE	18
2022-09-13	14:49:24	0.0794531	0.353423	822.299	FALSE	18
2022-09-13	14:49:24	1.06826	4.75183	846.715	FALSE	18
2022-09-13	14:49:24	4.60541	20.4858	842.784	1	19
2022-09-13	14:49:25	4.5563	20.2673	866.983	1	20
2022-09-13	14:49:25	4.36301	19.4075	862.192	1	21
2022-09-13	14:49:25	2.62373	11.6709	878.654	FALSE	21
2022-09-13	14:49:25	1.15772	5.14977	867.342	FALSE	21
2022-09-13	14:49:26	0.701285	3.11946	881.773	FALSE	21
2022-09-13	14:49:26	0.575484	2.55987	869.902	FALSE	21
2022-09-13	14:49:26	0.367799	1.63604	883.409	FALSE	21
2022-09-13	14:49:26	0.333193	1.48211	871.384	FALSE	21
2022-09-13	14:49:27	0.332481	1.47894	884.888	FALSE	21
2022-09-13	14:49:27	0.328461	1.46106	872.845	FALSE	21
2022-09-13	14:49:27	0.33757	1.50158	886.39	FALSE	21
2022-09-13	14:49:28	0.278842	1.24034	874.085	FALSE	21
2022-09-13	14:49:28	0.298486	1.32773	887.717	FALSE	21
2022-09-13	14:49:28	0.349631	1.55523	875.64	FALSE	21
2022-09-13	14:49:28	0.338435	1.50543	889.223	FALSE	21
2022-09-13	14:49:29	0.310954	1.38319	877.023	FALSE	21
2022-09-13	14:49:29	0.31813	1.41511	890.638	FALSE	21
2022-09-13	14:49:29	0.335382	1.49185	878.515	FALSE	21
2022-09-13	14:49:29	0.362913	1.61431	892.252	FALSE	21
2022-09-13	14:49:30	0.368461	1.63899	880.154	FALSE	21
2022-09-13	14:49:30	0.410242	1.82484	894.077	FALSE	21
2022-09-13	14:49:30	0.49528	2.2031	882.357	FALSE	21
2022-09-13	14:49:30	0.542761	2.41431	896.491	FALSE	21
2022-09-13	14:49:31	0.374364	1.66525	884.023	FALSE	21
2022-09-13	14:49:31	0.325814	1.44929	897.941	FALSE	21
2022-09-13	14:49:31	0.306781	1.36462	885.387	FALSE	21
2022-09-13	14:49:32	0.301031	1.33905	899.28	FALSE	21
2022-09-13	14:49:32	0.304033	1.3524	886.74	FALSE	21
2022-09-13	14:49:32	0.301285	1.34018	900.62	FALSE	21
2022-09-13	14:49:32	0.28902	1.28562	888.025	FALSE	21
2022-09-13	14:49:33	0.286832	1.27589	901.896	FALSE	21
2022-09-13	14:49:33	0.302048	1.34357	889.369	FALSE	21
2022-09-13	14:49:33	0.305051	1.35693	903.253	FALSE	21
2022-09-13	14:49:33	0.296603	1.31935	890.688	FALSE	21
2022-09-13	14:49:34	0.307494	1.36779	904.621	FALSE	21
2022-09-13	14:49:34	0.347239	1.54459	892.233	FALSE	21
2022-09-13	14:49:34	0.413295	1.83842	906.459	FALSE	21
2022-09-13	14:49:34	0.364644	1.62201	893.855	FALSE	21
2022-09-13	14:49:35	0.329631	1.46626	907.925	FALSE	21
2022-09-13	14:49:35	0.327901	1.45857	895.313	FALSE	21
2022-09-13	14:49:35	0.341183	1.51765	909.443	FALSE	21
2022-09-13	14:49:36	0.343015	1.5258	896.839	FALSE	21
2022-09-13	14:49:36	0.35299	1.57017	911.013	FALSE	21
2022-09-13	14:49:36	0.352328	1.56723	898.406	FALSE	21
2022-09-13	14:49:36	0.35472	1.57787	912.591	FALSE	21
2022-09-13	14:49:37	0.34958	1.555	899.961	FALSE	21
2022-09-13	14:49:37	0.336959	1.49886	914.09	FALSE	21
2022-09-13	14:49:37	0.3564	1.58534	901.547	FALSE	21
2022-09-13	14:49:37	0.371158	1.65099	915.741	FALSE	21
2022-09-13	14:49:38	0.36042	1.60322	903.15	FALSE	21
2022-09-13	14:49:38	0.358639	1.5953	917.336	FALSE	21
2022-09-13	14:49:38	0.360064	1.60164	904.752	FALSE	21
2022-09-13	14:49:38	0.365102	1.62405	918.96	FALSE	21
2022-09-13	14:49:39	0.373346	1.66072	906.412	FALSE	21
2022-09-13	14:49:39	0.367239	1.63355	920.594	FALSE	21
2022-09-13	14:49:39	0.381438	1.69671	908.109	FALSE	21
2022-09-13	14:49:40	0.380318	1.69173	922.285	FALSE	21
2022-09-13	14:49:40	0.363015	1.61476	909.724	FALSE	21
2022-09-13	14:49:40	0.366171	1.6288	923.914	FALSE	21
2022-09-13	14:49:40	0.392837	1.74742	911.471	FALSE	21
2022-09-13	14:49:41	0.403982	1.79699	925.711	FALSE	21
2022-09-13	14:49:41	0.368613	1.63966	913.111	FALSE	21
2022-09-13	14:49:41	0.381336	1.69626	927.407	FALSE	21
2022-09-13	14:49:41	0.404288	1.79835	914.909	FALSE	21
2022-09-13	14:49:42	0.414008	1.84159	929.249	FALSE	21
2022-09-13	14:49:42	0.458181	2.03808	916.947	FALSE	21
2022-09-13	14:49:42	0.465407	2.07022	931.319	FALSE	21
2022-09-13	14:49:42	0.514924	2.29048	919.238	FALSE	21
2022-09-13	14:49:43	0.616501	2.74232	934.062	FALSE	21
2022-09-13	14:49:43	0.478944	2.13044	921.368	FALSE	21
2022-09-13	14:49:43	0.734059	3.26524	937.327	FALSE	21
2022-09-13	14:49:44	0.731819	3.25528	924.624	FALSE	21
2022-09-13	14:49:44	0.731616	3.25437	940.581	FALSE	21
2022-09-13	14:49:44	0.731209	3.25256	927.876	FALSE	21
2022-09-13	14:49:44	0.729428	3.24464	943.826	FALSE	21
2022-09-13	14:49:45	0.734313	3.26637	931.142	FALSE	21
2022-09-13	14:49:45	0.731412	3.25347	947.079	FALSE	21
2022-09-13	14:49:45	0.730191	3.24804	934.39	FALSE	21
2022-09-13	14:49:45	0.735026	3.26954	950.349	FALSE	21
2022-09-13	14:49:46	0.728868	3.24215	937.633	FALSE	21
2022-09-13	14:49:46	0.731514	3.25392	953.603	FALSE	21
2022-09-13	14:49:46	0.731717	3.25482	940.887	FALSE	21
2022-09-13	14:49:46	0.730649	3.25007	956.853	FALSE	21
2022-09-13	14:49:47	0.730038	3.24736	944.135	FALSE	21
2022-09-13	14:49:47	0.950547	4.22822	961.081	FALSE	21
2022-09-13	14:49:47	0.574059	2.55353	946.688	FALSE	21
2022-09-13	14:49:48	0.679402	3.02212	964.103	FALSE	21
2022-09-13	14:49:48	0.42841	1.90565	948.594	FALSE	21
2022-09-13	14:49:48	0.357163	1.58873	965.692	FALSE	21
2022-09-13	14:49:48	0.363473	1.6168	950.211	FALSE	21
2022-09-13	14:49:49	0.336196	1.49547	967.187	FALSE	21
2022-09-13	14:49:49	0.323321	1.4382	951.649	FALSE	21
2022-09-13	14:49:49	0.341896	1.52082	968.708	FALSE	21
2022-09-13	14:49:49	0.331921	1.47645	953.125	FALSE	21
2022-09-13	14:49:50	0.348155	1.54866	970.257	FALSE	21
2022-09-13	14:49:50	0.498333	2.21668	955.342	FALSE	21
2022-09-13	14:49:50	1.15996	5.15973	975.417	FALSE	21
2022-09-13	14:49:50	1.48103	6.58792	961.93	FALSE	21
2022-09-13	14:49:51	3.42291	15.2258	990.642	1	22
2022-09-13	14:49:51	6.0507	26.9147	988.845	1	23
2022-09-13	14:49:51	4.70373	20.9231	1011.57	1	24
2022-09-13	14:49:52	4.64602	20.6664	1009.51	1	25
2022-09-13	14:49:52	4.81742	21.4288	1032.99	1	26
2022-09-13	14:49:52	2.58988	11.5203	1021.03	FALSE	26
2022-09-13	14:49:52	1.68856	7.51105	1040.51	FALSE	26
2022-09-13	14:49:53	1.48454	6.60353	1027.64	FALSE	26
2022-09-13	14:49:53	1.6394	7.29238	1047.8	FALSE	26
2022-09-13	14:49:53	0.904847	4.02494	1031.66	FALSE	26
2022-09-13	14:49:53	0.577672	2.5696	1050.37	FALSE	26
2022-09-13	14:49:54	0.427545	1.90181	1033.56	FALSE	26
2022-09-13	14:49:54	0.886374	3.94277	1054.31	FALSE	26
2022-09-13	14:49:54	0.654313	2.91052	1036.47	FALSE	26
2022-09-13	14:49:54	1.02312	4.55104	1058.86	FALSE	26
2022-09-13	14:49:55	1.23905	5.51154	1041.98	FALSE	26
2022-09-13	14:49:55	1.41655	6.3011	1065.16	FALSE	26
2022-09-13	14:49:55	1.38291	6.15146	1048.14	FALSE	26
2022-09-13	14:49:56	1.25075	5.56359	1070.73	FALSE	26
2022-09-13	14:49:56	0.663015	2.94922	1051.08	FALSE	26
2022-09-13	14:49:56	0.419708	1.86695	1072.59	FALSE	26
2022-09-13	14:49:56	0.397112	1.76643	1052.85	FALSE	26
2022-09-13	14:49:57	0.507697	2.25834	1074.85	FALSE	26
2022-09-13	14:49:57	0.355585	1.58171	1054.43	FALSE	26
2022-09-13	14:49:57	0.39986	1.77866	1076.63	FALSE	26
2022-09-13	14:49:57	0.395738	1.76032	1056.19	FALSE	26
2022-09-13	14:49:58	0.457468	2.03491	1078.66	FALSE	26
2022-09-13	14:49:58	0.460573	2.04872	1058.24	FALSE	26
2022-09-13	14:49:58	0.467901	2.08132	1080.75	FALSE	26
2022-09-13	14:49:58	0.454313	2.02088	1060.26	FALSE	26
2022-09-13	14:49:59	0.456247	2.02948	1082.78	FALSE	26
2022-09-13	14:49:59	0.449784	2.00073	1062.26	FALSE	26
2022-09-13	14:49:59	0.447137	1.98895	1084.76	FALSE	26
2022-09-13	14:50:00	0.45472	2.02269	1064.29	FALSE	26
2022-09-13	14:50:00	0.457977	2.03717	1086.8	FALSE	26
2022-09-13	14:50:00	0.455942	2.02812	1066.31	FALSE	26
2022-09-13	14:50:00	0.438333	1.94979	1088.75	FALSE	26
2022-09-13	14:50:01	0.439911	1.95681	1068.27	FALSE	26
2022-09-13	14:50:01	0.443066	1.97085	1090.72	FALSE	26
2022-09-13	14:50:01	0.457774	2.03627	1070.31	FALSE	26
2022-09-13	14:50:01	0.464746	2.06728	1092.79	FALSE	26
2022-09-13	14:50:02	0.459046	2.04193	1072.35	FALSE	26
2022-09-13	14:50:02	0.457367	2.03446	1094.82	FALSE	26
2022-09-13	14:50:02	0.459097	2.04216	1074.39	FALSE	26
2022-09-13	14:50:02	0.461998	2.05506	1096.88	FALSE	26
2022-09-13	14:50:03	0.465814	2.07203	1076.46	FALSE	26
2022-09-13	14:50:03	0.46785	2.08109	1098.96	FALSE	26
2022-09-13	14:50:03	0.466578	2.07543	1078.54	FALSE	26
2022-09-13	14:50:03	0.464949	2.06819	1101.03	FALSE	26
2022-09-13	14:50:04	0.469479	2.08834	1080.63	FALSE	26
2022-09-13	14:50:04	0.465662	2.07136	1103.1	FALSE	26
2022-09-13	14:50:04	0.462252	2.05619	1082.68	FALSE	26
2022-09-13	14:50:05	0.466069	2.07317	1105.17	FALSE	26
2022-09-13	14:50:05	0.467697	2.08041	1084.76	FALSE	26
2022-09-13	14:50:05	0.465204	2.06932	1107.24	FALSE	26
2022-09-13	14:50:05	0.465305	2.06977	1086.83	FALSE	26
2022-09-13	14:50:06	0.463015	2.05958	1109.3	FALSE	26
2022-09-13	14:50:06	0.462405	2.05687	1088.89	FALSE	26
2022-09-13	14:50:06	0.472074	2.09988	1111.4	FALSE	26
2022-09-13	14:50:06	0.480929	2.13927	1091.03	FALSE	26
2022-09-13	14:50:07	0.493906	2.19699	1113.6	FALSE	26
2022-09-13	14:50:07	0.475942	2.11709	1093.15	FALSE	26
2022-09-13	14:50:07	0.485305	2.15873	1115.76	FALSE	26
2022-09-13	14:50:07	0.617723	2.74776	1095.89	FALSE	26
2022-09-13	14:50:08	0.774313	3.4443	1119.2	FALSE	26
2022-09-13	14:50:08	0.55243	2.45732	1098.35	FALSE	26
2022-09-13	14:50:08	0.47472	2.11165	1121.31	FALSE	26
2022-09-13	14:50:09	0.615891	2.73961	1101.09	FALSE	26
2022-09-13	14:50:09	0.582354	2.59043	1123.9	FALSE	26
2022-09-13	14:50:09	0.604491	2.6889	1103.78	FALSE	26
2022-09-13	14:50:09	0.556145	2.47384	1126.38	FALSE	26
2022-09-13	14:50:10	0.589377	2.62167	1106.4	FALSE	26
2022-09-13	14:50:10	0.581641	2.58726	1128.96	FALSE	26
2022-09-13	14:50:10	0.622812	2.77039	1109.17	FALSE	26
2022-09-13	14:50:10	0.597112	2.65607	1131.62	FALSE	26
2022-09-13	14:50:11	0.599199	2.66536	1111.84	FALSE	26
2022-09-13	14:50:11	0.456501	2.03061	1133.65	FALSE	26
2022-09-13	14:50:11	0.45355	2.01748	1113.86	FALSE	26
2022-09-13	14:50:12	0.460064	2.04646	1135.7	FALSE	26
2022-09-13	14:50:12	0.476298	2.11867	1115.97	FALSE	26
2022-09-13	14:50:12	0.467341	2.07883	1137.78	FALSE	26
2022-09-13	14:50:12	0.576043	2.56235	1118.54	FALSE	26
2022-09-13	14:50:13	1.53268	6.81767	1144.59	FALSE	26
2022-09-13	14:50:13	1.56576	6.96481	1125.5	FALSE	26
2022-09-13	14:50:13	1.74413	7.75824	1152.35	FALSE	26
2022-09-13	14:50:13	1.13004	5.02664	1130.53	FALSE	26
2022-09-13	14:50:14	0.90902	4.0435	1156.4	FALSE	26
2022-09-13	14:50:14	1.27106	5.65393	1136.18	FALSE	26
2022-09-13	14:50:14	1.39279	6.19541	1162.59	FALSE	26
2022-09-13	14:50:14	0.332532	1.47917	1137.66	FALSE	26
2022-09-13	14:50:15	0.489784	2.17866	1164.77	FALSE	26
2022-09-13	14:50:15	0.476094	2.11776	1139.78	FALSE	26
2022-09-13	14:50:15	0.505509	2.24861	1167.02	FALSE	26
2022-09-13	14:50:15	0.444644	1.97787	1141.76	FALSE	26
2022-09-13	14:50:16	0.666629	2.9653	1169.98	FALSE	26
2022-09-13	14:50:16	0.571056	2.54017	1144.3	FALSE	26
2022-09-13	14:50:16	0.71701	3.1894	1173.17	FALSE	26
2022-09-13	14:50:17	0.522404	2.32376	1146.62	FALSE	26
2022-09-13	14:50:17	0.50668	2.25381	1175.43	FALSE	26
2022-09-13	14:50:17	0.426272	1.89614	1148.52	FALSE	26
2022-09-13	14:50:17	0.402557	1.79065	1177.22	FALSE	26
2022-09-13	14:50:18	0.400166	1.78002	1150.3	FALSE	26
2022-09-13	14:50:18	0.428664	1.90678	1179.12	FALSE	26
2022-09-13	14:50:18	1.08307	4.81771	1155.11	FALSE	26
2022-09-13	14:50:18	0.502455	2.23502	1181.36	FALSE	26
2022-09-13	14:50:19	0.333957	1.48551	1156.6	FALSE	26
2022-09-13	14:50:19	0.303473	1.34991	1182.71	FALSE	26
2022-09-13	14:50:19	0.281489	1.25212	1157.85	FALSE	26
2022-09-13	14:50:19	0.290903	1.29399	1184	FALSE	26
2022-09-13	14:50:20	0.291158	1.29513	1159.15	FALSE	26
2022-09-13	14:50:20	0.317621	1.41284	1185.42	FALSE	26
2022-09-13	14:50:20	0.287748	1.27996	1160.43	FALSE	26
2022-09-13	14:50:21	0.312176	1.38862	1186.81	FALSE	26
2022-09-13	14:50:21	0.29757	1.32365	1161.75	FALSE	26
2022-09-13	14:50:21	0.290598	1.29264	1188.1	FALSE	26
2022-09-13	14:50:21	0.297519	1.32342	1163.07	FALSE	26
2022-09-13	14:50:22	0.324491	1.4434	1189.54	FALSE	26
2022-09-13	14:50:22	0.371819	1.65393	1164.73	FALSE	26
2022-09-13	14:50:22	0.591463	2.63095	1192.17	FALSE	26
2022-09-13	14:50:22	0.184033	0.818616	1165.55	FALSE	26
2022-09-13	14:50:23	0.241132	1.0726	1193.24	FALSE	26
2022-09-13	14:50:23	0.273652	1.21726	1166.76	FALSE	26
2022-09-13	14:50:23	0.278232	1.23763	1194.48	FALSE	26
2022-09-13	14:50:23	0.278181	1.2374	1168	FALSE	26
2022-09-13	14:50:24	0.286425	1.27408	1195.76	FALSE	26
2022-09-13	14:50:24	0.439911	1.95681	1169.96	FALSE	26
2022-09-13	14:50:24	0.459758	2.0451	1197.8	FALSE	26
2022-09-13	14:50:25	0.712634	3.16994	1173.13	FALSE	26
2022-09-13	14:50:25	0.530293	2.35885	1200.16	FALSE	26
2022-09-13	14:50:25	0.326527	1.45246	1174.58	FALSE	26
2022-09-13	14:50:25	0.282303	1.25574	1201.42	FALSE	26
2022-09-13	14:50:26	0.302303	1.3447	1175.93	FALSE	26
2022-09-13	14:50:26	0.300522	1.33678	1202.75	FALSE	26
2022-09-13	14:50:26	0.299758	1.33338	1177.26	FALSE	26
2022-09-13	14:50:26	0.304746	1.35557	1204.11	FALSE	26
2022-09-13	14:50:27	0.352125	1.56632	1178.82	FALSE	26
2022-09-13	14:50:27	0.386883	1.72093	1205.83	FALSE	26
2022-09-13	14:50:27	0.443982	1.97492	1180.8	FALSE	26
2022-09-13	14:50:27	0.561183	2.49625	1208.33	FALSE	26
2022-09-13	14:50:28	0.404898	1.80107	1182.6	FALSE	26
2022-09-13	14:50:28	0.441489	1.96383	1210.29	FALSE	26
2022-09-13	14:50:28	0.425509	1.89275	1184.49	FALSE	26
2022-09-13	14:50:29	0.408308	1.81624	1212.11	FALSE	26
2022-09-13	14:50:29	0.388919	1.72999	1186.22	FALSE	26
2022-09-13	14:50:29	0.395433	1.75897	1213.86	FALSE	26
2022-09-13	14:50:29	0.405204	1.80243	1188.03	FALSE	26
2022-09-13	14:50:30	0.436043	1.93961	1215.8	FALSE	26
2022-09-13	14:50:30	0.446883	1.98782	1190.01	FALSE	26
2022-09-13	14:50:30	0.430954	1.91697	1217.72	FALSE	26
2022-09-13	14:50:30	0.422506	1.87939	1191.89	FALSE	26
2022-09-13	14:50:31	0.452074	2.01092	1219.73	FALSE	26
2022-09-13	14:50:31	0.476298	2.11867	1194.01	FALSE	26
2022-09-13	14:50:31	0.53584	2.38352	1222.12	FALSE	26
2022-09-13	14:50:31	0.470242	2.09173	1196.1	FALSE	26
2022-09-13	14:50:32	0.51014	2.2692	1224.39	FALSE	26
2022-09-13	14:50:32	0.506883	2.25472	1198.36	FALSE	26
2022-09-13	14:50:32	0.46897	2.08607	1226.47	FALSE	26
2022-09-13	14:50:33	0.433753	1.92942	1200.29	FALSE	26
2022-09-13	14:50:33	0.399249	1.77594	1228.25	FALSE	26
2022-09-13	14:50:33	0.387087	1.72184	1202.01	FALSE	26
2022-09-13	14:50:33	0.379148	1.68653	1229.93	FALSE	26
2022-09-13	14:50:34	0.375738	1.67136	1203.68	FALSE	26
2022-09-13	14:50:34	0.375687	1.67113	1231.6	FALSE	26
2022-09-13	14:50:34	0.370751	1.64917	1205.33	FALSE	26
2022-09-13	14:50:34	0.388308	1.72727	1233.33	FALSE	26
2022-09-13	14:50:35	0.406679	1.80899	1207.14	FALSE	26
2022-09-13	14:50:35	0.400471	1.78138	1235.11	FALSE	26
2022-09-13	14:50:35	0.395891	1.761	1208.9	FALSE	26
2022-09-13	14:50:35	0.392939	1.74787	1236.86	FALSE	26
2022-09-13	14:50:36	0.399758	1.7782	1210.68	FALSE	26
2022-09-13	14:50:36	0.400166	1.78002	1238.64	FALSE	26
2022-09-13	14:50:36	0.397316	1.76734	1212.45	FALSE	26
2022-09-13	14:50:37	0.405204	1.80243	1240.44	FALSE	26
2022-09-13	14:50:37	0.409682	1.82235	1214.27	FALSE	26
2022-09-13	14:50:37	0.403575	1.79518	1242.24	FALSE	26
2022-09-13	14:50:37	0.399809	1.77843	1216.05	FALSE	26
2022-09-13	14:50:38	0.399504	1.77707	1244.02	FALSE	26
2022-09-13	14:50:38	0.400013	1.77934	1217.83	FALSE	26
2022-09-13	14:50:38	0.398537	1.77277	1245.79	FALSE	26
2022-09-13	14:50:38	0.384237	1.70916	1219.53	FALSE	26
2022-09-13	14:50:39	0.369987	1.64578	1247.43	FALSE	26
2022-09-13	14:50:39	0.383015	1.70373	1221.24	FALSE	26
2022-09-13	14:50:39	0.392074	1.74402	1249.18	FALSE	26
2022-09-13	14:50:39	0.392735	1.74696	1222.99	FALSE	26
2022-09-13	14:50:40	0.405713	1.80469	1250.98	FALSE	26
2022-09-13	14:50:40	0.410394	1.82551	1224.81	FALSE	26
2022-09-13	14:50:40	0.416756	1.85381	1252.84	FALSE	26
2022-09-13	14:50:41	0.425662	1.89343	1226.7	FALSE	26
2022-09-13	14:50:41	0.422965	1.88143	1254.72	FALSE	26
2022-09-13	14:50:41	0.42042	1.87011	1228.57	FALSE	26
2022-09-13	14:50:41	0.418639	1.86219	1256.58	FALSE	26
2022-09-13	14:50:42	0.427341	1.9009	1230.48	FALSE	26
2022-09-13	14:50:42	0.429326	1.90973	1258.49	FALSE	26
2022-09-13	14:50:42	0.404135	1.79767	1232.27	FALSE	26
2022-09-13	14:50:42	0.406323	1.80741	1260.3	FALSE	26
2022-09-13	14:50:43	0.362354	1.61182	1233.89	FALSE	26
2022-09-13	14:50:43	0.442201	1.967	1262.26	FALSE	26
2022-09-13	14:50:43	0.46673	2.07611	1235.96	FALSE	26
2022-09-13	14:50:43	0.326934	1.45427	1263.72	FALSE	26
2022-09-13	14:50:44	0.404186	1.7979	1237.76	FALSE	26
2022-09-13	14:50:44	0.406527	1.80831	1265.53	FALSE	26
2022-09-13	14:50:44	0.526883	2.34368	1240.1	FALSE	26
2022-09-13	14:50:45	0.450344	2.00322	1267.53	FALSE	26
2022-09-13	14:50:45	0.413753	1.84046	1241.94	FALSE	26
2022-09-13	14:50:45	0.432481	1.92376	1269.45	FALSE	26
2022-09-13	14:50:45	0.483015	2.14855	1244.09	FALSE	26
2022-09-13	14:50:46	1.29543	5.76233	1275.22	FALSE	26
2022-09-13	14:50:46	0.563168	2.50508	1246.6	FALSE	26
2022-09-13	14:50:46	2.25223	10.0184	1285.23	FALSE	26
2022-09-13	14:50:46	0.415636	1.84883	1248.45	FALSE	26
2022-09-13	14:50:47	0.27584	1.22699	1286.46	FALSE	26
2022-09-13	14:50:47	0.360623	1.60412	1250.05	FALSE	26
2022-09-13	14:50:47	0.555331	2.47022	1288.93	FALSE	26
2022-09-13	14:50:47	0.713244	3.17265	1253.22	FALSE	26
2022-09-13	14:50:48	0.0819468	0.364516	1289.3	FALSE	26
2022-09-13	14:50:48	-0.431895	-1.92116	1253.22	FALSE	26
2022-09-13	14:50:48	-0.396883	-1.76541	1289.3	FALSE	26
2022-09-13	14:50:49	-0.243651	-1.08381	1253.22	FALSE	26
2022-09-13	14:50:49	-0.255814	-1.13791	1289.3	FALSE	26
2022-09-13	14:50:49	-0.319376	-1.42065	1253.22	FALSE	26
2022-09-13	14:50:49	-0.185178	-0.823709	1289.3	FALSE	26
2022-09-13	14:50:50	-0.197493	-0.878488	1253.22	FALSE	26
2022-09-13	14:50:50	-0.171997	-0.765077	1289.3	FALSE	26
2022-09-13	14:50:50	-0.113168	-0.503394	1253.22	FALSE	26
2022-09-13	14:50:50	-0.0477224	-0.212279	1289.3	FALSE	26
2022-09-13	14:50:51	0.153194	0.681438	1253.9	FALSE	26
2022-09-13	14:50:51	0.201641	0.896939	1290.19	FALSE	26
2022-09-13	14:50:51	-0.0355086	-0.157949	1253.9	FALSE	26
2022-09-13	14:50:51	-0.0163229	-0.0726075	1290.19	FALSE	26
2022-09-13	14:50:52	0.147697	0.656986	1254.56	FALSE	26
2022-09-13	14:50:52	0.0581809	0.2588	1290.45	FALSE	26
2022-09-13	14:50:52	-0.203753	-0.906334	1254.56	FALSE	26
2022-09-13	14:50:53	-0.127621	-0.567684	1290.45	FALSE	26
2022-09-13	14:50:53	0.0103437	0.0460108	1254.61	FALSE	26
2022-09-13	14:50:53	0.0965523	0.429484	1290.88	FALSE	26
2022-09-13	14:50:53	0.137723	0.612619	1255.22	FALSE	26
2022-09-13	14:50:54	0.116247	0.51709	1291.4	FALSE	26
2022-09-13	14:50:54	0.102812	0.457328	1255.68	FALSE	26
2022-09-13	14:50:54	0.184033	0.818616	1292.22	FALSE	26
2022-09-13	14:50:54	0.118588	0.527503	1256.2	FALSE	26
2022-09-13	14:50:55	0.178486	0.793941	1293.01	FALSE	26
2022-09-13	14:50:55	0.557723	2.48086	1258.69	FALSE	26
2022-09-13	14:50:55	0.982507	4.37039	1297.38	FALSE	26
2022-09-13	14:50:55	1.26485	5.62631	1264.31	FALSE	26
2022-09-13	14:50:56	1.44597	6.43196	1303.81	FALSE	26
2022-09-13	14:50:56	0.918486	4.08561	1268.4	FALSE	26
2022-09-13	14:50:56	0.703779	3.13055	1306.94	FALSE	26
2022-09-13	14:50:57	0.527697	2.3473	1270.74	FALSE	26
2022-09-13	14:50:57	0.468104	2.08222	1309.03	FALSE	26
2022-09-13	14:50:57	0.346832	1.54278	1272.29	FALSE	26
2022-09-13	14:50:57	0.394822	1.75625	1310.78	FALSE	26
2022-09-13	14:50:58	0.313143	1.39292	1273.68	FALSE	26
2022-09-13	14:50:58	0.302506	1.34561	1312.13	FALSE	26
2022-09-13	14:50:58	0.329784	1.46695	1275.15	FALSE	26
2022-09-13	14:50:58	0.327545	1.45699	1313.59	FALSE	26
2022-09-13	14:50:59	0.313957	1.39654	1276.54	FALSE	26
2022-09-13	14:50:59	0.303066	1.3481	1314.93	FALSE	26
2022-09-13	14:50:59	0.296145	1.31731	1277.86	FALSE	26
2022-09-13	14:50:59	0.296145	1.31731	1316.25	FALSE	26
2022-09-13	14:51:00	0.28902	1.28562	1279.15	FALSE	26
2022-09-13	14:51:00	0.294466	1.30984	1317.56	FALSE	26
2022-09-13	14:51:00	0.296654	1.31958	1280.47	FALSE	26
2022-09-13	14:51:01	0.299707	1.33316	1318.89	FALSE	26
2022-09-13	14:51:01	0.30383	1.3515	1281.82	FALSE	26
2022-09-13	14:51:01	0.30556	1.35919	1320.25	FALSE	26
2022-09-13	14:51:01	0.303626	1.35059	1283.17	FALSE	26
2022-09-13	14:51:02	0.301947	1.34312	1321.6	FALSE	26
2022-09-13	14:51:02	0.295738	1.3155	1284.48	FALSE	26
2022-09-13	14:51:02	0.299504	1.33225	1322.93	FALSE	26
2022-09-13	14:51:02	0.31187	1.38726	1285.87	FALSE	26
2022-09-13	14:51:03	0.327443	1.45653	1324.39	FALSE	26
2022-09-13	14:51:03	0.341285	1.5181	1287.39	FALSE	26
2022-09-13	14:51:03	0.356094	1.58398	1325.97	FALSE	26
2022-09-13	14:51:03	0.370751	1.64917	1289.04	FALSE	26
2022-09-13	14:51:04	0.365	1.62359	1327.59	FALSE	26
2022-09-13	14:51:04	0.358842	1.5962	1290.63	FALSE	26
2022-09-13	14:51:04	0.345967	1.53893	1329.13	FALSE	26
2022-09-13	14:51:05	0.331412	1.47419	1292.11	FALSE	26
2022-09-13	14:51:05	0.346883	1.543	1330.67	FALSE	26
2022-09-13	14:51:05	0.321896	1.43186	1293.54	FALSE	26
2022-09-13	14:51:05	0.314466	1.39881	1332.07	FALSE	26
2022-09-13	14:51:06	0.339758	1.51131	1295.05	FALSE	26
2022-09-13	14:51:06	0.326069	1.45042	1333.52	FALSE	26
2022-09-13	14:51:06	0.330395	1.46966	1296.52	FALSE	26
2022-09-13	14:51:06	0.313957	1.39654	1334.92	FALSE	26
2022-09-13	14:51:07	0.308003	1.37006	1297.89	FALSE	26
2022-09-13	14:51:07	0.299758	1.33338	1336.25	FALSE	26
2022-09-13	14:51:07	0.305916	1.36078	1299.25	FALSE	26
2022-09-13	14:51:07	0.305763	1.36009	1337.61	FALSE	26
2022-09-13	14:51:08	0.331158	1.47306	1300.73	FALSE	26
2022-09-13	14:51:08	0.331463	1.47441	1339.09	FALSE	26
2022-09-13	14:51:08	0.33243	1.47872	1302.2	FALSE	26
2022-09-13	14:51:09	0.327188	1.4554	1340.54	FALSE	26
2022-09-13	14:51:09	0.323575	1.43933	1303.64	FALSE	26
2022-09-13	14:51:09	0.34271	1.52444	1342.07	FALSE	26
2022-09-13	14:51:09	0.339809	1.51154	1305.15	FALSE	26
2022-09-13	14:51:10	0.390191	1.73565	1343.8	FALSE	26
2022-09-13	14:51:10	0.559504	2.48879	1307.64	FALSE	26
2022-09-13	14:51:10	0.558842	2.48584	1346.29	FALSE	26
2022-09-13	14:51:10	0.5393	2.39891	1310.04	FALSE	26
2022-09-13	14:51:11	0.513957	2.28618	1348.58	FALSE	26
2022-09-13	14:51:11	0.478181	2.12704	1312.17	FALSE	26
2022-09-13	14:51:11	0.41355	1.83955	1350.42	FALSE	26
2022-09-13	14:51:11	0.342405	1.52309	1313.69	FALSE	26
2022-09-13	14:51:12	0.325407	1.44748	1351.86	FALSE	26
2022-09-13	14:51:12	0.319402	1.42076	1315.11	FALSE	26
2022-09-13	14:51:12	0.304288	1.35353	1353.22	FALSE	26
2022-09-13	14:51:13	0.286425	1.27408	1316.39	FALSE	26
2022-09-13	14:51:13	0.283473	1.26094	1354.48	FALSE	26
2022-09-13	14:51:13	0.275535	1.22563	1317.61	FALSE	26
2022-09-13	14:51:13	0.273702	1.21748	1355.69	FALSE	26
2022-09-13	14:51:14	0.277417	1.23401	1318.85	FALSE	26
2022-09-13	14:51:14	0.282048	1.25461	1356.95	FALSE	26
2022-09-13	14:51:14	0.275433	1.22518	1320.07	FALSE	26
2022-09-13	14:51:14	0.274873	1.22269	1358.17	FALSE	26
2022-09-13	14:51:15	0.273906	1.21839	1321.29	FALSE	26
2022-09-13	14:51:15	0.269682	1.1996	1359.37	FALSE	26
2022-09-13	14:51:15	0.317824	1.41374	1322.7	FALSE	26
2022-09-13	14:51:15	0.243015	1.08098	1360.45	FALSE	26
2022-09-13	14:51:16	0.128308	0.57074	1323.28	FALSE	26
2022-09-13	14:51:16	0.0560435	0.249293	1360.7	FALSE	26
2022-09-13	14:51:16	-0.0281295	-0.125126	1323.28	FALSE	26
2022-09-13	14:51:17	0.00785013	0.0349189	1360.74	FALSE	26
2022-09-13	14:51:17	0.444338	1.9765	1325.25	FALSE	26
2022-09-13	14:51:17	0.564084	2.50916	1363.25	FALSE	26
2022-09-13	14:51:17	0.848613	3.7748	1329.03	FALSE	26
2022-09-13	14:51:18	1.06678	4.74525	1367.99	FALSE	26
2022-09-13	14:51:18	0.75813	3.37231	1332.4	FALSE	26
2022-09-13	14:51:18	1.05849	4.70838	1372.7	FALSE	26
2022-09-13	14:51:18	0.93416	4.15533	1336.55	FALSE	26
2022-09-13	14:51:19	1.17528	5.22788	1377.93	FALSE	26
2022-09-13	14:51:19	0.743015	3.30508	1339.86	FALSE	26
2022-09-13	14:51:19	0.353143	1.57085	1379.5	FALSE	26
2022-09-13	14:51:19	0.611056	2.7181	1342.58	FALSE	26
2022-09-13	14:51:20	0.332786	1.4803	1380.98	FALSE	26
2022-09-13	14:51:20	0.941336	4.18725	1346.76	FALSE	26
2022-09-13	14:51:20	1.12933	5.02349	1386	FALSE	26
2022-09-13	14:51:21	0.603524	2.6846	1349.45	FALSE	26
2022-09-13	14:51:21	1.38973	6.1818	1392.18	FALSE	26
2022-09-13	14:51:21	0.745763	3.3173	1352.77	FALSE	26
2022-09-13	14:51:21	1.11538	4.96143	1397.15	FALSE	26
2022-09-13	14:51:22	0.215687	0.959419	1353.73	FALSE	26
2022-09-13	14:51:22	0.293244	1.30441	1398.45	FALSE	26
2022-09-13	14:51:22	0.106272	0.472719	1354.2	FALSE	26
2022-09-13	14:51:22	0.11472	0.510298	1398.96	FALSE	26
2022-09-13	14:51:23	-0.159427	-0.709163	1354.2	FALSE	26
2022-09-13	14:51:23	-0.285738	-1.27102	1398.96	FALSE	26
2022-09-13	14:51:23	-0.342175	-1.52206	1354.2	FALSE	26
2022-09-13	14:51:23	-0.596781	-2.6546	1398.96	FALSE	26
2022-09-13	14:51:24	-0.690165	-3.06999	1354.2	FALSE	26
2022-09-13	14:51:24	-0.698256	-3.10598	1398.96	FALSE	26
2022-09-13	14:51:24	-0.592251	-2.63445	1354.2	FALSE	26
2022-09-13	14:51:25	-0.515508	-2.29308	1398.96	FALSE	26
2022-09-13	14:51:25	-0.286806	-1.27577	1354.2	FALSE	26
2022-09-13	14:51:25	0.656247	2.91912	1401.88	FALSE	26
2022-09-13	14:51:25	0.363626	1.61748	1355.82	FALSE	26
2022-09-13	14:51:26	0.340013	1.51245	1403.39	FALSE	26
2022-09-13	14:51:26	0.366323	1.62948	1357.45	FALSE	26
2022-09-13	14:51:26	0.298741	1.32886	1404.72	FALSE	26
2022-09-13	14:51:26	0.209631	0.932481	1358.38	FALSE	26
2022-09-13	14:51:27	0.213041	0.947649	1405.67	FALSE	26
2022-09-13	14:51:27	0.182557	0.81205	1359.19	FALSE	26
2022-09-13	14:51:27	0.629936	2.80208	1408.47	FALSE	26
2022-09-13	14:51:27	0.22042	0.980472	1360.17	FALSE	26
2022-09-13	14:51:28	0.53187	2.36586	1410.84	FALSE	26
2022-09-13	14:51:28	0.651056	2.89603	1363.07	FALSE	26
2022-09-13	14:51:28	0.607748	2.70338	1413.54	FALSE	26
2022-09-13	14:51:29	0.378333	1.6829	1364.75	FALSE	26
2022-09-13	14:51:29	0.349886	1.55636	1415.1	FALSE	26
2022-09-13	14:51:29	0.22673	1.00854	1365.76	FALSE	26
2022-09-13	14:51:29	0.366476	1.63016	1416.73	FALSE	26
2022-09-13	14:51:30	0.551005	2.45098	1368.21	FALSE	26
2022-09-13	14:51:30	0.498588	2.21782	1418.94	FALSE	26
2022-09-13	14:51:30	0.468868	2.08562	1370.29	FALSE	26
2022-09-13	14:51:30	0.514669	2.28935	1421.23	FALSE	26
2022-09-13	14:51:31	0.504491	2.24408	1372.54	FALSE	26
2022-09-13	14:51:31	0.523524	2.32874	1423.56	FALSE	26
2022-09-13	14:51:31	0.52897	2.35296	1374.89	FALSE	26
2022-09-13	14:51:31	0.489886	2.17911	1425.74	FALSE	26
2022-09-13	14:51:32	0.52902	2.35319	1377.24	FALSE	26
2022-09-13	14:51:32	0.493092	2.19337	1427.93	FALSE	26
2022-09-13	14:51:32	0.433804	1.92965	1379.17	FALSE	26
2022-09-13	14:51:33	0.585661	2.60514	1430.54	FALSE	26
2022-09-13	14:51:33	0.278283	1.23786	1380.41	FALSE	26
2022-09-13	14:51:33	0.221031	0.98319	1431.52	FALSE	26
2022-09-13	14:51:33	0.219657	0.977078	1381.39	FALSE	26
2022-09-13	14:51:34	0.293906	1.30735	1432.83	FALSE	26
2022-09-13	14:51:34	0.349326	1.55387	1382.94	FALSE	26
2022-09-13	14:51:34	0.534466	2.37741	1435.21	FALSE	26
2022-09-13	14:51:34	0.611056	2.7181	1385.66	FALSE	26
2022-09-13	14:51:35	0.658537	2.9293	1438.14	FALSE	26
2022-09-13	14:51:35	0.32215	1.43299	1387.09	FALSE	26
2022-09-13	14:51:35	0.396501	1.76372	1439.9	FALSE	26
2022-09-13	14:51:35	0.381132	1.69535	1388.79	FALSE	26
2022-09-13	14:51:36	0.303473	1.34991	1441.25	FALSE	26
2022-09-13	14:51:36	0.131972	0.587038	1389.38	FALSE	26
2022-09-13	14:51:36	0.325102	1.44612	1442.7	FALSE	26
2022-09-13	14:51:37	0.688257	3.0615	1392.44	FALSE	26
2022-09-13	14:51:37	-0.0148471	-0.0660429	1442.7	FALSE	26
2022-09-13	14:51:37	-0.539936	-2.40174	1392.44	FALSE	26
2022-09-13	14:51:37	-0.636424	-2.83094	1442.7	FALSE	26
2022-09-13	14:51:38	-0.345585	-1.53723	1392.44	FALSE	26
2022-09-13	14:51:38	-0.216374	-0.962475	1442.7	FALSE	26
2022-09-13	14:51:38	-0.24874	-1.10645	1392.44	FALSE	26
2022-09-13	14:51:38	-0.54986	-2.44589	1442.7	FALSE	26
2022-09-13	14:51:39	-0.630877	-2.80627	1392.44	FALSE	26
2022-09-13	14:51:39	-0.669707	-2.97899	1442.7	FALSE	26
2022-09-13	14:51:39	-0.57444	-2.55522	1392.44	FALSE	26
2022-09-13	14:51:39	-0.540241	-2.4031	1442.7	FALSE	26
2022-09-13	14:51:40	-0.621055	-2.76258	1392.44	FALSE	26
2022-09-13	14:51:40	-0.617341	-2.74606	1442.7	FALSE	26
2022-09-13	14:51:40	-0.564974	-2.51312	1392.44	FALSE	26
2022-09-13	14:51:41	-0.546094	-2.42914	1442.7	FALSE	26
2022-09-13	14:51:41	-0.438206	-1.94923	1392.44	FALSE	26
2022-09-13	14:51:41	-0.302989	-1.34776	1442.7	FALSE	26
2022-09-13	14:51:41	-0.243906	-1.08494	1392.44	FALSE	26
2022-09-13	14:51:42	-0.0952542	-0.42371	1442.7	FALSE	26
2022-09-13	14:51:42	0.320776	1.42688	1393.87	FALSE	26
2022-09-13	14:51:42	0.324288	1.4425	1444.14	FALSE	26
2022-09-13	14:51:42	0.227494	1.01194	1394.88	FALSE	26
2022-09-13	14:51:43	0.605	2.69116	1446.83	FALSE	26
2022-09-13	14:51:43	0.43925	1.95387	1396.83	FALSE	26
2022-09-13	14:51:43	0.526527	2.3421	1449.17	FALSE	26
2022-09-13	14:51:43	0.445255	1.98058	1398.81	FALSE	26
2022-09-13	14:51:44	0.441031	1.96179	1451.13	FALSE	26
2022-09-13	14:51:44	0.424796	1.88958	1400.7	FALSE	26
2022-09-13	14:51:44	0.736298	3.2752	1454.41	FALSE	26
2022-09-13	14:51:45	0.835229	3.71527	1404.42	FALSE	26
2022-09-13	14:51:45	1.12118	4.98723	1459.4	FALSE	26
2022-09-13	14:51:45	1.20851	5.37569	1409.79	FALSE	26
2022-09-13	14:51:45	1.16373	5.1765	1464.57	FALSE	26
2022-09-13	14:51:46	1.16139	5.16609	1414.96	FALSE	26
2022-09-13	14:51:46	2.09716	9.32859	1473.9	FALSE	26
2022-09-13	14:51:46	3.76525	16.7486	1431.71	1	27
2022-09-13	14:51:46	3.49721	15.5563	1489.46	1	28
2022-09-13	14:51:47	3.1824	14.156	1445.86	1	29
2022-09-13	14:51:47	2.34739	10.4417	1499.9	FALSE	29
2022-09-13	14:51:47	1.61019	7.16245	1453.03	FALSE	29
2022-09-13	14:51:47	0.959758	4.2692	1504.17	FALSE	29
2022-09-13	14:51:48	0.347697	1.54663	1454.57	FALSE	29
2022-09-13	14:51:48	0.400013	1.77934	1505.95	FALSE	29
2022-09-13	14:51:48	0.256705	1.14188	1455.71	FALSE	29
2022-09-13	14:51:49	0.308969	1.37436	1507.32	FALSE	29
2022-09-13	14:51:49	1.00495	4.47022	1460.18	FALSE	29
2022-09-13	14:51:49	3.48597	15.5063	1522.83	1	30
2022-09-13	14:51:49	6.94708	30.902	1491.09	1	31
2022-09-13	14:51:50	10.3798	46.1714	1569	1	32
2022-09-13	14:51:50	1.9908	8.85548	1499.94	FALSE	32
2022-09-13	14:51:50	3.33482	14.8339	1583.83	1	33
2022-09-13	14:51:50	2.20001	9.78608	1509.73	FALSE	33
2022-09-13	14:51:51	1.67452	7.4486	1591.28	FALSE	33
2022-09-13	14:51:51	1.05996	4.71491	1514.44	FALSE	33
2022-09-13	14:51:51	1.32225	5.88163	1597.16	FALSE	33
2022-09-13	14:51:51	1.92261	8.55215	1522.99	FALSE	33
2022-09-13	14:51:52	3.67548	16.3493	1613.51	1	34
2022-09-13	14:51:52	7.24749	32.2383	1555.23	1	35
2022-09-13	14:51:52	12.9634	57.6638	1671.18	1	36
2022-09-13	14:51:53	10.3228	45.9179	1601.15	1	37
2022-09-13	14:51:53	6.88719	30.6356	1701.81	1	38
2022-09-13	14:51:53	11.6079	51.6343	1652.79	1	39
2022-09-13	14:51:53	10.6591	47.4138	1749.23	1	40
2022-09-13	14:51:54	8.23131	36.6145	1689.4	1	41
2022-09-13	14:51:54	5.52225	24.5641	1773.79	1	42
2022-09-13	14:51:54	4.62317	20.5648	1709.96	1	43
2022-09-13	14:51:54	4.08841	18.1861	1791.98	1	44
2022-09-13	14:51:55	3.90815	17.3842	1727.35	1	45
2022-09-13	14:51:55	3.93396	17.499	1809.48	1	46
2022-09-13	14:51:55	3.8224	17.0028	1744.35	1	47
2022-09-13	14:51:56	2.95436	13.1416	1822.62	FALSE	47
2022-09-13	14:51:56	2.03701	9.06103	1753.41	FALSE	47
2022-09-13	14:51:56	0.967697	4.30451	1826.92	FALSE	47
2022-09-13	14:51:56	0.594924	2.64634	1756.06	FALSE	47
2022-09-13	14:51:57	0.518893	2.30814	1829.23	FALSE	47
2022-09-13	14:51:57	0.447647	1.99122	1758.05	FALSE	47
2022-09-13	14:51:57	0.779758	3.46852	1832.7	FALSE	47
2022-09-13	14:51:57	1.368	6.08514	1764.14	FALSE	47
2022-09-13	14:51:58	1.52744	6.79436	1839.49	FALSE	47
2022-09-13	14:51:58	2.77182	12.3296	1776.46	FALSE	47
2022-09-13	14:51:58	3.1566	14.0412	1853.53	1	48
2022-09-13	14:51:58	3.09299	13.7582	1790.22	1	49
2022-09-13	14:51:59	1.98658	8.83671	1862.37	FALSE	49
2022-09-13	14:51:59	2.58831	11.5133	1801.74	FALSE	49
2022-09-13	14:51:59	1.33039	5.91784	1868.29	FALSE	49
2022-09-13	14:51:59	1.80358	8.02268	1809.76	FALSE	49
2022-09-13	14:52:00	1.0105	4.49491	1872.78	FALSE	49
2022-09-13	14:52:00	0.927646	4.12635	1813.89	FALSE	49
2022-09-13	14:52:00	0.614974	2.73553	1875.52	FALSE	49
2022-09-13	14:52:01	0.511107	2.27351	1816.16	FALSE	49
2022-09-13	14:52:01	0.481031	2.13972	1877.66	FALSE	49
2022-09-13	14:52:01	0.662608	2.94741	1819.11	FALSE	49
2022-09-13	14:52:01	0.561946	2.49965	1880.16	FALSE	49
2022-09-13	14:52:02	0.494975	2.20175	1821.31	FALSE	49
2022-09-13	14:52:02	0.419657	1.86672	1882.03	FALSE	49
2022-09-13	14:52:02	0.481896	2.14357	1823.45	FALSE	49
2022-09-13	14:52:02	0.590343	2.62596	1884.65	FALSE	49
2022-09-13	14:52:03	0.78159	3.47667	1826.93	FALSE	49
2022-09-13	14:52:03	1.07833	4.79663	1889.45	FALSE	49
2022-09-13	14:52:03	1.21411	5.4006	1832.33	FALSE	49
2022-09-13	14:52:03	1.48861	6.62164	1896.07	FALSE	49
2022-09-13	14:52:04	1.50154	6.67915	1839.01	FALSE	49
2022-09-13	14:52:04	1.25594	5.58667	1901.66	FALSE	49
2022-09-13	14:52:04	0.553702	2.46298	1841.47	FALSE	49
2022-09-13	14:52:05	0.398639	1.77323	1903.43	FALSE	49
2022-09-13	14:52:05	0.50444	2.24385	1843.71	FALSE	49
2022-09-13	14:52:05	0.621234	2.76337	1906.19	FALSE	49
2022-09-13	14:52:05	0.650496	2.89354	1846.61	FALSE	49
2022-09-13	14:52:06	0.585916	2.60627	1908.8	FALSE	49
2022-09-13	14:52:06	0.417825	1.85857	1848.47	FALSE	49
2022-09-13	14:52:06	0.388919	1.72999	1910.53	FALSE	49
2022-09-13	14:52:06	0.154364	0.686642	1849.15	FALSE	49
2022-09-13	14:52:07	0.146934	0.653592	1911.18	FALSE	49
2022-09-13	14:52:07	0.207494	0.922975	1850.08	FALSE	49
2022-09-13	14:52:07	0.233194	1.03729	1912.22	FALSE	49
2022-09-13	14:52:07	0.274567	1.22133	1851.3	FALSE	49
2022-09-13	14:52:08	0.249733	1.11086	1913.33	FALSE	49
2022-09-13	14:52:08	0.94897	4.22121	1855.52	FALSE	49
2022-09-13	14:52:08	0.409886	1.82325	1915.15	FALSE	49
2022-09-13	14:52:09	1.73905	7.73564	1863.25	FALSE	49
2022-09-13	14:52:09	2.08118	9.2575	1924.41	FALSE	49
2022-09-13	14:52:09	4.83207	21.494	1884.75	1	50
2022-09-13	14:52:09	5.93645	26.4065	1950.82	1	51
2022-09-13	14:52:10	15.006	66.7497	1951.5	1	52
2022-09-13	14:52:10	12.3545	54.9553	2005.77	1	53
2022-09-13	14:52:10	8.22779	36.5989	1988.1	1	54
2022-09-13	14:52:10	6.13802	27.3031	2033.08	1	55
2022-09-13	14:52:11	6.55116	29.1409	2017.24	1	56
2022-09-13	14:52:11	4.7624	21.1841	2054.26	1	57
2022-09-13	14:52:11	0.871667	3.87735	2021.12	FALSE	57
2022-09-13	14:52:11	1.00551	4.47271	2058.73	FALSE	57
2022-09-13	14:52:12	0.288715	1.28426	2022.4	FALSE	57
2022-09-13	14:52:12	0.278995	1.24103	2059.97	FALSE	57
2022-09-13	14:52:12	0.504593	2.24453	2024.64	FALSE	57
2022-09-13	14:52:13	0.317977	1.41443	2061.39	FALSE	57
2022-09-13	14:52:13	0.373804	1.66275	2026.31	FALSE	57
2022-09-13	14:52:13	0.546883	2.43264	2063.82	FALSE	57
2022-09-13	14:52:13	0.408461	1.81692	2028.12	FALSE	57
2022-09-13	14:52:14	0.352023	1.56587	2065.39	FALSE	57
2022-09-13	14:52:14	0.375026	1.66819	2029.79	FALSE	57
2022-09-13	14:52:14	0.352278	1.567	2066.95	FALSE	57
2022-09-13	14:52:14	0.351972	1.56564	2031.36	FALSE	57
2022-09-13	14:52:15	0.365509	1.62586	2068.58	FALSE	57
2022-09-13	14:52:15	0.418944	1.86355	2033.22	FALSE	57
2022-09-13	14:52:15	0.473906	2.10803	2070.69	FALSE	57
2022-09-13	14:52:15	0.27528	1.2245	2034.45	FALSE	57
2022-09-13	14:52:16	0.216196	0.961683	2071.65	FALSE	57
2022-09-13	14:52:16	-0.0737783	-0.328181	2034.45	FALSE	57
2022-09-13	14:52:16	0.242659	1.0794	2072.73	FALSE	57
2022-09-13	14:52:17	0.0344659	0.153311	2034.6	FALSE	57
2022-09-13	14:52:17	-0.374287	-1.6649	2072.73	FALSE	57
2022-09-13	14:52:17	-0.445381	-1.98114	2034.6	FALSE	57
2022-09-13	14:52:17	-0.30701	-1.36564	2072.73	FALSE	57
2022-09-13	14:52:18	0.0383336	0.170516	2034.77	FALSE	57
2022-09-13	14:52:18	0.475433	2.11482	2074.84	FALSE	57
2022-09-13	14:52:18	0.318181	1.41533	2036.18	FALSE	57
2022-09-13	14:52:18	0.461489	2.0528	2076.9	FALSE	57
2022-09-13	14:52:19	0.423728	1.88483	2038.07	FALSE	57
2022-09-13	14:52:19	0.484339	2.15444	2079.05	FALSE	57
2022-09-13	14:52:19	0.46383	2.06321	2040.13	FALSE	57
2022-09-13	14:52:19	0.498486	2.21737	2081.27	FALSE	57
2022-09-13	14:52:20	0.512735	2.28075	2042.41	FALSE	57
2022-09-13	14:52:20	0.392939	1.74787	2083.02	FALSE	57
2022-09-13	14:52:20	0.523575	2.32897	2044.74	FALSE	57
2022-09-13	14:52:21	0.643931	2.86433	2085.88	FALSE	57
2022-09-13	14:52:21	0.636501	2.83128	2047.57	FALSE	57
2022-09-13	14:52:21	0.66388	2.95307	2088.83	FALSE	57
2022-09-13	14:52:21	0.633651	2.81861	2050.39	FALSE	57
2022-09-13	14:52:22	0.627646	2.79189	2091.63	FALSE	57
2022-09-13	14:52:22	0.617621	2.7473	2053.14	FALSE	57
2022-09-13	14:52:22	0.593855	2.64159	2094.27	FALSE	57
2022-09-13	14:52:22	0.660725	2.93904	2056.08	FALSE	57
2022-09-13	14:52:23	0.630852	2.80616	2097.07	FALSE	57
2022-09-13	14:52:23	0.677672	3.01442	2059.09	FALSE	57
2022-09-13	14:52:23	0.687545	3.05834	2100.13	FALSE	57
2022-09-13	14:52:23	0.817621	3.63694	2062.73	FALSE	57
2022-09-13	14:52:24	0.805407	3.58261	2103.71	FALSE	57
2022-09-13	14:52:24	0.692226	3.07916	2065.81	FALSE	57
2022-09-13	14:52:24	0.724389	3.22223	2106.94	FALSE	57
2022-09-13	14:52:25	0.687646	3.05879	2068.87	FALSE	57
2022-09-13	14:52:25	0.702964	3.12692	2110.06	FALSE	57
2022-09-13	14:52:25	0.80103	3.56314	2072.43	FALSE	57
2022-09-13	14:52:25	0.681743	3.03253	2113.1	FALSE	57
2022-09-13	14:52:26	0.692125	3.07871	2075.51	FALSE	57
2022-09-13	14:52:26	0.952583	4.23728	2117.33	FALSE	57
2022-09-13	14:52:26	0.677112	3.01193	2078.52	FALSE	57
2022-09-13	14:52:26	0.577112	2.56711	2119.9	FALSE	57
2022-09-13	14:52:27	0.538842	2.39688	2080.92	FALSE	57
2022-09-13	14:52:27	0.527036	2.34436	2122.25	FALSE	57
2022-09-13	14:52:27	1.02576	4.56279	2085.48	FALSE	57
2022-09-13	14:52:27	0.523575	2.32897	2124.57	FALSE	57
2022-09-13	14:52:28	0.494008	2.19745	2087.68	FALSE	57
2022-09-13	14:52:28	0.515534	2.2932	2126.87	FALSE	57
2022-09-13	14:52:28	0.475891	2.11686	2089.8	FALSE	57
2022-09-13	14:52:29	0.480776	2.13859	2129.01	FALSE	57
2022-09-13	14:52:29	0.492277	2.18975	2091.99	FALSE	57
2022-09-13	14:52:29	0.490751	2.18296	2131.19	FALSE	57
2022-09-13	14:52:29	0.484746	2.15625	2094.14	FALSE	57
2022-09-13	14:52:30	0.492837	2.19224	2133.38	FALSE	57
2022-09-13	14:52:30	0.48673	2.16507	2096.31	FALSE	57
2022-09-13	14:52:30	0.484389	2.15466	2135.54	FALSE	57
2022-09-13	14:52:30	0.482557	2.14651	2098.45	FALSE	57
2022-09-13	14:52:31	0.488715	2.1739	2137.71	FALSE	57
2022-09-13	14:52:31	0.482863	2.14787	2100.6	FALSE	57
2022-09-13	14:52:31	0.492125	2.18907	2139.9	FALSE	57
2022-09-13	14:52:31	0.465713	2.07158	2102.67	FALSE	57
2022-09-13	14:52:32	0.477367	2.12342	2142.02	FALSE	57
2022-09-13	14:52:32	0.48271	2.14719	2104.82	FALSE	57
2022-09-13	14:52:32	0.494008	2.19745	2144.22	FALSE	57
2022-09-13	14:52:33	0.463372	2.06117	2106.88	FALSE	57
2022-09-13	14:52:33	0.499148	2.22031	2146.44	FALSE	57
2022-09-13	14:52:33	0.488003	2.17073	2109.05	FALSE	57
2022-09-13	14:52:33	0.490038	2.17979	2148.62	FALSE	57
2022-09-13	14:52:34	0.503626	2.24023	2111.29	FALSE	57
2022-09-13	14:52:34	0.492583	2.19111	2150.81	FALSE	57
2022-09-13	14:52:34	0.496705	2.20944	2113.5	FALSE	57
2022-09-13	14:52:34	0.489987	2.17956	2152.99	FALSE	57

## Sheet: Unnamed_star_2022913144724 (2)
Date	Time	Lbs	Total force x time			**GoPro Fitting: 1435
2022-09-13	14:47:24	0.413651	0.413651	FALSE	0
2022-09-13	14:47:24	0.351768	0.765419	FALSE	0
2022-09-13	14:47:24	0.383626	1.14905	FALSE	0
2022-09-13	14:47:25	0.381692	1.53074	FALSE	0
2022-09-13	14:47:25	0.383066	1.9138	FALSE	0
2022-09-13	14:47:25	0.394822	2.30863	FALSE	0
2022-09-13	14:47:25	0.380216	2.68884	FALSE	0
2022-09-13	14:47:26	0.363066	3.05191	FALSE	0
2022-09-13	14:47:26	0.299911	3.35182	FALSE	0
2022-09-13	14:47:26	0.335738	3.68756	FALSE	0
2022-09-13	14:47:27	0.336501	4.02406	FALSE	0
2022-09-13	14:47:27	0.348562	4.37262	FALSE	0
2022-09-13	14:47:27	0.338435	4.71105	FALSE	0
2022-09-13	14:47:27	0.342863	5.05392	FALSE	0
2022-09-13	14:47:28	0.348817	5.40273	FALSE	0
2022-09-13	14:47:28	0.359097	5.76183	FALSE	0
2022-09-13	14:47:28	0.366222	6.12805	FALSE	0
2022-09-13	14:47:28	0.36159	6.48964	FALSE	0
2022-09-13	14:47:29	0.373041	6.86268	FALSE	0
2022-09-13	14:47:29	0.338791	7.20147	FALSE	0
2022-09-13	14:47:29	0.334771	7.53625	FALSE	0
2022-09-13	14:47:29	0.382303	7.91855	FALSE	0
2022-09-13	14:47:30	0.375687	8.29424	FALSE	0
2022-09-13	14:47:30	1.40246	9.6967	FALSE	0
2022-09-13	14:47:30	0.757672	10.4544	FALSE	0
2022-09-13	14:47:31	0.34154	10.7959	FALSE	0
2022-09-13	14:47:31	0.356552	11.1525	FALSE	0
2022-09-13	14:47:31	1.31167	12.4641	FALSE	0
2022-09-13	14:47:31	0.790649	13.2548	FALSE	0
2022-09-13	14:47:32	1.46765	14.7224	FALSE	0
2022-09-13	14:47:32	0.446323	15.1688	FALSE	0
2022-09-13	14:47:32	-0.213218	15.1688	FALSE	0
2022-09-13	14:47:32	1.7222	16.891	FALSE	0
2022-09-13	14:47:33	0.448562	17.3395	FALSE	0
2022-09-13	14:47:33	0.160216	17.4997	FALSE	0
2022-09-13	14:47:33	0.118232	17.618	FALSE	0
2022-09-13	14:47:33	0.158842	17.7768	FALSE	0
2022-09-13	14:47:34	0.137468	17.9143	FALSE	0
2022-09-13	14:47:34	0.163524	18.0778	FALSE	0
2022-09-13	14:47:34	0.0941605	18.172	FALSE	0
2022-09-13	14:47:35	0.242252	18.4142	FALSE	0
2022-09-13	14:47:35	0.194822	18.609	FALSE	0
2022-09-13	14:47:35	0.232634	18.8417	FALSE	0
2022-09-13	14:47:35	0.230802	19.0725	FALSE	0
2022-09-13	14:47:36	0.115229	19.1877	FALSE	0
2022-09-13	14:47:36	0.160522	19.3482	FALSE	0
2022-09-13	14:47:36	0.151819	19.5	FALSE	0
2022-09-13	14:47:36	0.195178	19.6952	FALSE	0
2022-09-13	14:47:37	0.280573	19.9758	FALSE	0
2022-09-13	14:47:37	0.213092	20.1889	FALSE	0
2022-09-13	14:47:37	0.520929	20.7098	FALSE	0
2022-09-13	14:47:37	0.475382	21.1852	FALSE	0
2022-09-13	14:47:38	0.343931	21.5291	FALSE	0
2022-09-13	14:47:38	0.266985	21.7961	FALSE	0
2022-09-13	14:47:38	0.195127	21.9912	FALSE	0
2022-09-13	14:47:39	0.529783	22.521	FALSE	0
2022-09-13	14:47:39	0.398181	22.9192	FALSE	0
2022-09-13	14:47:39	0.300878	23.2201	FALSE	0
2022-09-13	14:47:39	0.414517	23.6346	FALSE	0
2022-09-13	14:47:40	0.343524	23.9781	FALSE	0
2022-09-13	14:47:40	0.16159	24.1397	FALSE	0
2022-09-13	14:47:40	-0.215916	24.1397	FALSE	0
2022-09-13	14:47:40	-0.110674	24.1397	FALSE	0
2022-09-13	14:47:41	0.477316	24.617	FALSE	0
2022-09-13	14:47:41	0.645305	25.2623	FALSE	0
2022-09-13	14:47:41	0.443626	25.706	FALSE	0
2022-09-13	14:47:41	0.312481	26.0184	FALSE	0
2022-09-13	14:47:42	0.270089	26.2885	FALSE	0
2022-09-13	14:47:42	0.214568	26.5031	FALSE	0
2022-09-13	14:47:42	0.492277	26.9954	FALSE	0
2022-09-13	14:47:43	0.45416	27.4495	FALSE	0
2022-09-13	14:47:43	0.465051	27.9146	FALSE	0
2022-09-13	14:47:43	0.426679	28.3413	FALSE	0
2022-09-13	14:47:43	0.448257	28.7895	FALSE	0
2022-09-13	14:47:44	0.468308	29.2578	FALSE	0
2022-09-13	14:47:44	0.477061	29.7349	FALSE	0
2022-09-13	14:47:44	0.498639	30.2335	FALSE	0
2022-09-13	14:47:45	0.488206	30.7217	FALSE	0
2022-09-13	14:47:45	0.428155	31.1499	FALSE	0
2022-09-13	14:47:45	0.468257	31.6181	FALSE	0
2022-09-13	14:47:45	1.35075	32.9689	FALSE	0
2022-09-13	14:47:45	0.468054	33.4369	FALSE	0
2022-09-13	14:47:46	0.135077	33.572	FALSE	0
2022-09-13	14:47:46	-0.018155	33.572	FALSE	0
2022-09-13	14:47:46	0.124898	33.6969	FALSE	0
2022-09-13	14:47:47	0.0454582	33.7424	FALSE	0
2022-09-13	14:47:47	-0.0708776	33.7424	FALSE	0
2022-09-13	14:47:47	0.0265778	33.769	FALSE	0
2022-09-13	14:47:47	0.186171	33.9551	FALSE	0
2022-09-13	14:47:48	0.46729	34.4224	FALSE	0
2022-09-13	14:47:48	0.624542	35.047	FALSE	0
2022-09-13	14:47:48	0.861641	35.9086	FALSE	0
2022-09-13	14:47:48	1.20011	37.1087	FALSE	0
2022-09-13	14:47:49	0.341489	37.4502	FALSE	0
2022-09-13	14:47:49	0.590801	38.041	FALSE	0
2022-09-13	14:47:49	0.392837	38.4338	FALSE	0
2022-09-13	14:47:49	1.19711	39.6309	FALSE	0
2022-09-13	14:47:50	1.50022	41.1312	FALSE	0
2022-09-13	14:47:50	2.31645	43.4476	FALSE	0
2022-09-13	14:47:50	1.01782	44.4654	FALSE	0
2022-09-13	14:47:50	0.341031	44.8065	FALSE	0
2022-09-13	14:47:51	0.260318	45.0668	FALSE	0
2022-09-13	14:47:51	0.413855	45.4806	FALSE	0
2022-09-13	14:47:51	0.527544	46.0082	FALSE	0
2022-09-13	14:47:52	0.557672	46.5659	FALSE	0
2022-09-13	14:47:52	0.32098	46.8868	FALSE	0
2022-09-13	14:47:52	0.157977	47.0448	FALSE	0
2022-09-13	14:47:52	0.439809	47.4846	FALSE	0
2022-09-13	14:47:53	0.176349	47.661	FALSE	0
2022-09-13	14:47:53	0.304186	47.9652	FALSE	0
2022-09-13	14:47:53	0.352685	48.3178	FALSE	0
2022-09-13	14:47:53	0.325407	48.6433	FALSE	0
2022-09-13	14:47:54	0.269173	48.9124	FALSE	0
2022-09-13	14:47:54	0.378435	49.2909	FALSE	0
2022-09-13	14:47:54	0.0396058	49.3305	FALSE	0
2022-09-13	14:47:54	0.0637788	49.3942	FALSE	0
2022-09-13	14:47:55	0.241438	49.6357	FALSE	0
2022-09-13	14:47:55	0.231158	49.8668	FALSE	0
2022-09-13	14:47:55	0.366018	50.2329	FALSE	0
2022-09-13	14:47:56	1.12373	51.3566	FALSE	0
2022-09-13	14:47:56	1.01406	52.3706	FALSE	0
2022-09-13	14:47:56	0.65299	53.0236	FALSE	0
2022-09-13	14:47:56	0.475433	53.4991	FALSE	0
2022-09-13	14:47:57	0.525712	54.0248	FALSE	0
2022-09-13	14:47:57	0.422303	54.4471	FALSE	0
2022-09-13	14:47:57	0.423372	54.8705	FALSE	0
2022-09-13	14:47:57	0.349478	55.2199	FALSE	0
2022-09-13	14:47:58	0.389529	55.6095	FALSE	0
2022-09-13	14:47:58	0.439555	56.049	FALSE	0
2022-09-13	14:47:58	0.577723	56.6267	FALSE	0
2022-09-13	14:47:58	0.513601	57.1403	FALSE	0
2022-09-13	14:47:59	0.505967	57.6463	FALSE	0
2022-09-13	14:47:59	0.321896	57.9682	FALSE	0
2022-09-13	14:47:59	0.253601	58.2218	FALSE	0
2022-09-13	14:48:00	0.176909	58.3987	FALSE	0
2022-09-13	14:48:00	0.222252	58.621	FALSE	0
2022-09-13	14:48:00	0.343626	58.9646	FALSE	0
2022-09-13	14:48:00	0.342863	59.3075	FALSE	0
2022-09-13	14:48:01	0.333499	59.641	FALSE	0
2022-09-13	14:48:01	0.305458	59.9464	FALSE	0
2022-09-13	14:48:01	0.411667	60.3581	FALSE	0
2022-09-13	14:48:01	0.393651	60.7517	FALSE	0
2022-09-13	14:48:02	0.353906	61.1056	FALSE	0
2022-09-13	14:48:02	0.365305	61.4709	FALSE	0
2022-09-13	14:48:02	0.366476	61.8374	FALSE	0
2022-09-13	14:48:02	0.400522	62.2379	FALSE	0
2022-09-13	14:48:03	0.388715	62.6267	FALSE	0
2022-09-13	14:48:03	0.403473	63.0301	FALSE	0
2022-09-13	14:48:03	0.437417	63.4675	FALSE	0
2022-09-13	14:48:04	0.495331	63.9629	FALSE	0
2022-09-13	14:48:04	0.626934	64.5898	FALSE	0
2022-09-13	14:48:04	0.904847	65.4947	FALSE	0
2022-09-13	14:48:04	1.22495	66.7196	FALSE	0
2022-09-13	14:48:05	1.06994	67.7895	FALSE	0
2022-09-13	14:48:05	1.17553	68.9651	FALSE	0
2022-09-13	14:48:05	0.9907	69.9558	FALSE	0
2022-09-13	14:48:05	1.06541	71.0212	FALSE	0
2022-09-13	14:48:06	1.06332	72.0845	FALSE	0
2022-09-13	14:48:06	1.04841	73.1329	FALSE	0
2022-09-13	14:48:06	1.00159	74.1345	FALSE	0
2022-09-13	14:48:06	1.02072	75.1552	FALSE	0
2022-09-13	14:48:07	0.897774	76.053	FALSE	0
2022-09-13	14:48:07	0.876094	76.9291	FALSE	0
2022-09-13	14:48:07	0.793906	77.723	FALSE	0
2022-09-13	14:48:08	0.802303	78.5253	FALSE	0
2022-09-13	14:48:08	0.881947	79.4073	FALSE	0
2022-09-13	14:48:08	0.784389	80.1916	FALSE	0
2022-09-13	14:48:08	0.772583	80.9642	FALSE	0
2022-09-13	14:48:09	0.826476	81.7907	FALSE	0
2022-09-13	14:48:09	0.809122	82.5998	FALSE	0
2022-09-13	14:48:09	0.866476	83.4663	FALSE	0
2022-09-13	14:48:09	0.850954	84.3173	FALSE	0
2022-09-13	14:48:10	0.797519	85.1148	FALSE	0
2022-09-13	14:48:10	0.817366	85.9321	FALSE	0
2022-09-13	14:48:10	0.845661	86.7778	FALSE	0
2022-09-13	14:48:10	0.872633	87.6504	FALSE	0
2022-09-13	14:48:11	0.855941	88.5064	FALSE	0
2022-09-13	14:48:11	0.784593	89.291	FALSE	0
2022-09-13	14:48:11	0.843779	90.1347	FALSE	0
2022-09-13	14:48:12	0.869122	91.0039	FALSE	0
2022-09-13	14:48:12	0.812277	91.8161	FALSE	0
2022-09-13	14:48:12	0.789783	92.6059	FALSE	0
2022-09-13	14:48:12	0.834517	93.4404	FALSE	0
2022-09-13	14:48:13	0.830191	94.2706	FALSE	0
2022-09-13	14:48:13	0.78215	95.0528	FALSE	0
2022-09-13	14:48:13	0.847901	95.9007	FALSE	0
2022-09-13	14:48:14	0.875636	96.7763	FALSE	0
2022-09-13	14:48:14	0.827392	97.6037	FALSE	0
2022-09-13	14:48:14	0.840878	98.4446	FALSE	0
2022-09-13	14:48:14	0.770649	99.2152	FALSE	0
2022-09-13	14:48:14	0.812277	100.028	FALSE	0
2022-09-13	14:48:15	0.821794	100.849	FALSE	0
2022-09-13	14:48:15	0.80668	101.656	FALSE	0
2022-09-13	14:48:15	0.739707	102.396	FALSE	0
2022-09-13	14:48:16	0.743015	103.139	FALSE	0
2022-09-13	14:48:16	0.716196	103.855	FALSE	0
2022-09-13	14:48:16	0.726476	104.581	FALSE	0
2022-09-13	14:48:16	0.677773	105.259	FALSE	0
2022-09-13	14:48:17	0.634364	105.894	FALSE	0
2022-09-13	14:48:17	0.670293	106.564	FALSE	0
2022-09-13	14:48:17	0.656349	107.22	FALSE	0
2022-09-13	14:48:17	0.644898	107.865	FALSE	0
2022-09-13	14:48:18	0.658384	108.523	FALSE	0
2022-09-13	14:48:18	0.643677	109.167	FALSE	0
2022-09-13	14:48:18	0.998384	110.166	FALSE	0
2022-09-13	14:48:18	1.23014	111.396	FALSE	0
2022-09-13	14:48:19	1.55319	112.949	FALSE	0
2022-09-13	14:48:19	2.16189	115.111	FALSE	0
2022-09-13	14:48:19	2.3138	117.425	FALSE	0
2022-09-13	14:48:20	1.3763	118.801	FALSE	0
2022-09-13	14:48:20	1.19523	119.996	FALSE	0
2022-09-13	14:48:20	1.28159	121.278	FALSE	0
2022-09-13	14:48:20	1.74892	123.027	FALSE	0
2022-09-13	14:48:21	1.82011	124.847	FALSE	0
2022-09-13	14:48:21	2.32164	127.168	FALSE	0
2022-09-13	14:48:21	4.20739	131.376	1	1
2022-09-13	14:48:21	5.42719	136.803	1	2
2022-09-13	14:48:22	4.03304	140.836	1	3
2022-09-13	14:48:22	1.09864	141.935	FALSE	3
2022-09-13	14:48:22	0.61243	142.547	FALSE	3
2022-09-13	14:48:22	1.06469	143.612	FALSE	3
2022-09-13	14:48:23	1.07701	144.689	FALSE	3
2022-09-13	14:48:23	0.755331	145.444	FALSE	3
2022-09-13	14:48:23	0.994568	146.439	FALSE	3
2022-09-13	14:48:24	0.907392	147.346	FALSE	3
2022-09-13	14:48:24	0.907086	148.253	FALSE	3
2022-09-13	14:48:24	0.970903	149.224	FALSE	3
2022-09-13	14:48:24	0.964898	150.189	FALSE	3
2022-09-13	14:48:25	1.05935	151.248	FALSE	3
2022-09-13	14:48:25	1.2308	152.479	FALSE	3
2022-09-13	14:48:25	1.44495	153.924	FALSE	3
2022-09-13	14:48:25	1.22816	155.152	FALSE	3
2022-09-13	14:48:26	0.907443	156.06	FALSE	3
2022-09-13	14:48:26	1.03294	157.093	FALSE	3
2022-09-13	14:48:26	0.886578	157.979	FALSE	3
2022-09-13	14:48:26	0.928918	158.908	FALSE	3
2022-09-13	14:48:27	0.839249	159.747	FALSE	3
2022-09-13	14:48:27	0.745458	160.493	FALSE	3
2022-09-13	14:48:27	0.693295	161.186	FALSE	3
2022-09-13	14:48:28	0.690293	161.876	FALSE	3
2022-09-13	14:48:28	0.633448	162.51	FALSE	3
2022-09-13	14:48:28	0.628868	163.139	FALSE	3
2022-09-13	14:48:28	0.597621	163.736	FALSE	3
2022-09-13	14:48:29	0.651056	164.387	FALSE	3
2022-09-13	14:48:29	0.672023	165.059	FALSE	3
2022-09-13	14:48:29	0.617061	165.676	FALSE	3
2022-09-13	14:48:29	0.579758	166.256	FALSE	3
2022-09-13	14:48:30	0.58841	166.845	FALSE	3
2022-09-13	14:48:30	0.609529	167.454	FALSE	3
2022-09-13	14:48:30	0.608257	168.062	FALSE	3
2022-09-13	14:48:30	0.610802	168.673	FALSE	3
2022-09-13	14:48:31	0.628155	169.301	FALSE	3
2022-09-13	14:48:31	0.604797	169.906	FALSE	3
2022-09-13	14:48:31	0.614465	170.521	FALSE	3
2022-09-13	14:48:32	0.656349	171.177	FALSE	3
2022-09-13	14:48:32	0.623219	171.8	FALSE	3
2022-09-13	14:48:32	0.576705	172.377	FALSE	3
2022-09-13	14:48:32	0.591311	172.968	FALSE	3
2022-09-13	14:48:33	0.651361	173.62	FALSE	3
2022-09-13	14:48:33	0.723372	174.343	FALSE	3
2022-09-13	14:48:33	0.665	175.008	FALSE	3
2022-09-13	14:48:33	0.62388	175.632	FALSE	3
2022-09-13	14:48:34	0.639707	176.271	FALSE	3
2022-09-13	14:48:34	0.640013	176.911	FALSE	3
2022-09-13	14:48:34	0.687494	177.599	FALSE	3
2022-09-13	14:48:34	0.755331	178.354	FALSE	3
2022-09-13	14:48:35	0.775076	179.129	FALSE	3
2022-09-13	14:48:35	0.742812	179.872	FALSE	3
2022-09-13	14:48:35	0.722456	180.595	FALSE	3
2022-09-13	14:48:36	0.71645	181.311	FALSE	3
2022-09-13	14:48:36	0.713702	182.025	FALSE	3
2022-09-13	14:48:36	0.689173	182.714	FALSE	3
2022-09-13	14:48:36	0.694008	183.408	FALSE	3
2022-09-13	14:48:37	0.689173	184.097	FALSE	3
2022-09-13	14:48:37	0.717265	184.814	FALSE	3
2022-09-13	14:48:37	0.759911	185.574	FALSE	3
2022-09-13	14:48:37	0.705764	186.28	FALSE	3
2022-09-13	14:48:38	0.697672	186.978	FALSE	3
2022-09-13	14:48:38	0.678232	187.656	FALSE	3
2022-09-13	14:48:38	0.687494	188.343	FALSE	3
2022-09-13	14:48:38	0.665865	189.009	FALSE	3
2022-09-13	14:48:39	0.67696	189.686	FALSE	3
2022-09-13	14:48:39	0.660725	190.347	FALSE	3
2022-09-13	14:48:39	0.642354	190.989	FALSE	3
2022-09-13	14:48:40	0.663779	191.653	FALSE	3
2022-09-13	14:48:40	0.726832	192.38	FALSE	3
2022-09-13	14:48:40	0.741234	193.121	FALSE	3
2022-09-13	14:48:40	0.717774	193.839	FALSE	3
2022-09-13	14:48:41	0.846578	194.686	FALSE	3
2022-09-13	14:48:41	1.55279	196.238	FALSE	3
2022-09-13	14:48:41	2.26256	198.501	FALSE	3
2022-09-13	14:48:41	5.22734	203.728	1	4
2022-09-13	14:48:42	5.20413	208.932	1	5
2022-09-13	14:48:42	7.70184	216.634	1	6
2022-09-13	14:48:42	7.66876	224.303	1	7
2022-09-13	14:48:42	12.3724	236.675	1	8
2022-09-13	14:48:43	12.8395	249.515	1	9
2022-09-13	14:48:43	7.66103	257.176	1	10
2022-09-13	14:48:43	2.52317	259.699	FALSE	10
2022-09-13	14:48:44	2.80388	262.503	FALSE	10
2022-09-13	14:48:44	2.49701	265	FALSE	10
2022-09-13	14:48:44	2.37711	267.377	FALSE	10
2022-09-13	14:48:44	2.31569	269.693	FALSE	10
2022-09-13	14:48:45	2.63187	272.325	FALSE	10
2022-09-13	14:48:45	3.96673	276.291	1	11
2022-09-13	14:48:45	3.7737	280.065	1	12
2022-09-13	14:48:45	2.86902	282.934	FALSE	12
2022-09-13	14:48:46	2.35625	285.29	FALSE	12
2022-09-13	14:48:46	2.4481	287.738	FALSE	12
2022-09-13	14:48:46	2.30017	290.039	FALSE	12
2022-09-13	14:48:46	2.66011	292.699	FALSE	12
2022-09-13	14:48:47	1.80714	294.506	FALSE	12
2022-09-13	14:48:47	2.45772	296.964	FALSE	12
2022-09-13	14:48:47	2.81894	299.783	FALSE	12
2022-09-13	14:48:48	6.17635	305.959	1	13
2022-09-13	14:48:48	9.68489	315.644	1	14
2022-09-13	14:48:48	6.98617	322.63	1	15
2022-09-13	14:48:48	2.33752	324.967	FALSE	15
2022-09-13	14:48:49	1.36485	326.332	FALSE	15
2022-09-13	14:48:49	0.503677	326.836	FALSE	15
2022-09-13	14:48:49	0.798232	327.634	FALSE	15
2022-09-13	14:48:49	0.567392	328.202	FALSE	15
2022-09-13	14:48:50	0.493753	328.695	FALSE	15
2022-09-13	14:48:50	0.531616	329.227	FALSE	15
2022-09-13	14:48:50	0.610496	329.838	FALSE	15
2022-09-13	14:48:50	0.741997	330.58	FALSE	15
2022-09-13	14:48:51	0.858435	331.438	FALSE	15
2022-09-13	14:48:51	0.824898	332.263	FALSE	15
2022-09-13	14:48:51	0.671107	332.934	FALSE	15
2022-09-13	14:48:52	0.589427	333.523	FALSE	15
2022-09-13	14:48:52	0.60042	334.124	FALSE	15
2022-09-13	14:48:52	0.585865	334.71	FALSE	15
2022-09-13	14:48:52	0.565662	335.275	FALSE	15
2022-09-13	14:48:53	0.580725	335.856	FALSE	15
2022-09-13	14:48:53	0.656145	336.512	FALSE	15
2022-09-13	14:48:53	0.567595	337.08	FALSE	15
2022-09-13	14:48:53	0.531056	337.611	FALSE	15
2022-09-13	14:48:54	0.514669	338.126	FALSE	15
2022-09-13	14:48:54	0.509987	338.635	FALSE	15
2022-09-13	14:48:54	0.445	339.08	FALSE	15
2022-09-13	14:48:54	0.341183	339.422	FALSE	15
2022-09-13	14:48:55	0.182761	339.604	FALSE	15
2022-09-13	14:48:55	-0.0151524	339.604	FALSE	15
2022-09-13	14:48:55	0.0489697	339.653	FALSE	15
2022-09-13	14:48:56	-0.119427	339.653	FALSE	15
2022-09-13	14:48:56	-0.376323	339.653	FALSE	15
2022-09-13	14:48:56	-0.438104	339.653	FALSE	15
2022-09-13	14:48:56	-0.619987	339.653	FALSE	15
2022-09-13	14:48:57	-0.830114	339.653	FALSE	15
2022-09-13	14:48:57	-0.743956	339.653	FALSE	15
2022-09-13	14:48:57	-0.884058	339.653	FALSE	15
2022-09-13	14:48:57	-0.835916	339.653	FALSE	15
2022-09-13	14:48:58	-0.907875	339.653	FALSE	15
2022-09-13	14:48:58	-0.937646	339.653	FALSE	15
2022-09-13	14:48:58	-0.843549	339.653	FALSE	15
2022-09-13	14:48:58	-0.702989	339.653	FALSE	15
2022-09-13	14:48:59	-0.697798	339.653	FALSE	15
2022-09-13	14:48:59	-0.136679	339.653	FALSE	15
2022-09-13	14:48:59	1.72256	341.376	FALSE	15
2022-09-13	14:49:00	2.61238	343.988	FALSE	15
2022-09-13	14:49:00	1.55477	345.543	FALSE	15
2022-09-13	14:49:00	0.23813	345.781	FALSE	15
2022-09-13	14:49:00	0.158028	345.939	FALSE	15
2022-09-13	14:49:01	0.168613	346.108	FALSE	15
2022-09-13	14:49:01	0.12042	346.228	FALSE	15
2022-09-13	14:49:01	0.129326	346.358	FALSE	15
2022-09-13	14:49:01	0.239708	346.597	FALSE	15
2022-09-13	14:49:02	-0.118155	346.597	FALSE	15
2022-09-13	14:49:02	-0.0486893	346.597	FALSE	15
2022-09-13	14:49:02	-0.176272	346.597	FALSE	15
2022-09-13	14:49:02	-0.150725	346.597	FALSE	15
2022-09-13	14:49:03	-0.333117	346.597	FALSE	15
2022-09-13	14:49:03	-0.454083	346.597	FALSE	15
2022-09-13	14:49:03	-0.465229	346.597	FALSE	15
2022-09-13	14:49:04	-0.603244	346.597	FALSE	15
2022-09-13	14:49:04	-0.81103	346.597	FALSE	15
2022-09-13	14:49:04	-0.290267	346.597	FALSE	15
2022-09-13	14:49:04	-0.230216	346.597	FALSE	15
2022-09-13	14:49:05	0.0178246	346.615	FALSE	15
2022-09-13	14:49:05	0.228155	346.843	FALSE	15
2022-09-13	14:49:05	0.0822012	346.926	FALSE	15
2022-09-13	14:49:05	0.23925	347.165	FALSE	15
2022-09-13	14:49:06	0.322048	347.487	FALSE	15
2022-09-13	14:49:06	0.319148	347.806	FALSE	15
2022-09-13	14:49:06	0.348104	348.154	FALSE	15
2022-09-13	14:49:06	0.556247	348.71	FALSE	15
2022-09-13	14:49:07	0.509886	349.22	FALSE	15
2022-09-13	14:49:07	0.38159	349.602	FALSE	15
2022-09-13	14:49:07	0.594262	350.196	FALSE	15
2022-09-13	14:49:08	0.597112	350.793	FALSE	15
2022-09-13	14:49:08	0.459758	351.253	FALSE	15
2022-09-13	14:49:08	0.292125	351.545	FALSE	15
2022-09-13	14:49:08	0.281489	351.827	FALSE	15
2022-09-13	14:49:09	0.492277	352.319	FALSE	15
2022-09-13	14:49:09	0.472125	352.791	FALSE	15
2022-09-13	14:49:09	0.663779	353.455	FALSE	15
2022-09-13	14:49:09	0.74159	354.196	FALSE	15
2022-09-13	14:49:10	2.13905	356.335	FALSE	15
2022-09-13	14:49:10	4.64098	360.976	1	16
2022-09-13	14:49:10	4.91787	365.894	1	17
2022-09-13	14:49:10	0.600776	366.495	FALSE	17
2022-09-13	14:49:11	0.341794	366.837	FALSE	17
2022-09-13	14:49:11	0.17243	367.009	FALSE	17
2022-09-13	14:49:11	1.13447	368.144	FALSE	17
2022-09-13	14:49:12	2.12184	370.266	FALSE	17
2022-09-13	14:49:12	0.523982	370.79	FALSE	17
2022-09-13	14:49:12	0.163117	370.953	FALSE	17
2022-09-13	14:49:12	-0.259376	370.953	FALSE	17
2022-09-13	14:49:13	-0.478562	370.953	FALSE	17
2022-09-13	14:49:13	-0.735915	370.953	FALSE	17
2022-09-13	14:49:13	-0.804668	370.953	FALSE	17
2022-09-13	14:49:13	-0.994898	370.953	FALSE	17
2022-09-13	14:49:14	-1.15581	370.953	FALSE	17
2022-09-13	14:49:14	-0.923091	370.953	FALSE	17
2022-09-13	14:49:14	-0.944363	370.953	FALSE	17
2022-09-13	14:49:14	-0.760088	370.953	FALSE	17
2022-09-13	14:49:15	-0.65963	370.953	FALSE	17
2022-09-13	14:49:15	-0.501513	370.953	FALSE	17
2022-09-13	14:49:15	-0.491895	370.953	FALSE	17
2022-09-13	14:49:16	-0.425279	370.953	FALSE	17
2022-09-13	14:49:16	-0.244007	370.953	FALSE	17
2022-09-13	14:49:16	0.630089	371.583	FALSE	17
2022-09-13	14:49:16	2.91838	374.501	FALSE	17
2022-09-13	14:49:17	3.61248	378.114	1	18
2022-09-13	14:49:17	0.589377	378.703	FALSE	18
2022-09-13	14:49:17	0.0325829	378.736	FALSE	18
2022-09-13	14:49:17	0.000572752	378.736	FALSE	18
2022-09-13	14:49:18	-0.0760175	378.736	FALSE	18
2022-09-13	14:49:18	-0.167875	378.736	FALSE	18
2022-09-13	14:49:18	-0.130572	378.736	FALSE	18
2022-09-13	14:49:18	-0.0412593	378.736	FALSE	18
2022-09-13	14:49:19	-0.023244	378.736	FALSE	18
2022-09-13	14:49:19	0.0659671	378.802	FALSE	18
2022-09-13	14:49:19	1.14912	379.951	FALSE	18
2022-09-13	14:49:20	2.20347	382.155	FALSE	18
2022-09-13	14:49:20	2.3736	384.528	FALSE	18
2022-09-13	14:49:20	0.42897	384.957	FALSE	18
2022-09-13	14:49:20	1.13899	386.096	FALSE	18
2022-09-13	14:49:21	0.481794	386.578	FALSE	18
2022-09-13	14:49:21	0.671616	387.25	FALSE	18
2022-09-13	14:49:21	0.73243	387.982	FALSE	18
2022-09-13	14:49:21	0.344288	388.326	FALSE	18
2022-09-13	14:49:22	0.179097	388.505	FALSE	18
2022-09-13	14:49:22	0.334873	388.84	FALSE	18
2022-09-13	14:49:22	0.986221	389.827	FALSE	18
2022-09-13	14:49:22	1.16393	390.99	FALSE	18
2022-09-13	14:49:23	0.451921	391.442	FALSE	18
2022-09-13	14:49:23	0.185865	391.628	FALSE	18
2022-09-13	14:49:23	0.0851528	391.713	FALSE	18
2022-09-13	14:49:24	0.126781	391.84	FALSE	18
2022-09-13	14:49:24	0.0794531	391.92	FALSE	18
2022-09-13	14:49:24	1.06826	392.988	FALSE	18
2022-09-13	14:49:24	4.60541	397.593	1	19
2022-09-13	14:49:25	4.5563	402.15	1	20
2022-09-13	14:49:25	4.36301	406.513	1	21
2022-09-13	14:49:25	2.62373	409.136	FALSE	21
2022-09-13	14:49:25	1.15772	410.294	FALSE	21
2022-09-13	14:49:26	0.701285	410.995	FALSE	21
2022-09-13	14:49:26	0.575484	411.571	FALSE	21
2022-09-13	14:49:26	0.367799	411.939	FALSE	21
2022-09-13	14:49:26	0.333193	412.272	FALSE	21
2022-09-13	14:49:27	0.332481	412.604	FALSE	21
2022-09-13	14:49:27	0.328461	412.933	FALSE	21
2022-09-13	14:49:27	0.33757	413.27	FALSE	21
2022-09-13	14:49:28	0.278842	413.549	FALSE	21
2022-09-13	14:49:28	0.298486	413.848	FALSE	21
2022-09-13	14:49:28	0.349631	414.197	FALSE	21
2022-09-13	14:49:28	0.338435	414.536	FALSE	21
2022-09-13	14:49:29	0.310954	414.847	FALSE	21
2022-09-13	14:49:29	0.31813	415.165	FALSE	21
2022-09-13	14:49:29	0.335382	415.5	FALSE	21
2022-09-13	14:49:29	0.362913	415.863	FALSE	21
2022-09-13	14:49:30	0.368461	416.232	FALSE	21
2022-09-13	14:49:30	0.410242	416.642	FALSE	21
2022-09-13	14:49:30	0.49528	417.137	FALSE	21
2022-09-13	14:49:30	0.542761	417.68	FALSE	21
2022-09-13	14:49:31	0.374364	418.054	FALSE	21
2022-09-13	14:49:31	0.325814	418.38	FALSE	21
2022-09-13	14:49:31	0.306781	418.687	FALSE	21
2022-09-13	14:49:32	0.301031	418.988	FALSE	21
2022-09-13	14:49:32	0.304033	419.292	FALSE	21
2022-09-13	14:49:32	0.301285	419.593	FALSE	21
2022-09-13	14:49:32	0.28902	419.882	FALSE	21
2022-09-13	14:49:33	0.286832	420.169	FALSE	21
2022-09-13	14:49:33	0.302048	420.471	FALSE	21
2022-09-13	14:49:33	0.305051	420.776	FALSE	21
2022-09-13	14:49:33	0.296603	421.073	FALSE	21
2022-09-13	14:49:34	0.307494	421.38	FALSE	21
2022-09-13	14:49:34	0.347239	421.727	FALSE	21
2022-09-13	14:49:34	0.413295	422.141	FALSE	21
2022-09-13	14:49:34	0.364644	422.505	FALSE	21
2022-09-13	14:49:35	0.329631	422.835	FALSE	21
2022-09-13	14:49:35	0.327901	423.163	FALSE	21
2022-09-13	14:49:35	0.341183	423.504	FALSE	21
2022-09-13	14:49:36	0.343015	423.847	FALSE	21
2022-09-13	14:49:36	0.35299	424.2	FALSE	21
2022-09-13	14:49:36	0.352328	424.552	FALSE	21
2022-09-13	14:49:36	0.35472	424.907	FALSE	21
2022-09-13	14:49:37	0.34958	425.257	FALSE	21
2022-09-13	14:49:37	0.336959	425.594	FALSE	21
2022-09-13	14:49:37	0.3564	425.95	FALSE	21
2022-09-13	14:49:37	0.371158	426.321	FALSE	21
2022-09-13	14:49:38	0.36042	426.682	FALSE	21
2022-09-13	14:49:38	0.358639	427.04	FALSE	21
2022-09-13	14:49:38	0.360064	427.4	FALSE	21
2022-09-13	14:49:38	0.365102	427.765	FALSE	21
2022-09-13	14:49:39	0.373346	428.139	FALSE	21
2022-09-13	14:49:39	0.367239	428.506	FALSE	21
2022-09-13	14:49:39	0.381438	428.888	FALSE	21
2022-09-13	14:49:40	0.380318	429.268	FALSE	21
2022-09-13	14:49:40	0.363015	429.631	FALSE	21
2022-09-13	14:49:40	0.366171	429.997	FALSE	21
2022-09-13	14:49:40	0.392837	430.39	FALSE	21
2022-09-13	14:49:41	0.403982	430.794	FALSE	21
2022-09-13	14:49:41	0.368613	431.162	FALSE	21
2022-09-13	14:49:41	0.381336	431.544	FALSE	21
2022-09-13	14:49:41	0.404288	431.948	FALSE	21
2022-09-13	14:49:42	0.414008	432.362	FALSE	21
2022-09-13	14:49:42	0.458181	432.82	FALSE	21
2022-09-13	14:49:42	0.465407	433.286	FALSE	21
2022-09-13	14:49:42	0.514924	433.801	FALSE	21
2022-09-13	14:49:43	0.616501	434.417	FALSE	21
2022-09-13	14:49:43	0.478944	434.896	FALSE	21
2022-09-13	14:49:43	0.734059	435.63	FALSE	21
2022-09-13	14:49:44	0.731819	436.362	FALSE	21
2022-09-13	14:49:44	0.731616	437.094	FALSE	21
2022-09-13	14:49:44	0.731209	437.825	FALSE	21
2022-09-13	14:49:44	0.729428	438.554	FALSE	21
2022-09-13	14:49:45	0.734313	439.288	FALSE	21
2022-09-13	14:49:45	0.731412	440.02	FALSE	21
2022-09-13	14:49:45	0.730191	440.75	FALSE	21
2022-09-13	14:49:45	0.735026	441.485	FALSE	21
2022-09-13	14:49:46	0.728868	442.214	FALSE	21
2022-09-13	14:49:46	0.731514	442.945	FALSE	21
2022-09-13	14:49:46	0.731717	443.677	FALSE	21
2022-09-13	14:49:46	0.730649	444.408	FALSE	21
2022-09-13	14:49:47	0.730038	445.138	FALSE	21
2022-09-13	14:49:47	0.950547	446.088	FALSE	21
2022-09-13	14:49:47	0.574059	446.663	FALSE	21
2022-09-13	14:49:48	0.679402	447.342	FALSE	21
2022-09-13	14:49:48	0.42841	447.77	FALSE	21
2022-09-13	14:49:48	0.357163	448.127	FALSE	21
2022-09-13	14:49:48	0.363473	448.491	FALSE	21
2022-09-13	14:49:49	0.336196	448.827	FALSE	21
2022-09-13	14:49:49	0.323321	449.15	FALSE	21
2022-09-13	14:49:49	0.341896	449.492	FALSE	21
2022-09-13	14:49:49	0.331921	449.824	FALSE	21
2022-09-13	14:49:50	0.348155	450.172	FALSE	21
2022-09-13	14:49:50	0.498333	450.671	FALSE	21
2022-09-13	14:49:50	1.15996	451.831	FALSE	21
2022-09-13	14:49:50	1.48103	453.312	FALSE	21
2022-09-13	14:49:51	3.42291	456.735	1	22
2022-09-13	14:49:51	6.0507	462.785	1	23
2022-09-13	14:49:51	4.70373	467.489	1	24
2022-09-13	14:49:52	4.64602	472.135	1	25
2022-09-13	14:49:52	4.81742	476.953	1	26
2022-09-13	14:49:52	2.58988	479.542	FALSE	26
2022-09-13	14:49:52	1.68856	481.231	FALSE	26
2022-09-13	14:49:53	1.48454	482.716	FALSE	26
2022-09-13	14:49:53	1.6394	484.355	FALSE	26
2022-09-13	14:49:53	0.904847	485.26	FALSE	26
2022-09-13	14:49:53	0.577672	485.837	FALSE	26
2022-09-13	14:49:54	0.427545	486.265	FALSE	26
2022-09-13	14:49:54	0.886374	487.151	FALSE	26
2022-09-13	14:49:54	0.654313	487.806	FALSE	26
2022-09-13	14:49:54	1.02312	488.829	FALSE	26
2022-09-13	14:49:55	1.23905	490.068	FALSE	26
2022-09-13	14:49:55	1.41655	491.484	FALSE	26
2022-09-13	14:49:55	1.38291	492.867	FALSE	26
2022-09-13	14:49:56	1.25075	494.118	FALSE	26
2022-09-13	14:49:56	0.663015	494.781	FALSE	26
2022-09-13	14:49:56	0.419708	495.201	FALSE	26
2022-09-13	14:49:56	0.397112	495.598	FALSE	26
2022-09-13	14:49:57	0.507697	496.106	FALSE	26
2022-09-13	14:49:57	0.355585	496.461	FALSE	26
2022-09-13	14:49:57	0.39986	496.861	FALSE	26
2022-09-13	14:49:57	0.395738	497.257	FALSE	26
2022-09-13	14:49:58	0.457468	497.714	FALSE	26
2022-09-13	14:49:58	0.460573	498.175	FALSE	26
2022-09-13	14:49:58	0.467901	498.643	FALSE	26
2022-09-13	14:49:58	0.454313	499.097	FALSE	26
2022-09-13	14:49:59	0.456247	499.553	FALSE	26
2022-09-13	14:49:59	0.449784	500.003	FALSE	26
2022-09-13	14:49:59	0.447137	500.45	FALSE	26
2022-09-13	14:50:00	0.45472	500.905	FALSE	26
2022-09-13	14:50:00	0.457977	501.363	FALSE	26
2022-09-13	14:50:00	0.455942	501.819	FALSE	26
2022-09-13	14:50:00	0.438333	502.257	FALSE	26
2022-09-13	14:50:01	0.439911	502.697	FALSE	26
2022-09-13	14:50:01	0.443066	503.14	FALSE	26
2022-09-13	14:50:01	0.457774	503.598	FALSE	26
2022-09-13	14:50:01	0.464746	504.063	FALSE	26
2022-09-13	14:50:02	0.459046	504.522	FALSE	26
2022-09-13	14:50:02	0.457367	504.979	FALSE	26
2022-09-13	14:50:02	0.459097	505.438	FALSE	26
2022-09-13	14:50:02	0.461998	505.9	FALSE	26
2022-09-13	14:50:03	0.465814	506.366	FALSE	26
2022-09-13	14:50:03	0.46785	506.834	FALSE	26
2022-09-13	14:50:03	0.466578	507.3	FALSE	26
2022-09-13	14:50:03	0.464949	507.765	FALSE	26
2022-09-13	14:50:04	0.469479	508.235	FALSE	26
2022-09-13	14:50:04	0.465662	508.7	FALSE	26
2022-09-13	14:50:04	0.462252	509.163	FALSE	26
2022-09-13	14:50:05	0.466069	509.629	FALSE	26
2022-09-13	14:50:05	0.467697	510.097	FALSE	26
2022-09-13	14:50:05	0.465204	510.562	FALSE	26
2022-09-13	14:50:05	0.465305	511.027	FALSE	26
2022-09-13	14:50:06	0.463015	511.49	FALSE	26
2022-09-13	14:50:06	0.462405	511.952	FALSE	26
2022-09-13	14:50:06	0.472074	512.425	FALSE	26
2022-09-13	14:50:06	0.480929	512.905	FALSE	26
2022-09-13	14:50:07	0.493906	513.399	FALSE	26
2022-09-13	14:50:07	0.475942	513.875	FALSE	26
2022-09-13	14:50:07	0.485305	514.361	FALSE	26
2022-09-13	14:50:07	0.617723	514.978	FALSE	26
2022-09-13	14:50:08	0.774313	515.753	FALSE	26
2022-09-13	14:50:08	0.55243	516.305	FALSE	26
2022-09-13	14:50:08	0.47472	516.78	FALSE	26
2022-09-13	14:50:09	0.615891	517.396	FALSE	26
2022-09-13	14:50:09	0.582354	517.978	FALSE	26
2022-09-13	14:50:09	0.604491	518.583	FALSE	26
2022-09-13	14:50:09	0.556145	519.139	FALSE	26
2022-09-13	14:50:10	0.589377	519.728	FALSE	26
2022-09-13	14:50:10	0.581641	520.31	FALSE	26
2022-09-13	14:50:10	0.622812	520.932	FALSE	26
2022-09-13	14:50:10	0.597112	521.53	FALSE	26
2022-09-13	14:50:11	0.599199	522.129	FALSE	26
2022-09-13	14:50:11	0.456501	522.585	FALSE	26
2022-09-13	14:50:11	0.45355	523.039	FALSE	26
2022-09-13	14:50:12	0.460064	523.499	FALSE	26
2022-09-13	14:50:12	0.476298	523.975	FALSE	26
2022-09-13	14:50:12	0.467341	524.443	FALSE	26
2022-09-13	14:50:12	0.576043	525.019	FALSE	26
2022-09-13	14:50:13	1.53268	526.551	FALSE	26
2022-09-13	14:50:13	1.56576	528.117	FALSE	26
2022-09-13	14:50:13	1.74413	529.861	FALSE	26
2022-09-13	14:50:13	1.13004	530.991	FALSE	26
2022-09-13	14:50:14	0.90902	531.9	FALSE	26
2022-09-13	14:50:14	1.27106	533.171	FALSE	26
2022-09-13	14:50:14	1.39279	534.564	FALSE	26
2022-09-13	14:50:14	0.332532	534.897	FALSE	26
2022-09-13	14:50:15	0.489784	535.386	FALSE	26
2022-09-13	14:50:15	0.476094	535.862	FALSE	26
2022-09-13	14:50:15	0.505509	536.368	FALSE	26
2022-09-13	14:50:15	0.444644	536.813	FALSE	26
2022-09-13	14:50:16	0.666629	537.479	FALSE	26
2022-09-13	14:50:16	0.571056	538.05	FALSE	26
2022-09-13	14:50:16	0.71701	538.767	FALSE	26
2022-09-13	14:50:17	0.522404	539.29	FALSE	26
2022-09-13	14:50:17	0.50668	539.796	FALSE	26
2022-09-13	14:50:17	0.426272	540.223	FALSE	26
2022-09-13	14:50:17	0.402557	540.625	FALSE	26
2022-09-13	14:50:18	0.400166	541.025	FALSE	26
2022-09-13	14:50:18	0.428664	541.454	FALSE	26
2022-09-13	14:50:18	1.08307	542.537	FALSE	26
2022-09-13	14:50:18	0.502455	543.04	FALSE	26
2022-09-13	14:50:19	0.333957	543.374	FALSE	26
2022-09-13	14:50:19	0.303473	543.677	FALSE	26
2022-09-13	14:50:19	0.281489	543.959	FALSE	26
2022-09-13	14:50:19	0.290903	544.249	FALSE	26
2022-09-13	14:50:20	0.291158	544.541	FALSE	26
2022-09-13	14:50:20	0.317621	544.858	FALSE	26
2022-09-13	14:50:20	0.287748	545.146	FALSE	26
2022-09-13	14:50:21	0.312176	545.458	FALSE	26
2022-09-13	14:50:21	0.29757	545.756	FALSE	26
2022-09-13	14:50:21	0.290598	546.046	FALSE	26
2022-09-13	14:50:21	0.297519	546.344	FALSE	26
2022-09-13	14:50:22	0.324491	546.668	FALSE	26
2022-09-13	14:50:22	0.371819	547.04	FALSE	26
2022-09-13	14:50:22	0.591463	547.632	FALSE	26
2022-09-13	14:50:22	0.184033	547.816	FALSE	26
2022-09-13	14:50:23	0.241132	548.057	FALSE	26
2022-09-13	14:50:23	0.273652	548.33	FALSE	26
2022-09-13	14:50:23	0.278232	548.609	FALSE	26
2022-09-13	14:50:23	0.278181	548.887	FALSE	26
2022-09-13	14:50:24	0.286425	549.173	FALSE	26
2022-09-13	14:50:24	0.439911	549.613	FALSE	26
2022-09-13	14:50:24	0.459758	550.073	FALSE	26
2022-09-13	14:50:25	0.712634	550.786	FALSE	26
2022-09-13	14:50:25	0.530293	551.316	FALSE	26
2022-09-13	14:50:25	0.326527	551.642	FALSE	26
2022-09-13	14:50:25	0.282303	551.925	FALSE	26
2022-09-13	14:50:26	0.302303	552.227	FALSE	26
2022-09-13	14:50:26	0.300522	552.528	FALSE	26
2022-09-13	14:50:26	0.299758	552.827	FALSE	26
2022-09-13	14:50:26	0.304746	553.132	FALSE	26
2022-09-13	14:50:27	0.352125	553.484	FALSE	26
2022-09-13	14:50:27	0.386883	553.871	FALSE	26
2022-09-13	14:50:27	0.443982	554.315	FALSE	26
2022-09-13	14:50:27	0.561183	554.876	FALSE	26
2022-09-13	14:50:28	0.404898	555.281	FALSE	26
2022-09-13	14:50:28	0.441489	555.723	FALSE	26
2022-09-13	14:50:28	0.425509	556.148	FALSE	26
2022-09-13	14:50:29	0.408308	556.556	FALSE	26
2022-09-13	14:50:29	0.388919	556.945	FALSE	26
2022-09-13	14:50:29	0.395433	557.341	FALSE	26
2022-09-13	14:50:29	0.405204	557.746	FALSE	26
2022-09-13	14:50:30	0.436043	558.182	FALSE	26
2022-09-13	14:50:30	0.446883	558.629	FALSE	26
2022-09-13	14:50:30	0.430954	559.06	FALSE	26
2022-09-13	14:50:30	0.422506	559.482	FALSE	26
2022-09-13	14:50:31	0.452074	559.934	FALSE	26
2022-09-13	14:50:31	0.476298	560.411	FALSE	26
2022-09-13	14:50:31	0.53584	560.947	FALSE	26
2022-09-13	14:50:31	0.470242	561.417	FALSE	26
2022-09-13	14:50:32	0.51014	561.927	FALSE	26
2022-09-13	14:50:32	0.506883	562.434	FALSE	26
2022-09-13	14:50:32	0.46897	562.903	FALSE	26
2022-09-13	14:50:33	0.433753	563.337	FALSE	26
2022-09-13	14:50:33	0.399249	563.736	FALSE	26
2022-09-13	14:50:33	0.387087	564.123	FALSE	26
2022-09-13	14:50:33	0.379148	564.502	FALSE	26
2022-09-13	14:50:34	0.375738	564.878	FALSE	26
2022-09-13	14:50:34	0.375687	565.253	FALSE	26
2022-09-13	14:50:34	0.370751	565.624	FALSE	26
2022-09-13	14:50:34	0.388308	566.012	FALSE	26
2022-09-13	14:50:35	0.406679	566.419	FALSE	26
2022-09-13	14:50:35	0.400471	566.82	FALSE	26
2022-09-13	14:50:35	0.395891	567.216	FALSE	26
2022-09-13	14:50:35	0.392939	567.608	FALSE	26
2022-09-13	14:50:36	0.399758	568.008	FALSE	26
2022-09-13	14:50:36	0.400166	568.408	FALSE	26
2022-09-13	14:50:36	0.397316	568.806	FALSE	26
2022-09-13	14:50:37	0.405204	569.211	FALSE	26
2022-09-13	14:50:37	0.409682	569.621	FALSE	26
2022-09-13	14:50:37	0.403575	570.024	FALSE	26
2022-09-13	14:50:37	0.399809	570.424	FALSE	26
2022-09-13	14:50:38	0.399504	570.823	FALSE	26
2022-09-13	14:50:38	0.400013	571.224	FALSE	26
2022-09-13	14:50:38	0.398537	571.622	FALSE	26
2022-09-13	14:50:38	0.384237	572.006	FALSE	26
2022-09-13	14:50:39	0.369987	572.376	FALSE	26
2022-09-13	14:50:39	0.383015	572.759	FALSE	26
2022-09-13	14:50:39	0.392074	573.151	FALSE	26
2022-09-13	14:50:39	0.392735	573.544	FALSE	26
2022-09-13	14:50:40	0.405713	573.95	FALSE	26
2022-09-13	14:50:40	0.410394	574.36	FALSE	26
2022-09-13	14:50:40	0.416756	574.777	FALSE	26
2022-09-13	14:50:41	0.425662	575.203	FALSE	26
2022-09-13	14:50:41	0.422965	575.626	FALSE	26
2022-09-13	14:50:41	0.42042	576.046	FALSE	26
2022-09-13	14:50:41	0.418639	576.465	FALSE	26
2022-09-13	14:50:42	0.427341	576.892	FALSE	26
2022-09-13	14:50:42	0.429326	577.321	FALSE	26
2022-09-13	14:50:42	0.404135	577.725	FALSE	26
2022-09-13	14:50:42	0.406323	578.132	FALSE	26
2022-09-13	14:50:43	0.362354	578.494	FALSE	26
2022-09-13	14:50:43	0.442201	578.936	FALSE	26
2022-09-13	14:50:43	0.46673	579.403	FALSE	26
2022-09-13	14:50:43	0.326934	579.73	FALSE	26
2022-09-13	14:50:44	0.404186	580.134	FALSE	26
2022-09-13	14:50:44	0.406527	580.541	FALSE	26
2022-09-13	14:50:44	0.526883	581.068	FALSE	26
2022-09-13	14:50:45	0.450344	581.518	FALSE	26
2022-09-13	14:50:45	0.413753	581.932	FALSE	26
2022-09-13	14:50:45	0.432481	582.364	FALSE	26
2022-09-13	14:50:45	0.483015	582.847	FALSE	26
2022-09-13	14:50:46	1.29543	584.143	FALSE	26
2022-09-13	14:50:46	0.563168	584.706	FALSE	26
2022-09-13	14:50:46	2.25223	586.958	FALSE	26
2022-09-13	14:50:46	0.415636	587.374	FALSE	26
2022-09-13	14:50:47	0.27584	587.649	FALSE	26
2022-09-13	14:50:47	0.360623	588.01	FALSE	26
2022-09-13	14:50:47	0.555331	588.565	FALSE	26
2022-09-13	14:50:47	0.713244	589.279	FALSE	26
2022-09-13	14:50:48	0.0819468	589.361	FALSE	26
2022-09-13	14:50:48	-0.431895	589.361	FALSE	26
2022-09-13	14:50:48	-0.396883	589.361	FALSE	26
2022-09-13	14:50:49	-0.243651	589.361	FALSE	26
2022-09-13	14:50:49	-0.255814	589.361	FALSE	26
2022-09-13	14:50:49	-0.319376	589.361	FALSE	26
2022-09-13	14:50:49	-0.185178	589.361	FALSE	26
2022-09-13	14:50:50	-0.197493	589.361	FALSE	26
2022-09-13	14:50:50	-0.171997	589.361	FALSE	26
2022-09-13	14:50:50	-0.113168	589.361	FALSE	26
2022-09-13	14:50:50	-0.0477224	589.361	FALSE	26
2022-09-13	14:50:51	0.153194	589.514	FALSE	26
2022-09-13	14:50:51	0.201641	589.715	FALSE	26
2022-09-13	14:50:51	-0.0355086	589.715	FALSE	26
2022-09-13	14:50:51	-0.0163229	589.715	FALSE	26
2022-09-13	14:50:52	0.147697	589.863	FALSE	26
2022-09-13	14:50:52	0.0581809	589.921	FALSE	26
2022-09-13	14:50:52	-0.203753	589.921	FALSE	26
2022-09-13	14:50:53	-0.127621	589.921	FALSE	26
2022-09-13	14:50:53	0.0103437	589.932	FALSE	26
2022-09-13	14:50:53	0.0965523	590.028	FALSE	26
2022-09-13	14:50:53	0.137723	590.166	FALSE	26
2022-09-13	14:50:54	0.116247	590.282	FALSE	26
2022-09-13	14:50:54	0.102812	590.385	FALSE	26
2022-09-13	14:50:54	0.184033	590.569	FALSE	26
2022-09-13	14:50:54	0.118588	590.688	FALSE	26
2022-09-13	14:50:55	0.178486	590.866	FALSE	26
2022-09-13	14:50:55	0.557723	591.424	FALSE	26
2022-09-13	14:50:55	0.982507	592.406	FALSE	26
2022-09-13	14:50:55	1.26485	593.671	FALSE	26
2022-09-13	14:50:56	1.44597	595.117	FALSE	26
2022-09-13	14:50:56	0.918486	596.036	FALSE	26
2022-09-13	14:50:56	0.703779	596.739	FALSE	26
2022-09-13	14:50:57	0.527697	597.267	FALSE	26
2022-09-13	14:50:57	0.468104	597.735	FALSE	26
2022-09-13	14:50:57	0.346832	598.082	FALSE	26
2022-09-13	14:50:57	0.394822	598.477	FALSE	26
2022-09-13	14:50:58	0.313143	598.79	FALSE	26
2022-09-13	14:50:58	0.302506	599.093	FALSE	26
2022-09-13	14:50:58	0.329784	599.422	FALSE	26
2022-09-13	14:50:58	0.327545	599.75	FALSE	26
2022-09-13	14:50:59	0.313957	600.064	FALSE	26
2022-09-13	14:50:59	0.303066	600.367	FALSE	26
2022-09-13	14:50:59	0.296145	600.663	FALSE	26
2022-09-13	14:50:59	0.296145	600.959	FALSE	26
2022-09-13	14:51:00	0.28902	601.248	FALSE	26
2022-09-13	14:51:00	0.294466	601.543	FALSE	26
2022-09-13	14:51:00	0.296654	601.839	FALSE	26
2022-09-13	14:51:01	0.299707	602.139	FALSE	26
2022-09-13	14:51:01	0.30383	602.443	FALSE	26
2022-09-13	14:51:01	0.30556	602.748	FALSE	26
2022-09-13	14:51:01	0.303626	603.052	FALSE	26
2022-09-13	14:51:02	0.301947	603.354	FALSE	26
2022-09-13	14:51:02	0.295738	603.65	FALSE	26
2022-09-13	14:51:02	0.299504	603.949	FALSE	26
2022-09-13	14:51:02	0.31187	604.261	FALSE	26
2022-09-13	14:51:03	0.327443	604.589	FALSE	26
2022-09-13	14:51:03	0.341285	604.93	FALSE	26
2022-09-13	14:51:03	0.356094	605.286	FALSE	26
2022-09-13	14:51:03	0.370751	605.657	FALSE	26
2022-09-13	14:51:04	0.365	606.022	FALSE	26
2022-09-13	14:51:04	0.358842	606.381	FALSE	26
2022-09-13	14:51:04	0.345967	606.726	FALSE	26
2022-09-13	14:51:05	0.331412	607.058	FALSE	26
2022-09-13	14:51:05	0.346883	607.405	FALSE	26
2022-09-13	14:51:05	0.321896	607.727	FALSE	26
2022-09-13	14:51:05	0.314466	608.041	FALSE	26
2022-09-13	14:51:06	0.339758	608.381	FALSE	26
2022-09-13	14:51:06	0.326069	608.707	FALSE	26
2022-09-13	14:51:06	0.330395	609.037	FALSE	26
2022-09-13	14:51:06	0.313957	609.351	FALSE	26
2022-09-13	14:51:07	0.308003	609.659	FALSE	26
2022-09-13	14:51:07	0.299758	609.959	FALSE	26
2022-09-13	14:51:07	0.305916	610.265	FALSE	26
2022-09-13	14:51:07	0.305763	610.571	FALSE	26
2022-09-13	14:51:08	0.331158	610.902	FALSE	26
2022-09-13	14:51:08	0.331463	611.233	FALSE	26
2022-09-13	14:51:08	0.33243	611.566	FALSE	26
2022-09-13	14:51:09	0.327188	611.893	FALSE	26
2022-09-13	14:51:09	0.323575	612.217	FALSE	26
2022-09-13	14:51:09	0.34271	612.559	FALSE	26
2022-09-13	14:51:09	0.339809	612.899	FALSE	26
2022-09-13	14:51:10	0.390191	613.289	FALSE	26
2022-09-13	14:51:10	0.559504	613.849	FALSE	26
2022-09-13	14:51:10	0.558842	614.408	FALSE	26
2022-09-13	14:51:10	0.5393	614.947	FALSE	26
2022-09-13	14:51:11	0.513957	615.461	FALSE	26
2022-09-13	14:51:11	0.478181	615.939	FALSE	26
2022-09-13	14:51:11	0.41355	616.353	FALSE	26
2022-09-13	14:51:11	0.342405	616.695	FALSE	26
2022-09-13	14:51:12	0.325407	617.02	FALSE	26
2022-09-13	14:51:12	0.319402	617.34	FALSE	26
2022-09-13	14:51:12	0.304288	617.644	FALSE	26
2022-09-13	14:51:13	0.286425	617.931	FALSE	26
2022-09-13	14:51:13	0.283473	618.214	FALSE	26
2022-09-13	14:51:13	0.275535	618.49	FALSE	26
2022-09-13	14:51:13	0.273702	618.763	FALSE	26
2022-09-13	14:51:14	0.277417	619.041	FALSE	26
2022-09-13	14:51:14	0.282048	619.323	FALSE	26
2022-09-13	14:51:14	0.275433	619.598	FALSE	26
2022-09-13	14:51:14	0.274873	619.873	FALSE	26
2022-09-13	14:51:15	0.273906	620.147	FALSE	26
2022-09-13	14:51:15	0.269682	620.417	FALSE	26
2022-09-13	14:51:15	0.317824	620.734	FALSE	26
2022-09-13	14:51:15	0.243015	620.977	FALSE	26
2022-09-13	14:51:16	0.128308	621.106	FALSE	26
2022-09-13	14:51:16	0.0560435	621.162	FALSE	26
2022-09-13	14:51:16	-0.0281295	621.162	FALSE	26
2022-09-13	14:51:17	0.00785013	621.17	FALSE	26
2022-09-13	14:51:17	0.444338	621.614	FALSE	26
2022-09-13	14:51:17	0.564084	622.178	FALSE	26
2022-09-13	14:51:17	0.848613	623.027	FALSE	26
2022-09-13	14:51:18	1.06678	624.093	FALSE	26
2022-09-13	14:51:18	0.75813	624.852	FALSE	26
2022-09-13	14:51:18	1.05849	625.91	FALSE	26
2022-09-13	14:51:18	0.93416	626.844	FALSE	26
2022-09-13	14:51:19	1.17528	628.02	FALSE	26
2022-09-13	14:51:19	0.743015	628.763	FALSE	26
2022-09-13	14:51:19	0.353143	629.116	FALSE	26
2022-09-13	14:51:19	0.611056	629.727	FALSE	26
2022-09-13	14:51:20	0.332786	630.06	FALSE	26
2022-09-13	14:51:20	0.941336	631.001	FALSE	26
2022-09-13	14:51:20	1.12933	632.13	FALSE	26
2022-09-13	14:51:21	0.603524	632.734	FALSE	26
2022-09-13	14:51:21	1.38973	634.123	FALSE	26
2022-09-13	14:51:21	0.745763	634.869	FALSE	26
2022-09-13	14:51:21	1.11538	635.985	FALSE	26
2022-09-13	14:51:22	0.215687	636.2	FALSE	26
2022-09-13	14:51:22	0.293244	636.494	FALSE	26
2022-09-13	14:51:22	0.106272	636.6	FALSE	26
2022-09-13	14:51:22	0.11472	636.715	FALSE	26
2022-09-13	14:51:23	-0.159427	636.715	FALSE	26
2022-09-13	14:51:23	-0.285738	636.715	FALSE	26
2022-09-13	14:51:23	-0.342175	636.715	FALSE	26
2022-09-13	14:51:23	-0.596781	636.715	FALSE	26
2022-09-13	14:51:24	-0.690165	636.715	FALSE	26
2022-09-13	14:51:24	-0.698256	636.715	FALSE	26
2022-09-13	14:51:24	-0.592251	636.715	FALSE	26
2022-09-13	14:51:25	-0.515508	636.715	FALSE	26
2022-09-13	14:51:25	-0.286806	636.715	FALSE	26
2022-09-13	14:51:25	0.656247	637.371	FALSE	26
2022-09-13	14:51:25	0.363626	637.734	FALSE	26
2022-09-13	14:51:26	0.340013	638.074	FALSE	26
2022-09-13	14:51:26	0.366323	638.441	FALSE	26
2022-09-13	14:51:26	0.298741	638.739	FALSE	26
2022-09-13	14:51:26	0.209631	638.949	FALSE	26
2022-09-13	14:51:27	0.213041	639.162	FALSE	26
2022-09-13	14:51:27	0.182557	639.345	FALSE	26
2022-09-13	14:51:27	0.629936	639.975	FALSE	26
2022-09-13	14:51:27	0.22042	640.195	FALSE	26
2022-09-13	14:51:28	0.53187	640.727	FALSE	26
2022-09-13	14:51:28	0.651056	641.378	FALSE	26
2022-09-13	14:51:28	0.607748	641.986	FALSE	26
2022-09-13	14:51:29	0.378333	642.364	FALSE	26
2022-09-13	14:51:29	0.349886	642.714	FALSE	26
2022-09-13	14:51:29	0.22673	642.941	FALSE	26
2022-09-13	14:51:29	0.366476	643.307	FALSE	26
2022-09-13	14:51:30	0.551005	643.858	FALSE	26
2022-09-13	14:51:30	0.498588	644.357	FALSE	26
2022-09-13	14:51:30	0.468868	644.826	FALSE	26
2022-09-13	14:51:30	0.514669	645.34	FALSE	26
2022-09-13	14:51:31	0.504491	645.845	FALSE	26
2022-09-13	14:51:31	0.523524	646.368	FALSE	26
2022-09-13	14:51:31	0.52897	646.897	FALSE	26
2022-09-13	14:51:31	0.489886	647.387	FALSE	26
2022-09-13	14:51:32	0.52902	647.916	FALSE	26
2022-09-13	14:51:32	0.493092	648.409	FALSE	26
2022-09-13	14:51:32	0.433804	648.843	FALSE	26
2022-09-13	14:51:33	0.585661	649.429	FALSE	26
2022-09-13	14:51:33	0.278283	649.707	FALSE	26
2022-09-13	14:51:33	0.221031	649.928	FALSE	26
2022-09-13	14:51:33	0.219657	650.148	FALSE	26
2022-09-13	14:51:34	0.293906	650.442	FALSE	26
2022-09-13	14:51:34	0.349326	650.791	FALSE	26
2022-09-13	14:51:34	0.534466	651.325	FALSE	26
2022-09-13	14:51:34	0.611056	651.936	FALSE	26
2022-09-13	14:51:35	0.658537	652.595	FALSE	26
2022-09-13	14:51:35	0.32215	652.917	FALSE	26
2022-09-13	14:51:35	0.396501	653.314	FALSE	26
2022-09-13	14:51:35	0.381132	653.695	FALSE	26
2022-09-13	14:51:36	0.303473	653.998	FALSE	26
2022-09-13	14:51:36	0.131972	654.13	FALSE	26
2022-09-13	14:51:36	0.325102	654.455	FALSE	26
2022-09-13	14:51:37	0.688257	655.144	FALSE	26
2022-09-13	14:51:37	-0.0148471	655.144	FALSE	26
2022-09-13	14:51:37	-0.539936	655.144	FALSE	26
2022-09-13	14:51:37	-0.636424	655.144	FALSE	26
2022-09-13	14:51:38	-0.345585	655.144	FALSE	26
2022-09-13	14:51:38	-0.216374	655.144	FALSE	26
2022-09-13	14:51:38	-0.24874	655.144	FALSE	26
2022-09-13	14:51:38	-0.54986	655.144	FALSE	26
2022-09-13	14:51:39	-0.630877	655.144	FALSE	26
2022-09-13	14:51:39	-0.669707	655.144	FALSE	26
2022-09-13	14:51:39	-0.57444	655.144	FALSE	26
2022-09-13	14:51:39	-0.540241	655.144	FALSE	26
2022-09-13	14:51:40	-0.621055	655.144	FALSE	26
2022-09-13	14:51:40	-0.617341	655.144	FALSE	26
2022-09-13	14:51:40	-0.564974	655.144	FALSE	26
2022-09-13	14:51:41	-0.546094	655.144	FALSE	26
2022-09-13	14:51:41	-0.438206	655.144	FALSE	26
2022-09-13	14:51:41	-0.302989	655.144	FALSE	26
2022-09-13	14:51:41	-0.243906	655.144	FALSE	26
2022-09-13	14:51:42	-0.0952542	655.144	FALSE	26
2022-09-13	14:51:42	0.320776	655.464	FALSE	26
2022-09-13	14:51:42	0.324288	655.789	FALSE	26
2022-09-13	14:51:42	0.227494	656.016	FALSE	26
2022-09-13	14:51:43	0.605	656.621	FALSE	26
2022-09-13	14:51:43	0.43925	657.06	FALSE	26
2022-09-13	14:51:43	0.526527	657.587	FALSE	26
2022-09-13	14:51:43	0.445255	658.032	FALSE	26
2022-09-13	14:51:44	0.441031	658.473	FALSE	26
2022-09-13	14:51:44	0.424796	658.898	FALSE	26
2022-09-13	14:51:44	0.736298	659.634	FALSE	26
2022-09-13	14:51:45	0.835229	660.47	FALSE	26
2022-09-13	14:51:45	1.12118	661.591	FALSE	26
2022-09-13	14:51:45	1.20851	662.799	FALSE	26
2022-09-13	14:51:45	1.16373	663.963	FALSE	26
2022-09-13	14:51:46	1.16139	665.124	FALSE	26
2022-09-13	14:51:46	2.09716	667.221	FALSE	26
2022-09-13	14:51:46	3.76525	670.987	1	27
2022-09-13	14:51:46	3.49721	674.484	1	28
2022-09-13	14:51:47	3.1824	677.666	1	29
2022-09-13	14:51:47	2.34739	680.014	FALSE	29
2022-09-13	14:51:47	1.61019	681.624	FALSE	29
2022-09-13	14:51:47	0.959758	682.584	FALSE	29
2022-09-13	14:51:48	0.347697	682.931	FALSE	29
2022-09-13	14:51:48	0.400013	683.331	FALSE	29
2022-09-13	14:51:48	0.256705	683.588	FALSE	29
2022-09-13	14:51:49	0.308969	683.897	FALSE	29
2022-09-13	14:51:49	1.00495	684.902	FALSE	29
2022-09-13	14:51:49	3.48597	688.388	1	30
2022-09-13	14:51:49	6.94708	695.335	1	31
2022-09-13	14:51:50	10.3798	705.715	1	32
2022-09-13	14:51:50	1.9908	707.706	FALSE	32
2022-09-13	14:51:50	3.33482	711.04	1	33
2022-09-13	14:51:50	2.20001	713.24	FALSE	33
2022-09-13	14:51:51	1.67452	714.915	FALSE	33
2022-09-13	14:51:51	1.05996	715.975	FALSE	33
2022-09-13	14:51:51	1.32225	717.297	FALSE	33
2022-09-13	14:51:51	1.92261	719.22	FALSE	33
2022-09-13	14:51:52	3.67548	722.895	1	34
2022-09-13	14:51:52	7.24749	730.143	1	35
2022-09-13	14:51:52	12.9634	743.106	1	36
2022-09-13	14:51:53	10.3228	753.429	1	37
2022-09-13	14:51:53	6.88719	760.316	1	38
2022-09-13	14:51:53	11.6079	771.924	1	39
2022-09-13	14:51:53	10.6591	782.583	1	40
2022-09-13	14:51:54	8.23131	790.815	1	41
2022-09-13	14:51:54	5.52225	796.337	1	42
2022-09-13	14:51:54	4.62317	800.96	1	43
2022-09-13	14:51:54	4.08841	805.048	1	44
2022-09-13	14:51:55	3.90815	808.956	1	45
2022-09-13	14:51:55	3.93396	812.89	1	46
2022-09-13	14:51:55	3.8224	816.713	1	47
2022-09-13	14:51:56	2.95436	819.667	FALSE	47
2022-09-13	14:51:56	2.03701	821.704	FALSE	47
2022-09-13	14:51:56	0.967697	822.672	FALSE	47
2022-09-13	14:51:56	0.594924	823.267	FALSE	47
2022-09-13	14:51:57	0.518893	823.786	FALSE	47
2022-09-13	14:51:57	0.447647	824.233	FALSE	47
2022-09-13	14:51:57	0.779758	825.013	FALSE	47
2022-09-13	14:51:57	1.368	826.381	FALSE	47
2022-09-13	14:51:58	1.52744	827.909	FALSE	47
2022-09-13	14:51:58	2.77182	830.68	FALSE	47
2022-09-13	14:51:58	3.1566	833.837	1	48
2022-09-13	14:51:58	3.09299	836.93	1	49
2022-09-13	14:51:59	1.98658	838.917	FALSE	49
2022-09-13	14:51:59	2.58831	841.505	FALSE	49
2022-09-13	14:51:59	1.33039	842.835	FALSE	49
2022-09-13	14:51:59	1.80358	844.639	FALSE	49
2022-09-13	14:52:00	1.0105	845.649	FALSE	49
2022-09-13	14:52:00	0.927646	846.577	FALSE	49
2022-09-13	14:52:00	0.614974	847.192	FALSE	49
2022-09-13	14:52:01	0.511107	847.703	FALSE	49
2022-09-13	14:52:01	0.481031	848.184	FALSE	49
2022-09-13	14:52:01	0.662608	848.847	FALSE	49
2022-09-13	14:52:01	0.561946	849.409	FALSE	49
2022-09-13	14:52:02	0.494975	849.904	FALSE	49
2022-09-13	14:52:02	0.419657	850.323	FALSE	49
2022-09-13	14:52:02	0.481896	850.805	FALSE	49
2022-09-13	14:52:02	0.590343	851.396	FALSE	49
2022-09-13	14:52:03	0.78159	852.177	FALSE	49
2022-09-13	14:52:03	1.07833	853.255	FALSE	49
2022-09-13	14:52:03	1.21411	854.47	FALSE	49
2022-09-13	14:52:03	1.48861	855.958	FALSE	49
2022-09-13	14:52:04	1.50154	857.46	FALSE	49
2022-09-13	14:52:04	1.25594	858.716	FALSE	49
2022-09-13	14:52:04	0.553702	859.269	FALSE	49
2022-09-13	14:52:05	0.398639	859.668	FALSE	49
2022-09-13	14:52:05	0.50444	860.172	FALSE	49
2022-09-13	14:52:05	0.621234	860.794	FALSE	49
2022-09-13	14:52:05	0.650496	861.444	FALSE	49
2022-09-13	14:52:06	0.585916	862.03	FALSE	49
2022-09-13	14:52:06	0.417825	862.448	FALSE	49
2022-09-13	14:52:06	0.388919	862.837	FALSE	49
2022-09-13	14:52:06	0.154364	862.991	FALSE	49
2022-09-13	14:52:07	0.146934	863.138	FALSE	49
2022-09-13	14:52:07	0.207494	863.346	FALSE	49
2022-09-13	14:52:07	0.233194	863.579	FALSE	49
2022-09-13	14:52:07	0.274567	863.853	FALSE	49
2022-09-13	14:52:08	0.249733	864.103	FALSE	49
2022-09-13	14:52:08	0.94897	865.052	FALSE	49
2022-09-13	14:52:08	0.409886	865.462	FALSE	49
2022-09-13	14:52:09	1.73905	867.201	FALSE	49
2022-09-13	14:52:09	2.08118	869.282	FALSE	49
2022-09-13	14:52:09	4.83207	874.114	1	50
2022-09-13	14:52:09	5.93645	880.051	1	51
2022-09-13	14:52:10	15.006	895.057	1	52
2022-09-13	14:52:10	12.3545	907.411	1	53
2022-09-13	14:52:10	8.22779	915.639	1	54
2022-09-13	14:52:10	6.13802	921.777	1	55
2022-09-13	14:52:11	6.55116	928.328	1	56
2022-09-13	14:52:11	4.7624	933.091	1	57
2022-09-13	14:52:11	0.871667	933.962	FALSE	57
2022-09-13	14:52:11	1.00551	934.968	FALSE	57
2022-09-13	14:52:12	0.288715	935.256	FALSE	57
2022-09-13	14:52:12	0.278995	935.535	FALSE	57
2022-09-13	14:52:12	0.504593	936.04	FALSE	57
2022-09-13	14:52:13	0.317977	936.358	FALSE	57
2022-09-13	14:52:13	0.373804	936.732	FALSE	57
2022-09-13	14:52:13	0.546883	937.279	FALSE	57
2022-09-13	14:52:13	0.408461	937.687	FALSE	57
2022-09-13	14:52:14	0.352023	938.039	FALSE	57
2022-09-13	14:52:14	0.375026	938.414	FALSE	57
2022-09-13	14:52:14	0.352278	938.767	FALSE	57
2022-09-13	14:52:14	0.351972	939.118	FALSE	57
2022-09-13	14:52:15	0.365509	939.484	FALSE	57
2022-09-13	14:52:15	0.418944	939.903	FALSE	57
2022-09-13	14:52:15	0.473906	940.377	FALSE	57
2022-09-13	14:52:15	0.27528	940.652	FALSE	57
2022-09-13	14:52:16	0.216196	940.868	FALSE	57
2022-09-13	14:52:16	-0.0737783	940.868	FALSE	57
2022-09-13	14:52:16	0.242659	941.111	FALSE	57
2022-09-13	14:52:17	0.0344659	941.145	FALSE	57
2022-09-13	14:52:17	-0.374287	941.145	FALSE	57
2022-09-13	14:52:17	-0.445381	941.145	FALSE	57
2022-09-13	14:52:17	-0.30701	941.145	FALSE	57
2022-09-13	14:52:18	0.0383336	941.184	FALSE	57
2022-09-13	14:52:18	0.475433	941.659	FALSE	57
2022-09-13	14:52:18	0.318181	941.977	FALSE	57
2022-09-13	14:52:18	0.461489	942.439	FALSE	57
2022-09-13	14:52:19	0.423728	942.863	FALSE	57
2022-09-13	14:52:19	0.484339	943.347	FALSE	57
2022-09-13	14:52:19	0.46383	943.811	FALSE	57
2022-09-13	14:52:19	0.498486	944.309	FALSE	57
2022-09-13	14:52:20	0.512735	944.822	FALSE	57
2022-09-13	14:52:20	0.392939	945.215	FALSE	57
2022-09-13	14:52:20	0.523575	945.739	FALSE	57
2022-09-13	14:52:21	0.643931	946.382	FALSE	57
2022-09-13	14:52:21	0.636501	947.019	FALSE	57
2022-09-13	14:52:21	0.66388	947.683	FALSE	57
2022-09-13	14:52:21	0.633651	948.316	FALSE	57
2022-09-13	14:52:22	0.627646	948.944	FALSE	57
2022-09-13	14:52:22	0.617621	949.562	FALSE	57
2022-09-13	14:52:22	0.593855	950.156	FALSE	57
2022-09-13	14:52:22	0.660725	950.816	FALSE	57
2022-09-13	14:52:23	0.630852	951.447	FALSE	57
2022-09-13	14:52:23	0.677672	952.125	FALSE	57
2022-09-13	14:52:23	0.687545	952.812	FALSE	57
2022-09-13	14:52:23	0.817621	953.63	FALSE	57
2022-09-13	14:52:24	0.805407	954.435	FALSE	57
2022-09-13	14:52:24	0.692226	955.128	FALSE	57
2022-09-13	14:52:24	0.724389	955.852	FALSE	57
2022-09-13	14:52:25	0.687646	956.54	FALSE	57
2022-09-13	14:52:25	0.702964	957.243	FALSE	57
2022-09-13	14:52:25	0.80103	958.044	FALSE	57
2022-09-13	14:52:25	0.681743	958.725	FALSE	57
2022-09-13	14:52:26	0.692125	959.418	FALSE	57
2022-09-13	14:52:26	0.952583	960.37	FALSE	57
2022-09-13	14:52:26	0.677112	961.047	FALSE	57
2022-09-13	14:52:26	0.577112	961.624	FALSE	57
2022-09-13	14:52:27	0.538842	962.163	FALSE	57
2022-09-13	14:52:27	0.527036	962.69	FALSE	57
2022-09-13	14:52:27	1.02576	963.716	FALSE	57
2022-09-13	14:52:27	0.523575	964.24	FALSE	57
2022-09-13	14:52:28	0.494008	964.734	FALSE	57
2022-09-13	14:52:28	0.515534	965.249	FALSE	57
2022-09-13	14:52:28	0.475891	965.725	FALSE	57
2022-09-13	14:52:29	0.480776	966.206	FALSE	57
2022-09-13	14:52:29	0.492277	966.698	FALSE	57
2022-09-13	14:52:29	0.490751	967.189	FALSE	57
2022-09-13	14:52:29	0.484746	967.674	FALSE	57
2022-09-13	14:52:30	0.492837	968.166	FALSE	57
2022-09-13	14:52:30	0.48673	968.653	FALSE	57
2022-09-13	14:52:30	0.484389	969.138	FALSE	57
2022-09-13	14:52:30	0.482557	969.62	FALSE	57
2022-09-13	14:52:31	0.488715	970.109	FALSE	57
2022-09-13	14:52:31	0.482863	970.592	FALSE	57
2022-09-13	14:52:31	0.492125	971.084	FALSE	57
2022-09-13	14:52:31	0.465713	971.549	FALSE	57
2022-09-13	14:52:32	0.477367	972.027	FALSE	57
2022-09-13	14:52:32	0.48271	972.51	FALSE	57
2022-09-13	14:52:32	0.494008	973.004	FALSE	57
2022-09-13	14:52:33	0.463372	973.467	FALSE	57
2022-09-13	14:52:33	0.499148	973.966	FALSE	57
2022-09-13	14:52:33	0.488003	974.454	FALSE	57
2022-09-13	14:52:33	0.490038	974.944	FALSE	57
2022-09-13	14:52:34	0.503626	975.448	FALSE	57
2022-09-13	14:52:34	0.492583	975.94	FALSE	57
2022-09-13	14:52:34	0.496705	976.437	FALSE	57
2022-09-13	14:52:34	0.489987	976.927	FALSE	57

## Sheet: Unnamed_star_2022913144724
						**GoPro Fitting: 1435
2022-09-13	14:47:24	0.413651
2022-09-13	14:47:24	0.351768
2022-09-13	14:47:24	0.383626
2022-09-13	14:47:25	0.381692
2022-09-13	14:47:25	0.383066
2022-09-13	14:47:25	0.394822
2022-09-13	14:47:25	0.380216
2022-09-13	14:47:26	0.363066
2022-09-13	14:47:26	0.299911
2022-09-13	14:47:26	0.335738
2022-09-13	14:47:27	0.336501
2022-09-13	14:47:27	0.348562
2022-09-13	14:47:27	0.338435
2022-09-13	14:47:27	0.342863
2022-09-13	14:47:28	0.348817
2022-09-13	14:47:28	0.359097
2022-09-13	14:47:28	0.366222
2022-09-13	14:47:28	0.36159
2022-09-13	14:47:29	0.373041
2022-09-13	14:47:29	0.338791
2022-09-13	14:47:29	0.334771
2022-09-13	14:47:29	0.382303
2022-09-13	14:47:30	0.375687
2022-09-13	14:47:30	1.40246
2022-09-13	14:47:30	0.757672
2022-09-13	14:47:31	0.34154
2022-09-13	14:47:31	0.356552
2022-09-13	14:47:31	1.31167
2022-09-13	14:47:31	0.790649
2022-09-13	14:47:32	1.46765
2022-09-13	14:47:32	0.446323
2022-09-13	14:47:32	-0.213218
2022-09-13	14:47:32	1.7222
2022-09-13	14:47:33	0.448562
2022-09-13	14:47:33	0.160216
2022-09-13	14:47:33	0.118232
2022-09-13	14:47:33	0.158842
2022-09-13	14:47:34	0.137468
2022-09-13	14:47:34	0.163524
2022-09-13	14:47:34	0.0941605
2022-09-13	14:47:35	0.242252
2022-09-13	14:47:35	0.194822
2022-09-13	14:47:35	0.232634
2022-09-13	14:47:35	0.230802
2022-09-13	14:47:36	0.115229
2022-09-13	14:47:36	0.160522
2022-09-13	14:47:36	0.151819
2022-09-13	14:47:36	0.195178
2022-09-13	14:47:37	0.280573
2022-09-13	14:47:37	0.213092
2022-09-13	14:47:37	0.520929
2022-09-13	14:47:37	0.475382
2022-09-13	14:47:38	0.343931
2022-09-13	14:47:38	0.266985
2022-09-13	14:47:38	0.195127
2022-09-13	14:47:39	0.529783
2022-09-13	14:47:39	0.398181
2022-09-13	14:47:39	0.300878
2022-09-13	14:47:39	0.414517
2022-09-13	14:47:40	0.343524
2022-09-13	14:47:40	0.16159
2022-09-13	14:47:40	-0.215916
2022-09-13	14:47:40	-0.110674
2022-09-13	14:47:41	0.477316
2022-09-13	14:47:41	0.645305
2022-09-13	14:47:41	0.443626
2022-09-13	14:47:41	0.312481
2022-09-13	14:47:42	0.270089
2022-09-13	14:47:42	0.214568
2022-09-13	14:47:42	0.492277
2022-09-13	14:47:43	0.45416
2022-09-13	14:47:43	0.465051
2022-09-13	14:47:43	0.426679
2022-09-13	14:47:43	0.448257
2022-09-13	14:47:44	0.468308
2022-09-13	14:47:44	0.477061
2022-09-13	14:47:44	0.498639
2022-09-13	14:47:45	0.488206
2022-09-13	14:47:45	0.428155
2022-09-13	14:47:45	0.468257
2022-09-13	14:47:45	1.35075
2022-09-13	14:47:45	0.468054
2022-09-13	14:47:46	0.135077
2022-09-13	14:47:46	-0.018155
2022-09-13	14:47:46	0.124898
2022-09-13	14:47:47	0.0454582
2022-09-13	14:47:47	-0.0708776
2022-09-13	14:47:47	0.0265778
2022-09-13	14:47:47	0.186171
2022-09-13	14:47:48	0.46729
2022-09-13	14:47:48	0.624542
2022-09-13	14:47:48	0.861641
2022-09-13	14:47:48	1.20011
2022-09-13	14:47:49	0.341489
2022-09-13	14:47:49	0.590801
2022-09-13	14:47:49	0.392837
2022-09-13	14:47:49	1.19711
2022-09-13	14:47:50	1.50022
2022-09-13	14:47:50	2.31645
2022-09-13	14:47:50	1.01782
2022-09-13	14:47:50	0.341031
2022-09-13	14:47:51	0.260318
2022-09-13	14:47:51	0.413855
2022-09-13	14:47:51	0.527544
2022-09-13	14:47:52	0.557672
2022-09-13	14:47:52	0.32098
2022-09-13	14:47:52	0.157977
2022-09-13	14:47:52	0.439809
2022-09-13	14:47:53	0.176349
2022-09-13	14:47:53	0.304186
2022-09-13	14:47:53	0.352685
2022-09-13	14:47:53	0.325407
2022-09-13	14:47:54	0.269173
2022-09-13	14:47:54	0.378435
2022-09-13	14:47:54	0.0396058
2022-09-13	14:47:54	0.0637788
2022-09-13	14:47:55	0.241438
2022-09-13	14:47:55	0.231158
2022-09-13	14:47:55	0.366018
2022-09-13	14:47:56	1.12373
2022-09-13	14:47:56	1.01406
2022-09-13	14:47:56	0.65299
2022-09-13	14:47:56	0.475433
2022-09-13	14:47:57	0.525712
2022-09-13	14:47:57	0.422303
2022-09-13	14:47:57	0.423372
2022-09-13	14:47:57	0.349478
2022-09-13	14:47:58	0.389529
2022-09-13	14:47:58	0.439555
2022-09-13	14:47:58	0.577723
2022-09-13	14:47:58	0.513601
2022-09-13	14:47:59	0.505967
2022-09-13	14:47:59	0.321896
2022-09-13	14:47:59	0.253601
2022-09-13	14:48:00	0.176909
2022-09-13	14:48:00	0.222252
2022-09-13	14:48:00	0.343626
2022-09-13	14:48:00	0.342863
2022-09-13	14:48:01	0.333499
2022-09-13	14:48:01	0.305458
2022-09-13	14:48:01	0.411667
2022-09-13	14:48:01	0.393651
2022-09-13	14:48:02	0.353906
2022-09-13	14:48:02	0.365305
2022-09-13	14:48:02	0.366476
2022-09-13	14:48:02	0.400522
2022-09-13	14:48:03	0.388715
2022-09-13	14:48:03	0.403473
2022-09-13	14:48:03	0.437417
2022-09-13	14:48:04	0.495331
2022-09-13	14:48:04	0.626934
2022-09-13	14:48:04	0.904847
2022-09-13	14:48:04	1.22495
2022-09-13	14:48:05	1.06994
2022-09-13	14:48:05	1.17553
2022-09-13	14:48:05	0.9907
2022-09-13	14:48:05	1.06541
2022-09-13	14:48:06	1.06332
2022-09-13	14:48:06	1.04841
2022-09-13	14:48:06	1.00159
2022-09-13	14:48:06	1.02072
2022-09-13	14:48:07	0.897774
2022-09-13	14:48:07	0.876094
2022-09-13	14:48:07	0.793906
2022-09-13	14:48:08	0.802303
2022-09-13	14:48:08	0.881947
2022-09-13	14:48:08	0.784389
2022-09-13	14:48:08	0.772583
2022-09-13	14:48:09	0.826476
2022-09-13	14:48:09	0.809122
2022-09-13	14:48:09	0.866476
2022-09-13	14:48:09	0.850954
2022-09-13	14:48:10	0.797519
2022-09-13	14:48:10	0.817366
2022-09-13	14:48:10	0.845661
2022-09-13	14:48:10	0.872633
2022-09-13	14:48:11	0.855941
2022-09-13	14:48:11	0.784593
2022-09-13	14:48:11	0.843779
2022-09-13	14:48:12	0.869122
2022-09-13	14:48:12	0.812277
2022-09-13	14:48:12	0.789783
2022-09-13	14:48:12	0.834517
2022-09-13	14:48:13	0.830191
2022-09-13	14:48:13	0.78215
2022-09-13	14:48:13	0.847901
2022-09-13	14:48:14	0.875636
2022-09-13	14:48:14	0.827392
2022-09-13	14:48:14	0.840878
2022-09-13	14:48:14	0.770649
2022-09-13	14:48:14	0.812277
2022-09-13	14:48:15	0.821794
2022-09-13	14:48:15	0.80668
2022-09-13	14:48:15	0.739707
2022-09-13	14:48:16	0.743015
2022-09-13	14:48:16	0.716196
2022-09-13	14:48:16	0.726476
2022-09-13	14:48:16	0.677773
2022-09-13	14:48:17	0.634364
2022-09-13	14:48:17	0.670293
2022-09-13	14:48:17	0.656349
2022-09-13	14:48:17	0.644898
2022-09-13	14:48:18	0.658384
2022-09-13	14:48:18	0.643677
2022-09-13	14:48:18	0.998384
2022-09-13	14:48:18	1.23014
2022-09-13	14:48:19	1.55319
2022-09-13	14:48:19	2.16189
2022-09-13	14:48:19	2.3138
2022-09-13	14:48:20	1.3763
2022-09-13	14:48:20	1.19523
2022-09-13	14:48:20	1.28159
2022-09-13	14:48:20	1.74892
2022-09-13	14:48:21	1.82011
2022-09-13	14:48:21	2.32164
2022-09-13	14:48:21	4.20739
2022-09-13	14:48:21	5.42719
2022-09-13	14:48:22	4.03304
2022-09-13	14:48:22	1.09864
2022-09-13	14:48:22	0.61243
2022-09-13	14:48:22	1.06469
2022-09-13	14:48:23	1.07701
2022-09-13	14:48:23	0.755331
2022-09-13	14:48:23	0.994568
2022-09-13	14:48:24	0.907392
2022-09-13	14:48:24	0.907086
2022-09-13	14:48:24	0.970903
2022-09-13	14:48:24	0.964898
2022-09-13	14:48:25	1.05935
2022-09-13	14:48:25	1.2308
2022-09-13	14:48:25	1.44495
2022-09-13	14:48:25	1.22816
2022-09-13	14:48:26	0.907443
2022-09-13	14:48:26	1.03294
2022-09-13	14:48:26	0.886578
2022-09-13	14:48:26	0.928918
2022-09-13	14:48:27	0.839249
2022-09-13	14:48:27	0.745458
2022-09-13	14:48:27	0.693295
2022-09-13	14:48:28	0.690293
2022-09-13	14:48:28	0.633448
2022-09-13	14:48:28	0.628868
2022-09-13	14:48:28	0.597621
2022-09-13	14:48:29	0.651056
2022-09-13	14:48:29	0.672023
2022-09-13	14:48:29	0.617061
2022-09-13	14:48:29	0.579758
2022-09-13	14:48:30	0.58841
2022-09-13	14:48:30	0.609529
2022-09-13	14:48:30	0.608257
2022-09-13	14:48:30	0.610802
2022-09-13	14:48:31	0.628155
2022-09-13	14:48:31	0.604797
2022-09-13	14:48:31	0.614465
2022-09-13	14:48:32	0.656349
2022-09-13	14:48:32	0.623219
2022-09-13	14:48:32	0.576705
2022-09-13	14:48:32	0.591311
2022-09-13	14:48:33	0.651361
2022-09-13	14:48:33	0.723372
2022-09-13	14:48:33	0.665
2022-09-13	14:48:33	0.62388
2022-09-13	14:48:34	0.639707
2022-09-13	14:48:34	0.640013
2022-09-13	14:48:34	0.687494
2022-09-13	14:48:34	0.755331
2022-09-13	14:48:35	0.775076
2022-09-13	14:48:35	0.742812
2022-09-13	14:48:35	0.722456
2022-09-13	14:48:36	0.71645
2022-09-13	14:48:36	0.713702
2022-09-13	14:48:36	0.689173
2022-09-13	14:48:36	0.694008
2022-09-13	14:48:37	0.689173
2022-09-13	14:48:37	0.717265
2022-09-13	14:48:37	0.759911
2022-09-13	14:48:37	0.705764
2022-09-13	14:48:38	0.697672
2022-09-13	14:48:38	0.678232
2022-09-13	14:48:38	0.687494
2022-09-13	14:48:38	0.665865
2022-09-13	14:48:39	0.67696
2022-09-13	14:48:39	0.660725
2022-09-13	14:48:39	0.642354
2022-09-13	14:48:40	0.663779
2022-09-13	14:48:40	0.726832
2022-09-13	14:48:40	0.741234
2022-09-13	14:48:40	0.717774
2022-09-13	14:48:41	0.846578
2022-09-13	14:48:41	1.55279
2022-09-13	14:48:41	2.26256
2022-09-13	14:48:41	5.22734
2022-09-13	14:48:42	5.20413
2022-09-13	14:48:42	7.70184
2022-09-13	14:48:42	7.66876
2022-09-13	14:48:42	12.3724
2022-09-13	14:48:43	12.8395
2022-09-13	14:48:43	7.66103
2022-09-13	14:48:43	2.52317
2022-09-13	14:48:44	2.80388
2022-09-13	14:48:44	2.49701
2022-09-13	14:48:44	2.37711
2022-09-13	14:48:44	2.31569
2022-09-13	14:48:45	2.63187
2022-09-13	14:48:45	3.96673
2022-09-13	14:48:45	3.7737
2022-09-13	14:48:45	2.86902
2022-09-13	14:48:46	2.35625
2022-09-13	14:48:46	2.4481
2022-09-13	14:48:46	2.30017
2022-09-13	14:48:46	2.66011
2022-09-13	14:48:47	1.80714
2022-09-13	14:48:47	2.45772
2022-09-13	14:48:47	2.81894
2022-09-13	14:48:48	6.17635
2022-09-13	14:48:48	9.68489
2022-09-13	14:48:48	6.98617
2022-09-13	14:48:48	2.33752
2022-09-13	14:48:49	1.36485
2022-09-13	14:48:49	0.503677
2022-09-13	14:48:49	0.798232
2022-09-13	14:48:49	0.567392
2022-09-13	14:48:50	0.493753
2022-09-13	14:48:50	0.531616
2022-09-13	14:48:50	0.610496
2022-09-13	14:48:50	0.741997
2022-09-13	14:48:51	0.858435
2022-09-13	14:48:51	0.824898
2022-09-13	14:48:51	0.671107
2022-09-13	14:48:52	0.589427
2022-09-13	14:48:52	0.60042
2022-09-13	14:48:52	0.585865
2022-09-13	14:48:52	0.565662
2022-09-13	14:48:53	0.580725
2022-09-13	14:48:53	0.656145
2022-09-13	14:48:53	0.567595
2022-09-13	14:48:53	0.531056
2022-09-13	14:48:54	0.514669
2022-09-13	14:48:54	0.509987
2022-09-13	14:48:54	0.445
2022-09-13	14:48:54	0.341183
2022-09-13	14:48:55	0.182761
2022-09-13	14:48:55	-0.0151524
2022-09-13	14:48:55	0.0489697
2022-09-13	14:48:56	-0.119427
2022-09-13	14:48:56	-0.376323
2022-09-13	14:48:56	-0.438104
2022-09-13	14:48:56	-0.619987
2022-09-13	14:48:57	-0.830114
2022-09-13	14:48:57	-0.743956
2022-09-13	14:48:57	-0.884058
2022-09-13	14:48:57	-0.835916
2022-09-13	14:48:58	-0.907875
2022-09-13	14:48:58	-0.937646
2022-09-13	14:48:58	-0.843549
2022-09-13	14:48:58	-0.702989
2022-09-13	14:48:59	-0.697798
2022-09-13	14:48:59	-0.136679
2022-09-13	14:48:59	1.72256
2022-09-13	14:49:00	2.61238
2022-09-13	14:49:00	1.55477
2022-09-13	14:49:00	0.23813
2022-09-13	14:49:00	0.158028
2022-09-13	14:49:01	0.168613
2022-09-13	14:49:01	0.12042
2022-09-13	14:49:01	0.129326
2022-09-13	14:49:01	0.239708
2022-09-13	14:49:02	-0.118155
2022-09-13	14:49:02	-0.0486893
2022-09-13	14:49:02	-0.176272
2022-09-13	14:49:02	-0.150725
2022-09-13	14:49:03	-0.333117
2022-09-13	14:49:03	-0.454083
2022-09-13	14:49:03	-0.465229
2022-09-13	14:49:04	-0.603244
2022-09-13	14:49:04	-0.81103
2022-09-13	14:49:04	-0.290267
2022-09-13	14:49:04	-0.230216
2022-09-13	14:49:05	0.0178246
2022-09-13	14:49:05	0.228155
2022-09-13	14:49:05	0.0822012
2022-09-13	14:49:05	0.23925
2022-09-13	14:49:06	0.322048
2022-09-13	14:49:06	0.319148
2022-09-13	14:49:06	0.348104
2022-09-13	14:49:06	0.556247
2022-09-13	14:49:07	0.509886
2022-09-13	14:49:07	0.38159
2022-09-13	14:49:07	0.594262
2022-09-13	14:49:08	0.597112
2022-09-13	14:49:08	0.459758
2022-09-13	14:49:08	0.292125
2022-09-13	14:49:08	0.281489
2022-09-13	14:49:09	0.492277
2022-09-13	14:49:09	0.472125
2022-09-13	14:49:09	0.663779
2022-09-13	14:49:09	0.74159
2022-09-13	14:49:10	2.13905
2022-09-13	14:49:10	4.64098
2022-09-13	14:49:10	4.91787
2022-09-13	14:49:10	0.600776
2022-09-13	14:49:11	0.341794
2022-09-13	14:49:11	0.17243
2022-09-13	14:49:11	1.13447
2022-09-13	14:49:12	2.12184
2022-09-13	14:49:12	0.523982
2022-09-13	14:49:12	0.163117
2022-09-13	14:49:12	-0.259376
2022-09-13	14:49:13	-0.478562
2022-09-13	14:49:13	-0.735915
2022-09-13	14:49:13	-0.804668
2022-09-13	14:49:13	-0.994898
2022-09-13	14:49:14	-1.15581
2022-09-13	14:49:14	-0.923091
2022-09-13	14:49:14	-0.944363
2022-09-13	14:49:14	-0.760088
2022-09-13	14:49:15	-0.65963
2022-09-13	14:49:15	-0.501513
2022-09-13	14:49:15	-0.491895
2022-09-13	14:49:16	-0.425279
2022-09-13	14:49:16	-0.244007
2022-09-13	14:49:16	0.630089
2022-09-13	14:49:16	2.91838
2022-09-13	14:49:17	3.61248
2022-09-13	14:49:17	0.589377
2022-09-13	14:49:17	0.0325829
2022-09-13	14:49:17	0.000572752
2022-09-13	14:49:18	-0.0760175
2022-09-13	14:49:18	-0.167875
2022-09-13	14:49:18	-0.130572
2022-09-13	14:49:18	-0.0412593
2022-09-13	14:49:19	-0.023244
2022-09-13	14:49:19	0.0659671
2022-09-13	14:49:19	1.14912
2022-09-13	14:49:20	2.20347
2022-09-13	14:49:20	2.3736
2022-09-13	14:49:20	0.42897
2022-09-13	14:49:20	1.13899
2022-09-13	14:49:21	0.481794
2022-09-13	14:49:21	0.671616
2022-09-13	14:49:21	0.73243
2022-09-13	14:49:21	0.344288
2022-09-13	14:49:22	0.179097
2022-09-13	14:49:22	0.334873
2022-09-13	14:49:22	0.986221
2022-09-13	14:49:22	1.16393
2022-09-13	14:49:23	0.451921
2022-09-13	14:49:23	0.185865
2022-09-13	14:49:23	0.0851528
2022-09-13	14:49:24	0.126781
2022-09-13	14:49:24	0.0794531
2022-09-13	14:49:24	1.06826
2022-09-13	14:49:24	4.60541
2022-09-13	14:49:25	4.5563
2022-09-13	14:49:25	4.36301
2022-09-13	14:49:25	2.62373
2022-09-13	14:49:25	1.15772
2022-09-13	14:49:26	0.701285
2022-09-13	14:49:26	0.575484
2022-09-13	14:49:26	0.367799
2022-09-13	14:49:26	0.333193
2022-09-13	14:49:27	0.332481
2022-09-13	14:49:27	0.328461
2022-09-13	14:49:27	0.33757
2022-09-13	14:49:28	0.278842
2022-09-13	14:49:28	0.298486
2022-09-13	14:49:28	0.349631
2022-09-13	14:49:28	0.338435
2022-09-13	14:49:29	0.310954
2022-09-13	14:49:29	0.31813
2022-09-13	14:49:29	0.335382
2022-09-13	14:49:29	0.362913
2022-09-13	14:49:30	0.368461
2022-09-13	14:49:30	0.410242
2022-09-13	14:49:30	0.49528
2022-09-13	14:49:30	0.542761
2022-09-13	14:49:31	0.374364
2022-09-13	14:49:31	0.325814
2022-09-13	14:49:31	0.306781
2022-09-13	14:49:32	0.301031
2022-09-13	14:49:32	0.304033
2022-09-13	14:49:32	0.301285
2022-09-13	14:49:32	0.28902
2022-09-13	14:49:33	0.286832
2022-09-13	14:49:33	0.302048
2022-09-13	14:49:33	0.305051
2022-09-13	14:49:33	0.296603
2022-09-13	14:49:34	0.307494
2022-09-13	14:49:34	0.347239
2022-09-13	14:49:34	0.413295
2022-09-13	14:49:34	0.364644
2022-09-13	14:49:35	0.329631
2022-09-13	14:49:35	0.327901
2022-09-13	14:49:35	0.341183
2022-09-13	14:49:36	0.343015
2022-09-13	14:49:36	0.35299
2022-09-13	14:49:36	0.352328
2022-09-13	14:49:36	0.35472
2022-09-13	14:49:37	0.34958
2022-09-13	14:49:37	0.336959
2022-09-13	14:49:37	0.3564
2022-09-13	14:49:37	0.371158
2022-09-13	14:49:38	0.36042
2022-09-13	14:49:38	0.358639
2022-09-13	14:49:38	0.360064
2022-09-13	14:49:38	0.365102
2022-09-13	14:49:39	0.373346
2022-09-13	14:49:39	0.367239
2022-09-13	14:49:39	0.381438
2022-09-13	14:49:40	0.380318
2022-09-13	14:49:40	0.363015
2022-09-13	14:49:40	0.366171
2022-09-13	14:49:40	0.392837
2022-09-13	14:49:41	0.403982
2022-09-13	14:49:41	0.368613
2022-09-13	14:49:41	0.381336
2022-09-13	14:49:41	0.404288
2022-09-13	14:49:42	0.414008
2022-09-13	14:49:42	0.458181
2022-09-13	14:49:42	0.465407
2022-09-13	14:49:42	0.514924
2022-09-13	14:49:43	0.616501
2022-09-13	14:49:43	0.478944
2022-09-13	14:49:43	0.734059
2022-09-13	14:49:44	0.731819
2022-09-13	14:49:44	0.731616
2022-09-13	14:49:44	0.731209
2022-09-13	14:49:44	0.729428
2022-09-13	14:49:45	0.734313
2022-09-13	14:49:45	0.731412
2022-09-13	14:49:45	0.730191
2022-09-13	14:49:45	0.735026
2022-09-13	14:49:46	0.728868
2022-09-13	14:49:46	0.731514
2022-09-13	14:49:46	0.731717
2022-09-13	14:49:46	0.730649
2022-09-13	14:49:47	0.730038
2022-09-13	14:49:47	0.950547
2022-09-13	14:49:47	0.574059
2022-09-13	14:49:48	0.679402
2022-09-13	14:49:48	0.42841
2022-09-13	14:49:48	0.357163
2022-09-13	14:49:48	0.363473
2022-09-13	14:49:49	0.336196
2022-09-13	14:49:49	0.323321
2022-09-13	14:49:49	0.341896
2022-09-13	14:49:49	0.331921
2022-09-13	14:49:50	0.348155
2022-09-13	14:49:50	0.498333
2022-09-13	14:49:50	1.15996
2022-09-13	14:49:50	1.48103
2022-09-13	14:49:51	3.42291
2022-09-13	14:49:51	6.0507
2022-09-13	14:49:51	4.70373
2022-09-13	14:49:52	4.64602
2022-09-13	14:49:52	4.81742
2022-09-13	14:49:52	2.58988
2022-09-13	14:49:52	1.68856
2022-09-13	14:49:53	1.48454
2022-09-13	14:49:53	1.6394
2022-09-13	14:49:53	0.904847
2022-09-13	14:49:53	0.577672
2022-09-13	14:49:54	0.427545
2022-09-13	14:49:54	0.886374
2022-09-13	14:49:54	0.654313
2022-09-13	14:49:54	1.02312
2022-09-13	14:49:55	1.23905
2022-09-13	14:49:55	1.41655
2022-09-13	14:49:55	1.38291
2022-09-13	14:49:56	1.25075
2022-09-13	14:49:56	0.663015
2022-09-13	14:49:56	0.419708
2022-09-13	14:49:56	0.397112
2022-09-13	14:49:57	0.507697
2022-09-13	14:49:57	0.355585
2022-09-13	14:49:57	0.39986
2022-09-13	14:49:57	0.395738
2022-09-13	14:49:58	0.457468
2022-09-13	14:49:58	0.460573
2022-09-13	14:49:58	0.467901
2022-09-13	14:49:58	0.454313
2022-09-13	14:49:59	0.456247
2022-09-13	14:49:59	0.449784
2022-09-13	14:49:59	0.447137
2022-09-13	14:50:00	0.45472
2022-09-13	14:50:00	0.457977
2022-09-13	14:50:00	0.455942
2022-09-13	14:50:00	0.438333
2022-09-13	14:50:01	0.439911
2022-09-13	14:50:01	0.443066
2022-09-13	14:50:01	0.457774
2022-09-13	14:50:01	0.464746
2022-09-13	14:50:02	0.459046
2022-09-13	14:50:02	0.457367
2022-09-13	14:50:02	0.459097
2022-09-13	14:50:02	0.461998
2022-09-13	14:50:03	0.465814
2022-09-13	14:50:03	0.46785
2022-09-13	14:50:03	0.466578
2022-09-13	14:50:03	0.464949
2022-09-13	14:50:04	0.469479
2022-09-13	14:50:04	0.465662
2022-09-13	14:50:04	0.462252
2022-09-13	14:50:05	0.466069
2022-09-13	14:50:05	0.467697
2022-09-13	14:50:05	0.465204
2022-09-13	14:50:05	0.465305
2022-09-13	14:50:06	0.463015
2022-09-13	14:50:06	0.462405
2022-09-13	14:50:06	0.472074
2022-09-13	14:50:06	0.480929
2022-09-13	14:50:07	0.493906
2022-09-13	14:50:07	0.475942
2022-09-13	14:50:07	0.485305
2022-09-13	14:50:07	0.617723
2022-09-13	14:50:08	0.774313
2022-09-13	14:50:08	0.55243
2022-09-13	14:50:08	0.47472
2022-09-13	14:50:09	0.615891
2022-09-13	14:50:09	0.582354
2022-09-13	14:50:09	0.604491
2022-09-13	14:50:09	0.556145
2022-09-13	14:50:10	0.589377
2022-09-13	14:50:10	0.581641
2022-09-13	14:50:10	0.622812
2022-09-13	14:50:10	0.597112
2022-09-13	14:50:11	0.599199
2022-09-13	14:50:11	0.456501
2022-09-13	14:50:11	0.45355
2022-09-13	14:50:12	0.460064
2022-09-13	14:50:12	0.476298
2022-09-13	14:50:12	0.467341
2022-09-13	14:50:12	0.576043
2022-09-13	14:50:13	1.53268
2022-09-13	14:50:13	1.56576
2022-09-13	14:50:13	1.74413
2022-09-13	14:50:13	1.13004
2022-09-13	14:50:14	0.90902
2022-09-13	14:50:14	1.27106
2022-09-13	14:50:14	1.39279
2022-09-13	14:50:14	0.332532
2022-09-13	14:50:15	0.489784
2022-09-13	14:50:15	0.476094
2022-09-13	14:50:15	0.505509
2022-09-13	14:50:15	0.444644
2022-09-13	14:50:16	0.666629
2022-09-13	14:50:16	0.571056
2022-09-13	14:50:16	0.71701
2022-09-13	14:50:17	0.522404
2022-09-13	14:50:17	0.50668
2022-09-13	14:50:17	0.426272
2022-09-13	14:50:17	0.402557
2022-09-13	14:50:18	0.400166
2022-09-13	14:50:18	0.428664
2022-09-13	14:50:18	1.08307
2022-09-13	14:50:18	0.502455
2022-09-13	14:50:19	0.333957
2022-09-13	14:50:19	0.303473
2022-09-13	14:50:19	0.281489
2022-09-13	14:50:19	0.290903
2022-09-13	14:50:20	0.291158
2022-09-13	14:50:20	0.317621
2022-09-13	14:50:20	0.287748
2022-09-13	14:50:21	0.312176
2022-09-13	14:50:21	0.29757
2022-09-13	14:50:21	0.290598
2022-09-13	14:50:21	0.297519
2022-09-13	14:50:22	0.324491
2022-09-13	14:50:22	0.371819
2022-09-13	14:50:22	0.591463
2022-09-13	14:50:22	0.184033
2022-09-13	14:50:23	0.241132
2022-09-13	14:50:23	0.273652
2022-09-13	14:50:23	0.278232
2022-09-13	14:50:23	0.278181
2022-09-13	14:50:24	0.286425
2022-09-13	14:50:24	0.439911
2022-09-13	14:50:24	0.459758
2022-09-13	14:50:25	0.712634
2022-09-13	14:50:25	0.530293
2022-09-13	14:50:25	0.326527
2022-09-13	14:50:25	0.282303
2022-09-13	14:50:26	0.302303
2022-09-13	14:50:26	0.300522
2022-09-13	14:50:26	0.299758
2022-09-13	14:50:26	0.304746
2022-09-13	14:50:27	0.352125
2022-09-13	14:50:27	0.386883
2022-09-13	14:50:27	0.443982
2022-09-13	14:50:27	0.561183
2022-09-13	14:50:28	0.404898
2022-09-13	14:50:28	0.441489
2022-09-13	14:50:28	0.425509
2022-09-13	14:50:29	0.408308
2022-09-13	14:50:29	0.388919
2022-09-13	14:50:29	0.395433
2022-09-13	14:50:29	0.405204
2022-09-13	14:50:30	0.436043
2022-09-13	14:50:30	0.446883
2022-09-13	14:50:30	0.430954
2022-09-13	14:50:30	0.422506
2022-09-13	14:50:31	0.452074
2022-09-13	14:50:31	0.476298
2022-09-13	14:50:31	0.53584
2022-09-13	14:50:31	0.470242
2022-09-13	14:50:32	0.51014
2022-09-13	14:50:32	0.506883
2022-09-13	14:50:32	0.46897
2022-09-13	14:50:33	0.433753
2022-09-13	14:50:33	0.399249
2022-09-13	14:50:33	0.387087
2022-09-13	14:50:33	0.379148
2022-09-13	14:50:34	0.375738
2022-09-13	14:50:34	0.375687
2022-09-13	14:50:34	0.370751
2022-09-13	14:50:34	0.388308
2022-09-13	14:50:35	0.406679
2022-09-13	14:50:35	0.400471
2022-09-13	14:50:35	0.395891
2022-09-13	14:50:35	0.392939
2022-09-13	14:50:36	0.399758
2022-09-13	14:50:36	0.400166
2022-09-13	14:50:36	0.397316
2022-09-13	14:50:37	0.405204
2022-09-13	14:50:37	0.409682
2022-09-13	14:50:37	0.403575
2022-09-13	14:50:37	0.399809
2022-09-13	14:50:38	0.399504
2022-09-13	14:50:38	0.400013
2022-09-13	14:50:38	0.398537
2022-09-13	14:50:38	0.384237
2022-09-13	14:50:39	0.369987
2022-09-13	14:50:39	0.383015
2022-09-13	14:50:39	0.392074
2022-09-13	14:50:39	0.392735
2022-09-13	14:50:40	0.405713
2022-09-13	14:50:40	0.410394
2022-09-13	14:50:40	0.416756
2022-09-13	14:50:41	0.425662
2022-09-13	14:50:41	0.422965
2022-09-13	14:50:41	0.42042
2022-09-13	14:50:41	0.418639
2022-09-13	14:50:42	0.427341
2022-09-13	14:50:42	0.429326
2022-09-13	14:50:42	0.404135
2022-09-13	14:50:42	0.406323
2022-09-13	14:50:43	0.362354
2022-09-13	14:50:43	0.442201
2022-09-13	14:50:43	0.46673
2022-09-13	14:50:43	0.326934
2022-09-13	14:50:44	0.404186
2022-09-13	14:50:44	0.406527
2022-09-13	14:50:44	0.526883
2022-09-13	14:50:45	0.450344
2022-09-13	14:50:45	0.413753
2022-09-13	14:50:45	0.432481
2022-09-13	14:50:45	0.483015
2022-09-13	14:50:46	1.29543
2022-09-13	14:50:46	0.563168
2022-09-13	14:50:46	2.25223
2022-09-13	14:50:46	0.415636
2022-09-13	14:50:47	0.27584
2022-09-13	14:50:47	0.360623
2022-09-13	14:50:47	0.555331
2022-09-13	14:50:47	0.713244
2022-09-13	14:50:48	0.0819468
2022-09-13	14:50:48	-0.431895
2022-09-13	14:50:48	-0.396883
2022-09-13	14:50:49	-0.243651
2022-09-13	14:50:49	-0.255814
2022-09-13	14:50:49	-0.319376
2022-09-13	14:50:49	-0.185178
2022-09-13	14:50:50	-0.197493
2022-09-13	14:50:50	-0.171997
2022-09-13	14:50:50	-0.113168
2022-09-13	14:50:50	-0.0477224
2022-09-13	14:50:51	0.153194
2022-09-13	14:50:51	0.201641
2022-09-13	14:50:51	-0.0355086
2022-09-13	14:50:51	-0.0163229
2022-09-13	14:50:52	0.147697
2022-09-13	14:50:52	0.0581809
2022-09-13	14:50:52	-0.203753
2022-09-13	14:50:53	-0.127621
2022-09-13	14:50:53	0.0103437
2022-09-13	14:50:53	0.0965523
2022-09-13	14:50:53	0.137723
2022-09-13	14:50:54	0.116247
2022-09-13	14:50:54	0.102812
2022-09-13	14:50:54	0.184033
2022-09-13	14:50:54	0.118588
2022-09-13	14:50:55	0.178486
2022-09-13	14:50:55	0.557723
2022-09-13	14:50:55	0.982507
2022-09-13	14:50:55	1.26485
2022-09-13	14:50:56	1.44597
2022-09-13	14:50:56	0.918486
2022-09-13	14:50:56	0.703779
2022-09-13	14:50:57	0.527697
2022-09-13	14:50:57	0.468104
2022-09-13	14:50:57	0.346832
2022-09-13	14:50:57	0.394822
2022-09-13	14:50:58	0.313143
2022-09-13	14:50:58	0.302506
2022-09-13	14:50:58	0.329784
2022-09-13	14:50:58	0.327545
2022-09-13	14:50:59	0.313957
2022-09-13	14:50:59	0.303066
2022-09-13	14:50:59	0.296145
2022-09-13	14:50:59	0.296145
2022-09-13	14:51:00	0.28902
2022-09-13	14:51:00	0.294466
2022-09-13	14:51:00	0.296654
2022-09-13	14:51:01	0.299707
2022-09-13	14:51:01	0.30383
2022-09-13	14:51:01	0.30556
2022-09-13	14:51:01	0.303626
2022-09-13	14:51:02	0.301947
2022-09-13	14:51:02	0.295738
2022-09-13	14:51:02	0.299504
2022-09-13	14:51:02	0.31187
2022-09-13	14:51:03	0.327443
2022-09-13	14:51:03	0.341285
2022-09-13	14:51:03	0.356094
2022-09-13	14:51:03	0.370751
2022-09-13	14:51:04	0.365
2022-09-13	14:51:04	0.358842
2022-09-13	14:51:04	0.345967
2022-09-13	14:51:05	0.331412
2022-09-13	14:51:05	0.346883
2022-09-13	14:51:05	0.321896
2022-09-13	14:51:05	0.314466
2022-09-13	14:51:06	0.339758
2022-09-13	14:51:06	0.326069
2022-09-13	14:51:06	0.330395
2022-09-13	14:51:06	0.313957
2022-09-13	14:51:07	0.308003
2022-09-13	14:51:07	0.299758
2022-09-13	14:51:07	0.305916
2022-09-13	14:51:07	0.305763
2022-09-13	14:51:08	0.331158
2022-09-13	14:51:08	0.331463
2022-09-13	14:51:08	0.33243
2022-09-13	14:51:09	0.327188
2022-09-13	14:51:09	0.323575
2022-09-13	14:51:09	0.34271
2022-09-13	14:51:09	0.339809
2022-09-13	14:51:10	0.390191
2022-09-13	14:51:10	0.559504
2022-09-13	14:51:10	0.558842
2022-09-13	14:51:10	0.5393
2022-09-13	14:51:11	0.513957
2022-09-13	14:51:11	0.478181
2022-09-13	14:51:11	0.41355
2022-09-13	14:51:11	0.342405
2022-09-13	14:51:12	0.325407
2022-09-13	14:51:12	0.319402
2022-09-13	14:51:12	0.304288
2022-09-13	14:51:13	0.286425
2022-09-13	14:51:13	0.283473
2022-09-13	14:51:13	0.275535
2022-09-13	14:51:13	0.273702
2022-09-13	14:51:14	0.277417
2022-09-13	14:51:14	0.282048
2022-09-13	14:51:14	0.275433
2022-09-13	14:51:14	0.274873
2022-09-13	14:51:15	0.273906
2022-09-13	14:51:15	0.269682
2022-09-13	14:51:15	0.317824
2022-09-13	14:51:15	0.243015
2022-09-13	14:51:16	0.128308
2022-09-13	14:51:16	0.0560435
2022-09-13	14:51:16	-0.0281295
2022-09-13	14:51:17	0.00785013
2022-09-13	14:51:17	0.444338
2022-09-13	14:51:17	0.564084
2022-09-13	14:51:17	0.848613
2022-09-13	14:51:18	1.06678
2022-09-13	14:51:18	0.75813
2022-09-13	14:51:18	1.05849
2022-09-13	14:51:18	0.93416
2022-09-13	14:51:19	1.17528
2022-09-13	14:51:19	0.743015
2022-09-13	14:51:19	0.353143
2022-09-13	14:51:19	0.611056
2022-09-13	14:51:20	0.332786
2022-09-13	14:51:20	0.941336
2022-09-13	14:51:20	1.12933
2022-09-13	14:51:21	0.603524
2022-09-13	14:51:21	1.38973
2022-09-13	14:51:21	0.745763
2022-09-13	14:51:21	1.11538
2022-09-13	14:51:22	0.215687
2022-09-13	14:51:22	0.293244
2022-09-13	14:51:22	0.106272
2022-09-13	14:51:22	0.11472
2022-09-13	14:51:23	-0.159427
2022-09-13	14:51:23	-0.285738
2022-09-13	14:51:23	-0.342175
2022-09-13	14:51:23	-0.596781
2022-09-13	14:51:24	-0.690165
2022-09-13	14:51:24	-0.698256
2022-09-13	14:51:24	-0.592251
2022-09-13	14:51:25	-0.515508
2022-09-13	14:51:25	-0.286806
2022-09-13	14:51:25	0.656247
2022-09-13	14:51:25	0.363626
2022-09-13	14:51:26	0.340013
2022-09-13	14:51:26	0.366323
2022-09-13	14:51:26	0.298741
2022-09-13	14:51:26	0.209631
2022-09-13	14:51:27	0.213041
2022-09-13	14:51:27	0.182557
2022-09-13	14:51:27	0.629936
2022-09-13	14:51:27	0.22042
2022-09-13	14:51:28	0.53187
2022-09-13	14:51:28	0.651056
2022-09-13	14:51:28	0.607748
2022-09-13	14:51:29	0.378333
2022-09-13	14:51:29	0.349886
2022-09-13	14:51:29	0.22673
2022-09-13	14:51:29	0.366476
2022-09-13	14:51:30	0.551005
2022-09-13	14:51:30	0.498588
2022-09-13	14:51:30	0.468868
2022-09-13	14:51:30	0.514669
2022-09-13	14:51:31	0.504491
2022-09-13	14:51:31	0.523524
2022-09-13	14:51:31	0.52897
2022-09-13	14:51:31	0.489886
2022-09-13	14:51:32	0.52902
2022-09-13	14:51:32	0.493092
2022-09-13	14:51:32	0.433804
2022-09-13	14:51:33	0.585661
2022-09-13	14:51:33	0.278283
2022-09-13	14:51:33	0.221031
2022-09-13	14:51:33	0.219657
2022-09-13	14:51:34	0.293906
2022-09-13	14:51:34	0.349326
2022-09-13	14:51:34	0.534466
2022-09-13	14:51:34	0.611056
2022-09-13	14:51:35	0.658537
2022-09-13	14:51:35	0.32215
2022-09-13	14:51:35	0.396501
2022-09-13	14:51:35	0.381132
2022-09-13	14:51:36	0.303473
2022-09-13	14:51:36	0.131972
2022-09-13	14:51:36	0.325102
2022-09-13	14:51:37	0.688257
2022-09-13	14:51:37	-0.0148471
2022-09-13	14:51:37	-0.539936
2022-09-13	14:51:37	-0.636424
2022-09-13	14:51:38	-0.345585
2022-09-13	14:51:38	-0.216374
2022-09-13	14:51:38	-0.24874
2022-09-13	14:51:38	-0.54986
2022-09-13	14:51:39	-0.630877
2022-09-13	14:51:39	-0.669707
2022-09-13	14:51:39	-0.57444
2022-09-13	14:51:39	-0.540241
2022-09-13	14:51:40	-0.621055
2022-09-13	14:51:40	-0.617341
2022-09-13	14:51:40	-0.564974
2022-09-13	14:51:41	-0.546094
2022-09-13	14:51:41	-0.438206
2022-09-13	14:51:41	-0.302989
2022-09-13	14:51:41	-0.243906
2022-09-13	14:51:42	-0.0952542
2022-09-13	14:51:42	0.320776
2022-09-13	14:51:42	0.324288
2022-09-13	14:51:42	0.227494
2022-09-13	14:51:43	0.605
2022-09-13	14:51:43	0.43925
2022-09-13	14:51:43	0.526527
2022-09-13	14:51:43	0.445255
2022-09-13	14:51:44	0.441031
2022-09-13	14:51:44	0.424796
2022-09-13	14:51:44	0.736298
2022-09-13	14:51:45	0.835229
2022-09-13	14:51:45	1.12118
2022-09-13	14:51:45	1.20851
2022-09-13	14:51:45	1.16373
2022-09-13	14:51:46	1.16139
2022-09-13	14:51:46	2.09716
2022-09-13	14:51:46	3.76525
2022-09-13	14:51:46	3.49721
2022-09-13	14:51:47	3.1824
2022-09-13	14:51:47	2.34739
2022-09-13	14:51:47	1.61019
2022-09-13	14:51:47	0.959758
2022-09-13	14:51:48	0.347697
2022-09-13	14:51:48	0.400013
2022-09-13	14:51:48	0.256705
2022-09-13	14:51:49	0.308969
2022-09-13	14:51:49	1.00495
2022-09-13	14:51:49	3.48597
2022-09-13	14:51:49	6.94708
2022-09-13	14:51:50	10.3798
2022-09-13	14:51:50	1.9908
2022-09-13	14:51:50	3.33482
2022-09-13	14:51:50	2.20001
2022-09-13	14:51:51	1.67452
2022-09-13	14:51:51	1.05996
2022-09-13	14:51:51	1.32225
2022-09-13	14:51:51	1.92261
2022-09-13	14:51:52	3.67548
2022-09-13	14:51:52	7.24749
2022-09-13	14:51:52	12.9634
2022-09-13	14:51:53	10.3228
2022-09-13	14:51:53	6.88719
2022-09-13	14:51:53	11.6079
2022-09-13	14:51:53	10.6591
2022-09-13	14:51:54	8.23131
2022-09-13	14:51:54	5.52225
2022-09-13	14:51:54	4.62317
2022-09-13	14:51:54	4.08841
2022-09-13	14:51:55	3.90815
2022-09-13	14:51:55	3.93396
2022-09-13	14:51:55	3.8224
2022-09-13	14:51:56	2.95436
2022-09-13	14:51:56	2.03701
2022-09-13	14:51:56	0.967697
2022-09-13	14:51:56	0.594924
2022-09-13	14:51:57	0.518893
2022-09-13	14:51:57	0.447647
2022-09-13	14:51:57	0.779758
2022-09-13	14:51:57	1.368
2022-09-13	14:51:58	1.52744
2022-09-13	14:51:58	2.77182
2022-09-13	14:51:58	3.1566
2022-09-13	14:51:58	3.09299
2022-09-13	14:51:59	1.98658
2022-09-13	14:51:59	2.58831
2022-09-13	14:51:59	1.33039
2022-09-13	14:51:59	1.80358
2022-09-13	14:52:00	1.0105
2022-09-13	14:52:00	0.927646
2022-09-13	14:52:00	0.614974
2022-09-13	14:52:01	0.511107
2022-09-13	14:52:01	0.481031
2022-09-13	14:52:01	0.662608
2022-09-13	14:52:01	0.561946
2022-09-13	14:52:02	0.494975
2022-09-13	14:52:02	0.419657
2022-09-13	14:52:02	0.481896
2022-09-13	14:52:02	0.590343
2022-09-13	14:52:03	0.78159
2022-09-13	14:52:03	1.07833
2022-09-13	14:52:03	1.21411
2022-09-13	14:52:03	1.48861
2022-09-13	14:52:04	1.50154
2022-09-13	14:52:04	1.25594
2022-09-13	14:52:04	0.553702
2022-09-13	14:52:05	0.398639
2022-09-13	14:52:05	0.50444
2022-09-13	14:52:05	0.621234
2022-09-13	14:52:05	0.650496
2022-09-13	14:52:06	0.585916
2022-09-13	14:52:06	0.417825
2022-09-13	14:52:06	0.388919
2022-09-13	14:52:06	0.154364
2022-09-13	14:52:07	0.146934
2022-09-13	14:52:07	0.207494
2022-09-13	14:52:07	0.233194
2022-09-13	14:52:07	0.274567
2022-09-13	14:52:08	0.249733
2022-09-13	14:52:08	0.94897
2022-09-13	14:52:08	0.409886
2022-09-13	14:52:09	1.73905
2022-09-13	14:52:09	2.08118
2022-09-13	14:52:09	4.83207
2022-09-13	14:52:09	5.93645
2022-09-13	14:52:10	15.006
2022-09-13	14:52:10	12.3545
2022-09-13	14:52:10	8.22779
2022-09-13	14:52:10	6.13802
2022-09-13	14:52:11	6.55116
2022-09-13	14:52:11	4.7624
2022-09-13	14:52:11	0.871667
2022-09-13	14:52:11	1.00551
2022-09-13	14:52:12	0.288715
2022-09-13	14:52:12	0.278995
2022-09-13	14:52:12	0.504593
2022-09-13	14:52:13	0.317977
2022-09-13	14:52:13	0.373804
2022-09-13	14:52:13	0.546883
2022-09-13	14:52:13	0.408461
2022-09-13	14:52:14	0.352023
2022-09-13	14:52:14	0.375026
2022-09-13	14:52:14	0.352278
2022-09-13	14:52:14	0.351972
2022-09-13	14:52:15	0.365509
2022-09-13	14:52:15	0.418944
2022-09-13	14:52:15	0.473906
2022-09-13	14:52:15	0.27528
2022-09-13	14:52:16	0.216196
2022-09-13	14:52:16	-0.0737783
2022-09-13	14:52:16	0.242659
2022-09-13	14:52:17	0.0344659
2022-09-13	14:52:17	-0.374287
2022-09-13	14:52:17	-0.445381
2022-09-13	14:52:17	-0.30701
2022-09-13	14:52:18	0.0383336
2022-09-13	14:52:18	0.475433
2022-09-13	14:52:18	0.318181
2022-09-13	14:52:18	0.461489
2022-09-13	14:52:19	0.423728
2022-09-13	14:52:19	0.484339
2022-09-13	14:52:19	0.46383
2022-09-13	14:52:19	0.498486
2022-09-13	14:52:20	0.512735
2022-09-13	14:52:20	0.392939
2022-09-13	14:52:20	0.523575
2022-09-13	14:52:21	0.643931
2022-09-13	14:52:21	0.636501
2022-09-13	14:52:21	0.66388
2022-09-13	14:52:21	0.633651
2022-09-13	14:52:22	0.627646
2022-09-13	14:52:22	0.617621
2022-09-13	14:52:22	0.593855
2022-09-13	14:52:22	0.660725
2022-09-13	14:52:23	0.630852
2022-09-13	14:52:23	0.677672
2022-09-13	14:52:23	0.687545
2022-09-13	14:52:23	0.817621
2022-09-13	14:52:24	0.805407
2022-09-13	14:52:24	0.692226
2022-09-13	14:52:24	0.724389
2022-09-13	14:52:25	0.687646
2022-09-13	14:52:25	0.702964
2022-09-13	14:52:25	0.80103
2022-09-13	14:52:25	0.681743
2022-09-13	14:52:26	0.692125
2022-09-13	14:52:26	0.952583
2022-09-13	14:52:26	0.677112
2022-09-13	14:52:26	0.577112
2022-09-13	14:52:27	0.538842
2022-09-13	14:52:27	0.527036
2022-09-13	14:52:27	1.02576
2022-09-13	14:52:27	0.523575
2022-09-13	14:52:28	0.494008
2022-09-13	14:52:28	0.515534
2022-09-13	14:52:28	0.475891
2022-09-13	14:52:29	0.480776
2022-09-13	14:52:29	0.492277
2022-09-13	14:52:29	0.490751
2022-09-13	14:52:29	0.484746
2022-09-13	14:52:30	0.492837
2022-09-13	14:52:30	0.48673
2022-09-13	14:52:30	0.484389
2022-09-13	14:52:30	0.482557
2022-09-13	14:52:31	0.488715
2022-09-13	14:52:31	0.482863
2022-09-13	14:52:31	0.492125
2022-09-13	14:52:31	0.465713
2022-09-13	14:52:32	0.477367
2022-09-13	14:52:32	0.48271
2022-09-13	14:52:32	0.494008
2022-09-13	14:52:33	0.463372
2022-09-13	14:52:33	0.499148
2022-09-13	14:52:33	0.488003
2022-09-13	14:52:33	0.490038
2022-09-13	14:52:34	0.503626
2022-09-13	14:52:34	0.492583
2022-09-13	14:52:34	0.496705
2022-09-13	14:52:34	0.489987
