# Supplementary material for: Comparing efficacy in reducing pulling and welfare impacts of four types of leash walking equipment
Source: PeerJ journal article supplement (doi:10.7717/peerj.18131), 2024-10-24
Supplement: Shelter_2_Tension_files.zip [file Boris_harness_2022915104715 copy.xlsx]

## Sheet: Averaged Newtons
Date	Time	Averaged Newtons	Impulse	Total steps
2022-09-15	10:47:33	1.5391	1.5391	0
2022-09-15	10:47:34	1.53395	3.07305	0		Impulse newtons	5288.08
2022-09-15	10:47:35	1.3066	4.37965	0		Total steps	112
2022-09-15	10:47:36	1.40905	5.7887	0		# > 5sec	3
2022-09-15	10:47:37	1.57639	7.36509	0
2022-09-15	10:47:38	0.936274	8.30136	0
2022-09-15	10:47:39	0.963949	9.26531	0
2022-09-15	10:47:40	1.07974	10.345	0
2022-09-15	10:47:41	1.07006	11.4151	0
2022-09-15	10:47:42	0.949911	12.365	0
2022-09-15	10:47:43	0.938142	13.3032	0
2022-09-15	10:47:44	0.815165	14.1183	0
2022-09-15	10:47:45	1.25936	15.3777	0
2022-09-15	10:47:46	1.64329	17.021	0
2022-09-15	10:47:47	1.66898	18.69	0
2022-09-15	10:47:48	1.65806	20.348	0
2022-09-15	10:47:49	1.21307	21.5611	0
2022-09-15	10:47:50	-0.780849	21.5611	0
2022-09-15	10:47:51	-3.62426	21.5611	0
2022-09-15	10:47:52	6.89771	28.4588	0
2022-09-15	10:47:53	15.3303	43.7891	1
2022-09-15	10:47:54	30.9874	74.7765	2
2022-09-15	10:47:55	-0.116694	74.7765	2
2022-09-15	10:47:56	1.73004	76.5066	2
2022-09-15	10:47:57	23.2675	99.774	3
2022-09-15	10:47:58	26.5229	126.297	4
2022-09-15	10:47:59	22.7239	149.021	5
2022-09-15	10:48:00	43.7577	192.779	6
2022-09-15	10:48:01	81.787	274.565	7
2022-09-15	10:48:02	38.9235	313.489	8
2022-09-15	10:48:03	101.246	414.735	9
2022-09-15	10:48:04	32.8923	447.627	10
2022-09-15	10:48:05	42.0009	489.628	11
2022-09-15	10:48:06	90.4688	580.097	12
2022-09-15	10:48:07	109.789	689.886	13
2022-09-15	10:48:08	53.5017	743.387	14
2022-09-15	10:48:09	115.739	859.127	15
2022-09-15	10:48:10	83.5032	942.63	16
2022-09-15	10:48:11	164.87	1107.5	17
2022-09-15	10:48:12	116.447	1223.95	18
2022-09-15	10:48:13	75.4086	1299.36	19
2022-09-15	10:48:14	75.9326	1375.29	20
2022-09-15	10:48:15	75.7713	1451.06	21
2022-09-15	10:48:16	77.6468	1528.71	22
2022-09-15	10:48:17	75.113	1603.82	23
2022-09-15	10:48:18	16.9473	1620.77	24
2022-09-15	10:48:19	54.7179	1675.48	25
2022-09-15	10:48:20	69.7089	1745.19	26
2022-09-15	10:48:21	60.5051	1805.7	27
2022-09-15	10:48:22	75.3181	1881.02	28
2022-09-15	10:48:23	20.7762	1901.79	29
2022-09-15	10:48:24	65.169	1966.96	30
2022-09-15	10:48:25	53.6971	2020.66	31
2022-09-15	10:48:26	-0.893033	2020.66	31
2022-09-15	10:48:27	36.4302	2057.09	32
2022-09-15	10:48:28	103.61	2160.7	33
2022-09-15	10:48:29	118.66	2279.36	34
2022-09-15	10:48:30	7.77082	2287.13	34
2022-09-15	10:48:31	3.6705	2290.8	34
2022-09-15	10:48:32	12.3248	2303.13	34
2022-09-15	10:48:33	-2.15816	2303.13	34
2022-09-15	10:48:34	18.0291	2321.15	35
2022-09-15	10:48:35	19.585	2340.74	36
2022-09-15	10:48:36	3.0795	2343.82	36
2022-09-15	10:48:37	55.6349	2399.45	37
2022-09-15	10:48:38	8.01276	2407.47	37
2022-09-15	10:48:39	4.83633	2412.3	37
2022-09-15	10:48:40	0.80362	2413.11	37
2022-09-15	10:48:41	-4.33795	2413.11	37
2022-09-15	10:48:42	10.1784	2423.29	37
2022-09-15	10:48:43	30.0597	2453.34	38
2022-09-15	10:48:44	17.5476	2470.89	39
2022-09-15	10:48:45	24.5376	2495.43	40
2022-09-15	10:48:46	20.6043	2516.03	41
2022-09-15	10:48:47	9.96575	2526	41
2022-09-15	10:48:48	9.80472	2535.8	41
2022-09-15	10:48:49	6.08928	2541.89	41
2022-09-15	10:48:50	0.108415	2542	41
2022-09-15	10:48:51	-2.16609	2542	41
2022-09-15	10:48:52	4.56744	2546.57	41
2022-09-15	10:48:53	1.69711	2548.27	41
2022-09-15	10:48:54	1.81005	2550.08	41
2022-09-15	10:48:55	1.37402	2551.45	41
2022-09-15	10:48:56	-2.51776	2551.45	41
2022-09-15	10:48:57	-1.90639	2551.45	41
2022-09-15	10:48:58	46.8168	2598.27	42
2022-09-15	10:48:59	7.42233	2605.69	42
2022-09-15	10:49:00	1.25217	2606.94	42
2022-09-15	10:49:01	0.110527	2607.05	42
2022-09-15	10:49:02	5.80256	2612.86	42
2022-09-15	10:49:03	21.233	2634.09	43
2022-09-15	10:49:04	7.28492	2641.37	43
2022-09-15	10:49:05	2.09841	2643.47	43
2022-09-15	10:49:06	27.5453	2671.02	44
2022-09-15	10:49:07	26.2306	2697.25	45
2022-09-15	10:49:08	48.0234	2745.27	46
2022-09-15	10:49:09	13.9298	2759.2	47
2022-09-15	10:49:10	4.68193	2763.88	47
2022-09-15	10:49:11	54.2641	2818.15	48
2022-09-15	10:49:12	2.11889	2820.27	48
2022-09-15	10:49:13	0.958439	2821.22	48
2022-09-15	10:49:14	23.8162	2845.04	49
2022-09-15	10:49:15	46.1774	2891.22	50
2022-09-15	10:49:16	19.8042	2911.02	51
2022-09-15	10:49:17	14.4874	2925.51	52
2022-09-15	10:49:18	12.6014	2938.11	52
2022-09-15	10:49:19	11.6261	2949.74	52
2022-09-15	10:49:20	9.63284	2959.37	52
2022-09-15	10:49:21	9.37976	2968.75	52
2022-09-15	10:49:22	9.08327	2977.83	52
2022-09-15	10:49:23	11.3429	2989.18	52
2022-09-15	10:49:24	11.1464	3000.32	52
2022-09-15	10:49:25	11.1269	3011.45	52
2022-09-15	10:49:26	11.1482	3022.6	52
2022-09-15	10:49:27	13.0017	3035.6	53
2022-09-15	10:49:28	13.3098	3048.91	54
2022-09-15	10:49:29	13.2478	3062.16	55
2022-09-15	10:49:30	12.8343	3074.99	55
2022-09-15	10:49:31	12.3167	3087.31	55
2022-09-15	10:49:32	11.2244	3098.53	55
2022-09-15	10:49:33	11.7622	3110.29	55
2022-09-15	10:49:34	11.175	3121.47	55
2022-09-15	10:49:35	10.8968	3132.37	55
2022-09-15	10:49:36	12.2262	3144.59	55
2022-09-15	10:49:37	12.5529	3157.15	55
2022-09-15	10:49:38	12.5693	3169.71	55
2022-09-15	10:49:39	12.6381	3182.35	55
2022-09-15	10:49:40	9.57844	3191.93	55
2022-09-15	10:49:41	7.61513	3199.55	55
2022-09-15	10:49:42	3.95018	3203.5	55
2022-09-15	10:49:43	11.6549	3215.15	55
2022-09-15	10:49:44	-0.753003	3215.15	55
2022-09-15	10:49:45	0.122073	3215.27	55
2022-09-15	10:49:46	32.4472	3247.72	56
2022-09-15	10:49:47	52.6132	3300.33	57
2022-09-15	10:49:48	23.3565	3323.69	58
2022-09-15	10:49:49	18.4678	3342.16	59
2022-09-15	10:49:50	13.9463	3356.1	60
2022-09-15	10:49:51	9.30973	3365.41	60
2022-09-15	10:49:52	7.29375	3372.71	60
2022-09-15	10:49:53	7.28763	3380	60
2022-09-15	10:49:54	7.51061	3387.51	60
2022-09-15	10:49:55	6.18799	3393.69	60
2022-09-15	10:49:56	7.06624	3400.76	60
2022-09-15	10:49:57	7.24297	3408	60
2022-09-15	10:49:58	7.61496	3415.62	60
2022-09-15	10:49:59	7.44602	3423.06	60
2022-09-15	10:50:00	6.91395	3429.98	60
2022-09-15	10:50:01	6.68124	3436.66	60
2022-09-15	10:50:02	7.27332	3443.93	60
2022-09-15	10:50:03	7.45122	3451.38	60
2022-09-15	10:50:04	7.4573	3458.84	60
2022-09-15	10:50:05	8.12798	3466.97	60
2022-09-15	10:50:06	7.76261	3474.73	60
2022-09-15	10:50:07	7.48828	3482.22	60
2022-09-15	10:50:08	7.54886	3489.77	60
2022-09-15	10:50:09	7.1372	3496.91	60
2022-09-15	10:50:10	7.20675	3504.11	60
2022-09-15	10:50:11	7.12589	3511.24	60
2022-09-15	10:50:12	16.2521	3527.49	61
2022-09-15	10:50:13	5.73388	3533.22	61
2022-09-15	10:50:14	35.8162	3569.04	62
2022-09-15	10:50:15	7.98288	3577.02	62
2022-09-15	10:50:16	-1.83989	3577.02	62
2022-09-15	10:50:17	-1.17968	3577.02	62
2022-09-15	10:50:18	-2.17401	3577.02	62
2022-09-15	10:50:19	2.37848	3579.4	62
2022-09-15	10:50:20	18.5819	3597.98	63
2022-09-15	10:50:21	15.9446	3613.93	64
2022-09-15	10:50:22	18.4389	3632.37	65
2022-09-15	10:50:23	2.13474	3634.5	65
2022-09-15	10:50:24	2.39003	3636.89	65
2022-09-15	10:50:25	10.9806	3647.87	65
2022-09-15	10:50:26	1.48709	3649.36	65
2022-09-15	10:50:27	1.64499	3651.01	65
2022-09-15	10:50:28	10.242	3661.25	65
2022-09-15	10:50:29	2.23676	3663.48	65
2022-09-15	10:50:30	1.50797	3664.99	65
2022-09-15	10:50:31	6.05056	3671.04	65
2022-09-15	10:50:32	9.69673	3680.74	65
2022-09-15	10:50:33	5.12375	3685.86	65
2022-09-15	10:50:34	6.2478	3692.11	65
2022-09-15	10:50:35	11.1688	3703.28	65
2022-09-15	10:50:36	2.84679	3706.13	65
2022-09-15	10:50:37	-0.67385	3706.13	65
2022-09-15	10:50:38	5.53201	3711.66	65
2022-09-15	10:50:39	3.13616	3714.79	65
2022-09-15	10:50:40	-0.205431	3714.79	65
2022-09-15	10:50:41	-0.819935	3714.79	65
2022-09-15	10:50:42	0.187153	3714.98	65
2022-09-15	10:50:43	4.0821	3719.06	65
2022-09-15	10:50:44	5.40038	3724.46	65
2022-09-15	10:50:45	0.312978	3724.78	65
2022-09-15	10:50:46	-0.0285216	3724.78	65
2022-09-15	10:50:47	3.31198	3728.09	65
2022-09-15	10:50:48	5.32262	3733.41	65
2022-09-15	10:50:49	1.24329	3734.66	65
2022-09-15	10:50:50	0.710751	3735.37	65
2022-09-15	10:50:51	0.479625	3735.85	65
2022-09-15	10:50:52	0.177004	3736.02	65
2022-09-15	10:50:53	-0.940118	3736.02	65
2022-09-15	10:50:54	-1.50327	3736.02	65
2022-09-15	10:50:55	-0.345443	3736.02	65
2022-09-15	10:50:56	6.26322	3742.29	65
2022-09-15	10:50:57	5.65363	3747.94	65
2022-09-15	10:50:58	5.16258	3753.1	65
2022-09-15	10:50:59	3.60282	3756.7	65
2022-09-15	10:51:00	18.5428	3775.25	66
2022-09-15	10:51:01	4.59891	3779.85	66
2022-09-15	10:51:02	8.75679	3788.6	66
2022-09-15	10:51:03	6.16557	3794.77	66
2022-09-15	10:51:04	7.50729	3802.28	66
2022-09-15	10:51:05	12.3783	3814.65	66
2022-09-15	10:51:06	8.50755	3823.16	66
2022-09-15	10:51:07	3.54633	3826.71	66
2022-09-15	10:51:08	5.35488	3832.06	66
2022-09-15	10:51:09	3.13207	3835.2	66
2022-09-15	10:51:10	1.71063	3836.91	66
2022-09-15	10:51:11	19.4708	3856.38	67
2022-09-15	10:51:12	6.26775	3862.64	67
2022-09-15	10:51:13	6.19364	3868.84	67
2022-09-15	10:51:14	10.618	3879.46	67
2022-09-15	10:51:15	10.7644	3890.22	67
2022-09-15	10:51:16	0.778097	3891	67
2022-09-15	10:51:17	1.26298	3892.26	67
2022-09-15	10:51:18	35.4685	3927.73	68
2022-09-15	10:51:19	19.5051	3947.24	69
2022-09-15	10:51:20	10.9888	3958.22	69
2022-09-15	10:51:21	10.4795	3968.7	69
2022-09-15	10:51:22	11.2328	3979.94	69
2022-09-15	10:51:23	8.38484	3988.32	69
2022-09-15	10:51:24	6.9873	3995.31	69
2022-09-15	10:51:25	6.19923	4001.51	69
2022-09-15	10:51:26	10.0852	4011.59	69
2022-09-15	10:51:27	10.2807	4021.87	69
2022-09-15	10:51:28	10.0353	4031.91	69
2022-09-15	10:51:29	1.44782	4033.36	69
2022-09-15	10:51:30	20.2359	4053.59	70
2022-09-15	10:51:31	14.8467	4068.44	71
2022-09-15	10:51:32	6.37196	4074.81	71
2022-09-15	10:51:33	17.2469	4092.06	72
2022-09-15	10:51:34	0.965022	4093.02	72
2022-09-15	10:51:35	19.5073	4112.53	73
2022-09-15	10:51:36	16.6237	4129.15	74
2022-09-15	10:51:37	12.1625	4141.32	74
2022-09-15	10:51:38	16.8536	4158.17	75
2022-09-15	10:51:39	23.3404	4181.51	76
2022-09-15	10:51:40	34.5468	4216.06	77
2022-09-15	10:51:41	31.2591	4247.32	78
2022-09-15	10:51:42	18.3178	4265.63	79
2022-09-15	10:51:43	16.2848	4281.92	80
2022-09-15	10:51:44	52.5869	4334.51	81
2022-09-15	10:51:45	34.5022	4369.01	82
2022-09-15	10:51:46	20.0884	4389.1	83
2022-09-15	10:51:47	15.4508	4404.55	84
2022-09-15	10:51:48	18.8781	4423.43	85
2022-09-15	10:51:49	17.4299	4440.86	86
2022-09-15	10:51:50	18.1065	4458.96	87
2022-09-15	10:51:51	15.4007	4474.36	88
2022-09-15	10:51:52	13.2291	4487.59	89
2022-09-15	10:51:53	13.548	4501.14	90
2022-09-15	10:51:54	21.9735	4523.11	91
2022-09-15	10:51:55	46.062	4569.18	92
2022-09-15	10:51:56	19.7226	4588.9	93
2022-09-15	10:51:57	8.66217	4597.56	93
2022-09-15	10:51:58	44.8741	4642.43	94
2022-09-15	10:51:59	21.7215	4664.16	95
2022-09-15	10:52:00	16.5381	4680.69	96
2022-09-15	10:52:01	12.0691	4692.76	96
2022-09-15	10:52:02	11.0539	4703.82	96
2022-09-15	10:52:03	9.01959	4712.84	96
2022-09-15	10:52:04	8.39668	4721.23	96
2022-09-15	10:52:05	9.98665	4731.22	96
2022-09-15	10:52:06	11.9508	4743.17	96
2022-09-15	10:52:07	12.1714	4755.34	96
2022-09-15	10:52:08	51.6432	4806.98	97
2022-09-15	10:52:09	26.8188	4833.8	98
2022-09-15	10:52:10	15.8952	4849.7	99
2022-09-15	10:52:11	13.965	4863.66	100
2022-09-15	10:52:12	11.2209	4874.88	100
2022-09-15	10:52:13	9.96227	4884.85	100
2022-09-15	10:52:14	19.771	4904.62	101
2022-09-15	10:52:15	16.7251	4921.34	102
2022-09-15	10:52:16	18.1927	4939.54	103
2022-09-15	10:52:17	19.3124	4958.85	104
2022-09-15	10:52:18	6.97456	4965.82	104
2022-09-15	10:52:19	14.2398	4980.06	105
2022-09-15	10:52:20	10.3469	4990.41	105
2022-09-15	10:52:21	56.7718	5047.18	106
2022-09-15	10:52:22	71.5334	5118.71	107
2022-09-15	10:52:23	45.8971	5164.61	108
2022-09-15	10:52:24	22.4427	5187.05	109
2022-09-15	10:52:25	34.3419	5221.4	110
2022-09-15	10:52:26	18.4328	5239.83	111
2022-09-15	10:52:27	14.0244	5253.85	112
2022-09-15	10:52:28	7.75531	5261.61	112
2022-09-15	10:52:29	7.00753	5268.62	112
2022-09-15	10:52:30	6.2732	5274.89	112
2022-09-15	10:52:31	3.18737	5278.08	112
2022-09-15	10:52:32	4.75907	5282.84	112
2022-09-15	10:52:33	5.2453	5288.08	112

## Sheet: Boris_harness_2022915104715 (4)
Date	Time	Lbs	Newtons	Averaged Newtons	Total force x time		total steps > 13.345	**GoPro Fitting: 1036
2022-09-15	10:47:33	0.30673	1.3644	1.5391	1.3644	FALSE	0
2022-09-15	10:47:33	0.358384	1.59416	1.5391	1.59416	FALSE	0		Dog barking at other dog in nearby yard which lead to big pulling incident
2022-09-15	10:47:33	0.3907	1.73791	1.5391	3.10231	FALSE	0
2022-09-15	10:47:33	0.328206	1.45993	1.5391	3.05409	FALSE	0
2022-09-15	10:47:34	0.333244	1.48234	1.53395	4.58464	FALSE	0
2022-09-15	10:47:34	0.320776	1.42688	1.53395	4.48097	FALSE	0
2022-09-15	10:47:34	0.360318	1.60277	1.53395	6.18741	FALSE	0
2022-09-15	10:47:34	0.365051	1.62382	1.53395	6.10479	FALSE	0
2022-09-15	10:47:35	0.315636	1.40401	1.3066	7.59142	FALSE	0
2022-09-15	10:47:35	0.275941	1.22744	1.3066	7.33223	FALSE	0
2022-09-15	10:47:35	0.289631	1.28834	1.3066	8.87976	FALSE	0
2022-09-15	10:47:36	0.28159	1.25257	1.40905	8.58479	FALSE	0
2022-09-15	10:47:36	0.316247	1.40673	1.40905	10.2865	FALSE	0
2022-09-15	10:47:36	0.32729	1.45585	1.40905	10.0406	FALSE	0
2022-09-15	10:47:36	0.341947	1.52105	1.40905	11.8075	FALSE	0
2022-09-15	10:47:37	0.337468	1.50113	1.57639	11.5418	FALSE	0
2022-09-15	10:47:37	0.325356	1.44725	1.57639	13.2548	FALSE	0
2022-09-15	10:47:37	0.39472	1.75579	1.57639	13.2976	FALSE	0
2022-09-15	10:47:37	0.360013	1.60141	1.57639	14.8562	FALSE	0
2022-09-15	10:47:38	0.176909	0.786927	0.936274	14.0845	FALSE	0
2022-09-15	10:47:38	0.170496	0.7584	0.936274	15.6146	FALSE	0
2022-09-15	10:47:38	0.243779	1.08438	0.936274	15.1689	FALSE	0
2022-09-15	10:47:38	0.250751	1.11539	0.936274	16.73	FALSE	0
2022-09-15	10:47:39	0.154924	0.689133	0.963949	15.858	FALSE	0
2022-09-15	10:47:39	0.242049	1.07668	0.963949	17.8067	FALSE	0
2022-09-15	10:47:39	0.253143	1.12603	0.963949	16.984	FALSE	0
2022-09-15	10:47:40	0.251005	1.11652	1.07974	18.9232	FALSE	0
2022-09-15	10:47:40	0.256094	1.13916	1.07974	18.1232	FALSE	0
2022-09-15	10:47:40	0.220573	0.981153	1.07974	19.9043	FALSE	0
2022-09-15	10:47:40	0.24327	1.08211	1.07974	19.2053	FALSE	0
2022-09-15	10:47:41	0.230395	1.02484	1.07006	20.9292	FALSE	0
2022-09-15	10:47:41	0.234618	1.04363	1.07006	20.2489	FALSE	0
2022-09-15	10:47:41	0.236807	1.05336	1.07006	21.9826	FALSE	0
2022-09-15	10:47:41	0.26042	1.1584	1.07006	21.4073	FALSE	0
2022-09-15	10:47:42	0.228562	1.01669	0.949911	22.9992	FALSE	0
2022-09-15	10:47:42	0.223982	0.996317	0.949911	22.4036	FALSE	0
2022-09-15	10:47:42	0.211209	0.9395	0.949911	23.9387	FALSE	0
2022-09-15	10:47:42	0.190445	0.847137	0.949911	23.2508	FALSE	0
2022-09-15	10:47:43	0.209428	0.931578	0.938142	24.8703	FALSE	0
2022-09-15	10:47:43	0.208512	0.927503	0.938142	24.1783	FALSE	0
2022-09-15	10:47:43	0.214771	0.955344	0.938142	25.8257	FALSE	0
2022-09-15	10:47:44	0.21355	0.949913	0.815165	25.1282	FALSE	0
2022-09-15	10:47:44	0.190802	0.848725	0.815165	26.6744	FALSE	0
2022-09-15	10:47:44	0.162252	0.721729	0.815165	25.8499	FALSE	0
2022-09-15	10:47:44	0.166425	0.740292	0.815165	27.4147	FALSE	0
2022-09-15	10:47:45	0.126832	0.564174	1.25936	26.4141	FALSE	0
2022-09-15	10:47:45	0.338741	1.50679	1.25936	28.9215	FALSE	0
2022-09-15	10:47:45	0.373957	1.66344	1.25936	28.0775	FALSE	0
2022-09-15	10:47:45	0.292939	1.30305	1.25936	30.2245	FALSE	0
2022-09-15	10:47:46	0.341896	1.52082	1.64329	29.5984	FALSE	0
2022-09-15	10:47:46	0.359962	1.60118	1.64329	31.8257	FALSE	0
2022-09-15	10:47:46	0.406425	1.80786	1.64329	31.4062	FALSE	0
2022-09-15	10:47:47	0.38383	1.70735	1.66898	33.5331	FALSE	0
2022-09-15	10:47:47	0.36785	1.63627	1.66898	33.0425	FALSE	0
2022-09-15	10:47:47	0.378537	1.68381	1.66898	35.2169	FALSE	0
2022-09-15	10:47:47	0.370598	1.64849	1.66898	34.691	FALSE	0
2022-09-15	10:47:48	0.377367	1.6786	1.65806	36.8955	FALSE	0
2022-09-15	10:47:48	0.383881	1.70758	1.65806	36.3986	FALSE	0
2022-09-15	10:47:48	0.341845	1.52059	1.65806	38.4161	FALSE	0
2022-09-15	10:47:48	0.387901	1.72546	1.65806	38.124	FALSE	0
2022-09-15	10:47:49	0.271819	1.20911	1.21307	39.6252	FALSE	0
2022-09-15	10:47:49	0.445865	1.9833	1.21307	40.1073	FALSE	0
2022-09-15	10:47:49	0.326425	1.452	1.21307	41.0772	FALSE	0
2022-09-15	10:47:49	0.0467305	0.207867	1.21307	40.3152	FALSE	0
2022-09-15	10:47:50	-0.158715	-0.705996	-0.780849	41.0772	FALSE	0
2022-09-15	10:47:50	-0.126654	-0.563382	-0.780849	40.3152	FALSE	0
2022-09-15	10:47:50	-0.241259	-1.07317	-0.780849	41.0772	FALSE	0
2022-09-15	10:47:51	-0.544211	-2.42076	-3.62426	40.3152	FALSE	0
2022-09-15	10:47:51	-0.836424	-3.72058	-3.62426	41.0772	FALSE	0
2022-09-15	10:47:51	-1.02156	-4.5441	-3.62426	40.3152	FALSE	0
2022-09-15	10:47:51	-0.856882	-3.81158	-3.62426	41.0772	FALSE	0
2022-09-15	10:47:52	-0.620139	-2.7585	6.89771	40.3152	FALSE	0
2022-09-15	10:47:52	0.237875	1.05812	6.89771	42.1353	FALSE	0
2022-09-15	10:47:52	1.16312	5.17379	6.89771	45.489	FALSE	0
2022-09-15	10:47:52	5.42184	24.1174	6.89771	66.2527	1	1
2022-09-15	10:47:53	4.22744	18.8045	15.3303	64.2935	1	2
2022-09-15	10:47:53	2.60077	11.5687	15.3303	77.8215	FALSE	2
2022-09-15	10:47:53	2.94993	13.1219	15.3303	77.4154	FALSE	2
2022-09-15	10:47:53	4.00749	17.8261	15.3303	95.6476	1	3
2022-09-15	10:47:54	6.7395	29.9786	30.9874	107.394	1	4
2022-09-15	10:47:54	11.5685	51.459	30.9874	147.107	1	5
2022-09-15	10:47:54	2.59085	11.5246	30.9874	118.919	FALSE	5
2022-09-15	10:47:55	-0.0279768	-0.124446	-0.116694	147.107	FALSE	5
2022-09-15	10:47:55	-0.18757	-0.834349	-0.116694	118.919	FALSE	5
2022-09-15	10:47:55	-0.154694	-0.68811	-0.116694	147.107	FALSE	5
2022-09-15	10:47:55	0.265305	1.18013	-0.116694	120.099	FALSE	5
2022-09-15	10:47:56	0.0469341	0.208772	1.73004	147.315	FALSE	5
2022-09-15	10:47:56	1.06301	4.72848	1.73004	124.827	FALSE	5
2022-09-15	10:47:56	0.285763	1.27113	1.73004	148.586	FALSE	5
2022-09-15	10:47:56	0.160013	0.71177	1.73004	125.539	FALSE	5
2022-09-15	10:47:57	0.0337534	0.150142	23.2675	148.737	FALSE	5
2022-09-15	10:47:57	0.460623	2.04894	23.2675	127.588	FALSE	5
2022-09-15	10:47:57	4.39925	19.5687	23.2675	168.305	1	6
2022-09-15	10:47:57	16.0294	71.302	23.2675	198.89	1	7
2022-09-15	10:47:58	7.56948	33.6706	26.5229	201.976	1	8
2022-09-15	10:47:58	5.84698	26.0085	26.5229	224.898	1	9
2022-09-15	10:47:58	4.47141	19.8897	26.5229	221.866	1	10
2022-09-15	10:47:59	4.96719	22.0951	22.7239	246.994	1	11
2022-09-15	10:47:59	3.85334	17.1404	22.7239	239.006	1	12
2022-09-15	10:47:59	7.40489	32.9384	22.7239	279.932	1	13
2022-09-15	10:47:59	4.20881	18.7216	22.7239	257.728	1	14
2022-09-15	10:48:00	6.31014	28.0688	43.7577	308.001	1	15
2022-09-15	10:48:00	9.18662	40.8639	43.7577	298.592	1	16
2022-09-15	10:48:00	11.0821	49.2954	43.7577	357.296	1	17
2022-09-15	10:48:00	12.7698	56.8026	43.7577	355.394	1	18
2022-09-15	10:48:01	14.9816	66.6412	81.787	423.937	1	19
2022-09-15	10:48:01	21.404	95.2093	81.787	450.604	1	20
2022-09-15	10:48:01	18.774	83.5105	81.787	507.448	1	21
2022-09-15	10:48:02	16.3036	72.5217	38.9235	523.125	1	22
2022-09-15	10:48:02	2.51513	11.1878	38.9235	518.636	FALSE	22
2022-09-15	10:48:02	11.8745	52.8202	38.9235	575.945	1	23
2022-09-15	10:48:02	4.30831	19.1642	38.9235	537.8	1	24
2022-09-15	10:48:03	25.6589	114.136	101.246	690.081	1	25
2022-09-15	10:48:03	16.8169	74.8049	101.246	612.605	1	26
2022-09-15	10:48:03	23.0433	102.501	101.246	792.582	1	27
2022-09-15	10:48:03	25.5252	113.541	101.246	726.146	1	28
2022-09-15	10:48:04	8.61579	38.3248	32.8923	830.907	1	29
2022-09-15	10:48:04	11.0145	48.9947	32.8923	775.141	1	30
2022-09-15	10:48:04	2.55329	11.3575	32.8923	842.265	FALSE	30
2022-09-15	10:48:05	2.8734	12.7815	42.0009	787.922	FALSE	30
2022-09-15	10:48:05	0.31416	1.39745	42.0009	843.662	FALSE	30
2022-09-15	10:48:05	4.40495	19.5941	42.0009	807.516	1	31
2022-09-15	10:48:05	30.1764	134.231	42.0009	977.893	1	32
2022-09-15	10:48:06	17.8008	79.1815	90.4688	886.698	1	33
2022-09-15	10:48:06	19.2461	85.6105	90.4688	1063.5	1	34
2022-09-15	10:48:06	24.2676	107.947	90.4688	994.645	1	35
2022-09-15	10:48:06	20.0387	89.1361	90.4688	1152.64	1	36
2022-09-15	10:48:07	8.28434	36.8504	109.789	1031.5	1	37
2022-09-15	10:48:07	17.164	76.3489	109.789	1228.99	1	38
2022-09-15	10:48:07	38.2431	170.113	109.789	1201.61	1	39
2022-09-15	10:48:07	35.0351	155.843	109.789	1384.83	1	40
2022-09-15	10:48:08	15.8351	70.4377	53.5017	1272.05	1	41
2022-09-15	10:48:08	0.557875	2.48154	53.5017	1387.31	FALSE	41
2022-09-15	10:48:08	20.1386	89.5805	53.5017	1361.63	1	42
2022-09-15	10:48:08	11.5793	51.507	53.5017	1438.82	1	43
2022-09-15	10:48:09	32.434	144.273	115.739	1505.9	1	44
2022-09-15	10:48:09	25.4551	113.229	115.739	1552.05	1	45
2022-09-15	10:48:09	20.169	89.7157	115.739	1595.62	1	46
2022-09-15	10:48:10	32.107	142.818	83.5032	1694.87	1	47
2022-09-15	10:48:10	7.0993	31.5791	83.5032	1627.19	1	48
2022-09-15	10:48:10	18.7168	83.2561	83.5032	1778.12	1	49
2022-09-15	10:48:10	17.1663	76.3591	83.5032	1703.55	1	50
2022-09-15	10:48:11	24.4528	108.771	164.87	1886.89	1	51
2022-09-15	10:48:11	49.944	222.161	164.87	1925.71	1	52
2022-09-15	10:48:11	27.2107	121.039	164.87	2007.93	1	53
2022-09-15	10:48:11	46.6503	207.51	164.87	2133.22	1	54
2022-09-15	10:48:12	43.3969	193.038	116.447	2200.97	1	55
2022-09-15	10:48:12	25.3973	112.972	116.447	2246.2	1	56
2022-09-15	10:48:12	15.9444	70.9239	116.447	2271.9	1	57
2022-09-15	10:48:12	19.9754	88.8546	116.447	2335.05	1	58
2022-09-15	10:48:13	20.0827	89.3319	75.4086	2361.23	1	59
2022-09-15	10:48:13	13.6015	60.5022	75.4086	2395.55	1	60
2022-09-15	10:48:13	17.1736	76.3916	75.4086	2437.62	1	61
2022-09-15	10:48:14	16.8005	74.732	75.9326	2470.29	1	62
2022-09-15	10:48:14	9.46107	42.0847	75.9326	2479.7	1	63
2022-09-15	10:48:14	13.7726	61.2633	75.9326	2531.55	1	64
2022-09-15	10:48:14	28.2475	125.651	75.9326	2605.35	1	65
2022-09-15	10:48:15	20.6013	91.6387	75.7713	2623.19	1	66
2022-09-15	10:48:15	19.6145	87.2492	75.7713	2692.6	1	67
2022-09-15	10:48:15	18.9455	84.2734	75.7713	2707.46	1	68
2022-09-15	10:48:15	8.97533	39.9241	75.7713	2732.53	1	69
2022-09-15	10:48:16	15.6209	69.4849	77.6468	2776.95	1	70
2022-09-15	10:48:16	5.69202	25.3192	77.6468	2757.85	1	71
2022-09-15	10:48:16	31.0544	138.136	77.6468	2915.08	1	72
2022-09-15	10:48:17	11.7368	52.2076	75.113	2810.05	1	73
2022-09-15	10:48:17	13.8202	61.475	75.113	2976.56	1	74
2022-09-15	10:48:17	29.7394	132.287	75.113	2942.34	1	75
2022-09-15	10:48:17	12.2482	54.4824	75.113	3031.04	1	76
2022-09-15	10:48:18	5.2538	23.37	16.9473	2965.71	1	77
2022-09-15	10:48:18	5.99105	26.6494	16.9473	3057.69	1	78
2022-09-15	10:48:18	2.37202	10.5512	16.9473	2976.26	FALSE	78
2022-09-15	10:48:18	1.62281	7.21858	16.9473	3064.91	FALSE	78
2022-09-15	10:48:19	2.49584	11.102	54.7179	2987.36	FALSE	78
2022-09-15	10:48:19	20.1639	89.6931	54.7179	3154.6	1	79
2022-09-15	10:48:19	18.3035	81.4176	54.7179	3068.78	1	80
2022-09-15	10:48:19	8.24133	36.6591	54.7179	3191.26	1	81
2022-09-15	10:48:20	10.2442	45.5683	69.7089	3114.35	1	82
2022-09-15	10:48:20	15.4191	68.5872	69.7089	3259.85	1	83
2022-09-15	10:48:20	21.3505	94.9713	69.7089	3209.32	1	84
2022-09-15	10:48:21	16.3268	72.6249	60.5051	3332.47	1	85
2022-09-15	10:48:21	14.2339	63.3152	60.5051	3272.64	1	86
2022-09-15	10:48:21	10.0372	44.6475	60.5051	3377.12	1	87
2022-09-15	10:48:21	13.8107	61.4328	60.5051	3334.07	1	88
2022-09-15	10:48:22	21.3643	95.0327	75.3181	3472.15	1	89
2022-09-15	10:48:22	12.0243	53.4865	75.3181	3387.56	1	90
2022-09-15	10:48:22	10.1233	45.0305	75.3181	3517.18	1	91
2022-09-15	10:48:22	24.2172	107.723	75.3181	3495.28	1	92
2022-09-15	10:48:23	14.7162	65.4606	20.7762	3582.64	1	93
2022-09-15	10:48:23	1.63411	7.26885	20.7762	3502.55	FALSE	93
2022-09-15	10:48:23	0.438283	1.94957	20.7762	3584.59	FALSE	93
2022-09-15	10:48:23	1.89416	8.4256	20.7762	3510.97	FALSE	93
2022-09-15	10:48:24	7.95533	35.3869	65.169	3619.98	1	94
2022-09-15	10:48:24	19.8623	88.3515	65.169	3599.32	1	95
2022-09-15	10:48:24	16.1343	71.7686	65.169	3691.75	1	96
2022-09-15	10:48:25	23.076	102.647	53.6971	3701.97	1	97
2022-09-15	10:48:25	20.5091	91.2286	53.6971	3782.98	1	98
2022-09-15	10:48:25	4.51482	20.0828	53.6971	3722.05	1	99
2022-09-15	10:48:25	0.186679	0.830386	53.6971	3783.81	FALSE	99
2022-09-15	10:48:26	-0.17846	-0.793826	-0.893033	3722.05	FALSE	99
2022-09-15	10:48:26	-0.312506	-1.39009	-0.893033	3783.81	FALSE	99
2022-09-15	10:48:26	-0.264872	-1.1782	-0.893033	3722.05	FALSE	99
2022-09-15	10:48:26	-0.0472135	-0.210015	-0.893033	3783.81	FALSE	99
2022-09-15	10:48:27	0.179504	0.79847	36.4302	3722.85	FALSE	99
2022-09-15	10:48:27	3.80011	16.9036	36.4302	3800.71	1	100
2022-09-15	10:48:27	16.1005	71.6182	36.4302	3794.47	1	101
2022-09-15	10:48:27	12.6794	56.4005	36.4302	3857.11	1	102
2022-09-15	10:48:28	23.5576	104.789	103.61	3899.26	1	103
2022-09-15	10:48:28	23.3412	103.826	103.61	3960.94	1	104
2022-09-15	10:48:28	22.9791	102.216	103.61	4001.48	1	105
2022-09-15	10:48:29	15.1514	67.3965	118.66	4028.33	1	106
2022-09-15	10:48:29	21.2524	94.5349	118.66	4096.01	1	107
2022-09-15	10:48:29	30.7875	136.949	118.66	4165.28	1	108
2022-09-15	10:48:29	39.5123	175.759	118.66	4271.77	1	109
2022-09-15	10:48:30	6.04922	26.9081	7.77082	4192.19	1	110
2022-09-15	10:48:30	0.229122	1.01918	7.77082	4272.79	FALSE	110
2022-09-15	10:48:30	0.325916	1.44974	7.77082	4193.64	FALSE	110
2022-09-15	10:48:30	0.383575	1.70622	7.77082	4274.49	FALSE	110
2022-09-15	10:48:31	-0.923803	-4.10926	3.6705	4193.64	FALSE	110
2022-09-15	10:48:31	-0.553015	-2.45992	3.6705	4274.49	FALSE	110
2022-09-15	10:48:31	-0.172557	-0.767568	3.6705	4193.64	FALSE	110
2022-09-15	10:48:31	4.95004	22.0188	3.6705	4296.51	1	111
2022-09-15	10:48:32	7.90093	35.1449	12.3248	4228.79	1	112
2022-09-15	10:48:32	0.0316669	0.140861	12.3248	4296.65	FALSE	112
2022-09-15	10:48:32	0.379606	1.68856	12.3248	4230.47	FALSE	112
2022-09-15	10:48:33	-0.0728623	-0.324106	-2.15816	4296.65	FALSE	112
2022-09-15	10:48:33	-0.92818	-4.12873	-2.15816	4230.47	FALSE	112
2022-09-15	10:48:33	-1.05927	-4.71184	-2.15816	4296.65	FALSE	112
2022-09-15	10:48:33	0.119606	0.532031	-2.15816	4231.01	FALSE	112
2022-09-15	10:48:34	0.456094	2.0288	18.0291	4298.68	FALSE	112
2022-09-15	10:48:34	1.14429	5.09003	18.0291	4236.1	FALSE	112
2022-09-15	10:48:34	3.59589	15.9952	18.0291	4314.68	1	113
2022-09-15	10:48:34	11.0162	49.0023	18.0291	4285.1	1	114
2022-09-15	10:48:35	11.4379	50.8781	19.585	4365.56	1	115
2022-09-15	10:48:35	0.462354	2.05664	19.585	4287.15	FALSE	115
2022-09-15	10:48:35	1.30846	5.82029	19.585	4371.38	FALSE	115
2022-09-15	10:48:36	0.157417	0.700222	3.0795	4287.85	FALSE	115
2022-09-15	10:48:36	0.668919	2.97549	3.0795	4374.35	FALSE	115
2022-09-15	10:48:36	0.104084	0.462986	3.0795	4288.32	FALSE	115
2022-09-15	10:48:36	1.83879	8.17931	3.0795	4382.53	FALSE	115
2022-09-15	10:48:37	27.3453	121.637	55.6349	4409.96	1	116
2022-09-15	10:48:37	13.8463	61.5911	55.6349	4444.12	1	117
2022-09-15	10:48:37	4.36714	19.4259	55.6349	4429.38	1	118
2022-09-15	10:48:37	4.47044	19.8854	55.6349	4464.01	1	119
2022-09-15	10:48:38	4.82011	21.4408	8.01276	4450.82	1	120
2022-09-15	10:48:38	1.0848	4.82541	8.01276	4468.83	FALSE	120
2022-09-15	10:48:38	0.832735	3.70417	8.01276	4454.53	FALSE	120
2022-09-15	10:48:38	0.467748	2.08064	8.01276	4470.91	FALSE	120
2022-09-15	10:48:39	1.3991	6.22348	4.83633	4460.75	FALSE	120
2022-09-15	10:48:39	0.562608	2.50259	4.83633	4473.42	FALSE	120
2022-09-15	10:48:39	1.30006	5.78293	4.83633	4466.53	FALSE	120
2022-09-15	10:48:40	0.64444	2.8666	0.80362	4476.28	FALSE	120
2022-09-15	10:48:40	0.707646	3.14775	0.80362	4469.68	FALSE	120
2022-09-15	10:48:40	-0.121259	-0.539384	0.80362	4476.28	FALSE	120
2022-09-15	10:48:40	-0.50818	-2.26049	0.80362	4469.68	FALSE	120
2022-09-15	10:48:41	-0.885126	-3.93722	-4.33795	4476.28	FALSE	120
2022-09-15	10:48:41	-0.99103	-4.4083	-4.33795	4469.68	FALSE	120
2022-09-15	10:48:41	-1.16767	-5.19403	-4.33795	4476.28	FALSE	120
2022-09-15	10:48:41	-0.857035	-3.81226	-4.33795	4469.68	FALSE	120
2022-09-15	10:48:42	-0.82131	-3.65335	10.1784	4476.28	FALSE	120
2022-09-15	10:48:42	-0.567671	-2.52511	10.1784	4469.68	FALSE	120
2022-09-15	10:48:42	2.45986	10.9419	10.1784	4487.23	FALSE	120
2022-09-15	10:48:42	8.08194	35.9501	10.1784	4505.63	1	121
2022-09-15	10:48:43	12.8036	56.953	30.0597	4544.18	1	122
2022-09-15	10:48:43	3.70637	16.4867	30.0597	4522.12	1	123
2022-09-15	10:48:43	3.76322	16.7396	30.0597	4560.92	1	124
2022-09-15	10:48:44	5.16398	22.9704	17.5476	4545.09	1	125
2022-09-15	10:48:44	3.29599	14.6612	17.5476	4575.58	1	126
2022-09-15	10:48:44	3.37477	15.0117	17.5476	4560.1	1	127
2022-09-15	10:48:44	3.94475	17.547	17.5476	4593.13	1	128
2022-09-15	10:48:45	5.10123	22.6913	24.5376	4582.79	1	129
2022-09-15	10:48:45	6.3424	28.2123	24.5376	4621.34	1	130
2022-09-15	10:48:45	5.42683	24.1396	24.5376	4606.93	1	131
2022-09-15	10:48:45	5.19477	23.1074	24.5376	4644.45	1	132
2022-09-15	10:48:46	6.81441	30.3119	20.6043	4637.24	1	133
2022-09-15	10:48:46	4.91548	21.865	20.6043	4666.31	1	134
2022-09-15	10:48:46	4.21777	18.7615	20.6043	4656	1	135
2022-09-15	10:48:46	2.58052	11.4787	20.6043	4677.79	FALSE	135
2022-09-15	10:48:47	2.32734	10.3525	9.96575	4666.36	FALSE	135
2022-09-15	10:48:47	2.19721	9.77363	9.96575	4687.56	FALSE	135
2022-09-15	10:48:47	2.19665	9.77114	9.96575	4676.13	FALSE	135
2022-09-15	10:48:48	2.14704	9.55046	9.80472	4697.11	FALSE	135
2022-09-15	10:48:48	2.18541	9.72114	9.80472	4685.85	FALSE	135
2022-09-15	10:48:48	2.23604	9.94635	9.80472	4707.06	FALSE	135
2022-09-15	10:48:48	2.24831	10.0009	9.80472	4695.85	FALSE	135
2022-09-15	10:48:49	2.11701	9.41688	6.08928	4716.48	FALSE	135
2022-09-15	10:48:49	2.09452	9.31684	6.08928	4705.17	FALSE	135
2022-09-15	10:48:49	0.863473	3.8409	6.08928	4720.32	FALSE	135
2022-09-15	10:48:49	0.400725	1.7825	6.08928	4706.95	FALSE	135
2022-09-15	10:48:50	0.274059	1.21907	0.108415	4721.54	FALSE	135
2022-09-15	10:48:50	0.0606745	0.269892	0.108415	4707.22	FALSE	135
2022-09-15	10:48:50	-0.261615	-1.16372	0.108415	4721.54	FALSE	135
2022-09-15	10:48:51	-0.364414	-1.62099	-2.16609	4707.22	FALSE	135
2022-09-15	10:48:51	-0.375254	-1.6692	-2.16609	4721.54	FALSE	135
2022-09-15	10:48:51	-0.485941	-2.16156	-2.16609	4707.22	FALSE	135
2022-09-15	10:48:51	-0.722226	-3.21261	-2.16609	4721.54	FALSE	135
2022-09-15	10:48:52	-0.538053	-2.39337	4.56744	4707.22	FALSE	135
2022-09-15	10:48:52	1.40057	6.23002	4.56744	4727.77	FALSE	135
2022-09-15	10:48:52	2.72006	12.0994	4.56744	4719.32	FALSE	135
2022-09-15	10:48:52	0.524644	2.33372	4.56744	4730.1	FALSE	135
2022-09-15	10:48:53	0.256043	1.13893	1.69711	4720.46	FALSE	135
2022-09-15	10:48:53	0.285	1.26774	1.69711	4731.37	FALSE	135
2022-09-15	10:48:53	0.563829	2.50802	1.69711	4722.96	FALSE	135
2022-09-15	10:48:53	0.421234	1.87373	1.69711	4733.24	FALSE	135
2022-09-15	10:48:54	0.429987	1.91267	1.81005	4724.88	FALSE	135
2022-09-15	10:48:54	0.401234	1.78477	1.81005	4735.03	FALSE	135
2022-09-15	10:48:54	0.389529	1.7327	1.81005	4726.61	FALSE	135
2022-09-15	10:48:55	0.400725	1.7825	1.37402	4736.81	FALSE	135
2022-09-15	10:48:55	0.428512	1.90611	1.37402	4728.52	FALSE	135
2022-09-15	10:48:55	0.335178	1.49094	1.37402	4738.3	FALSE	135
2022-09-15	10:48:55	0.071158	0.316525	1.37402	4728.83	FALSE	135
2022-09-15	10:48:56	-0.431946	-1.92138	-2.51776	4738.3	FALSE	135
2022-09-15	10:48:56	-0.614898	-2.73519	-2.51776	4728.83	FALSE	135
2022-09-15	10:48:56	-0.56416	-2.5095	-2.51776	4738.3	FALSE	135
2022-09-15	10:48:56	-0.653065	-2.90496	-2.51776	4728.83	FALSE	135
2022-09-15	10:48:57	-0.785076	-3.49218	-1.90639	4738.3	FALSE	135
2022-09-15	10:48:57	-0.959122	-4.26637	-1.90639	4728.83	FALSE	135
2022-09-15	10:48:57	-0.688893	-3.06433	-1.90639	4738.3	FALSE	135
2022-09-15	10:48:57	0.718791	3.19733	-1.90639	4732.03	FALSE	135
2022-09-15	10:48:58	14.9864	66.6625	46.8168	4804.96	1	136
2022-09-15	10:48:58	11.5093	51.1957	46.8168	4783.23	1	137
2022-09-15	10:48:58	5.07894	22.5921	46.8168	4827.55	1	138
2022-09-15	10:48:59	3.21365	14.295	7.42233	4797.52	1	139
2022-09-15	10:48:59	1.74037	7.74151	7.42233	4835.3	FALSE	139
2022-09-15	10:48:59	1.38933	6.18002	7.42233	4803.7	FALSE	139
2022-09-15	10:48:59	0.331107	1.47283	7.42233	4836.77	FALSE	139
2022-09-15	10:49:00	0.377112	1.67747	1.25217	4805.38	FALSE	139
2022-09-15	10:49:00	0.268104	1.19258	1.25217	4837.96	FALSE	139
2022-09-15	10:49:00	0.345814	1.53825	1.25217	4806.92	FALSE	139
2022-09-15	10:49:00	0.134975	0.600396	1.25217	4838.56	FALSE	139
2022-09-15	10:49:01	0.237061	1.05449	0.110527	4807.97	FALSE	139
2022-09-15	10:49:01	0.0700384	0.311545	0.110527	4838.87	FALSE	139
2022-09-15	10:49:01	-0.03673	-0.163382	0.110527	4807.97	FALSE	139
2022-09-15	10:49:01	-0.170979	-0.760549	0.110527	4838.87	FALSE	139
2022-09-15	10:49:02	0.0684099	0.304301	5.80256	4808.28	FALSE	139
2022-09-15	10:49:02	1.11248	4.94853	5.80256	4843.82	FALSE	139
2022-09-15	10:49:02	2.73253	12.1548	5.80256	4820.43	FALSE	139
2022-09-15	10:49:03	5.43691	24.1845	21.233	4868.01	1	140
2022-09-15	10:49:03	6.28993	27.9789	21.233	4848.41	1	141
2022-09-15	10:49:03	4.09151	18.1999	21.233	4886.21	1	142
2022-09-15	10:49:03	3.27523	14.5689	21.233	4862.98	1	143
2022-09-15	10:49:04	1.35899	6.04506	7.28492	4892.25	FALSE	143
2022-09-15	10:49:04	1.73401	7.71322	7.28492	4870.69	FALSE	143
2022-09-15	10:49:04	1.47447	6.55874	7.28492	4898.81	FALSE	143
2022-09-15	10:49:04	1.98342	8.82265	7.28492	4879.51	FALSE	143
2022-09-15	10:49:05	1.18429	5.26796	2.09841	4904.08	FALSE	143
2022-09-15	10:49:05	0.43528	1.93621	2.09841	4881.45	FALSE	143
2022-09-15	10:49:05	0.335535	1.49253	2.09841	4905.57	FALSE	143
2022-09-15	10:49:05	-0.0681294	-0.303053	2.09841	4881.45	FALSE	143
2022-09-15	10:49:06	1.20948	5.38001	27.5453	4910.95	FALSE	143
2022-09-15	10:49:06	5.30042	23.5773	27.5453	4905.03	1	144
2022-09-15	10:49:06	12.0675	53.6787	27.5453	4964.63	1	145
2022-09-15	10:49:07	9.82357	43.6972	26.2306	4948.72	1	146
2022-09-15	10:49:07	5.06093	22.512	26.2306	4987.14	1	147
2022-09-15	10:49:07	3.51564	15.6383	26.2306	4964.36	1	148
2022-09-15	10:49:07	5.18749	23.075	26.2306	5010.22	1	149
2022-09-15	10:49:08	7.45594	33.1655	48.0234	4997.53	1	150
2022-09-15	10:49:08	10.4545	46.5037	48.0234	5056.72	1	151
2022-09-15	10:49:08	11.9113	52.9838	48.0234	5050.51	1	152
2022-09-15	10:49:08	13.3628	59.4404	48.0234	5116.16	1	153
2022-09-15	10:49:09	5.40805	24.0561	13.9298	5074.57	1	154
2022-09-15	10:49:09	3.25879	14.4957	13.9298	5130.66	1	155
2022-09-15	10:49:09	0.72785	3.23762	13.9298	5077.81	FALSE	155
2022-09-15	10:49:10	0.586883	2.61057	4.68193	5133.27	FALSE	155
2022-09-15	10:49:10	0.273702	1.21748	4.68193	5079.02	FALSE	155
2022-09-15	10:49:10	0.197214	0.877247	4.68193	5134.14	FALSE	155
2022-09-15	10:49:10	3.15238	14.0224	4.68193	5093.05	1	156
2022-09-15	10:49:11	7.93538	35.2982	54.2641	5169.44	1	157
2022-09-15	10:49:11	34.0396	151.415	54.2641	5244.46	1	158
2022-09-15	10:49:11	3.23742	14.4007	54.2641	5183.84	1	159
2022-09-15	10:49:11	3.58403	15.9425	54.2641	5260.4	1	160
2022-09-15	10:49:12	0.563015	2.5044	2.11889	5186.35	FALSE	160
2022-09-15	10:49:12	0.0514634	0.228919	2.11889	5260.63	FALSE	160
2022-09-15	10:49:12	0.627952	2.79326	2.11889	5189.14	FALSE	160
2022-09-15	10:49:12	0.662964	2.949	2.11889	5263.58	FALSE	160
2022-09-15	10:49:13	0.064644	0.287549	0.958439	5189.43	FALSE	160
2022-09-15	10:49:13	0.333041	1.48143	0.958439	5265.06	FALSE	160
2022-09-15	10:49:13	0.248715	1.10633	0.958439	5190.53	FALSE	160
2022-09-15	10:49:14	1.12785	5.0169	23.8162	5270.08	FALSE	160
2022-09-15	10:49:14	5.2393	23.3055	23.8162	5213.84	1	161
2022-09-15	10:49:14	6.87283	30.5717	23.8162	5300.65	1	162
2022-09-15	10:49:14	8.17649	36.3707	23.8162	5250.21	1	163
2022-09-15	10:49:15	8.18464	36.4069	46.1774	5337.06	1	164
2022-09-15	10:49:15	10.2098	45.4152	46.1774	5295.63	1	165
2022-09-15	10:49:15	12.451	55.3845	46.1774	5392.44	1	166
2022-09-15	10:49:15	10.6791	47.5028	46.1774	5343.13	1	167
2022-09-15	10:49:16	5.30825	23.6122	19.8042	5416.05	1	168
2022-09-15	10:49:16	3.8053	16.9267	19.8042	5360.06	1	169
2022-09-15	10:49:16	4.91579	21.8664	19.8042	5437.92	1	170
2022-09-15	10:49:16	3.77935	16.8113	19.8042	5376.87	1	171
2022-09-15	10:49:17	3.40001	15.1239	14.4874	5453.04	1	172
2022-09-15	10:49:17	3.10393	13.8069	14.4874	5390.67	1	173
2022-09-15	10:49:17	3.26678	14.5313	14.4874	5467.58	1	174
2022-09-15	10:49:18	2.85848	12.7151	12.6014	5403.39	FALSE	174
2022-09-15	10:49:18	2.94434	13.097	12.6014	5480.67	FALSE	174
2022-09-15	10:49:18	2.85665	12.707	12.6014	5416.1	FALSE	174
2022-09-15	10:49:18	2.67217	11.8863	12.6014	5492.56	FALSE	174
2022-09-15	10:49:19	2.88993	12.855	11.6261	5428.95	FALSE	174
2022-09-15	10:49:19	2.98225	13.2656	11.6261	5505.83	FALSE	174
2022-09-15	10:49:19	2.03604	9.05671	11.6261	5438.01	FALSE	174
2022-09-15	10:49:19	2.54642	11.327	11.6261	5517.15	FALSE	174
2022-09-15	10:49:20	2.14378	9.53596	9.63284	5447.54	FALSE	174
2022-09-15	10:49:20	2.1476	9.55295	9.63284	5526.71	FALSE	174
2022-09-15	10:49:20	2.22474	9.89609	9.63284	5457.44	FALSE	174
2022-09-15	10:49:20	2.14612	9.54637	9.63284	5536.25	FALSE	174
2022-09-15	10:49:21	2.18729	9.7295	9.37976	5467.17	FALSE	174
2022-09-15	10:49:21	2.05731	9.15133	9.37976	5545.4	FALSE	174
2022-09-15	10:49:21	2.08139	9.25844	9.37976	5476.43	FALSE	174
2022-09-15	10:49:22	2.02963	9.0282	9.08327	5554.43	FALSE	174
2022-09-15	10:49:22	2.08408	9.2704	9.08327	5485.7	FALSE	174
2022-09-15	10:49:22	1.95961	8.71674	9.08327	5563.15	FALSE	174
2022-09-15	10:49:22	2.09472	9.31773	9.08327	5495.02	FALSE	174
2022-09-15	10:49:23	2.50337	11.1355	11.3429	5574.28	FALSE	174
2022-09-15	10:49:23	2.47533	11.0108	11.3429	5506.03	FALSE	174
2022-09-15	10:49:23	2.73309	12.1573	11.3429	5586.44	FALSE	174
2022-09-15	10:49:23	2.48821	11.0681	11.3429	5517.09	FALSE	174
2022-09-15	10:49:24	2.66088	11.8361	11.1464	5598.28	FALSE	174
2022-09-15	10:49:24	2.51589	11.1912	11.1464	5528.29	FALSE	174
2022-09-15	10:49:24	2.49263	11.0877	11.1464	5609.36	FALSE	174
2022-09-15	10:49:24	2.35391	10.4707	11.1464	5538.76	FALSE	174
2022-09-15	10:49:25	2.47777	11.0216	11.1269	5620.39	FALSE	174
2022-09-15	10:49:25	2.51747	11.1982	11.1269	5549.95	FALSE	174
2022-09-15	10:49:25	2.50907	11.1608	11.1269	5631.55	FALSE	174
2022-09-15	10:49:26	2.52205	11.2186	11.1482	5561.17	FALSE	174
2022-09-15	10:49:26	2.52836	11.2467	11.1482	5642.79	FALSE	174
2022-09-15	10:49:26	2.4736	11.0031	11.1482	5572.18	FALSE	174
2022-09-15	10:49:26	2.50093	11.1246	11.1482	5653.92	FALSE	174
2022-09-15	10:49:27	2.7624	12.2877	13.0017	5584.46	FALSE	174
2022-09-15	10:49:27	2.81594	12.5259	13.0017	5666.44	FALSE	174
2022-09-15	10:49:27	2.83675	12.6184	13.0017	5597.08	FALSE	174
2022-09-15	10:49:27	3.2766	14.575	13.0017	5681.02	1	175
2022-09-15	10:49:28	3.12978	13.9219	13.3098	5611	1	176
2022-09-15	10:49:28	2.80897	12.4949	13.3098	5693.51	FALSE	176
2022-09-15	10:49:28	3.03777	13.5126	13.3098	5624.52	1	177
2022-09-15	10:49:29	2.88434	12.8301	13.2478	5706.34	FALSE	177
2022-09-15	10:49:29	3.26408	14.5193	13.2478	5639.04	1	178
2022-09-15	10:49:29	3.35111	14.9064	13.2478	5721.25	1	179
2022-09-15	10:49:29	2.41345	10.7355	13.2478	5649.77	FALSE	179
2022-09-15	10:49:30	3.13426	13.9418	12.8343	5735.19	1	180
2022-09-15	10:49:30	2.62729	11.6867	12.8343	5661.46	FALSE	180
2022-09-15	10:49:30	2.85843	12.7149	12.8343	5747.91	FALSE	180
2022-09-15	10:49:30	2.92118	12.994	12.8343	5674.45	FALSE	180
2022-09-15	10:49:31	2.82612	12.5711	12.3167	5760.48	FALSE	180
2022-09-15	10:49:31	2.81996	12.5437	12.3167	5687	FALSE	180
2022-09-15	10:49:31	2.50072	11.1237	12.3167	5771.6	FALSE	180
2022-09-15	10:49:31	2.92887	13.0282	12.3167	5700.02	FALSE	180
2022-09-15	10:49:32	2.4735	11.0026	11.2244	5782.6	FALSE	180
2022-09-15	10:49:32	2.51915	11.2057	11.2244	5711.23	FALSE	180
2022-09-15	10:49:32	2.57742	11.4649	11.2244	5794.07	FALSE	180
2022-09-15	10:49:33	2.68805	11.957	11.7622	5723.19	FALSE	180
2022-09-15	10:49:33	2.73614	12.1709	11.7622	5806.24	FALSE	180
2022-09-15	10:49:33	2.56958	11.43	11.7622	5734.62	FALSE	180
2022-09-15	10:49:33	2.58327	11.4909	11.7622	5817.73	FALSE	180
2022-09-15	10:49:34	2.52083	11.2132	11.175	5745.83	FALSE	180
2022-09-15	10:49:34	2.54642	11.327	11.175	5829.06	FALSE	180
2022-09-15	10:49:34	2.50795	11.1559	11.175	5756.99	FALSE	180
2022-09-15	10:49:34	2.4738	11.004	11.175	5840.06	FALSE	180
2022-09-15	10:49:35	2.18083	9.70077	10.8968	5766.69	FALSE	180
2022-09-15	10:49:35	2.40347	10.6911	10.8968	5850.75	FALSE	180
2022-09-15	10:49:35	2.58724	11.5086	10.8968	5778.19	FALSE	180
2022-09-15	10:49:35	2.62734	11.6869	10.8968	5862.44	FALSE	180
2022-09-15	10:49:36	2.72815	12.1354	12.2262	5790.33	FALSE	180
2022-09-15	10:49:36	2.77462	12.3421	12.2262	5874.78	FALSE	180
2022-09-15	10:49:36	2.74296	12.2012	12.2262	5802.53	FALSE	180
2022-09-15	10:49:37	2.7539	12.2499	12.5529	5887.03	FALSE	180
2022-09-15	10:49:37	2.79401	12.4283	12.5529	5814.96	FALSE	180
2022-09-15	10:49:37	2.82541	12.568	12.5529	5899.6	FALSE	180
2022-09-15	10:49:37	2.91472	12.9653	12.5529	5827.93	FALSE	180
2022-09-15	10:49:38	2.88673	12.8408	12.5693	5912.44	FALSE	180
2022-09-15	10:49:38	2.68861	11.9595	12.5693	5839.88	FALSE	180
2022-09-15	10:49:38	2.7963	12.4385	12.5693	5924.88	FALSE	180
2022-09-15	10:49:38	2.93121	13.0386	12.5693	5852.92	FALSE	180
2022-09-15	10:49:39	2.94846	13.1153	12.6381	5937.99	FALSE	180
2022-09-15	10:49:39	3.17823	14.1374	12.6381	5867.06	1	181
2022-09-15	10:49:39	2.7367	12.1734	12.6381	5950.17	FALSE	181
2022-09-15	10:49:39	2.50134	11.1265	12.6381	5878.19	FALSE	181
2022-09-15	10:49:40	2.14317	9.53325	9.57844	5959.7	FALSE	181
2022-09-15	10:49:40	2.12286	9.44291	9.57844	5887.63	FALSE	181
2022-09-15	10:49:40	2.19396	9.75917	9.57844	5969.46	FALSE	181
2022-09-15	10:49:41	1.77884	7.91264	7.61513	5895.54	FALSE	181
2022-09-15	10:49:41	1.98413	8.82581	7.61513	5978.29	FALSE	181
2022-09-15	10:49:41	2.4221	10.774	7.61513	5906.32	FALSE	181
2022-09-15	10:49:41	0.662761	2.94809	7.61513	5981.23	FALSE	181
2022-09-15	10:49:42	0.986069	4.38623	3.95018	5910.7	FALSE	181
2022-09-15	10:49:42	0.310445	1.38092	3.95018	5982.62	FALSE	181
2022-09-15	10:49:42	0.951768	4.23365	3.95018	5914.94	FALSE	181
2022-09-15	10:49:42	1.30388	5.79992	3.95018	5988.42	FALSE	181
2022-09-15	10:49:43	2.12195	9.43886	11.6549	5924.38	FALSE	181
2022-09-15	10:49:43	2.84312	12.6468	11.6549	6001.06	FALSE	181
2022-09-15	10:49:43	3.93345	17.4968	11.6549	5941.87	1	182
2022-09-15	10:49:43	1.582	7.03705	11.6549	6008.1	FALSE	182
2022-09-15	10:49:44	-0.248587	-1.10576	-0.753003	5941.87	FALSE	182
2022-09-15	10:49:44	-0.18818	-0.837062	-0.753003	6008.1	FALSE	182
2022-09-15	10:49:44	-0.0710811	-0.316183	-0.753003	5941.87	FALSE	182
2022-09-15	10:49:45	0.0483081	0.214884	0.122073	6008.31	FALSE	182
2022-09-15	10:49:45	0.0393514	0.175043	0.122073	5942.05	FALSE	182
2022-09-15	10:49:45	-0.38762	-1.72421	0.122073	6008.31	FALSE	182
2022-09-15	10:49:45	0.409733	1.82257	0.122073	5943.87	FALSE	182
2022-09-15	10:49:46	3.8678	17.2047	32.4472	6025.52	1	183
2022-09-15	10:49:46	10.5476	46.9178	32.4472	5990.79	1	184
2022-09-15	10:49:46	7.56418	33.647	32.4472	6059.17	1	185
2022-09-15	10:49:46	7.19828	32.0194	32.4472	6022.81	1	186
2022-09-15	10:49:47	11.9927	53.3459	52.6132	6112.51	1	187
2022-09-15	10:49:47	16.1721	71.9367	52.6132	6094.74	1	188
2022-09-15	10:49:47	7.31914	32.557	52.6132	6145.07	1	189
2022-09-15	10:49:48	6.18128	27.4956	23.3565	6122.24	1	190
2022-09-15	10:49:48	5.10968	22.7289	23.3565	6167.8	1	191
2022-09-15	10:49:48	4.86596	21.6448	23.3565	6143.88	1	192
2022-09-15	10:49:48	4.84622	21.557	23.3565	6189.35	1	193
2022-09-15	10:49:49	4.38612	19.5103	18.4678	6163.39	1	194
2022-09-15	10:49:49	4.25309	18.9186	18.4678	6208.27	1	195
2022-09-15	10:49:49	4.14021	18.4165	18.4678	6181.81	1	196
2022-09-15	10:49:49	3.82754	17.0257	18.4678	6225.3	1	197
2022-09-15	10:49:50	3.87955	17.257	13.9463	6199.07	1	198
2022-09-15	10:49:50	3.41594	15.1948	13.9463	6240.49	1	199
2022-09-15	10:49:50	2.74612	12.2153	13.9463	6211.28	FALSE	199
2022-09-15	10:49:50	2.49945	11.1181	13.9463	6251.61	FALSE	199
2022-09-15	10:49:51	2.17838	9.68987	9.30973	6220.97	FALSE	199
2022-09-15	10:49:51	2.3191	10.3158	9.30973	6261.93	FALSE	199
2022-09-15	10:49:51	1.78128	7.92349	9.30973	6228.9	FALSE	199
2022-09-15	10:49:52	1.60118	7.12237	7.29375	6269.05	FALSE	199
2022-09-15	10:49:52	1.63299	7.26387	7.29375	6236.16	FALSE	199
2022-09-15	10:49:52	1.69116	7.52262	7.29375	6276.57	FALSE	199
2022-09-15	10:49:52	1.6335	7.26613	7.29375	6243.43	FALSE	199
2022-09-15	10:49:53	1.60546	7.14141	7.28763	6283.71	FALSE	199
2022-09-15	10:49:53	1.72184	7.65909	7.28763	6251.09	FALSE	199
2022-09-15	10:49:53	1.66149	7.39064	7.28763	6291.1	FALSE	199
2022-09-15	10:49:53	1.56454	6.95939	7.28763	6258.04	FALSE	199
2022-09-15	10:49:54	1.59772	7.10698	7.51061	6298.21	FALSE	199
2022-09-15	10:49:54	1.60948	7.15929	7.51061	6265.2	FALSE	199
2022-09-15	10:49:54	1.76006	7.8291	7.51061	6306.04	FALSE	199
2022-09-15	10:49:54	1.78658	7.94707	7.51061	6273.15	FALSE	199
2022-09-15	10:49:55	1.2278	5.4615	6.18799	6311.5	FALSE	199
2022-09-15	10:49:55	1.56851	6.97705	6.18799	6280.13	FALSE	199
2022-09-15	10:49:55	1.37706	6.12544	6.18799	6317.63	FALSE	199
2022-09-15	10:49:56	1.80062	8.00952	7.06624	6288.14	FALSE	199
2022-09-15	10:49:56	1.4877	6.61759	7.06624	6324.25	FALSE	199
2022-09-15	10:49:56	1.32734	5.90427	7.06624	6294.04	FALSE	199
2022-09-15	10:49:56	1.73859	7.7336	7.06624	6331.98	FALSE	199
2022-09-15	10:49:57	1.64011	7.29554	7.24297	6301.34	FALSE	199
2022-09-15	10:49:57	1.57721	7.01575	7.24297	6338.99	FALSE	199
2022-09-15	10:49:57	1.62719	7.23807	7.24297	6308.58	FALSE	199
2022-09-15	10:49:57	1.66866	7.42253	7.24297	6346.42	FALSE	199
2022-09-15	10:49:58	1.67782	7.46328	7.61496	6316.04	FALSE	199
2022-09-15	10:49:58	1.72897	7.6908	7.61496	6354.11	FALSE	199
2022-09-15	10:49:58	1.76006	7.8291	7.61496	6323.87	FALSE	199
2022-09-15	10:49:58	1.68083	7.47667	7.61496	6361.58	FALSE	199
2022-09-15	10:49:59	1.71177	7.6143	7.44602	6331.48	FALSE	199
2022-09-15	10:49:59	1.66363	7.40016	7.44602	6368.98	FALSE	199
2022-09-15	10:49:59	1.64642	7.32361	7.44602	6338.81	FALSE	199
2022-09-15	10:50:00	1.61803	7.19732	6.91395	6376.18	FALSE	199
2022-09-15	10:50:00	1.62688	7.23669	6.91395	6346.04	FALSE	199
2022-09-15	10:50:00	1.52963	6.8041	6.91395	6382.99	FALSE	199
2022-09-15	10:50:00	1.44276	6.41769	6.91395	6352.46	FALSE	199
2022-09-15	10:50:01	1.44566	6.43058	6.68124	6389.42	FALSE	199
2022-09-15	10:50:01	1.45793	6.48516	6.68124	6358.95	FALSE	199
2022-09-15	10:50:01	1.52892	6.80094	6.68124	6396.22	FALSE	199
2022-09-15	10:50:01	1.57553	7.00827	6.68124	6365.95	FALSE	199
2022-09-15	10:50:02	1.58846	7.06579	7.27332	6403.28	FALSE	199
2022-09-15	10:50:02	1.56408	6.95734	7.27332	6372.91	FALSE	199
2022-09-15	10:50:02	1.66999	7.42845	7.27332	6410.71	FALSE	199
2022-09-15	10:50:02	1.71793	7.6417	7.27332	6380.55	FALSE	199
2022-09-15	10:50:03	1.71462	7.62697	7.45122	6418.34	FALSE	199
2022-09-15	10:50:03	1.66067	7.38699	7.45122	6387.94	FALSE	199
2022-09-15	10:50:03	1.65004	7.33971	7.45122	6425.68	FALSE	199
2022-09-15	10:50:04	1.61487	7.18326	7.4573	6395.12	FALSE	199
2022-09-15	10:50:04	1.66724	7.41622	7.4573	6433.09	FALSE	199
2022-09-15	10:50:04	1.69564	7.54255	7.4573	6402.67	FALSE	199
2022-09-15	10:50:04	1.72815	7.68716	7.4573	6440.78	FALSE	199
2022-09-15	10:50:05	1.8077	8.04101	8.12798	6410.71	FALSE	199
2022-09-15	10:50:05	1.84134	8.19065	8.12798	6448.97	FALSE	199
2022-09-15	10:50:05	1.83329	8.15484	8.12798	6418.86	FALSE	199
2022-09-15	10:50:05	1.82668	8.12544	8.12798	6457.1	FALSE	199
2022-09-15	10:50:06	1.77894	7.91308	7.76261	6426.77	FALSE	199
2022-09-15	10:50:06	1.79548	7.98665	7.76261	6465.08	FALSE	199
2022-09-15	10:50:06	1.71411	7.6247	7.76261	6434.4	FALSE	199
2022-09-15	10:50:06	1.69192	7.526	7.76261	6472.61	FALSE	199
2022-09-15	10:50:07	1.68154	7.47983	7.48828	6441.88	FALSE	199
2022-09-15	10:50:07	1.68897	7.51288	7.48828	6480.12	FALSE	199
2022-09-15	10:50:07	1.67981	7.47213	7.48828	6449.35	FALSE	199
2022-09-15	10:50:08	1.7307	7.6985	7.54886	6487.82	FALSE	199
2022-09-15	10:50:08	1.75375	7.80103	7.54886	6457.15	FALSE	199
2022-09-15	10:50:08	1.66658	7.41328	7.54886	6495.24	FALSE	199
2022-09-15	10:50:08	1.63721	7.28264	7.54886	6464.43	FALSE	199
2022-09-15	10:50:09	1.61019	7.16245	7.1372	6502.4	FALSE	199
2022-09-15	10:50:09	1.6023	7.12735	7.1372	6471.56	FALSE	199
2022-09-15	10:50:09	1.59345	7.08798	7.1372	6509.49	FALSE	199
2022-09-15	10:50:09	1.61212	7.17103	7.1372	6478.73	FALSE	199
2022-09-15	10:50:10	1.61813	7.19777	7.20675	6516.68	FALSE	199
2022-09-15	10:50:10	1.61803	7.19732	7.20675	6485.93	FALSE	199
2022-09-15	10:50:10	1.62429	7.22517	7.20675	6523.91	FALSE	199
2022-09-15	10:50:11	1.6136	7.17762	7.12589	6493.11	FALSE	199
2022-09-15	10:50:11	1.65233	7.34989	7.12589	6531.26	FALSE	199
2022-09-15	10:50:11	1.52037	6.76291	7.12589	6499.87	FALSE	199
2022-09-15	10:50:11	1.62159	7.21316	7.12589	6538.47	FALSE	199
2022-09-15	10:50:12	1.86195	8.28233	16.2521	6508.15	FALSE	199
2022-09-15	10:50:12	2.62617	11.6817	16.2521	6550.15	FALSE	199
2022-09-15	10:50:12	4.23075	18.8192	16.2521	6526.97	1	200
2022-09-15	10:50:12	5.89563	26.2249	16.2521	6576.38	1	201
2022-09-15	10:50:13	4.81813	21.432	5.73388	6548.4	1	202
2022-09-15	10:50:13	0.390089	1.73519	5.73388	6578.11	FALSE	202
2022-09-15	10:50:13	0.1164	0.51777	5.73388	6548.92	FALSE	202
2022-09-15	10:50:13	-0.168486	-0.749459	5.73388	6578.11	FALSE	202
2022-09-15	10:50:14	-0.083702	-0.372323	35.8162	6548.92	FALSE	202
2022-09-15	10:50:14	11.3259	50.3799	35.8162	6628.49	1	203
2022-09-15	10:50:14	12.9133	57.4409	35.8162	6606.36	1	204
2022-09-15	10:50:15	6.20052	27.5812	7.98288	6656.07	1	205
2022-09-15	10:50:15	0.453753	2.01838	7.98288	6608.38	FALSE	205
2022-09-15	10:50:15	0.244542	1.08777	7.98288	6657.16	FALSE	205
2022-09-15	10:50:15	0.279707	1.24419	7.98288	6609.63	FALSE	205
2022-09-15	10:50:16	-0.491641	-2.18692	-1.83989	6657.16	FALSE	205
2022-09-15	10:50:16	-0.435966	-1.93926	-1.83989	6609.63	FALSE	205
2022-09-15	10:50:16	-0.394949	-1.75681	-1.83989	6657.16	FALSE	205
2022-09-15	10:50:16	-0.331946	-1.47656	-1.83989	6609.63	FALSE	205
2022-09-15	10:50:17	-0.266552	-1.18568	-1.17968	6657.16	FALSE	205
2022-09-15	10:50:17	-0.291234	-1.29547	-1.17968	6609.63	FALSE	205
2022-09-15	10:50:17	-0.203753	-0.906334	-1.17968	6657.16	FALSE	205
2022-09-15	10:50:17	-0.299274	-1.33123	-1.17968	6609.63	FALSE	205
2022-09-15	10:50:18	-0.390165	-1.73553	-2.17401	6657.16	FALSE	205
2022-09-15	10:50:18	-0.4379	-1.94787	-2.17401	6609.63	FALSE	205
2022-09-15	10:50:18	-0.638155	-2.83864	-2.17401	6657.16	FALSE	205
2022-09-15	10:50:19	-0.819732	-3.64633	2.37848	6609.63	FALSE	205
2022-09-15	10:50:19	-0.879885	-3.9139	2.37848	6657.16	FALSE	205
2022-09-15	10:50:19	-0.339224	-1.50894	2.37848	6609.63	FALSE	205
2022-09-15	10:50:19	4.17767	18.5831	2.37848	6675.75	1	206
2022-09-15	10:50:20	4.62322	20.565	18.5819	6630.19	1	207
2022-09-15	10:50:20	6.21492	27.6452	18.5819	6703.39	1	208
2022-09-15	10:50:20	3.74988	16.6802	18.5819	6646.87	1	209
2022-09-15	10:50:20	2.12159	9.43726	18.5819	6712.83	FALSE	209
2022-09-15	10:50:21	1.51182	6.72488	15.9446	6653.6	FALSE	209
2022-09-15	10:50:21	3.71976	16.5462	15.9446	6729.37	1	210
2022-09-15	10:50:21	3.9563	17.5984	15.9446	6671.19	1	211
2022-09-15	10:50:21	5.15014	22.9089	15.9446	6752.28	1	212
2022-09-15	10:50:22	4.37334	19.4535	18.4389	6690.65	1	213
2022-09-15	10:50:22	6.0682	26.9926	18.4389	6779.28	1	214
2022-09-15	10:50:22	1.99421	8.87064	18.4389	6699.52	FALSE	214
2022-09-15	10:50:23	0.690598	3.07192	2.13474	6782.35	FALSE	214
2022-09-15	10:50:23	0.40841	1.81669	2.13474	6701.34	FALSE	214
2022-09-15	10:50:23	0.495585	2.20446	2.13474	6784.55	FALSE	214
2022-09-15	10:50:23	0.325051	1.44589	2.13474	6702.78	FALSE	214
2022-09-15	10:50:24	0.418333	1.86083	2.39003	6786.41	FALSE	214
2022-09-15	10:50:24	0.728868	3.24215	2.39003	6706.02	FALSE	214
2022-09-15	10:50:24	0.192227	0.855064	2.39003	6787.27	FALSE	214
2022-09-15	10:50:24	0.809784	3.60208	2.39003	6709.63	FALSE	214
2022-09-15	10:50:25	4.67548	20.7975	10.9806	6808.07	1	215
2022-09-15	10:50:25	2.80759	12.4887	10.9806	6722.11	FALSE	215
2022-09-15	10:50:25	1.94398	8.64721	10.9806	6816.71	FALSE	215
2022-09-15	10:50:25	0.447188	1.98918	10.9806	6724.1	FALSE	215
2022-09-15	10:50:26	0.313143	1.39292	1.48709	6818.11	FALSE	215
2022-09-15	10:50:26	0.393397	1.74991	1.48709	6725.85	FALSE	215
2022-09-15	10:50:26	0.2964	1.31845	1.48709	6819.42	FALSE	215
2022-09-15	10:50:27	0.373295	1.66049	1.64499	6727.51	FALSE	215
2022-09-15	10:50:27	0.260878	1.16044	1.64499	6820.58	FALSE	215
2022-09-15	10:50:27	0.436145	1.94006	1.64499	6729.45	FALSE	215
2022-09-15	10:50:27	0.408919	1.81895	1.64499	6822.4	FALSE	215
2022-09-15	10:50:28	2.09874	9.33562	10.242	6738.79	FALSE	215
2022-09-15	10:50:28	2.2906	10.189	10.242	6832.59	FALSE	215
2022-09-15	10:50:28	3.01401	13.4069	10.242	6752.2	1	216
2022-09-15	10:50:28	1.80668	8.03647	10.242	6840.63	FALSE	216
2022-09-15	10:50:29	0.683524	3.04045	2.23676	6755.24	FALSE	216
2022-09-15	10:50:29	0.350191	1.55772	2.23676	6842.19	FALSE	216
2022-09-15	10:50:29	0.474822	2.1121	2.23676	6757.35	FALSE	216
2022-09-15	10:50:30	0.262303	1.16678	1.50797	6843.35	FALSE	216
2022-09-15	10:50:30	0.441285	1.96292	1.50797	6759.31	FALSE	216
2022-09-15	10:50:30	0.223168	0.992696	1.50797	6844.35	FALSE	216
2022-09-15	10:50:30	0.429275	1.9095	1.50797	6761.22	FALSE	216
2022-09-15	10:50:31	0.26098	1.16089	6.05056	6845.51	FALSE	216
2022-09-15	10:50:31	0.557519	2.47996	6.05056	6763.7	FALSE	216
2022-09-15	10:50:31	0.335331	1.49162	6.05056	6847	FALSE	216
2022-09-15	10:50:31	4.28708	19.0698	6.05056	6782.77	1	217
2022-09-15	10:50:32	2.58281	11.4889	9.69673	6858.49	FALSE	217
2022-09-15	10:50:32	2.81976	12.5429	9.69673	6795.31	FALSE	217
2022-09-15	10:50:32	1.81416	8.06975	9.69673	6866.56	FALSE	217
2022-09-15	10:50:32	1.50296	6.68547	9.69673	6802	FALSE	217
2022-09-15	10:50:33	2.51757	11.1987	5.12375	6877.76	FALSE	217
2022-09-15	10:50:33	0.242252	1.07759	5.12375	6803.08	FALSE	217
2022-09-15	10:50:33	0.695789	3.09501	5.12375	6880.85	FALSE	217
2022-09-15	10:50:34	2.46877	10.9816	6.2478	6814.06	FALSE	217
2022-09-15	10:50:34	0.238181	1.05948	6.2478	6881.91	FALSE	217
2022-09-15	10:50:34	2.45833	10.9351	6.2478	6824.99	FALSE	217
2022-09-15	10:50:34	0.45299	2.01499	6.2478	6883.93	FALSE	217
2022-09-15	10:50:35	2.41426	10.7391	11.1688	6835.73	FALSE	217
2022-09-15	10:50:35	1.23849	5.50905	11.1688	6889.43	FALSE	217
2022-09-15	10:50:35	1.00276	4.46048	11.1688	6840.19	FALSE	217
2022-09-15	10:50:35	5.38795	23.9667	11.1688	6913.4	1	218
2022-09-15	10:50:36	0.281489	1.25212	2.84679	6841.45	FALSE	218
2022-09-15	10:50:36	1.98373	8.82403	2.84679	6922.22	FALSE	218
2022-09-15	10:50:36	0.289478	1.28766	2.84679	6842.73	FALSE	218
2022-09-15	10:50:36	0.00525471	0.023374	2.84679	6922.25	FALSE	218
2022-09-15	10:50:37	0.149275	0.664005	-0.67385	6843.4	FALSE	218
2022-09-15	10:50:37	-0.117748	-0.523767	-0.67385	6922.25	FALSE	218
2022-09-15	10:50:37	-0.485992	-2.16179	-0.67385	6843.4	FALSE	218
2022-09-15	10:50:38	-0.237544	-1.05664	5.53201	6922.25	FALSE	218
2022-09-15	10:50:38	0.165458	0.73599	5.53201	6844.13	FALSE	218
2022-09-15	10:50:38	2.92439	13.0083	5.53201	6935.26	FALSE	218
2022-09-15	10:50:38	2.1223	9.44041	5.53201	6853.57	FALSE	218
2022-09-15	10:50:39	2.89569	12.8806	3.13616	6948.14	FALSE	218
2022-09-15	10:50:39	0.189428	0.842614	3.13616	6854.42	FALSE	218
2022-09-15	10:50:39	-0.0974934	-0.43367	3.13616	6948.14	FALSE	218
2022-09-15	10:50:39	-0.167468	-0.744931	3.13616	6854.42	FALSE	218
2022-09-15	10:50:40	-0.191641	-0.852457	-0.205431	6948.14	FALSE	218
2022-09-15	10:50:40	0.0557381	0.247934	-0.205431	6854.66	FALSE	218
2022-09-15	10:50:40	0.0831681	0.369948	-0.205431	6948.51	FALSE	218
2022-09-15	10:50:40	-0.131997	-0.587149	-0.205431	6854.66	FALSE	218
2022-09-15	10:50:41	-0.0688928	-0.306449	-0.819935	6948.51	FALSE	218
2022-09-15	10:50:41	-0.306043	-1.36134	-0.819935	6854.66	FALSE	218
2022-09-15	10:50:41	-0.178053	-0.792015	-0.819935	6948.51	FALSE	218
2022-09-15	10:50:42	-0.190623	-0.847929	0.187153	6854.66	FALSE	218
2022-09-15	10:50:42	0.00993663	0.0442001	0.187153	6948.55	FALSE	218
2022-09-15	10:50:42	0.000878093	0.00390593	0.187153	6854.67	FALSE	218
2022-09-15	10:50:42	0.348104	1.54844	0.187153	6950.1	FALSE	218
2022-09-15	10:50:43	0.569122	2.53157	4.0821	6857.2	FALSE	218
2022-09-15	10:50:43	0.361692	1.60888	4.0821	6951.71	FALSE	218
2022-09-15	10:50:43	0.680776	3.02823	4.0821	6860.23	FALSE	218
2022-09-15	10:50:43	2.0592	9.15973	4.0821	6960.87	FALSE	218
2022-09-15	10:50:44	0.154415	0.686869	5.40038	6860.91	FALSE	218
2022-09-15	10:50:44	0.814415	3.62268	5.40038	6964.49	FALSE	218
2022-09-15	10:50:44	3.71472	16.5238	5.40038	6877.44	1	219
2022-09-15	10:50:44	0.172685	0.768137	5.40038	6965.26	FALSE	219
2022-09-15	10:50:45	0.0605728	0.26944	0.312978	6877.71	FALSE	219
2022-09-15	10:50:45	0.110191	0.490152	0.312978	6965.75	FALSE	219
2022-09-15	10:50:45	0.0403183	0.179344	0.312978	6877.89	FALSE	219
2022-09-15	10:50:46	0.0486135	0.216243	-0.0285216	6965.97	FALSE	219
2022-09-15	10:50:46	0.0143132	0.063668	-0.0285216	6877.95	FALSE	219
2022-09-15	10:50:46	-0.0471117	-0.209562	-0.0285216	6965.97	FALSE	219
2022-09-15	10:50:46	-0.0414628	-0.184435	-0.0285216	6877.95	FALSE	219
2022-09-15	10:50:47	-0.180496	-0.802882	3.31198	6965.97	FALSE	219
2022-09-15	10:50:47	-0.0559667	-0.248951	3.31198	6877.95	FALSE	219
2022-09-15	10:50:47	0.199199	0.886077	3.31198	6966.85	FALSE	219
2022-09-15	10:50:47	3.01553	13.4137	3.31198	6891.36	1	220
2022-09-15	10:50:48	2.44892	10.8933	5.32262	6977.75	FALSE	220
2022-09-15	10:50:48	1.3336	5.93212	5.32262	6897.3	FALSE	220
2022-09-15	10:50:48	0.437977	1.94821	5.32262	6979.69	FALSE	220
2022-09-15	10:50:48	0.565814	2.51685	5.32262	6899.81	FALSE	220
2022-09-15	10:50:49	0.366323	1.62948	1.24329	6981.32	FALSE	220
2022-09-15	10:50:49	0.229071	1.01895	1.24329	6900.83	FALSE	220
2022-09-15	10:50:49	0.243117	1.08143	1.24329	6982.4	FALSE	220
2022-09-15	10:50:50	0.245713	1.09298	0.710751	6901.93	FALSE	220
2022-09-15	10:50:50	0.118486	0.527049	0.710751	6982.93	FALSE	220
2022-09-15	10:50:50	0.10897	0.48472	0.710751	6902.41	FALSE	220
2022-09-15	10:50:50	0.165967	0.738254	0.710751	6983.67	FALSE	220
2022-09-15	10:50:51	0.130598	0.580926	0.479625	6902.99	FALSE	220
2022-09-15	10:50:51	0.154669	0.687999	0.479625	6984.36	FALSE	220
2022-09-15	10:50:51	0.125153	0.556706	0.479625	6903.55	FALSE	220
2022-09-15	10:50:51	0.0208781	0.09287	0.479625	6984.45	FALSE	220
2022-09-15	10:50:52	0.112685	0.501245	0.177004	6904.05	FALSE	220
2022-09-15	10:50:52	0.187341	0.83333	0.177004	6985.28	FALSE	220
2022-09-15	10:50:52	-0.180649	-0.803563	0.177004	6904.05	FALSE	220
2022-09-15	10:50:53	-0.13047	-0.580357	-0.940118	6985.28	FALSE	220
2022-09-15	10:50:53	-0.253371	-1.12704	-0.940118	6904.05	FALSE	220
2022-09-15	10:50:53	-0.153727	-0.683808	-0.940118	6985.28	FALSE	220
2022-09-15	10:50:53	-0.307824	-1.36926	-0.940118	6904.05	FALSE	220
2022-09-15	10:50:54	-0.160292	-0.713011	-1.50327	6985.28	FALSE	220
2022-09-15	10:50:54	-0.185025	-0.823028	-1.50327	6904.05	FALSE	220
2022-09-15	10:50:54	-0.404414	-1.79891	-1.50327	6985.28	FALSE	220
2022-09-15	10:50:54	-0.602073	-2.67814	-1.50327	6904.05	FALSE	220
2022-09-15	10:50:55	-0.625687	-2.78318	-0.345443	6985.28	FALSE	220
2022-09-15	10:50:55	-0.538867	-2.39699	-0.345443	6904.05	FALSE	220
2022-09-15	10:50:55	0.291514	1.29671	-0.345443	6986.58	FALSE	220
2022-09-15	10:50:55	0.562404	2.50169	-0.345443	6906.55	FALSE	220
2022-09-15	10:50:56	2.31584	10.3013	6.26322	6996.88	FALSE	220
2022-09-15	10:50:56	1.04062	4.62889	6.26322	6911.18	FALSE	220
2022-09-15	10:50:56	0.867646	3.85946	6.26322	7000.74	FALSE	220
2022-09-15	10:50:57	2.41009	10.7206	5.65363	6921.9	FALSE	220
2022-09-15	10:50:57	0.323982	1.44114	5.65363	7002.18	FALSE	220
2022-09-15	10:50:57	1.03991	4.62573	5.65363	6926.53	FALSE	220
2022-09-15	10:50:57	1.30999	5.8271	5.65363	7008.01	FALSE	220
2022-09-15	10:50:58	0.205255	0.913015	5.16258	6927.44	FALSE	220
2022-09-15	10:50:58	2.38836	10.6239	5.16258	7018.63	FALSE	220
2022-09-15	10:50:58	1.08531	4.82768	5.16258	6932.27	FALSE	220
2022-09-15	10:50:58	0.963473	4.28572	5.16258	7022.92	FALSE	220
2022-09-15	10:50:59	0.381845	1.69852	3.60282	6933.97	FALSE	220
2022-09-15	10:50:59	0.199402	0.88698	3.60282	7023.81	FALSE	220
2022-09-15	10:50:59	1.5477	6.88448	3.60282	6940.85	FALSE	220
2022-09-15	10:50:59	1.11085	4.94128	3.60282	7028.75	FALSE	220
2022-09-15	10:51:00	4.33518	19.2837	18.5428	6960.13	1	221
2022-09-15	10:51:00	2.75034	12.2341	18.5428	7040.98	FALSE	221
2022-09-15	10:51:00	5.42031	24.1106	18.5428	6984.24	1	222
2022-09-15	10:51:01	0.685102	3.04747	4.59891	7044.03	FALSE	222
2022-09-15	10:51:01	2.245	9.98621	4.59891	6994.23	FALSE	222
2022-09-15	10:51:01	0.51187	2.2769	4.59891	7046.31	FALSE	222
2022-09-15	10:51:01	0.69355	3.08505	4.59891	6997.32	FALSE	222
2022-09-15	10:51:02	2.7677	12.3113	8.75679	7058.62	FALSE	222
2022-09-15	10:51:02	1.0363	4.60967	8.75679	7001.92	FALSE	222
2022-09-15	10:51:02	3.56698	15.8666	8.75679	7074.48	1	223
2022-09-15	10:51:02	0.503473	2.23955	8.75679	7004.16	FALSE	223
2022-09-15	10:51:03	0.43243	1.92354	6.16557	7076.41	FALSE	223
2022-09-15	10:51:03	2.36719	10.5297	6.16557	7014.69	FALSE	223
2022-09-15	10:51:03	0.908715	4.04215	6.16557	7080.45	FALSE	223
2022-09-15	10:51:03	1.83599	8.16685	6.16557	7022.86	FALSE	223
2022-09-15	10:51:04	0.88271	3.92647	7.50729	7084.38	FALSE	223
2022-09-15	10:51:04	1.58424	7.04702	7.50729	7029.91	FALSE	223
2022-09-15	10:51:04	2.59619	11.5484	7.50729	7095.92	FALSE	223
2022-09-15	10:51:05	0.690852	3.07305	12.3783	7032.98	FALSE	223
2022-09-15	10:51:05	4.33991	19.3048	12.3783	7115.23	1	224
2022-09-15	10:51:05	3.16535	14.0801	12.3783	7047.06	1	225
2022-09-15	10:51:05	2.93497	13.0553	12.3783	7128.28	FALSE	225
2022-09-15	10:51:06	4.15014	18.4607	8.50755	7065.52	1	226
2022-09-15	10:51:06	1.99935	8.89351	8.50755	7137.18	FALSE	226
2022-09-15	10:51:06	0.626629	2.78737	8.50755	7068.31	FALSE	226
2022-09-15	10:51:06	0.874211	3.88867	8.50755	7141.07	FALSE	226
2022-09-15	10:51:07	1.02393	4.55465	3.54633	7072.86	FALSE	226
2022-09-15	10:51:07	0.484186	2.15376	3.54633	7143.22	FALSE	226
2022-09-15	10:51:07	1.11706	4.96891	3.54633	7077.83	FALSE	226
2022-09-15	10:51:07	0.563829	2.50802	3.54633	7145.73	FALSE	226
2022-09-15	10:51:08	0.402761	1.79156	5.35488	7079.62	FALSE	226
2022-09-15	10:51:08	0.807952	3.59393	5.35488	7149.32	FALSE	226
2022-09-15	10:51:08	2.40078	10.6791	5.35488	7090.3	FALSE	226
2022-09-15	10:51:09	2.5651	11.4101	3.13207	7160.73	FALSE	226
2022-09-15	10:51:09	0.0165015	0.073402	3.13207	7090.38	FALSE	226
2022-09-15	10:51:09	0.137875	0.613296	3.13207	7161.35	FALSE	226
2022-09-15	10:51:09	0.0970104	0.431522	3.13207	7090.81	FALSE	226
2022-09-15	10:51:10	0.0699875	0.311318	1.71063	7161.66	FALSE	226
2022-09-15	10:51:10	-0.060903	-0.270909	1.71063	7090.81	FALSE	226
2022-09-15	10:51:10	0.320725	1.42665	1.71063	7163.08	FALSE	226
2022-09-15	10:51:10	1.20846	5.37547	1.71063	7096.18	FALSE	226
2022-09-15	10:51:11	8.33716	37.0854	19.4708	7200.17	1	227
2022-09-15	10:51:11	3.25619	14.4842	19.4708	7110.67	1	228
2022-09-15	10:51:11	4.86347	21.6337	19.4708	7221.8	1	229
2022-09-15	10:51:11	1.05212	4.68004	19.4708	7115.35	FALSE	229
2022-09-15	10:51:12	2.69263	11.9774	6.26775	7233.78	FALSE	229
2022-09-15	10:51:12	0.548868	2.44147	6.26775	7117.79	FALSE	229
2022-09-15	10:51:12	0.985662	4.38442	6.26775	7238.16	FALSE	229
2022-09-15	10:51:13	1.15467	5.1362	6.19364	7122.93	FALSE	229
2022-09-15	10:51:13	0.987392	4.39212	6.19364	7242.56	FALSE	229
2022-09-15	10:51:13	0.619657	2.75636	6.19364	7125.68	FALSE	229
2022-09-15	10:51:13	2.80785	12.4899	6.19364	7255.05	FALSE	229
2022-09-15	10:51:14	2.41299	10.7335	10.618	7136.42	FALSE	229
2022-09-15	10:51:14	3.39365	15.0956	10.618	7270.14	1	230
2022-09-15	10:51:14	1.35447	6.02495	10.618	7142.44	FALSE	230
2022-09-15	10:51:15	2.02749	9.01868	10.7644	7279.16	FALSE	230
2022-09-15	10:51:15	2.16648	9.63694	10.7644	7152.08	FALSE	230
2022-09-15	10:51:15	2.74403	12.206	10.7644	7291.37	FALSE	230
2022-09-15	10:51:15	2.8106	12.5021	10.7644	7164.58	FALSE	230
2022-09-15	10:51:15	2.35116	10.4584	10.7644	7301.83	FALSE	230
2022-09-15	10:51:16	0.215026	0.956479	0.778097	7165.54	FALSE	230
2022-09-15	10:51:16	0.181387	0.806846	0.778097	7302.63	FALSE	230
2022-09-15	10:51:16	0.128359	0.570967	0.778097	7166.11	FALSE	230
2022-09-15	10:51:17	0.101743	0.452573	1.26298	7303.08	FALSE	230
2022-09-15	10:51:17	0.216094	0.961229	1.26298	7167.07	FALSE	230
2022-09-15	10:51:17	0.17986	0.800053	1.26298	7303.88	FALSE	230
2022-09-15	10:51:17	0.638028	2.83808	1.26298	7169.91	FALSE	230
2022-09-15	10:51:18	7.46357	33.1995	35.4685	7337.08	1	231
2022-09-15	10:51:18	10.723	47.698	35.4685	7217.6	1	232
2022-09-15	10:51:18	9.25731	41.1784	35.4685	7378.26	1	233
2022-09-15	10:51:18	4.45085	19.7983	35.4685	7237.4	1	234
2022-09-15	10:51:19	2.96266	13.1785	19.5051	7391.44	FALSE	234
2022-09-15	10:51:19	5.27594	23.4684	19.5051	7260.87	1	235
2022-09-15	10:51:19	4.91624	21.8684	19.5051	7413.31	1	236
2022-09-15	10:51:20	1.74963	7.7827	10.9888	7268.65	FALSE	236
2022-09-15	10:51:20	2.28195	10.1506	10.9888	7423.46	FALSE	236
2022-09-15	10:51:20	2.75457	12.2529	10.9888	7280.91	FALSE	236
2022-09-15	10:51:20	3.09543	13.7691	10.9888	7437.23	1	237
2022-09-15	10:51:21	1.88001	8.36266	10.4795	7289.27	FALSE	237
2022-09-15	10:51:21	2.63329	11.7134	10.4795	7448.94	FALSE	237
2022-09-15	10:51:21	2.33961	10.4071	10.4795	7299.68	FALSE	237
2022-09-15	10:51:21	2.5707	11.435	10.4795	7460.38	FALSE	237
2022-09-15	10:51:22	2.63553	11.7234	11.2328	7311.4	FALSE	237
2022-09-15	10:51:22	2.64622	11.7709	11.2328	7472.15	FALSE	237
2022-09-15	10:51:22	2.36444	10.5175	11.2328	7321.92	FALSE	237
2022-09-15	10:51:22	2.45477	10.9193	11.2328	7483.07	FALSE	237
2022-09-15	10:51:23	1.98795	8.8428	8.38484	7330.76	FALSE	237
2022-09-15	10:51:23	1.90235	8.46203	8.38484	7491.53	FALSE	237
2022-09-15	10:51:23	1.76469	7.84969	8.38484	7338.61	FALSE	237
2022-09-15	10:51:24	1.7649	7.85063	6.9873	7499.38	FALSE	237
2022-09-15	10:51:24	1.64749	7.32837	6.9873	7345.94	FALSE	237
2022-09-15	10:51:24	1.56948	6.98136	6.9873	7506.36	FALSE	237
2022-09-15	10:51:24	1.30139	5.78884	6.9873	7351.73	FALSE	237
2022-09-15	10:51:25	1.12235	4.99244	6.19923	7511.35	FALSE	237
2022-09-15	10:51:25	1.14022	5.07193	6.19923	7356.8	FALSE	237
2022-09-15	10:51:25	1.70917	7.60273	6.19923	7518.96	FALSE	237
2022-09-15	10:51:25	1.60286	7.12984	6.19923	7363.93	FALSE	237
2022-09-15	10:51:26	1.82719	8.12771	10.0852	7527.08	FALSE	237
2022-09-15	10:51:26	2.19615	9.76891	10.0852	7373.7	FALSE	237
2022-09-15	10:51:26	2.3909	10.6352	10.0852	7537.72	FALSE	237
2022-09-15	10:51:26	2.65482	11.8092	10.0852	7385.51	FALSE	237
2022-09-15	10:51:27	2.42215	10.7742	10.2807	7548.49	FALSE	237
2022-09-15	10:51:27	2.28892	10.1816	10.2807	7395.69	FALSE	237
2022-09-15	10:51:27	2.22251	9.88617	10.2807	7558.38	FALSE	237
2022-09-15	10:51:28	2.1935	9.75713	10.0353	7405.45	FALSE	237
2022-09-15	10:51:28	2.14322	9.53347	10.0353	7567.91	FALSE	237
2022-09-15	10:51:28	2.09518	9.31978	10.0353	7414.77	FALSE	237
2022-09-15	10:51:28	2.59223	11.5308	10.0353	7579.44	FALSE	237
2022-09-15	10:51:29	0.591107	2.62936	1.44782	7417.39	FALSE	237
2022-09-15	10:51:29	0.179148	0.796886	1.44782	7580.24	FALSE	237
2022-09-15	10:51:29	0.256552	1.14119	1.44782	7418.54	FALSE	237
2022-09-15	10:51:29	0.275127	1.22382	1.44782	7581.46	FALSE	237
2022-09-15	10:51:30	1.04581	4.65197	20.2359	7423.19	FALSE	237
2022-09-15	10:51:30	2.50739	11.1534	20.2359	7592.62	FALSE	237
2022-09-15	10:51:30	10.9034	48.5005	20.2359	7471.69	1	238
2022-09-15	10:51:30	3.74037	16.6379	20.2359	7609.26	1	239
2022-09-15	10:51:31	7.34515	32.6727	14.8467	7504.36	1	240
2022-09-15	10:51:31	1.42714	6.3482	14.8467	7615.6	FALSE	240
2022-09-15	10:51:31	1.24078	5.51924	14.8467	7509.88	FALSE	240
2022-09-15	10:51:32	2.17665	9.68217	6.37196	7625.29	FALSE	240
2022-09-15	10:51:32	0.559962	2.49082	6.37196	7512.37	FALSE	240
2022-09-15	10:51:32	1.69192	7.526	6.37196	7632.81	FALSE	240
2022-09-15	10:51:32	1.30139	5.78884	6.37196	7518.16	FALSE	240
2022-09-15	10:51:33	3.29131	14.6404	17.2469	7647.45	1	241
2022-09-15	10:51:33	7.19212	31.992	17.2469	7550.15	1	242
2022-09-15	10:51:33	3.51334	15.628	17.2469	7663.08	1	243
2022-09-15	10:51:33	1.51233	6.72715	17.2469	7556.88	FALSE	243
2022-09-15	10:51:34	-0.0824297	-0.366664	0.965022	7663.08	FALSE	243
2022-09-15	10:51:34	0.279758	1.24442	0.965022	7558.12	FALSE	243
2022-09-15	10:51:34	0.150038	0.667399	0.965022	7663.75	FALSE	243
2022-09-15	10:51:34	0.52042	2.31493	0.965022	7560.44	FALSE	243
2022-09-15	10:51:35	1.41436	6.29136	19.5073	7670.04	FALSE	243
2022-09-15	10:51:35	3.30352	14.6947	19.5073	7575.13	1	244
2022-09-15	10:51:35	8.43843	37.5358	19.5073	7707.58	1	245
2022-09-15	10:51:36	5.20026	23.1318	16.6237	7598.26	1	246
2022-09-15	10:51:36	4.52256	20.1173	16.6237	7727.69	1	247
2022-09-15	10:51:36	3.10037	13.7911	16.6237	7612.06	1	248
2022-09-15	10:51:36	2.12551	9.45469	16.6237	7737.15	FALSE	248
2022-09-15	10:51:37	4.2339	18.8332	12.1625	7630.89	1	249
2022-09-15	10:51:37	1.25375	5.57693	12.1625	7742.72	FALSE	249
2022-09-15	10:51:37	4.46663	19.8685	12.1625	7650.76	1	250
2022-09-15	10:51:37	0.982761	4.37152	12.1625	7747.1	FALSE	250
2022-09-15	10:51:38	5.17701	23.0284	16.8536	7673.79	1	251
2022-09-15	10:51:38	3.74739	16.6691	16.8536	7763.77	1	252
2022-09-15	10:51:38	3.0282	13.47	16.8536	7687.26	1	253
2022-09-15	10:51:38	3.20281	14.2467	16.8536	7778.01	1	254
2022-09-15	10:51:39	2.2138	9.84743	23.3404	7697.1	FALSE	254
2022-09-15	10:51:39	8.10108	36.0352	23.3404	7814.05	1	255
2022-09-15	10:51:39	5.42662	24.1387	23.3404	7721.24	1	256
2022-09-15	10:51:40	9.58535	42.6376	34.5468	7856.68	1	257
2022-09-15	10:51:40	7.2279	32.1511	34.5468	7753.39	1	258
2022-09-15	10:51:40	6.13416	27.286	34.5468	7883.97	1	259
2022-09-15	10:51:40	8.11848	36.1126	34.5468	7789.51	1	260
2022-09-15	10:51:41	9.8309	43.7298	31.2591	7927.7	1	261
2022-09-15	10:51:41	8.90006	39.5892	31.2591	7829.1	1	262
2022-09-15	10:51:41	5.3706	23.8895	31.2591	7951.59	1	263
2022-09-15	10:51:41	4.0079	17.8279	31.2591	7846.92	1	264
2022-09-15	10:51:42	4.27691	19.0246	18.3178	7970.61	1	265
2022-09-15	10:51:42	4.18591	18.6198	18.3178	7865.54	1	266
2022-09-15	10:51:42	4.04658	18	18.3178	7988.61	1	267
2022-09-15	10:51:42	3.96266	17.6267	18.3178	7883.17	1	268
2022-09-15	10:51:43	3.37818	15.0268	16.2848	8003.64	1	269
2022-09-15	10:51:43	3.34988	14.9009	16.2848	7898.07	1	270
2022-09-15	10:51:43	4.25487	18.9265	16.2848	8022.57	1	271
2022-09-15	10:51:44	6.05131	26.9174	52.5869	7924.99	1	272
2022-09-15	10:51:44	12.866	57.2305	52.5869	8079.8	1	273
2022-09-15	10:51:44	16.3882	72.898	52.5869	7997.89	1	274
2022-09-15	10:51:44	11.9827	53.3014	52.5869	8133.1	1	275
2022-09-15	10:51:45	8.98734	39.9775	34.5022	8037.86	1	276
2022-09-15	10:51:45	7.92642	35.2583	34.5022	8168.36	1	277
2022-09-15	10:51:45	8.35075	37.1458	34.5022	8075.01	1	278
2022-09-15	10:51:45	5.76123	25.6271	34.5022	8193.99	1	279
2022-09-15	10:51:46	4.61731	20.5387	20.0884	8095.55	1	280
2022-09-15	10:51:46	4.36948	19.4363	20.0884	8213.42	1	281
2022-09-15	10:51:46	4.56144	20.2902	20.0884	8115.84	1	282
2022-09-15	10:51:47	4.1391	18.4115	15.4508	8231.83	1	283
2022-09-15	10:51:47	3.51324	15.6276	15.4508	8131.47	1	284
2022-09-15	10:51:47	3.06958	13.6541	15.4508	8245.49	1	285
2022-09-15	10:51:47	3.17202	14.1098	15.4508	8145.58	1	286
2022-09-15	10:51:48	3.99854	17.7863	18.8781	8263.27	1	287
2022-09-15	10:51:48	4.69233	20.8724	18.8781	8166.45	1	288
2022-09-15	10:51:48	4.4363	19.7335	18.8781	8283.01	1	289
2022-09-15	10:51:48	3.84876	17.1201	18.8781	8183.57	1	290
2022-09-15	10:51:49	3.8021	16.9125	17.4299	8299.92	1	291
2022-09-15	10:51:49	3.79782	16.8935	17.4299	8200.46	1	292
2022-09-15	10:51:49	4.07971	18.1474	17.4299	8318.07	1	293
2022-09-15	10:51:49	3.99401	17.7662	17.4299	8218.23	1	294
2022-09-15	10:51:50	3.9134	17.4076	18.1065	8335.47	1	295
2022-09-15	10:51:50	4.27299	19.0071	18.1065	8237.23	1	296
2022-09-15	10:51:50	4.0252	17.9049	18.1065	8353.38	1	297
2022-09-15	10:51:51	3.84062	17.0838	15.4007	8254.32	1	298
2022-09-15	10:51:51	3.5967	15.9988	15.4007	8369.38	1	299
2022-09-15	10:51:51	3.31431	14.7427	15.4007	8269.06	1	300
2022-09-15	10:51:51	3.09726	13.7772	15.4007	8383.16	1	301
2022-09-15	10:51:52	3.10973	13.8327	13.2291	8282.89	1	302
2022-09-15	10:51:52	3.03716	13.5099	13.2291	8396.67	1	303
2022-09-15	10:51:52	2.87268	12.7783	13.2291	8295.67	FALSE	303
2022-09-15	10:51:52	2.8766	12.7957	13.2291	8409.46	FALSE	303
2022-09-15	10:51:53	2.96373	13.1833	13.548	8308.86	FALSE	303
2022-09-15	10:51:53	2.96169	13.1742	13.548	8422.64	FALSE	303
2022-09-15	10:51:53	2.97955	13.2536	13.548	8322.11	FALSE	303
2022-09-15	10:51:53	3.27793	14.5809	13.548	8437.22	1	304
2022-09-15	10:51:54	3.11304	13.8474	21.9735	8335.96	1	305
2022-09-15	10:51:54	4.1824	18.6042	21.9735	8455.82	1	306
2022-09-15	10:51:54	7.52418	33.4691	21.9735	8369.43	1	307
2022-09-15	10:51:55	8.3112	36.9699	46.062	8492.79	1	308
2022-09-15	10:51:55	8.39853	37.3583	46.062	8406.78	1	309
2022-09-15	10:51:55	14.26	63.4313	46.062	8556.22	1	310
2022-09-15	10:51:55	10.4511	46.4886	46.062	8453.27	1	311
2022-09-15	10:51:56	6.32067	28.1156	19.7226	8584.34	1	312
2022-09-15	10:51:56	4.08016	18.1494	19.7226	8471.42	1	313
2022-09-15	10:51:56	2.90067	12.9028	19.7226	8597.24	FALSE	313
2022-09-15	10:51:57	2.24693	9.99479	8.66217	8481.42	FALSE	313
2022-09-15	10:51:57	1.6619	7.39246	8.66217	8604.63	FALSE	313
2022-09-15	10:51:57	1.18531	5.2725	8.66217	8486.69	FALSE	313
2022-09-15	10:51:57	1.25589	5.58645	8.66217	8610.22	FALSE	313
2022-09-15	10:51:57	3.38668	15.0646	8.66217	8501.75	1	314
2022-09-15	10:51:58	9.46647	42.1088	44.8741	8652.33	1	315
2022-09-15	10:51:58	12.0666	53.6747	44.8741	8555.43	1	316
2022-09-15	10:51:58	8.73136	38.8388	44.8741	8691.17	1	317
2022-09-15	10:51:59	6.41105	28.5176	21.7215	8583.95	1	318
2022-09-15	10:51:59	4.01879	17.8764	21.7215	8709.04	1	319
2022-09-15	10:51:59	4.76342	21.1886	21.7215	8605.13	1	320
2022-09-15	10:51:59	4.33955	19.3032	21.7215	8728.35	1	321
2022-09-15	10:52:00	3.87752	17.248	16.5381	8622.38	1	322
2022-09-15	10:52:00	3.95395	17.588	16.5381	8745.93	1	323
2022-09-15	10:52:00	3.59843	16.0065	16.5381	8638.39	1	324
2022-09-15	10:52:00	3.44184	15.31	16.5381	8761.24	1	325
2022-09-15	10:52:01	2.96286	13.1794	12.0691	8651.57	FALSE	325
2022-09-15	10:52:01	2.82424	12.5628	12.0691	8773.81	FALSE	325
2022-09-15	10:52:01	2.46612	10.9698	12.0691	8662.54	FALSE	325
2022-09-15	10:52:01	2.59981	11.5645	12.0691	8785.37	FALSE	325
2022-09-15	10:52:02	2.62179	11.6622	11.0539	8674.2	FALSE	325
2022-09-15	10:52:02	2.55436	11.3623	11.0539	8796.73	FALSE	325
2022-09-15	10:52:02	2.27894	10.1372	11.0539	8684.34	FALSE	325
2022-09-15	10:52:03	1.96434	8.73778	9.01959	8805.47	FALSE	325
2022-09-15	10:52:03	2.0507	9.12192	9.01959	8693.46	FALSE	325
2022-09-15	10:52:03	1.95899	8.71398	9.01959	8814.19	FALSE	325
2022-09-15	10:52:03	2.13675	9.50469	9.01959	8702.96	FALSE	325
2022-09-15	10:52:04	2.01258	8.95236	8.39668	8823.14	FALSE	325
2022-09-15	10:52:04	1.90958	8.49419	8.39668	8711.46	FALSE	325
2022-09-15	10:52:04	1.81889	8.09079	8.39668	8831.23	FALSE	325
2022-09-15	10:52:04	1.80958	8.04937	8.39668	8719.51	FALSE	325
2022-09-15	10:52:05	1.93813	8.62119	9.98665	8839.85	FALSE	325
2022-09-15	10:52:05	2.04729	9.10676	9.98665	8728.61	FALSE	325
2022-09-15	10:52:05	2.34907	10.4491	9.98665	8850.3	FALSE	325
2022-09-15	10:52:05	2.64591	11.7695	9.98665	8740.38	FALSE	325
2022-09-15	10:52:06	2.76067	12.28	11.9508	8862.58	FALSE	325
2022-09-15	10:52:06	2.64703	11.7745	11.9508	8752.16	FALSE	325
2022-09-15	10:52:06	2.65228	11.7979	11.9508	8874.38	FALSE	325
2022-09-15	10:52:07	2.81345	12.5148	12.1714	8764.67	FALSE	325
2022-09-15	10:52:07	2.12475	9.45131	12.1714	8883.83	FALSE	325
2022-09-15	10:52:07	2.25019	10.0093	12.1714	8774.68	FALSE	325
2022-09-15	10:52:07	3.7566	16.7101	12.1714	8900.54	1	326
2022-09-15	10:52:08	6.78225	30.1688	51.6432	8804.85	1	327
2022-09-15	10:52:08	10.2231	45.4744	51.6432	8946.01	1	328
2022-09-15	10:52:08	17.1587	76.3253	51.6432	8881.18	1	329
2022-09-15	10:52:08	12.2756	54.6043	51.6432	9000.62	1	330
2022-09-15	10:52:09	8.09523	36.0092	26.8188	8917.19	1	331
2022-09-15	10:52:09	5.35986	23.8417	26.8188	9024.46	1	332
2022-09-15	10:52:09	4.63233	20.6055	26.8188	8937.79	1	333
2022-09-15	10:52:10	4.2794	19.0356	15.8952	9043.49	1	334
2022-09-15	10:52:10	3.36342	14.9612	15.8952	8952.75	1	335
2022-09-15	10:52:10	3.35874	14.9403	15.8952	9058.43	1	336
2022-09-15	10:52:10	3.29202	14.6436	15.8952	8967.4	1	337
2022-09-15	10:52:11	3.02759	13.4673	13.965	9071.9	1	338
2022-09-15	10:52:11	3.54851	15.7845	13.965	8983.18	1	339
2022-09-15	10:52:11	3.6221	16.1118	13.965	9088.01	1	340
2022-09-15	10:52:11	2.35966	10.4962	13.965	8993.68	FALSE	340
2022-09-15	10:52:12	2.46215	10.9521	11.2209	9098.97	FALSE	340
2022-09-15	10:52:12	2.64759	11.777	11.2209	9005.45	FALSE	340
2022-09-15	10:52:12	2.60108	11.5701	11.2209	9110.54	FALSE	340
2022-09-15	10:52:12	2.37945	10.5843	11.2209	9016.04	FALSE	340
2022-09-15	10:52:13	2.28876	10.1809	9.96227	9120.72	FALSE	340
2022-09-15	10:52:13	2.25884	10.0478	9.96227	9026.09	FALSE	340
2022-09-15	10:52:13	2.2049	9.80784	9.96227	9130.52	FALSE	340
2022-09-15	10:52:13	2.20597	9.8126	9.96227	9035.9	FALSE	340
2022-09-15	10:52:14	4.83721	21.5169	19.771	9152.04	1	341
2022-09-15	10:52:14	4.65589	20.7103	19.771	9056.61	1	342
2022-09-15	10:52:14	3.84108	17.0859	19.771	9169.13	1	343
2022-09-15	10:52:15	3.82597	17.0187	16.7251	9073.63	1	344
2022-09-15	10:52:15	3.77833	16.8068	16.7251	9185.93	1	345
2022-09-15	10:52:15	3.70464	16.479	16.7251	9090.11	1	346
2022-09-15	10:52:15	3.7309	16.5958	16.7251	9202.53	1	347
2022-09-15	10:52:16	3.87925	17.2557	18.1927	9107.36	1	348
2022-09-15	10:52:16	3.87518	17.2376	18.1927	9219.77	1	349
2022-09-15	10:52:16	4.20993	18.7266	18.1927	9126.09	1	350
2022-09-15	10:52:16	4.39523	19.5509	18.1927	9239.32	1	351
2022-09-15	10:52:17	5.04408	22.4371	19.3124	9148.53	1	352
2022-09-15	10:52:17	4.98642	22.1806	19.3124	9261.5	1	353
2022-09-15	10:52:17	3.72388	16.5646	19.3124	9165.09	1	354
2022-09-15	10:52:17	3.61207	16.0672	19.3124	9277.57	1	355
2022-09-15	10:52:18	1.94408	8.64766	6.97456	9173.74	FALSE	355
2022-09-15	10:52:18	1.20953	5.38023	6.97456	9282.95	FALSE	355
2022-09-15	10:52:18	1.55024	6.89578	6.97456	9180.63	FALSE	355
2022-09-15	10:52:19	2.91965	12.9872	14.2398	9295.93	FALSE	355
2022-09-15	10:52:19	3.98744	17.7369	14.2398	9198.37	1	356
2022-09-15	10:52:19	3.31467	14.7443	14.2398	9310.68	1	357
2022-09-15	10:52:19	2.58322	11.4907	14.2398	9209.86	FALSE	357
2022-09-15	10:52:20	2.73472	12.1646	10.3469	9322.84	FALSE	357
2022-09-15	10:52:20	2.24337	9.97896	10.3469	9219.84	FALSE	357
2022-09-15	10:52:20	1.94184	8.63769	10.3469	9331.48	FALSE	357
2022-09-15	10:52:20	2.38439	10.6062	10.3469	9230.45	FALSE	357
2022-09-15	10:52:21	2.65238	11.7983	56.7718	9343.28	FALSE	357
2022-09-15	10:52:21	12.2826	54.6355	56.7718	9285.08	1	358
2022-09-15	10:52:21	22.4852	100.019	56.7718	9443.3	1	359
2022-09-15	10:52:21	13.6313	60.6347	56.7718	9345.72	1	360
2022-09-15	10:52:22	12.1237	53.9286	71.5334	9497.23	1	361
2022-09-15	10:52:22	18.6349	82.8918	71.5334	9428.61	1	362
2022-09-15	10:52:22	17.4857	77.7799	71.5334	9575.01	1	363
2022-09-15	10:52:23	9.35802	41.6263	45.8971	9470.24	1	364
2022-09-15	10:52:23	11.8254	52.6017	45.8971	9627.61	1	365
2022-09-15	10:52:23	13.3081	59.1971	45.8971	9529.43	1	366
2022-09-15	10:52:23	6.78103	30.1634	45.8971	9657.77	1	367
2022-09-15	10:52:24	4.2593	18.9462	22.4427	9548.38	1	368
2022-09-15	10:52:24	5.02592	22.3563	22.4427	9680.13	1	369
2022-09-15	10:52:24	5.20713	23.1624	22.4427	9571.54	1	370
2022-09-15	10:52:24	5.68907	25.3061	22.4427	9705.43	1	371
2022-09-15	10:52:25	6.51543	28.9819	34.3419	9600.52	1	372
2022-09-15	10:52:25	8.16545	36.3216	34.3419	9741.75	1	373
2022-09-15	10:52:25	8.48031	37.7221	34.3419	9638.25	1	374
2022-09-15	10:52:26	6.08505	27.0675	18.4328	9768.82	1	375
2022-09-15	10:52:26	3.74658	16.6655	18.4328	9654.91	1	376
2022-09-15	10:52:26	3.29161	14.6417	18.4328	9783.46	1	377
2022-09-15	10:52:26	3.45223	15.3562	18.4328	9670.27	1	378
2022-09-15	10:52:27	3.34159	14.8641	14.0244	9798.33	1	379
2022-09-15	10:52:27	4.59355	20.433	14.0244	9690.7	1	380
2022-09-15	10:52:27	2.43772	10.8435	14.0244	9809.17	FALSE	380
2022-09-15	10:52:27	2.23843	9.95698	14.0244	9700.66	FALSE	380
2022-09-15	10:52:28	1.81299	8.06454	7.75531	9817.24	FALSE	380
2022-09-15	10:52:28	1.72688	7.68151	7.75531	9708.34	FALSE	380
2022-09-15	10:52:28	1.70973	7.60522	7.75531	9824.84	FALSE	380
2022-09-15	10:52:28	1.72429	7.66999	7.75531	9716.01	FALSE	380
2022-09-15	10:52:29	1.61197	7.17036	7.00753	9832.01	FALSE	380
2022-09-15	10:52:29	1.18225	5.25888	7.00753	9721.27	FALSE	380
2022-09-15	10:52:29	1.93187	8.59334	7.00753	9840.6	FALSE	380
2022-09-15	10:52:30	1.7535	7.79992	6.2732	9729.07	FALSE	380
2022-09-15	10:52:30	1.58922	7.06917	6.2732	9847.67	FALSE	380
2022-09-15	10:52:30	1.37212	6.10346	6.2732	9735.17	FALSE	380
2022-09-15	10:52:30	0.926272	4.12024	6.2732	9851.79	FALSE	380
2022-09-15	10:52:31	0.632735	2.81453	3.18737	9737.99	FALSE	380
2022-09-15	10:52:31	0.657112	2.92297	3.18737	9854.72	FALSE	380
2022-09-15	10:52:31	0.786629	3.49908	3.18737	9741.48	FALSE	380
2022-09-15	10:52:31	0.789733	3.51289	3.18737	9858.23	FALSE	380
2022-09-15	10:52:32	0.858689	3.81962	4.75907	9745.3	FALSE	380
2022-09-15	10:52:32	0.961539	4.27712	4.75907	9862.51	FALSE	380
2022-09-15	10:52:32	1.1933	5.30804	4.75907	9750.61	FALSE	380
2022-09-15	10:52:32	1.26602	5.63151	4.75907	9868.14	FALSE	380
2022-09-15	10:52:33	1.29024	5.73925	5.2453	9756.35	FALSE	380
2022-09-15	10:52:33	1.13772	5.06081	5.2453	9873.2	FALSE	380
2022-09-15	10:52:33	1.10963	4.93586	5.2453	9761.29	FALSE	380

## Sheet: Boris_harness_2022915104715 (3)
Date	Time	Lbs	Newtons	Total force x time		total steps > 13.345	**GoPro Fitting: 1036
2022-09-15	10:47:33	0.30673	1.3644	1.3644	FALSE	0
2022-09-15	10:47:33	0.358384	1.59416	1.59416	FALSE	0		Dog barking at other dog in nearby yard which lead to big pulling incident
2022-09-15	10:47:33	0.3907	1.73791	3.10231	FALSE	0
2022-09-15	10:47:33	0.328206	1.45993	3.05409	FALSE	0
2022-09-15	10:47:34	0.333244	1.48234	4.58464	FALSE	0
2022-09-15	10:47:34	0.320776	1.42688	4.48097	FALSE	0
2022-09-15	10:47:34	0.360318	1.60277	6.18741	FALSE	0
2022-09-15	10:47:34	0.365051	1.62382	6.10479	FALSE	0
2022-09-15	10:47:35	0.315636	1.40401	7.59142	FALSE	0
2022-09-15	10:47:35	0.275941	1.22744	7.33223	FALSE	0
2022-09-15	10:47:35	0.289631	1.28834	8.87976	FALSE	0
2022-09-15	10:47:36	0.28159	1.25257	8.58479	FALSE	0
2022-09-15	10:47:36	0.316247	1.40673	10.2865	FALSE	0
2022-09-15	10:47:36	0.32729	1.45585	10.0406	FALSE	0
2022-09-15	10:47:36	0.341947	1.52105	11.8075	FALSE	0
2022-09-15	10:47:37	0.337468	1.50113	11.5418	FALSE	0
2022-09-15	10:47:37	0.325356	1.44725	13.2548	FALSE	0
2022-09-15	10:47:37	0.39472	1.75579	13.2976	FALSE	0
2022-09-15	10:47:37	0.360013	1.60141	14.8562	FALSE	0
2022-09-15	10:47:38	0.176909	0.786927	14.0845	FALSE	0
2022-09-15	10:47:38	0.170496	0.7584	15.6146	FALSE	0
2022-09-15	10:47:38	0.243779	1.08438	15.1689	FALSE	0
2022-09-15	10:47:38	0.250751	1.11539	16.73	FALSE	0
2022-09-15	10:47:39	0.154924	0.689133	15.858	FALSE	0
2022-09-15	10:47:39	0.242049	1.07668	17.8067	FALSE	0
2022-09-15	10:47:39	0.253143	1.12603	16.984	FALSE	0
2022-09-15	10:47:40	0.251005	1.11652	18.9232	FALSE	0
2022-09-15	10:47:40	0.256094	1.13916	18.1232	FALSE	0
2022-09-15	10:47:40	0.220573	0.981153	19.9043	FALSE	0
2022-09-15	10:47:40	0.24327	1.08211	19.2053	FALSE	0
2022-09-15	10:47:41	0.230395	1.02484	20.9292	FALSE	0
2022-09-15	10:47:41	0.234618	1.04363	20.2489	FALSE	0
2022-09-15	10:47:41	0.236807	1.05336	21.9826	FALSE	0
2022-09-15	10:47:41	0.26042	1.1584	21.4073	FALSE	0
2022-09-15	10:47:42	0.228562	1.01669	22.9992	FALSE	0
2022-09-15	10:47:42	0.223982	0.996317	22.4036	FALSE	0
2022-09-15	10:47:42	0.211209	0.9395	23.9387	FALSE	0
2022-09-15	10:47:42	0.190445	0.847137	23.2508	FALSE	0
2022-09-15	10:47:43	0.209428	0.931578	24.8703	FALSE	0
2022-09-15	10:47:43	0.208512	0.927503	24.1783	FALSE	0
2022-09-15	10:47:43	0.214771	0.955344	25.8257	FALSE	0
2022-09-15	10:47:44	0.21355	0.949913	25.1282	FALSE	0
2022-09-15	10:47:44	0.190802	0.848725	26.6744	FALSE	0
2022-09-15	10:47:44	0.162252	0.721729	25.8499	FALSE	0
2022-09-15	10:47:44	0.166425	0.740292	27.4147	FALSE	0
2022-09-15	10:47:45	0.126832	0.564174	26.4141	FALSE	0
2022-09-15	10:47:45	0.338741	1.50679	28.9215	FALSE	0
2022-09-15	10:47:45	0.373957	1.66344	28.0775	FALSE	0
2022-09-15	10:47:45	0.292939	1.30305	30.2245	FALSE	0
2022-09-15	10:47:46	0.341896	1.52082	29.5984	FALSE	0
2022-09-15	10:47:46	0.359962	1.60118	31.8257	FALSE	0
2022-09-15	10:47:46	0.406425	1.80786	31.4062	FALSE	0
2022-09-15	10:47:47	0.38383	1.70735	33.5331	FALSE	0
2022-09-15	10:47:47	0.36785	1.63627	33.0425	FALSE	0
2022-09-15	10:47:47	0.378537	1.68381	35.2169	FALSE	0
2022-09-15	10:47:47	0.370598	1.64849	34.691	FALSE	0
2022-09-15	10:47:48	0.377367	1.6786	36.8955	FALSE	0
2022-09-15	10:47:48	0.383881	1.70758	36.3986	FALSE	0
2022-09-15	10:47:48	0.341845	1.52059	38.4161	FALSE	0
2022-09-15	10:47:48	0.387901	1.72546	38.124	FALSE	0
2022-09-15	10:47:49	0.271819	1.20911	39.6252	FALSE	0
2022-09-15	10:47:49	0.445865	1.9833	40.1073	FALSE	0
2022-09-15	10:47:49	0.326425	1.452	41.0772	FALSE	0
2022-09-15	10:47:49	0.0467305	0.207867	40.3152	FALSE	0
2022-09-15	10:47:50	-0.158715	-0.705996	41.0772	FALSE	0
2022-09-15	10:47:50	-0.126654	-0.563382	40.3152	FALSE	0
2022-09-15	10:47:50	-0.241259	-1.07317	41.0772	FALSE	0
2022-09-15	10:47:51	-0.544211	-2.42076	40.3152	FALSE	0
2022-09-15	10:47:51	-0.836424	-3.72058	41.0772	FALSE	0
2022-09-15	10:47:51	-1.02156	-4.5441	40.3152	FALSE	0
2022-09-15	10:47:51	-0.856882	-3.81158	41.0772	FALSE	0
2022-09-15	10:47:52	-0.620139	-2.7585	40.3152	FALSE	0
2022-09-15	10:47:52	0.237875	1.05812	42.1353	FALSE	0
2022-09-15	10:47:52	1.16312	5.17379	45.489	FALSE	0
2022-09-15	10:47:52	5.42184	24.1174	66.2527	1	1
2022-09-15	10:47:53	4.22744	18.8045	64.2935	1	2
2022-09-15	10:47:53	2.60077	11.5687	77.8215	FALSE	2
2022-09-15	10:47:53	2.94993	13.1219	77.4154	FALSE	2
2022-09-15	10:47:53	4.00749	17.8261	95.6476	1	3
2022-09-15	10:47:54	6.7395	29.9786	107.394	1	4
2022-09-15	10:47:54	11.5685	51.459	147.107	1	5
2022-09-15	10:47:54	2.59085	11.5246	118.919	FALSE	5
2022-09-15	10:47:55	-0.0279768	-0.124446	147.107	FALSE	5
2022-09-15	10:47:55	-0.18757	-0.834349	118.919	FALSE	5
2022-09-15	10:47:55	-0.154694	-0.68811	147.107	FALSE	5
2022-09-15	10:47:55	0.265305	1.18013	120.099	FALSE	5
2022-09-15	10:47:56	0.0469341	0.208772	147.315	FALSE	5
2022-09-15	10:47:56	1.06301	4.72848	124.827	FALSE	5
2022-09-15	10:47:56	0.285763	1.27113	148.586	FALSE	5
2022-09-15	10:47:56	0.160013	0.71177	125.539	FALSE	5
2022-09-15	10:47:57	0.0337534	0.150142	148.737	FALSE	5
2022-09-15	10:47:57	0.460623	2.04894	127.588	FALSE	5
2022-09-15	10:47:57	4.39925	19.5687	168.305	1	6
2022-09-15	10:47:57	16.0294	71.302	198.89	1	7
2022-09-15	10:47:58	7.56948	33.6706	201.976	1	8
2022-09-15	10:47:58	5.84698	26.0085	224.898	1	9
2022-09-15	10:47:58	4.47141	19.8897	221.866	1	10
2022-09-15	10:47:59	4.96719	22.0951	246.994	1	11
2022-09-15	10:47:59	3.85334	17.1404	239.006	1	12
2022-09-15	10:47:59	7.40489	32.9384	279.932	1	13
2022-09-15	10:47:59	4.20881	18.7216	257.728	1	14
2022-09-15	10:48:00	6.31014	28.0688	308.001	1	15
2022-09-15	10:48:00	9.18662	40.8639	298.592	1	16
2022-09-15	10:48:00	11.0821	49.2954	357.296	1	17
2022-09-15	10:48:00	12.7698	56.8026	355.394	1	18
2022-09-15	10:48:01	14.9816	66.6412	423.937	1	19
2022-09-15	10:48:01	21.404	95.2093	450.604	1	20
2022-09-15	10:48:01	18.774	83.5105	507.448	1	21
2022-09-15	10:48:02	16.3036	72.5217	523.125	1	22
2022-09-15	10:48:02	2.51513	11.1878	518.636	FALSE	22
2022-09-15	10:48:02	11.8745	52.8202	575.945	1	23
2022-09-15	10:48:02	4.30831	19.1642	537.8	1	24
2022-09-15	10:48:03	25.6589	114.136	690.081	1	25
2022-09-15	10:48:03	16.8169	74.8049	612.605	1	26
2022-09-15	10:48:03	23.0433	102.501	792.582	1	27
2022-09-15	10:48:03	25.5252	113.541	726.146	1	28
2022-09-15	10:48:04	8.61579	38.3248	830.907	1	29
2022-09-15	10:48:04	11.0145	48.9947	775.141	1	30
2022-09-15	10:48:04	2.55329	11.3575	842.265	FALSE	30
2022-09-15	10:48:05	2.8734	12.7815	787.922	FALSE	30
2022-09-15	10:48:05	0.31416	1.39745	843.662	FALSE	30
2022-09-15	10:48:05	4.40495	19.5941	807.516	1	31
2022-09-15	10:48:05	30.1764	134.231	977.893	1	32
2022-09-15	10:48:06	17.8008	79.1815	886.698	1	33
2022-09-15	10:48:06	19.2461	85.6105	1063.5	1	34
2022-09-15	10:48:06	24.2676	107.947	994.645	1	35
2022-09-15	10:48:06	20.0387	89.1361	1152.64	1	36
2022-09-15	10:48:07	8.28434	36.8504	1031.5	1	37
2022-09-15	10:48:07	17.164	76.3489	1228.99	1	38
2022-09-15	10:48:07	38.2431	170.113	1201.61	1	39
2022-09-15	10:48:07	35.0351	155.843	1384.83	1	40
2022-09-15	10:48:08	15.8351	70.4377	1272.05	1	41
2022-09-15	10:48:08	0.557875	2.48154	1387.31	FALSE	41
2022-09-15	10:48:08	20.1386	89.5805	1361.63	1	42
2022-09-15	10:48:08	11.5793	51.507	1438.82	1	43
2022-09-15	10:48:09	32.434	144.273	1505.9	1	44
2022-09-15	10:48:09	25.4551	113.229	1552.05	1	45
2022-09-15	10:48:09	20.169	89.7157	1595.62	1	46
2022-09-15	10:48:10	32.107	142.818	1694.87	1	47
2022-09-15	10:48:10	7.0993	31.5791	1627.19	1	48
2022-09-15	10:48:10	18.7168	83.2561	1778.12	1	49
2022-09-15	10:48:10	17.1663	76.3591	1703.55	1	50
2022-09-15	10:48:11	24.4528	108.771	1886.89	1	51
2022-09-15	10:48:11	49.944	222.161	1925.71	1	52
2022-09-15	10:48:11	27.2107	121.039	2007.93	1	53
2022-09-15	10:48:11	46.6503	207.51	2133.22	1	54
2022-09-15	10:48:12	43.3969	193.038	2200.97	1	55
2022-09-15	10:48:12	25.3973	112.972	2246.2	1	56
2022-09-15	10:48:12	15.9444	70.9239	2271.9	1	57
2022-09-15	10:48:12	19.9754	88.8546	2335.05	1	58
2022-09-15	10:48:13	20.0827	89.3319	2361.23	1	59
2022-09-15	10:48:13	13.6015	60.5022	2395.55	1	60
2022-09-15	10:48:13	17.1736	76.3916	2437.62	1	61
2022-09-15	10:48:14	16.8005	74.732	2470.29	1	62
2022-09-15	10:48:14	9.46107	42.0847	2479.7	1	63
2022-09-15	10:48:14	13.7726	61.2633	2531.55	1	64
2022-09-15	10:48:14	28.2475	125.651	2605.35	1	65
2022-09-15	10:48:15	20.6013	91.6387	2623.19	1	66
2022-09-15	10:48:15	19.6145	87.2492	2692.6	1	67
2022-09-15	10:48:15	18.9455	84.2734	2707.46	1	68
2022-09-15	10:48:15	8.97533	39.9241	2732.53	1	69
2022-09-15	10:48:16	15.6209	69.4849	2776.95	1	70
2022-09-15	10:48:16	5.69202	25.3192	2757.85	1	71
2022-09-15	10:48:16	31.0544	138.136	2915.08	1	72
2022-09-15	10:48:17	11.7368	52.2076	2810.05	1	73
2022-09-15	10:48:17	13.8202	61.475	2976.56	1	74
2022-09-15	10:48:17	29.7394	132.287	2942.34	1	75
2022-09-15	10:48:17	12.2482	54.4824	3031.04	1	76
2022-09-15	10:48:18	5.2538	23.37	2965.71	1	77
2022-09-15	10:48:18	5.99105	26.6494	3057.69	1	78
2022-09-15	10:48:18	2.37202	10.5512	2976.26	FALSE	78
2022-09-15	10:48:18	1.62281	7.21858	3064.91	FALSE	78
2022-09-15	10:48:19	2.49584	11.102	2987.36	FALSE	78
2022-09-15	10:48:19	20.1639	89.6931	3154.6	1	79
2022-09-15	10:48:19	18.3035	81.4176	3068.78	1	80
2022-09-15	10:48:19	8.24133	36.6591	3191.26	1	81
2022-09-15	10:48:20	10.2442	45.5683	3114.35	1	82
2022-09-15	10:48:20	15.4191	68.5872	3259.85	1	83
2022-09-15	10:48:20	21.3505	94.9713	3209.32	1	84
2022-09-15	10:48:21	16.3268	72.6249	3332.47	1	85
2022-09-15	10:48:21	14.2339	63.3152	3272.64	1	86
2022-09-15	10:48:21	10.0372	44.6475	3377.12	1	87
2022-09-15	10:48:21	13.8107	61.4328	3334.07	1	88
2022-09-15	10:48:22	21.3643	95.0327	3472.15	1	89
2022-09-15	10:48:22	12.0243	53.4865	3387.56	1	90
2022-09-15	10:48:22	10.1233	45.0305	3517.18	1	91
2022-09-15	10:48:22	24.2172	107.723	3495.28	1	92
2022-09-15	10:48:23	14.7162	65.4606	3582.64	1	93
2022-09-15	10:48:23	1.63411	7.26885	3502.55	FALSE	93
2022-09-15	10:48:23	0.438283	1.94957	3584.59	FALSE	93
2022-09-15	10:48:23	1.89416	8.4256	3510.97	FALSE	93
2022-09-15	10:48:24	7.95533	35.3869	3619.98	1	94
2022-09-15	10:48:24	19.8623	88.3515	3599.32	1	95
2022-09-15	10:48:24	16.1343	71.7686	3691.75	1	96
2022-09-15	10:48:25	23.076	102.647	3701.97	1	97
2022-09-15	10:48:25	20.5091	91.2286	3782.98	1	98
2022-09-15	10:48:25	4.51482	20.0828	3722.05	1	99
2022-09-15	10:48:25	0.186679	0.830386	3783.81	FALSE	99
2022-09-15	10:48:26	-0.17846	-0.793826	3722.05	FALSE	99
2022-09-15	10:48:26	-0.312506	-1.39009	3783.81	FALSE	99
2022-09-15	10:48:26	-0.264872	-1.1782	3722.05	FALSE	99
2022-09-15	10:48:26	-0.0472135	-0.210015	3783.81	FALSE	99
2022-09-15	10:48:27	0.179504	0.79847	3722.85	FALSE	99
2022-09-15	10:48:27	3.80011	16.9036	3800.71	1	100
2022-09-15	10:48:27	16.1005	71.6182	3794.47	1	101
2022-09-15	10:48:27	12.6794	56.4005	3857.11	1	102
2022-09-15	10:48:28	23.5576	104.789	3899.26	1	103
2022-09-15	10:48:28	23.3412	103.826	3960.94	1	104
2022-09-15	10:48:28	22.9791	102.216	4001.48	1	105
2022-09-15	10:48:29	15.1514	67.3965	4028.33	1	106
2022-09-15	10:48:29	21.2524	94.5349	4096.01	1	107
2022-09-15	10:48:29	30.7875	136.949	4165.28	1	108
2022-09-15	10:48:29	39.5123	175.759	4271.77	1	109
2022-09-15	10:48:30	6.04922	26.9081	4192.19	1	110
2022-09-15	10:48:30	0.229122	1.01918	4272.79	FALSE	110
2022-09-15	10:48:30	0.325916	1.44974	4193.64	FALSE	110
2022-09-15	10:48:30	0.383575	1.70622	4274.49	FALSE	110
2022-09-15	10:48:31	-0.923803	-4.10926	4193.64	FALSE	110
2022-09-15	10:48:31	-0.553015	-2.45992	4274.49	FALSE	110
2022-09-15	10:48:31	-0.172557	-0.767568	4193.64	FALSE	110
2022-09-15	10:48:31	4.95004	22.0188	4296.51	1	111
2022-09-15	10:48:32	7.90093	35.1449	4228.79	1	112
2022-09-15	10:48:32	0.0316669	0.140861	4296.65	FALSE	112
2022-09-15	10:48:32	0.379606	1.68856	4230.47	FALSE	112
2022-09-15	10:48:33	-0.0728623	-0.324106	4296.65	FALSE	112
2022-09-15	10:48:33	-0.92818	-4.12873	4230.47	FALSE	112
2022-09-15	10:48:33	-1.05927	-4.71184	4296.65	FALSE	112
2022-09-15	10:48:33	0.119606	0.532031	4231.01	FALSE	112
2022-09-15	10:48:34	0.456094	2.0288	4298.68	FALSE	112
2022-09-15	10:48:34	1.14429	5.09003	4236.1	FALSE	112
2022-09-15	10:48:34	3.59589	15.9952	4314.68	1	113
2022-09-15	10:48:34	11.0162	49.0023	4285.1	1	114
2022-09-15	10:48:35	11.4379	50.8781	4365.56	1	115
2022-09-15	10:48:35	0.462354	2.05664	4287.15	FALSE	115
2022-09-15	10:48:35	1.30846	5.82029	4371.38	FALSE	115
2022-09-15	10:48:36	0.157417	0.700222	4287.85	FALSE	115
2022-09-15	10:48:36	0.668919	2.97549	4374.35	FALSE	115
2022-09-15	10:48:36	0.104084	0.462986	4288.32	FALSE	115
2022-09-15	10:48:36	1.83879	8.17931	4382.53	FALSE	115
2022-09-15	10:48:37	27.3453	121.637	4409.96	1	116
2022-09-15	10:48:37	13.8463	61.5911	4444.12	1	117
2022-09-15	10:48:37	4.36714	19.4259	4429.38	1	118
2022-09-15	10:48:37	4.47044	19.8854	4464.01	1	119
2022-09-15	10:48:38	4.82011	21.4408	4450.82	1	120
2022-09-15	10:48:38	1.0848	4.82541	4468.83	FALSE	120
2022-09-15	10:48:38	0.832735	3.70417	4454.53	FALSE	120
2022-09-15	10:48:38	0.467748	2.08064	4470.91	FALSE	120
2022-09-15	10:48:39	1.3991	6.22348	4460.75	FALSE	120
2022-09-15	10:48:39	0.562608	2.50259	4473.42	FALSE	120
2022-09-15	10:48:39	1.30006	5.78293	4466.53	FALSE	120
2022-09-15	10:48:40	0.64444	2.8666	4476.28	FALSE	120
2022-09-15	10:48:40	0.707646	3.14775	4469.68	FALSE	120
2022-09-15	10:48:40	-0.121259	-0.539384	4476.28	FALSE	120
2022-09-15	10:48:40	-0.50818	-2.26049	4469.68	FALSE	120
2022-09-15	10:48:41	-0.885126	-3.93722	4476.28	FALSE	120
2022-09-15	10:48:41	-0.99103	-4.4083	4469.68	FALSE	120
2022-09-15	10:48:41	-1.16767	-5.19403	4476.28	FALSE	120
2022-09-15	10:48:41	-0.857035	-3.81226	4469.68	FALSE	120
2022-09-15	10:48:42	-0.82131	-3.65335	4476.28	FALSE	120
2022-09-15	10:48:42	-0.567671	-2.52511	4469.68	FALSE	120
2022-09-15	10:48:42	2.45986	10.9419	4487.23	FALSE	120
2022-09-15	10:48:42	8.08194	35.9501	4505.63	1	121
2022-09-15	10:48:43	12.8036	56.953	4544.18	1	122
2022-09-15	10:48:43	3.70637	16.4867	4522.12	1	123
2022-09-15	10:48:43	3.76322	16.7396	4560.92	1	124
2022-09-15	10:48:44	5.16398	22.9704	4545.09	1	125
2022-09-15	10:48:44	3.29599	14.6612	4575.58	1	126
2022-09-15	10:48:44	3.37477	15.0117	4560.1	1	127
2022-09-15	10:48:44	3.94475	17.547	4593.13	1	128
2022-09-15	10:48:45	5.10123	22.6913	4582.79	1	129
2022-09-15	10:48:45	6.3424	28.2123	4621.34	1	130
2022-09-15	10:48:45	5.42683	24.1396	4606.93	1	131
2022-09-15	10:48:45	5.19477	23.1074	4644.45	1	132
2022-09-15	10:48:46	6.81441	30.3119	4637.24	1	133
2022-09-15	10:48:46	4.91548	21.865	4666.31	1	134
2022-09-15	10:48:46	4.21777	18.7615	4656	1	135
2022-09-15	10:48:46	2.58052	11.4787	4677.79	FALSE	135
2022-09-15	10:48:47	2.32734	10.3525	4666.36	FALSE	135
2022-09-15	10:48:47	2.19721	9.77363	4687.56	FALSE	135
2022-09-15	10:48:47	2.19665	9.77114	4676.13	FALSE	135
2022-09-15	10:48:48	2.14704	9.55046	4697.11	FALSE	135
2022-09-15	10:48:48	2.18541	9.72114	4685.85	FALSE	135
2022-09-15	10:48:48	2.23604	9.94635	4707.06	FALSE	135
2022-09-15	10:48:48	2.24831	10.0009	4695.85	FALSE	135
2022-09-15	10:48:49	2.11701	9.41688	4716.48	FALSE	135
2022-09-15	10:48:49	2.09452	9.31684	4705.17	FALSE	135
2022-09-15	10:48:49	0.863473	3.8409	4720.32	FALSE	135
2022-09-15	10:48:49	0.400725	1.7825	4706.95	FALSE	135
2022-09-15	10:48:50	0.274059	1.21907	4721.54	FALSE	135
2022-09-15	10:48:50	0.0606745	0.269892	4707.22	FALSE	135
2022-09-15	10:48:50	-0.261615	-1.16372	4721.54	FALSE	135
2022-09-15	10:48:51	-0.364414	-1.62099	4707.22	FALSE	135
2022-09-15	10:48:51	-0.375254	-1.6692	4721.54	FALSE	135
2022-09-15	10:48:51	-0.485941	-2.16156	4707.22	FALSE	135
2022-09-15	10:48:51	-0.722226	-3.21261	4721.54	FALSE	135
2022-09-15	10:48:52	-0.538053	-2.39337	4707.22	FALSE	135
2022-09-15	10:48:52	1.40057	6.23002	4727.77	FALSE	135
2022-09-15	10:48:52	2.72006	12.0994	4719.32	FALSE	135
2022-09-15	10:48:52	0.524644	2.33372	4730.1	FALSE	135
2022-09-15	10:48:53	0.256043	1.13893	4720.46	FALSE	135
2022-09-15	10:48:53	0.285	1.26774	4731.37	FALSE	135
2022-09-15	10:48:53	0.563829	2.50802	4722.96	FALSE	135
2022-09-15	10:48:53	0.421234	1.87373	4733.24	FALSE	135
2022-09-15	10:48:54	0.429987	1.91267	4724.88	FALSE	135
2022-09-15	10:48:54	0.401234	1.78477	4735.03	FALSE	135
2022-09-15	10:48:54	0.389529	1.7327	4726.61	FALSE	135
2022-09-15	10:48:55	0.400725	1.7825	4736.81	FALSE	135
2022-09-15	10:48:55	0.428512	1.90611	4728.52	FALSE	135
2022-09-15	10:48:55	0.335178	1.49094	4738.3	FALSE	135
2022-09-15	10:48:55	0.071158	0.316525	4728.83	FALSE	135
2022-09-15	10:48:56	-0.431946	-1.92138	4738.3	FALSE	135
2022-09-15	10:48:56	-0.614898	-2.73519	4728.83	FALSE	135
2022-09-15	10:48:56	-0.56416	-2.5095	4738.3	FALSE	135
2022-09-15	10:48:56	-0.653065	-2.90496	4728.83	FALSE	135
2022-09-15	10:48:57	-0.785076	-3.49218	4738.3	FALSE	135
2022-09-15	10:48:57	-0.959122	-4.26637	4728.83	FALSE	135
2022-09-15	10:48:57	-0.688893	-3.06433	4738.3	FALSE	135
2022-09-15	10:48:57	0.718791	3.19733	4732.03	FALSE	135
2022-09-15	10:48:58	14.9864	66.6625	4804.96	1	136
2022-09-15	10:48:58	11.5093	51.1957	4783.23	1	137
2022-09-15	10:48:58	5.07894	22.5921	4827.55	1	138
2022-09-15	10:48:59	3.21365	14.295	4797.52	1	139
2022-09-15	10:48:59	1.74037	7.74151	4835.3	FALSE	139
2022-09-15	10:48:59	1.38933	6.18002	4803.7	FALSE	139
2022-09-15	10:48:59	0.331107	1.47283	4836.77	FALSE	139
2022-09-15	10:49:00	0.377112	1.67747	4805.38	FALSE	139
2022-09-15	10:49:00	0.268104	1.19258	4837.96	FALSE	139
2022-09-15	10:49:00	0.345814	1.53825	4806.92	FALSE	139
2022-09-15	10:49:00	0.134975	0.600396	4838.56	FALSE	139
2022-09-15	10:49:01	0.237061	1.05449	4807.97	FALSE	139
2022-09-15	10:49:01	0.0700384	0.311545	4838.87	FALSE	139
2022-09-15	10:49:01	-0.03673	-0.163382	4807.97	FALSE	139
2022-09-15	10:49:01	-0.170979	-0.760549	4838.87	FALSE	139
2022-09-15	10:49:02	0.0684099	0.304301	4808.28	FALSE	139
2022-09-15	10:49:02	1.11248	4.94853	4843.82	FALSE	139
2022-09-15	10:49:02	2.73253	12.1548	4820.43	FALSE	139
2022-09-15	10:49:03	5.43691	24.1845	4868.01	1	140
2022-09-15	10:49:03	6.28993	27.9789	4848.41	1	141
2022-09-15	10:49:03	4.09151	18.1999	4886.21	1	142
2022-09-15	10:49:03	3.27523	14.5689	4862.98	1	143
2022-09-15	10:49:04	1.35899	6.04506	4892.25	FALSE	143
2022-09-15	10:49:04	1.73401	7.71322	4870.69	FALSE	143
2022-09-15	10:49:04	1.47447	6.55874	4898.81	FALSE	143
2022-09-15	10:49:04	1.98342	8.82265	4879.51	FALSE	143
2022-09-15	10:49:05	1.18429	5.26796	4904.08	FALSE	143
2022-09-15	10:49:05	0.43528	1.93621	4881.45	FALSE	143
2022-09-15	10:49:05	0.335535	1.49253	4905.57	FALSE	143
2022-09-15	10:49:05	-0.0681294	-0.303053	4881.45	FALSE	143
2022-09-15	10:49:06	1.20948	5.38001	4910.95	FALSE	143
2022-09-15	10:49:06	5.30042	23.5773	4905.03	1	144
2022-09-15	10:49:06	12.0675	53.6787	4964.63	1	145
2022-09-15	10:49:07	9.82357	43.6972	4948.72	1	146
2022-09-15	10:49:07	5.06093	22.512	4987.14	1	147
2022-09-15	10:49:07	3.51564	15.6383	4964.36	1	148
2022-09-15	10:49:07	5.18749	23.075	5010.22	1	149
2022-09-15	10:49:08	7.45594	33.1655	4997.53	1	150
2022-09-15	10:49:08	10.4545	46.5037	5056.72	1	151
2022-09-15	10:49:08	11.9113	52.9838	5050.51	1	152
2022-09-15	10:49:08	13.3628	59.4404	5116.16	1	153
2022-09-15	10:49:09	5.40805	24.0561	5074.57	1	154
2022-09-15	10:49:09	3.25879	14.4957	5130.66	1	155
2022-09-15	10:49:09	0.72785	3.23762	5077.81	FALSE	155
2022-09-15	10:49:10	0.586883	2.61057	5133.27	FALSE	155
2022-09-15	10:49:10	0.273702	1.21748	5079.02	FALSE	155
2022-09-15	10:49:10	0.197214	0.877247	5134.14	FALSE	155
2022-09-15	10:49:10	3.15238	14.0224	5093.05	1	156
2022-09-15	10:49:11	7.93538	35.2982	5169.44	1	157
2022-09-15	10:49:11	34.0396	151.415	5244.46	1	158
2022-09-15	10:49:11	3.23742	14.4007	5183.84	1	159
2022-09-15	10:49:11	3.58403	15.9425	5260.4	1	160
2022-09-15	10:49:12	0.563015	2.5044	5186.35	FALSE	160
2022-09-15	10:49:12	0.0514634	0.228919	5260.63	FALSE	160
2022-09-15	10:49:12	0.627952	2.79326	5189.14	FALSE	160
2022-09-15	10:49:12	0.662964	2.949	5263.58	FALSE	160
2022-09-15	10:49:13	0.064644	0.287549	5189.43	FALSE	160
2022-09-15	10:49:13	0.333041	1.48143	5265.06	FALSE	160
2022-09-15	10:49:13	0.248715	1.10633	5190.53	FALSE	160
2022-09-15	10:49:14	1.12785	5.0169	5270.08	FALSE	160
2022-09-15	10:49:14	5.2393	23.3055	5213.84	1	161
2022-09-15	10:49:14	6.87283	30.5717	5300.65	1	162
2022-09-15	10:49:14	8.17649	36.3707	5250.21	1	163
2022-09-15	10:49:15	8.18464	36.4069	5337.06	1	164
2022-09-15	10:49:15	10.2098	45.4152	5295.63	1	165
2022-09-15	10:49:15	12.451	55.3845	5392.44	1	166
2022-09-15	10:49:15	10.6791	47.5028	5343.13	1	167
2022-09-15	10:49:16	5.30825	23.6122	5416.05	1	168
2022-09-15	10:49:16	3.8053	16.9267	5360.06	1	169
2022-09-15	10:49:16	4.91579	21.8664	5437.92	1	170
2022-09-15	10:49:16	3.77935	16.8113	5376.87	1	171
2022-09-15	10:49:17	3.40001	15.1239	5453.04	1	172
2022-09-15	10:49:17	3.10393	13.8069	5390.67	1	173
2022-09-15	10:49:17	3.26678	14.5313	5467.58	1	174
2022-09-15	10:49:18	2.85848	12.7151	5403.39	FALSE	174
2022-09-15	10:49:18	2.94434	13.097	5480.67	FALSE	174
2022-09-15	10:49:18	2.85665	12.707	5416.1	FALSE	174
2022-09-15	10:49:18	2.67217	11.8863	5492.56	FALSE	174
2022-09-15	10:49:19	2.88993	12.855	5428.95	FALSE	174
2022-09-15	10:49:19	2.98225	13.2656	5505.83	FALSE	174
2022-09-15	10:49:19	2.03604	9.05671	5438.01	FALSE	174
2022-09-15	10:49:19	2.54642	11.327	5517.15	FALSE	174
2022-09-15	10:49:20	2.14378	9.53596	5447.54	FALSE	174
2022-09-15	10:49:20	2.1476	9.55295	5526.71	FALSE	174
2022-09-15	10:49:20	2.22474	9.89609	5457.44	FALSE	174
2022-09-15	10:49:20	2.14612	9.54637	5536.25	FALSE	174
2022-09-15	10:49:21	2.18729	9.7295	5467.17	FALSE	174
2022-09-15	10:49:21	2.05731	9.15133	5545.4	FALSE	174
2022-09-15	10:49:21	2.08139	9.25844	5476.43	FALSE	174
2022-09-15	10:49:22	2.02963	9.0282	5554.43	FALSE	174
2022-09-15	10:49:22	2.08408	9.2704	5485.7	FALSE	174
2022-09-15	10:49:22	1.95961	8.71674	5563.15	FALSE	174
2022-09-15	10:49:22	2.09472	9.31773	5495.02	FALSE	174
2022-09-15	10:49:23	2.50337	11.1355	5574.28	FALSE	174
2022-09-15	10:49:23	2.47533	11.0108	5506.03	FALSE	174
2022-09-15	10:49:23	2.73309	12.1573	5586.44	FALSE	174
2022-09-15	10:49:23	2.48821	11.0681	5517.09	FALSE	174
2022-09-15	10:49:24	2.66088	11.8361	5598.28	FALSE	174
2022-09-15	10:49:24	2.51589	11.1912	5528.29	FALSE	174
2022-09-15	10:49:24	2.49263	11.0877	5609.36	FALSE	174
2022-09-15	10:49:24	2.35391	10.4707	5538.76	FALSE	174
2022-09-15	10:49:25	2.47777	11.0216	5620.39	FALSE	174
2022-09-15	10:49:25	2.51747	11.1982	5549.95	FALSE	174
2022-09-15	10:49:25	2.50907	11.1608	5631.55	FALSE	174
2022-09-15	10:49:26	2.52205	11.2186	5561.17	FALSE	174
2022-09-15	10:49:26	2.52836	11.2467	5642.79	FALSE	174
2022-09-15	10:49:26	2.4736	11.0031	5572.18	FALSE	174
2022-09-15	10:49:26	2.50093	11.1246	5653.92	FALSE	174
2022-09-15	10:49:27	2.7624	12.2877	5584.46	FALSE	174
2022-09-15	10:49:27	2.81594	12.5259	5666.44	FALSE	174
2022-09-15	10:49:27	2.83675	12.6184	5597.08	FALSE	174
2022-09-15	10:49:27	3.2766	14.575	5681.02	1	175
2022-09-15	10:49:28	3.12978	13.9219	5611	1	176
2022-09-15	10:49:28	2.80897	12.4949	5693.51	FALSE	176
2022-09-15	10:49:28	3.03777	13.5126	5624.52	1	177
2022-09-15	10:49:29	2.88434	12.8301	5706.34	FALSE	177
2022-09-15	10:49:29	3.26408	14.5193	5639.04	1	178
2022-09-15	10:49:29	3.35111	14.9064	5721.25	1	179
2022-09-15	10:49:29	2.41345	10.7355	5649.77	FALSE	179
2022-09-15	10:49:30	3.13426	13.9418	5735.19	1	180
2022-09-15	10:49:30	2.62729	11.6867	5661.46	FALSE	180
2022-09-15	10:49:30	2.85843	12.7149	5747.91	FALSE	180
2022-09-15	10:49:30	2.92118	12.994	5674.45	FALSE	180
2022-09-15	10:49:31	2.82612	12.5711	5760.48	FALSE	180
2022-09-15	10:49:31	2.81996	12.5437	5687	FALSE	180
2022-09-15	10:49:31	2.50072	11.1237	5771.6	FALSE	180
2022-09-15	10:49:31	2.92887	13.0282	5700.02	FALSE	180
2022-09-15	10:49:32	2.4735	11.0026	5782.6	FALSE	180
2022-09-15	10:49:32	2.51915	11.2057	5711.23	FALSE	180
2022-09-15	10:49:32	2.57742	11.4649	5794.07	FALSE	180
2022-09-15	10:49:33	2.68805	11.957	5723.19	FALSE	180
2022-09-15	10:49:33	2.73614	12.1709	5806.24	FALSE	180
2022-09-15	10:49:33	2.56958	11.43	5734.62	FALSE	180
2022-09-15	10:49:33	2.58327	11.4909	5817.73	FALSE	180
2022-09-15	10:49:34	2.52083	11.2132	5745.83	FALSE	180
2022-09-15	10:49:34	2.54642	11.327	5829.06	FALSE	180
2022-09-15	10:49:34	2.50795	11.1559	5756.99	FALSE	180
2022-09-15	10:49:34	2.4738	11.004	5840.06	FALSE	180
2022-09-15	10:49:35	2.18083	9.70077	5766.69	FALSE	180
2022-09-15	10:49:35	2.40347	10.6911	5850.75	FALSE	180
2022-09-15	10:49:35	2.58724	11.5086	5778.19	FALSE	180
2022-09-15	10:49:35	2.62734	11.6869	5862.44	FALSE	180
2022-09-15	10:49:36	2.72815	12.1354	5790.33	FALSE	180
2022-09-15	10:49:36	2.77462	12.3421	5874.78	FALSE	180
2022-09-15	10:49:36	2.74296	12.2012	5802.53	FALSE	180
2022-09-15	10:49:37	2.7539	12.2499	5887.03	FALSE	180
2022-09-15	10:49:37	2.79401	12.4283	5814.96	FALSE	180
2022-09-15	10:49:37	2.82541	12.568	5899.6	FALSE	180
2022-09-15	10:49:37	2.91472	12.9653	5827.93	FALSE	180
2022-09-15	10:49:38	2.88673	12.8408	5912.44	FALSE	180
2022-09-15	10:49:38	2.68861	11.9595	5839.88	FALSE	180
2022-09-15	10:49:38	2.7963	12.4385	5924.88	FALSE	180
2022-09-15	10:49:38	2.93121	13.0386	5852.92	FALSE	180
2022-09-15	10:49:39	2.94846	13.1153	5937.99	FALSE	180
2022-09-15	10:49:39	3.17823	14.1374	5867.06	1	181
2022-09-15	10:49:39	2.7367	12.1734	5950.17	FALSE	181
2022-09-15	10:49:39	2.50134	11.1265	5878.19	FALSE	181
2022-09-15	10:49:40	2.14317	9.53325	5959.7	FALSE	181
2022-09-15	10:49:40	2.12286	9.44291	5887.63	FALSE	181
2022-09-15	10:49:40	2.19396	9.75917	5969.46	FALSE	181
2022-09-15	10:49:41	1.77884	7.91264	5895.54	FALSE	181
2022-09-15	10:49:41	1.98413	8.82581	5978.29	FALSE	181
2022-09-15	10:49:41	2.4221	10.774	5906.32	FALSE	181
2022-09-15	10:49:41	0.662761	2.94809	5981.23	FALSE	181
2022-09-15	10:49:42	0.986069	4.38623	5910.7	FALSE	181
2022-09-15	10:49:42	0.310445	1.38092	5982.62	FALSE	181
2022-09-15	10:49:42	0.951768	4.23365	5914.94	FALSE	181
2022-09-15	10:49:42	1.30388	5.79992	5988.42	FALSE	181
2022-09-15	10:49:43	2.12195	9.43886	5924.38	FALSE	181
2022-09-15	10:49:43	2.84312	12.6468	6001.06	FALSE	181
2022-09-15	10:49:43	3.93345	17.4968	5941.87	1	182
2022-09-15	10:49:43	1.582	7.03705	6008.1	FALSE	182
2022-09-15	10:49:44	-0.248587	-1.10576	5941.87	FALSE	182
2022-09-15	10:49:44	-0.18818	-0.837062	6008.1	FALSE	182
2022-09-15	10:49:44	-0.0710811	-0.316183	5941.87	FALSE	182
2022-09-15	10:49:45	0.0483081	0.214884	6008.31	FALSE	182
2022-09-15	10:49:45	0.0393514	0.175043	5942.05	FALSE	182
2022-09-15	10:49:45	-0.38762	-1.72421	6008.31	FALSE	182
2022-09-15	10:49:45	0.409733	1.82257	5943.87	FALSE	182
2022-09-15	10:49:46	3.8678	17.2047	6025.52	1	183
2022-09-15	10:49:46	10.5476	46.9178	5990.79	1	184
2022-09-15	10:49:46	7.56418	33.647	6059.17	1	185
2022-09-15	10:49:46	7.19828	32.0194	6022.81	1	186
2022-09-15	10:49:47	11.9927	53.3459	6112.51	1	187
2022-09-15	10:49:47	16.1721	71.9367	6094.74	1	188
2022-09-15	10:49:47	7.31914	32.557	6145.07	1	189
2022-09-15	10:49:48	6.18128	27.4956	6122.24	1	190
2022-09-15	10:49:48	5.10968	22.7289	6167.8	1	191
2022-09-15	10:49:48	4.86596	21.6448	6143.88	1	192
2022-09-15	10:49:48	4.84622	21.557	6189.35	1	193
2022-09-15	10:49:49	4.38612	19.5103	6163.39	1	194
2022-09-15	10:49:49	4.25309	18.9186	6208.27	1	195
2022-09-15	10:49:49	4.14021	18.4165	6181.81	1	196
2022-09-15	10:49:49	3.82754	17.0257	6225.3	1	197
2022-09-15	10:49:50	3.87955	17.257	6199.07	1	198
2022-09-15	10:49:50	3.41594	15.1948	6240.49	1	199
2022-09-15	10:49:50	2.74612	12.2153	6211.28	FALSE	199
2022-09-15	10:49:50	2.49945	11.1181	6251.61	FALSE	199
2022-09-15	10:49:51	2.17838	9.68987	6220.97	FALSE	199
2022-09-15	10:49:51	2.3191	10.3158	6261.93	FALSE	199
2022-09-15	10:49:51	1.78128	7.92349	6228.9	FALSE	199
2022-09-15	10:49:52	1.60118	7.12237	6269.05	FALSE	199
2022-09-15	10:49:52	1.63299	7.26387	6236.16	FALSE	199
2022-09-15	10:49:52	1.69116	7.52262	6276.57	FALSE	199
2022-09-15	10:49:52	1.6335	7.26613	6243.43	FALSE	199
2022-09-15	10:49:53	1.60546	7.14141	6283.71	FALSE	199
2022-09-15	10:49:53	1.72184	7.65909	6251.09	FALSE	199
2022-09-15	10:49:53	1.66149	7.39064	6291.1	FALSE	199
2022-09-15	10:49:53	1.56454	6.95939	6258.04	FALSE	199
2022-09-15	10:49:54	1.59772	7.10698	6298.21	FALSE	199
2022-09-15	10:49:54	1.60948	7.15929	6265.2	FALSE	199
2022-09-15	10:49:54	1.76006	7.8291	6306.04	FALSE	199
2022-09-15	10:49:54	1.78658	7.94707	6273.15	FALSE	199
2022-09-15	10:49:55	1.2278	5.4615	6311.5	FALSE	199
2022-09-15	10:49:55	1.56851	6.97705	6280.13	FALSE	199
2022-09-15	10:49:55	1.37706	6.12544	6317.63	FALSE	199
2022-09-15	10:49:56	1.80062	8.00952	6288.14	FALSE	199
2022-09-15	10:49:56	1.4877	6.61759	6324.25	FALSE	199
2022-09-15	10:49:56	1.32734	5.90427	6294.04	FALSE	199
2022-09-15	10:49:56	1.73859	7.7336	6331.98	FALSE	199
2022-09-15	10:49:57	1.64011	7.29554	6301.34	FALSE	199
2022-09-15	10:49:57	1.57721	7.01575	6338.99	FALSE	199
2022-09-15	10:49:57	1.62719	7.23807	6308.58	FALSE	199
2022-09-15	10:49:57	1.66866	7.42253	6346.42	FALSE	199
2022-09-15	10:49:58	1.67782	7.46328	6316.04	FALSE	199
2022-09-15	10:49:58	1.72897	7.6908	6354.11	FALSE	199
2022-09-15	10:49:58	1.76006	7.8291	6323.87	FALSE	199
2022-09-15	10:49:58	1.68083	7.47667	6361.58	FALSE	199
2022-09-15	10:49:59	1.71177	7.6143	6331.48	FALSE	199
2022-09-15	10:49:59	1.66363	7.40016	6368.98	FALSE	199
2022-09-15	10:49:59	1.64642	7.32361	6338.81	FALSE	199
2022-09-15	10:50:00	1.61803	7.19732	6376.18	FALSE	199
2022-09-15	10:50:00	1.62688	7.23669	6346.04	FALSE	199
2022-09-15	10:50:00	1.52963	6.8041	6382.99	FALSE	199
2022-09-15	10:50:00	1.44276	6.41769	6352.46	FALSE	199
2022-09-15	10:50:01	1.44566	6.43058	6389.42	FALSE	199
2022-09-15	10:50:01	1.45793	6.48516	6358.95	FALSE	199
2022-09-15	10:50:01	1.52892	6.80094	6396.22	FALSE	199
2022-09-15	10:50:01	1.57553	7.00827	6365.95	FALSE	199
2022-09-15	10:50:02	1.58846	7.06579	6403.28	FALSE	199
2022-09-15	10:50:02	1.56408	6.95734	6372.91	FALSE	199
2022-09-15	10:50:02	1.66999	7.42845	6410.71	FALSE	199
2022-09-15	10:50:02	1.71793	7.6417	6380.55	FALSE	199
2022-09-15	10:50:03	1.71462	7.62697	6418.34	FALSE	199
2022-09-15	10:50:03	1.66067	7.38699	6387.94	FALSE	199
2022-09-15	10:50:03	1.65004	7.33971	6425.68	FALSE	199
2022-09-15	10:50:04	1.61487	7.18326	6395.12	FALSE	199
2022-09-15	10:50:04	1.66724	7.41622	6433.09	FALSE	199
2022-09-15	10:50:04	1.69564	7.54255	6402.67	FALSE	199
2022-09-15	10:50:04	1.72815	7.68716	6440.78	FALSE	199
2022-09-15	10:50:05	1.8077	8.04101	6410.71	FALSE	199
2022-09-15	10:50:05	1.84134	8.19065	6448.97	FALSE	199
2022-09-15	10:50:05	1.83329	8.15484	6418.86	FALSE	199
2022-09-15	10:50:05	1.82668	8.12544	6457.1	FALSE	199
2022-09-15	10:50:06	1.77894	7.91308	6426.77	FALSE	199
2022-09-15	10:50:06	1.79548	7.98665	6465.08	FALSE	199
2022-09-15	10:50:06	1.71411	7.6247	6434.4	FALSE	199
2022-09-15	10:50:06	1.69192	7.526	6472.61	FALSE	199
2022-09-15	10:50:07	1.68154	7.47983	6441.88	FALSE	199
2022-09-15	10:50:07	1.68897	7.51288	6480.12	FALSE	199
2022-09-15	10:50:07	1.67981	7.47213	6449.35	FALSE	199
2022-09-15	10:50:08	1.7307	7.6985	6487.82	FALSE	199
2022-09-15	10:50:08	1.75375	7.80103	6457.15	FALSE	199
2022-09-15	10:50:08	1.66658	7.41328	6495.24	FALSE	199
2022-09-15	10:50:08	1.63721	7.28264	6464.43	FALSE	199
2022-09-15	10:50:09	1.61019	7.16245	6502.4	FALSE	199
2022-09-15	10:50:09	1.6023	7.12735	6471.56	FALSE	199
2022-09-15	10:50:09	1.59345	7.08798	6509.49	FALSE	199
2022-09-15	10:50:09	1.61212	7.17103	6478.73	FALSE	199
2022-09-15	10:50:10	1.61813	7.19777	6516.68	FALSE	199
2022-09-15	10:50:10	1.61803	7.19732	6485.93	FALSE	199
2022-09-15	10:50:10	1.62429	7.22517	6523.91	FALSE	199
2022-09-15	10:50:11	1.6136	7.17762	6493.11	FALSE	199
2022-09-15	10:50:11	1.65233	7.34989	6531.26	FALSE	199
2022-09-15	10:50:11	1.52037	6.76291	6499.87	FALSE	199
2022-09-15	10:50:11	1.62159	7.21316	6538.47	FALSE	199
2022-09-15	10:50:12	1.86195	8.28233	6508.15	FALSE	199
2022-09-15	10:50:12	2.62617	11.6817	6550.15	FALSE	199
2022-09-15	10:50:12	4.23075	18.8192	6526.97	1	200
2022-09-15	10:50:12	5.89563	26.2249	6576.38	1	201
2022-09-15	10:50:13	4.81813	21.432	6548.4	1	202
2022-09-15	10:50:13	0.390089	1.73519	6578.11	FALSE	202
2022-09-15	10:50:13	0.1164	0.51777	6548.92	FALSE	202
2022-09-15	10:50:13	-0.168486	-0.749459	6578.11	FALSE	202
2022-09-15	10:50:14	-0.083702	-0.372323	6548.92	FALSE	202
2022-09-15	10:50:14	11.3259	50.3799	6628.49	1	203
2022-09-15	10:50:14	12.9133	57.4409	6606.36	1	204
2022-09-15	10:50:15	6.20052	27.5812	6656.07	1	205
2022-09-15	10:50:15	0.453753	2.01838	6608.38	FALSE	205
2022-09-15	10:50:15	0.244542	1.08777	6657.16	FALSE	205
2022-09-15	10:50:15	0.279707	1.24419	6609.63	FALSE	205
2022-09-15	10:50:16	-0.491641	-2.18692	6657.16	FALSE	205
2022-09-15	10:50:16	-0.435966	-1.93926	6609.63	FALSE	205
2022-09-15	10:50:16	-0.394949	-1.75681	6657.16	FALSE	205
2022-09-15	10:50:16	-0.331946	-1.47656	6609.63	FALSE	205
2022-09-15	10:50:17	-0.266552	-1.18568	6657.16	FALSE	205
2022-09-15	10:50:17	-0.291234	-1.29547	6609.63	FALSE	205
2022-09-15	10:50:17	-0.203753	-0.906334	6657.16	FALSE	205
2022-09-15	10:50:17	-0.299274	-1.33123	6609.63	FALSE	205
2022-09-15	10:50:18	-0.390165	-1.73553	6657.16	FALSE	205
2022-09-15	10:50:18	-0.4379	-1.94787	6609.63	FALSE	205
2022-09-15	10:50:18	-0.638155	-2.83864	6657.16	FALSE	205
2022-09-15	10:50:19	-0.819732	-3.64633	6609.63	FALSE	205
2022-09-15	10:50:19	-0.879885	-3.9139	6657.16	FALSE	205
2022-09-15	10:50:19	-0.339224	-1.50894	6609.63	FALSE	205
2022-09-15	10:50:19	4.17767	18.5831	6675.75	1	206
2022-09-15	10:50:20	4.62322	20.565	6630.19	1	207
2022-09-15	10:50:20	6.21492	27.6452	6703.39	1	208
2022-09-15	10:50:20	3.74988	16.6802	6646.87	1	209
2022-09-15	10:50:20	2.12159	9.43726	6712.83	FALSE	209
2022-09-15	10:50:21	1.51182	6.72488	6653.6	FALSE	209
2022-09-15	10:50:21	3.71976	16.5462	6729.37	1	210
2022-09-15	10:50:21	3.9563	17.5984	6671.19	1	211
2022-09-15	10:50:21	5.15014	22.9089	6752.28	1	212
2022-09-15	10:50:22	4.37334	19.4535	6690.65	1	213
2022-09-15	10:50:22	6.0682	26.9926	6779.28	1	214
2022-09-15	10:50:22	1.99421	8.87064	6699.52	FALSE	214
2022-09-15	10:50:23	0.690598	3.07192	6782.35	FALSE	214
2022-09-15	10:50:23	0.40841	1.81669	6701.34	FALSE	214
2022-09-15	10:50:23	0.495585	2.20446	6784.55	FALSE	214
2022-09-15	10:50:23	0.325051	1.44589	6702.78	FALSE	214
2022-09-15	10:50:24	0.418333	1.86083	6786.41	FALSE	214
2022-09-15	10:50:24	0.728868	3.24215	6706.02	FALSE	214
2022-09-15	10:50:24	0.192227	0.855064	6787.27	FALSE	214
2022-09-15	10:50:24	0.809784	3.60208	6709.63	FALSE	214
2022-09-15	10:50:25	4.67548	20.7975	6808.07	1	215
2022-09-15	10:50:25	2.80759	12.4887	6722.11	FALSE	215
2022-09-15	10:50:25	1.94398	8.64721	6816.71	FALSE	215
2022-09-15	10:50:25	0.447188	1.98918	6724.1	FALSE	215
2022-09-15	10:50:26	0.313143	1.39292	6818.11	FALSE	215
2022-09-15	10:50:26	0.393397	1.74991	6725.85	FALSE	215
2022-09-15	10:50:26	0.2964	1.31845	6819.42	FALSE	215
2022-09-15	10:50:27	0.373295	1.66049	6727.51	FALSE	215
2022-09-15	10:50:27	0.260878	1.16044	6820.58	FALSE	215
2022-09-15	10:50:27	0.436145	1.94006	6729.45	FALSE	215
2022-09-15	10:50:27	0.408919	1.81895	6822.4	FALSE	215
2022-09-15	10:50:28	2.09874	9.33562	6738.79	FALSE	215
2022-09-15	10:50:28	2.2906	10.189	6832.59	FALSE	215
2022-09-15	10:50:28	3.01401	13.4069	6752.2	1	216
2022-09-15	10:50:28	1.80668	8.03647	6840.63	FALSE	216
2022-09-15	10:50:29	0.683524	3.04045	6755.24	FALSE	216
2022-09-15	10:50:29	0.350191	1.55772	6842.19	FALSE	216
2022-09-15	10:50:29	0.474822	2.1121	6757.35	FALSE	216
2022-09-15	10:50:30	0.262303	1.16678	6843.35	FALSE	216
2022-09-15	10:50:30	0.441285	1.96292	6759.31	FALSE	216
2022-09-15	10:50:30	0.223168	0.992696	6844.35	FALSE	216
2022-09-15	10:50:30	0.429275	1.9095	6761.22	FALSE	216
2022-09-15	10:50:31	0.26098	1.16089	6845.51	FALSE	216
2022-09-15	10:50:31	0.557519	2.47996	6763.7	FALSE	216
2022-09-15	10:50:31	0.335331	1.49162	6847	FALSE	216
2022-09-15	10:50:31	4.28708	19.0698	6782.77	1	217
2022-09-15	10:50:32	2.58281	11.4889	6858.49	FALSE	217
2022-09-15	10:50:32	2.81976	12.5429	6795.31	FALSE	217
2022-09-15	10:50:32	1.81416	8.06975	6866.56	FALSE	217
2022-09-15	10:50:32	1.50296	6.68547	6802	FALSE	217
2022-09-15	10:50:33	2.51757	11.1987	6877.76	FALSE	217
2022-09-15	10:50:33	0.242252	1.07759	6803.08	FALSE	217
2022-09-15	10:50:33	0.695789	3.09501	6880.85	FALSE	217
2022-09-15	10:50:34	2.46877	10.9816	6814.06	FALSE	217
2022-09-15	10:50:34	0.238181	1.05948	6881.91	FALSE	217
2022-09-15	10:50:34	2.45833	10.9351	6824.99	FALSE	217
2022-09-15	10:50:34	0.45299	2.01499	6883.93	FALSE	217
2022-09-15	10:50:35	2.41426	10.7391	6835.73	FALSE	217
2022-09-15	10:50:35	1.23849	5.50905	6889.43	FALSE	217
2022-09-15	10:50:35	1.00276	4.46048	6840.19	FALSE	217
2022-09-15	10:50:35	5.38795	23.9667	6913.4	1	218
2022-09-15	10:50:36	0.281489	1.25212	6841.45	FALSE	218
2022-09-15	10:50:36	1.98373	8.82403	6922.22	FALSE	218
2022-09-15	10:50:36	0.289478	1.28766	6842.73	FALSE	218
2022-09-15	10:50:36	0.00525471	0.023374	6922.25	FALSE	218
2022-09-15	10:50:37	0.149275	0.664005	6843.4	FALSE	218
2022-09-15	10:50:37	-0.117748	-0.523767	6922.25	FALSE	218
2022-09-15	10:50:37	-0.485992	-2.16179	6843.4	FALSE	218
2022-09-15	10:50:38	-0.237544	-1.05664	6922.25	FALSE	218
2022-09-15	10:50:38	0.165458	0.73599	6844.13	FALSE	218
2022-09-15	10:50:38	2.92439	13.0083	6935.26	FALSE	218
2022-09-15	10:50:38	2.1223	9.44041	6853.57	FALSE	218
2022-09-15	10:50:39	2.89569	12.8806	6948.14	FALSE	218
2022-09-15	10:50:39	0.189428	0.842614	6854.42	FALSE	218
2022-09-15	10:50:39	-0.0974934	-0.43367	6948.14	FALSE	218
2022-09-15	10:50:39	-0.167468	-0.744931	6854.42	FALSE	218
2022-09-15	10:50:40	-0.191641	-0.852457	6948.14	FALSE	218
2022-09-15	10:50:40	0.0557381	0.247934	6854.66	FALSE	218
2022-09-15	10:50:40	0.0831681	0.369948	6948.51	FALSE	218
2022-09-15	10:50:40	-0.131997	-0.587149	6854.66	FALSE	218
2022-09-15	10:50:41	-0.0688928	-0.306449	6948.51	FALSE	218
2022-09-15	10:50:41	-0.306043	-1.36134	6854.66	FALSE	218
2022-09-15	10:50:41	-0.178053	-0.792015	6948.51	FALSE	218
2022-09-15	10:50:42	-0.190623	-0.847929	6854.66	FALSE	218
2022-09-15	10:50:42	0.00993663	0.0442001	6948.55	FALSE	218
2022-09-15	10:50:42	0.000878093	0.00390593	6854.67	FALSE	218
2022-09-15	10:50:42	0.348104	1.54844	6950.1	FALSE	218
2022-09-15	10:50:43	0.569122	2.53157	6857.2	FALSE	218
2022-09-15	10:50:43	0.361692	1.60888	6951.71	FALSE	218
2022-09-15	10:50:43	0.680776	3.02823	6860.23	FALSE	218
2022-09-15	10:50:43	2.0592	9.15973	6960.87	FALSE	218
2022-09-15	10:50:44	0.154415	0.686869	6860.91	FALSE	218
2022-09-15	10:50:44	0.814415	3.62268	6964.49	FALSE	218
2022-09-15	10:50:44	3.71472	16.5238	6877.44	1	219
2022-09-15	10:50:44	0.172685	0.768137	6965.26	FALSE	219
2022-09-15	10:50:45	0.0605728	0.26944	6877.71	FALSE	219
2022-09-15	10:50:45	0.110191	0.490152	6965.75	FALSE	219
2022-09-15	10:50:45	0.0403183	0.179344	6877.89	FALSE	219
2022-09-15	10:50:46	0.0486135	0.216243	6965.97	FALSE	219
2022-09-15	10:50:46	0.0143132	0.063668	6877.95	FALSE	219
2022-09-15	10:50:46	-0.0471117	-0.209562	6965.97	FALSE	219
2022-09-15	10:50:46	-0.0414628	-0.184435	6877.95	FALSE	219
2022-09-15	10:50:47	-0.180496	-0.802882	6965.97	FALSE	219
2022-09-15	10:50:47	-0.0559667	-0.248951	6877.95	FALSE	219
2022-09-15	10:50:47	0.199199	0.886077	6966.85	FALSE	219
2022-09-15	10:50:47	3.01553	13.4137	6891.36	1	220
2022-09-15	10:50:48	2.44892	10.8933	6977.75	FALSE	220
2022-09-15	10:50:48	1.3336	5.93212	6897.3	FALSE	220
2022-09-15	10:50:48	0.437977	1.94821	6979.69	FALSE	220
2022-09-15	10:50:48	0.565814	2.51685	6899.81	FALSE	220
2022-09-15	10:50:49	0.366323	1.62948	6981.32	FALSE	220
2022-09-15	10:50:49	0.229071	1.01895	6900.83	FALSE	220
2022-09-15	10:50:49	0.243117	1.08143	6982.4	FALSE	220
2022-09-15	10:50:50	0.245713	1.09298	6901.93	FALSE	220
2022-09-15	10:50:50	0.118486	0.527049	6982.93	FALSE	220
2022-09-15	10:50:50	0.10897	0.48472	6902.41	FALSE	220
2022-09-15	10:50:50	0.165967	0.738254	6983.67	FALSE	220
2022-09-15	10:50:51	0.130598	0.580926	6902.99	FALSE	220
2022-09-15	10:50:51	0.154669	0.687999	6984.36	FALSE	220
2022-09-15	10:50:51	0.125153	0.556706	6903.55	FALSE	220
2022-09-15	10:50:51	0.0208781	0.09287	6984.45	FALSE	220
2022-09-15	10:50:52	0.112685	0.501245	6904.05	FALSE	220
2022-09-15	10:50:52	0.187341	0.83333	6985.28	FALSE	220
2022-09-15	10:50:52	-0.180649	-0.803563	6904.05	FALSE	220
2022-09-15	10:50:53	-0.13047	-0.580357	6985.28	FALSE	220
2022-09-15	10:50:53	-0.253371	-1.12704	6904.05	FALSE	220
2022-09-15	10:50:53	-0.153727	-0.683808	6985.28	FALSE	220
2022-09-15	10:50:53	-0.307824	-1.36926	6904.05	FALSE	220
2022-09-15	10:50:54	-0.160292	-0.713011	6985.28	FALSE	220
2022-09-15	10:50:54	-0.185025	-0.823028	6904.05	FALSE	220
2022-09-15	10:50:54	-0.404414	-1.79891	6985.28	FALSE	220
2022-09-15	10:50:54	-0.602073	-2.67814	6904.05	FALSE	220
2022-09-15	10:50:55	-0.625687	-2.78318	6985.28	FALSE	220
2022-09-15	10:50:55	-0.538867	-2.39699	6904.05	FALSE	220
2022-09-15	10:50:55	0.291514	1.29671	6986.58	FALSE	220
2022-09-15	10:50:55	0.562404	2.50169	6906.55	FALSE	220
2022-09-15	10:50:56	2.31584	10.3013	6996.88	FALSE	220
2022-09-15	10:50:56	1.04062	4.62889	6911.18	FALSE	220
2022-09-15	10:50:56	0.867646	3.85946	7000.74	FALSE	220
2022-09-15	10:50:57	2.41009	10.7206	6921.9	FALSE	220
2022-09-15	10:50:57	0.323982	1.44114	7002.18	FALSE	220
2022-09-15	10:50:57	1.03991	4.62573	6926.53	FALSE	220
2022-09-15	10:50:57	1.30999	5.8271	7008.01	FALSE	220
2022-09-15	10:50:58	0.205255	0.913015	6927.44	FALSE	220
2022-09-15	10:50:58	2.38836	10.6239	7018.63	FALSE	220
2022-09-15	10:50:58	1.08531	4.82768	6932.27	FALSE	220
2022-09-15	10:50:58	0.963473	4.28572	7022.92	FALSE	220
2022-09-15	10:50:59	0.381845	1.69852	6933.97	FALSE	220
2022-09-15	10:50:59	0.199402	0.88698	7023.81	FALSE	220
2022-09-15	10:50:59	1.5477	6.88448	6940.85	FALSE	220
2022-09-15	10:50:59	1.11085	4.94128	7028.75	FALSE	220
2022-09-15	10:51:00	4.33518	19.2837	6960.13	1	221
2022-09-15	10:51:00	2.75034	12.2341	7040.98	FALSE	221
2022-09-15	10:51:00	5.42031	24.1106	6984.24	1	222
2022-09-15	10:51:01	0.685102	3.04747	7044.03	FALSE	222
2022-09-15	10:51:01	2.245	9.98621	6994.23	FALSE	222
2022-09-15	10:51:01	0.51187	2.2769	7046.31	FALSE	222
2022-09-15	10:51:01	0.69355	3.08505	6997.32	FALSE	222
2022-09-15	10:51:02	2.7677	12.3113	7058.62	FALSE	222
2022-09-15	10:51:02	1.0363	4.60967	7001.92	FALSE	222
2022-09-15	10:51:02	3.56698	15.8666	7074.48	1	223
2022-09-15	10:51:02	0.503473	2.23955	7004.16	FALSE	223
2022-09-15	10:51:03	0.43243	1.92354	7076.41	FALSE	223
2022-09-15	10:51:03	2.36719	10.5297	7014.69	FALSE	223
2022-09-15	10:51:03	0.908715	4.04215	7080.45	FALSE	223
2022-09-15	10:51:03	1.83599	8.16685	7022.86	FALSE	223
2022-09-15	10:51:04	0.88271	3.92647	7084.38	FALSE	223
2022-09-15	10:51:04	1.58424	7.04702	7029.91	FALSE	223
2022-09-15	10:51:04	2.59619	11.5484	7095.92	FALSE	223
2022-09-15	10:51:05	0.690852	3.07305	7032.98	FALSE	223
2022-09-15	10:51:05	4.33991	19.3048	7115.23	1	224
2022-09-15	10:51:05	3.16535	14.0801	7047.06	1	225
2022-09-15	10:51:05	2.93497	13.0553	7128.28	FALSE	225
2022-09-15	10:51:06	4.15014	18.4607	7065.52	1	226
2022-09-15	10:51:06	1.99935	8.89351	7137.18	FALSE	226
2022-09-15	10:51:06	0.626629	2.78737	7068.31	FALSE	226
2022-09-15	10:51:06	0.874211	3.88867	7141.07	FALSE	226
2022-09-15	10:51:07	1.02393	4.55465	7072.86	FALSE	226
2022-09-15	10:51:07	0.484186	2.15376	7143.22	FALSE	226
2022-09-15	10:51:07	1.11706	4.96891	7077.83	FALSE	226
2022-09-15	10:51:07	0.563829	2.50802	7145.73	FALSE	226
2022-09-15	10:51:08	0.402761	1.79156	7079.62	FALSE	226
2022-09-15	10:51:08	0.807952	3.59393	7149.32	FALSE	226
2022-09-15	10:51:08	2.40078	10.6791	7090.3	FALSE	226
2022-09-15	10:51:09	2.5651	11.4101	7160.73	FALSE	226
2022-09-15	10:51:09	0.0165015	0.073402	7090.38	FALSE	226
2022-09-15	10:51:09	0.137875	0.613296	7161.35	FALSE	226
2022-09-15	10:51:09	0.0970104	0.431522	7090.81	FALSE	226
2022-09-15	10:51:10	0.0699875	0.311318	7161.66	FALSE	226
2022-09-15	10:51:10	-0.060903	-0.270909	7090.81	FALSE	226
2022-09-15	10:51:10	0.320725	1.42665	7163.08	FALSE	226
2022-09-15	10:51:10	1.20846	5.37547	7096.18	FALSE	226
2022-09-15	10:51:11	8.33716	37.0854	7200.17	1	227
2022-09-15	10:51:11	3.25619	14.4842	7110.67	1	228
2022-09-15	10:51:11	4.86347	21.6337	7221.8	1	229
2022-09-15	10:51:11	1.05212	4.68004	7115.35	FALSE	229
2022-09-15	10:51:12	2.69263	11.9774	7233.78	FALSE	229
2022-09-15	10:51:12	0.548868	2.44147	7117.79	FALSE	229
2022-09-15	10:51:12	0.985662	4.38442	7238.16	FALSE	229
2022-09-15	10:51:13	1.15467	5.1362	7122.93	FALSE	229
2022-09-15	10:51:13	0.987392	4.39212	7242.56	FALSE	229
2022-09-15	10:51:13	0.619657	2.75636	7125.68	FALSE	229
2022-09-15	10:51:13	2.80785	12.4899	7255.05	FALSE	229
2022-09-15	10:51:14	2.41299	10.7335	7136.42	FALSE	229
2022-09-15	10:51:14	3.39365	15.0956	7270.14	1	230
2022-09-15	10:51:14	1.35447	6.02495	7142.44	FALSE	230
2022-09-15	10:51:15	2.02749	9.01868	7279.16	FALSE	230
2022-09-15	10:51:15	2.16648	9.63694	7152.08	FALSE	230
2022-09-15	10:51:15	2.74403	12.206	7291.37	FALSE	230
2022-09-15	10:51:15	2.8106	12.5021	7164.58	FALSE	230
2022-09-15	10:51:15	2.35116	10.4584	7301.83	FALSE	230
2022-09-15	10:51:16	0.215026	0.956479	7165.54	FALSE	230
2022-09-15	10:51:16	0.181387	0.806846	7302.63	FALSE	230
2022-09-15	10:51:16	0.128359	0.570967	7166.11	FALSE	230
2022-09-15	10:51:17	0.101743	0.452573	7303.08	FALSE	230
2022-09-15	10:51:17	0.216094	0.961229	7167.07	FALSE	230
2022-09-15	10:51:17	0.17986	0.800053	7303.88	FALSE	230
2022-09-15	10:51:17	0.638028	2.83808	7169.91	FALSE	230
2022-09-15	10:51:18	7.46357	33.1995	7337.08	1	231
2022-09-15	10:51:18	10.723	47.698	7217.6	1	232
2022-09-15	10:51:18	9.25731	41.1784	7378.26	1	233
2022-09-15	10:51:18	4.45085	19.7983	7237.4	1	234
2022-09-15	10:51:19	2.96266	13.1785	7391.44	FALSE	234
2022-09-15	10:51:19	5.27594	23.4684	7260.87	1	235
2022-09-15	10:51:19	4.91624	21.8684	7413.31	1	236
2022-09-15	10:51:20	1.74963	7.7827	7268.65	FALSE	236
2022-09-15	10:51:20	2.28195	10.1506	7423.46	FALSE	236
2022-09-15	10:51:20	2.75457	12.2529	7280.91	FALSE	236
2022-09-15	10:51:20	3.09543	13.7691	7437.23	1	237
2022-09-15	10:51:21	1.88001	8.36266	7289.27	FALSE	237
2022-09-15	10:51:21	2.63329	11.7134	7448.94	FALSE	237
2022-09-15	10:51:21	2.33961	10.4071	7299.68	FALSE	237
2022-09-15	10:51:21	2.5707	11.435	7460.38	FALSE	237
2022-09-15	10:51:22	2.63553	11.7234	7311.4	FALSE	237
2022-09-15	10:51:22	2.64622	11.7709	7472.15	FALSE	237
2022-09-15	10:51:22	2.36444	10.5175	7321.92	FALSE	237
2022-09-15	10:51:22	2.45477	10.9193	7483.07	FALSE	237
2022-09-15	10:51:23	1.98795	8.8428	7330.76	FALSE	237
2022-09-15	10:51:23	1.90235	8.46203	7491.53	FALSE	237
2022-09-15	10:51:23	1.76469	7.84969	7338.61	FALSE	237
2022-09-15	10:51:24	1.7649	7.85063	7499.38	FALSE	237
2022-09-15	10:51:24	1.64749	7.32837	7345.94	FALSE	237
2022-09-15	10:51:24	1.56948	6.98136	7506.36	FALSE	237
2022-09-15	10:51:24	1.30139	5.78884	7351.73	FALSE	237
2022-09-15	10:51:25	1.12235	4.99244	7511.35	FALSE	237
2022-09-15	10:51:25	1.14022	5.07193	7356.8	FALSE	237
2022-09-15	10:51:25	1.70917	7.60273	7518.96	FALSE	237
2022-09-15	10:51:25	1.60286	7.12984	7363.93	FALSE	237
2022-09-15	10:51:26	1.82719	8.12771	7527.08	FALSE	237
2022-09-15	10:51:26	2.19615	9.76891	7373.7	FALSE	237
2022-09-15	10:51:26	2.3909	10.6352	7537.72	FALSE	237
2022-09-15	10:51:26	2.65482	11.8092	7385.51	FALSE	237
2022-09-15	10:51:27	2.42215	10.7742	7548.49	FALSE	237
2022-09-15	10:51:27	2.28892	10.1816	7395.69	FALSE	237
2022-09-15	10:51:27	2.22251	9.88617	7558.38	FALSE	237
2022-09-15	10:51:28	2.1935	9.75713	7405.45	FALSE	237
2022-09-15	10:51:28	2.14322	9.53347	7567.91	FALSE	237
2022-09-15	10:51:28	2.09518	9.31978	7414.77	FALSE	237
2022-09-15	10:51:28	2.59223	11.5308	7579.44	FALSE	237
2022-09-15	10:51:29	0.591107	2.62936	7417.39	FALSE	237
2022-09-15	10:51:29	0.179148	0.796886	7580.24	FALSE	237
2022-09-15	10:51:29	0.256552	1.14119	7418.54	FALSE	237
2022-09-15	10:51:29	0.275127	1.22382	7581.46	FALSE	237
2022-09-15	10:51:30	1.04581	4.65197	7423.19	FALSE	237
2022-09-15	10:51:30	2.50739	11.1534	7592.62	FALSE	237
2022-09-15	10:51:30	10.9034	48.5005	7471.69	1	238
2022-09-15	10:51:30	3.74037	16.6379	7609.26	1	239
2022-09-15	10:51:31	7.34515	32.6727	7504.36	1	240
2022-09-15	10:51:31	1.42714	6.3482	7615.6	FALSE	240
2022-09-15	10:51:31	1.24078	5.51924	7509.88	FALSE	240
2022-09-15	10:51:32	2.17665	9.68217	7625.29	FALSE	240
2022-09-15	10:51:32	0.559962	2.49082	7512.37	FALSE	240
2022-09-15	10:51:32	1.69192	7.526	7632.81	FALSE	240
2022-09-15	10:51:32	1.30139	5.78884	7518.16	FALSE	240
2022-09-15	10:51:33	3.29131	14.6404	7647.45	1	241
2022-09-15	10:51:33	7.19212	31.992	7550.15	1	242
2022-09-15	10:51:33	3.51334	15.628	7663.08	1	243
2022-09-15	10:51:33	1.51233	6.72715	7556.88	FALSE	243
2022-09-15	10:51:34	-0.0824297	-0.366664	7663.08	FALSE	243
2022-09-15	10:51:34	0.279758	1.24442	7558.12	FALSE	243
2022-09-15	10:51:34	0.150038	0.667399	7663.75	FALSE	243
2022-09-15	10:51:34	0.52042	2.31493	7560.44	FALSE	243
2022-09-15	10:51:35	1.41436	6.29136	7670.04	FALSE	243
2022-09-15	10:51:35	3.30352	14.6947	7575.13	1	244
2022-09-15	10:51:35	8.43843	37.5358	7707.58	1	245
2022-09-15	10:51:36	5.20026	23.1318	7598.26	1	246
2022-09-15	10:51:36	4.52256	20.1173	7727.69	1	247
2022-09-15	10:51:36	3.10037	13.7911	7612.06	1	248
2022-09-15	10:51:36	2.12551	9.45469	7737.15	FALSE	248
2022-09-15	10:51:37	4.2339	18.8332	7630.89	1	249
2022-09-15	10:51:37	1.25375	5.57693	7742.72	FALSE	249
2022-09-15	10:51:37	4.46663	19.8685	7650.76	1	250
2022-09-15	10:51:37	0.982761	4.37152	7747.1	FALSE	250
2022-09-15	10:51:38	5.17701	23.0284	7673.79	1	251
2022-09-15	10:51:38	3.74739	16.6691	7763.77	1	252
2022-09-15	10:51:38	3.0282	13.47	7687.26	1	253
2022-09-15	10:51:38	3.20281	14.2467	7778.01	1	254
2022-09-15	10:51:39	2.2138	9.84743	7697.1	FALSE	254
2022-09-15	10:51:39	8.10108	36.0352	7814.05	1	255
2022-09-15	10:51:39	5.42662	24.1387	7721.24	1	256
2022-09-15	10:51:40	9.58535	42.6376	7856.68	1	257
2022-09-15	10:51:40	7.2279	32.1511	7753.39	1	258
2022-09-15	10:51:40	6.13416	27.286	7883.97	1	259
2022-09-15	10:51:40	8.11848	36.1126	7789.51	1	260
2022-09-15	10:51:41	9.8309	43.7298	7927.7	1	261
2022-09-15	10:51:41	8.90006	39.5892	7829.1	1	262
2022-09-15	10:51:41	5.3706	23.8895	7951.59	1	263
2022-09-15	10:51:41	4.0079	17.8279	7846.92	1	264
2022-09-15	10:51:42	4.27691	19.0246	7970.61	1	265
2022-09-15	10:51:42	4.18591	18.6198	7865.54	1	266
2022-09-15	10:51:42	4.04658	18	7988.61	1	267
2022-09-15	10:51:42	3.96266	17.6267	7883.17	1	268
2022-09-15	10:51:43	3.37818	15.0268	8003.64	1	269
2022-09-15	10:51:43	3.34988	14.9009	7898.07	1	270
2022-09-15	10:51:43	4.25487	18.9265	8022.57	1	271
2022-09-15	10:51:44	6.05131	26.9174	7924.99	1	272
2022-09-15	10:51:44	12.866	57.2305	8079.8	1	273
2022-09-15	10:51:44	16.3882	72.898	7997.89	1	274
2022-09-15	10:51:44	11.9827	53.3014	8133.1	1	275
2022-09-15	10:51:45	8.98734	39.9775	8037.86	1	276
2022-09-15	10:51:45	7.92642	35.2583	8168.36	1	277
2022-09-15	10:51:45	8.35075	37.1458	8075.01	1	278
2022-09-15	10:51:45	5.76123	25.6271	8193.99	1	279
2022-09-15	10:51:46	4.61731	20.5387	8095.55	1	280
2022-09-15	10:51:46	4.36948	19.4363	8213.42	1	281
2022-09-15	10:51:46	4.56144	20.2902	8115.84	1	282
2022-09-15	10:51:47	4.1391	18.4115	8231.83	1	283
2022-09-15	10:51:47	3.51324	15.6276	8131.47	1	284
2022-09-15	10:51:47	3.06958	13.6541	8245.49	1	285
2022-09-15	10:51:47	3.17202	14.1098	8145.58	1	286
2022-09-15	10:51:48	3.99854	17.7863	8263.27	1	287
2022-09-15	10:51:48	4.69233	20.8724	8166.45	1	288
2022-09-15	10:51:48	4.4363	19.7335	8283.01	1	289
2022-09-15	10:51:48	3.84876	17.1201	8183.57	1	290
2022-09-15	10:51:49	3.8021	16.9125	8299.92	1	291
2022-09-15	10:51:49	3.79782	16.8935	8200.46	1	292
2022-09-15	10:51:49	4.07971	18.1474	8318.07	1	293
2022-09-15	10:51:49	3.99401	17.7662	8218.23	1	294
2022-09-15	10:51:50	3.9134	17.4076	8335.47	1	295
2022-09-15	10:51:50	4.27299	19.0071	8237.23	1	296
2022-09-15	10:51:50	4.0252	17.9049	8353.38	1	297
2022-09-15	10:51:51	3.84062	17.0838	8254.32	1	298
2022-09-15	10:51:51	3.5967	15.9988	8369.38	1	299
2022-09-15	10:51:51	3.31431	14.7427	8269.06	1	300
2022-09-15	10:51:51	3.09726	13.7772	8383.16	1	301
2022-09-15	10:51:52	3.10973	13.8327	8282.89	1	302
2022-09-15	10:51:52	3.03716	13.5099	8396.67	1	303
2022-09-15	10:51:52	2.87268	12.7783	8295.67	FALSE	303
2022-09-15	10:51:52	2.8766	12.7957	8409.46	FALSE	303
2022-09-15	10:51:53	2.96373	13.1833	8308.86	FALSE	303
2022-09-15	10:51:53	2.96169	13.1742	8422.64	FALSE	303
2022-09-15	10:51:53	2.97955	13.2536	8322.11	FALSE	303
2022-09-15	10:51:53	3.27793	14.5809	8437.22	1	304
2022-09-15	10:51:54	3.11304	13.8474	8335.96	1	305
2022-09-15	10:51:54	4.1824	18.6042	8455.82	1	306
2022-09-15	10:51:54	7.52418	33.4691	8369.43	1	307
2022-09-15	10:51:55	8.3112	36.9699	8492.79	1	308
2022-09-15	10:51:55	8.39853	37.3583	8406.78	1	309
2022-09-15	10:51:55	14.26	63.4313	8556.22	1	310
2022-09-15	10:51:55	10.4511	46.4886	8453.27	1	311
2022-09-15	10:51:56	6.32067	28.1156	8584.34	1	312
2022-09-15	10:51:56	4.08016	18.1494	8471.42	1	313
2022-09-15	10:51:56	2.90067	12.9028	8597.24	FALSE	313
2022-09-15	10:51:57	2.24693	9.99479	8481.42	FALSE	313
2022-09-15	10:51:57	1.6619	7.39246	8604.63	FALSE	313
2022-09-15	10:51:57	1.18531	5.2725	8486.69	FALSE	313
2022-09-15	10:51:57	1.25589	5.58645	8610.22	FALSE	313
2022-09-15	10:51:57	3.38668	15.0646	8501.75	1	314
2022-09-15	10:51:58	9.46647	42.1088	8652.33	1	315
2022-09-15	10:51:58	12.0666	53.6747	8555.43	1	316
2022-09-15	10:51:58	8.73136	38.8388	8691.17	1	317
2022-09-15	10:51:59	6.41105	28.5176	8583.95	1	318
2022-09-15	10:51:59	4.01879	17.8764	8709.04	1	319
2022-09-15	10:51:59	4.76342	21.1886	8605.13	1	320
2022-09-15	10:51:59	4.33955	19.3032	8728.35	1	321
2022-09-15	10:52:00	3.87752	17.248	8622.38	1	322
2022-09-15	10:52:00	3.95395	17.588	8745.93	1	323
2022-09-15	10:52:00	3.59843	16.0065	8638.39	1	324
2022-09-15	10:52:00	3.44184	15.31	8761.24	1	325
2022-09-15	10:52:01	2.96286	13.1794	8651.57	FALSE	325
2022-09-15	10:52:01	2.82424	12.5628	8773.81	FALSE	325
2022-09-15	10:52:01	2.46612	10.9698	8662.54	FALSE	325
2022-09-15	10:52:01	2.59981	11.5645	8785.37	FALSE	325
2022-09-15	10:52:02	2.62179	11.6622	8674.2	FALSE	325
2022-09-15	10:52:02	2.55436	11.3623	8796.73	FALSE	325
2022-09-15	10:52:02	2.27894	10.1372	8684.34	FALSE	325
2022-09-15	10:52:03	1.96434	8.73778	8805.47	FALSE	325
2022-09-15	10:52:03	2.0507	9.12192	8693.46	FALSE	325
2022-09-15	10:52:03	1.95899	8.71398	8814.19	FALSE	325
2022-09-15	10:52:03	2.13675	9.50469	8702.96	FALSE	325
2022-09-15	10:52:04	2.01258	8.95236	8823.14	FALSE	325
2022-09-15	10:52:04	1.90958	8.49419	8711.46	FALSE	325
2022-09-15	10:52:04	1.81889	8.09079	8831.23	FALSE	325
2022-09-15	10:52:04	1.80958	8.04937	8719.51	FALSE	325
2022-09-15	10:52:05	1.93813	8.62119	8839.85	FALSE	325
2022-09-15	10:52:05	2.04729	9.10676	8728.61	FALSE	325
2022-09-15	10:52:05	2.34907	10.4491	8850.3	FALSE	325
2022-09-15	10:52:05	2.64591	11.7695	8740.38	FALSE	325
2022-09-15	10:52:06	2.76067	12.28	8862.58	FALSE	325
2022-09-15	10:52:06	2.64703	11.7745	8752.16	FALSE	325
2022-09-15	10:52:06	2.65228	11.7979	8874.38	FALSE	325
2022-09-15	10:52:07	2.81345	12.5148	8764.67	FALSE	325
2022-09-15	10:52:07	2.12475	9.45131	8883.83	FALSE	325
2022-09-15	10:52:07	2.25019	10.0093	8774.68	FALSE	325
2022-09-15	10:52:07	3.7566	16.7101	8900.54	1	326
2022-09-15	10:52:08	6.78225	30.1688	8804.85	1	327
2022-09-15	10:52:08	10.2231	45.4744	8946.01	1	328
2022-09-15	10:52:08	17.1587	76.3253	8881.18	1	329
2022-09-15	10:52:08	12.2756	54.6043	9000.62	1	330
2022-09-15	10:52:09	8.09523	36.0092	8917.19	1	331
2022-09-15	10:52:09	5.35986	23.8417	9024.46	1	332
2022-09-15	10:52:09	4.63233	20.6055	8937.79	1	333
2022-09-15	10:52:10	4.2794	19.0356	9043.49	1	334
2022-09-15	10:52:10	3.36342	14.9612	8952.75	1	335
2022-09-15	10:52:10	3.35874	14.9403	9058.43	1	336
2022-09-15	10:52:10	3.29202	14.6436	8967.4	1	337
2022-09-15	10:52:11	3.02759	13.4673	9071.9	1	338
2022-09-15	10:52:11	3.54851	15.7845	8983.18	1	339
2022-09-15	10:52:11	3.6221	16.1118	9088.01	1	340
2022-09-15	10:52:11	2.35966	10.4962	8993.68	FALSE	340
2022-09-15	10:52:12	2.46215	10.9521	9098.97	FALSE	340
2022-09-15	10:52:12	2.64759	11.777	9005.45	FALSE	340
2022-09-15	10:52:12	2.60108	11.5701	9110.54	FALSE	340
2022-09-15	10:52:12	2.37945	10.5843	9016.04	FALSE	340
2022-09-15	10:52:13	2.28876	10.1809	9120.72	FALSE	340
2022-09-15	10:52:13	2.25884	10.0478	9026.09	FALSE	340
2022-09-15	10:52:13	2.2049	9.80784	9130.52	FALSE	340
2022-09-15	10:52:13	2.20597	9.8126	9035.9	FALSE	340
2022-09-15	10:52:14	4.83721	21.5169	9152.04	1	341
2022-09-15	10:52:14	4.65589	20.7103	9056.61	1	342
2022-09-15	10:52:14	3.84108	17.0859	9169.13	1	343
2022-09-15	10:52:15	3.82597	17.0187	9073.63	1	344
2022-09-15	10:52:15	3.77833	16.8068	9185.93	1	345
2022-09-15	10:52:15	3.70464	16.479	9090.11	1	346
2022-09-15	10:52:15	3.7309	16.5958	9202.53	1	347
2022-09-15	10:52:16	3.87925	17.2557	9107.36	1	348
2022-09-15	10:52:16	3.87518	17.2376	9219.77	1	349
2022-09-15	10:52:16	4.20993	18.7266	9126.09	1	350
2022-09-15	10:52:16	4.39523	19.5509	9239.32	1	351
2022-09-15	10:52:17	5.04408	22.4371	9148.53	1	352
2022-09-15	10:52:17	4.98642	22.1806	9261.5	1	353
2022-09-15	10:52:17	3.72388	16.5646	9165.09	1	354
2022-09-15	10:52:17	3.61207	16.0672	9277.57	1	355
2022-09-15	10:52:18	1.94408	8.64766	9173.74	FALSE	355
2022-09-15	10:52:18	1.20953	5.38023	9282.95	FALSE	355
2022-09-15	10:52:18	1.55024	6.89578	9180.63	FALSE	355
2022-09-15	10:52:19	2.91965	12.9872	9295.93	FALSE	355
2022-09-15	10:52:19	3.98744	17.7369	9198.37	1	356
2022-09-15	10:52:19	3.31467	14.7443	9310.68	1	357
2022-09-15	10:52:19	2.58322	11.4907	9209.86	FALSE	357
2022-09-15	10:52:20	2.73472	12.1646	9322.84	FALSE	357
2022-09-15	10:52:20	2.24337	9.97896	9219.84	FALSE	357
2022-09-15	10:52:20	1.94184	8.63769	9331.48	FALSE	357
2022-09-15	10:52:20	2.38439	10.6062	9230.45	FALSE	357
2022-09-15	10:52:21	2.65238	11.7983	9343.28	FALSE	357
2022-09-15	10:52:21	12.2826	54.6355	9285.08	1	358
2022-09-15	10:52:21	22.4852	100.019	9443.3	1	359
2022-09-15	10:52:21	13.6313	60.6347	9345.72	1	360
2022-09-15	10:52:22	12.1237	53.9286	9497.23	1	361
2022-09-15	10:52:22	18.6349	82.8918	9428.61	1	362
2022-09-15	10:52:22	17.4857	77.7799	9575.01	1	363
2022-09-15	10:52:23	9.35802	41.6263	9470.24	1	364
2022-09-15	10:52:23	11.8254	52.6017	9627.61	1	365
2022-09-15	10:52:23	13.3081	59.1971	9529.43	1	366
2022-09-15	10:52:23	6.78103	30.1634	9657.77	1	367
2022-09-15	10:52:24	4.2593	18.9462	9548.38	1	368
2022-09-15	10:52:24	5.02592	22.3563	9680.13	1	369
2022-09-15	10:52:24	5.20713	23.1624	9571.54	1	370
2022-09-15	10:52:24	5.68907	25.3061	9705.43	1	371
2022-09-15	10:52:25	6.51543	28.9819	9600.52	1	372
2022-09-15	10:52:25	8.16545	36.3216	9741.75	1	373
2022-09-15	10:52:25	8.48031	37.7221	9638.25	1	374
2022-09-15	10:52:26	6.08505	27.0675	9768.82	1	375
2022-09-15	10:52:26	3.74658	16.6655	9654.91	1	376
2022-09-15	10:52:26	3.29161	14.6417	9783.46	1	377
2022-09-15	10:52:26	3.45223	15.3562	9670.27	1	378
2022-09-15	10:52:27	3.34159	14.8641	9798.33	1	379
2022-09-15	10:52:27	4.59355	20.433	9690.7	1	380
2022-09-15	10:52:27	2.43772	10.8435	9809.17	FALSE	380
2022-09-15	10:52:27	2.23843	9.95698	9700.66	FALSE	380
2022-09-15	10:52:28	1.81299	8.06454	9817.24	FALSE	380
2022-09-15	10:52:28	1.72688	7.68151	9708.34	FALSE	380
2022-09-15	10:52:28	1.70973	7.60522	9824.84	FALSE	380
2022-09-15	10:52:28	1.72429	7.66999	9716.01	FALSE	380
2022-09-15	10:52:29	1.61197	7.17036	9832.01	FALSE	380
2022-09-15	10:52:29	1.18225	5.25888	9721.27	FALSE	380
2022-09-15	10:52:29	1.93187	8.59334	9840.6	FALSE	380
2022-09-15	10:52:30	1.7535	7.79992	9729.07	FALSE	380
2022-09-15	10:52:30	1.58922	7.06917	9847.67	FALSE	380
2022-09-15	10:52:30	1.37212	6.10346	9735.17	FALSE	380
2022-09-15	10:52:30	0.926272	4.12024	9851.79	FALSE	380
2022-09-15	10:52:31	0.632735	2.81453	9737.99	FALSE	380
2022-09-15	10:52:31	0.657112	2.92297	9854.72	FALSE	380
2022-09-15	10:52:31	0.786629	3.49908	9741.48	FALSE	380
2022-09-15	10:52:31	0.789733	3.51289	9858.23	FALSE	380
2022-09-15	10:52:32	0.858689	3.81962	9745.3	FALSE	380
2022-09-15	10:52:32	0.961539	4.27712	9862.51	FALSE	380
2022-09-15	10:52:32	1.1933	5.30804	9750.61	FALSE	380
2022-09-15	10:52:32	1.26602	5.63151	9868.14	FALSE	380
2022-09-15	10:52:33	1.29024	5.73925	9756.35	FALSE	380
2022-09-15	10:52:33	1.13772	5.06081	9873.2	FALSE	380
2022-09-15	10:52:33	1.10963	4.93586	9761.29	FALSE	380

## Sheet: Boris_harness_2022915104715 (2)
Date	Time	Lbs	Total force x time			**GoPro Fitting: 1036
2022-09-15	10:47:15	0.245458	0.245458	FALSE	0
2022-09-15	10:47:15	0.360115	0.605573	FALSE	0
2022-09-15	10:47:15	0.277672	0.883245	FALSE	0
2022-09-15	10:47:16	0.20098	1.08422	FALSE	0
2022-09-15	10:47:16	0.20327	1.2875	FALSE	0
2022-09-15	10:47:16	0.224033	1.51153	FALSE	0
2022-09-15	10:47:17	0.22215	1.73368	FALSE	0
2022-09-15	10:47:17	0.311005	2.04468	FALSE	0
2022-09-15	10:47:17	0.123372	2.16805	FALSE	0
2022-09-15	10:47:17	0.114619	2.28267	FALSE	0
2022-09-15	10:47:18	0.064186	2.34686	FALSE	0
2022-09-15	10:47:18	0.136501	2.48336	FALSE	0
2022-09-15	10:47:18	0.239657	2.72302	FALSE	0
2022-09-15	10:47:18	0.156654	2.87967	FALSE	0
2022-09-15	10:47:19	0.176145	3.05582	FALSE	0
2022-09-15	10:47:19	0.222456	3.27827	FALSE	0
2022-09-15	10:47:19	0.263168	3.54144	FALSE	0
2022-09-15	10:47:19	0.300471	3.84191	FALSE	0
2022-09-15	10:47:20	0.0552801	3.89719	FALSE	0
2022-09-15	10:47:20	0.299657	4.19685	FALSE	0
2022-09-15	10:47:20	0.329071	4.52592	FALSE	0
2022-09-15	10:47:21	0.533092	5.05901	FALSE	0
2022-09-15	10:47:21	3.61212	8.67113	1	1
2022-09-15	10:47:21	2.41513	11.0863	FALSE	1
2022-09-15	10:47:21	0.692735	11.779	FALSE	1
2022-09-15	10:47:22	0.112939	11.8919	FALSE	1
2022-09-15	10:47:22	-0.0679259	11.8919	FALSE	1
2022-09-15	10:47:22	0.359707	12.2516	FALSE	1
2022-09-15	10:47:22	0.232532	12.4842	FALSE	1
2022-09-15	10:47:23	0.0619468	12.5461	FALSE	1
2022-09-15	10:47:23	0.141591	12.6877	FALSE	1
2022-09-15	10:47:23	0.139199	12.8269	FALSE	1
2022-09-15	10:47:23	0.169886	12.9968	FALSE	1
2022-09-15	10:47:24	0.279606	13.2764	FALSE	1
2022-09-15	10:47:24	1.02088	14.2973	FALSE	1
2022-09-15	10:47:24	0.40383	14.7011	FALSE	1
2022-09-15	10:47:25	0.471412	15.1725	FALSE	1
2022-09-15	10:47:25	0.531565	15.7041	FALSE	1
2022-09-15	10:47:25	0.313906	16.018	FALSE	1
2022-09-15	10:47:25	0.30215	16.3201	FALSE	1
2022-09-15	10:47:26	0.277672	16.5978	FALSE	1
2022-09-15	10:47:26	0.352583	16.9504	FALSE	1
2022-09-15	10:47:26	0.381947	17.3323	FALSE	1
2022-09-15	10:47:26	0.275687	17.608	FALSE	1
2022-09-15	10:47:27	0.550191	18.1582	FALSE	1
2022-09-15	10:47:27	0.484084	18.6423	FALSE	1
2022-09-15	10:47:27	0.43986	19.0822	FALSE	1
2022-09-15	10:47:27	0.356247	19.4384	FALSE	1
2022-09-15	10:47:28	0.319606	19.758	FALSE	1
2022-09-15	10:47:28	0.349478	20.1075	FALSE	1
2022-09-15	10:47:28	0.319657	20.4272	FALSE	1
2022-09-15	10:47:29	0.367188	20.7943	FALSE	1
2022-09-15	10:47:29	0.412634	21.207	FALSE	1
2022-09-15	10:47:29	0.387188	21.5942	FALSE	1
2022-09-15	10:47:29	0.346323	21.9405	FALSE	1
2022-09-15	10:47:30	0.355534	22.296	FALSE	1
2022-09-15	10:47:30	0.31584	22.6119	FALSE	1
2022-09-15	10:47:30	0.31528	22.9271	FALSE	1
2022-09-15	10:47:30	0.337977	23.2651	FALSE	1
2022-09-15	10:47:31	0.345611	23.6107	FALSE	1
2022-09-15	10:47:31	0.337214	23.9479	FALSE	1
2022-09-15	10:47:31	0.308512	24.2565	FALSE	1
2022-09-15	10:47:32	0.355484	24.6119	FALSE	1
2022-09-15	10:47:32	0.323931	24.9359	FALSE	1
2022-09-15	10:47:32	0.339199	25.2751	FALSE	1
2022-09-15	10:47:32	0.365763	25.6408	FALSE	1
2022-09-15	10:47:33	0.30673	25.9476	FALSE	1
2022-09-15	10:47:33	0.358384	26.306	FALSE	1
2022-09-15	10:47:33	0.3907	26.6967	FALSE	1
2022-09-15	10:47:33	0.328206	27.0249	FALSE	1
2022-09-15	10:47:34	0.333244	27.3581	FALSE	1
2022-09-15	10:47:34	0.320776	27.6789	FALSE	1
2022-09-15	10:47:34	0.360318	28.0392	FALSE	1
2022-09-15	10:47:34	0.365051	28.4042	FALSE	1
2022-09-15	10:47:35	0.315636	28.7199	FALSE	1
2022-09-15	10:47:35	0.275941	28.9958	FALSE	1
2022-09-15	10:47:35	0.289631	29.2855	FALSE	1
2022-09-15	10:47:36	0.28159	29.567	FALSE	1
2022-09-15	10:47:36	0.316247	29.8833	FALSE	1
2022-09-15	10:47:36	0.32729	30.2106	FALSE	1
2022-09-15	10:47:36	0.341947	30.5525	FALSE	1
2022-09-15	10:47:37	0.337468	30.89	FALSE	1
2022-09-15	10:47:37	0.325356	31.2154	FALSE	1
2022-09-15	10:47:37	0.39472	31.6101	FALSE	1
2022-09-15	10:47:37	0.360013	31.9701	FALSE	1
2022-09-15	10:47:38	0.176909	32.147	FALSE	1
2022-09-15	10:47:38	0.170496	32.3175	FALSE	1
2022-09-15	10:47:38	0.243779	32.5613	FALSE	1
2022-09-15	10:47:38	0.250751	32.812	FALSE	1
2022-09-15	10:47:39	0.154924	32.9669	FALSE	1
2022-09-15	10:47:39	0.242049	33.209	FALSE	1
2022-09-15	10:47:39	0.253143	33.4621	FALSE	1
2022-09-15	10:47:40	0.251005	33.7131	FALSE	1
2022-09-15	10:47:40	0.256094	33.9692	FALSE	1
2022-09-15	10:47:40	0.220573	34.1898	FALSE	1
2022-09-15	10:47:40	0.24327	34.4331	FALSE	1
2022-09-15	10:47:41	0.230395	34.6635	FALSE	1
2022-09-15	10:47:41	0.234618	34.8981	FALSE	1
2022-09-15	10:47:41	0.236807	35.1349	FALSE	1
2022-09-15	10:47:41	0.26042	35.3953	FALSE	1
2022-09-15	10:47:42	0.228562	35.6239	FALSE	1
2022-09-15	10:47:42	0.223982	35.8479	FALSE	1
2022-09-15	10:47:42	0.211209	36.0591	FALSE	1
2022-09-15	10:47:42	0.190445	36.2495	FALSE	1
2022-09-15	10:47:43	0.209428	36.4589	FALSE	1
2022-09-15	10:47:43	0.208512	36.6675	FALSE	1
2022-09-15	10:47:43	0.214771	36.8822	FALSE	1
2022-09-15	10:47:44	0.21355	37.0958	FALSE	1
2022-09-15	10:47:44	0.190802	37.2866	FALSE	1
2022-09-15	10:47:44	0.162252	37.4488	FALSE	1
2022-09-15	10:47:44	0.166425	37.6153	FALSE	1
2022-09-15	10:47:45	0.126832	37.7421	FALSE	1
2022-09-15	10:47:45	0.338741	38.0808	FALSE	1
2022-09-15	10:47:45	0.373957	38.4548	FALSE	1
2022-09-15	10:47:45	0.292939	38.7477	FALSE	1
2022-09-15	10:47:46	0.341896	39.0896	FALSE	1
2022-09-15	10:47:46	0.359962	39.4496	FALSE	1
2022-09-15	10:47:46	0.406425	39.856	FALSE	1
2022-09-15	10:47:47	0.38383	40.2398	FALSE	1
2022-09-15	10:47:47	0.36785	40.6077	FALSE	1
2022-09-15	10:47:47	0.378537	40.9862	FALSE	1
2022-09-15	10:47:47	0.370598	41.3568	FALSE	1
2022-09-15	10:47:48	0.377367	41.7342	FALSE	1
2022-09-15	10:47:48	0.383881	42.1181	FALSE	1
2022-09-15	10:47:48	0.341845	42.4599	FALSE	1
2022-09-15	10:47:48	0.387901	42.8478	FALSE	1
2022-09-15	10:47:49	0.271819	43.1196	FALSE	1
2022-09-15	10:47:49	0.445865	43.5655	FALSE	1
2022-09-15	10:47:49	0.326425	43.8919	FALSE	1
2022-09-15	10:47:49	0.0467305	43.9387	FALSE	1
2022-09-15	10:47:50	-0.158715	43.9387	FALSE	1
2022-09-15	10:47:50	-0.126654	43.9387	FALSE	1
2022-09-15	10:47:50	-0.241259	43.9387	FALSE	1
2022-09-15	10:47:51	-0.544211	43.9387	FALSE	1
2022-09-15	10:47:51	-0.836424	43.9387	FALSE	1
2022-09-15	10:47:51	-1.02156	43.9387	FALSE	1
2022-09-15	10:47:51	-0.856882	43.9387	FALSE	1
2022-09-15	10:47:52	-0.620139	43.9387	FALSE	1
2022-09-15	10:47:52	0.237875	44.1765	FALSE	1
2022-09-15	10:47:52	1.16312	45.3397	FALSE	1
2022-09-15	10:47:52	5.42184	50.7615	1	2
2022-09-15	10:47:53	4.22744	54.9889	1	3
2022-09-15	10:47:53	2.60077	57.5897	FALSE	3
2022-09-15	10:47:53	2.94993	60.5396	FALSE	3
2022-09-15	10:47:53	4.00749	64.5471	1	4
2022-09-15	10:47:54	6.7395	71.2866	1	5
2022-09-15	10:47:54	11.5685	82.8551	1	6
2022-09-15	10:47:54	2.59085	85.446	FALSE	6
2022-09-15	10:47:55	-0.0279768	85.446	FALSE	6
2022-09-15	10:47:55	-0.18757	85.446	FALSE	6
2022-09-15	10:47:55	-0.154694	85.446	FALSE	6
2022-09-15	10:47:55	0.265305	85.7113	FALSE	6
2022-09-15	10:47:56	0.0469341	85.7582	FALSE	6
2022-09-15	10:47:56	1.06301	86.8212	FALSE	6
2022-09-15	10:47:56	0.285763	87.107	FALSE	6
2022-09-15	10:47:56	0.160013	87.267	FALSE	6
2022-09-15	10:47:57	0.0337534	87.3007	FALSE	6
2022-09-15	10:47:57	0.460623	87.7614	FALSE	6
2022-09-15	10:47:57	4.39925	92.1606	1	7
2022-09-15	10:47:57	16.0294	108.19	1	8
2022-09-15	10:47:58	7.56948	115.76	1	9
2022-09-15	10:47:58	5.84698	121.606	1	10
2022-09-15	10:47:58	4.47141	126.078	1	11
2022-09-15	10:47:59	4.96719	131.045	1	12
2022-09-15	10:47:59	3.85334	134.898	1	13
2022-09-15	10:47:59	7.40489	142.303	1	14
2022-09-15	10:47:59	4.20881	146.512	1	15
2022-09-15	10:48:00	6.31014	152.822	1	16
2022-09-15	10:48:00	9.18662	162.009	1	17
2022-09-15	10:48:00	11.0821	173.091	1	18
2022-09-15	10:48:00	12.7698	185.861	1	19
2022-09-15	10:48:01	14.9816	200.842	1	20
2022-09-15	10:48:01	21.404	222.246	1	21
2022-09-15	10:48:01	18.774	241.02	1	22
2022-09-15	10:48:02	16.3036	257.324	1	23
2022-09-15	10:48:02	2.51513	259.839	FALSE	23
2022-09-15	10:48:02	11.8745	271.714	1	24
2022-09-15	10:48:02	4.30831	276.022	1	25
2022-09-15	10:48:03	25.6589	301.681	1	26
2022-09-15	10:48:03	16.8169	318.498	1	27
2022-09-15	10:48:03	23.0433	341.541	1	28
2022-09-15	10:48:03	25.5252	367.066	1	29
2022-09-15	10:48:04	8.61579	375.682	1	30
2022-09-15	10:48:04	11.0145	386.697	1	31
2022-09-15	10:48:04	2.55329	389.25	FALSE	31
2022-09-15	10:48:05	2.8734	392.123	FALSE	31
2022-09-15	10:48:05	0.31416	392.437	FALSE	31
2022-09-15	10:48:05	4.40495	396.842	1	32
2022-09-15	10:48:05	30.1764	427.019	1	33
2022-09-15	10:48:06	17.8008	444.82	1	34
2022-09-15	10:48:06	19.2461	464.066	1	35
2022-09-15	10:48:06	24.2676	488.333	1	36
2022-09-15	10:48:06	20.0387	508.372	1	37
2022-09-15	10:48:07	8.28434	516.656	1	38
2022-09-15	10:48:07	17.164	533.82	1	39
2022-09-15	10:48:07	38.2431	572.063	1	40
2022-09-15	10:48:07	35.0351	607.098	1	41
2022-09-15	10:48:08	15.8351	622.934	1	42
2022-09-15	10:48:08	0.557875	623.491	FALSE	42
2022-09-15	10:48:08	20.1386	643.63	1	43
2022-09-15	10:48:08	11.5793	655.209	1	44
2022-09-15	10:48:09	32.434	687.643	1	45
2022-09-15	10:48:09	25.4551	713.098	1	46
2022-09-15	10:48:09	20.169	733.267	1	47
2022-09-15	10:48:10	32.107	765.374	1	48
2022-09-15	10:48:10	7.0993	772.474	1	49
2022-09-15	10:48:10	18.7168	791.191	1	50
2022-09-15	10:48:10	17.1663	808.357	1	51
2022-09-15	10:48:11	24.4528	832.81	1	52
2022-09-15	10:48:11	49.944	882.754	1	53
2022-09-15	10:48:11	27.2107	909.964	1	54
2022-09-15	10:48:11	46.6503	956.615	1	55
2022-09-15	10:48:12	43.3969	1000.01	1	56
2022-09-15	10:48:12	25.3973	1025.41	1	57
2022-09-15	10:48:12	15.9444	1041.35	1	58
2022-09-15	10:48:12	19.9754	1061.33	1	59
2022-09-15	10:48:13	20.0827	1081.41	1	60
2022-09-15	10:48:13	13.6015	1095.01	1	61
2022-09-15	10:48:13	17.1736	1112.19	1	62
2022-09-15	10:48:14	16.8005	1128.99	1	63
2022-09-15	10:48:14	9.46107	1138.45	1	64
2022-09-15	10:48:14	13.7726	1152.22	1	65
2022-09-15	10:48:14	28.2475	1180.47	1	66
2022-09-15	10:48:15	20.6013	1201.07	1	67
2022-09-15	10:48:15	19.6145	1220.68	1	68
2022-09-15	10:48:15	18.9455	1239.63	1	69
2022-09-15	10:48:15	8.97533	1248.6	1	70
2022-09-15	10:48:16	15.6209	1264.23	1	71
2022-09-15	10:48:16	5.69202	1269.92	1	72
2022-09-15	10:48:16	31.0544	1300.97	1	73
2022-09-15	10:48:17	11.7368	1312.71	1	74
2022-09-15	10:48:17	13.8202	1326.53	1	75
2022-09-15	10:48:17	29.7394	1356.27	1	76
2022-09-15	10:48:17	12.2482	1368.52	1	77
2022-09-15	10:48:18	5.2538	1373.77	1	78
2022-09-15	10:48:18	5.99105	1379.76	1	79
2022-09-15	10:48:18	2.37202	1382.13	FALSE	79
2022-09-15	10:48:18	1.62281	1383.76	FALSE	79
2022-09-15	10:48:19	2.49584	1386.25	FALSE	79
2022-09-15	10:48:19	20.1639	1406.42	1	80
2022-09-15	10:48:19	18.3035	1424.72	1	81
2022-09-15	10:48:19	8.24133	1432.96	1	82
2022-09-15	10:48:20	10.2442	1443.21	1	83
2022-09-15	10:48:20	15.4191	1458.62	1	84
2022-09-15	10:48:20	21.3505	1479.97	1	85
2022-09-15	10:48:21	16.3268	1496.3	1	86
2022-09-15	10:48:21	14.2339	1510.54	1	87
2022-09-15	10:48:21	10.0372	1520.57	1	88
2022-09-15	10:48:21	13.8107	1534.38	1	89
2022-09-15	10:48:22	21.3643	1555.75	1	90
2022-09-15	10:48:22	12.0243	1567.77	1	91
2022-09-15	10:48:22	10.1233	1577.9	1	92
2022-09-15	10:48:22	24.2172	1602.11	1	93
2022-09-15	10:48:23	14.7162	1616.83	1	94
2022-09-15	10:48:23	1.63411	1618.46	FALSE	94
2022-09-15	10:48:23	0.438283	1618.9	FALSE	94
2022-09-15	10:48:23	1.89416	1620.8	FALSE	94
2022-09-15	10:48:24	7.95533	1628.75	1	95
2022-09-15	10:48:24	19.8623	1648.61	1	96
2022-09-15	10:48:24	16.1343	1664.75	1	97
2022-09-15	10:48:25	23.076	1687.82	1	98
2022-09-15	10:48:25	20.5091	1708.33	1	99
2022-09-15	10:48:25	4.51482	1712.85	1	100
2022-09-15	10:48:25	0.186679	1713.03	FALSE	100
2022-09-15	10:48:26	-0.17846	1713.03	FALSE	100
2022-09-15	10:48:26	-0.312506	1713.03	FALSE	100
2022-09-15	10:48:26	-0.264872	1713.03	FALSE	100
2022-09-15	10:48:26	-0.0472135	1713.03	FALSE	100
2022-09-15	10:48:27	0.179504	1713.21	FALSE	100
2022-09-15	10:48:27	3.80011	1717.01	1	101
2022-09-15	10:48:27	16.1005	1733.11	1	102
2022-09-15	10:48:27	12.6794	1745.79	1	103
2022-09-15	10:48:28	23.5576	1769.35	1	104
2022-09-15	10:48:28	23.3412	1792.69	1	105
2022-09-15	10:48:28	22.9791	1815.67	1	106
2022-09-15	10:48:29	15.1514	1830.82	1	107
2022-09-15	10:48:29	21.2524	1852.07	1	108
2022-09-15	10:48:29	30.7875	1882.86	1	109
2022-09-15	10:48:29	39.5123	1922.37	1	110
2022-09-15	10:48:30	6.04922	1928.42	1	111
2022-09-15	10:48:30	0.229122	1928.65	FALSE	111
2022-09-15	10:48:30	0.325916	1928.98	FALSE	111
2022-09-15	10:48:30	0.383575	1929.36	FALSE	111
2022-09-15	10:48:31	-0.923803	1929.36	FALSE	111
2022-09-15	10:48:31	-0.553015	1929.36	FALSE	111
2022-09-15	10:48:31	-0.172557	1929.36	FALSE	111
2022-09-15	10:48:31	4.95004	1934.31	1	112
2022-09-15	10:48:32	7.90093	1942.21	1	113
2022-09-15	10:48:32	0.0316669	1942.25	FALSE	113
2022-09-15	10:48:32	0.379606	1942.62	FALSE	113
2022-09-15	10:48:33	-0.0728623	1942.62	FALSE	113
2022-09-15	10:48:33	-0.92818	1942.62	FALSE	113
2022-09-15	10:48:33	-1.05927	1942.62	FALSE	113
2022-09-15	10:48:33	0.119606	1942.74	FALSE	113
2022-09-15	10:48:34	0.456094	1943.2	FALSE	113
2022-09-15	10:48:34	1.14429	1944.34	FALSE	113
2022-09-15	10:48:34	3.59589	1947.94	1	114
2022-09-15	10:48:34	11.0162	1958.96	1	115
2022-09-15	10:48:35	11.4379	1970.39	1	116
2022-09-15	10:48:35	0.462354	1970.86	FALSE	116
2022-09-15	10:48:35	1.30846	1972.17	FALSE	116
2022-09-15	10:48:36	0.157417	1972.32	FALSE	116
2022-09-15	10:48:36	0.668919	1972.99	FALSE	116
2022-09-15	10:48:36	0.104084	1973.1	FALSE	116
2022-09-15	10:48:36	1.83879	1974.93	FALSE	116
2022-09-15	10:48:37	27.3453	2002.28	1	117
2022-09-15	10:48:37	13.8463	2016.13	1	118
2022-09-15	10:48:37	4.36714	2020.49	1	119
2022-09-15	10:48:37	4.47044	2024.96	1	120
2022-09-15	10:48:38	4.82011	2029.78	1	121
2022-09-15	10:48:38	1.0848	2030.87	FALSE	121
2022-09-15	10:48:38	0.832735	2031.7	FALSE	121
2022-09-15	10:48:38	0.467748	2032.17	FALSE	121
2022-09-15	10:48:39	1.3991	2033.57	FALSE	121
2022-09-15	10:48:39	0.562608	2034.13	FALSE	121
2022-09-15	10:48:39	1.30006	2035.43	FALSE	121
2022-09-15	10:48:40	0.64444	2036.08	FALSE	121
2022-09-15	10:48:40	0.707646	2036.78	FALSE	121
2022-09-15	10:48:40	-0.121259	2036.78	FALSE	121
2022-09-15	10:48:40	-0.50818	2036.78	FALSE	121
2022-09-15	10:48:41	-0.885126	2036.78	FALSE	121
2022-09-15	10:48:41	-0.99103	2036.78	FALSE	121
2022-09-15	10:48:41	-1.16767	2036.78	FALSE	121
2022-09-15	10:48:41	-0.857035	2036.78	FALSE	121
2022-09-15	10:48:42	-0.82131	2036.78	FALSE	121
2022-09-15	10:48:42	-0.567671	2036.78	FALSE	121
2022-09-15	10:48:42	2.45986	2039.24	FALSE	121
2022-09-15	10:48:42	8.08194	2047.33	1	122
2022-09-15	10:48:43	12.8036	2060.13	1	123
2022-09-15	10:48:43	3.70637	2063.83	1	124
2022-09-15	10:48:43	3.76322	2067.6	1	125
2022-09-15	10:48:44	5.16398	2072.76	1	126
2022-09-15	10:48:44	3.29599	2076.06	1	127
2022-09-15	10:48:44	3.37477	2079.43	1	128
2022-09-15	10:48:44	3.94475	2083.38	1	129
2022-09-15	10:48:45	5.10123	2088.48	1	130
2022-09-15	10:48:45	6.3424	2094.82	1	131
2022-09-15	10:48:45	5.42683	2100.25	1	132
2022-09-15	10:48:45	5.19477	2105.44	1	133
2022-09-15	10:48:46	6.81441	2112.26	1	134
2022-09-15	10:48:46	4.91548	2117.17	1	135
2022-09-15	10:48:46	4.21777	2121.39	1	136
2022-09-15	10:48:46	2.58052	2123.97	FALSE	136
2022-09-15	10:48:47	2.32734	2126.3	FALSE	136
2022-09-15	10:48:47	2.19721	2128.5	FALSE	136
2022-09-15	10:48:47	2.19665	2130.69	FALSE	136
2022-09-15	10:48:48	2.14704	2132.84	FALSE	136
2022-09-15	10:48:48	2.18541	2135.02	FALSE	136
2022-09-15	10:48:48	2.23604	2137.26	FALSE	136
2022-09-15	10:48:48	2.24831	2139.51	FALSE	136
2022-09-15	10:48:49	2.11701	2141.63	FALSE	136
2022-09-15	10:48:49	2.09452	2143.72	FALSE	136
2022-09-15	10:48:49	0.863473	2144.58	FALSE	136
2022-09-15	10:48:49	0.400725	2144.98	FALSE	136
2022-09-15	10:48:50	0.274059	2145.26	FALSE	136
2022-09-15	10:48:50	0.0606745	2145.32	FALSE	136
2022-09-15	10:48:50	-0.261615	2145.32	FALSE	136
2022-09-15	10:48:51	-0.364414	2145.32	FALSE	136
2022-09-15	10:48:51	-0.375254	2145.32	FALSE	136
2022-09-15	10:48:51	-0.485941	2145.32	FALSE	136
2022-09-15	10:48:51	-0.722226	2145.32	FALSE	136
2022-09-15	10:48:52	-0.538053	2145.32	FALSE	136
2022-09-15	10:48:52	1.40057	2146.72	FALSE	136
2022-09-15	10:48:52	2.72006	2149.44	FALSE	136
2022-09-15	10:48:52	0.524644	2149.96	FALSE	136
2022-09-15	10:48:53	0.256043	2150.22	FALSE	136
2022-09-15	10:48:53	0.285	2150.51	FALSE	136
2022-09-15	10:48:53	0.563829	2151.07	FALSE	136
2022-09-15	10:48:53	0.421234	2151.49	FALSE	136
2022-09-15	10:48:54	0.429987	2151.92	FALSE	136
2022-09-15	10:48:54	0.401234	2152.32	FALSE	136
2022-09-15	10:48:54	0.389529	2152.71	FALSE	136
2022-09-15	10:48:55	0.400725	2153.11	FALSE	136
2022-09-15	10:48:55	0.428512	2153.54	FALSE	136
2022-09-15	10:48:55	0.335178	2153.88	FALSE	136
2022-09-15	10:48:55	0.071158	2153.95	FALSE	136
2022-09-15	10:48:56	-0.431946	2153.95	FALSE	136
2022-09-15	10:48:56	-0.614898	2153.95	FALSE	136
2022-09-15	10:48:56	-0.56416	2153.95	FALSE	136
2022-09-15	10:48:56	-0.653065	2153.95	FALSE	136
2022-09-15	10:48:57	-0.785076	2153.95	FALSE	136
2022-09-15	10:48:57	-0.959122	2153.95	FALSE	136
2022-09-15	10:48:57	-0.688893	2153.95	FALSE	136
2022-09-15	10:48:57	0.718791	2154.67	FALSE	136
2022-09-15	10:48:58	14.9864	2169.65	1	137
2022-09-15	10:48:58	11.5093	2181.16	1	138
2022-09-15	10:48:58	5.07894	2186.24	1	139
2022-09-15	10:48:59	3.21365	2189.45	1	140
2022-09-15	10:48:59	1.74037	2191.19	FALSE	140
2022-09-15	10:48:59	1.38933	2192.58	FALSE	140
2022-09-15	10:48:59	0.331107	2192.92	FALSE	140
2022-09-15	10:49:00	0.377112	2193.29	FALSE	140
2022-09-15	10:49:00	0.268104	2193.56	FALSE	140
2022-09-15	10:49:00	0.345814	2193.91	FALSE	140
2022-09-15	10:49:00	0.134975	2194.04	FALSE	140
2022-09-15	10:49:01	0.237061	2194.28	FALSE	140
2022-09-15	10:49:01	0.0700384	2194.35	FALSE	140
2022-09-15	10:49:01	-0.03673	2194.35	FALSE	140
2022-09-15	10:49:01	-0.170979	2194.35	FALSE	140
2022-09-15	10:49:02	0.0684099	2194.42	FALSE	140
2022-09-15	10:49:02	1.11248	2195.53	FALSE	140
2022-09-15	10:49:02	2.73253	2198.26	FALSE	140
2022-09-15	10:49:03	5.43691	2203.7	1	141
2022-09-15	10:49:03	6.28993	2209.99	1	142
2022-09-15	10:49:03	4.09151	2214.08	1	143
2022-09-15	10:49:03	3.27523	2217.36	1	144
2022-09-15	10:49:04	1.35899	2218.71	FALSE	144
2022-09-15	10:49:04	1.73401	2220.45	FALSE	144
2022-09-15	10:49:04	1.47447	2221.92	FALSE	144
2022-09-15	10:49:04	1.98342	2223.91	FALSE	144
2022-09-15	10:49:05	1.18429	2225.09	FALSE	144
2022-09-15	10:49:05	0.43528	2225.53	FALSE	144
2022-09-15	10:49:05	0.335535	2225.86	FALSE	144
2022-09-15	10:49:05	-0.0681294	2225.86	FALSE	144
2022-09-15	10:49:06	1.20948	2227.07	FALSE	144
2022-09-15	10:49:06	5.30042	2232.37	1	145
2022-09-15	10:49:06	12.0675	2244.44	1	146
2022-09-15	10:49:07	9.82357	2254.26	1	147
2022-09-15	10:49:07	5.06093	2259.32	1	148
2022-09-15	10:49:07	3.51564	2262.84	1	149
2022-09-15	10:49:07	5.18749	2268.03	1	150
2022-09-15	10:49:08	7.45594	2275.48	1	151
2022-09-15	10:49:08	10.4545	2285.94	1	152
2022-09-15	10:49:08	11.9113	2297.85	1	153
2022-09-15	10:49:08	13.3628	2311.21	1	154
2022-09-15	10:49:09	5.40805	2316.62	1	155
2022-09-15	10:49:09	3.25879	2319.88	1	156
2022-09-15	10:49:09	0.72785	2320.61	FALSE	156
2022-09-15	10:49:10	0.586883	2321.19	FALSE	156
2022-09-15	10:49:10	0.273702	2321.47	FALSE	156
2022-09-15	10:49:10	0.197214	2321.66	FALSE	156
2022-09-15	10:49:10	3.15238	2324.82	1	157
2022-09-15	10:49:11	7.93538	2332.75	1	158
2022-09-15	10:49:11	34.0396	2366.79	1	159
2022-09-15	10:49:11	3.23742	2370.03	1	160
2022-09-15	10:49:11	3.58403	2373.61	1	161
2022-09-15	10:49:12	0.563015	2374.18	FALSE	161
2022-09-15	10:49:12	0.0514634	2374.23	FALSE	161
2022-09-15	10:49:12	0.627952	2374.85	FALSE	161
2022-09-15	10:49:12	0.662964	2375.52	FALSE	161
2022-09-15	10:49:13	0.064644	2375.58	FALSE	161
2022-09-15	10:49:13	0.333041	2375.92	FALSE	161
2022-09-15	10:49:13	0.248715	2376.16	FALSE	161
2022-09-15	10:49:14	1.12785	2377.29	FALSE	161
2022-09-15	10:49:14	5.2393	2382.53	1	162
2022-09-15	10:49:14	6.87283	2389.4	1	163
2022-09-15	10:49:14	8.17649	2397.58	1	164
2022-09-15	10:49:15	8.18464	2405.77	1	165
2022-09-15	10:49:15	10.2098	2415.97	1	166
2022-09-15	10:49:15	12.451	2428.43	1	167
2022-09-15	10:49:15	10.6791	2439.1	1	168
2022-09-15	10:49:16	5.30825	2444.41	1	169
2022-09-15	10:49:16	3.8053	2448.22	1	170
2022-09-15	10:49:16	4.91579	2453.13	1	171
2022-09-15	10:49:16	3.77935	2456.91	1	172
2022-09-15	10:49:17	3.40001	2460.31	1	173
2022-09-15	10:49:17	3.10393	2463.42	1	174
2022-09-15	10:49:17	3.26678	2466.68	1	175
2022-09-15	10:49:18	2.85848	2469.54	FALSE	175
2022-09-15	10:49:18	2.94434	2472.49	FALSE	175
2022-09-15	10:49:18	2.85665	2475.34	FALSE	175
2022-09-15	10:49:18	2.67217	2478.02	FALSE	175
2022-09-15	10:49:19	2.88993	2480.91	FALSE	175
2022-09-15	10:49:19	2.98225	2483.89	FALSE	175
2022-09-15	10:49:19	2.03604	2485.92	FALSE	175
2022-09-15	10:49:19	2.54642	2488.47	FALSE	175
2022-09-15	10:49:20	2.14378	2490.61	FALSE	175
2022-09-15	10:49:20	2.1476	2492.76	FALSE	175
2022-09-15	10:49:20	2.22474	2494.99	FALSE	175
2022-09-15	10:49:20	2.14612	2497.13	FALSE	175
2022-09-15	10:49:21	2.18729	2499.32	FALSE	175
2022-09-15	10:49:21	2.05731	2501.38	FALSE	175
2022-09-15	10:49:21	2.08139	2503.46	FALSE	175
2022-09-15	10:49:22	2.02963	2505.49	FALSE	175
2022-09-15	10:49:22	2.08408	2507.57	FALSE	175
2022-09-15	10:49:22	1.95961	2509.53	FALSE	175
2022-09-15	10:49:22	2.09472	2511.63	FALSE	175
2022-09-15	10:49:23	2.50337	2514.13	FALSE	175
2022-09-15	10:49:23	2.47533	2516.61	FALSE	175
2022-09-15	10:49:23	2.73309	2519.34	FALSE	175
2022-09-15	10:49:23	2.48821	2521.83	FALSE	175
2022-09-15	10:49:24	2.66088	2524.49	FALSE	175
2022-09-15	10:49:24	2.51589	2527	FALSE	175
2022-09-15	10:49:24	2.49263	2529.5	FALSE	175
2022-09-15	10:49:24	2.35391	2531.85	FALSE	175
2022-09-15	10:49:25	2.47777	2534.33	FALSE	175
2022-09-15	10:49:25	2.51747	2536.85	FALSE	175
2022-09-15	10:49:25	2.50907	2539.35	FALSE	175
2022-09-15	10:49:26	2.52205	2541.88	FALSE	175
2022-09-15	10:49:26	2.52836	2544.4	FALSE	175
2022-09-15	10:49:26	2.4736	2546.88	FALSE	175
2022-09-15	10:49:26	2.50093	2549.38	FALSE	175
2022-09-15	10:49:27	2.7624	2552.14	FALSE	175
2022-09-15	10:49:27	2.81594	2554.96	FALSE	175
2022-09-15	10:49:27	2.83675	2557.79	FALSE	175
2022-09-15	10:49:27	3.2766	2561.07	1	176
2022-09-15	10:49:28	3.12978	2564.2	1	177
2022-09-15	10:49:28	2.80897	2567.01	FALSE	177
2022-09-15	10:49:28	3.03777	2570.05	1	178
2022-09-15	10:49:29	2.88434	2572.93	FALSE	178
2022-09-15	10:49:29	3.26408	2576.2	1	179
2022-09-15	10:49:29	3.35111	2579.55	1	180
2022-09-15	10:49:29	2.41345	2581.96	FALSE	180
2022-09-15	10:49:30	3.13426	2585.09	1	181
2022-09-15	10:49:30	2.62729	2587.72	FALSE	181
2022-09-15	10:49:30	2.85843	2590.58	FALSE	181
2022-09-15	10:49:30	2.92118	2593.5	FALSE	181
2022-09-15	10:49:31	2.82612	2596.33	FALSE	181
2022-09-15	10:49:31	2.81996	2599.15	FALSE	181
2022-09-15	10:49:31	2.50072	2601.65	FALSE	181
2022-09-15	10:49:31	2.92887	2604.58	FALSE	181
2022-09-15	10:49:32	2.4735	2607.05	FALSE	181
2022-09-15	10:49:32	2.51915	2609.57	FALSE	181
2022-09-15	10:49:32	2.57742	2612.15	FALSE	181
2022-09-15	10:49:33	2.68805	2614.84	FALSE	181
2022-09-15	10:49:33	2.73614	2617.57	FALSE	181
2022-09-15	10:49:33	2.56958	2620.14	FALSE	181
2022-09-15	10:49:33	2.58327	2622.72	FALSE	181
2022-09-15	10:49:34	2.52083	2625.25	FALSE	181
2022-09-15	10:49:34	2.54642	2627.79	FALSE	181
2022-09-15	10:49:34	2.50795	2630.3	FALSE	181
2022-09-15	10:49:34	2.4738	2632.77	FALSE	181
2022-09-15	10:49:35	2.18083	2634.95	FALSE	181
2022-09-15	10:49:35	2.40347	2637.36	FALSE	181
2022-09-15	10:49:35	2.58724	2639.95	FALSE	181
2022-09-15	10:49:35	2.62734	2642.57	FALSE	181
2022-09-15	10:49:36	2.72815	2645.3	FALSE	181
2022-09-15	10:49:36	2.77462	2648.08	FALSE	181
2022-09-15	10:49:36	2.74296	2650.82	FALSE	181
2022-09-15	10:49:37	2.7539	2653.57	FALSE	181
2022-09-15	10:49:37	2.79401	2656.37	FALSE	181
2022-09-15	10:49:37	2.82541	2659.19	FALSE	181
2022-09-15	10:49:37	2.91472	2662.11	FALSE	181
2022-09-15	10:49:38	2.88673	2664.99	FALSE	181
2022-09-15	10:49:38	2.68861	2667.68	FALSE	181
2022-09-15	10:49:38	2.7963	2670.48	FALSE	181
2022-09-15	10:49:38	2.93121	2673.41	FALSE	181
2022-09-15	10:49:39	2.94846	2676.36	FALSE	181
2022-09-15	10:49:39	3.17823	2679.54	1	182
2022-09-15	10:49:39	2.7367	2682.27	FALSE	182
2022-09-15	10:49:39	2.50134	2684.77	FALSE	182
2022-09-15	10:49:40	2.14317	2686.92	FALSE	182
2022-09-15	10:49:40	2.12286	2689.04	FALSE	182
2022-09-15	10:49:40	2.19396	2691.23	FALSE	182
2022-09-15	10:49:41	1.77884	2693.01	FALSE	182
2022-09-15	10:49:41	1.98413	2695	FALSE	182
2022-09-15	10:49:41	2.4221	2697.42	FALSE	182
2022-09-15	10:49:41	0.662761	2698.08	FALSE	182
2022-09-15	10:49:42	0.986069	2699.07	FALSE	182
2022-09-15	10:49:42	0.310445	2699.38	FALSE	182
2022-09-15	10:49:42	0.951768	2700.33	FALSE	182
2022-09-15	10:49:42	1.30388	2701.63	FALSE	182
2022-09-15	10:49:43	2.12195	2703.76	FALSE	182
2022-09-15	10:49:43	2.84312	2706.6	FALSE	182
2022-09-15	10:49:43	3.93345	2710.53	1	183
2022-09-15	10:49:43	1.582	2712.11	FALSE	183
2022-09-15	10:49:44	-0.248587	2712.11	FALSE	183
2022-09-15	10:49:44	-0.18818	2712.11	FALSE	183
2022-09-15	10:49:44	-0.0710811	2712.11	FALSE	183
2022-09-15	10:49:45	0.0483081	2712.16	FALSE	183
2022-09-15	10:49:45	0.0393514	2712.2	FALSE	183
2022-09-15	10:49:45	-0.38762	2712.2	FALSE	183
2022-09-15	10:49:45	0.409733	2712.61	FALSE	183
2022-09-15	10:49:46	3.8678	2716.48	1	184
2022-09-15	10:49:46	10.5476	2727.03	1	185
2022-09-15	10:49:46	7.56418	2734.59	1	186
2022-09-15	10:49:46	7.19828	2741.79	1	187
2022-09-15	10:49:47	11.9927	2753.78	1	188
2022-09-15	10:49:47	16.1721	2769.95	1	189
2022-09-15	10:49:47	7.31914	2777.27	1	190
2022-09-15	10:49:48	6.18128	2783.45	1	191
2022-09-15	10:49:48	5.10968	2788.56	1	192
2022-09-15	10:49:48	4.86596	2793.43	1	193
2022-09-15	10:49:48	4.84622	2798.28	1	194
2022-09-15	10:49:49	4.38612	2802.66	1	195
2022-09-15	10:49:49	4.25309	2806.92	1	196
2022-09-15	10:49:49	4.14021	2811.06	1	197
2022-09-15	10:49:49	3.82754	2814.88	1	198
2022-09-15	10:49:50	3.87955	2818.76	1	199
2022-09-15	10:49:50	3.41594	2822.18	1	200
2022-09-15	10:49:50	2.74612	2824.93	FALSE	200
2022-09-15	10:49:50	2.49945	2827.42	FALSE	200
2022-09-15	10:49:51	2.17838	2829.6	FALSE	200
2022-09-15	10:49:51	2.3191	2831.92	FALSE	200
2022-09-15	10:49:51	1.78128	2833.7	FALSE	200
2022-09-15	10:49:52	1.60118	2835.3	FALSE	200
2022-09-15	10:49:52	1.63299	2836.94	FALSE	200
2022-09-15	10:49:52	1.69116	2838.63	FALSE	200
2022-09-15	10:49:52	1.6335	2840.26	FALSE	200
2022-09-15	10:49:53	1.60546	2841.87	FALSE	200
2022-09-15	10:49:53	1.72184	2843.59	FALSE	200
2022-09-15	10:49:53	1.66149	2845.25	FALSE	200
2022-09-15	10:49:53	1.56454	2846.82	FALSE	200
2022-09-15	10:49:54	1.59772	2848.41	FALSE	200
2022-09-15	10:49:54	1.60948	2850.02	FALSE	200
2022-09-15	10:49:54	1.76006	2851.78	FALSE	200
2022-09-15	10:49:54	1.78658	2853.57	FALSE	200
2022-09-15	10:49:55	1.2278	2854.8	FALSE	200
2022-09-15	10:49:55	1.56851	2856.37	FALSE	200
2022-09-15	10:49:55	1.37706	2857.74	FALSE	200
2022-09-15	10:49:56	1.80062	2859.54	FALSE	200
2022-09-15	10:49:56	1.4877	2861.03	FALSE	200
2022-09-15	10:49:56	1.32734	2862.36	FALSE	200
2022-09-15	10:49:56	1.73859	2864.1	FALSE	200
2022-09-15	10:49:57	1.64011	2865.74	FALSE	200
2022-09-15	10:49:57	1.57721	2867.31	FALSE	200
2022-09-15	10:49:57	1.62719	2868.94	FALSE	200
2022-09-15	10:49:57	1.66866	2870.61	FALSE	200
2022-09-15	10:49:58	1.67782	2872.29	FALSE	200
2022-09-15	10:49:58	1.72897	2874.02	FALSE	200
2022-09-15	10:49:58	1.76006	2875.78	FALSE	200
2022-09-15	10:49:58	1.68083	2877.46	FALSE	200
2022-09-15	10:49:59	1.71177	2879.17	FALSE	200
2022-09-15	10:49:59	1.66363	2880.83	FALSE	200
2022-09-15	10:49:59	1.64642	2882.48	FALSE	200
2022-09-15	10:50:00	1.61803	2884.1	FALSE	200
2022-09-15	10:50:00	1.62688	2885.72	FALSE	200
2022-09-15	10:50:00	1.52963	2887.25	FALSE	200
2022-09-15	10:50:00	1.44276	2888.7	FALSE	200
2022-09-15	10:50:01	1.44566	2890.14	FALSE	200
2022-09-15	10:50:01	1.45793	2891.6	FALSE	200
2022-09-15	10:50:01	1.52892	2893.13	FALSE	200
2022-09-15	10:50:01	1.57553	2894.71	FALSE	200
2022-09-15	10:50:02	1.58846	2896.29	FALSE	200
2022-09-15	10:50:02	1.56408	2897.86	FALSE	200
2022-09-15	10:50:02	1.66999	2899.53	FALSE	200
2022-09-15	10:50:02	1.71793	2901.25	FALSE	200
2022-09-15	10:50:03	1.71462	2902.96	FALSE	200
2022-09-15	10:50:03	1.66067	2904.62	FALSE	200
2022-09-15	10:50:03	1.65004	2906.27	FALSE	200
2022-09-15	10:50:04	1.61487	2907.89	FALSE	200
2022-09-15	10:50:04	1.66724	2909.55	FALSE	200
2022-09-15	10:50:04	1.69564	2911.25	FALSE	200
2022-09-15	10:50:04	1.72815	2912.98	FALSE	200
2022-09-15	10:50:05	1.8077	2914.78	FALSE	200
2022-09-15	10:50:05	1.84134	2916.63	FALSE	200
2022-09-15	10:50:05	1.83329	2918.46	FALSE	200
2022-09-15	10:50:05	1.82668	2920.29	FALSE	200
2022-09-15	10:50:06	1.77894	2922.06	FALSE	200
2022-09-15	10:50:06	1.79548	2923.86	FALSE	200
2022-09-15	10:50:06	1.71411	2925.57	FALSE	200
2022-09-15	10:50:06	1.69192	2927.27	FALSE	200
2022-09-15	10:50:07	1.68154	2928.95	FALSE	200
2022-09-15	10:50:07	1.68897	2930.64	FALSE	200
2022-09-15	10:50:07	1.67981	2932.32	FALSE	200
2022-09-15	10:50:08	1.7307	2934.05	FALSE	200
2022-09-15	10:50:08	1.75375	2935.8	FALSE	200
2022-09-15	10:50:08	1.66658	2937.47	FALSE	200
2022-09-15	10:50:08	1.63721	2939.1	FALSE	200
2022-09-15	10:50:09	1.61019	2940.71	FALSE	200
2022-09-15	10:50:09	1.6023	2942.32	FALSE	200
2022-09-15	10:50:09	1.59345	2943.91	FALSE	200
2022-09-15	10:50:09	1.61212	2945.52	FALSE	200
2022-09-15	10:50:10	1.61813	2947.14	FALSE	200
2022-09-15	10:50:10	1.61803	2948.76	FALSE	200
2022-09-15	10:50:10	1.62429	2950.38	FALSE	200
2022-09-15	10:50:11	1.6136	2952	FALSE	200
2022-09-15	10:50:11	1.65233	2953.65	FALSE	200
2022-09-15	10:50:11	1.52037	2955.17	FALSE	200
2022-09-15	10:50:11	1.62159	2956.79	FALSE	200
2022-09-15	10:50:12	1.86195	2958.65	FALSE	200
2022-09-15	10:50:12	2.62617	2961.28	FALSE	200
2022-09-15	10:50:12	4.23075	2965.51	1	201
2022-09-15	10:50:12	5.89563	2971.41	1	202
2022-09-15	10:50:13	4.81813	2976.22	1	203
2022-09-15	10:50:13	0.390089	2976.61	FALSE	203
2022-09-15	10:50:13	0.1164	2976.73	FALSE	203
2022-09-15	10:50:13	-0.168486	2976.73	FALSE	203
2022-09-15	10:50:14	-0.083702	2976.73	FALSE	203
2022-09-15	10:50:14	11.3259	2988.06	1	204
2022-09-15	10:50:14	12.9133	3000.97	1	205
2022-09-15	10:50:15	6.20052	3007.17	1	206
2022-09-15	10:50:15	0.453753	3007.62	FALSE	206
2022-09-15	10:50:15	0.244542	3007.87	FALSE	206
2022-09-15	10:50:15	0.279707	3008.15	FALSE	206
2022-09-15	10:50:16	-0.491641	3008.15	FALSE	206
2022-09-15	10:50:16	-0.435966	3008.15	FALSE	206
2022-09-15	10:50:16	-0.394949	3008.15	FALSE	206
2022-09-15	10:50:16	-0.331946	3008.15	FALSE	206
2022-09-15	10:50:17	-0.266552	3008.15	FALSE	206
2022-09-15	10:50:17	-0.291234	3008.15	FALSE	206
2022-09-15	10:50:17	-0.203753	3008.15	FALSE	206
2022-09-15	10:50:17	-0.299274	3008.15	FALSE	206
2022-09-15	10:50:18	-0.390165	3008.15	FALSE	206
2022-09-15	10:50:18	-0.4379	3008.15	FALSE	206
2022-09-15	10:50:18	-0.638155	3008.15	FALSE	206
2022-09-15	10:50:19	-0.819732	3008.15	FALSE	206
2022-09-15	10:50:19	-0.879885	3008.15	FALSE	206
2022-09-15	10:50:19	-0.339224	3008.15	FALSE	206
2022-09-15	10:50:19	4.17767	3012.33	1	207
2022-09-15	10:50:20	4.62322	3016.95	1	208
2022-09-15	10:50:20	6.21492	3023.16	1	209
2022-09-15	10:50:20	3.74988	3026.91	1	210
2022-09-15	10:50:20	2.12159	3029.04	FALSE	210
2022-09-15	10:50:21	1.51182	3030.55	FALSE	210
2022-09-15	10:50:21	3.71976	3034.27	1	211
2022-09-15	10:50:21	3.9563	3038.22	1	212
2022-09-15	10:50:21	5.15014	3043.37	1	213
2022-09-15	10:50:22	4.37334	3047.75	1	214
2022-09-15	10:50:22	6.0682	3053.81	1	215
2022-09-15	10:50:22	1.99421	3055.81	FALSE	215
2022-09-15	10:50:23	0.690598	3056.5	FALSE	215
2022-09-15	10:50:23	0.40841	3056.91	FALSE	215
2022-09-15	10:50:23	0.495585	3057.4	FALSE	215
2022-09-15	10:50:23	0.325051	3057.73	FALSE	215
2022-09-15	10:50:24	0.418333	3058.15	FALSE	215
2022-09-15	10:50:24	0.728868	3058.88	FALSE	215
2022-09-15	10:50:24	0.192227	3059.07	FALSE	215
2022-09-15	10:50:24	0.809784	3059.88	FALSE	215
2022-09-15	10:50:25	4.67548	3064.55	1	216
2022-09-15	10:50:25	2.80759	3067.36	FALSE	216
2022-09-15	10:50:25	1.94398	3069.3	FALSE	216
2022-09-15	10:50:25	0.447188	3069.75	FALSE	216
2022-09-15	10:50:26	0.313143	3070.07	FALSE	216
2022-09-15	10:50:26	0.393397	3070.46	FALSE	216
2022-09-15	10:50:26	0.2964	3070.76	FALSE	216
2022-09-15	10:50:27	0.373295	3071.13	FALSE	216
2022-09-15	10:50:27	0.260878	3071.39	FALSE	216
2022-09-15	10:50:27	0.436145	3071.83	FALSE	216
2022-09-15	10:50:27	0.408919	3072.23	FALSE	216
2022-09-15	10:50:28	2.09874	3074.33	FALSE	216
2022-09-15	10:50:28	2.2906	3076.62	FALSE	216
2022-09-15	10:50:28	3.01401	3079.64	1	217
2022-09-15	10:50:28	1.80668	3081.44	FALSE	217
2022-09-15	10:50:29	0.683524	3082.13	FALSE	217
2022-09-15	10:50:29	0.350191	3082.48	FALSE	217
2022-09-15	10:50:29	0.474822	3082.95	FALSE	217
2022-09-15	10:50:30	0.262303	3083.22	FALSE	217
2022-09-15	10:50:30	0.441285	3083.66	FALSE	217
2022-09-15	10:50:30	0.223168	3083.88	FALSE	217
2022-09-15	10:50:30	0.429275	3084.31	FALSE	217
2022-09-15	10:50:31	0.26098	3084.57	FALSE	217
2022-09-15	10:50:31	0.557519	3085.13	FALSE	217
2022-09-15	10:50:31	0.335331	3085.46	FALSE	217
2022-09-15	10:50:31	4.28708	3089.75	1	218
2022-09-15	10:50:32	2.58281	3092.33	FALSE	218
2022-09-15	10:50:32	2.81976	3095.15	FALSE	218
2022-09-15	10:50:32	1.81416	3096.97	FALSE	218
2022-09-15	10:50:32	1.50296	3098.47	FALSE	218
2022-09-15	10:50:33	2.51757	3100.99	FALSE	218
2022-09-15	10:50:33	0.242252	3101.23	FALSE	218
2022-09-15	10:50:33	0.695789	3101.93	FALSE	218
2022-09-15	10:50:34	2.46877	3104.39	FALSE	218
2022-09-15	10:50:34	0.238181	3104.63	FALSE	218
2022-09-15	10:50:34	2.45833	3107.09	FALSE	218
2022-09-15	10:50:34	0.45299	3107.54	FALSE	218
2022-09-15	10:50:35	2.41426	3109.96	FALSE	218
2022-09-15	10:50:35	1.23849	3111.2	FALSE	218
2022-09-15	10:50:35	1.00276	3112.2	FALSE	218
2022-09-15	10:50:35	5.38795	3117.59	1	219
2022-09-15	10:50:36	0.281489	3117.87	FALSE	219
2022-09-15	10:50:36	1.98373	3119.85	FALSE	219
2022-09-15	10:50:36	0.289478	3120.14	FALSE	219
2022-09-15	10:50:36	0.00525471	3120.15	FALSE	219
2022-09-15	10:50:37	0.149275	3120.3	FALSE	219
2022-09-15	10:50:37	-0.117748	3120.3	FALSE	219
2022-09-15	10:50:37	-0.485992	3120.3	FALSE	219
2022-09-15	10:50:38	-0.237544	3120.3	FALSE	219
2022-09-15	10:50:38	0.165458	3120.46	FALSE	219
2022-09-15	10:50:38	2.92439	3123.39	FALSE	219
2022-09-15	10:50:38	2.1223	3125.51	FALSE	219
2022-09-15	10:50:39	2.89569	3128.4	FALSE	219
2022-09-15	10:50:39	0.189428	3128.59	FALSE	219
2022-09-15	10:50:39	-0.0974934	3128.59	FALSE	219
2022-09-15	10:50:39	-0.167468	3128.59	FALSE	219
2022-09-15	10:50:40	-0.191641	3128.59	FALSE	219
2022-09-15	10:50:40	0.0557381	3128.65	FALSE	219
2022-09-15	10:50:40	0.0831681	3128.73	FALSE	219
2022-09-15	10:50:40	-0.131997	3128.73	FALSE	219
2022-09-15	10:50:41	-0.0688928	3128.73	FALSE	219
2022-09-15	10:50:41	-0.306043	3128.73	FALSE	219
2022-09-15	10:50:41	-0.178053	3128.73	FALSE	219
2022-09-15	10:50:42	-0.190623	3128.73	FALSE	219
2022-09-15	10:50:42	0.00993663	3128.74	FALSE	219
2022-09-15	10:50:42	0.000878093	3128.74	FALSE	219
2022-09-15	10:50:42	0.348104	3129.09	FALSE	219
2022-09-15	10:50:43	0.569122	3129.66	FALSE	219
2022-09-15	10:50:43	0.361692	3130.02	FALSE	219
2022-09-15	10:50:43	0.680776	3130.7	FALSE	219
2022-09-15	10:50:43	2.0592	3132.76	FALSE	219
2022-09-15	10:50:44	0.154415	3132.92	FALSE	219
2022-09-15	10:50:44	0.814415	3133.73	FALSE	219
2022-09-15	10:50:44	3.71472	3137.45	1	220
2022-09-15	10:50:44	0.172685	3137.62	FALSE	220
2022-09-15	10:50:45	0.0605728	3137.68	FALSE	220
2022-09-15	10:50:45	0.110191	3137.79	FALSE	220
2022-09-15	10:50:45	0.0403183	3137.83	FALSE	220
2022-09-15	10:50:46	0.0486135	3137.88	FALSE	220
2022-09-15	10:50:46	0.0143132	3137.89	FALSE	220
2022-09-15	10:50:46	-0.0471117	3137.89	FALSE	220
2022-09-15	10:50:46	-0.0414628	3137.89	FALSE	220
2022-09-15	10:50:47	-0.180496	3137.89	FALSE	220
2022-09-15	10:50:47	-0.0559667	3137.89	FALSE	220
2022-09-15	10:50:47	0.199199	3138.09	FALSE	220
2022-09-15	10:50:47	3.01553	3141.11	1	221
2022-09-15	10:50:48	2.44892	3143.56	FALSE	221
2022-09-15	10:50:48	1.3336	3144.89	FALSE	221
2022-09-15	10:50:48	0.437977	3145.33	FALSE	221
2022-09-15	10:50:48	0.565814	3145.89	FALSE	221
2022-09-15	10:50:49	0.366323	3146.26	FALSE	221
2022-09-15	10:50:49	0.229071	3146.49	FALSE	221
2022-09-15	10:50:49	0.243117	3146.73	FALSE	221
2022-09-15	10:50:50	0.245713	3146.98	FALSE	221
2022-09-15	10:50:50	0.118486	3147.1	FALSE	221
2022-09-15	10:50:50	0.10897	3147.2	FALSE	221
2022-09-15	10:50:50	0.165967	3147.37	FALSE	221
2022-09-15	10:50:51	0.130598	3147.5	FALSE	221
2022-09-15	10:50:51	0.154669	3147.66	FALSE	221
2022-09-15	10:50:51	0.125153	3147.78	FALSE	221
2022-09-15	10:50:51	0.0208781	3147.8	FALSE	221
2022-09-15	10:50:52	0.112685	3147.91	FALSE	221
2022-09-15	10:50:52	0.187341	3148.1	FALSE	221
2022-09-15	10:50:52	-0.180649	3148.1	FALSE	221
2022-09-15	10:50:53	-0.13047	3148.1	FALSE	221
2022-09-15	10:50:53	-0.253371	3148.1	FALSE	221
2022-09-15	10:50:53	-0.153727	3148.1	FALSE	221
2022-09-15	10:50:53	-0.307824	3148.1	FALSE	221
2022-09-15	10:50:54	-0.160292	3148.1	FALSE	221
2022-09-15	10:50:54	-0.185025	3148.1	FALSE	221
2022-09-15	10:50:54	-0.404414	3148.1	FALSE	221
2022-09-15	10:50:54	-0.602073	3148.1	FALSE	221
2022-09-15	10:50:55	-0.625687	3148.1	FALSE	221
2022-09-15	10:50:55	-0.538867	3148.1	FALSE	221
2022-09-15	10:50:55	0.291514	3148.39	FALSE	221
2022-09-15	10:50:55	0.562404	3148.96	FALSE	221
2022-09-15	10:50:56	2.31584	3151.27	FALSE	221
2022-09-15	10:50:56	1.04062	3152.31	FALSE	221
2022-09-15	10:50:56	0.867646	3153.18	FALSE	221
2022-09-15	10:50:57	2.41009	3155.59	FALSE	221
2022-09-15	10:50:57	0.323982	3155.91	FALSE	221
2022-09-15	10:50:57	1.03991	3156.95	FALSE	221
2022-09-15	10:50:57	1.30999	3158.26	FALSE	221
2022-09-15	10:50:58	0.205255	3158.47	FALSE	221
2022-09-15	10:50:58	2.38836	3160.86	FALSE	221
2022-09-15	10:50:58	1.08531	3161.94	FALSE	221
2022-09-15	10:50:58	0.963473	3162.91	FALSE	221
2022-09-15	10:50:59	0.381845	3163.29	FALSE	221
2022-09-15	10:50:59	0.199402	3163.49	FALSE	221
2022-09-15	10:50:59	1.5477	3165.04	FALSE	221
2022-09-15	10:50:59	1.11085	3166.15	FALSE	221
2022-09-15	10:51:00	4.33518	3170.48	1	222
2022-09-15	10:51:00	2.75034	3173.23	FALSE	222
2022-09-15	10:51:00	5.42031	3178.65	1	223
2022-09-15	10:51:01	0.685102	3179.34	FALSE	223
2022-09-15	10:51:01	2.245	3181.58	FALSE	223
2022-09-15	10:51:01	0.51187	3182.09	FALSE	223
2022-09-15	10:51:01	0.69355	3182.79	FALSE	223
2022-09-15	10:51:02	2.7677	3185.56	FALSE	223
2022-09-15	10:51:02	1.0363	3186.59	FALSE	223
2022-09-15	10:51:02	3.56698	3190.16	1	224
2022-09-15	10:51:02	0.503473	3190.66	FALSE	224
2022-09-15	10:51:03	0.43243	3191.09	FALSE	224
2022-09-15	10:51:03	2.36719	3193.46	FALSE	224
2022-09-15	10:51:03	0.908715	3194.37	FALSE	224
2022-09-15	10:51:03	1.83599	3196.21	FALSE	224
2022-09-15	10:51:04	0.88271	3197.09	FALSE	224
2022-09-15	10:51:04	1.58424	3198.67	FALSE	224
2022-09-15	10:51:04	2.59619	3201.27	FALSE	224
2022-09-15	10:51:05	0.690852	3201.96	FALSE	224
2022-09-15	10:51:05	4.33991	3206.3	1	225
2022-09-15	10:51:05	3.16535	3209.47	1	226
2022-09-15	10:51:05	2.93497	3212.4	FALSE	226
2022-09-15	10:51:06	4.15014	3216.55	1	227
2022-09-15	10:51:06	1.99935	3218.55	FALSE	227
2022-09-15	10:51:06	0.626629	3219.18	FALSE	227
2022-09-15	10:51:06	0.874211	3220.05	FALSE	227
2022-09-15	10:51:07	1.02393	3221.08	FALSE	227
2022-09-15	10:51:07	0.484186	3221.56	FALSE	227
2022-09-15	10:51:07	1.11706	3222.68	FALSE	227
2022-09-15	10:51:07	0.563829	3223.24	FALSE	227
2022-09-15	10:51:08	0.402761	3223.64	FALSE	227
2022-09-15	10:51:08	0.807952	3224.45	FALSE	227
2022-09-15	10:51:08	2.40078	3226.85	FALSE	227
2022-09-15	10:51:09	2.5651	3229.42	FALSE	227
2022-09-15	10:51:09	0.0165015	3229.43	FALSE	227
2022-09-15	10:51:09	0.137875	3229.57	FALSE	227
2022-09-15	10:51:09	0.0970104	3229.67	FALSE	227
2022-09-15	10:51:10	0.0699875	3229.74	FALSE	227
2022-09-15	10:51:10	-0.060903	3229.74	FALSE	227
2022-09-15	10:51:10	0.320725	3230.06	FALSE	227
2022-09-15	10:51:10	1.20846	3231.27	FALSE	227
2022-09-15	10:51:11	8.33716	3239.6	1	228
2022-09-15	10:51:11	3.25619	3242.86	1	229
2022-09-15	10:51:11	4.86347	3247.72	1	230
2022-09-15	10:51:11	1.05212	3248.78	FALSE	230
2022-09-15	10:51:12	2.69263	3251.47	FALSE	230
2022-09-15	10:51:12	0.548868	3252.02	FALSE	230
2022-09-15	10:51:12	0.985662	3253	FALSE	230
2022-09-15	10:51:13	1.15467	3254.16	FALSE	230
2022-09-15	10:51:13	0.987392	3255.15	FALSE	230
2022-09-15	10:51:13	0.619657	3255.77	FALSE	230
2022-09-15	10:51:13	2.80785	3258.57	FALSE	230
2022-09-15	10:51:14	2.41299	3260.99	FALSE	230
2022-09-15	10:51:14	3.39365	3264.38	1	231
2022-09-15	10:51:14	1.35447	3265.73	FALSE	231
2022-09-15	10:51:15	2.02749	3267.76	FALSE	231
2022-09-15	10:51:15	2.16648	3269.93	FALSE	231
2022-09-15	10:51:15	2.74403	3272.67	FALSE	231
2022-09-15	10:51:15	2.8106	3275.48	FALSE	231
2022-09-15	10:51:15	2.35116	3277.83	FALSE	231
2022-09-15	10:51:16	0.215026	3278.05	FALSE	231
2022-09-15	10:51:16	0.181387	3278.23	FALSE	231
2022-09-15	10:51:16	0.128359	3278.36	FALSE	231
2022-09-15	10:51:17	0.101743	3278.46	FALSE	231
2022-09-15	10:51:17	0.216094	3278.68	FALSE	231
2022-09-15	10:51:17	0.17986	3278.86	FALSE	231
2022-09-15	10:51:17	0.638028	3279.49	FALSE	231
2022-09-15	10:51:18	7.46357	3286.96	1	232
2022-09-15	10:51:18	10.723	3297.68	1	233
2022-09-15	10:51:18	9.25731	3306.94	1	234
2022-09-15	10:51:18	4.45085	3311.39	1	235
2022-09-15	10:51:19	2.96266	3314.35	FALSE	235
2022-09-15	10:51:19	5.27594	3319.63	1	236
2022-09-15	10:51:19	4.91624	3324.54	1	237
2022-09-15	10:51:20	1.74963	3326.29	FALSE	237
2022-09-15	10:51:20	2.28195	3328.58	FALSE	237
2022-09-15	10:51:20	2.75457	3331.33	FALSE	237
2022-09-15	10:51:20	3.09543	3334.43	1	238
2022-09-15	10:51:21	1.88001	3336.31	FALSE	238
2022-09-15	10:51:21	2.63329	3338.94	FALSE	238
2022-09-15	10:51:21	2.33961	3341.28	FALSE	238
2022-09-15	10:51:21	2.5707	3343.85	FALSE	238
2022-09-15	10:51:22	2.63553	3346.48	FALSE	238
2022-09-15	10:51:22	2.64622	3349.13	FALSE	238
2022-09-15	10:51:22	2.36444	3351.5	FALSE	238
2022-09-15	10:51:22	2.45477	3353.95	FALSE	238
2022-09-15	10:51:23	1.98795	3355.94	FALSE	238
2022-09-15	10:51:23	1.90235	3357.84	FALSE	238
2022-09-15	10:51:23	1.76469	3359.6	FALSE	238
2022-09-15	10:51:24	1.7649	3361.37	FALSE	238
2022-09-15	10:51:24	1.64749	3363.02	FALSE	238
2022-09-15	10:51:24	1.56948	3364.59	FALSE	238
2022-09-15	10:51:24	1.30139	3365.89	FALSE	238
2022-09-15	10:51:25	1.12235	3367.01	FALSE	238
2022-09-15	10:51:25	1.14022	3368.15	FALSE	238
2022-09-15	10:51:25	1.70917	3369.86	FALSE	238
2022-09-15	10:51:25	1.60286	3371.46	FALSE	238
2022-09-15	10:51:26	1.82719	3373.29	FALSE	238
2022-09-15	10:51:26	2.19615	3375.49	FALSE	238
2022-09-15	10:51:26	2.3909	3377.88	FALSE	238
2022-09-15	10:51:26	2.65482	3380.53	FALSE	238
2022-09-15	10:51:27	2.42215	3382.95	FALSE	238
2022-09-15	10:51:27	2.28892	3385.24	FALSE	238
2022-09-15	10:51:27	2.22251	3387.47	FALSE	238
2022-09-15	10:51:28	2.1935	3389.66	FALSE	238
2022-09-15	10:51:28	2.14322	3391.8	FALSE	238
2022-09-15	10:51:28	2.09518	3393.9	FALSE	238
2022-09-15	10:51:28	2.59223	3396.49	FALSE	238
2022-09-15	10:51:29	0.591107	3397.08	FALSE	238
2022-09-15	10:51:29	0.179148	3397.26	FALSE	238
2022-09-15	10:51:29	0.256552	3397.52	FALSE	238
2022-09-15	10:51:29	0.275127	3397.79	FALSE	238
2022-09-15	10:51:30	1.04581	3398.84	FALSE	238
2022-09-15	10:51:30	2.50739	3401.34	FALSE	238
2022-09-15	10:51:30	10.9034	3412.25	1	239
2022-09-15	10:51:30	3.74037	3415.99	1	240
2022-09-15	10:51:31	7.34515	3423.33	1	241
2022-09-15	10:51:31	1.42714	3424.76	FALSE	241
2022-09-15	10:51:31	1.24078	3426	FALSE	241
2022-09-15	10:51:32	2.17665	3428.18	FALSE	241
2022-09-15	10:51:32	0.559962	3428.74	FALSE	241
2022-09-15	10:51:32	1.69192	3430.43	FALSE	241
2022-09-15	10:51:32	1.30139	3431.73	FALSE	241
2022-09-15	10:51:33	3.29131	3435.02	1	242
2022-09-15	10:51:33	7.19212	3442.21	1	243
2022-09-15	10:51:33	3.51334	3445.73	1	244
2022-09-15	10:51:33	1.51233	3447.24	FALSE	244
2022-09-15	10:51:34	-0.0824297	3447.24	FALSE	244
2022-09-15	10:51:34	0.279758	3447.52	FALSE	244
2022-09-15	10:51:34	0.150038	3447.67	FALSE	244
2022-09-15	10:51:34	0.52042	3448.19	FALSE	244
2022-09-15	10:51:35	1.41436	3449.61	FALSE	244
2022-09-15	10:51:35	3.30352	3452.91	1	245
2022-09-15	10:51:35	8.43843	3461.35	1	246
2022-09-15	10:51:36	5.20026	3466.55	1	247
2022-09-15	10:51:36	4.52256	3471.07	1	248
2022-09-15	10:51:36	3.10037	3474.17	1	249
2022-09-15	10:51:36	2.12551	3476.3	FALSE	249
2022-09-15	10:51:37	4.2339	3480.53	1	250
2022-09-15	10:51:37	1.25375	3481.78	FALSE	250
2022-09-15	10:51:37	4.46663	3486.25	1	251
2022-09-15	10:51:37	0.982761	3487.23	FALSE	251
2022-09-15	10:51:38	5.17701	3492.41	1	252
2022-09-15	10:51:38	3.74739	3496.16	1	253
2022-09-15	10:51:38	3.0282	3499.19	1	254
2022-09-15	10:51:38	3.20281	3502.39	1	255
2022-09-15	10:51:39	2.2138	3504.6	FALSE	255
2022-09-15	10:51:39	8.10108	3512.7	1	256
2022-09-15	10:51:39	5.42662	3518.13	1	257
2022-09-15	10:51:40	9.58535	3527.72	1	258
2022-09-15	10:51:40	7.2279	3534.94	1	259
2022-09-15	10:51:40	6.13416	3541.08	1	260
2022-09-15	10:51:40	8.11848	3549.2	1	261
2022-09-15	10:51:41	9.8309	3559.03	1	262
2022-09-15	10:51:41	8.90006	3567.93	1	263
2022-09-15	10:51:41	5.3706	3573.3	1	264
2022-09-15	10:51:41	4.0079	3577.31	1	265
2022-09-15	10:51:42	4.27691	3581.58	1	266
2022-09-15	10:51:42	4.18591	3585.77	1	267
2022-09-15	10:51:42	4.04658	3589.81	1	268
2022-09-15	10:51:42	3.96266	3593.78	1	269
2022-09-15	10:51:43	3.37818	3597.16	1	270
2022-09-15	10:51:43	3.34988	3600.51	1	271
2022-09-15	10:51:43	4.25487	3604.76	1	272
2022-09-15	10:51:44	6.05131	3610.81	1	273
2022-09-15	10:51:44	12.866	3623.68	1	274
2022-09-15	10:51:44	16.3882	3640.07	1	275
2022-09-15	10:51:44	11.9827	3652.05	1	276
2022-09-15	10:51:45	8.98734	3661.04	1	277
2022-09-15	10:51:45	7.92642	3668.96	1	278
2022-09-15	10:51:45	8.35075	3677.31	1	279
2022-09-15	10:51:45	5.76123	3683.07	1	280
2022-09-15	10:51:46	4.61731	3687.69	1	281
2022-09-15	10:51:46	4.36948	3692.06	1	282
2022-09-15	10:51:46	4.56144	3696.62	1	283
2022-09-15	10:51:47	4.1391	3700.76	1	284
2022-09-15	10:51:47	3.51324	3704.27	1	285
2022-09-15	10:51:47	3.06958	3707.34	1	286
2022-09-15	10:51:47	3.17202	3710.52	1	287
2022-09-15	10:51:48	3.99854	3714.51	1	288
2022-09-15	10:51:48	4.69233	3719.21	1	289
2022-09-15	10:51:48	4.4363	3723.64	1	290
2022-09-15	10:51:48	3.84876	3727.49	1	291
2022-09-15	10:51:49	3.8021	3731.29	1	292
2022-09-15	10:51:49	3.79782	3735.09	1	293
2022-09-15	10:51:49	4.07971	3739.17	1	294
2022-09-15	10:51:49	3.99401	3743.17	1	295
2022-09-15	10:51:50	3.9134	3747.08	1	296
2022-09-15	10:51:50	4.27299	3751.35	1	297
2022-09-15	10:51:50	4.0252	3755.38	1	298
2022-09-15	10:51:51	3.84062	3759.22	1	299
2022-09-15	10:51:51	3.5967	3762.81	1	300
2022-09-15	10:51:51	3.31431	3766.13	1	301
2022-09-15	10:51:51	3.09726	3769.23	1	302
2022-09-15	10:51:52	3.10973	3772.34	1	303
2022-09-15	10:51:52	3.03716	3775.37	1	304
2022-09-15	10:51:52	2.87268	3778.25	FALSE	304
2022-09-15	10:51:52	2.8766	3781.12	FALSE	304
2022-09-15	10:51:53	2.96373	3784.09	FALSE	304
2022-09-15	10:51:53	2.96169	3787.05	FALSE	304
2022-09-15	10:51:53	2.97955	3790.03	FALSE	304
2022-09-15	10:51:53	3.27793	3793.31	1	305
2022-09-15	10:51:54	3.11304	3796.42	1	306
2022-09-15	10:51:54	4.1824	3800.6	1	307
2022-09-15	10:51:54	7.52418	3808.12	1	308
2022-09-15	10:51:55	8.3112	3816.44	1	309
2022-09-15	10:51:55	8.39853	3824.83	1	310
2022-09-15	10:51:55	14.26	3839.09	1	311
2022-09-15	10:51:55	10.4511	3849.55	1	312
2022-09-15	10:51:56	6.32067	3855.87	1	313
2022-09-15	10:51:56	4.08016	3859.95	1	314
2022-09-15	10:51:56	2.90067	3862.85	FALSE	314
2022-09-15	10:51:57	2.24693	3865.09	FALSE	314
2022-09-15	10:51:57	1.6619	3866.76	FALSE	314
2022-09-15	10:51:57	1.18531	3867.94	FALSE	314
2022-09-15	10:51:57	1.25589	3869.2	FALSE	314
2022-09-15	10:51:57	3.38668	3872.58	1	315
2022-09-15	10:51:58	9.46647	3882.05	1	316
2022-09-15	10:51:58	12.0666	3894.12	1	317
2022-09-15	10:51:58	8.73136	3902.85	1	318
2022-09-15	10:51:59	6.41105	3909.26	1	319
2022-09-15	10:51:59	4.01879	3913.28	1	320
2022-09-15	10:51:59	4.76342	3918.04	1	321
2022-09-15	10:51:59	4.33955	3922.38	1	322
2022-09-15	10:52:00	3.87752	3926.26	1	323
2022-09-15	10:52:00	3.95395	3930.21	1	324
2022-09-15	10:52:00	3.59843	3933.81	1	325
2022-09-15	10:52:00	3.44184	3937.25	1	326
2022-09-15	10:52:01	2.96286	3940.22	FALSE	326
2022-09-15	10:52:01	2.82424	3943.04	FALSE	326
2022-09-15	10:52:01	2.46612	3945.51	FALSE	326
2022-09-15	10:52:01	2.59981	3948.11	FALSE	326
2022-09-15	10:52:02	2.62179	3950.73	FALSE	326
2022-09-15	10:52:02	2.55436	3953.28	FALSE	326
2022-09-15	10:52:02	2.27894	3955.56	FALSE	326
2022-09-15	10:52:03	1.96434	3957.53	FALSE	326
2022-09-15	10:52:03	2.0507	3959.58	FALSE	326
2022-09-15	10:52:03	1.95899	3961.54	FALSE	326
2022-09-15	10:52:03	2.13675	3963.67	FALSE	326
2022-09-15	10:52:04	2.01258	3965.68	FALSE	326
2022-09-15	10:52:04	1.90958	3967.59	FALSE	326
2022-09-15	10:52:04	1.81889	3969.41	FALSE	326
2022-09-15	10:52:04	1.80958	3971.22	FALSE	326
2022-09-15	10:52:05	1.93813	3973.16	FALSE	326
2022-09-15	10:52:05	2.04729	3975.21	FALSE	326
2022-09-15	10:52:05	2.34907	3977.56	FALSE	326
2022-09-15	10:52:05	2.64591	3980.2	FALSE	326
2022-09-15	10:52:06	2.76067	3982.96	FALSE	326
2022-09-15	10:52:06	2.64703	3985.61	FALSE	326
2022-09-15	10:52:06	2.65228	3988.26	FALSE	326
2022-09-15	10:52:07	2.81345	3991.08	FALSE	326
2022-09-15	10:52:07	2.12475	3993.2	FALSE	326
2022-09-15	10:52:07	2.25019	3995.45	FALSE	326
2022-09-15	10:52:07	3.7566	3999.21	1	327
2022-09-15	10:52:08	6.78225	4005.99	1	328
2022-09-15	10:52:08	10.2231	4016.21	1	329
2022-09-15	10:52:08	17.1587	4033.37	1	330
2022-09-15	10:52:08	12.2756	4045.65	1	331
2022-09-15	10:52:09	8.09523	4053.74	1	332
2022-09-15	10:52:09	5.35986	4059.1	1	333
2022-09-15	10:52:09	4.63233	4063.73	1	334
2022-09-15	10:52:10	4.2794	4068.01	1	335
2022-09-15	10:52:10	3.36342	4071.38	1	336
2022-09-15	10:52:10	3.35874	4074.74	1	337
2022-09-15	10:52:10	3.29202	4078.03	1	338
2022-09-15	10:52:11	3.02759	4081.06	1	339
2022-09-15	10:52:11	3.54851	4084.6	1	340
2022-09-15	10:52:11	3.6221	4088.23	1	341
2022-09-15	10:52:11	2.35966	4090.59	FALSE	341
2022-09-15	10:52:12	2.46215	4093.05	FALSE	341
2022-09-15	10:52:12	2.64759	4095.7	FALSE	341
2022-09-15	10:52:12	2.60108	4098.3	FALSE	341
2022-09-15	10:52:12	2.37945	4100.68	FALSE	341
2022-09-15	10:52:13	2.28876	4102.97	FALSE	341
2022-09-15	10:52:13	2.25884	4105.22	FALSE	341
2022-09-15	10:52:13	2.2049	4107.43	FALSE	341
2022-09-15	10:52:13	2.20597	4109.64	FALSE	341
2022-09-15	10:52:14	4.83721	4114.47	1	342
2022-09-15	10:52:14	4.65589	4119.13	1	343
2022-09-15	10:52:14	3.84108	4122.97	1	344
2022-09-15	10:52:15	3.82597	4126.8	1	345
2022-09-15	10:52:15	3.77833	4130.57	1	346
2022-09-15	10:52:15	3.70464	4134.28	1	347
2022-09-15	10:52:15	3.7309	4138.01	1	348
2022-09-15	10:52:16	3.87925	4141.89	1	349
2022-09-15	10:52:16	3.87518	4145.76	1	350
2022-09-15	10:52:16	4.20993	4149.97	1	351
2022-09-15	10:52:16	4.39523	4154.37	1	352
2022-09-15	10:52:17	5.04408	4159.41	1	353
2022-09-15	10:52:17	4.98642	4164.4	1	354
2022-09-15	10:52:17	3.72388	4168.12	1	355
2022-09-15	10:52:17	3.61207	4171.74	1	356
2022-09-15	10:52:18	1.94408	4173.68	FALSE	356
2022-09-15	10:52:18	1.20953	4174.89	FALSE	356
2022-09-15	10:52:18	1.55024	4176.44	FALSE	356
2022-09-15	10:52:19	2.91965	4179.36	FALSE	356
2022-09-15	10:52:19	3.98744	4183.35	1	357
2022-09-15	10:52:19	3.31467	4186.66	1	358
2022-09-15	10:52:19	2.58322	4189.24	FALSE	358
2022-09-15	10:52:20	2.73472	4191.98	FALSE	358
2022-09-15	10:52:20	2.24337	4194.22	FALSE	358
2022-09-15	10:52:20	1.94184	4196.16	FALSE	358
2022-09-15	10:52:20	2.38439	4198.55	FALSE	358
2022-09-15	10:52:21	2.65238	4201.2	FALSE	358
2022-09-15	10:52:21	12.2826	4213.48	1	359
2022-09-15	10:52:21	22.4852	4235.97	1	360
2022-09-15	10:52:21	13.6313	4249.6	1	361
2022-09-15	10:52:22	12.1237	4261.72	1	362
2022-09-15	10:52:22	18.6349	4280.36	1	363
2022-09-15	10:52:22	17.4857	4297.84	1	364
2022-09-15	10:52:23	9.35802	4307.2	1	365
2022-09-15	10:52:23	11.8254	4319.03	1	366
2022-09-15	10:52:23	13.3081	4332.34	1	367
2022-09-15	10:52:23	6.78103	4339.12	1	368
2022-09-15	10:52:24	4.2593	4343.38	1	369
2022-09-15	10:52:24	5.02592	4348.4	1	370
2022-09-15	10:52:24	5.20713	4353.61	1	371
2022-09-15	10:52:24	5.68907	4359.3	1	372
2022-09-15	10:52:25	6.51543	4365.81	1	373
2022-09-15	10:52:25	8.16545	4373.98	1	374
2022-09-15	10:52:25	8.48031	4382.46	1	375
2022-09-15	10:52:26	6.08505	4388.54	1	376
2022-09-15	10:52:26	3.74658	4392.29	1	377
2022-09-15	10:52:26	3.29161	4395.58	1	378
2022-09-15	10:52:26	3.45223	4399.03	1	379
2022-09-15	10:52:27	3.34159	4402.38	1	380
2022-09-15	10:52:27	4.59355	4406.97	1	381
2022-09-15	10:52:27	2.43772	4409.41	FALSE	381
2022-09-15	10:52:27	2.23843	4411.65	FALSE	381
2022-09-15	10:52:28	1.81299	4413.46	FALSE	381
2022-09-15	10:52:28	1.72688	4415.19	FALSE	381
2022-09-15	10:52:28	1.70973	4416.9	FALSE	381
2022-09-15	10:52:28	1.72429	4418.62	FALSE	381
2022-09-15	10:52:29	1.61197	4420.23	FALSE	381
2022-09-15	10:52:29	1.18225	4421.41	FALSE	381
2022-09-15	10:52:29	1.93187	4423.35	FALSE	381
2022-09-15	10:52:30	1.7535	4425.1	FALSE	381
2022-09-15	10:52:30	1.58922	4426.69	FALSE	381
2022-09-15	10:52:30	1.37212	4428.06	FALSE	381
2022-09-15	10:52:30	0.926272	4428.99	FALSE	381
2022-09-15	10:52:31	0.632735	4429.62	FALSE	381
2022-09-15	10:52:31	0.657112	4430.28	FALSE	381
2022-09-15	10:52:31	0.786629	4431.06	FALSE	381
2022-09-15	10:52:31	0.789733	4431.85	FALSE	381
2022-09-15	10:52:32	0.858689	4432.71	FALSE	381
2022-09-15	10:52:32	0.961539	4433.67	FALSE	381
2022-09-15	10:52:32	1.1933	4434.87	FALSE	381
2022-09-15	10:52:32	1.26602	4436.13	FALSE	381
2022-09-15	10:52:33	1.29024	4437.42	FALSE	381
2022-09-15	10:52:33	1.13772	4438.56	FALSE	381
2022-09-15	10:52:33	1.10963	4439.67	FALSE	381
2022-09-15	10:52:34	1.07014	4440.74	FALSE	381
2022-09-15	10:52:34	1.04729	4441.79	FALSE	381
2022-09-15	10:52:34	0.91645	4442.7	FALSE	381
2022-09-15	10:52:34	0.957773	4443.66	FALSE	381
2022-09-15	10:52:35	0.935076	4444.6	FALSE	381
2022-09-15	10:52:35	0.897367	4445.49	FALSE	381
2022-09-15	10:52:35	0.912735	4446.41	FALSE	381
2022-09-15	10:52:35	0.897417	4447.3	FALSE	381
2022-09-15	10:52:36	0.901997	4448.21	FALSE	381
2022-09-15	10:52:36	0.931005	4449.14	FALSE	381
2022-09-15	10:52:36	0.985916	4450.12	FALSE	381
2022-09-15	10:52:36	1.04525	4451.17	FALSE	381
2022-09-15	10:52:37	1.03538	4452.2	FALSE	381
2022-09-15	10:52:37	0.928308	4453.13	FALSE	381
2022-09-15	10:52:37	0.919402	4454.05	FALSE	381
2022-09-15	10:52:38	0.958282	4455.01	FALSE	381
2022-09-15	10:52:38	0.976247	4455.99	FALSE	381

## Sheet: Boris_harness_2022915104715
						**GoPro Fitting: 1036
2022-09-15	10:47:15	0.245458
2022-09-15	10:47:15	0.360115
2022-09-15	10:47:15	0.277672
2022-09-15	10:47:16	0.20098
2022-09-15	10:47:16	0.20327
2022-09-15	10:47:16	0.224033
2022-09-15	10:47:17	0.22215
2022-09-15	10:47:17	0.311005
2022-09-15	10:47:17	0.123372
2022-09-15	10:47:17	0.114619
2022-09-15	10:47:18	0.064186
2022-09-15	10:47:18	0.136501
2022-09-15	10:47:18	0.239657
2022-09-15	10:47:18	0.156654
2022-09-15	10:47:19	0.176145
2022-09-15	10:47:19	0.222456
2022-09-15	10:47:19	0.263168
2022-09-15	10:47:19	0.300471
2022-09-15	10:47:20	0.0552801
2022-09-15	10:47:20	0.299657
2022-09-15	10:47:20	0.329071
2022-09-15	10:47:21	0.533092
2022-09-15	10:47:21	3.61212
2022-09-15	10:47:21	2.41513
2022-09-15	10:47:21	0.692735
2022-09-15	10:47:22	0.112939
2022-09-15	10:47:22	-0.0679259
2022-09-15	10:47:22	0.359707
2022-09-15	10:47:22	0.232532
2022-09-15	10:47:23	0.0619468
2022-09-15	10:47:23	0.141591
2022-09-15	10:47:23	0.139199
2022-09-15	10:47:23	0.169886
2022-09-15	10:47:24	0.279606
2022-09-15	10:47:24	1.02088
2022-09-15	10:47:24	0.40383
2022-09-15	10:47:25	0.471412
2022-09-15	10:47:25	0.531565
2022-09-15	10:47:25	0.313906
2022-09-15	10:47:25	0.30215
2022-09-15	10:47:26	0.277672
2022-09-15	10:47:26	0.352583
2022-09-15	10:47:26	0.381947
2022-09-15	10:47:26	0.275687
2022-09-15	10:47:27	0.550191
2022-09-15	10:47:27	0.484084
2022-09-15	10:47:27	0.43986
2022-09-15	10:47:27	0.356247
2022-09-15	10:47:28	0.319606
2022-09-15	10:47:28	0.349478
2022-09-15	10:47:28	0.319657
2022-09-15	10:47:29	0.367188
2022-09-15	10:47:29	0.412634
2022-09-15	10:47:29	0.387188
2022-09-15	10:47:29	0.346323
2022-09-15	10:47:30	0.355534
2022-09-15	10:47:30	0.31584
2022-09-15	10:47:30	0.31528
2022-09-15	10:47:30	0.337977
2022-09-15	10:47:31	0.345611
2022-09-15	10:47:31	0.337214
2022-09-15	10:47:31	0.308512
2022-09-15	10:47:32	0.355484
2022-09-15	10:47:32	0.323931
2022-09-15	10:47:32	0.339199
2022-09-15	10:47:32	0.365763
2022-09-15	10:47:33	0.30673
2022-09-15	10:47:33	0.358384
2022-09-15	10:47:33	0.3907
2022-09-15	10:47:33	0.328206
2022-09-15	10:47:34	0.333244
2022-09-15	10:47:34	0.320776
2022-09-15	10:47:34	0.360318
2022-09-15	10:47:34	0.365051
2022-09-15	10:47:35	0.315636
2022-09-15	10:47:35	0.275941
2022-09-15	10:47:35	0.289631
2022-09-15	10:47:36	0.28159
2022-09-15	10:47:36	0.316247
2022-09-15	10:47:36	0.32729
2022-09-15	10:47:36	0.341947
2022-09-15	10:47:37	0.337468
2022-09-15	10:47:37	0.325356
2022-09-15	10:47:37	0.39472
2022-09-15	10:47:37	0.360013
2022-09-15	10:47:38	0.176909
2022-09-15	10:47:38	0.170496
2022-09-15	10:47:38	0.243779
2022-09-15	10:47:38	0.250751
2022-09-15	10:47:39	0.154924
2022-09-15	10:47:39	0.242049
2022-09-15	10:47:39	0.253143
2022-09-15	10:47:40	0.251005
2022-09-15	10:47:40	0.256094
2022-09-15	10:47:40	0.220573
2022-09-15	10:47:40	0.24327
2022-09-15	10:47:41	0.230395
2022-09-15	10:47:41	0.234618
2022-09-15	10:47:41	0.236807
2022-09-15	10:47:41	0.26042
2022-09-15	10:47:42	0.228562
2022-09-15	10:47:42	0.223982
2022-09-15	10:47:42	0.211209
2022-09-15	10:47:42	0.190445
2022-09-15	10:47:43	0.209428
2022-09-15	10:47:43	0.208512
2022-09-15	10:47:43	0.214771
2022-09-15	10:47:44	0.21355
2022-09-15	10:47:44	0.190802
2022-09-15	10:47:44	0.162252
2022-09-15	10:47:44	0.166425
2022-09-15	10:47:45	0.126832
2022-09-15	10:47:45	0.338741
2022-09-15	10:47:45	0.373957
2022-09-15	10:47:45	0.292939
2022-09-15	10:47:46	0.341896
2022-09-15	10:47:46	0.359962
2022-09-15	10:47:46	0.406425
2022-09-15	10:47:47	0.38383
2022-09-15	10:47:47	0.36785
2022-09-15	10:47:47	0.378537
2022-09-15	10:47:47	0.370598
2022-09-15	10:47:48	0.377367
2022-09-15	10:47:48	0.383881
2022-09-15	10:47:48	0.341845
2022-09-15	10:47:48	0.387901
2022-09-15	10:47:49	0.271819
2022-09-15	10:47:49	0.445865
2022-09-15	10:47:49	0.326425
2022-09-15	10:47:49	0.0467305
2022-09-15	10:47:50	-0.158715
2022-09-15	10:47:50	-0.126654
2022-09-15	10:47:50	-0.241259
2022-09-15	10:47:51	-0.544211
2022-09-15	10:47:51	-0.836424
2022-09-15	10:47:51	-1.02156
2022-09-15	10:47:51	-0.856882
2022-09-15	10:47:52	-0.620139
2022-09-15	10:47:52	0.237875
2022-09-15	10:47:52	1.16312
2022-09-15	10:47:52	5.42184
2022-09-15	10:47:53	4.22744
2022-09-15	10:47:53	2.60077
2022-09-15	10:47:53	2.94993
2022-09-15	10:47:53	4.00749
2022-09-15	10:47:54	6.7395
2022-09-15	10:47:54	11.5685
2022-09-15	10:47:54	2.59085
2022-09-15	10:47:55	-0.0279768
2022-09-15	10:47:55	-0.18757
2022-09-15	10:47:55	-0.154694
2022-09-15	10:47:55	0.265305
2022-09-15	10:47:56	0.0469341
2022-09-15	10:47:56	1.06301
2022-09-15	10:47:56	0.285763
2022-09-15	10:47:56	0.160013
2022-09-15	10:47:57	0.0337534
2022-09-15	10:47:57	0.460623
2022-09-15	10:47:57	4.39925
2022-09-15	10:47:57	16.0294
2022-09-15	10:47:58	7.56948
2022-09-15	10:47:58	5.84698
2022-09-15	10:47:58	4.47141
2022-09-15	10:47:59	4.96719
2022-09-15	10:47:59	3.85334
2022-09-15	10:47:59	7.40489
2022-09-15	10:47:59	4.20881
2022-09-15	10:48:00	6.31014
2022-09-15	10:48:00	9.18662
2022-09-15	10:48:00	11.0821
2022-09-15	10:48:00	12.7698
2022-09-15	10:48:01	14.9816
2022-09-15	10:48:01	21.404
2022-09-15	10:48:01	18.774
2022-09-15	10:48:02	16.3036
2022-09-15	10:48:02	2.51513
2022-09-15	10:48:02	11.8745
2022-09-15	10:48:02	4.30831
2022-09-15	10:48:03	25.6589
2022-09-15	10:48:03	16.8169
2022-09-15	10:48:03	23.0433
2022-09-15	10:48:03	25.5252
2022-09-15	10:48:04	8.61579
2022-09-15	10:48:04	11.0145
2022-09-15	10:48:04	2.55329
2022-09-15	10:48:05	2.8734
2022-09-15	10:48:05	0.31416
2022-09-15	10:48:05	4.40495
2022-09-15	10:48:05	30.1764
2022-09-15	10:48:06	17.8008
2022-09-15	10:48:06	19.2461
2022-09-15	10:48:06	24.2676
2022-09-15	10:48:06	20.0387
2022-09-15	10:48:07	8.28434
2022-09-15	10:48:07	17.164
2022-09-15	10:48:07	38.2431
2022-09-15	10:48:07	35.0351
2022-09-15	10:48:08	15.8351
2022-09-15	10:48:08	0.557875
2022-09-15	10:48:08	20.1386
2022-09-15	10:48:08	11.5793
2022-09-15	10:48:09	32.434
2022-09-15	10:48:09	25.4551
2022-09-15	10:48:09	20.169
2022-09-15	10:48:10	32.107
2022-09-15	10:48:10	7.0993
2022-09-15	10:48:10	18.7168
2022-09-15	10:48:10	17.1663
2022-09-15	10:48:11	24.4528
2022-09-15	10:48:11	49.944
2022-09-15	10:48:11	27.2107
2022-09-15	10:48:11	46.6503
2022-09-15	10:48:12	43.3969
2022-09-15	10:48:12	25.3973
2022-09-15	10:48:12	15.9444
2022-09-15	10:48:12	19.9754
2022-09-15	10:48:13	20.0827
2022-09-15	10:48:13	13.6015
2022-09-15	10:48:13	17.1736
2022-09-15	10:48:14	16.8005
2022-09-15	10:48:14	9.46107
2022-09-15	10:48:14	13.7726
2022-09-15	10:48:14	28.2475
2022-09-15	10:48:15	20.6013
2022-09-15	10:48:15	19.6145
2022-09-15	10:48:15	18.9455
2022-09-15	10:48:15	8.97533
2022-09-15	10:48:16	15.6209
2022-09-15	10:48:16	5.69202
2022-09-15	10:48:16	31.0544
2022-09-15	10:48:17	11.7368
2022-09-15	10:48:17	13.8202
2022-09-15	10:48:17	29.7394
2022-09-15	10:48:17	12.2482
2022-09-15	10:48:18	5.2538
2022-09-15	10:48:18	5.99105
2022-09-15	10:48:18	2.37202
2022-09-15	10:48:18	1.62281
2022-09-15	10:48:19	2.49584
2022-09-15	10:48:19	20.1639
2022-09-15	10:48:19	18.3035
2022-09-15	10:48:19	8.24133
2022-09-15	10:48:20	10.2442
2022-09-15	10:48:20	15.4191
2022-09-15	10:48:20	21.3505
2022-09-15	10:48:21	16.3268
2022-09-15	10:48:21	14.2339
2022-09-15	10:48:21	10.0372
2022-09-15	10:48:21	13.8107
2022-09-15	10:48:22	21.3643
2022-09-15	10:48:22	12.0243
2022-09-15	10:48:22	10.1233
2022-09-15	10:48:22	24.2172
2022-09-15	10:48:23	14.7162
2022-09-15	10:48:23	1.63411
2022-09-15	10:48:23	0.438283
2022-09-15	10:48:23	1.89416
2022-09-15	10:48:24	7.95533
2022-09-15	10:48:24	19.8623
2022-09-15	10:48:24	16.1343
2022-09-15	10:48:25	23.076
2022-09-15	10:48:25	20.5091
2022-09-15	10:48:25	4.51482
2022-09-15	10:48:25	0.186679
2022-09-15	10:48:26	-0.17846
2022-09-15	10:48:26	-0.312506
2022-09-15	10:48:26	-0.264872
2022-09-15	10:48:26	-0.0472135
2022-09-15	10:48:27	0.179504
2022-09-15	10:48:27	3.80011
2022-09-15	10:48:27	16.1005
2022-09-15	10:48:27	12.6794
2022-09-15	10:48:28	23.5576
2022-09-15	10:48:28	23.3412
2022-09-15	10:48:28	22.9791
2022-09-15	10:48:29	15.1514
2022-09-15	10:48:29	21.2524
2022-09-15	10:48:29	30.7875
2022-09-15	10:48:29	39.5123
2022-09-15	10:48:30	6.04922
2022-09-15	10:48:30	0.229122
2022-09-15	10:48:30	0.325916
2022-09-15	10:48:30	0.383575
2022-09-15	10:48:31	-0.923803
2022-09-15	10:48:31	-0.553015
2022-09-15	10:48:31	-0.172557
2022-09-15	10:48:31	4.95004
2022-09-15	10:48:32	7.90093
2022-09-15	10:48:32	0.0316669
2022-09-15	10:48:32	0.379606
2022-09-15	10:48:33	-0.0728623
2022-09-15	10:48:33	-0.92818
2022-09-15	10:48:33	-1.05927
2022-09-15	10:48:33	0.119606
2022-09-15	10:48:34	0.456094
2022-09-15	10:48:34	1.14429
2022-09-15	10:48:34	3.59589
2022-09-15	10:48:34	11.0162
2022-09-15	10:48:35	11.4379
2022-09-15	10:48:35	0.462354
2022-09-15	10:48:35	1.30846
2022-09-15	10:48:36	0.157417
2022-09-15	10:48:36	0.668919
2022-09-15	10:48:36	0.104084
2022-09-15	10:48:36	1.83879
2022-09-15	10:48:37	27.3453
2022-09-15	10:48:37	13.8463
2022-09-15	10:48:37	4.36714
2022-09-15	10:48:37	4.47044
2022-09-15	10:48:38	4.82011
2022-09-15	10:48:38	1.0848
2022-09-15	10:48:38	0.832735
2022-09-15	10:48:38	0.467748
2022-09-15	10:48:39	1.3991
2022-09-15	10:48:39	0.562608
2022-09-15	10:48:39	1.30006
2022-09-15	10:48:40	0.64444
2022-09-15	10:48:40	0.707646
2022-09-15	10:48:40	-0.121259
2022-09-15	10:48:40	-0.50818
2022-09-15	10:48:41	-0.885126
2022-09-15	10:48:41	-0.99103
2022-09-15	10:48:41	-1.16767
2022-09-15	10:48:41	-0.857035
2022-09-15	10:48:42	-0.82131
2022-09-15	10:48:42	-0.567671
2022-09-15	10:48:42	2.45986
2022-09-15	10:48:42	8.08194
2022-09-15	10:48:43	12.8036
2022-09-15	10:48:43	3.70637
2022-09-15	10:48:43	3.76322
2022-09-15	10:48:44	5.16398
2022-09-15	10:48:44	3.29599
2022-09-15	10:48:44	3.37477
2022-09-15	10:48:44	3.94475
2022-09-15	10:48:45	5.10123
2022-09-15	10:48:45	6.3424
2022-09-15	10:48:45	5.42683
2022-09-15	10:48:45	5.19477
2022-09-15	10:48:46	6.81441
2022-09-15	10:48:46	4.91548
2022-09-15	10:48:46	4.21777
2022-09-15	10:48:46	2.58052
2022-09-15	10:48:47	2.32734
2022-09-15	10:48:47	2.19721
2022-09-15	10:48:47	2.19665
2022-09-15	10:48:48	2.14704
2022-09-15	10:48:48	2.18541
2022-09-15	10:48:48	2.23604
2022-09-15	10:48:48	2.24831
2022-09-15	10:48:49	2.11701
2022-09-15	10:48:49	2.09452
2022-09-15	10:48:49	0.863473
2022-09-15	10:48:49	0.400725
2022-09-15	10:48:50	0.274059
2022-09-15	10:48:50	0.0606745
2022-09-15	10:48:50	-0.261615
2022-09-15	10:48:51	-0.364414
2022-09-15	10:48:51	-0.375254
2022-09-15	10:48:51	-0.485941
2022-09-15	10:48:51	-0.722226
2022-09-15	10:48:52	-0.538053
2022-09-15	10:48:52	1.40057
2022-09-15	10:48:52	2.72006
2022-09-15	10:48:52	0.524644
2022-09-15	10:48:53	0.256043
2022-09-15	10:48:53	0.285
2022-09-15	10:48:53	0.563829
2022-09-15	10:48:53	0.421234
2022-09-15	10:48:54	0.429987
2022-09-15	10:48:54	0.401234
2022-09-15	10:48:54	0.389529
2022-09-15	10:48:55	0.400725
2022-09-15	10:48:55	0.428512
2022-09-15	10:48:55	0.335178
2022-09-15	10:48:55	0.071158
2022-09-15	10:48:56	-0.431946
2022-09-15	10:48:56	-0.614898
2022-09-15	10:48:56	-0.56416
2022-09-15	10:48:56	-0.653065
2022-09-15	10:48:57	-0.785076
2022-09-15	10:48:57	-0.959122
2022-09-15	10:48:57	-0.688893
2022-09-15	10:48:57	0.718791
2022-09-15	10:48:58	14.9864
2022-09-15	10:48:58	11.5093
2022-09-15	10:48:58	5.07894
2022-09-15	10:48:59	3.21365
2022-09-15	10:48:59	1.74037
2022-09-15	10:48:59	1.38933
2022-09-15	10:48:59	0.331107
2022-09-15	10:49:00	0.377112
2022-09-15	10:49:00	0.268104
2022-09-15	10:49:00	0.345814
2022-09-15	10:49:00	0.134975
2022-09-15	10:49:01	0.237061
2022-09-15	10:49:01	0.0700384
2022-09-15	10:49:01	-0.03673
2022-09-15	10:49:01	-0.170979
2022-09-15	10:49:02	0.0684099
2022-09-15	10:49:02	1.11248
2022-09-15	10:49:02	2.73253
2022-09-15	10:49:03	5.43691
2022-09-15	10:49:03	6.28993
2022-09-15	10:49:03	4.09151
2022-09-15	10:49:03	3.27523
2022-09-15	10:49:04	1.35899
2022-09-15	10:49:04	1.73401
2022-09-15	10:49:04	1.47447
2022-09-15	10:49:04	1.98342
2022-09-15	10:49:05	1.18429
2022-09-15	10:49:05	0.43528
2022-09-15	10:49:05	0.335535
2022-09-15	10:49:05	-0.0681294
2022-09-15	10:49:06	1.20948
2022-09-15	10:49:06	5.30042
2022-09-15	10:49:06	12.0675
2022-09-15	10:49:07	9.82357
2022-09-15	10:49:07	5.06093
2022-09-15	10:49:07	3.51564
2022-09-15	10:49:07	5.18749
2022-09-15	10:49:08	7.45594
2022-09-15	10:49:08	10.4545
2022-09-15	10:49:08	11.9113
2022-09-15	10:49:08	13.3628
2022-09-15	10:49:09	5.40805
2022-09-15	10:49:09	3.25879
2022-09-15	10:49:09	0.72785
2022-09-15	10:49:10	0.586883
2022-09-15	10:49:10	0.273702
2022-09-15	10:49:10	0.197214
2022-09-15	10:49:10	3.15238
2022-09-15	10:49:11	7.93538
2022-09-15	10:49:11	34.0396
2022-09-15	10:49:11	3.23742
2022-09-15	10:49:11	3.58403
2022-09-15	10:49:12	0.563015
2022-09-15	10:49:12	0.0514634
2022-09-15	10:49:12	0.627952
2022-09-15	10:49:12	0.662964
2022-09-15	10:49:13	0.064644
2022-09-15	10:49:13	0.333041
2022-09-15	10:49:13	0.248715
2022-09-15	10:49:14	1.12785
2022-09-15	10:49:14	5.2393
2022-09-15	10:49:14	6.87283
2022-09-15	10:49:14	8.17649
2022-09-15	10:49:15	8.18464
2022-09-15	10:49:15	10.2098
2022-09-15	10:49:15	12.451
2022-09-15	10:49:15	10.6791
2022-09-15	10:49:16	5.30825
2022-09-15	10:49:16	3.8053
2022-09-15	10:49:16	4.91579
2022-09-15	10:49:16	3.77935
2022-09-15	10:49:17	3.40001
2022-09-15	10:49:17	3.10393
2022-09-15	10:49:17	3.26678
2022-09-15	10:49:18	2.85848
2022-09-15	10:49:18	2.94434
2022-09-15	10:49:18	2.85665
2022-09-15	10:49:18	2.67217
2022-09-15	10:49:19	2.88993
2022-09-15	10:49:19	2.98225
2022-09-15	10:49:19	2.03604
2022-09-15	10:49:19	2.54642
2022-09-15	10:49:20	2.14378
2022-09-15	10:49:20	2.1476
2022-09-15	10:49:20	2.22474
2022-09-15	10:49:20	2.14612
2022-09-15	10:49:21	2.18729
2022-09-15	10:49:21	2.05731
2022-09-15	10:49:21	2.08139
2022-09-15	10:49:22	2.02963
2022-09-15	10:49:22	2.08408
2022-09-15	10:49:22	1.95961
2022-09-15	10:49:22	2.09472
2022-09-15	10:49:23	2.50337
2022-09-15	10:49:23	2.47533
2022-09-15	10:49:23	2.73309
2022-09-15	10:49:23	2.48821
2022-09-15	10:49:24	2.66088
2022-09-15	10:49:24	2.51589
2022-09-15	10:49:24	2.49263
2022-09-15	10:49:24	2.35391
2022-09-15	10:49:25	2.47777
2022-09-15	10:49:25	2.51747
2022-09-15	10:49:25	2.50907
2022-09-15	10:49:26	2.52205
2022-09-15	10:49:26	2.52836
2022-09-15	10:49:26	2.4736
2022-09-15	10:49:26	2.50093
2022-09-15	10:49:27	2.7624
2022-09-15	10:49:27	2.81594
2022-09-15	10:49:27	2.83675
2022-09-15	10:49:27	3.2766
2022-09-15	10:49:28	3.12978
2022-09-15	10:49:28	2.80897
2022-09-15	10:49:28	3.03777
2022-09-15	10:49:29	2.88434
2022-09-15	10:49:29	3.26408
2022-09-15	10:49:29	3.35111
2022-09-15	10:49:29	2.41345
2022-09-15	10:49:30	3.13426
2022-09-15	10:49:30	2.62729
2022-09-15	10:49:30	2.85843
2022-09-15	10:49:30	2.92118
2022-09-15	10:49:31	2.82612
2022-09-15	10:49:31	2.81996
2022-09-15	10:49:31	2.50072
2022-09-15	10:49:31	2.92887
2022-09-15	10:49:32	2.4735
2022-09-15	10:49:32	2.51915
2022-09-15	10:49:32	2.57742
2022-09-15	10:49:33	2.68805
2022-09-15	10:49:33	2.73614
2022-09-15	10:49:33	2.56958
2022-09-15	10:49:33	2.58327
2022-09-15	10:49:34	2.52083
2022-09-15	10:49:34	2.54642
2022-09-15	10:49:34	2.50795
2022-09-15	10:49:34	2.4738
2022-09-15	10:49:35	2.18083
2022-09-15	10:49:35	2.40347
2022-09-15	10:49:35	2.58724
2022-09-15	10:49:35	2.62734
2022-09-15	10:49:36	2.72815
2022-09-15	10:49:36	2.77462
2022-09-15	10:49:36	2.74296
2022-09-15	10:49:37	2.7539
2022-09-15	10:49:37	2.79401
2022-09-15	10:49:37	2.82541
2022-09-15	10:49:37	2.91472
2022-09-15	10:49:38	2.88673
2022-09-15	10:49:38	2.68861
2022-09-15	10:49:38	2.7963
2022-09-15	10:49:38	2.93121
2022-09-15	10:49:39	2.94846
2022-09-15	10:49:39	3.17823
2022-09-15	10:49:39	2.7367
2022-09-15	10:49:39	2.50134
2022-09-15	10:49:40	2.14317
2022-09-15	10:49:40	2.12286
2022-09-15	10:49:40	2.19396
2022-09-15	10:49:41	1.77884
2022-09-15	10:49:41	1.98413
2022-09-15	10:49:41	2.4221
2022-09-15	10:49:41	0.662761
2022-09-15	10:49:42	0.986069
2022-09-15	10:49:42	0.310445
2022-09-15	10:49:42	0.951768
2022-09-15	10:49:42	1.30388
2022-09-15	10:49:43	2.12195
2022-09-15	10:49:43	2.84312
2022-09-15	10:49:43	3.93345
2022-09-15	10:49:43	1.582
2022-09-15	10:49:44	-0.248587
2022-09-15	10:49:44	-0.18818
2022-09-15	10:49:44	-0.0710811
2022-09-15	10:49:45	0.0483081
2022-09-15	10:49:45	0.0393514
2022-09-15	10:49:45	-0.38762
2022-09-15	10:49:45	0.409733
2022-09-15	10:49:46	3.8678
2022-09-15	10:49:46	10.5476
2022-09-15	10:49:46	7.56418
2022-09-15	10:49:46	7.19828
2022-09-15	10:49:47	11.9927
2022-09-15	10:49:47	16.1721
2022-09-15	10:49:47	7.31914
2022-09-15	10:49:48	6.18128
2022-09-15	10:49:48	5.10968
2022-09-15	10:49:48	4.86596
2022-09-15	10:49:48	4.84622
2022-09-15	10:49:49	4.38612
2022-09-15	10:49:49	4.25309
2022-09-15	10:49:49	4.14021
2022-09-15	10:49:49	3.82754
2022-09-15	10:49:50	3.87955
2022-09-15	10:49:50	3.41594
2022-09-15	10:49:50	2.74612
2022-09-15	10:49:50	2.49945
2022-09-15	10:49:51	2.17838
2022-09-15	10:49:51	2.3191
2022-09-15	10:49:51	1.78128
2022-09-15	10:49:52	1.60118
2022-09-15	10:49:52	1.63299
2022-09-15	10:49:52	1.69116
2022-09-15	10:49:52	1.6335
2022-09-15	10:49:53	1.60546
2022-09-15	10:49:53	1.72184
2022-09-15	10:49:53	1.66149
2022-09-15	10:49:53	1.56454
2022-09-15	10:49:54	1.59772
2022-09-15	10:49:54	1.60948
2022-09-15	10:49:54	1.76006
2022-09-15	10:49:54	1.78658
2022-09-15	10:49:55	1.2278
2022-09-15	10:49:55	1.56851
2022-09-15	10:49:55	1.37706
2022-09-15	10:49:56	1.80062
2022-09-15	10:49:56	1.4877
2022-09-15	10:49:56	1.32734
2022-09-15	10:49:56	1.73859
2022-09-15	10:49:57	1.64011
2022-09-15	10:49:57	1.57721
2022-09-15	10:49:57	1.62719
2022-09-15	10:49:57	1.66866
2022-09-15	10:49:58	1.67782
2022-09-15	10:49:58	1.72897
2022-09-15	10:49:58	1.76006
2022-09-15	10:49:58	1.68083
2022-09-15	10:49:59	1.71177
2022-09-15	10:49:59	1.66363
2022-09-15	10:49:59	1.64642
2022-09-15	10:50:00	1.61803
2022-09-15	10:50:00	1.62688
2022-09-15	10:50:00	1.52963
2022-09-15	10:50:00	1.44276
2022-09-15	10:50:01	1.44566
2022-09-15	10:50:01	1.45793
2022-09-15	10:50:01	1.52892
2022-09-15	10:50:01	1.57553
2022-09-15	10:50:02	1.58846
2022-09-15	10:50:02	1.56408
2022-09-15	10:50:02	1.66999
2022-09-15	10:50:02	1.71793
2022-09-15	10:50:03	1.71462
2022-09-15	10:50:03	1.66067
2022-09-15	10:50:03	1.65004
2022-09-15	10:50:04	1.61487
2022-09-15	10:50:04	1.66724
2022-09-15	10:50:04	1.69564
2022-09-15	10:50:04	1.72815
2022-09-15	10:50:05	1.8077
2022-09-15	10:50:05	1.84134
2022-09-15	10:50:05	1.83329
2022-09-15	10:50:05	1.82668
2022-09-15	10:50:06	1.77894
2022-09-15	10:50:06	1.79548
2022-09-15	10:50:06	1.71411
2022-09-15	10:50:06	1.69192
2022-09-15	10:50:07	1.68154
2022-09-15	10:50:07	1.68897
2022-09-15	10:50:07	1.67981
2022-09-15	10:50:08	1.7307
2022-09-15	10:50:08	1.75375
2022-09-15	10:50:08	1.66658
2022-09-15	10:50:08	1.63721
2022-09-15	10:50:09	1.61019
2022-09-15	10:50:09	1.6023
2022-09-15	10:50:09	1.59345
2022-09-15	10:50:09	1.61212
2022-09-15	10:50:10	1.61813
2022-09-15	10:50:10	1.61803
2022-09-15	10:50:10	1.62429
2022-09-15	10:50:11	1.6136
2022-09-15	10:50:11	1.65233
2022-09-15	10:50:11	1.52037
2022-09-15	10:50:11	1.62159
2022-09-15	10:50:12	1.86195
2022-09-15	10:50:12	2.62617
2022-09-15	10:50:12	4.23075
2022-09-15	10:50:12	5.89563
2022-09-15	10:50:13	4.81813
2022-09-15	10:50:13	0.390089
2022-09-15	10:50:13	0.1164
2022-09-15	10:50:13	-0.168486
2022-09-15	10:50:14	-0.083702
2022-09-15	10:50:14	11.3259
2022-09-15	10:50:14	12.9133
2022-09-15	10:50:15	6.20052
2022-09-15	10:50:15	0.453753
2022-09-15	10:50:15	0.244542
2022-09-15	10:50:15	0.279707
2022-09-15	10:50:16	-0.491641
2022-09-15	10:50:16	-0.435966
2022-09-15	10:50:16	-0.394949
2022-09-15	10:50:16	-0.331946
2022-09-15	10:50:17	-0.266552
2022-09-15	10:50:17	-0.291234
2022-09-15	10:50:17	-0.203753
2022-09-15	10:50:17	-0.299274
2022-09-15	10:50:18	-0.390165
2022-09-15	10:50:18	-0.4379
2022-09-15	10:50:18	-0.638155
2022-09-15	10:50:19	-0.819732
2022-09-15	10:50:19	-0.879885
2022-09-15	10:50:19	-0.339224
2022-09-15	10:50:19	4.17767
2022-09-15	10:50:20	4.62322
2022-09-15	10:50:20	6.21492
2022-09-15	10:50:20	3.74988
2022-09-15	10:50:20	2.12159
2022-09-15	10:50:21	1.51182
2022-09-15	10:50:21	3.71976
2022-09-15	10:50:21	3.9563
2022-09-15	10:50:21	5.15014
2022-09-15	10:50:22	4.37334
2022-09-15	10:50:22	6.0682
2022-09-15	10:50:22	1.99421
2022-09-15	10:50:23	0.690598
2022-09-15	10:50:23	0.40841
2022-09-15	10:50:23	0.495585
2022-09-15	10:50:23	0.325051
2022-09-15	10:50:24	0.418333
2022-09-15	10:50:24	0.728868
2022-09-15	10:50:24	0.192227
2022-09-15	10:50:24	0.809784
2022-09-15	10:50:25	4.67548
2022-09-15	10:50:25	2.80759
2022-09-15	10:50:25	1.94398
2022-09-15	10:50:25	0.447188
2022-09-15	10:50:26	0.313143
2022-09-15	10:50:26	0.393397
2022-09-15	10:50:26	0.2964
2022-09-15	10:50:27	0.373295
2022-09-15	10:50:27	0.260878
2022-09-15	10:50:27	0.436145
2022-09-15	10:50:27	0.408919
2022-09-15	10:50:28	2.09874
2022-09-15	10:50:28	2.2906
2022-09-15	10:50:28	3.01401
2022-09-15	10:50:28	1.80668
2022-09-15	10:50:29	0.683524
2022-09-15	10:50:29	0.350191
2022-09-15	10:50:29	0.474822
2022-09-15	10:50:30	0.262303
2022-09-15	10:50:30	0.441285
2022-09-15	10:50:30	0.223168
2022-09-15	10:50:30	0.429275
2022-09-15	10:50:31	0.26098
2022-09-15	10:50:31	0.557519
2022-09-15	10:50:31	0.335331
2022-09-15	10:50:31	4.28708
2022-09-15	10:50:32	2.58281
2022-09-15	10:50:32	2.81976
2022-09-15	10:50:32	1.81416
2022-09-15	10:50:32	1.50296
2022-09-15	10:50:33	2.51757
2022-09-15	10:50:33	0.242252
2022-09-15	10:50:33	0.695789
2022-09-15	10:50:34	2.46877
2022-09-15	10:50:34	0.238181
2022-09-15	10:50:34	2.45833
2022-09-15	10:50:34	0.45299
2022-09-15	10:50:35	2.41426
2022-09-15	10:50:35	1.23849
2022-09-15	10:50:35	1.00276
2022-09-15	10:50:35	5.38795
2022-09-15	10:50:36	0.281489
2022-09-15	10:50:36	1.98373
2022-09-15	10:50:36	0.289478
2022-09-15	10:50:36	0.00525471
2022-09-15	10:50:37	0.149275
2022-09-15	10:50:37	-0.117748
2022-09-15	10:50:37	-0.485992
2022-09-15	10:50:38	-0.237544
2022-09-15	10:50:38	0.165458
2022-09-15	10:50:38	2.92439
2022-09-15	10:50:38	2.1223
2022-09-15	10:50:39	2.89569
2022-09-15	10:50:39	0.189428
2022-09-15	10:50:39	-0.0974934
2022-09-15	10:50:39	-0.167468
2022-09-15	10:50:40	-0.191641
2022-09-15	10:50:40	0.0557381
2022-09-15	10:50:40	0.0831681
2022-09-15	10:50:40	-0.131997
2022-09-15	10:50:41	-0.0688928
2022-09-15	10:50:41	-0.306043
2022-09-15	10:50:41	-0.178053
2022-09-15	10:50:42	-0.190623
2022-09-15	10:50:42	0.00993663
2022-09-15	10:50:42	0.000878093
2022-09-15	10:50:42	0.348104
2022-09-15	10:50:43	0.569122
2022-09-15	10:50:43	0.361692
2022-09-15	10:50:43	0.680776
2022-09-15	10:50:43	2.0592
2022-09-15	10:50:44	0.154415
2022-09-15	10:50:44	0.814415
2022-09-15	10:50:44	3.71472
2022-09-15	10:50:44	0.172685
2022-09-15	10:50:45	0.0605728
2022-09-15	10:50:45	0.110191
2022-09-15	10:50:45	0.0403183
2022-09-15	10:50:46	0.0486135
2022-09-15	10:50:46	0.0143132
2022-09-15	10:50:46	-0.0471117
2022-09-15	10:50:46	-0.0414628
2022-09-15	10:50:47	-0.180496
2022-09-15	10:50:47	-0.0559667
2022-09-15	10:50:47	0.199199
2022-09-15	10:50:47	3.01553
2022-09-15	10:50:48	2.44892
2022-09-15	10:50:48	1.3336
2022-09-15	10:50:48	0.437977
2022-09-15	10:50:48	0.565814
2022-09-15	10:50:49	0.366323
2022-09-15	10:50:49	0.229071
2022-09-15	10:50:49	0.243117
2022-09-15	10:50:50	0.245713
2022-09-15	10:50:50	0.118486
2022-09-15	10:50:50	0.10897
2022-09-15	10:50:50	0.165967
2022-09-15	10:50:51	0.130598
2022-09-15	10:50:51	0.154669
2022-09-15	10:50:51	0.125153
2022-09-15	10:50:51	0.0208781
2022-09-15	10:50:52	0.112685
2022-09-15	10:50:52	0.187341
2022-09-15	10:50:52	-0.180649
2022-09-15	10:50:53	-0.13047
2022-09-15	10:50:53	-0.253371
2022-09-15	10:50:53	-0.153727
2022-09-15	10:50:53	-0.307824
2022-09-15	10:50:54	-0.160292
2022-09-15	10:50:54	-0.185025
2022-09-15	10:50:54	-0.404414
2022-09-15	10:50:54	-0.602073
2022-09-15	10:50:55	-0.625687
2022-09-15	10:50:55	-0.538867
2022-09-15	10:50:55	0.291514
2022-09-15	10:50:55	0.562404
2022-09-15	10:50:56	2.31584
2022-09-15	10:50:56	1.04062
2022-09-15	10:50:56	0.867646
2022-09-15	10:50:57	2.41009
2022-09-15	10:50:57	0.323982
2022-09-15	10:50:57	1.03991
2022-09-15	10:50:57	1.30999
2022-09-15	10:50:58	0.205255
2022-09-15	10:50:58	2.38836
2022-09-15	10:50:58	1.08531
2022-09-15	10:50:58	0.963473
2022-09-15	10:50:59	0.381845
2022-09-15	10:50:59	0.199402
2022-09-15	10:50:59	1.5477
2022-09-15	10:50:59	1.11085
2022-09-15	10:51:00	4.33518
2022-09-15	10:51:00	2.75034
2022-09-15	10:51:00	5.42031
2022-09-15	10:51:01	0.685102
2022-09-15	10:51:01	2.245
2022-09-15	10:51:01	0.51187
2022-09-15	10:51:01	0.69355
2022-09-15	10:51:02	2.7677
2022-09-15	10:51:02	1.0363
2022-09-15	10:51:02	3.56698
2022-09-15	10:51:02	0.503473
2022-09-15	10:51:03	0.43243
2022-09-15	10:51:03	2.36719
2022-09-15	10:51:03	0.908715
2022-09-15	10:51:03	1.83599
2022-09-15	10:51:04	0.88271
2022-09-15	10:51:04	1.58424
2022-09-15	10:51:04	2.59619
2022-09-15	10:51:05	0.690852
2022-09-15	10:51:05	4.33991
2022-09-15	10:51:05	3.16535
2022-09-15	10:51:05	2.93497
2022-09-15	10:51:06	4.15014
2022-09-15	10:51:06	1.99935
2022-09-15	10:51:06	0.626629
2022-09-15	10:51:06	0.874211
2022-09-15	10:51:07	1.02393
2022-09-15	10:51:07	0.484186
2022-09-15	10:51:07	1.11706
2022-09-15	10:51:07	0.563829
2022-09-15	10:51:08	0.402761
2022-09-15	10:51:08	0.807952
2022-09-15	10:51:08	2.40078
2022-09-15	10:51:09	2.5651
2022-09-15	10:51:09	0.0165015
2022-09-15	10:51:09	0.137875
2022-09-15	10:51:09	0.0970104
2022-09-15	10:51:10	0.0699875
2022-09-15	10:51:10	-0.060903
2022-09-15	10:51:10	0.320725
2022-09-15	10:51:10	1.20846
2022-09-15	10:51:11	8.33716
2022-09-15	10:51:11	3.25619
2022-09-15	10:51:11	4.86347
2022-09-15	10:51:11	1.05212
2022-09-15	10:51:12	2.69263
2022-09-15	10:51:12	0.548868
2022-09-15	10:51:12	0.985662
2022-09-15	10:51:13	1.15467
2022-09-15	10:51:13	0.987392
2022-09-15	10:51:13	0.619657
2022-09-15	10:51:13	2.80785
2022-09-15	10:51:14	2.41299
2022-09-15	10:51:14	3.39365
2022-09-15	10:51:14	1.35447
2022-09-15	10:51:15	2.02749
2022-09-15	10:51:15	2.16648
2022-09-15	10:51:15	2.74403
2022-09-15	10:51:15	2.8106
2022-09-15	10:51:15	2.35116
2022-09-15	10:51:16	0.215026
2022-09-15	10:51:16	0.181387
2022-09-15	10:51:16	0.128359
2022-09-15	10:51:17	0.101743
2022-09-15	10:51:17	0.216094
2022-09-15	10:51:17	0.17986
2022-09-15	10:51:17	0.638028
2022-09-15	10:51:18	7.46357
2022-09-15	10:51:18	10.723
2022-09-15	10:51:18	9.25731
2022-09-15	10:51:18	4.45085
2022-09-15	10:51:19	2.96266
2022-09-15	10:51:19	5.27594
2022-09-15	10:51:19	4.91624
2022-09-15	10:51:20	1.74963
2022-09-15	10:51:20	2.28195
2022-09-15	10:51:20	2.75457
2022-09-15	10:51:20	3.09543
2022-09-15	10:51:21	1.88001
2022-09-15	10:51:21	2.63329
2022-09-15	10:51:21	2.33961
2022-09-15	10:51:21	2.5707
2022-09-15	10:51:22	2.63553
2022-09-15	10:51:22	2.64622
2022-09-15	10:51:22	2.36444
2022-09-15	10:51:22	2.45477
2022-09-15	10:51:23	1.98795
2022-09-15	10:51:23	1.90235
2022-09-15	10:51:23	1.76469
2022-09-15	10:51:24	1.7649
2022-09-15	10:51:24	1.64749
2022-09-15	10:51:24	1.56948
2022-09-15	10:51:24	1.30139
2022-09-15	10:51:25	1.12235
2022-09-15	10:51:25	1.14022
2022-09-15	10:51:25	1.70917
2022-09-15	10:51:25	1.60286
2022-09-15	10:51:26	1.82719
2022-09-15	10:51:26	2.19615
2022-09-15	10:51:26	2.3909
2022-09-15	10:51:26	2.65482
2022-09-15	10:51:27	2.42215
2022-09-15	10:51:27	2.28892
2022-09-15	10:51:27	2.22251
2022-09-15	10:51:28	2.1935
2022-09-15	10:51:28	2.14322
2022-09-15	10:51:28	2.09518
2022-09-15	10:51:28	2.59223
2022-09-15	10:51:29	0.591107
2022-09-15	10:51:29	0.179148
2022-09-15	10:51:29	0.256552
2022-09-15	10:51:29	0.275127
2022-09-15	10:51:30	1.04581
2022-09-15	10:51:30	2.50739
2022-09-15	10:51:30	10.9034
2022-09-15	10:51:30	3.74037
2022-09-15	10:51:31	7.34515
2022-09-15	10:51:31	1.42714
2022-09-15	10:51:31	1.24078
2022-09-15	10:51:32	2.17665
2022-09-15	10:51:32	0.559962
2022-09-15	10:51:32	1.69192
2022-09-15	10:51:32	1.30139
2022-09-15	10:51:33	3.29131
2022-09-15	10:51:33	7.19212
2022-09-15	10:51:33	3.51334
2022-09-15	10:51:33	1.51233
2022-09-15	10:51:34	-0.0824297
2022-09-15	10:51:34	0.279758
2022-09-15	10:51:34	0.150038
2022-09-15	10:51:34	0.52042
2022-09-15	10:51:35	1.41436
2022-09-15	10:51:35	3.30352
2022-09-15	10:51:35	8.43843
2022-09-15	10:51:36	5.20026
2022-09-15	10:51:36	4.52256
2022-09-15	10:51:36	3.10037
2022-09-15	10:51:36	2.12551
2022-09-15	10:51:37	4.2339
2022-09-15	10:51:37	1.25375
2022-09-15	10:51:37	4.46663
2022-09-15	10:51:37	0.982761
2022-09-15	10:51:38	5.17701
2022-09-15	10:51:38	3.74739
2022-09-15	10:51:38	3.0282
2022-09-15	10:51:38	3.20281
2022-09-15	10:51:39	2.2138
2022-09-15	10:51:39	8.10108
2022-09-15	10:51:39	5.42662
2022-09-15	10:51:40	9.58535
2022-09-15	10:51:40	7.2279
2022-09-15	10:51:40	6.13416
2022-09-15	10:51:40	8.11848
2022-09-15	10:51:41	9.8309
2022-09-15	10:51:41	8.90006
2022-09-15	10:51:41	5.3706
2022-09-15	10:51:41	4.0079
2022-09-15	10:51:42	4.27691
2022-09-15	10:51:42	4.18591
2022-09-15	10:51:42	4.04658
2022-09-15	10:51:42	3.96266
2022-09-15	10:51:43	3.37818
2022-09-15	10:51:43	3.34988
2022-09-15	10:51:43	4.25487
2022-09-15	10:51:44	6.05131
2022-09-15	10:51:44	12.866
2022-09-15	10:51:44	16.3882
2022-09-15	10:51:44	11.9827
2022-09-15	10:51:45	8.98734
2022-09-15	10:51:45	7.92642
2022-09-15	10:51:45	8.35075
2022-09-15	10:51:45	5.76123
2022-09-15	10:51:46	4.61731
2022-09-15	10:51:46	4.36948
2022-09-15	10:51:46	4.56144
2022-09-15	10:51:47	4.1391
2022-09-15	10:51:47	3.51324
2022-09-15	10:51:47	3.06958
2022-09-15	10:51:47	3.17202
2022-09-15	10:51:48	3.99854
2022-09-15	10:51:48	4.69233
2022-09-15	10:51:48	4.4363
2022-09-15	10:51:48	3.84876
2022-09-15	10:51:49	3.8021
2022-09-15	10:51:49	3.79782
2022-09-15	10:51:49	4.07971
2022-09-15	10:51:49	3.99401
2022-09-15	10:51:50	3.9134
2022-09-15	10:51:50	4.27299
2022-09-15	10:51:50	4.0252
2022-09-15	10:51:51	3.84062
2022-09-15	10:51:51	3.5967
2022-09-15	10:51:51	3.31431
2022-09-15	10:51:51	3.09726
2022-09-15	10:51:52	3.10973
2022-09-15	10:51:52	3.03716
2022-09-15	10:51:52	2.87268
2022-09-15	10:51:52	2.8766
2022-09-15	10:51:53	2.96373
2022-09-15	10:51:53	2.96169
2022-09-15	10:51:53	2.97955
2022-09-15	10:51:53	3.27793
2022-09-15	10:51:54	3.11304
2022-09-15	10:51:54	4.1824
2022-09-15	10:51:54	7.52418
2022-09-15	10:51:55	8.3112
2022-09-15	10:51:55	8.39853
2022-09-15	10:51:55	14.26
2022-09-15	10:51:55	10.4511
2022-09-15	10:51:56	6.32067
2022-09-15	10:51:56	4.08016
2022-09-15	10:51:56	2.90067
2022-09-15	10:51:57	2.24693
2022-09-15	10:51:57	1.6619
2022-09-15	10:51:57	1.18531
2022-09-15	10:51:57	1.25589
2022-09-15	10:51:57	3.38668
2022-09-15	10:51:58	9.46647
2022-09-15	10:51:58	12.0666
2022-09-15	10:51:58	8.73136
2022-09-15	10:51:59	6.41105
2022-09-15	10:51:59	4.01879
2022-09-15	10:51:59	4.76342
2022-09-15	10:51:59	4.33955
2022-09-15	10:52:00	3.87752
2022-09-15	10:52:00	3.95395
2022-09-15	10:52:00	3.59843
2022-09-15	10:52:00	3.44184
2022-09-15	10:52:01	2.96286
2022-09-15	10:52:01	2.82424
2022-09-15	10:52:01	2.46612
2022-09-15	10:52:01	2.59981
2022-09-15	10:52:02	2.62179
2022-09-15	10:52:02	2.55436
2022-09-15	10:52:02	2.27894
2022-09-15	10:52:03	1.96434
2022-09-15	10:52:03	2.0507
2022-09-15	10:52:03	1.95899
2022-09-15	10:52:03	2.13675
2022-09-15	10:52:04	2.01258
2022-09-15	10:52:04	1.90958
2022-09-15	10:52:04	1.81889
2022-09-15	10:52:04	1.80958
2022-09-15	10:52:05	1.93813
2022-09-15	10:52:05	2.04729
2022-09-15	10:52:05	2.34907
2022-09-15	10:52:05	2.64591
2022-09-15	10:52:06	2.76067
2022-09-15	10:52:06	2.64703
2022-09-15	10:52:06	2.65228
2022-09-15	10:52:07	2.81345
2022-09-15	10:52:07	2.12475
2022-09-15	10:52:07	2.25019
2022-09-15	10:52:07	3.7566
2022-09-15	10:52:08	6.78225
2022-09-15	10:52:08	10.2231
2022-09-15	10:52:08	17.1587
2022-09-15	10:52:08	12.2756
2022-09-15	10:52:09	8.09523
2022-09-15	10:52:09	5.35986
2022-09-15	10:52:09	4.63233
2022-09-15	10:52:10	4.2794
2022-09-15	10:52:10	3.36342
2022-09-15	10:52:10	3.35874
2022-09-15	10:52:10	3.29202
2022-09-15	10:52:11	3.02759
2022-09-15	10:52:11	3.54851
2022-09-15	10:52:11	3.6221
2022-09-15	10:52:11	2.35966
2022-09-15	10:52:12	2.46215
2022-09-15	10:52:12	2.64759
2022-09-15	10:52:12	2.60108
2022-09-15	10:52:12	2.37945
2022-09-15	10:52:13	2.28876
2022-09-15	10:52:13	2.25884
2022-09-15	10:52:13	2.2049
2022-09-15	10:52:13	2.20597
2022-09-15	10:52:14	4.83721
2022-09-15	10:52:14	4.65589
2022-09-15	10:52:14	3.84108
2022-09-15	10:52:15	3.82597
2022-09-15	10:52:15	3.77833
2022-09-15	10:52:15	3.70464
2022-09-15	10:52:15	3.7309
2022-09-15	10:52:16	3.87925
2022-09-15	10:52:16	3.87518
2022-09-15	10:52:16	4.20993
2022-09-15	10:52:16	4.39523
2022-09-15	10:52:17	5.04408
2022-09-15	10:52:17	4.98642
2022-09-15	10:52:17	3.72388
2022-09-15	10:52:17	3.61207
2022-09-15	10:52:18	1.94408
2022-09-15	10:52:18	1.20953
2022-09-15	10:52:18	1.55024
2022-09-15	10:52:19	2.91965
2022-09-15	10:52:19	3.98744
2022-09-15	10:52:19	3.31467
2022-09-15	10:52:19	2.58322
2022-09-15	10:52:20	2.73472
2022-09-15	10:52:20	2.24337
2022-09-15	10:52:20	1.94184
2022-09-15	10:52:20	2.38439
2022-09-15	10:52:21	2.65238
2022-09-15	10:52:21	12.2826
2022-09-15	10:52:21	22.4852
2022-09-15	10:52:21	13.6313
2022-09-15	10:52:22	12.1237
2022-09-15	10:52:22	18.6349
2022-09-15	10:52:22	17.4857
2022-09-15	10:52:23	9.35802
2022-09-15	10:52:23	11.8254
2022-09-15	10:52:23	13.3081
2022-09-15	10:52:23	6.78103
2022-09-15	10:52:24	4.2593
2022-09-15	10:52:24	5.02592
2022-09-15	10:52:24	5.20713
2022-09-15	10:52:24	5.68907
2022-09-15	10:52:25	6.51543
2022-09-15	10:52:25	8.16545
2022-09-15	10:52:25	8.48031
2022-09-15	10:52:26	6.08505
2022-09-15	10:52:26	3.74658
2022-09-15	10:52:26	3.29161
2022-09-15	10:52:26	3.45223
2022-09-15	10:52:27	3.34159
2022-09-15	10:52:27	4.59355
2022-09-15	10:52:27	2.43772
2022-09-15	10:52:27	2.23843
2022-09-15	10:52:28	1.81299
2022-09-15	10:52:28	1.72688
2022-09-15	10:52:28	1.70973
2022-09-15	10:52:28	1.72429
2022-09-15	10:52:29	1.61197
2022-09-15	10:52:29	1.18225
2022-09-15	10:52:29	1.93187
2022-09-15	10:52:30	1.7535
2022-09-15	10:52:30	1.58922
2022-09-15	10:52:30	1.37212
2022-09-15	10:52:30	0.926272
2022-09-15	10:52:31	0.632735
2022-09-15	10:52:31	0.657112
2022-09-15	10:52:31	0.786629
2022-09-15	10:52:31	0.789733
2022-09-15	10:52:32	0.858689
2022-09-15	10:52:32	0.961539
2022-09-15	10:52:32	1.1933
2022-09-15	10:52:32	1.26602
2022-09-15	10:52:33	1.29024
2022-09-15	10:52:33	1.13772
2022-09-15	10:52:33	1.10963
2022-09-15	10:52:34	1.07014
2022-09-15	10:52:34	1.04729
2022-09-15	10:52:34	0.91645
2022-09-15	10:52:34	0.957773
2022-09-15	10:52:35	0.935076
2022-09-15	10:52:35	0.897367
2022-09-15	10:52:35	0.912735
2022-09-15	10:52:35	0.897417
2022-09-15	10:52:36	0.901997
2022-09-15	10:52:36	0.931005
2022-09-15	10:52:36	0.985916
2022-09-15	10:52:36	1.04525
2022-09-15	10:52:37	1.03538
2022-09-15	10:52:37	0.928308
2022-09-15	10:52:37	0.919402
2022-09-15	10:52:38	0.958282
2022-09-15	10:52:38	0.976247
