# Supplementary material for: Comparing efficacy in reducing pulling and welfare impacts of four types of leash walking equipment
Source: PeerJ journal article supplement (doi:10.7717/peerj.18131), 2024-10-24
Supplement: Shelter_2_Tension_files.zip [file Boris_martin_202291591647 copy.xlsx]

## Sheet: Averaged Newtons
Date	Time	Averaged Newtons	Impulse	Total steps
2022-09-15	09:16:56	1.21001	1.21001	0		Impulse	9921.84
2022-09-15	09:16:57	1.24335	2.45336	0		Total steps	135
2022-09-15	09:16:58	1.27453	3.72789	0		# > 5sec	10
2022-09-15	09:16:59	1.31612	5.04401	0
2022-09-15	09:17:00	1.36197	6.40598	0
2022-09-15	09:17:01	1.33537	7.74134	0
2022-09-15	09:17:02	1.45253	9.19388	0
2022-09-15	09:17:03	1.4511	10.645	0
2022-09-15	09:17:04	1.41754	12.0625	0
2022-09-15	09:17:05	1.75919	13.8217	0
2022-09-15	09:17:06	1.59247	15.4142	0
2022-09-15	09:17:07	1.64291	17.0571	0
2022-09-15	09:17:08	1.55834	18.6154	0
2022-09-15	09:17:09	1.86457	20.48	0
2022-09-15	09:17:10	0.800055	21.28	0
2022-09-15	09:17:11	0.137918	21.418	0
2022-09-15	09:17:12	-0.223598	21.418	0
2022-09-15	09:17:13	-0.807352	21.418	0
2022-09-15	09:17:14	2.58929	24.0072	0
2022-09-15	09:17:15	5.44565	29.4529	0
2022-09-15	09:17:16	1.84238	31.2953	0
2022-09-15	09:17:17	1.4593	32.7546	0
2022-09-15	09:17:18	6.69998	39.4546	0
2022-09-15	09:17:19	2.04968	41.5042	0
2022-09-15	09:17:20	2.25336	43.7576	0
2022-09-15	09:17:21	1.65755	45.4151	0
2022-09-15	09:17:22	3.39914	48.8143	0
2022-09-15	09:17:23	32.2234	81.0377	1
2022-09-15	09:17:24	2.18454	83.2223	1
2022-09-15	09:17:25	3.12506	86.3473	1
2022-09-15	09:17:26	4.46812	90.8154	1
2022-09-15	09:17:27	1.92953	92.745	1
2022-09-15	09:17:28	1.89962	94.6446	1
2022-09-15	09:17:29	2.16802	96.8126	1
2022-09-15	09:17:30	1.35902	98.1716	1
2022-09-15	09:17:31	1.21499	99.3866	1
2022-09-15	09:17:32	4.86036	104.247	1
2022-09-15	09:17:33	10.2029	114.45	1
2022-09-15	09:17:34	47.6492	162.099	2
2022-09-15	09:17:35	93.8469	255.946	3
2022-09-15	09:17:36	45.6277	301.574	4
2022-09-15	09:17:37	84.3327	385.906	5
2022-09-15	09:17:38	72.1825	458.089	6
2022-09-15	09:17:39	19.1038	477.193	7
2022-09-15	09:17:40	29.2647	506.457	8
2022-09-15	09:17:41	66.7854	573.243	9
2022-09-15	09:17:42	45.1192	618.362	10
2022-09-15	09:17:43	23.1856	641.548	11
2022-09-15	09:17:44	41.2986	682.846	12
2022-09-15	09:17:45	-3.67859	682.846	12
2022-09-15	09:17:46	-2.11516	682.846	12
2022-09-15	09:17:47	8.27671	691.123	12
2022-09-15	09:17:48	2.65613	693.779	12
2022-09-15	09:17:49	9.71835	703.497	12
2022-09-15	09:17:50	0.343161	703.841	12
2022-09-15	09:17:51	0.143294	703.984	12
2022-09-15	09:17:52	-1.86677	703.984	12
2022-09-15	09:17:53	2.70304	706.687	12
2022-09-15	09:17:54	81.4274	788.114	13
2022-09-15	09:17:55	0.800659	788.915	13
2022-09-15	09:17:56	-1.08986	788.915	13
2022-09-15	09:17:57	5.42624	794.341	13
2022-09-15	09:17:58	1.75602	796.097	13
2022-09-15	09:17:59	1.21628	797.313	13
2022-09-15	09:18:00	35.9024	833.216	14
2022-09-15	09:18:01	80.0762	913.292	15
2022-09-15	09:18:02	87.4474	1000.74	16
2022-09-15	09:18:03	19.3906	1020.13	17
2022-09-15	09:18:04	10.1154	1030.25	17
2022-09-15	09:18:05	76.1291	1106.37	18
2022-09-15	09:18:06	86.747	1193.12	19
2022-09-15	09:18:07	13.345	1206.47	20
2022-09-15	09:18:08	5.6638	1212.13	20
2022-09-15	09:18:09	3.32585	1215.46	20
2022-09-15	09:18:10	0.310413	1215.77	20
2022-09-15	09:18:11	21.1724	1236.94	21
2022-09-15	09:18:12	32.1476	1269.09	22
2022-09-15	09:18:13	37.8534	1306.94	23
2022-09-15	09:18:14	61.8846	1368.82	24
2022-09-15	09:18:15	76.3241	1445.15	25
2022-09-15	09:18:16	113.56	1558.71	26
2022-09-15	09:18:17	48.8442	1607.55	27
2022-09-15	09:18:18	1.47311	1609.03	27
2022-09-15	09:18:19	0.615844	1609.64	27
2022-09-15	09:18:20	1.85053	1611.49	27
2022-09-15	09:18:21	2.22876	1613.72	27
2022-09-15	09:18:22	63.8408	1677.56	28
2022-09-15	09:18:23	3.04396	1680.61	28
2022-09-15	09:18:24	61.7387	1742.34	29
2022-09-15	09:18:25	114.394	1856.74	30
2022-09-15	09:18:26	113.518	1970.26	31
2022-09-15	09:18:27	125.794	2096.05	32
2022-09-15	09:18:28	93.9911	2190.04	33
2022-09-15	09:18:29	57.7143	2247.76	34
2022-09-15	09:18:30	5.41362	2253.17	34
2022-09-15	09:18:31	5.05504	2258.23	34
2022-09-15	09:18:32	2.11041	2260.34	34
2022-09-15	09:18:33	8.55633	2268.89	34
2022-09-15	09:18:34	125.766	2394.66	35
2022-09-15	09:18:35	101.696	2496.35	36
2022-09-15	09:18:36	55.2305	2551.58	37
2022-09-15	09:18:37	90.4136	2642	38
2022-09-15	09:18:38	73.7218	2715.72	39
2022-09-15	09:18:39	75.5028	2791.22	40
2022-09-15	09:18:40	29.9641	2821.19	41
2022-09-15	09:18:41	-2.05075	2821.19	41
2022-09-15	09:18:42	-1.99299	2821.19	41
2022-09-15	09:18:43	1.40594	2822.59	41
2022-09-15	09:18:44	1.72371	2824.32	41
2022-09-15	09:18:45	1.20996	2825.53	41
2022-09-15	09:18:46	1.2726	2826.8	41
2022-09-15	09:18:47	0.968323	2827.77	41
2022-09-15	09:18:48	1.85709	2829.62	41
2022-09-15	09:18:49	51.3037	2880.93	42
2022-09-15	09:18:50	66.7838	2947.71	43
2022-09-15	09:18:51	65.9866	3013.7	44
2022-09-15	09:18:52	72.2906	3085.99	45
2022-09-15	09:18:53	154.196	3240.18	46
2022-09-15	09:18:54	169.466	3409.65	47
2022-09-15	09:18:55	106.323	3515.97	48
2022-09-15	09:18:56	66.672	3582.65	49
2022-09-15	09:18:57	59.5801	3642.23	50
2022-09-15	09:18:58	69.921	3712.15	51
2022-09-15	09:18:59	89.0493	3801.2	52
2022-09-15	09:19:00	39.0366	3840.23	53
2022-09-15	09:19:01	11.2124	3851.44	53
2022-09-15	09:19:02	9.19973	3860.64	53
2022-09-15	09:19:03	47.1263	3907.77	54
2022-09-15	09:19:04	33.1827	3940.95	55
2022-09-15	09:19:05	29.432	3970.39	56
2022-09-15	09:19:06	16.1047	3986.49	57
2022-09-15	09:19:07	16.9941	4003.48	58
2022-09-15	09:19:08	32.9036	4036.39	59
2022-09-15	09:19:09	45.4163	4081.8	60
2022-09-15	09:19:10	-0.756532	4081.8	60
2022-09-15	09:19:11	1.18726	4082.99	60
2022-09-15	09:19:12	146.745	4229.74	61
2022-09-15	09:19:13	204.55	4434.29	62
2022-09-15	09:19:14	99.5765	4533.86	63
2022-09-15	09:19:15	117.391	4651.25	64
2022-09-15	09:19:16	131.996	4783.25	65
2022-09-15	09:19:17	88.408	4871.66	66
2022-09-15	09:19:18	86.6887	4958.35	67
2022-09-15	09:19:19	87.0503	5045.4	68
2022-09-15	09:19:20	78.044	5123.44	69
2022-09-15	09:19:21	70.8762	5194.32	70
2022-09-15	09:19:22	1.19892	5195.52	70
2022-09-15	09:19:23	0.468081	5195.98	70
2022-09-15	09:19:24	103.812	5299.8	71
2022-09-15	09:19:25	166.213	5466.01	72
2022-09-15	09:19:26	182.471	5648.48	73
2022-09-15	09:19:27	97.5503	5746.03	74
2022-09-15	09:19:28	7.24479	5753.28	74
2022-09-15	09:19:29	15.6069	5768.88	75
2022-09-15	09:19:30	2.15483	5771.04	75
2022-09-15	09:19:31	14.7817	5785.82	76
2022-09-15	09:19:32	6.41045	5792.23	76
2022-09-15	09:19:33	6.73688	5798.97	76
2022-09-15	09:19:34	10.3643	5809.33	76
2022-09-15	09:19:35	15.2392	5824.57	77
2022-09-15	09:19:36	22.5761	5847.15	78
2022-09-15	09:19:37	3.00469	5850.15	78
2022-09-15	09:19:38	54.6397	5904.79	79
2022-09-15	09:19:39	32.1872	5936.98	80
2022-09-15	09:19:40	0.991395	5937.97	80
2022-09-15	09:19:41	17.5936	5955.56	81
2022-09-15	09:19:42	8.07467	5963.64	81
2022-09-15	09:19:43	40.8805	6004.52	82
2022-09-15	09:19:44	19.8067	6024.32	83
2022-09-15	09:19:45	2.98856	6027.31	83
2022-09-15	09:19:46	1.30554	6028.62	83
2022-09-15	09:19:47	21.2393	6049.86	84
2022-09-15	09:19:48	15.5589	6065.42	85
2022-09-15	09:19:49	20.4838	6085.9	86
2022-09-15	09:19:50	16.872	6102.77	87
2022-09-15	09:19:51	30.4089	6133.18	88
2022-09-15	09:19:52	22.1135	6155.29	89
2022-09-15	09:19:53	10.3501	6165.64	89
2022-09-15	09:19:54	8.86363	6174.51	89
2022-09-15	09:19:55	3.62347	6178.13	89
2022-09-15	09:19:56	10.6193	6188.75	89
2022-09-15	09:19:57	11.8257	6200.58	89
2022-09-15	09:19:58	12.2075	6212.78	89
2022-09-15	09:19:59	6.37785	6219.16	89
2022-09-15	09:20:00	3.16728	6222.33	89
2022-09-15	09:20:01	1.32101	6223.65	89
2022-09-15	09:20:02	1.81199	6225.46	89
2022-09-15	09:20:03	0.918899	6226.38	89
2022-09-15	09:20:04	0.348896	6226.73	89
2022-09-15	09:20:05	0.242841	6226.97	89
2022-09-15	09:20:06	0.202585	6227.18	89
2022-09-15	09:20:07	0.177646	6227.35	89
2022-09-15	09:20:08	0.125977	6227.48	89
2022-09-15	09:20:09	0.171874	6227.65	89
2022-09-15	09:20:10	0.163724	6227.81	89
2022-09-15	09:20:11	0.753535	6228.57	89
2022-09-15	09:20:12	0.547368	6229.12	89
2022-09-15	09:20:13	127.25	6356.37	90
2022-09-15	09:20:14	150.463	6506.83	91
2022-09-15	09:20:15	57.6397	6564.47	92
2022-09-15	09:20:16	105.018	6669.49	93
2022-09-15	09:20:17	25.2214	6694.71	94
2022-09-15	09:20:18	89.016	6783.72	95
2022-09-15	09:20:19	65.3652	6849.09	96
2022-09-15	09:20:20	37.7616	6886.85	97
2022-09-15	09:20:21	2.92879	6889.78	97
2022-09-15	09:20:22	6.64728	6896.43	97
2022-09-15	09:20:23	-1.01109	6896.43	97
2022-09-15	09:20:24	74.6385	6971.06	98
2022-09-15	09:20:25	3.94763	6975.01	98
2022-09-15	09:20:26	2.16354	6977.18	98
2022-09-15	09:20:27	2.24102	6979.42	98
2022-09-15	09:20:28	2.92923	6982.35	98
2022-09-15	09:20:29	2.96988	6985.32	98
2022-09-15	09:20:30	4.34978	6989.67	98
2022-09-15	09:20:31	10.9658	7000.63	98
2022-09-15	09:20:32	45.0074	7045.64	99
2022-09-15	09:20:33	38.1041	7083.74	100
2022-09-15	09:20:34	68.2676	7152.01	101
2022-09-15	09:20:35	99.6879	7251.7	102
2022-09-15	09:20:36	97.5366	7349.24	103
2022-09-15	09:20:37	101.427	7450.66	104
2022-09-15	09:20:38	159.932	7610.59	105
2022-09-15	09:20:39	93.2184	7703.81	106
2022-09-15	09:20:40	8.62679	7712.44	106
2022-09-15	09:20:41	-0.172815	7712.44	106
2022-09-15	09:20:42	1.06881	7713.51	106
2022-09-15	09:20:43	2.25964	7715.77	106
2022-09-15	09:20:44	1.83972	7717.61	106
2022-09-15	09:20:45	2.05489	7719.66	106
2022-09-15	09:20:46	0.551498	7720.21	106
2022-09-15	09:20:47	2.28109	7722.5	106
2022-09-15	09:20:48	4.93745	7727.43	106
2022-09-15	09:20:49	-0.194112	7727.43	106
2022-09-15	09:20:50	2.43559	7729.87	106
2022-09-15	09:20:51	24.4353	7754.3	107
2022-09-15	09:20:52	0.497735	7754.8	107
2022-09-15	09:20:53	0.244935	7755.05	107
2022-09-15	09:20:54	0.98085	7756.03	107
2022-09-15	09:20:55	2.15313	7758.18	107
2022-09-15	09:20:56	-2.3653	7758.18	107
2022-09-15	09:20:57	0.687886	7758.87	107
2022-09-15	09:20:58	0.0320327	7758.9	107
2022-09-15	09:20:59	1.52754	7760.43	107
2022-09-15	09:21:00	3.11544	7763.54	107
2022-09-15	09:21:01	6.75656	7770.3	107
2022-09-15	09:21:02	11.5062	7781.81	107
2022-09-15	09:21:03	92.1652	7873.97	108
2022-09-15	09:21:04	73.534	7947.51	109
2022-09-15	09:21:05	-0.439386	7947.51	109
2022-09-15	09:21:06	-2.99806	7947.51	109
2022-09-15	09:21:07	48.6925	7996.2	110
2022-09-15	09:21:08	112.644	8108.84	111
2022-09-15	09:21:09	101.626	8210.47	112
2022-09-15	09:21:10	65.2338	8275.7	113
2022-09-15	09:21:11	37.9689	8313.67	114
2022-09-15	09:21:12	55.0526	8368.72	115
2022-09-15	09:21:13	50.6264	8419.35	116
2022-09-15	09:21:14	117.689	8537.04	117
2022-09-15	09:21:15	125.628	8662.67	118
2022-09-15	09:21:16	84.6994	8747.37	119
2022-09-15	09:21:17	70.1776	8817.54	120
2022-09-15	09:21:18	103.363	8920.91	121
2022-09-15	09:21:19	58.7494	8979.66	122
2022-09-15	09:21:20	0.667967	8980.32	122
2022-09-15	09:21:21	60.2456	9040.57	123
2022-09-15	09:21:22	2.6026	9043.17	123
2022-09-15	09:21:23	0.114432	9043.29	123
2022-09-15	09:21:24	0.564515	9043.85	123
2022-09-15	09:21:25	96.4013	9140.25	124
2022-09-15	09:21:26	118.637	9258.89	125
2022-09-15	09:21:27	156.16	9415.05	126
2022-09-15	09:21:28	153.507	9568.56	127
2022-09-15	09:21:29	16.9952	9585.55	128
2022-09-15	09:21:30	-0.0354071	9585.55	128
2022-09-15	09:21:31	8.49747	9594.05	128
2022-09-15	09:21:32	22.676	9616.73	129
2022-09-15	09:21:33	3.06405	9619.79	129
2022-09-15	09:21:34	0.965305	9620.75	129
2022-09-15	09:21:35	0.869097	9621.62	129
2022-09-15	09:21:36	-3.12251	9621.62	129
2022-09-15	09:21:37	-3.01566	9621.62	129
2022-09-15	09:21:38	-2.7419	9621.62	129
2022-09-15	09:21:39	-3.59506	9621.62	129
2022-09-15	09:21:40	-3.27225	9621.62	129
2022-09-15	09:21:41	1.26072	9622.88	129
2022-09-15	09:21:42	6.07105	9628.96	129
2022-09-15	09:21:43	9.22032	9638.18	129
2022-09-15	09:21:44	12.3397	9650.52	129
2022-09-15	09:21:45	28.0815	9678.6	130
2022-09-15	09:21:46	27.202	9705.8	131
2022-09-15	09:21:47	1.73286	9707.53	131
2022-09-15	09:21:48	-0.0717015	9707.53	131
2022-09-15	09:21:49	22.8418	9730.37	132
2022-09-15	09:21:50	104.985	9835.36	133
2022-09-15	09:21:51	64.8982	9900.26	134
2022-09-15	09:21:52	17.102	9917.36	135
2022-09-15	09:21:53	-0.0934904	9917.36	135
2022-09-15	09:21:54	1.14544	9918.5	135
2022-09-15	09:21:55	1.38375	9919.89	135
2022-09-15	09:21:56	1.95455	9921.84	135

## Sheet: Boris_martin_202291591647 (4)
Date	Time	Lbs	newtons	Averaged Newtons	Total force x time		total steps > 13.345	**GoPro Fitting: 905
2022-09-15	09:16:56	0.270445	1.20299	1.21001	1.20299	FALSE	0
2022-09-15	09:16:56	0.269835	1.20028	1.21001	1.20028	FALSE	0
2022-09-15	09:16:56	0.282863	1.25823	1.21001	2.46122	FALSE	0
2022-09-15	09:16:56	0.264949	1.17855	1.21001	2.37883	FALSE	0
2022-09-15	09:16:57	0.284542	1.2657	1.24335	3.72692	FALSE	0
2022-09-15	09:16:57	0.263473	1.17198	1.24335	3.55081	FALSE	0
2022-09-15	09:16:57	0.279504	1.24329	1.24335	4.97021	FALSE	0
2022-09-15	09:16:57	0.290547	1.29241	1.24335	4.84322	FALSE	0
2022-09-15	09:16:58	0.296196	1.31754	1.27453	6.28775	FALSE	0
2022-09-15	09:16:58	0.280115	1.24601	1.27453	6.08923	FALSE	0
2022-09-15	09:16:58	0.28327	1.26004	1.27453	7.54779	FALSE	0
2022-09-15	09:16:59	0.292227	1.29988	1.31612	7.38911	FALSE	0
2022-09-15	09:16:59	0.265509	1.18104	1.31612	8.72883	FALSE	0
2022-09-15	09:16:59	0.26159	1.1636	1.31612	8.55271	FALSE	0
2022-09-15	09:16:59	0.364186	1.61997	1.31612	10.3488	FALSE	0
2022-09-15	09:17:00	0.362405	1.61205	1.36197	10.1648	FALSE	0
2022-09-15	09:17:00	0.272685	1.21296	1.36197	11.5618	FALSE	0
2022-09-15	09:17:00	0.29645	1.31867	1.36197	11.4834	FALSE	0
2022-09-15	09:17:00	0.293194	1.30419	1.36197	12.8659	FALSE	0
2022-09-15	09:17:01	0.279402	1.24284	1.33537	12.7263	FALSE	0
2022-09-15	09:17:01	0.292125	1.29943	1.33537	14.1654	FALSE	0
2022-09-15	09:17:01	0.315229	1.4022	1.33537	14.1285	FALSE	0
2022-09-15	09:17:01	0.314059	1.397	1.33537	15.5624	FALSE	0
2022-09-15	09:17:02	0.322456	1.43435	1.45253	15.5628	FALSE	0
2022-09-15	09:17:02	0.330802	1.47147	1.45253	17.0338	FALSE	0
2022-09-15	09:17:02	0.326374	1.45178	1.45253	17.0146	FALSE	0
2022-09-15	09:17:03	0.300471	1.33656	1.4511	18.3704	FALSE	0
2022-09-15	09:17:03	0.314517	1.39903	1.4511	18.4136	FALSE	0
2022-09-15	09:17:03	0.323881	1.44069	1.4511	19.8111	FALSE	0
2022-09-15	09:17:03	0.366018	1.62812	1.4511	20.0418	FALSE	0
2022-09-15	09:17:04	0.297519	1.32342	1.41754	21.1345	FALSE	0
2022-09-15	09:17:04	0.30612	1.36168	1.41754	21.4034	FALSE	0
2022-09-15	09:17:04	0.295127	1.31278	1.41754	22.4473	FALSE	0
2022-09-15	09:17:04	0.375942	1.67227	1.41754	23.0757	FALSE	0
2022-09-15	09:17:05	0.422048	1.87735	1.75919	24.3247	FALSE	0
2022-09-15	09:17:05	0.404593	1.79971	1.75919	24.8754	FALSE	0
2022-09-15	09:17:05	0.384847	1.71188	1.75919	26.0365	FALSE	0
2022-09-15	09:17:05	0.370445	1.64781	1.75919	26.5232	FALSE	0
2022-09-15	09:17:06	0.355789	1.58262	1.59247	27.6191	FALSE	0
2022-09-15	09:17:06	0.366934	1.6322	1.59247	28.1554	FALSE	0
2022-09-15	09:17:06	0.343423	1.52761	1.59247	29.1468	FALSE	0
2022-09-15	09:17:06	0.365865	1.62744	1.59247	29.7829	FALSE	0
2022-09-15	09:17:07	0.506781	2.25426	1.64291	31.401	FALSE	0
2022-09-15	09:17:07	0.321031	1.42801	1.64291	31.2109	FALSE	0
2022-09-15	09:17:07	0.280216	1.24646	1.64291	32.6475	FALSE	0
2022-09-15	09:17:08	0.228155	1.01488	1.55834	32.2257	FALSE	0
2022-09-15	09:17:08	0.552837	2.45913	1.55834	35.1066	FALSE	0
2022-09-15	09:17:08	0.271005	1.20548	1.55834	33.4312	FALSE	0
2022-09-15	09:17:08	0.349326	1.55387	1.55834	36.6605	FALSE	0
2022-09-15	09:17:09	0.308715	1.37323	1.86457	34.8045	FALSE	0
2022-09-15	09:17:09	0.371158	1.65099	1.86457	38.3115	FALSE	0
2022-09-15	09:17:09	0.500623	2.22687	1.86457	37.0313	FALSE	0
2022-09-15	09:17:09	0.496196	2.20718	1.86457	40.5186	FALSE	0
2022-09-15	09:17:10	0.0770104	0.342558	0.800055	37.3739	FALSE	0
2022-09-15	09:17:10	0.189886	0.844651	0.800055	41.3633	FALSE	0
2022-09-15	09:17:10	0.116451	0.517997	0.800055	37.8919	FALSE	0
2022-09-15	09:17:10	0.336094	1.49501	0.800055	42.8583	FALSE	0
2022-09-15	09:17:11	0.0948221	0.421788	0.137918	38.3137	FALSE	0
2022-09-15	09:17:11	-0.0253814	-0.112902	0.137918	42.8583	FALSE	0
2022-09-15	09:17:11	0.0235753	0.104868	0.137918	38.4185	FALSE	0
2022-09-15	09:17:12	-0.0174425	-0.0775877	-0.223598	42.8583	FALSE	0
2022-09-15	09:17:12	0.158384	0.704524	-0.223598	39.1231	FALSE	0
2022-09-15	09:17:12	-0.0964246	-0.428916	-0.223598	42.8583	FALSE	0
2022-09-15	09:17:12	-0.245585	-1.09241	-0.223598	39.1231	FALSE	0
2022-09-15	09:17:13	-0.0937783	-0.417145	-0.807352	42.8583	FALSE	0
2022-09-15	09:17:13	-0.124414	-0.553418	-0.807352	39.1231	FALSE	0
2022-09-15	09:17:13	-0.124669	-0.554553	-0.807352	42.8583	FALSE	0
2022-09-15	09:17:13	-0.383142	-1.70429	-0.807352	39.1231	FALSE	0
2022-09-15	09:17:14	-0.131183	-0.583528	2.58929	42.8583	FALSE	0
2022-09-15	09:17:14	0.523524	2.32874	2.58929	41.4518	FALSE	0
2022-09-15	09:17:14	0.417061	1.85517	2.58929	44.7135	FALSE	0
2022-09-15	09:17:14	1.51899	6.75677	2.58929	48.2086	FALSE	0
2022-09-15	09:17:15	1.77889	7.91286	5.44565	52.6263	FALSE	0
2022-09-15	09:17:15	1.24378	5.53258	5.44565	53.7412	FALSE	0
2022-09-15	09:17:15	0.650038	2.8915	5.44565	55.5178	FALSE	0
2022-09-15	09:17:16	0.526374	2.34142	1.84238	56.0826	FALSE	0
2022-09-15	09:17:16	0.445255	1.98058	1.84238	57.4984	FALSE	0
2022-09-15	09:17:16	0.298486	1.32773	1.84238	57.4103	FALSE	0
2022-09-15	09:17:16	0.386629	1.7198	1.84238	59.2182	FALSE	0
2022-09-15	09:17:17	0.461845	2.05438	1.4593	59.4647	FALSE	0
2022-09-15	09:17:17	0.340318	1.5138	1.4593	60.732	FALSE	0
2022-09-15	09:17:17	0.284186	1.26412	1.4593	60.7288	FALSE	0
2022-09-15	09:17:17	0.225916	1.00492	1.4593	61.737	FALSE	0
2022-09-15	09:17:18	0.395738	1.76032	6.69998	62.4891	FALSE	0
2022-09-15	09:17:18	1.87905	8.35839	6.69998	70.0953	FALSE	0
2022-09-15	09:17:18	2.78678	12.3962	6.69998	74.8853	FALSE	0
2022-09-15	09:17:18	0.963321	4.28504	6.69998	74.3804	FALSE	0
2022-09-15	09:17:19	0.432786	1.92512	2.04968	76.8104	FALSE	0
2022-09-15	09:17:19	0.498282	2.21646	2.04968	76.5968	FALSE	0
2022-09-15	09:17:19	0.411361	1.82982	2.04968	78.6402	FALSE	0
2022-09-15	09:17:19	0.500725	2.22732	2.04968	78.8242	FALSE	0
2022-09-15	09:17:20	0.461743	2.05393	2.25336	80.6941	FALSE	0
2022-09-15	09:17:20	0.623066	2.77152	2.25336	81.5957	FALSE	0
2022-09-15	09:17:20	0.434924	1.93463	2.25336	82.6288	FALSE	0
2022-09-15	09:17:21	0.613346	2.72829	1.65755	84.324	FALSE	0
2022-09-15	09:17:21	0.388512	1.72818	1.65755	84.3569	FALSE	0
2022-09-15	09:17:21	0.223575	0.994506	1.65755	85.3185	FALSE	0
2022-09-15	09:17:21	0.265102	1.17923	1.65755	85.5362	FALSE	0
2022-09-15	09:17:22	0.358028	1.59258	3.39914	86.9111	FALSE	0
2022-09-15	09:17:22	0.449377	1.99892	3.39914	87.5351	FALSE	0
2022-09-15	09:17:22	0.406374	1.80763	3.39914	88.7187	FALSE	0
2022-09-15	09:17:22	1.84286	8.19741	3.39914	95.7325	FALSE	0
2022-09-15	09:17:23	17.7321	78.8759	32.2234	167.595	1	1
2022-09-15	09:17:23	6.52011	29.0028	32.2234	124.735	1	2
2022-09-15	09:17:23	3.58546	15.9488	32.2234	183.543	1	3
2022-09-15	09:17:23	1.13894	5.06623	32.2234	129.801	FALSE	3
2022-09-15	09:17:24	0.779707	3.46829	2.18454	187.012	FALSE	3
2022-09-15	09:17:24	0.369936	1.64555	2.18454	131.447	FALSE	3
2022-09-15	09:17:24	0.323677	1.43978	2.18454	188.452	FALSE	3
2022-09-15	09:17:25	0.480674	2.13813	3.12506	133.585	FALSE	3
2022-09-15	09:17:25	0.386527	1.71935	3.12506	190.171	FALSE	3
2022-09-15	09:17:25	0.358537	1.59484	3.12506	135.18	FALSE	3
2022-09-15	09:17:25	1.58444	7.04791	3.12506	197.219	FALSE	3
2022-09-15	09:17:26	2.54698	11.3295	4.46812	146.509	FALSE	3
2022-09-15	09:17:26	0.474924	2.11256	4.46812	199.331	FALSE	3
2022-09-15	09:17:26	0.372532	1.6571	4.46812	148.167	FALSE	3
2022-09-15	09:17:26	0.623473	2.77333	4.46812	202.105	FALSE	3
2022-09-15	09:17:27	0.581896	2.58839	1.92953	150.755	FALSE	3
2022-09-15	09:17:27	0.449275	1.99847	1.92953	204.103	FALSE	3
2022-09-15	09:17:27	0.305458	1.35874	1.92953	152.114	FALSE	3
2022-09-15	09:17:27	0.398486	1.77255	1.92953	205.876	FALSE	3
2022-09-15	09:17:28	0.42958	1.91086	1.89962	154.025	FALSE	3
2022-09-15	09:17:28	0.448868	1.99665	1.89962	207.872	FALSE	3
2022-09-15	09:17:28	0.40271	1.79133	1.89962	155.816	FALSE	3
2022-09-15	09:17:29	0.437875	1.94776	2.16802	209.82	FALSE	3
2022-09-15	09:17:29	0.43187	1.92104	2.16802	157.737	FALSE	3
2022-09-15	09:17:29	0.488359	2.17232	2.16802	211.992	FALSE	3
2022-09-15	09:17:29	0.591463	2.63095	2.16802	160.368	FALSE	3
2022-09-15	09:17:30	0.291056	1.29468	1.35902	213.287	FALSE	3
2022-09-15	09:17:30	0.15126	0.672835	1.35902	161.041	FALSE	3
2022-09-15	09:17:30	0.29416	1.30848	1.35902	214.596	FALSE	3
2022-09-15	09:17:30	0.485611	2.16009	1.35902	163.201	FALSE	3
2022-09-15	09:17:31	0.140776	0.6262	1.21499	215.222	FALSE	3
2022-09-15	09:17:31	0.166781	0.741875	1.21499	163.943	FALSE	3
2022-09-15	09:17:31	0.449886	2.00118	1.21499	217.223	FALSE	3
2022-09-15	09:17:31	0.335127	1.49071	1.21499	165.433	FALSE	3
2022-09-15	09:17:32	0.449071	1.99756	4.86036	219.221	FALSE	3
2022-09-15	09:17:32	0.570496	2.53768	4.86036	167.971	FALSE	3
2022-09-15	09:17:32	1.59385	7.08976	4.86036	226.31	FALSE	3
2022-09-15	09:17:32	1.75721	7.81642	4.86036	175.788	FALSE	3
2022-09-15	09:17:33	2.21803	9.86624	10.2029	236.177	FALSE	3
2022-09-15	09:17:33	2.31721	10.3074	10.2029	186.095	FALSE	3
2022-09-15	09:17:33	2.34592	10.4351	10.2029	246.612	FALSE	3
2022-09-15	09:17:34	1.1563	5.14345	47.6492	191.238	FALSE	3
2022-09-15	09:17:34	5.50169	24.4726	47.6492	271.084	1	4
2022-09-15	09:17:34	10.4087	46.3	47.6492	237.538	1	5
2022-09-15	09:17:34	25.7814	114.681	47.6492	385.765	1	6
2022-09-15	09:17:35	42.4017	188.611	93.8469	426.15	1	7
2022-09-15	09:17:35	26.7835	119.138	93.8469	504.903	1	8
2022-09-15	09:17:35	12.4194	55.244	93.8469	481.394	1	9
2022-09-15	09:17:35	2.78627	12.3939	93.8469	517.297	FALSE	9
2022-09-15	09:17:36	2.48266	11.0434	45.6277	492.437	FALSE	9
2022-09-15	09:17:36	12.6319	56.1892	45.6277	573.487	1	10
2022-09-15	09:17:36	13.8317	61.5262	45.6277	553.963	1	11
2022-09-15	09:17:36	12.084	53.752	45.6277	627.239	1	12
2022-09-15	09:17:37	17.8017	79.1855	84.3327	633.149	1	13
2022-09-15	09:17:37	16.4623	73.2276	84.3327	700.466	1	14
2022-09-15	09:17:37	22.6125	100.585	84.3327	733.734	1	15
2022-09-15	09:17:38	22.7579	101.232	72.1825	801.698	1	16
2022-09-15	09:17:38	21.9998	97.8595	72.1825	831.593	1	17
2022-09-15	09:17:38	17.9112	79.6726	72.1825	881.37	1	18
2022-09-15	09:17:38	2.24052	9.96628	72.1825	841.559	FALSE	18
2022-09-15	09:17:39	1.36515	6.07246	19.1038	887.443	FALSE	18
2022-09-15	09:17:39	5.8854	26.1794	19.1038	867.739	1	19
2022-09-15	09:17:39	5.6336	25.0594	19.1038	912.502	1	20
2022-09-15	09:17:40	8.23909	36.6491	29.2647	904.388	1	21
2022-09-15	09:17:40	5.93034	26.3793	29.2647	938.882	1	22
2022-09-15	09:17:40	3.80805	16.939	29.2647	921.327	1	23
2022-09-15	09:17:40	5.15125	22.9138	29.2647	961.795	1	24
2022-09-15	09:17:40	9.76627	43.4423	29.2647	964.769	1	25
2022-09-15	09:17:41	9.11411	40.5414	66.7854	1002.34	1	26
2022-09-15	09:17:41	16.8948	75.1514	66.7854	1039.92	1	27
2022-09-15	09:17:41	16.1479	71.8291	66.7854	1074.17	1	28
2022-09-15	09:17:41	17.8993	79.6197	66.7854	1119.54	1	29
2022-09-15	09:17:42	17.7772	79.0765	45.1192	1153.24	1	30
2022-09-15	09:17:42	11.8213	52.5835	45.1192	1172.12	1	31
2022-09-15	09:17:42	0.83126	3.69761	45.1192	1156.94	FALSE	31
2022-09-15	09:17:43	0.818028	3.63875	23.1856	1175.76	FALSE	31
2022-09-15	09:17:43	0.272226	1.21092	23.1856	1158.15	FALSE	31
2022-09-15	09:17:43	2.61421	11.6285	23.1856	1187.39	FALSE	31
2022-09-15	09:17:43	17.145	76.2644	23.1856	1234.42	1	32
2022-09-15	09:17:44	30.3694	135.089	41.2986	1322.48	1	33
2022-09-15	09:17:44	6.47894	28.8196	41.2986	1263.24	1	34
2022-09-15	09:17:44	0.290089	1.29037	41.2986	1323.77	FALSE	34
2022-09-15	09:17:44	-0.00105572	-0.00469605	41.2986	1263.24	FALSE	34
2022-09-15	09:17:45	-0.422175	-1.87792	-3.67859	1323.77	FALSE	34
2022-09-15	09:17:45	-0.930215	-4.13778	-3.67859	1263.24	FALSE	34
2022-09-15	09:17:45	-0.921463	-4.09885	-3.67859	1323.77	FALSE	34
2022-09-15	09:17:45	-1.03408	-4.59979	-3.67859	1263.24	FALSE	34
2022-09-15	09:17:46	-0.852608	-3.79257	-2.11516	1323.77	FALSE	34
2022-09-15	09:17:46	-0.833676	-3.70836	-2.11516	1263.24	FALSE	34
2022-09-15	09:17:46	0.259758	1.15546	-2.11516	1324.93	FALSE	34
2022-09-15	09:17:47	3.88108	17.2638	8.27671	1280.5	1	35
2022-09-15	09:17:47	2.00953	8.93879	8.27671	1333.86	FALSE	35
2022-09-15	09:17:47	0.867493	3.85878	8.27671	1284.36	FALSE	35
2022-09-15	09:17:47	0.684644	3.04543	8.27671	1336.91	FALSE	35
2022-09-15	09:17:48	0.647595	2.88063	2.65613	1287.24	FALSE	35
2022-09-15	09:17:48	0.336807	1.49818	2.65613	1338.41	FALSE	35
2022-09-15	09:17:48	0.144135	0.641141	2.65613	1287.88	FALSE	35
2022-09-15	09:17:48	1.25996	5.60455	2.65613	1344.01	FALSE	35
2022-09-15	09:17:49	5.09049	22.6435	9.71835	1310.52	1	36
2022-09-15	09:17:49	2.71935	12.0962	9.71835	1356.11	FALSE	36
2022-09-15	09:17:49	0.650649	2.89422	9.71835	1313.42	FALSE	36
2022-09-15	09:17:49	0.278639	1.23944	9.71835	1357.35	FALSE	36
2022-09-15	09:17:50	0.162659	0.72354	0.343161	1314.14	FALSE	36
2022-09-15	09:17:50	0.0277483	0.12343	0.343161	1357.47	FALSE	36
2022-09-15	09:17:50	0.0410307	0.182513	0.343161	1314.32	FALSE	36
2022-09-15	09:17:51	0.0752292	0.334635	0.143294	1357.81	FALSE	36
2022-09-15	09:17:51	0.0778247	0.34618	0.143294	1314.67	FALSE	36
2022-09-15	09:17:51	-0.00253154	-0.0112608	0.143294	1357.81	FALSE	36
2022-09-15	09:17:51	-0.0216664	-0.0963765	0.143294	1314.67	FALSE	36
2022-09-15	09:17:52	-0.131539	-0.585112	-1.86677	1357.81	FALSE	36
2022-09-15	09:17:52	-0.298766	-1.32897	-1.86677	1314.67	FALSE	36
2022-09-15	09:17:52	-0.55215	-2.45607	-1.86677	1357.81	FALSE	36
2022-09-15	09:17:52	-0.696221	-3.09693	-1.86677	1314.67	FALSE	36
2022-09-15	09:17:53	-0.707366	-3.14651	2.70304	1357.81	FALSE	36
2022-09-15	09:17:53	-0.642226	-2.85675	2.70304	1314.67	FALSE	36
2022-09-15	09:17:53	-0.568333	-2.52806	2.70304	1357.81	FALSE	36
2022-09-15	09:17:53	4.34861	19.3435	2.70304	1334.01	1	37
2022-09-15	09:17:54	18.1796	80.8665	81.4274	1438.67	1	38
2022-09-15	09:17:54	25.9015	115.215	81.4274	1449.23	1	39
2022-09-15	09:17:54	27.6368	122.934	81.4274	1561.61	1	40
2022-09-15	09:17:54	1.50485	6.69387	81.4274	1455.92	FALSE	40
2022-09-15	09:17:55	0.3364	1.49637	0.800659	1563.1	FALSE	40
2022-09-15	09:17:55	0.203372	0.904639	0.800659	1456.83	FALSE	40
2022-09-15	09:17:55	0.000216527	0.000963155	0.800659	1563.1	FALSE	40
2022-09-15	09:17:56	-0.419274	-1.86501	-1.08986	1456.83	FALSE	40
2022-09-15	09:17:56	-0.349554	-1.55489	-1.08986	1563.1	FALSE	40
2022-09-15	09:17:56	-0.236526	-1.05211	-1.08986	1456.83	FALSE	40
2022-09-15	09:17:56	0.0253056	0.112564	-1.08986	1563.22	FALSE	40
2022-09-15	09:17:57	1.29798	5.77367	5.42624	1462.6	FALSE	40
2022-09-15	09:17:57	2.38388	10.604	5.42624	1573.82	FALSE	40
2022-09-15	09:17:57	0.597875	2.65947	5.42624	1465.26	FALSE	40
2022-09-15	09:17:57	0.599758	2.66784	5.42624	1576.49	FALSE	40
2022-09-15	09:17:58	0.38271	1.70237	1.75602	1466.96	FALSE	40
2022-09-15	09:17:58	0.54897	2.44193	1.75602	1578.93	FALSE	40
2022-09-15	09:17:58	0.319249	1.42008	1.75602	1468.38	FALSE	40
2022-09-15	09:17:58	0.328155	1.4597	1.75602	1580.39	FALSE	40
2022-09-15	09:17:59	0.266171	1.18398	1.21628	1469.57	FALSE	40
2022-09-15	09:17:59	0.250649	1.11494	1.21628	1581.51	FALSE	40
2022-09-15	09:17:59	0.303473	1.34991	1.21628	1470.92	FALSE	40
2022-09-15	09:18:00	0.130395	0.580023	35.9024	1582.09	FALSE	40
2022-09-15	09:18:00	2.09782	9.33152	35.9024	1480.25	FALSE	40
2022-09-15	09:18:00	6.40795	28.5038	35.9024	1610.59	1	41
2022-09-15	09:18:00	23.6487	105.194	35.9024	1585.44	1	42
2022-09-15	09:18:01	19.83	88.2078	80.0762	1698.8	1	43
2022-09-15	09:18:01	6.92769	30.8158	80.0762	1616.26	1	44
2022-09-15	09:18:01	12.6237	56.1527	80.0762	1754.95	1	45
2022-09-15	09:18:01	32.6263	145.128	80.0762	1761.39	1	46
2022-09-15	09:18:02	12.3162	54.7849	87.4474	1809.73	1	47
2022-09-15	09:18:02	5.72622	25.4714	87.4474	1786.86	1	48
2022-09-15	09:18:02	30.2222	134.434	87.4474	1944.17	1	49
2022-09-15	09:18:02	30.3716	135.099	87.4474	1921.96	1	50
2022-09-15	09:18:03	6.68764	29.748	19.3906	1973.92	1	51
2022-09-15	09:18:03	4.63614	20.6225	19.3906	1942.58	1	52
2022-09-15	09:18:03	1.7538	7.80125	19.3906	1981.72	FALSE	52
2022-09-15	09:18:04	0.285865	1.27158	10.1154	1943.85	FALSE	52
2022-09-15	09:18:04	0.508868	2.26355	10.1154	1983.98	FALSE	52
2022-09-15	09:18:04	1.39014	6.18362	10.1154	1950.03	FALSE	52
2022-09-15	09:18:04	6.91131	30.7429	10.1154	2014.72	1	53
2022-09-15	09:18:05	18.6086	82.7748	76.1291	2032.81	1	54
2022-09-15	09:18:05	14.4975	64.4878	76.1291	2079.21	1	55
2022-09-15	09:18:05	25.9265	115.326	76.1291	2148.13	1	56
2022-09-15	09:18:05	9.42576	41.9277	76.1291	2121.14	1	57
2022-09-15	09:18:06	13.074	58.1558	86.747	2206.29	1	58
2022-09-15	09:18:06	17.3026	76.9654	86.747	2198.11	1	59
2022-09-15	09:18:06	20.4264	90.8607	86.747	2297.15	1	60
2022-09-15	09:18:06	27.2034	121.006	86.747	2319.11	1	61
2022-09-15	09:18:07	3.90566	17.3732	13.345	2314.52	1	62
2022-09-15	09:18:07	2.46632	10.9707	13.345	2330.08	FALSE	62
2022-09-15	09:18:07	3.23945	14.4097	13.345	2328.93	1	63
2022-09-15	09:18:07	2.38897	10.6266	13.345	2340.71	FALSE	63
2022-09-15	09:18:08	1.08648	4.83288	5.6638	2333.77	FALSE	63
2022-09-15	09:18:08	1.95024	8.67506	5.6638	2349.38	FALSE	63
2022-09-15	09:18:08	0.783117	3.48346	5.6638	2337.25	FALSE	63
2022-09-15	09:18:09	0.515687	2.29388	3.32585	2351.68	FALSE	63
2022-09-15	09:18:09	0.667494	2.96915	3.32585	2340.22	FALSE	63
2022-09-15	09:18:09	0.764898	3.40242	3.32585	2355.08	FALSE	63
2022-09-15	09:18:09	1.04266	4.63796	3.32585	2344.86	FALSE	63
2022-09-15	09:18:10	0.538232	2.39416	0.310413	2357.47	FALSE	63
2022-09-15	09:18:10	0.327239	1.45562	0.310413	2346.31	FALSE	63
2022-09-15	09:18:10	-0.144313	-0.641933	0.310413	2357.47	FALSE	63
2022-09-15	09:18:10	-0.442022	-1.9662	0.310413	2346.31	FALSE	63
2022-09-15	09:18:11	1.59655	7.10177	21.1724	2364.58	FALSE	63
2022-09-15	09:18:11	8.58382	38.1825	21.1724	2384.5	1	64
2022-09-15	09:18:11	2.35391	10.4707	21.1724	2375.05	FALSE	64
2022-09-15	09:18:11	6.50479	28.9346	21.1724	2413.43	1	65
2022-09-15	09:18:12	8.22011	36.5647	32.1476	2411.61	1	66
2022-09-15	09:18:12	7.68026	34.1633	32.1476	2447.59	1	67
2022-09-15	09:18:12	5.78093	25.7147	32.1476	2437.33	1	68
2022-09-15	09:18:13	5.94902	26.4624	37.8534	2474.06	1	69
2022-09-15	09:18:13	9.71965	43.2349	37.8534	2480.56	1	70
2022-09-15	09:18:13	5.26749	23.4308	37.8534	2497.49	1	71
2022-09-15	09:18:13	13.1031	58.2852	37.8534	2538.85	1	72
2022-09-15	09:18:14	26.9249	119.767	61.8846	2617.25	1	73
2022-09-15	09:18:14	9.91803	44.1174	61.8846	2582.96	1	74
2022-09-15	09:18:14	9.15904	40.7412	61.8846	2658	1	75
2022-09-15	09:18:14	9.64713	42.9124	61.8846	2625.88	1	76
2022-09-15	09:18:15	5.45385	24.2598	76.3241	2682.26	1	77
2022-09-15	09:18:15	21.7638	96.8097	76.3241	2722.69	1	78
2022-09-15	09:18:15	33.3305	148.261	76.3241	2830.52	1	79
2022-09-15	09:18:15	8.0855	35.9659	76.3241	2758.65	1	80
2022-09-15	09:18:16	31.7017	141.016	113.56	2971.53	1	81
2022-09-15	09:18:16	14.7814	65.7506	113.56	2824.4	1	82
2022-09-15	09:18:16	30.1054	133.915	113.56	3105.45	1	83
2022-09-15	09:18:17	15.0634	67.005	48.8442	2891.41	1	84
2022-09-15	09:18:17	14.8743	66.1639	48.8442	3171.61	1	85
2022-09-15	09:18:17	10.8513	48.2688	48.8442	2939.68	1	86
2022-09-15	09:18:17	3.1337	13.9393	48.8442	3185.55	1	87
2022-09-15	09:18:18	1.04846	4.66376	1.47311	2944.34	FALSE	87
2022-09-15	09:18:18	0.396959	1.76575	1.47311	3187.32	FALSE	87
2022-09-15	09:18:18	0.121845	0.541991	1.47311	2944.88	FALSE	87
2022-09-15	09:18:18	-0.242582	-1.07905	1.47311	3187.32	FALSE	87
2022-09-15	09:18:19	-0.251183	-1.11731	0.615844	2944.88	FALSE	87
2022-09-15	09:18:19	0.0614379	0.273288	0.615844	3187.59	FALSE	87
2022-09-15	09:18:19	0.543982	2.41974	0.615844	2947.3	FALSE	87
2022-09-15	09:18:19	0.199555	0.887661	0.615844	3188.48	FALSE	87
2022-09-15	09:18:20	0.5707	2.53859	1.85053	2949.84	FALSE	87
2022-09-15	09:18:20	0.380318	1.69173	1.85053	3190.17	FALSE	87
2022-09-15	09:18:20	0.482964	2.14832	1.85053	2951.99	FALSE	87
2022-09-15	09:18:20	0.230089	1.02348	1.85053	3191.19	FALSE	87
2022-09-15	09:18:21	0.347036	1.54369	2.22876	2953.53	FALSE	87
2022-09-15	09:18:21	0.412277	1.83389	2.22876	3193.03	FALSE	87
2022-09-15	09:18:21	0.743829	3.3087	2.22876	2956.84	FALSE	87
2022-09-15	09:18:22	1.69558	7.54228	63.8408	3200.57	FALSE	87
2022-09-15	09:18:22	17.286	76.8916	63.8408	3033.73	1	88
2022-09-15	09:18:22	23.9706	106.626	63.8408	3307.19	1	89
2022-09-15	09:18:22	14.456	64.3032	63.8408	3098.04	1	90
2022-09-15	09:18:23	0.872227	3.87984	3.04396	3311.07	FALSE	90
2022-09-15	09:18:23	0.295484	1.31437	3.04396	3099.35	FALSE	90
2022-09-15	09:18:23	0.569682	2.53406	3.04396	3313.61	FALSE	90
2022-09-15	09:18:23	0.99986	4.44758	3.04396	3103.8	FALSE	90
2022-09-15	09:18:24	14.5225	64.599	61.7387	3378.21	1	91
2022-09-15	09:18:24	15.8844	70.657	61.7387	3174.46	1	92
2022-09-15	09:18:24	7.85283	34.931	61.7387	3413.14	1	93
2022-09-15	09:18:24	17.2582	76.7679	61.7387	3251.22	1	94
2022-09-15	09:18:25	32.3041	143.695	114.394	3556.83	1	95
2022-09-15	09:18:25	25.4945	113.405	114.394	3364.63	1	96
2022-09-15	09:18:25	19.3523	86.0829	114.394	3642.92	1	97
2022-09-15	09:18:26	17.5999	78.2879	113.518	3442.92	1	98
2022-09-15	09:18:26	20.4665	91.0391	113.518	3733.95	1	99
2022-09-15	09:18:26	29.7007	132.115	113.518	3575.03	1	100
2022-09-15	09:18:26	34.313	152.631	113.518	3886.59	1	101
2022-09-15	09:18:27	22.1603	98.5734	125.794	3673.6	1	102
2022-09-15	09:18:27	21.014	93.4745	125.794	3980.06	1	103
2022-09-15	09:18:27	27.7632	123.496	125.794	3797.1	1	104
2022-09-15	09:18:27	42.1817	187.633	125.794	4167.69	1	105
2022-09-15	09:18:28	14.0827	62.6427	93.9911	3859.74	1	106
2022-09-15	09:18:28	24.3222	108.19	93.9911	4275.88	1	107
2022-09-15	09:18:28	24.9855	111.141	93.9911	3970.88	1	108
2022-09-15	09:18:29	31.5101	140.163	57.7143	4416.05	1	109
2022-09-15	09:18:29	8.63879	38.4271	57.7143	4009.31	1	110
2022-09-15	09:18:29	7.01095	31.1861	57.7143	4447.23	1	111
2022-09-15	09:18:29	4.73915	21.0807	57.7143	4030.39	1	112
2022-09-15	09:18:30	1.90317	8.46568	5.41362	4455.7	FALSE	112
2022-09-15	09:18:30	1.37197	6.1028	5.41362	4036.49	FALSE	112
2022-09-15	09:18:30	0.929885	4.13631	5.41362	4459.83	FALSE	112
2022-09-15	09:18:30	0.663117	2.94968	5.41362	4039.44	FALSE	112
2022-09-15	09:18:31	0.50042	2.22597	5.05504	4462.06	FALSE	112
2022-09-15	09:18:31	0.410089	1.82416	5.05504	4041.27	FALSE	112
2022-09-15	09:18:31	1.5105	6.71901	5.05504	4468.78	FALSE	112
2022-09-15	09:18:31	2.12469	9.45105	5.05504	4050.72	FALSE	112
2022-09-15	09:18:32	0.776094	3.45222	2.11041	4472.23	FALSE	112
2022-09-15	09:18:32	0.492125	2.18907	2.11041	4052.91	FALSE	112
2022-09-15	09:18:32	0.320064	1.42371	2.11041	4473.65	FALSE	112
2022-09-15	09:18:32	0.309479	1.37662	2.11041	4054.28	FALSE	112
2022-09-15	09:18:33	0.224949	1.00062	8.55633	4474.66	FALSE	112
2022-09-15	09:18:33	0.295942	1.31641	8.55633	4055.6	FALSE	112
2022-09-15	09:18:33	0.379046	1.68607	8.55633	4476.34	FALSE	112
2022-09-15	09:18:33	6.79426	30.2222	8.55633	4085.82	1	113
2022-09-15	09:18:34	38.6337	171.85	125.766	4648.19	1	114
2022-09-15	09:18:34	29.9466	133.208	125.766	4219.03	1	115
2022-09-15	09:18:34	16.2399	72.2383	125.766	4720.43	1	116
2022-09-15	09:18:35	12.9413	57.5655	101.696	4276.6	1	117
2022-09-15	09:18:35	34.2728	152.452	101.696	4872.88	1	118
2022-09-15	09:18:35	26.4653	117.723	101.696	4394.32	1	119
2022-09-15	09:18:35	17.7696	79.0427	101.696	4951.93	1	120
2022-09-15	09:18:36	27.7075	123.249	55.2305	4517.57	1	121
2022-09-15	09:18:36	5.82088	25.8924	55.2305	4977.82	1	122
2022-09-15	09:18:36	7.90108	35.1456	55.2305	4552.71	1	123
2022-09-15	09:18:36	8.23599	36.6353	55.2305	5014.45	1	124
2022-09-15	09:18:37	16.9651	75.4642	90.4136	4628.18	1	125
2022-09-15	09:18:37	21.6776	96.4263	90.4136	5110.88	1	126
2022-09-15	09:18:37	13.9748	62.1627	90.4136	4690.34	1	127
2022-09-15	09:18:37	28.686	127.601	90.4136	5238.48	1	128
2022-09-15	09:18:38	11.5917	51.5622	73.7218	4741.9	1	129
2022-09-15	09:18:38	13.9888	62.225	73.7218	5300.71	1	130
2022-09-15	09:18:38	24.1397	107.378	73.7218	4849.28	1	131
2022-09-15	09:18:39	8.24714	36.6849	75.5028	5337.39	1	132
2022-09-15	09:18:39	24.7426	110.06	75.5028	4959.34	1	133
2022-09-15	09:18:39	28.8756	128.444	75.5028	5465.83	1	134
2022-09-15	09:18:39	6.02978	26.8217	75.5028	4986.16	1	135
2022-09-15	09:18:40	19.7731	87.9547	29.9641	5553.79	1	136
2022-09-15	09:18:40	2.10464	9.36186	29.9641	4995.52	FALSE	136
2022-09-15	09:18:40	4.46963	19.8818	29.9641	5573.67	1	137
2022-09-15	09:18:40	0.59757	2.65811	29.9641	4998.18	FALSE	137
2022-09-15	09:18:41	0.246883	1.09818	-2.05075	5574.77	FALSE	137
2022-09-15	09:18:41	-0.144211	-0.641479	-2.05075	4998.18	FALSE	137
2022-09-15	09:18:41	-0.60762	-2.70282	-2.05075	5574.77	FALSE	137
2022-09-15	09:18:41	-1.33917	-5.9569	-2.05075	4998.18	FALSE	137
2022-09-15	09:18:42	-0.388944	-1.7301	-1.99299	5574.77	FALSE	137
2022-09-15	09:18:42	-0.348791	-1.55149	-1.99299	4998.18	FALSE	137
2022-09-15	09:18:42	-0.606399	-2.69738	-1.99299	5574.77	FALSE	137
2022-09-15	09:18:43	0.0972139	0.432427	1.40594	4998.62	FALSE	137
2022-09-15	09:18:43	0.514669	2.28935	1.40594	5577.06	FALSE	137
2022-09-15	09:18:43	0.312532	1.3902	1.40594	5000.01	FALSE	137
2022-09-15	09:18:43	0.33986	1.51177	1.40594	5578.57	FALSE	137
2022-09-15	09:18:44	0.358842	1.5962	1.72371	5001.6	FALSE	137
2022-09-15	09:18:44	0.40612	1.8065	1.72371	5580.38	FALSE	137
2022-09-15	09:18:44	0.446832	1.9876	1.72371	5003.59	FALSE	137
2022-09-15	09:18:44	0.338232	1.50452	1.72371	5581.88	FALSE	137
2022-09-15	09:18:45	0.314567	1.39926	1.20996	5004.99	FALSE	137
2022-09-15	09:18:45	0.251718	1.11969	1.20996	5583	FALSE	137
2022-09-15	09:18:45	0.24897	1.10747	1.20996	5006.1	FALSE	137
2022-09-15	09:18:45	0.272786	1.21341	1.20996	5584.21	FALSE	137
2022-09-15	09:18:46	0.280216	1.24646	1.2726	5007.34	FALSE	137
2022-09-15	09:18:46	0.273295	1.21567	1.2726	5585.43	FALSE	137
2022-09-15	09:18:46	0.289987	1.28992	1.2726	5008.63	FALSE	137
2022-09-15	09:18:46	0.300878	1.33837	1.2726	5586.77	FALSE	137
2022-09-15	09:18:47	0.353244	1.5713	0.968323	5010.2	FALSE	137
2022-09-15	09:18:47	0.228817	1.01782	0.968323	5587.79	FALSE	137
2022-09-15	09:18:47	0.0710053	0.315846	0.968323	5010.52	FALSE	137
2022-09-15	09:18:48	0.221845	0.986811	1.85709	5588.77	FALSE	137
2022-09-15	09:18:48	0.128359	0.570967	1.85709	5011.09	FALSE	137
2022-09-15	09:18:48	0.272888	1.21386	1.85709	5589.99	FALSE	137
2022-09-15	09:18:48	1.04688	4.65673	1.85709	5015.75	FALSE	137
2022-09-15	09:18:49	6.02418	26.7968	51.3037	5616.78	1	138
2022-09-15	09:18:49	11.8931	52.9029	51.3037	5068.65	1	139
2022-09-15	09:18:49	13.3217	59.2576	51.3037	5676.04	1	140
2022-09-15	09:18:49	14.8954	66.2577	51.3037	5134.91	1	141
2022-09-15	09:18:50	13.2564	58.9671	66.7838	5735.01	1	142
2022-09-15	09:18:50	16.8723	75.0514	66.7838	5209.96	1	143
2022-09-15	09:18:50	21.1056	93.8819	66.7838	5828.89	1	144
2022-09-15	09:18:50	8.82037	39.2348	66.7838	5249.19	1	145
2022-09-15	09:18:51	21.7865	96.9107	65.9866	5925.8	1	146
2022-09-15	09:18:51	7.55736	33.6166	65.9866	5282.81	1	147
2022-09-15	09:18:51	15.1595	67.4325	65.9866	5993.23	1	148
2022-09-15	09:18:52	9.06861	40.339	72.2906	5323.15	1	149
2022-09-15	09:18:52	16.1885	72.0097	72.2906	6065.24	1	150
2022-09-15	09:18:52	27.9241	124.212	72.2906	5447.36	1	151
2022-09-15	09:18:52	11.8254	52.6017	72.2906	6117.85	1	152
2022-09-15	09:18:53	37.6388	167.425	154.196	5614.79	1	153
2022-09-15	09:18:53	33.4245	148.679	154.196	6266.52	1	154
2022-09-15	09:18:53	25.0919	111.614	154.196	5726.4	1	155
2022-09-15	09:18:53	42.5036	189.065	154.196	6455.59	1	156
2022-09-15	09:18:54	40.3905	179.665	169.466	5906.07	1	157
2022-09-15	09:18:54	47.8516	212.853	169.466	6668.44	1	158
2022-09-15	09:18:54	34.6122	153.962	169.466	6060.03	1	159
2022-09-15	09:18:54	29.5363	131.383	169.466	6799.83	1	160
2022-09-15	09:18:55	35.5792	158.263	106.323	6218.29	1	161
2022-09-15	09:18:55	23.9126	106.368	106.323	6906.19	1	162
2022-09-15	09:18:55	19.4538	86.5344	106.323	6304.83	1	163
2022-09-15	09:18:55	16.6643	74.1261	106.323	6980.32	1	164
2022-09-15	09:18:56	17.277	76.8516	66.672	6381.68	1	165
2022-09-15	09:18:56	14.5102	64.5443	66.672	7044.86	1	166
2022-09-15	09:18:56	13.1784	58.6202	66.672	6440.3	1	167
2022-09-15	09:18:57	13.9241	61.9372	59.5801	7106.8	1	168
2022-09-15	09:18:57	12.9409	57.5637	59.5801	6497.86	1	169
2022-09-15	09:18:57	11.8297	52.6209	59.5801	7159.42	1	170
2022-09-15	09:18:57	14.8821	66.1986	59.5801	6564.06	1	171
2022-09-15	09:18:58	16.569	73.7022	69.921	7233.12	1	172
2022-09-15	09:18:58	20.9157	93.0372	69.921	6657.1	1	173
2022-09-15	09:18:58	15.3159	68.1282	69.921	7301.25	1	174
2022-09-15	09:18:58	10.0752	44.8165	69.921	6701.91	1	175
2022-09-15	09:18:59	24.593	109.395	89.0493	7410.65	1	176
2022-09-15	09:18:59	24.0482	106.971	89.0493	6808.88	1	177
2022-09-15	09:18:59	15.6378	69.5601	89.0493	7480.21	1	178
2022-09-15	09:18:59	15.7977	70.2713	89.0493	6879.16	1	179
2022-09-15	09:19:00	18.2805	81.3153	39.0366	7561.52	1	180
2022-09-15	09:19:00	5.21202	23.1841	39.0366	6902.34	1	181
2022-09-15	09:19:00	2.83492	12.6103	39.0366	7574.13	FALSE	181
2022-09-15	09:19:01	3.05116	13.5722	11.2124	6915.91	1	182
2022-09-15	09:19:01	2.52882	11.2487	11.2124	7585.38	FALSE	182
2022-09-15	09:19:01	2.97009	13.2116	11.2124	6929.12	FALSE	182
2022-09-15	09:19:01	1.53258	6.81722	11.2124	7592.2	FALSE	182
2022-09-15	09:19:02	1.01538	4.51661	9.19973	6933.64	FALSE	182
2022-09-15	09:19:02	0.914109	4.06614	9.19973	7596.26	FALSE	182
2022-09-15	09:19:02	1.97681	8.79325	9.19973	6942.43	FALSE	182
2022-09-15	09:19:02	4.36647	19.4229	9.19973	7615.69	1	183
2022-09-15	09:19:03	5.5649	24.7538	47.1263	6967.19	1	184
2022-09-15	09:19:03	12.5277	55.7257	47.1263	7671.41	1	185
2022-09-15	09:19:03	9.9336	44.1866	47.1263	7011.37	1	186
2022-09-15	09:19:03	14.3517	63.8392	47.1263	7735.25	1	187
2022-09-15	09:19:04	7.16413	31.8675	33.1827	7043.24	1	188
2022-09-15	09:19:04	8.95528	39.8349	33.1827	7775.09	1	189
2022-09-15	09:19:04	6.26001	27.8458	33.1827	7071.09	1	190
2022-09-15	09:19:05	10.7518	47.8262	29.432	7822.91	1	191
2022-09-15	09:19:05	5.85222	26.0318	29.432	7097.12	1	192
2022-09-15	09:19:05	5.33767	23.743	29.432	7846.66	1	193
2022-09-15	09:19:05	4.52474	20.1269	29.432	7117.25	1	194
2022-09-15	09:19:06	5.03568	22.3997	16.1047	7869.06	1	195
2022-09-15	09:19:06	3.95543	17.5945	16.1047	7134.84	1	196
2022-09-15	09:19:06	3.35197	14.9102	16.1047	7883.97	1	197
2022-09-15	09:19:06	2.13889	9.51421	16.1047	7144.35	FALSE	197
2022-09-15	09:19:07	2.43548	10.8335	16.9941	7894.8	FALSE	197
2022-09-15	09:19:07	3.87731	17.2471	16.9941	7161.6	1	198
2022-09-15	09:19:07	4.15009	18.4604	16.9941	7913.26	1	199
2022-09-15	09:19:07	4.81889	21.4354	16.9941	7183.04	1	200
2022-09-15	09:19:08	5.98286	26.613	32.9036	7939.87	1	201
2022-09-15	09:19:08	5.20505	23.1531	32.9036	7206.19	1	202
2022-09-15	09:19:08	3.93731	17.5139	32.9036	7957.39	1	203
2022-09-15	09:19:08	14.463	64.3343	32.9036	7270.52	1	204
2022-09-15	09:19:09	23.3769	103.985	45.4163	8061.37	1	205
2022-09-15	09:19:09	5.74927	25.5739	45.4163	7296.1	1	206
2022-09-15	09:19:09	1.50398	6.69	45.4163	8068.06	FALSE	206
2022-09-15	09:19:10	0.117825	0.524109	-0.756532	7296.62	FALSE	206
2022-09-15	09:19:10	0.0239315	0.106452	-0.756532	8068.17	FALSE	206
2022-09-15	09:19:10	-0.26533	-1.18024	-0.756532	7296.62	FALSE	206
2022-09-15	09:19:10	-0.55673	-2.47645	-0.756532	8068.17	FALSE	206
2022-09-15	09:19:11	-0.404262	-1.79824	1.18726	7296.62	FALSE	206
2022-09-15	09:19:11	-0.107722	-0.479169	1.18726	8068.17	FALSE	206
2022-09-15	09:19:11	0.678181	3.01668	1.18726	7299.64	FALSE	206
2022-09-15	09:19:11	0.901438	4.00978	1.18726	8072.18	FALSE	206
2022-09-15	09:19:12	15.1523	67.4005	146.745	7367.04	1	207
2022-09-15	09:19:12	37.9616	168.861	146.745	8241.04	1	208
2022-09-15	09:19:12	40.5186	180.235	146.745	7547.27	1	209
2022-09-15	09:19:12	38.3266	170.484	146.745	8411.52	1	210
2022-09-15	09:19:13	47.6722	212.055	204.55	7759.33	1	211
2022-09-15	09:19:13	61.0664	271.636	204.55	8683.16	1	212
2022-09-15	09:19:13	29.2161	129.959	204.55	7889.29	1	213
2022-09-15	09:19:14	23.4474	104.299	99.5765	8787.46	1	214
2022-09-15	09:19:14	21.5171	95.7124	99.5765	7985	1	215
2022-09-15	09:19:14	24.6896	109.824	99.5765	8897.28	1	216
2022-09-15	09:19:14	19.8891	88.4707	99.5765	8073.47	1	217
2022-09-15	09:19:15	25.9495	115.429	117.391	9012.71	1	218
2022-09-15	09:19:15	22.7364	101.136	117.391	8174.61	1	219
2022-09-15	09:19:15	28.9861	128.936	117.391	9141.65	1	220
2022-09-15	09:19:15	27.8905	124.063	117.391	8298.67	1	221
2022-09-15	09:19:16	36.9278	164.262	131.996	9305.91	1	222
2022-09-15	09:19:16	26.4555	117.679	131.996	8416.35	1	223
2022-09-15	09:19:16	31.5891	140.515	131.996	9446.42	1	224
2022-09-15	09:19:16	23.7234	105.526	131.996	8521.88	1	225
2022-09-15	09:19:17	20.4559	90.9919	88.408	9537.42	1	226
2022-09-15	09:19:17	18.7973	83.6141	88.408	8605.49	1	227
2022-09-15	09:19:17	19.8383	88.2447	88.408	9625.66	1	228
2022-09-15	09:19:17	20.4085	90.7811	88.408	8696.27	1	229
2022-09-15	09:19:18	19.3972	86.2826	86.6887	9711.94	1	230
2022-09-15	09:19:18	19.5108	86.7879	86.6887	8783.06	1	231
2022-09-15	09:19:18	19.5575	86.9957	86.6887	9798.94	1	232
2022-09-15	09:19:19	19.1595	85.2253	87.0503	8868.28	1	233
2022-09-15	09:19:19	19.4263	86.4121	87.0503	9885.35	1	234
2022-09-15	09:19:19	19.843	88.2656	87.0503	8956.55	1	235
2022-09-15	09:19:19	19.8503	88.2981	87.0503	9973.65	1	236
2022-09-15	09:19:20	19.4321	86.4379	78.044	9042.99	1	237
2022-09-15	09:19:20	20.2444	90.0511	78.044	10063.7	1	238
2022-09-15	09:19:20	18.4243	81.955	78.044	9124.94	1	239
2022-09-15	09:19:20	12.0795	53.732	78.044	10117.4	1	240
2022-09-15	09:19:21	10.9144	48.5494	70.8762	9173.49	1	241
2022-09-15	09:19:21	30.4542	135.466	70.8762	10252.9	1	242
2022-09-15	09:19:21	19.4853	86.6745	70.8762	9260.17	1	243
2022-09-15	09:19:21	2.88083	12.8145	70.8762	10265.7	FALSE	243
2022-09-15	09:19:22	0.299249	1.33112	1.19892	9261.5	FALSE	243
2022-09-15	09:19:22	0.350751	1.56021	1.19892	10267.3	FALSE	243
2022-09-15	09:19:22	0.158588	0.705431	1.19892	9262.2	FALSE	243
2022-09-15	09:19:23	0.41014	1.82438	0.468081	10269.1	FALSE	243
2022-09-15	09:19:23	-0.265687	-1.18183	0.468081	9262.2	FALSE	243
2022-09-15	09:19:23	-0.41561	-1.84872	0.468081	10269.1	FALSE	243
2022-09-15	09:19:23	0.692074	3.07848	0.468081	9265.28	FALSE	243
2022-09-15	09:19:24	10.1548	45.1706	103.812	10314.3	1	244
2022-09-15	09:19:24	22.9669	102.161	103.812	9367.44	1	245
2022-09-15	09:19:24	25.9745	115.54	103.812	10429.8	1	246
2022-09-15	09:19:24	34.2558	152.377	103.812	9519.82	1	247
2022-09-15	09:19:25	48.0125	213.569	166.213	10643.4	1	248
2022-09-15	09:19:25	39.5056	175.729	166.213	9695.55	1	249
2022-09-15	09:19:25	27.8199	123.748	166.213	10767.1	1	250
2022-09-15	09:19:25	34.1278	151.807	166.213	9847.36	1	251
2022-09-15	09:19:26	32.8369	146.065	182.471	10913.2	1	252
2022-09-15	09:19:26	50.326	223.86	182.471	10071.2	1	253
2022-09-15	09:19:26	39.9011	177.488	182.471	11090.7	1	254
2022-09-15	09:19:27	39.6975	176.582	97.5503	10247.8	1	255
2022-09-15	09:19:27	38.7745	172.477	97.5503	11263.2	1	256
2022-09-15	09:19:27	8.30632	36.9482	97.5503	10284.7	1	257
2022-09-15	09:19:27	0.942863	4.19404	97.5503	11267.3	FALSE	257
2022-09-15	09:19:28	0.308155	1.37074	7.24479	10286.1	FALSE	257
2022-09-15	09:19:28	0.648053	2.88267	7.24479	11270.2	FALSE	257
2022-09-15	09:19:28	1.20439	5.35737	7.24479	10291.5	FALSE	257
2022-09-15	09:19:28	4.35421	19.3684	7.24479	11289.6	1	258
2022-09-15	09:19:29	8.28983	36.8748	15.6069	10328.3	1	259
2022-09-15	09:19:29	4.08556	18.1734	15.6069	11307.8	1	260
2022-09-15	09:19:29	1.22943	5.46875	15.6069	10333.8	FALSE	260
2022-09-15	09:19:29	0.429529	1.91063	15.6069	11309.7	FALSE	260
2022-09-15	09:19:30	0.455382	2.02563	2.15483	10335.8	FALSE	260
2022-09-15	09:19:30	0.24841	1.10498	2.15483	11310.8	FALSE	260
2022-09-15	09:19:30	0.0622012	0.276683	2.15483	10336.1	FALSE	260
2022-09-15	09:19:30	1.17172	5.21204	2.15483	11316	FALSE	260
2022-09-15	09:19:31	5.64927	25.1291	14.7817	10361.2	1	261
2022-09-15	09:19:31	3.47543	15.4594	14.7817	11331.5	1	262
2022-09-15	09:19:31	0.844542	3.75669	14.7817	10365	FALSE	262
2022-09-15	09:19:32	1.01996	4.53699	6.41045	11336	FALSE	262
2022-09-15	09:19:32	1.28897	5.7336	6.41045	10370.7	FALSE	262
2022-09-15	09:19:32	1.95513	8.69681	6.41045	11344.7	FALSE	262
2022-09-15	09:19:32	1.50047	6.67439	6.41045	10377.4	FALSE	262
2022-09-15	09:19:33	1.3391	5.95658	6.73688	11350.7	FALSE	262
2022-09-15	09:19:33	1.20831	5.3748	6.73688	10382.8	FALSE	262
2022-09-15	09:19:33	1.66083	7.3877	6.73688	11358	FALSE	262
2022-09-15	09:19:33	1.84983	8.22841	6.73688	10391	FALSE	262
2022-09-15	09:19:34	1.45879	6.48899	10.3643	11364.5	FALSE	262
2022-09-15	09:19:34	1.54566	6.8754	10.3643	10397.9	FALSE	262
2022-09-15	09:19:34	1.55553	6.91931	10.3643	11371.4	FALSE	262
2022-09-15	09:19:34	4.76001	21.1735	10.3643	10419.1	1	263
2022-09-15	09:19:35	7.89009	35.0967	15.2392	11406.5	1	264
2022-09-15	09:19:35	2.23899	9.95948	15.2392	10429	FALSE	264
2022-09-15	09:19:35	0.148715	0.661514	15.2392	11407.2	FALSE	264
2022-09-15	09:19:36	0.238792	1.06219	22.5761	10430.1	FALSE	264
2022-09-15	09:19:36	1.76602	7.85561	22.5761	11415.1	FALSE	264
2022-09-15	09:19:36	7.54749	33.5727	22.5761	10463.7	1	265
2022-09-15	09:19:36	10.749	47.8137	22.5761	11462.9	1	266
2022-09-15	09:19:37	1.53513	6.82857	3.00469	10470.5	FALSE	266
2022-09-15	09:19:37	0.463677	2.06253	3.00469	11464.9	FALSE	266
2022-09-15	09:19:37	0.294262	1.30894	3.00469	10471.8	FALSE	266
2022-09-15	09:19:37	0.408868	1.81873	3.00469	11466.8	FALSE	266
2022-09-15	09:19:38	0.0848984	0.377645	54.6397	10472.2	FALSE	266
2022-09-15	09:19:38	3.02474	13.4546	54.6397	11480.2	1	267
2022-09-15	09:19:38	26.2575	116.799	54.6397	10589	1	268
2022-09-15	09:19:38	19.7671	87.928	54.6397	11568.1	1	269
2022-09-15	09:19:39	13.2467	58.924	32.1872	10647.9	1	270
2022-09-15	09:19:39	7.0512	31.3651	32.1872	11599.5	1	271
2022-09-15	09:19:39	1.41009	6.27236	32.1872	10654.2	FALSE	271
2022-09-15	09:19:40	0.624389	2.77741	0.991395	11602.3	FALSE	271
2022-09-15	09:19:40	0.261031	1.16112	0.991395	10655.3	FALSE	271
2022-09-15	09:19:40	0.262557	1.16791	0.991395	11603.4	FALSE	271
2022-09-15	09:19:40	-0.256475	-1.14085	0.991395	10655.3	FALSE	271
2022-09-15	09:19:41	0.679504	3.02257	17.5936	11606.5	FALSE	271
2022-09-15	09:19:41	3.37955	15.0329	17.5936	10670.4	1	272
2022-09-15	09:19:41	10.2024	45.3823	17.5936	11651.9	1	273
2022-09-15	09:19:41	1.5594	6.93652	17.5936	10677.3	FALSE	273
2022-09-15	09:19:42	0.612226	2.7233	8.07467	11654.6	FALSE	273
2022-09-15	09:19:42	0.387087	1.72184	8.07467	10679	FALSE	273
2022-09-15	09:19:42	1.90785	8.4865	8.07467	11663.1	FALSE	273
2022-09-15	09:19:42	4.3539	19.367	8.07467	10698.4	1	274
2022-09-15	09:19:43	7.4197	33.0043	40.8805	11696.1	1	275
2022-09-15	09:19:43	8.5881	38.2016	40.8805	10736.6	1	276
2022-09-15	09:19:43	5.97696	26.5867	40.8805	11722.7	1	277
2022-09-15	09:19:43	14.7766	65.7293	40.8805	10802.3	1	278
2022-09-15	09:19:44	7.86769	34.9971	19.8067	11757.7	1	279
2022-09-15	09:19:44	2.5224	11.2201	19.8067	10813.5	FALSE	279
2022-09-15	09:19:44	2.96815	13.2029	19.8067	11770.9	FALSE	279
2022-09-15	09:19:45	0.834822	3.71346	2.98856	10817.3	FALSE	279
2022-09-15	09:19:45	0.393397	1.74991	2.98856	11772.6	FALSE	279
2022-09-15	09:19:45	0.793142	3.52805	2.98856	10820.8	FALSE	279
2022-09-15	09:19:45	0.666069	2.96281	2.98856	11775.6	FALSE	279
2022-09-15	09:19:46	0.261132	1.16157	1.30554	10821.9	FALSE	279
2022-09-15	09:19:46	0.312786	1.39133	1.30554	11777	FALSE	279
2022-09-15	09:19:46	0.398537	1.77277	1.30554	10823.7	FALSE	279
2022-09-15	09:19:46	0.20154	0.89649	1.30554	11777.9	FALSE	279
2022-09-15	09:19:47	0.315484	1.40334	21.2393	10825.1	FALSE	279
2022-09-15	09:19:47	1.18505	5.27134	21.2393	11783.1	FALSE	279
2022-09-15	09:19:47	3.47777	15.4698	21.2393	10840.6	1	280
2022-09-15	09:19:47	14.1209	62.8126	21.2393	11845.9	1	281
2022-09-15	09:19:48	3.78602	16.841	15.5589	10857.4	1	282
2022-09-15	09:19:48	2.6508	11.7913	15.5589	11857.7	FALSE	282
2022-09-15	09:19:48	4.05655	18.0443	15.5589	10875.5	1	283
2022-09-15	09:19:49	4.53365	20.1666	20.4838	11877.9	1	284
2022-09-15	09:19:49	5.53294	24.6116	20.4838	10900.1	1	285
2022-09-15	09:19:49	4.34159	19.3123	20.4838	11897.2	1	286
2022-09-15	09:19:49	4.01172	17.8449	20.4838	10917.9	1	287
2022-09-15	09:19:50	3.82861	17.0304	16.872	11914.2	1	288
2022-09-15	09:19:50	3.87731	17.2471	16.872	10935.2	1	289
2022-09-15	09:19:50	3.92312	17.4508	16.872	11931.7	1	290
2022-09-15	09:19:50	3.54291	15.7596	16.872	10950.9	1	291
2022-09-15	09:19:51	3.44388	15.3191	30.4089	11947	1	292
2022-09-15	09:19:51	3.21024	14.2798	30.4089	10965.2	1	293
2022-09-15	09:19:51	4.54255	20.2062	30.4089	11967.2	1	294
2022-09-15	09:19:51	16.1482	71.8304	30.4089	11037	1	295
2022-09-15	09:19:52	13.0322	57.9698	22.1135	12025.2	1	296
2022-09-15	09:19:52	4.50607	20.0439	22.1135	11057.1	1	297
2022-09-15	09:19:52	1.33146	5.9226	22.1135	12031.1	FALSE	297
2022-09-15	09:19:52	1.01564	4.51777	22.1135	11061.6	FALSE	297
2022-09-15	09:19:53	0.990954	4.40796	10.3501	12035.5	FALSE	297
2022-09-15	09:19:53	2.16001	9.60816	10.3501	11071.2	FALSE	297
2022-09-15	09:19:53	3.82943	17.0341	10.3501	12052.6	1	298
2022-09-15	09:19:54	2.08587	9.27837	8.86363	11080.5	FALSE	298
2022-09-15	09:19:54	2.16001	9.60816	8.86363	12062.2	FALSE	298
2022-09-15	09:19:54	2.6966	11.995	8.86363	11092.5	FALSE	298
2022-09-15	09:19:54	1.02805	4.57297	8.86363	12066.7	FALSE	298
2022-09-15	09:19:55	0.717621	3.19212	3.62347	11095.7	FALSE	298
2022-09-15	09:19:55	0.885102	3.93711	3.62347	12070.7	FALSE	298
2022-09-15	09:19:55	1.02108	4.54197	3.62347	11100.2	FALSE	298
2022-09-15	09:19:55	0.634567	2.82268	3.62347	12073.5	FALSE	298
2022-09-15	09:19:56	1.09111	4.85348	10.6193	11105.1	FALSE	298
2022-09-15	09:19:56	1.22963	5.46964	10.6193	12079	FALSE	298
2022-09-15	09:19:56	2.90978	12.9433	10.6193	11118	FALSE	298
2022-09-15	09:19:56	4.31879	19.2108	10.6193	12098.2	1	299
2022-09-15	09:19:57	2.52225	11.2195	11.8257	11129.2	FALSE	299
2022-09-15	09:19:57	3.39686	15.1099	11.8257	12113.3	1	300
2022-09-15	09:19:57	2.0565	9.14772	11.8257	11138.4	FALSE	300
2022-09-15	09:19:58	2.58958	11.519	12.2075	12124.8	FALSE	300
2022-09-15	09:19:58	2.73085	12.1474	12.2075	11150.5	FALSE	300
2022-09-15	09:19:58	2.23721	9.95156	12.2075	12134.8	FALSE	300
2022-09-15	09:19:58	3.41981	15.212	12.2075	11165.7	1	301
2022-09-15	09:19:59	2.69553	11.9903	6.37785	12146.7	FALSE	301
2022-09-15	09:19:59	1.35457	6.0254	6.37785	11171.8	FALSE	301
2022-09-15	09:19:59	0.891311	3.96473	6.37785	12150.7	FALSE	301
2022-09-15	09:19:59	0.793804	3.531	6.37785	11175.3	FALSE	301
2022-09-15	09:20:00	0.908969	4.04328	3.16728	12154.8	FALSE	301
2022-09-15	09:20:00	0.795178	3.53711	3.16728	11178.8	FALSE	301
2022-09-15	09:20:00	0.656959	2.92229	3.16728	12157.7	FALSE	301
2022-09-15	09:20:00	0.487036	2.16643	3.16728	11181	FALSE	301
2022-09-15	09:20:01	0.411412	1.83004	1.32101	12159.5	FALSE	301
2022-09-15	09:20:01	0.294517	1.31007	1.32101	11182.3	FALSE	301
2022-09-15	09:20:01	0.185	0.822917	1.32101	12160.3	FALSE	301
2022-09-15	09:20:02	0.127036	0.565082	1.81199	11182.9	FALSE	301
2022-09-15	09:20:02	0.206018	0.916409	1.81199	12161.2	FALSE	301
2022-09-15	09:20:02	0.613193	2.72761	1.81199	11185.6	FALSE	301
2022-09-15	09:20:02	0.683168	3.03887	1.81199	12164.3	FALSE	301
2022-09-15	09:20:03	0.330547	1.47034	0.918899	11187.1	FALSE	301
2022-09-15	09:20:03	0.210496	0.936328	0.918899	12165.2	FALSE	301
2022-09-15	09:20:03	0.179708	0.799377	0.918899	11187.9	FALSE	301
2022-09-15	09:20:03	0.10556	0.469552	0.918899	12165.7	FALSE	301
2022-09-15	09:20:04	0.0828119	0.368364	0.348896	11188.3	FALSE	301
2022-09-15	09:20:04	0.086985	0.386927	0.348896	12166.1	FALSE	301
2022-09-15	09:20:04	0.0788424	0.350707	0.348896	11188.6	FALSE	301
2022-09-15	09:20:04	0.065102	0.289587	0.348896	12166.4	FALSE	301
2022-09-15	09:20:05	0.0620486	0.276005	0.242841	11188.9	FALSE	301
2022-09-15	09:20:05	0.0604709	0.268987	0.242841	12166.6	FALSE	301
2022-09-15	09:20:05	0.0515651	0.229372	0.242841	11189.1	FALSE	301
2022-09-15	09:20:05	0.0442877	0.197001	0.242841	12166.8	FALSE	301
2022-09-15	09:20:06	0.0428628	0.190662	0.202585	11189.3	FALSE	301
2022-09-15	09:20:06	0.0482063	0.214431	0.202585	12167	FALSE	301
2022-09-15	09:20:06	0.04556	0.20266	0.202585	11189.5	FALSE	301
2022-09-15	09:20:07	0.0458654	0.204018	0.177646	12167.2	FALSE	301
2022-09-15	09:20:07	0.0415396	0.184776	0.177646	11189.7	FALSE	301
2022-09-15	09:20:07	0.0328374	0.146067	0.177646	12167.4	FALSE	301
2022-09-15	09:20:07	0.0395041	0.175722	0.177646	11189.9	FALSE	301
2022-09-15	09:20:08	0.0242369	0.107811	0.125977	12167.5	FALSE	301
2022-09-15	09:20:08	0.0252547	0.112338	0.125977	11190	FALSE	301
2022-09-15	09:20:08	0.0281045	0.125014	0.125977	12167.6	FALSE	301
2022-09-15	09:20:08	0.0356872	0.158744	0.125977	11190.1	FALSE	301
2022-09-15	09:20:09	0.0420485	0.18704	0.171874	12167.8	FALSE	301
2022-09-15	09:20:09	0.0383845	0.170742	0.171874	11190.3	FALSE	301
2022-09-15	09:20:09	0.0371122	0.165082	0.171874	12168	FALSE	301
2022-09-15	09:20:09	0.0370104	0.16463	0.171874	11190.5	FALSE	301
2022-09-15	09:20:10	0.0377229	0.167799	0.163724	12168.1	FALSE	301
2022-09-15	09:20:10	0.0360435	0.160329	0.163724	11190.6	FALSE	301
2022-09-15	09:20:10	0.0366542	0.163045	0.163724	12168.3	FALSE	301
2022-09-15	09:20:11	-0.0113356	-0.050423	0.753535	11190.6	FALSE	301
2022-09-15	09:20:11	-0.0884857	-0.393602	0.753535	12168.3	FALSE	301
2022-09-15	09:20:11	0.107036	0.476118	0.753535	11191.1	FALSE	301
2022-09-15	09:20:11	0.670394	2.98205	0.753535	12171.3	FALSE	301
2022-09-15	09:20:12	-0.0697071	-0.310071	0.547368	11191.1	FALSE	301
2022-09-15	09:20:12	0.126222	0.561461	0.547368	12171.9	FALSE	301
2022-09-15	09:20:12	0.0441351	0.196322	0.547368	11191.3	FALSE	301
2022-09-15	09:20:12	0.391565	1.74176	0.547368	12173.6	FALSE	301
2022-09-15	09:20:13	8.00835	35.6227	127.25	11226.9	1	302
2022-09-15	09:20:13	55.8152	248.277	127.25	12421.9	1	303
2022-09-15	09:20:13	21.2394	94.4771	127.25	11321.4	1	304
2022-09-15	09:20:13	29.3652	130.622	127.25	12552.5	1	305
2022-09-15	09:20:14	24.6621	109.702	150.463	11431.1	1	306
2022-09-15	09:20:14	42.8239	190.489	150.463	12743	1	307
2022-09-15	09:20:14	24.348	108.305	150.463	11539.4	1	308
2022-09-15	09:20:14	43.4683	193.356	150.463	12936.3	1	309
2022-09-15	09:20:15	11.5018	51.1623	57.6397	11590.6	1	310
2022-09-15	09:20:15	19.6371	87.3497	57.6397	13023.7	1	311
2022-09-15	09:20:15	7.73502	34.4069	57.6397	11625	1	312
2022-09-15	09:20:16	8.29365	36.8918	105.018	13060.6	1	313
2022-09-15	09:20:16	15.9729	71.0507	105.018	11696	1	314
2022-09-15	09:20:16	36.9493	164.358	105.018	13224.9	1	315
2022-09-15	09:20:16	33.2204	147.771	105.018	11843.8	1	316
2022-09-15	09:20:17	15.125	67.279	25.2214	13292.2	1	317
2022-09-15	09:20:17	7.00551	31.1619	25.2214	11875	1	318
2022-09-15	09:20:17	0.218791	0.973226	25.2214	13293.2	FALSE	318
2022-09-15	09:20:17	0.330802	1.47147	25.2214	11876.4	FALSE	318
2022-09-15	09:20:18	0.539198	2.39846	89.016	13295.6	FALSE	318
2022-09-15	09:20:18	3.97212	17.6688	89.016	11894.1	1	319
2022-09-15	09:20:18	41.2917	183.674	89.016	13479.3	1	320
2022-09-15	09:20:18	34.2437	152.323	89.016	12046.4	1	321
2022-09-15	09:20:19	13.9795	62.1836	65.3652	13541.4	1	322
2022-09-15	09:20:19	22.5487	100.301	65.3652	12146.7	1	323
2022-09-15	09:20:19	7.55604	33.6108	65.3652	13575.1	1	324
2022-09-15	09:20:20	17.0352	75.776	37.7616	12222.5	1	325
2022-09-15	09:20:20	7.98072	35.4998	37.7616	13610.6	1	326
2022-09-15	09:20:20	6.83543	30.4054	37.7616	12252.9	1	327
2022-09-15	09:20:20	2.10536	9.36506	37.7616	13619.9	FALSE	327
2022-09-15	09:20:21	0.531667	2.36496	2.92879	12255.3	FALSE	327
2022-09-15	09:20:21	0.347036	1.54369	2.92879	13621.5	FALSE	327
2022-09-15	09:20:21	0.249886	1.11154	2.92879	12256.4	FALSE	327
2022-09-15	09:20:21	1.5051	6.69499	2.92879	13628.2	FALSE	327
2022-09-15	09:20:22	4.09808	18.2291	6.64728	12274.6	1	328
2022-09-15	09:20:22	1.34978	6.00409	6.64728	13634.2	FALSE	328
2022-09-15	09:20:22	0.319657	1.4219	6.64728	12276	FALSE	328
2022-09-15	09:20:22	0.209987	0.934064	6.64728	13635.1	FALSE	328
2022-09-15	09:20:23	-0.074847	-0.332934	-1.01109	12276	FALSE	328
2022-09-15	09:20:23	-0.244923	-1.08947	-1.01109	13635.1	FALSE	328
2022-09-15	09:20:23	-0.306196	-1.36202	-1.01109	12276	FALSE	328
2022-09-15	09:20:23	-0.283244	-1.25993	-1.01109	13635.1	FALSE	328
2022-09-15	09:20:24	14.4003	64.0554	74.6385	12340.1	1	329
2022-09-15	09:20:24	30.1952	134.314	74.6385	13769.4	1	330
2022-09-15	09:20:24	5.74296	25.5458	74.6385	12365.6	1	331
2022-09-15	09:20:25	1.50347	6.68774	3.94763	13776.1	FALSE	331
2022-09-15	09:20:25	1.00154	4.45505	3.94763	12370.1	FALSE	331
2022-09-15	09:20:25	0.582914	2.59292	3.94763	13778.7	FALSE	331
2022-09-15	09:20:25	0.461947	2.05483	3.94763	12372.1	FALSE	331
2022-09-15	09:20:26	0.167748	0.746177	2.16354	13779.4	FALSE	331
2022-09-15	09:20:26	0.136959	0.609221	2.16354	12372.8	FALSE	331
2022-09-15	09:20:26	0.594466	2.6443	2.16354	13782.1	FALSE	331
2022-09-15	09:20:26	1.04637	4.65446	2.16354	12377.4	FALSE	331
2022-09-15	09:20:27	0.567392	2.52387	2.24102	13784.6	FALSE	331
2022-09-15	09:20:27	0.412685	1.83571	2.24102	12379.2	FALSE	331
2022-09-15	09:20:27	0.466934	2.07702	2.24102	13786.7	FALSE	331
2022-09-15	09:20:27	0.568206	2.52749	2.24102	12381.8	FALSE	331
2022-09-15	09:20:28	0.883779	3.93123	2.92923	13790.6	FALSE	331
2022-09-15	09:20:28	0.386171	1.71777	2.92923	12383.5	FALSE	331
2022-09-15	09:20:28	0.705611	3.1387	2.92923	13793.8	FALSE	331
2022-09-15	09:20:29	0.427188	1.90022	2.96988	12385.4	FALSE	331
2022-09-15	09:20:29	0.803829	3.57559	2.96988	13797.3	FALSE	331
2022-09-15	09:20:29	0.684491	3.04475	2.96988	12388.4	FALSE	331
2022-09-15	09:20:29	0.755127	3.35896	2.96988	13800.7	FALSE	331
2022-09-15	09:20:30	0.614058	2.73145	4.34978	12391.2	FALSE	331
2022-09-15	09:20:30	0.743219	3.30599	4.34978	13804	FALSE	331
2022-09-15	09:20:30	0.869733	3.86875	4.34978	12395	FALSE	331
2022-09-15	09:20:30	1.68449	7.49295	4.34978	13811.5	FALSE	331
2022-09-15	09:20:31	1.7795	7.91557	10.9658	12402.9	FALSE	331
2022-09-15	09:20:31	2.27569	10.1227	10.9658	13821.6	FALSE	331
2022-09-15	09:20:31	1.83335	8.15511	10.9658	12411.1	FALSE	331
2022-09-15	09:20:31	3.97233	17.6697	10.9658	13839.3	1	332
2022-09-15	09:20:32	5.80372	25.8161	45.0074	12436.9	1	333
2022-09-15	09:20:32	14.6111	64.9931	45.0074	13904.3	1	334
2022-09-15	09:20:32	9.93955	44.2131	45.0074	12481.1	1	335
2022-09-15	09:20:33	8.21711	36.5513	38.1041	13940.8	1	336
2022-09-15	09:20:33	11.7187	52.1271	38.1041	12533.3	1	337
2022-09-15	09:20:33	4.84352	21.5449	38.1041	13962.4	1	338
2022-09-15	09:20:33	9.48545	42.1932	38.1041	12575.5	1	339
2022-09-15	09:20:34	6.68769	29.7482	68.2676	13992.1	1	340
2022-09-15	09:20:34	16.2697	72.3709	68.2676	12647.8	1	341
2022-09-15	09:20:34	10.117	45.0024	68.2676	14037.1	1	342
2022-09-15	09:20:34	28.3146	125.949	68.2676	12773.8	1	343
2022-09-15	09:20:35	35.4439	157.662	99.6879	14194.8	1	344
2022-09-15	09:20:35	21.9991	97.8564	99.6879	12871.6	1	345
2022-09-15	09:20:35	21.088	93.8036	99.6879	14288.6	1	346
2022-09-15	09:20:35	11.1124	49.4302	99.6879	12921.1	1	347
2022-09-15	09:20:36	23.4889	104.483	97.5366	14393.1	1	348
2022-09-15	09:20:36	15.6509	69.6183	97.5366	12990.7	1	349
2022-09-15	09:20:36	15.8445	70.4795	97.5366	14463.6	1	350
2022-09-15	09:20:36	32.7245	145.565	97.5366	13136.2	1	351
2022-09-15	09:20:37	17.4701	77.7105	101.427	14541.3	1	352
2022-09-15	09:20:37	23.1134	102.813	101.427	13239.1	1	353
2022-09-15	09:20:37	27.8221	123.758	101.427	14665	1	354
2022-09-15	09:20:38	41.3945	184.131	159.932	13423.2	1	355
2022-09-15	09:20:38	29.2686	130.193	159.932	14795.2	1	356
2022-09-15	09:20:38	35.9142	159.754	159.932	13582.9	1	357
2022-09-15	09:20:38	37.2402	165.652	159.932	14960.9	1	358
2022-09-15	09:20:39	19.5936	87.1563	93.2184	13670.1	1	359
2022-09-15	09:20:39	35.0882	156.079	93.2184	15116.9	1	360
2022-09-15	09:20:39	19.7246	87.739	93.2184	13757.8	1	361
2022-09-15	09:20:39	9.41935	41.8992	93.2184	15158.8	1	362
2022-09-15	09:20:40	6.71243	29.8582	8.62679	13787.7	1	363
2022-09-15	09:20:40	0.661082	2.94062	8.62679	15161.8	FALSE	363
2022-09-15	09:20:40	0.23528	1.04657	8.62679	13788.7	FALSE	363
2022-09-15	09:20:40	0.148766	0.661741	8.62679	15162.4	FALSE	363
2022-09-15	09:20:41	-0.091132	-0.405373	-0.172815	13788.7	FALSE	363
2022-09-15	09:20:41	-0.0554578	-0.246687	-0.172815	15162.4	FALSE	363
2022-09-15	09:20:41	0.0300384	0.133617	-0.172815	13788.9	FALSE	363
2022-09-15	09:20:42	0.118944	0.529087	1.06881	15163	FALSE	363
2022-09-15	09:20:42	0.0985371	0.438313	1.06881	13789.3	FALSE	363
2022-09-15	09:20:42	0.119555	0.531805	1.06881	15163.5	FALSE	363
2022-09-15	09:20:42	0.624084	2.77605	1.06881	13792.1	FALSE	363
2022-09-15	09:20:43	0.647697	2.88109	2.25964	15166.4	FALSE	363
2022-09-15	09:20:43	0.550598	2.44917	2.25964	13794.5	FALSE	363
2022-09-15	09:20:43	0.38444	1.71007	2.25964	15168.1	FALSE	363
2022-09-15	09:20:43	0.449224	1.99824	2.25964	13796.5	FALSE	363
2022-09-15	09:20:44	0.551107	2.45143	1.83972	15170.5	FALSE	363
2022-09-15	09:20:44	0.231005	1.02756	1.83972	13797.6	FALSE	363
2022-09-15	09:20:44	0.360318	1.60277	1.83972	15172.2	FALSE	363
2022-09-15	09:20:44	0.511921	2.27713	1.83972	13799.8	FALSE	363
2022-09-15	09:20:45	0.774975	3.44724	2.05489	15175.6	FALSE	363
2022-09-15	09:20:45	0.528206	2.34957	2.05489	13802.2	FALSE	363
2022-09-15	09:20:45	0.413804	1.84068	2.05489	15177.4	FALSE	363
2022-09-15	09:20:45	0.130853	0.58206	2.05489	13802.8	FALSE	363
2022-09-15	09:20:46	0.102405	0.455518	0.551498	15177.9	FALSE	363
2022-09-15	09:20:46	0.13757	0.611939	0.551498	13803.4	FALSE	363
2022-09-15	09:20:46	0.131972	0.587038	0.551498	15178.5	FALSE	363
2022-09-15	09:20:47	0.140878	0.626654	2.28109	13804	FALSE	363
2022-09-15	09:20:47	0.125407	0.557835	2.28109	15179	FALSE	363
2022-09-15	09:20:47	0.327494	1.45676	2.28109	13805.5	FALSE	363
2022-09-15	09:20:47	1.45747	6.48312	2.28109	15185.5	FALSE	363
2022-09-15	09:20:48	2.28994	10.1861	4.93745	13815.7	FALSE	363
2022-09-15	09:20:48	1.37065	6.09693	4.93745	15191.6	FALSE	363
2022-09-15	09:20:48	0.33813	1.50407	4.93745	13817.2	FALSE	363
2022-09-15	09:20:48	0.441234	1.9627	4.93745	15193.6	FALSE	363
2022-09-15	09:20:49	0.0908017	0.403904	-0.194112	13817.6	FALSE	363
2022-09-15	09:20:49	-0.16304	-0.725235	-0.194112	15193.6	FALSE	363
2022-09-15	09:20:49	-0.136883	-0.608883	-0.194112	13817.6	FALSE	363
2022-09-15	09:20:49	0.0345676	0.153764	-0.194112	15193.7	FALSE	363
2022-09-15	09:20:50	0.60215	2.67848	2.43559	13820.2	FALSE	363
2022-09-15	09:20:50	0.286578	1.27476	2.43559	15195	FALSE	363
2022-09-15	09:20:50	0.753906	3.35352	2.43559	13823.6	FALSE	363
2022-09-15	09:20:51	2.41233	10.7305	24.4353	15205.7	FALSE	363
2022-09-15	09:20:51	13.3805	59.5191	24.4353	13883.1	1	364
2022-09-15	09:20:51	3.77981	16.8134	24.4353	15222.6	1	365
2022-09-15	09:20:51	2.40057	10.6782	24.4353	13893.8	FALSE	365
2022-09-15	09:20:52	0.308461	1.3721	0.497735	15223.9	FALSE	365
2022-09-15	09:20:52	0.296043	1.31686	0.497735	13895.1	FALSE	365
2022-09-15	09:20:52	-0.0928114	-0.412844	0.497735	15223.9	FALSE	365
2022-09-15	09:20:52	-0.0641091	-0.28517	0.497735	13895.1	FALSE	365
2022-09-15	09:20:53	0.0555855	0.247255	0.244935	15224.2	FALSE	365
2022-09-15	09:20:53	0.0208781	0.09287	0.244935	13895.2	FALSE	365
2022-09-15	09:20:53	0.101743	0.452573	0.244935	15224.6	FALSE	365
2022-09-15	09:20:53	0.0420485	0.18704	0.244935	13895.4	FALSE	365
2022-09-15	09:20:54	0.0634735	0.282343	0.98085	15224.9	FALSE	365
2022-09-15	09:20:54	0.171667	0.763609	0.98085	13896.2	FALSE	365
2022-09-15	09:20:54	0.426374	1.8966	0.98085	15226.8	FALSE	365
2022-09-15	09:20:55	0.278893	1.24057	2.15313	13897.4	FALSE	365
2022-09-15	09:20:55	0.806934	3.5894	2.15313	15230.4	FALSE	365
2022-09-15	09:20:55	0.441132	1.96224	2.15313	13899.4	FALSE	365
2022-09-15	09:20:55	0.409224	1.82031	2.15313	15232.2	FALSE	365
2022-09-15	09:20:56	0.184797	0.822014	-2.3653	13900.2	FALSE	365
2022-09-15	09:20:56	-0.56818	-2.52738	-2.3653	15232.2	FALSE	365
2022-09-15	09:20:56	-2.00518	-8.91944	-2.3653	13900.2	FALSE	365
2022-09-15	09:20:56	0.26159	1.1636	-2.3653	15233.4	FALSE	365
2022-09-15	09:20:57	0.141234	0.628237	0.687886	13900.8	FALSE	365
2022-09-15	09:20:57	-0.144364	-0.64216	0.687886	15233.4	FALSE	365
2022-09-15	09:20:57	0.380369	1.69196	0.687886	13902.5	FALSE	365
2022-09-15	09:20:57	0.241336	1.07351	0.687886	15234.5	FALSE	365
2022-09-15	09:20:58	0.0559417	0.24884	0.0320327	13902.7	FALSE	365
2022-09-15	09:20:58	-0.0784602	-0.349007	0.0320327	15234.5	FALSE	365
2022-09-15	09:20:58	-0.0325061	-0.144594	0.0320327	13902.7	FALSE	365
2022-09-15	09:20:58	0.0838297	0.372891	0.0320327	15234.8	FALSE	365
2022-09-15	09:20:59	0.209682	0.932707	1.52754	13903.7	FALSE	365
2022-09-15	09:20:59	0.341336	1.51833	1.52754	15236.3	FALSE	365
2022-09-15	09:20:59	0.479199	2.13157	1.52754	13905.8	FALSE	365
2022-09-15	09:21:00	0.292837	1.3026	3.11544	15237.6	FALSE	365
2022-09-15	09:21:00	0.456094	2.0288	3.11544	13907.8	FALSE	365
2022-09-15	09:21:00	0.482964	2.14832	3.11544	15239.8	FALSE	365
2022-09-15	09:21:00	1.56963	6.98203	3.11544	13914.8	FALSE	365
2022-09-15	09:21:01	1.63406	7.26863	6.75656	15247.1	FALSE	365
2022-09-15	09:21:01	2.72072	12.1023	6.75656	13926.9	FALSE	365
2022-09-15	09:21:01	0.53874	2.39642	6.75656	15249.5	FALSE	365
2022-09-15	09:21:01	1.18225	5.25888	6.75656	13932.2	FALSE	365
2022-09-15	09:21:02	1.65141	7.3458	11.5062	15256.8	FALSE	365
2022-09-15	09:21:02	1.66113	7.38904	11.5062	13939.6	FALSE	365
2022-09-15	09:21:02	2.71996	12.0989	11.5062	15268.9	FALSE	365
2022-09-15	09:21:02	4.31436	19.1911	11.5062	13958.8	1	366
2022-09-15	09:21:03	16.668	74.1426	92.1652	15343	1	367
2022-09-15	09:21:03	17.4871	77.7861	92.1652	14036.5	1	368
2022-09-15	09:21:03	28.0039	124.567	92.1652	15467.6	1	369
2022-09-15	09:21:04	15.9985	71.1645	73.534	14107.7	1	370
2022-09-15	09:21:04	13.3643	59.4471	73.534	15527.1	1	371
2022-09-15	09:21:04	22.207	98.7812	73.534	14206.5	1	372
2022-09-15	09:21:04	14.5549	64.7431	73.534	15591.8	1	373
2022-09-15	09:21:05	0.177672	0.790321	-0.439386	14207.3	FALSE	373
2022-09-15	09:21:05	0.0370104	0.16463	-0.439386	15592	FALSE	373
2022-09-15	09:21:05	-0.115458	-0.51358	-0.439386	14207.3	FALSE	373
2022-09-15	09:21:05	-0.494338	-2.19891	-0.439386	15592	FALSE	373
2022-09-15	09:21:06	-0.682328	-3.03513	-2.99806	14207.3	FALSE	373
2022-09-15	09:21:06	-0.929198	-4.13326	-2.99806	15592	FALSE	373
2022-09-15	09:21:06	-0.807315	-3.5911	-2.99806	14207.3	FALSE	373
2022-09-15	09:21:06	-0.277137	-1.23276	-2.99806	15592	FALSE	373
2022-09-15	09:21:07	0.227596	1.01239	48.6925	14208.3	FALSE	373
2022-09-15	09:21:07	0.39986	1.77866	48.6925	15593.7	FALSE	373
2022-09-15	09:21:07	11.0105	48.9769	48.6925	14257.3	1	374
2022-09-15	09:21:07	32.1483	143.002	48.6925	15736.7	1	375
2022-09-15	09:21:08	31.6164	140.636	112.644	14397.9	1	376
2022-09-15	09:21:08	23.9081	106.348	112.644	15843.1	1	377
2022-09-15	09:21:08	20.4459	90.9475	112.644	14488.9	1	378
2022-09-15	09:21:09	27.9244	124.213	101.626	15967.3	1	379
2022-09-15	09:21:09	27.3787	121.786	101.626	14610.6	1	380
2022-09-15	09:21:09	24.2794	108	101.626	16075.3	1	381
2022-09-15	09:21:09	11.8039	52.5061	101.626	14663.1	1	382
2022-09-15	09:21:10	14.1836	63.0915	65.2338	16138.4	1	383
2022-09-15	09:21:10	21.7038	96.5428	65.2338	14759.7	1	384
2022-09-15	09:21:10	6.32729	28.1451	65.2338	16166.5	1	385
2022-09-15	09:21:10	16.4462	73.156	65.2338	14832.8	1	386
2022-09-15	09:21:11	12.0764	53.7182	37.9689	16220.3	1	387
2022-09-15	09:21:11	3.68866	16.4079	37.9689	14849.3	1	388
2022-09-15	09:21:11	9.0395	40.2095	37.9689	16260.5	1	389
2022-09-15	09:21:11	9.33863	41.5401	37.9689	14890.8	1	390
2022-09-15	09:21:12	9.01385	40.0954	55.0526	16300.6	1	391
2022-09-15	09:21:12	10.032	44.6243	55.0526	14935.4	1	392
2022-09-15	09:21:12	18.0833	80.4381	55.0526	16381	1	393
2022-09-15	09:21:13	23.2759	103.536	50.6264	15039	1	394
2022-09-15	09:21:13	3.05904	13.6072	50.6264	16394.6	1	395
2022-09-15	09:21:13	8.93472	39.7434	50.6264	15078.7	1	396
2022-09-15	09:21:13	10.2556	45.619	50.6264	16440.2	1	397
2022-09-15	09:21:14	8.69889	38.6944	117.689	15117.4	1	398
2022-09-15	09:21:14	32.7448	145.655	117.689	16585.9	1	399
2022-09-15	09:21:14	32.2338	143.382	117.689	15260.8	1	400
2022-09-15	09:21:14	32.1528	143.022	117.689	16728.9	1	401
2022-09-15	09:21:15	21.8274	97.0926	125.628	15357.9	1	402
2022-09-15	09:21:15	31.8417	141.638	125.628	16870.5	1	403
2022-09-15	09:21:15	32.8561	146.151	125.628	15504	1	404
2022-09-15	09:21:15	26.4449	117.632	125.628	16988.2	1	405
2022-09-15	09:21:16	11.62	51.6881	84.6994	15555.7	1	406
2022-09-15	09:21:16	24.7911	110.276	84.6994	17098.5	1	407
2022-09-15	09:21:16	20.7127	92.1342	84.6994	15647.8	1	408
2022-09-15	09:21:17	9.99212	44.4469	70.1776	17142.9	1	409
2022-09-15	09:21:17	17.7981	79.1695	70.1776	15727	1	410
2022-09-15	09:21:17	18.7988	83.6208	70.1776	17226.5	1	411
2022-09-15	09:21:17	16.5175	73.4731	70.1776	15800.5	1	412
2022-09-15	09:21:18	17.493	77.8124	103.363	17304.3	1	413
2022-09-15	09:21:18	20.696	92.0599	103.363	15892.5	1	414
2022-09-15	09:21:18	30.5127	135.727	103.363	17440.1	1	415
2022-09-15	09:21:18	24.2467	107.854	103.363	16000.4	1	416
2022-09-15	09:21:19	22.14	98.4831	58.7494	17538.5	1	417
2022-09-15	09:21:19	26.4563	117.683	58.7494	16118.1	1	418
2022-09-15	09:21:19	2.20266	9.79787	58.7494	17548.3	FALSE	418
2022-09-15	09:21:19	2.03085	9.03363	58.7494	16127.1	FALSE	418
2022-09-15	09:21:20	0.54841	2.43944	0.667967	17550.8	FALSE	418
2022-09-15	09:21:20	0.0136008	0.0604991	0.667967	16127.2	FALSE	418
2022-09-15	09:21:20	0.0245422	0.109169	0.667967	17550.9	FALSE	418
2022-09-15	09:21:20	0.0141097	0.0627628	0.667967	16127.2	FALSE	418
2022-09-15	09:21:21	0.903575	4.01928	60.2456	17554.9	FALSE	418
2022-09-15	09:21:21	13.1699	58.5823	60.2456	16185.8	1	419
2022-09-15	09:21:21	26.558	118.135	60.2456	17673	1	420
2022-09-15	09:21:22	1.80704	8.03808	2.6026	16193.9	FALSE	420
2022-09-15	09:21:22	0.573448	2.55081	2.6026	17675.6	FALSE	420
2022-09-15	09:21:22	0.0114125	0.0507651	2.6026	16193.9	FALSE	420
2022-09-15	09:21:22	-0.0515392	-0.229257	2.6026	17675.6	FALSE	420
2022-09-15	09:21:23	-0.187417	-0.833668	0.114432	16193.9	FALSE	420
2022-09-15	09:21:23	-0.00324403	-0.0144301	0.114432	17675.6	FALSE	420
2022-09-15	09:21:23	0.138283	0.61511	0.114432	16194.5	FALSE	420
2022-09-15	09:21:23	0.15528	0.690716	0.114432	17676.3	FALSE	420
2022-09-15	09:21:24	0.114059	0.507357	0.564515	16195	FALSE	420
2022-09-15	09:21:24	0.0552292	0.245671	0.564515	17676.5	FALSE	420
2022-09-15	09:21:24	0.0414379	0.184324	0.564515	16195.2	FALSE	420
2022-09-15	09:21:24	0.296908	1.32071	0.564515	17677.9	FALSE	420
2022-09-15	09:21:25	6.13436	27.2869	96.4013	16222.5	1	421
2022-09-15	09:21:25	28.6776	127.564	96.4013	17805.4	1	422
2022-09-15	09:21:25	30.204	134.353	96.4013	16356.9	1	423
2022-09-15	09:21:26	9.62871	42.8304	118.637	17848.3	1	424
2022-09-15	09:21:26	19.5596	87.005	118.637	16443.9	1	425
2022-09-15	09:21:26	38.6419	171.887	118.637	18020.1	1	426
2022-09-15	09:21:26	38.853	172.826	118.637	16616.7	1	427
2022-09-15	09:21:27	33.0273	146.912	156.16	18167	1	428
2022-09-15	09:21:27	34.1406	151.864	156.16	16768.6	1	429
2022-09-15	09:21:27	41.6354	185.203	156.16	18352.3	1	430
2022-09-15	09:21:27	31.6221	140.661	156.16	16909.2	1	431
2022-09-15	09:21:28	58.1184	258.522	153.507	18610.8	1	432
2022-09-15	09:21:28	31.4732	139.999	153.507	17049.2	1	433
2022-09-15	09:21:28	24.1209	107.295	153.507	18718.1	1	434
2022-09-15	09:21:28	24.3269	108.211	153.507	17157.4	1	435
2022-09-15	09:21:29	13.4603	59.8741	16.9952	18777.9	1	436
2022-09-15	09:21:29	1.36561	6.07451	16.9952	17163.5	FALSE	436
2022-09-15	09:21:29	0.209682	0.932707	16.9952	18778.9	FALSE	436
2022-09-15	09:21:29	0.247137	1.09931	16.9952	17164.6	FALSE	436
2022-09-15	09:21:30	0.0974684	0.433559	-0.0354071	18779.3	FALSE	436
2022-09-15	09:21:30	-0.156221	-0.694902	-0.0354071	17164.6	FALSE	436
2022-09-15	09:21:30	0.034873	0.155122	-0.0354071	18779.5	FALSE	436
2022-09-15	09:21:31	0.331616	1.47509	8.49747	17166.1	FALSE	436
2022-09-15	09:21:31	-0.00619567	-0.0275596	8.49747	18779.5	FALSE	436
2022-09-15	09:21:31	1.86139	8.27983	8.49747	17174.4	FALSE	436
2022-09-15	09:21:31	5.45446	24.2625	8.49747	18803.7	1	437
2022-09-15	09:21:32	9.39492	41.7905	22.676	17216.1	1	438
2022-09-15	09:21:32	5.00657	22.2702	22.676	18826	1	439
2022-09-15	09:21:32	3.89217	17.3132	22.676	17233.5	1	440
2022-09-15	09:21:32	2.09752	9.33019	22.676	18835.3	FALSE	440
2022-09-15	09:21:33	1.56057	6.94173	3.06405	17240.4	FALSE	440
2022-09-15	09:21:33	0.633142	2.81634	3.06405	18838.1	FALSE	440
2022-09-15	09:21:33	0.252888	1.1249	3.06405	17241.5	FALSE	440
2022-09-15	09:21:33	0.308715	1.37323	3.06405	18839.5	FALSE	440
2022-09-15	09:21:34	0.0931936	0.414544	0.965305	17241.9	FALSE	440
2022-09-15	09:21:34	0.400216	1.78024	0.965305	18841.3	FALSE	440
2022-09-15	09:21:34	0.157621	0.70113	0.965305	17242.6	FALSE	440
2022-09-15	09:21:35	0.339657	1.51086	0.869097	18842.8	FALSE	440
2022-09-15	09:21:35	0.109071	0.48517	0.869097	17243.1	FALSE	440
2022-09-15	09:21:35	0.272481	1.21205	0.869097	18844	FALSE	440
2022-09-15	09:21:35	0.0603183	0.268308	0.869097	17243.4	FALSE	440
2022-09-15	09:21:36	-0.331386	-1.47407	-3.12251	18844	FALSE	440
2022-09-15	09:21:36	-0.73902	-3.28731	-3.12251	17243.4	FALSE	440
2022-09-15	09:21:36	-0.870317	-3.87134	-3.12251	18844	FALSE	440
2022-09-15	09:21:36	-0.867162	-3.85731	-3.12251	17243.4	FALSE	440
2022-09-15	09:21:37	-0.744262	-3.31063	-3.01566	18844	FALSE	440
2022-09-15	09:21:37	-0.6493	-2.88822	-3.01566	17243.4	FALSE	440
2022-09-15	09:21:37	-0.747722	-3.32602	-3.01566	18844	FALSE	440
2022-09-15	09:21:37	-0.570521	-2.53779	-3.01566	17243.4	FALSE	440
2022-09-15	09:21:38	-0.602175	-2.67859	-2.7419	18844	FALSE	440
2022-09-15	09:21:38	-0.597646	-2.65845	-2.7419	17243.4	FALSE	440
2022-09-15	09:21:38	-0.649401	-2.88867	-2.7419	18844	FALSE	440
2022-09-15	09:21:39	-0.667518	-2.96925	-3.59506	17243.4	FALSE	440
2022-09-15	09:21:39	-0.800088	-3.55895	-3.59506	18844	FALSE	440
2022-09-15	09:21:39	-0.843244	-3.75092	-3.59506	17243.4	FALSE	440
2022-09-15	09:21:39	-0.921971	-4.10111	-3.59506	18844	FALSE	440
2022-09-15	09:21:40	-0.932149	-4.14639	-3.27225	17243.4	FALSE	440
2022-09-15	09:21:40	-0.784872	-3.49127	-3.27225	18844	FALSE	440
2022-09-15	09:21:40	-0.722582	-3.21419	-3.27225	17243.4	FALSE	440
2022-09-15	09:21:40	-0.502939	-2.23717	-3.27225	18844	FALSE	440
2022-09-15	09:21:41	0.123728	0.550367	1.26072	17243.9	FALSE	440
2022-09-15	09:21:41	0.354618	1.57741	1.26072	18845.6	FALSE	440
2022-09-15	09:21:41	0.146069	0.649744	1.26072	17244.6	FALSE	440
2022-09-15	09:21:41	0.509275	2.26536	1.26072	18847.9	FALSE	440
2022-09-15	09:21:42	0.372532	1.6571	6.07105	17246.2	FALSE	440
2022-09-15	09:21:42	1.14037	5.07259	6.07105	18852.9	FALSE	440
2022-09-15	09:21:42	1.77029	7.8746	6.07105	17254.1	FALSE	440
2022-09-15	09:21:42	2.17614	9.67991	6.07105	18862.6	FALSE	440
2022-09-15	09:21:43	2.12154	9.43703	9.22032	17263.6	FALSE	440
2022-09-15	09:21:43	2.77024	12.3226	9.22032	18874.9	FALSE	440
2022-09-15	09:21:43	1.32668	5.90134	9.22032	17269.5	FALSE	440
2022-09-15	09:21:44	0.964593	4.2907	12.3397	18879.2	FALSE	440
2022-09-15	09:21:44	1.89599	8.43374	12.3397	17277.9	FALSE	440
2022-09-15	09:21:44	2.87569	12.7916	12.3397	18892	FALSE	440
2022-09-15	09:21:44	5.36011	23.8428	12.3397	17301.7	1	441
2022-09-15	09:21:45	5.28545	23.5107	28.0815	18915.5	1	442
2022-09-15	09:21:45	5.81217	25.8537	28.0815	17327.6	1	443
2022-09-15	09:21:45	6.63736	29.5243	28.0815	18945.1	1	444
2022-09-15	09:21:45	7.51701	33.4372	28.0815	17361	1	445
2022-09-15	09:21:46	9.99131	44.4433	27.202	18989.5	1	446
2022-09-15	09:21:46	8.42551	37.4784	27.202	17398.5	1	447
2022-09-15	09:21:46	3.11701	13.8651	27.202	19003.4	1	448
2022-09-15	09:21:46	2.92729	13.0212	27.202	17411.5	FALSE	448
2022-09-15	09:21:47	0.86103	3.83003	1.73286	19007.2	FALSE	448
2022-09-15	09:21:47	0.347036	1.54369	1.73286	17413.1	FALSE	448
2022-09-15	09:21:47	-0.0393763	-0.175154	1.73286	19007.2	FALSE	448
2022-09-15	09:21:48	-0.218002	-0.969716	-0.0717015	17413.1	FALSE	448
2022-09-15	09:21:48	0.0187407	0.0833624	-0.0717015	19007.3	FALSE	448
2022-09-15	09:21:48	0.172176	0.765873	-0.0717015	17413.8	FALSE	448
2022-09-15	09:21:48	-0.0373916	-0.166325	-0.0717015	19007.3	FALSE	448
2022-09-15	09:21:49	0.186272	0.828575	22.8418	17414.7	FALSE	448
2022-09-15	09:21:49	0.199199	0.886077	22.8418	19008.2	FALSE	448
2022-09-15	09:21:49	4.38815	19.5194	22.8418	17434.2	1	449
2022-09-15	09:21:49	15.7666	70.133	22.8418	19078.3	1	450
2022-09-15	09:21:50	26.7117	118.819	104.985	17553	1	451
2022-09-15	09:21:50	28.3195	125.971	104.985	19204.3	1	452
2022-09-15	09:21:50	19.3603	86.1185	104.985	17639.1	1	453
2022-09-15	09:21:50	20.0155	89.0329	104.985	19293.3	1	454
2022-09-15	09:21:51	16.9869	75.5611	64.8982	17714.7	1	455
2022-09-15	09:21:51	11.7724	52.366	64.8982	19345.7	1	456
2022-09-15	09:21:51	19.6344	87.3377	64.8982	17802	1	457
2022-09-15	09:21:51	9.9654	44.3281	64.8982	19390	1	458
2022-09-15	09:21:52	8.32001	37.0091	17.102	17839	1	459
2022-09-15	09:21:52	1.93996	8.62933	17.102	19398.6	FALSE	459
2022-09-15	09:21:52	1.27416	5.66772	17.102	17844.7	FALSE	459
2022-09-15	09:21:53	-0.0982567	-0.437065	-0.0934904	19398.6	FALSE	459
2022-09-15	09:21:53	-0.00507608	-0.0225794	-0.0934904	17844.7	FALSE	459
2022-09-15	09:21:53	-0.0682313	-0.303506	-0.0934904	19398.6	FALSE	459
2022-09-15	09:21:53	0.0874938	0.38919	-0.0934904	17845.1	FALSE	459
2022-09-15	09:21:54	0.205153	0.912562	1.14544	19399.5	FALSE	459
2022-09-15	09:21:54	0.335382	1.49185	1.14544	17846.6	FALSE	459
2022-09-15	09:21:54	0.23528	1.04657	1.14544	19400.6	FALSE	459
2022-09-15	09:21:54	0.254211	1.13078	1.14544	17847.7	FALSE	459
2022-09-15	09:21:55	0.28383	1.26253	1.38375	19401.8	FALSE	459
2022-09-15	09:21:55	0.22673	1.00854	1.38375	17848.7	FALSE	459
2022-09-15	09:21:55	0.394059	1.75285	1.38375	19403.6	FALSE	459
2022-09-15	09:21:55	0.339707	1.51108	1.38375	17850.2	FALSE	459
2022-09-15	09:21:56	0.394008	1.75263	1.95455	19405.4	FALSE	459
2022-09-15	09:21:56	0.523778	2.32987	1.95455	17852.6	FALSE	459
2022-09-15	09:21:56	0.40042	1.78115	1.95455	19407.1	FALSE	459

## Sheet: Boris_martin_202291591647 (3)
Date	Time	Lbs	newtons	Total force x time		total steps > 13.345	**GoPro Fitting: 905
2022-09-15	09:16:56	0.270445	1.20299	1.20299	FALSE	0
2022-09-15	09:16:56	0.269835	1.20028	1.20028	FALSE	0
2022-09-15	09:16:56	0.282863	1.25823	2.46122	FALSE	0
2022-09-15	09:16:56	0.264949	1.17855	2.37883	FALSE	0
2022-09-15	09:16:57	0.284542	1.2657	3.72692	FALSE	0
2022-09-15	09:16:57	0.263473	1.17198	3.55081	FALSE	0
2022-09-15	09:16:57	0.279504	1.24329	4.97021	FALSE	0
2022-09-15	09:16:57	0.290547	1.29241	4.84322	FALSE	0
2022-09-15	09:16:58	0.296196	1.31754	6.28775	FALSE	0
2022-09-15	09:16:58	0.280115	1.24601	6.08923	FALSE	0
2022-09-15	09:16:58	0.28327	1.26004	7.54779	FALSE	0
2022-09-15	09:16:59	0.292227	1.29988	7.38911	FALSE	0
2022-09-15	09:16:59	0.265509	1.18104	8.72883	FALSE	0
2022-09-15	09:16:59	0.26159	1.1636	8.55271	FALSE	0
2022-09-15	09:16:59	0.364186	1.61997	10.3488	FALSE	0
2022-09-15	09:17:00	0.362405	1.61205	10.1648	FALSE	0
2022-09-15	09:17:00	0.272685	1.21296	11.5618	FALSE	0
2022-09-15	09:17:00	0.29645	1.31867	11.4834	FALSE	0
2022-09-15	09:17:00	0.293194	1.30419	12.8659	FALSE	0
2022-09-15	09:17:01	0.279402	1.24284	12.7263	FALSE	0
2022-09-15	09:17:01	0.292125	1.29943	14.1654	FALSE	0
2022-09-15	09:17:01	0.315229	1.4022	14.1285	FALSE	0
2022-09-15	09:17:01	0.314059	1.397	15.5624	FALSE	0
2022-09-15	09:17:02	0.322456	1.43435	15.5628	FALSE	0
2022-09-15	09:17:02	0.330802	1.47147	17.0338	FALSE	0
2022-09-15	09:17:02	0.326374	1.45178	17.0146	FALSE	0
2022-09-15	09:17:03	0.300471	1.33656	18.3704	FALSE	0
2022-09-15	09:17:03	0.314517	1.39903	18.4136	FALSE	0
2022-09-15	09:17:03	0.323881	1.44069	19.8111	FALSE	0
2022-09-15	09:17:03	0.366018	1.62812	20.0418	FALSE	0
2022-09-15	09:17:04	0.297519	1.32342	21.1345	FALSE	0
2022-09-15	09:17:04	0.30612	1.36168	21.4034	FALSE	0
2022-09-15	09:17:04	0.295127	1.31278	22.4473	FALSE	0
2022-09-15	09:17:04	0.375942	1.67227	23.0757	FALSE	0
2022-09-15	09:17:05	0.422048	1.87735	24.3247	FALSE	0
2022-09-15	09:17:05	0.404593	1.79971	24.8754	FALSE	0
2022-09-15	09:17:05	0.384847	1.71188	26.0365	FALSE	0
2022-09-15	09:17:05	0.370445	1.64781	26.5232	FALSE	0
2022-09-15	09:17:06	0.355789	1.58262	27.6191	FALSE	0
2022-09-15	09:17:06	0.366934	1.6322	28.1554	FALSE	0
2022-09-15	09:17:06	0.343423	1.52761	29.1468	FALSE	0
2022-09-15	09:17:06	0.365865	1.62744	29.7829	FALSE	0
2022-09-15	09:17:07	0.506781	2.25426	31.401	FALSE	0
2022-09-15	09:17:07	0.321031	1.42801	31.2109	FALSE	0
2022-09-15	09:17:07	0.280216	1.24646	32.6475	FALSE	0
2022-09-15	09:17:08	0.228155	1.01488	32.2257	FALSE	0
2022-09-15	09:17:08	0.552837	2.45913	35.1066	FALSE	0
2022-09-15	09:17:08	0.271005	1.20548	33.4312	FALSE	0
2022-09-15	09:17:08	0.349326	1.55387	36.6605	FALSE	0
2022-09-15	09:17:09	0.308715	1.37323	34.8045	FALSE	0
2022-09-15	09:17:09	0.371158	1.65099	38.3115	FALSE	0
2022-09-15	09:17:09	0.500623	2.22687	37.0313	FALSE	0
2022-09-15	09:17:09	0.496196	2.20718	40.5186	FALSE	0
2022-09-15	09:17:10	0.0770104	0.342558	37.3739	FALSE	0
2022-09-15	09:17:10	0.189886	0.844651	41.3633	FALSE	0
2022-09-15	09:17:10	0.116451	0.517997	37.8919	FALSE	0
2022-09-15	09:17:10	0.336094	1.49501	42.8583	FALSE	0
2022-09-15	09:17:11	0.0948221	0.421788	38.3137	FALSE	0
2022-09-15	09:17:11	-0.0253814	-0.112902	42.8583	FALSE	0
2022-09-15	09:17:11	0.0235753	0.104868	38.4185	FALSE	0
2022-09-15	09:17:12	-0.0174425	-0.0775877	42.8583	FALSE	0
2022-09-15	09:17:12	0.158384	0.704524	39.1231	FALSE	0
2022-09-15	09:17:12	-0.0964246	-0.428916	42.8583	FALSE	0
2022-09-15	09:17:12	-0.245585	-1.09241	39.1231	FALSE	0
2022-09-15	09:17:13	-0.0937783	-0.417145	42.8583	FALSE	0
2022-09-15	09:17:13	-0.124414	-0.553418	39.1231	FALSE	0
2022-09-15	09:17:13	-0.124669	-0.554553	42.8583	FALSE	0
2022-09-15	09:17:13	-0.383142	-1.70429	39.1231	FALSE	0
2022-09-15	09:17:14	-0.131183	-0.583528	42.8583	FALSE	0
2022-09-15	09:17:14	0.523524	2.32874	41.4518	FALSE	0
2022-09-15	09:17:14	0.417061	1.85517	44.7135	FALSE	0
2022-09-15	09:17:14	1.51899	6.75677	48.2086	FALSE	0
2022-09-15	09:17:15	1.77889	7.91286	52.6263	FALSE	0
2022-09-15	09:17:15	1.24378	5.53258	53.7412	FALSE	0
2022-09-15	09:17:15	0.650038	2.8915	55.5178	FALSE	0
2022-09-15	09:17:16	0.526374	2.34142	56.0826	FALSE	0
2022-09-15	09:17:16	0.445255	1.98058	57.4984	FALSE	0
2022-09-15	09:17:16	0.298486	1.32773	57.4103	FALSE	0
2022-09-15	09:17:16	0.386629	1.7198	59.2182	FALSE	0
2022-09-15	09:17:17	0.461845	2.05438	59.4647	FALSE	0
2022-09-15	09:17:17	0.340318	1.5138	60.732	FALSE	0
2022-09-15	09:17:17	0.284186	1.26412	60.7288	FALSE	0
2022-09-15	09:17:17	0.225916	1.00492	61.737	FALSE	0
2022-09-15	09:17:18	0.395738	1.76032	62.4891	FALSE	0
2022-09-15	09:17:18	1.87905	8.35839	70.0953	FALSE	0
2022-09-15	09:17:18	2.78678	12.3962	74.8853	FALSE	0
2022-09-15	09:17:18	0.963321	4.28504	74.3804	FALSE	0
2022-09-15	09:17:19	0.432786	1.92512	76.8104	FALSE	0
2022-09-15	09:17:19	0.498282	2.21646	76.5968	FALSE	0
2022-09-15	09:17:19	0.411361	1.82982	78.6402	FALSE	0
2022-09-15	09:17:19	0.500725	2.22732	78.8242	FALSE	0
2022-09-15	09:17:20	0.461743	2.05393	80.6941	FALSE	0
2022-09-15	09:17:20	0.623066	2.77152	81.5957	FALSE	0
2022-09-15	09:17:20	0.434924	1.93463	82.6288	FALSE	0
2022-09-15	09:17:21	0.613346	2.72829	84.324	FALSE	0
2022-09-15	09:17:21	0.388512	1.72818	84.3569	FALSE	0
2022-09-15	09:17:21	0.223575	0.994506	85.3185	FALSE	0
2022-09-15	09:17:21	0.265102	1.17923	85.5362	FALSE	0
2022-09-15	09:17:22	0.358028	1.59258	86.9111	FALSE	0
2022-09-15	09:17:22	0.449377	1.99892	87.5351	FALSE	0
2022-09-15	09:17:22	0.406374	1.80763	88.7187	FALSE	0
2022-09-15	09:17:22	1.84286	8.19741	95.7325	FALSE	0
2022-09-15	09:17:23	17.7321	78.8759	167.595	1	1
2022-09-15	09:17:23	6.52011	29.0028	124.735	1	2
2022-09-15	09:17:23	3.58546	15.9488	183.543	1	3
2022-09-15	09:17:23	1.13894	5.06623	129.801	FALSE	3
2022-09-15	09:17:24	0.779707	3.46829	187.012	FALSE	3
2022-09-15	09:17:24	0.369936	1.64555	131.447	FALSE	3
2022-09-15	09:17:24	0.323677	1.43978	188.452	FALSE	3
2022-09-15	09:17:25	0.480674	2.13813	133.585	FALSE	3
2022-09-15	09:17:25	0.386527	1.71935	190.171	FALSE	3
2022-09-15	09:17:25	0.358537	1.59484	135.18	FALSE	3
2022-09-15	09:17:25	1.58444	7.04791	197.219	FALSE	3
2022-09-15	09:17:26	2.54698	11.3295	146.509	FALSE	3
2022-09-15	09:17:26	0.474924	2.11256	199.331	FALSE	3
2022-09-15	09:17:26	0.372532	1.6571	148.167	FALSE	3
2022-09-15	09:17:26	0.623473	2.77333	202.105	FALSE	3
2022-09-15	09:17:27	0.581896	2.58839	150.755	FALSE	3
2022-09-15	09:17:27	0.449275	1.99847	204.103	FALSE	3
2022-09-15	09:17:27	0.305458	1.35874	152.114	FALSE	3
2022-09-15	09:17:27	0.398486	1.77255	205.876	FALSE	3
2022-09-15	09:17:28	0.42958	1.91086	154.025	FALSE	3
2022-09-15	09:17:28	0.448868	1.99665	207.872	FALSE	3
2022-09-15	09:17:28	0.40271	1.79133	155.816	FALSE	3
2022-09-15	09:17:29	0.437875	1.94776	209.82	FALSE	3
2022-09-15	09:17:29	0.43187	1.92104	157.737	FALSE	3
2022-09-15	09:17:29	0.488359	2.17232	211.992	FALSE	3
2022-09-15	09:17:29	0.591463	2.63095	160.368	FALSE	3
2022-09-15	09:17:30	0.291056	1.29468	213.287	FALSE	3
2022-09-15	09:17:30	0.15126	0.672835	161.041	FALSE	3
2022-09-15	09:17:30	0.29416	1.30848	214.596	FALSE	3
2022-09-15	09:17:30	0.485611	2.16009	163.201	FALSE	3
2022-09-15	09:17:31	0.140776	0.6262	215.222	FALSE	3
2022-09-15	09:17:31	0.166781	0.741875	163.943	FALSE	3
2022-09-15	09:17:31	0.449886	2.00118	217.223	FALSE	3
2022-09-15	09:17:31	0.335127	1.49071	165.433	FALSE	3
2022-09-15	09:17:32	0.449071	1.99756	219.221	FALSE	3
2022-09-15	09:17:32	0.570496	2.53768	167.971	FALSE	3
2022-09-15	09:17:32	1.59385	7.08976	226.31	FALSE	3
2022-09-15	09:17:32	1.75721	7.81642	175.788	FALSE	3
2022-09-15	09:17:33	2.21803	9.86624	236.177	FALSE	3
2022-09-15	09:17:33	2.31721	10.3074	186.095	FALSE	3
2022-09-15	09:17:33	2.34592	10.4351	246.612	FALSE	3
2022-09-15	09:17:34	1.1563	5.14345	191.238	FALSE	3
2022-09-15	09:17:34	5.50169	24.4726	271.084	1	4
2022-09-15	09:17:34	10.4087	46.3	237.538	1	5
2022-09-15	09:17:34	25.7814	114.681	385.765	1	6
2022-09-15	09:17:35	42.4017	188.611	426.15	1	7
2022-09-15	09:17:35	26.7835	119.138	504.903	1	8
2022-09-15	09:17:35	12.4194	55.244	481.394	1	9
2022-09-15	09:17:35	2.78627	12.3939	517.297	FALSE	9
2022-09-15	09:17:36	2.48266	11.0434	492.437	FALSE	9
2022-09-15	09:17:36	12.6319	56.1892	573.487	1	10
2022-09-15	09:17:36	13.8317	61.5262	553.963	1	11
2022-09-15	09:17:36	12.084	53.752	627.239	1	12
2022-09-15	09:17:37	17.8017	79.1855	633.149	1	13
2022-09-15	09:17:37	16.4623	73.2276	700.466	1	14
2022-09-15	09:17:37	22.6125	100.585	733.734	1	15
2022-09-15	09:17:38	22.7579	101.232	801.698	1	16
2022-09-15	09:17:38	21.9998	97.8595	831.593	1	17
2022-09-15	09:17:38	17.9112	79.6726	881.37	1	18
2022-09-15	09:17:38	2.24052	9.96628	841.559	FALSE	18
2022-09-15	09:17:39	1.36515	6.07246	887.443	FALSE	18
2022-09-15	09:17:39	5.8854	26.1794	867.739	1	19
2022-09-15	09:17:39	5.6336	25.0594	912.502	1	20
2022-09-15	09:17:40	8.23909	36.6491	904.388	1	21
2022-09-15	09:17:40	5.93034	26.3793	938.882	1	22
2022-09-15	09:17:40	3.80805	16.939	921.327	1	23
2022-09-15	09:17:40	5.15125	22.9138	961.795	1	24
2022-09-15	09:17:40	9.76627	43.4423	964.769	1	25
2022-09-15	09:17:41	9.11411	40.5414	1002.34	1	26
2022-09-15	09:17:41	16.8948	75.1514	1039.92	1	27
2022-09-15	09:17:41	16.1479	71.8291	1074.17	1	28
2022-09-15	09:17:41	17.8993	79.6197	1119.54	1	29
2022-09-15	09:17:42	17.7772	79.0765	1153.24	1	30
2022-09-15	09:17:42	11.8213	52.5835	1172.12	1	31
2022-09-15	09:17:42	0.83126	3.69761	1156.94	FALSE	31
2022-09-15	09:17:43	0.818028	3.63875	1175.76	FALSE	31
2022-09-15	09:17:43	0.272226	1.21092	1158.15	FALSE	31
2022-09-15	09:17:43	2.61421	11.6285	1187.39	FALSE	31
2022-09-15	09:17:43	17.145	76.2644	1234.42	1	32
2022-09-15	09:17:44	30.3694	135.089	1322.48	1	33
2022-09-15	09:17:44	6.47894	28.8196	1263.24	1	34
2022-09-15	09:17:44	0.290089	1.29037	1323.77	FALSE	34
2022-09-15	09:17:44	-0.00105572	-0.00469605	1263.24	FALSE	34
2022-09-15	09:17:45	-0.422175	-1.87792	1323.77	FALSE	34
2022-09-15	09:17:45	-0.930215	-4.13778	1263.24	FALSE	34
2022-09-15	09:17:45	-0.921463	-4.09885	1323.77	FALSE	34
2022-09-15	09:17:45	-1.03408	-4.59979	1263.24	FALSE	34
2022-09-15	09:17:46	-0.852608	-3.79257	1323.77	FALSE	34
2022-09-15	09:17:46	-0.833676	-3.70836	1263.24	FALSE	34
2022-09-15	09:17:46	0.259758	1.15546	1324.93	FALSE	34
2022-09-15	09:17:47	3.88108	17.2638	1280.5	1	35
2022-09-15	09:17:47	2.00953	8.93879	1333.86	FALSE	35
2022-09-15	09:17:47	0.867493	3.85878	1284.36	FALSE	35
2022-09-15	09:17:47	0.684644	3.04543	1336.91	FALSE	35
2022-09-15	09:17:48	0.647595	2.88063	1287.24	FALSE	35
2022-09-15	09:17:48	0.336807	1.49818	1338.41	FALSE	35
2022-09-15	09:17:48	0.144135	0.641141	1287.88	FALSE	35
2022-09-15	09:17:48	1.25996	5.60455	1344.01	FALSE	35
2022-09-15	09:17:49	5.09049	22.6435	1310.52	1	36
2022-09-15	09:17:49	2.71935	12.0962	1356.11	FALSE	36
2022-09-15	09:17:49	0.650649	2.89422	1313.42	FALSE	36
2022-09-15	09:17:49	0.278639	1.23944	1357.35	FALSE	36
2022-09-15	09:17:50	0.162659	0.72354	1314.14	FALSE	36
2022-09-15	09:17:50	0.0277483	0.12343	1357.47	FALSE	36
2022-09-15	09:17:50	0.0410307	0.182513	1314.32	FALSE	36
2022-09-15	09:17:51	0.0752292	0.334635	1357.81	FALSE	36
2022-09-15	09:17:51	0.0778247	0.34618	1314.67	FALSE	36
2022-09-15	09:17:51	-0.00253154	-0.0112608	1357.81	FALSE	36
2022-09-15	09:17:51	-0.0216664	-0.0963765	1314.67	FALSE	36
2022-09-15	09:17:52	-0.131539	-0.585112	1357.81	FALSE	36
2022-09-15	09:17:52	-0.298766	-1.32897	1314.67	FALSE	36
2022-09-15	09:17:52	-0.55215	-2.45607	1357.81	FALSE	36
2022-09-15	09:17:52	-0.696221	-3.09693	1314.67	FALSE	36
2022-09-15	09:17:53	-0.707366	-3.14651	1357.81	FALSE	36
2022-09-15	09:17:53	-0.642226	-2.85675	1314.67	FALSE	36
2022-09-15	09:17:53	-0.568333	-2.52806	1357.81	FALSE	36
2022-09-15	09:17:53	4.34861	19.3435	1334.01	1	37
2022-09-15	09:17:54	18.1796	80.8665	1438.67	1	38
2022-09-15	09:17:54	25.9015	115.215	1449.23	1	39
2022-09-15	09:17:54	27.6368	122.934	1561.61	1	40
2022-09-15	09:17:54	1.50485	6.69387	1455.92	FALSE	40
2022-09-15	09:17:55	0.3364	1.49637	1563.1	FALSE	40
2022-09-15	09:17:55	0.203372	0.904639	1456.83	FALSE	40
2022-09-15	09:17:55	0.000216527	0.000963155	1563.1	FALSE	40
2022-09-15	09:17:56	-0.419274	-1.86501	1456.83	FALSE	40
2022-09-15	09:17:56	-0.349554	-1.55489	1563.1	FALSE	40
2022-09-15	09:17:56	-0.236526	-1.05211	1456.83	FALSE	40
2022-09-15	09:17:56	0.0253056	0.112564	1563.22	FALSE	40
2022-09-15	09:17:57	1.29798	5.77367	1462.6	FALSE	40
2022-09-15	09:17:57	2.38388	10.604	1573.82	FALSE	40
2022-09-15	09:17:57	0.597875	2.65947	1465.26	FALSE	40
2022-09-15	09:17:57	0.599758	2.66784	1576.49	FALSE	40
2022-09-15	09:17:58	0.38271	1.70237	1466.96	FALSE	40
2022-09-15	09:17:58	0.54897	2.44193	1578.93	FALSE	40
2022-09-15	09:17:58	0.319249	1.42008	1468.38	FALSE	40
2022-09-15	09:17:58	0.328155	1.4597	1580.39	FALSE	40
2022-09-15	09:17:59	0.266171	1.18398	1469.57	FALSE	40
2022-09-15	09:17:59	0.250649	1.11494	1581.51	FALSE	40
2022-09-15	09:17:59	0.303473	1.34991	1470.92	FALSE	40
2022-09-15	09:18:00	0.130395	0.580023	1582.09	FALSE	40
2022-09-15	09:18:00	2.09782	9.33152	1480.25	FALSE	40
2022-09-15	09:18:00	6.40795	28.5038	1610.59	1	41
2022-09-15	09:18:00	23.6487	105.194	1585.44	1	42
2022-09-15	09:18:01	19.83	88.2078	1698.8	1	43
2022-09-15	09:18:01	6.92769	30.8158	1616.26	1	44
2022-09-15	09:18:01	12.6237	56.1527	1754.95	1	45
2022-09-15	09:18:01	32.6263	145.128	1761.39	1	46
2022-09-15	09:18:02	12.3162	54.7849	1809.73	1	47
2022-09-15	09:18:02	5.72622	25.4714	1786.86	1	48
2022-09-15	09:18:02	30.2222	134.434	1944.17	1	49
2022-09-15	09:18:02	30.3716	135.099	1921.96	1	50
2022-09-15	09:18:03	6.68764	29.748	1973.92	1	51
2022-09-15	09:18:03	4.63614	20.6225	1942.58	1	52
2022-09-15	09:18:03	1.7538	7.80125	1981.72	FALSE	52
2022-09-15	09:18:04	0.285865	1.27158	1943.85	FALSE	52
2022-09-15	09:18:04	0.508868	2.26355	1983.98	FALSE	52
2022-09-15	09:18:04	1.39014	6.18362	1950.03	FALSE	52
2022-09-15	09:18:04	6.91131	30.7429	2014.72	1	53
2022-09-15	09:18:05	18.6086	82.7748	2032.81	1	54
2022-09-15	09:18:05	14.4975	64.4878	2079.21	1	55
2022-09-15	09:18:05	25.9265	115.326	2148.13	1	56
2022-09-15	09:18:05	9.42576	41.9277	2121.14	1	57
2022-09-15	09:18:06	13.074	58.1558	2206.29	1	58
2022-09-15	09:18:06	17.3026	76.9654	2198.11	1	59
2022-09-15	09:18:06	20.4264	90.8607	2297.15	1	60
2022-09-15	09:18:06	27.2034	121.006	2319.11	1	61
2022-09-15	09:18:07	3.90566	17.3732	2314.52	1	62
2022-09-15	09:18:07	2.46632	10.9707	2330.08	FALSE	62
2022-09-15	09:18:07	3.23945	14.4097	2328.93	1	63
2022-09-15	09:18:07	2.38897	10.6266	2340.71	FALSE	63
2022-09-15	09:18:08	1.08648	4.83288	2333.77	FALSE	63
2022-09-15	09:18:08	1.95024	8.67506	2349.38	FALSE	63
2022-09-15	09:18:08	0.783117	3.48346	2337.25	FALSE	63
2022-09-15	09:18:09	0.515687	2.29388	2351.68	FALSE	63
2022-09-15	09:18:09	0.667494	2.96915	2340.22	FALSE	63
2022-09-15	09:18:09	0.764898	3.40242	2355.08	FALSE	63
2022-09-15	09:18:09	1.04266	4.63796	2344.86	FALSE	63
2022-09-15	09:18:10	0.538232	2.39416	2357.47	FALSE	63
2022-09-15	09:18:10	0.327239	1.45562	2346.31	FALSE	63
2022-09-15	09:18:10	-0.144313	-0.641933	2357.47	FALSE	63
2022-09-15	09:18:10	-0.442022	-1.9662	2346.31	FALSE	63
2022-09-15	09:18:11	1.59655	7.10177	2364.58	FALSE	63
2022-09-15	09:18:11	8.58382	38.1825	2384.5	1	64
2022-09-15	09:18:11	2.35391	10.4707	2375.05	FALSE	64
2022-09-15	09:18:11	6.50479	28.9346	2413.43	1	65
2022-09-15	09:18:12	8.22011	36.5647	2411.61	1	66
2022-09-15	09:18:12	7.68026	34.1633	2447.59	1	67
2022-09-15	09:18:12	5.78093	25.7147	2437.33	1	68
2022-09-15	09:18:13	5.94902	26.4624	2474.06	1	69
2022-09-15	09:18:13	9.71965	43.2349	2480.56	1	70
2022-09-15	09:18:13	5.26749	23.4308	2497.49	1	71
2022-09-15	09:18:13	13.1031	58.2852	2538.85	1	72
2022-09-15	09:18:14	26.9249	119.767	2617.25	1	73
2022-09-15	09:18:14	9.91803	44.1174	2582.96	1	74
2022-09-15	09:18:14	9.15904	40.7412	2658	1	75
2022-09-15	09:18:14	9.64713	42.9124	2625.88	1	76
2022-09-15	09:18:15	5.45385	24.2598	2682.26	1	77
2022-09-15	09:18:15	21.7638	96.8097	2722.69	1	78
2022-09-15	09:18:15	33.3305	148.261	2830.52	1	79
2022-09-15	09:18:15	8.0855	35.9659	2758.65	1	80
2022-09-15	09:18:16	31.7017	141.016	2971.53	1	81
2022-09-15	09:18:16	14.7814	65.7506	2824.4	1	82
2022-09-15	09:18:16	30.1054	133.915	3105.45	1	83
2022-09-15	09:18:17	15.0634	67.005	2891.41	1	84
2022-09-15	09:18:17	14.8743	66.1639	3171.61	1	85
2022-09-15	09:18:17	10.8513	48.2688	2939.68	1	86
2022-09-15	09:18:17	3.1337	13.9393	3185.55	1	87
2022-09-15	09:18:18	1.04846	4.66376	2944.34	FALSE	87
2022-09-15	09:18:18	0.396959	1.76575	3187.32	FALSE	87
2022-09-15	09:18:18	0.121845	0.541991	2944.88	FALSE	87
2022-09-15	09:18:18	-0.242582	-1.07905	3187.32	FALSE	87
2022-09-15	09:18:19	-0.251183	-1.11731	2944.88	FALSE	87
2022-09-15	09:18:19	0.0614379	0.273288	3187.59	FALSE	87
2022-09-15	09:18:19	0.543982	2.41974	2947.3	FALSE	87
2022-09-15	09:18:19	0.199555	0.887661	3188.48	FALSE	87
2022-09-15	09:18:20	0.5707	2.53859	2949.84	FALSE	87
2022-09-15	09:18:20	0.380318	1.69173	3190.17	FALSE	87
2022-09-15	09:18:20	0.482964	2.14832	2951.99	FALSE	87
2022-09-15	09:18:20	0.230089	1.02348	3191.19	FALSE	87
2022-09-15	09:18:21	0.347036	1.54369	2953.53	FALSE	87
2022-09-15	09:18:21	0.412277	1.83389	3193.03	FALSE	87
2022-09-15	09:18:21	0.743829	3.3087	2956.84	FALSE	87
2022-09-15	09:18:22	1.69558	7.54228	3200.57	FALSE	87
2022-09-15	09:18:22	17.286	76.8916	3033.73	1	88
2022-09-15	09:18:22	23.9706	106.626	3307.19	1	89
2022-09-15	09:18:22	14.456	64.3032	3098.04	1	90
2022-09-15	09:18:23	0.872227	3.87984	3311.07	FALSE	90
2022-09-15	09:18:23	0.295484	1.31437	3099.35	FALSE	90
2022-09-15	09:18:23	0.569682	2.53406	3313.61	FALSE	90
2022-09-15	09:18:23	0.99986	4.44758	3103.8	FALSE	90
2022-09-15	09:18:24	14.5225	64.599	3378.21	1	91
2022-09-15	09:18:24	15.8844	70.657	3174.46	1	92
2022-09-15	09:18:24	7.85283	34.931	3413.14	1	93
2022-09-15	09:18:24	17.2582	76.7679	3251.22	1	94
2022-09-15	09:18:25	32.3041	143.695	3556.83	1	95
2022-09-15	09:18:25	25.4945	113.405	3364.63	1	96
2022-09-15	09:18:25	19.3523	86.0829	3642.92	1	97
2022-09-15	09:18:26	17.5999	78.2879	3442.92	1	98
2022-09-15	09:18:26	20.4665	91.0391	3733.95	1	99
2022-09-15	09:18:26	29.7007	132.115	3575.03	1	100
2022-09-15	09:18:26	34.313	152.631	3886.59	1	101
2022-09-15	09:18:27	22.1603	98.5734	3673.6	1	102
2022-09-15	09:18:27	21.014	93.4745	3980.06	1	103
2022-09-15	09:18:27	27.7632	123.496	3797.1	1	104
2022-09-15	09:18:27	42.1817	187.633	4167.69	1	105
2022-09-15	09:18:28	14.0827	62.6427	3859.74	1	106
2022-09-15	09:18:28	24.3222	108.19	4275.88	1	107
2022-09-15	09:18:28	24.9855	111.141	3970.88	1	108
2022-09-15	09:18:29	31.5101	140.163	4416.05	1	109
2022-09-15	09:18:29	8.63879	38.4271	4009.31	1	110
2022-09-15	09:18:29	7.01095	31.1861	4447.23	1	111
2022-09-15	09:18:29	4.73915	21.0807	4030.39	1	112
2022-09-15	09:18:30	1.90317	8.46568	4455.7	FALSE	112
2022-09-15	09:18:30	1.37197	6.1028	4036.49	FALSE	112
2022-09-15	09:18:30	0.929885	4.13631	4459.83	FALSE	112
2022-09-15	09:18:30	0.663117	2.94968	4039.44	FALSE	112
2022-09-15	09:18:31	0.50042	2.22597	4462.06	FALSE	112
2022-09-15	09:18:31	0.410089	1.82416	4041.27	FALSE	112
2022-09-15	09:18:31	1.5105	6.71901	4468.78	FALSE	112
2022-09-15	09:18:31	2.12469	9.45105	4050.72	FALSE	112
2022-09-15	09:18:32	0.776094	3.45222	4472.23	FALSE	112
2022-09-15	09:18:32	0.492125	2.18907	4052.91	FALSE	112
2022-09-15	09:18:32	0.320064	1.42371	4473.65	FALSE	112
2022-09-15	09:18:32	0.309479	1.37662	4054.28	FALSE	112
2022-09-15	09:18:33	0.224949	1.00062	4474.66	FALSE	112
2022-09-15	09:18:33	0.295942	1.31641	4055.6	FALSE	112
2022-09-15	09:18:33	0.379046	1.68607	4476.34	FALSE	112
2022-09-15	09:18:33	6.79426	30.2222	4085.82	1	113
2022-09-15	09:18:34	38.6337	171.85	4648.19	1	114
2022-09-15	09:18:34	29.9466	133.208	4219.03	1	115
2022-09-15	09:18:34	16.2399	72.2383	4720.43	1	116
2022-09-15	09:18:35	12.9413	57.5655	4276.6	1	117
2022-09-15	09:18:35	34.2728	152.452	4872.88	1	118
2022-09-15	09:18:35	26.4653	117.723	4394.32	1	119
2022-09-15	09:18:35	17.7696	79.0427	4951.93	1	120
2022-09-15	09:18:36	27.7075	123.249	4517.57	1	121
2022-09-15	09:18:36	5.82088	25.8924	4977.82	1	122
2022-09-15	09:18:36	7.90108	35.1456	4552.71	1	123
2022-09-15	09:18:36	8.23599	36.6353	5014.45	1	124
2022-09-15	09:18:37	16.9651	75.4642	4628.18	1	125
2022-09-15	09:18:37	21.6776	96.4263	5110.88	1	126
2022-09-15	09:18:37	13.9748	62.1627	4690.34	1	127
2022-09-15	09:18:37	28.686	127.601	5238.48	1	128
2022-09-15	09:18:38	11.5917	51.5622	4741.9	1	129
2022-09-15	09:18:38	13.9888	62.225	5300.71	1	130
2022-09-15	09:18:38	24.1397	107.378	4849.28	1	131
2022-09-15	09:18:39	8.24714	36.6849	5337.39	1	132
2022-09-15	09:18:39	24.7426	110.06	4959.34	1	133
2022-09-15	09:18:39	28.8756	128.444	5465.83	1	134
2022-09-15	09:18:39	6.02978	26.8217	4986.16	1	135
2022-09-15	09:18:40	19.7731	87.9547	5553.79	1	136
2022-09-15	09:18:40	2.10464	9.36186	4995.52	FALSE	136
2022-09-15	09:18:40	4.46963	19.8818	5573.67	1	137
2022-09-15	09:18:40	0.59757	2.65811	4998.18	FALSE	137
2022-09-15	09:18:41	0.246883	1.09818	5574.77	FALSE	137
2022-09-15	09:18:41	-0.144211	-0.641479	4998.18	FALSE	137
2022-09-15	09:18:41	-0.60762	-2.70282	5574.77	FALSE	137
2022-09-15	09:18:41	-1.33917	-5.9569	4998.18	FALSE	137
2022-09-15	09:18:42	-0.388944	-1.7301	5574.77	FALSE	137
2022-09-15	09:18:42	-0.348791	-1.55149	4998.18	FALSE	137
2022-09-15	09:18:42	-0.606399	-2.69738	5574.77	FALSE	137
2022-09-15	09:18:43	0.0972139	0.432427	4998.62	FALSE	137
2022-09-15	09:18:43	0.514669	2.28935	5577.06	FALSE	137
2022-09-15	09:18:43	0.312532	1.3902	5000.01	FALSE	137
2022-09-15	09:18:43	0.33986	1.51177	5578.57	FALSE	137
2022-09-15	09:18:44	0.358842	1.5962	5001.6	FALSE	137
2022-09-15	09:18:44	0.40612	1.8065	5580.38	FALSE	137
2022-09-15	09:18:44	0.446832	1.9876	5003.59	FALSE	137
2022-09-15	09:18:44	0.338232	1.50452	5581.88	FALSE	137
2022-09-15	09:18:45	0.314567	1.39926	5004.99	FALSE	137
2022-09-15	09:18:45	0.251718	1.11969	5583	FALSE	137
2022-09-15	09:18:45	0.24897	1.10747	5006.1	FALSE	137
2022-09-15	09:18:45	0.272786	1.21341	5584.21	FALSE	137
2022-09-15	09:18:46	0.280216	1.24646	5007.34	FALSE	137
2022-09-15	09:18:46	0.273295	1.21567	5585.43	FALSE	137
2022-09-15	09:18:46	0.289987	1.28992	5008.63	FALSE	137
2022-09-15	09:18:46	0.300878	1.33837	5586.77	FALSE	137
2022-09-15	09:18:47	0.353244	1.5713	5010.2	FALSE	137
2022-09-15	09:18:47	0.228817	1.01782	5587.79	FALSE	137
2022-09-15	09:18:47	0.0710053	0.315846	5010.52	FALSE	137
2022-09-15	09:18:48	0.221845	0.986811	5588.77	FALSE	137
2022-09-15	09:18:48	0.128359	0.570967	5011.09	FALSE	137
2022-09-15	09:18:48	0.272888	1.21386	5589.99	FALSE	137
2022-09-15	09:18:48	1.04688	4.65673	5015.75	FALSE	137
2022-09-15	09:18:49	6.02418	26.7968	5616.78	1	138
2022-09-15	09:18:49	11.8931	52.9029	5068.65	1	139
2022-09-15	09:18:49	13.3217	59.2576	5676.04	1	140
2022-09-15	09:18:49	14.8954	66.2577	5134.91	1	141
2022-09-15	09:18:50	13.2564	58.9671	5735.01	1	142
2022-09-15	09:18:50	16.8723	75.0514	5209.96	1	143
2022-09-15	09:18:50	21.1056	93.8819	5828.89	1	144
2022-09-15	09:18:50	8.82037	39.2348	5249.19	1	145
2022-09-15	09:18:51	21.7865	96.9107	5925.8	1	146
2022-09-15	09:18:51	7.55736	33.6166	5282.81	1	147
2022-09-15	09:18:51	15.1595	67.4325	5993.23	1	148
2022-09-15	09:18:52	9.06861	40.339	5323.15	1	149
2022-09-15	09:18:52	16.1885	72.0097	6065.24	1	150
2022-09-15	09:18:52	27.9241	124.212	5447.36	1	151
2022-09-15	09:18:52	11.8254	52.6017	6117.85	1	152
2022-09-15	09:18:53	37.6388	167.425	5614.79	1	153
2022-09-15	09:18:53	33.4245	148.679	6266.52	1	154
2022-09-15	09:18:53	25.0919	111.614	5726.4	1	155
2022-09-15	09:18:53	42.5036	189.065	6455.59	1	156
2022-09-15	09:18:54	40.3905	179.665	5906.07	1	157
2022-09-15	09:18:54	47.8516	212.853	6668.44	1	158
2022-09-15	09:18:54	34.6122	153.962	6060.03	1	159
2022-09-15	09:18:54	29.5363	131.383	6799.83	1	160
2022-09-15	09:18:55	35.5792	158.263	6218.29	1	161
2022-09-15	09:18:55	23.9126	106.368	6906.19	1	162
2022-09-15	09:18:55	19.4538	86.5344	6304.83	1	163
2022-09-15	09:18:55	16.6643	74.1261	6980.32	1	164
2022-09-15	09:18:56	17.277	76.8516	6381.68	1	165
2022-09-15	09:18:56	14.5102	64.5443	7044.86	1	166
2022-09-15	09:18:56	13.1784	58.6202	6440.3	1	167
2022-09-15	09:18:57	13.9241	61.9372	7106.8	1	168
2022-09-15	09:18:57	12.9409	57.5637	6497.86	1	169
2022-09-15	09:18:57	11.8297	52.6209	7159.42	1	170
2022-09-15	09:18:57	14.8821	66.1986	6564.06	1	171
2022-09-15	09:18:58	16.569	73.7022	7233.12	1	172
2022-09-15	09:18:58	20.9157	93.0372	6657.1	1	173
2022-09-15	09:18:58	15.3159	68.1282	7301.25	1	174
2022-09-15	09:18:58	10.0752	44.8165	6701.91	1	175
2022-09-15	09:18:59	24.593	109.395	7410.65	1	176
2022-09-15	09:18:59	24.0482	106.971	6808.88	1	177
2022-09-15	09:18:59	15.6378	69.5601	7480.21	1	178
2022-09-15	09:18:59	15.7977	70.2713	6879.16	1	179
2022-09-15	09:19:00	18.2805	81.3153	7561.52	1	180
2022-09-15	09:19:00	5.21202	23.1841	6902.34	1	181
2022-09-15	09:19:00	2.83492	12.6103	7574.13	FALSE	181
2022-09-15	09:19:01	3.05116	13.5722	6915.91	1	182
2022-09-15	09:19:01	2.52882	11.2487	7585.38	FALSE	182
2022-09-15	09:19:01	2.97009	13.2116	6929.12	FALSE	182
2022-09-15	09:19:01	1.53258	6.81722	7592.2	FALSE	182
2022-09-15	09:19:02	1.01538	4.51661	6933.64	FALSE	182
2022-09-15	09:19:02	0.914109	4.06614	7596.26	FALSE	182
2022-09-15	09:19:02	1.97681	8.79325	6942.43	FALSE	182
2022-09-15	09:19:02	4.36647	19.4229	7615.69	1	183
2022-09-15	09:19:03	5.5649	24.7538	6967.19	1	184
2022-09-15	09:19:03	12.5277	55.7257	7671.41	1	185
2022-09-15	09:19:03	9.9336	44.1866	7011.37	1	186
2022-09-15	09:19:03	14.3517	63.8392	7735.25	1	187
2022-09-15	09:19:04	7.16413	31.8675	7043.24	1	188
2022-09-15	09:19:04	8.95528	39.8349	7775.09	1	189
2022-09-15	09:19:04	6.26001	27.8458	7071.09	1	190
2022-09-15	09:19:05	10.7518	47.8262	7822.91	1	191
2022-09-15	09:19:05	5.85222	26.0318	7097.12	1	192
2022-09-15	09:19:05	5.33767	23.743	7846.66	1	193
2022-09-15	09:19:05	4.52474	20.1269	7117.25	1	194
2022-09-15	09:19:06	5.03568	22.3997	7869.06	1	195
2022-09-15	09:19:06	3.95543	17.5945	7134.84	1	196
2022-09-15	09:19:06	3.35197	14.9102	7883.97	1	197
2022-09-15	09:19:06	2.13889	9.51421	7144.35	FALSE	197
2022-09-15	09:19:07	2.43548	10.8335	7894.8	FALSE	197
2022-09-15	09:19:07	3.87731	17.2471	7161.6	1	198
2022-09-15	09:19:07	4.15009	18.4604	7913.26	1	199
2022-09-15	09:19:07	4.81889	21.4354	7183.04	1	200
2022-09-15	09:19:08	5.98286	26.613	7939.87	1	201
2022-09-15	09:19:08	5.20505	23.1531	7206.19	1	202
2022-09-15	09:19:08	3.93731	17.5139	7957.39	1	203
2022-09-15	09:19:08	14.463	64.3343	7270.52	1	204
2022-09-15	09:19:09	23.3769	103.985	8061.37	1	205
2022-09-15	09:19:09	5.74927	25.5739	7296.1	1	206
2022-09-15	09:19:09	1.50398	6.69	8068.06	FALSE	206
2022-09-15	09:19:10	0.117825	0.524109	7296.62	FALSE	206
2022-09-15	09:19:10	0.0239315	0.106452	8068.17	FALSE	206
2022-09-15	09:19:10	-0.26533	-1.18024	7296.62	FALSE	206
2022-09-15	09:19:10	-0.55673	-2.47645	8068.17	FALSE	206
2022-09-15	09:19:11	-0.404262	-1.79824	7296.62	FALSE	206
2022-09-15	09:19:11	-0.107722	-0.479169	8068.17	FALSE	206
2022-09-15	09:19:11	0.678181	3.01668	7299.64	FALSE	206
2022-09-15	09:19:11	0.901438	4.00978	8072.18	FALSE	206
2022-09-15	09:19:12	15.1523	67.4005	7367.04	1	207
2022-09-15	09:19:12	37.9616	168.861	8241.04	1	208
2022-09-15	09:19:12	40.5186	180.235	7547.27	1	209
2022-09-15	09:19:12	38.3266	170.484	8411.52	1	210
2022-09-15	09:19:13	47.6722	212.055	7759.33	1	211
2022-09-15	09:19:13	61.0664	271.636	8683.16	1	212
2022-09-15	09:19:13	29.2161	129.959	7889.29	1	213
2022-09-15	09:19:14	23.4474	104.299	8787.46	1	214
2022-09-15	09:19:14	21.5171	95.7124	7985	1	215
2022-09-15	09:19:14	24.6896	109.824	8897.28	1	216
2022-09-15	09:19:14	19.8891	88.4707	8073.47	1	217
2022-09-15	09:19:15	25.9495	115.429	9012.71	1	218
2022-09-15	09:19:15	22.7364	101.136	8174.61	1	219
2022-09-15	09:19:15	28.9861	128.936	9141.65	1	220
2022-09-15	09:19:15	27.8905	124.063	8298.67	1	221
2022-09-15	09:19:16	36.9278	164.262	9305.91	1	222
2022-09-15	09:19:16	26.4555	117.679	8416.35	1	223
2022-09-15	09:19:16	31.5891	140.515	9446.42	1	224
2022-09-15	09:19:16	23.7234	105.526	8521.88	1	225
2022-09-15	09:19:17	20.4559	90.9919	9537.42	1	226
2022-09-15	09:19:17	18.7973	83.6141	8605.49	1	227
2022-09-15	09:19:17	19.8383	88.2447	9625.66	1	228
2022-09-15	09:19:17	20.4085	90.7811	8696.27	1	229
2022-09-15	09:19:18	19.3972	86.2826	9711.94	1	230
2022-09-15	09:19:18	19.5108	86.7879	8783.06	1	231
2022-09-15	09:19:18	19.5575	86.9957	9798.94	1	232
2022-09-15	09:19:19	19.1595	85.2253	8868.28	1	233
2022-09-15	09:19:19	19.4263	86.4121	9885.35	1	234
2022-09-15	09:19:19	19.843	88.2656	8956.55	1	235
2022-09-15	09:19:19	19.8503	88.2981	9973.65	1	236
2022-09-15	09:19:20	19.4321	86.4379	9042.99	1	237
2022-09-15	09:19:20	20.2444	90.0511	10063.7	1	238
2022-09-15	09:19:20	18.4243	81.955	9124.94	1	239
2022-09-15	09:19:20	12.0795	53.732	10117.4	1	240
2022-09-15	09:19:21	10.9144	48.5494	9173.49	1	241
2022-09-15	09:19:21	30.4542	135.466	10252.9	1	242
2022-09-15	09:19:21	19.4853	86.6745	9260.17	1	243
2022-09-15	09:19:21	2.88083	12.8145	10265.7	FALSE	243
2022-09-15	09:19:22	0.299249	1.33112	9261.5	FALSE	243
2022-09-15	09:19:22	0.350751	1.56021	10267.3	FALSE	243
2022-09-15	09:19:22	0.158588	0.705431	9262.2	FALSE	243
2022-09-15	09:19:23	0.41014	1.82438	10269.1	FALSE	243
2022-09-15	09:19:23	-0.265687	-1.18183	9262.2	FALSE	243
2022-09-15	09:19:23	-0.41561	-1.84872	10269.1	FALSE	243
2022-09-15	09:19:23	0.692074	3.07848	9265.28	FALSE	243
2022-09-15	09:19:24	10.1548	45.1706	10314.3	1	244
2022-09-15	09:19:24	22.9669	102.161	9367.44	1	245
2022-09-15	09:19:24	25.9745	115.54	10429.8	1	246
2022-09-15	09:19:24	34.2558	152.377	9519.82	1	247
2022-09-15	09:19:25	48.0125	213.569	10643.4	1	248
2022-09-15	09:19:25	39.5056	175.729	9695.55	1	249
2022-09-15	09:19:25	27.8199	123.748	10767.1	1	250
2022-09-15	09:19:25	34.1278	151.807	9847.36	1	251
2022-09-15	09:19:26	32.8369	146.065	10913.2	1	252
2022-09-15	09:19:26	50.326	223.86	10071.2	1	253
2022-09-15	09:19:26	39.9011	177.488	11090.7	1	254
2022-09-15	09:19:27	39.6975	176.582	10247.8	1	255
2022-09-15	09:19:27	38.7745	172.477	11263.2	1	256
2022-09-15	09:19:27	8.30632	36.9482	10284.7	1	257
2022-09-15	09:19:27	0.942863	4.19404	11267.3	FALSE	257
2022-09-15	09:19:28	0.308155	1.37074	10286.1	FALSE	257
2022-09-15	09:19:28	0.648053	2.88267	11270.2	FALSE	257
2022-09-15	09:19:28	1.20439	5.35737	10291.5	FALSE	257
2022-09-15	09:19:28	4.35421	19.3684	11289.6	1	258
2022-09-15	09:19:29	8.28983	36.8748	10328.3	1	259
2022-09-15	09:19:29	4.08556	18.1734	11307.8	1	260
2022-09-15	09:19:29	1.22943	5.46875	10333.8	FALSE	260
2022-09-15	09:19:29	0.429529	1.91063	11309.7	FALSE	260
2022-09-15	09:19:30	0.455382	2.02563	10335.8	FALSE	260
2022-09-15	09:19:30	0.24841	1.10498	11310.8	FALSE	260
2022-09-15	09:19:30	0.0622012	0.276683	10336.1	FALSE	260
2022-09-15	09:19:30	1.17172	5.21204	11316	FALSE	260
2022-09-15	09:19:31	5.64927	25.1291	10361.2	1	261
2022-09-15	09:19:31	3.47543	15.4594	11331.5	1	262
2022-09-15	09:19:31	0.844542	3.75669	10365	FALSE	262
2022-09-15	09:19:32	1.01996	4.53699	11336	FALSE	262
2022-09-15	09:19:32	1.28897	5.7336	10370.7	FALSE	262
2022-09-15	09:19:32	1.95513	8.69681	11344.7	FALSE	262
2022-09-15	09:19:32	1.50047	6.67439	10377.4	FALSE	262
2022-09-15	09:19:33	1.3391	5.95658	11350.7	FALSE	262
2022-09-15	09:19:33	1.20831	5.3748	10382.8	FALSE	262
2022-09-15	09:19:33	1.66083	7.3877	11358	FALSE	262
2022-09-15	09:19:33	1.84983	8.22841	10391	FALSE	262
2022-09-15	09:19:34	1.45879	6.48899	11364.5	FALSE	262
2022-09-15	09:19:34	1.54566	6.8754	10397.9	FALSE	262
2022-09-15	09:19:34	1.55553	6.91931	11371.4	FALSE	262
2022-09-15	09:19:34	4.76001	21.1735	10419.1	1	263
2022-09-15	09:19:35	7.89009	35.0967	11406.5	1	264
2022-09-15	09:19:35	2.23899	9.95948	10429	FALSE	264
2022-09-15	09:19:35	0.148715	0.661514	11407.2	FALSE	264
2022-09-15	09:19:36	0.238792	1.06219	10430.1	FALSE	264
2022-09-15	09:19:36	1.76602	7.85561	11415.1	FALSE	264
2022-09-15	09:19:36	7.54749	33.5727	10463.7	1	265
2022-09-15	09:19:36	10.749	47.8137	11462.9	1	266
2022-09-15	09:19:37	1.53513	6.82857	10470.5	FALSE	266
2022-09-15	09:19:37	0.463677	2.06253	11464.9	FALSE	266
2022-09-15	09:19:37	0.294262	1.30894	10471.8	FALSE	266
2022-09-15	09:19:37	0.408868	1.81873	11466.8	FALSE	266
2022-09-15	09:19:38	0.0848984	0.377645	10472.2	FALSE	266
2022-09-15	09:19:38	3.02474	13.4546	11480.2	1	267
2022-09-15	09:19:38	26.2575	116.799	10589	1	268
2022-09-15	09:19:38	19.7671	87.928	11568.1	1	269
2022-09-15	09:19:39	13.2467	58.924	10647.9	1	270
2022-09-15	09:19:39	7.0512	31.3651	11599.5	1	271
2022-09-15	09:19:39	1.41009	6.27236	10654.2	FALSE	271
2022-09-15	09:19:40	0.624389	2.77741	11602.3	FALSE	271
2022-09-15	09:19:40	0.261031	1.16112	10655.3	FALSE	271
2022-09-15	09:19:40	0.262557	1.16791	11603.4	FALSE	271
2022-09-15	09:19:40	-0.256475	-1.14085	10655.3	FALSE	271
2022-09-15	09:19:41	0.679504	3.02257	11606.5	FALSE	271
2022-09-15	09:19:41	3.37955	15.0329	10670.4	1	272
2022-09-15	09:19:41	10.2024	45.3823	11651.9	1	273
2022-09-15	09:19:41	1.5594	6.93652	10677.3	FALSE	273
2022-09-15	09:19:42	0.612226	2.7233	11654.6	FALSE	273
2022-09-15	09:19:42	0.387087	1.72184	10679	FALSE	273
2022-09-15	09:19:42	1.90785	8.4865	11663.1	FALSE	273
2022-09-15	09:19:42	4.3539	19.367	10698.4	1	274
2022-09-15	09:19:43	7.4197	33.0043	11696.1	1	275
2022-09-15	09:19:43	8.5881	38.2016	10736.6	1	276
2022-09-15	09:19:43	5.97696	26.5867	11722.7	1	277
2022-09-15	09:19:43	14.7766	65.7293	10802.3	1	278
2022-09-15	09:19:44	7.86769	34.9971	11757.7	1	279
2022-09-15	09:19:44	2.5224	11.2201	10813.5	FALSE	279
2022-09-15	09:19:44	2.96815	13.2029	11770.9	FALSE	279
2022-09-15	09:19:45	0.834822	3.71346	10817.3	FALSE	279
2022-09-15	09:19:45	0.393397	1.74991	11772.6	FALSE	279
2022-09-15	09:19:45	0.793142	3.52805	10820.8	FALSE	279
2022-09-15	09:19:45	0.666069	2.96281	11775.6	FALSE	279
2022-09-15	09:19:46	0.261132	1.16157	10821.9	FALSE	279
2022-09-15	09:19:46	0.312786	1.39133	11777	FALSE	279
2022-09-15	09:19:46	0.398537	1.77277	10823.7	FALSE	279
2022-09-15	09:19:46	0.20154	0.89649	11777.9	FALSE	279
2022-09-15	09:19:47	0.315484	1.40334	10825.1	FALSE	279
2022-09-15	09:19:47	1.18505	5.27134	11783.1	FALSE	279
2022-09-15	09:19:47	3.47777	15.4698	10840.6	1	280
2022-09-15	09:19:47	14.1209	62.8126	11845.9	1	281
2022-09-15	09:19:48	3.78602	16.841	10857.4	1	282
2022-09-15	09:19:48	2.6508	11.7913	11857.7	FALSE	282
2022-09-15	09:19:48	4.05655	18.0443	10875.5	1	283
2022-09-15	09:19:49	4.53365	20.1666	11877.9	1	284
2022-09-15	09:19:49	5.53294	24.6116	10900.1	1	285
2022-09-15	09:19:49	4.34159	19.3123	11897.2	1	286
2022-09-15	09:19:49	4.01172	17.8449	10917.9	1	287
2022-09-15	09:19:50	3.82861	17.0304	11914.2	1	288
2022-09-15	09:19:50	3.87731	17.2471	10935.2	1	289
2022-09-15	09:19:50	3.92312	17.4508	11931.7	1	290
2022-09-15	09:19:50	3.54291	15.7596	10950.9	1	291
2022-09-15	09:19:51	3.44388	15.3191	11947	1	292
2022-09-15	09:19:51	3.21024	14.2798	10965.2	1	293
2022-09-15	09:19:51	4.54255	20.2062	11967.2	1	294
2022-09-15	09:19:51	16.1482	71.8304	11037	1	295
2022-09-15	09:19:52	13.0322	57.9698	12025.2	1	296
2022-09-15	09:19:52	4.50607	20.0439	11057.1	1	297
2022-09-15	09:19:52	1.33146	5.9226	12031.1	FALSE	297
2022-09-15	09:19:52	1.01564	4.51777	11061.6	FALSE	297
2022-09-15	09:19:53	0.990954	4.40796	12035.5	FALSE	297
2022-09-15	09:19:53	2.16001	9.60816	11071.2	FALSE	297
2022-09-15	09:19:53	3.82943	17.0341	12052.6	1	298
2022-09-15	09:19:54	2.08587	9.27837	11080.5	FALSE	298
2022-09-15	09:19:54	2.16001	9.60816	12062.2	FALSE	298
2022-09-15	09:19:54	2.6966	11.995	11092.5	FALSE	298
2022-09-15	09:19:54	1.02805	4.57297	12066.7	FALSE	298
2022-09-15	09:19:55	0.717621	3.19212	11095.7	FALSE	298
2022-09-15	09:19:55	0.885102	3.93711	12070.7	FALSE	298
2022-09-15	09:19:55	1.02108	4.54197	11100.2	FALSE	298
2022-09-15	09:19:55	0.634567	2.82268	12073.5	FALSE	298
2022-09-15	09:19:56	1.09111	4.85348	11105.1	FALSE	298
2022-09-15	09:19:56	1.22963	5.46964	12079	FALSE	298
2022-09-15	09:19:56	2.90978	12.9433	11118	FALSE	298
2022-09-15	09:19:56	4.31879	19.2108	12098.2	1	299
2022-09-15	09:19:57	2.52225	11.2195	11129.2	FALSE	299
2022-09-15	09:19:57	3.39686	15.1099	12113.3	1	300
2022-09-15	09:19:57	2.0565	9.14772	11138.4	FALSE	300
2022-09-15	09:19:58	2.58958	11.519	12124.8	FALSE	300
2022-09-15	09:19:58	2.73085	12.1474	11150.5	FALSE	300
2022-09-15	09:19:58	2.23721	9.95156	12134.8	FALSE	300
2022-09-15	09:19:58	3.41981	15.212	11165.7	1	301
2022-09-15	09:19:59	2.69553	11.9903	12146.7	FALSE	301
2022-09-15	09:19:59	1.35457	6.0254	11171.8	FALSE	301
2022-09-15	09:19:59	0.891311	3.96473	12150.7	FALSE	301
2022-09-15	09:19:59	0.793804	3.531	11175.3	FALSE	301
2022-09-15	09:20:00	0.908969	4.04328	12154.8	FALSE	301
2022-09-15	09:20:00	0.795178	3.53711	11178.8	FALSE	301
2022-09-15	09:20:00	0.656959	2.92229	12157.7	FALSE	301
2022-09-15	09:20:00	0.487036	2.16643	11181	FALSE	301
2022-09-15	09:20:01	0.411412	1.83004	12159.5	FALSE	301
2022-09-15	09:20:01	0.294517	1.31007	11182.3	FALSE	301
2022-09-15	09:20:01	0.185	0.822917	12160.3	FALSE	301
2022-09-15	09:20:02	0.127036	0.565082	11182.9	FALSE	301
2022-09-15	09:20:02	0.206018	0.916409	12161.2	FALSE	301
2022-09-15	09:20:02	0.613193	2.72761	11185.6	FALSE	301
2022-09-15	09:20:02	0.683168	3.03887	12164.3	FALSE	301
2022-09-15	09:20:03	0.330547	1.47034	11187.1	FALSE	301
2022-09-15	09:20:03	0.210496	0.936328	12165.2	FALSE	301
2022-09-15	09:20:03	0.179708	0.799377	11187.9	FALSE	301
2022-09-15	09:20:03	0.10556	0.469552	12165.7	FALSE	301
2022-09-15	09:20:04	0.0828119	0.368364	11188.3	FALSE	301
2022-09-15	09:20:04	0.086985	0.386927	12166.1	FALSE	301
2022-09-15	09:20:04	0.0788424	0.350707	11188.6	FALSE	301
2022-09-15	09:20:04	0.065102	0.289587	12166.4	FALSE	301
2022-09-15	09:20:05	0.0620486	0.276005	11188.9	FALSE	301
2022-09-15	09:20:05	0.0604709	0.268987	12166.6	FALSE	301
2022-09-15	09:20:05	0.0515651	0.229372	11189.1	FALSE	301
2022-09-15	09:20:05	0.0442877	0.197001	12166.8	FALSE	301
2022-09-15	09:20:06	0.0428628	0.190662	11189.3	FALSE	301
2022-09-15	09:20:06	0.0482063	0.214431	12167	FALSE	301
2022-09-15	09:20:06	0.04556	0.20266	11189.5	FALSE	301
2022-09-15	09:20:07	0.0458654	0.204018	12167.2	FALSE	301
2022-09-15	09:20:07	0.0415396	0.184776	11189.7	FALSE	301
2022-09-15	09:20:07	0.0328374	0.146067	12167.4	FALSE	301
2022-09-15	09:20:07	0.0395041	0.175722	11189.9	FALSE	301
2022-09-15	09:20:08	0.0242369	0.107811	12167.5	FALSE	301
2022-09-15	09:20:08	0.0252547	0.112338	11190	FALSE	301
2022-09-15	09:20:08	0.0281045	0.125014	12167.6	FALSE	301
2022-09-15	09:20:08	0.0356872	0.158744	11190.1	FALSE	301
2022-09-15	09:20:09	0.0420485	0.18704	12167.8	FALSE	301
2022-09-15	09:20:09	0.0383845	0.170742	11190.3	FALSE	301
2022-09-15	09:20:09	0.0371122	0.165082	12168	FALSE	301
2022-09-15	09:20:09	0.0370104	0.16463	11190.5	FALSE	301
2022-09-15	09:20:10	0.0377229	0.167799	12168.1	FALSE	301
2022-09-15	09:20:10	0.0360435	0.160329	11190.6	FALSE	301
2022-09-15	09:20:10	0.0366542	0.163045	12168.3	FALSE	301
2022-09-15	09:20:11	-0.0113356	-0.050423	11190.6	FALSE	301
2022-09-15	09:20:11	-0.0884857	-0.393602	12168.3	FALSE	301
2022-09-15	09:20:11	0.107036	0.476118	11191.1	FALSE	301
2022-09-15	09:20:11	0.670394	2.98205	12171.3	FALSE	301
2022-09-15	09:20:12	-0.0697071	-0.310071	11191.1	FALSE	301
2022-09-15	09:20:12	0.126222	0.561461	12171.9	FALSE	301
2022-09-15	09:20:12	0.0441351	0.196322	11191.3	FALSE	301
2022-09-15	09:20:12	0.391565	1.74176	12173.6	FALSE	301
2022-09-15	09:20:13	8.00835	35.6227	11226.9	1	302
2022-09-15	09:20:13	55.8152	248.277	12421.9	1	303
2022-09-15	09:20:13	21.2394	94.4771	11321.4	1	304
2022-09-15	09:20:13	29.3652	130.622	12552.5	1	305
2022-09-15	09:20:14	24.6621	109.702	11431.1	1	306
2022-09-15	09:20:14	42.8239	190.489	12743	1	307
2022-09-15	09:20:14	24.348	108.305	11539.4	1	308
2022-09-15	09:20:14	43.4683	193.356	12936.3	1	309
2022-09-15	09:20:15	11.5018	51.1623	11590.6	1	310
2022-09-15	09:20:15	19.6371	87.3497	13023.7	1	311
2022-09-15	09:20:15	7.73502	34.4069	11625	1	312
2022-09-15	09:20:16	8.29365	36.8918	13060.6	1	313
2022-09-15	09:20:16	15.9729	71.0507	11696	1	314
2022-09-15	09:20:16	36.9493	164.358	13224.9	1	315
2022-09-15	09:20:16	33.2204	147.771	11843.8	1	316
2022-09-15	09:20:17	15.125	67.279	13292.2	1	317
2022-09-15	09:20:17	7.00551	31.1619	11875	1	318
2022-09-15	09:20:17	0.218791	0.973226	13293.2	FALSE	318
2022-09-15	09:20:17	0.330802	1.47147	11876.4	FALSE	318
2022-09-15	09:20:18	0.539198	2.39846	13295.6	FALSE	318
2022-09-15	09:20:18	3.97212	17.6688	11894.1	1	319
2022-09-15	09:20:18	41.2917	183.674	13479.3	1	320
2022-09-15	09:20:18	34.2437	152.323	12046.4	1	321
2022-09-15	09:20:19	13.9795	62.1836	13541.4	1	322
2022-09-15	09:20:19	22.5487	100.301	12146.7	1	323
2022-09-15	09:20:19	7.55604	33.6108	13575.1	1	324
2022-09-15	09:20:20	17.0352	75.776	12222.5	1	325
2022-09-15	09:20:20	7.98072	35.4998	13610.6	1	326
2022-09-15	09:20:20	6.83543	30.4054	12252.9	1	327
2022-09-15	09:20:20	2.10536	9.36506	13619.9	FALSE	327
2022-09-15	09:20:21	0.531667	2.36496	12255.3	FALSE	327
2022-09-15	09:20:21	0.347036	1.54369	13621.5	FALSE	327
2022-09-15	09:20:21	0.249886	1.11154	12256.4	FALSE	327
2022-09-15	09:20:21	1.5051	6.69499	13628.2	FALSE	327
2022-09-15	09:20:22	4.09808	18.2291	12274.6	1	328
2022-09-15	09:20:22	1.34978	6.00409	13634.2	FALSE	328
2022-09-15	09:20:22	0.319657	1.4219	12276	FALSE	328
2022-09-15	09:20:22	0.209987	0.934064	13635.1	FALSE	328
2022-09-15	09:20:23	-0.074847	-0.332934	12276	FALSE	328
2022-09-15	09:20:23	-0.244923	-1.08947	13635.1	FALSE	328
2022-09-15	09:20:23	-0.306196	-1.36202	12276	FALSE	328
2022-09-15	09:20:23	-0.283244	-1.25993	13635.1	FALSE	328
2022-09-15	09:20:24	14.4003	64.0554	12340.1	1	329
2022-09-15	09:20:24	30.1952	134.314	13769.4	1	330
2022-09-15	09:20:24	5.74296	25.5458	12365.6	1	331
2022-09-15	09:20:25	1.50347	6.68774	13776.1	FALSE	331
2022-09-15	09:20:25	1.00154	4.45505	12370.1	FALSE	331
2022-09-15	09:20:25	0.582914	2.59292	13778.7	FALSE	331
2022-09-15	09:20:25	0.461947	2.05483	12372.1	FALSE	331
2022-09-15	09:20:26	0.167748	0.746177	13779.4	FALSE	331
2022-09-15	09:20:26	0.136959	0.609221	12372.8	FALSE	331
2022-09-15	09:20:26	0.594466	2.6443	13782.1	FALSE	331
2022-09-15	09:20:26	1.04637	4.65446	12377.4	FALSE	331
2022-09-15	09:20:27	0.567392	2.52387	13784.6	FALSE	331
2022-09-15	09:20:27	0.412685	1.83571	12379.2	FALSE	331
2022-09-15	09:20:27	0.466934	2.07702	13786.7	FALSE	331
2022-09-15	09:20:27	0.568206	2.52749	12381.8	FALSE	331
2022-09-15	09:20:28	0.883779	3.93123	13790.6	FALSE	331
2022-09-15	09:20:28	0.386171	1.71777	12383.5	FALSE	331
2022-09-15	09:20:28	0.705611	3.1387	13793.8	FALSE	331
2022-09-15	09:20:29	0.427188	1.90022	12385.4	FALSE	331
2022-09-15	09:20:29	0.803829	3.57559	13797.3	FALSE	331
2022-09-15	09:20:29	0.684491	3.04475	12388.4	FALSE	331
2022-09-15	09:20:29	0.755127	3.35896	13800.7	FALSE	331
2022-09-15	09:20:30	0.614058	2.73145	12391.2	FALSE	331
2022-09-15	09:20:30	0.743219	3.30599	13804	FALSE	331
2022-09-15	09:20:30	0.869733	3.86875	12395	FALSE	331
2022-09-15	09:20:30	1.68449	7.49295	13811.5	FALSE	331
2022-09-15	09:20:31	1.7795	7.91557	12402.9	FALSE	331
2022-09-15	09:20:31	2.27569	10.1227	13821.6	FALSE	331
2022-09-15	09:20:31	1.83335	8.15511	12411.1	FALSE	331
2022-09-15	09:20:31	3.97233	17.6697	13839.3	1	332
2022-09-15	09:20:32	5.80372	25.8161	12436.9	1	333
2022-09-15	09:20:32	14.6111	64.9931	13904.3	1	334
2022-09-15	09:20:32	9.93955	44.2131	12481.1	1	335
2022-09-15	09:20:33	8.21711	36.5513	13940.8	1	336
2022-09-15	09:20:33	11.7187	52.1271	12533.3	1	337
2022-09-15	09:20:33	4.84352	21.5449	13962.4	1	338
2022-09-15	09:20:33	9.48545	42.1932	12575.5	1	339
2022-09-15	09:20:34	6.68769	29.7482	13992.1	1	340
2022-09-15	09:20:34	16.2697	72.3709	12647.8	1	341
2022-09-15	09:20:34	10.117	45.0024	14037.1	1	342
2022-09-15	09:20:34	28.3146	125.949	12773.8	1	343
2022-09-15	09:20:35	35.4439	157.662	14194.8	1	344
2022-09-15	09:20:35	21.9991	97.8564	12871.6	1	345
2022-09-15	09:20:35	21.088	93.8036	14288.6	1	346
2022-09-15	09:20:35	11.1124	49.4302	12921.1	1	347
2022-09-15	09:20:36	23.4889	104.483	14393.1	1	348
2022-09-15	09:20:36	15.6509	69.6183	12990.7	1	349
2022-09-15	09:20:36	15.8445	70.4795	14463.6	1	350
2022-09-15	09:20:36	32.7245	145.565	13136.2	1	351
2022-09-15	09:20:37	17.4701	77.7105	14541.3	1	352
2022-09-15	09:20:37	23.1134	102.813	13239.1	1	353
2022-09-15	09:20:37	27.8221	123.758	14665	1	354
2022-09-15	09:20:38	41.3945	184.131	13423.2	1	355
2022-09-15	09:20:38	29.2686	130.193	14795.2	1	356
2022-09-15	09:20:38	35.9142	159.754	13582.9	1	357
2022-09-15	09:20:38	37.2402	165.652	14960.9	1	358
2022-09-15	09:20:39	19.5936	87.1563	13670.1	1	359
2022-09-15	09:20:39	35.0882	156.079	15116.9	1	360
2022-09-15	09:20:39	19.7246	87.739	13757.8	1	361
2022-09-15	09:20:39	9.41935	41.8992	15158.8	1	362
2022-09-15	09:20:40	6.71243	29.8582	13787.7	1	363
2022-09-15	09:20:40	0.661082	2.94062	15161.8	FALSE	363
2022-09-15	09:20:40	0.23528	1.04657	13788.7	FALSE	363
2022-09-15	09:20:40	0.148766	0.661741	15162.4	FALSE	363
2022-09-15	09:20:41	-0.091132	-0.405373	13788.7	FALSE	363
2022-09-15	09:20:41	-0.0554578	-0.246687	15162.4	FALSE	363
2022-09-15	09:20:41	0.0300384	0.133617	13788.9	FALSE	363
2022-09-15	09:20:42	0.118944	0.529087	15163	FALSE	363
2022-09-15	09:20:42	0.0985371	0.438313	13789.3	FALSE	363
2022-09-15	09:20:42	0.119555	0.531805	15163.5	FALSE	363
2022-09-15	09:20:42	0.624084	2.77605	13792.1	FALSE	363
2022-09-15	09:20:43	0.647697	2.88109	15166.4	FALSE	363
2022-09-15	09:20:43	0.550598	2.44917	13794.5	FALSE	363
2022-09-15	09:20:43	0.38444	1.71007	15168.1	FALSE	363
2022-09-15	09:20:43	0.449224	1.99824	13796.5	FALSE	363
2022-09-15	09:20:44	0.551107	2.45143	15170.5	FALSE	363
2022-09-15	09:20:44	0.231005	1.02756	13797.6	FALSE	363
2022-09-15	09:20:44	0.360318	1.60277	15172.2	FALSE	363
2022-09-15	09:20:44	0.511921	2.27713	13799.8	FALSE	363
2022-09-15	09:20:45	0.774975	3.44724	15175.6	FALSE	363
2022-09-15	09:20:45	0.528206	2.34957	13802.2	FALSE	363
2022-09-15	09:20:45	0.413804	1.84068	15177.4	FALSE	363
2022-09-15	09:20:45	0.130853	0.58206	13802.8	FALSE	363
2022-09-15	09:20:46	0.102405	0.455518	15177.9	FALSE	363
2022-09-15	09:20:46	0.13757	0.611939	13803.4	FALSE	363
2022-09-15	09:20:46	0.131972	0.587038	15178.5	FALSE	363
2022-09-15	09:20:47	0.140878	0.626654	13804	FALSE	363
2022-09-15	09:20:47	0.125407	0.557835	15179	FALSE	363
2022-09-15	09:20:47	0.327494	1.45676	13805.5	FALSE	363
2022-09-15	09:20:47	1.45747	6.48312	15185.5	FALSE	363
2022-09-15	09:20:48	2.28994	10.1861	13815.7	FALSE	363
2022-09-15	09:20:48	1.37065	6.09693	15191.6	FALSE	363
2022-09-15	09:20:48	0.33813	1.50407	13817.2	FALSE	363
2022-09-15	09:20:48	0.441234	1.9627	15193.6	FALSE	363
2022-09-15	09:20:49	0.0908017	0.403904	13817.6	FALSE	363
2022-09-15	09:20:49	-0.16304	-0.725235	15193.6	FALSE	363
2022-09-15	09:20:49	-0.136883	-0.608883	13817.6	FALSE	363
2022-09-15	09:20:49	0.0345676	0.153764	15193.7	FALSE	363
2022-09-15	09:20:50	0.60215	2.67848	13820.2	FALSE	363
2022-09-15	09:20:50	0.286578	1.27476	15195	FALSE	363
2022-09-15	09:20:50	0.753906	3.35352	13823.6	FALSE	363
2022-09-15	09:20:51	2.41233	10.7305	15205.7	FALSE	363
2022-09-15	09:20:51	13.3805	59.5191	13883.1	1	364
2022-09-15	09:20:51	3.77981	16.8134	15222.6	1	365
2022-09-15	09:20:51	2.40057	10.6782	13893.8	FALSE	365
2022-09-15	09:20:52	0.308461	1.3721	15223.9	FALSE	365
2022-09-15	09:20:52	0.296043	1.31686	13895.1	FALSE	365
2022-09-15	09:20:52	-0.0928114	-0.412844	15223.9	FALSE	365
2022-09-15	09:20:52	-0.0641091	-0.28517	13895.1	FALSE	365
2022-09-15	09:20:53	0.0555855	0.247255	15224.2	FALSE	365
2022-09-15	09:20:53	0.0208781	0.09287	13895.2	FALSE	365
2022-09-15	09:20:53	0.101743	0.452573	15224.6	FALSE	365
2022-09-15	09:20:53	0.0420485	0.18704	13895.4	FALSE	365
2022-09-15	09:20:54	0.0634735	0.282343	15224.9	FALSE	365
2022-09-15	09:20:54	0.171667	0.763609	13896.2	FALSE	365
2022-09-15	09:20:54	0.426374	1.8966	15226.8	FALSE	365
2022-09-15	09:20:55	0.278893	1.24057	13897.4	FALSE	365
2022-09-15	09:20:55	0.806934	3.5894	15230.4	FALSE	365
2022-09-15	09:20:55	0.441132	1.96224	13899.4	FALSE	365
2022-09-15	09:20:55	0.409224	1.82031	15232.2	FALSE	365
2022-09-15	09:20:56	0.184797	0.822014	13900.2	FALSE	365
2022-09-15	09:20:56	-0.56818	-2.52738	15232.2	FALSE	365
2022-09-15	09:20:56	-2.00518	-8.91944	13900.2	FALSE	365
2022-09-15	09:20:56	0.26159	1.1636	15233.4	FALSE	365
2022-09-15	09:20:57	0.141234	0.628237	13900.8	FALSE	365
2022-09-15	09:20:57	-0.144364	-0.64216	15233.4	FALSE	365
2022-09-15	09:20:57	0.380369	1.69196	13902.5	FALSE	365
2022-09-15	09:20:57	0.241336	1.07351	15234.5	FALSE	365
2022-09-15	09:20:58	0.0559417	0.24884	13902.7	FALSE	365
2022-09-15	09:20:58	-0.0784602	-0.349007	15234.5	FALSE	365
2022-09-15	09:20:58	-0.0325061	-0.144594	13902.7	FALSE	365
2022-09-15	09:20:58	0.0838297	0.372891	15234.8	FALSE	365
2022-09-15	09:20:59	0.209682	0.932707	13903.7	FALSE	365
2022-09-15	09:20:59	0.341336	1.51833	15236.3	FALSE	365
2022-09-15	09:20:59	0.479199	2.13157	13905.8	FALSE	365
2022-09-15	09:21:00	0.292837	1.3026	15237.6	FALSE	365
2022-09-15	09:21:00	0.456094	2.0288	13907.8	FALSE	365
2022-09-15	09:21:00	0.482964	2.14832	15239.8	FALSE	365
2022-09-15	09:21:00	1.56963	6.98203	13914.8	FALSE	365
2022-09-15	09:21:01	1.63406	7.26863	15247.1	FALSE	365
2022-09-15	09:21:01	2.72072	12.1023	13926.9	FALSE	365
2022-09-15	09:21:01	0.53874	2.39642	15249.5	FALSE	365
2022-09-15	09:21:01	1.18225	5.25888	13932.2	FALSE	365
2022-09-15	09:21:02	1.65141	7.3458	15256.8	FALSE	365
2022-09-15	09:21:02	1.66113	7.38904	13939.6	FALSE	365
2022-09-15	09:21:02	2.71996	12.0989	15268.9	FALSE	365
2022-09-15	09:21:02	4.31436	19.1911	13958.8	1	366
2022-09-15	09:21:03	16.668	74.1426	15343	1	367
2022-09-15	09:21:03	17.4871	77.7861	14036.5	1	368
2022-09-15	09:21:03	28.0039	124.567	15467.6	1	369
2022-09-15	09:21:04	15.9985	71.1645	14107.7	1	370
2022-09-15	09:21:04	13.3643	59.4471	15527.1	1	371
2022-09-15	09:21:04	22.207	98.7812	14206.5	1	372
2022-09-15	09:21:04	14.5549	64.7431	15591.8	1	373
2022-09-15	09:21:05	0.177672	0.790321	14207.3	FALSE	373
2022-09-15	09:21:05	0.0370104	0.16463	15592	FALSE	373
2022-09-15	09:21:05	-0.115458	-0.51358	14207.3	FALSE	373
2022-09-15	09:21:05	-0.494338	-2.19891	15592	FALSE	373
2022-09-15	09:21:06	-0.682328	-3.03513	14207.3	FALSE	373
2022-09-15	09:21:06	-0.929198	-4.13326	15592	FALSE	373
2022-09-15	09:21:06	-0.807315	-3.5911	14207.3	FALSE	373
2022-09-15	09:21:06	-0.277137	-1.23276	15592	FALSE	373
2022-09-15	09:21:07	0.227596	1.01239	14208.3	FALSE	373
2022-09-15	09:21:07	0.39986	1.77866	15593.7	FALSE	373
2022-09-15	09:21:07	11.0105	48.9769	14257.3	1	374
2022-09-15	09:21:07	32.1483	143.002	15736.7	1	375
2022-09-15	09:21:08	31.6164	140.636	14397.9	1	376
2022-09-15	09:21:08	23.9081	106.348	15843.1	1	377
2022-09-15	09:21:08	20.4459	90.9475	14488.9	1	378
2022-09-15	09:21:09	27.9244	124.213	15967.3	1	379
2022-09-15	09:21:09	27.3787	121.786	14610.6	1	380
2022-09-15	09:21:09	24.2794	108	16075.3	1	381
2022-09-15	09:21:09	11.8039	52.5061	14663.1	1	382
2022-09-15	09:21:10	14.1836	63.0915	16138.4	1	383
2022-09-15	09:21:10	21.7038	96.5428	14759.7	1	384
2022-09-15	09:21:10	6.32729	28.1451	16166.5	1	385
2022-09-15	09:21:10	16.4462	73.156	14832.8	1	386
2022-09-15	09:21:11	12.0764	53.7182	16220.3	1	387
2022-09-15	09:21:11	3.68866	16.4079	14849.3	1	388
2022-09-15	09:21:11	9.0395	40.2095	16260.5	1	389
2022-09-15	09:21:11	9.33863	41.5401	14890.8	1	390
2022-09-15	09:21:12	9.01385	40.0954	16300.6	1	391
2022-09-15	09:21:12	10.032	44.6243	14935.4	1	392
2022-09-15	09:21:12	18.0833	80.4381	16381	1	393
2022-09-15	09:21:13	23.2759	103.536	15039	1	394
2022-09-15	09:21:13	3.05904	13.6072	16394.6	1	395
2022-09-15	09:21:13	8.93472	39.7434	15078.7	1	396
2022-09-15	09:21:13	10.2556	45.619	16440.2	1	397
2022-09-15	09:21:14	8.69889	38.6944	15117.4	1	398
2022-09-15	09:21:14	32.7448	145.655	16585.9	1	399
2022-09-15	09:21:14	32.2338	143.382	15260.8	1	400
2022-09-15	09:21:14	32.1528	143.022	16728.9	1	401
2022-09-15	09:21:15	21.8274	97.0926	15357.9	1	402
2022-09-15	09:21:15	31.8417	141.638	16870.5	1	403
2022-09-15	09:21:15	32.8561	146.151	15504	1	404
2022-09-15	09:21:15	26.4449	117.632	16988.2	1	405
2022-09-15	09:21:16	11.62	51.6881	15555.7	1	406
2022-09-15	09:21:16	24.7911	110.276	17098.5	1	407
2022-09-15	09:21:16	20.7127	92.1342	15647.8	1	408
2022-09-15	09:21:17	9.99212	44.4469	17142.9	1	409
2022-09-15	09:21:17	17.7981	79.1695	15727	1	410
2022-09-15	09:21:17	18.7988	83.6208	17226.5	1	411
2022-09-15	09:21:17	16.5175	73.4731	15800.5	1	412
2022-09-15	09:21:18	17.493	77.8124	17304.3	1	413
2022-09-15	09:21:18	20.696	92.0599	15892.5	1	414
2022-09-15	09:21:18	30.5127	135.727	17440.1	1	415
2022-09-15	09:21:18	24.2467	107.854	16000.4	1	416
2022-09-15	09:21:19	22.14	98.4831	17538.5	1	417
2022-09-15	09:21:19	26.4563	117.683	16118.1	1	418
2022-09-15	09:21:19	2.20266	9.79787	17548.3	FALSE	418
2022-09-15	09:21:19	2.03085	9.03363	16127.1	FALSE	418
2022-09-15	09:21:20	0.54841	2.43944	17550.8	FALSE	418
2022-09-15	09:21:20	0.0136008	0.0604991	16127.2	FALSE	418
2022-09-15	09:21:20	0.0245422	0.109169	17550.9	FALSE	418
2022-09-15	09:21:20	0.0141097	0.0627628	16127.2	FALSE	418
2022-09-15	09:21:21	0.903575	4.01928	17554.9	FALSE	418
2022-09-15	09:21:21	13.1699	58.5823	16185.8	1	419
2022-09-15	09:21:21	26.558	118.135	17673	1	420
2022-09-15	09:21:22	1.80704	8.03808	16193.9	FALSE	420
2022-09-15	09:21:22	0.573448	2.55081	17675.6	FALSE	420
2022-09-15	09:21:22	0.0114125	0.0507651	16193.9	FALSE	420
2022-09-15	09:21:22	-0.0515392	-0.229257	17675.6	FALSE	420
2022-09-15	09:21:23	-0.187417	-0.833668	16193.9	FALSE	420
2022-09-15	09:21:23	-0.00324403	-0.0144301	17675.6	FALSE	420
2022-09-15	09:21:23	0.138283	0.61511	16194.5	FALSE	420
2022-09-15	09:21:23	0.15528	0.690716	17676.3	FALSE	420
2022-09-15	09:21:24	0.114059	0.507357	16195	FALSE	420
2022-09-15	09:21:24	0.0552292	0.245671	17676.5	FALSE	420
2022-09-15	09:21:24	0.0414379	0.184324	16195.2	FALSE	420
2022-09-15	09:21:24	0.296908	1.32071	17677.9	FALSE	420
2022-09-15	09:21:25	6.13436	27.2869	16222.5	1	421
2022-09-15	09:21:25	28.6776	127.564	17805.4	1	422
2022-09-15	09:21:25	30.204	134.353	16356.9	1	423
2022-09-15	09:21:26	9.62871	42.8304	17848.3	1	424
2022-09-15	09:21:26	19.5596	87.005	16443.9	1	425
2022-09-15	09:21:26	38.6419	171.887	18020.1	1	426
2022-09-15	09:21:26	38.853	172.826	16616.7	1	427
2022-09-15	09:21:27	33.0273	146.912	18167	1	428
2022-09-15	09:21:27	34.1406	151.864	16768.6	1	429
2022-09-15	09:21:27	41.6354	185.203	18352.3	1	430
2022-09-15	09:21:27	31.6221	140.661	16909.2	1	431
2022-09-15	09:21:28	58.1184	258.522	18610.8	1	432
2022-09-15	09:21:28	31.4732	139.999	17049.2	1	433
2022-09-15	09:21:28	24.1209	107.295	18718.1	1	434
2022-09-15	09:21:28	24.3269	108.211	17157.4	1	435
2022-09-15	09:21:29	13.4603	59.8741	18777.9	1	436
2022-09-15	09:21:29	1.36561	6.07451	17163.5	FALSE	436
2022-09-15	09:21:29	0.209682	0.932707	18778.9	FALSE	436
2022-09-15	09:21:29	0.247137	1.09931	17164.6	FALSE	436
2022-09-15	09:21:30	0.0974684	0.433559	18779.3	FALSE	436
2022-09-15	09:21:30	-0.156221	-0.694902	17164.6	FALSE	436
2022-09-15	09:21:30	0.034873	0.155122	18779.5	FALSE	436
2022-09-15	09:21:31	0.331616	1.47509	17166.1	FALSE	436
2022-09-15	09:21:31	-0.00619567	-0.0275596	18779.5	FALSE	436
2022-09-15	09:21:31	1.86139	8.27983	17174.4	FALSE	436
2022-09-15	09:21:31	5.45446	24.2625	18803.7	1	437
2022-09-15	09:21:32	9.39492	41.7905	17216.1	1	438
2022-09-15	09:21:32	5.00657	22.2702	18826	1	439
2022-09-15	09:21:32	3.89217	17.3132	17233.5	1	440
2022-09-15	09:21:32	2.09752	9.33019	18835.3	FALSE	440
2022-09-15	09:21:33	1.56057	6.94173	17240.4	FALSE	440
2022-09-15	09:21:33	0.633142	2.81634	18838.1	FALSE	440
2022-09-15	09:21:33	0.252888	1.1249	17241.5	FALSE	440
2022-09-15	09:21:33	0.308715	1.37323	18839.5	FALSE	440
2022-09-15	09:21:34	0.0931936	0.414544	17241.9	FALSE	440
2022-09-15	09:21:34	0.400216	1.78024	18841.3	FALSE	440
2022-09-15	09:21:34	0.157621	0.70113	17242.6	FALSE	440
2022-09-15	09:21:35	0.339657	1.51086	18842.8	FALSE	440
2022-09-15	09:21:35	0.109071	0.48517	17243.1	FALSE	440
2022-09-15	09:21:35	0.272481	1.21205	18844	FALSE	440
2022-09-15	09:21:35	0.0603183	0.268308	17243.4	FALSE	440
2022-09-15	09:21:36	-0.331386	-1.47407	18844	FALSE	440
2022-09-15	09:21:36	-0.73902	-3.28731	17243.4	FALSE	440
2022-09-15	09:21:36	-0.870317	-3.87134	18844	FALSE	440
2022-09-15	09:21:36	-0.867162	-3.85731	17243.4	FALSE	440
2022-09-15	09:21:37	-0.744262	-3.31063	18844	FALSE	440
2022-09-15	09:21:37	-0.6493	-2.88822	17243.4	FALSE	440
2022-09-15	09:21:37	-0.747722	-3.32602	18844	FALSE	440
2022-09-15	09:21:37	-0.570521	-2.53779	17243.4	FALSE	440
2022-09-15	09:21:38	-0.602175	-2.67859	18844	FALSE	440
2022-09-15	09:21:38	-0.597646	-2.65845	17243.4	FALSE	440
2022-09-15	09:21:38	-0.649401	-2.88867	18844	FALSE	440
2022-09-15	09:21:39	-0.667518	-2.96925	17243.4	FALSE	440
2022-09-15	09:21:39	-0.800088	-3.55895	18844	FALSE	440
2022-09-15	09:21:39	-0.843244	-3.75092	17243.4	FALSE	440
2022-09-15	09:21:39	-0.921971	-4.10111	18844	FALSE	440
2022-09-15	09:21:40	-0.932149	-4.14639	17243.4	FALSE	440
2022-09-15	09:21:40	-0.784872	-3.49127	18844	FALSE	440
2022-09-15	09:21:40	-0.722582	-3.21419	17243.4	FALSE	440
2022-09-15	09:21:40	-0.502939	-2.23717	18844	FALSE	440
2022-09-15	09:21:41	0.123728	0.550367	17243.9	FALSE	440
2022-09-15	09:21:41	0.354618	1.57741	18845.6	FALSE	440
2022-09-15	09:21:41	0.146069	0.649744	17244.6	FALSE	440
2022-09-15	09:21:41	0.509275	2.26536	18847.9	FALSE	440
2022-09-15	09:21:42	0.372532	1.6571	17246.2	FALSE	440
2022-09-15	09:21:42	1.14037	5.07259	18852.9	FALSE	440
2022-09-15	09:21:42	1.77029	7.8746	17254.1	FALSE	440
2022-09-15	09:21:42	2.17614	9.67991	18862.6	FALSE	440
2022-09-15	09:21:43	2.12154	9.43703	17263.6	FALSE	440
2022-09-15	09:21:43	2.77024	12.3226	18874.9	FALSE	440
2022-09-15	09:21:43	1.32668	5.90134	17269.5	FALSE	440
2022-09-15	09:21:44	0.964593	4.2907	18879.2	FALSE	440
2022-09-15	09:21:44	1.89599	8.43374	17277.9	FALSE	440
2022-09-15	09:21:44	2.87569	12.7916	18892	FALSE	440
2022-09-15	09:21:44	5.36011	23.8428	17301.7	1	441
2022-09-15	09:21:45	5.28545	23.5107	18915.5	1	442
2022-09-15	09:21:45	5.81217	25.8537	17327.6	1	443
2022-09-15	09:21:45	6.63736	29.5243	18945.1	1	444
2022-09-15	09:21:45	7.51701	33.4372	17361	1	445
2022-09-15	09:21:46	9.99131	44.4433	18989.5	1	446
2022-09-15	09:21:46	8.42551	37.4784	17398.5	1	447
2022-09-15	09:21:46	3.11701	13.8651	19003.4	1	448
2022-09-15	09:21:46	2.92729	13.0212	17411.5	FALSE	448
2022-09-15	09:21:47	0.86103	3.83003	19007.2	FALSE	448
2022-09-15	09:21:47	0.347036	1.54369	17413.1	FALSE	448
2022-09-15	09:21:47	-0.0393763	-0.175154	19007.2	FALSE	448
2022-09-15	09:21:48	-0.218002	-0.969716	17413.1	FALSE	448
2022-09-15	09:21:48	0.0187407	0.0833624	19007.3	FALSE	448
2022-09-15	09:21:48	0.172176	0.765873	17413.8	FALSE	448
2022-09-15	09:21:48	-0.0373916	-0.166325	19007.3	FALSE	448
2022-09-15	09:21:49	0.186272	0.828575	17414.7	FALSE	448
2022-09-15	09:21:49	0.199199	0.886077	19008.2	FALSE	448
2022-09-15	09:21:49	4.38815	19.5194	17434.2	1	449
2022-09-15	09:21:49	15.7666	70.133	19078.3	1	450
2022-09-15	09:21:50	26.7117	118.819	17553	1	451
2022-09-15	09:21:50	28.3195	125.971	19204.3	1	452
2022-09-15	09:21:50	19.3603	86.1185	17639.1	1	453
2022-09-15	09:21:50	20.0155	89.0329	19293.3	1	454
2022-09-15	09:21:51	16.9869	75.5611	17714.7	1	455
2022-09-15	09:21:51	11.7724	52.366	19345.7	1	456
2022-09-15	09:21:51	19.6344	87.3377	17802	1	457
2022-09-15	09:21:51	9.9654	44.3281	19390	1	458
2022-09-15	09:21:52	8.32001	37.0091	17839	1	459
2022-09-15	09:21:52	1.93996	8.62933	19398.6	FALSE	459
2022-09-15	09:21:52	1.27416	5.66772	17844.7	FALSE	459
2022-09-15	09:21:53	-0.0982567	-0.437065	19398.6	FALSE	459
2022-09-15	09:21:53	-0.00507608	-0.0225794	17844.7	FALSE	459
2022-09-15	09:21:53	-0.0682313	-0.303506	19398.6	FALSE	459
2022-09-15	09:21:53	0.0874938	0.38919	17845.1	FALSE	459
2022-09-15	09:21:54	0.205153	0.912562	19399.5	FALSE	459
2022-09-15	09:21:54	0.335382	1.49185	17846.6	FALSE	459
2022-09-15	09:21:54	0.23528	1.04657	19400.6	FALSE	459
2022-09-15	09:21:54	0.254211	1.13078	17847.7	FALSE	459
2022-09-15	09:21:55	0.28383	1.26253	19401.8	FALSE	459
2022-09-15	09:21:55	0.22673	1.00854	17848.7	FALSE	459
2022-09-15	09:21:55	0.394059	1.75285	19403.6	FALSE	459
2022-09-15	09:21:55	0.339707	1.51108	17850.2	FALSE	459
2022-09-15	09:21:56	0.394008	1.75263	19405.4	FALSE	459
2022-09-15	09:21:56	0.523778	2.32987	17852.6	FALSE	459
2022-09-15	09:21:56	0.40042	1.78115	19407.1	FALSE	459

## Sheet: Boris_martin_202291591647 (2)
Date	Time	Lbs	Total force x time			**GoPro Fitting: 905
2022-09-15	09:16:47	0.00912238	0.00912238	FALSE	0
2022-09-15	09:16:47	-0.0741855	0.00912238	FALSE	0
2022-09-15	09:16:47	0.208104	0.217226	FALSE	0
2022-09-15	09:16:48	0.186069	0.403295	FALSE	0
2022-09-15	09:16:48	0.257723	0.661018	FALSE	0
2022-09-15	09:16:48	0.192532	0.85355	FALSE	0
2022-09-15	09:16:48	0.19299	1.04654	FALSE	0
2022-09-15	09:16:49	0.196807	1.24335	FALSE	0
2022-09-15	09:16:49	0.245458	1.48881	FALSE	0
2022-09-15	09:16:49	0.223422	1.71223	FALSE	0
2022-09-15	09:16:50	0.311005	2.02323	FALSE	0
2022-09-15	09:16:50	0.386171	2.4094	FALSE	0
2022-09-15	09:16:50	0.264186	2.67359	FALSE	0
2022-09-15	09:16:50	0.308206	2.9818	FALSE	0
2022-09-15	09:16:51	0.275076	3.25687	FALSE	0
2022-09-15	09:16:51	0.255382	3.51225	FALSE	0
2022-09-15	09:16:51	0.393906	3.90616	FALSE	0
2022-09-15	09:16:51	0.443219	4.34938	FALSE	0
2022-09-15	09:16:52	0.340675	4.69005	FALSE	0
2022-09-15	09:16:52	0.327036	5.01709	FALSE	0
2022-09-15	09:16:52	0.333651	5.35074	FALSE	0
2022-09-15	09:16:52	0.319555	5.6703	FALSE	0
2022-09-15	09:16:53	0.343015	6.01331	FALSE	0
2022-09-15	09:16:53	0.329173	6.34248	FALSE	0
2022-09-15	09:16:53	0.299707	6.64219	FALSE	0
2022-09-15	09:16:53	0.276451	6.91864	FALSE	0
2022-09-15	09:16:54	0.269529	7.18817	FALSE	0
2022-09-15	09:16:54	0.282354	7.47052	FALSE	0
2022-09-15	09:16:54	0.273295	7.74382	FALSE	0
2022-09-15	09:16:55	0.284949	8.02877	FALSE	0
2022-09-15	09:16:55	0.26673	8.2955	FALSE	0
2022-09-15	09:16:55	0.272125	8.56762	FALSE	0
2022-09-15	09:16:55	0.271667	8.83929	FALSE	0
2022-09-15	09:16:56	0.270445	9.10974	FALSE	0
2022-09-15	09:16:56	0.269835	9.37957	FALSE	0
2022-09-15	09:16:56	0.282863	9.66243	FALSE	0
2022-09-15	09:16:56	0.264949	9.92738	FALSE	0
2022-09-15	09:16:57	0.284542	10.2119	FALSE	0
2022-09-15	09:16:57	0.263473	10.4754	FALSE	0
2022-09-15	09:16:57	0.279504	10.7549	FALSE	0
2022-09-15	09:16:57	0.290547	11.0454	FALSE	0
2022-09-15	09:16:58	0.296196	11.3416	FALSE	0
2022-09-15	09:16:58	0.280115	11.6218	FALSE	0
2022-09-15	09:16:58	0.28327	11.905	FALSE	0
2022-09-15	09:16:59	0.292227	12.1973	FALSE	0
2022-09-15	09:16:59	0.265509	12.4628	FALSE	0
2022-09-15	09:16:59	0.26159	12.7244	FALSE	0
2022-09-15	09:16:59	0.364186	13.0885	FALSE	0
2022-09-15	09:17:00	0.362405	13.4509	FALSE	0
2022-09-15	09:17:00	0.272685	13.7236	FALSE	0
2022-09-15	09:17:00	0.29645	14.0201	FALSE	0
2022-09-15	09:17:00	0.293194	14.3133	FALSE	0
2022-09-15	09:17:01	0.279402	14.5927	FALSE	0
2022-09-15	09:17:01	0.292125	14.8848	FALSE	0
2022-09-15	09:17:01	0.315229	15.2	FALSE	0
2022-09-15	09:17:01	0.314059	15.5141	FALSE	0
2022-09-15	09:17:02	0.322456	15.8365	FALSE	0
2022-09-15	09:17:02	0.330802	16.1673	FALSE	0
2022-09-15	09:17:02	0.326374	16.4937	FALSE	0
2022-09-15	09:17:03	0.300471	16.7942	FALSE	0
2022-09-15	09:17:03	0.314517	17.1087	FALSE	0
2022-09-15	09:17:03	0.323881	17.4326	FALSE	0
2022-09-15	09:17:03	0.366018	17.7986	FALSE	0
2022-09-15	09:17:04	0.297519	18.0961	FALSE	0
2022-09-15	09:17:04	0.30612	18.4022	FALSE	0
2022-09-15	09:17:04	0.295127	18.6974	FALSE	0
2022-09-15	09:17:04	0.375942	19.0733	FALSE	0
2022-09-15	09:17:05	0.422048	19.4954	FALSE	0
2022-09-15	09:17:05	0.404593	19.9	FALSE	0
2022-09-15	09:17:05	0.384847	20.2848	FALSE	0
2022-09-15	09:17:05	0.370445	20.6553	FALSE	0
2022-09-15	09:17:06	0.355789	21.011	FALSE	0
2022-09-15	09:17:06	0.366934	21.378	FALSE	0
2022-09-15	09:17:06	0.343423	21.7214	FALSE	0
2022-09-15	09:17:06	0.365865	22.0873	FALSE	0
2022-09-15	09:17:07	0.506781	22.594	FALSE	0
2022-09-15	09:17:07	0.321031	22.9151	FALSE	0
2022-09-15	09:17:07	0.280216	23.1953	FALSE	0
2022-09-15	09:17:08	0.228155	23.4234	FALSE	0
2022-09-15	09:17:08	0.552837	23.9763	FALSE	0
2022-09-15	09:17:08	0.271005	24.2473	FALSE	0
2022-09-15	09:17:08	0.349326	24.5966	FALSE	0
2022-09-15	09:17:09	0.308715	24.9053	FALSE	0
2022-09-15	09:17:09	0.371158	25.2765	FALSE	0
2022-09-15	09:17:09	0.500623	25.7771	FALSE	0
2022-09-15	09:17:09	0.496196	26.2733	FALSE	0
2022-09-15	09:17:10	0.0770104	26.3503	FALSE	0
2022-09-15	09:17:10	0.189886	26.5402	FALSE	0
2022-09-15	09:17:10	0.116451	26.6567	FALSE	0
2022-09-15	09:17:10	0.336094	26.9927	FALSE	0
2022-09-15	09:17:11	0.0948221	27.0876	FALSE	0
2022-09-15	09:17:11	-0.0253814	27.0876	FALSE	0
2022-09-15	09:17:11	0.0235753	27.1111	FALSE	0
2022-09-15	09:17:12	-0.0174425	27.1111	FALSE	0
2022-09-15	09:17:12	0.158384	27.2695	FALSE	0
2022-09-15	09:17:12	-0.0964246	27.2695	FALSE	0
2022-09-15	09:17:12	-0.245585	27.2695	FALSE	0
2022-09-15	09:17:13	-0.0937783	27.2695	FALSE	0
2022-09-15	09:17:13	-0.124414	27.2695	FALSE	0
2022-09-15	09:17:13	-0.124669	27.2695	FALSE	0
2022-09-15	09:17:13	-0.383142	27.2695	FALSE	0
2022-09-15	09:17:14	-0.131183	27.2695	FALSE	0
2022-09-15	09:17:14	0.523524	27.7931	FALSE	0
2022-09-15	09:17:14	0.417061	28.2101	FALSE	0
2022-09-15	09:17:14	1.51899	29.7291	FALSE	0
2022-09-15	09:17:15	1.77889	31.508	FALSE	0
2022-09-15	09:17:15	1.24378	32.7518	FALSE	0
2022-09-15	09:17:15	0.650038	33.4018	FALSE	0
2022-09-15	09:17:16	0.526374	33.9282	FALSE	0
2022-09-15	09:17:16	0.445255	34.3734	FALSE	0
2022-09-15	09:17:16	0.298486	34.6719	FALSE	0
2022-09-15	09:17:16	0.386629	35.0586	FALSE	0
2022-09-15	09:17:17	0.461845	35.5204	FALSE	0
2022-09-15	09:17:17	0.340318	35.8607	FALSE	0
2022-09-15	09:17:17	0.284186	36.1449	FALSE	0
2022-09-15	09:17:17	0.225916	36.3708	FALSE	0
2022-09-15	09:17:18	0.395738	36.7666	FALSE	0
2022-09-15	09:17:18	1.87905	38.6456	FALSE	0
2022-09-15	09:17:18	2.78678	41.4324	FALSE	0
2022-09-15	09:17:18	0.963321	42.3957	FALSE	0
2022-09-15	09:17:19	0.432786	42.8285	FALSE	0
2022-09-15	09:17:19	0.498282	43.3268	FALSE	0
2022-09-15	09:17:19	0.411361	43.7381	FALSE	0
2022-09-15	09:17:19	0.500725	44.2389	FALSE	0
2022-09-15	09:17:20	0.461743	44.7006	FALSE	0
2022-09-15	09:17:20	0.623066	45.3237	FALSE	0
2022-09-15	09:17:20	0.434924	45.7586	FALSE	0
2022-09-15	09:17:21	0.613346	46.3719	FALSE	0
2022-09-15	09:17:21	0.388512	46.7605	FALSE	0
2022-09-15	09:17:21	0.223575	46.984	FALSE	0
2022-09-15	09:17:21	0.265102	47.2491	FALSE	0
2022-09-15	09:17:22	0.358028	47.6072	FALSE	0
2022-09-15	09:17:22	0.449377	48.0565	FALSE	0
2022-09-15	09:17:22	0.406374	48.4629	FALSE	0
2022-09-15	09:17:22	1.84286	50.3058	FALSE	0
2022-09-15	09:17:23	17.7321	68.0379	1	1
2022-09-15	09:17:23	6.52011	74.558	1	2
2022-09-15	09:17:23	3.58546	78.1434	1	3
2022-09-15	09:17:23	1.13894	79.2824	FALSE	3
2022-09-15	09:17:24	0.779707	80.0621	FALSE	3
2022-09-15	09:17:24	0.369936	80.432	FALSE	3
2022-09-15	09:17:24	0.323677	80.7557	FALSE	3
2022-09-15	09:17:25	0.480674	81.2364	FALSE	3
2022-09-15	09:17:25	0.386527	81.6229	FALSE	3
2022-09-15	09:17:25	0.358537	81.9814	FALSE	3
2022-09-15	09:17:25	1.58444	83.5659	FALSE	3
2022-09-15	09:17:26	2.54698	86.1129	FALSE	3
2022-09-15	09:17:26	0.474924	86.5878	FALSE	3
2022-09-15	09:17:26	0.372532	86.9603	FALSE	3
2022-09-15	09:17:26	0.623473	87.5838	FALSE	3
2022-09-15	09:17:27	0.581896	88.1657	FALSE	3
2022-09-15	09:17:27	0.449275	88.615	FALSE	3
2022-09-15	09:17:27	0.305458	88.9204	FALSE	3
2022-09-15	09:17:27	0.398486	89.3189	FALSE	3
2022-09-15	09:17:28	0.42958	89.7485	FALSE	3
2022-09-15	09:17:28	0.448868	90.1973	FALSE	3
2022-09-15	09:17:28	0.40271	90.6001	FALSE	3
2022-09-15	09:17:29	0.437875	91.0379	FALSE	3
2022-09-15	09:17:29	0.43187	91.4698	FALSE	3
2022-09-15	09:17:29	0.488359	91.9582	FALSE	3
2022-09-15	09:17:29	0.591463	92.5496	FALSE	3
2022-09-15	09:17:30	0.291056	92.8407	FALSE	3
2022-09-15	09:17:30	0.15126	92.9919	FALSE	3
2022-09-15	09:17:30	0.29416	93.2861	FALSE	3
2022-09-15	09:17:30	0.485611	93.7717	FALSE	3
2022-09-15	09:17:31	0.140776	93.9125	FALSE	3
2022-09-15	09:17:31	0.166781	94.0793	FALSE	3
2022-09-15	09:17:31	0.449886	94.5292	FALSE	3
2022-09-15	09:17:31	0.335127	94.8643	FALSE	3
2022-09-15	09:17:32	0.449071	95.3134	FALSE	3
2022-09-15	09:17:32	0.570496	95.8839	FALSE	3
2022-09-15	09:17:32	1.59385	97.4777	FALSE	3
2022-09-15	09:17:32	1.75721	99.2349	FALSE	3
2022-09-15	09:17:33	2.21803	101.453	FALSE	3
2022-09-15	09:17:33	2.31721	103.77	FALSE	3
2022-09-15	09:17:33	2.34592	106.116	FALSE	3
2022-09-15	09:17:34	1.1563	107.272	FALSE	3
2022-09-15	09:17:34	5.50169	112.774	1	4
2022-09-15	09:17:34	10.4087	123.183	1	5
2022-09-15	09:17:34	25.7814	148.964	1	6
2022-09-15	09:17:35	42.4017	191.366	1	7
2022-09-15	09:17:35	26.7835	218.149	1	8
2022-09-15	09:17:35	12.4194	230.569	1	9
2022-09-15	09:17:35	2.78627	233.355	FALSE	9
2022-09-15	09:17:36	2.48266	235.838	FALSE	9
2022-09-15	09:17:36	12.6319	248.47	1	10
2022-09-15	09:17:36	13.8317	262.301	1	11
2022-09-15	09:17:36	12.084	274.385	1	12
2022-09-15	09:17:37	17.8017	292.187	1	13
2022-09-15	09:17:37	16.4623	308.649	1	14
2022-09-15	09:17:37	22.6125	331.262	1	15
2022-09-15	09:17:38	22.7579	354.02	1	16
2022-09-15	09:17:38	21.9998	376.019	1	17
2022-09-15	09:17:38	17.9112	393.931	1	18
2022-09-15	09:17:38	2.24052	396.171	FALSE	18
2022-09-15	09:17:39	1.36515	397.536	FALSE	18
2022-09-15	09:17:39	5.8854	403.422	1	19
2022-09-15	09:17:39	5.6336	409.055	1	20
2022-09-15	09:17:40	8.23909	417.294	1	21
2022-09-15	09:17:40	5.93034	423.225	1	22
2022-09-15	09:17:40	3.80805	427.033	1	23
2022-09-15	09:17:40	5.15125	432.184	1	24
2022-09-15	09:17:40	9.76627	441.95	1	25
2022-09-15	09:17:41	9.11411	451.064	1	26
2022-09-15	09:17:41	16.8948	467.959	1	27
2022-09-15	09:17:41	16.1479	484.107	1	28
2022-09-15	09:17:41	17.8993	502.006	1	29
2022-09-15	09:17:42	17.7772	519.784	1	30
2022-09-15	09:17:42	11.8213	531.605	1	31
2022-09-15	09:17:42	0.83126	532.436	FALSE	31
2022-09-15	09:17:43	0.818028	533.254	FALSE	31
2022-09-15	09:17:43	0.272226	533.526	FALSE	31
2022-09-15	09:17:43	2.61421	536.141	FALSE	31
2022-09-15	09:17:43	17.145	553.286	1	32
2022-09-15	09:17:44	30.3694	583.655	1	33
2022-09-15	09:17:44	6.47894	590.134	1	34
2022-09-15	09:17:44	0.290089	590.424	FALSE	34
2022-09-15	09:17:44	-0.00105572	590.424	FALSE	34
2022-09-15	09:17:45	-0.422175	590.424	FALSE	34
2022-09-15	09:17:45	-0.930215	590.424	FALSE	34
2022-09-15	09:17:45	-0.921463	590.424	FALSE	34
2022-09-15	09:17:45	-1.03408	590.424	FALSE	34
2022-09-15	09:17:46	-0.852608	590.424	FALSE	34
2022-09-15	09:17:46	-0.833676	590.424	FALSE	34
2022-09-15	09:17:46	0.259758	590.684	FALSE	34
2022-09-15	09:17:47	3.88108	594.565	1	35
2022-09-15	09:17:47	2.00953	596.574	FALSE	35
2022-09-15	09:17:47	0.867493	597.442	FALSE	35
2022-09-15	09:17:47	0.684644	598.127	FALSE	35
2022-09-15	09:17:48	0.647595	598.774	FALSE	35
2022-09-15	09:17:48	0.336807	599.111	FALSE	35
2022-09-15	09:17:48	0.144135	599.255	FALSE	35
2022-09-15	09:17:48	1.25996	600.515	FALSE	35
2022-09-15	09:17:49	5.09049	605.606	1	36
2022-09-15	09:17:49	2.71935	608.325	FALSE	36
2022-09-15	09:17:49	0.650649	608.976	FALSE	36
2022-09-15	09:17:49	0.278639	609.254	FALSE	36
2022-09-15	09:17:50	0.162659	609.417	FALSE	36
2022-09-15	09:17:50	0.0277483	609.445	FALSE	36
2022-09-15	09:17:50	0.0410307	609.486	FALSE	36
2022-09-15	09:17:51	0.0752292	609.561	FALSE	36
2022-09-15	09:17:51	0.0778247	609.639	FALSE	36
2022-09-15	09:17:51	-0.00253154	609.639	FALSE	36
2022-09-15	09:17:51	-0.0216664	609.639	FALSE	36
2022-09-15	09:17:52	-0.131539	609.639	FALSE	36
2022-09-15	09:17:52	-0.298766	609.639	FALSE	36
2022-09-15	09:17:52	-0.55215	609.639	FALSE	36
2022-09-15	09:17:52	-0.696221	609.639	FALSE	36
2022-09-15	09:17:53	-0.707366	609.639	FALSE	36
2022-09-15	09:17:53	-0.642226	609.639	FALSE	36
2022-09-15	09:17:53	-0.568333	609.639	FALSE	36
2022-09-15	09:17:53	4.34861	613.987	1	37
2022-09-15	09:17:54	18.1796	632.167	1	38
2022-09-15	09:17:54	25.9015	658.068	1	39
2022-09-15	09:17:54	27.6368	685.705	1	40
2022-09-15	09:17:54	1.50485	687.21	FALSE	40
2022-09-15	09:17:55	0.3364	687.547	FALSE	40
2022-09-15	09:17:55	0.203372	687.75	FALSE	40
2022-09-15	09:17:55	0.000216527	687.75	FALSE	40
2022-09-15	09:17:56	-0.419274	687.75	FALSE	40
2022-09-15	09:17:56	-0.349554	687.75	FALSE	40
2022-09-15	09:17:56	-0.236526	687.75	FALSE	40
2022-09-15	09:17:56	0.0253056	687.775	FALSE	40
2022-09-15	09:17:57	1.29798	689.073	FALSE	40
2022-09-15	09:17:57	2.38388	691.457	FALSE	40
2022-09-15	09:17:57	0.597875	692.055	FALSE	40
2022-09-15	09:17:57	0.599758	692.655	FALSE	40
2022-09-15	09:17:58	0.38271	693.038	FALSE	40
2022-09-15	09:17:58	0.54897	693.587	FALSE	40
2022-09-15	09:17:58	0.319249	693.906	FALSE	40
2022-09-15	09:17:58	0.328155	694.234	FALSE	40
2022-09-15	09:17:59	0.266171	694.5	FALSE	40
2022-09-15	09:17:59	0.250649	694.751	FALSE	40
2022-09-15	09:17:59	0.303473	695.054	FALSE	40
2022-09-15	09:18:00	0.130395	695.185	FALSE	40
2022-09-15	09:18:00	2.09782	697.282	FALSE	40
2022-09-15	09:18:00	6.40795	703.69	1	41
2022-09-15	09:18:00	23.6487	727.339	1	42
2022-09-15	09:18:01	19.83	747.169	1	43
2022-09-15	09:18:01	6.92769	754.097	1	44
2022-09-15	09:18:01	12.6237	766.721	1	45
2022-09-15	09:18:01	32.6263	799.347	1	46
2022-09-15	09:18:02	12.3162	811.663	1	47
2022-09-15	09:18:02	5.72622	817.389	1	48
2022-09-15	09:18:02	30.2222	847.611	1	49
2022-09-15	09:18:02	30.3716	877.983	1	50
2022-09-15	09:18:03	6.68764	884.671	1	51
2022-09-15	09:18:03	4.63614	889.307	1	52
2022-09-15	09:18:03	1.7538	891.061	FALSE	52
2022-09-15	09:18:04	0.285865	891.346	FALSE	52
2022-09-15	09:18:04	0.508868	891.855	FALSE	52
2022-09-15	09:18:04	1.39014	893.245	FALSE	52
2022-09-15	09:18:04	6.91131	900.157	1	53
2022-09-15	09:18:05	18.6086	918.765	1	54
2022-09-15	09:18:05	14.4975	933.263	1	55
2022-09-15	09:18:05	25.9265	959.189	1	56
2022-09-15	09:18:05	9.42576	968.615	1	57
2022-09-15	09:18:06	13.074	981.689	1	58
2022-09-15	09:18:06	17.3026	998.992	1	59
2022-09-15	09:18:06	20.4264	1019.42	1	60
2022-09-15	09:18:06	27.2034	1046.62	1	61
2022-09-15	09:18:07	3.90566	1050.53	1	62
2022-09-15	09:18:07	2.46632	1052.99	FALSE	62
2022-09-15	09:18:07	3.23945	1056.23	1	63
2022-09-15	09:18:07	2.38897	1058.62	FALSE	63
2022-09-15	09:18:08	1.08648	1059.71	FALSE	63
2022-09-15	09:18:08	1.95024	1061.66	FALSE	63
2022-09-15	09:18:08	0.783117	1062.44	FALSE	63
2022-09-15	09:18:09	0.515687	1062.96	FALSE	63
2022-09-15	09:18:09	0.667494	1063.62	FALSE	63
2022-09-15	09:18:09	0.764898	1064.39	FALSE	63
2022-09-15	09:18:09	1.04266	1065.43	FALSE	63
2022-09-15	09:18:10	0.538232	1065.97	FALSE	63
2022-09-15	09:18:10	0.327239	1066.3	FALSE	63
2022-09-15	09:18:10	-0.144313	1066.3	FALSE	63
2022-09-15	09:18:10	-0.442022	1066.3	FALSE	63
2022-09-15	09:18:11	1.59655	1067.89	FALSE	63
2022-09-15	09:18:11	8.58382	1076.48	1	64
2022-09-15	09:18:11	2.35391	1078.83	FALSE	64
2022-09-15	09:18:11	6.50479	1085.34	1	65
2022-09-15	09:18:12	8.22011	1093.56	1	66
2022-09-15	09:18:12	7.68026	1101.24	1	67
2022-09-15	09:18:12	5.78093	1107.02	1	68
2022-09-15	09:18:13	5.94902	1112.97	1	69
2022-09-15	09:18:13	9.71965	1122.69	1	70
2022-09-15	09:18:13	5.26749	1127.95	1	71
2022-09-15	09:18:13	13.1031	1141.06	1	72
2022-09-15	09:18:14	26.9249	1167.98	1	73
2022-09-15	09:18:14	9.91803	1177.9	1	74
2022-09-15	09:18:14	9.15904	1187.06	1	75
2022-09-15	09:18:14	9.64713	1196.71	1	76
2022-09-15	09:18:15	5.45385	1202.16	1	77
2022-09-15	09:18:15	21.7638	1223.92	1	78
2022-09-15	09:18:15	33.3305	1257.25	1	79
2022-09-15	09:18:15	8.0855	1265.34	1	80
2022-09-15	09:18:16	31.7017	1297.04	1	81
2022-09-15	09:18:16	14.7814	1311.82	1	82
2022-09-15	09:18:16	30.1054	1341.93	1	83
2022-09-15	09:18:17	15.0634	1356.99	1	84
2022-09-15	09:18:17	14.8743	1371.87	1	85
2022-09-15	09:18:17	10.8513	1382.72	1	86
2022-09-15	09:18:17	3.1337	1385.85	1	87
2022-09-15	09:18:18	1.04846	1386.9	FALSE	87
2022-09-15	09:18:18	0.396959	1387.3	FALSE	87
2022-09-15	09:18:18	0.121845	1387.42	FALSE	87
2022-09-15	09:18:18	-0.242582	1387.42	FALSE	87
2022-09-15	09:18:19	-0.251183	1387.42	FALSE	87
2022-09-15	09:18:19	0.0614379	1387.48	FALSE	87
2022-09-15	09:18:19	0.543982	1388.02	FALSE	87
2022-09-15	09:18:19	0.199555	1388.22	FALSE	87
2022-09-15	09:18:20	0.5707	1388.79	FALSE	87
2022-09-15	09:18:20	0.380318	1389.17	FALSE	87
2022-09-15	09:18:20	0.482964	1389.66	FALSE	87
2022-09-15	09:18:20	0.230089	1389.89	FALSE	87
2022-09-15	09:18:21	0.347036	1390.23	FALSE	87
2022-09-15	09:18:21	0.412277	1390.65	FALSE	87
2022-09-15	09:18:21	0.743829	1391.39	FALSE	87
2022-09-15	09:18:22	1.69558	1393.09	FALSE	87
2022-09-15	09:18:22	17.286	1410.37	1	88
2022-09-15	09:18:22	23.9706	1434.34	1	89
2022-09-15	09:18:22	14.456	1448.8	1	90
2022-09-15	09:18:23	0.872227	1449.67	FALSE	90
2022-09-15	09:18:23	0.295484	1449.97	FALSE	90
2022-09-15	09:18:23	0.569682	1450.54	FALSE	90
2022-09-15	09:18:23	0.99986	1451.54	FALSE	90
2022-09-15	09:18:24	14.5225	1466.06	1	91
2022-09-15	09:18:24	15.8844	1481.94	1	92
2022-09-15	09:18:24	7.85283	1489.8	1	93
2022-09-15	09:18:24	17.2582	1507.05	1	94
2022-09-15	09:18:25	32.3041	1539.36	1	95
2022-09-15	09:18:25	25.4945	1564.85	1	96
2022-09-15	09:18:25	19.3523	1584.21	1	97
2022-09-15	09:18:26	17.5999	1601.81	1	98
2022-09-15	09:18:26	20.4665	1622.27	1	99
2022-09-15	09:18:26	29.7007	1651.97	1	100
2022-09-15	09:18:26	34.313	1686.29	1	101
2022-09-15	09:18:27	22.1603	1708.45	1	102
2022-09-15	09:18:27	21.014	1729.46	1	103
2022-09-15	09:18:27	27.7632	1757.22	1	104
2022-09-15	09:18:27	42.1817	1799.4	1	105
2022-09-15	09:18:28	14.0827	1813.49	1	106
2022-09-15	09:18:28	24.3222	1837.81	1	107
2022-09-15	09:18:28	24.9855	1862.8	1	108
2022-09-15	09:18:29	31.5101	1894.31	1	109
2022-09-15	09:18:29	8.63879	1902.94	1	110
2022-09-15	09:18:29	7.01095	1909.95	1	111
2022-09-15	09:18:29	4.73915	1914.69	1	112
2022-09-15	09:18:30	1.90317	1916.6	FALSE	112
2022-09-15	09:18:30	1.37197	1917.97	FALSE	112
2022-09-15	09:18:30	0.929885	1918.9	FALSE	112
2022-09-15	09:18:30	0.663117	1919.56	FALSE	112
2022-09-15	09:18:31	0.50042	1920.06	FALSE	112
2022-09-15	09:18:31	0.410089	1920.47	FALSE	112
2022-09-15	09:18:31	1.5105	1921.98	FALSE	112
2022-09-15	09:18:31	2.12469	1924.11	FALSE	112
2022-09-15	09:18:32	0.776094	1924.88	FALSE	112
2022-09-15	09:18:32	0.492125	1925.38	FALSE	112
2022-09-15	09:18:32	0.320064	1925.7	FALSE	112
2022-09-15	09:18:32	0.309479	1926.01	FALSE	112
2022-09-15	09:18:33	0.224949	1926.23	FALSE	112
2022-09-15	09:18:33	0.295942	1926.53	FALSE	112
2022-09-15	09:18:33	0.379046	1926.91	FALSE	112
2022-09-15	09:18:33	6.79426	1933.7	1	113
2022-09-15	09:18:34	38.6337	1972.33	1	114
2022-09-15	09:18:34	29.9466	2002.28	1	115
2022-09-15	09:18:34	16.2399	2018.52	1	116
2022-09-15	09:18:35	12.9413	2031.46	1	117
2022-09-15	09:18:35	34.2728	2065.73	1	118
2022-09-15	09:18:35	26.4653	2092.2	1	119
2022-09-15	09:18:35	17.7696	2109.97	1	120
2022-09-15	09:18:36	27.7075	2137.68	1	121
2022-09-15	09:18:36	5.82088	2143.5	1	122
2022-09-15	09:18:36	7.90108	2151.4	1	123
2022-09-15	09:18:36	8.23599	2159.63	1	124
2022-09-15	09:18:37	16.9651	2176.6	1	125
2022-09-15	09:18:37	21.6776	2198.28	1	126
2022-09-15	09:18:37	13.9748	2212.25	1	127
2022-09-15	09:18:37	28.686	2240.94	1	128
2022-09-15	09:18:38	11.5917	2252.53	1	129
2022-09-15	09:18:38	13.9888	2266.52	1	130
2022-09-15	09:18:38	24.1397	2290.66	1	131
2022-09-15	09:18:39	8.24714	2298.91	1	132
2022-09-15	09:18:39	24.7426	2323.65	1	133
2022-09-15	09:18:39	28.8756	2352.52	1	134
2022-09-15	09:18:39	6.02978	2358.55	1	135
2022-09-15	09:18:40	19.7731	2378.33	1	136
2022-09-15	09:18:40	2.10464	2380.43	FALSE	136
2022-09-15	09:18:40	4.46963	2384.9	1	137
2022-09-15	09:18:40	0.59757	2385.5	FALSE	137
2022-09-15	09:18:41	0.246883	2385.75	FALSE	137
2022-09-15	09:18:41	-0.144211	2385.75	FALSE	137
2022-09-15	09:18:41	-0.60762	2385.75	FALSE	137
2022-09-15	09:18:41	-1.33917	2385.75	FALSE	137
2022-09-15	09:18:42	-0.388944	2385.75	FALSE	137
2022-09-15	09:18:42	-0.348791	2385.75	FALSE	137
2022-09-15	09:18:42	-0.606399	2385.75	FALSE	137
2022-09-15	09:18:43	0.0972139	2385.84	FALSE	137
2022-09-15	09:18:43	0.514669	2386.36	FALSE	137
2022-09-15	09:18:43	0.312532	2386.67	FALSE	137
2022-09-15	09:18:43	0.33986	2387.01	FALSE	137
2022-09-15	09:18:44	0.358842	2387.37	FALSE	137
2022-09-15	09:18:44	0.40612	2387.77	FALSE	137
2022-09-15	09:18:44	0.446832	2388.22	FALSE	137
2022-09-15	09:18:44	0.338232	2388.56	FALSE	137
2022-09-15	09:18:45	0.314567	2388.87	FALSE	137
2022-09-15	09:18:45	0.251718	2389.13	FALSE	137
2022-09-15	09:18:45	0.24897	2389.37	FALSE	137
2022-09-15	09:18:45	0.272786	2389.65	FALSE	137
2022-09-15	09:18:46	0.280216	2389.93	FALSE	137
2022-09-15	09:18:46	0.273295	2390.2	FALSE	137
2022-09-15	09:18:46	0.289987	2390.49	FALSE	137
2022-09-15	09:18:46	0.300878	2390.79	FALSE	137
2022-09-15	09:18:47	0.353244	2391.15	FALSE	137
2022-09-15	09:18:47	0.228817	2391.37	FALSE	137
2022-09-15	09:18:47	0.0710053	2391.44	FALSE	137
2022-09-15	09:18:48	0.221845	2391.67	FALSE	137
2022-09-15	09:18:48	0.128359	2391.8	FALSE	137
2022-09-15	09:18:48	0.272888	2392.07	FALSE	137
2022-09-15	09:18:48	1.04688	2393.11	FALSE	137
2022-09-15	09:18:49	6.02418	2399.14	1	138
2022-09-15	09:18:49	11.8931	2411.03	1	139
2022-09-15	09:18:49	13.3217	2424.35	1	140
2022-09-15	09:18:49	14.8954	2439.25	1	141
2022-09-15	09:18:50	13.2564	2452.51	1	142
2022-09-15	09:18:50	16.8723	2469.38	1	143
2022-09-15	09:18:50	21.1056	2490.48	1	144
2022-09-15	09:18:50	8.82037	2499.3	1	145
2022-09-15	09:18:51	21.7865	2521.09	1	146
2022-09-15	09:18:51	7.55736	2528.65	1	147
2022-09-15	09:18:51	15.1595	2543.81	1	148
2022-09-15	09:18:52	9.06861	2552.88	1	149
2022-09-15	09:18:52	16.1885	2569.06	1	150
2022-09-15	09:18:52	27.9241	2596.99	1	151
2022-09-15	09:18:52	11.8254	2608.81	1	152
2022-09-15	09:18:53	37.6388	2646.45	1	153
2022-09-15	09:18:53	33.4245	2679.88	1	154
2022-09-15	09:18:53	25.0919	2704.97	1	155
2022-09-15	09:18:53	42.5036	2747.47	1	156
2022-09-15	09:18:54	40.3905	2787.86	1	157
2022-09-15	09:18:54	47.8516	2835.71	1	158
2022-09-15	09:18:54	34.6122	2870.33	1	159
2022-09-15	09:18:54	29.5363	2899.86	1	160
2022-09-15	09:18:55	35.5792	2935.44	1	161
2022-09-15	09:18:55	23.9126	2959.36	1	162
2022-09-15	09:18:55	19.4538	2978.81	1	163
2022-09-15	09:18:55	16.6643	2995.47	1	164
2022-09-15	09:18:56	17.277	3012.75	1	165
2022-09-15	09:18:56	14.5102	3027.26	1	166
2022-09-15	09:18:56	13.1784	3040.44	1	167
2022-09-15	09:18:57	13.9241	3054.36	1	168
2022-09-15	09:18:57	12.9409	3067.3	1	169
2022-09-15	09:18:57	11.8297	3079.13	1	170
2022-09-15	09:18:57	14.8821	3094.02	1	171
2022-09-15	09:18:58	16.569	3110.58	1	172
2022-09-15	09:18:58	20.9157	3131.5	1	173
2022-09-15	09:18:58	15.3159	3146.82	1	174
2022-09-15	09:18:58	10.0752	3156.89	1	175
2022-09-15	09:18:59	24.593	3181.48	1	176
2022-09-15	09:18:59	24.0482	3205.53	1	177
2022-09-15	09:18:59	15.6378	3221.17	1	178
2022-09-15	09:18:59	15.7977	3236.97	1	179
2022-09-15	09:19:00	18.2805	3255.25	1	180
2022-09-15	09:19:00	5.21202	3260.46	1	181
2022-09-15	09:19:00	2.83492	3263.3	FALSE	181
2022-09-15	09:19:01	3.05116	3266.35	1	182
2022-09-15	09:19:01	2.52882	3268.88	FALSE	182
2022-09-15	09:19:01	2.97009	3271.85	FALSE	182
2022-09-15	09:19:01	1.53258	3273.38	FALSE	182
2022-09-15	09:19:02	1.01538	3274.39	FALSE	182
2022-09-15	09:19:02	0.914109	3275.31	FALSE	182
2022-09-15	09:19:02	1.97681	3277.28	FALSE	182
2022-09-15	09:19:02	4.36647	3281.65	1	183
2022-09-15	09:19:03	5.5649	3287.22	1	184
2022-09-15	09:19:03	12.5277	3299.74	1	185
2022-09-15	09:19:03	9.9336	3309.68	1	186
2022-09-15	09:19:03	14.3517	3324.03	1	187
2022-09-15	09:19:04	7.16413	3331.19	1	188
2022-09-15	09:19:04	8.95528	3340.15	1	189
2022-09-15	09:19:04	6.26001	3346.41	1	190
2022-09-15	09:19:05	10.7518	3357.16	1	191
2022-09-15	09:19:05	5.85222	3363.01	1	192
2022-09-15	09:19:05	5.33767	3368.35	1	193
2022-09-15	09:19:05	4.52474	3372.87	1	194
2022-09-15	09:19:06	5.03568	3377.91	1	195
2022-09-15	09:19:06	3.95543	3381.87	1	196
2022-09-15	09:19:06	3.35197	3385.22	1	197
2022-09-15	09:19:06	2.13889	3387.36	FALSE	197
2022-09-15	09:19:07	2.43548	3389.79	FALSE	197
2022-09-15	09:19:07	3.87731	3393.67	1	198
2022-09-15	09:19:07	4.15009	3397.82	1	199
2022-09-15	09:19:07	4.81889	3402.64	1	200
2022-09-15	09:19:08	5.98286	3408.62	1	201
2022-09-15	09:19:08	5.20505	3413.83	1	202
2022-09-15	09:19:08	3.93731	3417.76	1	203
2022-09-15	09:19:08	14.463	3432.23	1	204
2022-09-15	09:19:09	23.3769	3455.6	1	205
2022-09-15	09:19:09	5.74927	3461.35	1	206
2022-09-15	09:19:09	1.50398	3462.86	FALSE	206
2022-09-15	09:19:10	0.117825	3462.97	FALSE	206
2022-09-15	09:19:10	0.0239315	3463	FALSE	206
2022-09-15	09:19:10	-0.26533	3463	FALSE	206
2022-09-15	09:19:10	-0.55673	3463	FALSE	206
2022-09-15	09:19:11	-0.404262	3463	FALSE	206
2022-09-15	09:19:11	-0.107722	3463	FALSE	206
2022-09-15	09:19:11	0.678181	3463.68	FALSE	206
2022-09-15	09:19:11	0.901438	3464.58	FALSE	206
2022-09-15	09:19:12	15.1523	3479.73	1	207
2022-09-15	09:19:12	37.9616	3517.69	1	208
2022-09-15	09:19:12	40.5186	3558.21	1	209
2022-09-15	09:19:12	38.3266	3596.54	1	210
2022-09-15	09:19:13	47.6722	3644.21	1	211
2022-09-15	09:19:13	61.0664	3705.28	1	212
2022-09-15	09:19:13	29.2161	3734.49	1	213
2022-09-15	09:19:14	23.4474	3757.94	1	214
2022-09-15	09:19:14	21.5171	3779.46	1	215
2022-09-15	09:19:14	24.6896	3804.15	1	216
2022-09-15	09:19:14	19.8891	3824.04	1	217
2022-09-15	09:19:15	25.9495	3849.98	1	218
2022-09-15	09:19:15	22.7364	3872.72	1	219
2022-09-15	09:19:15	28.9861	3901.71	1	220
2022-09-15	09:19:15	27.8905	3929.6	1	221
2022-09-15	09:19:16	36.9278	3966.53	1	222
2022-09-15	09:19:16	26.4555	3992.98	1	223
2022-09-15	09:19:16	31.5891	4024.57	1	224
2022-09-15	09:19:16	23.7234	4048.29	1	225
2022-09-15	09:19:17	20.4559	4068.75	1	226
2022-09-15	09:19:17	18.7973	4087.55	1	227
2022-09-15	09:19:17	19.8383	4107.38	1	228
2022-09-15	09:19:17	20.4085	4127.79	1	229
2022-09-15	09:19:18	19.3972	4147.19	1	230
2022-09-15	09:19:18	19.5108	4166.7	1	231
2022-09-15	09:19:18	19.5575	4186.26	1	232
2022-09-15	09:19:19	19.1595	4205.42	1	233
2022-09-15	09:19:19	19.4263	4224.84	1	234
2022-09-15	09:19:19	19.843	4244.69	1	235
2022-09-15	09:19:19	19.8503	4264.54	1	236
2022-09-15	09:19:20	19.4321	4283.97	1	237
2022-09-15	09:19:20	20.2444	4304.21	1	238
2022-09-15	09:19:20	18.4243	4322.64	1	239
2022-09-15	09:19:20	12.0795	4334.72	1	240
2022-09-15	09:19:21	10.9144	4345.63	1	241
2022-09-15	09:19:21	30.4542	4376.09	1	242
2022-09-15	09:19:21	19.4853	4395.57	1	243
2022-09-15	09:19:21	2.88083	4398.45	FALSE	243
2022-09-15	09:19:22	0.299249	4398.75	FALSE	243
2022-09-15	09:19:22	0.350751	4399.1	FALSE	243
2022-09-15	09:19:22	0.158588	4399.26	FALSE	243
2022-09-15	09:19:23	0.41014	4399.67	FALSE	243
2022-09-15	09:19:23	-0.265687	4399.67	FALSE	243
2022-09-15	09:19:23	-0.41561	4399.67	FALSE	243
2022-09-15	09:19:23	0.692074	4400.36	FALSE	243
2022-09-15	09:19:24	10.1548	4410.52	1	244
2022-09-15	09:19:24	22.9669	4433.49	1	245
2022-09-15	09:19:24	25.9745	4459.46	1	246
2022-09-15	09:19:24	34.2558	4493.72	1	247
2022-09-15	09:19:25	48.0125	4541.73	1	248
2022-09-15	09:19:25	39.5056	4581.23	1	249
2022-09-15	09:19:25	27.8199	4609.05	1	250
2022-09-15	09:19:25	34.1278	4643.18	1	251
2022-09-15	09:19:26	32.8369	4676.02	1	252
2022-09-15	09:19:26	50.326	4726.34	1	253
2022-09-15	09:19:26	39.9011	4766.25	1	254
2022-09-15	09:19:27	39.6975	4805.94	1	255
2022-09-15	09:19:27	38.7745	4844.72	1	256
2022-09-15	09:19:27	8.30632	4853.02	1	257
2022-09-15	09:19:27	0.942863	4853.97	FALSE	257
2022-09-15	09:19:28	0.308155	4854.28	FALSE	257
2022-09-15	09:19:28	0.648053	4854.92	FALSE	257
2022-09-15	09:19:28	1.20439	4856.13	FALSE	257
2022-09-15	09:19:28	4.35421	4860.48	1	258
2022-09-15	09:19:29	8.28983	4868.77	1	259
2022-09-15	09:19:29	4.08556	4872.86	1	260
2022-09-15	09:19:29	1.22943	4874.09	FALSE	260
2022-09-15	09:19:29	0.429529	4874.52	FALSE	260
2022-09-15	09:19:30	0.455382	4874.97	FALSE	260
2022-09-15	09:19:30	0.24841	4875.22	FALSE	260
2022-09-15	09:19:30	0.0622012	4875.28	FALSE	260
2022-09-15	09:19:30	1.17172	4876.45	FALSE	260
2022-09-15	09:19:31	5.64927	4882.1	1	261
2022-09-15	09:19:31	3.47543	4885.58	1	262
2022-09-15	09:19:31	0.844542	4886.42	FALSE	262
2022-09-15	09:19:32	1.01996	4887.44	FALSE	262
2022-09-15	09:19:32	1.28897	4888.73	FALSE	262
2022-09-15	09:19:32	1.95513	4890.69	FALSE	262
2022-09-15	09:19:32	1.50047	4892.19	FALSE	262
2022-09-15	09:19:33	1.3391	4893.53	FALSE	262
2022-09-15	09:19:33	1.20831	4894.73	FALSE	262
2022-09-15	09:19:33	1.66083	4896.4	FALSE	262
2022-09-15	09:19:33	1.84983	4898.25	FALSE	262
2022-09-15	09:19:34	1.45879	4899.7	FALSE	262
2022-09-15	09:19:34	1.54566	4901.25	FALSE	262
2022-09-15	09:19:34	1.55553	4902.81	FALSE	262
2022-09-15	09:19:34	4.76001	4907.57	1	263
2022-09-15	09:19:35	7.89009	4915.46	1	264
2022-09-15	09:19:35	2.23899	4917.69	FALSE	264
2022-09-15	09:19:35	0.148715	4917.84	FALSE	264
2022-09-15	09:19:36	0.238792	4918.08	FALSE	264
2022-09-15	09:19:36	1.76602	4919.85	FALSE	264
2022-09-15	09:19:36	7.54749	4927.4	1	265
2022-09-15	09:19:36	10.749	4938.14	1	266
2022-09-15	09:19:37	1.53513	4939.68	FALSE	266
2022-09-15	09:19:37	0.463677	4940.14	FALSE	266
2022-09-15	09:19:37	0.294262	4940.44	FALSE	266
2022-09-15	09:19:37	0.408868	4940.85	FALSE	266
2022-09-15	09:19:38	0.0848984	4940.93	FALSE	266
2022-09-15	09:19:38	3.02474	4943.96	1	267
2022-09-15	09:19:38	26.2575	4970.21	1	268
2022-09-15	09:19:38	19.7671	4989.98	1	269
2022-09-15	09:19:39	13.2467	5003.23	1	270
2022-09-15	09:19:39	7.0512	5010.28	1	271
2022-09-15	09:19:39	1.41009	5011.69	FALSE	271
2022-09-15	09:19:40	0.624389	5012.31	FALSE	271
2022-09-15	09:19:40	0.261031	5012.57	FALSE	271
2022-09-15	09:19:40	0.262557	5012.84	FALSE	271
2022-09-15	09:19:40	-0.256475	5012.84	FALSE	271
2022-09-15	09:19:41	0.679504	5013.52	FALSE	271
2022-09-15	09:19:41	3.37955	5016.9	1	272
2022-09-15	09:19:41	10.2024	5027.1	1	273
2022-09-15	09:19:41	1.5594	5028.66	FALSE	273
2022-09-15	09:19:42	0.612226	5029.27	FALSE	273
2022-09-15	09:19:42	0.387087	5029.66	FALSE	273
2022-09-15	09:19:42	1.90785	5031.56	FALSE	273
2022-09-15	09:19:42	4.3539	5035.92	1	274
2022-09-15	09:19:43	7.4197	5043.34	1	275
2022-09-15	09:19:43	8.5881	5051.93	1	276
2022-09-15	09:19:43	5.97696	5057.9	1	277
2022-09-15	09:19:43	14.7766	5072.68	1	278
2022-09-15	09:19:44	7.86769	5080.55	1	279
2022-09-15	09:19:44	2.5224	5083.07	FALSE	279
2022-09-15	09:19:44	2.96815	5086.04	FALSE	279
2022-09-15	09:19:45	0.834822	5086.87	FALSE	279
2022-09-15	09:19:45	0.393397	5087.27	FALSE	279
2022-09-15	09:19:45	0.793142	5088.06	FALSE	279
2022-09-15	09:19:45	0.666069	5088.73	FALSE	279
2022-09-15	09:19:46	0.261132	5088.99	FALSE	279
2022-09-15	09:19:46	0.312786	5089.3	FALSE	279
2022-09-15	09:19:46	0.398537	5089.7	FALSE	279
2022-09-15	09:19:46	0.20154	5089.9	FALSE	279
2022-09-15	09:19:47	0.315484	5090.22	FALSE	279
2022-09-15	09:19:47	1.18505	5091.4	FALSE	279
2022-09-15	09:19:47	3.47777	5094.88	1	280
2022-09-15	09:19:47	14.1209	5109	1	281
2022-09-15	09:19:48	3.78602	5112.78	1	282
2022-09-15	09:19:48	2.6508	5115.44	FALSE	282
2022-09-15	09:19:48	4.05655	5119.49	1	283
2022-09-15	09:19:49	4.53365	5124.03	1	284
2022-09-15	09:19:49	5.53294	5129.56	1	285
2022-09-15	09:19:49	4.34159	5133.9	1	286
2022-09-15	09:19:49	4.01172	5137.91	1	287
2022-09-15	09:19:50	3.82861	5141.74	1	288
2022-09-15	09:19:50	3.87731	5145.62	1	289
2022-09-15	09:19:50	3.92312	5149.54	1	290
2022-09-15	09:19:50	3.54291	5153.08	1	291
2022-09-15	09:19:51	3.44388	5156.53	1	292
2022-09-15	09:19:51	3.21024	5159.74	1	293
2022-09-15	09:19:51	4.54255	5164.28	1	294
2022-09-15	09:19:51	16.1482	5180.43	1	295
2022-09-15	09:19:52	13.0322	5193.46	1	296
2022-09-15	09:19:52	4.50607	5197.97	1	297
2022-09-15	09:19:52	1.33146	5199.3	FALSE	297
2022-09-15	09:19:52	1.01564	5200.31	FALSE	297
2022-09-15	09:19:53	0.990954	5201.31	FALSE	297
2022-09-15	09:19:53	2.16001	5203.47	FALSE	297
2022-09-15	09:19:53	3.82943	5207.29	1	298
2022-09-15	09:19:54	2.08587	5209.38	FALSE	298
2022-09-15	09:19:54	2.16001	5211.54	FALSE	298
2022-09-15	09:19:54	2.6966	5214.24	FALSE	298
2022-09-15	09:19:54	1.02805	5215.27	FALSE	298
2022-09-15	09:19:55	0.717621	5215.98	FALSE	298
2022-09-15	09:19:55	0.885102	5216.87	FALSE	298
2022-09-15	09:19:55	1.02108	5217.89	FALSE	298
2022-09-15	09:19:55	0.634567	5218.52	FALSE	298
2022-09-15	09:19:56	1.09111	5219.61	FALSE	298
2022-09-15	09:19:56	1.22963	5220.84	FALSE	298
2022-09-15	09:19:56	2.90978	5223.75	FALSE	298
2022-09-15	09:19:56	4.31879	5228.07	1	299
2022-09-15	09:19:57	2.52225	5230.6	FALSE	299
2022-09-15	09:19:57	3.39686	5233.99	1	300
2022-09-15	09:19:57	2.0565	5236.05	FALSE	300
2022-09-15	09:19:58	2.58958	5238.64	FALSE	300
2022-09-15	09:19:58	2.73085	5241.37	FALSE	300
2022-09-15	09:19:58	2.23721	5243.61	FALSE	300
2022-09-15	09:19:58	3.41981	5247.03	1	301
2022-09-15	09:19:59	2.69553	5249.72	FALSE	301
2022-09-15	09:19:59	1.35457	5251.08	FALSE	301
2022-09-15	09:19:59	0.891311	5251.97	FALSE	301
2022-09-15	09:19:59	0.793804	5252.76	FALSE	301
2022-09-15	09:20:00	0.908969	5253.67	FALSE	301
2022-09-15	09:20:00	0.795178	5254.47	FALSE	301
2022-09-15	09:20:00	0.656959	5255.12	FALSE	301
2022-09-15	09:20:00	0.487036	5255.61	FALSE	301
2022-09-15	09:20:01	0.411412	5256.02	FALSE	301
2022-09-15	09:20:01	0.294517	5256.32	FALSE	301
2022-09-15	09:20:01	0.185	5256.5	FALSE	301
2022-09-15	09:20:02	0.127036	5256.63	FALSE	301
2022-09-15	09:20:02	0.206018	5256.83	FALSE	301
2022-09-15	09:20:02	0.613193	5257.45	FALSE	301
2022-09-15	09:20:02	0.683168	5258.13	FALSE	301
2022-09-15	09:20:03	0.330547	5258.46	FALSE	301
2022-09-15	09:20:03	0.210496	5258.67	FALSE	301
2022-09-15	09:20:03	0.179708	5258.85	FALSE	301
2022-09-15	09:20:03	0.10556	5258.96	FALSE	301
2022-09-15	09:20:04	0.0828119	5259.04	FALSE	301
2022-09-15	09:20:04	0.086985	5259.13	FALSE	301
2022-09-15	09:20:04	0.0788424	5259.2	FALSE	301
2022-09-15	09:20:04	0.065102	5259.27	FALSE	301
2022-09-15	09:20:05	0.0620486	5259.33	FALSE	301
2022-09-15	09:20:05	0.0604709	5259.39	FALSE	301
2022-09-15	09:20:05	0.0515651	5259.44	FALSE	301
2022-09-15	09:20:05	0.0442877	5259.49	FALSE	301
2022-09-15	09:20:06	0.0428628	5259.53	FALSE	301
2022-09-15	09:20:06	0.0482063	5259.58	FALSE	301
2022-09-15	09:20:06	0.04556	5259.62	FALSE	301
2022-09-15	09:20:07	0.0458654	5259.67	FALSE	301
2022-09-15	09:20:07	0.0415396	5259.71	FALSE	301
2022-09-15	09:20:07	0.0328374	5259.75	FALSE	301
2022-09-15	09:20:07	0.0395041	5259.78	FALSE	301
2022-09-15	09:20:08	0.0242369	5259.81	FALSE	301
2022-09-15	09:20:08	0.0252547	5259.83	FALSE	301
2022-09-15	09:20:08	0.0281045	5259.86	FALSE	301
2022-09-15	09:20:08	0.0356872	5259.9	FALSE	301
2022-09-15	09:20:09	0.0420485	5259.94	FALSE	301
2022-09-15	09:20:09	0.0383845	5259.98	FALSE	301
2022-09-15	09:20:09	0.0371122	5260.02	FALSE	301
2022-09-15	09:20:09	0.0370104	5260.05	FALSE	301
2022-09-15	09:20:10	0.0377229	5260.09	FALSE	301
2022-09-15	09:20:10	0.0360435	5260.13	FALSE	301
2022-09-15	09:20:10	0.0366542	5260.16	FALSE	301
2022-09-15	09:20:11	-0.0113356	5260.16	FALSE	301
2022-09-15	09:20:11	-0.0884857	5260.16	FALSE	301
2022-09-15	09:20:11	0.107036	5260.27	FALSE	301
2022-09-15	09:20:11	0.670394	5260.94	FALSE	301
2022-09-15	09:20:12	-0.0697071	5260.94	FALSE	301
2022-09-15	09:20:12	0.126222	5261.07	FALSE	301
2022-09-15	09:20:12	0.0441351	5261.11	FALSE	301
2022-09-15	09:20:12	0.391565	5261.5	FALSE	301
2022-09-15	09:20:13	8.00835	5269.51	1	302
2022-09-15	09:20:13	55.8152	5325.33	1	303
2022-09-15	09:20:13	21.2394	5346.57	1	304
2022-09-15	09:20:13	29.3652	5375.93	1	305
2022-09-15	09:20:14	24.6621	5400.59	1	306
2022-09-15	09:20:14	42.8239	5443.42	1	307
2022-09-15	09:20:14	24.348	5467.76	1	308
2022-09-15	09:20:14	43.4683	5511.23	1	309
2022-09-15	09:20:15	11.5018	5522.73	1	310
2022-09-15	09:20:15	19.6371	5542.37	1	311
2022-09-15	09:20:15	7.73502	5550.11	1	312
2022-09-15	09:20:16	8.29365	5558.4	1	313
2022-09-15	09:20:16	15.9729	5574.37	1	314
2022-09-15	09:20:16	36.9493	5611.32	1	315
2022-09-15	09:20:16	33.2204	5644.54	1	316
2022-09-15	09:20:17	15.125	5659.67	1	317
2022-09-15	09:20:17	7.00551	5666.67	1	318
2022-09-15	09:20:17	0.218791	5666.89	FALSE	318
2022-09-15	09:20:17	0.330802	5667.22	FALSE	318
2022-09-15	09:20:18	0.539198	5667.76	FALSE	318
2022-09-15	09:20:18	3.97212	5671.73	1	319
2022-09-15	09:20:18	41.2917	5713.03	1	320
2022-09-15	09:20:18	34.2437	5747.27	1	321
2022-09-15	09:20:19	13.9795	5761.25	1	322
2022-09-15	09:20:19	22.5487	5783.8	1	323
2022-09-15	09:20:19	7.55604	5791.35	1	324
2022-09-15	09:20:20	17.0352	5808.39	1	325
2022-09-15	09:20:20	7.98072	5816.37	1	326
2022-09-15	09:20:20	6.83543	5823.21	1	327
2022-09-15	09:20:20	2.10536	5825.31	FALSE	327
2022-09-15	09:20:21	0.531667	5825.84	FALSE	327
2022-09-15	09:20:21	0.347036	5826.19	FALSE	327
2022-09-15	09:20:21	0.249886	5826.44	FALSE	327
2022-09-15	09:20:21	1.5051	5827.94	FALSE	327
2022-09-15	09:20:22	4.09808	5832.04	1	328
2022-09-15	09:20:22	1.34978	5833.39	FALSE	328
2022-09-15	09:20:22	0.319657	5833.71	FALSE	328
2022-09-15	09:20:22	0.209987	5833.92	FALSE	328
2022-09-15	09:20:23	-0.074847	5833.92	FALSE	328
2022-09-15	09:20:23	-0.244923	5833.92	FALSE	328
2022-09-15	09:20:23	-0.306196	5833.92	FALSE	328
2022-09-15	09:20:23	-0.283244	5833.92	FALSE	328
2022-09-15	09:20:24	14.4003	5848.32	1	329
2022-09-15	09:20:24	30.1952	5878.52	1	330
2022-09-15	09:20:24	5.74296	5884.26	1	331
2022-09-15	09:20:25	1.50347	5885.76	FALSE	331
2022-09-15	09:20:25	1.00154	5886.77	FALSE	331
2022-09-15	09:20:25	0.582914	5887.35	FALSE	331
2022-09-15	09:20:25	0.461947	5887.81	FALSE	331
2022-09-15	09:20:26	0.167748	5887.98	FALSE	331
2022-09-15	09:20:26	0.136959	5888.11	FALSE	331
2022-09-15	09:20:26	0.594466	5888.71	FALSE	331
2022-09-15	09:20:26	1.04637	5889.76	FALSE	331
2022-09-15	09:20:27	0.567392	5890.32	FALSE	331
2022-09-15	09:20:27	0.412685	5890.74	FALSE	331
2022-09-15	09:20:27	0.466934	5891.2	FALSE	331
2022-09-15	09:20:27	0.568206	5891.77	FALSE	331
2022-09-15	09:20:28	0.883779	5892.65	FALSE	331
2022-09-15	09:20:28	0.386171	5893.04	FALSE	331
2022-09-15	09:20:28	0.705611	5893.75	FALSE	331
2022-09-15	09:20:29	0.427188	5894.17	FALSE	331
2022-09-15	09:20:29	0.803829	5894.98	FALSE	331
2022-09-15	09:20:29	0.684491	5895.66	FALSE	331
2022-09-15	09:20:29	0.755127	5896.42	FALSE	331
2022-09-15	09:20:30	0.614058	5897.03	FALSE	331
2022-09-15	09:20:30	0.743219	5897.77	FALSE	331
2022-09-15	09:20:30	0.869733	5898.64	FALSE	331
2022-09-15	09:20:30	1.68449	5900.33	FALSE	331
2022-09-15	09:20:31	1.7795	5902.11	FALSE	331
2022-09-15	09:20:31	2.27569	5904.38	FALSE	331
2022-09-15	09:20:31	1.83335	5906.22	FALSE	331
2022-09-15	09:20:31	3.97233	5910.19	1	332
2022-09-15	09:20:32	5.80372	5915.99	1	333
2022-09-15	09:20:32	14.6111	5930.6	1	334
2022-09-15	09:20:32	9.93955	5940.54	1	335
2022-09-15	09:20:33	8.21711	5948.76	1	336
2022-09-15	09:20:33	11.7187	5960.48	1	337
2022-09-15	09:20:33	4.84352	5965.32	1	338
2022-09-15	09:20:33	9.48545	5974.81	1	339
2022-09-15	09:20:34	6.68769	5981.5	1	340
2022-09-15	09:20:34	16.2697	5997.77	1	341
2022-09-15	09:20:34	10.117	6007.88	1	342
2022-09-15	09:20:34	28.3146	6036.2	1	343
2022-09-15	09:20:35	35.4439	6071.64	1	344
2022-09-15	09:20:35	21.9991	6093.64	1	345
2022-09-15	09:20:35	21.088	6114.73	1	346
2022-09-15	09:20:35	11.1124	6125.84	1	347
2022-09-15	09:20:36	23.4889	6149.33	1	348
2022-09-15	09:20:36	15.6509	6164.98	1	349
2022-09-15	09:20:36	15.8445	6180.83	1	350
2022-09-15	09:20:36	32.7245	6213.55	1	351
2022-09-15	09:20:37	17.4701	6231.02	1	352
2022-09-15	09:20:37	23.1134	6254.13	1	353
2022-09-15	09:20:37	27.8221	6281.96	1	354
2022-09-15	09:20:38	41.3945	6323.35	1	355
2022-09-15	09:20:38	29.2686	6352.62	1	356
2022-09-15	09:20:38	35.9142	6388.53	1	357
2022-09-15	09:20:38	37.2402	6425.77	1	358
2022-09-15	09:20:39	19.5936	6445.37	1	359
2022-09-15	09:20:39	35.0882	6480.45	1	360
2022-09-15	09:20:39	19.7246	6500.18	1	361
2022-09-15	09:20:39	9.41935	6509.6	1	362
2022-09-15	09:20:40	6.71243	6516.31	1	363
2022-09-15	09:20:40	0.661082	6516.97	FALSE	363
2022-09-15	09:20:40	0.23528	6517.21	FALSE	363
2022-09-15	09:20:40	0.148766	6517.36	FALSE	363
2022-09-15	09:20:41	-0.091132	6517.36	FALSE	363
2022-09-15	09:20:41	-0.0554578	6517.36	FALSE	363
2022-09-15	09:20:41	0.0300384	6517.39	FALSE	363
2022-09-15	09:20:42	0.118944	6517.51	FALSE	363
2022-09-15	09:20:42	0.0985371	6517.6	FALSE	363
2022-09-15	09:20:42	0.119555	6517.72	FALSE	363
2022-09-15	09:20:42	0.624084	6518.35	FALSE	363
2022-09-15	09:20:43	0.647697	6519	FALSE	363
2022-09-15	09:20:43	0.550598	6519.55	FALSE	363
2022-09-15	09:20:43	0.38444	6519.93	FALSE	363
2022-09-15	09:20:43	0.449224	6520.38	FALSE	363
2022-09-15	09:20:44	0.551107	6520.93	FALSE	363
2022-09-15	09:20:44	0.231005	6521.16	FALSE	363
2022-09-15	09:20:44	0.360318	6521.52	FALSE	363
2022-09-15	09:20:44	0.511921	6522.03	FALSE	363
2022-09-15	09:20:45	0.774975	6522.81	FALSE	363
2022-09-15	09:20:45	0.528206	6523.34	FALSE	363
2022-09-15	09:20:45	0.413804	6523.75	FALSE	363
2022-09-15	09:20:45	0.130853	6523.88	FALSE	363
2022-09-15	09:20:46	0.102405	6523.98	FALSE	363
2022-09-15	09:20:46	0.13757	6524.12	FALSE	363
2022-09-15	09:20:46	0.131972	6524.25	FALSE	363
2022-09-15	09:20:47	0.140878	6524.39	FALSE	363
2022-09-15	09:20:47	0.125407	6524.52	FALSE	363
2022-09-15	09:20:47	0.327494	6524.85	FALSE	363
2022-09-15	09:20:47	1.45747	6526.3	FALSE	363
2022-09-15	09:20:48	2.28994	6528.59	FALSE	363
2022-09-15	09:20:48	1.37065	6529.97	FALSE	363
2022-09-15	09:20:48	0.33813	6530.3	FALSE	363
2022-09-15	09:20:48	0.441234	6530.74	FALSE	363
2022-09-15	09:20:49	0.0908017	6530.84	FALSE	363
2022-09-15	09:20:49	-0.16304	6530.84	FALSE	363
2022-09-15	09:20:49	-0.136883	6530.84	FALSE	363
2022-09-15	09:20:49	0.0345676	6530.87	FALSE	363
2022-09-15	09:20:50	0.60215	6531.47	FALSE	363
2022-09-15	09:20:50	0.286578	6531.76	FALSE	363
2022-09-15	09:20:50	0.753906	6532.51	FALSE	363
2022-09-15	09:20:51	2.41233	6534.92	FALSE	363
2022-09-15	09:20:51	13.3805	6548.31	1	364
2022-09-15	09:20:51	3.77981	6552.09	1	365
2022-09-15	09:20:51	2.40057	6554.49	FALSE	365
2022-09-15	09:20:52	0.308461	6554.79	FALSE	365
2022-09-15	09:20:52	0.296043	6555.09	FALSE	365
2022-09-15	09:20:52	-0.0928114	6555.09	FALSE	365
2022-09-15	09:20:52	-0.0641091	6555.09	FALSE	365
2022-09-15	09:20:53	0.0555855	6555.15	FALSE	365
2022-09-15	09:20:53	0.0208781	6555.17	FALSE	365
2022-09-15	09:20:53	0.101743	6555.27	FALSE	365
2022-09-15	09:20:53	0.0420485	6555.31	FALSE	365
2022-09-15	09:20:54	0.0634735	6555.37	FALSE	365
2022-09-15	09:20:54	0.171667	6555.55	FALSE	365
2022-09-15	09:20:54	0.426374	6555.97	FALSE	365
2022-09-15	09:20:55	0.278893	6556.25	FALSE	365
2022-09-15	09:20:55	0.806934	6557.06	FALSE	365
2022-09-15	09:20:55	0.441132	6557.5	FALSE	365
2022-09-15	09:20:55	0.409224	6557.91	FALSE	365
2022-09-15	09:20:56	0.184797	6558.09	FALSE	365
2022-09-15	09:20:56	-0.56818	6558.09	FALSE	365
2022-09-15	09:20:56	-2.00518	6558.09	FALSE	365
2022-09-15	09:20:56	0.26159	6558.35	FALSE	365
2022-09-15	09:20:57	0.141234	6558.5	FALSE	365
2022-09-15	09:20:57	-0.144364	6558.5	FALSE	365
2022-09-15	09:20:57	0.380369	6558.88	FALSE	365
2022-09-15	09:20:57	0.241336	6559.12	FALSE	365
2022-09-15	09:20:58	0.0559417	6559.17	FALSE	365
2022-09-15	09:20:58	-0.0784602	6559.17	FALSE	365
2022-09-15	09:20:58	-0.0325061	6559.17	FALSE	365
2022-09-15	09:20:58	0.0838297	6559.26	FALSE	365
2022-09-15	09:20:59	0.209682	6559.47	FALSE	365
2022-09-15	09:20:59	0.341336	6559.81	FALSE	365
2022-09-15	09:20:59	0.479199	6560.29	FALSE	365
2022-09-15	09:21:00	0.292837	6560.58	FALSE	365
2022-09-15	09:21:00	0.456094	6561.04	FALSE	365
2022-09-15	09:21:00	0.482964	6561.52	FALSE	365
2022-09-15	09:21:00	1.56963	6563.09	FALSE	365
2022-09-15	09:21:01	1.63406	6564.72	FALSE	365
2022-09-15	09:21:01	2.72072	6567.44	FALSE	365
2022-09-15	09:21:01	0.53874	6567.98	FALSE	365
2022-09-15	09:21:01	1.18225	6569.16	FALSE	365
2022-09-15	09:21:02	1.65141	6570.82	FALSE	365
2022-09-15	09:21:02	1.66113	6572.48	FALSE	365
2022-09-15	09:21:02	2.71996	6575.2	FALSE	365
2022-09-15	09:21:02	4.31436	6579.51	1	366
2022-09-15	09:21:03	16.668	6596.18	1	367
2022-09-15	09:21:03	17.4871	6613.67	1	368
2022-09-15	09:21:03	28.0039	6641.67	1	369
2022-09-15	09:21:04	15.9985	6657.67	1	370
2022-09-15	09:21:04	13.3643	6671.03	1	371
2022-09-15	09:21:04	22.207	6693.24	1	372
2022-09-15	09:21:04	14.5549	6707.8	1	373
2022-09-15	09:21:05	0.177672	6707.97	FALSE	373
2022-09-15	09:21:05	0.0370104	6708.01	FALSE	373
2022-09-15	09:21:05	-0.115458	6708.01	FALSE	373
2022-09-15	09:21:05	-0.494338	6708.01	FALSE	373
2022-09-15	09:21:06	-0.682328	6708.01	FALSE	373
2022-09-15	09:21:06	-0.929198	6708.01	FALSE	373
2022-09-15	09:21:06	-0.807315	6708.01	FALSE	373
2022-09-15	09:21:06	-0.277137	6708.01	FALSE	373
2022-09-15	09:21:07	0.227596	6708.24	FALSE	373
2022-09-15	09:21:07	0.39986	6708.64	FALSE	373
2022-09-15	09:21:07	11.0105	6719.65	1	374
2022-09-15	09:21:07	32.1483	6751.8	1	375
2022-09-15	09:21:08	31.6164	6783.41	1	376
2022-09-15	09:21:08	23.9081	6807.32	1	377
2022-09-15	09:21:08	20.4459	6827.77	1	378
2022-09-15	09:21:09	27.9244	6855.69	1	379
2022-09-15	09:21:09	27.3787	6883.07	1	380
2022-09-15	09:21:09	24.2794	6907.35	1	381
2022-09-15	09:21:09	11.8039	6919.15	1	382
2022-09-15	09:21:10	14.1836	6933.34	1	383
2022-09-15	09:21:10	21.7038	6955.04	1	384
2022-09-15	09:21:10	6.32729	6961.37	1	385
2022-09-15	09:21:10	16.4462	6977.81	1	386
2022-09-15	09:21:11	12.0764	6989.89	1	387
2022-09-15	09:21:11	3.68866	6993.58	1	388
2022-09-15	09:21:11	9.0395	7002.62	1	389
2022-09-15	09:21:11	9.33863	7011.96	1	390
2022-09-15	09:21:12	9.01385	7020.97	1	391
2022-09-15	09:21:12	10.032	7031	1	392
2022-09-15	09:21:12	18.0833	7049.09	1	393
2022-09-15	09:21:13	23.2759	7072.36	1	394
2022-09-15	09:21:13	3.05904	7075.42	1	395
2022-09-15	09:21:13	8.93472	7084.36	1	396
2022-09-15	09:21:13	10.2556	7094.61	1	397
2022-09-15	09:21:14	8.69889	7103.31	1	398
2022-09-15	09:21:14	32.7448	7136.06	1	399
2022-09-15	09:21:14	32.2338	7168.29	1	400
2022-09-15	09:21:14	32.1528	7200.44	1	401
2022-09-15	09:21:15	21.8274	7222.27	1	402
2022-09-15	09:21:15	31.8417	7254.11	1	403
2022-09-15	09:21:15	32.8561	7286.97	1	404
2022-09-15	09:21:15	26.4449	7313.41	1	405
2022-09-15	09:21:16	11.62	7325.03	1	406
2022-09-15	09:21:16	24.7911	7349.82	1	407
2022-09-15	09:21:16	20.7127	7370.54	1	408
2022-09-15	09:21:17	9.99212	7380.53	1	409
2022-09-15	09:21:17	17.7981	7398.33	1	410
2022-09-15	09:21:17	18.7988	7417.12	1	411
2022-09-15	09:21:17	16.5175	7433.64	1	412
2022-09-15	09:21:18	17.493	7451.14	1	413
2022-09-15	09:21:18	20.696	7471.83	1	414
2022-09-15	09:21:18	30.5127	7502.34	1	415
2022-09-15	09:21:18	24.2467	7526.59	1	416
2022-09-15	09:21:19	22.14	7548.73	1	417
2022-09-15	09:21:19	26.4563	7575.19	1	418
2022-09-15	09:21:19	2.20266	7577.39	FALSE	418
2022-09-15	09:21:19	2.03085	7579.42	FALSE	418
2022-09-15	09:21:20	0.54841	7579.97	FALSE	418
2022-09-15	09:21:20	0.0136008	7579.98	FALSE	418
2022-09-15	09:21:20	0.0245422	7580.01	FALSE	418
2022-09-15	09:21:20	0.0141097	7580.02	FALSE	418
2022-09-15	09:21:21	0.903575	7580.92	FALSE	418
2022-09-15	09:21:21	13.1699	7594.09	1	419
2022-09-15	09:21:21	26.558	7620.65	1	420
2022-09-15	09:21:22	1.80704	7622.46	FALSE	420
2022-09-15	09:21:22	0.573448	7623.03	FALSE	420
2022-09-15	09:21:22	0.0114125	7623.04	FALSE	420
2022-09-15	09:21:22	-0.0515392	7623.04	FALSE	420
2022-09-15	09:21:23	-0.187417	7623.04	FALSE	420
2022-09-15	09:21:23	-0.00324403	7623.04	FALSE	420
2022-09-15	09:21:23	0.138283	7623.18	FALSE	420
2022-09-15	09:21:23	0.15528	7623.34	FALSE	420
2022-09-15	09:21:24	0.114059	7623.45	FALSE	420
2022-09-15	09:21:24	0.0552292	7623.51	FALSE	420
2022-09-15	09:21:24	0.0414379	7623.55	FALSE	420
2022-09-15	09:21:24	0.296908	7623.85	FALSE	420
2022-09-15	09:21:25	6.13436	7629.98	1	421
2022-09-15	09:21:25	28.6776	7658.66	1	422
2022-09-15	09:21:25	30.204	7688.86	1	423
2022-09-15	09:21:26	9.62871	7698.49	1	424
2022-09-15	09:21:26	19.5596	7718.05	1	425
2022-09-15	09:21:26	38.6419	7756.69	1	426
2022-09-15	09:21:26	38.853	7795.55	1	427
2022-09-15	09:21:27	33.0273	7828.57	1	428
2022-09-15	09:21:27	34.1406	7862.71	1	429
2022-09-15	09:21:27	41.6354	7904.35	1	430
2022-09-15	09:21:27	31.6221	7935.97	1	431
2022-09-15	09:21:28	58.1184	7994.09	1	432
2022-09-15	09:21:28	31.4732	8025.56	1	433
2022-09-15	09:21:28	24.1209	8049.68	1	434
2022-09-15	09:21:28	24.3269	8074.01	1	435
2022-09-15	09:21:29	13.4603	8087.47	1	436
2022-09-15	09:21:29	1.36561	8088.84	FALSE	436
2022-09-15	09:21:29	0.209682	8089.05	FALSE	436
2022-09-15	09:21:29	0.247137	8089.29	FALSE	436
2022-09-15	09:21:30	0.0974684	8089.39	FALSE	436
2022-09-15	09:21:30	-0.156221	8089.39	FALSE	436
2022-09-15	09:21:30	0.034873	8089.42	FALSE	436
2022-09-15	09:21:31	0.331616	8089.76	FALSE	436
2022-09-15	09:21:31	-0.00619567	8089.76	FALSE	436
2022-09-15	09:21:31	1.86139	8091.62	FALSE	436
2022-09-15	09:21:31	5.45446	8097.07	1	437
2022-09-15	09:21:32	9.39492	8106.47	1	438
2022-09-15	09:21:32	5.00657	8111.47	1	439
2022-09-15	09:21:32	3.89217	8115.37	1	440
2022-09-15	09:21:32	2.09752	8117.46	FALSE	440
2022-09-15	09:21:33	1.56057	8119.02	FALSE	440
2022-09-15	09:21:33	0.633142	8119.66	FALSE	440
2022-09-15	09:21:33	0.252888	8119.91	FALSE	440
2022-09-15	09:21:33	0.308715	8120.22	FALSE	440
2022-09-15	09:21:34	0.0931936	8120.31	FALSE	440
2022-09-15	09:21:34	0.400216	8120.71	FALSE	440
2022-09-15	09:21:34	0.157621	8120.87	FALSE	440
2022-09-15	09:21:35	0.339657	8121.21	FALSE	440
2022-09-15	09:21:35	0.109071	8121.32	FALSE	440
2022-09-15	09:21:35	0.272481	8121.59	FALSE	440
2022-09-15	09:21:35	0.0603183	8121.65	FALSE	440
2022-09-15	09:21:36	-0.331386	8121.65	FALSE	440
2022-09-15	09:21:36	-0.73902	8121.65	FALSE	440
2022-09-15	09:21:36	-0.870317	8121.65	FALSE	440
2022-09-15	09:21:36	-0.867162	8121.65	FALSE	440
2022-09-15	09:21:37	-0.744262	8121.65	FALSE	440
2022-09-15	09:21:37	-0.6493	8121.65	FALSE	440
2022-09-15	09:21:37	-0.747722	8121.65	FALSE	440
2022-09-15	09:21:37	-0.570521	8121.65	FALSE	440
2022-09-15	09:21:38	-0.602175	8121.65	FALSE	440
2022-09-15	09:21:38	-0.597646	8121.65	FALSE	440
2022-09-15	09:21:38	-0.649401	8121.65	FALSE	440
2022-09-15	09:21:39	-0.667518	8121.65	FALSE	440
2022-09-15	09:21:39	-0.800088	8121.65	FALSE	440
2022-09-15	09:21:39	-0.843244	8121.65	FALSE	440
2022-09-15	09:21:39	-0.921971	8121.65	FALSE	440
2022-09-15	09:21:40	-0.932149	8121.65	FALSE	440
2022-09-15	09:21:40	-0.784872	8121.65	FALSE	440
2022-09-15	09:21:40	-0.722582	8121.65	FALSE	440
2022-09-15	09:21:40	-0.502939	8121.65	FALSE	440
2022-09-15	09:21:41	0.123728	8121.78	FALSE	440
2022-09-15	09:21:41	0.354618	8122.13	FALSE	440
2022-09-15	09:21:41	0.146069	8122.28	FALSE	440
2022-09-15	09:21:41	0.509275	8122.79	FALSE	440
2022-09-15	09:21:42	0.372532	8123.16	FALSE	440
2022-09-15	09:21:42	1.14037	8124.3	FALSE	440
2022-09-15	09:21:42	1.77029	8126.07	FALSE	440
2022-09-15	09:21:42	2.17614	8128.24	FALSE	440
2022-09-15	09:21:43	2.12154	8130.37	FALSE	440
2022-09-15	09:21:43	2.77024	8133.14	FALSE	440
2022-09-15	09:21:43	1.32668	8134.46	FALSE	440
2022-09-15	09:21:44	0.964593	8135.43	FALSE	440
2022-09-15	09:21:44	1.89599	8137.32	FALSE	440
2022-09-15	09:21:44	2.87569	8140.2	FALSE	440
2022-09-15	09:21:44	5.36011	8145.56	1	441
2022-09-15	09:21:45	5.28545	8150.84	1	442
2022-09-15	09:21:45	5.81217	8156.66	1	443
2022-09-15	09:21:45	6.63736	8163.29	1	444
2022-09-15	09:21:45	7.51701	8170.81	1	445
2022-09-15	09:21:46	9.99131	8180.8	1	446
2022-09-15	09:21:46	8.42551	8189.23	1	447
2022-09-15	09:21:46	3.11701	8192.35	1	448
2022-09-15	09:21:46	2.92729	8195.27	FALSE	448
2022-09-15	09:21:47	0.86103	8196.13	FALSE	448
2022-09-15	09:21:47	0.347036	8196.48	FALSE	448
2022-09-15	09:21:47	-0.0393763	8196.48	FALSE	448
2022-09-15	09:21:48	-0.218002	8196.48	FALSE	448
2022-09-15	09:21:48	0.0187407	8196.5	FALSE	448
2022-09-15	09:21:48	0.172176	8196.67	FALSE	448
2022-09-15	09:21:48	-0.0373916	8196.67	FALSE	448
2022-09-15	09:21:49	0.186272	8196.86	FALSE	448
2022-09-15	09:21:49	0.199199	8197.06	FALSE	448
2022-09-15	09:21:49	4.38815	8201.45	1	449
2022-09-15	09:21:49	15.7666	8217.21	1	450
2022-09-15	09:21:50	26.7117	8243.92	1	451
2022-09-15	09:21:50	28.3195	8272.24	1	452
2022-09-15	09:21:50	19.3603	8291.6	1	453
2022-09-15	09:21:50	20.0155	8311.62	1	454
2022-09-15	09:21:51	16.9869	8328.61	1	455
2022-09-15	09:21:51	11.7724	8340.38	1	456
2022-09-15	09:21:51	19.6344	8360.01	1	457
2022-09-15	09:21:51	9.9654	8369.98	1	458
2022-09-15	09:21:52	8.32001	8378.3	1	459
2022-09-15	09:21:52	1.93996	8380.24	FALSE	459
2022-09-15	09:21:52	1.27416	8381.51	FALSE	459
2022-09-15	09:21:53	-0.0982567	8381.51	FALSE	459
2022-09-15	09:21:53	-0.00507608	8381.51	FALSE	459
2022-09-15	09:21:53	-0.0682313	8381.51	FALSE	459
2022-09-15	09:21:53	0.0874938	8381.6	FALSE	459
2022-09-15	09:21:54	0.205153	8381.8	FALSE	459
2022-09-15	09:21:54	0.335382	8382.14	FALSE	459
2022-09-15	09:21:54	0.23528	8382.38	FALSE	459
2022-09-15	09:21:54	0.254211	8382.63	FALSE	459
2022-09-15	09:21:55	0.28383	8382.91	FALSE	459
2022-09-15	09:21:55	0.22673	8383.14	FALSE	459
2022-09-15	09:21:55	0.394059	8383.53	FALSE	459
2022-09-15	09:21:55	0.339707	8383.87	FALSE	459
2022-09-15	09:21:56	0.394008	8384.27	FALSE	459
2022-09-15	09:21:56	0.523778	8384.79	FALSE	459
2022-09-15	09:21:56	0.40042	8385.19	FALSE	459
2022-09-15	09:21:57	0.451768	8385.64	FALSE	459
2022-09-15	09:21:57	0.375229	8386.02	FALSE	459
2022-09-15	09:21:57	0.43584	8386.45	FALSE	459
2022-09-15	09:21:57	0.407392	8386.86	FALSE	459
2022-09-15	09:21:58	0.423677	8387.29	FALSE	459
2022-09-15	09:21:58	0.437265	8387.72	FALSE	459
2022-09-15	09:21:58	0.44042	8388.16	FALSE	459
2022-09-15	09:21:58	0.413651	8388.58	FALSE	459
2022-09-15	09:21:59	0.726221	8389.3	FALSE	459
2022-09-15	09:21:59	0.398384	8389.7	FALSE	459
2022-09-15	09:21:59	0.413957	8390.12	FALSE	459
2022-09-15	09:21:59	0.739707	8390.86	FALSE	459
2022-09-15	09:22:00	0.515941	8391.37	FALSE	459
2022-09-15	09:22:00	0.732532	8392.1	FALSE	459
2022-09-15	09:22:00	1.34317	8393.45	FALSE	459
2022-09-15	09:22:00	1.2424	8394.69	FALSE	459
2022-09-15	09:22:01	0.619809	8395.31	FALSE	459
2022-09-15	09:22:01	0.425102	8395.73	FALSE	459
2022-09-15	09:22:01	0.475585	8396.21	FALSE	459
2022-09-15	09:22:02	0.552023	8396.76	FALSE	459
2022-09-15	09:22:02	0.434211	8397.2	FALSE	459
2022-09-15	09:22:02	0.400776	8397.6	FALSE	459
2022-09-15	09:22:02	0.378079	8397.98	FALSE	459
2022-09-15	09:22:03	0.367952	8398.34	FALSE	459
2022-09-15	09:22:03	0.378079	8398.72	FALSE	459
2022-09-15	09:22:03	0.383575	8399.1	FALSE	459
2022-09-15	09:22:03	0.392227	8399.5	FALSE	459
2022-09-15	09:22:04	0.387392	8399.88	FALSE	459
2022-09-15	09:22:04	0.387952	8400.27	FALSE	459
2022-09-15	09:22:04	0.393143	8400.67	FALSE	459
2022-09-15	09:22:04	0.383422	8401.05	FALSE	459
2022-09-15	09:22:05	0.364746	8401.41	FALSE	459
2022-09-15	09:22:05	0.364288	8401.78	FALSE	459
2022-09-15	09:22:05	0.369428	8402.15	FALSE	459
2022-09-15	09:22:06	0.374975	8402.52	FALSE	459
2022-09-15	09:22:06	0.489173	8403.01	FALSE	459
2022-09-15	09:22:06	0.57416	8403.59	FALSE	459
2022-09-15	09:22:06	0.549835	8404.14	FALSE	459
2022-09-15	09:22:07	0.474924	8404.61	FALSE	459
2022-09-15	09:22:07	0.500623	8405.11	FALSE	459
2022-09-15	09:22:07	0.507087	8405.62	FALSE	459
2022-09-15	09:22:07	0.535076	8406.15	FALSE	459
2022-09-15	09:22:08	0.526323	8406.68	FALSE	459
2022-09-15	09:22:08	0.522812	8407.2	FALSE	459
2022-09-15	09:22:08	0.491005	8407.69	FALSE	459
2022-09-15	09:22:08	0.455992	8408.15	FALSE	459
2022-09-15	09:22:09	0.471412	8408.62	FALSE	459
2022-09-15	09:22:09	0.495789	8409.12	FALSE	459
2022-09-15	09:22:09	0.44902	8409.57	FALSE	459
2022-09-15	09:22:10	0.439148	8410	FALSE	459
2022-09-15	09:22:10	0.397214	8410.4	FALSE	459
2022-09-15	09:22:10	0.40042	8410.8	FALSE	459

## Sheet: Boris_martin_202291591647
						**GoPro Fitting: 905
2022-09-15	09:16:47	0.00912238
2022-09-15	09:16:47	-0.0741855
2022-09-15	09:16:47	0.208104
2022-09-15	09:16:48	0.186069
2022-09-15	09:16:48	0.257723
2022-09-15	09:16:48	0.192532
2022-09-15	09:16:48	0.19299
2022-09-15	09:16:49	0.196807
2022-09-15	09:16:49	0.245458
2022-09-15	09:16:49	0.223422
2022-09-15	09:16:50	0.311005
2022-09-15	09:16:50	0.386171
2022-09-15	09:16:50	0.264186
2022-09-15	09:16:50	0.308206
2022-09-15	09:16:51	0.275076
2022-09-15	09:16:51	0.255382
2022-09-15	09:16:51	0.393906
2022-09-15	09:16:51	0.443219
2022-09-15	09:16:52	0.340675
2022-09-15	09:16:52	0.327036
2022-09-15	09:16:52	0.333651
2022-09-15	09:16:52	0.319555
2022-09-15	09:16:53	0.343015
2022-09-15	09:16:53	0.329173
2022-09-15	09:16:53	0.299707
2022-09-15	09:16:53	0.276451
2022-09-15	09:16:54	0.269529
2022-09-15	09:16:54	0.282354
2022-09-15	09:16:54	0.273295
2022-09-15	09:16:55	0.284949
2022-09-15	09:16:55	0.26673
2022-09-15	09:16:55	0.272125
2022-09-15	09:16:55	0.271667
2022-09-15	09:16:56	0.270445
2022-09-15	09:16:56	0.269835
2022-09-15	09:16:56	0.282863
2022-09-15	09:16:56	0.264949
2022-09-15	09:16:57	0.284542
2022-09-15	09:16:57	0.263473
2022-09-15	09:16:57	0.279504
2022-09-15	09:16:57	0.290547
2022-09-15	09:16:58	0.296196
2022-09-15	09:16:58	0.280115
2022-09-15	09:16:58	0.28327
2022-09-15	09:16:59	0.292227
2022-09-15	09:16:59	0.265509
2022-09-15	09:16:59	0.26159
2022-09-15	09:16:59	0.364186
2022-09-15	09:17:00	0.362405
2022-09-15	09:17:00	0.272685
2022-09-15	09:17:00	0.29645
2022-09-15	09:17:00	0.293194
2022-09-15	09:17:01	0.279402
2022-09-15	09:17:01	0.292125
2022-09-15	09:17:01	0.315229
2022-09-15	09:17:01	0.314059
2022-09-15	09:17:02	0.322456
2022-09-15	09:17:02	0.330802
2022-09-15	09:17:02	0.326374
2022-09-15	09:17:03	0.300471
2022-09-15	09:17:03	0.314517
2022-09-15	09:17:03	0.323881
2022-09-15	09:17:03	0.366018
2022-09-15	09:17:04	0.297519
2022-09-15	09:17:04	0.30612
2022-09-15	09:17:04	0.295127
2022-09-15	09:17:04	0.375942
2022-09-15	09:17:05	0.422048
2022-09-15	09:17:05	0.404593
2022-09-15	09:17:05	0.384847
2022-09-15	09:17:05	0.370445
2022-09-15	09:17:06	0.355789
2022-09-15	09:17:06	0.366934
2022-09-15	09:17:06	0.343423
2022-09-15	09:17:06	0.365865
2022-09-15	09:17:07	0.506781
2022-09-15	09:17:07	0.321031
2022-09-15	09:17:07	0.280216
2022-09-15	09:17:08	0.228155
2022-09-15	09:17:08	0.552837
2022-09-15	09:17:08	0.271005
2022-09-15	09:17:08	0.349326
2022-09-15	09:17:09	0.308715
2022-09-15	09:17:09	0.371158
2022-09-15	09:17:09	0.500623
2022-09-15	09:17:09	0.496196
2022-09-15	09:17:10	0.0770104
2022-09-15	09:17:10	0.189886
2022-09-15	09:17:10	0.116451
2022-09-15	09:17:10	0.336094
2022-09-15	09:17:11	0.0948221
2022-09-15	09:17:11	-0.0253814
2022-09-15	09:17:11	0.0235753
2022-09-15	09:17:12	-0.0174425
2022-09-15	09:17:12	0.158384
2022-09-15	09:17:12	-0.0964246
2022-09-15	09:17:12	-0.245585
2022-09-15	09:17:13	-0.0937783
2022-09-15	09:17:13	-0.124414
2022-09-15	09:17:13	-0.124669
2022-09-15	09:17:13	-0.383142
2022-09-15	09:17:14	-0.131183
2022-09-15	09:17:14	0.523524
2022-09-15	09:17:14	0.417061
2022-09-15	09:17:14	1.51899
2022-09-15	09:17:15	1.77889
2022-09-15	09:17:15	1.24378
2022-09-15	09:17:15	0.650038
2022-09-15	09:17:16	0.526374
2022-09-15	09:17:16	0.445255
2022-09-15	09:17:16	0.298486
2022-09-15	09:17:16	0.386629
2022-09-15	09:17:17	0.461845
2022-09-15	09:17:17	0.340318
2022-09-15	09:17:17	0.284186
2022-09-15	09:17:17	0.225916
2022-09-15	09:17:18	0.395738
2022-09-15	09:17:18	1.87905
2022-09-15	09:17:18	2.78678
2022-09-15	09:17:18	0.963321
2022-09-15	09:17:19	0.432786
2022-09-15	09:17:19	0.498282
2022-09-15	09:17:19	0.411361
2022-09-15	09:17:19	0.500725
2022-09-15	09:17:20	0.461743
2022-09-15	09:17:20	0.623066
2022-09-15	09:17:20	0.434924
2022-09-15	09:17:21	0.613346
2022-09-15	09:17:21	0.388512
2022-09-15	09:17:21	0.223575
2022-09-15	09:17:21	0.265102
2022-09-15	09:17:22	0.358028
2022-09-15	09:17:22	0.449377
2022-09-15	09:17:22	0.406374
2022-09-15	09:17:22	1.84286
2022-09-15	09:17:23	17.7321
2022-09-15	09:17:23	6.52011
2022-09-15	09:17:23	3.58546
2022-09-15	09:17:23	1.13894
2022-09-15	09:17:24	0.779707
2022-09-15	09:17:24	0.369936
2022-09-15	09:17:24	0.323677
2022-09-15	09:17:25	0.480674
2022-09-15	09:17:25	0.386527
2022-09-15	09:17:25	0.358537
2022-09-15	09:17:25	1.58444
2022-09-15	09:17:26	2.54698
2022-09-15	09:17:26	0.474924
2022-09-15	09:17:26	0.372532
2022-09-15	09:17:26	0.623473
2022-09-15	09:17:27	0.581896
2022-09-15	09:17:27	0.449275
2022-09-15	09:17:27	0.305458
2022-09-15	09:17:27	0.398486
2022-09-15	09:17:28	0.42958
2022-09-15	09:17:28	0.448868
2022-09-15	09:17:28	0.40271
2022-09-15	09:17:29	0.437875
2022-09-15	09:17:29	0.43187
2022-09-15	09:17:29	0.488359
2022-09-15	09:17:29	0.591463
2022-09-15	09:17:30	0.291056
2022-09-15	09:17:30	0.15126
2022-09-15	09:17:30	0.29416
2022-09-15	09:17:30	0.485611
2022-09-15	09:17:31	0.140776
2022-09-15	09:17:31	0.166781
2022-09-15	09:17:31	0.449886
2022-09-15	09:17:31	0.335127
2022-09-15	09:17:32	0.449071
2022-09-15	09:17:32	0.570496
2022-09-15	09:17:32	1.59385
2022-09-15	09:17:32	1.75721
2022-09-15	09:17:33	2.21803
2022-09-15	09:17:33	2.31721
2022-09-15	09:17:33	2.34592
2022-09-15	09:17:34	1.1563
2022-09-15	09:17:34	5.50169
2022-09-15	09:17:34	10.4087
2022-09-15	09:17:34	25.7814
2022-09-15	09:17:35	42.4017
2022-09-15	09:17:35	26.7835
2022-09-15	09:17:35	12.4194
2022-09-15	09:17:35	2.78627
2022-09-15	09:17:36	2.48266
2022-09-15	09:17:36	12.6319
2022-09-15	09:17:36	13.8317
2022-09-15	09:17:36	12.084
2022-09-15	09:17:37	17.8017
2022-09-15	09:17:37	16.4623
2022-09-15	09:17:37	22.6125
2022-09-15	09:17:38	22.7579
2022-09-15	09:17:38	21.9998
2022-09-15	09:17:38	17.9112
2022-09-15	09:17:38	2.24052
2022-09-15	09:17:39	1.36515
2022-09-15	09:17:39	5.8854
2022-09-15	09:17:39	5.6336
2022-09-15	09:17:40	8.23909
2022-09-15	09:17:40	5.93034
2022-09-15	09:17:40	3.80805
2022-09-15	09:17:40	5.15125
2022-09-15	09:17:40	9.76627
2022-09-15	09:17:41	9.11411
2022-09-15	09:17:41	16.8948
2022-09-15	09:17:41	16.1479
2022-09-15	09:17:41	17.8993
2022-09-15	09:17:42	17.7772
2022-09-15	09:17:42	11.8213
2022-09-15	09:17:42	0.83126
2022-09-15	09:17:43	0.818028
2022-09-15	09:17:43	0.272226
2022-09-15	09:17:43	2.61421
2022-09-15	09:17:43	17.145
2022-09-15	09:17:44	30.3694
2022-09-15	09:17:44	6.47894
2022-09-15	09:17:44	0.290089
2022-09-15	09:17:44	-0.00105572
2022-09-15	09:17:45	-0.422175
2022-09-15	09:17:45	-0.930215
2022-09-15	09:17:45	-0.921463
2022-09-15	09:17:45	-1.03408
2022-09-15	09:17:46	-0.852608
2022-09-15	09:17:46	-0.833676
2022-09-15	09:17:46	0.259758
2022-09-15	09:17:47	3.88108
2022-09-15	09:17:47	2.00953
2022-09-15	09:17:47	0.867493
2022-09-15	09:17:47	0.684644
2022-09-15	09:17:48	0.647595
2022-09-15	09:17:48	0.336807
2022-09-15	09:17:48	0.144135
2022-09-15	09:17:48	1.25996
2022-09-15	09:17:49	5.09049
2022-09-15	09:17:49	2.71935
2022-09-15	09:17:49	0.650649
2022-09-15	09:17:49	0.278639
2022-09-15	09:17:50	0.162659
2022-09-15	09:17:50	0.0277483
2022-09-15	09:17:50	0.0410307
2022-09-15	09:17:51	0.0752292
2022-09-15	09:17:51	0.0778247
2022-09-15	09:17:51	-0.00253154
2022-09-15	09:17:51	-0.0216664
2022-09-15	09:17:52	-0.131539
2022-09-15	09:17:52	-0.298766
2022-09-15	09:17:52	-0.55215
2022-09-15	09:17:52	-0.696221
2022-09-15	09:17:53	-0.707366
2022-09-15	09:17:53	-0.642226
2022-09-15	09:17:53	-0.568333
2022-09-15	09:17:53	4.34861
2022-09-15	09:17:54	18.1796
2022-09-15	09:17:54	25.9015
2022-09-15	09:17:54	27.6368
2022-09-15	09:17:54	1.50485
2022-09-15	09:17:55	0.3364
2022-09-15	09:17:55	0.203372
2022-09-15	09:17:55	0.000216527
2022-09-15	09:17:56	-0.419274
2022-09-15	09:17:56	-0.349554
2022-09-15	09:17:56	-0.236526
2022-09-15	09:17:56	0.0253056
2022-09-15	09:17:57	1.29798
2022-09-15	09:17:57	2.38388
2022-09-15	09:17:57	0.597875
2022-09-15	09:17:57	0.599758
2022-09-15	09:17:58	0.38271
2022-09-15	09:17:58	0.54897
2022-09-15	09:17:58	0.319249
2022-09-15	09:17:58	0.328155
2022-09-15	09:17:59	0.266171
2022-09-15	09:17:59	0.250649
2022-09-15	09:17:59	0.303473
2022-09-15	09:18:00	0.130395
2022-09-15	09:18:00	2.09782
2022-09-15	09:18:00	6.40795
2022-09-15	09:18:00	23.6487
2022-09-15	09:18:01	19.83
2022-09-15	09:18:01	6.92769
2022-09-15	09:18:01	12.6237
2022-09-15	09:18:01	32.6263
2022-09-15	09:18:02	12.3162
2022-09-15	09:18:02	5.72622
2022-09-15	09:18:02	30.2222
2022-09-15	09:18:02	30.3716
2022-09-15	09:18:03	6.68764
2022-09-15	09:18:03	4.63614
2022-09-15	09:18:03	1.7538
2022-09-15	09:18:04	0.285865
2022-09-15	09:18:04	0.508868
2022-09-15	09:18:04	1.39014
2022-09-15	09:18:04	6.91131
2022-09-15	09:18:05	18.6086
2022-09-15	09:18:05	14.4975
2022-09-15	09:18:05	25.9265
2022-09-15	09:18:05	9.42576
2022-09-15	09:18:06	13.074
2022-09-15	09:18:06	17.3026
2022-09-15	09:18:06	20.4264
2022-09-15	09:18:06	27.2034
2022-09-15	09:18:07	3.90566
2022-09-15	09:18:07	2.46632
2022-09-15	09:18:07	3.23945
2022-09-15	09:18:07	2.38897
2022-09-15	09:18:08	1.08648
2022-09-15	09:18:08	1.95024
2022-09-15	09:18:08	0.783117
2022-09-15	09:18:09	0.515687
2022-09-15	09:18:09	0.667494
2022-09-15	09:18:09	0.764898
2022-09-15	09:18:09	1.04266
2022-09-15	09:18:10	0.538232
2022-09-15	09:18:10	0.327239
2022-09-15	09:18:10	-0.144313
2022-09-15	09:18:10	-0.442022
2022-09-15	09:18:11	1.59655
2022-09-15	09:18:11	8.58382
2022-09-15	09:18:11	2.35391
2022-09-15	09:18:11	6.50479
2022-09-15	09:18:12	8.22011
2022-09-15	09:18:12	7.68026
2022-09-15	09:18:12	5.78093
2022-09-15	09:18:13	5.94902
2022-09-15	09:18:13	9.71965
2022-09-15	09:18:13	5.26749
2022-09-15	09:18:13	13.1031
2022-09-15	09:18:14	26.9249
2022-09-15	09:18:14	9.91803
2022-09-15	09:18:14	9.15904
2022-09-15	09:18:14	9.64713
2022-09-15	09:18:15	5.45385
2022-09-15	09:18:15	21.7638
2022-09-15	09:18:15	33.3305
2022-09-15	09:18:15	8.0855
2022-09-15	09:18:16	31.7017
2022-09-15	09:18:16	14.7814
2022-09-15	09:18:16	30.1054
2022-09-15	09:18:17	15.0634
2022-09-15	09:18:17	14.8743
2022-09-15	09:18:17	10.8513
2022-09-15	09:18:17	3.1337
2022-09-15	09:18:18	1.04846
2022-09-15	09:18:18	0.396959
2022-09-15	09:18:18	0.121845
2022-09-15	09:18:18	-0.242582
2022-09-15	09:18:19	-0.251183
2022-09-15	09:18:19	0.0614379
2022-09-15	09:18:19	0.543982
2022-09-15	09:18:19	0.199555
2022-09-15	09:18:20	0.5707
2022-09-15	09:18:20	0.380318
2022-09-15	09:18:20	0.482964
2022-09-15	09:18:20	0.230089
2022-09-15	09:18:21	0.347036
2022-09-15	09:18:21	0.412277
2022-09-15	09:18:21	0.743829
2022-09-15	09:18:22	1.69558
2022-09-15	09:18:22	17.286
2022-09-15	09:18:22	23.9706
2022-09-15	09:18:22	14.456
2022-09-15	09:18:23	0.872227
2022-09-15	09:18:23	0.295484
2022-09-15	09:18:23	0.569682
2022-09-15	09:18:23	0.99986
2022-09-15	09:18:24	14.5225
2022-09-15	09:18:24	15.8844
2022-09-15	09:18:24	7.85283
2022-09-15	09:18:24	17.2582
2022-09-15	09:18:25	32.3041
2022-09-15	09:18:25	25.4945
2022-09-15	09:18:25	19.3523
2022-09-15	09:18:26	17.5999
2022-09-15	09:18:26	20.4665
2022-09-15	09:18:26	29.7007
2022-09-15	09:18:26	34.313
2022-09-15	09:18:27	22.1603
2022-09-15	09:18:27	21.014
2022-09-15	09:18:27	27.7632
2022-09-15	09:18:27	42.1817
2022-09-15	09:18:28	14.0827
2022-09-15	09:18:28	24.3222
2022-09-15	09:18:28	24.9855
2022-09-15	09:18:29	31.5101
2022-09-15	09:18:29	8.63879
2022-09-15	09:18:29	7.01095
2022-09-15	09:18:29	4.73915
2022-09-15	09:18:30	1.90317
2022-09-15	09:18:30	1.37197
2022-09-15	09:18:30	0.929885
2022-09-15	09:18:30	0.663117
2022-09-15	09:18:31	0.50042
2022-09-15	09:18:31	0.410089
2022-09-15	09:18:31	1.5105
2022-09-15	09:18:31	2.12469
2022-09-15	09:18:32	0.776094
2022-09-15	09:18:32	0.492125
2022-09-15	09:18:32	0.320064
2022-09-15	09:18:32	0.309479
2022-09-15	09:18:33	0.224949
2022-09-15	09:18:33	0.295942
2022-09-15	09:18:33	0.379046
2022-09-15	09:18:33	6.79426
2022-09-15	09:18:34	38.6337
2022-09-15	09:18:34	29.9466
2022-09-15	09:18:34	16.2399
2022-09-15	09:18:35	12.9413
2022-09-15	09:18:35	34.2728
2022-09-15	09:18:35	26.4653
2022-09-15	09:18:35	17.7696
2022-09-15	09:18:36	27.7075
2022-09-15	09:18:36	5.82088
2022-09-15	09:18:36	7.90108
2022-09-15	09:18:36	8.23599
2022-09-15	09:18:37	16.9651
2022-09-15	09:18:37	21.6776
2022-09-15	09:18:37	13.9748
2022-09-15	09:18:37	28.686
2022-09-15	09:18:38	11.5917
2022-09-15	09:18:38	13.9888
2022-09-15	09:18:38	24.1397
2022-09-15	09:18:39	8.24714
2022-09-15	09:18:39	24.7426
2022-09-15	09:18:39	28.8756
2022-09-15	09:18:39	6.02978
2022-09-15	09:18:40	19.7731
2022-09-15	09:18:40	2.10464
2022-09-15	09:18:40	4.46963
2022-09-15	09:18:40	0.59757
2022-09-15	09:18:41	0.246883
2022-09-15	09:18:41	-0.144211
2022-09-15	09:18:41	-0.60762
2022-09-15	09:18:41	-1.33917
2022-09-15	09:18:42	-0.388944
2022-09-15	09:18:42	-0.348791
2022-09-15	09:18:42	-0.606399
2022-09-15	09:18:43	0.0972139
2022-09-15	09:18:43	0.514669
2022-09-15	09:18:43	0.312532
2022-09-15	09:18:43	0.33986
2022-09-15	09:18:44	0.358842
2022-09-15	09:18:44	0.40612
2022-09-15	09:18:44	0.446832
2022-09-15	09:18:44	0.338232
2022-09-15	09:18:45	0.314567
2022-09-15	09:18:45	0.251718
2022-09-15	09:18:45	0.24897
2022-09-15	09:18:45	0.272786
2022-09-15	09:18:46	0.280216
2022-09-15	09:18:46	0.273295
2022-09-15	09:18:46	0.289987
2022-09-15	09:18:46	0.300878
2022-09-15	09:18:47	0.353244
2022-09-15	09:18:47	0.228817
2022-09-15	09:18:47	0.0710053
2022-09-15	09:18:48	0.221845
2022-09-15	09:18:48	0.128359
2022-09-15	09:18:48	0.272888
2022-09-15	09:18:48	1.04688
2022-09-15	09:18:49	6.02418
2022-09-15	09:18:49	11.8931
2022-09-15	09:18:49	13.3217
2022-09-15	09:18:49	14.8954
2022-09-15	09:18:50	13.2564
2022-09-15	09:18:50	16.8723
2022-09-15	09:18:50	21.1056
2022-09-15	09:18:50	8.82037
2022-09-15	09:18:51	21.7865
2022-09-15	09:18:51	7.55736
2022-09-15	09:18:51	15.1595
2022-09-15	09:18:52	9.06861
2022-09-15	09:18:52	16.1885
2022-09-15	09:18:52	27.9241
2022-09-15	09:18:52	11.8254
2022-09-15	09:18:53	37.6388
2022-09-15	09:18:53	33.4245
2022-09-15	09:18:53	25.0919
2022-09-15	09:18:53	42.5036
2022-09-15	09:18:54	40.3905
2022-09-15	09:18:54	47.8516
2022-09-15	09:18:54	34.6122
2022-09-15	09:18:54	29.5363
2022-09-15	09:18:55	35.5792
2022-09-15	09:18:55	23.9126
2022-09-15	09:18:55	19.4538
2022-09-15	09:18:55	16.6643
2022-09-15	09:18:56	17.277
2022-09-15	09:18:56	14.5102
2022-09-15	09:18:56	13.1784
2022-09-15	09:18:57	13.9241
2022-09-15	09:18:57	12.9409
2022-09-15	09:18:57	11.8297
2022-09-15	09:18:57	14.8821
2022-09-15	09:18:58	16.569
2022-09-15	09:18:58	20.9157
2022-09-15	09:18:58	15.3159
2022-09-15	09:18:58	10.0752
2022-09-15	09:18:59	24.593
2022-09-15	09:18:59	24.0482
2022-09-15	09:18:59	15.6378
2022-09-15	09:18:59	15.7977
2022-09-15	09:19:00	18.2805
2022-09-15	09:19:00	5.21202
2022-09-15	09:19:00	2.83492
2022-09-15	09:19:01	3.05116
2022-09-15	09:19:01	2.52882
2022-09-15	09:19:01	2.97009
2022-09-15	09:19:01	1.53258
2022-09-15	09:19:02	1.01538
2022-09-15	09:19:02	0.914109
2022-09-15	09:19:02	1.97681
2022-09-15	09:19:02	4.36647
2022-09-15	09:19:03	5.5649
2022-09-15	09:19:03	12.5277
2022-09-15	09:19:03	9.9336
2022-09-15	09:19:03	14.3517
2022-09-15	09:19:04	7.16413
2022-09-15	09:19:04	8.95528
2022-09-15	09:19:04	6.26001
2022-09-15	09:19:05	10.7518
2022-09-15	09:19:05	5.85222
2022-09-15	09:19:05	5.33767
2022-09-15	09:19:05	4.52474
2022-09-15	09:19:06	5.03568
2022-09-15	09:19:06	3.95543
2022-09-15	09:19:06	3.35197
2022-09-15	09:19:06	2.13889
2022-09-15	09:19:07	2.43548
2022-09-15	09:19:07	3.87731
2022-09-15	09:19:07	4.15009
2022-09-15	09:19:07	4.81889
2022-09-15	09:19:08	5.98286
2022-09-15	09:19:08	5.20505
2022-09-15	09:19:08	3.93731
2022-09-15	09:19:08	14.463
2022-09-15	09:19:09	23.3769
2022-09-15	09:19:09	5.74927
2022-09-15	09:19:09	1.50398
2022-09-15	09:19:10	0.117825
2022-09-15	09:19:10	0.0239315
2022-09-15	09:19:10	-0.26533
2022-09-15	09:19:10	-0.55673
2022-09-15	09:19:11	-0.404262
2022-09-15	09:19:11	-0.107722
2022-09-15	09:19:11	0.678181
2022-09-15	09:19:11	0.901438
2022-09-15	09:19:12	15.1523
2022-09-15	09:19:12	37.9616
2022-09-15	09:19:12	40.5186
2022-09-15	09:19:12	38.3266
2022-09-15	09:19:13	47.6722
2022-09-15	09:19:13	61.0664
2022-09-15	09:19:13	29.2161
2022-09-15	09:19:14	23.4474
2022-09-15	09:19:14	21.5171
2022-09-15	09:19:14	24.6896
2022-09-15	09:19:14	19.8891
2022-09-15	09:19:15	25.9495
2022-09-15	09:19:15	22.7364
2022-09-15	09:19:15	28.9861
2022-09-15	09:19:15	27.8905
2022-09-15	09:19:16	36.9278
2022-09-15	09:19:16	26.4555
2022-09-15	09:19:16	31.5891
2022-09-15	09:19:16	23.7234
2022-09-15	09:19:17	20.4559
2022-09-15	09:19:17	18.7973
2022-09-15	09:19:17	19.8383
2022-09-15	09:19:17	20.4085
2022-09-15	09:19:18	19.3972
2022-09-15	09:19:18	19.5108
2022-09-15	09:19:18	19.5575
2022-09-15	09:19:19	19.1595
2022-09-15	09:19:19	19.4263
2022-09-15	09:19:19	19.843
2022-09-15	09:19:19	19.8503
2022-09-15	09:19:20	19.4321
2022-09-15	09:19:20	20.2444
2022-09-15	09:19:20	18.4243
2022-09-15	09:19:20	12.0795
2022-09-15	09:19:21	10.9144
2022-09-15	09:19:21	30.4542
2022-09-15	09:19:21	19.4853
2022-09-15	09:19:21	2.88083
2022-09-15	09:19:22	0.299249
2022-09-15	09:19:22	0.350751
2022-09-15	09:19:22	0.158588
2022-09-15	09:19:23	0.41014
2022-09-15	09:19:23	-0.265687
2022-09-15	09:19:23	-0.41561
2022-09-15	09:19:23	0.692074
2022-09-15	09:19:24	10.1548
2022-09-15	09:19:24	22.9669
2022-09-15	09:19:24	25.9745
2022-09-15	09:19:24	34.2558
2022-09-15	09:19:25	48.0125
2022-09-15	09:19:25	39.5056
2022-09-15	09:19:25	27.8199
2022-09-15	09:19:25	34.1278
2022-09-15	09:19:26	32.8369
2022-09-15	09:19:26	50.326
2022-09-15	09:19:26	39.9011
2022-09-15	09:19:27	39.6975
2022-09-15	09:19:27	38.7745
2022-09-15	09:19:27	8.30632
2022-09-15	09:19:27	0.942863
2022-09-15	09:19:28	0.308155
2022-09-15	09:19:28	0.648053
2022-09-15	09:19:28	1.20439
2022-09-15	09:19:28	4.35421
2022-09-15	09:19:29	8.28983
2022-09-15	09:19:29	4.08556
2022-09-15	09:19:29	1.22943
2022-09-15	09:19:29	0.429529
2022-09-15	09:19:30	0.455382
2022-09-15	09:19:30	0.24841
2022-09-15	09:19:30	0.0622012
2022-09-15	09:19:30	1.17172
2022-09-15	09:19:31	5.64927
2022-09-15	09:19:31	3.47543
2022-09-15	09:19:31	0.844542
2022-09-15	09:19:32	1.01996
2022-09-15	09:19:32	1.28897
2022-09-15	09:19:32	1.95513
2022-09-15	09:19:32	1.50047
2022-09-15	09:19:33	1.3391
2022-09-15	09:19:33	1.20831
2022-09-15	09:19:33	1.66083
2022-09-15	09:19:33	1.84983
2022-09-15	09:19:34	1.45879
2022-09-15	09:19:34	1.54566
2022-09-15	09:19:34	1.55553
2022-09-15	09:19:34	4.76001
2022-09-15	09:19:35	7.89009
2022-09-15	09:19:35	2.23899
2022-09-15	09:19:35	0.148715
2022-09-15	09:19:36	0.238792
2022-09-15	09:19:36	1.76602
2022-09-15	09:19:36	7.54749
2022-09-15	09:19:36	10.749
2022-09-15	09:19:37	1.53513
2022-09-15	09:19:37	0.463677
2022-09-15	09:19:37	0.294262
2022-09-15	09:19:37	0.408868
2022-09-15	09:19:38	0.0848984
2022-09-15	09:19:38	3.02474
2022-09-15	09:19:38	26.2575
2022-09-15	09:19:38	19.7671
2022-09-15	09:19:39	13.2467
2022-09-15	09:19:39	7.0512
2022-09-15	09:19:39	1.41009
2022-09-15	09:19:40	0.624389
2022-09-15	09:19:40	0.261031
2022-09-15	09:19:40	0.262557
2022-09-15	09:19:40	-0.256475
2022-09-15	09:19:41	0.679504
2022-09-15	09:19:41	3.37955
2022-09-15	09:19:41	10.2024
2022-09-15	09:19:41	1.5594
2022-09-15	09:19:42	0.612226
2022-09-15	09:19:42	0.387087
2022-09-15	09:19:42	1.90785
2022-09-15	09:19:42	4.3539
2022-09-15	09:19:43	7.4197
2022-09-15	09:19:43	8.5881
2022-09-15	09:19:43	5.97696
2022-09-15	09:19:43	14.7766
2022-09-15	09:19:44	7.86769
2022-09-15	09:19:44	2.5224
2022-09-15	09:19:44	2.96815
2022-09-15	09:19:45	0.834822
2022-09-15	09:19:45	0.393397
2022-09-15	09:19:45	0.793142
2022-09-15	09:19:45	0.666069
2022-09-15	09:19:46	0.261132
2022-09-15	09:19:46	0.312786
2022-09-15	09:19:46	0.398537
2022-09-15	09:19:46	0.20154
2022-09-15	09:19:47	0.315484
2022-09-15	09:19:47	1.18505
2022-09-15	09:19:47	3.47777
2022-09-15	09:19:47	14.1209
2022-09-15	09:19:48	3.78602
2022-09-15	09:19:48	2.6508
2022-09-15	09:19:48	4.05655
2022-09-15	09:19:49	4.53365
2022-09-15	09:19:49	5.53294
2022-09-15	09:19:49	4.34159
2022-09-15	09:19:49	4.01172
2022-09-15	09:19:50	3.82861
2022-09-15	09:19:50	3.87731
2022-09-15	09:19:50	3.92312
2022-09-15	09:19:50	3.54291
2022-09-15	09:19:51	3.44388
2022-09-15	09:19:51	3.21024
2022-09-15	09:19:51	4.54255
2022-09-15	09:19:51	16.1482
2022-09-15	09:19:52	13.0322
2022-09-15	09:19:52	4.50607
2022-09-15	09:19:52	1.33146
2022-09-15	09:19:52	1.01564
2022-09-15	09:19:53	0.990954
2022-09-15	09:19:53	2.16001
2022-09-15	09:19:53	3.82943
2022-09-15	09:19:54	2.08587
2022-09-15	09:19:54	2.16001
2022-09-15	09:19:54	2.6966
2022-09-15	09:19:54	1.02805
2022-09-15	09:19:55	0.717621
2022-09-15	09:19:55	0.885102
2022-09-15	09:19:55	1.02108
2022-09-15	09:19:55	0.634567
2022-09-15	09:19:56	1.09111
2022-09-15	09:19:56	1.22963
2022-09-15	09:19:56	2.90978
2022-09-15	09:19:56	4.31879
2022-09-15	09:19:57	2.52225
2022-09-15	09:19:57	3.39686
2022-09-15	09:19:57	2.0565
2022-09-15	09:19:58	2.58958
2022-09-15	09:19:58	2.73085
2022-09-15	09:19:58	2.23721
2022-09-15	09:19:58	3.41981
2022-09-15	09:19:59	2.69553
2022-09-15	09:19:59	1.35457
2022-09-15	09:19:59	0.891311
2022-09-15	09:19:59	0.793804
2022-09-15	09:20:00	0.908969
2022-09-15	09:20:00	0.795178
2022-09-15	09:20:00	0.656959
2022-09-15	09:20:00	0.487036
2022-09-15	09:20:01	0.411412
2022-09-15	09:20:01	0.294517
2022-09-15	09:20:01	0.185
2022-09-15	09:20:02	0.127036
2022-09-15	09:20:02	0.206018
2022-09-15	09:20:02	0.613193
2022-09-15	09:20:02	0.683168
2022-09-15	09:20:03	0.330547
2022-09-15	09:20:03	0.210496
2022-09-15	09:20:03	0.179708
2022-09-15	09:20:03	0.10556
2022-09-15	09:20:04	0.0828119
2022-09-15	09:20:04	0.086985
2022-09-15	09:20:04	0.0788424
2022-09-15	09:20:04	0.065102
2022-09-15	09:20:05	0.0620486
2022-09-15	09:20:05	0.0604709
2022-09-15	09:20:05	0.0515651
2022-09-15	09:20:05	0.0442877
2022-09-15	09:20:06	0.0428628
2022-09-15	09:20:06	0.0482063
2022-09-15	09:20:06	0.04556
2022-09-15	09:20:07	0.0458654
2022-09-15	09:20:07	0.0415396
2022-09-15	09:20:07	0.0328374
2022-09-15	09:20:07	0.0395041
2022-09-15	09:20:08	0.0242369
2022-09-15	09:20:08	0.0252547
2022-09-15	09:20:08	0.0281045
2022-09-15	09:20:08	0.0356872
2022-09-15	09:20:09	0.0420485
2022-09-15	09:20:09	0.0383845
2022-09-15	09:20:09	0.0371122
2022-09-15	09:20:09	0.0370104
2022-09-15	09:20:10	0.0377229
2022-09-15	09:20:10	0.0360435
2022-09-15	09:20:10	0.0366542
2022-09-15	09:20:11	-0.0113356
2022-09-15	09:20:11	-0.0884857
2022-09-15	09:20:11	0.107036
2022-09-15	09:20:11	0.670394
2022-09-15	09:20:12	-0.0697071
2022-09-15	09:20:12	0.126222
2022-09-15	09:20:12	0.0441351
2022-09-15	09:20:12	0.391565
2022-09-15	09:20:13	8.00835
2022-09-15	09:20:13	55.8152
2022-09-15	09:20:13	21.2394
2022-09-15	09:20:13	29.3652
2022-09-15	09:20:14	24.6621
2022-09-15	09:20:14	42.8239
2022-09-15	09:20:14	24.348
2022-09-15	09:20:14	43.4683
2022-09-15	09:20:15	11.5018
2022-09-15	09:20:15	19.6371
2022-09-15	09:20:15	7.73502
2022-09-15	09:20:16	8.29365
2022-09-15	09:20:16	15.9729
2022-09-15	09:20:16	36.9493
2022-09-15	09:20:16	33.2204
2022-09-15	09:20:17	15.125
2022-09-15	09:20:17	7.00551
2022-09-15	09:20:17	0.218791
2022-09-15	09:20:17	0.330802
2022-09-15	09:20:18	0.539198
2022-09-15	09:20:18	3.97212
2022-09-15	09:20:18	41.2917
2022-09-15	09:20:18	34.2437
2022-09-15	09:20:19	13.9795
2022-09-15	09:20:19	22.5487
2022-09-15	09:20:19	7.55604
2022-09-15	09:20:20	17.0352
2022-09-15	09:20:20	7.98072
2022-09-15	09:20:20	6.83543
2022-09-15	09:20:20	2.10536
2022-09-15	09:20:21	0.531667
2022-09-15	09:20:21	0.347036
2022-09-15	09:20:21	0.249886
2022-09-15	09:20:21	1.5051
2022-09-15	09:20:22	4.09808
2022-09-15	09:20:22	1.34978
2022-09-15	09:20:22	0.319657
2022-09-15	09:20:22	0.209987
2022-09-15	09:20:23	-0.074847
2022-09-15	09:20:23	-0.244923
2022-09-15	09:20:23	-0.306196
2022-09-15	09:20:23	-0.283244
2022-09-15	09:20:24	14.4003
2022-09-15	09:20:24	30.1952
2022-09-15	09:20:24	5.74296
2022-09-15	09:20:25	1.50347
2022-09-15	09:20:25	1.00154
2022-09-15	09:20:25	0.582914
2022-09-15	09:20:25	0.461947
2022-09-15	09:20:26	0.167748
2022-09-15	09:20:26	0.136959
2022-09-15	09:20:26	0.594466
2022-09-15	09:20:26	1.04637
2022-09-15	09:20:27	0.567392
2022-09-15	09:20:27	0.412685
2022-09-15	09:20:27	0.466934
2022-09-15	09:20:27	0.568206
2022-09-15	09:20:28	0.883779
2022-09-15	09:20:28	0.386171
2022-09-15	09:20:28	0.705611
2022-09-15	09:20:29	0.427188
2022-09-15	09:20:29	0.803829
2022-09-15	09:20:29	0.684491
2022-09-15	09:20:29	0.755127
2022-09-15	09:20:30	0.614058
2022-09-15	09:20:30	0.743219
2022-09-15	09:20:30	0.869733
2022-09-15	09:20:30	1.68449
2022-09-15	09:20:31	1.7795
2022-09-15	09:20:31	2.27569
2022-09-15	09:20:31	1.83335
2022-09-15	09:20:31	3.97233
2022-09-15	09:20:32	5.80372
2022-09-15	09:20:32	14.6111
2022-09-15	09:20:32	9.93955
2022-09-15	09:20:33	8.21711
2022-09-15	09:20:33	11.7187
2022-09-15	09:20:33	4.84352
2022-09-15	09:20:33	9.48545
2022-09-15	09:20:34	6.68769
2022-09-15	09:20:34	16.2697
2022-09-15	09:20:34	10.117
2022-09-15	09:20:34	28.3146
2022-09-15	09:20:35	35.4439
2022-09-15	09:20:35	21.9991
2022-09-15	09:20:35	21.088
2022-09-15	09:20:35	11.1124
2022-09-15	09:20:36	23.4889
2022-09-15	09:20:36	15.6509
2022-09-15	09:20:36	15.8445
2022-09-15	09:20:36	32.7245
2022-09-15	09:20:37	17.4701
2022-09-15	09:20:37	23.1134
2022-09-15	09:20:37	27.8221
2022-09-15	09:20:38	41.3945
2022-09-15	09:20:38	29.2686
2022-09-15	09:20:38	35.9142
2022-09-15	09:20:38	37.2402
2022-09-15	09:20:39	19.5936
2022-09-15	09:20:39	35.0882
2022-09-15	09:20:39	19.7246
2022-09-15	09:20:39	9.41935
2022-09-15	09:20:40	6.71243
2022-09-15	09:20:40	0.661082
2022-09-15	09:20:40	0.23528
2022-09-15	09:20:40	0.148766
2022-09-15	09:20:41	-0.091132
2022-09-15	09:20:41	-0.0554578
2022-09-15	09:20:41	0.0300384
2022-09-15	09:20:42	0.118944
2022-09-15	09:20:42	0.0985371
2022-09-15	09:20:42	0.119555
2022-09-15	09:20:42	0.624084
2022-09-15	09:20:43	0.647697
2022-09-15	09:20:43	0.550598
2022-09-15	09:20:43	0.38444
2022-09-15	09:20:43	0.449224
2022-09-15	09:20:44	0.551107
2022-09-15	09:20:44	0.231005
2022-09-15	09:20:44	0.360318
2022-09-15	09:20:44	0.511921
2022-09-15	09:20:45	0.774975
2022-09-15	09:20:45	0.528206
2022-09-15	09:20:45	0.413804
2022-09-15	09:20:45	0.130853
2022-09-15	09:20:46	0.102405
2022-09-15	09:20:46	0.13757
2022-09-15	09:20:46	0.131972
2022-09-15	09:20:47	0.140878
2022-09-15	09:20:47	0.125407
2022-09-15	09:20:47	0.327494
2022-09-15	09:20:47	1.45747
2022-09-15	09:20:48	2.28994
2022-09-15	09:20:48	1.37065
2022-09-15	09:20:48	0.33813
2022-09-15	09:20:48	0.441234
2022-09-15	09:20:49	0.0908017
2022-09-15	09:20:49	-0.16304
2022-09-15	09:20:49	-0.136883
2022-09-15	09:20:49	0.0345676
2022-09-15	09:20:50	0.60215
2022-09-15	09:20:50	0.286578
2022-09-15	09:20:50	0.753906
2022-09-15	09:20:51	2.41233
2022-09-15	09:20:51	13.3805
2022-09-15	09:20:51	3.77981
2022-09-15	09:20:51	2.40057
2022-09-15	09:20:52	0.308461
2022-09-15	09:20:52	0.296043
2022-09-15	09:20:52	-0.0928114
2022-09-15	09:20:52	-0.0641091
2022-09-15	09:20:53	0.0555855
2022-09-15	09:20:53	0.0208781
2022-09-15	09:20:53	0.101743
2022-09-15	09:20:53	0.0420485
2022-09-15	09:20:54	0.0634735
2022-09-15	09:20:54	0.171667
2022-09-15	09:20:54	0.426374
2022-09-15	09:20:55	0.278893
2022-09-15	09:20:55	0.806934
2022-09-15	09:20:55	0.441132
2022-09-15	09:20:55	0.409224
2022-09-15	09:20:56	0.184797
2022-09-15	09:20:56	-0.56818
2022-09-15	09:20:56	-2.00518
2022-09-15	09:20:56	0.26159
2022-09-15	09:20:57	0.141234
2022-09-15	09:20:57	-0.144364
2022-09-15	09:20:57	0.380369
2022-09-15	09:20:57	0.241336
2022-09-15	09:20:58	0.0559417
2022-09-15	09:20:58	-0.0784602
2022-09-15	09:20:58	-0.0325061
2022-09-15	09:20:58	0.0838297
2022-09-15	09:20:59	0.209682
2022-09-15	09:20:59	0.341336
2022-09-15	09:20:59	0.479199
2022-09-15	09:21:00	0.292837
2022-09-15	09:21:00	0.456094
2022-09-15	09:21:00	0.482964
2022-09-15	09:21:00	1.56963
2022-09-15	09:21:01	1.63406
2022-09-15	09:21:01	2.72072
2022-09-15	09:21:01	0.53874
2022-09-15	09:21:01	1.18225
2022-09-15	09:21:02	1.65141
2022-09-15	09:21:02	1.66113
2022-09-15	09:21:02	2.71996
2022-09-15	09:21:02	4.31436
2022-09-15	09:21:03	16.668
2022-09-15	09:21:03	17.4871
2022-09-15	09:21:03	28.0039
2022-09-15	09:21:04	15.9985
2022-09-15	09:21:04	13.3643
2022-09-15	09:21:04	22.207
2022-09-15	09:21:04	14.5549
2022-09-15	09:21:05	0.177672
2022-09-15	09:21:05	0.0370104
2022-09-15	09:21:05	-0.115458
2022-09-15	09:21:05	-0.494338
2022-09-15	09:21:06	-0.682328
2022-09-15	09:21:06	-0.929198
2022-09-15	09:21:06	-0.807315
2022-09-15	09:21:06	-0.277137
2022-09-15	09:21:07	0.227596
2022-09-15	09:21:07	0.39986
2022-09-15	09:21:07	11.0105
2022-09-15	09:21:07	32.1483
2022-09-15	09:21:08	31.6164
2022-09-15	09:21:08	23.9081
2022-09-15	09:21:08	20.4459
2022-09-15	09:21:09	27.9244
2022-09-15	09:21:09	27.3787
2022-09-15	09:21:09	24.2794
2022-09-15	09:21:09	11.8039
2022-09-15	09:21:10	14.1836
2022-09-15	09:21:10	21.7038
2022-09-15	09:21:10	6.32729
2022-09-15	09:21:10	16.4462
2022-09-15	09:21:11	12.0764
2022-09-15	09:21:11	3.68866
2022-09-15	09:21:11	9.0395
2022-09-15	09:21:11	9.33863
2022-09-15	09:21:12	9.01385
2022-09-15	09:21:12	10.032
2022-09-15	09:21:12	18.0833
2022-09-15	09:21:13	23.2759
2022-09-15	09:21:13	3.05904
2022-09-15	09:21:13	8.93472
2022-09-15	09:21:13	10.2556
2022-09-15	09:21:14	8.69889
2022-09-15	09:21:14	32.7448
2022-09-15	09:21:14	32.2338
2022-09-15	09:21:14	32.1528
2022-09-15	09:21:15	21.8274
2022-09-15	09:21:15	31.8417
2022-09-15	09:21:15	32.8561
2022-09-15	09:21:15	26.4449
2022-09-15	09:21:16	11.62
2022-09-15	09:21:16	24.7911
2022-09-15	09:21:16	20.7127
2022-09-15	09:21:17	9.99212
2022-09-15	09:21:17	17.7981
2022-09-15	09:21:17	18.7988
2022-09-15	09:21:17	16.5175
2022-09-15	09:21:18	17.493
2022-09-15	09:21:18	20.696
2022-09-15	09:21:18	30.5127
2022-09-15	09:21:18	24.2467
2022-09-15	09:21:19	22.14
2022-09-15	09:21:19	26.4563
2022-09-15	09:21:19	2.20266
2022-09-15	09:21:19	2.03085
2022-09-15	09:21:20	0.54841
2022-09-15	09:21:20	0.0136008
2022-09-15	09:21:20	0.0245422
2022-09-15	09:21:20	0.0141097
2022-09-15	09:21:21	0.903575
2022-09-15	09:21:21	13.1699
2022-09-15	09:21:21	26.558
2022-09-15	09:21:22	1.80704
2022-09-15	09:21:22	0.573448
2022-09-15	09:21:22	0.0114125
2022-09-15	09:21:22	-0.0515392
2022-09-15	09:21:23	-0.187417
2022-09-15	09:21:23	-0.00324403
2022-09-15	09:21:23	0.138283
2022-09-15	09:21:23	0.15528
2022-09-15	09:21:24	0.114059
2022-09-15	09:21:24	0.0552292
2022-09-15	09:21:24	0.0414379
2022-09-15	09:21:24	0.296908
2022-09-15	09:21:25	6.13436
2022-09-15	09:21:25	28.6776
2022-09-15	09:21:25	30.204
2022-09-15	09:21:26	9.62871
2022-09-15	09:21:26	19.5596
2022-09-15	09:21:26	38.6419
2022-09-15	09:21:26	38.853
2022-09-15	09:21:27	33.0273
2022-09-15	09:21:27	34.1406
2022-09-15	09:21:27	41.6354
2022-09-15	09:21:27	31.6221
2022-09-15	09:21:28	58.1184
2022-09-15	09:21:28	31.4732
2022-09-15	09:21:28	24.1209
2022-09-15	09:21:28	24.3269
2022-09-15	09:21:29	13.4603
2022-09-15	09:21:29	1.36561
2022-09-15	09:21:29	0.209682
2022-09-15	09:21:29	0.247137
2022-09-15	09:21:30	0.0974684
2022-09-15	09:21:30	-0.156221
2022-09-15	09:21:30	0.034873
2022-09-15	09:21:31	0.331616
2022-09-15	09:21:31	-0.00619567
2022-09-15	09:21:31	1.86139
2022-09-15	09:21:31	5.45446
2022-09-15	09:21:32	9.39492
2022-09-15	09:21:32	5.00657
2022-09-15	09:21:32	3.89217
2022-09-15	09:21:32	2.09752
2022-09-15	09:21:33	1.56057
2022-09-15	09:21:33	0.633142
2022-09-15	09:21:33	0.252888
2022-09-15	09:21:33	0.308715
2022-09-15	09:21:34	0.0931936
2022-09-15	09:21:34	0.400216
2022-09-15	09:21:34	0.157621
2022-09-15	09:21:35	0.339657
2022-09-15	09:21:35	0.109071
2022-09-15	09:21:35	0.272481
2022-09-15	09:21:35	0.0603183
2022-09-15	09:21:36	-0.331386
2022-09-15	09:21:36	-0.73902
2022-09-15	09:21:36	-0.870317
2022-09-15	09:21:36	-0.867162
2022-09-15	09:21:37	-0.744262
2022-09-15	09:21:37	-0.6493
2022-09-15	09:21:37	-0.747722
2022-09-15	09:21:37	-0.570521
2022-09-15	09:21:38	-0.602175
2022-09-15	09:21:38	-0.597646
2022-09-15	09:21:38	-0.649401
2022-09-15	09:21:39	-0.667518
2022-09-15	09:21:39	-0.800088
2022-09-15	09:21:39	-0.843244
2022-09-15	09:21:39	-0.921971
2022-09-15	09:21:40	-0.932149
2022-09-15	09:21:40	-0.784872
2022-09-15	09:21:40	-0.722582
2022-09-15	09:21:40	-0.502939
2022-09-15	09:21:41	0.123728
2022-09-15	09:21:41	0.354618
2022-09-15	09:21:41	0.146069
2022-09-15	09:21:41	0.509275
2022-09-15	09:21:42	0.372532
2022-09-15	09:21:42	1.14037
2022-09-15	09:21:42	1.77029
2022-09-15	09:21:42	2.17614
2022-09-15	09:21:43	2.12154
2022-09-15	09:21:43	2.77024
2022-09-15	09:21:43	1.32668
2022-09-15	09:21:44	0.964593
2022-09-15	09:21:44	1.89599
2022-09-15	09:21:44	2.87569
2022-09-15	09:21:44	5.36011
2022-09-15	09:21:45	5.28545
2022-09-15	09:21:45	5.81217
2022-09-15	09:21:45	6.63736
2022-09-15	09:21:45	7.51701
2022-09-15	09:21:46	9.99131
2022-09-15	09:21:46	8.42551
2022-09-15	09:21:46	3.11701
2022-09-15	09:21:46	2.92729
2022-09-15	09:21:47	0.86103
2022-09-15	09:21:47	0.347036
2022-09-15	09:21:47	-0.0393763
2022-09-15	09:21:48	-0.218002
2022-09-15	09:21:48	0.0187407
2022-09-15	09:21:48	0.172176
2022-09-15	09:21:48	-0.0373916
2022-09-15	09:21:49	0.186272
2022-09-15	09:21:49	0.199199
2022-09-15	09:21:49	4.38815
2022-09-15	09:21:49	15.7666
2022-09-15	09:21:50	26.7117
2022-09-15	09:21:50	28.3195
2022-09-15	09:21:50	19.3603
2022-09-15	09:21:50	20.0155
2022-09-15	09:21:51	16.9869
2022-09-15	09:21:51	11.7724
2022-09-15	09:21:51	19.6344
2022-09-15	09:21:51	9.9654
2022-09-15	09:21:52	8.32001
2022-09-15	09:21:52	1.93996
2022-09-15	09:21:52	1.27416
2022-09-15	09:21:53	-0.0982567
2022-09-15	09:21:53	-0.00507608
2022-09-15	09:21:53	-0.0682313
2022-09-15	09:21:53	0.0874938
2022-09-15	09:21:54	0.205153
2022-09-15	09:21:54	0.335382
2022-09-15	09:21:54	0.23528
2022-09-15	09:21:54	0.254211
2022-09-15	09:21:55	0.28383
2022-09-15	09:21:55	0.22673
2022-09-15	09:21:55	0.394059
2022-09-15	09:21:55	0.339707
2022-09-15	09:21:56	0.394008
2022-09-15	09:21:56	0.523778
2022-09-15	09:21:56	0.40042
2022-09-15	09:21:57	0.451768
2022-09-15	09:21:57	0.375229
2022-09-15	09:21:57	0.43584
2022-09-15	09:21:57	0.407392
2022-09-15	09:21:58	0.423677
2022-09-15	09:21:58	0.437265
2022-09-15	09:21:58	0.44042
2022-09-15	09:21:58	0.413651
2022-09-15	09:21:59	0.726221
2022-09-15	09:21:59	0.398384
2022-09-15	09:21:59	0.413957
2022-09-15	09:21:59	0.739707
2022-09-15	09:22:00	0.515941
2022-09-15	09:22:00	0.732532
2022-09-15	09:22:00	1.34317
2022-09-15	09:22:00	1.2424
2022-09-15	09:22:01	0.619809
2022-09-15	09:22:01	0.425102
2022-09-15	09:22:01	0.475585
2022-09-15	09:22:02	0.552023
2022-09-15	09:22:02	0.434211
2022-09-15	09:22:02	0.400776
2022-09-15	09:22:02	0.378079
2022-09-15	09:22:03	0.367952
2022-09-15	09:22:03	0.378079
2022-09-15	09:22:03	0.383575
2022-09-15	09:22:03	0.392227
2022-09-15	09:22:04	0.387392
2022-09-15	09:22:04	0.387952
2022-09-15	09:22:04	0.393143
2022-09-15	09:22:04	0.383422
2022-09-15	09:22:05	0.364746
2022-09-15	09:22:05	0.364288
2022-09-15	09:22:05	0.369428
2022-09-15	09:22:06	0.374975
2022-09-15	09:22:06	0.489173
2022-09-15	09:22:06	0.57416
2022-09-15	09:22:06	0.549835
2022-09-15	09:22:07	0.474924
2022-09-15	09:22:07	0.500623
2022-09-15	09:22:07	0.507087
2022-09-15	09:22:07	0.535076
2022-09-15	09:22:08	0.526323
2022-09-15	09:22:08	0.522812
2022-09-15	09:22:08	0.491005
2022-09-15	09:22:08	0.455992
2022-09-15	09:22:09	0.471412
2022-09-15	09:22:09	0.495789
2022-09-15	09:22:09	0.44902
2022-09-15	09:22:10	0.439148
2022-09-15	09:22:10	0.397214
2022-09-15	09:22:10	0.40042
