# Supplementary material for: Comparing efficacy in reducing pulling and welfare impacts of four types of leash walking equipment
Source: PeerJ journal article supplement (doi:10.7717/peerj.18131), 2024-10-24
Supplement: Shelter_2_Tension_files.zip [file Boris_prong_2022915123721 copy.xlsx]

## Sheet: Averaged newtons
Date	Time	Averaged newtons	Impulse	Total steps
2022-09-15	12:37:28	2.19213	2.19213	0		Impulse	1013.01
2022-09-15	12:37:29	2.13508	4.32721	0		Total steps	11
2022-09-15	12:37:30	1.99139	6.3186	0		# > 5sec	0
2022-09-15	12:37:31	1.38281	7.70141	0
2022-09-15	12:37:32	1.70095	9.40236	0
2022-09-15	12:37:33	2.1134	11.5158	0
2022-09-15	12:37:34	0.707525	12.2233	0
2022-09-15	12:37:35	0.670946	12.8942	0
2022-09-15	12:37:36	1.92246	14.8167	0
2022-09-15	12:37:37	2.5829	17.3996	0
2022-09-15	12:37:38	6.25622	23.6558	0
2022-09-15	12:37:39	7.71638	31.3722	0
2022-09-15	12:37:40	3.7177	35.0899	0
2022-09-15	12:37:41	3.51707	38.607	0
2022-09-15	12:37:42	4.39608	43.0031	0
2022-09-15	12:37:43	4.48991	47.493	0
2022-09-15	12:37:44	4.61939	52.1124	0
2022-09-15	12:37:45	6.24972	58.3621	0
2022-09-15	12:37:46	4.50157	62.8637	0
2022-09-15	12:37:47	1.94904	64.8127	0
2022-09-15	12:37:48	5.15572	69.9684	0
2022-09-15	12:37:49	27.7881	97.7565	1
2022-09-15	12:37:50	3.54888	101.305	1
2022-09-15	12:37:51	1.78681	103.092	1
2022-09-15	12:37:52	-0.0752108	103.092	1
2022-09-15	12:37:53	4.54135	107.634	1
2022-09-15	12:37:54	12.0697	119.703	1
2022-09-15	12:37:55	14.3635	134.067	2
2022-09-15	12:37:56	5.97559	140.042	2
2022-09-15	12:37:57	4.17836	144.221	2
2022-09-15	12:37:58	2.79037	147.011	2
2022-09-15	12:37:59	3.23061	150.242	2
2022-09-15	12:38:00	1.75302	151.995	2
2022-09-15	12:38:01	3.11091	155.106	2
2022-09-15	12:38:02	-0.80922	155.106	2
2022-09-15	12:38:03	-3.80857	155.106	2
2022-09-15	12:38:04	-3.42098	155.106	2
2022-09-15	12:38:05	-2.20961	155.106	2
2022-09-15	12:38:06	-2.01284	155.106	2
2022-09-15	12:38:07	-2.05879	155.106	2
2022-09-15	12:38:08	-1.86971	155.106	2
2022-09-15	12:38:09	-0.586697	155.106	2
2022-09-15	12:38:10	-0.555401	155.106	2
2022-09-15	12:38:11	-0.501959	155.106	2
2022-09-15	12:38:12	12.4697	167.575	2
2022-09-15	12:38:13	7.26437	174.84	2
2022-09-15	12:38:14	6.07609	180.916	2
2022-09-15	12:38:15	13.4002	194.316	3
2022-09-15	12:38:16	11.1414	205.457	3
2022-09-15	12:38:17	2.67572	208.133	3
2022-09-15	12:38:18	-1.23067	208.133	3
2022-09-15	12:38:19	-5.23494	208.133	3
2022-09-15	12:38:20	-1.25398	208.133	3
2022-09-15	12:38:21	2.52897	210.662	3
2022-09-15	12:38:22	-0.365475	210.662	3
2022-09-15	12:38:23	4.35257	215.015	3
2022-09-15	12:38:24	1.58251	216.597	3
2022-09-15	12:38:25	2.39161	218.989	3
2022-09-15	12:38:26	1.49037	220.479	3
2022-09-15	12:38:27	7.21542	227.695	3
2022-09-15	12:38:28	3.93585	231.63	3
2022-09-15	12:38:29	-1.12456	231.63	3
2022-09-15	12:38:30	0.745273	232.376	3
2022-09-15	12:38:31	-3.7602	232.376	3
2022-09-15	12:38:32	-5.5595	232.376	3
2022-09-15	12:38:33	17.0167	249.392	4
2022-09-15	12:38:34	9.99379	259.386	4
2022-09-15	12:38:35	3.61219	262.998	4
2022-09-15	12:38:36	14.0637	277.062	5
2022-09-15	12:38:37	7.744	284.806	5
2022-09-15	12:38:38	4.00394	288.81	5
2022-09-15	12:38:39	2.57141	291.381	5
2022-09-15	12:38:40	4.90406	296.285	5
2022-09-15	12:38:41	4.88606	301.172	5
2022-09-15	12:38:42	0.911485	302.083	5
2022-09-15	12:38:43	1.06053	303.144	5
2022-09-15	12:38:44	4.36579	307.509	5
2022-09-15	12:38:45	7.76154	315.271	5
2022-09-15	12:38:46	9.14982	324.421	5
2022-09-15	12:38:47	2.56983	326.991	5
2022-09-15	12:38:48	1.54912	328.54	5
2022-09-15	12:38:49	-3.1443	328.54	5
2022-09-15	12:38:50	7.28136	335.821	5
2022-09-15	12:38:51	-0.785835	335.821	5
2022-09-15	12:38:52	2.20684	338.028	5
2022-09-15	12:38:53	3.35912	341.387	5
2022-09-15	12:38:54	0.977473	342.364	5
2022-09-15	12:38:55	2.6895	345.054	5
2022-09-15	12:38:56	3.28408	348.338	5
2022-09-15	12:38:57	4.01871	352.357	5
2022-09-15	12:38:58	5.30988	357.667	5
2022-09-15	12:38:59	3.75345	361.42	5
2022-09-15	12:39:00	3.46666	364.887	5
2022-09-15	12:39:01	4.51063	369.397	5
2022-09-15	12:39:02	4.14339	373.541	5
2022-09-15	12:39:03	3.2961	376.837	5
2022-09-15	12:39:04	3.92766	380.765	5
2022-09-15	12:39:05	4.01023	384.775	5
2022-09-15	12:39:06	5.16341	389.938	5
2022-09-15	12:39:07	4.40102	394.339	5
2022-09-15	12:39:08	2.70559	397.045	5
2022-09-15	12:39:09	4.1014	401.146	5
2022-09-15	12:39:10	3.51147	404.658	5
2022-09-15	12:39:11	4.44434	409.102	5
2022-09-15	12:39:12	7.36936	416.471	5
2022-09-15	12:39:13	10.1306	426.602	5
2022-09-15	12:39:14	11.1659	437.768	5
2022-09-15	12:39:15	9.90178	447.67	5
2022-09-15	12:39:16	22.8389	470.509	6
2022-09-15	12:39:17	19.7164	490.225	7
2022-09-15	12:39:18	9.00907	499.234	7
2022-09-15	12:39:19	8.26481	507.499	7
2022-09-15	12:39:20	4.95323	512.452	7
2022-09-15	12:39:21	5.5328	517.985	7
2022-09-15	12:39:22	5.09522	523.08	7
2022-09-15	12:39:23	5.56857	528.649	7
2022-09-15	12:39:24	6.05985	534.709	7
2022-09-15	12:39:25	6.07779	540.786	7
2022-09-15	12:39:26	6.56454	547.351	7
2022-09-15	12:39:27	6.46146	553.812	7
2022-09-15	12:39:28	6.34632	560.159	7
2022-09-15	12:39:29	6.08448	566.243	7
2022-09-15	12:39:30	3.80231	570.046	7
2022-09-15	12:39:31	2.53617	572.582	7
2022-09-15	12:39:32	2.45336	575.035	7
2022-09-15	12:39:33	2.4134	577.449	7
2022-09-15	12:39:34	3.11153	580.56	7
2022-09-15	12:39:35	3.02046	583.581	7
2022-09-15	12:39:36	0.675833	584.256	7
2022-09-15	12:39:37	3.78403	588.04	7
2022-09-15	12:39:38	1.26112	589.301	7
2022-09-15	12:39:39	1.61612	590.918	7
2022-09-15	12:39:40	0.804299	591.722	7
2022-09-15	12:39:41	0.504583	592.226	7
2022-09-15	12:39:42	0.30815	592.535	7
2022-09-15	12:39:43	-0.286529	592.535	7
2022-09-15	12:39:44	-2.42296	592.535	7
2022-09-15	12:39:45	2.92625	595.461	7
2022-09-15	12:39:46	8.54411	604.005	7
2022-09-15	12:39:47	1.38915	605.394	7
2022-09-15	12:39:48	2.08658	607.481	7
2022-09-15	12:39:49	-1.32082	607.481	7
2022-09-15	12:39:50	-1.85285	607.481	7
2022-09-15	12:39:51	-1.7559	607.481	7
2022-09-15	12:39:52	-3.58936	607.481	7
2022-09-15	12:39:53	-5.12159	607.481	7
2022-09-15	12:39:54	-5.30547	607.481	7
2022-09-15	12:39:55	-4.14736	607.481	7
2022-09-15	12:39:56	1.17553	608.656	7
2022-09-15	12:39:57	2.42416	611.08	7
2022-09-15	12:39:58	-0.301582	611.08	7
2022-09-15	12:39:59	-1.17724	611.08	7
2022-09-15	12:40:00	-0.393829	611.08	7
2022-09-15	12:40:01	-1.11607	611.08	7
2022-09-15	12:40:02	-2.4185	611.08	7
2022-09-15	12:40:03	-1.89897	611.08	7
2022-09-15	12:40:04	-1.52795	611.08	7
2022-09-15	12:40:05	-2.02234	611.08	7
2022-09-15	12:40:06	-1.94515	611.08	7
2022-09-15	12:40:07	-1.82885	611.08	7
2022-09-15	12:40:08	-0.870341	611.08	7
2022-09-15	12:40:09	2.24515	613.326	7
2022-09-15	12:40:10	3.26026	616.586	7
2022-09-15	12:40:11	3.24175	619.828	7
2022-09-15	12:40:12	3.0523	622.88	7
2022-09-15	12:40:13	3.27282	626.153	7
2022-09-15	12:40:14	3.25766	629.41	7
2022-09-15	12:40:15	3.26547	632.676	7
2022-09-15	12:40:16	3.22879	635.905	7
2022-09-15	12:40:17	3.26428	639.169	7
2022-09-15	12:40:18	3.27407	642.443	7
2022-09-15	12:40:19	3.26705	645.71	7
2022-09-15	12:40:20	3.28305	648.993	7
2022-09-15	12:40:21	1.49733	650.49	7
2022-09-15	12:40:22	-3.38408	650.49	7
2022-09-15	12:40:23	-0.420484	650.49	7
2022-09-15	12:40:24	3.05381	653.544	7
2022-09-15	12:40:25	3.13032	656.675	7
2022-09-15	12:40:26	3.09088	659.765	7
2022-09-15	12:40:27	3.04577	662.811	7
2022-09-15	12:40:28	2.93836	665.75	7
2022-09-15	12:40:29	2.82642	668.576	7
2022-09-15	12:40:30	2.82472	671.401	7
2022-09-15	12:40:31	2.14436	673.545	7
2022-09-15	12:40:32	0.264384	673.809	7
2022-09-15	12:40:33	-0.420371	673.809	7
2022-09-15	12:40:34	-0.965417	673.809	7
2022-09-15	12:40:35	-1.66202	673.809	7
2022-09-15	12:40:36	-1.65223	673.809	7
2022-09-15	12:40:37	-1.75013	673.809	7
2022-09-15	12:40:38	-1.58369	673.809	7
2022-09-15	12:40:39	-0.847306	673.809	7
2022-09-15	12:40:40	3.08482	676.894	7
2022-09-15	12:40:41	0.989074	677.883	7
2022-09-15	12:40:42	0.579399	678.463	7
2022-09-15	12:40:43	-4.35296	678.463	7
2022-09-15	12:40:44	-4.48618	678.463	7
2022-09-15	12:40:45	-1.94283	678.463	7
2022-09-15	12:40:46	-1.42206	678.463	7
2022-09-15	12:40:47	0.0305607	678.493	7
2022-09-15	12:40:48	1.68522	680.178	7
2022-09-15	12:40:49	3.05803	683.237	7
2022-09-15	12:40:50	2.95494	686.191	7
2022-09-15	12:40:51	2.79286	688.984	7
2022-09-15	12:40:52	1.76972	690.754	7
2022-09-15	12:40:53	1.56262	692.317	7
2022-09-15	12:40:54	0.49185	692.809	7
2022-09-15	12:40:55	-0.983016	692.809	7
2022-09-15	12:40:56	-1.80225	692.809	7
2022-09-15	12:40:57	-4.16713	692.809	7
2022-09-15	12:40:58	-5.63008	692.809	7
2022-09-15	12:40:59	-15.6296	692.809	7
2022-09-15	12:41:00	-29.683	692.809	7
2022-09-15	12:41:01	-31.418	692.809	7
2022-09-15	12:41:02	-35.4545	692.809	7
2022-09-15	12:41:03	-34.8389	692.809	7
2022-09-15	12:41:04	-26.0373	692.809	7
2022-09-15	12:41:05	-20.3982	692.809	7
2022-09-15	12:41:06	-19.6488	692.809	7
2022-09-15	12:41:07	-19.6606	692.809	7
2022-09-15	12:41:08	-7.14683	692.809	7
2022-09-15	12:41:09	-3.30655	692.809	7
2022-09-15	12:41:10	1.40645	694.215	7
2022-09-15	12:41:11	0.996999	695.212	7
2022-09-15	12:41:12	2.04131	697.253	7
2022-09-15	12:41:13	8.09924	705.352	7
2022-09-15	12:41:14	6.9834	712.336	7
2022-09-15	12:41:15	6.20604	718.542	7
2022-09-15	12:41:16	4.37089	722.913	7
2022-09-15	12:41:17	-2.10769	722.913	7
2022-09-15	12:41:18	-0.165364	722.913	7
2022-09-15	12:41:19	0.494453	723.407	7
2022-09-15	12:41:20	0.199095	723.606	7
2022-09-15	12:41:21	1.04786	724.654	7
2022-09-15	12:41:22	1.39728	726.052	7
2022-09-15	12:41:23	4.40179	730.453	7
2022-09-15	12:41:24	3.07622	733.53	7
2022-09-15	12:41:25	10.5818	744.111	7
2022-09-15	12:41:26	7.8767	751.988	7
2022-09-15	12:41:27	2.18641	754.174	7
2022-09-15	12:41:28	2.32704	756.501	7
2022-09-15	12:41:29	2.9622	759.464	7
2022-09-15	12:41:30	3.25975	762.723	7
2022-09-15	12:41:31	3.2812	766.005	7
2022-09-15	12:41:32	3.2606	769.265	7
2022-09-15	12:41:33	3.26584	772.531	7
2022-09-15	12:41:34	3.26139	775.792	7
2022-09-15	12:41:35	3.25239	779.045	7
2022-09-15	12:41:36	3.26716	782.312	7
2022-09-15	12:41:37	3.2669	785.579	7
2022-09-15	12:41:38	2.81436	788.393	7
2022-09-15	12:41:39	3.26858	791.662	7
2022-09-15	12:41:40	3.27118	794.933	7
2022-09-15	12:41:41	3.25403	798.187	7
2022-09-15	12:41:42	3.25815	801.445	7
2022-09-15	12:41:43	3.27248	804.718	7
2022-09-15	12:41:44	3.26892	807.987	7
2022-09-15	12:41:45	3.22093	811.208	7
2022-09-15	12:41:46	3.25015	814.458	7
2022-09-15	12:41:47	3.27265	817.73	7
2022-09-15	12:41:48	2.84209	820.572	7
2022-09-15	12:41:49	2.73061	823.303	7
2022-09-15	12:41:50	3.27075	826.574	7
2022-09-15	12:41:51	3.27537	829.849	7
2022-09-15	12:41:52	3.26875	833.118	7
2022-09-15	12:41:53	3.26122	836.379	7
2022-09-15	12:41:54	3.28425	839.663	7
2022-09-15	12:41:55	3.18957	842.853	7
2022-09-15	12:41:56	3.26422	846.117	7
2022-09-15	12:41:57	3.25488	849.372	7
2022-09-15	12:41:58	3.26388	852.636	7
2022-09-15	12:41:59	3.26416	855.9	7
2022-09-15	12:42:00	3.26654	859.167	7
2022-09-15	12:42:01	3.27984	862.446	7
2022-09-15	12:42:02	3.27233	865.719	7
2022-09-15	12:42:03	3.2602	868.979	7
2022-09-15	12:42:04	3.26858	872.248	7
2022-09-15	12:42:05	3.26665	875.514	7
2022-09-15	12:42:06	3.25732	878.772	7
2022-09-15	12:42:07	3.26348	882.035	7
2022-09-15	12:42:08	3.26473	885.3	7
2022-09-15	12:42:09	3.2623	888.562	7
2022-09-15	12:42:10	3.26954	891.832	7
2022-09-15	12:42:11	3.29942	895.131	7
2022-09-15	12:42:12	3.21233	898.343	7
2022-09-15	12:42:13	3.27684	901.62	7
2022-09-15	12:42:14	3.27882	904.899	7
2022-09-15	12:42:15	3.27622	908.175	7
2022-09-15	12:42:16	3.27367	911.449	7
2022-09-15	12:42:17	3.2636	914.712	7
2022-09-15	12:42:18	3.26286	917.975	7
2022-09-15	12:42:19	6.16626	924.142	7
2022-09-15	12:42:20	0.804638	924.946	7
2022-09-15	12:42:21	16.8245	941.771	8
2022-09-15	12:42:22	33.3345	975.105	9
2022-09-15	12:42:23	17.7013	992.807	10
2022-09-15	12:42:24	2.15353	994.96	10
2022-09-15	12:42:25	15.4616	1010.42	11
2022-09-15	12:42:26	0.780756	1011.2	11
2022-09-15	12:42:27	1.06785	1012.27	11
2022-09-15	12:42:28	0.744027	1013.01	11

## Sheet: Boris_prong_2022915123721 (4)
Date	Time	Lbs	Newtons	Averaged newtons	Total force x time		total steps > 13.345	**GoPro Fitting: 1221
2022-09-15	12:37:28	0.503168	2.23819	2.19213	2.23819	FALSE	0
2022-09-15	12:37:28	0.49243	2.19043	2.19213	2.19043	FALSE	0
2022-09-15	12:37:28	0.487494	2.16847	2.19213	4.40666	FALSE	0
2022-09-15	12:37:28	0.488155	2.17141	2.19213	4.36184	FALSE	0
2022-09-15	12:37:29	0.483372	2.15014	2.13508	6.5568	FALSE	0
2022-09-15	12:37:29	0.479606	2.13338	2.13508	6.49522	FALSE	0
2022-09-15	12:37:29	0.472328	2.10101	2.13508	8.65781	FALSE	0
2022-09-15	12:37:29	0.484644	2.15579	2.13508	8.65102	FALSE	0
2022-09-15	12:37:30	0.478893	2.13021	1.99139	10.788	FALSE	0
2022-09-15	12:37:30	0.474975	2.11278	1.99139	10.7638	FALSE	0
2022-09-15	12:37:30	0.432685	1.92467	1.99139	12.7127	FALSE	0
2022-09-15	12:37:30	0.404186	1.7979	1.99139	12.5617	FALSE	0
2022-09-15	12:37:31	0.428919	1.90792	1.38281	14.6206	FALSE	0
2022-09-15	12:37:31	0.266527	1.18557	1.38281	13.7473	FALSE	0
2022-09-15	12:37:31	0.237163	1.05495	1.38281	15.6756	FALSE	0
2022-09-15	12:37:32	0.311565	1.3859	1.70095	15.1332	FALSE	0
2022-09-15	12:37:32	0.427748	1.90271	1.70095	17.5783	FALSE	0
2022-09-15	12:37:32	0.287239	1.2777	1.70095	16.4109	FALSE	0
2022-09-15	12:37:32	0.503015	2.23751	1.70095	19.8158	FALSE	0
2022-09-15	12:37:33	0.311921	1.38749	2.1134	17.7984	FALSE	0
2022-09-15	12:37:33	0.521234	2.31855	2.1134	22.1343	FALSE	0
2022-09-15	12:37:33	0.648868	2.88629	2.1134	20.6846	FALSE	0
2022-09-15	12:37:33	0.418435	1.86128	2.1134	23.9956	FALSE	0
2022-09-15	12:37:34	0.558842	2.48584	0.707525	23.1705	FALSE	0
2022-09-15	12:37:34	0.663575	2.95171	0.707525	26.9473	FALSE	0
2022-09-15	12:37:34	-0.259478	-1.15421	0.707525	23.1705	FALSE	0
2022-09-15	12:37:34	-0.326704	-1.45324	0.707525	26.9473	FALSE	0
2022-09-15	12:37:35	-0.0248216	-0.110411	0.670946	23.1705	FALSE	0
2022-09-15	12:37:35	0.277977	1.2365	0.670946	28.1838	FALSE	0
2022-09-15	12:37:35	0.199351	0.886753	0.670946	24.0572	FALSE	0
2022-09-15	12:37:36	0.51757	2.30225	1.92246	30.4861	FALSE	0
2022-09-15	12:37:36	0.209122	0.930216	1.92246	24.9875	FALSE	0
2022-09-15	12:37:36	0.6564	2.9198	1.92246	33.4059	FALSE	0
2022-09-15	12:37:36	0.345662	1.53757	1.92246	26.525	FALSE	0
2022-09-15	12:37:37	0.437774	1.94731	2.5829	35.3532	FALSE	0
2022-09-15	12:37:37	0.693244	3.08369	2.5829	29.6087	FALSE	0
2022-09-15	12:37:37	0.616908	2.74413	2.5829	38.0973	FALSE	0
2022-09-15	12:37:37	0.57472	2.55647	2.5829	32.1652	FALSE	0
2022-09-15	12:37:38	0.344949	1.5344	6.25622	39.6317	FALSE	0
2022-09-15	12:37:38	0.399809	1.77843	6.25622	33.9436	FALSE	0
2022-09-15	12:37:38	2.64296	11.7564	6.25622	51.3881	FALSE	0
2022-09-15	12:37:38	2.23813	9.95565	6.25622	43.8993	FALSE	0
2022-09-15	12:37:39	1.91258	8.50754	7.71638	59.8957	FALSE	0
2022-09-15	12:37:39	1.68032	7.4744	7.71638	51.3737	FALSE	0
2022-09-15	12:37:39	1.61126	7.16721	7.71638	67.0629	FALSE	0
2022-09-15	12:37:40	0.46159	2.05324	3.7177	53.4269	FALSE	0
2022-09-15	12:37:40	1.50485	6.69387	3.7177	73.7567	FALSE	0
2022-09-15	12:37:40	0.539758	2.40095	3.7177	55.8279	FALSE	0
2022-09-15	12:37:40	0.836908	3.72273	3.7177	77.4795	FALSE	0
2022-09-15	12:37:41	1.10795	4.92838	3.51707	60.7562	FALSE	0
2022-09-15	12:37:41	0.565916	2.51731	3.51707	79.9968	FALSE	0
2022-09-15	12:37:41	0.898791	3.998	3.51707	64.7542	FALSE	0
2022-09-15	12:37:41	0.590038	2.62461	3.51707	82.6214	FALSE	0
2022-09-15	12:37:42	1.10948	4.93519	4.39608	69.6894	FALSE	0
2022-09-15	12:37:42	0.822303	3.65777	4.39608	86.2792	FALSE	0
2022-09-15	12:37:42	1.00597	4.47476	4.39608	74.1642	FALSE	0
2022-09-15	12:37:42	1.01538	4.51661	4.39608	90.7958	FALSE	0
2022-09-15	12:37:43	1.08943	4.846	4.48991	79.0102	FALSE	0
2022-09-15	12:37:43	1.33696	5.94707	4.48991	96.7428	FALSE	0
2022-09-15	12:37:43	0.601743	2.67667	4.48991	81.6869	FALSE	0
2022-09-15	12:37:44	1.5995	7.1149	4.61939	103.858	FALSE	0
2022-09-15	12:37:44	0.555891	2.47271	4.61939	84.1596	FALSE	0
2022-09-15	12:37:44	1.22958	5.46942	4.61939	109.327	FALSE	0
2022-09-15	12:37:44	0.76897	3.42053	4.61939	87.5801	FALSE	0
2022-09-15	12:37:45	1.46154	6.50122	6.24972	115.828	FALSE	0
2022-09-15	12:37:45	1.11258	4.94898	6.24972	92.5291	FALSE	0
2022-09-15	12:37:45	1.18164	5.25617	6.24972	121.085	FALSE	0
2022-09-15	12:37:45	1.86424	8.29251	6.24972	100.822	FALSE	0
2022-09-15	12:37:46	0.934618	4.15737	4.50157	125.242	FALSE	0
2022-09-15	12:37:46	1.28256	5.70508	4.50157	106.527	FALSE	0
2022-09-15	12:37:46	0.540572	2.40457	4.50157	127.646	FALSE	0
2022-09-15	12:37:46	1.29024	5.73925	4.50157	112.266	FALSE	0
2022-09-15	12:37:47	0.421539	1.87509	1.94904	129.522	FALSE	0
2022-09-15	12:37:47	0.530038	2.35772	1.94904	114.624	FALSE	0
2022-09-15	12:37:47	0.362913	1.61431	1.94904	131.136	FALSE	0
2022-09-15	12:37:48	0.387087	1.72184	5.15572	116.345	FALSE	0
2022-09-15	12:37:48	0.532735	2.36971	5.15572	133.506	FALSE	0
2022-09-15	12:37:48	0.811158	3.60819	5.15572	119.954	FALSE	0
2022-09-15	12:37:48	2.90525	12.9231	5.15572	146.429	FALSE	0
2022-09-15	12:37:49	5.01009	22.2859	27.7881	142.24	1	1
2022-09-15	12:37:49	8.3395	37.0958	27.7881	183.524	1	2
2022-09-15	12:37:49	5.19258	23.0976	27.7881	165.337	1	3
2022-09-15	12:37:49	6.44601	28.6731	27.7881	212.198	1	4
2022-09-15	12:37:50	0.626527	2.78692	3.54888	168.124	FALSE	4
2022-09-15	12:37:50	1.29599	5.76482	3.54888	217.962	FALSE	4
2022-09-15	12:37:50	0.468613	2.08448	3.54888	170.209	FALSE	4
2022-09-15	12:37:50	0.800165	3.55929	3.54888	221.522	FALSE	4
2022-09-15	12:37:51	0.559046	2.48675	1.78681	172.695	FALSE	4
2022-09-15	12:37:51	0.205	0.911881	1.78681	222.434	FALSE	4
2022-09-15	12:37:51	0.441031	1.96179	1.78681	174.657	FALSE	4
2022-09-15	12:37:52	0.118028	0.525012	-0.0752108	222.959	FALSE	4
2022-09-15	12:37:52	0.0189442	0.0842676	-0.0752108	174.741	FALSE	4
2022-09-15	12:37:52	-0.171488	-0.762813	-0.0752108	222.959	FALSE	4
2022-09-15	12:37:52	-0.0331168	-0.14731	-0.0752108	174.741	FALSE	4
2022-09-15	12:37:53	-0.21159	-0.941195	4.54135	222.959	FALSE	4
2022-09-15	12:37:53	0.294517	1.31007	4.54135	176.051	FALSE	4
2022-09-15	12:37:53	0.633804	2.81929	4.54135	225.778	FALSE	4
2022-09-15	12:37:53	3.36703	14.9772	4.54135	191.029	1	5
2022-09-15	12:37:54	3.12693	13.9092	12.0697	239.687	1	6
2022-09-15	12:37:54	1.43925	6.40207	12.0697	197.431	FALSE	6
2022-09-15	12:37:54	4.76408	21.1916	12.0697	260.879	1	7
2022-09-15	12:37:54	1.52332	6.77603	12.0697	204.207	FALSE	7
2022-09-15	12:37:55	3.37935	15.032	14.3635	275.911	1	8
2022-09-15	12:37:55	1.90373	8.46817	14.3635	212.675	FALSE	8
2022-09-15	12:37:55	4.40413	19.5905	14.3635	295.501	1	9
2022-09-15	12:37:56	0.689886	3.06875	5.97559	215.744	FALSE	9
2022-09-15	12:37:56	1.82546	8.12001	5.97559	303.621	FALSE	9
2022-09-15	12:37:56	1.7508	7.78791	5.97559	223.532	FALSE	9
2022-09-15	12:37:56	1.10734	4.92567	5.97559	308.547	FALSE	9
2022-09-15	12:37:57	1.02179	4.54513	4.17836	228.077	FALSE	9
2022-09-15	12:37:57	0.711972	3.16699	4.17836	311.714	FALSE	9
2022-09-15	12:37:57	1.02047	4.53925	4.17836	232.616	FALSE	9
2022-09-15	12:37:57	1.00312	4.46208	4.17836	316.176	FALSE	9
2022-09-15	12:37:58	0.824033	3.66546	2.79037	236.281	FALSE	9
2022-09-15	12:37:58	0.701489	3.12036	2.79037	319.296	FALSE	9
2022-09-15	12:37:58	0.541896	2.41046	2.79037	238.692	FALSE	9
2022-09-15	12:37:58	0.441794	1.96519	2.79037	321.262	FALSE	9
2022-09-15	12:37:59	0.541336	2.40797	3.23061	241.1	FALSE	9
2022-09-15	12:37:59	0.527443	2.34617	3.23061	323.608	FALSE	9
2022-09-15	12:37:59	1.11004	4.93768	3.23061	246.038	FALSE	9
2022-09-15	12:38:00	1.23569	5.4966	1.75302	329.104	FALSE	9
2022-09-15	12:38:00	0.475534	2.11527	1.75302	248.153	FALSE	9
2022-09-15	12:38:00	-0.0631931	-0.281096	1.75302	329.104	FALSE	9
2022-09-15	12:38:00	-0.0716409	-0.318673	1.75302	248.153	FALSE	9
2022-09-15	12:38:01	0.885611	3.93937	3.11091	333.044	FALSE	9
2022-09-15	12:38:01	1.40159	6.23455	3.11091	254.387	FALSE	9
2022-09-15	12:38:01	0.470852	2.09444	3.11091	335.138	FALSE	9
2022-09-15	12:38:01	0.0394023	0.175269	3.11091	254.563	FALSE	9
2022-09-15	12:38:02	-0.0453305	-0.201639	-0.80922	335.138	FALSE	9
2022-09-15	12:38:02	-0.0253814	-0.112902	-0.80922	254.563	FALSE	9
2022-09-15	12:38:02	-0.164974	-0.733837	-0.80922	335.138	FALSE	9
2022-09-15	12:38:02	-0.491997	-2.1885	-0.80922	254.563	FALSE	9
2022-09-15	12:38:03	-0.673066	-2.99393	-3.80857	335.138	FALSE	9
2022-09-15	12:38:03	-0.908842	-4.04271	-3.80857	254.563	FALSE	9
2022-09-15	12:38:03	-0.986704	-4.38906	-3.80857	335.138	FALSE	9
2022-09-15	12:38:04	-0.884312	-3.9336	-3.42098	254.563	FALSE	9
2022-09-15	12:38:04	-0.866908	-3.85618	-3.42098	335.138	FALSE	9
2022-09-15	12:38:04	-0.7179	-3.19336	-3.42098	254.563	FALSE	9
2022-09-15	12:38:04	-0.607162	-2.70078	-3.42098	335.138	FALSE	9
2022-09-15	12:38:05	-0.4722	-2.10044	-2.20961	254.563	FALSE	9
2022-09-15	12:38:05	-0.390419	-1.73666	-2.20961	335.138	FALSE	9
2022-09-15	12:38:05	-0.483346	-2.15002	-2.20961	254.563	FALSE	9
2022-09-15	12:38:05	-0.641004	-2.85131	-2.20961	335.138	FALSE	9
2022-09-15	12:38:06	-0.436679	-1.94244	-2.01284	254.563	FALSE	9
2022-09-15	12:38:06	-0.598765	-2.66343	-2.01284	335.138	FALSE	9
2022-09-15	12:38:06	-0.418664	-1.8623	-2.01284	254.563	FALSE	9
2022-09-15	12:38:06	-0.355916	-1.58319	-2.01284	335.138	FALSE	9
2022-09-15	12:38:07	-0.448231	-1.99382	-2.05879	254.563	FALSE	9
2022-09-15	12:38:07	-0.44986	-2.00107	-2.05879	335.138	FALSE	9
2022-09-15	12:38:07	-0.490419	-2.18148	-2.05879	254.563	FALSE	9
2022-09-15	12:38:08	-0.503345	-2.23898	-1.86971	335.138	FALSE	9
2022-09-15	12:38:08	-0.452964	-2.01487	-1.86971	254.563	FALSE	9
2022-09-15	12:38:08	-0.374491	-1.66581	-1.86971	335.138	FALSE	9
2022-09-15	12:38:08	-0.350521	-1.55919	-1.86971	254.563	FALSE	9
2022-09-15	12:38:09	-0.386857	-1.72082	-0.586697	335.138	FALSE	9
2022-09-15	12:38:09	-0.174694	-0.777074	-0.586697	254.563	FALSE	9
2022-09-15	12:38:09	0.035331	0.157159	-0.586697	335.295	FALSE	9
2022-09-15	12:38:09	-0.00136106	-0.00605427	-0.586697	254.563	FALSE	9
2022-09-15	12:38:10	-0.109096	-0.485281	-0.555401	335.295	FALSE	9
2022-09-15	12:38:10	-0.191946	-0.853814	-0.555401	254.563	FALSE	9
2022-09-15	12:38:10	-0.128028	-0.569494	-0.555401	335.295	FALSE	9
2022-09-15	12:38:10	-0.0703686	-0.313014	-0.555401	254.563	FALSE	9
2022-09-15	12:38:11	-0.13042	-0.580134	-0.501959	335.295	FALSE	9
2022-09-15	12:38:11	-0.171386	-0.762359	-0.501959	254.563	FALSE	9
2022-09-15	12:38:11	-0.03673	-0.163382	-0.501959	335.295	FALSE	9
2022-09-15	12:38:12	1.52429	6.78035	12.4697	261.343	FALSE	9
2022-09-15	12:38:12	3.6852	16.3925	12.4697	351.688	1	10
2022-09-15	12:38:12	3.77207	16.7789	12.4697	278.122	1	11
2022-09-15	12:38:12	2.23167	9.92691	12.4697	361.615	FALSE	11
2022-09-15	12:38:13	3.36642	14.9745	7.26437	293.096	1	12
2022-09-15	12:38:13	1.78617	7.94524	7.26437	369.56	FALSE	12
2022-09-15	12:38:13	0.783473	3.48504	7.26437	296.582	FALSE	12
2022-09-15	12:38:13	0.596349	2.65268	7.26437	372.213	FALSE	12
2022-09-15	12:38:14	0.916552	4.07701	6.07609	300.659	FALSE	12
2022-09-15	12:38:14	0.850852	3.78476	6.07609	375.997	FALSE	12
2022-09-15	12:38:14	1.3251	5.89431	6.07609	306.553	FALSE	12
2022-09-15	12:38:14	2.37136	10.5483	6.07609	386.546	FALSE	12
2022-09-15	12:38:15	2.1652	9.63124	13.4002	316.184	FALSE	12
2022-09-15	12:38:15	4.9224	21.8958	13.4002	408.441	1	13
2022-09-15	12:38:15	1.94989	8.6735	13.4002	324.858	FALSE	13
2022-09-15	12:38:16	4.19787	18.673	11.1414	427.114	1	14
2022-09-15	12:38:16	1.34871	5.99933	11.1414	330.857	FALSE	14
2022-09-15	12:38:16	2.70352	12.0258	11.1414	439.14	FALSE	14
2022-09-15	12:38:16	1.76866	7.86735	11.1414	338.724	FALSE	14
2022-09-15	12:38:17	1.23961	5.51403	2.67572	444.654	FALSE	14
2022-09-15	12:38:17	0.580522	2.58228	2.67572	341.307	FALSE	14
2022-09-15	12:38:17	0.356858	1.58738	2.67572	446.242	FALSE	14
2022-09-15	12:38:17	0.229122	1.01918	2.67572	342.326	FALSE	14
2022-09-15	12:38:18	-0.0938801	-0.417597	-1.23067	446.242	FALSE	14
2022-09-15	12:38:18	-0.206857	-0.920141	-1.23067	342.326	FALSE	14
2022-09-15	12:38:18	-0.316374	-1.40729	-1.23067	446.242	FALSE	14
2022-09-15	12:38:18	-0.489554	-2.17763	-1.23067	342.326	FALSE	14
2022-09-15	12:38:19	-0.78818	-3.50598	-5.23494	446.242	FALSE	14
2022-09-15	12:38:19	-1.62136	-7.21213	-5.23494	342.326	FALSE	14
2022-09-15	12:38:19	-1.12106	-4.9867	-5.23494	446.242	FALSE	14
2022-09-15	12:38:20	-0.856272	-3.80887	-1.25398	342.326	FALSE	14
2022-09-15	12:38:20	-0.945177	-4.20434	-1.25398	446.242	FALSE	14
2022-09-15	12:38:20	-0.383142	-1.70429	-1.25398	342.326	FALSE	14
2022-09-15	12:38:20	1.05696	4.70157	-1.25398	450.943	FALSE	14
2022-09-15	12:38:21	2.09772	9.33108	2.52897	351.657	FALSE	14
2022-09-15	12:38:21	1.00266	4.46003	2.52897	455.403	FALSE	14
2022-09-15	12:38:21	-0.677747	-3.01475	2.52897	351.657	FALSE	14
2022-09-15	12:38:21	-0.148486	-0.660495	2.52897	455.403	FALSE	14
2022-09-15	12:38:22	-0.201666	-0.897051	-0.365475	351.657	FALSE	14
2022-09-15	12:38:22	0.0391987	0.174364	-0.365475	455.578	FALSE	14
2022-09-15	12:38:22	-0.18304	-0.814199	-0.365475	351.657	FALSE	14
2022-09-15	12:38:22	0.0168577	0.0749864	-0.365475	455.653	FALSE	14
2022-09-15	12:38:23	0.0457127	0.203339	4.35257	351.86	FALSE	14
2022-09-15	12:38:23	1.61599	7.18825	4.35257	462.841	FALSE	14
2022-09-15	12:38:23	1.2738	5.66612	4.35257	357.526	FALSE	14
2022-09-15	12:38:24	0.505916	2.25042	1.58251	465.091	FALSE	14
2022-09-15	12:38:24	0.257926	1.14731	1.58251	358.674	FALSE	14
2022-09-15	12:38:24	0.401183	1.78454	1.58251	466.876	FALSE	14
2022-09-15	12:38:24	0.258028	1.14776	1.58251	359.821	FALSE	14
2022-09-15	12:38:25	0.349784	1.55591	2.39161	468.432	FALSE	14
2022-09-15	12:38:25	0.819249	3.64418	2.39161	363.466	FALSE	14
2022-09-15	12:38:25	0.652735	2.9035	2.39161	471.335	FALSE	14
2022-09-15	12:38:25	0.328868	1.46287	2.39161	364.928	FALSE	14
2022-09-15	12:38:26	0.253804	1.12897	1.49037	472.464	FALSE	14
2022-09-15	12:38:26	0.327494	1.45676	1.49037	366.385	FALSE	14
2022-09-15	12:38:26	0.29126	1.29558	1.49037	473.76	FALSE	14
2022-09-15	12:38:26	0.467647	2.08019	1.49037	368.465	FALSE	14
2022-09-15	12:38:27	0.849987	3.78091	7.21542	477.541	FALSE	14
2022-09-15	12:38:27	1.59253	7.08389	7.21542	375.549	FALSE	14
2022-09-15	12:38:27	2.42378	10.7815	7.21542	488.322	FALSE	14
2022-09-15	12:38:28	1.84871	8.22343	3.93585	383.773	FALSE	14
2022-09-15	12:38:28	1.28922	5.73471	3.93585	494.057	FALSE	14
2022-09-15	12:38:28	0.468155	2.08245	3.93585	385.855	FALSE	14
2022-09-15	12:38:28	-0.0668063	-0.297168	3.93585	494.057	FALSE	14
2022-09-15	12:38:29	-0.356475	-1.58567	-1.12456	385.855	FALSE	14
2022-09-15	12:38:29	-0.299274	-1.33123	-1.12456	494.057	FALSE	14
2022-09-15	12:38:29	-0.184618	-0.821218	-1.12456	385.855	FALSE	14
2022-09-15	12:38:29	-0.170878	-0.7601	-1.12456	494.057	FALSE	14
2022-09-15	12:38:30	-0.0340328	-0.151385	0.745273	385.855	FALSE	14
2022-09-15	12:38:30	0.01584	0.0704595	0.745273	494.127	FALSE	14
2022-09-15	12:38:30	-0.0241092	-0.107243	0.745273	385.855	FALSE	14
2022-09-15	12:38:30	0.712481	3.16926	0.745273	497.297	FALSE	14
2022-09-15	12:38:31	-0.274389	-1.22054	-3.7602	385.855	FALSE	14
2022-09-15	12:38:31	-0.925636	-4.11741	-3.7602	497.297	FALSE	14
2022-09-15	12:38:31	-1.33597	-5.94266	-3.7602	385.855	FALSE	14
2022-09-15	12:38:32	-1.29831	-5.77514	-5.5595	497.297	FALSE	14
2022-09-15	12:38:32	-1.28787	-5.7287	-5.5595	385.855	FALSE	14
2022-09-15	12:38:32	-1.08548	-4.82843	-5.5595	497.297	FALSE	14
2022-09-15	12:38:32	-1.32767	-5.90574	-5.5595	385.855	FALSE	14
2022-09-15	12:38:33	0.0237279	0.105546	17.0167	497.402	FALSE	14
2022-09-15	12:38:33	2.11523	9.40897	17.0167	395.264	FALSE	14
2022-09-15	12:38:33	5.52815	24.5903	17.0167	521.992	1	15
2022-09-15	12:38:33	7.63502	33.9621	17.0167	429.226	1	16
2022-09-15	12:38:34	3.52871	15.6964	9.99379	537.689	1	17
2022-09-15	12:38:34	3.59798	16.0045	9.99379	445.231	1	18
2022-09-15	12:38:34	0.706883	3.14436	9.99379	540.833	FALSE	18
2022-09-15	12:38:34	1.15324	5.12984	9.99379	450.361	FALSE	18
2022-09-15	12:38:35	0.952023	4.23479	3.61219	545.068	FALSE	18
2022-09-15	12:38:35	0.355534	1.58149	3.61219	451.942	FALSE	18
2022-09-15	12:38:35	1.12861	5.02028	3.61219	550.088	FALSE	18
2022-09-15	12:38:36	1.15747	5.14866	14.0637	457.091	FALSE	18
2022-09-15	12:38:36	3.79737	16.8915	14.0637	566.98	1	19
2022-09-15	12:38:36	3.5081	15.6047	14.0637	472.695	1	20
2022-09-15	12:38:36	4.18373	18.6101	14.0637	585.59	1	21
2022-09-15	12:38:37	3.01553	13.4137	7.744	486.109	1	22
2022-09-15	12:38:37	1.13971	5.06966	7.744	590.659	FALSE	22
2022-09-15	12:38:37	1.93467	8.6058	7.744	494.715	FALSE	22
2022-09-15	12:38:37	0.873804	3.88685	7.744	594.546	FALSE	22
2022-09-15	12:38:38	1.17039	5.20613	4.00394	499.921	FALSE	22
2022-09-15	12:38:38	1.9165	8.52498	4.00394	603.071	FALSE	22
2022-09-15	12:38:38	0.425407	1.8923	4.00394	501.813	FALSE	22
2022-09-15	12:38:38	0.0882063	0.392359	4.00394	603.464	FALSE	22
2022-09-15	12:38:39	0.382659	1.70214	2.57141	503.515	FALSE	22
2022-09-15	12:38:39	0.683524	3.04045	2.57141	606.504	FALSE	22
2022-09-15	12:38:39	0.668053	2.97163	2.57141	506.487	FALSE	22
2022-09-15	12:38:40	0.264237	1.17538	4.90406	607.679	FALSE	22
2022-09-15	12:38:40	1.84373	8.20128	4.90406	514.688	FALSE	22
2022-09-15	12:38:40	0.894822	3.98035	4.90406	611.66	FALSE	22
2022-09-15	12:38:40	1.40714	6.25924	4.90406	520.948	FALSE	22
2022-09-15	12:38:41	2.43945	10.8512	4.88606	622.511	FALSE	22
2022-09-15	12:38:41	1.65503	7.3619	4.88606	528.31	FALSE	22
2022-09-15	12:38:41	0.125662	0.55897	4.88606	623.07	FALSE	22
2022-09-15	12:38:41	0.173601	0.772212	4.88606	529.082	FALSE	22
2022-09-15	12:38:42	0.182659	0.812504	0.911485	623.882	FALSE	22
2022-09-15	12:38:42	0.189784	0.844197	0.911485	529.926	FALSE	22
2022-09-15	12:38:42	0.331361	1.47396	0.911485	625.356	FALSE	22
2022-09-15	12:38:42	0.11584	0.515279	0.911485	530.441	FALSE	22
2022-09-15	12:38:43	0.267087	1.18806	1.06053	626.544	FALSE	22
2022-09-15	12:38:43	0.163117	0.725577	1.06053	531.167	FALSE	22
2022-09-15	12:38:43	0.285051	1.26796	1.06053	627.812	FALSE	22
2022-09-15	12:38:44	0.352481	1.56791	4.36579	532.735	FALSE	22
2022-09-15	12:38:44	0.661947	2.94447	4.36579	630.757	FALSE	22
2022-09-15	12:38:44	1.46179	6.50233	4.36579	539.237	FALSE	22
2022-09-15	12:38:44	1.44968	6.44847	4.36579	637.205	FALSE	22
2022-09-15	12:38:45	1.68424	7.49184	7.76154	546.729	FALSE	22
2022-09-15	12:38:45	1.05187	4.67893	7.76154	641.884	FALSE	22
2022-09-15	12:38:45	1.90352	8.46724	7.76154	555.196	FALSE	22
2022-09-15	12:38:45	2.33986	10.4082	7.76154	652.292	FALSE	22
2022-09-15	12:38:46	3.48123	15.4852	9.14982	570.681	1	23
2022-09-15	12:38:46	3.56968	15.8787	9.14982	668.171	1	24
2022-09-15	12:38:46	0.651565	2.89829	9.14982	573.58	FALSE	24
2022-09-15	12:38:46	0.525407	2.33712	9.14982	670.508	FALSE	24
2022-09-15	12:38:47	0.725356	3.22653	2.56983	576.806	FALSE	24
2022-09-15	12:38:47	0.398028	1.77051	2.56983	672.279	FALSE	24
2022-09-15	12:38:47	0.609784	2.71244	2.56983	579.519	FALSE	24
2022-09-15	12:38:48	0.0587407	0.26129	1.54912	672.54	FALSE	24
2022-09-15	12:38:48	0.411463	1.83027	1.54912	581.349	FALSE	24
2022-09-15	12:38:48	0.205356	0.913465	1.54912	673.453	FALSE	24
2022-09-15	12:38:48	0.717468	3.19144	1.54912	584.54	FALSE	24
2022-09-15	12:38:49	-0.106145	-0.472154	-3.1443	673.453	FALSE	24
2022-09-15	12:38:49	-1.57098	-6.98803	-3.1443	584.54	FALSE	24
2022-09-15	12:38:49	-4.3237	-19.2327	-3.1443	673.453	FALSE	24
2022-09-15	12:38:49	3.17334	14.1157	-3.1443	598.656	1	25
2022-09-15	12:38:50	3.65747	16.2692	7.28136	689.723	1	26
2022-09-15	12:38:50	1.35228	6.01521	7.28136	604.671	FALSE	26
2022-09-15	12:38:50	1.09187	4.85686	7.28136	694.579	FALSE	26
2022-09-15	12:38:50	0.446069	1.9842	7.28136	606.655	FALSE	26
2022-09-15	12:38:51	0.49299	2.19292	-0.785835	696.772	FALSE	26
2022-09-15	12:38:51	0.384389	1.70984	-0.785835	608.365	FALSE	26
2022-09-15	12:38:51	-1.40737	-6.26026	-0.785835	696.772	FALSE	26
2022-09-15	12:38:52	0.576349	2.56372	2.20684	610.929	FALSE	26
2022-09-15	12:38:52	0.0219977	0.0978502	2.20684	696.87	FALSE	26
2022-09-15	12:38:52	0.492634	2.19133	2.20684	613.12	FALSE	26
2022-09-15	12:38:52	0.893499	3.97446	2.20684	700.845	FALSE	26
2022-09-15	12:38:53	1.48296	6.5965	3.35912	619.717	FALSE	26
2022-09-15	12:38:53	0.962964	4.28346	3.35912	705.128	FALSE	26
2022-09-15	12:38:53	0.1307	0.58138	3.35912	620.298	FALSE	26
2022-09-15	12:38:53	0.444033	1.97515	3.35912	707.103	FALSE	26
2022-09-15	12:38:54	0.0980791	0.436275	0.977473	620.734	FALSE	26
2022-09-15	12:38:54	0.296298	1.31799	0.977473	708.421	FALSE	26
2022-09-15	12:38:54	0.246578	1.09683	0.977473	621.831	FALSE	26
2022-09-15	12:38:54	0.238028	1.0588	0.977473	709.48	FALSE	26
2022-09-15	12:38:55	0.433193	1.92693	2.6895	623.758	FALSE	26
2022-09-15	12:38:55	0.393804	1.75172	2.6895	711.232	FALSE	26
2022-09-15	12:38:55	0.986883	4.38985	2.6895	628.148	FALSE	26
2022-09-15	12:38:56	0.515127	2.29139	3.28408	713.523	FALSE	26
2022-09-15	12:38:56	0.972939	4.32783	3.28408	632.476	FALSE	26
2022-09-15	12:38:56	0.771718	3.43276	3.28408	716.956	FALSE	26
2022-09-15	12:38:56	0.693397	3.08437	3.28408	635.56	FALSE	26
2022-09-15	12:38:57	0.817824	3.63784	4.01871	720.594	FALSE	26
2022-09-15	12:38:57	0.708817	3.15296	4.01871	638.713	FALSE	26
2022-09-15	12:38:57	1.3624	6.06023	4.01871	726.654	FALSE	26
2022-09-15	12:38:57	0.724746	3.22382	4.01871	641.937	FALSE	26
2022-09-15	12:38:58	1.0905	4.85076	5.30988	731.505	FALSE	26
2022-09-15	12:38:58	1.34281	5.97309	5.30988	647.91	FALSE	26
2022-09-15	12:38:58	1.12444	5.00173	5.30988	736.507	FALSE	26
2022-09-15	12:38:58	1.21711	5.41395	5.30988	653.324	FALSE	26
2022-09-15	12:38:59	0.903728	4.01996	3.75345	740.527	FALSE	26
2022-09-15	12:38:59	0.7793	3.46648	3.75345	656.79	FALSE	26
2022-09-15	12:38:59	0.84841	3.7739	3.75345	744.3	FALSE	26
2022-09-15	12:39:00	0.803728	3.57514	3.46666	660.366	FALSE	26
2022-09-15	12:39:00	0.720013	3.20276	3.46666	747.503	FALSE	26
2022-09-15	12:39:00	1.20475	5.35897	3.46666	665.725	FALSE	26
2022-09-15	12:39:00	0.388868	1.72976	3.46666	749.233	FALSE	26
2022-09-15	12:39:01	0.789733	3.51289	4.51063	669.237	FALSE	26
2022-09-15	12:39:01	0.704135	3.13213	4.51063	752.365	FALSE	26
2022-09-15	12:39:01	1.20663	5.36733	4.51063	674.605	FALSE	26
2022-09-15	12:39:01	1.35564	6.03016	4.51063	758.395	FALSE	26
2022-09-15	12:39:02	0.970242	4.31583	4.14339	678.921	FALSE	26
2022-09-15	12:39:02	1.24897	5.55567	4.14339	763.951	FALSE	26
2022-09-15	12:39:02	0.540522	2.40435	4.14339	681.325	FALSE	26
2022-09-15	12:39:02	0.966171	4.29772	4.14339	768.249	FALSE	26
2022-09-15	12:39:03	0.7107	3.16134	3.2961	684.486	FALSE	26
2022-09-15	12:39:03	0.704542	3.13394	3.2961	771.383	FALSE	26
2022-09-15	12:39:03	0.807748	3.59302	3.2961	688.079	FALSE	26
2022-09-15	12:39:04	0.543372	2.41703	3.92766	773.8	FALSE	26
2022-09-15	12:39:04	1.20846	5.37547	3.92766	693.455	FALSE	26
2022-09-15	12:39:04	0.551769	2.45438	3.92766	776.254	FALSE	26
2022-09-15	12:39:04	1.22831	5.46377	3.92766	698.919	FALSE	26
2022-09-15	12:39:05	0.995941	4.43014	4.01023	780.684	FALSE	26
2022-09-15	12:39:05	0.956399	4.25425	4.01023	703.173	FALSE	26
2022-09-15	12:39:05	0.996603	4.43309	4.01023	785.117	FALSE	26
2022-09-15	12:39:05	0.657214	2.92342	4.01023	706.096	FALSE	26
2022-09-15	12:39:06	1.21935	5.42391	5.16341	790.541	FALSE	26
2022-09-15	12:39:06	0.8307	3.69512	5.16341	709.791	FALSE	26
2022-09-15	12:39:06	1.47126	6.54446	5.16341	797.086	FALSE	26
2022-09-15	12:39:06	1.12184	4.99017	5.16341	714.782	FALSE	26
2022-09-15	12:39:07	1.38113	6.14354	4.40102	803.229	FALSE	26
2022-09-15	12:39:07	0.767341	3.41329	4.40102	718.195	FALSE	26
2022-09-15	12:39:07	0.819707	3.64622	4.40102	806.875	FALSE	26
2022-09-15	12:39:08	0.874465	3.8898	2.70559	722.085	FALSE	26
2022-09-15	12:39:08	0.731616	3.25437	2.70559	810.13	FALSE	26
2022-09-15	12:39:08	0.733142	3.26116	2.70559	725.346	FALSE	26
2022-09-15	12:39:08	0.0937534	0.417034	2.70559	810.547	FALSE	26
2022-09-15	12:39:09	0.341031	1.51697	4.1014	726.863	FALSE	26
2022-09-15	12:39:09	0.695942	3.09569	4.1014	813.642	FALSE	26
2022-09-15	12:39:09	1.83757	8.17388	4.1014	735.037	FALSE	26
2022-09-15	12:39:09	0.813601	3.61906	4.1014	817.261	FALSE	26
2022-09-15	12:39:10	0.999249	4.44486	3.51147	739.482	FALSE	26
2022-09-15	12:39:10	0.48556	2.15987	3.51147	819.421	FALSE	26
2022-09-15	12:39:10	0.843422	3.75171	3.51147	743.233	FALSE	26
2022-09-15	12:39:10	0.829428	3.68946	3.51147	823.111	FALSE	26
2022-09-15	12:39:11	1.00368	4.46457	4.44434	747.698	FALSE	26
2022-09-15	12:39:11	1.11793	4.97278	4.44434	828.084	FALSE	26
2022-09-15	12:39:11	0.875789	3.89568	4.44434	751.593	FALSE	26
2022-09-15	12:39:12	1.49299	6.64112	7.36936	834.725	FALSE	26
2022-09-15	12:39:12	1.48027	6.58454	7.36936	758.178	FALSE	26
2022-09-15	12:39:12	1.96011	8.71896	7.36936	843.444	FALSE	26
2022-09-15	12:39:12	1.69345	7.5328	7.36936	765.711	FALSE	26
2022-09-15	12:39:13	2.95859	13.1604	10.1306	856.604	FALSE	26
2022-09-15	12:39:13	2.12536	9.45403	10.1306	775.165	FALSE	26
2022-09-15	12:39:13	2.02872	9.02415	10.1306	865.628	FALSE	26
2022-09-15	12:39:13	1.99721	8.88399	10.1306	784.049	FALSE	26
2022-09-15	12:39:14	2.41396	10.7378	11.1659	876.366	FALSE	26
2022-09-15	12:39:14	2.36729	10.5302	11.1659	794.579	FALSE	26
2022-09-15	12:39:14	3.84968	17.1241	11.1659	893.49	1	27
2022-09-15	12:39:14	1.40994	6.2717	11.1659	800.851	FALSE	27
2022-09-15	12:39:15	2.62938	11.696	9.90178	905.186	FALSE	27
2022-09-15	12:39:15	2.39121	10.6366	9.90178	811.487	FALSE	27
2022-09-15	12:39:15	1.65747	7.37276	9.90178	912.559	FALSE	27
2022-09-15	12:39:16	2.63192	11.7073	22.8389	823.195	FALSE	27
2022-09-15	12:39:16	4.32021	19.2172	22.8389	931.776	1	28
2022-09-15	12:39:16	4.45971	19.8377	22.8389	843.032	1	29
2022-09-15	12:39:16	9.12586	40.5937	22.8389	972.37	1	30
2022-09-15	12:39:17	7.89752	35.1297	19.7164	878.162	1	31
2022-09-15	12:39:17	4.68805	20.8534	19.7164	993.223	1	32
2022-09-15	12:39:17	2.84943	12.6748	19.7164	890.837	FALSE	32
2022-09-15	12:39:17	2.29482	10.2078	19.7164	1003.43	FALSE	32
2022-09-15	12:39:18	2.16408	9.62626	9.00907	900.463	FALSE	32
2022-09-15	12:39:18	2.13258	9.48614	9.00907	1012.92	FALSE	32
2022-09-15	12:39:18	1.94989	8.6735	9.00907	909.137	FALSE	32
2022-09-15	12:39:18	1.85477	8.25039	9.00907	1021.17	FALSE	32
2022-09-15	12:39:19	1.89452	8.4272	8.26481	917.564	FALSE	32
2022-09-15	12:39:19	2.14378	9.53596	8.26481	1030.7	FALSE	32
2022-09-15	12:39:19	1.53574	6.83128	8.26481	924.395	FALSE	32
2022-09-15	12:39:20	1.04439	4.64566	4.95323	1035.35	FALSE	32
2022-09-15	12:39:20	1.09202	4.85752	4.95323	929.253	FALSE	32
2022-09-15	12:39:20	1.13706	5.05787	4.95323	1040.41	FALSE	32
2022-09-15	12:39:20	1.18067	5.25186	4.95323	934.504	FALSE	32
2022-09-15	12:39:21	1.4936	6.64383	5.5328	1047.05	FALSE	32
2022-09-15	12:39:21	1.01803	4.5284	5.5328	939.033	FALSE	32
2022-09-15	12:39:21	1.27258	5.66069	5.5328	1052.71	FALSE	32
2022-09-15	12:39:21	1.19111	5.2983	5.5328	944.331	FALSE	32
2022-09-15	12:39:22	1.23604	5.49815	5.09522	1058.21	FALSE	32
2022-09-15	12:39:22	1.27976	5.69263	5.09522	950.024	FALSE	32
2022-09-15	12:39:22	1.08688	4.83466	5.09522	1063.04	FALSE	32
2022-09-15	12:39:22	0.979148	4.35545	5.09522	954.379	FALSE	32
2022-09-15	12:39:23	1.13385	5.04359	5.56857	1068.09	FALSE	32
2022-09-15	12:39:23	1.24022	5.51675	5.56857	959.896	FALSE	32
2022-09-15	12:39:23	1.38154	6.14537	5.56857	1074.23	FALSE	32
2022-09-15	12:39:24	1.36128	6.05525	6.05985	965.951	FALSE	32
2022-09-15	12:39:24	1.32958	5.91424	6.05985	1080.15	FALSE	32
2022-09-15	12:39:24	1.39274	6.19519	6.05985	972.146	FALSE	32
2022-09-15	12:39:24	1.36566	6.07473	6.05985	1086.22	FALSE	32
2022-09-15	12:39:25	1.32698	5.90267	6.07779	978.049	FALSE	32
2022-09-15	12:39:25	1.33777	5.95067	6.07779	1092.17	FALSE	32
2022-09-15	12:39:25	1.35289	6.01793	6.07779	984.067	FALSE	32
2022-09-15	12:39:25	1.44775	6.43988	6.07779	1098.61	FALSE	32
2022-09-15	12:39:26	1.48698	6.61438	6.56454	990.681	FALSE	32
2022-09-15	12:39:26	1.53574	6.83128	6.56454	1105.44	FALSE	32
2022-09-15	12:39:26	1.47726	6.57115	6.56454	997.253	FALSE	32
2022-09-15	12:39:26	1.40312	6.24136	6.56454	1111.69	FALSE	32
2022-09-15	12:39:27	1.42057	6.31898	6.46146	1003.57	FALSE	32
2022-09-15	12:39:27	1.4621	6.50371	6.46146	1118.19	FALSE	32
2022-09-15	12:39:27	1.47513	6.56167	6.46146	1010.13	FALSE	32
2022-09-15	12:39:28	1.4533	6.46457	6.34632	1124.65	FALSE	32
2022-09-15	12:39:28	1.45156	6.45683	6.34632	1016.59	FALSE	32
2022-09-15	12:39:28	1.40688	6.25808	6.34632	1130.91	FALSE	32
2022-09-15	12:39:28	1.39513	6.20582	6.34632	1022.8	FALSE	32
2022-09-15	12:39:29	1.41961	6.31471	6.08448	1137.23	FALSE	32
2022-09-15	12:39:29	1.70546	7.58623	6.08448	1030.38	FALSE	32
2022-09-15	12:39:29	1.32439	5.89115	6.08448	1143.12	FALSE	32
2022-09-15	12:39:29	1.02195	4.54584	6.08448	1034.93	FALSE	32
2022-09-15	12:39:30	0.99014	4.40434	3.80231	1147.52	FALSE	32
2022-09-15	12:39:30	0.953906	4.24316	3.80231	1039.17	FALSE	32
2022-09-15	12:39:30	0.822659	3.65935	3.80231	1151.18	FALSE	32
2022-09-15	12:39:30	0.652481	2.90237	3.80231	1042.07	FALSE	32
2022-09-15	12:39:31	0.53874	2.39642	2.53617	1153.58	FALSE	32
2022-09-15	12:39:31	0.600216	2.66988	2.53617	1044.74	FALSE	32
2022-09-15	12:39:31	0.571514	2.54221	2.53617	1156.12	FALSE	32
2022-09-15	12:39:32	0.561641	2.49829	2.45336	1047.24	FALSE	32
2022-09-15	12:39:32	0.556654	2.47611	2.45336	1158.6	FALSE	32
2022-09-15	12:39:32	0.533346	2.37243	2.45336	1049.61	FALSE	32
2022-09-15	12:39:32	0.554517	2.4666	2.45336	1161.06	FALSE	32
2022-09-15	12:39:33	0.574364	2.55489	2.4134	1052.17	FALSE	32
2022-09-15	12:39:33	0.53874	2.39642	2.4134	1163.46	FALSE	32
2022-09-15	12:39:33	0.529987	2.35749	2.4134	1054.53	FALSE	32
2022-09-15	12:39:33	0.527137	2.34481	2.4134	1165.8	FALSE	32
2022-09-15	12:39:34	0.592736	2.63661	3.11153	1057.16	FALSE	32
2022-09-15	12:39:34	0.755585	3.36099	3.11153	1169.16	FALSE	32
2022-09-15	12:39:34	0.777519	3.45856	3.11153	1060.62	FALSE	32
2022-09-15	12:39:34	0.672176	2.98997	3.11153	1172.15	FALSE	32
2022-09-15	12:39:35	0.674313	2.99948	3.02046	1063.62	FALSE	32
2022-09-15	12:39:35	0.709275	3.155	3.02046	1175.31	FALSE	32
2022-09-15	12:39:35	0.653499	2.90689	3.02046	1066.53	FALSE	32
2022-09-15	12:39:36	0.302964	1.34764	0.675833	1176.66	FALSE	32
2022-09-15	12:39:36	0.235942	1.04952	0.675833	1067.58	FALSE	32
2022-09-15	12:39:36	-0.00512696	-0.0228057	0.675833	1176.66	FALSE	32
2022-09-15	12:39:36	0.073957	0.328976	0.675833	1067.91	FALSE	32
2022-09-15	12:39:37	0.177825	0.791001	3.78403	1177.45	FALSE	32
2022-09-15	12:39:37	2.0364	9.05831	3.78403	1076.96	FALSE	32
2022-09-15	12:39:37	0.818741	3.64192	3.78403	1181.09	FALSE	32
2022-09-15	12:39:37	0.369784	1.64487	3.78403	1078.61	FALSE	32
2022-09-15	12:39:38	0.364339	1.62065	1.26112	1182.71	FALSE	32
2022-09-15	12:39:38	0.338333	1.50497	1.26112	1080.11	FALSE	32
2022-09-15	12:39:38	0.099046	0.440576	1.26112	1183.15	FALSE	32
2022-09-15	12:39:38	0.332328	1.47826	1.26112	1081.59	FALSE	32
2022-09-15	12:39:39	0.366934	1.6322	1.61612	1184.78	FALSE	32
2022-09-15	12:39:39	0.393143	1.74878	1.61612	1083.34	FALSE	32
2022-09-15	12:39:39	0.329886	1.4674	1.61612	1186.25	FALSE	32
2022-09-15	12:39:40	0.27411	1.2193	0.804299	1084.56	FALSE	32
2022-09-15	12:39:40	0.15472	0.688226	0.804299	1186.94	FALSE	32
2022-09-15	12:39:40	0.184542	0.82088	0.804299	1085.38	FALSE	32
2022-09-15	12:39:40	0.109886	0.488795	0.804299	1187.43	FALSE	32
2022-09-15	12:39:41	0.131769	0.586135	0.504583	1085.97	FALSE	32
2022-09-15	12:39:41	0.114059	0.507357	0.504583	1187.94	FALSE	32
2022-09-15	12:39:41	0.0963997	0.428805	0.504583	1086.4	FALSE	32
2022-09-15	12:39:41	0.111514	0.496037	0.504583	1188.43	FALSE	32
2022-09-15	12:39:42	0.109937	0.489022	0.30815	1086.89	FALSE	32
2022-09-15	12:39:42	0.0556364	0.247482	0.30815	1188.68	FALSE	32
2022-09-15	12:39:42	0.0797076	0.354555	0.30815	1087.24	FALSE	32
2022-09-15	12:39:42	0.0318195	0.141539	0.30815	1188.82	FALSE	32
2022-09-15	12:39:43	-0.0228878	-0.10181	-0.286529	1087.24	FALSE	32
2022-09-15	12:39:43	-0.00935089	-0.0415946	-0.286529	1188.82	FALSE	32
2022-09-15	12:39:43	-0.161005	-0.716182	-0.286529	1087.24	FALSE	32
2022-09-15	12:39:44	-0.370826	-1.64951	-2.42296	1188.82	FALSE	32
2022-09-15	12:39:44	-0.498511	-2.21748	-2.42296	1087.24	FALSE	32
2022-09-15	12:39:44	-0.710572	-3.16077	-2.42296	1188.82	FALSE	32
2022-09-15	12:39:44	-0.598918	-2.66411	-2.42296	1087.24	FALSE	32
2022-09-15	12:39:45	0.0826592	0.367685	2.92625	1189.19	FALSE	32
2022-09-15	12:39:45	0.660318	2.93723	2.92625	1090.18	FALSE	32
2022-09-15	12:39:45	0.518893	2.30814	2.92625	1191.5	FALSE	32
2022-09-15	12:39:45	1.36953	6.09194	2.92625	1096.27	FALSE	32
2022-09-15	12:39:46	2.59655	11.55	8.54411	1203.05	FALSE	32
2022-09-15	12:39:46	2.3391	10.4048	8.54411	1106.67	FALSE	32
2022-09-15	12:39:46	1.98149	8.81406	8.54411	1211.86	FALSE	32
2022-09-15	12:39:46	0.766069	3.40763	8.54411	1110.08	FALSE	32
2022-09-15	12:39:47	0.413244	1.83819	1.38915	1213.7	FALSE	32
2022-09-15	12:39:47	0.191158	0.850309	1.38915	1110.93	FALSE	32
2022-09-15	12:39:47	0.332481	1.47894	1.38915	1215.18	FALSE	32
2022-09-15	12:39:48	0.549224	2.44306	2.08658	1113.38	FALSE	32
2022-09-15	12:39:48	0.695534	3.09387	2.08658	1218.27	FALSE	32
2022-09-15	12:39:48	0.0269341	0.119808	2.08658	1113.5	FALSE	32
2022-09-15	12:39:48	0.604644	2.68958	2.08658	1220.96	FALSE	32
2022-09-15	12:39:49	0.304695	1.35534	-1.32082	1114.85	FALSE	32
2022-09-15	12:39:49	-0.309096	-1.37492	-1.32082	1220.96	FALSE	32
2022-09-15	12:39:49	-0.519478	-2.31074	-1.32082	1114.85	FALSE	32
2022-09-15	12:39:49	-0.663854	-2.95296	-1.32082	1220.96	FALSE	32
2022-09-15	12:39:50	-0.496374	-2.20797	-1.85285	1114.85	FALSE	32
2022-09-15	12:39:50	-0.442837	-1.96983	-1.85285	1220.96	FALSE	32
2022-09-15	12:39:50	-0.243804	-1.08449	-1.85285	1114.85	FALSE	32
2022-09-15	12:39:50	-0.483142	-2.14911	-1.85285	1220.96	FALSE	32
2022-09-15	12:39:51	-0.104618	-0.465362	-1.7559	1114.85	FALSE	32
2022-09-15	12:39:51	-0.566602	-2.52036	-1.7559	1220.96	FALSE	32
2022-09-15	12:39:51	-0.412557	-1.83514	-1.7559	1114.85	FALSE	32
2022-09-15	12:39:51	-0.495203	-2.20276	-1.7559	1220.96	FALSE	32
2022-09-15	12:39:52	-0.329198	-1.46434	-3.58936	1114.85	FALSE	32
2022-09-15	12:39:52	-0.962633	-4.28198	-3.58936	1220.96	FALSE	32
2022-09-15	12:39:52	-1.12894	-5.02175	-3.58936	1114.85	FALSE	32
2022-09-15	12:39:53	-1.14095	-5.07517	-5.12159	1220.96	FALSE	32
2022-09-15	12:39:53	-1.17988	-5.24834	-5.12159	1114.85	FALSE	32
2022-09-15	12:39:53	-1.03607	-4.60865	-5.12159	1220.96	FALSE	32
2022-09-15	12:39:53	-1.24864	-5.5542	-5.12159	1114.85	FALSE	32
2022-09-15	12:39:54	-1.09856	-4.88661	-5.30547	1220.96	FALSE	32
2022-09-15	12:39:54	-1.1805	-5.2511	-5.30547	1114.85	FALSE	32
2022-09-15	12:39:54	-1.18467	-5.26965	-5.30547	1220.96	FALSE	32
2022-09-15	12:39:54	-1.30716	-5.81451	-5.30547	1114.85	FALSE	32
2022-09-15	12:39:55	-1.23597	-5.49784	-4.14736	1220.96	FALSE	32
2022-09-15	12:39:55	-1.255	-5.58249	-4.14736	1114.85	FALSE	32
2022-09-15	12:39:55	-1.07088	-4.76349	-4.14736	1220.96	FALSE	32
2022-09-15	12:39:55	-0.167621	-0.745612	-4.14736	1114.85	FALSE	32
2022-09-15	12:39:56	0.0979264	0.435596	1.17553	1221.4	FALSE	32
2022-09-15	12:39:56	0.250903	1.11607	1.17553	1115.97	FALSE	32
2022-09-15	12:39:56	0.443982	1.97492	1.17553	1223.37	FALSE	32
2022-09-15	12:39:57	0.313295	1.3936	2.42416	1117.36	FALSE	32
2022-09-15	12:39:57	1.25172	5.5679	2.42416	1228.94	FALSE	32
2022-09-15	12:39:57	0.416858	1.85427	2.42416	1119.21	FALSE	32
2022-09-15	12:39:57	0.198028	0.880868	2.42416	1229.82	FALSE	32
2022-09-15	12:39:58	0.000979898	0.00435878	-0.301582	1119.22	FALSE	32
2022-09-15	12:39:58	-0.0160175	-0.071249	-0.301582	1229.82	FALSE	32
2022-09-15	12:39:58	-0.0944908	-0.420314	-0.301582	1119.22	FALSE	32
2022-09-15	12:39:58	-0.161666	-0.719123	-0.301582	1229.82	FALSE	32
2022-09-15	12:39:59	-0.176221	-0.783866	-1.17724	1119.22	FALSE	32
2022-09-15	12:39:59	-0.225839	-1.00458	-1.17724	1229.82	FALSE	32
2022-09-15	12:39:59	-0.365127	-1.62416	-1.17724	1119.22	FALSE	32
2022-09-15	12:39:59	-0.291437	-1.29637	-1.17724	1229.82	FALSE	32
2022-09-15	12:40:00	-0.0545417	-0.242612	-0.393829	1119.22	FALSE	32
2022-09-15	12:40:00	-0.0764756	-0.340179	-0.393829	1229.82	FALSE	32
2022-09-15	12:40:00	-0.134593	-0.598697	-0.393829	1119.22	FALSE	32
2022-09-15	12:40:01	-0.142582	-0.634233	-1.11607	1229.82	FALSE	32
2022-09-15	12:40:01	-0.230012	-1.02314	-1.11607	1119.22	FALSE	32
2022-09-15	12:40:01	-0.35846	-1.5945	-1.11607	1229.82	FALSE	32
2022-09-15	12:40:01	-0.272557	-1.21239	-1.11607	1119.22	FALSE	32
2022-09-15	12:40:02	-0.39332	-1.74957	-2.4185	1229.82	FALSE	32
2022-09-15	12:40:02	-0.595916	-2.65075	-2.4185	1119.22	FALSE	32
2022-09-15	12:40:02	-0.612557	-2.72478	-2.4185	1229.82	FALSE	32
2022-09-15	12:40:02	-0.573015	-2.54889	-2.4185	1119.22	FALSE	32
2022-09-15	12:40:03	-0.454541	-2.02189	-1.89897	1229.82	FALSE	32
2022-09-15	12:40:03	-0.416882	-1.85437	-1.89897	1119.22	FALSE	32
2022-09-15	12:40:03	-0.43561	-1.93768	-1.89897	1229.82	FALSE	32
2022-09-15	12:40:03	-0.400597	-1.78194	-1.89897	1119.22	FALSE	32
2022-09-15	12:40:04	-0.368384	-1.63865	-1.52795	1229.82	FALSE	32
2022-09-15	12:40:04	-0.348638	-1.55081	-1.52795	1119.22	FALSE	32
2022-09-15	12:40:04	-0.313473	-1.39439	-1.52795	1229.82	FALSE	32
2022-09-15	12:40:05	-0.428791	-1.90735	-2.02234	1119.22	FALSE	32
2022-09-15	12:40:05	-0.463346	-2.06106	-2.02234	1229.82	FALSE	32
2022-09-15	12:40:05	-0.363956	-1.61895	-2.02234	1119.22	FALSE	32
2022-09-15	12:40:05	-0.56248	-2.50202	-2.02234	1229.82	FALSE	32
2022-09-15	12:40:06	-0.442938	-1.97028	-1.94515	1119.22	FALSE	32
2022-09-15	12:40:06	-0.497239	-2.21182	-1.94515	1229.82	FALSE	32
2022-09-15	12:40:06	-0.387671	-1.72444	-1.94515	1119.22	FALSE	32
2022-09-15	12:40:06	-0.42131	-1.87407	-1.94515	1229.82	FALSE	32
2022-09-15	12:40:07	-0.456323	-2.02982	-1.82885	1119.22	FALSE	32
2022-09-15	12:40:07	-0.442938	-1.97028	-1.82885	1229.82	FALSE	32
2022-09-15	12:40:07	-0.424771	-1.88947	-1.82885	1119.22	FALSE	32
2022-09-15	12:40:07	-0.320547	-1.42586	-1.82885	1229.82	FALSE	32
2022-09-15	12:40:08	-0.233066	-1.03672	-0.870341	1119.22	FALSE	32
2022-09-15	12:40:08	-0.231997	-1.03197	-0.870341	1229.82	FALSE	32
2022-09-15	12:40:08	-0.121921	-0.542329	-0.870341	1119.22	FALSE	32
2022-09-15	12:40:09	0.204288	0.908714	2.24515	1230.73	FALSE	32
2022-09-15	12:40:09	0.341234	1.51788	2.24515	1120.74	FALSE	32
2022-09-15	12:40:09	0.735687	3.27248	2.24515	1234	FALSE	32
2022-09-15	12:40:09	0.737722	3.28154	2.24515	1124.02	FALSE	32
2022-09-15	12:40:10	0.733193	3.26139	3.26026	1237.26	FALSE	32
2022-09-15	12:40:10	0.731107	3.25211	3.26026	1127.27	FALSE	32
2022-09-15	12:40:10	0.730242	3.24826	3.26026	1240.51	FALSE	32
2022-09-15	12:40:10	0.737214	3.27928	3.26026	1130.55	FALSE	32
2022-09-15	12:40:11	0.739097	3.28765	3.24175	1243.8	FALSE	32
2022-09-15	12:40:11	0.734822	3.26864	3.24175	1133.82	FALSE	32
2022-09-15	12:40:11	0.735738	3.27271	3.24175	1247.07	FALSE	32
2022-09-15	12:40:11	0.705458	3.13802	3.24175	1136.96	FALSE	32
2022-09-15	12:40:12	0.73528	3.27067	3.0523	1250.34	FALSE	32
2022-09-15	12:40:12	0.595178	2.64747	3.0523	1139.6	FALSE	32
2022-09-15	12:40:12	0.728104	3.23875	3.0523	1253.58	FALSE	32
2022-09-15	12:40:13	0.738028	3.2829	3.27282	1142.89	FALSE	32
2022-09-15	12:40:13	0.735941	3.27361	3.27282	1256.85	FALSE	32
2022-09-15	12:40:13	0.734669	3.26795	3.27282	1146.15	FALSE	32
2022-09-15	12:40:13	0.734415	3.26682	3.27282	1260.12	FALSE	32
2022-09-15	12:40:14	0.733244	3.26162	3.25766	1149.42	FALSE	32
2022-09-15	12:40:14	0.727188	3.23468	3.25766	1263.36	FALSE	32
2022-09-15	12:40:14	0.735433	3.27135	3.25766	1152.69	FALSE	32
2022-09-15	12:40:14	0.73355	3.26298	3.25766	1266.62	FALSE	32
2022-09-15	12:40:15	0.733855	3.26433	3.26547	1155.95	FALSE	32
2022-09-15	12:40:15	0.737163	3.27905	3.26547	1269.9	FALSE	32
2022-09-15	12:40:15	0.726527	3.23174	3.26547	1159.18	FALSE	32
2022-09-15	12:40:15	0.738893	3.28674	3.26547	1273.18	FALSE	32
2022-09-15	12:40:16	0.71355	3.17401	3.22879	1162.36	FALSE	32
2022-09-15	12:40:16	0.732023	3.25618	3.22879	1276.44	FALSE	32
2022-09-15	12:40:16	0.732023	3.25618	3.22879	1165.61	FALSE	32
2022-09-15	12:40:17	0.734109	3.26546	3.26428	1279.71	FALSE	32
2022-09-15	12:40:17	0.736705	3.27701	3.26428	1168.89	FALSE	32
2022-09-15	12:40:17	0.733193	3.26139	3.26428	1282.97	FALSE	32
2022-09-15	12:40:17	0.731361	3.25324	3.26428	1172.14	FALSE	32
2022-09-15	12:40:18	0.737315	3.27972	3.27407	1286.25	FALSE	32
2022-09-15	12:40:18	0.737366	3.27995	3.27407	1175.42	FALSE	32
2022-09-15	12:40:18	0.732888	3.26003	3.27407	1289.51	FALSE	32
2022-09-15	12:40:18	0.736603	3.27656	3.27407	1178.7	FALSE	32
2022-09-15	12:40:19	0.72897	3.2426	3.26705	1292.75	FALSE	32
2022-09-15	12:40:19	0.737265	3.2795	3.26705	1181.98	FALSE	32
2022-09-15	12:40:19	0.735992	3.27384	3.26705	1296.02	FALSE	32
2022-09-15	12:40:19	0.735636	3.27226	3.26705	1185.25	FALSE	32
2022-09-15	12:40:20	0.737519	3.28063	3.28305	1299.3	FALSE	32
2022-09-15	12:40:20	0.737824	3.28199	3.28305	1188.53	FALSE	32
2022-09-15	12:40:20	0.738842	3.28652	3.28305	1302.59	FALSE	32
2022-09-15	12:40:21	0.729936	3.2469	1.49733	1191.78	FALSE	32
2022-09-15	12:40:21	0.733702	3.26365	1.49733	1305.85	FALSE	32
2022-09-15	12:40:21	0.450903	2.00571	1.49733	1193.79	FALSE	32
2022-09-15	12:40:21	-0.568079	-2.52693	1.49733	1305.85	FALSE	32
2022-09-15	12:40:22	-0.749249	-3.33281	-3.38408	1193.79	FALSE	32
2022-09-15	12:40:22	-0.759172	-3.37695	-3.38408	1305.85	FALSE	32
2022-09-15	12:40:22	-0.835304	-3.7156	-3.38408	1193.79	FALSE	32
2022-09-15	12:40:22	-0.699376	-3.11096	-3.38408	1305.85	FALSE	32
2022-09-15	12:40:23	-0.590318	-2.62585	-0.420484	1193.79	FALSE	32
2022-09-15	12:40:23	-0.4236	-1.88426	-0.420484	1305.85	FALSE	32
2022-09-15	12:40:23	0.0320231	0.142445	-0.420484	1193.93	FALSE	32
2022-09-15	12:40:23	0.603779	2.68573	-0.420484	1308.54	FALSE	32
2022-09-15	12:40:24	0.635382	2.82631	3.05381	1196.76	FALSE	32
2022-09-15	12:40:24	0.688766	3.06377	3.05381	1311.6	FALSE	32
2022-09-15	12:40:24	0.735433	3.27135	3.05381	1200.03	FALSE	32
2022-09-15	12:40:25	0.710038	3.15839	3.13032	1314.76	FALSE	32
2022-09-15	12:40:25	0.688613	3.06309	3.13032	1203.09	FALSE	32
2022-09-15	12:40:25	0.700216	3.1147	3.13032	1317.88	FALSE	32
2022-09-15	12:40:25	0.716043	3.1851	3.13032	1206.28	FALSE	32
2022-09-15	12:40:26	0.726527	3.23174	3.09088	1321.11	FALSE	32
2022-09-15	12:40:26	0.734822	3.26864	3.09088	1209.54	FALSE	32
2022-09-15	12:40:26	0.628817	2.7971	3.09088	1323.91	FALSE	32
2022-09-15	12:40:26	0.689275	3.06603	3.09088	1212.61	FALSE	32
2022-09-15	12:40:27	0.613346	2.72829	3.04577	1326.63	FALSE	32
2022-09-15	12:40:27	0.725916	3.22902	3.04577	1215.84	FALSE	32
2022-09-15	12:40:27	0.716908	3.18895	3.04577	1329.82	FALSE	32
2022-09-15	12:40:27	0.68271	3.03683	3.04577	1218.88	FALSE	32
2022-09-15	12:40:28	0.727545	3.23627	2.93836	1333.06	FALSE	32
2022-09-15	12:40:28	0.534669	2.37831	2.93836	1221.25	FALSE	32
2022-09-15	12:40:28	0.719504	3.2005	2.93836	1336.26	FALSE	32
2022-09-15	12:40:29	0.498333	2.21668	2.82642	1223.47	FALSE	32
2022-09-15	12:40:29	0.722812	3.21521	2.82642	1339.48	FALSE	32
2022-09-15	12:40:29	0.617468	2.74662	2.82642	1226.22	FALSE	32
2022-09-15	12:40:29	0.703015	3.12715	2.82642	1342.6	FALSE	32
2022-09-15	12:40:30	0.628562	2.79597	2.82472	1229.01	FALSE	32
2022-09-15	12:40:30	0.69701	3.10044	2.82472	1345.7	FALSE	32
2022-09-15	12:40:30	0.725865	3.22879	2.82472	1232.24	FALSE	32
2022-09-15	12:40:30	0.488664	2.17368	2.82472	1347.88	FALSE	32
2022-09-15	12:40:31	0.585865	2.60604	2.14436	1234.85	FALSE	32
2022-09-15	12:40:31	0.556501	2.47543	2.14436	1350.35	FALSE	32
2022-09-15	12:40:31	0.429631	1.91108	2.14436	1236.76	FALSE	32
2022-09-15	12:40:31	0.356298	1.58488	2.14436	1351.94	FALSE	32
2022-09-15	12:40:32	0.33757	1.50158	0.264384	1238.26	FALSE	32
2022-09-15	12:40:32	-0.0840073	-0.373681	0.264384	1351.94	FALSE	32
2022-09-15	12:40:32	-0.0752541	-0.334745	0.264384	1238.26	FALSE	32
2022-09-15	12:40:33	-0.22299	-0.991904	-0.420371	1351.94	FALSE	32
2022-09-15	12:40:33	-0.337086	-1.49943	-0.420371	1238.26	FALSE	32
2022-09-15	12:40:33	0.0620994	0.276231	-0.420371	1352.21	FALSE	32
2022-09-15	12:40:33	0.119962	0.533615	-0.420371	1238.79	FALSE	32
2022-09-15	12:40:34	0.0142623	0.0634416	-0.965417	1352.28	FALSE	32
2022-09-15	12:40:34	-0.133066	-0.591904	-0.965417	1238.79	FALSE	32
2022-09-15	12:40:34	-0.326094	-1.45053	-0.965417	1352.28	FALSE	32
2022-09-15	12:40:34	-0.423244	-1.88267	-0.965417	1238.79	FALSE	32
2022-09-15	12:40:35	-0.393778	-1.7516	-1.66202	1352.28	FALSE	32
2022-09-15	12:40:35	-0.362429	-1.61216	-1.66202	1238.79	FALSE	32
2022-09-15	12:40:35	-0.36014	-1.60197	-1.66202	1352.28	FALSE	32
2022-09-15	12:40:35	-0.378206	-1.68234	-1.66202	1238.79	FALSE	32
2022-09-15	12:40:36	-0.374491	-1.66581	-1.65223	1352.28	FALSE	32
2022-09-15	12:40:36	-0.361921	-1.6099	-1.65223	1238.79	FALSE	32
2022-09-15	12:40:36	-0.3779	-1.68097	-1.65223	1352.28	FALSE	32
2022-09-15	12:40:37	-0.361463	-1.60786	-1.75013	1238.79	FALSE	32
2022-09-15	12:40:37	-0.387061	-1.72172	-1.75013	1352.28	FALSE	32
2022-09-15	12:40:37	-0.42248	-1.87928	-1.75013	1238.79	FALSE	32
2022-09-15	12:40:37	-0.402786	-1.79167	-1.75013	1352.28	FALSE	32
2022-09-15	12:40:38	-0.399987	-1.77922	-1.58369	1238.79	FALSE	32
2022-09-15	12:40:38	-0.368842	-1.64068	-1.58369	1352.28	FALSE	32
2022-09-15	12:40:38	-0.335712	-1.49331	-1.58369	1238.79	FALSE	32
2022-09-15	12:40:38	-0.31958	-1.42156	-1.58369	1352.28	FALSE	32
2022-09-15	12:40:39	-0.353778	-1.57368	-0.847306	1238.79	FALSE	32
2022-09-15	12:40:39	-0.604923	-2.69082	-0.847306	1352.28	FALSE	32
2022-09-15	12:40:39	-0.329707	-1.4666	-0.847306	1238.79	FALSE	32
2022-09-15	12:40:39	0.526476	2.34187	-0.847306	1354.62	FALSE	32
2022-09-15	12:40:40	0.696552	3.0984	3.08482	1241.89	FALSE	32
2022-09-15	12:40:40	0.727494	3.23604	3.08482	1357.85	FALSE	32
2022-09-15	12:40:40	0.65645	2.92002	3.08482	1244.81	FALSE	32
2022-09-15	12:40:41	-0.396221	-1.76247	0.989074	1357.85	FALSE	32
2022-09-15	12:40:41	0.337417	1.5009	0.989074	1246.31	FALSE	32
2022-09-15	12:40:41	0.524593	2.33349	0.989074	1360.19	FALSE	32
2022-09-15	12:40:41	0.423626	1.88437	0.989074	1248.2	FALSE	32
2022-09-15	12:40:42	0.354059	1.57493	0.579399	1361.76	FALSE	32
2022-09-15	12:40:42	0.507748	2.25856	0.579399	1250.46	FALSE	32
2022-09-15	12:40:42	-0.035814	-0.159308	0.579399	1361.76	FALSE	32
2022-09-15	12:40:42	-0.304974	-1.35659	0.579399	1250.46	FALSE	32
2022-09-15	12:40:43	-1.01943	-4.53463	-4.35296	1361.76	FALSE	32
2022-09-15	12:40:43	-0.848078	-3.77242	-4.35296	1250.46	FALSE	32
2022-09-15	12:40:43	-0.858206	-3.81747	-4.35296	1361.76	FALSE	32
2022-09-15	12:40:43	-1.18864	-5.28731	-4.35296	1250.46	FALSE	32
2022-09-15	12:40:44	-1.31317	-5.84124	-4.48618	1361.76	FALSE	32
2022-09-15	12:40:44	-1.01434	-4.51199	-4.48618	1250.46	FALSE	32
2022-09-15	12:40:44	-0.698103	-3.1053	-4.48618	1361.76	FALSE	32
2022-09-15	12:40:45	-0.966094	-4.29738	-1.94283	1250.46	FALSE	32
2022-09-15	12:40:45	-0.301208	-1.33983	-1.94283	1361.76	FALSE	32
2022-09-15	12:40:45	-0.291539	-1.29682	-1.94283	1250.46	FALSE	32
2022-09-15	12:40:45	-0.188231	-0.837289	-1.94283	1361.76	FALSE	32
2022-09-15	12:40:46	-0.191081	-0.849967	-1.42206	1250.46	FALSE	32
2022-09-15	12:40:46	-0.338155	-1.50418	-1.42206	1361.76	FALSE	32
2022-09-15	12:40:46	-0.434338	-1.93202	-1.42206	1250.46	FALSE	32
2022-09-15	12:40:46	-0.315203	-1.40209	-1.42206	1361.76	FALSE	32
2022-09-15	12:40:47	-0.0746435	-0.332029	0.0305607	1250.46	FALSE	32
2022-09-15	12:40:47	-0.214389	-0.953645	0.0305607	1361.76	FALSE	32
2022-09-15	12:40:47	0.270445	1.20299	0.0305607	1251.66	FALSE	32
2022-09-15	12:40:47	0.0460689	0.204924	0.0305607	1361.97	FALSE	32
2022-09-15	12:40:48	0.16958	0.754326	1.68522	1252.41	FALSE	32
2022-09-15	12:40:48	0.148104	0.658796	1.68522	1362.63	FALSE	32
2022-09-15	12:40:48	0.623422	2.77311	1.68522	1255.19	FALSE	32
2022-09-15	12:40:48	0.574313	2.55466	1.68522	1365.18	FALSE	32
2022-09-15	12:40:49	0.667443	2.96892	3.05803	1258.16	FALSE	32
2022-09-15	12:40:49	0.723677	3.21906	3.05803	1368.4	FALSE	32
2022-09-15	12:40:49	0.67131	2.98612	3.05803	1261.14	FALSE	32
2022-09-15	12:40:50	0.724389	3.22223	2.95494	1371.62	FALSE	32
2022-09-15	12:40:50	0.501692	2.23163	2.95494	1263.37	FALSE	32
2022-09-15	12:40:50	0.727545	3.23627	2.95494	1374.86	FALSE	32
2022-09-15	12:40:50	0.703575	3.12964	2.95494	1266.5	FALSE	32
2022-09-15	12:40:51	0.708206	3.15024	2.79286	1378.01	FALSE	32
2022-09-15	12:40:51	0.674008	2.99812	2.79286	1269.5	FALSE	32
2022-09-15	12:40:51	0.492227	2.18952	2.79286	1380.2	FALSE	32
2022-09-15	12:40:51	0.63701	2.83355	2.79286	1272.34	FALSE	32
2022-09-15	12:40:52	0.340878	1.51629	1.76972	1381.72	FALSE	32
2022-09-15	12:40:52	0.636755	2.83241	1.76972	1275.17	FALSE	32
2022-09-15	12:40:52	0.191107	0.850082	1.76972	1382.57	FALSE	32
2022-09-15	12:40:52	0.422659	1.88007	1.76972	1277.05	FALSE	32
2022-09-15	12:40:53	0.383015	1.70373	1.56262	1384.27	FALSE	32
2022-09-15	12:40:53	0.303982	1.35217	1.56262	1278.4	FALSE	32
2022-09-15	12:40:53	0.366883	1.63197	1.56262	1385.9	FALSE	32
2022-09-15	12:40:54	-0.0182059	-0.0809835	0.49185	1278.4	FALSE	32
2022-09-15	12:40:54	0.361336	1.60729	0.49185	1387.51	FALSE	32
2022-09-15	12:40:54	-0.100801	-0.448383	0.49185	1278.4	FALSE	32
2022-09-15	12:40:54	0.199962	0.889471	0.49185	1388.4	FALSE	32
2022-09-15	12:40:55	-0.0205468	-0.0913963	-0.983016	1278.4	FALSE	32
2022-09-15	12:40:55	-0.241208	-1.07294	-0.983016	1388.4	FALSE	32
2022-09-15	12:40:55	-0.243498	-1.08313	-0.983016	1278.4	FALSE	32
2022-09-15	12:40:55	-0.378715	-1.6846	-0.983016	1388.4	FALSE	32
2022-09-15	12:40:56	-0.0855849	-0.380699	-1.80225	1278.4	FALSE	32
2022-09-15	12:40:56	-0.525127	-2.33587	-1.80225	1388.4	FALSE	32
2022-09-15	12:40:56	-0.358714	-1.59563	-1.80225	1278.4	FALSE	32
2022-09-15	12:40:56	-0.651233	-2.89681	-1.80225	1388.4	FALSE	32
2022-09-15	12:40:57	-0.757646	-3.37016	-4.16713	1278.4	FALSE	32
2022-09-15	12:40:57	-0.791742	-3.52183	-4.16713	1388.4	FALSE	32
2022-09-15	12:40:57	-1.26105	-5.6094	-4.16713	1278.4	FALSE	32
2022-09-15	12:40:58	-0.859325	-3.82245	-5.63008	1388.4	FALSE	32
2022-09-15	12:40:58	-1.4378	-6.39562	-5.63008	1278.4	FALSE	32
2022-09-15	12:40:58	-1.31154	-5.83399	-5.63008	1388.4	FALSE	32
2022-09-15	12:40:58	-1.45413	-6.46826	-5.63008	1278.4	FALSE	32
2022-09-15	12:40:59	-1.32289	-5.88448	-15.6296	1388.4	FALSE	32
2022-09-15	12:40:59	-2.55184	-11.3511	-15.6296	1278.4	FALSE	32
2022-09-15	12:40:59	-5.33815	-23.7452	-15.6296	1388.4	FALSE	32
2022-09-15	12:40:59	-4.84192	-21.5378	-15.6296	1278.4	FALSE	32
2022-09-15	12:41:00	-4.32365	-19.2325	-29.683	1388.4	FALSE	32
2022-09-15	12:41:00	-4.55418	-20.2579	-29.683	1278.4	FALSE	32
2022-09-15	12:41:00	-8.90462	-39.6095	-29.683	1388.4	FALSE	32
2022-09-15	12:41:00	-8.90971	-39.6322	-29.683	1278.4	FALSE	32
2022-09-15	12:41:01	-7.90538	-35.1647	-31.418	1388.4	FALSE	32
2022-09-15	12:41:01	-7.75912	-34.5141	-31.418	1278.4	FALSE	32
2022-09-15	12:41:01	-5.52472	-24.5751	-31.418	1388.4	FALSE	32
2022-09-15	12:41:02	-6.11902	-27.2186	-35.4545	1278.4	FALSE	32
2022-09-15	12:41:02	-7.87108	-35.0121	-35.4545	1388.4	FALSE	32
2022-09-15	12:41:02	-8.93688	-39.753	-35.4545	1278.4	FALSE	32
2022-09-15	12:41:02	-8.9551	-39.8341	-35.4545	1388.4	FALSE	32
2022-09-15	12:41:03	-8.80945	-39.1862	-34.8389	1278.4	FALSE	32
2022-09-15	12:41:03	-8.29617	-36.903	-34.8389	1388.4	FALSE	32
2022-09-15	12:41:03	-7.54044	-33.5414	-34.8389	1278.4	FALSE	32
2022-09-15	12:41:03	-6.68248	-29.725	-34.8389	1388.4	FALSE	32
2022-09-15	12:41:04	-6.26182	-27.8538	-26.0373	1278.4	FALSE	32
2022-09-15	12:41:04	-6.02482	-26.7996	-26.0373	1388.4	FALSE	32
2022-09-15	12:41:04	-5.84004	-25.9777	-26.0373	1278.4	FALSE	32
2022-09-15	12:41:04	-5.28711	-23.5181	-26.0373	1388.4	FALSE	32
2022-09-15	12:41:05	-4.70518	-20.9296	-20.3982	1278.4	FALSE	32
2022-09-15	12:41:05	-4.57607	-20.3553	-20.3982	1388.4	FALSE	32
2022-09-15	12:41:05	-4.47591	-19.9097	-20.3982	1278.4	FALSE	32
2022-09-15	12:41:06	-4.43312	-19.7194	-19.6488	1388.4	FALSE	32
2022-09-15	12:41:06	-4.36014	-19.3948	-19.6488	1278.4	FALSE	32
2022-09-15	12:41:06	-4.41337	-19.6316	-19.6488	1388.4	FALSE	32
2022-09-15	12:41:06	-4.46233	-19.8493	-19.6488	1278.4	FALSE	32
2022-09-15	12:41:07	-4.44762	-19.7839	-19.6606	1388.4	FALSE	32
2022-09-15	12:41:07	-4.43973	-19.7488	-19.6606	1278.4	FALSE	32
2022-09-15	12:41:07	-4.40156	-19.579	-19.6606	1388.4	FALSE	32
2022-09-15	12:41:07	-4.39072	-19.5308	-19.6606	1278.4	FALSE	32
2022-09-15	12:41:08	-3.78533	-16.8379	-7.14683	1388.4	FALSE	32
2022-09-15	12:41:08	-0.330725	-1.47113	-7.14683	1278.4	FALSE	32
2022-09-15	12:41:08	0.677926	3.01555	-7.14683	1391.41	FALSE	32
2022-09-15	12:41:08	-2.98859	-13.2938	-7.14683	1278.4	FALSE	32
2022-09-15	12:41:09	-3.18416	-14.1638	-3.30655	1391.41	FALSE	32
2022-09-15	12:41:09	0.225662	1.00379	-3.30655	1279.4	FALSE	32
2022-09-15	12:41:09	0.728461	3.24034	-3.30655	1394.65	FALSE	32
2022-09-15	12:41:10	0.461132	2.05121	1.40645	1281.45	FALSE	32
2022-09-15	12:41:10	0.7393	3.28855	1.40645	1397.94	FALSE	32
2022-09-15	12:41:10	0.728054	3.23853	1.40645	1284.69	FALSE	32
2022-09-15	12:41:10	-0.663752	-2.9525	1.40645	1397.94	FALSE	32
2022-09-15	12:41:11	0.221387	0.984774	0.996999	1285.68	FALSE	32
2022-09-15	12:41:11	-0.0210048	-0.0934336	0.996999	1397.94	FALSE	32
2022-09-15	12:41:11	0.456909	2.03242	0.996999	1287.71	FALSE	32
2022-09-15	12:41:11	0.23925	1.06423	0.996999	1399.01	FALSE	32
2022-09-15	12:41:12	-0.399376	-1.7765	2.04131	1287.71	FALSE	32
2022-09-15	12:41:12	0.476043	2.11753	2.04131	1401.12	FALSE	32
2022-09-15	12:41:12	0.555738	2.47203	2.04131	1290.18	FALSE	32
2022-09-15	12:41:12	1.20322	5.35216	2.04131	1406.48	FALSE	32
2022-09-15	12:41:13	1.77207	7.88252	8.09924	1298.07	FALSE	32
2022-09-15	12:41:13	2.17268	9.66452	8.09924	1416.14	FALSE	32
2022-09-15	12:41:13	1.51762	6.75068	8.09924	1304.82	FALSE	32
2022-09-15	12:41:14	1.70882	7.60117	6.9834	1423.74	FALSE	32
2022-09-15	12:41:14	1.2764	5.67768	6.9834	1310.49	FALSE	32
2022-09-15	12:41:14	1.40607	6.25448	6.9834	1430	FALSE	32
2022-09-15	12:41:14	1.88846	8.40025	6.9834	1318.89	FALSE	32
2022-09-15	12:41:15	0.903219	4.0177	6.20604	1434.01	FALSE	32
2022-09-15	12:41:15	1.96302	8.73191	6.20604	1327.63	FALSE	32
2022-09-15	12:41:15	1.48617	6.61078	6.20604	1440.62	FALSE	32
2022-09-15	12:41:15	1.22831	5.46377	6.20604	1333.09	FALSE	32
2022-09-15	12:41:16	1.84454	8.20488	4.37089	1448.83	FALSE	32
2022-09-15	12:41:16	0.792176	3.52376	4.37089	1336.61	FALSE	32
2022-09-15	12:41:16	0.598232	2.66106	4.37089	1451.49	FALSE	32
2022-09-15	12:41:16	0.695534	3.09387	4.37089	1339.71	FALSE	32
2022-09-15	12:41:17	-0.38701	-1.7215	-2.10769	1451.49	FALSE	32
2022-09-15	12:41:17	-0.500648	-2.22698	-2.10769	1339.71	FALSE	32
2022-09-15	12:41:17	-0.533829	-2.37458	-2.10769	1451.49	FALSE	32
2022-09-15	12:41:18	-0.382888	-1.70316	-0.165364	1339.71	FALSE	32
2022-09-15	12:41:18	-0.12757	-0.567457	-0.165364	1451.49	FALSE	32
2022-09-15	12:41:18	0.285611	1.27045	-0.165364	1340.98	FALSE	32
2022-09-15	12:41:18	0.0761453	0.33871	-0.165364	1451.83	FALSE	32
2022-09-15	12:41:19	0.237672	1.05721	0.494453	1342.03	FALSE	32
2022-09-15	12:41:19	0.190598	0.847818	0.494453	1452.68	FALSE	32
2022-09-15	12:41:19	0.105255	0.468195	0.494453	1342.5	FALSE	32
2022-09-15	12:41:19	-0.0888929	-0.395413	0.494453	1452.68	FALSE	32
2022-09-15	12:41:20	-0.105381	-0.468756	0.199095	1342.5	FALSE	32
2022-09-15	12:41:20	0.327392	1.45631	0.199095	1454.13	FALSE	32
2022-09-15	12:41:20	-0.063702	-0.283359	0.199095	1342.5	FALSE	32
2022-09-15	12:41:20	0.0207254	0.0921907	0.199095	1454.23	FALSE	32
2022-09-15	12:41:21	0.124542	0.553988	1.04786	1343.06	FALSE	32
2022-09-15	12:41:21	0.317112	1.41058	1.04786	1455.64	FALSE	32
2022-09-15	12:41:21	0.265051	1.179	1.04786	1344.24	FALSE	32
2022-09-15	12:41:22	0.247494	1.1009	1.39728	1456.74	FALSE	32
2022-09-15	12:41:22	0.417316	1.85631	1.39728	1346.09	FALSE	32
2022-09-15	12:41:22	0.15584	0.693207	1.39728	1457.43	FALSE	32
2022-09-15	12:41:22	0.43584	1.9387	1.39728	1348.03	FALSE	32
2022-09-15	12:41:23	0.300827	1.33814	4.40179	1458.77	FALSE	32
2022-09-15	12:41:23	0.988613	4.39755	4.40179	1352.43	FALSE	32
2022-09-15	12:41:23	1.29116	5.74334	4.40179	1464.51	FALSE	32
2022-09-15	12:41:23	1.37767	6.12815	4.40179	1358.56	FALSE	32
2022-09-15	12:41:24	0.666374	2.96416	3.07622	1467.48	FALSE	32
2022-09-15	12:41:24	0.618639	2.75183	3.07622	1361.31	FALSE	32
2022-09-15	12:41:24	0.260267	1.15772	3.07622	1468.63	FALSE	32
2022-09-15	12:41:24	1.22098	5.43116	3.07622	1366.74	FALSE	32
2022-09-15	12:41:25	1.11039	4.93924	10.5818	1473.57	FALSE	32
2022-09-15	12:41:25	2.72312	12.113	10.5818	1378.85	FALSE	32
2022-09-15	12:41:25	3.30317	14.6932	10.5818	1488.27	1	33
2022-09-15	12:41:26	2.38006	10.587	7.8767	1389.44	FALSE	33
2022-09-15	12:41:26	3.65431	16.2551	7.8767	1504.52	1	34
2022-09-15	12:41:26	0.837417	3.725	7.8767	1393.16	FALSE	34
2022-09-15	12:41:26	0.21126	0.939727	7.8767	1505.46	FALSE	34
2022-09-15	12:41:27	0.055789	0.248161	2.18641	1393.41	FALSE	34
2022-09-15	12:41:27	0.443015	1.97062	2.18641	1507.43	FALSE	34
2022-09-15	12:41:27	0.734517	3.26728	2.18641	1396.68	FALSE	34
2022-09-15	12:41:27	0.732786	3.25958	2.18641	1510.69	FALSE	34
2022-09-15	12:41:28	0.734924	3.26909	2.32704	1399.95	FALSE	34
2022-09-15	12:41:28	0.622201	2.76767	2.32704	1513.46	FALSE	34
2022-09-15	12:41:28	0.00423688	0.0188465	2.32704	1399.97	FALSE	34
2022-09-15	12:41:28	0.731209	3.25256	2.32704	1516.71	FALSE	34
2022-09-15	12:41:29	0.739962	3.2915	2.9622	1403.26	FALSE	34
2022-09-15	12:41:29	0.732277	3.25731	2.9622	1519.97	FALSE	34
2022-09-15	12:41:29	0.52556	2.3378	2.9622	1405.6	FALSE	34
2022-09-15	12:41:30	0.73243	3.258	3.25975	1523.23	FALSE	34
2022-09-15	12:41:30	0.735636	3.27226	3.25975	1408.87	FALSE	34
2022-09-15	12:41:30	0.733092	3.26094	3.25975	1526.49	FALSE	34
2022-09-15	12:41:30	0.73014	3.24781	3.25975	1412.12	FALSE	34
2022-09-15	12:41:31	0.740114	3.29218	3.2812	1529.78	FALSE	34
2022-09-15	12:41:31	0.735687	3.27248	3.2812	1415.39	FALSE	34
2022-09-15	12:41:31	0.737773	3.28176	3.2812	1533.06	FALSE	34
2022-09-15	12:41:31	0.73701	3.27837	3.2812	1418.67	FALSE	34
2022-09-15	12:41:32	0.735738	3.27271	3.2606	1536.33	FALSE	34
2022-09-15	12:41:32	0.729224	3.24373	3.2606	1421.91	FALSE	34
2022-09-15	12:41:32	0.734771	3.26841	3.2606	1539.6	FALSE	34
2022-09-15	12:41:32	0.732328	3.25754	3.2606	1425.17	FALSE	34
2022-09-15	12:41:33	0.736094	3.27429	3.26584	1542.88	FALSE	34
2022-09-15	12:41:33	0.733193	3.26139	3.26584	1428.43	FALSE	34
2022-09-15	12:41:33	0.733295	3.26184	3.26584	1546.14	FALSE	34
2022-09-15	12:41:34	0.732735	3.25935	3.26139	1431.69	FALSE	34
2022-09-15	12:41:34	0.732735	3.25935	3.26139	1549.4	FALSE	34
2022-09-15	12:41:34	0.731107	3.25211	3.26139	1434.94	FALSE	34
2022-09-15	12:41:34	0.736196	3.27475	3.26139	1552.67	FALSE	34
2022-09-15	12:41:35	0.731005	3.25166	3.25239	1438.19	FALSE	34
2022-09-15	12:41:35	0.733499	3.26275	3.25239	1555.94	FALSE	34
2022-09-15	12:41:35	0.726221	3.23038	3.25239	1441.42	FALSE	34
2022-09-15	12:41:35	0.733957	3.26479	3.25239	1559.2	FALSE	34
2022-09-15	12:41:36	0.736247	3.27497	3.26716	1444.7	FALSE	34
2022-09-15	12:41:36	0.735076	3.26977	3.26716	1562.47	FALSE	34
2022-09-15	12:41:36	0.735127	3.26999	3.26716	1447.97	FALSE	34
2022-09-15	12:41:36	0.731514	3.25392	3.26716	1565.72	FALSE	34
2022-09-15	12:41:37	0.733397	3.2623	3.2669	1451.23	FALSE	34
2022-09-15	12:41:37	0.733295	3.26184	3.2669	1568.99	FALSE	34
2022-09-15	12:41:37	0.736603	3.27656	3.2669	1454.51	FALSE	34
2022-09-15	12:41:38	0.512583	2.28007	2.81436	1571.27	FALSE	34
2022-09-15	12:41:38	0.635432	2.82653	2.81436	1457.33	FALSE	34
2022-09-15	12:41:38	0.704542	3.13394	2.81436	1574.4	FALSE	34
2022-09-15	12:41:38	0.678232	3.01691	2.81436	1460.35	FALSE	34
2022-09-15	12:41:39	0.736247	3.27497	3.26858	1577.68	FALSE	34
2022-09-15	12:41:39	0.735687	3.27248	3.26858	1463.62	FALSE	34
2022-09-15	12:41:39	0.735992	3.27384	3.26858	1580.95	FALSE	34
2022-09-15	12:41:39	0.73131	3.25301	3.26858	1466.88	FALSE	34
2022-09-15	12:41:40	0.736298	3.2752	3.27118	1584.22	FALSE	34
2022-09-15	12:41:40	0.737773	3.28176	3.27118	1470.16	FALSE	34
2022-09-15	12:41:40	0.73645	3.27588	3.27118	1587.5	FALSE	34
2022-09-15	12:41:40	0.731056	3.25188	3.27118	1473.41	FALSE	34
2022-09-15	12:41:41	0.721997	3.21159	3.25403	1590.71	FALSE	34
2022-09-15	12:41:41	0.738181	3.28358	3.25403	1476.69	FALSE	34
2022-09-15	12:41:41	0.73014	3.24781	3.25403	1593.96	FALSE	34
2022-09-15	12:41:41	0.73584	3.27316	3.25403	1479.97	FALSE	34
2022-09-15	12:41:42	0.73131	3.25301	3.25815	1597.21	FALSE	34
2022-09-15	12:41:42	0.732583	3.25868	3.25815	1483.23	FALSE	34
2022-09-15	12:41:42	0.733499	3.26275	3.25815	1600.48	FALSE	34
2022-09-15	12:41:43	0.733906	3.26456	3.27248	1486.49	FALSE	34
2022-09-15	12:41:43	0.733193	3.26139	3.27248	1603.74	FALSE	34
2022-09-15	12:41:43	0.737773	3.28176	3.27248	1489.77	FALSE	34
2022-09-15	12:41:43	0.737875	3.28222	3.27248	1607.02	FALSE	34
2022-09-15	12:41:44	0.734262	3.26614	3.26892	1493.04	FALSE	34
2022-09-15	12:41:44	0.735687	3.27248	3.26892	1610.29	FALSE	34
2022-09-15	12:41:44	0.729529	3.24509	3.26892	1496.28	FALSE	34
2022-09-15	12:41:44	0.740064	3.29195	3.26892	1613.58	FALSE	34
2022-09-15	12:41:45	0.731768	3.25505	3.22093	1499.54	FALSE	34
2022-09-15	12:41:45	0.728817	3.24192	3.22093	1616.83	FALSE	34
2022-09-15	12:41:45	0.720013	3.20276	3.22093	1502.74	FALSE	34
2022-09-15	12:41:45	0.715789	3.18397	3.22093	1620.01	FALSE	34
2022-09-15	12:41:46	0.734109	3.26546	3.25015	1506.01	FALSE	34
2022-09-15	12:41:46	0.731056	3.25188	3.25015	1623.26	FALSE	34
2022-09-15	12:41:46	0.726832	3.23309	3.25015	1509.24	FALSE	34
2022-09-15	12:41:47	0.736908	3.27791	3.27265	1626.54	FALSE	34
2022-09-15	12:41:47	0.73472	3.26818	3.27265	1512.51	FALSE	34
2022-09-15	12:41:47	0.73528	3.27067	3.27265	1629.81	FALSE	34
2022-09-15	12:41:47	0.735992	3.27384	3.27265	1515.78	FALSE	34
2022-09-15	12:41:48	0.661845	2.94402	2.84209	1632.75	FALSE	34
2022-09-15	12:41:48	0.739351	3.28878	2.84209	1519.07	FALSE	34
2022-09-15	12:41:48	0.731972	3.25596	2.84209	1636.01	FALSE	34
2022-09-15	12:41:48	0.422557	1.87962	2.84209	1520.95	FALSE	34
2022-09-15	12:41:49	0.305967	1.361	2.73061	1637.37	FALSE	34
2022-09-15	12:41:49	0.674058	2.99834	2.73061	1523.95	FALSE	34
2022-09-15	12:41:49	0.73701	3.27837	2.73061	1640.65	FALSE	34
2022-09-15	12:41:49	0.738435	3.28471	2.73061	1527.23	FALSE	34
2022-09-15	12:41:50	0.741081	3.29648	3.27075	1643.95	FALSE	34
2022-09-15	12:41:50	0.728817	3.24192	3.27075	1530.48	FALSE	34
2022-09-15	12:41:50	0.735992	3.27384	3.27075	1647.22	FALSE	34
2022-09-15	12:41:51	0.735483	3.27158	3.27537	1533.75	FALSE	34
2022-09-15	12:41:51	0.738231	3.2838	3.27537	1650.5	FALSE	34
2022-09-15	12:41:51	0.732125	3.25664	3.27537	1537	FALSE	34
2022-09-15	12:41:51	0.739504	3.28946	3.27537	1653.79	FALSE	34
2022-09-15	12:41:52	0.733092	3.26094	3.26875	1540.26	FALSE	34
2022-09-15	12:41:52	0.733092	3.26094	3.26875	1657.05	FALSE	34
2022-09-15	12:41:52	0.734618	3.26773	3.26875	1543.53	FALSE	34
2022-09-15	12:41:52	0.738588	3.28539	3.26875	1660.34	FALSE	34
2022-09-15	12:41:53	0.734059	3.26524	3.26122	1546.8	FALSE	34
2022-09-15	12:41:53	0.734822	3.26864	3.26122	1663.61	FALSE	34
2022-09-15	12:41:53	0.735229	3.27045	3.26122	1550.07	FALSE	34
2022-09-15	12:41:53	0.728512	3.24057	3.26122	1666.85	FALSE	34
2022-09-15	12:41:54	0.736705	3.27701	3.28425	1553.34	FALSE	34
2022-09-15	12:41:54	0.741743	3.29942	3.28425	1670.15	FALSE	34
2022-09-15	12:41:54	0.736552	3.27633	3.28425	1556.62	FALSE	34
2022-09-15	12:41:55	0.691107	3.07418	3.18957	1673.22	FALSE	34
2022-09-15	12:41:55	0.731717	3.25482	3.18957	1559.88	FALSE	34
2022-09-15	12:41:55	0.71187	3.16654	3.18957	1676.39	FALSE	34
2022-09-15	12:41:55	0.733499	3.26275	3.18957	1563.14	FALSE	34
2022-09-15	12:41:56	0.735127	3.26999	3.26422	1679.66	FALSE	34
2022-09-15	12:41:56	0.737163	3.27905	3.26422	1566.42	FALSE	34
2022-09-15	12:41:56	0.737315	3.27972	3.26422	1682.94	FALSE	34
2022-09-15	12:41:56	0.725712	3.22811	3.26422	1569.65	FALSE	34
2022-09-15	12:41:57	0.734517	3.26728	3.25488	1686.21	FALSE	34
2022-09-15	12:41:57	0.734008	3.26501	3.25488	1572.91	FALSE	34
2022-09-15	12:41:57	0.727036	3.234	3.25488	1689.44	FALSE	34
2022-09-15	12:41:57	0.731361	3.25324	3.25488	1576.16	FALSE	34
2022-09-15	12:41:58	0.735738	3.27271	3.26388	1692.71	FALSE	34
2022-09-15	12:41:58	0.731717	3.25482	3.26388	1579.42	FALSE	34
2022-09-15	12:41:58	0.733804	3.26411	3.26388	1695.98	FALSE	34
2022-09-15	12:41:59	0.736501	3.2761	3.26416	1582.7	FALSE	34
2022-09-15	12:41:59	0.729631	3.24554	3.26416	1699.22	FALSE	34
2022-09-15	12:41:59	0.732379	3.25777	3.26416	1585.95	FALSE	34
2022-09-15	12:41:59	0.736756	3.27724	3.26416	1702.5	FALSE	34
2022-09-15	12:42:00	0.735941	3.27361	3.26654	1589.23	FALSE	34
2022-09-15	12:42:00	0.733092	3.26094	3.26654	1705.76	FALSE	34
2022-09-15	12:42:00	0.734618	3.26773	3.26654	1592.49	FALSE	34
2022-09-15	12:42:00	0.733753	3.26388	3.26654	1709.02	FALSE	34
2022-09-15	12:42:01	0.739656	3.29014	3.27984	1595.78	FALSE	34
2022-09-15	12:42:01	0.735687	3.27248	3.27984	1712.3	FALSE	34
2022-09-15	12:42:01	0.738231	3.2838	3.27984	1599.07	FALSE	34
2022-09-15	12:42:01	0.735789	3.27294	3.27984	1715.57	FALSE	34
2022-09-15	12:42:02	0.733499	3.26275	3.27233	1602.33	FALSE	34
2022-09-15	12:42:02	0.737112	3.27882	3.27233	1718.85	FALSE	34
2022-09-15	12:42:02	0.736349	3.27543	3.27233	1605.61	FALSE	34
2022-09-15	12:42:03	0.731005	3.25166	3.2602	1722.1	FALSE	34
2022-09-15	12:42:03	0.736247	3.27497	3.2602	1608.88	FALSE	34
2022-09-15	12:42:03	0.733753	3.26388	3.2602	1725.36	FALSE	34
2022-09-15	12:42:03	0.7307	3.2503	3.2602	1612.13	FALSE	34
2022-09-15	12:42:04	0.733702	3.26365	3.26858	1728.63	FALSE	34
2022-09-15	12:42:04	0.735178	3.27022	3.26858	1615.4	FALSE	34
2022-09-15	12:42:04	0.737061	3.27859	3.26858	1731.91	FALSE	34
2022-09-15	12:42:04	0.733295	3.26184	3.26858	1618.66	FALSE	34
2022-09-15	12:42:05	0.732684	3.25912	3.26665	1735.16	FALSE	34
2022-09-15	12:42:05	0.731717	3.25482	3.26665	1621.92	FALSE	34
2022-09-15	12:42:05	0.736603	3.27656	3.26665	1738.44	FALSE	34
2022-09-15	12:42:05	0.736501	3.2761	3.26665	1625.19	FALSE	34
2022-09-15	12:42:06	0.734008	3.26501	3.25732	1741.71	FALSE	34
2022-09-15	12:42:06	0.735127	3.26999	3.25732	1628.46	FALSE	34
2022-09-15	12:42:06	0.727697	3.23694	3.25732	1744.94	FALSE	34
2022-09-15	12:42:07	0.731921	3.25573	3.26348	1631.72	FALSE	34
2022-09-15	12:42:07	0.730751	3.25053	3.26348	1748.19	FALSE	34
2022-09-15	12:42:07	0.736043	3.27407	3.26348	1634.99	FALSE	34
2022-09-15	12:42:07	0.735941	3.27361	3.26348	1751.47	FALSE	34
2022-09-15	12:42:08	0.732735	3.25935	3.26473	1638.25	FALSE	34
2022-09-15	12:42:08	0.732023	3.25618	3.26473	1754.72	FALSE	34
2022-09-15	12:42:08	0.736043	3.27407	3.26473	1641.53	FALSE	34
2022-09-15	12:42:08	0.734975	3.26932	3.26473	1757.99	FALSE	34
2022-09-15	12:42:09	0.738435	3.28471	3.2623	1644.81	FALSE	34
2022-09-15	12:42:09	0.728155	3.23898	3.2623	1761.23	FALSE	34
2022-09-15	12:42:09	0.732837	3.25981	3.2623	1648.07	FALSE	34
2022-09-15	12:42:09	0.73416	3.26569	3.2623	1764.5	FALSE	34
2022-09-15	12:42:10	0.733855	3.26433	3.26954	1651.34	FALSE	34
2022-09-15	12:42:10	0.737315	3.27972	3.26954	1767.78	FALSE	34
2022-09-15	12:42:10	0.733906	3.26456	3.26954	1654.6	FALSE	34
2022-09-15	12:42:11	0.738079	3.28312	3.29942	1771.06	FALSE	34
2022-09-15	12:42:11	0.735687	3.27248	3.29942	1657.87	FALSE	34
2022-09-15	12:42:11	0.731361	3.25324	3.29942	1774.31	FALSE	34
2022-09-15	12:42:11	0.761845	3.38884	3.29942	1661.26	FALSE	34
2022-09-15	12:42:12	0.705255	3.13712	3.21233	1777.45	FALSE	34
2022-09-15	12:42:12	0.719097	3.19869	3.21233	1664.46	FALSE	34
2022-09-15	12:42:12	0.736857	3.27769	3.21233	1780.73	FALSE	34
2022-09-15	12:42:12	0.727443	3.23581	3.21233	1667.7	FALSE	34
2022-09-15	12:42:13	0.734262	3.26614	3.27684	1783.99	FALSE	34
2022-09-15	12:42:13	0.740522	3.29399	3.27684	1670.99	FALSE	34
2022-09-15	12:42:13	0.736094	3.27429	3.27684	1787.27	FALSE	34
2022-09-15	12:42:13	0.735789	3.27294	3.27684	1674.26	FALSE	34
2022-09-15	12:42:14	0.73645	3.27588	3.27882	1790.54	FALSE	34
2022-09-15	12:42:14	0.738486	3.28493	3.27882	1677.55	FALSE	34
2022-09-15	12:42:14	0.736399	3.27565	3.27882	1793.82	FALSE	34
2022-09-15	12:42:15	0.736247	3.27497	3.27622	1680.82	FALSE	34
2022-09-15	12:42:15	0.738639	3.28561	3.27622	1797.11	FALSE	34
2022-09-15	12:42:15	0.735789	3.27294	3.27622	1684.1	FALSE	34
2022-09-15	12:42:15	0.735433	3.27135	3.27622	1800.38	FALSE	34
2022-09-15	12:42:16	0.736196	3.27475	3.27367	1687.37	FALSE	34
2022-09-15	12:42:16	0.733193	3.26139	3.27367	1803.64	FALSE	34
2022-09-15	12:42:16	0.736196	3.27475	3.27367	1690.65	FALSE	34
2022-09-15	12:42:16	0.738231	3.2838	3.27367	1806.92	FALSE	34
2022-09-15	12:42:17	0.731056	3.25188	3.2636	1693.9	FALSE	34
2022-09-15	12:42:17	0.738181	3.28358	3.2636	1810.21	FALSE	34
2022-09-15	12:42:17	0.732634	3.2589	3.2636	1697.16	FALSE	34
2022-09-15	12:42:17	0.732888	3.26003	3.2636	1813.47	FALSE	34
2022-09-15	12:42:18	0.729478	3.24486	3.26286	1700.4	FALSE	34
2022-09-15	12:42:18	0.735891	3.27339	3.26286	1816.74	FALSE	34
2022-09-15	12:42:18	0.734975	3.26932	3.26286	1703.67	FALSE	34
2022-09-15	12:42:18	0.733753	3.26388	3.26286	1820	FALSE	34
2022-09-15	12:42:19	0.734059	3.26524	6.16626	1706.94	FALSE	34
2022-09-15	12:42:19	0.685	3.04702	6.16626	1823.05	FALSE	34
2022-09-15	12:42:19	2.73965	12.1865	6.16626	1719.12	FALSE	34
2022-09-15	12:42:20	0.297774	1.32456	0.804638	1824.37	FALSE	34
2022-09-15	12:42:20	0.014415	0.0641208	0.804638	1719.19	FALSE	34
2022-09-15	12:42:20	0.16215	0.721276	0.804638	1825.1	FALSE	34
2022-09-15	12:42:20	0.249224	1.1086	0.804638	1720.3	FALSE	34
2022-09-15	12:42:21	1.09492	4.87042	16.8245	1829.97	FALSE	34
2022-09-15	12:42:21	4.98622	22.1797	16.8245	1742.48	1	35
2022-09-15	12:42:21	4.87513	21.6856	16.8245	1851.65	1	36
2022-09-15	12:42:21	4.17304	18.5625	16.8245	1761.04	1	37
2022-09-15	12:42:22	2.95273	13.1343	33.3345	1864.79	FALSE	37
2022-09-15	12:42:22	9.55746	42.5135	33.3345	1803.55	1	38
2022-09-15	12:42:22	8.1712	36.3471	33.3345	1901.13	1	39
2022-09-15	12:42:22	9.29436	41.3432	33.3345	1844.89	1	40
2022-09-15	12:42:23	8.33289	37.0664	17.7013	1938.2	1	41
2022-09-15	12:42:23	3.37177	14.9983	17.7013	1859.89	1	42
2022-09-15	12:42:23	0.233652	1.03933	17.7013	1939.24	FALSE	42
2022-09-15	12:42:24	0.179809	0.799826	2.15353	1860.69	FALSE	42
2022-09-15	12:42:24	0.28897	1.2854	2.15353	1940.52	FALSE	42
2022-09-15	12:42:24	0.332023	1.4769	2.15353	1862.17	FALSE	42
2022-09-15	12:42:24	1.13574	5.052	2.15353	1945.58	FALSE	42
2022-09-15	12:42:25	3.12169	13.8859	15.4616	1876.06	1	43
2022-09-15	12:42:25	7.93126	35.2798	15.4616	1980.86	1	44
2022-09-15	12:42:25	2.46673	10.9725	15.4616	1887.03	FALSE	44
2022-09-15	12:42:25	0.383982	1.70803	15.4616	1982.56	FALSE	44
2022-09-15	12:42:26	0.156552	0.696375	0.780756	1887.72	FALSE	44
2022-09-15	12:42:26	0.109021	0.484947	0.780756	1983.05	FALSE	44
2022-09-15	12:42:26	0.32159	1.4305	0.780756	1889.15	FALSE	44
2022-09-15	12:42:26	0.114924	0.511205	0.780756	1983.56	FALSE	44
2022-09-15	12:42:27	0.378842	1.68516	1.06785	1890.84	FALSE	44
2022-09-15	12:42:27	0.0852547	0.37923	1.06785	1983.94	FALSE	44
2022-09-15	12:42:27	0.256094	1.13916	1.06785	1891.98	FALSE	44
2022-09-15	12:42:28	0.0305473	0.13588	0.744027	1984.08	FALSE	44
2022-09-15	12:42:28	0.156298	0.695245	0.744027	1892.67	FALSE	44
2022-09-15	12:42:28	0.281183	1.25076	0.744027	1985.33	FALSE	44
2022-09-15	12:42:28	0.201031	0.894226	0.744027	1893.57	FALSE	44

## Sheet: Boris_prong_2022915123721 (3)
Date	Time	Lbs	Newtons	Total force x time		total steps > 13.345	**GoPro Fitting: 1221
2022-09-15	12:37:28	0.503168	2.23819	2.23819	FALSE	0
2022-09-15	12:37:28	0.49243	2.19043	2.19043	FALSE	0
2022-09-15	12:37:28	0.487494	2.16847	4.40666	FALSE	0
2022-09-15	12:37:28	0.488155	2.17141	4.36184	FALSE	0
2022-09-15	12:37:29	0.483372	2.15014	6.5568	FALSE	0
2022-09-15	12:37:29	0.479606	2.13338	6.49522	FALSE	0
2022-09-15	12:37:29	0.472328	2.10101	8.65781	FALSE	0
2022-09-15	12:37:29	0.484644	2.15579	8.65102	FALSE	0
2022-09-15	12:37:30	0.478893	2.13021	10.788	FALSE	0
2022-09-15	12:37:30	0.474975	2.11278	10.7638	FALSE	0
2022-09-15	12:37:30	0.432685	1.92467	12.7127	FALSE	0
2022-09-15	12:37:30	0.404186	1.7979	12.5617	FALSE	0
2022-09-15	12:37:31	0.428919	1.90792	14.6206	FALSE	0
2022-09-15	12:37:31	0.266527	1.18557	13.7473	FALSE	0
2022-09-15	12:37:31	0.237163	1.05495	15.6756	FALSE	0
2022-09-15	12:37:32	0.311565	1.3859	15.1332	FALSE	0
2022-09-15	12:37:32	0.427748	1.90271	17.5783	FALSE	0
2022-09-15	12:37:32	0.287239	1.2777	16.4109	FALSE	0
2022-09-15	12:37:32	0.503015	2.23751	19.8158	FALSE	0
2022-09-15	12:37:33	0.311921	1.38749	17.7984	FALSE	0
2022-09-15	12:37:33	0.521234	2.31855	22.1343	FALSE	0
2022-09-15	12:37:33	0.648868	2.88629	20.6846	FALSE	0
2022-09-15	12:37:33	0.418435	1.86128	23.9956	FALSE	0
2022-09-15	12:37:34	0.558842	2.48584	23.1705	FALSE	0
2022-09-15	12:37:34	0.663575	2.95171	26.9473	FALSE	0
2022-09-15	12:37:34	-0.259478	-1.15421	23.1705	FALSE	0
2022-09-15	12:37:34	-0.326704	-1.45324	26.9473	FALSE	0
2022-09-15	12:37:35	-0.0248216	-0.110411	23.1705	FALSE	0
2022-09-15	12:37:35	0.277977	1.2365	28.1838	FALSE	0
2022-09-15	12:37:35	0.199351	0.886753	24.0572	FALSE	0
2022-09-15	12:37:36	0.51757	2.30225	30.4861	FALSE	0
2022-09-15	12:37:36	0.209122	0.930216	24.9875	FALSE	0
2022-09-15	12:37:36	0.6564	2.9198	33.4059	FALSE	0
2022-09-15	12:37:36	0.345662	1.53757	26.525	FALSE	0
2022-09-15	12:37:37	0.437774	1.94731	35.3532	FALSE	0
2022-09-15	12:37:37	0.693244	3.08369	29.6087	FALSE	0
2022-09-15	12:37:37	0.616908	2.74413	38.0973	FALSE	0
2022-09-15	12:37:37	0.57472	2.55647	32.1652	FALSE	0
2022-09-15	12:37:38	0.344949	1.5344	39.6317	FALSE	0
2022-09-15	12:37:38	0.399809	1.77843	33.9436	FALSE	0
2022-09-15	12:37:38	2.64296	11.7564	51.3881	FALSE	0
2022-09-15	12:37:38	2.23813	9.95565	43.8993	FALSE	0
2022-09-15	12:37:39	1.91258	8.50754	59.8957	FALSE	0
2022-09-15	12:37:39	1.68032	7.4744	51.3737	FALSE	0
2022-09-15	12:37:39	1.61126	7.16721	67.0629	FALSE	0
2022-09-15	12:37:40	0.46159	2.05324	53.4269	FALSE	0
2022-09-15	12:37:40	1.50485	6.69387	73.7567	FALSE	0
2022-09-15	12:37:40	0.539758	2.40095	55.8279	FALSE	0
2022-09-15	12:37:40	0.836908	3.72273	77.4795	FALSE	0
2022-09-15	12:37:41	1.10795	4.92838	60.7562	FALSE	0
2022-09-15	12:37:41	0.565916	2.51731	79.9968	FALSE	0
2022-09-15	12:37:41	0.898791	3.998	64.7542	FALSE	0
2022-09-15	12:37:41	0.590038	2.62461	82.6214	FALSE	0
2022-09-15	12:37:42	1.10948	4.93519	69.6894	FALSE	0
2022-09-15	12:37:42	0.822303	3.65777	86.2792	FALSE	0
2022-09-15	12:37:42	1.00597	4.47476	74.1642	FALSE	0
2022-09-15	12:37:42	1.01538	4.51661	90.7958	FALSE	0
2022-09-15	12:37:43	1.08943	4.846	79.0102	FALSE	0
2022-09-15	12:37:43	1.33696	5.94707	96.7428	FALSE	0
2022-09-15	12:37:43	0.601743	2.67667	81.6869	FALSE	0
2022-09-15	12:37:44	1.5995	7.1149	103.858	FALSE	0
2022-09-15	12:37:44	0.555891	2.47271	84.1596	FALSE	0
2022-09-15	12:37:44	1.22958	5.46942	109.327	FALSE	0
2022-09-15	12:37:44	0.76897	3.42053	87.5801	FALSE	0
2022-09-15	12:37:45	1.46154	6.50122	115.828	FALSE	0
2022-09-15	12:37:45	1.11258	4.94898	92.5291	FALSE	0
2022-09-15	12:37:45	1.18164	5.25617	121.085	FALSE	0
2022-09-15	12:37:45	1.86424	8.29251	100.822	FALSE	0
2022-09-15	12:37:46	0.934618	4.15737	125.242	FALSE	0
2022-09-15	12:37:46	1.28256	5.70508	106.527	FALSE	0
2022-09-15	12:37:46	0.540572	2.40457	127.646	FALSE	0
2022-09-15	12:37:46	1.29024	5.73925	112.266	FALSE	0
2022-09-15	12:37:47	0.421539	1.87509	129.522	FALSE	0
2022-09-15	12:37:47	0.530038	2.35772	114.624	FALSE	0
2022-09-15	12:37:47	0.362913	1.61431	131.136	FALSE	0
2022-09-15	12:37:48	0.387087	1.72184	116.345	FALSE	0
2022-09-15	12:37:48	0.532735	2.36971	133.506	FALSE	0
2022-09-15	12:37:48	0.811158	3.60819	119.954	FALSE	0
2022-09-15	12:37:48	2.90525	12.9231	146.429	FALSE	0
2022-09-15	12:37:49	5.01009	22.2859	142.24	1	1
2022-09-15	12:37:49	8.3395	37.0958	183.524	1	2
2022-09-15	12:37:49	5.19258	23.0976	165.337	1	3
2022-09-15	12:37:49	6.44601	28.6731	212.198	1	4
2022-09-15	12:37:50	0.626527	2.78692	168.124	FALSE	4
2022-09-15	12:37:50	1.29599	5.76482	217.962	FALSE	4
2022-09-15	12:37:50	0.468613	2.08448	170.209	FALSE	4
2022-09-15	12:37:50	0.800165	3.55929	221.522	FALSE	4
2022-09-15	12:37:51	0.559046	2.48675	172.695	FALSE	4
2022-09-15	12:37:51	0.205	0.911881	222.434	FALSE	4
2022-09-15	12:37:51	0.441031	1.96179	174.657	FALSE	4
2022-09-15	12:37:52	0.118028	0.525012	222.959	FALSE	4
2022-09-15	12:37:52	0.0189442	0.0842676	174.741	FALSE	4
2022-09-15	12:37:52	-0.171488	-0.762813	222.959	FALSE	4
2022-09-15	12:37:52	-0.0331168	-0.14731	174.741	FALSE	4
2022-09-15	12:37:53	-0.21159	-0.941195	222.959	FALSE	4
2022-09-15	12:37:53	0.294517	1.31007	176.051	FALSE	4
2022-09-15	12:37:53	0.633804	2.81929	225.778	FALSE	4
2022-09-15	12:37:53	3.36703	14.9772	191.029	1	5
2022-09-15	12:37:54	3.12693	13.9092	239.687	1	6
2022-09-15	12:37:54	1.43925	6.40207	197.431	FALSE	6
2022-09-15	12:37:54	4.76408	21.1916	260.879	1	7
2022-09-15	12:37:54	1.52332	6.77603	204.207	FALSE	7
2022-09-15	12:37:55	3.37935	15.032	275.911	1	8
2022-09-15	12:37:55	1.90373	8.46817	212.675	FALSE	8
2022-09-15	12:37:55	4.40413	19.5905	295.501	1	9
2022-09-15	12:37:56	0.689886	3.06875	215.744	FALSE	9
2022-09-15	12:37:56	1.82546	8.12001	303.621	FALSE	9
2022-09-15	12:37:56	1.7508	7.78791	223.532	FALSE	9
2022-09-15	12:37:56	1.10734	4.92567	308.547	FALSE	9
2022-09-15	12:37:57	1.02179	4.54513	228.077	FALSE	9
2022-09-15	12:37:57	0.711972	3.16699	311.714	FALSE	9
2022-09-15	12:37:57	1.02047	4.53925	232.616	FALSE	9
2022-09-15	12:37:57	1.00312	4.46208	316.176	FALSE	9
2022-09-15	12:37:58	0.824033	3.66546	236.281	FALSE	9
2022-09-15	12:37:58	0.701489	3.12036	319.296	FALSE	9
2022-09-15	12:37:58	0.541896	2.41046	238.692	FALSE	9
2022-09-15	12:37:58	0.441794	1.96519	321.262	FALSE	9
2022-09-15	12:37:59	0.541336	2.40797	241.1	FALSE	9
2022-09-15	12:37:59	0.527443	2.34617	323.608	FALSE	9
2022-09-15	12:37:59	1.11004	4.93768	246.038	FALSE	9
2022-09-15	12:38:00	1.23569	5.4966	329.104	FALSE	9
2022-09-15	12:38:00	0.475534	2.11527	248.153	FALSE	9
2022-09-15	12:38:00	-0.0631931	-0.281096	329.104	FALSE	9
2022-09-15	12:38:00	-0.0716409	-0.318673	248.153	FALSE	9
2022-09-15	12:38:01	0.885611	3.93937	333.044	FALSE	9
2022-09-15	12:38:01	1.40159	6.23455	254.387	FALSE	9
2022-09-15	12:38:01	0.470852	2.09444	335.138	FALSE	9
2022-09-15	12:38:01	0.0394023	0.175269	254.563	FALSE	9
2022-09-15	12:38:02	-0.0453305	-0.201639	335.138	FALSE	9
2022-09-15	12:38:02	-0.0253814	-0.112902	254.563	FALSE	9
2022-09-15	12:38:02	-0.164974	-0.733837	335.138	FALSE	9
2022-09-15	12:38:02	-0.491997	-2.1885	254.563	FALSE	9
2022-09-15	12:38:03	-0.673066	-2.99393	335.138	FALSE	9
2022-09-15	12:38:03	-0.908842	-4.04271	254.563	FALSE	9
2022-09-15	12:38:03	-0.986704	-4.38906	335.138	FALSE	9
2022-09-15	12:38:04	-0.884312	-3.9336	254.563	FALSE	9
2022-09-15	12:38:04	-0.866908	-3.85618	335.138	FALSE	9
2022-09-15	12:38:04	-0.7179	-3.19336	254.563	FALSE	9
2022-09-15	12:38:04	-0.607162	-2.70078	335.138	FALSE	9
2022-09-15	12:38:05	-0.4722	-2.10044	254.563	FALSE	9
2022-09-15	12:38:05	-0.390419	-1.73666	335.138	FALSE	9
2022-09-15	12:38:05	-0.483346	-2.15002	254.563	FALSE	9
2022-09-15	12:38:05	-0.641004	-2.85131	335.138	FALSE	9
2022-09-15	12:38:06	-0.436679	-1.94244	254.563	FALSE	9
2022-09-15	12:38:06	-0.598765	-2.66343	335.138	FALSE	9
2022-09-15	12:38:06	-0.418664	-1.8623	254.563	FALSE	9
2022-09-15	12:38:06	-0.355916	-1.58319	335.138	FALSE	9
2022-09-15	12:38:07	-0.448231	-1.99382	254.563	FALSE	9
2022-09-15	12:38:07	-0.44986	-2.00107	335.138	FALSE	9
2022-09-15	12:38:07	-0.490419	-2.18148	254.563	FALSE	9
2022-09-15	12:38:08	-0.503345	-2.23898	335.138	FALSE	9
2022-09-15	12:38:08	-0.452964	-2.01487	254.563	FALSE	9
2022-09-15	12:38:08	-0.374491	-1.66581	335.138	FALSE	9
2022-09-15	12:38:08	-0.350521	-1.55919	254.563	FALSE	9
2022-09-15	12:38:09	-0.386857	-1.72082	335.138	FALSE	9
2022-09-15	12:38:09	-0.174694	-0.777074	254.563	FALSE	9
2022-09-15	12:38:09	0.035331	0.157159	335.295	FALSE	9
2022-09-15	12:38:09	-0.00136106	-0.00605427	254.563	FALSE	9
2022-09-15	12:38:10	-0.109096	-0.485281	335.295	FALSE	9
2022-09-15	12:38:10	-0.191946	-0.853814	254.563	FALSE	9
2022-09-15	12:38:10	-0.128028	-0.569494	335.295	FALSE	9
2022-09-15	12:38:10	-0.0703686	-0.313014	254.563	FALSE	9
2022-09-15	12:38:11	-0.13042	-0.580134	335.295	FALSE	9
2022-09-15	12:38:11	-0.171386	-0.762359	254.563	FALSE	9
2022-09-15	12:38:11	-0.03673	-0.163382	335.295	FALSE	9
2022-09-15	12:38:12	1.52429	6.78035	261.343	FALSE	9
2022-09-15	12:38:12	3.6852	16.3925	351.688	1	10
2022-09-15	12:38:12	3.77207	16.7789	278.122	1	11
2022-09-15	12:38:12	2.23167	9.92691	361.615	FALSE	11
2022-09-15	12:38:13	3.36642	14.9745	293.096	1	12
2022-09-15	12:38:13	1.78617	7.94524	369.56	FALSE	12
2022-09-15	12:38:13	0.783473	3.48504	296.582	FALSE	12
2022-09-15	12:38:13	0.596349	2.65268	372.213	FALSE	12
2022-09-15	12:38:14	0.916552	4.07701	300.659	FALSE	12
2022-09-15	12:38:14	0.850852	3.78476	375.997	FALSE	12
2022-09-15	12:38:14	1.3251	5.89431	306.553	FALSE	12
2022-09-15	12:38:14	2.37136	10.5483	386.546	FALSE	12
2022-09-15	12:38:15	2.1652	9.63124	316.184	FALSE	12
2022-09-15	12:38:15	4.9224	21.8958	408.441	1	13
2022-09-15	12:38:15	1.94989	8.6735	324.858	FALSE	13
2022-09-15	12:38:16	4.19787	18.673	427.114	1	14
2022-09-15	12:38:16	1.34871	5.99933	330.857	FALSE	14
2022-09-15	12:38:16	2.70352	12.0258	439.14	FALSE	14
2022-09-15	12:38:16	1.76866	7.86735	338.724	FALSE	14
2022-09-15	12:38:17	1.23961	5.51403	444.654	FALSE	14
2022-09-15	12:38:17	0.580522	2.58228	341.307	FALSE	14
2022-09-15	12:38:17	0.356858	1.58738	446.242	FALSE	14
2022-09-15	12:38:17	0.229122	1.01918	342.326	FALSE	14
2022-09-15	12:38:18	-0.0938801	-0.417597	446.242	FALSE	14
2022-09-15	12:38:18	-0.206857	-0.920141	342.326	FALSE	14
2022-09-15	12:38:18	-0.316374	-1.40729	446.242	FALSE	14
2022-09-15	12:38:18	-0.489554	-2.17763	342.326	FALSE	14
2022-09-15	12:38:19	-0.78818	-3.50598	446.242	FALSE	14
2022-09-15	12:38:19	-1.62136	-7.21213	342.326	FALSE	14
2022-09-15	12:38:19	-1.12106	-4.9867	446.242	FALSE	14
2022-09-15	12:38:20	-0.856272	-3.80887	342.326	FALSE	14
2022-09-15	12:38:20	-0.945177	-4.20434	446.242	FALSE	14
2022-09-15	12:38:20	-0.383142	-1.70429	342.326	FALSE	14
2022-09-15	12:38:20	1.05696	4.70157	450.943	FALSE	14
2022-09-15	12:38:21	2.09772	9.33108	351.657	FALSE	14
2022-09-15	12:38:21	1.00266	4.46003	455.403	FALSE	14
2022-09-15	12:38:21	-0.677747	-3.01475	351.657	FALSE	14
2022-09-15	12:38:21	-0.148486	-0.660495	455.403	FALSE	14
2022-09-15	12:38:22	-0.201666	-0.897051	351.657	FALSE	14
2022-09-15	12:38:22	0.0391987	0.174364	455.578	FALSE	14
2022-09-15	12:38:22	-0.18304	-0.814199	351.657	FALSE	14
2022-09-15	12:38:22	0.0168577	0.0749864	455.653	FALSE	14
2022-09-15	12:38:23	0.0457127	0.203339	351.86	FALSE	14
2022-09-15	12:38:23	1.61599	7.18825	462.841	FALSE	14
2022-09-15	12:38:23	1.2738	5.66612	357.526	FALSE	14
2022-09-15	12:38:24	0.505916	2.25042	465.091	FALSE	14
2022-09-15	12:38:24	0.257926	1.14731	358.674	FALSE	14
2022-09-15	12:38:24	0.401183	1.78454	466.876	FALSE	14
2022-09-15	12:38:24	0.258028	1.14776	359.821	FALSE	14
2022-09-15	12:38:25	0.349784	1.55591	468.432	FALSE	14
2022-09-15	12:38:25	0.819249	3.64418	363.466	FALSE	14
2022-09-15	12:38:25	0.652735	2.9035	471.335	FALSE	14
2022-09-15	12:38:25	0.328868	1.46287	364.928	FALSE	14
2022-09-15	12:38:26	0.253804	1.12897	472.464	FALSE	14
2022-09-15	12:38:26	0.327494	1.45676	366.385	FALSE	14
2022-09-15	12:38:26	0.29126	1.29558	473.76	FALSE	14
2022-09-15	12:38:26	0.467647	2.08019	368.465	FALSE	14
2022-09-15	12:38:27	0.849987	3.78091	477.541	FALSE	14
2022-09-15	12:38:27	1.59253	7.08389	375.549	FALSE	14
2022-09-15	12:38:27	2.42378	10.7815	488.322	FALSE	14
2022-09-15	12:38:28	1.84871	8.22343	383.773	FALSE	14
2022-09-15	12:38:28	1.28922	5.73471	494.057	FALSE	14
2022-09-15	12:38:28	0.468155	2.08245	385.855	FALSE	14
2022-09-15	12:38:28	-0.0668063	-0.297168	494.057	FALSE	14
2022-09-15	12:38:29	-0.356475	-1.58567	385.855	FALSE	14
2022-09-15	12:38:29	-0.299274	-1.33123	494.057	FALSE	14
2022-09-15	12:38:29	-0.184618	-0.821218	385.855	FALSE	14
2022-09-15	12:38:29	-0.170878	-0.7601	494.057	FALSE	14
2022-09-15	12:38:30	-0.0340328	-0.151385	385.855	FALSE	14
2022-09-15	12:38:30	0.01584	0.0704595	494.127	FALSE	14
2022-09-15	12:38:30	-0.0241092	-0.107243	385.855	FALSE	14
2022-09-15	12:38:30	0.712481	3.16926	497.297	FALSE	14
2022-09-15	12:38:31	-0.274389	-1.22054	385.855	FALSE	14
2022-09-15	12:38:31	-0.925636	-4.11741	497.297	FALSE	14
2022-09-15	12:38:31	-1.33597	-5.94266	385.855	FALSE	14
2022-09-15	12:38:32	-1.29831	-5.77514	497.297	FALSE	14
2022-09-15	12:38:32	-1.28787	-5.7287	385.855	FALSE	14
2022-09-15	12:38:32	-1.08548	-4.82843	497.297	FALSE	14
2022-09-15	12:38:32	-1.32767	-5.90574	385.855	FALSE	14
2022-09-15	12:38:33	0.0237279	0.105546	497.402	FALSE	14
2022-09-15	12:38:33	2.11523	9.40897	395.264	FALSE	14
2022-09-15	12:38:33	5.52815	24.5903	521.992	1	15
2022-09-15	12:38:33	7.63502	33.9621	429.226	1	16
2022-09-15	12:38:34	3.52871	15.6964	537.689	1	17
2022-09-15	12:38:34	3.59798	16.0045	445.231	1	18
2022-09-15	12:38:34	0.706883	3.14436	540.833	FALSE	18
2022-09-15	12:38:34	1.15324	5.12984	450.361	FALSE	18
2022-09-15	12:38:35	0.952023	4.23479	545.068	FALSE	18
2022-09-15	12:38:35	0.355534	1.58149	451.942	FALSE	18
2022-09-15	12:38:35	1.12861	5.02028	550.088	FALSE	18
2022-09-15	12:38:36	1.15747	5.14866	457.091	FALSE	18
2022-09-15	12:38:36	3.79737	16.8915	566.98	1	19
2022-09-15	12:38:36	3.5081	15.6047	472.695	1	20
2022-09-15	12:38:36	4.18373	18.6101	585.59	1	21
2022-09-15	12:38:37	3.01553	13.4137	486.109	1	22
2022-09-15	12:38:37	1.13971	5.06966	590.659	FALSE	22
2022-09-15	12:38:37	1.93467	8.6058	494.715	FALSE	22
2022-09-15	12:38:37	0.873804	3.88685	594.546	FALSE	22
2022-09-15	12:38:38	1.17039	5.20613	499.921	FALSE	22
2022-09-15	12:38:38	1.9165	8.52498	603.071	FALSE	22
2022-09-15	12:38:38	0.425407	1.8923	501.813	FALSE	22
2022-09-15	12:38:38	0.0882063	0.392359	603.464	FALSE	22
2022-09-15	12:38:39	0.382659	1.70214	503.515	FALSE	22
2022-09-15	12:38:39	0.683524	3.04045	606.504	FALSE	22
2022-09-15	12:38:39	0.668053	2.97163	506.487	FALSE	22
2022-09-15	12:38:40	0.264237	1.17538	607.679	FALSE	22
2022-09-15	12:38:40	1.84373	8.20128	514.688	FALSE	22
2022-09-15	12:38:40	0.894822	3.98035	611.66	FALSE	22
2022-09-15	12:38:40	1.40714	6.25924	520.948	FALSE	22
2022-09-15	12:38:41	2.43945	10.8512	622.511	FALSE	22
2022-09-15	12:38:41	1.65503	7.3619	528.31	FALSE	22
2022-09-15	12:38:41	0.125662	0.55897	623.07	FALSE	22
2022-09-15	12:38:41	0.173601	0.772212	529.082	FALSE	22
2022-09-15	12:38:42	0.182659	0.812504	623.882	FALSE	22
2022-09-15	12:38:42	0.189784	0.844197	529.926	FALSE	22
2022-09-15	12:38:42	0.331361	1.47396	625.356	FALSE	22
2022-09-15	12:38:42	0.11584	0.515279	530.441	FALSE	22
2022-09-15	12:38:43	0.267087	1.18806	626.544	FALSE	22
2022-09-15	12:38:43	0.163117	0.725577	531.167	FALSE	22
2022-09-15	12:38:43	0.285051	1.26796	627.812	FALSE	22
2022-09-15	12:38:44	0.352481	1.56791	532.735	FALSE	22
2022-09-15	12:38:44	0.661947	2.94447	630.757	FALSE	22
2022-09-15	12:38:44	1.46179	6.50233	539.237	FALSE	22
2022-09-15	12:38:44	1.44968	6.44847	637.205	FALSE	22
2022-09-15	12:38:45	1.68424	7.49184	546.729	FALSE	22
2022-09-15	12:38:45	1.05187	4.67893	641.884	FALSE	22
2022-09-15	12:38:45	1.90352	8.46724	555.196	FALSE	22
2022-09-15	12:38:45	2.33986	10.4082	652.292	FALSE	22
2022-09-15	12:38:46	3.48123	15.4852	570.681	1	23
2022-09-15	12:38:46	3.56968	15.8787	668.171	1	24
2022-09-15	12:38:46	0.651565	2.89829	573.58	FALSE	24
2022-09-15	12:38:46	0.525407	2.33712	670.508	FALSE	24
2022-09-15	12:38:47	0.725356	3.22653	576.806	FALSE	24
2022-09-15	12:38:47	0.398028	1.77051	672.279	FALSE	24
2022-09-15	12:38:47	0.609784	2.71244	579.519	FALSE	24
2022-09-15	12:38:48	0.0587407	0.26129	672.54	FALSE	24
2022-09-15	12:38:48	0.411463	1.83027	581.349	FALSE	24
2022-09-15	12:38:48	0.205356	0.913465	673.453	FALSE	24
2022-09-15	12:38:48	0.717468	3.19144	584.54	FALSE	24
2022-09-15	12:38:49	-0.106145	-0.472154	673.453	FALSE	24
2022-09-15	12:38:49	-1.57098	-6.98803	584.54	FALSE	24
2022-09-15	12:38:49	-4.3237	-19.2327	673.453	FALSE	24
2022-09-15	12:38:49	3.17334	14.1157	598.656	1	25
2022-09-15	12:38:50	3.65747	16.2692	689.723	1	26
2022-09-15	12:38:50	1.35228	6.01521	604.671	FALSE	26
2022-09-15	12:38:50	1.09187	4.85686	694.579	FALSE	26
2022-09-15	12:38:50	0.446069	1.9842	606.655	FALSE	26
2022-09-15	12:38:51	0.49299	2.19292	696.772	FALSE	26
2022-09-15	12:38:51	0.384389	1.70984	608.365	FALSE	26
2022-09-15	12:38:51	-1.40737	-6.26026	696.772	FALSE	26
2022-09-15	12:38:52	0.576349	2.56372	610.929	FALSE	26
2022-09-15	12:38:52	0.0219977	0.0978502	696.87	FALSE	26
2022-09-15	12:38:52	0.492634	2.19133	613.12	FALSE	26
2022-09-15	12:38:52	0.893499	3.97446	700.845	FALSE	26
2022-09-15	12:38:53	1.48296	6.5965	619.717	FALSE	26
2022-09-15	12:38:53	0.962964	4.28346	705.128	FALSE	26
2022-09-15	12:38:53	0.1307	0.58138	620.298	FALSE	26
2022-09-15	12:38:53	0.444033	1.97515	707.103	FALSE	26
2022-09-15	12:38:54	0.0980791	0.436275	620.734	FALSE	26
2022-09-15	12:38:54	0.296298	1.31799	708.421	FALSE	26
2022-09-15	12:38:54	0.246578	1.09683	621.831	FALSE	26
2022-09-15	12:38:54	0.238028	1.0588	709.48	FALSE	26
2022-09-15	12:38:55	0.433193	1.92693	623.758	FALSE	26
2022-09-15	12:38:55	0.393804	1.75172	711.232	FALSE	26
2022-09-15	12:38:55	0.986883	4.38985	628.148	FALSE	26
2022-09-15	12:38:56	0.515127	2.29139	713.523	FALSE	26
2022-09-15	12:38:56	0.972939	4.32783	632.476	FALSE	26
2022-09-15	12:38:56	0.771718	3.43276	716.956	FALSE	26
2022-09-15	12:38:56	0.693397	3.08437	635.56	FALSE	26
2022-09-15	12:38:57	0.817824	3.63784	720.594	FALSE	26
2022-09-15	12:38:57	0.708817	3.15296	638.713	FALSE	26
2022-09-15	12:38:57	1.3624	6.06023	726.654	FALSE	26
2022-09-15	12:38:57	0.724746	3.22382	641.937	FALSE	26
2022-09-15	12:38:58	1.0905	4.85076	731.505	FALSE	26
2022-09-15	12:38:58	1.34281	5.97309	647.91	FALSE	26
2022-09-15	12:38:58	1.12444	5.00173	736.507	FALSE	26
2022-09-15	12:38:58	1.21711	5.41395	653.324	FALSE	26
2022-09-15	12:38:59	0.903728	4.01996	740.527	FALSE	26
2022-09-15	12:38:59	0.7793	3.46648	656.79	FALSE	26
2022-09-15	12:38:59	0.84841	3.7739	744.3	FALSE	26
2022-09-15	12:39:00	0.803728	3.57514	660.366	FALSE	26
2022-09-15	12:39:00	0.720013	3.20276	747.503	FALSE	26
2022-09-15	12:39:00	1.20475	5.35897	665.725	FALSE	26
2022-09-15	12:39:00	0.388868	1.72976	749.233	FALSE	26
2022-09-15	12:39:01	0.789733	3.51289	669.237	FALSE	26
2022-09-15	12:39:01	0.704135	3.13213	752.365	FALSE	26
2022-09-15	12:39:01	1.20663	5.36733	674.605	FALSE	26
2022-09-15	12:39:01	1.35564	6.03016	758.395	FALSE	26
2022-09-15	12:39:02	0.970242	4.31583	678.921	FALSE	26
2022-09-15	12:39:02	1.24897	5.55567	763.951	FALSE	26
2022-09-15	12:39:02	0.540522	2.40435	681.325	FALSE	26
2022-09-15	12:39:02	0.966171	4.29772	768.249	FALSE	26
2022-09-15	12:39:03	0.7107	3.16134	684.486	FALSE	26
2022-09-15	12:39:03	0.704542	3.13394	771.383	FALSE	26
2022-09-15	12:39:03	0.807748	3.59302	688.079	FALSE	26
2022-09-15	12:39:04	0.543372	2.41703	773.8	FALSE	26
2022-09-15	12:39:04	1.20846	5.37547	693.455	FALSE	26
2022-09-15	12:39:04	0.551769	2.45438	776.254	FALSE	26
2022-09-15	12:39:04	1.22831	5.46377	698.919	FALSE	26
2022-09-15	12:39:05	0.995941	4.43014	780.684	FALSE	26
2022-09-15	12:39:05	0.956399	4.25425	703.173	FALSE	26
2022-09-15	12:39:05	0.996603	4.43309	785.117	FALSE	26
2022-09-15	12:39:05	0.657214	2.92342	706.096	FALSE	26
2022-09-15	12:39:06	1.21935	5.42391	790.541	FALSE	26
2022-09-15	12:39:06	0.8307	3.69512	709.791	FALSE	26
2022-09-15	12:39:06	1.47126	6.54446	797.086	FALSE	26
2022-09-15	12:39:06	1.12184	4.99017	714.782	FALSE	26
2022-09-15	12:39:07	1.38113	6.14354	803.229	FALSE	26
2022-09-15	12:39:07	0.767341	3.41329	718.195	FALSE	26
2022-09-15	12:39:07	0.819707	3.64622	806.875	FALSE	26
2022-09-15	12:39:08	0.874465	3.8898	722.085	FALSE	26
2022-09-15	12:39:08	0.731616	3.25437	810.13	FALSE	26
2022-09-15	12:39:08	0.733142	3.26116	725.346	FALSE	26
2022-09-15	12:39:08	0.0937534	0.417034	810.547	FALSE	26
2022-09-15	12:39:09	0.341031	1.51697	726.863	FALSE	26
2022-09-15	12:39:09	0.695942	3.09569	813.642	FALSE	26
2022-09-15	12:39:09	1.83757	8.17388	735.037	FALSE	26
2022-09-15	12:39:09	0.813601	3.61906	817.261	FALSE	26
2022-09-15	12:39:10	0.999249	4.44486	739.482	FALSE	26
2022-09-15	12:39:10	0.48556	2.15987	819.421	FALSE	26
2022-09-15	12:39:10	0.843422	3.75171	743.233	FALSE	26
2022-09-15	12:39:10	0.829428	3.68946	823.111	FALSE	26
2022-09-15	12:39:11	1.00368	4.46457	747.698	FALSE	26
2022-09-15	12:39:11	1.11793	4.97278	828.084	FALSE	26
2022-09-15	12:39:11	0.875789	3.89568	751.593	FALSE	26
2022-09-15	12:39:12	1.49299	6.64112	834.725	FALSE	26
2022-09-15	12:39:12	1.48027	6.58454	758.178	FALSE	26
2022-09-15	12:39:12	1.96011	8.71896	843.444	FALSE	26
2022-09-15	12:39:12	1.69345	7.5328	765.711	FALSE	26
2022-09-15	12:39:13	2.95859	13.1604	856.604	FALSE	26
2022-09-15	12:39:13	2.12536	9.45403	775.165	FALSE	26
2022-09-15	12:39:13	2.02872	9.02415	865.628	FALSE	26
2022-09-15	12:39:13	1.99721	8.88399	784.049	FALSE	26
2022-09-15	12:39:14	2.41396	10.7378	876.366	FALSE	26
2022-09-15	12:39:14	2.36729	10.5302	794.579	FALSE	26
2022-09-15	12:39:14	3.84968	17.1241	893.49	1	27
2022-09-15	12:39:14	1.40994	6.2717	800.851	FALSE	27
2022-09-15	12:39:15	2.62938	11.696	905.186	FALSE	27
2022-09-15	12:39:15	2.39121	10.6366	811.487	FALSE	27
2022-09-15	12:39:15	1.65747	7.37276	912.559	FALSE	27
2022-09-15	12:39:16	2.63192	11.7073	823.195	FALSE	27
2022-09-15	12:39:16	4.32021	19.2172	931.776	1	28
2022-09-15	12:39:16	4.45971	19.8377	843.032	1	29
2022-09-15	12:39:16	9.12586	40.5937	972.37	1	30
2022-09-15	12:39:17	7.89752	35.1297	878.162	1	31
2022-09-15	12:39:17	4.68805	20.8534	993.223	1	32
2022-09-15	12:39:17	2.84943	12.6748	890.837	FALSE	32
2022-09-15	12:39:17	2.29482	10.2078	1003.43	FALSE	32
2022-09-15	12:39:18	2.16408	9.62626	900.463	FALSE	32
2022-09-15	12:39:18	2.13258	9.48614	1012.92	FALSE	32
2022-09-15	12:39:18	1.94989	8.6735	909.137	FALSE	32
2022-09-15	12:39:18	1.85477	8.25039	1021.17	FALSE	32
2022-09-15	12:39:19	1.89452	8.4272	917.564	FALSE	32
2022-09-15	12:39:19	2.14378	9.53596	1030.7	FALSE	32
2022-09-15	12:39:19	1.53574	6.83128	924.395	FALSE	32
2022-09-15	12:39:20	1.04439	4.64566	1035.35	FALSE	32
2022-09-15	12:39:20	1.09202	4.85752	929.253	FALSE	32
2022-09-15	12:39:20	1.13706	5.05787	1040.41	FALSE	32
2022-09-15	12:39:20	1.18067	5.25186	934.504	FALSE	32
2022-09-15	12:39:21	1.4936	6.64383	1047.05	FALSE	32
2022-09-15	12:39:21	1.01803	4.5284	939.033	FALSE	32
2022-09-15	12:39:21	1.27258	5.66069	1052.71	FALSE	32
2022-09-15	12:39:21	1.19111	5.2983	944.331	FALSE	32
2022-09-15	12:39:22	1.23604	5.49815	1058.21	FALSE	32
2022-09-15	12:39:22	1.27976	5.69263	950.024	FALSE	32
2022-09-15	12:39:22	1.08688	4.83466	1063.04	FALSE	32
2022-09-15	12:39:22	0.979148	4.35545	954.379	FALSE	32
2022-09-15	12:39:23	1.13385	5.04359	1068.09	FALSE	32
2022-09-15	12:39:23	1.24022	5.51675	959.896	FALSE	32
2022-09-15	12:39:23	1.38154	6.14537	1074.23	FALSE	32
2022-09-15	12:39:24	1.36128	6.05525	965.951	FALSE	32
2022-09-15	12:39:24	1.32958	5.91424	1080.15	FALSE	32
2022-09-15	12:39:24	1.39274	6.19519	972.146	FALSE	32
2022-09-15	12:39:24	1.36566	6.07473	1086.22	FALSE	32
2022-09-15	12:39:25	1.32698	5.90267	978.049	FALSE	32
2022-09-15	12:39:25	1.33777	5.95067	1092.17	FALSE	32
2022-09-15	12:39:25	1.35289	6.01793	984.067	FALSE	32
2022-09-15	12:39:25	1.44775	6.43988	1098.61	FALSE	32
2022-09-15	12:39:26	1.48698	6.61438	990.681	FALSE	32
2022-09-15	12:39:26	1.53574	6.83128	1105.44	FALSE	32
2022-09-15	12:39:26	1.47726	6.57115	997.253	FALSE	32
2022-09-15	12:39:26	1.40312	6.24136	1111.69	FALSE	32
2022-09-15	12:39:27	1.42057	6.31898	1003.57	FALSE	32
2022-09-15	12:39:27	1.4621	6.50371	1118.19	FALSE	32
2022-09-15	12:39:27	1.47513	6.56167	1010.13	FALSE	32
2022-09-15	12:39:28	1.4533	6.46457	1124.65	FALSE	32
2022-09-15	12:39:28	1.45156	6.45683	1016.59	FALSE	32
2022-09-15	12:39:28	1.40688	6.25808	1130.91	FALSE	32
2022-09-15	12:39:28	1.39513	6.20582	1022.8	FALSE	32
2022-09-15	12:39:29	1.41961	6.31471	1137.23	FALSE	32
2022-09-15	12:39:29	1.70546	7.58623	1030.38	FALSE	32
2022-09-15	12:39:29	1.32439	5.89115	1143.12	FALSE	32
2022-09-15	12:39:29	1.02195	4.54584	1034.93	FALSE	32
2022-09-15	12:39:30	0.99014	4.40434	1147.52	FALSE	32
2022-09-15	12:39:30	0.953906	4.24316	1039.17	FALSE	32
2022-09-15	12:39:30	0.822659	3.65935	1151.18	FALSE	32
2022-09-15	12:39:30	0.652481	2.90237	1042.07	FALSE	32
2022-09-15	12:39:31	0.53874	2.39642	1153.58	FALSE	32
2022-09-15	12:39:31	0.600216	2.66988	1044.74	FALSE	32
2022-09-15	12:39:31	0.571514	2.54221	1156.12	FALSE	32
2022-09-15	12:39:32	0.561641	2.49829	1047.24	FALSE	32
2022-09-15	12:39:32	0.556654	2.47611	1158.6	FALSE	32
2022-09-15	12:39:32	0.533346	2.37243	1049.61	FALSE	32
2022-09-15	12:39:32	0.554517	2.4666	1161.06	FALSE	32
2022-09-15	12:39:33	0.574364	2.55489	1052.17	FALSE	32
2022-09-15	12:39:33	0.53874	2.39642	1163.46	FALSE	32
2022-09-15	12:39:33	0.529987	2.35749	1054.53	FALSE	32
2022-09-15	12:39:33	0.527137	2.34481	1165.8	FALSE	32
2022-09-15	12:39:34	0.592736	2.63661	1057.16	FALSE	32
2022-09-15	12:39:34	0.755585	3.36099	1169.16	FALSE	32
2022-09-15	12:39:34	0.777519	3.45856	1060.62	FALSE	32
2022-09-15	12:39:34	0.672176	2.98997	1172.15	FALSE	32
2022-09-15	12:39:35	0.674313	2.99948	1063.62	FALSE	32
2022-09-15	12:39:35	0.709275	3.155	1175.31	FALSE	32
2022-09-15	12:39:35	0.653499	2.90689	1066.53	FALSE	32
2022-09-15	12:39:36	0.302964	1.34764	1176.66	FALSE	32
2022-09-15	12:39:36	0.235942	1.04952	1067.58	FALSE	32
2022-09-15	12:39:36	-0.00512696	-0.0228057	1176.66	FALSE	32
2022-09-15	12:39:36	0.073957	0.328976	1067.91	FALSE	32
2022-09-15	12:39:37	0.177825	0.791001	1177.45	FALSE	32
2022-09-15	12:39:37	2.0364	9.05831	1076.96	FALSE	32
2022-09-15	12:39:37	0.818741	3.64192	1181.09	FALSE	32
2022-09-15	12:39:37	0.369784	1.64487	1078.61	FALSE	32
2022-09-15	12:39:38	0.364339	1.62065	1182.71	FALSE	32
2022-09-15	12:39:38	0.338333	1.50497	1080.11	FALSE	32
2022-09-15	12:39:38	0.099046	0.440576	1183.15	FALSE	32
2022-09-15	12:39:38	0.332328	1.47826	1081.59	FALSE	32
2022-09-15	12:39:39	0.366934	1.6322	1184.78	FALSE	32
2022-09-15	12:39:39	0.393143	1.74878	1083.34	FALSE	32
2022-09-15	12:39:39	0.329886	1.4674	1186.25	FALSE	32
2022-09-15	12:39:40	0.27411	1.2193	1084.56	FALSE	32
2022-09-15	12:39:40	0.15472	0.688226	1186.94	FALSE	32
2022-09-15	12:39:40	0.184542	0.82088	1085.38	FALSE	32
2022-09-15	12:39:40	0.109886	0.488795	1187.43	FALSE	32
2022-09-15	12:39:41	0.131769	0.586135	1085.97	FALSE	32
2022-09-15	12:39:41	0.114059	0.507357	1187.94	FALSE	32
2022-09-15	12:39:41	0.0963997	0.428805	1086.4	FALSE	32
2022-09-15	12:39:41	0.111514	0.496037	1188.43	FALSE	32
2022-09-15	12:39:42	0.109937	0.489022	1086.89	FALSE	32
2022-09-15	12:39:42	0.0556364	0.247482	1188.68	FALSE	32
2022-09-15	12:39:42	0.0797076	0.354555	1087.24	FALSE	32
2022-09-15	12:39:42	0.0318195	0.141539	1188.82	FALSE	32
2022-09-15	12:39:43	-0.0228878	-0.10181	1087.24	FALSE	32
2022-09-15	12:39:43	-0.00935089	-0.0415946	1188.82	FALSE	32
2022-09-15	12:39:43	-0.161005	-0.716182	1087.24	FALSE	32
2022-09-15	12:39:44	-0.370826	-1.64951	1188.82	FALSE	32
2022-09-15	12:39:44	-0.498511	-2.21748	1087.24	FALSE	32
2022-09-15	12:39:44	-0.710572	-3.16077	1188.82	FALSE	32
2022-09-15	12:39:44	-0.598918	-2.66411	1087.24	FALSE	32
2022-09-15	12:39:45	0.0826592	0.367685	1189.19	FALSE	32
2022-09-15	12:39:45	0.660318	2.93723	1090.18	FALSE	32
2022-09-15	12:39:45	0.518893	2.30814	1191.5	FALSE	32
2022-09-15	12:39:45	1.36953	6.09194	1096.27	FALSE	32
2022-09-15	12:39:46	2.59655	11.55	1203.05	FALSE	32
2022-09-15	12:39:46	2.3391	10.4048	1106.67	FALSE	32
2022-09-15	12:39:46	1.98149	8.81406	1211.86	FALSE	32
2022-09-15	12:39:46	0.766069	3.40763	1110.08	FALSE	32
2022-09-15	12:39:47	0.413244	1.83819	1213.7	FALSE	32
2022-09-15	12:39:47	0.191158	0.850309	1110.93	FALSE	32
2022-09-15	12:39:47	0.332481	1.47894	1215.18	FALSE	32
2022-09-15	12:39:48	0.549224	2.44306	1113.38	FALSE	32
2022-09-15	12:39:48	0.695534	3.09387	1218.27	FALSE	32
2022-09-15	12:39:48	0.0269341	0.119808	1113.5	FALSE	32
2022-09-15	12:39:48	0.604644	2.68958	1220.96	FALSE	32
2022-09-15	12:39:49	0.304695	1.35534	1114.85	FALSE	32
2022-09-15	12:39:49	-0.309096	-1.37492	1220.96	FALSE	32
2022-09-15	12:39:49	-0.519478	-2.31074	1114.85	FALSE	32
2022-09-15	12:39:49	-0.663854	-2.95296	1220.96	FALSE	32
2022-09-15	12:39:50	-0.496374	-2.20797	1114.85	FALSE	32
2022-09-15	12:39:50	-0.442837	-1.96983	1220.96	FALSE	32
2022-09-15	12:39:50	-0.243804	-1.08449	1114.85	FALSE	32
2022-09-15	12:39:50	-0.483142	-2.14911	1220.96	FALSE	32
2022-09-15	12:39:51	-0.104618	-0.465362	1114.85	FALSE	32
2022-09-15	12:39:51	-0.566602	-2.52036	1220.96	FALSE	32
2022-09-15	12:39:51	-0.412557	-1.83514	1114.85	FALSE	32
2022-09-15	12:39:51	-0.495203	-2.20276	1220.96	FALSE	32
2022-09-15	12:39:52	-0.329198	-1.46434	1114.85	FALSE	32
2022-09-15	12:39:52	-0.962633	-4.28198	1220.96	FALSE	32
2022-09-15	12:39:52	-1.12894	-5.02175	1114.85	FALSE	32
2022-09-15	12:39:53	-1.14095	-5.07517	1220.96	FALSE	32
2022-09-15	12:39:53	-1.17988	-5.24834	1114.85	FALSE	32
2022-09-15	12:39:53	-1.03607	-4.60865	1220.96	FALSE	32
2022-09-15	12:39:53	-1.24864	-5.5542	1114.85	FALSE	32
2022-09-15	12:39:54	-1.09856	-4.88661	1220.96	FALSE	32
2022-09-15	12:39:54	-1.1805	-5.2511	1114.85	FALSE	32
2022-09-15	12:39:54	-1.18467	-5.26965	1220.96	FALSE	32
2022-09-15	12:39:54	-1.30716	-5.81451	1114.85	FALSE	32
2022-09-15	12:39:55	-1.23597	-5.49784	1220.96	FALSE	32
2022-09-15	12:39:55	-1.255	-5.58249	1114.85	FALSE	32
2022-09-15	12:39:55	-1.07088	-4.76349	1220.96	FALSE	32
2022-09-15	12:39:55	-0.167621	-0.745612	1114.85	FALSE	32
2022-09-15	12:39:56	0.0979264	0.435596	1221.4	FALSE	32
2022-09-15	12:39:56	0.250903	1.11607	1115.97	FALSE	32
2022-09-15	12:39:56	0.443982	1.97492	1223.37	FALSE	32
2022-09-15	12:39:57	0.313295	1.3936	1117.36	FALSE	32
2022-09-15	12:39:57	1.25172	5.5679	1228.94	FALSE	32
2022-09-15	12:39:57	0.416858	1.85427	1119.21	FALSE	32
2022-09-15	12:39:57	0.198028	0.880868	1229.82	FALSE	32
2022-09-15	12:39:58	0.000979898	0.00435878	1119.22	FALSE	32
2022-09-15	12:39:58	-0.0160175	-0.071249	1229.82	FALSE	32
2022-09-15	12:39:58	-0.0944908	-0.420314	1119.22	FALSE	32
2022-09-15	12:39:58	-0.161666	-0.719123	1229.82	FALSE	32
2022-09-15	12:39:59	-0.176221	-0.783866	1119.22	FALSE	32
2022-09-15	12:39:59	-0.225839	-1.00458	1229.82	FALSE	32
2022-09-15	12:39:59	-0.365127	-1.62416	1119.22	FALSE	32
2022-09-15	12:39:59	-0.291437	-1.29637	1229.82	FALSE	32
2022-09-15	12:40:00	-0.0545417	-0.242612	1119.22	FALSE	32
2022-09-15	12:40:00	-0.0764756	-0.340179	1229.82	FALSE	32
2022-09-15	12:40:00	-0.134593	-0.598697	1119.22	FALSE	32
2022-09-15	12:40:01	-0.142582	-0.634233	1229.82	FALSE	32
2022-09-15	12:40:01	-0.230012	-1.02314	1119.22	FALSE	32
2022-09-15	12:40:01	-0.35846	-1.5945	1229.82	FALSE	32
2022-09-15	12:40:01	-0.272557	-1.21239	1119.22	FALSE	32
2022-09-15	12:40:02	-0.39332	-1.74957	1229.82	FALSE	32
2022-09-15	12:40:02	-0.595916	-2.65075	1119.22	FALSE	32
2022-09-15	12:40:02	-0.612557	-2.72478	1229.82	FALSE	32
2022-09-15	12:40:02	-0.573015	-2.54889	1119.22	FALSE	32
2022-09-15	12:40:03	-0.454541	-2.02189	1229.82	FALSE	32
2022-09-15	12:40:03	-0.416882	-1.85437	1119.22	FALSE	32
2022-09-15	12:40:03	-0.43561	-1.93768	1229.82	FALSE	32
2022-09-15	12:40:03	-0.400597	-1.78194	1119.22	FALSE	32
2022-09-15	12:40:04	-0.368384	-1.63865	1229.82	FALSE	32
2022-09-15	12:40:04	-0.348638	-1.55081	1119.22	FALSE	32
2022-09-15	12:40:04	-0.313473	-1.39439	1229.82	FALSE	32
2022-09-15	12:40:05	-0.428791	-1.90735	1119.22	FALSE	32
2022-09-15	12:40:05	-0.463346	-2.06106	1229.82	FALSE	32
2022-09-15	12:40:05	-0.363956	-1.61895	1119.22	FALSE	32
2022-09-15	12:40:05	-0.56248	-2.50202	1229.82	FALSE	32
2022-09-15	12:40:06	-0.442938	-1.97028	1119.22	FALSE	32
2022-09-15	12:40:06	-0.497239	-2.21182	1229.82	FALSE	32
2022-09-15	12:40:06	-0.387671	-1.72444	1119.22	FALSE	32
2022-09-15	12:40:06	-0.42131	-1.87407	1229.82	FALSE	32
2022-09-15	12:40:07	-0.456323	-2.02982	1119.22	FALSE	32
2022-09-15	12:40:07	-0.442938	-1.97028	1229.82	FALSE	32
2022-09-15	12:40:07	-0.424771	-1.88947	1119.22	FALSE	32
2022-09-15	12:40:07	-0.320547	-1.42586	1229.82	FALSE	32
2022-09-15	12:40:08	-0.233066	-1.03672	1119.22	FALSE	32
2022-09-15	12:40:08	-0.231997	-1.03197	1229.82	FALSE	32
2022-09-15	12:40:08	-0.121921	-0.542329	1119.22	FALSE	32
2022-09-15	12:40:09	0.204288	0.908714	1230.73	FALSE	32
2022-09-15	12:40:09	0.341234	1.51788	1120.74	FALSE	32
2022-09-15	12:40:09	0.735687	3.27248	1234	FALSE	32
2022-09-15	12:40:09	0.737722	3.28154	1124.02	FALSE	32
2022-09-15	12:40:10	0.733193	3.26139	1237.26	FALSE	32
2022-09-15	12:40:10	0.731107	3.25211	1127.27	FALSE	32
2022-09-15	12:40:10	0.730242	3.24826	1240.51	FALSE	32
2022-09-15	12:40:10	0.737214	3.27928	1130.55	FALSE	32
2022-09-15	12:40:11	0.739097	3.28765	1243.8	FALSE	32
2022-09-15	12:40:11	0.734822	3.26864	1133.82	FALSE	32
2022-09-15	12:40:11	0.735738	3.27271	1247.07	FALSE	32
2022-09-15	12:40:11	0.705458	3.13802	1136.96	FALSE	32
2022-09-15	12:40:12	0.73528	3.27067	1250.34	FALSE	32
2022-09-15	12:40:12	0.595178	2.64747	1139.6	FALSE	32
2022-09-15	12:40:12	0.728104	3.23875	1253.58	FALSE	32
2022-09-15	12:40:13	0.738028	3.2829	1142.89	FALSE	32
2022-09-15	12:40:13	0.735941	3.27361	1256.85	FALSE	32
2022-09-15	12:40:13	0.734669	3.26795	1146.15	FALSE	32
2022-09-15	12:40:13	0.734415	3.26682	1260.12	FALSE	32
2022-09-15	12:40:14	0.733244	3.26162	1149.42	FALSE	32
2022-09-15	12:40:14	0.727188	3.23468	1263.36	FALSE	32
2022-09-15	12:40:14	0.735433	3.27135	1152.69	FALSE	32
2022-09-15	12:40:14	0.73355	3.26298	1266.62	FALSE	32
2022-09-15	12:40:15	0.733855	3.26433	1155.95	FALSE	32
2022-09-15	12:40:15	0.737163	3.27905	1269.9	FALSE	32
2022-09-15	12:40:15	0.726527	3.23174	1159.18	FALSE	32
2022-09-15	12:40:15	0.738893	3.28674	1273.18	FALSE	32
2022-09-15	12:40:16	0.71355	3.17401	1162.36	FALSE	32
2022-09-15	12:40:16	0.732023	3.25618	1276.44	FALSE	32
2022-09-15	12:40:16	0.732023	3.25618	1165.61	FALSE	32
2022-09-15	12:40:17	0.734109	3.26546	1279.71	FALSE	32
2022-09-15	12:40:17	0.736705	3.27701	1168.89	FALSE	32
2022-09-15	12:40:17	0.733193	3.26139	1282.97	FALSE	32
2022-09-15	12:40:17	0.731361	3.25324	1172.14	FALSE	32
2022-09-15	12:40:18	0.737315	3.27972	1286.25	FALSE	32
2022-09-15	12:40:18	0.737366	3.27995	1175.42	FALSE	32
2022-09-15	12:40:18	0.732888	3.26003	1289.51	FALSE	32
2022-09-15	12:40:18	0.736603	3.27656	1178.7	FALSE	32
2022-09-15	12:40:19	0.72897	3.2426	1292.75	FALSE	32
2022-09-15	12:40:19	0.737265	3.2795	1181.98	FALSE	32
2022-09-15	12:40:19	0.735992	3.27384	1296.02	FALSE	32
2022-09-15	12:40:19	0.735636	3.27226	1185.25	FALSE	32
2022-09-15	12:40:20	0.737519	3.28063	1299.3	FALSE	32
2022-09-15	12:40:20	0.737824	3.28199	1188.53	FALSE	32
2022-09-15	12:40:20	0.738842	3.28652	1302.59	FALSE	32
2022-09-15	12:40:21	0.729936	3.2469	1191.78	FALSE	32
2022-09-15	12:40:21	0.733702	3.26365	1305.85	FALSE	32
2022-09-15	12:40:21	0.450903	2.00571	1193.79	FALSE	32
2022-09-15	12:40:21	-0.568079	-2.52693	1305.85	FALSE	32
2022-09-15	12:40:22	-0.749249	-3.33281	1193.79	FALSE	32
2022-09-15	12:40:22	-0.759172	-3.37695	1305.85	FALSE	32
2022-09-15	12:40:22	-0.835304	-3.7156	1193.79	FALSE	32
2022-09-15	12:40:22	-0.699376	-3.11096	1305.85	FALSE	32
2022-09-15	12:40:23	-0.590318	-2.62585	1193.79	FALSE	32
2022-09-15	12:40:23	-0.4236	-1.88426	1305.85	FALSE	32
2022-09-15	12:40:23	0.0320231	0.142445	1193.93	FALSE	32
2022-09-15	12:40:23	0.603779	2.68573	1308.54	FALSE	32
2022-09-15	12:40:24	0.635382	2.82631	1196.76	FALSE	32
2022-09-15	12:40:24	0.688766	3.06377	1311.6	FALSE	32
2022-09-15	12:40:24	0.735433	3.27135	1200.03	FALSE	32
2022-09-15	12:40:25	0.710038	3.15839	1314.76	FALSE	32
2022-09-15	12:40:25	0.688613	3.06309	1203.09	FALSE	32
2022-09-15	12:40:25	0.700216	3.1147	1317.88	FALSE	32
2022-09-15	12:40:25	0.716043	3.1851	1206.28	FALSE	32
2022-09-15	12:40:26	0.726527	3.23174	1321.11	FALSE	32
2022-09-15	12:40:26	0.734822	3.26864	1209.54	FALSE	32
2022-09-15	12:40:26	0.628817	2.7971	1323.91	FALSE	32
2022-09-15	12:40:26	0.689275	3.06603	1212.61	FALSE	32
2022-09-15	12:40:27	0.613346	2.72829	1326.63	FALSE	32
2022-09-15	12:40:27	0.725916	3.22902	1215.84	FALSE	32
2022-09-15	12:40:27	0.716908	3.18895	1329.82	FALSE	32
2022-09-15	12:40:27	0.68271	3.03683	1218.88	FALSE	32
2022-09-15	12:40:28	0.727545	3.23627	1333.06	FALSE	32
2022-09-15	12:40:28	0.534669	2.37831	1221.25	FALSE	32
2022-09-15	12:40:28	0.719504	3.2005	1336.26	FALSE	32
2022-09-15	12:40:29	0.498333	2.21668	1223.47	FALSE	32
2022-09-15	12:40:29	0.722812	3.21521	1339.48	FALSE	32
2022-09-15	12:40:29	0.617468	2.74662	1226.22	FALSE	32
2022-09-15	12:40:29	0.703015	3.12715	1342.6	FALSE	32
2022-09-15	12:40:30	0.628562	2.79597	1229.01	FALSE	32
2022-09-15	12:40:30	0.69701	3.10044	1345.7	FALSE	32
2022-09-15	12:40:30	0.725865	3.22879	1232.24	FALSE	32
2022-09-15	12:40:30	0.488664	2.17368	1347.88	FALSE	32
2022-09-15	12:40:31	0.585865	2.60604	1234.85	FALSE	32
2022-09-15	12:40:31	0.556501	2.47543	1350.35	FALSE	32
2022-09-15	12:40:31	0.429631	1.91108	1236.76	FALSE	32
2022-09-15	12:40:31	0.356298	1.58488	1351.94	FALSE	32
2022-09-15	12:40:32	0.33757	1.50158	1238.26	FALSE	32
2022-09-15	12:40:32	-0.0840073	-0.373681	1351.94	FALSE	32
2022-09-15	12:40:32	-0.0752541	-0.334745	1238.26	FALSE	32
2022-09-15	12:40:33	-0.22299	-0.991904	1351.94	FALSE	32
2022-09-15	12:40:33	-0.337086	-1.49943	1238.26	FALSE	32
2022-09-15	12:40:33	0.0620994	0.276231	1352.21	FALSE	32
2022-09-15	12:40:33	0.119962	0.533615	1238.79	FALSE	32
2022-09-15	12:40:34	0.0142623	0.0634416	1352.28	FALSE	32
2022-09-15	12:40:34	-0.133066	-0.591904	1238.79	FALSE	32
2022-09-15	12:40:34	-0.326094	-1.45053	1352.28	FALSE	32
2022-09-15	12:40:34	-0.423244	-1.88267	1238.79	FALSE	32
2022-09-15	12:40:35	-0.393778	-1.7516	1352.28	FALSE	32
2022-09-15	12:40:35	-0.362429	-1.61216	1238.79	FALSE	32
2022-09-15	12:40:35	-0.36014	-1.60197	1352.28	FALSE	32
2022-09-15	12:40:35	-0.378206	-1.68234	1238.79	FALSE	32
2022-09-15	12:40:36	-0.374491	-1.66581	1352.28	FALSE	32
2022-09-15	12:40:36	-0.361921	-1.6099	1238.79	FALSE	32
2022-09-15	12:40:36	-0.3779	-1.68097	1352.28	FALSE	32
2022-09-15	12:40:37	-0.361463	-1.60786	1238.79	FALSE	32
2022-09-15	12:40:37	-0.387061	-1.72172	1352.28	FALSE	32
2022-09-15	12:40:37	-0.42248	-1.87928	1238.79	FALSE	32
2022-09-15	12:40:37	-0.402786	-1.79167	1352.28	FALSE	32
2022-09-15	12:40:38	-0.399987	-1.77922	1238.79	FALSE	32
2022-09-15	12:40:38	-0.368842	-1.64068	1352.28	FALSE	32
2022-09-15	12:40:38	-0.335712	-1.49331	1238.79	FALSE	32
2022-09-15	12:40:38	-0.31958	-1.42156	1352.28	FALSE	32
2022-09-15	12:40:39	-0.353778	-1.57368	1238.79	FALSE	32
2022-09-15	12:40:39	-0.604923	-2.69082	1352.28	FALSE	32
2022-09-15	12:40:39	-0.329707	-1.4666	1238.79	FALSE	32
2022-09-15	12:40:39	0.526476	2.34187	1354.62	FALSE	32
2022-09-15	12:40:40	0.696552	3.0984	1241.89	FALSE	32
2022-09-15	12:40:40	0.727494	3.23604	1357.85	FALSE	32
2022-09-15	12:40:40	0.65645	2.92002	1244.81	FALSE	32
2022-09-15	12:40:41	-0.396221	-1.76247	1357.85	FALSE	32
2022-09-15	12:40:41	0.337417	1.5009	1246.31	FALSE	32
2022-09-15	12:40:41	0.524593	2.33349	1360.19	FALSE	32
2022-09-15	12:40:41	0.423626	1.88437	1248.2	FALSE	32
2022-09-15	12:40:42	0.354059	1.57493	1361.76	FALSE	32
2022-09-15	12:40:42	0.507748	2.25856	1250.46	FALSE	32
2022-09-15	12:40:42	-0.035814	-0.159308	1361.76	FALSE	32
2022-09-15	12:40:42	-0.304974	-1.35659	1250.46	FALSE	32
2022-09-15	12:40:43	-1.01943	-4.53463	1361.76	FALSE	32
2022-09-15	12:40:43	-0.848078	-3.77242	1250.46	FALSE	32
2022-09-15	12:40:43	-0.858206	-3.81747	1361.76	FALSE	32
2022-09-15	12:40:43	-1.18864	-5.28731	1250.46	FALSE	32
2022-09-15	12:40:44	-1.31317	-5.84124	1361.76	FALSE	32
2022-09-15	12:40:44	-1.01434	-4.51199	1250.46	FALSE	32
2022-09-15	12:40:44	-0.698103	-3.1053	1361.76	FALSE	32
2022-09-15	12:40:45	-0.966094	-4.29738	1250.46	FALSE	32
2022-09-15	12:40:45	-0.301208	-1.33983	1361.76	FALSE	32
2022-09-15	12:40:45	-0.291539	-1.29682	1250.46	FALSE	32
2022-09-15	12:40:45	-0.188231	-0.837289	1361.76	FALSE	32
2022-09-15	12:40:46	-0.191081	-0.849967	1250.46	FALSE	32
2022-09-15	12:40:46	-0.338155	-1.50418	1361.76	FALSE	32
2022-09-15	12:40:46	-0.434338	-1.93202	1250.46	FALSE	32
2022-09-15	12:40:46	-0.315203	-1.40209	1361.76	FALSE	32
2022-09-15	12:40:47	-0.0746435	-0.332029	1250.46	FALSE	32
2022-09-15	12:40:47	-0.214389	-0.953645	1361.76	FALSE	32
2022-09-15	12:40:47	0.270445	1.20299	1251.66	FALSE	32
2022-09-15	12:40:47	0.0460689	0.204924	1361.97	FALSE	32
2022-09-15	12:40:48	0.16958	0.754326	1252.41	FALSE	32
2022-09-15	12:40:48	0.148104	0.658796	1362.63	FALSE	32
2022-09-15	12:40:48	0.623422	2.77311	1255.19	FALSE	32
2022-09-15	12:40:48	0.574313	2.55466	1365.18	FALSE	32
2022-09-15	12:40:49	0.667443	2.96892	1258.16	FALSE	32
2022-09-15	12:40:49	0.723677	3.21906	1368.4	FALSE	32
2022-09-15	12:40:49	0.67131	2.98612	1261.14	FALSE	32
2022-09-15	12:40:50	0.724389	3.22223	1371.62	FALSE	32
2022-09-15	12:40:50	0.501692	2.23163	1263.37	FALSE	32
2022-09-15	12:40:50	0.727545	3.23627	1374.86	FALSE	32
2022-09-15	12:40:50	0.703575	3.12964	1266.5	FALSE	32
2022-09-15	12:40:51	0.708206	3.15024	1378.01	FALSE	32
2022-09-15	12:40:51	0.674008	2.99812	1269.5	FALSE	32
2022-09-15	12:40:51	0.492227	2.18952	1380.2	FALSE	32
2022-09-15	12:40:51	0.63701	2.83355	1272.34	FALSE	32
2022-09-15	12:40:52	0.340878	1.51629	1381.72	FALSE	32
2022-09-15	12:40:52	0.636755	2.83241	1275.17	FALSE	32
2022-09-15	12:40:52	0.191107	0.850082	1382.57	FALSE	32
2022-09-15	12:40:52	0.422659	1.88007	1277.05	FALSE	32
2022-09-15	12:40:53	0.383015	1.70373	1384.27	FALSE	32
2022-09-15	12:40:53	0.303982	1.35217	1278.4	FALSE	32
2022-09-15	12:40:53	0.366883	1.63197	1385.9	FALSE	32
2022-09-15	12:40:54	-0.0182059	-0.0809835	1278.4	FALSE	32
2022-09-15	12:40:54	0.361336	1.60729	1387.51	FALSE	32
2022-09-15	12:40:54	-0.100801	-0.448383	1278.4	FALSE	32
2022-09-15	12:40:54	0.199962	0.889471	1388.4	FALSE	32
2022-09-15	12:40:55	-0.0205468	-0.0913963	1278.4	FALSE	32
2022-09-15	12:40:55	-0.241208	-1.07294	1388.4	FALSE	32
2022-09-15	12:40:55	-0.243498	-1.08313	1278.4	FALSE	32
2022-09-15	12:40:55	-0.378715	-1.6846	1388.4	FALSE	32
2022-09-15	12:40:56	-0.0855849	-0.380699	1278.4	FALSE	32
2022-09-15	12:40:56	-0.525127	-2.33587	1388.4	FALSE	32
2022-09-15	12:40:56	-0.358714	-1.59563	1278.4	FALSE	32
2022-09-15	12:40:56	-0.651233	-2.89681	1388.4	FALSE	32
2022-09-15	12:40:57	-0.757646	-3.37016	1278.4	FALSE	32
2022-09-15	12:40:57	-0.791742	-3.52183	1388.4	FALSE	32
2022-09-15	12:40:57	-1.26105	-5.6094	1278.4	FALSE	32
2022-09-15	12:40:58	-0.859325	-3.82245	1388.4	FALSE	32
2022-09-15	12:40:58	-1.4378	-6.39562	1278.4	FALSE	32
2022-09-15	12:40:58	-1.31154	-5.83399	1388.4	FALSE	32
2022-09-15	12:40:58	-1.45413	-6.46826	1278.4	FALSE	32
2022-09-15	12:40:59	-1.32289	-5.88448	1388.4	FALSE	32
2022-09-15	12:40:59	-2.55184	-11.3511	1278.4	FALSE	32
2022-09-15	12:40:59	-5.33815	-23.7452	1388.4	FALSE	32
2022-09-15	12:40:59	-4.84192	-21.5378	1278.4	FALSE	32
2022-09-15	12:41:00	-4.32365	-19.2325	1388.4	FALSE	32
2022-09-15	12:41:00	-4.55418	-20.2579	1278.4	FALSE	32
2022-09-15	12:41:00	-8.90462	-39.6095	1388.4	FALSE	32
2022-09-15	12:41:00	-8.90971	-39.6322	1278.4	FALSE	32
2022-09-15	12:41:01	-7.90538	-35.1647	1388.4	FALSE	32
2022-09-15	12:41:01	-7.75912	-34.5141	1278.4	FALSE	32
2022-09-15	12:41:01	-5.52472	-24.5751	1388.4	FALSE	32
2022-09-15	12:41:02	-6.11902	-27.2186	1278.4	FALSE	32
2022-09-15	12:41:02	-7.87108	-35.0121	1388.4	FALSE	32
2022-09-15	12:41:02	-8.93688	-39.753	1278.4	FALSE	32
2022-09-15	12:41:02	-8.9551	-39.8341	1388.4	FALSE	32
2022-09-15	12:41:03	-8.80945	-39.1862	1278.4	FALSE	32
2022-09-15	12:41:03	-8.29617	-36.903	1388.4	FALSE	32
2022-09-15	12:41:03	-7.54044	-33.5414	1278.4	FALSE	32
2022-09-15	12:41:03	-6.68248	-29.725	1388.4	FALSE	32
2022-09-15	12:41:04	-6.26182	-27.8538	1278.4	FALSE	32
2022-09-15	12:41:04	-6.02482	-26.7996	1388.4	FALSE	32
2022-09-15	12:41:04	-5.84004	-25.9777	1278.4	FALSE	32
2022-09-15	12:41:04	-5.28711	-23.5181	1388.4	FALSE	32
2022-09-15	12:41:05	-4.70518	-20.9296	1278.4	FALSE	32
2022-09-15	12:41:05	-4.57607	-20.3553	1388.4	FALSE	32
2022-09-15	12:41:05	-4.47591	-19.9097	1278.4	FALSE	32
2022-09-15	12:41:06	-4.43312	-19.7194	1388.4	FALSE	32
2022-09-15	12:41:06	-4.36014	-19.3948	1278.4	FALSE	32
2022-09-15	12:41:06	-4.41337	-19.6316	1388.4	FALSE	32
2022-09-15	12:41:06	-4.46233	-19.8493	1278.4	FALSE	32
2022-09-15	12:41:07	-4.44762	-19.7839	1388.4	FALSE	32
2022-09-15	12:41:07	-4.43973	-19.7488	1278.4	FALSE	32
2022-09-15	12:41:07	-4.40156	-19.579	1388.4	FALSE	32
2022-09-15	12:41:07	-4.39072	-19.5308	1278.4	FALSE	32
2022-09-15	12:41:08	-3.78533	-16.8379	1388.4	FALSE	32
2022-09-15	12:41:08	-0.330725	-1.47113	1278.4	FALSE	32
2022-09-15	12:41:08	0.677926	3.01555	1391.41	FALSE	32
2022-09-15	12:41:08	-2.98859	-13.2938	1278.4	FALSE	32
2022-09-15	12:41:09	-3.18416	-14.1638	1391.41	FALSE	32
2022-09-15	12:41:09	0.225662	1.00379	1279.4	FALSE	32
2022-09-15	12:41:09	0.728461	3.24034	1394.65	FALSE	32
2022-09-15	12:41:10	0.461132	2.05121	1281.45	FALSE	32
2022-09-15	12:41:10	0.7393	3.28855	1397.94	FALSE	32
2022-09-15	12:41:10	0.728054	3.23853	1284.69	FALSE	32
2022-09-15	12:41:10	-0.663752	-2.9525	1397.94	FALSE	32
2022-09-15	12:41:11	0.221387	0.984774	1285.68	FALSE	32
2022-09-15	12:41:11	-0.0210048	-0.0934336	1397.94	FALSE	32
2022-09-15	12:41:11	0.456909	2.03242	1287.71	FALSE	32
2022-09-15	12:41:11	0.23925	1.06423	1399.01	FALSE	32
2022-09-15	12:41:12	-0.399376	-1.7765	1287.71	FALSE	32
2022-09-15	12:41:12	0.476043	2.11753	1401.12	FALSE	32
2022-09-15	12:41:12	0.555738	2.47203	1290.18	FALSE	32
2022-09-15	12:41:12	1.20322	5.35216	1406.48	FALSE	32
2022-09-15	12:41:13	1.77207	7.88252	1298.07	FALSE	32
2022-09-15	12:41:13	2.17268	9.66452	1416.14	FALSE	32
2022-09-15	12:41:13	1.51762	6.75068	1304.82	FALSE	32
2022-09-15	12:41:14	1.70882	7.60117	1423.74	FALSE	32
2022-09-15	12:41:14	1.2764	5.67768	1310.49	FALSE	32
2022-09-15	12:41:14	1.40607	6.25448	1430	FALSE	32
2022-09-15	12:41:14	1.88846	8.40025	1318.89	FALSE	32
2022-09-15	12:41:15	0.903219	4.0177	1434.01	FALSE	32
2022-09-15	12:41:15	1.96302	8.73191	1327.63	FALSE	32
2022-09-15	12:41:15	1.48617	6.61078	1440.62	FALSE	32
2022-09-15	12:41:15	1.22831	5.46377	1333.09	FALSE	32
2022-09-15	12:41:16	1.84454	8.20488	1448.83	FALSE	32
2022-09-15	12:41:16	0.792176	3.52376	1336.61	FALSE	32
2022-09-15	12:41:16	0.598232	2.66106	1451.49	FALSE	32
2022-09-15	12:41:16	0.695534	3.09387	1339.71	FALSE	32
2022-09-15	12:41:17	-0.38701	-1.7215	1451.49	FALSE	32
2022-09-15	12:41:17	-0.500648	-2.22698	1339.71	FALSE	32
2022-09-15	12:41:17	-0.533829	-2.37458	1451.49	FALSE	32
2022-09-15	12:41:18	-0.382888	-1.70316	1339.71	FALSE	32
2022-09-15	12:41:18	-0.12757	-0.567457	1451.49	FALSE	32
2022-09-15	12:41:18	0.285611	1.27045	1340.98	FALSE	32
2022-09-15	12:41:18	0.0761453	0.33871	1451.83	FALSE	32
2022-09-15	12:41:19	0.237672	1.05721	1342.03	FALSE	32
2022-09-15	12:41:19	0.190598	0.847818	1452.68	FALSE	32
2022-09-15	12:41:19	0.105255	0.468195	1342.5	FALSE	32
2022-09-15	12:41:19	-0.0888929	-0.395413	1452.68	FALSE	32
2022-09-15	12:41:20	-0.105381	-0.468756	1342.5	FALSE	32
2022-09-15	12:41:20	0.327392	1.45631	1454.13	FALSE	32
2022-09-15	12:41:20	-0.063702	-0.283359	1342.5	FALSE	32
2022-09-15	12:41:20	0.0207254	0.0921907	1454.23	FALSE	32
2022-09-15	12:41:21	0.124542	0.553988	1343.06	FALSE	32
2022-09-15	12:41:21	0.317112	1.41058	1455.64	FALSE	32
2022-09-15	12:41:21	0.265051	1.179	1344.24	FALSE	32
2022-09-15	12:41:22	0.247494	1.1009	1456.74	FALSE	32
2022-09-15	12:41:22	0.417316	1.85631	1346.09	FALSE	32
2022-09-15	12:41:22	0.15584	0.693207	1457.43	FALSE	32
2022-09-15	12:41:22	0.43584	1.9387	1348.03	FALSE	32
2022-09-15	12:41:23	0.300827	1.33814	1458.77	FALSE	32
2022-09-15	12:41:23	0.988613	4.39755	1352.43	FALSE	32
2022-09-15	12:41:23	1.29116	5.74334	1464.51	FALSE	32
2022-09-15	12:41:23	1.37767	6.12815	1358.56	FALSE	32
2022-09-15	12:41:24	0.666374	2.96416	1467.48	FALSE	32
2022-09-15	12:41:24	0.618639	2.75183	1361.31	FALSE	32
2022-09-15	12:41:24	0.260267	1.15772	1468.63	FALSE	32
2022-09-15	12:41:24	1.22098	5.43116	1366.74	FALSE	32
2022-09-15	12:41:25	1.11039	4.93924	1473.57	FALSE	32
2022-09-15	12:41:25	2.72312	12.113	1378.85	FALSE	32
2022-09-15	12:41:25	3.30317	14.6932	1488.27	1	33
2022-09-15	12:41:26	2.38006	10.587	1389.44	FALSE	33
2022-09-15	12:41:26	3.65431	16.2551	1504.52	1	34
2022-09-15	12:41:26	0.837417	3.725	1393.16	FALSE	34
2022-09-15	12:41:26	0.21126	0.939727	1505.46	FALSE	34
2022-09-15	12:41:27	0.055789	0.248161	1393.41	FALSE	34
2022-09-15	12:41:27	0.443015	1.97062	1507.43	FALSE	34
2022-09-15	12:41:27	0.734517	3.26728	1396.68	FALSE	34
2022-09-15	12:41:27	0.732786	3.25958	1510.69	FALSE	34
2022-09-15	12:41:28	0.734924	3.26909	1399.95	FALSE	34
2022-09-15	12:41:28	0.622201	2.76767	1513.46	FALSE	34
2022-09-15	12:41:28	0.00423688	0.0188465	1399.97	FALSE	34
2022-09-15	12:41:28	0.731209	3.25256	1516.71	FALSE	34
2022-09-15	12:41:29	0.739962	3.2915	1403.26	FALSE	34
2022-09-15	12:41:29	0.732277	3.25731	1519.97	FALSE	34
2022-09-15	12:41:29	0.52556	2.3378	1405.6	FALSE	34
2022-09-15	12:41:30	0.73243	3.258	1523.23	FALSE	34
2022-09-15	12:41:30	0.735636	3.27226	1408.87	FALSE	34
2022-09-15	12:41:30	0.733092	3.26094	1526.49	FALSE	34
2022-09-15	12:41:30	0.73014	3.24781	1412.12	FALSE	34
2022-09-15	12:41:31	0.740114	3.29218	1529.78	FALSE	34
2022-09-15	12:41:31	0.735687	3.27248	1415.39	FALSE	34
2022-09-15	12:41:31	0.737773	3.28176	1533.06	FALSE	34
2022-09-15	12:41:31	0.73701	3.27837	1418.67	FALSE	34
2022-09-15	12:41:32	0.735738	3.27271	1536.33	FALSE	34
2022-09-15	12:41:32	0.729224	3.24373	1421.91	FALSE	34
2022-09-15	12:41:32	0.734771	3.26841	1539.6	FALSE	34
2022-09-15	12:41:32	0.732328	3.25754	1425.17	FALSE	34
2022-09-15	12:41:33	0.736094	3.27429	1542.88	FALSE	34
2022-09-15	12:41:33	0.733193	3.26139	1428.43	FALSE	34
2022-09-15	12:41:33	0.733295	3.26184	1546.14	FALSE	34
2022-09-15	12:41:34	0.732735	3.25935	1431.69	FALSE	34
2022-09-15	12:41:34	0.732735	3.25935	1549.4	FALSE	34
2022-09-15	12:41:34	0.731107	3.25211	1434.94	FALSE	34
2022-09-15	12:41:34	0.736196	3.27475	1552.67	FALSE	34
2022-09-15	12:41:35	0.731005	3.25166	1438.19	FALSE	34
2022-09-15	12:41:35	0.733499	3.26275	1555.94	FALSE	34
2022-09-15	12:41:35	0.726221	3.23038	1441.42	FALSE	34
2022-09-15	12:41:35	0.733957	3.26479	1559.2	FALSE	34
2022-09-15	12:41:36	0.736247	3.27497	1444.7	FALSE	34
2022-09-15	12:41:36	0.735076	3.26977	1562.47	FALSE	34
2022-09-15	12:41:36	0.735127	3.26999	1447.97	FALSE	34
2022-09-15	12:41:36	0.731514	3.25392	1565.72	FALSE	34
2022-09-15	12:41:37	0.733397	3.2623	1451.23	FALSE	34
2022-09-15	12:41:37	0.733295	3.26184	1568.99	FALSE	34
2022-09-15	12:41:37	0.736603	3.27656	1454.51	FALSE	34
2022-09-15	12:41:38	0.512583	2.28007	1571.27	FALSE	34
2022-09-15	12:41:38	0.635432	2.82653	1457.33	FALSE	34
2022-09-15	12:41:38	0.704542	3.13394	1574.4	FALSE	34
2022-09-15	12:41:38	0.678232	3.01691	1460.35	FALSE	34
2022-09-15	12:41:39	0.736247	3.27497	1577.68	FALSE	34
2022-09-15	12:41:39	0.735687	3.27248	1463.62	FALSE	34
2022-09-15	12:41:39	0.735992	3.27384	1580.95	FALSE	34
2022-09-15	12:41:39	0.73131	3.25301	1466.88	FALSE	34
2022-09-15	12:41:40	0.736298	3.2752	1584.22	FALSE	34
2022-09-15	12:41:40	0.737773	3.28176	1470.16	FALSE	34
2022-09-15	12:41:40	0.73645	3.27588	1587.5	FALSE	34
2022-09-15	12:41:40	0.731056	3.25188	1473.41	FALSE	34
2022-09-15	12:41:41	0.721997	3.21159	1590.71	FALSE	34
2022-09-15	12:41:41	0.738181	3.28358	1476.69	FALSE	34
2022-09-15	12:41:41	0.73014	3.24781	1593.96	FALSE	34
2022-09-15	12:41:41	0.73584	3.27316	1479.97	FALSE	34
2022-09-15	12:41:42	0.73131	3.25301	1597.21	FALSE	34
2022-09-15	12:41:42	0.732583	3.25868	1483.23	FALSE	34
2022-09-15	12:41:42	0.733499	3.26275	1600.48	FALSE	34
2022-09-15	12:41:43	0.733906	3.26456	1486.49	FALSE	34
2022-09-15	12:41:43	0.733193	3.26139	1603.74	FALSE	34
2022-09-15	12:41:43	0.737773	3.28176	1489.77	FALSE	34
2022-09-15	12:41:43	0.737875	3.28222	1607.02	FALSE	34
2022-09-15	12:41:44	0.734262	3.26614	1493.04	FALSE	34
2022-09-15	12:41:44	0.735687	3.27248	1610.29	FALSE	34
2022-09-15	12:41:44	0.729529	3.24509	1496.28	FALSE	34
2022-09-15	12:41:44	0.740064	3.29195	1613.58	FALSE	34
2022-09-15	12:41:45	0.731768	3.25505	1499.54	FALSE	34
2022-09-15	12:41:45	0.728817	3.24192	1616.83	FALSE	34
2022-09-15	12:41:45	0.720013	3.20276	1502.74	FALSE	34
2022-09-15	12:41:45	0.715789	3.18397	1620.01	FALSE	34
2022-09-15	12:41:46	0.734109	3.26546	1506.01	FALSE	34
2022-09-15	12:41:46	0.731056	3.25188	1623.26	FALSE	34
2022-09-15	12:41:46	0.726832	3.23309	1509.24	FALSE	34
2022-09-15	12:41:47	0.736908	3.27791	1626.54	FALSE	34
2022-09-15	12:41:47	0.73472	3.26818	1512.51	FALSE	34
2022-09-15	12:41:47	0.73528	3.27067	1629.81	FALSE	34
2022-09-15	12:41:47	0.735992	3.27384	1515.78	FALSE	34
2022-09-15	12:41:48	0.661845	2.94402	1632.75	FALSE	34
2022-09-15	12:41:48	0.739351	3.28878	1519.07	FALSE	34
2022-09-15	12:41:48	0.731972	3.25596	1636.01	FALSE	34
2022-09-15	12:41:48	0.422557	1.87962	1520.95	FALSE	34
2022-09-15	12:41:49	0.305967	1.361	1637.37	FALSE	34
2022-09-15	12:41:49	0.674058	2.99834	1523.95	FALSE	34
2022-09-15	12:41:49	0.73701	3.27837	1640.65	FALSE	34
2022-09-15	12:41:49	0.738435	3.28471	1527.23	FALSE	34
2022-09-15	12:41:50	0.741081	3.29648	1643.95	FALSE	34
2022-09-15	12:41:50	0.728817	3.24192	1530.48	FALSE	34
2022-09-15	12:41:50	0.735992	3.27384	1647.22	FALSE	34
2022-09-15	12:41:51	0.735483	3.27158	1533.75	FALSE	34
2022-09-15	12:41:51	0.738231	3.2838	1650.5	FALSE	34
2022-09-15	12:41:51	0.732125	3.25664	1537	FALSE	34
2022-09-15	12:41:51	0.739504	3.28946	1653.79	FALSE	34
2022-09-15	12:41:52	0.733092	3.26094	1540.26	FALSE	34
2022-09-15	12:41:52	0.733092	3.26094	1657.05	FALSE	34
2022-09-15	12:41:52	0.734618	3.26773	1543.53	FALSE	34
2022-09-15	12:41:52	0.738588	3.28539	1660.34	FALSE	34
2022-09-15	12:41:53	0.734059	3.26524	1546.8	FALSE	34
2022-09-15	12:41:53	0.734822	3.26864	1663.61	FALSE	34
2022-09-15	12:41:53	0.735229	3.27045	1550.07	FALSE	34
2022-09-15	12:41:53	0.728512	3.24057	1666.85	FALSE	34
2022-09-15	12:41:54	0.736705	3.27701	1553.34	FALSE	34
2022-09-15	12:41:54	0.741743	3.29942	1670.15	FALSE	34
2022-09-15	12:41:54	0.736552	3.27633	1556.62	FALSE	34
2022-09-15	12:41:55	0.691107	3.07418	1673.22	FALSE	34
2022-09-15	12:41:55	0.731717	3.25482	1559.88	FALSE	34
2022-09-15	12:41:55	0.71187	3.16654	1676.39	FALSE	34
2022-09-15	12:41:55	0.733499	3.26275	1563.14	FALSE	34
2022-09-15	12:41:56	0.735127	3.26999	1679.66	FALSE	34
2022-09-15	12:41:56	0.737163	3.27905	1566.42	FALSE	34
2022-09-15	12:41:56	0.737315	3.27972	1682.94	FALSE	34
2022-09-15	12:41:56	0.725712	3.22811	1569.65	FALSE	34
2022-09-15	12:41:57	0.734517	3.26728	1686.21	FALSE	34
2022-09-15	12:41:57	0.734008	3.26501	1572.91	FALSE	34
2022-09-15	12:41:57	0.727036	3.234	1689.44	FALSE	34
2022-09-15	12:41:57	0.731361	3.25324	1576.16	FALSE	34
2022-09-15	12:41:58	0.735738	3.27271	1692.71	FALSE	34
2022-09-15	12:41:58	0.731717	3.25482	1579.42	FALSE	34
2022-09-15	12:41:58	0.733804	3.26411	1695.98	FALSE	34
2022-09-15	12:41:59	0.736501	3.2761	1582.7	FALSE	34
2022-09-15	12:41:59	0.729631	3.24554	1699.22	FALSE	34
2022-09-15	12:41:59	0.732379	3.25777	1585.95	FALSE	34
2022-09-15	12:41:59	0.736756	3.27724	1702.5	FALSE	34
2022-09-15	12:42:00	0.735941	3.27361	1589.23	FALSE	34
2022-09-15	12:42:00	0.733092	3.26094	1705.76	FALSE	34
2022-09-15	12:42:00	0.734618	3.26773	1592.49	FALSE	34
2022-09-15	12:42:00	0.733753	3.26388	1709.02	FALSE	34
2022-09-15	12:42:01	0.739656	3.29014	1595.78	FALSE	34
2022-09-15	12:42:01	0.735687	3.27248	1712.3	FALSE	34
2022-09-15	12:42:01	0.738231	3.2838	1599.07	FALSE	34
2022-09-15	12:42:01	0.735789	3.27294	1715.57	FALSE	34
2022-09-15	12:42:02	0.733499	3.26275	1602.33	FALSE	34
2022-09-15	12:42:02	0.737112	3.27882	1718.85	FALSE	34
2022-09-15	12:42:02	0.736349	3.27543	1605.61	FALSE	34
2022-09-15	12:42:03	0.731005	3.25166	1722.1	FALSE	34
2022-09-15	12:42:03	0.736247	3.27497	1608.88	FALSE	34
2022-09-15	12:42:03	0.733753	3.26388	1725.36	FALSE	34
2022-09-15	12:42:03	0.7307	3.2503	1612.13	FALSE	34
2022-09-15	12:42:04	0.733702	3.26365	1728.63	FALSE	34
2022-09-15	12:42:04	0.735178	3.27022	1615.4	FALSE	34
2022-09-15	12:42:04	0.737061	3.27859	1731.91	FALSE	34
2022-09-15	12:42:04	0.733295	3.26184	1618.66	FALSE	34
2022-09-15	12:42:05	0.732684	3.25912	1735.16	FALSE	34
2022-09-15	12:42:05	0.731717	3.25482	1621.92	FALSE	34
2022-09-15	12:42:05	0.736603	3.27656	1738.44	FALSE	34
2022-09-15	12:42:05	0.736501	3.2761	1625.19	FALSE	34
2022-09-15	12:42:06	0.734008	3.26501	1741.71	FALSE	34
2022-09-15	12:42:06	0.735127	3.26999	1628.46	FALSE	34
2022-09-15	12:42:06	0.727697	3.23694	1744.94	FALSE	34
2022-09-15	12:42:07	0.731921	3.25573	1631.72	FALSE	34
2022-09-15	12:42:07	0.730751	3.25053	1748.19	FALSE	34
2022-09-15	12:42:07	0.736043	3.27407	1634.99	FALSE	34
2022-09-15	12:42:07	0.735941	3.27361	1751.47	FALSE	34
2022-09-15	12:42:08	0.732735	3.25935	1638.25	FALSE	34
2022-09-15	12:42:08	0.732023	3.25618	1754.72	FALSE	34
2022-09-15	12:42:08	0.736043	3.27407	1641.53	FALSE	34
2022-09-15	12:42:08	0.734975	3.26932	1757.99	FALSE	34
2022-09-15	12:42:09	0.738435	3.28471	1644.81	FALSE	34
2022-09-15	12:42:09	0.728155	3.23898	1761.23	FALSE	34
2022-09-15	12:42:09	0.732837	3.25981	1648.07	FALSE	34
2022-09-15	12:42:09	0.73416	3.26569	1764.5	FALSE	34
2022-09-15	12:42:10	0.733855	3.26433	1651.34	FALSE	34
2022-09-15	12:42:10	0.737315	3.27972	1767.78	FALSE	34
2022-09-15	12:42:10	0.733906	3.26456	1654.6	FALSE	34
2022-09-15	12:42:11	0.738079	3.28312	1771.06	FALSE	34
2022-09-15	12:42:11	0.735687	3.27248	1657.87	FALSE	34
2022-09-15	12:42:11	0.731361	3.25324	1774.31	FALSE	34
2022-09-15	12:42:11	0.761845	3.38884	1661.26	FALSE	34
2022-09-15	12:42:12	0.705255	3.13712	1777.45	FALSE	34
2022-09-15	12:42:12	0.719097	3.19869	1664.46	FALSE	34
2022-09-15	12:42:12	0.736857	3.27769	1780.73	FALSE	34
2022-09-15	12:42:12	0.727443	3.23581	1667.7	FALSE	34
2022-09-15	12:42:13	0.734262	3.26614	1783.99	FALSE	34
2022-09-15	12:42:13	0.740522	3.29399	1670.99	FALSE	34
2022-09-15	12:42:13	0.736094	3.27429	1787.27	FALSE	34
2022-09-15	12:42:13	0.735789	3.27294	1674.26	FALSE	34
2022-09-15	12:42:14	0.73645	3.27588	1790.54	FALSE	34
2022-09-15	12:42:14	0.738486	3.28493	1677.55	FALSE	34
2022-09-15	12:42:14	0.736399	3.27565	1793.82	FALSE	34
2022-09-15	12:42:15	0.736247	3.27497	1680.82	FALSE	34
2022-09-15	12:42:15	0.738639	3.28561	1797.11	FALSE	34
2022-09-15	12:42:15	0.735789	3.27294	1684.1	FALSE	34
2022-09-15	12:42:15	0.735433	3.27135	1800.38	FALSE	34
2022-09-15	12:42:16	0.736196	3.27475	1687.37	FALSE	34
2022-09-15	12:42:16	0.733193	3.26139	1803.64	FALSE	34
2022-09-15	12:42:16	0.736196	3.27475	1690.65	FALSE	34
2022-09-15	12:42:16	0.738231	3.2838	1806.92	FALSE	34
2022-09-15	12:42:17	0.731056	3.25188	1693.9	FALSE	34
2022-09-15	12:42:17	0.738181	3.28358	1810.21	FALSE	34
2022-09-15	12:42:17	0.732634	3.2589	1697.16	FALSE	34
2022-09-15	12:42:17	0.732888	3.26003	1813.47	FALSE	34
2022-09-15	12:42:18	0.729478	3.24486	1700.4	FALSE	34
2022-09-15	12:42:18	0.735891	3.27339	1816.74	FALSE	34
2022-09-15	12:42:18	0.734975	3.26932	1703.67	FALSE	34
2022-09-15	12:42:18	0.733753	3.26388	1820	FALSE	34
2022-09-15	12:42:19	0.734059	3.26524	1706.94	FALSE	34
2022-09-15	12:42:19	0.685	3.04702	1823.05	FALSE	34
2022-09-15	12:42:19	2.73965	12.1865	1719.12	FALSE	34
2022-09-15	12:42:20	0.297774	1.32456	1824.37	FALSE	34
2022-09-15	12:42:20	0.014415	0.0641208	1719.19	FALSE	34
2022-09-15	12:42:20	0.16215	0.721276	1825.1	FALSE	34
2022-09-15	12:42:20	0.249224	1.1086	1720.3	FALSE	34
2022-09-15	12:42:21	1.09492	4.87042	1829.97	FALSE	34
2022-09-15	12:42:21	4.98622	22.1797	1742.48	1	35
2022-09-15	12:42:21	4.87513	21.6856	1851.65	1	36
2022-09-15	12:42:21	4.17304	18.5625	1761.04	1	37
2022-09-15	12:42:22	2.95273	13.1343	1864.79	FALSE	37
2022-09-15	12:42:22	9.55746	42.5135	1803.55	1	38
2022-09-15	12:42:22	8.1712	36.3471	1901.13	1	39
2022-09-15	12:42:22	9.29436	41.3432	1844.89	1	40
2022-09-15	12:42:23	8.33289	37.0664	1938.2	1	41
2022-09-15	12:42:23	3.37177	14.9983	1859.89	1	42
2022-09-15	12:42:23	0.233652	1.03933	1939.24	FALSE	42
2022-09-15	12:42:24	0.179809	0.799826	1860.69	FALSE	42
2022-09-15	12:42:24	0.28897	1.2854	1940.52	FALSE	42
2022-09-15	12:42:24	0.332023	1.4769	1862.17	FALSE	42
2022-09-15	12:42:24	1.13574	5.052	1945.58	FALSE	42
2022-09-15	12:42:25	3.12169	13.8859	1876.06	1	43
2022-09-15	12:42:25	7.93126	35.2798	1980.86	1	44
2022-09-15	12:42:25	2.46673	10.9725	1887.03	FALSE	44
2022-09-15	12:42:25	0.383982	1.70803	1982.56	FALSE	44
2022-09-15	12:42:26	0.156552	0.696375	1887.72	FALSE	44
2022-09-15	12:42:26	0.109021	0.484947	1983.05	FALSE	44
2022-09-15	12:42:26	0.32159	1.4305	1889.15	FALSE	44
2022-09-15	12:42:26	0.114924	0.511205	1983.56	FALSE	44
2022-09-15	12:42:27	0.378842	1.68516	1890.84	FALSE	44
2022-09-15	12:42:27	0.0852547	0.37923	1983.94	FALSE	44
2022-09-15	12:42:27	0.256094	1.13916	1891.98	FALSE	44
2022-09-15	12:42:28	0.0305473	0.13588	1984.08	FALSE	44
2022-09-15	12:42:28	0.156298	0.695245	1892.67	FALSE	44
2022-09-15	12:42:28	0.281183	1.25076	1985.33	FALSE	44
2022-09-15	12:42:28	0.201031	0.894226	1893.57	FALSE	44
2022-09-15	12:42:29	0.527646	2.34707	1987.67	FALSE	44

## Sheet: Boris_prong_2022915123721 (2)
Date	Time	Lbs	Total force x time			**GoPro Fitting: 1221
2022-09-15	12:37:21	0.730394	0.730394	FALSE	0
2022-09-15	12:37:21	0.733499	1.46389	FALSE	0
2022-09-15	12:37:21	0.731463	2.19536	FALSE	0
2022-09-15	12:37:22	0.735636	2.93099	FALSE	0
2022-09-15	12:37:22	0.735229	3.66622	FALSE	0
2022-09-15	12:37:22	0.719148	4.38537	FALSE	0
2022-09-15	12:37:22	0.702557	5.08793	FALSE	0
2022-09-15	12:37:23	0.675687	5.76361	FALSE	0
2022-09-15	12:37:23	0.654669	6.41828	FALSE	0
2022-09-15	12:37:23	0.669885	7.08817	FALSE	0
2022-09-15	12:37:24	0.650293	7.73846	FALSE	0
2022-09-15	12:37:24	0.659911	8.39837	FALSE	0
2022-09-15	12:37:24	0.658282	9.05665	FALSE	0
2022-09-15	12:37:25	0.649936	9.70659	FALSE	0
2022-09-15	12:37:25	0.657672	10.3643	FALSE	0
2022-09-15	12:37:25	0.618791	10.9831	FALSE	0
2022-09-15	12:37:25	0.584796	11.5678	FALSE	0
2022-09-15	12:37:25	0.628003	12.1959	FALSE	0
2022-09-15	12:37:26	0.552023	12.7479	FALSE	0
2022-09-15	12:37:26	0.592888	13.3408	FALSE	0
2022-09-15	12:37:26	0.55014	13.8909	FALSE	0
2022-09-15	12:37:26	0.531311	14.4222	FALSE	0
2022-09-15	12:37:27	0.519758	14.942	FALSE	0
2022-09-15	12:37:27	0.606018	15.548	FALSE	0
2022-09-15	12:37:27	0.500827	16.0488	FALSE	0
2022-09-15	12:37:28	0.503168	16.552	FALSE	0
2022-09-15	12:37:28	0.49243	17.0444	FALSE	0
2022-09-15	12:37:28	0.487494	17.5319	FALSE	0
2022-09-15	12:37:28	0.488155	18.0201	FALSE	0
2022-09-15	12:37:29	0.483372	18.5034	FALSE	0
2022-09-15	12:37:29	0.479606	18.983	FALSE	0
2022-09-15	12:37:29	0.472328	19.4554	FALSE	0
2022-09-15	12:37:29	0.484644	19.94	FALSE	0
2022-09-15	12:37:30	0.478893	20.4189	FALSE	0
2022-09-15	12:37:30	0.474975	20.8939	FALSE	0
2022-09-15	12:37:30	0.432685	21.3266	FALSE	0
2022-09-15	12:37:30	0.404186	21.7308	FALSE	0
2022-09-15	12:37:31	0.428919	22.1597	FALSE	0
2022-09-15	12:37:31	0.266527	22.4262	FALSE	0
2022-09-15	12:37:31	0.237163	22.6634	FALSE	0
2022-09-15	12:37:32	0.311565	22.9749	FALSE	0
2022-09-15	12:37:32	0.427748	23.4027	FALSE	0
2022-09-15	12:37:32	0.287239	23.6899	FALSE	0
2022-09-15	12:37:32	0.503015	24.1929	FALSE	0
2022-09-15	12:37:33	0.311921	24.5048	FALSE	0
2022-09-15	12:37:33	0.521234	25.0261	FALSE	0
2022-09-15	12:37:33	0.648868	25.675	FALSE	0
2022-09-15	12:37:33	0.418435	26.0934	FALSE	0
2022-09-15	12:37:34	0.558842	26.6522	FALSE	0
2022-09-15	12:37:34	0.663575	27.3158	FALSE	0
2022-09-15	12:37:34	-0.259478	27.3158	FALSE	0
2022-09-15	12:37:34	-0.326704	27.3158	FALSE	0
2022-09-15	12:37:35	-0.0248216	27.3158	FALSE	0
2022-09-15	12:37:35	0.277977	27.5938	FALSE	0
2022-09-15	12:37:35	0.199351	27.7931	FALSE	0
2022-09-15	12:37:36	0.51757	28.3107	FALSE	0
2022-09-15	12:37:36	0.209122	28.5198	FALSE	0
2022-09-15	12:37:36	0.6564	29.1762	FALSE	0
2022-09-15	12:37:36	0.345662	29.5219	FALSE	0
2022-09-15	12:37:37	0.437774	29.9597	FALSE	0
2022-09-15	12:37:37	0.693244	30.6529	FALSE	0
2022-09-15	12:37:37	0.616908	31.2698	FALSE	0
2022-09-15	12:37:37	0.57472	31.8445	FALSE	0
2022-09-15	12:37:38	0.344949	32.1895	FALSE	0
2022-09-15	12:37:38	0.399809	32.5893	FALSE	0
2022-09-15	12:37:38	2.64296	35.2322	FALSE	0
2022-09-15	12:37:38	2.23813	37.4704	FALSE	0
2022-09-15	12:37:39	1.91258	39.383	FALSE	0
2022-09-15	12:37:39	1.68032	41.0633	FALSE	0
2022-09-15	12:37:39	1.61126	42.6745	FALSE	0
2022-09-15	12:37:40	0.46159	43.1361	FALSE	0
2022-09-15	12:37:40	1.50485	44.641	FALSE	0
2022-09-15	12:37:40	0.539758	45.1807	FALSE	0
2022-09-15	12:37:40	0.836908	46.0176	FALSE	0
2022-09-15	12:37:41	1.10795	47.1256	FALSE	0
2022-09-15	12:37:41	0.565916	47.6915	FALSE	0
2022-09-15	12:37:41	0.898791	48.5903	FALSE	0
2022-09-15	12:37:41	0.590038	49.1803	FALSE	0
2022-09-15	12:37:42	1.10948	50.2898	FALSE	0
2022-09-15	12:37:42	0.822303	51.1121	FALSE	0
2022-09-15	12:37:42	1.00597	52.1181	FALSE	0
2022-09-15	12:37:42	1.01538	53.1335	FALSE	0
2022-09-15	12:37:43	1.08943	54.2229	FALSE	0
2022-09-15	12:37:43	1.33696	55.5599	FALSE	0
2022-09-15	12:37:43	0.601743	56.1616	FALSE	0
2022-09-15	12:37:44	1.5995	57.7611	FALSE	0
2022-09-15	12:37:44	0.555891	58.317	FALSE	0
2022-09-15	12:37:44	1.22958	59.5466	FALSE	0
2022-09-15	12:37:44	0.76897	60.3155	FALSE	0
2022-09-15	12:37:45	1.46154	61.7771	FALSE	0
2022-09-15	12:37:45	1.11258	62.8897	FALSE	0
2022-09-15	12:37:45	1.18164	64.0713	FALSE	0
2022-09-15	12:37:45	1.86424	65.9355	FALSE	0
2022-09-15	12:37:46	0.934618	66.8702	FALSE	0
2022-09-15	12:37:46	1.28256	68.1527	FALSE	0
2022-09-15	12:37:46	0.540572	68.6933	FALSE	0
2022-09-15	12:37:46	1.29024	69.9835	FALSE	0
2022-09-15	12:37:47	0.421539	70.4051	FALSE	0
2022-09-15	12:37:47	0.530038	70.9351	FALSE	0
2022-09-15	12:37:47	0.362913	71.298	FALSE	0
2022-09-15	12:37:48	0.387087	71.6851	FALSE	0
2022-09-15	12:37:48	0.532735	72.2178	FALSE	0
2022-09-15	12:37:48	0.811158	73.029	FALSE	0
2022-09-15	12:37:48	2.90525	75.9343	FALSE	0
2022-09-15	12:37:49	5.01009	80.9443	1	1
2022-09-15	12:37:49	8.3395	89.2838	1	2
2022-09-15	12:37:49	5.19258	94.4764	1	3
2022-09-15	12:37:49	6.44601	100.922	1	4
2022-09-15	12:37:50	0.626527	101.549	FALSE	4
2022-09-15	12:37:50	1.29599	102.845	FALSE	4
2022-09-15	12:37:50	0.468613	103.314	FALSE	4
2022-09-15	12:37:50	0.800165	104.114	FALSE	4
2022-09-15	12:37:51	0.559046	104.673	FALSE	4
2022-09-15	12:37:51	0.205	104.878	FALSE	4
2022-09-15	12:37:51	0.441031	105.319	FALSE	4
2022-09-15	12:37:52	0.118028	105.437	FALSE	4
2022-09-15	12:37:52	0.0189442	105.456	FALSE	4
2022-09-15	12:37:52	-0.171488	105.456	FALSE	4
2022-09-15	12:37:52	-0.0331168	105.456	FALSE	4
2022-09-15	12:37:53	-0.21159	105.456	FALSE	4
2022-09-15	12:37:53	0.294517	105.75	FALSE	4
2022-09-15	12:37:53	0.633804	106.384	FALSE	4
2022-09-15	12:37:53	3.36703	109.751	1	5
2022-09-15	12:37:54	3.12693	112.878	1	6
2022-09-15	12:37:54	1.43925	114.317	FALSE	6
2022-09-15	12:37:54	4.76408	119.081	1	7
2022-09-15	12:37:54	1.52332	120.605	FALSE	7
2022-09-15	12:37:55	3.37935	123.984	1	8
2022-09-15	12:37:55	1.90373	125.888	FALSE	8
2022-09-15	12:37:55	4.40413	130.292	1	9
2022-09-15	12:37:56	0.689886	130.982	FALSE	9
2022-09-15	12:37:56	1.82546	132.807	FALSE	9
2022-09-15	12:37:56	1.7508	134.558	FALSE	9
2022-09-15	12:37:56	1.10734	135.665	FALSE	9
2022-09-15	12:37:57	1.02179	136.687	FALSE	9
2022-09-15	12:37:57	0.711972	137.399	FALSE	9
2022-09-15	12:37:57	1.02047	138.42	FALSE	9
2022-09-15	12:37:57	1.00312	139.423	FALSE	9
2022-09-15	12:37:58	0.824033	140.247	FALSE	9
2022-09-15	12:37:58	0.701489	140.948	FALSE	9
2022-09-15	12:37:58	0.541896	141.49	FALSE	9
2022-09-15	12:37:58	0.441794	141.932	FALSE	9
2022-09-15	12:37:59	0.541336	142.473	FALSE	9
2022-09-15	12:37:59	0.527443	143.001	FALSE	9
2022-09-15	12:37:59	1.11004	144.111	FALSE	9
2022-09-15	12:38:00	1.23569	145.346	FALSE	9
2022-09-15	12:38:00	0.475534	145.822	FALSE	9
2022-09-15	12:38:00	-0.0631931	145.822	FALSE	9
2022-09-15	12:38:00	-0.0716409	145.822	FALSE	9
2022-09-15	12:38:01	0.885611	146.708	FALSE	9
2022-09-15	12:38:01	1.40159	148.109	FALSE	9
2022-09-15	12:38:01	0.470852	148.58	FALSE	9
2022-09-15	12:38:01	0.0394023	148.619	FALSE	9
2022-09-15	12:38:02	-0.0453305	148.619	FALSE	9
2022-09-15	12:38:02	-0.0253814	148.619	FALSE	9
2022-09-15	12:38:02	-0.164974	148.619	FALSE	9
2022-09-15	12:38:02	-0.491997	148.619	FALSE	9
2022-09-15	12:38:03	-0.673066	148.619	FALSE	9
2022-09-15	12:38:03	-0.908842	148.619	FALSE	9
2022-09-15	12:38:03	-0.986704	148.619	FALSE	9
2022-09-15	12:38:04	-0.884312	148.619	FALSE	9
2022-09-15	12:38:04	-0.866908	148.619	FALSE	9
2022-09-15	12:38:04	-0.7179	148.619	FALSE	9
2022-09-15	12:38:04	-0.607162	148.619	FALSE	9
2022-09-15	12:38:05	-0.4722	148.619	FALSE	9
2022-09-15	12:38:05	-0.390419	148.619	FALSE	9
2022-09-15	12:38:05	-0.483346	148.619	FALSE	9
2022-09-15	12:38:05	-0.641004	148.619	FALSE	9
2022-09-15	12:38:06	-0.436679	148.619	FALSE	9
2022-09-15	12:38:06	-0.598765	148.619	FALSE	9
2022-09-15	12:38:06	-0.418664	148.619	FALSE	9
2022-09-15	12:38:06	-0.355916	148.619	FALSE	9
2022-09-15	12:38:07	-0.448231	148.619	FALSE	9
2022-09-15	12:38:07	-0.44986	148.619	FALSE	9
2022-09-15	12:38:07	-0.490419	148.619	FALSE	9
2022-09-15	12:38:08	-0.503345	148.619	FALSE	9
2022-09-15	12:38:08	-0.452964	148.619	FALSE	9
2022-09-15	12:38:08	-0.374491	148.619	FALSE	9
2022-09-15	12:38:08	-0.350521	148.619	FALSE	9
2022-09-15	12:38:09	-0.386857	148.619	FALSE	9
2022-09-15	12:38:09	-0.174694	148.619	FALSE	9
2022-09-15	12:38:09	0.035331	148.655	FALSE	9
2022-09-15	12:38:09	-0.00136106	148.655	FALSE	9
2022-09-15	12:38:10	-0.109096	148.655	FALSE	9
2022-09-15	12:38:10	-0.191946	148.655	FALSE	9
2022-09-15	12:38:10	-0.128028	148.655	FALSE	9
2022-09-15	12:38:10	-0.0703686	148.655	FALSE	9
2022-09-15	12:38:11	-0.13042	148.655	FALSE	9
2022-09-15	12:38:11	-0.171386	148.655	FALSE	9
2022-09-15	12:38:11	-0.03673	148.655	FALSE	9
2022-09-15	12:38:12	1.52429	150.179	FALSE	9
2022-09-15	12:38:12	3.6852	153.864	1	10
2022-09-15	12:38:12	3.77207	157.636	1	11
2022-09-15	12:38:12	2.23167	159.868	FALSE	11
2022-09-15	12:38:13	3.36642	163.234	1	12
2022-09-15	12:38:13	1.78617	165.021	FALSE	12
2022-09-15	12:38:13	0.783473	165.804	FALSE	12
2022-09-15	12:38:13	0.596349	166.4	FALSE	12
2022-09-15	12:38:14	0.916552	167.317	FALSE	12
2022-09-15	12:38:14	0.850852	168.168	FALSE	12
2022-09-15	12:38:14	1.3251	169.493	FALSE	12
2022-09-15	12:38:14	2.37136	171.864	FALSE	12
2022-09-15	12:38:15	2.1652	174.03	FALSE	12
2022-09-15	12:38:15	4.9224	178.952	1	13
2022-09-15	12:38:15	1.94989	180.902	FALSE	13
2022-09-15	12:38:16	4.19787	185.1	1	14
2022-09-15	12:38:16	1.34871	186.448	FALSE	14
2022-09-15	12:38:16	2.70352	189.152	FALSE	14
2022-09-15	12:38:16	1.76866	190.921	FALSE	14
2022-09-15	12:38:17	1.23961	192.16	FALSE	14
2022-09-15	12:38:17	0.580522	192.741	FALSE	14
2022-09-15	12:38:17	0.356858	193.098	FALSE	14
2022-09-15	12:38:17	0.229122	193.327	FALSE	14
2022-09-15	12:38:18	-0.0938801	193.327	FALSE	14
2022-09-15	12:38:18	-0.206857	193.327	FALSE	14
2022-09-15	12:38:18	-0.316374	193.327	FALSE	14
2022-09-15	12:38:18	-0.489554	193.327	FALSE	14
2022-09-15	12:38:19	-0.78818	193.327	FALSE	14
2022-09-15	12:38:19	-1.62136	193.327	FALSE	14
2022-09-15	12:38:19	-1.12106	193.327	FALSE	14
2022-09-15	12:38:20	-0.856272	193.327	FALSE	14
2022-09-15	12:38:20	-0.945177	193.327	FALSE	14
2022-09-15	12:38:20	-0.383142	193.327	FALSE	14
2022-09-15	12:38:20	1.05696	194.384	FALSE	14
2022-09-15	12:38:21	2.09772	196.481	FALSE	14
2022-09-15	12:38:21	1.00266	197.484	FALSE	14
2022-09-15	12:38:21	-0.677747	197.484	FALSE	14
2022-09-15	12:38:21	-0.148486	197.484	FALSE	14
2022-09-15	12:38:22	-0.201666	197.484	FALSE	14
2022-09-15	12:38:22	0.0391987	197.523	FALSE	14
2022-09-15	12:38:22	-0.18304	197.523	FALSE	14
2022-09-15	12:38:22	0.0168577	197.54	FALSE	14
2022-09-15	12:38:23	0.0457127	197.586	FALSE	14
2022-09-15	12:38:23	1.61599	199.202	FALSE	14
2022-09-15	12:38:23	1.2738	200.476	FALSE	14
2022-09-15	12:38:24	0.505916	200.981	FALSE	14
2022-09-15	12:38:24	0.257926	201.239	FALSE	14
2022-09-15	12:38:24	0.401183	201.641	FALSE	14
2022-09-15	12:38:24	0.258028	201.899	FALSE	14
2022-09-15	12:38:25	0.349784	202.248	FALSE	14
2022-09-15	12:38:25	0.819249	203.068	FALSE	14
2022-09-15	12:38:25	0.652735	203.72	FALSE	14
2022-09-15	12:38:25	0.328868	204.049	FALSE	14
2022-09-15	12:38:26	0.253804	204.303	FALSE	14
2022-09-15	12:38:26	0.327494	204.631	FALSE	14
2022-09-15	12:38:26	0.29126	204.922	FALSE	14
2022-09-15	12:38:26	0.467647	205.389	FALSE	14
2022-09-15	12:38:27	0.849987	206.239	FALSE	14
2022-09-15	12:38:27	1.59253	207.832	FALSE	14
2022-09-15	12:38:27	2.42378	210.256	FALSE	14
2022-09-15	12:38:28	1.84871	212.104	FALSE	14
2022-09-15	12:38:28	1.28922	213.394	FALSE	14
2022-09-15	12:38:28	0.468155	213.862	FALSE	14
2022-09-15	12:38:28	-0.0668063	213.862	FALSE	14
2022-09-15	12:38:29	-0.356475	213.862	FALSE	14
2022-09-15	12:38:29	-0.299274	213.862	FALSE	14
2022-09-15	12:38:29	-0.184618	213.862	FALSE	14
2022-09-15	12:38:29	-0.170878	213.862	FALSE	14
2022-09-15	12:38:30	-0.0340328	213.862	FALSE	14
2022-09-15	12:38:30	0.01584	213.878	FALSE	14
2022-09-15	12:38:30	-0.0241092	213.878	FALSE	14
2022-09-15	12:38:30	0.712481	214.59	FALSE	14
2022-09-15	12:38:31	-0.274389	214.59	FALSE	14
2022-09-15	12:38:31	-0.925636	214.59	FALSE	14
2022-09-15	12:38:31	-1.33597	214.59	FALSE	14
2022-09-15	12:38:32	-1.29831	214.59	FALSE	14
2022-09-15	12:38:32	-1.28787	214.59	FALSE	14
2022-09-15	12:38:32	-1.08548	214.59	FALSE	14
2022-09-15	12:38:32	-1.32767	214.59	FALSE	14
2022-09-15	12:38:33	0.0237279	214.614	FALSE	14
2022-09-15	12:38:33	2.11523	216.729	FALSE	14
2022-09-15	12:38:33	5.52815	222.257	1	15
2022-09-15	12:38:33	7.63502	229.892	1	16
2022-09-15	12:38:34	3.52871	233.421	1	17
2022-09-15	12:38:34	3.59798	237.019	1	18
2022-09-15	12:38:34	0.706883	237.726	FALSE	18
2022-09-15	12:38:34	1.15324	238.879	FALSE	18
2022-09-15	12:38:35	0.952023	239.831	FALSE	18
2022-09-15	12:38:35	0.355534	240.187	FALSE	18
2022-09-15	12:38:35	1.12861	241.315	FALSE	18
2022-09-15	12:38:36	1.15747	242.473	FALSE	18
2022-09-15	12:38:36	3.79737	246.27	1	19
2022-09-15	12:38:36	3.5081	249.778	1	20
2022-09-15	12:38:36	4.18373	253.962	1	21
2022-09-15	12:38:37	3.01553	256.977	1	22
2022-09-15	12:38:37	1.13971	258.117	FALSE	22
2022-09-15	12:38:37	1.93467	260.052	FALSE	22
2022-09-15	12:38:37	0.873804	260.926	FALSE	22
2022-09-15	12:38:38	1.17039	262.096	FALSE	22
2022-09-15	12:38:38	1.9165	264.013	FALSE	22
2022-09-15	12:38:38	0.425407	264.438	FALSE	22
2022-09-15	12:38:38	0.0882063	264.526	FALSE	22
2022-09-15	12:38:39	0.382659	264.909	FALSE	22
2022-09-15	12:38:39	0.683524	265.592	FALSE	22
2022-09-15	12:38:39	0.668053	266.26	FALSE	22
2022-09-15	12:38:40	0.264237	266.525	FALSE	22
2022-09-15	12:38:40	1.84373	268.368	FALSE	22
2022-09-15	12:38:40	0.894822	269.263	FALSE	22
2022-09-15	12:38:40	1.40714	270.67	FALSE	22
2022-09-15	12:38:41	2.43945	273.11	FALSE	22
2022-09-15	12:38:41	1.65503	274.765	FALSE	22
2022-09-15	12:38:41	0.125662	274.89	FALSE	22
2022-09-15	12:38:41	0.173601	275.064	FALSE	22
2022-09-15	12:38:42	0.182659	275.247	FALSE	22
2022-09-15	12:38:42	0.189784	275.437	FALSE	22
2022-09-15	12:38:42	0.331361	275.768	FALSE	22
2022-09-15	12:38:42	0.11584	275.884	FALSE	22
2022-09-15	12:38:43	0.267087	276.151	FALSE	22
2022-09-15	12:38:43	0.163117	276.314	FALSE	22
2022-09-15	12:38:43	0.285051	276.599	FALSE	22
2022-09-15	12:38:44	0.352481	276.951	FALSE	22
2022-09-15	12:38:44	0.661947	277.613	FALSE	22
2022-09-15	12:38:44	1.46179	279.075	FALSE	22
2022-09-15	12:38:44	1.44968	280.525	FALSE	22
2022-09-15	12:38:45	1.68424	282.209	FALSE	22
2022-09-15	12:38:45	1.05187	283.261	FALSE	22
2022-09-15	12:38:45	1.90352	285.164	FALSE	22
2022-09-15	12:38:45	2.33986	287.504	FALSE	22
2022-09-15	12:38:46	3.48123	290.986	1	23
2022-09-15	12:38:46	3.56968	294.555	1	24
2022-09-15	12:38:46	0.651565	295.207	FALSE	24
2022-09-15	12:38:46	0.525407	295.732	FALSE	24
2022-09-15	12:38:47	0.725356	296.458	FALSE	24
2022-09-15	12:38:47	0.398028	296.856	FALSE	24
2022-09-15	12:38:47	0.609784	297.465	FALSE	24
2022-09-15	12:38:48	0.0587407	297.524	FALSE	24
2022-09-15	12:38:48	0.411463	297.936	FALSE	24
2022-09-15	12:38:48	0.205356	298.141	FALSE	24
2022-09-15	12:38:48	0.717468	298.858	FALSE	24
2022-09-15	12:38:49	-0.106145	298.858	FALSE	24
2022-09-15	12:38:49	-1.57098	298.858	FALSE	24
2022-09-15	12:38:49	-4.3237	298.858	FALSE	24
2022-09-15	12:38:49	3.17334	302.032	1	25
2022-09-15	12:38:50	3.65747	305.689	1	26
2022-09-15	12:38:50	1.35228	307.042	FALSE	26
2022-09-15	12:38:50	1.09187	308.133	FALSE	26
2022-09-15	12:38:50	0.446069	308.579	FALSE	26
2022-09-15	12:38:51	0.49299	309.072	FALSE	26
2022-09-15	12:38:51	0.384389	309.457	FALSE	26
2022-09-15	12:38:51	-1.40737	309.457	FALSE	26
2022-09-15	12:38:52	0.576349	310.033	FALSE	26
2022-09-15	12:38:52	0.0219977	310.055	FALSE	26
2022-09-15	12:38:52	0.492634	310.548	FALSE	26
2022-09-15	12:38:52	0.893499	311.441	FALSE	26
2022-09-15	12:38:53	1.48296	312.924	FALSE	26
2022-09-15	12:38:53	0.962964	313.887	FALSE	26
2022-09-15	12:38:53	0.1307	314.018	FALSE	26
2022-09-15	12:38:53	0.444033	314.462	FALSE	26
2022-09-15	12:38:54	0.0980791	314.56	FALSE	26
2022-09-15	12:38:54	0.296298	314.856	FALSE	26
2022-09-15	12:38:54	0.246578	315.103	FALSE	26
2022-09-15	12:38:54	0.238028	315.341	FALSE	26
2022-09-15	12:38:55	0.433193	315.774	FALSE	26
2022-09-15	12:38:55	0.393804	316.168	FALSE	26
2022-09-15	12:38:55	0.986883	317.155	FALSE	26
2022-09-15	12:38:56	0.515127	317.67	FALSE	26
2022-09-15	12:38:56	0.972939	318.643	FALSE	26
2022-09-15	12:38:56	0.771718	319.415	FALSE	26
2022-09-15	12:38:56	0.693397	320.108	FALSE	26
2022-09-15	12:38:57	0.817824	320.926	FALSE	26
2022-09-15	12:38:57	0.708817	321.635	FALSE	26
2022-09-15	12:38:57	1.3624	322.997	FALSE	26
2022-09-15	12:38:57	0.724746	323.722	FALSE	26
2022-09-15	12:38:58	1.0905	324.812	FALSE	26
2022-09-15	12:38:58	1.34281	326.155	FALSE	26
2022-09-15	12:38:58	1.12444	327.28	FALSE	26
2022-09-15	12:38:58	1.21711	328.497	FALSE	26
2022-09-15	12:38:59	0.903728	329.4	FALSE	26
2022-09-15	12:38:59	0.7793	330.18	FALSE	26
2022-09-15	12:38:59	0.84841	331.028	FALSE	26
2022-09-15	12:39:00	0.803728	331.832	FALSE	26
2022-09-15	12:39:00	0.720013	332.552	FALSE	26
2022-09-15	12:39:00	1.20475	333.757	FALSE	26
2022-09-15	12:39:00	0.388868	334.145	FALSE	26
2022-09-15	12:39:01	0.789733	334.935	FALSE	26
2022-09-15	12:39:01	0.704135	335.639	FALSE	26
2022-09-15	12:39:01	1.20663	336.846	FALSE	26
2022-09-15	12:39:01	1.35564	338.202	FALSE	26
2022-09-15	12:39:02	0.970242	339.172	FALSE	26
2022-09-15	12:39:02	1.24897	340.421	FALSE	26
2022-09-15	12:39:02	0.540522	340.961	FALSE	26
2022-09-15	12:39:02	0.966171	341.928	FALSE	26
2022-09-15	12:39:03	0.7107	342.638	FALSE	26
2022-09-15	12:39:03	0.704542	343.343	FALSE	26
2022-09-15	12:39:03	0.807748	344.15	FALSE	26
2022-09-15	12:39:04	0.543372	344.694	FALSE	26
2022-09-15	12:39:04	1.20846	345.902	FALSE	26
2022-09-15	12:39:04	0.551769	346.454	FALSE	26
2022-09-15	12:39:04	1.22831	347.682	FALSE	26
2022-09-15	12:39:05	0.995941	348.678	FALSE	26
2022-09-15	12:39:05	0.956399	349.635	FALSE	26
2022-09-15	12:39:05	0.996603	350.631	FALSE	26
2022-09-15	12:39:05	0.657214	351.289	FALSE	26
2022-09-15	12:39:06	1.21935	352.508	FALSE	26
2022-09-15	12:39:06	0.8307	353.339	FALSE	26
2022-09-15	12:39:06	1.47126	354.81	FALSE	26
2022-09-15	12:39:06	1.12184	355.932	FALSE	26
2022-09-15	12:39:07	1.38113	357.313	FALSE	26
2022-09-15	12:39:07	0.767341	358.08	FALSE	26
2022-09-15	12:39:07	0.819707	358.9	FALSE	26
2022-09-15	12:39:08	0.874465	359.774	FALSE	26
2022-09-15	12:39:08	0.731616	360.506	FALSE	26
2022-09-15	12:39:08	0.733142	361.239	FALSE	26
2022-09-15	12:39:08	0.0937534	361.333	FALSE	26
2022-09-15	12:39:09	0.341031	361.674	FALSE	26
2022-09-15	12:39:09	0.695942	362.37	FALSE	26
2022-09-15	12:39:09	1.83757	364.207	FALSE	26
2022-09-15	12:39:09	0.813601	365.021	FALSE	26
2022-09-15	12:39:10	0.999249	366.02	FALSE	26
2022-09-15	12:39:10	0.48556	366.506	FALSE	26
2022-09-15	12:39:10	0.843422	367.349	FALSE	26
2022-09-15	12:39:10	0.829428	368.179	FALSE	26
2022-09-15	12:39:11	1.00368	369.182	FALSE	26
2022-09-15	12:39:11	1.11793	370.3	FALSE	26
2022-09-15	12:39:11	0.875789	371.176	FALSE	26
2022-09-15	12:39:12	1.49299	372.669	FALSE	26
2022-09-15	12:39:12	1.48027	374.149	FALSE	26
2022-09-15	12:39:12	1.96011	376.109	FALSE	26
2022-09-15	12:39:12	1.69345	377.803	FALSE	26
2022-09-15	12:39:13	2.95859	380.761	FALSE	26
2022-09-15	12:39:13	2.12536	382.887	FALSE	26
2022-09-15	12:39:13	2.02872	384.916	FALSE	26
2022-09-15	12:39:13	1.99721	386.913	FALSE	26
2022-09-15	12:39:14	2.41396	389.327	FALSE	26
2022-09-15	12:39:14	2.36729	391.694	FALSE	26
2022-09-15	12:39:14	3.84968	395.544	1	27
2022-09-15	12:39:14	1.40994	396.954	FALSE	27
2022-09-15	12:39:15	2.62938	399.583	FALSE	27
2022-09-15	12:39:15	2.39121	401.974	FALSE	27
2022-09-15	12:39:15	1.65747	403.632	FALSE	27
2022-09-15	12:39:16	2.63192	406.264	FALSE	27
2022-09-15	12:39:16	4.32021	410.584	1	28
2022-09-15	12:39:16	4.45971	415.044	1	29
2022-09-15	12:39:16	9.12586	424.169	1	30
2022-09-15	12:39:17	7.89752	432.067	1	31
2022-09-15	12:39:17	4.68805	436.755	1	32
2022-09-15	12:39:17	2.84943	439.604	FALSE	32
2022-09-15	12:39:17	2.29482	441.899	FALSE	32
2022-09-15	12:39:18	2.16408	444.063	FALSE	32
2022-09-15	12:39:18	2.13258	446.196	FALSE	32
2022-09-15	12:39:18	1.94989	448.146	FALSE	32
2022-09-15	12:39:18	1.85477	450.001	FALSE	32
2022-09-15	12:39:19	1.89452	451.895	FALSE	32
2022-09-15	12:39:19	2.14378	454.039	FALSE	32
2022-09-15	12:39:19	1.53574	455.575	FALSE	32
2022-09-15	12:39:20	1.04439	456.619	FALSE	32
2022-09-15	12:39:20	1.09202	457.711	FALSE	32
2022-09-15	12:39:20	1.13706	458.848	FALSE	32
2022-09-15	12:39:20	1.18067	460.029	FALSE	32
2022-09-15	12:39:21	1.4936	461.522	FALSE	32
2022-09-15	12:39:21	1.01803	462.54	FALSE	32
2022-09-15	12:39:21	1.27258	463.813	FALSE	32
2022-09-15	12:39:21	1.19111	465.004	FALSE	32
2022-09-15	12:39:22	1.23604	466.24	FALSE	32
2022-09-15	12:39:22	1.27976	467.52	FALSE	32
2022-09-15	12:39:22	1.08688	468.607	FALSE	32
2022-09-15	12:39:22	0.979148	469.586	FALSE	32
2022-09-15	12:39:23	1.13385	470.72	FALSE	32
2022-09-15	12:39:23	1.24022	471.96	FALSE	32
2022-09-15	12:39:23	1.38154	473.341	FALSE	32
2022-09-15	12:39:24	1.36128	474.703	FALSE	32
2022-09-15	12:39:24	1.32958	476.032	FALSE	32
2022-09-15	12:39:24	1.39274	477.425	FALSE	32
2022-09-15	12:39:24	1.36566	478.791	FALSE	32
2022-09-15	12:39:25	1.32698	480.118	FALSE	32
2022-09-15	12:39:25	1.33777	481.455	FALSE	32
2022-09-15	12:39:25	1.35289	482.808	FALSE	32
2022-09-15	12:39:25	1.44775	484.256	FALSE	32
2022-09-15	12:39:26	1.48698	485.743	FALSE	32
2022-09-15	12:39:26	1.53574	487.279	FALSE	32
2022-09-15	12:39:26	1.47726	488.756	FALSE	32
2022-09-15	12:39:26	1.40312	490.159	FALSE	32
2022-09-15	12:39:27	1.42057	491.58	FALSE	32
2022-09-15	12:39:27	1.4621	493.042	FALSE	32
2022-09-15	12:39:27	1.47513	494.517	FALSE	32
2022-09-15	12:39:28	1.4533	495.97	FALSE	32
2022-09-15	12:39:28	1.45156	497.422	FALSE	32
2022-09-15	12:39:28	1.40688	498.829	FALSE	32
2022-09-15	12:39:28	1.39513	500.224	FALSE	32
2022-09-15	12:39:29	1.41961	501.644	FALSE	32
2022-09-15	12:39:29	1.70546	503.349	FALSE	32
2022-09-15	12:39:29	1.32439	504.673	FALSE	32
2022-09-15	12:39:29	1.02195	505.695	FALSE	32
2022-09-15	12:39:30	0.99014	506.685	FALSE	32
2022-09-15	12:39:30	0.953906	507.639	FALSE	32
2022-09-15	12:39:30	0.822659	508.462	FALSE	32
2022-09-15	12:39:30	0.652481	509.114	FALSE	32
2022-09-15	12:39:31	0.53874	509.653	FALSE	32
2022-09-15	12:39:31	0.600216	510.253	FALSE	32
2022-09-15	12:39:31	0.571514	510.825	FALSE	32
2022-09-15	12:39:32	0.561641	511.387	FALSE	32
2022-09-15	12:39:32	0.556654	511.943	FALSE	32
2022-09-15	12:39:32	0.533346	512.477	FALSE	32
2022-09-15	12:39:32	0.554517	513.031	FALSE	32
2022-09-15	12:39:33	0.574364	513.605	FALSE	32
2022-09-15	12:39:33	0.53874	514.144	FALSE	32
2022-09-15	12:39:33	0.529987	514.674	FALSE	32
2022-09-15	12:39:33	0.527137	515.201	FALSE	32
2022-09-15	12:39:34	0.592736	515.794	FALSE	32
2022-09-15	12:39:34	0.755585	516.55	FALSE	32
2022-09-15	12:39:34	0.777519	517.327	FALSE	32
2022-09-15	12:39:34	0.672176	517.999	FALSE	32
2022-09-15	12:39:35	0.674313	518.674	FALSE	32
2022-09-15	12:39:35	0.709275	519.383	FALSE	32
2022-09-15	12:39:35	0.653499	520.036	FALSE	32
2022-09-15	12:39:36	0.302964	520.339	FALSE	32
2022-09-15	12:39:36	0.235942	520.575	FALSE	32
2022-09-15	12:39:36	-0.00512696	520.575	FALSE	32
2022-09-15	12:39:36	0.073957	520.649	FALSE	32
2022-09-15	12:39:37	0.177825	520.827	FALSE	32
2022-09-15	12:39:37	2.0364	522.864	FALSE	32
2022-09-15	12:39:37	0.818741	523.682	FALSE	32
2022-09-15	12:39:37	0.369784	524.052	FALSE	32
2022-09-15	12:39:38	0.364339	524.416	FALSE	32
2022-09-15	12:39:38	0.338333	524.755	FALSE	32
2022-09-15	12:39:38	0.099046	524.854	FALSE	32
2022-09-15	12:39:38	0.332328	525.186	FALSE	32
2022-09-15	12:39:39	0.366934	525.553	FALSE	32
2022-09-15	12:39:39	0.393143	525.946	FALSE	32
2022-09-15	12:39:39	0.329886	526.276	FALSE	32
2022-09-15	12:39:40	0.27411	526.55	FALSE	32
2022-09-15	12:39:40	0.15472	526.705	FALSE	32
2022-09-15	12:39:40	0.184542	526.889	FALSE	32
2022-09-15	12:39:40	0.109886	526.999	FALSE	32
2022-09-15	12:39:41	0.131769	527.131	FALSE	32
2022-09-15	12:39:41	0.114059	527.245	FALSE	32
2022-09-15	12:39:41	0.0963997	527.342	FALSE	32
2022-09-15	12:39:41	0.111514	527.453	FALSE	32
2022-09-15	12:39:42	0.109937	527.563	FALSE	32
2022-09-15	12:39:42	0.0556364	527.619	FALSE	32
2022-09-15	12:39:42	0.0797076	527.698	FALSE	32
2022-09-15	12:39:42	0.0318195	527.73	FALSE	32
2022-09-15	12:39:43	-0.0228878	527.73	FALSE	32
2022-09-15	12:39:43	-0.00935089	527.73	FALSE	32
2022-09-15	12:39:43	-0.161005	527.73	FALSE	32
2022-09-15	12:39:44	-0.370826	527.73	FALSE	32
2022-09-15	12:39:44	-0.498511	527.73	FALSE	32
2022-09-15	12:39:44	-0.710572	527.73	FALSE	32
2022-09-15	12:39:44	-0.598918	527.73	FALSE	32
2022-09-15	12:39:45	0.0826592	527.813	FALSE	32
2022-09-15	12:39:45	0.660318	528.473	FALSE	32
2022-09-15	12:39:45	0.518893	528.992	FALSE	32
2022-09-15	12:39:45	1.36953	530.362	FALSE	32
2022-09-15	12:39:46	2.59655	532.958	FALSE	32
2022-09-15	12:39:46	2.3391	535.297	FALSE	32
2022-09-15	12:39:46	1.98149	537.279	FALSE	32
2022-09-15	12:39:46	0.766069	538.045	FALSE	32
2022-09-15	12:39:47	0.413244	538.458	FALSE	32
2022-09-15	12:39:47	0.191158	538.649	FALSE	32
2022-09-15	12:39:47	0.332481	538.982	FALSE	32
2022-09-15	12:39:48	0.549224	539.531	FALSE	32
2022-09-15	12:39:48	0.695534	540.226	FALSE	32
2022-09-15	12:39:48	0.0269341	540.253	FALSE	32
2022-09-15	12:39:48	0.604644	540.858	FALSE	32
2022-09-15	12:39:49	0.304695	541.163	FALSE	32
2022-09-15	12:39:49	-0.309096	541.163	FALSE	32
2022-09-15	12:39:49	-0.519478	541.163	FALSE	32
2022-09-15	12:39:49	-0.663854	541.163	FALSE	32
2022-09-15	12:39:50	-0.496374	541.163	FALSE	32
2022-09-15	12:39:50	-0.442837	541.163	FALSE	32
2022-09-15	12:39:50	-0.243804	541.163	FALSE	32
2022-09-15	12:39:50	-0.483142	541.163	FALSE	32
2022-09-15	12:39:51	-0.104618	541.163	FALSE	32
2022-09-15	12:39:51	-0.566602	541.163	FALSE	32
2022-09-15	12:39:51	-0.412557	541.163	FALSE	32
2022-09-15	12:39:51	-0.495203	541.163	FALSE	32
2022-09-15	12:39:52	-0.329198	541.163	FALSE	32
2022-09-15	12:39:52	-0.962633	541.163	FALSE	32
2022-09-15	12:39:52	-1.12894	541.163	FALSE	32
2022-09-15	12:39:53	-1.14095	541.163	FALSE	32
2022-09-15	12:39:53	-1.17988	541.163	FALSE	32
2022-09-15	12:39:53	-1.03607	541.163	FALSE	32
2022-09-15	12:39:53	-1.24864	541.163	FALSE	32
2022-09-15	12:39:54	-1.09856	541.163	FALSE	32
2022-09-15	12:39:54	-1.1805	541.163	FALSE	32
2022-09-15	12:39:54	-1.18467	541.163	FALSE	32
2022-09-15	12:39:54	-1.30716	541.163	FALSE	32
2022-09-15	12:39:55	-1.23597	541.163	FALSE	32
2022-09-15	12:39:55	-1.255	541.163	FALSE	32
2022-09-15	12:39:55	-1.07088	541.163	FALSE	32
2022-09-15	12:39:55	-0.167621	541.163	FALSE	32
2022-09-15	12:39:56	0.0979264	541.261	FALSE	32
2022-09-15	12:39:56	0.250903	541.512	FALSE	32
2022-09-15	12:39:56	0.443982	541.956	FALSE	32
2022-09-15	12:39:57	0.313295	542.269	FALSE	32
2022-09-15	12:39:57	1.25172	543.521	FALSE	32
2022-09-15	12:39:57	0.416858	543.937	FALSE	32
2022-09-15	12:39:57	0.198028	544.135	FALSE	32
2022-09-15	12:39:58	0.000979898	544.136	FALSE	32
2022-09-15	12:39:58	-0.0160175	544.136	FALSE	32
2022-09-15	12:39:58	-0.0944908	544.136	FALSE	32
2022-09-15	12:39:58	-0.161666	544.136	FALSE	32
2022-09-15	12:39:59	-0.176221	544.136	FALSE	32
2022-09-15	12:39:59	-0.225839	544.136	FALSE	32
2022-09-15	12:39:59	-0.365127	544.136	FALSE	32
2022-09-15	12:39:59	-0.291437	544.136	FALSE	32
2022-09-15	12:40:00	-0.0545417	544.136	FALSE	32
2022-09-15	12:40:00	-0.0764756	544.136	FALSE	32
2022-09-15	12:40:00	-0.134593	544.136	FALSE	32
2022-09-15	12:40:01	-0.142582	544.136	FALSE	32
2022-09-15	12:40:01	-0.230012	544.136	FALSE	32
2022-09-15	12:40:01	-0.35846	544.136	FALSE	32
2022-09-15	12:40:01	-0.272557	544.136	FALSE	32
2022-09-15	12:40:02	-0.39332	544.136	FALSE	32
2022-09-15	12:40:02	-0.595916	544.136	FALSE	32
2022-09-15	12:40:02	-0.612557	544.136	FALSE	32
2022-09-15	12:40:02	-0.573015	544.136	FALSE	32
2022-09-15	12:40:03	-0.454541	544.136	FALSE	32
2022-09-15	12:40:03	-0.416882	544.136	FALSE	32
2022-09-15	12:40:03	-0.43561	544.136	FALSE	32
2022-09-15	12:40:03	-0.400597	544.136	FALSE	32
2022-09-15	12:40:04	-0.368384	544.136	FALSE	32
2022-09-15	12:40:04	-0.348638	544.136	FALSE	32
2022-09-15	12:40:04	-0.313473	544.136	FALSE	32
2022-09-15	12:40:05	-0.428791	544.136	FALSE	32
2022-09-15	12:40:05	-0.463346	544.136	FALSE	32
2022-09-15	12:40:05	-0.363956	544.136	FALSE	32
2022-09-15	12:40:05	-0.56248	544.136	FALSE	32
2022-09-15	12:40:06	-0.442938	544.136	FALSE	32
2022-09-15	12:40:06	-0.497239	544.136	FALSE	32
2022-09-15	12:40:06	-0.387671	544.136	FALSE	32
2022-09-15	12:40:06	-0.42131	544.136	FALSE	32
2022-09-15	12:40:07	-0.456323	544.136	FALSE	32
2022-09-15	12:40:07	-0.442938	544.136	FALSE	32
2022-09-15	12:40:07	-0.424771	544.136	FALSE	32
2022-09-15	12:40:07	-0.320547	544.136	FALSE	32
2022-09-15	12:40:08	-0.233066	544.136	FALSE	32
2022-09-15	12:40:08	-0.231997	544.136	FALSE	32
2022-09-15	12:40:08	-0.121921	544.136	FALSE	32
2022-09-15	12:40:09	0.204288	544.341	FALSE	32
2022-09-15	12:40:09	0.341234	544.682	FALSE	32
2022-09-15	12:40:09	0.735687	545.418	FALSE	32
2022-09-15	12:40:09	0.737722	546.155	FALSE	32
2022-09-15	12:40:10	0.733193	546.889	FALSE	32
2022-09-15	12:40:10	0.731107	547.62	FALSE	32
2022-09-15	12:40:10	0.730242	548.35	FALSE	32
2022-09-15	12:40:10	0.737214	549.087	FALSE	32
2022-09-15	12:40:11	0.739097	549.826	FALSE	32
2022-09-15	12:40:11	0.734822	550.561	FALSE	32
2022-09-15	12:40:11	0.735738	551.297	FALSE	32
2022-09-15	12:40:11	0.705458	552.002	FALSE	32
2022-09-15	12:40:12	0.73528	552.737	FALSE	32
2022-09-15	12:40:12	0.595178	553.333	FALSE	32
2022-09-15	12:40:12	0.728104	554.061	FALSE	32
2022-09-15	12:40:13	0.738028	554.799	FALSE	32
2022-09-15	12:40:13	0.735941	555.535	FALSE	32
2022-09-15	12:40:13	0.734669	556.269	FALSE	32
2022-09-15	12:40:13	0.734415	557.004	FALSE	32
2022-09-15	12:40:14	0.733244	557.737	FALSE	32
2022-09-15	12:40:14	0.727188	558.464	FALSE	32
2022-09-15	12:40:14	0.735433	559.2	FALSE	32
2022-09-15	12:40:14	0.73355	559.933	FALSE	32
2022-09-15	12:40:15	0.733855	560.667	FALSE	32
2022-09-15	12:40:15	0.737163	561.404	FALSE	32
2022-09-15	12:40:15	0.726527	562.131	FALSE	32
2022-09-15	12:40:15	0.738893	562.87	FALSE	32
2022-09-15	12:40:16	0.71355	563.583	FALSE	32
2022-09-15	12:40:16	0.732023	564.315	FALSE	32
2022-09-15	12:40:16	0.732023	565.047	FALSE	32
2022-09-15	12:40:17	0.734109	565.781	FALSE	32
2022-09-15	12:40:17	0.736705	566.518	FALSE	32
2022-09-15	12:40:17	0.733193	567.251	FALSE	32
2022-09-15	12:40:17	0.731361	567.983	FALSE	32
2022-09-15	12:40:18	0.737315	568.72	FALSE	32
2022-09-15	12:40:18	0.737366	569.457	FALSE	32
2022-09-15	12:40:18	0.732888	570.19	FALSE	32
2022-09-15	12:40:18	0.736603	570.927	FALSE	32
2022-09-15	12:40:19	0.72897	571.656	FALSE	32
2022-09-15	12:40:19	0.737265	572.393	FALSE	32
2022-09-15	12:40:19	0.735992	573.129	FALSE	32
2022-09-15	12:40:19	0.735636	573.865	FALSE	32
2022-09-15	12:40:20	0.737519	574.602	FALSE	32
2022-09-15	12:40:20	0.737824	575.34	FALSE	32
2022-09-15	12:40:20	0.738842	576.079	FALSE	32
2022-09-15	12:40:21	0.729936	576.809	FALSE	32
2022-09-15	12:40:21	0.733702	577.542	FALSE	32
2022-09-15	12:40:21	0.450903	577.993	FALSE	32
2022-09-15	12:40:21	-0.568079	577.993	FALSE	32
2022-09-15	12:40:22	-0.749249	577.993	FALSE	32
2022-09-15	12:40:22	-0.759172	577.993	FALSE	32
2022-09-15	12:40:22	-0.835304	577.993	FALSE	32
2022-09-15	12:40:22	-0.699376	577.993	FALSE	32
2022-09-15	12:40:23	-0.590318	577.993	FALSE	32
2022-09-15	12:40:23	-0.4236	577.993	FALSE	32
2022-09-15	12:40:23	0.0320231	578.025	FALSE	32
2022-09-15	12:40:23	0.603779	578.629	FALSE	32
2022-09-15	12:40:24	0.635382	579.265	FALSE	32
2022-09-15	12:40:24	0.688766	579.953	FALSE	32
2022-09-15	12:40:24	0.735433	580.689	FALSE	32
2022-09-15	12:40:25	0.710038	581.399	FALSE	32
2022-09-15	12:40:25	0.688613	582.087	FALSE	32
2022-09-15	12:40:25	0.700216	582.788	FALSE	32
2022-09-15	12:40:25	0.716043	583.504	FALSE	32
2022-09-15	12:40:26	0.726527	584.23	FALSE	32
2022-09-15	12:40:26	0.734822	584.965	FALSE	32
2022-09-15	12:40:26	0.628817	585.594	FALSE	32
2022-09-15	12:40:26	0.689275	586.283	FALSE	32
2022-09-15	12:40:27	0.613346	586.896	FALSE	32
2022-09-15	12:40:27	0.725916	587.622	FALSE	32
2022-09-15	12:40:27	0.716908	588.339	FALSE	32
2022-09-15	12:40:27	0.68271	589.022	FALSE	32
2022-09-15	12:40:28	0.727545	589.75	FALSE	32
2022-09-15	12:40:28	0.534669	590.284	FALSE	32
2022-09-15	12:40:28	0.719504	591.004	FALSE	32
2022-09-15	12:40:29	0.498333	591.502	FALSE	32
2022-09-15	12:40:29	0.722812	592.225	FALSE	32
2022-09-15	12:40:29	0.617468	592.842	FALSE	32
2022-09-15	12:40:29	0.703015	593.545	FALSE	32
2022-09-15	12:40:30	0.628562	594.174	FALSE	32
2022-09-15	12:40:30	0.69701	594.871	FALSE	32
2022-09-15	12:40:30	0.725865	595.597	FALSE	32
2022-09-15	12:40:30	0.488664	596.085	FALSE	32
2022-09-15	12:40:31	0.585865	596.671	FALSE	32
2022-09-15	12:40:31	0.556501	597.228	FALSE	32
2022-09-15	12:40:31	0.429631	597.657	FALSE	32
2022-09-15	12:40:31	0.356298	598.014	FALSE	32
2022-09-15	12:40:32	0.33757	598.351	FALSE	32
2022-09-15	12:40:32	-0.0840073	598.351	FALSE	32
2022-09-15	12:40:32	-0.0752541	598.351	FALSE	32
2022-09-15	12:40:33	-0.22299	598.351	FALSE	32
2022-09-15	12:40:33	-0.337086	598.351	FALSE	32
2022-09-15	12:40:33	0.0620994	598.413	FALSE	32
2022-09-15	12:40:33	0.119962	598.533	FALSE	32
2022-09-15	12:40:34	0.0142623	598.548	FALSE	32
2022-09-15	12:40:34	-0.133066	598.548	FALSE	32
2022-09-15	12:40:34	-0.326094	598.548	FALSE	32
2022-09-15	12:40:34	-0.423244	598.548	FALSE	32
2022-09-15	12:40:35	-0.393778	598.548	FALSE	32
2022-09-15	12:40:35	-0.362429	598.548	FALSE	32
2022-09-15	12:40:35	-0.36014	598.548	FALSE	32
2022-09-15	12:40:35	-0.378206	598.548	FALSE	32
2022-09-15	12:40:36	-0.374491	598.548	FALSE	32
2022-09-15	12:40:36	-0.361921	598.548	FALSE	32
2022-09-15	12:40:36	-0.3779	598.548	FALSE	32
2022-09-15	12:40:37	-0.361463	598.548	FALSE	32
2022-09-15	12:40:37	-0.387061	598.548	FALSE	32
2022-09-15	12:40:37	-0.42248	598.548	FALSE	32
2022-09-15	12:40:37	-0.402786	598.548	FALSE	32
2022-09-15	12:40:38	-0.399987	598.548	FALSE	32
2022-09-15	12:40:38	-0.368842	598.548	FALSE	32
2022-09-15	12:40:38	-0.335712	598.548	FALSE	32
2022-09-15	12:40:38	-0.31958	598.548	FALSE	32
2022-09-15	12:40:39	-0.353778	598.548	FALSE	32
2022-09-15	12:40:39	-0.604923	598.548	FALSE	32
2022-09-15	12:40:39	-0.329707	598.548	FALSE	32
2022-09-15	12:40:39	0.526476	599.074	FALSE	32
2022-09-15	12:40:40	0.696552	599.771	FALSE	32
2022-09-15	12:40:40	0.727494	600.498	FALSE	32
2022-09-15	12:40:40	0.65645	601.155	FALSE	32
2022-09-15	12:40:41	-0.396221	601.155	FALSE	32
2022-09-15	12:40:41	0.337417	601.492	FALSE	32
2022-09-15	12:40:41	0.524593	602.017	FALSE	32
2022-09-15	12:40:41	0.423626	602.44	FALSE	32
2022-09-15	12:40:42	0.354059	602.794	FALSE	32
2022-09-15	12:40:42	0.507748	603.302	FALSE	32
2022-09-15	12:40:42	-0.035814	603.302	FALSE	32
2022-09-15	12:40:42	-0.304974	603.302	FALSE	32
2022-09-15	12:40:43	-1.01943	603.302	FALSE	32
2022-09-15	12:40:43	-0.848078	603.302	FALSE	32
2022-09-15	12:40:43	-0.858206	603.302	FALSE	32
2022-09-15	12:40:43	-1.18864	603.302	FALSE	32
2022-09-15	12:40:44	-1.31317	603.302	FALSE	32
2022-09-15	12:40:44	-1.01434	603.302	FALSE	32
2022-09-15	12:40:44	-0.698103	603.302	FALSE	32
2022-09-15	12:40:45	-0.966094	603.302	FALSE	32
2022-09-15	12:40:45	-0.301208	603.302	FALSE	32
2022-09-15	12:40:45	-0.291539	603.302	FALSE	32
2022-09-15	12:40:45	-0.188231	603.302	FALSE	32
2022-09-15	12:40:46	-0.191081	603.302	FALSE	32
2022-09-15	12:40:46	-0.338155	603.302	FALSE	32
2022-09-15	12:40:46	-0.434338	603.302	FALSE	32
2022-09-15	12:40:46	-0.315203	603.302	FALSE	32
2022-09-15	12:40:47	-0.0746435	603.302	FALSE	32
2022-09-15	12:40:47	-0.214389	603.302	FALSE	32
2022-09-15	12:40:47	0.270445	603.572	FALSE	32
2022-09-15	12:40:47	0.0460689	603.619	FALSE	32
2022-09-15	12:40:48	0.16958	603.788	FALSE	32
2022-09-15	12:40:48	0.148104	603.936	FALSE	32
2022-09-15	12:40:48	0.623422	604.56	FALSE	32
2022-09-15	12:40:48	0.574313	605.134	FALSE	32
2022-09-15	12:40:49	0.667443	605.801	FALSE	32
2022-09-15	12:40:49	0.723677	606.525	FALSE	32
2022-09-15	12:40:49	0.67131	607.196	FALSE	32
2022-09-15	12:40:50	0.724389	607.921	FALSE	32
2022-09-15	12:40:50	0.501692	608.422	FALSE	32
2022-09-15	12:40:50	0.727545	609.15	FALSE	32
2022-09-15	12:40:50	0.703575	609.854	FALSE	32
2022-09-15	12:40:51	0.708206	610.562	FALSE	32
2022-09-15	12:40:51	0.674008	611.236	FALSE	32
2022-09-15	12:40:51	0.492227	611.728	FALSE	32
2022-09-15	12:40:51	0.63701	612.365	FALSE	32
2022-09-15	12:40:52	0.340878	612.706	FALSE	32
2022-09-15	12:40:52	0.636755	613.343	FALSE	32
2022-09-15	12:40:52	0.191107	613.534	FALSE	32
2022-09-15	12:40:52	0.422659	613.956	FALSE	32
2022-09-15	12:40:53	0.383015	614.339	FALSE	32
2022-09-15	12:40:53	0.303982	614.643	FALSE	32
2022-09-15	12:40:53	0.366883	615.01	FALSE	32
2022-09-15	12:40:54	-0.0182059	615.01	FALSE	32
2022-09-15	12:40:54	0.361336	615.372	FALSE	32
2022-09-15	12:40:54	-0.100801	615.372	FALSE	32
2022-09-15	12:40:54	0.199962	615.572	FALSE	32
2022-09-15	12:40:55	-0.0205468	615.572	FALSE	32
2022-09-15	12:40:55	-0.241208	615.572	FALSE	32
2022-09-15	12:40:55	-0.243498	615.572	FALSE	32
2022-09-15	12:40:55	-0.378715	615.572	FALSE	32
2022-09-15	12:40:56	-0.0855849	615.572	FALSE	32
2022-09-15	12:40:56	-0.525127	615.572	FALSE	32
2022-09-15	12:40:56	-0.358714	615.572	FALSE	32
2022-09-15	12:40:56	-0.651233	615.572	FALSE	32
2022-09-15	12:40:57	-0.757646	615.572	FALSE	32
2022-09-15	12:40:57	-0.791742	615.572	FALSE	32
2022-09-15	12:40:57	-1.26105	615.572	FALSE	32
2022-09-15	12:40:58	-0.859325	615.572	FALSE	32
2022-09-15	12:40:58	-1.4378	615.572	FALSE	32
2022-09-15	12:40:58	-1.31154	615.572	FALSE	32
2022-09-15	12:40:58	-1.45413	615.572	FALSE	32
2022-09-15	12:40:59	-1.32289	615.572	FALSE	32
2022-09-15	12:40:59	-2.55184	615.572	FALSE	32
2022-09-15	12:40:59	-5.33815	615.572	FALSE	32
2022-09-15	12:40:59	-4.84192	615.572	FALSE	32
2022-09-15	12:41:00	-4.32365	615.572	FALSE	32
2022-09-15	12:41:00	-4.55418	615.572	FALSE	32
2022-09-15	12:41:00	-8.90462	615.572	FALSE	32
2022-09-15	12:41:00	-8.90971	615.572	FALSE	32
2022-09-15	12:41:01	-7.90538	615.572	FALSE	32
2022-09-15	12:41:01	-7.75912	615.572	FALSE	32
2022-09-15	12:41:01	-5.52472	615.572	FALSE	32
2022-09-15	12:41:02	-6.11902	615.572	FALSE	32
2022-09-15	12:41:02	-7.87108	615.572	FALSE	32
2022-09-15	12:41:02	-8.93688	615.572	FALSE	32
2022-09-15	12:41:02	-8.9551	615.572	FALSE	32
2022-09-15	12:41:03	-8.80945	615.572	FALSE	32
2022-09-15	12:41:03	-8.29617	615.572	FALSE	32
2022-09-15	12:41:03	-7.54044	615.572	FALSE	32
2022-09-15	12:41:03	-6.68248	615.572	FALSE	32
2022-09-15	12:41:04	-6.26182	615.572	FALSE	32
2022-09-15	12:41:04	-6.02482	615.572	FALSE	32
2022-09-15	12:41:04	-5.84004	615.572	FALSE	32
2022-09-15	12:41:04	-5.28711	615.572	FALSE	32
2022-09-15	12:41:05	-4.70518	615.572	FALSE	32
2022-09-15	12:41:05	-4.57607	615.572	FALSE	32
2022-09-15	12:41:05	-4.47591	615.572	FALSE	32
2022-09-15	12:41:06	-4.43312	615.572	FALSE	32
2022-09-15	12:41:06	-4.36014	615.572	FALSE	32
2022-09-15	12:41:06	-4.41337	615.572	FALSE	32
2022-09-15	12:41:06	-4.46233	615.572	FALSE	32
2022-09-15	12:41:07	-4.44762	615.572	FALSE	32
2022-09-15	12:41:07	-4.43973	615.572	FALSE	32
2022-09-15	12:41:07	-4.40156	615.572	FALSE	32
2022-09-15	12:41:07	-4.39072	615.572	FALSE	32
2022-09-15	12:41:08	-3.78533	615.572	FALSE	32
2022-09-15	12:41:08	-0.330725	615.572	FALSE	32
2022-09-15	12:41:08	0.677926	616.25	FALSE	32
2022-09-15	12:41:08	-2.98859	616.25	FALSE	32
2022-09-15	12:41:09	-3.18416	616.25	FALSE	32
2022-09-15	12:41:09	0.225662	616.475	FALSE	32
2022-09-15	12:41:09	0.728461	617.204	FALSE	32
2022-09-15	12:41:10	0.461132	617.665	FALSE	32
2022-09-15	12:41:10	0.7393	618.404	FALSE	32
2022-09-15	12:41:10	0.728054	619.132	FALSE	32
2022-09-15	12:41:10	-0.663752	619.132	FALSE	32
2022-09-15	12:41:11	0.221387	619.354	FALSE	32
2022-09-15	12:41:11	-0.0210048	619.354	FALSE	32
2022-09-15	12:41:11	0.456909	619.81	FALSE	32
2022-09-15	12:41:11	0.23925	620.05	FALSE	32
2022-09-15	12:41:12	-0.399376	620.05	FALSE	32
2022-09-15	12:41:12	0.476043	620.526	FALSE	32
2022-09-15	12:41:12	0.555738	621.082	FALSE	32
2022-09-15	12:41:12	1.20322	622.285	FALSE	32
2022-09-15	12:41:13	1.77207	624.057	FALSE	32
2022-09-15	12:41:13	2.17268	626.229	FALSE	32
2022-09-15	12:41:13	1.51762	627.747	FALSE	32
2022-09-15	12:41:14	1.70882	629.456	FALSE	32
2022-09-15	12:41:14	1.2764	630.732	FALSE	32
2022-09-15	12:41:14	1.40607	632.138	FALSE	32
2022-09-15	12:41:14	1.88846	634.027	FALSE	32
2022-09-15	12:41:15	0.903219	634.93	FALSE	32
2022-09-15	12:41:15	1.96302	636.893	FALSE	32
2022-09-15	12:41:15	1.48617	638.379	FALSE	32
2022-09-15	12:41:15	1.22831	639.608	FALSE	32
2022-09-15	12:41:16	1.84454	641.452	FALSE	32
2022-09-15	12:41:16	0.792176	642.244	FALSE	32
2022-09-15	12:41:16	0.598232	642.843	FALSE	32
2022-09-15	12:41:16	0.695534	643.538	FALSE	32
2022-09-15	12:41:17	-0.38701	643.538	FALSE	32
2022-09-15	12:41:17	-0.500648	643.538	FALSE	32
2022-09-15	12:41:17	-0.533829	643.538	FALSE	32
2022-09-15	12:41:18	-0.382888	643.538	FALSE	32
2022-09-15	12:41:18	-0.12757	643.538	FALSE	32
2022-09-15	12:41:18	0.285611	643.824	FALSE	32
2022-09-15	12:41:18	0.0761453	643.9	FALSE	32
2022-09-15	12:41:19	0.237672	644.137	FALSE	32
2022-09-15	12:41:19	0.190598	644.328	FALSE	32
2022-09-15	12:41:19	0.105255	644.433	FALSE	32
2022-09-15	12:41:19	-0.0888929	644.433	FALSE	32
2022-09-15	12:41:20	-0.105381	644.433	FALSE	32
2022-09-15	12:41:20	0.327392	644.761	FALSE	32
2022-09-15	12:41:20	-0.063702	644.761	FALSE	32
2022-09-15	12:41:20	0.0207254	644.781	FALSE	32
2022-09-15	12:41:21	0.124542	644.906	FALSE	32
2022-09-15	12:41:21	0.317112	645.223	FALSE	32
2022-09-15	12:41:21	0.265051	645.488	FALSE	32
2022-09-15	12:41:22	0.247494	645.736	FALSE	32
2022-09-15	12:41:22	0.417316	646.153	FALSE	32
2022-09-15	12:41:22	0.15584	646.309	FALSE	32
2022-09-15	12:41:22	0.43584	646.745	FALSE	32
2022-09-15	12:41:23	0.300827	647.045	FALSE	32
2022-09-15	12:41:23	0.988613	648.034	FALSE	32
2022-09-15	12:41:23	1.29116	649.325	FALSE	32
2022-09-15	12:41:23	1.37767	650.703	FALSE	32
2022-09-15	12:41:24	0.666374	651.369	FALSE	32
2022-09-15	12:41:24	0.618639	651.988	FALSE	32
2022-09-15	12:41:24	0.260267	652.248	FALSE	32
2022-09-15	12:41:24	1.22098	653.469	FALSE	32
2022-09-15	12:41:25	1.11039	654.58	FALSE	32
2022-09-15	12:41:25	2.72312	657.303	FALSE	32
2022-09-15	12:41:25	3.30317	660.606	1	33
2022-09-15	12:41:26	2.38006	662.986	FALSE	33
2022-09-15	12:41:26	3.65431	666.64	1	34
2022-09-15	12:41:26	0.837417	667.478	FALSE	34
2022-09-15	12:41:26	0.21126	667.689	FALSE	34
2022-09-15	12:41:27	0.055789	667.745	FALSE	34
2022-09-15	12:41:27	0.443015	668.188	FALSE	34
2022-09-15	12:41:27	0.734517	668.922	FALSE	34
2022-09-15	12:41:27	0.732786	669.655	FALSE	34
2022-09-15	12:41:28	0.734924	670.39	FALSE	34
2022-09-15	12:41:28	0.622201	671.012	FALSE	34
2022-09-15	12:41:28	0.00423688	671.016	FALSE	34
2022-09-15	12:41:28	0.731209	671.748	FALSE	34
2022-09-15	12:41:29	0.739962	672.488	FALSE	34
2022-09-15	12:41:29	0.732277	673.22	FALSE	34
2022-09-15	12:41:29	0.52556	673.745	FALSE	34
2022-09-15	12:41:30	0.73243	674.478	FALSE	34
2022-09-15	12:41:30	0.735636	675.213	FALSE	34
2022-09-15	12:41:30	0.733092	675.947	FALSE	34
2022-09-15	12:41:30	0.73014	676.677	FALSE	34
2022-09-15	12:41:31	0.740114	677.417	FALSE	34
2022-09-15	12:41:31	0.735687	678.152	FALSE	34
2022-09-15	12:41:31	0.737773	678.89	FALSE	34
2022-09-15	12:41:31	0.73701	679.627	FALSE	34
2022-09-15	12:41:32	0.735738	680.363	FALSE	34
2022-09-15	12:41:32	0.729224	681.092	FALSE	34
2022-09-15	12:41:32	0.734771	681.827	FALSE	34
2022-09-15	12:41:32	0.732328	682.559	FALSE	34
2022-09-15	12:41:33	0.736094	683.295	FALSE	34
2022-09-15	12:41:33	0.733193	684.029	FALSE	34
2022-09-15	12:41:33	0.733295	684.762	FALSE	34
2022-09-15	12:41:34	0.732735	685.495	FALSE	34
2022-09-15	12:41:34	0.732735	686.227	FALSE	34
2022-09-15	12:41:34	0.731107	686.958	FALSE	34
2022-09-15	12:41:34	0.736196	687.695	FALSE	34
2022-09-15	12:41:35	0.731005	688.426	FALSE	34
2022-09-15	12:41:35	0.733499	689.159	FALSE	34
2022-09-15	12:41:35	0.726221	689.885	FALSE	34
2022-09-15	12:41:35	0.733957	690.619	FALSE	34
2022-09-15	12:41:36	0.736247	691.356	FALSE	34
2022-09-15	12:41:36	0.735076	692.091	FALSE	34
2022-09-15	12:41:36	0.735127	692.826	FALSE	34
2022-09-15	12:41:36	0.731514	693.557	FALSE	34
2022-09-15	12:41:37	0.733397	694.291	FALSE	34
2022-09-15	12:41:37	0.733295	695.024	FALSE	34
2022-09-15	12:41:37	0.736603	695.761	FALSE	34
2022-09-15	12:41:38	0.512583	696.273	FALSE	34
2022-09-15	12:41:38	0.635432	696.909	FALSE	34
2022-09-15	12:41:38	0.704542	697.613	FALSE	34
2022-09-15	12:41:38	0.678232	698.291	FALSE	34
2022-09-15	12:41:39	0.736247	699.028	FALSE	34
2022-09-15	12:41:39	0.735687	699.763	FALSE	34
2022-09-15	12:41:39	0.735992	700.499	FALSE	34
2022-09-15	12:41:39	0.73131	701.231	FALSE	34
2022-09-15	12:41:40	0.736298	701.967	FALSE	34
2022-09-15	12:41:40	0.737773	702.705	FALSE	34
2022-09-15	12:41:40	0.73645	703.441	FALSE	34
2022-09-15	12:41:40	0.731056	704.172	FALSE	34
2022-09-15	12:41:41	0.721997	704.894	FALSE	34
2022-09-15	12:41:41	0.738181	705.632	FALSE	34
2022-09-15	12:41:41	0.73014	706.363	FALSE	34
2022-09-15	12:41:41	0.73584	707.098	FALSE	34
2022-09-15	12:41:42	0.73131	707.83	FALSE	34
2022-09-15	12:41:42	0.732583	708.562	FALSE	34
2022-09-15	12:41:42	0.733499	709.296	FALSE	34
2022-09-15	12:41:43	0.733906	710.03	FALSE	34
2022-09-15	12:41:43	0.733193	710.763	FALSE	34
2022-09-15	12:41:43	0.737773	711.501	FALSE	34
2022-09-15	12:41:43	0.737875	712.239	FALSE	34
2022-09-15	12:41:44	0.734262	712.973	FALSE	34
2022-09-15	12:41:44	0.735687	713.708	FALSE	34
2022-09-15	12:41:44	0.729529	714.438	FALSE	34
2022-09-15	12:41:44	0.740064	715.178	FALSE	34
2022-09-15	12:41:45	0.731768	715.91	FALSE	34
2022-09-15	12:41:45	0.728817	716.639	FALSE	34
2022-09-15	12:41:45	0.720013	717.359	FALSE	34
2022-09-15	12:41:45	0.715789	718.074	FALSE	34
2022-09-15	12:41:46	0.734109	718.809	FALSE	34
2022-09-15	12:41:46	0.731056	719.54	FALSE	34
2022-09-15	12:41:46	0.726832	720.266	FALSE	34
2022-09-15	12:41:47	0.736908	721.003	FALSE	34
2022-09-15	12:41:47	0.73472	721.738	FALSE	34
2022-09-15	12:41:47	0.73528	722.473	FALSE	34
2022-09-15	12:41:47	0.735992	723.209	FALSE	34
2022-09-15	12:41:48	0.661845	723.871	FALSE	34
2022-09-15	12:41:48	0.739351	724.611	FALSE	34
2022-09-15	12:41:48	0.731972	725.343	FALSE	34
2022-09-15	12:41:48	0.422557	725.765	FALSE	34
2022-09-15	12:41:49	0.305967	726.071	FALSE	34
2022-09-15	12:41:49	0.674058	726.745	FALSE	34
2022-09-15	12:41:49	0.73701	727.482	FALSE	34
2022-09-15	12:41:49	0.738435	728.221	FALSE	34
2022-09-15	12:41:50	0.741081	728.962	FALSE	34
2022-09-15	12:41:50	0.728817	729.69	FALSE	34
2022-09-15	12:41:50	0.735992	730.426	FALSE	34
2022-09-15	12:41:51	0.735483	731.162	FALSE	34
2022-09-15	12:41:51	0.738231	731.9	FALSE	34
2022-09-15	12:41:51	0.732125	732.632	FALSE	34
2022-09-15	12:41:51	0.739504	733.372	FALSE	34
2022-09-15	12:41:52	0.733092	734.105	FALSE	34
2022-09-15	12:41:52	0.733092	734.838	FALSE	34
2022-09-15	12:41:52	0.734618	735.573	FALSE	34
2022-09-15	12:41:52	0.738588	736.311	FALSE	34
2022-09-15	12:41:53	0.734059	737.045	FALSE	34
2022-09-15	12:41:53	0.734822	737.78	FALSE	34
2022-09-15	12:41:53	0.735229	738.515	FALSE	34
2022-09-15	12:41:53	0.728512	739.244	FALSE	34
2022-09-15	12:41:54	0.736705	739.98	FALSE	34
2022-09-15	12:41:54	0.741743	740.722	FALSE	34
2022-09-15	12:41:54	0.736552	741.459	FALSE	34
2022-09-15	12:41:55	0.691107	742.15	FALSE	34
2022-09-15	12:41:55	0.731717	742.882	FALSE	34
2022-09-15	12:41:55	0.71187	743.593	FALSE	34
2022-09-15	12:41:55	0.733499	744.327	FALSE	34
2022-09-15	12:41:56	0.735127	745.062	FALSE	34
2022-09-15	12:41:56	0.737163	745.799	FALSE	34
2022-09-15	12:41:56	0.737315	746.537	FALSE	34
2022-09-15	12:41:56	0.725712	747.262	FALSE	34
2022-09-15	12:41:57	0.734517	747.997	FALSE	34
2022-09-15	12:41:57	0.734008	748.731	FALSE	34
2022-09-15	12:41:57	0.727036	749.458	FALSE	34
2022-09-15	12:41:57	0.731361	750.189	FALSE	34
2022-09-15	12:41:58	0.735738	750.925	FALSE	34
2022-09-15	12:41:58	0.731717	751.657	FALSE	34
2022-09-15	12:41:58	0.733804	752.39	FALSE	34
2022-09-15	12:41:59	0.736501	753.127	FALSE	34
2022-09-15	12:41:59	0.729631	753.857	FALSE	34
2022-09-15	12:41:59	0.732379	754.589	FALSE	34
2022-09-15	12:41:59	0.736756	755.326	FALSE	34
2022-09-15	12:42:00	0.735941	756.062	FALSE	34
2022-09-15	12:42:00	0.733092	756.795	FALSE	34
2022-09-15	12:42:00	0.734618	757.529	FALSE	34
2022-09-15	12:42:00	0.733753	758.263	FALSE	34
2022-09-15	12:42:01	0.739656	759.003	FALSE	34
2022-09-15	12:42:01	0.735687	759.738	FALSE	34
2022-09-15	12:42:01	0.738231	760.477	FALSE	34
2022-09-15	12:42:01	0.735789	761.213	FALSE	34
2022-09-15	12:42:02	0.733499	761.946	FALSE	34
2022-09-15	12:42:02	0.737112	762.683	FALSE	34
2022-09-15	12:42:02	0.736349	763.419	FALSE	34
2022-09-15	12:42:03	0.731005	764.15	FALSE	34
2022-09-15	12:42:03	0.736247	764.887	FALSE	34
2022-09-15	12:42:03	0.733753	765.62	FALSE	34
2022-09-15	12:42:03	0.7307	766.351	FALSE	34
2022-09-15	12:42:04	0.733702	767.085	FALSE	34
2022-09-15	12:42:04	0.735178	767.82	FALSE	34
2022-09-15	12:42:04	0.737061	768.557	FALSE	34
2022-09-15	12:42:04	0.733295	769.29	FALSE	34
2022-09-15	12:42:05	0.732684	770.023	FALSE	34
2022-09-15	12:42:05	0.731717	770.755	FALSE	34
2022-09-15	12:42:05	0.736603	771.491	FALSE	34
2022-09-15	12:42:05	0.736501	772.228	FALSE	34
2022-09-15	12:42:06	0.734008	772.962	FALSE	34
2022-09-15	12:42:06	0.735127	773.697	FALSE	34
2022-09-15	12:42:06	0.727697	774.425	FALSE	34
2022-09-15	12:42:07	0.731921	775.157	FALSE	34
2022-09-15	12:42:07	0.730751	775.887	FALSE	34
2022-09-15	12:42:07	0.736043	776.623	FALSE	34
2022-09-15	12:42:07	0.735941	777.359	FALSE	34
2022-09-15	12:42:08	0.732735	778.092	FALSE	34
2022-09-15	12:42:08	0.732023	778.824	FALSE	34
2022-09-15	12:42:08	0.736043	779.56	FALSE	34
2022-09-15	12:42:08	0.734975	780.295	FALSE	34
2022-09-15	12:42:09	0.738435	781.034	FALSE	34
2022-09-15	12:42:09	0.728155	781.762	FALSE	34
2022-09-15	12:42:09	0.732837	782.495	FALSE	34
2022-09-15	12:42:09	0.73416	783.229	FALSE	34
2022-09-15	12:42:10	0.733855	783.963	FALSE	34
2022-09-15	12:42:10	0.737315	784.7	FALSE	34
2022-09-15	12:42:10	0.733906	785.434	FALSE	34
2022-09-15	12:42:11	0.738079	786.172	FALSE	34
2022-09-15	12:42:11	0.735687	786.908	FALSE	34
2022-09-15	12:42:11	0.731361	787.639	FALSE	34
2022-09-15	12:42:11	0.761845	788.401	FALSE	34
2022-09-15	12:42:12	0.705255	789.106	FALSE	34
2022-09-15	12:42:12	0.719097	789.825	FALSE	34
2022-09-15	12:42:12	0.736857	790.562	FALSE	34
2022-09-15	12:42:12	0.727443	791.289	FALSE	34
2022-09-15	12:42:13	0.734262	792.024	FALSE	34
2022-09-15	12:42:13	0.740522	792.764	FALSE	34
2022-09-15	12:42:13	0.736094	793.5	FALSE	34
2022-09-15	12:42:13	0.735789	794.236	FALSE	34
2022-09-15	12:42:14	0.73645	794.973	FALSE	34
2022-09-15	12:42:14	0.738486	795.711	FALSE	34
2022-09-15	12:42:14	0.736399	796.447	FALSE	34
2022-09-15	12:42:15	0.736247	797.184	FALSE	34
2022-09-15	12:42:15	0.738639	797.922	FALSE	34
2022-09-15	12:42:15	0.735789	798.658	FALSE	34
2022-09-15	12:42:15	0.735433	799.394	FALSE	34
2022-09-15	12:42:16	0.736196	800.13	FALSE	34
2022-09-15	12:42:16	0.733193	800.863	FALSE	34
2022-09-15	12:42:16	0.736196	801.599	FALSE	34
2022-09-15	12:42:16	0.738231	802.337	FALSE	34
2022-09-15	12:42:17	0.731056	803.068	FALSE	34
2022-09-15	12:42:17	0.738181	803.807	FALSE	34
2022-09-15	12:42:17	0.732634	804.539	FALSE	34
2022-09-15	12:42:17	0.732888	805.272	FALSE	34
2022-09-15	12:42:18	0.729478	806.002	FALSE	34
2022-09-15	12:42:18	0.735891	806.738	FALSE	34
2022-09-15	12:42:18	0.734975	807.472	FALSE	34
2022-09-15	12:42:18	0.733753	808.206	FALSE	34
2022-09-15	12:42:19	0.734059	808.94	FALSE	34
2022-09-15	12:42:19	0.685	809.625	FALSE	34
2022-09-15	12:42:19	2.73965	812.365	FALSE	34
2022-09-15	12:42:20	0.297774	812.663	FALSE	34
2022-09-15	12:42:20	0.014415	812.677	FALSE	34
2022-09-15	12:42:20	0.16215	812.839	FALSE	34
2022-09-15	12:42:20	0.249224	813.089	FALSE	34
2022-09-15	12:42:21	1.09492	814.183	FALSE	34
2022-09-15	12:42:21	4.98622	819.17	1	35
2022-09-15	12:42:21	4.87513	824.045	1	36
2022-09-15	12:42:21	4.17304	828.218	1	37
2022-09-15	12:42:22	2.95273	831.171	FALSE	37
2022-09-15	12:42:22	9.55746	840.728	1	38
2022-09-15	12:42:22	8.1712	848.899	1	39
2022-09-15	12:42:22	9.29436	858.194	1	40
2022-09-15	12:42:23	8.33289	866.526	1	41
2022-09-15	12:42:23	3.37177	869.898	1	42
2022-09-15	12:42:23	0.233652	870.132	FALSE	42
2022-09-15	12:42:24	0.179809	870.312	FALSE	42
2022-09-15	12:42:24	0.28897	870.601	FALSE	42
2022-09-15	12:42:24	0.332023	870.933	FALSE	42
2022-09-15	12:42:24	1.13574	872.068	FALSE	42
2022-09-15	12:42:25	3.12169	875.19	1	43
2022-09-15	12:42:25	7.93126	883.121	1	44
2022-09-15	12:42:25	2.46673	885.588	FALSE	44
2022-09-15	12:42:25	0.383982	885.972	FALSE	44
2022-09-15	12:42:26	0.156552	886.129	FALSE	44
2022-09-15	12:42:26	0.109021	886.238	FALSE	44
2022-09-15	12:42:26	0.32159	886.559	FALSE	44
2022-09-15	12:42:26	0.114924	886.674	FALSE	44
2022-09-15	12:42:27	0.378842	887.053	FALSE	44
2022-09-15	12:42:27	0.0852547	887.138	FALSE	44
2022-09-15	12:42:27	0.256094	887.394	FALSE	44
2022-09-15	12:42:28	0.0305473	887.425	FALSE	44
2022-09-15	12:42:28	0.156298	887.581	FALSE	44
2022-09-15	12:42:28	0.281183	887.862	FALSE	44
2022-09-15	12:42:28	0.201031	888.063	FALSE	44
2022-09-15	12:42:29	0.527646	888.591	FALSE	44
2022-09-15	12:42:29	0.369529	888.961	FALSE	44
2022-09-15	12:42:29	0.884949	889.846	FALSE	44
2022-09-15	12:42:29	0.631412	890.477	FALSE	44
2022-09-15	12:42:30	0.927748	891.405	FALSE	44
2022-09-15	12:42:30	0.768562	892.173	FALSE	44
2022-09-15	12:42:30	1.55843	893.732	FALSE	44
2022-09-15	12:42:30	2.57645	896.308	FALSE	44
2022-09-15	12:42:31	1.4391	897.747	FALSE	44
2022-09-15	12:42:31	0.614771	898.362	FALSE	44
2022-09-15	12:42:31	0.207646	898.57	FALSE	44
2022-09-15	12:42:32	0.614873	899.185	FALSE	44
2022-09-15	12:42:32	0.218588	899.403	FALSE	44
2022-09-15	12:42:32	0.623371	900.027	FALSE	44
2022-09-15	12:42:32	1.45233	901.479	FALSE	44
2022-09-15	12:42:33	3.25696	904.736	1	45
2022-09-15	12:42:33	2.87619	907.612	FALSE	45
2022-09-15	12:42:33	3.5938	911.206	1	46
2022-09-15	12:42:33	4.56892	915.775	1	47
2022-09-15	12:42:34	4.48479	920.259	1	48
2022-09-15	12:42:34	2.41452	922.674	FALSE	48
2022-09-15	12:42:34	1.20617	923.88	FALSE	48
2022-09-15	12:42:34	0.909631	924.79	FALSE	48
2022-09-15	12:42:35	0.639199	925.429	FALSE	48
2022-09-15	12:42:35	0.484288	925.913	FALSE	48
2022-09-15	12:42:35	0.561438	926.475	FALSE	48
2022-09-15	12:42:36	0.505051	926.98	FALSE	48
2022-09-15	12:42:36	0.435178	927.415	FALSE	48

## Sheet: Boris_prong_2022915123721
						**GoPro Fitting: 1221
2022-09-15	12:37:21	0.730394
2022-09-15	12:37:21	0.733499
2022-09-15	12:37:21	0.731463
2022-09-15	12:37:22	0.735636
2022-09-15	12:37:22	0.735229
2022-09-15	12:37:22	0.719148
2022-09-15	12:37:22	0.702557
2022-09-15	12:37:23	0.675687
2022-09-15	12:37:23	0.654669
2022-09-15	12:37:23	0.669885
2022-09-15	12:37:24	0.650293
2022-09-15	12:37:24	0.659911
2022-09-15	12:37:24	0.658282
2022-09-15	12:37:25	0.649936
2022-09-15	12:37:25	0.657672
2022-09-15	12:37:25	0.618791
2022-09-15	12:37:25	0.584796
2022-09-15	12:37:25	0.628003
2022-09-15	12:37:26	0.552023
2022-09-15	12:37:26	0.592888
2022-09-15	12:37:26	0.55014
2022-09-15	12:37:26	0.531311
2022-09-15	12:37:27	0.519758
2022-09-15	12:37:27	0.606018
2022-09-15	12:37:27	0.500827
2022-09-15	12:37:28	0.503168
2022-09-15	12:37:28	0.49243
2022-09-15	12:37:28	0.487494
2022-09-15	12:37:28	0.488155
2022-09-15	12:37:29	0.483372
2022-09-15	12:37:29	0.479606
2022-09-15	12:37:29	0.472328
2022-09-15	12:37:29	0.484644
2022-09-15	12:37:30	0.478893
2022-09-15	12:37:30	0.474975
2022-09-15	12:37:30	0.432685
2022-09-15	12:37:30	0.404186
2022-09-15	12:37:31	0.428919
2022-09-15	12:37:31	0.266527
2022-09-15	12:37:31	0.237163
2022-09-15	12:37:32	0.311565
2022-09-15	12:37:32	0.427748
2022-09-15	12:37:32	0.287239
2022-09-15	12:37:32	0.503015
2022-09-15	12:37:33	0.311921
2022-09-15	12:37:33	0.521234
2022-09-15	12:37:33	0.648868
2022-09-15	12:37:33	0.418435
2022-09-15	12:37:34	0.558842
2022-09-15	12:37:34	0.663575
2022-09-15	12:37:34	-0.259478
2022-09-15	12:37:34	-0.326704
2022-09-15	12:37:35	-0.0248216
2022-09-15	12:37:35	0.277977
2022-09-15	12:37:35	0.199351
2022-09-15	12:37:36	0.51757
2022-09-15	12:37:36	0.209122
2022-09-15	12:37:36	0.6564
2022-09-15	12:37:36	0.345662
2022-09-15	12:37:37	0.437774
2022-09-15	12:37:37	0.693244
2022-09-15	12:37:37	0.616908
2022-09-15	12:37:37	0.57472
2022-09-15	12:37:38	0.344949
2022-09-15	12:37:38	0.399809
2022-09-15	12:37:38	2.64296
2022-09-15	12:37:38	2.23813
2022-09-15	12:37:39	1.91258
2022-09-15	12:37:39	1.68032
2022-09-15	12:37:39	1.61126
2022-09-15	12:37:40	0.46159
2022-09-15	12:37:40	1.50485
2022-09-15	12:37:40	0.539758
2022-09-15	12:37:40	0.836908
2022-09-15	12:37:41	1.10795
2022-09-15	12:37:41	0.565916
2022-09-15	12:37:41	0.898791
2022-09-15	12:37:41	0.590038
2022-09-15	12:37:42	1.10948
2022-09-15	12:37:42	0.822303
2022-09-15	12:37:42	1.00597
2022-09-15	12:37:42	1.01538
2022-09-15	12:37:43	1.08943
2022-09-15	12:37:43	1.33696
2022-09-15	12:37:43	0.601743
2022-09-15	12:37:44	1.5995
2022-09-15	12:37:44	0.555891
2022-09-15	12:37:44	1.22958
2022-09-15	12:37:44	0.76897
2022-09-15	12:37:45	1.46154
2022-09-15	12:37:45	1.11258
2022-09-15	12:37:45	1.18164
2022-09-15	12:37:45	1.86424
2022-09-15	12:37:46	0.934618
2022-09-15	12:37:46	1.28256
2022-09-15	12:37:46	0.540572
2022-09-15	12:37:46	1.29024
2022-09-15	12:37:47	0.421539
2022-09-15	12:37:47	0.530038
2022-09-15	12:37:47	0.362913
2022-09-15	12:37:48	0.387087
2022-09-15	12:37:48	0.532735
2022-09-15	12:37:48	0.811158
2022-09-15	12:37:48	2.90525
2022-09-15	12:37:49	5.01009
2022-09-15	12:37:49	8.3395
2022-09-15	12:37:49	5.19258
2022-09-15	12:37:49	6.44601
2022-09-15	12:37:50	0.626527
2022-09-15	12:37:50	1.29599
2022-09-15	12:37:50	0.468613
2022-09-15	12:37:50	0.800165
2022-09-15	12:37:51	0.559046
2022-09-15	12:37:51	0.205
2022-09-15	12:37:51	0.441031
2022-09-15	12:37:52	0.118028
2022-09-15	12:37:52	0.0189442
2022-09-15	12:37:52	-0.171488
2022-09-15	12:37:52	-0.0331168
2022-09-15	12:37:53	-0.21159
2022-09-15	12:37:53	0.294517
2022-09-15	12:37:53	0.633804
2022-09-15	12:37:53	3.36703
2022-09-15	12:37:54	3.12693
2022-09-15	12:37:54	1.43925
2022-09-15	12:37:54	4.76408
2022-09-15	12:37:54	1.52332
2022-09-15	12:37:55	3.37935
2022-09-15	12:37:55	1.90373
2022-09-15	12:37:55	4.40413
2022-09-15	12:37:56	0.689886
2022-09-15	12:37:56	1.82546
2022-09-15	12:37:56	1.7508
2022-09-15	12:37:56	1.10734
2022-09-15	12:37:57	1.02179
2022-09-15	12:37:57	0.711972
2022-09-15	12:37:57	1.02047
2022-09-15	12:37:57	1.00312
2022-09-15	12:37:58	0.824033
2022-09-15	12:37:58	0.701489
2022-09-15	12:37:58	0.541896
2022-09-15	12:37:58	0.441794
2022-09-15	12:37:59	0.541336
2022-09-15	12:37:59	0.527443
2022-09-15	12:37:59	1.11004
2022-09-15	12:38:00	1.23569
2022-09-15	12:38:00	0.475534
2022-09-15	12:38:00	-0.0631931
2022-09-15	12:38:00	-0.0716409
2022-09-15	12:38:01	0.885611
2022-09-15	12:38:01	1.40159
2022-09-15	12:38:01	0.470852
2022-09-15	12:38:01	0.0394023
2022-09-15	12:38:02	-0.0453305
2022-09-15	12:38:02	-0.0253814
2022-09-15	12:38:02	-0.164974
2022-09-15	12:38:02	-0.491997
2022-09-15	12:38:03	-0.673066
2022-09-15	12:38:03	-0.908842
2022-09-15	12:38:03	-0.986704
2022-09-15	12:38:04	-0.884312
2022-09-15	12:38:04	-0.866908
2022-09-15	12:38:04	-0.7179
2022-09-15	12:38:04	-0.607162
2022-09-15	12:38:05	-0.4722
2022-09-15	12:38:05	-0.390419
2022-09-15	12:38:05	-0.483346
2022-09-15	12:38:05	-0.641004
2022-09-15	12:38:06	-0.436679
2022-09-15	12:38:06	-0.598765
2022-09-15	12:38:06	-0.418664
2022-09-15	12:38:06	-0.355916
2022-09-15	12:38:07	-0.448231
2022-09-15	12:38:07	-0.44986
2022-09-15	12:38:07	-0.490419
2022-09-15	12:38:08	-0.503345
2022-09-15	12:38:08	-0.452964
2022-09-15	12:38:08	-0.374491
2022-09-15	12:38:08	-0.350521
2022-09-15	12:38:09	-0.386857
2022-09-15	12:38:09	-0.174694
2022-09-15	12:38:09	0.035331
2022-09-15	12:38:09	-0.00136106
2022-09-15	12:38:10	-0.109096
2022-09-15	12:38:10	-0.191946
2022-09-15	12:38:10	-0.128028
2022-09-15	12:38:10	-0.0703686
2022-09-15	12:38:11	-0.13042
2022-09-15	12:38:11	-0.171386
2022-09-15	12:38:11	-0.03673
2022-09-15	12:38:12	1.52429
2022-09-15	12:38:12	3.6852
2022-09-15	12:38:12	3.77207
2022-09-15	12:38:12	2.23167
2022-09-15	12:38:13	3.36642
2022-09-15	12:38:13	1.78617
2022-09-15	12:38:13	0.783473
2022-09-15	12:38:13	0.596349
2022-09-15	12:38:14	0.916552
2022-09-15	12:38:14	0.850852
2022-09-15	12:38:14	1.3251
2022-09-15	12:38:14	2.37136
2022-09-15	12:38:15	2.1652
2022-09-15	12:38:15	4.9224
2022-09-15	12:38:15	1.94989
2022-09-15	12:38:16	4.19787
2022-09-15	12:38:16	1.34871
2022-09-15	12:38:16	2.70352
2022-09-15	12:38:16	1.76866
2022-09-15	12:38:17	1.23961
2022-09-15	12:38:17	0.580522
2022-09-15	12:38:17	0.356858
2022-09-15	12:38:17	0.229122
2022-09-15	12:38:18	-0.0938801
2022-09-15	12:38:18	-0.206857
2022-09-15	12:38:18	-0.316374
2022-09-15	12:38:18	-0.489554
2022-09-15	12:38:19	-0.78818
2022-09-15	12:38:19	-1.62136
2022-09-15	12:38:19	-1.12106
2022-09-15	12:38:20	-0.856272
2022-09-15	12:38:20	-0.945177
2022-09-15	12:38:20	-0.383142
2022-09-15	12:38:20	1.05696
2022-09-15	12:38:21	2.09772
2022-09-15	12:38:21	1.00266
2022-09-15	12:38:21	-0.677747
2022-09-15	12:38:21	-0.148486
2022-09-15	12:38:22	-0.201666
2022-09-15	12:38:22	0.0391987
2022-09-15	12:38:22	-0.18304
2022-09-15	12:38:22	0.0168577
2022-09-15	12:38:23	0.0457127
2022-09-15	12:38:23	1.61599
2022-09-15	12:38:23	1.2738
2022-09-15	12:38:24	0.505916
2022-09-15	12:38:24	0.257926
2022-09-15	12:38:24	0.401183
2022-09-15	12:38:24	0.258028
2022-09-15	12:38:25	0.349784
2022-09-15	12:38:25	0.819249
2022-09-15	12:38:25	0.652735
2022-09-15	12:38:25	0.328868
2022-09-15	12:38:26	0.253804
2022-09-15	12:38:26	0.327494
2022-09-15	12:38:26	0.29126
2022-09-15	12:38:26	0.467647
2022-09-15	12:38:27	0.849987
2022-09-15	12:38:27	1.59253
2022-09-15	12:38:27	2.42378
2022-09-15	12:38:28	1.84871
2022-09-15	12:38:28	1.28922
2022-09-15	12:38:28	0.468155
2022-09-15	12:38:28	-0.0668063
2022-09-15	12:38:29	-0.356475
2022-09-15	12:38:29	-0.299274
2022-09-15	12:38:29	-0.184618
2022-09-15	12:38:29	-0.170878
2022-09-15	12:38:30	-0.0340328
2022-09-15	12:38:30	0.01584
2022-09-15	12:38:30	-0.0241092
2022-09-15	12:38:30	0.712481
2022-09-15	12:38:31	-0.274389
2022-09-15	12:38:31	-0.925636
2022-09-15	12:38:31	-1.33597
2022-09-15	12:38:32	-1.29831
2022-09-15	12:38:32	-1.28787
2022-09-15	12:38:32	-1.08548
2022-09-15	12:38:32	-1.32767
2022-09-15	12:38:33	0.0237279
2022-09-15	12:38:33	2.11523
2022-09-15	12:38:33	5.52815
2022-09-15	12:38:33	7.63502
2022-09-15	12:38:34	3.52871
2022-09-15	12:38:34	3.59798
2022-09-15	12:38:34	0.706883
2022-09-15	12:38:34	1.15324
2022-09-15	12:38:35	0.952023
2022-09-15	12:38:35	0.355534
2022-09-15	12:38:35	1.12861
2022-09-15	12:38:36	1.15747
2022-09-15	12:38:36	3.79737
2022-09-15	12:38:36	3.5081
2022-09-15	12:38:36	4.18373
2022-09-15	12:38:37	3.01553
2022-09-15	12:38:37	1.13971
2022-09-15	12:38:37	1.93467
2022-09-15	12:38:37	0.873804
2022-09-15	12:38:38	1.17039
2022-09-15	12:38:38	1.9165
2022-09-15	12:38:38	0.425407
2022-09-15	12:38:38	0.0882063
2022-09-15	12:38:39	0.382659
2022-09-15	12:38:39	0.683524
2022-09-15	12:38:39	0.668053
2022-09-15	12:38:40	0.264237
2022-09-15	12:38:40	1.84373
2022-09-15	12:38:40	0.894822
2022-09-15	12:38:40	1.40714
2022-09-15	12:38:41	2.43945
2022-09-15	12:38:41	1.65503
2022-09-15	12:38:41	0.125662
2022-09-15	12:38:41	0.173601
2022-09-15	12:38:42	0.182659
2022-09-15	12:38:42	0.189784
2022-09-15	12:38:42	0.331361
2022-09-15	12:38:42	0.11584
2022-09-15	12:38:43	0.267087
2022-09-15	12:38:43	0.163117
2022-09-15	12:38:43	0.285051
2022-09-15	12:38:44	0.352481
2022-09-15	12:38:44	0.661947
2022-09-15	12:38:44	1.46179
2022-09-15	12:38:44	1.44968
2022-09-15	12:38:45	1.68424
2022-09-15	12:38:45	1.05187
2022-09-15	12:38:45	1.90352
2022-09-15	12:38:45	2.33986
2022-09-15	12:38:46	3.48123
2022-09-15	12:38:46	3.56968
2022-09-15	12:38:46	0.651565
2022-09-15	12:38:46	0.525407
2022-09-15	12:38:47	0.725356
2022-09-15	12:38:47	0.398028
2022-09-15	12:38:47	0.609784
2022-09-15	12:38:48	0.0587407
2022-09-15	12:38:48	0.411463
2022-09-15	12:38:48	0.205356
2022-09-15	12:38:48	0.717468
2022-09-15	12:38:49	-0.106145
2022-09-15	12:38:49	-1.57098
2022-09-15	12:38:49	-4.3237
2022-09-15	12:38:49	3.17334
2022-09-15	12:38:50	3.65747
2022-09-15	12:38:50	1.35228
2022-09-15	12:38:50	1.09187
2022-09-15	12:38:50	0.446069
2022-09-15	12:38:51	0.49299
2022-09-15	12:38:51	0.384389
2022-09-15	12:38:51	-1.40737
2022-09-15	12:38:52	0.576349
2022-09-15	12:38:52	0.0219977
2022-09-15	12:38:52	0.492634
2022-09-15	12:38:52	0.893499
2022-09-15	12:38:53	1.48296
2022-09-15	12:38:53	0.962964
2022-09-15	12:38:53	0.1307
2022-09-15	12:38:53	0.444033
2022-09-15	12:38:54	0.0980791
2022-09-15	12:38:54	0.296298
2022-09-15	12:38:54	0.246578
2022-09-15	12:38:54	0.238028
2022-09-15	12:38:55	0.433193
2022-09-15	12:38:55	0.393804
2022-09-15	12:38:55	0.986883
2022-09-15	12:38:56	0.515127
2022-09-15	12:38:56	0.972939
2022-09-15	12:38:56	0.771718
2022-09-15	12:38:56	0.693397
2022-09-15	12:38:57	0.817824
2022-09-15	12:38:57	0.708817
2022-09-15	12:38:57	1.3624
2022-09-15	12:38:57	0.724746
2022-09-15	12:38:58	1.0905
2022-09-15	12:38:58	1.34281
2022-09-15	12:38:58	1.12444
2022-09-15	12:38:58	1.21711
2022-09-15	12:38:59	0.903728
2022-09-15	12:38:59	0.7793
2022-09-15	12:38:59	0.84841
2022-09-15	12:39:00	0.803728
2022-09-15	12:39:00	0.720013
2022-09-15	12:39:00	1.20475
2022-09-15	12:39:00	0.388868
2022-09-15	12:39:01	0.789733
2022-09-15	12:39:01	0.704135
2022-09-15	12:39:01	1.20663
2022-09-15	12:39:01	1.35564
2022-09-15	12:39:02	0.970242
2022-09-15	12:39:02	1.24897
2022-09-15	12:39:02	0.540522
2022-09-15	12:39:02	0.966171
2022-09-15	12:39:03	0.7107
2022-09-15	12:39:03	0.704542
2022-09-15	12:39:03	0.807748
2022-09-15	12:39:04	0.543372
2022-09-15	12:39:04	1.20846
2022-09-15	12:39:04	0.551769
2022-09-15	12:39:04	1.22831
2022-09-15	12:39:05	0.995941
2022-09-15	12:39:05	0.956399
2022-09-15	12:39:05	0.996603
2022-09-15	12:39:05	0.657214
2022-09-15	12:39:06	1.21935
2022-09-15	12:39:06	0.8307
2022-09-15	12:39:06	1.47126
2022-09-15	12:39:06	1.12184
2022-09-15	12:39:07	1.38113
2022-09-15	12:39:07	0.767341
2022-09-15	12:39:07	0.819707
2022-09-15	12:39:08	0.874465
2022-09-15	12:39:08	0.731616
2022-09-15	12:39:08	0.733142
2022-09-15	12:39:08	0.0937534
2022-09-15	12:39:09	0.341031
2022-09-15	12:39:09	0.695942
2022-09-15	12:39:09	1.83757
2022-09-15	12:39:09	0.813601
2022-09-15	12:39:10	0.999249
2022-09-15	12:39:10	0.48556
2022-09-15	12:39:10	0.843422
2022-09-15	12:39:10	0.829428
2022-09-15	12:39:11	1.00368
2022-09-15	12:39:11	1.11793
2022-09-15	12:39:11	0.875789
2022-09-15	12:39:12	1.49299
2022-09-15	12:39:12	1.48027
2022-09-15	12:39:12	1.96011
2022-09-15	12:39:12	1.69345
2022-09-15	12:39:13	2.95859
2022-09-15	12:39:13	2.12536
2022-09-15	12:39:13	2.02872
2022-09-15	12:39:13	1.99721
2022-09-15	12:39:14	2.41396
2022-09-15	12:39:14	2.36729
2022-09-15	12:39:14	3.84968
2022-09-15	12:39:14	1.40994
2022-09-15	12:39:15	2.62938
2022-09-15	12:39:15	2.39121
2022-09-15	12:39:15	1.65747
2022-09-15	12:39:16	2.63192
2022-09-15	12:39:16	4.32021
2022-09-15	12:39:16	4.45971
2022-09-15	12:39:16	9.12586
2022-09-15	12:39:17	7.89752
2022-09-15	12:39:17	4.68805
2022-09-15	12:39:17	2.84943
2022-09-15	12:39:17	2.29482
2022-09-15	12:39:18	2.16408
2022-09-15	12:39:18	2.13258
2022-09-15	12:39:18	1.94989
2022-09-15	12:39:18	1.85477
2022-09-15	12:39:19	1.89452
2022-09-15	12:39:19	2.14378
2022-09-15	12:39:19	1.53574
2022-09-15	12:39:20	1.04439
2022-09-15	12:39:20	1.09202
2022-09-15	12:39:20	1.13706
2022-09-15	12:39:20	1.18067
2022-09-15	12:39:21	1.4936
2022-09-15	12:39:21	1.01803
2022-09-15	12:39:21	1.27258
2022-09-15	12:39:21	1.19111
2022-09-15	12:39:22	1.23604
2022-09-15	12:39:22	1.27976
2022-09-15	12:39:22	1.08688
2022-09-15	12:39:22	0.979148
2022-09-15	12:39:23	1.13385
2022-09-15	12:39:23	1.24022
2022-09-15	12:39:23	1.38154
2022-09-15	12:39:24	1.36128
2022-09-15	12:39:24	1.32958
2022-09-15	12:39:24	1.39274
2022-09-15	12:39:24	1.36566
2022-09-15	12:39:25	1.32698
2022-09-15	12:39:25	1.33777
2022-09-15	12:39:25	1.35289
2022-09-15	12:39:25	1.44775
2022-09-15	12:39:26	1.48698
2022-09-15	12:39:26	1.53574
2022-09-15	12:39:26	1.47726
2022-09-15	12:39:26	1.40312
2022-09-15	12:39:27	1.42057
2022-09-15	12:39:27	1.4621
2022-09-15	12:39:27	1.47513
2022-09-15	12:39:28	1.4533
2022-09-15	12:39:28	1.45156
2022-09-15	12:39:28	1.40688
2022-09-15	12:39:28	1.39513
2022-09-15	12:39:29	1.41961
2022-09-15	12:39:29	1.70546
2022-09-15	12:39:29	1.32439
2022-09-15	12:39:29	1.02195
2022-09-15	12:39:30	0.99014
2022-09-15	12:39:30	0.953906
2022-09-15	12:39:30	0.822659
2022-09-15	12:39:30	0.652481
2022-09-15	12:39:31	0.53874
2022-09-15	12:39:31	0.600216
2022-09-15	12:39:31	0.571514
2022-09-15	12:39:32	0.561641
2022-09-15	12:39:32	0.556654
2022-09-15	12:39:32	0.533346
2022-09-15	12:39:32	0.554517
2022-09-15	12:39:33	0.574364
2022-09-15	12:39:33	0.53874
2022-09-15	12:39:33	0.529987
2022-09-15	12:39:33	0.527137
2022-09-15	12:39:34	0.592736
2022-09-15	12:39:34	0.755585
2022-09-15	12:39:34	0.777519
2022-09-15	12:39:34	0.672176
2022-09-15	12:39:35	0.674313
2022-09-15	12:39:35	0.709275
2022-09-15	12:39:35	0.653499
2022-09-15	12:39:36	0.302964
2022-09-15	12:39:36	0.235942
2022-09-15	12:39:36	-0.00512696
2022-09-15	12:39:36	0.073957
2022-09-15	12:39:37	0.177825
2022-09-15	12:39:37	2.0364
2022-09-15	12:39:37	0.818741
2022-09-15	12:39:37	0.369784
2022-09-15	12:39:38	0.364339
2022-09-15	12:39:38	0.338333
2022-09-15	12:39:38	0.099046
2022-09-15	12:39:38	0.332328
2022-09-15	12:39:39	0.366934
2022-09-15	12:39:39	0.393143
2022-09-15	12:39:39	0.329886
2022-09-15	12:39:40	0.27411
2022-09-15	12:39:40	0.15472
2022-09-15	12:39:40	0.184542
2022-09-15	12:39:40	0.109886
2022-09-15	12:39:41	0.131769
2022-09-15	12:39:41	0.114059
2022-09-15	12:39:41	0.0963997
2022-09-15	12:39:41	0.111514
2022-09-15	12:39:42	0.109937
2022-09-15	12:39:42	0.0556364
2022-09-15	12:39:42	0.0797076
2022-09-15	12:39:42	0.0318195
2022-09-15	12:39:43	-0.0228878
2022-09-15	12:39:43	-0.00935089
2022-09-15	12:39:43	-0.161005
2022-09-15	12:39:44	-0.370826
2022-09-15	12:39:44	-0.498511
2022-09-15	12:39:44	-0.710572
2022-09-15	12:39:44	-0.598918
2022-09-15	12:39:45	0.0826592
2022-09-15	12:39:45	0.660318
2022-09-15	12:39:45	0.518893
2022-09-15	12:39:45	1.36953
2022-09-15	12:39:46	2.59655
2022-09-15	12:39:46	2.3391
2022-09-15	12:39:46	1.98149
2022-09-15	12:39:46	0.766069
2022-09-15	12:39:47	0.413244
2022-09-15	12:39:47	0.191158
2022-09-15	12:39:47	0.332481
2022-09-15	12:39:48	0.549224
2022-09-15	12:39:48	0.695534
2022-09-15	12:39:48	0.0269341
2022-09-15	12:39:48	0.604644
2022-09-15	12:39:49	0.304695
2022-09-15	12:39:49	-0.309096
2022-09-15	12:39:49	-0.519478
2022-09-15	12:39:49	-0.663854
2022-09-15	12:39:50	-0.496374
2022-09-15	12:39:50	-0.442837
2022-09-15	12:39:50	-0.243804
2022-09-15	12:39:50	-0.483142
2022-09-15	12:39:51	-0.104618
2022-09-15	12:39:51	-0.566602
2022-09-15	12:39:51	-0.412557
2022-09-15	12:39:51	-0.495203
2022-09-15	12:39:52	-0.329198
2022-09-15	12:39:52	-0.962633
2022-09-15	12:39:52	-1.12894
2022-09-15	12:39:53	-1.14095
2022-09-15	12:39:53	-1.17988
2022-09-15	12:39:53	-1.03607
2022-09-15	12:39:53	-1.24864
2022-09-15	12:39:54	-1.09856
2022-09-15	12:39:54	-1.1805
2022-09-15	12:39:54	-1.18467
2022-09-15	12:39:54	-1.30716
2022-09-15	12:39:55	-1.23597
2022-09-15	12:39:55	-1.255
2022-09-15	12:39:55	-1.07088
2022-09-15	12:39:55	-0.167621
2022-09-15	12:39:56	0.0979264
2022-09-15	12:39:56	0.250903
2022-09-15	12:39:56	0.443982
2022-09-15	12:39:57	0.313295
2022-09-15	12:39:57	1.25172
2022-09-15	12:39:57	0.416858
2022-09-15	12:39:57	0.198028
2022-09-15	12:39:58	0.000979898
2022-09-15	12:39:58	-0.0160175
2022-09-15	12:39:58	-0.0944908
2022-09-15	12:39:58	-0.161666
2022-09-15	12:39:59	-0.176221
2022-09-15	12:39:59	-0.225839
2022-09-15	12:39:59	-0.365127
2022-09-15	12:39:59	-0.291437
2022-09-15	12:40:00	-0.0545417
2022-09-15	12:40:00	-0.0764756
2022-09-15	12:40:00	-0.134593
2022-09-15	12:40:01	-0.142582
2022-09-15	12:40:01	-0.230012
2022-09-15	12:40:01	-0.35846
2022-09-15	12:40:01	-0.272557
2022-09-15	12:40:02	-0.39332
2022-09-15	12:40:02	-0.595916
2022-09-15	12:40:02	-0.612557
2022-09-15	12:40:02	-0.573015
2022-09-15	12:40:03	-0.454541
2022-09-15	12:40:03	-0.416882
2022-09-15	12:40:03	-0.43561
2022-09-15	12:40:03	-0.400597
2022-09-15	12:40:04	-0.368384
2022-09-15	12:40:04	-0.348638
2022-09-15	12:40:04	-0.313473
2022-09-15	12:40:05	-0.428791
2022-09-15	12:40:05	-0.463346
2022-09-15	12:40:05	-0.363956
2022-09-15	12:40:05	-0.56248
2022-09-15	12:40:06	-0.442938
2022-09-15	12:40:06	-0.497239
2022-09-15	12:40:06	-0.387671
2022-09-15	12:40:06	-0.42131
2022-09-15	12:40:07	-0.456323
2022-09-15	12:40:07	-0.442938
2022-09-15	12:40:07	-0.424771
2022-09-15	12:40:07	-0.320547
2022-09-15	12:40:08	-0.233066
2022-09-15	12:40:08	-0.231997
2022-09-15	12:40:08	-0.121921
2022-09-15	12:40:09	0.204288
2022-09-15	12:40:09	0.341234
2022-09-15	12:40:09	0.735687
2022-09-15	12:40:09	0.737722
2022-09-15	12:40:10	0.733193
2022-09-15	12:40:10	0.731107
2022-09-15	12:40:10	0.730242
2022-09-15	12:40:10	0.737214
2022-09-15	12:40:11	0.739097
2022-09-15	12:40:11	0.734822
2022-09-15	12:40:11	0.735738
2022-09-15	12:40:11	0.705458
2022-09-15	12:40:12	0.73528
2022-09-15	12:40:12	0.595178
2022-09-15	12:40:12	0.728104
2022-09-15	12:40:13	0.738028
2022-09-15	12:40:13	0.735941
2022-09-15	12:40:13	0.734669
2022-09-15	12:40:13	0.734415
2022-09-15	12:40:14	0.733244
2022-09-15	12:40:14	0.727188
2022-09-15	12:40:14	0.735433
2022-09-15	12:40:14	0.73355
2022-09-15	12:40:15	0.733855
2022-09-15	12:40:15	0.737163
2022-09-15	12:40:15	0.726527
2022-09-15	12:40:15	0.738893
2022-09-15	12:40:16	0.71355
2022-09-15	12:40:16	0.732023
2022-09-15	12:40:16	0.732023
2022-09-15	12:40:17	0.734109
2022-09-15	12:40:17	0.736705
2022-09-15	12:40:17	0.733193
2022-09-15	12:40:17	0.731361
2022-09-15	12:40:18	0.737315
2022-09-15	12:40:18	0.737366
2022-09-15	12:40:18	0.732888
2022-09-15	12:40:18	0.736603
2022-09-15	12:40:19	0.72897
2022-09-15	12:40:19	0.737265
2022-09-15	12:40:19	0.735992
2022-09-15	12:40:19	0.735636
2022-09-15	12:40:20	0.737519
2022-09-15	12:40:20	0.737824
2022-09-15	12:40:20	0.738842
2022-09-15	12:40:21	0.729936
2022-09-15	12:40:21	0.733702
2022-09-15	12:40:21	0.450903
2022-09-15	12:40:21	-0.568079
2022-09-15	12:40:22	-0.749249
2022-09-15	12:40:22	-0.759172
2022-09-15	12:40:22	-0.835304
2022-09-15	12:40:22	-0.699376
2022-09-15	12:40:23	-0.590318
2022-09-15	12:40:23	-0.4236
2022-09-15	12:40:23	0.0320231
2022-09-15	12:40:23	0.603779
2022-09-15	12:40:24	0.635382
2022-09-15	12:40:24	0.688766
2022-09-15	12:40:24	0.735433
2022-09-15	12:40:25	0.710038
2022-09-15	12:40:25	0.688613
2022-09-15	12:40:25	0.700216
2022-09-15	12:40:25	0.716043
2022-09-15	12:40:26	0.726527
2022-09-15	12:40:26	0.734822
2022-09-15	12:40:26	0.628817
2022-09-15	12:40:26	0.689275
2022-09-15	12:40:27	0.613346
2022-09-15	12:40:27	0.725916
2022-09-15	12:40:27	0.716908
2022-09-15	12:40:27	0.68271
2022-09-15	12:40:28	0.727545
2022-09-15	12:40:28	0.534669
2022-09-15	12:40:28	0.719504
2022-09-15	12:40:29	0.498333
2022-09-15	12:40:29	0.722812
2022-09-15	12:40:29	0.617468
2022-09-15	12:40:29	0.703015
2022-09-15	12:40:30	0.628562
2022-09-15	12:40:30	0.69701
2022-09-15	12:40:30	0.725865
2022-09-15	12:40:30	0.488664
2022-09-15	12:40:31	0.585865
2022-09-15	12:40:31	0.556501
2022-09-15	12:40:31	0.429631
2022-09-15	12:40:31	0.356298
2022-09-15	12:40:32	0.33757
2022-09-15	12:40:32	-0.0840073
2022-09-15	12:40:32	-0.0752541
2022-09-15	12:40:33	-0.22299
2022-09-15	12:40:33	-0.337086
2022-09-15	12:40:33	0.0620994
2022-09-15	12:40:33	0.119962
2022-09-15	12:40:34	0.0142623
2022-09-15	12:40:34	-0.133066
2022-09-15	12:40:34	-0.326094
2022-09-15	12:40:34	-0.423244
2022-09-15	12:40:35	-0.393778
2022-09-15	12:40:35	-0.362429
2022-09-15	12:40:35	-0.36014
2022-09-15	12:40:35	-0.378206
2022-09-15	12:40:36	-0.374491
2022-09-15	12:40:36	-0.361921
2022-09-15	12:40:36	-0.3779
2022-09-15	12:40:37	-0.361463
2022-09-15	12:40:37	-0.387061
2022-09-15	12:40:37	-0.42248
2022-09-15	12:40:37	-0.402786
2022-09-15	12:40:38	-0.399987
2022-09-15	12:40:38	-0.368842
2022-09-15	12:40:38	-0.335712
2022-09-15	12:40:38	-0.31958
2022-09-15	12:40:39	-0.353778
2022-09-15	12:40:39	-0.604923
2022-09-15	12:40:39	-0.329707
2022-09-15	12:40:39	0.526476
2022-09-15	12:40:40	0.696552
2022-09-15	12:40:40	0.727494
2022-09-15	12:40:40	0.65645
2022-09-15	12:40:41	-0.396221
2022-09-15	12:40:41	0.337417
2022-09-15	12:40:41	0.524593
2022-09-15	12:40:41	0.423626
2022-09-15	12:40:42	0.354059
2022-09-15	12:40:42	0.507748
2022-09-15	12:40:42	-0.035814
2022-09-15	12:40:42	-0.304974
2022-09-15	12:40:43	-1.01943
2022-09-15	12:40:43	-0.848078
2022-09-15	12:40:43	-0.858206
2022-09-15	12:40:43	-1.18864
2022-09-15	12:40:44	-1.31317
2022-09-15	12:40:44	-1.01434
2022-09-15	12:40:44	-0.698103
2022-09-15	12:40:45	-0.966094
2022-09-15	12:40:45	-0.301208
2022-09-15	12:40:45	-0.291539
2022-09-15	12:40:45	-0.188231
2022-09-15	12:40:46	-0.191081
2022-09-15	12:40:46	-0.338155
2022-09-15	12:40:46	-0.434338
2022-09-15	12:40:46	-0.315203
2022-09-15	12:40:47	-0.0746435
2022-09-15	12:40:47	-0.214389
2022-09-15	12:40:47	0.270445
2022-09-15	12:40:47	0.0460689
2022-09-15	12:40:48	0.16958
2022-09-15	12:40:48	0.148104
2022-09-15	12:40:48	0.623422
2022-09-15	12:40:48	0.574313
2022-09-15	12:40:49	0.667443
2022-09-15	12:40:49	0.723677
2022-09-15	12:40:49	0.67131
2022-09-15	12:40:50	0.724389
2022-09-15	12:40:50	0.501692
2022-09-15	12:40:50	0.727545
2022-09-15	12:40:50	0.703575
2022-09-15	12:40:51	0.708206
2022-09-15	12:40:51	0.674008
2022-09-15	12:40:51	0.492227
2022-09-15	12:40:51	0.63701
2022-09-15	12:40:52	0.340878
2022-09-15	12:40:52	0.636755
2022-09-15	12:40:52	0.191107
2022-09-15	12:40:52	0.422659
2022-09-15	12:40:53	0.383015
2022-09-15	12:40:53	0.303982
2022-09-15	12:40:53	0.366883
2022-09-15	12:40:54	-0.0182059
2022-09-15	12:40:54	0.361336
2022-09-15	12:40:54	-0.100801
2022-09-15	12:40:54	0.199962
2022-09-15	12:40:55	-0.0205468
2022-09-15	12:40:55	-0.241208
2022-09-15	12:40:55	-0.243498
2022-09-15	12:40:55	-0.378715
2022-09-15	12:40:56	-0.0855849
2022-09-15	12:40:56	-0.525127
2022-09-15	12:40:56	-0.358714
2022-09-15	12:40:56	-0.651233
2022-09-15	12:40:57	-0.757646
2022-09-15	12:40:57	-0.791742
2022-09-15	12:40:57	-1.26105
2022-09-15	12:40:58	-0.859325
2022-09-15	12:40:58	-1.4378
2022-09-15	12:40:58	-1.31154
2022-09-15	12:40:58	-1.45413
2022-09-15	12:40:59	-1.32289
2022-09-15	12:40:59	-2.55184
2022-09-15	12:40:59	-5.33815
2022-09-15	12:40:59	-4.84192
2022-09-15	12:41:00	-4.32365
2022-09-15	12:41:00	-4.55418
2022-09-15	12:41:00	-8.90462
2022-09-15	12:41:00	-8.90971
2022-09-15	12:41:01	-7.90538
2022-09-15	12:41:01	-7.75912
2022-09-15	12:41:01	-5.52472
2022-09-15	12:41:02	-6.11902
2022-09-15	12:41:02	-7.87108
2022-09-15	12:41:02	-8.93688
2022-09-15	12:41:02	-8.9551
2022-09-15	12:41:03	-8.80945
2022-09-15	12:41:03	-8.29617
2022-09-15	12:41:03	-7.54044
2022-09-15	12:41:03	-6.68248
2022-09-15	12:41:04	-6.26182
2022-09-15	12:41:04	-6.02482
2022-09-15	12:41:04	-5.84004
2022-09-15	12:41:04	-5.28711
2022-09-15	12:41:05	-4.70518
2022-09-15	12:41:05	-4.57607
2022-09-15	12:41:05	-4.47591
2022-09-15	12:41:06	-4.43312
2022-09-15	12:41:06	-4.36014
2022-09-15	12:41:06	-4.41337
2022-09-15	12:41:06	-4.46233
2022-09-15	12:41:07	-4.44762
2022-09-15	12:41:07	-4.43973
2022-09-15	12:41:07	-4.40156
2022-09-15	12:41:07	-4.39072
2022-09-15	12:41:08	-3.78533
2022-09-15	12:41:08	-0.330725
2022-09-15	12:41:08	0.677926
2022-09-15	12:41:08	-2.98859
2022-09-15	12:41:09	-3.18416
2022-09-15	12:41:09	0.225662
2022-09-15	12:41:09	0.728461
2022-09-15	12:41:10	0.461132
2022-09-15	12:41:10	0.7393
2022-09-15	12:41:10	0.728054
2022-09-15	12:41:10	-0.663752
2022-09-15	12:41:11	0.221387
2022-09-15	12:41:11	-0.0210048
2022-09-15	12:41:11	0.456909
2022-09-15	12:41:11	0.23925
2022-09-15	12:41:12	-0.399376
2022-09-15	12:41:12	0.476043
2022-09-15	12:41:12	0.555738
2022-09-15	12:41:12	1.20322
2022-09-15	12:41:13	1.77207
2022-09-15	12:41:13	2.17268
2022-09-15	12:41:13	1.51762
2022-09-15	12:41:14	1.70882
2022-09-15	12:41:14	1.2764
2022-09-15	12:41:14	1.40607
2022-09-15	12:41:14	1.88846
2022-09-15	12:41:15	0.903219
2022-09-15	12:41:15	1.96302
2022-09-15	12:41:15	1.48617
2022-09-15	12:41:15	1.22831
2022-09-15	12:41:16	1.84454
2022-09-15	12:41:16	0.792176
2022-09-15	12:41:16	0.598232
2022-09-15	12:41:16	0.695534
2022-09-15	12:41:17	-0.38701
2022-09-15	12:41:17	-0.500648
2022-09-15	12:41:17	-0.533829
2022-09-15	12:41:18	-0.382888
2022-09-15	12:41:18	-0.12757
2022-09-15	12:41:18	0.285611
2022-09-15	12:41:18	0.0761453
2022-09-15	12:41:19	0.237672
2022-09-15	12:41:19	0.190598
2022-09-15	12:41:19	0.105255
2022-09-15	12:41:19	-0.0888929
2022-09-15	12:41:20	-0.105381
2022-09-15	12:41:20	0.327392
2022-09-15	12:41:20	-0.063702
2022-09-15	12:41:20	0.0207254
2022-09-15	12:41:21	0.124542
2022-09-15	12:41:21	0.317112
2022-09-15	12:41:21	0.265051
2022-09-15	12:41:22	0.247494
2022-09-15	12:41:22	0.417316
2022-09-15	12:41:22	0.15584
2022-09-15	12:41:22	0.43584
2022-09-15	12:41:23	0.300827
2022-09-15	12:41:23	0.988613
2022-09-15	12:41:23	1.29116
2022-09-15	12:41:23	1.37767
2022-09-15	12:41:24	0.666374
2022-09-15	12:41:24	0.618639
2022-09-15	12:41:24	0.260267
2022-09-15	12:41:24	1.22098
2022-09-15	12:41:25	1.11039
2022-09-15	12:41:25	2.72312
2022-09-15	12:41:25	3.30317
2022-09-15	12:41:26	2.38006
2022-09-15	12:41:26	3.65431
2022-09-15	12:41:26	0.837417
2022-09-15	12:41:26	0.21126
2022-09-15	12:41:27	0.055789
2022-09-15	12:41:27	0.443015
2022-09-15	12:41:27	0.734517
2022-09-15	12:41:27	0.732786
2022-09-15	12:41:28	0.734924
2022-09-15	12:41:28	0.622201
2022-09-15	12:41:28	0.00423688
2022-09-15	12:41:28	0.731209
2022-09-15	12:41:29	0.739962
2022-09-15	12:41:29	0.732277
2022-09-15	12:41:29	0.52556
2022-09-15	12:41:30	0.73243
2022-09-15	12:41:30	0.735636
2022-09-15	12:41:30	0.733092
2022-09-15	12:41:30	0.73014
2022-09-15	12:41:31	0.740114
2022-09-15	12:41:31	0.735687
2022-09-15	12:41:31	0.737773
2022-09-15	12:41:31	0.73701
2022-09-15	12:41:32	0.735738
2022-09-15	12:41:32	0.729224
2022-09-15	12:41:32	0.734771
2022-09-15	12:41:32	0.732328
2022-09-15	12:41:33	0.736094
2022-09-15	12:41:33	0.733193
2022-09-15	12:41:33	0.733295
2022-09-15	12:41:34	0.732735
2022-09-15	12:41:34	0.732735
2022-09-15	12:41:34	0.731107
2022-09-15	12:41:34	0.736196
2022-09-15	12:41:35	0.731005
2022-09-15	12:41:35	0.733499
2022-09-15	12:41:35	0.726221
2022-09-15	12:41:35	0.733957
2022-09-15	12:41:36	0.736247
2022-09-15	12:41:36	0.735076
2022-09-15	12:41:36	0.735127
2022-09-15	12:41:36	0.731514
2022-09-15	12:41:37	0.733397
2022-09-15	12:41:37	0.733295
2022-09-15	12:41:37	0.736603
2022-09-15	12:41:38	0.512583
2022-09-15	12:41:38	0.635432
2022-09-15	12:41:38	0.704542
2022-09-15	12:41:38	0.678232
2022-09-15	12:41:39	0.736247
2022-09-15	12:41:39	0.735687
2022-09-15	12:41:39	0.735992
2022-09-15	12:41:39	0.73131
2022-09-15	12:41:40	0.736298
2022-09-15	12:41:40	0.737773
2022-09-15	12:41:40	0.73645
2022-09-15	12:41:40	0.731056
2022-09-15	12:41:41	0.721997
2022-09-15	12:41:41	0.738181
2022-09-15	12:41:41	0.73014
2022-09-15	12:41:41	0.73584
2022-09-15	12:41:42	0.73131
2022-09-15	12:41:42	0.732583
2022-09-15	12:41:42	0.733499
2022-09-15	12:41:43	0.733906
2022-09-15	12:41:43	0.733193
2022-09-15	12:41:43	0.737773
2022-09-15	12:41:43	0.737875
2022-09-15	12:41:44	0.734262
2022-09-15	12:41:44	0.735687
2022-09-15	12:41:44	0.729529
2022-09-15	12:41:44	0.740064
2022-09-15	12:41:45	0.731768
2022-09-15	12:41:45	0.728817
2022-09-15	12:41:45	0.720013
2022-09-15	12:41:45	0.715789
2022-09-15	12:41:46	0.734109
2022-09-15	12:41:46	0.731056
2022-09-15	12:41:46	0.726832
2022-09-15	12:41:47	0.736908
2022-09-15	12:41:47	0.73472
2022-09-15	12:41:47	0.73528
2022-09-15	12:41:47	0.735992
2022-09-15	12:41:48	0.661845
2022-09-15	12:41:48	0.739351
2022-09-15	12:41:48	0.731972
2022-09-15	12:41:48	0.422557
2022-09-15	12:41:49	0.305967
2022-09-15	12:41:49	0.674058
2022-09-15	12:41:49	0.73701
2022-09-15	12:41:49	0.738435
2022-09-15	12:41:50	0.741081
2022-09-15	12:41:50	0.728817
2022-09-15	12:41:50	0.735992
2022-09-15	12:41:51	0.735483
2022-09-15	12:41:51	0.738231
2022-09-15	12:41:51	0.732125
2022-09-15	12:41:51	0.739504
2022-09-15	12:41:52	0.733092
2022-09-15	12:41:52	0.733092
2022-09-15	12:41:52	0.734618
2022-09-15	12:41:52	0.738588
2022-09-15	12:41:53	0.734059
2022-09-15	12:41:53	0.734822
2022-09-15	12:41:53	0.735229
2022-09-15	12:41:53	0.728512
2022-09-15	12:41:54	0.736705
2022-09-15	12:41:54	0.741743
2022-09-15	12:41:54	0.736552
2022-09-15	12:41:55	0.691107
2022-09-15	12:41:55	0.731717
2022-09-15	12:41:55	0.71187
2022-09-15	12:41:55	0.733499
2022-09-15	12:41:56	0.735127
2022-09-15	12:41:56	0.737163
2022-09-15	12:41:56	0.737315
2022-09-15	12:41:56	0.725712
2022-09-15	12:41:57	0.734517
2022-09-15	12:41:57	0.734008
2022-09-15	12:41:57	0.727036
2022-09-15	12:41:57	0.731361
2022-09-15	12:41:58	0.735738
2022-09-15	12:41:58	0.731717
2022-09-15	12:41:58	0.733804
2022-09-15	12:41:59	0.736501
2022-09-15	12:41:59	0.729631
2022-09-15	12:41:59	0.732379
2022-09-15	12:41:59	0.736756
2022-09-15	12:42:00	0.735941
2022-09-15	12:42:00	0.733092
2022-09-15	12:42:00	0.734618
2022-09-15	12:42:00	0.733753
2022-09-15	12:42:01	0.739656
2022-09-15	12:42:01	0.735687
2022-09-15	12:42:01	0.738231
2022-09-15	12:42:01	0.735789
2022-09-15	12:42:02	0.733499
2022-09-15	12:42:02	0.737112
2022-09-15	12:42:02	0.736349
2022-09-15	12:42:03	0.731005
2022-09-15	12:42:03	0.736247
2022-09-15	12:42:03	0.733753
2022-09-15	12:42:03	0.7307
2022-09-15	12:42:04	0.733702
2022-09-15	12:42:04	0.735178
2022-09-15	12:42:04	0.737061
2022-09-15	12:42:04	0.733295
2022-09-15	12:42:05	0.732684
2022-09-15	12:42:05	0.731717
2022-09-15	12:42:05	0.736603
2022-09-15	12:42:05	0.736501
2022-09-15	12:42:06	0.734008
2022-09-15	12:42:06	0.735127
2022-09-15	12:42:06	0.727697
2022-09-15	12:42:07	0.731921
2022-09-15	12:42:07	0.730751
2022-09-15	12:42:07	0.736043
2022-09-15	12:42:07	0.735941
2022-09-15	12:42:08	0.732735
2022-09-15	12:42:08	0.732023
2022-09-15	12:42:08	0.736043
2022-09-15	12:42:08	0.734975
2022-09-15	12:42:09	0.738435
2022-09-15	12:42:09	0.728155
2022-09-15	12:42:09	0.732837
2022-09-15	12:42:09	0.73416
2022-09-15	12:42:10	0.733855
2022-09-15	12:42:10	0.737315
2022-09-15	12:42:10	0.733906
2022-09-15	12:42:11	0.738079
2022-09-15	12:42:11	0.735687
2022-09-15	12:42:11	0.731361
2022-09-15	12:42:11	0.761845
2022-09-15	12:42:12	0.705255
2022-09-15	12:42:12	0.719097
2022-09-15	12:42:12	0.736857
2022-09-15	12:42:12	0.727443
2022-09-15	12:42:13	0.734262
2022-09-15	12:42:13	0.740522
2022-09-15	12:42:13	0.736094
2022-09-15	12:42:13	0.735789
2022-09-15	12:42:14	0.73645
2022-09-15	12:42:14	0.738486
2022-09-15	12:42:14	0.736399
2022-09-15	12:42:15	0.736247
2022-09-15	12:42:15	0.738639
2022-09-15	12:42:15	0.735789
2022-09-15	12:42:15	0.735433
2022-09-15	12:42:16	0.736196
2022-09-15	12:42:16	0.733193
2022-09-15	12:42:16	0.736196
2022-09-15	12:42:16	0.738231
2022-09-15	12:42:17	0.731056
2022-09-15	12:42:17	0.738181
2022-09-15	12:42:17	0.732634
2022-09-15	12:42:17	0.732888
2022-09-15	12:42:18	0.729478
2022-09-15	12:42:18	0.735891
2022-09-15	12:42:18	0.734975
2022-09-15	12:42:18	0.733753
2022-09-15	12:42:19	0.734059
2022-09-15	12:42:19	0.685
2022-09-15	12:42:19	2.73965
2022-09-15	12:42:20	0.297774
2022-09-15	12:42:20	0.014415
2022-09-15	12:42:20	0.16215
2022-09-15	12:42:20	0.249224
2022-09-15	12:42:21	1.09492
2022-09-15	12:42:21	4.98622
2022-09-15	12:42:21	4.87513
2022-09-15	12:42:21	4.17304
2022-09-15	12:42:22	2.95273
2022-09-15	12:42:22	9.55746
2022-09-15	12:42:22	8.1712
2022-09-15	12:42:22	9.29436
2022-09-15	12:42:23	8.33289
2022-09-15	12:42:23	3.37177
2022-09-15	12:42:23	0.233652
2022-09-15	12:42:24	0.179809
2022-09-15	12:42:24	0.28897
2022-09-15	12:42:24	0.332023
2022-09-15	12:42:24	1.13574
2022-09-15	12:42:25	3.12169
2022-09-15	12:42:25	7.93126
2022-09-15	12:42:25	2.46673
2022-09-15	12:42:25	0.383982
2022-09-15	12:42:26	0.156552
2022-09-15	12:42:26	0.109021
2022-09-15	12:42:26	0.32159
2022-09-15	12:42:26	0.114924
2022-09-15	12:42:27	0.378842
2022-09-15	12:42:27	0.0852547
2022-09-15	12:42:27	0.256094
2022-09-15	12:42:28	0.0305473
2022-09-15	12:42:28	0.156298
2022-09-15	12:42:28	0.281183
2022-09-15	12:42:28	0.201031
2022-09-15	12:42:29	0.527646
2022-09-15	12:42:29	0.369529
2022-09-15	12:42:29	0.884949
2022-09-15	12:42:29	0.631412
2022-09-15	12:42:30	0.927748
2022-09-15	12:42:30	0.768562
2022-09-15	12:42:30	1.55843
2022-09-15	12:42:30	2.57645
2022-09-15	12:42:31	1.4391
2022-09-15	12:42:31	0.614771
2022-09-15	12:42:31	0.207646
2022-09-15	12:42:32	0.614873
2022-09-15	12:42:32	0.218588
2022-09-15	12:42:32	0.623371
2022-09-15	12:42:32	1.45233
2022-09-15	12:42:33	3.25696
2022-09-15	12:42:33	2.87619
2022-09-15	12:42:33	3.5938
2022-09-15	12:42:33	4.56892
2022-09-15	12:42:34	4.48479
2022-09-15	12:42:34	2.41452
2022-09-15	12:42:34	1.20617
2022-09-15	12:42:34	0.909631
2022-09-15	12:42:35	0.639199
2022-09-15	12:42:35	0.484288
2022-09-15	12:42:35	0.561438
2022-09-15	12:42:36	0.505051
2022-09-15	12:42:36	0.435178
