# Supplementary material for: Comparing efficacy in reducing pulling and welfare impacts of four types of leash walking equipment
Source: PeerJ journal article supplement (doi:10.7717/peerj.18131), 2024-10-24
Supplement: Shelter_2_Tension_files.zip [file Boris_star_2022915112914 copy.xlsx]

## Sheet: Averaged newtons
Date	Time	Averaged Newtons	Impuse	Total steps
2022-09-15	11:29:22	3.23106	3.23106	0
2022-09-15	11:29:23	3.23377	6.46483	0		Impulse	4658.42
2022-09-15	11:29:24	3.17729	9.64212	0		Total steps	109
2022-09-15	11:29:25	3.21487	12.857	0		# > 5 sec	8
2022-09-15	11:29:26	3.2426	16.0996	0
2022-09-15	11:29:27	3.25075	19.3503	0
2022-09-15	11:29:28	0.78698	20.1373	0
2022-09-15	11:29:29	-2.38324	20.1373	0
2022-09-15	11:29:30	-4.22409	20.1373	0
2022-09-15	11:29:31	-3.76073	20.1373	0
2022-09-15	11:29:32	-1.64198	20.1373	0
2022-09-15	11:29:33	2.6121	22.7494	0
2022-09-15	11:29:34	7.184	29.9334	0
2022-09-15	11:29:35	4.28218	34.2156	0
2022-09-15	11:29:36	2.6023	36.8179	0
2022-09-15	11:29:37	5.35255	42.1705	0
2022-09-15	11:29:38	12.7629	54.9333	0
2022-09-15	11:29:39	17.3284	72.2617	1
2022-09-15	11:29:40	35.4204	107.682	2
2022-09-15	11:29:41	22.0324	129.715	3
2022-09-15	11:29:42	33.3772	163.092	4
2022-09-15	11:29:43	22.365	185.457	5
2022-09-15	11:29:44	10.8859	196.343	5
2022-09-15	11:29:45	20.1321	216.475	6
2022-09-15	11:29:46	39.708	256.183	7
2022-09-15	11:29:47	3.46935	259.652	7
2022-09-15	11:29:48	3.23955	262.892	7
2022-09-15	11:29:49	3.22743	266.119	7
2022-09-15	11:29:50	3.25015	269.369	7
2022-09-15	11:29:51	3.24854	272.618	7
2022-09-15	11:29:52	3.21663	275.835	7
2022-09-15	11:29:53	3.24441	279.079	7
2022-09-15	11:29:54	3.23136	282.31	7
2022-09-15	11:29:55	3.23253	285.543	7
2022-09-15	11:29:56	3.21849	288.761	7
2022-09-15	11:29:57	3.22483	291.986	7
2022-09-15	11:29:58	3.22479	295.211	7
2022-09-15	11:29:59	4.21804	299.429	7
2022-09-15	11:30:00	3.23208	302.661	7
2022-09-15	11:30:01	3.21832	305.879	7
2022-09-15	11:30:02	3.21612	309.095	7
2022-09-15	11:30:03	3.22777	312.323	7
2022-09-15	11:30:04	3.23321	315.556	7
2022-09-15	11:30:05	3.23875	318.795	7
2022-09-15	11:30:06	3.2223	322.018	7
2022-09-15	11:30:07	3.23824	325.256	7
2022-09-15	11:30:08	3.21334	328.469	7
2022-09-15	11:30:09	3.23462	331.704	7
2022-09-15	11:30:10	3.24834	334.952	7
2022-09-15	11:30:11	3.2679	338.22	7
2022-09-15	11:30:12	3.24006	341.46	7
2022-09-15	11:30:13	3.35556	344.816	7
2022-09-15	11:30:14	3.46184	348.277	7
2022-09-15	11:30:15	2.99948	351.277	7
2022-09-15	11:30:16	2.75839	354.035	7
2022-09-15	11:30:17	-1.80684	354.035	7
2022-09-15	11:30:18	2.9564	356.992	7
2022-09-15	11:30:19	12.7612	369.753	7
2022-09-15	11:30:20	21.2271	390.98	8
2022-09-15	11:30:21	25.5095	416.49	9
2022-09-15	11:30:22	9.46131	425.951	9
2022-09-15	11:30:23	0.0635547	426.014	9
2022-09-15	11:30:24	-0.986074	426.014	9
2022-09-15	11:30:25	-1.27698	426.014	9
2022-09-15	11:30:26	13.5136	439.528	10
2022-09-15	11:30:27	82.6038	522.132	11
2022-09-15	11:30:28	52.2917	574.424	12
2022-09-15	11:30:29	40.199	614.623	13
2022-09-15	11:30:30	52.7496	667.372	14
2022-09-15	11:30:31	21.3153	688.687	15
2022-09-15	11:30:32	1.72167	690.409	15
2022-09-15	11:30:33	4.04561	694.455	15
2022-09-15	11:30:34	40.9735	735.428	16
2022-09-15	11:30:35	55.5654	790.994	17
2022-09-15	11:30:36	74.6339	865.627	18
2022-09-15	11:30:37	53.4124	919.04	19
2022-09-15	11:30:38	74.335	993.375	20
2022-09-15	11:30:39	65.4672	1058.84	21
2022-09-15	11:30:40	57.3518	1116.19	22
2022-09-15	11:30:41	42.4324	1158.63	23
2022-09-15	11:30:42	44.0503	1202.68	24
2022-09-15	11:30:43	41.5242	1244.2	25
2022-09-15	11:30:44	3.70599	1247.91	25
2022-09-15	11:30:45	0.283021	1248.19	25
2022-09-15	11:30:46	11.3595	1259.55	25
2022-09-15	11:30:47	21.8678	1281.42	26
2022-09-15	11:30:48	21.4601	1302.88	27
2022-09-15	11:30:49	43.6735	1346.55	28
2022-09-15	11:30:50	42.9461	1389.5	29
2022-09-15	11:30:51	6.90614	1396.4	29
2022-09-15	11:30:52	14.6936	1411.1	30
2022-09-15	11:30:53	10.8843	1421.98	30
2022-09-15	11:30:54	29.9929	1451.97	31
2022-09-15	11:30:55	17.0913	1469.07	32
2022-09-15	11:30:56	11.7233	1480.79	32
2022-09-15	11:30:57	12.7888	1493.58	32
2022-09-15	11:30:58	16.1778	1509.76	33
2022-09-15	11:30:59	11.5944	1521.35	33
2022-09-15	11:31:00	13.0759	1534.43	34
2022-09-15	11:31:01	28.9567	1563.38	35
2022-09-15	11:31:02	14.6716	1578.05	36
2022-09-15	11:31:03	16.794	1594.85	37
2022-09-15	11:31:04	3.45524	1598.3	37
2022-09-15	11:31:05	2.5001	1600.8	37
2022-09-15	11:31:06	0.918276	1601.72	37
2022-09-15	11:31:07	0.880813	1602.6	37
2022-09-15	11:31:08	1.34508	1603.95	37
2022-09-15	11:31:09	1.57458	1605.52	37
2022-09-15	11:31:10	1.08443	1606.61	37
2022-09-15	11:31:11	1.38664	1607.99	37
2022-09-15	11:31:12	1.48468	1609.48	37
2022-09-15	11:31:13	-1.46938	1609.48	37
2022-09-15	11:31:14	-0.962133	1609.48	37
2022-09-15	11:31:15	0.971984	1610.45	37
2022-09-15	11:31:16	1.31128	1611.76	37
2022-09-15	11:31:17	-1.6554	1611.76	37
2022-09-15	11:31:18	-2.10899	1611.76	37
2022-09-15	11:31:19	2.7387	1614.5	37
2022-09-15	11:31:20	5.25361	1619.75	37
2022-09-15	11:31:21	4.79484	1624.55	37
2022-09-15	11:31:22	6.82131	1631.37	37
2022-09-15	11:31:23	1.22988	1632.6	37
2022-09-15	11:31:24	1.30117	1633.9	37
2022-09-15	11:31:25	2.60333	1636.5	37
2022-09-15	11:31:26	0.835594	1637.34	37
2022-09-15	11:31:27	9.60488	1646.94	37
2022-09-15	11:31:28	38.8037	1685.75	38
2022-09-15	11:31:29	39.589	1725.34	39
2022-09-15	11:31:30	18.8198	1744.16	40
2022-09-15	11:31:31	68.5666	1812.72	41
2022-09-15	11:31:32	69.8984	1882.62	42
2022-09-15	11:31:33	43.9512	1926.57	43
2022-09-15	11:31:34	36.149	1962.72	44
2022-09-15	11:31:35	28.7226	1991.44	45
2022-09-15	11:31:36	25.6009	2017.05	46
2022-09-15	11:31:37	19.0831	2036.13	47
2022-09-15	11:31:38	13.3229	2049.45	48
2022-09-15	11:31:39	1.77883	2051.23	48
2022-09-15	11:31:40	-0.759721	2051.23	48
2022-09-15	11:31:41	2.52002	2053.75	48
2022-09-15	11:31:42	0.325579	2054.08	48
2022-09-15	11:31:43	0.236012	2054.31	48
2022-09-15	11:31:44	0.232937	2054.54	48
2022-09-15	11:31:45	0.277438	2054.82	48
2022-09-15	11:31:46	-0.349641	2054.82	48
2022-09-15	11:31:47	-3.74556	2054.82	48
2022-09-15	11:31:48	-2.65103	2054.82	48
2022-09-15	11:31:49	14.1934	2069.02	49
2022-09-15	11:31:50	21.5408	2090.56	50
2022-09-15	11:31:51	12.5114	2103.07	50
2022-09-15	11:31:52	10.6558	2113.72	50
2022-09-15	11:31:53	10.7916	2124.51	50
2022-09-15	11:31:54	10.0492	2134.56	50
2022-09-15	11:31:55	9.96538	2144.53	50
2022-09-15	11:31:56	10.0689	2154.6	50
2022-09-15	11:31:57	10.6794	2165.28	50
2022-09-15	11:31:58	10.8595	2176.14	50
2022-09-15	11:31:59	10.6603	2186.8	50
2022-09-15	11:32:00	9.98022	2196.78	50
2022-09-15	11:32:01	8.49912	2205.28	50
2022-09-15	11:32:02	9.04331	2214.32	50
2022-09-15	11:32:03	8.76487	2223.09	50
2022-09-15	11:32:04	9.54225	2232.63	50
2022-09-15	11:32:05	7.55929	2240.19	50
2022-09-15	11:32:06	8.17276	2248.36	50
2022-09-15	11:32:07	10.1288	2258.49	50
2022-09-15	11:32:08	7.72538	2266.21	50
2022-09-15	11:32:09	9.75179	2275.97	50
2022-09-15	11:32:10	48.2055	2324.17	51
2022-09-15	11:32:11	61.5205	2385.69	52
2022-09-15	11:32:12	44.8708	2430.56	53
2022-09-15	11:32:13	30.4053	2460.97	54
2022-09-15	11:32:14	32.6923	2493.66	55
2022-09-15	11:32:15	55.4698	2549.13	56
2022-09-15	11:32:16	26.1386	2575.27	57
2022-09-15	11:32:17	12.2258	2587.49	57
2022-09-15	11:32:18	2.09507	2589.59	57
2022-09-15	11:32:19	4.3497	2593.94	57
2022-09-15	11:32:20	30.5444	2624.48	58
2022-09-15	11:32:21	20.3038	2644.79	59
2022-09-15	11:32:22	15.0171	2659.8	60
2022-09-15	11:32:23	16.8916	2676.7	61
2022-09-15	11:32:24	18.5166	2695.21	62
2022-09-15	11:32:25	19.6708	2714.88	63
2022-09-15	11:32:26	19.5937	2734.48	64
2022-09-15	11:32:27	19.2295	2753.71	65
2022-09-15	11:32:28	19.1246	2772.83	66
2022-09-15	11:32:29	28.7496	2801.58	67
2022-09-15	11:32:30	20.5384	2822.12	68
2022-09-15	11:32:31	16.4873	2838.61	69
2022-09-15	11:32:32	4.20519	2842.81	69
2022-09-15	11:32:33	0.512505	2843.32	69
2022-09-15	11:32:34	-3.30281	2843.32	69
2022-09-15	11:32:35	-2.07358	2843.32	69
2022-09-15	11:32:36	2.39535	2845.72	69
2022-09-15	11:32:37	0.896261	2846.62	69
2022-09-15	11:32:38	34.7799	2881.4	70
2022-09-15	11:32:39	40.7995	2922.19	71
2022-09-15	11:32:40	2.40293	2924.6	71
2022-09-15	11:32:41	0.939216	2925.54	71
2022-09-15	11:32:42	3.20463	2928.74	71
2022-09-15	11:32:43	1.52927	2930.27	71
2022-09-15	11:32:44	-1.58364	2930.27	71
2022-09-15	11:32:45	-2.83643	2930.27	71
2022-09-15	11:32:46	-3.36478	2930.27	71
2022-09-15	11:32:47	-1.62982	2930.27	71
2022-09-15	11:32:48	19.3796	2949.65	72
2022-09-15	11:32:49	25.7056	2975.36	73
2022-09-15	11:32:50	28.6987	3004.05	74
2022-09-15	11:32:51	44.3091	3048.36	75
2022-09-15	11:32:52	50.1504	3098.51	76
2022-09-15	11:32:53	10.7896	3109.3	76
2022-09-15	11:32:54	9.94121	3119.25	76
2022-09-15	11:32:55	29.7646	3149.01	77
2022-09-15	11:32:56	39.0529	3188.06	78
2022-09-15	11:32:57	43.6754	3231.74	79
2022-09-15	11:32:58	25.1293	3256.87	80
2022-09-15	11:32:59	42.1339	3299	81
2022-09-15	11:33:00	43.8705	3342.87	82
2022-09-15	11:33:01	37.9117	3380.78	83
2022-09-15	11:33:02	48.4061	3429.19	84
2022-09-15	11:33:03	55.6062	3484.8	85
2022-09-15	11:33:04	48.561	3533.36	86
2022-09-15	11:33:05	67.9059	3601.26	87
2022-09-15	11:33:06	51.0004	3652.26	88
2022-09-15	11:33:07	17.0401	3669.3	89
2022-09-15	11:33:08	-0.334858	3669.3	89
2022-09-15	11:33:09	0.118903	3669.42	89
2022-09-15	11:33:10	0.939046	3670.36	89
2022-09-15	11:33:11	-1.52523	3670.36	89
2022-09-15	11:33:12	-1.09665	3670.36	89
2022-09-15	11:33:13	10.355	3680.72	89
2022-09-15	11:33:14	-0.275285	3680.72	89
2022-09-15	11:33:15	7.49086	3688.21	89
2022-09-15	11:33:16	16.3318	3704.54	90
2022-09-15	11:33:17	1.15964	3705.7	90
2022-09-15	11:33:18	4.72503	3710.42	90
2022-09-15	11:33:19	20.5235	3730.95	91
2022-09-15	11:33:20	12.2901	3743.24	91
2022-09-15	11:33:21	2.82885	3746.07	91
2022-09-15	11:33:22	1.86008	3747.93	91
2022-09-15	11:33:23	1.31765	3749.24	91
2022-09-15	11:33:24	-0.898298	3749.24	91
2022-09-15	11:33:25	0.0478784	3749.29	91
2022-09-15	11:33:26	8.98701	3758.28	91
2022-09-15	11:33:27	5.70423	3763.98	91
2022-09-15	11:33:28	2.5215	3766.5	91
2022-09-15	11:33:29	-1.36638	3766.5	91
2022-09-15	11:33:30	0.799601	3767.3	91
2022-09-15	11:33:31	-1.51205	3767.3	91
2022-09-15	11:33:32	-3.23637	3767.3	91
2022-09-15	11:33:33	-0.894506	3767.3	91
2022-09-15	11:33:34	12.6657	3779.97	91
2022-09-15	11:33:35	2.79105	3782.76	91
2022-09-15	11:33:36	0.863777	3783.62	91
2022-09-15	11:33:37	1.89003	3785.51	91
2022-09-15	11:33:38	0.0942296	3785.61	91
2022-09-15	11:33:39	-1.75308	3785.61	91
2022-09-15	11:33:40	35.4379	3821.05	92
2022-09-15	11:33:41	4.10666	3825.15	92
2022-09-15	11:33:42	-0.539912	3825.15	92
2022-09-15	11:33:43	-1.42393	3825.15	92
2022-09-15	11:33:44	0.179061	3825.33	92
2022-09-15	11:33:45	-0.0494614	3825.33	92
2022-09-15	11:33:46	0.741952	3826.07	92
2022-09-15	11:33:47	2.38918	3828.46	92
2022-09-15	11:33:48	12.6754	3841.14	92
2022-09-15	11:33:49	8.74887	3849.89	92
2022-09-15	11:33:50	0.569456	3850.46	92
2022-09-15	11:33:51	42.5325	3892.99	93
2022-09-15	11:33:52	61.5114	3954.5	94
2022-09-15	11:33:53	29.848	3984.35	95
2022-09-15	11:33:54	1.56957	3985.92	95
2022-09-15	11:33:55	9.67935	3995.6	95
2022-09-15	11:33:56	-0.849797	3995.6	95
2022-09-15	11:33:57	-1.82484	3995.6	95
2022-09-15	11:33:58	4.48418	4000.08	95
2022-09-15	11:33:59	89.6224	4089.7	96
2022-09-15	11:34:00	36.3422	4126.05	97
2022-09-15	11:34:01	30.9099	4156.96	98
2022-09-15	11:34:02	65.1076	4222.06	99
2022-09-15	11:34:03	79.275	4301.34	100
2022-09-15	11:34:04	54.546	4355.89	101
2022-09-15	11:34:05	19.5347	4375.42	102
2022-09-15	11:34:06	8.33708	4383.76	102
2022-09-15	11:34:07	2.89043	4386.65	102
2022-09-15	11:34:08	30.6865	4417.33	103
2022-09-15	11:34:09	4.67077	4422	103
2022-09-15	11:34:10	47.1668	4469.17	104
2022-09-15	11:34:11	48.0619	4517.23	105
2022-09-15	11:34:12	52.5957	4569.83	106
2022-09-15	11:34:13	20.8744	4590.7	107
2022-09-15	11:34:14	4.84011	4595.54	107
2022-09-15	11:34:15	2.78703	4598.33	107
2022-09-15	11:34:16	-2.05324	4598.33	107
2022-09-15	11:34:17	20.7139	4619.04	108
2022-09-15	11:34:18	2.4254	4621.47	108
2022-09-15	11:34:19	29.6528	4651.12	109
2022-09-15	11:34:20	7.30143	4658.42	109
2022-09-15	11:34:21	-0.462476	4658.42	109
2022-09-15	11:34:22	-1.1487	4658.42	109

## Sheet: Boris_star_2022915112914 (4)
Date	Time	Lbs	Newtons	Averaged Newtons	Total force x time		Total steps > 13.345	**GoPro Fitting: 1118
2022-09-15	11:29:22	0.729784	3.24623	3.23106	3.24623	FALSE	0
2022-09-15	11:29:22	0.724491	3.22268	3.23106	3.22268	FALSE	0
2022-09-15	11:29:22	0.72327	3.21725	3.23106	6.46347	FALSE	0
2022-09-15	11:29:22	0.727952	3.23808	3.23106	6.46076	FALSE	0
2022-09-15	11:29:23	0.726832	3.23309	3.23377	9.69657	FALSE	0
2022-09-15	11:29:23	0.725051	3.22517	3.23377	9.68593	FALSE	0
2022-09-15	11:29:23	0.729071	3.24305	3.23377	12.9396	FALSE	0
2022-09-15	11:29:24	0.748868	3.33111	3.17729	13.017	FALSE	0
2022-09-15	11:29:24	0.651819	2.89942	3.17729	15.839	FALSE	0
2022-09-15	11:29:24	0.732837	3.25981	3.17729	16.2768	FALSE	0
2022-09-15	11:29:24	0.723626	3.21883	3.17729	19.0579	FALSE	0
2022-09-15	11:29:25	0.724695	3.22359	3.21487	19.5004	FALSE	0
2022-09-15	11:29:25	0.728308	3.23966	3.21487	22.2975	FALSE	0
2022-09-15	11:29:25	0.732786	3.25958	3.21487	22.76	FALSE	0
2022-09-15	11:29:25	0.705153	3.13666	3.21487	25.4342	FALSE	0
2022-09-15	11:29:26	0.728206	3.23921	3.2426	25.9992	FALSE	0
2022-09-15	11:29:26	0.733957	3.26479	3.2426	28.699	FALSE	0
2022-09-15	11:29:26	0.723982	3.22042	3.2426	29.2196	FALSE	0
2022-09-15	11:29:26	0.729733	3.246	3.2426	31.945	FALSE	0
2022-09-15	11:29:27	0.729326	3.24419	3.25075	32.4638	FALSE	0
2022-09-15	11:29:27	0.732226	3.25709	3.25075	35.2021	FALSE	0
2022-09-15	11:29:27	0.730852	3.25098	3.25075	35.7148	FALSE	0
2022-09-15	11:29:28	0.584338	2.59925	0.78698	37.8013	FALSE	0
2022-09-15	11:29:28	0.208715	0.928406	0.78698	36.6432	FALSE	0
2022-09-15	11:29:28	0.0180282	0.080193	0.78698	37.8815	FALSE	0
2022-09-15	11:29:28	-0.103397	-0.459931	0.78698	36.6432	FALSE	0
2022-09-15	11:29:29	-0.480699	-2.13825	-2.38324	37.8815	FALSE	0
2022-09-15	11:29:29	-0.48701	-2.16632	-2.38324	36.6432	FALSE	0
2022-09-15	11:29:29	-0.471183	-2.09592	-2.38324	37.8815	FALSE	0
2022-09-15	11:29:29	-0.704211	-3.13247	-2.38324	36.6432	FALSE	0
2022-09-15	11:29:30	-0.916933	-4.0787	-4.22409	37.8815	FALSE	0
2022-09-15	11:29:30	-0.908383	-4.04067	-4.22409	36.6432	FALSE	0
2022-09-15	11:29:30	-0.897595	-3.99268	-4.22409	37.8815	FALSE	0
2022-09-15	11:29:30	-1.07556	-4.78431	-4.22409	36.6432	FALSE	0
2022-09-15	11:29:31	-0.777442	-3.45822	-3.76073	37.8815	FALSE	0
2022-09-15	11:29:31	-0.837697	-3.72624	-3.76073	36.6432	FALSE	0
2022-09-15	11:29:31	-0.921208	-4.09772	-3.76073	37.8815	FALSE	0
2022-09-15	11:29:32	-0.899529	-4.00128	-1.64198	36.6432	FALSE	0
2022-09-15	11:29:32	-0.640088	-2.84724	-1.64198	37.8815	FALSE	0
2022-09-15	11:29:32	-0.00894378	-0.0397837	-1.64198	36.6432	FALSE	0
2022-09-15	11:29:32	0.0720231	0.320373	-1.64198	38.2019	FALSE	0
2022-09-15	11:29:33	0.323626	1.43955	2.6121	38.0828	FALSE	0
2022-09-15	11:29:33	0.573855	2.55262	2.6121	40.7545	FALSE	0
2022-09-15	11:29:33	0.728461	3.24034	2.6121	41.3231	FALSE	0
2022-09-15	11:29:33	0.722965	3.21589	2.6121	43.9704	FALSE	0
2022-09-15	11:29:34	0.969275	4.31153	7.184	45.6346	FALSE	0
2022-09-15	11:29:34	4.11095	18.2863	7.184	62.2567	1	1
2022-09-15	11:29:34	1.01894	4.53245	7.184	50.1671	FALSE	1
2022-09-15	11:29:34	0.36098	1.60571	7.184	63.8624	FALSE	1
2022-09-15	11:29:35	0.332074	1.47713	4.28218	51.6442	FALSE	1
2022-09-15	11:29:35	1.08419	4.82269	4.28218	68.6851	FALSE	1
2022-09-15	11:29:35	1.47177	6.54673	4.28218	58.1909	FALSE	1
2022-09-15	11:29:36	1.21268	5.39424	2.6023	74.0794	FALSE	1
2022-09-15	11:29:36	0.792786	3.52647	2.6023	61.7174	FALSE	1
2022-09-15	11:29:36	0.231616	1.03027	2.6023	75.1097	FALSE	1
2022-09-15	11:29:36	0.103015	0.458231	2.6023	62.1756	FALSE	1
2022-09-15	11:29:37	1.16612	5.18713	5.35255	80.2968	FALSE	1
2022-09-15	11:29:37	1.07452	4.77968	5.35255	66.9553	FALSE	1
2022-09-15	11:29:37	1.29375	5.75486	5.35255	86.0516	FALSE	1
2022-09-15	11:29:37	1.27884	5.68854	5.35255	72.6439	FALSE	1
2022-09-15	11:29:38	0.997366	4.43648	12.7629	90.4881	FALSE	1
2022-09-15	11:29:38	2.33955	10.4068	12.7629	83.0506	FALSE	1
2022-09-15	11:29:38	3.14693	13.9982	12.7629	104.486	1	2
2022-09-15	11:29:38	4.99304	22.21	12.7629	105.261	1	3
2022-09-15	11:29:39	1.96576	8.74409	17.3284	113.23	FALSE	3
2022-09-15	11:29:39	5.46652	24.3162	17.3284	129.577	1	4
2022-09-15	11:29:39	4.25451	18.9249	17.3284	132.155	1	5
2022-09-15	11:29:40	6.55746	29.1689	35.4204	158.746	1	6
2022-09-15	11:29:40	5.80678	25.8297	35.4204	157.985	1	7
2022-09-15	11:29:40	7.48795	33.3079	35.4204	192.054	1	8
2022-09-15	11:29:40	11.9993	53.3753	35.4204	211.36	1	9
2022-09-15	11:29:41	4.74551	21.109	22.0324	213.163	1	10
2022-09-15	11:29:41	5.13573	22.8448	22.0324	234.205	1	11
2022-09-15	11:29:41	4.90057	21.7987	22.0324	234.961	1	12
2022-09-15	11:29:41	5.03065	22.3773	22.0324	256.582	1	13
2022-09-15	11:29:42	5.72622	25.4714	33.3772	260.433	1	14
2022-09-15	11:29:42	4.64892	20.6793	33.3772	277.262	1	15
2022-09-15	11:29:42	15.2317	67.7536	33.3772	328.186	1	16
2022-09-15	11:29:42	4.40724	19.6043	33.3772	296.866	1	17
2022-09-15	11:29:43	5.65014	25.133	22.365	353.319	1	18
2022-09-15	11:29:43	7.65976	34.0721	22.365	330.938	1	19
2022-09-15	11:29:43	1.77375	7.88999	22.365	361.209	FALSE	19
2022-09-15	11:29:44	3.03935	13.5196	10.8859	344.458	1	20
2022-09-15	11:29:44	3.91034	17.394	10.8859	378.603	1	21
2022-09-15	11:29:44	1.87472	8.33913	10.8859	352.797	FALSE	21
2022-09-15	11:29:44	0.964644	4.29093	10.8859	382.894	FALSE	21
2022-09-15	11:29:45	0.876501	3.89885	20.1321	356.696	FALSE	21
2022-09-15	11:29:45	3.63401	16.1648	20.1321	399.059	1	22
2022-09-15	11:29:45	3.81655	16.9768	20.1321	373.673	1	23
2022-09-15	11:29:45	9.77655	43.488	20.1321	442.547	1	24
2022-09-15	11:29:46	15.0753	67.0579	39.708	440.731	1	25
2022-09-15	11:29:46	7.31813	32.5525	39.708	475.1	1	26
2022-09-15	11:29:46	10.8569	48.2937	39.708	489.024	1	27
2022-09-15	11:29:46	2.4567	10.9279	39.708	486.027	FALSE	27
2022-09-15	11:29:47	0.970649	4.31764	3.46935	493.342	FALSE	27
2022-09-15	11:29:47	0.643423	2.86207	3.46935	488.89	FALSE	27
2022-09-15	11:29:47	0.725763	3.22834	3.46935	496.57	FALSE	27
2022-09-15	11:29:48	0.726629	3.23219	3.23955	492.122	FALSE	27
2022-09-15	11:29:48	0.731972	3.25596	3.23955	499.826	FALSE	27
2022-09-15	11:29:48	0.730038	3.24736	3.23955	495.369	FALSE	27
2022-09-15	11:29:48	0.724491	3.22268	3.23955	503.049	FALSE	27
2022-09-15	11:29:49	0.722404	3.2134	3.22743	498.582	FALSE	27
2022-09-15	11:29:49	0.726679	3.23241	3.22743	506.281	FALSE	27
2022-09-15	11:29:49	0.72729	3.23513	3.22743	501.818	FALSE	27
2022-09-15	11:29:49	0.725865	3.22879	3.22743	509.51	FALSE	27
2022-09-15	11:29:50	0.733397	3.2623	3.25015	505.08	FALSE	27
2022-09-15	11:29:50	0.725305	3.2263	3.25015	512.736	FALSE	27
2022-09-15	11:29:50	0.733295	3.26184	3.25015	508.342	FALSE	27
2022-09-15	11:29:51	0.722914	3.21567	3.24854	515.952	FALSE	27
2022-09-15	11:29:51	0.731819	3.25528	3.24854	511.597	FALSE	27
2022-09-15	11:29:51	0.729173	3.24351	3.24854	519.195	FALSE	27
2022-09-15	11:29:51	0.737315	3.27972	3.24854	514.877	FALSE	27
2022-09-15	11:29:52	0.716043	3.1851	3.21663	522.381	FALSE	27
2022-09-15	11:29:52	0.721997	3.21159	3.21663	518.088	FALSE	27
2022-09-15	11:29:52	0.72327	3.21725	3.21663	525.598	FALSE	27
2022-09-15	11:29:52	0.731209	3.25256	3.21663	521.341	FALSE	27
2022-09-15	11:29:53	0.729529	3.24509	3.24441	528.843	FALSE	27
2022-09-15	11:29:53	0.728359	3.23989	3.24441	524.581	FALSE	27
2022-09-15	11:29:53	0.732837	3.25981	3.24441	532.103	FALSE	27
2022-09-15	11:29:53	0.726781	3.23287	3.24441	527.814	FALSE	27
2022-09-15	11:29:54	0.724338	3.222	3.23136	535.325	FALSE	27
2022-09-15	11:29:54	0.72902	3.24283	3.23136	531.056	FALSE	27
2022-09-15	11:29:54	0.725967	3.22925	3.23136	538.554	FALSE	27
2022-09-15	11:29:55	0.72673	3.23264	3.23253	534.289	FALSE	27
2022-09-15	11:29:55	0.730903	3.2512	3.23253	541.805	FALSE	27
2022-09-15	11:29:55	0.722659	3.21453	3.23253	537.504	FALSE	27
2022-09-15	11:29:55	0.726527	3.23174	3.23253	545.037	FALSE	27
2022-09-15	11:29:56	0.723321	3.21748	3.21849	540.721	FALSE	27
2022-09-15	11:29:56	0.723524	3.21838	3.21849	548.255	FALSE	27
2022-09-15	11:29:56	0.724847	3.22426	3.21849	543.945	FALSE	27
2022-09-15	11:29:56	0.722507	3.21386	3.21849	551.469	FALSE	27
2022-09-15	11:29:57	0.725153	3.22563	3.22483	547.171	FALSE	27
2022-09-15	11:29:57	0.728308	3.23966	3.22483	554.709	FALSE	27
2022-09-15	11:29:57	0.72617	3.23015	3.22483	550.401	FALSE	27
2022-09-15	11:29:57	0.720267	3.20389	3.22483	557.913	FALSE	27
2022-09-15	11:29:58	0.727239	3.2349	3.22479	553.636	FALSE	27
2022-09-15	11:29:58	0.724084	3.22087	3.22479	561.134	FALSE	27
2022-09-15	11:29:58	0.723575	3.21861	3.22479	556.855	FALSE	27
2022-09-15	11:29:59	0.734466	3.26705	4.21804	564.401	FALSE	27
2022-09-15	11:29:59	0.73701	3.27837	4.21804	560.133	FALSE	27
2022-09-15	11:29:59	0.722862	3.21543	4.21804	567.616	FALSE	27
2022-09-15	11:29:59	1.59869	7.11129	4.21804	567.244	FALSE	27
2022-09-15	11:30:00	0.725153	3.22563	3.23208	570.842	FALSE	27
2022-09-15	11:30:00	0.729377	3.24441	3.23208	570.489	FALSE	27
2022-09-15	11:30:00	0.727901	3.23785	3.23208	574.08	FALSE	27
2022-09-15	11:30:00	0.723982	3.22042	3.23208	573.709	FALSE	27
2022-09-15	11:30:01	0.726527	3.23174	3.21832	577.311	FALSE	27
2022-09-15	11:30:01	0.723779	3.21951	3.21832	576.929	FALSE	27
2022-09-15	11:30:01	0.722659	3.21453	3.21832	580.526	FALSE	27
2022-09-15	11:30:01	0.721081	3.20751	3.21832	580.136	FALSE	27
2022-09-15	11:30:02	0.724796	3.22404	3.21612	583.75	FALSE	27
2022-09-15	11:30:02	0.720827	3.20638	3.21612	583.343	FALSE	27
2022-09-15	11:30:02	0.723422	3.21793	3.21612	586.968	FALSE	27
2022-09-15	11:30:03	0.723931	3.22019	3.22777	586.563	FALSE	27
2022-09-15	11:30:03	0.722354	3.21318	3.22777	590.181	FALSE	27
2022-09-15	11:30:03	0.727239	3.2349	3.22777	589.798	FALSE	27
2022-09-15	11:30:03	0.72902	3.24283	3.22777	593.424	FALSE	27
2022-09-15	11:30:04	0.7193	3.19959	3.23321	592.997	FALSE	27
2022-09-15	11:30:04	0.728868	3.24215	3.23321	596.666	FALSE	27
2022-09-15	11:30:04	0.728715	3.24147	3.23321	596.239	FALSE	27
2022-09-15	11:30:04	0.730547	3.24962	3.23321	599.916	FALSE	27
2022-09-15	11:30:05	0.728206	3.23921	3.23875	599.478	FALSE	27
2022-09-15	11:30:05	0.73416	3.26569	3.23875	603.181	FALSE	27
2022-09-15	11:30:05	0.728461	3.24034	3.23875	602.718	FALSE	27
2022-09-15	11:30:05	0.721591	3.20978	3.23875	606.391	FALSE	27
2022-09-15	11:30:06	0.717824	3.19302	3.2223	605.911	FALSE	27
2022-09-15	11:30:06	0.72556	3.22744	3.2223	609.618	FALSE	27
2022-09-15	11:30:06	0.729835	3.24645	3.2223	609.158	FALSE	27
2022-09-15	11:30:07	0.728104	3.23875	3.23824	612.857	FALSE	27
2022-09-15	11:30:07	0.727239	3.2349	3.23824	612.393	FALSE	27
2022-09-15	11:30:07	0.732379	3.25777	3.23824	616.115	FALSE	27
2022-09-15	11:30:07	0.724237	3.22155	3.23824	615.614	FALSE	27
2022-09-15	11:30:08	0.72556	3.22744	3.21334	619.342	FALSE	27
2022-09-15	11:30:08	0.722303	3.21295	3.21334	618.827	FALSE	27
2022-09-15	11:30:08	0.717112	3.18986	3.21334	622.532	FALSE	27
2022-09-15	11:30:08	0.724593	3.22313	3.21334	622.05	FALSE	27
2022-09-15	11:30:09	0.720521	3.20502	3.23462	625.737	FALSE	27
2022-09-15	11:30:09	0.728104	3.23875	3.23462	625.289	FALSE	27
2022-09-15	11:30:09	0.729835	3.24645	3.23462	628.984	FALSE	27
2022-09-15	11:30:09	0.730242	3.24826	3.23462	628.537	FALSE	27
2022-09-15	11:30:10	0.722608	3.2143	3.24834	632.198	FALSE	27
2022-09-15	11:30:10	0.731259	3.25279	3.24834	631.79	FALSE	27
2022-09-15	11:30:10	0.736908	3.27791	3.24834	635.476	FALSE	27
2022-09-15	11:30:11	0.732786	3.25958	3.2679	635.05	FALSE	27
2022-09-15	11:30:11	0.733092	3.26094	3.2679	638.737	FALSE	27
2022-09-15	11:30:11	0.741947	3.30033	3.2679	638.35	FALSE	27
2022-09-15	11:30:11	0.730801	3.25075	3.2679	641.988	FALSE	27
2022-09-15	11:30:12	0.733295	3.26184	3.24006	641.612	FALSE	27
2022-09-15	11:30:12	0.733397	3.2623	3.24006	645.25	FALSE	27
2022-09-15	11:30:12	0.711463	3.16473	3.24006	644.777	FALSE	27
2022-09-15	11:30:12	0.735433	3.27135	3.24006	648.521	FALSE	27
2022-09-15	11:30:13	0.765814	3.40649	3.35556	648.183	FALSE	27
2022-09-15	11:30:13	0.733499	3.26275	3.35556	651.784	FALSE	27
2022-09-15	11:30:13	0.763779	3.39744	3.35556	651.581	FALSE	27
2022-09-15	11:30:14	0.821234	3.65301	3.46184	655.437	FALSE	27
2022-09-15	11:30:14	0.720114	3.20321	3.46184	654.784	FALSE	27
2022-09-15	11:30:14	0.847494	3.76982	3.46184	659.207	FALSE	27
2022-09-15	11:30:14	0.724186	3.22132	3.46184	658.005	FALSE	27
2022-09-15	11:30:15	0.722812	3.21521	2.99948	662.422	FALSE	27
2022-09-15	11:30:15	0.681285	3.03049	2.99948	661.036	FALSE	27
2022-09-15	11:30:15	0.61757	2.74707	2.99948	665.169	FALSE	27
2022-09-15	11:30:15	0.675585	3.00514	2.99948	664.041	FALSE	27
2022-09-15	11:30:16	0.731565	3.25415	2.75839	668.423	FALSE	27
2022-09-15	11:30:16	1.0395	4.6239	2.75839	668.665	FALSE	27
2022-09-15	11:30:16	0.698079	3.1052	2.75839	671.528	FALSE	27
2022-09-15	11:30:16	0.0113107	0.0503123	2.75839	668.715	FALSE	27
2022-09-15	11:30:17	-0.0449234	-0.199828	-1.80684	671.528	FALSE	27
2022-09-15	11:30:17	-0.40757	-1.81295	-1.80684	668.715	FALSE	27
2022-09-15	11:30:17	-0.577799	-2.57017	-1.80684	671.528	FALSE	27
2022-09-15	11:30:17	-0.594491	-2.64441	-1.80684	668.715	FALSE	27
2022-09-15	11:30:18	-0.577137	-2.56722	2.9564	671.528	FALSE	27
2022-09-15	11:30:18	-0.169809	-0.755344	2.9564	668.715	FALSE	27
2022-09-15	11:30:18	2.74083	12.1918	2.9564	683.72	FALSE	27
2022-09-15	11:30:19	2.54403	11.3164	12.7612	680.031	FALSE	27
2022-09-15	11:30:19	2.99553	13.3247	12.7612	697.045	FALSE	27
2022-09-15	11:30:19	2.98225	13.2656	12.7612	693.297	FALSE	27
2022-09-15	11:30:19	2.9536	13.1382	12.7612	710.183	FALSE	27
2022-09-15	11:30:20	2.45955	10.9406	21.2271	704.237	FALSE	27
2022-09-15	11:30:20	3.06271	13.6235	21.2271	723.807	1	28
2022-09-15	11:30:20	6.90744	30.7257	21.2271	734.963	1	29
2022-09-15	11:30:20	6.65853	29.6185	21.2271	753.425	1	30
2022-09-15	11:30:21	3.51207	15.6224	25.5095	750.586	1	31
2022-09-15	11:30:21	10.0007	44.4851	25.5095	797.91	1	32
2022-09-15	11:30:21	3.69161	16.421	25.5095	767.007	1	33
2022-09-15	11:30:22	1.70785	7.59686	9.46131	805.507	FALSE	33
2022-09-15	11:30:22	5.17141	23.0035	9.46131	790.01	1	34
2022-09-15	11:30:22	1.38424	6.15738	9.46131	811.665	FALSE	34
2022-09-15	11:30:22	0.244491	1.08754	9.46131	791.098	FALSE	34
2022-09-15	11:30:23	0.186883	0.831293	0.0635547	812.496	FALSE	34
2022-09-15	11:30:23	0.036247	0.161234	0.0635547	791.259	FALSE	34
2022-09-15	11:30:23	-0.235814	-1.04895	0.0635547	812.496	FALSE	34
2022-09-15	11:30:23	0.0698349	0.31064	0.0635547	791.569	FALSE	34
2022-09-15	11:30:24	-0.167926	-0.746968	-0.986074	812.496	FALSE	34
2022-09-15	11:30:24	-0.141921	-0.631293	-0.986074	791.569	FALSE	34
2022-09-15	11:30:24	-0.237392	-1.05597	-0.986074	812.496	FALSE	34
2022-09-15	11:30:24	-0.339478	-1.51007	-0.986074	791.569	FALSE	34
2022-09-15	11:30:25	-0.257188	-1.14402	-1.27698	812.496	FALSE	34
2022-09-15	11:30:25	-0.275865	-1.2271	-1.27698	791.569	FALSE	34
2022-09-15	11:30:25	-0.32818	-1.45981	-1.27698	812.496	FALSE	34
2022-09-15	11:30:26	-0.286094	-1.2726	13.5136	791.569	FALSE	34
2022-09-15	11:30:26	0.201896	0.898074	13.5136	813.394	FALSE	34
2022-09-15	11:30:26	3.38693	15.0657	13.5136	806.635	1	35
2022-09-15	11:30:26	8.84927	39.3633	13.5136	852.757	1	36
2022-09-15	11:30:27	12.1651	54.1128	82.6038	860.748	1	37
2022-09-15	11:30:27	22.0524	98.0935	82.6038	950.851	1	38
2022-09-15	11:30:27	33.1795	147.589	82.6038	1008.34	1	39
2022-09-15	11:30:27	6.88367	30.6199	82.6038	981.471	1	40
2022-09-15	11:30:28	7.68077	34.1656	52.2917	1042.5	1	41
2022-09-15	11:30:28	6.15472	27.3774	52.2917	1008.85	1	42
2022-09-15	11:30:28	19.8051	88.097	52.2917	1130.6	1	43
2022-09-15	11:30:28	13.3822	59.5267	52.2917	1068.37	1	44
2022-09-15	11:30:29	11.2026	49.8314	40.199	1180.43	1	45
2022-09-15	11:30:29	8.87405	39.4735	40.199	1107.85	1	46
2022-09-15	11:30:29	7.03477	31.2921	40.199	1211.72	1	47
2022-09-15	11:30:30	13.7313	61.0796	52.7496	1168.93	1	48
2022-09-15	11:30:30	14.407	64.0852	52.7496	1275.81	1	49
2022-09-15	11:30:30	13.6639	60.7798	52.7496	1229.71	1	50
2022-09-15	11:30:30	5.63238	25.054	52.7496	1300.86	1	51
2022-09-15	11:30:31	7.52495	33.4725	21.3153	1263.18	1	52
2022-09-15	11:30:31	2.47889	11.0266	21.3153	1311.89	FALSE	52
2022-09-15	11:30:31	3.84306	17.0947	21.3153	1280.27	1	53
2022-09-15	11:30:31	5.32067	23.6674	21.3153	1335.56	1	54
2022-09-15	11:30:32	0.846374	3.76484	1.72167	1284.04	FALSE	54
2022-09-15	11:30:32	0.25411	1.13033	1.72167	1336.69	FALSE	54
2022-09-15	11:30:32	0.26383	1.17357	1.72167	1285.21	FALSE	54
2022-09-15	11:30:32	0.18388	0.817935	1.72167	1337.5	FALSE	54
2022-09-15	11:30:33	0.107138	0.476571	4.04561	1285.69	FALSE	54
2022-09-15	11:30:33	0.345916	1.5387	4.04561	1339.04	FALSE	54
2022-09-15	11:30:33	2.27543	10.1216	4.04561	1295.81	FALSE	54
2022-09-15	11:30:34	6.76098	30.0742	40.9735	1369.12	1	55
2022-09-15	11:30:34	14.4748	64.3868	40.9735	1360.2	1	56
2022-09-15	11:30:34	11.1764	49.7149	40.9735	1418.83	1	57
2022-09-15	11:30:34	4.43283	19.7181	40.9735	1379.92	1	58
2022-09-15	11:30:35	2.89859	12.8935	55.5654	1431.73	FALSE	58
2022-09-15	11:30:35	16.0937	71.588	55.5654	1451.5	1	59
2022-09-15	11:30:35	8.12454	36.1396	55.5654	1467.87	1	60
2022-09-15	11:30:35	22.8498	101.64	55.5654	1553.14	1	61
2022-09-15	11:30:36	23.4772	104.431	74.6339	1572.3	1	62
2022-09-15	11:30:36	11.7357	52.2027	74.6339	1605.35	1	63
2022-09-15	11:30:36	22.1308	98.4422	74.6339	1670.74	1	64
2022-09-15	11:30:36	9.77008	43.4593	74.6339	1648.81	1	65
2022-09-15	11:30:37	7.57894	33.7126	53.4124	1704.45	1	66
2022-09-15	11:30:37	16.1029	71.6289	53.4124	1720.44	1	67
2022-09-15	11:30:37	12.3411	54.8957	53.4124	1759.35	1	68
2022-09-15	11:30:38	18.3471	81.6116	74.335	1802.05	1	69
2022-09-15	11:30:38	14.8234	65.9374	74.335	1825.28	1	70
2022-09-15	11:30:38	11.0023	48.9404	74.335	1850.99	1	71
2022-09-15	11:30:38	22.6722	100.85	74.335	1926.14	1	72
2022-09-15	11:30:39	14.6064	64.9722	65.4672	1915.96	1	73
2022-09-15	11:30:39	10.1213	45.0216	65.4672	1971.16	1	74
2022-09-15	11:30:39	21.0033	93.4269	65.4672	2009.39	1	75
2022-09-15	11:30:39	13.1397	58.448	65.4672	2029.6	1	76
2022-09-15	11:30:40	12.4375	55.3245	57.3518	2064.71	1	77
2022-09-15	11:30:40	18.892	84.0354	57.3518	2113.64	1	78
2022-09-15	11:30:40	8.38993	37.3201	57.3518	2102.03	1	79
2022-09-15	11:30:40	11.8536	52.7272	57.3518	2166.37	1	80
2022-09-15	11:30:41	10.3668	46.1136	42.4324	2148.14	1	81
2022-09-15	11:30:41	5.72469	25.4646	42.4324	2191.83	1	82
2022-09-15	11:30:41	12.5262	55.719	42.4324	2203.86	1	83
2022-09-15	11:30:42	12.5293	55.7328	44.0503	2247.56	1	84
2022-09-15	11:30:42	9.71024	43.1931	44.0503	2247.06	1	85
2022-09-15	11:30:42	9.89812	44.0288	44.0503	2291.59	1	86
2022-09-15	11:30:42	7.47411	33.2463	44.0503	2280.3	1	87
2022-09-15	11:30:43	9.4138	41.8745	41.5242	2333.47	1	88
2022-09-15	11:30:43	14.7732	65.7141	41.5242	2346.02	1	89
2022-09-15	11:30:43	6.55019	29.1366	41.5242	2362.6	1	90
2022-09-15	11:30:43	6.60306	29.3717	41.5242	2375.39	1	91
2022-09-15	11:30:44	2.33411	10.3826	3.70599	2372.99	FALSE	91
2022-09-15	11:30:44	0.674415	2.99993	3.70599	2378.39	FALSE	91
2022-09-15	11:30:44	0.135535	0.602887	3.70599	2373.59	FALSE	91
2022-09-15	11:30:44	0.188512	0.838539	3.70599	2379.23	FALSE	91
2022-09-15	11:30:45	0.100674	0.447818	0.283021	2374.04	FALSE	91
2022-09-15	11:30:45	-0.00365114	-0.016241	0.283021	2379.23	FALSE	91
2022-09-15	11:30:45	0.0938551	0.417486	0.283021	2374.46	FALSE	91
2022-09-15	11:30:46	0.545712	2.42744	11.3595	2381.66	FALSE	91
2022-09-15	11:30:46	1.29304	5.7517	11.3595	2380.21	FALSE	91
2022-09-15	11:30:46	5.33349	23.7244	11.3595	2405.38	1	92
2022-09-15	11:30:46	3.04271	13.5346	11.3595	2393.74	1	93
2022-09-15	11:30:47	5.21136	23.1812	21.8678	2428.56	1	94
2022-09-15	11:30:47	2.40093	10.6798	21.8678	2404.42	FALSE	94
2022-09-15	11:30:47	7.24199	32.2138	21.8678	2460.77	1	95
2022-09-15	11:30:47	4.81014	21.3965	21.8678	2425.82	1	96
2022-09-15	11:30:48	4.71584	20.977	21.4601	2481.75	1	97
2022-09-15	11:30:48	6.92607	30.8085	21.4601	2456.63	1	98
2022-09-15	11:30:48	2.83146	12.5949	21.4601	2494.35	FALSE	98
2022-09-15	11:30:49	4.93915	21.9703	43.6735	2478.6	1	99
2022-09-15	11:30:49	6.30586	28.0497	43.6735	2522.4	1	100
2022-09-15	11:30:49	9.43166	41.9539	43.6735	2520.55	1	101
2022-09-15	11:30:49	18.5963	82.7201	43.6735	2605.12	1	102
2022-09-15	11:30:50	14.8266	65.9517	42.9461	2586.5	1	103
2022-09-15	11:30:50	16.885	75.1079	42.9461	2680.22	1	104
2022-09-15	11:30:50	5.0538	22.4803	42.9461	2608.98	1	105
2022-09-15	11:30:50	1.8535	8.24474	42.9461	2688.47	FALSE	105
2022-09-15	11:30:51	1.87019	8.31898	6.90614	2617.3	FALSE	105
2022-09-15	11:30:51	0.64958	2.88946	6.90614	2691.36	FALSE	105
2022-09-15	11:30:51	1.29559	5.76304	6.90614	2623.06	FALSE	105
2022-09-15	11:30:51	2.39492	10.6531	6.90614	2702.01	FALSE	105
2022-09-15	11:30:52	2.70515	12.033	14.6936	2635.1	FALSE	105
2022-09-15	11:30:52	3.742	16.6452	14.6936	2718.66	1	106
2022-09-15	11:30:52	3.46266	15.4026	14.6936	2650.5	1	107
2022-09-15	11:30:53	2.89843	12.8928	10.8843	2731.55	FALSE	107
2022-09-15	11:30:53	1.85151	8.23589	10.8843	2658.74	FALSE	107
2022-09-15	11:30:53	1.44515	6.42832	10.8843	2737.98	FALSE	107
2022-09-15	11:30:53	3.59253	15.9803	10.8843	2674.72	1	108
2022-09-15	11:30:54	3.49833	15.5613	29.9929	2753.54	1	109
2022-09-15	11:30:54	7.76703	34.5493	29.9929	2709.27	1	110
2022-09-15	11:30:54	9.46749	42.1133	29.9929	2795.65	1	111
2022-09-15	11:30:54	6.23797	27.7477	29.9929	2737.01	1	112
2022-09-15	11:30:55	5.41456	24.085	17.0913	2819.74	1	113
2022-09-15	11:30:55	3.21599	14.3054	17.0913	2751.32	1	114
2022-09-15	11:30:55	4.71945	20.9931	17.0913	2840.73	1	115
2022-09-15	11:30:55	2.0192	8.98181	17.0913	2760.3	FALSE	115
2022-09-15	11:30:56	2.2909	10.1904	11.7233	2850.92	FALSE	115
2022-09-15	11:30:56	4.09497	18.2152	11.7233	2778.52	1	116
2022-09-15	11:30:56	1.52067	6.76424	11.7233	2857.69	FALSE	116
2022-09-15	11:30:57	2.48281	11.044	12.7888	2789.56	FALSE	116
2022-09-15	11:30:57	2.92016	12.9895	12.7888	2870.67	FALSE	116
2022-09-15	11:30:57	2.822	12.5528	12.7888	2802.11	FALSE	116
2022-09-15	11:30:57	3.27523	14.5689	12.7888	2885.24	1	117
2022-09-15	11:30:58	2.52291	11.2224	16.1778	2813.34	FALSE	117
2022-09-15	11:30:58	5.10973	22.7291	16.1778	2907.97	1	118
2022-09-15	11:30:58	2.9109	12.9483	16.1778	2826.28	FALSE	118
2022-09-15	11:30:58	4.00423	17.8116	16.1778	2925.78	1	119
2022-09-15	11:30:59	5.44724	24.2304	11.5944	2850.51	1	120
2022-09-15	11:30:59	1.57584	7.00965	11.5944	2932.79	FALSE	120
2022-09-15	11:30:59	2.42714	10.7964	11.5944	2861.31	FALSE	120
2022-09-15	11:30:59	0.97589	4.34095	11.5944	2937.13	FALSE	120
2022-09-15	11:31:00	1.5563	6.92273	13.0759	2868.23	FALSE	120
2022-09-15	11:31:00	2.725	12.1213	13.0759	2949.26	FALSE	120
2022-09-15	11:31:00	4.53747	20.1836	13.0759	2888.42	1	121
2022-09-15	11:31:01	9.23762	41.0908	28.9567	2990.35	1	122
2022-09-15	11:31:01	5.96917	26.5521	28.9567	2914.97	1	123
2022-09-15	11:31:01	7.97991	35.4962	28.9567	3025.84	1	124
2022-09-15	11:31:01	2.85233	12.6877	28.9567	2927.66	FALSE	124
2022-09-15	11:31:02	5.65609	25.1594	14.6716	3051	1	125
2022-09-15	11:31:02	1.92576	8.56617	14.6716	2936.22	FALSE	125
2022-09-15	11:31:02	3.27563	14.5707	14.6716	3065.57	1	126
2022-09-15	11:31:02	2.33584	10.3903	14.6716	2946.61	FALSE	126
2022-09-15	11:31:03	2.83243	12.5992	16.794	3078.17	FALSE	126
2022-09-15	11:31:03	3.02912	13.4741	16.794	2960.09	1	127
2022-09-15	11:31:03	4.37553	19.4632	16.794	3097.64	1	128
2022-09-15	11:31:03	4.8648	21.6396	16.794	2981.73	1	129
2022-09-15	11:31:04	1.60673	7.14706	3.45524	3104.78	FALSE	129
2022-09-15	11:31:04	0.409835	1.82303	3.45524	2983.55	FALSE	129
2022-09-15	11:31:04	0.313753	1.39564	3.45524	3106.18	FALSE	129
2022-09-15	11:31:05	0.389428	1.73225	2.5001	2985.28	FALSE	129
2022-09-15	11:31:05	0.238028	1.0588	2.5001	3107.24	FALSE	129
2022-09-15	11:31:05	0.217926	0.969378	2.5001	2986.25	FALSE	129
2022-09-15	11:31:05	1.40281	6.23998	2.5001	3113.48	FALSE	129
2022-09-15	11:31:06	0.629173	2.79869	0.918276	2989.05	FALSE	129
2022-09-15	11:31:06	0.538537	2.39552	0.918276	3115.87	FALSE	129
2022-09-15	11:31:06	0.446323	1.98533	0.918276	2991.04	FALSE	129
2022-09-15	11:31:06	-0.788282	-3.50644	0.918276	3115.87	FALSE	129
2022-09-15	11:31:07	0.030242	0.134522	0.880813	2991.17	FALSE	129
2022-09-15	11:31:07	0.180064	0.800961	0.880813	3116.67	FALSE	129
2022-09-15	11:31:07	0.259453	1.1541	0.880813	2992.32	FALSE	129
2022-09-15	11:31:07	0.322303	1.43367	0.880813	3118.11	FALSE	129
2022-09-15	11:31:08	0.266934	1.18738	1.34508	2993.51	FALSE	129
2022-09-15	11:31:08	0.5593	2.48788	1.34508	3120.6	FALSE	129
2022-09-15	11:31:08	0.080929	0.359988	1.34508	2993.87	FALSE	129
2022-09-15	11:31:09	0.327392	1.45631	1.57458	3122.05	FALSE	129
2022-09-15	11:31:09	0.128003	0.569383	1.57458	2994.44	FALSE	129
2022-09-15	11:31:09	0.563219	2.50531	1.57458	3124.56	FALSE	129
2022-09-15	11:31:09	0.397316	1.76734	1.57458	2996.21	FALSE	129
2022-09-15	11:31:10	0.362812	1.61386	1.08443	3126.17	FALSE	129
2022-09-15	11:31:10	0.314008	1.39677	1.08443	2997.6	FALSE	129
2022-09-15	11:31:10	0.204288	0.908714	1.08443	3127.08	FALSE	129
2022-09-15	11:31:10	0.0940587	0.418392	1.08443	2998.02	FALSE	129
2022-09-15	11:31:11	0.100827	0.448499	1.38664	3127.53	FALSE	129
2022-09-15	11:31:11	0.176349	0.784436	1.38664	2998.81	FALSE	129
2022-09-15	11:31:11	0.422354	1.87872	1.38664	3129.41	FALSE	129
2022-09-15	11:31:11	0.547392	2.43491	1.38664	3001.24	FALSE	129
2022-09-15	11:31:12	0.418944	1.86355	1.48468	3131.27	FALSE	129
2022-09-15	11:31:12	0.302201	1.34425	1.48468	3002.59	FALSE	129
2022-09-15	11:31:12	0.280165	1.24623	1.48468	3132.52	FALSE	129
2022-09-15	11:31:13	-0.132404	-0.588959	-1.46938	3002.59	FALSE	129
2022-09-15	11:31:13	-0.36014	-1.60197	-1.46938	3132.52	FALSE	129
2022-09-15	11:31:13	-0.415814	-1.84962	-1.46938	3002.59	FALSE	129
2022-09-15	11:31:13	-0.412964	-1.83695	-1.46938	3132.52	FALSE	129
2022-09-15	11:31:14	-0.588994	-2.61996	-0.962133	3002.59	FALSE	129
2022-09-15	11:31:14	-0.521615	-2.32025	-0.962133	3132.52	FALSE	129
2022-09-15	11:31:14	-0.0454323	-0.202092	-0.962133	3002.59	FALSE	129
2022-09-15	11:31:14	0.290853	1.29377	-0.962133	3133.81	FALSE	129
2022-09-15	11:31:15	0.284695	1.26638	0.971984	3003.85	FALSE	129
2022-09-15	11:31:15	0.18271	0.812731	0.971984	3134.62	FALSE	129
2022-09-15	11:31:15	0.218079	0.970059	0.971984	3004.82	FALSE	129
2022-09-15	11:31:15	0.188563	0.838766	0.971984	3135.46	FALSE	129
2022-09-15	11:31:16	0.384288	1.70939	1.31128	3006.53	FALSE	129
2022-09-15	11:31:16	0.292634	1.30169	1.31128	3136.76	FALSE	129
2022-09-15	11:31:16	0.207443	0.922748	1.31128	3007.46	FALSE	129
2022-09-15	11:31:17	-0.0135748	-0.0603834	-1.6554	3136.76	FALSE	129
2022-09-15	11:31:17	-0.305178	-1.35749	-1.6554	3007.46	FALSE	129
2022-09-15	11:31:17	-0.558562	-2.4846	-1.6554	3136.76	FALSE	129
2022-09-15	11:31:17	-0.611284	-2.71911	-1.6554	3007.46	FALSE	129
2022-09-15	11:31:18	-0.56589	-2.51719	-2.10899	3136.76	FALSE	129
2022-09-15	11:31:18	-0.542684	-2.41397	-2.10899	3007.46	FALSE	129
2022-09-15	11:31:18	-0.503345	-2.23898	-2.10899	3136.76	FALSE	129
2022-09-15	11:31:18	-0.284567	-1.26581	-2.10899	3007.46	FALSE	129
2022-09-15	11:31:19	0.18958	0.84329	2.7387	3137.61	FALSE	129
2022-09-15	11:31:19	0.355942	1.5833	2.7387	3009.04	FALSE	129
2022-09-15	11:31:19	1.15111	5.12037	2.7387	3142.73	FALSE	129
2022-09-15	11:31:19	0.766119	3.40785	2.7387	3012.45	FALSE	129
2022-09-15	11:31:20	0.542201	2.41182	5.25361	3145.14	FALSE	129
2022-09-15	11:31:20	0.416603	1.85313	5.25361	3014.3	FALSE	129
2022-09-15	11:31:20	2.58439	11.4959	5.25361	3156.63	FALSE	129
2022-09-15	11:31:21	1.70938	7.60366	4.79484	3021.9	FALSE	129
2022-09-15	11:31:21	1.4163	6.29999	4.79484	3162.93	FALSE	129
2022-09-15	11:31:21	0.698079	3.1052	4.79484	3025.01	FALSE	129
2022-09-15	11:31:21	0.487952	2.17051	4.79484	3165.11	FALSE	129
2022-09-15	11:31:22	0.841998	3.74538	6.82131	3028.75	FALSE	129
2022-09-15	11:31:22	1.58276	7.04043	6.82131	3172.15	FALSE	129
2022-09-15	11:31:22	1.49391	6.64521	6.82131	3035.4	FALSE	129
2022-09-15	11:31:22	2.21533	9.85423	6.82131	3182	FALSE	129
2022-09-15	11:31:23	0.556807	2.47679	1.22988	3037.88	FALSE	129
2022-09-15	11:31:23	0.17584	0.782171	1.22988	3182.78	FALSE	129
2022-09-15	11:31:23	0.172583	0.767684	1.22988	3038.64	FALSE	129
2022-09-15	11:31:23	0.200725	0.892865	1.22988	3183.67	FALSE	129
2022-09-15	11:31:24	0.310293	1.38025	1.30117	3040.02	FALSE	129
2022-09-15	11:31:24	0.266374	1.18488	1.30117	3184.86	FALSE	129
2022-09-15	11:31:24	0.300878	1.33837	1.30117	3041.36	FALSE	129
2022-09-15	11:31:25	0.73243	3.258	2.60333	3188.12	FALSE	129
2022-09-15	11:31:25	0.585458	2.60423	2.60333	3043.97	FALSE	129
2022-09-15	11:31:25	0.735178	3.27022	2.60333	3191.39	FALSE	129
2022-09-15	11:31:25	0.287952	1.28087	2.60333	3045.25	FALSE	129
2022-09-15	11:31:26	0.122812	0.546292	0.835594	3191.93	FALSE	129
2022-09-15	11:31:26	0.231463	1.02959	0.835594	3046.28	FALSE	129
2022-09-15	11:31:26	0.189173	0.841479	0.835594	3192.78	FALSE	129
2022-09-15	11:31:26	0.207952	0.925012	0.835594	3047.2	FALSE	129
2022-09-15	11:31:27	0.725712	3.22811	9.60488	3196	FALSE	129
2022-09-15	11:31:27	0.719555	3.20072	9.60488	3050.4	FALSE	129
2022-09-15	11:31:27	2.50083	11.1242	9.60488	3207.13	FALSE	129
2022-09-15	11:31:27	4.691	20.8665	9.60488	3071.27	1	130
2022-09-15	11:31:28	6.06535	26.9799	38.8037	3234.11	1	131
2022-09-15	11:31:28	10.6277	47.2741	38.8037	3118.54	1	132
2022-09-15	11:31:28	9.47731	42.157	38.8037	3276.26	1	133
2022-09-15	11:31:29	15.3432	68.2496	39.589	3186.79	1	134
2022-09-15	11:31:29	7.13634	31.7439	39.589	3308.01	1	135
2022-09-15	11:31:29	8.73344	38.8481	39.589	3225.64	1	136
2022-09-15	11:31:29	4.38704	19.5144	39.589	3327.52	1	137
2022-09-15	11:31:30	4.31625	19.1995	18.8198	3244.84	1	138
2022-09-15	11:31:30	8.09985	36.0298	18.8198	3363.55	1	139
2022-09-15	11:31:30	1.54317	6.86433	18.8198	3251.7	FALSE	139
2022-09-15	11:31:30	2.96424	13.1855	18.8198	3376.74	FALSE	139
2022-09-15	11:31:31	8.08103	35.946	68.5666	3287.65	1	140
2022-09-15	11:31:31	14.3872	63.9971	68.5666	3440.74	1	141
2022-09-15	11:31:31	16.3607	72.7757	68.5666	3360.43	1	142
2022-09-15	11:31:31	22.8289	101.548	68.5666	3542.28	1	143
2022-09-15	11:31:32	22.7759	101.312	69.8984	3461.74	1	144
2022-09-15	11:31:32	13.3242	59.2687	69.8984	3601.55	1	145
2022-09-15	11:31:32	11.0415	49.1148	69.8984	3510.85	1	146
2022-09-15	11:31:33	9.79268	43.5598	43.9512	3645.11	1	147
2022-09-15	11:31:33	10.8421	48.2278	43.9512	3559.08	1	148
2022-09-15	11:31:33	9.77828	43.4957	43.9512	3688.61	1	149
2022-09-15	11:31:33	9.10963	40.5215	43.9512	3599.6	1	150
2022-09-15	11:31:34	8.19894	36.4705	36.149	3725.08	1	151
2022-09-15	11:31:34	8.59329	38.2247	36.149	3637.83	1	152
2022-09-15	11:31:34	8.0768	35.9272	36.149	3761.01	1	153
2022-09-15	11:31:34	7.63757	33.9734	36.149	3671.8	1	154
2022-09-15	11:31:35	7.11965	31.6696	28.7226	3792.67	1	155
2022-09-15	11:31:35	6.30317	28.0378	28.7226	3699.84	1	156
2022-09-15	11:31:35	6.21115	27.6284	28.7226	3820.3	1	157
2022-09-15	11:31:35	6.19451	27.5544	28.7226	3727.39	1	158
2022-09-15	11:31:36	5.70912	25.3953	25.6009	3845.7	1	159
2022-09-15	11:31:36	5.9651	26.534	25.6009	3753.93	1	160
2022-09-15	11:31:36	5.59177	24.8733	25.6009	3870.57	1	161
2022-09-15	11:31:37	4.73701	21.0712	19.0831	3775	1	162
2022-09-15	11:31:37	4.75212	21.1384	19.0831	3891.71	1	163
2022-09-15	11:31:37	3.90785	17.3829	19.0831	3792.38	1	164
2022-09-15	11:31:37	3.76327	16.7398	19.0831	3908.45	1	165
2022-09-15	11:31:38	3.95482	17.5918	13.3229	3809.97	1	166
2022-09-15	11:31:38	3.92332	17.4517	13.3229	3925.9	1	167
2022-09-15	11:31:38	2.82032	12.5453	13.3229	3822.52	FALSE	167
2022-09-15	11:31:38	1.282	5.70259	13.3229	3931.6	FALSE	167
2022-09-15	11:31:39	0.970954	4.319	1.77883	3826.84	FALSE	167
2022-09-15	11:31:39	0.398079	1.77074	1.77883	3933.37	FALSE	167
2022-09-15	11:31:39	0.262812	1.16904	1.77883	3828.01	FALSE	167
2022-09-15	11:31:39	-0.0322517	-0.143462	1.77883	3933.37	FALSE	167
2022-09-15	11:31:40	-0.226145	-1.00594	-0.759721	3828.01	FALSE	167
2022-09-15	11:31:40	-0.364109	-1.61963	-0.759721	3933.37	FALSE	167
2022-09-15	11:31:40	0.0778756	0.346406	-0.759721	3828.35	FALSE	167
2022-09-15	11:31:41	0.92958	4.13496	2.52002	3937.51	FALSE	167
2022-09-15	11:31:41	0.841692	3.74401	2.52002	3832.1	FALSE	167
2022-09-15	11:31:41	0.293041	1.3035	2.52002	3938.81	FALSE	167
2022-09-15	11:31:41	0.201794	0.89762	2.52002	3832.99	FALSE	167
2022-09-15	11:31:42	0.162557	0.723086	0.325579	3939.54	FALSE	167
2022-09-15	11:31:42	0.0382827	0.170289	0.325579	3833.16	FALSE	167
2022-09-15	11:31:42	0.0389951	0.173458	0.325579	3939.71	FALSE	167
2022-09-15	11:31:42	0.0529391	0.235484	0.325579	3833.4	FALSE	167
2022-09-15	11:31:43	0.0384862	0.171194	0.236012	3939.88	FALSE	167
2022-09-15	11:31:43	0.0532954	0.237069	0.236012	3833.64	FALSE	167
2022-09-15	11:31:43	0.0673921	0.299774	0.236012	3940.18	FALSE	167
2022-09-15	11:31:44	0.0692242	0.307923	0.232937	3833.94	FALSE	167
2022-09-15	11:31:44	0.0579264	0.257668	0.232937	3940.44	FALSE	167
2022-09-15	11:31:44	0.0253564	0.11279	0.232937	3834.06	FALSE	167
2022-09-15	11:31:44	0.0569595	0.253367	0.232937	3940.69	FALSE	167
2022-09-15	11:31:45	0.0622012	0.276683	0.277438	3834.33	FALSE	167
2022-09-15	11:31:45	0.053957	0.240012	0.277438	3940.93	FALSE	167
2022-09-15	11:31:45	0.0709544	0.315619	0.277438	3834.65	FALSE	167
2022-09-15	11:31:46	0.0655091	0.291398	-0.349641	3941.22	FALSE	167
2022-09-15	11:31:46	0.0654073	0.290945	-0.349641	3834.94	FALSE	167
2022-09-15	11:31:46	0.0260689	0.11596	-0.349641	3941.34	FALSE	167
2022-09-15	11:31:46	-0.142328	-0.633103	-0.349641	3834.94	FALSE	167
2022-09-15	11:31:46	-0.407671	-1.8134	-0.349641	3941.34	FALSE	167
2022-09-15	11:31:47	-0.681259	-3.03038	-3.74556	3834.94	FALSE	167
2022-09-15	11:31:47	-0.846551	-3.76563	-3.74556	3941.34	FALSE	167
2022-09-15	11:31:47	-0.998307	-4.44067	-3.74556	3834.94	FALSE	167
2022-09-15	11:31:48	-0.835101	-3.7147	-2.65103	3941.34	FALSE	167
2022-09-15	11:31:48	-1.22212	-5.43623	-2.65103	3834.94	FALSE	167
2022-09-15	11:31:48	-0.378206	-1.68234	-2.65103	3941.34	FALSE	167
2022-09-15	11:31:48	0.0515142	0.229145	-2.65103	3835.17	FALSE	167
2022-09-15	11:31:49	0.53986	2.40141	14.1934	3943.74	FALSE	167
2022-09-15	11:31:49	1.01686	4.5232	14.1934	3839.69	FALSE	167
2022-09-15	11:31:49	4.73513	21.0628	14.1934	3964.8	1	168
2022-09-15	11:31:49	6.47141	28.7861	14.1934	3868.48	1	169
2022-09-15	11:31:50	6.05187	26.9199	21.5408	3991.72	1	170
2022-09-15	11:31:50	5.85131	26.0278	21.5408	3894.51	1	171
2022-09-15	11:31:50	4.17116	18.5542	21.5408	4010.28	1	172
2022-09-15	11:31:50	3.29604	14.6614	21.5408	3909.17	1	173
2022-09-15	11:31:51	3.15131	14.0177	12.5114	4024.3	1	174
2022-09-15	11:31:51	2.7649	12.2988	12.5114	3921.47	FALSE	174
2022-09-15	11:31:51	2.52184	11.2176	12.5114	4035.51	FALSE	174
2022-09-15	11:31:52	2.27899	10.1374	10.6558	3931.6	FALSE	174
2022-09-15	11:31:52	2.34485	10.4304	10.6558	4045.94	FALSE	174
2022-09-15	11:31:52	2.43406	10.8272	10.6558	3942.43	FALSE	174
2022-09-15	11:31:52	2.52424	11.2283	10.6558	4057.17	FALSE	174
2022-09-15	11:31:53	2.4222	10.7744	10.7916	3953.21	FALSE	174
2022-09-15	11:31:53	2.442	10.8625	10.7916	4068.03	FALSE	174
2022-09-15	11:31:53	2.44169	10.8611	10.7916	3964.07	FALSE	174
2022-09-15	11:31:53	2.39833	10.6683	10.7916	4078.7	FALSE	174
2022-09-15	11:31:54	2.31762	10.3092	10.0492	3974.38	FALSE	174
2022-09-15	11:31:54	2.20322	9.80036	10.0492	4088.5	FALSE	174
2022-09-15	11:31:54	2.29426	10.2053	10.0492	3984.58	FALSE	174
2022-09-15	11:31:54	2.22154	9.88185	10.0492	4098.38	FALSE	174
2022-09-15	11:31:55	2.28317	10.156	9.96538	3994.74	FALSE	174
2022-09-15	11:31:55	2.24693	9.99479	9.96538	4108.38	FALSE	174
2022-09-15	11:31:55	2.19085	9.74534	9.96538	4004.48	FALSE	174
2022-09-15	11:31:56	2.17838	9.68987	10.0689	4118.07	FALSE	174
2022-09-15	11:31:56	2.23762	9.95338	10.0689	4014.44	FALSE	174
2022-09-15	11:31:56	2.30785	10.2658	10.0689	4128.34	FALSE	174
2022-09-15	11:31:56	2.33055	10.3668	10.0689	4024.8	FALSE	174
2022-09-15	11:31:57	2.36617	10.5252	10.6794	4138.86	FALSE	174
2022-09-15	11:31:57	2.38113	10.5917	10.6794	4035.4	FALSE	174
2022-09-15	11:31:57	2.41172	10.7278	10.6794	4149.59	FALSE	174
2022-09-15	11:31:57	2.44434	10.8729	10.6794	4046.27	FALSE	174
2022-09-15	11:31:58	2.41645	10.7489	10.8595	4160.34	FALSE	174
2022-09-15	11:31:58	2.4652	10.9657	10.8595	4057.23	FALSE	174
2022-09-15	11:31:58	2.4453	10.8772	10.8595	4171.21	FALSE	174
2022-09-15	11:31:58	2.43838	10.8464	10.8595	4068.08	FALSE	174
2022-09-15	11:31:59	2.41106	10.7249	10.6603	4181.94	FALSE	174
2022-09-15	11:31:59	2.4053	10.6993	10.6603	4078.78	FALSE	174
2022-09-15	11:31:59	2.37329	10.5569	10.6603	4192.5	FALSE	174
2022-09-15	11:32:00	2.39996	10.6755	9.98022	4089.46	FALSE	174
2022-09-15	11:32:00	2.37686	10.5727	9.98022	4203.07	FALSE	174
2022-09-15	11:32:00	2.22617	9.90245	9.98022	4099.36	FALSE	174
2022-09-15	11:32:00	1.97162	8.77016	9.98022	4211.84	FALSE	174
2022-09-15	11:32:01	1.87625	8.34594	8.49912	4107.7	FALSE	174
2022-09-15	11:32:01	1.95095	8.67822	8.49912	4220.52	FALSE	174
2022-09-15	11:32:01	1.94948	8.67168	8.49912	4116.38	FALSE	174
2022-09-15	11:32:01	1.86607	8.30065	8.49912	4228.82	FALSE	174
2022-09-15	11:32:02	1.65172	7.34718	9.04331	4123.72	FALSE	174
2022-09-15	11:32:02	1.80393	8.02424	9.04331	4236.84	FALSE	174
2022-09-15	11:32:02	2.1564	9.5921	9.04331	4133.31	FALSE	174
2022-09-15	11:32:02	2.52006	11.2097	9.04331	4248.05	FALSE	174
2022-09-15	11:32:03	2.345	10.431	8.76487	4143.75	FALSE	174
2022-09-15	11:32:03	1.95503	8.69636	8.76487	4256.75	FALSE	174
2022-09-15	11:32:03	1.61126	7.16721	8.76487	4150.91	FALSE	174
2022-09-15	11:32:04	2.27905	10.1377	9.54225	4266.89	FALSE	174
2022-09-15	11:32:04	2.23564	9.94457	9.54225	4160.86	FALSE	174
2022-09-15	11:32:04	2.1222	9.43997	9.54225	4276.33	FALSE	174
2022-09-15	11:32:04	1.94388	8.64677	9.54225	4169.5	FALSE	174
2022-09-15	11:32:05	1.41045	6.27396	7.55929	4282.6	FALSE	174
2022-09-15	11:32:05	1.71274	7.61861	7.55929	4177.12	FALSE	174
2022-09-15	11:32:05	1.82307	8.10938	7.55929	4290.71	FALSE	174
2022-09-15	11:32:05	1.85136	8.23522	7.55929	4185.36	FALSE	174
2022-09-15	11:32:06	1.90017	8.45234	8.17276	4299.16	FALSE	174
2022-09-15	11:32:06	1.76882	7.86807	8.17276	4193.23	FALSE	174
2022-09-15	11:32:06	1.76836	7.86602	8.17276	4307.03	FALSE	174
2022-09-15	11:32:06	1.91192	8.5046	8.17276	4201.73	FALSE	174
2022-09-15	11:32:07	2.19676	9.77163	10.1288	4316.8	FALSE	174
2022-09-15	11:32:07	2.24795	9.99933	10.1288	4211.73	FALSE	174
2022-09-15	11:32:07	2.38648	10.6155	10.1288	4327.41	FALSE	174
2022-09-15	11:32:08	1.9881	8.84347	7.72538	4220.57	FALSE	174
2022-09-15	11:32:08	1.72907	7.69125	7.72538	4335.11	FALSE	174
2022-09-15	11:32:08	1.62653	7.23513	7.72538	4227.81	FALSE	174
2022-09-15	11:32:08	1.60327	7.13167	7.72538	4342.24	FALSE	174
2022-09-15	11:32:09	2.00215	8.90596	9.75179	4236.71	FALSE	174
2022-09-15	11:32:09	2.26347	10.0684	9.75179	4352.31	FALSE	174
2022-09-15	11:32:09	2.58245	11.4873	9.75179	4248.2	FALSE	174
2022-09-15	11:32:09	1.92113	8.54557	9.75179	4360.85	FALSE	174
2022-09-15	11:32:10	2.37034	10.5437	48.2055	4258.75	FALSE	174
2022-09-15	11:32:10	5.34749	23.7867	48.2055	4384.64	1	175
2022-09-15	11:32:10	17.0424	75.808	48.2055	4334.55	1	176
2022-09-15	11:32:10	18.5881	82.6836	48.2055	4467.32	1	177
2022-09-15	11:32:11	9.71955	43.2345	61.5205	4377.79	1	178
2022-09-15	11:32:11	17.3773	77.2977	61.5205	4544.62	1	179
2022-09-15	11:32:11	14.3944	64.0292	61.5205	4441.82	1	180
2022-09-15	11:32:12	15.787	70.2237	44.8708	4614.84	1	181
2022-09-15	11:32:12	11.4826	51.0769	44.8708	4492.89	1	182
2022-09-15	11:32:12	6.98943	31.0904	44.8708	4645.93	1	183
2022-09-15	11:32:12	6.0906	27.0922	44.8708	4519.99	1	184
2022-09-15	11:32:13	5.98739	26.6331	30.4053	4672.57	1	185
2022-09-15	11:32:13	8.01843	35.6676	30.4053	4555.65	1	186
2022-09-15	11:32:13	6.87416	30.5776	30.4053	4703.14	1	187
2022-09-15	11:32:13	6.46169	28.7429	30.4053	4584.4	1	188
2022-09-15	11:32:14	6.98138	31.0546	32.6923	4734.2	1	189
2022-09-15	11:32:14	7.49838	33.3543	32.6923	4617.75	1	190
2022-09-15	11:32:14	7.85823	34.955	32.6923	4769.15	1	191
2022-09-15	11:32:14	7.06021	31.4052	32.6923	4649.16	1	192
2022-09-15	11:32:15	9.76988	43.4584	55.4698	4812.61	1	193
2022-09-15	11:32:15	11.7627	52.3228	55.4698	4701.48	1	194
2022-09-15	11:32:15	15.8779	70.6281	55.4698	4883.24	1	195
2022-09-15	11:32:16	7.99731	35.5736	26.1386	4737.05	1	196
2022-09-15	11:32:16	3.93859	17.5196	26.1386	4900.76	1	197
2022-09-15	11:32:16	6.00561	26.7142	26.1386	4763.77	1	198
2022-09-15	11:32:16	5.56337	24.747	26.1386	4925.51	1	199
2022-09-15	11:32:17	3.89899	17.3435	12.2258	4781.11	1	200
2022-09-15	11:32:17	2.942	13.0866	12.2258	4938.59	FALSE	200
2022-09-15	11:32:17	2.03645	9.05854	12.2258	4790.17	FALSE	200
2022-09-15	11:32:17	2.11645	9.41439	12.2258	4948.01	FALSE	200
2022-09-15	11:32:18	0.985814	4.3851	2.09507	4794.55	FALSE	200
2022-09-15	11:32:18	0.410547	1.8262	2.09507	4949.83	FALSE	200
2022-09-15	11:32:18	0.163931	0.729198	2.09507	4795.28	FALSE	200
2022-09-15	11:32:18	0.323677	1.43978	2.09507	4951.27	FALSE	200
2022-09-15	11:32:19	0.413295	1.83842	4.3497	4797.12	FALSE	200
2022-09-15	11:32:19	0.832226	3.70191	4.3497	4954.98	FALSE	200
2022-09-15	11:32:19	1.68805	7.50878	4.3497	4804.63	FALSE	200
2022-09-15	11:32:20	4.7765	21.2468	30.5444	4976.22	1	201
2022-09-15	11:32:20	9.90836	44.0744	30.5444	4848.7	1	202
2022-09-15	11:32:20	6.50642	28.9419	30.5444	5005.16	1	203
2022-09-15	11:32:20	6.27548	27.9146	30.5444	4876.62	1	204
2022-09-15	11:32:21	4.65716	20.716	20.3038	5025.88	1	205
2022-09-15	11:32:21	4.98683	22.1824	20.3038	4898.8	1	206
2022-09-15	11:32:21	3.89548	17.3279	20.3038	5043.21	1	207
2022-09-15	11:32:21	4.71854	20.989	20.3038	4919.79	1	208
2022-09-15	11:32:22	3.5193	15.6546	15.0171	5058.86	1	209
2022-09-15	11:32:22	3.36602	14.9727	15.0171	4934.76	1	210
2022-09-15	11:32:22	3.29248	14.6456	15.0171	5073.51	1	211
2022-09-15	11:32:22	3.32617	14.7955	15.0171	4949.56	1	212
2022-09-15	11:32:23	3.62184	16.1107	16.8916	5089.62	1	213
2022-09-15	11:32:23	3.79568	16.8839	16.8916	4966.44	1	214
2022-09-15	11:32:23	3.97467	17.6801	16.8916	5107.3	1	215
2022-09-15	11:32:24	4.04291	17.9837	18.5166	4984.43	1	216
2022-09-15	11:32:24	4.08642	18.1772	18.5166	5125.48	1	217
2022-09-15	11:32:24	4.16429	18.5236	18.5166	5002.95	1	218
2022-09-15	11:32:24	4.35721	19.3817	18.5166	5144.86	1	219
2022-09-15	11:32:25	4.46062	19.8417	19.6708	5022.79	1	220
2022-09-15	11:32:25	4.42841	19.6985	19.6708	5164.56	1	221
2022-09-15	11:32:25	4.36912	19.4347	19.6708	5042.23	1	222
2022-09-15	11:32:25	4.4306	19.7082	19.6708	5184.26	1	223
2022-09-15	11:32:26	4.46317	19.8531	19.5937	5062.08	1	224
2022-09-15	11:32:26	4.33624	19.2885	19.5937	5203.55	1	225
2022-09-15	11:32:26	4.44266	19.7618	19.5937	5081.84	1	226
2022-09-15	11:32:26	4.37741	19.4716	19.5937	5223.02	1	227
2022-09-15	11:32:27	4.35818	19.3861	19.2295	5101.23	1	228
2022-09-15	11:32:27	4.33894	19.3005	19.2295	5242.33	1	229
2022-09-15	11:32:27	4.27182	19.0019	19.2295	5120.23	1	230
2022-09-15	11:32:28	4.32627	19.2441	19.1246	5261.57	1	231
2022-09-15	11:32:28	4.38357	19.499	19.1246	5139.73	1	232
2022-09-15	11:32:28	3.4422	15.3116	19.1246	5276.88	1	233
2022-09-15	11:32:28	5.04561	22.4439	19.1246	5162.17	1	234
2022-09-15	11:32:29	8.39894	37.3602	28.7496	5314.24	1	235
2022-09-15	11:32:29	7.04561	31.3403	28.7496	5193.51	1	236
2022-09-15	11:32:29	5.50042	24.467	28.7496	5338.71	1	237
2022-09-15	11:32:29	4.9078	21.8309	28.7496	5215.34	1	238
2022-09-15	11:32:30	4.91686	21.8712	20.5384	5360.58	1	239
2022-09-15	11:32:30	5.04551	22.4434	20.5384	5237.79	1	240
2022-09-15	11:32:30	4.41976	19.66	20.5384	5380.24	1	241
2022-09-15	11:32:30	4.08683	18.179	20.5384	5255.97	1	242
2022-09-15	11:32:31	3.96973	17.6582	16.4873	5397.9	1	243
2022-09-15	11:32:31	3.64225	16.2015	16.4873	5272.17	1	244
2022-09-15	11:32:31	3.50754	15.6022	16.4873	5413.5	1	245
2022-09-15	11:32:32	2.8507	12.6805	4.20519	5284.85	FALSE	245
2022-09-15	11:32:32	0.432125	1.92218	4.20519	5415.42	FALSE	245
2022-09-15	11:32:32	0.211972	0.942894	4.20519	5285.79	FALSE	245
2022-09-15	11:32:32	0.28668	1.27521	4.20519	5416.7	FALSE	245
2022-09-15	11:32:33	0.200267	0.890828	0.512505	5286.68	FALSE	245
2022-09-15	11:32:33	0.308613	1.37277	0.512505	5418.07	FALSE	245
2022-09-15	11:32:33	0.187188	0.83265	0.512505	5287.51	FALSE	245
2022-09-15	11:32:33	-0.235203	-1.04623	0.512505	5418.07	FALSE	245
2022-09-15	11:32:34	-0.525127	-2.33587	-3.30281	5287.51	FALSE	245
2022-09-15	11:32:34	-0.730317	-3.2486	-3.30281	5418.07	FALSE	245
2022-09-15	11:32:34	-0.858104	-3.81702	-3.30281	5287.51	FALSE	245
2022-09-15	11:32:34	-0.856475	-3.80977	-3.30281	5418.07	FALSE	245
2022-09-15	11:32:35	-0.856577	-3.81023	-2.07358	5287.51	FALSE	245
2022-09-15	11:32:35	-0.37673	-1.67577	-2.07358	5418.07	FALSE	245
2022-09-15	11:32:35	-0.165178	-0.734745	-2.07358	5287.51	FALSE	245
2022-09-15	11:32:36	0.853041	3.7945	2.39535	5421.86	FALSE	245
2022-09-15	11:32:36	0.425407	1.8923	2.39535	5289.41	FALSE	245
2022-09-15	11:32:36	0.526425	2.34164	2.39535	5424.21	FALSE	245
2022-09-15	11:32:36	0.349122	1.55296	2.39535	5290.96	FALSE	245
2022-09-15	11:32:37	0.256247	1.13984	0.896261	5425.35	FALSE	245
2022-09-15	11:32:37	0.164389	0.731235	0.896261	5291.69	FALSE	245
2022-09-15	11:32:37	0.169682	0.754779	0.896261	5426.1	FALSE	245
2022-09-15	11:32:37	0.215636	0.959192	0.896261	5292.65	FALSE	245
2022-09-15	11:32:38	0.399962	1.77911	34.7799	5427.88	FALSE	245
2022-09-15	11:32:38	3.04571	13.5479	34.7799	5306.2	1	246
2022-09-15	11:32:38	11.9982	53.3704	34.7799	5481.25	1	247
2022-09-15	11:32:38	15.8316	70.4221	34.7799	5376.62	1	248
2022-09-15	11:32:39	18.7772	83.5247	40.7995	5564.77	1	249
2022-09-15	11:32:39	6.69594	29.7849	40.7995	5406.4	1	250
2022-09-15	11:32:39	2.04327	9.08887	40.7995	5573.86	FALSE	250
2022-09-15	11:32:40	0.943728	4.19789	2.40293	5410.6	FALSE	250
2022-09-15	11:32:40	0.444491	1.97718	2.40293	5575.84	FALSE	250
2022-09-15	11:32:40	0.348308	1.54934	2.40293	5412.15	FALSE	250
2022-09-15	11:32:40	0.424288	1.88732	2.40293	5577.73	FALSE	250
2022-09-15	11:32:41	0.238384	1.06038	0.939216	5413.21	FALSE	250
2022-09-15	11:32:41	0.249377	1.10928	0.939216	5578.84	FALSE	250
2022-09-15	11:32:41	0.0370104	0.16463	0.939216	5413.38	FALSE	250
2022-09-15	11:32:41	0.319809	1.42257	0.939216	5580.26	FALSE	250
2022-09-15	11:32:42	0.525	2.3353	3.20463	5415.71	FALSE	250
2022-09-15	11:32:42	0.420166	1.86898	3.20463	5582.13	FALSE	250
2022-09-15	11:32:42	0.925153	4.11527	3.20463	5419.83	FALSE	250
2022-09-15	11:32:42	1.01141	4.49895	3.20463	5586.63	FALSE	250
2022-09-15	11:32:43	0.470089	2.09105	1.52927	5421.92	FALSE	250
2022-09-15	11:32:43	0.38668	1.72003	1.52927	5588.35	FALSE	250
2022-09-15	11:32:43	0.174618	0.776736	1.52927	5422.7	FALSE	250
2022-09-15	11:32:44	-0.179783	-0.799711	-1.58364	5588.35	FALSE	250
2022-09-15	11:32:44	-0.309351	-1.37606	-1.58364	5422.7	FALSE	250
2022-09-15	11:32:44	-0.498257	-2.21635	-1.58364	5588.35	FALSE	250
2022-09-15	11:32:44	-0.436679	-1.94244	-1.58364	5422.7	FALSE	250
2022-09-15	11:32:45	-0.455763	-2.02732	-2.83643	5588.35	FALSE	250
2022-09-15	11:32:45	-0.576272	-2.56337	-2.83643	5422.7	FALSE	250
2022-09-15	11:32:45	-0.702684	-3.12568	-2.83643	5588.35	FALSE	250
2022-09-15	11:32:45	-0.815915	-3.62935	-2.83643	5422.7	FALSE	250
2022-09-15	11:32:46	-0.780496	-3.4718	-3.36478	5588.35	FALSE	250
2022-09-15	11:32:46	-0.763905	-3.398	-3.36478	5422.7	FALSE	250
2022-09-15	11:32:46	-0.887518	-3.94786	-3.36478	5588.35	FALSE	250
2022-09-15	11:32:46	-0.593829	-2.64147	-3.36478	5422.7	FALSE	250
2022-09-15	11:32:47	-0.601055	-2.67361	-1.62982	5588.35	FALSE	250
2022-09-15	11:32:47	-0.51444	-2.28833	-1.62982	5422.7	FALSE	250
2022-09-15	11:32:47	0.0162979	0.0724963	-1.62982	5588.42	FALSE	250
2022-09-15	11:32:48	3.01604	13.4159	19.3796	5436.11	1	251
2022-09-15	11:32:48	6.22698	27.6989	19.3796	5616.12	1	252
2022-09-15	11:32:48	4.16128	18.5102	19.3796	5454.62	1	253
2022-09-15	11:32:48	4.02261	17.8934	19.3796	5634.01	1	254
2022-09-15	11:32:49	8.19355	36.4465	25.7056	5491.07	1	255
2022-09-15	11:32:49	2.75492	12.2544	25.7056	5646.27	FALSE	255
2022-09-15	11:32:49	5.12118	22.78	25.7056	5513.85	1	256
2022-09-15	11:32:49	7.04586	31.3414	25.7056	5677.61	1	257
2022-09-15	11:32:50	2.885	12.8331	28.6987	5526.68	FALSE	257
2022-09-15	11:32:50	6.61385	29.4197	28.6987	5707.03	1	258
2022-09-15	11:32:50	7.35563	32.7193	28.6987	5559.4	1	259
2022-09-15	11:32:50	8.95258	39.8229	28.6987	5746.85	1	260
2022-09-15	11:32:51	8.11761	36.1088	44.3091	5595.51	1	261
2022-09-15	11:32:51	5.38377	23.9481	44.3091	5770.8	1	262
2022-09-15	11:32:51	16.382	72.8704	44.3091	5668.38	1	263
2022-09-15	11:32:52	12.3633	54.9944	50.1504	5825.79	1	264
2022-09-15	11:32:52	11.4847	51.0862	50.1504	5719.47	1	265
2022-09-15	11:32:52	9.97492	44.3704	50.1504	5870.16	1	266
2022-09-15	11:32:53	4.71808	20.987	10.7896	5740.45	1	267
2022-09-15	11:32:53	4.56378	20.3006	10.7896	5890.46	1	268
2022-09-15	11:32:53	1.02632	4.56528	10.7896	5745.02	FALSE	268
2022-09-15	11:32:53	1.20754	5.37138	10.7896	5895.84	FALSE	268
2022-09-15	11:32:53	0.612379	2.72398	10.7896	5747.74	FALSE	268
2022-09-15	11:32:54	0.835687	3.7173	9.94121	5899.55	FALSE	268
2022-09-15	11:32:54	1.31207	5.83635	9.94121	5753.58	FALSE	268
2022-09-15	11:32:54	2.43141	10.8154	9.94121	5910.37	FALSE	268
2022-09-15	11:32:54	4.36037	19.3958	9.94121	5772.97	1	269
2022-09-15	11:32:55	4.84647	21.5581	29.7646	5931.93	1	270
2022-09-15	11:32:55	5.11227	22.7404	29.7646	5795.71	1	271
2022-09-15	11:32:55	10.1154	44.9953	29.7646	5976.92	1	272
2022-09-15	11:32:56	8.61925	38.3401	39.0529	5834.05	1	273
2022-09-15	11:32:56	14.1962	63.1475	39.0529	6040.07	1	274
2022-09-15	11:32:56	8.3022	36.9298	39.0529	5870.98	1	275
2022-09-15	11:32:56	4.00032	17.7942	39.0529	6057.86	1	276
2022-09-15	11:32:57	11.2745	50.1512	43.6754	5921.14	1	277
2022-09-15	11:32:57	3.87314	17.2285	43.6754	6075.09	1	278
2022-09-15	11:32:57	6.70255	29.8143	43.6754	5950.95	1	279
2022-09-15	11:32:57	17.4245	77.5077	43.6754	6152.6	1	280
2022-09-15	11:32:58	2.39838	10.6685	25.1293	5961.62	FALSE	280
2022-09-15	11:32:58	8.17752	36.3752	25.1293	6188.98	1	281
2022-09-15	11:32:58	6.37207	28.3442	25.1293	5989.96	1	282
2022-09-15	11:32:59	4.91574	21.8662	42.1339	6210.84	1	283
2022-09-15	11:32:59	16.1493	71.8353	42.1339	6061.8	1	284
2022-09-15	11:32:59	7.61115	33.8559	42.1339	6244.7	1	285
2022-09-15	11:32:59	9.21233	40.9783	42.1339	6102.78	1	286
2022-09-15	11:33:00	7.91085	35.189	43.8705	6279.89	1	287
2022-09-15	11:33:00	5.55497	24.7096	43.8705	6127.49	1	288
2022-09-15	11:33:00	14.5554	64.7453	43.8705	6344.63	1	289
2022-09-15	11:33:00	11.4289	50.838	43.8705	6178.32	1	290
2022-09-15	11:33:01	8.38306	37.2895	37.9117	6381.92	1	291
2022-09-15	11:33:01	16.3311	72.644	37.9117	6250.97	1	292
2022-09-15	11:33:01	3.56429	15.8547	37.9117	6397.78	1	293
2022-09-15	11:33:01	5.81324	25.8585	37.9117	6276.83	1	294
2022-09-15	11:33:02	14.289	63.5603	48.4061	6461.34	1	295
2022-09-15	11:33:02	4.18653	18.6225	48.4061	6295.45	1	296
2022-09-15	11:33:02	10.3331	45.9637	48.4061	6507.3	1	297
2022-09-15	11:33:02	14.7201	65.4779	48.4061	6360.93	1	298
2022-09-15	11:33:03	7.66617	34.1007	55.6062	6541.4	1	299
2022-09-15	11:33:03	14.2146	63.2294	55.6062	6424.16	1	300
2022-09-15	11:33:03	15.6217	69.4884	55.6062	6610.89	1	301
2022-09-15	11:33:04	6.42047	28.5595	48.561	6452.72	1	302
2022-09-15	11:33:04	13.3115	59.2122	48.561	6670.1	1	303
2022-09-15	11:33:04	14.2086	63.2027	48.561	6515.92	1	304
2022-09-15	11:33:04	9.72739	43.2694	48.561	6713.37	1	305
2022-09-15	11:33:05	28.5612	127.046	67.9059	6642.96	1	306
2022-09-15	11:33:05	17.9954	80.0471	67.9059	6793.42	1	307
2022-09-15	11:33:05	5.71864	25.4377	67.9059	6668.4	1	308
2022-09-15	11:33:05	8.78846	39.0928	67.9059	6832.51	1	309
2022-09-15	11:33:06	14.4632	64.3352	51.0004	6732.74	1	310
2022-09-15	11:33:06	9.85319	43.829	51.0004	6876.34	1	311
2022-09-15	11:33:06	10.0798	44.837	51.0004	6777.57	1	312
2022-09-15	11:33:07	3.30551	14.7036	17.0401	6891.04	1	313
2022-09-15	11:33:07	5.23803	23.2998	17.0401	6800.87	1	314
2022-09-15	11:33:07	6.13004	27.2676	17.0401	6918.31	1	315
2022-09-15	11:33:07	0.649529	2.88923	17.0401	6803.76	FALSE	315
2022-09-15	11:33:08	-0.00960535	-0.0427265	-0.334858	6918.31	FALSE	315
2022-09-15	11:33:08	-0.0757631	-0.337009	-0.334858	6803.76	FALSE	315
2022-09-15	11:33:08	-0.131437	-0.584658	-0.334858	6918.31	FALSE	315
2022-09-15	11:33:08	-0.0843127	-0.37504	-0.334858	6803.76	FALSE	315
2022-09-15	11:33:09	-0.0866537	-0.385453	0.118903	6918.31	FALSE	315
2022-09-15	11:33:09	-0.011183	-0.0497442	0.118903	6803.76	FALSE	315
2022-09-15	11:33:09	0.0698857	0.310866	0.118903	6918.62	FALSE	315
2022-09-15	11:33:09	0.134873	0.599942	0.118903	6804.36	FALSE	315
2022-09-15	11:33:10	0.194517	0.865251	0.939046	6919.49	FALSE	315
2022-09-15	11:33:10	0.2193	0.97549	0.939046	6805.34	FALSE	315
2022-09-15	11:33:10	0.219504	0.976398	0.939046	6920.46	FALSE	315
2022-09-15	11:33:11	-0.0426842	-0.189868	-1.52523	6805.34	FALSE	315
2022-09-15	11:33:11	-0.38075	-1.69365	-1.52523	6920.46	FALSE	315
2022-09-15	11:33:11	-0.38762	-1.72421	-1.52523	6805.34	FALSE	315
2022-09-15	11:33:11	-0.560496	-2.4932	-1.52523	6920.46	FALSE	315
2022-09-15	11:33:12	-0.688434	-3.06229	-1.09665	6805.34	FALSE	315
2022-09-15	11:33:12	-0.745533	-3.31628	-1.09665	6920.46	FALSE	315
2022-09-15	11:33:12	-0.33388	-1.48517	-1.09665	6805.34	FALSE	315
2022-09-15	11:33:12	0.781692	3.47712	-1.09665	6923.94	FALSE	315
2022-09-15	11:33:13	3.65457	16.2563	10.355	6821.6	1	316
2022-09-15	11:33:13	4.13095	18.3753	10.355	6942.32	1	317
2022-09-15	11:33:13	0.956145	4.25312	10.355	6825.85	FALSE	317
2022-09-15	11:33:13	0.569987	2.53542	10.355	6944.85	FALSE	317
2022-09-15	11:33:14	-0.0146944	-0.0653636	-0.275285	6825.85	FALSE	317
2022-09-15	11:33:14	-0.0491473	-0.218617	-0.275285	6944.85	FALSE	317
2022-09-15	11:33:14	-0.121819	-0.541875	-0.275285	6825.85	FALSE	317
2022-09-15	11:33:15	0.272176	1.21069	7.49086	6946.06	FALSE	317
2022-09-15	11:33:15	0.678333	3.01736	7.49086	6828.87	FALSE	317
2022-09-15	11:33:15	1.64851	7.3329	7.49086	6953.39	FALSE	317
2022-09-15	11:33:15	4.13706	18.4025	7.49086	6847.27	1	318
2022-09-15	11:33:16	5.82642	25.9171	16.3318	6979.31	1	319
2022-09-15	11:33:16	5.7738	25.683	16.3318	6872.95	1	320
2022-09-15	11:33:16	1.53742	6.83875	16.3318	6986.15	FALSE	320
2022-09-15	11:33:16	1.54856	6.8883	16.3318	6879.84	FALSE	320
2022-09-15	11:33:17	0.418028	1.85947	1.15964	6988.01	FALSE	320
2022-09-15	11:33:17	0.300827	1.33814	1.15964	6881.18	FALSE	320
2022-09-15	11:33:17	0.30159	1.34153	1.15964	6989.35	FALSE	320
2022-09-15	11:33:17	0.0223539	0.0994346	1.15964	6881.28	FALSE	320
2022-09-15	11:33:18	0.395687	1.76009	4.72503	6991.11	FALSE	320
2022-09-15	11:33:18	0.456298	2.0297	4.72503	6883.31	FALSE	320
2022-09-15	11:33:18	2.33472	10.3853	4.72503	7001.5	FALSE	320
2022-09-15	11:33:19	3.41304	15.1819	20.5235	6898.49	1	321
2022-09-15	11:33:19	5.07854	22.5904	20.5235	7024.09	1	322
2022-09-15	11:33:19	5.4911	24.4255	20.5235	6922.91	1	323
2022-09-15	11:33:19	4.47289	19.8963	20.5235	7043.98	1	324
2022-09-15	11:33:20	5.17599	23.0238	12.2901	6945.94	1	325
2022-09-15	11:33:20	1.34469	5.98145	12.2901	7049.97	FALSE	325
2022-09-15	11:33:20	3.04235	13.533	12.2901	6959.47	1	326
2022-09-15	11:33:20	1.48871	6.62208	12.2901	7056.59	FALSE	326
2022-09-15	11:33:21	0.624796	2.77922	2.82885	6962.25	FALSE	326
2022-09-15	11:33:21	0.884745	3.93552	2.82885	7060.52	FALSE	326
2022-09-15	11:33:21	0.449835	2.00096	2.82885	6964.25	FALSE	326
2022-09-15	11:33:21	0.58444	2.59971	2.82885	7063.12	FALSE	326
2022-09-15	11:33:22	0.411616	1.83095	1.86008	6966.08	FALSE	326
2022-09-15	11:33:22	0.422405	1.87894	1.86008	7065	FALSE	326
2022-09-15	11:33:22	0.420471	1.87034	1.86008	6967.95	FALSE	326
2022-09-15	11:33:23	0.434822	1.93418	1.31765	7066.94	FALSE	326
2022-09-15	11:33:23	0.584796	2.60129	1.31765	6970.55	FALSE	326
2022-09-15	11:33:23	0.212481	0.945158	1.31765	7067.88	FALSE	326
2022-09-15	11:33:23	-0.0472135	-0.210015	1.31765	6970.55	FALSE	326
2022-09-15	11:33:24	0.0197585	0.0878898	-0.898298	7067.97	FALSE	326
2022-09-15	11:33:24	-0.209962	-0.933953	-0.898298	6970.55	FALSE	326
2022-09-15	11:33:24	-0.328079	-1.45936	-0.898298	7067.97	FALSE	326
2022-09-15	11:33:24	-0.289503	-1.28777	-0.898298	6970.55	FALSE	326
2022-09-15	11:33:25	-0.262328	-1.16689	0.0478784	7067.97	FALSE	326
2022-09-15	11:33:25	-0.288638	-1.28392	0.0478784	6970.55	FALSE	326
2022-09-15	11:33:25	-0.00894378	-0.0397837	0.0478784	7067.97	FALSE	326
2022-09-15	11:33:25	0.602964	2.6821	0.0478784	6973.24	FALSE	326
2022-09-15	11:33:26	1.82057	8.09826	8.98701	7076.07	FALSE	326
2022-09-15	11:33:26	2.37854	10.5802	8.98701	6983.82	FALSE	326
2022-09-15	11:33:26	1.862	8.28255	8.98701	7084.35	FALSE	326
2022-09-15	11:33:27	1.43452	6.38103	5.70423	6990.2	FALSE	326
2022-09-15	11:33:27	1.15706	5.14683	5.70423	7089.5	FALSE	326
2022-09-15	11:33:27	1.52001	6.76131	5.70423	6996.96	FALSE	326
2022-09-15	11:33:27	1.01788	4.52773	5.70423	7094.02	FALSE	326
2022-09-15	11:33:28	0.991514	4.41045	2.5215	7001.37	FALSE	326
2022-09-15	11:33:28	0.560216	2.49195	2.5215	7096.52	FALSE	326
2022-09-15	11:33:28	0.253397	1.12716	2.5215	7002.5	FALSE	326
2022-09-15	11:33:28	0.462303	2.05642	2.5215	7098.57	FALSE	326
2022-09-15	11:33:29	0.230598	1.02575	-1.36638	7003.52	FALSE	326
2022-09-15	11:33:29	0.0723284	0.321731	-1.36638	7098.89	FALSE	326
2022-09-15	11:33:29	-0.56935	-2.53258	-1.36638	7003.52	FALSE	326
2022-09-15	11:33:29	-0.962277	-4.2804	-1.36638	7098.89	FALSE	326
2022-09-15	11:33:30	-0.04416	-0.196433	0.799601	7003.52	FALSE	326
2022-09-15	11:33:30	0.287901	1.28064	0.799601	7100.17	FALSE	326
2022-09-15	11:33:30	0.295534	1.31459	0.799601	7004.84	FALSE	326
2022-09-15	11:33:31	-0.237086	-1.05461	-1.51205	7100.17	FALSE	326
2022-09-15	11:33:31	-0.166857	-0.742213	-1.51205	7004.84	FALSE	326
2022-09-15	11:33:31	-0.40477	-1.8005	-1.51205	7100.17	FALSE	326
2022-09-15	11:33:31	-0.550979	-2.45086	-1.51205	7004.84	FALSE	326
2022-09-15	11:33:32	-0.575356	-2.5593	-3.23637	7100.17	FALSE	326
2022-09-15	11:33:32	-0.708689	-3.15239	-3.23637	7004.84	FALSE	326
2022-09-15	11:33:32	-0.762836	-3.39325	-3.23637	7100.17	FALSE	326
2022-09-15	11:33:32	-0.863396	-3.84056	-3.23637	7004.84	FALSE	326
2022-09-15	11:33:33	-0.643142	-2.86082	-0.894506	7100.17	FALSE	326
2022-09-15	11:33:33	-0.282277	-1.25562	-0.894506	7004.84	FALSE	326
2022-09-15	11:33:33	-0.119122	-0.529878	-0.894506	7100.17	FALSE	326
2022-09-15	11:33:33	0.240165	1.0683	-0.894506	7005.9	FALSE	326
2022-09-15	11:33:34	0.532328	2.3679	12.6657	7102.54	FALSE	326
2022-09-15	11:33:34	6.35986	28.2899	12.6657	7034.19	1	327
2022-09-15	11:33:34	1.64994	7.33926	12.6657	7109.88	FALSE	327
2022-09-15	11:33:35	1.06592	4.74143	2.79105	7038.94	FALSE	327
2022-09-15	11:33:35	0.573295	2.55013	2.79105	7112.43	FALSE	327
2022-09-15	11:33:35	0.170802	0.759761	2.79105	7039.7	FALSE	327
2022-09-15	11:33:35	0.699809	3.11289	2.79105	7115.54	FALSE	327
2022-09-15	11:33:36	0.106476	0.473627	0.863777	7040.17	FALSE	327
2022-09-15	11:33:36	0.16444	0.731462	0.863777	7116.28	FALSE	327
2022-09-15	11:33:36	0.132786	0.590659	0.863777	7040.76	FALSE	327
2022-09-15	11:33:36	0.373041	1.65936	0.863777	7117.94	FALSE	327
2022-09-15	11:33:37	0.279657	1.24397	1.89003	7042	FALSE	327
2022-09-15	11:33:37	0.838639	3.73043	1.89003	7121.67	FALSE	327
2022-09-15	11:33:37	0.298842	1.32931	1.89003	7043.33	FALSE	327
2022-09-15	11:33:37	0.282456	1.25642	1.89003	7122.92	FALSE	327
2022-09-15	11:33:38	0.162965	0.724901	0.0942296	7044.06	FALSE	327
2022-09-15	11:33:38	0.0905473	0.402772	0.0942296	7123.33	FALSE	327
2022-09-15	11:33:38	-0.189961	-0.844985	0.0942296	7044.06	FALSE	327
2022-09-15	11:33:39	-0.35444	-1.57662	-1.75308	7123.33	FALSE	327
2022-09-15	11:33:39	-0.350165	-1.5576	-1.75308	7044.06	FALSE	327
2022-09-15	11:33:39	-0.528638	-2.35149	-1.75308	7123.33	FALSE	327
2022-09-15	11:33:39	-0.343193	-1.52659	-1.75308	7044.06	FALSE	327
2022-09-15	11:33:40	0.18271	0.812731	35.4379	7124.14	FALSE	327
2022-09-15	11:33:40	8.88596	39.5265	35.4379	7083.58	1	328
2022-09-15	11:33:40	18.3393	81.5769	35.4379	7205.72	1	329
2022-09-15	11:33:40	4.4592	19.8354	35.4379	7103.42	1	330
2022-09-15	11:33:41	3.46515	15.4137	4.10666	7221.13	1	331
2022-09-15	11:33:41	0.294567	1.31029	4.10666	7104.73	FALSE	331
2022-09-15	11:33:41	-0.0758648	-0.337462	4.10666	7221.13	FALSE	331
2022-09-15	11:33:41	0.00902061	0.0401255	4.10666	7104.77	FALSE	331
2022-09-15	11:33:42	-0.131437	-0.584658	-0.539912	7221.13	FALSE	331
2022-09-15	11:33:42	-0.00685724	-0.0305024	-0.539912	7104.77	FALSE	331
2022-09-15	11:33:42	-0.225839	-1.00458	-0.539912	7221.13	FALSE	331
2022-09-15	11:33:43	-0.402582	-1.79077	-1.42393	7104.77	FALSE	331
2022-09-15	11:33:43	-0.210165	-0.934856	-1.42393	7221.13	FALSE	331
2022-09-15	11:33:43	-0.45159	-2.00876	-1.42393	7104.77	FALSE	331
2022-09-15	11:33:43	-0.216119	-0.961341	-1.42393	7221.13	FALSE	331
2022-09-15	11:33:44	-0.119783	-0.532819	0.179061	7104.77	FALSE	331
2022-09-15	11:33:44	0.0649493	0.288907	0.179061	7221.42	FALSE	331
2022-09-15	11:33:44	0.14271	0.634803	0.179061	7105.41	FALSE	331
2022-09-15	11:33:44	0.0731427	0.325353	0.179061	7221.74	FALSE	331
2022-09-15	11:33:45	0.0876465	0.389869	-0.0494614	7105.8	FALSE	331
2022-09-15	11:33:45	-0.0468064	-0.208204	-0.0494614	7221.74	FALSE	331
2022-09-15	11:33:45	-0.101005	-0.44929	-0.0494614	7105.8	FALSE	331
2022-09-15	11:33:45	0.0156872	0.0697798	-0.0494614	7221.81	FALSE	331
2022-09-15	11:33:46	0.066985	0.297963	0.741952	7106.09	FALSE	331
2022-09-15	11:33:46	0.195229	0.868418	0.741952	7222.68	FALSE	331
2022-09-15	11:33:46	0.238181	1.05948	0.741952	7107.15	FALSE	331
2022-09-15	11:33:47	0.394008	1.75263	2.38918	7224.43	FALSE	331
2022-09-15	11:33:47	0.512583	2.28007	2.38918	7109.43	FALSE	331
2022-09-15	11:33:47	0.699758	3.11266	2.38918	7227.55	FALSE	331
2022-09-15	11:33:47	0.542099	2.41136	2.38918	7111.84	FALSE	331
2022-09-15	11:33:48	1.7852	7.94093	12.6754	7235.49	FALSE	331
2022-09-15	11:33:48	1.96999	8.76291	12.6754	7120.61	FALSE	331
2022-09-15	11:33:48	2.45263	10.9098	12.6754	7246.4	FALSE	331
2022-09-15	11:33:48	5.19044	23.0881	12.6754	7143.7	1	332
2022-09-15	11:33:49	3.87289	17.2274	8.74887	7263.62	1	333
2022-09-15	11:33:49	4.01116	17.8424	8.74887	7161.54	1	334
2022-09-15	11:33:49	0.170649	0.759081	8.74887	7264.38	FALSE	334
2022-09-15	11:33:49	-0.187366	-0.833441	8.74887	7161.54	FALSE	334
2022-09-15	11:33:50	0.0266796	0.118676	0.569456	7264.5	FALSE	334
2022-09-15	11:33:50	-0.178155	-0.792469	0.569456	7161.54	FALSE	334
2022-09-15	11:33:50	0.535534	2.38216	0.569456	7266.88	FALSE	334
2022-09-15	11:33:51	1.33401	5.93394	42.5325	7167.47	FALSE	334
2022-09-15	11:33:51	5.59909	24.9059	42.5325	7291.79	1	335
2022-09-15	11:33:51	16.8156	74.7992	42.5325	7242.27	1	336
2022-09-15	11:33:51	14.4982	64.4909	42.5325	7356.28	1	337
2022-09-15	11:33:52	16.7441	74.4811	61.5114	7316.75	1	338
2022-09-15	11:33:52	14.6091	64.9842	61.5114	7421.27	1	339
2022-09-15	11:33:52	10.0858	44.8637	61.5114	7361.62	1	340
2022-09-15	11:33:52	13.8745	61.7166	61.5114	7482.98	1	341
2022-09-15	11:33:53	8.73385	38.8499	29.848	7400.47	1	342
2022-09-15	11:33:53	7.58306	33.731	29.848	7516.71	1	343
2022-09-15	11:33:53	9.64464	42.9013	29.848	7443.37	1	344
2022-09-15	11:33:53	0.878944	3.90972	29.848	7520.62	FALSE	344
2022-09-15	11:33:54	0.888613	3.95273	1.56957	7447.32	FALSE	344
2022-09-15	11:33:54	0.12444	0.553534	1.56957	7521.18	FALSE	344
2022-09-15	11:33:54	0.0455091	0.202434	1.56957	7447.52	FALSE	344
2022-09-15	11:33:55	1.30067	5.78564	9.67935	7526.96	FALSE	344
2022-09-15	11:33:55	2.7709	12.3255	9.67935	7459.85	FALSE	344
2022-09-15	11:33:55	4.30062	19.13	9.67935	7546.09	1	345
2022-09-15	11:33:55	0.33187	1.47622	9.67935	7461.32	FALSE	345
2022-09-15	11:33:56	-0.0288929	-0.128521	-0.849797	7546.09	FALSE	345
2022-09-15	11:33:56	-0.24187	-1.07589	-0.849797	7461.32	FALSE	345
2022-09-15	11:33:56	-0.24528	-1.09105	-0.849797	7546.09	FALSE	345
2022-09-15	11:33:56	-0.248129	-1.10373	-0.849797	7461.32	FALSE	345
2022-09-15	11:33:57	-0.272964	-1.2142	-1.82484	7546.09	FALSE	345
2022-09-15	11:33:57	-0.363753	-1.61805	-1.82484	7461.32	FALSE	345
2022-09-15	11:33:57	-0.493422	-2.19484	-1.82484	7546.09	FALSE	345
2022-09-15	11:33:57	-0.510826	-2.27226	-1.82484	7461.32	FALSE	345
2022-09-15	11:33:58	0.237316	1.05563	4.48418	7547.15	FALSE	345
2022-09-15	11:33:58	0.151158	0.672381	4.48418	7462	FALSE	345
2022-09-15	11:33:58	2.63579	11.7245	4.48418	7558.87	FALSE	345
2022-09-15	11:33:59	21.4913	95.5976	89.6224	7557.59	1	346
2022-09-15	11:33:59	39.248	174.583	89.6224	7733.45	1	347
2022-09-15	11:33:59	11.8656	52.7806	89.6224	7610.37	1	348
2022-09-15	11:33:59	7.98718	35.5286	89.6224	7768.98	1	349
2022-09-15	11:34:00	13.6761	60.834	36.3422	7671.21	1	350
2022-09-15	11:34:00	8.95487	39.8331	36.3422	7808.82	1	351
2022-09-15	11:34:00	7.19345	31.9979	36.3422	7703.21	1	352
2022-09-15	11:34:00	2.85594	12.7038	36.3422	7821.52	FALSE	352
2022-09-15	11:34:01	1.36001	6.0496	30.9099	7709.26	FALSE	352
2022-09-15	11:34:01	5.27355	23.4578	30.9099	7844.98	1	353
2022-09-15	11:34:01	9.86683	43.8896	30.9099	7753.15	1	354
2022-09-15	11:34:01	11.295	50.2424	30.9099	7895.22	1	355
2022-09-15	11:34:02	12.1167	53.8975	65.1076	7807.04	1	356
2022-09-15	11:34:02	16.735	74.4406	65.1076	7969.66	1	357
2022-09-15	11:34:02	15.0588	66.9846	65.1076	7874.03	1	358
2022-09-15	11:34:03	11.9426	53.1231	79.275	8022.78	1	359
2022-09-15	11:34:03	17.2119	76.562	79.275	7950.59	1	360
2022-09-15	11:34:03	17.094	76.0375	79.275	8098.82	1	361
2022-09-15	11:34:03	25.0388	111.378	79.275	8061.97	1	362
2022-09-15	11:34:04	8.02286	35.6873	54.546	8134.51	1	363
2022-09-15	11:34:04	10.059	44.7444	54.546	8106.71	1	364
2022-09-15	11:34:04	8.59828	38.2469	54.546	8172.76	1	365
2022-09-15	11:34:04	22.3698	99.5053	54.546	8206.22	1	366
2022-09-15	11:34:05	8.6108	38.3026	19.5347	8211.06	1	367
2022-09-15	11:34:05	4.54332	20.2096	19.5347	8226.43	1	368
2022-09-15	11:34:05	2.73833	12.1806	19.5347	8223.24	FALSE	368
2022-09-15	11:34:05	1.67391	7.44589	19.5347	8233.87	FALSE	368
2022-09-15	11:34:06	1.3224	5.8823	8.33708	8229.12	FALSE	368
2022-09-15	11:34:06	1.64556	7.31978	8.33708	8241.19	FALSE	368
2022-09-15	11:34:06	2.65482	11.8092	8.33708	8240.93	FALSE	368
2022-09-15	11:34:07	0.627901	2.79303	2.89043	8243.98	FALSE	368
2022-09-15	11:34:07	0.516857	2.29908	2.89043	8243.23	FALSE	368
2022-09-15	11:34:07	0.362812	1.61386	2.89043	8245.6	FALSE	368
2022-09-15	11:34:07	1.09162	4.85574	2.89043	8248.09	FALSE	368
2022-09-15	11:34:08	5.61568	24.9797	30.6865	8270.58	1	369
2022-09-15	11:34:08	9.65894	42.9649	30.6865	8291.05	1	370
2022-09-15	11:34:08	6.14729	27.3444	30.6865	8297.92	1	371
2022-09-15	11:34:08	6.17263	27.4571	30.6865	8318.51	1	372
2022-09-15	11:34:09	1.48408	6.60148	4.67077	8304.52	FALSE	372
2022-09-15	11:34:09	0.86612	3.85267	4.67077	8322.36	FALSE	372
2022-09-15	11:34:09	0.170395	0.757951	4.67077	8305.28	FALSE	372
2022-09-15	11:34:09	1.67955	7.47097	4.67077	8329.83	FALSE	372
2022-09-15	11:34:10	7.61227	33.8609	47.1668	8339.14	1	373
2022-09-15	11:34:10	16.3781	72.8531	47.1668	8402.68	1	374
2022-09-15	11:34:10	7.82037	34.7866	47.1668	8373.93	1	375
2022-09-15	11:34:11	8.53008	37.9435	48.0619	8440.63	1	376
2022-09-15	11:34:11	15.308	68.093	48.0619	8442.02	1	377
2022-09-15	11:34:11	14.2973	63.5972	48.0619	8504.22	1	378
2022-09-15	11:34:11	5.08378	22.6137	48.0619	8464.64	1	379
2022-09-15	11:34:12	2.15187	9.57195	52.5957	8513.8	FALSE	379
2022-09-15	11:34:12	9.96876	44.343	52.5957	8508.98	1	380
2022-09-15	11:34:12	16.3916	72.9131	52.5957	8586.71	1	381
2022-09-15	11:34:12	18.7839	83.5545	52.5957	8592.53	1	382
2022-09-15	11:34:13	10.2778	45.7177	20.8744	8632.43	1	383
2022-09-15	11:34:13	3.78301	16.8276	20.8744	8609.36	1	384
2022-09-15	11:34:13	2.94596	13.1042	20.8744	8645.53	FALSE	384
2022-09-15	11:34:13	1.76429	7.84791	20.8744	8617.21	FALSE	384
2022-09-15	11:34:14	1.50495	6.69432	4.84011	8652.23	FALSE	384
2022-09-15	11:34:14	0.528868	2.35251	4.84011	8619.56	FALSE	384
2022-09-15	11:34:14	1.2305	5.47351	4.84011	8657.7	FALSE	384
2022-09-15	11:34:15	2.3024	10.2415	2.78703	8629.8	FALSE	384
2022-09-15	11:34:15	0.147443	0.655856	2.78703	8658.36	FALSE	384
2022-09-15	11:34:15	0.142456	0.633673	2.78703	8630.44	FALSE	384
2022-09-15	11:34:15	-0.0860938	-0.382962	2.78703	8658.36	FALSE	384
2022-09-15	11:34:16	-0.319122	-1.41952	-2.05324	8630.44	FALSE	384
2022-09-15	11:34:16	-0.622735	-2.77005	-2.05324	8658.36	FALSE	384
2022-09-15	11:34:16	-0.685483	-3.04917	-2.05324	8630.44	FALSE	384
2022-09-15	11:34:16	-0.21902	-0.974245	-2.05324	8658.36	FALSE	384
2022-09-15	11:34:17	2.54113	11.3035	20.7139	8641.74	FALSE	384
2022-09-15	11:34:17	8.08092	35.9455	20.7139	8694.3	1	385
2022-09-15	11:34:17	6.14047	27.314	20.7139	8669.05	1	386
2022-09-15	11:34:17	1.86424	8.29251	20.7139	8702.59	FALSE	386
2022-09-15	11:34:18	0.689428	3.06671	2.4254	8672.12	FALSE	386
2022-09-15	11:34:18	0.518181	2.30497	2.4254	8704.9	FALSE	386
2022-09-15	11:34:18	0.428155	1.90452	2.4254	8674.03	FALSE	386
2022-09-15	11:34:19	0.839911	3.73609	29.6528	8708.63	FALSE	386
2022-09-15	11:34:19	4.61619	20.5337	29.6528	8694.56	1	387
2022-09-15	11:34:19	13.3048	59.1824	29.6528	8767.82	1	388
2022-09-15	11:34:19	7.90413	35.1592	29.6528	8729.72	1	389
2022-09-15	11:34:20	5.11904	22.7705	7.30143	8790.59	1	390
2022-09-15	11:34:20	1.0738	4.77648	7.30143	8734.5	FALSE	390
2022-09-15	11:34:20	0.225713	1.00402	7.30143	8791.59	FALSE	390
2022-09-15	11:34:20	0.147188	0.654722	7.30143	8735.15	FALSE	390
2022-09-15	11:34:21	-0.143193	-0.636951	-0.462476	8791.59	FALSE	390
2022-09-15	11:34:21	-0.0532186	-0.236727	-0.462476	8735.15	FALSE	390
2022-09-15	11:34:21	-0.108842	-0.484151	-0.462476	8791.59	FALSE	390
2022-09-15	11:34:21	-0.110623	-0.492073	-0.462476	8735.15	FALSE	390
2022-09-15	11:34:22	-0.281514	-1.25223	-1.1487	8791.59	FALSE	390
2022-09-15	11:34:22	-0.290369	-1.29162	-1.1487	8735.15	FALSE	390
2022-09-15	11:34:22	-0.202837	-0.90226	-1.1487	8791.59	FALSE	390

## Sheet: Boris_star_2022915112914 (3)
Date	Time	Lbs	Newtons	Total force x time		Total steps > 13.345	**GoPro Fitting: 1118
2022-09-15	11:29:22	0.729784	3.24623	3.24623	FALSE	0
2022-09-15	11:29:22	0.724491	3.22268	3.22268	FALSE	0
2022-09-15	11:29:22	0.72327	3.21725	6.46347	FALSE	0
2022-09-15	11:29:22	0.727952	3.23808	6.46076	FALSE	0
2022-09-15	11:29:23	0.726832	3.23309	9.69657	FALSE	0
2022-09-15	11:29:23	0.725051	3.22517	9.68593	FALSE	0
2022-09-15	11:29:23	0.729071	3.24305	12.9396	FALSE	0
2022-09-15	11:29:24	0.748868	3.33111	13.017	FALSE	0
2022-09-15	11:29:24	0.651819	2.89942	15.839	FALSE	0
2022-09-15	11:29:24	0.732837	3.25981	16.2768	FALSE	0
2022-09-15	11:29:24	0.723626	3.21883	19.0579	FALSE	0
2022-09-15	11:29:25	0.724695	3.22359	19.5004	FALSE	0
2022-09-15	11:29:25	0.728308	3.23966	22.2975	FALSE	0
2022-09-15	11:29:25	0.732786	3.25958	22.76	FALSE	0
2022-09-15	11:29:25	0.705153	3.13666	25.4342	FALSE	0
2022-09-15	11:29:26	0.728206	3.23921	25.9992	FALSE	0
2022-09-15	11:29:26	0.733957	3.26479	28.699	FALSE	0
2022-09-15	11:29:26	0.723982	3.22042	29.2196	FALSE	0
2022-09-15	11:29:26	0.729733	3.246	31.945	FALSE	0
2022-09-15	11:29:27	0.729326	3.24419	32.4638	FALSE	0
2022-09-15	11:29:27	0.732226	3.25709	35.2021	FALSE	0
2022-09-15	11:29:27	0.730852	3.25098	35.7148	FALSE	0
2022-09-15	11:29:28	0.584338	2.59925	37.8013	FALSE	0
2022-09-15	11:29:28	0.208715	0.928406	36.6432	FALSE	0
2022-09-15	11:29:28	0.0180282	0.080193	37.8815	FALSE	0
2022-09-15	11:29:28	-0.103397	-0.459931	36.6432	FALSE	0
2022-09-15	11:29:29	-0.480699	-2.13825	37.8815	FALSE	0
2022-09-15	11:29:29	-0.48701	-2.16632	36.6432	FALSE	0
2022-09-15	11:29:29	-0.471183	-2.09592	37.8815	FALSE	0
2022-09-15	11:29:29	-0.704211	-3.13247	36.6432	FALSE	0
2022-09-15	11:29:30	-0.916933	-4.0787	37.8815	FALSE	0
2022-09-15	11:29:30	-0.908383	-4.04067	36.6432	FALSE	0
2022-09-15	11:29:30	-0.897595	-3.99268	37.8815	FALSE	0
2022-09-15	11:29:30	-1.07556	-4.78431	36.6432	FALSE	0
2022-09-15	11:29:31	-0.777442	-3.45822	37.8815	FALSE	0
2022-09-15	11:29:31	-0.837697	-3.72624	36.6432	FALSE	0
2022-09-15	11:29:31	-0.921208	-4.09772	37.8815	FALSE	0
2022-09-15	11:29:32	-0.899529	-4.00128	36.6432	FALSE	0
2022-09-15	11:29:32	-0.640088	-2.84724	37.8815	FALSE	0
2022-09-15	11:29:32	-0.00894378	-0.0397837	36.6432	FALSE	0
2022-09-15	11:29:32	0.0720231	0.320373	38.2019	FALSE	0
2022-09-15	11:29:33	0.323626	1.43955	38.0828	FALSE	0
2022-09-15	11:29:33	0.573855	2.55262	40.7545	FALSE	0
2022-09-15	11:29:33	0.728461	3.24034	41.3231	FALSE	0
2022-09-15	11:29:33	0.722965	3.21589	43.9704	FALSE	0
2022-09-15	11:29:34	0.969275	4.31153	45.6346	FALSE	0
2022-09-15	11:29:34	4.11095	18.2863	62.2567	1	1
2022-09-15	11:29:34	1.01894	4.53245	50.1671	FALSE	1
2022-09-15	11:29:34	0.36098	1.60571	63.8624	FALSE	1
2022-09-15	11:29:35	0.332074	1.47713	51.6442	FALSE	1
2022-09-15	11:29:35	1.08419	4.82269	68.6851	FALSE	1
2022-09-15	11:29:35	1.47177	6.54673	58.1909	FALSE	1
2022-09-15	11:29:36	1.21268	5.39424	74.0794	FALSE	1
2022-09-15	11:29:36	0.792786	3.52647	61.7174	FALSE	1
2022-09-15	11:29:36	0.231616	1.03027	75.1097	FALSE	1
2022-09-15	11:29:36	0.103015	0.458231	62.1756	FALSE	1
2022-09-15	11:29:37	1.16612	5.18713	80.2968	FALSE	1
2022-09-15	11:29:37	1.07452	4.77968	66.9553	FALSE	1
2022-09-15	11:29:37	1.29375	5.75486	86.0516	FALSE	1
2022-09-15	11:29:37	1.27884	5.68854	72.6439	FALSE	1
2022-09-15	11:29:38	0.997366	4.43648	90.4881	FALSE	1
2022-09-15	11:29:38	2.33955	10.4068	83.0506	FALSE	1
2022-09-15	11:29:38	3.14693	13.9982	104.486	1	2
2022-09-15	11:29:38	4.99304	22.21	105.261	1	3
2022-09-15	11:29:39	1.96576	8.74409	113.23	FALSE	3
2022-09-15	11:29:39	5.46652	24.3162	129.577	1	4
2022-09-15	11:29:39	4.25451	18.9249	132.155	1	5
2022-09-15	11:29:40	6.55746	29.1689	158.746	1	6
2022-09-15	11:29:40	5.80678	25.8297	157.985	1	7
2022-09-15	11:29:40	7.48795	33.3079	192.054	1	8
2022-09-15	11:29:40	11.9993	53.3753	211.36	1	9
2022-09-15	11:29:41	4.74551	21.109	213.163	1	10
2022-09-15	11:29:41	5.13573	22.8448	234.205	1	11
2022-09-15	11:29:41	4.90057	21.7987	234.961	1	12
2022-09-15	11:29:41	5.03065	22.3773	256.582	1	13
2022-09-15	11:29:42	5.72622	25.4714	260.433	1	14
2022-09-15	11:29:42	4.64892	20.6793	277.262	1	15
2022-09-15	11:29:42	15.2317	67.7536	328.186	1	16
2022-09-15	11:29:42	4.40724	19.6043	296.866	1	17
2022-09-15	11:29:43	5.65014	25.133	353.319	1	18
2022-09-15	11:29:43	7.65976	34.0721	330.938	1	19
2022-09-15	11:29:43	1.77375	7.88999	361.209	FALSE	19
2022-09-15	11:29:44	3.03935	13.5196	344.458	1	20
2022-09-15	11:29:44	3.91034	17.394	378.603	1	21
2022-09-15	11:29:44	1.87472	8.33913	352.797	FALSE	21
2022-09-15	11:29:44	0.964644	4.29093	382.894	FALSE	21
2022-09-15	11:29:45	0.876501	3.89885	356.696	FALSE	21
2022-09-15	11:29:45	3.63401	16.1648	399.059	1	22
2022-09-15	11:29:45	3.81655	16.9768	373.673	1	23
2022-09-15	11:29:45	9.77655	43.488	442.547	1	24
2022-09-15	11:29:46	15.0753	67.0579	440.731	1	25
2022-09-15	11:29:46	7.31813	32.5525	475.1	1	26
2022-09-15	11:29:46	10.8569	48.2937	489.024	1	27
2022-09-15	11:29:46	2.4567	10.9279	486.027	FALSE	27
2022-09-15	11:29:47	0.970649	4.31764	493.342	FALSE	27
2022-09-15	11:29:47	0.643423	2.86207	488.89	FALSE	27
2022-09-15	11:29:47	0.725763	3.22834	496.57	FALSE	27
2022-09-15	11:29:48	0.726629	3.23219	492.122	FALSE	27
2022-09-15	11:29:48	0.731972	3.25596	499.826	FALSE	27
2022-09-15	11:29:48	0.730038	3.24736	495.369	FALSE	27
2022-09-15	11:29:48	0.724491	3.22268	503.049	FALSE	27
2022-09-15	11:29:49	0.722404	3.2134	498.582	FALSE	27
2022-09-15	11:29:49	0.726679	3.23241	506.281	FALSE	27
2022-09-15	11:29:49	0.72729	3.23513	501.818	FALSE	27
2022-09-15	11:29:49	0.725865	3.22879	509.51	FALSE	27
2022-09-15	11:29:50	0.733397	3.2623	505.08	FALSE	27
2022-09-15	11:29:50	0.725305	3.2263	512.736	FALSE	27
2022-09-15	11:29:50	0.733295	3.26184	508.342	FALSE	27
2022-09-15	11:29:51	0.722914	3.21567	515.952	FALSE	27
2022-09-15	11:29:51	0.731819	3.25528	511.597	FALSE	27
2022-09-15	11:29:51	0.729173	3.24351	519.195	FALSE	27
2022-09-15	11:29:51	0.737315	3.27972	514.877	FALSE	27
2022-09-15	11:29:52	0.716043	3.1851	522.381	FALSE	27
2022-09-15	11:29:52	0.721997	3.21159	518.088	FALSE	27
2022-09-15	11:29:52	0.72327	3.21725	525.598	FALSE	27
2022-09-15	11:29:52	0.731209	3.25256	521.341	FALSE	27
2022-09-15	11:29:53	0.729529	3.24509	528.843	FALSE	27
2022-09-15	11:29:53	0.728359	3.23989	524.581	FALSE	27
2022-09-15	11:29:53	0.732837	3.25981	532.103	FALSE	27
2022-09-15	11:29:53	0.726781	3.23287	527.814	FALSE	27
2022-09-15	11:29:54	0.724338	3.222	535.325	FALSE	27
2022-09-15	11:29:54	0.72902	3.24283	531.056	FALSE	27
2022-09-15	11:29:54	0.725967	3.22925	538.554	FALSE	27
2022-09-15	11:29:55	0.72673	3.23264	534.289	FALSE	27
2022-09-15	11:29:55	0.730903	3.2512	541.805	FALSE	27
2022-09-15	11:29:55	0.722659	3.21453	537.504	FALSE	27
2022-09-15	11:29:55	0.726527	3.23174	545.037	FALSE	27
2022-09-15	11:29:56	0.723321	3.21748	540.721	FALSE	27
2022-09-15	11:29:56	0.723524	3.21838	548.255	FALSE	27
2022-09-15	11:29:56	0.724847	3.22426	543.945	FALSE	27
2022-09-15	11:29:56	0.722507	3.21386	551.469	FALSE	27
2022-09-15	11:29:57	0.725153	3.22563	547.171	FALSE	27
2022-09-15	11:29:57	0.728308	3.23966	554.709	FALSE	27
2022-09-15	11:29:57	0.72617	3.23015	550.401	FALSE	27
2022-09-15	11:29:57	0.720267	3.20389	557.913	FALSE	27
2022-09-15	11:29:58	0.727239	3.2349	553.636	FALSE	27
2022-09-15	11:29:58	0.724084	3.22087	561.134	FALSE	27
2022-09-15	11:29:58	0.723575	3.21861	556.855	FALSE	27
2022-09-15	11:29:59	0.734466	3.26705	564.401	FALSE	27
2022-09-15	11:29:59	0.73701	3.27837	560.133	FALSE	27
2022-09-15	11:29:59	0.722862	3.21543	567.616	FALSE	27
2022-09-15	11:29:59	1.59869	7.11129	567.244	FALSE	27
2022-09-15	11:30:00	0.725153	3.22563	570.842	FALSE	27
2022-09-15	11:30:00	0.729377	3.24441	570.489	FALSE	27
2022-09-15	11:30:00	0.727901	3.23785	574.08	FALSE	27
2022-09-15	11:30:00	0.723982	3.22042	573.709	FALSE	27
2022-09-15	11:30:01	0.726527	3.23174	577.311	FALSE	27
2022-09-15	11:30:01	0.723779	3.21951	576.929	FALSE	27
2022-09-15	11:30:01	0.722659	3.21453	580.526	FALSE	27
2022-09-15	11:30:01	0.721081	3.20751	580.136	FALSE	27
2022-09-15	11:30:02	0.724796	3.22404	583.75	FALSE	27
2022-09-15	11:30:02	0.720827	3.20638	583.343	FALSE	27
2022-09-15	11:30:02	0.723422	3.21793	586.968	FALSE	27
2022-09-15	11:30:03	0.723931	3.22019	586.563	FALSE	27
2022-09-15	11:30:03	0.722354	3.21318	590.181	FALSE	27
2022-09-15	11:30:03	0.727239	3.2349	589.798	FALSE	27
2022-09-15	11:30:03	0.72902	3.24283	593.424	FALSE	27
2022-09-15	11:30:04	0.7193	3.19959	592.997	FALSE	27
2022-09-15	11:30:04	0.728868	3.24215	596.666	FALSE	27
2022-09-15	11:30:04	0.728715	3.24147	596.239	FALSE	27
2022-09-15	11:30:04	0.730547	3.24962	599.916	FALSE	27
2022-09-15	11:30:05	0.728206	3.23921	599.478	FALSE	27
2022-09-15	11:30:05	0.73416	3.26569	603.181	FALSE	27
2022-09-15	11:30:05	0.728461	3.24034	602.718	FALSE	27
2022-09-15	11:30:05	0.721591	3.20978	606.391	FALSE	27
2022-09-15	11:30:06	0.717824	3.19302	605.911	FALSE	27
2022-09-15	11:30:06	0.72556	3.22744	609.618	FALSE	27
2022-09-15	11:30:06	0.729835	3.24645	609.158	FALSE	27
2022-09-15	11:30:07	0.728104	3.23875	612.857	FALSE	27
2022-09-15	11:30:07	0.727239	3.2349	612.393	FALSE	27
2022-09-15	11:30:07	0.732379	3.25777	616.115	FALSE	27
2022-09-15	11:30:07	0.724237	3.22155	615.614	FALSE	27
2022-09-15	11:30:08	0.72556	3.22744	619.342	FALSE	27
2022-09-15	11:30:08	0.722303	3.21295	618.827	FALSE	27
2022-09-15	11:30:08	0.717112	3.18986	622.532	FALSE	27
2022-09-15	11:30:08	0.724593	3.22313	622.05	FALSE	27
2022-09-15	11:30:09	0.720521	3.20502	625.737	FALSE	27
2022-09-15	11:30:09	0.728104	3.23875	625.289	FALSE	27
2022-09-15	11:30:09	0.729835	3.24645	628.984	FALSE	27
2022-09-15	11:30:09	0.730242	3.24826	628.537	FALSE	27
2022-09-15	11:30:10	0.722608	3.2143	632.198	FALSE	27
2022-09-15	11:30:10	0.731259	3.25279	631.79	FALSE	27
2022-09-15	11:30:10	0.736908	3.27791	635.476	FALSE	27
2022-09-15	11:30:11	0.732786	3.25958	635.05	FALSE	27
2022-09-15	11:30:11	0.733092	3.26094	638.737	FALSE	27
2022-09-15	11:30:11	0.741947	3.30033	638.35	FALSE	27
2022-09-15	11:30:11	0.730801	3.25075	641.988	FALSE	27
2022-09-15	11:30:12	0.733295	3.26184	641.612	FALSE	27
2022-09-15	11:30:12	0.733397	3.2623	645.25	FALSE	27
2022-09-15	11:30:12	0.711463	3.16473	644.777	FALSE	27
2022-09-15	11:30:12	0.735433	3.27135	648.521	FALSE	27
2022-09-15	11:30:13	0.765814	3.40649	648.183	FALSE	27
2022-09-15	11:30:13	0.733499	3.26275	651.784	FALSE	27
2022-09-15	11:30:13	0.763779	3.39744	651.581	FALSE	27
2022-09-15	11:30:14	0.821234	3.65301	655.437	FALSE	27
2022-09-15	11:30:14	0.720114	3.20321	654.784	FALSE	27
2022-09-15	11:30:14	0.847494	3.76982	659.207	FALSE	27
2022-09-15	11:30:14	0.724186	3.22132	658.005	FALSE	27
2022-09-15	11:30:15	0.722812	3.21521	662.422	FALSE	27
2022-09-15	11:30:15	0.681285	3.03049	661.036	FALSE	27
2022-09-15	11:30:15	0.61757	2.74707	665.169	FALSE	27
2022-09-15	11:30:15	0.675585	3.00514	664.041	FALSE	27
2022-09-15	11:30:16	0.731565	3.25415	668.423	FALSE	27
2022-09-15	11:30:16	1.0395	4.6239	668.665	FALSE	27
2022-09-15	11:30:16	0.698079	3.1052	671.528	FALSE	27
2022-09-15	11:30:16	0.0113107	0.0503123	668.715	FALSE	27
2022-09-15	11:30:17	-0.0449234	-0.199828	671.528	FALSE	27
2022-09-15	11:30:17	-0.40757	-1.81295	668.715	FALSE	27
2022-09-15	11:30:17	-0.577799	-2.57017	671.528	FALSE	27
2022-09-15	11:30:17	-0.594491	-2.64441	668.715	FALSE	27
2022-09-15	11:30:18	-0.577137	-2.56722	671.528	FALSE	27
2022-09-15	11:30:18	-0.169809	-0.755344	668.715	FALSE	27
2022-09-15	11:30:18	2.74083	12.1918	683.72	FALSE	27
2022-09-15	11:30:19	2.54403	11.3164	680.031	FALSE	27
2022-09-15	11:30:19	2.99553	13.3247	697.045	FALSE	27
2022-09-15	11:30:19	2.98225	13.2656	693.297	FALSE	27
2022-09-15	11:30:19	2.9536	13.1382	710.183	FALSE	27
2022-09-15	11:30:20	2.45955	10.9406	704.237	FALSE	27
2022-09-15	11:30:20	3.06271	13.6235	723.807	1	28
2022-09-15	11:30:20	6.90744	30.7257	734.963	1	29
2022-09-15	11:30:20	6.65853	29.6185	753.425	1	30
2022-09-15	11:30:21	3.51207	15.6224	750.586	1	31
2022-09-15	11:30:21	10.0007	44.4851	797.91	1	32
2022-09-15	11:30:21	3.69161	16.421	767.007	1	33
2022-09-15	11:30:22	1.70785	7.59686	805.507	FALSE	33
2022-09-15	11:30:22	5.17141	23.0035	790.01	1	34
2022-09-15	11:30:22	1.38424	6.15738	811.665	FALSE	34
2022-09-15	11:30:22	0.244491	1.08754	791.098	FALSE	34
2022-09-15	11:30:23	0.186883	0.831293	812.496	FALSE	34
2022-09-15	11:30:23	0.036247	0.161234	791.259	FALSE	34
2022-09-15	11:30:23	-0.235814	-1.04895	812.496	FALSE	34
2022-09-15	11:30:23	0.0698349	0.31064	791.569	FALSE	34
2022-09-15	11:30:24	-0.167926	-0.746968	812.496	FALSE	34
2022-09-15	11:30:24	-0.141921	-0.631293	791.569	FALSE	34
2022-09-15	11:30:24	-0.237392	-1.05597	812.496	FALSE	34
2022-09-15	11:30:24	-0.339478	-1.51007	791.569	FALSE	34
2022-09-15	11:30:25	-0.257188	-1.14402	812.496	FALSE	34
2022-09-15	11:30:25	-0.275865	-1.2271	791.569	FALSE	34
2022-09-15	11:30:25	-0.32818	-1.45981	812.496	FALSE	34
2022-09-15	11:30:26	-0.286094	-1.2726	791.569	FALSE	34
2022-09-15	11:30:26	0.201896	0.898074	813.394	FALSE	34
2022-09-15	11:30:26	3.38693	15.0657	806.635	1	35
2022-09-15	11:30:26	8.84927	39.3633	852.757	1	36
2022-09-15	11:30:27	12.1651	54.1128	860.748	1	37
2022-09-15	11:30:27	22.0524	98.0935	950.851	1	38
2022-09-15	11:30:27	33.1795	147.589	1008.34	1	39
2022-09-15	11:30:27	6.88367	30.6199	981.471	1	40
2022-09-15	11:30:28	7.68077	34.1656	1042.5	1	41
2022-09-15	11:30:28	6.15472	27.3774	1008.85	1	42
2022-09-15	11:30:28	19.8051	88.097	1130.6	1	43
2022-09-15	11:30:28	13.3822	59.5267	1068.37	1	44
2022-09-15	11:30:29	11.2026	49.8314	1180.43	1	45
2022-09-15	11:30:29	8.87405	39.4735	1107.85	1	46
2022-09-15	11:30:29	7.03477	31.2921	1211.72	1	47
2022-09-15	11:30:30	13.7313	61.0796	1168.93	1	48
2022-09-15	11:30:30	14.407	64.0852	1275.81	1	49
2022-09-15	11:30:30	13.6639	60.7798	1229.71	1	50
2022-09-15	11:30:30	5.63238	25.054	1300.86	1	51
2022-09-15	11:30:31	7.52495	33.4725	1263.18	1	52
2022-09-15	11:30:31	2.47889	11.0266	1311.89	FALSE	52
2022-09-15	11:30:31	3.84306	17.0947	1280.27	1	53
2022-09-15	11:30:31	5.32067	23.6674	1335.56	1	54
2022-09-15	11:30:32	0.846374	3.76484	1284.04	FALSE	54
2022-09-15	11:30:32	0.25411	1.13033	1336.69	FALSE	54
2022-09-15	11:30:32	0.26383	1.17357	1285.21	FALSE	54
2022-09-15	11:30:32	0.18388	0.817935	1337.5	FALSE	54
2022-09-15	11:30:33	0.107138	0.476571	1285.69	FALSE	54
2022-09-15	11:30:33	0.345916	1.5387	1339.04	FALSE	54
2022-09-15	11:30:33	2.27543	10.1216	1295.81	FALSE	54
2022-09-15	11:30:34	6.76098	30.0742	1369.12	1	55
2022-09-15	11:30:34	14.4748	64.3868	1360.2	1	56
2022-09-15	11:30:34	11.1764	49.7149	1418.83	1	57
2022-09-15	11:30:34	4.43283	19.7181	1379.92	1	58
2022-09-15	11:30:35	2.89859	12.8935	1431.73	FALSE	58
2022-09-15	11:30:35	16.0937	71.588	1451.5	1	59
2022-09-15	11:30:35	8.12454	36.1396	1467.87	1	60
2022-09-15	11:30:35	22.8498	101.64	1553.14	1	61
2022-09-15	11:30:36	23.4772	104.431	1572.3	1	62
2022-09-15	11:30:36	11.7357	52.2027	1605.35	1	63
2022-09-15	11:30:36	22.1308	98.4422	1670.74	1	64
2022-09-15	11:30:36	9.77008	43.4593	1648.81	1	65
2022-09-15	11:30:37	7.57894	33.7126	1704.45	1	66
2022-09-15	11:30:37	16.1029	71.6289	1720.44	1	67
2022-09-15	11:30:37	12.3411	54.8957	1759.35	1	68
2022-09-15	11:30:38	18.3471	81.6116	1802.05	1	69
2022-09-15	11:30:38	14.8234	65.9374	1825.28	1	70
2022-09-15	11:30:38	11.0023	48.9404	1850.99	1	71
2022-09-15	11:30:38	22.6722	100.85	1926.14	1	72
2022-09-15	11:30:39	14.6064	64.9722	1915.96	1	73
2022-09-15	11:30:39	10.1213	45.0216	1971.16	1	74
2022-09-15	11:30:39	21.0033	93.4269	2009.39	1	75
2022-09-15	11:30:39	13.1397	58.448	2029.6	1	76
2022-09-15	11:30:40	12.4375	55.3245	2064.71	1	77
2022-09-15	11:30:40	18.892	84.0354	2113.64	1	78
2022-09-15	11:30:40	8.38993	37.3201	2102.03	1	79
2022-09-15	11:30:40	11.8536	52.7272	2166.37	1	80
2022-09-15	11:30:41	10.3668	46.1136	2148.14	1	81
2022-09-15	11:30:41	5.72469	25.4646	2191.83	1	82
2022-09-15	11:30:41	12.5262	55.719	2203.86	1	83
2022-09-15	11:30:42	12.5293	55.7328	2247.56	1	84
2022-09-15	11:30:42	9.71024	43.1931	2247.06	1	85
2022-09-15	11:30:42	9.89812	44.0288	2291.59	1	86
2022-09-15	11:30:42	7.47411	33.2463	2280.3	1	87
2022-09-15	11:30:43	9.4138	41.8745	2333.47	1	88
2022-09-15	11:30:43	14.7732	65.7141	2346.02	1	89
2022-09-15	11:30:43	6.55019	29.1366	2362.6	1	90
2022-09-15	11:30:43	6.60306	29.3717	2375.39	1	91
2022-09-15	11:30:44	2.33411	10.3826	2372.99	FALSE	91
2022-09-15	11:30:44	0.674415	2.99993	2378.39	FALSE	91
2022-09-15	11:30:44	0.135535	0.602887	2373.59	FALSE	91
2022-09-15	11:30:44	0.188512	0.838539	2379.23	FALSE	91
2022-09-15	11:30:45	0.100674	0.447818	2374.04	FALSE	91
2022-09-15	11:30:45	-0.00365114	-0.016241	2379.23	FALSE	91
2022-09-15	11:30:45	0.0938551	0.417486	2374.46	FALSE	91
2022-09-15	11:30:46	0.545712	2.42744	2381.66	FALSE	91
2022-09-15	11:30:46	1.29304	5.7517	2380.21	FALSE	91
2022-09-15	11:30:46	5.33349	23.7244	2405.38	1	92
2022-09-15	11:30:46	3.04271	13.5346	2393.74	1	93
2022-09-15	11:30:47	5.21136	23.1812	2428.56	1	94
2022-09-15	11:30:47	2.40093	10.6798	2404.42	FALSE	94
2022-09-15	11:30:47	7.24199	32.2138	2460.77	1	95
2022-09-15	11:30:47	4.81014	21.3965	2425.82	1	96
2022-09-15	11:30:48	4.71584	20.977	2481.75	1	97
2022-09-15	11:30:48	6.92607	30.8085	2456.63	1	98
2022-09-15	11:30:48	2.83146	12.5949	2494.35	FALSE	98
2022-09-15	11:30:49	4.93915	21.9703	2478.6	1	99
2022-09-15	11:30:49	6.30586	28.0497	2522.4	1	100
2022-09-15	11:30:49	9.43166	41.9539	2520.55	1	101
2022-09-15	11:30:49	18.5963	82.7201	2605.12	1	102
2022-09-15	11:30:50	14.8266	65.9517	2586.5	1	103
2022-09-15	11:30:50	16.885	75.1079	2680.22	1	104
2022-09-15	11:30:50	5.0538	22.4803	2608.98	1	105
2022-09-15	11:30:50	1.8535	8.24474	2688.47	FALSE	105
2022-09-15	11:30:51	1.87019	8.31898	2617.3	FALSE	105
2022-09-15	11:30:51	0.64958	2.88946	2691.36	FALSE	105
2022-09-15	11:30:51	1.29559	5.76304	2623.06	FALSE	105
2022-09-15	11:30:51	2.39492	10.6531	2702.01	FALSE	105
2022-09-15	11:30:52	2.70515	12.033	2635.1	FALSE	105
2022-09-15	11:30:52	3.742	16.6452	2718.66	1	106
2022-09-15	11:30:52	3.46266	15.4026	2650.5	1	107
2022-09-15	11:30:53	2.89843	12.8928	2731.55	FALSE	107
2022-09-15	11:30:53	1.85151	8.23589	2658.74	FALSE	107
2022-09-15	11:30:53	1.44515	6.42832	2737.98	FALSE	107
2022-09-15	11:30:53	3.59253	15.9803	2674.72	1	108
2022-09-15	11:30:54	3.49833	15.5613	2753.54	1	109
2022-09-15	11:30:54	7.76703	34.5493	2709.27	1	110
2022-09-15	11:30:54	9.46749	42.1133	2795.65	1	111
2022-09-15	11:30:54	6.23797	27.7477	2737.01	1	112
2022-09-15	11:30:55	5.41456	24.085	2819.74	1	113
2022-09-15	11:30:55	3.21599	14.3054	2751.32	1	114
2022-09-15	11:30:55	4.71945	20.9931	2840.73	1	115
2022-09-15	11:30:55	2.0192	8.98181	2760.3	FALSE	115
2022-09-15	11:30:56	2.2909	10.1904	2850.92	FALSE	115
2022-09-15	11:30:56	4.09497	18.2152	2778.52	1	116
2022-09-15	11:30:56	1.52067	6.76424	2857.69	FALSE	116
2022-09-15	11:30:57	2.48281	11.044	2789.56	FALSE	116
2022-09-15	11:30:57	2.92016	12.9895	2870.67	FALSE	116
2022-09-15	11:30:57	2.822	12.5528	2802.11	FALSE	116
2022-09-15	11:30:57	3.27523	14.5689	2885.24	1	117
2022-09-15	11:30:58	2.52291	11.2224	2813.34	FALSE	117
2022-09-15	11:30:58	5.10973	22.7291	2907.97	1	118
2022-09-15	11:30:58	2.9109	12.9483	2826.28	FALSE	118
2022-09-15	11:30:58	4.00423	17.8116	2925.78	1	119
2022-09-15	11:30:59	5.44724	24.2304	2850.51	1	120
2022-09-15	11:30:59	1.57584	7.00965	2932.79	FALSE	120
2022-09-15	11:30:59	2.42714	10.7964	2861.31	FALSE	120
2022-09-15	11:30:59	0.97589	4.34095	2937.13	FALSE	120
2022-09-15	11:31:00	1.5563	6.92273	2868.23	FALSE	120
2022-09-15	11:31:00	2.725	12.1213	2949.26	FALSE	120
2022-09-15	11:31:00	4.53747	20.1836	2888.42	1	121
2022-09-15	11:31:01	9.23762	41.0908	2990.35	1	122
2022-09-15	11:31:01	5.96917	26.5521	2914.97	1	123
2022-09-15	11:31:01	7.97991	35.4962	3025.84	1	124
2022-09-15	11:31:01	2.85233	12.6877	2927.66	FALSE	124
2022-09-15	11:31:02	5.65609	25.1594	3051	1	125
2022-09-15	11:31:02	1.92576	8.56617	2936.22	FALSE	125
2022-09-15	11:31:02	3.27563	14.5707	3065.57	1	126
2022-09-15	11:31:02	2.33584	10.3903	2946.61	FALSE	126
2022-09-15	11:31:03	2.83243	12.5992	3078.17	FALSE	126
2022-09-15	11:31:03	3.02912	13.4741	2960.09	1	127
2022-09-15	11:31:03	4.37553	19.4632	3097.64	1	128
2022-09-15	11:31:03	4.8648	21.6396	2981.73	1	129
2022-09-15	11:31:04	1.60673	7.14706	3104.78	FALSE	129
2022-09-15	11:31:04	0.409835	1.82303	2983.55	FALSE	129
2022-09-15	11:31:04	0.313753	1.39564	3106.18	FALSE	129
2022-09-15	11:31:05	0.389428	1.73225	2985.28	FALSE	129
2022-09-15	11:31:05	0.238028	1.0588	3107.24	FALSE	129
2022-09-15	11:31:05	0.217926	0.969378	2986.25	FALSE	129
2022-09-15	11:31:05	1.40281	6.23998	3113.48	FALSE	129
2022-09-15	11:31:06	0.629173	2.79869	2989.05	FALSE	129
2022-09-15	11:31:06	0.538537	2.39552	3115.87	FALSE	129
2022-09-15	11:31:06	0.446323	1.98533	2991.04	FALSE	129
2022-09-15	11:31:06	-0.788282	-3.50644	3115.87	FALSE	129
2022-09-15	11:31:07	0.030242	0.134522	2991.17	FALSE	129
2022-09-15	11:31:07	0.180064	0.800961	3116.67	FALSE	129
2022-09-15	11:31:07	0.259453	1.1541	2992.32	FALSE	129
2022-09-15	11:31:07	0.322303	1.43367	3118.11	FALSE	129
2022-09-15	11:31:08	0.266934	1.18738	2993.51	FALSE	129
2022-09-15	11:31:08	0.5593	2.48788	3120.6	FALSE	129
2022-09-15	11:31:08	0.080929	0.359988	2993.87	FALSE	129
2022-09-15	11:31:09	0.327392	1.45631	3122.05	FALSE	129
2022-09-15	11:31:09	0.128003	0.569383	2994.44	FALSE	129
2022-09-15	11:31:09	0.563219	2.50531	3124.56	FALSE	129
2022-09-15	11:31:09	0.397316	1.76734	2996.21	FALSE	129
2022-09-15	11:31:10	0.362812	1.61386	3126.17	FALSE	129
2022-09-15	11:31:10	0.314008	1.39677	2997.6	FALSE	129
2022-09-15	11:31:10	0.204288	0.908714	3127.08	FALSE	129
2022-09-15	11:31:10	0.0940587	0.418392	2998.02	FALSE	129
2022-09-15	11:31:11	0.100827	0.448499	3127.53	FALSE	129
2022-09-15	11:31:11	0.176349	0.784436	2998.81	FALSE	129
2022-09-15	11:31:11	0.422354	1.87872	3129.41	FALSE	129
2022-09-15	11:31:11	0.547392	2.43491	3001.24	FALSE	129
2022-09-15	11:31:12	0.418944	1.86355	3131.27	FALSE	129
2022-09-15	11:31:12	0.302201	1.34425	3002.59	FALSE	129
2022-09-15	11:31:12	0.280165	1.24623	3132.52	FALSE	129
2022-09-15	11:31:13	-0.132404	-0.588959	3002.59	FALSE	129
2022-09-15	11:31:13	-0.36014	-1.60197	3132.52	FALSE	129
2022-09-15	11:31:13	-0.415814	-1.84962	3002.59	FALSE	129
2022-09-15	11:31:13	-0.412964	-1.83695	3132.52	FALSE	129
2022-09-15	11:31:14	-0.588994	-2.61996	3002.59	FALSE	129
2022-09-15	11:31:14	-0.521615	-2.32025	3132.52	FALSE	129
2022-09-15	11:31:14	-0.0454323	-0.202092	3002.59	FALSE	129
2022-09-15	11:31:14	0.290853	1.29377	3133.81	FALSE	129
2022-09-15	11:31:15	0.284695	1.26638	3003.85	FALSE	129
2022-09-15	11:31:15	0.18271	0.812731	3134.62	FALSE	129
2022-09-15	11:31:15	0.218079	0.970059	3004.82	FALSE	129
2022-09-15	11:31:15	0.188563	0.838766	3135.46	FALSE	129
2022-09-15	11:31:16	0.384288	1.70939	3006.53	FALSE	129
2022-09-15	11:31:16	0.292634	1.30169	3136.76	FALSE	129
2022-09-15	11:31:16	0.207443	0.922748	3007.46	FALSE	129
2022-09-15	11:31:17	-0.0135748	-0.0603834	3136.76	FALSE	129
2022-09-15	11:31:17	-0.305178	-1.35749	3007.46	FALSE	129
2022-09-15	11:31:17	-0.558562	-2.4846	3136.76	FALSE	129
2022-09-15	11:31:17	-0.611284	-2.71911	3007.46	FALSE	129
2022-09-15	11:31:18	-0.56589	-2.51719	3136.76	FALSE	129
2022-09-15	11:31:18	-0.542684	-2.41397	3007.46	FALSE	129
2022-09-15	11:31:18	-0.503345	-2.23898	3136.76	FALSE	129
2022-09-15	11:31:18	-0.284567	-1.26581	3007.46	FALSE	129
2022-09-15	11:31:19	0.18958	0.84329	3137.61	FALSE	129
2022-09-15	11:31:19	0.355942	1.5833	3009.04	FALSE	129
2022-09-15	11:31:19	1.15111	5.12037	3142.73	FALSE	129
2022-09-15	11:31:19	0.766119	3.40785	3012.45	FALSE	129
2022-09-15	11:31:20	0.542201	2.41182	3145.14	FALSE	129
2022-09-15	11:31:20	0.416603	1.85313	3014.3	FALSE	129
2022-09-15	11:31:20	2.58439	11.4959	3156.63	FALSE	129
2022-09-15	11:31:21	1.70938	7.60366	3021.9	FALSE	129
2022-09-15	11:31:21	1.4163	6.29999	3162.93	FALSE	129
2022-09-15	11:31:21	0.698079	3.1052	3025.01	FALSE	129
2022-09-15	11:31:21	0.487952	2.17051	3165.11	FALSE	129
2022-09-15	11:31:22	0.841998	3.74538	3028.75	FALSE	129
2022-09-15	11:31:22	1.58276	7.04043	3172.15	FALSE	129
2022-09-15	11:31:22	1.49391	6.64521	3035.4	FALSE	129
2022-09-15	11:31:22	2.21533	9.85423	3182	FALSE	129
2022-09-15	11:31:23	0.556807	2.47679	3037.88	FALSE	129
2022-09-15	11:31:23	0.17584	0.782171	3182.78	FALSE	129
2022-09-15	11:31:23	0.172583	0.767684	3038.64	FALSE	129
2022-09-15	11:31:23	0.200725	0.892865	3183.67	FALSE	129
2022-09-15	11:31:24	0.310293	1.38025	3040.02	FALSE	129
2022-09-15	11:31:24	0.266374	1.18488	3184.86	FALSE	129
2022-09-15	11:31:24	0.300878	1.33837	3041.36	FALSE	129
2022-09-15	11:31:25	0.73243	3.258	3188.12	FALSE	129
2022-09-15	11:31:25	0.585458	2.60423	3043.97	FALSE	129
2022-09-15	11:31:25	0.735178	3.27022	3191.39	FALSE	129
2022-09-15	11:31:25	0.287952	1.28087	3045.25	FALSE	129
2022-09-15	11:31:26	0.122812	0.546292	3191.93	FALSE	129
2022-09-15	11:31:26	0.231463	1.02959	3046.28	FALSE	129
2022-09-15	11:31:26	0.189173	0.841479	3192.78	FALSE	129
2022-09-15	11:31:26	0.207952	0.925012	3047.2	FALSE	129
2022-09-15	11:31:27	0.725712	3.22811	3196	FALSE	129
2022-09-15	11:31:27	0.719555	3.20072	3050.4	FALSE	129
2022-09-15	11:31:27	2.50083	11.1242	3207.13	FALSE	129
2022-09-15	11:31:27	4.691	20.8665	3071.27	1	130
2022-09-15	11:31:28	6.06535	26.9799	3234.11	1	131
2022-09-15	11:31:28	10.6277	47.2741	3118.54	1	132
2022-09-15	11:31:28	9.47731	42.157	3276.26	1	133
2022-09-15	11:31:29	15.3432	68.2496	3186.79	1	134
2022-09-15	11:31:29	7.13634	31.7439	3308.01	1	135
2022-09-15	11:31:29	8.73344	38.8481	3225.64	1	136
2022-09-15	11:31:29	4.38704	19.5144	3327.52	1	137
2022-09-15	11:31:30	4.31625	19.1995	3244.84	1	138
2022-09-15	11:31:30	8.09985	36.0298	3363.55	1	139
2022-09-15	11:31:30	1.54317	6.86433	3251.7	FALSE	139
2022-09-15	11:31:30	2.96424	13.1855	3376.74	FALSE	139
2022-09-15	11:31:31	8.08103	35.946	3287.65	1	140
2022-09-15	11:31:31	14.3872	63.9971	3440.74	1	141
2022-09-15	11:31:31	16.3607	72.7757	3360.43	1	142
2022-09-15	11:31:31	22.8289	101.548	3542.28	1	143
2022-09-15	11:31:32	22.7759	101.312	3461.74	1	144
2022-09-15	11:31:32	13.3242	59.2687	3601.55	1	145
2022-09-15	11:31:32	11.0415	49.1148	3510.85	1	146
2022-09-15	11:31:33	9.79268	43.5598	3645.11	1	147
2022-09-15	11:31:33	10.8421	48.2278	3559.08	1	148
2022-09-15	11:31:33	9.77828	43.4957	3688.61	1	149
2022-09-15	11:31:33	9.10963	40.5215	3599.6	1	150
2022-09-15	11:31:34	8.19894	36.4705	3725.08	1	151
2022-09-15	11:31:34	8.59329	38.2247	3637.83	1	152
2022-09-15	11:31:34	8.0768	35.9272	3761.01	1	153
2022-09-15	11:31:34	7.63757	33.9734	3671.8	1	154
2022-09-15	11:31:35	7.11965	31.6696	3792.67	1	155
2022-09-15	11:31:35	6.30317	28.0378	3699.84	1	156
2022-09-15	11:31:35	6.21115	27.6284	3820.3	1	157
2022-09-15	11:31:35	6.19451	27.5544	3727.39	1	158
2022-09-15	11:31:36	5.70912	25.3953	3845.7	1	159
2022-09-15	11:31:36	5.9651	26.534	3753.93	1	160
2022-09-15	11:31:36	5.59177	24.8733	3870.57	1	161
2022-09-15	11:31:37	4.73701	21.0712	3775	1	162
2022-09-15	11:31:37	4.75212	21.1384	3891.71	1	163
2022-09-15	11:31:37	3.90785	17.3829	3792.38	1	164
2022-09-15	11:31:37	3.76327	16.7398	3908.45	1	165
2022-09-15	11:31:38	3.95482	17.5918	3809.97	1	166
2022-09-15	11:31:38	3.92332	17.4517	3925.9	1	167
2022-09-15	11:31:38	2.82032	12.5453	3822.52	FALSE	167
2022-09-15	11:31:38	1.282	5.70259	3931.6	FALSE	167
2022-09-15	11:31:39	0.970954	4.319	3826.84	FALSE	167
2022-09-15	11:31:39	0.398079	1.77074	3933.37	FALSE	167
2022-09-15	11:31:39	0.262812	1.16904	3828.01	FALSE	167
2022-09-15	11:31:39	-0.0322517	-0.143462	3933.37	FALSE	167
2022-09-15	11:31:40	-0.226145	-1.00594	3828.01	FALSE	167
2022-09-15	11:31:40	-0.364109	-1.61963	3933.37	FALSE	167
2022-09-15	11:31:40	0.0778756	0.346406	3828.35	FALSE	167
2022-09-15	11:31:41	0.92958	4.13496	3937.51	FALSE	167
2022-09-15	11:31:41	0.841692	3.74401	3832.1	FALSE	167
2022-09-15	11:31:41	0.293041	1.3035	3938.81	FALSE	167
2022-09-15	11:31:41	0.201794	0.89762	3832.99	FALSE	167
2022-09-15	11:31:42	0.162557	0.723086	3939.54	FALSE	167
2022-09-15	11:31:42	0.0382827	0.170289	3833.16	FALSE	167
2022-09-15	11:31:42	0.0389951	0.173458	3939.71	FALSE	167
2022-09-15	11:31:42	0.0529391	0.235484	3833.4	FALSE	167
2022-09-15	11:31:43	0.0384862	0.171194	3939.88	FALSE	167
2022-09-15	11:31:43	0.0532954	0.237069	3833.64	FALSE	167
2022-09-15	11:31:43	0.0673921	0.299774	3940.18	FALSE	167
2022-09-15	11:31:44	0.0692242	0.307923	3833.94	FALSE	167
2022-09-15	11:31:44	0.0579264	0.257668	3940.44	FALSE	167
2022-09-15	11:31:44	0.0253564	0.11279	3834.06	FALSE	167
2022-09-15	11:31:44	0.0569595	0.253367	3940.69	FALSE	167
2022-09-15	11:31:45	0.0622012	0.276683	3834.33	FALSE	167
2022-09-15	11:31:45	0.053957	0.240012	3940.93	FALSE	167
2022-09-15	11:31:45	0.0709544	0.315619	3834.65	FALSE	167
2022-09-15	11:31:46	0.0655091	0.291398	3941.22	FALSE	167
2022-09-15	11:31:46	0.0654073	0.290945	3834.94	FALSE	167
2022-09-15	11:31:46	0.0260689	0.11596	3941.34	FALSE	167
2022-09-15	11:31:46	-0.142328	-0.633103	3834.94	FALSE	167
2022-09-15	11:31:46	-0.407671	-1.8134	3941.34	FALSE	167
2022-09-15	11:31:47	-0.681259	-3.03038	3834.94	FALSE	167
2022-09-15	11:31:47	-0.846551	-3.76563	3941.34	FALSE	167
2022-09-15	11:31:47	-0.998307	-4.44067	3834.94	FALSE	167
2022-09-15	11:31:48	-0.835101	-3.7147	3941.34	FALSE	167
2022-09-15	11:31:48	-1.22212	-5.43623	3834.94	FALSE	167
2022-09-15	11:31:48	-0.378206	-1.68234	3941.34	FALSE	167
2022-09-15	11:31:48	0.0515142	0.229145	3835.17	FALSE	167
2022-09-15	11:31:49	0.53986	2.40141	3943.74	FALSE	167
2022-09-15	11:31:49	1.01686	4.5232	3839.69	FALSE	167
2022-09-15	11:31:49	4.73513	21.0628	3964.8	1	168
2022-09-15	11:31:49	6.47141	28.7861	3868.48	1	169
2022-09-15	11:31:50	6.05187	26.9199	3991.72	1	170
2022-09-15	11:31:50	5.85131	26.0278	3894.51	1	171
2022-09-15	11:31:50	4.17116	18.5542	4010.28	1	172
2022-09-15	11:31:50	3.29604	14.6614	3909.17	1	173
2022-09-15	11:31:51	3.15131	14.0177	4024.3	1	174
2022-09-15	11:31:51	2.7649	12.2988	3921.47	FALSE	174
2022-09-15	11:31:51	2.52184	11.2176	4035.51	FALSE	174
2022-09-15	11:31:52	2.27899	10.1374	3931.6	FALSE	174
2022-09-15	11:31:52	2.34485	10.4304	4045.94	FALSE	174
2022-09-15	11:31:52	2.43406	10.8272	3942.43	FALSE	174
2022-09-15	11:31:52	2.52424	11.2283	4057.17	FALSE	174
2022-09-15	11:31:53	2.4222	10.7744	3953.21	FALSE	174
2022-09-15	11:31:53	2.442	10.8625	4068.03	FALSE	174
2022-09-15	11:31:53	2.44169	10.8611	3964.07	FALSE	174
2022-09-15	11:31:53	2.39833	10.6683	4078.7	FALSE	174
2022-09-15	11:31:54	2.31762	10.3092	3974.38	FALSE	174
2022-09-15	11:31:54	2.20322	9.80036	4088.5	FALSE	174
2022-09-15	11:31:54	2.29426	10.2053	3984.58	FALSE	174
2022-09-15	11:31:54	2.22154	9.88185	4098.38	FALSE	174
2022-09-15	11:31:55	2.28317	10.156	3994.74	FALSE	174
2022-09-15	11:31:55	2.24693	9.99479	4108.38	FALSE	174
2022-09-15	11:31:55	2.19085	9.74534	4004.48	FALSE	174
2022-09-15	11:31:56	2.17838	9.68987	4118.07	FALSE	174
2022-09-15	11:31:56	2.23762	9.95338	4014.44	FALSE	174
2022-09-15	11:31:56	2.30785	10.2658	4128.34	FALSE	174
2022-09-15	11:31:56	2.33055	10.3668	4024.8	FALSE	174
2022-09-15	11:31:57	2.36617	10.5252	4138.86	FALSE	174
2022-09-15	11:31:57	2.38113	10.5917	4035.4	FALSE	174
2022-09-15	11:31:57	2.41172	10.7278	4149.59	FALSE	174
2022-09-15	11:31:57	2.44434	10.8729	4046.27	FALSE	174
2022-09-15	11:31:58	2.41645	10.7489	4160.34	FALSE	174
2022-09-15	11:31:58	2.4652	10.9657	4057.23	FALSE	174
2022-09-15	11:31:58	2.4453	10.8772	4171.21	FALSE	174
2022-09-15	11:31:58	2.43838	10.8464	4068.08	FALSE	174
2022-09-15	11:31:59	2.41106	10.7249	4181.94	FALSE	174
2022-09-15	11:31:59	2.4053	10.6993	4078.78	FALSE	174
2022-09-15	11:31:59	2.37329	10.5569	4192.5	FALSE	174
2022-09-15	11:32:00	2.39996	10.6755	4089.46	FALSE	174
2022-09-15	11:32:00	2.37686	10.5727	4203.07	FALSE	174
2022-09-15	11:32:00	2.22617	9.90245	4099.36	FALSE	174
2022-09-15	11:32:00	1.97162	8.77016	4211.84	FALSE	174
2022-09-15	11:32:01	1.87625	8.34594	4107.7	FALSE	174
2022-09-15	11:32:01	1.95095	8.67822	4220.52	FALSE	174
2022-09-15	11:32:01	1.94948	8.67168	4116.38	FALSE	174
2022-09-15	11:32:01	1.86607	8.30065	4228.82	FALSE	174
2022-09-15	11:32:02	1.65172	7.34718	4123.72	FALSE	174
2022-09-15	11:32:02	1.80393	8.02424	4236.84	FALSE	174
2022-09-15	11:32:02	2.1564	9.5921	4133.31	FALSE	174
2022-09-15	11:32:02	2.52006	11.2097	4248.05	FALSE	174
2022-09-15	11:32:03	2.345	10.431	4143.75	FALSE	174
2022-09-15	11:32:03	1.95503	8.69636	4256.75	FALSE	174
2022-09-15	11:32:03	1.61126	7.16721	4150.91	FALSE	174
2022-09-15	11:32:04	2.27905	10.1377	4266.89	FALSE	174
2022-09-15	11:32:04	2.23564	9.94457	4160.86	FALSE	174
2022-09-15	11:32:04	2.1222	9.43997	4276.33	FALSE	174
2022-09-15	11:32:04	1.94388	8.64677	4169.5	FALSE	174
2022-09-15	11:32:05	1.41045	6.27396	4282.6	FALSE	174
2022-09-15	11:32:05	1.71274	7.61861	4177.12	FALSE	174
2022-09-15	11:32:05	1.82307	8.10938	4290.71	FALSE	174
2022-09-15	11:32:05	1.85136	8.23522	4185.36	FALSE	174
2022-09-15	11:32:06	1.90017	8.45234	4299.16	FALSE	174
2022-09-15	11:32:06	1.76882	7.86807	4193.23	FALSE	174
2022-09-15	11:32:06	1.76836	7.86602	4307.03	FALSE	174
2022-09-15	11:32:06	1.91192	8.5046	4201.73	FALSE	174
2022-09-15	11:32:07	2.19676	9.77163	4316.8	FALSE	174
2022-09-15	11:32:07	2.24795	9.99933	4211.73	FALSE	174
2022-09-15	11:32:07	2.38648	10.6155	4327.41	FALSE	174
2022-09-15	11:32:08	1.9881	8.84347	4220.57	FALSE	174
2022-09-15	11:32:08	1.72907	7.69125	4335.11	FALSE	174
2022-09-15	11:32:08	1.62653	7.23513	4227.81	FALSE	174
2022-09-15	11:32:08	1.60327	7.13167	4342.24	FALSE	174
2022-09-15	11:32:09	2.00215	8.90596	4236.71	FALSE	174
2022-09-15	11:32:09	2.26347	10.0684	4352.31	FALSE	174
2022-09-15	11:32:09	2.58245	11.4873	4248.2	FALSE	174
2022-09-15	11:32:09	1.92113	8.54557	4360.85	FALSE	174
2022-09-15	11:32:10	2.37034	10.5437	4258.75	FALSE	174
2022-09-15	11:32:10	5.34749	23.7867	4384.64	1	175
2022-09-15	11:32:10	17.0424	75.808	4334.55	1	176
2022-09-15	11:32:10	18.5881	82.6836	4467.32	1	177
2022-09-15	11:32:11	9.71955	43.2345	4377.79	1	178
2022-09-15	11:32:11	17.3773	77.2977	4544.62	1	179
2022-09-15	11:32:11	14.3944	64.0292	4441.82	1	180
2022-09-15	11:32:12	15.787	70.2237	4614.84	1	181
2022-09-15	11:32:12	11.4826	51.0769	4492.89	1	182
2022-09-15	11:32:12	6.98943	31.0904	4645.93	1	183
2022-09-15	11:32:12	6.0906	27.0922	4519.99	1	184
2022-09-15	11:32:13	5.98739	26.6331	4672.57	1	185
2022-09-15	11:32:13	8.01843	35.6676	4555.65	1	186
2022-09-15	11:32:13	6.87416	30.5776	4703.14	1	187
2022-09-15	11:32:13	6.46169	28.7429	4584.4	1	188
2022-09-15	11:32:14	6.98138	31.0546	4734.2	1	189
2022-09-15	11:32:14	7.49838	33.3543	4617.75	1	190
2022-09-15	11:32:14	7.85823	34.955	4769.15	1	191
2022-09-15	11:32:14	7.06021	31.4052	4649.16	1	192
2022-09-15	11:32:15	9.76988	43.4584	4812.61	1	193
2022-09-15	11:32:15	11.7627	52.3228	4701.48	1	194
2022-09-15	11:32:15	15.8779	70.6281	4883.24	1	195
2022-09-15	11:32:16	7.99731	35.5736	4737.05	1	196
2022-09-15	11:32:16	3.93859	17.5196	4900.76	1	197
2022-09-15	11:32:16	6.00561	26.7142	4763.77	1	198
2022-09-15	11:32:16	5.56337	24.747	4925.51	1	199
2022-09-15	11:32:17	3.89899	17.3435	4781.11	1	200
2022-09-15	11:32:17	2.942	13.0866	4938.59	FALSE	200
2022-09-15	11:32:17	2.03645	9.05854	4790.17	FALSE	200
2022-09-15	11:32:17	2.11645	9.41439	4948.01	FALSE	200
2022-09-15	11:32:18	0.985814	4.3851	4794.55	FALSE	200
2022-09-15	11:32:18	0.410547	1.8262	4949.83	FALSE	200
2022-09-15	11:32:18	0.163931	0.729198	4795.28	FALSE	200
2022-09-15	11:32:18	0.323677	1.43978	4951.27	FALSE	200
2022-09-15	11:32:19	0.413295	1.83842	4797.12	FALSE	200
2022-09-15	11:32:19	0.832226	3.70191	4954.98	FALSE	200
2022-09-15	11:32:19	1.68805	7.50878	4804.63	FALSE	200
2022-09-15	11:32:20	4.7765	21.2468	4976.22	1	201
2022-09-15	11:32:20	9.90836	44.0744	4848.7	1	202
2022-09-15	11:32:20	6.50642	28.9419	5005.16	1	203
2022-09-15	11:32:20	6.27548	27.9146	4876.62	1	204
2022-09-15	11:32:21	4.65716	20.716	5025.88	1	205
2022-09-15	11:32:21	4.98683	22.1824	4898.8	1	206
2022-09-15	11:32:21	3.89548	17.3279	5043.21	1	207
2022-09-15	11:32:21	4.71854	20.989	4919.79	1	208
2022-09-15	11:32:22	3.5193	15.6546	5058.86	1	209
2022-09-15	11:32:22	3.36602	14.9727	4934.76	1	210
2022-09-15	11:32:22	3.29248	14.6456	5073.51	1	211
2022-09-15	11:32:22	3.32617	14.7955	4949.56	1	212
2022-09-15	11:32:23	3.62184	16.1107	5089.62	1	213
2022-09-15	11:32:23	3.79568	16.8839	4966.44	1	214
2022-09-15	11:32:23	3.97467	17.6801	5107.3	1	215
2022-09-15	11:32:24	4.04291	17.9837	4984.43	1	216
2022-09-15	11:32:24	4.08642	18.1772	5125.48	1	217
2022-09-15	11:32:24	4.16429	18.5236	5002.95	1	218
2022-09-15	11:32:24	4.35721	19.3817	5144.86	1	219
2022-09-15	11:32:25	4.46062	19.8417	5022.79	1	220
2022-09-15	11:32:25	4.42841	19.6985	5164.56	1	221
2022-09-15	11:32:25	4.36912	19.4347	5042.23	1	222
2022-09-15	11:32:25	4.4306	19.7082	5184.26	1	223
2022-09-15	11:32:26	4.46317	19.8531	5062.08	1	224
2022-09-15	11:32:26	4.33624	19.2885	5203.55	1	225
2022-09-15	11:32:26	4.44266	19.7618	5081.84	1	226
2022-09-15	11:32:26	4.37741	19.4716	5223.02	1	227
2022-09-15	11:32:27	4.35818	19.3861	5101.23	1	228
2022-09-15	11:32:27	4.33894	19.3005	5242.33	1	229
2022-09-15	11:32:27	4.27182	19.0019	5120.23	1	230
2022-09-15	11:32:28	4.32627	19.2441	5261.57	1	231
2022-09-15	11:32:28	4.38357	19.499	5139.73	1	232
2022-09-15	11:32:28	3.4422	15.3116	5276.88	1	233
2022-09-15	11:32:28	5.04561	22.4439	5162.17	1	234
2022-09-15	11:32:29	8.39894	37.3602	5314.24	1	235
2022-09-15	11:32:29	7.04561	31.3403	5193.51	1	236
2022-09-15	11:32:29	5.50042	24.467	5338.71	1	237
2022-09-15	11:32:29	4.9078	21.8309	5215.34	1	238
2022-09-15	11:32:30	4.91686	21.8712	5360.58	1	239
2022-09-15	11:32:30	5.04551	22.4434	5237.79	1	240
2022-09-15	11:32:30	4.41976	19.66	5380.24	1	241
2022-09-15	11:32:30	4.08683	18.179	5255.97	1	242
2022-09-15	11:32:31	3.96973	17.6582	5397.9	1	243
2022-09-15	11:32:31	3.64225	16.2015	5272.17	1	244
2022-09-15	11:32:31	3.50754	15.6022	5413.5	1	245
2022-09-15	11:32:32	2.8507	12.6805	5284.85	FALSE	245
2022-09-15	11:32:32	0.432125	1.92218	5415.42	FALSE	245
2022-09-15	11:32:32	0.211972	0.942894	5285.79	FALSE	245
2022-09-15	11:32:32	0.28668	1.27521	5416.7	FALSE	245
2022-09-15	11:32:33	0.200267	0.890828	5286.68	FALSE	245
2022-09-15	11:32:33	0.308613	1.37277	5418.07	FALSE	245
2022-09-15	11:32:33	0.187188	0.83265	5287.51	FALSE	245
2022-09-15	11:32:33	-0.235203	-1.04623	5418.07	FALSE	245
2022-09-15	11:32:34	-0.525127	-2.33587	5287.51	FALSE	245
2022-09-15	11:32:34	-0.730317	-3.2486	5418.07	FALSE	245
2022-09-15	11:32:34	-0.858104	-3.81702	5287.51	FALSE	245
2022-09-15	11:32:34	-0.856475	-3.80977	5418.07	FALSE	245
2022-09-15	11:32:35	-0.856577	-3.81023	5287.51	FALSE	245
2022-09-15	11:32:35	-0.37673	-1.67577	5418.07	FALSE	245
2022-09-15	11:32:35	-0.165178	-0.734745	5287.51	FALSE	245
2022-09-15	11:32:36	0.853041	3.7945	5421.86	FALSE	245
2022-09-15	11:32:36	0.425407	1.8923	5289.41	FALSE	245
2022-09-15	11:32:36	0.526425	2.34164	5424.21	FALSE	245
2022-09-15	11:32:36	0.349122	1.55296	5290.96	FALSE	245
2022-09-15	11:32:37	0.256247	1.13984	5425.35	FALSE	245
2022-09-15	11:32:37	0.164389	0.731235	5291.69	FALSE	245
2022-09-15	11:32:37	0.169682	0.754779	5426.1	FALSE	245
2022-09-15	11:32:37	0.215636	0.959192	5292.65	FALSE	245
2022-09-15	11:32:38	0.399962	1.77911	5427.88	FALSE	245
2022-09-15	11:32:38	3.04571	13.5479	5306.2	1	246
2022-09-15	11:32:38	11.9982	53.3704	5481.25	1	247
2022-09-15	11:32:38	15.8316	70.4221	5376.62	1	248
2022-09-15	11:32:39	18.7772	83.5247	5564.77	1	249
2022-09-15	11:32:39	6.69594	29.7849	5406.4	1	250
2022-09-15	11:32:39	2.04327	9.08887	5573.86	FALSE	250
2022-09-15	11:32:40	0.943728	4.19789	5410.6	FALSE	250
2022-09-15	11:32:40	0.444491	1.97718	5575.84	FALSE	250
2022-09-15	11:32:40	0.348308	1.54934	5412.15	FALSE	250
2022-09-15	11:32:40	0.424288	1.88732	5577.73	FALSE	250
2022-09-15	11:32:41	0.238384	1.06038	5413.21	FALSE	250
2022-09-15	11:32:41	0.249377	1.10928	5578.84	FALSE	250
2022-09-15	11:32:41	0.0370104	0.16463	5413.38	FALSE	250
2022-09-15	11:32:41	0.319809	1.42257	5580.26	FALSE	250
2022-09-15	11:32:42	0.525	2.3353	5415.71	FALSE	250
2022-09-15	11:32:42	0.420166	1.86898	5582.13	FALSE	250
2022-09-15	11:32:42	0.925153	4.11527	5419.83	FALSE	250
2022-09-15	11:32:42	1.01141	4.49895	5586.63	FALSE	250
2022-09-15	11:32:43	0.470089	2.09105	5421.92	FALSE	250
2022-09-15	11:32:43	0.38668	1.72003	5588.35	FALSE	250
2022-09-15	11:32:43	0.174618	0.776736	5422.7	FALSE	250
2022-09-15	11:32:44	-0.179783	-0.799711	5588.35	FALSE	250
2022-09-15	11:32:44	-0.309351	-1.37606	5422.7	FALSE	250
2022-09-15	11:32:44	-0.498257	-2.21635	5588.35	FALSE	250
2022-09-15	11:32:44	-0.436679	-1.94244	5422.7	FALSE	250
2022-09-15	11:32:45	-0.455763	-2.02732	5588.35	FALSE	250
2022-09-15	11:32:45	-0.576272	-2.56337	5422.7	FALSE	250
2022-09-15	11:32:45	-0.702684	-3.12568	5588.35	FALSE	250
2022-09-15	11:32:45	-0.815915	-3.62935	5422.7	FALSE	250
2022-09-15	11:32:46	-0.780496	-3.4718	5588.35	FALSE	250
2022-09-15	11:32:46	-0.763905	-3.398	5422.7	FALSE	250
2022-09-15	11:32:46	-0.887518	-3.94786	5588.35	FALSE	250
2022-09-15	11:32:46	-0.593829	-2.64147	5422.7	FALSE	250
2022-09-15	11:32:47	-0.601055	-2.67361	5588.35	FALSE	250
2022-09-15	11:32:47	-0.51444	-2.28833	5422.7	FALSE	250
2022-09-15	11:32:47	0.0162979	0.0724963	5588.42	FALSE	250
2022-09-15	11:32:48	3.01604	13.4159	5436.11	1	251
2022-09-15	11:32:48	6.22698	27.6989	5616.12	1	252
2022-09-15	11:32:48	4.16128	18.5102	5454.62	1	253
2022-09-15	11:32:48	4.02261	17.8934	5634.01	1	254
2022-09-15	11:32:49	8.19355	36.4465	5491.07	1	255
2022-09-15	11:32:49	2.75492	12.2544	5646.27	FALSE	255
2022-09-15	11:32:49	5.12118	22.78	5513.85	1	256
2022-09-15	11:32:49	7.04586	31.3414	5677.61	1	257
2022-09-15	11:32:50	2.885	12.8331	5526.68	FALSE	257
2022-09-15	11:32:50	6.61385	29.4197	5707.03	1	258
2022-09-15	11:32:50	7.35563	32.7193	5559.4	1	259
2022-09-15	11:32:50	8.95258	39.8229	5746.85	1	260
2022-09-15	11:32:51	8.11761	36.1088	5595.51	1	261
2022-09-15	11:32:51	5.38377	23.9481	5770.8	1	262
2022-09-15	11:32:51	16.382	72.8704	5668.38	1	263
2022-09-15	11:32:52	12.3633	54.9944	5825.79	1	264
2022-09-15	11:32:52	11.4847	51.0862	5719.47	1	265
2022-09-15	11:32:52	9.97492	44.3704	5870.16	1	266
2022-09-15	11:32:53	4.71808	20.987	5740.45	1	267
2022-09-15	11:32:53	4.56378	20.3006	5890.46	1	268
2022-09-15	11:32:53	1.02632	4.56528	5745.02	FALSE	268
2022-09-15	11:32:53	1.20754	5.37138	5895.84	FALSE	268
2022-09-15	11:32:53	0.612379	2.72398	5747.74	FALSE	268
2022-09-15	11:32:54	0.835687	3.7173	5899.55	FALSE	268
2022-09-15	11:32:54	1.31207	5.83635	5753.58	FALSE	268
2022-09-15	11:32:54	2.43141	10.8154	5910.37	FALSE	268
2022-09-15	11:32:54	4.36037	19.3958	5772.97	1	269
2022-09-15	11:32:55	4.84647	21.5581	5931.93	1	270
2022-09-15	11:32:55	5.11227	22.7404	5795.71	1	271
2022-09-15	11:32:55	10.1154	44.9953	5976.92	1	272
2022-09-15	11:32:56	8.61925	38.3401	5834.05	1	273
2022-09-15	11:32:56	14.1962	63.1475	6040.07	1	274
2022-09-15	11:32:56	8.3022	36.9298	5870.98	1	275
2022-09-15	11:32:56	4.00032	17.7942	6057.86	1	276
2022-09-15	11:32:57	11.2745	50.1512	5921.14	1	277
2022-09-15	11:32:57	3.87314	17.2285	6075.09	1	278
2022-09-15	11:32:57	6.70255	29.8143	5950.95	1	279
2022-09-15	11:32:57	17.4245	77.5077	6152.6	1	280
2022-09-15	11:32:58	2.39838	10.6685	5961.62	FALSE	280
2022-09-15	11:32:58	8.17752	36.3752	6188.98	1	281
2022-09-15	11:32:58	6.37207	28.3442	5989.96	1	282
2022-09-15	11:32:59	4.91574	21.8662	6210.84	1	283
2022-09-15	11:32:59	16.1493	71.8353	6061.8	1	284
2022-09-15	11:32:59	7.61115	33.8559	6244.7	1	285
2022-09-15	11:32:59	9.21233	40.9783	6102.78	1	286
2022-09-15	11:33:00	7.91085	35.189	6279.89	1	287
2022-09-15	11:33:00	5.55497	24.7096	6127.49	1	288
2022-09-15	11:33:00	14.5554	64.7453	6344.63	1	289
2022-09-15	11:33:00	11.4289	50.838	6178.32	1	290
2022-09-15	11:33:01	8.38306	37.2895	6381.92	1	291
2022-09-15	11:33:01	16.3311	72.644	6250.97	1	292
2022-09-15	11:33:01	3.56429	15.8547	6397.78	1	293
2022-09-15	11:33:01	5.81324	25.8585	6276.83	1	294
2022-09-15	11:33:02	14.289	63.5603	6461.34	1	295
2022-09-15	11:33:02	4.18653	18.6225	6295.45	1	296
2022-09-15	11:33:02	10.3331	45.9637	6507.3	1	297
2022-09-15	11:33:02	14.7201	65.4779	6360.93	1	298
2022-09-15	11:33:03	7.66617	34.1007	6541.4	1	299
2022-09-15	11:33:03	14.2146	63.2294	6424.16	1	300
2022-09-15	11:33:03	15.6217	69.4884	6610.89	1	301
2022-09-15	11:33:04	6.42047	28.5595	6452.72	1	302
2022-09-15	11:33:04	13.3115	59.2122	6670.1	1	303
2022-09-15	11:33:04	14.2086	63.2027	6515.92	1	304
2022-09-15	11:33:04	9.72739	43.2694	6713.37	1	305
2022-09-15	11:33:05	28.5612	127.046	6642.96	1	306
2022-09-15	11:33:05	17.9954	80.0471	6793.42	1	307
2022-09-15	11:33:05	5.71864	25.4377	6668.4	1	308
2022-09-15	11:33:05	8.78846	39.0928	6832.51	1	309
2022-09-15	11:33:06	14.4632	64.3352	6732.74	1	310
2022-09-15	11:33:06	9.85319	43.829	6876.34	1	311
2022-09-15	11:33:06	10.0798	44.837	6777.57	1	312
2022-09-15	11:33:07	3.30551	14.7036	6891.04	1	313
2022-09-15	11:33:07	5.23803	23.2998	6800.87	1	314
2022-09-15	11:33:07	6.13004	27.2676	6918.31	1	315
2022-09-15	11:33:07	0.649529	2.88923	6803.76	FALSE	315
2022-09-15	11:33:08	-0.00960535	-0.0427265	6918.31	FALSE	315
2022-09-15	11:33:08	-0.0757631	-0.337009	6803.76	FALSE	315
2022-09-15	11:33:08	-0.131437	-0.584658	6918.31	FALSE	315
2022-09-15	11:33:08	-0.0843127	-0.37504	6803.76	FALSE	315
2022-09-15	11:33:09	-0.0866537	-0.385453	6918.31	FALSE	315
2022-09-15	11:33:09	-0.011183	-0.0497442	6803.76	FALSE	315
2022-09-15	11:33:09	0.0698857	0.310866	6918.62	FALSE	315
2022-09-15	11:33:09	0.134873	0.599942	6804.36	FALSE	315
2022-09-15	11:33:10	0.194517	0.865251	6919.49	FALSE	315
2022-09-15	11:33:10	0.2193	0.97549	6805.34	FALSE	315
2022-09-15	11:33:10	0.219504	0.976398	6920.46	FALSE	315
2022-09-15	11:33:11	-0.0426842	-0.189868	6805.34	FALSE	315
2022-09-15	11:33:11	-0.38075	-1.69365	6920.46	FALSE	315
2022-09-15	11:33:11	-0.38762	-1.72421	6805.34	FALSE	315
2022-09-15	11:33:11	-0.560496	-2.4932	6920.46	FALSE	315
2022-09-15	11:33:12	-0.688434	-3.06229	6805.34	FALSE	315
2022-09-15	11:33:12	-0.745533	-3.31628	6920.46	FALSE	315
2022-09-15	11:33:12	-0.33388	-1.48517	6805.34	FALSE	315
2022-09-15	11:33:12	0.781692	3.47712	6923.94	FALSE	315
2022-09-15	11:33:13	3.65457	16.2563	6821.6	1	316
2022-09-15	11:33:13	4.13095	18.3753	6942.32	1	317
2022-09-15	11:33:13	0.956145	4.25312	6825.85	FALSE	317
2022-09-15	11:33:13	0.569987	2.53542	6944.85	FALSE	317
2022-09-15	11:33:14	-0.0146944	-0.0653636	6825.85	FALSE	317
2022-09-15	11:33:14	-0.0491473	-0.218617	6944.85	FALSE	317
2022-09-15	11:33:14	-0.121819	-0.541875	6825.85	FALSE	317
2022-09-15	11:33:15	0.272176	1.21069	6946.06	FALSE	317
2022-09-15	11:33:15	0.678333	3.01736	6828.87	FALSE	317
2022-09-15	11:33:15	1.64851	7.3329	6953.39	FALSE	317
2022-09-15	11:33:15	4.13706	18.4025	6847.27	1	318
2022-09-15	11:33:16	5.82642	25.9171	6979.31	1	319
2022-09-15	11:33:16	5.7738	25.683	6872.95	1	320
2022-09-15	11:33:16	1.53742	6.83875	6986.15	FALSE	320
2022-09-15	11:33:16	1.54856	6.8883	6879.84	FALSE	320
2022-09-15	11:33:17	0.418028	1.85947	6988.01	FALSE	320
2022-09-15	11:33:17	0.300827	1.33814	6881.18	FALSE	320
2022-09-15	11:33:17	0.30159	1.34153	6989.35	FALSE	320
2022-09-15	11:33:17	0.0223539	0.0994346	6881.28	FALSE	320
2022-09-15	11:33:18	0.395687	1.76009	6991.11	FALSE	320
2022-09-15	11:33:18	0.456298	2.0297	6883.31	FALSE	320
2022-09-15	11:33:18	2.33472	10.3853	7001.5	FALSE	320
2022-09-15	11:33:19	3.41304	15.1819	6898.49	1	321
2022-09-15	11:33:19	5.07854	22.5904	7024.09	1	322
2022-09-15	11:33:19	5.4911	24.4255	6922.91	1	323
2022-09-15	11:33:19	4.47289	19.8963	7043.98	1	324
2022-09-15	11:33:20	5.17599	23.0238	6945.94	1	325
2022-09-15	11:33:20	1.34469	5.98145	7049.97	FALSE	325
2022-09-15	11:33:20	3.04235	13.533	6959.47	1	326
2022-09-15	11:33:20	1.48871	6.62208	7056.59	FALSE	326
2022-09-15	11:33:21	0.624796	2.77922	6962.25	FALSE	326
2022-09-15	11:33:21	0.884745	3.93552	7060.52	FALSE	326
2022-09-15	11:33:21	0.449835	2.00096	6964.25	FALSE	326
2022-09-15	11:33:21	0.58444	2.59971	7063.12	FALSE	326
2022-09-15	11:33:22	0.411616	1.83095	6966.08	FALSE	326
2022-09-15	11:33:22	0.422405	1.87894	7065	FALSE	326
2022-09-15	11:33:22	0.420471	1.87034	6967.95	FALSE	326
2022-09-15	11:33:23	0.434822	1.93418	7066.94	FALSE	326
2022-09-15	11:33:23	0.584796	2.60129	6970.55	FALSE	326
2022-09-15	11:33:23	0.212481	0.945158	7067.88	FALSE	326
2022-09-15	11:33:23	-0.0472135	-0.210015	6970.55	FALSE	326
2022-09-15	11:33:24	0.0197585	0.0878898	7067.97	FALSE	326
2022-09-15	11:33:24	-0.209962	-0.933953	6970.55	FALSE	326
2022-09-15	11:33:24	-0.328079	-1.45936	7067.97	FALSE	326
2022-09-15	11:33:24	-0.289503	-1.28777	6970.55	FALSE	326
2022-09-15	11:33:25	-0.262328	-1.16689	7067.97	FALSE	326
2022-09-15	11:33:25	-0.288638	-1.28392	6970.55	FALSE	326
2022-09-15	11:33:25	-0.00894378	-0.0397837	7067.97	FALSE	326
2022-09-15	11:33:25	0.602964	2.6821	6973.24	FALSE	326
2022-09-15	11:33:26	1.82057	8.09826	7076.07	FALSE	326
2022-09-15	11:33:26	2.37854	10.5802	6983.82	FALSE	326
2022-09-15	11:33:26	1.862	8.28255	7084.35	FALSE	326
2022-09-15	11:33:27	1.43452	6.38103	6990.2	FALSE	326
2022-09-15	11:33:27	1.15706	5.14683	7089.5	FALSE	326
2022-09-15	11:33:27	1.52001	6.76131	6996.96	FALSE	326
2022-09-15	11:33:27	1.01788	4.52773	7094.02	FALSE	326
2022-09-15	11:33:28	0.991514	4.41045	7001.37	FALSE	326
2022-09-15	11:33:28	0.560216	2.49195	7096.52	FALSE	326
2022-09-15	11:33:28	0.253397	1.12716	7002.5	FALSE	326
2022-09-15	11:33:28	0.462303	2.05642	7098.57	FALSE	326
2022-09-15	11:33:29	0.230598	1.02575	7003.52	FALSE	326
2022-09-15	11:33:29	0.0723284	0.321731	7098.89	FALSE	326
2022-09-15	11:33:29	-0.56935	-2.53258	7003.52	FALSE	326
2022-09-15	11:33:29	-0.962277	-4.2804	7098.89	FALSE	326
2022-09-15	11:33:30	-0.04416	-0.196433	7003.52	FALSE	326
2022-09-15	11:33:30	0.287901	1.28064	7100.17	FALSE	326
2022-09-15	11:33:30	0.295534	1.31459	7004.84	FALSE	326
2022-09-15	11:33:31	-0.237086	-1.05461	7100.17	FALSE	326
2022-09-15	11:33:31	-0.166857	-0.742213	7004.84	FALSE	326
2022-09-15	11:33:31	-0.40477	-1.8005	7100.17	FALSE	326
2022-09-15	11:33:31	-0.550979	-2.45086	7004.84	FALSE	326
2022-09-15	11:33:32	-0.575356	-2.5593	7100.17	FALSE	326
2022-09-15	11:33:32	-0.708689	-3.15239	7004.84	FALSE	326
2022-09-15	11:33:32	-0.762836	-3.39325	7100.17	FALSE	326
2022-09-15	11:33:32	-0.863396	-3.84056	7004.84	FALSE	326
2022-09-15	11:33:33	-0.643142	-2.86082	7100.17	FALSE	326
2022-09-15	11:33:33	-0.282277	-1.25562	7004.84	FALSE	326
2022-09-15	11:33:33	-0.119122	-0.529878	7100.17	FALSE	326
2022-09-15	11:33:33	0.240165	1.0683	7005.9	FALSE	326
2022-09-15	11:33:34	0.532328	2.3679	7102.54	FALSE	326
2022-09-15	11:33:34	6.35986	28.2899	7034.19	1	327
2022-09-15	11:33:34	1.64994	7.33926	7109.88	FALSE	327
2022-09-15	11:33:35	1.06592	4.74143	7038.94	FALSE	327
2022-09-15	11:33:35	0.573295	2.55013	7112.43	FALSE	327
2022-09-15	11:33:35	0.170802	0.759761	7039.7	FALSE	327
2022-09-15	11:33:35	0.699809	3.11289	7115.54	FALSE	327
2022-09-15	11:33:36	0.106476	0.473627	7040.17	FALSE	327
2022-09-15	11:33:36	0.16444	0.731462	7116.28	FALSE	327
2022-09-15	11:33:36	0.132786	0.590659	7040.76	FALSE	327
2022-09-15	11:33:36	0.373041	1.65936	7117.94	FALSE	327
2022-09-15	11:33:37	0.279657	1.24397	7042	FALSE	327
2022-09-15	11:33:37	0.838639	3.73043	7121.67	FALSE	327
2022-09-15	11:33:37	0.298842	1.32931	7043.33	FALSE	327
2022-09-15	11:33:37	0.282456	1.25642	7122.92	FALSE	327
2022-09-15	11:33:38	0.162965	0.724901	7044.06	FALSE	327
2022-09-15	11:33:38	0.0905473	0.402772	7123.33	FALSE	327
2022-09-15	11:33:38	-0.189961	-0.844985	7044.06	FALSE	327
2022-09-15	11:33:39	-0.35444	-1.57662	7123.33	FALSE	327
2022-09-15	11:33:39	-0.350165	-1.5576	7044.06	FALSE	327
2022-09-15	11:33:39	-0.528638	-2.35149	7123.33	FALSE	327
2022-09-15	11:33:39	-0.343193	-1.52659	7044.06	FALSE	327
2022-09-15	11:33:40	0.18271	0.812731	7124.14	FALSE	327
2022-09-15	11:33:40	8.88596	39.5265	7083.58	1	328
2022-09-15	11:33:40	18.3393	81.5769	7205.72	1	329
2022-09-15	11:33:40	4.4592	19.8354	7103.42	1	330
2022-09-15	11:33:41	3.46515	15.4137	7221.13	1	331
2022-09-15	11:33:41	0.294567	1.31029	7104.73	FALSE	331
2022-09-15	11:33:41	-0.0758648	-0.337462	7221.13	FALSE	331
2022-09-15	11:33:41	0.00902061	0.0401255	7104.77	FALSE	331
2022-09-15	11:33:42	-0.131437	-0.584658	7221.13	FALSE	331
2022-09-15	11:33:42	-0.00685724	-0.0305024	7104.77	FALSE	331
2022-09-15	11:33:42	-0.225839	-1.00458	7221.13	FALSE	331
2022-09-15	11:33:43	-0.402582	-1.79077	7104.77	FALSE	331
2022-09-15	11:33:43	-0.210165	-0.934856	7221.13	FALSE	331
2022-09-15	11:33:43	-0.45159	-2.00876	7104.77	FALSE	331
2022-09-15	11:33:43	-0.216119	-0.961341	7221.13	FALSE	331
2022-09-15	11:33:44	-0.119783	-0.532819	7104.77	FALSE	331
2022-09-15	11:33:44	0.0649493	0.288907	7221.42	FALSE	331
2022-09-15	11:33:44	0.14271	0.634803	7105.41	FALSE	331
2022-09-15	11:33:44	0.0731427	0.325353	7221.74	FALSE	331
2022-09-15	11:33:45	0.0876465	0.389869	7105.8	FALSE	331
2022-09-15	11:33:45	-0.0468064	-0.208204	7221.74	FALSE	331
2022-09-15	11:33:45	-0.101005	-0.44929	7105.8	FALSE	331
2022-09-15	11:33:45	0.0156872	0.0697798	7221.81	FALSE	331
2022-09-15	11:33:46	0.066985	0.297963	7106.09	FALSE	331
2022-09-15	11:33:46	0.195229	0.868418	7222.68	FALSE	331
2022-09-15	11:33:46	0.238181	1.05948	7107.15	FALSE	331
2022-09-15	11:33:47	0.394008	1.75263	7224.43	FALSE	331
2022-09-15	11:33:47	0.512583	2.28007	7109.43	FALSE	331
2022-09-15	11:33:47	0.699758	3.11266	7227.55	FALSE	331
2022-09-15	11:33:47	0.542099	2.41136	7111.84	FALSE	331
2022-09-15	11:33:48	1.7852	7.94093	7235.49	FALSE	331
2022-09-15	11:33:48	1.96999	8.76291	7120.61	FALSE	331
2022-09-15	11:33:48	2.45263	10.9098	7246.4	FALSE	331
2022-09-15	11:33:48	5.19044	23.0881	7143.7	1	332
2022-09-15	11:33:49	3.87289	17.2274	7263.62	1	333
2022-09-15	11:33:49	4.01116	17.8424	7161.54	1	334
2022-09-15	11:33:49	0.170649	0.759081	7264.38	FALSE	334
2022-09-15	11:33:49	-0.187366	-0.833441	7161.54	FALSE	334
2022-09-15	11:33:50	0.0266796	0.118676	7264.5	FALSE	334
2022-09-15	11:33:50	-0.178155	-0.792469	7161.54	FALSE	334
2022-09-15	11:33:50	0.535534	2.38216	7266.88	FALSE	334
2022-09-15	11:33:51	1.33401	5.93394	7167.47	FALSE	334
2022-09-15	11:33:51	5.59909	24.9059	7291.79	1	335
2022-09-15	11:33:51	16.8156	74.7992	7242.27	1	336
2022-09-15	11:33:51	14.4982	64.4909	7356.28	1	337
2022-09-15	11:33:52	16.7441	74.4811	7316.75	1	338
2022-09-15	11:33:52	14.6091	64.9842	7421.27	1	339
2022-09-15	11:33:52	10.0858	44.8637	7361.62	1	340
2022-09-15	11:33:52	13.8745	61.7166	7482.98	1	341
2022-09-15	11:33:53	8.73385	38.8499	7400.47	1	342
2022-09-15	11:33:53	7.58306	33.731	7516.71	1	343
2022-09-15	11:33:53	9.64464	42.9013	7443.37	1	344
2022-09-15	11:33:53	0.878944	3.90972	7520.62	FALSE	344
2022-09-15	11:33:54	0.888613	3.95273	7447.32	FALSE	344
2022-09-15	11:33:54	0.12444	0.553534	7521.18	FALSE	344
2022-09-15	11:33:54	0.0455091	0.202434	7447.52	FALSE	344
2022-09-15	11:33:55	1.30067	5.78564	7526.96	FALSE	344
2022-09-15	11:33:55	2.7709	12.3255	7459.85	FALSE	344
2022-09-15	11:33:55	4.30062	19.13	7546.09	1	345
2022-09-15	11:33:55	0.33187	1.47622	7461.32	FALSE	345
2022-09-15	11:33:56	-0.0288929	-0.128521	7546.09	FALSE	345
2022-09-15	11:33:56	-0.24187	-1.07589	7461.32	FALSE	345
2022-09-15	11:33:56	-0.24528	-1.09105	7546.09	FALSE	345
2022-09-15	11:33:56	-0.248129	-1.10373	7461.32	FALSE	345
2022-09-15	11:33:57	-0.272964	-1.2142	7546.09	FALSE	345
2022-09-15	11:33:57	-0.363753	-1.61805	7461.32	FALSE	345
2022-09-15	11:33:57	-0.493422	-2.19484	7546.09	FALSE	345
2022-09-15	11:33:57	-0.510826	-2.27226	7461.32	FALSE	345
2022-09-15	11:33:58	0.237316	1.05563	7547.15	FALSE	345
2022-09-15	11:33:58	0.151158	0.672381	7462	FALSE	345
2022-09-15	11:33:58	2.63579	11.7245	7558.87	FALSE	345
2022-09-15	11:33:59	21.4913	95.5976	7557.59	1	346
2022-09-15	11:33:59	39.248	174.583	7733.45	1	347
2022-09-15	11:33:59	11.8656	52.7806	7610.37	1	348
2022-09-15	11:33:59	7.98718	35.5286	7768.98	1	349
2022-09-15	11:34:00	13.6761	60.834	7671.21	1	350
2022-09-15	11:34:00	8.95487	39.8331	7808.82	1	351
2022-09-15	11:34:00	7.19345	31.9979	7703.21	1	352
2022-09-15	11:34:00	2.85594	12.7038	7821.52	FALSE	352
2022-09-15	11:34:01	1.36001	6.0496	7709.26	FALSE	352
2022-09-15	11:34:01	5.27355	23.4578	7844.98	1	353
2022-09-15	11:34:01	9.86683	43.8896	7753.15	1	354
2022-09-15	11:34:01	11.295	50.2424	7895.22	1	355
2022-09-15	11:34:02	12.1167	53.8975	7807.04	1	356
2022-09-15	11:34:02	16.735	74.4406	7969.66	1	357
2022-09-15	11:34:02	15.0588	66.9846	7874.03	1	358
2022-09-15	11:34:03	11.9426	53.1231	8022.78	1	359
2022-09-15	11:34:03	17.2119	76.562	7950.59	1	360
2022-09-15	11:34:03	17.094	76.0375	8098.82	1	361
2022-09-15	11:34:03	25.0388	111.378	8061.97	1	362
2022-09-15	11:34:04	8.02286	35.6873	8134.51	1	363
2022-09-15	11:34:04	10.059	44.7444	8106.71	1	364
2022-09-15	11:34:04	8.59828	38.2469	8172.76	1	365
2022-09-15	11:34:04	22.3698	99.5053	8206.22	1	366
2022-09-15	11:34:05	8.6108	38.3026	8211.06	1	367
2022-09-15	11:34:05	4.54332	20.2096	8226.43	1	368
2022-09-15	11:34:05	2.73833	12.1806	8223.24	FALSE	368
2022-09-15	11:34:05	1.67391	7.44589	8233.87	FALSE	368
2022-09-15	11:34:06	1.3224	5.8823	8229.12	FALSE	368
2022-09-15	11:34:06	1.64556	7.31978	8241.19	FALSE	368
2022-09-15	11:34:06	2.65482	11.8092	8240.93	FALSE	368
2022-09-15	11:34:07	0.627901	2.79303	8243.98	FALSE	368
2022-09-15	11:34:07	0.516857	2.29908	8243.23	FALSE	368
2022-09-15	11:34:07	0.362812	1.61386	8245.6	FALSE	368
2022-09-15	11:34:07	1.09162	4.85574	8248.09	FALSE	368
2022-09-15	11:34:08	5.61568	24.9797	8270.58	1	369
2022-09-15	11:34:08	9.65894	42.9649	8291.05	1	370
2022-09-15	11:34:08	6.14729	27.3444	8297.92	1	371
2022-09-15	11:34:08	6.17263	27.4571	8318.51	1	372
2022-09-15	11:34:09	1.48408	6.60148	8304.52	FALSE	372
2022-09-15	11:34:09	0.86612	3.85267	8322.36	FALSE	372
2022-09-15	11:34:09	0.170395	0.757951	8305.28	FALSE	372
2022-09-15	11:34:09	1.67955	7.47097	8329.83	FALSE	372
2022-09-15	11:34:10	7.61227	33.8609	8339.14	1	373
2022-09-15	11:34:10	16.3781	72.8531	8402.68	1	374
2022-09-15	11:34:10	7.82037	34.7866	8373.93	1	375
2022-09-15	11:34:11	8.53008	37.9435	8440.63	1	376
2022-09-15	11:34:11	15.308	68.093	8442.02	1	377
2022-09-15	11:34:11	14.2973	63.5972	8504.22	1	378
2022-09-15	11:34:11	5.08378	22.6137	8464.64	1	379
2022-09-15	11:34:12	2.15187	9.57195	8513.8	FALSE	379
2022-09-15	11:34:12	9.96876	44.343	8508.98	1	380
2022-09-15	11:34:12	16.3916	72.9131	8586.71	1	381
2022-09-15	11:34:12	18.7839	83.5545	8592.53	1	382
2022-09-15	11:34:13	10.2778	45.7177	8632.43	1	383
2022-09-15	11:34:13	3.78301	16.8276	8609.36	1	384
2022-09-15	11:34:13	2.94596	13.1042	8645.53	FALSE	384
2022-09-15	11:34:13	1.76429	7.84791	8617.21	FALSE	384
2022-09-15	11:34:14	1.50495	6.69432	8652.23	FALSE	384
2022-09-15	11:34:14	0.528868	2.35251	8619.56	FALSE	384
2022-09-15	11:34:14	1.2305	5.47351	8657.7	FALSE	384
2022-09-15	11:34:15	2.3024	10.2415	8629.8	FALSE	384
2022-09-15	11:34:15	0.147443	0.655856	8658.36	FALSE	384
2022-09-15	11:34:15	0.142456	0.633673	8630.44	FALSE	384
2022-09-15	11:34:15	-0.0860938	-0.382962	8658.36	FALSE	384
2022-09-15	11:34:16	-0.319122	-1.41952	8630.44	FALSE	384
2022-09-15	11:34:16	-0.622735	-2.77005	8658.36	FALSE	384
2022-09-15	11:34:16	-0.685483	-3.04917	8630.44	FALSE	384
2022-09-15	11:34:16	-0.21902	-0.974245	8658.36	FALSE	384
2022-09-15	11:34:17	2.54113	11.3035	8641.74	FALSE	384
2022-09-15	11:34:17	8.08092	35.9455	8694.3	1	385
2022-09-15	11:34:17	6.14047	27.314	8669.05	1	386
2022-09-15	11:34:17	1.86424	8.29251	8702.59	FALSE	386
2022-09-15	11:34:18	0.689428	3.06671	8672.12	FALSE	386
2022-09-15	11:34:18	0.518181	2.30497	8704.9	FALSE	386
2022-09-15	11:34:18	0.428155	1.90452	8674.03	FALSE	386
2022-09-15	11:34:19	0.839911	3.73609	8708.63	FALSE	386
2022-09-15	11:34:19	4.61619	20.5337	8694.56	1	387
2022-09-15	11:34:19	13.3048	59.1824	8767.82	1	388
2022-09-15	11:34:19	7.90413	35.1592	8729.72	1	389
2022-09-15	11:34:20	5.11904	22.7705	8790.59	1	390
2022-09-15	11:34:20	1.0738	4.77648	8734.5	FALSE	390
2022-09-15	11:34:20	0.225713	1.00402	8791.59	FALSE	390
2022-09-15	11:34:20	0.147188	0.654722	8735.15	FALSE	390
2022-09-15	11:34:21	-0.143193	-0.636951	8791.59	FALSE	390
2022-09-15	11:34:21	-0.0532186	-0.236727	8735.15	FALSE	390
2022-09-15	11:34:21	-0.108842	-0.484151	8791.59	FALSE	390
2022-09-15	11:34:21	-0.110623	-0.492073	8735.15	FALSE	390
2022-09-15	11:34:22	-0.281514	-1.25223	8791.59	FALSE	390
2022-09-15	11:34:22	-0.290369	-1.29162	8735.15	FALSE	390
2022-09-15	11:34:22	-0.202837	-0.90226	8791.59	FALSE	390

## Sheet: Boris_star_2022915112914 (2)
Date	Time	Lbs	Total force x time			**GoPro Fitting: 1118
2022-09-15	11:29:15	0.728919	0.728919	FALSE	0
2022-09-15	11:29:15	0.730038	1.45896	FALSE	0
2022-09-15	11:29:15	0.731819	2.19078	FALSE	0
2022-09-15	11:29:15	0.727137	2.91791	FALSE	0
2022-09-15	11:29:15	0.73472	3.65263	FALSE	0
2022-09-15	11:29:16	0.726323	4.37896	FALSE	0
2022-09-15	11:29:16	0.728155	5.10711	FALSE	0
2022-09-15	11:29:16	0.72215	5.82926	FALSE	0
2022-09-15	11:29:17	0.725611	6.55487	FALSE	0
2022-09-15	11:29:17	0.723372	7.27824	FALSE	0
2022-09-15	11:29:17	0.732023	8.01027	FALSE	0
2022-09-15	11:29:17	0.726578	8.73685	FALSE	0
2022-09-15	11:29:18	0.724898	9.46174	FALSE	0
2022-09-15	11:29:18	0.729631	10.1914	FALSE	0
2022-09-15	11:29:18	0.727239	10.9186	FALSE	0
2022-09-15	11:29:18	0.730649	11.6493	FALSE	0
2022-09-15	11:29:19	0.728359	12.3776	FALSE	0
2022-09-15	11:29:19	0.72897	13.1066	FALSE	0
2022-09-15	11:29:19	0.728817	13.8354	FALSE	0
2022-09-15	11:29:19	0.728104	14.5635	FALSE	0
2022-09-15	11:29:20	0.725356	15.2889	FALSE	0
2022-09-15	11:29:20	0.726629	16.0155	FALSE	0
2022-09-15	11:29:20	0.731412	16.7469	FALSE	0
2022-09-15	11:29:21	0.728766	17.4757	FALSE	0
2022-09-15	11:29:21	0.726985	18.2027	FALSE	0
2022-09-15	11:29:21	0.732837	18.9355	FALSE	0
2022-09-15	11:29:21	0.724135	19.6596	FALSE	0
2022-09-15	11:29:22	0.729784	20.3894	FALSE	0
2022-09-15	11:29:22	0.724491	21.1139	FALSE	0
2022-09-15	11:29:22	0.72327	21.8372	FALSE	0
2022-09-15	11:29:22	0.727952	22.5651	FALSE	0
2022-09-15	11:29:23	0.726832	23.292	FALSE	0
2022-09-15	11:29:23	0.725051	24.017	FALSE	0
2022-09-15	11:29:23	0.729071	24.7461	FALSE	0
2022-09-15	11:29:24	0.748868	25.495	FALSE	0
2022-09-15	11:29:24	0.651819	26.1468	FALSE	0
2022-09-15	11:29:24	0.732837	26.8796	FALSE	0
2022-09-15	11:29:24	0.723626	27.6032	FALSE	0
2022-09-15	11:29:25	0.724695	28.3279	FALSE	0
2022-09-15	11:29:25	0.728308	29.0562	FALSE	0
2022-09-15	11:29:25	0.732786	29.789	FALSE	0
2022-09-15	11:29:25	0.705153	30.4942	FALSE	0
2022-09-15	11:29:26	0.728206	31.2224	FALSE	0
2022-09-15	11:29:26	0.733957	31.9563	FALSE	0
2022-09-15	11:29:26	0.723982	32.6803	FALSE	0
2022-09-15	11:29:26	0.729733	33.4101	FALSE	0
2022-09-15	11:29:27	0.729326	34.1394	FALSE	0
2022-09-15	11:29:27	0.732226	34.8716	FALSE	0
2022-09-15	11:29:27	0.730852	35.6025	FALSE	0
2022-09-15	11:29:28	0.584338	36.1868	FALSE	0
2022-09-15	11:29:28	0.208715	36.3955	FALSE	0
2022-09-15	11:29:28	0.0180282	36.4135	FALSE	0
2022-09-15	11:29:28	-0.103397	36.4135	FALSE	0
2022-09-15	11:29:29	-0.480699	36.4135	FALSE	0
2022-09-15	11:29:29	-0.48701	36.4135	FALSE	0
2022-09-15	11:29:29	-0.471183	36.4135	FALSE	0
2022-09-15	11:29:29	-0.704211	36.4135	FALSE	0
2022-09-15	11:29:30	-0.916933	36.4135	FALSE	0
2022-09-15	11:29:30	-0.908383	36.4135	FALSE	0
2022-09-15	11:29:30	-0.897595	36.4135	FALSE	0
2022-09-15	11:29:30	-1.07556	36.4135	FALSE	0
2022-09-15	11:29:31	-0.777442	36.4135	FALSE	0
2022-09-15	11:29:31	-0.837697	36.4135	FALSE	0
2022-09-15	11:29:31	-0.921208	36.4135	FALSE	0
2022-09-15	11:29:32	-0.899529	36.4135	FALSE	0
2022-09-15	11:29:32	-0.640088	36.4135	FALSE	0
2022-09-15	11:29:32	-0.00894378	36.4135	FALSE	0
2022-09-15	11:29:32	0.0720231	36.4856	FALSE	0
2022-09-15	11:29:33	0.323626	36.8092	FALSE	0
2022-09-15	11:29:33	0.573855	37.383	FALSE	0
2022-09-15	11:29:33	0.728461	38.1115	FALSE	0
2022-09-15	11:29:33	0.722965	38.8345	FALSE	0
2022-09-15	11:29:34	0.969275	39.8037	FALSE	0
2022-09-15	11:29:34	4.11095	43.9147	1	1
2022-09-15	11:29:34	1.01894	44.9336	FALSE	1
2022-09-15	11:29:34	0.36098	45.2946	FALSE	1
2022-09-15	11:29:35	0.332074	45.6267	FALSE	1
2022-09-15	11:29:35	1.08419	46.7109	FALSE	1
2022-09-15	11:29:35	1.47177	48.1826	FALSE	1
2022-09-15	11:29:36	1.21268	49.3953	FALSE	1
2022-09-15	11:29:36	0.792786	50.1881	FALSE	1
2022-09-15	11:29:36	0.231616	50.4197	FALSE	1
2022-09-15	11:29:36	0.103015	50.5227	FALSE	1
2022-09-15	11:29:37	1.16612	51.6889	FALSE	1
2022-09-15	11:29:37	1.07452	52.7634	FALSE	1
2022-09-15	11:29:37	1.29375	54.0571	FALSE	1
2022-09-15	11:29:37	1.27884	55.336	FALSE	1
2022-09-15	11:29:38	0.997366	56.3333	FALSE	1
2022-09-15	11:29:38	2.33955	58.6729	FALSE	1
2022-09-15	11:29:38	3.14693	61.8198	1	2
2022-09-15	11:29:38	4.99304	66.8129	1	3
2022-09-15	11:29:39	1.96576	68.7786	FALSE	3
2022-09-15	11:29:39	5.46652	74.2451	1	4
2022-09-15	11:29:39	4.25451	78.4997	1	5
2022-09-15	11:29:40	6.55746	85.0571	1	6
2022-09-15	11:29:40	5.80678	90.8639	1	7
2022-09-15	11:29:40	7.48795	98.3518	1	8
2022-09-15	11:29:40	11.9993	110.351	1	9
2022-09-15	11:29:41	4.74551	115.097	1	10
2022-09-15	11:29:41	5.13573	120.232	1	11
2022-09-15	11:29:41	4.90057	125.133	1	12
2022-09-15	11:29:41	5.03065	130.164	1	13
2022-09-15	11:29:42	5.72622	135.89	1	14
2022-09-15	11:29:42	4.64892	140.539	1	15
2022-09-15	11:29:42	15.2317	155.77	1	16
2022-09-15	11:29:42	4.40724	160.178	1	17
2022-09-15	11:29:43	5.65014	165.828	1	18
2022-09-15	11:29:43	7.65976	173.488	1	19
2022-09-15	11:29:43	1.77375	175.261	FALSE	19
2022-09-15	11:29:44	3.03935	178.301	1	20
2022-09-15	11:29:44	3.91034	182.211	1	21
2022-09-15	11:29:44	1.87472	184.086	FALSE	21
2022-09-15	11:29:44	0.964644	185.05	FALSE	21
2022-09-15	11:29:45	0.876501	185.927	FALSE	21
2022-09-15	11:29:45	3.63401	189.561	1	22
2022-09-15	11:29:45	3.81655	193.377	1	23
2022-09-15	11:29:45	9.77655	203.154	1	24
2022-09-15	11:29:46	15.0753	218.229	1	25
2022-09-15	11:29:46	7.31813	225.547	1	26
2022-09-15	11:29:46	10.8569	236.404	1	27
2022-09-15	11:29:46	2.4567	238.861	FALSE	27
2022-09-15	11:29:47	0.970649	239.832	FALSE	27
2022-09-15	11:29:47	0.643423	240.475	FALSE	27
2022-09-15	11:29:47	0.725763	241.201	FALSE	27
2022-09-15	11:29:48	0.726629	241.927	FALSE	27
2022-09-15	11:29:48	0.731972	242.659	FALSE	27
2022-09-15	11:29:48	0.730038	243.389	FALSE	27
2022-09-15	11:29:48	0.724491	244.114	FALSE	27
2022-09-15	11:29:49	0.722404	244.836	FALSE	27
2022-09-15	11:29:49	0.726679	245.563	FALSE	27
2022-09-15	11:29:49	0.72729	246.29	FALSE	27
2022-09-15	11:29:49	0.725865	247.016	FALSE	27
2022-09-15	11:29:50	0.733397	247.75	FALSE	27
2022-09-15	11:29:50	0.725305	248.475	FALSE	27
2022-09-15	11:29:50	0.733295	249.208	FALSE	27
2022-09-15	11:29:51	0.722914	249.931	FALSE	27
2022-09-15	11:29:51	0.731819	250.663	FALSE	27
2022-09-15	11:29:51	0.729173	251.392	FALSE	27
2022-09-15	11:29:51	0.737315	252.129	FALSE	27
2022-09-15	11:29:52	0.716043	252.845	FALSE	27
2022-09-15	11:29:52	0.721997	253.567	FALSE	27
2022-09-15	11:29:52	0.72327	254.291	FALSE	27
2022-09-15	11:29:52	0.731209	255.022	FALSE	27
2022-09-15	11:29:53	0.729529	255.751	FALSE	27
2022-09-15	11:29:53	0.728359	256.48	FALSE	27
2022-09-15	11:29:53	0.732837	257.213	FALSE	27
2022-09-15	11:29:53	0.726781	257.939	FALSE	27
2022-09-15	11:29:54	0.724338	258.664	FALSE	27
2022-09-15	11:29:54	0.72902	259.393	FALSE	27
2022-09-15	11:29:54	0.725967	260.119	FALSE	27
2022-09-15	11:29:55	0.72673	260.846	FALSE	27
2022-09-15	11:29:55	0.730903	261.576	FALSE	27
2022-09-15	11:29:55	0.722659	262.299	FALSE	27
2022-09-15	11:29:55	0.726527	263.026	FALSE	27
2022-09-15	11:29:56	0.723321	263.749	FALSE	27
2022-09-15	11:29:56	0.723524	264.472	FALSE	27
2022-09-15	11:29:56	0.724847	265.197	FALSE	27
2022-09-15	11:29:56	0.722507	265.92	FALSE	27
2022-09-15	11:29:57	0.725153	266.645	FALSE	27
2022-09-15	11:29:57	0.728308	267.373	FALSE	27
2022-09-15	11:29:57	0.72617	268.099	FALSE	27
2022-09-15	11:29:57	0.720267	268.82	FALSE	27
2022-09-15	11:29:58	0.727239	269.547	FALSE	27
2022-09-15	11:29:58	0.724084	270.271	FALSE	27
2022-09-15	11:29:58	0.723575	270.995	FALSE	27
2022-09-15	11:29:59	0.734466	271.729	FALSE	27
2022-09-15	11:29:59	0.73701	272.466	FALSE	27
2022-09-15	11:29:59	0.722862	273.189	FALSE	27
2022-09-15	11:29:59	1.59869	274.788	FALSE	27
2022-09-15	11:30:00	0.725153	275.513	FALSE	27
2022-09-15	11:30:00	0.729377	276.242	FALSE	27
2022-09-15	11:30:00	0.727901	276.97	FALSE	27
2022-09-15	11:30:00	0.723982	277.694	FALSE	27
2022-09-15	11:30:01	0.726527	278.421	FALSE	27
2022-09-15	11:30:01	0.723779	279.144	FALSE	27
2022-09-15	11:30:01	0.722659	279.867	FALSE	27
2022-09-15	11:30:01	0.721081	280.588	FALSE	27
2022-09-15	11:30:02	0.724796	281.313	FALSE	27
2022-09-15	11:30:02	0.720827	282.034	FALSE	27
2022-09-15	11:30:02	0.723422	282.757	FALSE	27
2022-09-15	11:30:03	0.723931	283.481	FALSE	27
2022-09-15	11:30:03	0.722354	284.203	FALSE	27
2022-09-15	11:30:03	0.727239	284.931	FALSE	27
2022-09-15	11:30:03	0.72902	285.66	FALSE	27
2022-09-15	11:30:04	0.7193	286.379	FALSE	27
2022-09-15	11:30:04	0.728868	287.108	FALSE	27
2022-09-15	11:30:04	0.728715	287.837	FALSE	27
2022-09-15	11:30:04	0.730547	288.567	FALSE	27
2022-09-15	11:30:05	0.728206	289.295	FALSE	27
2022-09-15	11:30:05	0.73416	290.029	FALSE	27
2022-09-15	11:30:05	0.728461	290.758	FALSE	27
2022-09-15	11:30:05	0.721591	291.48	FALSE	27
2022-09-15	11:30:06	0.717824	292.197	FALSE	27
2022-09-15	11:30:06	0.72556	292.923	FALSE	27
2022-09-15	11:30:06	0.729835	293.653	FALSE	27
2022-09-15	11:30:07	0.728104	294.381	FALSE	27
2022-09-15	11:30:07	0.727239	295.108	FALSE	27
2022-09-15	11:30:07	0.732379	295.84	FALSE	27
2022-09-15	11:30:07	0.724237	296.565	FALSE	27
2022-09-15	11:30:08	0.72556	297.29	FALSE	27
2022-09-15	11:30:08	0.722303	298.013	FALSE	27
2022-09-15	11:30:08	0.717112	298.73	FALSE	27
2022-09-15	11:30:08	0.724593	299.454	FALSE	27
2022-09-15	11:30:09	0.720521	300.175	FALSE	27
2022-09-15	11:30:09	0.728104	300.903	FALSE	27
2022-09-15	11:30:09	0.729835	301.633	FALSE	27
2022-09-15	11:30:09	0.730242	302.363	FALSE	27
2022-09-15	11:30:10	0.722608	303.086	FALSE	27
2022-09-15	11:30:10	0.731259	303.817	FALSE	27
2022-09-15	11:30:10	0.736908	304.554	FALSE	27
2022-09-15	11:30:11	0.732786	305.287	FALSE	27
2022-09-15	11:30:11	0.733092	306.02	FALSE	27
2022-09-15	11:30:11	0.741947	306.762	FALSE	27
2022-09-15	11:30:11	0.730801	307.492	FALSE	27
2022-09-15	11:30:12	0.733295	308.226	FALSE	27
2022-09-15	11:30:12	0.733397	308.959	FALSE	27
2022-09-15	11:30:12	0.711463	309.671	FALSE	27
2022-09-15	11:30:12	0.735433	310.406	FALSE	27
2022-09-15	11:30:13	0.765814	311.172	FALSE	27
2022-09-15	11:30:13	0.733499	311.905	FALSE	27
2022-09-15	11:30:13	0.763779	312.669	FALSE	27
2022-09-15	11:30:14	0.821234	313.49	FALSE	27
2022-09-15	11:30:14	0.720114	314.21	FALSE	27
2022-09-15	11:30:14	0.847494	315.058	FALSE	27
2022-09-15	11:30:14	0.724186	315.782	FALSE	27
2022-09-15	11:30:15	0.722812	316.505	FALSE	27
2022-09-15	11:30:15	0.681285	317.186	FALSE	27
2022-09-15	11:30:15	0.61757	317.804	FALSE	27
2022-09-15	11:30:15	0.675585	318.479	FALSE	27
2022-09-15	11:30:16	0.731565	319.211	FALSE	27
2022-09-15	11:30:16	1.0395	320.25	FALSE	27
2022-09-15	11:30:16	0.698079	320.948	FALSE	27
2022-09-15	11:30:16	0.0113107	320.96	FALSE	27
2022-09-15	11:30:17	-0.0449234	320.96	FALSE	27
2022-09-15	11:30:17	-0.40757	320.96	FALSE	27
2022-09-15	11:30:17	-0.577799	320.96	FALSE	27
2022-09-15	11:30:17	-0.594491	320.96	FALSE	27
2022-09-15	11:30:18	-0.577137	320.96	FALSE	27
2022-09-15	11:30:18	-0.169809	320.96	FALSE	27
2022-09-15	11:30:18	2.74083	323.701	FALSE	27
2022-09-15	11:30:19	2.54403	326.245	FALSE	27
2022-09-15	11:30:19	2.99553	329.24	FALSE	27
2022-09-15	11:30:19	2.98225	332.222	FALSE	27
2022-09-15	11:30:19	2.9536	335.176	FALSE	27
2022-09-15	11:30:20	2.45955	337.636	FALSE	27
2022-09-15	11:30:20	3.06271	340.698	1	28
2022-09-15	11:30:20	6.90744	347.606	1	29
2022-09-15	11:30:20	6.65853	354.264	1	30
2022-09-15	11:30:21	3.51207	357.776	1	31
2022-09-15	11:30:21	10.0007	367.777	1	32
2022-09-15	11:30:21	3.69161	371.469	1	33
2022-09-15	11:30:22	1.70785	373.176	FALSE	33
2022-09-15	11:30:22	5.17141	378.348	1	34
2022-09-15	11:30:22	1.38424	379.732	FALSE	34
2022-09-15	11:30:22	0.244491	379.977	FALSE	34
2022-09-15	11:30:23	0.186883	380.164	FALSE	34
2022-09-15	11:30:23	0.036247	380.2	FALSE	34
2022-09-15	11:30:23	-0.235814	380.2	FALSE	34
2022-09-15	11:30:23	0.0698349	380.27	FALSE	34
2022-09-15	11:30:24	-0.167926	380.27	FALSE	34
2022-09-15	11:30:24	-0.141921	380.27	FALSE	34
2022-09-15	11:30:24	-0.237392	380.27	FALSE	34
2022-09-15	11:30:24	-0.339478	380.27	FALSE	34
2022-09-15	11:30:25	-0.257188	380.27	FALSE	34
2022-09-15	11:30:25	-0.275865	380.27	FALSE	34
2022-09-15	11:30:25	-0.32818	380.27	FALSE	34
2022-09-15	11:30:26	-0.286094	380.27	FALSE	34
2022-09-15	11:30:26	0.201896	380.471	FALSE	34
2022-09-15	11:30:26	3.38693	383.858	1	35
2022-09-15	11:30:26	8.84927	392.708	1	36
2022-09-15	11:30:27	12.1651	404.873	1	37
2022-09-15	11:30:27	22.0524	426.925	1	38
2022-09-15	11:30:27	33.1795	460.105	1	39
2022-09-15	11:30:27	6.88367	466.988	1	40
2022-09-15	11:30:28	7.68077	474.669	1	41
2022-09-15	11:30:28	6.15472	480.824	1	42
2022-09-15	11:30:28	19.8051	500.629	1	43
2022-09-15	11:30:28	13.3822	514.011	1	44
2022-09-15	11:30:29	11.2026	525.214	1	45
2022-09-15	11:30:29	8.87405	534.088	1	46
2022-09-15	11:30:29	7.03477	541.123	1	47
2022-09-15	11:30:30	13.7313	554.854	1	48
2022-09-15	11:30:30	14.407	569.261	1	49
2022-09-15	11:30:30	13.6639	582.925	1	50
2022-09-15	11:30:30	5.63238	588.557	1	51
2022-09-15	11:30:31	7.52495	596.082	1	52
2022-09-15	11:30:31	2.47889	598.561	FALSE	52
2022-09-15	11:30:31	3.84306	602.404	1	53
2022-09-15	11:30:31	5.32067	607.725	1	54
2022-09-15	11:30:32	0.846374	608.571	FALSE	54
2022-09-15	11:30:32	0.25411	608.825	FALSE	54
2022-09-15	11:30:32	0.26383	609.089	FALSE	54
2022-09-15	11:30:32	0.18388	609.273	FALSE	54
2022-09-15	11:30:33	0.107138	609.38	FALSE	54
2022-09-15	11:30:33	0.345916	609.726	FALSE	54
2022-09-15	11:30:33	2.27543	612.001	FALSE	54
2022-09-15	11:30:34	6.76098	618.762	1	55
2022-09-15	11:30:34	14.4748	633.237	1	56
2022-09-15	11:30:34	11.1764	644.414	1	57
2022-09-15	11:30:34	4.43283	648.846	1	58
2022-09-15	11:30:35	2.89859	651.745	FALSE	58
2022-09-15	11:30:35	16.0937	667.839	1	59
2022-09-15	11:30:35	8.12454	675.963	1	60
2022-09-15	11:30:35	22.8498	698.813	1	61
2022-09-15	11:30:36	23.4772	722.29	1	62
2022-09-15	11:30:36	11.7357	734.026	1	63
2022-09-15	11:30:36	22.1308	756.157	1	64
2022-09-15	11:30:36	9.77008	765.927	1	65
2022-09-15	11:30:37	7.57894	773.506	1	66
2022-09-15	11:30:37	16.1029	789.609	1	67
2022-09-15	11:30:37	12.3411	801.95	1	68
2022-09-15	11:30:38	18.3471	820.297	1	69
2022-09-15	11:30:38	14.8234	835.12	1	70
2022-09-15	11:30:38	11.0023	846.123	1	71
2022-09-15	11:30:38	22.6722	868.795	1	72
2022-09-15	11:30:39	14.6064	883.401	1	73
2022-09-15	11:30:39	10.1213	893.522	1	74
2022-09-15	11:30:39	21.0033	914.526	1	75
2022-09-15	11:30:39	13.1397	927.665	1	76
2022-09-15	11:30:40	12.4375	940.103	1	77
2022-09-15	11:30:40	18.892	958.995	1	78
2022-09-15	11:30:40	8.38993	967.385	1	79
2022-09-15	11:30:40	11.8536	979.238	1	80
2022-09-15	11:30:41	10.3668	989.605	1	81
2022-09-15	11:30:41	5.72469	995.33	1	82
2022-09-15	11:30:41	12.5262	1007.86	1	83
2022-09-15	11:30:42	12.5293	1020.39	1	84
2022-09-15	11:30:42	9.71024	1030.1	1	85
2022-09-15	11:30:42	9.89812	1039.99	1	86
2022-09-15	11:30:42	7.47411	1047.47	1	87
2022-09-15	11:30:43	9.4138	1056.88	1	88
2022-09-15	11:30:43	14.7732	1071.65	1	89
2022-09-15	11:30:43	6.55019	1078.21	1	90
2022-09-15	11:30:43	6.60306	1084.81	1	91
2022-09-15	11:30:44	2.33411	1087.14	FALSE	91
2022-09-15	11:30:44	0.674415	1087.82	FALSE	91
2022-09-15	11:30:44	0.135535	1087.95	FALSE	91
2022-09-15	11:30:44	0.188512	1088.14	FALSE	91
2022-09-15	11:30:45	0.100674	1088.24	FALSE	91
2022-09-15	11:30:45	-0.00365114	1088.24	FALSE	91
2022-09-15	11:30:45	0.0938551	1088.34	FALSE	91
2022-09-15	11:30:46	0.545712	1088.88	FALSE	91
2022-09-15	11:30:46	1.29304	1090.17	FALSE	91
2022-09-15	11:30:46	5.33349	1095.51	1	92
2022-09-15	11:30:46	3.04271	1098.55	1	93
2022-09-15	11:30:47	5.21136	1103.76	1	94
2022-09-15	11:30:47	2.40093	1106.16	FALSE	94
2022-09-15	11:30:47	7.24199	1113.4	1	95
2022-09-15	11:30:47	4.81014	1118.21	1	96
2022-09-15	11:30:48	4.71584	1122.93	1	97
2022-09-15	11:30:48	6.92607	1129.86	1	98
2022-09-15	11:30:48	2.83146	1132.69	FALSE	98
2022-09-15	11:30:49	4.93915	1137.63	1	99
2022-09-15	11:30:49	6.30586	1143.93	1	100
2022-09-15	11:30:49	9.43166	1153.36	1	101
2022-09-15	11:30:49	18.5963	1171.96	1	102
2022-09-15	11:30:50	14.8266	1186.79	1	103
2022-09-15	11:30:50	16.885	1203.67	1	104
2022-09-15	11:30:50	5.0538	1208.73	1	105
2022-09-15	11:30:50	1.8535	1210.58	FALSE	105
2022-09-15	11:30:51	1.87019	1212.45	FALSE	105
2022-09-15	11:30:51	0.64958	1213.1	FALSE	105
2022-09-15	11:30:51	1.29559	1214.4	FALSE	105
2022-09-15	11:30:51	2.39492	1216.79	FALSE	105
2022-09-15	11:30:52	2.70515	1219.5	FALSE	105
2022-09-15	11:30:52	3.742	1223.24	1	106
2022-09-15	11:30:52	3.46266	1226.7	1	107
2022-09-15	11:30:53	2.89843	1229.6	FALSE	107
2022-09-15	11:30:53	1.85151	1231.45	FALSE	107
2022-09-15	11:30:53	1.44515	1232.9	FALSE	107
2022-09-15	11:30:53	3.59253	1236.49	1	108
2022-09-15	11:30:54	3.49833	1239.99	1	109
2022-09-15	11:30:54	7.76703	1247.75	1	110
2022-09-15	11:30:54	9.46749	1257.22	1	111
2022-09-15	11:30:54	6.23797	1263.46	1	112
2022-09-15	11:30:55	5.41456	1268.87	1	113
2022-09-15	11:30:55	3.21599	1272.09	1	114
2022-09-15	11:30:55	4.71945	1276.81	1	115
2022-09-15	11:30:55	2.0192	1278.83	FALSE	115
2022-09-15	11:30:56	2.2909	1281.12	FALSE	115
2022-09-15	11:30:56	4.09497	1285.21	1	116
2022-09-15	11:30:56	1.52067	1286.73	FALSE	116
2022-09-15	11:30:57	2.48281	1289.22	FALSE	116
2022-09-15	11:30:57	2.92016	1292.14	FALSE	116
2022-09-15	11:30:57	2.822	1294.96	FALSE	116
2022-09-15	11:30:57	3.27523	1298.23	1	117
2022-09-15	11:30:58	2.52291	1300.76	FALSE	117
2022-09-15	11:30:58	5.10973	1305.87	1	118
2022-09-15	11:30:58	2.9109	1308.78	FALSE	118
2022-09-15	11:30:58	4.00423	1312.78	1	119
2022-09-15	11:30:59	5.44724	1318.23	1	120
2022-09-15	11:30:59	1.57584	1319.81	FALSE	120
2022-09-15	11:30:59	2.42714	1322.23	FALSE	120
2022-09-15	11:30:59	0.97589	1323.21	FALSE	120
2022-09-15	11:31:00	1.5563	1324.76	FALSE	120
2022-09-15	11:31:00	2.725	1327.49	FALSE	120
2022-09-15	11:31:00	4.53747	1332.03	1	121
2022-09-15	11:31:01	9.23762	1341.26	1	122
2022-09-15	11:31:01	5.96917	1347.23	1	123
2022-09-15	11:31:01	7.97991	1355.21	1	124
2022-09-15	11:31:01	2.85233	1358.07	FALSE	124
2022-09-15	11:31:02	5.65609	1363.72	1	125
2022-09-15	11:31:02	1.92576	1365.65	FALSE	125
2022-09-15	11:31:02	3.27563	1368.92	1	126
2022-09-15	11:31:02	2.33584	1371.26	FALSE	126
2022-09-15	11:31:03	2.83243	1374.09	FALSE	126
2022-09-15	11:31:03	3.02912	1377.12	1	127
2022-09-15	11:31:03	4.37553	1381.5	1	128
2022-09-15	11:31:03	4.8648	1386.36	1	129
2022-09-15	11:31:04	1.60673	1387.97	FALSE	129
2022-09-15	11:31:04	0.409835	1388.38	FALSE	129
2022-09-15	11:31:04	0.313753	1388.69	FALSE	129
2022-09-15	11:31:05	0.389428	1389.08	FALSE	129
2022-09-15	11:31:05	0.238028	1389.32	FALSE	129
2022-09-15	11:31:05	0.217926	1389.54	FALSE	129
2022-09-15	11:31:05	1.40281	1390.94	FALSE	129
2022-09-15	11:31:06	0.629173	1391.57	FALSE	129
2022-09-15	11:31:06	0.538537	1392.11	FALSE	129
2022-09-15	11:31:06	0.446323	1392.55	FALSE	129
2022-09-15	11:31:06	-0.788282	1392.55	FALSE	129
2022-09-15	11:31:07	0.030242	1392.58	FALSE	129
2022-09-15	11:31:07	0.180064	1392.76	FALSE	129
2022-09-15	11:31:07	0.259453	1393.02	FALSE	129
2022-09-15	11:31:07	0.322303	1393.35	FALSE	129
2022-09-15	11:31:08	0.266934	1393.61	FALSE	129
2022-09-15	11:31:08	0.5593	1394.17	FALSE	129
2022-09-15	11:31:08	0.080929	1394.25	FALSE	129
2022-09-15	11:31:09	0.327392	1394.58	FALSE	129
2022-09-15	11:31:09	0.128003	1394.71	FALSE	129
2022-09-15	11:31:09	0.563219	1395.27	FALSE	129
2022-09-15	11:31:09	0.397316	1395.67	FALSE	129
2022-09-15	11:31:10	0.362812	1396.03	FALSE	129
2022-09-15	11:31:10	0.314008	1396.35	FALSE	129
2022-09-15	11:31:10	0.204288	1396.55	FALSE	129
2022-09-15	11:31:10	0.0940587	1396.64	FALSE	129
2022-09-15	11:31:11	0.100827	1396.74	FALSE	129
2022-09-15	11:31:11	0.176349	1396.92	FALSE	129
2022-09-15	11:31:11	0.422354	1397.34	FALSE	129
2022-09-15	11:31:11	0.547392	1397.89	FALSE	129
2022-09-15	11:31:12	0.418944	1398.31	FALSE	129
2022-09-15	11:31:12	0.302201	1398.61	FALSE	129
2022-09-15	11:31:12	0.280165	1398.89	FALSE	129
2022-09-15	11:31:13	-0.132404	1398.89	FALSE	129
2022-09-15	11:31:13	-0.36014	1398.89	FALSE	129
2022-09-15	11:31:13	-0.415814	1398.89	FALSE	129
2022-09-15	11:31:13	-0.412964	1398.89	FALSE	129
2022-09-15	11:31:14	-0.588994	1398.89	FALSE	129
2022-09-15	11:31:14	-0.521615	1398.89	FALSE	129
2022-09-15	11:31:14	-0.0454323	1398.89	FALSE	129
2022-09-15	11:31:14	0.290853	1399.18	FALSE	129
2022-09-15	11:31:15	0.284695	1399.47	FALSE	129
2022-09-15	11:31:15	0.18271	1399.65	FALSE	129
2022-09-15	11:31:15	0.218079	1399.87	FALSE	129
2022-09-15	11:31:15	0.188563	1400.06	FALSE	129
2022-09-15	11:31:16	0.384288	1400.44	FALSE	129
2022-09-15	11:31:16	0.292634	1400.73	FALSE	129
2022-09-15	11:31:16	0.207443	1400.94	FALSE	129
2022-09-15	11:31:17	-0.0135748	1400.94	FALSE	129
2022-09-15	11:31:17	-0.305178	1400.94	FALSE	129
2022-09-15	11:31:17	-0.558562	1400.94	FALSE	129
2022-09-15	11:31:17	-0.611284	1400.94	FALSE	129
2022-09-15	11:31:18	-0.56589	1400.94	FALSE	129
2022-09-15	11:31:18	-0.542684	1400.94	FALSE	129
2022-09-15	11:31:18	-0.503345	1400.94	FALSE	129
2022-09-15	11:31:18	-0.284567	1400.94	FALSE	129
2022-09-15	11:31:19	0.18958	1401.13	FALSE	129
2022-09-15	11:31:19	0.355942	1401.49	FALSE	129
2022-09-15	11:31:19	1.15111	1402.64	FALSE	129
2022-09-15	11:31:19	0.766119	1403.4	FALSE	129
2022-09-15	11:31:20	0.542201	1403.95	FALSE	129
2022-09-15	11:31:20	0.416603	1404.36	FALSE	129
2022-09-15	11:31:20	2.58439	1406.95	FALSE	129
2022-09-15	11:31:21	1.70938	1408.66	FALSE	129
2022-09-15	11:31:21	1.4163	1410.07	FALSE	129
2022-09-15	11:31:21	0.698079	1410.77	FALSE	129
2022-09-15	11:31:21	0.487952	1411.26	FALSE	129
2022-09-15	11:31:22	0.841998	1412.1	FALSE	129
2022-09-15	11:31:22	1.58276	1413.68	FALSE	129
2022-09-15	11:31:22	1.49391	1415.18	FALSE	129
2022-09-15	11:31:22	2.21533	1417.39	FALSE	129
2022-09-15	11:31:23	0.556807	1417.95	FALSE	129
2022-09-15	11:31:23	0.17584	1418.13	FALSE	129
2022-09-15	11:31:23	0.172583	1418.3	FALSE	129
2022-09-15	11:31:23	0.200725	1418.5	FALSE	129
2022-09-15	11:31:24	0.310293	1418.81	FALSE	129
2022-09-15	11:31:24	0.266374	1419.08	FALSE	129
2022-09-15	11:31:24	0.300878	1419.38	FALSE	129
2022-09-15	11:31:25	0.73243	1420.11	FALSE	129
2022-09-15	11:31:25	0.585458	1420.69	FALSE	129
2022-09-15	11:31:25	0.735178	1421.43	FALSE	129
2022-09-15	11:31:25	0.287952	1421.72	FALSE	129
2022-09-15	11:31:26	0.122812	1421.84	FALSE	129
2022-09-15	11:31:26	0.231463	1422.07	FALSE	129
2022-09-15	11:31:26	0.189173	1422.26	FALSE	129
2022-09-15	11:31:26	0.207952	1422.47	FALSE	129
2022-09-15	11:31:27	0.725712	1423.19	FALSE	129
2022-09-15	11:31:27	0.719555	1423.91	FALSE	129
2022-09-15	11:31:27	2.50083	1426.42	FALSE	129
2022-09-15	11:31:27	4.691	1431.11	1	130
2022-09-15	11:31:28	6.06535	1437.17	1	131
2022-09-15	11:31:28	10.6277	1447.8	1	132
2022-09-15	11:31:28	9.47731	1457.28	1	133
2022-09-15	11:31:29	15.3432	1472.62	1	134
2022-09-15	11:31:29	7.13634	1479.76	1	135
2022-09-15	11:31:29	8.73344	1488.49	1	136
2022-09-15	11:31:29	4.38704	1492.88	1	137
2022-09-15	11:31:30	4.31625	1497.19	1	138
2022-09-15	11:31:30	8.09985	1505.29	1	139
2022-09-15	11:31:30	1.54317	1506.84	FALSE	139
2022-09-15	11:31:30	2.96424	1509.8	FALSE	139
2022-09-15	11:31:31	8.08103	1517.88	1	140
2022-09-15	11:31:31	14.3872	1532.27	1	141
2022-09-15	11:31:31	16.3607	1548.63	1	142
2022-09-15	11:31:31	22.8289	1571.46	1	143
2022-09-15	11:31:32	22.7759	1594.23	1	144
2022-09-15	11:31:32	13.3242	1607.56	1	145
2022-09-15	11:31:32	11.0415	1618.6	1	146
2022-09-15	11:31:33	9.79268	1628.39	1	147
2022-09-15	11:31:33	10.8421	1639.23	1	148
2022-09-15	11:31:33	9.77828	1649.01	1	149
2022-09-15	11:31:33	9.10963	1658.12	1	150
2022-09-15	11:31:34	8.19894	1666.32	1	151
2022-09-15	11:31:34	8.59329	1674.91	1	152
2022-09-15	11:31:34	8.0768	1682.99	1	153
2022-09-15	11:31:34	7.63757	1690.63	1	154
2022-09-15	11:31:35	7.11965	1697.75	1	155
2022-09-15	11:31:35	6.30317	1704.05	1	156
2022-09-15	11:31:35	6.21115	1710.26	1	157
2022-09-15	11:31:35	6.19451	1716.46	1	158
2022-09-15	11:31:36	5.70912	1722.17	1	159
2022-09-15	11:31:36	5.9651	1728.13	1	160
2022-09-15	11:31:36	5.59177	1733.72	1	161
2022-09-15	11:31:37	4.73701	1738.46	1	162
2022-09-15	11:31:37	4.75212	1743.21	1	163
2022-09-15	11:31:37	3.90785	1747.12	1	164
2022-09-15	11:31:37	3.76327	1750.88	1	165
2022-09-15	11:31:38	3.95482	1754.84	1	166
2022-09-15	11:31:38	3.92332	1758.76	1	167
2022-09-15	11:31:38	2.82032	1761.58	FALSE	167
2022-09-15	11:31:38	1.282	1762.86	FALSE	167
2022-09-15	11:31:39	0.970954	1763.84	FALSE	167
2022-09-15	11:31:39	0.398079	1764.23	FALSE	167
2022-09-15	11:31:39	0.262812	1764.5	FALSE	167
2022-09-15	11:31:39	-0.0322517	1764.5	FALSE	167
2022-09-15	11:31:40	-0.226145	1764.5	FALSE	167
2022-09-15	11:31:40	-0.364109	1764.5	FALSE	167
2022-09-15	11:31:40	0.0778756	1764.57	FALSE	167
2022-09-15	11:31:41	0.92958	1765.5	FALSE	167
2022-09-15	11:31:41	0.841692	1766.35	FALSE	167
2022-09-15	11:31:41	0.293041	1766.64	FALSE	167
2022-09-15	11:31:41	0.201794	1766.84	FALSE	167
2022-09-15	11:31:42	0.162557	1767	FALSE	167
2022-09-15	11:31:42	0.0382827	1767.04	FALSE	167
2022-09-15	11:31:42	0.0389951	1767.08	FALSE	167
2022-09-15	11:31:42	0.0529391	1767.13	FALSE	167
2022-09-15	11:31:43	0.0384862	1767.17	FALSE	167
2022-09-15	11:31:43	0.0532954	1767.22	FALSE	167
2022-09-15	11:31:43	0.0673921	1767.29	FALSE	167
2022-09-15	11:31:44	0.0692242	1767.36	FALSE	167
2022-09-15	11:31:44	0.0579264	1767.42	FALSE	167
2022-09-15	11:31:44	0.0253564	1767.44	FALSE	167
2022-09-15	11:31:44	0.0569595	1767.5	FALSE	167
2022-09-15	11:31:45	0.0622012	1767.56	FALSE	167
2022-09-15	11:31:45	0.053957	1767.62	FALSE	167
2022-09-15	11:31:45	0.0709544	1767.69	FALSE	167
2022-09-15	11:31:46	0.0655091	1767.75	FALSE	167
2022-09-15	11:31:46	0.0654073	1767.82	FALSE	167
2022-09-15	11:31:46	0.0260689	1767.85	FALSE	167
2022-09-15	11:31:46	-0.142328	1767.85	FALSE	167
2022-09-15	11:31:46	-0.407671	1767.85	FALSE	167
2022-09-15	11:31:47	-0.681259	1767.85	FALSE	167
2022-09-15	11:31:47	-0.846551	1767.85	FALSE	167
2022-09-15	11:31:47	-0.998307	1767.85	FALSE	167
2022-09-15	11:31:48	-0.835101	1767.85	FALSE	167
2022-09-15	11:31:48	-1.22212	1767.85	FALSE	167
2022-09-15	11:31:48	-0.378206	1767.85	FALSE	167
2022-09-15	11:31:48	0.0515142	1767.9	FALSE	167
2022-09-15	11:31:49	0.53986	1768.44	FALSE	167
2022-09-15	11:31:49	1.01686	1769.45	FALSE	167
2022-09-15	11:31:49	4.73513	1774.19	1	168
2022-09-15	11:31:49	6.47141	1780.66	1	169
2022-09-15	11:31:50	6.05187	1786.71	1	170
2022-09-15	11:31:50	5.85131	1792.56	1	171
2022-09-15	11:31:50	4.17116	1796.73	1	172
2022-09-15	11:31:50	3.29604	1800.03	1	173
2022-09-15	11:31:51	3.15131	1803.18	1	174
2022-09-15	11:31:51	2.7649	1805.95	FALSE	174
2022-09-15	11:31:51	2.52184	1808.47	FALSE	174
2022-09-15	11:31:52	2.27899	1810.75	FALSE	174
2022-09-15	11:31:52	2.34485	1813.09	FALSE	174
2022-09-15	11:31:52	2.43406	1815.53	FALSE	174
2022-09-15	11:31:52	2.52424	1818.05	FALSE	174
2022-09-15	11:31:53	2.4222	1820.47	FALSE	174
2022-09-15	11:31:53	2.442	1822.91	FALSE	174
2022-09-15	11:31:53	2.44169	1825.36	FALSE	174
2022-09-15	11:31:53	2.39833	1827.75	FALSE	174
2022-09-15	11:31:54	2.31762	1830.07	FALSE	174
2022-09-15	11:31:54	2.20322	1832.28	FALSE	174
2022-09-15	11:31:54	2.29426	1834.57	FALSE	174
2022-09-15	11:31:54	2.22154	1836.79	FALSE	174
2022-09-15	11:31:55	2.28317	1839.07	FALSE	174
2022-09-15	11:31:55	2.24693	1841.32	FALSE	174
2022-09-15	11:31:55	2.19085	1843.51	FALSE	174
2022-09-15	11:31:56	2.17838	1845.69	FALSE	174
2022-09-15	11:31:56	2.23762	1847.93	FALSE	174
2022-09-15	11:31:56	2.30785	1850.24	FALSE	174
2022-09-15	11:31:56	2.33055	1852.57	FALSE	174
2022-09-15	11:31:57	2.36617	1854.93	FALSE	174
2022-09-15	11:31:57	2.38113	1857.31	FALSE	174
2022-09-15	11:31:57	2.41172	1859.73	FALSE	174
2022-09-15	11:31:57	2.44434	1862.17	FALSE	174
2022-09-15	11:31:58	2.41645	1864.59	FALSE	174
2022-09-15	11:31:58	2.4652	1867.05	FALSE	174
2022-09-15	11:31:58	2.4453	1869.5	FALSE	174
2022-09-15	11:31:58	2.43838	1871.94	FALSE	174
2022-09-15	11:31:59	2.41106	1874.35	FALSE	174
2022-09-15	11:31:59	2.4053	1876.75	FALSE	174
2022-09-15	11:31:59	2.37329	1879.13	FALSE	174
2022-09-15	11:32:00	2.39996	1881.53	FALSE	174
2022-09-15	11:32:00	2.37686	1883.9	FALSE	174
2022-09-15	11:32:00	2.22617	1886.13	FALSE	174
2022-09-15	11:32:00	1.97162	1888.1	FALSE	174
2022-09-15	11:32:01	1.87625	1889.98	FALSE	174
2022-09-15	11:32:01	1.95095	1891.93	FALSE	174
2022-09-15	11:32:01	1.94948	1893.88	FALSE	174
2022-09-15	11:32:01	1.86607	1895.74	FALSE	174
2022-09-15	11:32:02	1.65172	1897.39	FALSE	174
2022-09-15	11:32:02	1.80393	1899.2	FALSE	174
2022-09-15	11:32:02	2.1564	1901.35	FALSE	174
2022-09-15	11:32:02	2.52006	1903.87	FALSE	174
2022-09-15	11:32:03	2.345	1906.22	FALSE	174
2022-09-15	11:32:03	1.95503	1908.17	FALSE	174
2022-09-15	11:32:03	1.61126	1909.79	FALSE	174
2022-09-15	11:32:04	2.27905	1912.07	FALSE	174
2022-09-15	11:32:04	2.23564	1914.3	FALSE	174
2022-09-15	11:32:04	2.1222	1916.42	FALSE	174
2022-09-15	11:32:04	1.94388	1918.37	FALSE	174
2022-09-15	11:32:05	1.41045	1919.78	FALSE	174
2022-09-15	11:32:05	1.71274	1921.49	FALSE	174
2022-09-15	11:32:05	1.82307	1923.31	FALSE	174
2022-09-15	11:32:05	1.85136	1925.16	FALSE	174
2022-09-15	11:32:06	1.90017	1927.06	FALSE	174
2022-09-15	11:32:06	1.76882	1928.83	FALSE	174
2022-09-15	11:32:06	1.76836	1930.6	FALSE	174
2022-09-15	11:32:06	1.91192	1932.51	FALSE	174
2022-09-15	11:32:07	2.19676	1934.71	FALSE	174
2022-09-15	11:32:07	2.24795	1936.96	FALSE	174
2022-09-15	11:32:07	2.38648	1939.34	FALSE	174
2022-09-15	11:32:08	1.9881	1941.33	FALSE	174
2022-09-15	11:32:08	1.72907	1943.06	FALSE	174
2022-09-15	11:32:08	1.62653	1944.69	FALSE	174
2022-09-15	11:32:08	1.60327	1946.29	FALSE	174
2022-09-15	11:32:09	2.00215	1948.29	FALSE	174
2022-09-15	11:32:09	2.26347	1950.56	FALSE	174
2022-09-15	11:32:09	2.58245	1953.14	FALSE	174
2022-09-15	11:32:09	1.92113	1955.06	FALSE	174
2022-09-15	11:32:10	2.37034	1957.43	FALSE	174
2022-09-15	11:32:10	5.34749	1962.78	1	175
2022-09-15	11:32:10	17.0424	1979.82	1	176
2022-09-15	11:32:10	18.5881	1998.41	1	177
2022-09-15	11:32:11	9.71955	2008.13	1	178
2022-09-15	11:32:11	17.3773	2025.51	1	179
2022-09-15	11:32:11	14.3944	2039.9	1	180
2022-09-15	11:32:12	15.787	2055.69	1	181
2022-09-15	11:32:12	11.4826	2067.17	1	182
2022-09-15	11:32:12	6.98943	2074.16	1	183
2022-09-15	11:32:12	6.0906	2080.25	1	184
2022-09-15	11:32:13	5.98739	2086.24	1	185
2022-09-15	11:32:13	8.01843	2094.26	1	186
2022-09-15	11:32:13	6.87416	2101.13	1	187
2022-09-15	11:32:13	6.46169	2107.59	1	188
2022-09-15	11:32:14	6.98138	2114.57	1	189
2022-09-15	11:32:14	7.49838	2122.07	1	190
2022-09-15	11:32:14	7.85823	2129.93	1	191
2022-09-15	11:32:14	7.06021	2136.99	1	192
2022-09-15	11:32:15	9.76988	2146.76	1	193
2022-09-15	11:32:15	11.7627	2158.52	1	194
2022-09-15	11:32:15	15.8779	2174.4	1	195
2022-09-15	11:32:16	7.99731	2182.4	1	196
2022-09-15	11:32:16	3.93859	2186.34	1	197
2022-09-15	11:32:16	6.00561	2192.34	1	198
2022-09-15	11:32:16	5.56337	2197.91	1	199
2022-09-15	11:32:17	3.89899	2201.8	1	200
2022-09-15	11:32:17	2.942	2204.75	FALSE	200
2022-09-15	11:32:17	2.03645	2206.78	FALSE	200
2022-09-15	11:32:17	2.11645	2208.9	FALSE	200
2022-09-15	11:32:18	0.985814	2209.89	FALSE	200
2022-09-15	11:32:18	0.410547	2210.3	FALSE	200
2022-09-15	11:32:18	0.163931	2210.46	FALSE	200
2022-09-15	11:32:18	0.323677	2210.78	FALSE	200
2022-09-15	11:32:19	0.413295	2211.2	FALSE	200
2022-09-15	11:32:19	0.832226	2212.03	FALSE	200
2022-09-15	11:32:19	1.68805	2213.72	FALSE	200
2022-09-15	11:32:20	4.7765	2218.49	1	201
2022-09-15	11:32:20	9.90836	2228.4	1	202
2022-09-15	11:32:20	6.50642	2234.91	1	203
2022-09-15	11:32:20	6.27548	2241.18	1	204
2022-09-15	11:32:21	4.65716	2245.84	1	205
2022-09-15	11:32:21	4.98683	2250.83	1	206
2022-09-15	11:32:21	3.89548	2254.72	1	207
2022-09-15	11:32:21	4.71854	2259.44	1	208
2022-09-15	11:32:22	3.5193	2262.96	1	209
2022-09-15	11:32:22	3.36602	2266.33	1	210
2022-09-15	11:32:22	3.29248	2269.62	1	211
2022-09-15	11:32:22	3.32617	2272.95	1	212
2022-09-15	11:32:23	3.62184	2276.57	1	213
2022-09-15	11:32:23	3.79568	2280.36	1	214
2022-09-15	11:32:23	3.97467	2284.34	1	215
2022-09-15	11:32:24	4.04291	2288.38	1	216
2022-09-15	11:32:24	4.08642	2292.47	1	217
2022-09-15	11:32:24	4.16429	2296.63	1	218
2022-09-15	11:32:24	4.35721	2300.99	1	219
2022-09-15	11:32:25	4.46062	2305.45	1	220
2022-09-15	11:32:25	4.42841	2309.88	1	221
2022-09-15	11:32:25	4.36912	2314.25	1	222
2022-09-15	11:32:25	4.4306	2318.68	1	223
2022-09-15	11:32:26	4.46317	2323.14	1	224
2022-09-15	11:32:26	4.33624	2327.48	1	225
2022-09-15	11:32:26	4.44266	2331.92	1	226
2022-09-15	11:32:26	4.37741	2336.3	1	227
2022-09-15	11:32:27	4.35818	2340.66	1	228
2022-09-15	11:32:27	4.33894	2344.99	1	229
2022-09-15	11:32:27	4.27182	2349.27	1	230
2022-09-15	11:32:28	4.32627	2353.59	1	231
2022-09-15	11:32:28	4.38357	2357.98	1	232
2022-09-15	11:32:28	3.4422	2361.42	1	233
2022-09-15	11:32:28	5.04561	2366.46	1	234
2022-09-15	11:32:29	8.39894	2374.86	1	235
2022-09-15	11:32:29	7.04561	2381.91	1	236
2022-09-15	11:32:29	5.50042	2387.41	1	237
2022-09-15	11:32:29	4.9078	2392.32	1	238
2022-09-15	11:32:30	4.91686	2397.23	1	239
2022-09-15	11:32:30	5.04551	2402.28	1	240
2022-09-15	11:32:30	4.41976	2406.7	1	241
2022-09-15	11:32:30	4.08683	2410.79	1	242
2022-09-15	11:32:31	3.96973	2414.76	1	243
2022-09-15	11:32:31	3.64225	2418.4	1	244
2022-09-15	11:32:31	3.50754	2421.9	1	245
2022-09-15	11:32:32	2.8507	2424.76	FALSE	245
2022-09-15	11:32:32	0.432125	2425.19	FALSE	245
2022-09-15	11:32:32	0.211972	2425.4	FALSE	245
2022-09-15	11:32:32	0.28668	2425.69	FALSE	245
2022-09-15	11:32:33	0.200267	2425.89	FALSE	245
2022-09-15	11:32:33	0.308613	2426.2	FALSE	245
2022-09-15	11:32:33	0.187188	2426.38	FALSE	245
2022-09-15	11:32:33	-0.235203	2426.38	FALSE	245
2022-09-15	11:32:34	-0.525127	2426.38	FALSE	245
2022-09-15	11:32:34	-0.730317	2426.38	FALSE	245
2022-09-15	11:32:34	-0.858104	2426.38	FALSE	245
2022-09-15	11:32:34	-0.856475	2426.38	FALSE	245
2022-09-15	11:32:35	-0.856577	2426.38	FALSE	245
2022-09-15	11:32:35	-0.37673	2426.38	FALSE	245
2022-09-15	11:32:35	-0.165178	2426.38	FALSE	245
2022-09-15	11:32:36	0.853041	2427.24	FALSE	245
2022-09-15	11:32:36	0.425407	2427.66	FALSE	245
2022-09-15	11:32:36	0.526425	2428.19	FALSE	245
2022-09-15	11:32:36	0.349122	2428.54	FALSE	245
2022-09-15	11:32:37	0.256247	2428.79	FALSE	245
2022-09-15	11:32:37	0.164389	2428.96	FALSE	245
2022-09-15	11:32:37	0.169682	2429.13	FALSE	245
2022-09-15	11:32:37	0.215636	2429.34	FALSE	245
2022-09-15	11:32:38	0.399962	2429.74	FALSE	245
2022-09-15	11:32:38	3.04571	2432.79	1	246
2022-09-15	11:32:38	11.9982	2444.79	1	247
2022-09-15	11:32:38	15.8316	2460.62	1	248
2022-09-15	11:32:39	18.7772	2479.39	1	249
2022-09-15	11:32:39	6.69594	2486.09	1	250
2022-09-15	11:32:39	2.04327	2488.13	FALSE	250
2022-09-15	11:32:40	0.943728	2489.08	FALSE	250
2022-09-15	11:32:40	0.444491	2489.52	FALSE	250
2022-09-15	11:32:40	0.348308	2489.87	FALSE	250
2022-09-15	11:32:40	0.424288	2490.29	FALSE	250
2022-09-15	11:32:41	0.238384	2490.53	FALSE	250
2022-09-15	11:32:41	0.249377	2490.78	FALSE	250
2022-09-15	11:32:41	0.0370104	2490.82	FALSE	250
2022-09-15	11:32:41	0.319809	2491.14	FALSE	250
2022-09-15	11:32:42	0.525	2491.66	FALSE	250
2022-09-15	11:32:42	0.420166	2492.08	FALSE	250
2022-09-15	11:32:42	0.925153	2493.01	FALSE	250
2022-09-15	11:32:42	1.01141	2494.02	FALSE	250
2022-09-15	11:32:43	0.470089	2494.49	FALSE	250
2022-09-15	11:32:43	0.38668	2494.88	FALSE	250
2022-09-15	11:32:43	0.174618	2495.05	FALSE	250
2022-09-15	11:32:44	-0.179783	2495.05	FALSE	250
2022-09-15	11:32:44	-0.309351	2495.05	FALSE	250
2022-09-15	11:32:44	-0.498257	2495.05	FALSE	250
2022-09-15	11:32:44	-0.436679	2495.05	FALSE	250
2022-09-15	11:32:45	-0.455763	2495.05	FALSE	250
2022-09-15	11:32:45	-0.576272	2495.05	FALSE	250
2022-09-15	11:32:45	-0.702684	2495.05	FALSE	250
2022-09-15	11:32:45	-0.815915	2495.05	FALSE	250
2022-09-15	11:32:46	-0.780496	2495.05	FALSE	250
2022-09-15	11:32:46	-0.763905	2495.05	FALSE	250
2022-09-15	11:32:46	-0.887518	2495.05	FALSE	250
2022-09-15	11:32:46	-0.593829	2495.05	FALSE	250
2022-09-15	11:32:47	-0.601055	2495.05	FALSE	250
2022-09-15	11:32:47	-0.51444	2495.05	FALSE	250
2022-09-15	11:32:47	0.0162979	2495.07	FALSE	250
2022-09-15	11:32:48	3.01604	2498.09	1	251
2022-09-15	11:32:48	6.22698	2504.31	1	252
2022-09-15	11:32:48	4.16128	2508.47	1	253
2022-09-15	11:32:48	4.02261	2512.5	1	254
2022-09-15	11:32:49	8.19355	2520.69	1	255
2022-09-15	11:32:49	2.75492	2523.44	FALSE	255
2022-09-15	11:32:49	5.12118	2528.57	1	256
2022-09-15	11:32:49	7.04586	2535.61	1	257
2022-09-15	11:32:50	2.885	2538.5	FALSE	257
2022-09-15	11:32:50	6.61385	2545.11	1	258
2022-09-15	11:32:50	7.35563	2552.47	1	259
2022-09-15	11:32:50	8.95258	2561.42	1	260
2022-09-15	11:32:51	8.11761	2569.54	1	261
2022-09-15	11:32:51	5.38377	2574.92	1	262
2022-09-15	11:32:51	16.382	2591.3	1	263
2022-09-15	11:32:52	12.3633	2603.67	1	264
2022-09-15	11:32:52	11.4847	2615.15	1	265
2022-09-15	11:32:52	9.97492	2625.12	1	266
2022-09-15	11:32:53	4.71808	2629.84	1	267
2022-09-15	11:32:53	4.56378	2634.41	1	268
2022-09-15	11:32:53	1.02632	2635.43	FALSE	268
2022-09-15	11:32:53	1.20754	2636.64	FALSE	268
2022-09-15	11:32:53	0.612379	2637.25	FALSE	268
2022-09-15	11:32:54	0.835687	2638.09	FALSE	268
2022-09-15	11:32:54	1.31207	2639.4	FALSE	268
2022-09-15	11:32:54	2.43141	2641.83	FALSE	268
2022-09-15	11:32:54	4.36037	2646.19	1	269
2022-09-15	11:32:55	4.84647	2651.04	1	270
2022-09-15	11:32:55	5.11227	2656.15	1	271
2022-09-15	11:32:55	10.1154	2666.27	1	272
2022-09-15	11:32:56	8.61925	2674.89	1	273
2022-09-15	11:32:56	14.1962	2689.08	1	274
2022-09-15	11:32:56	8.3022	2697.38	1	275
2022-09-15	11:32:56	4.00032	2701.38	1	276
2022-09-15	11:32:57	11.2745	2712.66	1	277
2022-09-15	11:32:57	3.87314	2716.53	1	278
2022-09-15	11:32:57	6.70255	2723.23	1	279
2022-09-15	11:32:57	17.4245	2740.66	1	280
2022-09-15	11:32:58	2.39838	2743.06	FALSE	280
2022-09-15	11:32:58	8.17752	2751.24	1	281
2022-09-15	11:32:58	6.37207	2757.61	1	282
2022-09-15	11:32:59	4.91574	2762.52	1	283
2022-09-15	11:32:59	16.1493	2778.67	1	284
2022-09-15	11:32:59	7.61115	2786.28	1	285
2022-09-15	11:32:59	9.21233	2795.5	1	286
2022-09-15	11:33:00	7.91085	2803.41	1	287
2022-09-15	11:33:00	5.55497	2808.96	1	288
2022-09-15	11:33:00	14.5554	2823.52	1	289
2022-09-15	11:33:00	11.4289	2834.95	1	290
2022-09-15	11:33:01	8.38306	2843.33	1	291
2022-09-15	11:33:01	16.3311	2859.66	1	292
2022-09-15	11:33:01	3.56429	2863.22	1	293
2022-09-15	11:33:01	5.81324	2869.04	1	294
2022-09-15	11:33:02	14.289	2883.33	1	295
2022-09-15	11:33:02	4.18653	2887.51	1	296
2022-09-15	11:33:02	10.3331	2897.85	1	297
2022-09-15	11:33:02	14.7201	2912.57	1	298
2022-09-15	11:33:03	7.66617	2920.23	1	299
2022-09-15	11:33:03	14.2146	2934.45	1	300
2022-09-15	11:33:03	15.6217	2950.07	1	301
2022-09-15	11:33:04	6.42047	2956.49	1	302
2022-09-15	11:33:04	13.3115	2969.8	1	303
2022-09-15	11:33:04	14.2086	2984.01	1	304
2022-09-15	11:33:04	9.72739	2993.74	1	305
2022-09-15	11:33:05	28.5612	3022.3	1	306
2022-09-15	11:33:05	17.9954	3040.29	1	307
2022-09-15	11:33:05	5.71864	3046.01	1	308
2022-09-15	11:33:05	8.78846	3054.8	1	309
2022-09-15	11:33:06	14.4632	3069.26	1	310
2022-09-15	11:33:06	9.85319	3079.12	1	311
2022-09-15	11:33:06	10.0798	3089.2	1	312
2022-09-15	11:33:07	3.30551	3092.5	1	313
2022-09-15	11:33:07	5.23803	3097.74	1	314
2022-09-15	11:33:07	6.13004	3103.87	1	315
2022-09-15	11:33:07	0.649529	3104.52	FALSE	315
2022-09-15	11:33:08	-0.00960535	3104.52	FALSE	315
2022-09-15	11:33:08	-0.0757631	3104.52	FALSE	315
2022-09-15	11:33:08	-0.131437	3104.52	FALSE	315
2022-09-15	11:33:08	-0.0843127	3104.52	FALSE	315
2022-09-15	11:33:09	-0.0866537	3104.52	FALSE	315
2022-09-15	11:33:09	-0.011183	3104.52	FALSE	315
2022-09-15	11:33:09	0.0698857	3104.59	FALSE	315
2022-09-15	11:33:09	0.134873	3104.72	FALSE	315
2022-09-15	11:33:10	0.194517	3104.92	FALSE	315
2022-09-15	11:33:10	0.2193	3105.14	FALSE	315
2022-09-15	11:33:10	0.219504	3105.36	FALSE	315
2022-09-15	11:33:11	-0.0426842	3105.36	FALSE	315
2022-09-15	11:33:11	-0.38075	3105.36	FALSE	315
2022-09-15	11:33:11	-0.38762	3105.36	FALSE	315
2022-09-15	11:33:11	-0.560496	3105.36	FALSE	315
2022-09-15	11:33:12	-0.688434	3105.36	FALSE	315
2022-09-15	11:33:12	-0.745533	3105.36	FALSE	315
2022-09-15	11:33:12	-0.33388	3105.36	FALSE	315
2022-09-15	11:33:12	0.781692	3106.14	FALSE	315
2022-09-15	11:33:13	3.65457	3109.79	1	316
2022-09-15	11:33:13	4.13095	3113.92	1	317
2022-09-15	11:33:13	0.956145	3114.88	FALSE	317
2022-09-15	11:33:13	0.569987	3115.45	FALSE	317
2022-09-15	11:33:14	-0.0146944	3115.45	FALSE	317
2022-09-15	11:33:14	-0.0491473	3115.45	FALSE	317
2022-09-15	11:33:14	-0.121819	3115.45	FALSE	317
2022-09-15	11:33:15	0.272176	3115.72	FALSE	317
2022-09-15	11:33:15	0.678333	3116.4	FALSE	317
2022-09-15	11:33:15	1.64851	3118.05	FALSE	317
2022-09-15	11:33:15	4.13706	3122.19	1	318
2022-09-15	11:33:16	5.82642	3128.01	1	319
2022-09-15	11:33:16	5.7738	3133.79	1	320
2022-09-15	11:33:16	1.53742	3135.32	FALSE	320
2022-09-15	11:33:16	1.54856	3136.87	FALSE	320
2022-09-15	11:33:17	0.418028	3137.29	FALSE	320
2022-09-15	11:33:17	0.300827	3137.59	FALSE	320
2022-09-15	11:33:17	0.30159	3137.89	FALSE	320
2022-09-15	11:33:17	0.0223539	3137.92	FALSE	320
2022-09-15	11:33:18	0.395687	3138.31	FALSE	320
2022-09-15	11:33:18	0.456298	3138.77	FALSE	320
2022-09-15	11:33:18	2.33472	3141.1	FALSE	320
2022-09-15	11:33:19	3.41304	3144.52	1	321
2022-09-15	11:33:19	5.07854	3149.59	1	322
2022-09-15	11:33:19	5.4911	3155.09	1	323
2022-09-15	11:33:19	4.47289	3159.56	1	324
2022-09-15	11:33:20	5.17599	3164.73	1	325
2022-09-15	11:33:20	1.34469	3166.08	FALSE	325
2022-09-15	11:33:20	3.04235	3169.12	1	326
2022-09-15	11:33:20	1.48871	3170.61	FALSE	326
2022-09-15	11:33:21	0.624796	3171.23	FALSE	326
2022-09-15	11:33:21	0.884745	3172.12	FALSE	326
2022-09-15	11:33:21	0.449835	3172.57	FALSE	326
2022-09-15	11:33:21	0.58444	3173.15	FALSE	326
2022-09-15	11:33:22	0.411616	3173.57	FALSE	326
2022-09-15	11:33:22	0.422405	3173.99	FALSE	326
2022-09-15	11:33:22	0.420471	3174.41	FALSE	326
2022-09-15	11:33:23	0.434822	3174.84	FALSE	326
2022-09-15	11:33:23	0.584796	3175.43	FALSE	326
2022-09-15	11:33:23	0.212481	3175.64	FALSE	326
2022-09-15	11:33:23	-0.0472135	3175.64	FALSE	326
2022-09-15	11:33:24	0.0197585	3175.66	FALSE	326
2022-09-15	11:33:24	-0.209962	3175.66	FALSE	326
2022-09-15	11:33:24	-0.328079	3175.66	FALSE	326
2022-09-15	11:33:24	-0.289503	3175.66	FALSE	326
2022-09-15	11:33:25	-0.262328	3175.66	FALSE	326
2022-09-15	11:33:25	-0.288638	3175.66	FALSE	326
2022-09-15	11:33:25	-0.00894378	3175.66	FALSE	326
2022-09-15	11:33:25	0.602964	3176.26	FALSE	326
2022-09-15	11:33:26	1.82057	3178.08	FALSE	326
2022-09-15	11:33:26	2.37854	3180.46	FALSE	326
2022-09-15	11:33:26	1.862	3182.32	FALSE	326
2022-09-15	11:33:27	1.43452	3183.76	FALSE	326
2022-09-15	11:33:27	1.15706	3184.92	FALSE	326
2022-09-15	11:33:27	1.52001	3186.44	FALSE	326
2022-09-15	11:33:27	1.01788	3187.45	FALSE	326
2022-09-15	11:33:28	0.991514	3188.45	FALSE	326
2022-09-15	11:33:28	0.560216	3189.01	FALSE	326
2022-09-15	11:33:28	0.253397	3189.26	FALSE	326
2022-09-15	11:33:28	0.462303	3189.72	FALSE	326
2022-09-15	11:33:29	0.230598	3189.95	FALSE	326
2022-09-15	11:33:29	0.0723284	3190.02	FALSE	326
2022-09-15	11:33:29	-0.56935	3190.02	FALSE	326
2022-09-15	11:33:29	-0.962277	3190.02	FALSE	326
2022-09-15	11:33:30	-0.04416	3190.02	FALSE	326
2022-09-15	11:33:30	0.287901	3190.31	FALSE	326
2022-09-15	11:33:30	0.295534	3190.61	FALSE	326
2022-09-15	11:33:31	-0.237086	3190.61	FALSE	326
2022-09-15	11:33:31	-0.166857	3190.61	FALSE	326
2022-09-15	11:33:31	-0.40477	3190.61	FALSE	326
2022-09-15	11:33:31	-0.550979	3190.61	FALSE	326
2022-09-15	11:33:32	-0.575356	3190.61	FALSE	326
2022-09-15	11:33:32	-0.708689	3190.61	FALSE	326
2022-09-15	11:33:32	-0.762836	3190.61	FALSE	326
2022-09-15	11:33:32	-0.863396	3190.61	FALSE	326
2022-09-15	11:33:33	-0.643142	3190.61	FALSE	326
2022-09-15	11:33:33	-0.282277	3190.61	FALSE	326
2022-09-15	11:33:33	-0.119122	3190.61	FALSE	326
2022-09-15	11:33:33	0.240165	3190.85	FALSE	326
2022-09-15	11:33:34	0.532328	3191.38	FALSE	326
2022-09-15	11:33:34	6.35986	3197.74	1	327
2022-09-15	11:33:34	1.64994	3199.39	FALSE	327
2022-09-15	11:33:35	1.06592	3200.46	FALSE	327
2022-09-15	11:33:35	0.573295	3201.03	FALSE	327
2022-09-15	11:33:35	0.170802	3201.2	FALSE	327
2022-09-15	11:33:35	0.699809	3201.9	FALSE	327
2022-09-15	11:33:36	0.106476	3202.01	FALSE	327
2022-09-15	11:33:36	0.16444	3202.17	FALSE	327
2022-09-15	11:33:36	0.132786	3202.3	FALSE	327
2022-09-15	11:33:36	0.373041	3202.68	FALSE	327
2022-09-15	11:33:37	0.279657	3202.96	FALSE	327
2022-09-15	11:33:37	0.838639	3203.79	FALSE	327
2022-09-15	11:33:37	0.298842	3204.09	FALSE	327
2022-09-15	11:33:37	0.282456	3204.38	FALSE	327
2022-09-15	11:33:38	0.162965	3204.54	FALSE	327
2022-09-15	11:33:38	0.0905473	3204.63	FALSE	327
2022-09-15	11:33:38	-0.189961	3204.63	FALSE	327
2022-09-15	11:33:39	-0.35444	3204.63	FALSE	327
2022-09-15	11:33:39	-0.350165	3204.63	FALSE	327
2022-09-15	11:33:39	-0.528638	3204.63	FALSE	327
2022-09-15	11:33:39	-0.343193	3204.63	FALSE	327
2022-09-15	11:33:40	0.18271	3204.81	FALSE	327
2022-09-15	11:33:40	8.88596	3213.7	1	328
2022-09-15	11:33:40	18.3393	3232.04	1	329
2022-09-15	11:33:40	4.4592	3236.5	1	330
2022-09-15	11:33:41	3.46515	3239.96	1	331
2022-09-15	11:33:41	0.294567	3240.26	FALSE	331
2022-09-15	11:33:41	-0.0758648	3240.26	FALSE	331
2022-09-15	11:33:41	0.00902061	3240.27	FALSE	331
2022-09-15	11:33:42	-0.131437	3240.27	FALSE	331
2022-09-15	11:33:42	-0.00685724	3240.27	FALSE	331
2022-09-15	11:33:42	-0.225839	3240.27	FALSE	331
2022-09-15	11:33:43	-0.402582	3240.27	FALSE	331
2022-09-15	11:33:43	-0.210165	3240.27	FALSE	331
2022-09-15	11:33:43	-0.45159	3240.27	FALSE	331
2022-09-15	11:33:43	-0.216119	3240.27	FALSE	331
2022-09-15	11:33:44	-0.119783	3240.27	FALSE	331
2022-09-15	11:33:44	0.0649493	3240.33	FALSE	331
2022-09-15	11:33:44	0.14271	3240.47	FALSE	331
2022-09-15	11:33:44	0.0731427	3240.55	FALSE	331
2022-09-15	11:33:45	0.0876465	3240.63	FALSE	331
2022-09-15	11:33:45	-0.0468064	3240.63	FALSE	331
2022-09-15	11:33:45	-0.101005	3240.63	FALSE	331
2022-09-15	11:33:45	0.0156872	3240.65	FALSE	331
2022-09-15	11:33:46	0.066985	3240.72	FALSE	331
2022-09-15	11:33:46	0.195229	3240.91	FALSE	331
2022-09-15	11:33:46	0.238181	3241.15	FALSE	331
2022-09-15	11:33:47	0.394008	3241.54	FALSE	331
2022-09-15	11:33:47	0.512583	3242.06	FALSE	331
2022-09-15	11:33:47	0.699758	3242.76	FALSE	331
2022-09-15	11:33:47	0.542099	3243.3	FALSE	331
2022-09-15	11:33:48	1.7852	3245.08	FALSE	331
2022-09-15	11:33:48	1.96999	3247.05	FALSE	331
2022-09-15	11:33:48	2.45263	3249.51	FALSE	331
2022-09-15	11:33:48	5.19044	3254.7	1	332
2022-09-15	11:33:49	3.87289	3258.57	1	333
2022-09-15	11:33:49	4.01116	3262.58	1	334
2022-09-15	11:33:49	0.170649	3262.75	FALSE	334
2022-09-15	11:33:49	-0.187366	3262.75	FALSE	334
2022-09-15	11:33:50	0.0266796	3262.78	FALSE	334
2022-09-15	11:33:50	-0.178155	3262.78	FALSE	334
2022-09-15	11:33:50	0.535534	3263.31	FALSE	334
2022-09-15	11:33:51	1.33401	3264.65	FALSE	334
2022-09-15	11:33:51	5.59909	3270.25	1	335
2022-09-15	11:33:51	16.8156	3287.06	1	336
2022-09-15	11:33:51	14.4982	3301.56	1	337
2022-09-15	11:33:52	16.7441	3318.3	1	338
2022-09-15	11:33:52	14.6091	3332.91	1	339
2022-09-15	11:33:52	10.0858	3343	1	340
2022-09-15	11:33:52	13.8745	3356.87	1	341
2022-09-15	11:33:53	8.73385	3365.61	1	342
2022-09-15	11:33:53	7.58306	3373.19	1	343
2022-09-15	11:33:53	9.64464	3382.84	1	344
2022-09-15	11:33:53	0.878944	3383.71	FALSE	344
2022-09-15	11:33:54	0.888613	3384.6	FALSE	344
2022-09-15	11:33:54	0.12444	3384.73	FALSE	344
2022-09-15	11:33:54	0.0455091	3384.77	FALSE	344
2022-09-15	11:33:55	1.30067	3386.07	FALSE	344
2022-09-15	11:33:55	2.7709	3388.84	FALSE	344
2022-09-15	11:33:55	4.30062	3393.15	1	345
2022-09-15	11:33:55	0.33187	3393.48	FALSE	345
2022-09-15	11:33:56	-0.0288929	3393.48	FALSE	345
2022-09-15	11:33:56	-0.24187	3393.48	FALSE	345
2022-09-15	11:33:56	-0.24528	3393.48	FALSE	345
2022-09-15	11:33:56	-0.248129	3393.48	FALSE	345
2022-09-15	11:33:57	-0.272964	3393.48	FALSE	345
2022-09-15	11:33:57	-0.363753	3393.48	FALSE	345
2022-09-15	11:33:57	-0.493422	3393.48	FALSE	345
2022-09-15	11:33:57	-0.510826	3393.48	FALSE	345
2022-09-15	11:33:58	0.237316	3393.71	FALSE	345
2022-09-15	11:33:58	0.151158	3393.87	FALSE	345
2022-09-15	11:33:58	2.63579	3396.5	FALSE	345
2022-09-15	11:33:59	21.4913	3417.99	1	346
2022-09-15	11:33:59	39.248	3457.24	1	347
2022-09-15	11:33:59	11.8656	3469.11	1	348
2022-09-15	11:33:59	7.98718	3477.09	1	349
2022-09-15	11:34:00	13.6761	3490.77	1	350
2022-09-15	11:34:00	8.95487	3499.72	1	351
2022-09-15	11:34:00	7.19345	3506.92	1	352
2022-09-15	11:34:00	2.85594	3509.77	FALSE	352
2022-09-15	11:34:01	1.36001	3511.13	FALSE	352
2022-09-15	11:34:01	5.27355	3516.41	1	353
2022-09-15	11:34:01	9.86683	3526.27	1	354
2022-09-15	11:34:01	11.295	3537.57	1	355
2022-09-15	11:34:02	12.1167	3549.69	1	356
2022-09-15	11:34:02	16.735	3566.42	1	357
2022-09-15	11:34:02	15.0588	3581.48	1	358
2022-09-15	11:34:03	11.9426	3593.42	1	359
2022-09-15	11:34:03	17.2119	3610.63	1	360
2022-09-15	11:34:03	17.094	3627.73	1	361
2022-09-15	11:34:03	25.0388	3652.77	1	362
2022-09-15	11:34:04	8.02286	3660.79	1	363
2022-09-15	11:34:04	10.059	3670.85	1	364
2022-09-15	11:34:04	8.59828	3679.45	1	365
2022-09-15	11:34:04	22.3698	3701.82	1	366
2022-09-15	11:34:05	8.6108	3710.43	1	367
2022-09-15	11:34:05	4.54332	3714.97	1	368
2022-09-15	11:34:05	2.73833	3717.71	FALSE	368
2022-09-15	11:34:05	1.67391	3719.38	FALSE	368
2022-09-15	11:34:06	1.3224	3720.71	FALSE	368
2022-09-15	11:34:06	1.64556	3722.35	FALSE	368
2022-09-15	11:34:06	2.65482	3725.01	FALSE	368
2022-09-15	11:34:07	0.627901	3725.63	FALSE	368
2022-09-15	11:34:07	0.516857	3726.15	FALSE	368
2022-09-15	11:34:07	0.362812	3726.51	FALSE	368
2022-09-15	11:34:07	1.09162	3727.61	FALSE	368
2022-09-15	11:34:08	5.61568	3733.22	1	369
2022-09-15	11:34:08	9.65894	3742.88	1	370
2022-09-15	11:34:08	6.14729	3749.03	1	371
2022-09-15	11:34:08	6.17263	3755.2	1	372
2022-09-15	11:34:09	1.48408	3756.68	FALSE	372
2022-09-15	11:34:09	0.86612	3757.55	FALSE	372
2022-09-15	11:34:09	0.170395	3757.72	FALSE	372
2022-09-15	11:34:09	1.67955	3759.4	FALSE	372
2022-09-15	11:34:10	7.61227	3767.01	1	373
2022-09-15	11:34:10	16.3781	3783.39	1	374
2022-09-15	11:34:10	7.82037	3791.21	1	375
2022-09-15	11:34:11	8.53008	3799.74	1	376
2022-09-15	11:34:11	15.308	3815.05	1	377
2022-09-15	11:34:11	14.2973	3829.35	1	378
2022-09-15	11:34:11	5.08378	3834.43	1	379
2022-09-15	11:34:12	2.15187	3836.58	FALSE	379
2022-09-15	11:34:12	9.96876	3846.55	1	380
2022-09-15	11:34:12	16.3916	3862.94	1	381
2022-09-15	11:34:12	18.7839	3881.73	1	382
2022-09-15	11:34:13	10.2778	3892	1	383
2022-09-15	11:34:13	3.78301	3895.79	1	384
2022-09-15	11:34:13	2.94596	3898.73	FALSE	384
2022-09-15	11:34:13	1.76429	3900.5	FALSE	384
2022-09-15	11:34:14	1.50495	3902	FALSE	384
2022-09-15	11:34:14	0.528868	3902.53	FALSE	384
2022-09-15	11:34:14	1.2305	3903.76	FALSE	384
2022-09-15	11:34:15	2.3024	3906.06	FALSE	384
2022-09-15	11:34:15	0.147443	3906.21	FALSE	384
2022-09-15	11:34:15	0.142456	3906.35	FALSE	384
2022-09-15	11:34:15	-0.0860938	3906.35	FALSE	384
2022-09-15	11:34:16	-0.319122	3906.35	FALSE	384
2022-09-15	11:34:16	-0.622735	3906.35	FALSE	384
2022-09-15	11:34:16	-0.685483	3906.35	FALSE	384
2022-09-15	11:34:16	-0.21902	3906.35	FALSE	384
2022-09-15	11:34:17	2.54113	3908.89	FALSE	384
2022-09-15	11:34:17	8.08092	3916.98	1	385
2022-09-15	11:34:17	6.14047	3923.12	1	386
2022-09-15	11:34:17	1.86424	3924.98	FALSE	386
2022-09-15	11:34:18	0.689428	3925.67	FALSE	386
2022-09-15	11:34:18	0.518181	3926.19	FALSE	386
2022-09-15	11:34:18	0.428155	3926.62	FALSE	386
2022-09-15	11:34:19	0.839911	3927.46	FALSE	386
2022-09-15	11:34:19	4.61619	3932.07	1	387
2022-09-15	11:34:19	13.3048	3945.38	1	388
2022-09-15	11:34:19	7.90413	3953.28	1	389
2022-09-15	11:34:20	5.11904	3958.4	1	390
2022-09-15	11:34:20	1.0738	3959.47	FALSE	390
2022-09-15	11:34:20	0.225713	3959.7	FALSE	390
2022-09-15	11:34:20	0.147188	3959.85	FALSE	390
2022-09-15	11:34:21	-0.143193	3959.85	FALSE	390
2022-09-15	11:34:21	-0.0532186	3959.85	FALSE	390
2022-09-15	11:34:21	-0.108842	3959.85	FALSE	390
2022-09-15	11:34:21	-0.110623	3959.85	FALSE	390
2022-09-15	11:34:22	-0.281514	3959.85	FALSE	390
2022-09-15	11:34:22	-0.290369	3959.85	FALSE	390
2022-09-15	11:34:22	-0.202837	3959.85	FALSE	390
2022-09-15	11:34:23	-0.0767809	3959.85	FALSE	390
2022-09-15	11:34:23	0.15869	3960.01	FALSE	390
2022-09-15	11:34:23	0.308003	3960.31	FALSE	390
2022-09-15	11:34:23	0.32383	3960.64	FALSE	390
2022-09-15	11:34:24	0.20383	3960.84	FALSE	390
2022-09-15	11:34:24	0.524593	3961.37	FALSE	390
2022-09-15	11:34:24	0.465051	3961.83	FALSE	390
2022-09-15	11:34:24	1.52184	3963.35	FALSE	390
2022-09-15	11:34:25	12.5396	3975.89	1	391
2022-09-15	11:34:25	27.049	4002.94	1	392
2022-09-15	11:34:25	21.316	4024.26	1	393
2022-09-15	11:34:25	30.351	4054.61	1	394
2022-09-15	11:34:26	31.1857	4085.79	1	395
2022-09-15	11:34:26	13.4204	4099.21	1	396
2022-09-15	11:34:26	19.6253	4118.84	1	397
2022-09-15	11:34:27	12.3059	4131.15	1	398
2022-09-15	11:34:27	4.30932	4135.46	1	399
2022-09-15	11:34:27	11.5303	4146.99	1	400
2022-09-15	11:34:27	14.4214	4161.41	1	401
2022-09-15	11:34:28	6.10993	4167.52	1	402
2022-09-15	11:34:28	6.31141	4173.83	1	403
2022-09-15	11:34:28	15.9261	4189.75	1	404
2022-09-15	11:34:28	22.6693	4212.42	1	405
2022-09-15	11:34:29	11.4669	4223.89	1	406
2022-09-15	11:34:29	16.3757	4240.27	1	407
2022-09-15	11:34:29	12.1238	4252.39	1	408
2022-09-15	11:34:29	8.93512	4261.33	1	409
2022-09-15	11:34:30	11.7935	4273.12	1	410

## Sheet: Boris_star_2022915112914
						**GoPro Fitting: 1118
2022-09-15	11:29:15	0.728919
2022-09-15	11:29:15	0.730038
2022-09-15	11:29:15	0.731819
2022-09-15	11:29:15	0.727137
2022-09-15	11:29:15	0.73472
2022-09-15	11:29:16	0.726323
2022-09-15	11:29:16	0.728155
2022-09-15	11:29:16	0.72215
2022-09-15	11:29:17	0.725611
2022-09-15	11:29:17	0.723372
2022-09-15	11:29:17	0.732023
2022-09-15	11:29:17	0.726578
2022-09-15	11:29:18	0.724898
2022-09-15	11:29:18	0.729631
2022-09-15	11:29:18	0.727239
2022-09-15	11:29:18	0.730649
2022-09-15	11:29:19	0.728359
2022-09-15	11:29:19	0.72897
2022-09-15	11:29:19	0.728817
2022-09-15	11:29:19	0.728104
2022-09-15	11:29:20	0.725356
2022-09-15	11:29:20	0.726629
2022-09-15	11:29:20	0.731412
2022-09-15	11:29:21	0.728766
2022-09-15	11:29:21	0.726985
2022-09-15	11:29:21	0.732837
2022-09-15	11:29:21	0.724135
2022-09-15	11:29:22	0.729784
2022-09-15	11:29:22	0.724491
2022-09-15	11:29:22	0.72327
2022-09-15	11:29:22	0.727952
2022-09-15	11:29:23	0.726832
2022-09-15	11:29:23	0.725051
2022-09-15	11:29:23	0.729071
2022-09-15	11:29:24	0.748868
2022-09-15	11:29:24	0.651819
2022-09-15	11:29:24	0.732837
2022-09-15	11:29:24	0.723626
2022-09-15	11:29:25	0.724695
2022-09-15	11:29:25	0.728308
2022-09-15	11:29:25	0.732786
2022-09-15	11:29:25	0.705153
2022-09-15	11:29:26	0.728206
2022-09-15	11:29:26	0.733957
2022-09-15	11:29:26	0.723982
2022-09-15	11:29:26	0.729733
2022-09-15	11:29:27	0.729326
2022-09-15	11:29:27	0.732226
2022-09-15	11:29:27	0.730852
2022-09-15	11:29:28	0.584338
2022-09-15	11:29:28	0.208715
2022-09-15	11:29:28	0.0180282
2022-09-15	11:29:28	-0.103397
2022-09-15	11:29:29	-0.480699
2022-09-15	11:29:29	-0.48701
2022-09-15	11:29:29	-0.471183
2022-09-15	11:29:29	-0.704211
2022-09-15	11:29:30	-0.916933
2022-09-15	11:29:30	-0.908383
2022-09-15	11:29:30	-0.897595
2022-09-15	11:29:30	-1.07556
2022-09-15	11:29:31	-0.777442
2022-09-15	11:29:31	-0.837697
2022-09-15	11:29:31	-0.921208
2022-09-15	11:29:32	-0.899529
2022-09-15	11:29:32	-0.640088
2022-09-15	11:29:32	-0.00894378
2022-09-15	11:29:32	0.0720231
2022-09-15	11:29:33	0.323626
2022-09-15	11:29:33	0.573855
2022-09-15	11:29:33	0.728461
2022-09-15	11:29:33	0.722965
2022-09-15	11:29:34	0.969275
2022-09-15	11:29:34	4.11095
2022-09-15	11:29:34	1.01894
2022-09-15	11:29:34	0.36098
2022-09-15	11:29:35	0.332074
2022-09-15	11:29:35	1.08419
2022-09-15	11:29:35	1.47177
2022-09-15	11:29:36	1.21268
2022-09-15	11:29:36	0.792786
2022-09-15	11:29:36	0.231616
2022-09-15	11:29:36	0.103015
2022-09-15	11:29:37	1.16612
2022-09-15	11:29:37	1.07452
2022-09-15	11:29:37	1.29375
2022-09-15	11:29:37	1.27884
2022-09-15	11:29:38	0.997366
2022-09-15	11:29:38	2.33955
2022-09-15	11:29:38	3.14693
2022-09-15	11:29:38	4.99304
2022-09-15	11:29:39	1.96576
2022-09-15	11:29:39	5.46652
2022-09-15	11:29:39	4.25451
2022-09-15	11:29:40	6.55746
2022-09-15	11:29:40	5.80678
2022-09-15	11:29:40	7.48795
2022-09-15	11:29:40	11.9993
2022-09-15	11:29:41	4.74551
2022-09-15	11:29:41	5.13573
2022-09-15	11:29:41	4.90057
2022-09-15	11:29:41	5.03065
2022-09-15	11:29:42	5.72622
2022-09-15	11:29:42	4.64892
2022-09-15	11:29:42	15.2317
2022-09-15	11:29:42	4.40724
2022-09-15	11:29:43	5.65014
2022-09-15	11:29:43	7.65976
2022-09-15	11:29:43	1.77375
2022-09-15	11:29:44	3.03935
2022-09-15	11:29:44	3.91034
2022-09-15	11:29:44	1.87472
2022-09-15	11:29:44	0.964644
2022-09-15	11:29:45	0.876501
2022-09-15	11:29:45	3.63401
2022-09-15	11:29:45	3.81655
2022-09-15	11:29:45	9.77655
2022-09-15	11:29:46	15.0753
2022-09-15	11:29:46	7.31813
2022-09-15	11:29:46	10.8569
2022-09-15	11:29:46	2.4567
2022-09-15	11:29:47	0.970649
2022-09-15	11:29:47	0.643423
2022-09-15	11:29:47	0.725763
2022-09-15	11:29:48	0.726629
2022-09-15	11:29:48	0.731972
2022-09-15	11:29:48	0.730038
2022-09-15	11:29:48	0.724491
2022-09-15	11:29:49	0.722404
2022-09-15	11:29:49	0.726679
2022-09-15	11:29:49	0.72729
2022-09-15	11:29:49	0.725865
2022-09-15	11:29:50	0.733397
2022-09-15	11:29:50	0.725305
2022-09-15	11:29:50	0.733295
2022-09-15	11:29:51	0.722914
2022-09-15	11:29:51	0.731819
2022-09-15	11:29:51	0.729173
2022-09-15	11:29:51	0.737315
2022-09-15	11:29:52	0.716043
2022-09-15	11:29:52	0.721997
2022-09-15	11:29:52	0.72327
2022-09-15	11:29:52	0.731209
2022-09-15	11:29:53	0.729529
2022-09-15	11:29:53	0.728359
2022-09-15	11:29:53	0.732837
2022-09-15	11:29:53	0.726781
2022-09-15	11:29:54	0.724338
2022-09-15	11:29:54	0.72902
2022-09-15	11:29:54	0.725967
2022-09-15	11:29:55	0.72673
2022-09-15	11:29:55	0.730903
2022-09-15	11:29:55	0.722659
2022-09-15	11:29:55	0.726527
2022-09-15	11:29:56	0.723321
2022-09-15	11:29:56	0.723524
2022-09-15	11:29:56	0.724847
2022-09-15	11:29:56	0.722507
2022-09-15	11:29:57	0.725153
2022-09-15	11:29:57	0.728308
2022-09-15	11:29:57	0.72617
2022-09-15	11:29:57	0.720267
2022-09-15	11:29:58	0.727239
2022-09-15	11:29:58	0.724084
2022-09-15	11:29:58	0.723575
2022-09-15	11:29:59	0.734466
2022-09-15	11:29:59	0.73701
2022-09-15	11:29:59	0.722862
2022-09-15	11:29:59	1.59869
2022-09-15	11:30:00	0.725153
2022-09-15	11:30:00	0.729377
2022-09-15	11:30:00	0.727901
2022-09-15	11:30:00	0.723982
2022-09-15	11:30:01	0.726527
2022-09-15	11:30:01	0.723779
2022-09-15	11:30:01	0.722659
2022-09-15	11:30:01	0.721081
2022-09-15	11:30:02	0.724796
2022-09-15	11:30:02	0.720827
2022-09-15	11:30:02	0.723422
2022-09-15	11:30:03	0.723931
2022-09-15	11:30:03	0.722354
2022-09-15	11:30:03	0.727239
2022-09-15	11:30:03	0.72902
2022-09-15	11:30:04	0.7193
2022-09-15	11:30:04	0.728868
2022-09-15	11:30:04	0.728715
2022-09-15	11:30:04	0.730547
2022-09-15	11:30:05	0.728206
2022-09-15	11:30:05	0.73416
2022-09-15	11:30:05	0.728461
2022-09-15	11:30:05	0.721591
2022-09-15	11:30:06	0.717824
2022-09-15	11:30:06	0.72556
2022-09-15	11:30:06	0.729835
2022-09-15	11:30:07	0.728104
2022-09-15	11:30:07	0.727239
2022-09-15	11:30:07	0.732379
2022-09-15	11:30:07	0.724237
2022-09-15	11:30:08	0.72556
2022-09-15	11:30:08	0.722303
2022-09-15	11:30:08	0.717112
2022-09-15	11:30:08	0.724593
2022-09-15	11:30:09	0.720521
2022-09-15	11:30:09	0.728104
2022-09-15	11:30:09	0.729835
2022-09-15	11:30:09	0.730242
2022-09-15	11:30:10	0.722608
2022-09-15	11:30:10	0.731259
2022-09-15	11:30:10	0.736908
2022-09-15	11:30:11	0.732786
2022-09-15	11:30:11	0.733092
2022-09-15	11:30:11	0.741947
2022-09-15	11:30:11	0.730801
2022-09-15	11:30:12	0.733295
2022-09-15	11:30:12	0.733397
2022-09-15	11:30:12	0.711463
2022-09-15	11:30:12	0.735433
2022-09-15	11:30:13	0.765814
2022-09-15	11:30:13	0.733499
2022-09-15	11:30:13	0.763779
2022-09-15	11:30:14	0.821234
2022-09-15	11:30:14	0.720114
2022-09-15	11:30:14	0.847494
2022-09-15	11:30:14	0.724186
2022-09-15	11:30:15	0.722812
2022-09-15	11:30:15	0.681285
2022-09-15	11:30:15	0.61757
2022-09-15	11:30:15	0.675585
2022-09-15	11:30:16	0.731565
2022-09-15	11:30:16	1.0395
2022-09-15	11:30:16	0.698079
2022-09-15	11:30:16	0.0113107
2022-09-15	11:30:17	-0.0449234
2022-09-15	11:30:17	-0.40757
2022-09-15	11:30:17	-0.577799
2022-09-15	11:30:17	-0.594491
2022-09-15	11:30:18	-0.577137
2022-09-15	11:30:18	-0.169809
2022-09-15	11:30:18	2.74083
2022-09-15	11:30:19	2.54403
2022-09-15	11:30:19	2.99553
2022-09-15	11:30:19	2.98225
2022-09-15	11:30:19	2.9536
2022-09-15	11:30:20	2.45955
2022-09-15	11:30:20	3.06271
2022-09-15	11:30:20	6.90744
2022-09-15	11:30:20	6.65853
2022-09-15	11:30:21	3.51207
2022-09-15	11:30:21	10.0007
2022-09-15	11:30:21	3.69161
2022-09-15	11:30:22	1.70785
2022-09-15	11:30:22	5.17141
2022-09-15	11:30:22	1.38424
2022-09-15	11:30:22	0.244491
2022-09-15	11:30:23	0.186883
2022-09-15	11:30:23	0.036247
2022-09-15	11:30:23	-0.235814
2022-09-15	11:30:23	0.0698349
2022-09-15	11:30:24	-0.167926
2022-09-15	11:30:24	-0.141921
2022-09-15	11:30:24	-0.237392
2022-09-15	11:30:24	-0.339478
2022-09-15	11:30:25	-0.257188
2022-09-15	11:30:25	-0.275865
2022-09-15	11:30:25	-0.32818
2022-09-15	11:30:26	-0.286094
2022-09-15	11:30:26	0.201896
2022-09-15	11:30:26	3.38693
2022-09-15	11:30:26	8.84927
2022-09-15	11:30:27	12.1651
2022-09-15	11:30:27	22.0524
2022-09-15	11:30:27	33.1795
2022-09-15	11:30:27	6.88367
2022-09-15	11:30:28	7.68077
2022-09-15	11:30:28	6.15472
2022-09-15	11:30:28	19.8051
2022-09-15	11:30:28	13.3822
2022-09-15	11:30:29	11.2026
2022-09-15	11:30:29	8.87405
2022-09-15	11:30:29	7.03477
2022-09-15	11:30:30	13.7313
2022-09-15	11:30:30	14.407
2022-09-15	11:30:30	13.6639
2022-09-15	11:30:30	5.63238
2022-09-15	11:30:31	7.52495
2022-09-15	11:30:31	2.47889
2022-09-15	11:30:31	3.84306
2022-09-15	11:30:31	5.32067
2022-09-15	11:30:32	0.846374
2022-09-15	11:30:32	0.25411
2022-09-15	11:30:32	0.26383
2022-09-15	11:30:32	0.18388
2022-09-15	11:30:33	0.107138
2022-09-15	11:30:33	0.345916
2022-09-15	11:30:33	2.27543
2022-09-15	11:30:34	6.76098
2022-09-15	11:30:34	14.4748
2022-09-15	11:30:34	11.1764
2022-09-15	11:30:34	4.43283
2022-09-15	11:30:35	2.89859
2022-09-15	11:30:35	16.0937
2022-09-15	11:30:35	8.12454
2022-09-15	11:30:35	22.8498
2022-09-15	11:30:36	23.4772
2022-09-15	11:30:36	11.7357
2022-09-15	11:30:36	22.1308
2022-09-15	11:30:36	9.77008
2022-09-15	11:30:37	7.57894
2022-09-15	11:30:37	16.1029
2022-09-15	11:30:37	12.3411
2022-09-15	11:30:38	18.3471
2022-09-15	11:30:38	14.8234
2022-09-15	11:30:38	11.0023
2022-09-15	11:30:38	22.6722
2022-09-15	11:30:39	14.6064
2022-09-15	11:30:39	10.1213
2022-09-15	11:30:39	21.0033
2022-09-15	11:30:39	13.1397
2022-09-15	11:30:40	12.4375
2022-09-15	11:30:40	18.892
2022-09-15	11:30:40	8.38993
2022-09-15	11:30:40	11.8536
2022-09-15	11:30:41	10.3668
2022-09-15	11:30:41	5.72469
2022-09-15	11:30:41	12.5262
2022-09-15	11:30:42	12.5293
2022-09-15	11:30:42	9.71024
2022-09-15	11:30:42	9.89812
2022-09-15	11:30:42	7.47411
2022-09-15	11:30:43	9.4138
2022-09-15	11:30:43	14.7732
2022-09-15	11:30:43	6.55019
2022-09-15	11:30:43	6.60306
2022-09-15	11:30:44	2.33411
2022-09-15	11:30:44	0.674415
2022-09-15	11:30:44	0.135535
2022-09-15	11:30:44	0.188512
2022-09-15	11:30:45	0.100674
2022-09-15	11:30:45	-0.00365114
2022-09-15	11:30:45	0.0938551
2022-09-15	11:30:46	0.545712
2022-09-15	11:30:46	1.29304
2022-09-15	11:30:46	5.33349
2022-09-15	11:30:46	3.04271
2022-09-15	11:30:47	5.21136
2022-09-15	11:30:47	2.40093
2022-09-15	11:30:47	7.24199
2022-09-15	11:30:47	4.81014
2022-09-15	11:30:48	4.71584
2022-09-15	11:30:48	6.92607
2022-09-15	11:30:48	2.83146
2022-09-15	11:30:49	4.93915
2022-09-15	11:30:49	6.30586
2022-09-15	11:30:49	9.43166
2022-09-15	11:30:49	18.5963
2022-09-15	11:30:50	14.8266
2022-09-15	11:30:50	16.885
2022-09-15	11:30:50	5.0538
2022-09-15	11:30:50	1.8535
2022-09-15	11:30:51	1.87019
2022-09-15	11:30:51	0.64958
2022-09-15	11:30:51	1.29559
2022-09-15	11:30:51	2.39492
2022-09-15	11:30:52	2.70515
2022-09-15	11:30:52	3.742
2022-09-15	11:30:52	3.46266
2022-09-15	11:30:53	2.89843
2022-09-15	11:30:53	1.85151
2022-09-15	11:30:53	1.44515
2022-09-15	11:30:53	3.59253
2022-09-15	11:30:54	3.49833
2022-09-15	11:30:54	7.76703
2022-09-15	11:30:54	9.46749
2022-09-15	11:30:54	6.23797
2022-09-15	11:30:55	5.41456
2022-09-15	11:30:55	3.21599
2022-09-15	11:30:55	4.71945
2022-09-15	11:30:55	2.0192
2022-09-15	11:30:56	2.2909
2022-09-15	11:30:56	4.09497
2022-09-15	11:30:56	1.52067
2022-09-15	11:30:57	2.48281
2022-09-15	11:30:57	2.92016
2022-09-15	11:30:57	2.822
2022-09-15	11:30:57	3.27523
2022-09-15	11:30:58	2.52291
2022-09-15	11:30:58	5.10973
2022-09-15	11:30:58	2.9109
2022-09-15	11:30:58	4.00423
2022-09-15	11:30:59	5.44724
2022-09-15	11:30:59	1.57584
2022-09-15	11:30:59	2.42714
2022-09-15	11:30:59	0.97589
2022-09-15	11:31:00	1.5563
2022-09-15	11:31:00	2.725
2022-09-15	11:31:00	4.53747
2022-09-15	11:31:01	9.23762
2022-09-15	11:31:01	5.96917
2022-09-15	11:31:01	7.97991
2022-09-15	11:31:01	2.85233
2022-09-15	11:31:02	5.65609
2022-09-15	11:31:02	1.92576
2022-09-15	11:31:02	3.27563
2022-09-15	11:31:02	2.33584
2022-09-15	11:31:03	2.83243
2022-09-15	11:31:03	3.02912
2022-09-15	11:31:03	4.37553
2022-09-15	11:31:03	4.8648
2022-09-15	11:31:04	1.60673
2022-09-15	11:31:04	0.409835
2022-09-15	11:31:04	0.313753
2022-09-15	11:31:05	0.389428
2022-09-15	11:31:05	0.238028
2022-09-15	11:31:05	0.217926
2022-09-15	11:31:05	1.40281
2022-09-15	11:31:06	0.629173
2022-09-15	11:31:06	0.538537
2022-09-15	11:31:06	0.446323
2022-09-15	11:31:06	-0.788282
2022-09-15	11:31:07	0.030242
2022-09-15	11:31:07	0.180064
2022-09-15	11:31:07	0.259453
2022-09-15	11:31:07	0.322303
2022-09-15	11:31:08	0.266934
2022-09-15	11:31:08	0.5593
2022-09-15	11:31:08	0.080929
2022-09-15	11:31:09	0.327392
2022-09-15	11:31:09	0.128003
2022-09-15	11:31:09	0.563219
2022-09-15	11:31:09	0.397316
2022-09-15	11:31:10	0.362812
2022-09-15	11:31:10	0.314008
2022-09-15	11:31:10	0.204288
2022-09-15	11:31:10	0.0940587
2022-09-15	11:31:11	0.100827
2022-09-15	11:31:11	0.176349
2022-09-15	11:31:11	0.422354
2022-09-15	11:31:11	0.547392
2022-09-15	11:31:12	0.418944
2022-09-15	11:31:12	0.302201
2022-09-15	11:31:12	0.280165
2022-09-15	11:31:13	-0.132404
2022-09-15	11:31:13	-0.36014
2022-09-15	11:31:13	-0.415814
2022-09-15	11:31:13	-0.412964
2022-09-15	11:31:14	-0.588994
2022-09-15	11:31:14	-0.521615
2022-09-15	11:31:14	-0.0454323
2022-09-15	11:31:14	0.290853
2022-09-15	11:31:15	0.284695
2022-09-15	11:31:15	0.18271
2022-09-15	11:31:15	0.218079
2022-09-15	11:31:15	0.188563
2022-09-15	11:31:16	0.384288
2022-09-15	11:31:16	0.292634
2022-09-15	11:31:16	0.207443
2022-09-15	11:31:17	-0.0135748
2022-09-15	11:31:17	-0.305178
2022-09-15	11:31:17	-0.558562
2022-09-15	11:31:17	-0.611284
2022-09-15	11:31:18	-0.56589
2022-09-15	11:31:18	-0.542684
2022-09-15	11:31:18	-0.503345
2022-09-15	11:31:18	-0.284567
2022-09-15	11:31:19	0.18958
2022-09-15	11:31:19	0.355942
2022-09-15	11:31:19	1.15111
2022-09-15	11:31:19	0.766119
2022-09-15	11:31:20	0.542201
2022-09-15	11:31:20	0.416603
2022-09-15	11:31:20	2.58439
2022-09-15	11:31:21	1.70938
2022-09-15	11:31:21	1.4163
2022-09-15	11:31:21	0.698079
2022-09-15	11:31:21	0.487952
2022-09-15	11:31:22	0.841998
2022-09-15	11:31:22	1.58276
2022-09-15	11:31:22	1.49391
2022-09-15	11:31:22	2.21533
2022-09-15	11:31:23	0.556807
2022-09-15	11:31:23	0.17584
2022-09-15	11:31:23	0.172583
2022-09-15	11:31:23	0.200725
2022-09-15	11:31:24	0.310293
2022-09-15	11:31:24	0.266374
2022-09-15	11:31:24	0.300878
2022-09-15	11:31:25	0.73243
2022-09-15	11:31:25	0.585458
2022-09-15	11:31:25	0.735178
2022-09-15	11:31:25	0.287952
2022-09-15	11:31:26	0.122812
2022-09-15	11:31:26	0.231463
2022-09-15	11:31:26	0.189173
2022-09-15	11:31:26	0.207952
2022-09-15	11:31:27	0.725712
2022-09-15	11:31:27	0.719555
2022-09-15	11:31:27	2.50083
2022-09-15	11:31:27	4.691
2022-09-15	11:31:28	6.06535
2022-09-15	11:31:28	10.6277
2022-09-15	11:31:28	9.47731
2022-09-15	11:31:29	15.3432
2022-09-15	11:31:29	7.13634
2022-09-15	11:31:29	8.73344
2022-09-15	11:31:29	4.38704
2022-09-15	11:31:30	4.31625
2022-09-15	11:31:30	8.09985
2022-09-15	11:31:30	1.54317
2022-09-15	11:31:30	2.96424
2022-09-15	11:31:31	8.08103
2022-09-15	11:31:31	14.3872
2022-09-15	11:31:31	16.3607
2022-09-15	11:31:31	22.8289
2022-09-15	11:31:32	22.7759
2022-09-15	11:31:32	13.3242
2022-09-15	11:31:32	11.0415
2022-09-15	11:31:33	9.79268
2022-09-15	11:31:33	10.8421
2022-09-15	11:31:33	9.77828
2022-09-15	11:31:33	9.10963
2022-09-15	11:31:34	8.19894
2022-09-15	11:31:34	8.59329
2022-09-15	11:31:34	8.0768
2022-09-15	11:31:34	7.63757
2022-09-15	11:31:35	7.11965
2022-09-15	11:31:35	6.30317
2022-09-15	11:31:35	6.21115
2022-09-15	11:31:35	6.19451
2022-09-15	11:31:36	5.70912
2022-09-15	11:31:36	5.9651
2022-09-15	11:31:36	5.59177
2022-09-15	11:31:37	4.73701
2022-09-15	11:31:37	4.75212
2022-09-15	11:31:37	3.90785
2022-09-15	11:31:37	3.76327
2022-09-15	11:31:38	3.95482
2022-09-15	11:31:38	3.92332
2022-09-15	11:31:38	2.82032
2022-09-15	11:31:38	1.282
2022-09-15	11:31:39	0.970954
2022-09-15	11:31:39	0.398079
2022-09-15	11:31:39	0.262812
2022-09-15	11:31:39	-0.0322517
2022-09-15	11:31:40	-0.226145
2022-09-15	11:31:40	-0.364109
2022-09-15	11:31:40	0.0778756
2022-09-15	11:31:41	0.92958
2022-09-15	11:31:41	0.841692
2022-09-15	11:31:41	0.293041
2022-09-15	11:31:41	0.201794
2022-09-15	11:31:42	0.162557
2022-09-15	11:31:42	0.0382827
2022-09-15	11:31:42	0.0389951
2022-09-15	11:31:42	0.0529391
2022-09-15	11:31:43	0.0384862
2022-09-15	11:31:43	0.0532954
2022-09-15	11:31:43	0.0673921
2022-09-15	11:31:44	0.0692242
2022-09-15	11:31:44	0.0579264
2022-09-15	11:31:44	0.0253564
2022-09-15	11:31:44	0.0569595
2022-09-15	11:31:45	0.0622012
2022-09-15	11:31:45	0.053957
2022-09-15	11:31:45	0.0709544
2022-09-15	11:31:46	0.0655091
2022-09-15	11:31:46	0.0654073
2022-09-15	11:31:46	0.0260689
2022-09-15	11:31:46	-0.142328
2022-09-15	11:31:46	-0.407671
2022-09-15	11:31:47	-0.681259
2022-09-15	11:31:47	-0.846551
2022-09-15	11:31:47	-0.998307
2022-09-15	11:31:48	-0.835101
2022-09-15	11:31:48	-1.22212
2022-09-15	11:31:48	-0.378206
2022-09-15	11:31:48	0.0515142
2022-09-15	11:31:49	0.53986
2022-09-15	11:31:49	1.01686
2022-09-15	11:31:49	4.73513
2022-09-15	11:31:49	6.47141
2022-09-15	11:31:50	6.05187
2022-09-15	11:31:50	5.85131
2022-09-15	11:31:50	4.17116
2022-09-15	11:31:50	3.29604
2022-09-15	11:31:51	3.15131
2022-09-15	11:31:51	2.7649
2022-09-15	11:31:51	2.52184
2022-09-15	11:31:52	2.27899
2022-09-15	11:31:52	2.34485
2022-09-15	11:31:52	2.43406
2022-09-15	11:31:52	2.52424
2022-09-15	11:31:53	2.4222
2022-09-15	11:31:53	2.442
2022-09-15	11:31:53	2.44169
2022-09-15	11:31:53	2.39833
2022-09-15	11:31:54	2.31762
2022-09-15	11:31:54	2.20322
2022-09-15	11:31:54	2.29426
2022-09-15	11:31:54	2.22154
2022-09-15	11:31:55	2.28317
2022-09-15	11:31:55	2.24693
2022-09-15	11:31:55	2.19085
2022-09-15	11:31:56	2.17838
2022-09-15	11:31:56	2.23762
2022-09-15	11:31:56	2.30785
2022-09-15	11:31:56	2.33055
2022-09-15	11:31:57	2.36617
2022-09-15	11:31:57	2.38113
2022-09-15	11:31:57	2.41172
2022-09-15	11:31:57	2.44434
2022-09-15	11:31:58	2.41645
2022-09-15	11:31:58	2.4652
2022-09-15	11:31:58	2.4453
2022-09-15	11:31:58	2.43838
2022-09-15	11:31:59	2.41106
2022-09-15	11:31:59	2.4053
2022-09-15	11:31:59	2.37329
2022-09-15	11:32:00	2.39996
2022-09-15	11:32:00	2.37686
2022-09-15	11:32:00	2.22617
2022-09-15	11:32:00	1.97162
2022-09-15	11:32:01	1.87625
2022-09-15	11:32:01	1.95095
2022-09-15	11:32:01	1.94948
2022-09-15	11:32:01	1.86607
2022-09-15	11:32:02	1.65172
2022-09-15	11:32:02	1.80393
2022-09-15	11:32:02	2.1564
2022-09-15	11:32:02	2.52006
2022-09-15	11:32:03	2.345
2022-09-15	11:32:03	1.95503
2022-09-15	11:32:03	1.61126
2022-09-15	11:32:04	2.27905
2022-09-15	11:32:04	2.23564
2022-09-15	11:32:04	2.1222
2022-09-15	11:32:04	1.94388
2022-09-15	11:32:05	1.41045
2022-09-15	11:32:05	1.71274
2022-09-15	11:32:05	1.82307
2022-09-15	11:32:05	1.85136
2022-09-15	11:32:06	1.90017
2022-09-15	11:32:06	1.76882
2022-09-15	11:32:06	1.76836
2022-09-15	11:32:06	1.91192
2022-09-15	11:32:07	2.19676
2022-09-15	11:32:07	2.24795
2022-09-15	11:32:07	2.38648
2022-09-15	11:32:08	1.9881
2022-09-15	11:32:08	1.72907
2022-09-15	11:32:08	1.62653
2022-09-15	11:32:08	1.60327
2022-09-15	11:32:09	2.00215
2022-09-15	11:32:09	2.26347
2022-09-15	11:32:09	2.58245
2022-09-15	11:32:09	1.92113
2022-09-15	11:32:10	2.37034
2022-09-15	11:32:10	5.34749
2022-09-15	11:32:10	17.0424
2022-09-15	11:32:10	18.5881
2022-09-15	11:32:11	9.71955
2022-09-15	11:32:11	17.3773
2022-09-15	11:32:11	14.3944
2022-09-15	11:32:12	15.787
2022-09-15	11:32:12	11.4826
2022-09-15	11:32:12	6.98943
2022-09-15	11:32:12	6.0906
2022-09-15	11:32:13	5.98739
2022-09-15	11:32:13	8.01843
2022-09-15	11:32:13	6.87416
2022-09-15	11:32:13	6.46169
2022-09-15	11:32:14	6.98138
2022-09-15	11:32:14	7.49838
2022-09-15	11:32:14	7.85823
2022-09-15	11:32:14	7.06021
2022-09-15	11:32:15	9.76988
2022-09-15	11:32:15	11.7627
2022-09-15	11:32:15	15.8779
2022-09-15	11:32:16	7.99731
2022-09-15	11:32:16	3.93859
2022-09-15	11:32:16	6.00561
2022-09-15	11:32:16	5.56337
2022-09-15	11:32:17	3.89899
2022-09-15	11:32:17	2.942
2022-09-15	11:32:17	2.03645
2022-09-15	11:32:17	2.11645
2022-09-15	11:32:18	0.985814
2022-09-15	11:32:18	0.410547
2022-09-15	11:32:18	0.163931
2022-09-15	11:32:18	0.323677
2022-09-15	11:32:19	0.413295
2022-09-15	11:32:19	0.832226
2022-09-15	11:32:19	1.68805
2022-09-15	11:32:20	4.7765
2022-09-15	11:32:20	9.90836
2022-09-15	11:32:20	6.50642
2022-09-15	11:32:20	6.27548
2022-09-15	11:32:21	4.65716
2022-09-15	11:32:21	4.98683
2022-09-15	11:32:21	3.89548
2022-09-15	11:32:21	4.71854
2022-09-15	11:32:22	3.5193
2022-09-15	11:32:22	3.36602
2022-09-15	11:32:22	3.29248
2022-09-15	11:32:22	3.32617
2022-09-15	11:32:23	3.62184
2022-09-15	11:32:23	3.79568
2022-09-15	11:32:23	3.97467
2022-09-15	11:32:24	4.04291
2022-09-15	11:32:24	4.08642
2022-09-15	11:32:24	4.16429
2022-09-15	11:32:24	4.35721
2022-09-15	11:32:25	4.46062
2022-09-15	11:32:25	4.42841
2022-09-15	11:32:25	4.36912
2022-09-15	11:32:25	4.4306
2022-09-15	11:32:26	4.46317
2022-09-15	11:32:26	4.33624
2022-09-15	11:32:26	4.44266
2022-09-15	11:32:26	4.37741
2022-09-15	11:32:27	4.35818
2022-09-15	11:32:27	4.33894
2022-09-15	11:32:27	4.27182
2022-09-15	11:32:28	4.32627
2022-09-15	11:32:28	4.38357
2022-09-15	11:32:28	3.4422
2022-09-15	11:32:28	5.04561
2022-09-15	11:32:29	8.39894
2022-09-15	11:32:29	7.04561
2022-09-15	11:32:29	5.50042
2022-09-15	11:32:29	4.9078
2022-09-15	11:32:30	4.91686
2022-09-15	11:32:30	5.04551
2022-09-15	11:32:30	4.41976
2022-09-15	11:32:30	4.08683
2022-09-15	11:32:31	3.96973
2022-09-15	11:32:31	3.64225
2022-09-15	11:32:31	3.50754
2022-09-15	11:32:32	2.8507
2022-09-15	11:32:32	0.432125
2022-09-15	11:32:32	0.211972
2022-09-15	11:32:32	0.28668
2022-09-15	11:32:33	0.200267
2022-09-15	11:32:33	0.308613
2022-09-15	11:32:33	0.187188
2022-09-15	11:32:33	-0.235203
2022-09-15	11:32:34	-0.525127
2022-09-15	11:32:34	-0.730317
2022-09-15	11:32:34	-0.858104
2022-09-15	11:32:34	-0.856475
2022-09-15	11:32:35	-0.856577
2022-09-15	11:32:35	-0.37673
2022-09-15	11:32:35	-0.165178
2022-09-15	11:32:36	0.853041
2022-09-15	11:32:36	0.425407
2022-09-15	11:32:36	0.526425
2022-09-15	11:32:36	0.349122
2022-09-15	11:32:37	0.256247
2022-09-15	11:32:37	0.164389
2022-09-15	11:32:37	0.169682
2022-09-15	11:32:37	0.215636
2022-09-15	11:32:38	0.399962
2022-09-15	11:32:38	3.04571
2022-09-15	11:32:38	11.9982
2022-09-15	11:32:38	15.8316
2022-09-15	11:32:39	18.7772
2022-09-15	11:32:39	6.69594
2022-09-15	11:32:39	2.04327
2022-09-15	11:32:40	0.943728
2022-09-15	11:32:40	0.444491
2022-09-15	11:32:40	0.348308
2022-09-15	11:32:40	0.424288
2022-09-15	11:32:41	0.238384
2022-09-15	11:32:41	0.249377
2022-09-15	11:32:41	0.0370104
2022-09-15	11:32:41	0.319809
2022-09-15	11:32:42	0.525
2022-09-15	11:32:42	0.420166
2022-09-15	11:32:42	0.925153
2022-09-15	11:32:42	1.01141
2022-09-15	11:32:43	0.470089
2022-09-15	11:32:43	0.38668
2022-09-15	11:32:43	0.174618
2022-09-15	11:32:44	-0.179783
2022-09-15	11:32:44	-0.309351
2022-09-15	11:32:44	-0.498257
2022-09-15	11:32:44	-0.436679
2022-09-15	11:32:45	-0.455763
2022-09-15	11:32:45	-0.576272
2022-09-15	11:32:45	-0.702684
2022-09-15	11:32:45	-0.815915
2022-09-15	11:32:46	-0.780496
2022-09-15	11:32:46	-0.763905
2022-09-15	11:32:46	-0.887518
2022-09-15	11:32:46	-0.593829
2022-09-15	11:32:47	-0.601055
2022-09-15	11:32:47	-0.51444
2022-09-15	11:32:47	0.0162979
2022-09-15	11:32:48	3.01604
2022-09-15	11:32:48	6.22698
2022-09-15	11:32:48	4.16128
2022-09-15	11:32:48	4.02261
2022-09-15	11:32:49	8.19355
2022-09-15	11:32:49	2.75492
2022-09-15	11:32:49	5.12118
2022-09-15	11:32:49	7.04586
2022-09-15	11:32:50	2.885
2022-09-15	11:32:50	6.61385
2022-09-15	11:32:50	7.35563
2022-09-15	11:32:50	8.95258
2022-09-15	11:32:51	8.11761
2022-09-15	11:32:51	5.38377
2022-09-15	11:32:51	16.382
2022-09-15	11:32:52	12.3633
2022-09-15	11:32:52	11.4847
2022-09-15	11:32:52	9.97492
2022-09-15	11:32:53	4.71808
2022-09-15	11:32:53	4.56378
2022-09-15	11:32:53	1.02632
2022-09-15	11:32:53	1.20754
2022-09-15	11:32:53	0.612379
2022-09-15	11:32:54	0.835687
2022-09-15	11:32:54	1.31207
2022-09-15	11:32:54	2.43141
2022-09-15	11:32:54	4.36037
2022-09-15	11:32:55	4.84647
2022-09-15	11:32:55	5.11227
2022-09-15	11:32:55	10.1154
2022-09-15	11:32:56	8.61925
2022-09-15	11:32:56	14.1962
2022-09-15	11:32:56	8.3022
2022-09-15	11:32:56	4.00032
2022-09-15	11:32:57	11.2745
2022-09-15	11:32:57	3.87314
2022-09-15	11:32:57	6.70255
2022-09-15	11:32:57	17.4245
2022-09-15	11:32:58	2.39838
2022-09-15	11:32:58	8.17752
2022-09-15	11:32:58	6.37207
2022-09-15	11:32:59	4.91574
2022-09-15	11:32:59	16.1493
2022-09-15	11:32:59	7.61115
2022-09-15	11:32:59	9.21233
2022-09-15	11:33:00	7.91085
2022-09-15	11:33:00	5.55497
2022-09-15	11:33:00	14.5554
2022-09-15	11:33:00	11.4289
2022-09-15	11:33:01	8.38306
2022-09-15	11:33:01	16.3311
2022-09-15	11:33:01	3.56429
2022-09-15	11:33:01	5.81324
2022-09-15	11:33:02	14.289
2022-09-15	11:33:02	4.18653
2022-09-15	11:33:02	10.3331
2022-09-15	11:33:02	14.7201
2022-09-15	11:33:03	7.66617
2022-09-15	11:33:03	14.2146
2022-09-15	11:33:03	15.6217
2022-09-15	11:33:04	6.42047
2022-09-15	11:33:04	13.3115
2022-09-15	11:33:04	14.2086
2022-09-15	11:33:04	9.72739
2022-09-15	11:33:05	28.5612
2022-09-15	11:33:05	17.9954
2022-09-15	11:33:05	5.71864
2022-09-15	11:33:05	8.78846
2022-09-15	11:33:06	14.4632
2022-09-15	11:33:06	9.85319
2022-09-15	11:33:06	10.0798
2022-09-15	11:33:07	3.30551
2022-09-15	11:33:07	5.23803
2022-09-15	11:33:07	6.13004
2022-09-15	11:33:07	0.649529
2022-09-15	11:33:08	-0.00960535
2022-09-15	11:33:08	-0.0757631
2022-09-15	11:33:08	-0.131437
2022-09-15	11:33:08	-0.0843127
2022-09-15	11:33:09	-0.0866537
2022-09-15	11:33:09	-0.011183
2022-09-15	11:33:09	0.0698857
2022-09-15	11:33:09	0.134873
2022-09-15	11:33:10	0.194517
2022-09-15	11:33:10	0.2193
2022-09-15	11:33:10	0.219504
2022-09-15	11:33:11	-0.0426842
2022-09-15	11:33:11	-0.38075
2022-09-15	11:33:11	-0.38762
2022-09-15	11:33:11	-0.560496
2022-09-15	11:33:12	-0.688434
2022-09-15	11:33:12	-0.745533
2022-09-15	11:33:12	-0.33388
2022-09-15	11:33:12	0.781692
2022-09-15	11:33:13	3.65457
2022-09-15	11:33:13	4.13095
2022-09-15	11:33:13	0.956145
2022-09-15	11:33:13	0.569987
2022-09-15	11:33:14	-0.0146944
2022-09-15	11:33:14	-0.0491473
2022-09-15	11:33:14	-0.121819
2022-09-15	11:33:15	0.272176
2022-09-15	11:33:15	0.678333
2022-09-15	11:33:15	1.64851
2022-09-15	11:33:15	4.13706
2022-09-15	11:33:16	5.82642
2022-09-15	11:33:16	5.7738
2022-09-15	11:33:16	1.53742
2022-09-15	11:33:16	1.54856
2022-09-15	11:33:17	0.418028
2022-09-15	11:33:17	0.300827
2022-09-15	11:33:17	0.30159
2022-09-15	11:33:17	0.0223539
2022-09-15	11:33:18	0.395687
2022-09-15	11:33:18	0.456298
2022-09-15	11:33:18	2.33472
2022-09-15	11:33:19	3.41304
2022-09-15	11:33:19	5.07854
2022-09-15	11:33:19	5.4911
2022-09-15	11:33:19	4.47289
2022-09-15	11:33:20	5.17599
2022-09-15	11:33:20	1.34469
2022-09-15	11:33:20	3.04235
2022-09-15	11:33:20	1.48871
2022-09-15	11:33:21	0.624796
2022-09-15	11:33:21	0.884745
2022-09-15	11:33:21	0.449835
2022-09-15	11:33:21	0.58444
2022-09-15	11:33:22	0.411616
2022-09-15	11:33:22	0.422405
2022-09-15	11:33:22	0.420471
2022-09-15	11:33:23	0.434822
2022-09-15	11:33:23	0.584796
2022-09-15	11:33:23	0.212481
2022-09-15	11:33:23	-0.0472135
2022-09-15	11:33:24	0.0197585
2022-09-15	11:33:24	-0.209962
2022-09-15	11:33:24	-0.328079
2022-09-15	11:33:24	-0.289503
2022-09-15	11:33:25	-0.262328
2022-09-15	11:33:25	-0.288638
2022-09-15	11:33:25	-0.00894378
2022-09-15	11:33:25	0.602964
2022-09-15	11:33:26	1.82057
2022-09-15	11:33:26	2.37854
2022-09-15	11:33:26	1.862
2022-09-15	11:33:27	1.43452
2022-09-15	11:33:27	1.15706
2022-09-15	11:33:27	1.52001
2022-09-15	11:33:27	1.01788
2022-09-15	11:33:28	0.991514
2022-09-15	11:33:28	0.560216
2022-09-15	11:33:28	0.253397
2022-09-15	11:33:28	0.462303
2022-09-15	11:33:29	0.230598
2022-09-15	11:33:29	0.0723284
2022-09-15	11:33:29	-0.56935
2022-09-15	11:33:29	-0.962277
2022-09-15	11:33:30	-0.04416
2022-09-15	11:33:30	0.287901
2022-09-15	11:33:30	0.295534
2022-09-15	11:33:31	-0.237086
2022-09-15	11:33:31	-0.166857
2022-09-15	11:33:31	-0.40477
2022-09-15	11:33:31	-0.550979
2022-09-15	11:33:32	-0.575356
2022-09-15	11:33:32	-0.708689
2022-09-15	11:33:32	-0.762836
2022-09-15	11:33:32	-0.863396
2022-09-15	11:33:33	-0.643142
2022-09-15	11:33:33	-0.282277
2022-09-15	11:33:33	-0.119122
2022-09-15	11:33:33	0.240165
2022-09-15	11:33:34	0.532328
2022-09-15	11:33:34	6.35986
2022-09-15	11:33:34	1.64994
2022-09-15	11:33:35	1.06592
2022-09-15	11:33:35	0.573295
2022-09-15	11:33:35	0.170802
2022-09-15	11:33:35	0.699809
2022-09-15	11:33:36	0.106476
2022-09-15	11:33:36	0.16444
2022-09-15	11:33:36	0.132786
2022-09-15	11:33:36	0.373041
2022-09-15	11:33:37	0.279657
2022-09-15	11:33:37	0.838639
2022-09-15	11:33:37	0.298842
2022-09-15	11:33:37	0.282456
2022-09-15	11:33:38	0.162965
2022-09-15	11:33:38	0.0905473
2022-09-15	11:33:38	-0.189961
2022-09-15	11:33:39	-0.35444
2022-09-15	11:33:39	-0.350165
2022-09-15	11:33:39	-0.528638
2022-09-15	11:33:39	-0.343193
2022-09-15	11:33:40	0.18271
2022-09-15	11:33:40	8.88596
2022-09-15	11:33:40	18.3393
2022-09-15	11:33:40	4.4592
2022-09-15	11:33:41	3.46515
2022-09-15	11:33:41	0.294567
2022-09-15	11:33:41	-0.0758648
2022-09-15	11:33:41	0.00902061
2022-09-15	11:33:42	-0.131437
2022-09-15	11:33:42	-0.00685724
2022-09-15	11:33:42	-0.225839
2022-09-15	11:33:43	-0.402582
2022-09-15	11:33:43	-0.210165
2022-09-15	11:33:43	-0.45159
2022-09-15	11:33:43	-0.216119
2022-09-15	11:33:44	-0.119783
2022-09-15	11:33:44	0.0649493
2022-09-15	11:33:44	0.14271
2022-09-15	11:33:44	0.0731427
2022-09-15	11:33:45	0.0876465
2022-09-15	11:33:45	-0.0468064
2022-09-15	11:33:45	-0.101005
2022-09-15	11:33:45	0.0156872
2022-09-15	11:33:46	0.066985
2022-09-15	11:33:46	0.195229
2022-09-15	11:33:46	0.238181
2022-09-15	11:33:47	0.394008
2022-09-15	11:33:47	0.512583
2022-09-15	11:33:47	0.699758
2022-09-15	11:33:47	0.542099
2022-09-15	11:33:48	1.7852
2022-09-15	11:33:48	1.96999
2022-09-15	11:33:48	2.45263
2022-09-15	11:33:48	5.19044
2022-09-15	11:33:49	3.87289
2022-09-15	11:33:49	4.01116
2022-09-15	11:33:49	0.170649
2022-09-15	11:33:49	-0.187366
2022-09-15	11:33:50	0.0266796
2022-09-15	11:33:50	-0.178155
2022-09-15	11:33:50	0.535534
2022-09-15	11:33:51	1.33401
2022-09-15	11:33:51	5.59909
2022-09-15	11:33:51	16.8156
2022-09-15	11:33:51	14.4982
2022-09-15	11:33:52	16.7441
2022-09-15	11:33:52	14.6091
2022-09-15	11:33:52	10.0858
2022-09-15	11:33:52	13.8745
2022-09-15	11:33:53	8.73385
2022-09-15	11:33:53	7.58306
2022-09-15	11:33:53	9.64464
2022-09-15	11:33:53	0.878944
2022-09-15	11:33:54	0.888613
2022-09-15	11:33:54	0.12444
2022-09-15	11:33:54	0.0455091
2022-09-15	11:33:55	1.30067
2022-09-15	11:33:55	2.7709
2022-09-15	11:33:55	4.30062
2022-09-15	11:33:55	0.33187
2022-09-15	11:33:56	-0.0288929
2022-09-15	11:33:56	-0.24187
2022-09-15	11:33:56	-0.24528
2022-09-15	11:33:56	-0.248129
2022-09-15	11:33:57	-0.272964
2022-09-15	11:33:57	-0.363753
2022-09-15	11:33:57	-0.493422
2022-09-15	11:33:57	-0.510826
2022-09-15	11:33:58	0.237316
2022-09-15	11:33:58	0.151158
2022-09-15	11:33:58	2.63579
2022-09-15	11:33:59	21.4913
2022-09-15	11:33:59	39.248
2022-09-15	11:33:59	11.8656
2022-09-15	11:33:59	7.98718
2022-09-15	11:34:00	13.6761
2022-09-15	11:34:00	8.95487
2022-09-15	11:34:00	7.19345
2022-09-15	11:34:00	2.85594
2022-09-15	11:34:01	1.36001
2022-09-15	11:34:01	5.27355
2022-09-15	11:34:01	9.86683
2022-09-15	11:34:01	11.295
2022-09-15	11:34:02	12.1167
2022-09-15	11:34:02	16.735
2022-09-15	11:34:02	15.0588
2022-09-15	11:34:03	11.9426
2022-09-15	11:34:03	17.2119
2022-09-15	11:34:03	17.094
2022-09-15	11:34:03	25.0388
2022-09-15	11:34:04	8.02286
2022-09-15	11:34:04	10.059
2022-09-15	11:34:04	8.59828
2022-09-15	11:34:04	22.3698
2022-09-15	11:34:05	8.6108
2022-09-15	11:34:05	4.54332
2022-09-15	11:34:05	2.73833
2022-09-15	11:34:05	1.67391
2022-09-15	11:34:06	1.3224
2022-09-15	11:34:06	1.64556
2022-09-15	11:34:06	2.65482
2022-09-15	11:34:07	0.627901
2022-09-15	11:34:07	0.516857
2022-09-15	11:34:07	0.362812
2022-09-15	11:34:07	1.09162
2022-09-15	11:34:08	5.61568
2022-09-15	11:34:08	9.65894
2022-09-15	11:34:08	6.14729
2022-09-15	11:34:08	6.17263
2022-09-15	11:34:09	1.48408
2022-09-15	11:34:09	0.86612
2022-09-15	11:34:09	0.170395
2022-09-15	11:34:09	1.67955
2022-09-15	11:34:10	7.61227
2022-09-15	11:34:10	16.3781
2022-09-15	11:34:10	7.82037
2022-09-15	11:34:11	8.53008
2022-09-15	11:34:11	15.308
2022-09-15	11:34:11	14.2973
2022-09-15	11:34:11	5.08378
2022-09-15	11:34:12	2.15187
2022-09-15	11:34:12	9.96876
2022-09-15	11:34:12	16.3916
2022-09-15	11:34:12	18.7839
2022-09-15	11:34:13	10.2778
2022-09-15	11:34:13	3.78301
2022-09-15	11:34:13	2.94596
2022-09-15	11:34:13	1.76429
2022-09-15	11:34:14	1.50495
2022-09-15	11:34:14	0.528868
2022-09-15	11:34:14	1.2305
2022-09-15	11:34:15	2.3024
2022-09-15	11:34:15	0.147443
2022-09-15	11:34:15	0.142456
2022-09-15	11:34:15	-0.0860938
2022-09-15	11:34:16	-0.319122
2022-09-15	11:34:16	-0.622735
2022-09-15	11:34:16	-0.685483
2022-09-15	11:34:16	-0.21902
2022-09-15	11:34:17	2.54113
2022-09-15	11:34:17	8.08092
2022-09-15	11:34:17	6.14047
2022-09-15	11:34:17	1.86424
2022-09-15	11:34:18	0.689428
2022-09-15	11:34:18	0.518181
2022-09-15	11:34:18	0.428155
2022-09-15	11:34:19	0.839911
2022-09-15	11:34:19	4.61619
2022-09-15	11:34:19	13.3048
2022-09-15	11:34:19	7.90413
2022-09-15	11:34:20	5.11904
2022-09-15	11:34:20	1.0738
2022-09-15	11:34:20	0.225713
2022-09-15	11:34:20	0.147188
2022-09-15	11:34:21	-0.143193
2022-09-15	11:34:21	-0.0532186
2022-09-15	11:34:21	-0.108842
2022-09-15	11:34:21	-0.110623
2022-09-15	11:34:22	-0.281514
2022-09-15	11:34:22	-0.290369
2022-09-15	11:34:22	-0.202837
2022-09-15	11:34:23	-0.0767809
2022-09-15	11:34:23	0.15869
2022-09-15	11:34:23	0.308003
2022-09-15	11:34:23	0.32383
2022-09-15	11:34:24	0.20383
2022-09-15	11:34:24	0.524593
2022-09-15	11:34:24	0.465051
2022-09-15	11:34:24	1.52184
2022-09-15	11:34:25	12.5396
2022-09-15	11:34:25	27.049
2022-09-15	11:34:25	21.316
2022-09-15	11:34:25	30.351
2022-09-15	11:34:26	31.1857
2022-09-15	11:34:26	13.4204
2022-09-15	11:34:26	19.6253
2022-09-15	11:34:27	12.3059
2022-09-15	11:34:27	4.30932
2022-09-15	11:34:27	11.5303
2022-09-15	11:34:27	14.4214
2022-09-15	11:34:28	6.10993
2022-09-15	11:34:28	6.31141
2022-09-15	11:34:28	15.9261
2022-09-15	11:34:28	22.6693
2022-09-15	11:34:29	11.4669
2022-09-15	11:34:29	16.3757
2022-09-15	11:34:29	12.1238
2022-09-15	11:34:29	8.93512
2022-09-15	11:34:30	11.7935
