# Supplementary material for: Comparing efficacy in reducing pulling and welfare impacts of four types of leash walking equipment
Source: PeerJ journal article supplement (doi:10.7717/peerj.18131), 2024-10-24
Supplement: Shelter_2_Tension_files.zip [file KimChi_harness_202291411258 copy.xlsx]

## Sheet: averaged newtons
Date	Time	Averaged Newtons	Impulse	Total steps
2022-09-14	11:25:20	1.15223	1.15223	0		Impulse	908.225
2022-09-14	11:25:21	1.77572	2.92795	0		Total steps	6
2022-09-14	11:25:22	1.8391	4.76705	0		# > 5 sec	0
2022-09-14	11:25:23	0.791623	5.55867	0
2022-09-14	11:25:24	1.23859	6.79726	0
2022-09-14	11:25:25	1.53885	8.33611	0
2022-09-14	11:25:26	-1.52863	8.33611	0
2022-09-14	11:25:27	-0.802881	8.33611	0
2022-09-14	11:25:28	-0.62054	8.33611	0
2022-09-14	11:25:29	-2.357	8.33611	0
2022-09-14	11:25:30	0.327787	8.6639	0
2022-09-14	11:25:31	-3.60021	8.6639	0
2022-09-14	11:25:32	-1.22172	8.6639	0
2022-09-14	11:25:33	0.12011	8.78401	0
2022-09-14	11:25:34	2.59721	11.3812	0
2022-09-14	11:25:35	1.18687	12.5681	0
2022-09-14	11:25:36	3.2202	15.7883	0
2022-09-14	11:25:37	4.22641	20.0147	0
2022-09-14	11:25:38	3.44504	23.4597	0
2022-09-14	11:25:39	4.02653	27.4863	0
2022-09-14	11:25:40	5.19573	32.682	0
2022-09-14	11:25:41	2.91991	35.6019	0
2022-09-14	11:25:42	1.24385	36.8458	0
2022-09-14	11:25:43	3.25019	40.0959	0
2022-09-14	11:25:44	3.23687	43.3328	0
2022-09-14	11:25:45	3.24215	46.575	0
2022-09-14	11:25:46	3.25036	49.8253	0
2022-09-14	11:25:47	3.24181	53.0671	0
2022-09-14	11:25:48	3.25603	56.3232	0
2022-09-14	11:25:49	3.25743	59.5806	0
2022-09-14	11:25:50	3.23621	62.8168	0
2022-09-14	11:25:51	4.12002	66.9368	0
2022-09-14	11:25:52	4.6495	71.5863	0
2022-09-14	11:25:53	3.24736	74.8337	0
2022-09-14	11:25:54	3.24192	78.0756	0
2022-09-14	11:25:55	3.23728	81.3129	0
2022-09-14	11:25:56	3.24087	84.5537	0
2022-09-14	11:25:57	3.24373	87.7975	0
2022-09-14	11:25:58	3.25053	91.048	0
2022-09-14	11:25:59	3.25137	94.2994	0
2022-09-14	11:26:00	1.5384	95.8378	0
2022-09-14	11:26:01	1.13118	96.969	0
2022-09-14	11:26:02	2.66711	99.6361	0
2022-09-14	11:26:03	13.0653	112.701	1
2022-09-14	11:26:04	5.18969	117.891	1
2022-09-14	11:26:05	2.68142	120.573	1
2022-09-14	11:26:06	1.87537	122.448	1
2022-09-14	11:26:07	2.04232	124.49	1
2022-09-14	11:26:08	1.10513	125.595	1
2022-09-14	11:26:09	2.26264	127.858	1
2022-09-14	11:26:10	0.542387	128.4	1
2022-09-14	11:26:11	-1.94872	128.4	1
2022-09-14	11:26:12	-1.80088	128.4	1
2022-09-14	11:26:13	-2.69093	128.4	1
2022-09-14	11:26:14	-0.859814	128.4	1
2022-09-14	11:26:15	0.563156	128.964	1
2022-09-14	11:26:16	3.15583	132.119	1
2022-09-14	11:26:17	0.89202	133.011	1
2022-09-14	11:26:18	-1.04	133.011	1
2022-09-14	11:26:19	0.201132	133.212	1
2022-09-14	11:26:20	1.87343	135.086	1
2022-09-14	11:26:21	3.10089	138.187	1
2022-09-14	11:26:22	-1.47113	138.187	1
2022-09-14	11:26:23	0.00854687	138.195	1
2022-09-14	11:26:24	-1.00526	138.195	1
2022-09-14	11:26:25	2.68799	140.883	1
2022-09-14	11:26:26	5.18408	146.067	1
2022-09-14	11:26:27	0.813184	146.881	1
2022-09-14	11:26:28	0.0473693	146.928	1
2022-09-14	11:26:29	-0.467626	146.928	1
2022-09-14	11:26:30	-0.2116	146.928	1
2022-09-14	11:26:31	-0.844591	146.928	1
2022-09-14	11:26:32	-1.06849	146.928	1
2022-09-14	11:26:33	-0.834348	146.928	1
2022-09-14	11:26:34	-0.66638	146.928	1
2022-09-14	11:26:35	-0.375209	146.928	1
2022-09-14	11:26:36	0.17874	147.107	1
2022-09-14	11:26:37	0.323429	147.43	1
2022-09-14	11:26:38	-0.234746	147.43	1
2022-09-14	11:26:39	2.11261	149.543	1
2022-09-14	11:26:40	0.632616	150.175	1
2022-09-14	11:26:41	0.277815	150.453	1
2022-09-14	11:26:42	0.944252	151.397	1
2022-09-14	11:26:43	-0.33684	151.397	1
2022-09-14	11:26:44	-0.579603	151.397	1
2022-09-14	11:26:45	0.556196	151.954	1
2022-09-14	11:26:46	0.638481	152.592	1
2022-09-14	11:26:47	0.946062	153.538	1
2022-09-14	11:26:48	0.938198	154.476	1
2022-09-14	11:26:49	1.255	155.731	1
2022-09-14	11:26:50	1.43407	157.165	1
2022-09-14	11:26:51	1.1538	158.319	1
2022-09-14	11:26:52	1.53786	159.857	1
2022-09-14	11:26:53	1.57283	161.43	1
2022-09-14	11:26:54	1.48251	162.912	1
2022-09-14	11:26:55	1.30313	164.216	1
2022-09-14	11:26:56	1.31205	165.528	1
2022-09-14	11:26:57	1.62218	167.15	1
2022-09-14	11:26:58	3.0417	170.192	1
2022-09-14	11:26:59	5.02234	175.214	1
2022-09-14	11:27:00	1.15031	176.364	1
2022-09-14	11:27:01	1.94827	178.312	1
2022-09-14	11:27:02	1.53723	179.85	1
2022-09-14	11:27:03	2.05936	181.909	1
2022-09-14	11:27:04	1.54623	183.455	1
2022-09-14	11:27:05	3.73202	187.187	1
2022-09-14	11:27:06	2.20514	189.392	1
2022-09-14	11:27:07	1.70018	191.093	1
2022-09-14	11:27:08	2.26581	193.358	1
2022-09-14	11:27:09	2.8323	196.191	1
2022-09-14	11:27:10	4.16925	200.36	1
2022-09-14	11:27:11	11.7197	212.08	1
2022-09-14	11:27:12	3.6949	215.775	1
2022-09-14	11:27:13	1.5923	217.367	1
2022-09-14	11:27:14	1.38438	218.751	1
2022-09-14	11:27:15	1.63876	220.39	1
2022-09-14	11:27:16	3.12019	223.51	1
2022-09-14	11:27:17	8.77263	232.283	1
2022-09-14	11:27:18	1.58313	233.866	1
2022-09-14	11:27:19	1.41261	235.279	1
2022-09-14	11:27:20	1.2138	236.492	1
2022-09-14	11:27:21	1.33457	237.827	1
2022-09-14	11:27:22	1.3318	239.159	1
2022-09-14	11:27:23	1.75187	240.911	1
2022-09-14	11:27:24	1.3537	242.264	1
2022-09-14	11:27:25	2.25528	244.52	1
2022-09-14	11:27:26	3.12087	247.64	1
2022-09-14	11:27:27	9.07996	256.72	1
2022-09-14	11:27:28	7.74276	264.463	1
2022-09-14	11:27:29	5.27774	269.741	1
2022-09-14	11:27:30	2.98188	272.723	1
2022-09-14	11:27:31	2.26007	274.983	1
2022-09-14	11:27:32	2.05987	277.043	1
2022-09-14	11:27:33	2.11872	279.161	1
2022-09-14	11:27:34	2.07826	281.24	1
2022-09-14	11:27:35	2.5118	283.752	1
2022-09-14	11:27:36	3.36745	287.119	1
2022-09-14	11:27:37	5.74717	292.866	1
2022-09-14	11:27:38	4.69653	297.563	1
2022-09-14	11:27:39	2.17262	299.735	1
2022-09-14	11:27:40	0.865419	300.601	1
2022-09-14	11:27:41	3.61368	304.214	1
2022-09-14	11:27:42	1.97617	306.191	1
2022-09-14	11:27:43	0.452347	306.643	1
2022-09-14	11:27:44	-1.69716	306.643	1
2022-09-14	11:27:45	-0.800051	306.643	1
2022-09-14	11:27:46	-0.576624	306.643	1
2022-09-14	11:27:47	2.12003	308.763	1
2022-09-14	11:27:48	5.52012	314.283	1
2022-09-14	11:27:49	1.35727	315.64	1
2022-09-14	11:27:50	2.08347	317.724	1
2022-09-14	11:27:51	13.7329	331.457	2
2022-09-14	11:27:52	6.37574	337.832	2
2022-09-14	11:27:53	2.93032	340.763	2
2022-09-14	11:27:54	10.0778	350.841	2
2022-09-14	11:27:55	3.8735	354.714	2
2022-09-14	11:27:56	6.35606	361.07	2
2022-09-14	11:27:57	3.03004	364.1	2
2022-09-14	11:27:58	1.16785	365.268	2
2022-09-14	11:27:59	2.10478	367.373	2
2022-09-14	11:28:00	6.28322	373.656	2
2022-09-14	11:28:01	3.0451	376.701	2
2022-09-14	11:28:02	3.5156	380.217	2
2022-09-14	11:28:03	2.09218	382.309	2
2022-09-14	11:28:04	1.77781	384.087	2
2022-09-14	11:28:05	1.88494	385.972	2
2022-09-14	11:28:06	1.78273	387.754	2
2022-09-14	11:28:07	1.61265	389.367	2
2022-09-14	11:28:08	1.73553	391.102	2
2022-09-14	11:28:09	3.61827	394.721	2
2022-09-14	11:28:10	2.99507	397.716	2
2022-09-14	11:28:11	6.06795	403.784	2
2022-09-14	11:28:12	5.93298	409.717	2
2022-09-14	11:28:13	4.3443	414.061	2
2022-09-14	11:28:14	4.93104	418.992	2
2022-09-14	11:28:15	9.64168	428.634	2
2022-09-14	11:28:16	2.91238	431.546	2
2022-09-14	11:28:17	3.04543	434.592	2
2022-09-14	11:28:18	1.92676	436.518	2
2022-09-14	11:28:19	1.678	438.196	2
2022-09-14	11:28:20	8.18462	446.381	2
2022-09-14	11:28:21	2.56462	448.946	2
2022-09-14	11:28:22	3.51884	452.464	2
2022-09-14	11:28:23	4.72072	457.185	2
2022-09-14	11:28:24	6.1268	463.312	2
2022-09-14	11:28:25	7.9178	471.23	2
2022-09-14	11:28:26	12.9246	484.154	2
2022-09-14	11:28:27	8.97903	493.133	2
2022-09-14	11:28:28	10.2913	503.425	2
2022-09-14	11:28:29	10.9444	514.369	2
2022-09-14	11:28:30	3.27509	517.644	2
2022-09-14	11:28:31	1.97107	519.615	2
2022-09-14	11:28:32	3.86892	523.484	2
2022-09-14	11:28:33	8.18547	531.67	2
2022-09-14	11:28:34	3.05205	534.722	2
2022-09-14	11:28:35	3.25498	537.977	2
2022-09-14	11:28:36	3.25765	541.234	2
2022-09-14	11:28:37	3.18901	544.423	2
2022-09-14	11:28:38	2.6087	547.032	2
2022-09-14	11:28:39	2.00661	549.039	2
2022-09-14	11:28:40	1.55466	550.593	2
2022-09-14	11:28:41	1.42178	552.015	2
2022-09-14	11:28:42	1.57074	553.586	2
2022-09-14	11:28:43	2.23253	555.818	2
2022-09-14	11:28:44	2.16632	557.985	2
2022-09-14	11:28:45	0.152745	558.137	2
2022-09-14	11:28:46	-0.0709094	558.137	2
2022-09-14	11:28:47	1.21303	559.351	2
2022-09-14	11:28:48	6.47292	565.823	2
2022-09-14	11:28:49	0.707016	566.53	2
2022-09-14	11:28:50	1.75534	568.286	2
2022-09-14	11:28:51	5.82414	574.11	2
2022-09-14	11:28:52	4.28306	578.393	2
2022-09-14	11:28:53	1.87854	580.272	2
2022-09-14	11:28:54	2.45851	582.73	2
2022-09-14	11:28:55	19.6735	602.403	3
2022-09-14	11:28:56	13.0289	615.432	4
2022-09-14	11:28:57	13.7366	629.169	5
2022-09-14	11:28:58	6.57506	635.744	5
2022-09-14	11:28:59	5.68801	641.432	5
2022-09-14	11:29:00	1.77764	643.21	5
2022-09-14	11:29:01	3.51566	646.725	5
2022-09-14	11:29:02	9.06273	655.788	5
2022-09-14	11:29:03	10.8796	666.668	5
2022-09-14	11:29:04	6.24819	672.916	5
2022-09-14	11:29:05	3.28233	676.198	5
2022-09-14	11:29:06	3.4164	679.615	5
2022-09-14	11:29:07	3.55137	683.166	5
2022-09-14	11:29:08	3.2151	686.381	5
2022-09-14	11:29:09	3.45635	689.838	5
2022-09-14	11:29:10	3.95963	693.797	5
2022-09-14	11:29:11	3.53356	697.331	5
2022-09-14	11:29:12	2.05608	699.387	5
2022-09-14	11:29:13	1.88613	701.273	5
2022-09-14	11:29:14	1.82376	703.097	5
2022-09-14	11:29:15	1.73286	704.83	5
2022-09-14	11:29:16	1.85817	706.688	5
2022-09-14	11:29:17	1.35359	708.041	5
2022-09-14	11:29:18	3.70457	711.746	5
2022-09-14	11:29:19	11.0069	722.753	5
2022-09-14	11:29:20	18.35	741.103	6
2022-09-14	11:29:21	10.3805	751.483	6
2022-09-14	11:29:22	6.96148	758.445	6
2022-09-14	11:29:23	6.9581	765.403	6
2022-09-14	11:29:24	4.97628	770.379	6
2022-09-14	11:29:25	5.12414	775.503	6
2022-09-14	11:29:26	3.59716	779.101	6
2022-09-14	11:29:27	5.49794	784.598	6
2022-09-14	11:29:28	8.17908	792.778	6
2022-09-14	11:29:29	5.20779	797.985	6
2022-09-14	11:29:30	2.73989	800.725	6
2022-09-14	11:29:31	1.65015	802.375	6
2022-09-14	11:29:32	-1.2704	802.375	6
2022-09-14	11:29:33	3.96632	806.342	6
2022-09-14	11:29:34	6.46947	812.811	6
2022-09-14	11:29:35	4.21646	817.028	6
2022-09-14	11:29:36	1.44242	818.47	6
2022-09-14	11:29:37	3.28657	821.757	6
2022-09-14	11:29:38	0.758119	822.515	6
2022-09-14	11:29:39	-0.323314	822.515	6
2022-09-14	11:29:40	1.33218	823.847	6
2022-09-14	11:29:41	2.81617	826.663	6
2022-09-14	11:29:42	2.33451	828.998	6
2022-09-14	11:29:43	2.45262	831.45	6
2022-09-14	11:29:44	2.56998	834.02	6
2022-09-14	11:29:45	2.55862	836.579	6
2022-09-14	11:29:46	3.01363	839.592	6
2022-09-14	11:29:47	3.48935	843.082	6
2022-09-14	11:29:48	5.00414	848.086	6
2022-09-14	11:29:49	3.40666	851.493	6
2022-09-14	11:29:50	3.20712	854.7	6
2022-09-14	11:29:51	3.07033	857.77	6
2022-09-14	11:29:52	2.39869	860.169	6
2022-09-14	11:29:53	2.22348	862.392	6
2022-09-14	11:29:54	2.36139	864.754	6
2022-09-14	11:29:55	3.1172	867.871	6
2022-09-14	11:29:56	3.74831	871.619	6
2022-09-14	11:29:57	3.34498	874.964	6
2022-09-14	11:29:58	2.82461	877.789	6
2022-09-14	11:29:59	1.54204	879.331	6
2022-09-14	11:30:00	3.8532	883.184	6
2022-09-14	11:30:01	3.21232	886.396	6
2022-09-14	11:30:02	3.25879	889.655	6
2022-09-14	11:30:03	3.19727	892.852	6
2022-09-14	11:30:04	2.99744	895.85	6
2022-09-14	11:30:05	2.82976	898.679	6
2022-09-14	11:30:06	2.23627	900.916	6
2022-09-14	11:30:07	1.61244	902.528	6
2022-09-14	11:30:08	1.42499	903.953	6
2022-09-14	11:30:09	-0.743686	903.953	6
2022-09-14	11:30:10	-3.4928	903.953	6
2022-09-14	11:30:11	-3.95754	903.953	6
2022-09-14	11:30:12	-4.17929	903.953	6
2022-09-14	11:30:13	-4.28153	903.953	6
2022-09-14	11:30:14	1.57951	905.533	6
2022-09-14	11:30:15	2.69263	908.225	6
2022-09-14	11:30:16	-0.645253	908.225	6
2022-09-14	11:30:17	-2.44079	908.225	6
2022-09-14	11:30:18	-3.01368	908.225	6
2022-09-14	11:30:19	-5.1607	908.225	6
2022-09-14	11:30:20	-9.53086	908.225	6

## Sheet: KimChi_harness_202291411258 (4)
Date	Time	Lbs	Newtons	Averaged Newtons	Total force x time	total steps > 13.345		**GoPro Fitting: 11:13
2022-09-14	11:25:20	0.11411	0.507584	1.15223	0.507584	FALSE	0
2022-09-14	11:25:20	0.313295	1.3936	1.15223	1.3936	FALSE	0
2022-09-14	11:25:20	0.27299	1.21431	1.15223	1.7219	FALSE	0
2022-09-14	11:25:20	0.335738	1.49343	1.15223	2.88703	FALSE	0
2022-09-14	11:25:21	0.388461	1.72795	1.77572	3.44985	FALSE	0
2022-09-14	11:25:21	0.405865	1.80537	1.77572	4.6924	FALSE	0
2022-09-14	11:25:21	0.40327	1.79383	1.77572	5.24368	FALSE	0
2022-09-14	11:25:22	0.405611	1.80424	1.8391	6.49664	FALSE	0
2022-09-14	11:25:22	0.385356	1.71414	1.8391	6.95782	FALSE	0
2022-09-14	11:25:22	0.459351	2.04329	1.8391	8.53992	FALSE	0
2022-09-14	11:25:22	0.403473	1.79473	1.8391	8.75255	FALSE	0
2022-09-14	11:25:23	0.119046	0.52954	0.791623	9.06946	FALSE	0
2022-09-14	11:25:23	0.107189	0.476798	0.791623	9.22934	FALSE	0
2022-09-14	11:25:23	0.205967	0.916182	0.791623	9.98564	FALSE	0
2022-09-14	11:25:23	0.279657	1.24397	0.791623	10.4733	FALSE	0
2022-09-14	11:25:24	0.298893	1.32954	1.23859	11.3152	FALSE	0
2022-09-14	11:25:24	0.288257	1.28222	1.23859	11.7555	FALSE	0
2022-09-14	11:25:24	0.242659	1.0794	1.23859	12.3946	FALSE	0
2022-09-14	11:25:24	0.283982	1.26321	1.23859	13.0187	FALSE	0
2022-09-14	11:25:25	0.120267	0.534972	1.53885	12.9295	FALSE	0
2022-09-14	11:25:25	0.316552	1.40809	1.53885	14.4268	FALSE	0
2022-09-14	11:25:25	0.60103	2.6735	1.53885	15.603	FALSE	0
2022-09-14	11:25:26	0.12098	0.538143	-1.52863	14.965	FALSE	0
2022-09-14	11:25:26	-0.407112	-1.81092	-1.52863	15.603	FALSE	0
2022-09-14	11:25:26	-0.546602	-2.4314	-1.52863	14.965	FALSE	0
2022-09-14	11:25:26	-0.54187	-2.41035	-1.52863	15.603	FALSE	0
2022-09-14	11:25:27	-0.286348	-1.27373	-0.802881	14.965	FALSE	0
2022-09-14	11:25:27	-0.162175	-0.721387	-0.802881	15.603	FALSE	0
2022-09-14	11:25:27	-0.245381	-1.0915	-0.802881	14.965	FALSE	0
2022-09-14	11:25:27	-0.0280786	-0.124899	-0.802881	15.603	FALSE	0
2022-09-14	11:25:28	-0.103702	-0.461287	-0.62054	14.965	FALSE	0
2022-09-14	11:25:28	0.00998751	0.0444264	-0.62054	15.6475	FALSE	0
2022-09-14	11:25:28	-0.207061	-0.921049	-0.62054	14.965	FALSE	0
2022-09-14	11:25:28	-0.257239	-1.14425	-0.62054	15.6475	FALSE	0
2022-09-14	11:25:29	-0.483142	-2.14911	-2.357	14.965	FALSE	0
2022-09-14	11:25:29	-0.628892	-2.79744	-2.357	15.6475	FALSE	0
2022-09-14	11:25:29	-0.477595	-2.12444	-2.357	14.965	FALSE	0
2022-09-14	11:25:30	0.286578	1.27476	0.327787	16.9222	FALSE	0
2022-09-14	11:25:30	0.398079	1.77074	0.327787	16.7357	FALSE	0
2022-09-14	11:25:30	0.0068323	0.0303914	0.327787	16.9526	FALSE	0
2022-09-14	11:25:30	-0.39673	-1.76473	0.327787	16.7357	FALSE	0
2022-09-14	11:25:31	-0.756475	-3.36495	-3.60021	16.9526	FALSE	0
2022-09-14	11:25:31	-0.879121	-3.91051	-3.60021	16.7357	FALSE	0
2022-09-14	11:25:31	-0.898256	-3.99562	-3.60021	16.9526	FALSE	0
2022-09-14	11:25:31	-0.7036	-3.12975	-3.60021	16.7357	FALSE	0
2022-09-14	11:25:32	-0.532709	-2.3696	-1.22172	16.9526	FALSE	0
2022-09-14	11:25:32	-0.296984	-1.32104	-1.22172	16.7357	FALSE	0
2022-09-14	11:25:32	-0.101972	-0.453592	-1.22172	16.9526	FALSE	0
2022-09-14	11:25:32	-0.166959	-0.742667	-1.22172	16.7357	FALSE	0
2022-09-14	11:25:33	-0.0822262	-0.365759	0.12011	16.9526	FALSE	0
2022-09-14	11:25:33	0.0166542	0.0740812	0.12011	16.8098	FALSE	0
2022-09-14	11:25:33	0.146578	0.652008	0.12011	17.6046	FALSE	0
2022-09-14	11:25:34	0.00713764	0.0317497	2.59721	16.8415	FALSE	0
2022-09-14	11:25:34	0.617061	2.74481	2.59721	20.3494	FALSE	0
2022-09-14	11:25:34	0.382659	1.70214	2.59721	18.5437	FALSE	0
2022-09-14	11:25:34	1.32866	5.91015	2.59721	26.2596	FALSE	0
2022-09-14	11:25:35	0.238944	1.06287	1.18687	19.6066	FALSE	0
2022-09-14	11:25:35	0.276756	1.23107	1.18687	27.4907	FALSE	0
2022-09-14	11:25:35	0.228003	1.0142	1.18687	20.6208	FALSE	0
2022-09-14	11:25:35	0.323575	1.43933	1.18687	28.93	FALSE	0
2022-09-14	11:25:36	0.62098	2.76224	3.2202	23.383	FALSE	0
2022-09-14	11:25:36	0.428868	1.90769	3.2202	30.8377	FALSE	0
2022-09-14	11:25:36	1.39106	6.18771	3.2202	29.5707	FALSE	0
2022-09-14	11:25:36	0.454822	2.02314	3.2202	32.8608	FALSE	0
2022-09-14	11:25:37	1.22032	5.42823	4.22641	34.9989	FALSE	0
2022-09-14	11:25:37	0.319809	1.42257	4.22641	34.2834	FALSE	0
2022-09-14	11:25:37	1.31029	5.82843	4.22641	40.8274	FALSE	0
2022-09-14	11:25:38	1.40714	6.25924	3.44504	40.5426	FALSE	0
2022-09-14	11:25:38	0.497163	2.21148	3.44504	43.0389	FALSE	0
2022-09-14	11:25:38	0.860878	3.82936	3.44504	44.372	FALSE	0
2022-09-14	11:25:38	0.332736	1.48008	3.44504	44.5189	FALSE	0
2022-09-14	11:25:39	0.476603	2.12003	4.02653	46.492	FALSE	0
2022-09-14	11:25:39	0.877723	3.90429	4.02653	48.4232	FALSE	0
2022-09-14	11:25:39	0.252837	1.12467	4.02653	47.6167	FALSE	0
2022-09-14	11:25:39	2.01365	8.95712	4.02653	57.3803	FALSE	0
2022-09-14	11:25:40	0.656705	2.92116	5.19573	50.5378	FALSE	0
2022-09-14	11:25:40	2.32459	10.3402	5.19573	67.7206	FALSE	0
2022-09-14	11:25:40	0.522862	2.32579	5.19573	52.8636	FALSE	0
2022-09-14	11:25:41	0.438232	1.94934	2.91991	69.6699	FALSE	0
2022-09-14	11:25:41	0.351667	1.56429	2.91991	54.4279	FALSE	0
2022-09-14	11:25:41	0.200013	0.889698	2.91991	70.5596	FALSE	0
2022-09-14	11:25:41	1.63579	7.27632	2.91991	61.7042	FALSE	0
2022-09-14	11:25:42	0.0971122	0.431974	1.24385	70.9916	FALSE	0
2022-09-14	11:25:42	0.188766	0.839669	1.24385	62.5439	FALSE	0
2022-09-14	11:25:42	0.177875	0.791224	1.24385	71.7828	FALSE	0
2022-09-14	11:25:42	0.654771	2.91255	1.24385	65.4565	FALSE	0
2022-09-14	11:25:43	0.73014	3.24781	3.25019	75.0306	FALSE	0
2022-09-14	11:25:43	0.733702	3.26365	3.25019	68.7201	FALSE	0
2022-09-14	11:25:43	0.724847	3.22426	3.25019	78.2549	FALSE	0
2022-09-14	11:25:43	0.734008	3.26501	3.25019	71.9851	FALSE	0
2022-09-14	11:25:44	0.723168	3.2168	3.23687	81.4717	FALSE	0
2022-09-14	11:25:44	0.73014	3.24781	3.23687	75.2329	FALSE	0
2022-09-14	11:25:44	0.729733	3.246	3.23687	84.7177	FALSE	0
2022-09-14	11:25:45	0.72897	3.2426	3.24215	78.4755	FALSE	0
2022-09-14	11:25:45	0.72327	3.21725	3.24215	87.9349	FALSE	0
2022-09-14	11:25:45	0.73299	3.26049	3.24215	81.736	FALSE	0
2022-09-14	11:25:45	0.730242	3.24826	3.24215	91.1832	FALSE	0
2022-09-14	11:25:46	0.724695	3.22359	3.25036	84.9596	FALSE	0
2022-09-14	11:25:46	0.731921	3.25573	3.25036	94.4389	FALSE	0
2022-09-14	11:25:46	0.735229	3.27045	3.25036	88.2301	FALSE	0
2022-09-14	11:25:46	0.731005	3.25166	3.25036	97.6906	FALSE	0
2022-09-14	11:25:47	0.724288	3.22178	3.24181	91.4518	FALSE	0
2022-09-14	11:25:47	0.728868	3.24215	3.24181	100.933	FALSE	0
2022-09-14	11:25:47	0.732175	3.25686	3.24181	94.7087	FALSE	0
2022-09-14	11:25:47	0.729835	3.24645	3.24181	104.179	FALSE	0
2022-09-14	11:25:48	0.734262	3.26614	3.25603	97.9748	FALSE	0
2022-09-14	11:25:48	0.733193	3.26139	3.25603	107.441	FALSE	0
2022-09-14	11:25:48	0.728512	3.24057	3.25603	101.215	FALSE	0
2022-09-14	11:25:49	0.731972	3.25596	3.25743	110.697	FALSE	0
2022-09-14	11:25:49	0.728562	3.24079	3.25743	104.456	FALSE	0
2022-09-14	11:25:49	0.732074	3.25641	3.25743	113.953	FALSE	0
2022-09-14	11:25:49	0.736603	3.27656	3.25743	107.733	FALSE	0
2022-09-14	11:25:50	0.727596	3.23649	3.23621	117.189	FALSE	0
2022-09-14	11:25:50	0.725865	3.22879	3.23621	110.962	FALSE	0
2022-09-14	11:25:50	0.729529	3.24509	3.23621	120.435	FALSE	0
2022-09-14	11:25:50	0.727137	3.23445	3.23621	114.196	FALSE	0
2022-09-14	11:25:51	0.730496	3.24939	4.12002	123.684	FALSE	0
2022-09-14	11:25:51	0.727596	3.23649	4.12002	117.432	FALSE	0
2022-09-14	11:25:51	0.939148	4.17752	4.12002	127.861	FALSE	0
2022-09-14	11:25:51	1.30765	5.81669	4.12002	123.249	FALSE	0
2022-09-14	11:25:52	1.41355	6.28775	4.6495	134.149	FALSE	0
2022-09-14	11:25:52	0.996908	4.43445	4.6495	127.684	FALSE	0
2022-09-14	11:25:52	0.725305	3.2263	4.6495	137.375	FALSE	0
2022-09-14	11:25:53	0.726069	3.2297	3.24736	130.913	FALSE	0
2022-09-14	11:25:53	0.729987	3.24713	3.24736	140.623	FALSE	0
2022-09-14	11:25:53	0.731667	3.2546	3.24736	134.168	FALSE	0
2022-09-14	11:25:53	0.73243	3.258	3.24736	143.881	FALSE	0
2022-09-14	11:25:54	0.729377	3.24441	3.24192	137.412	FALSE	0
2022-09-14	11:25:54	0.730496	3.24939	3.24192	147.13	FALSE	0
2022-09-14	11:25:54	0.729478	3.24486	3.24192	140.657	FALSE	0
2022-09-14	11:25:54	0.725916	3.22902	3.24192	150.359	FALSE	0
2022-09-14	11:25:55	0.725	3.22494	3.23728	143.882	FALSE	0
2022-09-14	11:25:55	0.729631	3.24554	3.23728	153.605	FALSE	0
2022-09-14	11:25:55	0.726323	3.23083	3.23728	147.113	FALSE	0
2022-09-14	11:25:55	0.73014	3.24781	3.23728	156.852	FALSE	0
2022-09-14	11:25:56	0.727646	3.23671	3.24087	150.35	FALSE	0
2022-09-14	11:25:56	0.730089	3.24758	3.24087	160.1	FALSE	0
2022-09-14	11:25:56	0.728003	3.2383	3.24087	153.588	FALSE	0
2022-09-14	11:25:57	0.732277	3.25731	3.24373	163.357	FALSE	0
2022-09-14	11:25:57	0.727341	3.23536	3.24373	156.823	FALSE	0
2022-09-14	11:25:57	0.72958	3.24532	3.24373	166.603	FALSE	0
2022-09-14	11:25:57	0.727697	3.23694	3.24373	160.06	FALSE	0
2022-09-14	11:25:58	0.729428	3.24464	3.25053	169.847	FALSE	0
2022-09-14	11:25:58	0.732532	3.25845	3.25053	163.319	FALSE	0
2022-09-14	11:25:58	0.730903	3.2512	3.25053	173.098	FALSE	0
2022-09-14	11:25:58	0.73014	3.24781	3.25053	166.567	FALSE	0
2022-09-14	11:25:59	0.731514	3.25392	3.25137	176.352	FALSE	0
2022-09-14	11:25:59	0.728817	3.24192	3.25137	169.808	FALSE	0
2022-09-14	11:25:59	0.73131	3.25301	3.25137	179.605	FALSE	0
2022-09-14	11:25:59	0.732125	3.25664	3.25137	173.065	FALSE	0
2022-09-14	11:26:00	0.84785	3.77141	1.5384	183.377	FALSE	0
2022-09-14	11:26:00	0.220115	0.979116	1.5384	174.044	FALSE	0
2022-09-14	11:26:00	-0.0304196	-0.135312	1.5384	183.377	FALSE	0
2022-09-14	11:26:01	0.173092	0.769948	1.13118	174.814	FALSE	0
2022-09-14	11:26:01	0.0306999	0.136559	1.13118	183.513	FALSE	0
2022-09-14	11:26:01	0.289173	1.2863	1.13118	176.1	FALSE	0
2022-09-14	11:26:01	0.524236	2.33191	1.13118	185.845	FALSE	0
2022-09-14	11:26:02	0.348817	1.55161	2.66711	177.652	FALSE	0
2022-09-14	11:26:02	0.286832	1.27589	2.66711	187.121	FALSE	0
2022-09-14	11:26:02	1.13172	5.03412	2.66711	182.686	FALSE	0
2022-09-14	11:26:02	0.631005	2.80684	2.66711	189.928	FALSE	0
2022-09-14	11:26:03	1.10317	4.90712	13.0653	187.593	FALSE	0
2022-09-14	11:26:03	3.26602	14.5279	13.0653	204.456	1	1
2022-09-14	11:26:03	5.44373	24.2148	13.0653	211.808	1	2
2022-09-14	11:26:03	1.93594	8.61145	13.0653	213.067	FALSE	2
2022-09-14	11:26:04	1.27177	5.65709	5.18969	217.465	FALSE	2
2022-09-14	11:26:04	0.857875	3.816	5.18969	216.883	FALSE	2
2022-09-14	11:26:04	1.37044	6.09599	5.18969	223.561	FALSE	2
2022-09-14	11:26:05	1.20347	5.35328	2.68142	222.237	FALSE	2
2022-09-14	11:26:05	0.582099	2.58929	2.68142	226.15	FALSE	2
2022-09-14	11:26:05	0.301336	1.3404	2.68142	223.577	FALSE	2
2022-09-14	11:26:05	0.324339	1.44272	2.68142	227.593	FALSE	2
2022-09-14	11:26:06	0.44159	1.96428	1.87537	225.541	FALSE	2
2022-09-14	11:26:06	0.408155	1.81556	1.87537	229.409	FALSE	2
2022-09-14	11:26:06	0.431565	1.91969	1.87537	227.461	FALSE	2
2022-09-14	11:26:06	0.405102	1.80197	1.87537	231.211	FALSE	2
2022-09-14	11:26:07	0.388054	1.72614	2.04232	229.187	FALSE	2
2022-09-14	11:26:07	0.420267	1.86943	2.04232	233.08	FALSE	2
2022-09-14	11:26:07	0.497875	2.21465	2.04232	231.402	FALSE	2
2022-09-14	11:26:07	0.530344	2.35908	2.04232	235.439	FALSE	2
2022-09-14	11:26:08	0.340878	1.51629	1.10513	232.918	FALSE	2
2022-09-14	11:26:08	0.127189	0.565762	1.10513	236.005	FALSE	2
2022-09-14	11:26:08	0.277265	1.23333	1.10513	234.151	FALSE	2
2022-09-14	11:26:09	0.546628	2.43151	2.26264	238.437	FALSE	2
2022-09-14	11:26:09	0.544593	2.42246	2.26264	236.574	FALSE	2
2022-09-14	11:26:09	0.421947	1.8769	2.26264	240.313	FALSE	2
2022-09-14	11:26:09	0.521489	2.31969	2.26264	238.894	FALSE	2
2022-09-14	11:26:10	0.200064	0.889925	0.542387	241.203	FALSE	2
2022-09-14	11:26:10	0.211769	0.941991	0.542387	239.836	FALSE	2
2022-09-14	11:26:10	0.126883	0.564401	0.542387	241.768	FALSE	2
2022-09-14	11:26:10	-0.0509794	-0.226767	0.542387	239.836	FALSE	2
2022-09-14	11:26:11	-0.34243	-1.5232	-1.94872	241.768	FALSE	2
2022-09-14	11:26:11	-0.484974	-2.15726	-1.94872	239.836	FALSE	2
2022-09-14	11:26:11	-0.557799	-2.4812	-1.94872	241.768	FALSE	2
2022-09-14	11:26:11	-0.367162	-1.63321	-1.94872	239.836	FALSE	2
2022-09-14	11:26:12	-0.389503	-1.73259	-1.80088	241.768	FALSE	2
2022-09-14	11:26:12	-0.237493	-1.05642	-1.80088	239.836	FALSE	2
2022-09-14	11:26:12	-0.587569	-2.61362	-1.80088	241.768	FALSE	2
2022-09-14	11:26:13	-0.760343	-3.38216	-2.69093	239.836	FALSE	2
2022-09-14	11:26:13	-0.675254	-3.00366	-2.69093	241.768	FALSE	2
2022-09-14	11:26:13	-0.502887	-2.23694	-2.69093	239.836	FALSE	2
2022-09-14	11:26:13	-0.48131	-2.14096	-2.69093	241.768	FALSE	2
2022-09-14	11:26:14	-0.115763	-0.514937	-0.859814	239.836	FALSE	2
2022-09-14	11:26:14	-0.308333	-1.37153	-0.859814	241.768	FALSE	2
2022-09-14	11:26:14	-0.122226	-0.543686	-0.859814	239.836	FALSE	2
2022-09-14	11:26:14	-0.226857	-1.00911	-0.859814	241.768	FALSE	2
2022-09-14	11:26:15	-0.0633458	-0.281775	0.563156	239.836	FALSE	2
2022-09-14	11:26:15	-0.0582058	-0.258911	0.563156	241.768	FALSE	2
2022-09-14	11:26:15	0.197926	0.880414	0.563156	240.716	FALSE	2
2022-09-14	11:26:15	0.430038	1.9129	0.563156	243.681	FALSE	2
2022-09-14	11:26:16	0.456501	2.03061	3.15583	242.747	FALSE	2
2022-09-14	11:26:16	1.3735	6.1096	3.15583	249.79	FALSE	2
2022-09-14	11:26:16	0.298384	1.32727	3.15583	244.074	FALSE	2
2022-09-14	11:26:17	1.22032	5.42823	0.89202	255.218	FALSE	2
2022-09-14	11:26:17	0.0552292	0.245671	0.89202	244.319	FALSE	2
2022-09-14	11:26:17	-0.163142	-0.725688	0.89202	255.218	FALSE	2
2022-09-14	11:26:17	-0.310267	-1.38013	0.89202	244.319	FALSE	2
2022-09-14	11:26:18	-0.222684	-0.990543	-1.04	255.218	FALSE	2
2022-09-14	11:26:18	-0.22131	-0.984431	-1.04	244.319	FALSE	2
2022-09-14	11:26:18	-0.253269	-1.12659	-1.04	255.218	FALSE	2
2022-09-14	11:26:18	-0.237951	-1.05845	-1.04	244.319	FALSE	2
2022-09-14	11:26:19	-0.113982	-0.507015	0.201132	255.218	FALSE	2
2022-09-14	11:26:19	-0.0100634	-0.044764	0.201132	244.319	FALSE	2
2022-09-14	11:26:19	0.0880027	0.391454	0.201132	255.61	FALSE	2
2022-09-14	11:26:19	0.216909	0.964855	0.201132	245.284	FALSE	2
2022-09-14	11:26:20	0.310293	1.38025	1.87343	256.99	FALSE	2
2022-09-14	11:26:20	0.312583	1.39043	1.87343	246.675	FALSE	2
2022-09-14	11:26:20	0.640623	2.84962	1.87343	259.84	FALSE	2
2022-09-14	11:26:21	0.734364	3.2666	3.10089	249.941	FALSE	2
2022-09-14	11:26:21	0.730852	3.25098	3.10089	263.091	FALSE	2
2022-09-14	11:26:21	0.681031	3.02936	3.10089	252.971	FALSE	2
2022-09-14	11:26:21	0.642201	2.85664	3.10089	265.947	FALSE	2
2022-09-14	11:26:22	-0.294898	-1.31177	-1.47113	252.971	FALSE	2
2022-09-14	11:26:22	-0.401208	-1.78465	-1.47113	265.947	FALSE	2
2022-09-14	11:26:22	-0.419427	-1.8657	-1.47113	252.971	FALSE	2
2022-09-14	11:26:22	-0.207366	-0.922405	-1.47113	265.947	FALSE	2
2022-09-14	11:26:23	-0.141463	-0.629256	0.00854687	252.971	FALSE	2
2022-09-14	11:26:23	0.0187916	0.0835888	0.00854687	266.031	FALSE	2
2022-09-14	11:26:23	0.127138	0.565535	0.00854687	253.536	FALSE	2
2022-09-14	11:26:23	0.00321909	0.0143192	0.00854687	266.045	FALSE	2
2022-09-14	11:26:24	-0.210776	-0.937574	-1.00526	253.536	FALSE	2
2022-09-14	11:26:24	-0.258002	-1.14764	-1.00526	266.045	FALSE	2
2022-09-14	11:26:24	-0.209198	-0.930555	-1.00526	253.536	FALSE	2
2022-09-14	11:26:25	-0.412608	-1.83536	2.68799	266.045	FALSE	2
2022-09-14	11:26:25	-0.314643	-1.39959	2.68799	253.536	FALSE	2
2022-09-14	11:26:25	-0.15785	-0.702148	2.68799	266.045	FALSE	2
2022-09-14	11:26:25	3.30225	14.6891	2.68799	268.225	1	3
2022-09-14	11:26:26	1.96434	8.73778	5.18408	274.783	FALSE	3
2022-09-14	11:26:26	1.3336	5.93212	5.18408	274.157	FALSE	3
2022-09-14	11:26:26	0.988562	4.39732	5.18408	279.18	FALSE	3
2022-09-14	11:26:26	0.375229	1.66909	5.18408	275.827	FALSE	3
2022-09-14	11:26:27	0.456501	2.03061	0.813184	281.211	FALSE	3
2022-09-14	11:26:27	0.169224	0.752742	0.813184	276.579	FALSE	3
2022-09-14	11:26:27	0.173601	0.772212	0.813184	281.983	FALSE	3
2022-09-14	11:26:27	-0.0680786	-0.302827	0.813184	276.579	FALSE	3
2022-09-14	11:26:28	0.0633717	0.28189	0.0473693	282.265	FALSE	3
2022-09-14	11:26:28	-0.0691473	-0.307581	0.0473693	276.579	FALSE	3
2022-09-14	11:26:28	0.0377229	0.167799	0.0473693	282.433	FALSE	3
2022-09-14	11:26:29	-0.17902	-0.796317	-0.467626	276.579	FALSE	3
2022-09-14	11:26:29	-0.0645671	-0.287207	-0.467626	282.433	FALSE	3
2022-09-14	11:26:29	-0.124262	-0.552742	-0.467626	276.579	FALSE	3
2022-09-14	11:26:29	-0.0526588	-0.234237	-0.467626	282.433	FALSE	3
2022-09-14	11:26:30	-0.130725	-0.581491	-0.2116	276.579	FALSE	3
2022-09-14	11:26:30	-0.0379005	-0.168589	-0.2116	282.433	FALSE	3
2022-09-14	11:26:30	-0.00548322	-0.0243905	-0.2116	276.579	FALSE	3
2022-09-14	11:26:30	-0.0161702	-0.0719283	-0.2116	282.433	FALSE	3
2022-09-14	11:26:31	0.0582827	0.259253	-0.844591	276.839	FALSE	3
2022-09-14	11:26:31	-0.164109	-0.72999	-0.844591	282.433	FALSE	3
2022-09-14	11:26:31	-0.369402	-1.64317	-0.844591	276.839	FALSE	3
2022-09-14	11:26:31	-0.284262	-1.26445	-0.844591	282.433	FALSE	3
2022-09-14	11:26:32	-0.328231	-1.46004	-1.06849	276.839	FALSE	3
2022-09-14	11:26:32	-0.233829	-1.04012	-1.06849	282.433	FALSE	3
2022-09-14	11:26:32	-0.158562	-0.705315	-1.06849	276.839	FALSE	3
2022-09-14	11:26:33	-0.193676	-0.86151	-0.834348	282.433	FALSE	3
2022-09-14	11:26:33	-0.220598	-0.981264	-0.834348	276.839	FALSE	3
2022-09-14	11:26:33	-0.171285	-0.76191	-0.834348	282.433	FALSE	3
2022-09-14	11:26:33	-0.16472	-0.732708	-0.834348	276.839	FALSE	3
2022-09-14	11:26:34	-0.198104	-0.881206	-0.66638	282.433	FALSE	3
2022-09-14	11:26:34	-0.127621	-0.567684	-0.66638	276.839	FALSE	3
2022-09-14	11:26:34	-0.0973407	-0.432991	-0.66638	282.433	FALSE	3
2022-09-14	11:26:34	-0.17617	-0.783639	-0.66638	276.839	FALSE	3
2022-09-14	11:26:35	-0.126297	-0.561794	-0.375209	282.433	FALSE	3
2022-09-14	11:26:35	-0.161361	-0.717766	-0.375209	276.839	FALSE	3
2022-09-14	11:26:35	-0.0867045	-0.385679	-0.375209	282.433	FALSE	3
2022-09-14	11:26:35	0.0369595	0.164403	-0.375209	277.003	FALSE	3
2022-09-14	11:26:36	-0.0280277	-0.124673	0.17874	282.433	FALSE	3
2022-09-14	11:26:36	0.130038	0.578435	0.17874	277.581	FALSE	3
2022-09-14	11:26:36	0.0185371	0.0824567	0.17874	282.515	FALSE	3
2022-09-14	11:26:37	0.208308	0.926596	0.323429	278.508	FALSE	3
2022-09-14	11:26:37	0.0696821	0.30996	0.323429	282.825	FALSE	3
2022-09-14	11:26:37	0.0566542	0.252009	0.323429	278.76	FALSE	3
2022-09-14	11:26:37	-0.0438038	-0.194848	0.323429	282.825	FALSE	3
2022-09-14	11:26:38	-0.0268572	-0.119466	-0.234746	278.76	FALSE	3
2022-09-14	11:26:38	-0.0364247	-0.162024	-0.234746	282.825	FALSE	3
2022-09-14	11:26:38	-0.00996157	-0.0443111	-0.234746	278.76	FALSE	3
2022-09-14	11:26:38	-0.13785	-0.613184	-0.234746	282.825	FALSE	3
2022-09-14	11:26:39	0.878588	3.90814	2.11261	282.668	FALSE	3
2022-09-14	11:26:39	0.180674	0.803674	2.11261	283.629	FALSE	3
2022-09-14	11:26:39	0.239199	1.064	2.11261	283.732	FALSE	3
2022-09-14	11:26:39	0.601285	2.67464	2.11261	286.304	FALSE	3
2022-09-14	11:26:40	0.169835	0.75546	0.632616	284.488	FALSE	3
2022-09-14	11:26:40	0.114008	0.50713	0.632616	286.811	FALSE	3
2022-09-14	11:26:40	0.142812	0.635256	0.632616	285.123	FALSE	3
2022-09-14	11:26:41	0.0315142	0.140181	0.277815	286.951	FALSE	3
2022-09-14	11:26:41	-0.0387657	-0.172438	0.277815	285.123	FALSE	3
2022-09-14	11:26:41	0.101285	0.450536	0.277815	287.402	FALSE	3
2022-09-14	11:26:41	0.155789	0.692981	0.277815	285.816	FALSE	3
2022-09-14	11:26:42	0.229936	1.0228	0.944252	288.424	FALSE	3
2022-09-14	11:26:42	0.200318	0.891055	0.944252	286.707	FALSE	3
2022-09-14	11:26:42	0.228919	1.01828	0.944252	289.443	FALSE	3
2022-09-14	11:26:42	0.189936	0.844873	0.944252	287.552	FALSE	3
2022-09-14	11:26:43	-0.092557	-0.411712	-0.33684	289.443	FALSE	3
2022-09-14	11:26:43	-0.072557	-0.322748	-0.33684	287.552	FALSE	3
2022-09-14	11:26:43	-0.0317427	-0.141198	-0.33684	289.443	FALSE	3
2022-09-14	11:26:43	-0.106043	-0.4717	-0.33684	287.552	FALSE	3
2022-09-14	11:26:44	-0.201259	-0.89524	-0.579603	289.443	FALSE	3
2022-09-14	11:26:44	-0.130572	-0.58081	-0.579603	287.552	FALSE	3
2022-09-14	11:26:44	-0.059071	-0.26276	-0.579603	289.443	FALSE	3
2022-09-14	11:26:45	0.0155346	0.069101	0.556196	287.621	FALSE	3
2022-09-14	11:26:45	0.134313	0.597451	0.556196	290.04	FALSE	3
2022-09-14	11:26:45	0.158741	0.706112	0.556196	288.327	FALSE	3
2022-09-14	11:26:45	0.191565	0.852119	0.556196	290.892	FALSE	3
2022-09-14	11:26:46	0.189631	0.843517	0.638481	289.17	FALSE	3
2022-09-14	11:26:46	0.213143	0.948103	0.638481	291.84	FALSE	3
2022-09-14	11:26:46	0.180216	0.801637	0.638481	289.972	FALSE	3
2022-09-14	11:26:46	-0.00884198	-0.0393309	0.638481	291.84	FALSE	3
2022-09-14	11:26:47	0.147646	0.656759	0.946062	290.629	FALSE	3
2022-09-14	11:26:47	0.273753	1.21771	0.946062	293.058	FALSE	3
2022-09-14	11:26:47	0.216654	0.96372	0.946062	291.593	FALSE	3
2022-09-14	11:26:48	0.200624	0.892416	0.938198	293.95	FALSE	3
2022-09-14	11:26:48	0.190496	0.847364	0.938198	292.44	FALSE	3
2022-09-14	11:26:48	0.221234	0.984093	0.938198	294.934	FALSE	3
2022-09-14	11:26:48	0.231311	1.02892	0.938198	293.469	FALSE	3
2022-09-14	11:26:49	0.269733	1.19983	1.255	296.134	FALSE	3
2022-09-14	11:26:49	0.25472	1.13305	1.255	294.602	FALSE	3
2022-09-14	11:26:49	0.313702	1.39541	1.255	297.53	FALSE	3
2022-09-14	11:26:49	0.290395	1.29174	1.255	295.894	FALSE	3
2022-09-14	11:26:50	0.393957	1.7524	1.43407	299.282	FALSE	3
2022-09-14	11:26:50	0.404746	1.80039	1.43407	297.694	FALSE	3
2022-09-14	11:26:50	0.198232	0.881776	1.43407	300.164	FALSE	3
2022-09-14	11:26:50	0.292634	1.30169	1.43407	298.996	FALSE	3
2022-09-14	11:26:51	0.261285	1.16225	1.1538	301.326	FALSE	3
2022-09-14	11:26:51	0.149733	0.666042	1.1538	299.662	FALSE	3
2022-09-14	11:26:51	0.367138	1.6331	1.1538	302.959	FALSE	3
2022-09-14	11:26:52	0.325763	1.44906	1.53786	301.111	FALSE	3
2022-09-14	11:26:52	0.358995	1.59688	1.53786	304.556	FALSE	3
2022-09-14	11:26:52	0.334822	1.48936	1.53786	302.6	FALSE	3
2022-09-14	11:26:52	0.363321	1.61612	1.53786	306.172	FALSE	3
2022-09-14	11:26:53	0.339809	1.51154	1.57283	304.112	FALSE	3
2022-09-14	11:26:53	0.382761	1.7026	1.57283	307.875	FALSE	3
2022-09-14	11:26:53	0.33472	1.4889	1.57283	305.601	FALSE	3
2022-09-14	11:26:53	0.357061	1.58828	1.57283	309.463	FALSE	3
2022-09-14	11:26:54	0.334211	1.48664	1.48251	307.087	FALSE	3
2022-09-14	11:26:54	0.341794	1.52037	1.48251	310.983	FALSE	3
2022-09-14	11:26:54	0.402354	1.78975	1.48251	308.877	FALSE	3
2022-09-14	11:26:54	0.254771	1.13327	1.48251	312.117	FALSE	3
2022-09-14	11:26:55	0.231056	1.02778	1.30313	309.905	FALSE	3
2022-09-14	11:26:55	0.431819	1.92082	1.30313	314.038	FALSE	3
2022-09-14	11:26:55	0.215992	0.960776	1.30313	310.866	FALSE	3
2022-09-14	11:26:56	0.292227	1.29988	1.31205	315.337	FALSE	3
2022-09-14	11:26:56	0.274008	1.21884	1.31205	312.084	FALSE	3
2022-09-14	11:26:56	0.287901	1.28064	1.31205	316.618	FALSE	3
2022-09-14	11:26:56	0.325712	1.44883	1.31205	313.533	FALSE	3
2022-09-14	11:26:57	0.249733	1.11086	1.62218	317.729	FALSE	3
2022-09-14	11:26:57	0.451667	2.00911	1.62218	315.542	FALSE	3
2022-09-14	11:26:57	0.322506	1.43457	1.62218	319.164	FALSE	3
2022-09-14	11:26:57	0.434822	1.93418	1.62218	317.477	FALSE	3
2022-09-14	11:26:58	0.402456	1.7902	3.0417	320.954	FALSE	3
2022-09-14	11:26:58	0.553906	2.46388	3.0417	319.94	FALSE	3
2022-09-14	11:26:58	0.559148	2.4872	3.0417	323.441	FALSE	3
2022-09-14	11:26:58	1.21971	5.42551	3.0417	325.366	FALSE	3
2022-09-14	11:26:59	1.06816	4.75139	5.02234	328.192	FALSE	3
2022-09-14	11:26:59	2.03421	9.04857	5.02234	334.415	FALSE	3
2022-09-14	11:26:59	0.284847	1.26706	5.02234	329.459	FALSE	3
2022-09-14	11:27:00	0.0905982	0.402999	1.15031	334.818	FALSE	3
2022-09-14	11:27:00	0.400166	1.78002	1.15031	331.239	FALSE	3
2022-09-14	11:27:00	0.172481	0.76723	1.15031	335.585	FALSE	3
2022-09-14	11:27:00	0.371158	1.65099	1.15031	332.89	FALSE	3
2022-09-14	11:27:01	0.234262	1.04204	1.94827	336.627	FALSE	3
2022-09-14	11:27:01	0.417875	1.85879	1.94827	334.749	FALSE	3
2022-09-14	11:27:01	0.56729	2.52342	1.94827	339.15	FALSE	3
2022-09-14	11:27:01	0.532532	2.36881	1.94827	337.118	FALSE	3
2022-09-14	11:27:02	0.28612	1.27272	1.53723	340.423	FALSE	3
2022-09-14	11:27:02	0.429886	1.91222	1.53723	339.03	FALSE	3
2022-09-14	11:27:02	0.312125	1.38839	1.53723	341.811	FALSE	3
2022-09-14	11:27:02	0.354211	1.5756	1.53723	340.606	FALSE	3
2022-09-14	11:27:03	0.37869	1.68449	2.05936	343.496	FALSE	3
2022-09-14	11:27:03	0.477112	2.12229	2.05936	342.728	FALSE	3
2022-09-14	11:27:03	0.533092	2.3713	2.05936	345.867	FALSE	3
2022-09-14	11:27:04	0.429428	1.91018	1.54623	344.638	FALSE	3
2022-09-14	11:27:04	0.382964	1.7035	1.54623	347.571	FALSE	3
2022-09-14	11:27:04	0.311361	1.385	1.54623	346.023	FALSE	3
2022-09-14	11:27:04	0.26668	1.18625	1.54623	348.757	FALSE	3
2022-09-14	11:27:05	0.414771	1.84498	3.73202	347.868	FALSE	3
2022-09-14	11:27:05	0.425713	1.89366	3.73202	350.651	FALSE	3
2022-09-14	11:27:05	1.25289	5.57311	3.73202	353.441	FALSE	3
2022-09-14	11:27:05	1.26261	5.61634	3.73202	356.267	FALSE	3
2022-09-14	11:27:06	0.909784	4.0469	2.20514	357.488	FALSE	3
2022-09-14	11:27:06	0.342914	1.52535	2.20514	357.792	FALSE	3
2022-09-14	11:27:06	0.487392	2.16802	2.20514	359.656	FALSE	3
2022-09-14	11:27:06	0.242863	1.0803	2.20514	358.873	FALSE	3
2022-09-14	11:27:07	0.489631	2.17798	1.70018	361.834	FALSE	3
2022-09-14	11:27:07	0.224237	0.997451	1.70018	359.87	FALSE	3
2022-09-14	11:27:07	0.432786	1.92512	1.70018	363.759	FALSE	3
2022-09-14	11:27:08	0.352328	1.56723	2.26581	361.437	FALSE	3
2022-09-14	11:27:08	0.624847	2.77944	2.26581	366.539	FALSE	3
2022-09-14	11:27:08	0.660776	2.93926	2.26581	364.376	FALSE	3
2022-09-14	11:27:08	0.399555	1.7773	2.26581	368.316	FALSE	3
2022-09-14	11:27:09	0.800929	3.56269	2.8323	367.939	FALSE	3
2022-09-14	11:27:09	0.473804	2.10757	2.8323	370.424	FALSE	3
2022-09-14	11:27:09	0.98215	4.3688	2.8323	372.308	FALSE	3
2022-09-14	11:27:09	0.290038	1.29015	2.8323	371.714	FALSE	3
2022-09-14	11:27:10	0.467545	2.07973	4.16925	374.388	FALSE	3
2022-09-14	11:27:10	0.266476	1.18534	4.16925	372.899	FALSE	3
2022-09-14	11:27:10	1.20067	5.34082	4.16925	379.728	FALSE	3
2022-09-14	11:27:10	1.81447	8.07113	4.16925	380.97	FALSE	3
2022-09-14	11:27:11	3.24123	14.4176	11.7197	394.146	1	4
2022-09-14	11:27:11	3.74566	16.6614	11.7197	397.632	1	5
2022-09-14	11:27:11	0.917214	4.07995	11.7197	398.226	FALSE	5
2022-09-14	11:27:12	0.854313	3.80016	3.6949	401.432	FALSE	5
2022-09-14	11:27:12	0.703372	3.12874	3.6949	401.355	FALSE	5
2022-09-14	11:27:12	0.642354	2.85732	3.6949	404.289	FALSE	5
2022-09-14	11:27:12	1.12256	4.99337	3.6949	406.348	FALSE	5
2022-09-14	11:27:13	0.376603	1.67521	1.5923	405.964	FALSE	5
2022-09-14	11:27:13	0.362965	1.61454	1.5923	407.963	FALSE	5
2022-09-14	11:27:13	0.262354	1.167	1.5923	407.131	FALSE	5
2022-09-14	11:27:13	0.429936	1.91244	1.5923	409.875	FALSE	5
2022-09-14	11:27:14	0.148664	0.661287	1.38438	407.793	FALSE	5
2022-09-14	11:27:14	0.453295	2.01635	1.38438	411.892	FALSE	5
2022-09-14	11:27:14	0.208919	0.929313	1.38438	408.722	FALSE	5
2022-09-14	11:27:14	0.434008	1.93055	1.38438	413.822	FALSE	5
2022-09-14	11:27:15	0.322048	1.43253	1.63876	410.155	FALSE	5
2022-09-14	11:27:15	0.449326	1.99869	1.63876	415.821	FALSE	5
2022-09-14	11:27:15	0.333855	1.48505	1.63876	411.64	FALSE	5
2022-09-14	11:27:16	0.352125	1.56632	3.12019	417.387	FALSE	5
2022-09-14	11:27:16	0.341387	1.51856	3.12019	413.158	FALSE	5
2022-09-14	11:27:16	0.19299	0.858458	3.12019	418.246	FALSE	5
2022-09-14	11:27:16	1.9193	8.53743	3.12019	421.696	FALSE	5
2022-09-14	11:27:17	1.39452	6.2031	8.77263	424.449	FALSE	5
2022-09-14	11:27:17	3.0965	13.7739	8.77263	435.469	1	6
2022-09-14	11:27:17	1.07899	4.79956	8.77263	429.248	FALSE	6
2022-09-14	11:27:17	2.31869	10.314	8.77263	445.783	FALSE	6
2022-09-14	11:27:18	0.381692	1.69784	1.58313	430.946	FALSE	6
2022-09-14	11:27:18	0.329784	1.46695	1.58313	447.25	FALSE	6
2022-09-14	11:27:18	0.413906	1.84114	1.58313	432.787	FALSE	6
2022-09-14	11:27:18	0.298232	1.3266	1.58313	448.577	FALSE	6
2022-09-14	11:27:19	0.351056	1.56157	1.41261	434.349	FALSE	6
2022-09-14	11:27:19	0.197112	0.876794	1.41261	449.454	FALSE	6
2022-09-14	11:27:19	0.404542	1.79948	1.41261	436.148	FALSE	6
2022-09-14	11:27:20	0.139046	0.618504	1.2138	450.072	FALSE	6
2022-09-14	11:27:20	0.297214	1.32207	1.2138	437.47	FALSE	6
2022-09-14	11:27:20	0.25925	1.1532	1.2138	451.226	FALSE	6
2022-09-14	11:27:20	0.395992	1.76145	1.2138	439.232	FALSE	6
2022-09-14	11:27:21	0.238282	1.05993	1.33457	452.285	FALSE	6
2022-09-14	11:27:21	0.278028	1.23672	1.33457	440.468	FALSE	6
2022-09-14	11:27:21	0.316756	1.40899	1.33457	453.694	FALSE	6
2022-09-14	11:27:21	0.367036	1.63265	1.33457	442.101	FALSE	6
2022-09-14	11:27:22	0.275585	1.22586	1.3318	454.92	FALSE	6
2022-09-14	11:27:22	0.275891	1.22722	1.3318	443.328	FALSE	6
2022-09-14	11:27:22	0.438079	1.94866	1.3318	456.869	FALSE	6
2022-09-14	11:27:22	0.208054	0.925466	1.3318	444.254	FALSE	6
2022-09-14	11:27:23	0.373346	1.66072	1.75187	458.53	FALSE	6
2022-09-14	11:27:23	0.245763	1.0932	1.75187	445.347	FALSE	6
2022-09-14	11:27:23	0.562404	2.50169	1.75187	461.031	FALSE	6
2022-09-14	11:27:24	0.175942	0.782625	1.3537	446.13	FALSE	6
2022-09-14	11:27:24	0.408308	1.81624	1.3537	462.848	FALSE	6
2022-09-14	11:27:24	0.307137	1.36621	1.3537	447.496	FALSE	6
2022-09-14	11:27:24	0.325916	1.44974	1.3537	464.297	FALSE	6
2022-09-14	11:27:25	0.364135	1.61975	2.25528	449.116	FALSE	6
2022-09-14	11:27:25	0.621641	2.76518	2.25528	467.063	FALSE	6
2022-09-14	11:27:25	0.470802	2.09422	2.25528	451.21	FALSE	6
2022-09-14	11:27:25	0.571463	2.54198	2.25528	469.604	FALSE	6
2022-09-14	11:27:26	0.538079	2.39348	3.12087	453.603	FALSE	6
2022-09-14	11:27:26	0.77874	3.46399	3.12087	473.068	FALSE	6
2022-09-14	11:27:26	0.606476	2.69773	3.12087	456.301	FALSE	6
2022-09-14	11:27:26	0.883117	3.92828	3.12087	476.997	FALSE	6
2022-09-14	11:27:27	1.25793	5.59552	9.07996	461.897	FALSE	6
2022-09-14	11:27:27	2.19024	9.74263	9.07996	486.739	FALSE	6
2022-09-14	11:27:27	2.67563	11.9017	9.07996	473.798	FALSE	6
2022-09-14	11:27:28	2.53075	11.2573	7.74276	497.997	FALSE	6
2022-09-14	11:27:28	1.78607	7.9448	7.74276	481.743	FALSE	6
2022-09-14	11:27:28	1.4136	6.28798	7.74276	504.285	FALSE	6
2022-09-14	11:27:28	1.23218	5.48098	7.74276	487.224	FALSE	6
2022-09-14	11:27:29	1.1478	5.10564	5.27774	509.39	FALSE	6
2022-09-14	11:27:29	1.14989	5.11494	5.27774	492.339	FALSE	6
2022-09-14	11:27:29	1.18785	5.28379	5.27774	514.674	FALSE	6
2022-09-14	11:27:29	1.26042	5.6066	5.27774	497.946	FALSE	6
2022-09-14	11:27:30	0.869275	3.86671	2.98188	518.541	FALSE	6
2022-09-14	11:27:30	0.710903	3.16224	2.98188	501.108	FALSE	6
2022-09-14	11:27:30	0.553855	2.46366	2.98188	521.004	FALSE	6
2022-09-14	11:27:30	0.547392	2.43491	2.98188	503.543	FALSE	6
2022-09-14	11:27:31	0.417163	1.85562	2.26007	522.86	FALSE	6
2022-09-14	11:27:31	0.549071	2.44238	2.26007	505.985	FALSE	6
2022-09-14	11:27:31	0.558028	2.48222	2.26007	525.342	FALSE	6
2022-09-14	11:27:32	0.50958	2.26671	2.05987	508.252	FALSE	6
2022-09-14	11:27:32	0.458537	2.03966	2.05987	527.382	FALSE	6
2022-09-14	11:27:32	0.452481	2.01273	2.05987	510.265	FALSE	6
2022-09-14	11:27:32	0.431718	1.92037	2.05987	529.302	FALSE	6
2022-09-14	11:27:33	0.461692	2.0537	2.11872	512.318	FALSE	6
2022-09-14	11:27:33	0.460369	2.04781	2.11872	531.35	FALSE	6
2022-09-14	11:27:33	0.486221	2.16281	2.11872	514.481	FALSE	6
2022-09-14	11:27:33	0.496959	2.21057	2.11872	533.561	FALSE	6
2022-09-14	11:27:34	0.481539	2.14198	2.07826	516.623	FALSE	6
2022-09-14	11:27:34	0.471209	2.09603	2.07826	535.657	FALSE	6
2022-09-14	11:27:34	0.46159	2.05324	2.07826	518.676	FALSE	6
2022-09-14	11:27:34	0.454517	2.02178	2.07826	537.679	FALSE	6
2022-09-14	11:27:35	0.471718	2.0983	2.5118	520.775	FALSE	6
2022-09-14	11:27:35	0.557061	2.47792	2.5118	540.156	FALSE	6
2022-09-14	11:27:35	0.665254	2.95918	2.5118	523.734	FALSE	6
2022-09-14	11:27:36	0.764389	3.40016	3.36745	543.557	FALSE	6
2022-09-14	11:27:36	0.794567	3.53439	3.36745	527.268	FALSE	6
2022-09-14	11:27:36	0.748359	3.32885	3.36745	546.885	FALSE	6
2022-09-14	11:27:36	0.720827	3.20638	3.36745	530.475	FALSE	6
2022-09-14	11:27:37	0.724135	3.2211	5.74717	550.107	FALSE	6
2022-09-14	11:27:37	0.836552	3.72115	5.74717	534.196	FALSE	6
2022-09-14	11:27:37	1.09375	4.86522	5.74717	554.972	FALSE	6
2022-09-14	11:27:37	2.51365	11.1812	5.74717	545.377	FALSE	6
2022-09-14	11:27:38	3.21976	14.3221	4.69653	569.294	1	7
2022-09-14	11:27:38	0.466985	2.07724	4.69653	547.454	FALSE	7
2022-09-14	11:27:38	0.345713	1.5378	4.69653	570.832	FALSE	7
2022-09-14	11:27:38	0.190853	0.848952	4.69653	548.303	FALSE	7
2022-09-14	11:27:39	0.395992	1.76145	2.17262	572.593	FALSE	7
2022-09-14	11:27:39	0.576959	2.56643	2.17262	550.87	FALSE	7
2022-09-14	11:27:39	0.492328	2.18997	2.17262	574.783	FALSE	7
2022-09-14	11:27:40	0.0103437	0.0460108	0.865419	550.916	FALSE	7
2022-09-14	11:27:40	0.0922776	0.410469	0.865419	575.194	FALSE	7
2022-09-14	11:27:40	0.090191	0.401188	0.865419	551.317	FALSE	7
2022-09-14	11:27:40	0.585407	2.60401	0.865419	577.798	FALSE	7
2022-09-14	11:27:41	0.360471	1.60345	3.61368	552.92	FALSE	7
2022-09-14	11:27:41	1.40052	6.22979	3.61368	584.027	FALSE	7
2022-09-14	11:27:41	0.316807	1.40922	3.61368	554.329	FALSE	7
2022-09-14	11:27:41	1.17177	5.21227	3.61368	589.24	FALSE	7
2022-09-14	11:27:42	0.293804	1.3069	1.97617	555.636	FALSE	7
2022-09-14	11:27:42	0.486679	2.16485	1.97617	591.405	FALSE	7
2022-09-14	11:27:42	0.538486	2.39529	1.97617	558.032	FALSE	7
2022-09-14	11:27:42	0.458079	2.03763	1.97617	593.442	FALSE	7
2022-09-14	11:27:43	0.282201	1.25529	0.452347	559.287	FALSE	7
2022-09-14	11:27:43	0.118893	0.52886	0.452347	593.971	FALSE	7
2022-09-14	11:27:43	-0.0960175	-0.427105	0.452347	559.287	FALSE	7
2022-09-14	11:27:44	-0.306348	-1.3627	-1.69716	593.971	FALSE	7
2022-09-14	11:27:44	-0.534541	-2.37775	-1.69716	559.287	FALSE	7
2022-09-14	11:27:44	-0.410572	-1.82631	-1.69716	593.971	FALSE	7
2022-09-14	11:27:44	-0.274694	-1.22189	-1.69716	559.287	FALSE	7
2022-09-14	11:27:45	-0.251844	-1.12025	-0.800051	593.971	FALSE	7
2022-09-14	11:27:45	-0.170623	-0.758965	-0.800051	559.287	FALSE	7
2022-09-14	11:27:45	-0.12304	-0.547307	-0.800051	593.971	FALSE	7
2022-09-14	11:27:45	-0.173931	-0.77368	-0.800051	559.287	FALSE	7
2022-09-14	11:27:46	-0.179936	-0.800391	-0.576624	593.971	FALSE	7
2022-09-14	11:27:46	-0.113626	-0.505431	-0.576624	559.287	FALSE	7
2022-09-14	11:27:46	-0.145076	-0.645327	-0.576624	593.971	FALSE	7
2022-09-14	11:27:46	-0.0798852	-0.355345	-0.576624	559.287	FALSE	7
2022-09-14	11:27:47	-0.0712338	-0.316862	2.12003	593.971	FALSE	7
2022-09-14	11:27:47	1.13854	5.06445	2.12003	564.351	FALSE	7
2022-09-14	11:27:47	0.362507	1.6125	2.12003	595.584	FALSE	7
2022-09-14	11:27:48	2.31401	10.2932	5.52012	574.645	FALSE	7
2022-09-14	11:27:48	0.718842	3.19755	5.52012	598.781	FALSE	7
2022-09-14	11:27:48	1.40184	6.23566	5.52012	580.88	FALSE	7
2022-09-14	11:27:48	0.529224	2.35409	5.52012	601.135	FALSE	7
2022-09-14	11:27:49	0.222659	0.990432	1.35727	581.871	FALSE	7
2022-09-14	11:27:49	0.370242	1.64691	1.35727	602.782	FALSE	7
2022-09-14	11:27:49	0.282964	1.25868	1.35727	583.129	FALSE	7
2022-09-14	11:27:49	0.344644	1.53305	1.35727	604.315	FALSE	7
2022-09-14	11:27:50	0.192277	0.855287	2.08347	583.985	FALSE	7
2022-09-14	11:27:50	0.331107	1.47283	2.08347	605.788	FALSE	7
2022-09-14	11:27:50	0.443575	1.97311	2.08347	585.958	FALSE	7
2022-09-14	11:27:50	0.906577	4.03264	2.08347	609.821	FALSE	7
2022-09-14	11:27:51	2.96943	13.2086	13.7329	599.166	FALSE	7
2022-09-14	11:27:51	1.65431	7.3587	13.7329	617.179	FALSE	7
2022-09-14	11:27:51	4.63813	20.6313	13.7329	619.798	1	8
2022-09-14	11:27:52	1.36805	6.08536	6.37574	623.265	FALSE	8
2022-09-14	11:27:52	2.04571	9.09973	6.37574	628.897	FALSE	8
2022-09-14	11:27:52	1.59782	7.10742	6.37574	630.372	FALSE	8
2022-09-14	11:27:52	0.721743	3.21046	6.37574	632.108	FALSE	8
2022-09-14	11:27:53	0.753448	3.35149	2.93032	633.724	FALSE	8
2022-09-14	11:27:53	0.222761	0.990885	2.93032	633.099	FALSE	8
2022-09-14	11:27:53	1.20383	5.35488	2.93032	639.078	FALSE	8
2022-09-14	11:27:53	0.455026	2.02405	2.93032	635.123	FALSE	8
2022-09-14	11:27:54	3.78999	16.8586	10.0778	655.937	1	9
2022-09-14	11:27:54	1.14581	5.09679	10.0778	640.22	FALSE	9
2022-09-14	11:27:54	3.28999	14.6345	10.0778	670.572	1	10
2022-09-14	11:27:54	0.836552	3.72115	10.0778	643.941	FALSE	10
2022-09-14	11:27:55	1.57477	7.00489	3.8735	677.576	FALSE	10
2022-09-14	11:27:55	0.770547	3.42755	3.8735	647.368	FALSE	10
2022-09-14	11:27:55	0.267087	1.18806	3.8735	678.765	FALSE	10
2022-09-14	11:27:56	1.05385	4.68774	6.35606	652.056	FALSE	10
2022-09-14	11:27:56	0.303321	1.34923	6.35606	680.114	FALSE	10
2022-09-14	11:27:56	3.64653	16.2205	6.35606	668.277	1	11
2022-09-14	11:27:56	0.711921	3.16677	6.35606	683.281	FALSE	11
2022-09-14	11:27:57	1.33879	5.95521	3.03004	674.232	FALSE	11
2022-09-14	11:27:57	0.658893	2.93089	3.03004	686.211	FALSE	11
2022-09-14	11:27:57	0.412277	1.83389	3.03004	676.066	FALSE	11
2022-09-14	11:27:57	0.314771	1.40016	3.03004	687.612	FALSE	11
2022-09-14	11:27:58	0.332837	1.48053	1.16785	677.546	FALSE	11
2022-09-14	11:27:58	0.215534	0.958738	1.16785	688.57	FALSE	11
2022-09-14	11:27:58	0.248308	1.10452	1.16785	678.651	FALSE	11
2022-09-14	11:27:58	0.253499	1.12761	1.16785	689.698	FALSE	11
2022-09-14	11:27:59	0.334415	1.48754	2.10478	680.138	FALSE	11
2022-09-14	11:27:59	0.324542	1.44363	2.10478	691.142	FALSE	11
2022-09-14	11:27:59	0.760572	3.38318	2.10478	683.521	FALSE	11
2022-09-14	11:28:00	1.72933	7.69241	6.28322	698.834	FALSE	11
2022-09-14	11:28:00	1.38072	6.14172	6.28322	689.663	FALSE	11
2022-09-14	11:28:00	1.72963	7.69374	6.28322	706.528	FALSE	11
2022-09-14	11:28:00	0.810445	3.60502	6.28322	693.268	FALSE	11
2022-09-14	11:28:01	0.49584	2.2056	3.0451	708.733	FALSE	11
2022-09-14	11:28:01	0.39299	1.7481	3.0451	695.016	FALSE	11
2022-09-14	11:28:01	0.667392	2.96869	3.0451	711.702	FALSE	11
2022-09-14	11:28:01	1.18205	5.25799	3.0451	700.274	FALSE	11
2022-09-14	11:28:02	1.071	4.76402	3.5156	716.466	FALSE	11
2022-09-14	11:28:02	0.893295	3.97355	3.5156	704.248	FALSE	11
2022-09-14	11:28:02	0.605204	2.69207	3.5156	719.158	FALSE	11
2022-09-14	11:28:02	0.59187	2.63276	3.5156	706.881	FALSE	11
2022-09-14	11:28:03	0.525153	2.33599	2.09218	721.494	FALSE	11
2022-09-14	11:28:03	0.483015	2.14855	2.09218	709.029	FALSE	11
2022-09-14	11:28:03	0.402863	1.79202	2.09218	723.286	FALSE	11
2022-09-14	11:28:04	0.311361	1.385	1.77781	710.414	FALSE	11
2022-09-14	11:28:04	0.417112	1.8554	1.77781	725.141	FALSE	11
2022-09-14	11:28:04	0.435382	1.93667	1.77781	712.351	FALSE	11
2022-09-14	11:28:04	0.434822	1.93418	1.77781	727.076	FALSE	11
2022-09-14	11:28:05	0.423931	1.88573	1.88494	714.236	FALSE	11
2022-09-14	11:28:05	0.424491	1.88822	1.88494	728.964	FALSE	11
2022-09-14	11:28:05	0.423066	1.88188	1.88494	716.118	FALSE	11
2022-09-14	11:28:05	0.423524	1.88392	1.88494	730.848	FALSE	11
2022-09-14	11:28:06	0.411667	1.83118	1.78273	717.95	FALSE	11
2022-09-14	11:28:06	0.406679	1.80899	1.78273	732.657	FALSE	11
2022-09-14	11:28:06	0.385	1.71256	1.78273	719.662	FALSE	11
2022-09-14	11:28:06	0.399758	1.7782	1.78273	734.435	FALSE	11
2022-09-14	11:28:07	0.349529	1.55477	1.61265	721.217	FALSE	11
2022-09-14	11:28:07	0.385611	1.71527	1.61265	736.15	FALSE	11
2022-09-14	11:28:07	0.352481	1.56791	1.61265	722.785	FALSE	11
2022-09-14	11:28:08	-1.41164	-6.27926	1.73553	736.15	FALSE	11
2022-09-14	11:28:08	0.890446	3.96088	1.73553	726.746	FALSE	11
2022-09-14	11:28:08	1.42973	6.35972	1.73553	742.51	FALSE	11
2022-09-14	11:28:08	0.652125	2.90078	1.73553	729.646	FALSE	11
2022-09-14	11:28:09	0.62098	2.76224	3.61827	745.272	FALSE	11
2022-09-14	11:28:09	0.539758	2.40095	3.61827	732.047	FALSE	11
2022-09-14	11:28:09	0.898333	3.99596	3.61827	749.268	FALSE	11
2022-09-14	11:28:09	1.19462	5.31391	3.61827	737.361	FALSE	11
2022-09-14	11:28:10	1.19238	5.30394	2.99507	754.572	FALSE	11
2022-09-14	11:28:10	0.532328	2.3679	2.99507	739.729	FALSE	11
2022-09-14	11:28:10	0.534211	2.37628	2.99507	756.948	FALSE	11
2022-09-14	11:28:10	0.434364	1.93214	2.99507	741.661	FALSE	11
2022-09-14	11:28:11	0.483473	2.15058	6.06795	759.099	FALSE	11
2022-09-14	11:28:11	0.769733	3.42393	6.06795	745.085	FALSE	11
2022-09-14	11:28:11	2.8392	12.6293	6.06795	771.728	FALSE	11
2022-09-14	11:28:12	1.27752	5.68266	5.93298	750.768	FALSE	11
2022-09-14	11:28:12	1.92434	8.55985	5.93298	780.288	FALSE	11
2022-09-14	11:28:12	0.882761	3.9267	5.93298	754.695	FALSE	11
2022-09-14	11:28:12	1.25055	5.5627	5.93298	785.851	FALSE	11
2022-09-14	11:28:13	0.677519	3.01374	4.3443	757.708	FALSE	11
2022-09-14	11:28:13	0.773906	3.44249	4.3443	789.293	FALSE	11
2022-09-14	11:28:13	1.00429	4.46728	4.3443	762.176	FALSE	11
2022-09-14	11:28:13	1.45085	6.45367	4.3443	795.747	FALSE	11
2022-09-14	11:28:14	1.30128	5.78835	4.93104	767.964	FALSE	11
2022-09-14	11:28:14	1.81991	8.09532	4.93104	803.842	FALSE	11
2022-09-14	11:28:14	2.4937	11.0925	4.93104	779.056	FALSE	11
2022-09-14	11:28:14	-1.1807	-5.25199	4.93104	803.842	FALSE	11
2022-09-14	11:28:15	1.13737	5.05925	9.64168	784.116	FALSE	11
2022-09-14	11:28:15	1.91228	8.5062	9.64168	812.349	FALSE	11
2022-09-14	11:28:15	3.45299	15.3596	9.64168	799.475	1	12
2022-09-14	11:28:16	0.990445	4.4057	2.91238	816.754	FALSE	12
2022-09-14	11:28:16	0.679656	3.02325	2.91238	802.499	FALSE	12
2022-09-14	11:28:16	0.396654	1.7644	2.91238	818.519	FALSE	12
2022-09-14	11:28:16	0.552176	2.45619	2.91238	804.955	FALSE	12
2022-09-14	11:28:17	0.488613	2.17345	3.04543	820.692	FALSE	12
2022-09-14	11:28:17	0.530089	2.35794	3.04543	807.313	FALSE	12
2022-09-14	11:28:17	0.860674	3.82845	3.04543	824.521	FALSE	12
2022-09-14	11:28:17	0.859199	3.82189	3.04543	811.135	FALSE	12
2022-09-14	11:28:18	0.506171	2.25155	1.92676	826.772	FALSE	12
2022-09-14	11:28:18	0.423982	1.88596	1.92676	813.021	FALSE	12
2022-09-14	11:28:18	0.458944	2.04147	1.92676	828.814	FALSE	12
2022-09-14	11:28:18	0.343524	1.52806	1.92676	814.549	FALSE	12
2022-09-14	11:28:19	0.35182	1.56497	1.678	830.379	FALSE	12
2022-09-14	11:28:19	0.261081	1.16134	1.678	815.71	FALSE	12
2022-09-14	11:28:19	0.518791	2.30769	1.678	832.686	FALSE	12
2022-09-14	11:28:20	1.25375	5.57693	8.18462	821.287	FALSE	12
2022-09-14	11:28:20	1.66739	7.41688	8.18462	840.103	FALSE	12
2022-09-14	11:28:20	2.6423	11.7535	8.18462	833.04	FALSE	12
2022-09-14	11:28:20	1.7965	7.99119	8.18462	848.094	FALSE	12
2022-09-14	11:28:21	0.777214	3.4572	2.56462	836.498	FALSE	12
2022-09-14	11:28:21	0.505763	2.24973	2.56462	850.344	FALSE	12
2022-09-14	11:28:21	0.580013	2.58001	2.56462	839.078	FALSE	12
2022-09-14	11:28:21	0.443219	1.97153	2.56462	852.316	FALSE	12
2022-09-14	11:28:22	0.665967	2.96235	3.51884	842.04	FALSE	12
2022-09-14	11:28:22	0.465865	2.07226	3.51884	854.388	FALSE	12
2022-09-14	11:28:22	0.943626	4.19744	3.51884	846.237	FALSE	12
2022-09-14	11:28:22	1.08882	4.84329	3.51884	859.231	FALSE	12
2022-09-14	11:28:23	1.02449	4.55714	4.72072	850.794	FALSE	12
2022-09-14	11:28:23	1.611	7.16605	4.72072	866.397	FALSE	12
2022-09-14	11:28:23	0.548308	2.43898	4.72072	853.233	FALSE	12
2022-09-14	11:28:24	1.49884	6.66714	6.1268	873.064	FALSE	12
2022-09-14	11:28:24	0.533142	2.37152	6.1268	855.605	FALSE	12
2022-09-14	11:28:24	2.52739	11.2423	6.1268	884.307	FALSE	12
2022-09-14	11:28:24	0.950089	4.22619	6.1268	859.831	FALSE	12
2022-09-14	11:28:25	1.12887	5.02144	7.9178	889.328	FALSE	12
2022-09-14	11:28:25	0.84841	3.7739	7.9178	863.605	FALSE	12
2022-09-14	11:28:25	1.5249	6.78306	7.9178	896.111	FALSE	12
2022-09-14	11:28:25	3.61782	16.0928	7.9178	879.698	1	13
2022-09-14	11:28:26	2.3937	10.6477	12.9246	906.759	FALSE	13
2022-09-14	11:28:26	4.56021	20.2847	12.9246	899.983	1	14
2022-09-14	11:28:26	1.76286	7.84155	12.9246	914.6	FALSE	14
2022-09-14	11:28:27	3.67223	16.3348	8.97903	916.317	1	15
2022-09-14	11:28:27	1.07706	4.79098	8.97903	919.391	FALSE	15
2022-09-14	11:28:27	2.52113	11.2145	8.97903	927.532	FALSE	15
2022-09-14	11:28:27	0.80388	3.57582	8.97903	922.967	FALSE	15
2022-09-14	11:28:28	2.50495	11.1425	10.2913	938.674	FALSE	15
2022-09-14	11:28:28	0.980114	4.35974	10.2913	927.327	FALSE	15
2022-09-14	11:28:28	3.331	14.817	10.2913	953.491	1	16
2022-09-14	11:28:28	2.43828	10.846	10.2913	938.173	FALSE	16
2022-09-14	11:28:29	3.96983	17.6586	10.9444	971.15	1	17
2022-09-14	11:28:29	2.60892	11.605	10.9444	949.778	FALSE	17
2022-09-14	11:28:29	2.5394	11.2958	10.9444	982.446	FALSE	17
2022-09-14	11:28:29	0.723524	3.21838	10.9444	952.996	FALSE	17
2022-09-14	11:28:30	1.1249	5.00378	3.27509	987.449	FALSE	17
2022-09-14	11:28:30	0.894516	3.97899	3.27509	956.975	FALSE	17
2022-09-14	11:28:30	0.572837	2.54809	3.27509	989.998	FALSE	17
2022-09-14	11:28:30	0.352837	1.56949	3.27509	958.545	FALSE	17
2022-09-14	11:28:31	0.535433	2.38171	1.97107	992.379	FALSE	17
2022-09-14	11:28:31	0.289326	1.28698	1.97107	959.832	FALSE	17
2022-09-14	11:28:31	0.504593	2.24453	1.97107	994.624	FALSE	17
2022-09-14	11:28:32	1.06225	4.7251	3.86892	964.557	FALSE	17
2022-09-14	11:28:32	0.561132	2.49603	3.86892	997.12	FALSE	17
2022-09-14	11:28:32	1.22826	5.46355	3.86892	970.02	FALSE	17
2022-09-14	11:28:32	0.627443	2.79099	3.86892	999.911	FALSE	17
2022-09-14	11:28:33	1.89589	8.4333	8.18547	978.454	FALSE	17
2022-09-14	11:28:33	0.985407	4.38329	8.18547	1004.29	FALSE	17
2022-09-14	11:28:33	2.48698	11.0626	8.18547	989.516	FALSE	17
2022-09-14	11:28:33	1.99243	8.86273	8.18547	1013.16	FALSE	17
2022-09-14	11:28:34	0.574211	2.55421	3.05205	992.07	FALSE	17
2022-09-14	11:28:34	0.706374	3.14209	3.05205	1016.3	FALSE	17
2022-09-14	11:28:34	0.732328	3.25754	3.05205	995.328	FALSE	17
2022-09-14	11:28:34	0.731616	3.25437	3.05205	1019.55	FALSE	17
2022-09-14	11:28:35	0.72958	3.24532	3.25498	998.573	FALSE	17
2022-09-14	11:28:35	0.732328	3.25754	3.25498	1022.81	FALSE	17
2022-09-14	11:28:35	0.733346	3.26207	3.25498	1001.84	FALSE	17
2022-09-14	11:28:36	0.731412	3.25347	3.25765	1026.06	FALSE	17
2022-09-14	11:28:36	0.733142	3.26116	3.25765	1005.1	FALSE	17
2022-09-14	11:28:36	0.732634	3.2589	3.25765	1029.32	FALSE	17
2022-09-14	11:28:36	0.732226	3.25709	3.25765	1008.35	FALSE	17
2022-09-14	11:28:37	0.734211	3.26592	3.18901	1032.59	FALSE	17
2022-09-14	11:28:37	0.726476	3.23151	3.18901	1011.59	FALSE	17
2022-09-14	11:28:37	0.726069	3.2297	3.18901	1035.82	FALSE	17
2022-09-14	11:28:37	0.680929	3.02891	3.18901	1014.61	FALSE	17
2022-09-14	11:28:38	0.649733	2.89014	2.6087	1038.71	FALSE	17
2022-09-14	11:28:38	0.590801	2.628	2.6087	1017.24	FALSE	17
2022-09-14	11:28:38	0.565611	2.51595	2.6087	1041.22	FALSE	17
2022-09-14	11:28:38	0.539707	2.40072	2.6087	1019.64	FALSE	17
2022-09-14	11:28:39	0.567137	2.52274	2.00661	1043.75	FALSE	17
2022-09-14	11:28:39	0.399148	1.77549	2.00661	1021.42	FALSE	17
2022-09-14	11:28:39	0.387036	1.72161	2.00661	1045.47	FALSE	17
2022-09-14	11:28:40	0.359453	1.59892	1.55466	1023.02	FALSE	17
2022-09-14	11:28:40	0.358588	1.59507	1.55466	1047.06	FALSE	17
2022-09-14	11:28:40	0.382812	1.70282	1.55466	1024.72	FALSE	17
2022-09-14	11:28:40	0.297163	1.32184	1.55466	1048.39	FALSE	17
2022-09-14	11:28:41	0.321692	1.43095	1.42178	1026.15	FALSE	17
2022-09-14	11:28:41	0.259911	1.15614	1.42178	1049.54	FALSE	17
2022-09-14	11:28:41	0.332583	1.4794	1.42178	1027.63	FALSE	17
2022-09-14	11:28:41	0.364339	1.62065	1.42178	1051.16	FALSE	17
2022-09-14	11:28:42	0.261336	1.16247	1.57074	1028.79	FALSE	17
2022-09-14	11:28:42	0.44444	1.97696	1.57074	1053.14	FALSE	17
2022-09-14	11:28:42	0.337468	1.50113	1.57074	1030.29	FALSE	17
2022-09-14	11:28:42	0.369224	1.64238	1.57074	1054.78	FALSE	17
2022-09-14	11:28:43	0.430598	1.91539	2.23253	1032.21	FALSE	17
2022-09-14	11:28:43	0.365305	1.62495	2.23253	1056.41	FALSE	17
2022-09-14	11:28:43	0.709784	3.15726	2.23253	1035.37	FALSE	17
2022-09-14	11:28:44	0.512328	2.27894	2.16632	1058.69	FALSE	17
2022-09-14	11:28:44	0.597061	2.65585	2.16632	1038.02	FALSE	17
2022-09-14	11:28:44	0.365305	1.62495	2.16632	1060.31	FALSE	17
2022-09-14	11:28:44	0.473346	2.10554	2.16632	1040.13	FALSE	17
2022-09-14	11:28:45	0.201285	0.895356	0.152745	1061.21	FALSE	17
2022-09-14	11:28:45	0.0711071	0.316299	0.152745	1040.44	FALSE	17
2022-09-14	11:28:45	0.0166542	0.0740812	0.152745	1061.28	FALSE	17
2022-09-14	11:28:45	-0.151692	-0.674756	0.152745	1040.44	FALSE	17
2022-09-14	11:28:46	-0.11215	-0.498866	-0.0709094	1061.28	FALSE	17
2022-09-14	11:28:46	0.0998094	0.443972	-0.0709094	1040.89	FALSE	17
2022-09-14	11:28:46	0.078588	0.349575	-0.0709094	1061.63	FALSE	17
2022-09-14	11:28:46	-0.130012	-0.578319	-0.0709094	1040.89	FALSE	17
2022-09-14	11:28:47	0.00291375	0.0129609	1.21303	1061.64	FALSE	17
2022-09-14	11:28:47	0.440522	1.95953	1.21303	1042.85	FALSE	17
2022-09-14	11:28:47	0.374669	1.6666	1.21303	1063.31	FALSE	17
2022-09-14	11:28:48	3.49558	15.549	6.47292	1058.4	1	18
2022-09-14	11:28:48	0.797214	3.54617	6.47292	1066.86	FALSE	18
2022-09-14	11:28:48	1.17813	5.24056	6.47292	1063.64	FALSE	18
2022-09-14	11:28:48	0.349784	1.55591	6.47292	1068.41	FALSE	18
2022-09-14	11:28:49	0.220674	0.981602	0.707016	1064.62	FALSE	18
2022-09-14	11:28:49	0.143321	0.63752	0.707016	1069.05	FALSE	18
2022-09-14	11:28:49	0.0935498	0.416128	0.707016	1065.04	FALSE	18
2022-09-14	11:28:49	0.178232	0.792812	0.707016	1069.84	FALSE	18
2022-09-14	11:28:50	0.292277	1.30011	1.75534	1066.34	FALSE	18
2022-09-14	11:28:50	0.197672	0.879285	1.75534	1070.72	FALSE	18
2022-09-14	11:28:50	0.354008	1.5747	1.75534	1067.91	FALSE	18
2022-09-14	11:28:50	0.734517	3.26728	1.75534	1073.99	FALSE	18
2022-09-14	11:28:51	0.857926	3.81623	5.82414	1071.73	FALSE	18
2022-09-14	11:28:51	2.08016	9.25297	5.82414	1083.24	FALSE	18
2022-09-14	11:28:51	0.989886	4.40321	5.82414	1076.13	FALSE	18
2022-09-14	11:28:52	0.705	3.13598	4.28306	1086.38	FALSE	18
2022-09-14	11:28:52	1.4392	6.40185	4.28306	1082.53	FALSE	18
2022-09-14	11:28:52	0.68958	3.06739	4.28306	1089.45	FALSE	18
2022-09-14	11:28:52	1.01772	4.52702	4.28306	1087.06	FALSE	18
2022-09-14	11:28:53	0.405967	1.80582	1.87854	1091.25	FALSE	18
2022-09-14	11:28:53	0.517977	2.30407	1.87854	1089.36	FALSE	18
2022-09-14	11:28:53	0.287188	1.27747	1.87854	1092.53	FALSE	18
2022-09-14	11:28:53	0.47813	2.12682	1.87854	1091.49	FALSE	18
2022-09-14	11:28:54	0.416959	1.85472	2.45851	1094.38	FALSE	18
2022-09-14	11:28:54	0.383422	1.70554	2.45851	1093.19	FALSE	18
2022-09-14	11:28:54	0.46271	2.05823	2.45851	1096.44	FALSE	18
2022-09-14	11:28:54	0.947697	4.21555	2.45851	1097.41	FALSE	18
2022-09-14	11:28:55	4.30963	19.1701	19.6735	1115.61	1	19
2022-09-14	11:28:55	3.8195	16.9899	19.6735	1114.4	1	20
2022-09-14	11:28:55	5.13925	22.8604	19.6735	1138.47	1	21
2022-09-14	11:28:56	4.88347	21.7227	13.0289	1136.12	1	22
2022-09-14	11:28:56	1.73406	7.71345	13.0289	1146.19	FALSE	22
2022-09-14	11:28:56	3.03085	13.4818	13.0289	1149.6	1	23
2022-09-14	11:28:56	2.06775	9.19777	13.0289	1155.38	FALSE	23
2022-09-14	11:28:57	3.86749	17.2034	13.7366	1166.81	1	24
2022-09-14	11:28:57	3.88281	17.2715	13.7366	1172.65	1	25
2022-09-14	11:28:57	1.51411	6.73506	13.7366	1173.54	FALSE	25
2022-09-14	11:28:58	0.737519	3.28063	6.57506	1175.94	FALSE	25
2022-09-14	11:28:58	0.732023	3.25618	6.57506	1176.8	FALSE	25
2022-09-14	11:28:58	1.57609	7.01076	6.57506	1182.95	FALSE	25
2022-09-14	11:28:58	2.9451	13.1004	6.57506	1189.9	FALSE	25
2022-09-14	11:28:58	1.39996	6.2273	6.57506	1189.17	FALSE	25
2022-09-14	11:28:59	2.42006	10.7649	5.68801	1200.66	FALSE	25
2022-09-14	11:28:59	0.487137	2.16688	5.68801	1191.34	FALSE	25
2022-09-14	11:28:59	0.928969	4.13224	5.68801	1204.8	FALSE	25
2022-09-14	11:29:00	0.360674	1.60435	1.77764	1192.94	FALSE	25
2022-09-14	11:29:00	0.499555	2.22212	1.77764	1207.02	FALSE	25
2022-09-14	11:29:00	0.212888	0.946968	1.77764	1193.89	FALSE	25
2022-09-14	11:29:00	0.525407	2.33712	1.77764	1209.36	FALSE	25
2022-09-14	11:29:01	0.249377	1.10928	3.51566	1195	FALSE	25
2022-09-14	11:29:01	0.567443	2.5241	3.51566	1211.88	FALSE	25
2022-09-14	11:29:01	1.5652	6.96232	3.51566	1201.96	FALSE	25
2022-09-14	11:29:01	0.779402	3.46694	3.51566	1215.35	FALSE	25
2022-09-14	11:29:02	1.52098	6.76562	9.06273	1208.73	FALSE	25
2022-09-14	11:29:02	2.47696	11.018	9.06273	1226.36	FALSE	25
2022-09-14	11:29:02	1.54566	6.8754	9.06273	1215.6	FALSE	25
2022-09-14	11:29:02	2.60597	11.5919	9.06273	1237.96	FALSE	25
2022-09-14	11:29:03	2.0592	9.15973	10.8796	1224.76	FALSE	25
2022-09-14	11:29:03	2.94953	13.1201	10.8796	1251.08	FALSE	25
2022-09-14	11:29:03	2.32882	10.3591	10.8796	1235.12	FALSE	25
2022-09-14	11:29:04	1.99818	8.8883	6.24819	1259.97	FALSE	25
2022-09-14	11:29:04	1.60419	7.13576	6.24819	1242.26	FALSE	25
2022-09-14	11:29:04	0.880827	3.91809	6.24819	1263.88	FALSE	25
2022-09-14	11:29:04	1.13543	5.05062	6.24819	1247.31	FALSE	25
2022-09-14	11:29:05	0.892023	3.9679	3.28233	1267.85	FALSE	25
2022-09-14	11:29:05	0.764389	3.40016	3.28233	1250.71	FALSE	25
2022-09-14	11:29:05	0.684695	3.04566	3.28233	1270.9	FALSE	25
2022-09-14	11:29:05	0.610496	2.71561	3.28233	1253.43	FALSE	25
2022-09-14	11:29:06	0.631819	2.81046	3.4164	1273.71	FALSE	25
2022-09-14	11:29:06	0.745458	3.31595	3.4164	1256.74	FALSE	25
2022-09-14	11:29:06	0.813804	3.61996	3.4164	1277.33	FALSE	25
2022-09-14	11:29:06	0.881082	3.91923	3.4164	1260.66	FALSE	25
2022-09-14	11:29:07	0.89014	3.95952	3.55137	1281.29	FALSE	25
2022-09-14	11:29:07	0.777061	3.45652	3.55137	1264.12	FALSE	25
2022-09-14	11:29:07	0.727952	3.23808	3.55137	1284.52	FALSE	25
2022-09-14	11:29:08	0.775331	3.44883	3.2151	1267.57	FALSE	25
2022-09-14	11:29:08	0.768308	3.41759	3.2151	1287.94	FALSE	25
2022-09-14	11:29:08	0.759809	3.37978	3.2151	1270.95	FALSE	25
2022-09-14	11:29:08	0.587697	2.61419	3.2151	1290.56	FALSE	25
2022-09-14	11:29:09	0.581998	2.58884	3.45635	1273.53	FALSE	25
2022-09-14	11:29:09	0.839504	3.73428	3.45635	1294.29	FALSE	25
2022-09-14	11:29:09	0.821387	3.65369	3.45635	1277.19	FALSE	25
2022-09-14	11:29:09	0.865204	3.8486	3.45635	1298.14	FALSE	25
2022-09-14	11:29:10	0.876603	3.89931	3.95963	1281.09	FALSE	25
2022-09-14	11:29:10	0.881285	3.92013	3.95963	1302.06	FALSE	25
2022-09-14	11:29:10	0.889326	3.9559	3.95963	1285.04	FALSE	25
2022-09-14	11:29:10	0.913448	4.0632	3.95963	1306.12	FALSE	25
2022-09-14	11:29:11	0.88271	3.92647	3.53356	1288.97	FALSE	25
2022-09-14	11:29:11	0.865712	3.85086	3.53356	1309.97	FALSE	25
2022-09-14	11:29:11	0.63472	2.82336	3.53356	1291.79	FALSE	25
2022-09-14	11:29:12	0.506883	2.25472	2.05608	1312.23	FALSE	25
2022-09-14	11:29:12	0.486476	2.16394	2.05608	1293.96	FALSE	25
2022-09-14	11:29:12	0.448512	1.99507	2.05608	1314.22	FALSE	25
2022-09-14	11:29:12	0.407036	1.81058	2.05608	1295.77	FALSE	25
2022-09-14	11:29:13	0.418486	1.86151	1.88613	1316.09	FALSE	25
2022-09-14	11:29:13	0.427137	1.89999	1.88613	1297.67	FALSE	25
2022-09-14	11:29:13	0.422303	1.87849	1.88613	1317.96	FALSE	25
2022-09-14	11:29:13	0.428155	1.90452	1.88613	1299.57	FALSE	25
2022-09-14	11:29:14	0.423473	1.88369	1.82376	1319.85	FALSE	25
2022-09-14	11:29:14	0.422456	1.87917	1.82376	1301.45	FALSE	25
2022-09-14	11:29:14	0.417316	1.85631	1.82376	1321.7	FALSE	25
2022-09-14	11:29:14	0.376756	1.67589	1.82376	1303.13	FALSE	25
2022-09-14	11:29:15	0.372074	1.65506	1.73286	1323.36	FALSE	25
2022-09-14	11:29:15	0.404288	1.79835	1.73286	1304.93	FALSE	25
2022-09-14	11:29:15	0.392328	1.74515	1.73286	1325.1	FALSE	25
2022-09-14	11:29:16	0.417468	1.85698	1.85817	1306.78	FALSE	25
2022-09-14	11:29:16	0.419249	1.8649	1.85817	1326.97	FALSE	25
2022-09-14	11:29:16	0.404186	1.7979	1.85817	1308.58	FALSE	25
2022-09-14	11:29:16	0.430038	1.9129	1.85817	1328.88	FALSE	25
2022-09-14	11:29:17	0.413753	1.84046	1.35359	1310.42	FALSE	25
2022-09-14	11:29:17	0.429835	1.91199	1.35359	1330.79	FALSE	25
2022-09-14	11:29:17	0.239504	1.06536	1.35359	1311.49	FALSE	25
2022-09-14	11:29:17	0.13411	0.596548	1.35359	1331.39	FALSE	25
2022-09-14	11:29:18	0.290344	1.29151	3.70457	1312.78	FALSE	25
2022-09-14	11:29:18	0.240827	1.07125	3.70457	1332.46	FALSE	25
2022-09-14	11:29:18	0.266425	1.18511	3.70457	1313.96	FALSE	25
2022-09-14	11:29:18	2.5337	11.2704	3.70457	1343.73	FALSE	25
2022-09-14	11:29:19	2.49304	11.0895	11.0069	1325.05	FALSE	25
2022-09-14	11:29:19	3.39284	15.092	11.0069	1358.82	1	26
2022-09-14	11:29:19	1.53752	6.8392	11.0069	1331.89	FALSE	26
2022-09-14	11:29:20	5.47492	24.3535	18.35	1383.18	1	27
2022-09-14	11:29:20	2.38449	10.6067	18.35	1342.5	FALSE	27
2022-09-14	11:29:20	6.83879	30.4203	18.35	1413.6	1	28
2022-09-14	11:29:20	1.80286	8.01948	18.35	1350.52	FALSE	28
2022-09-14	11:29:21	4.16703	18.5358	10.3805	1432.13	1	29
2022-09-14	11:29:21	1.84571	8.21009	10.3805	1358.73	FALSE	29
2022-09-14	11:29:21	1.442	6.4143	10.3805	1438.55	FALSE	29
2022-09-14	11:29:21	1.87986	8.36199	10.3805	1367.09	FALSE	29
2022-09-14	11:29:22	2.11645	9.41439	6.96148	1447.96	FALSE	29
2022-09-14	11:29:22	1.01431	4.51185	6.96148	1371.6	FALSE	29
2022-09-14	11:29:22	2.27202	10.1064	6.96148	1458.07	FALSE	29
2022-09-14	11:29:22	0.857265	3.81329	6.96148	1375.41	FALSE	29
2022-09-14	11:29:23	1.62927	7.24732	6.9581	1465.32	FALSE	29
2022-09-14	11:29:23	1.27304	5.66274	6.9581	1381.08	FALSE	29
2022-09-14	11:29:23	1.79044	7.96424	6.9581	1473.28	FALSE	29
2022-09-14	11:29:24	2.34587	10.4349	4.97628	1391.51	FALSE	29
2022-09-14	11:29:24	0.472735	2.10282	4.97628	1475.38	FALSE	29
2022-09-14	11:29:24	1.21116	5.38748	4.97628	1396.9	FALSE	29
2022-09-14	11:29:24	0.445102	1.9799	4.97628	1477.36	FALSE	29
2022-09-14	11:29:25	1.23202	5.48027	5.12414	1402.38	FALSE	29
2022-09-14	11:29:25	1.37172	6.10168	5.12414	1483.46	FALSE	29
2022-09-14	11:29:25	0.879453	3.91198	5.12414	1406.29	FALSE	29
2022-09-14	11:29:25	1.12464	5.00262	5.12414	1488.47	FALSE	29
2022-09-14	11:29:26	0.598893	2.664	3.59716	1408.96	FALSE	29
2022-09-14	11:29:26	1.00205	4.45732	3.59716	1492.92	FALSE	29
2022-09-14	11:29:26	0.691921	3.0778	3.59716	1412.03	FALSE	29
2022-09-14	11:29:26	0.941845	4.18951	3.59716	1497.11	FALSE	29
2022-09-14	11:29:27	1.24968	5.55883	5.49794	1417.59	FALSE	29
2022-09-14	11:29:27	0.496043	2.2065	5.49794	1499.32	FALSE	29
2022-09-14	11:29:27	1.96225	8.72848	5.49794	1426.32	FALSE	29
2022-09-14	11:29:28	0.820318	3.64894	8.17908	1502.97	FALSE	29
2022-09-14	11:29:28	2.15167	9.57106	8.17908	1435.89	FALSE	29
2022-09-14	11:29:28	2.05543	9.14296	8.17908	1512.11	FALSE	29
2022-09-14	11:29:28	2.32754	10.3534	8.17908	1446.25	FALSE	29
2022-09-14	11:29:29	1.22134	5.43276	5.20779	1517.55	FALSE	29
2022-09-14	11:29:29	2.16001	9.60816	5.20779	1455.85	FALSE	29
2022-09-14	11:29:29	0.544186	2.42065	5.20779	1519.97	FALSE	29
2022-09-14	11:29:29	0.757519	3.3696	5.20779	1459.22	FALSE	29
2022-09-14	11:29:30	0.771361	3.43117	2.73989	1523.4	FALSE	29
2022-09-14	11:29:30	0.330903	1.47192	2.73989	1460.7	FALSE	29
2022-09-14	11:29:30	0.907595	4.03716	2.73989	1527.43	FALSE	29
2022-09-14	11:29:30	0.453957	2.01929	2.73989	1462.71	FALSE	29
2022-09-14	11:29:31	0.571361	2.54153	1.65015	1529.98	FALSE	29
2022-09-14	11:29:31	0.259911	1.15614	1.65015	1463.87	FALSE	29
2022-09-14	11:29:31	0.281641	1.2528	1.65015	1531.23	FALSE	29
2022-09-14	11:29:32	0.571514	2.54221	-1.2704	1466.41	FALSE	29
2022-09-14	11:29:32	-1.50294	-6.68538	-1.2704	1531.23	FALSE	29
2022-09-14	11:29:32	-0.614949	-2.73542	-1.2704	1466.41	FALSE	29
2022-09-14	11:29:32	0.403982	1.79699	-1.2704	1533.03	FALSE	29
2022-09-14	11:29:33	0.539249	2.39869	3.96632	1468.81	FALSE	29
2022-09-14	11:29:33	0.545153	2.42495	3.96632	1535.45	FALSE	29
2022-09-14	11:29:33	1.20658	5.36711	3.96632	1474.18	FALSE	29
2022-09-14	11:29:33	1.27569	5.67452	3.96632	1541.12	FALSE	29
2022-09-14	11:29:34	1.68327	7.48752	6.46947	1481.67	FALSE	29
2022-09-14	11:29:34	1.39991	6.22708	6.46947	1547.35	FALSE	29
2022-09-14	11:29:34	1.23024	5.47235	6.46947	1487.14	FALSE	29
2022-09-14	11:29:34	1.50419	6.69094	6.46947	1554.04	FALSE	29
2022-09-14	11:29:35	1.44246	6.41635	4.21646	1493.56	FALSE	29
2022-09-14	11:29:35	1.19233	5.30372	4.21646	1559.35	FALSE	29
2022-09-14	11:29:35	0.736654	3.27678	4.21646	1496.83	FALSE	29
2022-09-14	11:29:35	0.420166	1.86898	4.21646	1561.22	FALSE	29
2022-09-14	11:29:36	0.387494	1.72365	1.44242	1498.56	FALSE	29
2022-09-14	11:29:36	0.292023	1.29898	1.44242	1562.51	FALSE	29
2022-09-14	11:29:36	0.293295	1.30463	1.44242	1499.86	FALSE	29
2022-09-14	11:29:37	0.3193	1.42031	3.28657	1563.93	FALSE	29
2022-09-14	11:29:37	0.682761	3.03706	3.28657	1502.9	FALSE	29
2022-09-14	11:29:37	0.719097	3.19869	3.28657	1567.13	FALSE	29
2022-09-14	11:29:37	1.23426	5.49024	3.28657	1508.39	FALSE	29
2022-09-14	11:29:38	0.50327	2.23865	0.758119	1569.37	FALSE	29
2022-09-14	11:29:38	0.466069	2.07317	0.758119	1510.46	FALSE	29
2022-09-14	11:29:38	-0.0034476	-0.0153356	0.758119	1569.37	FALSE	29
2022-09-14	11:29:38	-0.28416	-1.264	0.758119	1510.46	FALSE	29
2022-09-14	11:29:39	-0.325585	-1.44827	-0.323314	1569.37	FALSE	29
2022-09-14	11:29:39	-0.225585	-1.00345	-0.323314	1510.46	FALSE	29
2022-09-14	11:29:39	-0.0639056	-0.284265	-0.323314	1569.37	FALSE	29
2022-09-14	11:29:39	0.324339	1.44272	-0.323314	1511.9	FALSE	29
2022-09-14	11:29:40	0.24729	1.1	1.33218	1570.47	FALSE	29
2022-09-14	11:29:40	0.227036	1.0099	1.33218	1512.91	FALSE	29
2022-09-14	11:29:40	0.424135	1.88664	1.33218	1572.36	FALSE	29
2022-09-14	11:29:41	0.601794	2.6769	2.81617	1515.59	FALSE	29
2022-09-14	11:29:41	0.652175	2.901	2.81617	1575.26	FALSE	29
2022-09-14	11:29:41	0.692175	3.07893	2.81617	1518.67	FALSE	29
2022-09-14	11:29:41	0.586272	2.60786	2.81617	1577.87	FALSE	29
2022-09-14	11:29:42	0.526832	2.34345	2.33451	1521.01	FALSE	29
2022-09-14	11:29:42	0.52215	2.32263	2.33451	1580.19	FALSE	29
2022-09-14	11:29:42	0.521336	2.31901	2.33451	1523.33	FALSE	29
2022-09-14	11:29:42	0.52897	2.35296	2.33451	1582.54	FALSE	29
2022-09-14	11:29:43	0.538486	2.39529	2.45262	1525.73	FALSE	29
2022-09-14	11:29:43	0.549987	2.44645	2.45262	1584.99	FALSE	29
2022-09-14	11:29:43	0.548461	2.43966	2.45262	1528.17	FALSE	29
2022-09-14	11:29:43	0.568563	2.52908	2.45262	1587.52	FALSE	29
2022-09-14	11:29:44	0.579351	2.57707	2.56998	1530.74	FALSE	29
2022-09-14	11:29:44	0.584542	2.60016	2.56998	1590.12	FALSE	29
2022-09-14	11:29:44	0.569376	2.5327	2.56998	1533.28	FALSE	29
2022-09-14	11:29:45	0.569479	2.53316	2.55862	1592.65	FALSE	29
2022-09-14	11:29:45	0.565305	2.51459	2.55862	1535.79	FALSE	29
2022-09-14	11:29:45	0.567646	2.525	2.55862	1595.18	FALSE	29
2022-09-14	11:29:45	0.598384	2.66173	2.55862	1538.45	FALSE	29
2022-09-14	11:29:46	0.611158	2.71855	3.01363	1597.9	FALSE	29
2022-09-14	11:29:46	0.657468	2.92455	3.01363	1541.38	FALSE	29
2022-09-14	11:29:46	0.662303	2.94606	3.01363	1600.84	FALSE	29
2022-09-14	11:29:46	0.779046	3.46535	3.01363	1544.84	FALSE	29
2022-09-14	11:29:47	0.764338	3.39993	3.48935	1604.24	FALSE	29
2022-09-14	11:29:47	0.789834	3.51334	3.48935	1548.36	FALSE	29
2022-09-14	11:29:47	0.870751	3.87327	3.48935	1608.11	FALSE	29
2022-09-14	11:29:47	0.712837	3.17084	3.48935	1551.53	FALSE	29
2022-09-14	11:29:48	1.04016	4.62684	5.00414	1612.74	FALSE	29
2022-09-14	11:29:48	1.02464	4.5578	5.00414	1556.08	FALSE	29
2022-09-14	11:29:48	1.31014	5.82776	5.00414	1618.57	FALSE	29
2022-09-14	11:29:49	0.932074	4.14605	3.40666	1560.23	FALSE	29
2022-09-14	11:29:49	0.818587	3.64124	3.40666	1622.21	FALSE	29
2022-09-14	11:29:49	0.711463	3.16473	3.40666	1563.4	FALSE	29
2022-09-14	11:29:49	0.601285	2.67464	3.40666	1624.89	FALSE	29
2022-09-14	11:29:50	0.583829	2.59699	3.20712	1565.99	FALSE	29
2022-09-14	11:29:50	0.688664	3.06332	3.20712	1627.95	FALSE	29
2022-09-14	11:29:50	0.837163	3.72387	3.20712	1569.72	FALSE	29
2022-09-14	11:29:50	0.774313	3.4443	3.20712	1631.39	FALSE	29
2022-09-14	11:29:51	0.877061	3.90134	3.07033	1573.62	FALSE	29
2022-09-14	11:29:51	0.770903	3.42913	3.07033	1634.82	FALSE	29
2022-09-14	11:29:51	0.599249	2.66558	3.07033	1576.28	FALSE	29
2022-09-14	11:29:51	0.513753	2.28528	3.07033	1637.11	FALSE	29
2022-09-14	11:29:52	0.557366	2.47928	2.39869	1578.76	FALSE	29
2022-09-14	11:29:52	0.538384	2.39484	2.39869	1639.5	FALSE	29
2022-09-14	11:29:52	0.521997	2.32195	2.39869	1581.08	FALSE	29
2022-09-14	11:29:53	0.513193	2.28279	2.22348	1641.79	FALSE	29
2022-09-14	11:29:53	0.4993	2.22099	2.22348	1583.31	FALSE	29
2022-09-14	11:29:53	0.491667	2.18703	2.22348	1643.97	FALSE	29
2022-09-14	11:29:53	0.49528	2.2031	2.22348	1585.51	FALSE	29
2022-09-14	11:29:54	0.484593	2.15557	2.36139	1646.13	FALSE	29
2022-09-14	11:29:54	0.506069	2.2511	2.36139	1587.76	FALSE	29
2022-09-14	11:29:54	0.578486	2.57322	2.36139	1648.7	FALSE	29
2022-09-14	11:29:54	0.554313	2.4657	2.36139	1590.23	FALSE	29
2022-09-14	11:29:55	0.547239	2.43423	3.1172	1651.14	FALSE	29
2022-09-14	11:29:55	0.531209	2.36292	3.1172	1592.59	FALSE	29
2022-09-14	11:29:55	0.62327	2.77243	3.1172	1653.91	FALSE	29
2022-09-14	11:29:55	1.10139	4.8992	3.1172	1597.49	FALSE	29
2022-09-14	11:29:56	0.591666	2.63185	3.74831	1656.54	FALSE	29
2022-09-14	11:29:56	1.23136	5.47734	3.74831	1602.96	FALSE	29
2022-09-14	11:29:56	0.704949	3.13575	3.74831	1659.68	FALSE	29
2022-09-14	11:29:57	0.870802	3.8735	3.34498	1606.84	FALSE	29
2022-09-14	11:29:57	0.677723	3.01465	3.34498	1662.69	FALSE	29
2022-09-14	11:29:57	0.726069	3.2297	3.34498	1610.07	FALSE	29
2022-09-14	11:29:57	0.733346	3.26207	3.34498	1665.95	FALSE	29
2022-09-14	11:29:58	0.723422	3.21793	2.82461	1613.29	FALSE	29
2022-09-14	11:29:58	0.683219	3.03909	2.82461	1668.99	FALSE	29
2022-09-14	11:29:58	0.614465	2.73326	2.82461	1616.02	FALSE	29
2022-09-14	11:29:58	0.518893	2.30814	2.82461	1671.3	FALSE	29
2022-09-14	11:29:59	0.452939	2.01476	1.54204	1618.03	FALSE	29
2022-09-14	11:29:59	0.308512	1.37232	1.54204	1672.67	FALSE	29
2022-09-14	11:29:59	0.280674	1.24849	1.54204	1619.28	FALSE	29
2022-09-14	11:29:59	0.344542	1.53259	1.54204	1674.2	FALSE	29
2022-09-14	11:30:00	0.491667	2.18703	3.8532	1621.47	FALSE	29
2022-09-14	11:30:00	1.42515	6.33935	3.8532	1680.54	FALSE	29
2022-09-14	11:30:00	0.681895	3.03321	3.8532	1624.5	FALSE	29
2022-09-14	11:30:01	1.10525	4.91637	3.21232	1685.46	FALSE	29
2022-09-14	11:30:01	0.802914	3.57152	3.21232	1628.07	FALSE	29
2022-09-14	11:30:01	0.397417	1.76779	3.21232	1687.23	FALSE	29
2022-09-14	11:30:01	0.583066	2.59359	3.21232	1630.67	FALSE	29
2022-09-14	11:30:02	0.735483	3.27158	3.25879	1690.5	FALSE	29
2022-09-14	11:30:02	0.733651	3.26343	3.25879	1633.93	FALSE	29
2022-09-14	11:30:02	0.730903	3.2512	3.25879	1693.75	FALSE	29
2022-09-14	11:30:02	0.730394	3.24894	3.25879	1637.18	FALSE	29
2022-09-14	11:30:03	0.732532	3.25845	3.19727	1697.01	FALSE	29
2022-09-14	11:30:03	0.723473	3.21815	3.19727	1640.4	FALSE	29
2022-09-14	11:30:03	0.72215	3.21227	3.19727	1700.22	FALSE	29
2022-09-14	11:30:03	0.696959	3.10021	3.19727	1643.5	FALSE	29
2022-09-14	11:30:04	0.704746	3.13485	2.99744	1703.36	FALSE	29
2022-09-14	11:30:04	0.667494	2.96915	2.99744	1646.47	FALSE	29
2022-09-14	11:30:04	0.649326	2.88833	2.99744	1706.24	FALSE	29
2022-09-14	11:30:05	0.65472	2.91233	2.82976	1649.38	FALSE	29
2022-09-14	11:30:05	0.640267	2.84804	2.82976	1709.09	FALSE	29
2022-09-14	11:30:05	0.639402	2.84419	2.82976	1652.22	FALSE	29
2022-09-14	11:30:05	0.610242	2.71448	2.82976	1711.81	FALSE	29
2022-09-14	11:30:06	0.607544	2.70248	2.23627	1654.93	FALSE	29
2022-09-14	11:30:06	0.606018	2.69569	2.23627	1714.5	FALSE	29
2022-09-14	11:30:06	0.416756	1.85381	2.23627	1656.78	FALSE	29
2022-09-14	11:30:06	0.380624	1.69309	2.23627	1716.2	FALSE	29
2022-09-14	11:30:07	0.36612	1.62857	1.61244	1658.41	FALSE	29
2022-09-14	11:30:07	0.368613	1.63966	1.61244	1717.84	FALSE	29
2022-09-14	11:30:07	0.375026	1.66819	1.61244	1660.08	FALSE	29
2022-09-14	11:30:07	0.340216	1.51335	1.61244	1719.35	FALSE	29
2022-09-14	11:30:08	0.323575	1.43933	1.42499	1661.52	FALSE	29
2022-09-14	11:30:08	0.321183	1.42869	1.42499	1720.78	FALSE	29
2022-09-14	11:30:08	0.316298	1.40696	1.42499	1662.92	FALSE	29
2022-09-14	11:30:09	0.622354	2.76836	-0.743686	1723.55	FALSE	29
2022-09-14	11:30:09	-0.248486	-1.10532	-0.743686	1662.92	FALSE	29
2022-09-14	11:30:09	-0.446806	-1.98748	-0.743686	1723.55	FALSE	29
2022-09-14	11:30:09	-0.595814	-2.6503	-0.743686	1662.92	FALSE	29
2022-09-14	11:30:10	-0.696526	-3.09829	-3.4928	1723.55	FALSE	29
2022-09-14	11:30:10	-0.777798	-3.4598	-3.4928	1662.92	FALSE	29
2022-09-14	11:30:10	-0.835356	-3.71583	-3.4928	1723.55	FALSE	29
2022-09-14	11:30:10	-0.831182	-3.69726	-3.4928	1662.92	FALSE	29
2022-09-14	11:30:11	-0.869554	-3.86795	-3.95754	1723.55	FALSE	29
2022-09-14	11:30:11	-0.886857	-3.94492	-3.95754	1662.92	FALSE	29
2022-09-14	11:30:11	-0.897798	-3.99359	-3.95754	1723.55	FALSE	29
2022-09-14	11:30:11	-0.904567	-4.02369	-3.95754	1662.92	FALSE	29
2022-09-14	11:30:12	-0.922328	-4.1027	-4.17929	1723.55	FALSE	29
2022-09-14	11:30:12	-0.939732	-4.18012	-4.17929	1662.92	FALSE	29
2022-09-14	11:30:12	-0.956577	-4.25505	-4.17929	1723.55	FALSE	29
2022-09-14	11:30:13	-0.95734	-4.25844	-4.28153	1662.92	FALSE	29
2022-09-14	11:30:13	-0.972913	-4.32771	-4.28153	1723.55	FALSE	29
2022-09-14	11:30:13	-0.954236	-4.24463	-4.28153	1662.92	FALSE	29
2022-09-14	11:30:13	-0.965635	-4.29534	-4.28153	1723.55	FALSE	29
2022-09-14	11:30:14	-0.770572	-3.42766	1.57951	1662.92	FALSE	29
2022-09-14	11:30:14	0.732481	3.25822	1.57951	1726.8	FALSE	29
2022-09-14	11:30:14	0.722914	3.21567	1.57951	1666.14	FALSE	29
2022-09-14	11:30:14	0.735534	3.2718	1.57951	1730.08	FALSE	29
2022-09-14	11:30:15	0.730954	3.25143	2.69263	1669.39	FALSE	29
2022-09-14	11:30:15	0.734568	3.26751	2.69263	1733.34	FALSE	29
2022-09-14	11:30:15	0.62729	2.79031	2.69263	1672.18	FALSE	29
2022-09-14	11:30:15	0.328511	1.46128	2.69263	1734.8	FALSE	29
2022-09-14	11:30:16	-0.0367809	-0.163609	-0.645253	1672.18	FALSE	29
2022-09-14	11:30:16	-0.152659	-0.679058	-0.645253	1734.8	FALSE	29
2022-09-14	11:30:16	-0.245738	-1.09309	-0.645253	1672.18	FALSE	29
2022-09-14	11:30:17	-0.489147	-2.17582	-2.44079	1734.8	FALSE	29
2022-09-14	11:30:17	-0.556119	-2.47373	-2.44079	1672.18	FALSE	29
2022-09-14	11:30:17	-0.565686	-2.51628	-2.44079	1734.8	FALSE	29
2022-09-14	11:30:17	-0.583905	-2.59733	-2.44079	1672.18	FALSE	29
2022-09-14	11:30:18	-0.396883	-1.76541	-3.01368	1734.8	FALSE	29
2022-09-14	11:30:18	-0.676271	-3.00819	-3.01368	1672.18	FALSE	29
2022-09-14	11:30:18	-0.775254	-3.44848	-3.01368	1734.8	FALSE	29
2022-09-14	11:30:18	-0.861615	-3.83264	-3.01368	1672.18	FALSE	29
2022-09-14	11:30:19	-0.949147	-4.222	-5.1607	1734.8	FALSE	29
2022-09-14	11:30:19	-1.07454	-4.77977	-5.1607	1672.18	FALSE	29
2022-09-14	11:30:19	-1.24095	-5.51999	-5.1607	1734.8	FALSE	29
2022-09-14	11:30:19	-1.37607	-6.12103	-5.1607	1672.18	FALSE	29
2022-09-14	11:30:20	-1.65902	-7.37965	-9.53086	1734.8	FALSE	29
2022-09-14	11:30:20	-2.34401	-10.4266	-9.53086	1672.18	FALSE	29
2022-09-14	11:30:20	-2.42487	-10.7863	-9.53086	1734.8	FALSE	29

## Sheet: KimChi_harness_202291411258 (3)
Date	Time	Lbs	Newtons	Total force x time	total steps > 13.345		**GoPro Fitting: 11:13
2022-09-14	11:25:20	0.11411	0.507584	0.507584	FALSE	0
2022-09-14	11:25:20	0.313295	1.3936	1.3936	FALSE	0
2022-09-14	11:25:20	0.27299	1.21431	1.7219	FALSE	0
2022-09-14	11:25:20	0.335738	1.49343	2.88703	FALSE	0
2022-09-14	11:25:21	0.388461	1.72795	3.44985	FALSE	0
2022-09-14	11:25:21	0.405865	1.80537	4.6924	FALSE	0
2022-09-14	11:25:21	0.40327	1.79383	5.24368	FALSE	0
2022-09-14	11:25:22	0.405611	1.80424	6.49664	FALSE	0
2022-09-14	11:25:22	0.385356	1.71414	6.95782	FALSE	0
2022-09-14	11:25:22	0.459351	2.04329	8.53992	FALSE	0
2022-09-14	11:25:22	0.403473	1.79473	8.75255	FALSE	0
2022-09-14	11:25:23	0.119046	0.52954	9.06946	FALSE	0
2022-09-14	11:25:23	0.107189	0.476798	9.22934	FALSE	0
2022-09-14	11:25:23	0.205967	0.916182	9.98564	FALSE	0
2022-09-14	11:25:23	0.279657	1.24397	10.4733	FALSE	0
2022-09-14	11:25:24	0.298893	1.32954	11.3152	FALSE	0
2022-09-14	11:25:24	0.288257	1.28222	11.7555	FALSE	0
2022-09-14	11:25:24	0.242659	1.0794	12.3946	FALSE	0
2022-09-14	11:25:24	0.283982	1.26321	13.0187	FALSE	0
2022-09-14	11:25:25	0.120267	0.534972	12.9295	FALSE	0
2022-09-14	11:25:25	0.316552	1.40809	14.4268	FALSE	0
2022-09-14	11:25:25	0.60103	2.6735	15.603	FALSE	0
2022-09-14	11:25:26	0.12098	0.538143	14.965	FALSE	0
2022-09-14	11:25:26	-0.407112	-1.81092	15.603	FALSE	0
2022-09-14	11:25:26	-0.546602	-2.4314	14.965	FALSE	0
2022-09-14	11:25:26	-0.54187	-2.41035	15.603	FALSE	0
2022-09-14	11:25:27	-0.286348	-1.27373	14.965	FALSE	0
2022-09-14	11:25:27	-0.162175	-0.721387	15.603	FALSE	0
2022-09-14	11:25:27	-0.245381	-1.0915	14.965	FALSE	0
2022-09-14	11:25:27	-0.0280786	-0.124899	15.603	FALSE	0
2022-09-14	11:25:28	-0.103702	-0.461287	14.965	FALSE	0
2022-09-14	11:25:28	0.00998751	0.0444264	15.6475	FALSE	0
2022-09-14	11:25:28	-0.207061	-0.921049	14.965	FALSE	0
2022-09-14	11:25:28	-0.257239	-1.14425	15.6475	FALSE	0
2022-09-14	11:25:29	-0.483142	-2.14911	14.965	FALSE	0
2022-09-14	11:25:29	-0.628892	-2.79744	15.6475	FALSE	0
2022-09-14	11:25:29	-0.477595	-2.12444	14.965	FALSE	0
2022-09-14	11:25:30	0.286578	1.27476	16.9222	FALSE	0
2022-09-14	11:25:30	0.398079	1.77074	16.7357	FALSE	0
2022-09-14	11:25:30	0.0068323	0.0303914	16.9526	FALSE	0
2022-09-14	11:25:30	-0.39673	-1.76473	16.7357	FALSE	0
2022-09-14	11:25:31	-0.756475	-3.36495	16.9526	FALSE	0
2022-09-14	11:25:31	-0.879121	-3.91051	16.7357	FALSE	0
2022-09-14	11:25:31	-0.898256	-3.99562	16.9526	FALSE	0
2022-09-14	11:25:31	-0.7036	-3.12975	16.7357	FALSE	0
2022-09-14	11:25:32	-0.532709	-2.3696	16.9526	FALSE	0
2022-09-14	11:25:32	-0.296984	-1.32104	16.7357	FALSE	0
2022-09-14	11:25:32	-0.101972	-0.453592	16.9526	FALSE	0
2022-09-14	11:25:32	-0.166959	-0.742667	16.7357	FALSE	0
2022-09-14	11:25:33	-0.0822262	-0.365759	16.9526	FALSE	0
2022-09-14	11:25:33	0.0166542	0.0740812	16.8098	FALSE	0
2022-09-14	11:25:33	0.146578	0.652008	17.6046	FALSE	0
2022-09-14	11:25:34	0.00713764	0.0317497	16.8415	FALSE	0
2022-09-14	11:25:34	0.617061	2.74481	20.3494	FALSE	0
2022-09-14	11:25:34	0.382659	1.70214	18.5437	FALSE	0
2022-09-14	11:25:34	1.32866	5.91015	26.2596	FALSE	0
2022-09-14	11:25:35	0.238944	1.06287	19.6066	FALSE	0
2022-09-14	11:25:35	0.276756	1.23107	27.4907	FALSE	0
2022-09-14	11:25:35	0.228003	1.0142	20.6208	FALSE	0
2022-09-14	11:25:35	0.323575	1.43933	28.93	FALSE	0
2022-09-14	11:25:36	0.62098	2.76224	23.383	FALSE	0
2022-09-14	11:25:36	0.428868	1.90769	30.8377	FALSE	0
2022-09-14	11:25:36	1.39106	6.18771	29.5707	FALSE	0
2022-09-14	11:25:36	0.454822	2.02314	32.8608	FALSE	0
2022-09-14	11:25:37	1.22032	5.42823	34.9989	FALSE	0
2022-09-14	11:25:37	0.319809	1.42257	34.2834	FALSE	0
2022-09-14	11:25:37	1.31029	5.82843	40.8274	FALSE	0
2022-09-14	11:25:38	1.40714	6.25924	40.5426	FALSE	0
2022-09-14	11:25:38	0.497163	2.21148	43.0389	FALSE	0
2022-09-14	11:25:38	0.860878	3.82936	44.372	FALSE	0
2022-09-14	11:25:38	0.332736	1.48008	44.5189	FALSE	0
2022-09-14	11:25:39	0.476603	2.12003	46.492	FALSE	0
2022-09-14	11:25:39	0.877723	3.90429	48.4232	FALSE	0
2022-09-14	11:25:39	0.252837	1.12467	47.6167	FALSE	0
2022-09-14	11:25:39	2.01365	8.95712	57.3803	FALSE	0
2022-09-14	11:25:40	0.656705	2.92116	50.5378	FALSE	0
2022-09-14	11:25:40	2.32459	10.3402	67.7206	FALSE	0
2022-09-14	11:25:40	0.522862	2.32579	52.8636	FALSE	0
2022-09-14	11:25:41	0.438232	1.94934	69.6699	FALSE	0
2022-09-14	11:25:41	0.351667	1.56429	54.4279	FALSE	0
2022-09-14	11:25:41	0.200013	0.889698	70.5596	FALSE	0
2022-09-14	11:25:41	1.63579	7.27632	61.7042	FALSE	0
2022-09-14	11:25:42	0.0971122	0.431974	70.9916	FALSE	0
2022-09-14	11:25:42	0.188766	0.839669	62.5439	FALSE	0
2022-09-14	11:25:42	0.177875	0.791224	71.7828	FALSE	0
2022-09-14	11:25:42	0.654771	2.91255	65.4565	FALSE	0
2022-09-14	11:25:43	0.73014	3.24781	75.0306	FALSE	0
2022-09-14	11:25:43	0.733702	3.26365	68.7201	FALSE	0
2022-09-14	11:25:43	0.724847	3.22426	78.2549	FALSE	0
2022-09-14	11:25:43	0.734008	3.26501	71.9851	FALSE	0
2022-09-14	11:25:44	0.723168	3.2168	81.4717	FALSE	0
2022-09-14	11:25:44	0.73014	3.24781	75.2329	FALSE	0
2022-09-14	11:25:44	0.729733	3.246	84.7177	FALSE	0
2022-09-14	11:25:45	0.72897	3.2426	78.4755	FALSE	0
2022-09-14	11:25:45	0.72327	3.21725	87.9349	FALSE	0
2022-09-14	11:25:45	0.73299	3.26049	81.736	FALSE	0
2022-09-14	11:25:45	0.730242	3.24826	91.1832	FALSE	0
2022-09-14	11:25:46	0.724695	3.22359	84.9596	FALSE	0
2022-09-14	11:25:46	0.731921	3.25573	94.4389	FALSE	0
2022-09-14	11:25:46	0.735229	3.27045	88.2301	FALSE	0
2022-09-14	11:25:46	0.731005	3.25166	97.6906	FALSE	0
2022-09-14	11:25:47	0.724288	3.22178	91.4518	FALSE	0
2022-09-14	11:25:47	0.728868	3.24215	100.933	FALSE	0
2022-09-14	11:25:47	0.732175	3.25686	94.7087	FALSE	0
2022-09-14	11:25:47	0.729835	3.24645	104.179	FALSE	0
2022-09-14	11:25:48	0.734262	3.26614	97.9748	FALSE	0
2022-09-14	11:25:48	0.733193	3.26139	107.441	FALSE	0
2022-09-14	11:25:48	0.728512	3.24057	101.215	FALSE	0
2022-09-14	11:25:49	0.731972	3.25596	110.697	FALSE	0
2022-09-14	11:25:49	0.728562	3.24079	104.456	FALSE	0
2022-09-14	11:25:49	0.732074	3.25641	113.953	FALSE	0
2022-09-14	11:25:49	0.736603	3.27656	107.733	FALSE	0
2022-09-14	11:25:50	0.727596	3.23649	117.189	FALSE	0
2022-09-14	11:25:50	0.725865	3.22879	110.962	FALSE	0
2022-09-14	11:25:50	0.729529	3.24509	120.435	FALSE	0
2022-09-14	11:25:50	0.727137	3.23445	114.196	FALSE	0
2022-09-14	11:25:51	0.730496	3.24939	123.684	FALSE	0
2022-09-14	11:25:51	0.727596	3.23649	117.432	FALSE	0
2022-09-14	11:25:51	0.939148	4.17752	127.861	FALSE	0
2022-09-14	11:25:51	1.30765	5.81669	123.249	FALSE	0
2022-09-14	11:25:52	1.41355	6.28775	134.149	FALSE	0
2022-09-14	11:25:52	0.996908	4.43445	127.684	FALSE	0
2022-09-14	11:25:52	0.725305	3.2263	137.375	FALSE	0
2022-09-14	11:25:53	0.726069	3.2297	130.913	FALSE	0
2022-09-14	11:25:53	0.729987	3.24713	140.623	FALSE	0
2022-09-14	11:25:53	0.731667	3.2546	134.168	FALSE	0
2022-09-14	11:25:53	0.73243	3.258	143.881	FALSE	0
2022-09-14	11:25:54	0.729377	3.24441	137.412	FALSE	0
2022-09-14	11:25:54	0.730496	3.24939	147.13	FALSE	0
2022-09-14	11:25:54	0.729478	3.24486	140.657	FALSE	0
2022-09-14	11:25:54	0.725916	3.22902	150.359	FALSE	0
2022-09-14	11:25:55	0.725	3.22494	143.882	FALSE	0
2022-09-14	11:25:55	0.729631	3.24554	153.605	FALSE	0
2022-09-14	11:25:55	0.726323	3.23083	147.113	FALSE	0
2022-09-14	11:25:55	0.73014	3.24781	156.852	FALSE	0
2022-09-14	11:25:56	0.727646	3.23671	150.35	FALSE	0
2022-09-14	11:25:56	0.730089	3.24758	160.1	FALSE	0
2022-09-14	11:25:56	0.728003	3.2383	153.588	FALSE	0
2022-09-14	11:25:57	0.732277	3.25731	163.357	FALSE	0
2022-09-14	11:25:57	0.727341	3.23536	156.823	FALSE	0
2022-09-14	11:25:57	0.72958	3.24532	166.603	FALSE	0
2022-09-14	11:25:57	0.727697	3.23694	160.06	FALSE	0
2022-09-14	11:25:58	0.729428	3.24464	169.847	FALSE	0
2022-09-14	11:25:58	0.732532	3.25845	163.319	FALSE	0
2022-09-14	11:25:58	0.730903	3.2512	173.098	FALSE	0
2022-09-14	11:25:58	0.73014	3.24781	166.567	FALSE	0
2022-09-14	11:25:59	0.731514	3.25392	176.352	FALSE	0
2022-09-14	11:25:59	0.728817	3.24192	169.808	FALSE	0
2022-09-14	11:25:59	0.73131	3.25301	179.605	FALSE	0
2022-09-14	11:25:59	0.732125	3.25664	173.065	FALSE	0
2022-09-14	11:26:00	0.84785	3.77141	183.377	FALSE	0
2022-09-14	11:26:00	0.220115	0.979116	174.044	FALSE	0
2022-09-14	11:26:00	-0.0304196	-0.135312	183.377	FALSE	0
2022-09-14	11:26:01	0.173092	0.769948	174.814	FALSE	0
2022-09-14	11:26:01	0.0306999	0.136559	183.513	FALSE	0
2022-09-14	11:26:01	0.289173	1.2863	176.1	FALSE	0
2022-09-14	11:26:01	0.524236	2.33191	185.845	FALSE	0
2022-09-14	11:26:02	0.348817	1.55161	177.652	FALSE	0
2022-09-14	11:26:02	0.286832	1.27589	187.121	FALSE	0
2022-09-14	11:26:02	1.13172	5.03412	182.686	FALSE	0
2022-09-14	11:26:02	0.631005	2.80684	189.928	FALSE	0
2022-09-14	11:26:03	1.10317	4.90712	187.593	FALSE	0
2022-09-14	11:26:03	3.26602	14.5279	204.456	1	1
2022-09-14	11:26:03	5.44373	24.2148	211.808	1	2
2022-09-14	11:26:03	1.93594	8.61145	213.067	FALSE	2
2022-09-14	11:26:04	1.27177	5.65709	217.465	FALSE	2
2022-09-14	11:26:04	0.857875	3.816	216.883	FALSE	2
2022-09-14	11:26:04	1.37044	6.09599	223.561	FALSE	2
2022-09-14	11:26:05	1.20347	5.35328	222.237	FALSE	2
2022-09-14	11:26:05	0.582099	2.58929	226.15	FALSE	2
2022-09-14	11:26:05	0.301336	1.3404	223.577	FALSE	2
2022-09-14	11:26:05	0.324339	1.44272	227.593	FALSE	2
2022-09-14	11:26:06	0.44159	1.96428	225.541	FALSE	2
2022-09-14	11:26:06	0.408155	1.81556	229.409	FALSE	2
2022-09-14	11:26:06	0.431565	1.91969	227.461	FALSE	2
2022-09-14	11:26:06	0.405102	1.80197	231.211	FALSE	2
2022-09-14	11:26:07	0.388054	1.72614	229.187	FALSE	2
2022-09-14	11:26:07	0.420267	1.86943	233.08	FALSE	2
2022-09-14	11:26:07	0.497875	2.21465	231.402	FALSE	2
2022-09-14	11:26:07	0.530344	2.35908	235.439	FALSE	2
2022-09-14	11:26:08	0.340878	1.51629	232.918	FALSE	2
2022-09-14	11:26:08	0.127189	0.565762	236.005	FALSE	2
2022-09-14	11:26:08	0.277265	1.23333	234.151	FALSE	2
2022-09-14	11:26:09	0.546628	2.43151	238.437	FALSE	2
2022-09-14	11:26:09	0.544593	2.42246	236.574	FALSE	2
2022-09-14	11:26:09	0.421947	1.8769	240.313	FALSE	2
2022-09-14	11:26:09	0.521489	2.31969	238.894	FALSE	2
2022-09-14	11:26:10	0.200064	0.889925	241.203	FALSE	2
2022-09-14	11:26:10	0.211769	0.941991	239.836	FALSE	2
2022-09-14	11:26:10	0.126883	0.564401	241.768	FALSE	2
2022-09-14	11:26:10	-0.0509794	-0.226767	239.836	FALSE	2
2022-09-14	11:26:11	-0.34243	-1.5232	241.768	FALSE	2
2022-09-14	11:26:11	-0.484974	-2.15726	239.836	FALSE	2
2022-09-14	11:26:11	-0.557799	-2.4812	241.768	FALSE	2
2022-09-14	11:26:11	-0.367162	-1.63321	239.836	FALSE	2
2022-09-14	11:26:12	-0.389503	-1.73259	241.768	FALSE	2
2022-09-14	11:26:12	-0.237493	-1.05642	239.836	FALSE	2
2022-09-14	11:26:12	-0.587569	-2.61362	241.768	FALSE	2
2022-09-14	11:26:13	-0.760343	-3.38216	239.836	FALSE	2
2022-09-14	11:26:13	-0.675254	-3.00366	241.768	FALSE	2
2022-09-14	11:26:13	-0.502887	-2.23694	239.836	FALSE	2
2022-09-14	11:26:13	-0.48131	-2.14096	241.768	FALSE	2
2022-09-14	11:26:14	-0.115763	-0.514937	239.836	FALSE	2
2022-09-14	11:26:14	-0.308333	-1.37153	241.768	FALSE	2
2022-09-14	11:26:14	-0.122226	-0.543686	239.836	FALSE	2
2022-09-14	11:26:14	-0.226857	-1.00911	241.768	FALSE	2
2022-09-14	11:26:15	-0.0633458	-0.281775	239.836	FALSE	2
2022-09-14	11:26:15	-0.0582058	-0.258911	241.768	FALSE	2
2022-09-14	11:26:15	0.197926	0.880414	240.716	FALSE	2
2022-09-14	11:26:15	0.430038	1.9129	243.681	FALSE	2
2022-09-14	11:26:16	0.456501	2.03061	242.747	FALSE	2
2022-09-14	11:26:16	1.3735	6.1096	249.79	FALSE	2
2022-09-14	11:26:16	0.298384	1.32727	244.074	FALSE	2
2022-09-14	11:26:17	1.22032	5.42823	255.218	FALSE	2
2022-09-14	11:26:17	0.0552292	0.245671	244.319	FALSE	2
2022-09-14	11:26:17	-0.163142	-0.725688	255.218	FALSE	2
2022-09-14	11:26:17	-0.310267	-1.38013	244.319	FALSE	2
2022-09-14	11:26:18	-0.222684	-0.990543	255.218	FALSE	2
2022-09-14	11:26:18	-0.22131	-0.984431	244.319	FALSE	2
2022-09-14	11:26:18	-0.253269	-1.12659	255.218	FALSE	2
2022-09-14	11:26:18	-0.237951	-1.05845	244.319	FALSE	2
2022-09-14	11:26:19	-0.113982	-0.507015	255.218	FALSE	2
2022-09-14	11:26:19	-0.0100634	-0.044764	244.319	FALSE	2
2022-09-14	11:26:19	0.0880027	0.391454	255.61	FALSE	2
2022-09-14	11:26:19	0.216909	0.964855	245.284	FALSE	2
2022-09-14	11:26:20	0.310293	1.38025	256.99	FALSE	2
2022-09-14	11:26:20	0.312583	1.39043	246.675	FALSE	2
2022-09-14	11:26:20	0.640623	2.84962	259.84	FALSE	2
2022-09-14	11:26:21	0.734364	3.2666	249.941	FALSE	2
2022-09-14	11:26:21	0.730852	3.25098	263.091	FALSE	2
2022-09-14	11:26:21	0.681031	3.02936	252.971	FALSE	2
2022-09-14	11:26:21	0.642201	2.85664	265.947	FALSE	2
2022-09-14	11:26:22	-0.294898	-1.31177	252.971	FALSE	2
2022-09-14	11:26:22	-0.401208	-1.78465	265.947	FALSE	2
2022-09-14	11:26:22	-0.419427	-1.8657	252.971	FALSE	2
2022-09-14	11:26:22	-0.207366	-0.922405	265.947	FALSE	2
2022-09-14	11:26:23	-0.141463	-0.629256	252.971	FALSE	2
2022-09-14	11:26:23	0.0187916	0.0835888	266.031	FALSE	2
2022-09-14	11:26:23	0.127138	0.565535	253.536	FALSE	2
2022-09-14	11:26:23	0.00321909	0.0143192	266.045	FALSE	2
2022-09-14	11:26:24	-0.210776	-0.937574	253.536	FALSE	2
2022-09-14	11:26:24	-0.258002	-1.14764	266.045	FALSE	2
2022-09-14	11:26:24	-0.209198	-0.930555	253.536	FALSE	2
2022-09-14	11:26:25	-0.412608	-1.83536	266.045	FALSE	2
2022-09-14	11:26:25	-0.314643	-1.39959	253.536	FALSE	2
2022-09-14	11:26:25	-0.15785	-0.702148	266.045	FALSE	2
2022-09-14	11:26:25	3.30225	14.6891	268.225	1	3
2022-09-14	11:26:26	1.96434	8.73778	274.783	FALSE	3
2022-09-14	11:26:26	1.3336	5.93212	274.157	FALSE	3
2022-09-14	11:26:26	0.988562	4.39732	279.18	FALSE	3
2022-09-14	11:26:26	0.375229	1.66909	275.827	FALSE	3
2022-09-14	11:26:27	0.456501	2.03061	281.211	FALSE	3
2022-09-14	11:26:27	0.169224	0.752742	276.579	FALSE	3
2022-09-14	11:26:27	0.173601	0.772212	281.983	FALSE	3
2022-09-14	11:26:27	-0.0680786	-0.302827	276.579	FALSE	3
2022-09-14	11:26:28	0.0633717	0.28189	282.265	FALSE	3
2022-09-14	11:26:28	-0.0691473	-0.307581	276.579	FALSE	3
2022-09-14	11:26:28	0.0377229	0.167799	282.433	FALSE	3
2022-09-14	11:26:29	-0.17902	-0.796317	276.579	FALSE	3
2022-09-14	11:26:29	-0.0645671	-0.287207	282.433	FALSE	3
2022-09-14	11:26:29	-0.124262	-0.552742	276.579	FALSE	3
2022-09-14	11:26:29	-0.0526588	-0.234237	282.433	FALSE	3
2022-09-14	11:26:30	-0.130725	-0.581491	276.579	FALSE	3
2022-09-14	11:26:30	-0.0379005	-0.168589	282.433	FALSE	3
2022-09-14	11:26:30	-0.00548322	-0.0243905	276.579	FALSE	3
2022-09-14	11:26:30	-0.0161702	-0.0719283	282.433	FALSE	3
2022-09-14	11:26:31	0.0582827	0.259253	276.839	FALSE	3
2022-09-14	11:26:31	-0.164109	-0.72999	282.433	FALSE	3
2022-09-14	11:26:31	-0.369402	-1.64317	276.839	FALSE	3
2022-09-14	11:26:31	-0.284262	-1.26445	282.433	FALSE	3
2022-09-14	11:26:32	-0.328231	-1.46004	276.839	FALSE	3
2022-09-14	11:26:32	-0.233829	-1.04012	282.433	FALSE	3
2022-09-14	11:26:32	-0.158562	-0.705315	276.839	FALSE	3
2022-09-14	11:26:33	-0.193676	-0.86151	282.433	FALSE	3
2022-09-14	11:26:33	-0.220598	-0.981264	276.839	FALSE	3
2022-09-14	11:26:33	-0.171285	-0.76191	282.433	FALSE	3
2022-09-14	11:26:33	-0.16472	-0.732708	276.839	FALSE	3
2022-09-14	11:26:34	-0.198104	-0.881206	282.433	FALSE	3
2022-09-14	11:26:34	-0.127621	-0.567684	276.839	FALSE	3
2022-09-14	11:26:34	-0.0973407	-0.432991	282.433	FALSE	3
2022-09-14	11:26:34	-0.17617	-0.783639	276.839	FALSE	3
2022-09-14	11:26:35	-0.126297	-0.561794	282.433	FALSE	3
2022-09-14	11:26:35	-0.161361	-0.717766	276.839	FALSE	3
2022-09-14	11:26:35	-0.0867045	-0.385679	282.433	FALSE	3
2022-09-14	11:26:35	0.0369595	0.164403	277.003	FALSE	3
2022-09-14	11:26:36	-0.0280277	-0.124673	282.433	FALSE	3
2022-09-14	11:26:36	0.130038	0.578435	277.581	FALSE	3
2022-09-14	11:26:36	0.0185371	0.0824567	282.515	FALSE	3
2022-09-14	11:26:37	0.208308	0.926596	278.508	FALSE	3
2022-09-14	11:26:37	0.0696821	0.30996	282.825	FALSE	3
2022-09-14	11:26:37	0.0566542	0.252009	278.76	FALSE	3
2022-09-14	11:26:37	-0.0438038	-0.194848	282.825	FALSE	3
2022-09-14	11:26:38	-0.0268572	-0.119466	278.76	FALSE	3
2022-09-14	11:26:38	-0.0364247	-0.162024	282.825	FALSE	3
2022-09-14	11:26:38	-0.00996157	-0.0443111	278.76	FALSE	3
2022-09-14	11:26:38	-0.13785	-0.613184	282.825	FALSE	3
2022-09-14	11:26:39	0.878588	3.90814	282.668	FALSE	3
2022-09-14	11:26:39	0.180674	0.803674	283.629	FALSE	3
2022-09-14	11:26:39	0.239199	1.064	283.732	FALSE	3
2022-09-14	11:26:39	0.601285	2.67464	286.304	FALSE	3
2022-09-14	11:26:40	0.169835	0.75546	284.488	FALSE	3
2022-09-14	11:26:40	0.114008	0.50713	286.811	FALSE	3
2022-09-14	11:26:40	0.142812	0.635256	285.123	FALSE	3
2022-09-14	11:26:41	0.0315142	0.140181	286.951	FALSE	3
2022-09-14	11:26:41	-0.0387657	-0.172438	285.123	FALSE	3
2022-09-14	11:26:41	0.101285	0.450536	287.402	FALSE	3
2022-09-14	11:26:41	0.155789	0.692981	285.816	FALSE	3
2022-09-14	11:26:42	0.229936	1.0228	288.424	FALSE	3
2022-09-14	11:26:42	0.200318	0.891055	286.707	FALSE	3
2022-09-14	11:26:42	0.228919	1.01828	289.443	FALSE	3
2022-09-14	11:26:42	0.189936	0.844873	287.552	FALSE	3
2022-09-14	11:26:43	-0.092557	-0.411712	289.443	FALSE	3
2022-09-14	11:26:43	-0.072557	-0.322748	287.552	FALSE	3
2022-09-14	11:26:43	-0.0317427	-0.141198	289.443	FALSE	3
2022-09-14	11:26:43	-0.106043	-0.4717	287.552	FALSE	3
2022-09-14	11:26:44	-0.201259	-0.89524	289.443	FALSE	3
2022-09-14	11:26:44	-0.130572	-0.58081	287.552	FALSE	3
2022-09-14	11:26:44	-0.059071	-0.26276	289.443	FALSE	3
2022-09-14	11:26:45	0.0155346	0.069101	287.621	FALSE	3
2022-09-14	11:26:45	0.134313	0.597451	290.04	FALSE	3
2022-09-14	11:26:45	0.158741	0.706112	288.327	FALSE	3
2022-09-14	11:26:45	0.191565	0.852119	290.892	FALSE	3
2022-09-14	11:26:46	0.189631	0.843517	289.17	FALSE	3
2022-09-14	11:26:46	0.213143	0.948103	291.84	FALSE	3
2022-09-14	11:26:46	0.180216	0.801637	289.972	FALSE	3
2022-09-14	11:26:46	-0.00884198	-0.0393309	291.84	FALSE	3
2022-09-14	11:26:47	0.147646	0.656759	290.629	FALSE	3
2022-09-14	11:26:47	0.273753	1.21771	293.058	FALSE	3
2022-09-14	11:26:47	0.216654	0.96372	291.593	FALSE	3
2022-09-14	11:26:48	0.200624	0.892416	293.95	FALSE	3
2022-09-14	11:26:48	0.190496	0.847364	292.44	FALSE	3
2022-09-14	11:26:48	0.221234	0.984093	294.934	FALSE	3
2022-09-14	11:26:48	0.231311	1.02892	293.469	FALSE	3
2022-09-14	11:26:49	0.269733	1.19983	296.134	FALSE	3
2022-09-14	11:26:49	0.25472	1.13305	294.602	FALSE	3
2022-09-14	11:26:49	0.313702	1.39541	297.53	FALSE	3
2022-09-14	11:26:49	0.290395	1.29174	295.894	FALSE	3
2022-09-14	11:26:50	0.393957	1.7524	299.282	FALSE	3
2022-09-14	11:26:50	0.404746	1.80039	297.694	FALSE	3
2022-09-14	11:26:50	0.198232	0.881776	300.164	FALSE	3
2022-09-14	11:26:50	0.292634	1.30169	298.996	FALSE	3
2022-09-14	11:26:51	0.261285	1.16225	301.326	FALSE	3
2022-09-14	11:26:51	0.149733	0.666042	299.662	FALSE	3
2022-09-14	11:26:51	0.367138	1.6331	302.959	FALSE	3
2022-09-14	11:26:52	0.325763	1.44906	301.111	FALSE	3
2022-09-14	11:26:52	0.358995	1.59688	304.556	FALSE	3
2022-09-14	11:26:52	0.334822	1.48936	302.6	FALSE	3
2022-09-14	11:26:52	0.363321	1.61612	306.172	FALSE	3
2022-09-14	11:26:53	0.339809	1.51154	304.112	FALSE	3
2022-09-14	11:26:53	0.382761	1.7026	307.875	FALSE	3
2022-09-14	11:26:53	0.33472	1.4889	305.601	FALSE	3
2022-09-14	11:26:53	0.357061	1.58828	309.463	FALSE	3
2022-09-14	11:26:54	0.334211	1.48664	307.087	FALSE	3
2022-09-14	11:26:54	0.341794	1.52037	310.983	FALSE	3
2022-09-14	11:26:54	0.402354	1.78975	308.877	FALSE	3
2022-09-14	11:26:54	0.254771	1.13327	312.117	FALSE	3
2022-09-14	11:26:55	0.231056	1.02778	309.905	FALSE	3
2022-09-14	11:26:55	0.431819	1.92082	314.038	FALSE	3
2022-09-14	11:26:55	0.215992	0.960776	310.866	FALSE	3
2022-09-14	11:26:56	0.292227	1.29988	315.337	FALSE	3
2022-09-14	11:26:56	0.274008	1.21884	312.084	FALSE	3
2022-09-14	11:26:56	0.287901	1.28064	316.618	FALSE	3
2022-09-14	11:26:56	0.325712	1.44883	313.533	FALSE	3
2022-09-14	11:26:57	0.249733	1.11086	317.729	FALSE	3
2022-09-14	11:26:57	0.451667	2.00911	315.542	FALSE	3
2022-09-14	11:26:57	0.322506	1.43457	319.164	FALSE	3
2022-09-14	11:26:57	0.434822	1.93418	317.477	FALSE	3
2022-09-14	11:26:58	0.402456	1.7902	320.954	FALSE	3
2022-09-14	11:26:58	0.553906	2.46388	319.94	FALSE	3
2022-09-14	11:26:58	0.559148	2.4872	323.441	FALSE	3
2022-09-14	11:26:58	1.21971	5.42551	325.366	FALSE	3
2022-09-14	11:26:59	1.06816	4.75139	328.192	FALSE	3
2022-09-14	11:26:59	2.03421	9.04857	334.415	FALSE	3
2022-09-14	11:26:59	0.284847	1.26706	329.459	FALSE	3
2022-09-14	11:27:00	0.0905982	0.402999	334.818	FALSE	3
2022-09-14	11:27:00	0.400166	1.78002	331.239	FALSE	3
2022-09-14	11:27:00	0.172481	0.76723	335.585	FALSE	3
2022-09-14	11:27:00	0.371158	1.65099	332.89	FALSE	3
2022-09-14	11:27:01	0.234262	1.04204	336.627	FALSE	3
2022-09-14	11:27:01	0.417875	1.85879	334.749	FALSE	3
2022-09-14	11:27:01	0.56729	2.52342	339.15	FALSE	3
2022-09-14	11:27:01	0.532532	2.36881	337.118	FALSE	3
2022-09-14	11:27:02	0.28612	1.27272	340.423	FALSE	3
2022-09-14	11:27:02	0.429886	1.91222	339.03	FALSE	3
2022-09-14	11:27:02	0.312125	1.38839	341.811	FALSE	3
2022-09-14	11:27:02	0.354211	1.5756	340.606	FALSE	3
2022-09-14	11:27:03	0.37869	1.68449	343.496	FALSE	3
2022-09-14	11:27:03	0.477112	2.12229	342.728	FALSE	3
2022-09-14	11:27:03	0.533092	2.3713	345.867	FALSE	3
2022-09-14	11:27:04	0.429428	1.91018	344.638	FALSE	3
2022-09-14	11:27:04	0.382964	1.7035	347.571	FALSE	3
2022-09-14	11:27:04	0.311361	1.385	346.023	FALSE	3
2022-09-14	11:27:04	0.26668	1.18625	348.757	FALSE	3
2022-09-14	11:27:05	0.414771	1.84498	347.868	FALSE	3
2022-09-14	11:27:05	0.425713	1.89366	350.651	FALSE	3
2022-09-14	11:27:05	1.25289	5.57311	353.441	FALSE	3
2022-09-14	11:27:05	1.26261	5.61634	356.267	FALSE	3
2022-09-14	11:27:06	0.909784	4.0469	357.488	FALSE	3
2022-09-14	11:27:06	0.342914	1.52535	357.792	FALSE	3
2022-09-14	11:27:06	0.487392	2.16802	359.656	FALSE	3
2022-09-14	11:27:06	0.242863	1.0803	358.873	FALSE	3
2022-09-14	11:27:07	0.489631	2.17798	361.834	FALSE	3
2022-09-14	11:27:07	0.224237	0.997451	359.87	FALSE	3
2022-09-14	11:27:07	0.432786	1.92512	363.759	FALSE	3
2022-09-14	11:27:08	0.352328	1.56723	361.437	FALSE	3
2022-09-14	11:27:08	0.624847	2.77944	366.539	FALSE	3
2022-09-14	11:27:08	0.660776	2.93926	364.376	FALSE	3
2022-09-14	11:27:08	0.399555	1.7773	368.316	FALSE	3
2022-09-14	11:27:09	0.800929	3.56269	367.939	FALSE	3
2022-09-14	11:27:09	0.473804	2.10757	370.424	FALSE	3
2022-09-14	11:27:09	0.98215	4.3688	372.308	FALSE	3
2022-09-14	11:27:09	0.290038	1.29015	371.714	FALSE	3
2022-09-14	11:27:10	0.467545	2.07973	374.388	FALSE	3
2022-09-14	11:27:10	0.266476	1.18534	372.899	FALSE	3
2022-09-14	11:27:10	1.20067	5.34082	379.728	FALSE	3
2022-09-14	11:27:10	1.81447	8.07113	380.97	FALSE	3
2022-09-14	11:27:11	3.24123	14.4176	394.146	1	4
2022-09-14	11:27:11	3.74566	16.6614	397.632	1	5
2022-09-14	11:27:11	0.917214	4.07995	398.226	FALSE	5
2022-09-14	11:27:12	0.854313	3.80016	401.432	FALSE	5
2022-09-14	11:27:12	0.703372	3.12874	401.355	FALSE	5
2022-09-14	11:27:12	0.642354	2.85732	404.289	FALSE	5
2022-09-14	11:27:12	1.12256	4.99337	406.348	FALSE	5
2022-09-14	11:27:13	0.376603	1.67521	405.964	FALSE	5
2022-09-14	11:27:13	0.362965	1.61454	407.963	FALSE	5
2022-09-14	11:27:13	0.262354	1.167	407.131	FALSE	5
2022-09-14	11:27:13	0.429936	1.91244	409.875	FALSE	5
2022-09-14	11:27:14	0.148664	0.661287	407.793	FALSE	5
2022-09-14	11:27:14	0.453295	2.01635	411.892	FALSE	5
2022-09-14	11:27:14	0.208919	0.929313	408.722	FALSE	5
2022-09-14	11:27:14	0.434008	1.93055	413.822	FALSE	5
2022-09-14	11:27:15	0.322048	1.43253	410.155	FALSE	5
2022-09-14	11:27:15	0.449326	1.99869	415.821	FALSE	5
2022-09-14	11:27:15	0.333855	1.48505	411.64	FALSE	5
2022-09-14	11:27:16	0.352125	1.56632	417.387	FALSE	5
2022-09-14	11:27:16	0.341387	1.51856	413.158	FALSE	5
2022-09-14	11:27:16	0.19299	0.858458	418.246	FALSE	5
2022-09-14	11:27:16	1.9193	8.53743	421.696	FALSE	5
2022-09-14	11:27:17	1.39452	6.2031	424.449	FALSE	5
2022-09-14	11:27:17	3.0965	13.7739	435.469	1	6
2022-09-14	11:27:17	1.07899	4.79956	429.248	FALSE	6
2022-09-14	11:27:17	2.31869	10.314	445.783	FALSE	6
2022-09-14	11:27:18	0.381692	1.69784	430.946	FALSE	6
2022-09-14	11:27:18	0.329784	1.46695	447.25	FALSE	6
2022-09-14	11:27:18	0.413906	1.84114	432.787	FALSE	6
2022-09-14	11:27:18	0.298232	1.3266	448.577	FALSE	6
2022-09-14	11:27:19	0.351056	1.56157	434.349	FALSE	6
2022-09-14	11:27:19	0.197112	0.876794	449.454	FALSE	6
2022-09-14	11:27:19	0.404542	1.79948	436.148	FALSE	6
2022-09-14	11:27:20	0.139046	0.618504	450.072	FALSE	6
2022-09-14	11:27:20	0.297214	1.32207	437.47	FALSE	6
2022-09-14	11:27:20	0.25925	1.1532	451.226	FALSE	6
2022-09-14	11:27:20	0.395992	1.76145	439.232	FALSE	6
2022-09-14	11:27:21	0.238282	1.05993	452.285	FALSE	6
2022-09-14	11:27:21	0.278028	1.23672	440.468	FALSE	6
2022-09-14	11:27:21	0.316756	1.40899	453.694	FALSE	6
2022-09-14	11:27:21	0.367036	1.63265	442.101	FALSE	6
2022-09-14	11:27:22	0.275585	1.22586	454.92	FALSE	6
2022-09-14	11:27:22	0.275891	1.22722	443.328	FALSE	6
2022-09-14	11:27:22	0.438079	1.94866	456.869	FALSE	6
2022-09-14	11:27:22	0.208054	0.925466	444.254	FALSE	6
2022-09-14	11:27:23	0.373346	1.66072	458.53	FALSE	6
2022-09-14	11:27:23	0.245763	1.0932	445.347	FALSE	6
2022-09-14	11:27:23	0.562404	2.50169	461.031	FALSE	6
2022-09-14	11:27:24	0.175942	0.782625	446.13	FALSE	6
2022-09-14	11:27:24	0.408308	1.81624	462.848	FALSE	6
2022-09-14	11:27:24	0.307137	1.36621	447.496	FALSE	6
2022-09-14	11:27:24	0.325916	1.44974	464.297	FALSE	6
2022-09-14	11:27:25	0.364135	1.61975	449.116	FALSE	6
2022-09-14	11:27:25	0.621641	2.76518	467.063	FALSE	6
2022-09-14	11:27:25	0.470802	2.09422	451.21	FALSE	6
2022-09-14	11:27:25	0.571463	2.54198	469.604	FALSE	6
2022-09-14	11:27:26	0.538079	2.39348	453.603	FALSE	6
2022-09-14	11:27:26	0.77874	3.46399	473.068	FALSE	6
2022-09-14	11:27:26	0.606476	2.69773	456.301	FALSE	6
2022-09-14	11:27:26	0.883117	3.92828	476.997	FALSE	6
2022-09-14	11:27:27	1.25793	5.59552	461.897	FALSE	6
2022-09-14	11:27:27	2.19024	9.74263	486.739	FALSE	6
2022-09-14	11:27:27	2.67563	11.9017	473.798	FALSE	6
2022-09-14	11:27:28	2.53075	11.2573	497.997	FALSE	6
2022-09-14	11:27:28	1.78607	7.9448	481.743	FALSE	6
2022-09-14	11:27:28	1.4136	6.28798	504.285	FALSE	6
2022-09-14	11:27:28	1.23218	5.48098	487.224	FALSE	6
2022-09-14	11:27:29	1.1478	5.10564	509.39	FALSE	6
2022-09-14	11:27:29	1.14989	5.11494	492.339	FALSE	6
2022-09-14	11:27:29	1.18785	5.28379	514.674	FALSE	6
2022-09-14	11:27:29	1.26042	5.6066	497.946	FALSE	6
2022-09-14	11:27:30	0.869275	3.86671	518.541	FALSE	6
2022-09-14	11:27:30	0.710903	3.16224	501.108	FALSE	6
2022-09-14	11:27:30	0.553855	2.46366	521.004	FALSE	6
2022-09-14	11:27:30	0.547392	2.43491	503.543	FALSE	6
2022-09-14	11:27:31	0.417163	1.85562	522.86	FALSE	6
2022-09-14	11:27:31	0.549071	2.44238	505.985	FALSE	6
2022-09-14	11:27:31	0.558028	2.48222	525.342	FALSE	6
2022-09-14	11:27:32	0.50958	2.26671	508.252	FALSE	6
2022-09-14	11:27:32	0.458537	2.03966	527.382	FALSE	6
2022-09-14	11:27:32	0.452481	2.01273	510.265	FALSE	6
2022-09-14	11:27:32	0.431718	1.92037	529.302	FALSE	6
2022-09-14	11:27:33	0.461692	2.0537	512.318	FALSE	6
2022-09-14	11:27:33	0.460369	2.04781	531.35	FALSE	6
2022-09-14	11:27:33	0.486221	2.16281	514.481	FALSE	6
2022-09-14	11:27:33	0.496959	2.21057	533.561	FALSE	6
2022-09-14	11:27:34	0.481539	2.14198	516.623	FALSE	6
2022-09-14	11:27:34	0.471209	2.09603	535.657	FALSE	6
2022-09-14	11:27:34	0.46159	2.05324	518.676	FALSE	6
2022-09-14	11:27:34	0.454517	2.02178	537.679	FALSE	6
2022-09-14	11:27:35	0.471718	2.0983	520.775	FALSE	6
2022-09-14	11:27:35	0.557061	2.47792	540.156	FALSE	6
2022-09-14	11:27:35	0.665254	2.95918	523.734	FALSE	6
2022-09-14	11:27:36	0.764389	3.40016	543.557	FALSE	6
2022-09-14	11:27:36	0.794567	3.53439	527.268	FALSE	6
2022-09-14	11:27:36	0.748359	3.32885	546.885	FALSE	6
2022-09-14	11:27:36	0.720827	3.20638	530.475	FALSE	6
2022-09-14	11:27:37	0.724135	3.2211	550.107	FALSE	6
2022-09-14	11:27:37	0.836552	3.72115	534.196	FALSE	6
2022-09-14	11:27:37	1.09375	4.86522	554.972	FALSE	6
2022-09-14	11:27:37	2.51365	11.1812	545.377	FALSE	6
2022-09-14	11:27:38	3.21976	14.3221	569.294	1	7
2022-09-14	11:27:38	0.466985	2.07724	547.454	FALSE	7
2022-09-14	11:27:38	0.345713	1.5378	570.832	FALSE	7
2022-09-14	11:27:38	0.190853	0.848952	548.303	FALSE	7
2022-09-14	11:27:39	0.395992	1.76145	572.593	FALSE	7
2022-09-14	11:27:39	0.576959	2.56643	550.87	FALSE	7
2022-09-14	11:27:39	0.492328	2.18997	574.783	FALSE	7
2022-09-14	11:27:40	0.0103437	0.0460108	550.916	FALSE	7
2022-09-14	11:27:40	0.0922776	0.410469	575.194	FALSE	7
2022-09-14	11:27:40	0.090191	0.401188	551.317	FALSE	7
2022-09-14	11:27:40	0.585407	2.60401	577.798	FALSE	7
2022-09-14	11:27:41	0.360471	1.60345	552.92	FALSE	7
2022-09-14	11:27:41	1.40052	6.22979	584.027	FALSE	7
2022-09-14	11:27:41	0.316807	1.40922	554.329	FALSE	7
2022-09-14	11:27:41	1.17177	5.21227	589.24	FALSE	7
2022-09-14	11:27:42	0.293804	1.3069	555.636	FALSE	7
2022-09-14	11:27:42	0.486679	2.16485	591.405	FALSE	7
2022-09-14	11:27:42	0.538486	2.39529	558.032	FALSE	7
2022-09-14	11:27:42	0.458079	2.03763	593.442	FALSE	7
2022-09-14	11:27:43	0.282201	1.25529	559.287	FALSE	7
2022-09-14	11:27:43	0.118893	0.52886	593.971	FALSE	7
2022-09-14	11:27:43	-0.0960175	-0.427105	559.287	FALSE	7
2022-09-14	11:27:44	-0.306348	-1.3627	593.971	FALSE	7
2022-09-14	11:27:44	-0.534541	-2.37775	559.287	FALSE	7
2022-09-14	11:27:44	-0.410572	-1.82631	593.971	FALSE	7
2022-09-14	11:27:44	-0.274694	-1.22189	559.287	FALSE	7
2022-09-14	11:27:45	-0.251844	-1.12025	593.971	FALSE	7
2022-09-14	11:27:45	-0.170623	-0.758965	559.287	FALSE	7
2022-09-14	11:27:45	-0.12304	-0.547307	593.971	FALSE	7
2022-09-14	11:27:45	-0.173931	-0.77368	559.287	FALSE	7
2022-09-14	11:27:46	-0.179936	-0.800391	593.971	FALSE	7
2022-09-14	11:27:46	-0.113626	-0.505431	559.287	FALSE	7
2022-09-14	11:27:46	-0.145076	-0.645327	593.971	FALSE	7
2022-09-14	11:27:46	-0.0798852	-0.355345	559.287	FALSE	7
2022-09-14	11:27:47	-0.0712338	-0.316862	593.971	FALSE	7
2022-09-14	11:27:47	1.13854	5.06445	564.351	FALSE	7
2022-09-14	11:27:47	0.362507	1.6125	595.584	FALSE	7
2022-09-14	11:27:48	2.31401	10.2932	574.645	FALSE	7
2022-09-14	11:27:48	0.718842	3.19755	598.781	FALSE	7
2022-09-14	11:27:48	1.40184	6.23566	580.88	FALSE	7
2022-09-14	11:27:48	0.529224	2.35409	601.135	FALSE	7
2022-09-14	11:27:49	0.222659	0.990432	581.871	FALSE	7
2022-09-14	11:27:49	0.370242	1.64691	602.782	FALSE	7
2022-09-14	11:27:49	0.282964	1.25868	583.129	FALSE	7
2022-09-14	11:27:49	0.344644	1.53305	604.315	FALSE	7
2022-09-14	11:27:50	0.192277	0.855287	583.985	FALSE	7
2022-09-14	11:27:50	0.331107	1.47283	605.788	FALSE	7
2022-09-14	11:27:50	0.443575	1.97311	585.958	FALSE	7
2022-09-14	11:27:50	0.906577	4.03264	609.821	FALSE	7
2022-09-14	11:27:51	2.96943	13.2086	599.166	FALSE	7
2022-09-14	11:27:51	1.65431	7.3587	617.179	FALSE	7
2022-09-14	11:27:51	4.63813	20.6313	619.798	1	8
2022-09-14	11:27:52	1.36805	6.08536	623.265	FALSE	8
2022-09-14	11:27:52	2.04571	9.09973	628.897	FALSE	8
2022-09-14	11:27:52	1.59782	7.10742	630.372	FALSE	8
2022-09-14	11:27:52	0.721743	3.21046	632.108	FALSE	8
2022-09-14	11:27:53	0.753448	3.35149	633.724	FALSE	8
2022-09-14	11:27:53	0.222761	0.990885	633.099	FALSE	8
2022-09-14	11:27:53	1.20383	5.35488	639.078	FALSE	8
2022-09-14	11:27:53	0.455026	2.02405	635.123	FALSE	8
2022-09-14	11:27:54	3.78999	16.8586	655.937	1	9
2022-09-14	11:27:54	1.14581	5.09679	640.22	FALSE	9
2022-09-14	11:27:54	3.28999	14.6345	670.572	1	10
2022-09-14	11:27:54	0.836552	3.72115	643.941	FALSE	10
2022-09-14	11:27:55	1.57477	7.00489	677.576	FALSE	10
2022-09-14	11:27:55	0.770547	3.42755	647.368	FALSE	10
2022-09-14	11:27:55	0.267087	1.18806	678.765	FALSE	10
2022-09-14	11:27:56	1.05385	4.68774	652.056	FALSE	10
2022-09-14	11:27:56	0.303321	1.34923	680.114	FALSE	10
2022-09-14	11:27:56	3.64653	16.2205	668.277	1	11
2022-09-14	11:27:56	0.711921	3.16677	683.281	FALSE	11
2022-09-14	11:27:57	1.33879	5.95521	674.232	FALSE	11
2022-09-14	11:27:57	0.658893	2.93089	686.211	FALSE	11
2022-09-14	11:27:57	0.412277	1.83389	676.066	FALSE	11
2022-09-14	11:27:57	0.314771	1.40016	687.612	FALSE	11
2022-09-14	11:27:58	0.332837	1.48053	677.546	FALSE	11
2022-09-14	11:27:58	0.215534	0.958738	688.57	FALSE	11
2022-09-14	11:27:58	0.248308	1.10452	678.651	FALSE	11
2022-09-14	11:27:58	0.253499	1.12761	689.698	FALSE	11
2022-09-14	11:27:59	0.334415	1.48754	680.138	FALSE	11
2022-09-14	11:27:59	0.324542	1.44363	691.142	FALSE	11
2022-09-14	11:27:59	0.760572	3.38318	683.521	FALSE	11
2022-09-14	11:28:00	1.72933	7.69241	698.834	FALSE	11
2022-09-14	11:28:00	1.38072	6.14172	689.663	FALSE	11
2022-09-14	11:28:00	1.72963	7.69374	706.528	FALSE	11
2022-09-14	11:28:00	0.810445	3.60502	693.268	FALSE	11
2022-09-14	11:28:01	0.49584	2.2056	708.733	FALSE	11
2022-09-14	11:28:01	0.39299	1.7481	695.016	FALSE	11
2022-09-14	11:28:01	0.667392	2.96869	711.702	FALSE	11
2022-09-14	11:28:01	1.18205	5.25799	700.274	FALSE	11
2022-09-14	11:28:02	1.071	4.76402	716.466	FALSE	11
2022-09-14	11:28:02	0.893295	3.97355	704.248	FALSE	11
2022-09-14	11:28:02	0.605204	2.69207	719.158	FALSE	11
2022-09-14	11:28:02	0.59187	2.63276	706.881	FALSE	11
2022-09-14	11:28:03	0.525153	2.33599	721.494	FALSE	11
2022-09-14	11:28:03	0.483015	2.14855	709.029	FALSE	11
2022-09-14	11:28:03	0.402863	1.79202	723.286	FALSE	11
2022-09-14	11:28:04	0.311361	1.385	710.414	FALSE	11
2022-09-14	11:28:04	0.417112	1.8554	725.141	FALSE	11
2022-09-14	11:28:04	0.435382	1.93667	712.351	FALSE	11
2022-09-14	11:28:04	0.434822	1.93418	727.076	FALSE	11
2022-09-14	11:28:05	0.423931	1.88573	714.236	FALSE	11
2022-09-14	11:28:05	0.424491	1.88822	728.964	FALSE	11
2022-09-14	11:28:05	0.423066	1.88188	716.118	FALSE	11
2022-09-14	11:28:05	0.423524	1.88392	730.848	FALSE	11
2022-09-14	11:28:06	0.411667	1.83118	717.95	FALSE	11
2022-09-14	11:28:06	0.406679	1.80899	732.657	FALSE	11
2022-09-14	11:28:06	0.385	1.71256	719.662	FALSE	11
2022-09-14	11:28:06	0.399758	1.7782	734.435	FALSE	11
2022-09-14	11:28:07	0.349529	1.55477	721.217	FALSE	11
2022-09-14	11:28:07	0.385611	1.71527	736.15	FALSE	11
2022-09-14	11:28:07	0.352481	1.56791	722.785	FALSE	11
2022-09-14	11:28:08	-1.41164	-6.27926	736.15	FALSE	11
2022-09-14	11:28:08	0.890446	3.96088	726.746	FALSE	11
2022-09-14	11:28:08	1.42973	6.35972	742.51	FALSE	11
2022-09-14	11:28:08	0.652125	2.90078	729.646	FALSE	11
2022-09-14	11:28:09	0.62098	2.76224	745.272	FALSE	11
2022-09-14	11:28:09	0.539758	2.40095	732.047	FALSE	11
2022-09-14	11:28:09	0.898333	3.99596	749.268	FALSE	11
2022-09-14	11:28:09	1.19462	5.31391	737.361	FALSE	11
2022-09-14	11:28:10	1.19238	5.30394	754.572	FALSE	11
2022-09-14	11:28:10	0.532328	2.3679	739.729	FALSE	11
2022-09-14	11:28:10	0.534211	2.37628	756.948	FALSE	11
2022-09-14	11:28:10	0.434364	1.93214	741.661	FALSE	11
2022-09-14	11:28:11	0.483473	2.15058	759.099	FALSE	11
2022-09-14	11:28:11	0.769733	3.42393	745.085	FALSE	11
2022-09-14	11:28:11	2.8392	12.6293	771.728	FALSE	11
2022-09-14	11:28:12	1.27752	5.68266	750.768	FALSE	11
2022-09-14	11:28:12	1.92434	8.55985	780.288	FALSE	11
2022-09-14	11:28:12	0.882761	3.9267	754.695	FALSE	11
2022-09-14	11:28:12	1.25055	5.5627	785.851	FALSE	11
2022-09-14	11:28:13	0.677519	3.01374	757.708	FALSE	11
2022-09-14	11:28:13	0.773906	3.44249	789.293	FALSE	11
2022-09-14	11:28:13	1.00429	4.46728	762.176	FALSE	11
2022-09-14	11:28:13	1.45085	6.45367	795.747	FALSE	11
2022-09-14	11:28:14	1.30128	5.78835	767.964	FALSE	11
2022-09-14	11:28:14	1.81991	8.09532	803.842	FALSE	11
2022-09-14	11:28:14	2.4937	11.0925	779.056	FALSE	11
2022-09-14	11:28:14	-1.1807	-5.25199	803.842	FALSE	11
2022-09-14	11:28:15	1.13737	5.05925	784.116	FALSE	11
2022-09-14	11:28:15	1.91228	8.5062	812.349	FALSE	11
2022-09-14	11:28:15	3.45299	15.3596	799.475	1	12
2022-09-14	11:28:16	0.990445	4.4057	816.754	FALSE	12
2022-09-14	11:28:16	0.679656	3.02325	802.499	FALSE	12
2022-09-14	11:28:16	0.396654	1.7644	818.519	FALSE	12
2022-09-14	11:28:16	0.552176	2.45619	804.955	FALSE	12
2022-09-14	11:28:17	0.488613	2.17345	820.692	FALSE	12
2022-09-14	11:28:17	0.530089	2.35794	807.313	FALSE	12
2022-09-14	11:28:17	0.860674	3.82845	824.521	FALSE	12
2022-09-14	11:28:17	0.859199	3.82189	811.135	FALSE	12
2022-09-14	11:28:18	0.506171	2.25155	826.772	FALSE	12
2022-09-14	11:28:18	0.423982	1.88596	813.021	FALSE	12
2022-09-14	11:28:18	0.458944	2.04147	828.814	FALSE	12
2022-09-14	11:28:18	0.343524	1.52806	814.549	FALSE	12
2022-09-14	11:28:19	0.35182	1.56497	830.379	FALSE	12
2022-09-14	11:28:19	0.261081	1.16134	815.71	FALSE	12
2022-09-14	11:28:19	0.518791	2.30769	832.686	FALSE	12
2022-09-14	11:28:20	1.25375	5.57693	821.287	FALSE	12
2022-09-14	11:28:20	1.66739	7.41688	840.103	FALSE	12
2022-09-14	11:28:20	2.6423	11.7535	833.04	FALSE	12
2022-09-14	11:28:20	1.7965	7.99119	848.094	FALSE	12
2022-09-14	11:28:21	0.777214	3.4572	836.498	FALSE	12
2022-09-14	11:28:21	0.505763	2.24973	850.344	FALSE	12
2022-09-14	11:28:21	0.580013	2.58001	839.078	FALSE	12
2022-09-14	11:28:21	0.443219	1.97153	852.316	FALSE	12
2022-09-14	11:28:22	0.665967	2.96235	842.04	FALSE	12
2022-09-14	11:28:22	0.465865	2.07226	854.388	FALSE	12
2022-09-14	11:28:22	0.943626	4.19744	846.237	FALSE	12
2022-09-14	11:28:22	1.08882	4.84329	859.231	FALSE	12
2022-09-14	11:28:23	1.02449	4.55714	850.794	FALSE	12
2022-09-14	11:28:23	1.611	7.16605	866.397	FALSE	12
2022-09-14	11:28:23	0.548308	2.43898	853.233	FALSE	12
2022-09-14	11:28:24	1.49884	6.66714	873.064	FALSE	12
2022-09-14	11:28:24	0.533142	2.37152	855.605	FALSE	12
2022-09-14	11:28:24	2.52739	11.2423	884.307	FALSE	12
2022-09-14	11:28:24	0.950089	4.22619	859.831	FALSE	12
2022-09-14	11:28:25	1.12887	5.02144	889.328	FALSE	12
2022-09-14	11:28:25	0.84841	3.7739	863.605	FALSE	12
2022-09-14	11:28:25	1.5249	6.78306	896.111	FALSE	12
2022-09-14	11:28:25	3.61782	16.0928	879.698	1	13
2022-09-14	11:28:26	2.3937	10.6477	906.759	FALSE	13
2022-09-14	11:28:26	4.56021	20.2847	899.983	1	14
2022-09-14	11:28:26	1.76286	7.84155	914.6	FALSE	14
2022-09-14	11:28:27	3.67223	16.3348	916.317	1	15
2022-09-14	11:28:27	1.07706	4.79098	919.391	FALSE	15
2022-09-14	11:28:27	2.52113	11.2145	927.532	FALSE	15
2022-09-14	11:28:27	0.80388	3.57582	922.967	FALSE	15
2022-09-14	11:28:28	2.50495	11.1425	938.674	FALSE	15
2022-09-14	11:28:28	0.980114	4.35974	927.327	FALSE	15
2022-09-14	11:28:28	3.331	14.817	953.491	1	16
2022-09-14	11:28:28	2.43828	10.846	938.173	FALSE	16
2022-09-14	11:28:29	3.96983	17.6586	971.15	1	17
2022-09-14	11:28:29	2.60892	11.605	949.778	FALSE	17
2022-09-14	11:28:29	2.5394	11.2958	982.446	FALSE	17
2022-09-14	11:28:29	0.723524	3.21838	952.996	FALSE	17
2022-09-14	11:28:30	1.1249	5.00378	987.449	FALSE	17
2022-09-14	11:28:30	0.894516	3.97899	956.975	FALSE	17
2022-09-14	11:28:30	0.572837	2.54809	989.998	FALSE	17
2022-09-14	11:28:30	0.352837	1.56949	958.545	FALSE	17
2022-09-14	11:28:31	0.535433	2.38171	992.379	FALSE	17
2022-09-14	11:28:31	0.289326	1.28698	959.832	FALSE	17
2022-09-14	11:28:31	0.504593	2.24453	994.624	FALSE	17
2022-09-14	11:28:32	1.06225	4.7251	964.557	FALSE	17
2022-09-14	11:28:32	0.561132	2.49603	997.12	FALSE	17
2022-09-14	11:28:32	1.22826	5.46355	970.02	FALSE	17
2022-09-14	11:28:32	0.627443	2.79099	999.911	FALSE	17
2022-09-14	11:28:33	1.89589	8.4333	978.454	FALSE	17
2022-09-14	11:28:33	0.985407	4.38329	1004.29	FALSE	17
2022-09-14	11:28:33	2.48698	11.0626	989.516	FALSE	17
2022-09-14	11:28:33	1.99243	8.86273	1013.16	FALSE	17
2022-09-14	11:28:34	0.574211	2.55421	992.07	FALSE	17
2022-09-14	11:28:34	0.706374	3.14209	1016.3	FALSE	17
2022-09-14	11:28:34	0.732328	3.25754	995.328	FALSE	17
2022-09-14	11:28:34	0.731616	3.25437	1019.55	FALSE	17
2022-09-14	11:28:35	0.72958	3.24532	998.573	FALSE	17
2022-09-14	11:28:35	0.732328	3.25754	1022.81	FALSE	17
2022-09-14	11:28:35	0.733346	3.26207	1001.84	FALSE	17
2022-09-14	11:28:36	0.731412	3.25347	1026.06	FALSE	17
2022-09-14	11:28:36	0.733142	3.26116	1005.1	FALSE	17
2022-09-14	11:28:36	0.732634	3.2589	1029.32	FALSE	17
2022-09-14	11:28:36	0.732226	3.25709	1008.35	FALSE	17
2022-09-14	11:28:37	0.734211	3.26592	1032.59	FALSE	17
2022-09-14	11:28:37	0.726476	3.23151	1011.59	FALSE	17
2022-09-14	11:28:37	0.726069	3.2297	1035.82	FALSE	17
2022-09-14	11:28:37	0.680929	3.02891	1014.61	FALSE	17
2022-09-14	11:28:38	0.649733	2.89014	1038.71	FALSE	17
2022-09-14	11:28:38	0.590801	2.628	1017.24	FALSE	17
2022-09-14	11:28:38	0.565611	2.51595	1041.22	FALSE	17
2022-09-14	11:28:38	0.539707	2.40072	1019.64	FALSE	17
2022-09-14	11:28:39	0.567137	2.52274	1043.75	FALSE	17
2022-09-14	11:28:39	0.399148	1.77549	1021.42	FALSE	17
2022-09-14	11:28:39	0.387036	1.72161	1045.47	FALSE	17
2022-09-14	11:28:40	0.359453	1.59892	1023.02	FALSE	17
2022-09-14	11:28:40	0.358588	1.59507	1047.06	FALSE	17
2022-09-14	11:28:40	0.382812	1.70282	1024.72	FALSE	17
2022-09-14	11:28:40	0.297163	1.32184	1048.39	FALSE	17
2022-09-14	11:28:41	0.321692	1.43095	1026.15	FALSE	17
2022-09-14	11:28:41	0.259911	1.15614	1049.54	FALSE	17
2022-09-14	11:28:41	0.332583	1.4794	1027.63	FALSE	17
2022-09-14	11:28:41	0.364339	1.62065	1051.16	FALSE	17
2022-09-14	11:28:42	0.261336	1.16247	1028.79	FALSE	17
2022-09-14	11:28:42	0.44444	1.97696	1053.14	FALSE	17
2022-09-14	11:28:42	0.337468	1.50113	1030.29	FALSE	17
2022-09-14	11:28:42	0.369224	1.64238	1054.78	FALSE	17
2022-09-14	11:28:43	0.430598	1.91539	1032.21	FALSE	17
2022-09-14	11:28:43	0.365305	1.62495	1056.41	FALSE	17
2022-09-14	11:28:43	0.709784	3.15726	1035.37	FALSE	17
2022-09-14	11:28:44	0.512328	2.27894	1058.69	FALSE	17
2022-09-14	11:28:44	0.597061	2.65585	1038.02	FALSE	17
2022-09-14	11:28:44	0.365305	1.62495	1060.31	FALSE	17
2022-09-14	11:28:44	0.473346	2.10554	1040.13	FALSE	17
2022-09-14	11:28:45	0.201285	0.895356	1061.21	FALSE	17
2022-09-14	11:28:45	0.0711071	0.316299	1040.44	FALSE	17
2022-09-14	11:28:45	0.0166542	0.0740812	1061.28	FALSE	17
2022-09-14	11:28:45	-0.151692	-0.674756	1040.44	FALSE	17
2022-09-14	11:28:46	-0.11215	-0.498866	1061.28	FALSE	17
2022-09-14	11:28:46	0.0998094	0.443972	1040.89	FALSE	17
2022-09-14	11:28:46	0.078588	0.349575	1061.63	FALSE	17
2022-09-14	11:28:46	-0.130012	-0.578319	1040.89	FALSE	17
2022-09-14	11:28:47	0.00291375	0.0129609	1061.64	FALSE	17
2022-09-14	11:28:47	0.440522	1.95953	1042.85	FALSE	17
2022-09-14	11:28:47	0.374669	1.6666	1063.31	FALSE	17
2022-09-14	11:28:48	3.49558	15.549	1058.4	1	18
2022-09-14	11:28:48	0.797214	3.54617	1066.86	FALSE	18
2022-09-14	11:28:48	1.17813	5.24056	1063.64	FALSE	18
2022-09-14	11:28:48	0.349784	1.55591	1068.41	FALSE	18
2022-09-14	11:28:49	0.220674	0.981602	1064.62	FALSE	18
2022-09-14	11:28:49	0.143321	0.63752	1069.05	FALSE	18
2022-09-14	11:28:49	0.0935498	0.416128	1065.04	FALSE	18
2022-09-14	11:28:49	0.178232	0.792812	1069.84	FALSE	18
2022-09-14	11:28:50	0.292277	1.30011	1066.34	FALSE	18
2022-09-14	11:28:50	0.197672	0.879285	1070.72	FALSE	18
2022-09-14	11:28:50	0.354008	1.5747	1067.91	FALSE	18
2022-09-14	11:28:50	0.734517	3.26728	1073.99	FALSE	18
2022-09-14	11:28:51	0.857926	3.81623	1071.73	FALSE	18
2022-09-14	11:28:51	2.08016	9.25297	1083.24	FALSE	18
2022-09-14	11:28:51	0.989886	4.40321	1076.13	FALSE	18
2022-09-14	11:28:52	0.705	3.13598	1086.38	FALSE	18
2022-09-14	11:28:52	1.4392	6.40185	1082.53	FALSE	18
2022-09-14	11:28:52	0.68958	3.06739	1089.45	FALSE	18
2022-09-14	11:28:52	1.01772	4.52702	1087.06	FALSE	18
2022-09-14	11:28:53	0.405967	1.80582	1091.25	FALSE	18
2022-09-14	11:28:53	0.517977	2.30407	1089.36	FALSE	18
2022-09-14	11:28:53	0.287188	1.27747	1092.53	FALSE	18
2022-09-14	11:28:53	0.47813	2.12682	1091.49	FALSE	18
2022-09-14	11:28:54	0.416959	1.85472	1094.38	FALSE	18
2022-09-14	11:28:54	0.383422	1.70554	1093.19	FALSE	18
2022-09-14	11:28:54	0.46271	2.05823	1096.44	FALSE	18
2022-09-14	11:28:54	0.947697	4.21555	1097.41	FALSE	18
2022-09-14	11:28:55	4.30963	19.1701	1115.61	1	19
2022-09-14	11:28:55	3.8195	16.9899	1114.4	1	20
2022-09-14	11:28:55	5.13925	22.8604	1138.47	1	21
2022-09-14	11:28:56	4.88347	21.7227	1136.12	1	22
2022-09-14	11:28:56	1.73406	7.71345	1146.19	FALSE	22
2022-09-14	11:28:56	3.03085	13.4818	1149.6	1	23
2022-09-14	11:28:56	2.06775	9.19777	1155.38	FALSE	23
2022-09-14	11:28:57	3.86749	17.2034	1166.81	1	24
2022-09-14	11:28:57	3.88281	17.2715	1172.65	1	25
2022-09-14	11:28:57	1.51411	6.73506	1173.54	FALSE	25
2022-09-14	11:28:58	0.737519	3.28063	1175.94	FALSE	25
2022-09-14	11:28:58	0.732023	3.25618	1176.8	FALSE	25
2022-09-14	11:28:58	1.57609	7.01076	1182.95	FALSE	25
2022-09-14	11:28:58	2.9451	13.1004	1189.9	FALSE	25
2022-09-14	11:28:58	1.39996	6.2273	1189.17	FALSE	25
2022-09-14	11:28:59	2.42006	10.7649	1200.66	FALSE	25
2022-09-14	11:28:59	0.487137	2.16688	1191.34	FALSE	25
2022-09-14	11:28:59	0.928969	4.13224	1204.8	FALSE	25
2022-09-14	11:29:00	0.360674	1.60435	1192.94	FALSE	25
2022-09-14	11:29:00	0.499555	2.22212	1207.02	FALSE	25
2022-09-14	11:29:00	0.212888	0.946968	1193.89	FALSE	25
2022-09-14	11:29:00	0.525407	2.33712	1209.36	FALSE	25
2022-09-14	11:29:01	0.249377	1.10928	1195	FALSE	25
2022-09-14	11:29:01	0.567443	2.5241	1211.88	FALSE	25
2022-09-14	11:29:01	1.5652	6.96232	1201.96	FALSE	25
2022-09-14	11:29:01	0.779402	3.46694	1215.35	FALSE	25
2022-09-14	11:29:02	1.52098	6.76562	1208.73	FALSE	25
2022-09-14	11:29:02	2.47696	11.018	1226.36	FALSE	25
2022-09-14	11:29:02	1.54566	6.8754	1215.6	FALSE	25
2022-09-14	11:29:02	2.60597	11.5919	1237.96	FALSE	25
2022-09-14	11:29:03	2.0592	9.15973	1224.76	FALSE	25
2022-09-14	11:29:03	2.94953	13.1201	1251.08	FALSE	25
2022-09-14	11:29:03	2.32882	10.3591	1235.12	FALSE	25
2022-09-14	11:29:04	1.99818	8.8883	1259.97	FALSE	25
2022-09-14	11:29:04	1.60419	7.13576	1242.26	FALSE	25
2022-09-14	11:29:04	0.880827	3.91809	1263.88	FALSE	25
2022-09-14	11:29:04	1.13543	5.05062	1247.31	FALSE	25
2022-09-14	11:29:05	0.892023	3.9679	1267.85	FALSE	25
2022-09-14	11:29:05	0.764389	3.40016	1250.71	FALSE	25
2022-09-14	11:29:05	0.684695	3.04566	1270.9	FALSE	25
2022-09-14	11:29:05	0.610496	2.71561	1253.43	FALSE	25
2022-09-14	11:29:06	0.631819	2.81046	1273.71	FALSE	25
2022-09-14	11:29:06	0.745458	3.31595	1256.74	FALSE	25
2022-09-14	11:29:06	0.813804	3.61996	1277.33	FALSE	25
2022-09-14	11:29:06	0.881082	3.91923	1260.66	FALSE	25
2022-09-14	11:29:07	0.89014	3.95952	1281.29	FALSE	25
2022-09-14	11:29:07	0.777061	3.45652	1264.12	FALSE	25
2022-09-14	11:29:07	0.727952	3.23808	1284.52	FALSE	25
2022-09-14	11:29:08	0.775331	3.44883	1267.57	FALSE	25
2022-09-14	11:29:08	0.768308	3.41759	1287.94	FALSE	25
2022-09-14	11:29:08	0.759809	3.37978	1270.95	FALSE	25
2022-09-14	11:29:08	0.587697	2.61419	1290.56	FALSE	25
2022-09-14	11:29:09	0.581998	2.58884	1273.53	FALSE	25
2022-09-14	11:29:09	0.839504	3.73428	1294.29	FALSE	25
2022-09-14	11:29:09	0.821387	3.65369	1277.19	FALSE	25
2022-09-14	11:29:09	0.865204	3.8486	1298.14	FALSE	25
2022-09-14	11:29:10	0.876603	3.89931	1281.09	FALSE	25
2022-09-14	11:29:10	0.881285	3.92013	1302.06	FALSE	25
2022-09-14	11:29:10	0.889326	3.9559	1285.04	FALSE	25
2022-09-14	11:29:10	0.913448	4.0632	1306.12	FALSE	25
2022-09-14	11:29:11	0.88271	3.92647	1288.97	FALSE	25
2022-09-14	11:29:11	0.865712	3.85086	1309.97	FALSE	25
2022-09-14	11:29:11	0.63472	2.82336	1291.79	FALSE	25
2022-09-14	11:29:12	0.506883	2.25472	1312.23	FALSE	25
2022-09-14	11:29:12	0.486476	2.16394	1293.96	FALSE	25
2022-09-14	11:29:12	0.448512	1.99507	1314.22	FALSE	25
2022-09-14	11:29:12	0.407036	1.81058	1295.77	FALSE	25
2022-09-14	11:29:13	0.418486	1.86151	1316.09	FALSE	25
2022-09-14	11:29:13	0.427137	1.89999	1297.67	FALSE	25
2022-09-14	11:29:13	0.422303	1.87849	1317.96	FALSE	25
2022-09-14	11:29:13	0.428155	1.90452	1299.57	FALSE	25
2022-09-14	11:29:14	0.423473	1.88369	1319.85	FALSE	25
2022-09-14	11:29:14	0.422456	1.87917	1301.45	FALSE	25
2022-09-14	11:29:14	0.417316	1.85631	1321.7	FALSE	25
2022-09-14	11:29:14	0.376756	1.67589	1303.13	FALSE	25
2022-09-14	11:29:15	0.372074	1.65506	1323.36	FALSE	25
2022-09-14	11:29:15	0.404288	1.79835	1304.93	FALSE	25
2022-09-14	11:29:15	0.392328	1.74515	1325.1	FALSE	25
2022-09-14	11:29:16	0.417468	1.85698	1306.78	FALSE	25
2022-09-14	11:29:16	0.419249	1.8649	1326.97	FALSE	25
2022-09-14	11:29:16	0.404186	1.7979	1308.58	FALSE	25
2022-09-14	11:29:16	0.430038	1.9129	1328.88	FALSE	25
2022-09-14	11:29:17	0.413753	1.84046	1310.42	FALSE	25
2022-09-14	11:29:17	0.429835	1.91199	1330.79	FALSE	25
2022-09-14	11:29:17	0.239504	1.06536	1311.49	FALSE	25
2022-09-14	11:29:17	0.13411	0.596548	1331.39	FALSE	25
2022-09-14	11:29:18	0.290344	1.29151	1312.78	FALSE	25
2022-09-14	11:29:18	0.240827	1.07125	1332.46	FALSE	25
2022-09-14	11:29:18	0.266425	1.18511	1313.96	FALSE	25
2022-09-14	11:29:18	2.5337	11.2704	1343.73	FALSE	25
2022-09-14	11:29:19	2.49304	11.0895	1325.05	FALSE	25
2022-09-14	11:29:19	3.39284	15.092	1358.82	1	26
2022-09-14	11:29:19	1.53752	6.8392	1331.89	FALSE	26
2022-09-14	11:29:20	5.47492	24.3535	1383.18	1	27
2022-09-14	11:29:20	2.38449	10.6067	1342.5	FALSE	27
2022-09-14	11:29:20	6.83879	30.4203	1413.6	1	28
2022-09-14	11:29:20	1.80286	8.01948	1350.52	FALSE	28
2022-09-14	11:29:21	4.16703	18.5358	1432.13	1	29
2022-09-14	11:29:21	1.84571	8.21009	1358.73	FALSE	29
2022-09-14	11:29:21	1.442	6.4143	1438.55	FALSE	29
2022-09-14	11:29:21	1.87986	8.36199	1367.09	FALSE	29
2022-09-14	11:29:22	2.11645	9.41439	1447.96	FALSE	29
2022-09-14	11:29:22	1.01431	4.51185	1371.6	FALSE	29
2022-09-14	11:29:22	2.27202	10.1064	1458.07	FALSE	29
2022-09-14	11:29:22	0.857265	3.81329	1375.41	FALSE	29
2022-09-14	11:29:23	1.62927	7.24732	1465.32	FALSE	29
2022-09-14	11:29:23	1.27304	5.66274	1381.08	FALSE	29
2022-09-14	11:29:23	1.79044	7.96424	1473.28	FALSE	29
2022-09-14	11:29:24	2.34587	10.4349	1391.51	FALSE	29
2022-09-14	11:29:24	0.472735	2.10282	1475.38	FALSE	29
2022-09-14	11:29:24	1.21116	5.38748	1396.9	FALSE	29
2022-09-14	11:29:24	0.445102	1.9799	1477.36	FALSE	29
2022-09-14	11:29:25	1.23202	5.48027	1402.38	FALSE	29
2022-09-14	11:29:25	1.37172	6.10168	1483.46	FALSE	29
2022-09-14	11:29:25	0.879453	3.91198	1406.29	FALSE	29
2022-09-14	11:29:25	1.12464	5.00262	1488.47	FALSE	29
2022-09-14	11:29:26	0.598893	2.664	1408.96	FALSE	29
2022-09-14	11:29:26	1.00205	4.45732	1492.92	FALSE	29
2022-09-14	11:29:26	0.691921	3.0778	1412.03	FALSE	29
2022-09-14	11:29:26	0.941845	4.18951	1497.11	FALSE	29
2022-09-14	11:29:27	1.24968	5.55883	1417.59	FALSE	29
2022-09-14	11:29:27	0.496043	2.2065	1499.32	FALSE	29
2022-09-14	11:29:27	1.96225	8.72848	1426.32	FALSE	29
2022-09-14	11:29:28	0.820318	3.64894	1502.97	FALSE	29
2022-09-14	11:29:28	2.15167	9.57106	1435.89	FALSE	29
2022-09-14	11:29:28	2.05543	9.14296	1512.11	FALSE	29
2022-09-14	11:29:28	2.32754	10.3534	1446.25	FALSE	29
2022-09-14	11:29:29	1.22134	5.43276	1517.55	FALSE	29
2022-09-14	11:29:29	2.16001	9.60816	1455.85	FALSE	29
2022-09-14	11:29:29	0.544186	2.42065	1519.97	FALSE	29
2022-09-14	11:29:29	0.757519	3.3696	1459.22	FALSE	29
2022-09-14	11:29:30	0.771361	3.43117	1523.4	FALSE	29
2022-09-14	11:29:30	0.330903	1.47192	1460.7	FALSE	29
2022-09-14	11:29:30	0.907595	4.03716	1527.43	FALSE	29
2022-09-14	11:29:30	0.453957	2.01929	1462.71	FALSE	29
2022-09-14	11:29:31	0.571361	2.54153	1529.98	FALSE	29
2022-09-14	11:29:31	0.259911	1.15614	1463.87	FALSE	29
2022-09-14	11:29:31	0.281641	1.2528	1531.23	FALSE	29
2022-09-14	11:29:32	0.571514	2.54221	1466.41	FALSE	29
2022-09-14	11:29:32	-1.50294	-6.68538	1531.23	FALSE	29
2022-09-14	11:29:32	-0.614949	-2.73542	1466.41	FALSE	29
2022-09-14	11:29:32	0.403982	1.79699	1533.03	FALSE	29
2022-09-14	11:29:33	0.539249	2.39869	1468.81	FALSE	29
2022-09-14	11:29:33	0.545153	2.42495	1535.45	FALSE	29
2022-09-14	11:29:33	1.20658	5.36711	1474.18	FALSE	29
2022-09-14	11:29:33	1.27569	5.67452	1541.12	FALSE	29
2022-09-14	11:29:34	1.68327	7.48752	1481.67	FALSE	29
2022-09-14	11:29:34	1.39991	6.22708	1547.35	FALSE	29
2022-09-14	11:29:34	1.23024	5.47235	1487.14	FALSE	29
2022-09-14	11:29:34	1.50419	6.69094	1554.04	FALSE	29
2022-09-14	11:29:35	1.44246	6.41635	1493.56	FALSE	29
2022-09-14	11:29:35	1.19233	5.30372	1559.35	FALSE	29
2022-09-14	11:29:35	0.736654	3.27678	1496.83	FALSE	29
2022-09-14	11:29:35	0.420166	1.86898	1561.22	FALSE	29
2022-09-14	11:29:36	0.387494	1.72365	1498.56	FALSE	29
2022-09-14	11:29:36	0.292023	1.29898	1562.51	FALSE	29
2022-09-14	11:29:36	0.293295	1.30463	1499.86	FALSE	29
2022-09-14	11:29:37	0.3193	1.42031	1563.93	FALSE	29
2022-09-14	11:29:37	0.682761	3.03706	1502.9	FALSE	29
2022-09-14	11:29:37	0.719097	3.19869	1567.13	FALSE	29
2022-09-14	11:29:37	1.23426	5.49024	1508.39	FALSE	29
2022-09-14	11:29:38	0.50327	2.23865	1569.37	FALSE	29
2022-09-14	11:29:38	0.466069	2.07317	1510.46	FALSE	29
2022-09-14	11:29:38	-0.0034476	-0.0153356	1569.37	FALSE	29
2022-09-14	11:29:38	-0.28416	-1.264	1510.46	FALSE	29
2022-09-14	11:29:39	-0.325585	-1.44827	1569.37	FALSE	29
2022-09-14	11:29:39	-0.225585	-1.00345	1510.46	FALSE	29
2022-09-14	11:29:39	-0.0639056	-0.284265	1569.37	FALSE	29
2022-09-14	11:29:39	0.324339	1.44272	1511.9	FALSE	29
2022-09-14	11:29:40	0.24729	1.1	1570.47	FALSE	29
2022-09-14	11:29:40	0.227036	1.0099	1512.91	FALSE	29
2022-09-14	11:29:40	0.424135	1.88664	1572.36	FALSE	29
2022-09-14	11:29:41	0.601794	2.6769	1515.59	FALSE	29
2022-09-14	11:29:41	0.652175	2.901	1575.26	FALSE	29
2022-09-14	11:29:41	0.692175	3.07893	1518.67	FALSE	29
2022-09-14	11:29:41	0.586272	2.60786	1577.87	FALSE	29
2022-09-14	11:29:42	0.526832	2.34345	1521.01	FALSE	29
2022-09-14	11:29:42	0.52215	2.32263	1580.19	FALSE	29
2022-09-14	11:29:42	0.521336	2.31901	1523.33	FALSE	29
2022-09-14	11:29:42	0.52897	2.35296	1582.54	FALSE	29
2022-09-14	11:29:43	0.538486	2.39529	1525.73	FALSE	29
2022-09-14	11:29:43	0.549987	2.44645	1584.99	FALSE	29
2022-09-14	11:29:43	0.548461	2.43966	1528.17	FALSE	29
2022-09-14	11:29:43	0.568563	2.52908	1587.52	FALSE	29
2022-09-14	11:29:44	0.579351	2.57707	1530.74	FALSE	29
2022-09-14	11:29:44	0.584542	2.60016	1590.12	FALSE	29
2022-09-14	11:29:44	0.569376	2.5327	1533.28	FALSE	29
2022-09-14	11:29:45	0.569479	2.53316	1592.65	FALSE	29
2022-09-14	11:29:45	0.565305	2.51459	1535.79	FALSE	29
2022-09-14	11:29:45	0.567646	2.525	1595.18	FALSE	29
2022-09-14	11:29:45	0.598384	2.66173	1538.45	FALSE	29
2022-09-14	11:29:46	0.611158	2.71855	1597.9	FALSE	29
2022-09-14	11:29:46	0.657468	2.92455	1541.38	FALSE	29
2022-09-14	11:29:46	0.662303	2.94606	1600.84	FALSE	29
2022-09-14	11:29:46	0.779046	3.46535	1544.84	FALSE	29
2022-09-14	11:29:47	0.764338	3.39993	1604.24	FALSE	29
2022-09-14	11:29:47	0.789834	3.51334	1548.36	FALSE	29
2022-09-14	11:29:47	0.870751	3.87327	1608.11	FALSE	29
2022-09-14	11:29:47	0.712837	3.17084	1551.53	FALSE	29
2022-09-14	11:29:48	1.04016	4.62684	1612.74	FALSE	29
2022-09-14	11:29:48	1.02464	4.5578	1556.08	FALSE	29
2022-09-14	11:29:48	1.31014	5.82776	1618.57	FALSE	29
2022-09-14	11:29:49	0.932074	4.14605	1560.23	FALSE	29
2022-09-14	11:29:49	0.818587	3.64124	1622.21	FALSE	29
2022-09-14	11:29:49	0.711463	3.16473	1563.4	FALSE	29
2022-09-14	11:29:49	0.601285	2.67464	1624.89	FALSE	29
2022-09-14	11:29:50	0.583829	2.59699	1565.99	FALSE	29
2022-09-14	11:29:50	0.688664	3.06332	1627.95	FALSE	29
2022-09-14	11:29:50	0.837163	3.72387	1569.72	FALSE	29
2022-09-14	11:29:50	0.774313	3.4443	1631.39	FALSE	29
2022-09-14	11:29:51	0.877061	3.90134	1573.62	FALSE	29
2022-09-14	11:29:51	0.770903	3.42913	1634.82	FALSE	29
2022-09-14	11:29:51	0.599249	2.66558	1576.28	FALSE	29
2022-09-14	11:29:51	0.513753	2.28528	1637.11	FALSE	29
2022-09-14	11:29:52	0.557366	2.47928	1578.76	FALSE	29
2022-09-14	11:29:52	0.538384	2.39484	1639.5	FALSE	29
2022-09-14	11:29:52	0.521997	2.32195	1581.08	FALSE	29
2022-09-14	11:29:53	0.513193	2.28279	1641.79	FALSE	29
2022-09-14	11:29:53	0.4993	2.22099	1583.31	FALSE	29
2022-09-14	11:29:53	0.491667	2.18703	1643.97	FALSE	29
2022-09-14	11:29:53	0.49528	2.2031	1585.51	FALSE	29
2022-09-14	11:29:54	0.484593	2.15557	1646.13	FALSE	29
2022-09-14	11:29:54	0.506069	2.2511	1587.76	FALSE	29
2022-09-14	11:29:54	0.578486	2.57322	1648.7	FALSE	29
2022-09-14	11:29:54	0.554313	2.4657	1590.23	FALSE	29
2022-09-14	11:29:55	0.547239	2.43423	1651.14	FALSE	29
2022-09-14	11:29:55	0.531209	2.36292	1592.59	FALSE	29
2022-09-14	11:29:55	0.62327	2.77243	1653.91	FALSE	29
2022-09-14	11:29:55	1.10139	4.8992	1597.49	FALSE	29
2022-09-14	11:29:56	0.591666	2.63185	1656.54	FALSE	29
2022-09-14	11:29:56	1.23136	5.47734	1602.96	FALSE	29
2022-09-14	11:29:56	0.704949	3.13575	1659.68	FALSE	29
2022-09-14	11:29:57	0.870802	3.8735	1606.84	FALSE	29
2022-09-14	11:29:57	0.677723	3.01465	1662.69	FALSE	29
2022-09-14	11:29:57	0.726069	3.2297	1610.07	FALSE	29
2022-09-14	11:29:57	0.733346	3.26207	1665.95	FALSE	29
2022-09-14	11:29:58	0.723422	3.21793	1613.29	FALSE	29
2022-09-14	11:29:58	0.683219	3.03909	1668.99	FALSE	29
2022-09-14	11:29:58	0.614465	2.73326	1616.02	FALSE	29
2022-09-14	11:29:58	0.518893	2.30814	1671.3	FALSE	29
2022-09-14	11:29:59	0.452939	2.01476	1618.03	FALSE	29
2022-09-14	11:29:59	0.308512	1.37232	1672.67	FALSE	29
2022-09-14	11:29:59	0.280674	1.24849	1619.28	FALSE	29
2022-09-14	11:29:59	0.344542	1.53259	1674.2	FALSE	29
2022-09-14	11:30:00	0.491667	2.18703	1621.47	FALSE	29
2022-09-14	11:30:00	1.42515	6.33935	1680.54	FALSE	29
2022-09-14	11:30:00	0.681895	3.03321	1624.5	FALSE	29
2022-09-14	11:30:01	1.10525	4.91637	1685.46	FALSE	29
2022-09-14	11:30:01	0.802914	3.57152	1628.07	FALSE	29
2022-09-14	11:30:01	0.397417	1.76779	1687.23	FALSE	29
2022-09-14	11:30:01	0.583066	2.59359	1630.67	FALSE	29
2022-09-14	11:30:02	0.735483	3.27158	1690.5	FALSE	29
2022-09-14	11:30:02	0.733651	3.26343	1633.93	FALSE	29
2022-09-14	11:30:02	0.730903	3.2512	1693.75	FALSE	29
2022-09-14	11:30:02	0.730394	3.24894	1637.18	FALSE	29
2022-09-14	11:30:03	0.732532	3.25845	1697.01	FALSE	29
2022-09-14	11:30:03	0.723473	3.21815	1640.4	FALSE	29
2022-09-14	11:30:03	0.72215	3.21227	1700.22	FALSE	29
2022-09-14	11:30:03	0.696959	3.10021	1643.5	FALSE	29
2022-09-14	11:30:04	0.704746	3.13485	1703.36	FALSE	29
2022-09-14	11:30:04	0.667494	2.96915	1646.47	FALSE	29
2022-09-14	11:30:04	0.649326	2.88833	1706.24	FALSE	29
2022-09-14	11:30:05	0.65472	2.91233	1649.38	FALSE	29
2022-09-14	11:30:05	0.640267	2.84804	1709.09	FALSE	29
2022-09-14	11:30:05	0.639402	2.84419	1652.22	FALSE	29
2022-09-14	11:30:05	0.610242	2.71448	1711.81	FALSE	29
2022-09-14	11:30:06	0.607544	2.70248	1654.93	FALSE	29
2022-09-14	11:30:06	0.606018	2.69569	1714.5	FALSE	29
2022-09-14	11:30:06	0.416756	1.85381	1656.78	FALSE	29
2022-09-14	11:30:06	0.380624	1.69309	1716.2	FALSE	29
2022-09-14	11:30:07	0.36612	1.62857	1658.41	FALSE	29
2022-09-14	11:30:07	0.368613	1.63966	1717.84	FALSE	29
2022-09-14	11:30:07	0.375026	1.66819	1660.08	FALSE	29
2022-09-14	11:30:07	0.340216	1.51335	1719.35	FALSE	29
2022-09-14	11:30:08	0.323575	1.43933	1661.52	FALSE	29
2022-09-14	11:30:08	0.321183	1.42869	1720.78	FALSE	29
2022-09-14	11:30:08	0.316298	1.40696	1662.92	FALSE	29
2022-09-14	11:30:09	0.622354	2.76836	1723.55	FALSE	29
2022-09-14	11:30:09	-0.248486	-1.10532	1662.92	FALSE	29
2022-09-14	11:30:09	-0.446806	-1.98748	1723.55	FALSE	29
2022-09-14	11:30:09	-0.595814	-2.6503	1662.92	FALSE	29
2022-09-14	11:30:10	-0.696526	-3.09829	1723.55	FALSE	29
2022-09-14	11:30:10	-0.777798	-3.4598	1662.92	FALSE	29
2022-09-14	11:30:10	-0.835356	-3.71583	1723.55	FALSE	29
2022-09-14	11:30:10	-0.831182	-3.69726	1662.92	FALSE	29
2022-09-14	11:30:11	-0.869554	-3.86795	1723.55	FALSE	29
2022-09-14	11:30:11	-0.886857	-3.94492	1662.92	FALSE	29
2022-09-14	11:30:11	-0.897798	-3.99359	1723.55	FALSE	29
2022-09-14	11:30:11	-0.904567	-4.02369	1662.92	FALSE	29
2022-09-14	11:30:12	-0.922328	-4.1027	1723.55	FALSE	29
2022-09-14	11:30:12	-0.939732	-4.18012	1662.92	FALSE	29
2022-09-14	11:30:12	-0.956577	-4.25505	1723.55	FALSE	29
2022-09-14	11:30:13	-0.95734	-4.25844	1662.92	FALSE	29
2022-09-14	11:30:13	-0.972913	-4.32771	1723.55	FALSE	29
2022-09-14	11:30:13	-0.954236	-4.24463	1662.92	FALSE	29
2022-09-14	11:30:13	-0.965635	-4.29534	1723.55	FALSE	29
2022-09-14	11:30:14	-0.770572	-3.42766	1662.92	FALSE	29
2022-09-14	11:30:14	0.732481	3.25822	1726.8	FALSE	29
2022-09-14	11:30:14	0.722914	3.21567	1666.14	FALSE	29
2022-09-14	11:30:14	0.735534	3.2718	1730.08	FALSE	29
2022-09-14	11:30:15	0.730954	3.25143	1669.39	FALSE	29
2022-09-14	11:30:15	0.734568	3.26751	1733.34	FALSE	29
2022-09-14	11:30:15	0.62729	2.79031	1672.18	FALSE	29
2022-09-14	11:30:15	0.328511	1.46128	1734.8	FALSE	29
2022-09-14	11:30:16	-0.0367809	-0.163609	1672.18	FALSE	29
2022-09-14	11:30:16	-0.152659	-0.679058	1734.8	FALSE	29
2022-09-14	11:30:16	-0.245738	-1.09309	1672.18	FALSE	29
2022-09-14	11:30:17	-0.489147	-2.17582	1734.8	FALSE	29
2022-09-14	11:30:17	-0.556119	-2.47373	1672.18	FALSE	29
2022-09-14	11:30:17	-0.565686	-2.51628	1734.8	FALSE	29
2022-09-14	11:30:17	-0.583905	-2.59733	1672.18	FALSE	29
2022-09-14	11:30:18	-0.396883	-1.76541	1734.8	FALSE	29
2022-09-14	11:30:18	-0.676271	-3.00819	1672.18	FALSE	29
2022-09-14	11:30:18	-0.775254	-3.44848	1734.8	FALSE	29
2022-09-14	11:30:18	-0.861615	-3.83264	1672.18	FALSE	29
2022-09-14	11:30:19	-0.949147	-4.222	1734.8	FALSE	29
2022-09-14	11:30:19	-1.07454	-4.77977	1672.18	FALSE	29
2022-09-14	11:30:19	-1.24095	-5.51999	1734.8	FALSE	29
2022-09-14	11:30:19	-1.37607	-6.12103	1672.18	FALSE	29
2022-09-14	11:30:20	-1.65902	-7.37965	1734.8	FALSE	29
2022-09-14	11:30:20	-2.34401	-10.4266	1672.18	FALSE	29
2022-09-14	11:30:20	-2.42487	-10.7863	1734.8	FALSE	29

## Sheet: KimChi_harness_202291411258 (2)
Date	Time	Lbs	Total force x time			**GoPro Fitting: 11:13
2022-09-14	11:25:08	0.0370613	0.0370613	FALSE	0
2022-09-14	11:25:08	-0.0240074	0.0370613	FALSE	0
2022-09-14	11:25:08	0.0531427	0.090204	FALSE	0
2022-09-14	11:25:09	0.0298857	0.12009	FALSE	0
2022-09-14	11:25:09	0.171718	0.291808	FALSE	0
2022-09-14	11:25:09	0.110445	0.402253	FALSE	0
2022-09-14	11:25:10	0.212023	0.614276	FALSE	0
2022-09-14	11:25:10	0.126985	0.741261	FALSE	0
2022-09-14	11:25:10	0.192939	0.9342	FALSE	0
2022-09-14	11:25:10	0.282659	1.21686	FALSE	0
2022-09-14	11:25:11	0.280573	1.49743	FALSE	0
2022-09-14	11:25:11	0.208613	1.70604	FALSE	0
2022-09-14	11:25:11	0.191667	1.89771	FALSE	0
2022-09-14	11:25:11	0.178232	2.07594	FALSE	0
2022-09-14	11:25:12	0.167138	2.24308	FALSE	0
2022-09-14	11:25:12	0.159351	2.40243	FALSE	0
2022-09-14	11:25:12	0.152532	2.55496	FALSE	0
2022-09-14	11:25:12	0.152685	2.70765	FALSE	0
2022-09-14	11:25:13	0.17126	2.87891	FALSE	0
2022-09-14	11:25:13	0.147952	3.02686	FALSE	0
2022-09-14	11:25:13	0.110496	3.13736	FALSE	0
2022-09-14	11:25:14	0.111972	3.24933	FALSE	0
2022-09-14	11:25:14	0.14154	3.39087	FALSE	0
2022-09-14	11:25:14	0.213448	3.60432	FALSE	0
2022-09-14	11:25:14	0.290496	3.89481	FALSE	0
2022-09-14	11:25:15	0.299962	4.19478	FALSE	0
2022-09-14	11:25:15	0.0892241	4.284	FALSE	0
2022-09-14	11:25:15	0.228155	4.51215	FALSE	0
2022-09-14	11:25:15	0.260573	4.77273	FALSE	0
2022-09-14	11:25:16	0.232074	5.0048	FALSE	0
2022-09-14	11:25:16	0.225611	5.23041	FALSE	0
2022-09-14	11:25:16	0.209987	5.4404	FALSE	0
2022-09-14	11:25:16	0.190445	5.63084	FALSE	0
2022-09-14	11:25:17	0.213702	5.84455	FALSE	0
2022-09-14	11:25:17	0.237367	6.08191	FALSE	0
2022-09-14	11:25:17	0.16673	6.24864	FALSE	0
2022-09-14	11:25:18	0.0689188	6.31756	FALSE	0
2022-09-14	11:25:18	-0.143906	6.31756	FALSE	0
2022-09-14	11:25:18	0.295738	6.6133	FALSE	0
2022-09-14	11:25:18	0.662557	7.27586	FALSE	0
2022-09-14	11:25:19	0.541794	7.81765	FALSE	0
2022-09-14	11:25:19	0.39014	8.20779	FALSE	0
2022-09-14	11:25:19	0.214211	8.422	FALSE	0
2022-09-14	11:25:19	0.412074	8.83408	FALSE	0
2022-09-14	11:25:20	0.11411	8.94819	FALSE	0
2022-09-14	11:25:20	0.313295	9.26148	FALSE	0
2022-09-14	11:25:20	0.27299	9.53447	FALSE	0
2022-09-14	11:25:20	0.335738	9.87021	FALSE	0
2022-09-14	11:25:21	0.388461	10.2587	FALSE	0
2022-09-14	11:25:21	0.405865	10.6645	FALSE	0
2022-09-14	11:25:21	0.40327	11.0678	FALSE	0
2022-09-14	11:25:22	0.405611	11.4734	FALSE	0
2022-09-14	11:25:22	0.385356	11.8588	FALSE	0
2022-09-14	11:25:22	0.459351	12.3181	FALSE	0
2022-09-14	11:25:22	0.403473	12.7216	FALSE	0
2022-09-14	11:25:23	0.119046	12.8406	FALSE	0
2022-09-14	11:25:23	0.107189	12.9478	FALSE	0
2022-09-14	11:25:23	0.205967	13.1538	FALSE	0
2022-09-14	11:25:23	0.279657	13.4335	FALSE	0
2022-09-14	11:25:24	0.298893	13.7323	FALSE	0
2022-09-14	11:25:24	0.288257	14.0206	FALSE	0
2022-09-14	11:25:24	0.242659	14.2633	FALSE	0
2022-09-14	11:25:24	0.283982	14.5472	FALSE	0
2022-09-14	11:25:25	0.120267	14.6675	FALSE	0
2022-09-14	11:25:25	0.316552	14.9841	FALSE	0
2022-09-14	11:25:25	0.60103	15.5851	FALSE	0
2022-09-14	11:25:26	0.12098	15.7061	FALSE	0
2022-09-14	11:25:26	-0.407112	15.7061	FALSE	0
2022-09-14	11:25:26	-0.546602	15.7061	FALSE	0
2022-09-14	11:25:26	-0.54187	15.7061	FALSE	0
2022-09-14	11:25:27	-0.286348	15.7061	FALSE	0
2022-09-14	11:25:27	-0.162175	15.7061	FALSE	0
2022-09-14	11:25:27	-0.245381	15.7061	FALSE	0
2022-09-14	11:25:27	-0.0280786	15.7061	FALSE	0
2022-09-14	11:25:28	-0.103702	15.7061	FALSE	0
2022-09-14	11:25:28	0.00998751	15.7161	FALSE	0
2022-09-14	11:25:28	-0.207061	15.7161	FALSE	0
2022-09-14	11:25:28	-0.257239	15.7161	FALSE	0
2022-09-14	11:25:29	-0.483142	15.7161	FALSE	0
2022-09-14	11:25:29	-0.628892	15.7161	FALSE	0
2022-09-14	11:25:29	-0.477595	15.7161	FALSE	0
2022-09-14	11:25:30	0.286578	16.0026	FALSE	0
2022-09-14	11:25:30	0.398079	16.4007	FALSE	0
2022-09-14	11:25:30	0.0068323	16.4076	FALSE	0
2022-09-14	11:25:30	-0.39673	16.4076	FALSE	0
2022-09-14	11:25:31	-0.756475	16.4076	FALSE	0
2022-09-14	11:25:31	-0.879121	16.4076	FALSE	0
2022-09-14	11:25:31	-0.898256	16.4076	FALSE	0
2022-09-14	11:25:31	-0.7036	16.4076	FALSE	0
2022-09-14	11:25:32	-0.532709	16.4076	FALSE	0
2022-09-14	11:25:32	-0.296984	16.4076	FALSE	0
2022-09-14	11:25:32	-0.101972	16.4076	FALSE	0
2022-09-14	11:25:32	-0.166959	16.4076	FALSE	0
2022-09-14	11:25:33	-0.0822262	16.4076	FALSE	0
2022-09-14	11:25:33	0.0166542	16.4242	FALSE	0
2022-09-14	11:25:33	0.146578	16.5708	FALSE	0
2022-09-14	11:25:34	0.00713764	16.5779	FALSE	0
2022-09-14	11:25:34	0.617061	17.195	FALSE	0
2022-09-14	11:25:34	0.382659	17.5776	FALSE	0
2022-09-14	11:25:34	1.32866	18.9063	FALSE	0
2022-09-14	11:25:35	0.238944	19.1452	FALSE	0
2022-09-14	11:25:35	0.276756	19.422	FALSE	0
2022-09-14	11:25:35	0.228003	19.65	FALSE	0
2022-09-14	11:25:35	0.323575	19.9736	FALSE	0
2022-09-14	11:25:36	0.62098	20.5946	FALSE	0
2022-09-14	11:25:36	0.428868	21.0234	FALSE	0
2022-09-14	11:25:36	1.39106	22.4145	FALSE	0
2022-09-14	11:25:36	0.454822	22.8693	FALSE	0
2022-09-14	11:25:37	1.22032	24.0896	FALSE	0
2022-09-14	11:25:37	0.319809	24.4094	FALSE	0
2022-09-14	11:25:37	1.31029	25.7197	FALSE	0
2022-09-14	11:25:38	1.40714	27.1269	FALSE	0
2022-09-14	11:25:38	0.497163	27.624	FALSE	0
2022-09-14	11:25:38	0.860878	28.4849	FALSE	0
2022-09-14	11:25:38	0.332736	28.8176	FALSE	0
2022-09-14	11:25:39	0.476603	29.2942	FALSE	0
2022-09-14	11:25:39	0.877723	30.172	FALSE	0
2022-09-14	11:25:39	0.252837	30.4248	FALSE	0
2022-09-14	11:25:39	2.01365	32.4385	FALSE	0
2022-09-14	11:25:40	0.656705	33.0952	FALSE	0
2022-09-14	11:25:40	2.32459	35.4198	FALSE	0
2022-09-14	11:25:40	0.522862	35.9426	FALSE	0
2022-09-14	11:25:41	0.438232	36.3808	FALSE	0
2022-09-14	11:25:41	0.351667	36.7325	FALSE	0
2022-09-14	11:25:41	0.200013	36.9325	FALSE	0
2022-09-14	11:25:41	1.63579	38.5683	FALSE	0
2022-09-14	11:25:42	0.0971122	38.6654	FALSE	0
2022-09-14	11:25:42	0.188766	38.8542	FALSE	0
2022-09-14	11:25:42	0.177875	39.0321	FALSE	0
2022-09-14	11:25:42	0.654771	39.6868	FALSE	0
2022-09-14	11:25:43	0.73014	40.417	FALSE	0
2022-09-14	11:25:43	0.733702	41.1507	FALSE	0
2022-09-14	11:25:43	0.724847	41.8755	FALSE	0
2022-09-14	11:25:43	0.734008	42.6095	FALSE	0
2022-09-14	11:25:44	0.723168	43.3327	FALSE	0
2022-09-14	11:25:44	0.73014	44.0628	FALSE	0
2022-09-14	11:25:44	0.729733	44.7926	FALSE	0
2022-09-14	11:25:45	0.72897	45.5216	FALSE	0
2022-09-14	11:25:45	0.72327	46.2448	FALSE	0
2022-09-14	11:25:45	0.73299	46.9778	FALSE	0
2022-09-14	11:25:45	0.730242	47.7081	FALSE	0
2022-09-14	11:25:46	0.724695	48.4327	FALSE	0
2022-09-14	11:25:46	0.731921	49.1647	FALSE	0
2022-09-14	11:25:46	0.735229	49.8999	FALSE	0
2022-09-14	11:25:46	0.731005	50.6309	FALSE	0
2022-09-14	11:25:47	0.724288	51.3552	FALSE	0
2022-09-14	11:25:47	0.728868	52.0841	FALSE	0
2022-09-14	11:25:47	0.732175	52.8162	FALSE	0
2022-09-14	11:25:47	0.729835	53.5461	FALSE	0
2022-09-14	11:25:48	0.734262	54.2803	FALSE	0
2022-09-14	11:25:48	0.733193	55.0135	FALSE	0
2022-09-14	11:25:48	0.728512	55.742	FALSE	0
2022-09-14	11:25:49	0.731972	56.474	FALSE	0
2022-09-14	11:25:49	0.728562	57.2026	FALSE	0
2022-09-14	11:25:49	0.732074	57.9346	FALSE	0
2022-09-14	11:25:49	0.736603	58.6712	FALSE	0
2022-09-14	11:25:50	0.727596	59.3988	FALSE	0
2022-09-14	11:25:50	0.725865	60.1247	FALSE	0
2022-09-14	11:25:50	0.729529	60.8542	FALSE	0
2022-09-14	11:25:50	0.727137	61.5814	FALSE	0
2022-09-14	11:25:51	0.730496	62.3119	FALSE	0
2022-09-14	11:25:51	0.727596	63.0395	FALSE	0
2022-09-14	11:25:51	0.939148	63.9786	FALSE	0
2022-09-14	11:25:51	1.30765	65.2863	FALSE	0
2022-09-14	11:25:52	1.41355	66.6998	FALSE	0
2022-09-14	11:25:52	0.996908	67.6967	FALSE	0
2022-09-14	11:25:52	0.725305	68.422	FALSE	0
2022-09-14	11:25:53	0.726069	69.1481	FALSE	0
2022-09-14	11:25:53	0.729987	69.8781	FALSE	0
2022-09-14	11:25:53	0.731667	70.6097	FALSE	0
2022-09-14	11:25:53	0.73243	71.3422	FALSE	0
2022-09-14	11:25:54	0.729377	72.0716	FALSE	0
2022-09-14	11:25:54	0.730496	72.8021	FALSE	0
2022-09-14	11:25:54	0.729478	73.5315	FALSE	0
2022-09-14	11:25:54	0.725916	74.2574	FALSE	0
2022-09-14	11:25:55	0.725	74.9824	FALSE	0
2022-09-14	11:25:55	0.729631	75.7121	FALSE	0
2022-09-14	11:25:55	0.726323	76.4384	FALSE	0
2022-09-14	11:25:55	0.73014	77.1685	FALSE	0
2022-09-14	11:25:56	0.727646	77.8962	FALSE	0
2022-09-14	11:25:56	0.730089	78.6263	FALSE	0
2022-09-14	11:25:56	0.728003	79.3543	FALSE	0
2022-09-14	11:25:57	0.732277	80.0866	FALSE	0
2022-09-14	11:25:57	0.727341	80.8139	FALSE	0
2022-09-14	11:25:57	0.72958	81.5435	FALSE	0
2022-09-14	11:25:57	0.727697	82.2712	FALSE	0
2022-09-14	11:25:58	0.729428	83.0006	FALSE	0
2022-09-14	11:25:58	0.732532	83.7331	FALSE	0
2022-09-14	11:25:58	0.730903	84.464	FALSE	0
2022-09-14	11:25:58	0.73014	85.1942	FALSE	0
2022-09-14	11:25:59	0.731514	85.9257	FALSE	0
2022-09-14	11:25:59	0.728817	86.6545	FALSE	0
2022-09-14	11:25:59	0.73131	87.3858	FALSE	0
2022-09-14	11:25:59	0.732125	88.1179	FALSE	0
2022-09-14	11:26:00	0.84785	88.9658	FALSE	0
2022-09-14	11:26:00	0.220115	89.1859	FALSE	0
2022-09-14	11:26:00	-0.0304196	89.1859	FALSE	0
2022-09-14	11:26:01	0.173092	89.359	FALSE	0
2022-09-14	11:26:01	0.0306999	89.3897	FALSE	0
2022-09-14	11:26:01	0.289173	89.6789	FALSE	0
2022-09-14	11:26:01	0.524236	90.2031	FALSE	0
2022-09-14	11:26:02	0.348817	90.5519	FALSE	0
2022-09-14	11:26:02	0.286832	90.8388	FALSE	0
2022-09-14	11:26:02	1.13172	91.9705	FALSE	0
2022-09-14	11:26:02	0.631005	92.6015	FALSE	0
2022-09-14	11:26:03	1.10317	93.7047	FALSE	0
2022-09-14	11:26:03	3.26602	96.9707	1	1
2022-09-14	11:26:03	5.44373	102.414	1	2
2022-09-14	11:26:03	1.93594	104.35	FALSE	2
2022-09-14	11:26:04	1.27177	105.622	FALSE	2
2022-09-14	11:26:04	0.857875	106.48	FALSE	2
2022-09-14	11:26:04	1.37044	107.85	FALSE	2
2022-09-14	11:26:05	1.20347	109.054	FALSE	2
2022-09-14	11:26:05	0.582099	109.636	FALSE	2
2022-09-14	11:26:05	0.301336	109.937	FALSE	2
2022-09-14	11:26:05	0.324339	110.262	FALSE	2
2022-09-14	11:26:06	0.44159	110.703	FALSE	2
2022-09-14	11:26:06	0.408155	111.111	FALSE	2
2022-09-14	11:26:06	0.431565	111.543	FALSE	2
2022-09-14	11:26:06	0.405102	111.948	FALSE	2
2022-09-14	11:26:07	0.388054	112.336	FALSE	2
2022-09-14	11:26:07	0.420267	112.756	FALSE	2
2022-09-14	11:26:07	0.497875	113.254	FALSE	2
2022-09-14	11:26:07	0.530344	113.785	FALSE	2
2022-09-14	11:26:08	0.340878	114.126	FALSE	2
2022-09-14	11:26:08	0.127189	114.253	FALSE	2
2022-09-14	11:26:08	0.277265	114.53	FALSE	2
2022-09-14	11:26:09	0.546628	115.077	FALSE	2
2022-09-14	11:26:09	0.544593	115.621	FALSE	2
2022-09-14	11:26:09	0.421947	116.043	FALSE	2
2022-09-14	11:26:09	0.521489	116.565	FALSE	2
2022-09-14	11:26:10	0.200064	116.765	FALSE	2
2022-09-14	11:26:10	0.211769	116.976	FALSE	2
2022-09-14	11:26:10	0.126883	117.103	FALSE	2
2022-09-14	11:26:10	-0.0509794	117.103	FALSE	2
2022-09-14	11:26:11	-0.34243	117.103	FALSE	2
2022-09-14	11:26:11	-0.484974	117.103	FALSE	2
2022-09-14	11:26:11	-0.557799	117.103	FALSE	2
2022-09-14	11:26:11	-0.367162	117.103	FALSE	2
2022-09-14	11:26:12	-0.389503	117.103	FALSE	2
2022-09-14	11:26:12	-0.237493	117.103	FALSE	2
2022-09-14	11:26:12	-0.587569	117.103	FALSE	2
2022-09-14	11:26:13	-0.760343	117.103	FALSE	2
2022-09-14	11:26:13	-0.675254	117.103	FALSE	2
2022-09-14	11:26:13	-0.502887	117.103	FALSE	2
2022-09-14	11:26:13	-0.48131	117.103	FALSE	2
2022-09-14	11:26:14	-0.115763	117.103	FALSE	2
2022-09-14	11:26:14	-0.308333	117.103	FALSE	2
2022-09-14	11:26:14	-0.122226	117.103	FALSE	2
2022-09-14	11:26:14	-0.226857	117.103	FALSE	2
2022-09-14	11:26:15	-0.0633458	117.103	FALSE	2
2022-09-14	11:26:15	-0.0582058	117.103	FALSE	2
2022-09-14	11:26:15	0.197926	117.301	FALSE	2
2022-09-14	11:26:15	0.430038	117.731	FALSE	2
2022-09-14	11:26:16	0.456501	118.188	FALSE	2
2022-09-14	11:26:16	1.3735	119.561	FALSE	2
2022-09-14	11:26:16	0.298384	119.86	FALSE	2
2022-09-14	11:26:17	1.22032	121.08	FALSE	2
2022-09-14	11:26:17	0.0552292	121.135	FALSE	2
2022-09-14	11:26:17	-0.163142	121.135	FALSE	2
2022-09-14	11:26:17	-0.310267	121.135	FALSE	2
2022-09-14	11:26:18	-0.222684	121.135	FALSE	2
2022-09-14	11:26:18	-0.22131	121.135	FALSE	2
2022-09-14	11:26:18	-0.253269	121.135	FALSE	2
2022-09-14	11:26:18	-0.237951	121.135	FALSE	2
2022-09-14	11:26:19	-0.113982	121.135	FALSE	2
2022-09-14	11:26:19	-0.0100634	121.135	FALSE	2
2022-09-14	11:26:19	0.0880027	121.223	FALSE	2
2022-09-14	11:26:19	0.216909	121.44	FALSE	2
2022-09-14	11:26:20	0.310293	121.75	FALSE	2
2022-09-14	11:26:20	0.312583	122.063	FALSE	2
2022-09-14	11:26:20	0.640623	122.704	FALSE	2
2022-09-14	11:26:21	0.734364	123.438	FALSE	2
2022-09-14	11:26:21	0.730852	124.169	FALSE	2
2022-09-14	11:26:21	0.681031	124.85	FALSE	2
2022-09-14	11:26:21	0.642201	125.492	FALSE	2
2022-09-14	11:26:22	-0.294898	125.492	FALSE	2
2022-09-14	11:26:22	-0.401208	125.492	FALSE	2
2022-09-14	11:26:22	-0.419427	125.492	FALSE	2
2022-09-14	11:26:22	-0.207366	125.492	FALSE	2
2022-09-14	11:26:23	-0.141463	125.492	FALSE	2
2022-09-14	11:26:23	0.0187916	125.511	FALSE	2
2022-09-14	11:26:23	0.127138	125.638	FALSE	2
2022-09-14	11:26:23	0.00321909	125.641	FALSE	2
2022-09-14	11:26:24	-0.210776	125.641	FALSE	2
2022-09-14	11:26:24	-0.258002	125.641	FALSE	2
2022-09-14	11:26:24	-0.209198	125.641	FALSE	2
2022-09-14	11:26:25	-0.412608	125.641	FALSE	2
2022-09-14	11:26:25	-0.314643	125.641	FALSE	2
2022-09-14	11:26:25	-0.15785	125.641	FALSE	2
2022-09-14	11:26:25	3.30225	128.943	1	3
2022-09-14	11:26:26	1.96434	130.908	FALSE	3
2022-09-14	11:26:26	1.3336	132.241	FALSE	3
2022-09-14	11:26:26	0.988562	133.23	FALSE	3
2022-09-14	11:26:26	0.375229	133.605	FALSE	3
2022-09-14	11:26:27	0.456501	134.062	FALSE	3
2022-09-14	11:26:27	0.169224	134.231	FALSE	3
2022-09-14	11:26:27	0.173601	134.405	FALSE	3
2022-09-14	11:26:27	-0.0680786	134.405	FALSE	3
2022-09-14	11:26:28	0.0633717	134.468	FALSE	3
2022-09-14	11:26:28	-0.0691473	134.468	FALSE	3
2022-09-14	11:26:28	0.0377229	134.506	FALSE	3
2022-09-14	11:26:29	-0.17902	134.506	FALSE	3
2022-09-14	11:26:29	-0.0645671	134.506	FALSE	3
2022-09-14	11:26:29	-0.124262	134.506	FALSE	3
2022-09-14	11:26:29	-0.0526588	134.506	FALSE	3
2022-09-14	11:26:30	-0.130725	134.506	FALSE	3
2022-09-14	11:26:30	-0.0379005	134.506	FALSE	3
2022-09-14	11:26:30	-0.00548322	134.506	FALSE	3
2022-09-14	11:26:30	-0.0161702	134.506	FALSE	3
2022-09-14	11:26:31	0.0582827	134.564	FALSE	3
2022-09-14	11:26:31	-0.164109	134.564	FALSE	3
2022-09-14	11:26:31	-0.369402	134.564	FALSE	3
2022-09-14	11:26:31	-0.284262	134.564	FALSE	3
2022-09-14	11:26:32	-0.328231	134.564	FALSE	3
2022-09-14	11:26:32	-0.233829	134.564	FALSE	3
2022-09-14	11:26:32	-0.158562	134.564	FALSE	3
2022-09-14	11:26:33	-0.193676	134.564	FALSE	3
2022-09-14	11:26:33	-0.220598	134.564	FALSE	3
2022-09-14	11:26:33	-0.171285	134.564	FALSE	3
2022-09-14	11:26:33	-0.16472	134.564	FALSE	3
2022-09-14	11:26:34	-0.198104	134.564	FALSE	3
2022-09-14	11:26:34	-0.127621	134.564	FALSE	3
2022-09-14	11:26:34	-0.0973407	134.564	FALSE	3
2022-09-14	11:26:34	-0.17617	134.564	FALSE	3
2022-09-14	11:26:35	-0.126297	134.564	FALSE	3
2022-09-14	11:26:35	-0.161361	134.564	FALSE	3
2022-09-14	11:26:35	-0.0867045	134.564	FALSE	3
2022-09-14	11:26:35	0.0369595	134.601	FALSE	3
2022-09-14	11:26:36	-0.0280277	134.601	FALSE	3
2022-09-14	11:26:36	0.130038	134.731	FALSE	3
2022-09-14	11:26:36	0.0185371	134.749	FALSE	3
2022-09-14	11:26:37	0.208308	134.958	FALSE	3
2022-09-14	11:26:37	0.0696821	135.027	FALSE	3
2022-09-14	11:26:37	0.0566542	135.084	FALSE	3
2022-09-14	11:26:37	-0.0438038	135.084	FALSE	3
2022-09-14	11:26:38	-0.0268572	135.084	FALSE	3
2022-09-14	11:26:38	-0.0364247	135.084	FALSE	3
2022-09-14	11:26:38	-0.00996157	135.084	FALSE	3
2022-09-14	11:26:38	-0.13785	135.084	FALSE	3
2022-09-14	11:26:39	0.878588	135.963	FALSE	3
2022-09-14	11:26:39	0.180674	136.143	FALSE	3
2022-09-14	11:26:39	0.239199	136.383	FALSE	3
2022-09-14	11:26:39	0.601285	136.984	FALSE	3
2022-09-14	11:26:40	0.169835	137.154	FALSE	3
2022-09-14	11:26:40	0.114008	137.268	FALSE	3
2022-09-14	11:26:40	0.142812	137.41	FALSE	3
2022-09-14	11:26:41	0.0315142	137.442	FALSE	3
2022-09-14	11:26:41	-0.0387657	137.442	FALSE	3
2022-09-14	11:26:41	0.101285	137.543	FALSE	3
2022-09-14	11:26:41	0.155789	137.699	FALSE	3
2022-09-14	11:26:42	0.229936	137.929	FALSE	3
2022-09-14	11:26:42	0.200318	138.129	FALSE	3
2022-09-14	11:26:42	0.228919	138.358	FALSE	3
2022-09-14	11:26:42	0.189936	138.548	FALSE	3
2022-09-14	11:26:43	-0.092557	138.548	FALSE	3
2022-09-14	11:26:43	-0.072557	138.548	FALSE	3
2022-09-14	11:26:43	-0.0317427	138.548	FALSE	3
2022-09-14	11:26:43	-0.106043	138.548	FALSE	3
2022-09-14	11:26:44	-0.201259	138.548	FALSE	3
2022-09-14	11:26:44	-0.130572	138.548	FALSE	3
2022-09-14	11:26:44	-0.059071	138.548	FALSE	3
2022-09-14	11:26:45	0.0155346	138.564	FALSE	3
2022-09-14	11:26:45	0.134313	138.698	FALSE	3
2022-09-14	11:26:45	0.158741	138.857	FALSE	3
2022-09-14	11:26:45	0.191565	139.048	FALSE	3
2022-09-14	11:26:46	0.189631	139.238	FALSE	3
2022-09-14	11:26:46	0.213143	139.451	FALSE	3
2022-09-14	11:26:46	0.180216	139.631	FALSE	3
2022-09-14	11:26:46	-0.00884198	139.631	FALSE	3
2022-09-14	11:26:47	0.147646	139.779	FALSE	3
2022-09-14	11:26:47	0.273753	140.053	FALSE	3
2022-09-14	11:26:47	0.216654	140.269	FALSE	3
2022-09-14	11:26:48	0.200624	140.47	FALSE	3
2022-09-14	11:26:48	0.190496	140.661	FALSE	3
2022-09-14	11:26:48	0.221234	140.882	FALSE	3
2022-09-14	11:26:48	0.231311	141.113	FALSE	3
2022-09-14	11:26:49	0.269733	141.383	FALSE	3
2022-09-14	11:26:49	0.25472	141.638	FALSE	3
2022-09-14	11:26:49	0.313702	141.951	FALSE	3
2022-09-14	11:26:49	0.290395	142.242	FALSE	3
2022-09-14	11:26:50	0.393957	142.636	FALSE	3
2022-09-14	11:26:50	0.404746	143.04	FALSE	3
2022-09-14	11:26:50	0.198232	143.239	FALSE	3
2022-09-14	11:26:50	0.292634	143.531	FALSE	3
2022-09-14	11:26:51	0.261285	143.792	FALSE	3
2022-09-14	11:26:51	0.149733	143.942	FALSE	3
2022-09-14	11:26:51	0.367138	144.309	FALSE	3
2022-09-14	11:26:52	0.325763	144.635	FALSE	3
2022-09-14	11:26:52	0.358995	144.994	FALSE	3
2022-09-14	11:26:52	0.334822	145.329	FALSE	3
2022-09-14	11:26:52	0.363321	145.692	FALSE	3
2022-09-14	11:26:53	0.339809	146.032	FALSE	3
2022-09-14	11:26:53	0.382761	146.415	FALSE	3
2022-09-14	11:26:53	0.33472	146.75	FALSE	3
2022-09-14	11:26:53	0.357061	147.107	FALSE	3
2022-09-14	11:26:54	0.334211	147.441	FALSE	3
2022-09-14	11:26:54	0.341794	147.783	FALSE	3
2022-09-14	11:26:54	0.402354	148.185	FALSE	3
2022-09-14	11:26:54	0.254771	148.44	FALSE	3
2022-09-14	11:26:55	0.231056	148.671	FALSE	3
2022-09-14	11:26:55	0.431819	149.103	FALSE	3
2022-09-14	11:26:55	0.215992	149.319	FALSE	3
2022-09-14	11:26:56	0.292227	149.611	FALSE	3
2022-09-14	11:26:56	0.274008	149.885	FALSE	3
2022-09-14	11:26:56	0.287901	150.173	FALSE	3
2022-09-14	11:26:56	0.325712	150.498	FALSE	3
2022-09-14	11:26:57	0.249733	150.748	FALSE	3
2022-09-14	11:26:57	0.451667	151.2	FALSE	3
2022-09-14	11:26:57	0.322506	151.522	FALSE	3
2022-09-14	11:26:57	0.434822	151.957	FALSE	3
2022-09-14	11:26:58	0.402456	152.36	FALSE	3
2022-09-14	11:26:58	0.553906	152.914	FALSE	3
2022-09-14	11:26:58	0.559148	153.473	FALSE	3
2022-09-14	11:26:58	1.21971	154.692	FALSE	3
2022-09-14	11:26:59	1.06816	155.761	FALSE	3
2022-09-14	11:26:59	2.03421	157.795	FALSE	3
2022-09-14	11:26:59	0.284847	158.08	FALSE	3
2022-09-14	11:27:00	0.0905982	158.17	FALSE	3
2022-09-14	11:27:00	0.400166	158.57	FALSE	3
2022-09-14	11:27:00	0.172481	158.743	FALSE	3
2022-09-14	11:27:00	0.371158	159.114	FALSE	3
2022-09-14	11:27:01	0.234262	159.348	FALSE	3
2022-09-14	11:27:01	0.417875	159.766	FALSE	3
2022-09-14	11:27:01	0.56729	160.333	FALSE	3
2022-09-14	11:27:01	0.532532	160.866	FALSE	3
2022-09-14	11:27:02	0.28612	161.152	FALSE	3
2022-09-14	11:27:02	0.429886	161.582	FALSE	3
2022-09-14	11:27:02	0.312125	161.894	FALSE	3
2022-09-14	11:27:02	0.354211	162.248	FALSE	3
2022-09-14	11:27:03	0.37869	162.627	FALSE	3
2022-09-14	11:27:03	0.477112	163.104	FALSE	3
2022-09-14	11:27:03	0.533092	163.637	FALSE	3
2022-09-14	11:27:04	0.429428	164.067	FALSE	3
2022-09-14	11:27:04	0.382964	164.45	FALSE	3
2022-09-14	11:27:04	0.311361	164.761	FALSE	3
2022-09-14	11:27:04	0.26668	165.028	FALSE	3
2022-09-14	11:27:05	0.414771	165.442	FALSE	3
2022-09-14	11:27:05	0.425713	165.868	FALSE	3
2022-09-14	11:27:05	1.25289	167.121	FALSE	3
2022-09-14	11:27:05	1.26261	168.384	FALSE	3
2022-09-14	11:27:06	0.909784	169.293	FALSE	3
2022-09-14	11:27:06	0.342914	169.636	FALSE	3
2022-09-14	11:27:06	0.487392	170.124	FALSE	3
2022-09-14	11:27:06	0.242863	170.367	FALSE	3
2022-09-14	11:27:07	0.489631	170.856	FALSE	3
2022-09-14	11:27:07	0.224237	171.08	FALSE	3
2022-09-14	11:27:07	0.432786	171.513	FALSE	3
2022-09-14	11:27:08	0.352328	171.866	FALSE	3
2022-09-14	11:27:08	0.624847	172.49	FALSE	3
2022-09-14	11:27:08	0.660776	173.151	FALSE	3
2022-09-14	11:27:08	0.399555	173.551	FALSE	3
2022-09-14	11:27:09	0.800929	174.352	FALSE	3
2022-09-14	11:27:09	0.473804	174.825	FALSE	3
2022-09-14	11:27:09	0.98215	175.808	FALSE	3
2022-09-14	11:27:09	0.290038	176.098	FALSE	3
2022-09-14	11:27:10	0.467545	176.565	FALSE	3
2022-09-14	11:27:10	0.266476	176.832	FALSE	3
2022-09-14	11:27:10	1.20067	178.032	FALSE	3
2022-09-14	11:27:10	1.81447	179.847	FALSE	3
2022-09-14	11:27:11	3.24123	183.088	1	4
2022-09-14	11:27:11	3.74566	186.834	1	5
2022-09-14	11:27:11	0.917214	187.751	FALSE	5
2022-09-14	11:27:12	0.854313	188.605	FALSE	5
2022-09-14	11:27:12	0.703372	189.309	FALSE	5
2022-09-14	11:27:12	0.642354	189.951	FALSE	5
2022-09-14	11:27:12	1.12256	191.074	FALSE	5
2022-09-14	11:27:13	0.376603	191.45	FALSE	5
2022-09-14	11:27:13	0.362965	191.813	FALSE	5
2022-09-14	11:27:13	0.262354	192.075	FALSE	5
2022-09-14	11:27:13	0.429936	192.505	FALSE	5
2022-09-14	11:27:14	0.148664	192.654	FALSE	5
2022-09-14	11:27:14	0.453295	193.107	FALSE	5
2022-09-14	11:27:14	0.208919	193.316	FALSE	5
2022-09-14	11:27:14	0.434008	193.75	FALSE	5
2022-09-14	11:27:15	0.322048	194.072	FALSE	5
2022-09-14	11:27:15	0.449326	194.522	FALSE	5
2022-09-14	11:27:15	0.333855	194.855	FALSE	5
2022-09-14	11:27:16	0.352125	195.208	FALSE	5
2022-09-14	11:27:16	0.341387	195.549	FALSE	5
2022-09-14	11:27:16	0.19299	195.742	FALSE	5
2022-09-14	11:27:16	1.9193	197.661	FALSE	5
2022-09-14	11:27:17	1.39452	199.056	FALSE	5
2022-09-14	11:27:17	3.0965	202.152	1	6
2022-09-14	11:27:17	1.07899	203.231	FALSE	6
2022-09-14	11:27:17	2.31869	205.55	FALSE	6
2022-09-14	11:27:18	0.381692	205.932	FALSE	6
2022-09-14	11:27:18	0.329784	206.261	FALSE	6
2022-09-14	11:27:18	0.413906	206.675	FALSE	6
2022-09-14	11:27:18	0.298232	206.974	FALSE	6
2022-09-14	11:27:19	0.351056	207.325	FALSE	6
2022-09-14	11:27:19	0.197112	207.522	FALSE	6
2022-09-14	11:27:19	0.404542	207.926	FALSE	6
2022-09-14	11:27:20	0.139046	208.065	FALSE	6
2022-09-14	11:27:20	0.297214	208.363	FALSE	6
2022-09-14	11:27:20	0.25925	208.622	FALSE	6
2022-09-14	11:27:20	0.395992	209.018	FALSE	6
2022-09-14	11:27:21	0.238282	209.256	FALSE	6
2022-09-14	11:27:21	0.278028	209.534	FALSE	6
2022-09-14	11:27:21	0.316756	209.851	FALSE	6
2022-09-14	11:27:21	0.367036	210.218	FALSE	6
2022-09-14	11:27:22	0.275585	210.493	FALSE	6
2022-09-14	11:27:22	0.275891	210.769	FALSE	6
2022-09-14	11:27:22	0.438079	211.207	FALSE	6
2022-09-14	11:27:22	0.208054	211.416	FALSE	6
2022-09-14	11:27:23	0.373346	211.789	FALSE	6
2022-09-14	11:27:23	0.245763	212.035	FALSE	6
2022-09-14	11:27:23	0.562404	212.597	FALSE	6
2022-09-14	11:27:24	0.175942	212.773	FALSE	6
2022-09-14	11:27:24	0.408308	213.181	FALSE	6
2022-09-14	11:27:24	0.307137	213.488	FALSE	6
2022-09-14	11:27:24	0.325916	213.814	FALSE	6
2022-09-14	11:27:25	0.364135	214.178	FALSE	6
2022-09-14	11:27:25	0.621641	214.8	FALSE	6
2022-09-14	11:27:25	0.470802	215.271	FALSE	6
2022-09-14	11:27:25	0.571463	215.842	FALSE	6
2022-09-14	11:27:26	0.538079	216.38	FALSE	6
2022-09-14	11:27:26	0.77874	217.159	FALSE	6
2022-09-14	11:27:26	0.606476	217.766	FALSE	6
2022-09-14	11:27:26	0.883117	218.649	FALSE	6
2022-09-14	11:27:27	1.25793	219.907	FALSE	6
2022-09-14	11:27:27	2.19024	222.097	FALSE	6
2022-09-14	11:27:27	2.67563	224.773	FALSE	6
2022-09-14	11:27:28	2.53075	227.303	FALSE	6
2022-09-14	11:27:28	1.78607	229.089	FALSE	6
2022-09-14	11:27:28	1.4136	230.503	FALSE	6
2022-09-14	11:27:28	1.23218	231.735	FALSE	6
2022-09-14	11:27:29	1.1478	232.883	FALSE	6
2022-09-14	11:27:29	1.14989	234.033	FALSE	6
2022-09-14	11:27:29	1.18785	235.221	FALSE	6
2022-09-14	11:27:29	1.26042	236.481	FALSE	6
2022-09-14	11:27:30	0.869275	237.35	FALSE	6
2022-09-14	11:27:30	0.710903	238.061	FALSE	6
2022-09-14	11:27:30	0.553855	238.615	FALSE	6
2022-09-14	11:27:30	0.547392	239.163	FALSE	6
2022-09-14	11:27:31	0.417163	239.58	FALSE	6
2022-09-14	11:27:31	0.549071	240.129	FALSE	6
2022-09-14	11:27:31	0.558028	240.687	FALSE	6
2022-09-14	11:27:32	0.50958	241.196	FALSE	6
2022-09-14	11:27:32	0.458537	241.655	FALSE	6
2022-09-14	11:27:32	0.452481	242.107	FALSE	6
2022-09-14	11:27:32	0.431718	242.539	FALSE	6
2022-09-14	11:27:33	0.461692	243.001	FALSE	6
2022-09-14	11:27:33	0.460369	243.461	FALSE	6
2022-09-14	11:27:33	0.486221	243.947	FALSE	6
2022-09-14	11:27:33	0.496959	244.444	FALSE	6
2022-09-14	11:27:34	0.481539	244.926	FALSE	6
2022-09-14	11:27:34	0.471209	245.397	FALSE	6
2022-09-14	11:27:34	0.46159	245.859	FALSE	6
2022-09-14	11:27:34	0.454517	246.313	FALSE	6
2022-09-14	11:27:35	0.471718	246.785	FALSE	6
2022-09-14	11:27:35	0.557061	247.342	FALSE	6
2022-09-14	11:27:35	0.665254	248.007	FALSE	6
2022-09-14	11:27:36	0.764389	248.772	FALSE	6
2022-09-14	11:27:36	0.794567	249.566	FALSE	6
2022-09-14	11:27:36	0.748359	250.315	FALSE	6
2022-09-14	11:27:36	0.720827	251.035	FALSE	6
2022-09-14	11:27:37	0.724135	251.76	FALSE	6
2022-09-14	11:27:37	0.836552	252.596	FALSE	6
2022-09-14	11:27:37	1.09375	253.69	FALSE	6
2022-09-14	11:27:37	2.51365	256.204	FALSE	6
2022-09-14	11:27:38	3.21976	259.423	1	7
2022-09-14	11:27:38	0.466985	259.89	FALSE	7
2022-09-14	11:27:38	0.345713	260.236	FALSE	7
2022-09-14	11:27:38	0.190853	260.427	FALSE	7
2022-09-14	11:27:39	0.395992	260.823	FALSE	7
2022-09-14	11:27:39	0.576959	261.4	FALSE	7
2022-09-14	11:27:39	0.492328	261.892	FALSE	7
2022-09-14	11:27:40	0.0103437	261.902	FALSE	7
2022-09-14	11:27:40	0.0922776	261.995	FALSE	7
2022-09-14	11:27:40	0.090191	262.085	FALSE	7
2022-09-14	11:27:40	0.585407	262.67	FALSE	7
2022-09-14	11:27:41	0.360471	263.031	FALSE	7
2022-09-14	11:27:41	1.40052	264.431	FALSE	7
2022-09-14	11:27:41	0.316807	264.748	FALSE	7
2022-09-14	11:27:41	1.17177	265.92	FALSE	7
2022-09-14	11:27:42	0.293804	266.214	FALSE	7
2022-09-14	11:27:42	0.486679	266.7	FALSE	7
2022-09-14	11:27:42	0.538486	267.239	FALSE	7
2022-09-14	11:27:42	0.458079	267.697	FALSE	7
2022-09-14	11:27:43	0.282201	267.979	FALSE	7
2022-09-14	11:27:43	0.118893	268.098	FALSE	7
2022-09-14	11:27:43	-0.0960175	268.098	FALSE	7
2022-09-14	11:27:44	-0.306348	268.098	FALSE	7
2022-09-14	11:27:44	-0.534541	268.098	FALSE	7
2022-09-14	11:27:44	-0.410572	268.098	FALSE	7
2022-09-14	11:27:44	-0.274694	268.098	FALSE	7
2022-09-14	11:27:45	-0.251844	268.098	FALSE	7
2022-09-14	11:27:45	-0.170623	268.098	FALSE	7
2022-09-14	11:27:45	-0.12304	268.098	FALSE	7
2022-09-14	11:27:45	-0.173931	268.098	FALSE	7
2022-09-14	11:27:46	-0.179936	268.098	FALSE	7
2022-09-14	11:27:46	-0.113626	268.098	FALSE	7
2022-09-14	11:27:46	-0.145076	268.098	FALSE	7
2022-09-14	11:27:46	-0.0798852	268.098	FALSE	7
2022-09-14	11:27:47	-0.0712338	268.098	FALSE	7
2022-09-14	11:27:47	1.13854	269.237	FALSE	7
2022-09-14	11:27:47	0.362507	269.599	FALSE	7
2022-09-14	11:27:48	2.31401	271.913	FALSE	7
2022-09-14	11:27:48	0.718842	272.632	FALSE	7
2022-09-14	11:27:48	1.40184	274.034	FALSE	7
2022-09-14	11:27:48	0.529224	274.563	FALSE	7
2022-09-14	11:27:49	0.222659	274.786	FALSE	7
2022-09-14	11:27:49	0.370242	275.156	FALSE	7
2022-09-14	11:27:49	0.282964	275.439	FALSE	7
2022-09-14	11:27:49	0.344644	275.784	FALSE	7
2022-09-14	11:27:50	0.192277	275.976	FALSE	7
2022-09-14	11:27:50	0.331107	276.307	FALSE	7
2022-09-14	11:27:50	0.443575	276.75	FALSE	7
2022-09-14	11:27:50	0.906577	277.657	FALSE	7
2022-09-14	11:27:51	2.96943	280.626	FALSE	7
2022-09-14	11:27:51	1.65431	282.281	FALSE	7
2022-09-14	11:27:51	4.63813	286.919	1	8
2022-09-14	11:27:52	1.36805	288.287	FALSE	8
2022-09-14	11:27:52	2.04571	290.333	FALSE	8
2022-09-14	11:27:52	1.59782	291.93	FALSE	8
2022-09-14	11:27:52	0.721743	292.652	FALSE	8
2022-09-14	11:27:53	0.753448	293.406	FALSE	8
2022-09-14	11:27:53	0.222761	293.628	FALSE	8
2022-09-14	11:27:53	1.20383	294.832	FALSE	8
2022-09-14	11:27:53	0.455026	295.287	FALSE	8
2022-09-14	11:27:54	3.78999	299.077	1	9
2022-09-14	11:27:54	1.14581	300.223	FALSE	9
2022-09-14	11:27:54	3.28999	303.513	1	10
2022-09-14	11:27:54	0.836552	304.35	FALSE	10
2022-09-14	11:27:55	1.57477	305.924	FALSE	10
2022-09-14	11:27:55	0.770547	306.695	FALSE	10
2022-09-14	11:27:55	0.267087	306.962	FALSE	10
2022-09-14	11:27:56	1.05385	308.016	FALSE	10
2022-09-14	11:27:56	0.303321	308.319	FALSE	10
2022-09-14	11:27:56	3.64653	311.966	1	11
2022-09-14	11:27:56	0.711921	312.678	FALSE	11
2022-09-14	11:27:57	1.33879	314.016	FALSE	11
2022-09-14	11:27:57	0.658893	314.675	FALSE	11
2022-09-14	11:27:57	0.412277	315.088	FALSE	11
2022-09-14	11:27:57	0.314771	315.402	FALSE	11
2022-09-14	11:27:58	0.332837	315.735	FALSE	11
2022-09-14	11:27:58	0.215534	315.951	FALSE	11
2022-09-14	11:27:58	0.248308	316.199	FALSE	11
2022-09-14	11:27:58	0.253499	316.453	FALSE	11
2022-09-14	11:27:59	0.334415	316.787	FALSE	11
2022-09-14	11:27:59	0.324542	317.112	FALSE	11
2022-09-14	11:27:59	0.760572	317.872	FALSE	11
2022-09-14	11:28:00	1.72933	319.601	FALSE	11
2022-09-14	11:28:00	1.38072	320.982	FALSE	11
2022-09-14	11:28:00	1.72963	322.712	FALSE	11
2022-09-14	11:28:00	0.810445	323.522	FALSE	11
2022-09-14	11:28:01	0.49584	324.018	FALSE	11
2022-09-14	11:28:01	0.39299	324.411	FALSE	11
2022-09-14	11:28:01	0.667392	325.078	FALSE	11
2022-09-14	11:28:01	1.18205	326.26	FALSE	11
2022-09-14	11:28:02	1.071	327.331	FALSE	11
2022-09-14	11:28:02	0.893295	328.225	FALSE	11
2022-09-14	11:28:02	0.605204	328.83	FALSE	11
2022-09-14	11:28:02	0.59187	329.422	FALSE	11
2022-09-14	11:28:03	0.525153	329.947	FALSE	11
2022-09-14	11:28:03	0.483015	330.43	FALSE	11
2022-09-14	11:28:03	0.402863	330.833	FALSE	11
2022-09-14	11:28:04	0.311361	331.144	FALSE	11
2022-09-14	11:28:04	0.417112	331.561	FALSE	11
2022-09-14	11:28:04	0.435382	331.997	FALSE	11
2022-09-14	11:28:04	0.434822	332.432	FALSE	11
2022-09-14	11:28:05	0.423931	332.856	FALSE	11
2022-09-14	11:28:05	0.424491	333.28	FALSE	11
2022-09-14	11:28:05	0.423066	333.703	FALSE	11
2022-09-14	11:28:05	0.423524	334.127	FALSE	11
2022-09-14	11:28:06	0.411667	334.538	FALSE	11
2022-09-14	11:28:06	0.406679	334.945	FALSE	11
2022-09-14	11:28:06	0.385	335.33	FALSE	11
2022-09-14	11:28:06	0.399758	335.73	FALSE	11
2022-09-14	11:28:07	0.349529	336.079	FALSE	11
2022-09-14	11:28:07	0.385611	336.465	FALSE	11
2022-09-14	11:28:07	0.352481	336.817	FALSE	11
2022-09-14	11:28:08	-1.41164	336.817	FALSE	11
2022-09-14	11:28:08	0.890446	337.708	FALSE	11
2022-09-14	11:28:08	1.42973	339.137	FALSE	11
2022-09-14	11:28:08	0.652125	339.79	FALSE	11
2022-09-14	11:28:09	0.62098	340.411	FALSE	11
2022-09-14	11:28:09	0.539758	340.95	FALSE	11
2022-09-14	11:28:09	0.898333	341.849	FALSE	11
2022-09-14	11:28:09	1.19462	343.043	FALSE	11
2022-09-14	11:28:10	1.19238	344.236	FALSE	11
2022-09-14	11:28:10	0.532328	344.768	FALSE	11
2022-09-14	11:28:10	0.534211	345.302	FALSE	11
2022-09-14	11:28:10	0.434364	345.737	FALSE	11
2022-09-14	11:28:11	0.483473	346.22	FALSE	11
2022-09-14	11:28:11	0.769733	346.99	FALSE	11
2022-09-14	11:28:11	2.8392	349.829	FALSE	11
2022-09-14	11:28:12	1.27752	351.107	FALSE	11
2022-09-14	11:28:12	1.92434	353.031	FALSE	11
2022-09-14	11:28:12	0.882761	353.914	FALSE	11
2022-09-14	11:28:12	1.25055	355.164	FALSE	11
2022-09-14	11:28:13	0.677519	355.842	FALSE	11
2022-09-14	11:28:13	0.773906	356.616	FALSE	11
2022-09-14	11:28:13	1.00429	357.62	FALSE	11
2022-09-14	11:28:13	1.45085	359.071	FALSE	11
2022-09-14	11:28:14	1.30128	360.372	FALSE	11
2022-09-14	11:28:14	1.81991	362.192	FALSE	11
2022-09-14	11:28:14	2.4937	364.686	FALSE	11
2022-09-14	11:28:14	-1.1807	364.686	FALSE	11
2022-09-14	11:28:15	1.13737	365.823	FALSE	11
2022-09-14	11:28:15	1.91228	367.735	FALSE	11
2022-09-14	11:28:15	3.45299	371.188	1	12
2022-09-14	11:28:16	0.990445	372.179	FALSE	12
2022-09-14	11:28:16	0.679656	372.858	FALSE	12
2022-09-14	11:28:16	0.396654	373.255	FALSE	12
2022-09-14	11:28:16	0.552176	373.807	FALSE	12
2022-09-14	11:28:17	0.488613	374.296	FALSE	12
2022-09-14	11:28:17	0.530089	374.826	FALSE	12
2022-09-14	11:28:17	0.860674	375.687	FALSE	12
2022-09-14	11:28:17	0.859199	376.546	FALSE	12
2022-09-14	11:28:18	0.506171	377.052	FALSE	12
2022-09-14	11:28:18	0.423982	377.476	FALSE	12
2022-09-14	11:28:18	0.458944	377.935	FALSE	12
2022-09-14	11:28:18	0.343524	378.278	FALSE	12
2022-09-14	11:28:19	0.35182	378.63	FALSE	12
2022-09-14	11:28:19	0.261081	378.891	FALSE	12
2022-09-14	11:28:19	0.518791	379.41	FALSE	12
2022-09-14	11:28:20	1.25375	380.664	FALSE	12
2022-09-14	11:28:20	1.66739	382.331	FALSE	12
2022-09-14	11:28:20	2.6423	384.974	FALSE	12
2022-09-14	11:28:20	1.7965	386.77	FALSE	12
2022-09-14	11:28:21	0.777214	387.547	FALSE	12
2022-09-14	11:28:21	0.505763	388.053	FALSE	12
2022-09-14	11:28:21	0.580013	388.633	FALSE	12
2022-09-14	11:28:21	0.443219	389.076	FALSE	12
2022-09-14	11:28:22	0.665967	389.742	FALSE	12
2022-09-14	11:28:22	0.465865	390.208	FALSE	12
2022-09-14	11:28:22	0.943626	391.152	FALSE	12
2022-09-14	11:28:22	1.08882	392.241	FALSE	12
2022-09-14	11:28:23	1.02449	393.265	FALSE	12
2022-09-14	11:28:23	1.611	394.876	FALSE	12
2022-09-14	11:28:23	0.548308	395.424	FALSE	12
2022-09-14	11:28:24	1.49884	396.923	FALSE	12
2022-09-14	11:28:24	0.533142	397.456	FALSE	12
2022-09-14	11:28:24	2.52739	399.984	FALSE	12
2022-09-14	11:28:24	0.950089	400.934	FALSE	12
2022-09-14	11:28:25	1.12887	402.063	FALSE	12
2022-09-14	11:28:25	0.84841	402.911	FALSE	12
2022-09-14	11:28:25	1.5249	404.436	FALSE	12
2022-09-14	11:28:25	3.61782	408.054	1	13
2022-09-14	11:28:26	2.3937	410.447	FALSE	13
2022-09-14	11:28:26	4.56021	415.008	1	14
2022-09-14	11:28:26	1.76286	416.771	FALSE	14
2022-09-14	11:28:27	3.67223	420.443	1	15
2022-09-14	11:28:27	1.07706	421.52	FALSE	15
2022-09-14	11:28:27	2.52113	424.041	FALSE	15
2022-09-14	11:28:27	0.80388	424.845	FALSE	15
2022-09-14	11:28:28	2.50495	427.35	FALSE	15
2022-09-14	11:28:28	0.980114	428.33	FALSE	15
2022-09-14	11:28:28	3.331	431.661	1	16
2022-09-14	11:28:28	2.43828	434.099	FALSE	16
2022-09-14	11:28:29	3.96983	438.069	1	17
2022-09-14	11:28:29	2.60892	440.678	FALSE	17
2022-09-14	11:28:29	2.5394	443.217	FALSE	17
2022-09-14	11:28:29	0.723524	443.941	FALSE	17
2022-09-14	11:28:30	1.1249	445.066	FALSE	17
2022-09-14	11:28:30	0.894516	445.96	FALSE	17
2022-09-14	11:28:30	0.572837	446.533	FALSE	17
2022-09-14	11:28:30	0.352837	446.886	FALSE	17
2022-09-14	11:28:31	0.535433	447.421	FALSE	17
2022-09-14	11:28:31	0.289326	447.711	FALSE	17
2022-09-14	11:28:31	0.504593	448.215	FALSE	17
2022-09-14	11:28:32	1.06225	449.278	FALSE	17
2022-09-14	11:28:32	0.561132	449.839	FALSE	17
2022-09-14	11:28:32	1.22826	451.067	FALSE	17
2022-09-14	11:28:32	0.627443	451.694	FALSE	17
2022-09-14	11:28:33	1.89589	453.59	FALSE	17
2022-09-14	11:28:33	0.985407	454.576	FALSE	17
2022-09-14	11:28:33	2.48698	457.063	FALSE	17
2022-09-14	11:28:33	1.99243	459.055	FALSE	17
2022-09-14	11:28:34	0.574211	459.629	FALSE	17
2022-09-14	11:28:34	0.706374	460.336	FALSE	17
2022-09-14	11:28:34	0.732328	461.068	FALSE	17
2022-09-14	11:28:34	0.731616	461.8	FALSE	17
2022-09-14	11:28:35	0.72958	462.529	FALSE	17
2022-09-14	11:28:35	0.732328	463.262	FALSE	17
2022-09-14	11:28:35	0.733346	463.995	FALSE	17
2022-09-14	11:28:36	0.731412	464.726	FALSE	17
2022-09-14	11:28:36	0.733142	465.459	FALSE	17
2022-09-14	11:28:36	0.732634	466.192	FALSE	17
2022-09-14	11:28:36	0.732226	466.924	FALSE	17
2022-09-14	11:28:37	0.734211	467.658	FALSE	17
2022-09-14	11:28:37	0.726476	468.385	FALSE	17
2022-09-14	11:28:37	0.726069	469.111	FALSE	17
2022-09-14	11:28:37	0.680929	469.792	FALSE	17
2022-09-14	11:28:38	0.649733	470.442	FALSE	17
2022-09-14	11:28:38	0.590801	471.033	FALSE	17
2022-09-14	11:28:38	0.565611	471.598	FALSE	17
2022-09-14	11:28:38	0.539707	472.138	FALSE	17
2022-09-14	11:28:39	0.567137	472.705	FALSE	17
2022-09-14	11:28:39	0.399148	473.104	FALSE	17
2022-09-14	11:28:39	0.387036	473.491	FALSE	17
2022-09-14	11:28:40	0.359453	473.851	FALSE	17
2022-09-14	11:28:40	0.358588	474.209	FALSE	17
2022-09-14	11:28:40	0.382812	474.592	FALSE	17
2022-09-14	11:28:40	0.297163	474.889	FALSE	17
2022-09-14	11:28:41	0.321692	475.211	FALSE	17
2022-09-14	11:28:41	0.259911	475.471	FALSE	17
2022-09-14	11:28:41	0.332583	475.803	FALSE	17
2022-09-14	11:28:41	0.364339	476.168	FALSE	17
2022-09-14	11:28:42	0.261336	476.429	FALSE	17
2022-09-14	11:28:42	0.44444	476.873	FALSE	17
2022-09-14	11:28:42	0.337468	477.211	FALSE	17
2022-09-14	11:28:42	0.369224	477.58	FALSE	17
2022-09-14	11:28:43	0.430598	478.011	FALSE	17
2022-09-14	11:28:43	0.365305	478.376	FALSE	17
2022-09-14	11:28:43	0.709784	479.086	FALSE	17
2022-09-14	11:28:44	0.512328	479.598	FALSE	17
2022-09-14	11:28:44	0.597061	480.195	FALSE	17
2022-09-14	11:28:44	0.365305	480.561	FALSE	17
2022-09-14	11:28:44	0.473346	481.034	FALSE	17
2022-09-14	11:28:45	0.201285	481.235	FALSE	17
2022-09-14	11:28:45	0.0711071	481.306	FALSE	17
2022-09-14	11:28:45	0.0166542	481.323	FALSE	17
2022-09-14	11:28:45	-0.151692	481.323	FALSE	17
2022-09-14	11:28:46	-0.11215	481.323	FALSE	17
2022-09-14	11:28:46	0.0998094	481.423	FALSE	17
2022-09-14	11:28:46	0.078588	481.501	FALSE	17
2022-09-14	11:28:46	-0.130012	481.501	FALSE	17
2022-09-14	11:28:47	0.00291375	481.504	FALSE	17
2022-09-14	11:28:47	0.440522	481.945	FALSE	17
2022-09-14	11:28:47	0.374669	482.319	FALSE	17
2022-09-14	11:28:48	3.49558	485.815	1	18
2022-09-14	11:28:48	0.797214	486.612	FALSE	18
2022-09-14	11:28:48	1.17813	487.79	FALSE	18
2022-09-14	11:28:48	0.349784	488.14	FALSE	18
2022-09-14	11:28:49	0.220674	488.361	FALSE	18
2022-09-14	11:28:49	0.143321	488.504	FALSE	18
2022-09-14	11:28:49	0.0935498	488.598	FALSE	18
2022-09-14	11:28:49	0.178232	488.776	FALSE	18
2022-09-14	11:28:50	0.292277	489.068	FALSE	18
2022-09-14	11:28:50	0.197672	489.266	FALSE	18
2022-09-14	11:28:50	0.354008	489.62	FALSE	18
2022-09-14	11:28:50	0.734517	490.354	FALSE	18
2022-09-14	11:28:51	0.857926	491.212	FALSE	18
2022-09-14	11:28:51	2.08016	493.292	FALSE	18
2022-09-14	11:28:51	0.989886	494.282	FALSE	18
2022-09-14	11:28:52	0.705	494.987	FALSE	18
2022-09-14	11:28:52	1.4392	496.427	FALSE	18
2022-09-14	11:28:52	0.68958	497.116	FALSE	18
2022-09-14	11:28:52	1.01772	498.134	FALSE	18
2022-09-14	11:28:53	0.405967	498.54	FALSE	18
2022-09-14	11:28:53	0.517977	499.058	FALSE	18
2022-09-14	11:28:53	0.287188	499.345	FALSE	18
2022-09-14	11:28:53	0.47813	499.823	FALSE	18
2022-09-14	11:28:54	0.416959	500.24	FALSE	18
2022-09-14	11:28:54	0.383422	500.623	FALSE	18
2022-09-14	11:28:54	0.46271	501.086	FALSE	18
2022-09-14	11:28:54	0.947697	502.034	FALSE	18
2022-09-14	11:28:55	4.30963	506.344	1	19
2022-09-14	11:28:55	3.8195	510.163	1	20
2022-09-14	11:28:55	5.13925	515.302	1	21
2022-09-14	11:28:56	4.88347	520.186	1	22
2022-09-14	11:28:56	1.73406	521.92	FALSE	22
2022-09-14	11:28:56	3.03085	524.951	1	23
2022-09-14	11:28:56	2.06775	527.018	FALSE	23
2022-09-14	11:28:57	3.86749	530.886	1	24
2022-09-14	11:28:57	3.88281	534.769	1	25
2022-09-14	11:28:57	1.51411	536.283	FALSE	25
2022-09-14	11:28:58	0.737519	537.02	FALSE	25
2022-09-14	11:28:58	0.732023	537.752	FALSE	25
2022-09-14	11:28:58	1.57609	539.328	FALSE	25
2022-09-14	11:28:58	2.9451	542.274	FALSE	25
2022-09-14	11:28:58	1.39996	543.674	FALSE	25
2022-09-14	11:28:59	2.42006	546.094	FALSE	25
2022-09-14	11:28:59	0.487137	546.581	FALSE	25
2022-09-14	11:28:59	0.928969	547.51	FALSE	25
2022-09-14	11:29:00	0.360674	547.87	FALSE	25
2022-09-14	11:29:00	0.499555	548.37	FALSE	25
2022-09-14	11:29:00	0.212888	548.583	FALSE	25
2022-09-14	11:29:00	0.525407	549.108	FALSE	25
2022-09-14	11:29:01	0.249377	549.358	FALSE	25
2022-09-14	11:29:01	0.567443	549.925	FALSE	25
2022-09-14	11:29:01	1.5652	551.49	FALSE	25
2022-09-14	11:29:01	0.779402	552.27	FALSE	25
2022-09-14	11:29:02	1.52098	553.791	FALSE	25
2022-09-14	11:29:02	2.47696	556.268	FALSE	25
2022-09-14	11:29:02	1.54566	557.813	FALSE	25
2022-09-14	11:29:02	2.60597	560.419	FALSE	25
2022-09-14	11:29:03	2.0592	562.478	FALSE	25
2022-09-14	11:29:03	2.94953	565.428	FALSE	25
2022-09-14	11:29:03	2.32882	567.757	FALSE	25
2022-09-14	11:29:04	1.99818	569.755	FALSE	25
2022-09-14	11:29:04	1.60419	571.359	FALSE	25
2022-09-14	11:29:04	0.880827	572.24	FALSE	25
2022-09-14	11:29:04	1.13543	573.375	FALSE	25
2022-09-14	11:29:05	0.892023	574.267	FALSE	25
2022-09-14	11:29:05	0.764389	575.032	FALSE	25
2022-09-14	11:29:05	0.684695	575.716	FALSE	25
2022-09-14	11:29:05	0.610496	576.327	FALSE	25
2022-09-14	11:29:06	0.631819	576.959	FALSE	25
2022-09-14	11:29:06	0.745458	577.704	FALSE	25
2022-09-14	11:29:06	0.813804	578.518	FALSE	25
2022-09-14	11:29:06	0.881082	579.399	FALSE	25
2022-09-14	11:29:07	0.89014	580.289	FALSE	25
2022-09-14	11:29:07	0.777061	581.066	FALSE	25
2022-09-14	11:29:07	0.727952	581.794	FALSE	25
2022-09-14	11:29:08	0.775331	582.57	FALSE	25
2022-09-14	11:29:08	0.768308	583.338	FALSE	25
2022-09-14	11:29:08	0.759809	584.098	FALSE	25
2022-09-14	11:29:08	0.587697	584.685	FALSE	25
2022-09-14	11:29:09	0.581998	585.267	FALSE	25
2022-09-14	11:29:09	0.839504	586.107	FALSE	25
2022-09-14	11:29:09	0.821387	586.928	FALSE	25
2022-09-14	11:29:09	0.865204	587.794	FALSE	25
2022-09-14	11:29:10	0.876603	588.67	FALSE	25
2022-09-14	11:29:10	0.881285	589.551	FALSE	25
2022-09-14	11:29:10	0.889326	590.441	FALSE	25
2022-09-14	11:29:10	0.913448	591.354	FALSE	25
2022-09-14	11:29:11	0.88271	592.237	FALSE	25
2022-09-14	11:29:11	0.865712	593.103	FALSE	25
2022-09-14	11:29:11	0.63472	593.737	FALSE	25
2022-09-14	11:29:12	0.506883	594.244	FALSE	25
2022-09-14	11:29:12	0.486476	594.731	FALSE	25
2022-09-14	11:29:12	0.448512	595.179	FALSE	25
2022-09-14	11:29:12	0.407036	595.586	FALSE	25
2022-09-14	11:29:13	0.418486	596.005	FALSE	25
2022-09-14	11:29:13	0.427137	596.432	FALSE	25
2022-09-14	11:29:13	0.422303	596.854	FALSE	25
2022-09-14	11:29:13	0.428155	597.282	FALSE	25
2022-09-14	11:29:14	0.423473	597.706	FALSE	25
2022-09-14	11:29:14	0.422456	598.128	FALSE	25
2022-09-14	11:29:14	0.417316	598.546	FALSE	25
2022-09-14	11:29:14	0.376756	598.922	FALSE	25
2022-09-14	11:29:15	0.372074	599.294	FALSE	25
2022-09-14	11:29:15	0.404288	599.699	FALSE	25
2022-09-14	11:29:15	0.392328	600.091	FALSE	25
2022-09-14	11:29:16	0.417468	600.508	FALSE	25
2022-09-14	11:29:16	0.419249	600.928	FALSE	25
2022-09-14	11:29:16	0.404186	601.332	FALSE	25
2022-09-14	11:29:16	0.430038	601.762	FALSE	25
2022-09-14	11:29:17	0.413753	602.176	FALSE	25
2022-09-14	11:29:17	0.429835	602.606	FALSE	25
2022-09-14	11:29:17	0.239504	602.845	FALSE	25
2022-09-14	11:29:17	0.13411	602.979	FALSE	25
2022-09-14	11:29:18	0.290344	603.27	FALSE	25
2022-09-14	11:29:18	0.240827	603.51	FALSE	25
2022-09-14	11:29:18	0.266425	603.777	FALSE	25
2022-09-14	11:29:18	2.5337	606.31	FALSE	25
2022-09-14	11:29:19	2.49304	608.803	FALSE	25
2022-09-14	11:29:19	3.39284	612.196	1	26
2022-09-14	11:29:19	1.53752	613.734	FALSE	26
2022-09-14	11:29:20	5.47492	619.209	1	27
2022-09-14	11:29:20	2.38449	621.593	FALSE	27
2022-09-14	11:29:20	6.83879	628.432	1	28
2022-09-14	11:29:20	1.80286	630.235	FALSE	28
2022-09-14	11:29:21	4.16703	634.402	1	29
2022-09-14	11:29:21	1.84571	636.248	FALSE	29
2022-09-14	11:29:21	1.442	637.69	FALSE	29
2022-09-14	11:29:21	1.87986	639.57	FALSE	29
2022-09-14	11:29:22	2.11645	641.686	FALSE	29
2022-09-14	11:29:22	1.01431	642.7	FALSE	29
2022-09-14	11:29:22	2.27202	644.972	FALSE	29
2022-09-14	11:29:22	0.857265	645.83	FALSE	29
2022-09-14	11:29:23	1.62927	647.459	FALSE	29
2022-09-14	11:29:23	1.27304	648.732	FALSE	29
2022-09-14	11:29:23	1.79044	650.522	FALSE	29
2022-09-14	11:29:24	2.34587	652.868	FALSE	29
2022-09-14	11:29:24	0.472735	653.341	FALSE	29
2022-09-14	11:29:24	1.21116	654.552	FALSE	29
2022-09-14	11:29:24	0.445102	654.997	FALSE	29
2022-09-14	11:29:25	1.23202	656.229	FALSE	29
2022-09-14	11:29:25	1.37172	657.601	FALSE	29
2022-09-14	11:29:25	0.879453	658.48	FALSE	29
2022-09-14	11:29:25	1.12464	659.605	FALSE	29
2022-09-14	11:29:26	0.598893	660.204	FALSE	29
2022-09-14	11:29:26	1.00205	661.206	FALSE	29
2022-09-14	11:29:26	0.691921	661.898	FALSE	29
2022-09-14	11:29:26	0.941845	662.84	FALSE	29
2022-09-14	11:29:27	1.24968	664.089	FALSE	29
2022-09-14	11:29:27	0.496043	664.585	FALSE	29
2022-09-14	11:29:27	1.96225	666.548	FALSE	29
2022-09-14	11:29:28	0.820318	667.368	FALSE	29
2022-09-14	11:29:28	2.15167	669.52	FALSE	29
2022-09-14	11:29:28	2.05543	671.575	FALSE	29
2022-09-14	11:29:28	2.32754	673.903	FALSE	29
2022-09-14	11:29:29	1.22134	675.124	FALSE	29
2022-09-14	11:29:29	2.16001	677.284	FALSE	29
2022-09-14	11:29:29	0.544186	677.828	FALSE	29
2022-09-14	11:29:29	0.757519	678.586	FALSE	29
2022-09-14	11:29:30	0.771361	679.357	FALSE	29
2022-09-14	11:29:30	0.330903	679.688	FALSE	29
2022-09-14	11:29:30	0.907595	680.596	FALSE	29
2022-09-14	11:29:30	0.453957	681.05	FALSE	29
2022-09-14	11:29:31	0.571361	681.621	FALSE	29
2022-09-14	11:29:31	0.259911	681.881	FALSE	29
2022-09-14	11:29:31	0.281641	682.162	FALSE	29
2022-09-14	11:29:32	0.571514	682.734	FALSE	29
2022-09-14	11:29:32	-1.50294	682.734	FALSE	29
2022-09-14	11:29:32	-0.614949	682.734	FALSE	29
2022-09-14	11:29:32	0.403982	683.138	FALSE	29
2022-09-14	11:29:33	0.539249	683.677	FALSE	29
2022-09-14	11:29:33	0.545153	684.222	FALSE	29
2022-09-14	11:29:33	1.20658	685.429	FALSE	29
2022-09-14	11:29:33	1.27569	686.705	FALSE	29
2022-09-14	11:29:34	1.68327	688.388	FALSE	29
2022-09-14	11:29:34	1.39991	689.788	FALSE	29
2022-09-14	11:29:34	1.23024	691.018	FALSE	29
2022-09-14	11:29:34	1.50419	692.522	FALSE	29
2022-09-14	11:29:35	1.44246	693.965	FALSE	29
2022-09-14	11:29:35	1.19233	695.157	FALSE	29
2022-09-14	11:29:35	0.736654	695.894	FALSE	29
2022-09-14	11:29:35	0.420166	696.314	FALSE	29
2022-09-14	11:29:36	0.387494	696.701	FALSE	29
2022-09-14	11:29:36	0.292023	696.993	FALSE	29
2022-09-14	11:29:36	0.293295	697.287	FALSE	29
2022-09-14	11:29:37	0.3193	697.606	FALSE	29
2022-09-14	11:29:37	0.682761	698.289	FALSE	29
2022-09-14	11:29:37	0.719097	699.008	FALSE	29
2022-09-14	11:29:37	1.23426	700.242	FALSE	29
2022-09-14	11:29:38	0.50327	700.745	FALSE	29
2022-09-14	11:29:38	0.466069	701.211	FALSE	29
2022-09-14	11:29:38	-0.0034476	701.211	FALSE	29
2022-09-14	11:29:38	-0.28416	701.211	FALSE	29
2022-09-14	11:29:39	-0.325585	701.211	FALSE	29
2022-09-14	11:29:39	-0.225585	701.211	FALSE	29
2022-09-14	11:29:39	-0.0639056	701.211	FALSE	29
2022-09-14	11:29:39	0.324339	701.536	FALSE	29
2022-09-14	11:29:40	0.24729	701.783	FALSE	29
2022-09-14	11:29:40	0.227036	702.01	FALSE	29
2022-09-14	11:29:40	0.424135	702.434	FALSE	29
2022-09-14	11:29:41	0.601794	703.036	FALSE	29
2022-09-14	11:29:41	0.652175	703.688	FALSE	29
2022-09-14	11:29:41	0.692175	704.38	FALSE	29
2022-09-14	11:29:41	0.586272	704.967	FALSE	29
2022-09-14	11:29:42	0.526832	705.493	FALSE	29
2022-09-14	11:29:42	0.52215	706.016	FALSE	29
2022-09-14	11:29:42	0.521336	706.537	FALSE	29
2022-09-14	11:29:42	0.52897	707.066	FALSE	29
2022-09-14	11:29:43	0.538486	707.604	FALSE	29
2022-09-14	11:29:43	0.549987	708.154	FALSE	29
2022-09-14	11:29:43	0.548461	708.703	FALSE	29
2022-09-14	11:29:43	0.568563	709.271	FALSE	29
2022-09-14	11:29:44	0.579351	709.851	FALSE	29
2022-09-14	11:29:44	0.584542	710.435	FALSE	29
2022-09-14	11:29:44	0.569376	711.005	FALSE	29
2022-09-14	11:29:45	0.569479	711.574	FALSE	29
2022-09-14	11:29:45	0.565305	712.139	FALSE	29
2022-09-14	11:29:45	0.567646	712.707	FALSE	29
2022-09-14	11:29:45	0.598384	713.305	FALSE	29
2022-09-14	11:29:46	0.611158	713.917	FALSE	29
2022-09-14	11:29:46	0.657468	714.574	FALSE	29
2022-09-14	11:29:46	0.662303	715.236	FALSE	29
2022-09-14	11:29:46	0.779046	716.015	FALSE	29
2022-09-14	11:29:47	0.764338	716.78	FALSE	29
2022-09-14	11:29:47	0.789834	717.57	FALSE	29
2022-09-14	11:29:47	0.870751	718.44	FALSE	29
2022-09-14	11:29:47	0.712837	719.153	FALSE	29
2022-09-14	11:29:48	1.04016	720.193	FALSE	29
2022-09-14	11:29:48	1.02464	721.218	FALSE	29
2022-09-14	11:29:48	1.31014	722.528	FALSE	29
2022-09-14	11:29:49	0.932074	723.46	FALSE	29
2022-09-14	11:29:49	0.818587	724.279	FALSE	29
2022-09-14	11:29:49	0.711463	724.99	FALSE	29
2022-09-14	11:29:49	0.601285	725.592	FALSE	29
2022-09-14	11:29:50	0.583829	726.175	FALSE	29
2022-09-14	11:29:50	0.688664	726.864	FALSE	29
2022-09-14	11:29:50	0.837163	727.701	FALSE	29
2022-09-14	11:29:50	0.774313	728.476	FALSE	29
2022-09-14	11:29:51	0.877061	729.353	FALSE	29
2022-09-14	11:29:51	0.770903	730.123	FALSE	29
2022-09-14	11:29:51	0.599249	730.723	FALSE	29
2022-09-14	11:29:51	0.513753	731.236	FALSE	29
2022-09-14	11:29:52	0.557366	731.794	FALSE	29
2022-09-14	11:29:52	0.538384	732.332	FALSE	29
2022-09-14	11:29:52	0.521997	732.854	FALSE	29
2022-09-14	11:29:53	0.513193	733.367	FALSE	29
2022-09-14	11:29:53	0.4993	733.867	FALSE	29
2022-09-14	11:29:53	0.491667	734.358	FALSE	29
2022-09-14	11:29:53	0.49528	734.854	FALSE	29
2022-09-14	11:29:54	0.484593	735.338	FALSE	29
2022-09-14	11:29:54	0.506069	735.844	FALSE	29
2022-09-14	11:29:54	0.578486	736.423	FALSE	29
2022-09-14	11:29:54	0.554313	736.977	FALSE	29
2022-09-14	11:29:55	0.547239	737.524	FALSE	29
2022-09-14	11:29:55	0.531209	738.056	FALSE	29
2022-09-14	11:29:55	0.62327	738.679	FALSE	29
2022-09-14	11:29:55	1.10139	739.78	FALSE	29
2022-09-14	11:29:56	0.591666	740.372	FALSE	29
2022-09-14	11:29:56	1.23136	741.603	FALSE	29
2022-09-14	11:29:56	0.704949	742.308	FALSE	29
2022-09-14	11:29:57	0.870802	743.179	FALSE	29
2022-09-14	11:29:57	0.677723	743.857	FALSE	29
2022-09-14	11:29:57	0.726069	744.583	FALSE	29
2022-09-14	11:29:57	0.733346	745.316	FALSE	29
2022-09-14	11:29:58	0.723422	746.04	FALSE	29
2022-09-14	11:29:58	0.683219	746.723	FALSE	29
2022-09-14	11:29:58	0.614465	747.337	FALSE	29
2022-09-14	11:29:58	0.518893	747.856	FALSE	29
2022-09-14	11:29:59	0.452939	748.309	FALSE	29
2022-09-14	11:29:59	0.308512	748.618	FALSE	29
2022-09-14	11:29:59	0.280674	748.898	FALSE	29
2022-09-14	11:29:59	0.344542	749.243	FALSE	29
2022-09-14	11:30:00	0.491667	749.734	FALSE	29
2022-09-14	11:30:00	1.42515	751.16	FALSE	29
2022-09-14	11:30:00	0.681895	751.842	FALSE	29
2022-09-14	11:30:01	1.10525	752.947	FALSE	29
2022-09-14	11:30:01	0.802914	753.75	FALSE	29
2022-09-14	11:30:01	0.397417	754.147	FALSE	29
2022-09-14	11:30:01	0.583066	754.73	FALSE	29
2022-09-14	11:30:02	0.735483	755.466	FALSE	29
2022-09-14	11:30:02	0.733651	756.199	FALSE	29
2022-09-14	11:30:02	0.730903	756.93	FALSE	29
2022-09-14	11:30:02	0.730394	757.661	FALSE	29
2022-09-14	11:30:03	0.732532	758.393	FALSE	29
2022-09-14	11:30:03	0.723473	759.117	FALSE	29
2022-09-14	11:30:03	0.72215	759.839	FALSE	29
2022-09-14	11:30:03	0.696959	760.536	FALSE	29
2022-09-14	11:30:04	0.704746	761.24	FALSE	29
2022-09-14	11:30:04	0.667494	761.908	FALSE	29
2022-09-14	11:30:04	0.649326	762.557	FALSE	29
2022-09-14	11:30:05	0.65472	763.212	FALSE	29
2022-09-14	11:30:05	0.640267	763.852	FALSE	29
2022-09-14	11:30:05	0.639402	764.492	FALSE	29
2022-09-14	11:30:05	0.610242	765.102	FALSE	29
2022-09-14	11:30:06	0.607544	765.709	FALSE	29
2022-09-14	11:30:06	0.606018	766.315	FALSE	29
2022-09-14	11:30:06	0.416756	766.732	FALSE	29
2022-09-14	11:30:06	0.380624	767.113	FALSE	29
2022-09-14	11:30:07	0.36612	767.479	FALSE	29
2022-09-14	11:30:07	0.368613	767.848	FALSE	29
2022-09-14	11:30:07	0.375026	768.223	FALSE	29
2022-09-14	11:30:07	0.340216	768.563	FALSE	29
2022-09-14	11:30:08	0.323575	768.886	FALSE	29
2022-09-14	11:30:08	0.321183	769.208	FALSE	29
2022-09-14	11:30:08	0.316298	769.524	FALSE	29
2022-09-14	11:30:09	0.622354	770.146	FALSE	29
2022-09-14	11:30:09	-0.248486	770.146	FALSE	29
2022-09-14	11:30:09	-0.446806	770.146	FALSE	29
2022-09-14	11:30:09	-0.595814	770.146	FALSE	29
2022-09-14	11:30:10	-0.696526	770.146	FALSE	29
2022-09-14	11:30:10	-0.777798	770.146	FALSE	29
2022-09-14	11:30:10	-0.835356	770.146	FALSE	29
2022-09-14	11:30:10	-0.831182	770.146	FALSE	29
2022-09-14	11:30:11	-0.869554	770.146	FALSE	29
2022-09-14	11:30:11	-0.886857	770.146	FALSE	29
2022-09-14	11:30:11	-0.897798	770.146	FALSE	29
2022-09-14	11:30:11	-0.904567	770.146	FALSE	29
2022-09-14	11:30:12	-0.922328	770.146	FALSE	29
2022-09-14	11:30:12	-0.939732	770.146	FALSE	29
2022-09-14	11:30:12	-0.956577	770.146	FALSE	29
2022-09-14	11:30:13	-0.95734	770.146	FALSE	29
2022-09-14	11:30:13	-0.972913	770.146	FALSE	29
2022-09-14	11:30:13	-0.954236	770.146	FALSE	29
2022-09-14	11:30:13	-0.965635	770.146	FALSE	29
2022-09-14	11:30:14	-0.770572	770.146	FALSE	29
2022-09-14	11:30:14	0.732481	770.879	FALSE	29
2022-09-14	11:30:14	0.722914	771.602	FALSE	29
2022-09-14	11:30:14	0.735534	772.337	FALSE	29
2022-09-14	11:30:15	0.730954	773.068	FALSE	29
2022-09-14	11:30:15	0.734568	773.803	FALSE	29
2022-09-14	11:30:15	0.62729	774.43	FALSE	29
2022-09-14	11:30:15	0.328511	774.759	FALSE	29
2022-09-14	11:30:16	-0.0367809	774.759	FALSE	29
2022-09-14	11:30:16	-0.152659	774.759	FALSE	29
2022-09-14	11:30:16	-0.245738	774.759	FALSE	29
2022-09-14	11:30:17	-0.489147	774.759	FALSE	29
2022-09-14	11:30:17	-0.556119	774.759	FALSE	29
2022-09-14	11:30:17	-0.565686	774.759	FALSE	29
2022-09-14	11:30:17	-0.583905	774.759	FALSE	29
2022-09-14	11:30:18	-0.396883	774.759	FALSE	29
2022-09-14	11:30:18	-0.676271	774.759	FALSE	29
2022-09-14	11:30:18	-0.775254	774.759	FALSE	29
2022-09-14	11:30:18	-0.861615	774.759	FALSE	29
2022-09-14	11:30:19	-0.949147	774.759	FALSE	29
2022-09-14	11:30:19	-1.07454	774.759	FALSE	29
2022-09-14	11:30:19	-1.24095	774.759	FALSE	29
2022-09-14	11:30:19	-1.37607	774.759	FALSE	29
2022-09-14	11:30:20	-1.65902	774.759	FALSE	29
2022-09-14	11:30:20	-2.34401	774.759	FALSE	29
2022-09-14	11:30:20	-2.42487	774.759	FALSE	29
2022-09-14	11:30:21	-2.42217	774.759	FALSE	29
2022-09-14	11:30:21	-2.4382	774.759	FALSE	29
2022-09-14	11:30:21	-2.4179	774.759	FALSE	29
2022-09-14	11:30:21	-2.43357	774.759	FALSE	29
2022-09-14	11:30:22	-2.39902	774.759	FALSE	29
2022-09-14	11:30:22	-2.38289	774.759	FALSE	29
2022-09-14	11:30:22	-2.378	774.759	FALSE	29
2022-09-14	11:30:22	-2.29205	774.759	FALSE	29
2022-09-14	11:30:23	-2.24579	774.759	FALSE	29
2022-09-14	11:30:23	-2.11312	774.759	FALSE	29
2022-09-14	11:30:23	-1.76482	774.759	FALSE	29
2022-09-14	11:30:23	-2.42706	774.759	FALSE	29
2022-09-14	11:30:24	-2.61592	774.759	FALSE	29
2022-09-14	11:30:24	-2.6322	774.759	FALSE	29
2022-09-14	11:30:24	-2.56757	774.759	FALSE	29
2022-09-14	11:30:25	-2.46207	774.759	FALSE	29
2022-09-14	11:30:25	-2.34014	774.759	FALSE	29
2022-09-14	11:30:25	-1.88151	774.759	FALSE	29
2022-09-14	11:30:25	-1.59714	774.759	FALSE	29
2022-09-14	11:30:26	-2.23795	774.759	FALSE	29
2022-09-14	11:30:26	-2.27846	774.759	FALSE	29
2022-09-14	11:30:26	-2.27678	774.759	FALSE	29
2022-09-14	11:30:26	-2.36055	774.759	FALSE	29
2022-09-14	11:30:27	-2.42375	774.759	FALSE	29
2022-09-14	11:30:27	-2.54487	774.759	FALSE	29
2022-09-14	11:30:27	-2.94049	774.759	FALSE	29
2022-09-14	11:30:27	-2.87541	774.759	FALSE	29
2022-09-14	11:30:28	-2.79871	774.759	FALSE	29
2022-09-14	11:30:28	-2.85851	774.759	FALSE	29
2022-09-14	11:30:28	-2.79317	774.759	FALSE	29
2022-09-14	11:30:29	-2.77703	774.759	FALSE	29
2022-09-14	11:30:29	-2.71454	774.759	FALSE	29
2022-09-14	11:30:29	-2.69724	774.759	FALSE	29
2022-09-14	11:30:29	-2.69235	774.759	FALSE	29
2022-09-14	11:30:30	-2.6895	774.759	FALSE	29
2022-09-14	11:30:30	-2.69566	774.759	FALSE	29
2022-09-14	11:30:30	-2.60614	774.759	FALSE	29
2022-09-14	11:30:30	-2.56436	774.759	FALSE	29
2022-09-14	11:30:31	-2.51164	774.759	FALSE	29

## Sheet: KimChi_harness_202291411258
						**GoPro Fitting: 11:13
2022-09-14	11:25:08	0.0370613
2022-09-14	11:25:08	-0.0240074
2022-09-14	11:25:08	0.0531427
2022-09-14	11:25:09	0.0298857
2022-09-14	11:25:09	0.171718
2022-09-14	11:25:09	0.110445
2022-09-14	11:25:10	0.212023
2022-09-14	11:25:10	0.126985
2022-09-14	11:25:10	0.192939
2022-09-14	11:25:10	0.282659
2022-09-14	11:25:11	0.280573
2022-09-14	11:25:11	0.208613
2022-09-14	11:25:11	0.191667
2022-09-14	11:25:11	0.178232
2022-09-14	11:25:12	0.167138
2022-09-14	11:25:12	0.159351
2022-09-14	11:25:12	0.152532
2022-09-14	11:25:12	0.152685
2022-09-14	11:25:13	0.17126
2022-09-14	11:25:13	0.147952
2022-09-14	11:25:13	0.110496
2022-09-14	11:25:14	0.111972
2022-09-14	11:25:14	0.14154
2022-09-14	11:25:14	0.213448
2022-09-14	11:25:14	0.290496
2022-09-14	11:25:15	0.299962
2022-09-14	11:25:15	0.0892241
2022-09-14	11:25:15	0.228155
2022-09-14	11:25:15	0.260573
2022-09-14	11:25:16	0.232074
2022-09-14	11:25:16	0.225611
2022-09-14	11:25:16	0.209987
2022-09-14	11:25:16	0.190445
2022-09-14	11:25:17	0.213702
2022-09-14	11:25:17	0.237367
2022-09-14	11:25:17	0.16673
2022-09-14	11:25:18	0.0689188
2022-09-14	11:25:18	-0.143906
2022-09-14	11:25:18	0.295738
2022-09-14	11:25:18	0.662557
2022-09-14	11:25:19	0.541794
2022-09-14	11:25:19	0.39014
2022-09-14	11:25:19	0.214211
2022-09-14	11:25:19	0.412074
2022-09-14	11:25:20	0.11411
2022-09-14	11:25:20	0.313295
2022-09-14	11:25:20	0.27299
2022-09-14	11:25:20	0.335738
2022-09-14	11:25:21	0.388461
2022-09-14	11:25:21	0.405865
2022-09-14	11:25:21	0.40327
2022-09-14	11:25:22	0.405611
2022-09-14	11:25:22	0.385356
2022-09-14	11:25:22	0.459351
2022-09-14	11:25:22	0.403473
2022-09-14	11:25:23	0.119046
2022-09-14	11:25:23	0.107189
2022-09-14	11:25:23	0.205967
2022-09-14	11:25:23	0.279657
2022-09-14	11:25:24	0.298893
2022-09-14	11:25:24	0.288257
2022-09-14	11:25:24	0.242659
2022-09-14	11:25:24	0.283982
2022-09-14	11:25:25	0.120267
2022-09-14	11:25:25	0.316552
2022-09-14	11:25:25	0.60103
2022-09-14	11:25:26	0.12098
2022-09-14	11:25:26	-0.407112
2022-09-14	11:25:26	-0.546602
2022-09-14	11:25:26	-0.54187
2022-09-14	11:25:27	-0.286348
2022-09-14	11:25:27	-0.162175
2022-09-14	11:25:27	-0.245381
2022-09-14	11:25:27	-0.0280786
2022-09-14	11:25:28	-0.103702
2022-09-14	11:25:28	0.00998751
2022-09-14	11:25:28	-0.207061
2022-09-14	11:25:28	-0.257239
2022-09-14	11:25:29	-0.483142
2022-09-14	11:25:29	-0.628892
2022-09-14	11:25:29	-0.477595
2022-09-14	11:25:30	0.286578
2022-09-14	11:25:30	0.398079
2022-09-14	11:25:30	0.0068323
2022-09-14	11:25:30	-0.39673
2022-09-14	11:25:31	-0.756475
2022-09-14	11:25:31	-0.879121
2022-09-14	11:25:31	-0.898256
2022-09-14	11:25:31	-0.7036
2022-09-14	11:25:32	-0.532709
2022-09-14	11:25:32	-0.296984
2022-09-14	11:25:32	-0.101972
2022-09-14	11:25:32	-0.166959
2022-09-14	11:25:33	-0.0822262
2022-09-14	11:25:33	0.0166542
2022-09-14	11:25:33	0.146578
2022-09-14	11:25:34	0.00713764
2022-09-14	11:25:34	0.617061
2022-09-14	11:25:34	0.382659
2022-09-14	11:25:34	1.32866
2022-09-14	11:25:35	0.238944
2022-09-14	11:25:35	0.276756
2022-09-14	11:25:35	0.228003
2022-09-14	11:25:35	0.323575
2022-09-14	11:25:36	0.62098
2022-09-14	11:25:36	0.428868
2022-09-14	11:25:36	1.39106
2022-09-14	11:25:36	0.454822
2022-09-14	11:25:37	1.22032
2022-09-14	11:25:37	0.319809
2022-09-14	11:25:37	1.31029
2022-09-14	11:25:38	1.40714
2022-09-14	11:25:38	0.497163
2022-09-14	11:25:38	0.860878
2022-09-14	11:25:38	0.332736
2022-09-14	11:25:39	0.476603
2022-09-14	11:25:39	0.877723
2022-09-14	11:25:39	0.252837
2022-09-14	11:25:39	2.01365
2022-09-14	11:25:40	0.656705
2022-09-14	11:25:40	2.32459
2022-09-14	11:25:40	0.522862
2022-09-14	11:25:41	0.438232
2022-09-14	11:25:41	0.351667
2022-09-14	11:25:41	0.200013
2022-09-14	11:25:41	1.63579
2022-09-14	11:25:42	0.0971122
2022-09-14	11:25:42	0.188766
2022-09-14	11:25:42	0.177875
2022-09-14	11:25:42	0.654771
2022-09-14	11:25:43	0.73014
2022-09-14	11:25:43	0.733702
2022-09-14	11:25:43	0.724847
2022-09-14	11:25:43	0.734008
2022-09-14	11:25:44	0.723168
2022-09-14	11:25:44	0.73014
2022-09-14	11:25:44	0.729733
2022-09-14	11:25:45	0.72897
2022-09-14	11:25:45	0.72327
2022-09-14	11:25:45	0.73299
2022-09-14	11:25:45	0.730242
2022-09-14	11:25:46	0.724695
2022-09-14	11:25:46	0.731921
2022-09-14	11:25:46	0.735229
2022-09-14	11:25:46	0.731005
2022-09-14	11:25:47	0.724288
2022-09-14	11:25:47	0.728868
2022-09-14	11:25:47	0.732175
2022-09-14	11:25:47	0.729835
2022-09-14	11:25:48	0.734262
2022-09-14	11:25:48	0.733193
2022-09-14	11:25:48	0.728512
2022-09-14	11:25:49	0.731972
2022-09-14	11:25:49	0.728562
2022-09-14	11:25:49	0.732074
2022-09-14	11:25:49	0.736603
2022-09-14	11:25:50	0.727596
2022-09-14	11:25:50	0.725865
2022-09-14	11:25:50	0.729529
2022-09-14	11:25:50	0.727137
2022-09-14	11:25:51	0.730496
2022-09-14	11:25:51	0.727596
2022-09-14	11:25:51	0.939148
2022-09-14	11:25:51	1.30765
2022-09-14	11:25:52	1.41355
2022-09-14	11:25:52	0.996908
2022-09-14	11:25:52	0.725305
2022-09-14	11:25:53	0.726069
2022-09-14	11:25:53	0.729987
2022-09-14	11:25:53	0.731667
2022-09-14	11:25:53	0.73243
2022-09-14	11:25:54	0.729377
2022-09-14	11:25:54	0.730496
2022-09-14	11:25:54	0.729478
2022-09-14	11:25:54	0.725916
2022-09-14	11:25:55	0.725
2022-09-14	11:25:55	0.729631
2022-09-14	11:25:55	0.726323
2022-09-14	11:25:55	0.73014
2022-09-14	11:25:56	0.727646
2022-09-14	11:25:56	0.730089
2022-09-14	11:25:56	0.728003
2022-09-14	11:25:57	0.732277
2022-09-14	11:25:57	0.727341
2022-09-14	11:25:57	0.72958
2022-09-14	11:25:57	0.727697
2022-09-14	11:25:58	0.729428
2022-09-14	11:25:58	0.732532
2022-09-14	11:25:58	0.730903
2022-09-14	11:25:58	0.73014
2022-09-14	11:25:59	0.731514
2022-09-14	11:25:59	0.728817
2022-09-14	11:25:59	0.73131
2022-09-14	11:25:59	0.732125
2022-09-14	11:26:00	0.84785
2022-09-14	11:26:00	0.220115
2022-09-14	11:26:00	-0.0304196
2022-09-14	11:26:01	0.173092
2022-09-14	11:26:01	0.0306999
2022-09-14	11:26:01	0.289173
2022-09-14	11:26:01	0.524236
2022-09-14	11:26:02	0.348817
2022-09-14	11:26:02	0.286832
2022-09-14	11:26:02	1.13172
2022-09-14	11:26:02	0.631005
2022-09-14	11:26:03	1.10317
2022-09-14	11:26:03	3.26602
2022-09-14	11:26:03	5.44373
2022-09-14	11:26:03	1.93594
2022-09-14	11:26:04	1.27177
2022-09-14	11:26:04	0.857875
2022-09-14	11:26:04	1.37044
2022-09-14	11:26:05	1.20347
2022-09-14	11:26:05	0.582099
2022-09-14	11:26:05	0.301336
2022-09-14	11:26:05	0.324339
2022-09-14	11:26:06	0.44159
2022-09-14	11:26:06	0.408155
2022-09-14	11:26:06	0.431565
2022-09-14	11:26:06	0.405102
2022-09-14	11:26:07	0.388054
2022-09-14	11:26:07	0.420267
2022-09-14	11:26:07	0.497875
2022-09-14	11:26:07	0.530344
2022-09-14	11:26:08	0.340878
2022-09-14	11:26:08	0.127189
2022-09-14	11:26:08	0.277265
2022-09-14	11:26:09	0.546628
2022-09-14	11:26:09	0.544593
2022-09-14	11:26:09	0.421947
2022-09-14	11:26:09	0.521489
2022-09-14	11:26:10	0.200064
2022-09-14	11:26:10	0.211769
2022-09-14	11:26:10	0.126883
2022-09-14	11:26:10	-0.0509794
2022-09-14	11:26:11	-0.34243
2022-09-14	11:26:11	-0.484974
2022-09-14	11:26:11	-0.557799
2022-09-14	11:26:11	-0.367162
2022-09-14	11:26:12	-0.389503
2022-09-14	11:26:12	-0.237493
2022-09-14	11:26:12	-0.587569
2022-09-14	11:26:13	-0.760343
2022-09-14	11:26:13	-0.675254
2022-09-14	11:26:13	-0.502887
2022-09-14	11:26:13	-0.48131
2022-09-14	11:26:14	-0.115763
2022-09-14	11:26:14	-0.308333
2022-09-14	11:26:14	-0.122226
2022-09-14	11:26:14	-0.226857
2022-09-14	11:26:15	-0.0633458
2022-09-14	11:26:15	-0.0582058
2022-09-14	11:26:15	0.197926
2022-09-14	11:26:15	0.430038
2022-09-14	11:26:16	0.456501
2022-09-14	11:26:16	1.3735
2022-09-14	11:26:16	0.298384
2022-09-14	11:26:17	1.22032
2022-09-14	11:26:17	0.0552292
2022-09-14	11:26:17	-0.163142
2022-09-14	11:26:17	-0.310267
2022-09-14	11:26:18	-0.222684
2022-09-14	11:26:18	-0.22131
2022-09-14	11:26:18	-0.253269
2022-09-14	11:26:18	-0.237951
2022-09-14	11:26:19	-0.113982
2022-09-14	11:26:19	-0.0100634
2022-09-14	11:26:19	0.0880027
2022-09-14	11:26:19	0.216909
2022-09-14	11:26:20	0.310293
2022-09-14	11:26:20	0.312583
2022-09-14	11:26:20	0.640623
2022-09-14	11:26:21	0.734364
2022-09-14	11:26:21	0.730852
2022-09-14	11:26:21	0.681031
2022-09-14	11:26:21	0.642201
2022-09-14	11:26:22	-0.294898
2022-09-14	11:26:22	-0.401208
2022-09-14	11:26:22	-0.419427
2022-09-14	11:26:22	-0.207366
2022-09-14	11:26:23	-0.141463
2022-09-14	11:26:23	0.0187916
2022-09-14	11:26:23	0.127138
2022-09-14	11:26:23	0.00321909
2022-09-14	11:26:24	-0.210776
2022-09-14	11:26:24	-0.258002
2022-09-14	11:26:24	-0.209198
2022-09-14	11:26:25	-0.412608
2022-09-14	11:26:25	-0.314643
2022-09-14	11:26:25	-0.15785
2022-09-14	11:26:25	3.30225
2022-09-14	11:26:26	1.96434
2022-09-14	11:26:26	1.3336
2022-09-14	11:26:26	0.988562
2022-09-14	11:26:26	0.375229
2022-09-14	11:26:27	0.456501
2022-09-14	11:26:27	0.169224
2022-09-14	11:26:27	0.173601
2022-09-14	11:26:27	-0.0680786
2022-09-14	11:26:28	0.0633717
2022-09-14	11:26:28	-0.0691473
2022-09-14	11:26:28	0.0377229
2022-09-14	11:26:29	-0.17902
2022-09-14	11:26:29	-0.0645671
2022-09-14	11:26:29	-0.124262
2022-09-14	11:26:29	-0.0526588
2022-09-14	11:26:30	-0.130725
2022-09-14	11:26:30	-0.0379005
2022-09-14	11:26:30	-0.00548322
2022-09-14	11:26:30	-0.0161702
2022-09-14	11:26:31	0.0582827
2022-09-14	11:26:31	-0.164109
2022-09-14	11:26:31	-0.369402
2022-09-14	11:26:31	-0.284262
2022-09-14	11:26:32	-0.328231
2022-09-14	11:26:32	-0.233829
2022-09-14	11:26:32	-0.158562
2022-09-14	11:26:33	-0.193676
2022-09-14	11:26:33	-0.220598
2022-09-14	11:26:33	-0.171285
2022-09-14	11:26:33	-0.16472
2022-09-14	11:26:34	-0.198104
2022-09-14	11:26:34	-0.127621
2022-09-14	11:26:34	-0.0973407
2022-09-14	11:26:34	-0.17617
2022-09-14	11:26:35	-0.126297
2022-09-14	11:26:35	-0.161361
2022-09-14	11:26:35	-0.0867045
2022-09-14	11:26:35	0.0369595
2022-09-14	11:26:36	-0.0280277
2022-09-14	11:26:36	0.130038
2022-09-14	11:26:36	0.0185371
2022-09-14	11:26:37	0.208308
2022-09-14	11:26:37	0.0696821
2022-09-14	11:26:37	0.0566542
2022-09-14	11:26:37	-0.0438038
2022-09-14	11:26:38	-0.0268572
2022-09-14	11:26:38	-0.0364247
2022-09-14	11:26:38	-0.00996157
2022-09-14	11:26:38	-0.13785
2022-09-14	11:26:39	0.878588
2022-09-14	11:26:39	0.180674
2022-09-14	11:26:39	0.239199
2022-09-14	11:26:39	0.601285
2022-09-14	11:26:40	0.169835
2022-09-14	11:26:40	0.114008
2022-09-14	11:26:40	0.142812
2022-09-14	11:26:41	0.0315142
2022-09-14	11:26:41	-0.0387657
2022-09-14	11:26:41	0.101285
2022-09-14	11:26:41	0.155789
2022-09-14	11:26:42	0.229936
2022-09-14	11:26:42	0.200318
2022-09-14	11:26:42	0.228919
2022-09-14	11:26:42	0.189936
2022-09-14	11:26:43	-0.092557
2022-09-14	11:26:43	-0.072557
2022-09-14	11:26:43	-0.0317427
2022-09-14	11:26:43	-0.106043
2022-09-14	11:26:44	-0.201259
2022-09-14	11:26:44	-0.130572
2022-09-14	11:26:44	-0.059071
2022-09-14	11:26:45	0.0155346
2022-09-14	11:26:45	0.134313
2022-09-14	11:26:45	0.158741
2022-09-14	11:26:45	0.191565
2022-09-14	11:26:46	0.189631
2022-09-14	11:26:46	0.213143
2022-09-14	11:26:46	0.180216
2022-09-14	11:26:46	-0.00884198
2022-09-14	11:26:47	0.147646
2022-09-14	11:26:47	0.273753
2022-09-14	11:26:47	0.216654
2022-09-14	11:26:48	0.200624
2022-09-14	11:26:48	0.190496
2022-09-14	11:26:48	0.221234
2022-09-14	11:26:48	0.231311
2022-09-14	11:26:49	0.269733
2022-09-14	11:26:49	0.25472
2022-09-14	11:26:49	0.313702
2022-09-14	11:26:49	0.290395
2022-09-14	11:26:50	0.393957
2022-09-14	11:26:50	0.404746
2022-09-14	11:26:50	0.198232
2022-09-14	11:26:50	0.292634
2022-09-14	11:26:51	0.261285
2022-09-14	11:26:51	0.149733
2022-09-14	11:26:51	0.367138
2022-09-14	11:26:52	0.325763
2022-09-14	11:26:52	0.358995
2022-09-14	11:26:52	0.334822
2022-09-14	11:26:52	0.363321
2022-09-14	11:26:53	0.339809
2022-09-14	11:26:53	0.382761
2022-09-14	11:26:53	0.33472
2022-09-14	11:26:53	0.357061
2022-09-14	11:26:54	0.334211
2022-09-14	11:26:54	0.341794
2022-09-14	11:26:54	0.402354
2022-09-14	11:26:54	0.254771
2022-09-14	11:26:55	0.231056
2022-09-14	11:26:55	0.431819
2022-09-14	11:26:55	0.215992
2022-09-14	11:26:56	0.292227
2022-09-14	11:26:56	0.274008
2022-09-14	11:26:56	0.287901
2022-09-14	11:26:56	0.325712
2022-09-14	11:26:57	0.249733
2022-09-14	11:26:57	0.451667
2022-09-14	11:26:57	0.322506
2022-09-14	11:26:57	0.434822
2022-09-14	11:26:58	0.402456
2022-09-14	11:26:58	0.553906
2022-09-14	11:26:58	0.559148
2022-09-14	11:26:58	1.21971
2022-09-14	11:26:59	1.06816
2022-09-14	11:26:59	2.03421
2022-09-14	11:26:59	0.284847
2022-09-14	11:27:00	0.0905982
2022-09-14	11:27:00	0.400166
2022-09-14	11:27:00	0.172481
2022-09-14	11:27:00	0.371158
2022-09-14	11:27:01	0.234262
2022-09-14	11:27:01	0.417875
2022-09-14	11:27:01	0.56729
2022-09-14	11:27:01	0.532532
2022-09-14	11:27:02	0.28612
2022-09-14	11:27:02	0.429886
2022-09-14	11:27:02	0.312125
2022-09-14	11:27:02	0.354211
2022-09-14	11:27:03	0.37869
2022-09-14	11:27:03	0.477112
2022-09-14	11:27:03	0.533092
2022-09-14	11:27:04	0.429428
2022-09-14	11:27:04	0.382964
2022-09-14	11:27:04	0.311361
2022-09-14	11:27:04	0.26668
2022-09-14	11:27:05	0.414771
2022-09-14	11:27:05	0.425713
2022-09-14	11:27:05	1.25289
2022-09-14	11:27:05	1.26261
2022-09-14	11:27:06	0.909784
2022-09-14	11:27:06	0.342914
2022-09-14	11:27:06	0.487392
2022-09-14	11:27:06	0.242863
2022-09-14	11:27:07	0.489631
2022-09-14	11:27:07	0.224237
2022-09-14	11:27:07	0.432786
2022-09-14	11:27:08	0.352328
2022-09-14	11:27:08	0.624847
2022-09-14	11:27:08	0.660776
2022-09-14	11:27:08	0.399555
2022-09-14	11:27:09	0.800929
2022-09-14	11:27:09	0.473804
2022-09-14	11:27:09	0.98215
2022-09-14	11:27:09	0.290038
2022-09-14	11:27:10	0.467545
2022-09-14	11:27:10	0.266476
2022-09-14	11:27:10	1.20067
2022-09-14	11:27:10	1.81447
2022-09-14	11:27:11	3.24123
2022-09-14	11:27:11	3.74566
2022-09-14	11:27:11	0.917214
2022-09-14	11:27:12	0.854313
2022-09-14	11:27:12	0.703372
2022-09-14	11:27:12	0.642354
2022-09-14	11:27:12	1.12256
2022-09-14	11:27:13	0.376603
2022-09-14	11:27:13	0.362965
2022-09-14	11:27:13	0.262354
2022-09-14	11:27:13	0.429936
2022-09-14	11:27:14	0.148664
2022-09-14	11:27:14	0.453295
2022-09-14	11:27:14	0.208919
2022-09-14	11:27:14	0.434008
2022-09-14	11:27:15	0.322048
2022-09-14	11:27:15	0.449326
2022-09-14	11:27:15	0.333855
2022-09-14	11:27:16	0.352125
2022-09-14	11:27:16	0.341387
2022-09-14	11:27:16	0.19299
2022-09-14	11:27:16	1.9193
2022-09-14	11:27:17	1.39452
2022-09-14	11:27:17	3.0965
2022-09-14	11:27:17	1.07899
2022-09-14	11:27:17	2.31869
2022-09-14	11:27:18	0.381692
2022-09-14	11:27:18	0.329784
2022-09-14	11:27:18	0.413906
2022-09-14	11:27:18	0.298232
2022-09-14	11:27:19	0.351056
2022-09-14	11:27:19	0.197112
2022-09-14	11:27:19	0.404542
2022-09-14	11:27:20	0.139046
2022-09-14	11:27:20	0.297214
2022-09-14	11:27:20	0.25925
2022-09-14	11:27:20	0.395992
2022-09-14	11:27:21	0.238282
2022-09-14	11:27:21	0.278028
2022-09-14	11:27:21	0.316756
2022-09-14	11:27:21	0.367036
2022-09-14	11:27:22	0.275585
2022-09-14	11:27:22	0.275891
2022-09-14	11:27:22	0.438079
2022-09-14	11:27:22	0.208054
2022-09-14	11:27:23	0.373346
2022-09-14	11:27:23	0.245763
2022-09-14	11:27:23	0.562404
2022-09-14	11:27:24	0.175942
2022-09-14	11:27:24	0.408308
2022-09-14	11:27:24	0.307137
2022-09-14	11:27:24	0.325916
2022-09-14	11:27:25	0.364135
2022-09-14	11:27:25	0.621641
2022-09-14	11:27:25	0.470802
2022-09-14	11:27:25	0.571463
2022-09-14	11:27:26	0.538079
2022-09-14	11:27:26	0.77874
2022-09-14	11:27:26	0.606476
2022-09-14	11:27:26	0.883117
2022-09-14	11:27:27	1.25793
2022-09-14	11:27:27	2.19024
2022-09-14	11:27:27	2.67563
2022-09-14	11:27:28	2.53075
2022-09-14	11:27:28	1.78607
2022-09-14	11:27:28	1.4136
2022-09-14	11:27:28	1.23218
2022-09-14	11:27:29	1.1478
2022-09-14	11:27:29	1.14989
2022-09-14	11:27:29	1.18785
2022-09-14	11:27:29	1.26042
2022-09-14	11:27:30	0.869275
2022-09-14	11:27:30	0.710903
2022-09-14	11:27:30	0.553855
2022-09-14	11:27:30	0.547392
2022-09-14	11:27:31	0.417163
2022-09-14	11:27:31	0.549071
2022-09-14	11:27:31	0.558028
2022-09-14	11:27:32	0.50958
2022-09-14	11:27:32	0.458537
2022-09-14	11:27:32	0.452481
2022-09-14	11:27:32	0.431718
2022-09-14	11:27:33	0.461692
2022-09-14	11:27:33	0.460369
2022-09-14	11:27:33	0.486221
2022-09-14	11:27:33	0.496959
2022-09-14	11:27:34	0.481539
2022-09-14	11:27:34	0.471209
2022-09-14	11:27:34	0.46159
2022-09-14	11:27:34	0.454517
2022-09-14	11:27:35	0.471718
2022-09-14	11:27:35	0.557061
2022-09-14	11:27:35	0.665254
2022-09-14	11:27:36	0.764389
2022-09-14	11:27:36	0.794567
2022-09-14	11:27:36	0.748359
2022-09-14	11:27:36	0.720827
2022-09-14	11:27:37	0.724135
2022-09-14	11:27:37	0.836552
2022-09-14	11:27:37	1.09375
2022-09-14	11:27:37	2.51365
2022-09-14	11:27:38	3.21976
2022-09-14	11:27:38	0.466985
2022-09-14	11:27:38	0.345713
2022-09-14	11:27:38	0.190853
2022-09-14	11:27:39	0.395992
2022-09-14	11:27:39	0.576959
2022-09-14	11:27:39	0.492328
2022-09-14	11:27:40	0.0103437
2022-09-14	11:27:40	0.0922776
2022-09-14	11:27:40	0.090191
2022-09-14	11:27:40	0.585407
2022-09-14	11:27:41	0.360471
2022-09-14	11:27:41	1.40052
2022-09-14	11:27:41	0.316807
2022-09-14	11:27:41	1.17177
2022-09-14	11:27:42	0.293804
2022-09-14	11:27:42	0.486679
2022-09-14	11:27:42	0.538486
2022-09-14	11:27:42	0.458079
2022-09-14	11:27:43	0.282201
2022-09-14	11:27:43	0.118893
2022-09-14	11:27:43	-0.0960175
2022-09-14	11:27:44	-0.306348
2022-09-14	11:27:44	-0.534541
2022-09-14	11:27:44	-0.410572
2022-09-14	11:27:44	-0.274694
2022-09-14	11:27:45	-0.251844
2022-09-14	11:27:45	-0.170623
2022-09-14	11:27:45	-0.12304
2022-09-14	11:27:45	-0.173931
2022-09-14	11:27:46	-0.179936
2022-09-14	11:27:46	-0.113626
2022-09-14	11:27:46	-0.145076
2022-09-14	11:27:46	-0.0798852
2022-09-14	11:27:47	-0.0712338
2022-09-14	11:27:47	1.13854
2022-09-14	11:27:47	0.362507
2022-09-14	11:27:48	2.31401
2022-09-14	11:27:48	0.718842
2022-09-14	11:27:48	1.40184
2022-09-14	11:27:48	0.529224
2022-09-14	11:27:49	0.222659
2022-09-14	11:27:49	0.370242
2022-09-14	11:27:49	0.282964
2022-09-14	11:27:49	0.344644
2022-09-14	11:27:50	0.192277
2022-09-14	11:27:50	0.331107
2022-09-14	11:27:50	0.443575
2022-09-14	11:27:50	0.906577
2022-09-14	11:27:51	2.96943
2022-09-14	11:27:51	1.65431
2022-09-14	11:27:51	4.63813
2022-09-14	11:27:52	1.36805
2022-09-14	11:27:52	2.04571
2022-09-14	11:27:52	1.59782
2022-09-14	11:27:52	0.721743
2022-09-14	11:27:53	0.753448
2022-09-14	11:27:53	0.222761
2022-09-14	11:27:53	1.20383
2022-09-14	11:27:53	0.455026
2022-09-14	11:27:54	3.78999
2022-09-14	11:27:54	1.14581
2022-09-14	11:27:54	3.28999
2022-09-14	11:27:54	0.836552
2022-09-14	11:27:55	1.57477
2022-09-14	11:27:55	0.770547
2022-09-14	11:27:55	0.267087
2022-09-14	11:27:56	1.05385
2022-09-14	11:27:56	0.303321
2022-09-14	11:27:56	3.64653
2022-09-14	11:27:56	0.711921
2022-09-14	11:27:57	1.33879
2022-09-14	11:27:57	0.658893
2022-09-14	11:27:57	0.412277
2022-09-14	11:27:57	0.314771
2022-09-14	11:27:58	0.332837
2022-09-14	11:27:58	0.215534
2022-09-14	11:27:58	0.248308
2022-09-14	11:27:58	0.253499
2022-09-14	11:27:59	0.334415
2022-09-14	11:27:59	0.324542
2022-09-14	11:27:59	0.760572
2022-09-14	11:28:00	1.72933
2022-09-14	11:28:00	1.38072
2022-09-14	11:28:00	1.72963
2022-09-14	11:28:00	0.810445
2022-09-14	11:28:01	0.49584
2022-09-14	11:28:01	0.39299
2022-09-14	11:28:01	0.667392
2022-09-14	11:28:01	1.18205
2022-09-14	11:28:02	1.071
2022-09-14	11:28:02	0.893295
2022-09-14	11:28:02	0.605204
2022-09-14	11:28:02	0.59187
2022-09-14	11:28:03	0.525153
2022-09-14	11:28:03	0.483015
2022-09-14	11:28:03	0.402863
2022-09-14	11:28:04	0.311361
2022-09-14	11:28:04	0.417112
2022-09-14	11:28:04	0.435382
2022-09-14	11:28:04	0.434822
2022-09-14	11:28:05	0.423931
2022-09-14	11:28:05	0.424491
2022-09-14	11:28:05	0.423066
2022-09-14	11:28:05	0.423524
2022-09-14	11:28:06	0.411667
2022-09-14	11:28:06	0.406679
2022-09-14	11:28:06	0.385
2022-09-14	11:28:06	0.399758
2022-09-14	11:28:07	0.349529
2022-09-14	11:28:07	0.385611
2022-09-14	11:28:07	0.352481
2022-09-14	11:28:08	-1.41164
2022-09-14	11:28:08	0.890446
2022-09-14	11:28:08	1.42973
2022-09-14	11:28:08	0.652125
2022-09-14	11:28:09	0.62098
2022-09-14	11:28:09	0.539758
2022-09-14	11:28:09	0.898333
2022-09-14	11:28:09	1.19462
2022-09-14	11:28:10	1.19238
2022-09-14	11:28:10	0.532328
2022-09-14	11:28:10	0.534211
2022-09-14	11:28:10	0.434364
2022-09-14	11:28:11	0.483473
2022-09-14	11:28:11	0.769733
2022-09-14	11:28:11	2.8392
2022-09-14	11:28:12	1.27752
2022-09-14	11:28:12	1.92434
2022-09-14	11:28:12	0.882761
2022-09-14	11:28:12	1.25055
2022-09-14	11:28:13	0.677519
2022-09-14	11:28:13	0.773906
2022-09-14	11:28:13	1.00429
2022-09-14	11:28:13	1.45085
2022-09-14	11:28:14	1.30128
2022-09-14	11:28:14	1.81991
2022-09-14	11:28:14	2.4937
2022-09-14	11:28:14	-1.1807
2022-09-14	11:28:15	1.13737
2022-09-14	11:28:15	1.91228
2022-09-14	11:28:15	3.45299
2022-09-14	11:28:16	0.990445
2022-09-14	11:28:16	0.679656
2022-09-14	11:28:16	0.396654
2022-09-14	11:28:16	0.552176
2022-09-14	11:28:17	0.488613
2022-09-14	11:28:17	0.530089
2022-09-14	11:28:17	0.860674
2022-09-14	11:28:17	0.859199
2022-09-14	11:28:18	0.506171
2022-09-14	11:28:18	0.423982
2022-09-14	11:28:18	0.458944
2022-09-14	11:28:18	0.343524
2022-09-14	11:28:19	0.35182
2022-09-14	11:28:19	0.261081
2022-09-14	11:28:19	0.518791
2022-09-14	11:28:20	1.25375
2022-09-14	11:28:20	1.66739
2022-09-14	11:28:20	2.6423
2022-09-14	11:28:20	1.7965
2022-09-14	11:28:21	0.777214
2022-09-14	11:28:21	0.505763
2022-09-14	11:28:21	0.580013
2022-09-14	11:28:21	0.443219
2022-09-14	11:28:22	0.665967
2022-09-14	11:28:22	0.465865
2022-09-14	11:28:22	0.943626
2022-09-14	11:28:22	1.08882
2022-09-14	11:28:23	1.02449
2022-09-14	11:28:23	1.611
2022-09-14	11:28:23	0.548308
2022-09-14	11:28:24	1.49884
2022-09-14	11:28:24	0.533142
2022-09-14	11:28:24	2.52739
2022-09-14	11:28:24	0.950089
2022-09-14	11:28:25	1.12887
2022-09-14	11:28:25	0.84841
2022-09-14	11:28:25	1.5249
2022-09-14	11:28:25	3.61782
2022-09-14	11:28:26	2.3937
2022-09-14	11:28:26	4.56021
2022-09-14	11:28:26	1.76286
2022-09-14	11:28:27	3.67223
2022-09-14	11:28:27	1.07706
2022-09-14	11:28:27	2.52113
2022-09-14	11:28:27	0.80388
2022-09-14	11:28:28	2.50495
2022-09-14	11:28:28	0.980114
2022-09-14	11:28:28	3.331
2022-09-14	11:28:28	2.43828
2022-09-14	11:28:29	3.96983
2022-09-14	11:28:29	2.60892
2022-09-14	11:28:29	2.5394
2022-09-14	11:28:29	0.723524
2022-09-14	11:28:30	1.1249
2022-09-14	11:28:30	0.894516
2022-09-14	11:28:30	0.572837
2022-09-14	11:28:30	0.352837
2022-09-14	11:28:31	0.535433
2022-09-14	11:28:31	0.289326
2022-09-14	11:28:31	0.504593
2022-09-14	11:28:32	1.06225
2022-09-14	11:28:32	0.561132
2022-09-14	11:28:32	1.22826
2022-09-14	11:28:32	0.627443
2022-09-14	11:28:33	1.89589
2022-09-14	11:28:33	0.985407
2022-09-14	11:28:33	2.48698
2022-09-14	11:28:33	1.99243
2022-09-14	11:28:34	0.574211
2022-09-14	11:28:34	0.706374
2022-09-14	11:28:34	0.732328
2022-09-14	11:28:34	0.731616
2022-09-14	11:28:35	0.72958
2022-09-14	11:28:35	0.732328
2022-09-14	11:28:35	0.733346
2022-09-14	11:28:36	0.731412
2022-09-14	11:28:36	0.733142
2022-09-14	11:28:36	0.732634
2022-09-14	11:28:36	0.732226
2022-09-14	11:28:37	0.734211
2022-09-14	11:28:37	0.726476
2022-09-14	11:28:37	0.726069
2022-09-14	11:28:37	0.680929
2022-09-14	11:28:38	0.649733
2022-09-14	11:28:38	0.590801
2022-09-14	11:28:38	0.565611
2022-09-14	11:28:38	0.539707
2022-09-14	11:28:39	0.567137
2022-09-14	11:28:39	0.399148
2022-09-14	11:28:39	0.387036
2022-09-14	11:28:40	0.359453
2022-09-14	11:28:40	0.358588
2022-09-14	11:28:40	0.382812
2022-09-14	11:28:40	0.297163
2022-09-14	11:28:41	0.321692
2022-09-14	11:28:41	0.259911
2022-09-14	11:28:41	0.332583
2022-09-14	11:28:41	0.364339
2022-09-14	11:28:42	0.261336
2022-09-14	11:28:42	0.44444
2022-09-14	11:28:42	0.337468
2022-09-14	11:28:42	0.369224
2022-09-14	11:28:43	0.430598
2022-09-14	11:28:43	0.365305
2022-09-14	11:28:43	0.709784
2022-09-14	11:28:44	0.512328
2022-09-14	11:28:44	0.597061
2022-09-14	11:28:44	0.365305
2022-09-14	11:28:44	0.473346
2022-09-14	11:28:45	0.201285
2022-09-14	11:28:45	0.0711071
2022-09-14	11:28:45	0.0166542
2022-09-14	11:28:45	-0.151692
2022-09-14	11:28:46	-0.11215
2022-09-14	11:28:46	0.0998094
2022-09-14	11:28:46	0.078588
2022-09-14	11:28:46	-0.130012
2022-09-14	11:28:47	0.00291375
2022-09-14	11:28:47	0.440522
2022-09-14	11:28:47	0.374669
2022-09-14	11:28:48	3.49558
2022-09-14	11:28:48	0.797214
2022-09-14	11:28:48	1.17813
2022-09-14	11:28:48	0.349784
2022-09-14	11:28:49	0.220674
2022-09-14	11:28:49	0.143321
2022-09-14	11:28:49	0.0935498
2022-09-14	11:28:49	0.178232
2022-09-14	11:28:50	0.292277
2022-09-14	11:28:50	0.197672
2022-09-14	11:28:50	0.354008
2022-09-14	11:28:50	0.734517
2022-09-14	11:28:51	0.857926
2022-09-14	11:28:51	2.08016
2022-09-14	11:28:51	0.989886
2022-09-14	11:28:52	0.705
2022-09-14	11:28:52	1.4392
2022-09-14	11:28:52	0.68958
2022-09-14	11:28:52	1.01772
2022-09-14	11:28:53	0.405967
2022-09-14	11:28:53	0.517977
2022-09-14	11:28:53	0.287188
2022-09-14	11:28:53	0.47813
2022-09-14	11:28:54	0.416959
2022-09-14	11:28:54	0.383422
2022-09-14	11:28:54	0.46271
2022-09-14	11:28:54	0.947697
2022-09-14	11:28:55	4.30963
2022-09-14	11:28:55	3.8195
2022-09-14	11:28:55	5.13925
2022-09-14	11:28:56	4.88347
2022-09-14	11:28:56	1.73406
2022-09-14	11:28:56	3.03085
2022-09-14	11:28:56	2.06775
2022-09-14	11:28:57	3.86749
2022-09-14	11:28:57	3.88281
2022-09-14	11:28:57	1.51411
2022-09-14	11:28:58	0.737519
2022-09-14	11:28:58	0.732023
2022-09-14	11:28:58	1.57609
2022-09-14	11:28:58	2.9451
2022-09-14	11:28:58	1.39996
2022-09-14	11:28:59	2.42006
2022-09-14	11:28:59	0.487137
2022-09-14	11:28:59	0.928969
2022-09-14	11:29:00	0.360674
2022-09-14	11:29:00	0.499555
2022-09-14	11:29:00	0.212888
2022-09-14	11:29:00	0.525407
2022-09-14	11:29:01	0.249377
2022-09-14	11:29:01	0.567443
2022-09-14	11:29:01	1.5652
2022-09-14	11:29:01	0.779402
2022-09-14	11:29:02	1.52098
2022-09-14	11:29:02	2.47696
2022-09-14	11:29:02	1.54566
2022-09-14	11:29:02	2.60597
2022-09-14	11:29:03	2.0592
2022-09-14	11:29:03	2.94953
2022-09-14	11:29:03	2.32882
2022-09-14	11:29:04	1.99818
2022-09-14	11:29:04	1.60419
2022-09-14	11:29:04	0.880827
2022-09-14	11:29:04	1.13543
2022-09-14	11:29:05	0.892023
2022-09-14	11:29:05	0.764389
2022-09-14	11:29:05	0.684695
2022-09-14	11:29:05	0.610496
2022-09-14	11:29:06	0.631819
2022-09-14	11:29:06	0.745458
2022-09-14	11:29:06	0.813804
2022-09-14	11:29:06	0.881082
2022-09-14	11:29:07	0.89014
2022-09-14	11:29:07	0.777061
2022-09-14	11:29:07	0.727952
2022-09-14	11:29:08	0.775331
2022-09-14	11:29:08	0.768308
2022-09-14	11:29:08	0.759809
2022-09-14	11:29:08	0.587697
2022-09-14	11:29:09	0.581998
2022-09-14	11:29:09	0.839504
2022-09-14	11:29:09	0.821387
2022-09-14	11:29:09	0.865204
2022-09-14	11:29:10	0.876603
2022-09-14	11:29:10	0.881285
2022-09-14	11:29:10	0.889326
2022-09-14	11:29:10	0.913448
2022-09-14	11:29:11	0.88271
2022-09-14	11:29:11	0.865712
2022-09-14	11:29:11	0.63472
2022-09-14	11:29:12	0.506883
2022-09-14	11:29:12	0.486476
2022-09-14	11:29:12	0.448512
2022-09-14	11:29:12	0.407036
2022-09-14	11:29:13	0.418486
2022-09-14	11:29:13	0.427137
2022-09-14	11:29:13	0.422303
2022-09-14	11:29:13	0.428155
2022-09-14	11:29:14	0.423473
2022-09-14	11:29:14	0.422456
2022-09-14	11:29:14	0.417316
2022-09-14	11:29:14	0.376756
2022-09-14	11:29:15	0.372074
2022-09-14	11:29:15	0.404288
2022-09-14	11:29:15	0.392328
2022-09-14	11:29:16	0.417468
2022-09-14	11:29:16	0.419249
2022-09-14	11:29:16	0.404186
2022-09-14	11:29:16	0.430038
2022-09-14	11:29:17	0.413753
2022-09-14	11:29:17	0.429835
2022-09-14	11:29:17	0.239504
2022-09-14	11:29:17	0.13411
2022-09-14	11:29:18	0.290344
2022-09-14	11:29:18	0.240827
2022-09-14	11:29:18	0.266425
2022-09-14	11:29:18	2.5337
2022-09-14	11:29:19	2.49304
2022-09-14	11:29:19	3.39284
2022-09-14	11:29:19	1.53752
2022-09-14	11:29:20	5.47492
2022-09-14	11:29:20	2.38449
2022-09-14	11:29:20	6.83879
2022-09-14	11:29:20	1.80286
2022-09-14	11:29:21	4.16703
2022-09-14	11:29:21	1.84571
2022-09-14	11:29:21	1.442
2022-09-14	11:29:21	1.87986
2022-09-14	11:29:22	2.11645
2022-09-14	11:29:22	1.01431
2022-09-14	11:29:22	2.27202
2022-09-14	11:29:22	0.857265
2022-09-14	11:29:23	1.62927
2022-09-14	11:29:23	1.27304
2022-09-14	11:29:23	1.79044
2022-09-14	11:29:24	2.34587
2022-09-14	11:29:24	0.472735
2022-09-14	11:29:24	1.21116
2022-09-14	11:29:24	0.445102
2022-09-14	11:29:25	1.23202
2022-09-14	11:29:25	1.37172
2022-09-14	11:29:25	0.879453
2022-09-14	11:29:25	1.12464
2022-09-14	11:29:26	0.598893
2022-09-14	11:29:26	1.00205
2022-09-14	11:29:26	0.691921
2022-09-14	11:29:26	0.941845
2022-09-14	11:29:27	1.24968
2022-09-14	11:29:27	0.496043
2022-09-14	11:29:27	1.96225
2022-09-14	11:29:28	0.820318
2022-09-14	11:29:28	2.15167
2022-09-14	11:29:28	2.05543
2022-09-14	11:29:28	2.32754
2022-09-14	11:29:29	1.22134
2022-09-14	11:29:29	2.16001
2022-09-14	11:29:29	0.544186
2022-09-14	11:29:29	0.757519
2022-09-14	11:29:30	0.771361
2022-09-14	11:29:30	0.330903
2022-09-14	11:29:30	0.907595
2022-09-14	11:29:30	0.453957
2022-09-14	11:29:31	0.571361
2022-09-14	11:29:31	0.259911
2022-09-14	11:29:31	0.281641
2022-09-14	11:29:32	0.571514
2022-09-14	11:29:32	-1.50294
2022-09-14	11:29:32	-0.614949
2022-09-14	11:29:32	0.403982
2022-09-14	11:29:33	0.539249
2022-09-14	11:29:33	0.545153
2022-09-14	11:29:33	1.20658
2022-09-14	11:29:33	1.27569
2022-09-14	11:29:34	1.68327
2022-09-14	11:29:34	1.39991
2022-09-14	11:29:34	1.23024
2022-09-14	11:29:34	1.50419
2022-09-14	11:29:35	1.44246
2022-09-14	11:29:35	1.19233
2022-09-14	11:29:35	0.736654
2022-09-14	11:29:35	0.420166
2022-09-14	11:29:36	0.387494
2022-09-14	11:29:36	0.292023
2022-09-14	11:29:36	0.293295
2022-09-14	11:29:37	0.3193
2022-09-14	11:29:37	0.682761
2022-09-14	11:29:37	0.719097
2022-09-14	11:29:37	1.23426
2022-09-14	11:29:38	0.50327
2022-09-14	11:29:38	0.466069
2022-09-14	11:29:38	-0.0034476
2022-09-14	11:29:38	-0.28416
2022-09-14	11:29:39	-0.325585
2022-09-14	11:29:39	-0.225585
2022-09-14	11:29:39	-0.0639056
2022-09-14	11:29:39	0.324339
2022-09-14	11:29:40	0.24729
2022-09-14	11:29:40	0.227036
2022-09-14	11:29:40	0.424135
2022-09-14	11:29:41	0.601794
2022-09-14	11:29:41	0.652175
2022-09-14	11:29:41	0.692175
2022-09-14	11:29:41	0.586272
2022-09-14	11:29:42	0.526832
2022-09-14	11:29:42	0.52215
2022-09-14	11:29:42	0.521336
2022-09-14	11:29:42	0.52897
2022-09-14	11:29:43	0.538486
2022-09-14	11:29:43	0.549987
2022-09-14	11:29:43	0.548461
2022-09-14	11:29:43	0.568563
2022-09-14	11:29:44	0.579351
2022-09-14	11:29:44	0.584542
2022-09-14	11:29:44	0.569376
2022-09-14	11:29:45	0.569479
2022-09-14	11:29:45	0.565305
2022-09-14	11:29:45	0.567646
2022-09-14	11:29:45	0.598384
2022-09-14	11:29:46	0.611158
2022-09-14	11:29:46	0.657468
2022-09-14	11:29:46	0.662303
2022-09-14	11:29:46	0.779046
2022-09-14	11:29:47	0.764338
2022-09-14	11:29:47	0.789834
2022-09-14	11:29:47	0.870751
2022-09-14	11:29:47	0.712837
2022-09-14	11:29:48	1.04016
2022-09-14	11:29:48	1.02464
2022-09-14	11:29:48	1.31014
2022-09-14	11:29:49	0.932074
2022-09-14	11:29:49	0.818587
2022-09-14	11:29:49	0.711463
2022-09-14	11:29:49	0.601285
2022-09-14	11:29:50	0.583829
2022-09-14	11:29:50	0.688664
2022-09-14	11:29:50	0.837163
2022-09-14	11:29:50	0.774313
2022-09-14	11:29:51	0.877061
2022-09-14	11:29:51	0.770903
2022-09-14	11:29:51	0.599249
2022-09-14	11:29:51	0.513753
2022-09-14	11:29:52	0.557366
2022-09-14	11:29:52	0.538384
2022-09-14	11:29:52	0.521997
2022-09-14	11:29:53	0.513193
2022-09-14	11:29:53	0.4993
2022-09-14	11:29:53	0.491667
2022-09-14	11:29:53	0.49528
2022-09-14	11:29:54	0.484593
2022-09-14	11:29:54	0.506069
2022-09-14	11:29:54	0.578486
2022-09-14	11:29:54	0.554313
2022-09-14	11:29:55	0.547239
2022-09-14	11:29:55	0.531209
2022-09-14	11:29:55	0.62327
2022-09-14	11:29:55	1.10139
2022-09-14	11:29:56	0.591666
2022-09-14	11:29:56	1.23136
2022-09-14	11:29:56	0.704949
2022-09-14	11:29:57	0.870802
2022-09-14	11:29:57	0.677723
2022-09-14	11:29:57	0.726069
2022-09-14	11:29:57	0.733346
2022-09-14	11:29:58	0.723422
2022-09-14	11:29:58	0.683219
2022-09-14	11:29:58	0.614465
2022-09-14	11:29:58	0.518893
2022-09-14	11:29:59	0.452939
2022-09-14	11:29:59	0.308512
2022-09-14	11:29:59	0.280674
2022-09-14	11:29:59	0.344542
2022-09-14	11:30:00	0.491667
2022-09-14	11:30:00	1.42515
2022-09-14	11:30:00	0.681895
2022-09-14	11:30:01	1.10525
2022-09-14	11:30:01	0.802914
2022-09-14	11:30:01	0.397417
2022-09-14	11:30:01	0.583066
2022-09-14	11:30:02	0.735483
2022-09-14	11:30:02	0.733651
2022-09-14	11:30:02	0.730903
2022-09-14	11:30:02	0.730394
2022-09-14	11:30:03	0.732532
2022-09-14	11:30:03	0.723473
2022-09-14	11:30:03	0.72215
2022-09-14	11:30:03	0.696959
2022-09-14	11:30:04	0.704746
2022-09-14	11:30:04	0.667494
2022-09-14	11:30:04	0.649326
2022-09-14	11:30:05	0.65472
2022-09-14	11:30:05	0.640267
2022-09-14	11:30:05	0.639402
2022-09-14	11:30:05	0.610242
2022-09-14	11:30:06	0.607544
2022-09-14	11:30:06	0.606018
2022-09-14	11:30:06	0.416756
2022-09-14	11:30:06	0.380624
2022-09-14	11:30:07	0.36612
2022-09-14	11:30:07	0.368613
2022-09-14	11:30:07	0.375026
2022-09-14	11:30:07	0.340216
2022-09-14	11:30:08	0.323575
2022-09-14	11:30:08	0.321183
2022-09-14	11:30:08	0.316298
2022-09-14	11:30:09	0.622354
2022-09-14	11:30:09	-0.248486
2022-09-14	11:30:09	-0.446806
2022-09-14	11:30:09	-0.595814
2022-09-14	11:30:10	-0.696526
2022-09-14	11:30:10	-0.777798
2022-09-14	11:30:10	-0.835356
2022-09-14	11:30:10	-0.831182
2022-09-14	11:30:11	-0.869554
2022-09-14	11:30:11	-0.886857
2022-09-14	11:30:11	-0.897798
2022-09-14	11:30:11	-0.904567
2022-09-14	11:30:12	-0.922328
2022-09-14	11:30:12	-0.939732
2022-09-14	11:30:12	-0.956577
2022-09-14	11:30:13	-0.95734
2022-09-14	11:30:13	-0.972913
2022-09-14	11:30:13	-0.954236
2022-09-14	11:30:13	-0.965635
2022-09-14	11:30:14	-0.770572
2022-09-14	11:30:14	0.732481
2022-09-14	11:30:14	0.722914
2022-09-14	11:30:14	0.735534
2022-09-14	11:30:15	0.730954
2022-09-14	11:30:15	0.734568
2022-09-14	11:30:15	0.62729
2022-09-14	11:30:15	0.328511
2022-09-14	11:30:16	-0.0367809
2022-09-14	11:30:16	-0.152659
2022-09-14	11:30:16	-0.245738
2022-09-14	11:30:17	-0.489147
2022-09-14	11:30:17	-0.556119
2022-09-14	11:30:17	-0.565686
2022-09-14	11:30:17	-0.583905
2022-09-14	11:30:18	-0.396883
2022-09-14	11:30:18	-0.676271
2022-09-14	11:30:18	-0.775254
2022-09-14	11:30:18	-0.861615
2022-09-14	11:30:19	-0.949147
2022-09-14	11:30:19	-1.07454
2022-09-14	11:30:19	-1.24095
2022-09-14	11:30:19	-1.37607
2022-09-14	11:30:20	-1.65902
2022-09-14	11:30:20	-2.34401
2022-09-14	11:30:20	-2.42487
2022-09-14	11:30:21	-2.42217
2022-09-14	11:30:21	-2.4382
2022-09-14	11:30:21	-2.4179
2022-09-14	11:30:21	-2.43357
2022-09-14	11:30:22	-2.39902
2022-09-14	11:30:22	-2.38289
2022-09-14	11:30:22	-2.378
2022-09-14	11:30:22	-2.29205
2022-09-14	11:30:23	-2.24579
2022-09-14	11:30:23	-2.11312
2022-09-14	11:30:23	-1.76482
2022-09-14	11:30:23	-2.42706
2022-09-14	11:30:24	-2.61592
2022-09-14	11:30:24	-2.6322
2022-09-14	11:30:24	-2.56757
2022-09-14	11:30:25	-2.46207
2022-09-14	11:30:25	-2.34014
2022-09-14	11:30:25	-1.88151
2022-09-14	11:30:25	-1.59714
2022-09-14	11:30:26	-2.23795
2022-09-14	11:30:26	-2.27846
2022-09-14	11:30:26	-2.27678
2022-09-14	11:30:26	-2.36055
2022-09-14	11:30:27	-2.42375
2022-09-14	11:30:27	-2.54487
2022-09-14	11:30:27	-2.94049
2022-09-14	11:30:27	-2.87541
2022-09-14	11:30:28	-2.79871
2022-09-14	11:30:28	-2.85851
2022-09-14	11:30:28	-2.79317
2022-09-14	11:30:29	-2.77703
2022-09-14	11:30:29	-2.71454
2022-09-14	11:30:29	-2.69724
2022-09-14	11:30:29	-2.69235
2022-09-14	11:30:30	-2.6895
2022-09-14	11:30:30	-2.69566
2022-09-14	11:30:30	-2.60614
2022-09-14	11:30:30	-2.56436
2022-09-14	11:30:31	-2.51164
