# Supplementary material for: Comparing efficacy in reducing pulling and welfare impacts of four types of leash walking equipment
Source: PeerJ journal article supplement (doi:10.7717/peerj.18131), 2024-10-24
Supplement: Shelter_2_Tension_files.zip [file KimChi_martin_2022914101649 copy.xlsx]

## Sheet: Averaged Newtons
Date	Time	Averaged Newtons	Impulse	Total steps
2022-09-14	10:16:56	6.36591	6.36591	0		Impulse newtons	2184.88
2022-09-14	10:16:57	6.85171	13.2176	0		Total steps	51
2022-09-14	10:16:58	6.87553	20.0931	0		# > 5 sec	2
2022-09-14	10:16:59	6.8624	26.9556	0
2022-09-14	10:17:00	4.52941	31.485	0
2022-09-14	10:17:01	14.0331	45.5181	1
2022-09-14	10:17:02	19.3896	64.9077	2
2022-09-14	10:17:03	40.8772	105.785	3
2022-09-14	10:17:04	75.9686	181.754	4
2022-09-14	10:17:05	-0.567115	181.754	4
2022-09-14	10:17:06	-2.65445	181.754	4
2022-09-14	10:17:07	-3.58465	181.754	4
2022-09-14	10:17:08	-4.43139	181.754	4
2022-09-14	10:17:09	-4.32788	181.754	4
2022-09-14	10:17:10	-3.53488	181.754	4
2022-09-14	10:17:11	-3.12743	181.754	4
2022-09-14	10:17:12	-1.87096	181.754	4
2022-09-14	10:17:13	-0.0707967	181.754	4
2022-09-14	10:17:14	1.60503	183.359	4
2022-09-14	10:17:15	0.877981	184.237	4
2022-09-14	10:17:16	2.59552	186.832	4
2022-09-14	10:17:17	3.60117	190.433	4
2022-09-14	10:17:18	10.5225	200.956	4
2022-09-14	10:17:19	4.16077	205.117	4
2022-09-14	10:17:20	3.27124	208.388	4
2022-09-14	10:17:21	3.26716	211.655	4
2022-09-14	10:17:22	3.26532	214.92	4
2022-09-14	10:17:23	3.21266	218.133	4
2022-09-14	10:17:24	0.250594	218.383	4
2022-09-14	10:17:25	1.95155	220.335	4
2022-09-14	10:17:26	3.25075	223.586	4
2022-09-14	10:17:27	3.26167	226.847	4
2022-09-14	10:17:28	3.27933	230.127	4
2022-09-14	10:17:29	3.28075	233.408	4
2022-09-14	10:17:30	3.27324	236.681	4
2022-09-14	10:17:31	3.2915	239.972	4
2022-09-14	10:17:32	3.25981	243.232	4
2022-09-14	10:17:33	3.25601	246.488	4
2022-09-14	10:17:34	3.27362	249.762	4
2022-09-14	10:17:35	3.26173	253.023	4
2022-09-14	10:17:36	3.26739	256.291	4
2022-09-14	10:17:37	4.88883	261.18	4
2022-09-14	10:17:38	5.91565	267.095	4
2022-09-14	10:17:39	3.31059	270.406	4
2022-09-14	10:17:40	3.4289	273.835	4
2022-09-14	10:17:41	3.33474	277.17	4
2022-09-14	10:17:42	3.28193	280.451	4
2022-09-14	10:17:43	3.26939	283.721	4
2022-09-14	10:17:44	3.27627	286.997	4
2022-09-14	10:17:45	3.28652	290.284	4
2022-09-14	10:17:46	10.2624	300.546	4
2022-09-14	10:17:47	8.82818	309.374	4
2022-09-14	10:17:48	14.1175	323.492	5
2022-09-14	10:17:49	6.20038	329.692	5
2022-09-14	10:17:50	7.10115	336.793	5
2022-09-14	10:17:51	12.6408	349.434	5
2022-09-14	10:17:52	3.27707	352.711	5
2022-09-14	10:17:53	2.43502	355.146	5
2022-09-14	10:17:54	8.74066	363.887	5
2022-09-14	10:17:55	17.5849	381.472	6
2022-09-14	10:17:56	10.7297	392.201	6
2022-09-14	10:17:57	3.31837	395.52	6
2022-09-14	10:17:58	4.1945	399.714	6
2022-09-14	10:17:59	2.13021	401.845	6
2022-09-14	10:18:00	1.47617	403.321	6
2022-09-14	10:18:01	1.97911	405.3	6
2022-09-14	10:18:02	1.78256	407.082	6
2022-09-14	10:18:03	1.71218	408.795	6
2022-09-14	10:18:04	1.43208	410.227	6
2022-09-14	10:18:05	1.34725	411.574	6
2022-09-14	10:18:06	1.96162	413.536	6
2022-09-14	10:18:07	1.52727	415.063	6
2022-09-14	10:18:08	1.63718	416.7	6
2022-09-14	10:18:09	1.87668	418.577	6
2022-09-14	10:18:10	1.89829	420.475	6
2022-09-14	10:18:11	1.87175	422.347	6
2022-09-14	10:18:12	1.81035	424.157	6
2022-09-14	10:18:13	1.72037	425.877	6
2022-09-14	10:18:14	1.80197	427.679	6
2022-09-14	10:18:15	1.88086	429.56	6
2022-09-14	10:18:16	1.97047	431.531	6
2022-09-14	10:18:17	2.05353	433.584	6
2022-09-14	10:18:18	1.71856	435.303	6
2022-09-14	10:18:19	1.67289	436.976	6
2022-09-14	10:18:20	2.1198	439.096	6
2022-09-14	10:18:21	-0.216977	439.096	6
2022-09-14	10:18:22	-1.89716	439.096	6
2022-09-14	10:18:23	-0.180191	439.096	6
2022-09-14	10:18:24	0.761797	439.857	6
2022-09-14	10:18:25	1.67464	441.532	6
2022-09-14	10:18:26	1.60537	443.137	6
2022-09-14	10:18:27	1.37068	444.508	6
2022-09-14	10:18:28	-1.63019	444.508	6
2022-09-14	10:18:29	-0.878943	444.508	6
2022-09-14	10:18:30	6.21276	450.721	6
2022-09-14	10:18:31	0.36712	451.088	6
2022-09-14	10:18:32	0.646801	451.735	6
2022-09-14	10:18:33	-0.212392	451.735	6
2022-09-14	10:18:34	-0.338085	451.735	6
2022-09-14	10:18:35	12.0113	463.746	6
2022-09-14	10:18:36	11.0549	474.801	6
2022-09-14	10:18:37	19.0919	493.893	7
2022-09-14	10:18:38	7.61315	501.506	7
2022-09-14	10:18:39	2.24266	503.749	7
2022-09-14	10:18:40	1.51035	505.259	7
2022-09-14	10:18:41	1.64638	506.905	7
2022-09-14	10:18:42	7.73432	514.64	7
2022-09-14	10:18:43	7.59906	522.239	7
2022-09-14	10:18:44	9.30324	531.542	7
2022-09-14	10:18:45	9.87423	541.416	7
2022-09-14	10:18:46	13.6846	555.101	8
2022-09-14	10:18:47	1.56378	556.665	8
2022-09-14	10:18:48	1.60078	558.265	8
2022-09-14	10:18:49	1.41737	559.683	8
2022-09-14	10:18:50	6.70574	566.388	8
2022-09-14	10:18:51	8.926	575.314	8
2022-09-14	10:18:52	2.26219	577.577	8
2022-09-14	10:18:53	2.01861	579.595	8
2022-09-14	10:18:54	4.54956	584.145	8
2022-09-14	10:18:55	10.5786	594.723	8
2022-09-14	10:18:56	4.58492	599.308	8
2022-09-14	10:18:57	11.2511	610.559	8
2022-09-14	10:18:58	12.2273	622.787	8
2022-09-14	10:18:59	9.1037	631.89	8
2022-09-14	10:19:00	12.3201	644.21	8
2022-09-14	10:19:01	12.0414	656.252	8
2022-09-14	10:19:02	2.94436	659.196	8
2022-09-14	10:19:03	1.49139	660.688	8
2022-09-14	10:19:04	1.70492	662.393	8
2022-09-14	10:19:05	13.7573	676.15	9
2022-09-14	10:19:06	4.21646	680.366	9
2022-09-14	10:19:07	2.24176	682.608	9
2022-09-14	10:19:08	4.35182	686.96	9
2022-09-14	10:19:09	9.84438	696.804	9
2022-09-14	10:19:10	14.6489	711.453	10
2022-09-14	10:19:11	19.6693	731.122	11
2022-09-14	10:19:12	11.1938	742.316	11
2022-09-14	10:19:13	20.9972	763.313	12
2022-09-14	10:19:14	42.7131	806.027	13
2022-09-14	10:19:15	2.24119	808.268	13
2022-09-14	10:19:16	3.6954	811.963	13
2022-09-14	10:19:17	54.3053	866.269	14
2022-09-14	10:19:18	17.1738	883.442	15
2022-09-14	10:19:19	11.9017	895.344	15
2022-09-14	10:19:20	5.9414	901.285	15
2022-09-14	10:19:21	18.6923	919.978	16
2022-09-14	10:19:22	15.9624	935.94	17
2022-09-14	10:19:23	11.9292	947.869	17
2022-09-14	10:19:24	2.73004	950.599	17
2022-09-14	10:19:25	3.27576	953.875	17
2022-09-14	10:19:26	8.03631	961.911	17
2022-09-14	10:19:27	7.16149	969.073	17
2022-09-14	10:19:28	10.9743	980.047	17
2022-09-14	10:19:29	14.2729	994.32	18
2022-09-14	10:19:30	3.4787	997.799	18
2022-09-14	10:19:31	2.23683	1000.04	18
2022-09-14	10:19:32	0.438595	1000.47	18
2022-09-14	10:19:33	0.956477	1001.43	18
2022-09-14	10:19:34	13.3289	1014.76	19
2022-09-14	10:19:35	7.45508	1022.21	19
2022-09-14	10:19:36	9.54399	1031.76	19
2022-09-14	10:19:37	4.06897	1035.83	19
2022-09-14	10:19:38	0.558629	1036.39	19
2022-09-14	10:19:39	-1.93715	1036.39	19
2022-09-14	10:19:40	-1.53944	1036.39	19
2022-09-14	10:19:41	-1.11154	1036.39	19
2022-09-14	10:19:42	-0.797562	1036.39	19
2022-09-14	10:19:43	1.02748	1037.41	19
2022-09-14	10:19:44	2.4417	1039.86	19
2022-09-14	10:19:45	2.43542	1042.29	19
2022-09-14	10:19:46	2.44804	1044.74	19
2022-09-14	10:19:47	-0.602392	1044.74	19
2022-09-14	10:19:48	0.500961	1045.24	19
2022-09-14	10:19:49	48.3146	1093.55	20
2022-09-14	10:19:50	14.3012	1107.86	21
2022-09-14	10:19:51	5.78845	1113.64	21
2022-09-14	10:19:52	22.4961	1136.14	22
2022-09-14	10:19:53	21.8088	1157.95	23
2022-09-14	10:19:54	7.1359	1165.08	23
2022-09-14	10:19:55	27.1667	1192.25	24
2022-09-14	10:19:56	6.70849	1198.96	24
2022-09-14	10:19:57	16.9224	1215.88	25
2022-09-14	10:19:58	10.3004	1226.18	25
2022-09-14	10:19:59	18.7434	1244.93	26
2022-09-14	10:20:00	35.2209	1280.15	27
2022-09-14	10:20:01	65.9743	1346.12	28
2022-09-14	10:20:02	16.42	1362.54	29
2022-09-14	10:20:03	27.1316	1389.67	30
2022-09-14	10:20:04	15.3583	1405.03	31
2022-09-14	10:20:05	13.3415	1418.37	32
2022-09-14	10:20:06	6.95231	1425.33	32
2022-09-14	10:20:07	1.79875	1427.12	32
2022-09-14	10:20:08	0.894978	1428.02	32
2022-09-14	10:20:09	8.50082	1436.52	32
2022-09-14	10:20:10	1.94374	1438.46	32
2022-09-14	10:20:11	7.08706	1445.55	32
2022-09-14	10:20:12	6.82621	1452.38	32
2022-09-14	10:20:13	2.96955	1455.35	32
2022-09-14	10:20:14	1.61329	1456.96	32
2022-09-14	10:20:15	-0.0481595	1456.96	32
2022-09-14	10:20:16	0.25914	1457.22	32
2022-09-14	10:20:17	1.02348	1458.24	32
2022-09-14	10:20:18	0.741085	1458.98	32
2022-09-14	10:20:19	10.673	1469.66	32
2022-09-14	10:20:20	4.94197	1474.6	32
2022-09-14	10:20:21	12.281	1486.88	32
2022-09-14	10:20:22	1.01352	1487.89	32
2022-09-14	10:20:23	0.307753	1488.2	32
2022-09-14	10:20:24	-1.52274	1488.2	32
2022-09-14	10:20:25	10.4894	1498.69	32
2022-09-14	10:20:26	28.0574	1526.75	33
2022-09-14	10:20:27	-0.856642	1526.75	33
2022-09-14	10:20:28	-0.301525	1526.75	33
2022-09-14	10:20:29	4.41709	1531.16	33
2022-09-14	10:20:30	20.7918	1551.96	34
2022-09-14	10:20:31	13.888	1565.84	35
2022-09-14	10:20:32	21.6736	1587.52	36
2022-09-14	10:20:33	24.6173	1612.14	37
2022-09-14	10:20:34	18.4566	1630.59	38
2022-09-14	10:20:35	10.1506	1640.74	38
2022-09-14	10:20:36	7.59136	1648.33	38
2022-09-14	10:20:37	11.7035	1660.04	38
2022-09-14	10:20:38	26.2522	1686.29	39
2022-09-14	10:20:39	36.5971	1722.89	40
2022-09-14	10:20:40	55.3649	1778.25	41
2022-09-14	10:20:41	47.7569	1826.01	42
2022-09-14	10:20:42	31.7788	1857.79	43
2022-09-14	10:20:43	13.127	1870.91	44
2022-09-14	10:20:44	1.65823	1872.57	44
2022-09-14	10:20:45	0.958966	1873.53	44
2022-09-14	10:20:46	2.66181	1876.19	44
2022-09-14	10:20:47	0.31528	1876.51	44
2022-09-14	10:20:48	0.277645	1876.79	44
2022-09-14	10:20:49	3.49891	1880.28	44
2022-09-14	10:20:50	8.623	1888.91	44
2022-09-14	10:20:51	12.9861	1901.89	44
2022-09-14	10:20:52	10.484	1912.38	44
2022-09-14	10:20:53	11.0964	1923.47	44
2022-09-14	10:20:54	14.8417	1938.32	45
2022-09-14	10:20:55	19.8161	1958.13	46
2022-09-14	10:20:56	16.1792	1974.31	47
2022-09-14	10:20:57	15.0287	1989.34	48
2022-09-14	10:20:58	4.78758	1994.13	48
2022-09-14	10:20:59	3.6864	1997.81	48
2022-09-14	10:21:00	6.53841	2004.35	48
2022-09-14	10:21:01	0.802092	2005.15	48
2022-09-14	10:21:02	0.0404646	2005.2	48
2022-09-14	10:21:03	-1.01341	2005.2	48
2022-09-14	10:21:04	10.0295	2015.22	48
2022-09-14	10:21:05	13.6456	2028.87	49
2022-09-14	10:21:06	7.79917	2036.67	49
2022-09-14	10:21:07	1.34478	2038.01	49
2022-09-14	10:21:08	0.102661	2038.12	49
2022-09-14	10:21:09	5.39765	2043.51	49
2022-09-14	10:21:10	0.680927	2044.2	49
2022-09-14	10:21:11	12.1107	2056.31	49
2022-09-14	10:21:12	19.4074	2075.71	50
2022-09-14	10:21:13	32.4778	2108.19	51
2022-09-14	10:21:14	7.63448	2115.83	51
2022-09-14	10:21:15	1.03065	2116.86	51
2022-09-14	10:21:16	0.727218	2117.58	51
2022-09-14	10:21:17	2.14962	2119.73	51
2022-09-14	10:21:18	2.33174	2122.06	51
2022-09-14	10:21:19	1.555	2123.62	51
2022-09-14	10:21:20	1.82931	2125.45	51
2022-09-14	10:21:21	-2.12653	2125.45	51
2022-09-14	10:21:22	-0.572436	2125.45	51
2022-09-14	10:21:23	0.0122818	2125.46	51
2022-09-14	10:21:24	-0.0377463	2125.46	51
2022-09-14	10:21:25	0.00826364	2125.47	51
2022-09-14	10:21:26	0.00826368	2125.48	51
2022-09-14	10:21:27	2.02053	2127.5	51
2022-09-14	10:21:28	-0.467475	2127.5	51
2022-09-14	10:21:29	-0.540573	2127.5	51
2022-09-14	10:21:30	-0.572492	2127.5	51
2022-09-14	10:21:31	-0.558796	2127.5	51
2022-09-14	10:21:32	-0.519238	2127.5	51
2022-09-14	10:21:33	-0.421728	2127.5	51
2022-09-14	10:21:34	-0.467683	2127.5	51
2022-09-14	10:21:35	2.39037	2129.89	51
2022-09-14	10:21:36	3.28078	2133.17	51
2022-09-14	10:21:37	3.28431	2136.45	51
2022-09-14	10:21:38	3.29897	2139.75	51
2022-09-14	10:21:39	3.27486	2143.03	51
2022-09-14	10:21:40	3.28901	2146.32	51
2022-09-14	10:21:41	3.70791	2150.02	51
2022-09-14	10:21:42	1.86728	2151.89	51
2022-09-14	10:21:43	1.93101	2153.82	51
2022-09-14	10:21:44	2.04278	2155.87	51
2022-09-14	10:21:45	2.23495	2158.1	51
2022-09-14	10:21:46	10.5981	2168.7	51
2022-09-14	10:21:47	6.01808	2174.72	51
2022-09-14	10:21:48	2.06836	2176.79	51
2022-09-14	10:21:49	1.76673	2178.55	51
2022-09-14	10:21:50	1.73248	2180.28	51
2022-09-14	10:21:51	-0.358969	2180.28	51
2022-09-14	10:21:52	-1.06264	2180.28	51
2022-09-14	10:21:53	0.182135	2180.47	51
2022-09-14	10:21:54	1.22976	2181.7	51
2022-09-14	10:21:55	1.26813	2182.96	51
2022-09-14	10:21:56	1.91714	2184.88	51

## Sheet: KimChi_martin_2022914101649 (4)
Date	Time	Lbs	Newtons	Averaged Newtons	Total force x time	total steps > 13.345		**GoPro Fitting: 10:06
2022-09-14	10:16:56	1.54302	6.86366	6.36591	6.86366	FALSE	0
2022-09-14	10:16:56	1.44907	6.44575	6.36591	6.44575	FALSE	0
2022-09-14	10:16:56	1.18113	5.2539	6.36591	12.1176	FALSE	0
2022-09-14	10:16:56	1.55126	6.90031	6.36591	13.3461	FALSE	0
2022-09-14	10:16:57	1.54072	6.85343	6.85171	18.971	FALSE	0
2022-09-14	10:16:57	1.52775	6.79574	6.85171	20.1418	FALSE	0
2022-09-14	10:16:57	1.55253	6.90596	6.85171	25.877	FALSE	0
2022-09-14	10:16:58	1.55355	6.9105	6.87553	27.0523	FALSE	0
2022-09-14	10:16:58	1.54632	6.87834	6.87553	32.7553	FALSE	0
2022-09-14	10:16:58	1.55177	6.90258	6.87553	33.9549	FALSE	0
2022-09-14	10:16:58	1.53111	6.81068	6.87553	39.566	FALSE	0
2022-09-14	10:16:59	1.53559	6.83061	6.8624	40.7855	FALSE	0
2022-09-14	10:16:59	1.54022	6.85121	6.8624	46.4172	FALSE	0
2022-09-14	10:16:59	1.53996	6.85005	6.8624	47.6356	FALSE	0
2022-09-14	10:16:59	1.55518	6.91775	6.8624	53.3349	FALSE	0
2022-09-14	10:17:00	1.58088	7.03207	4.52941	54.6676	FALSE	0
2022-09-14	10:17:00	1.56347	6.95463	4.52941	60.2896	FALSE	0
2022-09-14	10:17:00	0.440725	1.96043	4.52941	56.6281	FALSE	0
2022-09-14	10:17:00	0.487952	2.17051	4.52941	62.4601	FALSE	0
2022-09-14	10:17:01	1.02968	4.58022	14.0331	61.2083	FALSE	0
2022-09-14	10:17:01	3.04469	13.5434	14.0331	76.0035	1	1
2022-09-14	10:17:01	5.38998	23.9757	14.0331	85.184	1	2
2022-09-14	10:17:02	4.61976	20.5496	19.3896	96.5531	1	3
2022-09-14	10:17:02	4.22785	18.8063	19.3896	103.99	1	4
2022-09-14	10:17:02	3.46775	15.4252	19.3896	111.978	1	5
2022-09-14	10:17:02	5.12057	22.7773	19.3896	126.768	1	6
2022-09-14	10:17:03	4.1221	18.3359	40.8772	130.314	1	7
2022-09-14	10:17:03	8.69248	38.6659	40.8772	165.434	1	8
2022-09-14	10:17:03	8.99976	40.0327	40.8772	170.347	1	9
2022-09-14	10:17:03	14.9441	66.4743	40.8772	231.908	1	10
2022-09-14	10:17:04	29.9604	133.27	75.9686	303.617	1	11
2022-09-14	10:17:04	24.963	111.04	75.9686	342.948	1	12
2022-09-14	10:17:04	12.3999	55.1572	75.9686	358.774	1	13
2022-09-14	10:17:04	0.9907	4.40683	75.9686	347.355	FALSE	13
2022-09-14	10:17:05	0.11411	0.507584	-0.567115	359.282	FALSE	13
2022-09-14	10:17:05	-0.147977	-0.658231	-0.567115	347.355	FALSE	13
2022-09-14	10:17:05	-0.139936	-0.622463	-0.567115	359.282	FALSE	13
2022-09-14	10:17:05	-0.33617	-1.49535	-0.567115	347.355	FALSE	13
2022-09-14	10:17:06	-0.397646	-1.76881	-2.65445	359.282	FALSE	13
2022-09-14	10:17:06	-0.611539	-2.72025	-2.65445	347.355	FALSE	13
2022-09-14	10:17:06	-0.781055	-3.47429	-2.65445	359.282	FALSE	13
2022-09-14	10:17:07	-0.826195	-3.67508	-3.58465	347.355	FALSE	13
2022-09-14	10:17:07	-0.843702	-3.75296	-3.58465	359.282	FALSE	13
2022-09-14	10:17:07	-0.795101	-3.53677	-3.58465	347.355	FALSE	13
2022-09-14	10:17:07	-0.75846	-3.37378	-3.58465	359.282	FALSE	13
2022-09-14	10:17:08	-0.905432	-4.02754	-4.43139	347.355	FALSE	13
2022-09-14	10:17:08	-0.861869	-3.83377	-4.43139	359.282	FALSE	13
2022-09-14	10:17:08	-1.12141	-4.98826	-4.43139	347.355	FALSE	13
2022-09-14	10:17:08	-1.09617	-4.87598	-4.43139	359.282	FALSE	13
2022-09-14	10:17:09	-0.871335	-3.87587	-4.32788	347.355	FALSE	13
2022-09-14	10:17:09	-1.08777	-4.83862	-4.32788	359.282	FALSE	13
2022-09-14	10:17:09	-0.976068	-4.34175	-4.32788	347.355	FALSE	13
2022-09-14	10:17:09	-0.956628	-4.25527	-4.32788	359.282	FALSE	13
2022-09-14	10:17:10	-0.737137	-3.27893	-3.53488	347.355	FALSE	13
2022-09-14	10:17:10	-0.867162	-3.85731	-3.53488	359.282	FALSE	13
2022-09-14	10:17:10	-0.779732	-3.4684	-3.53488	347.355	FALSE	13
2022-09-14	10:17:11	-0.567824	-2.52579	-3.12743	359.282	FALSE	13
2022-09-14	10:17:11	-0.566602	-2.52036	-3.12743	347.355	FALSE	13
2022-09-14	10:17:11	-0.822633	-3.65924	-3.12743	359.282	FALSE	13
2022-09-14	10:17:11	-0.855254	-3.80434	-3.12743	347.355	FALSE	13
2022-09-14	10:17:12	-0.728333	-3.23977	-1.87096	359.282	FALSE	13
2022-09-14	10:17:12	-0.423753	-1.88494	-1.87096	347.355	FALSE	13
2022-09-14	10:17:12	-0.218409	-0.971527	-1.87096	359.282	FALSE	13
2022-09-14	10:17:12	-0.311946	-1.3876	-1.87096	347.355	FALSE	13
2022-09-14	10:17:13	0.00143789	0.00639602	-0.0707967	359.288	FALSE	13
2022-09-14	10:17:13	-0.109809	-0.488452	-0.0707967	347.355	FALSE	13
2022-09-14	10:17:13	0.0477483	0.212394	-0.0707967	359.5	FALSE	13
2022-09-14	10:17:13	-0.00304046	-0.0135246	-0.0707967	347.355	FALSE	13
2022-09-14	10:17:14	0.248359	1.10475	1.60503	360.605	FALSE	13
2022-09-14	10:17:14	0.414211	1.84249	1.60503	349.198	FALSE	13
2022-09-14	10:17:14	0.419911	1.86785	1.60503	362.473	FALSE	13
2022-09-14	10:17:15	0.140064	0.623033	0.877981	349.821	FALSE	13
2022-09-14	10:17:15	0.252684	1.12399	0.877981	363.597	FALSE	13
2022-09-14	10:17:15	0.221641	0.985903	0.877981	350.807	FALSE	13
2022-09-14	10:17:15	0.175127	0.779	0.877981	364.376	FALSE	13
2022-09-14	10:17:16	0.12556	0.558516	2.59552	351.365	FALSE	13
2022-09-14	10:17:16	0.734364	3.2666	2.59552	367.643	FALSE	13
2022-09-14	10:17:16	0.739198	3.2881	2.59552	354.653	FALSE	13
2022-09-14	10:17:16	0.734873	3.26886	2.59552	370.911	FALSE	13
2022-09-14	10:17:17	0.737417	3.28018	3.60117	357.933	FALSE	13
2022-09-14	10:17:17	0.732684	3.25912	3.60117	374.171	FALSE	13
2022-09-14	10:17:17	0.728817	3.24192	3.60117	361.175	FALSE	13
2022-09-14	10:17:17	1.0394	4.62346	3.60117	378.794	FALSE	13
2022-09-14	10:17:18	0.688664	3.06332	10.5225	364.239	FALSE	13
2022-09-14	10:17:18	2.15482	9.58507	10.5225	388.379	FALSE	13
2022-09-14	10:17:18	4.25324	18.9193	10.5225	383.158	1	14
2022-09-14	10:17:19	1.57513	7.00649	4.16077	395.386	FALSE	14
2022-09-14	10:17:19	0.697366	3.10202	4.16077	386.26	FALSE	14
2022-09-14	10:17:19	0.73757	3.28086	4.16077	398.667	FALSE	14
2022-09-14	10:17:19	0.731463	3.25369	4.16077	389.514	FALSE	14
2022-09-14	10:17:20	0.7307	3.2503	3.27124	401.917	FALSE	14
2022-09-14	10:17:20	0.735891	3.27339	3.27124	392.787	FALSE	14
2022-09-14	10:17:20	0.736756	3.27724	3.27124	405.194	FALSE	14
2022-09-14	10:17:20	0.738282	3.28403	3.27124	396.071	FALSE	14
2022-09-14	10:17:21	0.729173	3.24351	3.26716	408.438	FALSE	14
2022-09-14	10:17:21	0.731667	3.2546	3.26716	399.326	FALSE	14
2022-09-14	10:17:21	0.738486	3.28493	3.26716	411.722	FALSE	14
2022-09-14	10:17:21	0.738639	3.28561	3.26716	402.611	FALSE	14
2022-09-14	10:17:22	0.734008	3.26501	3.26532	414.987	FALSE	14
2022-09-14	10:17:22	0.73528	3.27067	3.26532	405.882	FALSE	14
2022-09-14	10:17:22	0.732939	3.26026	3.26532	418.248	FALSE	14
2022-09-14	10:17:23	0.732735	3.25935	3.21266	409.141	FALSE	14
2022-09-14	10:17:23	0.736908	3.27791	3.21266	421.526	FALSE	14
2022-09-14	10:17:23	0.737672	3.28131	3.21266	412.423	FALSE	14
2022-09-14	10:17:23	0.681641	3.03208	3.21266	424.558	FALSE	14
2022-09-14	10:17:24	0.0358399	0.159423	0.250594	412.582	FALSE	14
2022-09-14	10:17:24	0.0519723	0.231183	0.250594	424.789	FALSE	14
2022-09-14	10:17:24	-0.00507608	-0.0225794	0.250594	412.582	FALSE	14
2022-09-14	10:17:24	0.142608	0.634349	0.250594	425.423	FALSE	14
2022-09-14	10:17:25	0.125713	0.559197	1.95155	413.141	FALSE	14
2022-09-14	10:17:25	0.156909	0.697963	1.95155	426.121	FALSE	14
2022-09-14	10:17:25	0.738181	3.28358	1.95155	416.425	FALSE	14
2022-09-14	10:17:25	0.734109	3.26546	1.95155	429.387	FALSE	14
2022-09-14	10:17:26	0.734466	3.26705	3.25075	419.692	FALSE	14
2022-09-14	10:17:26	0.721743	3.21046	3.25075	432.597	FALSE	14
2022-09-14	10:17:26	0.736196	3.27475	3.25075	422.967	FALSE	14
2022-09-14	10:17:27	0.73299	3.26049	3.26167	435.858	FALSE	14
2022-09-14	10:17:27	0.732481	3.25822	3.26167	426.225	FALSE	14
2022-09-14	10:17:27	0.726425	3.23128	3.26167	439.089	FALSE	14
2022-09-14	10:17:27	0.741132	3.2967	3.26167	429.521	FALSE	14
2022-09-14	10:17:28	0.735433	3.27135	3.27933	442.36	FALSE	14
2022-09-14	10:17:28	0.736857	3.27769	3.27933	432.799	FALSE	14
2022-09-14	10:17:28	0.735891	3.27339	3.27933	445.634	FALSE	14
2022-09-14	10:17:28	0.740725	3.29489	3.27933	436.094	FALSE	14
2022-09-14	10:17:29	0.742252	3.30169	3.28075	448.935	FALSE	14
2022-09-14	10:17:29	0.738181	3.28358	3.28075	439.378	FALSE	14
2022-09-14	10:17:29	0.73757	3.28086	3.28075	452.216	FALSE	14
2022-09-14	10:17:29	0.732175	3.25686	3.28075	442.634	FALSE	14
2022-09-14	10:17:30	0.728461	3.24034	3.27324	455.457	FALSE	14
2022-09-14	10:17:30	0.74159	3.29874	3.27324	445.933	FALSE	14
2022-09-14	10:17:30	0.737519	3.28063	3.27324	458.737	FALSE	14
2022-09-14	10:17:31	0.738231	3.2838	3.2915	449.217	FALSE	14
2022-09-14	10:17:31	0.742964	3.30485	3.2915	462.042	FALSE	14
2022-09-14	10:17:31	0.743066	3.30531	3.2915	452.522	FALSE	14
2022-09-14	10:17:31	0.735585	3.27203	3.2915	465.314	FALSE	14
2022-09-14	10:17:32	0.737061	3.27859	3.25981	455.801	FALSE	14
2022-09-14	10:17:32	0.735076	3.26977	3.25981	468.584	FALSE	14
2022-09-14	10:17:32	0.728359	3.23989	3.25981	459.041	FALSE	14
2022-09-14	10:17:32	0.730852	3.25098	3.25981	471.835	FALSE	14
2022-09-14	10:17:33	0.729071	3.24305	3.25601	462.284	FALSE	14
2022-09-14	10:17:33	0.733397	3.2623	3.25601	475.097	FALSE	14
2022-09-14	10:17:33	0.734771	3.26841	3.25601	465.552	FALSE	14
2022-09-14	10:17:33	0.7307	3.2503	3.25601	478.347	FALSE	14
2022-09-14	10:17:34	0.734618	3.26773	3.27362	468.82	FALSE	14
2022-09-14	10:17:34	0.734568	3.26751	3.27362	481.615	FALSE	14
2022-09-14	10:17:34	0.738639	3.28561	3.27362	472.106	FALSE	14
2022-09-14	10:17:35	0.733702	3.26365	3.26173	484.879	FALSE	14
2022-09-14	10:17:35	0.730954	3.25143	3.26173	475.357	FALSE	14
2022-09-14	10:17:35	0.73645	3.27588	3.26173	488.154	FALSE	14
2022-09-14	10:17:35	0.731972	3.25596	3.26173	478.613	FALSE	14
2022-09-14	10:17:36	0.735331	3.2709	3.26739	491.425	FALSE	14
2022-09-14	10:17:36	0.730852	3.25098	3.26739	481.864	FALSE	14
2022-09-14	10:17:36	0.734109	3.26546	3.26739	494.691	FALSE	14
2022-09-14	10:17:36	0.737875	3.28222	3.26739	485.146	FALSE	14
2022-09-14	10:17:37	0.737417	3.28018	4.88883	497.971	FALSE	14
2022-09-14	10:17:37	2.14154	9.526	4.88883	494.672	FALSE	14
2022-09-14	10:17:37	0.64785	2.88177	4.88883	500.853	FALSE	14
2022-09-14	10:17:37	0.869427	3.86739	4.88883	498.54	FALSE	14
2022-09-14	10:17:38	2.42866	10.8032	5.91565	511.656	FALSE	14
2022-09-14	10:17:38	1.49233	6.63818	5.91565	505.178	FALSE	14
2022-09-14	10:17:38	0.665254	2.95918	5.91565	514.615	FALSE	14
2022-09-14	10:17:38	0.733346	3.26207	5.91565	508.44	FALSE	14
2022-09-14	10:17:39	0.738639	3.28561	3.31059	517.901	FALSE	14
2022-09-14	10:17:39	0.75472	3.35715	3.31059	511.797	FALSE	14
2022-09-14	10:17:39	0.739402	3.28901	3.31059	521.19	FALSE	14
2022-09-14	10:17:40	0.75187	3.34447	3.4289	515.141	FALSE	14
2022-09-14	10:17:40	0.743829	3.3087	3.4289	524.498	FALSE	14
2022-09-14	10:17:40	0.853855	3.79812	3.4289	518.94	FALSE	14
2022-09-14	10:17:40	0.733855	3.26433	3.4289	527.763	FALSE	14
2022-09-14	10:17:41	0.745713	3.31708	3.33474	522.257	FALSE	14
2022-09-14	10:17:41	0.748053	3.32749	3.33474	531.09	FALSE	14
2022-09-14	10:17:41	0.758079	3.37209	3.33474	525.629	FALSE	14
2022-09-14	10:17:41	0.746883	3.32228	3.33474	534.413	FALSE	14
2022-09-14	10:17:42	0.741743	3.29942	3.28193	528.928	FALSE	14
2022-09-14	10:17:42	0.738028	3.2829	3.28193	537.695	FALSE	14
2022-09-14	10:17:42	0.736654	3.27678	3.28193	532.205	FALSE	14
2022-09-14	10:17:42	0.734822	3.26864	3.28193	540.964	FALSE	14
2022-09-14	10:17:43	0.733448	3.26252	3.26939	535.467	FALSE	14
2022-09-14	10:17:43	0.733397	3.2623	3.26939	544.226	FALSE	14
2022-09-14	10:17:43	0.73813	3.28335	3.26939	538.751	FALSE	14
2022-09-14	10:17:44	0.741539	3.29851	3.27627	547.525	FALSE	14
2022-09-14	10:17:44	0.739707	3.29036	3.27627	542.041	FALSE	14
2022-09-14	10:17:44	0.730038	3.24736	3.27627	550.772	FALSE	14
2022-09-14	10:17:44	0.734873	3.26886	3.27627	545.31	FALSE	14
2022-09-14	10:17:45	0.738893	3.28674	3.28652	554.059	FALSE	14
2022-09-14	10:17:45	0.736756	3.27724	3.28652	548.587	FALSE	14
2022-09-14	10:17:45	0.736603	3.27656	3.28652	557.336	FALSE	14
2022-09-14	10:17:45	0.743117	3.30553	3.28652	551.893	FALSE	14
2022-09-14	10:17:46	3.81614	16.975	10.2624	574.31	1	15
2022-09-14	10:17:46	2.75859	12.2708	10.2624	564.164	FALSE	15
2022-09-14	10:17:46	1.6224	7.21676	10.2624	581.527	FALSE	15
2022-09-14	10:17:46	1.03126	4.58725	10.2624	568.751	FALSE	15
2022-09-14	10:17:47	1.13564	5.05155	8.82818	586.579	FALSE	15
2022-09-14	10:17:47	1.57284	6.99631	8.82818	575.747	FALSE	15
2022-09-14	10:17:47	3.24551	14.4367	8.82818	601.015	1	16
2022-09-14	10:17:48	1.86281	8.28615	14.1175	584.033	FALSE	16
2022-09-14	10:17:48	4.85172	21.5814	14.1175	622.597	1	17
2022-09-14	10:17:48	4.10016	18.2383	14.1175	602.272	1	18
2022-09-14	10:17:48	1.88037	8.36426	14.1175	630.961	FALSE	18
2022-09-14	10:17:49	1.74307	7.75352	6.20038	610.025	FALSE	18
2022-09-14	10:17:49	2.30897	10.2708	6.20038	641.232	FALSE	18
2022-09-14	10:17:49	0.670801	2.98386	6.20038	613.009	FALSE	18
2022-09-14	10:17:49	0.852786	3.79336	6.20038	645.025	FALSE	18
2022-09-14	10:17:50	0.737112	3.27882	7.10115	616.288	FALSE	18
2022-09-14	10:17:50	1.84576	8.21031	7.10115	653.236	FALSE	18
2022-09-14	10:17:50	1.28286	5.70642	7.10115	621.994	FALSE	18
2022-09-14	10:17:50	2.51991	11.2091	7.10115	664.445	FALSE	18
2022-09-14	10:17:51	3.81029	16.9489	12.6408	638.943	1	19
2022-09-14	10:17:51	3.46805	15.4266	12.6408	679.871	1	20
2022-09-14	10:17:51	1.24698	5.54682	12.6408	644.49	FALSE	20
2022-09-14	10:17:52	0.992277	4.41385	3.27707	684.285	FALSE	20
2022-09-14	10:17:52	0.543015	2.41544	3.27707	646.905	FALSE	20
2022-09-14	10:17:52	0.578893	2.57503	3.27707	686.86	FALSE	20
2022-09-14	10:17:52	0.832684	3.70394	3.27707	650.609	FALSE	20
2022-09-14	10:17:53	0.806272	3.58646	2.43502	690.447	FALSE	20
2022-09-14	10:17:53	0.734975	3.26932	2.43502	653.879	FALSE	20
2022-09-14	10:17:53	0.406629	1.80877	2.43502	692.255	FALSE	20
2022-09-14	10:17:53	0.241794	1.07555	2.43502	654.954	FALSE	20
2022-09-14	10:17:54	0.564491	2.51097	8.74066	694.766	FALSE	20
2022-09-14	10:17:54	1.13503	5.04884	8.74066	660.003	FALSE	20
2022-09-14	10:17:54	2.21355	9.84631	8.74066	704.613	FALSE	20
2022-09-14	10:17:54	3.94688	17.5565	8.74066	677.56	1	21
2022-09-14	10:17:55	4.79406	21.3249	17.5849	725.938	1	22
2022-09-14	10:17:55	3.24861	14.4505	17.5849	692.01	1	23
2022-09-14	10:17:55	3.81711	16.9793	17.5849	742.917	1	24
2022-09-14	10:17:56	3.73899	16.6318	10.7297	708.642	1	25
2022-09-14	10:17:56	2.9906	13.3028	10.7297	756.22	FALSE	25
2022-09-14	10:17:56	1.93991	8.62911	10.7297	717.271	FALSE	25
2022-09-14	10:17:56	0.979097	4.35522	10.7297	760.575	FALSE	25
2022-09-14	10:17:57	0.652939	2.9044	3.31837	720.175	FALSE	25
2022-09-14	10:17:57	0.275127	1.22382	3.31837	761.799	FALSE	25
2022-09-14	10:17:57	1.04103	4.63071	3.31837	724.806	FALSE	25
2022-09-14	10:17:57	1.01492	4.51457	3.31837	766.313	FALSE	25
2022-09-14	10:17:58	1.29594	5.7646	4.1945	730.571	FALSE	25
2022-09-14	10:17:58	1.10933	4.93452	4.1945	771.248	FALSE	25
2022-09-14	10:17:58	0.939707	4.18	4.1945	734.751	FALSE	25
2022-09-14	10:17:58	0.426883	1.89886	4.1945	773.147	FALSE	25
2022-09-14	10:17:59	0.53874	2.39642	2.13021	737.147	FALSE	25
2022-09-14	10:17:59	0.392125	1.74425	2.13021	774.891	FALSE	25
2022-09-14	10:17:59	0.505814	2.24996	2.13021	739.397	FALSE	25
2022-09-14	10:18:00	0.304033	1.3524	1.47617	776.243	FALSE	25
2022-09-14	10:18:00	0.295738	1.3155	1.47617	740.713	FALSE	25
2022-09-14	10:18:00	0.366985	1.63242	1.47617	777.876	FALSE	25
2022-09-14	10:18:00	0.360674	1.60435	1.47617	742.317	FALSE	25
2022-09-14	10:18:01	0.46556	2.0709	1.97911	779.947	FALSE	25
2022-09-14	10:18:01	0.411667	1.83118	1.97911	744.148	FALSE	25
2022-09-14	10:18:01	0.46729	2.0786	1.97911	782.025	FALSE	25
2022-09-14	10:18:01	0.435178	1.93576	1.97911	746.084	FALSE	25
2022-09-14	10:18:02	0.432074	1.92195	1.78256	783.947	FALSE	25
2022-09-14	10:18:02	0.389682	1.73338	1.78256	747.817	FALSE	25
2022-09-14	10:18:02	0.386527	1.71935	1.78256	785.666	FALSE	25
2022-09-14	10:18:02	0.394669	1.75557	1.78256	749.573	FALSE	25
2022-09-14	10:18:03	0.388919	1.72999	1.71218	787.396	FALSE	25
2022-09-14	10:18:03	0.372888	1.65868	1.71218	751.231	FALSE	25
2022-09-14	10:18:03	0.392939	1.74787	1.71218	789.144	FALSE	25
2022-09-14	10:18:04	0.488054	2.17096	1.43208	753.402	FALSE	25
2022-09-14	10:18:04	0.387494	1.72365	1.43208	790.868	FALSE	25
2022-09-14	10:18:04	0.249631	1.11041	1.43208	754.513	FALSE	25
2022-09-14	10:18:04	0.162608	0.723313	1.43208	791.591	FALSE	25
2022-09-14	10:18:05	0.175331	0.779907	1.34725	755.293	FALSE	25
2022-09-14	10:18:05	0.376705	1.67566	1.34725	793.267	FALSE	25
2022-09-14	10:18:05	0.342303	1.52263	1.34725	756.815	FALSE	25
2022-09-14	10:18:05	0.317163	1.4108	1.34725	794.678	FALSE	25
2022-09-14	10:18:06	0.46958	2.08879	1.96162	758.904	FALSE	25
2022-09-14	10:18:06	0.416552	1.85291	1.96162	796.531	FALSE	25
2022-09-14	10:18:06	0.425	1.89048	1.96162	760.795	FALSE	25
2022-09-14	10:18:06	0.452837	2.01431	1.96162	798.545	FALSE	25
2022-09-14	10:18:07	0.36556	1.62608	1.52727	762.421	FALSE	25
2022-09-14	10:18:07	0.323626	1.43955	1.52727	799.985	FALSE	25
2022-09-14	10:18:07	0.273295	1.21567	1.52727	763.636	FALSE	25
2022-09-14	10:18:07	0.410903	1.82778	1.52727	801.812	FALSE	25
2022-09-14	10:18:08	0.345713	1.5378	1.63718	765.174	FALSE	25
2022-09-14	10:18:08	0.369631	1.64419	1.63718	803.457	FALSE	25
2022-09-14	10:18:08	0.388817	1.72954	1.63718	766.904	FALSE	25
2022-09-14	10:18:09	0.433397	1.92784	1.87668	805.384	FALSE	25
2022-09-14	10:18:09	0.432176	1.92241	1.87668	768.826	FALSE	25
2022-09-14	10:18:09	0.401794	1.78726	1.87668	807.172	FALSE	25
2022-09-14	10:18:09	0.420216	1.8692	1.87668	770.695	FALSE	25
2022-09-14	10:18:10	0.389071	1.73067	1.89829	808.902	FALSE	25
2022-09-14	10:18:10	0.370089	1.64623	1.89829	772.342	FALSE	25
2022-09-14	10:18:10	0.475484	2.11505	1.89829	811.017	FALSE	25
2022-09-14	10:18:10	0.472379	2.10124	1.89829	774.443	FALSE	25
2022-09-14	10:18:11	0.417417	1.85675	1.87175	812.874	FALSE	25
2022-09-14	10:18:11	0.413957	1.84136	1.87175	776.284	FALSE	25
2022-09-14	10:18:11	0.435789	1.93848	1.87175	814.813	FALSE	25
2022-09-14	10:18:11	0.415992	1.85042	1.87175	778.135	FALSE	25
2022-09-14	10:18:12	0.425305	1.89184	1.81035	816.704	FALSE	25
2022-09-14	10:18:12	0.38556	1.71505	1.81035	779.85	FALSE	25
2022-09-14	10:18:12	0.410089	1.82416	1.81035	818.529	FALSE	25
2022-09-14	10:18:13	0.410598	1.82642	1.72037	781.676	FALSE	25
2022-09-14	10:18:13	0.384542	1.71052	1.72037	820.239	FALSE	25
2022-09-14	10:18:13	0.388664	1.72886	1.72037	783.405	FALSE	25
2022-09-14	10:18:13	0.363219	1.61567	1.72037	821.855	FALSE	25
2022-09-14	10:18:14	0.415229	1.84702	1.80197	785.252	FALSE	25
2022-09-14	10:18:14	0.4193	1.86513	1.80197	823.72	FALSE	25
2022-09-14	10:18:14	0.398028	1.77051	1.80197	787.022	FALSE	25
2022-09-14	10:18:14	0.38785	1.72523	1.80197	825.445	FALSE	25
2022-09-14	10:18:15	0.398283	1.77164	1.88086	788.794	FALSE	25
2022-09-14	10:18:15	0.41869	1.86242	1.88086	827.308	FALSE	25
2022-09-14	10:18:15	0.385814	1.71618	1.88086	790.51	FALSE	25
2022-09-14	10:18:15	0.488562	2.17322	1.88086	829.481	FALSE	25
2022-09-14	10:18:16	0.499606	2.22235	1.97047	792.733	FALSE	25
2022-09-14	10:18:16	0.41757	1.85743	1.97047	831.338	FALSE	25
2022-09-14	10:18:16	0.411769	1.83163	1.97047	794.564	FALSE	25
2022-09-14	10:18:17	0.343626	1.52852	2.05353	832.867	FALSE	25
2022-09-14	10:18:17	0.520013	2.31312	2.05353	796.877	FALSE	25
2022-09-14	10:18:17	0.63757	2.83604	2.05353	835.703	FALSE	25
2022-09-14	10:18:17	0.345407	1.53644	2.05353	798.414	FALSE	25
2022-09-14	10:18:18	0.386527	1.71935	1.71856	837.422	FALSE	25
2022-09-14	10:18:18	0.35416	1.57537	1.71856	799.989	FALSE	25
2022-09-14	10:18:18	0.411718	1.8314	1.71856	839.253	FALSE	25
2022-09-14	10:18:18	0.39299	1.7481	1.71856	801.737	FALSE	25
2022-09-14	10:18:19	0.398079	1.77074	1.67289	841.024	FALSE	25
2022-09-14	10:18:19	0.420573	1.87079	1.67289	803.608	FALSE	25
2022-09-14	10:18:19	0.404186	1.7979	1.67289	842.822	FALSE	25
2022-09-14	10:18:19	0.281489	1.25212	1.67289	804.86	FALSE	25
2022-09-14	10:18:20	0.449886	2.00118	2.1198	844.823	FALSE	25
2022-09-14	10:18:20	0.484033	2.15308	2.1198	807.013	FALSE	25
2022-09-14	10:18:20	0.495738	2.20514	2.1198	847.028	FALSE	25
2022-09-14	10:18:21	0.106374	0.473173	-0.216977	807.486	FALSE	25
2022-09-14	10:18:21	0.0129901	0.0577826	-0.216977	847.086	FALSE	25
2022-09-14	10:18:21	-0.0999361	-0.444536	-0.216977	807.486	FALSE	25
2022-09-14	10:18:21	-0.214542	-0.954326	-0.216977	847.086	FALSE	25
2022-09-14	10:18:22	-0.55729	-2.47894	-1.89716	807.486	FALSE	25
2022-09-14	10:18:22	-0.464262	-2.06513	-1.89716	847.086	FALSE	25
2022-09-14	10:18:22	-0.432811	-1.92523	-1.89716	807.486	FALSE	25
2022-09-14	10:18:22	-0.251641	-1.11935	-1.89716	847.086	FALSE	25
2022-09-14	10:18:23	-0.153575	-0.683132	-0.180191	807.486	FALSE	25
2022-09-14	10:18:23	0.0338043	0.150368	-0.180191	847.237	FALSE	25
2022-09-14	10:18:23	0.113143	0.503283	-0.180191	807.99	FALSE	25
2022-09-14	10:18:23	-0.155407	-0.691281	-0.180191	847.237	FALSE	25
2022-09-14	10:18:24	-0.213982	-0.951835	0.761797	807.99	FALSE	25
2022-09-14	10:18:24	0.253041	1.12558	0.761797	848.362	FALSE	25
2022-09-14	10:18:24	0.47472	2.11165	0.761797	810.101	FALSE	25
2022-09-14	10:18:25	0.409682	1.82235	1.67464	850.185	FALSE	25
2022-09-14	10:18:25	0.373753	1.66253	1.67464	811.764	FALSE	25
2022-09-14	10:18:25	0.319504	1.42122	1.67464	851.606	FALSE	25
2022-09-14	10:18:25	0.402964	1.79246	1.67464	813.556	FALSE	25
2022-09-14	10:18:26	0.354568	1.57719	1.60537	853.183	FALSE	25
2022-09-14	10:18:26	0.357774	1.59145	1.60537	815.148	FALSE	25
2022-09-14	10:18:26	0.508257	2.26083	1.60537	855.444	FALSE	25
2022-09-14	10:18:26	0.223015	0.992015	1.60537	816.14	FALSE	25
2022-09-14	10:18:27	0.326374	1.45178	1.37068	856.896	FALSE	25
2022-09-14	10:18:27	0.277417	1.23401	1.37068	817.374	FALSE	25
2022-09-14	10:18:27	0.453193	2.01589	1.37068	858.911	FALSE	25
2022-09-14	10:18:27	0.175585	0.781037	1.37068	818.155	FALSE	25
2022-09-14	10:18:28	-0.0387657	-0.172438	-1.63019	858.911	FALSE	25
2022-09-14	10:18:28	-0.300445	-1.33644	-1.63019	818.155	FALSE	25
2022-09-14	10:18:28	-0.760241	-3.3817	-1.63019	858.911	FALSE	25
2022-09-14	10:18:29	-0.686857	-3.05528	-0.878943	818.155	FALSE	25
2022-09-14	10:18:29	-0.518664	-2.30712	-0.878943	858.911	FALSE	25
2022-09-14	10:18:29	0.129326	0.575268	-0.878943	818.73	FALSE	25
2022-09-14	10:18:29	0.285814	1.27136	-0.878943	860.183	FALSE	25
2022-09-14	10:18:30	0.529529	2.35545	6.21276	821.086	FALSE	25
2022-09-14	10:18:30	1.52505	6.78373	6.21276	866.967	FALSE	25
2022-09-14	10:18:30	2.70617	12.0376	6.21276	833.123	FALSE	25
2022-09-14	10:18:30	0.826018	3.67429	6.21276	870.641	FALSE	25
2022-09-14	10:18:31	0.24154	1.07442	0.36712	834.198	FALSE	25
2022-09-14	10:18:31	0.1364	0.606734	0.36712	871.248	FALSE	25
2022-09-14	10:18:31	0.0487661	0.216921	0.36712	834.414	FALSE	25
2022-09-14	10:18:31	-0.0965773	-0.429595	0.36712	871.248	FALSE	25
2022-09-14	10:18:32	-0.11388	-0.506561	0.646801	834.414	FALSE	25
2022-09-14	10:18:32	0.105916	0.471136	0.646801	871.719	FALSE	25
2022-09-14	10:18:32	0.444186	1.97583	0.646801	836.39	FALSE	25
2022-09-14	10:18:33	0.460929	2.0503	-0.212392	873.769	FALSE	25
2022-09-14	10:18:33	0.0356364	0.158518	-0.212392	836.549	FALSE	25
2022-09-14	10:18:33	-0.249249	-1.10871	-0.212392	873.769	FALSE	25
2022-09-14	10:18:33	-0.438308	-1.94968	-0.212392	836.549	FALSE	25
2022-09-14	10:18:34	-0.344669	-1.53316	-0.338085	873.769	FALSE	25
2022-09-14	10:18:34	-0.144058	-0.640799	-0.338085	836.549	FALSE	25
2022-09-14	10:18:34	-0.168079	-0.747649	-0.338085	873.769	FALSE	25
2022-09-14	10:18:34	0.352786	1.56926	-0.338085	838.118	FALSE	25
2022-09-14	10:18:35	1.36704	6.08087	12.0113	879.85	FALSE	25
2022-09-14	10:18:35	3.8882	17.2955	12.0113	855.414	1	26
2022-09-14	10:18:35	2.98795	13.291	12.0113	893.141	FALSE	26
2022-09-14	10:18:35	2.55787	11.3779	12.0113	866.791	FALSE	26
2022-09-14	10:18:36	1.69441	7.53707	11.0549	900.678	FALSE	26
2022-09-14	10:18:36	2.58841	11.5138	11.0549	878.305	FALSE	26
2022-09-14	10:18:36	2.07833	9.24483	11.0549	909.923	FALSE	26
2022-09-14	10:18:36	3.57986	15.9239	11.0549	894.229	1	27
2022-09-14	10:18:37	2.99497	13.3222	19.0919	923.245	FALSE	27
2022-09-14	10:18:37	5.05279	22.4758	19.0919	916.705	1	28
2022-09-14	10:18:37	4.82836	21.4775	19.0919	944.722	1	29
2022-09-14	10:18:38	3.5677	15.8698	7.61315	932.575	1	30
2022-09-14	10:18:38	2.08866	9.29078	7.61315	954.013	FALSE	30
2022-09-14	10:18:38	0.841081	3.7413	7.61315	936.316	FALSE	30
2022-09-14	10:18:38	0.348613	1.5507	7.61315	955.564	FALSE	30
2022-09-14	10:18:39	0.513244	2.28301	2.24266	938.599	FALSE	30
2022-09-14	10:18:39	0.799046	3.55432	2.24266	959.118	FALSE	30
2022-09-14	10:18:39	0.215789	0.959873	2.24266	939.559	FALSE	30
2022-09-14	10:18:39	0.488613	2.17345	2.24266	961.292	FALSE	30
2022-09-14	10:18:40	0.225356	1.00243	1.51035	940.561	FALSE	30
2022-09-14	10:18:40	0.44388	1.97447	1.51035	963.266	FALSE	30
2022-09-14	10:18:40	0.193448	0.860495	1.51035	941.422	FALSE	30
2022-09-14	10:18:40	0.495483	2.20401	1.51035	965.47	FALSE	30
2022-09-14	10:18:41	0.214924	0.956025	1.64638	942.378	FALSE	30
2022-09-14	10:18:41	0.489275	2.17639	1.64638	967.647	FALSE	30
2022-09-14	10:18:41	0.406171	1.80673	1.64638	944.185	FALSE	30
2022-09-14	10:18:42	1.07406	4.77763	7.73432	972.424	FALSE	30
2022-09-14	10:18:42	1.42057	6.31898	7.73432	950.504	FALSE	30
2022-09-14	10:18:42	2.08922	9.29327	7.73432	981.717	FALSE	30
2022-09-14	10:18:42	2.37116	10.5474	7.73432	961.051	FALSE	30
2022-09-14	10:18:43	2.7681	12.3131	7.59906	994.031	FALSE	30
2022-09-14	10:18:43	1.53523	6.82901	7.59906	967.88	FALSE	30
2022-09-14	10:18:43	0.935229	4.16009	7.59906	998.191	FALSE	30
2022-09-14	10:18:43	1.59482	7.09408	7.59906	974.974	FALSE	30
2022-09-14	10:18:44	2.49431	11.0952	9.30324	1009.29	FALSE	30
2022-09-14	10:18:44	3.0766	13.6853	9.30324	988.66	1	31
2022-09-14	10:18:44	1.15513	5.13825	9.30324	1014.42	FALSE	31
2022-09-14	10:18:44	1.63981	7.2942	9.30324	995.954	FALSE	31
2022-09-14	10:18:45	1.2848	5.71505	9.87423	1020.14	FALSE	31
2022-09-14	10:18:45	2.20805	9.82185	9.87423	1005.78	FALSE	31
2022-09-14	10:18:45	3.16663	14.0858	9.87423	1034.22	1	32
2022-09-14	10:18:46	4.23828	18.8527	13.6846	1024.63	1	33
2022-09-14	10:18:46	4.4706	19.8861	13.6846	1054.11	1	34
2022-09-14	10:18:46	2.06744	9.19639	13.6846	1033.82	FALSE	34
2022-09-14	10:18:46	1.52943	6.80321	13.6846	1060.91	FALSE	34
2022-09-14	10:18:47	0.287443	1.2786	1.56378	1035.1	FALSE	34
2022-09-14	10:18:47	0.435891	1.93893	1.56378	1062.85	FALSE	34
2022-09-14	10:18:47	0.305102	1.35715	1.56378	1036.46	FALSE	34
2022-09-14	10:18:47	0.377774	1.68041	1.56378	1064.53	FALSE	34
2022-09-14	10:18:48	0.499656	2.22257	1.60078	1038.68	FALSE	34
2022-09-14	10:18:48	0.27187	1.20933	1.60078	1065.74	FALSE	34
2022-09-14	10:18:48	0.439351	1.95432	1.60078	1040.64	FALSE	34
2022-09-14	10:18:48	0.228613	1.01692	1.60078	1066.76	FALSE	34
2022-09-14	10:18:49	0.385713	1.71573	1.41737	1042.35	FALSE	34
2022-09-14	10:18:49	0.160166	0.71245	1.41737	1067.47	FALSE	34
2022-09-14	10:18:49	0.410038	1.82393	1.41737	1044.18	FALSE	34
2022-09-14	10:18:50	0.363015	1.61476	6.70574	1069.09	FALSE	34
2022-09-14	10:18:50	1.05019	4.67146	6.70574	1048.85	FALSE	34
2022-09-14	10:18:50	1.8706	8.3208	6.70574	1077.41	FALSE	34
2022-09-14	10:18:50	2.74627	12.216	6.70574	1061.06	FALSE	34
2022-09-14	10:18:51	2.52022	11.2104	8.926	1088.62	FALSE	34
2022-09-14	10:18:51	2.74276	12.2003	8.926	1073.26	FALSE	34
2022-09-14	10:18:51	1.50607	6.6993	8.926	1095.32	FALSE	34
2022-09-14	10:18:51	1.25757	5.59392	8.926	1078.86	FALSE	34
2022-09-14	10:18:52	0.704491	3.13372	2.26219	1098.45	FALSE	34
2022-09-14	10:18:52	0.55584	2.47249	2.26219	1081.33	FALSE	34
2022-09-14	10:18:52	0.422761	1.88053	2.26219	1100.33	FALSE	34
2022-09-14	10:18:52	0.351158	1.56202	2.26219	1082.89	FALSE	34
2022-09-14	10:18:53	0.329021	1.46355	2.01861	1101.8	FALSE	34
2022-09-14	10:18:53	0.331565	1.47487	2.01861	1084.37	FALSE	34
2022-09-14	10:18:53	0.700827	3.11742	2.01861	1104.91	FALSE	34
2022-09-14	10:18:54	0.736196	3.27475	4.54956	1087.64	FALSE	34
2022-09-14	10:18:54	0.740929	3.2958	4.54956	1108.21	FALSE	34
2022-09-14	10:18:54	0.741285	3.29738	4.54956	1090.94	FALSE	34
2022-09-14	10:18:54	1.87274	8.33032	4.54956	1116.54	FALSE	34
2022-09-14	10:18:55	3.13543	13.947	10.5786	1104.89	1	35
2022-09-14	10:18:55	3.00169	13.3521	10.5786	1129.89	1	36
2022-09-14	10:18:55	2.04917	9.11512	10.5786	1114	FALSE	36
2022-09-14	10:18:55	1.32637	5.89996	10.5786	1135.79	FALSE	36
2022-09-14	10:18:56	1.11874	4.97638	4.58492	1118.98	FALSE	36
2022-09-14	10:18:56	0.997621	4.43762	4.58492	1140.23	FALSE	36
2022-09-14	10:18:56	0.811616	3.61023	4.58492	1122.59	FALSE	36
2022-09-14	10:18:56	1.19497	5.31547	4.58492	1145.54	FALSE	36
2022-09-14	10:18:57	2.01324	8.95529	11.2511	1131.54	FALSE	36
2022-09-14	10:18:57	2.84164	12.6402	11.2511	1158.18	FALSE	36
2022-09-14	10:18:57	2.73319	12.1578	11.2511	1143.7	FALSE	36
2022-09-14	10:18:58	2.75187	12.2409	12.2273	1170.43	FALSE	36
2022-09-14	10:18:58	2.87294	12.7794	12.2273	1156.48	FALSE	36
2022-09-14	10:18:58	2.80764	12.4889	12.2273	1182.91	FALSE	36
2022-09-14	10:18:58	2.56286	11.4001	12.2273	1167.88	FALSE	36
2022-09-14	10:18:59	2.33426	10.3833	9.1037	1193.3	FALSE	36
2022-09-14	10:18:59	2.38408	10.6049	9.1037	1178.49	FALSE	36
2022-09-14	10:18:59	2.13966	9.51764	9.1037	1202.82	FALSE	36
2022-09-14	10:18:59	1.32841	5.90903	9.1037	1184.4	FALSE	36
2022-09-14	10:19:00	1.2764	5.67768	12.3201	1208.49	FALSE	36
2022-09-14	10:19:00	2.27584	10.1234	12.3201	1194.52	FALSE	36
2022-09-14	10:19:00	3.64464	16.2121	12.3201	1224.7	1	37
2022-09-14	10:19:00	3.88184	17.2672	12.3201	1211.79	1	38
2022-09-14	10:19:01	2.97141	13.2174	12.0414	1237.92	FALSE	38
2022-09-14	10:19:01	2.84189	12.6413	12.0414	1224.43	FALSE	38
2022-09-14	10:19:01	2.3078	10.2656	12.0414	1248.19	FALSE	38
2022-09-14	10:19:02	0.858842	3.8203	2.94436	1228.25	FALSE	38
2022-09-14	10:19:02	0.511107	2.27351	2.94436	1250.46	FALSE	38
2022-09-14	10:19:02	0.65014	2.89195	2.94436	1231.14	FALSE	38
2022-09-14	10:19:02	0.627596	2.79167	2.94436	1253.25	FALSE	38
2022-09-14	10:19:03	0.318791	1.41805	1.49139	1232.56	FALSE	38
2022-09-14	10:19:03	0.473753	2.10735	1.49139	1255.36	FALSE	38
2022-09-14	10:19:03	0.18098	0.805035	1.49139	1233.36	FALSE	38
2022-09-14	10:19:03	0.367595	1.63514	1.49139	1257	FALSE	38
2022-09-14	10:19:04	0.349173	1.55319	1.70492	1234.92	FALSE	38
2022-09-14	10:19:04	0.214008	0.95195	1.70492	1257.95	FALSE	38
2022-09-14	10:19:04	0.470344	2.09218	1.70492	1237.01	FALSE	38
2022-09-14	10:19:04	0.499606	2.22235	1.70492	1260.17	FALSE	38
2022-09-14	10:19:05	2.26296	10.0661	13.7573	1247.07	FALSE	38
2022-09-14	10:19:05	3.16902	14.0964	13.7573	1274.27	1	39
2022-09-14	10:19:05	5.20367	23.147	13.7573	1270.22	1	40
2022-09-14	10:19:05	1.73548	7.71976	13.7573	1281.99	FALSE	40
2022-09-14	10:19:06	1.74373	7.75646	4.21646	1277.98	FALSE	40
2022-09-14	10:19:06	0.585509	2.60446	4.21646	1284.59	FALSE	40
2022-09-14	10:19:06	0.514466	2.28845	4.21646	1280.27	FALSE	40
2022-09-14	10:19:07	0.500165	2.22483	2.24176	1286.82	FALSE	40
2022-09-14	10:19:07	0.248206	1.10407	2.24176	1281.37	FALSE	40
2022-09-14	10:19:07	0.423982	1.88596	2.24176	1288.7	FALSE	40
2022-09-14	10:19:07	0.843524	3.75216	2.24176	1285.12	FALSE	40
2022-09-14	10:19:08	1.24785	5.55069	4.35182	1294.25	FALSE	40
2022-09-14	10:19:08	0.874211	3.88867	4.35182	1289.01	FALSE	40
2022-09-14	10:19:08	0.928969	4.13224	4.35182	1298.38	FALSE	40
2022-09-14	10:19:08	0.862303	3.8357	4.35182	1292.85	FALSE	40
2022-09-14	10:19:09	1.34495	5.98261	9.84438	1304.37	FALSE	40
2022-09-14	10:19:09	1.53207	6.81495	9.84438	1299.66	FALSE	40
2022-09-14	10:19:09	2.20357	9.80192	9.84438	1314.17	FALSE	40
2022-09-14	10:19:09	3.77187	16.778	9.84438	1316.44	1	41
2022-09-14	10:19:10	2.95314	13.1362	14.6489	1327.3	FALSE	41
2022-09-14	10:19:10	4.32739	19.2491	14.6489	1335.69	1	42
2022-09-14	10:19:10	2.59915	11.5615	14.6489	1338.87	FALSE	42
2022-09-14	10:19:11	5.47599	24.3583	19.6693	1360.05	1	43
2022-09-14	10:19:11	2.49467	11.0968	19.6693	1349.96	FALSE	43
2022-09-14	10:19:11	4.78739	21.2953	19.6693	1381.34	1	44
2022-09-14	10:19:11	4.92933	21.9266	19.6693	1371.89	1	45
2022-09-14	10:19:12	1.805	8.029	11.1938	1389.37	FALSE	45
2022-09-14	10:19:12	3.71273	16.515	11.1938	1388.4	1	46
2022-09-14	10:19:12	1.29991	5.78226	11.1938	1395.15	FALSE	46
2022-09-14	10:19:12	3.24826	14.4489	11.1938	1402.85	1	47
2022-09-14	10:19:13	1.74999	7.78431	20.9972	1402.94	FALSE	47
2022-09-14	10:19:13	3.66261	16.292	20.9972	1419.15	1	48
2022-09-14	10:19:13	5.37385	23.904	20.9972	1426.84	1	49
2022-09-14	10:19:13	8.09507	36.0085	20.9972	1455.15	1	50
2022-09-14	10:19:14	14.0699	62.5857	42.7131	1489.43	1	51
2022-09-14	10:19:14	9.15405	40.719	42.7131	1495.87	1	52
2022-09-14	10:19:14	5.58306	24.8346	42.7131	1514.26	1	53
2022-09-14	10:19:15	1.14154	5.0778	2.24119	1500.95	FALSE	53
2022-09-14	10:19:15	0.321183	1.42869	2.24119	1515.69	FALSE	53
2022-09-14	10:19:15	0.284237	1.26434	2.24119	1502.22	FALSE	53
2022-09-14	10:19:15	0.26841	1.19394	2.24119	1516.88	FALSE	53
2022-09-14	10:19:16	0.453092	2.01544	3.6954	1504.23	FALSE	53
2022-09-14	10:19:16	0.234313	1.04227	3.6954	1517.93	FALSE	53
2022-09-14	10:19:16	0.641387	2.85302	3.6954	1507.08	FALSE	53
2022-09-14	10:19:16	1.99426	8.87087	3.6954	1526.8	FALSE	53
2022-09-14	10:19:17	11.8773	52.8326	54.3053	1559.92	1	54
2022-09-14	10:19:17	17.772	79.0534	54.3053	1605.85	1	55
2022-09-14	10:19:17	13.0428	58.017	54.3053	1617.93	1	56
2022-09-14	10:19:17	6.14143	27.3183	54.3053	1633.17	1	57
2022-09-14	10:19:18	4.21187	18.7352	17.1738	1636.67	1	58
2022-09-14	10:19:18	5.26159	23.4046	17.1738	1656.57	1	59
2022-09-14	10:19:18	2.10907	9.38157	17.1738	1646.05	FALSE	59
2022-09-14	10:19:19	1.83055	8.14265	11.9017	1664.72	FALSE	59
2022-09-14	10:19:19	2.95218	13.1319	11.9017	1659.18	FALSE	59
2022-09-14	10:19:19	1.90744	8.48467	11.9017	1673.2	FALSE	59
2022-09-14	10:19:19	4.01228	17.8474	11.9017	1677.03	1	60
2022-09-14	10:19:20	1.60698	7.14817	5.9414	1680.35	FALSE	60
2022-09-14	10:19:20	1.40719	6.25946	5.9414	1683.29	FALSE	60
2022-09-14	10:19:20	0.856247	3.80876	5.9414	1684.16	FALSE	60
2022-09-14	10:19:20	1.47233	6.54922	5.9414	1689.84	FALSE	60
2022-09-14	10:19:21	1.95706	8.70539	18.6923	1692.86	FALSE	60
2022-09-14	10:19:21	3.98464	17.7245	18.6923	1707.56	1	61
2022-09-14	10:19:21	5.2307	23.2672	18.6923	1716.13	1	62
2022-09-14	10:19:21	5.63645	25.0721	18.6923	1732.63	1	63
2022-09-14	10:19:22	4.31502	19.1941	15.9624	1735.33	1	64
2022-09-14	10:19:22	3.53431	15.7213	15.9624	1748.36	1	65
2022-09-14	10:19:22	2.91619	12.9718	15.9624	1748.3	FALSE	65
2022-09-14	10:19:23	2.77167	12.3289	11.9292	1760.68	FALSE	65
2022-09-14	10:19:23	2.74851	12.2259	11.9292	1760.52	FALSE	65
2022-09-14	10:19:23	2.80113	12.46	11.9292	1773.14	FALSE	65
2022-09-14	10:19:23	2.40592	10.702	11.9292	1771.22	FALSE	65
2022-09-14	10:19:24	1.35706	6.03647	2.73004	1779.18	FALSE	65
2022-09-14	10:19:24	0.448308	1.99416	2.73004	1773.22	FALSE	65
2022-09-14	10:19:24	0.359249	1.59801	2.73004	1780.78	FALSE	65
2022-09-14	10:19:24	0.290344	1.29151	2.73004	1774.51	FALSE	65
2022-09-14	10:19:25	0.329886	1.4674	3.27576	1782.25	FALSE	65
2022-09-14	10:19:25	0.388308	1.72727	3.27576	1776.24	FALSE	65
2022-09-14	10:19:25	0.998893	4.44328	3.27576	1786.69	FALSE	65
2022-09-14	10:19:25	1.22861	5.4651	3.27576	1781.7	FALSE	65
2022-09-14	10:19:26	0.952379	4.23637	8.03631	1790.93	FALSE	65
2022-09-14	10:19:26	1.78001	7.91784	8.03631	1789.62	FALSE	65
2022-09-14	10:19:26	2.68754	11.9547	8.03631	1802.88	FALSE	65
2022-09-14	10:19:27	2.2077	9.82029	7.16149	1799.44	FALSE	65
2022-09-14	10:19:27	1.02449	4.55714	7.16149	1807.44	FALSE	65
2022-09-14	10:19:27	1.30795	5.81802	7.16149	1805.26	FALSE	65
2022-09-14	10:19:27	1.89976	8.45051	7.16149	1815.89	FALSE	65
2022-09-14	10:19:28	1.59039	7.07437	10.9743	1812.33	FALSE	65
2022-09-14	10:19:28	1.1907	5.29647	10.9743	1821.19	FALSE	65
2022-09-14	10:19:28	2.18739	9.72995	10.9743	1822.06	FALSE	65
2022-09-14	10:19:28	4.90001	21.7962	10.9743	1842.98	1	66
2022-09-14	10:19:29	4.86876	21.6572	14.2729	1843.72	1	67
2022-09-14	10:19:29	5.6769	25.252	14.2729	1868.23	1	68
2022-09-14	10:19:29	1.5449	6.87202	14.2729	1850.59	FALSE	68
2022-09-14	10:19:29	0.744186	3.31029	14.2729	1871.54	FALSE	68
2022-09-14	10:19:30	0.74042	3.29354	3.4787	1853.89	FALSE	68
2022-09-14	10:19:30	1.23085	5.47507	3.4787	1877.02	FALSE	68
2022-09-14	10:19:30	0.546934	2.43287	3.4787	1856.32	FALSE	68
2022-09-14	10:19:30	0.609987	2.71334	3.4787	1879.73	FALSE	68
2022-09-14	10:19:31	0.567952	2.52636	2.23683	1858.85	FALSE	68
2022-09-14	10:19:31	0.62042	2.75975	2.23683	1882.49	FALSE	68
2022-09-14	10:19:31	0.320216	1.42438	2.23683	1860.27	FALSE	68
2022-09-14	10:19:32	0.158893	0.706788	0.438595	1883.2	FALSE	68
2022-09-14	10:19:32	-0.0972898	-0.432764	0.438595	1860.27	FALSE	68
2022-09-14	10:19:32	0.386374	1.71867	0.438595	1884.92	FALSE	68
2022-09-14	10:19:32	-0.0535748	-0.238311	0.438595	1860.27	FALSE	68
2022-09-14	10:19:33	0.137825	0.613073	0.956477	1885.53	FALSE	68
2022-09-14	10:19:33	0.310242	1.38002	0.956477	1861.65	FALSE	68
2022-09-14	10:19:33	0.0908526	0.404131	0.956477	1885.93	FALSE	68
2022-09-14	10:19:33	0.321183	1.42869	0.956477	1863.08	FALSE	68
2022-09-14	10:19:34	0.968817	4.30949	13.3289	1890.24	FALSE	68
2022-09-14	10:19:34	4.5424	20.2055	13.3289	1883.28	1	69
2022-09-14	10:19:34	2.70093	12.0143	13.3289	1902.26	FALSE	69
2022-09-14	10:19:34	3.7737	16.7862	13.3289	1900.07	1	70
2022-09-14	10:19:35	1.63788	7.28562	7.45508	1909.54	FALSE	70
2022-09-14	10:19:35	1.88765	8.39664	7.45508	1908.47	FALSE	70
2022-09-14	10:19:35	1.5024	6.68298	7.45508	1916.23	FALSE	70
2022-09-14	10:19:36	0.649529	2.88923	9.54399	1911.36	FALSE	70
2022-09-14	10:19:36	2.14408	9.5373	9.54399	1925.76	FALSE	70
2022-09-14	10:19:36	1.42668	6.34616	9.54399	1917.7	FALSE	70
2022-09-14	10:19:36	4.36205	19.4033	9.54399	1945.17	1	71
2022-09-14	10:19:37	1.95849	8.71176	4.06897	1926.41	FALSE	71
2022-09-14	10:19:37	0.783778	3.4864	4.06897	1948.65	FALSE	71
2022-09-14	10:19:37	0.563015	2.5044	4.06897	1928.92	FALSE	71
2022-09-14	10:19:37	0.353702	1.57334	4.06897	1950.23	FALSE	71
2022-09-14	10:19:38	0.532786	2.36994	0.558629	1931.29	FALSE	71
2022-09-14	10:19:38	0.233092	1.03684	0.558629	1951.26	FALSE	71
2022-09-14	10:19:38	-0.101208	-0.450193	0.558629	1931.29	FALSE	71
2022-09-14	10:19:38	-0.162328	-0.722067	0.558629	1951.26	FALSE	71
2022-09-14	10:19:39	-0.433066	-1.92636	-1.93715	1931.29	FALSE	71
2022-09-14	10:19:39	-0.449503	-1.99948	-1.93715	1951.26	FALSE	71
2022-09-14	10:19:39	-0.423905	-1.88561	-1.93715	1931.29	FALSE	71
2022-09-14	10:19:40	-0.432455	-1.92365	-1.53944	1951.26	FALSE	71
2022-09-14	10:19:40	-0.424974	-1.89037	-1.53944	1931.29	FALSE	71
2022-09-14	10:19:40	-0.303651	-1.3507	-1.53944	1951.26	FALSE	71
2022-09-14	10:19:40	-0.223244	-0.993034	-1.53944	1931.29	FALSE	71
2022-09-14	10:19:41	-0.235509	-1.04759	-1.11154	1951.26	FALSE	71
2022-09-14	10:19:41	-0.275254	-1.22438	-1.11154	1931.29	FALSE	71
2022-09-14	10:19:41	-0.259071	-1.1524	-1.11154	1951.26	FALSE	71
2022-09-14	10:19:41	-0.229707	-1.02178	-1.11154	1931.29	FALSE	71
2022-09-14	10:19:42	-0.220089	-0.979	-0.797562	1951.26	FALSE	71
2022-09-14	10:19:42	-0.233015	-1.0365	-0.797562	1931.29	FALSE	71
2022-09-14	10:19:42	-0.142328	-0.633103	-0.797562	1951.26	FALSE	71
2022-09-14	10:19:42	-0.121768	-0.541648	-0.797562	1931.29	FALSE	71
2022-09-14	10:19:43	-0.0339819	-0.151158	1.02748	1951.26	FALSE	71
2022-09-14	10:19:43	0.268562	1.19462	1.02748	1932.48	FALSE	71
2022-09-14	10:19:43	0.458384	2.03898	1.02748	1953.3	FALSE	71
2022-09-14	10:19:44	0.525662	2.33825	2.4417	1934.82	FALSE	71
2022-09-14	10:19:44	0.654619	2.91188	2.4417	1956.22	FALSE	71
2022-09-14	10:19:44	0.45126	2.00729	2.4417	1936.83	FALSE	71
2022-09-14	10:19:44	0.564135	2.50939	2.4417	1958.72	FALSE	71
2022-09-14	10:19:45	0.776654	3.45471	2.43542	1940.28	FALSE	71
2022-09-14	10:19:45	0.569631	2.53383	2.43542	1961.26	FALSE	71
2022-09-14	10:19:45	0.489784	2.17866	2.43542	1942.46	FALSE	71
2022-09-14	10:19:45	0.353957	1.57447	2.43542	1962.83	FALSE	71
2022-09-14	10:19:46	0.927901	4.12749	2.44804	1946.59	FALSE	71
2022-09-14	10:19:46	0.434008	1.93055	2.44804	1964.76	FALSE	71
2022-09-14	10:19:46	0.452634	2.01341	2.44804	1948.6	FALSE	71
2022-09-14	10:19:46	0.386832	1.72071	2.44804	1966.48	FALSE	71
2022-09-14	10:19:47	0.0132954	0.0591406	-0.602392	1948.66	FALSE	71
2022-09-14	10:19:47	-0.233829	-1.04012	-0.602392	1966.48	FALSE	71
2022-09-14	10:19:47	-0.185738	-0.8262	-0.602392	1948.66	FALSE	71
2022-09-14	10:19:48	0.204084	0.907806	0.500961	1967.39	FALSE	71
2022-09-14	10:19:48	0.0694786	0.309055	0.500961	1948.97	FALSE	71
2022-09-14	10:19:48	0.0431173	0.191794	0.500961	1967.58	FALSE	71
2022-09-14	10:19:48	0.133804	0.595187	0.500961	1949.57	FALSE	71
2022-09-14	10:19:49	2.78653	12.395	48.3146	1979.98	FALSE	71
2022-09-14	10:19:49	8.69034	38.6564	48.3146	1988.22	1	72
2022-09-14	10:19:49	14.457	64.3076	48.3146	2044.29	1	73
2022-09-14	10:19:49	17.5126	77.8995	48.3146	2066.12	1	74
2022-09-14	10:19:50	8.16856	36.3354	14.3012	2080.62	1	75
2022-09-14	10:19:50	3.05375	13.5837	14.3012	2079.71	1	76
2022-09-14	10:19:50	0.827596	3.68131	14.3012	2084.3	FALSE	76
2022-09-14	10:19:50	0.810293	3.60435	14.3012	2083.31	FALSE	76
2022-09-14	10:19:51	0.568613	2.5293	5.78845	2086.83	FALSE	76
2022-09-14	10:19:51	1.74897	7.77977	5.78845	2091.09	FALSE	76
2022-09-14	10:19:51	1.58632	7.05627	5.78845	2093.89	FALSE	76
2022-09-14	10:19:52	4.05166	18.0226	22.4961	2109.11	1	77
2022-09-14	10:19:52	4.16042	18.5064	22.4961	2112.39	1	78
2022-09-14	10:19:52	5.69767	25.3444	22.4961	2134.46	1	79
2022-09-14	10:19:52	6.31965	28.1111	22.4961	2140.51	1	80
2022-09-14	10:19:53	4.16932	18.546	21.8088	2153	1	81
2022-09-14	10:19:53	6.66439	29.6445	21.8088	2170.15	1	82
2022-09-14	10:19:53	3.98434	17.7231	21.8088	2170.73	1	83
2022-09-14	10:19:53	4.79334	21.3217	21.8088	2191.47	1	84
2022-09-14	10:19:54	2.14098	9.52351	7.1359	2180.25	FALSE	84
2022-09-14	10:19:54	1.1595	5.15769	7.1359	2196.63	FALSE	84
2022-09-14	10:19:54	0.804796	3.57989	7.1359	2183.83	FALSE	84
2022-09-14	10:19:54	2.31161	10.2825	7.1359	2206.91	FALSE	84
2022-09-14	10:19:55	7.52525	33.4738	27.1667	2217.3	1	85
2022-09-14	10:19:55	10.3306	45.9526	27.1667	2252.86	1	86
2022-09-14	10:19:55	3.93614	17.5087	27.1667	2234.81	1	87
2022-09-14	10:19:55	2.63737	11.7315	27.1667	2264.6	FALSE	87
2022-09-14	10:19:56	1.56958	6.98181	6.70849	2241.79	FALSE	87
2022-09-14	10:19:56	1.1594	5.15724	6.70849	2269.75	FALSE	87
2022-09-14	10:19:56	1.79543	7.98643	6.70849	2249.78	FALSE	87
2022-09-14	10:19:57	1.6765	7.45741	16.9224	2277.21	FALSE	87
2022-09-14	10:19:57	3.51075	15.6165	16.9224	2265.4	1	88
2022-09-14	10:19:57	5.05716	22.4953	16.9224	2299.71	1	89
2022-09-14	10:19:57	4.97289	22.1204	16.9224	2287.52	1	90
2022-09-14	10:19:58	2.50291	11.1334	10.3004	2310.84	FALSE	90
2022-09-14	10:19:58	3.06093	13.6156	10.3004	2301.13	1	91
2022-09-14	10:19:58	1.92546	8.56483	10.3004	2319.4	FALSE	91
2022-09-14	10:19:58	1.77324	7.88773	10.3004	2309.02	FALSE	91
2022-09-14	10:19:59	1.72551	7.67541	18.7434	2327.08	FALSE	91
2022-09-14	10:19:59	4.73365	21.0562	18.7434	2330.08	1	92
2022-09-14	10:19:59	5.59685	24.8959	18.7434	2351.98	1	93
2022-09-14	10:19:59	4.79879	21.346	18.7434	2351.42	1	94
2022-09-14	10:20:00	3.16851	14.0942	35.2209	2366.07	1	95
2022-09-14	10:20:00	9.97782	44.3833	35.2209	2395.81	1	96
2022-09-14	10:20:00	10.6077	47.1852	35.2209	2413.26	1	97
2022-09-14	10:20:01	21.2637	94.5852	65.9743	2490.39	1	98
2022-09-14	10:20:01	13.0433	58.0192	65.9743	2471.27	1	99
2022-09-14	10:20:01	12.9193	57.4676	65.9743	2547.86	1	100
2022-09-14	10:20:01	12.1004	53.825	65.9743	2525.1	1	101
2022-09-14	10:20:02	5.58052	24.8233	16.42	2572.68	1	102
2022-09-14	10:20:02	3.83431	17.0558	16.42	2542.16	1	103
2022-09-14	10:20:02	2.79507	12.433	16.42	2585.11	FALSE	103
2022-09-14	10:20:02	2.55558	11.3677	16.42	2553.52	FALSE	103
2022-09-14	10:20:03	5.81161	25.8512	27.1316	2610.97	1	104
2022-09-14	10:20:03	10.651	47.3778	27.1316	2600.9	1	105
2022-09-14	10:20:03	4.54322	20.2092	27.1316	2631.18	1	106
2022-09-14	10:20:03	3.39202	15.0884	27.1316	2615.99	1	107
2022-09-14	10:20:04	3.09187	13.7533	15.3583	2644.93	1	108
2022-09-14	10:20:04	2.91915	12.985	15.3583	2628.97	FALSE	108
2022-09-14	10:20:04	4.34708	19.3367	15.3583	2664.27	1	109
2022-09-14	10:20:05	5.22403	23.2375	13.3415	2652.21	1	110
2022-09-14	10:20:05	5.19395	23.1037	13.3415	2687.37	1	111
2022-09-14	10:20:05	0.753041	3.34968	13.3415	2655.56	FALSE	111
2022-09-14	10:20:05	0.826221	3.6752	13.3415	2691.04	FALSE	111
2022-09-14	10:20:06	1.57833	7.02073	6.95231	2662.58	FALSE	111
2022-09-14	10:20:06	2.42078	10.7681	6.95231	2701.81	FALSE	111
2022-09-14	10:20:06	1.23609	5.49838	6.95231	2668.08	FALSE	111
2022-09-14	10:20:06	1.0166	4.52204	6.95231	2706.33	FALSE	111
2022-09-14	10:20:07	0.52958	2.35568	1.79875	2670.44	FALSE	111
2022-09-14	10:20:07	0.580165	2.58069	1.79875	2708.92	FALSE	111
2022-09-14	10:20:07	0.244339	1.08687	1.79875	2671.52	FALSE	111
2022-09-14	10:20:07	0.263422	1.17175	1.79875	2710.09	FALSE	111
2022-09-14	10:20:08	0.145407	0.646799	0.894978	2672.17	FALSE	111
2022-09-14	10:20:08	0.370954	1.65008	0.894978	2711.74	FALSE	111
2022-09-14	10:20:08	0.0872394	0.388058	0.894978	2672.56	FALSE	111
2022-09-14	10:20:09	0.48444	2.15489	8.50082	2713.89	FALSE	111
2022-09-14	10:20:09	3.15345	14.0272	8.50082	2686.59	1	112
2022-09-14	10:20:09	3.34561	14.8819	8.50082	2728.77	1	113
2022-09-14	10:20:09	0.660776	2.93926	8.50082	2689.52	FALSE	113
2022-09-14	10:20:10	0.543728	2.41861	1.94374	2731.19	FALSE	113
2022-09-14	10:20:10	0.432481	1.92376	1.94374	2691.45	FALSE	113
2022-09-14	10:20:10	0.55645	2.4752	1.94374	2733.67	FALSE	113
2022-09-14	10:20:10	0.215229	0.957382	1.94374	2692.41	FALSE	113
2022-09-14	10:20:11	0.562099	2.50033	7.08706	2736.17	FALSE	113
2022-09-14	10:20:11	1.35095	6.0093	7.08706	2698.41	FALSE	113
2022-09-14	10:20:11	3.03416	13.4966	7.08706	2749.66	1	114
2022-09-14	10:20:11	1.42576	6.34207	7.08706	2704.76	FALSE	114
2022-09-14	10:20:12	1.55457	6.91504	6.82621	2756.58	FALSE	114
2022-09-14	10:20:12	1.70805	7.59775	6.82621	2712.35	FALSE	114
2022-09-14	10:20:12	1.34118	5.96584	6.82621	2762.55	FALSE	114
2022-09-14	10:20:13	0.791667	3.52149	2.96955	2715.88	FALSE	114
2022-09-14	10:20:13	0.578486	2.57322	2.96955	2765.12	FALSE	114
2022-09-14	10:20:13	1.03218	4.59134	2.96955	2720.47	FALSE	114
2022-09-14	10:20:13	0.268003	1.19213	2.96955	2766.31	FALSE	114
2022-09-14	10:20:14	0.492277	2.18975	1.61329	2722.66	FALSE	114
2022-09-14	10:20:14	0.409835	1.82303	1.61329	2768.13	FALSE	114
2022-09-14	10:20:14	0.261183	1.16179	1.61329	2723.82	FALSE	114
2022-09-14	10:20:14	0.287443	1.2786	1.61329	2769.41	FALSE	114
2022-09-14	10:20:15	0.149937	0.66695	-0.0481595	2724.49	FALSE	114
2022-09-14	10:20:15	0.152837	0.67985	-0.0481595	2770.09	FALSE	114
2022-09-14	10:20:15	-0.217341	-0.966776	-0.0481595	2724.49	FALSE	114
2022-09-14	10:20:15	-0.12874	-0.572661	-0.0481595	2770.09	FALSE	114
2022-09-14	10:20:16	-0.0584094	-0.259817	0.25914	2724.49	FALSE	114
2022-09-14	10:20:16	0.0637279	0.283474	0.25914	2770.38	FALSE	114
2022-09-14	10:20:16	0.0504455	0.224392	0.25914	2724.71	FALSE	114
2022-09-14	10:20:16	0.177265	0.78851	0.25914	2771.16	FALSE	114
2022-09-14	10:20:17	0.318944	1.41873	1.02348	2726.13	FALSE	114
2022-09-14	10:20:17	0.130853	0.58206	1.02348	2771.75	FALSE	114
2022-09-14	10:20:17	0.240471	1.06966	1.02348	2727.2	FALSE	114
2022-09-14	10:20:18	0.102863	0.457555	0.741085	2772.2	FALSE	114
2022-09-14	10:20:18	0.224949	1.00062	0.741085	2728.2	FALSE	114
2022-09-14	10:20:18	0.00876615	0.0389936	0.741085	2772.24	FALSE	114
2022-09-14	10:20:18	0.329835	1.46717	0.741085	2729.67	FALSE	114
2022-09-14	10:20:19	1.88648	8.39144	10.673	2780.63	FALSE	114
2022-09-14	10:20:19	3.48235	15.4902	10.673	2745.16	1	115
2022-09-14	10:20:19	2.71217	12.0643	10.673	2792.7	FALSE	115
2022-09-14	10:20:19	1.5166	6.74614	10.673	2751.9	FALSE	115
2022-09-14	10:20:20	0.912735	4.06003	4.94197	2796.76	FALSE	115
2022-09-14	10:20:20	1.16342	5.17512	4.94197	2757.08	FALSE	115
2022-09-14	10:20:20	0.677875	3.01532	4.94197	2799.77	FALSE	115
2022-09-14	10:20:20	1.68999	7.51741	4.94197	2764.6	FALSE	115
2022-09-14	10:20:21	4.55278	20.2517	12.281	2820.03	1	116
2022-09-14	10:20:21	1.97411	8.78124	12.281	2773.38	FALSE	116
2022-09-14	10:20:21	1.75579	7.81011	12.281	2827.84	FALSE	116
2022-09-14	10:20:22	0.657366	2.9241	1.01352	2776.3	FALSE	116
2022-09-14	10:20:22	0.545865	2.42812	1.01352	2830.26	FALSE	116
2022-09-14	10:20:22	-0.052099	-0.231747	1.01352	2776.3	FALSE	116
2022-09-14	10:20:22	-0.239733	-1.06638	1.01352	2830.26	FALSE	116
2022-09-14	10:20:23	-0.196068	-0.87215	0.307753	2776.3	FALSE	116
2022-09-14	10:20:23	0.377926	1.68109	0.307753	2831.94	FALSE	116
2022-09-14	10:20:23	0.0762979	0.339388	0.307753	2776.64	FALSE	116
2022-09-14	10:20:23	0.018588	0.0826831	0.307753	2832.03	FALSE	116
2022-09-14	10:20:24	-0.222023	-0.987603	-1.52274	2776.64	FALSE	116
2022-09-14	10:20:24	-0.379376	-1.68754	-1.52274	2832.03	FALSE	116
2022-09-14	10:20:24	-0.462531	-2.05743	-1.52274	2776.64	FALSE	116
2022-09-14	10:20:24	-0.305381	-1.3584	-1.52274	2832.03	FALSE	116
2022-09-14	10:20:25	0.43299	1.92603	10.4894	2778.57	FALSE	116
2022-09-14	10:20:25	1.29635	5.76642	10.4894	2837.79	FALSE	116
2022-09-14	10:20:25	5.34505	23.7759	10.4894	2802.34	1	117
2022-09-14	10:20:26	9.36266	41.647	28.0574	2879.44	1	118
2022-09-14	10:20:26	7.16403	31.867	28.0574	2834.21	1	119
2022-09-14	10:20:26	5.05981	22.507	28.0574	2901.95	1	120
2022-09-14	10:20:26	3.64388	16.2087	28.0574	2850.42	1	121
2022-09-14	10:20:27	1.97197	8.77172	-0.856642	2910.72	FALSE	121
2022-09-14	10:20:27	0.513448	2.28392	-0.856642	2852.7	FALSE	121
2022-09-14	10:20:27	0.422965	1.88143	-0.856642	2912.6	FALSE	121
2022-09-14	10:20:27	-3.67871	-16.3636	-0.856642	2852.7	FALSE	121
2022-09-14	10:20:28	0.0447458	0.199038	-0.301525	2912.8	FALSE	121
2022-09-14	10:20:28	-0.131437	-0.584658	-0.301525	2852.7	FALSE	121
2022-09-14	10:20:28	-0.302531	-1.34572	-0.301525	2912.8	FALSE	121
2022-09-14	10:20:28	0.118079	0.525239	-0.301525	2853.23	FALSE	121
2022-09-14	10:20:29	0.113397	0.504413	4.41709	2913.3	FALSE	121
2022-09-14	10:20:29	0.881692	3.92194	4.41709	2857.15	FALSE	121
2022-09-14	10:20:29	1.98393	8.82492	4.41709	2922.13	FALSE	121
2022-09-14	10:20:30	4.41009	19.617	20.7918	2876.77	1	122
2022-09-14	10:20:30	8.09039	35.9877	20.7918	2958.12	1	123
2022-09-14	10:20:30	1.47324	6.55327	20.7918	2883.32	FALSE	123
2022-09-14	10:20:30	4.72306	21.0091	20.7918	2979.13	1	124
2022-09-14	10:20:31	2.2994	10.2282	13.888	2893.55	FALSE	124
2022-09-14	10:20:31	3.55716	15.823	13.888	2994.95	1	125
2022-09-14	10:20:31	3.81945	16.9897	13.888	2910.54	1	126
2022-09-14	10:20:31	2.81263	12.5111	13.888	3007.46	FALSE	126
2022-09-14	10:20:32	5.84922	26.0185	21.6736	2936.56	1	127
2022-09-14	10:20:32	2.41273	10.7323	21.6736	3018.19	FALSE	127
2022-09-14	10:20:32	7.20749	32.0604	21.6736	2968.62	1	128
2022-09-14	10:20:32	4.02037	17.8834	21.6736	3036.08	1	129
2022-09-14	10:20:33	7.28866	32.4214	24.6173	3001.04	1	130
2022-09-14	10:20:33	5.40953	24.0627	24.6173	3060.14	1	131
2022-09-14	10:20:33	3.90449	17.368	24.6173	3018.41	1	132
2022-09-14	10:20:34	6.84892	30.4654	18.4566	3090.6	1	133
2022-09-14	10:20:34	2.07976	9.25119	18.4566	3027.66	FALSE	133
2022-09-14	10:20:34	3.84591	17.1074	18.4566	3107.71	1	134
2022-09-14	10:20:34	3.82235	17.0026	18.4566	3044.66	1	135
2022-09-14	10:20:35	1.90678	8.48174	10.1506	3116.19	FALSE	135
2022-09-14	10:20:35	3.35248	14.9125	10.1506	3059.57	1	136
2022-09-14	10:20:35	1.49228	6.63796	10.1506	3122.83	FALSE	136
2022-09-14	10:20:35	2.37625	10.57	10.1506	3070.14	FALSE	136
2022-09-14	10:20:36	1.69029	7.51875	7.59136	3130.35	FALSE	136
2022-09-14	10:20:36	1.72118	7.65615	7.59136	3077.8	FALSE	136
2022-09-14	10:20:36	1.46485	6.51595	7.59136	3136.87	FALSE	136
2022-09-14	10:20:36	1.95014	8.67461	7.59136	3086.47	FALSE	136
2022-09-14	10:20:37	2.05696	9.14977	11.7035	3146.02	FALSE	136
2022-09-14	10:20:37	2.01599	8.96753	11.7035	3095.44	FALSE	136
2022-09-14	10:20:37	3.82022	16.9931	11.7035	3163.01	1	137
2022-09-14	10:20:38	2.77594	12.3479	26.2522	3107.79	FALSE	137
2022-09-14	10:20:38	6.90912	30.7331	26.2522	3193.74	1	138
2022-09-14	10:20:38	4.41105	19.6212	26.2522	3127.41	1	139
2022-09-14	10:20:38	9.5109	42.3064	26.2522	3236.05	1	140
2022-09-14	10:20:39	4.6765	20.802	36.5971	3148.21	1	141
2022-09-14	10:20:39	5.78774	25.745	36.5971	3261.79	1	142
2022-09-14	10:20:39	14.952	66.5095	36.5971	3214.72	1	143
2022-09-14	10:20:39	7.49334	33.3319	36.5971	3295.13	1	144
2022-09-14	10:20:40	17.2549	76.7532	55.3649	3291.47	1	145
2022-09-14	10:20:40	10.132	45.0692	55.3649	3340.19	1	146
2022-09-14	10:20:40	4.69238	20.8726	55.3649	3312.35	1	147
2022-09-14	10:20:40	17.7071	78.7647	55.3649	3418.96	1	148
2022-09-14	10:20:41	17.5565	78.0948	47.7569	3390.44	1	149
2022-09-14	10:20:41	5.77731	25.6986	47.7569	3444.66	1	150
2022-09-14	10:20:41	8.87487	39.4772	47.7569	3429.92	1	151
2022-09-14	10:20:42	9.90495	44.0592	31.7788	3488.72	1	152
2022-09-14	10:20:42	3.34958	14.8996	31.7788	3444.82	1	153
2022-09-14	10:20:42	8.12719	36.1514	31.7788	3524.87	1	154
2022-09-14	10:20:42	7.19502	32.0049	31.7788	3476.82	1	155
2022-09-14	10:20:43	5.50769	24.4993	13.127	3549.37	1	156
2022-09-14	10:20:43	4.53085	20.1541	13.127	3496.98	1	157
2022-09-14	10:20:43	1.02754	4.5707	13.127	3553.94	FALSE	157
2022-09-14	10:20:43	0.738231	3.2838	13.127	3500.26	FALSE	157
2022-09-14	10:20:44	0.309937	1.37866	1.65823	3555.32	FALSE	157
2022-09-14	10:20:44	0.441794	1.96519	1.65823	3502.23	FALSE	157
2022-09-14	10:20:44	0.400624	1.78206	1.65823	3557.1	FALSE	157
2022-09-14	10:20:44	0.338791	1.50701	1.65823	3503.73	FALSE	157
2022-09-14	10:20:45	0.210191	0.934972	0.958966	3558.03	FALSE	157
2022-09-14	10:20:45	0.197468	0.878377	0.958966	3504.61	FALSE	157
2022-09-14	10:20:45	0.152481	0.678266	0.958966	3558.71	FALSE	157
2022-09-14	10:20:45	0.302201	1.34425	0.958966	3505.96	FALSE	157
2022-09-14	10:20:46	1.04551	4.65064	2.66181	3563.36	FALSE	157
2022-09-14	10:20:46	0.513499	2.28415	2.66181	3508.24	FALSE	157
2022-09-14	10:20:46	0.236196	1.05065	2.66181	3564.41	FALSE	157
2022-09-14	10:20:47	0.222405	0.989302	0.31528	3509.23	FALSE	157
2022-09-14	10:20:47	0.0973158	0.43288	0.31528	3564.85	FALSE	157
2022-09-14	10:20:47	-0.0677223	-0.301242	0.31528	3509.23	FALSE	157
2022-09-14	10:20:47	0.0315142	0.140181	0.31528	3564.99	FALSE	157
2022-09-14	10:20:48	0.0545168	0.242502	0.277645	3509.47	FALSE	157
2022-09-14	10:20:48	0.0541096	0.24069	0.277645	3565.23	FALSE	157
2022-09-14	10:20:48	0.108715	0.483586	0.277645	3509.96	FALSE	157
2022-09-14	10:20:48	0.0323284	0.143803	0.277645	3565.37	FALSE	157
2022-09-14	10:20:49	0.231463	1.02959	3.49891	3510.98	FALSE	157
2022-09-14	10:20:49	0.364593	1.62178	3.49891	3566.99	FALSE	157
2022-09-14	10:20:49	1.04128	4.63182	3.49891	3515.62	FALSE	157
2022-09-14	10:20:49	1.50902	6.71242	3.49891	3573.71	FALSE	157
2022-09-14	10:20:50	1.36775	6.08403	8.623	3521.7	FALSE	157
2022-09-14	10:20:50	1.16759	5.19367	8.623	3578.9	FALSE	157
2022-09-14	10:20:50	3.28027	14.5913	8.623	3536.29	1	158
2022-09-14	10:20:51	3.48266	15.4916	12.9861	3594.39	1	159
2022-09-14	10:20:51	2.40622	10.7033	12.9861	3547	FALSE	159
2022-09-14	10:20:51	3.02607	13.4606	12.9861	3607.85	1	160
2022-09-14	10:20:51	2.76271	12.2891	12.9861	3559.28	FALSE	160
2022-09-14	10:20:52	2.76597	12.3036	10.484	3620.15	FALSE	160
2022-09-14	10:20:52	2.02424	9.00422	10.484	3568.29	FALSE	160
2022-09-14	10:20:52	1.29803	5.7739	10.484	3625.93	FALSE	160
2022-09-14	10:20:52	3.33935	14.8541	10.484	3583.14	1	161
2022-09-14	10:20:53	2.72892	12.1388	11.0964	3638.07	FALSE	161
2022-09-14	10:20:53	2.84642	12.6614	11.0964	3595.8	FALSE	161
2022-09-14	10:20:53	1.81533	8.07495	11.0964	3646.14	FALSE	161
2022-09-14	10:20:53	2.58765	11.5104	11.0964	3607.31	FALSE	161
2022-09-14	10:20:54	1.90994	8.4958	14.8417	3654.64	FALSE	161
2022-09-14	10:20:54	3.89085	17.3073	14.8417	3624.62	1	162
2022-09-14	10:20:54	4.20892	18.7221	14.8417	3673.36	1	163
2022-09-14	10:20:55	5.69701	25.3414	19.8161	3649.96	1	164
2022-09-14	10:20:55	4.27828	19.0306	19.8161	3692.39	1	165
2022-09-14	10:20:55	5.85472	26.043	19.8161	3676.01	1	166
2022-09-14	10:20:55	1.98938	8.84916	19.8161	3701.24	FALSE	166
2022-09-14	10:20:56	3.27935	14.5872	16.1792	3690.59	1	167
2022-09-14	10:20:56	1.97426	8.7819	16.1792	3710.02	FALSE	167
2022-09-14	10:20:56	3.51899	15.6532	16.1792	3706.25	1	168
2022-09-14	10:20:56	5.7764	25.6946	16.1792	3735.72	1	169
2022-09-14	10:20:57	2.80271	12.467	15.0287	3718.71	FALSE	169
2022-09-14	10:20:57	3.55492	15.813	15.0287	3751.53	1	170
2022-09-14	10:20:57	2.19187	9.74988	15.0287	3728.46	FALSE	170
2022-09-14	10:20:57	4.96495	22.0851	15.0287	3773.61	1	171
2022-09-14	10:20:58	1.39426	6.20195	4.78758	3734.67	FALSE	171
2022-09-14	10:20:58	1.36072	6.05275	4.78758	3779.67	FALSE	171
2022-09-14	10:20:58	0.473906	2.10803	4.78758	3736.77	FALSE	171
2022-09-14	10:20:59	0.614313	2.73259	3.6864	3782.4	FALSE	171
2022-09-14	10:20:59	0.81645	3.63173	3.6864	3740.41	FALSE	171
2022-09-14	10:20:59	0.419199	1.86468	3.6864	3784.26	FALSE	171
2022-09-14	10:20:59	1.465	6.51661	3.6864	3746.92	FALSE	171
2022-09-14	10:21:00	2.39854	10.6692	6.53841	3794.93	FALSE	171
2022-09-14	10:21:00	1.9448	8.65086	6.53841	3755.57	FALSE	171
2022-09-14	10:21:00	1.07503	4.78195	6.53841	3799.72	FALSE	171
2022-09-14	10:21:00	0.461234	2.05166	6.53841	3757.62	FALSE	171
2022-09-14	10:21:01	0.274975	1.22314	0.802092	3800.94	FALSE	171
2022-09-14	10:21:01	0.224084	0.99677	0.802092	3758.62	FALSE	171
2022-09-14	10:21:01	0.100827	0.448499	0.802092	3801.39	FALSE	171
2022-09-14	10:21:01	0.121387	0.539954	0.802092	3759.16	FALSE	171
2022-09-14	10:21:02	0.099962	0.444651	0.0404646	3801.83	FALSE	171
2022-09-14	10:21:02	0.0614379	0.273288	0.0404646	3759.43	FALSE	171
2022-09-14	10:21:02	0.0220485	0.0980761	0.0404646	3801.93	FALSE	171
2022-09-14	10:21:02	-0.147061	-0.654157	0.0404646	3759.43	FALSE	171
2022-09-14	10:21:03	-0.159529	-0.709617	-1.01341	3801.93	FALSE	171
2022-09-14	10:21:03	-0.174185	-0.77481	-1.01341	3759.43	FALSE	171
2022-09-14	10:21:03	-0.349758	-1.55579	-1.01341	3801.93	FALSE	171
2022-09-14	10:21:04	-0.140394	-0.624501	10.0295	3759.43	FALSE	171
2022-09-14	10:21:04	0.635585	2.82721	10.0295	3804.76	FALSE	171
2022-09-14	10:21:04	3.62703	16.1338	10.0295	3775.57	1	172
2022-09-14	10:21:04	4.89675	21.7817	10.0295	3826.54	1	173
2022-09-14	10:21:05	3.50525	15.5921	13.6456	3791.16	1	174
2022-09-14	10:21:05	2.35905	10.4935	13.6456	3837.03	FALSE	174
2022-09-14	10:21:05	2.66663	11.8617	13.6456	3803.02	FALSE	174
2022-09-14	10:21:05	3.73971	16.635	13.6456	3853.67	1	175
2022-09-14	10:21:06	2.17156	9.65953	7.79917	3812.68	FALSE	175
2022-09-14	10:21:06	1.01034	4.49419	7.79917	3858.16	FALSE	175
2022-09-14	10:21:06	1.46897	6.53427	7.79917	3819.22	FALSE	175
2022-09-14	10:21:06	2.36246	10.5087	7.79917	3868.67	FALSE	175
2022-09-14	10:21:07	0.42785	1.90316	1.34478	3821.12	FALSE	175
2022-09-14	10:21:07	0.373193	1.66004	1.34478	3870.33	FALSE	175
2022-09-14	10:21:07	0.105916	0.471136	1.34478	3821.59	FALSE	175
2022-09-14	10:21:08	0.0334989	0.14901	0.102661	3870.48	FALSE	175
2022-09-14	10:21:08	-0.133727	-0.594844	0.102661	3821.59	FALSE	175
2022-09-14	10:21:08	0.131667	0.585681	0.102661	3871.07	FALSE	175
2022-09-14	10:21:08	0.0608781	0.270798	0.102661	3821.86	FALSE	175
2022-09-14	10:21:09	0.244288	1.08664	5.39765	3872.15	FALSE	175
2022-09-14	10:21:09	0.0768577	0.341878	5.39765	3822.2	FALSE	175
2022-09-14	10:21:09	2.09207	9.30595	5.39765	3881.46	FALSE	175
2022-09-14	10:21:09	2.44057	10.8561	5.39765	3833.06	FALSE	175
2022-09-14	10:21:10	0.454517	2.02178	0.680927	3883.48	FALSE	175
2022-09-14	10:21:10	0.0157891	0.0702331	0.680927	3833.13	FALSE	175
2022-09-14	10:21:10	0.0242369	0.107811	0.680927	3883.59	FALSE	175
2022-09-14	10:21:10	0.117774	0.523882	0.680927	3833.65	FALSE	175
2022-09-14	10:21:11	0.539962	2.40186	12.1107	3885.99	FALSE	175
2022-09-14	10:21:11	3.39884	15.1187	12.1107	3848.77	1	176
2022-09-14	10:21:11	4.22902	18.8115	12.1107	3904.8	1	177
2022-09-14	10:21:12	4.34001	19.3052	19.4074	3868.08	1	178
2022-09-14	10:21:12	2.96108	13.1715	19.4074	3917.97	FALSE	178
2022-09-14	10:21:12	3.97563	17.6844	19.4074	3885.76	1	179
2022-09-14	10:21:12	6.17517	27.4684	19.4074	3945.44	1	180
2022-09-14	10:21:13	7.98306	35.5102	32.4778	3921.27	1	181
2022-09-14	10:21:13	6.94556	30.8952	32.4778	3976.34	1	182
2022-09-14	10:21:13	5.46805	24.323	32.4778	3945.59	1	183
2022-09-14	10:21:13	8.80866	39.1827	32.4778	4015.52	1	184
2022-09-14	10:21:14	3.06525	13.6348	7.63448	3959.23	1	185
2022-09-14	10:21:14	2.0424	9.085	7.63448	4024.6	FALSE	185
2022-09-14	10:21:14	1.36235	6.06001	7.63448	3965.29	FALSE	185
2022-09-14	10:21:14	0.395229	1.75806	7.63448	4026.36	FALSE	185
2022-09-14	10:21:15	0.445407	1.98126	1.03065	3967.27	FALSE	185
2022-09-14	10:21:15	0.0480537	0.213752	1.03065	4026.58	FALSE	185
2022-09-14	10:21:15	0.201641	0.896939	1.03065	3968.17	FALSE	185
2022-09-14	10:21:16	0.101896	0.453254	0.727218	4027.03	FALSE	185
2022-09-14	10:21:16	0.112888	0.502148	0.727218	3968.67	FALSE	185
2022-09-14	10:21:16	0.186374	0.829029	0.727218	4027.86	FALSE	185
2022-09-14	10:21:16	0.252786	1.12444	0.727218	3969.79	FALSE	185
2022-09-14	10:21:17	0.483168	2.14923	2.14962	4030.01	FALSE	185
2022-09-14	10:21:17	0.537417	2.39054	2.14962	3972.18	FALSE	185
2022-09-14	10:21:17	0.550394	2.44826	2.14962	4032.46	FALSE	185
2022-09-14	10:21:17	0.362048	1.61046	2.14962	3973.8	FALSE	185
2022-09-14	10:21:18	0.654619	2.91188	2.33174	4035.37	FALSE	185
2022-09-14	10:21:18	0.856196	3.80853	2.33174	3977.6	FALSE	185
2022-09-14	10:21:18	0.289173	1.2863	2.33174	4036.65	FALSE	185
2022-09-14	10:21:18	0.296807	1.32026	2.33174	3978.92	FALSE	185
2022-09-14	10:21:19	0.285356	1.26932	1.555	4037.92	FALSE	185
2022-09-14	10:21:19	0.312939	1.39202	1.555	3980.32	FALSE	185
2022-09-14	10:21:19	0.450445	2.00367	1.555	4039.93	FALSE	185
2022-09-14	10:21:20	0.288512	1.28336	1.82931	3981.6	FALSE	185
2022-09-14	10:21:20	0.371565	1.6528	1.82931	4041.58	FALSE	185
2022-09-14	10:21:20	0.269071	1.19688	1.82931	3982.8	FALSE	185
2022-09-14	10:21:20	0.71584	3.1842	1.82931	4044.76	FALSE	185
2022-09-14	10:21:21	-0.138358	-0.615444	-2.12653	3982.8	FALSE	185
2022-09-14	10:21:21	-0.510674	-2.27158	-2.12653	4044.76	FALSE	185
2022-09-14	10:21:21	-0.660903	-2.93983	-2.12653	3982.8	FALSE	185
2022-09-14	10:21:21	-0.602328	-2.67928	-2.12653	4044.76	FALSE	185
2022-09-14	10:21:22	-0.46131	-2.052	-0.572436	3982.8	FALSE	185
2022-09-14	10:21:22	-0.11729	-0.521729	-0.572436	4044.76	FALSE	185
2022-09-14	10:21:22	0.0324303	0.144256	-0.572436	3982.94	FALSE	185
2022-09-14	10:21:22	0.0314125	0.139729	-0.572436	4044.9	FALSE	185
2022-09-14	10:21:23	0.0108527	0.048275	0.0122818	3982.99	FALSE	185
2022-09-14	10:21:23	-0.0124552	-0.0554032	0.0122818	4044.9	FALSE	185
2022-09-14	10:21:23	-0.00538142	-0.0239376	0.0122818	3982.99	FALSE	185
2022-09-14	10:21:23	0.0180282	0.080193	0.0122818	4044.98	FALSE	185
2022-09-14	10:21:24	-0.00614479	-0.0273333	-0.0377463	3982.99	FALSE	185
2022-09-14	10:21:24	-0.0102669	-0.0456692	-0.0377463	4044.98	FALSE	185
2022-09-14	10:21:24	-0.00904555	-0.0402364	-0.0377463	3982.99	FALSE	185
2022-09-14	10:21:25	0.00423688	0.0188465	0.00826364	4045	FALSE	185
2022-09-14	10:21:25	0.00876615	0.0389936	0.00826364	3983.03	FALSE	185
2022-09-14	10:21:25	-0.000394156	-0.00175328	0.00826364	4045	FALSE	185
2022-09-14	10:21:25	-0.00517788	-0.0230322	0.00826364	3983.03	FALSE	185
2022-09-14	10:21:26	-0.00675547	-0.0300497	0.00826368	4045	FALSE	185
2022-09-14	10:21:26	0.00332086	0.0147718	0.00826368	3983.04	FALSE	185
2022-09-14	10:21:26	0.00500025	0.0222421	0.00826368	4045.02	FALSE	185
2022-09-14	10:21:26	0.00586539	0.0260904	0.00826368	3983.07	FALSE	185
2022-09-14	10:21:27	-0.0170863	-0.0760033	2.02053	4045.02	FALSE	185
2022-09-14	10:21:27	0.353651	1.57311	2.02053	3984.64	FALSE	185
2022-09-14	10:21:27	0.739198	3.2881	2.02053	4048.31	FALSE	185
2022-09-14	10:21:27	0.741183	3.29693	2.02053	3987.94	FALSE	185
2022-09-14	10:21:28	-0.089758	-0.399262	-0.467475	4048.31	FALSE	185
2022-09-14	10:21:28	-0.108944	-0.484605	-0.467475	3987.94	FALSE	185
2022-09-14	10:21:28	-0.116577	-0.518558	-0.467475	4048.31	FALSE	185
2022-09-14	10:21:29	-0.111946	-0.497958	-0.540573	3987.94	FALSE	185
2022-09-14	10:21:29	-0.130063	-0.578546	-0.540573	4048.31	FALSE	185
2022-09-14	10:21:29	-0.118053	-0.525123	-0.540573	3987.94	FALSE	185
2022-09-14	10:21:29	-0.126043	-0.560664	-0.540573	4048.31	FALSE	185
2022-09-14	10:21:30	-0.136476	-0.607073	-0.572492	3987.94	FALSE	185
2022-09-14	10:21:30	-0.122175	-0.543459	-0.572492	4048.31	FALSE	185
2022-09-14	10:21:30	-0.121972	-0.542556	-0.572492	3987.94	FALSE	185
2022-09-14	10:21:30	-0.134185	-0.596882	-0.572492	4048.31	FALSE	185
2022-09-14	10:21:31	-0.12818	-0.57017	-0.558796	3987.94	FALSE	185
2022-09-14	10:21:31	-0.134185	-0.596882	-0.558796	4048.31	FALSE	185
2022-09-14	10:21:31	-0.128079	-0.569721	-0.558796	3987.94	FALSE	185
2022-09-14	10:21:31	-0.112048	-0.498412	-0.558796	4048.31	FALSE	185
2022-09-14	10:21:32	-0.114542	-0.509506	-0.519238	3987.94	FALSE	185
2022-09-14	10:21:32	-0.123193	-0.547987	-0.519238	4048.31	FALSE	185
2022-09-14	10:21:32	-0.112455	-0.500222	-0.519238	3987.94	FALSE	185
2022-09-14	10:21:33	-0.103956	-0.462417	-0.421728	4048.31	FALSE	185
2022-09-14	10:21:33	-0.0984603	-0.437971	-0.421728	3987.94	FALSE	185
2022-09-14	10:21:33	-0.0971371	-0.432085	-0.421728	4048.31	FALSE	185
2022-09-14	10:21:33	-0.0796817	-0.35444	-0.421728	3987.94	FALSE	185
2022-09-14	10:21:34	-0.0784602	-0.349007	-0.467683	4048.31	FALSE	185
2022-09-14	10:21:34	-0.100191	-0.44567	-0.467683	3987.94	FALSE	185
2022-09-14	10:21:34	-0.123244	-0.548214	-0.467683	4048.31	FALSE	185
2022-09-14	10:21:34	-0.118664	-0.527841	-0.467683	3987.94	FALSE	185
2022-09-14	10:21:35	-0.059529	-0.264797	2.39037	4048.31	FALSE	185
2022-09-14	10:21:35	0.737672	3.28131	2.39037	3991.22	FALSE	185
2022-09-14	10:21:35	0.731005	3.25166	2.39037	4051.56	FALSE	185
2022-09-14	10:21:35	0.740369	3.29331	2.39037	3994.51	FALSE	185
2022-09-14	10:21:36	0.732583	3.25868	3.28078	4054.82	FALSE	185
2022-09-14	10:21:36	0.747595	3.32545	3.28078	3997.84	FALSE	185
2022-09-14	10:21:36	0.732481	3.25822	3.28078	4058.08	FALSE	185
2022-09-14	10:21:37	0.739809	3.29082	3.28431	4001.13	FALSE	185
2022-09-14	10:21:37	0.74042	3.29354	3.28431	4061.37	FALSE	185
2022-09-14	10:21:37	0.733193	3.26139	3.28431	4004.39	FALSE	185
2022-09-14	10:21:37	0.739962	3.2915	3.28431	4064.67	FALSE	185
2022-09-14	10:21:38	0.740674	3.29467	3.29897	4007.69	FALSE	185
2022-09-14	10:21:38	0.741132	3.2967	3.29897	4067.96	FALSE	185
2022-09-14	10:21:38	0.742557	3.30304	3.29897	4010.99	FALSE	185
2022-09-14	10:21:38	0.742201	3.30146	3.29897	4071.26	FALSE	185
2022-09-14	10:21:39	0.736247	3.27497	3.27486	4014.26	FALSE	185
2022-09-14	10:21:39	0.734466	3.26705	3.27486	4074.53	FALSE	185
2022-09-14	10:21:39	0.738181	3.28358	3.27486	4017.55	FALSE	185
2022-09-14	10:21:39	0.735992	3.27384	3.27486	4077.8	FALSE	185
2022-09-14	10:21:40	0.734008	3.26501	3.28901	4020.81	FALSE	185
2022-09-14	10:21:40	0.738842	3.28652	3.28901	4081.09	FALSE	185
2022-09-14	10:21:40	0.745356	3.31549	3.28901	4024.13	FALSE	185
2022-09-14	10:21:41	0.96673	4.30021	3.70791	4085.39	FALSE	185
2022-09-14	10:21:41	0.899606	4.00163	3.70791	4028.13	FALSE	185
2022-09-14	10:21:41	0.940267	4.1825	3.70791	4089.57	FALSE	185
2022-09-14	10:21:41	0.527697	2.3473	3.70791	4030.48	FALSE	185
2022-09-14	10:21:42	0.494262	2.19858	1.86728	4091.77	FALSE	185
2022-09-14	10:21:42	0.480674	2.13813	1.86728	4032.61	FALSE	185
2022-09-14	10:21:42	0.419758	1.86717	1.86728	4093.64	FALSE	185
2022-09-14	10:21:42	0.28444	1.26525	1.86728	4033.88	FALSE	185
2022-09-14	10:21:43	0.538079	2.39348	1.93101	4096.03	FALSE	185
2022-09-14	10:21:43	0.430089	1.91312	1.93101	4035.79	FALSE	185
2022-09-14	10:21:43	0.423168	1.88234	1.93101	4097.92	FALSE	185
2022-09-14	10:21:43	0.345102	1.53508	1.93101	4037.33	FALSE	185
2022-09-14	10:21:44	0.601539	2.67577	2.04278	4100.59	FALSE	185
2022-09-14	10:21:44	0.42271	1.8803	2.04278	4039.21	FALSE	185
2022-09-14	10:21:44	0.475331	2.11437	2.04278	4102.71	FALSE	185
2022-09-14	10:21:44	0.337366	1.50067	2.04278	4040.71	FALSE	185
2022-09-14	10:21:45	0.557112	2.47815	2.23495	4105.18	FALSE	185
2022-09-14	10:21:45	0.264491	1.17651	2.23495	4041.89	FALSE	185
2022-09-14	10:21:45	0.685712	3.05018	2.23495	4108.23	FALSE	185
2022-09-14	10:21:46	0.278639	1.23944	10.5981	4043.12	FALSE	185
2022-09-14	10:21:46	1.95879	8.71309	10.5981	4116.95	FALSE	185
2022-09-14	10:21:46	3.14021	13.9683	10.5981	4057.09	1	186
2022-09-14	10:21:46	4.15263	18.4717	10.5981	4135.42	1	187
2022-09-14	10:21:47	2.30719	10.2628	6.01808	4067.36	FALSE	187
2022-09-14	10:21:47	2.04296	9.08749	6.01808	4144.51	FALSE	187
2022-09-14	10:21:47	0.489326	2.17662	6.01808	4069.53	FALSE	187
2022-09-14	10:21:47	0.572226	2.54538	6.01808	4147.05	FALSE	187
2022-09-14	10:21:48	0.614516	2.73349	2.06836	4072.27	FALSE	187
2022-09-14	10:21:48	0.448512	1.99507	2.06836	4149.05	FALSE	187
2022-09-14	10:21:48	0.510242	2.26966	2.06836	4074.54	FALSE	187
2022-09-14	10:21:48	0.28668	1.27521	2.06836	4150.32	FALSE	187
2022-09-14	10:21:49	0.412023	1.83276	1.76673	4076.37	FALSE	187
2022-09-14	10:21:49	0.360674	1.60435	1.76673	4151.93	FALSE	187
2022-09-14	10:21:49	0.418842	1.86309	1.76673	4078.23	FALSE	187
2022-09-14	10:21:50	0.578995	2.57549	1.73248	4154.5	FALSE	187
2022-09-14	10:21:50	0.226069	1.0056	1.73248	4079.24	FALSE	187
2022-09-14	10:21:50	0.551463	2.45302	1.73248	4156.96	FALSE	187
2022-09-14	10:21:50	0.201387	0.89581	1.73248	4080.13	FALSE	187
2022-09-14	10:21:51	0.105051	0.467288	-0.358969	4157.42	FALSE	187
2022-09-14	10:21:51	-0.171692	-0.76372	-0.358969	4080.13	FALSE	187
2022-09-14	10:21:51	-0.151336	-0.673173	-0.358969	4157.42	FALSE	187
2022-09-14	10:21:51	-0.104822	-0.466269	-0.358969	4080.13	FALSE	187
2022-09-14	10:21:52	-0.132201	-0.588056	-1.06264	4157.42	FALSE	187
2022-09-14	10:21:52	-0.346246	-1.54017	-1.06264	4080.13	FALSE	187
2022-09-14	10:21:52	-0.286196	-1.27306	-1.06264	4157.42	FALSE	187
2022-09-14	10:21:52	-0.190928	-0.849286	-1.06264	4080.13	FALSE	187
2022-09-14	10:21:53	-0.159631	-0.710071	0.182135	4157.42	FALSE	187
2022-09-14	10:21:53	0.0780282	0.347085	0.182135	4080.48	FALSE	187
2022-09-14	10:21:53	0.20444	0.90939	0.182135	4158.33	FALSE	187
2022-09-14	10:21:54	0.442863	1.96994	1.22976	4082.45	FALSE	187
2022-09-14	10:21:54	0.446171	1.98466	1.22976	4160.32	FALSE	187
2022-09-14	10:21:54	0.0848475	0.377419	1.22976	4082.83	FALSE	187
2022-09-14	10:21:54	0.131972	0.587038	1.22976	4160.9	FALSE	187
2022-09-14	10:21:55	-0.0191219	-0.085058	1.26813	4082.83	FALSE	187
2022-09-14	10:21:55	0.319249	1.42008	1.26813	4162.32	FALSE	187
2022-09-14	10:21:55	0.468308	2.08313	1.26813	4084.91	FALSE	187
2022-09-14	10:21:55	0.371921	1.65438	1.26813	4163.98	FALSE	187
2022-09-14	10:21:56	0.319199	1.41986	1.91714	4086.33	FALSE	187
2022-09-14	10:21:56	0.516349	2.29682	1.91714	4166.27	FALSE	187
2022-09-14	10:21:56	0.448257	1.99394	1.91714	4088.32	FALSE	187
2022-09-14	10:21:56	0.440166	1.95795	1.91714	4168.23	FALSE	187

## Sheet: KimChi_martin_2022914101649 (3)
Date	Time	Lbs	Newtons	Total force x time	total steps > 13.345		**GoPro Fitting: 10:06
2022-09-14	10:16:56	1.54302	6.86366	6.86366	FALSE	0
2022-09-14	10:16:56	1.44907	6.44575	6.44575	FALSE	0
2022-09-14	10:16:56	1.18113	5.2539	12.1176	FALSE	0
2022-09-14	10:16:56	1.55126	6.90031	13.3461	FALSE	0
2022-09-14	10:16:57	1.54072	6.85343	18.971	FALSE	0
2022-09-14	10:16:57	1.52775	6.79574	20.1418	FALSE	0
2022-09-14	10:16:57	1.55253	6.90596	25.877	FALSE	0
2022-09-14	10:16:58	1.55355	6.9105	27.0523	FALSE	0
2022-09-14	10:16:58	1.54632	6.87834	32.7553	FALSE	0
2022-09-14	10:16:58	1.55177	6.90258	33.9549	FALSE	0
2022-09-14	10:16:58	1.53111	6.81068	39.566	FALSE	0
2022-09-14	10:16:59	1.53559	6.83061	40.7855	FALSE	0
2022-09-14	10:16:59	1.54022	6.85121	46.4172	FALSE	0
2022-09-14	10:16:59	1.53996	6.85005	47.6356	FALSE	0
2022-09-14	10:16:59	1.55518	6.91775	53.3349	FALSE	0
2022-09-14	10:17:00	1.58088	7.03207	54.6676	FALSE	0
2022-09-14	10:17:00	1.56347	6.95463	60.2896	FALSE	0
2022-09-14	10:17:00	0.440725	1.96043	56.6281	FALSE	0
2022-09-14	10:17:00	0.487952	2.17051	62.4601	FALSE	0
2022-09-14	10:17:01	1.02968	4.58022	61.2083	FALSE	0
2022-09-14	10:17:01	3.04469	13.5434	76.0035	1	1
2022-09-14	10:17:01	5.38998	23.9757	85.184	1	2
2022-09-14	10:17:02	4.61976	20.5496	96.5531	1	3
2022-09-14	10:17:02	4.22785	18.8063	103.99	1	4
2022-09-14	10:17:02	3.46775	15.4252	111.978	1	5
2022-09-14	10:17:02	5.12057	22.7773	126.768	1	6
2022-09-14	10:17:03	4.1221	18.3359	130.314	1	7
2022-09-14	10:17:03	8.69248	38.6659	165.434	1	8
2022-09-14	10:17:03	8.99976	40.0327	170.347	1	9
2022-09-14	10:17:03	14.9441	66.4743	231.908	1	10
2022-09-14	10:17:04	29.9604	133.27	303.617	1	11
2022-09-14	10:17:04	24.963	111.04	342.948	1	12
2022-09-14	10:17:04	12.3999	55.1572	358.774	1	13
2022-09-14	10:17:04	0.9907	4.40683	347.355	FALSE	13
2022-09-14	10:17:05	0.11411	0.507584	359.282	FALSE	13
2022-09-14	10:17:05	-0.147977	-0.658231	347.355	FALSE	13
2022-09-14	10:17:05	-0.139936	-0.622463	359.282	FALSE	13
2022-09-14	10:17:05	-0.33617	-1.49535	347.355	FALSE	13
2022-09-14	10:17:06	-0.397646	-1.76881	359.282	FALSE	13
2022-09-14	10:17:06	-0.611539	-2.72025	347.355	FALSE	13
2022-09-14	10:17:06	-0.781055	-3.47429	359.282	FALSE	13
2022-09-14	10:17:07	-0.826195	-3.67508	347.355	FALSE	13
2022-09-14	10:17:07	-0.843702	-3.75296	359.282	FALSE	13
2022-09-14	10:17:07	-0.795101	-3.53677	347.355	FALSE	13
2022-09-14	10:17:07	-0.75846	-3.37378	359.282	FALSE	13
2022-09-14	10:17:08	-0.905432	-4.02754	347.355	FALSE	13
2022-09-14	10:17:08	-0.861869	-3.83377	359.282	FALSE	13
2022-09-14	10:17:08	-1.12141	-4.98826	347.355	FALSE	13
2022-09-14	10:17:08	-1.09617	-4.87598	359.282	FALSE	13
2022-09-14	10:17:09	-0.871335	-3.87587	347.355	FALSE	13
2022-09-14	10:17:09	-1.08777	-4.83862	359.282	FALSE	13
2022-09-14	10:17:09	-0.976068	-4.34175	347.355	FALSE	13
2022-09-14	10:17:09	-0.956628	-4.25527	359.282	FALSE	13
2022-09-14	10:17:10	-0.737137	-3.27893	347.355	FALSE	13
2022-09-14	10:17:10	-0.867162	-3.85731	359.282	FALSE	13
2022-09-14	10:17:10	-0.779732	-3.4684	347.355	FALSE	13
2022-09-14	10:17:11	-0.567824	-2.52579	359.282	FALSE	13
2022-09-14	10:17:11	-0.566602	-2.52036	347.355	FALSE	13
2022-09-14	10:17:11	-0.822633	-3.65924	359.282	FALSE	13
2022-09-14	10:17:11	-0.855254	-3.80434	347.355	FALSE	13
2022-09-14	10:17:12	-0.728333	-3.23977	359.282	FALSE	13
2022-09-14	10:17:12	-0.423753	-1.88494	347.355	FALSE	13
2022-09-14	10:17:12	-0.218409	-0.971527	359.282	FALSE	13
2022-09-14	10:17:12	-0.311946	-1.3876	347.355	FALSE	13
2022-09-14	10:17:13	0.00143789	0.00639602	359.288	FALSE	13
2022-09-14	10:17:13	-0.109809	-0.488452	347.355	FALSE	13
2022-09-14	10:17:13	0.0477483	0.212394	359.5	FALSE	13
2022-09-14	10:17:13	-0.00304046	-0.0135246	347.355	FALSE	13
2022-09-14	10:17:14	0.248359	1.10475	360.605	FALSE	13
2022-09-14	10:17:14	0.414211	1.84249	349.198	FALSE	13
2022-09-14	10:17:14	0.419911	1.86785	362.473	FALSE	13
2022-09-14	10:17:15	0.140064	0.623033	349.821	FALSE	13
2022-09-14	10:17:15	0.252684	1.12399	363.597	FALSE	13
2022-09-14	10:17:15	0.221641	0.985903	350.807	FALSE	13
2022-09-14	10:17:15	0.175127	0.779	364.376	FALSE	13
2022-09-14	10:17:16	0.12556	0.558516	351.365	FALSE	13
2022-09-14	10:17:16	0.734364	3.2666	367.643	FALSE	13
2022-09-14	10:17:16	0.739198	3.2881	354.653	FALSE	13
2022-09-14	10:17:16	0.734873	3.26886	370.911	FALSE	13
2022-09-14	10:17:17	0.737417	3.28018	357.933	FALSE	13
2022-09-14	10:17:17	0.732684	3.25912	374.171	FALSE	13
2022-09-14	10:17:17	0.728817	3.24192	361.175	FALSE	13
2022-09-14	10:17:17	1.0394	4.62346	378.794	FALSE	13
2022-09-14	10:17:18	0.688664	3.06332	364.239	FALSE	13
2022-09-14	10:17:18	2.15482	9.58507	388.379	FALSE	13
2022-09-14	10:17:18	4.25324	18.9193	383.158	1	14
2022-09-14	10:17:19	1.57513	7.00649	395.386	FALSE	14
2022-09-14	10:17:19	0.697366	3.10202	386.26	FALSE	14
2022-09-14	10:17:19	0.73757	3.28086	398.667	FALSE	14
2022-09-14	10:17:19	0.731463	3.25369	389.514	FALSE	14
2022-09-14	10:17:20	0.7307	3.2503	401.917	FALSE	14
2022-09-14	10:17:20	0.735891	3.27339	392.787	FALSE	14
2022-09-14	10:17:20	0.736756	3.27724	405.194	FALSE	14
2022-09-14	10:17:20	0.738282	3.28403	396.071	FALSE	14
2022-09-14	10:17:21	0.729173	3.24351	408.438	FALSE	14
2022-09-14	10:17:21	0.731667	3.2546	399.326	FALSE	14
2022-09-14	10:17:21	0.738486	3.28493	411.722	FALSE	14
2022-09-14	10:17:21	0.738639	3.28561	402.611	FALSE	14
2022-09-14	10:17:22	0.734008	3.26501	414.987	FALSE	14
2022-09-14	10:17:22	0.73528	3.27067	405.882	FALSE	14
2022-09-14	10:17:22	0.732939	3.26026	418.248	FALSE	14
2022-09-14	10:17:23	0.732735	3.25935	409.141	FALSE	14
2022-09-14	10:17:23	0.736908	3.27791	421.526	FALSE	14
2022-09-14	10:17:23	0.737672	3.28131	412.423	FALSE	14
2022-09-14	10:17:23	0.681641	3.03208	424.558	FALSE	14
2022-09-14	10:17:24	0.0358399	0.159423	412.582	FALSE	14
2022-09-14	10:17:24	0.0519723	0.231183	424.789	FALSE	14
2022-09-14	10:17:24	-0.00507608	-0.0225794	412.582	FALSE	14
2022-09-14	10:17:24	0.142608	0.634349	425.423	FALSE	14
2022-09-14	10:17:25	0.125713	0.559197	413.141	FALSE	14
2022-09-14	10:17:25	0.156909	0.697963	426.121	FALSE	14
2022-09-14	10:17:25	0.738181	3.28358	416.425	FALSE	14
2022-09-14	10:17:25	0.734109	3.26546	429.387	FALSE	14
2022-09-14	10:17:26	0.734466	3.26705	419.692	FALSE	14
2022-09-14	10:17:26	0.721743	3.21046	432.597	FALSE	14
2022-09-14	10:17:26	0.736196	3.27475	422.967	FALSE	14
2022-09-14	10:17:27	0.73299	3.26049	435.858	FALSE	14
2022-09-14	10:17:27	0.732481	3.25822	426.225	FALSE	14
2022-09-14	10:17:27	0.726425	3.23128	439.089	FALSE	14
2022-09-14	10:17:27	0.741132	3.2967	429.521	FALSE	14
2022-09-14	10:17:28	0.735433	3.27135	442.36	FALSE	14
2022-09-14	10:17:28	0.736857	3.27769	432.799	FALSE	14
2022-09-14	10:17:28	0.735891	3.27339	445.634	FALSE	14
2022-09-14	10:17:28	0.740725	3.29489	436.094	FALSE	14
2022-09-14	10:17:29	0.742252	3.30169	448.935	FALSE	14
2022-09-14	10:17:29	0.738181	3.28358	439.378	FALSE	14
2022-09-14	10:17:29	0.73757	3.28086	452.216	FALSE	14
2022-09-14	10:17:29	0.732175	3.25686	442.634	FALSE	14
2022-09-14	10:17:30	0.728461	3.24034	455.457	FALSE	14
2022-09-14	10:17:30	0.74159	3.29874	445.933	FALSE	14
2022-09-14	10:17:30	0.737519	3.28063	458.737	FALSE	14
2022-09-14	10:17:31	0.738231	3.2838	449.217	FALSE	14
2022-09-14	10:17:31	0.742964	3.30485	462.042	FALSE	14
2022-09-14	10:17:31	0.743066	3.30531	452.522	FALSE	14
2022-09-14	10:17:31	0.735585	3.27203	465.314	FALSE	14
2022-09-14	10:17:32	0.737061	3.27859	455.801	FALSE	14
2022-09-14	10:17:32	0.735076	3.26977	468.584	FALSE	14
2022-09-14	10:17:32	0.728359	3.23989	459.041	FALSE	14
2022-09-14	10:17:32	0.730852	3.25098	471.835	FALSE	14
2022-09-14	10:17:33	0.729071	3.24305	462.284	FALSE	14
2022-09-14	10:17:33	0.733397	3.2623	475.097	FALSE	14
2022-09-14	10:17:33	0.734771	3.26841	465.552	FALSE	14
2022-09-14	10:17:33	0.7307	3.2503	478.347	FALSE	14
2022-09-14	10:17:34	0.734618	3.26773	468.82	FALSE	14
2022-09-14	10:17:34	0.734568	3.26751	481.615	FALSE	14
2022-09-14	10:17:34	0.738639	3.28561	472.106	FALSE	14
2022-09-14	10:17:35	0.733702	3.26365	484.879	FALSE	14
2022-09-14	10:17:35	0.730954	3.25143	475.357	FALSE	14
2022-09-14	10:17:35	0.73645	3.27588	488.154	FALSE	14
2022-09-14	10:17:35	0.731972	3.25596	478.613	FALSE	14
2022-09-14	10:17:36	0.735331	3.2709	491.425	FALSE	14
2022-09-14	10:17:36	0.730852	3.25098	481.864	FALSE	14
2022-09-14	10:17:36	0.734109	3.26546	494.691	FALSE	14
2022-09-14	10:17:36	0.737875	3.28222	485.146	FALSE	14
2022-09-14	10:17:37	0.737417	3.28018	497.971	FALSE	14
2022-09-14	10:17:37	2.14154	9.526	494.672	FALSE	14
2022-09-14	10:17:37	0.64785	2.88177	500.853	FALSE	14
2022-09-14	10:17:37	0.869427	3.86739	498.54	FALSE	14
2022-09-14	10:17:38	2.42866	10.8032	511.656	FALSE	14
2022-09-14	10:17:38	1.49233	6.63818	505.178	FALSE	14
2022-09-14	10:17:38	0.665254	2.95918	514.615	FALSE	14
2022-09-14	10:17:38	0.733346	3.26207	508.44	FALSE	14
2022-09-14	10:17:39	0.738639	3.28561	517.901	FALSE	14
2022-09-14	10:17:39	0.75472	3.35715	511.797	FALSE	14
2022-09-14	10:17:39	0.739402	3.28901	521.19	FALSE	14
2022-09-14	10:17:40	0.75187	3.34447	515.141	FALSE	14
2022-09-14	10:17:40	0.743829	3.3087	524.498	FALSE	14
2022-09-14	10:17:40	0.853855	3.79812	518.94	FALSE	14
2022-09-14	10:17:40	0.733855	3.26433	527.763	FALSE	14
2022-09-14	10:17:41	0.745713	3.31708	522.257	FALSE	14
2022-09-14	10:17:41	0.748053	3.32749	531.09	FALSE	14
2022-09-14	10:17:41	0.758079	3.37209	525.629	FALSE	14
2022-09-14	10:17:41	0.746883	3.32228	534.413	FALSE	14
2022-09-14	10:17:42	0.741743	3.29942	528.928	FALSE	14
2022-09-14	10:17:42	0.738028	3.2829	537.695	FALSE	14
2022-09-14	10:17:42	0.736654	3.27678	532.205	FALSE	14
2022-09-14	10:17:42	0.734822	3.26864	540.964	FALSE	14
2022-09-14	10:17:43	0.733448	3.26252	535.467	FALSE	14
2022-09-14	10:17:43	0.733397	3.2623	544.226	FALSE	14
2022-09-14	10:17:43	0.73813	3.28335	538.751	FALSE	14
2022-09-14	10:17:44	0.741539	3.29851	547.525	FALSE	14
2022-09-14	10:17:44	0.739707	3.29036	542.041	FALSE	14
2022-09-14	10:17:44	0.730038	3.24736	550.772	FALSE	14
2022-09-14	10:17:44	0.734873	3.26886	545.31	FALSE	14
2022-09-14	10:17:45	0.738893	3.28674	554.059	FALSE	14
2022-09-14	10:17:45	0.736756	3.27724	548.587	FALSE	14
2022-09-14	10:17:45	0.736603	3.27656	557.336	FALSE	14
2022-09-14	10:17:45	0.743117	3.30553	551.893	FALSE	14
2022-09-14	10:17:46	3.81614	16.975	574.31	1	15
2022-09-14	10:17:46	2.75859	12.2708	564.164	FALSE	15
2022-09-14	10:17:46	1.6224	7.21676	581.527	FALSE	15
2022-09-14	10:17:46	1.03126	4.58725	568.751	FALSE	15
2022-09-14	10:17:47	1.13564	5.05155	586.579	FALSE	15
2022-09-14	10:17:47	1.57284	6.99631	575.747	FALSE	15
2022-09-14	10:17:47	3.24551	14.4367	601.015	1	16
2022-09-14	10:17:48	1.86281	8.28615	584.033	FALSE	16
2022-09-14	10:17:48	4.85172	21.5814	622.597	1	17
2022-09-14	10:17:48	4.10016	18.2383	602.272	1	18
2022-09-14	10:17:48	1.88037	8.36426	630.961	FALSE	18
2022-09-14	10:17:49	1.74307	7.75352	610.025	FALSE	18
2022-09-14	10:17:49	2.30897	10.2708	641.232	FALSE	18
2022-09-14	10:17:49	0.670801	2.98386	613.009	FALSE	18
2022-09-14	10:17:49	0.852786	3.79336	645.025	FALSE	18
2022-09-14	10:17:50	0.737112	3.27882	616.288	FALSE	18
2022-09-14	10:17:50	1.84576	8.21031	653.236	FALSE	18
2022-09-14	10:17:50	1.28286	5.70642	621.994	FALSE	18
2022-09-14	10:17:50	2.51991	11.2091	664.445	FALSE	18
2022-09-14	10:17:51	3.81029	16.9489	638.943	1	19
2022-09-14	10:17:51	3.46805	15.4266	679.871	1	20
2022-09-14	10:17:51	1.24698	5.54682	644.49	FALSE	20
2022-09-14	10:17:52	0.992277	4.41385	684.285	FALSE	20
2022-09-14	10:17:52	0.543015	2.41544	646.905	FALSE	20
2022-09-14	10:17:52	0.578893	2.57503	686.86	FALSE	20
2022-09-14	10:17:52	0.832684	3.70394	650.609	FALSE	20
2022-09-14	10:17:53	0.806272	3.58646	690.447	FALSE	20
2022-09-14	10:17:53	0.734975	3.26932	653.879	FALSE	20
2022-09-14	10:17:53	0.406629	1.80877	692.255	FALSE	20
2022-09-14	10:17:53	0.241794	1.07555	654.954	FALSE	20
2022-09-14	10:17:54	0.564491	2.51097	694.766	FALSE	20
2022-09-14	10:17:54	1.13503	5.04884	660.003	FALSE	20
2022-09-14	10:17:54	2.21355	9.84631	704.613	FALSE	20
2022-09-14	10:17:54	3.94688	17.5565	677.56	1	21
2022-09-14	10:17:55	4.79406	21.3249	725.938	1	22
2022-09-14	10:17:55	3.24861	14.4505	692.01	1	23
2022-09-14	10:17:55	3.81711	16.9793	742.917	1	24
2022-09-14	10:17:56	3.73899	16.6318	708.642	1	25
2022-09-14	10:17:56	2.9906	13.3028	756.22	FALSE	25
2022-09-14	10:17:56	1.93991	8.62911	717.271	FALSE	25
2022-09-14	10:17:56	0.979097	4.35522	760.575	FALSE	25
2022-09-14	10:17:57	0.652939	2.9044	720.175	FALSE	25
2022-09-14	10:17:57	0.275127	1.22382	761.799	FALSE	25
2022-09-14	10:17:57	1.04103	4.63071	724.806	FALSE	25
2022-09-14	10:17:57	1.01492	4.51457	766.313	FALSE	25
2022-09-14	10:17:58	1.29594	5.7646	730.571	FALSE	25
2022-09-14	10:17:58	1.10933	4.93452	771.248	FALSE	25
2022-09-14	10:17:58	0.939707	4.18	734.751	FALSE	25
2022-09-14	10:17:58	0.426883	1.89886	773.147	FALSE	25
2022-09-14	10:17:59	0.53874	2.39642	737.147	FALSE	25
2022-09-14	10:17:59	0.392125	1.74425	774.891	FALSE	25
2022-09-14	10:17:59	0.505814	2.24996	739.397	FALSE	25
2022-09-14	10:18:00	0.304033	1.3524	776.243	FALSE	25
2022-09-14	10:18:00	0.295738	1.3155	740.713	FALSE	25
2022-09-14	10:18:00	0.366985	1.63242	777.876	FALSE	25
2022-09-14	10:18:00	0.360674	1.60435	742.317	FALSE	25
2022-09-14	10:18:01	0.46556	2.0709	779.947	FALSE	25
2022-09-14	10:18:01	0.411667	1.83118	744.148	FALSE	25
2022-09-14	10:18:01	0.46729	2.0786	782.025	FALSE	25
2022-09-14	10:18:01	0.435178	1.93576	746.084	FALSE	25
2022-09-14	10:18:02	0.432074	1.92195	783.947	FALSE	25
2022-09-14	10:18:02	0.389682	1.73338	747.817	FALSE	25
2022-09-14	10:18:02	0.386527	1.71935	785.666	FALSE	25
2022-09-14	10:18:02	0.394669	1.75557	749.573	FALSE	25
2022-09-14	10:18:03	0.388919	1.72999	787.396	FALSE	25
2022-09-14	10:18:03	0.372888	1.65868	751.231	FALSE	25
2022-09-14	10:18:03	0.392939	1.74787	789.144	FALSE	25
2022-09-14	10:18:04	0.488054	2.17096	753.402	FALSE	25
2022-09-14	10:18:04	0.387494	1.72365	790.868	FALSE	25
2022-09-14	10:18:04	0.249631	1.11041	754.513	FALSE	25
2022-09-14	10:18:04	0.162608	0.723313	791.591	FALSE	25
2022-09-14	10:18:05	0.175331	0.779907	755.293	FALSE	25
2022-09-14	10:18:05	0.376705	1.67566	793.267	FALSE	25
2022-09-14	10:18:05	0.342303	1.52263	756.815	FALSE	25
2022-09-14	10:18:05	0.317163	1.4108	794.678	FALSE	25
2022-09-14	10:18:06	0.46958	2.08879	758.904	FALSE	25
2022-09-14	10:18:06	0.416552	1.85291	796.531	FALSE	25
2022-09-14	10:18:06	0.425	1.89048	760.795	FALSE	25
2022-09-14	10:18:06	0.452837	2.01431	798.545	FALSE	25
2022-09-14	10:18:07	0.36556	1.62608	762.421	FALSE	25
2022-09-14	10:18:07	0.323626	1.43955	799.985	FALSE	25
2022-09-14	10:18:07	0.273295	1.21567	763.636	FALSE	25
2022-09-14	10:18:07	0.410903	1.82778	801.812	FALSE	25
2022-09-14	10:18:08	0.345713	1.5378	765.174	FALSE	25
2022-09-14	10:18:08	0.369631	1.64419	803.457	FALSE	25
2022-09-14	10:18:08	0.388817	1.72954	766.904	FALSE	25
2022-09-14	10:18:09	0.433397	1.92784	805.384	FALSE	25
2022-09-14	10:18:09	0.432176	1.92241	768.826	FALSE	25
2022-09-14	10:18:09	0.401794	1.78726	807.172	FALSE	25
2022-09-14	10:18:09	0.420216	1.8692	770.695	FALSE	25
2022-09-14	10:18:10	0.389071	1.73067	808.902	FALSE	25
2022-09-14	10:18:10	0.370089	1.64623	772.342	FALSE	25
2022-09-14	10:18:10	0.475484	2.11505	811.017	FALSE	25
2022-09-14	10:18:10	0.472379	2.10124	774.443	FALSE	25
2022-09-14	10:18:11	0.417417	1.85675	812.874	FALSE	25
2022-09-14	10:18:11	0.413957	1.84136	776.284	FALSE	25
2022-09-14	10:18:11	0.435789	1.93848	814.813	FALSE	25
2022-09-14	10:18:11	0.415992	1.85042	778.135	FALSE	25
2022-09-14	10:18:12	0.425305	1.89184	816.704	FALSE	25
2022-09-14	10:18:12	0.38556	1.71505	779.85	FALSE	25
2022-09-14	10:18:12	0.410089	1.82416	818.529	FALSE	25
2022-09-14	10:18:13	0.410598	1.82642	781.676	FALSE	25
2022-09-14	10:18:13	0.384542	1.71052	820.239	FALSE	25
2022-09-14	10:18:13	0.388664	1.72886	783.405	FALSE	25
2022-09-14	10:18:13	0.363219	1.61567	821.855	FALSE	25
2022-09-14	10:18:14	0.415229	1.84702	785.252	FALSE	25
2022-09-14	10:18:14	0.4193	1.86513	823.72	FALSE	25
2022-09-14	10:18:14	0.398028	1.77051	787.022	FALSE	25
2022-09-14	10:18:14	0.38785	1.72523	825.445	FALSE	25
2022-09-14	10:18:15	0.398283	1.77164	788.794	FALSE	25
2022-09-14	10:18:15	0.41869	1.86242	827.308	FALSE	25
2022-09-14	10:18:15	0.385814	1.71618	790.51	FALSE	25
2022-09-14	10:18:15	0.488562	2.17322	829.481	FALSE	25
2022-09-14	10:18:16	0.499606	2.22235	792.733	FALSE	25
2022-09-14	10:18:16	0.41757	1.85743	831.338	FALSE	25
2022-09-14	10:18:16	0.411769	1.83163	794.564	FALSE	25
2022-09-14	10:18:17	0.343626	1.52852	832.867	FALSE	25
2022-09-14	10:18:17	0.520013	2.31312	796.877	FALSE	25
2022-09-14	10:18:17	0.63757	2.83604	835.703	FALSE	25
2022-09-14	10:18:17	0.345407	1.53644	798.414	FALSE	25
2022-09-14	10:18:18	0.386527	1.71935	837.422	FALSE	25
2022-09-14	10:18:18	0.35416	1.57537	799.989	FALSE	25
2022-09-14	10:18:18	0.411718	1.8314	839.253	FALSE	25
2022-09-14	10:18:18	0.39299	1.7481	801.737	FALSE	25
2022-09-14	10:18:19	0.398079	1.77074	841.024	FALSE	25
2022-09-14	10:18:19	0.420573	1.87079	803.608	FALSE	25
2022-09-14	10:18:19	0.404186	1.7979	842.822	FALSE	25
2022-09-14	10:18:19	0.281489	1.25212	804.86	FALSE	25
2022-09-14	10:18:20	0.449886	2.00118	844.823	FALSE	25
2022-09-14	10:18:20	0.484033	2.15308	807.013	FALSE	25
2022-09-14	10:18:20	0.495738	2.20514	847.028	FALSE	25
2022-09-14	10:18:21	0.106374	0.473173	807.486	FALSE	25
2022-09-14	10:18:21	0.0129901	0.0577826	847.086	FALSE	25
2022-09-14	10:18:21	-0.0999361	-0.444536	807.486	FALSE	25
2022-09-14	10:18:21	-0.214542	-0.954326	847.086	FALSE	25
2022-09-14	10:18:22	-0.55729	-2.47894	807.486	FALSE	25
2022-09-14	10:18:22	-0.464262	-2.06513	847.086	FALSE	25
2022-09-14	10:18:22	-0.432811	-1.92523	807.486	FALSE	25
2022-09-14	10:18:22	-0.251641	-1.11935	847.086	FALSE	25
2022-09-14	10:18:23	-0.153575	-0.683132	807.486	FALSE	25
2022-09-14	10:18:23	0.0338043	0.150368	847.237	FALSE	25
2022-09-14	10:18:23	0.113143	0.503283	807.99	FALSE	25
2022-09-14	10:18:23	-0.155407	-0.691281	847.237	FALSE	25
2022-09-14	10:18:24	-0.213982	-0.951835	807.99	FALSE	25
2022-09-14	10:18:24	0.253041	1.12558	848.362	FALSE	25
2022-09-14	10:18:24	0.47472	2.11165	810.101	FALSE	25
2022-09-14	10:18:25	0.409682	1.82235	850.185	FALSE	25
2022-09-14	10:18:25	0.373753	1.66253	811.764	FALSE	25
2022-09-14	10:18:25	0.319504	1.42122	851.606	FALSE	25
2022-09-14	10:18:25	0.402964	1.79246	813.556	FALSE	25
2022-09-14	10:18:26	0.354568	1.57719	853.183	FALSE	25
2022-09-14	10:18:26	0.357774	1.59145	815.148	FALSE	25
2022-09-14	10:18:26	0.508257	2.26083	855.444	FALSE	25
2022-09-14	10:18:26	0.223015	0.992015	816.14	FALSE	25
2022-09-14	10:18:27	0.326374	1.45178	856.896	FALSE	25
2022-09-14	10:18:27	0.277417	1.23401	817.374	FALSE	25
2022-09-14	10:18:27	0.453193	2.01589	858.911	FALSE	25
2022-09-14	10:18:27	0.175585	0.781037	818.155	FALSE	25
2022-09-14	10:18:28	-0.0387657	-0.172438	858.911	FALSE	25
2022-09-14	10:18:28	-0.300445	-1.33644	818.155	FALSE	25
2022-09-14	10:18:28	-0.760241	-3.3817	858.911	FALSE	25
2022-09-14	10:18:29	-0.686857	-3.05528	818.155	FALSE	25
2022-09-14	10:18:29	-0.518664	-2.30712	858.911	FALSE	25
2022-09-14	10:18:29	0.129326	0.575268	818.73	FALSE	25
2022-09-14	10:18:29	0.285814	1.27136	860.183	FALSE	25
2022-09-14	10:18:30	0.529529	2.35545	821.086	FALSE	25
2022-09-14	10:18:30	1.52505	6.78373	866.967	FALSE	25
2022-09-14	10:18:30	2.70617	12.0376	833.123	FALSE	25
2022-09-14	10:18:30	0.826018	3.67429	870.641	FALSE	25
2022-09-14	10:18:31	0.24154	1.07442	834.198	FALSE	25
2022-09-14	10:18:31	0.1364	0.606734	871.248	FALSE	25
2022-09-14	10:18:31	0.0487661	0.216921	834.414	FALSE	25
2022-09-14	10:18:31	-0.0965773	-0.429595	871.248	FALSE	25
2022-09-14	10:18:32	-0.11388	-0.506561	834.414	FALSE	25
2022-09-14	10:18:32	0.105916	0.471136	871.719	FALSE	25
2022-09-14	10:18:32	0.444186	1.97583	836.39	FALSE	25
2022-09-14	10:18:33	0.460929	2.0503	873.769	FALSE	25
2022-09-14	10:18:33	0.0356364	0.158518	836.549	FALSE	25
2022-09-14	10:18:33	-0.249249	-1.10871	873.769	FALSE	25
2022-09-14	10:18:33	-0.438308	-1.94968	836.549	FALSE	25
2022-09-14	10:18:34	-0.344669	-1.53316	873.769	FALSE	25
2022-09-14	10:18:34	-0.144058	-0.640799	836.549	FALSE	25
2022-09-14	10:18:34	-0.168079	-0.747649	873.769	FALSE	25
2022-09-14	10:18:34	0.352786	1.56926	838.118	FALSE	25
2022-09-14	10:18:35	1.36704	6.08087	879.85	FALSE	25
2022-09-14	10:18:35	3.8882	17.2955	855.414	1	26
2022-09-14	10:18:35	2.98795	13.291	893.141	FALSE	26
2022-09-14	10:18:35	2.55787	11.3779	866.791	FALSE	26
2022-09-14	10:18:36	1.69441	7.53707	900.678	FALSE	26
2022-09-14	10:18:36	2.58841	11.5138	878.305	FALSE	26
2022-09-14	10:18:36	2.07833	9.24483	909.923	FALSE	26
2022-09-14	10:18:36	3.57986	15.9239	894.229	1	27
2022-09-14	10:18:37	2.99497	13.3222	923.245	FALSE	27
2022-09-14	10:18:37	5.05279	22.4758	916.705	1	28
2022-09-14	10:18:37	4.82836	21.4775	944.722	1	29
2022-09-14	10:18:38	3.5677	15.8698	932.575	1	30
2022-09-14	10:18:38	2.08866	9.29078	954.013	FALSE	30
2022-09-14	10:18:38	0.841081	3.7413	936.316	FALSE	30
2022-09-14	10:18:38	0.348613	1.5507	955.564	FALSE	30
2022-09-14	10:18:39	0.513244	2.28301	938.599	FALSE	30
2022-09-14	10:18:39	0.799046	3.55432	959.118	FALSE	30
2022-09-14	10:18:39	0.215789	0.959873	939.559	FALSE	30
2022-09-14	10:18:39	0.488613	2.17345	961.292	FALSE	30
2022-09-14	10:18:40	0.225356	1.00243	940.561	FALSE	30
2022-09-14	10:18:40	0.44388	1.97447	963.266	FALSE	30
2022-09-14	10:18:40	0.193448	0.860495	941.422	FALSE	30
2022-09-14	10:18:40	0.495483	2.20401	965.47	FALSE	30
2022-09-14	10:18:41	0.214924	0.956025	942.378	FALSE	30
2022-09-14	10:18:41	0.489275	2.17639	967.647	FALSE	30
2022-09-14	10:18:41	0.406171	1.80673	944.185	FALSE	30
2022-09-14	10:18:42	1.07406	4.77763	972.424	FALSE	30
2022-09-14	10:18:42	1.42057	6.31898	950.504	FALSE	30
2022-09-14	10:18:42	2.08922	9.29327	981.717	FALSE	30
2022-09-14	10:18:42	2.37116	10.5474	961.051	FALSE	30
2022-09-14	10:18:43	2.7681	12.3131	994.031	FALSE	30
2022-09-14	10:18:43	1.53523	6.82901	967.88	FALSE	30
2022-09-14	10:18:43	0.935229	4.16009	998.191	FALSE	30
2022-09-14	10:18:43	1.59482	7.09408	974.974	FALSE	30
2022-09-14	10:18:44	2.49431	11.0952	1009.29	FALSE	30
2022-09-14	10:18:44	3.0766	13.6853	988.66	1	31
2022-09-14	10:18:44	1.15513	5.13825	1014.42	FALSE	31
2022-09-14	10:18:44	1.63981	7.2942	995.954	FALSE	31
2022-09-14	10:18:45	1.2848	5.71505	1020.14	FALSE	31
2022-09-14	10:18:45	2.20805	9.82185	1005.78	FALSE	31
2022-09-14	10:18:45	3.16663	14.0858	1034.22	1	32
2022-09-14	10:18:46	4.23828	18.8527	1024.63	1	33
2022-09-14	10:18:46	4.4706	19.8861	1054.11	1	34
2022-09-14	10:18:46	2.06744	9.19639	1033.82	FALSE	34
2022-09-14	10:18:46	1.52943	6.80321	1060.91	FALSE	34
2022-09-14	10:18:47	0.287443	1.2786	1035.1	FALSE	34
2022-09-14	10:18:47	0.435891	1.93893	1062.85	FALSE	34
2022-09-14	10:18:47	0.305102	1.35715	1036.46	FALSE	34
2022-09-14	10:18:47	0.377774	1.68041	1064.53	FALSE	34
2022-09-14	10:18:48	0.499656	2.22257	1038.68	FALSE	34
2022-09-14	10:18:48	0.27187	1.20933	1065.74	FALSE	34
2022-09-14	10:18:48	0.439351	1.95432	1040.64	FALSE	34
2022-09-14	10:18:48	0.228613	1.01692	1066.76	FALSE	34
2022-09-14	10:18:49	0.385713	1.71573	1042.35	FALSE	34
2022-09-14	10:18:49	0.160166	0.71245	1067.47	FALSE	34
2022-09-14	10:18:49	0.410038	1.82393	1044.18	FALSE	34
2022-09-14	10:18:50	0.363015	1.61476	1069.09	FALSE	34
2022-09-14	10:18:50	1.05019	4.67146	1048.85	FALSE	34
2022-09-14	10:18:50	1.8706	8.3208	1077.41	FALSE	34
2022-09-14	10:18:50	2.74627	12.216	1061.06	FALSE	34
2022-09-14	10:18:51	2.52022	11.2104	1088.62	FALSE	34
2022-09-14	10:18:51	2.74276	12.2003	1073.26	FALSE	34
2022-09-14	10:18:51	1.50607	6.6993	1095.32	FALSE	34
2022-09-14	10:18:51	1.25757	5.59392	1078.86	FALSE	34
2022-09-14	10:18:52	0.704491	3.13372	1098.45	FALSE	34
2022-09-14	10:18:52	0.55584	2.47249	1081.33	FALSE	34
2022-09-14	10:18:52	0.422761	1.88053	1100.33	FALSE	34
2022-09-14	10:18:52	0.351158	1.56202	1082.89	FALSE	34
2022-09-14	10:18:53	0.329021	1.46355	1101.8	FALSE	34
2022-09-14	10:18:53	0.331565	1.47487	1084.37	FALSE	34
2022-09-14	10:18:53	0.700827	3.11742	1104.91	FALSE	34
2022-09-14	10:18:54	0.736196	3.27475	1087.64	FALSE	34
2022-09-14	10:18:54	0.740929	3.2958	1108.21	FALSE	34
2022-09-14	10:18:54	0.741285	3.29738	1090.94	FALSE	34
2022-09-14	10:18:54	1.87274	8.33032	1116.54	FALSE	34
2022-09-14	10:18:55	3.13543	13.947	1104.89	1	35
2022-09-14	10:18:55	3.00169	13.3521	1129.89	1	36
2022-09-14	10:18:55	2.04917	9.11512	1114	FALSE	36
2022-09-14	10:18:55	1.32637	5.89996	1135.79	FALSE	36
2022-09-14	10:18:56	1.11874	4.97638	1118.98	FALSE	36
2022-09-14	10:18:56	0.997621	4.43762	1140.23	FALSE	36
2022-09-14	10:18:56	0.811616	3.61023	1122.59	FALSE	36
2022-09-14	10:18:56	1.19497	5.31547	1145.54	FALSE	36
2022-09-14	10:18:57	2.01324	8.95529	1131.54	FALSE	36
2022-09-14	10:18:57	2.84164	12.6402	1158.18	FALSE	36
2022-09-14	10:18:57	2.73319	12.1578	1143.7	FALSE	36
2022-09-14	10:18:58	2.75187	12.2409	1170.43	FALSE	36
2022-09-14	10:18:58	2.87294	12.7794	1156.48	FALSE	36
2022-09-14	10:18:58	2.80764	12.4889	1182.91	FALSE	36
2022-09-14	10:18:58	2.56286	11.4001	1167.88	FALSE	36
2022-09-14	10:18:59	2.33426	10.3833	1193.3	FALSE	36
2022-09-14	10:18:59	2.38408	10.6049	1178.49	FALSE	36
2022-09-14	10:18:59	2.13966	9.51764	1202.82	FALSE	36
2022-09-14	10:18:59	1.32841	5.90903	1184.4	FALSE	36
2022-09-14	10:19:00	1.2764	5.67768	1208.49	FALSE	36
2022-09-14	10:19:00	2.27584	10.1234	1194.52	FALSE	36
2022-09-14	10:19:00	3.64464	16.2121	1224.7	1	37
2022-09-14	10:19:00	3.88184	17.2672	1211.79	1	38
2022-09-14	10:19:01	2.97141	13.2174	1237.92	FALSE	38
2022-09-14	10:19:01	2.84189	12.6413	1224.43	FALSE	38
2022-09-14	10:19:01	2.3078	10.2656	1248.19	FALSE	38
2022-09-14	10:19:02	0.858842	3.8203	1228.25	FALSE	38
2022-09-14	10:19:02	0.511107	2.27351	1250.46	FALSE	38
2022-09-14	10:19:02	0.65014	2.89195	1231.14	FALSE	38
2022-09-14	10:19:02	0.627596	2.79167	1253.25	FALSE	38
2022-09-14	10:19:03	0.318791	1.41805	1232.56	FALSE	38
2022-09-14	10:19:03	0.473753	2.10735	1255.36	FALSE	38
2022-09-14	10:19:03	0.18098	0.805035	1233.36	FALSE	38
2022-09-14	10:19:03	0.367595	1.63514	1257	FALSE	38
2022-09-14	10:19:04	0.349173	1.55319	1234.92	FALSE	38
2022-09-14	10:19:04	0.214008	0.95195	1257.95	FALSE	38
2022-09-14	10:19:04	0.470344	2.09218	1237.01	FALSE	38
2022-09-14	10:19:04	0.499606	2.22235	1260.17	FALSE	38
2022-09-14	10:19:05	2.26296	10.0661	1247.07	FALSE	38
2022-09-14	10:19:05	3.16902	14.0964	1274.27	1	39
2022-09-14	10:19:05	5.20367	23.147	1270.22	1	40
2022-09-14	10:19:05	1.73548	7.71976	1281.99	FALSE	40
2022-09-14	10:19:06	1.74373	7.75646	1277.98	FALSE	40
2022-09-14	10:19:06	0.585509	2.60446	1284.59	FALSE	40
2022-09-14	10:19:06	0.514466	2.28845	1280.27	FALSE	40
2022-09-14	10:19:07	0.500165	2.22483	1286.82	FALSE	40
2022-09-14	10:19:07	0.248206	1.10407	1281.37	FALSE	40
2022-09-14	10:19:07	0.423982	1.88596	1288.7	FALSE	40
2022-09-14	10:19:07	0.843524	3.75216	1285.12	FALSE	40
2022-09-14	10:19:08	1.24785	5.55069	1294.25	FALSE	40
2022-09-14	10:19:08	0.874211	3.88867	1289.01	FALSE	40
2022-09-14	10:19:08	0.928969	4.13224	1298.38	FALSE	40
2022-09-14	10:19:08	0.862303	3.8357	1292.85	FALSE	40
2022-09-14	10:19:09	1.34495	5.98261	1304.37	FALSE	40
2022-09-14	10:19:09	1.53207	6.81495	1299.66	FALSE	40
2022-09-14	10:19:09	2.20357	9.80192	1314.17	FALSE	40
2022-09-14	10:19:09	3.77187	16.778	1316.44	1	41
2022-09-14	10:19:10	2.95314	13.1362	1327.3	FALSE	41
2022-09-14	10:19:10	4.32739	19.2491	1335.69	1	42
2022-09-14	10:19:10	2.59915	11.5615	1338.87	FALSE	42
2022-09-14	10:19:11	5.47599	24.3583	1360.05	1	43
2022-09-14	10:19:11	2.49467	11.0968	1349.96	FALSE	43
2022-09-14	10:19:11	4.78739	21.2953	1381.34	1	44
2022-09-14	10:19:11	4.92933	21.9266	1371.89	1	45
2022-09-14	10:19:12	1.805	8.029	1389.37	FALSE	45
2022-09-14	10:19:12	3.71273	16.515	1388.4	1	46
2022-09-14	10:19:12	1.29991	5.78226	1395.15	FALSE	46
2022-09-14	10:19:12	3.24826	14.4489	1402.85	1	47
2022-09-14	10:19:13	1.74999	7.78431	1402.94	FALSE	47
2022-09-14	10:19:13	3.66261	16.292	1419.15	1	48
2022-09-14	10:19:13	5.37385	23.904	1426.84	1	49
2022-09-14	10:19:13	8.09507	36.0085	1455.15	1	50
2022-09-14	10:19:14	14.0699	62.5857	1489.43	1	51
2022-09-14	10:19:14	9.15405	40.719	1495.87	1	52
2022-09-14	10:19:14	5.58306	24.8346	1514.26	1	53
2022-09-14	10:19:15	1.14154	5.0778	1500.95	FALSE	53
2022-09-14	10:19:15	0.321183	1.42869	1515.69	FALSE	53
2022-09-14	10:19:15	0.284237	1.26434	1502.22	FALSE	53
2022-09-14	10:19:15	0.26841	1.19394	1516.88	FALSE	53
2022-09-14	10:19:16	0.453092	2.01544	1504.23	FALSE	53
2022-09-14	10:19:16	0.234313	1.04227	1517.93	FALSE	53
2022-09-14	10:19:16	0.641387	2.85302	1507.08	FALSE	53
2022-09-14	10:19:16	1.99426	8.87087	1526.8	FALSE	53
2022-09-14	10:19:17	11.8773	52.8326	1559.92	1	54
2022-09-14	10:19:17	17.772	79.0534	1605.85	1	55
2022-09-14	10:19:17	13.0428	58.017	1617.93	1	56
2022-09-14	10:19:17	6.14143	27.3183	1633.17	1	57
2022-09-14	10:19:18	4.21187	18.7352	1636.67	1	58
2022-09-14	10:19:18	5.26159	23.4046	1656.57	1	59
2022-09-14	10:19:18	2.10907	9.38157	1646.05	FALSE	59
2022-09-14	10:19:19	1.83055	8.14265	1664.72	FALSE	59
2022-09-14	10:19:19	2.95218	13.1319	1659.18	FALSE	59
2022-09-14	10:19:19	1.90744	8.48467	1673.2	FALSE	59
2022-09-14	10:19:19	4.01228	17.8474	1677.03	1	60
2022-09-14	10:19:20	1.60698	7.14817	1680.35	FALSE	60
2022-09-14	10:19:20	1.40719	6.25946	1683.29	FALSE	60
2022-09-14	10:19:20	0.856247	3.80876	1684.16	FALSE	60
2022-09-14	10:19:20	1.47233	6.54922	1689.84	FALSE	60
2022-09-14	10:19:21	1.95706	8.70539	1692.86	FALSE	60
2022-09-14	10:19:21	3.98464	17.7245	1707.56	1	61
2022-09-14	10:19:21	5.2307	23.2672	1716.13	1	62
2022-09-14	10:19:21	5.63645	25.0721	1732.63	1	63
2022-09-14	10:19:22	4.31502	19.1941	1735.33	1	64
2022-09-14	10:19:22	3.53431	15.7213	1748.36	1	65
2022-09-14	10:19:22	2.91619	12.9718	1748.3	FALSE	65
2022-09-14	10:19:23	2.77167	12.3289	1760.68	FALSE	65
2022-09-14	10:19:23	2.74851	12.2259	1760.52	FALSE	65
2022-09-14	10:19:23	2.80113	12.46	1773.14	FALSE	65
2022-09-14	10:19:23	2.40592	10.702	1771.22	FALSE	65
2022-09-14	10:19:24	1.35706	6.03647	1779.18	FALSE	65
2022-09-14	10:19:24	0.448308	1.99416	1773.22	FALSE	65
2022-09-14	10:19:24	0.359249	1.59801	1780.78	FALSE	65
2022-09-14	10:19:24	0.290344	1.29151	1774.51	FALSE	65
2022-09-14	10:19:25	0.329886	1.4674	1782.25	FALSE	65
2022-09-14	10:19:25	0.388308	1.72727	1776.24	FALSE	65
2022-09-14	10:19:25	0.998893	4.44328	1786.69	FALSE	65
2022-09-14	10:19:25	1.22861	5.4651	1781.7	FALSE	65
2022-09-14	10:19:26	0.952379	4.23637	1790.93	FALSE	65
2022-09-14	10:19:26	1.78001	7.91784	1789.62	FALSE	65
2022-09-14	10:19:26	2.68754	11.9547	1802.88	FALSE	65
2022-09-14	10:19:27	2.2077	9.82029	1799.44	FALSE	65
2022-09-14	10:19:27	1.02449	4.55714	1807.44	FALSE	65
2022-09-14	10:19:27	1.30795	5.81802	1805.26	FALSE	65
2022-09-14	10:19:27	1.89976	8.45051	1815.89	FALSE	65
2022-09-14	10:19:28	1.59039	7.07437	1812.33	FALSE	65
2022-09-14	10:19:28	1.1907	5.29647	1821.19	FALSE	65
2022-09-14	10:19:28	2.18739	9.72995	1822.06	FALSE	65
2022-09-14	10:19:28	4.90001	21.7962	1842.98	1	66
2022-09-14	10:19:29	4.86876	21.6572	1843.72	1	67
2022-09-14	10:19:29	5.6769	25.252	1868.23	1	68
2022-09-14	10:19:29	1.5449	6.87202	1850.59	FALSE	68
2022-09-14	10:19:29	0.744186	3.31029	1871.54	FALSE	68
2022-09-14	10:19:30	0.74042	3.29354	1853.89	FALSE	68
2022-09-14	10:19:30	1.23085	5.47507	1877.02	FALSE	68
2022-09-14	10:19:30	0.546934	2.43287	1856.32	FALSE	68
2022-09-14	10:19:30	0.609987	2.71334	1879.73	FALSE	68
2022-09-14	10:19:31	0.567952	2.52636	1858.85	FALSE	68
2022-09-14	10:19:31	0.62042	2.75975	1882.49	FALSE	68
2022-09-14	10:19:31	0.320216	1.42438	1860.27	FALSE	68
2022-09-14	10:19:32	0.158893	0.706788	1883.2	FALSE	68
2022-09-14	10:19:32	-0.0972898	-0.432764	1860.27	FALSE	68
2022-09-14	10:19:32	0.386374	1.71867	1884.92	FALSE	68
2022-09-14	10:19:32	-0.0535748	-0.238311	1860.27	FALSE	68
2022-09-14	10:19:33	0.137825	0.613073	1885.53	FALSE	68
2022-09-14	10:19:33	0.310242	1.38002	1861.65	FALSE	68
2022-09-14	10:19:33	0.0908526	0.404131	1885.93	FALSE	68
2022-09-14	10:19:33	0.321183	1.42869	1863.08	FALSE	68
2022-09-14	10:19:34	0.968817	4.30949	1890.24	FALSE	68
2022-09-14	10:19:34	4.5424	20.2055	1883.28	1	69
2022-09-14	10:19:34	2.70093	12.0143	1902.26	FALSE	69
2022-09-14	10:19:34	3.7737	16.7862	1900.07	1	70
2022-09-14	10:19:35	1.63788	7.28562	1909.54	FALSE	70
2022-09-14	10:19:35	1.88765	8.39664	1908.47	FALSE	70
2022-09-14	10:19:35	1.5024	6.68298	1916.23	FALSE	70
2022-09-14	10:19:36	0.649529	2.88923	1911.36	FALSE	70
2022-09-14	10:19:36	2.14408	9.5373	1925.76	FALSE	70
2022-09-14	10:19:36	1.42668	6.34616	1917.7	FALSE	70
2022-09-14	10:19:36	4.36205	19.4033	1945.17	1	71
2022-09-14	10:19:37	1.95849	8.71176	1926.41	FALSE	71
2022-09-14	10:19:37	0.783778	3.4864	1948.65	FALSE	71
2022-09-14	10:19:37	0.563015	2.5044	1928.92	FALSE	71
2022-09-14	10:19:37	0.353702	1.57334	1950.23	FALSE	71
2022-09-14	10:19:38	0.532786	2.36994	1931.29	FALSE	71
2022-09-14	10:19:38	0.233092	1.03684	1951.26	FALSE	71
2022-09-14	10:19:38	-0.101208	-0.450193	1931.29	FALSE	71
2022-09-14	10:19:38	-0.162328	-0.722067	1951.26	FALSE	71
2022-09-14	10:19:39	-0.433066	-1.92636	1931.29	FALSE	71
2022-09-14	10:19:39	-0.449503	-1.99948	1951.26	FALSE	71
2022-09-14	10:19:39	-0.423905	-1.88561	1931.29	FALSE	71
2022-09-14	10:19:40	-0.432455	-1.92365	1951.26	FALSE	71
2022-09-14	10:19:40	-0.424974	-1.89037	1931.29	FALSE	71
2022-09-14	10:19:40	-0.303651	-1.3507	1951.26	FALSE	71
2022-09-14	10:19:40	-0.223244	-0.993034	1931.29	FALSE	71
2022-09-14	10:19:41	-0.235509	-1.04759	1951.26	FALSE	71
2022-09-14	10:19:41	-0.275254	-1.22438	1931.29	FALSE	71
2022-09-14	10:19:41	-0.259071	-1.1524	1951.26	FALSE	71
2022-09-14	10:19:41	-0.229707	-1.02178	1931.29	FALSE	71
2022-09-14	10:19:42	-0.220089	-0.979	1951.26	FALSE	71
2022-09-14	10:19:42	-0.233015	-1.0365	1931.29	FALSE	71
2022-09-14	10:19:42	-0.142328	-0.633103	1951.26	FALSE	71
2022-09-14	10:19:42	-0.121768	-0.541648	1931.29	FALSE	71
2022-09-14	10:19:43	-0.0339819	-0.151158	1951.26	FALSE	71
2022-09-14	10:19:43	0.268562	1.19462	1932.48	FALSE	71
2022-09-14	10:19:43	0.458384	2.03898	1953.3	FALSE	71
2022-09-14	10:19:44	0.525662	2.33825	1934.82	FALSE	71
2022-09-14	10:19:44	0.654619	2.91188	1956.22	FALSE	71
2022-09-14	10:19:44	0.45126	2.00729	1936.83	FALSE	71
2022-09-14	10:19:44	0.564135	2.50939	1958.72	FALSE	71
2022-09-14	10:19:45	0.776654	3.45471	1940.28	FALSE	71
2022-09-14	10:19:45	0.569631	2.53383	1961.26	FALSE	71
2022-09-14	10:19:45	0.489784	2.17866	1942.46	FALSE	71
2022-09-14	10:19:45	0.353957	1.57447	1962.83	FALSE	71
2022-09-14	10:19:46	0.927901	4.12749	1946.59	FALSE	71
2022-09-14	10:19:46	0.434008	1.93055	1964.76	FALSE	71
2022-09-14	10:19:46	0.452634	2.01341	1948.6	FALSE	71
2022-09-14	10:19:46	0.386832	1.72071	1966.48	FALSE	71
2022-09-14	10:19:47	0.0132954	0.0591406	1948.66	FALSE	71
2022-09-14	10:19:47	-0.233829	-1.04012	1966.48	FALSE	71
2022-09-14	10:19:47	-0.185738	-0.8262	1948.66	FALSE	71
2022-09-14	10:19:48	0.204084	0.907806	1967.39	FALSE	71
2022-09-14	10:19:48	0.0694786	0.309055	1948.97	FALSE	71
2022-09-14	10:19:48	0.0431173	0.191794	1967.58	FALSE	71
2022-09-14	10:19:48	0.133804	0.595187	1949.57	FALSE	71
2022-09-14	10:19:49	2.78653	12.395	1979.98	FALSE	71
2022-09-14	10:19:49	8.69034	38.6564	1988.22	1	72
2022-09-14	10:19:49	14.457	64.3076	2044.29	1	73
2022-09-14	10:19:49	17.5126	77.8995	2066.12	1	74
2022-09-14	10:19:50	8.16856	36.3354	2080.62	1	75
2022-09-14	10:19:50	3.05375	13.5837	2079.71	1	76
2022-09-14	10:19:50	0.827596	3.68131	2084.3	FALSE	76
2022-09-14	10:19:50	0.810293	3.60435	2083.31	FALSE	76
2022-09-14	10:19:51	0.568613	2.5293	2086.83	FALSE	76
2022-09-14	10:19:51	1.74897	7.77977	2091.09	FALSE	76
2022-09-14	10:19:51	1.58632	7.05627	2093.89	FALSE	76
2022-09-14	10:19:52	4.05166	18.0226	2109.11	1	77
2022-09-14	10:19:52	4.16042	18.5064	2112.39	1	78
2022-09-14	10:19:52	5.69767	25.3444	2134.46	1	79
2022-09-14	10:19:52	6.31965	28.1111	2140.51	1	80
2022-09-14	10:19:53	4.16932	18.546	2153	1	81
2022-09-14	10:19:53	6.66439	29.6445	2170.15	1	82
2022-09-14	10:19:53	3.98434	17.7231	2170.73	1	83
2022-09-14	10:19:53	4.79334	21.3217	2191.47	1	84
2022-09-14	10:19:54	2.14098	9.52351	2180.25	FALSE	84
2022-09-14	10:19:54	1.1595	5.15769	2196.63	FALSE	84
2022-09-14	10:19:54	0.804796	3.57989	2183.83	FALSE	84
2022-09-14	10:19:54	2.31161	10.2825	2206.91	FALSE	84
2022-09-14	10:19:55	7.52525	33.4738	2217.3	1	85
2022-09-14	10:19:55	10.3306	45.9526	2252.86	1	86
2022-09-14	10:19:55	3.93614	17.5087	2234.81	1	87
2022-09-14	10:19:55	2.63737	11.7315	2264.6	FALSE	87
2022-09-14	10:19:56	1.56958	6.98181	2241.79	FALSE	87
2022-09-14	10:19:56	1.1594	5.15724	2269.75	FALSE	87
2022-09-14	10:19:56	1.79543	7.98643	2249.78	FALSE	87
2022-09-14	10:19:57	1.6765	7.45741	2277.21	FALSE	87
2022-09-14	10:19:57	3.51075	15.6165	2265.4	1	88
2022-09-14	10:19:57	5.05716	22.4953	2299.71	1	89
2022-09-14	10:19:57	4.97289	22.1204	2287.52	1	90
2022-09-14	10:19:58	2.50291	11.1334	2310.84	FALSE	90
2022-09-14	10:19:58	3.06093	13.6156	2301.13	1	91
2022-09-14	10:19:58	1.92546	8.56483	2319.4	FALSE	91
2022-09-14	10:19:58	1.77324	7.88773	2309.02	FALSE	91
2022-09-14	10:19:59	1.72551	7.67541	2327.08	FALSE	91
2022-09-14	10:19:59	4.73365	21.0562	2330.08	1	92
2022-09-14	10:19:59	5.59685	24.8959	2351.98	1	93
2022-09-14	10:19:59	4.79879	21.346	2351.42	1	94
2022-09-14	10:20:00	3.16851	14.0942	2366.07	1	95
2022-09-14	10:20:00	9.97782	44.3833	2395.81	1	96
2022-09-14	10:20:00	10.6077	47.1852	2413.26	1	97
2022-09-14	10:20:01	21.2637	94.5852	2490.39	1	98
2022-09-14	10:20:01	13.0433	58.0192	2471.27	1	99
2022-09-14	10:20:01	12.9193	57.4676	2547.86	1	100
2022-09-14	10:20:01	12.1004	53.825	2525.1	1	101
2022-09-14	10:20:02	5.58052	24.8233	2572.68	1	102
2022-09-14	10:20:02	3.83431	17.0558	2542.16	1	103
2022-09-14	10:20:02	2.79507	12.433	2585.11	FALSE	103
2022-09-14	10:20:02	2.55558	11.3677	2553.52	FALSE	103
2022-09-14	10:20:03	5.81161	25.8512	2610.97	1	104
2022-09-14	10:20:03	10.651	47.3778	2600.9	1	105
2022-09-14	10:20:03	4.54322	20.2092	2631.18	1	106
2022-09-14	10:20:03	3.39202	15.0884	2615.99	1	107
2022-09-14	10:20:04	3.09187	13.7533	2644.93	1	108
2022-09-14	10:20:04	2.91915	12.985	2628.97	FALSE	108
2022-09-14	10:20:04	4.34708	19.3367	2664.27	1	109
2022-09-14	10:20:05	5.22403	23.2375	2652.21	1	110
2022-09-14	10:20:05	5.19395	23.1037	2687.37	1	111
2022-09-14	10:20:05	0.753041	3.34968	2655.56	FALSE	111
2022-09-14	10:20:05	0.826221	3.6752	2691.04	FALSE	111
2022-09-14	10:20:06	1.57833	7.02073	2662.58	FALSE	111
2022-09-14	10:20:06	2.42078	10.7681	2701.81	FALSE	111
2022-09-14	10:20:06	1.23609	5.49838	2668.08	FALSE	111
2022-09-14	10:20:06	1.0166	4.52204	2706.33	FALSE	111
2022-09-14	10:20:07	0.52958	2.35568	2670.44	FALSE	111
2022-09-14	10:20:07	0.580165	2.58069	2708.92	FALSE	111
2022-09-14	10:20:07	0.244339	1.08687	2671.52	FALSE	111
2022-09-14	10:20:07	0.263422	1.17175	2710.09	FALSE	111
2022-09-14	10:20:08	0.145407	0.646799	2672.17	FALSE	111
2022-09-14	10:20:08	0.370954	1.65008	2711.74	FALSE	111
2022-09-14	10:20:08	0.0872394	0.388058	2672.56	FALSE	111
2022-09-14	10:20:09	0.48444	2.15489	2713.89	FALSE	111
2022-09-14	10:20:09	3.15345	14.0272	2686.59	1	112
2022-09-14	10:20:09	3.34561	14.8819	2728.77	1	113
2022-09-14	10:20:09	0.660776	2.93926	2689.52	FALSE	113
2022-09-14	10:20:10	0.543728	2.41861	2731.19	FALSE	113
2022-09-14	10:20:10	0.432481	1.92376	2691.45	FALSE	113
2022-09-14	10:20:10	0.55645	2.4752	2733.67	FALSE	113
2022-09-14	10:20:10	0.215229	0.957382	2692.41	FALSE	113
2022-09-14	10:20:11	0.562099	2.50033	2736.17	FALSE	113
2022-09-14	10:20:11	1.35095	6.0093	2698.41	FALSE	113
2022-09-14	10:20:11	3.03416	13.4966	2749.66	1	114
2022-09-14	10:20:11	1.42576	6.34207	2704.76	FALSE	114
2022-09-14	10:20:12	1.55457	6.91504	2756.58	FALSE	114
2022-09-14	10:20:12	1.70805	7.59775	2712.35	FALSE	114
2022-09-14	10:20:12	1.34118	5.96584	2762.55	FALSE	114
2022-09-14	10:20:13	0.791667	3.52149	2715.88	FALSE	114
2022-09-14	10:20:13	0.578486	2.57322	2765.12	FALSE	114
2022-09-14	10:20:13	1.03218	4.59134	2720.47	FALSE	114
2022-09-14	10:20:13	0.268003	1.19213	2766.31	FALSE	114
2022-09-14	10:20:14	0.492277	2.18975	2722.66	FALSE	114
2022-09-14	10:20:14	0.409835	1.82303	2768.13	FALSE	114
2022-09-14	10:20:14	0.261183	1.16179	2723.82	FALSE	114
2022-09-14	10:20:14	0.287443	1.2786	2769.41	FALSE	114
2022-09-14	10:20:15	0.149937	0.66695	2724.49	FALSE	114
2022-09-14	10:20:15	0.152837	0.67985	2770.09	FALSE	114
2022-09-14	10:20:15	-0.217341	-0.966776	2724.49	FALSE	114
2022-09-14	10:20:15	-0.12874	-0.572661	2770.09	FALSE	114
2022-09-14	10:20:16	-0.0584094	-0.259817	2724.49	FALSE	114
2022-09-14	10:20:16	0.0637279	0.283474	2770.38	FALSE	114
2022-09-14	10:20:16	0.0504455	0.224392	2724.71	FALSE	114
2022-09-14	10:20:16	0.177265	0.78851	2771.16	FALSE	114
2022-09-14	10:20:17	0.318944	1.41873	2726.13	FALSE	114
2022-09-14	10:20:17	0.130853	0.58206	2771.75	FALSE	114
2022-09-14	10:20:17	0.240471	1.06966	2727.2	FALSE	114
2022-09-14	10:20:18	0.102863	0.457555	2772.2	FALSE	114
2022-09-14	10:20:18	0.224949	1.00062	2728.2	FALSE	114
2022-09-14	10:20:18	0.00876615	0.0389936	2772.24	FALSE	114
2022-09-14	10:20:18	0.329835	1.46717	2729.67	FALSE	114
2022-09-14	10:20:19	1.88648	8.39144	2780.63	FALSE	114
2022-09-14	10:20:19	3.48235	15.4902	2745.16	1	115
2022-09-14	10:20:19	2.71217	12.0643	2792.7	FALSE	115
2022-09-14	10:20:19	1.5166	6.74614	2751.9	FALSE	115
2022-09-14	10:20:20	0.912735	4.06003	2796.76	FALSE	115
2022-09-14	10:20:20	1.16342	5.17512	2757.08	FALSE	115
2022-09-14	10:20:20	0.677875	3.01532	2799.77	FALSE	115
2022-09-14	10:20:20	1.68999	7.51741	2764.6	FALSE	115
2022-09-14	10:20:21	4.55278	20.2517	2820.03	1	116
2022-09-14	10:20:21	1.97411	8.78124	2773.38	FALSE	116
2022-09-14	10:20:21	1.75579	7.81011	2827.84	FALSE	116
2022-09-14	10:20:22	0.657366	2.9241	2776.3	FALSE	116
2022-09-14	10:20:22	0.545865	2.42812	2830.26	FALSE	116
2022-09-14	10:20:22	-0.052099	-0.231747	2776.3	FALSE	116
2022-09-14	10:20:22	-0.239733	-1.06638	2830.26	FALSE	116
2022-09-14	10:20:23	-0.196068	-0.87215	2776.3	FALSE	116
2022-09-14	10:20:23	0.377926	1.68109	2831.94	FALSE	116
2022-09-14	10:20:23	0.0762979	0.339388	2776.64	FALSE	116
2022-09-14	10:20:23	0.018588	0.0826831	2832.03	FALSE	116
2022-09-14	10:20:24	-0.222023	-0.987603	2776.64	FALSE	116
2022-09-14	10:20:24	-0.379376	-1.68754	2832.03	FALSE	116
2022-09-14	10:20:24	-0.462531	-2.05743	2776.64	FALSE	116
2022-09-14	10:20:24	-0.305381	-1.3584	2832.03	FALSE	116
2022-09-14	10:20:25	0.43299	1.92603	2778.57	FALSE	116
2022-09-14	10:20:25	1.29635	5.76642	2837.79	FALSE	116
2022-09-14	10:20:25	5.34505	23.7759	2802.34	1	117
2022-09-14	10:20:26	9.36266	41.647	2879.44	1	118
2022-09-14	10:20:26	7.16403	31.867	2834.21	1	119
2022-09-14	10:20:26	5.05981	22.507	2901.95	1	120
2022-09-14	10:20:26	3.64388	16.2087	2850.42	1	121
2022-09-14	10:20:27	1.97197	8.77172	2910.72	FALSE	121
2022-09-14	10:20:27	0.513448	2.28392	2852.7	FALSE	121
2022-09-14	10:20:27	0.422965	1.88143	2912.6	FALSE	121
2022-09-14	10:20:27	-3.67871	-16.3636	2852.7	FALSE	121
2022-09-14	10:20:28	0.0447458	0.199038	2912.8	FALSE	121
2022-09-14	10:20:28	-0.131437	-0.584658	2852.7	FALSE	121
2022-09-14	10:20:28	-0.302531	-1.34572	2912.8	FALSE	121
2022-09-14	10:20:28	0.118079	0.525239	2853.23	FALSE	121
2022-09-14	10:20:29	0.113397	0.504413	2913.3	FALSE	121
2022-09-14	10:20:29	0.881692	3.92194	2857.15	FALSE	121
2022-09-14	10:20:29	1.98393	8.82492	2922.13	FALSE	121
2022-09-14	10:20:30	4.41009	19.617	2876.77	1	122
2022-09-14	10:20:30	8.09039	35.9877	2958.12	1	123
2022-09-14	10:20:30	1.47324	6.55327	2883.32	FALSE	123
2022-09-14	10:20:30	4.72306	21.0091	2979.13	1	124
2022-09-14	10:20:31	2.2994	10.2282	2893.55	FALSE	124
2022-09-14	10:20:31	3.55716	15.823	2994.95	1	125
2022-09-14	10:20:31	3.81945	16.9897	2910.54	1	126
2022-09-14	10:20:31	2.81263	12.5111	3007.46	FALSE	126
2022-09-14	10:20:32	5.84922	26.0185	2936.56	1	127
2022-09-14	10:20:32	2.41273	10.7323	3018.19	FALSE	127
2022-09-14	10:20:32	7.20749	32.0604	2968.62	1	128
2022-09-14	10:20:32	4.02037	17.8834	3036.08	1	129
2022-09-14	10:20:33	7.28866	32.4214	3001.04	1	130
2022-09-14	10:20:33	5.40953	24.0627	3060.14	1	131
2022-09-14	10:20:33	3.90449	17.368	3018.41	1	132
2022-09-14	10:20:34	6.84892	30.4654	3090.6	1	133
2022-09-14	10:20:34	2.07976	9.25119	3027.66	FALSE	133
2022-09-14	10:20:34	3.84591	17.1074	3107.71	1	134
2022-09-14	10:20:34	3.82235	17.0026	3044.66	1	135
2022-09-14	10:20:35	1.90678	8.48174	3116.19	FALSE	135
2022-09-14	10:20:35	3.35248	14.9125	3059.57	1	136
2022-09-14	10:20:35	1.49228	6.63796	3122.83	FALSE	136
2022-09-14	10:20:35	2.37625	10.57	3070.14	FALSE	136
2022-09-14	10:20:36	1.69029	7.51875	3130.35	FALSE	136
2022-09-14	10:20:36	1.72118	7.65615	3077.8	FALSE	136
2022-09-14	10:20:36	1.46485	6.51595	3136.87	FALSE	136
2022-09-14	10:20:36	1.95014	8.67461	3086.47	FALSE	136
2022-09-14	10:20:37	2.05696	9.14977	3146.02	FALSE	136
2022-09-14	10:20:37	2.01599	8.96753	3095.44	FALSE	136
2022-09-14	10:20:37	3.82022	16.9931	3163.01	1	137
2022-09-14	10:20:38	2.77594	12.3479	3107.79	FALSE	137
2022-09-14	10:20:38	6.90912	30.7331	3193.74	1	138
2022-09-14	10:20:38	4.41105	19.6212	3127.41	1	139
2022-09-14	10:20:38	9.5109	42.3064	3236.05	1	140
2022-09-14	10:20:39	4.6765	20.802	3148.21	1	141
2022-09-14	10:20:39	5.78774	25.745	3261.79	1	142
2022-09-14	10:20:39	14.952	66.5095	3214.72	1	143
2022-09-14	10:20:39	7.49334	33.3319	3295.13	1	144
2022-09-14	10:20:40	17.2549	76.7532	3291.47	1	145
2022-09-14	10:20:40	10.132	45.0692	3340.19	1	146
2022-09-14	10:20:40	4.69238	20.8726	3312.35	1	147
2022-09-14	10:20:40	17.7071	78.7647	3418.96	1	148
2022-09-14	10:20:41	17.5565	78.0948	3390.44	1	149
2022-09-14	10:20:41	5.77731	25.6986	3444.66	1	150
2022-09-14	10:20:41	8.87487	39.4772	3429.92	1	151
2022-09-14	10:20:42	9.90495	44.0592	3488.72	1	152
2022-09-14	10:20:42	3.34958	14.8996	3444.82	1	153
2022-09-14	10:20:42	8.12719	36.1514	3524.87	1	154
2022-09-14	10:20:42	7.19502	32.0049	3476.82	1	155
2022-09-14	10:20:43	5.50769	24.4993	3549.37	1	156
2022-09-14	10:20:43	4.53085	20.1541	3496.98	1	157
2022-09-14	10:20:43	1.02754	4.5707	3553.94	FALSE	157
2022-09-14	10:20:43	0.738231	3.2838	3500.26	FALSE	157
2022-09-14	10:20:44	0.309937	1.37866	3555.32	FALSE	157
2022-09-14	10:20:44	0.441794	1.96519	3502.23	FALSE	157
2022-09-14	10:20:44	0.400624	1.78206	3557.1	FALSE	157
2022-09-14	10:20:44	0.338791	1.50701	3503.73	FALSE	157
2022-09-14	10:20:45	0.210191	0.934972	3558.03	FALSE	157
2022-09-14	10:20:45	0.197468	0.878377	3504.61	FALSE	157
2022-09-14	10:20:45	0.152481	0.678266	3558.71	FALSE	157
2022-09-14	10:20:45	0.302201	1.34425	3505.96	FALSE	157
2022-09-14	10:20:46	1.04551	4.65064	3563.36	FALSE	157
2022-09-14	10:20:46	0.513499	2.28415	3508.24	FALSE	157
2022-09-14	10:20:46	0.236196	1.05065	3564.41	FALSE	157
2022-09-14	10:20:47	0.222405	0.989302	3509.23	FALSE	157
2022-09-14	10:20:47	0.0973158	0.43288	3564.85	FALSE	157
2022-09-14	10:20:47	-0.0677223	-0.301242	3509.23	FALSE	157
2022-09-14	10:20:47	0.0315142	0.140181	3564.99	FALSE	157
2022-09-14	10:20:48	0.0545168	0.242502	3509.47	FALSE	157
2022-09-14	10:20:48	0.0541096	0.24069	3565.23	FALSE	157
2022-09-14	10:20:48	0.108715	0.483586	3509.96	FALSE	157
2022-09-14	10:20:48	0.0323284	0.143803	3565.37	FALSE	157
2022-09-14	10:20:49	0.231463	1.02959	3510.98	FALSE	157
2022-09-14	10:20:49	0.364593	1.62178	3566.99	FALSE	157
2022-09-14	10:20:49	1.04128	4.63182	3515.62	FALSE	157
2022-09-14	10:20:49	1.50902	6.71242	3573.71	FALSE	157
2022-09-14	10:20:50	1.36775	6.08403	3521.7	FALSE	157
2022-09-14	10:20:50	1.16759	5.19367	3578.9	FALSE	157
2022-09-14	10:20:50	3.28027	14.5913	3536.29	1	158
2022-09-14	10:20:51	3.48266	15.4916	3594.39	1	159
2022-09-14	10:20:51	2.40622	10.7033	3547	FALSE	159
2022-09-14	10:20:51	3.02607	13.4606	3607.85	1	160
2022-09-14	10:20:51	2.76271	12.2891	3559.28	FALSE	160
2022-09-14	10:20:52	2.76597	12.3036	3620.15	FALSE	160
2022-09-14	10:20:52	2.02424	9.00422	3568.29	FALSE	160
2022-09-14	10:20:52	1.29803	5.7739	3625.93	FALSE	160
2022-09-14	10:20:52	3.33935	14.8541	3583.14	1	161
2022-09-14	10:20:53	2.72892	12.1388	3638.07	FALSE	161
2022-09-14	10:20:53	2.84642	12.6614	3595.8	FALSE	161
2022-09-14	10:20:53	1.81533	8.07495	3646.14	FALSE	161
2022-09-14	10:20:53	2.58765	11.5104	3607.31	FALSE	161
2022-09-14	10:20:54	1.90994	8.4958	3654.64	FALSE	161
2022-09-14	10:20:54	3.89085	17.3073	3624.62	1	162
2022-09-14	10:20:54	4.20892	18.7221	3673.36	1	163
2022-09-14	10:20:55	5.69701	25.3414	3649.96	1	164
2022-09-14	10:20:55	4.27828	19.0306	3692.39	1	165
2022-09-14	10:20:55	5.85472	26.043	3676.01	1	166
2022-09-14	10:20:55	1.98938	8.84916	3701.24	FALSE	166
2022-09-14	10:20:56	3.27935	14.5872	3690.59	1	167
2022-09-14	10:20:56	1.97426	8.7819	3710.02	FALSE	167
2022-09-14	10:20:56	3.51899	15.6532	3706.25	1	168
2022-09-14	10:20:56	5.7764	25.6946	3735.72	1	169
2022-09-14	10:20:57	2.80271	12.467	3718.71	FALSE	169
2022-09-14	10:20:57	3.55492	15.813	3751.53	1	170
2022-09-14	10:20:57	2.19187	9.74988	3728.46	FALSE	170
2022-09-14	10:20:57	4.96495	22.0851	3773.61	1	171
2022-09-14	10:20:58	1.39426	6.20195	3734.67	FALSE	171
2022-09-14	10:20:58	1.36072	6.05275	3779.67	FALSE	171
2022-09-14	10:20:58	0.473906	2.10803	3736.77	FALSE	171
2022-09-14	10:20:59	0.614313	2.73259	3782.4	FALSE	171
2022-09-14	10:20:59	0.81645	3.63173	3740.41	FALSE	171
2022-09-14	10:20:59	0.419199	1.86468	3784.26	FALSE	171
2022-09-14	10:20:59	1.465	6.51661	3746.92	FALSE	171
2022-09-14	10:21:00	2.39854	10.6692	3794.93	FALSE	171
2022-09-14	10:21:00	1.9448	8.65086	3755.57	FALSE	171
2022-09-14	10:21:00	1.07503	4.78195	3799.72	FALSE	171
2022-09-14	10:21:00	0.461234	2.05166	3757.62	FALSE	171
2022-09-14	10:21:01	0.274975	1.22314	3800.94	FALSE	171
2022-09-14	10:21:01	0.224084	0.99677	3758.62	FALSE	171
2022-09-14	10:21:01	0.100827	0.448499	3801.39	FALSE	171
2022-09-14	10:21:01	0.121387	0.539954	3759.16	FALSE	171
2022-09-14	10:21:02	0.099962	0.444651	3801.83	FALSE	171
2022-09-14	10:21:02	0.0614379	0.273288	3759.43	FALSE	171
2022-09-14	10:21:02	0.0220485	0.0980761	3801.93	FALSE	171
2022-09-14	10:21:02	-0.147061	-0.654157	3759.43	FALSE	171
2022-09-14	10:21:03	-0.159529	-0.709617	3801.93	FALSE	171
2022-09-14	10:21:03	-0.174185	-0.77481	3759.43	FALSE	171
2022-09-14	10:21:03	-0.349758	-1.55579	3801.93	FALSE	171
2022-09-14	10:21:04	-0.140394	-0.624501	3759.43	FALSE	171
2022-09-14	10:21:04	0.635585	2.82721	3804.76	FALSE	171
2022-09-14	10:21:04	3.62703	16.1338	3775.57	1	172
2022-09-14	10:21:04	4.89675	21.7817	3826.54	1	173
2022-09-14	10:21:05	3.50525	15.5921	3791.16	1	174
2022-09-14	10:21:05	2.35905	10.4935	3837.03	FALSE	174
2022-09-14	10:21:05	2.66663	11.8617	3803.02	FALSE	174
2022-09-14	10:21:05	3.73971	16.635	3853.67	1	175
2022-09-14	10:21:06	2.17156	9.65953	3812.68	FALSE	175
2022-09-14	10:21:06	1.01034	4.49419	3858.16	FALSE	175
2022-09-14	10:21:06	1.46897	6.53427	3819.22	FALSE	175
2022-09-14	10:21:06	2.36246	10.5087	3868.67	FALSE	175
2022-09-14	10:21:07	0.42785	1.90316	3821.12	FALSE	175
2022-09-14	10:21:07	0.373193	1.66004	3870.33	FALSE	175
2022-09-14	10:21:07	0.105916	0.471136	3821.59	FALSE	175
2022-09-14	10:21:08	0.0334989	0.14901	3870.48	FALSE	175
2022-09-14	10:21:08	-0.133727	-0.594844	3821.59	FALSE	175
2022-09-14	10:21:08	0.131667	0.585681	3871.07	FALSE	175
2022-09-14	10:21:08	0.0608781	0.270798	3821.86	FALSE	175
2022-09-14	10:21:09	0.244288	1.08664	3872.15	FALSE	175
2022-09-14	10:21:09	0.0768577	0.341878	3822.2	FALSE	175
2022-09-14	10:21:09	2.09207	9.30595	3881.46	FALSE	175
2022-09-14	10:21:09	2.44057	10.8561	3833.06	FALSE	175
2022-09-14	10:21:10	0.454517	2.02178	3883.48	FALSE	175
2022-09-14	10:21:10	0.0157891	0.0702331	3833.13	FALSE	175
2022-09-14	10:21:10	0.0242369	0.107811	3883.59	FALSE	175
2022-09-14	10:21:10	0.117774	0.523882	3833.65	FALSE	175
2022-09-14	10:21:11	0.539962	2.40186	3885.99	FALSE	175
2022-09-14	10:21:11	3.39884	15.1187	3848.77	1	176
2022-09-14	10:21:11	4.22902	18.8115	3904.8	1	177
2022-09-14	10:21:12	4.34001	19.3052	3868.08	1	178
2022-09-14	10:21:12	2.96108	13.1715	3917.97	FALSE	178
2022-09-14	10:21:12	3.97563	17.6844	3885.76	1	179
2022-09-14	10:21:12	6.17517	27.4684	3945.44	1	180
2022-09-14	10:21:13	7.98306	35.5102	3921.27	1	181
2022-09-14	10:21:13	6.94556	30.8952	3976.34	1	182
2022-09-14	10:21:13	5.46805	24.323	3945.59	1	183
2022-09-14	10:21:13	8.80866	39.1827	4015.52	1	184
2022-09-14	10:21:14	3.06525	13.6348	3959.23	1	185
2022-09-14	10:21:14	2.0424	9.085	4024.6	FALSE	185
2022-09-14	10:21:14	1.36235	6.06001	3965.29	FALSE	185
2022-09-14	10:21:14	0.395229	1.75806	4026.36	FALSE	185
2022-09-14	10:21:15	0.445407	1.98126	3967.27	FALSE	185
2022-09-14	10:21:15	0.0480537	0.213752	4026.58	FALSE	185
2022-09-14	10:21:15	0.201641	0.896939	3968.17	FALSE	185
2022-09-14	10:21:16	0.101896	0.453254	4027.03	FALSE	185
2022-09-14	10:21:16	0.112888	0.502148	3968.67	FALSE	185
2022-09-14	10:21:16	0.186374	0.829029	4027.86	FALSE	185
2022-09-14	10:21:16	0.252786	1.12444	3969.79	FALSE	185
2022-09-14	10:21:17	0.483168	2.14923	4030.01	FALSE	185
2022-09-14	10:21:17	0.537417	2.39054	3972.18	FALSE	185
2022-09-14	10:21:17	0.550394	2.44826	4032.46	FALSE	185
2022-09-14	10:21:17	0.362048	1.61046	3973.8	FALSE	185
2022-09-14	10:21:18	0.654619	2.91188	4035.37	FALSE	185
2022-09-14	10:21:18	0.856196	3.80853	3977.6	FALSE	185
2022-09-14	10:21:18	0.289173	1.2863	4036.65	FALSE	185
2022-09-14	10:21:18	0.296807	1.32026	3978.92	FALSE	185
2022-09-14	10:21:19	0.285356	1.26932	4037.92	FALSE	185
2022-09-14	10:21:19	0.312939	1.39202	3980.32	FALSE	185
2022-09-14	10:21:19	0.450445	2.00367	4039.93	FALSE	185
2022-09-14	10:21:20	0.288512	1.28336	3981.6	FALSE	185
2022-09-14	10:21:20	0.371565	1.6528	4041.58	FALSE	185
2022-09-14	10:21:20	0.269071	1.19688	3982.8	FALSE	185
2022-09-14	10:21:20	0.71584	3.1842	4044.76	FALSE	185
2022-09-14	10:21:21	-0.138358	-0.615444	3982.8	FALSE	185
2022-09-14	10:21:21	-0.510674	-2.27158	4044.76	FALSE	185
2022-09-14	10:21:21	-0.660903	-2.93983	3982.8	FALSE	185
2022-09-14	10:21:21	-0.602328	-2.67928	4044.76	FALSE	185
2022-09-14	10:21:22	-0.46131	-2.052	3982.8	FALSE	185
2022-09-14	10:21:22	-0.11729	-0.521729	4044.76	FALSE	185
2022-09-14	10:21:22	0.0324303	0.144256	3982.94	FALSE	185
2022-09-14	10:21:22	0.0314125	0.139729	4044.9	FALSE	185
2022-09-14	10:21:23	0.0108527	0.048275	3982.99	FALSE	185
2022-09-14	10:21:23	-0.0124552	-0.0554032	4044.9	FALSE	185
2022-09-14	10:21:23	-0.00538142	-0.0239376	3982.99	FALSE	185
2022-09-14	10:21:23	0.0180282	0.080193	4044.98	FALSE	185
2022-09-14	10:21:24	-0.00614479	-0.0273333	3982.99	FALSE	185
2022-09-14	10:21:24	-0.0102669	-0.0456692	4044.98	FALSE	185
2022-09-14	10:21:24	-0.00904555	-0.0402364	3982.99	FALSE	185
2022-09-14	10:21:25	0.00423688	0.0188465	4045	FALSE	185
2022-09-14	10:21:25	0.00876615	0.0389936	3983.03	FALSE	185
2022-09-14	10:21:25	-0.000394156	-0.00175328	4045	FALSE	185
2022-09-14	10:21:25	-0.00517788	-0.0230322	3983.03	FALSE	185
2022-09-14	10:21:26	-0.00675547	-0.0300497	4045	FALSE	185
2022-09-14	10:21:26	0.00332086	0.0147718	3983.04	FALSE	185
2022-09-14	10:21:26	0.00500025	0.0222421	4045.02	FALSE	185
2022-09-14	10:21:26	0.00586539	0.0260904	3983.07	FALSE	185
2022-09-14	10:21:27	-0.0170863	-0.0760033	4045.02	FALSE	185
2022-09-14	10:21:27	0.353651	1.57311	3984.64	FALSE	185
2022-09-14	10:21:27	0.739198	3.2881	4048.31	FALSE	185
2022-09-14	10:21:27	0.741183	3.29693	3987.94	FALSE	185
2022-09-14	10:21:28	-0.089758	-0.399262	4048.31	FALSE	185
2022-09-14	10:21:28	-0.108944	-0.484605	3987.94	FALSE	185
2022-09-14	10:21:28	-0.116577	-0.518558	4048.31	FALSE	185
2022-09-14	10:21:29	-0.111946	-0.497958	3987.94	FALSE	185
2022-09-14	10:21:29	-0.130063	-0.578546	4048.31	FALSE	185
2022-09-14	10:21:29	-0.118053	-0.525123	3987.94	FALSE	185
2022-09-14	10:21:29	-0.126043	-0.560664	4048.31	FALSE	185
2022-09-14	10:21:30	-0.136476	-0.607073	3987.94	FALSE	185
2022-09-14	10:21:30	-0.122175	-0.543459	4048.31	FALSE	185
2022-09-14	10:21:30	-0.121972	-0.542556	3987.94	FALSE	185
2022-09-14	10:21:30	-0.134185	-0.596882	4048.31	FALSE	185
2022-09-14	10:21:31	-0.12818	-0.57017	3987.94	FALSE	185
2022-09-14	10:21:31	-0.134185	-0.596882	4048.31	FALSE	185
2022-09-14	10:21:31	-0.128079	-0.569721	3987.94	FALSE	185
2022-09-14	10:21:31	-0.112048	-0.498412	4048.31	FALSE	185
2022-09-14	10:21:32	-0.114542	-0.509506	3987.94	FALSE	185
2022-09-14	10:21:32	-0.123193	-0.547987	4048.31	FALSE	185
2022-09-14	10:21:32	-0.112455	-0.500222	3987.94	FALSE	185
2022-09-14	10:21:33	-0.103956	-0.462417	4048.31	FALSE	185
2022-09-14	10:21:33	-0.0984603	-0.437971	3987.94	FALSE	185
2022-09-14	10:21:33	-0.0971371	-0.432085	4048.31	FALSE	185
2022-09-14	10:21:33	-0.0796817	-0.35444	3987.94	FALSE	185
2022-09-14	10:21:34	-0.0784602	-0.349007	4048.31	FALSE	185
2022-09-14	10:21:34	-0.100191	-0.44567	3987.94	FALSE	185
2022-09-14	10:21:34	-0.123244	-0.548214	4048.31	FALSE	185
2022-09-14	10:21:34	-0.118664	-0.527841	3987.94	FALSE	185
2022-09-14	10:21:35	-0.059529	-0.264797	4048.31	FALSE	185
2022-09-14	10:21:35	0.737672	3.28131	3991.22	FALSE	185
2022-09-14	10:21:35	0.731005	3.25166	4051.56	FALSE	185
2022-09-14	10:21:35	0.740369	3.29331	3994.51	FALSE	185
2022-09-14	10:21:36	0.732583	3.25868	4054.82	FALSE	185
2022-09-14	10:21:36	0.747595	3.32545	3997.84	FALSE	185
2022-09-14	10:21:36	0.732481	3.25822	4058.08	FALSE	185
2022-09-14	10:21:37	0.739809	3.29082	4001.13	FALSE	185
2022-09-14	10:21:37	0.74042	3.29354	4061.37	FALSE	185
2022-09-14	10:21:37	0.733193	3.26139	4004.39	FALSE	185
2022-09-14	10:21:37	0.739962	3.2915	4064.67	FALSE	185
2022-09-14	10:21:38	0.740674	3.29467	4007.69	FALSE	185
2022-09-14	10:21:38	0.741132	3.2967	4067.96	FALSE	185
2022-09-14	10:21:38	0.742557	3.30304	4010.99	FALSE	185
2022-09-14	10:21:38	0.742201	3.30146	4071.26	FALSE	185
2022-09-14	10:21:39	0.736247	3.27497	4014.26	FALSE	185
2022-09-14	10:21:39	0.734466	3.26705	4074.53	FALSE	185
2022-09-14	10:21:39	0.738181	3.28358	4017.55	FALSE	185
2022-09-14	10:21:39	0.735992	3.27384	4077.8	FALSE	185
2022-09-14	10:21:40	0.734008	3.26501	4020.81	FALSE	185
2022-09-14	10:21:40	0.738842	3.28652	4081.09	FALSE	185
2022-09-14	10:21:40	0.745356	3.31549	4024.13	FALSE	185
2022-09-14	10:21:41	0.96673	4.30021	4085.39	FALSE	185
2022-09-14	10:21:41	0.899606	4.00163	4028.13	FALSE	185
2022-09-14	10:21:41	0.940267	4.1825	4089.57	FALSE	185
2022-09-14	10:21:41	0.527697	2.3473	4030.48	FALSE	185
2022-09-14	10:21:42	0.494262	2.19858	4091.77	FALSE	185
2022-09-14	10:21:42	0.480674	2.13813	4032.61	FALSE	185
2022-09-14	10:21:42	0.419758	1.86717	4093.64	FALSE	185
2022-09-14	10:21:42	0.28444	1.26525	4033.88	FALSE	185
2022-09-14	10:21:43	0.538079	2.39348	4096.03	FALSE	185
2022-09-14	10:21:43	0.430089	1.91312	4035.79	FALSE	185
2022-09-14	10:21:43	0.423168	1.88234	4097.92	FALSE	185
2022-09-14	10:21:43	0.345102	1.53508	4037.33	FALSE	185
2022-09-14	10:21:44	0.601539	2.67577	4100.59	FALSE	185
2022-09-14	10:21:44	0.42271	1.8803	4039.21	FALSE	185
2022-09-14	10:21:44	0.475331	2.11437	4102.71	FALSE	185
2022-09-14	10:21:44	0.337366	1.50067	4040.71	FALSE	185
2022-09-14	10:21:45	0.557112	2.47815	4105.18	FALSE	185
2022-09-14	10:21:45	0.264491	1.17651	4041.89	FALSE	185
2022-09-14	10:21:45	0.685712	3.05018	4108.23	FALSE	185
2022-09-14	10:21:46	0.278639	1.23944	4043.12	FALSE	185
2022-09-14	10:21:46	1.95879	8.71309	4116.95	FALSE	185
2022-09-14	10:21:46	3.14021	13.9683	4057.09	1	186
2022-09-14	10:21:46	4.15263	18.4717	4135.42	1	187
2022-09-14	10:21:47	2.30719	10.2628	4067.36	FALSE	187
2022-09-14	10:21:47	2.04296	9.08749	4144.51	FALSE	187
2022-09-14	10:21:47	0.489326	2.17662	4069.53	FALSE	187
2022-09-14	10:21:47	0.572226	2.54538	4147.05	FALSE	187
2022-09-14	10:21:48	0.614516	2.73349	4072.27	FALSE	187
2022-09-14	10:21:48	0.448512	1.99507	4149.05	FALSE	187
2022-09-14	10:21:48	0.510242	2.26966	4074.54	FALSE	187
2022-09-14	10:21:48	0.28668	1.27521	4150.32	FALSE	187
2022-09-14	10:21:49	0.412023	1.83276	4076.37	FALSE	187
2022-09-14	10:21:49	0.360674	1.60435	4151.93	FALSE	187
2022-09-14	10:21:49	0.418842	1.86309	4078.23	FALSE	187
2022-09-14	10:21:50	0.578995	2.57549	4154.5	FALSE	187
2022-09-14	10:21:50	0.226069	1.0056	4079.24	FALSE	187
2022-09-14	10:21:50	0.551463	2.45302	4156.96	FALSE	187
2022-09-14	10:21:50	0.201387	0.89581	4080.13	FALSE	187
2022-09-14	10:21:51	0.105051	0.467288	4157.42	FALSE	187
2022-09-14	10:21:51	-0.171692	-0.76372	4080.13	FALSE	187
2022-09-14	10:21:51	-0.151336	-0.673173	4157.42	FALSE	187
2022-09-14	10:21:51	-0.104822	-0.466269	4080.13	FALSE	187
2022-09-14	10:21:52	-0.132201	-0.588056	4157.42	FALSE	187
2022-09-14	10:21:52	-0.346246	-1.54017	4080.13	FALSE	187
2022-09-14	10:21:52	-0.286196	-1.27306	4157.42	FALSE	187
2022-09-14	10:21:52	-0.190928	-0.849286	4080.13	FALSE	187
2022-09-14	10:21:53	-0.159631	-0.710071	4157.42	FALSE	187
2022-09-14	10:21:53	0.0780282	0.347085	4080.48	FALSE	187
2022-09-14	10:21:53	0.20444	0.90939	4158.33	FALSE	187
2022-09-14	10:21:54	0.442863	1.96994	4082.45	FALSE	187
2022-09-14	10:21:54	0.446171	1.98466	4160.32	FALSE	187
2022-09-14	10:21:54	0.0848475	0.377419	4082.83	FALSE	187
2022-09-14	10:21:54	0.131972	0.587038	4160.9	FALSE	187
2022-09-14	10:21:55	-0.0191219	-0.085058	4082.83	FALSE	187
2022-09-14	10:21:55	0.319249	1.42008	4162.32	FALSE	187
2022-09-14	10:21:55	0.468308	2.08313	4084.91	FALSE	187
2022-09-14	10:21:55	0.371921	1.65438	4163.98	FALSE	187
2022-09-14	10:21:56	0.319199	1.41986	4086.33	FALSE	187
2022-09-14	10:21:56	0.516349	2.29682	4166.27	FALSE	187
2022-09-14	10:21:56	0.448257	1.99394	4088.32	FALSE	187
2022-09-14	10:21:56	0.440166	1.95795	4168.23	FALSE	187

## Sheet: KimChi_martin_2022914101649 (2)
Date	Time	Lbs	Total force x time			**GoPro Fitting: 10:06
2022-09-14	10:16:50	0.312328	0.312328	FALSE	0
2022-09-14	10:16:50	0.322303	0.634631	FALSE	0
2022-09-14	10:16:50	0.338741	0.973372	FALSE	0
2022-09-14	10:16:50	0.334211	1.30758	FALSE	0
2022-09-14	10:16:51	0.323982	1.63156	FALSE	0
2022-09-14	10:16:51	0.401387	2.03295	FALSE	0
2022-09-14	10:16:51	0.335738	2.36869	FALSE	0
2022-09-14	10:16:51	0.379249	2.74794	FALSE	0
2022-09-14	10:16:52	0.348664	3.0966	FALSE	0
2022-09-14	10:16:52	0.355331	3.45193	FALSE	0
2022-09-14	10:16:52	0.349886	3.80182	FALSE	0
2022-09-14	10:16:52	0.365916	4.16774	FALSE	0
2022-09-14	10:16:53	0.357468	4.5252	FALSE	0
2022-09-14	10:16:53	0.374059	4.89926	FALSE	0
2022-09-14	10:16:53	0.377061	5.27632	FALSE	0
2022-09-14	10:16:54	0.365255	5.64158	FALSE	0
2022-09-14	10:16:54	0.373448	6.01503	FALSE	0
2022-09-14	10:16:54	0.366781	6.38181	FALSE	0
2022-09-14	10:16:54	0.40215	6.78396	FALSE	0
2022-09-14	10:16:55	0.373855	7.15781	FALSE	0
2022-09-14	10:16:55	0.417367	7.57518	FALSE	0
2022-09-14	10:16:55	0.293346	7.86853	FALSE	0
2022-09-14	10:16:55	0.932786	8.80131	FALSE	0
2022-09-14	10:16:56	1.54302	10.3443	FALSE	0
2022-09-14	10:16:56	1.44907	11.7934	FALSE	0
2022-09-14	10:16:56	1.18113	12.9745	FALSE	0
2022-09-14	10:16:56	1.55126	14.5258	FALSE	0
2022-09-14	10:16:57	1.54072	16.0665	FALSE	0
2022-09-14	10:16:57	1.52775	17.5943	FALSE	0
2022-09-14	10:16:57	1.55253	19.1468	FALSE	0
2022-09-14	10:16:58	1.55355	20.7003	FALSE	0
2022-09-14	10:16:58	1.54632	22.2467	FALSE	0
2022-09-14	10:16:58	1.55177	23.7984	FALSE	0
2022-09-14	10:16:58	1.53111	25.3295	FALSE	0
2022-09-14	10:16:59	1.53559	26.8651	FALSE	0
2022-09-14	10:16:59	1.54022	28.4054	FALSE	0
2022-09-14	10:16:59	1.53996	29.9453	FALSE	0
2022-09-14	10:16:59	1.55518	31.5005	FALSE	0
2022-09-14	10:17:00	1.58088	33.0814	FALSE	0
2022-09-14	10:17:00	1.56347	34.6448	FALSE	0
2022-09-14	10:17:00	0.440725	35.0856	FALSE	0
2022-09-14	10:17:00	0.487952	35.5735	FALSE	0
2022-09-14	10:17:01	1.02968	36.6032	FALSE	0
2022-09-14	10:17:01	3.04469	39.6479	1	1
2022-09-14	10:17:01	5.38998	45.0379	1	2
2022-09-14	10:17:02	4.61976	49.6576	1	3
2022-09-14	10:17:02	4.22785	53.8855	1	4
2022-09-14	10:17:02	3.46775	57.3532	1	5
2022-09-14	10:17:02	5.12057	62.4738	1	6
2022-09-14	10:17:03	4.1221	66.5959	1	7
2022-09-14	10:17:03	8.69248	75.2884	1	8
2022-09-14	10:17:03	8.99976	84.2881	1	9
2022-09-14	10:17:03	14.9441	99.2322	1	10
2022-09-14	10:17:04	29.9604	129.193	1	11
2022-09-14	10:17:04	24.963	154.156	1	12
2022-09-14	10:17:04	12.3999	166.556	1	13
2022-09-14	10:17:04	0.9907	167.546	FALSE	13
2022-09-14	10:17:05	0.11411	167.66	FALSE	13
2022-09-14	10:17:05	-0.147977	167.66	FALSE	13
2022-09-14	10:17:05	-0.139936	167.66	FALSE	13
2022-09-14	10:17:05	-0.33617	167.66	FALSE	13
2022-09-14	10:17:06	-0.397646	167.66	FALSE	13
2022-09-14	10:17:06	-0.611539	167.66	FALSE	13
2022-09-14	10:17:06	-0.781055	167.66	FALSE	13
2022-09-14	10:17:07	-0.826195	167.66	FALSE	13
2022-09-14	10:17:07	-0.843702	167.66	FALSE	13
2022-09-14	10:17:07	-0.795101	167.66	FALSE	13
2022-09-14	10:17:07	-0.75846	167.66	FALSE	13
2022-09-14	10:17:08	-0.905432	167.66	FALSE	13
2022-09-14	10:17:08	-0.861869	167.66	FALSE	13
2022-09-14	10:17:08	-1.12141	167.66	FALSE	13
2022-09-14	10:17:08	-1.09617	167.66	FALSE	13
2022-09-14	10:17:09	-0.871335	167.66	FALSE	13
2022-09-14	10:17:09	-1.08777	167.66	FALSE	13
2022-09-14	10:17:09	-0.976068	167.66	FALSE	13
2022-09-14	10:17:09	-0.956628	167.66	FALSE	13
2022-09-14	10:17:10	-0.737137	167.66	FALSE	13
2022-09-14	10:17:10	-0.867162	167.66	FALSE	13
2022-09-14	10:17:10	-0.779732	167.66	FALSE	13
2022-09-14	10:17:11	-0.567824	167.66	FALSE	13
2022-09-14	10:17:11	-0.566602	167.66	FALSE	13
2022-09-14	10:17:11	-0.822633	167.66	FALSE	13
2022-09-14	10:17:11	-0.855254	167.66	FALSE	13
2022-09-14	10:17:12	-0.728333	167.66	FALSE	13
2022-09-14	10:17:12	-0.423753	167.66	FALSE	13
2022-09-14	10:17:12	-0.218409	167.66	FALSE	13
2022-09-14	10:17:12	-0.311946	167.66	FALSE	13
2022-09-14	10:17:13	0.00143789	167.662	FALSE	13
2022-09-14	10:17:13	-0.109809	167.662	FALSE	13
2022-09-14	10:17:13	0.0477483	167.71	FALSE	13
2022-09-14	10:17:13	-0.00304046	167.71	FALSE	13
2022-09-14	10:17:14	0.248359	167.958	FALSE	13
2022-09-14	10:17:14	0.414211	168.372	FALSE	13
2022-09-14	10:17:14	0.419911	168.792	FALSE	13
2022-09-14	10:17:15	0.140064	168.932	FALSE	13
2022-09-14	10:17:15	0.252684	169.185	FALSE	13
2022-09-14	10:17:15	0.221641	169.406	FALSE	13
2022-09-14	10:17:15	0.175127	169.582	FALSE	13
2022-09-14	10:17:16	0.12556	169.707	FALSE	13
2022-09-14	10:17:16	0.734364	170.441	FALSE	13
2022-09-14	10:17:16	0.739198	171.181	FALSE	13
2022-09-14	10:17:16	0.734873	171.916	FALSE	13
2022-09-14	10:17:17	0.737417	172.653	FALSE	13
2022-09-14	10:17:17	0.732684	173.386	FALSE	13
2022-09-14	10:17:17	0.728817	174.114	FALSE	13
2022-09-14	10:17:17	1.0394	175.154	FALSE	13
2022-09-14	10:17:18	0.688664	175.843	FALSE	13
2022-09-14	10:17:18	2.15482	177.997	FALSE	13
2022-09-14	10:17:18	4.25324	182.251	1	14
2022-09-14	10:17:19	1.57513	183.826	FALSE	14
2022-09-14	10:17:19	0.697366	184.523	FALSE	14
2022-09-14	10:17:19	0.73757	185.261	FALSE	14
2022-09-14	10:17:19	0.731463	185.992	FALSE	14
2022-09-14	10:17:20	0.7307	186.723	FALSE	14
2022-09-14	10:17:20	0.735891	187.459	FALSE	14
2022-09-14	10:17:20	0.736756	188.195	FALSE	14
2022-09-14	10:17:20	0.738282	188.934	FALSE	14
2022-09-14	10:17:21	0.729173	189.663	FALSE	14
2022-09-14	10:17:21	0.731667	190.395	FALSE	14
2022-09-14	10:17:21	0.738486	191.133	FALSE	14
2022-09-14	10:17:21	0.738639	191.872	FALSE	14
2022-09-14	10:17:22	0.734008	192.606	FALSE	14
2022-09-14	10:17:22	0.73528	193.341	FALSE	14
2022-09-14	10:17:22	0.732939	194.074	FALSE	14
2022-09-14	10:17:23	0.732735	194.807	FALSE	14
2022-09-14	10:17:23	0.736908	195.544	FALSE	14
2022-09-14	10:17:23	0.737672	196.281	FALSE	14
2022-09-14	10:17:23	0.681641	196.963	FALSE	14
2022-09-14	10:17:24	0.0358399	196.999	FALSE	14
2022-09-14	10:17:24	0.0519723	197.051	FALSE	14
2022-09-14	10:17:24	-0.00507608	197.051	FALSE	14
2022-09-14	10:17:24	0.142608	197.193	FALSE	14
2022-09-14	10:17:25	0.125713	197.319	FALSE	14
2022-09-14	10:17:25	0.156909	197.476	FALSE	14
2022-09-14	10:17:25	0.738181	198.214	FALSE	14
2022-09-14	10:17:25	0.734109	198.948	FALSE	14
2022-09-14	10:17:26	0.734466	199.683	FALSE	14
2022-09-14	10:17:26	0.721743	200.404	FALSE	14
2022-09-14	10:17:26	0.736196	201.141	FALSE	14
2022-09-14	10:17:27	0.73299	201.874	FALSE	14
2022-09-14	10:17:27	0.732481	202.606	FALSE	14
2022-09-14	10:17:27	0.726425	203.333	FALSE	14
2022-09-14	10:17:27	0.741132	204.074	FALSE	14
2022-09-14	10:17:28	0.735433	204.809	FALSE	14
2022-09-14	10:17:28	0.736857	205.546	FALSE	14
2022-09-14	10:17:28	0.735891	206.282	FALSE	14
2022-09-14	10:17:28	0.740725	207.023	FALSE	14
2022-09-14	10:17:29	0.742252	207.765	FALSE	14
2022-09-14	10:17:29	0.738181	208.503	FALSE	14
2022-09-14	10:17:29	0.73757	209.241	FALSE	14
2022-09-14	10:17:29	0.732175	209.973	FALSE	14
2022-09-14	10:17:30	0.728461	210.701	FALSE	14
2022-09-14	10:17:30	0.74159	211.443	FALSE	14
2022-09-14	10:17:30	0.737519	212.18	FALSE	14
2022-09-14	10:17:31	0.738231	212.919	FALSE	14
2022-09-14	10:17:31	0.742964	213.661	FALSE	14
2022-09-14	10:17:31	0.743066	214.405	FALSE	14
2022-09-14	10:17:31	0.735585	215.14	FALSE	14
2022-09-14	10:17:32	0.737061	215.877	FALSE	14
2022-09-14	10:17:32	0.735076	216.612	FALSE	14
2022-09-14	10:17:32	0.728359	217.341	FALSE	14
2022-09-14	10:17:32	0.730852	218.071	FALSE	14
2022-09-14	10:17:33	0.729071	218.801	FALSE	14
2022-09-14	10:17:33	0.733397	219.534	FALSE	14
2022-09-14	10:17:33	0.734771	220.269	FALSE	14
2022-09-14	10:17:33	0.7307	220.999	FALSE	14
2022-09-14	10:17:34	0.734618	221.734	FALSE	14
2022-09-14	10:17:34	0.734568	222.469	FALSE	14
2022-09-14	10:17:34	0.738639	223.207	FALSE	14
2022-09-14	10:17:35	0.733702	223.941	FALSE	14
2022-09-14	10:17:35	0.730954	224.672	FALSE	14
2022-09-14	10:17:35	0.73645	225.408	FALSE	14
2022-09-14	10:17:35	0.731972	226.14	FALSE	14
2022-09-14	10:17:36	0.735331	226.876	FALSE	14
2022-09-14	10:17:36	0.730852	227.607	FALSE	14
2022-09-14	10:17:36	0.734109	228.341	FALSE	14
2022-09-14	10:17:36	0.737875	229.078	FALSE	14
2022-09-14	10:17:37	0.737417	229.816	FALSE	14
2022-09-14	10:17:37	2.14154	231.957	FALSE	14
2022-09-14	10:17:37	0.64785	232.605	FALSE	14
2022-09-14	10:17:37	0.869427	233.475	FALSE	14
2022-09-14	10:17:38	2.42866	235.903	FALSE	14
2022-09-14	10:17:38	1.49233	237.396	FALSE	14
2022-09-14	10:17:38	0.665254	238.061	FALSE	14
2022-09-14	10:17:38	0.733346	238.794	FALSE	14
2022-09-14	10:17:39	0.738639	239.533	FALSE	14
2022-09-14	10:17:39	0.75472	240.288	FALSE	14
2022-09-14	10:17:39	0.739402	241.027	FALSE	14
2022-09-14	10:17:40	0.75187	241.779	FALSE	14
2022-09-14	10:17:40	0.743829	242.523	FALSE	14
2022-09-14	10:17:40	0.853855	243.377	FALSE	14
2022-09-14	10:17:40	0.733855	244.11	FALSE	14
2022-09-14	10:17:41	0.745713	244.856	FALSE	14
2022-09-14	10:17:41	0.748053	245.604	FALSE	14
2022-09-14	10:17:41	0.758079	246.362	FALSE	14
2022-09-14	10:17:41	0.746883	247.109	FALSE	14
2022-09-14	10:17:42	0.741743	247.851	FALSE	14
2022-09-14	10:17:42	0.738028	248.589	FALSE	14
2022-09-14	10:17:42	0.736654	249.326	FALSE	14
2022-09-14	10:17:42	0.734822	250.06	FALSE	14
2022-09-14	10:17:43	0.733448	250.794	FALSE	14
2022-09-14	10:17:43	0.733397	251.527	FALSE	14
2022-09-14	10:17:43	0.73813	252.265	FALSE	14
2022-09-14	10:17:44	0.741539	253.007	FALSE	14
2022-09-14	10:17:44	0.739707	253.747	FALSE	14
2022-09-14	10:17:44	0.730038	254.477	FALSE	14
2022-09-14	10:17:44	0.734873	255.212	FALSE	14
2022-09-14	10:17:45	0.738893	255.95	FALSE	14
2022-09-14	10:17:45	0.736756	256.687	FALSE	14
2022-09-14	10:17:45	0.736603	257.424	FALSE	14
2022-09-14	10:17:45	0.743117	258.167	FALSE	14
2022-09-14	10:17:46	3.81614	261.983	1	15
2022-09-14	10:17:46	2.75859	264.742	FALSE	15
2022-09-14	10:17:46	1.6224	266.364	FALSE	15
2022-09-14	10:17:46	1.03126	267.395	FALSE	15
2022-09-14	10:17:47	1.13564	268.531	FALSE	15
2022-09-14	10:17:47	1.57284	270.104	FALSE	15
2022-09-14	10:17:47	3.24551	273.349	1	16
2022-09-14	10:17:48	1.86281	275.212	FALSE	16
2022-09-14	10:17:48	4.85172	280.064	1	17
2022-09-14	10:17:48	4.10016	284.164	1	18
2022-09-14	10:17:48	1.88037	286.044	FALSE	18
2022-09-14	10:17:49	1.74307	287.787	FALSE	18
2022-09-14	10:17:49	2.30897	290.096	FALSE	18
2022-09-14	10:17:49	0.670801	290.767	FALSE	18
2022-09-14	10:17:49	0.852786	291.62	FALSE	18
2022-09-14	10:17:50	0.737112	292.357	FALSE	18
2022-09-14	10:17:50	1.84576	294.203	FALSE	18
2022-09-14	10:17:50	1.28286	295.486	FALSE	18
2022-09-14	10:17:50	2.51991	298.006	FALSE	18
2022-09-14	10:17:51	3.81029	301.816	1	19
2022-09-14	10:17:51	3.46805	305.284	1	20
2022-09-14	10:17:51	1.24698	306.531	FALSE	20
2022-09-14	10:17:52	0.992277	307.523	FALSE	20
2022-09-14	10:17:52	0.543015	308.066	FALSE	20
2022-09-14	10:17:52	0.578893	308.645	FALSE	20
2022-09-14	10:17:52	0.832684	309.478	FALSE	20
2022-09-14	10:17:53	0.806272	310.284	FALSE	20
2022-09-14	10:17:53	0.734975	311.019	FALSE	20
2022-09-14	10:17:53	0.406629	311.426	FALSE	20
2022-09-14	10:17:53	0.241794	311.668	FALSE	20
2022-09-14	10:17:54	0.564491	312.232	FALSE	20
2022-09-14	10:17:54	1.13503	313.367	FALSE	20
2022-09-14	10:17:54	2.21355	315.581	FALSE	20
2022-09-14	10:17:54	3.94688	319.527	1	21
2022-09-14	10:17:55	4.79406	324.322	1	22
2022-09-14	10:17:55	3.24861	327.57	1	23
2022-09-14	10:17:55	3.81711	331.387	1	24
2022-09-14	10:17:56	3.73899	335.126	1	25
2022-09-14	10:17:56	2.9906	338.117	FALSE	25
2022-09-14	10:17:56	1.93991	340.057	FALSE	25
2022-09-14	10:17:56	0.979097	341.036	FALSE	25
2022-09-14	10:17:57	0.652939	341.689	FALSE	25
2022-09-14	10:17:57	0.275127	341.964	FALSE	25
2022-09-14	10:17:57	1.04103	343.005	FALSE	25
2022-09-14	10:17:57	1.01492	344.02	FALSE	25
2022-09-14	10:17:58	1.29594	345.316	FALSE	25
2022-09-14	10:17:58	1.10933	346.425	FALSE	25
2022-09-14	10:17:58	0.939707	347.365	FALSE	25
2022-09-14	10:17:58	0.426883	347.792	FALSE	25
2022-09-14	10:17:59	0.53874	348.33	FALSE	25
2022-09-14	10:17:59	0.392125	348.723	FALSE	25
2022-09-14	10:17:59	0.505814	349.228	FALSE	25
2022-09-14	10:18:00	0.304033	349.532	FALSE	25
2022-09-14	10:18:00	0.295738	349.828	FALSE	25
2022-09-14	10:18:00	0.366985	350.195	FALSE	25
2022-09-14	10:18:00	0.360674	350.556	FALSE	25
2022-09-14	10:18:01	0.46556	351.021	FALSE	25
2022-09-14	10:18:01	0.411667	351.433	FALSE	25
2022-09-14	10:18:01	0.46729	351.9	FALSE	25
2022-09-14	10:18:01	0.435178	352.336	FALSE	25
2022-09-14	10:18:02	0.432074	352.768	FALSE	25
2022-09-14	10:18:02	0.389682	353.157	FALSE	25
2022-09-14	10:18:02	0.386527	353.544	FALSE	25
2022-09-14	10:18:02	0.394669	353.938	FALSE	25
2022-09-14	10:18:03	0.388919	354.327	FALSE	25
2022-09-14	10:18:03	0.372888	354.7	FALSE	25
2022-09-14	10:18:03	0.392939	355.093	FALSE	25
2022-09-14	10:18:04	0.488054	355.581	FALSE	25
2022-09-14	10:18:04	0.387494	355.969	FALSE	25
2022-09-14	10:18:04	0.249631	356.218	FALSE	25
2022-09-14	10:18:04	0.162608	356.381	FALSE	25
2022-09-14	10:18:05	0.175331	356.556	FALSE	25
2022-09-14	10:18:05	0.376705	356.933	FALSE	25
2022-09-14	10:18:05	0.342303	357.275	FALSE	25
2022-09-14	10:18:05	0.317163	357.593	FALSE	25
2022-09-14	10:18:06	0.46958	358.062	FALSE	25
2022-09-14	10:18:06	0.416552	358.479	FALSE	25
2022-09-14	10:18:06	0.425	358.904	FALSE	25
2022-09-14	10:18:06	0.452837	359.356	FALSE	25
2022-09-14	10:18:07	0.36556	359.722	FALSE	25
2022-09-14	10:18:07	0.323626	360.046	FALSE	25
2022-09-14	10:18:07	0.273295	360.319	FALSE	25
2022-09-14	10:18:07	0.410903	360.73	FALSE	25
2022-09-14	10:18:08	0.345713	361.076	FALSE	25
2022-09-14	10:18:08	0.369631	361.445	FALSE	25
2022-09-14	10:18:08	0.388817	361.834	FALSE	25
2022-09-14	10:18:09	0.433397	362.267	FALSE	25
2022-09-14	10:18:09	0.432176	362.7	FALSE	25
2022-09-14	10:18:09	0.401794	363.101	FALSE	25
2022-09-14	10:18:09	0.420216	363.522	FALSE	25
2022-09-14	10:18:10	0.389071	363.911	FALSE	25
2022-09-14	10:18:10	0.370089	364.281	FALSE	25
2022-09-14	10:18:10	0.475484	364.756	FALSE	25
2022-09-14	10:18:10	0.472379	365.229	FALSE	25
2022-09-14	10:18:11	0.417417	365.646	FALSE	25
2022-09-14	10:18:11	0.413957	366.06	FALSE	25
2022-09-14	10:18:11	0.435789	366.496	FALSE	25
2022-09-14	10:18:11	0.415992	366.912	FALSE	25
2022-09-14	10:18:12	0.425305	367.337	FALSE	25
2022-09-14	10:18:12	0.38556	367.723	FALSE	25
2022-09-14	10:18:12	0.410089	368.133	FALSE	25
2022-09-14	10:18:13	0.410598	368.543	FALSE	25
2022-09-14	10:18:13	0.384542	368.928	FALSE	25
2022-09-14	10:18:13	0.388664	369.317	FALSE	25
2022-09-14	10:18:13	0.363219	369.68	FALSE	25
2022-09-14	10:18:14	0.415229	370.095	FALSE	25
2022-09-14	10:18:14	0.4193	370.514	FALSE	25
2022-09-14	10:18:14	0.398028	370.912	FALSE	25
2022-09-14	10:18:14	0.38785	371.3	FALSE	25
2022-09-14	10:18:15	0.398283	371.698	FALSE	25
2022-09-14	10:18:15	0.41869	372.117	FALSE	25
2022-09-14	10:18:15	0.385814	372.503	FALSE	25
2022-09-14	10:18:15	0.488562	372.992	FALSE	25
2022-09-14	10:18:16	0.499606	373.491	FALSE	25
2022-09-14	10:18:16	0.41757	373.909	FALSE	25
2022-09-14	10:18:16	0.411769	374.32	FALSE	25
2022-09-14	10:18:17	0.343626	374.664	FALSE	25
2022-09-14	10:18:17	0.520013	375.184	FALSE	25
2022-09-14	10:18:17	0.63757	375.822	FALSE	25
2022-09-14	10:18:17	0.345407	376.167	FALSE	25
2022-09-14	10:18:18	0.386527	376.554	FALSE	25
2022-09-14	10:18:18	0.35416	376.908	FALSE	25
2022-09-14	10:18:18	0.411718	377.32	FALSE	25
2022-09-14	10:18:18	0.39299	377.712	FALSE	25
2022-09-14	10:18:19	0.398079	378.111	FALSE	25
2022-09-14	10:18:19	0.420573	378.531	FALSE	25
2022-09-14	10:18:19	0.404186	378.935	FALSE	25
2022-09-14	10:18:19	0.281489	379.217	FALSE	25
2022-09-14	10:18:20	0.449886	379.667	FALSE	25
2022-09-14	10:18:20	0.484033	380.151	FALSE	25
2022-09-14	10:18:20	0.495738	380.646	FALSE	25
2022-09-14	10:18:21	0.106374	380.753	FALSE	25
2022-09-14	10:18:21	0.0129901	380.766	FALSE	25
2022-09-14	10:18:21	-0.0999361	380.766	FALSE	25
2022-09-14	10:18:21	-0.214542	380.766	FALSE	25
2022-09-14	10:18:22	-0.55729	380.766	FALSE	25
2022-09-14	10:18:22	-0.464262	380.766	FALSE	25
2022-09-14	10:18:22	-0.432811	380.766	FALSE	25
2022-09-14	10:18:22	-0.251641	380.766	FALSE	25
2022-09-14	10:18:23	-0.153575	380.766	FALSE	25
2022-09-14	10:18:23	0.0338043	380.8	FALSE	25
2022-09-14	10:18:23	0.113143	380.913	FALSE	25
2022-09-14	10:18:23	-0.155407	380.913	FALSE	25
2022-09-14	10:18:24	-0.213982	380.913	FALSE	25
2022-09-14	10:18:24	0.253041	381.166	FALSE	25
2022-09-14	10:18:24	0.47472	381.641	FALSE	25
2022-09-14	10:18:25	0.409682	382.05	FALSE	25
2022-09-14	10:18:25	0.373753	382.424	FALSE	25
2022-09-14	10:18:25	0.319504	382.743	FALSE	25
2022-09-14	10:18:25	0.402964	383.146	FALSE	25
2022-09-14	10:18:26	0.354568	383.501	FALSE	25
2022-09-14	10:18:26	0.357774	383.859	FALSE	25
2022-09-14	10:18:26	0.508257	384.367	FALSE	25
2022-09-14	10:18:26	0.223015	384.59	FALSE	25
2022-09-14	10:18:27	0.326374	384.916	FALSE	25
2022-09-14	10:18:27	0.277417	385.194	FALSE	25
2022-09-14	10:18:27	0.453193	385.647	FALSE	25
2022-09-14	10:18:27	0.175585	385.823	FALSE	25
2022-09-14	10:18:28	-0.0387657	385.823	FALSE	25
2022-09-14	10:18:28	-0.300445	385.823	FALSE	25
2022-09-14	10:18:28	-0.760241	385.823	FALSE	25
2022-09-14	10:18:29	-0.686857	385.823	FALSE	25
2022-09-14	10:18:29	-0.518664	385.823	FALSE	25
2022-09-14	10:18:29	0.129326	385.952	FALSE	25
2022-09-14	10:18:29	0.285814	386.238	FALSE	25
2022-09-14	10:18:30	0.529529	386.767	FALSE	25
2022-09-14	10:18:30	1.52505	388.292	FALSE	25
2022-09-14	10:18:30	2.70617	390.999	FALSE	25
2022-09-14	10:18:30	0.826018	391.825	FALSE	25
2022-09-14	10:18:31	0.24154	392.066	FALSE	25
2022-09-14	10:18:31	0.1364	392.202	FALSE	25
2022-09-14	10:18:31	0.0487661	392.251	FALSE	25
2022-09-14	10:18:31	-0.0965773	392.251	FALSE	25
2022-09-14	10:18:32	-0.11388	392.251	FALSE	25
2022-09-14	10:18:32	0.105916	392.357	FALSE	25
2022-09-14	10:18:32	0.444186	392.801	FALSE	25
2022-09-14	10:18:33	0.460929	393.262	FALSE	25
2022-09-14	10:18:33	0.0356364	393.298	FALSE	25
2022-09-14	10:18:33	-0.249249	393.298	FALSE	25
2022-09-14	10:18:33	-0.438308	393.298	FALSE	25
2022-09-14	10:18:34	-0.344669	393.298	FALSE	25
2022-09-14	10:18:34	-0.144058	393.298	FALSE	25
2022-09-14	10:18:34	-0.168079	393.298	FALSE	25
2022-09-14	10:18:34	0.352786	393.651	FALSE	25
2022-09-14	10:18:35	1.36704	395.018	FALSE	25
2022-09-14	10:18:35	3.8882	398.906	1	26
2022-09-14	10:18:35	2.98795	401.894	FALSE	26
2022-09-14	10:18:35	2.55787	404.452	FALSE	26
2022-09-14	10:18:36	1.69441	406.146	FALSE	26
2022-09-14	10:18:36	2.58841	408.735	FALSE	26
2022-09-14	10:18:36	2.07833	410.813	FALSE	26
2022-09-14	10:18:36	3.57986	414.393	1	27
2022-09-14	10:18:37	2.99497	417.388	FALSE	27
2022-09-14	10:18:37	5.05279	422.441	1	28
2022-09-14	10:18:37	4.82836	427.269	1	29
2022-09-14	10:18:38	3.5677	430.837	1	30
2022-09-14	10:18:38	2.08866	432.925	FALSE	30
2022-09-14	10:18:38	0.841081	433.766	FALSE	30
2022-09-14	10:18:38	0.348613	434.115	FALSE	30
2022-09-14	10:18:39	0.513244	434.628	FALSE	30
2022-09-14	10:18:39	0.799046	435.427	FALSE	30
2022-09-14	10:18:39	0.215789	435.643	FALSE	30
2022-09-14	10:18:39	0.488613	436.132	FALSE	30
2022-09-14	10:18:40	0.225356	436.357	FALSE	30
2022-09-14	10:18:40	0.44388	436.801	FALSE	30
2022-09-14	10:18:40	0.193448	436.994	FALSE	30
2022-09-14	10:18:40	0.495483	437.49	FALSE	30
2022-09-14	10:18:41	0.214924	437.705	FALSE	30
2022-09-14	10:18:41	0.489275	438.194	FALSE	30
2022-09-14	10:18:41	0.406171	438.6	FALSE	30
2022-09-14	10:18:42	1.07406	439.674	FALSE	30
2022-09-14	10:18:42	1.42057	441.095	FALSE	30
2022-09-14	10:18:42	2.08922	443.184	FALSE	30
2022-09-14	10:18:42	2.37116	445.555	FALSE	30
2022-09-14	10:18:43	2.7681	448.323	FALSE	30
2022-09-14	10:18:43	1.53523	449.859	FALSE	30
2022-09-14	10:18:43	0.935229	450.794	FALSE	30
2022-09-14	10:18:43	1.59482	452.389	FALSE	30
2022-09-14	10:18:44	2.49431	454.883	FALSE	30
2022-09-14	10:18:44	3.0766	457.959	1	31
2022-09-14	10:18:44	1.15513	459.115	FALSE	31
2022-09-14	10:18:44	1.63981	460.754	FALSE	31
2022-09-14	10:18:45	1.2848	462.039	FALSE	31
2022-09-14	10:18:45	2.20805	464.247	FALSE	31
2022-09-14	10:18:45	3.16663	467.414	1	32
2022-09-14	10:18:46	4.23828	471.652	1	33
2022-09-14	10:18:46	4.4706	476.123	1	34
2022-09-14	10:18:46	2.06744	478.19	FALSE	34
2022-09-14	10:18:46	1.52943	479.72	FALSE	34
2022-09-14	10:18:47	0.287443	480.007	FALSE	34
2022-09-14	10:18:47	0.435891	480.443	FALSE	34
2022-09-14	10:18:47	0.305102	480.748	FALSE	34
2022-09-14	10:18:47	0.377774	481.126	FALSE	34
2022-09-14	10:18:48	0.499656	481.626	FALSE	34
2022-09-14	10:18:48	0.27187	481.897	FALSE	34
2022-09-14	10:18:48	0.439351	482.337	FALSE	34
2022-09-14	10:18:48	0.228613	482.565	FALSE	34
2022-09-14	10:18:49	0.385713	482.951	FALSE	34
2022-09-14	10:18:49	0.160166	483.111	FALSE	34
2022-09-14	10:18:49	0.410038	483.521	FALSE	34
2022-09-14	10:18:50	0.363015	483.884	FALSE	34
2022-09-14	10:18:50	1.05019	484.934	FALSE	34
2022-09-14	10:18:50	1.8706	486.805	FALSE	34
2022-09-14	10:18:50	2.74627	489.551	FALSE	34
2022-09-14	10:18:51	2.52022	492.072	FALSE	34
2022-09-14	10:18:51	2.74276	494.814	FALSE	34
2022-09-14	10:18:51	1.50607	496.32	FALSE	34
2022-09-14	10:18:51	1.25757	497.578	FALSE	34
2022-09-14	10:18:52	0.704491	498.282	FALSE	34
2022-09-14	10:18:52	0.55584	498.838	FALSE	34
2022-09-14	10:18:52	0.422761	499.261	FALSE	34
2022-09-14	10:18:52	0.351158	499.612	FALSE	34
2022-09-14	10:18:53	0.329021	499.941	FALSE	34
2022-09-14	10:18:53	0.331565	500.273	FALSE	34
2022-09-14	10:18:53	0.700827	500.974	FALSE	34
2022-09-14	10:18:54	0.736196	501.71	FALSE	34
2022-09-14	10:18:54	0.740929	502.451	FALSE	34
2022-09-14	10:18:54	0.741285	503.192	FALSE	34
2022-09-14	10:18:54	1.87274	505.065	FALSE	34
2022-09-14	10:18:55	3.13543	508.2	1	35
2022-09-14	10:18:55	3.00169	511.202	1	36
2022-09-14	10:18:55	2.04917	513.251	FALSE	36
2022-09-14	10:18:55	1.32637	514.577	FALSE	36
2022-09-14	10:18:56	1.11874	515.696	FALSE	36
2022-09-14	10:18:56	0.997621	516.694	FALSE	36
2022-09-14	10:18:56	0.811616	517.505	FALSE	36
2022-09-14	10:18:56	1.19497	518.7	FALSE	36
2022-09-14	10:18:57	2.01324	520.714	FALSE	36
2022-09-14	10:18:57	2.84164	523.555	FALSE	36
2022-09-14	10:18:57	2.73319	526.288	FALSE	36
2022-09-14	10:18:58	2.75187	529.04	FALSE	36
2022-09-14	10:18:58	2.87294	531.913	FALSE	36
2022-09-14	10:18:58	2.80764	534.721	FALSE	36
2022-09-14	10:18:58	2.56286	537.284	FALSE	36
2022-09-14	10:18:59	2.33426	539.618	FALSE	36
2022-09-14	10:18:59	2.38408	542.002	FALSE	36
2022-09-14	10:18:59	2.13966	544.142	FALSE	36
2022-09-14	10:18:59	1.32841	545.47	FALSE	36
2022-09-14	10:19:00	1.2764	546.747	FALSE	36
2022-09-14	10:19:00	2.27584	549.022	FALSE	36
2022-09-14	10:19:00	3.64464	552.667	1	37
2022-09-14	10:19:00	3.88184	556.549	1	38
2022-09-14	10:19:01	2.97141	559.52	FALSE	38
2022-09-14	10:19:01	2.84189	562.362	FALSE	38
2022-09-14	10:19:01	2.3078	564.67	FALSE	38
2022-09-14	10:19:02	0.858842	565.529	FALSE	38
2022-09-14	10:19:02	0.511107	566.04	FALSE	38
2022-09-14	10:19:02	0.65014	566.69	FALSE	38
2022-09-14	10:19:02	0.627596	567.318	FALSE	38
2022-09-14	10:19:03	0.318791	567.636	FALSE	38
2022-09-14	10:19:03	0.473753	568.11	FALSE	38
2022-09-14	10:19:03	0.18098	568.291	FALSE	38
2022-09-14	10:19:03	0.367595	568.659	FALSE	38
2022-09-14	10:19:04	0.349173	569.008	FALSE	38
2022-09-14	10:19:04	0.214008	569.222	FALSE	38
2022-09-14	10:19:04	0.470344	569.692	FALSE	38
2022-09-14	10:19:04	0.499606	570.192	FALSE	38
2022-09-14	10:19:05	2.26296	572.455	FALSE	38
2022-09-14	10:19:05	3.16902	575.624	1	39
2022-09-14	10:19:05	5.20367	580.828	1	40
2022-09-14	10:19:05	1.73548	582.563	FALSE	40
2022-09-14	10:19:06	1.74373	584.307	FALSE	40
2022-09-14	10:19:06	0.585509	584.892	FALSE	40
2022-09-14	10:19:06	0.514466	585.407	FALSE	40
2022-09-14	10:19:07	0.500165	585.907	FALSE	40
2022-09-14	10:19:07	0.248206	586.155	FALSE	40
2022-09-14	10:19:07	0.423982	586.579	FALSE	40
2022-09-14	10:19:07	0.843524	587.423	FALSE	40
2022-09-14	10:19:08	1.24785	588.67	FALSE	40
2022-09-14	10:19:08	0.874211	589.545	FALSE	40
2022-09-14	10:19:08	0.928969	590.474	FALSE	40
2022-09-14	10:19:08	0.862303	591.336	FALSE	40
2022-09-14	10:19:09	1.34495	592.681	FALSE	40
2022-09-14	10:19:09	1.53207	594.213	FALSE	40
2022-09-14	10:19:09	2.20357	596.417	FALSE	40
2022-09-14	10:19:09	3.77187	600.188	1	41
2022-09-14	10:19:10	2.95314	603.142	FALSE	41
2022-09-14	10:19:10	4.32739	607.469	1	42
2022-09-14	10:19:10	2.59915	610.068	FALSE	42
2022-09-14	10:19:11	5.47599	615.544	1	43
2022-09-14	10:19:11	2.49467	618.039	FALSE	43
2022-09-14	10:19:11	4.78739	622.826	1	44
2022-09-14	10:19:11	4.92933	627.755	1	45
2022-09-14	10:19:12	1.805	629.56	FALSE	45
2022-09-14	10:19:12	3.71273	633.273	1	46
2022-09-14	10:19:12	1.29991	634.573	FALSE	46
2022-09-14	10:19:12	3.24826	637.821	1	47
2022-09-14	10:19:13	1.74999	639.571	FALSE	47
2022-09-14	10:19:13	3.66261	643.234	1	48
2022-09-14	10:19:13	5.37385	648.608	1	49
2022-09-14	10:19:13	8.09507	656.703	1	50
2022-09-14	10:19:14	14.0699	670.773	1	51
2022-09-14	10:19:14	9.15405	679.927	1	52
2022-09-14	10:19:14	5.58306	685.51	1	53
2022-09-14	10:19:15	1.14154	686.651	FALSE	53
2022-09-14	10:19:15	0.321183	686.973	FALSE	53
2022-09-14	10:19:15	0.284237	687.257	FALSE	53
2022-09-14	10:19:15	0.26841	687.525	FALSE	53
2022-09-14	10:19:16	0.453092	687.978	FALSE	53
2022-09-14	10:19:16	0.234313	688.213	FALSE	53
2022-09-14	10:19:16	0.641387	688.854	FALSE	53
2022-09-14	10:19:16	1.99426	690.848	FALSE	53
2022-09-14	10:19:17	11.8773	702.726	1	54
2022-09-14	10:19:17	17.772	720.498	1	55
2022-09-14	10:19:17	13.0428	733.54	1	56
2022-09-14	10:19:17	6.14143	739.682	1	57
2022-09-14	10:19:18	4.21187	743.894	1	58
2022-09-14	10:19:18	5.26159	749.155	1	59
2022-09-14	10:19:18	2.10907	751.264	FALSE	59
2022-09-14	10:19:19	1.83055	753.095	FALSE	59
2022-09-14	10:19:19	2.95218	756.047	FALSE	59
2022-09-14	10:19:19	1.90744	757.955	FALSE	59
2022-09-14	10:19:19	4.01228	761.967	1	60
2022-09-14	10:19:20	1.60698	763.574	FALSE	60
2022-09-14	10:19:20	1.40719	764.981	FALSE	60
2022-09-14	10:19:20	0.856247	765.837	FALSE	60
2022-09-14	10:19:20	1.47233	767.31	FALSE	60
2022-09-14	10:19:21	1.95706	769.267	FALSE	60
2022-09-14	10:19:21	3.98464	773.251	1	61
2022-09-14	10:19:21	5.2307	778.482	1	62
2022-09-14	10:19:21	5.63645	784.118	1	63
2022-09-14	10:19:22	4.31502	788.433	1	64
2022-09-14	10:19:22	3.53431	791.968	1	65
2022-09-14	10:19:22	2.91619	794.884	FALSE	65
2022-09-14	10:19:23	2.77167	797.656	FALSE	65
2022-09-14	10:19:23	2.74851	800.404	FALSE	65
2022-09-14	10:19:23	2.80113	803.205	FALSE	65
2022-09-14	10:19:23	2.40592	805.611	FALSE	65
2022-09-14	10:19:24	1.35706	806.968	FALSE	65
2022-09-14	10:19:24	0.448308	807.417	FALSE	65
2022-09-14	10:19:24	0.359249	807.776	FALSE	65
2022-09-14	10:19:24	0.290344	808.066	FALSE	65
2022-09-14	10:19:25	0.329886	808.396	FALSE	65
2022-09-14	10:19:25	0.388308	808.784	FALSE	65
2022-09-14	10:19:25	0.998893	809.783	FALSE	65
2022-09-14	10:19:25	1.22861	811.012	FALSE	65
2022-09-14	10:19:26	0.952379	811.964	FALSE	65
2022-09-14	10:19:26	1.78001	813.744	FALSE	65
2022-09-14	10:19:26	2.68754	816.432	FALSE	65
2022-09-14	10:19:27	2.2077	818.639	FALSE	65
2022-09-14	10:19:27	1.02449	819.664	FALSE	65
2022-09-14	10:19:27	1.30795	820.972	FALSE	65
2022-09-14	10:19:27	1.89976	822.872	FALSE	65
2022-09-14	10:19:28	1.59039	824.462	FALSE	65
2022-09-14	10:19:28	1.1907	825.653	FALSE	65
2022-09-14	10:19:28	2.18739	827.84	FALSE	65
2022-09-14	10:19:28	4.90001	832.74	1	66
2022-09-14	10:19:29	4.86876	837.609	1	67
2022-09-14	10:19:29	5.6769	843.286	1	68
2022-09-14	10:19:29	1.5449	844.831	FALSE	68
2022-09-14	10:19:29	0.744186	845.575	FALSE	68
2022-09-14	10:19:30	0.74042	846.315	FALSE	68
2022-09-14	10:19:30	1.23085	847.546	FALSE	68
2022-09-14	10:19:30	0.546934	848.093	FALSE	68
2022-09-14	10:19:30	0.609987	848.703	FALSE	68
2022-09-14	10:19:31	0.567952	849.271	FALSE	68
2022-09-14	10:19:31	0.62042	849.891	FALSE	68
2022-09-14	10:19:31	0.320216	850.212	FALSE	68
2022-09-14	10:19:32	0.158893	850.371	FALSE	68
2022-09-14	10:19:32	-0.0972898	850.371	FALSE	68
2022-09-14	10:19:32	0.386374	850.757	FALSE	68
2022-09-14	10:19:32	-0.0535748	850.757	FALSE	68
2022-09-14	10:19:33	0.137825	850.895	FALSE	68
2022-09-14	10:19:33	0.310242	851.205	FALSE	68
2022-09-14	10:19:33	0.0908526	851.296	FALSE	68
2022-09-14	10:19:33	0.321183	851.617	FALSE	68
2022-09-14	10:19:34	0.968817	852.586	FALSE	68
2022-09-14	10:19:34	4.5424	857.128	1	69
2022-09-14	10:19:34	2.70093	859.829	FALSE	69
2022-09-14	10:19:34	3.7737	863.603	1	70
2022-09-14	10:19:35	1.63788	865.241	FALSE	70
2022-09-14	10:19:35	1.88765	867.128	FALSE	70
2022-09-14	10:19:35	1.5024	868.631	FALSE	70
2022-09-14	10:19:36	0.649529	869.28	FALSE	70
2022-09-14	10:19:36	2.14408	871.424	FALSE	70
2022-09-14	10:19:36	1.42668	872.851	FALSE	70
2022-09-14	10:19:36	4.36205	877.213	1	71
2022-09-14	10:19:37	1.95849	879.172	FALSE	71
2022-09-14	10:19:37	0.783778	879.955	FALSE	71
2022-09-14	10:19:37	0.563015	880.518	FALSE	71
2022-09-14	10:19:37	0.353702	880.872	FALSE	71
2022-09-14	10:19:38	0.532786	881.405	FALSE	71
2022-09-14	10:19:38	0.233092	881.638	FALSE	71
2022-09-14	10:19:38	-0.101208	881.638	FALSE	71
2022-09-14	10:19:38	-0.162328	881.638	FALSE	71
2022-09-14	10:19:39	-0.433066	881.638	FALSE	71
2022-09-14	10:19:39	-0.449503	881.638	FALSE	71
2022-09-14	10:19:39	-0.423905	881.638	FALSE	71
2022-09-14	10:19:40	-0.432455	881.638	FALSE	71
2022-09-14	10:19:40	-0.424974	881.638	FALSE	71
2022-09-14	10:19:40	-0.303651	881.638	FALSE	71
2022-09-14	10:19:40	-0.223244	881.638	FALSE	71
2022-09-14	10:19:41	-0.235509	881.638	FALSE	71
2022-09-14	10:19:41	-0.275254	881.638	FALSE	71
2022-09-14	10:19:41	-0.259071	881.638	FALSE	71
2022-09-14	10:19:41	-0.229707	881.638	FALSE	71
2022-09-14	10:19:42	-0.220089	881.638	FALSE	71
2022-09-14	10:19:42	-0.233015	881.638	FALSE	71
2022-09-14	10:19:42	-0.142328	881.638	FALSE	71
2022-09-14	10:19:42	-0.121768	881.638	FALSE	71
2022-09-14	10:19:43	-0.0339819	881.638	FALSE	71
2022-09-14	10:19:43	0.268562	881.907	FALSE	71
2022-09-14	10:19:43	0.458384	882.365	FALSE	71
2022-09-14	10:19:44	0.525662	882.891	FALSE	71
2022-09-14	10:19:44	0.654619	883.545	FALSE	71
2022-09-14	10:19:44	0.45126	883.997	FALSE	71
2022-09-14	10:19:44	0.564135	884.561	FALSE	71
2022-09-14	10:19:45	0.776654	885.337	FALSE	71
2022-09-14	10:19:45	0.569631	885.907	FALSE	71
2022-09-14	10:19:45	0.489784	886.397	FALSE	71
2022-09-14	10:19:45	0.353957	886.751	FALSE	71
2022-09-14	10:19:46	0.927901	887.679	FALSE	71
2022-09-14	10:19:46	0.434008	888.113	FALSE	71
2022-09-14	10:19:46	0.452634	888.565	FALSE	71
2022-09-14	10:19:46	0.386832	888.952	FALSE	71
2022-09-14	10:19:47	0.0132954	888.965	FALSE	71
2022-09-14	10:19:47	-0.233829	888.965	FALSE	71
2022-09-14	10:19:47	-0.185738	888.965	FALSE	71
2022-09-14	10:19:48	0.204084	889.169	FALSE	71
2022-09-14	10:19:48	0.0694786	889.239	FALSE	71
2022-09-14	10:19:48	0.0431173	889.282	FALSE	71
2022-09-14	10:19:48	0.133804	889.416	FALSE	71
2022-09-14	10:19:49	2.78653	892.202	FALSE	71
2022-09-14	10:19:49	8.69034	900.893	1	72
2022-09-14	10:19:49	14.457	915.35	1	73
2022-09-14	10:19:49	17.5126	932.862	1	74
2022-09-14	10:19:50	8.16856	941.031	1	75
2022-09-14	10:19:50	3.05375	944.085	1	76
2022-09-14	10:19:50	0.827596	944.912	FALSE	76
2022-09-14	10:19:50	0.810293	945.723	FALSE	76
2022-09-14	10:19:51	0.568613	946.291	FALSE	76
2022-09-14	10:19:51	1.74897	948.04	FALSE	76
2022-09-14	10:19:51	1.58632	949.626	FALSE	76
2022-09-14	10:19:52	4.05166	953.678	1	77
2022-09-14	10:19:52	4.16042	957.839	1	78
2022-09-14	10:19:52	5.69767	963.536	1	79
2022-09-14	10:19:52	6.31965	969.856	1	80
2022-09-14	10:19:53	4.16932	974.025	1	81
2022-09-14	10:19:53	6.66439	980.69	1	82
2022-09-14	10:19:53	3.98434	984.674	1	83
2022-09-14	10:19:53	4.79334	989.467	1	84
2022-09-14	10:19:54	2.14098	991.608	FALSE	84
2022-09-14	10:19:54	1.1595	992.768	FALSE	84
2022-09-14	10:19:54	0.804796	993.572	FALSE	84
2022-09-14	10:19:54	2.31161	995.884	FALSE	84
2022-09-14	10:19:55	7.52525	1003.41	1	85
2022-09-14	10:19:55	10.3306	1013.74	1	86
2022-09-14	10:19:55	3.93614	1017.68	1	87
2022-09-14	10:19:55	2.63737	1020.31	FALSE	87
2022-09-14	10:19:56	1.56958	1021.88	FALSE	87
2022-09-14	10:19:56	1.1594	1023.04	FALSE	87
2022-09-14	10:19:56	1.79543	1024.84	FALSE	87
2022-09-14	10:19:57	1.6765	1026.51	FALSE	87
2022-09-14	10:19:57	3.51075	1030.03	1	88
2022-09-14	10:19:57	5.05716	1035.08	1	89
2022-09-14	10:19:57	4.97289	1040.06	1	90
2022-09-14	10:19:58	2.50291	1042.56	FALSE	90
2022-09-14	10:19:58	3.06093	1045.62	1	91
2022-09-14	10:19:58	1.92546	1047.54	FALSE	91
2022-09-14	10:19:58	1.77324	1049.32	FALSE	91
2022-09-14	10:19:59	1.72551	1051.04	FALSE	91
2022-09-14	10:19:59	4.73365	1055.78	1	92
2022-09-14	10:19:59	5.59685	1061.37	1	93
2022-09-14	10:19:59	4.79879	1066.17	1	94
2022-09-14	10:20:00	3.16851	1069.34	1	95
2022-09-14	10:20:00	9.97782	1079.32	1	96
2022-09-14	10:20:00	10.6077	1089.93	1	97
2022-09-14	10:20:01	21.2637	1111.19	1	98
2022-09-14	10:20:01	13.0433	1124.23	1	99
2022-09-14	10:20:01	12.9193	1137.15	1	100
2022-09-14	10:20:01	12.1004	1149.25	1	101
2022-09-14	10:20:02	5.58052	1154.83	1	102
2022-09-14	10:20:02	3.83431	1158.67	1	103
2022-09-14	10:20:02	2.79507	1161.46	FALSE	103
2022-09-14	10:20:02	2.55558	1164.02	FALSE	103
2022-09-14	10:20:03	5.81161	1169.83	1	104
2022-09-14	10:20:03	10.651	1180.48	1	105
2022-09-14	10:20:03	4.54322	1185.02	1	106
2022-09-14	10:20:03	3.39202	1188.42	1	107
2022-09-14	10:20:04	3.09187	1191.51	1	108
2022-09-14	10:20:04	2.91915	1194.43	FALSE	108
2022-09-14	10:20:04	4.34708	1198.77	1	109
2022-09-14	10:20:05	5.22403	1204	1	110
2022-09-14	10:20:05	5.19395	1209.19	1	111
2022-09-14	10:20:05	0.753041	1209.95	FALSE	111
2022-09-14	10:20:05	0.826221	1210.77	FALSE	111
2022-09-14	10:20:06	1.57833	1212.35	FALSE	111
2022-09-14	10:20:06	2.42078	1214.77	FALSE	111
2022-09-14	10:20:06	1.23609	1216.01	FALSE	111
2022-09-14	10:20:06	1.0166	1217.02	FALSE	111
2022-09-14	10:20:07	0.52958	1217.55	FALSE	111
2022-09-14	10:20:07	0.580165	1218.13	FALSE	111
2022-09-14	10:20:07	0.244339	1218.38	FALSE	111
2022-09-14	10:20:07	0.263422	1218.64	FALSE	111
2022-09-14	10:20:08	0.145407	1218.79	FALSE	111
2022-09-14	10:20:08	0.370954	1219.16	FALSE	111
2022-09-14	10:20:08	0.0872394	1219.24	FALSE	111
2022-09-14	10:20:09	0.48444	1219.73	FALSE	111
2022-09-14	10:20:09	3.15345	1222.88	1	112
2022-09-14	10:20:09	3.34561	1226.23	1	113
2022-09-14	10:20:09	0.660776	1226.89	FALSE	113
2022-09-14	10:20:10	0.543728	1227.43	FALSE	113
2022-09-14	10:20:10	0.432481	1227.87	FALSE	113
2022-09-14	10:20:10	0.55645	1228.42	FALSE	113
2022-09-14	10:20:10	0.215229	1228.64	FALSE	113
2022-09-14	10:20:11	0.562099	1229.2	FALSE	113
2022-09-14	10:20:11	1.35095	1230.55	FALSE	113
2022-09-14	10:20:11	3.03416	1233.58	1	114
2022-09-14	10:20:11	1.42576	1235.01	FALSE	114
2022-09-14	10:20:12	1.55457	1236.56	FALSE	114
2022-09-14	10:20:12	1.70805	1238.27	FALSE	114
2022-09-14	10:20:12	1.34118	1239.61	FALSE	114
2022-09-14	10:20:13	0.791667	1240.41	FALSE	114
2022-09-14	10:20:13	0.578486	1240.98	FALSE	114
2022-09-14	10:20:13	1.03218	1242.02	FALSE	114
2022-09-14	10:20:13	0.268003	1242.28	FALSE	114
2022-09-14	10:20:14	0.492277	1242.78	FALSE	114
2022-09-14	10:20:14	0.409835	1243.19	FALSE	114
2022-09-14	10:20:14	0.261183	1243.45	FALSE	114
2022-09-14	10:20:14	0.287443	1243.73	FALSE	114
2022-09-14	10:20:15	0.149937	1243.88	FALSE	114
2022-09-14	10:20:15	0.152837	1244.04	FALSE	114
2022-09-14	10:20:15	-0.217341	1244.04	FALSE	114
2022-09-14	10:20:15	-0.12874	1244.04	FALSE	114
2022-09-14	10:20:16	-0.0584094	1244.04	FALSE	114
2022-09-14	10:20:16	0.0637279	1244.1	FALSE	114
2022-09-14	10:20:16	0.0504455	1244.15	FALSE	114
2022-09-14	10:20:16	0.177265	1244.33	FALSE	114
2022-09-14	10:20:17	0.318944	1244.65	FALSE	114
2022-09-14	10:20:17	0.130853	1244.78	FALSE	114
2022-09-14	10:20:17	0.240471	1245.02	FALSE	114
2022-09-14	10:20:18	0.102863	1245.12	FALSE	114
2022-09-14	10:20:18	0.224949	1245.35	FALSE	114
2022-09-14	10:20:18	0.00876615	1245.36	FALSE	114
2022-09-14	10:20:18	0.329835	1245.69	FALSE	114
2022-09-14	10:20:19	1.88648	1247.57	FALSE	114
2022-09-14	10:20:19	3.48235	1251.05	1	115
2022-09-14	10:20:19	2.71217	1253.77	FALSE	115
2022-09-14	10:20:19	1.5166	1255.28	FALSE	115
2022-09-14	10:20:20	0.912735	1256.2	FALSE	115
2022-09-14	10:20:20	1.16342	1257.36	FALSE	115
2022-09-14	10:20:20	0.677875	1258.04	FALSE	115
2022-09-14	10:20:20	1.68999	1259.73	FALSE	115
2022-09-14	10:20:21	4.55278	1264.28	1	116
2022-09-14	10:20:21	1.97411	1266.25	FALSE	116
2022-09-14	10:20:21	1.75579	1268.01	FALSE	116
2022-09-14	10:20:22	0.657366	1268.67	FALSE	116
2022-09-14	10:20:22	0.545865	1269.21	FALSE	116
2022-09-14	10:20:22	-0.052099	1269.21	FALSE	116
2022-09-14	10:20:22	-0.239733	1269.21	FALSE	116
2022-09-14	10:20:23	-0.196068	1269.21	FALSE	116
2022-09-14	10:20:23	0.377926	1269.59	FALSE	116
2022-09-14	10:20:23	0.0762979	1269.67	FALSE	116
2022-09-14	10:20:23	0.018588	1269.69	FALSE	116
2022-09-14	10:20:24	-0.222023	1269.69	FALSE	116
2022-09-14	10:20:24	-0.379376	1269.69	FALSE	116
2022-09-14	10:20:24	-0.462531	1269.69	FALSE	116
2022-09-14	10:20:24	-0.305381	1269.69	FALSE	116
2022-09-14	10:20:25	0.43299	1270.12	FALSE	116
2022-09-14	10:20:25	1.29635	1271.42	FALSE	116
2022-09-14	10:20:25	5.34505	1276.76	1	117
2022-09-14	10:20:26	9.36266	1286.12	1	118
2022-09-14	10:20:26	7.16403	1293.29	1	119
2022-09-14	10:20:26	5.05981	1298.35	1	120
2022-09-14	10:20:26	3.64388	1301.99	1	121
2022-09-14	10:20:27	1.97197	1303.96	FALSE	121
2022-09-14	10:20:27	0.513448	1304.48	FALSE	121
2022-09-14	10:20:27	0.422965	1304.9	FALSE	121
2022-09-14	10:20:27	-3.67871	1304.9	FALSE	121
2022-09-14	10:20:28	0.0447458	1304.94	FALSE	121
2022-09-14	10:20:28	-0.131437	1304.94	FALSE	121
2022-09-14	10:20:28	-0.302531	1304.94	FALSE	121
2022-09-14	10:20:28	0.118079	1305.06	FALSE	121
2022-09-14	10:20:29	0.113397	1305.18	FALSE	121
2022-09-14	10:20:29	0.881692	1306.06	FALSE	121
2022-09-14	10:20:29	1.98393	1308.04	FALSE	121
2022-09-14	10:20:30	4.41009	1312.45	1	122
2022-09-14	10:20:30	8.09039	1320.54	1	123
2022-09-14	10:20:30	1.47324	1322.01	FALSE	123
2022-09-14	10:20:30	4.72306	1326.74	1	124
2022-09-14	10:20:31	2.2994	1329.04	FALSE	124
2022-09-14	10:20:31	3.55716	1332.59	1	125
2022-09-14	10:20:31	3.81945	1336.41	1	126
2022-09-14	10:20:31	2.81263	1339.23	FALSE	126
2022-09-14	10:20:32	5.84922	1345.08	1	127
2022-09-14	10:20:32	2.41273	1347.49	FALSE	127
2022-09-14	10:20:32	7.20749	1354.7	1	128
2022-09-14	10:20:32	4.02037	1358.72	1	129
2022-09-14	10:20:33	7.28866	1366	1	130
2022-09-14	10:20:33	5.40953	1371.41	1	131
2022-09-14	10:20:33	3.90449	1375.32	1	132
2022-09-14	10:20:34	6.84892	1382.17	1	133
2022-09-14	10:20:34	2.07976	1384.25	FALSE	133
2022-09-14	10:20:34	3.84591	1388.09	1	134
2022-09-14	10:20:34	3.82235	1391.92	1	135
2022-09-14	10:20:35	1.90678	1393.82	FALSE	135
2022-09-14	10:20:35	3.35248	1397.18	1	136
2022-09-14	10:20:35	1.49228	1398.67	FALSE	136
2022-09-14	10:20:35	2.37625	1401.04	FALSE	136
2022-09-14	10:20:36	1.69029	1402.73	FALSE	136
2022-09-14	10:20:36	1.72118	1404.46	FALSE	136
2022-09-14	10:20:36	1.46485	1405.92	FALSE	136
2022-09-14	10:20:36	1.95014	1407.87	FALSE	136
2022-09-14	10:20:37	2.05696	1409.93	FALSE	136
2022-09-14	10:20:37	2.01599	1411.94	FALSE	136
2022-09-14	10:20:37	3.82022	1415.76	1	137
2022-09-14	10:20:38	2.77594	1418.54	FALSE	137
2022-09-14	10:20:38	6.90912	1425.45	1	138
2022-09-14	10:20:38	4.41105	1429.86	1	139
2022-09-14	10:20:38	9.5109	1439.37	1	140
2022-09-14	10:20:39	4.6765	1444.05	1	141
2022-09-14	10:20:39	5.78774	1449.83	1	142
2022-09-14	10:20:39	14.952	1464.79	1	143
2022-09-14	10:20:39	7.49334	1472.28	1	144
2022-09-14	10:20:40	17.2549	1489.53	1	145
2022-09-14	10:20:40	10.132	1499.67	1	146
2022-09-14	10:20:40	4.69238	1504.36	1	147
2022-09-14	10:20:40	17.7071	1522.07	1	148
2022-09-14	10:20:41	17.5565	1539.62	1	149
2022-09-14	10:20:41	5.77731	1545.4	1	150
2022-09-14	10:20:41	8.87487	1554.27	1	151
2022-09-14	10:20:42	9.90495	1564.18	1	152
2022-09-14	10:20:42	3.34958	1567.53	1	153
2022-09-14	10:20:42	8.12719	1575.66	1	154
2022-09-14	10:20:42	7.19502	1582.85	1	155
2022-09-14	10:20:43	5.50769	1588.36	1	156
2022-09-14	10:20:43	4.53085	1592.89	1	157
2022-09-14	10:20:43	1.02754	1593.92	FALSE	157
2022-09-14	10:20:43	0.738231	1594.66	FALSE	157
2022-09-14	10:20:44	0.309937	1594.97	FALSE	157
2022-09-14	10:20:44	0.441794	1595.41	FALSE	157
2022-09-14	10:20:44	0.400624	1595.81	FALSE	157
2022-09-14	10:20:44	0.338791	1596.15	FALSE	157
2022-09-14	10:20:45	0.210191	1596.36	FALSE	157
2022-09-14	10:20:45	0.197468	1596.55	FALSE	157
2022-09-14	10:20:45	0.152481	1596.71	FALSE	157
2022-09-14	10:20:45	0.302201	1597.01	FALSE	157
2022-09-14	10:20:46	1.04551	1598.06	FALSE	157
2022-09-14	10:20:46	0.513499	1598.57	FALSE	157
2022-09-14	10:20:46	0.236196	1598.8	FALSE	157
2022-09-14	10:20:47	0.222405	1599.03	FALSE	157
2022-09-14	10:20:47	0.0973158	1599.12	FALSE	157
2022-09-14	10:20:47	-0.0677223	1599.12	FALSE	157
2022-09-14	10:20:47	0.0315142	1599.16	FALSE	157
2022-09-14	10:20:48	0.0545168	1599.21	FALSE	157
2022-09-14	10:20:48	0.0541096	1599.26	FALSE	157
2022-09-14	10:20:48	0.108715	1599.37	FALSE	157
2022-09-14	10:20:48	0.0323284	1599.41	FALSE	157
2022-09-14	10:20:49	0.231463	1599.64	FALSE	157
2022-09-14	10:20:49	0.364593	1600	FALSE	157
2022-09-14	10:20:49	1.04128	1601.04	FALSE	157
2022-09-14	10:20:49	1.50902	1602.55	FALSE	157
2022-09-14	10:20:50	1.36775	1603.92	FALSE	157
2022-09-14	10:20:50	1.16759	1605.09	FALSE	157
2022-09-14	10:20:50	3.28027	1608.37	1	158
2022-09-14	10:20:51	3.48266	1611.85	1	159
2022-09-14	10:20:51	2.40622	1614.26	FALSE	159
2022-09-14	10:20:51	3.02607	1617.28	1	160
2022-09-14	10:20:51	2.76271	1620.05	FALSE	160
2022-09-14	10:20:52	2.76597	1622.81	FALSE	160
2022-09-14	10:20:52	2.02424	1624.84	FALSE	160
2022-09-14	10:20:52	1.29803	1626.13	FALSE	160
2022-09-14	10:20:52	3.33935	1629.47	1	161
2022-09-14	10:20:53	2.72892	1632.2	FALSE	161
2022-09-14	10:20:53	2.84642	1635.05	FALSE	161
2022-09-14	10:20:53	1.81533	1636.86	FALSE	161
2022-09-14	10:20:53	2.58765	1639.45	FALSE	161
2022-09-14	10:20:54	1.90994	1641.36	FALSE	161
2022-09-14	10:20:54	3.89085	1645.25	1	162
2022-09-14	10:20:54	4.20892	1649.46	1	163
2022-09-14	10:20:55	5.69701	1655.16	1	164
2022-09-14	10:20:55	4.27828	1659.44	1	165
2022-09-14	10:20:55	5.85472	1665.29	1	166
2022-09-14	10:20:55	1.98938	1667.28	FALSE	166
2022-09-14	10:20:56	3.27935	1670.56	1	167
2022-09-14	10:20:56	1.97426	1672.53	FALSE	167
2022-09-14	10:20:56	3.51899	1676.05	1	168
2022-09-14	10:20:56	5.7764	1681.83	1	169
2022-09-14	10:20:57	2.80271	1684.63	FALSE	169
2022-09-14	10:20:57	3.55492	1688.19	1	170
2022-09-14	10:20:57	2.19187	1690.38	FALSE	170
2022-09-14	10:20:57	4.96495	1695.34	1	171
2022-09-14	10:20:58	1.39426	1696.74	FALSE	171
2022-09-14	10:20:58	1.36072	1698.1	FALSE	171
2022-09-14	10:20:58	0.473906	1698.57	FALSE	171
2022-09-14	10:20:59	0.614313	1699.19	FALSE	171
2022-09-14	10:20:59	0.81645	1700	FALSE	171
2022-09-14	10:20:59	0.419199	1700.42	FALSE	171
2022-09-14	10:20:59	1.465	1701.89	FALSE	171
2022-09-14	10:21:00	2.39854	1704.29	FALSE	171
2022-09-14	10:21:00	1.9448	1706.23	FALSE	171
2022-09-14	10:21:00	1.07503	1707.31	FALSE	171
2022-09-14	10:21:00	0.461234	1707.77	FALSE	171
2022-09-14	10:21:01	0.274975	1708.04	FALSE	171
2022-09-14	10:21:01	0.224084	1708.27	FALSE	171
2022-09-14	10:21:01	0.100827	1708.37	FALSE	171
2022-09-14	10:21:01	0.121387	1708.49	FALSE	171
2022-09-14	10:21:02	0.099962	1708.59	FALSE	171
2022-09-14	10:21:02	0.0614379	1708.65	FALSE	171
2022-09-14	10:21:02	0.0220485	1708.67	FALSE	171
2022-09-14	10:21:02	-0.147061	1708.67	FALSE	171
2022-09-14	10:21:03	-0.159529	1708.67	FALSE	171
2022-09-14	10:21:03	-0.174185	1708.67	FALSE	171
2022-09-14	10:21:03	-0.349758	1708.67	FALSE	171
2022-09-14	10:21:04	-0.140394	1708.67	FALSE	171
2022-09-14	10:21:04	0.635585	1709.31	FALSE	171
2022-09-14	10:21:04	3.62703	1712.93	1	172
2022-09-14	10:21:04	4.89675	1717.83	1	173
2022-09-14	10:21:05	3.50525	1721.34	1	174
2022-09-14	10:21:05	2.35905	1723.7	FALSE	174
2022-09-14	10:21:05	2.66663	1726.36	FALSE	174
2022-09-14	10:21:05	3.73971	1730.1	1	175
2022-09-14	10:21:06	2.17156	1732.27	FALSE	175
2022-09-14	10:21:06	1.01034	1733.28	FALSE	175
2022-09-14	10:21:06	1.46897	1734.75	FALSE	175
2022-09-14	10:21:06	2.36246	1737.12	FALSE	175
2022-09-14	10:21:07	0.42785	1737.54	FALSE	175
2022-09-14	10:21:07	0.373193	1737.92	FALSE	175
2022-09-14	10:21:07	0.105916	1738.02	FALSE	175
2022-09-14	10:21:08	0.0334989	1738.06	FALSE	175
2022-09-14	10:21:08	-0.133727	1738.06	FALSE	175
2022-09-14	10:21:08	0.131667	1738.19	FALSE	175
2022-09-14	10:21:08	0.0608781	1738.25	FALSE	175
2022-09-14	10:21:09	0.244288	1738.49	FALSE	175
2022-09-14	10:21:09	0.0768577	1738.57	FALSE	175
2022-09-14	10:21:09	2.09207	1740.66	FALSE	175
2022-09-14	10:21:09	2.44057	1743.1	FALSE	175
2022-09-14	10:21:10	0.454517	1743.56	FALSE	175
2022-09-14	10:21:10	0.0157891	1743.57	FALSE	175
2022-09-14	10:21:10	0.0242369	1743.6	FALSE	175
2022-09-14	10:21:10	0.117774	1743.71	FALSE	175
2022-09-14	10:21:11	0.539962	1744.25	FALSE	175
2022-09-14	10:21:11	3.39884	1747.65	1	176
2022-09-14	10:21:11	4.22902	1751.88	1	177
2022-09-14	10:21:12	4.34001	1756.22	1	178
2022-09-14	10:21:12	2.96108	1759.18	FALSE	178
2022-09-14	10:21:12	3.97563	1763.16	1	179
2022-09-14	10:21:12	6.17517	1769.33	1	180
2022-09-14	10:21:13	7.98306	1777.32	1	181
2022-09-14	10:21:13	6.94556	1784.26	1	182
2022-09-14	10:21:13	5.46805	1789.73	1	183
2022-09-14	10:21:13	8.80866	1798.54	1	184
2022-09-14	10:21:14	3.06525	1801.6	1	185
2022-09-14	10:21:14	2.0424	1803.65	FALSE	185
2022-09-14	10:21:14	1.36235	1805.01	FALSE	185
2022-09-14	10:21:14	0.395229	1805.4	FALSE	185
2022-09-14	10:21:15	0.445407	1805.85	FALSE	185
2022-09-14	10:21:15	0.0480537	1805.9	FALSE	185
2022-09-14	10:21:15	0.201641	1806.1	FALSE	185
2022-09-14	10:21:16	0.101896	1806.2	FALSE	185
2022-09-14	10:21:16	0.112888	1806.31	FALSE	185
2022-09-14	10:21:16	0.186374	1806.5	FALSE	185
2022-09-14	10:21:16	0.252786	1806.75	FALSE	185
2022-09-14	10:21:17	0.483168	1807.24	FALSE	185
2022-09-14	10:21:17	0.537417	1807.77	FALSE	185
2022-09-14	10:21:17	0.550394	1808.32	FALSE	185
2022-09-14	10:21:17	0.362048	1808.69	FALSE	185
2022-09-14	10:21:18	0.654619	1809.34	FALSE	185
2022-09-14	10:21:18	0.856196	1810.2	FALSE	185
2022-09-14	10:21:18	0.289173	1810.49	FALSE	185
2022-09-14	10:21:18	0.296807	1810.78	FALSE	185
2022-09-14	10:21:19	0.285356	1811.07	FALSE	185
2022-09-14	10:21:19	0.312939	1811.38	FALSE	185
2022-09-14	10:21:19	0.450445	1811.83	FALSE	185
2022-09-14	10:21:20	0.288512	1812.12	FALSE	185
2022-09-14	10:21:20	0.371565	1812.49	FALSE	185
2022-09-14	10:21:20	0.269071	1812.76	FALSE	185
2022-09-14	10:21:20	0.71584	1813.48	FALSE	185
2022-09-14	10:21:21	-0.138358	1813.48	FALSE	185
2022-09-14	10:21:21	-0.510674	1813.48	FALSE	185
2022-09-14	10:21:21	-0.660903	1813.48	FALSE	185
2022-09-14	10:21:21	-0.602328	1813.48	FALSE	185
2022-09-14	10:21:22	-0.46131	1813.48	FALSE	185
2022-09-14	10:21:22	-0.11729	1813.48	FALSE	185
2022-09-14	10:21:22	0.0324303	1813.51	FALSE	185
2022-09-14	10:21:22	0.0314125	1813.54	FALSE	185
2022-09-14	10:21:23	0.0108527	1813.55	FALSE	185
2022-09-14	10:21:23	-0.0124552	1813.55	FALSE	185
2022-09-14	10:21:23	-0.00538142	1813.55	FALSE	185
2022-09-14	10:21:23	0.0180282	1813.57	FALSE	185
2022-09-14	10:21:24	-0.00614479	1813.57	FALSE	185
2022-09-14	10:21:24	-0.0102669	1813.57	FALSE	185
2022-09-14	10:21:24	-0.00904555	1813.57	FALSE	185
2022-09-14	10:21:25	0.00423688	1813.57	FALSE	185
2022-09-14	10:21:25	0.00876615	1813.58	FALSE	185
2022-09-14	10:21:25	-0.000394156	1813.58	FALSE	185
2022-09-14	10:21:25	-0.00517788	1813.58	FALSE	185
2022-09-14	10:21:26	-0.00675547	1813.58	FALSE	185
2022-09-14	10:21:26	0.00332086	1813.59	FALSE	185
2022-09-14	10:21:26	0.00500025	1813.59	FALSE	185
2022-09-14	10:21:26	0.00586539	1813.6	FALSE	185
2022-09-14	10:21:27	-0.0170863	1813.6	FALSE	185
2022-09-14	10:21:27	0.353651	1813.95	FALSE	185
2022-09-14	10:21:27	0.739198	1814.69	FALSE	185
2022-09-14	10:21:27	0.741183	1815.43	FALSE	185
2022-09-14	10:21:28	-0.089758	1815.43	FALSE	185
2022-09-14	10:21:28	-0.108944	1815.43	FALSE	185
2022-09-14	10:21:28	-0.116577	1815.43	FALSE	185
2022-09-14	10:21:29	-0.111946	1815.43	FALSE	185
2022-09-14	10:21:29	-0.130063	1815.43	FALSE	185
2022-09-14	10:21:29	-0.118053	1815.43	FALSE	185
2022-09-14	10:21:29	-0.126043	1815.43	FALSE	185
2022-09-14	10:21:30	-0.136476	1815.43	FALSE	185
2022-09-14	10:21:30	-0.122175	1815.43	FALSE	185
2022-09-14	10:21:30	-0.121972	1815.43	FALSE	185
2022-09-14	10:21:30	-0.134185	1815.43	FALSE	185
2022-09-14	10:21:31	-0.12818	1815.43	FALSE	185
2022-09-14	10:21:31	-0.134185	1815.43	FALSE	185
2022-09-14	10:21:31	-0.128079	1815.43	FALSE	185
2022-09-14	10:21:31	-0.112048	1815.43	FALSE	185
2022-09-14	10:21:32	-0.114542	1815.43	FALSE	185
2022-09-14	10:21:32	-0.123193	1815.43	FALSE	185
2022-09-14	10:21:32	-0.112455	1815.43	FALSE	185
2022-09-14	10:21:33	-0.103956	1815.43	FALSE	185
2022-09-14	10:21:33	-0.0984603	1815.43	FALSE	185
2022-09-14	10:21:33	-0.0971371	1815.43	FALSE	185
2022-09-14	10:21:33	-0.0796817	1815.43	FALSE	185
2022-09-14	10:21:34	-0.0784602	1815.43	FALSE	185
2022-09-14	10:21:34	-0.100191	1815.43	FALSE	185
2022-09-14	10:21:34	-0.123244	1815.43	FALSE	185
2022-09-14	10:21:34	-0.118664	1815.43	FALSE	185
2022-09-14	10:21:35	-0.059529	1815.43	FALSE	185
2022-09-14	10:21:35	0.737672	1816.17	FALSE	185
2022-09-14	10:21:35	0.731005	1816.9	FALSE	185
2022-09-14	10:21:35	0.740369	1817.64	FALSE	185
2022-09-14	10:21:36	0.732583	1818.37	FALSE	185
2022-09-14	10:21:36	0.747595	1819.12	FALSE	185
2022-09-14	10:21:36	0.732481	1819.85	FALSE	185
2022-09-14	10:21:37	0.739809	1820.59	FALSE	185
2022-09-14	10:21:37	0.74042	1821.33	FALSE	185
2022-09-14	10:21:37	0.733193	1822.07	FALSE	185
2022-09-14	10:21:37	0.739962	1822.81	FALSE	185
2022-09-14	10:21:38	0.740674	1823.55	FALSE	185
2022-09-14	10:21:38	0.741132	1824.29	FALSE	185
2022-09-14	10:21:38	0.742557	1825.03	FALSE	185
2022-09-14	10:21:38	0.742201	1825.77	FALSE	185
2022-09-14	10:21:39	0.736247	1826.51	FALSE	185
2022-09-14	10:21:39	0.734466	1827.24	FALSE	185
2022-09-14	10:21:39	0.738181	1827.98	FALSE	185
2022-09-14	10:21:39	0.735992	1828.72	FALSE	185
2022-09-14	10:21:40	0.734008	1829.45	FALSE	185
2022-09-14	10:21:40	0.738842	1830.19	FALSE	185
2022-09-14	10:21:40	0.745356	1830.94	FALSE	185
2022-09-14	10:21:41	0.96673	1831.9	FALSE	185
2022-09-14	10:21:41	0.899606	1832.8	FALSE	185
2022-09-14	10:21:41	0.940267	1833.74	FALSE	185
2022-09-14	10:21:41	0.527697	1834.27	FALSE	185
2022-09-14	10:21:42	0.494262	1834.76	FALSE	185
2022-09-14	10:21:42	0.480674	1835.25	FALSE	185
2022-09-14	10:21:42	0.419758	1835.66	FALSE	185
2022-09-14	10:21:42	0.28444	1835.95	FALSE	185
2022-09-14	10:21:43	0.538079	1836.49	FALSE	185
2022-09-14	10:21:43	0.430089	1836.92	FALSE	185
2022-09-14	10:21:43	0.423168	1837.34	FALSE	185
2022-09-14	10:21:43	0.345102	1837.69	FALSE	185
2022-09-14	10:21:44	0.601539	1838.29	FALSE	185
2022-09-14	10:21:44	0.42271	1838.71	FALSE	185
2022-09-14	10:21:44	0.475331	1839.19	FALSE	185
2022-09-14	10:21:44	0.337366	1839.52	FALSE	185
2022-09-14	10:21:45	0.557112	1840.08	FALSE	185
2022-09-14	10:21:45	0.264491	1840.34	FALSE	185
2022-09-14	10:21:45	0.685712	1841.03	FALSE	185
2022-09-14	10:21:46	0.278639	1841.31	FALSE	185
2022-09-14	10:21:46	1.95879	1843.27	FALSE	185
2022-09-14	10:21:46	3.14021	1846.41	1	186
2022-09-14	10:21:46	4.15263	1850.56	1	187
2022-09-14	10:21:47	2.30719	1852.87	FALSE	187
2022-09-14	10:21:47	2.04296	1854.91	FALSE	187
2022-09-14	10:21:47	0.489326	1855.4	FALSE	187
2022-09-14	10:21:47	0.572226	1855.97	FALSE	187
2022-09-14	10:21:48	0.614516	1856.59	FALSE	187
2022-09-14	10:21:48	0.448512	1857.04	FALSE	187
2022-09-14	10:21:48	0.510242	1857.55	FALSE	187
2022-09-14	10:21:48	0.28668	1857.83	FALSE	187
2022-09-14	10:21:49	0.412023	1858.24	FALSE	187
2022-09-14	10:21:49	0.360674	1858.6	FALSE	187
2022-09-14	10:21:49	0.418842	1859.02	FALSE	187
2022-09-14	10:21:50	0.578995	1859.6	FALSE	187
2022-09-14	10:21:50	0.226069	1859.83	FALSE	187
2022-09-14	10:21:50	0.551463	1860.38	FALSE	187
2022-09-14	10:21:50	0.201387	1860.58	FALSE	187
2022-09-14	10:21:51	0.105051	1860.69	FALSE	187
2022-09-14	10:21:51	-0.171692	1860.69	FALSE	187
2022-09-14	10:21:51	-0.151336	1860.69	FALSE	187
2022-09-14	10:21:51	-0.104822	1860.69	FALSE	187
2022-09-14	10:21:52	-0.132201	1860.69	FALSE	187
2022-09-14	10:21:52	-0.346246	1860.69	FALSE	187
2022-09-14	10:21:52	-0.286196	1860.69	FALSE	187
2022-09-14	10:21:52	-0.190928	1860.69	FALSE	187
2022-09-14	10:21:53	-0.159631	1860.69	FALSE	187
2022-09-14	10:21:53	0.0780282	1860.76	FALSE	187
2022-09-14	10:21:53	0.20444	1860.97	FALSE	187
2022-09-14	10:21:54	0.442863	1861.41	FALSE	187
2022-09-14	10:21:54	0.446171	1861.86	FALSE	187
2022-09-14	10:21:54	0.0848475	1861.94	FALSE	187
2022-09-14	10:21:54	0.131972	1862.07	FALSE	187
2022-09-14	10:21:55	-0.0191219	1862.07	FALSE	187
2022-09-14	10:21:55	0.319249	1862.39	FALSE	187
2022-09-14	10:21:55	0.468308	1862.86	FALSE	187
2022-09-14	10:21:55	0.371921	1863.23	FALSE	187
2022-09-14	10:21:56	0.319199	1863.55	FALSE	187
2022-09-14	10:21:56	0.516349	1864.07	FALSE	187
2022-09-14	10:21:56	0.448257	1864.52	FALSE	187
2022-09-14	10:21:56	0.440166	1864.96	FALSE	187
2022-09-14	10:21:57	0.431463	1865.39	FALSE	187
2022-09-14	10:21:57	0.368257	1865.76	FALSE	187
2022-09-14	10:21:57	0.550852	1866.31	FALSE	187
2022-09-14	10:21:58	0.352532	1866.66	FALSE	187
2022-09-14	10:21:58	0.505916	1867.17	FALSE	187
2022-09-14	10:21:58	0.318384	1867.49	FALSE	187
2022-09-14	10:21:58	0.54729	1868.03	FALSE	187
2022-09-14	10:21:59	0.340064	1868.37	FALSE	187
2022-09-14	10:21:59	0.520267	1868.89	FALSE	187
2022-09-14	10:21:59	0.280827	1869.17	FALSE	187
2022-09-14	10:21:59	0.687494	1869.86	FALSE	187
2022-09-14	10:22:00	0.120216	1869.98	FALSE	187
2022-09-14	10:22:00	0.12154	1870.1	FALSE	187
2022-09-14	10:22:00	0.218181	1870.32	FALSE	187
2022-09-14	10:22:00	0.40154	1870.72	FALSE	187
2022-09-14	10:22:01	0.290547	1871.01	FALSE	187
2022-09-14	10:22:01	0.461285	1871.47	FALSE	187
2022-09-14	10:22:01	0.347697	1871.82	FALSE	187
2022-09-14	10:22:01	0.435433	1872.26	FALSE	187
2022-09-14	10:22:02	0.42388	1872.68	FALSE	187
2022-09-14	10:22:02	0.373397	1873.06	FALSE	187
2022-09-14	10:22:02	0.271463	1873.33	FALSE	187
2022-09-14	10:22:03	0.291158	1873.62	FALSE	187
2022-09-14	10:22:03	0.375382	1873.99	FALSE	187
2022-09-14	10:22:03	0.186679	1874.18	FALSE	187
2022-09-14	10:22:03	0.184644	1874.36	FALSE	187
2022-09-14	10:22:04	0.216501	1874.58	FALSE	187
2022-09-14	10:22:04	0.185713	1874.77	FALSE	187
2022-09-14	10:22:04	0.209733	1874.98	FALSE	187
2022-09-14	10:22:04	0.402659	1875.38	FALSE	187
2022-09-14	10:22:05	0.203015	1875.58	FALSE	187
2022-09-14	10:22:05	0.562404	1876.14	FALSE	187
2022-09-14	10:22:05	0.387137	1876.53	FALSE	187
2022-09-14	10:22:05	0.395738	1876.93	FALSE	187
2022-09-14	10:22:06	0.193244	1877.12	FALSE	187
2022-09-14	10:22:06	0.497926	1877.62	FALSE	187
2022-09-14	10:22:06	0.315636	1877.93	FALSE	187
2022-09-14	10:22:07	0.319606	1878.25	FALSE	187
2022-09-14	10:22:07	0.223626	1878.48	FALSE	187
2022-09-14	10:22:07	0.297672	1878.78	FALSE	187
2022-09-14	10:22:07	0.292379	1879.07	FALSE	187
2022-09-14	10:22:08	0.192888	1879.26	FALSE	187
2022-09-14	10:22:08	0.288054	1879.55	FALSE	187
2022-09-14	10:22:08	0.230242	1879.78	FALSE	187
2022-09-14	10:22:08	0.278435	1880.06	FALSE	187
2022-09-14	10:22:09	0.169733	1880.23	FALSE	187
2022-09-14	10:22:09	0.356908	1880.58	FALSE	187
2022-09-14	10:22:09	0.212328	1880.8	FALSE	187
2022-09-14	10:22:09	0.565611	1881.36	FALSE	187
2022-09-14	10:22:10	1.35452	1882.72	FALSE	187
2022-09-14	10:22:10	1.65935	1884.38	FALSE	187
2022-09-14	10:22:10	1.48515	1885.86	FALSE	187
2022-09-14	10:22:11	2.08841	1887.95	FALSE	187
2022-09-14	10:22:11	1.04047	1888.99	FALSE	187
2022-09-14	10:22:11	1.56953	1890.56	FALSE	187
2022-09-14	10:22:11	0.734313	1891.29	FALSE	187
2022-09-14	10:22:12	0.695025	1891.99	FALSE	187
2022-09-14	10:22:12	0.616959	1892.61	FALSE	187

## Sheet: KimChi_martin_2022914101649
Date	Time	Lbs			**GoPro Fitting: 10:06
2022-09-14	10:16:50	0.312328
2022-09-14	10:16:50	0.322303
2022-09-14	10:16:50	0.338741
2022-09-14	10:16:50	0.334211
2022-09-14	10:16:51	0.323982
2022-09-14	10:16:51	0.401387
2022-09-14	10:16:51	0.335738
2022-09-14	10:16:51	0.379249
2022-09-14	10:16:52	0.348664
2022-09-14	10:16:52	0.355331
2022-09-14	10:16:52	0.349886
2022-09-14	10:16:52	0.365916
2022-09-14	10:16:53	0.357468
2022-09-14	10:16:53	0.374059
2022-09-14	10:16:53	0.377061
2022-09-14	10:16:54	0.365255
2022-09-14	10:16:54	0.373448
2022-09-14	10:16:54	0.366781
2022-09-14	10:16:54	0.40215
2022-09-14	10:16:55	0.373855
2022-09-14	10:16:55	0.417367
2022-09-14	10:16:55	0.293346
2022-09-14	10:16:55	0.932786
2022-09-14	10:16:56	1.54302
2022-09-14	10:16:56	1.44907
2022-09-14	10:16:56	1.18113
2022-09-14	10:16:56	1.55126
2022-09-14	10:16:57	1.54072
2022-09-14	10:16:57	1.52775
2022-09-14	10:16:57	1.55253
2022-09-14	10:16:58	1.55355
2022-09-14	10:16:58	1.54632
2022-09-14	10:16:58	1.55177
2022-09-14	10:16:58	1.53111
2022-09-14	10:16:59	1.53559
2022-09-14	10:16:59	1.54022
2022-09-14	10:16:59	1.53996
2022-09-14	10:16:59	1.55518
2022-09-14	10:17:00	1.58088
2022-09-14	10:17:00	1.56347
2022-09-14	10:17:00	0.440725
2022-09-14	10:17:00	0.487952
2022-09-14	10:17:01	1.02968
2022-09-14	10:17:01	3.04469
2022-09-14	10:17:01	5.38998
2022-09-14	10:17:02	4.61976
2022-09-14	10:17:02	4.22785
2022-09-14	10:17:02	3.46775
2022-09-14	10:17:02	5.12057
2022-09-14	10:17:03	4.1221
2022-09-14	10:17:03	8.69248
2022-09-14	10:17:03	8.99976
2022-09-14	10:17:03	14.9441
2022-09-14	10:17:04	29.9604
2022-09-14	10:17:04	24.963
2022-09-14	10:17:04	12.3999
2022-09-14	10:17:04	0.9907
2022-09-14	10:17:05	0.11411
2022-09-14	10:17:05	-0.147977
2022-09-14	10:17:05	-0.139936
2022-09-14	10:17:05	-0.33617
2022-09-14	10:17:06	-0.397646
2022-09-14	10:17:06	-0.611539
2022-09-14	10:17:06	-0.781055
2022-09-14	10:17:07	-0.826195
2022-09-14	10:17:07	-0.843702
2022-09-14	10:17:07	-0.795101
2022-09-14	10:17:07	-0.75846
2022-09-14	10:17:08	-0.905432
2022-09-14	10:17:08	-0.861869
2022-09-14	10:17:08	-1.12141
2022-09-14	10:17:08	-1.09617
2022-09-14	10:17:09	-0.871335
2022-09-14	10:17:09	-1.08777
2022-09-14	10:17:09	-0.976068
2022-09-14	10:17:09	-0.956628
2022-09-14	10:17:10	-0.737137
2022-09-14	10:17:10	-0.867162
2022-09-14	10:17:10	-0.779732
2022-09-14	10:17:11	-0.567824
2022-09-14	10:17:11	-0.566602
2022-09-14	10:17:11	-0.822633
2022-09-14	10:17:11	-0.855254
2022-09-14	10:17:12	-0.728333
2022-09-14	10:17:12	-0.423753
2022-09-14	10:17:12	-0.218409
2022-09-14	10:17:12	-0.311946
2022-09-14	10:17:13	0.00143789
2022-09-14	10:17:13	-0.109809
2022-09-14	10:17:13	0.0477483
2022-09-14	10:17:13	-0.00304046
2022-09-14	10:17:14	0.248359
2022-09-14	10:17:14	0.414211
2022-09-14	10:17:14	0.419911
2022-09-14	10:17:15	0.140064
2022-09-14	10:17:15	0.252684
2022-09-14	10:17:15	0.221641
2022-09-14	10:17:15	0.175127
2022-09-14	10:17:16	0.12556
2022-09-14	10:17:16	0.734364
2022-09-14	10:17:16	0.739198
2022-09-14	10:17:16	0.734873
2022-09-14	10:17:17	0.737417
2022-09-14	10:17:17	0.732684
2022-09-14	10:17:17	0.728817
2022-09-14	10:17:17	1.0394
2022-09-14	10:17:18	0.688664
2022-09-14	10:17:18	2.15482
2022-09-14	10:17:18	4.25324
2022-09-14	10:17:19	1.57513
2022-09-14	10:17:19	0.697366
2022-09-14	10:17:19	0.73757
2022-09-14	10:17:19	0.731463
2022-09-14	10:17:20	0.7307
2022-09-14	10:17:20	0.735891
2022-09-14	10:17:20	0.736756
2022-09-14	10:17:20	0.738282
2022-09-14	10:17:21	0.729173
2022-09-14	10:17:21	0.731667
2022-09-14	10:17:21	0.738486
2022-09-14	10:17:21	0.738639
2022-09-14	10:17:22	0.734008
2022-09-14	10:17:22	0.73528
2022-09-14	10:17:22	0.732939
2022-09-14	10:17:23	0.732735
2022-09-14	10:17:23	0.736908
2022-09-14	10:17:23	0.737672
2022-09-14	10:17:23	0.681641
2022-09-14	10:17:24	0.0358399
2022-09-14	10:17:24	0.0519723
2022-09-14	10:17:24	-0.00507608
2022-09-14	10:17:24	0.142608
2022-09-14	10:17:25	0.125713
2022-09-14	10:17:25	0.156909
2022-09-14	10:17:25	0.738181
2022-09-14	10:17:25	0.734109
2022-09-14	10:17:26	0.734466
2022-09-14	10:17:26	0.721743
2022-09-14	10:17:26	0.736196
2022-09-14	10:17:27	0.73299
2022-09-14	10:17:27	0.732481
2022-09-14	10:17:27	0.726425
2022-09-14	10:17:27	0.741132
2022-09-14	10:17:28	0.735433
2022-09-14	10:17:28	0.736857
2022-09-14	10:17:28	0.735891
2022-09-14	10:17:28	0.740725
2022-09-14	10:17:29	0.742252
2022-09-14	10:17:29	0.738181
2022-09-14	10:17:29	0.73757
2022-09-14	10:17:29	0.732175
2022-09-14	10:17:30	0.728461
2022-09-14	10:17:30	0.74159
2022-09-14	10:17:30	0.737519
2022-09-14	10:17:31	0.738231
2022-09-14	10:17:31	0.742964
2022-09-14	10:17:31	0.743066
2022-09-14	10:17:31	0.735585
2022-09-14	10:17:32	0.737061
2022-09-14	10:17:32	0.735076
2022-09-14	10:17:32	0.728359
2022-09-14	10:17:32	0.730852
2022-09-14	10:17:33	0.729071
2022-09-14	10:17:33	0.733397
2022-09-14	10:17:33	0.734771
2022-09-14	10:17:33	0.7307
2022-09-14	10:17:34	0.734618
2022-09-14	10:17:34	0.734568
2022-09-14	10:17:34	0.738639
2022-09-14	10:17:35	0.733702
2022-09-14	10:17:35	0.730954
2022-09-14	10:17:35	0.73645
2022-09-14	10:17:35	0.731972
2022-09-14	10:17:36	0.735331
2022-09-14	10:17:36	0.730852
2022-09-14	10:17:36	0.734109
2022-09-14	10:17:36	0.737875
2022-09-14	10:17:37	0.737417
2022-09-14	10:17:37	2.14154
2022-09-14	10:17:37	0.64785
2022-09-14	10:17:37	0.869427
2022-09-14	10:17:38	2.42866
2022-09-14	10:17:38	1.49233
2022-09-14	10:17:38	0.665254
2022-09-14	10:17:38	0.733346
2022-09-14	10:17:39	0.738639
2022-09-14	10:17:39	0.75472
2022-09-14	10:17:39	0.739402
2022-09-14	10:17:40	0.75187
2022-09-14	10:17:40	0.743829
2022-09-14	10:17:40	0.853855
2022-09-14	10:17:40	0.733855
2022-09-14	10:17:41	0.745713
2022-09-14	10:17:41	0.748053
2022-09-14	10:17:41	0.758079
2022-09-14	10:17:41	0.746883
2022-09-14	10:17:42	0.741743
2022-09-14	10:17:42	0.738028
2022-09-14	10:17:42	0.736654
2022-09-14	10:17:42	0.734822
2022-09-14	10:17:43	0.733448
2022-09-14	10:17:43	0.733397
2022-09-14	10:17:43	0.73813
2022-09-14	10:17:44	0.741539
2022-09-14	10:17:44	0.739707
2022-09-14	10:17:44	0.730038
2022-09-14	10:17:44	0.734873
2022-09-14	10:17:45	0.738893
2022-09-14	10:17:45	0.736756
2022-09-14	10:17:45	0.736603
2022-09-14	10:17:45	0.743117
2022-09-14	10:17:46	3.81614
2022-09-14	10:17:46	2.75859
2022-09-14	10:17:46	1.6224
2022-09-14	10:17:46	1.03126
2022-09-14	10:17:47	1.13564
2022-09-14	10:17:47	1.57284
2022-09-14	10:17:47	3.24551
2022-09-14	10:17:48	1.86281
2022-09-14	10:17:48	4.85172
2022-09-14	10:17:48	4.10016
2022-09-14	10:17:48	1.88037
2022-09-14	10:17:49	1.74307
2022-09-14	10:17:49	2.30897
2022-09-14	10:17:49	0.670801
2022-09-14	10:17:49	0.852786
2022-09-14	10:17:50	0.737112
2022-09-14	10:17:50	1.84576
2022-09-14	10:17:50	1.28286
2022-09-14	10:17:50	2.51991
2022-09-14	10:17:51	3.81029
2022-09-14	10:17:51	3.46805
2022-09-14	10:17:51	1.24698
2022-09-14	10:17:52	0.992277
2022-09-14	10:17:52	0.543015
2022-09-14	10:17:52	0.578893
2022-09-14	10:17:52	0.832684
2022-09-14	10:17:53	0.806272
2022-09-14	10:17:53	0.734975
2022-09-14	10:17:53	0.406629
2022-09-14	10:17:53	0.241794
2022-09-14	10:17:54	0.564491
2022-09-14	10:17:54	1.13503
2022-09-14	10:17:54	2.21355
2022-09-14	10:17:54	3.94688
2022-09-14	10:17:55	4.79406
2022-09-14	10:17:55	3.24861
2022-09-14	10:17:55	3.81711
2022-09-14	10:17:56	3.73899
2022-09-14	10:17:56	2.9906
2022-09-14	10:17:56	1.93991
2022-09-14	10:17:56	0.979097
2022-09-14	10:17:57	0.652939
2022-09-14	10:17:57	0.275127
2022-09-14	10:17:57	1.04103
2022-09-14	10:17:57	1.01492
2022-09-14	10:17:58	1.29594
2022-09-14	10:17:58	1.10933
2022-09-14	10:17:58	0.939707
2022-09-14	10:17:58	0.426883
2022-09-14	10:17:59	0.53874
2022-09-14	10:17:59	0.392125
2022-09-14	10:17:59	0.505814
2022-09-14	10:18:00	0.304033
2022-09-14	10:18:00	0.295738
2022-09-14	10:18:00	0.366985
2022-09-14	10:18:00	0.360674
2022-09-14	10:18:01	0.46556
2022-09-14	10:18:01	0.411667
2022-09-14	10:18:01	0.46729
2022-09-14	10:18:01	0.435178
2022-09-14	10:18:02	0.432074
2022-09-14	10:18:02	0.389682
2022-09-14	10:18:02	0.386527
2022-09-14	10:18:02	0.394669
2022-09-14	10:18:03	0.388919
2022-09-14	10:18:03	0.372888
2022-09-14	10:18:03	0.392939
2022-09-14	10:18:04	0.488054
2022-09-14	10:18:04	0.387494
2022-09-14	10:18:04	0.249631
2022-09-14	10:18:04	0.162608
2022-09-14	10:18:05	0.175331
2022-09-14	10:18:05	0.376705
2022-09-14	10:18:05	0.342303
2022-09-14	10:18:05	0.317163
2022-09-14	10:18:06	0.46958
2022-09-14	10:18:06	0.416552
2022-09-14	10:18:06	0.425
2022-09-14	10:18:06	0.452837
2022-09-14	10:18:07	0.36556
2022-09-14	10:18:07	0.323626
2022-09-14	10:18:07	0.273295
2022-09-14	10:18:07	0.410903
2022-09-14	10:18:08	0.345713
2022-09-14	10:18:08	0.369631
2022-09-14	10:18:08	0.388817
2022-09-14	10:18:09	0.433397
2022-09-14	10:18:09	0.432176
2022-09-14	10:18:09	0.401794
2022-09-14	10:18:09	0.420216
2022-09-14	10:18:10	0.389071
2022-09-14	10:18:10	0.370089
2022-09-14	10:18:10	0.475484
2022-09-14	10:18:10	0.472379
2022-09-14	10:18:11	0.417417
2022-09-14	10:18:11	0.413957
2022-09-14	10:18:11	0.435789
2022-09-14	10:18:11	0.415992
2022-09-14	10:18:12	0.425305
2022-09-14	10:18:12	0.38556
2022-09-14	10:18:12	0.410089
2022-09-14	10:18:13	0.410598
2022-09-14	10:18:13	0.384542
2022-09-14	10:18:13	0.388664
2022-09-14	10:18:13	0.363219
2022-09-14	10:18:14	0.415229
2022-09-14	10:18:14	0.4193
2022-09-14	10:18:14	0.398028
2022-09-14	10:18:14	0.38785
2022-09-14	10:18:15	0.398283
2022-09-14	10:18:15	0.41869
2022-09-14	10:18:15	0.385814
2022-09-14	10:18:15	0.488562
2022-09-14	10:18:16	0.499606
2022-09-14	10:18:16	0.41757
2022-09-14	10:18:16	0.411769
2022-09-14	10:18:17	0.343626
2022-09-14	10:18:17	0.520013
2022-09-14	10:18:17	0.63757
2022-09-14	10:18:17	0.345407
2022-09-14	10:18:18	0.386527
2022-09-14	10:18:18	0.35416
2022-09-14	10:18:18	0.411718
2022-09-14	10:18:18	0.39299
2022-09-14	10:18:19	0.398079
2022-09-14	10:18:19	0.420573
2022-09-14	10:18:19	0.404186
2022-09-14	10:18:19	0.281489
2022-09-14	10:18:20	0.449886
2022-09-14	10:18:20	0.484033
2022-09-14	10:18:20	0.495738
2022-09-14	10:18:21	0.106374
2022-09-14	10:18:21	0.0129901
2022-09-14	10:18:21	-0.0999361
2022-09-14	10:18:21	-0.214542
2022-09-14	10:18:22	-0.55729
2022-09-14	10:18:22	-0.464262
2022-09-14	10:18:22	-0.432811
2022-09-14	10:18:22	-0.251641
2022-09-14	10:18:23	-0.153575
2022-09-14	10:18:23	0.0338043
2022-09-14	10:18:23	0.113143
2022-09-14	10:18:23	-0.155407
2022-09-14	10:18:24	-0.213982
2022-09-14	10:18:24	0.253041
2022-09-14	10:18:24	0.47472
2022-09-14	10:18:25	0.409682
2022-09-14	10:18:25	0.373753
2022-09-14	10:18:25	0.319504
2022-09-14	10:18:25	0.402964
2022-09-14	10:18:26	0.354568
2022-09-14	10:18:26	0.357774
2022-09-14	10:18:26	0.508257
2022-09-14	10:18:26	0.223015
2022-09-14	10:18:27	0.326374
2022-09-14	10:18:27	0.277417
2022-09-14	10:18:27	0.453193
2022-09-14	10:18:27	0.175585
2022-09-14	10:18:28	-0.0387657
2022-09-14	10:18:28	-0.300445
2022-09-14	10:18:28	-0.760241
2022-09-14	10:18:29	-0.686857
2022-09-14	10:18:29	-0.518664
2022-09-14	10:18:29	0.129326
2022-09-14	10:18:29	0.285814
2022-09-14	10:18:30	0.529529
2022-09-14	10:18:30	1.52505
2022-09-14	10:18:30	2.70617
2022-09-14	10:18:30	0.826018
2022-09-14	10:18:31	0.24154
2022-09-14	10:18:31	0.1364
2022-09-14	10:18:31	0.0487661
2022-09-14	10:18:31	-0.0965773
2022-09-14	10:18:32	-0.11388
2022-09-14	10:18:32	0.105916
2022-09-14	10:18:32	0.444186
2022-09-14	10:18:33	0.460929
2022-09-14	10:18:33	0.0356364
2022-09-14	10:18:33	-0.249249
2022-09-14	10:18:33	-0.438308
2022-09-14	10:18:34	-0.344669
2022-09-14	10:18:34	-0.144058
2022-09-14	10:18:34	-0.168079
2022-09-14	10:18:34	0.352786
2022-09-14	10:18:35	1.36704
2022-09-14	10:18:35	3.8882
2022-09-14	10:18:35	2.98795
2022-09-14	10:18:35	2.55787
2022-09-14	10:18:36	1.69441
2022-09-14	10:18:36	2.58841
2022-09-14	10:18:36	2.07833
2022-09-14	10:18:36	3.57986
2022-09-14	10:18:37	2.99497
2022-09-14	10:18:37	5.05279
2022-09-14	10:18:37	4.82836
2022-09-14	10:18:38	3.5677
2022-09-14	10:18:38	2.08866
2022-09-14	10:18:38	0.841081
2022-09-14	10:18:38	0.348613
2022-09-14	10:18:39	0.513244
2022-09-14	10:18:39	0.799046
2022-09-14	10:18:39	0.215789
2022-09-14	10:18:39	0.488613
2022-09-14	10:18:40	0.225356
2022-09-14	10:18:40	0.44388
2022-09-14	10:18:40	0.193448
2022-09-14	10:18:40	0.495483
2022-09-14	10:18:41	0.214924
2022-09-14	10:18:41	0.489275
2022-09-14	10:18:41	0.406171
2022-09-14	10:18:42	1.07406
2022-09-14	10:18:42	1.42057
2022-09-14	10:18:42	2.08922
2022-09-14	10:18:42	2.37116
2022-09-14	10:18:43	2.7681
2022-09-14	10:18:43	1.53523
2022-09-14	10:18:43	0.935229
2022-09-14	10:18:43	1.59482
2022-09-14	10:18:44	2.49431
2022-09-14	10:18:44	3.0766
2022-09-14	10:18:44	1.15513
2022-09-14	10:18:44	1.63981
2022-09-14	10:18:45	1.2848
2022-09-14	10:18:45	2.20805
2022-09-14	10:18:45	3.16663
2022-09-14	10:18:46	4.23828
2022-09-14	10:18:46	4.4706
2022-09-14	10:18:46	2.06744
2022-09-14	10:18:46	1.52943
2022-09-14	10:18:47	0.287443
2022-09-14	10:18:47	0.435891
2022-09-14	10:18:47	0.305102
2022-09-14	10:18:47	0.377774
2022-09-14	10:18:48	0.499656
2022-09-14	10:18:48	0.27187
2022-09-14	10:18:48	0.439351
2022-09-14	10:18:48	0.228613
2022-09-14	10:18:49	0.385713
2022-09-14	10:18:49	0.160166
2022-09-14	10:18:49	0.410038
2022-09-14	10:18:50	0.363015
2022-09-14	10:18:50	1.05019
2022-09-14	10:18:50	1.8706
2022-09-14	10:18:50	2.74627
2022-09-14	10:18:51	2.52022
2022-09-14	10:18:51	2.74276
2022-09-14	10:18:51	1.50607
2022-09-14	10:18:51	1.25757
2022-09-14	10:18:52	0.704491
2022-09-14	10:18:52	0.55584
2022-09-14	10:18:52	0.422761
2022-09-14	10:18:52	0.351158
2022-09-14	10:18:53	0.329021
2022-09-14	10:18:53	0.331565
2022-09-14	10:18:53	0.700827
2022-09-14	10:18:54	0.736196
2022-09-14	10:18:54	0.740929
2022-09-14	10:18:54	0.741285
2022-09-14	10:18:54	1.87274
2022-09-14	10:18:55	3.13543
2022-09-14	10:18:55	3.00169
2022-09-14	10:18:55	2.04917
2022-09-14	10:18:55	1.32637
2022-09-14	10:18:56	1.11874
2022-09-14	10:18:56	0.997621
2022-09-14	10:18:56	0.811616
2022-09-14	10:18:56	1.19497
2022-09-14	10:18:57	2.01324
2022-09-14	10:18:57	2.84164
2022-09-14	10:18:57	2.73319
2022-09-14	10:18:58	2.75187
2022-09-14	10:18:58	2.87294
2022-09-14	10:18:58	2.80764
2022-09-14	10:18:58	2.56286
2022-09-14	10:18:59	2.33426
2022-09-14	10:18:59	2.38408
2022-09-14	10:18:59	2.13966
2022-09-14	10:18:59	1.32841
2022-09-14	10:19:00	1.2764
2022-09-14	10:19:00	2.27584
2022-09-14	10:19:00	3.64464
2022-09-14	10:19:00	3.88184
2022-09-14	10:19:01	2.97141
2022-09-14	10:19:01	2.84189
2022-09-14	10:19:01	2.3078
2022-09-14	10:19:02	0.858842
2022-09-14	10:19:02	0.511107
2022-09-14	10:19:02	0.65014
2022-09-14	10:19:02	0.627596
2022-09-14	10:19:03	0.318791
2022-09-14	10:19:03	0.473753
2022-09-14	10:19:03	0.18098
2022-09-14	10:19:03	0.367595
2022-09-14	10:19:04	0.349173
2022-09-14	10:19:04	0.214008
2022-09-14	10:19:04	0.470344
2022-09-14	10:19:04	0.499606
2022-09-14	10:19:05	2.26296
2022-09-14	10:19:05	3.16902
2022-09-14	10:19:05	5.20367
2022-09-14	10:19:05	1.73548
2022-09-14	10:19:06	1.74373
2022-09-14	10:19:06	0.585509
2022-09-14	10:19:06	0.514466
2022-09-14	10:19:07	0.500165
2022-09-14	10:19:07	0.248206
2022-09-14	10:19:07	0.423982
2022-09-14	10:19:07	0.843524
2022-09-14	10:19:08	1.24785
2022-09-14	10:19:08	0.874211
2022-09-14	10:19:08	0.928969
2022-09-14	10:19:08	0.862303
2022-09-14	10:19:09	1.34495
2022-09-14	10:19:09	1.53207
2022-09-14	10:19:09	2.20357
2022-09-14	10:19:09	3.77187
2022-09-14	10:19:10	2.95314
2022-09-14	10:19:10	4.32739
2022-09-14	10:19:10	2.59915
2022-09-14	10:19:11	5.47599
2022-09-14	10:19:11	2.49467
2022-09-14	10:19:11	4.78739
2022-09-14	10:19:11	4.92933
2022-09-14	10:19:12	1.805
2022-09-14	10:19:12	3.71273
2022-09-14	10:19:12	1.29991
2022-09-14	10:19:12	3.24826
2022-09-14	10:19:13	1.74999
2022-09-14	10:19:13	3.66261
2022-09-14	10:19:13	5.37385
2022-09-14	10:19:13	8.09507
2022-09-14	10:19:14	14.0699
2022-09-14	10:19:14	9.15405
2022-09-14	10:19:14	5.58306
2022-09-14	10:19:15	1.14154
2022-09-14	10:19:15	0.321183
2022-09-14	10:19:15	0.284237
2022-09-14	10:19:15	0.26841
2022-09-14	10:19:16	0.453092
2022-09-14	10:19:16	0.234313
2022-09-14	10:19:16	0.641387
2022-09-14	10:19:16	1.99426
2022-09-14	10:19:17	11.8773
2022-09-14	10:19:17	17.772
2022-09-14	10:19:17	13.0428
2022-09-14	10:19:17	6.14143
2022-09-14	10:19:18	4.21187
2022-09-14	10:19:18	5.26159
2022-09-14	10:19:18	2.10907
2022-09-14	10:19:19	1.83055
2022-09-14	10:19:19	2.95218
2022-09-14	10:19:19	1.90744
2022-09-14	10:19:19	4.01228
2022-09-14	10:19:20	1.60698
2022-09-14	10:19:20	1.40719
2022-09-14	10:19:20	0.856247
2022-09-14	10:19:20	1.47233
2022-09-14	10:19:21	1.95706
2022-09-14	10:19:21	3.98464
2022-09-14	10:19:21	5.2307
2022-09-14	10:19:21	5.63645
2022-09-14	10:19:22	4.31502
2022-09-14	10:19:22	3.53431
2022-09-14	10:19:22	2.91619
2022-09-14	10:19:23	2.77167
2022-09-14	10:19:23	2.74851
2022-09-14	10:19:23	2.80113
2022-09-14	10:19:23	2.40592
2022-09-14	10:19:24	1.35706
2022-09-14	10:19:24	0.448308
2022-09-14	10:19:24	0.359249
2022-09-14	10:19:24	0.290344
2022-09-14	10:19:25	0.329886
2022-09-14	10:19:25	0.388308
2022-09-14	10:19:25	0.998893
2022-09-14	10:19:25	1.22861
2022-09-14	10:19:26	0.952379
2022-09-14	10:19:26	1.78001
2022-09-14	10:19:26	2.68754
2022-09-14	10:19:27	2.2077
2022-09-14	10:19:27	1.02449
2022-09-14	10:19:27	1.30795
2022-09-14	10:19:27	1.89976
2022-09-14	10:19:28	1.59039
2022-09-14	10:19:28	1.1907
2022-09-14	10:19:28	2.18739
2022-09-14	10:19:28	4.90001
2022-09-14	10:19:29	4.86876
2022-09-14	10:19:29	5.6769
2022-09-14	10:19:29	1.5449
2022-09-14	10:19:29	0.744186
2022-09-14	10:19:30	0.74042
2022-09-14	10:19:30	1.23085
2022-09-14	10:19:30	0.546934
2022-09-14	10:19:30	0.609987
2022-09-14	10:19:31	0.567952
2022-09-14	10:19:31	0.62042
2022-09-14	10:19:31	0.320216
2022-09-14	10:19:32	0.158893
2022-09-14	10:19:32	-0.0972898
2022-09-14	10:19:32	0.386374
2022-09-14	10:19:32	-0.0535748
2022-09-14	10:19:33	0.137825
2022-09-14	10:19:33	0.310242
2022-09-14	10:19:33	0.0908526
2022-09-14	10:19:33	0.321183
2022-09-14	10:19:34	0.968817
2022-09-14	10:19:34	4.5424
2022-09-14	10:19:34	2.70093
2022-09-14	10:19:34	3.7737
2022-09-14	10:19:35	1.63788
2022-09-14	10:19:35	1.88765
2022-09-14	10:19:35	1.5024
2022-09-14	10:19:36	0.649529
2022-09-14	10:19:36	2.14408
2022-09-14	10:19:36	1.42668
2022-09-14	10:19:36	4.36205
2022-09-14	10:19:37	1.95849
2022-09-14	10:19:37	0.783778
2022-09-14	10:19:37	0.563015
2022-09-14	10:19:37	0.353702
2022-09-14	10:19:38	0.532786
2022-09-14	10:19:38	0.233092
2022-09-14	10:19:38	-0.101208
2022-09-14	10:19:38	-0.162328
2022-09-14	10:19:39	-0.433066
2022-09-14	10:19:39	-0.449503
2022-09-14	10:19:39	-0.423905
2022-09-14	10:19:40	-0.432455
2022-09-14	10:19:40	-0.424974
2022-09-14	10:19:40	-0.303651
2022-09-14	10:19:40	-0.223244
2022-09-14	10:19:41	-0.235509
2022-09-14	10:19:41	-0.275254
2022-09-14	10:19:41	-0.259071
2022-09-14	10:19:41	-0.229707
2022-09-14	10:19:42	-0.220089
2022-09-14	10:19:42	-0.233015
2022-09-14	10:19:42	-0.142328
2022-09-14	10:19:42	-0.121768
2022-09-14	10:19:43	-0.0339819
2022-09-14	10:19:43	0.268562
2022-09-14	10:19:43	0.458384
2022-09-14	10:19:44	0.525662
2022-09-14	10:19:44	0.654619
2022-09-14	10:19:44	0.45126
2022-09-14	10:19:44	0.564135
2022-09-14	10:19:45	0.776654
2022-09-14	10:19:45	0.569631
2022-09-14	10:19:45	0.489784
2022-09-14	10:19:45	0.353957
2022-09-14	10:19:46	0.927901
2022-09-14	10:19:46	0.434008
2022-09-14	10:19:46	0.452634
2022-09-14	10:19:46	0.386832
2022-09-14	10:19:47	0.0132954
2022-09-14	10:19:47	-0.233829
2022-09-14	10:19:47	-0.185738
2022-09-14	10:19:48	0.204084
2022-09-14	10:19:48	0.0694786
2022-09-14	10:19:48	0.0431173
2022-09-14	10:19:48	0.133804
2022-09-14	10:19:49	2.78653
2022-09-14	10:19:49	8.69034
2022-09-14	10:19:49	14.457
2022-09-14	10:19:49	17.5126
2022-09-14	10:19:50	8.16856
2022-09-14	10:19:50	3.05375
2022-09-14	10:19:50	0.827596
2022-09-14	10:19:50	0.810293
2022-09-14	10:19:51	0.568613
2022-09-14	10:19:51	1.74897
2022-09-14	10:19:51	1.58632
2022-09-14	10:19:52	4.05166
2022-09-14	10:19:52	4.16042
2022-09-14	10:19:52	5.69767
2022-09-14	10:19:52	6.31965
2022-09-14	10:19:53	4.16932
2022-09-14	10:19:53	6.66439
2022-09-14	10:19:53	3.98434
2022-09-14	10:19:53	4.79334
2022-09-14	10:19:54	2.14098
2022-09-14	10:19:54	1.1595
2022-09-14	10:19:54	0.804796
2022-09-14	10:19:54	2.31161
2022-09-14	10:19:55	7.52525
2022-09-14	10:19:55	10.3306
2022-09-14	10:19:55	3.93614
2022-09-14	10:19:55	2.63737
2022-09-14	10:19:56	1.56958
2022-09-14	10:19:56	1.1594
2022-09-14	10:19:56	1.79543
2022-09-14	10:19:57	1.6765
2022-09-14	10:19:57	3.51075
2022-09-14	10:19:57	5.05716
2022-09-14	10:19:57	4.97289
2022-09-14	10:19:58	2.50291
2022-09-14	10:19:58	3.06093
2022-09-14	10:19:58	1.92546
2022-09-14	10:19:58	1.77324
2022-09-14	10:19:59	1.72551
2022-09-14	10:19:59	4.73365
2022-09-14	10:19:59	5.59685
2022-09-14	10:19:59	4.79879
2022-09-14	10:20:00	3.16851
2022-09-14	10:20:00	9.97782
2022-09-14	10:20:00	10.6077
2022-09-14	10:20:01	21.2637
2022-09-14	10:20:01	13.0433
2022-09-14	10:20:01	12.9193
2022-09-14	10:20:01	12.1004
2022-09-14	10:20:02	5.58052
2022-09-14	10:20:02	3.83431
2022-09-14	10:20:02	2.79507
2022-09-14	10:20:02	2.55558
2022-09-14	10:20:03	5.81161
2022-09-14	10:20:03	10.651
2022-09-14	10:20:03	4.54322
2022-09-14	10:20:03	3.39202
2022-09-14	10:20:04	3.09187
2022-09-14	10:20:04	2.91915
2022-09-14	10:20:04	4.34708
2022-09-14	10:20:05	5.22403
2022-09-14	10:20:05	5.19395
2022-09-14	10:20:05	0.753041
2022-09-14	10:20:05	0.826221
2022-09-14	10:20:06	1.57833
2022-09-14	10:20:06	2.42078
2022-09-14	10:20:06	1.23609
2022-09-14	10:20:06	1.0166
2022-09-14	10:20:07	0.52958
2022-09-14	10:20:07	0.580165
2022-09-14	10:20:07	0.244339
2022-09-14	10:20:07	0.263422
2022-09-14	10:20:08	0.145407
2022-09-14	10:20:08	0.370954
2022-09-14	10:20:08	0.0872394
2022-09-14	10:20:09	0.48444
2022-09-14	10:20:09	3.15345
2022-09-14	10:20:09	3.34561
2022-09-14	10:20:09	0.660776
2022-09-14	10:20:10	0.543728
2022-09-14	10:20:10	0.432481
2022-09-14	10:20:10	0.55645
2022-09-14	10:20:10	0.215229
2022-09-14	10:20:11	0.562099
2022-09-14	10:20:11	1.35095
2022-09-14	10:20:11	3.03416
2022-09-14	10:20:11	1.42576
2022-09-14	10:20:12	1.55457
2022-09-14	10:20:12	1.70805
2022-09-14	10:20:12	1.34118
2022-09-14	10:20:13	0.791667
2022-09-14	10:20:13	0.578486
2022-09-14	10:20:13	1.03218
2022-09-14	10:20:13	0.268003
2022-09-14	10:20:14	0.492277
2022-09-14	10:20:14	0.409835
2022-09-14	10:20:14	0.261183
2022-09-14	10:20:14	0.287443
2022-09-14	10:20:15	0.149937
2022-09-14	10:20:15	0.152837
2022-09-14	10:20:15	-0.217341
2022-09-14	10:20:15	-0.12874
2022-09-14	10:20:16	-0.0584094
2022-09-14	10:20:16	0.0637279
2022-09-14	10:20:16	0.0504455
2022-09-14	10:20:16	0.177265
2022-09-14	10:20:17	0.318944
2022-09-14	10:20:17	0.130853
2022-09-14	10:20:17	0.240471
2022-09-14	10:20:18	0.102863
2022-09-14	10:20:18	0.224949
2022-09-14	10:20:18	0.00876615
2022-09-14	10:20:18	0.329835
2022-09-14	10:20:19	1.88648
2022-09-14	10:20:19	3.48235
2022-09-14	10:20:19	2.71217
2022-09-14	10:20:19	1.5166
2022-09-14	10:20:20	0.912735
2022-09-14	10:20:20	1.16342
2022-09-14	10:20:20	0.677875
2022-09-14	10:20:20	1.68999
2022-09-14	10:20:21	4.55278
2022-09-14	10:20:21	1.97411
2022-09-14	10:20:21	1.75579
2022-09-14	10:20:22	0.657366
2022-09-14	10:20:22	0.545865
2022-09-14	10:20:22	-0.052099
2022-09-14	10:20:22	-0.239733
2022-09-14	10:20:23	-0.196068
2022-09-14	10:20:23	0.377926
2022-09-14	10:20:23	0.0762979
2022-09-14	10:20:23	0.018588
2022-09-14	10:20:24	-0.222023
2022-09-14	10:20:24	-0.379376
2022-09-14	10:20:24	-0.462531
2022-09-14	10:20:24	-0.305381
2022-09-14	10:20:25	0.43299
2022-09-14	10:20:25	1.29635
2022-09-14	10:20:25	5.34505
2022-09-14	10:20:26	9.36266
2022-09-14	10:20:26	7.16403
2022-09-14	10:20:26	5.05981
2022-09-14	10:20:26	3.64388
2022-09-14	10:20:27	1.97197
2022-09-14	10:20:27	0.513448
2022-09-14	10:20:27	0.422965
2022-09-14	10:20:27	-3.67871
2022-09-14	10:20:28	0.0447458
2022-09-14	10:20:28	-0.131437
2022-09-14	10:20:28	-0.302531
2022-09-14	10:20:28	0.118079
2022-09-14	10:20:29	0.113397
2022-09-14	10:20:29	0.881692
2022-09-14	10:20:29	1.98393
2022-09-14	10:20:30	4.41009
2022-09-14	10:20:30	8.09039
2022-09-14	10:20:30	1.47324
2022-09-14	10:20:30	4.72306
2022-09-14	10:20:31	2.2994
2022-09-14	10:20:31	3.55716
2022-09-14	10:20:31	3.81945
2022-09-14	10:20:31	2.81263
2022-09-14	10:20:32	5.84922
2022-09-14	10:20:32	2.41273
2022-09-14	10:20:32	7.20749
2022-09-14	10:20:32	4.02037
2022-09-14	10:20:33	7.28866
2022-09-14	10:20:33	5.40953
2022-09-14	10:20:33	3.90449
2022-09-14	10:20:34	6.84892
2022-09-14	10:20:34	2.07976
2022-09-14	10:20:34	3.84591
2022-09-14	10:20:34	3.82235
2022-09-14	10:20:35	1.90678
2022-09-14	10:20:35	3.35248
2022-09-14	10:20:35	1.49228
2022-09-14	10:20:35	2.37625
2022-09-14	10:20:36	1.69029
2022-09-14	10:20:36	1.72118
2022-09-14	10:20:36	1.46485
2022-09-14	10:20:36	1.95014
2022-09-14	10:20:37	2.05696
2022-09-14	10:20:37	2.01599
2022-09-14	10:20:37	3.82022
2022-09-14	10:20:38	2.77594
2022-09-14	10:20:38	6.90912
2022-09-14	10:20:38	4.41105
2022-09-14	10:20:38	9.5109
2022-09-14	10:20:39	4.6765
2022-09-14	10:20:39	5.78774
2022-09-14	10:20:39	14.952
2022-09-14	10:20:39	7.49334
2022-09-14	10:20:40	17.2549
2022-09-14	10:20:40	10.132
2022-09-14	10:20:40	4.69238
2022-09-14	10:20:40	17.7071
2022-09-14	10:20:41	17.5565
2022-09-14	10:20:41	5.77731
2022-09-14	10:20:41	8.87487
2022-09-14	10:20:42	9.90495
2022-09-14	10:20:42	3.34958
2022-09-14	10:20:42	8.12719
2022-09-14	10:20:42	7.19502
2022-09-14	10:20:43	5.50769
2022-09-14	10:20:43	4.53085
2022-09-14	10:20:43	1.02754
2022-09-14	10:20:43	0.738231
2022-09-14	10:20:44	0.309937
2022-09-14	10:20:44	0.441794
2022-09-14	10:20:44	0.400624
2022-09-14	10:20:44	0.338791
2022-09-14	10:20:45	0.210191
2022-09-14	10:20:45	0.197468
2022-09-14	10:20:45	0.152481
2022-09-14	10:20:45	0.302201
2022-09-14	10:20:46	1.04551
2022-09-14	10:20:46	0.513499
2022-09-14	10:20:46	0.236196
2022-09-14	10:20:47	0.222405
2022-09-14	10:20:47	0.0973158
2022-09-14	10:20:47	-0.0677223
2022-09-14	10:20:47	0.0315142
2022-09-14	10:20:48	0.0545168
2022-09-14	10:20:48	0.0541096
2022-09-14	10:20:48	0.108715
2022-09-14	10:20:48	0.0323284
2022-09-14	10:20:49	0.231463
2022-09-14	10:20:49	0.364593
2022-09-14	10:20:49	1.04128
2022-09-14	10:20:49	1.50902
2022-09-14	10:20:50	1.36775
2022-09-14	10:20:50	1.16759
2022-09-14	10:20:50	3.28027
2022-09-14	10:20:51	3.48266
2022-09-14	10:20:51	2.40622
2022-09-14	10:20:51	3.02607
2022-09-14	10:20:51	2.76271
2022-09-14	10:20:52	2.76597
2022-09-14	10:20:52	2.02424
2022-09-14	10:20:52	1.29803
2022-09-14	10:20:52	3.33935
2022-09-14	10:20:53	2.72892
2022-09-14	10:20:53	2.84642
2022-09-14	10:20:53	1.81533
2022-09-14	10:20:53	2.58765
2022-09-14	10:20:54	1.90994
2022-09-14	10:20:54	3.89085
2022-09-14	10:20:54	4.20892
2022-09-14	10:20:55	5.69701
2022-09-14	10:20:55	4.27828
2022-09-14	10:20:55	5.85472
2022-09-14	10:20:55	1.98938
2022-09-14	10:20:56	3.27935
2022-09-14	10:20:56	1.97426
2022-09-14	10:20:56	3.51899
2022-09-14	10:20:56	5.7764
2022-09-14	10:20:57	2.80271
2022-09-14	10:20:57	3.55492
2022-09-14	10:20:57	2.19187
2022-09-14	10:20:57	4.96495
2022-09-14	10:20:58	1.39426
2022-09-14	10:20:58	1.36072
2022-09-14	10:20:58	0.473906
2022-09-14	10:20:59	0.614313
2022-09-14	10:20:59	0.81645
2022-09-14	10:20:59	0.419199
2022-09-14	10:20:59	1.465
2022-09-14	10:21:00	2.39854
2022-09-14	10:21:00	1.9448
2022-09-14	10:21:00	1.07503
2022-09-14	10:21:00	0.461234
2022-09-14	10:21:01	0.274975
2022-09-14	10:21:01	0.224084
2022-09-14	10:21:01	0.100827
2022-09-14	10:21:01	0.121387
2022-09-14	10:21:02	0.099962
2022-09-14	10:21:02	0.0614379
2022-09-14	10:21:02	0.0220485
2022-09-14	10:21:02	-0.147061
2022-09-14	10:21:03	-0.159529
2022-09-14	10:21:03	-0.174185
2022-09-14	10:21:03	-0.349758
2022-09-14	10:21:04	-0.140394
2022-09-14	10:21:04	0.635585
2022-09-14	10:21:04	3.62703
2022-09-14	10:21:04	4.89675
2022-09-14	10:21:05	3.50525
2022-09-14	10:21:05	2.35905
2022-09-14	10:21:05	2.66663
2022-09-14	10:21:05	3.73971
2022-09-14	10:21:06	2.17156
2022-09-14	10:21:06	1.01034
2022-09-14	10:21:06	1.46897
2022-09-14	10:21:06	2.36246
2022-09-14	10:21:07	0.42785
2022-09-14	10:21:07	0.373193
2022-09-14	10:21:07	0.105916
2022-09-14	10:21:08	0.0334989
2022-09-14	10:21:08	-0.133727
2022-09-14	10:21:08	0.131667
2022-09-14	10:21:08	0.0608781
2022-09-14	10:21:09	0.244288
2022-09-14	10:21:09	0.0768577
2022-09-14	10:21:09	2.09207
2022-09-14	10:21:09	2.44057
2022-09-14	10:21:10	0.454517
2022-09-14	10:21:10	0.0157891
2022-09-14	10:21:10	0.0242369
2022-09-14	10:21:10	0.117774
2022-09-14	10:21:11	0.539962
2022-09-14	10:21:11	3.39884
2022-09-14	10:21:11	4.22902
2022-09-14	10:21:12	4.34001
2022-09-14	10:21:12	2.96108
2022-09-14	10:21:12	3.97563
2022-09-14	10:21:12	6.17517
2022-09-14	10:21:13	7.98306
2022-09-14	10:21:13	6.94556
2022-09-14	10:21:13	5.46805
2022-09-14	10:21:13	8.80866
2022-09-14	10:21:14	3.06525
2022-09-14	10:21:14	2.0424
2022-09-14	10:21:14	1.36235
2022-09-14	10:21:14	0.395229
2022-09-14	10:21:15	0.445407
2022-09-14	10:21:15	0.0480537
2022-09-14	10:21:15	0.201641
2022-09-14	10:21:16	0.101896
2022-09-14	10:21:16	0.112888
2022-09-14	10:21:16	0.186374
2022-09-14	10:21:16	0.252786
2022-09-14	10:21:17	0.483168
2022-09-14	10:21:17	0.537417
2022-09-14	10:21:17	0.550394
2022-09-14	10:21:17	0.362048
2022-09-14	10:21:18	0.654619
2022-09-14	10:21:18	0.856196
2022-09-14	10:21:18	0.289173
2022-09-14	10:21:18	0.296807
2022-09-14	10:21:19	0.285356
2022-09-14	10:21:19	0.312939
2022-09-14	10:21:19	0.450445
2022-09-14	10:21:20	0.288512
2022-09-14	10:21:20	0.371565
2022-09-14	10:21:20	0.269071
2022-09-14	10:21:20	0.71584
2022-09-14	10:21:21	-0.138358
2022-09-14	10:21:21	-0.510674
2022-09-14	10:21:21	-0.660903
2022-09-14	10:21:21	-0.602328
2022-09-14	10:21:22	-0.46131
2022-09-14	10:21:22	-0.11729
2022-09-14	10:21:22	0.0324303
2022-09-14	10:21:22	0.0314125
2022-09-14	10:21:23	0.0108527
2022-09-14	10:21:23	-0.0124552
2022-09-14	10:21:23	-0.00538142
2022-09-14	10:21:23	0.0180282
2022-09-14	10:21:24	-0.00614479
2022-09-14	10:21:24	-0.0102669
2022-09-14	10:21:24	-0.00904555
2022-09-14	10:21:25	0.00423688
2022-09-14	10:21:25	0.00876615
2022-09-14	10:21:25	-0.000394156
2022-09-14	10:21:25	-0.00517788
2022-09-14	10:21:26	-0.00675547
2022-09-14	10:21:26	0.00332086
2022-09-14	10:21:26	0.00500025
2022-09-14	10:21:26	0.00586539
2022-09-14	10:21:27	-0.0170863
2022-09-14	10:21:27	0.353651
2022-09-14	10:21:27	0.739198
2022-09-14	10:21:27	0.741183
2022-09-14	10:21:28	-0.089758
2022-09-14	10:21:28	-0.108944
2022-09-14	10:21:28	-0.116577
2022-09-14	10:21:29	-0.111946
2022-09-14	10:21:29	-0.130063
2022-09-14	10:21:29	-0.118053
2022-09-14	10:21:29	-0.126043
2022-09-14	10:21:30	-0.136476
2022-09-14	10:21:30	-0.122175
2022-09-14	10:21:30	-0.121972
2022-09-14	10:21:30	-0.134185
2022-09-14	10:21:31	-0.12818
2022-09-14	10:21:31	-0.134185
2022-09-14	10:21:31	-0.128079
2022-09-14	10:21:31	-0.112048
2022-09-14	10:21:32	-0.114542
2022-09-14	10:21:32	-0.123193
2022-09-14	10:21:32	-0.112455
2022-09-14	10:21:33	-0.103956
2022-09-14	10:21:33	-0.0984603
2022-09-14	10:21:33	-0.0971371
2022-09-14	10:21:33	-0.0796817
2022-09-14	10:21:34	-0.0784602
2022-09-14	10:21:34	-0.100191
2022-09-14	10:21:34	-0.123244
2022-09-14	10:21:34	-0.118664
2022-09-14	10:21:35	-0.059529
2022-09-14	10:21:35	0.737672
2022-09-14	10:21:35	0.731005
2022-09-14	10:21:35	0.740369
2022-09-14	10:21:36	0.732583
2022-09-14	10:21:36	0.747595
2022-09-14	10:21:36	0.732481
2022-09-14	10:21:37	0.739809
2022-09-14	10:21:37	0.74042
2022-09-14	10:21:37	0.733193
2022-09-14	10:21:37	0.739962
2022-09-14	10:21:38	0.740674
2022-09-14	10:21:38	0.741132
2022-09-14	10:21:38	0.742557
2022-09-14	10:21:38	0.742201
2022-09-14	10:21:39	0.736247
2022-09-14	10:21:39	0.734466
2022-09-14	10:21:39	0.738181
2022-09-14	10:21:39	0.735992
2022-09-14	10:21:40	0.734008
2022-09-14	10:21:40	0.738842
2022-09-14	10:21:40	0.745356
2022-09-14	10:21:41	0.96673
2022-09-14	10:21:41	0.899606
2022-09-14	10:21:41	0.940267
2022-09-14	10:21:41	0.527697
2022-09-14	10:21:42	0.494262
2022-09-14	10:21:42	0.480674
2022-09-14	10:21:42	0.419758
2022-09-14	10:21:42	0.28444
2022-09-14	10:21:43	0.538079
2022-09-14	10:21:43	0.430089
2022-09-14	10:21:43	0.423168
2022-09-14	10:21:43	0.345102
2022-09-14	10:21:44	0.601539
2022-09-14	10:21:44	0.42271
2022-09-14	10:21:44	0.475331
2022-09-14	10:21:44	0.337366
2022-09-14	10:21:45	0.557112
2022-09-14	10:21:45	0.264491
2022-09-14	10:21:45	0.685712
2022-09-14	10:21:46	0.278639
2022-09-14	10:21:46	1.95879
2022-09-14	10:21:46	3.14021
2022-09-14	10:21:46	4.15263
2022-09-14	10:21:47	2.30719
2022-09-14	10:21:47	2.04296
2022-09-14	10:21:47	0.489326
2022-09-14	10:21:47	0.572226
2022-09-14	10:21:48	0.614516
2022-09-14	10:21:48	0.448512
2022-09-14	10:21:48	0.510242
2022-09-14	10:21:48	0.28668
2022-09-14	10:21:49	0.412023
2022-09-14	10:21:49	0.360674
2022-09-14	10:21:49	0.418842
2022-09-14	10:21:50	0.578995
2022-09-14	10:21:50	0.226069
2022-09-14	10:21:50	0.551463
2022-09-14	10:21:50	0.201387
2022-09-14	10:21:51	0.105051
2022-09-14	10:21:51	-0.171692
2022-09-14	10:21:51	-0.151336
2022-09-14	10:21:51	-0.104822
2022-09-14	10:21:52	-0.132201
2022-09-14	10:21:52	-0.346246
2022-09-14	10:21:52	-0.286196
2022-09-14	10:21:52	-0.190928
2022-09-14	10:21:53	-0.159631
2022-09-14	10:21:53	0.0780282
2022-09-14	10:21:53	0.20444
2022-09-14	10:21:54	0.442863
2022-09-14	10:21:54	0.446171
2022-09-14	10:21:54	0.0848475
2022-09-14	10:21:54	0.131972
2022-09-14	10:21:55	-0.0191219
2022-09-14	10:21:55	0.319249
2022-09-14	10:21:55	0.468308
2022-09-14	10:21:55	0.371921
2022-09-14	10:21:56	0.319199
2022-09-14	10:21:56	0.516349
2022-09-14	10:21:56	0.448257
2022-09-14	10:21:56	0.440166
2022-09-14	10:21:57	0.431463
2022-09-14	10:21:57	0.368257
2022-09-14	10:21:57	0.550852
2022-09-14	10:21:58	0.352532
2022-09-14	10:21:58	0.505916
2022-09-14	10:21:58	0.318384
2022-09-14	10:21:58	0.54729
2022-09-14	10:21:59	0.340064
2022-09-14	10:21:59	0.520267
2022-09-14	10:21:59	0.280827
2022-09-14	10:21:59	0.687494
2022-09-14	10:22:00	0.120216
2022-09-14	10:22:00	0.12154
2022-09-14	10:22:00	0.218181
2022-09-14	10:22:00	0.40154
2022-09-14	10:22:01	0.290547
2022-09-14	10:22:01	0.461285
2022-09-14	10:22:01	0.347697
2022-09-14	10:22:01	0.435433
2022-09-14	10:22:02	0.42388
2022-09-14	10:22:02	0.373397
2022-09-14	10:22:02	0.271463
2022-09-14	10:22:03	0.291158
2022-09-14	10:22:03	0.375382
2022-09-14	10:22:03	0.186679
2022-09-14	10:22:03	0.184644
2022-09-14	10:22:04	0.216501
2022-09-14	10:22:04	0.185713
2022-09-14	10:22:04	0.209733
2022-09-14	10:22:04	0.402659
2022-09-14	10:22:05	0.203015
2022-09-14	10:22:05	0.562404
2022-09-14	10:22:05	0.387137
2022-09-14	10:22:05	0.395738
2022-09-14	10:22:06	0.193244
2022-09-14	10:22:06	0.497926
2022-09-14	10:22:06	0.315636
2022-09-14	10:22:07	0.319606
2022-09-14	10:22:07	0.223626
2022-09-14	10:22:07	0.297672
2022-09-14	10:22:07	0.292379
2022-09-14	10:22:08	0.192888
2022-09-14	10:22:08	0.288054
2022-09-14	10:22:08	0.230242
2022-09-14	10:22:08	0.278435
2022-09-14	10:22:09	0.169733
2022-09-14	10:22:09	0.356908
2022-09-14	10:22:09	0.212328
2022-09-14	10:22:09	0.565611
2022-09-14	10:22:10	1.35452
2022-09-14	10:22:10	1.65935
2022-09-14	10:22:10	1.48515
2022-09-14	10:22:11	2.08841
2022-09-14	10:22:11	1.04047
2022-09-14	10:22:11	1.56953
2022-09-14	10:22:11	0.734313
2022-09-14	10:22:12	0.695025
2022-09-14	10:22:12	0.616959
