# Supplementary material for: Comparing efficacy in reducing pulling and welfare impacts of four types of leash walking equipment
Source: PeerJ journal article supplement (doi:10.7717/peerj.18131), 2024-10-24
Supplement: Shelter_2_Tension_files.zip [file KimChi_prong_2022914135524 copy.xlsx]

## Sheet: Averaged Newtons
Date	Time	Averaged Newtons	Impulse	Total Steps
2022-09-14	13:55:39	0.872663	0.872663	0		Impulse	879.058
2022-09-14	13:55:40	1.98822	2.86088	0		Total steps	3
2022-09-14	13:55:41	2.25325	5.11413	0
2022-09-14	13:55:42	1.82084	6.93497	0
2022-09-14	13:55:43	5.29902	12.234	0
2022-09-14	13:55:44	1.07713	13.3111	0
2022-09-14	13:55:45	0.744197	14.0553	0
2022-09-14	13:55:46	1.49192	15.5472	0
2022-09-14	13:55:47	1.37204	16.9193	0
2022-09-14	13:55:48	2.18465	19.1039	0
2022-09-14	13:55:49	1.49999	20.6039	0
2022-09-14	13:55:50	0.173761	20.7777	0
2022-09-14	13:55:51	4.3516	25.1293	0
2022-09-14	13:55:52	3.16988	28.2992	0
2022-09-14	13:55:53	4.38674	32.6859	0
2022-09-14	13:55:54	4.74918	37.4351	0
2022-09-14	13:55:55	5.67926	43.1144	0
2022-09-14	13:55:56	3.6679	46.7823	0
2022-09-14	13:55:57	5.16721	51.9495	0
2022-09-14	13:55:58	13.0725	65.022	1
2022-09-14	13:55:59	20.7611	85.7831	2
2022-09-14	13:56:00	9.59164	95.3747	2
2022-09-14	13:56:01	11.1264	106.501	2
2022-09-14	13:56:02	4.62143	111.123	2
2022-09-14	13:56:03	21.6537	132.776	3
2022-09-14	13:56:04	2.75704	135.533	3
2022-09-14	13:56:05	1.45223	136.986	3
2022-09-14	13:56:06	0.129146	137.115	3
2022-09-14	13:56:07	10.7525	147.867	3
2022-09-14	13:56:08	6.87292	154.74	3
2022-09-14	13:56:09	2.27675	157.017	3
2022-09-14	13:56:10	2.47192	159.489	3
2022-09-14	13:56:11	1.55302	161.042	3
2022-09-14	13:56:12	4.69336	165.735	3
2022-09-14	13:56:13	4.69953	170.435	3
2022-09-14	13:56:14	4.94565	175.38	3
2022-09-14	13:56:15	2.05494	177.435	3
2022-09-14	13:56:16	2.11035	179.546	3
2022-09-14	13:56:17	1.52097	181.067	3
2022-09-14	13:56:18	8.56442	189.631	3
2022-09-14	13:56:19	4.57673	194.208	3
2022-09-14	13:56:20	4.0714	198.279	3
2022-09-14	13:56:21	1.04348	199.323	3
2022-09-14	13:56:22	-2.17062	199.323	3
2022-09-14	13:56:23	6.47745	205.8	3
2022-09-14	13:56:24	4.17487	209.975	3
2022-09-14	13:56:25	2.29484	212.27	3
2022-09-14	13:56:26	3.23989	215.51	3
2022-09-14	13:56:27	3.22851	218.738	3
2022-09-14	13:56:28	3.24049	221.979	3
2022-09-14	13:56:29	3.22477	225.203	3
2022-09-14	13:56:30	3.22438	228.428	3
2022-09-14	13:56:31	3.22681	231.655	3
2022-09-14	13:56:32	3.23876	234.893	3
2022-09-14	13:56:33	3.22636	238.12	3
2022-09-14	13:56:34	3.24515	241.365	3
2022-09-14	13:56:35	3.24124	244.606	3
2022-09-14	13:56:36	3.24117	247.847	3
2022-09-14	13:56:37	3.23683	251.084	3
2022-09-14	13:56:38	3.2314	254.316	3
2022-09-14	13:56:39	-3.07945	254.316	3
2022-09-14	13:56:40	-6.86156	254.316	3
2022-09-14	13:56:41	-7.99012	254.316	3
2022-09-14	13:56:42	-7.57325	254.316	3
2022-09-14	13:56:43	-6.83936	254.316	3
2022-09-14	13:56:44	-6.92909	254.316	3
2022-09-14	13:56:45	-4.52607	254.316	3
2022-09-14	13:56:46	0.190492	254.506	3
2022-09-14	13:56:47	1.01663	255.523	3
2022-09-14	13:56:48	-0.619672	255.523	3
2022-09-14	13:56:49	-0.566946	255.523	3
2022-09-14	13:56:50	-1.52111	255.523	3
2022-09-14	13:56:51	2.70056	258.223	3
2022-09-14	13:56:52	3.24532	261.469	3
2022-09-14	13:56:53	3.23491	264.703	3
2022-09-14	13:56:54	3.23813	267.942	3
2022-09-14	13:56:55	3.24094	271.183	3
2022-09-14	13:56:56	3.26869	274.451	3
2022-09-14	13:56:57	3.2284	277.68	3
2022-09-14	13:56:58	3.24051	280.92	3
2022-09-14	13:56:59	3.25498	284.175	3
2022-09-14	13:57:00	3.26439	287.44	3
2022-09-14	13:57:01	3.24056	290.68	3
2022-09-14	13:57:02	3.2559	293.936	3
2022-09-14	13:57:03	3.24909	297.185	3
2022-09-14	13:57:04	3.24639	300.431	3
2022-09-14	13:57:05	3.24623	303.678	3
2022-09-14	13:57:06	3.23773	306.915	3
2022-09-14	13:57:07	3.23113	310.147	3
2022-09-14	13:57:08	-4.12533	310.147	3
2022-09-14	13:57:09	-22.5885	310.147	3
2022-09-14	13:57:10	-14.2125	310.147	3
2022-09-14	13:57:11	-12.758	310.147	3
2022-09-14	13:57:12	-8.70861	310.147	3
2022-09-14	13:57:13	3.26247	313.409	3
2022-09-14	13:57:14	3.23757	316.647	3
2022-09-14	13:57:15	3.24215	319.889	3
2022-09-14	13:57:16	3.24826	323.137	3
2022-09-14	13:57:17	3.24634	326.383	3
2022-09-14	13:57:18	3.25901	329.642	3
2022-09-14	13:57:19	3.23475	332.877	3
2022-09-14	13:57:20	3.25251	336.13	3
2022-09-14	13:57:21	3.25941	339.389	3
2022-09-14	13:57:22	3.26207	342.651	3
2022-09-14	13:57:23	3.25973	345.911	3
2022-09-14	13:57:24	3.24509	349.156	3
2022-09-14	13:57:25	3.23892	352.395	3
2022-09-14	13:57:26	3.23683	355.632	3
2022-09-14	13:57:27	3.26033	358.892	3
2022-09-14	13:57:28	3.25143	362.143	3
2022-09-14	13:57:29	3.25064	365.394	3
2022-09-14	13:57:30	3.24764	368.642	3
2022-09-14	13:57:31	3.26743	371.909	3
2022-09-14	13:57:32	3.26088	375.17	3
2022-09-14	13:57:33	3.26139	378.431	3
2022-09-14	13:57:34	-1.06774	378.431	3
2022-09-14	13:57:35	-1.48686	378.431	3
2022-09-14	13:57:36	-4.00315	378.431	3
2022-09-14	13:57:37	-8.38105	378.431	3
2022-09-14	13:57:38	-6.83182	378.431	3
2022-09-14	13:57:39	-1.71804	378.431	3
2022-09-14	13:57:40	0.343633	378.775	3
2022-09-14	13:57:41	-0.345441	378.775	3
2022-09-14	13:57:42	0.813938	379.589	3
2022-09-14	13:57:43	-0.463381	379.589	3
2022-09-14	13:57:44	-1.87073	379.589	3
2022-09-14	13:57:45	-3.4074	379.589	3
2022-09-14	13:57:46	-3.43317	379.589	3
2022-09-14	13:57:47	-2.70757	379.589	3
2022-09-14	13:57:48	-2.59891	379.589	3
2022-09-14	13:57:49	-1.84493	379.589	3
2022-09-14	13:57:50	-1.20997	379.589	3
2022-09-14	13:57:51	0.955289	380.544	3
2022-09-14	13:57:52	3.09076	383.635	3
2022-09-14	13:57:53	3.2366	386.872	3
2022-09-14	13:57:54	3.25543	390.127	3
2022-09-14	13:57:55	3.24696	393.374	3
2022-09-14	13:57:56	3.25743	396.631	3
2022-09-14	13:57:57	3.24628	399.878	3
2022-09-14	13:57:58	3.25098	403.129	3
2022-09-14	13:57:59	3.25958	406.388	3
2022-09-14	13:58:00	3.25952	409.648	3
2022-09-14	13:58:01	3.25669	412.905	3
2022-09-14	13:58:02	3.25437	416.159	3
2022-09-14	13:58:03	2.14346	418.302	3
2022-09-14	13:58:04	2.8662	421.169	3
2022-09-14	13:58:05	3.24356	424.412	3
2022-09-14	13:58:06	3.23061	427.643	3
2022-09-14	13:58:07	3.24815	430.891	3
2022-09-14	13:58:08	3.24402	434.135	3
2022-09-14	13:58:09	3.255	437.39	3
2022-09-14	13:58:10	3.26479	440.655	3
2022-09-14	13:58:11	3.24345	443.898	3
2022-09-14	13:58:12	3.25873	447.157	3
2022-09-14	13:58:13	3.26264	450.419	3
2022-09-14	13:58:14	3.24124	453.661	3
2022-09-14	13:58:15	3.26326	456.924	3
2022-09-14	13:58:16	3.25715	460.181	3
2022-09-14	13:58:17	3.24079	463.422	3
2022-09-14	13:58:18	3.23483	466.657	3
2022-09-14	13:58:19	3.24006	469.897	3
2022-09-14	13:58:20	3.24464	473.141	3
2022-09-14	13:58:21	3.24526	476.387	3
2022-09-14	13:58:22	3.24871	479.635	3
2022-09-14	13:58:23	3.25143	482.887	3
2022-09-14	13:58:24	3.25335	486.14	3
2022-09-14	13:58:25	3.25601	489.396	3
2022-09-14	13:58:26	3.258	492.654	3
2022-09-14	13:58:27	3.24928	495.903	3
2022-09-14	13:58:28	3.25788	499.161	3
2022-09-14	13:58:29	3.23626	502.398	3
2022-09-14	13:58:30	3.24208	505.64	3
2022-09-14	13:58:31	3.25352	508.893	3
2022-09-14	13:58:32	3.2572	512.15	3
2022-09-14	13:58:33	3.24871	515.399	3
2022-09-14	13:58:34	3.24939	518.649	3
2022-09-14	13:58:35	3.24396	521.893	3
2022-09-14	13:58:36	3.25471	525.147	3
2022-09-14	13:58:37	3.25543	528.403	3
2022-09-14	13:58:38	3.24883	531.651	3
2022-09-14	13:58:39	3.2512	534.903	3
2022-09-14	13:58:40	3.2456	538.148	3
2022-09-14	13:58:41	3.25611	541.404	3
2022-09-14	13:58:42	3.26179	544.666	3
2022-09-14	13:58:43	2.99569	547.662	3
2022-09-14	13:58:44	3.25896	550.921	3
2022-09-14	13:58:45	3.24562	554.166	3
2022-09-14	13:58:46	3.24764	557.414	3
2022-09-14	13:58:47	3.24028	560.654	3
2022-09-14	13:58:48	3.2559	563.91	3
2022-09-14	13:58:49	3.25702	567.167	3
2022-09-14	13:58:50	3.25788	570.425	3
2022-09-14	13:58:51	3.25534	573.681	3
2022-09-14	13:58:52	3.25771	576.938	3
2022-09-14	13:58:53	3.24366	580.182	3
2022-09-14	13:58:54	3.25539	583.437	3
2022-09-14	13:58:55	3.26162	586.699	3
2022-09-14	13:58:56	3.25737	589.956	3
2022-09-14	13:58:57	3.25203	593.208	3
2022-09-14	13:58:58	3.24798	596.456	3
2022-09-14	13:58:59	3.26971	599.726	3
2022-09-14	13:59:00	3.24124	602.967	3
2022-09-14	13:59:01	3.25965	606.227	3
2022-09-14	13:59:02	3.25692	609.484	3
2022-09-14	13:59:03	3.25041	612.734	3
2022-09-14	13:59:04	3.27254	616.007	3
2022-09-14	13:59:05	3.24517	619.252	3
2022-09-14	13:59:06	3.25613	622.508	3
2022-09-14	13:59:07	3.26241	625.77	3
2022-09-14	13:59:08	3.25534	629.026	3
2022-09-14	13:59:09	3.17937	632.205	3
2022-09-14	13:59:10	-5.13948	632.205	3
2022-09-14	13:59:11	-7.81395	632.205	3
2022-09-14	13:59:12	-7.52718	632.205	3
2022-09-14	13:59:13	-7.18702	632.205	3
2022-09-14	13:59:14	-6.73839	632.205	3
2022-09-14	13:59:15	-6.92119	632.205	3
2022-09-14	13:59:16	-6.74519	632.205	3
2022-09-14	13:59:17	-5.92709	632.205	3
2022-09-14	13:59:18	-5.79636	632.205	3
2022-09-14	13:59:19	-5.77246	632.205	3
2022-09-14	13:59:20	-8.92793	632.205	3
2022-09-14	13:59:21	-9.59969	632.205	3
2022-09-14	13:59:22	-7.71603	632.205	3
2022-09-14	13:59:23	-6.9173	632.205	3
2022-09-14	13:59:24	0.760096	632.965	3
2022-09-14	13:59:25	1.62405	634.589	3
2022-09-14	13:59:26	1.60463	636.194	3
2022-09-14	13:59:27	1.39173	637.586	3
2022-09-14	13:59:28	2.48148	640.067	3
2022-09-14	13:59:29	11.6519	651.719	3
2022-09-14	13:59:30	5.02618	656.745	3
2022-09-14	13:59:31	4.66286	661.408	3
2022-09-14	13:59:32	4.17463	665.583	3
2022-09-14	13:59:33	5.92458	671.507	3
2022-09-14	13:59:34	6.74259	678.25	3
2022-09-14	13:59:35	10.5189	688.769	3
2022-09-14	13:59:36	8.48156	697.25	3
2022-09-14	13:59:37	11.5289	708.779	3
2022-09-14	13:59:38	7.34994	716.129	3
2022-09-14	13:59:39	2.87565	719.005	3
2022-09-14	13:59:40	4.7787	723.784	3
2022-09-14	13:59:41	3.24351	727.027	3
2022-09-14	13:59:42	-11.9098	727.027	3
2022-09-14	13:59:43	-23.8386	727.027	3
2022-09-14	13:59:44	-20.5841	727.027	3
2022-09-14	13:59:45	-16.1369	727.027	3
2022-09-14	13:59:46	-5.2079	727.027	3
2022-09-14	13:59:47	-6.34061	727.027	3
2022-09-14	13:59:48	-7.18429	727.027	3
2022-09-14	13:59:49	-6.59646	727.027	3
2022-09-14	13:59:50	-2.90147	727.027	3
2022-09-14	13:59:51	3.25692	730.284	3
2022-09-14	13:59:52	3.26554	733.549	3
2022-09-14	13:59:53	3.25273	736.802	3
2022-09-14	13:59:54	3.25234	740.055	3
2022-09-14	13:59:55	3.25183	743.306	3
2022-09-14	13:59:56	3.25814	746.565	3
2022-09-14	13:59:57	3.23881	749.803	3
2022-09-14	13:59:58	3.26377	753.067	3
2022-09-14	13:59:59	3.25505	756.322	3
2022-09-14	14:00:00	3.27573	759.598	3
2022-09-14	14:00:01	3.25319	762.851	3
2022-09-14	14:00:02	3.24526	766.096	3
2022-09-14	14:00:03	3.25268	769.349	3
2022-09-14	14:00:04	3.24947	772.598	3
2022-09-14	14:00:05	3.24537	775.844	3
2022-09-14	14:00:06	3.26818	779.112	3
2022-09-14	14:00:07	3.24821	782.36	3
2022-09-14	14:00:08	3.00778	785.368	3
2022-09-14	14:00:09	3.02104	788.389	3
2022-09-14	14:00:10	3.26705	791.656	3
2022-09-14	14:00:11	3.24713	794.903	3
2022-09-14	14:00:12	3.25596	798.159	3
2022-09-14	14:00:13	3.25166	801.411	3
2022-09-14	14:00:14	3.25913	804.67	3
2022-09-14	14:00:15	3.25154	807.922	3
2022-09-14	14:00:16	3.25098	811.172	3
2022-09-14	14:00:17	-0.473681	811.172	3
2022-09-14	14:00:18	-0.893661	811.172	3
2022-09-14	14:00:19	3.2512	814.424	3
2022-09-14	14:00:20	3.24932	817.673	3
2022-09-14	14:00:21	3.26139	820.934	3
2022-09-14	14:00:22	3.25675	824.191	3
2022-09-14	14:00:23	3.2589	827.45	3
2022-09-14	14:00:24	3.24653	830.697	3
2022-09-14	14:00:25	3.25709	833.954	3
2022-09-14	14:00:26	3.24668	837.2	3
2022-09-14	14:00:27	3.24832	840.449	3
2022-09-14	14:00:28	3.24419	843.693	3
2022-09-14	14:00:29	3.25579	846.949	3
2022-09-14	14:00:30	3.24209	850.191	3
2022-09-14	14:00:31	3.24555	853.436	3
2022-09-14	14:00:32	3.23415	856.67	3
2022-09-14	14:00:33	3.2477	859.918	3
2022-09-14	14:00:34	3.24617	863.164	3
2022-09-14	14:00:35	3.23943	866.404	3
2022-09-14	14:00:36	3.24962	869.653	3
2022-09-14	14:00:37	3.25551	872.909	3
2022-09-14	14:00:38	3.24215	876.151	3
2022-09-14	14:00:39	2.90735	879.058	3

## Sheet: KimChi_prong_2022914135524 (4)
Date	Time	Lbs	Newtons	Averaged Newtons	Total force x time		total steps > 13.345	**GoPro Fitting: 13:45
2022-09-14	13:55:39	0.138995	0.618278	0.872663	0.618278	FALSE	0
2022-09-14	13:55:39	0.120573	0.536333	0.872663	0.536333	FALSE	0
2022-09-14	13:55:39	0.130853	0.58206	0.872663	1.20034	FALSE	0
2022-09-14	13:55:39	0.394313	1.75398	0.872663	2.29032	FALSE	0
2022-09-14	13:55:40	0.492277	2.18975	1.98822	3.39008	FALSE	0
2022-09-14	13:55:40	0.326374	1.45178	1.98822	3.74209	FALSE	0
2022-09-14	13:55:40	0.510089	2.26898	1.98822	5.65906	FALSE	0
2022-09-14	13:55:40	0.459148	2.04238	1.98822	5.78447	FALSE	0
2022-09-14	13:55:41	0.548461	2.43966	2.25325	8.09873	FALSE	0
2022-09-14	13:55:41	0.531819	2.36564	2.25325	8.15011	FALSE	0
2022-09-14	13:55:41	0.463473	2.06162	2.25325	10.1603	FALSE	0
2022-09-14	13:55:41	0.482456	2.14606	2.25325	10.2962	FALSE	0
2022-09-14	13:55:42	0.117214	0.521391	1.82084	10.6817	FALSE	0
2022-09-14	13:55:42	0.365713	1.62676	1.82084	11.9229	FALSE	0
2022-09-14	13:55:42	0.745102	3.31436	1.82084	13.9961	FALSE	0
2022-09-14	13:55:43	0.599402	2.66626	5.29902	14.5892	FALSE	0
2022-09-14	13:55:43	0.601438	2.67532	5.29902	16.6714	FALSE	0
2022-09-14	13:55:43	1.92551	8.56505	5.29902	23.1543	FALSE	0
2022-09-14	13:55:43	1.63874	7.28944	5.29902	23.9609	FALSE	0
2022-09-14	13:55:44	0.425204	1.89139	1.07713	25.0456	FALSE	0
2022-09-14	13:55:44	0.160013	0.71177	1.07713	24.6726	FALSE	0
2022-09-14	13:55:44	0.225407	1.00266	1.07713	26.0483	FALSE	0
2022-09-14	13:55:44	0.157977	0.702713	1.07713	25.3753	FALSE	0
2022-09-14	13:55:45	0.146222	0.650425	0.744197	26.6987	FALSE	0
2022-09-14	13:55:45	0.17014	0.756817	0.744197	26.1322	FALSE	0
2022-09-14	13:55:45	0.0277992	0.123656	0.744197	26.8224	FALSE	0
2022-09-14	13:55:45	0.325051	1.44589	0.744197	27.5781	FALSE	0
2022-09-14	13:55:46	0.36841	1.63876	1.49192	28.4611	FALSE	0
2022-09-14	13:55:46	0.506934	2.25494	1.49192	29.833	FALSE	0
2022-09-14	13:55:46	0.130853	0.58206	1.49192	29.0432	FALSE	0
2022-09-14	13:55:47	0.342608	1.52399	1.37204	31.357	FALSE	0
2022-09-14	13:55:47	0.205356	0.913465	1.37204	29.9567	FALSE	0
2022-09-14	13:55:47	0.406476	1.80809	1.37204	33.1651	FALSE	0
2022-09-14	13:55:47	0.279351	1.24261	1.37204	31.1993	FALSE	0
2022-09-14	13:55:48	0.375687	1.67113	2.18465	34.8362	FALSE	0
2022-09-14	13:55:48	0.459046	2.04193	2.18465	33.2412	FALSE	0
2022-09-14	13:55:48	0.258842	1.15138	2.18465	35.9876	FALSE	0
2022-09-14	13:55:48	0.870954	3.87418	2.18465	37.1154	FALSE	0
2022-09-14	13:55:49	0.635534	2.82698	1.49999	38.8146	FALSE	0
2022-09-14	13:55:49	0.382863	1.70305	1.49999	38.8184	FALSE	0
2022-09-14	13:55:49	0.265967	1.18307	1.49999	39.9976	FALSE	0
2022-09-14	13:55:49	0.0644913	0.28687	1.49999	39.1053	FALSE	0
2022-09-14	13:55:50	-0.0745417	-0.331576	0.173761	39.9976	FALSE	0
2022-09-14	13:55:50	0.139199	0.619185	0.173761	39.7245	FALSE	0
2022-09-14	13:55:50	0.0525321	0.233673	0.173761	40.2313	FALSE	0
2022-09-14	13:55:51	0.203321	0.904412	4.3516	40.6289	FALSE	0
2022-09-14	13:55:51	1.40261	6.23909	4.3516	46.4704	FALSE	0
2022-09-14	13:55:51	1.77976	7.91673	4.3516	48.5456	FALSE	0
2022-09-14	13:55:51	0.527443	2.34617	4.3516	48.8166	FALSE	0
2022-09-14	13:55:52	0.684593	3.04521	3.16988	51.5908	FALSE	0
2022-09-14	13:55:52	0.463321	2.06094	3.16988	50.8775	FALSE	0
2022-09-14	13:55:52	1.15523	5.13869	3.16988	56.7295	FALSE	0
2022-09-14	13:55:52	0.547341	2.43468	3.16988	53.3122	FALSE	0
2022-09-14	13:55:53	0.778028	3.46082	4.38674	60.1904	FALSE	0
2022-09-14	13:55:53	0.983779	4.37605	4.38674	57.6882	FALSE	0
2022-09-14	13:55:53	1.18658	5.27815	4.38674	65.4685	FALSE	0
2022-09-14	13:55:53	0.996349	4.43196	4.38674	62.1202	FALSE	0
2022-09-14	13:55:54	1.08938	4.84578	4.74918	70.3143	FALSE	0
2022-09-14	13:55:54	0.525203	2.33621	4.74918	64.4564	FALSE	0
2022-09-14	13:55:54	1.58841	7.06557	4.74918	77.3798	FALSE	0
2022-09-14	13:55:55	1.46317	6.50847	5.67926	70.9649	FALSE	0
2022-09-14	13:55:55	1.84571	8.21009	5.67926	85.5899	FALSE	0
2022-09-14	13:55:55	0.8107	3.60616	5.67926	74.571	FALSE	0
2022-09-14	13:55:55	0.987442	4.39234	5.67926	89.9823	FALSE	0
2022-09-14	13:55:56	0.752277	3.34628	3.6679	77.9173	FALSE	0
2022-09-14	13:55:56	0.664287	2.95488	3.6679	92.9372	FALSE	0
2022-09-14	13:55:56	0.945051	4.20378	3.6679	82.1211	FALSE	0
2022-09-14	13:55:56	0.936705	4.16665	3.6679	97.1038	FALSE	0
2022-09-14	13:55:57	0.666934	2.96666	5.16721	85.0878	FALSE	0
2022-09-14	13:55:57	1.33202	5.92509	5.16721	103.029	FALSE	0
2022-09-14	13:55:57	1.48597	6.60989	5.16721	91.6976	FALSE	0
2022-09-14	13:55:58	1.67543	7.45265	13.0725	110.482	FALSE	0
2022-09-14	13:55:58	1.76205	7.83795	13.0725	99.5356	FALSE	0
2022-09-14	13:55:58	2.53487	11.2756	13.0725	121.757	FALSE	0
2022-09-14	13:55:58	5.78301	25.724	13.0725	125.26	1	1
2022-09-14	13:55:59	5.11263	22.742	20.7611	144.499	1	2
2022-09-14	13:55:59	6.14459	27.3324	20.7611	152.592	1	3
2022-09-14	13:55:59	4.34357	19.3211	20.7611	163.82	1	4
2022-09-14	13:55:59	3.06841	13.6489	20.7611	166.241	1	5
2022-09-14	13:56:00	2.01182	8.94898	9.59164	172.769	FALSE	5
2022-09-14	13:56:00	2.36515	10.5207	9.59164	176.762	FALSE	5
2022-09-14	13:56:00	2.2193	9.87189	9.59164	182.641	FALSE	5
2022-09-14	13:56:00	2.02892	9.02504	9.59164	185.787	FALSE	5
2022-09-14	13:56:01	2.21284	9.84315	11.1264	192.484	FALSE	5
2022-09-14	13:56:01	2.44215	10.8632	11.1264	196.65	FALSE	5
2022-09-14	13:56:01	2.84902	12.673	11.1264	205.157	FALSE	5
2022-09-14	13:56:02	1.64663	7.32454	4.62143	203.974	FALSE	5
2022-09-14	13:56:02	0.580064	2.58024	4.62143	207.737	FALSE	5
2022-09-14	13:56:02	0.615891	2.73961	4.62143	206.714	FALSE	5
2022-09-14	13:56:02	1.31319	5.84133	4.62143	213.579	FALSE	5
2022-09-14	13:56:03	4.91411	21.8589	21.6537	228.573	1	6
2022-09-14	13:56:03	6.01487	26.7553	21.6537	240.334	1	7
2022-09-14	13:56:03	5.1424	22.8744	21.6537	251.447	1	8
2022-09-14	13:56:03	3.40052	15.1262	21.6537	255.46	1	9
2022-09-14	13:56:04	1.28261	5.70531	2.75704	257.153	FALSE	9
2022-09-14	13:56:04	0.631616	2.80955	2.75704	258.27	FALSE	9
2022-09-14	13:56:04	0.408868	1.81873	2.75704	258.971	FALSE	9
2022-09-14	13:56:04	0.156145	0.694564	2.75704	258.964	FALSE	9
2022-09-14	13:56:05	0.642405	2.85755	1.45223	261.829	FALSE	9
2022-09-14	13:56:05	0.217723	0.968475	1.45223	259.933	FALSE	9
2022-09-14	13:56:05	0.1193	0.53067	1.45223	262.359	FALSE	9
2022-09-14	13:56:06	-0.034389	-0.152969	0.129146	259.933	FALSE	9
2022-09-14	13:56:06	0.0427101	0.189983	0.129146	262.549	FALSE	9
2022-09-14	13:56:06	-0.0772389	-0.343574	0.129146	259.933	FALSE	9
2022-09-14	13:56:06	0.185051	0.823144	0.129146	263.373	FALSE	9
2022-09-14	13:56:07	-0.0989692	-0.440235	10.7525	259.933	FALSE	9
2022-09-14	13:56:07	0.254771	1.13327	10.7525	264.506	FALSE	9
2022-09-14	13:56:07	4.22286	18.7841	10.7525	278.717	1	10
2022-09-14	13:56:07	5.29039	23.5327	10.7525	288.039	1	11
2022-09-14	13:56:08	3.21803	14.3144	6.87292	293.032	1	12
2022-09-14	13:56:08	0.763728	3.39721	6.87292	291.436	FALSE	12
2022-09-14	13:56:08	1.3367	5.94591	6.87292	298.977	FALSE	12
2022-09-14	13:56:08	0.861946	3.83411	6.87292	295.27	FALSE	12
2022-09-14	13:56:09	0.827494	3.68086	2.27675	302.658	FALSE	12
2022-09-14	13:56:09	0.387188	1.72229	2.27675	296.992	FALSE	12
2022-09-14	13:56:09	0.320827	1.4271	2.27675	304.085	FALSE	12
2022-09-14	13:56:10	0.72612	3.22993	2.47192	300.222	FALSE	12
2022-09-14	13:56:10	0.303626	1.35059	2.47192	305.436	FALSE	12
2022-09-14	13:56:10	0.936043	4.16371	2.47192	304.386	FALSE	12
2022-09-14	13:56:10	0.257061	1.14346	2.47192	306.579	FALSE	12
2022-09-14	13:56:11	0.14841	0.660157	1.55302	305.046	FALSE	12
2022-09-14	13:56:11	0.426476	1.89705	1.55302	308.476	FALSE	12
2022-09-14	13:56:11	0.413397	1.83887	1.55302	306.885	FALSE	12
2022-09-14	13:56:11	0.408257	1.81601	1.55302	310.293	FALSE	12
2022-09-14	13:56:12	0.788002	3.50519	4.69336	310.39	FALSE	12
2022-09-14	13:56:12	1.56128	6.94489	4.69336	317.237	FALSE	12
2022-09-14	13:56:12	1.2192	5.42325	4.69336	315.813	FALSE	12
2022-09-14	13:56:12	0.651972	2.9001	4.69336	320.137	FALSE	12
2022-09-14	13:56:13	0.520623	2.31584	4.69953	318.129	FALSE	12
2022-09-14	13:56:13	1.14271	5.083	4.69953	325.22	FALSE	12
2022-09-14	13:56:13	1.50617	6.69975	4.69953	324.829	FALSE	12
2022-09-14	13:56:14	1.09116	4.8537	4.94565	330.074	FALSE	12
2022-09-14	13:56:14	1.80159	8.01383	4.94565	332.843	FALSE	12
2022-09-14	13:56:14	0.735433	3.27135	4.94565	333.346	FALSE	12
2022-09-14	13:56:14	0.819148	3.64373	4.94565	336.486	FALSE	12
2022-09-14	13:56:15	0.523422	2.32829	2.05494	335.674	FALSE	12
2022-09-14	13:56:15	0.437316	1.94527	2.05494	338.432	FALSE	12
2022-09-14	13:56:15	0.586883	2.61057	2.05494	338.284	FALSE	12
2022-09-14	13:56:15	0.300267	1.33565	2.05494	339.767	FALSE	12
2022-09-14	13:56:16	0.648511	2.88471	2.11035	341.169	FALSE	12
2022-09-14	13:56:16	0.303982	1.35217	2.11035	341.12	FALSE	12
2022-09-14	13:56:16	0.576094	2.56258	2.11035	343.732	FALSE	12
2022-09-14	13:56:16	0.369122	1.64193	2.11035	342.761	FALSE	12
2022-09-14	13:56:17	0.433651	1.92897	1.52097	345.661	FALSE	12
2022-09-14	13:56:17	0.14042	0.624616	1.52097	343.386	FALSE	12
2022-09-14	13:56:17	0.451718	2.00933	1.52097	347.67	FALSE	12
2022-09-14	13:56:18	1.00016	4.44891	8.56442	347.835	FALSE	12
2022-09-14	13:56:18	1.80683	8.03714	8.56442	355.707	FALSE	12
2022-09-14	13:56:18	3.20434	14.2535	8.56442	362.089	1	13
2022-09-14	13:56:18	1.69014	7.51808	8.56442	363.225	FALSE	13
2022-09-14	13:56:19	1.61915	7.2023	4.57673	369.291	FALSE	13
2022-09-14	13:56:19	1.14103	5.07553	4.57673	368.301	FALSE	13
2022-09-14	13:56:19	0.723372	3.2177	4.57673	372.509	FALSE	13
2022-09-14	13:56:19	0.632023	2.81136	4.57673	371.112	FALSE	13
2022-09-14	13:56:20	1.0221	4.54651	4.0714	377.055	FALSE	13
2022-09-14	13:56:20	1.09589	4.87474	4.0714	375.987	FALSE	13
2022-09-14	13:56:20	1.13777	5.06103	4.0714	382.116	FALSE	13
2022-09-14	13:56:20	0.405407	1.80333	4.0714	377.79	FALSE	13
2022-09-14	13:56:21	0.431005	1.9172	1.04348	384.033	FALSE	13
2022-09-14	13:56:21	0.402608	1.79088	1.04348	379.581	FALSE	13
2022-09-14	13:56:21	-0.12986	-0.577643	1.04348	384.033	FALSE	13
2022-09-14	13:56:22	-0.524312	-2.33224	-2.17062	379.581	FALSE	13
2022-09-14	13:56:22	-0.729045	-3.24294	-2.17062	384.033	FALSE	13
2022-09-14	13:56:22	-0.519529	-2.31097	-2.17062	379.581	FALSE	13
2022-09-14	13:56:22	-0.17902	-0.796317	-2.17062	384.033	FALSE	13
2022-09-14	13:56:23	0.604644	2.68958	6.47745	382.271	FALSE	13
2022-09-14	13:56:23	1.77884	7.91264	6.47745	391.946	FALSE	13
2022-09-14	13:56:23	1.82963	8.13856	6.47745	390.409	FALSE	13
2022-09-14	13:56:23	1.61167	7.16903	6.47745	399.115	FALSE	13
2022-09-14	13:56:24	1.30347	5.7981	4.17487	396.207	FALSE	13
2022-09-14	13:56:24	0.841336	3.74243	4.17487	402.857	FALSE	13
2022-09-14	13:56:24	0.670852	2.98408	4.17487	399.191	FALSE	13
2022-09-14	13:56:25	0.475891	2.11686	2.29484	404.974	FALSE	13
2022-09-14	13:56:25	0.277723	1.23537	2.29484	400.427	FALSE	13
2022-09-14	13:56:25	0.582201	2.58975	2.29484	407.564	FALSE	13
2022-09-14	13:56:25	0.727799	3.2374	2.29484	403.664	FALSE	13
2022-09-14	13:56:26	0.724186	3.22132	3.23989	410.785	FALSE	13
2022-09-14	13:56:26	0.730343	3.24871	3.23989	406.913	FALSE	13
2022-09-14	13:56:26	0.726527	3.23174	3.23989	414.017	FALSE	13
2022-09-14	13:56:26	0.732379	3.25777	3.23989	410.171	FALSE	13
2022-09-14	13:56:27	0.72388	3.21996	3.22851	417.237	FALSE	13
2022-09-14	13:56:27	0.728206	3.23921	3.22851	413.41	FALSE	13
2022-09-14	13:56:27	0.721946	3.21136	3.22851	420.448	FALSE	13
2022-09-14	13:56:27	0.729173	3.24351	3.22851	416.653	FALSE	13
2022-09-14	13:56:28	0.72617	3.23015	3.24049	423.679	FALSE	13
2022-09-14	13:56:28	0.731921	3.25573	3.24049	419.909	FALSE	13
2022-09-14	13:56:28	0.727392	3.23559	3.24049	426.914	FALSE	13
2022-09-14	13:56:29	0.721132	3.20774	3.22477	423.117	FALSE	13
2022-09-14	13:56:29	0.727188	3.23468	3.22477	430.149	FALSE	13
2022-09-14	13:56:29	0.723779	3.21951	3.22477	426.336	FALSE	13
2022-09-14	13:56:29	0.727748	3.23717	3.22477	433.386	FALSE	13
2022-09-14	13:56:30	0.723779	3.21951	3.22438	429.556	FALSE	13
2022-09-14	13:56:30	0.722252	3.21272	3.22438	436.599	FALSE	13
2022-09-14	13:56:30	0.724084	3.22087	3.22438	432.777	FALSE	13
2022-09-14	13:56:30	0.729377	3.24441	3.22438	439.843	FALSE	13
2022-09-14	13:56:31	0.728512	3.24057	3.22681	436.017	FALSE	13
2022-09-14	13:56:31	0.727545	3.23627	3.22681	443.079	FALSE	13
2022-09-14	13:56:31	0.719198	3.19914	3.22681	439.216	FALSE	13
2022-09-14	13:56:31	0.726425	3.23128	3.22681	446.311	FALSE	13
2022-09-14	13:56:32	0.724237	3.22155	3.23876	442.438	FALSE	13
2022-09-14	13:56:32	0.731616	3.25437	3.23876	449.565	FALSE	13
2022-09-14	13:56:32	0.728461	3.24034	3.23876	445.678	FALSE	13
2022-09-14	13:56:33	0.730242	3.24826	3.22636	452.813	FALSE	13
2022-09-14	13:56:33	0.719504	3.2005	3.22636	448.879	FALSE	13
2022-09-14	13:56:33	0.727697	3.23694	3.22636	456.05	FALSE	13
2022-09-14	13:56:33	0.72383	3.21974	3.22636	452.099	FALSE	13
2022-09-14	13:56:34	0.733957	3.26479	3.24515	459.315	FALSE	13
2022-09-14	13:56:34	0.724847	3.22426	3.24515	455.323	FALSE	13
2022-09-14	13:56:34	0.731667	3.2546	3.24515	462.57	FALSE	13
2022-09-14	13:56:34	0.727697	3.23694	3.24515	458.56	FALSE	13
2022-09-14	13:56:35	0.72902	3.24283	3.24124	465.812	FALSE	13
2022-09-14	13:56:35	0.732074	3.25641	3.24124	461.816	FALSE	13
2022-09-14	13:56:35	0.723015	3.21612	3.24124	469.029	FALSE	13
2022-09-14	13:56:35	0.730547	3.24962	3.24124	465.066	FALSE	13
2022-09-14	13:56:36	0.729478	3.24486	3.24117	472.273	FALSE	13
2022-09-14	13:56:36	0.728155	3.23898	3.24117	468.305	FALSE	13
2022-09-14	13:56:36	0.728308	3.23966	3.24117	475.513	FALSE	13
2022-09-14	13:56:37	0.734262	3.26614	3.23683	471.571	FALSE	13
2022-09-14	13:56:37	0.72444	3.22245	3.23683	478.736	FALSE	13
2022-09-14	13:56:37	0.722761	3.21499	3.23683	474.786	FALSE	13
2022-09-14	13:56:37	0.729224	3.24373	3.23683	481.979	FALSE	13
2022-09-14	13:56:38	0.72612	3.22993	3.2314	478.016	FALSE	13
2022-09-14	13:56:38	0.724644	3.22336	3.2314	485.203	FALSE	13
2022-09-14	13:56:38	0.728155	3.23898	3.2314	481.255	FALSE	13
2022-09-14	13:56:38	0.726883	3.23332	3.2314	488.436	FALSE	13
2022-09-14	13:56:39	0.320064	1.42371	-3.07945	482.678	FALSE	13
2022-09-14	13:56:39	-1.2292	-5.46773	-3.07945	488.436	FALSE	13
2022-09-14	13:56:39	-0.910674	-4.05086	-3.07945	482.678	FALSE	13
2022-09-14	13:56:39	-0.949351	-4.2229	-3.07945	488.436	FALSE	13
2022-09-14	13:56:40	-1.37759	-6.1278	-6.86156	482.678	FALSE	13
2022-09-14	13:56:40	-1.55342	-6.90992	-6.86156	488.436	FALSE	13
2022-09-14	13:56:40	-1.69663	-7.54695	-6.86156	482.678	FALSE	13
2022-09-14	13:56:41	-1.78436	-7.93719	-7.99012	488.436	FALSE	13
2022-09-14	13:56:41	-1.76696	-7.85979	-7.99012	482.678	FALSE	13
2022-09-14	13:56:41	-1.74401	-7.75771	-7.99012	488.436	FALSE	13
2022-09-14	13:56:41	-1.88971	-8.40581	-7.99012	482.678	FALSE	13
2022-09-14	13:56:42	-1.795	-7.98452	-7.57325	488.436	FALSE	13
2022-09-14	13:56:42	-1.79006	-7.96254	-7.57325	482.678	FALSE	13
2022-09-14	13:56:42	-1.67724	-7.4607	-7.57325	488.436	FALSE	13
2022-09-14	13:56:42	-1.54787	-6.88524	-7.57325	482.678	FALSE	13
2022-09-14	13:56:43	-1.51658	-6.74605	-6.83936	488.436	FALSE	13
2022-09-14	13:56:43	-1.49556	-6.65255	-6.83936	482.678	FALSE	13
2022-09-14	13:56:43	-1.50421	-6.69103	-6.83936	488.436	FALSE	13
2022-09-14	13:56:43	-1.63388	-7.26783	-6.83936	482.678	FALSE	13
2022-09-14	13:56:44	-1.6353	-7.27414	-6.92909	488.436	FALSE	13
2022-09-14	13:56:44	-1.552	-6.90361	-6.92909	482.678	FALSE	13
2022-09-14	13:56:44	-1.48589	-6.60954	-6.92909	488.436	FALSE	13
2022-09-14	13:56:45	-1.09337	-4.86353	-4.52607	482.678	FALSE	13
2022-09-14	13:56:45	-1.14966	-5.11392	-4.52607	488.436	FALSE	13
2022-09-14	13:56:45	-1.02833	-4.57422	-4.52607	482.678	FALSE	13
2022-09-14	13:56:45	-0.798663	-3.55261	-4.52607	488.436	FALSE	13
2022-09-14	13:56:46	-0.363142	-1.61533	0.190492	482.678	FALSE	13
2022-09-14	13:56:46	0.0667814	0.297057	0.190492	488.733	FALSE	13
2022-09-14	13:56:46	0.191972	0.85393	0.190492	483.532	FALSE	13
2022-09-14	13:56:46	0.275687	1.22631	0.190492	489.959	FALSE	13
2022-09-14	13:56:47	0.776959	3.45607	1.01663	486.988	FALSE	13
2022-09-14	13:56:47	0.255076	1.13463	1.01663	491.094	FALSE	13
2022-09-14	13:56:47	-0.111285	-0.495018	1.01663	486.988	FALSE	13
2022-09-14	13:56:47	-0.0065519	-0.0291442	1.01663	491.094	FALSE	13
2022-09-14	13:56:48	-0.22533	-1.00231	-0.619672	486.988	FALSE	13
2022-09-14	13:56:48	-0.187112	-0.832312	-0.619672	491.094	FALSE	13
2022-09-14	13:56:48	-0.00548322	-0.0243905	-0.619672	486.988	FALSE	13
2022-09-14	13:56:49	-0.388129	-1.72648	-0.566946	491.094	FALSE	13
2022-09-14	13:56:49	-0.0624806	-0.277926	-0.566946	486.988	FALSE	13
2022-09-14	13:56:49	-0.130216	-0.579227	-0.566946	491.094	FALSE	13
2022-09-14	13:56:49	0.0710053	0.315846	-0.566946	487.304	FALSE	13
2022-09-14	13:56:50	-0.137748	-0.612731	-1.52111	491.094	FALSE	13
2022-09-14	13:56:50	0.286781	1.27566	-1.52111	488.58	FALSE	13
2022-09-14	13:56:50	0.350038	1.55704	-1.52111	492.651	FALSE	13
2022-09-14	13:56:50	-1.86691	-8.30439	-1.52111	488.58	FALSE	13
2022-09-14	13:56:51	0.232074	1.03231	2.70056	493.683	FALSE	13
2022-09-14	13:56:51	0.732583	3.25868	2.70056	491.839	FALSE	13
2022-09-14	13:56:51	0.729071	3.24305	2.70056	496.926	FALSE	13
2022-09-14	13:56:51	0.73472	3.26818	2.70056	495.107	FALSE	13
2022-09-14	13:56:52	0.73131	3.25301	3.24532	500.179	FALSE	13
2022-09-14	13:56:52	0.726883	3.23332	3.24532	498.34	FALSE	13
2022-09-14	13:56:52	0.730547	3.24962	3.24532	503.429	FALSE	13
2022-09-14	13:56:53	0.727036	3.234	3.23491	501.574	FALSE	13
2022-09-14	13:56:53	0.731412	3.25347	3.23491	506.682	FALSE	13
2022-09-14	13:56:53	0.723372	3.2177	3.23491	504.792	FALSE	13
2022-09-14	13:56:53	0.727137	3.23445	3.23491	509.917	FALSE	13
2022-09-14	13:56:54	0.730445	3.24917	3.23813	508.041	FALSE	13
2022-09-14	13:56:54	0.723524	3.21838	3.23813	513.135	FALSE	13
2022-09-14	13:56:54	0.732074	3.25641	3.23813	511.297	FALSE	13
2022-09-14	13:56:54	0.725814	3.22857	3.23813	516.364	FALSE	13
2022-09-14	13:56:55	0.724237	3.22155	3.24094	514.519	FALSE	13
2022-09-14	13:56:55	0.735178	3.27022	3.24094	519.634	FALSE	13
2022-09-14	13:56:55	0.726374	3.23106	3.24094	517.75	FALSE	13
2022-09-14	13:56:56	0.737315	3.27972	3.26869	522.914	FALSE	13
2022-09-14	13:56:56	0.731056	3.25188	3.26869	521.002	FALSE	13
2022-09-14	13:56:56	0.734618	3.26773	3.26869	526.182	FALSE	13
2022-09-14	13:56:56	0.736349	3.27543	3.26869	524.277	FALSE	13
2022-09-14	13:56:57	0.723473	3.21815	3.2284	529.4	FALSE	13
2022-09-14	13:56:57	0.725611	3.22766	3.2284	527.505	FALSE	13
2022-09-14	13:56:57	0.731412	3.25347	3.2284	532.653	FALSE	13
2022-09-14	13:56:57	0.722608	3.2143	3.2284	530.719	FALSE	13
2022-09-14	13:56:58	0.729428	3.24464	3.24051	535.898	FALSE	13
2022-09-14	13:56:58	0.72617	3.23015	3.24051	533.949	FALSE	13
2022-09-14	13:56:58	0.730496	3.24939	3.24051	539.147	FALSE	13
2022-09-14	13:56:58	0.727901	3.23785	3.24051	537.187	FALSE	13
2022-09-14	13:56:59	0.734924	3.26909	3.25498	542.416	FALSE	13
2022-09-14	13:56:59	0.73187	3.2555	3.25498	540.443	FALSE	13
2022-09-14	13:56:59	0.728461	3.24034	3.25498	545.657	FALSE	13
2022-09-14	13:57:00	0.736807	3.27746	3.26439	543.72	FALSE	13
2022-09-14	13:57:00	0.73645	3.27588	3.26439	548.932	FALSE	13
2022-09-14	13:57:00	0.733651	3.26343	3.26439	546.984	FALSE	13
2022-09-14	13:57:00	0.728562	3.24079	3.26439	552.173	FALSE	13
2022-09-14	13:57:01	0.732735	3.25935	3.24056	550.243	FALSE	13
2022-09-14	13:57:01	0.721591	3.20978	3.24056	555.383	FALSE	13
2022-09-14	13:57:01	0.727646	3.23671	3.24056	553.48	FALSE	13
2022-09-14	13:57:01	0.732074	3.25641	3.24056	558.639	FALSE	13
2022-09-14	13:57:02	0.73131	3.25301	3.2559	556.733	FALSE	13
2022-09-14	13:57:02	0.731209	3.25256	3.2559	561.892	FALSE	13
2022-09-14	13:57:02	0.725967	3.22925	3.2559	559.962	FALSE	13
2022-09-14	13:57:02	0.739351	3.28878	3.2559	565.181	FALSE	13
2022-09-14	13:57:03	0.732125	3.25664	3.24909	563.219	FALSE	13
2022-09-14	13:57:03	0.731005	3.25166	3.24909	568.432	FALSE	13
2022-09-14	13:57:03	0.728155	3.23898	3.24909	566.458	FALSE	13
2022-09-14	13:57:04	0.72841	3.24011	3.24639	571.673	FALSE	13
2022-09-14	13:57:04	0.729173	3.24351	3.24639	569.701	FALSE	13
2022-09-14	13:57:04	0.727239	3.2349	3.24639	574.907	FALSE	13
2022-09-14	13:57:04	0.734466	3.26705	3.24639	572.968	FALSE	13
2022-09-14	13:57:05	0.726527	3.23174	3.24623	578.139	FALSE	13
2022-09-14	13:57:05	0.734466	3.26705	3.24623	576.235	FALSE	13
2022-09-14	13:57:05	0.731056	3.25188	3.24623	581.391	FALSE	13
2022-09-14	13:57:05	0.727087	3.23423	3.24623	579.47	FALSE	13
2022-09-14	13:57:06	0.728562	3.24079	3.23773	584.632	FALSE	13
2022-09-14	13:57:06	0.729682	3.24577	3.23773	582.715	FALSE	13
2022-09-14	13:57:06	0.725153	3.22563	3.23773	587.858	FALSE	13
2022-09-14	13:57:06	0.728104	3.23875	3.23773	585.954	FALSE	13
2022-09-14	13:57:07	0.726425	3.23128	3.23113	591.089	FALSE	13
2022-09-14	13:57:07	0.731565	3.25415	3.23113	589.208	FALSE	13
2022-09-14	13:57:07	0.721183	3.20797	3.23113	594.297	FALSE	13
2022-09-14	13:57:08	0.729428	3.24464	-4.12533	592.453	FALSE	13
2022-09-14	13:57:08	0.0688679	0.306338	-4.12533	594.603	FALSE	13
2022-09-14	13:57:08	0.716298	3.18624	-4.12533	595.639	FALSE	13
2022-09-14	13:57:08	-5.22426	-23.2386	-4.12533	594.603	FALSE	13
2022-09-14	13:57:09	-7.1748	-31.9149	-22.5885	595.639	FALSE	13
2022-09-14	13:57:09	-6.6524	-29.5912	-22.5885	594.603	FALSE	13
2022-09-14	13:57:09	-3.20645	-14.2629	-22.5885	595.639	FALSE	13
2022-09-14	13:57:09	-3.27887	-14.5851	-22.5885	594.603	FALSE	13
2022-09-14	13:57:10	-3.26747	-14.5344	-14.2125	595.639	FALSE	13
2022-09-14	13:57:10	-3.22716	-14.3551	-14.2125	594.603	FALSE	13
2022-09-14	13:57:10	-3.17322	-14.1151	-14.2125	595.639	FALSE	13
2022-09-14	13:57:10	-3.11261	-13.8455	-14.2125	594.603	FALSE	13
2022-09-14	13:57:11	-2.96278	-13.179	-12.758	595.639	FALSE	13
2022-09-14	13:57:11	-2.87581	-12.7922	-12.758	594.603	FALSE	13
2022-09-14	13:57:11	-2.76579	-12.3028	-12.758	595.639	FALSE	13
2022-09-14	13:57:12	-2.65245	-11.7986	-8.70861	594.603	FALSE	13
2022-09-14	13:57:12	-2.57016	-11.4326	-8.70861	595.639	FALSE	13
2022-09-14	13:57:12	-2.44319	-10.8678	-8.70861	594.603	FALSE	13
2022-09-14	13:57:12	-0.16533	-0.735421	-8.70861	595.639	FALSE	13
2022-09-14	13:57:13	0.73131	3.25301	3.26247	597.856	FALSE	13
2022-09-14	13:57:13	0.729173	3.24351	3.26247	598.883	FALSE	13
2022-09-14	13:57:13	0.732888	3.26003	3.26247	601.116	FALSE	13
2022-09-14	13:57:13	0.740369	3.29331	3.26247	602.176	FALSE	13
2022-09-14	13:57:14	0.730598	3.24985	3.23757	604.366	FALSE	13
2022-09-14	13:57:14	0.728206	3.23921	3.23757	605.415	FALSE	13
2022-09-14	13:57:14	0.728766	3.2417	3.23757	607.608	FALSE	13
2022-09-14	13:57:14	0.723779	3.21951	3.23757	608.635	FALSE	13
2022-09-14	13:57:15	0.726679	3.23241	3.24215	610.84	FALSE	13
2022-09-14	13:57:15	0.728461	3.24034	3.24215	611.875	FALSE	13
2022-09-14	13:57:15	0.731463	3.25369	3.24215	614.094	FALSE	13
2022-09-14	13:57:16	0.730547	3.24962	3.24826	615.125	FALSE	13
2022-09-14	13:57:16	0.732684	3.25912	3.24826	617.353	FALSE	13
2022-09-14	13:57:16	0.73243	3.258	3.24826	618.383	FALSE	13
2022-09-14	13:57:16	0.725305	3.2263	3.24826	620.579	FALSE	13
2022-09-14	13:57:17	0.731107	3.25211	3.24634	621.635	FALSE	13
2022-09-14	13:57:17	0.729987	3.24713	3.24634	623.826	FALSE	13
2022-09-14	13:57:17	0.727646	3.23671	3.24634	624.871	FALSE	13
2022-09-14	13:57:17	0.730496	3.24939	3.24634	627.076	FALSE	13
2022-09-14	13:57:18	0.732277	3.25731	3.25901	628.129	FALSE	13
2022-09-14	13:57:18	0.729122	3.24328	3.25901	630.319	FALSE	13
2022-09-14	13:57:18	0.732481	3.25822	3.25901	631.387	FALSE	13
2022-09-14	13:57:18	0.736756	3.27724	3.25901	633.596	FALSE	13
2022-09-14	13:57:19	0.72444	3.22245	3.23475	634.609	FALSE	13
2022-09-14	13:57:19	0.732074	3.25641	3.23475	636.853	FALSE	13
2022-09-14	13:57:19	0.725102	3.2254	3.23475	637.835	FALSE	13
2022-09-14	13:57:20	0.728461	3.24034	3.25251	640.093	FALSE	13
2022-09-14	13:57:20	0.732888	3.26003	3.25251	641.095	FALSE	13
2022-09-14	13:57:20	0.732481	3.25822	3.25251	643.351	FALSE	13
2022-09-14	13:57:20	0.730954	3.25143	3.25251	644.346	FALSE	13
2022-09-14	13:57:21	0.735127	3.26999	3.25941	646.621	FALSE	13
2022-09-14	13:57:21	0.735433	3.27135	3.25941	647.618	FALSE	13
2022-09-14	13:57:21	0.728359	3.23989	3.25941	649.861	FALSE	13
2022-09-14	13:57:21	0.732074	3.25641	3.25941	650.874	FALSE	13
2022-09-14	13:57:22	0.730649	3.25007	3.26207	653.111	FALSE	13
2022-09-14	13:57:22	0.732939	3.26026	3.26207	654.134	FALSE	13
2022-09-14	13:57:22	0.734975	3.26932	3.26207	656.38	FALSE	13
2022-09-14	13:57:22	0.734822	3.26864	3.26207	657.403	FALSE	13
2022-09-14	13:57:23	0.730903	3.2512	3.25973	659.632	FALSE	13
2022-09-14	13:57:23	0.731768	3.25505	3.25973	660.658	FALSE	13
2022-09-14	13:57:23	0.735789	3.27294	3.25973	662.905	FALSE	13
2022-09-14	13:57:24	0.735178	3.27022	3.24509	663.928	FALSE	13
2022-09-14	13:57:24	0.727748	3.23717	3.24509	666.142	FALSE	13
2022-09-14	13:57:24	0.723931	3.22019	3.24509	667.148	FALSE	13
2022-09-14	13:57:24	0.731259	3.25279	3.24509	669.395	FALSE	13
2022-09-14	13:57:25	0.72612	3.22993	3.23892	670.378	FALSE	13
2022-09-14	13:57:25	0.726527	3.23174	3.23892	672.626	FALSE	13
2022-09-14	13:57:25	0.732175	3.25686	3.23892	673.635	FALSE	13
2022-09-14	13:57:25	0.727748	3.23717	3.23892	675.863	FALSE	13
2022-09-14	13:57:26	0.724033	3.22064	3.23683	676.856	FALSE	13
2022-09-14	13:57:26	0.728257	3.23943	3.23683	679.103	FALSE	13
2022-09-14	13:57:26	0.730038	3.24736	3.23683	680.103	FALSE	13
2022-09-14	13:57:26	0.728359	3.23989	3.23683	682.343	FALSE	13
2022-09-14	13:57:27	0.736298	3.2752	3.26033	683.378	FALSE	13
2022-09-14	13:57:27	0.734109	3.26546	3.26033	685.608	FALSE	13
2022-09-14	13:57:27	0.728461	3.24034	3.26033	686.619	FALSE	13
2022-09-14	13:57:28	0.735026	3.26954	3.25143	688.878	FALSE	13
2022-09-14	13:57:28	0.729377	3.24441	3.25143	689.863	FALSE	13
2022-09-14	13:57:28	0.730954	3.25143	3.25143	692.129	FALSE	13
2022-09-14	13:57:28	0.728461	3.24034	3.25143	693.103	FALSE	13
2022-09-14	13:57:29	0.728206	3.23921	3.25064	695.368	FALSE	13
2022-09-14	13:57:29	0.725204	3.22585	3.25064	696.329	FALSE	13
2022-09-14	13:57:29	0.731819	3.25528	3.25064	698.624	FALSE	13
2022-09-14	13:57:29	0.737875	3.28222	3.25064	699.612	FALSE	13
2022-09-14	13:57:30	0.733448	3.26252	3.24764	701.886	FALSE	13
2022-09-14	13:57:30	0.726425	3.23128	3.24764	702.843	FALSE	13
2022-09-14	13:57:30	0.730751	3.25053	3.24764	705.137	FALSE	13
2022-09-14	13:57:30	0.729784	3.24623	3.24764	706.089	FALSE	13
2022-09-14	13:57:31	0.736145	3.27452	3.26743	708.411	FALSE	13
2022-09-14	13:57:31	0.735433	3.27135	3.26743	709.36	FALSE	13
2022-09-14	13:57:31	0.732074	3.25641	3.26743	711.668	FALSE	13
2022-09-14	13:57:32	0.733702	3.26365	3.26088	712.624	FALSE	13
2022-09-14	13:57:32	0.731972	3.25596	3.26088	714.924	FALSE	13
2022-09-14	13:57:32	0.730751	3.25053	3.26088	715.875	FALSE	13
2022-09-14	13:57:32	0.735891	3.27339	3.26088	718.197	FALSE	13
2022-09-14	13:57:33	0.731158	3.25234	3.26139	719.127	FALSE	13
2022-09-14	13:57:33	0.736145	3.27452	3.26139	721.472	FALSE	13
2022-09-14	13:57:33	0.735229	3.27045	3.26139	722.397	FALSE	13
2022-09-14	13:57:33	0.730242	3.24826	3.26139	724.72	FALSE	13
2022-09-14	13:57:34	0.642405	2.85755	-1.06774	725.255	FALSE	13
2022-09-14	13:57:34	-0.874083	-3.8881	-1.06774	724.72	FALSE	13
2022-09-14	13:57:34	-0.488435	-2.17266	-1.06774	725.255	FALSE	13
2022-09-14	13:57:35	-0.467722	-2.08052	-1.48686	724.72	FALSE	13
2022-09-14	13:57:35	-0.489452	-2.17718	-1.48686	725.255	FALSE	13
2022-09-14	13:57:35	-0.512201	-2.27837	-1.48686	724.72	FALSE	13
2022-09-14	13:57:35	0.132328	0.588621	-1.48686	725.843	FALSE	13
2022-09-14	13:57:36	0.248715	1.10633	-4.00315	725.826	FALSE	13
2022-09-14	13:57:36	0.338944	1.50769	-4.00315	727.351	FALSE	13
2022-09-14	13:57:36	-2.14365	-9.53538	-4.00315	725.826	FALSE	13
2022-09-14	13:57:36	-2.0438	-9.09123	-4.00315	727.351	FALSE	13
2022-09-14	13:57:37	-1.98925	-8.84858	-8.38105	725.826	FALSE	13
2022-09-14	13:57:37	-1.89994	-8.45131	-8.38105	727.351	FALSE	13
2022-09-14	13:57:37	-1.76324	-7.84324	-8.38105	725.826	FALSE	13
2022-09-14	13:57:38	-1.75536	-7.80819	-6.83182	727.351	FALSE	13
2022-09-14	13:57:38	-1.58385	-7.04528	-6.83182	725.826	FALSE	13
2022-09-14	13:57:38	-1.41235	-6.28242	-6.83182	727.351	FALSE	13
2022-09-14	13:57:38	-1.39189	-6.19141	-6.83182	725.826	FALSE	13
2022-09-14	13:57:39	-1.44044	-6.40737	-1.71804	727.351	FALSE	13
2022-09-14	13:57:39	-1.40421	-6.24621	-1.71804	725.826	FALSE	13
2022-09-14	13:57:39	0.596756	2.65449	-1.71804	730.006	FALSE	13
2022-09-14	13:57:39	0.702964	3.12692	-1.71804	728.953	FALSE	13
2022-09-14	13:57:40	0.681743	3.03253	0.343633	733.038	FALSE	13
2022-09-14	13:57:40	-0.164058	-0.729763	0.343633	728.953	FALSE	13
2022-09-14	13:57:40	-0.112404	-0.499995	0.343633	733.038	FALSE	13
2022-09-14	13:57:40	-0.096272	-0.428237	0.343633	728.953	FALSE	13
2022-09-14	13:57:41	-0.154643	-0.687883	-0.345441	733.038	FALSE	13
2022-09-14	13:57:41	-0.111895	-0.497731	-0.345441	728.953	FALSE	13
2022-09-14	13:57:41	-0.121921	-0.542329	-0.345441	733.038	FALSE	13
2022-09-14	13:57:41	0.0778247	0.34618	-0.345441	729.299	FALSE	13
2022-09-14	13:57:42	0.510852	2.27237	0.813938	735.311	FALSE	13
2022-09-14	13:57:42	0.141489	0.629371	0.813938	729.929	FALSE	13
2022-09-14	13:57:42	-0.103397	-0.459931	0.813938	735.311	FALSE	13
2022-09-14	13:57:43	-0.110063	-0.489582	-0.463381	729.929	FALSE	13
2022-09-14	13:57:43	-0.0870099	-0.387037	-0.463381	735.311	FALSE	13
2022-09-14	13:57:43	-0.0382059	-0.169947	-0.463381	729.929	FALSE	13
2022-09-14	13:57:43	-0.181412	-0.806957	-0.463381	735.311	FALSE	13
2022-09-14	13:57:44	-0.295559	-1.31471	-1.87073	729.929	FALSE	13
2022-09-14	13:57:44	-0.366959	-1.63231	-1.87073	735.311	FALSE	13
2022-09-14	13:57:44	-0.49103	-2.1842	-1.87073	729.929	FALSE	13
2022-09-14	13:57:44	-0.528689	-2.35171	-1.87073	735.311	FALSE	13
2022-09-14	13:57:45	-0.548028	-2.43774	-3.4074	729.929	FALSE	13
2022-09-14	13:57:45	-0.464414	-2.06581	-3.4074	735.311	FALSE	13
2022-09-14	13:57:45	-0.561106	-2.49591	-3.4074	729.929	FALSE	13
2022-09-14	13:57:45	-1.49052	-6.63013	-3.4074	735.311	FALSE	13
2022-09-14	13:57:46	-0.793676	-3.53043	-3.43317	729.929	FALSE	13
2022-09-14	13:57:46	-0.860699	-3.82856	-3.43317	735.311	FALSE	13
2022-09-14	13:57:46	-0.661055	-2.9405	-3.43317	729.929	FALSE	13
2022-09-14	13:57:47	-0.612404	-2.7241	-2.70757	735.311	FALSE	13
2022-09-14	13:57:47	-0.621055	-2.76258	-2.70757	729.929	FALSE	13
2022-09-14	13:57:47	-0.60131	-2.67475	-2.70757	735.311	FALSE	13
2022-09-14	13:57:47	-0.599987	-2.66886	-2.70757	729.929	FALSE	13
2022-09-14	13:57:48	-0.593524	-2.64011	-2.59891	735.311	FALSE	13
2022-09-14	13:57:48	-0.596424	-2.65301	-2.59891	729.929	FALSE	13
2022-09-14	13:57:48	-0.579631	-2.57831	-2.59891	735.311	FALSE	13
2022-09-14	13:57:48	-0.567468	-2.52421	-2.59891	729.929	FALSE	13
2022-09-14	13:57:49	-0.546857	-2.43253	-1.84493	735.311	FALSE	13
2022-09-14	13:57:49	-0.422328	-1.8786	-1.84493	729.929	FALSE	13
2022-09-14	13:57:49	-0.365178	-1.62438	-1.84493	735.311	FALSE	13
2022-09-14	13:57:49	-0.324669	-1.44419	-1.84493	729.929	FALSE	13
2022-09-14	13:57:50	-0.3236	-1.43944	-1.20997	735.311	FALSE	13
2022-09-14	13:57:50	-0.250928	-1.11618	-1.20997	729.929	FALSE	13
2022-09-14	13:57:50	-0.241514	-1.0743	-1.20997	735.311	FALSE	13
2022-09-14	13:57:51	-0.199478	-0.887318	0.955289	729.929	FALSE	13
2022-09-14	13:57:51	-0.284974	-1.26762	0.955289	735.311	FALSE	13
2022-09-14	13:57:51	0.601438	2.67532	0.955289	732.604	FALSE	13
2022-09-14	13:57:51	0.742048	3.30078	0.955289	738.611	FALSE	13
2022-09-14	13:57:52	0.733601	3.2632	3.09076	735.867	FALSE	13
2022-09-14	13:57:52	0.727137	3.23445	3.09076	741.846	FALSE	13
2022-09-14	13:57:52	0.591158	2.62959	3.09076	738.497	FALSE	13
2022-09-14	13:57:52	0.727443	3.23581	3.09076	745.082	FALSE	13
2022-09-14	13:57:53	0.727341	3.23536	3.2366	741.732	FALSE	13
2022-09-14	13:57:53	0.729529	3.24509	3.2366	748.327	FALSE	13
2022-09-14	13:57:53	0.732634	3.2589	3.2366	744.991	FALSE	13
2022-09-14	13:57:53	0.720979	3.20706	3.2366	751.534	FALSE	13
2022-09-14	13:57:54	0.731412	3.25347	3.25543	748.244	FALSE	13
2022-09-14	13:57:54	0.731819	3.25528	3.25543	754.789	FALSE	13
2022-09-14	13:57:54	0.732328	3.25754	3.25543	751.502	FALSE	13
2022-09-14	13:57:55	0.727137	3.23445	3.24696	758.023	FALSE	13
2022-09-14	13:57:55	0.731768	3.25505	3.24696	754.757	FALSE	13
2022-09-14	13:57:55	0.729987	3.24713	3.24696	761.271	FALSE	13
2022-09-14	13:57:55	0.730903	3.2512	3.24696	758.008	FALSE	13
2022-09-14	13:57:56	0.732583	3.25868	3.25743	764.529	FALSE	13
2022-09-14	13:57:56	0.732481	3.25822	3.25743	761.267	FALSE	13
2022-09-14	13:57:56	0.726578	3.23196	3.25743	767.761	FALSE	13
2022-09-14	13:57:56	0.73757	3.28086	3.25743	764.547	FALSE	13
2022-09-14	13:57:57	0.729682	3.24577	3.24628	771.007	FALSE	13
2022-09-14	13:57:57	0.734568	3.26751	3.24628	767.815	FALSE	13
2022-09-14	13:57:57	0.727799	3.2374	3.24628	774.244	FALSE	13
2022-09-14	13:57:57	0.727137	3.23445	3.24628	771.049	FALSE	13
2022-09-14	13:57:58	0.732125	3.25664	3.25098	777.501	FALSE	13
2022-09-14	13:57:58	0.734313	3.26637	3.25098	774.316	FALSE	13
2022-09-14	13:57:58	0.72612	3.22993	3.25098	780.731	FALSE	13
2022-09-14	13:57:59	0.733804	3.26411	3.25958	777.58	FALSE	13
2022-09-14	13:57:59	0.731565	3.25415	3.25958	783.985	FALSE	13
2022-09-14	13:57:59	0.730598	3.24985	3.25958	780.83	FALSE	13
2022-09-14	13:57:59	0.735178	3.27022	3.25958	787.255	FALSE	13
2022-09-14	13:58:00	0.734415	3.26682	3.25952	784.096	FALSE	13
2022-09-14	13:58:00	0.731768	3.25505	3.25952	790.51	FALSE	13
2022-09-14	13:58:00	0.736094	3.27429	3.25952	787.371	FALSE	13
2022-09-14	13:58:00	0.728817	3.24192	3.25952	793.752	FALSE	13
2022-09-14	13:58:01	0.729478	3.24486	3.25669	790.616	FALSE	13
2022-09-14	13:58:01	0.736247	3.27497	3.25669	797.027	FALSE	13
2022-09-14	13:58:01	0.730038	3.24736	3.25669	793.863	FALSE	13
2022-09-14	13:58:01	0.732786	3.25958	3.25669	800.287	FALSE	13
2022-09-14	13:58:02	0.730445	3.24917	3.25437	797.112	FALSE	13
2022-09-14	13:58:02	0.736145	3.27452	3.25437	803.561	FALSE	13
2022-09-14	13:58:02	0.728257	3.23943	3.25437	800.352	FALSE	13
2022-09-14	13:58:03	0.723117	3.21657	2.14346	806.778	FALSE	13
2022-09-14	13:58:03	0.728054	3.23853	2.14346	803.59	FALSE	13
2022-09-14	13:58:03	0.727392	3.23559	2.14346	810.014	FALSE	13
2022-09-14	13:58:03	-0.251081	-1.11686	2.14346	803.59	FALSE	13
2022-09-14	13:58:04	0.697163	3.10112	2.8662	813.115	FALSE	13
2022-09-14	13:58:04	0.698333	3.10632	2.8662	806.696	FALSE	13
2022-09-14	13:58:04	0.704288	3.13281	2.8662	816.247	FALSE	13
2022-09-14	13:58:04	0.477621	2.12455	2.8662	808.821	FALSE	13
2022-09-14	13:58:05	0.72673	3.23264	3.24356	819.48	FALSE	13
2022-09-14	13:58:05	0.726781	3.23287	3.24356	812.054	FALSE	13
2022-09-14	13:58:05	0.730547	3.24962	3.24356	822.73	FALSE	13
2022-09-14	13:58:05	0.732684	3.25912	3.24356	815.313	FALSE	13
2022-09-14	13:58:06	0.722914	3.21567	3.23061	825.945	FALSE	13
2022-09-14	13:58:06	0.731158	3.25234	3.23061	818.565	FALSE	13
2022-09-14	13:58:06	0.724746	3.22382	3.23061	829.169	FALSE	13
2022-09-14	13:58:07	0.728868	3.24215	3.24815	821.807	FALSE	13
2022-09-14	13:58:07	0.72897	3.2426	3.24815	832.412	FALSE	13
2022-09-14	13:58:07	0.732074	3.25641	3.24815	825.064	FALSE	13
2022-09-14	13:58:07	0.730954	3.25143	3.24815	835.663	FALSE	13
2022-09-14	13:58:08	0.726476	3.23151	3.24402	828.295	FALSE	13
2022-09-14	13:58:08	0.724389	3.22223	3.24402	838.885	FALSE	13
2022-09-14	13:58:08	0.728257	3.23943	3.24402	831.535	FALSE	13
2022-09-14	13:58:08	0.738028	3.2829	3.24402	842.168	FALSE	13
2022-09-14	13:58:09	0.730649	3.25007	3.255	834.785	FALSE	13
2022-09-14	13:58:09	0.735026	3.26954	3.255	845.438	FALSE	13
2022-09-14	13:58:09	0.728919	3.24238	3.255	838.027	FALSE	13
2022-09-14	13:58:09	0.73243	3.258	3.255	848.696	FALSE	13
2022-09-14	13:58:10	0.732735	3.25935	3.26479	841.287	FALSE	13
2022-09-14	13:58:10	0.736196	3.27475	3.26479	851.971	FALSE	13
2022-09-14	13:58:10	0.732939	3.26026	3.26479	844.547	FALSE	13
2022-09-14	13:58:11	0.729326	3.24419	3.24345	855.215	FALSE	13
2022-09-14	13:58:11	0.728766	3.2417	3.24345	847.789	FALSE	13
2022-09-14	13:58:11	0.730598	3.24985	3.24345	858.465	FALSE	13
2022-09-14	13:58:11	0.727952	3.23808	3.24345	851.027	FALSE	13
2022-09-14	13:58:12	0.736857	3.27769	3.25873	861.742	FALSE	13
2022-09-14	13:58:12	0.7307	3.2503	3.25873	854.277	FALSE	13
2022-09-14	13:58:12	0.727901	3.23785	3.25873	864.98	FALSE	13
2022-09-14	13:58:12	0.734924	3.26909	3.25873	857.546	FALSE	13
2022-09-14	13:58:13	0.740827	3.29535	3.26264	868.276	FALSE	13
2022-09-14	13:58:13	0.73584	3.27316	3.26264	860.819	FALSE	13
2022-09-14	13:58:13	0.727646	3.23671	3.26264	871.512	FALSE	13
2022-09-14	13:58:13	0.72958	3.24532	3.26264	864.065	FALSE	13
2022-09-14	13:58:14	0.725458	3.22698	3.24124	874.739	FALSE	13
2022-09-14	13:58:14	0.73014	3.24781	3.24124	867.312	FALSE	13
2022-09-14	13:58:14	0.730394	3.24894	3.24124	877.988	FALSE	13
2022-09-14	13:58:15	0.73472	3.26818	3.26326	870.581	FALSE	13
2022-09-14	13:58:15	0.727596	3.23649	3.26326	881.225	FALSE	13
2022-09-14	13:58:15	0.740318	3.29308	3.26326	873.874	FALSE	13
2022-09-14	13:58:15	0.731819	3.25528	3.26326	884.48	FALSE	13
2022-09-14	13:58:16	0.733855	3.26433	3.25715	877.138	FALSE	13
2022-09-14	13:58:16	0.737722	3.28154	3.25715	887.762	FALSE	13
2022-09-14	13:58:16	0.731158	3.25234	3.25715	880.39	FALSE	13
2022-09-14	13:58:16	0.726221	3.23038	3.25715	890.992	FALSE	13
2022-09-14	13:58:17	0.729275	3.24396	3.24079	883.634	FALSE	13
2022-09-14	13:58:17	0.724389	3.22223	3.24079	894.214	FALSE	13
2022-09-14	13:58:17	0.731056	3.25188	3.24079	886.886	FALSE	13
2022-09-14	13:58:17	0.729529	3.24509	3.24079	897.459	FALSE	13
2022-09-14	13:58:18	0.728461	3.24034	3.23483	890.126	FALSE	13
2022-09-14	13:58:18	0.722404	3.2134	3.23483	900.673	FALSE	13
2022-09-14	13:58:18	0.730801	3.25075	3.23483	893.377	FALSE	13
2022-09-14	13:58:19	0.727494	3.23604	3.24006	903.909	FALSE	13
2022-09-14	13:58:19	0.726679	3.23241	3.24006	896.61	FALSE	13
2022-09-14	13:58:19	0.730598	3.24985	3.24006	907.159	FALSE	13
2022-09-14	13:58:19	0.728817	3.24192	3.24006	899.852	FALSE	13
2022-09-14	13:58:20	0.723422	3.21793	3.24464	910.376	FALSE	13
2022-09-14	13:58:20	0.727952	3.23808	3.24464	903.09	FALSE	13
2022-09-14	13:58:20	0.735585	3.27203	3.24464	913.648	FALSE	13
2022-09-14	13:58:20	0.730751	3.25053	3.24464	906.34	FALSE	13
2022-09-14	13:58:21	0.722659	3.21453	3.24526	916.863	FALSE	13
2022-09-14	13:58:21	0.73299	3.26049	3.24526	909.601	FALSE	13
2022-09-14	13:58:21	0.731616	3.25437	3.24526	920.117	FALSE	13
2022-09-14	13:58:21	0.731005	3.25166	3.24526	912.852	FALSE	13
2022-09-14	13:58:22	0.726272	3.2306	3.24871	923.348	FALSE	13
2022-09-14	13:58:22	0.732735	3.25935	3.24871	916.112	FALSE	13
2022-09-14	13:58:22	0.732023	3.25618	3.24871	926.604	FALSE	13
2022-09-14	13:58:23	0.731412	3.25347	3.25143	919.365	FALSE	13
2022-09-14	13:58:23	0.731514	3.25392	3.25143	929.858	FALSE	13
2022-09-14	13:58:23	0.729784	3.24623	3.25143	922.611	FALSE	13
2022-09-14	13:58:23	0.731107	3.25211	3.25143	933.11	FALSE	13
2022-09-14	13:58:24	0.735076	3.26977	3.25335	925.881	FALSE	13
2022-09-14	13:58:24	0.72897	3.2426	3.25335	936.353	FALSE	13
2022-09-14	13:58:24	0.731768	3.25505	3.25335	929.136	FALSE	13
2022-09-14	13:58:24	0.729733	3.246	3.25335	939.599	FALSE	13
2022-09-14	13:58:25	0.734313	3.26637	3.25601	932.403	FALSE	13
2022-09-14	13:58:25	0.731768	3.25505	3.25601	942.854	FALSE	13
2022-09-14	13:58:25	0.732328	3.25754	3.25601	935.66	FALSE	13
2022-09-14	13:58:25	0.729529	3.24509	3.25601	946.099	FALSE	13
2022-09-14	13:58:26	0.731056	3.25188	3.258	938.912	FALSE	13
2022-09-14	13:58:26	0.733193	3.26139	3.258	949.36	FALSE	13
2022-09-14	13:58:26	0.733041	3.26071	3.258	942.173	FALSE	13
2022-09-14	13:58:27	0.730242	3.24826	3.24928	952.609	FALSE	13
2022-09-14	13:58:27	0.733193	3.26139	3.24928	945.434	FALSE	13
2022-09-14	13:58:27	0.73014	3.24781	3.24928	955.856	FALSE	13
2022-09-14	13:58:27	0.728308	3.23966	3.24928	948.674	FALSE	13
2022-09-14	13:58:28	0.72673	3.23264	3.25788	959.089	FALSE	13
2022-09-14	13:58:28	0.732583	3.25868	3.25788	951.932	FALSE	13
2022-09-14	13:58:28	0.736145	3.27452	3.25788	962.364	FALSE	13
2022-09-14	13:58:28	0.73416	3.26569	3.25788	955.198	FALSE	13
2022-09-14	13:58:29	0.727748	3.23717	3.23626	965.601	FALSE	13
2022-09-14	13:58:29	0.726221	3.23038	3.23626	958.428	FALSE	13
2022-09-14	13:58:29	0.725458	3.22698	3.23626	968.828	FALSE	13
2022-09-14	13:58:29	0.730751	3.25053	3.23626	961.679	FALSE	13
2022-09-14	13:58:30	0.728868	3.24215	3.24208	972.07	FALSE	13
2022-09-14	13:58:30	0.727494	3.23604	3.24208	964.915	FALSE	13
2022-09-14	13:58:30	0.730191	3.24804	3.24208	975.318	FALSE	13
2022-09-14	13:58:31	0.730242	3.24826	3.25352	968.163	FALSE	13
2022-09-14	13:58:31	0.731717	3.25482	3.25352	978.573	FALSE	13
2022-09-14	13:58:31	0.733957	3.26479	3.25352	971.428	FALSE	13
2022-09-14	13:58:31	0.729784	3.24623	3.25352	981.819	FALSE	13
2022-09-14	13:58:32	0.731616	3.25437	3.2572	974.682	FALSE	13
2022-09-14	13:58:32	0.735382	3.27113	3.2572	985.09	FALSE	13
2022-09-14	13:58:32	0.731209	3.25256	3.2572	977.935	FALSE	13
2022-09-14	13:58:32	0.730801	3.25075	3.2572	988.341	FALSE	13
2022-09-14	13:58:33	0.729987	3.24713	3.24871	981.182	FALSE	13
2022-09-14	13:58:33	0.73243	3.258	3.24871	991.599	FALSE	13
2022-09-14	13:58:33	0.728613	3.24102	3.24871	984.423	FALSE	13
2022-09-14	13:58:34	0.731514	3.25392	3.24939	994.853	FALSE	13
2022-09-14	13:58:34	0.731107	3.25211	3.24939	987.675	FALSE	13
2022-09-14	13:58:34	0.731361	3.25324	3.24939	998.106	FALSE	13
2022-09-14	13:58:34	0.728003	3.2383	3.24939	990.914	FALSE	13
2022-09-14	13:58:35	0.729478	3.24486	3.24396	1001.35	FALSE	13
2022-09-14	13:58:35	0.731717	3.25482	3.24396	994.168	FALSE	13
2022-09-14	13:58:35	0.726832	3.23309	3.24396	1004.58	FALSE	13
2022-09-14	13:58:35	0.729071	3.24305	3.24396	997.411	FALSE	13
2022-09-14	13:58:36	0.734008	3.26501	3.25471	1007.85	FALSE	13
2022-09-14	13:58:36	0.731209	3.25256	3.25471	1000.66	FALSE	13
2022-09-14	13:58:36	0.731107	3.25211	3.25471	1011.1	FALSE	13
2022-09-14	13:58:36	0.730445	3.24917	3.25471	1003.91	FALSE	13
2022-09-14	13:58:37	0.732837	3.25981	3.25543	1014.36	FALSE	13
2022-09-14	13:58:37	0.731158	3.25234	3.25543	1007.17	FALSE	13
2022-09-14	13:58:37	0.731565	3.25415	3.25543	1017.62	FALSE	13
2022-09-14	13:58:38	0.72902	3.24283	3.24883	1010.41	FALSE	13
2022-09-14	13:58:38	0.734211	3.26592	3.24883	1020.88	FALSE	13
2022-09-14	13:58:38	0.729478	3.24486	3.24883	1013.65	FALSE	13
2022-09-14	13:58:38	0.728766	3.2417	3.24883	1024.12	FALSE	13
2022-09-14	13:58:39	0.729733	3.246	3.2512	1016.9	FALSE	13
2022-09-14	13:58:39	0.728257	3.23943	3.2512	1027.36	FALSE	13
2022-09-14	13:58:39	0.731616	3.25437	3.2512	1020.15	FALSE	13
2022-09-14	13:58:39	0.734008	3.26501	3.2512	1030.63	FALSE	13
2022-09-14	13:58:40	0.728562	3.24079	3.2456	1023.39	FALSE	13
2022-09-14	13:58:40	0.732481	3.25822	3.2456	1033.89	FALSE	13
2022-09-14	13:58:40	0.724288	3.22178	3.2456	1026.62	FALSE	13
2022-09-14	13:58:40	0.733244	3.26162	3.2456	1037.15	FALSE	13
2022-09-14	13:58:41	0.731616	3.25437	3.25611	1029.87	FALSE	13
2022-09-14	13:58:41	0.733041	3.26071	3.25611	1040.41	FALSE	13
2022-09-14	13:58:41	0.731361	3.25324	3.25611	1033.12	FALSE	13
2022-09-14	13:58:42	0.736552	3.27633	3.26179	1043.68	FALSE	13
2022-09-14	13:58:42	0.72841	3.24011	3.26179	1036.36	FALSE	13
2022-09-14	13:58:42	0.727392	3.23559	3.26179	1046.92	FALSE	13
2022-09-14	13:58:42	0.740776	3.29512	3.26179	1039.66	FALSE	13
2022-09-14	13:58:43	0.733397	3.2623	2.99569	1050.18	FALSE	13
2022-09-14	13:58:43	0.490751	2.18296	2.99569	1041.84	FALSE	13
2022-09-14	13:58:43	0.731361	3.25324	2.99569	1053.44	FALSE	13
2022-09-14	13:58:43	0.738333	3.28425	2.99569	1045.13	FALSE	13
2022-09-14	13:58:44	0.738537	3.28516	3.25896	1056.72	FALSE	13
2022-09-14	13:58:44	0.729275	3.24396	3.25896	1048.37	FALSE	13
2022-09-14	13:58:44	0.735026	3.26954	3.25896	1059.99	FALSE	13
2022-09-14	13:58:44	0.727748	3.23717	3.25896	1051.61	FALSE	13
2022-09-14	13:58:45	0.732175	3.25686	3.24562	1063.25	FALSE	13
2022-09-14	13:58:45	0.727697	3.23694	3.24562	1054.84	FALSE	13
2022-09-14	13:58:45	0.729071	3.24305	3.24562	1066.49	FALSE	13
2022-09-14	13:58:46	0.733753	3.26388	3.24764	1058.11	FALSE	13
2022-09-14	13:58:46	0.731056	3.25188	3.24764	1069.74	FALSE	13
2022-09-14	13:58:46	0.72897	3.2426	3.24764	1061.35	FALSE	13
2022-09-14	13:58:46	0.726629	3.23219	3.24764	1072.97	FALSE	13
2022-09-14	13:58:47	0.726272	3.2306	3.24028	1064.58	FALSE	13
2022-09-14	13:58:47	0.731361	3.25324	3.24028	1076.23	FALSE	13
2022-09-14	13:58:47	0.725458	3.22698	3.24028	1067.81	FALSE	13
2022-09-14	13:58:47	0.7307	3.2503	3.24028	1079.48	FALSE	13
2022-09-14	13:58:48	0.730751	3.25053	3.2559	1071.06	FALSE	13
2022-09-14	13:58:48	0.733092	3.26094	3.2559	1082.74	FALSE	13
2022-09-14	13:58:48	0.730089	3.24758	3.2559	1074.31	FALSE	13
2022-09-14	13:58:48	0.733906	3.26456	3.2559	1086	FALSE	13
2022-09-14	13:58:49	0.729326	3.24419	3.25702	1077.55	FALSE	13
2022-09-14	13:58:49	0.730191	3.24804	3.25702	1089.25	FALSE	13
2022-09-14	13:58:49	0.737112	3.27882	3.25702	1080.83	FALSE	13
2022-09-14	13:58:50	0.731616	3.25437	3.25788	1092.51	FALSE	13
2022-09-14	13:58:50	0.73187	3.2555	3.25788	1084.08	FALSE	13
2022-09-14	13:58:50	0.737214	3.27928	3.25788	1095.78	FALSE	13
2022-09-14	13:58:50	0.728919	3.24238	3.25788	1087.33	FALSE	13
2022-09-14	13:58:51	0.736857	3.27769	3.25534	1099.06	FALSE	13
2022-09-14	13:58:51	0.731768	3.25505	3.25534	1090.58	FALSE	13
2022-09-14	13:58:51	0.730293	3.24849	3.25534	1102.31	FALSE	13
2022-09-14	13:58:51	0.72841	3.24011	3.25534	1093.82	FALSE	13
2022-09-14	13:58:52	0.727494	3.23604	3.25771	1105.55	FALSE	13
2022-09-14	13:58:52	0.73528	3.27067	3.25771	1097.09	FALSE	13
2022-09-14	13:58:52	0.734669	3.26795	3.25771	1108.81	FALSE	13
2022-09-14	13:58:52	0.732023	3.25618	3.25771	1100.35	FALSE	13
2022-09-14	13:58:53	0.725712	3.22811	3.24366	1112.04	FALSE	13
2022-09-14	13:58:53	0.729478	3.24486	3.24366	1103.59	FALSE	13
2022-09-14	13:58:53	0.73243	3.258	3.24366	1115.3	FALSE	13
2022-09-14	13:58:54	0.730038	3.24736	3.25539	1106.84	FALSE	13
2022-09-14	13:58:54	0.737722	3.28154	3.25539	1118.58	FALSE	13
2022-09-14	13:58:54	0.727036	3.234	3.25539	1110.08	FALSE	13
2022-09-14	13:58:54	0.732583	3.25868	3.25539	1121.84	FALSE	13
2022-09-14	13:58:55	0.730547	3.24962	3.26162	1113.33	FALSE	13
2022-09-14	13:58:55	0.735331	3.2709	3.26162	1125.11	FALSE	13
2022-09-14	13:58:55	0.728919	3.24238	3.26162	1116.57	FALSE	13
2022-09-14	13:58:55	0.738181	3.28358	3.26162	1128.4	FALSE	13
2022-09-14	13:58:56	0.723372	3.2177	3.25737	1119.79	FALSE	13
2022-09-14	13:58:56	0.741896	3.3001	3.25737	1131.7	FALSE	13
2022-09-14	13:58:56	0.732175	3.25686	3.25737	1123.04	FALSE	13
2022-09-14	13:58:56	0.731717	3.25482	3.25737	1134.95	FALSE	13
2022-09-14	13:58:57	0.731921	3.25573	3.25203	1126.3	FALSE	13
2022-09-14	13:58:57	0.732023	3.25618	3.25203	1138.21	FALSE	13
2022-09-14	13:58:57	0.729326	3.24419	3.25203	1129.54	FALSE	13
2022-09-14	13:58:58	0.724491	3.22268	3.24798	1141.43	FALSE	13
2022-09-14	13:58:58	0.727901	3.23785	3.24798	1132.78	FALSE	13
2022-09-14	13:58:58	0.736399	3.27565	3.24798	1144.7	FALSE	13
2022-09-14	13:58:58	0.731921	3.25573	3.24798	1136.04	FALSE	13
2022-09-14	13:58:59	0.737315	3.27972	3.26971	1147.98	FALSE	13
2022-09-14	13:58:59	0.73355	3.26298	3.26971	1139.3	FALSE	13
2022-09-14	13:58:59	0.731819	3.25528	3.26971	1151.24	FALSE	13
2022-09-14	13:58:59	0.73757	3.28086	3.26971	1142.58	FALSE	13
2022-09-14	13:59:00	0.727901	3.23785	3.24124	1154.48	FALSE	13
2022-09-14	13:59:00	0.728359	3.23989	3.24124	1145.82	FALSE	13
2022-09-14	13:59:00	0.729224	3.24373	3.24124	1157.72	FALSE	13
2022-09-14	13:59:00	0.729173	3.24351	3.24124	1149.06	FALSE	13
2022-09-14	13:59:01	0.733804	3.26411	3.25965	1160.99	FALSE	13
2022-09-14	13:59:01	0.733651	3.26343	3.25965	1152.33	FALSE	13
2022-09-14	13:59:01	0.730954	3.25143	3.25965	1164.24	FALSE	13
2022-09-14	13:59:02	0.731921	3.25573	3.25692	1155.58	FALSE	13
2022-09-14	13:59:02	0.731361	3.25324	3.25692	1167.49	FALSE	13
2022-09-14	13:59:02	0.730496	3.24939	3.25692	1158.83	FALSE	13
2022-09-14	13:59:02	0.734975	3.26932	3.25692	1170.76	FALSE	13
2022-09-14	13:59:03	0.729122	3.24328	3.25041	1162.07	FALSE	13
2022-09-14	13:59:03	0.729122	3.24328	3.25041	1174	FALSE	13
2022-09-14	13:59:03	0.731972	3.25596	3.25041	1165.33	FALSE	13
2022-09-14	13:59:03	0.732684	3.25912	3.25041	1177.26	FALSE	13
2022-09-14	13:59:04	0.731056	3.25188	3.27254	1168.58	FALSE	13
2022-09-14	13:59:04	0.739504	3.28946	3.27254	1180.55	FALSE	13
2022-09-14	13:59:04	0.735992	3.27384	3.27254	1171.86	FALSE	13
2022-09-14	13:59:04	0.736247	3.27497	3.27254	1183.83	FALSE	13
2022-09-14	13:59:05	0.730547	3.24962	3.24517	1175.11	FALSE	13
2022-09-14	13:59:05	0.731565	3.25415	3.24517	1187.08	FALSE	13
2022-09-14	13:59:05	0.726527	3.23174	3.24517	1178.34	FALSE	13
2022-09-14	13:59:06	0.732481	3.25822	3.25613	1190.34	FALSE	13
2022-09-14	13:59:06	0.733142	3.26116	3.25613	1181.6	FALSE	13
2022-09-14	13:59:06	0.733753	3.26388	3.25613	1193.6	FALSE	13
2022-09-14	13:59:06	0.728664	3.24124	3.25613	1184.84	FALSE	13
2022-09-14	13:59:07	0.731158	3.25234	3.26241	1196.86	FALSE	13
2022-09-14	13:59:07	0.734822	3.26864	3.26241	1188.11	FALSE	13
2022-09-14	13:59:07	0.731056	3.25188	3.26241	1200.11	FALSE	13
2022-09-14	13:59:07	0.736654	3.27678	3.26241	1191.39	FALSE	13
2022-09-14	13:59:08	0.737163	3.27905	3.25534	1203.39	FALSE	13
2022-09-14	13:59:08	0.737315	3.27972	3.25534	1194.67	FALSE	13
2022-09-14	13:59:08	0.725509	3.22721	3.25534	1206.61	FALSE	13
2022-09-14	13:59:08	0.727341	3.23536	3.25534	1197.9	FALSE	13
2022-09-14	13:59:09	0.730343	3.24871	3.17937	1209.86	FALSE	13
2022-09-14	13:59:09	0.733651	3.26343	3.17937	1201.16	FALSE	13
2022-09-14	13:59:09	0.680267	3.02596	3.17937	1212.89	FALSE	13
2022-09-14	13:59:10	0.731921	3.25573	-5.13948	1204.42	FALSE	13
2022-09-14	13:59:10	-1.84508	-8.20728	-5.13948	1212.89	FALSE	13
2022-09-14	13:59:10	-1.77795	-7.90868	-5.13948	1204.42	FALSE	13
2022-09-14	13:59:10	-1.73052	-7.6977	-5.13948	1212.89	FALSE	13
2022-09-14	13:59:11	-1.7605	-7.83106	-7.81395	1204.42	FALSE	13
2022-09-14	13:59:11	-1.79383	-7.97931	-7.81395	1212.89	FALSE	13
2022-09-14	13:59:11	-1.75744	-7.81744	-7.81395	1204.42	FALSE	13
2022-09-14	13:59:11	-1.71485	-7.628	-7.81395	1212.89	FALSE	13
2022-09-14	13:59:12	-1.68548	-7.49735	-7.52718	1204.42	FALSE	13
2022-09-14	13:59:12	-1.70894	-7.60171	-7.52718	1212.89	FALSE	13
2022-09-14	13:59:12	-1.70075	-7.56528	-7.52718	1204.42	FALSE	13
2022-09-14	13:59:12	-1.67357	-7.44437	-7.52718	1212.89	FALSE	13
2022-09-14	13:59:13	-1.64452	-7.31515	-7.18702	1204.42	FALSE	13
2022-09-14	13:59:13	-1.61454	-7.1818	-7.18702	1212.89	FALSE	13
2022-09-14	13:59:13	-1.58808	-7.0641	-7.18702	1204.42	FALSE	13
2022-09-14	13:59:14	-1.57235	-6.99413	-6.73839	1212.89	FALSE	13
2022-09-14	13:59:14	-1.54599	-6.87687	-6.73839	1204.42	FALSE	13
2022-09-14	13:59:14	-1.48752	-6.61679	-6.73839	1212.89	FALSE	13
2022-09-14	13:59:14	-1.45357	-6.46577	-6.73839	1204.42	FALSE	13
2022-09-14	13:59:15	-1.42095	-6.32067	-6.92119	1212.89	FALSE	13
2022-09-14	13:59:15	-1.54172	-6.85788	-6.92119	1204.42	FALSE	13
2022-09-14	13:59:15	-1.64502	-7.31738	-6.92119	1212.89	FALSE	13
2022-09-14	13:59:15	-1.61612	-7.18882	-6.92119	1204.42	FALSE	13
2022-09-14	13:59:16	-1.60304	-7.13064	-6.74519	1212.89	FALSE	13
2022-09-14	13:59:16	-1.5548	-6.91606	-6.74519	1204.42	FALSE	13
2022-09-14	13:59:16	-1.51281	-6.72928	-6.74519	1212.89	FALSE	13
2022-09-14	13:59:16	-1.3949	-6.20479	-6.74519	1204.42	FALSE	13
2022-09-14	13:59:17	-1.34726	-5.99288	-5.92709	1212.89	FALSE	13
2022-09-14	13:59:17	-1.32884	-5.91095	-5.92709	1204.42	FALSE	13
2022-09-14	13:59:17	-1.32131	-5.87745	-5.92709	1212.89	FALSE	13
2022-09-14	13:59:18	-1.31006	-5.82741	-5.79636	1204.42	FALSE	13
2022-09-14	13:59:18	-1.31098	-5.8315	-5.79636	1212.89	FALSE	13
2022-09-14	13:59:18	-1.2976	-5.77198	-5.79636	1204.42	FALSE	13
2022-09-14	13:59:18	-1.29368	-5.75455	-5.79636	1212.89	FALSE	13
2022-09-14	13:59:19	-1.30034	-5.78417	-5.77246	1204.42	FALSE	13
2022-09-14	13:59:19	-1.29912	-5.77875	-5.77246	1212.89	FALSE	13
2022-09-14	13:59:19	-1.31749	-5.86046	-5.77246	1204.42	FALSE	13
2022-09-14	13:59:19	-1.27388	-5.66647	-5.77246	1212.89	FALSE	13
2022-09-14	13:59:20	-1.56106	-6.94391	-8.92793	1204.42	FALSE	13
2022-09-14	13:59:20	-2.03648	-9.05867	-8.92793	1212.89	FALSE	13
2022-09-14	13:59:20	-2.17647	-9.68137	-8.92793	1204.42	FALSE	13
2022-09-14	13:59:20	-2.25434	-10.0278	-8.92793	1212.89	FALSE	13
2022-09-14	13:59:21	-2.18136	-9.70313	-9.59969	1204.42	FALSE	13
2022-09-14	13:59:21	-2.15648	-9.59245	-9.59969	1212.89	FALSE	13
2022-09-14	13:59:21	-2.13648	-9.50349	-9.59969	1204.42	FALSE	13
2022-09-14	13:59:22	-2.09352	-9.3124	-7.71603	1212.89	FALSE	13
2022-09-14	13:59:22	-1.64492	-7.31693	-7.71603	1204.42	FALSE	13
2022-09-14	13:59:22	-1.60095	-7.12135	-7.71603	1212.89	FALSE	13
2022-09-14	13:59:22	-1.59917	-7.11343	-7.71603	1204.42	FALSE	13
2022-09-14	13:59:23	-1.59022	-7.07362	-6.9173	1212.89	FALSE	13
2022-09-14	13:59:23	-1.53205	-6.81486	-6.9173	1204.42	FALSE	13
2022-09-14	13:59:23	-1.51714	-6.74854	-6.9173	1212.89	FALSE	13
2022-09-14	13:59:23	-1.5809	-7.03216	-6.9173	1204.42	FALSE	13
2022-09-14	13:59:24	-1.51032	-6.71821	0.760096	1212.89	FALSE	13
2022-09-14	13:59:24	0.72673	3.23264	0.760096	1207.65	FALSE	13
2022-09-14	13:59:24	0.732939	3.26026	0.760096	1216.15	FALSE	13
2022-09-14	13:59:24	0.73416	3.26569	0.760096	1210.92	FALSE	13
2022-09-14	13:59:25	0.408359	1.81646	1.62405	1217.96	FALSE	13
2022-09-14	13:59:25	0.348104	1.54844	1.62405	1212.47	FALSE	13
2022-09-14	13:59:25	0.338842	1.50724	1.62405	1219.47	FALSE	13
2022-09-14	13:59:26	0.314669	1.39971	1.60463	1213.87	FALSE	13
2022-09-14	13:59:26	0.357672	1.591	1.60463	1221.06	FALSE	13
2022-09-14	13:59:26	0.353346	1.57175	1.60463	1215.44	FALSE	13
2022-09-14	13:59:26	0.417265	1.85608	1.60463	1222.92	FALSE	13
2022-09-14	13:59:27	0.252277	1.12218	1.39173	1216.56	FALSE	13
2022-09-14	13:59:27	0.23411	1.04137	1.39173	1223.96	FALSE	13
2022-09-14	13:59:27	0.411412	1.83004	1.39173	1218.39	FALSE	13
2022-09-14	13:59:27	0.353702	1.57334	1.39173	1225.53	FALSE	13
2022-09-14	13:59:28	0.449122	1.99778	2.48148	1220.39	FALSE	13
2022-09-14	13:59:28	0.374211	1.66457	2.48148	1227.2	FALSE	13
2022-09-14	13:59:28	0.410089	1.82416	2.48148	1222.21	FALSE	13
2022-09-14	13:59:28	0.998028	4.43943	2.48148	1231.64	FALSE	13
2022-09-14	13:59:29	3.26729	14.5336	11.6519	1236.75	1	14
2022-09-14	13:59:29	2.70815	12.0464	11.6519	1243.68	FALSE	14
2022-09-14	13:59:29	1.88296	8.37578	11.6519	1245.12	FALSE	14
2022-09-14	13:59:30	1.39319	6.19719	5.02618	1249.88	FALSE	14
2022-09-14	13:59:30	0.651819	2.89942	5.02618	1248.02	FALSE	14
2022-09-14	13:59:30	1.72154	7.65775	5.02618	1257.54	FALSE	14
2022-09-14	13:59:30	0.753193	3.35035	5.02618	1251.37	FALSE	14
2022-09-14	13:59:31	1.32912	5.91219	4.66286	1263.45	FALSE	14
2022-09-14	13:59:31	0.835484	3.7164	4.66286	1255.09	FALSE	14
2022-09-14	13:59:31	0.925255	4.11572	4.66286	1267.57	FALSE	14
2022-09-14	13:59:31	1.10317	4.90712	4.66286	1259.99	FALSE	14
2022-09-14	13:59:32	0.80673	3.5885	4.17463	1271.16	FALSE	14
2022-09-14	13:59:32	1.18429	5.26796	4.17463	1265.26	FALSE	14
2022-09-14	13:59:32	0.379249	1.68698	4.17463	1272.84	FALSE	14
2022-09-14	13:59:32	1.38373	6.15511	4.17463	1271.42	FALSE	14
2022-09-14	13:59:33	0.825763	3.67316	5.92458	1276.52	FALSE	14
2022-09-14	13:59:33	1.62973	7.24936	5.92458	1278.67	FALSE	14
2022-09-14	13:59:33	1.54022	6.85121	5.92458	1283.37	FALSE	14
2022-09-14	13:59:34	0.971514	4.32149	6.74259	1282.99	FALSE	14
2022-09-14	13:59:34	1.05416	4.68911	6.74259	1288.06	FALSE	14
2022-09-14	13:59:34	1.34027	5.96179	6.74259	1288.95	FALSE	14
2022-09-14	13:59:34	2.69726	11.998	6.74259	1300.05	FALSE	14
2022-09-14	13:59:35	2.48083	11.0352	10.5189	1299.99	FALSE	14
2022-09-14	13:59:35	2.67451	11.8968	10.5189	1311.95	FALSE	14
2022-09-14	13:59:35	1.93889	8.62457	10.5189	1308.61	FALSE	14
2022-09-14	13:59:36	1.82271	8.10778	8.48156	1320.06	FALSE	14
2022-09-14	13:59:36	1.81589	8.07744	8.48156	1316.69	FALSE	14
2022-09-14	13:59:36	1.45533	6.4736	8.48156	1326.53	FALSE	14
2022-09-14	13:59:36	2.26179	10.0609	8.48156	1326.75	FALSE	14
2022-09-14	13:59:36	2.17798	9.68809	8.48156	1336.22	FALSE	14
2022-09-14	13:59:37	2.80474	12.476	11.5289	1339.22	FALSE	14
2022-09-14	13:59:37	2.28556	10.1666	11.5289	1346.39	FALSE	14
2022-09-14	13:59:37	2.68515	11.9441	11.5289	1351.17	FALSE	14
2022-09-14	13:59:38	2.05141	9.12508	7.34994	1355.51	FALSE	14
2022-09-14	13:59:38	1.61879	7.2007	7.34994	1358.37	FALSE	14
2022-09-14	13:59:38	1.862	8.28255	7.34994	1363.79	FALSE	14
2022-09-14	13:59:38	1.07716	4.79142	7.34994	1363.16	FALSE	14
2022-09-14	13:59:39	0.944033	4.19925	2.87565	1367.99	FALSE	14
2022-09-14	13:59:39	0.621031	2.76247	2.87565	1365.92	FALSE	14
2022-09-14	13:59:39	0.726527	3.23174	2.87565	1371.23	FALSE	14
2022-09-14	13:59:39	0.294313	1.30916	2.87565	1367.23	FALSE	14
2022-09-14	13:59:40	0.506018	2.25087	4.7787	1373.48	FALSE	14
2022-09-14	13:59:40	0.914924	4.06976	4.7787	1371.3	FALSE	14
2022-09-14	13:59:40	1.84948	8.22686	4.7787	1381.7	FALSE	14
2022-09-14	13:59:40	1.02678	4.56732	4.7787	1375.87	FALSE	14
2022-09-14	13:59:41	0.964746	4.29138	3.24351	1385.99	FALSE	14
2022-09-14	13:59:41	0.501336	2.23004	3.24351	1378.1	FALSE	14
2022-09-14	13:59:41	0.721437	3.2091	3.24351	1389.2	FALSE	14
2022-09-14	13:59:42	0.581387	2.58613	-11.9098	1380.69	FALSE	14
2022-09-14	13:59:42	0.614568	2.73372	-11.9098	1391.94	FALSE	14
2022-09-14	13:59:42	-6.0579	-26.9468	-11.9098	1380.69	FALSE	14
2022-09-14	13:59:42	-5.84782	-26.0123	-11.9098	1391.94	FALSE	14
2022-09-14	13:59:43	-5.5864	-24.8494	-23.8386	1380.69	FALSE	14
2022-09-14	13:59:43	-5.51892	-24.5493	-23.8386	1391.94	FALSE	14
2022-09-14	13:59:43	-5.278	-23.4776	-23.8386	1380.69	FALSE	14
2022-09-14	13:59:43	-5.05327	-22.478	-23.8386	1391.94	FALSE	14
2022-09-14	13:59:44	-4.95647	-22.0474	-20.5841	1380.69	FALSE	14
2022-09-14	13:59:44	-4.75281	-21.1414	-20.5841	1391.94	FALSE	14
2022-09-14	13:59:44	-4.59805	-20.453	-20.5841	1380.69	FALSE	14
2022-09-14	13:59:44	-4.20273	-18.6946	-20.5841	1391.94	FALSE	14
2022-09-14	13:59:45	-4.05037	-18.0169	-16.1369	1380.69	FALSE	14
2022-09-14	13:59:45	-3.45953	-15.3887	-16.1369	1391.94	FALSE	14
2022-09-14	13:59:45	-3.37332	-15.0052	-16.1369	1380.69	FALSE	14
2022-09-14	13:59:46	-0.915915	-4.07417	-5.2079	1391.94	FALSE	14
2022-09-14	13:59:46	-1.31312	-5.84102	-5.2079	1380.69	FALSE	14
2022-09-14	13:59:46	-1.10111	-4.89796	-5.2079	1391.94	FALSE	14
2022-09-14	13:59:46	-1.35301	-6.01846	-5.2079	1380.69	FALSE	14
2022-09-14	13:59:47	-1.06126	-4.7207	-6.34061	1391.94	FALSE	14
2022-09-14	13:59:47	-1.7065	-7.59085	-6.34061	1380.69	FALSE	14
2022-09-14	13:59:47	-1.43363	-6.37707	-6.34061	1391.94	FALSE	14
2022-09-14	13:59:47	-1.50034	-6.67381	-6.34061	1380.69	FALSE	14
2022-09-14	13:59:48	-1.618	-7.19719	-7.18429	1391.94	FALSE	14
2022-09-14	13:59:48	-1.67642	-7.45705	-7.18429	1380.69	FALSE	14
2022-09-14	13:59:48	-1.55088	-6.89862	-7.18429	1391.94	FALSE	14
2022-09-14	13:59:49	-1.55785	-6.92963	-6.59646	1380.69	FALSE	14
2022-09-14	13:59:49	-1.52574	-6.7868	-6.59646	1391.94	FALSE	14
2022-09-14	13:59:49	-1.49352	-6.64348	-6.59646	1380.69	FALSE	14
2022-09-14	13:59:49	-1.35469	-6.02593	-6.59646	1391.94	FALSE	14
2022-09-14	13:59:50	-1.36233	-6.05992	-2.90147	1380.69	FALSE	14
2022-09-14	13:59:50	-1.31994	-5.87136	-2.90147	1391.94	FALSE	14
2022-09-14	13:59:50	-0.598053	-2.66026	-2.90147	1380.69	FALSE	14
2022-09-14	13:59:50	0.671209	2.98567	-2.90147	1394.92	FALSE	14
2022-09-14	13:59:51	0.733397	3.2623	3.25692	1383.95	FALSE	14
2022-09-14	13:59:51	0.729936	3.2469	3.25692	1398.17	FALSE	14
2022-09-14	13:59:51	0.73584	3.27316	3.25692	1387.22	FALSE	14
2022-09-14	13:59:51	0.72958	3.24532	3.25692	1401.41	FALSE	14
2022-09-14	13:59:52	0.732379	3.25777	3.26554	1390.48	FALSE	14
2022-09-14	13:59:52	0.732684	3.25912	3.26554	1404.67	FALSE	14
2022-09-14	13:59:52	0.737315	3.27972	3.26554	1393.76	FALSE	14
2022-09-14	13:59:53	0.733448	3.26252	3.25273	1407.94	FALSE	14
2022-09-14	13:59:53	0.728003	3.2383	3.25273	1397	FALSE	14
2022-09-14	13:59:53	0.734109	3.26546	3.25273	1411.2	FALSE	14
2022-09-14	13:59:53	0.729428	3.24464	3.25273	1400.24	FALSE	14
2022-09-14	13:59:54	0.729224	3.24373	3.25234	1414.45	FALSE	14
2022-09-14	13:59:54	0.730089	3.24758	3.25234	1403.49	FALSE	14
2022-09-14	13:59:54	0.729784	3.24623	3.25234	1417.69	FALSE	14
2022-09-14	13:59:54	0.735534	3.2718	3.25234	1406.76	FALSE	14
2022-09-14	13:59:55	0.729936	3.2469	3.25183	1420.94	FALSE	14
2022-09-14	13:59:55	0.732074	3.25641	3.25183	1410.02	FALSE	14
2022-09-14	13:59:55	0.728919	3.24238	3.25183	1424.18	FALSE	14
2022-09-14	13:59:55	0.733244	3.26162	3.25183	1413.28	FALSE	14
2022-09-14	13:59:56	0.733244	3.26162	3.25814	1427.44	FALSE	14
2022-09-14	13:59:56	0.731717	3.25482	3.25814	1416.53	FALSE	14
2022-09-14	13:59:56	0.73243	3.258	3.25814	1430.7	FALSE	14
2022-09-14	13:59:57	0.730089	3.24758	3.23881	1419.78	FALSE	14
2022-09-14	13:59:57	0.727137	3.23445	3.23881	1433.94	FALSE	14
2022-09-14	13:59:57	0.727748	3.23717	3.23881	1423.02	FALSE	14
2022-09-14	13:59:57	0.727494	3.23604	3.23881	1437.17	FALSE	14
2022-09-14	13:59:58	0.73701	3.27837	3.26377	1426.3	FALSE	14
2022-09-14	13:59:58	0.733957	3.26479	3.26377	1440.44	FALSE	14
2022-09-14	13:59:58	0.732379	3.25777	3.26377	1429.55	FALSE	14
2022-09-14	13:59:58	0.731565	3.25415	3.26377	1443.69	FALSE	14
2022-09-14	13:59:59	0.731412	3.25347	3.25505	1432.81	FALSE	14
2022-09-14	13:59:59	0.736603	3.27656	3.25505	1446.97	FALSE	14
2022-09-14	13:59:59	0.731972	3.25596	3.25505	1436.06	FALSE	14
2022-09-14	13:59:59	0.727087	3.23423	3.25505	1450.2	FALSE	14
2022-09-14	14:00:00	0.732786	3.25958	3.27573	1439.32	FALSE	14
2022-09-14	14:00:00	0.739402	3.28901	3.27573	1453.49	FALSE	14
2022-09-14	14:00:00	0.737061	3.27859	3.27573	1442.6	FALSE	14
2022-09-14	14:00:01	0.730293	3.24849	3.25319	1456.74	FALSE	14
2022-09-14	14:00:01	0.73355	3.26298	3.25319	1445.87	FALSE	14
2022-09-14	14:00:01	0.729835	3.24645	3.25319	1459.99	FALSE	14
2022-09-14	14:00:01	0.731717	3.25482	3.25319	1449.12	FALSE	14
2022-09-14	14:00:02	0.732175	3.25686	3.24526	1463.24	FALSE	14
2022-09-14	14:00:02	0.7307	3.2503	3.24526	1452.37	FALSE	14
2022-09-14	14:00:02	0.729682	3.24577	3.24526	1466.49	FALSE	14
2022-09-14	14:00:02	0.725712	3.22811	3.24526	1455.6	FALSE	14
2022-09-14	14:00:03	0.729377	3.24441	3.25268	1469.73	FALSE	14
2022-09-14	14:00:03	0.729377	3.24441	3.25268	1458.84	FALSE	14
2022-09-14	14:00:03	0.73187	3.2555	3.25268	1472.99	FALSE	14
2022-09-14	14:00:03	0.734313	3.26637	3.25268	1462.11	FALSE	14
2022-09-14	14:00:04	0.731819	3.25528	3.24947	1476.24	FALSE	14
2022-09-14	14:00:04	0.730598	3.24985	3.24947	1465.36	FALSE	14
2022-09-14	14:00:04	0.729122	3.24328	3.24947	1479.49	FALSE	14
2022-09-14	14:00:05	0.730343	3.24871	3.24537	1468.61	FALSE	14
2022-09-14	14:00:05	0.733244	3.26162	3.24537	1482.75	FALSE	14
2022-09-14	14:00:05	0.725509	3.22721	3.24537	1471.84	FALSE	14
2022-09-14	14:00:05	0.729275	3.24396	3.24537	1485.99	FALSE	14
2022-09-14	14:00:06	0.730343	3.24871	3.26818	1475.08	FALSE	14
2022-09-14	14:00:06	0.737061	3.27859	3.26818	1489.27	FALSE	14
2022-09-14	14:00:06	0.732175	3.25686	3.26818	1478.34	FALSE	14
2022-09-14	14:00:06	0.7393	3.28855	3.26818	1492.56	FALSE	14
2022-09-14	14:00:07	0.727596	3.23649	3.24821	1481.58	FALSE	14
2022-09-14	14:00:07	0.734008	3.26501	3.24821	1495.82	FALSE	14
2022-09-14	14:00:07	0.733092	3.26094	3.24821	1484.84	FALSE	14
2022-09-14	14:00:07	0.726221	3.23038	3.24821	1499.05	FALSE	14
2022-09-14	14:00:08	0.735687	3.27248	3.00778	1488.11	FALSE	14
2022-09-14	14:00:08	0.730343	3.24871	3.00778	1502.3	FALSE	14
2022-09-14	14:00:08	0.562506	2.50214	3.00778	1490.61	FALSE	14
2022-09-14	14:00:09	0.507035	2.25539	3.02104	1504.56	FALSE	14
2022-09-14	14:00:09	0.730242	3.24826	3.02104	1493.86	FALSE	14
2022-09-14	14:00:09	0.737875	3.28222	3.02104	1507.84	FALSE	14
2022-09-14	14:00:09	0.741489	3.29829	3.02104	1497.16	FALSE	14
2022-09-14	14:00:10	0.732684	3.25912	3.26705	1511.1	FALSE	14
2022-09-14	14:00:10	0.736857	3.27769	3.26705	1500.44	FALSE	14
2022-09-14	14:00:10	0.737163	3.27905	3.26705	1514.38	FALSE	14
2022-09-14	14:00:10	0.731158	3.25234	3.26705	1503.69	FALSE	14
2022-09-14	14:00:11	0.725051	3.22517	3.24713	1517.6	FALSE	14
2022-09-14	14:00:11	0.735382	3.27113	3.24713	1506.96	FALSE	14
2022-09-14	14:00:11	0.730903	3.2512	3.24713	1520.86	FALSE	14
2022-09-14	14:00:11	0.728613	3.24102	3.24713	1510.2	FALSE	14
2022-09-14	14:00:12	0.731667	3.2546	3.25596	1524.11	FALSE	14
2022-09-14	14:00:12	0.730293	3.24849	3.25596	1513.45	FALSE	14
2022-09-14	14:00:12	0.733957	3.26479	3.25596	1527.37	FALSE	14
2022-09-14	14:00:13	0.731463	3.25369	3.25166	1516.7	FALSE	14
2022-09-14	14:00:13	0.735178	3.27022	3.25166	1530.64	FALSE	14
2022-09-14	14:00:13	0.726832	3.23309	3.25166	1519.94	FALSE	14
2022-09-14	14:00:13	0.730547	3.24962	3.25166	1533.89	FALSE	14
2022-09-14	14:00:14	0.728766	3.2417	3.25913	1523.18	FALSE	14
2022-09-14	14:00:14	0.738842	3.28652	3.25913	1537.18	FALSE	14
2022-09-14	14:00:14	0.727697	3.23694	3.25913	1526.42	FALSE	14
2022-09-14	14:00:14	0.735433	3.27135	3.25913	1540.45	FALSE	14
2022-09-14	14:00:15	0.729682	3.24577	3.25154	1529.66	FALSE	14
2022-09-14	14:00:15	0.730598	3.24985	3.25154	1543.7	FALSE	14
2022-09-14	14:00:15	0.729224	3.24373	3.25154	1532.9	FALSE	14
2022-09-14	14:00:15	0.734415	3.26682	3.25154	1546.97	FALSE	14
2022-09-14	14:00:16	0.728817	3.24192	3.25098	1536.15	FALSE	14
2022-09-14	14:00:16	0.728664	3.24124	3.25098	1550.21	FALSE	14
2022-09-14	14:00:16	0.735076	3.26977	3.25098	1539.42	FALSE	14
2022-09-14	14:00:17	0.198232	0.881776	-0.473681	1551.09	FALSE	14
2022-09-14	14:00:17	0.074873	0.33305	-0.473681	1539.75	FALSE	14
2022-09-14	14:00:17	-0.019987	-0.0889062	-0.473681	1551.09	FALSE	14
2022-09-14	14:00:17	-0.679071	-3.02064	-0.473681	1539.75	FALSE	14
2022-09-14	14:00:18	-0.64706	-2.87825	-0.893661	1551.09	FALSE	14
2022-09-14	14:00:18	0.693651	3.0855	-0.893661	1542.84	FALSE	14
2022-09-14	14:00:18	-1.57938	-7.0254	-0.893661	1551.09	FALSE	14
2022-09-14	14:00:18	0.729173	3.24351	-0.893661	1546.08	FALSE	14
2022-09-14	14:00:19	0.725051	3.22517	3.2512	1554.32	FALSE	14
2022-09-14	14:00:19	0.732939	3.26026	3.2512	1549.34	FALSE	14
2022-09-14	14:00:19	0.732379	3.25777	3.2512	1557.57	FALSE	14
2022-09-14	14:00:19	0.733244	3.26162	3.2512	1552.6	FALSE	14
2022-09-14	14:00:20	0.726018	3.22947	3.24932	1560.8	FALSE	14
2022-09-14	14:00:20	0.733346	3.26207	3.24932	1555.86	FALSE	14
2022-09-14	14:00:20	0.732074	3.25641	3.24932	1564.06	FALSE	14
2022-09-14	14:00:21	0.734517	3.26728	3.26139	1559.13	FALSE	14
2022-09-14	14:00:21	0.729224	3.24373	3.26139	1567.3	FALSE	14
2022-09-14	14:00:21	0.734466	3.26705	3.26139	1562.4	FALSE	14
2022-09-14	14:00:21	0.734568	3.26751	3.26139	1570.57	FALSE	14
2022-09-14	14:00:22	0.736857	3.27769	3.25675	1565.67	FALSE	14
2022-09-14	14:00:22	0.732837	3.25981	3.25675	1573.83	FALSE	14
2022-09-14	14:00:22	0.729478	3.24486	3.25675	1568.92	FALSE	14
2022-09-14	14:00:22	0.729428	3.24464	3.25675	1577.08	FALSE	14
2022-09-14	14:00:23	0.733193	3.26139	3.2589	1572.18	FALSE	14
2022-09-14	14:00:23	0.738486	3.28493	3.2589	1580.36	FALSE	14
2022-09-14	14:00:23	0.732634	3.2589	3.2589	1575.44	FALSE	14
2022-09-14	14:00:23	0.726221	3.23038	3.2589	1583.59	FALSE	14
2022-09-14	14:00:24	0.733244	3.26162	3.24653	1578.7	FALSE	14
2022-09-14	14:00:24	0.728766	3.2417	3.24653	1586.83	FALSE	14
2022-09-14	14:00:24	0.727545	3.23627	3.24653	1581.94	FALSE	14
2022-09-14	14:00:25	0.732481	3.25822	3.25709	1590.09	FALSE	14
2022-09-14	14:00:25	0.733041	3.26071	3.25709	1585.2	FALSE	14
2022-09-14	14:00:25	0.732786	3.25958	3.25709	1593.35	FALSE	14
2022-09-14	14:00:25	0.730598	3.24985	3.25709	1588.45	FALSE	14
2022-09-14	14:00:26	0.729733	3.246	3.24668	1596.6	FALSE	14
2022-09-14	14:00:26	0.728715	3.24147	3.24668	1591.69	FALSE	14
2022-09-14	14:00:26	0.729529	3.24509	3.24668	1599.84	FALSE	14
2022-09-14	14:00:26	0.731565	3.25415	3.24668	1594.94	FALSE	14
2022-09-14	14:00:27	0.72902	3.24283	3.24832	1603.09	FALSE	14
2022-09-14	14:00:27	0.728562	3.24079	3.24832	1598.18	FALSE	14
2022-09-14	14:00:27	0.731158	3.25234	3.24832	1606.34	FALSE	14
2022-09-14	14:00:27	0.732277	3.25731	3.24832	1601.44	FALSE	14
2022-09-14	14:00:28	0.727494	3.23604	3.24419	1609.57	FALSE	14
2022-09-14	14:00:28	0.732583	3.25868	3.24419	1604.7	FALSE	14
2022-09-14	14:00:28	0.727901	3.23785	3.24419	1612.81	FALSE	14
2022-09-14	14:00:29	0.730954	3.25143	3.25579	1607.95	FALSE	14
2022-09-14	14:00:29	0.734211	3.26592	3.25579	1616.08	FALSE	14
2022-09-14	14:00:29	0.732023	3.25618	3.25579	1611.21	FALSE	14
2022-09-14	14:00:29	0.730547	3.24962	3.25579	1619.33	FALSE	14
2022-09-14	14:00:30	0.725712	3.22811	3.24209	1614.44	FALSE	14
2022-09-14	14:00:30	0.731616	3.25437	3.24209	1622.58	FALSE	14
2022-09-14	14:00:30	0.730191	3.24804	3.24209	1617.68	FALSE	14
2022-09-14	14:00:30	0.727901	3.23785	3.24209	1625.82	FALSE	14
2022-09-14	14:00:31	0.731107	3.25211	3.24555	1620.94	FALSE	14
2022-09-14	14:00:31	0.727087	3.23423	3.24555	1629.05	FALSE	14
2022-09-14	14:00:31	0.729275	3.24396	3.24555	1624.18	FALSE	14
2022-09-14	14:00:31	0.731056	3.25188	3.24555	1632.31	FALSE	14
2022-09-14	14:00:32	0.729733	3.246	3.23415	1627.43	FALSE	14
2022-09-14	14:00:32	0.724796	3.22404	3.23415	1635.53	FALSE	14
2022-09-14	14:00:32	0.726679	3.23241	3.23415	1630.66	FALSE	14
2022-09-14	14:00:33	0.729784	3.24623	3.2477	1638.78	FALSE	14
2022-09-14	14:00:33	0.731259	3.25279	3.2477	1633.91	FALSE	14
2022-09-14	14:00:33	0.730649	3.25007	3.2477	1642.03	FALSE	14
2022-09-14	14:00:33	0.728766	3.2417	3.2477	1637.15	FALSE	14
2022-09-14	14:00:34	0.733499	3.26275	3.24617	1645.29	FALSE	14
2022-09-14	14:00:34	0.724338	3.222	3.24617	1640.38	FALSE	14
2022-09-14	14:00:34	0.729784	3.24623	3.24617	1648.53	FALSE	14
2022-09-14	14:00:34	0.731463	3.25369	3.24617	1643.63	FALSE	14
2022-09-14	14:00:35	0.728104	3.23875	3.23943	1651.77	FALSE	14
2022-09-14	14:00:35	0.728257	3.23943	3.23943	1646.87	FALSE	14
2022-09-14	14:00:35	0.732125	3.25664	3.23943	1655.03	FALSE	14
2022-09-14	14:00:35	0.724542	3.22291	3.23943	1650.09	FALSE	14
2022-09-14	14:00:36	0.730751	3.25053	3.24962	1658.28	FALSE	14
2022-09-14	14:00:36	0.731107	3.25211	3.24962	1653.34	FALSE	14
2022-09-14	14:00:36	0.729784	3.24623	3.24962	1661.53	FALSE	14
2022-09-14	14:00:37	0.735331	3.2709	3.25551	1656.61	FALSE	14
2022-09-14	14:00:37	0.732634	3.2589	3.25551	1664.79	FALSE	14
2022-09-14	14:00:37	0.727392	3.23559	3.25551	1659.85	FALSE	14
2022-09-14	14:00:37	0.732125	3.25664	3.25551	1668.04	FALSE	14
2022-09-14	14:00:38	0.731921	3.25573	3.24215	1663.11	FALSE	14
2022-09-14	14:00:38	0.730598	3.24985	3.24215	1671.29	FALSE	14
2022-09-14	14:00:38	0.723779	3.21951	3.24215	1666.33	FALSE	14
2022-09-14	14:00:38	0.729173	3.24351	3.24215	1674.54	FALSE	14
2022-09-14	14:00:39	0.73187	3.2555	2.90735	1669.58	FALSE	14
2022-09-14	14:00:39	0.728817	3.24192	2.90735	1677.78	FALSE	14
2022-09-14	14:00:39	0.423168	1.88234	2.90735	1671.46	FALSE	14
2022-09-14	14:00:39	0.730547	3.24962	2.90735	1681.03	FALSE	14

## Sheet: KimChi_prong_2022914135524 (3)
Date	Time	Lbs	Newtons	Total force x time		total steps > 13.345	**GoPro Fitting: 13:45
2022-09-14	13:55:39	0.138995	0.618278	0.618278	FALSE	0
2022-09-14	13:55:39	0.120573	0.536333	0.536333	FALSE	0
2022-09-14	13:55:39	0.130853	0.58206	1.20034	FALSE	0
2022-09-14	13:55:39	0.394313	1.75398	2.29032	FALSE	0
2022-09-14	13:55:40	0.492277	2.18975	3.39008	FALSE	0
2022-09-14	13:55:40	0.326374	1.45178	3.74209	FALSE	0
2022-09-14	13:55:40	0.510089	2.26898	5.65906	FALSE	0
2022-09-14	13:55:40	0.459148	2.04238	5.78447	FALSE	0
2022-09-14	13:55:41	0.548461	2.43966	8.09873	FALSE	0
2022-09-14	13:55:41	0.531819	2.36564	8.15011	FALSE	0
2022-09-14	13:55:41	0.463473	2.06162	10.1603	FALSE	0
2022-09-14	13:55:41	0.482456	2.14606	10.2962	FALSE	0
2022-09-14	13:55:42	0.117214	0.521391	10.6817	FALSE	0
2022-09-14	13:55:42	0.365713	1.62676	11.9229	FALSE	0
2022-09-14	13:55:42	0.745102	3.31436	13.9961	FALSE	0
2022-09-14	13:55:43	0.599402	2.66626	14.5892	FALSE	0
2022-09-14	13:55:43	0.601438	2.67532	16.6714	FALSE	0
2022-09-14	13:55:43	1.92551	8.56505	23.1543	FALSE	0
2022-09-14	13:55:43	1.63874	7.28944	23.9609	FALSE	0
2022-09-14	13:55:44	0.425204	1.89139	25.0456	FALSE	0
2022-09-14	13:55:44	0.160013	0.71177	24.6726	FALSE	0
2022-09-14	13:55:44	0.225407	1.00266	26.0483	FALSE	0
2022-09-14	13:55:44	0.157977	0.702713	25.3753	FALSE	0
2022-09-14	13:55:45	0.146222	0.650425	26.6987	FALSE	0
2022-09-14	13:55:45	0.17014	0.756817	26.1322	FALSE	0
2022-09-14	13:55:45	0.0277992	0.123656	26.8224	FALSE	0
2022-09-14	13:55:45	0.325051	1.44589	27.5781	FALSE	0
2022-09-14	13:55:46	0.36841	1.63876	28.4611	FALSE	0
2022-09-14	13:55:46	0.506934	2.25494	29.833	FALSE	0
2022-09-14	13:55:46	0.130853	0.58206	29.0432	FALSE	0
2022-09-14	13:55:47	0.342608	1.52399	31.357	FALSE	0
2022-09-14	13:55:47	0.205356	0.913465	29.9567	FALSE	0
2022-09-14	13:55:47	0.406476	1.80809	33.1651	FALSE	0
2022-09-14	13:55:47	0.279351	1.24261	31.1993	FALSE	0
2022-09-14	13:55:48	0.375687	1.67113	34.8362	FALSE	0
2022-09-14	13:55:48	0.459046	2.04193	33.2412	FALSE	0
2022-09-14	13:55:48	0.258842	1.15138	35.9876	FALSE	0
2022-09-14	13:55:48	0.870954	3.87418	37.1154	FALSE	0
2022-09-14	13:55:49	0.635534	2.82698	38.8146	FALSE	0
2022-09-14	13:55:49	0.382863	1.70305	38.8184	FALSE	0
2022-09-14	13:55:49	0.265967	1.18307	39.9976	FALSE	0
2022-09-14	13:55:49	0.0644913	0.28687	39.1053	FALSE	0
2022-09-14	13:55:50	-0.0745417	-0.331576	39.9976	FALSE	0
2022-09-14	13:55:50	0.139199	0.619185	39.7245	FALSE	0
2022-09-14	13:55:50	0.0525321	0.233673	40.2313	FALSE	0
2022-09-14	13:55:51	0.203321	0.904412	40.6289	FALSE	0
2022-09-14	13:55:51	1.40261	6.23909	46.4704	FALSE	0
2022-09-14	13:55:51	1.77976	7.91673	48.5456	FALSE	0
2022-09-14	13:55:51	0.527443	2.34617	48.8166	FALSE	0
2022-09-14	13:55:52	0.684593	3.04521	51.5908	FALSE	0
2022-09-14	13:55:52	0.463321	2.06094	50.8775	FALSE	0
2022-09-14	13:55:52	1.15523	5.13869	56.7295	FALSE	0
2022-09-14	13:55:52	0.547341	2.43468	53.3122	FALSE	0
2022-09-14	13:55:53	0.778028	3.46082	60.1904	FALSE	0
2022-09-14	13:55:53	0.983779	4.37605	57.6882	FALSE	0
2022-09-14	13:55:53	1.18658	5.27815	65.4685	FALSE	0
2022-09-14	13:55:53	0.996349	4.43196	62.1202	FALSE	0
2022-09-14	13:55:54	1.08938	4.84578	70.3143	FALSE	0
2022-09-14	13:55:54	0.525203	2.33621	64.4564	FALSE	0
2022-09-14	13:55:54	1.58841	7.06557	77.3798	FALSE	0
2022-09-14	13:55:55	1.46317	6.50847	70.9649	FALSE	0
2022-09-14	13:55:55	1.84571	8.21009	85.5899	FALSE	0
2022-09-14	13:55:55	0.8107	3.60616	74.571	FALSE	0
2022-09-14	13:55:55	0.987442	4.39234	89.9823	FALSE	0
2022-09-14	13:55:56	0.752277	3.34628	77.9173	FALSE	0
2022-09-14	13:55:56	0.664287	2.95488	92.9372	FALSE	0
2022-09-14	13:55:56	0.945051	4.20378	82.1211	FALSE	0
2022-09-14	13:55:56	0.936705	4.16665	97.1038	FALSE	0
2022-09-14	13:55:57	0.666934	2.96666	85.0878	FALSE	0
2022-09-14	13:55:57	1.33202	5.92509	103.029	FALSE	0
2022-09-14	13:55:57	1.48597	6.60989	91.6976	FALSE	0
2022-09-14	13:55:58	1.67543	7.45265	110.482	FALSE	0
2022-09-14	13:55:58	1.76205	7.83795	99.5356	FALSE	0
2022-09-14	13:55:58	2.53487	11.2756	121.757	FALSE	0
2022-09-14	13:55:58	5.78301	25.724	125.26	1	1
2022-09-14	13:55:59	5.11263	22.742	144.499	1	2
2022-09-14	13:55:59	6.14459	27.3324	152.592	1	3
2022-09-14	13:55:59	4.34357	19.3211	163.82	1	4
2022-09-14	13:55:59	3.06841	13.6489	166.241	1	5
2022-09-14	13:56:00	2.01182	8.94898	172.769	FALSE	5
2022-09-14	13:56:00	2.36515	10.5207	176.762	FALSE	5
2022-09-14	13:56:00	2.2193	9.87189	182.641	FALSE	5
2022-09-14	13:56:00	2.02892	9.02504	185.787	FALSE	5
2022-09-14	13:56:01	2.21284	9.84315	192.484	FALSE	5
2022-09-14	13:56:01	2.44215	10.8632	196.65	FALSE	5
2022-09-14	13:56:01	2.84902	12.673	205.157	FALSE	5
2022-09-14	13:56:02	1.64663	7.32454	203.974	FALSE	5
2022-09-14	13:56:02	0.580064	2.58024	207.737	FALSE	5
2022-09-14	13:56:02	0.615891	2.73961	206.714	FALSE	5
2022-09-14	13:56:02	1.31319	5.84133	213.579	FALSE	5
2022-09-14	13:56:03	4.91411	21.8589	228.573	1	6
2022-09-14	13:56:03	6.01487	26.7553	240.334	1	7
2022-09-14	13:56:03	5.1424	22.8744	251.447	1	8
2022-09-14	13:56:03	3.40052	15.1262	255.46	1	9
2022-09-14	13:56:04	1.28261	5.70531	257.153	FALSE	9
2022-09-14	13:56:04	0.631616	2.80955	258.27	FALSE	9
2022-09-14	13:56:04	0.408868	1.81873	258.971	FALSE	9
2022-09-14	13:56:04	0.156145	0.694564	258.964	FALSE	9
2022-09-14	13:56:05	0.642405	2.85755	261.829	FALSE	9
2022-09-14	13:56:05	0.217723	0.968475	259.933	FALSE	9
2022-09-14	13:56:05	0.1193	0.53067	262.359	FALSE	9
2022-09-14	13:56:06	-0.034389	-0.152969	259.933	FALSE	9
2022-09-14	13:56:06	0.0427101	0.189983	262.549	FALSE	9
2022-09-14	13:56:06	-0.0772389	-0.343574	259.933	FALSE	9
2022-09-14	13:56:06	0.185051	0.823144	263.373	FALSE	9
2022-09-14	13:56:07	-0.0989692	-0.440235	259.933	FALSE	9
2022-09-14	13:56:07	0.254771	1.13327	264.506	FALSE	9
2022-09-14	13:56:07	4.22286	18.7841	278.717	1	10
2022-09-14	13:56:07	5.29039	23.5327	288.039	1	11
2022-09-14	13:56:08	3.21803	14.3144	293.032	1	12
2022-09-14	13:56:08	0.763728	3.39721	291.436	FALSE	12
2022-09-14	13:56:08	1.3367	5.94591	298.977	FALSE	12
2022-09-14	13:56:08	0.861946	3.83411	295.27	FALSE	12
2022-09-14	13:56:09	0.827494	3.68086	302.658	FALSE	12
2022-09-14	13:56:09	0.387188	1.72229	296.992	FALSE	12
2022-09-14	13:56:09	0.320827	1.4271	304.085	FALSE	12
2022-09-14	13:56:10	0.72612	3.22993	300.222	FALSE	12
2022-09-14	13:56:10	0.303626	1.35059	305.436	FALSE	12
2022-09-14	13:56:10	0.936043	4.16371	304.386	FALSE	12
2022-09-14	13:56:10	0.257061	1.14346	306.579	FALSE	12
2022-09-14	13:56:11	0.14841	0.660157	305.046	FALSE	12
2022-09-14	13:56:11	0.426476	1.89705	308.476	FALSE	12
2022-09-14	13:56:11	0.413397	1.83887	306.885	FALSE	12
2022-09-14	13:56:11	0.408257	1.81601	310.293	FALSE	12
2022-09-14	13:56:12	0.788002	3.50519	310.39	FALSE	12
2022-09-14	13:56:12	1.56128	6.94489	317.237	FALSE	12
2022-09-14	13:56:12	1.2192	5.42325	315.813	FALSE	12
2022-09-14	13:56:12	0.651972	2.9001	320.137	FALSE	12
2022-09-14	13:56:13	0.520623	2.31584	318.129	FALSE	12
2022-09-14	13:56:13	1.14271	5.083	325.22	FALSE	12
2022-09-14	13:56:13	1.50617	6.69975	324.829	FALSE	12
2022-09-14	13:56:14	1.09116	4.8537	330.074	FALSE	12
2022-09-14	13:56:14	1.80159	8.01383	332.843	FALSE	12
2022-09-14	13:56:14	0.735433	3.27135	333.346	FALSE	12
2022-09-14	13:56:14	0.819148	3.64373	336.486	FALSE	12
2022-09-14	13:56:15	0.523422	2.32829	335.674	FALSE	12
2022-09-14	13:56:15	0.437316	1.94527	338.432	FALSE	12
2022-09-14	13:56:15	0.586883	2.61057	338.284	FALSE	12
2022-09-14	13:56:15	0.300267	1.33565	339.767	FALSE	12
2022-09-14	13:56:16	0.648511	2.88471	341.169	FALSE	12
2022-09-14	13:56:16	0.303982	1.35217	341.12	FALSE	12
2022-09-14	13:56:16	0.576094	2.56258	343.732	FALSE	12
2022-09-14	13:56:16	0.369122	1.64193	342.761	FALSE	12
2022-09-14	13:56:17	0.433651	1.92897	345.661	FALSE	12
2022-09-14	13:56:17	0.14042	0.624616	343.386	FALSE	12
2022-09-14	13:56:17	0.451718	2.00933	347.67	FALSE	12
2022-09-14	13:56:18	1.00016	4.44891	347.835	FALSE	12
2022-09-14	13:56:18	1.80683	8.03714	355.707	FALSE	12
2022-09-14	13:56:18	3.20434	14.2535	362.089	1	13
2022-09-14	13:56:18	1.69014	7.51808	363.225	FALSE	13
2022-09-14	13:56:19	1.61915	7.2023	369.291	FALSE	13
2022-09-14	13:56:19	1.14103	5.07553	368.301	FALSE	13
2022-09-14	13:56:19	0.723372	3.2177	372.509	FALSE	13
2022-09-14	13:56:19	0.632023	2.81136	371.112	FALSE	13
2022-09-14	13:56:20	1.0221	4.54651	377.055	FALSE	13
2022-09-14	13:56:20	1.09589	4.87474	375.987	FALSE	13
2022-09-14	13:56:20	1.13777	5.06103	382.116	FALSE	13
2022-09-14	13:56:20	0.405407	1.80333	377.79	FALSE	13
2022-09-14	13:56:21	0.431005	1.9172	384.033	FALSE	13
2022-09-14	13:56:21	0.402608	1.79088	379.581	FALSE	13
2022-09-14	13:56:21	-0.12986	-0.577643	384.033	FALSE	13
2022-09-14	13:56:22	-0.524312	-2.33224	379.581	FALSE	13
2022-09-14	13:56:22	-0.729045	-3.24294	384.033	FALSE	13
2022-09-14	13:56:22	-0.519529	-2.31097	379.581	FALSE	13
2022-09-14	13:56:22	-0.17902	-0.796317	384.033	FALSE	13
2022-09-14	13:56:23	0.604644	2.68958	382.271	FALSE	13
2022-09-14	13:56:23	1.77884	7.91264	391.946	FALSE	13
2022-09-14	13:56:23	1.82963	8.13856	390.409	FALSE	13
2022-09-14	13:56:23	1.61167	7.16903	399.115	FALSE	13
2022-09-14	13:56:24	1.30347	5.7981	396.207	FALSE	13
2022-09-14	13:56:24	0.841336	3.74243	402.857	FALSE	13
2022-09-14	13:56:24	0.670852	2.98408	399.191	FALSE	13
2022-09-14	13:56:25	0.475891	2.11686	404.974	FALSE	13
2022-09-14	13:56:25	0.277723	1.23537	400.427	FALSE	13
2022-09-14	13:56:25	0.582201	2.58975	407.564	FALSE	13
2022-09-14	13:56:25	0.727799	3.2374	403.664	FALSE	13
2022-09-14	13:56:26	0.724186	3.22132	410.785	FALSE	13
2022-09-14	13:56:26	0.730343	3.24871	406.913	FALSE	13
2022-09-14	13:56:26	0.726527	3.23174	414.017	FALSE	13
2022-09-14	13:56:26	0.732379	3.25777	410.171	FALSE	13
2022-09-14	13:56:27	0.72388	3.21996	417.237	FALSE	13
2022-09-14	13:56:27	0.728206	3.23921	413.41	FALSE	13
2022-09-14	13:56:27	0.721946	3.21136	420.448	FALSE	13
2022-09-14	13:56:27	0.729173	3.24351	416.653	FALSE	13
2022-09-14	13:56:28	0.72617	3.23015	423.679	FALSE	13
2022-09-14	13:56:28	0.731921	3.25573	419.909	FALSE	13
2022-09-14	13:56:28	0.727392	3.23559	426.914	FALSE	13
2022-09-14	13:56:29	0.721132	3.20774	423.117	FALSE	13
2022-09-14	13:56:29	0.727188	3.23468	430.149	FALSE	13
2022-09-14	13:56:29	0.723779	3.21951	426.336	FALSE	13
2022-09-14	13:56:29	0.727748	3.23717	433.386	FALSE	13
2022-09-14	13:56:30	0.723779	3.21951	429.556	FALSE	13
2022-09-14	13:56:30	0.722252	3.21272	436.599	FALSE	13
2022-09-14	13:56:30	0.724084	3.22087	432.777	FALSE	13
2022-09-14	13:56:30	0.729377	3.24441	439.843	FALSE	13
2022-09-14	13:56:31	0.728512	3.24057	436.017	FALSE	13
2022-09-14	13:56:31	0.727545	3.23627	443.079	FALSE	13
2022-09-14	13:56:31	0.719198	3.19914	439.216	FALSE	13
2022-09-14	13:56:31	0.726425	3.23128	446.311	FALSE	13
2022-09-14	13:56:32	0.724237	3.22155	442.438	FALSE	13
2022-09-14	13:56:32	0.731616	3.25437	449.565	FALSE	13
2022-09-14	13:56:32	0.728461	3.24034	445.678	FALSE	13
2022-09-14	13:56:33	0.730242	3.24826	452.813	FALSE	13
2022-09-14	13:56:33	0.719504	3.2005	448.879	FALSE	13
2022-09-14	13:56:33	0.727697	3.23694	456.05	FALSE	13
2022-09-14	13:56:33	0.72383	3.21974	452.099	FALSE	13
2022-09-14	13:56:34	0.733957	3.26479	459.315	FALSE	13
2022-09-14	13:56:34	0.724847	3.22426	455.323	FALSE	13
2022-09-14	13:56:34	0.731667	3.2546	462.57	FALSE	13
2022-09-14	13:56:34	0.727697	3.23694	458.56	FALSE	13
2022-09-14	13:56:35	0.72902	3.24283	465.812	FALSE	13
2022-09-14	13:56:35	0.732074	3.25641	461.816	FALSE	13
2022-09-14	13:56:35	0.723015	3.21612	469.029	FALSE	13
2022-09-14	13:56:35	0.730547	3.24962	465.066	FALSE	13
2022-09-14	13:56:36	0.729478	3.24486	472.273	FALSE	13
2022-09-14	13:56:36	0.728155	3.23898	468.305	FALSE	13
2022-09-14	13:56:36	0.728308	3.23966	475.513	FALSE	13
2022-09-14	13:56:37	0.734262	3.26614	471.571	FALSE	13
2022-09-14	13:56:37	0.72444	3.22245	478.736	FALSE	13
2022-09-14	13:56:37	0.722761	3.21499	474.786	FALSE	13
2022-09-14	13:56:37	0.729224	3.24373	481.979	FALSE	13
2022-09-14	13:56:38	0.72612	3.22993	478.016	FALSE	13
2022-09-14	13:56:38	0.724644	3.22336	485.203	FALSE	13
2022-09-14	13:56:38	0.728155	3.23898	481.255	FALSE	13
2022-09-14	13:56:38	0.726883	3.23332	488.436	FALSE	13
2022-09-14	13:56:39	0.320064	1.42371	482.678	FALSE	13
2022-09-14	13:56:39	-1.2292	-5.46773	488.436	FALSE	13
2022-09-14	13:56:39	-0.910674	-4.05086	482.678	FALSE	13
2022-09-14	13:56:39	-0.949351	-4.2229	488.436	FALSE	13
2022-09-14	13:56:40	-1.37759	-6.1278	482.678	FALSE	13
2022-09-14	13:56:40	-1.55342	-6.90992	488.436	FALSE	13
2022-09-14	13:56:40	-1.69663	-7.54695	482.678	FALSE	13
2022-09-14	13:56:41	-1.78436	-7.93719	488.436	FALSE	13
2022-09-14	13:56:41	-1.76696	-7.85979	482.678	FALSE	13
2022-09-14	13:56:41	-1.74401	-7.75771	488.436	FALSE	13
2022-09-14	13:56:41	-1.88971	-8.40581	482.678	FALSE	13
2022-09-14	13:56:42	-1.795	-7.98452	488.436	FALSE	13
2022-09-14	13:56:42	-1.79006	-7.96254	482.678	FALSE	13
2022-09-14	13:56:42	-1.67724	-7.4607	488.436	FALSE	13
2022-09-14	13:56:42	-1.54787	-6.88524	482.678	FALSE	13
2022-09-14	13:56:43	-1.51658	-6.74605	488.436	FALSE	13
2022-09-14	13:56:43	-1.49556	-6.65255	482.678	FALSE	13
2022-09-14	13:56:43	-1.50421	-6.69103	488.436	FALSE	13
2022-09-14	13:56:43	-1.63388	-7.26783	482.678	FALSE	13
2022-09-14	13:56:44	-1.6353	-7.27414	488.436	FALSE	13
2022-09-14	13:56:44	-1.552	-6.90361	482.678	FALSE	13
2022-09-14	13:56:44	-1.48589	-6.60954	488.436	FALSE	13
2022-09-14	13:56:45	-1.09337	-4.86353	482.678	FALSE	13
2022-09-14	13:56:45	-1.14966	-5.11392	488.436	FALSE	13
2022-09-14	13:56:45	-1.02833	-4.57422	482.678	FALSE	13
2022-09-14	13:56:45	-0.798663	-3.55261	488.436	FALSE	13
2022-09-14	13:56:46	-0.363142	-1.61533	482.678	FALSE	13
2022-09-14	13:56:46	0.0667814	0.297057	488.733	FALSE	13
2022-09-14	13:56:46	0.191972	0.85393	483.532	FALSE	13
2022-09-14	13:56:46	0.275687	1.22631	489.959	FALSE	13
2022-09-14	13:56:47	0.776959	3.45607	486.988	FALSE	13
2022-09-14	13:56:47	0.255076	1.13463	491.094	FALSE	13
2022-09-14	13:56:47	-0.111285	-0.495018	486.988	FALSE	13
2022-09-14	13:56:47	-0.0065519	-0.0291442	491.094	FALSE	13
2022-09-14	13:56:48	-0.22533	-1.00231	486.988	FALSE	13
2022-09-14	13:56:48	-0.187112	-0.832312	491.094	FALSE	13
2022-09-14	13:56:48	-0.00548322	-0.0243905	486.988	FALSE	13
2022-09-14	13:56:49	-0.388129	-1.72648	491.094	FALSE	13
2022-09-14	13:56:49	-0.0624806	-0.277926	486.988	FALSE	13
2022-09-14	13:56:49	-0.130216	-0.579227	491.094	FALSE	13
2022-09-14	13:56:49	0.0710053	0.315846	487.304	FALSE	13
2022-09-14	13:56:50	-0.137748	-0.612731	491.094	FALSE	13
2022-09-14	13:56:50	0.286781	1.27566	488.58	FALSE	13
2022-09-14	13:56:50	0.350038	1.55704	492.651	FALSE	13
2022-09-14	13:56:50	-1.86691	-8.30439	488.58	FALSE	13
2022-09-14	13:56:51	0.232074	1.03231	493.683	FALSE	13
2022-09-14	13:56:51	0.732583	3.25868	491.839	FALSE	13
2022-09-14	13:56:51	0.729071	3.24305	496.926	FALSE	13
2022-09-14	13:56:51	0.73472	3.26818	495.107	FALSE	13
2022-09-14	13:56:52	0.73131	3.25301	500.179	FALSE	13
2022-09-14	13:56:52	0.726883	3.23332	498.34	FALSE	13
2022-09-14	13:56:52	0.730547	3.24962	503.429	FALSE	13
2022-09-14	13:56:53	0.727036	3.234	501.574	FALSE	13
2022-09-14	13:56:53	0.731412	3.25347	506.682	FALSE	13
2022-09-14	13:56:53	0.723372	3.2177	504.792	FALSE	13
2022-09-14	13:56:53	0.727137	3.23445	509.917	FALSE	13
2022-09-14	13:56:54	0.730445	3.24917	508.041	FALSE	13
2022-09-14	13:56:54	0.723524	3.21838	513.135	FALSE	13
2022-09-14	13:56:54	0.732074	3.25641	511.297	FALSE	13
2022-09-14	13:56:54	0.725814	3.22857	516.364	FALSE	13
2022-09-14	13:56:55	0.724237	3.22155	514.519	FALSE	13
2022-09-14	13:56:55	0.735178	3.27022	519.634	FALSE	13
2022-09-14	13:56:55	0.726374	3.23106	517.75	FALSE	13
2022-09-14	13:56:56	0.737315	3.27972	522.914	FALSE	13
2022-09-14	13:56:56	0.731056	3.25188	521.002	FALSE	13
2022-09-14	13:56:56	0.734618	3.26773	526.182	FALSE	13
2022-09-14	13:56:56	0.736349	3.27543	524.277	FALSE	13
2022-09-14	13:56:57	0.723473	3.21815	529.4	FALSE	13
2022-09-14	13:56:57	0.725611	3.22766	527.505	FALSE	13
2022-09-14	13:56:57	0.731412	3.25347	532.653	FALSE	13
2022-09-14	13:56:57	0.722608	3.2143	530.719	FALSE	13
2022-09-14	13:56:58	0.729428	3.24464	535.898	FALSE	13
2022-09-14	13:56:58	0.72617	3.23015	533.949	FALSE	13
2022-09-14	13:56:58	0.730496	3.24939	539.147	FALSE	13
2022-09-14	13:56:58	0.727901	3.23785	537.187	FALSE	13
2022-09-14	13:56:59	0.734924	3.26909	542.416	FALSE	13
2022-09-14	13:56:59	0.73187	3.2555	540.443	FALSE	13
2022-09-14	13:56:59	0.728461	3.24034	545.657	FALSE	13
2022-09-14	13:57:00	0.736807	3.27746	543.72	FALSE	13
2022-09-14	13:57:00	0.73645	3.27588	548.932	FALSE	13
2022-09-14	13:57:00	0.733651	3.26343	546.984	FALSE	13
2022-09-14	13:57:00	0.728562	3.24079	552.173	FALSE	13
2022-09-14	13:57:01	0.732735	3.25935	550.243	FALSE	13
2022-09-14	13:57:01	0.721591	3.20978	555.383	FALSE	13
2022-09-14	13:57:01	0.727646	3.23671	553.48	FALSE	13
2022-09-14	13:57:01	0.732074	3.25641	558.639	FALSE	13
2022-09-14	13:57:02	0.73131	3.25301	556.733	FALSE	13
2022-09-14	13:57:02	0.731209	3.25256	561.892	FALSE	13
2022-09-14	13:57:02	0.725967	3.22925	559.962	FALSE	13
2022-09-14	13:57:02	0.739351	3.28878	565.181	FALSE	13
2022-09-14	13:57:03	0.732125	3.25664	563.219	FALSE	13
2022-09-14	13:57:03	0.731005	3.25166	568.432	FALSE	13
2022-09-14	13:57:03	0.728155	3.23898	566.458	FALSE	13
2022-09-14	13:57:04	0.72841	3.24011	571.673	FALSE	13
2022-09-14	13:57:04	0.729173	3.24351	569.701	FALSE	13
2022-09-14	13:57:04	0.727239	3.2349	574.907	FALSE	13
2022-09-14	13:57:04	0.734466	3.26705	572.968	FALSE	13
2022-09-14	13:57:05	0.726527	3.23174	578.139	FALSE	13
2022-09-14	13:57:05	0.734466	3.26705	576.235	FALSE	13
2022-09-14	13:57:05	0.731056	3.25188	581.391	FALSE	13
2022-09-14	13:57:05	0.727087	3.23423	579.47	FALSE	13
2022-09-14	13:57:06	0.728562	3.24079	584.632	FALSE	13
2022-09-14	13:57:06	0.729682	3.24577	582.715	FALSE	13
2022-09-14	13:57:06	0.725153	3.22563	587.858	FALSE	13
2022-09-14	13:57:06	0.728104	3.23875	585.954	FALSE	13
2022-09-14	13:57:07	0.726425	3.23128	591.089	FALSE	13
2022-09-14	13:57:07	0.731565	3.25415	589.208	FALSE	13
2022-09-14	13:57:07	0.721183	3.20797	594.297	FALSE	13
2022-09-14	13:57:08	0.729428	3.24464	592.453	FALSE	13
2022-09-14	13:57:08	0.0688679	0.306338	594.603	FALSE	13
2022-09-14	13:57:08	0.716298	3.18624	595.639	FALSE	13
2022-09-14	13:57:08	-5.22426	-23.2386	594.603	FALSE	13
2022-09-14	13:57:09	-7.1748	-31.9149	595.639	FALSE	13
2022-09-14	13:57:09	-6.6524	-29.5912	594.603	FALSE	13
2022-09-14	13:57:09	-3.20645	-14.2629	595.639	FALSE	13
2022-09-14	13:57:09	-3.27887	-14.5851	594.603	FALSE	13
2022-09-14	13:57:10	-3.26747	-14.5344	595.639	FALSE	13
2022-09-14	13:57:10	-3.22716	-14.3551	594.603	FALSE	13
2022-09-14	13:57:10	-3.17322	-14.1151	595.639	FALSE	13
2022-09-14	13:57:10	-3.11261	-13.8455	594.603	FALSE	13
2022-09-14	13:57:11	-2.96278	-13.179	595.639	FALSE	13
2022-09-14	13:57:11	-2.87581	-12.7922	594.603	FALSE	13
2022-09-14	13:57:11	-2.76579	-12.3028	595.639	FALSE	13
2022-09-14	13:57:12	-2.65245	-11.7986	594.603	FALSE	13
2022-09-14	13:57:12	-2.57016	-11.4326	595.639	FALSE	13
2022-09-14	13:57:12	-2.44319	-10.8678	594.603	FALSE	13
2022-09-14	13:57:12	-0.16533	-0.735421	595.639	FALSE	13
2022-09-14	13:57:13	0.73131	3.25301	597.856	FALSE	13
2022-09-14	13:57:13	0.729173	3.24351	598.883	FALSE	13
2022-09-14	13:57:13	0.732888	3.26003	601.116	FALSE	13
2022-09-14	13:57:13	0.740369	3.29331	602.176	FALSE	13
2022-09-14	13:57:14	0.730598	3.24985	604.366	FALSE	13
2022-09-14	13:57:14	0.728206	3.23921	605.415	FALSE	13
2022-09-14	13:57:14	0.728766	3.2417	607.608	FALSE	13
2022-09-14	13:57:14	0.723779	3.21951	608.635	FALSE	13
2022-09-14	13:57:15	0.726679	3.23241	610.84	FALSE	13
2022-09-14	13:57:15	0.728461	3.24034	611.875	FALSE	13
2022-09-14	13:57:15	0.731463	3.25369	614.094	FALSE	13
2022-09-14	13:57:16	0.730547	3.24962	615.125	FALSE	13
2022-09-14	13:57:16	0.732684	3.25912	617.353	FALSE	13
2022-09-14	13:57:16	0.73243	3.258	618.383	FALSE	13
2022-09-14	13:57:16	0.725305	3.2263	620.579	FALSE	13
2022-09-14	13:57:17	0.731107	3.25211	621.635	FALSE	13
2022-09-14	13:57:17	0.729987	3.24713	623.826	FALSE	13
2022-09-14	13:57:17	0.727646	3.23671	624.871	FALSE	13
2022-09-14	13:57:17	0.730496	3.24939	627.076	FALSE	13
2022-09-14	13:57:18	0.732277	3.25731	628.129	FALSE	13
2022-09-14	13:57:18	0.729122	3.24328	630.319	FALSE	13
2022-09-14	13:57:18	0.732481	3.25822	631.387	FALSE	13
2022-09-14	13:57:18	0.736756	3.27724	633.596	FALSE	13
2022-09-14	13:57:19	0.72444	3.22245	634.609	FALSE	13
2022-09-14	13:57:19	0.732074	3.25641	636.853	FALSE	13
2022-09-14	13:57:19	0.725102	3.2254	637.835	FALSE	13
2022-09-14	13:57:20	0.728461	3.24034	640.093	FALSE	13
2022-09-14	13:57:20	0.732888	3.26003	641.095	FALSE	13
2022-09-14	13:57:20	0.732481	3.25822	643.351	FALSE	13
2022-09-14	13:57:20	0.730954	3.25143	644.346	FALSE	13
2022-09-14	13:57:21	0.735127	3.26999	646.621	FALSE	13
2022-09-14	13:57:21	0.735433	3.27135	647.618	FALSE	13
2022-09-14	13:57:21	0.728359	3.23989	649.861	FALSE	13
2022-09-14	13:57:21	0.732074	3.25641	650.874	FALSE	13
2022-09-14	13:57:22	0.730649	3.25007	653.111	FALSE	13
2022-09-14	13:57:22	0.732939	3.26026	654.134	FALSE	13
2022-09-14	13:57:22	0.734975	3.26932	656.38	FALSE	13
2022-09-14	13:57:22	0.734822	3.26864	657.403	FALSE	13
2022-09-14	13:57:23	0.730903	3.2512	659.632	FALSE	13
2022-09-14	13:57:23	0.731768	3.25505	660.658	FALSE	13
2022-09-14	13:57:23	0.735789	3.27294	662.905	FALSE	13
2022-09-14	13:57:24	0.735178	3.27022	663.928	FALSE	13
2022-09-14	13:57:24	0.727748	3.23717	666.142	FALSE	13
2022-09-14	13:57:24	0.723931	3.22019	667.148	FALSE	13
2022-09-14	13:57:24	0.731259	3.25279	669.395	FALSE	13
2022-09-14	13:57:25	0.72612	3.22993	670.378	FALSE	13
2022-09-14	13:57:25	0.726527	3.23174	672.626	FALSE	13
2022-09-14	13:57:25	0.732175	3.25686	673.635	FALSE	13
2022-09-14	13:57:25	0.727748	3.23717	675.863	FALSE	13
2022-09-14	13:57:26	0.724033	3.22064	676.856	FALSE	13
2022-09-14	13:57:26	0.728257	3.23943	679.103	FALSE	13
2022-09-14	13:57:26	0.730038	3.24736	680.103	FALSE	13
2022-09-14	13:57:26	0.728359	3.23989	682.343	FALSE	13
2022-09-14	13:57:27	0.736298	3.2752	683.378	FALSE	13
2022-09-14	13:57:27	0.734109	3.26546	685.608	FALSE	13
2022-09-14	13:57:27	0.728461	3.24034	686.619	FALSE	13
2022-09-14	13:57:28	0.735026	3.26954	688.878	FALSE	13
2022-09-14	13:57:28	0.729377	3.24441	689.863	FALSE	13
2022-09-14	13:57:28	0.730954	3.25143	692.129	FALSE	13
2022-09-14	13:57:28	0.728461	3.24034	693.103	FALSE	13
2022-09-14	13:57:29	0.728206	3.23921	695.368	FALSE	13
2022-09-14	13:57:29	0.725204	3.22585	696.329	FALSE	13
2022-09-14	13:57:29	0.731819	3.25528	698.624	FALSE	13
2022-09-14	13:57:29	0.737875	3.28222	699.612	FALSE	13
2022-09-14	13:57:30	0.733448	3.26252	701.886	FALSE	13
2022-09-14	13:57:30	0.726425	3.23128	702.843	FALSE	13
2022-09-14	13:57:30	0.730751	3.25053	705.137	FALSE	13
2022-09-14	13:57:30	0.729784	3.24623	706.089	FALSE	13
2022-09-14	13:57:31	0.736145	3.27452	708.411	FALSE	13
2022-09-14	13:57:31	0.735433	3.27135	709.36	FALSE	13
2022-09-14	13:57:31	0.732074	3.25641	711.668	FALSE	13
2022-09-14	13:57:32	0.733702	3.26365	712.624	FALSE	13
2022-09-14	13:57:32	0.731972	3.25596	714.924	FALSE	13
2022-09-14	13:57:32	0.730751	3.25053	715.875	FALSE	13
2022-09-14	13:57:32	0.735891	3.27339	718.197	FALSE	13
2022-09-14	13:57:33	0.731158	3.25234	719.127	FALSE	13
2022-09-14	13:57:33	0.736145	3.27452	721.472	FALSE	13
2022-09-14	13:57:33	0.735229	3.27045	722.397	FALSE	13
2022-09-14	13:57:33	0.730242	3.24826	724.72	FALSE	13
2022-09-14	13:57:34	0.642405	2.85755	725.255	FALSE	13
2022-09-14	13:57:34	-0.874083	-3.8881	724.72	FALSE	13
2022-09-14	13:57:34	-0.488435	-2.17266	725.255	FALSE	13
2022-09-14	13:57:35	-0.467722	-2.08052	724.72	FALSE	13
2022-09-14	13:57:35	-0.489452	-2.17718	725.255	FALSE	13
2022-09-14	13:57:35	-0.512201	-2.27837	724.72	FALSE	13
2022-09-14	13:57:35	0.132328	0.588621	725.843	FALSE	13
2022-09-14	13:57:36	0.248715	1.10633	725.826	FALSE	13
2022-09-14	13:57:36	0.338944	1.50769	727.351	FALSE	13
2022-09-14	13:57:36	-2.14365	-9.53538	725.826	FALSE	13
2022-09-14	13:57:36	-2.0438	-9.09123	727.351	FALSE	13
2022-09-14	13:57:37	-1.98925	-8.84858	725.826	FALSE	13
2022-09-14	13:57:37	-1.89994	-8.45131	727.351	FALSE	13
2022-09-14	13:57:37	-1.76324	-7.84324	725.826	FALSE	13
2022-09-14	13:57:38	-1.75536	-7.80819	727.351	FALSE	13
2022-09-14	13:57:38	-1.58385	-7.04528	725.826	FALSE	13
2022-09-14	13:57:38	-1.41235	-6.28242	727.351	FALSE	13
2022-09-14	13:57:38	-1.39189	-6.19141	725.826	FALSE	13
2022-09-14	13:57:39	-1.44044	-6.40737	727.351	FALSE	13
2022-09-14	13:57:39	-1.40421	-6.24621	725.826	FALSE	13
2022-09-14	13:57:39	0.596756	2.65449	730.006	FALSE	13
2022-09-14	13:57:39	0.702964	3.12692	728.953	FALSE	13
2022-09-14	13:57:40	0.681743	3.03253	733.038	FALSE	13
2022-09-14	13:57:40	-0.164058	-0.729763	728.953	FALSE	13
2022-09-14	13:57:40	-0.112404	-0.499995	733.038	FALSE	13
2022-09-14	13:57:40	-0.096272	-0.428237	728.953	FALSE	13
2022-09-14	13:57:41	-0.154643	-0.687883	733.038	FALSE	13
2022-09-14	13:57:41	-0.111895	-0.497731	728.953	FALSE	13
2022-09-14	13:57:41	-0.121921	-0.542329	733.038	FALSE	13
2022-09-14	13:57:41	0.0778247	0.34618	729.299	FALSE	13
2022-09-14	13:57:42	0.510852	2.27237	735.311	FALSE	13
2022-09-14	13:57:42	0.141489	0.629371	729.929	FALSE	13
2022-09-14	13:57:42	-0.103397	-0.459931	735.311	FALSE	13
2022-09-14	13:57:43	-0.110063	-0.489582	729.929	FALSE	13
2022-09-14	13:57:43	-0.0870099	-0.387037	735.311	FALSE	13
2022-09-14	13:57:43	-0.0382059	-0.169947	729.929	FALSE	13
2022-09-14	13:57:43	-0.181412	-0.806957	735.311	FALSE	13
2022-09-14	13:57:44	-0.295559	-1.31471	729.929	FALSE	13
2022-09-14	13:57:44	-0.366959	-1.63231	735.311	FALSE	13
2022-09-14	13:57:44	-0.49103	-2.1842	729.929	FALSE	13
2022-09-14	13:57:44	-0.528689	-2.35171	735.311	FALSE	13
2022-09-14	13:57:45	-0.548028	-2.43774	729.929	FALSE	13
2022-09-14	13:57:45	-0.464414	-2.06581	735.311	FALSE	13
2022-09-14	13:57:45	-0.561106	-2.49591	729.929	FALSE	13
2022-09-14	13:57:45	-1.49052	-6.63013	735.311	FALSE	13
2022-09-14	13:57:46	-0.793676	-3.53043	729.929	FALSE	13
2022-09-14	13:57:46	-0.860699	-3.82856	735.311	FALSE	13
2022-09-14	13:57:46	-0.661055	-2.9405	729.929	FALSE	13
2022-09-14	13:57:47	-0.612404	-2.7241	735.311	FALSE	13
2022-09-14	13:57:47	-0.621055	-2.76258	729.929	FALSE	13
2022-09-14	13:57:47	-0.60131	-2.67475	735.311	FALSE	13
2022-09-14	13:57:47	-0.599987	-2.66886	729.929	FALSE	13
2022-09-14	13:57:48	-0.593524	-2.64011	735.311	FALSE	13
2022-09-14	13:57:48	-0.596424	-2.65301	729.929	FALSE	13
2022-09-14	13:57:48	-0.579631	-2.57831	735.311	FALSE	13
2022-09-14	13:57:48	-0.567468	-2.52421	729.929	FALSE	13
2022-09-14	13:57:49	-0.546857	-2.43253	735.311	FALSE	13
2022-09-14	13:57:49	-0.422328	-1.8786	729.929	FALSE	13
2022-09-14	13:57:49	-0.365178	-1.62438	735.311	FALSE	13
2022-09-14	13:57:49	-0.324669	-1.44419	729.929	FALSE	13
2022-09-14	13:57:50	-0.3236	-1.43944	735.311	FALSE	13
2022-09-14	13:57:50	-0.250928	-1.11618	729.929	FALSE	13
2022-09-14	13:57:50	-0.241514	-1.0743	735.311	FALSE	13
2022-09-14	13:57:51	-0.199478	-0.887318	729.929	FALSE	13
2022-09-14	13:57:51	-0.284974	-1.26762	735.311	FALSE	13
2022-09-14	13:57:51	0.601438	2.67532	732.604	FALSE	13
2022-09-14	13:57:51	0.742048	3.30078	738.611	FALSE	13
2022-09-14	13:57:52	0.733601	3.2632	735.867	FALSE	13
2022-09-14	13:57:52	0.727137	3.23445	741.846	FALSE	13
2022-09-14	13:57:52	0.591158	2.62959	738.497	FALSE	13
2022-09-14	13:57:52	0.727443	3.23581	745.082	FALSE	13
2022-09-14	13:57:53	0.727341	3.23536	741.732	FALSE	13
2022-09-14	13:57:53	0.729529	3.24509	748.327	FALSE	13
2022-09-14	13:57:53	0.732634	3.2589	744.991	FALSE	13
2022-09-14	13:57:53	0.720979	3.20706	751.534	FALSE	13
2022-09-14	13:57:54	0.731412	3.25347	748.244	FALSE	13
2022-09-14	13:57:54	0.731819	3.25528	754.789	FALSE	13
2022-09-14	13:57:54	0.732328	3.25754	751.502	FALSE	13
2022-09-14	13:57:55	0.727137	3.23445	758.023	FALSE	13
2022-09-14	13:57:55	0.731768	3.25505	754.757	FALSE	13
2022-09-14	13:57:55	0.729987	3.24713	761.271	FALSE	13
2022-09-14	13:57:55	0.730903	3.2512	758.008	FALSE	13
2022-09-14	13:57:56	0.732583	3.25868	764.529	FALSE	13
2022-09-14	13:57:56	0.732481	3.25822	761.267	FALSE	13
2022-09-14	13:57:56	0.726578	3.23196	767.761	FALSE	13
2022-09-14	13:57:56	0.73757	3.28086	764.547	FALSE	13
2022-09-14	13:57:57	0.729682	3.24577	771.007	FALSE	13
2022-09-14	13:57:57	0.734568	3.26751	767.815	FALSE	13
2022-09-14	13:57:57	0.727799	3.2374	774.244	FALSE	13
2022-09-14	13:57:57	0.727137	3.23445	771.049	FALSE	13
2022-09-14	13:57:58	0.732125	3.25664	777.501	FALSE	13
2022-09-14	13:57:58	0.734313	3.26637	774.316	FALSE	13
2022-09-14	13:57:58	0.72612	3.22993	780.731	FALSE	13
2022-09-14	13:57:59	0.733804	3.26411	777.58	FALSE	13
2022-09-14	13:57:59	0.731565	3.25415	783.985	FALSE	13
2022-09-14	13:57:59	0.730598	3.24985	780.83	FALSE	13
2022-09-14	13:57:59	0.735178	3.27022	787.255	FALSE	13
2022-09-14	13:58:00	0.734415	3.26682	784.096	FALSE	13
2022-09-14	13:58:00	0.731768	3.25505	790.51	FALSE	13
2022-09-14	13:58:00	0.736094	3.27429	787.371	FALSE	13
2022-09-14	13:58:00	0.728817	3.24192	793.752	FALSE	13
2022-09-14	13:58:01	0.729478	3.24486	790.616	FALSE	13
2022-09-14	13:58:01	0.736247	3.27497	797.027	FALSE	13
2022-09-14	13:58:01	0.730038	3.24736	793.863	FALSE	13
2022-09-14	13:58:01	0.732786	3.25958	800.287	FALSE	13
2022-09-14	13:58:02	0.730445	3.24917	797.112	FALSE	13
2022-09-14	13:58:02	0.736145	3.27452	803.561	FALSE	13
2022-09-14	13:58:02	0.728257	3.23943	800.352	FALSE	13
2022-09-14	13:58:03	0.723117	3.21657	806.778	FALSE	13
2022-09-14	13:58:03	0.728054	3.23853	803.59	FALSE	13
2022-09-14	13:58:03	0.727392	3.23559	810.014	FALSE	13
2022-09-14	13:58:03	-0.251081	-1.11686	803.59	FALSE	13
2022-09-14	13:58:04	0.697163	3.10112	813.115	FALSE	13
2022-09-14	13:58:04	0.698333	3.10632	806.696	FALSE	13
2022-09-14	13:58:04	0.704288	3.13281	816.247	FALSE	13
2022-09-14	13:58:04	0.477621	2.12455	808.821	FALSE	13
2022-09-14	13:58:05	0.72673	3.23264	819.48	FALSE	13
2022-09-14	13:58:05	0.726781	3.23287	812.054	FALSE	13
2022-09-14	13:58:05	0.730547	3.24962	822.73	FALSE	13
2022-09-14	13:58:05	0.732684	3.25912	815.313	FALSE	13
2022-09-14	13:58:06	0.722914	3.21567	825.945	FALSE	13
2022-09-14	13:58:06	0.731158	3.25234	818.565	FALSE	13
2022-09-14	13:58:06	0.724746	3.22382	829.169	FALSE	13
2022-09-14	13:58:07	0.728868	3.24215	821.807	FALSE	13
2022-09-14	13:58:07	0.72897	3.2426	832.412	FALSE	13
2022-09-14	13:58:07	0.732074	3.25641	825.064	FALSE	13
2022-09-14	13:58:07	0.730954	3.25143	835.663	FALSE	13
2022-09-14	13:58:08	0.726476	3.23151	828.295	FALSE	13
2022-09-14	13:58:08	0.724389	3.22223	838.885	FALSE	13
2022-09-14	13:58:08	0.728257	3.23943	831.535	FALSE	13
2022-09-14	13:58:08	0.738028	3.2829	842.168	FALSE	13
2022-09-14	13:58:09	0.730649	3.25007	834.785	FALSE	13
2022-09-14	13:58:09	0.735026	3.26954	845.438	FALSE	13
2022-09-14	13:58:09	0.728919	3.24238	838.027	FALSE	13
2022-09-14	13:58:09	0.73243	3.258	848.696	FALSE	13
2022-09-14	13:58:10	0.732735	3.25935	841.287	FALSE	13
2022-09-14	13:58:10	0.736196	3.27475	851.971	FALSE	13
2022-09-14	13:58:10	0.732939	3.26026	844.547	FALSE	13
2022-09-14	13:58:11	0.729326	3.24419	855.215	FALSE	13
2022-09-14	13:58:11	0.728766	3.2417	847.789	FALSE	13
2022-09-14	13:58:11	0.730598	3.24985	858.465	FALSE	13
2022-09-14	13:58:11	0.727952	3.23808	851.027	FALSE	13
2022-09-14	13:58:12	0.736857	3.27769	861.742	FALSE	13
2022-09-14	13:58:12	0.7307	3.2503	854.277	FALSE	13
2022-09-14	13:58:12	0.727901	3.23785	864.98	FALSE	13
2022-09-14	13:58:12	0.734924	3.26909	857.546	FALSE	13
2022-09-14	13:58:13	0.740827	3.29535	868.276	FALSE	13
2022-09-14	13:58:13	0.73584	3.27316	860.819	FALSE	13
2022-09-14	13:58:13	0.727646	3.23671	871.512	FALSE	13
2022-09-14	13:58:13	0.72958	3.24532	864.065	FALSE	13
2022-09-14	13:58:14	0.725458	3.22698	874.739	FALSE	13
2022-09-14	13:58:14	0.73014	3.24781	867.312	FALSE	13
2022-09-14	13:58:14	0.730394	3.24894	877.988	FALSE	13
2022-09-14	13:58:15	0.73472	3.26818	870.581	FALSE	13
2022-09-14	13:58:15	0.727596	3.23649	881.225	FALSE	13
2022-09-14	13:58:15	0.740318	3.29308	873.874	FALSE	13
2022-09-14	13:58:15	0.731819	3.25528	884.48	FALSE	13
2022-09-14	13:58:16	0.733855	3.26433	877.138	FALSE	13
2022-09-14	13:58:16	0.737722	3.28154	887.762	FALSE	13
2022-09-14	13:58:16	0.731158	3.25234	880.39	FALSE	13
2022-09-14	13:58:16	0.726221	3.23038	890.992	FALSE	13
2022-09-14	13:58:17	0.729275	3.24396	883.634	FALSE	13
2022-09-14	13:58:17	0.724389	3.22223	894.214	FALSE	13
2022-09-14	13:58:17	0.731056	3.25188	886.886	FALSE	13
2022-09-14	13:58:17	0.729529	3.24509	897.459	FALSE	13
2022-09-14	13:58:18	0.728461	3.24034	890.126	FALSE	13
2022-09-14	13:58:18	0.722404	3.2134	900.673	FALSE	13
2022-09-14	13:58:18	0.730801	3.25075	893.377	FALSE	13
2022-09-14	13:58:19	0.727494	3.23604	903.909	FALSE	13
2022-09-14	13:58:19	0.726679	3.23241	896.61	FALSE	13
2022-09-14	13:58:19	0.730598	3.24985	907.159	FALSE	13
2022-09-14	13:58:19	0.728817	3.24192	899.852	FALSE	13
2022-09-14	13:58:20	0.723422	3.21793	910.376	FALSE	13
2022-09-14	13:58:20	0.727952	3.23808	903.09	FALSE	13
2022-09-14	13:58:20	0.735585	3.27203	913.648	FALSE	13
2022-09-14	13:58:20	0.730751	3.25053	906.34	FALSE	13
2022-09-14	13:58:21	0.722659	3.21453	916.863	FALSE	13
2022-09-14	13:58:21	0.73299	3.26049	909.601	FALSE	13
2022-09-14	13:58:21	0.731616	3.25437	920.117	FALSE	13
2022-09-14	13:58:21	0.731005	3.25166	912.852	FALSE	13
2022-09-14	13:58:22	0.726272	3.2306	923.348	FALSE	13
2022-09-14	13:58:22	0.732735	3.25935	916.112	FALSE	13
2022-09-14	13:58:22	0.732023	3.25618	926.604	FALSE	13
2022-09-14	13:58:23	0.731412	3.25347	919.365	FALSE	13
2022-09-14	13:58:23	0.731514	3.25392	929.858	FALSE	13
2022-09-14	13:58:23	0.729784	3.24623	922.611	FALSE	13
2022-09-14	13:58:23	0.731107	3.25211	933.11	FALSE	13
2022-09-14	13:58:24	0.735076	3.26977	925.881	FALSE	13
2022-09-14	13:58:24	0.72897	3.2426	936.353	FALSE	13
2022-09-14	13:58:24	0.731768	3.25505	929.136	FALSE	13
2022-09-14	13:58:24	0.729733	3.246	939.599	FALSE	13
2022-09-14	13:58:25	0.734313	3.26637	932.403	FALSE	13
2022-09-14	13:58:25	0.731768	3.25505	942.854	FALSE	13
2022-09-14	13:58:25	0.732328	3.25754	935.66	FALSE	13
2022-09-14	13:58:25	0.729529	3.24509	946.099	FALSE	13
2022-09-14	13:58:26	0.731056	3.25188	938.912	FALSE	13
2022-09-14	13:58:26	0.733193	3.26139	949.36	FALSE	13
2022-09-14	13:58:26	0.733041	3.26071	942.173	FALSE	13
2022-09-14	13:58:27	0.730242	3.24826	952.609	FALSE	13
2022-09-14	13:58:27	0.733193	3.26139	945.434	FALSE	13
2022-09-14	13:58:27	0.73014	3.24781	955.856	FALSE	13
2022-09-14	13:58:27	0.728308	3.23966	948.674	FALSE	13
2022-09-14	13:58:28	0.72673	3.23264	959.089	FALSE	13
2022-09-14	13:58:28	0.732583	3.25868	951.932	FALSE	13
2022-09-14	13:58:28	0.736145	3.27452	962.364	FALSE	13
2022-09-14	13:58:28	0.73416	3.26569	955.198	FALSE	13
2022-09-14	13:58:29	0.727748	3.23717	965.601	FALSE	13
2022-09-14	13:58:29	0.726221	3.23038	958.428	FALSE	13
2022-09-14	13:58:29	0.725458	3.22698	968.828	FALSE	13
2022-09-14	13:58:29	0.730751	3.25053	961.679	FALSE	13
2022-09-14	13:58:30	0.728868	3.24215	972.07	FALSE	13
2022-09-14	13:58:30	0.727494	3.23604	964.915	FALSE	13
2022-09-14	13:58:30	0.730191	3.24804	975.318	FALSE	13
2022-09-14	13:58:31	0.730242	3.24826	968.163	FALSE	13
2022-09-14	13:58:31	0.731717	3.25482	978.573	FALSE	13
2022-09-14	13:58:31	0.733957	3.26479	971.428	FALSE	13
2022-09-14	13:58:31	0.729784	3.24623	981.819	FALSE	13
2022-09-14	13:58:32	0.731616	3.25437	974.682	FALSE	13
2022-09-14	13:58:32	0.735382	3.27113	985.09	FALSE	13
2022-09-14	13:58:32	0.731209	3.25256	977.935	FALSE	13
2022-09-14	13:58:32	0.730801	3.25075	988.341	FALSE	13
2022-09-14	13:58:33	0.729987	3.24713	981.182	FALSE	13
2022-09-14	13:58:33	0.73243	3.258	991.599	FALSE	13
2022-09-14	13:58:33	0.728613	3.24102	984.423	FALSE	13
2022-09-14	13:58:34	0.731514	3.25392	994.853	FALSE	13
2022-09-14	13:58:34	0.731107	3.25211	987.675	FALSE	13
2022-09-14	13:58:34	0.731361	3.25324	998.106	FALSE	13
2022-09-14	13:58:34	0.728003	3.2383	990.914	FALSE	13
2022-09-14	13:58:35	0.729478	3.24486	1001.35	FALSE	13
2022-09-14	13:58:35	0.731717	3.25482	994.168	FALSE	13
2022-09-14	13:58:35	0.726832	3.23309	1004.58	FALSE	13
2022-09-14	13:58:35	0.729071	3.24305	997.411	FALSE	13
2022-09-14	13:58:36	0.734008	3.26501	1007.85	FALSE	13
2022-09-14	13:58:36	0.731209	3.25256	1000.66	FALSE	13
2022-09-14	13:58:36	0.731107	3.25211	1011.1	FALSE	13
2022-09-14	13:58:36	0.730445	3.24917	1003.91	FALSE	13
2022-09-14	13:58:37	0.732837	3.25981	1014.36	FALSE	13
2022-09-14	13:58:37	0.731158	3.25234	1007.17	FALSE	13
2022-09-14	13:58:37	0.731565	3.25415	1017.62	FALSE	13
2022-09-14	13:58:38	0.72902	3.24283	1010.41	FALSE	13
2022-09-14	13:58:38	0.734211	3.26592	1020.88	FALSE	13
2022-09-14	13:58:38	0.729478	3.24486	1013.65	FALSE	13
2022-09-14	13:58:38	0.728766	3.2417	1024.12	FALSE	13
2022-09-14	13:58:39	0.729733	3.246	1016.9	FALSE	13
2022-09-14	13:58:39	0.728257	3.23943	1027.36	FALSE	13
2022-09-14	13:58:39	0.731616	3.25437	1020.15	FALSE	13
2022-09-14	13:58:39	0.734008	3.26501	1030.63	FALSE	13
2022-09-14	13:58:40	0.728562	3.24079	1023.39	FALSE	13
2022-09-14	13:58:40	0.732481	3.25822	1033.89	FALSE	13
2022-09-14	13:58:40	0.724288	3.22178	1026.62	FALSE	13
2022-09-14	13:58:40	0.733244	3.26162	1037.15	FALSE	13
2022-09-14	13:58:41	0.731616	3.25437	1029.87	FALSE	13
2022-09-14	13:58:41	0.733041	3.26071	1040.41	FALSE	13
2022-09-14	13:58:41	0.731361	3.25324	1033.12	FALSE	13
2022-09-14	13:58:42	0.736552	3.27633	1043.68	FALSE	13
2022-09-14	13:58:42	0.72841	3.24011	1036.36	FALSE	13
2022-09-14	13:58:42	0.727392	3.23559	1046.92	FALSE	13
2022-09-14	13:58:42	0.740776	3.29512	1039.66	FALSE	13
2022-09-14	13:58:43	0.733397	3.2623	1050.18	FALSE	13
2022-09-14	13:58:43	0.490751	2.18296	1041.84	FALSE	13
2022-09-14	13:58:43	0.731361	3.25324	1053.44	FALSE	13
2022-09-14	13:58:43	0.738333	3.28425	1045.13	FALSE	13
2022-09-14	13:58:44	0.738537	3.28516	1056.72	FALSE	13
2022-09-14	13:58:44	0.729275	3.24396	1048.37	FALSE	13
2022-09-14	13:58:44	0.735026	3.26954	1059.99	FALSE	13
2022-09-14	13:58:44	0.727748	3.23717	1051.61	FALSE	13
2022-09-14	13:58:45	0.732175	3.25686	1063.25	FALSE	13
2022-09-14	13:58:45	0.727697	3.23694	1054.84	FALSE	13
2022-09-14	13:58:45	0.729071	3.24305	1066.49	FALSE	13
2022-09-14	13:58:46	0.733753	3.26388	1058.11	FALSE	13
2022-09-14	13:58:46	0.731056	3.25188	1069.74	FALSE	13
2022-09-14	13:58:46	0.72897	3.2426	1061.35	FALSE	13
2022-09-14	13:58:46	0.726629	3.23219	1072.97	FALSE	13
2022-09-14	13:58:47	0.726272	3.2306	1064.58	FALSE	13
2022-09-14	13:58:47	0.731361	3.25324	1076.23	FALSE	13
2022-09-14	13:58:47	0.725458	3.22698	1067.81	FALSE	13
2022-09-14	13:58:47	0.7307	3.2503	1079.48	FALSE	13
2022-09-14	13:58:48	0.730751	3.25053	1071.06	FALSE	13
2022-09-14	13:58:48	0.733092	3.26094	1082.74	FALSE	13
2022-09-14	13:58:48	0.730089	3.24758	1074.31	FALSE	13
2022-09-14	13:58:48	0.733906	3.26456	1086	FALSE	13
2022-09-14	13:58:49	0.729326	3.24419	1077.55	FALSE	13
2022-09-14	13:58:49	0.730191	3.24804	1089.25	FALSE	13
2022-09-14	13:58:49	0.737112	3.27882	1080.83	FALSE	13
2022-09-14	13:58:50	0.731616	3.25437	1092.51	FALSE	13
2022-09-14	13:58:50	0.73187	3.2555	1084.08	FALSE	13
2022-09-14	13:58:50	0.737214	3.27928	1095.78	FALSE	13
2022-09-14	13:58:50	0.728919	3.24238	1087.33	FALSE	13
2022-09-14	13:58:51	0.736857	3.27769	1099.06	FALSE	13
2022-09-14	13:58:51	0.731768	3.25505	1090.58	FALSE	13
2022-09-14	13:58:51	0.730293	3.24849	1102.31	FALSE	13
2022-09-14	13:58:51	0.72841	3.24011	1093.82	FALSE	13
2022-09-14	13:58:52	0.727494	3.23604	1105.55	FALSE	13
2022-09-14	13:58:52	0.73528	3.27067	1097.09	FALSE	13
2022-09-14	13:58:52	0.734669	3.26795	1108.81	FALSE	13
2022-09-14	13:58:52	0.732023	3.25618	1100.35	FALSE	13
2022-09-14	13:58:53	0.725712	3.22811	1112.04	FALSE	13
2022-09-14	13:58:53	0.729478	3.24486	1103.59	FALSE	13
2022-09-14	13:58:53	0.73243	3.258	1115.3	FALSE	13
2022-09-14	13:58:54	0.730038	3.24736	1106.84	FALSE	13
2022-09-14	13:58:54	0.737722	3.28154	1118.58	FALSE	13
2022-09-14	13:58:54	0.727036	3.234	1110.08	FALSE	13
2022-09-14	13:58:54	0.732583	3.25868	1121.84	FALSE	13
2022-09-14	13:58:55	0.730547	3.24962	1113.33	FALSE	13
2022-09-14	13:58:55	0.735331	3.2709	1125.11	FALSE	13
2022-09-14	13:58:55	0.728919	3.24238	1116.57	FALSE	13
2022-09-14	13:58:55	0.738181	3.28358	1128.4	FALSE	13
2022-09-14	13:58:56	0.723372	3.2177	1119.79	FALSE	13
2022-09-14	13:58:56	0.741896	3.3001	1131.7	FALSE	13
2022-09-14	13:58:56	0.732175	3.25686	1123.04	FALSE	13
2022-09-14	13:58:56	0.731717	3.25482	1134.95	FALSE	13
2022-09-14	13:58:57	0.731921	3.25573	1126.3	FALSE	13
2022-09-14	13:58:57	0.732023	3.25618	1138.21	FALSE	13
2022-09-14	13:58:57	0.729326	3.24419	1129.54	FALSE	13
2022-09-14	13:58:58	0.724491	3.22268	1141.43	FALSE	13
2022-09-14	13:58:58	0.727901	3.23785	1132.78	FALSE	13
2022-09-14	13:58:58	0.736399	3.27565	1144.7	FALSE	13
2022-09-14	13:58:58	0.731921	3.25573	1136.04	FALSE	13
2022-09-14	13:58:59	0.737315	3.27972	1147.98	FALSE	13
2022-09-14	13:58:59	0.73355	3.26298	1139.3	FALSE	13
2022-09-14	13:58:59	0.731819	3.25528	1151.24	FALSE	13
2022-09-14	13:58:59	0.73757	3.28086	1142.58	FALSE	13
2022-09-14	13:59:00	0.727901	3.23785	1154.48	FALSE	13
2022-09-14	13:59:00	0.728359	3.23989	1145.82	FALSE	13
2022-09-14	13:59:00	0.729224	3.24373	1157.72	FALSE	13
2022-09-14	13:59:00	0.729173	3.24351	1149.06	FALSE	13
2022-09-14	13:59:01	0.733804	3.26411	1160.99	FALSE	13
2022-09-14	13:59:01	0.733651	3.26343	1152.33	FALSE	13
2022-09-14	13:59:01	0.730954	3.25143	1164.24	FALSE	13
2022-09-14	13:59:02	0.731921	3.25573	1155.58	FALSE	13
2022-09-14	13:59:02	0.731361	3.25324	1167.49	FALSE	13
2022-09-14	13:59:02	0.730496	3.24939	1158.83	FALSE	13
2022-09-14	13:59:02	0.734975	3.26932	1170.76	FALSE	13
2022-09-14	13:59:03	0.729122	3.24328	1162.07	FALSE	13
2022-09-14	13:59:03	0.729122	3.24328	1174	FALSE	13
2022-09-14	13:59:03	0.731972	3.25596	1165.33	FALSE	13
2022-09-14	13:59:03	0.732684	3.25912	1177.26	FALSE	13
2022-09-14	13:59:04	0.731056	3.25188	1168.58	FALSE	13
2022-09-14	13:59:04	0.739504	3.28946	1180.55	FALSE	13
2022-09-14	13:59:04	0.735992	3.27384	1171.86	FALSE	13
2022-09-14	13:59:04	0.736247	3.27497	1183.83	FALSE	13
2022-09-14	13:59:05	0.730547	3.24962	1175.11	FALSE	13
2022-09-14	13:59:05	0.731565	3.25415	1187.08	FALSE	13
2022-09-14	13:59:05	0.726527	3.23174	1178.34	FALSE	13
2022-09-14	13:59:06	0.732481	3.25822	1190.34	FALSE	13
2022-09-14	13:59:06	0.733142	3.26116	1181.6	FALSE	13
2022-09-14	13:59:06	0.733753	3.26388	1193.6	FALSE	13
2022-09-14	13:59:06	0.728664	3.24124	1184.84	FALSE	13
2022-09-14	13:59:07	0.731158	3.25234	1196.86	FALSE	13
2022-09-14	13:59:07	0.734822	3.26864	1188.11	FALSE	13
2022-09-14	13:59:07	0.731056	3.25188	1200.11	FALSE	13
2022-09-14	13:59:07	0.736654	3.27678	1191.39	FALSE	13
2022-09-14	13:59:08	0.737163	3.27905	1203.39	FALSE	13
2022-09-14	13:59:08	0.737315	3.27972	1194.67	FALSE	13
2022-09-14	13:59:08	0.725509	3.22721	1206.61	FALSE	13
2022-09-14	13:59:08	0.727341	3.23536	1197.9	FALSE	13
2022-09-14	13:59:09	0.730343	3.24871	1209.86	FALSE	13
2022-09-14	13:59:09	0.733651	3.26343	1201.16	FALSE	13
2022-09-14	13:59:09	0.680267	3.02596	1212.89	FALSE	13
2022-09-14	13:59:10	0.731921	3.25573	1204.42	FALSE	13
2022-09-14	13:59:10	-1.84508	-8.20728	1212.89	FALSE	13
2022-09-14	13:59:10	-1.77795	-7.90868	1204.42	FALSE	13
2022-09-14	13:59:10	-1.73052	-7.6977	1212.89	FALSE	13
2022-09-14	13:59:11	-1.7605	-7.83106	1204.42	FALSE	13
2022-09-14	13:59:11	-1.79383	-7.97931	1212.89	FALSE	13
2022-09-14	13:59:11	-1.75744	-7.81744	1204.42	FALSE	13
2022-09-14	13:59:11	-1.71485	-7.628	1212.89	FALSE	13
2022-09-14	13:59:12	-1.68548	-7.49735	1204.42	FALSE	13
2022-09-14	13:59:12	-1.70894	-7.60171	1212.89	FALSE	13
2022-09-14	13:59:12	-1.70075	-7.56528	1204.42	FALSE	13
2022-09-14	13:59:12	-1.67357	-7.44437	1212.89	FALSE	13
2022-09-14	13:59:13	-1.64452	-7.31515	1204.42	FALSE	13
2022-09-14	13:59:13	-1.61454	-7.1818	1212.89	FALSE	13
2022-09-14	13:59:13	-1.58808	-7.0641	1204.42	FALSE	13
2022-09-14	13:59:14	-1.57235	-6.99413	1212.89	FALSE	13
2022-09-14	13:59:14	-1.54599	-6.87687	1204.42	FALSE	13
2022-09-14	13:59:14	-1.48752	-6.61679	1212.89	FALSE	13
2022-09-14	13:59:14	-1.45357	-6.46577	1204.42	FALSE	13
2022-09-14	13:59:15	-1.42095	-6.32067	1212.89	FALSE	13
2022-09-14	13:59:15	-1.54172	-6.85788	1204.42	FALSE	13
2022-09-14	13:59:15	-1.64502	-7.31738	1212.89	FALSE	13
2022-09-14	13:59:15	-1.61612	-7.18882	1204.42	FALSE	13
2022-09-14	13:59:16	-1.60304	-7.13064	1212.89	FALSE	13
2022-09-14	13:59:16	-1.5548	-6.91606	1204.42	FALSE	13
2022-09-14	13:59:16	-1.51281	-6.72928	1212.89	FALSE	13
2022-09-14	13:59:16	-1.3949	-6.20479	1204.42	FALSE	13
2022-09-14	13:59:17	-1.34726	-5.99288	1212.89	FALSE	13
2022-09-14	13:59:17	-1.32884	-5.91095	1204.42	FALSE	13
2022-09-14	13:59:17	-1.32131	-5.87745	1212.89	FALSE	13
2022-09-14	13:59:18	-1.31006	-5.82741	1204.42	FALSE	13
2022-09-14	13:59:18	-1.31098	-5.8315	1212.89	FALSE	13
2022-09-14	13:59:18	-1.2976	-5.77198	1204.42	FALSE	13
2022-09-14	13:59:18	-1.29368	-5.75455	1212.89	FALSE	13
2022-09-14	13:59:19	-1.30034	-5.78417	1204.42	FALSE	13
2022-09-14	13:59:19	-1.29912	-5.77875	1212.89	FALSE	13
2022-09-14	13:59:19	-1.31749	-5.86046	1204.42	FALSE	13
2022-09-14	13:59:19	-1.27388	-5.66647	1212.89	FALSE	13
2022-09-14	13:59:20	-1.56106	-6.94391	1204.42	FALSE	13
2022-09-14	13:59:20	-2.03648	-9.05867	1212.89	FALSE	13
2022-09-14	13:59:20	-2.17647	-9.68137	1204.42	FALSE	13
2022-09-14	13:59:20	-2.25434	-10.0278	1212.89	FALSE	13
2022-09-14	13:59:21	-2.18136	-9.70313	1204.42	FALSE	13
2022-09-14	13:59:21	-2.15648	-9.59245	1212.89	FALSE	13
2022-09-14	13:59:21	-2.13648	-9.50349	1204.42	FALSE	13
2022-09-14	13:59:22	-2.09352	-9.3124	1212.89	FALSE	13
2022-09-14	13:59:22	-1.64492	-7.31693	1204.42	FALSE	13
2022-09-14	13:59:22	-1.60095	-7.12135	1212.89	FALSE	13
2022-09-14	13:59:22	-1.59917	-7.11343	1204.42	FALSE	13
2022-09-14	13:59:23	-1.59022	-7.07362	1212.89	FALSE	13
2022-09-14	13:59:23	-1.53205	-6.81486	1204.42	FALSE	13
2022-09-14	13:59:23	-1.51714	-6.74854	1212.89	FALSE	13
2022-09-14	13:59:23	-1.5809	-7.03216	1204.42	FALSE	13
2022-09-14	13:59:24	-1.51032	-6.71821	1212.89	FALSE	13
2022-09-14	13:59:24	0.72673	3.23264	1207.65	FALSE	13
2022-09-14	13:59:24	0.732939	3.26026	1216.15	FALSE	13
2022-09-14	13:59:24	0.73416	3.26569	1210.92	FALSE	13
2022-09-14	13:59:25	0.408359	1.81646	1217.96	FALSE	13
2022-09-14	13:59:25	0.348104	1.54844	1212.47	FALSE	13
2022-09-14	13:59:25	0.338842	1.50724	1219.47	FALSE	13
2022-09-14	13:59:26	0.314669	1.39971	1213.87	FALSE	13
2022-09-14	13:59:26	0.357672	1.591	1221.06	FALSE	13
2022-09-14	13:59:26	0.353346	1.57175	1215.44	FALSE	13
2022-09-14	13:59:26	0.417265	1.85608	1222.92	FALSE	13
2022-09-14	13:59:27	0.252277	1.12218	1216.56	FALSE	13
2022-09-14	13:59:27	0.23411	1.04137	1223.96	FALSE	13
2022-09-14	13:59:27	0.411412	1.83004	1218.39	FALSE	13
2022-09-14	13:59:27	0.353702	1.57334	1225.53	FALSE	13
2022-09-14	13:59:28	0.449122	1.99778	1220.39	FALSE	13
2022-09-14	13:59:28	0.374211	1.66457	1227.2	FALSE	13
2022-09-14	13:59:28	0.410089	1.82416	1222.21	FALSE	13
2022-09-14	13:59:28	0.998028	4.43943	1231.64	FALSE	13
2022-09-14	13:59:29	3.26729	14.5336	1236.75	1	14
2022-09-14	13:59:29	2.70815	12.0464	1243.68	FALSE	14
2022-09-14	13:59:29	1.88296	8.37578	1245.12	FALSE	14
2022-09-14	13:59:30	1.39319	6.19719	1249.88	FALSE	14
2022-09-14	13:59:30	0.651819	2.89942	1248.02	FALSE	14
2022-09-14	13:59:30	1.72154	7.65775	1257.54	FALSE	14
2022-09-14	13:59:30	0.753193	3.35035	1251.37	FALSE	14
2022-09-14	13:59:31	1.32912	5.91219	1263.45	FALSE	14
2022-09-14	13:59:31	0.835484	3.7164	1255.09	FALSE	14
2022-09-14	13:59:31	0.925255	4.11572	1267.57	FALSE	14
2022-09-14	13:59:31	1.10317	4.90712	1259.99	FALSE	14
2022-09-14	13:59:32	0.80673	3.5885	1271.16	FALSE	14
2022-09-14	13:59:32	1.18429	5.26796	1265.26	FALSE	14
2022-09-14	13:59:32	0.379249	1.68698	1272.84	FALSE	14
2022-09-14	13:59:32	1.38373	6.15511	1271.42	FALSE	14
2022-09-14	13:59:33	0.825763	3.67316	1276.52	FALSE	14
2022-09-14	13:59:33	1.62973	7.24936	1278.67	FALSE	14
2022-09-14	13:59:33	1.54022	6.85121	1283.37	FALSE	14
2022-09-14	13:59:34	0.971514	4.32149	1282.99	FALSE	14
2022-09-14	13:59:34	1.05416	4.68911	1288.06	FALSE	14
2022-09-14	13:59:34	1.34027	5.96179	1288.95	FALSE	14
2022-09-14	13:59:34	2.69726	11.998	1300.05	FALSE	14
2022-09-14	13:59:35	2.48083	11.0352	1299.99	FALSE	14
2022-09-14	13:59:35	2.67451	11.8968	1311.95	FALSE	14
2022-09-14	13:59:35	1.93889	8.62457	1308.61	FALSE	14
2022-09-14	13:59:36	1.82271	8.10778	1320.06	FALSE	14
2022-09-14	13:59:36	1.81589	8.07744	1316.69	FALSE	14
2022-09-14	13:59:36	1.45533	6.4736	1326.53	FALSE	14
2022-09-14	13:59:36	2.26179	10.0609	1326.75	FALSE	14
2022-09-14	13:59:36	2.17798	9.68809	1336.22	FALSE	14
2022-09-14	13:59:37	2.80474	12.476	1339.22	FALSE	14
2022-09-14	13:59:37	2.28556	10.1666	1346.39	FALSE	14
2022-09-14	13:59:37	2.68515	11.9441	1351.17	FALSE	14
2022-09-14	13:59:38	2.05141	9.12508	1355.51	FALSE	14
2022-09-14	13:59:38	1.61879	7.2007	1358.37	FALSE	14
2022-09-14	13:59:38	1.862	8.28255	1363.79	FALSE	14
2022-09-14	13:59:38	1.07716	4.79142	1363.16	FALSE	14
2022-09-14	13:59:39	0.944033	4.19925	1367.99	FALSE	14
2022-09-14	13:59:39	0.621031	2.76247	1365.92	FALSE	14
2022-09-14	13:59:39	0.726527	3.23174	1371.23	FALSE	14
2022-09-14	13:59:39	0.294313	1.30916	1367.23	FALSE	14
2022-09-14	13:59:40	0.506018	2.25087	1373.48	FALSE	14
2022-09-14	13:59:40	0.914924	4.06976	1371.3	FALSE	14
2022-09-14	13:59:40	1.84948	8.22686	1381.7	FALSE	14
2022-09-14	13:59:40	1.02678	4.56732	1375.87	FALSE	14
2022-09-14	13:59:41	0.964746	4.29138	1385.99	FALSE	14
2022-09-14	13:59:41	0.501336	2.23004	1378.1	FALSE	14
2022-09-14	13:59:41	0.721437	3.2091	1389.2	FALSE	14
2022-09-14	13:59:42	0.581387	2.58613	1380.69	FALSE	14
2022-09-14	13:59:42	0.614568	2.73372	1391.94	FALSE	14
2022-09-14	13:59:42	-6.0579	-26.9468	1380.69	FALSE	14
2022-09-14	13:59:42	-5.84782	-26.0123	1391.94	FALSE	14
2022-09-14	13:59:43	-5.5864	-24.8494	1380.69	FALSE	14
2022-09-14	13:59:43	-5.51892	-24.5493	1391.94	FALSE	14
2022-09-14	13:59:43	-5.278	-23.4776	1380.69	FALSE	14
2022-09-14	13:59:43	-5.05327	-22.478	1391.94	FALSE	14
2022-09-14	13:59:44	-4.95647	-22.0474	1380.69	FALSE	14
2022-09-14	13:59:44	-4.75281	-21.1414	1391.94	FALSE	14
2022-09-14	13:59:44	-4.59805	-20.453	1380.69	FALSE	14
2022-09-14	13:59:44	-4.20273	-18.6946	1391.94	FALSE	14
2022-09-14	13:59:45	-4.05037	-18.0169	1380.69	FALSE	14
2022-09-14	13:59:45	-3.45953	-15.3887	1391.94	FALSE	14
2022-09-14	13:59:45	-3.37332	-15.0052	1380.69	FALSE	14
2022-09-14	13:59:46	-0.915915	-4.07417	1391.94	FALSE	14
2022-09-14	13:59:46	-1.31312	-5.84102	1380.69	FALSE	14
2022-09-14	13:59:46	-1.10111	-4.89796	1391.94	FALSE	14
2022-09-14	13:59:46	-1.35301	-6.01846	1380.69	FALSE	14
2022-09-14	13:59:47	-1.06126	-4.7207	1391.94	FALSE	14
2022-09-14	13:59:47	-1.7065	-7.59085	1380.69	FALSE	14
2022-09-14	13:59:47	-1.43363	-6.37707	1391.94	FALSE	14
2022-09-14	13:59:47	-1.50034	-6.67381	1380.69	FALSE	14
2022-09-14	13:59:48	-1.618	-7.19719	1391.94	FALSE	14
2022-09-14	13:59:48	-1.67642	-7.45705	1380.69	FALSE	14
2022-09-14	13:59:48	-1.55088	-6.89862	1391.94	FALSE	14
2022-09-14	13:59:49	-1.55785	-6.92963	1380.69	FALSE	14
2022-09-14	13:59:49	-1.52574	-6.7868	1391.94	FALSE	14
2022-09-14	13:59:49	-1.49352	-6.64348	1380.69	FALSE	14
2022-09-14	13:59:49	-1.35469	-6.02593	1391.94	FALSE	14
2022-09-14	13:59:50	-1.36233	-6.05992	1380.69	FALSE	14
2022-09-14	13:59:50	-1.31994	-5.87136	1391.94	FALSE	14
2022-09-14	13:59:50	-0.598053	-2.66026	1380.69	FALSE	14
2022-09-14	13:59:50	0.671209	2.98567	1394.92	FALSE	14
2022-09-14	13:59:51	0.733397	3.2623	1383.95	FALSE	14
2022-09-14	13:59:51	0.729936	3.2469	1398.17	FALSE	14
2022-09-14	13:59:51	0.73584	3.27316	1387.22	FALSE	14
2022-09-14	13:59:51	0.72958	3.24532	1401.41	FALSE	14
2022-09-14	13:59:52	0.732379	3.25777	1390.48	FALSE	14
2022-09-14	13:59:52	0.732684	3.25912	1404.67	FALSE	14
2022-09-14	13:59:52	0.737315	3.27972	1393.76	FALSE	14
2022-09-14	13:59:53	0.733448	3.26252	1407.94	FALSE	14
2022-09-14	13:59:53	0.728003	3.2383	1397	FALSE	14
2022-09-14	13:59:53	0.734109	3.26546	1411.2	FALSE	14
2022-09-14	13:59:53	0.729428	3.24464	1400.24	FALSE	14
2022-09-14	13:59:54	0.729224	3.24373	1414.45	FALSE	14
2022-09-14	13:59:54	0.730089	3.24758	1403.49	FALSE	14
2022-09-14	13:59:54	0.729784	3.24623	1417.69	FALSE	14
2022-09-14	13:59:54	0.735534	3.2718	1406.76	FALSE	14
2022-09-14	13:59:55	0.729936	3.2469	1420.94	FALSE	14
2022-09-14	13:59:55	0.732074	3.25641	1410.02	FALSE	14
2022-09-14	13:59:55	0.728919	3.24238	1424.18	FALSE	14
2022-09-14	13:59:55	0.733244	3.26162	1413.28	FALSE	14
2022-09-14	13:59:56	0.733244	3.26162	1427.44	FALSE	14
2022-09-14	13:59:56	0.731717	3.25482	1416.53	FALSE	14
2022-09-14	13:59:56	0.73243	3.258	1430.7	FALSE	14
2022-09-14	13:59:57	0.730089	3.24758	1419.78	FALSE	14
2022-09-14	13:59:57	0.727137	3.23445	1433.94	FALSE	14
2022-09-14	13:59:57	0.727748	3.23717	1423.02	FALSE	14
2022-09-14	13:59:57	0.727494	3.23604	1437.17	FALSE	14
2022-09-14	13:59:58	0.73701	3.27837	1426.3	FALSE	14
2022-09-14	13:59:58	0.733957	3.26479	1440.44	FALSE	14
2022-09-14	13:59:58	0.732379	3.25777	1429.55	FALSE	14
2022-09-14	13:59:58	0.731565	3.25415	1443.69	FALSE	14
2022-09-14	13:59:59	0.731412	3.25347	1432.81	FALSE	14
2022-09-14	13:59:59	0.736603	3.27656	1446.97	FALSE	14
2022-09-14	13:59:59	0.731972	3.25596	1436.06	FALSE	14
2022-09-14	13:59:59	0.727087	3.23423	1450.2	FALSE	14
2022-09-14	14:00:00	0.732786	3.25958	1439.32	FALSE	14
2022-09-14	14:00:00	0.739402	3.28901	1453.49	FALSE	14
2022-09-14	14:00:00	0.737061	3.27859	1442.6	FALSE	14
2022-09-14	14:00:01	0.730293	3.24849	1456.74	FALSE	14
2022-09-14	14:00:01	0.73355	3.26298	1445.87	FALSE	14
2022-09-14	14:00:01	0.729835	3.24645	1459.99	FALSE	14
2022-09-14	14:00:01	0.731717	3.25482	1449.12	FALSE	14
2022-09-14	14:00:02	0.732175	3.25686	1463.24	FALSE	14
2022-09-14	14:00:02	0.7307	3.2503	1452.37	FALSE	14
2022-09-14	14:00:02	0.729682	3.24577	1466.49	FALSE	14
2022-09-14	14:00:02	0.725712	3.22811	1455.6	FALSE	14
2022-09-14	14:00:03	0.729377	3.24441	1469.73	FALSE	14
2022-09-14	14:00:03	0.729377	3.24441	1458.84	FALSE	14
2022-09-14	14:00:03	0.73187	3.2555	1472.99	FALSE	14
2022-09-14	14:00:03	0.734313	3.26637	1462.11	FALSE	14
2022-09-14	14:00:04	0.731819	3.25528	1476.24	FALSE	14
2022-09-14	14:00:04	0.730598	3.24985	1465.36	FALSE	14
2022-09-14	14:00:04	0.729122	3.24328	1479.49	FALSE	14
2022-09-14	14:00:05	0.730343	3.24871	1468.61	FALSE	14
2022-09-14	14:00:05	0.733244	3.26162	1482.75	FALSE	14
2022-09-14	14:00:05	0.725509	3.22721	1471.84	FALSE	14
2022-09-14	14:00:05	0.729275	3.24396	1485.99	FALSE	14
2022-09-14	14:00:06	0.730343	3.24871	1475.08	FALSE	14
2022-09-14	14:00:06	0.737061	3.27859	1489.27	FALSE	14
2022-09-14	14:00:06	0.732175	3.25686	1478.34	FALSE	14
2022-09-14	14:00:06	0.7393	3.28855	1492.56	FALSE	14
2022-09-14	14:00:07	0.727596	3.23649	1481.58	FALSE	14
2022-09-14	14:00:07	0.734008	3.26501	1495.82	FALSE	14
2022-09-14	14:00:07	0.733092	3.26094	1484.84	FALSE	14
2022-09-14	14:00:07	0.726221	3.23038	1499.05	FALSE	14
2022-09-14	14:00:08	0.735687	3.27248	1488.11	FALSE	14
2022-09-14	14:00:08	0.730343	3.24871	1502.3	FALSE	14
2022-09-14	14:00:08	0.562506	2.50214	1490.61	FALSE	14
2022-09-14	14:00:09	0.507035	2.25539	1504.56	FALSE	14
2022-09-14	14:00:09	0.730242	3.24826	1493.86	FALSE	14
2022-09-14	14:00:09	0.737875	3.28222	1507.84	FALSE	14
2022-09-14	14:00:09	0.741489	3.29829	1497.16	FALSE	14
2022-09-14	14:00:10	0.732684	3.25912	1511.1	FALSE	14
2022-09-14	14:00:10	0.736857	3.27769	1500.44	FALSE	14
2022-09-14	14:00:10	0.737163	3.27905	1514.38	FALSE	14
2022-09-14	14:00:10	0.731158	3.25234	1503.69	FALSE	14
2022-09-14	14:00:11	0.725051	3.22517	1517.6	FALSE	14
2022-09-14	14:00:11	0.735382	3.27113	1506.96	FALSE	14
2022-09-14	14:00:11	0.730903	3.2512	1520.86	FALSE	14
2022-09-14	14:00:11	0.728613	3.24102	1510.2	FALSE	14
2022-09-14	14:00:12	0.731667	3.2546	1524.11	FALSE	14
2022-09-14	14:00:12	0.730293	3.24849	1513.45	FALSE	14
2022-09-14	14:00:12	0.733957	3.26479	1527.37	FALSE	14
2022-09-14	14:00:13	0.731463	3.25369	1516.7	FALSE	14
2022-09-14	14:00:13	0.735178	3.27022	1530.64	FALSE	14
2022-09-14	14:00:13	0.726832	3.23309	1519.94	FALSE	14
2022-09-14	14:00:13	0.730547	3.24962	1533.89	FALSE	14
2022-09-14	14:00:14	0.728766	3.2417	1523.18	FALSE	14
2022-09-14	14:00:14	0.738842	3.28652	1537.18	FALSE	14
2022-09-14	14:00:14	0.727697	3.23694	1526.42	FALSE	14
2022-09-14	14:00:14	0.735433	3.27135	1540.45	FALSE	14
2022-09-14	14:00:15	0.729682	3.24577	1529.66	FALSE	14
2022-09-14	14:00:15	0.730598	3.24985	1543.7	FALSE	14
2022-09-14	14:00:15	0.729224	3.24373	1532.9	FALSE	14
2022-09-14	14:00:15	0.734415	3.26682	1546.97	FALSE	14
2022-09-14	14:00:16	0.728817	3.24192	1536.15	FALSE	14
2022-09-14	14:00:16	0.728664	3.24124	1550.21	FALSE	14
2022-09-14	14:00:16	0.735076	3.26977	1539.42	FALSE	14
2022-09-14	14:00:17	0.198232	0.881776	1551.09	FALSE	14
2022-09-14	14:00:17	0.074873	0.33305	1539.75	FALSE	14
2022-09-14	14:00:17	-0.019987	-0.0889062	1551.09	FALSE	14
2022-09-14	14:00:17	-0.679071	-3.02064	1539.75	FALSE	14
2022-09-14	14:00:18	-0.64706	-2.87825	1551.09	FALSE	14
2022-09-14	14:00:18	0.693651	3.0855	1542.84	FALSE	14
2022-09-14	14:00:18	-1.57938	-7.0254	1551.09	FALSE	14
2022-09-14	14:00:18	0.729173	3.24351	1546.08	FALSE	14
2022-09-14	14:00:19	0.725051	3.22517	1554.32	FALSE	14
2022-09-14	14:00:19	0.732939	3.26026	1549.34	FALSE	14
2022-09-14	14:00:19	0.732379	3.25777	1557.57	FALSE	14
2022-09-14	14:00:19	0.733244	3.26162	1552.6	FALSE	14
2022-09-14	14:00:20	0.726018	3.22947	1560.8	FALSE	14
2022-09-14	14:00:20	0.733346	3.26207	1555.86	FALSE	14
2022-09-14	14:00:20	0.732074	3.25641	1564.06	FALSE	14
2022-09-14	14:00:21	0.734517	3.26728	1559.13	FALSE	14
2022-09-14	14:00:21	0.729224	3.24373	1567.3	FALSE	14
2022-09-14	14:00:21	0.734466	3.26705	1562.4	FALSE	14
2022-09-14	14:00:21	0.734568	3.26751	1570.57	FALSE	14
2022-09-14	14:00:22	0.736857	3.27769	1565.67	FALSE	14
2022-09-14	14:00:22	0.732837	3.25981	1573.83	FALSE	14
2022-09-14	14:00:22	0.729478	3.24486	1568.92	FALSE	14
2022-09-14	14:00:22	0.729428	3.24464	1577.08	FALSE	14
2022-09-14	14:00:23	0.733193	3.26139	1572.18	FALSE	14
2022-09-14	14:00:23	0.738486	3.28493	1580.36	FALSE	14
2022-09-14	14:00:23	0.732634	3.2589	1575.44	FALSE	14
2022-09-14	14:00:23	0.726221	3.23038	1583.59	FALSE	14
2022-09-14	14:00:24	0.733244	3.26162	1578.7	FALSE	14
2022-09-14	14:00:24	0.728766	3.2417	1586.83	FALSE	14
2022-09-14	14:00:24	0.727545	3.23627	1581.94	FALSE	14
2022-09-14	14:00:25	0.732481	3.25822	1590.09	FALSE	14
2022-09-14	14:00:25	0.733041	3.26071	1585.2	FALSE	14
2022-09-14	14:00:25	0.732786	3.25958	1593.35	FALSE	14
2022-09-14	14:00:25	0.730598	3.24985	1588.45	FALSE	14
2022-09-14	14:00:26	0.729733	3.246	1596.6	FALSE	14
2022-09-14	14:00:26	0.728715	3.24147	1591.69	FALSE	14
2022-09-14	14:00:26	0.729529	3.24509	1599.84	FALSE	14
2022-09-14	14:00:26	0.731565	3.25415	1594.94	FALSE	14
2022-09-14	14:00:27	0.72902	3.24283	1603.09	FALSE	14
2022-09-14	14:00:27	0.728562	3.24079	1598.18	FALSE	14
2022-09-14	14:00:27	0.731158	3.25234	1606.34	FALSE	14
2022-09-14	14:00:27	0.732277	3.25731	1601.44	FALSE	14
2022-09-14	14:00:28	0.727494	3.23604	1609.57	FALSE	14
2022-09-14	14:00:28	0.732583	3.25868	1604.7	FALSE	14
2022-09-14	14:00:28	0.727901	3.23785	1612.81	FALSE	14
2022-09-14	14:00:29	0.730954	3.25143	1607.95	FALSE	14
2022-09-14	14:00:29	0.734211	3.26592	1616.08	FALSE	14
2022-09-14	14:00:29	0.732023	3.25618	1611.21	FALSE	14
2022-09-14	14:00:29	0.730547	3.24962	1619.33	FALSE	14
2022-09-14	14:00:30	0.725712	3.22811	1614.44	FALSE	14
2022-09-14	14:00:30	0.731616	3.25437	1622.58	FALSE	14
2022-09-14	14:00:30	0.730191	3.24804	1617.68	FALSE	14
2022-09-14	14:00:30	0.727901	3.23785	1625.82	FALSE	14
2022-09-14	14:00:31	0.731107	3.25211	1620.94	FALSE	14
2022-09-14	14:00:31	0.727087	3.23423	1629.05	FALSE	14
2022-09-14	14:00:31	0.729275	3.24396	1624.18	FALSE	14
2022-09-14	14:00:31	0.731056	3.25188	1632.31	FALSE	14
2022-09-14	14:00:32	0.729733	3.246	1627.43	FALSE	14
2022-09-14	14:00:32	0.724796	3.22404	1635.53	FALSE	14
2022-09-14	14:00:32	0.726679	3.23241	1630.66	FALSE	14
2022-09-14	14:00:33	0.729784	3.24623	1638.78	FALSE	14
2022-09-14	14:00:33	0.731259	3.25279	1633.91	FALSE	14
2022-09-14	14:00:33	0.730649	3.25007	1642.03	FALSE	14
2022-09-14	14:00:33	0.728766	3.2417	1637.15	FALSE	14
2022-09-14	14:00:34	0.733499	3.26275	1645.29	FALSE	14
2022-09-14	14:00:34	0.724338	3.222	1640.38	FALSE	14
2022-09-14	14:00:34	0.729784	3.24623	1648.53	FALSE	14
2022-09-14	14:00:34	0.731463	3.25369	1643.63	FALSE	14
2022-09-14	14:00:35	0.728104	3.23875	1651.77	FALSE	14
2022-09-14	14:00:35	0.728257	3.23943	1646.87	FALSE	14
2022-09-14	14:00:35	0.732125	3.25664	1655.03	FALSE	14
2022-09-14	14:00:35	0.724542	3.22291	1650.09	FALSE	14
2022-09-14	14:00:36	0.730751	3.25053	1658.28	FALSE	14
2022-09-14	14:00:36	0.731107	3.25211	1653.34	FALSE	14
2022-09-14	14:00:36	0.729784	3.24623	1661.53	FALSE	14
2022-09-14	14:00:37	0.735331	3.2709	1656.61	FALSE	14
2022-09-14	14:00:37	0.732634	3.2589	1664.79	FALSE	14
2022-09-14	14:00:37	0.727392	3.23559	1659.85	FALSE	14
2022-09-14	14:00:37	0.732125	3.25664	1668.04	FALSE	14
2022-09-14	14:00:38	0.731921	3.25573	1663.11	FALSE	14
2022-09-14	14:00:38	0.730598	3.24985	1671.29	FALSE	14
2022-09-14	14:00:38	0.723779	3.21951	1666.33	FALSE	14
2022-09-14	14:00:38	0.729173	3.24351	1674.54	FALSE	14
2022-09-14	14:00:39	0.73187	3.2555	1669.58	FALSE	14
2022-09-14	14:00:39	0.728817	3.24192	1677.78	FALSE	14
2022-09-14	14:00:39	0.423168	1.88234	1671.46	FALSE	14
2022-09-14	14:00:39	0.730547	3.24962	1681.03	FALSE	14

## Sheet: KimChi_prong_2022914135524 (2)
Date	Time	Lbs	Total force x time			**GoPro Fitting: 13:45
2022-09-14	13:55:24	0.164237	0.164237	FALSE	0
2022-09-14	13:55:24	0.159097	0.323334	FALSE	0
2022-09-14	13:55:24	0.14729	0.470624	FALSE	0
2022-09-14	13:55:25	0.165662	0.636286	FALSE	0
2022-09-14	13:55:25	0.235382	0.871668	FALSE	0
2022-09-14	13:55:25	0.233753	1.10542	FALSE	0
2022-09-14	13:55:25	0.259148	1.36457	FALSE	0
2022-09-14	13:55:26	0.292685	1.65725	FALSE	0
2022-09-14	13:55:26	0.320369	1.97762	FALSE	0
2022-09-14	13:55:26	0.304186	2.28181	FALSE	0
2022-09-14	13:55:26	0.212685	2.49449	FALSE	0
2022-09-14	13:55:27	0.247748	2.74224	FALSE	0
2022-09-14	13:55:27	0.428664	3.17091	FALSE	0
2022-09-14	13:55:27	0.632837	3.80374	FALSE	0
2022-09-14	13:55:28	0.310954	4.1147	FALSE	0
2022-09-14	13:55:28	1.00246	5.11716	FALSE	0
2022-09-14	13:55:28	0.599097	5.71625	FALSE	0
2022-09-14	13:55:28	0.507697	6.22395	FALSE	0
2022-09-14	13:55:29	0.303575	6.52753	FALSE	0
2022-09-14	13:55:29	0.363168	6.89069	FALSE	0
2022-09-14	13:55:29	0.479249	7.36994	FALSE	0
2022-09-14	13:55:29	0.829428	8.19937	FALSE	0
2022-09-14	13:55:30	0.787952	8.98732	FALSE	0
2022-09-14	13:55:30	1.47075	10.4581	FALSE	0
2022-09-14	13:55:30	2.62668	13.0848	FALSE	0
2022-09-14	13:55:31	0.64383	13.7286	FALSE	0
2022-09-14	13:55:31	0.290344	14.0189	FALSE	0
2022-09-14	13:55:31	0.414466	14.4334	FALSE	0
2022-09-14	13:55:31	0.30383	14.7372	FALSE	0
2022-09-14	13:55:32	0.214364	14.9516	FALSE	0
2022-09-14	13:55:32	0.373244	15.3248	FALSE	0
2022-09-14	13:55:32	0.524084	15.8489	FALSE	0
2022-09-14	13:55:32	0.411921	16.2608	FALSE	0
2022-09-14	13:55:33	0.396501	16.6573	FALSE	0
2022-09-14	13:55:33	0.385051	17.0424	FALSE	0
2022-09-14	13:55:33	0.391056	17.4334	FALSE	0
2022-09-14	13:55:33	0.383728	17.8172	FALSE	0
2022-09-14	13:55:34	0.370344	18.1875	FALSE	0
2022-09-14	13:55:34	0.341794	18.5293	FALSE	0
2022-09-14	13:55:34	0.315331	18.8446	FALSE	0
2022-09-14	13:55:35	0.28897	19.1336	FALSE	0
2022-09-14	13:55:35	0.295229	19.4288	FALSE	0
2022-09-14	13:55:35	0.338181	19.767	FALSE	0
2022-09-14	13:55:35	0.310802	20.0778	FALSE	0
2022-09-14	13:55:36	0.285713	20.3635	FALSE	0
2022-09-14	13:55:36	0.298486	20.662	FALSE	0
2022-09-14	13:55:36	0.31355	20.9756	FALSE	0
2022-09-14	13:55:36	0.326781	21.3024	FALSE	0
2022-09-14	13:55:37	0.317519	21.6199	FALSE	0
2022-09-14	13:55:37	0.320471	21.9403	FALSE	0
2022-09-14	13:55:37	0.338791	22.2791	FALSE	0
2022-09-14	13:55:37	0.303321	22.5825	FALSE	0
2022-09-14	13:55:38	0.315891	22.8983	FALSE	0
2022-09-14	13:55:38	0.348868	23.2472	FALSE	0
2022-09-14	13:55:38	0.347952	23.5952	FALSE	0
2022-09-14	13:55:39	0.138995	23.7342	FALSE	0
2022-09-14	13:55:39	0.120573	23.8547	FALSE	0
2022-09-14	13:55:39	0.130853	23.9856	FALSE	0
2022-09-14	13:55:39	0.394313	24.3799	FALSE	0
2022-09-14	13:55:40	0.492277	24.8722	FALSE	0
2022-09-14	13:55:40	0.326374	25.1986	FALSE	0
2022-09-14	13:55:40	0.510089	25.7086	FALSE	0
2022-09-14	13:55:40	0.459148	26.1678	FALSE	0
2022-09-14	13:55:41	0.548461	26.7162	FALSE	0
2022-09-14	13:55:41	0.531819	27.2481	FALSE	0
2022-09-14	13:55:41	0.463473	27.7115	FALSE	0
2022-09-14	13:55:41	0.482456	28.194	FALSE	0
2022-09-14	13:55:42	0.117214	28.3112	FALSE	0
2022-09-14	13:55:42	0.365713	28.6769	FALSE	0
2022-09-14	13:55:42	0.745102	29.422	FALSE	0
2022-09-14	13:55:43	0.599402	30.0214	FALSE	0
2022-09-14	13:55:43	0.601438	30.6229	FALSE	0
2022-09-14	13:55:43	1.92551	32.5484	FALSE	0
2022-09-14	13:55:43	1.63874	34.1871	FALSE	0
2022-09-14	13:55:44	0.425204	34.6123	FALSE	0
2022-09-14	13:55:44	0.160013	34.7723	FALSE	0
2022-09-14	13:55:44	0.225407	34.9977	FALSE	0
2022-09-14	13:55:44	0.157977	35.1557	FALSE	0
2022-09-14	13:55:45	0.146222	35.3019	FALSE	0
2022-09-14	13:55:45	0.17014	35.4721	FALSE	0
2022-09-14	13:55:45	0.0277992	35.4999	FALSE	0
2022-09-14	13:55:45	0.325051	35.8249	FALSE	0
2022-09-14	13:55:46	0.36841	36.1933	FALSE	0
2022-09-14	13:55:46	0.506934	36.7003	FALSE	0
2022-09-14	13:55:46	0.130853	36.8311	FALSE	0
2022-09-14	13:55:47	0.342608	37.1737	FALSE	0
2022-09-14	13:55:47	0.205356	37.3791	FALSE	0
2022-09-14	13:55:47	0.406476	37.7856	FALSE	0
2022-09-14	13:55:47	0.279351	38.0649	FALSE	0
2022-09-14	13:55:48	0.375687	38.4406	FALSE	0
2022-09-14	13:55:48	0.459046	38.8997	FALSE	0
2022-09-14	13:55:48	0.258842	39.1585	FALSE	0
2022-09-14	13:55:48	0.870954	40.0294	FALSE	0
2022-09-14	13:55:49	0.635534	40.665	FALSE	0
2022-09-14	13:55:49	0.382863	41.0478	FALSE	0
2022-09-14	13:55:49	0.265967	41.3138	FALSE	0
2022-09-14	13:55:49	0.0644913	41.3783	FALSE	0
2022-09-14	13:55:50	-0.0745417	41.3783	FALSE	0
2022-09-14	13:55:50	0.139199	41.5175	FALSE	0
2022-09-14	13:55:50	0.0525321	41.57	FALSE	0
2022-09-14	13:55:51	0.203321	41.7734	FALSE	0
2022-09-14	13:55:51	1.40261	43.176	FALSE	0
2022-09-14	13:55:51	1.77976	44.9557	FALSE	0
2022-09-14	13:55:51	0.527443	45.4832	FALSE	0
2022-09-14	13:55:52	0.684593	46.1678	FALSE	0
2022-09-14	13:55:52	0.463321	46.6311	FALSE	0
2022-09-14	13:55:52	1.15523	47.7863	FALSE	0
2022-09-14	13:55:52	0.547341	48.3337	FALSE	0
2022-09-14	13:55:53	0.778028	49.1117	FALSE	0
2022-09-14	13:55:53	0.983779	50.0955	FALSE	0
2022-09-14	13:55:53	1.18658	51.282	FALSE	0
2022-09-14	13:55:53	0.996349	52.2784	FALSE	0
2022-09-14	13:55:54	1.08938	53.3678	FALSE	0
2022-09-14	13:55:54	0.525203	53.893	FALSE	0
2022-09-14	13:55:54	1.58841	55.4814	FALSE	0
2022-09-14	13:55:55	1.46317	56.9446	FALSE	0
2022-09-14	13:55:55	1.84571	58.7903	FALSE	0
2022-09-14	13:55:55	0.8107	59.601	FALSE	0
2022-09-14	13:55:55	0.987442	60.5884	FALSE	0
2022-09-14	13:55:56	0.752277	61.3407	FALSE	0
2022-09-14	13:55:56	0.664287	62.005	FALSE	0
2022-09-14	13:55:56	0.945051	62.95	FALSE	0
2022-09-14	13:55:56	0.936705	63.8867	FALSE	0
2022-09-14	13:55:57	0.666934	64.5537	FALSE	0
2022-09-14	13:55:57	1.33202	65.8857	FALSE	0
2022-09-14	13:55:57	1.48597	67.3716	FALSE	0
2022-09-14	13:55:58	1.67543	69.0471	FALSE	0
2022-09-14	13:55:58	1.76205	70.8091	FALSE	0
2022-09-14	13:55:58	2.53487	73.344	FALSE	0
2022-09-14	13:55:58	5.78301	79.127	1	1
2022-09-14	13:55:59	5.11263	84.2396	1	2
2022-09-14	13:55:59	6.14459	90.3842	1	3
2022-09-14	13:55:59	4.34357	94.7278	1	4
2022-09-14	13:55:59	3.06841	97.7962	1	5
2022-09-14	13:56:00	2.01182	99.808	FALSE	5
2022-09-14	13:56:00	2.36515	102.173	FALSE	5
2022-09-14	13:56:00	2.2193	104.392	FALSE	5
2022-09-14	13:56:00	2.02892	106.421	FALSE	5
2022-09-14	13:56:01	2.21284	108.634	FALSE	5
2022-09-14	13:56:01	2.44215	111.076	FALSE	5
2022-09-14	13:56:01	2.84902	113.925	FALSE	5
2022-09-14	13:56:02	1.64663	115.572	FALSE	5
2022-09-14	13:56:02	0.580064	116.152	FALSE	5
2022-09-14	13:56:02	0.615891	116.768	FALSE	5
2022-09-14	13:56:02	1.31319	118.081	FALSE	5
2022-09-14	13:56:03	4.91411	122.995	1	6
2022-09-14	13:56:03	6.01487	129.01	1	7
2022-09-14	13:56:03	5.1424	134.153	1	8
2022-09-14	13:56:03	3.40052	137.553	1	9
2022-09-14	13:56:04	1.28261	138.836	FALSE	9
2022-09-14	13:56:04	0.631616	139.467	FALSE	9
2022-09-14	13:56:04	0.408868	139.876	FALSE	9
2022-09-14	13:56:04	0.156145	140.032	FALSE	9
2022-09-14	13:56:05	0.642405	140.675	FALSE	9
2022-09-14	13:56:05	0.217723	140.892	FALSE	9
2022-09-14	13:56:05	0.1193	141.012	FALSE	9
2022-09-14	13:56:06	-0.034389	141.012	FALSE	9
2022-09-14	13:56:06	0.0427101	141.054	FALSE	9
2022-09-14	13:56:06	-0.0772389	141.054	FALSE	9
2022-09-14	13:56:06	0.185051	141.24	FALSE	9
2022-09-14	13:56:07	-0.0989692	141.24	FALSE	9
2022-09-14	13:56:07	0.254771	141.494	FALSE	9
2022-09-14	13:56:07	4.22286	145.717	1	10
2022-09-14	13:56:07	5.29039	151.008	1	11
2022-09-14	13:56:08	3.21803	154.226	1	12
2022-09-14	13:56:08	0.763728	154.989	FALSE	12
2022-09-14	13:56:08	1.3367	156.326	FALSE	12
2022-09-14	13:56:08	0.861946	157.188	FALSE	12
2022-09-14	13:56:09	0.827494	158.015	FALSE	12
2022-09-14	13:56:09	0.387188	158.403	FALSE	12
2022-09-14	13:56:09	0.320827	158.723	FALSE	12
2022-09-14	13:56:10	0.72612	159.45	FALSE	12
2022-09-14	13:56:10	0.303626	159.753	FALSE	12
2022-09-14	13:56:10	0.936043	160.689	FALSE	12
2022-09-14	13:56:10	0.257061	160.946	FALSE	12
2022-09-14	13:56:11	0.14841	161.095	FALSE	12
2022-09-14	13:56:11	0.426476	161.521	FALSE	12
2022-09-14	13:56:11	0.413397	161.935	FALSE	12
2022-09-14	13:56:11	0.408257	162.343	FALSE	12
2022-09-14	13:56:12	0.788002	163.131	FALSE	12
2022-09-14	13:56:12	1.56128	164.692	FALSE	12
2022-09-14	13:56:12	1.2192	165.911	FALSE	12
2022-09-14	13:56:12	0.651972	166.563	FALSE	12
2022-09-14	13:56:13	0.520623	167.084	FALSE	12
2022-09-14	13:56:13	1.14271	168.227	FALSE	12
2022-09-14	13:56:13	1.50617	169.733	FALSE	12
2022-09-14	13:56:14	1.09116	170.824	FALSE	12
2022-09-14	13:56:14	1.80159	172.626	FALSE	12
2022-09-14	13:56:14	0.735433	173.361	FALSE	12
2022-09-14	13:56:14	0.819148	174.18	FALSE	12
2022-09-14	13:56:15	0.523422	174.704	FALSE	12
2022-09-14	13:56:15	0.437316	175.141	FALSE	12
2022-09-14	13:56:15	0.586883	175.728	FALSE	12
2022-09-14	13:56:15	0.300267	176.028	FALSE	12
2022-09-14	13:56:16	0.648511	176.677	FALSE	12
2022-09-14	13:56:16	0.303982	176.981	FALSE	12
2022-09-14	13:56:16	0.576094	177.557	FALSE	12
2022-09-14	13:56:16	0.369122	177.926	FALSE	12
2022-09-14	13:56:17	0.433651	178.359	FALSE	12
2022-09-14	13:56:17	0.14042	178.5	FALSE	12
2022-09-14	13:56:17	0.451718	178.952	FALSE	12
2022-09-14	13:56:18	1.00016	179.952	FALSE	12
2022-09-14	13:56:18	1.80683	181.758	FALSE	12
2022-09-14	13:56:18	3.20434	184.963	1	13
2022-09-14	13:56:18	1.69014	186.653	FALSE	13
2022-09-14	13:56:19	1.61915	188.272	FALSE	13
2022-09-14	13:56:19	1.14103	189.413	FALSE	13
2022-09-14	13:56:19	0.723372	190.137	FALSE	13
2022-09-14	13:56:19	0.632023	190.769	FALSE	13
2022-09-14	13:56:20	1.0221	191.791	FALSE	13
2022-09-14	13:56:20	1.09589	192.887	FALSE	13
2022-09-14	13:56:20	1.13777	194.024	FALSE	13
2022-09-14	13:56:20	0.405407	194.43	FALSE	13
2022-09-14	13:56:21	0.431005	194.861	FALSE	13
2022-09-14	13:56:21	0.402608	195.263	FALSE	13
2022-09-14	13:56:21	-0.12986	195.263	FALSE	13
2022-09-14	13:56:22	-0.524312	195.263	FALSE	13
2022-09-14	13:56:22	-0.729045	195.263	FALSE	13
2022-09-14	13:56:22	-0.519529	195.263	FALSE	13
2022-09-14	13:56:22	-0.17902	195.263	FALSE	13
2022-09-14	13:56:23	0.604644	195.868	FALSE	13
2022-09-14	13:56:23	1.77884	197.647	FALSE	13
2022-09-14	13:56:23	1.82963	199.476	FALSE	13
2022-09-14	13:56:23	1.61167	201.088	FALSE	13
2022-09-14	13:56:24	1.30347	202.392	FALSE	13
2022-09-14	13:56:24	0.841336	203.233	FALSE	13
2022-09-14	13:56:24	0.670852	203.904	FALSE	13
2022-09-14	13:56:25	0.475891	204.38	FALSE	13
2022-09-14	13:56:25	0.277723	204.657	FALSE	13
2022-09-14	13:56:25	0.582201	205.24	FALSE	13
2022-09-14	13:56:25	0.727799	205.967	FALSE	13
2022-09-14	13:56:26	0.724186	206.692	FALSE	13
2022-09-14	13:56:26	0.730343	207.422	FALSE	13
2022-09-14	13:56:26	0.726527	208.148	FALSE	13
2022-09-14	13:56:26	0.732379	208.881	FALSE	13
2022-09-14	13:56:27	0.72388	209.605	FALSE	13
2022-09-14	13:56:27	0.728206	210.333	FALSE	13
2022-09-14	13:56:27	0.721946	211.055	FALSE	13
2022-09-14	13:56:27	0.729173	211.784	FALSE	13
2022-09-14	13:56:28	0.72617	212.51	FALSE	13
2022-09-14	13:56:28	0.731921	213.242	FALSE	13
2022-09-14	13:56:28	0.727392	213.97	FALSE	13
2022-09-14	13:56:29	0.721132	214.691	FALSE	13
2022-09-14	13:56:29	0.727188	215.418	FALSE	13
2022-09-14	13:56:29	0.723779	216.142	FALSE	13
2022-09-14	13:56:29	0.727748	216.869	FALSE	13
2022-09-14	13:56:30	0.723779	217.593	FALSE	13
2022-09-14	13:56:30	0.722252	218.315	FALSE	13
2022-09-14	13:56:30	0.724084	219.039	FALSE	13
2022-09-14	13:56:30	0.729377	219.769	FALSE	13
2022-09-14	13:56:31	0.728512	220.497	FALSE	13
2022-09-14	13:56:31	0.727545	221.225	FALSE	13
2022-09-14	13:56:31	0.719198	221.944	FALSE	13
2022-09-14	13:56:31	0.726425	222.671	FALSE	13
2022-09-14	13:56:32	0.724237	223.395	FALSE	13
2022-09-14	13:56:32	0.731616	224.126	FALSE	13
2022-09-14	13:56:32	0.728461	224.855	FALSE	13
2022-09-14	13:56:33	0.730242	225.585	FALSE	13
2022-09-14	13:56:33	0.719504	226.305	FALSE	13
2022-09-14	13:56:33	0.727697	227.032	FALSE	13
2022-09-14	13:56:33	0.72383	227.756	FALSE	13
2022-09-14	13:56:34	0.733957	228.49	FALSE	13
2022-09-14	13:56:34	0.724847	229.215	FALSE	13
2022-09-14	13:56:34	0.731667	229.947	FALSE	13
2022-09-14	13:56:34	0.727697	230.674	FALSE	13
2022-09-14	13:56:35	0.72902	231.403	FALSE	13
2022-09-14	13:56:35	0.732074	232.135	FALSE	13
2022-09-14	13:56:35	0.723015	232.858	FALSE	13
2022-09-14	13:56:35	0.730547	233.589	FALSE	13
2022-09-14	13:56:36	0.729478	234.318	FALSE	13
2022-09-14	13:56:36	0.728155	235.047	FALSE	13
2022-09-14	13:56:36	0.728308	235.775	FALSE	13
2022-09-14	13:56:37	0.734262	236.509	FALSE	13
2022-09-14	13:56:37	0.72444	237.234	FALSE	13
2022-09-14	13:56:37	0.722761	237.956	FALSE	13
2022-09-14	13:56:37	0.729224	238.686	FALSE	13
2022-09-14	13:56:38	0.72612	239.412	FALSE	13
2022-09-14	13:56:38	0.724644	240.136	FALSE	13
2022-09-14	13:56:38	0.728155	240.864	FALSE	13
2022-09-14	13:56:38	0.726883	241.591	FALSE	13
2022-09-14	13:56:39	0.320064	241.911	FALSE	13
2022-09-14	13:56:39	-1.2292	241.911	FALSE	13
2022-09-14	13:56:39	-0.910674	241.911	FALSE	13
2022-09-14	13:56:39	-0.949351	241.911	FALSE	13
2022-09-14	13:56:40	-1.37759	241.911	FALSE	13
2022-09-14	13:56:40	-1.55342	241.911	FALSE	13
2022-09-14	13:56:40	-1.69663	241.911	FALSE	13
2022-09-14	13:56:41	-1.78436	241.911	FALSE	13
2022-09-14	13:56:41	-1.76696	241.911	FALSE	13
2022-09-14	13:56:41	-1.74401	241.911	FALSE	13
2022-09-14	13:56:41	-1.88971	241.911	FALSE	13
2022-09-14	13:56:42	-1.795	241.911	FALSE	13
2022-09-14	13:56:42	-1.79006	241.911	FALSE	13
2022-09-14	13:56:42	-1.67724	241.911	FALSE	13
2022-09-14	13:56:42	-1.54787	241.911	FALSE	13
2022-09-14	13:56:43	-1.51658	241.911	FALSE	13
2022-09-14	13:56:43	-1.49556	241.911	FALSE	13
2022-09-14	13:56:43	-1.50421	241.911	FALSE	13
2022-09-14	13:56:43	-1.63388	241.911	FALSE	13
2022-09-14	13:56:44	-1.6353	241.911	FALSE	13
2022-09-14	13:56:44	-1.552	241.911	FALSE	13
2022-09-14	13:56:44	-1.48589	241.911	FALSE	13
2022-09-14	13:56:45	-1.09337	241.911	FALSE	13
2022-09-14	13:56:45	-1.14966	241.911	FALSE	13
2022-09-14	13:56:45	-1.02833	241.911	FALSE	13
2022-09-14	13:56:45	-0.798663	241.911	FALSE	13
2022-09-14	13:56:46	-0.363142	241.911	FALSE	13
2022-09-14	13:56:46	0.0667814	241.978	FALSE	13
2022-09-14	13:56:46	0.191972	242.17	FALSE	13
2022-09-14	13:56:46	0.275687	242.446	FALSE	13
2022-09-14	13:56:47	0.776959	243.223	FALSE	13
2022-09-14	13:56:47	0.255076	243.478	FALSE	13
2022-09-14	13:56:47	-0.111285	243.478	FALSE	13
2022-09-14	13:56:47	-0.0065519	243.478	FALSE	13
2022-09-14	13:56:48	-0.22533	243.478	FALSE	13
2022-09-14	13:56:48	-0.187112	243.478	FALSE	13
2022-09-14	13:56:48	-0.00548322	243.478	FALSE	13
2022-09-14	13:56:49	-0.388129	243.478	FALSE	13
2022-09-14	13:56:49	-0.0624806	243.478	FALSE	13
2022-09-14	13:56:49	-0.130216	243.478	FALSE	13
2022-09-14	13:56:49	0.0710053	243.549	FALSE	13
2022-09-14	13:56:50	-0.137748	243.549	FALSE	13
2022-09-14	13:56:50	0.286781	243.836	FALSE	13
2022-09-14	13:56:50	0.350038	244.186	FALSE	13
2022-09-14	13:56:50	-1.86691	244.186	FALSE	13
2022-09-14	13:56:51	0.232074	244.418	FALSE	13
2022-09-14	13:56:51	0.732583	245.15	FALSE	13
2022-09-14	13:56:51	0.729071	245.879	FALSE	13
2022-09-14	13:56:51	0.73472	246.614	FALSE	13
2022-09-14	13:56:52	0.73131	247.345	FALSE	13
2022-09-14	13:56:52	0.726883	248.072	FALSE	13
2022-09-14	13:56:52	0.730547	248.803	FALSE	13
2022-09-14	13:56:53	0.727036	249.53	FALSE	13
2022-09-14	13:56:53	0.731412	250.261	FALSE	13
2022-09-14	13:56:53	0.723372	250.985	FALSE	13
2022-09-14	13:56:53	0.727137	251.712	FALSE	13
2022-09-14	13:56:54	0.730445	252.442	FALSE	13
2022-09-14	13:56:54	0.723524	253.166	FALSE	13
2022-09-14	13:56:54	0.732074	253.898	FALSE	13
2022-09-14	13:56:54	0.725814	254.624	FALSE	13
2022-09-14	13:56:55	0.724237	255.348	FALSE	13
2022-09-14	13:56:55	0.735178	256.083	FALSE	13
2022-09-14	13:56:55	0.726374	256.81	FALSE	13
2022-09-14	13:56:56	0.737315	257.547	FALSE	13
2022-09-14	13:56:56	0.731056	258.278	FALSE	13
2022-09-14	13:56:56	0.734618	259.013	FALSE	13
2022-09-14	13:56:56	0.736349	259.749	FALSE	13
2022-09-14	13:56:57	0.723473	260.472	FALSE	13
2022-09-14	13:56:57	0.725611	261.198	FALSE	13
2022-09-14	13:56:57	0.731412	261.929	FALSE	13
2022-09-14	13:56:57	0.722608	262.652	FALSE	13
2022-09-14	13:56:58	0.729428	263.381	FALSE	13
2022-09-14	13:56:58	0.72617	264.108	FALSE	13
2022-09-14	13:56:58	0.730496	264.838	FALSE	13
2022-09-14	13:56:58	0.727901	265.566	FALSE	13
2022-09-14	13:56:59	0.734924	266.301	FALSE	13
2022-09-14	13:56:59	0.73187	267.033	FALSE	13
2022-09-14	13:56:59	0.728461	267.761	FALSE	13
2022-09-14	13:57:00	0.736807	268.498	FALSE	13
2022-09-14	13:57:00	0.73645	269.234	FALSE	13
2022-09-14	13:57:00	0.733651	269.968	FALSE	13
2022-09-14	13:57:00	0.728562	270.697	FALSE	13
2022-09-14	13:57:01	0.732735	271.429	FALSE	13
2022-09-14	13:57:01	0.721591	272.151	FALSE	13
2022-09-14	13:57:01	0.727646	272.879	FALSE	13
2022-09-14	13:57:01	0.732074	273.611	FALSE	13
2022-09-14	13:57:02	0.73131	274.342	FALSE	13
2022-09-14	13:57:02	0.731209	275.073	FALSE	13
2022-09-14	13:57:02	0.725967	275.799	FALSE	13
2022-09-14	13:57:02	0.739351	276.539	FALSE	13
2022-09-14	13:57:03	0.732125	277.271	FALSE	13
2022-09-14	13:57:03	0.731005	278.002	FALSE	13
2022-09-14	13:57:03	0.728155	278.73	FALSE	13
2022-09-14	13:57:04	0.72841	279.458	FALSE	13
2022-09-14	13:57:04	0.729173	280.187	FALSE	13
2022-09-14	13:57:04	0.727239	280.915	FALSE	13
2022-09-14	13:57:04	0.734466	281.649	FALSE	13
2022-09-14	13:57:05	0.726527	282.376	FALSE	13
2022-09-14	13:57:05	0.734466	283.11	FALSE	13
2022-09-14	13:57:05	0.731056	283.841	FALSE	13
2022-09-14	13:57:05	0.727087	284.568	FALSE	13
2022-09-14	13:57:06	0.728562	285.297	FALSE	13
2022-09-14	13:57:06	0.729682	286.027	FALSE	13
2022-09-14	13:57:06	0.725153	286.752	FALSE	13
2022-09-14	13:57:06	0.728104	287.48	FALSE	13
2022-09-14	13:57:07	0.726425	288.206	FALSE	13
2022-09-14	13:57:07	0.731565	288.938	FALSE	13
2022-09-14	13:57:07	0.721183	289.659	FALSE	13
2022-09-14	13:57:08	0.729428	290.388	FALSE	13
2022-09-14	13:57:08	0.0688679	290.457	FALSE	13
2022-09-14	13:57:08	0.716298	291.174	FALSE	13
2022-09-14	13:57:08	-5.22426	291.174	FALSE	13
2022-09-14	13:57:09	-7.1748	291.174	FALSE	13
2022-09-14	13:57:09	-6.6524	291.174	FALSE	13
2022-09-14	13:57:09	-3.20645	291.174	FALSE	13
2022-09-14	13:57:09	-3.27887	291.174	FALSE	13
2022-09-14	13:57:10	-3.26747	291.174	FALSE	13
2022-09-14	13:57:10	-3.22716	291.174	FALSE	13
2022-09-14	13:57:10	-3.17322	291.174	FALSE	13
2022-09-14	13:57:10	-3.11261	291.174	FALSE	13
2022-09-14	13:57:11	-2.96278	291.174	FALSE	13
2022-09-14	13:57:11	-2.87581	291.174	FALSE	13
2022-09-14	13:57:11	-2.76579	291.174	FALSE	13
2022-09-14	13:57:12	-2.65245	291.174	FALSE	13
2022-09-14	13:57:12	-2.57016	291.174	FALSE	13
2022-09-14	13:57:12	-2.44319	291.174	FALSE	13
2022-09-14	13:57:12	-0.16533	291.174	FALSE	13
2022-09-14	13:57:13	0.73131	291.905	FALSE	13
2022-09-14	13:57:13	0.729173	292.634	FALSE	13
2022-09-14	13:57:13	0.732888	293.367	FALSE	13
2022-09-14	13:57:13	0.740369	294.107	FALSE	13
2022-09-14	13:57:14	0.730598	294.838	FALSE	13
2022-09-14	13:57:14	0.728206	295.566	FALSE	13
2022-09-14	13:57:14	0.728766	296.295	FALSE	13
2022-09-14	13:57:14	0.723779	297.019	FALSE	13
2022-09-14	13:57:15	0.726679	297.745	FALSE	13
2022-09-14	13:57:15	0.728461	298.474	FALSE	13
2022-09-14	13:57:15	0.731463	299.205	FALSE	13
2022-09-14	13:57:16	0.730547	299.936	FALSE	13
2022-09-14	13:57:16	0.732684	300.668	FALSE	13
2022-09-14	13:57:16	0.73243	301.401	FALSE	13
2022-09-14	13:57:16	0.725305	302.126	FALSE	13
2022-09-14	13:57:17	0.731107	302.857	FALSE	13
2022-09-14	13:57:17	0.729987	303.587	FALSE	13
2022-09-14	13:57:17	0.727646	304.315	FALSE	13
2022-09-14	13:57:17	0.730496	305.045	FALSE	13
2022-09-14	13:57:18	0.732277	305.778	FALSE	13
2022-09-14	13:57:18	0.729122	306.507	FALSE	13
2022-09-14	13:57:18	0.732481	307.239	FALSE	13
2022-09-14	13:57:18	0.736756	307.976	FALSE	13
2022-09-14	13:57:19	0.72444	308.701	FALSE	13
2022-09-14	13:57:19	0.732074	309.433	FALSE	13
2022-09-14	13:57:19	0.725102	310.158	FALSE	13
2022-09-14	13:57:20	0.728461	310.886	FALSE	13
2022-09-14	13:57:20	0.732888	311.619	FALSE	13
2022-09-14	13:57:20	0.732481	312.352	FALSE	13
2022-09-14	13:57:20	0.730954	313.082	FALSE	13
2022-09-14	13:57:21	0.735127	313.818	FALSE	13
2022-09-14	13:57:21	0.735433	314.553	FALSE	13
2022-09-14	13:57:21	0.728359	315.281	FALSE	13
2022-09-14	13:57:21	0.732074	316.013	FALSE	13
2022-09-14	13:57:22	0.730649	316.744	FALSE	13
2022-09-14	13:57:22	0.732939	317.477	FALSE	13
2022-09-14	13:57:22	0.734975	318.212	FALSE	13
2022-09-14	13:57:22	0.734822	318.947	FALSE	13
2022-09-14	13:57:23	0.730903	319.678	FALSE	13
2022-09-14	13:57:23	0.731768	320.41	FALSE	13
2022-09-14	13:57:23	0.735789	321.145	FALSE	13
2022-09-14	13:57:24	0.735178	321.88	FALSE	13
2022-09-14	13:57:24	0.727748	322.608	FALSE	13
2022-09-14	13:57:24	0.723931	323.332	FALSE	13
2022-09-14	13:57:24	0.731259	324.063	FALSE	13
2022-09-14	13:57:25	0.72612	324.79	FALSE	13
2022-09-14	13:57:25	0.726527	325.516	FALSE	13
2022-09-14	13:57:25	0.732175	326.248	FALSE	13
2022-09-14	13:57:25	0.727748	326.976	FALSE	13
2022-09-14	13:57:26	0.724033	327.7	FALSE	13
2022-09-14	13:57:26	0.728257	328.428	FALSE	13
2022-09-14	13:57:26	0.730038	329.158	FALSE	13
2022-09-14	13:57:26	0.728359	329.887	FALSE	13
2022-09-14	13:57:27	0.736298	330.623	FALSE	13
2022-09-14	13:57:27	0.734109	331.357	FALSE	13
2022-09-14	13:57:27	0.728461	332.086	FALSE	13
2022-09-14	13:57:28	0.735026	332.821	FALSE	13
2022-09-14	13:57:28	0.729377	333.55	FALSE	13
2022-09-14	13:57:28	0.730954	334.281	FALSE	13
2022-09-14	13:57:28	0.728461	335.009	FALSE	13
2022-09-14	13:57:29	0.728206	335.738	FALSE	13
2022-09-14	13:57:29	0.725204	336.463	FALSE	13
2022-09-14	13:57:29	0.731819	337.195	FALSE	13
2022-09-14	13:57:29	0.737875	337.932	FALSE	13
2022-09-14	13:57:30	0.733448	338.666	FALSE	13
2022-09-14	13:57:30	0.726425	339.392	FALSE	13
2022-09-14	13:57:30	0.730751	340.123	FALSE	13
2022-09-14	13:57:30	0.729784	340.853	FALSE	13
2022-09-14	13:57:31	0.736145	341.589	FALSE	13
2022-09-14	13:57:31	0.735433	342.324	FALSE	13
2022-09-14	13:57:31	0.732074	343.057	FALSE	13
2022-09-14	13:57:32	0.733702	343.79	FALSE	13
2022-09-14	13:57:32	0.731972	344.522	FALSE	13
2022-09-14	13:57:32	0.730751	345.253	FALSE	13
2022-09-14	13:57:32	0.735891	345.989	FALSE	13
2022-09-14	13:57:33	0.731158	346.72	FALSE	13
2022-09-14	13:57:33	0.736145	347.456	FALSE	13
2022-09-14	13:57:33	0.735229	348.191	FALSE	13
2022-09-14	13:57:33	0.730242	348.922	FALSE	13
2022-09-14	13:57:34	0.642405	349.564	FALSE	13
2022-09-14	13:57:34	-0.874083	349.564	FALSE	13
2022-09-14	13:57:34	-0.488435	349.564	FALSE	13
2022-09-14	13:57:35	-0.467722	349.564	FALSE	13
2022-09-14	13:57:35	-0.489452	349.564	FALSE	13
2022-09-14	13:57:35	-0.512201	349.564	FALSE	13
2022-09-14	13:57:35	0.132328	349.696	FALSE	13
2022-09-14	13:57:36	0.248715	349.945	FALSE	13
2022-09-14	13:57:36	0.338944	350.284	FALSE	13
2022-09-14	13:57:36	-2.14365	350.284	FALSE	13
2022-09-14	13:57:36	-2.0438	350.284	FALSE	13
2022-09-14	13:57:37	-1.98925	350.284	FALSE	13
2022-09-14	13:57:37	-1.89994	350.284	FALSE	13
2022-09-14	13:57:37	-1.76324	350.284	FALSE	13
2022-09-14	13:57:38	-1.75536	350.284	FALSE	13
2022-09-14	13:57:38	-1.58385	350.284	FALSE	13
2022-09-14	13:57:38	-1.41235	350.284	FALSE	13
2022-09-14	13:57:38	-1.39189	350.284	FALSE	13
2022-09-14	13:57:39	-1.44044	350.284	FALSE	13
2022-09-14	13:57:39	-1.40421	350.284	FALSE	13
2022-09-14	13:57:39	0.596756	350.881	FALSE	13
2022-09-14	13:57:39	0.702964	351.584	FALSE	13
2022-09-14	13:57:40	0.681743	352.265	FALSE	13
2022-09-14	13:57:40	-0.164058	352.265	FALSE	13
2022-09-14	13:57:40	-0.112404	352.265	FALSE	13
2022-09-14	13:57:40	-0.096272	352.265	FALSE	13
2022-09-14	13:57:41	-0.154643	352.265	FALSE	13
2022-09-14	13:57:41	-0.111895	352.265	FALSE	13
2022-09-14	13:57:41	-0.121921	352.265	FALSE	13
2022-09-14	13:57:41	0.0778247	352.343	FALSE	13
2022-09-14	13:57:42	0.510852	352.854	FALSE	13
2022-09-14	13:57:42	0.141489	352.996	FALSE	13
2022-09-14	13:57:42	-0.103397	352.996	FALSE	13
2022-09-14	13:57:43	-0.110063	352.996	FALSE	13
2022-09-14	13:57:43	-0.0870099	352.996	FALSE	13
2022-09-14	13:57:43	-0.0382059	352.996	FALSE	13
2022-09-14	13:57:43	-0.181412	352.996	FALSE	13
2022-09-14	13:57:44	-0.295559	352.996	FALSE	13
2022-09-14	13:57:44	-0.366959	352.996	FALSE	13
2022-09-14	13:57:44	-0.49103	352.996	FALSE	13
2022-09-14	13:57:44	-0.528689	352.996	FALSE	13
2022-09-14	13:57:45	-0.548028	352.996	FALSE	13
2022-09-14	13:57:45	-0.464414	352.996	FALSE	13
2022-09-14	13:57:45	-0.561106	352.996	FALSE	13
2022-09-14	13:57:45	-1.49052	352.996	FALSE	13
2022-09-14	13:57:46	-0.793676	352.996	FALSE	13
2022-09-14	13:57:46	-0.860699	352.996	FALSE	13
2022-09-14	13:57:46	-0.661055	352.996	FALSE	13
2022-09-14	13:57:47	-0.612404	352.996	FALSE	13
2022-09-14	13:57:47	-0.621055	352.996	FALSE	13
2022-09-14	13:57:47	-0.60131	352.996	FALSE	13
2022-09-14	13:57:47	-0.599987	352.996	FALSE	13
2022-09-14	13:57:48	-0.593524	352.996	FALSE	13
2022-09-14	13:57:48	-0.596424	352.996	FALSE	13
2022-09-14	13:57:48	-0.579631	352.996	FALSE	13
2022-09-14	13:57:48	-0.567468	352.996	FALSE	13
2022-09-14	13:57:49	-0.546857	352.996	FALSE	13
2022-09-14	13:57:49	-0.422328	352.996	FALSE	13
2022-09-14	13:57:49	-0.365178	352.996	FALSE	13
2022-09-14	13:57:49	-0.324669	352.996	FALSE	13
2022-09-14	13:57:50	-0.3236	352.996	FALSE	13
2022-09-14	13:57:50	-0.250928	352.996	FALSE	13
2022-09-14	13:57:50	-0.241514	352.996	FALSE	13
2022-09-14	13:57:51	-0.199478	352.996	FALSE	13
2022-09-14	13:57:51	-0.284974	352.996	FALSE	13
2022-09-14	13:57:51	0.601438	353.597	FALSE	13
2022-09-14	13:57:51	0.742048	354.339	FALSE	13
2022-09-14	13:57:52	0.733601	355.073	FALSE	13
2022-09-14	13:57:52	0.727137	355.8	FALSE	13
2022-09-14	13:57:52	0.591158	356.391	FALSE	13
2022-09-14	13:57:52	0.727443	357.118	FALSE	13
2022-09-14	13:57:53	0.727341	357.846	FALSE	13
2022-09-14	13:57:53	0.729529	358.575	FALSE	13
2022-09-14	13:57:53	0.732634	359.308	FALSE	13
2022-09-14	13:57:53	0.720979	360.029	FALSE	13
2022-09-14	13:57:54	0.731412	360.76	FALSE	13
2022-09-14	13:57:54	0.731819	361.492	FALSE	13
2022-09-14	13:57:54	0.732328	362.225	FALSE	13
2022-09-14	13:57:55	0.727137	362.952	FALSE	13
2022-09-14	13:57:55	0.731768	363.683	FALSE	13
2022-09-14	13:57:55	0.729987	364.413	FALSE	13
2022-09-14	13:57:55	0.730903	365.144	FALSE	13
2022-09-14	13:57:56	0.732583	365.877	FALSE	13
2022-09-14	13:57:56	0.732481	366.609	FALSE	13
2022-09-14	13:57:56	0.726578	367.336	FALSE	13
2022-09-14	13:57:56	0.73757	368.074	FALSE	13
2022-09-14	13:57:57	0.729682	368.803	FALSE	13
2022-09-14	13:57:57	0.734568	369.538	FALSE	13
2022-09-14	13:57:57	0.727799	370.266	FALSE	13
2022-09-14	13:57:57	0.727137	370.993	FALSE	13
2022-09-14	13:57:58	0.732125	371.725	FALSE	13
2022-09-14	13:57:58	0.734313	372.459	FALSE	13
2022-09-14	13:57:58	0.72612	373.185	FALSE	13
2022-09-14	13:57:59	0.733804	373.919	FALSE	13
2022-09-14	13:57:59	0.731565	374.651	FALSE	13
2022-09-14	13:57:59	0.730598	375.381	FALSE	13
2022-09-14	13:57:59	0.735178	376.116	FALSE	13
2022-09-14	13:58:00	0.734415	376.851	FALSE	13
2022-09-14	13:58:00	0.731768	377.583	FALSE	13
2022-09-14	13:58:00	0.736094	378.319	FALSE	13
2022-09-14	13:58:00	0.728817	379.048	FALSE	13
2022-09-14	13:58:01	0.729478	379.777	FALSE	13
2022-09-14	13:58:01	0.736247	380.513	FALSE	13
2022-09-14	13:58:01	0.730038	381.243	FALSE	13
2022-09-14	13:58:01	0.732786	381.976	FALSE	13
2022-09-14	13:58:02	0.730445	382.707	FALSE	13
2022-09-14	13:58:02	0.736145	383.443	FALSE	13
2022-09-14	13:58:02	0.728257	384.171	FALSE	13
2022-09-14	13:58:03	0.723117	384.894	FALSE	13
2022-09-14	13:58:03	0.728054	385.622	FALSE	13
2022-09-14	13:58:03	0.727392	386.349	FALSE	13
2022-09-14	13:58:03	-0.251081	386.349	FALSE	13
2022-09-14	13:58:04	0.697163	387.047	FALSE	13
2022-09-14	13:58:04	0.698333	387.745	FALSE	13
2022-09-14	13:58:04	0.704288	388.449	FALSE	13
2022-09-14	13:58:04	0.477621	388.927	FALSE	13
2022-09-14	13:58:05	0.72673	389.654	FALSE	13
2022-09-14	13:58:05	0.726781	390.38	FALSE	13
2022-09-14	13:58:05	0.730547	391.111	FALSE	13
2022-09-14	13:58:05	0.732684	391.844	FALSE	13
2022-09-14	13:58:06	0.722914	392.567	FALSE	13
2022-09-14	13:58:06	0.731158	393.298	FALSE	13
2022-09-14	13:58:06	0.724746	394.022	FALSE	13
2022-09-14	13:58:07	0.728868	394.751	FALSE	13
2022-09-14	13:58:07	0.72897	395.48	FALSE	13
2022-09-14	13:58:07	0.732074	396.212	FALSE	13
2022-09-14	13:58:07	0.730954	396.943	FALSE	13
2022-09-14	13:58:08	0.726476	397.67	FALSE	13
2022-09-14	13:58:08	0.724389	398.394	FALSE	13
2022-09-14	13:58:08	0.728257	399.122	FALSE	13
2022-09-14	13:58:08	0.738028	399.86	FALSE	13
2022-09-14	13:58:09	0.730649	400.591	FALSE	13
2022-09-14	13:58:09	0.735026	401.326	FALSE	13
2022-09-14	13:58:09	0.728919	402.055	FALSE	13
2022-09-14	13:58:09	0.73243	402.787	FALSE	13
2022-09-14	13:58:10	0.732735	403.52	FALSE	13
2022-09-14	13:58:10	0.736196	404.256	FALSE	13
2022-09-14	13:58:10	0.732939	404.989	FALSE	13
2022-09-14	13:58:11	0.729326	405.719	FALSE	13
2022-09-14	13:58:11	0.728766	406.447	FALSE	13
2022-09-14	13:58:11	0.730598	407.178	FALSE	13
2022-09-14	13:58:11	0.727952	407.906	FALSE	13
2022-09-14	13:58:12	0.736857	408.643	FALSE	13
2022-09-14	13:58:12	0.7307	409.374	FALSE	13
2022-09-14	13:58:12	0.727901	410.101	FALSE	13
2022-09-14	13:58:12	0.734924	410.836	FALSE	13
2022-09-14	13:58:13	0.740827	411.577	FALSE	13
2022-09-14	13:58:13	0.73584	412.313	FALSE	13
2022-09-14	13:58:13	0.727646	413.041	FALSE	13
2022-09-14	13:58:13	0.72958	413.77	FALSE	13
2022-09-14	13:58:14	0.725458	414.496	FALSE	13
2022-09-14	13:58:14	0.73014	415.226	FALSE	13
2022-09-14	13:58:14	0.730394	415.956	FALSE	13
2022-09-14	13:58:15	0.73472	416.691	FALSE	13
2022-09-14	13:58:15	0.727596	417.419	FALSE	13
2022-09-14	13:58:15	0.740318	418.159	FALSE	13
2022-09-14	13:58:15	0.731819	418.891	FALSE	13
2022-09-14	13:58:16	0.733855	419.625	FALSE	13
2022-09-14	13:58:16	0.737722	420.362	FALSE	13
2022-09-14	13:58:16	0.731158	421.093	FALSE	13
2022-09-14	13:58:16	0.726221	421.82	FALSE	13
2022-09-14	13:58:17	0.729275	422.549	FALSE	13
2022-09-14	13:58:17	0.724389	423.273	FALSE	13
2022-09-14	13:58:17	0.731056	424.004	FALSE	13
2022-09-14	13:58:17	0.729529	424.734	FALSE	13
2022-09-14	13:58:18	0.728461	425.462	FALSE	13
2022-09-14	13:58:18	0.722404	426.185	FALSE	13
2022-09-14	13:58:18	0.730801	426.916	FALSE	13
2022-09-14	13:58:19	0.727494	427.643	FALSE	13
2022-09-14	13:58:19	0.726679	428.37	FALSE	13
2022-09-14	13:58:19	0.730598	429.1	FALSE	13
2022-09-14	13:58:19	0.728817	429.829	FALSE	13
2022-09-14	13:58:20	0.723422	430.553	FALSE	13
2022-09-14	13:58:20	0.727952	431.281	FALSE	13
2022-09-14	13:58:20	0.735585	432.016	FALSE	13
2022-09-14	13:58:20	0.730751	432.747	FALSE	13
2022-09-14	13:58:21	0.722659	433.47	FALSE	13
2022-09-14	13:58:21	0.73299	434.203	FALSE	13
2022-09-14	13:58:21	0.731616	434.934	FALSE	13
2022-09-14	13:58:21	0.731005	435.665	FALSE	13
2022-09-14	13:58:22	0.726272	436.391	FALSE	13
2022-09-14	13:58:22	0.732735	437.124	FALSE	13
2022-09-14	13:58:22	0.732023	437.856	FALSE	13
2022-09-14	13:58:23	0.731412	438.588	FALSE	13
2022-09-14	13:58:23	0.731514	439.319	FALSE	13
2022-09-14	13:58:23	0.729784	440.049	FALSE	13
2022-09-14	13:58:23	0.731107	440.78	FALSE	13
2022-09-14	13:58:24	0.735076	441.515	FALSE	13
2022-09-14	13:58:24	0.72897	442.244	FALSE	13
2022-09-14	13:58:24	0.731768	442.976	FALSE	13
2022-09-14	13:58:24	0.729733	443.706	FALSE	13
2022-09-14	13:58:25	0.734313	444.44	FALSE	13
2022-09-14	13:58:25	0.731768	445.172	FALSE	13
2022-09-14	13:58:25	0.732328	445.904	FALSE	13
2022-09-14	13:58:25	0.729529	446.633	FALSE	13
2022-09-14	13:58:26	0.731056	447.365	FALSE	13
2022-09-14	13:58:26	0.733193	448.098	FALSE	13
2022-09-14	13:58:26	0.733041	448.831	FALSE	13
2022-09-14	13:58:27	0.730242	449.561	FALSE	13
2022-09-14	13:58:27	0.733193	450.294	FALSE	13
2022-09-14	13:58:27	0.73014	451.024	FALSE	13
2022-09-14	13:58:27	0.728308	451.753	FALSE	13
2022-09-14	13:58:28	0.72673	452.479	FALSE	13
2022-09-14	13:58:28	0.732583	453.212	FALSE	13
2022-09-14	13:58:28	0.736145	453.948	FALSE	13
2022-09-14	13:58:28	0.73416	454.682	FALSE	13
2022-09-14	13:58:29	0.727748	455.41	FALSE	13
2022-09-14	13:58:29	0.726221	456.136	FALSE	13
2022-09-14	13:58:29	0.725458	456.862	FALSE	13
2022-09-14	13:58:29	0.730751	457.592	FALSE	13
2022-09-14	13:58:30	0.728868	458.321	FALSE	13
2022-09-14	13:58:30	0.727494	459.049	FALSE	13
2022-09-14	13:58:30	0.730191	459.779	FALSE	13
2022-09-14	13:58:31	0.730242	460.509	FALSE	13
2022-09-14	13:58:31	0.731717	461.241	FALSE	13
2022-09-14	13:58:31	0.733957	461.975	FALSE	13
2022-09-14	13:58:31	0.729784	462.705	FALSE	13
2022-09-14	13:58:32	0.731616	463.436	FALSE	13
2022-09-14	13:58:32	0.735382	464.172	FALSE	13
2022-09-14	13:58:32	0.731209	464.903	FALSE	13
2022-09-14	13:58:32	0.730801	465.634	FALSE	13
2022-09-14	13:58:33	0.729987	466.364	FALSE	13
2022-09-14	13:58:33	0.73243	467.096	FALSE	13
2022-09-14	13:58:33	0.728613	467.825	FALSE	13
2022-09-14	13:58:34	0.731514	468.556	FALSE	13
2022-09-14	13:58:34	0.731107	469.287	FALSE	13
2022-09-14	13:58:34	0.731361	470.019	FALSE	13
2022-09-14	13:58:34	0.728003	470.747	FALSE	13
2022-09-14	13:58:35	0.729478	471.476	FALSE	13
2022-09-14	13:58:35	0.731717	472.208	FALSE	13
2022-09-14	13:58:35	0.726832	472.935	FALSE	13
2022-09-14	13:58:35	0.729071	473.664	FALSE	13
2022-09-14	13:58:36	0.734008	474.398	FALSE	13
2022-09-14	13:58:36	0.731209	475.129	FALSE	13
2022-09-14	13:58:36	0.731107	475.86	FALSE	13
2022-09-14	13:58:36	0.730445	476.591	FALSE	13
2022-09-14	13:58:37	0.732837	477.323	FALSE	13
2022-09-14	13:58:37	0.731158	478.055	FALSE	13
2022-09-14	13:58:37	0.731565	478.786	FALSE	13
2022-09-14	13:58:38	0.72902	479.515	FALSE	13
2022-09-14	13:58:38	0.734211	480.249	FALSE	13
2022-09-14	13:58:38	0.729478	480.979	FALSE	13
2022-09-14	13:58:38	0.728766	481.708	FALSE	13
2022-09-14	13:58:39	0.729733	482.437	FALSE	13
2022-09-14	13:58:39	0.728257	483.166	FALSE	13
2022-09-14	13:58:39	0.731616	483.897	FALSE	13
2022-09-14	13:58:39	0.734008	484.631	FALSE	13
2022-09-14	13:58:40	0.728562	485.36	FALSE	13
2022-09-14	13:58:40	0.732481	486.092	FALSE	13
2022-09-14	13:58:40	0.724288	486.817	FALSE	13
2022-09-14	13:58:40	0.733244	487.55	FALSE	13
2022-09-14	13:58:41	0.731616	488.281	FALSE	13
2022-09-14	13:58:41	0.733041	489.014	FALSE	13
2022-09-14	13:58:41	0.731361	489.746	FALSE	13
2022-09-14	13:58:42	0.736552	490.482	FALSE	13
2022-09-14	13:58:42	0.72841	491.211	FALSE	13
2022-09-14	13:58:42	0.727392	491.938	FALSE	13
2022-09-14	13:58:42	0.740776	492.679	FALSE	13
2022-09-14	13:58:43	0.733397	493.412	FALSE	13
2022-09-14	13:58:43	0.490751	493.903	FALSE	13
2022-09-14	13:58:43	0.731361	494.634	FALSE	13
2022-09-14	13:58:43	0.738333	495.373	FALSE	13
2022-09-14	13:58:44	0.738537	496.111	FALSE	13
2022-09-14	13:58:44	0.729275	496.841	FALSE	13
2022-09-14	13:58:44	0.735026	497.576	FALSE	13
2022-09-14	13:58:44	0.727748	498.303	FALSE	13
2022-09-14	13:58:45	0.732175	499.036	FALSE	13
2022-09-14	13:58:45	0.727697	499.763	FALSE	13
2022-09-14	13:58:45	0.729071	500.492	FALSE	13
2022-09-14	13:58:46	0.733753	501.226	FALSE	13
2022-09-14	13:58:46	0.731056	501.957	FALSE	13
2022-09-14	13:58:46	0.72897	502.686	FALSE	13
2022-09-14	13:58:46	0.726629	503.413	FALSE	13
2022-09-14	13:58:47	0.726272	504.139	FALSE	13
2022-09-14	13:58:47	0.731361	504.87	FALSE	13
2022-09-14	13:58:47	0.725458	505.596	FALSE	13
2022-09-14	13:58:47	0.7307	506.327	FALSE	13
2022-09-14	13:58:48	0.730751	507.057	FALSE	13
2022-09-14	13:58:48	0.733092	507.79	FALSE	13
2022-09-14	13:58:48	0.730089	508.52	FALSE	13
2022-09-14	13:58:48	0.733906	509.254	FALSE	13
2022-09-14	13:58:49	0.729326	509.984	FALSE	13
2022-09-14	13:58:49	0.730191	510.714	FALSE	13
2022-09-14	13:58:49	0.737112	511.451	FALSE	13
2022-09-14	13:58:50	0.731616	512.183	FALSE	13
2022-09-14	13:58:50	0.73187	512.914	FALSE	13
2022-09-14	13:58:50	0.737214	513.652	FALSE	13
2022-09-14	13:58:50	0.728919	514.381	FALSE	13
2022-09-14	13:58:51	0.736857	515.117	FALSE	13
2022-09-14	13:58:51	0.731768	515.849	FALSE	13
2022-09-14	13:58:51	0.730293	516.58	FALSE	13
2022-09-14	13:58:51	0.72841	517.308	FALSE	13
2022-09-14	13:58:52	0.727494	518.035	FALSE	13
2022-09-14	13:58:52	0.73528	518.771	FALSE	13
2022-09-14	13:58:52	0.734669	519.505	FALSE	13
2022-09-14	13:58:52	0.732023	520.237	FALSE	13
2022-09-14	13:58:53	0.725712	520.963	FALSE	13
2022-09-14	13:58:53	0.729478	521.693	FALSE	13
2022-09-14	13:58:53	0.73243	522.425	FALSE	13
2022-09-14	13:58:54	0.730038	523.155	FALSE	13
2022-09-14	13:58:54	0.737722	523.893	FALSE	13
2022-09-14	13:58:54	0.727036	524.62	FALSE	13
2022-09-14	13:58:54	0.732583	525.352	FALSE	13
2022-09-14	13:58:55	0.730547	526.083	FALSE	13
2022-09-14	13:58:55	0.735331	526.818	FALSE	13
2022-09-14	13:58:55	0.728919	527.547	FALSE	13
2022-09-14	13:58:55	0.738181	528.285	FALSE	13
2022-09-14	13:58:56	0.723372	529.009	FALSE	13
2022-09-14	13:58:56	0.741896	529.751	FALSE	13
2022-09-14	13:58:56	0.732175	530.483	FALSE	13
2022-09-14	13:58:56	0.731717	531.215	FALSE	13
2022-09-14	13:58:57	0.731921	531.946	FALSE	13
2022-09-14	13:58:57	0.732023	532.678	FALSE	13
2022-09-14	13:58:57	0.729326	533.408	FALSE	13
2022-09-14	13:58:58	0.724491	534.132	FALSE	13
2022-09-14	13:58:58	0.727901	534.86	FALSE	13
2022-09-14	13:58:58	0.736399	535.597	FALSE	13
2022-09-14	13:58:58	0.731921	536.329	FALSE	13
2022-09-14	13:58:59	0.737315	537.066	FALSE	13
2022-09-14	13:58:59	0.73355	537.799	FALSE	13
2022-09-14	13:58:59	0.731819	538.531	FALSE	13
2022-09-14	13:58:59	0.73757	539.269	FALSE	13
2022-09-14	13:59:00	0.727901	539.997	FALSE	13
2022-09-14	13:59:00	0.728359	540.725	FALSE	13
2022-09-14	13:59:00	0.729224	541.454	FALSE	13
2022-09-14	13:59:00	0.729173	542.183	FALSE	13
2022-09-14	13:59:01	0.733804	542.917	FALSE	13
2022-09-14	13:59:01	0.733651	543.651	FALSE	13
2022-09-14	13:59:01	0.730954	544.382	FALSE	13
2022-09-14	13:59:02	0.731921	545.114	FALSE	13
2022-09-14	13:59:02	0.731361	545.845	FALSE	13
2022-09-14	13:59:02	0.730496	546.576	FALSE	13
2022-09-14	13:59:02	0.734975	547.311	FALSE	13
2022-09-14	13:59:03	0.729122	548.04	FALSE	13
2022-09-14	13:59:03	0.729122	548.769	FALSE	13
2022-09-14	13:59:03	0.731972	549.501	FALSE	13
2022-09-14	13:59:03	0.732684	550.233	FALSE	13
2022-09-14	13:59:04	0.731056	550.965	FALSE	13
2022-09-14	13:59:04	0.739504	551.704	FALSE	13
2022-09-14	13:59:04	0.735992	552.44	FALSE	13
2022-09-14	13:59:04	0.736247	553.176	FALSE	13
2022-09-14	13:59:05	0.730547	553.907	FALSE	13
2022-09-14	13:59:05	0.731565	554.638	FALSE	13
2022-09-14	13:59:05	0.726527	555.365	FALSE	13
2022-09-14	13:59:06	0.732481	556.097	FALSE	13
2022-09-14	13:59:06	0.733142	556.831	FALSE	13
2022-09-14	13:59:06	0.733753	557.564	FALSE	13
2022-09-14	13:59:06	0.728664	558.293	FALSE	13
2022-09-14	13:59:07	0.731158	559.024	FALSE	13
2022-09-14	13:59:07	0.734822	559.759	FALSE	13
2022-09-14	13:59:07	0.731056	560.49	FALSE	13
2022-09-14	13:59:07	0.736654	561.227	FALSE	13
2022-09-14	13:59:08	0.737163	561.964	FALSE	13
2022-09-14	13:59:08	0.737315	562.701	FALSE	13
2022-09-14	13:59:08	0.725509	563.427	FALSE	13
2022-09-14	13:59:08	0.727341	564.154	FALSE	13
2022-09-14	13:59:09	0.730343	564.884	FALSE	13
2022-09-14	13:59:09	0.733651	565.618	FALSE	13
2022-09-14	13:59:09	0.680267	566.298	FALSE	13
2022-09-14	13:59:10	0.731921	567.03	FALSE	13
2022-09-14	13:59:10	-1.84508	567.03	FALSE	13
2022-09-14	13:59:10	-1.77795	567.03	FALSE	13
2022-09-14	13:59:10	-1.73052	567.03	FALSE	13
2022-09-14	13:59:11	-1.7605	567.03	FALSE	13
2022-09-14	13:59:11	-1.79383	567.03	FALSE	13
2022-09-14	13:59:11	-1.75744	567.03	FALSE	13
2022-09-14	13:59:11	-1.71485	567.03	FALSE	13
2022-09-14	13:59:12	-1.68548	567.03	FALSE	13
2022-09-14	13:59:12	-1.70894	567.03	FALSE	13
2022-09-14	13:59:12	-1.70075	567.03	FALSE	13
2022-09-14	13:59:12	-1.67357	567.03	FALSE	13
2022-09-14	13:59:13	-1.64452	567.03	FALSE	13
2022-09-14	13:59:13	-1.61454	567.03	FALSE	13
2022-09-14	13:59:13	-1.58808	567.03	FALSE	13
2022-09-14	13:59:14	-1.57235	567.03	FALSE	13
2022-09-14	13:59:14	-1.54599	567.03	FALSE	13
2022-09-14	13:59:14	-1.48752	567.03	FALSE	13
2022-09-14	13:59:14	-1.45357	567.03	FALSE	13
2022-09-14	13:59:15	-1.42095	567.03	FALSE	13
2022-09-14	13:59:15	-1.54172	567.03	FALSE	13
2022-09-14	13:59:15	-1.64502	567.03	FALSE	13
2022-09-14	13:59:15	-1.61612	567.03	FALSE	13
2022-09-14	13:59:16	-1.60304	567.03	FALSE	13
2022-09-14	13:59:16	-1.5548	567.03	FALSE	13
2022-09-14	13:59:16	-1.51281	567.03	FALSE	13
2022-09-14	13:59:16	-1.3949	567.03	FALSE	13
2022-09-14	13:59:17	-1.34726	567.03	FALSE	13
2022-09-14	13:59:17	-1.32884	567.03	FALSE	13
2022-09-14	13:59:17	-1.32131	567.03	FALSE	13
2022-09-14	13:59:18	-1.31006	567.03	FALSE	13
2022-09-14	13:59:18	-1.31098	567.03	FALSE	13
2022-09-14	13:59:18	-1.2976	567.03	FALSE	13
2022-09-14	13:59:18	-1.29368	567.03	FALSE	13
2022-09-14	13:59:19	-1.30034	567.03	FALSE	13
2022-09-14	13:59:19	-1.29912	567.03	FALSE	13
2022-09-14	13:59:19	-1.31749	567.03	FALSE	13
2022-09-14	13:59:19	-1.27388	567.03	FALSE	13
2022-09-14	13:59:20	-1.56106	567.03	FALSE	13
2022-09-14	13:59:20	-2.03648	567.03	FALSE	13
2022-09-14	13:59:20	-2.17647	567.03	FALSE	13
2022-09-14	13:59:20	-2.25434	567.03	FALSE	13
2022-09-14	13:59:21	-2.18136	567.03	FALSE	13
2022-09-14	13:59:21	-2.15648	567.03	FALSE	13
2022-09-14	13:59:21	-2.13648	567.03	FALSE	13
2022-09-14	13:59:22	-2.09352	567.03	FALSE	13
2022-09-14	13:59:22	-1.64492	567.03	FALSE	13
2022-09-14	13:59:22	-1.60095	567.03	FALSE	13
2022-09-14	13:59:22	-1.59917	567.03	FALSE	13
2022-09-14	13:59:23	-1.59022	567.03	FALSE	13
2022-09-14	13:59:23	-1.53205	567.03	FALSE	13
2022-09-14	13:59:23	-1.51714	567.03	FALSE	13
2022-09-14	13:59:23	-1.5809	567.03	FALSE	13
2022-09-14	13:59:24	-1.51032	567.03	FALSE	13
2022-09-14	13:59:24	0.72673	567.757	FALSE	13
2022-09-14	13:59:24	0.732939	568.49	FALSE	13
2022-09-14	13:59:24	0.73416	569.224	FALSE	13
2022-09-14	13:59:25	0.408359	569.632	FALSE	13
2022-09-14	13:59:25	0.348104	569.98	FALSE	13
2022-09-14	13:59:25	0.338842	570.319	FALSE	13
2022-09-14	13:59:26	0.314669	570.634	FALSE	13
2022-09-14	13:59:26	0.357672	570.992	FALSE	13
2022-09-14	13:59:26	0.353346	571.345	FALSE	13
2022-09-14	13:59:26	0.417265	571.762	FALSE	13
2022-09-14	13:59:27	0.252277	572.015	FALSE	13
2022-09-14	13:59:27	0.23411	572.249	FALSE	13
2022-09-14	13:59:27	0.411412	572.66	FALSE	13
2022-09-14	13:59:27	0.353702	573.014	FALSE	13
2022-09-14	13:59:28	0.449122	573.463	FALSE	13
2022-09-14	13:59:28	0.374211	573.837	FALSE	13
2022-09-14	13:59:28	0.410089	574.247	FALSE	13
2022-09-14	13:59:28	0.998028	575.245	FALSE	13
2022-09-14	13:59:29	3.26729	578.513	1	14
2022-09-14	13:59:29	2.70815	581.221	FALSE	14
2022-09-14	13:59:29	1.88296	583.104	FALSE	14
2022-09-14	13:59:30	1.39319	584.497	FALSE	14
2022-09-14	13:59:30	0.651819	585.149	FALSE	14
2022-09-14	13:59:30	1.72154	586.87	FALSE	14
2022-09-14	13:59:30	0.753193	587.623	FALSE	14
2022-09-14	13:59:31	1.32912	588.952	FALSE	14
2022-09-14	13:59:31	0.835484	589.788	FALSE	14
2022-09-14	13:59:31	0.925255	590.713	FALSE	14
2022-09-14	13:59:31	1.10317	591.816	FALSE	14
2022-09-14	13:59:32	0.80673	592.623	FALSE	14
2022-09-14	13:59:32	1.18429	593.807	FALSE	14
2022-09-14	13:59:32	0.379249	594.187	FALSE	14
2022-09-14	13:59:32	1.38373	595.57	FALSE	14
2022-09-14	13:59:33	0.825763	596.396	FALSE	14
2022-09-14	13:59:33	1.62973	598.026	FALSE	14
2022-09-14	13:59:33	1.54022	599.566	FALSE	14
2022-09-14	13:59:34	0.971514	600.538	FALSE	14
2022-09-14	13:59:34	1.05416	601.592	FALSE	14
2022-09-14	13:59:34	1.34027	602.932	FALSE	14
2022-09-14	13:59:34	2.69726	605.629	FALSE	14
2022-09-14	13:59:35	2.48083	608.11	FALSE	14
2022-09-14	13:59:35	2.67451	610.785	FALSE	14
2022-09-14	13:59:35	1.93889	612.724	FALSE	14
2022-09-14	13:59:36	1.82271	614.546	FALSE	14
2022-09-14	13:59:36	1.81589	616.362	FALSE	14
2022-09-14	13:59:36	1.45533	617.817	FALSE	14
2022-09-14	13:59:36	2.26179	620.079	FALSE	14
2022-09-14	13:59:36	2.17798	622.257	FALSE	14
2022-09-14	13:59:37	2.80474	625.062	FALSE	14
2022-09-14	13:59:37	2.28556	627.348	FALSE	14
2022-09-14	13:59:37	2.68515	630.033	FALSE	14
2022-09-14	13:59:38	2.05141	632.084	FALSE	14
2022-09-14	13:59:38	1.61879	633.703	FALSE	14
2022-09-14	13:59:38	1.862	635.565	FALSE	14
2022-09-14	13:59:38	1.07716	636.642	FALSE	14
2022-09-14	13:59:39	0.944033	637.586	FALSE	14
2022-09-14	13:59:39	0.621031	638.207	FALSE	14
2022-09-14	13:59:39	0.726527	638.934	FALSE	14
2022-09-14	13:59:39	0.294313	639.228	FALSE	14
2022-09-14	13:59:40	0.506018	639.734	FALSE	14
2022-09-14	13:59:40	0.914924	640.649	FALSE	14
2022-09-14	13:59:40	1.84948	642.498	FALSE	14
2022-09-14	13:59:40	1.02678	643.525	FALSE	14
2022-09-14	13:59:41	0.964746	644.49	FALSE	14
2022-09-14	13:59:41	0.501336	644.991	FALSE	14
2022-09-14	13:59:41	0.721437	645.713	FALSE	14
2022-09-14	13:59:42	0.581387	646.294	FALSE	14
2022-09-14	13:59:42	0.614568	646.909	FALSE	14
2022-09-14	13:59:42	-6.0579	646.909	FALSE	14
2022-09-14	13:59:42	-5.84782	646.909	FALSE	14
2022-09-14	13:59:43	-5.5864	646.909	FALSE	14
2022-09-14	13:59:43	-5.51892	646.909	FALSE	14
2022-09-14	13:59:43	-5.278	646.909	FALSE	14
2022-09-14	13:59:43	-5.05327	646.909	FALSE	14
2022-09-14	13:59:44	-4.95647	646.909	FALSE	14
2022-09-14	13:59:44	-4.75281	646.909	FALSE	14
2022-09-14	13:59:44	-4.59805	646.909	FALSE	14
2022-09-14	13:59:44	-4.20273	646.909	FALSE	14
2022-09-14	13:59:45	-4.05037	646.909	FALSE	14
2022-09-14	13:59:45	-3.45953	646.909	FALSE	14
2022-09-14	13:59:45	-3.37332	646.909	FALSE	14
2022-09-14	13:59:46	-0.915915	646.909	FALSE	14
2022-09-14	13:59:46	-1.31312	646.909	FALSE	14
2022-09-14	13:59:46	-1.10111	646.909	FALSE	14
2022-09-14	13:59:46	-1.35301	646.909	FALSE	14
2022-09-14	13:59:47	-1.06126	646.909	FALSE	14
2022-09-14	13:59:47	-1.7065	646.909	FALSE	14
2022-09-14	13:59:47	-1.43363	646.909	FALSE	14
2022-09-14	13:59:47	-1.50034	646.909	FALSE	14
2022-09-14	13:59:48	-1.618	646.909	FALSE	14
2022-09-14	13:59:48	-1.67642	646.909	FALSE	14
2022-09-14	13:59:48	-1.55088	646.909	FALSE	14
2022-09-14	13:59:49	-1.55785	646.909	FALSE	14
2022-09-14	13:59:49	-1.52574	646.909	FALSE	14
2022-09-14	13:59:49	-1.49352	646.909	FALSE	14
2022-09-14	13:59:49	-1.35469	646.909	FALSE	14
2022-09-14	13:59:50	-1.36233	646.909	FALSE	14
2022-09-14	13:59:50	-1.31994	646.909	FALSE	14
2022-09-14	13:59:50	-0.598053	646.909	FALSE	14
2022-09-14	13:59:50	0.671209	647.58	FALSE	14
2022-09-14	13:59:51	0.733397	648.313	FALSE	14
2022-09-14	13:59:51	0.729936	649.043	FALSE	14
2022-09-14	13:59:51	0.73584	649.779	FALSE	14
2022-09-14	13:59:51	0.72958	650.509	FALSE	14
2022-09-14	13:59:52	0.732379	651.241	FALSE	14
2022-09-14	13:59:52	0.732684	651.974	FALSE	14
2022-09-14	13:59:52	0.737315	652.711	FALSE	14
2022-09-14	13:59:53	0.733448	653.444	FALSE	14
2022-09-14	13:59:53	0.728003	654.172	FALSE	14
2022-09-14	13:59:53	0.734109	654.907	FALSE	14
2022-09-14	13:59:53	0.729428	655.636	FALSE	14
2022-09-14	13:59:54	0.729224	656.365	FALSE	14
2022-09-14	13:59:54	0.730089	657.095	FALSE	14
2022-09-14	13:59:54	0.729784	657.825	FALSE	14
2022-09-14	13:59:54	0.735534	658.561	FALSE	14
2022-09-14	13:59:55	0.729936	659.291	FALSE	14
2022-09-14	13:59:55	0.732074	660.023	FALSE	14
2022-09-14	13:59:55	0.728919	660.752	FALSE	14
2022-09-14	13:59:55	0.733244	661.485	FALSE	14
2022-09-14	13:59:56	0.733244	662.218	FALSE	14
2022-09-14	13:59:56	0.731717	662.95	FALSE	14
2022-09-14	13:59:56	0.73243	663.682	FALSE	14
2022-09-14	13:59:57	0.730089	664.412	FALSE	14
2022-09-14	13:59:57	0.727137	665.139	FALSE	14
2022-09-14	13:59:57	0.727748	665.867	FALSE	14
2022-09-14	13:59:57	0.727494	666.595	FALSE	14
2022-09-14	13:59:58	0.73701	667.332	FALSE	14
2022-09-14	13:59:58	0.733957	668.066	FALSE	14
2022-09-14	13:59:58	0.732379	668.798	FALSE	14
2022-09-14	13:59:58	0.731565	669.53	FALSE	14
2022-09-14	13:59:59	0.731412	670.261	FALSE	14
2022-09-14	13:59:59	0.736603	670.998	FALSE	14
2022-09-14	13:59:59	0.731972	671.73	FALSE	14
2022-09-14	13:59:59	0.727087	672.457	FALSE	14
2022-09-14	14:00:00	0.732786	673.189	FALSE	14
2022-09-14	14:00:00	0.739402	673.929	FALSE	14
2022-09-14	14:00:00	0.737061	674.666	FALSE	14
2022-09-14	14:00:01	0.730293	675.396	FALSE	14
2022-09-14	14:00:01	0.73355	676.13	FALSE	14
2022-09-14	14:00:01	0.729835	676.86	FALSE	14
2022-09-14	14:00:01	0.731717	677.591	FALSE	14
2022-09-14	14:00:02	0.732175	678.323	FALSE	14
2022-09-14	14:00:02	0.7307	679.054	FALSE	14
2022-09-14	14:00:02	0.729682	679.784	FALSE	14
2022-09-14	14:00:02	0.725712	680.51	FALSE	14
2022-09-14	14:00:03	0.729377	681.239	FALSE	14
2022-09-14	14:00:03	0.729377	681.968	FALSE	14
2022-09-14	14:00:03	0.73187	682.7	FALSE	14
2022-09-14	14:00:03	0.734313	683.434	FALSE	14
2022-09-14	14:00:04	0.731819	684.166	FALSE	14
2022-09-14	14:00:04	0.730598	684.897	FALSE	14
2022-09-14	14:00:04	0.729122	685.626	FALSE	14
2022-09-14	14:00:05	0.730343	686.356	FALSE	14
2022-09-14	14:00:05	0.733244	687.09	FALSE	14
2022-09-14	14:00:05	0.725509	687.815	FALSE	14
2022-09-14	14:00:05	0.729275	688.544	FALSE	14
2022-09-14	14:00:06	0.730343	689.275	FALSE	14
2022-09-14	14:00:06	0.737061	690.012	FALSE	14
2022-09-14	14:00:06	0.732175	690.744	FALSE	14
2022-09-14	14:00:06	0.7393	691.483	FALSE	14
2022-09-14	14:00:07	0.727596	692.211	FALSE	14
2022-09-14	14:00:07	0.734008	692.945	FALSE	14
2022-09-14	14:00:07	0.733092	693.678	FALSE	14
2022-09-14	14:00:07	0.726221	694.404	FALSE	14
2022-09-14	14:00:08	0.735687	695.14	FALSE	14
2022-09-14	14:00:08	0.730343	695.87	FALSE	14
2022-09-14	14:00:08	0.562506	696.433	FALSE	14
2022-09-14	14:00:09	0.507035	696.94	FALSE	14
2022-09-14	14:00:09	0.730242	697.67	FALSE	14
2022-09-14	14:00:09	0.737875	698.408	FALSE	14
2022-09-14	14:00:09	0.741489	699.149	FALSE	14
2022-09-14	14:00:10	0.732684	699.882	FALSE	14
2022-09-14	14:00:10	0.736857	700.619	FALSE	14
2022-09-14	14:00:10	0.737163	701.356	FALSE	14
2022-09-14	14:00:10	0.731158	702.087	FALSE	14
2022-09-14	14:00:11	0.725051	702.812	FALSE	14
2022-09-14	14:00:11	0.735382	703.548	FALSE	14
2022-09-14	14:00:11	0.730903	704.279	FALSE	14
2022-09-14	14:00:11	0.728613	705.007	FALSE	14
2022-09-14	14:00:12	0.731667	705.739	FALSE	14
2022-09-14	14:00:12	0.730293	706.469	FALSE	14
2022-09-14	14:00:12	0.733957	707.203	FALSE	14
2022-09-14	14:00:13	0.731463	707.935	FALSE	14
2022-09-14	14:00:13	0.735178	708.67	FALSE	14
2022-09-14	14:00:13	0.726832	709.397	FALSE	14
2022-09-14	14:00:13	0.730547	710.127	FALSE	14
2022-09-14	14:00:14	0.728766	710.856	FALSE	14
2022-09-14	14:00:14	0.738842	711.595	FALSE	14
2022-09-14	14:00:14	0.727697	712.322	FALSE	14
2022-09-14	14:00:14	0.735433	713.058	FALSE	14
2022-09-14	14:00:15	0.729682	713.787	FALSE	14
2022-09-14	14:00:15	0.730598	714.518	FALSE	14
2022-09-14	14:00:15	0.729224	715.247	FALSE	14
2022-09-14	14:00:15	0.734415	715.982	FALSE	14
2022-09-14	14:00:16	0.728817	716.711	FALSE	14
2022-09-14	14:00:16	0.728664	717.439	FALSE	14
2022-09-14	14:00:16	0.735076	718.174	FALSE	14
2022-09-14	14:00:17	0.198232	718.373	FALSE	14
2022-09-14	14:00:17	0.074873	718.447	FALSE	14
2022-09-14	14:00:17	-0.019987	718.447	FALSE	14
2022-09-14	14:00:17	-0.679071	718.447	FALSE	14
2022-09-14	14:00:18	-0.64706	718.447	FALSE	14
2022-09-14	14:00:18	0.693651	719.141	FALSE	14
2022-09-14	14:00:18	-1.57938	719.141	FALSE	14
2022-09-14	14:00:18	0.729173	719.87	FALSE	14
2022-09-14	14:00:19	0.725051	720.595	FALSE	14
2022-09-14	14:00:19	0.732939	721.328	FALSE	14
2022-09-14	14:00:19	0.732379	722.061	FALSE	14
2022-09-14	14:00:19	0.733244	722.794	FALSE	14
2022-09-14	14:00:20	0.726018	723.52	FALSE	14
2022-09-14	14:00:20	0.733346	724.253	FALSE	14
2022-09-14	14:00:20	0.732074	724.985	FALSE	14
2022-09-14	14:00:21	0.734517	725.72	FALSE	14
2022-09-14	14:00:21	0.729224	726.449	FALSE	14
2022-09-14	14:00:21	0.734466	727.183	FALSE	14
2022-09-14	14:00:21	0.734568	727.918	FALSE	14
2022-09-14	14:00:22	0.736857	728.655	FALSE	14
2022-09-14	14:00:22	0.732837	729.388	FALSE	14
2022-09-14	14:00:22	0.729478	730.117	FALSE	14
2022-09-14	14:00:22	0.729428	730.847	FALSE	14
2022-09-14	14:00:23	0.733193	731.58	FALSE	14
2022-09-14	14:00:23	0.738486	732.318	FALSE	14
2022-09-14	14:00:23	0.732634	733.051	FALSE	14
2022-09-14	14:00:23	0.726221	733.777	FALSE	14
2022-09-14	14:00:24	0.733244	734.51	FALSE	14
2022-09-14	14:00:24	0.728766	735.239	FALSE	14
2022-09-14	14:00:24	0.727545	735.967	FALSE	14
2022-09-14	14:00:25	0.732481	736.699	FALSE	14
2022-09-14	14:00:25	0.733041	737.432	FALSE	14
2022-09-14	14:00:25	0.732786	738.165	FALSE	14
2022-09-14	14:00:25	0.730598	738.896	FALSE	14
2022-09-14	14:00:26	0.729733	739.625	FALSE	14
2022-09-14	14:00:26	0.728715	740.354	FALSE	14
2022-09-14	14:00:26	0.729529	741.084	FALSE	14
2022-09-14	14:00:26	0.731565	741.815	FALSE	14
2022-09-14	14:00:27	0.72902	742.544	FALSE	14
2022-09-14	14:00:27	0.728562	743.273	FALSE	14
2022-09-14	14:00:27	0.731158	744.004	FALSE	14
2022-09-14	14:00:27	0.732277	744.736	FALSE	14
2022-09-14	14:00:28	0.727494	745.464	FALSE	14
2022-09-14	14:00:28	0.732583	746.196	FALSE	14
2022-09-14	14:00:28	0.727901	746.924	FALSE	14
2022-09-14	14:00:29	0.730954	747.655	FALSE	14
2022-09-14	14:00:29	0.734211	748.389	FALSE	14
2022-09-14	14:00:29	0.732023	749.121	FALSE	14
2022-09-14	14:00:29	0.730547	749.852	FALSE	14
2022-09-14	14:00:30	0.725712	750.578	FALSE	14
2022-09-14	14:00:30	0.731616	751.309	FALSE	14
2022-09-14	14:00:30	0.730191	752.039	FALSE	14
2022-09-14	14:00:30	0.727901	752.767	FALSE	14
2022-09-14	14:00:31	0.731107	753.498	FALSE	14
2022-09-14	14:00:31	0.727087	754.226	FALSE	14
2022-09-14	14:00:31	0.729275	754.955	FALSE	14
2022-09-14	14:00:31	0.731056	755.686	FALSE	14
2022-09-14	14:00:32	0.729733	756.416	FALSE	14
2022-09-14	14:00:32	0.724796	757.14	FALSE	14
2022-09-14	14:00:32	0.726679	757.867	FALSE	14
2022-09-14	14:00:33	0.729784	758.597	FALSE	14
2022-09-14	14:00:33	0.731259	759.328	FALSE	14
2022-09-14	14:00:33	0.730649	760.059	FALSE	14
2022-09-14	14:00:33	0.728766	760.788	FALSE	14
2022-09-14	14:00:34	0.733499	761.521	FALSE	14
2022-09-14	14:00:34	0.724338	762.245	FALSE	14
2022-09-14	14:00:34	0.729784	762.975	FALSE	14
2022-09-14	14:00:34	0.731463	763.707	FALSE	14
2022-09-14	14:00:35	0.728104	764.435	FALSE	14
2022-09-14	14:00:35	0.728257	765.163	FALSE	14
2022-09-14	14:00:35	0.732125	765.895	FALSE	14
2022-09-14	14:00:35	0.724542	766.62	FALSE	14
2022-09-14	14:00:36	0.730751	767.35	FALSE	14
2022-09-14	14:00:36	0.731107	768.081	FALSE	14
2022-09-14	14:00:36	0.729784	768.811	FALSE	14
2022-09-14	14:00:37	0.735331	769.547	FALSE	14
2022-09-14	14:00:37	0.732634	770.279	FALSE	14
2022-09-14	14:00:37	0.727392	771.007	FALSE	14
2022-09-14	14:00:37	0.732125	771.739	FALSE	14
2022-09-14	14:00:38	0.731921	772.471	FALSE	14
2022-09-14	14:00:38	0.730598	773.201	FALSE	14
2022-09-14	14:00:38	0.723779	773.925	FALSE	14
2022-09-14	14:00:38	0.729173	774.654	FALSE	14
2022-09-14	14:00:39	0.73187	775.386	FALSE	14
2022-09-14	14:00:39	0.728817	776.115	FALSE	14
2022-09-14	14:00:39	0.423168	776.538	FALSE	14
2022-09-14	14:00:39	0.730547	777.269	FALSE	14
2022-09-14	14:00:40	0.728155	777.997	FALSE	14
2022-09-14	14:00:40	0.419555	778.416	FALSE	14
2022-09-14	14:00:40	0.724186	779.141	FALSE	14
2022-09-14	14:00:41	-1.03368	779.141	FALSE	14
2022-09-14	14:00:41	-2.01683	779.141	FALSE	14
2022-09-14	14:00:41	0.559809	779.7	FALSE	14
2022-09-14	14:00:41	0.438181	780.139	FALSE	14
2022-09-14	14:00:42	0.732226	780.871	FALSE	14
2022-09-14	14:00:42	0.738537	781.609	FALSE	14

## Sheet: KimChi_prong_2022914135524
						**GoPro Fitting: 13:45
2022-09-14	13:55:24	0.164237
2022-09-14	13:55:24	0.159097
2022-09-14	13:55:24	0.14729
2022-09-14	13:55:25	0.165662
2022-09-14	13:55:25	0.235382
2022-09-14	13:55:25	0.233753
2022-09-14	13:55:25	0.259148
2022-09-14	13:55:26	0.292685
2022-09-14	13:55:26	0.320369
2022-09-14	13:55:26	0.304186
2022-09-14	13:55:26	0.212685
2022-09-14	13:55:27	0.247748
2022-09-14	13:55:27	0.428664
2022-09-14	13:55:27	0.632837
2022-09-14	13:55:28	0.310954
2022-09-14	13:55:28	1.00246
2022-09-14	13:55:28	0.599097
2022-09-14	13:55:28	0.507697
2022-09-14	13:55:29	0.303575
2022-09-14	13:55:29	0.363168
2022-09-14	13:55:29	0.479249
2022-09-14	13:55:29	0.829428
2022-09-14	13:55:30	0.787952
2022-09-14	13:55:30	1.47075
2022-09-14	13:55:30	2.62668
2022-09-14	13:55:31	0.64383
2022-09-14	13:55:31	0.290344
2022-09-14	13:55:31	0.414466
2022-09-14	13:55:31	0.30383
2022-09-14	13:55:32	0.214364
2022-09-14	13:55:32	0.373244
2022-09-14	13:55:32	0.524084
2022-09-14	13:55:32	0.411921
2022-09-14	13:55:33	0.396501
2022-09-14	13:55:33	0.385051
2022-09-14	13:55:33	0.391056
2022-09-14	13:55:33	0.383728
2022-09-14	13:55:34	0.370344
2022-09-14	13:55:34	0.341794
2022-09-14	13:55:34	0.315331
2022-09-14	13:55:35	0.28897
2022-09-14	13:55:35	0.295229
2022-09-14	13:55:35	0.338181
2022-09-14	13:55:35	0.310802
2022-09-14	13:55:36	0.285713
2022-09-14	13:55:36	0.298486
2022-09-14	13:55:36	0.31355
2022-09-14	13:55:36	0.326781
2022-09-14	13:55:37	0.317519
2022-09-14	13:55:37	0.320471
2022-09-14	13:55:37	0.338791
2022-09-14	13:55:37	0.303321
2022-09-14	13:55:38	0.315891
2022-09-14	13:55:38	0.348868
2022-09-14	13:55:38	0.347952
2022-09-14	13:55:39	0.138995
2022-09-14	13:55:39	0.120573
2022-09-14	13:55:39	0.130853
2022-09-14	13:55:39	0.394313
2022-09-14	13:55:40	0.492277
2022-09-14	13:55:40	0.326374
2022-09-14	13:55:40	0.510089
2022-09-14	13:55:40	0.459148
2022-09-14	13:55:41	0.548461
2022-09-14	13:55:41	0.531819
2022-09-14	13:55:41	0.463473
2022-09-14	13:55:41	0.482456
2022-09-14	13:55:42	0.117214
2022-09-14	13:55:42	0.365713
2022-09-14	13:55:42	0.745102
2022-09-14	13:55:43	0.599402
2022-09-14	13:55:43	0.601438
2022-09-14	13:55:43	1.92551
2022-09-14	13:55:43	1.63874
2022-09-14	13:55:44	0.425204
2022-09-14	13:55:44	0.160013
2022-09-14	13:55:44	0.225407
2022-09-14	13:55:44	0.157977
2022-09-14	13:55:45	0.146222
2022-09-14	13:55:45	0.17014
2022-09-14	13:55:45	0.0277992
2022-09-14	13:55:45	0.325051
2022-09-14	13:55:46	0.36841
2022-09-14	13:55:46	0.506934
2022-09-14	13:55:46	0.130853
2022-09-14	13:55:47	0.342608
2022-09-14	13:55:47	0.205356
2022-09-14	13:55:47	0.406476
2022-09-14	13:55:47	0.279351
2022-09-14	13:55:48	0.375687
2022-09-14	13:55:48	0.459046
2022-09-14	13:55:48	0.258842
2022-09-14	13:55:48	0.870954
2022-09-14	13:55:49	0.635534
2022-09-14	13:55:49	0.382863
2022-09-14	13:55:49	0.265967
2022-09-14	13:55:49	0.0644913
2022-09-14	13:55:50	-0.0745417
2022-09-14	13:55:50	0.139199
2022-09-14	13:55:50	0.0525321
2022-09-14	13:55:51	0.203321
2022-09-14	13:55:51	1.40261
2022-09-14	13:55:51	1.77976
2022-09-14	13:55:51	0.527443
2022-09-14	13:55:52	0.684593
2022-09-14	13:55:52	0.463321
2022-09-14	13:55:52	1.15523
2022-09-14	13:55:52	0.547341
2022-09-14	13:55:53	0.778028
2022-09-14	13:55:53	0.983779
2022-09-14	13:55:53	1.18658
2022-09-14	13:55:53	0.996349
2022-09-14	13:55:54	1.08938
2022-09-14	13:55:54	0.525203
2022-09-14	13:55:54	1.58841
2022-09-14	13:55:55	1.46317
2022-09-14	13:55:55	1.84571
2022-09-14	13:55:55	0.8107
2022-09-14	13:55:55	0.987442
2022-09-14	13:55:56	0.752277
2022-09-14	13:55:56	0.664287
2022-09-14	13:55:56	0.945051
2022-09-14	13:55:56	0.936705
2022-09-14	13:55:57	0.666934
2022-09-14	13:55:57	1.33202
2022-09-14	13:55:57	1.48597
2022-09-14	13:55:58	1.67543
2022-09-14	13:55:58	1.76205
2022-09-14	13:55:58	2.53487
2022-09-14	13:55:58	5.78301
2022-09-14	13:55:59	5.11263
2022-09-14	13:55:59	6.14459
2022-09-14	13:55:59	4.34357
2022-09-14	13:55:59	3.06841
2022-09-14	13:56:00	2.01182
2022-09-14	13:56:00	2.36515
2022-09-14	13:56:00	2.2193
2022-09-14	13:56:00	2.02892
2022-09-14	13:56:01	2.21284
2022-09-14	13:56:01	2.44215
2022-09-14	13:56:01	2.84902
2022-09-14	13:56:02	1.64663
2022-09-14	13:56:02	0.580064
2022-09-14	13:56:02	0.615891
2022-09-14	13:56:02	1.31319
2022-09-14	13:56:03	4.91411
2022-09-14	13:56:03	6.01487
2022-09-14	13:56:03	5.1424
2022-09-14	13:56:03	3.40052
2022-09-14	13:56:04	1.28261
2022-09-14	13:56:04	0.631616
2022-09-14	13:56:04	0.408868
2022-09-14	13:56:04	0.156145
2022-09-14	13:56:05	0.642405
2022-09-14	13:56:05	0.217723
2022-09-14	13:56:05	0.1193
2022-09-14	13:56:06	-0.034389
2022-09-14	13:56:06	0.0427101
2022-09-14	13:56:06	-0.0772389
2022-09-14	13:56:06	0.185051
2022-09-14	13:56:07	-0.0989692
2022-09-14	13:56:07	0.254771
2022-09-14	13:56:07	4.22286
2022-09-14	13:56:07	5.29039
2022-09-14	13:56:08	3.21803
2022-09-14	13:56:08	0.763728
2022-09-14	13:56:08	1.3367
2022-09-14	13:56:08	0.861946
2022-09-14	13:56:09	0.827494
2022-09-14	13:56:09	0.387188
2022-09-14	13:56:09	0.320827
2022-09-14	13:56:10	0.72612
2022-09-14	13:56:10	0.303626
2022-09-14	13:56:10	0.936043
2022-09-14	13:56:10	0.257061
2022-09-14	13:56:11	0.14841
2022-09-14	13:56:11	0.426476
2022-09-14	13:56:11	0.413397
2022-09-14	13:56:11	0.408257
2022-09-14	13:56:12	0.788002
2022-09-14	13:56:12	1.56128
2022-09-14	13:56:12	1.2192
2022-09-14	13:56:12	0.651972
2022-09-14	13:56:13	0.520623
2022-09-14	13:56:13	1.14271
2022-09-14	13:56:13	1.50617
2022-09-14	13:56:14	1.09116
2022-09-14	13:56:14	1.80159
2022-09-14	13:56:14	0.735433
2022-09-14	13:56:14	0.819148
2022-09-14	13:56:15	0.523422
2022-09-14	13:56:15	0.437316
2022-09-14	13:56:15	0.586883
2022-09-14	13:56:15	0.300267
2022-09-14	13:56:16	0.648511
2022-09-14	13:56:16	0.303982
2022-09-14	13:56:16	0.576094
2022-09-14	13:56:16	0.369122
2022-09-14	13:56:17	0.433651
2022-09-14	13:56:17	0.14042
2022-09-14	13:56:17	0.451718
2022-09-14	13:56:18	1.00016
2022-09-14	13:56:18	1.80683
2022-09-14	13:56:18	3.20434
2022-09-14	13:56:18	1.69014
2022-09-14	13:56:19	1.61915
2022-09-14	13:56:19	1.14103
2022-09-14	13:56:19	0.723372
2022-09-14	13:56:19	0.632023
2022-09-14	13:56:20	1.0221
2022-09-14	13:56:20	1.09589
2022-09-14	13:56:20	1.13777
2022-09-14	13:56:20	0.405407
2022-09-14	13:56:21	0.431005
2022-09-14	13:56:21	0.402608
2022-09-14	13:56:21	-0.12986
2022-09-14	13:56:22	-0.524312
2022-09-14	13:56:22	-0.729045
2022-09-14	13:56:22	-0.519529
2022-09-14	13:56:22	-0.17902
2022-09-14	13:56:23	0.604644
2022-09-14	13:56:23	1.77884
2022-09-14	13:56:23	1.82963
2022-09-14	13:56:23	1.61167
2022-09-14	13:56:24	1.30347
2022-09-14	13:56:24	0.841336
2022-09-14	13:56:24	0.670852
2022-09-14	13:56:25	0.475891
2022-09-14	13:56:25	0.277723
2022-09-14	13:56:25	0.582201
2022-09-14	13:56:25	0.727799
2022-09-14	13:56:26	0.724186
2022-09-14	13:56:26	0.730343
2022-09-14	13:56:26	0.726527
2022-09-14	13:56:26	0.732379
2022-09-14	13:56:27	0.72388
2022-09-14	13:56:27	0.728206
2022-09-14	13:56:27	0.721946
2022-09-14	13:56:27	0.729173
2022-09-14	13:56:28	0.72617
2022-09-14	13:56:28	0.731921
2022-09-14	13:56:28	0.727392
2022-09-14	13:56:29	0.721132
2022-09-14	13:56:29	0.727188
2022-09-14	13:56:29	0.723779
2022-09-14	13:56:29	0.727748
2022-09-14	13:56:30	0.723779
2022-09-14	13:56:30	0.722252
2022-09-14	13:56:30	0.724084
2022-09-14	13:56:30	0.729377
2022-09-14	13:56:31	0.728512
2022-09-14	13:56:31	0.727545
2022-09-14	13:56:31	0.719198
2022-09-14	13:56:31	0.726425
2022-09-14	13:56:32	0.724237
2022-09-14	13:56:32	0.731616
2022-09-14	13:56:32	0.728461
2022-09-14	13:56:33	0.730242
2022-09-14	13:56:33	0.719504
2022-09-14	13:56:33	0.727697
2022-09-14	13:56:33	0.72383
2022-09-14	13:56:34	0.733957
2022-09-14	13:56:34	0.724847
2022-09-14	13:56:34	0.731667
2022-09-14	13:56:34	0.727697
2022-09-14	13:56:35	0.72902
2022-09-14	13:56:35	0.732074
2022-09-14	13:56:35	0.723015
2022-09-14	13:56:35	0.730547
2022-09-14	13:56:36	0.729478
2022-09-14	13:56:36	0.728155
2022-09-14	13:56:36	0.728308
2022-09-14	13:56:37	0.734262
2022-09-14	13:56:37	0.72444
2022-09-14	13:56:37	0.722761
2022-09-14	13:56:37	0.729224
2022-09-14	13:56:38	0.72612
2022-09-14	13:56:38	0.724644
2022-09-14	13:56:38	0.728155
2022-09-14	13:56:38	0.726883
2022-09-14	13:56:39	0.320064
2022-09-14	13:56:39	-1.2292
2022-09-14	13:56:39	-0.910674
2022-09-14	13:56:39	-0.949351
2022-09-14	13:56:40	-1.37759
2022-09-14	13:56:40	-1.55342
2022-09-14	13:56:40	-1.69663
2022-09-14	13:56:41	-1.78436
2022-09-14	13:56:41	-1.76696
2022-09-14	13:56:41	-1.74401
2022-09-14	13:56:41	-1.88971
2022-09-14	13:56:42	-1.795
2022-09-14	13:56:42	-1.79006
2022-09-14	13:56:42	-1.67724
2022-09-14	13:56:42	-1.54787
2022-09-14	13:56:43	-1.51658
2022-09-14	13:56:43	-1.49556
2022-09-14	13:56:43	-1.50421
2022-09-14	13:56:43	-1.63388
2022-09-14	13:56:44	-1.6353
2022-09-14	13:56:44	-1.552
2022-09-14	13:56:44	-1.48589
2022-09-14	13:56:45	-1.09337
2022-09-14	13:56:45	-1.14966
2022-09-14	13:56:45	-1.02833
2022-09-14	13:56:45	-0.798663
2022-09-14	13:56:46	-0.363142
2022-09-14	13:56:46	0.0667814
2022-09-14	13:56:46	0.191972
2022-09-14	13:56:46	0.275687
2022-09-14	13:56:47	0.776959
2022-09-14	13:56:47	0.255076
2022-09-14	13:56:47	-0.111285
2022-09-14	13:56:47	-0.0065519
2022-09-14	13:56:48	-0.22533
2022-09-14	13:56:48	-0.187112
2022-09-14	13:56:48	-0.00548322
2022-09-14	13:56:49	-0.388129
2022-09-14	13:56:49	-0.0624806
2022-09-14	13:56:49	-0.130216
2022-09-14	13:56:49	0.0710053
2022-09-14	13:56:50	-0.137748
2022-09-14	13:56:50	0.286781
2022-09-14	13:56:50	0.350038
2022-09-14	13:56:50	-1.86691
2022-09-14	13:56:51	0.232074
2022-09-14	13:56:51	0.732583
2022-09-14	13:56:51	0.729071
2022-09-14	13:56:51	0.73472
2022-09-14	13:56:52	0.73131
2022-09-14	13:56:52	0.726883
2022-09-14	13:56:52	0.730547
2022-09-14	13:56:53	0.727036
2022-09-14	13:56:53	0.731412
2022-09-14	13:56:53	0.723372
2022-09-14	13:56:53	0.727137
2022-09-14	13:56:54	0.730445
2022-09-14	13:56:54	0.723524
2022-09-14	13:56:54	0.732074
2022-09-14	13:56:54	0.725814
2022-09-14	13:56:55	0.724237
2022-09-14	13:56:55	0.735178
2022-09-14	13:56:55	0.726374
2022-09-14	13:56:56	0.737315
2022-09-14	13:56:56	0.731056
2022-09-14	13:56:56	0.734618
2022-09-14	13:56:56	0.736349
2022-09-14	13:56:57	0.723473
2022-09-14	13:56:57	0.725611
2022-09-14	13:56:57	0.731412
2022-09-14	13:56:57	0.722608
2022-09-14	13:56:58	0.729428
2022-09-14	13:56:58	0.72617
2022-09-14	13:56:58	0.730496
2022-09-14	13:56:58	0.727901
2022-09-14	13:56:59	0.734924
2022-09-14	13:56:59	0.73187
2022-09-14	13:56:59	0.728461
2022-09-14	13:57:00	0.736807
2022-09-14	13:57:00	0.73645
2022-09-14	13:57:00	0.733651
2022-09-14	13:57:00	0.728562
2022-09-14	13:57:01	0.732735
2022-09-14	13:57:01	0.721591
2022-09-14	13:57:01	0.727646
2022-09-14	13:57:01	0.732074
2022-09-14	13:57:02	0.73131
2022-09-14	13:57:02	0.731209
2022-09-14	13:57:02	0.725967
2022-09-14	13:57:02	0.739351
2022-09-14	13:57:03	0.732125
2022-09-14	13:57:03	0.731005
2022-09-14	13:57:03	0.728155
2022-09-14	13:57:04	0.72841
2022-09-14	13:57:04	0.729173
2022-09-14	13:57:04	0.727239
2022-09-14	13:57:04	0.734466
2022-09-14	13:57:05	0.726527
2022-09-14	13:57:05	0.734466
2022-09-14	13:57:05	0.731056
2022-09-14	13:57:05	0.727087
2022-09-14	13:57:06	0.728562
2022-09-14	13:57:06	0.729682
2022-09-14	13:57:06	0.725153
2022-09-14	13:57:06	0.728104
2022-09-14	13:57:07	0.726425
2022-09-14	13:57:07	0.731565
2022-09-14	13:57:07	0.721183
2022-09-14	13:57:08	0.729428
2022-09-14	13:57:08	0.0688679
2022-09-14	13:57:08	0.716298
2022-09-14	13:57:08	-5.22426
2022-09-14	13:57:09	-7.1748
2022-09-14	13:57:09	-6.6524
2022-09-14	13:57:09	-3.20645
2022-09-14	13:57:09	-3.27887
2022-09-14	13:57:10	-3.26747
2022-09-14	13:57:10	-3.22716
2022-09-14	13:57:10	-3.17322
2022-09-14	13:57:10	-3.11261
2022-09-14	13:57:11	-2.96278
2022-09-14	13:57:11	-2.87581
2022-09-14	13:57:11	-2.76579
2022-09-14	13:57:12	-2.65245
2022-09-14	13:57:12	-2.57016
2022-09-14	13:57:12	-2.44319
2022-09-14	13:57:12	-0.16533
2022-09-14	13:57:13	0.73131
2022-09-14	13:57:13	0.729173
2022-09-14	13:57:13	0.732888
2022-09-14	13:57:13	0.740369
2022-09-14	13:57:14	0.730598
2022-09-14	13:57:14	0.728206
2022-09-14	13:57:14	0.728766
2022-09-14	13:57:14	0.723779
2022-09-14	13:57:15	0.726679
2022-09-14	13:57:15	0.728461
2022-09-14	13:57:15	0.731463
2022-09-14	13:57:16	0.730547
2022-09-14	13:57:16	0.732684
2022-09-14	13:57:16	0.73243
2022-09-14	13:57:16	0.725305
2022-09-14	13:57:17	0.731107
2022-09-14	13:57:17	0.729987
2022-09-14	13:57:17	0.727646
2022-09-14	13:57:17	0.730496
2022-09-14	13:57:18	0.732277
2022-09-14	13:57:18	0.729122
2022-09-14	13:57:18	0.732481
2022-09-14	13:57:18	0.736756
2022-09-14	13:57:19	0.72444
2022-09-14	13:57:19	0.732074
2022-09-14	13:57:19	0.725102
2022-09-14	13:57:20	0.728461
2022-09-14	13:57:20	0.732888
2022-09-14	13:57:20	0.732481
2022-09-14	13:57:20	0.730954
2022-09-14	13:57:21	0.735127
2022-09-14	13:57:21	0.735433
2022-09-14	13:57:21	0.728359
2022-09-14	13:57:21	0.732074
2022-09-14	13:57:22	0.730649
2022-09-14	13:57:22	0.732939
2022-09-14	13:57:22	0.734975
2022-09-14	13:57:22	0.734822
2022-09-14	13:57:23	0.730903
2022-09-14	13:57:23	0.731768
2022-09-14	13:57:23	0.735789
2022-09-14	13:57:24	0.735178
2022-09-14	13:57:24	0.727748
2022-09-14	13:57:24	0.723931
2022-09-14	13:57:24	0.731259
2022-09-14	13:57:25	0.72612
2022-09-14	13:57:25	0.726527
2022-09-14	13:57:25	0.732175
2022-09-14	13:57:25	0.727748
2022-09-14	13:57:26	0.724033
2022-09-14	13:57:26	0.728257
2022-09-14	13:57:26	0.730038
2022-09-14	13:57:26	0.728359
2022-09-14	13:57:27	0.736298
2022-09-14	13:57:27	0.734109
2022-09-14	13:57:27	0.728461
2022-09-14	13:57:28	0.735026
2022-09-14	13:57:28	0.729377
2022-09-14	13:57:28	0.730954
2022-09-14	13:57:28	0.728461
2022-09-14	13:57:29	0.728206
2022-09-14	13:57:29	0.725204
2022-09-14	13:57:29	0.731819
2022-09-14	13:57:29	0.737875
2022-09-14	13:57:30	0.733448
2022-09-14	13:57:30	0.726425
2022-09-14	13:57:30	0.730751
2022-09-14	13:57:30	0.729784
2022-09-14	13:57:31	0.736145
2022-09-14	13:57:31	0.735433
2022-09-14	13:57:31	0.732074
2022-09-14	13:57:32	0.733702
2022-09-14	13:57:32	0.731972
2022-09-14	13:57:32	0.730751
2022-09-14	13:57:32	0.735891
2022-09-14	13:57:33	0.731158
2022-09-14	13:57:33	0.736145
2022-09-14	13:57:33	0.735229
2022-09-14	13:57:33	0.730242
2022-09-14	13:57:34	0.642405
2022-09-14	13:57:34	-0.874083
2022-09-14	13:57:34	-0.488435
2022-09-14	13:57:35	-0.467722
2022-09-14	13:57:35	-0.489452
2022-09-14	13:57:35	-0.512201
2022-09-14	13:57:35	0.132328
2022-09-14	13:57:36	0.248715
2022-09-14	13:57:36	0.338944
2022-09-14	13:57:36	-2.14365
2022-09-14	13:57:36	-2.0438
2022-09-14	13:57:37	-1.98925
2022-09-14	13:57:37	-1.89994
2022-09-14	13:57:37	-1.76324
2022-09-14	13:57:38	-1.75536
2022-09-14	13:57:38	-1.58385
2022-09-14	13:57:38	-1.41235
2022-09-14	13:57:38	-1.39189
2022-09-14	13:57:39	-1.44044
2022-09-14	13:57:39	-1.40421
2022-09-14	13:57:39	0.596756
2022-09-14	13:57:39	0.702964
2022-09-14	13:57:40	0.681743
2022-09-14	13:57:40	-0.164058
2022-09-14	13:57:40	-0.112404
2022-09-14	13:57:40	-0.096272
2022-09-14	13:57:41	-0.154643
2022-09-14	13:57:41	-0.111895
2022-09-14	13:57:41	-0.121921
2022-09-14	13:57:41	0.0778247
2022-09-14	13:57:42	0.510852
2022-09-14	13:57:42	0.141489
2022-09-14	13:57:42	-0.103397
2022-09-14	13:57:43	-0.110063
2022-09-14	13:57:43	-0.0870099
2022-09-14	13:57:43	-0.0382059
2022-09-14	13:57:43	-0.181412
2022-09-14	13:57:44	-0.295559
2022-09-14	13:57:44	-0.366959
2022-09-14	13:57:44	-0.49103
2022-09-14	13:57:44	-0.528689
2022-09-14	13:57:45	-0.548028
2022-09-14	13:57:45	-0.464414
2022-09-14	13:57:45	-0.561106
2022-09-14	13:57:45	-1.49052
2022-09-14	13:57:46	-0.793676
2022-09-14	13:57:46	-0.860699
2022-09-14	13:57:46	-0.661055
2022-09-14	13:57:47	-0.612404
2022-09-14	13:57:47	-0.621055
2022-09-14	13:57:47	-0.60131
2022-09-14	13:57:47	-0.599987
2022-09-14	13:57:48	-0.593524
2022-09-14	13:57:48	-0.596424
2022-09-14	13:57:48	-0.579631
2022-09-14	13:57:48	-0.567468
2022-09-14	13:57:49	-0.546857
2022-09-14	13:57:49	-0.422328
2022-09-14	13:57:49	-0.365178
2022-09-14	13:57:49	-0.324669
2022-09-14	13:57:50	-0.3236
2022-09-14	13:57:50	-0.250928
2022-09-14	13:57:50	-0.241514
2022-09-14	13:57:51	-0.199478
2022-09-14	13:57:51	-0.284974
2022-09-14	13:57:51	0.601438
2022-09-14	13:57:51	0.742048
2022-09-14	13:57:52	0.733601
2022-09-14	13:57:52	0.727137
2022-09-14	13:57:52	0.591158
2022-09-14	13:57:52	0.727443
2022-09-14	13:57:53	0.727341
2022-09-14	13:57:53	0.729529
2022-09-14	13:57:53	0.732634
2022-09-14	13:57:53	0.720979
2022-09-14	13:57:54	0.731412
2022-09-14	13:57:54	0.731819
2022-09-14	13:57:54	0.732328
2022-09-14	13:57:55	0.727137
2022-09-14	13:57:55	0.731768
2022-09-14	13:57:55	0.729987
2022-09-14	13:57:55	0.730903
2022-09-14	13:57:56	0.732583
2022-09-14	13:57:56	0.732481
2022-09-14	13:57:56	0.726578
2022-09-14	13:57:56	0.73757
2022-09-14	13:57:57	0.729682
2022-09-14	13:57:57	0.734568
2022-09-14	13:57:57	0.727799
2022-09-14	13:57:57	0.727137
2022-09-14	13:57:58	0.732125
2022-09-14	13:57:58	0.734313
2022-09-14	13:57:58	0.72612
2022-09-14	13:57:59	0.733804
2022-09-14	13:57:59	0.731565
2022-09-14	13:57:59	0.730598
2022-09-14	13:57:59	0.735178
2022-09-14	13:58:00	0.734415
2022-09-14	13:58:00	0.731768
2022-09-14	13:58:00	0.736094
2022-09-14	13:58:00	0.728817
2022-09-14	13:58:01	0.729478
2022-09-14	13:58:01	0.736247
2022-09-14	13:58:01	0.730038
2022-09-14	13:58:01	0.732786
2022-09-14	13:58:02	0.730445
2022-09-14	13:58:02	0.736145
2022-09-14	13:58:02	0.728257
2022-09-14	13:58:03	0.723117
2022-09-14	13:58:03	0.728054
2022-09-14	13:58:03	0.727392
2022-09-14	13:58:03	-0.251081
2022-09-14	13:58:04	0.697163
2022-09-14	13:58:04	0.698333
2022-09-14	13:58:04	0.704288
2022-09-14	13:58:04	0.477621
2022-09-14	13:58:05	0.72673
2022-09-14	13:58:05	0.726781
2022-09-14	13:58:05	0.730547
2022-09-14	13:58:05	0.732684
2022-09-14	13:58:06	0.722914
2022-09-14	13:58:06	0.731158
2022-09-14	13:58:06	0.724746
2022-09-14	13:58:07	0.728868
2022-09-14	13:58:07	0.72897
2022-09-14	13:58:07	0.732074
2022-09-14	13:58:07	0.730954
2022-09-14	13:58:08	0.726476
2022-09-14	13:58:08	0.724389
2022-09-14	13:58:08	0.728257
2022-09-14	13:58:08	0.738028
2022-09-14	13:58:09	0.730649
2022-09-14	13:58:09	0.735026
2022-09-14	13:58:09	0.728919
2022-09-14	13:58:09	0.73243
2022-09-14	13:58:10	0.732735
2022-09-14	13:58:10	0.736196
2022-09-14	13:58:10	0.732939
2022-09-14	13:58:11	0.729326
2022-09-14	13:58:11	0.728766
2022-09-14	13:58:11	0.730598
2022-09-14	13:58:11	0.727952
2022-09-14	13:58:12	0.736857
2022-09-14	13:58:12	0.7307
2022-09-14	13:58:12	0.727901
2022-09-14	13:58:12	0.734924
2022-09-14	13:58:13	0.740827
2022-09-14	13:58:13	0.73584
2022-09-14	13:58:13	0.727646
2022-09-14	13:58:13	0.72958
2022-09-14	13:58:14	0.725458
2022-09-14	13:58:14	0.73014
2022-09-14	13:58:14	0.730394
2022-09-14	13:58:15	0.73472
2022-09-14	13:58:15	0.727596
2022-09-14	13:58:15	0.740318
2022-09-14	13:58:15	0.731819
2022-09-14	13:58:16	0.733855
2022-09-14	13:58:16	0.737722
2022-09-14	13:58:16	0.731158
2022-09-14	13:58:16	0.726221
2022-09-14	13:58:17	0.729275
2022-09-14	13:58:17	0.724389
2022-09-14	13:58:17	0.731056
2022-09-14	13:58:17	0.729529
2022-09-14	13:58:18	0.728461
2022-09-14	13:58:18	0.722404
2022-09-14	13:58:18	0.730801
2022-09-14	13:58:19	0.727494
2022-09-14	13:58:19	0.726679
2022-09-14	13:58:19	0.730598
2022-09-14	13:58:19	0.728817
2022-09-14	13:58:20	0.723422
2022-09-14	13:58:20	0.727952
2022-09-14	13:58:20	0.735585
2022-09-14	13:58:20	0.730751
2022-09-14	13:58:21	0.722659
2022-09-14	13:58:21	0.73299
2022-09-14	13:58:21	0.731616
2022-09-14	13:58:21	0.731005
2022-09-14	13:58:22	0.726272
2022-09-14	13:58:22	0.732735
2022-09-14	13:58:22	0.732023
2022-09-14	13:58:23	0.731412
2022-09-14	13:58:23	0.731514
2022-09-14	13:58:23	0.729784
2022-09-14	13:58:23	0.731107
2022-09-14	13:58:24	0.735076
2022-09-14	13:58:24	0.72897
2022-09-14	13:58:24	0.731768
2022-09-14	13:58:24	0.729733
2022-09-14	13:58:25	0.734313
2022-09-14	13:58:25	0.731768
2022-09-14	13:58:25	0.732328
2022-09-14	13:58:25	0.729529
2022-09-14	13:58:26	0.731056
2022-09-14	13:58:26	0.733193
2022-09-14	13:58:26	0.733041
2022-09-14	13:58:27	0.730242
2022-09-14	13:58:27	0.733193
2022-09-14	13:58:27	0.73014
2022-09-14	13:58:27	0.728308
2022-09-14	13:58:28	0.72673
2022-09-14	13:58:28	0.732583
2022-09-14	13:58:28	0.736145
2022-09-14	13:58:28	0.73416
2022-09-14	13:58:29	0.727748
2022-09-14	13:58:29	0.726221
2022-09-14	13:58:29	0.725458
2022-09-14	13:58:29	0.730751
2022-09-14	13:58:30	0.728868
2022-09-14	13:58:30	0.727494
2022-09-14	13:58:30	0.730191
2022-09-14	13:58:31	0.730242
2022-09-14	13:58:31	0.731717
2022-09-14	13:58:31	0.733957
2022-09-14	13:58:31	0.729784
2022-09-14	13:58:32	0.731616
2022-09-14	13:58:32	0.735382
2022-09-14	13:58:32	0.731209
2022-09-14	13:58:32	0.730801
2022-09-14	13:58:33	0.729987
2022-09-14	13:58:33	0.73243
2022-09-14	13:58:33	0.728613
2022-09-14	13:58:34	0.731514
2022-09-14	13:58:34	0.731107
2022-09-14	13:58:34	0.731361
2022-09-14	13:58:34	0.728003
2022-09-14	13:58:35	0.729478
2022-09-14	13:58:35	0.731717
2022-09-14	13:58:35	0.726832
2022-09-14	13:58:35	0.729071
2022-09-14	13:58:36	0.734008
2022-09-14	13:58:36	0.731209
2022-09-14	13:58:36	0.731107
2022-09-14	13:58:36	0.730445
2022-09-14	13:58:37	0.732837
2022-09-14	13:58:37	0.731158
2022-09-14	13:58:37	0.731565
2022-09-14	13:58:38	0.72902
2022-09-14	13:58:38	0.734211
2022-09-14	13:58:38	0.729478
2022-09-14	13:58:38	0.728766
2022-09-14	13:58:39	0.729733
2022-09-14	13:58:39	0.728257
2022-09-14	13:58:39	0.731616
2022-09-14	13:58:39	0.734008
2022-09-14	13:58:40	0.728562
2022-09-14	13:58:40	0.732481
2022-09-14	13:58:40	0.724288
2022-09-14	13:58:40	0.733244
2022-09-14	13:58:41	0.731616
2022-09-14	13:58:41	0.733041
2022-09-14	13:58:41	0.731361
2022-09-14	13:58:42	0.736552
2022-09-14	13:58:42	0.72841
2022-09-14	13:58:42	0.727392
2022-09-14	13:58:42	0.740776
2022-09-14	13:58:43	0.733397
2022-09-14	13:58:43	0.490751
2022-09-14	13:58:43	0.731361
2022-09-14	13:58:43	0.738333
2022-09-14	13:58:44	0.738537
2022-09-14	13:58:44	0.729275
2022-09-14	13:58:44	0.735026
2022-09-14	13:58:44	0.727748
2022-09-14	13:58:45	0.732175
2022-09-14	13:58:45	0.727697
2022-09-14	13:58:45	0.729071
2022-09-14	13:58:46	0.733753
2022-09-14	13:58:46	0.731056
2022-09-14	13:58:46	0.72897
2022-09-14	13:58:46	0.726629
2022-09-14	13:58:47	0.726272
2022-09-14	13:58:47	0.731361
2022-09-14	13:58:47	0.725458
2022-09-14	13:58:47	0.7307
2022-09-14	13:58:48	0.730751
2022-09-14	13:58:48	0.733092
2022-09-14	13:58:48	0.730089
2022-09-14	13:58:48	0.733906
2022-09-14	13:58:49	0.729326
2022-09-14	13:58:49	0.730191
2022-09-14	13:58:49	0.737112
2022-09-14	13:58:50	0.731616
2022-09-14	13:58:50	0.73187
2022-09-14	13:58:50	0.737214
2022-09-14	13:58:50	0.728919
2022-09-14	13:58:51	0.736857
2022-09-14	13:58:51	0.731768
2022-09-14	13:58:51	0.730293
2022-09-14	13:58:51	0.72841
2022-09-14	13:58:52	0.727494
2022-09-14	13:58:52	0.73528
2022-09-14	13:58:52	0.734669
2022-09-14	13:58:52	0.732023
2022-09-14	13:58:53	0.725712
2022-09-14	13:58:53	0.729478
2022-09-14	13:58:53	0.73243
2022-09-14	13:58:54	0.730038
2022-09-14	13:58:54	0.737722
2022-09-14	13:58:54	0.727036
2022-09-14	13:58:54	0.732583
2022-09-14	13:58:55	0.730547
2022-09-14	13:58:55	0.735331
2022-09-14	13:58:55	0.728919
2022-09-14	13:58:55	0.738181
2022-09-14	13:58:56	0.723372
2022-09-14	13:58:56	0.741896
2022-09-14	13:58:56	0.732175
2022-09-14	13:58:56	0.731717
2022-09-14	13:58:57	0.731921
2022-09-14	13:58:57	0.732023
2022-09-14	13:58:57	0.729326
2022-09-14	13:58:58	0.724491
2022-09-14	13:58:58	0.727901
2022-09-14	13:58:58	0.736399
2022-09-14	13:58:58	0.731921
2022-09-14	13:58:59	0.737315
2022-09-14	13:58:59	0.73355
2022-09-14	13:58:59	0.731819
2022-09-14	13:58:59	0.73757
2022-09-14	13:59:00	0.727901
2022-09-14	13:59:00	0.728359
2022-09-14	13:59:00	0.729224
2022-09-14	13:59:00	0.729173
2022-09-14	13:59:01	0.733804
2022-09-14	13:59:01	0.733651
2022-09-14	13:59:01	0.730954
2022-09-14	13:59:02	0.731921
2022-09-14	13:59:02	0.731361
2022-09-14	13:59:02	0.730496
2022-09-14	13:59:02	0.734975
2022-09-14	13:59:03	0.729122
2022-09-14	13:59:03	0.729122
2022-09-14	13:59:03	0.731972
2022-09-14	13:59:03	0.732684
2022-09-14	13:59:04	0.731056
2022-09-14	13:59:04	0.739504
2022-09-14	13:59:04	0.735992
2022-09-14	13:59:04	0.736247
2022-09-14	13:59:05	0.730547
2022-09-14	13:59:05	0.731565
2022-09-14	13:59:05	0.726527
2022-09-14	13:59:06	0.732481
2022-09-14	13:59:06	0.733142
2022-09-14	13:59:06	0.733753
2022-09-14	13:59:06	0.728664
2022-09-14	13:59:07	0.731158
2022-09-14	13:59:07	0.734822
2022-09-14	13:59:07	0.731056
2022-09-14	13:59:07	0.736654
2022-09-14	13:59:08	0.737163
2022-09-14	13:59:08	0.737315
2022-09-14	13:59:08	0.725509
2022-09-14	13:59:08	0.727341
2022-09-14	13:59:09	0.730343
2022-09-14	13:59:09	0.733651
2022-09-14	13:59:09	0.680267
2022-09-14	13:59:10	0.731921
2022-09-14	13:59:10	-1.84508
2022-09-14	13:59:10	-1.77795
2022-09-14	13:59:10	-1.73052
2022-09-14	13:59:11	-1.7605
2022-09-14	13:59:11	-1.79383
2022-09-14	13:59:11	-1.75744
2022-09-14	13:59:11	-1.71485
2022-09-14	13:59:12	-1.68548
2022-09-14	13:59:12	-1.70894
2022-09-14	13:59:12	-1.70075
2022-09-14	13:59:12	-1.67357
2022-09-14	13:59:13	-1.64452
2022-09-14	13:59:13	-1.61454
2022-09-14	13:59:13	-1.58808
2022-09-14	13:59:14	-1.57235
2022-09-14	13:59:14	-1.54599
2022-09-14	13:59:14	-1.48752
2022-09-14	13:59:14	-1.45357
2022-09-14	13:59:15	-1.42095
2022-09-14	13:59:15	-1.54172
2022-09-14	13:59:15	-1.64502
2022-09-14	13:59:15	-1.61612
2022-09-14	13:59:16	-1.60304
2022-09-14	13:59:16	-1.5548
2022-09-14	13:59:16	-1.51281
2022-09-14	13:59:16	-1.3949
2022-09-14	13:59:17	-1.34726
2022-09-14	13:59:17	-1.32884
2022-09-14	13:59:17	-1.32131
2022-09-14	13:59:18	-1.31006
2022-09-14	13:59:18	-1.31098
2022-09-14	13:59:18	-1.2976
2022-09-14	13:59:18	-1.29368
2022-09-14	13:59:19	-1.30034
2022-09-14	13:59:19	-1.29912
2022-09-14	13:59:19	-1.31749
2022-09-14	13:59:19	-1.27388
2022-09-14	13:59:20	-1.56106
2022-09-14	13:59:20	-2.03648
2022-09-14	13:59:20	-2.17647
2022-09-14	13:59:20	-2.25434
2022-09-14	13:59:21	-2.18136
2022-09-14	13:59:21	-2.15648
2022-09-14	13:59:21	-2.13648
2022-09-14	13:59:22	-2.09352
2022-09-14	13:59:22	-1.64492
2022-09-14	13:59:22	-1.60095
2022-09-14	13:59:22	-1.59917
2022-09-14	13:59:23	-1.59022
2022-09-14	13:59:23	-1.53205
2022-09-14	13:59:23	-1.51714
2022-09-14	13:59:23	-1.5809
2022-09-14	13:59:24	-1.51032
2022-09-14	13:59:24	0.72673
2022-09-14	13:59:24	0.732939
2022-09-14	13:59:24	0.73416
2022-09-14	13:59:25	0.408359
2022-09-14	13:59:25	0.348104
2022-09-14	13:59:25	0.338842
2022-09-14	13:59:26	0.314669
2022-09-14	13:59:26	0.357672
2022-09-14	13:59:26	0.353346
2022-09-14	13:59:26	0.417265
2022-09-14	13:59:27	0.252277
2022-09-14	13:59:27	0.23411
2022-09-14	13:59:27	0.411412
2022-09-14	13:59:27	0.353702
2022-09-14	13:59:28	0.449122
2022-09-14	13:59:28	0.374211
2022-09-14	13:59:28	0.410089
2022-09-14	13:59:28	0.998028
2022-09-14	13:59:29	3.26729
2022-09-14	13:59:29	2.70815
2022-09-14	13:59:29	1.88296
2022-09-14	13:59:30	1.39319
2022-09-14	13:59:30	0.651819
2022-09-14	13:59:30	1.72154
2022-09-14	13:59:30	0.753193
2022-09-14	13:59:31	1.32912
2022-09-14	13:59:31	0.835484
2022-09-14	13:59:31	0.925255
2022-09-14	13:59:31	1.10317
2022-09-14	13:59:32	0.80673
2022-09-14	13:59:32	1.18429
2022-09-14	13:59:32	0.379249
2022-09-14	13:59:32	1.38373
2022-09-14	13:59:33	0.825763
2022-09-14	13:59:33	1.62973
2022-09-14	13:59:33	1.54022
2022-09-14	13:59:34	0.971514
2022-09-14	13:59:34	1.05416
2022-09-14	13:59:34	1.34027
2022-09-14	13:59:34	2.69726
2022-09-14	13:59:35	2.48083
2022-09-14	13:59:35	2.67451
2022-09-14	13:59:35	1.93889
2022-09-14	13:59:36	1.82271
2022-09-14	13:59:36	1.81589
2022-09-14	13:59:36	1.45533
2022-09-14	13:59:36	2.26179
2022-09-14	13:59:36	2.17798
2022-09-14	13:59:37	2.80474
2022-09-14	13:59:37	2.28556
2022-09-14	13:59:37	2.68515
2022-09-14	13:59:38	2.05141
2022-09-14	13:59:38	1.61879
2022-09-14	13:59:38	1.862
2022-09-14	13:59:38	1.07716
2022-09-14	13:59:39	0.944033
2022-09-14	13:59:39	0.621031
2022-09-14	13:59:39	0.726527
2022-09-14	13:59:39	0.294313
2022-09-14	13:59:40	0.506018
2022-09-14	13:59:40	0.914924
2022-09-14	13:59:40	1.84948
2022-09-14	13:59:40	1.02678
2022-09-14	13:59:41	0.964746
2022-09-14	13:59:41	0.501336
2022-09-14	13:59:41	0.721437
2022-09-14	13:59:42	0.581387
2022-09-14	13:59:42	0.614568
2022-09-14	13:59:42	-6.0579
2022-09-14	13:59:42	-5.84782
2022-09-14	13:59:43	-5.5864
2022-09-14	13:59:43	-5.51892
2022-09-14	13:59:43	-5.278
2022-09-14	13:59:43	-5.05327
2022-09-14	13:59:44	-4.95647
2022-09-14	13:59:44	-4.75281
2022-09-14	13:59:44	-4.59805
2022-09-14	13:59:44	-4.20273
2022-09-14	13:59:45	-4.05037
2022-09-14	13:59:45	-3.45953
2022-09-14	13:59:45	-3.37332
2022-09-14	13:59:46	-0.915915
2022-09-14	13:59:46	-1.31312
2022-09-14	13:59:46	-1.10111
2022-09-14	13:59:46	-1.35301
2022-09-14	13:59:47	-1.06126
2022-09-14	13:59:47	-1.7065
2022-09-14	13:59:47	-1.43363
2022-09-14	13:59:47	-1.50034
2022-09-14	13:59:48	-1.618
2022-09-14	13:59:48	-1.67642
2022-09-14	13:59:48	-1.55088
2022-09-14	13:59:49	-1.55785
2022-09-14	13:59:49	-1.52574
2022-09-14	13:59:49	-1.49352
2022-09-14	13:59:49	-1.35469
2022-09-14	13:59:50	-1.36233
2022-09-14	13:59:50	-1.31994
2022-09-14	13:59:50	-0.598053
2022-09-14	13:59:50	0.671209
2022-09-14	13:59:51	0.733397
2022-09-14	13:59:51	0.729936
2022-09-14	13:59:51	0.73584
2022-09-14	13:59:51	0.72958
2022-09-14	13:59:52	0.732379
2022-09-14	13:59:52	0.732684
2022-09-14	13:59:52	0.737315
2022-09-14	13:59:53	0.733448
2022-09-14	13:59:53	0.728003
2022-09-14	13:59:53	0.734109
2022-09-14	13:59:53	0.729428
2022-09-14	13:59:54	0.729224
2022-09-14	13:59:54	0.730089
2022-09-14	13:59:54	0.729784
2022-09-14	13:59:54	0.735534
2022-09-14	13:59:55	0.729936
2022-09-14	13:59:55	0.732074
2022-09-14	13:59:55	0.728919
2022-09-14	13:59:55	0.733244
2022-09-14	13:59:56	0.733244
2022-09-14	13:59:56	0.731717
2022-09-14	13:59:56	0.73243
2022-09-14	13:59:57	0.730089
2022-09-14	13:59:57	0.727137
2022-09-14	13:59:57	0.727748
2022-09-14	13:59:57	0.727494
2022-09-14	13:59:58	0.73701
2022-09-14	13:59:58	0.733957
2022-09-14	13:59:58	0.732379
2022-09-14	13:59:58	0.731565
2022-09-14	13:59:59	0.731412
2022-09-14	13:59:59	0.736603
2022-09-14	13:59:59	0.731972
2022-09-14	13:59:59	0.727087
2022-09-14	14:00:00	0.732786
2022-09-14	14:00:00	0.739402
2022-09-14	14:00:00	0.737061
2022-09-14	14:00:01	0.730293
2022-09-14	14:00:01	0.73355
2022-09-14	14:00:01	0.729835
2022-09-14	14:00:01	0.731717
2022-09-14	14:00:02	0.732175
2022-09-14	14:00:02	0.7307
2022-09-14	14:00:02	0.729682
2022-09-14	14:00:02	0.725712
2022-09-14	14:00:03	0.729377
2022-09-14	14:00:03	0.729377
2022-09-14	14:00:03	0.73187
2022-09-14	14:00:03	0.734313
2022-09-14	14:00:04	0.731819
2022-09-14	14:00:04	0.730598
2022-09-14	14:00:04	0.729122
2022-09-14	14:00:05	0.730343
2022-09-14	14:00:05	0.733244
2022-09-14	14:00:05	0.725509
2022-09-14	14:00:05	0.729275
2022-09-14	14:00:06	0.730343
2022-09-14	14:00:06	0.737061
2022-09-14	14:00:06	0.732175
2022-09-14	14:00:06	0.7393
2022-09-14	14:00:07	0.727596
2022-09-14	14:00:07	0.734008
2022-09-14	14:00:07	0.733092
2022-09-14	14:00:07	0.726221
2022-09-14	14:00:08	0.735687
2022-09-14	14:00:08	0.730343
2022-09-14	14:00:08	0.562506
2022-09-14	14:00:09	0.507035
2022-09-14	14:00:09	0.730242
2022-09-14	14:00:09	0.737875
2022-09-14	14:00:09	0.741489
2022-09-14	14:00:10	0.732684
2022-09-14	14:00:10	0.736857
2022-09-14	14:00:10	0.737163
2022-09-14	14:00:10	0.731158
2022-09-14	14:00:11	0.725051
2022-09-14	14:00:11	0.735382
2022-09-14	14:00:11	0.730903
2022-09-14	14:00:11	0.728613
2022-09-14	14:00:12	0.731667
2022-09-14	14:00:12	0.730293
2022-09-14	14:00:12	0.733957
2022-09-14	14:00:13	0.731463
2022-09-14	14:00:13	0.735178
2022-09-14	14:00:13	0.726832
2022-09-14	14:00:13	0.730547
2022-09-14	14:00:14	0.728766
2022-09-14	14:00:14	0.738842
2022-09-14	14:00:14	0.727697
2022-09-14	14:00:14	0.735433
2022-09-14	14:00:15	0.729682
2022-09-14	14:00:15	0.730598
2022-09-14	14:00:15	0.729224
2022-09-14	14:00:15	0.734415
2022-09-14	14:00:16	0.728817
2022-09-14	14:00:16	0.728664
2022-09-14	14:00:16	0.735076
2022-09-14	14:00:17	0.198232
2022-09-14	14:00:17	0.074873
2022-09-14	14:00:17	-0.019987
2022-09-14	14:00:17	-0.679071
2022-09-14	14:00:18	-0.64706
2022-09-14	14:00:18	0.693651
2022-09-14	14:00:18	-1.57938
2022-09-14	14:00:18	0.729173
2022-09-14	14:00:19	0.725051
2022-09-14	14:00:19	0.732939
2022-09-14	14:00:19	0.732379
2022-09-14	14:00:19	0.733244
2022-09-14	14:00:20	0.726018
2022-09-14	14:00:20	0.733346
2022-09-14	14:00:20	0.732074
2022-09-14	14:00:21	0.734517
2022-09-14	14:00:21	0.729224
2022-09-14	14:00:21	0.734466
2022-09-14	14:00:21	0.734568
2022-09-14	14:00:22	0.736857
2022-09-14	14:00:22	0.732837
2022-09-14	14:00:22	0.729478
2022-09-14	14:00:22	0.729428
2022-09-14	14:00:23	0.733193
2022-09-14	14:00:23	0.738486
2022-09-14	14:00:23	0.732634
2022-09-14	14:00:23	0.726221
2022-09-14	14:00:24	0.733244
2022-09-14	14:00:24	0.728766
2022-09-14	14:00:24	0.727545
2022-09-14	14:00:25	0.732481
2022-09-14	14:00:25	0.733041
2022-09-14	14:00:25	0.732786
2022-09-14	14:00:25	0.730598
2022-09-14	14:00:26	0.729733
2022-09-14	14:00:26	0.728715
2022-09-14	14:00:26	0.729529
2022-09-14	14:00:26	0.731565
2022-09-14	14:00:27	0.72902
2022-09-14	14:00:27	0.728562
2022-09-14	14:00:27	0.731158
2022-09-14	14:00:27	0.732277
2022-09-14	14:00:28	0.727494
2022-09-14	14:00:28	0.732583
2022-09-14	14:00:28	0.727901
2022-09-14	14:00:29	0.730954
2022-09-14	14:00:29	0.734211
2022-09-14	14:00:29	0.732023
2022-09-14	14:00:29	0.730547
2022-09-14	14:00:30	0.725712
2022-09-14	14:00:30	0.731616
2022-09-14	14:00:30	0.730191
2022-09-14	14:00:30	0.727901
2022-09-14	14:00:31	0.731107
2022-09-14	14:00:31	0.727087
2022-09-14	14:00:31	0.729275
2022-09-14	14:00:31	0.731056
2022-09-14	14:00:32	0.729733
2022-09-14	14:00:32	0.724796
2022-09-14	14:00:32	0.726679
2022-09-14	14:00:33	0.729784
2022-09-14	14:00:33	0.731259
2022-09-14	14:00:33	0.730649
2022-09-14	14:00:33	0.728766
2022-09-14	14:00:34	0.733499
2022-09-14	14:00:34	0.724338
2022-09-14	14:00:34	0.729784
2022-09-14	14:00:34	0.731463
2022-09-14	14:00:35	0.728104
2022-09-14	14:00:35	0.728257
2022-09-14	14:00:35	0.732125
2022-09-14	14:00:35	0.724542
2022-09-14	14:00:36	0.730751
2022-09-14	14:00:36	0.731107
2022-09-14	14:00:36	0.729784
2022-09-14	14:00:37	0.735331
2022-09-14	14:00:37	0.732634
2022-09-14	14:00:37	0.727392
2022-09-14	14:00:37	0.732125
2022-09-14	14:00:38	0.731921
2022-09-14	14:00:38	0.730598
2022-09-14	14:00:38	0.723779
2022-09-14	14:00:38	0.729173
2022-09-14	14:00:39	0.73187
2022-09-14	14:00:39	0.728817
2022-09-14	14:00:39	0.423168
2022-09-14	14:00:39	0.730547
2022-09-14	14:00:40	0.728155
2022-09-14	14:00:40	0.419555
2022-09-14	14:00:40	0.724186
2022-09-14	14:00:41	-1.03368
2022-09-14	14:00:41	-2.01683
2022-09-14	14:00:41	0.559809
2022-09-14	14:00:41	0.438181
2022-09-14	14:00:42	0.732226
2022-09-14	14:00:42	0.738537
