# Supplementary material for: Comparing efficacy in reducing pulling and welfare impacts of four types of leash walking equipment
Source: PeerJ journal article supplement (doi:10.7717/peerj.18131), 2024-10-24
Supplement: Shelter_2_Tension_files.zip [file KimChi_star_2022914124117 copy.xlsx]

## Sheet: Averaged Newtons
Date	Time	Averaged Newtons	Impulse	Total steps
2022-09-14	12:41:33	0.818164	0.818164	0		Impulse	967.472
2022-09-14	12:41:34	-1.43457	0.818164	0		Total steps	5
2022-09-14	12:41:35	0.589756	1.40792	0
2022-09-14	12:41:36	1.32554	2.73346	0
2022-09-14	12:41:37	1.62569	4.35914	0
2022-09-14	12:41:38	-0.11392	4.35914	0
2022-09-14	12:41:39	1.20266	5.5618	0
2022-09-14	12:41:40	6.11631	11.6781	0
2022-09-14	12:41:41	5.69822	17.3763	0
2022-09-14	12:41:42	2.05498	19.4313	0
2022-09-14	12:41:43	4.65339	24.0847	0
2022-09-14	12:41:44	1.14837	25.2331	0
2022-09-14	12:41:45	0.550932	25.784	0
2022-09-14	12:41:46	1.42761	27.2116	0
2022-09-14	12:41:47	8.61111	35.8227	0
2022-09-14	12:41:48	3.80174	39.6245	0
2022-09-14	12:41:49	1.17034	40.7948	0
2022-09-14	12:41:50	3.53943	44.3342	0
2022-09-14	12:41:51	0.456272	44.7905	0
2022-09-14	12:41:52	1.5155	46.306	0
2022-09-14	12:41:53	0.76508	47.0711	0
2022-09-14	12:41:54	3.99659	51.0677	0
2022-09-14	12:41:55	3.48271	54.5504	0
2022-09-14	12:41:56	4.9748	59.5252	0
2022-09-14	12:41:57	0.878436	60.4036	0
2022-09-14	12:41:58	-0.0921888	60.4036	0
2022-09-14	12:41:59	3.99061	64.3942	0
2022-09-14	12:42:00	0.898074	65.2923	0
2022-09-14	12:42:01	2.25675	67.5491	0
2022-09-14	12:42:02	1.64583	69.1949	0
2022-09-14	12:42:03	2.40548	71.6004	0
2022-09-14	12:42:04	1.65749	73.2579	0
2022-09-14	12:42:05	0.543575	73.8014	0
2022-09-14	12:42:06	0.743839	74.5453	0
2022-09-14	12:42:07	9.26566	83.8109	0
2022-09-14	12:42:08	12.9721	96.783	0
2022-09-14	12:42:09	12.6057	109.389	0
2022-09-14	12:42:10	12.3817	121.77	0
2022-09-14	12:42:11	11.2267	132.997	0
2022-09-14	12:42:12	4.44713	137.444	0
2022-09-14	12:42:13	1.87119	139.315	0
2022-09-14	12:42:14	1.65362	140.969	0
2022-09-14	12:42:15	1.67985	142.649	0
2022-09-14	12:42:16	1.97294	144.622	0
2022-09-14	12:42:17	6.77059	151.392	0
2022-09-14	12:42:18	6.16264	157.555	0
2022-09-14	12:42:19	3.16824	160.723	0
2022-09-14	12:42:20	5.00281	165.726	0
2022-09-14	12:42:21	6.0198	171.746	0
2022-09-14	12:42:22	6.75125	178.497	0
2022-09-14	12:42:23	-0.0588556	178.497	0
2022-09-14	12:42:24	-2.21861	178.497	0
2022-09-14	12:42:25	0.194964	178.692	0
2022-09-14	12:42:26	7.79256	186.485	0
2022-09-14	12:42:27	13.7523	200.237	1
2022-09-14	12:42:28	6.13955	206.376	1
2022-09-14	12:42:29	4.20498	210.581	1
2022-09-14	12:42:30	1.55336	212.135	1
2022-09-14	12:42:31	4.63784	216.773	1
2022-09-14	12:42:32	1.68058	218.453	1
2022-09-14	12:42:33	2.6151	221.068	1
2022-09-14	12:42:34	3.9958	225.064	1
2022-09-14	12:42:35	3.13887	228.203	1
2022-09-14	12:42:36	2.5118	230.715	1
2022-09-14	12:42:37	1.35642	232.071	1
2022-09-14	12:42:38	2.91119	234.982	1
2022-09-14	12:42:39	0.552913	235.535	1
2022-09-14	12:42:40	-0.656269	235.535	1
2022-09-14	12:42:41	1.84504	237.38	1
2022-09-14	12:42:42	1.10503	238.485	1
2022-09-14	12:42:43	2.2597	240.745	1
2022-09-14	12:42:44	1.83827	242.583	1
2022-09-14	12:42:45	1.86643	244.45	1
2022-09-14	12:42:46	1.64453	246.094	1
2022-09-14	12:42:47	2.48573	248.58	1
2022-09-14	12:42:48	2.79439	251.374	1
2022-09-14	12:42:49	3.18341	254.558	1
2022-09-14	12:42:50	2.87577	257.434	1
2022-09-14	12:42:51	2.26513	259.699	1
2022-09-14	12:42:52	2.52699	262.226	1
2022-09-14	12:42:53	3.17871	265.404	1
2022-09-14	12:42:54	3.18114	268.586	1
2022-09-14	12:42:55	0.129542	268.715	1
2022-09-14	12:42:56	-0.51205	268.715	1
2022-09-14	12:42:57	0.333334	269.048	1
2022-09-14	12:42:58	2.08986	271.138	1
2022-09-14	12:42:59	2.25668	273.395	1
2022-09-14	12:43:00	1.98466	275.38	1
2022-09-14	12:43:01	1.8503	277.23	1
2022-09-14	12:43:02	1.95285	279.183	1
2022-09-14	12:43:03	2.55549	281.738	1
2022-09-14	12:43:04	2.85392	284.592	1
2022-09-14	12:43:05	1.54487	286.137	1
2022-09-14	12:43:06	1.55379	287.691	1
2022-09-14	12:43:07	1.44023	289.131	1
2022-09-14	12:43:08	1.24069	290.372	1
2022-09-14	12:43:09	1.31273	291.685	1
2022-09-14	12:43:10	1.35285	293.037	1
2022-09-14	12:43:11	1.37855	294.416	1
2022-09-14	12:43:12	1.4537	295.87	1
2022-09-14	12:43:13	1.51171	297.381	1
2022-09-14	12:43:14	1.49154	298.873	1
2022-09-14	12:43:15	2.00356	300.876	1
2022-09-14	12:43:16	2.50435	303.381	1
2022-09-14	12:43:17	3.2078	306.589	1
2022-09-14	12:43:18	3.21551	309.804	1
2022-09-14	12:43:19	3.19054	312.995	1
2022-09-14	12:43:20	3.2031	316.198	1
2022-09-14	12:43:21	3.20055	319.398	1
2022-09-14	12:43:22	3.18216	322.58	1
2022-09-14	12:43:23	3.19303	325.773	1
2022-09-14	12:43:24	3.20989	328.983	1
2022-09-14	12:43:25	3.1879	332.171	1
2022-09-14	12:43:26	3.19874	335.37	1
2022-09-14	12:43:27	2.8713	338.241	1
2022-09-14	12:43:28	2.02733	340.269	1
2022-09-14	12:43:29	3.17899	343.448	1
2022-09-14	12:43:30	3.19365	346.641	1
2022-09-14	12:43:31	3.18307	349.824	1
2022-09-14	12:43:32	3.19586	353.02	1
2022-09-14	12:43:33	3.19967	356.22	1
2022-09-14	12:43:34	3.19738	359.417	1
2022-09-14	12:43:35	3.19037	362.608	1
2022-09-14	12:43:36	3.19535	365.803	1
2022-09-14	12:43:37	3.19982	369.003	1
2022-09-14	12:43:38	3.21159	372.214	1
2022-09-14	12:43:39	3.20344	375.418	1
2022-09-14	12:43:40	3.18872	378.607	1
2022-09-14	12:43:41	3.19054	381.797	1
2022-09-14	12:43:42	3.19789	384.995	1
2022-09-14	12:43:43	3.21521	388.21	1
2022-09-14	12:43:44	3.19408	391.404	1
2022-09-14	12:43:45	3.19676	394.601	1
2022-09-14	12:43:46	3.19461	397.796	1
2022-09-14	12:43:47	3.21634	401.012	1
2022-09-14	12:43:48	3.21136	404.223	1
2022-09-14	12:43:49	3.20542	407.429	1
2022-09-14	12:43:50	3.19705	410.626	1
2022-09-14	12:43:51	3.2001	413.826	1
2022-09-14	12:43:52	3.21166	417.038	1
2022-09-14	12:43:53	3.21334	420.251	1
2022-09-14	12:43:54	3.20276	423.454	1
2022-09-14	12:43:55	3.22489	426.679	1
2022-09-14	12:43:56	3.20585	429.884	1
2022-09-14	12:43:57	3.20225	433.087	1
2022-09-14	12:43:58	3.22087	436.308	1
2022-09-14	12:43:59	3.2011	439.509	1
2022-09-14	12:44:00	3.1997	442.708	1
2022-09-14	12:44:01	3.22845	445.937	1
2022-09-14	12:44:02	3.20859	449.145	1
2022-09-14	12:44:03	3.21981	452.365	1
2022-09-14	12:44:04	3.22523	455.59	1
2022-09-14	12:44:05	3.21046	458.801	1
2022-09-14	12:44:06	3.20565	462.007	1
2022-09-14	12:44:07	3.21265	465.219	1
2022-09-14	12:44:08	3.20938	468.429	1
2022-09-14	12:44:09	3.2293	471.658	1
2022-09-14	12:44:10	3.23151	474.889	1
2022-09-14	12:44:11	3.21808	478.107	1
2022-09-14	12:44:12	3.21414	481.322	1
2022-09-14	12:44:13	3.23055	484.552	1
2022-09-14	12:44:14	3.22279	487.775	1
2022-09-14	12:44:15	3.21974	490.995	1
2022-09-14	12:44:16	3.22245	494.217	1
2022-09-14	12:44:17	3.22585	497.443	1
2022-09-14	12:44:18	3.20087	500.644	1
2022-09-14	12:44:19	3.20961	503.853	1
2022-09-14	12:44:20	3.21068	507.064	1
2022-09-14	12:44:21	3.20916	510.273	1
2022-09-14	12:44:22	3.2334	513.507	1
2022-09-14	12:44:23	3.49065	516.997	1
2022-09-14	12:44:24	3.30695	520.304	1
2022-09-14	12:44:25	3.22528	523.53	1
2022-09-14	12:44:26	3.2211	526.751	1
2022-09-14	12:44:27	3.22019	529.971	1
2022-09-14	12:44:28	3.2061	533.177	1
2022-09-14	12:44:29	3.25007	536.427	1
2022-09-14	12:44:30	3.23619	539.663	1
2022-09-14	12:44:31	3.24102	542.904	1
2022-09-14	12:44:32	3.22755	546.132	1
2022-09-14	12:44:33	3.22562	549.357	1
2022-09-14	12:44:34	3.31738	552.675	1
2022-09-14	12:44:35	3.22291	555.898	1
2022-09-14	12:44:36	3.20655	559.104	1
2022-09-14	12:44:37	3.22857	562.333	1
2022-09-14	12:44:38	3.24385	565.577	1
2022-09-14	12:44:39	3.24266	568.819	1
2022-09-14	12:44:40	3.23168	572.051	1
2022-09-14	12:44:41	3.23502	575.286	1
2022-09-14	12:44:42	3.22321	578.509	1
2022-09-14	12:44:43	3.28397	581.793	1
2022-09-14	12:44:44	3.23111	585.024	1
2022-09-14	12:44:45	3.23566	588.26	1
2022-09-14	12:44:46	2.82993	591.09	1
2022-09-14	12:44:47	3.1997	594.29	1
2022-09-14	12:44:48	3.22659	597.516	1
2022-09-14	12:44:49	3.21053	600.727	1
2022-09-14	12:44:50	3.18652	603.913	1
2022-09-14	12:44:51	3.11798	607.031	1
2022-09-14	12:44:52	2.99365	610.025	1
2022-09-14	12:44:53	2.85068	612.876	1
2022-09-14	12:44:54	3.00452	615.88	1
2022-09-14	12:44:55	3.24402	619.124	1
2022-09-14	12:44:56	3.21232	622.336	1
2022-09-14	12:44:57	3.23974	625.576	1
2022-09-14	12:44:58	3.18193	628.758	1
2022-09-14	12:44:59	2.97639	631.734	1
2022-09-14	12:45:00	2.72025	634.455	1
2022-09-14	12:45:01	2.38088	636.836	1
2022-09-14	12:45:02	2.28845	639.124	1
2022-09-14	12:45:03	2.45008	641.574	1
2022-09-14	12:45:04	2.34549	643.92	1
2022-09-14	12:45:05	1.95606	645.876	1
2022-09-14	12:45:06	1.43661	647.312	1
2022-09-14	12:45:07	1.67164	648.984	1
2022-09-14	12:45:08	2.81583	651.8	1
2022-09-14	12:45:09	1.78266	653.582	1
2022-09-14	12:45:10	1.77424	655.357	1
2022-09-14	12:45:11	1.63882	656.995	1
2022-09-14	12:45:12	1.75451	658.75	1
2022-09-14	12:45:13	2.84498	661.595	1
2022-09-14	12:45:14	2.24249	663.837	1
2022-09-14	12:45:15	2.58788	666.425	1
2022-09-14	12:45:16	1.12535	667.551	1
2022-09-14	12:45:17	0.507696	668.058	1
2022-09-14	12:45:18	-0.125805	668.058	1
2022-09-14	12:45:19	-0.766379	668.058	1
2022-09-14	12:45:20	-1.21608	668.058	1
2022-09-14	12:45:21	3.23315	671.292	1
2022-09-14	12:45:22	3.26801	674.56	1
2022-09-14	12:45:23	3.21781	677.777	1
2022-09-14	12:45:24	3.22306	681	1
2022-09-14	12:45:25	3.25409	684.255	1
2022-09-14	12:45:26	3.23044	687.485	1
2022-09-14	12:45:27	3.06977	690.555	1
2022-09-14	12:45:28	3.23181	693.787	1
2022-09-14	12:45:29	3.22528	697.012	1
2022-09-14	12:45:30	3.23145	700.243	1
2022-09-14	12:45:31	3.25103	703.494	1
2022-09-14	12:45:32	3.23619	706.73	1
2022-09-14	12:45:33	3.2396	709.97	1
2022-09-14	12:45:34	3.2426	713.213	1
2022-09-14	12:45:35	3.2469	716.46	1
2022-09-14	12:45:36	3.23428	719.694	1
2022-09-14	12:45:37	3.24639	722.94	1
2022-09-14	12:45:38	3.23938	726.18	1
2022-09-14	12:45:39	2.5275	728.707	1
2022-09-14	12:45:40	1.77617	730.483	1
2022-09-14	12:45:41	3.2516	733.735	1
2022-09-14	12:45:42	1.77832	735.513	1
2022-09-14	12:45:43	3.23053	738.744	1
2022-09-14	12:45:44	3.22047	741.964	1
2022-09-14	12:45:45	3.23615	745.2	1
2022-09-14	12:45:46	3.21929	748.42	1
2022-09-14	12:45:47	3.22457	751.644	1
2022-09-14	12:45:48	3.2482	754.892	1
2022-09-14	12:45:49	3.22602	758.118	1
2022-09-14	12:45:50	0.546065	758.665	1
2022-09-14	12:45:51	3.23438	761.899	1
2022-09-14	12:45:52	3.21606	765.115	1
2022-09-14	12:45:53	3.25211	768.367	1
2022-09-14	12:45:54	3.22562	771.593	1
2022-09-14	12:45:55	3.25068	774.843	1
2022-09-14	12:45:56	3.24464	778.088	1
2022-09-14	12:45:57	3.0602	781.148	1
2022-09-14	12:45:58	3.05828	784.206	1
2022-09-14	12:45:59	3.23196	787.438	1
2022-09-14	12:46:00	3.2447	790.683	1
2022-09-14	12:46:01	3.23796	793.921	1
2022-09-14	12:46:02	3.23581	797.157	1
2022-09-14	12:46:03	3.23136	800.388	1
2022-09-14	12:46:04	3.23773	803.626	1
2022-09-14	12:46:05	3.23032	806.856	1
2022-09-14	12:46:06	3.24175	810.098	1
2022-09-14	12:46:07	3.24072	813.339	1
2022-09-14	12:46:08	3.23853	816.577	1
2022-09-14	12:46:09	3.22585	819.803	1
2022-09-14	12:46:10	3.23679	823.04	1
2022-09-14	12:46:11	3.24832	826.288	1
2022-09-14	12:46:12	3.24622	829.535	1
2022-09-14	12:46:13	3.26224	832.797	1
2022-09-14	12:46:14	3.21318	836.01	1
2022-09-14	12:46:15	3.23468	839.245	1
2022-09-14	12:46:16	3.22449	842.469	1
2022-09-14	12:46:17	3.24968	845.719	1
2022-09-14	12:46:18	3.22608	848.945	1
2022-09-14	12:46:19	3.22919	852.174	1
2022-09-14	12:46:20	3.24192	855.416	1
2022-09-14	12:46:21	3.22743	858.643	1
2022-09-14	12:46:22	3.2417	861.885	1
2022-09-14	12:46:23	3.24153	865.127	1
2022-09-14	12:46:24	3.2353	868.362	1
2022-09-14	12:46:25	14.8526	883.214	2
2022-09-14	12:46:26	2.8168	886.031	2
2022-09-14	12:46:27	4.12699	890.158	2
2022-09-14	12:46:28	6.50835	896.667	2
2022-09-14	12:46:29	11.5992	908.266	2
2022-09-14	12:46:30	4.58409	912.85	2
2022-09-14	12:46:31	16.119	928.969	3
2022-09-14	12:46:32	17.0317	946.001	4
2022-09-14	12:46:33	21.4713	967.472	5

## Sheet: KimChi_star_2022914124117 (4)
Date	Time	Lbs	Newtons	Averaged Newtons	Total force x time		total steps > 13.345	**GoPro Fitting: 12:30
2022-09-14	12:41:33	0.314415	1.39858	0.818164	1.39858	FALSE	0
2022-09-14	12:41:33	0.288664	1.28404	0.818164	1.28404	FALSE	0
2022-09-14	12:41:33	-0.0512847	-0.228125	0.818164	1.39858	FALSE	0
2022-09-14	12:41:34	-0.365025	-1.6237	-1.43457	1.28404	FALSE	0
2022-09-14	12:41:34	-0.450012	-2.00174	-1.43457	1.39858	FALSE	0
2022-09-14	12:41:34	-0.215814	-0.959984	-1.43457	1.28404	FALSE	0
2022-09-14	12:41:34	-0.259173	-1.15285	-1.43457	1.39858	FALSE	0
2022-09-14	12:41:35	-0.159529	-0.709617	0.589756	1.28404	FALSE	0
2022-09-14	12:41:35	-0.0759158	-0.337689	0.589756	1.39858	FALSE	0
2022-09-14	12:41:35	0.324288	1.4425	0.589756	2.72653	FALSE	0
2022-09-14	12:41:35	0.441489	1.96383	0.589756	3.36241	FALSE	0
2022-09-14	12:41:36	0.350089	1.55727	1.32554	4.2838	FALSE	0
2022-09-14	12:41:36	0.322659	1.43525	1.32554	4.79766	FALSE	0
2022-09-14	12:41:36	0.221234	0.984093	1.32554	5.26789	FALSE	0
2022-09-14	12:41:37	0.258079	1.14799	1.62569	5.94565	FALSE	0
2022-09-14	12:41:37	0.432379	1.92331	1.62569	7.1912	FALSE	0
2022-09-14	12:41:37	0.330852	1.4717	1.62569	7.41735	FALSE	0
2022-09-14	12:41:37	0.440573	1.95976	1.62569	9.15096	FALSE	0
2022-09-14	12:41:38	0.264288	1.17561	-0.11392	8.59295	FALSE	0
2022-09-14	12:41:38	-0.0548471	-0.243971	-0.11392	9.15096	FALSE	0
2022-09-14	12:41:38	-0.319325	-1.42042	-0.11392	8.59295	FALSE	0
2022-09-14	12:41:38	0.00744298	0.0331079	-0.11392	9.18407	FALSE	0
2022-09-14	12:41:39	0.0291733	0.129769	1.20266	8.72272	FALSE	0
2022-09-14	12:41:39	0.132227	0.588172	1.20266	9.77224	FALSE	0
2022-09-14	12:41:39	0.531463	2.36405	1.20266	11.0868	FALSE	0
2022-09-14	12:41:39	0.388613	1.72863	1.20266	11.5009	FALSE	0
2022-09-14	12:41:40	0.640522	2.84917	6.11631	13.9359	FALSE	0
2022-09-14	12:41:40	1.56388	6.95645	6.11631	18.4573	FALSE	0
2022-09-14	12:41:40	1.92062	8.5433	6.11631	22.4792	FALSE	0
2022-09-14	12:41:41	1.971	8.7674	5.69822	27.2247	FALSE	0
2022-09-14	12:41:41	1.83859	8.17842	5.69822	30.6577	FALSE	0
2022-09-14	12:41:41	0.971514	4.32149	5.69822	31.5462	FALSE	0
2022-09-14	12:41:41	0.342964	1.52557	5.69822	32.1832	FALSE	0
2022-09-14	12:41:42	0.668664	2.97435	2.05498	34.5206	FALSE	0
2022-09-14	12:41:42	0.355382	1.58081	2.05498	33.764	FALSE	0
2022-09-14	12:41:42	0.361896	1.60979	2.05498	36.1303	FALSE	0
2022-09-14	12:41:43	0.318384	1.41624	4.65339	35.1803	FALSE	0
2022-09-14	12:41:43	0.490293	2.18092	4.65339	38.3113	FALSE	0
2022-09-14	12:41:43	1.00464	4.46884	4.65339	39.6491	FALSE	0
2022-09-14	12:41:43	2.86927	12.7631	4.65339	51.0744	FALSE	0
2022-09-14	12:41:43	0.548054	2.43785	4.65339	42.087	FALSE	0
2022-09-14	12:41:44	0.259555	1.15455	1.14837	52.2289	FALSE	0
2022-09-14	12:41:44	0.376705	1.67566	1.14837	43.7626	FALSE	0
2022-09-14	12:41:44	0.138232	0.614884	1.14837	52.8438	FALSE	0
2022-09-14	12:41:45	0.178842	0.795525	0.550932	44.5582	FALSE	0
2022-09-14	12:41:45	0.00530559	0.0236003	0.550932	52.8674	FALSE	0
2022-09-14	12:41:45	0.133652	0.594511	0.550932	45.1527	FALSE	0
2022-09-14	12:41:45	0.177621	0.790094	0.550932	53.6575	FALSE	0
2022-09-14	12:41:46	0.0419468	0.186588	1.42761	45.3393	FALSE	0
2022-09-14	12:41:46	0.160624	0.714488	1.42761	54.372	FALSE	0
2022-09-14	12:41:46	0.103626	0.460949	1.42761	45.8002	FALSE	0
2022-09-14	12:41:46	0.97757	4.34843	1.42761	58.7204	FALSE	0
2022-09-14	12:41:47	1.7167	7.63622	8.61111	53.4364	FALSE	0
2022-09-14	12:41:47	2.89884	12.8946	8.61111	71.615	FALSE	0
2022-09-14	12:41:47	1.47462	6.5594	8.61111	59.9958	FALSE	0
2022-09-14	12:41:47	1.6533	7.35421	8.61111	78.9692	FALSE	0
2022-09-14	12:41:48	0.641947	2.85551	3.80174	62.8513	FALSE	0
2022-09-14	12:41:48	0.794262	3.53304	3.80174	82.5023	FALSE	0
2022-09-14	12:41:48	1.1278	5.01668	3.80174	67.868	FALSE	0
2022-09-14	12:41:49	0.207188	0.921614	1.17034	83.4239	FALSE	0
2022-09-14	12:41:49	0.214924	0.956025	1.17034	68.824	FALSE	0
2022-09-14	12:41:49	0.18958	0.84329	1.17034	84.2672	FALSE	0
2022-09-14	12:41:49	0.440725	1.96043	1.17034	70.7845	FALSE	0
2022-09-14	12:41:50	1.72286	7.66363	3.53943	91.9308	FALSE	0
2022-09-14	12:41:50	1.08963	4.84689	3.53943	75.6314	FALSE	0
2022-09-14	12:41:50	0.355331	1.58058	3.53943	93.5114	FALSE	0
2022-09-14	12:41:50	0.0149748	0.0666109	3.53943	75.698	FALSE	0
2022-09-14	12:41:51	0.0801656	0.356593	0.456272	93.868	FALSE	0
2022-09-14	12:41:51	0.0162979	0.0724963	0.456272	75.7705	FALSE	0
2022-09-14	12:41:51	0.21126	0.939727	0.456272	94.8077	FALSE	0
2022-09-14	12:41:52	0.00301552	0.0134136	1.5155	75.7839	FALSE	0
2022-09-14	12:41:52	0.223677	0.99496	1.5155	95.8027	FALSE	0
2022-09-14	12:41:52	0.262557	1.16791	1.5155	76.9518	FALSE	0
2022-09-14	12:41:52	0.873549	3.88572	1.5155	99.6884	FALSE	0
2022-09-14	12:41:53	0.213092	0.947876	0.76508	77.8997	FALSE	0
2022-09-14	12:41:53	0.178181	0.792585	0.76508	100.481	FALSE	0
2022-09-14	12:41:53	0.231565	1.03005	0.76508	78.9297	FALSE	0
2022-09-14	12:41:53	0.0651529	0.289813	0.76508	100.771	FALSE	0
2022-09-14	12:41:54	0.310853	1.38274	3.99659	80.3125	FALSE	0
2022-09-14	12:41:54	0.273193	1.21522	3.99659	101.986	FALSE	0
2022-09-14	12:41:54	0.898028	3.99461	3.99659	84.3071	FALSE	0
2022-09-14	12:41:54	2.11182	9.3938	3.99659	111.38	FALSE	0
2022-09-14	12:41:55	0.993906	4.42109	3.48271	88.7282	FALSE	0
2022-09-14	12:41:55	0.563015	2.5044	3.48271	113.884	FALSE	0
2022-09-14	12:41:55	0.791921	3.52262	3.48271	92.2508	FALSE	0
2022-09-14	12:41:56	1.00363	4.46435	4.9748	118.349	FALSE	0
2022-09-14	12:41:56	1.43462	6.38148	4.9748	98.6323	FALSE	0
2022-09-14	12:41:56	1.71182	7.61452	4.9748	125.963	FALSE	0
2022-09-14	12:41:56	0.323473	1.43887	4.9748	100.071	FALSE	0
2022-09-14	12:41:57	0.371209	1.65121	0.878436	127.614	FALSE	0
2022-09-14	12:41:57	0.153194	0.681438	0.878436	100.753	FALSE	0
2022-09-14	12:41:57	0.270242	1.20209	0.878436	128.816	FALSE	0
2022-09-14	12:41:57	-0.00471985	-0.0209948	0.878436	100.753	FALSE	0
2022-09-14	12:41:58	0.147036	0.654046	-0.0921888	129.47	FALSE	0
2022-09-14	12:41:58	-0.0865519	-0.385	-0.0921888	100.753	FALSE	0
2022-09-14	12:41:58	-0.102939	-0.457893	-0.0921888	129.47	FALSE	0
2022-09-14	12:41:58	-0.040445	-0.179907	-0.0921888	100.753	FALSE	0
2022-09-14	12:41:59	0.148766	0.661741	3.99061	130.132	FALSE	0
2022-09-14	12:41:59	1.1106	4.94017	3.99061	105.693	FALSE	0
2022-09-14	12:41:59	1.43202	6.36991	3.99061	136.502	FALSE	0
2022-09-14	12:42:00	0.414517	1.84385	0.898074	107.537	FALSE	0
2022-09-14	12:42:00	0.145713	0.648161	0.898074	137.15	FALSE	0
2022-09-14	12:42:00	0.202659	0.901468	0.898074	108.438	FALSE	0
2022-09-14	12:42:00	0.0446949	0.198812	0.898074	137.349	FALSE	0
2022-09-14	12:42:01	0.410598	1.82642	2.25675	110.264	FALSE	0
2022-09-14	12:42:01	0.826679	3.67723	2.25675	141.026	FALSE	0
2022-09-14	12:42:01	0.657265	2.92365	2.25675	113.188	FALSE	0
2022-09-14	12:42:01	0.134822	0.599715	2.25675	141.626	FALSE	0
2022-09-14	12:42:02	0.225814	1.00447	1.64583	114.193	FALSE	0
2022-09-14	12:42:02	0.382354	1.70079	1.64583	143.327	FALSE	0
2022-09-14	12:42:02	0.434211	1.93146	1.64583	116.124	FALSE	0
2022-09-14	12:42:02	0.437621	1.94663	1.64583	145.273	FALSE	0
2022-09-14	12:42:03	0.688308	3.06173	2.40548	119.186	FALSE	0
2022-09-14	12:42:03	0.444237	1.97606	2.40548	147.249	FALSE	0
2022-09-14	12:42:03	0.489784	2.17866	2.40548	121.364	FALSE	0
2022-09-14	12:42:04	0.460573	2.04872	1.65749	149.298	FALSE	0
2022-09-14	12:42:04	0.364389	1.62088	1.65749	122.985	FALSE	0
2022-09-14	12:42:04	0.335535	1.49253	1.65749	150.791	FALSE	0
2022-09-14	12:42:04	0.329987	1.46785	1.65749	124.453	FALSE	0
2022-09-14	12:42:05	0.321082	1.42824	0.543575	152.219	FALSE	0
2022-09-14	12:42:05	0.161641	0.719011	0.543575	125.172	FALSE	0
2022-09-14	12:42:05	-0.043244	-0.192358	0.543575	152.219	FALSE	0
2022-09-14	12:42:05	0.0493259	0.219411	0.543575	125.392	FALSE	0
2022-09-14	12:42:06	0.0687152	0.305659	0.743839	152.525	FALSE	0
2022-09-14	12:42:06	0.271616	1.2082	0.743839	126.6	FALSE	0
2022-09-14	12:42:06	0.161336	0.717655	0.743839	153.242	FALSE	0
2022-09-14	12:42:07	0.264237	1.17538	9.26566	127.775	FALSE	0
2022-09-14	12:42:07	2.28327	10.1564	9.26566	163.399	FALSE	0
2022-09-14	12:42:07	2.86571	12.7473	9.26566	140.522	FALSE	0
2022-09-14	12:42:07	2.91884	12.9836	9.26566	176.382	FALSE	0
2022-09-14	12:42:08	2.92658	13.018	12.9721	153.54	FALSE	0
2022-09-14	12:42:08	2.94195	13.0864	12.9721	189.469	FALSE	0
2022-09-14	12:42:08	2.9135	12.9598	12.9721	166.5	FALSE	0
2022-09-14	12:42:08	2.88296	12.824	12.9721	202.293	FALSE	0
2022-09-14	12:42:09	2.85049	12.6795	12.6057	179.18	FALSE	0
2022-09-14	12:42:09	2.83716	12.6203	12.6057	214.913	FALSE	0
2022-09-14	12:42:09	2.82856	12.582	12.6057	191.762	FALSE	0
2022-09-14	12:42:09	2.81935	12.541	12.6057	227.454	FALSE	0
2022-09-14	12:42:10	2.80795	12.4903	12.3817	204.252	FALSE	0
2022-09-14	12:42:10	2.7851	12.3887	12.3817	239.843	FALSE	0
2022-09-14	12:42:10	2.75752	12.266	12.3817	216.518	FALSE	0
2022-09-14	12:42:11	2.73304	12.1571	11.2267	252	FALSE	0
2022-09-14	12:42:11	2.59986	11.5647	11.2267	228.083	FALSE	0
2022-09-14	12:42:11	2.44785	10.8885	11.2267	262.888	FALSE	0
2022-09-14	12:42:11	2.31472	10.2963	11.2267	238.379	FALSE	0
2022-09-14	12:42:12	2.0506	9.12148	4.44713	272.01	FALSE	0
2022-09-14	12:42:12	1.05645	4.6993	4.44713	243.078	FALSE	0
2022-09-14	12:42:12	0.428715	1.90701	4.44713	273.917	FALSE	0
2022-09-14	12:42:12	0.46327	2.06072	4.44713	245.139	FALSE	0
2022-09-14	12:42:13	0.441031	1.96179	1.87119	275.879	FALSE	0
2022-09-14	12:42:13	0.453092	2.01544	1.87119	247.155	FALSE	0
2022-09-14	12:42:13	0.40271	1.79133	1.87119	277.67	FALSE	0
2022-09-14	12:42:13	0.385814	1.71618	1.87119	248.871	FALSE	0
2022-09-14	12:42:14	0.359911	1.60096	1.65362	279.271	FALSE	0
2022-09-14	12:42:14	0.395585	1.75964	1.65362	250.63	FALSE	0
2022-09-14	12:42:14	0.359758	1.60028	1.65362	280.871	FALSE	0
2022-09-14	12:42:15	0.369835	1.6451	1.67985	252.276	FALSE	0
2022-09-14	12:42:15	0.357468	1.59009	1.67985	282.461	FALSE	0
2022-09-14	12:42:15	0.358435	1.59439	1.67985	253.87	FALSE	0
2022-09-14	12:42:15	0.424848	1.88981	1.67985	284.351	FALSE	0
2022-09-14	12:42:16	0.436908	1.94345	1.97294	255.813	FALSE	0
2022-09-14	12:42:16	0.441285	1.96292	1.97294	286.314	FALSE	0
2022-09-14	12:42:16	0.445	1.97945	1.97294	257.793	FALSE	0
2022-09-14	12:42:16	0.450954	2.00593	1.97294	288.32	FALSE	0
2022-09-14	12:42:17	0.596145	2.65177	6.77059	260.445	FALSE	0
2022-09-14	12:42:17	0.972074	4.32398	6.77059	292.644	FALSE	0
2022-09-14	12:42:17	1.94286	8.64223	6.77059	269.087	FALSE	0
2022-09-14	12:42:17	2.57731	11.4644	6.77059	304.108	FALSE	0
2022-09-14	12:42:18	1.94505	8.65197	6.16264	277.739	FALSE	0
2022-09-14	12:42:18	1.29436	5.75757	6.16264	309.866	FALSE	0
2022-09-14	12:42:18	0.916857	4.07836	6.16264	281.817	FALSE	0
2022-09-14	12:42:19	0.705	3.13598	3.16824	313.002	FALSE	0
2022-09-14	12:42:19	0.54444	2.42178	3.16824	284.239	FALSE	0
2022-09-14	12:42:19	0.74673	3.3216	3.16824	316.323	FALSE	0
2022-09-14	12:42:19	0.852837	3.79359	3.16824	288.033	FALSE	0
2022-09-14	12:42:20	1.19207	5.30257	5.00281	321.626	FALSE	0
2022-09-14	12:42:20	1.51905	6.75704	5.00281	294.79	FALSE	0
2022-09-14	12:42:20	0.753092	3.3499	5.00281	324.976	FALSE	0
2022-09-14	12:42:20	1.03452	4.60175	5.00281	299.391	FALSE	0
2022-09-14	12:42:21	0.962354	4.28074	6.0198	329.257	FALSE	0
2022-09-14	12:42:21	1.14678	5.10111	6.0198	304.492	FALSE	0
2022-09-14	12:42:21	1.9508	8.67755	6.0198	337.934	FALSE	0
2022-09-14	12:42:22	2.22749	9.90832	6.75125	314.401	FALSE	0
2022-09-14	12:42:22	1.76831	7.8658	6.75125	345.8	FALSE	0
2022-09-14	12:42:22	0.894262	3.97786	6.75125	318.379	FALSE	0
2022-09-14	12:42:22	1.18093	5.25301	6.75125	351.053	FALSE	0
2022-09-14	12:42:23	0.294669	1.31075	-0.0588556	319.689	FALSE	0
2022-09-14	12:42:23	0.00433869	0.0192994	-0.0588556	351.072	FALSE	0
2022-09-14	12:42:23	-0.238613	-1.0614	-0.0588556	319.689	FALSE	0
2022-09-14	12:42:23	-0.11332	-0.50407	-0.0588556	351.072	FALSE	0
2022-09-14	12:42:24	-0.480954	-2.13938	-2.21861	319.689	FALSE	0
2022-09-14	12:42:24	-0.554542	-2.46671	-2.21861	351.072	FALSE	0
2022-09-14	12:42:24	-0.588231	-2.61657	-2.21861	319.689	FALSE	0
2022-09-14	12:42:24	-0.371335	-1.65177	-2.21861	351.072	FALSE	0
2022-09-14	12:42:25	-0.180394	-0.802429	0.194964	319.689	FALSE	0
2022-09-14	12:42:25	0.0448984	0.199717	0.194964	351.272	FALSE	0
2022-09-14	12:42:25	0.266985	1.1876	0.194964	320.877	FALSE	0
2022-09-14	12:42:26	0.667341	2.96847	7.79256	354.24	FALSE	0
2022-09-14	12:42:26	1.28897	5.7336	7.79256	326.611	FALSE	0
2022-09-14	12:42:26	2.21218	9.84022	7.79256	364.081	FALSE	0
2022-09-14	12:42:26	2.83889	12.628	7.79256	339.239	FALSE	0
2022-09-14	12:42:27	3.09167	13.7524	13.7523	377.833	1	1
2022-09-14	12:42:27	4.65477	20.7053	13.7523	359.944	1	2
2022-09-14	12:42:27	2.59609	11.5479	13.7523	389.381	FALSE	2
2022-09-14	12:42:27	2.02408	9.00351	13.7523	368.947	FALSE	2
2022-09-14	12:42:28	1.2849	5.71549	6.13955	395.096	FALSE	2
2022-09-14	12:42:28	1.68195	7.48165	6.13955	376.429	FALSE	2
2022-09-14	12:42:28	1.27676	5.67928	6.13955	400.776	FALSE	2
2022-09-14	12:42:28	1.27732	5.68177	6.13955	382.111	FALSE	2
2022-09-14	12:42:29	0.974567	4.33507	4.20498	405.111	FALSE	2
2022-09-14	12:42:29	1.12571	5.00738	4.20498	387.118	FALSE	2
2022-09-14	12:42:29	0.735687	3.27248	4.20498	408.383	FALSE	2
2022-09-14	12:42:30	0.405662	1.80447	1.55336	388.923	FALSE	2
2022-09-14	12:42:30	0.357621	1.59077	1.55336	409.974	FALSE	2
2022-09-14	12:42:30	0.313092	1.3927	1.55336	390.315	FALSE	2
2022-09-14	12:42:30	0.320471	1.42552	1.55336	411.4	FALSE	2
2022-09-14	12:42:31	0.360827	1.60503	4.63784	391.92	FALSE	2
2022-09-14	12:42:31	0.536756	2.3876	4.63784	413.787	FALSE	2
2022-09-14	12:42:31	1.47747	6.57208	4.63784	398.492	FALSE	2
2022-09-14	12:42:31	1.79548	7.98665	4.63784	421.774	FALSE	2
2022-09-14	12:42:32	0.810242	3.60412	1.68058	402.097	FALSE	2
2022-09-14	12:42:32	0.311565	1.3859	1.68058	423.16	FALSE	2
2022-09-14	12:42:32	0.202608	0.901241	1.68058	402.998	FALSE	2
2022-09-14	12:42:32	0.186832	0.831066	1.68058	423.991	FALSE	2
2022-09-14	12:42:33	0.336603	1.49728	2.6151	404.495	FALSE	2
2022-09-14	12:42:33	0.709326	3.15522	2.6151	427.146	FALSE	2
2022-09-14	12:42:33	0.717774	3.1928	2.6151	407.688	FALSE	2
2022-09-14	12:42:34	0.624898	2.77967	3.9958	429.926	FALSE	2
2022-09-14	12:42:34	1.10592	4.91935	3.9958	412.607	FALSE	2
2022-09-14	12:42:34	1.26042	5.6066	3.9958	435.532	FALSE	2
2022-09-14	12:42:34	0.601946	2.67758	3.9958	415.285	FALSE	2
2022-09-14	12:42:35	0.611972	2.72217	3.13887	438.254	FALSE	2
2022-09-14	12:42:35	0.717163	3.19008	3.13887	418.475	FALSE	2
2022-09-14	12:42:35	0.706272	3.14164	3.13887	441.396	FALSE	2
2022-09-14	12:42:35	0.787188	3.50157	3.13887	421.976	FALSE	2
2022-09-14	12:42:36	0.734771	3.26841	2.5118	444.664	FALSE	2
2022-09-14	12:42:36	0.598384	2.66173	2.5118	424.638	FALSE	2
2022-09-14	12:42:36	0.360878	1.60526	2.5118	446.27	FALSE	2
2022-09-14	12:42:37	0.328511	1.46128	1.35642	426.1	FALSE	2
2022-09-14	12:42:37	0.303015	1.34787	1.35642	447.618	FALSE	2
2022-09-14	12:42:37	0.285255	1.26887	1.35642	427.368	FALSE	2
2022-09-14	12:42:37	0.302964	1.34764	1.35642	448.965	FALSE	2
2022-09-14	12:42:38	0.495687	2.20491	2.91119	429.573	FALSE	2
2022-09-14	12:42:38	1.22383	5.44384	2.91119	454.409	FALSE	2
2022-09-14	12:42:38	0.559504	2.48879	2.91119	432.062	FALSE	2
2022-09-14	12:42:38	0.338842	1.50724	2.91119	455.916	FALSE	2
2022-09-14	12:42:39	0.173753	0.772888	0.552913	432.835	FALSE	2
2022-09-14	12:42:39	0.147596	0.656537	0.552913	456.573	FALSE	2
2022-09-14	12:42:39	0.138079	0.614203	0.552913	433.449	FALSE	2
2022-09-14	12:42:39	0.0377738	0.168025	0.552913	456.741	FALSE	2
2022-09-14	12:42:40	-0.0240074	-0.10679	-0.656269	433.449	FALSE	2
2022-09-14	12:42:40	-0.207417	-0.922632	-0.656269	456.741	FALSE	2
2022-09-14	12:42:40	-0.211183	-0.939384	-0.656269	433.449	FALSE	2
2022-09-14	12:42:41	-0.0666028	-0.296263	1.84504	456.741	FALSE	2
2022-09-14	12:42:41	0.102863	0.457555	1.84504	433.907	FALSE	2
2022-09-14	12:42:41	0.799707	3.55726	1.84504	460.298	FALSE	2
2022-09-14	12:42:41	0.823168	3.66162	1.84504	437.568	FALSE	2
2022-09-14	12:42:42	0.280522	1.24782	1.10503	461.546	FALSE	2
2022-09-14	12:42:42	0.381183	1.69558	1.10503	439.264	FALSE	2
2022-09-14	12:42:42	0.151565	0.674191	1.10503	462.22	FALSE	2
2022-09-14	12:42:42	0.18042	0.802544	1.10503	440.066	FALSE	2
2022-09-14	12:42:43	0.251972	1.12082	2.2597	463.341	FALSE	2
2022-09-14	12:42:43	0.637061	2.83377	2.2597	442.9	FALSE	2
2022-09-14	12:42:43	0.630954	2.80661	2.2597	466.148	FALSE	2
2022-09-14	12:42:43	0.512023	2.27758	2.2597	445.178	FALSE	2
2022-09-14	12:42:44	0.371972	1.65461	1.83827	467.802	FALSE	2
2022-09-14	12:42:44	0.455891	2.02789	1.83827	447.206	FALSE	2
2022-09-14	12:42:44	0.411921	1.83231	1.83827	469.635	FALSE	2
2022-09-14	12:42:45	0.419199	1.86468	1.86643	449.07	FALSE	2
2022-09-14	12:42:45	0.394822	1.75625	1.86643	471.391	FALSE	2
2022-09-14	12:42:45	0.395433	1.75897	1.86643	450.829	FALSE	2
2022-09-14	12:42:45	0.468919	2.08585	1.86643	473.477	FALSE	2
2022-09-14	12:42:46	0.49701	2.2108	1.64453	453.04	FALSE	2
2022-09-14	12:42:46	0.372277	1.65596	1.64453	475.133	FALSE	2
2022-09-14	12:42:46	0.252176	1.12173	1.64453	454.162	FALSE	2
2022-09-14	12:42:46	0.357366	1.58964	1.64453	476.722	FALSE	2
2022-09-14	12:42:47	0.36154	1.6082	2.48573	455.77	FALSE	2
2022-09-14	12:42:47	0.545611	2.42699	2.48573	479.149	FALSE	2
2022-09-14	12:42:47	0.629326	2.79937	2.48573	458.569	FALSE	2
2022-09-14	12:42:47	0.698792	3.10837	2.48573	482.258	FALSE	2
2022-09-14	12:42:48	0.599657	2.66739	2.79439	461.237	FALSE	2
2022-09-14	12:42:48	0.653091	2.90508	2.79439	485.163	FALSE	2
2022-09-14	12:42:48	0.63187	2.81068	2.79439	464.048	FALSE	2
2022-09-14	12:42:49	0.645763	2.87248	3.18341	488.035	FALSE	2
2022-09-14	12:42:49	0.743524	3.30734	3.18341	467.355	FALSE	2
2022-09-14	12:42:49	0.776247	3.4529	3.18341	491.488	FALSE	2
2022-09-14	12:42:49	0.697112	3.10089	3.18341	470.456	FALSE	2
2022-09-14	12:42:50	0.603066	2.68256	2.87577	494.171	FALSE	2
2022-09-14	12:42:50	0.643728	2.86343	2.87577	473.319	FALSE	2
2022-09-14	12:42:50	0.714313	3.17741	2.87577	497.348	FALSE	2
2022-09-14	12:42:50	0.624898	2.77967	2.87577	476.099	FALSE	2
2022-09-14	12:42:51	0.524491	2.33304	2.26513	499.681	FALSE	2
2022-09-14	12:42:51	0.447596	1.991	2.26513	478.09	FALSE	2
2022-09-14	12:42:51	0.555585	2.47135	2.26513	502.152	FALSE	2
2022-09-14	12:42:52	0.424084	1.88641	2.52699	479.976	FALSE	2
2022-09-14	12:42:52	0.418283	1.86061	2.52699	504.013	FALSE	2
2022-09-14	12:42:52	0.713295	3.17288	2.52699	483.149	FALSE	2
2022-09-14	12:42:52	0.716705	3.18805	2.52699	507.201	FALSE	2
2022-09-14	12:42:53	0.713499	3.17379	3.17871	486.323	FALSE	2
2022-09-14	12:42:53	0.714516	3.17831	3.17871	510.379	FALSE	2
2022-09-14	12:42:53	0.716043	3.1851	3.17871	489.508	FALSE	2
2022-09-14	12:42:53	0.714364	3.17763	3.17871	513.557	FALSE	2
2022-09-14	12:42:54	0.720369	3.20435	3.18114	492.712	FALSE	2
2022-09-14	12:42:54	0.717875	3.19325	3.18114	516.75	FALSE	2
2022-09-14	12:42:54	0.715432	3.18238	3.18114	495.895	FALSE	2
2022-09-14	12:42:54	0.706934	3.14458	3.18114	519.895	FALSE	2
2022-09-14	12:42:55	0.106934	0.475664	0.129542	496.37	FALSE	2
2022-09-14	12:42:55	-0.0174934	-0.0778141	0.129542	519.895	FALSE	2
2022-09-14	12:42:55	-0.00207355	-0.00922357	0.129542	496.37	FALSE	2
2022-09-14	12:42:56	-0.0652287	-0.29015	-0.51205	519.895	FALSE	2
2022-09-14	12:42:56	-0.0689946	-0.306902	-0.51205	496.37	FALSE	2
2022-09-14	12:42:56	-0.120699	-0.536893	-0.51205	519.895	FALSE	2
2022-09-14	12:42:56	-0.205534	-0.914256	-0.51205	496.37	FALSE	2
2022-09-14	12:42:57	-0.125941	-0.560211	0.333334	519.895	FALSE	2
2022-09-14	12:42:57	-0.0159158	-0.0707967	0.333334	496.37	FALSE	2
2022-09-14	12:42:57	0.245255	1.09094	0.333334	520.986	FALSE	2
2022-09-14	12:42:57	0.196349	0.8734	0.333334	497.244	FALSE	2
2022-09-14	12:42:58	0.441794	1.96519	2.08986	522.951	FALSE	2
2022-09-14	12:42:58	0.431107	1.91765	2.08986	499.161	FALSE	2
2022-09-14	12:42:58	0.478384	2.12795	2.08986	525.079	FALSE	2
2022-09-14	12:42:58	0.528003	2.34866	2.08986	501.51	FALSE	2
2022-09-14	12:42:59	0.54617	2.42947	2.25668	527.508	FALSE	2
2022-09-14	12:42:59	0.491361	2.18567	2.25668	503.696	FALSE	2
2022-09-14	12:42:59	0.48444	2.15489	2.25668	529.663	FALSE	2
2022-09-14	12:43:00	0.465102	2.06887	1.98466	505.765	FALSE	2
2022-09-14	12:43:00	0.442965	1.9704	1.98466	531.634	FALSE	2
2022-09-14	12:43:00	0.434415	1.93236	1.98466	507.697	FALSE	2
2022-09-14	12:43:00	0.442201	1.967	1.98466	533.601	FALSE	2
2022-09-14	12:43:01	0.431412	1.91901	1.8503	509.616	FALSE	2
2022-09-14	12:43:01	0.409122	1.81986	1.8503	535.421	FALSE	2
2022-09-14	12:43:01	0.402456	1.7902	1.8503	511.406	FALSE	2
2022-09-14	12:43:01	0.420878	1.87215	1.8503	537.293	FALSE	2
2022-09-14	12:43:02	0.423677	1.8846	1.95285	513.291	FALSE	2
2022-09-14	12:43:02	0.412532	1.83502	1.95285	539.128	FALSE	2
2022-09-14	12:43:02	0.431463	1.91923	1.95285	515.21	FALSE	2
2022-09-14	12:43:02	0.48841	2.17255	1.95285	541.3	FALSE	2
2022-09-14	12:43:03	0.528206	2.34957	2.55549	517.56	FALSE	2
2022-09-14	12:43:03	0.473143	2.10463	2.55549	543.405	FALSE	2
2022-09-14	12:43:03	0.72215	3.21227	2.55549	520.772	FALSE	2
2022-09-14	12:43:04	0.723982	3.22042	2.85392	546.625	FALSE	2
2022-09-14	12:43:04	0.719249	3.19936	2.85392	523.971	FALSE	2
2022-09-14	12:43:04	0.716145	3.18556	2.85392	549.811	FALSE	2
2022-09-14	12:43:04	0.406985	1.81035	2.85392	525.782	FALSE	2
2022-09-14	12:43:05	0.360776	1.6048	1.54487	551.416	FALSE	2
2022-09-14	12:43:05	0.334924	1.48981	1.54487	527.271	FALSE	2
2022-09-14	12:43:05	0.325458	1.4477	1.54487	552.863	FALSE	2
2022-09-14	12:43:05	0.368053	1.63717	1.54487	528.909	FALSE	2
2022-09-14	12:43:06	0.34556	1.53712	1.55379	554.4	FALSE	2
2022-09-14	12:43:06	0.354313	1.57606	1.55379	530.485	FALSE	2
2022-09-14	12:43:06	0.348053	1.54821	1.55379	555.949	FALSE	2
2022-09-14	12:43:07	0.345204	1.53554	1.44023	532.02	FALSE	2
2022-09-14	12:43:07	0.326629	1.45291	1.44023	557.402	FALSE	2
2022-09-14	12:43:07	0.311667	1.38636	1.44023	533.407	FALSE	2
2022-09-14	12:43:07	0.311616	1.38613	1.44023	558.788	FALSE	2
2022-09-14	12:43:08	0.285	1.26774	1.24069	534.674	FALSE	2
2022-09-14	12:43:08	0.26383	1.17357	1.24069	559.961	FALSE	2
2022-09-14	12:43:08	0.278333	1.23808	1.24069	535.912	FALSE	2
2022-09-14	12:43:08	0.288512	1.28336	1.24069	561.245	FALSE	2
2022-09-14	12:43:09	0.303779	1.35127	1.31273	537.264	FALSE	2
2022-09-14	12:43:09	0.285255	1.26887	1.31273	562.514	FALSE	2
2022-09-14	12:43:09	0.289682	1.28856	1.31273	538.552	FALSE	2
2022-09-14	12:43:09	0.301743	1.34221	1.31273	563.856	FALSE	2
2022-09-14	12:43:10	0.30271	1.34651	1.35285	539.899	FALSE	2
2022-09-14	12:43:10	0.301641	1.34176	1.35285	565.197	FALSE	2
2022-09-14	12:43:10	0.308054	1.37029	1.35285	541.269	FALSE	2
2022-09-14	12:43:11	0.303931	1.35195	1.37855	566.549	FALSE	2
2022-09-14	12:43:11	0.309326	1.37594	1.37855	542.645	FALSE	2
2022-09-14	12:43:11	0.313957	1.39654	1.37855	567.946	FALSE	2
2022-09-14	12:43:11	0.31243	1.38975	1.37855	544.035	FALSE	2
2022-09-14	12:43:12	0.333957	1.48551	1.4537	569.431	FALSE	2
2022-09-14	12:43:12	0.315229	1.4022	1.4537	545.437	FALSE	2
2022-09-14	12:43:12	0.329733	1.46672	1.4537	570.898	FALSE	2
2022-09-14	12:43:12	0.328308	1.46038	1.4537	546.897	FALSE	2
2022-09-14	12:43:13	0.338232	1.50452	1.51171	572.403	FALSE	2
2022-09-14	12:43:13	0.351718	1.56451	1.51171	548.462	FALSE	2
2022-09-14	12:43:13	0.336501	1.49682	1.51171	573.9	FALSE	2
2022-09-14	12:43:13	0.332939	1.48098	1.51171	549.943	FALSE	2
2022-09-14	12:43:14	0.328206	1.45993	1.49154	575.359	FALSE	2
2022-09-14	12:43:14	0.341489	1.51901	1.49154	551.462	FALSE	2
2022-09-14	12:43:14	0.336247	1.49569	1.49154	576.855	FALSE	2
2022-09-14	12:43:15	0.391107	1.73972	2.00356	553.202	FALSE	2
2022-09-14	12:43:15	0.431769	1.92059	2.00356	578.776	FALSE	2
2022-09-14	12:43:15	0.45757	2.03536	2.00356	555.237	FALSE	2
2022-09-14	12:43:15	0.521234	2.31855	2.00356	581.094	FALSE	2
2022-09-14	12:43:16	0.556196	2.47407	2.50435	557.711	FALSE	2
2022-09-14	12:43:16	0.556603	2.47588	2.50435	583.57	FALSE	2
2022-09-14	12:43:16	0.563422	2.50621	2.50435	560.217	FALSE	2
2022-09-14	12:43:16	0.575789	2.56122	2.50435	586.131	FALSE	2
2022-09-14	12:43:17	0.722456	3.21363	3.2078	563.431	FALSE	2
2022-09-14	12:43:17	0.720776	3.20616	3.2078	589.338	FALSE	2
2022-09-14	12:43:17	0.719046	3.19846	3.2078	566.629	FALSE	2
2022-09-14	12:43:17	0.722303	3.21295	3.2078	592.551	FALSE	2
2022-09-14	12:43:18	0.724389	3.22223	3.21551	569.852	FALSE	2
2022-09-14	12:43:18	0.727392	3.23559	3.21551	595.786	FALSE	2
2022-09-14	12:43:18	0.716857	3.18872	3.21551	573.04	FALSE	2
2022-09-14	12:43:19	0.717723	3.19258	3.19054	598.979	FALSE	2
2022-09-14	12:43:19	0.715687	3.18352	3.19054	576.224	FALSE	2
2022-09-14	12:43:19	0.717672	3.19235	3.19054	602.171	FALSE	2
2022-09-14	12:43:19	0.717977	3.19371	3.19054	579.417	FALSE	2
2022-09-14	12:43:20	0.717672	3.19235	3.2031	605.363	FALSE	2
2022-09-14	12:43:20	0.722914	3.21567	3.2031	582.633	FALSE	2
2022-09-14	12:43:20	0.720013	3.20276	3.2031	608.566	FALSE	2
2022-09-14	12:43:20	0.719758	3.20163	3.2031	585.835	FALSE	2
2022-09-14	12:43:21	0.721336	3.20865	3.20055	611.775	FALSE	2
2022-09-14	12:43:21	0.717468	3.19144	3.20055	589.026	FALSE	2
2022-09-14	12:43:21	0.716654	3.18782	3.20055	614.963	FALSE	2
2022-09-14	12:43:21	0.722608	3.2143	3.20055	592.24	FALSE	2
2022-09-14	12:43:22	0.709071	3.15409	3.18216	618.117	FALSE	2
2022-09-14	12:43:22	0.718435	3.19574	3.18216	595.436	FALSE	2
2022-09-14	12:43:22	0.718639	3.19665	3.18216	621.313	FALSE	2
2022-09-14	12:43:23	0.716705	3.18805	3.19303	598.624	FALSE	2
2022-09-14	12:43:23	0.71757	3.19189	3.19303	624.505	FALSE	2
2022-09-14	12:43:23	0.717316	3.19077	3.19303	601.815	FALSE	2
2022-09-14	12:43:23	0.719707	3.2014	3.19303	627.707	FALSE	2
2022-09-14	12:43:24	0.716807	3.1885	3.20989	605.004	FALSE	2
2022-09-14	12:43:24	0.719962	3.20253	3.20989	630.909	FALSE	2
2022-09-14	12:43:24	0.722914	3.21567	3.20989	608.219	FALSE	2
2022-09-14	12:43:24	0.726781	3.23287	3.20989	634.142	FALSE	2
2022-09-14	12:43:25	0.715738	3.18375	3.1879	611.403	FALSE	2
2022-09-14	12:43:25	0.718486	3.19597	3.1879	637.338	FALSE	2
2022-09-14	12:43:25	0.715789	3.18397	3.1879	614.587	FALSE	2
2022-09-14	12:43:26	0.719707	3.2014	3.19874	640.539	FALSE	2
2022-09-14	12:43:26	0.716501	3.18714	3.19874	617.774	FALSE	2
2022-09-14	12:43:26	0.722761	3.21499	3.19874	643.754	FALSE	2
2022-09-14	12:43:26	0.717468	3.19144	3.19874	620.966	FALSE	2
2022-09-14	12:43:27	0.721387	3.20887	2.8713	646.963	FALSE	2
2022-09-14	12:43:27	0.719046	3.19846	2.8713	624.164	FALSE	2
2022-09-14	12:43:27	0.717824	3.19302	2.8713	650.156	FALSE	2
2022-09-14	12:43:27	0.423728	1.88483	2.8713	626.049	FALSE	2
2022-09-14	12:43:28	0.440878	1.96111	2.02733	652.117	FALSE	2
2022-09-14	12:43:28	0.461896	2.05461	2.02733	628.103	FALSE	2
2022-09-14	12:43:28	0.459758	2.0451	2.02733	654.163	FALSE	2
2022-09-14	12:43:28	0.460522	2.04849	2.02733	630.152	FALSE	2
2022-09-14	12:43:29	0.709682	3.15681	3.17899	657.319	FALSE	2
2022-09-14	12:43:29	0.717977	3.19371	3.17899	633.346	FALSE	2
2022-09-14	12:43:29	0.716349	3.18646	3.17899	660.506	FALSE	2
2022-09-14	12:43:30	0.719656	3.20117	3.19365	636.547	FALSE	2
2022-09-14	12:43:30	0.718232	3.19484	3.19365	663.701	FALSE	2
2022-09-14	12:43:30	0.715738	3.18375	3.19365	639.731	FALSE	2
2022-09-14	12:43:30	0.718232	3.19484	3.19365	666.895	FALSE	2
2022-09-14	12:43:31	0.713041	3.17175	3.18307	642.902	FALSE	2
2022-09-14	12:43:31	0.717468	3.19144	3.18307	670.087	FALSE	2
2022-09-14	12:43:31	0.714873	3.1799	3.18307	646.082	FALSE	2
2022-09-14	12:43:31	0.716959	3.18918	3.18307	673.276	FALSE	2
2022-09-14	12:43:32	0.718995	3.19823	3.19586	649.28	FALSE	2
2022-09-14	12:43:32	0.717468	3.19144	3.19586	676.468	FALSE	2
2022-09-14	12:43:32	0.716298	3.18624	3.19586	652.467	FALSE	2
2022-09-14	12:43:32	0.721081	3.20751	3.19586	679.675	FALSE	2
2022-09-14	12:43:33	0.71299	3.17152	3.19967	655.638	FALSE	2
2022-09-14	12:43:33	0.726221	3.23038	3.19967	682.905	FALSE	2
2022-09-14	12:43:33	0.71874	3.1971	3.19967	658.835	FALSE	2
2022-09-14	12:43:34	0.719046	3.19846	3.19738	686.104	FALSE	2
2022-09-14	12:43:34	0.718639	3.19665	3.19738	662.032	FALSE	2
2022-09-14	12:43:34	0.716399	3.18669	3.19738	689.291	FALSE	2
2022-09-14	12:43:34	0.721132	3.20774	3.19738	665.24	FALSE	2
2022-09-14	12:43:35	0.721285	3.20842	3.19037	692.499	FALSE	2
2022-09-14	12:43:35	0.718893	3.19778	3.19037	668.437	FALSE	2
2022-09-14	12:43:35	0.713346	3.17311	3.19037	695.672	FALSE	2
2022-09-14	12:43:35	0.715382	3.18216	3.19037	671.62	FALSE	2
2022-09-14	12:43:36	0.71813	3.19439	3.19535	698.866	FALSE	2
2022-09-14	12:43:36	0.720267	3.20389	3.19535	674.823	FALSE	2
2022-09-14	12:43:36	0.715534	3.18284	3.19535	702.049	FALSE	2
2022-09-14	12:43:36	0.719453	3.20027	3.19535	678.024	FALSE	2
2022-09-14	12:43:37	0.719606	3.20095	3.19982	705.25	FALSE	2
2022-09-14	12:43:37	0.720521	3.20502	3.19982	681.229	FALSE	2
2022-09-14	12:43:37	0.717926	3.19348	3.19982	708.444	FALSE	2
2022-09-14	12:43:38	0.724135	3.2211	3.21159	684.45	FALSE	2
2022-09-14	12:43:38	0.719148	3.19891	3.21159	711.643	FALSE	2
2022-09-14	12:43:38	0.723168	3.2168	3.21159	687.667	FALSE	2
2022-09-14	12:43:38	0.721539	3.20955	3.21159	714.852	FALSE	2
2022-09-14	12:43:39	0.722507	3.21386	3.20344	690.881	FALSE	2
2022-09-14	12:43:39	0.721591	3.20978	3.20344	718.062	FALSE	2
2022-09-14	12:43:39	0.716654	3.18782	3.20344	694.068	FALSE	2
2022-09-14	12:43:39	0.719911	3.20231	3.20344	721.264	FALSE	2
2022-09-14	12:43:40	0.721895	3.21113	3.18872	697.279	FALSE	2
2022-09-14	12:43:40	0.716501	3.18714	3.18872	724.451	FALSE	2
2022-09-14	12:43:40	0.711463	3.16473	3.18872	700.444	FALSE	2
2022-09-14	12:43:40	0.71757	3.19189	3.18872	727.643	FALSE	2
2022-09-14	12:43:41	0.708613	3.15205	3.19054	703.596	FALSE	2
2022-09-14	12:43:41	0.721387	3.20887	3.19054	730.852	FALSE	2
2022-09-14	12:43:41	0.721794	3.21068	3.19054	706.807	FALSE	2
2022-09-14	12:43:42	0.713143	3.1722	3.19789	734.024	FALSE	2
2022-09-14	12:43:42	0.721183	3.20797	3.19789	710.015	FALSE	2
2022-09-14	12:43:42	0.726069	3.2297	3.19789	737.254	FALSE	2
2022-09-14	12:43:42	0.71528	3.18171	3.19789	713.197	FALSE	2
2022-09-14	12:43:43	0.718079	3.19416	3.21521	740.448	FALSE	2
2022-09-14	12:43:43	0.719351	3.19982	3.21521	716.396	FALSE	2
2022-09-14	12:43:43	0.726629	3.23219	3.21521	743.68	FALSE	2
2022-09-14	12:43:43	0.727188	3.23468	3.21521	719.631	FALSE	2
2022-09-14	12:43:44	0.717061	3.18963	3.19408	746.87	FALSE	2
2022-09-14	12:43:44	0.714924	3.18012	3.19408	722.811	FALSE	2
2022-09-14	12:43:44	0.722201	3.21249	3.19408	750.083	FALSE	2
2022-09-14	12:43:45	0.716399	3.18669	3.19676	725.998	FALSE	2
2022-09-14	12:43:45	0.720114	3.20321	3.19676	753.286	FALSE	2
2022-09-14	12:43:45	0.72215	3.21227	3.19676	729.21	FALSE	2
2022-09-14	12:43:45	0.715992	3.18488	3.19676	756.471	FALSE	2
2022-09-14	12:43:46	0.716552	3.18737	3.19461	732.398	FALSE	2
2022-09-14	12:43:46	0.718079	3.19416	3.19461	759.665	FALSE	2
2022-09-14	12:43:46	0.721488	3.20932	3.19461	735.607	FALSE	2
2022-09-14	12:43:46	0.716603	3.18759	3.19461	762.852	FALSE	2
2022-09-14	12:43:47	0.719606	3.20095	3.21634	738.808	FALSE	2
2022-09-14	12:43:47	0.721692	3.21023	3.21634	766.063	FALSE	2
2022-09-14	12:43:47	0.728104	3.23875	3.21634	742.047	FALSE	2
2022-09-14	12:43:47	0.722862	3.21543	3.21634	769.278	FALSE	2
2022-09-14	12:43:48	0.721794	3.21068	3.21136	745.257	FALSE	2
2022-09-14	12:43:48	0.718893	3.19778	3.21136	772.476	FALSE	2
2022-09-14	12:43:48	0.725153	3.22563	3.21136	748.483	FALSE	2
2022-09-14	12:43:49	0.727443	3.23581	3.20542	775.712	FALSE	2
2022-09-14	12:43:49	0.717366	3.19099	3.20542	751.674	FALSE	2
2022-09-14	12:43:49	0.721234	3.20819	3.20542	778.92	FALSE	2
2022-09-14	12:43:49	0.716399	3.18669	3.20542	754.861	FALSE	2
2022-09-14	12:43:50	0.713855	3.17537	3.19705	782.095	FALSE	2
2022-09-14	12:43:50	0.729886	3.24668	3.19705	758.107	FALSE	2
2022-09-14	12:43:50	0.71355	3.17401	3.19705	785.269	FALSE	2
2022-09-14	12:43:50	0.717621	3.19212	3.19705	761.299	FALSE	2
2022-09-14	12:43:51	0.711107	3.16315	3.2001	788.432	FALSE	2
2022-09-14	12:43:51	0.725102	3.2254	3.2001	764.525	FALSE	2
2022-09-14	12:43:51	0.721591	3.20978	3.2001	791.642	FALSE	2
2022-09-14	12:43:51	0.71986	3.20208	3.2001	767.727	FALSE	2
2022-09-14	12:43:52	0.724338	3.222	3.21166	794.864	FALSE	2
2022-09-14	12:43:52	0.721591	3.20978	3.21166	770.937	FALSE	2
2022-09-14	12:43:52	0.720114	3.20321	3.21166	798.067	FALSE	2
2022-09-14	12:43:53	0.721437	3.2091	3.21334	774.146	FALSE	2
2022-09-14	12:43:53	0.722761	3.21499	3.21334	801.282	FALSE	2
2022-09-14	12:43:53	0.716908	3.18895	3.21334	777.335	FALSE	2
2022-09-14	12:43:53	0.728461	3.24034	3.21334	804.523	FALSE	2
2022-09-14	12:43:54	0.715483	3.18261	3.20276	780.517	FALSE	2
2022-09-14	12:43:54	0.718486	3.19597	3.20276	807.719	FALSE	2
2022-09-14	12:43:54	0.719809	3.20185	3.20276	783.719	FALSE	2
2022-09-14	12:43:54	0.726272	3.2306	3.20276	810.949	FALSE	2
2022-09-14	12:43:55	0.715738	3.18375	3.22489	786.903	FALSE	2
2022-09-14	12:43:55	0.729784	3.24623	3.22489	814.196	FALSE	2
2022-09-14	12:43:55	0.725865	3.22879	3.22489	790.132	FALSE	2
2022-09-14	12:43:55	0.728562	3.24079	3.22489	817.436	FALSE	2
2022-09-14	12:43:56	0.720572	3.20525	3.20585	793.337	FALSE	2
2022-09-14	12:43:56	0.714974	3.18035	3.20585	820.617	FALSE	2
2022-09-14	12:43:56	0.726578	3.23196	3.20585	796.569	FALSE	2
2022-09-14	12:43:57	0.720114	3.20321	3.20225	823.82	FALSE	2
2022-09-14	12:43:57	0.719707	3.2014	3.20225	799.77	FALSE	2
2022-09-14	12:43:57	0.71472	3.17922	3.20225	826.999	FALSE	2
2022-09-14	12:43:57	0.725051	3.22517	3.20225	802.995	FALSE	2
2022-09-14	12:43:58	0.726781	3.23287	3.22087	830.232	FALSE	2
2022-09-14	12:43:58	0.720623	3.20548	3.22087	806.201	FALSE	2
2022-09-14	12:43:58	0.724542	3.22291	3.22087	833.455	FALSE	2
2022-09-14	12:43:58	0.724389	3.22223	3.22087	809.423	FALSE	2
2022-09-14	12:43:59	0.72388	3.21996	3.2011	836.675	FALSE	2
2022-09-14	12:43:59	0.718028	3.19393	3.2011	812.617	FALSE	2
2022-09-14	12:43:59	0.71701	3.1894	3.2011	839.864	FALSE	2
2022-09-14	12:44:00	0.71813	3.19439	3.1997	815.811	FALSE	2
2022-09-14	12:44:00	0.722965	3.21589	3.1997	843.08	FALSE	2
2022-09-14	12:44:00	0.716857	3.18872	3.1997	819	FALSE	2
2022-09-14	12:44:00	0.719351	3.19982	3.1997	846.28	FALSE	2
2022-09-14	12:44:01	0.724084	3.22087	3.22845	822.221	FALSE	2
2022-09-14	12:44:01	0.725305	3.2263	3.22845	849.506	FALSE	2
2022-09-14	12:44:01	0.725	3.22494	3.22845	825.446	FALSE	2
2022-09-14	12:44:01	0.728766	3.2417	3.22845	852.748	FALSE	2
2022-09-14	12:44:02	0.717519	3.19167	3.20859	828.638	FALSE	2
2022-09-14	12:44:02	0.720369	3.20435	3.20859	855.952	FALSE	2
2022-09-14	12:44:02	0.727137	3.23445	3.20859	831.872	FALSE	2
2022-09-14	12:44:02	0.720267	3.20389	3.20859	859.156	FALSE	2
2022-09-14	12:44:03	0.725662	3.22789	3.21981	835.1	FALSE	2
2022-09-14	12:44:03	0.725051	3.22517	3.21981	862.381	FALSE	2
2022-09-14	12:44:03	0.720827	3.20638	3.21981	838.306	FALSE	2
2022-09-14	12:44:04	0.731158	3.25234	3.22523	865.634	FALSE	2
2022-09-14	12:44:04	0.727036	3.234	3.22523	841.54	FALSE	2
2022-09-14	12:44:04	0.723066	3.21634	3.22523	868.85	FALSE	2
2022-09-14	12:44:04	0.718995	3.19823	3.22523	844.739	FALSE	2
2022-09-14	12:44:05	0.720165	3.20344	3.21046	872.053	FALSE	2
2022-09-14	12:44:05	0.716501	3.18714	3.21046	847.926	FALSE	2
2022-09-14	12:44:05	0.725102	3.2254	3.21046	875.279	FALSE	2
2022-09-14	12:44:05	0.725204	3.22585	3.21046	851.152	FALSE	2
2022-09-14	12:44:06	0.719606	3.20095	3.20565	878.48	FALSE	2
2022-09-14	12:44:06	0.716857	3.18872	3.20565	854.34	FALSE	2
2022-09-14	12:44:06	0.724186	3.22132	3.20565	881.701	FALSE	2
2022-09-14	12:44:06	0.721997	3.21159	3.20565	857.552	FALSE	2
2022-09-14	12:44:07	0.72388	3.21996	3.21265	884.921	FALSE	2
2022-09-14	12:44:07	0.719046	3.19846	3.21265	860.75	FALSE	2
2022-09-14	12:44:07	0.723779	3.21951	3.21265	888.141	FALSE	2
2022-09-14	12:44:08	0.716705	3.18805	3.20938	863.938	FALSE	2
2022-09-14	12:44:08	0.723931	3.22019	3.20938	891.361	FALSE	2
2022-09-14	12:44:08	0.721336	3.20865	3.20938	867.147	FALSE	2
2022-09-14	12:44:08	0.724033	3.22064	3.20938	894.581	FALSE	2
2022-09-14	12:44:09	0.722252	3.21272	3.2293	870.36	FALSE	2
2022-09-14	12:44:09	0.727545	3.23627	3.2293	897.818	FALSE	2
2022-09-14	12:44:09	0.725204	3.22585	3.2293	873.586	FALSE	2
2022-09-14	12:44:09	0.728919	3.24238	3.2293	901.06	FALSE	2
2022-09-14	12:44:10	0.732328	3.25754	3.23151	876.843	FALSE	2
2022-09-14	12:44:10	0.726272	3.2306	3.23151	904.291	FALSE	2
2022-09-14	12:44:10	0.725509	3.22721	3.23151	880.07	FALSE	2
2022-09-14	12:44:10	0.721794	3.21068	3.23151	907.501	FALSE	2
2022-09-14	12:44:11	0.729835	3.24645	3.21808	883.317	FALSE	2
2022-09-14	12:44:11	0.718232	3.19484	3.21808	910.696	FALSE	2
2022-09-14	12:44:11	0.722303	3.21295	3.21808	886.53	FALSE	2
2022-09-14	12:44:12	0.727036	3.234	3.21414	913.93	FALSE	2
2022-09-14	12:44:12	0.723117	3.21657	3.21414	889.746	FALSE	2
2022-09-14	12:44:12	0.71472	3.17922	3.21414	917.109	FALSE	2
2022-09-14	12:44:12	0.725407	3.22676	3.21414	892.973	FALSE	2
2022-09-14	12:44:13	0.719758	3.20163	3.23055	920.311	FALSE	2
2022-09-14	12:44:13	0.728054	3.23853	3.23055	896.212	FALSE	2
2022-09-14	12:44:13	0.729529	3.24509	3.23055	923.556	FALSE	2
2022-09-14	12:44:13	0.727697	3.23694	3.23055	899.449	FALSE	2
2022-09-14	12:44:14	0.724847	3.22426	3.22279	926.78	FALSE	2
2022-09-14	12:44:14	0.723524	3.21838	3.22279	902.667	FALSE	2
2022-09-14	12:44:14	0.725407	3.22676	3.22279	930.007	FALSE	2
2022-09-14	12:44:14	0.724288	3.22178	3.22279	905.889	FALSE	2
2022-09-14	12:44:15	0.719504	3.2005	3.21974	933.208	FALSE	2
2022-09-14	12:44:15	0.718028	3.19393	3.21974	909.083	FALSE	2
2022-09-14	12:44:15	0.733957	3.26479	3.21974	936.472	FALSE	2
2022-09-14	12:44:16	0.730293	3.24849	3.22245	912.331	FALSE	2
2022-09-14	12:44:16	0.725305	3.2263	3.22245	939.699	FALSE	2
2022-09-14	12:44:16	0.720979	3.20706	3.22245	915.538	FALSE	2
2022-09-14	12:44:16	0.721183	3.20797	3.22245	942.907	FALSE	2
2022-09-14	12:44:17	0.72612	3.22993	3.22585	918.768	FALSE	2
2022-09-14	12:44:17	0.724644	3.22336	3.22585	946.13	FALSE	2
2022-09-14	12:44:17	0.728512	3.24057	3.22585	922.009	FALSE	2
2022-09-14	12:44:17	0.721539	3.20955	3.22585	949.34	FALSE	2
2022-09-14	12:44:18	0.718486	3.19597	3.20087	925.205	FALSE	2
2022-09-14	12:44:18	0.718639	3.19665	3.20087	952.536	FALSE	2
2022-09-14	12:44:18	0.721641	3.21	3.20087	928.415	FALSE	2
2022-09-14	12:44:19	0.71757	3.19189	3.20961	955.728	FALSE	2
2022-09-14	12:44:19	0.725611	3.22766	3.20961	931.642	FALSE	2
2022-09-14	12:44:19	0.714516	3.17831	3.20961	958.906	FALSE	2
2022-09-14	12:44:19	0.728512	3.24057	3.20961	934.883	FALSE	2
2022-09-14	12:44:20	0.720165	3.20344	3.21068	962.11	FALSE	2
2022-09-14	12:44:20	0.722252	3.21272	3.21068	938.096	FALSE	2
2022-09-14	12:44:20	0.723066	3.21634	3.21068	965.326	FALSE	2
2022-09-14	12:44:20	0.721692	3.21023	3.21068	941.306	FALSE	2
2022-09-14	12:44:21	0.725356	3.22653	3.20916	968.553	FALSE	2
2022-09-14	12:44:21	0.713397	3.17333	3.20916	944.479	FALSE	2
2022-09-14	12:44:21	0.719504	3.2005	3.20916	971.753	FALSE	2
2022-09-14	12:44:21	0.727545	3.23627	3.20916	947.716	FALSE	2
2022-09-14	12:44:22	0.723626	3.21883	3.2334	974.972	FALSE	2
2022-09-14	12:44:22	0.727697	3.23694	3.2334	950.952	FALSE	2
2022-09-14	12:44:22	0.729377	3.24441	3.2334	978.217	FALSE	2
2022-09-14	12:44:23	0.381438	1.69671	3.49065	952.649	FALSE	2
2022-09-14	12:44:23	0.723168	3.2168	3.49065	981.433	FALSE	2
2022-09-14	12:44:23	0.719809	3.20185	3.49065	955.851	FALSE	2
2022-09-14	12:44:23	1.31452	5.84725	3.49065	987.281	FALSE	2
2022-09-14	12:44:24	0.795891	3.54028	3.30695	959.391	FALSE	2
2022-09-14	12:44:24	0.725662	3.22789	3.30695	990.508	FALSE	2
2022-09-14	12:44:24	0.72841	3.24011	3.30695	962.631	FALSE	2
2022-09-14	12:44:24	0.723779	3.21951	3.30695	993.728	FALSE	2
2022-09-14	12:44:25	0.732786	3.25958	3.22528	965.891	FALSE	2
2022-09-14	12:44:25	0.723219	3.21702	3.22528	996.945	FALSE	2
2022-09-14	12:44:25	0.719504	3.2005	3.22528	969.091	FALSE	2
2022-09-14	12:44:25	0.724796	3.22404	3.22528	1000.17	FALSE	2
2022-09-14	12:44:26	0.726832	3.23309	3.2211	972.325	FALSE	2
2022-09-14	12:44:26	0.722862	3.21543	3.2211	1003.38	FALSE	2
2022-09-14	12:44:26	0.72271	3.21476	3.2211	975.539	FALSE	2
2022-09-14	12:44:27	0.720318	3.20412	3.22019	1006.59	FALSE	2
2022-09-14	12:44:27	0.728766	3.2417	3.22019	978.781	FALSE	2
2022-09-14	12:44:27	0.726934	3.23355	3.22019	1009.82	FALSE	2
2022-09-14	12:44:27	0.719707	3.2014	3.22019	981.982	FALSE	2
2022-09-14	12:44:28	0.717672	3.19235	3.2061	1013.01	FALSE	2
2022-09-14	12:44:28	0.715382	3.18216	3.2061	985.165	FALSE	2
2022-09-14	12:44:28	0.719402	3.20004	3.2061	1016.21	FALSE	2
2022-09-14	12:44:28	0.730598	3.24985	3.2061	988.414	FALSE	2
2022-09-14	12:44:29	0.734466	3.26705	3.25007	1019.48	FALSE	2
2022-09-14	12:44:29	0.731768	3.25505	3.25007	991.67	FALSE	2
2022-09-14	12:44:29	0.729224	3.24373	3.25007	1022.73	FALSE	2
2022-09-14	12:44:29	0.727137	3.23445	3.25007	994.904	FALSE	2
2022-09-14	12:44:30	0.72958	3.24532	3.23619	1025.97	FALSE	2
2022-09-14	12:44:30	0.723219	3.21702	3.23619	998.121	FALSE	2
2022-09-14	12:44:30	0.729784	3.24623	3.23619	1029.22	FALSE	2
2022-09-14	12:44:31	0.728359	3.23989	3.24102	1001.36	FALSE	2
2022-09-14	12:44:31	0.729224	3.24373	3.24102	1032.46	FALSE	2
2022-09-14	12:44:31	0.727697	3.23694	3.24102	1004.6	FALSE	2
2022-09-14	12:44:31	0.729173	3.24351	3.24102	1035.7	FALSE	2
2022-09-14	12:44:32	0.726323	3.23083	3.22755	1007.83	FALSE	2
2022-09-14	12:44:32	0.723931	3.22019	3.22755	1038.92	FALSE	2
2022-09-14	12:44:32	0.731107	3.25211	3.22755	1011.08	FALSE	2
2022-09-14	12:44:32	0.720979	3.20706	3.22755	1042.13	FALSE	2
2022-09-14	12:44:33	0.72902	3.24283	3.22562	1014.32	FALSE	2
2022-09-14	12:44:33	0.717366	3.19099	3.22562	1045.32	FALSE	2
2022-09-14	12:44:33	0.726221	3.23038	3.22562	1017.55	FALSE	2
2022-09-14	12:44:33	0.728003	3.2383	3.22562	1048.56	FALSE	2
2022-09-14	12:44:34	0.72327	3.21725	3.31738	1020.77	FALSE	2
2022-09-14	12:44:34	0.784389	3.48912	3.31738	1052.05	FALSE	2
2022-09-14	12:44:34	0.729682	3.24577	3.31738	1024.02	FALSE	2
2022-09-14	12:44:35	0.73528	3.27067	3.22291	1055.32	FALSE	2
2022-09-14	12:44:35	0.720979	3.20706	3.22291	1027.22	FALSE	2
2022-09-14	12:44:35	0.72215	3.21227	3.22291	1058.53	FALSE	2
2022-09-14	12:44:35	0.719758	3.20163	3.22291	1030.43	FALSE	2
2022-09-14	12:44:36	0.722761	3.21499	3.20655	1061.75	FALSE	2
2022-09-14	12:44:36	0.716908	3.18895	3.20655	1033.61	FALSE	2
2022-09-14	12:44:36	0.719809	3.20185	3.20655	1064.95	FALSE	2
2022-09-14	12:44:36	0.723982	3.22042	3.20655	1036.84	FALSE	2
2022-09-14	12:44:37	0.717265	3.19054	3.22857	1068.14	FALSE	2
2022-09-14	12:44:37	0.733702	3.26365	3.22857	1040.1	FALSE	2
2022-09-14	12:44:37	0.726476	3.23151	3.22857	1071.37	FALSE	2
2022-09-14	12:44:38	0.735483	3.27158	3.24385	1043.37	FALSE	2
2022-09-14	12:44:38	0.726781	3.23287	3.24385	1074.6	FALSE	2
2022-09-14	12:44:38	0.725254	3.22607	3.24385	1046.6	FALSE	2
2022-09-14	12:44:38	0.729478	3.24486	3.24385	1077.85	FALSE	2
2022-09-14	12:44:39	0.733397	3.2623	3.24266	1049.86	FALSE	2
2022-09-14	12:44:39	0.728054	3.23853	3.24266	1081.09	FALSE	2
2022-09-14	12:44:39	0.732837	3.25981	3.24266	1053.12	FALSE	2
2022-09-14	12:44:39	0.721641	3.21	3.24266	1084.3	FALSE	2
2022-09-14	12:44:40	0.722404	3.2134	3.23168	1056.33	FALSE	2
2022-09-14	12:44:40	0.729275	3.24396	3.23168	1087.54	FALSE	2
2022-09-14	12:44:40	0.7307	3.2503	3.23168	1059.58	FALSE	2
2022-09-14	12:44:40	0.723677	3.21906	3.23168	1090.76	FALSE	2
2022-09-14	12:44:41	0.735941	3.27361	3.23502	1062.86	FALSE	2
2022-09-14	12:44:41	0.72556	3.22744	3.23502	1093.99	FALSE	2
2022-09-14	12:44:41	0.725102	3.2254	3.23502	1066.08	FALSE	2
2022-09-14	12:44:41	0.722456	3.21363	3.23502	1097.2	FALSE	2
2022-09-14	12:44:42	0.721488	3.20932	3.22321	1069.29	FALSE	2
2022-09-14	12:44:42	0.726934	3.23355	3.22321	1100.44	FALSE	2
2022-09-14	12:44:42	0.725407	3.22676	3.22321	1072.52	FALSE	2
2022-09-14	12:44:43	0.725407	3.22676	3.28397	1103.66	FALSE	2
2022-09-14	12:44:43	0.723982	3.22042	3.28397	1075.74	FALSE	2
2022-09-14	12:44:43	0.729326	3.24419	3.28397	1106.91	FALSE	2
2022-09-14	12:44:43	0.774364	3.44453	3.28397	1079.18	FALSE	2
2022-09-14	12:44:44	0.728512	3.24057	3.23111	1110.15	FALSE	2
2022-09-14	12:44:44	0.726069	3.2297	3.23111	1082.41	FALSE	2
2022-09-14	12:44:44	0.722252	3.21272	3.23111	1113.36	FALSE	2
2022-09-14	12:44:44	0.728715	3.24147	3.23111	1085.65	FALSE	2
2022-09-14	12:44:45	0.724542	3.22291	3.23566	1116.58	FALSE	2
2022-09-14	12:44:45	0.726781	3.23287	3.23566	1088.89	FALSE	2
2022-09-14	12:44:45	0.730903	3.2512	3.23566	1119.83	FALSE	2
2022-09-14	12:44:46	0.728664	3.24124	2.82993	1092.13	FALSE	2
2022-09-14	12:44:46	0.725916	3.22902	2.82993	1123.06	FALSE	2
2022-09-14	12:44:46	0.726425	3.23128	2.82993	1095.36	FALSE	2
2022-09-14	12:44:46	0.363779	1.61816	2.82993	1124.68	FALSE	2
2022-09-14	12:44:47	0.693855	3.08641	3.1997	1098.45	FALSE	2
2022-09-14	12:44:47	0.724542	3.22291	3.1997	1127.9	FALSE	2
2022-09-14	12:44:47	0.728562	3.24079	3.1997	1101.69	FALSE	2
2022-09-14	12:44:47	0.730343	3.24871	3.1997	1131.15	FALSE	2
2022-09-14	12:44:48	0.733346	3.26207	3.22659	1104.95	FALSE	2
2022-09-14	12:44:48	0.718791	3.19733	3.22659	1134.35	FALSE	2
2022-09-14	12:44:48	0.725407	3.22676	3.22659	1108.17	FALSE	2
2022-09-14	12:44:48	0.723931	3.22019	3.22659	1137.57	FALSE	2
2022-09-14	12:44:49	0.720318	3.20412	3.21053	1111.38	FALSE	2
2022-09-14	12:44:49	0.720267	3.20389	3.21053	1140.77	FALSE	2
2022-09-14	12:44:49	0.724695	3.22359	3.21053	1114.6	FALSE	2
2022-09-14	12:44:50	0.724746	3.22382	3.18652	1144	FALSE	2
2022-09-14	12:44:50	0.719758	3.20163	3.18652	1117.8	FALSE	2
2022-09-14	12:44:50	0.71757	3.19189	3.18652	1147.19	FALSE	2
2022-09-14	12:44:50	0.703372	3.12874	3.18652	1120.93	FALSE	2
2022-09-14	12:44:51	0.708664	3.15228	3.11798	1150.34	FALSE	2
2022-09-14	12:44:51	0.696298	3.09727	3.11798	1124.03	FALSE	2
2022-09-14	12:44:51	0.699198	3.11017	3.11798	1153.45	FALSE	2
2022-09-14	12:44:51	0.699656	3.11221	3.11798	1127.14	FALSE	2
2022-09-14	12:44:52	0.686374	3.05313	2.99365	1156.51	FALSE	2
2022-09-14	12:44:52	0.671565	2.98726	2.99365	1130.13	FALSE	2
2022-09-14	12:44:52	0.667341	2.96847	2.99365	1159.47	FALSE	2
2022-09-14	12:44:52	0.66673	2.96575	2.99365	1133.1	FALSE	2
2022-09-14	12:44:53	0.654364	2.91074	2.85068	1162.38	FALSE	2
2022-09-14	12:44:53	0.637672	2.83649	2.85068	1135.93	FALSE	2
2022-09-14	12:44:53	0.630547	2.8048	2.85068	1165.19	FALSE	2
2022-09-14	12:44:54	0.617723	2.74776	3.00452	1138.68	FALSE	2
2022-09-14	12:44:54	0.629326	2.79937	3.00452	1167.99	FALSE	2
2022-09-14	12:44:54	0.727188	3.23468	3.00452	1141.91	FALSE	2
2022-09-14	12:44:54	0.727545	3.23627	3.00452	1171.22	FALSE	2
2022-09-14	12:44:55	0.726272	3.2306	3.24402	1145.14	FALSE	2
2022-09-14	12:44:55	0.730394	3.24894	3.24402	1174.47	FALSE	2
2022-09-14	12:44:55	0.730394	3.24894	3.24402	1148.39	FALSE	2
2022-09-14	12:44:55	0.730089	3.24758	3.24402	1177.72	FALSE	2
2022-09-14	12:44:56	0.724796	3.22404	3.21232	1151.62	FALSE	2
2022-09-14	12:44:56	0.724389	3.22223	3.21232	1180.94	FALSE	2
2022-09-14	12:44:56	0.721845	3.21091	3.21232	1154.83	FALSE	2
2022-09-14	12:44:56	0.717621	3.19212	3.21232	1184.14	FALSE	2
2022-09-14	12:44:57	0.733092	3.26094	3.23974	1158.09	FALSE	2
2022-09-14	12:44:57	0.727748	3.23717	3.23974	1187.37	FALSE	2
2022-09-14	12:44:57	0.724135	3.2211	3.23974	1161.31	FALSE	2
2022-09-14	12:44:58	0.724542	3.22291	3.18193	1190.6	FALSE	2
2022-09-14	12:44:58	0.714618	3.17876	3.18193	1164.49	FALSE	2
2022-09-14	12:44:58	0.712685	3.17017	3.18193	1193.77	FALSE	2
2022-09-14	12:44:58	0.709478	3.1559	3.18193	1167.65	FALSE	2
2022-09-14	12:44:59	0.692125	3.07871	2.97639	1196.84	FALSE	2
2022-09-14	12:44:59	0.69131	3.07509	2.97639	1170.72	FALSE	2
2022-09-14	12:44:59	0.649784	2.89037	2.97639	1199.74	FALSE	2
2022-09-14	12:44:59	0.64327	2.86139	2.97639	1173.58	FALSE	2
2022-09-14	12:45:00	0.630242	2.80344	2.72025	1202.54	FALSE	2
2022-09-14	12:45:00	0.626934	2.78873	2.72025	1176.37	FALSE	2
2022-09-14	12:45:00	0.609224	2.70995	2.72025	1205.25	FALSE	2
2022-09-14	12:45:00	0.579758	2.57888	2.72025	1178.95	FALSE	2
2022-09-14	12:45:01	0.568308	2.52795	2.38088	1207.78	FALSE	2
2022-09-14	12:45:01	0.527748	2.34753	2.38088	1181.3	FALSE	2
2022-09-14	12:45:01	0.509682	2.26717	2.38088	1210.04	FALSE	2
2022-09-14	12:45:02	0.522964	2.32625	2.28845	1183.62	FALSE	2
2022-09-14	12:45:02	0.523015	2.32648	2.28845	1212.37	FALSE	2
2022-09-14	12:45:02	0.505611	2.24906	2.28845	1185.87	FALSE	2
2022-09-14	12:45:02	0.506272	2.252	2.28845	1214.62	FALSE	2
2022-09-14	12:45:03	0.532684	2.36948	2.45008	1188.24	FALSE	2
2022-09-14	12:45:03	0.538079	2.39348	2.45008	1217.02	FALSE	2
2022-09-14	12:45:03	0.534211	2.37628	2.45008	1190.62	FALSE	2
2022-09-14	12:45:03	0.598232	2.66106	2.45008	1219.68	FALSE	2
2022-09-14	12:45:04	0.525305	2.33666	2.34549	1192.95	FALSE	2
2022-09-14	12:45:04	0.579046	2.57571	2.34549	1222.25	FALSE	2
2022-09-14	12:45:04	0.520165	2.3138	2.34549	1195.27	FALSE	2
2022-09-14	12:45:04	0.484644	2.15579	2.34549	1224.41	FALSE	2
2022-09-14	12:45:05	0.477621	2.12455	1.95606	1197.39	FALSE	2
2022-09-14	12:45:05	0.437417	1.94572	1.95606	1226.35	FALSE	2
2022-09-14	12:45:05	0.404186	1.7979	1.95606	1199.19	FALSE	2
2022-09-14	12:45:06	0.337519	1.50135	1.43661	1227.86	FALSE	2
2022-09-14	12:45:06	0.35126	1.56247	1.43661	1200.75	FALSE	2
2022-09-14	12:45:06	0.309784	1.37798	1.43661	1229.23	FALSE	2
2022-09-14	12:45:06	0.293295	1.30463	1.43661	1202.06	FALSE	2
2022-09-14	12:45:07	0.293652	1.30622	1.67164	1230.54	FALSE	2
2022-09-14	12:45:07	0.30673	1.3644	1.67164	1203.42	FALSE	2
2022-09-14	12:45:07	0.362761	1.61363	1.67164	1232.15	FALSE	2
2022-09-14	12:45:07	0.540063	2.40231	1.67164	1205.82	FALSE	2
2022-09-14	12:45:08	0.849326	3.77797	2.81583	1235.93	FALSE	2
2022-09-14	12:45:08	0.652175	2.901	2.81583	1208.73	FALSE	2
2022-09-14	12:45:08	0.629478	2.80004	2.81583	1238.73	FALSE	2
2022-09-14	12:45:08	0.401132	1.78432	2.81583	1210.51	FALSE	2
2022-09-14	12:45:09	0.380624	1.69309	1.78266	1240.42	FALSE	2
2022-09-14	12:45:09	0.405102	1.80197	1.78266	1212.31	FALSE	2
2022-09-14	12:45:09	0.416552	1.85291	1.78266	1242.28	FALSE	2
2022-09-14	12:45:10	0.419148	1.86445	1.77424	1214.18	FALSE	2
2022-09-14	12:45:10	0.388359	1.7275	1.77424	1244	FALSE	2
2022-09-14	12:45:10	0.421539	1.87509	1.77424	1216.05	FALSE	2
2022-09-14	12:45:10	0.366425	1.62993	1.77424	1245.63	FALSE	2
2022-09-14	12:45:11	0.360318	1.60277	1.63882	1217.65	FALSE	2
2022-09-14	12:45:11	0.367443	1.63446	1.63882	1247.27	FALSE	2
2022-09-14	12:45:11	0.351718	1.56451	1.63882	1219.22	FALSE	2
2022-09-14	12:45:11	0.394211	1.75353	1.63882	1249.02	FALSE	2
2022-09-14	12:45:12	0.351005	1.56134	1.75451	1220.78	FALSE	2
2022-09-14	12:45:12	0.427545	1.90181	1.75451	1250.92	FALSE	2
2022-09-14	12:45:12	0.404746	1.80039	1.75451	1222.58	FALSE	2
2022-09-14	12:45:13	0.60729	2.70135	2.84498	1253.63	FALSE	2
2022-09-14	12:45:13	0.706883	3.14436	2.84498	1225.73	FALSE	2
2022-09-14	12:45:13	0.623779	2.77469	2.84498	1256.4	FALSE	2
2022-09-14	12:45:13	0.620369	2.75953	2.84498	1228.48	FALSE	2
2022-09-14	12:45:14	0.453397	2.0168	2.24249	1258.42	FALSE	2
2022-09-14	12:45:14	0.567341	2.52365	2.24249	1231.01	FALSE	2
2022-09-14	12:45:14	0.496705	2.20944	2.24249	1260.63	FALSE	2
2022-09-14	12:45:14	0.499097	2.22008	2.24249	1233.23	FALSE	2
2022-09-14	12:45:15	0.794669	3.53485	2.58788	1264.16	FALSE	2
2022-09-14	12:45:15	0.411565	1.83072	2.58788	1235.06	FALSE	2
2022-09-14	12:45:15	0.682405	3.03547	2.58788	1267.2	FALSE	2
2022-09-14	12:45:15	0.438486	1.95047	2.58788	1237.01	FALSE	2
2022-09-14	12:45:16	0.43411	1.93101	1.12535	1269.13	FALSE	2
2022-09-14	12:45:16	0.194415	0.864797	1.12535	1237.87	FALSE	2
2022-09-14	12:45:16	0.130445	0.580245	1.12535	1269.71	FALSE	2
2022-09-14	12:45:17	0.121947	0.542445	0.507696	1238.42	FALSE	2
2022-09-14	12:45:17	0.127341	0.566438	0.507696	1270.27	FALSE	2
2022-09-14	12:45:17	0.11584	0.515279	0.507696	1238.93	FALSE	2
2022-09-14	12:45:17	0.0914124	0.406621	0.507696	1270.68	FALSE	2
2022-09-14	12:45:18	0.0775193	0.344821	-0.125805	1239.28	FALSE	2
2022-09-14	12:45:18	0.00164146	0.00730154	-0.125805	1270.69	FALSE	2
2022-09-14	12:45:18	-0.0620226	-0.275889	-0.125805	1239.28	FALSE	2
2022-09-14	12:45:18	-0.130267	-0.579454	-0.125805	1270.69	FALSE	2
2022-09-14	12:45:19	-0.125331	-0.557497	-0.766379	1239.28	FALSE	2
2022-09-14	12:45:19	-0.120038	-0.533953	-0.766379	1270.69	FALSE	2
2022-09-14	12:45:19	-0.182582	-0.812161	-0.766379	1239.28	FALSE	2
2022-09-14	12:45:19	-0.261208	-1.16191	-0.766379	1270.69	FALSE	2
2022-09-14	12:45:20	-0.292913	-1.30294	-1.21608	1239.28	FALSE	2
2022-09-14	12:45:20	-0.310318	-1.38036	-1.21608	1270.69	FALSE	2
2022-09-14	12:45:20	-0.216933	-0.964961	-1.21608	1239.28	FALSE	2
2022-09-14	12:45:21	0.729173	3.24351	3.23315	1273.93	FALSE	2
2022-09-14	12:45:21	0.726476	3.23151	3.23315	1242.51	FALSE	2
2022-09-14	12:45:21	0.725305	3.2263	3.23315	1277.16	FALSE	2
2022-09-14	12:45:21	0.726425	3.23128	3.23315	1245.74	FALSE	2
2022-09-14	12:45:22	0.688868	3.06422	3.26801	1280.22	FALSE	2
2022-09-14	12:45:22	0.79757	3.54775	3.26801	1249.29	FALSE	2
2022-09-14	12:45:22	0.72612	3.22993	3.26801	1283.45	FALSE	2
2022-09-14	12:45:22	0.72617	3.23015	3.26801	1252.52	FALSE	2
2022-09-14	12:45:23	0.728562	3.24079	3.21781	1286.69	FALSE	2
2022-09-14	12:45:23	0.721641	3.21	3.21781	1255.73	FALSE	2
2022-09-14	12:45:23	0.724491	3.22268	3.21781	1289.92	FALSE	2
2022-09-14	12:45:23	0.718893	3.19778	3.21781	1258.93	FALSE	2
2022-09-14	12:45:24	0.727443	3.23581	3.22306	1293.15	FALSE	2
2022-09-14	12:45:24	0.723931	3.22019	3.22306	1262.15	FALSE	2
2022-09-14	12:45:24	0.722354	3.21318	3.22306	1296.36	FALSE	2
2022-09-14	12:45:25	0.730598	3.24985	3.25409	1265.4	FALSE	2
2022-09-14	12:45:25	0.731463	3.25369	3.25409	1299.62	FALSE	2
2022-09-14	12:45:25	0.728257	3.23943	3.25409	1268.63	FALSE	2
2022-09-14	12:45:25	0.735891	3.27339	3.25409	1302.89	FALSE	2
2022-09-14	12:45:26	0.728512	3.24057	3.23044	1271.88	FALSE	2
2022-09-14	12:45:26	0.72271	3.21476	3.23044	1306.11	FALSE	2
2022-09-14	12:45:26	0.725509	3.22721	3.23044	1275.1	FALSE	2
2022-09-14	12:45:26	0.728206	3.23921	3.23044	1309.35	FALSE	2
2022-09-14	12:45:27	0.56215	2.50056	3.06977	1277.6	FALSE	2
2022-09-14	12:45:27	0.748562	3.32975	3.06977	1312.68	FALSE	2
2022-09-14	12:45:27	0.730343	3.24871	3.06977	1280.85	FALSE	2
2022-09-14	12:45:27	0.719402	3.20004	3.06977	1315.88	FALSE	2
2022-09-14	12:45:28	0.727239	3.2349	3.23181	1284.09	FALSE	2
2022-09-14	12:45:28	0.727392	3.23559	3.23181	1319.11	FALSE	2
2022-09-14	12:45:28	0.725	3.22494	3.23181	1287.31	FALSE	2
2022-09-14	12:45:29	0.727646	3.23671	3.22528	1322.35	FALSE	2
2022-09-14	12:45:29	0.725865	3.22879	3.22528	1290.54	FALSE	2
2022-09-14	12:45:29	0.720827	3.20638	3.22528	1325.55	FALSE	2
2022-09-14	12:45:29	0.725967	3.22925	3.22528	1293.77	FALSE	2
2022-09-14	12:45:30	0.728715	3.24147	3.23145	1328.8	FALSE	2
2022-09-14	12:45:30	0.724491	3.22268	3.23145	1296.99	FALSE	2
2022-09-14	12:45:30	0.721845	3.21091	3.23145	1332.01	FALSE	2
2022-09-14	12:45:30	0.730801	3.25075	3.23145	1300.24	FALSE	2
2022-09-14	12:45:31	0.725611	3.22766	3.25103	1335.23	FALSE	2
2022-09-14	12:45:31	0.733142	3.26116	3.25103	1303.5	FALSE	2
2022-09-14	12:45:31	0.736043	3.27407	3.25103	1338.51	FALSE	2
2022-09-14	12:45:31	0.728664	3.24124	3.25103	1306.75	FALSE	2
2022-09-14	12:45:32	0.722404	3.2134	3.23619	1341.72	FALSE	2
2022-09-14	12:45:32	0.733957	3.26479	3.23619	1310.01	FALSE	2
2022-09-14	12:45:32	0.726221	3.23038	3.23619	1344.95	FALSE	2
2022-09-14	12:45:33	0.724338	3.222	3.2396	1313.23	FALSE	2
2022-09-14	12:45:33	0.735178	3.27022	3.2396	1348.22	FALSE	2
2022-09-14	12:45:33	0.727697	3.23694	3.2396	1316.47	FALSE	2
2022-09-14	12:45:33	0.725967	3.22925	3.2396	1351.45	FALSE	2
2022-09-14	12:45:34	0.724593	3.22313	3.2426	1319.69	FALSE	2
2022-09-14	12:45:34	0.731768	3.25505	3.2426	1354.71	FALSE	2
2022-09-14	12:45:34	0.73187	3.2555	3.2426	1322.95	FALSE	2
2022-09-14	12:45:34	0.727646	3.23671	3.2426	1357.94	FALSE	2
2022-09-14	12:45:35	0.725356	3.22653	3.2469	1326.17	FALSE	2
2022-09-14	12:45:35	0.73014	3.24781	3.2469	1361.19	FALSE	2
2022-09-14	12:45:35	0.734313	3.26637	3.2469	1329.44	FALSE	2
2022-09-14	12:45:36	0.726679	3.23241	3.23428	1364.42	FALSE	2
2022-09-14	12:45:36	0.728461	3.24034	3.23428	1332.68	FALSE	2
2022-09-14	12:45:36	0.725407	3.22676	3.23428	1367.65	FALSE	2
2022-09-14	12:45:36	0.72785	3.23762	3.23428	1335.92	FALSE	2
2022-09-14	12:45:37	0.729784	3.24623	3.24639	1370.9	FALSE	2
2022-09-14	12:45:37	0.731565	3.25415	3.24639	1339.17	FALSE	2
2022-09-14	12:45:37	0.729326	3.24419	3.24639	1374.14	FALSE	2
2022-09-14	12:45:37	0.728613	3.24102	3.24639	1342.41	FALSE	2
2022-09-14	12:45:38	0.727392	3.23559	3.23938	1377.38	FALSE	2
2022-09-14	12:45:38	0.729122	3.24328	3.23938	1345.66	FALSE	2
2022-09-14	12:45:38	0.726425	3.23128	3.23938	1380.61	FALSE	2
2022-09-14	12:45:38	0.730038	3.24736	3.23938	1348.9	FALSE	2
2022-09-14	12:45:39	0.723779	3.21951	2.5275	1383.83	FALSE	2
2022-09-14	12:45:39	0.726934	3.23355	2.5275	1352.14	FALSE	2
2022-09-14	12:45:39	0.253906	1.12942	2.5275	1384.96	FALSE	2
2022-09-14	12:45:40	-0.582175	-2.58963	1.77617	1352.14	FALSE	2
2022-09-14	12:45:40	0.728054	3.23853	1.77617	1388.2	FALSE	2
2022-09-14	12:45:40	0.724237	3.22155	1.77617	1355.36	FALSE	2
2022-09-14	12:45:40	0.727087	3.23423	1.77617	1391.43	FALSE	2
2022-09-14	12:45:41	0.733092	3.26094	3.2516	1358.62	FALSE	2
2022-09-14	12:45:41	0.729326	3.24419	3.2516	1394.67	FALSE	2
2022-09-14	12:45:41	0.72958	3.24532	3.2516	1361.87	FALSE	2
2022-09-14	12:45:41	0.731972	3.25596	3.2516	1397.93	FALSE	2
2022-09-14	12:45:42	0.731667	3.2546	1.77832	1365.12	FALSE	2
2022-09-14	12:45:42	0.0684608	0.304527	1.77832	1398.23	FALSE	2
2022-09-14	12:45:42	0.149784	0.666269	1.77832	1365.79	FALSE	2
2022-09-14	12:45:42	0.649224	2.88788	1.77832	1401.12	FALSE	2
2022-09-14	12:45:43	0.72612	3.22993	3.23053	1369.02	FALSE	2
2022-09-14	12:45:43	0.726272	3.2306	3.23053	1404.35	FALSE	2
2022-09-14	12:45:43	0.726374	3.23106	3.23053	1372.25	FALSE	2
2022-09-14	12:45:44	0.726018	3.22947	3.22047	1407.58	FALSE	2
2022-09-14	12:45:44	0.727443	3.23581	3.22047	1375.48	FALSE	2
2022-09-14	12:45:44	0.725407	3.22676	3.22047	1410.81	FALSE	2
2022-09-14	12:45:44	0.717112	3.18986	3.22047	1378.67	FALSE	2
2022-09-14	12:45:45	0.729784	3.24623	3.23615	1414.06	FALSE	2
2022-09-14	12:45:45	0.724746	3.22382	3.23615	1381.9	FALSE	2
2022-09-14	12:45:45	0.72556	3.22744	3.23615	1417.28	FALSE	2
2022-09-14	12:45:45	0.729987	3.24713	3.23615	1385.14	FALSE	2
2022-09-14	12:45:46	0.723626	3.21883	3.21929	1420.5	FALSE	2
2022-09-14	12:45:46	0.722252	3.21272	3.21929	1388.36	FALSE	2
2022-09-14	12:45:46	0.722812	3.21521	3.21929	1423.72	FALSE	2
2022-09-14	12:45:46	0.726221	3.23038	3.21929	1391.59	FALSE	2
2022-09-14	12:45:47	0.722557	3.21408	3.22457	1426.93	FALSE	2
2022-09-14	12:45:47	0.722557	3.21408	3.22457	1394.8	FALSE	2
2022-09-14	12:45:47	0.729631	3.24554	3.22457	1430.18	FALSE	2
2022-09-14	12:45:48	0.732735	3.25935	3.2482	1398.06	FALSE	2
2022-09-14	12:45:48	0.736756	3.27724	3.2482	1433.45	FALSE	2
2022-09-14	12:45:48	0.726323	3.23083	3.2482	1401.29	FALSE	2
2022-09-14	12:45:48	0.725102	3.2254	3.2482	1436.68	FALSE	2
2022-09-14	12:45:49	0.734313	3.26637	3.22602	1404.56	FALSE	2
2022-09-14	12:45:49	0.724644	3.22336	3.22602	1439.9	FALSE	2
2022-09-14	12:45:49	0.733295	3.26184	3.22602	1407.82	FALSE	2
2022-09-14	12:45:49	0.708715	3.15251	3.22602	1443.05	FALSE	2
2022-09-14	12:45:50	0.164542	0.731916	0.546065	1408.55	FALSE	2
2022-09-14	12:45:50	-0.227977	-1.01409	0.546065	1443.05	FALSE	2
2022-09-14	12:45:50	-0.172404	-0.766887	0.546065	1408.55	FALSE	2
2022-09-14	12:45:50	0.726883	3.23332	0.546065	1446.29	FALSE	2
2022-09-14	12:45:51	0.724491	3.22268	3.23438	1411.77	FALSE	2
2022-09-14	12:45:51	0.731463	3.25369	3.23438	1449.54	FALSE	2
2022-09-14	12:45:51	0.725407	3.22676	3.23438	1415	FALSE	2
2022-09-14	12:45:52	0.720776	3.20616	3.21606	1452.75	FALSE	2
2022-09-14	12:45:52	0.72444	3.22245	3.21606	1418.22	FALSE	2
2022-09-14	12:45:52	0.723728	3.21929	3.21606	1455.97	FALSE	2
2022-09-14	12:45:52	0.723066	3.21634	3.21606	1421.44	FALSE	2
2022-09-14	12:45:53	0.728104	3.23875	3.25211	1459.21	FALSE	2
2022-09-14	12:45:53	0.731107	3.25211	3.25211	1424.69	FALSE	2
2022-09-14	12:45:53	0.728359	3.23989	3.25211	1462.45	FALSE	2
2022-09-14	12:45:53	0.736857	3.27769	3.25211	1427.97	FALSE	2
2022-09-14	12:45:54	0.727646	3.23671	3.22562	1465.68	FALSE	2
2022-09-14	12:45:54	0.719351	3.19982	3.22562	1431.17	FALSE	2
2022-09-14	12:45:54	0.721845	3.21091	3.22562	1468.89	FALSE	2
2022-09-14	12:45:54	0.731768	3.25505	3.22562	1434.42	FALSE	2
2022-09-14	12:45:55	0.729682	3.24577	3.25068	1472.14	FALSE	2
2022-09-14	12:45:55	0.736145	3.27452	3.25068	1437.7	FALSE	2
2022-09-14	12:45:55	0.726527	3.23174	3.25068	1475.37	FALSE	2
2022-09-14	12:45:56	0.72902	3.24283	3.24464	1440.94	FALSE	2
2022-09-14	12:45:56	0.730293	3.24849	3.24464	1478.62	FALSE	2
2022-09-14	12:45:56	0.729835	3.24645	3.24464	1444.19	FALSE	2
2022-09-14	12:45:56	0.728562	3.24079	3.24464	1481.86	FALSE	2
2022-09-14	12:45:57	0.734975	3.26932	3.0602	1447.46	FALSE	2
2022-09-14	12:45:57	0.72556	3.22744	3.0602	1485.09	FALSE	2
2022-09-14	12:45:57	0.724695	3.22359	3.0602	1450.68	FALSE	2
2022-09-14	12:45:57	0.566628	2.52047	3.0602	1487.61	FALSE	2
2022-09-14	12:45:58	0.863931	3.84294	3.05828	1454.52	FALSE	2
2022-09-14	12:45:58	0.444491	1.97718	3.05828	1489.59	FALSE	2
2022-09-14	12:45:58	0.714415	3.17786	3.05828	1457.7	FALSE	2
2022-09-14	12:45:58	0.72729	3.23513	3.05828	1492.82	FALSE	2
2022-09-14	12:45:59	0.731667	3.2546	3.23196	1460.96	FALSE	2
2022-09-14	12:45:59	0.722608	3.2143	3.23196	1496.03	FALSE	2
2022-09-14	12:45:59	0.725458	3.22698	3.23196	1464.18	FALSE	2
2022-09-14	12:46:00	0.728359	3.23989	3.2447	1499.27	FALSE	2
2022-09-14	12:46:00	0.733244	3.26162	3.2447	1467.45	FALSE	2
2022-09-14	12:46:00	0.730547	3.24962	3.2447	1502.52	FALSE	2
2022-09-14	12:46:00	0.725611	3.22766	3.2447	1470.67	FALSE	2
2022-09-14	12:46:01	0.726527	3.23174	3.23796	1505.76	FALSE	2
2022-09-14	12:46:01	0.736349	3.27543	3.23796	1473.95	FALSE	2
2022-09-14	12:46:01	0.727341	3.23536	3.23796	1508.99	FALSE	2
2022-09-14	12:46:01	0.721488	3.20932	3.23796	1477.16	FALSE	2
2022-09-14	12:46:02	0.724237	3.22155	3.23581	1512.21	FALSE	2
2022-09-14	12:46:02	0.727545	3.23627	3.23581	1480.39	FALSE	2
2022-09-14	12:46:02	0.726934	3.23355	3.23581	1515.45	FALSE	2
2022-09-14	12:46:02	0.731056	3.25188	3.23581	1483.65	FALSE	2
2022-09-14	12:46:03	0.729886	3.24668	3.23136	1518.69	FALSE	2
2022-09-14	12:46:03	0.721692	3.21023	3.23136	1486.86	FALSE	2
2022-09-14	12:46:03	0.727748	3.23717	3.23136	1521.93	FALSE	2
2022-09-14	12:46:04	0.728664	3.24124	3.23773	1490.1	FALSE	2
2022-09-14	12:46:04	0.725865	3.22879	3.23773	1525.16	FALSE	2
2022-09-14	12:46:04	0.731768	3.25505	3.23773	1493.35	FALSE	2
2022-09-14	12:46:04	0.725204	3.22585	3.23773	1528.39	FALSE	2
2022-09-14	12:46:05	0.728919	3.24238	3.23032	1496.59	FALSE	2
2022-09-14	12:46:05	0.727188	3.23468	3.23032	1531.62	FALSE	2
2022-09-14	12:46:05	0.72388	3.21996	3.23032	1499.81	FALSE	2
2022-09-14	12:46:05	0.724847	3.22426	3.23032	1534.84	FALSE	2
2022-09-14	12:46:06	0.728512	3.24057	3.24175	1503.06	FALSE	2
2022-09-14	12:46:06	0.727952	3.23808	3.24175	1538.08	FALSE	2
2022-09-14	12:46:06	0.726832	3.23309	3.24175	1506.29	FALSE	2
2022-09-14	12:46:06	0.731819	3.25528	3.24175	1541.34	FALSE	2
2022-09-14	12:46:07	0.727596	3.23649	3.24072	1509.53	FALSE	2
2022-09-14	12:46:07	0.728461	3.24034	3.24072	1544.58	FALSE	2
2022-09-14	12:46:07	0.72958	3.24532	3.24072	1512.77	FALSE	2
2022-09-14	12:46:08	0.724898	3.22449	3.23853	1547.8	FALSE	2
2022-09-14	12:46:08	0.725611	3.22766	3.23853	1516	FALSE	2
2022-09-14	12:46:08	0.730293	3.24849	3.23853	1551.05	FALSE	2
2022-09-14	12:46:08	0.731412	3.25347	3.23853	1519.25	FALSE	2
2022-09-14	12:46:09	0.725204	3.22585	3.22585	1554.28	FALSE	2
2022-09-14	12:46:09	0.725051	3.22517	3.22585	1522.48	FALSE	2
2022-09-14	12:46:09	0.728308	3.23966	3.22585	1557.52	FALSE	2
2022-09-14	12:46:09	0.722252	3.21272	3.22585	1525.69	FALSE	2
2022-09-14	12:46:10	0.727494	3.23604	3.23679	1560.75	FALSE	2
2022-09-14	12:46:10	0.730598	3.24985	3.23679	1528.94	FALSE	2
2022-09-14	12:46:10	0.724898	3.22449	3.23679	1563.98	FALSE	2
2022-09-14	12:46:11	0.729275	3.24396	3.24832	1532.18	FALSE	2
2022-09-14	12:46:11	0.725967	3.22925	3.24832	1567.21	FALSE	2
2022-09-14	12:46:11	0.744745	3.31277	3.24832	1535.5	FALSE	2
2022-09-14	12:46:11	0.72103	3.20729	3.24832	1570.41	FALSE	2
2022-09-14	12:46:12	0.729529	3.24509	3.24622	1538.74	FALSE	2
2022-09-14	12:46:12	0.721743	3.21046	3.24622	1573.62	FALSE	2
2022-09-14	12:46:12	0.739606	3.28992	3.24622	1542.03	FALSE	2
2022-09-14	12:46:12	0.728257	3.23943	3.24622	1576.86	FALSE	2
2022-09-14	12:46:13	0.725102	3.2254	3.26224	1545.26	FALSE	2
2022-09-14	12:46:13	0.739351	3.28878	3.26224	1580.15	FALSE	2
2022-09-14	12:46:13	0.735534	3.2718	3.26224	1548.53	FALSE	2
2022-09-14	12:46:13	0.73355	3.26298	3.26224	1583.41	FALSE	2
2022-09-14	12:46:14	0.7307	3.2503	3.21318	1551.78	FALSE	2
2022-09-14	12:46:14	0.713397	3.17333	3.21318	1586.59	FALSE	2
2022-09-14	12:46:14	0.722965	3.21589	3.21318	1554.99	FALSE	2
2022-09-14	12:46:15	0.725204	3.22585	3.23468	1589.81	FALSE	2
2022-09-14	12:46:15	0.72729	3.23513	3.23468	1558.23	FALSE	2
2022-09-14	12:46:15	0.73243	3.258	3.23468	1593.07	FALSE	2
2022-09-14	12:46:15	0.72383	3.21974	3.23468	1561.45	FALSE	2
2022-09-14	12:46:16	0.726781	3.23287	3.22449	1596.3	FALSE	2
2022-09-14	12:46:16	0.726425	3.23128	3.22449	1564.68	FALSE	2
2022-09-14	12:46:16	0.724135	3.2211	3.22449	1599.53	FALSE	2
2022-09-14	12:46:16	0.722252	3.21272	3.22449	1567.89	FALSE	2
2022-09-14	12:46:17	0.725763	3.22834	3.24968	1602.75	FALSE	2
2022-09-14	12:46:17	0.734466	3.26705	3.24968	1571.16	FALSE	2
2022-09-14	12:46:17	0.731616	3.25437	3.24968	1606.01	FALSE	2
2022-09-14	12:46:17	0.730394	3.24894	3.24968	1574.41	FALSE	2
2022-09-14	12:46:18	0.728461	3.24034	3.22608	1609.25	FALSE	2
2022-09-14	12:46:18	0.718791	3.19733	3.22608	1577.61	FALSE	2
2022-09-14	12:46:18	0.728512	3.24057	3.22608	1612.49	FALSE	2
2022-09-14	12:46:19	0.729428	3.24464	3.22919	1580.85	FALSE	2
2022-09-14	12:46:19	0.726323	3.23083	3.22919	1615.72	FALSE	2
2022-09-14	12:46:19	0.725458	3.22698	3.22919	1584.08	FALSE	2
2022-09-14	12:46:19	0.722608	3.2143	3.22919	1618.93	FALSE	2
2022-09-14	12:46:20	0.735992	3.27384	3.24192	1587.35	FALSE	2
2022-09-14	12:46:20	0.727443	3.23581	3.24192	1622.17	FALSE	2
2022-09-14	12:46:20	0.726578	3.23196	3.24192	1590.58	FALSE	2
2022-09-14	12:46:20	0.725254	3.22607	3.24192	1625.4	FALSE	2
2022-09-14	12:46:21	0.725	3.22494	3.22743	1593.81	FALSE	2
2022-09-14	12:46:21	0.72444	3.22245	3.22743	1628.62	FALSE	2
2022-09-14	12:46:21	0.72388	3.21996	3.22743	1597.03	FALSE	2
2022-09-14	12:46:21	0.728919	3.24238	3.22743	1631.86	FALSE	2
2022-09-14	12:46:22	0.725204	3.22585	3.2417	1600.25	FALSE	2
2022-09-14	12:46:22	0.730089	3.24758	3.2417	1635.11	FALSE	2
2022-09-14	12:46:22	0.731005	3.25166	3.2417	1603.51	FALSE	2
2022-09-14	12:46:23	0.725509	3.22721	3.24153	1638.34	FALSE	2
2022-09-14	12:46:23	0.731717	3.25482	3.24153	1606.76	FALSE	2
2022-09-14	12:46:23	0.732735	3.25935	3.24153	1641.6	FALSE	2
2022-09-14	12:46:23	0.724949	3.22472	3.24153	1609.99	FALSE	2
2022-09-14	12:46:24	0.724338	3.222	3.2353	1644.82	FALSE	2
2022-09-14	12:46:24	0.725967	3.22925	3.2353	1613.22	FALSE	2
2022-09-14	12:46:24	0.730954	3.25143	3.2353	1648.07	FALSE	2
2022-09-14	12:46:24	0.728054	3.23853	3.2353	1616.45	FALSE	2
2022-09-14	12:46:25	0.763066	3.39427	14.8526	1651.46	FALSE	2
2022-09-14	12:46:25	5.58434	24.8403	14.8526	1641.29	1	3
2022-09-14	12:46:25	4.82525	21.4637	14.8526	1672.93	1	4
2022-09-14	12:46:25	2.18337	9.71207	14.8526	1651.01	FALSE	4
2022-09-14	12:46:26	0.659962	2.93564	2.8168	1675.86	FALSE	4
2022-09-14	12:46:26	0.804186	3.57718	2.8168	1654.58	FALSE	4
2022-09-14	12:46:26	0.435585	1.93757	2.8168	1677.8	FALSE	4
2022-09-14	12:46:27	0.664898	2.9576	4.12699	1657.54	FALSE	4
2022-09-14	12:46:27	1.03625	4.60945	4.12699	1682.41	FALSE	4
2022-09-14	12:46:27	0.972583	4.32624	4.12699	1661.87	FALSE	4
2022-09-14	12:46:27	1.03742	4.61465	4.12699	1687.02	FALSE	4
2022-09-14	12:46:28	1.30922	5.82367	6.50835	1667.69	FALSE	4
2022-09-14	12:46:28	0.855178	3.804	6.50835	1690.83	FALSE	4
2022-09-14	12:46:28	1.645	7.31729	6.50835	1675.01	FALSE	4
2022-09-14	12:46:28	2.04317	9.08843	6.50835	1699.92	FALSE	4
2022-09-14	12:46:29	3.18225	14.1553	11.5992	1689.16	1	5
2022-09-14	12:46:29	2.5225	11.2206	11.5992	1711.14	FALSE	5
2022-09-14	12:46:29	2.19676	9.77163	11.5992	1698.93	FALSE	5
2022-09-14	12:46:29	2.52897	11.2494	11.5992	1722.39	FALSE	5
2022-09-14	12:46:30	1.02485	4.55874	4.58409	1703.49	FALSE	5
2022-09-14	12:46:30	1.37345	6.10938	4.58409	1728.5	FALSE	5
2022-09-14	12:46:30	0.693346	3.08414	4.58409	1706.58	FALSE	5
2022-09-14	12:46:31	1.79864	8.00071	16.119	1736.5	FALSE	5
2022-09-14	12:46:31	2.94332	13.0925	16.119	1719.67	FALSE	5
2022-09-14	12:46:31	5.01365	22.3017	16.119	1758.8	1	6
2022-09-14	12:46:31	4.73925	21.0811	16.119	1740.75	1	7
2022-09-14	12:46:32	2.63757	11.7324	17.0317	1770.53	FALSE	7
2022-09-14	12:46:32	3.02062	13.4363	17.0317	1754.19	1	8
2022-09-14	12:46:32	3.26149	14.5078	17.0317	1785.04	1	9
2022-09-14	12:46:32	6.39594	28.4504	17.0317	1782.64	1	10
2022-09-14	12:46:33	4.48571	19.9533	21.4713	1804.99	1	11
2022-09-14	12:46:33	6.72286	29.9046	21.4713	1812.54	1	12
2022-09-14	12:46:33	4.49375	19.9891	21.4713	1824.98	1	13
2022-09-14	12:46:33	3.60556	16.0383	21.4713	1828.58	1	14

## Sheet: KimChi_star_2022914124117 (3)
Date	Time	Lbs	Newtons	Total force x time		total steps > 13.345	**GoPro Fitting: 12:30
2022-09-14	12:41:33	0.314415	1.39858	1.39858	FALSE	0
2022-09-14	12:41:33	0.288664	1.28404	1.28404	FALSE	0
2022-09-14	12:41:33	-0.0512847	-0.228125	1.39858	FALSE	0
2022-09-14	12:41:34	-0.365025	-1.6237	1.28404	FALSE	0
2022-09-14	12:41:34	-0.450012	-2.00174	1.39858	FALSE	0
2022-09-14	12:41:34	-0.215814	-0.959984	1.28404	FALSE	0
2022-09-14	12:41:34	-0.259173	-1.15285	1.39858	FALSE	0
2022-09-14	12:41:35	-0.159529	-0.709617	1.28404	FALSE	0
2022-09-14	12:41:35	-0.0759158	-0.337689	1.39858	FALSE	0
2022-09-14	12:41:35	0.324288	1.4425	2.72653	FALSE	0
2022-09-14	12:41:35	0.441489	1.96383	3.36241	FALSE	0
2022-09-14	12:41:36	0.350089	1.55727	4.2838	FALSE	0
2022-09-14	12:41:36	0.322659	1.43525	4.79766	FALSE	0
2022-09-14	12:41:36	0.221234	0.984093	5.26789	FALSE	0
2022-09-14	12:41:37	0.258079	1.14799	5.94565	FALSE	0
2022-09-14	12:41:37	0.432379	1.92331	7.1912	FALSE	0
2022-09-14	12:41:37	0.330852	1.4717	7.41735	FALSE	0
2022-09-14	12:41:37	0.440573	1.95976	9.15096	FALSE	0
2022-09-14	12:41:38	0.264288	1.17561	8.59295	FALSE	0
2022-09-14	12:41:38	-0.0548471	-0.243971	9.15096	FALSE	0
2022-09-14	12:41:38	-0.319325	-1.42042	8.59295	FALSE	0
2022-09-14	12:41:38	0.00744298	0.0331079	9.18407	FALSE	0
2022-09-14	12:41:39	0.0291733	0.129769	8.72272	FALSE	0
2022-09-14	12:41:39	0.132227	0.588172	9.77224	FALSE	0
2022-09-14	12:41:39	0.531463	2.36405	11.0868	FALSE	0
2022-09-14	12:41:39	0.388613	1.72863	11.5009	FALSE	0
2022-09-14	12:41:40	0.640522	2.84917	13.9359	FALSE	0
2022-09-14	12:41:40	1.56388	6.95645	18.4573	FALSE	0
2022-09-14	12:41:40	1.92062	8.5433	22.4792	FALSE	0
2022-09-14	12:41:41	1.971	8.7674	27.2247	FALSE	0
2022-09-14	12:41:41	1.83859	8.17842	30.6577	FALSE	0
2022-09-14	12:41:41	0.971514	4.32149	31.5462	FALSE	0
2022-09-14	12:41:41	0.342964	1.52557	32.1832	FALSE	0
2022-09-14	12:41:42	0.668664	2.97435	34.5206	FALSE	0
2022-09-14	12:41:42	0.355382	1.58081	33.764	FALSE	0
2022-09-14	12:41:42	0.361896	1.60979	36.1303	FALSE	0
2022-09-14	12:41:43	0.318384	1.41624	35.1803	FALSE	0
2022-09-14	12:41:43	0.490293	2.18092	38.3113	FALSE	0
2022-09-14	12:41:43	1.00464	4.46884	39.6491	FALSE	0
2022-09-14	12:41:43	2.86927	12.7631	51.0744	FALSE	0
2022-09-14	12:41:43	0.548054	2.43785	42.087	FALSE	0
2022-09-14	12:41:44	0.259555	1.15455	52.2289	FALSE	0
2022-09-14	12:41:44	0.376705	1.67566	43.7626	FALSE	0
2022-09-14	12:41:44	0.138232	0.614884	52.8438	FALSE	0
2022-09-14	12:41:45	0.178842	0.795525	44.5582	FALSE	0
2022-09-14	12:41:45	0.00530559	0.0236003	52.8674	FALSE	0
2022-09-14	12:41:45	0.133652	0.594511	45.1527	FALSE	0
2022-09-14	12:41:45	0.177621	0.790094	53.6575	FALSE	0
2022-09-14	12:41:46	0.0419468	0.186588	45.3393	FALSE	0
2022-09-14	12:41:46	0.160624	0.714488	54.372	FALSE	0
2022-09-14	12:41:46	0.103626	0.460949	45.8002	FALSE	0
2022-09-14	12:41:46	0.97757	4.34843	58.7204	FALSE	0
2022-09-14	12:41:47	1.7167	7.63622	53.4364	FALSE	0
2022-09-14	12:41:47	2.89884	12.8946	71.615	FALSE	0
2022-09-14	12:41:47	1.47462	6.5594	59.9958	FALSE	0
2022-09-14	12:41:47	1.6533	7.35421	78.9692	FALSE	0
2022-09-14	12:41:48	0.641947	2.85551	62.8513	FALSE	0
2022-09-14	12:41:48	0.794262	3.53304	82.5023	FALSE	0
2022-09-14	12:41:48	1.1278	5.01668	67.868	FALSE	0
2022-09-14	12:41:49	0.207188	0.921614	83.4239	FALSE	0
2022-09-14	12:41:49	0.214924	0.956025	68.824	FALSE	0
2022-09-14	12:41:49	0.18958	0.84329	84.2672	FALSE	0
2022-09-14	12:41:49	0.440725	1.96043	70.7845	FALSE	0
2022-09-14	12:41:50	1.72286	7.66363	91.9308	FALSE	0
2022-09-14	12:41:50	1.08963	4.84689	75.6314	FALSE	0
2022-09-14	12:41:50	0.355331	1.58058	93.5114	FALSE	0
2022-09-14	12:41:50	0.0149748	0.0666109	75.698	FALSE	0
2022-09-14	12:41:51	0.0801656	0.356593	93.868	FALSE	0
2022-09-14	12:41:51	0.0162979	0.0724963	75.7705	FALSE	0
2022-09-14	12:41:51	0.21126	0.939727	94.8077	FALSE	0
2022-09-14	12:41:52	0.00301552	0.0134136	75.7839	FALSE	0
2022-09-14	12:41:52	0.223677	0.99496	95.8027	FALSE	0
2022-09-14	12:41:52	0.262557	1.16791	76.9518	FALSE	0
2022-09-14	12:41:52	0.873549	3.88572	99.6884	FALSE	0
2022-09-14	12:41:53	0.213092	0.947876	77.8997	FALSE	0
2022-09-14	12:41:53	0.178181	0.792585	100.481	FALSE	0
2022-09-14	12:41:53	0.231565	1.03005	78.9297	FALSE	0
2022-09-14	12:41:53	0.0651529	0.289813	100.771	FALSE	0
2022-09-14	12:41:54	0.310853	1.38274	80.3125	FALSE	0
2022-09-14	12:41:54	0.273193	1.21522	101.986	FALSE	0
2022-09-14	12:41:54	0.898028	3.99461	84.3071	FALSE	0
2022-09-14	12:41:54	2.11182	9.3938	111.38	FALSE	0
2022-09-14	12:41:55	0.993906	4.42109	88.7282	FALSE	0
2022-09-14	12:41:55	0.563015	2.5044	113.884	FALSE	0
2022-09-14	12:41:55	0.791921	3.52262	92.2508	FALSE	0
2022-09-14	12:41:56	1.00363	4.46435	118.349	FALSE	0
2022-09-14	12:41:56	1.43462	6.38148	98.6323	FALSE	0
2022-09-14	12:41:56	1.71182	7.61452	125.963	FALSE	0
2022-09-14	12:41:56	0.323473	1.43887	100.071	FALSE	0
2022-09-14	12:41:57	0.371209	1.65121	127.614	FALSE	0
2022-09-14	12:41:57	0.153194	0.681438	100.753	FALSE	0
2022-09-14	12:41:57	0.270242	1.20209	128.816	FALSE	0
2022-09-14	12:41:57	-0.00471985	-0.0209948	100.753	FALSE	0
2022-09-14	12:41:58	0.147036	0.654046	129.47	FALSE	0
2022-09-14	12:41:58	-0.0865519	-0.385	100.753	FALSE	0
2022-09-14	12:41:58	-0.102939	-0.457893	129.47	FALSE	0
2022-09-14	12:41:58	-0.040445	-0.179907	100.753	FALSE	0
2022-09-14	12:41:59	0.148766	0.661741	130.132	FALSE	0
2022-09-14	12:41:59	1.1106	4.94017	105.693	FALSE	0
2022-09-14	12:41:59	1.43202	6.36991	136.502	FALSE	0
2022-09-14	12:42:00	0.414517	1.84385	107.537	FALSE	0
2022-09-14	12:42:00	0.145713	0.648161	137.15	FALSE	0
2022-09-14	12:42:00	0.202659	0.901468	108.438	FALSE	0
2022-09-14	12:42:00	0.0446949	0.198812	137.349	FALSE	0
2022-09-14	12:42:01	0.410598	1.82642	110.264	FALSE	0
2022-09-14	12:42:01	0.826679	3.67723	141.026	FALSE	0
2022-09-14	12:42:01	0.657265	2.92365	113.188	FALSE	0
2022-09-14	12:42:01	0.134822	0.599715	141.626	FALSE	0
2022-09-14	12:42:02	0.225814	1.00447	114.193	FALSE	0
2022-09-14	12:42:02	0.382354	1.70079	143.327	FALSE	0
2022-09-14	12:42:02	0.434211	1.93146	116.124	FALSE	0
2022-09-14	12:42:02	0.437621	1.94663	145.273	FALSE	0
2022-09-14	12:42:03	0.688308	3.06173	119.186	FALSE	0
2022-09-14	12:42:03	0.444237	1.97606	147.249	FALSE	0
2022-09-14	12:42:03	0.489784	2.17866	121.364	FALSE	0
2022-09-14	12:42:04	0.460573	2.04872	149.298	FALSE	0
2022-09-14	12:42:04	0.364389	1.62088	122.985	FALSE	0
2022-09-14	12:42:04	0.335535	1.49253	150.791	FALSE	0
2022-09-14	12:42:04	0.329987	1.46785	124.453	FALSE	0
2022-09-14	12:42:05	0.321082	1.42824	152.219	FALSE	0
2022-09-14	12:42:05	0.161641	0.719011	125.172	FALSE	0
2022-09-14	12:42:05	-0.043244	-0.192358	152.219	FALSE	0
2022-09-14	12:42:05	0.0493259	0.219411	125.392	FALSE	0
2022-09-14	12:42:06	0.0687152	0.305659	152.525	FALSE	0
2022-09-14	12:42:06	0.271616	1.2082	126.6	FALSE	0
2022-09-14	12:42:06	0.161336	0.717655	153.242	FALSE	0
2022-09-14	12:42:07	0.264237	1.17538	127.775	FALSE	0
2022-09-14	12:42:07	2.28327	10.1564	163.399	FALSE	0
2022-09-14	12:42:07	2.86571	12.7473	140.522	FALSE	0
2022-09-14	12:42:07	2.91884	12.9836	176.382	FALSE	0
2022-09-14	12:42:08	2.92658	13.018	153.54	FALSE	0
2022-09-14	12:42:08	2.94195	13.0864	189.469	FALSE	0
2022-09-14	12:42:08	2.9135	12.9598	166.5	FALSE	0
2022-09-14	12:42:08	2.88296	12.824	202.293	FALSE	0
2022-09-14	12:42:09	2.85049	12.6795	179.18	FALSE	0
2022-09-14	12:42:09	2.83716	12.6203	214.913	FALSE	0
2022-09-14	12:42:09	2.82856	12.582	191.762	FALSE	0
2022-09-14	12:42:09	2.81935	12.541	227.454	FALSE	0
2022-09-14	12:42:10	2.80795	12.4903	204.252	FALSE	0
2022-09-14	12:42:10	2.7851	12.3887	239.843	FALSE	0
2022-09-14	12:42:10	2.75752	12.266	216.518	FALSE	0
2022-09-14	12:42:11	2.73304	12.1571	252	FALSE	0
2022-09-14	12:42:11	2.59986	11.5647	228.083	FALSE	0
2022-09-14	12:42:11	2.44785	10.8885	262.888	FALSE	0
2022-09-14	12:42:11	2.31472	10.2963	238.379	FALSE	0
2022-09-14	12:42:12	2.0506	9.12148	272.01	FALSE	0
2022-09-14	12:42:12	1.05645	4.6993	243.078	FALSE	0
2022-09-14	12:42:12	0.428715	1.90701	273.917	FALSE	0
2022-09-14	12:42:12	0.46327	2.06072	245.139	FALSE	0
2022-09-14	12:42:13	0.441031	1.96179	275.879	FALSE	0
2022-09-14	12:42:13	0.453092	2.01544	247.155	FALSE	0
2022-09-14	12:42:13	0.40271	1.79133	277.67	FALSE	0
2022-09-14	12:42:13	0.385814	1.71618	248.871	FALSE	0
2022-09-14	12:42:14	0.359911	1.60096	279.271	FALSE	0
2022-09-14	12:42:14	0.395585	1.75964	250.63	FALSE	0
2022-09-14	12:42:14	0.359758	1.60028	280.871	FALSE	0
2022-09-14	12:42:15	0.369835	1.6451	252.276	FALSE	0
2022-09-14	12:42:15	0.357468	1.59009	282.461	FALSE	0
2022-09-14	12:42:15	0.358435	1.59439	253.87	FALSE	0
2022-09-14	12:42:15	0.424848	1.88981	284.351	FALSE	0
2022-09-14	12:42:16	0.436908	1.94345	255.813	FALSE	0
2022-09-14	12:42:16	0.441285	1.96292	286.314	FALSE	0
2022-09-14	12:42:16	0.445	1.97945	257.793	FALSE	0
2022-09-14	12:42:16	0.450954	2.00593	288.32	FALSE	0
2022-09-14	12:42:17	0.596145	2.65177	260.445	FALSE	0
2022-09-14	12:42:17	0.972074	4.32398	292.644	FALSE	0
2022-09-14	12:42:17	1.94286	8.64223	269.087	FALSE	0
2022-09-14	12:42:17	2.57731	11.4644	304.108	FALSE	0
2022-09-14	12:42:18	1.94505	8.65197	277.739	FALSE	0
2022-09-14	12:42:18	1.29436	5.75757	309.866	FALSE	0
2022-09-14	12:42:18	0.916857	4.07836	281.817	FALSE	0
2022-09-14	12:42:19	0.705	3.13598	313.002	FALSE	0
2022-09-14	12:42:19	0.54444	2.42178	284.239	FALSE	0
2022-09-14	12:42:19	0.74673	3.3216	316.323	FALSE	0
2022-09-14	12:42:19	0.852837	3.79359	288.033	FALSE	0
2022-09-14	12:42:20	1.19207	5.30257	321.626	FALSE	0
2022-09-14	12:42:20	1.51905	6.75704	294.79	FALSE	0
2022-09-14	12:42:20	0.753092	3.3499	324.976	FALSE	0
2022-09-14	12:42:20	1.03452	4.60175	299.391	FALSE	0
2022-09-14	12:42:21	0.962354	4.28074	329.257	FALSE	0
2022-09-14	12:42:21	1.14678	5.10111	304.492	FALSE	0
2022-09-14	12:42:21	1.9508	8.67755	337.934	FALSE	0
2022-09-14	12:42:22	2.22749	9.90832	314.401	FALSE	0
2022-09-14	12:42:22	1.76831	7.8658	345.8	FALSE	0
2022-09-14	12:42:22	0.894262	3.97786	318.379	FALSE	0
2022-09-14	12:42:22	1.18093	5.25301	351.053	FALSE	0
2022-09-14	12:42:23	0.294669	1.31075	319.689	FALSE	0
2022-09-14	12:42:23	0.00433869	0.0192994	351.072	FALSE	0
2022-09-14	12:42:23	-0.238613	-1.0614	319.689	FALSE	0
2022-09-14	12:42:23	-0.11332	-0.50407	351.072	FALSE	0
2022-09-14	12:42:24	-0.480954	-2.13938	319.689	FALSE	0
2022-09-14	12:42:24	-0.554542	-2.46671	351.072	FALSE	0
2022-09-14	12:42:24	-0.588231	-2.61657	319.689	FALSE	0
2022-09-14	12:42:24	-0.371335	-1.65177	351.072	FALSE	0
2022-09-14	12:42:25	-0.180394	-0.802429	319.689	FALSE	0
2022-09-14	12:42:25	0.0448984	0.199717	351.272	FALSE	0
2022-09-14	12:42:25	0.266985	1.1876	320.877	FALSE	0
2022-09-14	12:42:26	0.667341	2.96847	354.24	FALSE	0
2022-09-14	12:42:26	1.28897	5.7336	326.611	FALSE	0
2022-09-14	12:42:26	2.21218	9.84022	364.081	FALSE	0
2022-09-14	12:42:26	2.83889	12.628	339.239	FALSE	0
2022-09-14	12:42:27	3.09167	13.7524	377.833	1	1
2022-09-14	12:42:27	4.65477	20.7053	359.944	1	2
2022-09-14	12:42:27	2.59609	11.5479	389.381	FALSE	2
2022-09-14	12:42:27	2.02408	9.00351	368.947	FALSE	2
2022-09-14	12:42:28	1.2849	5.71549	395.096	FALSE	2
2022-09-14	12:42:28	1.68195	7.48165	376.429	FALSE	2
2022-09-14	12:42:28	1.27676	5.67928	400.776	FALSE	2
2022-09-14	12:42:28	1.27732	5.68177	382.111	FALSE	2
2022-09-14	12:42:29	0.974567	4.33507	405.111	FALSE	2
2022-09-14	12:42:29	1.12571	5.00738	387.118	FALSE	2
2022-09-14	12:42:29	0.735687	3.27248	408.383	FALSE	2
2022-09-14	12:42:30	0.405662	1.80447	388.923	FALSE	2
2022-09-14	12:42:30	0.357621	1.59077	409.974	FALSE	2
2022-09-14	12:42:30	0.313092	1.3927	390.315	FALSE	2
2022-09-14	12:42:30	0.320471	1.42552	411.4	FALSE	2
2022-09-14	12:42:31	0.360827	1.60503	391.92	FALSE	2
2022-09-14	12:42:31	0.536756	2.3876	413.787	FALSE	2
2022-09-14	12:42:31	1.47747	6.57208	398.492	FALSE	2
2022-09-14	12:42:31	1.79548	7.98665	421.774	FALSE	2
2022-09-14	12:42:32	0.810242	3.60412	402.097	FALSE	2
2022-09-14	12:42:32	0.311565	1.3859	423.16	FALSE	2
2022-09-14	12:42:32	0.202608	0.901241	402.998	FALSE	2
2022-09-14	12:42:32	0.186832	0.831066	423.991	FALSE	2
2022-09-14	12:42:33	0.336603	1.49728	404.495	FALSE	2
2022-09-14	12:42:33	0.709326	3.15522	427.146	FALSE	2
2022-09-14	12:42:33	0.717774	3.1928	407.688	FALSE	2
2022-09-14	12:42:34	0.624898	2.77967	429.926	FALSE	2
2022-09-14	12:42:34	1.10592	4.91935	412.607	FALSE	2
2022-09-14	12:42:34	1.26042	5.6066	435.532	FALSE	2
2022-09-14	12:42:34	0.601946	2.67758	415.285	FALSE	2
2022-09-14	12:42:35	0.611972	2.72217	438.254	FALSE	2
2022-09-14	12:42:35	0.717163	3.19008	418.475	FALSE	2
2022-09-14	12:42:35	0.706272	3.14164	441.396	FALSE	2
2022-09-14	12:42:35	0.787188	3.50157	421.976	FALSE	2
2022-09-14	12:42:36	0.734771	3.26841	444.664	FALSE	2
2022-09-14	12:42:36	0.598384	2.66173	424.638	FALSE	2
2022-09-14	12:42:36	0.360878	1.60526	446.27	FALSE	2
2022-09-14	12:42:37	0.328511	1.46128	426.1	FALSE	2
2022-09-14	12:42:37	0.303015	1.34787	447.618	FALSE	2
2022-09-14	12:42:37	0.285255	1.26887	427.368	FALSE	2
2022-09-14	12:42:37	0.302964	1.34764	448.965	FALSE	2
2022-09-14	12:42:38	0.495687	2.20491	429.573	FALSE	2
2022-09-14	12:42:38	1.22383	5.44384	454.409	FALSE	2
2022-09-14	12:42:38	0.559504	2.48879	432.062	FALSE	2
2022-09-14	12:42:38	0.338842	1.50724	455.916	FALSE	2
2022-09-14	12:42:39	0.173753	0.772888	432.835	FALSE	2
2022-09-14	12:42:39	0.147596	0.656537	456.573	FALSE	2
2022-09-14	12:42:39	0.138079	0.614203	433.449	FALSE	2
2022-09-14	12:42:39	0.0377738	0.168025	456.741	FALSE	2
2022-09-14	12:42:40	-0.0240074	-0.10679	433.449	FALSE	2
2022-09-14	12:42:40	-0.207417	-0.922632	456.741	FALSE	2
2022-09-14	12:42:40	-0.211183	-0.939384	433.449	FALSE	2
2022-09-14	12:42:41	-0.0666028	-0.296263	456.741	FALSE	2
2022-09-14	12:42:41	0.102863	0.457555	433.907	FALSE	2
2022-09-14	12:42:41	0.799707	3.55726	460.298	FALSE	2
2022-09-14	12:42:41	0.823168	3.66162	437.568	FALSE	2
2022-09-14	12:42:42	0.280522	1.24782	461.546	FALSE	2
2022-09-14	12:42:42	0.381183	1.69558	439.264	FALSE	2
2022-09-14	12:42:42	0.151565	0.674191	462.22	FALSE	2
2022-09-14	12:42:42	0.18042	0.802544	440.066	FALSE	2
2022-09-14	12:42:43	0.251972	1.12082	463.341	FALSE	2
2022-09-14	12:42:43	0.637061	2.83377	442.9	FALSE	2
2022-09-14	12:42:43	0.630954	2.80661	466.148	FALSE	2
2022-09-14	12:42:43	0.512023	2.27758	445.178	FALSE	2
2022-09-14	12:42:44	0.371972	1.65461	467.802	FALSE	2
2022-09-14	12:42:44	0.455891	2.02789	447.206	FALSE	2
2022-09-14	12:42:44	0.411921	1.83231	469.635	FALSE	2
2022-09-14	12:42:45	0.419199	1.86468	449.07	FALSE	2
2022-09-14	12:42:45	0.394822	1.75625	471.391	FALSE	2
2022-09-14	12:42:45	0.395433	1.75897	450.829	FALSE	2
2022-09-14	12:42:45	0.468919	2.08585	473.477	FALSE	2
2022-09-14	12:42:46	0.49701	2.2108	453.04	FALSE	2
2022-09-14	12:42:46	0.372277	1.65596	475.133	FALSE	2
2022-09-14	12:42:46	0.252176	1.12173	454.162	FALSE	2
2022-09-14	12:42:46	0.357366	1.58964	476.722	FALSE	2
2022-09-14	12:42:47	0.36154	1.6082	455.77	FALSE	2
2022-09-14	12:42:47	0.545611	2.42699	479.149	FALSE	2
2022-09-14	12:42:47	0.629326	2.79937	458.569	FALSE	2
2022-09-14	12:42:47	0.698792	3.10837	482.258	FALSE	2
2022-09-14	12:42:48	0.599657	2.66739	461.237	FALSE	2
2022-09-14	12:42:48	0.653091	2.90508	485.163	FALSE	2
2022-09-14	12:42:48	0.63187	2.81068	464.048	FALSE	2
2022-09-14	12:42:49	0.645763	2.87248	488.035	FALSE	2
2022-09-14	12:42:49	0.743524	3.30734	467.355	FALSE	2
2022-09-14	12:42:49	0.776247	3.4529	491.488	FALSE	2
2022-09-14	12:42:49	0.697112	3.10089	470.456	FALSE	2
2022-09-14	12:42:50	0.603066	2.68256	494.171	FALSE	2
2022-09-14	12:42:50	0.643728	2.86343	473.319	FALSE	2
2022-09-14	12:42:50	0.714313	3.17741	497.348	FALSE	2
2022-09-14	12:42:50	0.624898	2.77967	476.099	FALSE	2
2022-09-14	12:42:51	0.524491	2.33304	499.681	FALSE	2
2022-09-14	12:42:51	0.447596	1.991	478.09	FALSE	2
2022-09-14	12:42:51	0.555585	2.47135	502.152	FALSE	2
2022-09-14	12:42:52	0.424084	1.88641	479.976	FALSE	2
2022-09-14	12:42:52	0.418283	1.86061	504.013	FALSE	2
2022-09-14	12:42:52	0.713295	3.17288	483.149	FALSE	2
2022-09-14	12:42:52	0.716705	3.18805	507.201	FALSE	2
2022-09-14	12:42:53	0.713499	3.17379	486.323	FALSE	2
2022-09-14	12:42:53	0.714516	3.17831	510.379	FALSE	2
2022-09-14	12:42:53	0.716043	3.1851	489.508	FALSE	2
2022-09-14	12:42:53	0.714364	3.17763	513.557	FALSE	2
2022-09-14	12:42:54	0.720369	3.20435	492.712	FALSE	2
2022-09-14	12:42:54	0.717875	3.19325	516.75	FALSE	2
2022-09-14	12:42:54	0.715432	3.18238	495.895	FALSE	2
2022-09-14	12:42:54	0.706934	3.14458	519.895	FALSE	2
2022-09-14	12:42:55	0.106934	0.475664	496.37	FALSE	2
2022-09-14	12:42:55	-0.0174934	-0.0778141	519.895	FALSE	2
2022-09-14	12:42:55	-0.00207355	-0.00922357	496.37	FALSE	2
2022-09-14	12:42:56	-0.0652287	-0.29015	519.895	FALSE	2
2022-09-14	12:42:56	-0.0689946	-0.306902	496.37	FALSE	2
2022-09-14	12:42:56	-0.120699	-0.536893	519.895	FALSE	2
2022-09-14	12:42:56	-0.205534	-0.914256	496.37	FALSE	2
2022-09-14	12:42:57	-0.125941	-0.560211	519.895	FALSE	2
2022-09-14	12:42:57	-0.0159158	-0.0707967	496.37	FALSE	2
2022-09-14	12:42:57	0.245255	1.09094	520.986	FALSE	2
2022-09-14	12:42:57	0.196349	0.8734	497.244	FALSE	2
2022-09-14	12:42:58	0.441794	1.96519	522.951	FALSE	2
2022-09-14	12:42:58	0.431107	1.91765	499.161	FALSE	2
2022-09-14	12:42:58	0.478384	2.12795	525.079	FALSE	2
2022-09-14	12:42:58	0.528003	2.34866	501.51	FALSE	2
2022-09-14	12:42:59	0.54617	2.42947	527.508	FALSE	2
2022-09-14	12:42:59	0.491361	2.18567	503.696	FALSE	2
2022-09-14	12:42:59	0.48444	2.15489	529.663	FALSE	2
2022-09-14	12:43:00	0.465102	2.06887	505.765	FALSE	2
2022-09-14	12:43:00	0.442965	1.9704	531.634	FALSE	2
2022-09-14	12:43:00	0.434415	1.93236	507.697	FALSE	2
2022-09-14	12:43:00	0.442201	1.967	533.601	FALSE	2
2022-09-14	12:43:01	0.431412	1.91901	509.616	FALSE	2
2022-09-14	12:43:01	0.409122	1.81986	535.421	FALSE	2
2022-09-14	12:43:01	0.402456	1.7902	511.406	FALSE	2
2022-09-14	12:43:01	0.420878	1.87215	537.293	FALSE	2
2022-09-14	12:43:02	0.423677	1.8846	513.291	FALSE	2
2022-09-14	12:43:02	0.412532	1.83502	539.128	FALSE	2
2022-09-14	12:43:02	0.431463	1.91923	515.21	FALSE	2
2022-09-14	12:43:02	0.48841	2.17255	541.3	FALSE	2
2022-09-14	12:43:03	0.528206	2.34957	517.56	FALSE	2
2022-09-14	12:43:03	0.473143	2.10463	543.405	FALSE	2
2022-09-14	12:43:03	0.72215	3.21227	520.772	FALSE	2
2022-09-14	12:43:04	0.723982	3.22042	546.625	FALSE	2
2022-09-14	12:43:04	0.719249	3.19936	523.971	FALSE	2
2022-09-14	12:43:04	0.716145	3.18556	549.811	FALSE	2
2022-09-14	12:43:04	0.406985	1.81035	525.782	FALSE	2
2022-09-14	12:43:05	0.360776	1.6048	551.416	FALSE	2
2022-09-14	12:43:05	0.334924	1.48981	527.271	FALSE	2
2022-09-14	12:43:05	0.325458	1.4477	552.863	FALSE	2
2022-09-14	12:43:05	0.368053	1.63717	528.909	FALSE	2
2022-09-14	12:43:06	0.34556	1.53712	554.4	FALSE	2
2022-09-14	12:43:06	0.354313	1.57606	530.485	FALSE	2
2022-09-14	12:43:06	0.348053	1.54821	555.949	FALSE	2
2022-09-14	12:43:07	0.345204	1.53554	532.02	FALSE	2
2022-09-14	12:43:07	0.326629	1.45291	557.402	FALSE	2
2022-09-14	12:43:07	0.311667	1.38636	533.407	FALSE	2
2022-09-14	12:43:07	0.311616	1.38613	558.788	FALSE	2
2022-09-14	12:43:08	0.285	1.26774	534.674	FALSE	2
2022-09-14	12:43:08	0.26383	1.17357	559.961	FALSE	2
2022-09-14	12:43:08	0.278333	1.23808	535.912	FALSE	2
2022-09-14	12:43:08	0.288512	1.28336	561.245	FALSE	2
2022-09-14	12:43:09	0.303779	1.35127	537.264	FALSE	2
2022-09-14	12:43:09	0.285255	1.26887	562.514	FALSE	2
2022-09-14	12:43:09	0.289682	1.28856	538.552	FALSE	2
2022-09-14	12:43:09	0.301743	1.34221	563.856	FALSE	2
2022-09-14	12:43:10	0.30271	1.34651	539.899	FALSE	2
2022-09-14	12:43:10	0.301641	1.34176	565.197	FALSE	2
2022-09-14	12:43:10	0.308054	1.37029	541.269	FALSE	2
2022-09-14	12:43:11	0.303931	1.35195	566.549	FALSE	2
2022-09-14	12:43:11	0.309326	1.37594	542.645	FALSE	2
2022-09-14	12:43:11	0.313957	1.39654	567.946	FALSE	2
2022-09-14	12:43:11	0.31243	1.38975	544.035	FALSE	2
2022-09-14	12:43:12	0.333957	1.48551	569.431	FALSE	2
2022-09-14	12:43:12	0.315229	1.4022	545.437	FALSE	2
2022-09-14	12:43:12	0.329733	1.46672	570.898	FALSE	2
2022-09-14	12:43:12	0.328308	1.46038	546.897	FALSE	2
2022-09-14	12:43:13	0.338232	1.50452	572.403	FALSE	2
2022-09-14	12:43:13	0.351718	1.56451	548.462	FALSE	2
2022-09-14	12:43:13	0.336501	1.49682	573.9	FALSE	2
2022-09-14	12:43:13	0.332939	1.48098	549.943	FALSE	2
2022-09-14	12:43:14	0.328206	1.45993	575.359	FALSE	2
2022-09-14	12:43:14	0.341489	1.51901	551.462	FALSE	2
2022-09-14	12:43:14	0.336247	1.49569	576.855	FALSE	2
2022-09-14	12:43:15	0.391107	1.73972	553.202	FALSE	2
2022-09-14	12:43:15	0.431769	1.92059	578.776	FALSE	2
2022-09-14	12:43:15	0.45757	2.03536	555.237	FALSE	2
2022-09-14	12:43:15	0.521234	2.31855	581.094	FALSE	2
2022-09-14	12:43:16	0.556196	2.47407	557.711	FALSE	2
2022-09-14	12:43:16	0.556603	2.47588	583.57	FALSE	2
2022-09-14	12:43:16	0.563422	2.50621	560.217	FALSE	2
2022-09-14	12:43:16	0.575789	2.56122	586.131	FALSE	2
2022-09-14	12:43:17	0.722456	3.21363	563.431	FALSE	2
2022-09-14	12:43:17	0.720776	3.20616	589.338	FALSE	2
2022-09-14	12:43:17	0.719046	3.19846	566.629	FALSE	2
2022-09-14	12:43:17	0.722303	3.21295	592.551	FALSE	2
2022-09-14	12:43:18	0.724389	3.22223	569.852	FALSE	2
2022-09-14	12:43:18	0.727392	3.23559	595.786	FALSE	2
2022-09-14	12:43:18	0.716857	3.18872	573.04	FALSE	2
2022-09-14	12:43:19	0.717723	3.19258	598.979	FALSE	2
2022-09-14	12:43:19	0.715687	3.18352	576.224	FALSE	2
2022-09-14	12:43:19	0.717672	3.19235	602.171	FALSE	2
2022-09-14	12:43:19	0.717977	3.19371	579.417	FALSE	2
2022-09-14	12:43:20	0.717672	3.19235	605.363	FALSE	2
2022-09-14	12:43:20	0.722914	3.21567	582.633	FALSE	2
2022-09-14	12:43:20	0.720013	3.20276	608.566	FALSE	2
2022-09-14	12:43:20	0.719758	3.20163	585.835	FALSE	2
2022-09-14	12:43:21	0.721336	3.20865	611.775	FALSE	2
2022-09-14	12:43:21	0.717468	3.19144	589.026	FALSE	2
2022-09-14	12:43:21	0.716654	3.18782	614.963	FALSE	2
2022-09-14	12:43:21	0.722608	3.2143	592.24	FALSE	2
2022-09-14	12:43:22	0.709071	3.15409	618.117	FALSE	2
2022-09-14	12:43:22	0.718435	3.19574	595.436	FALSE	2
2022-09-14	12:43:22	0.718639	3.19665	621.313	FALSE	2
2022-09-14	12:43:23	0.716705	3.18805	598.624	FALSE	2
2022-09-14	12:43:23	0.71757	3.19189	624.505	FALSE	2
2022-09-14	12:43:23	0.717316	3.19077	601.815	FALSE	2
2022-09-14	12:43:23	0.719707	3.2014	627.707	FALSE	2
2022-09-14	12:43:24	0.716807	3.1885	605.004	FALSE	2
2022-09-14	12:43:24	0.719962	3.20253	630.909	FALSE	2
2022-09-14	12:43:24	0.722914	3.21567	608.219	FALSE	2
2022-09-14	12:43:24	0.726781	3.23287	634.142	FALSE	2
2022-09-14	12:43:25	0.715738	3.18375	611.403	FALSE	2
2022-09-14	12:43:25	0.718486	3.19597	637.338	FALSE	2
2022-09-14	12:43:25	0.715789	3.18397	614.587	FALSE	2
2022-09-14	12:43:26	0.719707	3.2014	640.539	FALSE	2
2022-09-14	12:43:26	0.716501	3.18714	617.774	FALSE	2
2022-09-14	12:43:26	0.722761	3.21499	643.754	FALSE	2
2022-09-14	12:43:26	0.717468	3.19144	620.966	FALSE	2
2022-09-14	12:43:27	0.721387	3.20887	646.963	FALSE	2
2022-09-14	12:43:27	0.719046	3.19846	624.164	FALSE	2
2022-09-14	12:43:27	0.717824	3.19302	650.156	FALSE	2
2022-09-14	12:43:27	0.423728	1.88483	626.049	FALSE	2
2022-09-14	12:43:28	0.440878	1.96111	652.117	FALSE	2
2022-09-14	12:43:28	0.461896	2.05461	628.103	FALSE	2
2022-09-14	12:43:28	0.459758	2.0451	654.163	FALSE	2
2022-09-14	12:43:28	0.460522	2.04849	630.152	FALSE	2
2022-09-14	12:43:29	0.709682	3.15681	657.319	FALSE	2
2022-09-14	12:43:29	0.717977	3.19371	633.346	FALSE	2
2022-09-14	12:43:29	0.716349	3.18646	660.506	FALSE	2
2022-09-14	12:43:30	0.719656	3.20117	636.547	FALSE	2
2022-09-14	12:43:30	0.718232	3.19484	663.701	FALSE	2
2022-09-14	12:43:30	0.715738	3.18375	639.731	FALSE	2
2022-09-14	12:43:30	0.718232	3.19484	666.895	FALSE	2
2022-09-14	12:43:31	0.713041	3.17175	642.902	FALSE	2
2022-09-14	12:43:31	0.717468	3.19144	670.087	FALSE	2
2022-09-14	12:43:31	0.714873	3.1799	646.082	FALSE	2
2022-09-14	12:43:31	0.716959	3.18918	673.276	FALSE	2
2022-09-14	12:43:32	0.718995	3.19823	649.28	FALSE	2
2022-09-14	12:43:32	0.717468	3.19144	676.468	FALSE	2
2022-09-14	12:43:32	0.716298	3.18624	652.467	FALSE	2
2022-09-14	12:43:32	0.721081	3.20751	679.675	FALSE	2
2022-09-14	12:43:33	0.71299	3.17152	655.638	FALSE	2
2022-09-14	12:43:33	0.726221	3.23038	682.905	FALSE	2
2022-09-14	12:43:33	0.71874	3.1971	658.835	FALSE	2
2022-09-14	12:43:34	0.719046	3.19846	686.104	FALSE	2
2022-09-14	12:43:34	0.718639	3.19665	662.032	FALSE	2
2022-09-14	12:43:34	0.716399	3.18669	689.291	FALSE	2
2022-09-14	12:43:34	0.721132	3.20774	665.24	FALSE	2
2022-09-14	12:43:35	0.721285	3.20842	692.499	FALSE	2
2022-09-14	12:43:35	0.718893	3.19778	668.437	FALSE	2
2022-09-14	12:43:35	0.713346	3.17311	695.672	FALSE	2
2022-09-14	12:43:35	0.715382	3.18216	671.62	FALSE	2
2022-09-14	12:43:36	0.71813	3.19439	698.866	FALSE	2
2022-09-14	12:43:36	0.720267	3.20389	674.823	FALSE	2
2022-09-14	12:43:36	0.715534	3.18284	702.049	FALSE	2
2022-09-14	12:43:36	0.719453	3.20027	678.024	FALSE	2
2022-09-14	12:43:37	0.719606	3.20095	705.25	FALSE	2
2022-09-14	12:43:37	0.720521	3.20502	681.229	FALSE	2
2022-09-14	12:43:37	0.717926	3.19348	708.444	FALSE	2
2022-09-14	12:43:38	0.724135	3.2211	684.45	FALSE	2
2022-09-14	12:43:38	0.719148	3.19891	711.643	FALSE	2
2022-09-14	12:43:38	0.723168	3.2168	687.667	FALSE	2
2022-09-14	12:43:38	0.721539	3.20955	714.852	FALSE	2
2022-09-14	12:43:39	0.722507	3.21386	690.881	FALSE	2
2022-09-14	12:43:39	0.721591	3.20978	718.062	FALSE	2
2022-09-14	12:43:39	0.716654	3.18782	694.068	FALSE	2
2022-09-14	12:43:39	0.719911	3.20231	721.264	FALSE	2
2022-09-14	12:43:40	0.721895	3.21113	697.279	FALSE	2
2022-09-14	12:43:40	0.716501	3.18714	724.451	FALSE	2
2022-09-14	12:43:40	0.711463	3.16473	700.444	FALSE	2
2022-09-14	12:43:40	0.71757	3.19189	727.643	FALSE	2
2022-09-14	12:43:41	0.708613	3.15205	703.596	FALSE	2
2022-09-14	12:43:41	0.721387	3.20887	730.852	FALSE	2
2022-09-14	12:43:41	0.721794	3.21068	706.807	FALSE	2
2022-09-14	12:43:42	0.713143	3.1722	734.024	FALSE	2
2022-09-14	12:43:42	0.721183	3.20797	710.015	FALSE	2
2022-09-14	12:43:42	0.726069	3.2297	737.254	FALSE	2
2022-09-14	12:43:42	0.71528	3.18171	713.197	FALSE	2
2022-09-14	12:43:43	0.718079	3.19416	740.448	FALSE	2
2022-09-14	12:43:43	0.719351	3.19982	716.396	FALSE	2
2022-09-14	12:43:43	0.726629	3.23219	743.68	FALSE	2
2022-09-14	12:43:43	0.727188	3.23468	719.631	FALSE	2
2022-09-14	12:43:44	0.717061	3.18963	746.87	FALSE	2
2022-09-14	12:43:44	0.714924	3.18012	722.811	FALSE	2
2022-09-14	12:43:44	0.722201	3.21249	750.083	FALSE	2
2022-09-14	12:43:45	0.716399	3.18669	725.998	FALSE	2
2022-09-14	12:43:45	0.720114	3.20321	753.286	FALSE	2
2022-09-14	12:43:45	0.72215	3.21227	729.21	FALSE	2
2022-09-14	12:43:45	0.715992	3.18488	756.471	FALSE	2
2022-09-14	12:43:46	0.716552	3.18737	732.398	FALSE	2
2022-09-14	12:43:46	0.718079	3.19416	759.665	FALSE	2
2022-09-14	12:43:46	0.721488	3.20932	735.607	FALSE	2
2022-09-14	12:43:46	0.716603	3.18759	762.852	FALSE	2
2022-09-14	12:43:47	0.719606	3.20095	738.808	FALSE	2
2022-09-14	12:43:47	0.721692	3.21023	766.063	FALSE	2
2022-09-14	12:43:47	0.728104	3.23875	742.047	FALSE	2
2022-09-14	12:43:47	0.722862	3.21543	769.278	FALSE	2
2022-09-14	12:43:48	0.721794	3.21068	745.257	FALSE	2
2022-09-14	12:43:48	0.718893	3.19778	772.476	FALSE	2
2022-09-14	12:43:48	0.725153	3.22563	748.483	FALSE	2
2022-09-14	12:43:49	0.727443	3.23581	775.712	FALSE	2
2022-09-14	12:43:49	0.717366	3.19099	751.674	FALSE	2
2022-09-14	12:43:49	0.721234	3.20819	778.92	FALSE	2
2022-09-14	12:43:49	0.716399	3.18669	754.861	FALSE	2
2022-09-14	12:43:50	0.713855	3.17537	782.095	FALSE	2
2022-09-14	12:43:50	0.729886	3.24668	758.107	FALSE	2
2022-09-14	12:43:50	0.71355	3.17401	785.269	FALSE	2
2022-09-14	12:43:50	0.717621	3.19212	761.299	FALSE	2
2022-09-14	12:43:51	0.711107	3.16315	788.432	FALSE	2
2022-09-14	12:43:51	0.725102	3.2254	764.525	FALSE	2
2022-09-14	12:43:51	0.721591	3.20978	791.642	FALSE	2
2022-09-14	12:43:51	0.71986	3.20208	767.727	FALSE	2
2022-09-14	12:43:52	0.724338	3.222	794.864	FALSE	2
2022-09-14	12:43:52	0.721591	3.20978	770.937	FALSE	2
2022-09-14	12:43:52	0.720114	3.20321	798.067	FALSE	2
2022-09-14	12:43:53	0.721437	3.2091	774.146	FALSE	2
2022-09-14	12:43:53	0.722761	3.21499	801.282	FALSE	2
2022-09-14	12:43:53	0.716908	3.18895	777.335	FALSE	2
2022-09-14	12:43:53	0.728461	3.24034	804.523	FALSE	2
2022-09-14	12:43:54	0.715483	3.18261	780.517	FALSE	2
2022-09-14	12:43:54	0.718486	3.19597	807.719	FALSE	2
2022-09-14	12:43:54	0.719809	3.20185	783.719	FALSE	2
2022-09-14	12:43:54	0.726272	3.2306	810.949	FALSE	2
2022-09-14	12:43:55	0.715738	3.18375	786.903	FALSE	2
2022-09-14	12:43:55	0.729784	3.24623	814.196	FALSE	2
2022-09-14	12:43:55	0.725865	3.22879	790.132	FALSE	2
2022-09-14	12:43:55	0.728562	3.24079	817.436	FALSE	2
2022-09-14	12:43:56	0.720572	3.20525	793.337	FALSE	2
2022-09-14	12:43:56	0.714974	3.18035	820.617	FALSE	2
2022-09-14	12:43:56	0.726578	3.23196	796.569	FALSE	2
2022-09-14	12:43:57	0.720114	3.20321	823.82	FALSE	2
2022-09-14	12:43:57	0.719707	3.2014	799.77	FALSE	2
2022-09-14	12:43:57	0.71472	3.17922	826.999	FALSE	2
2022-09-14	12:43:57	0.725051	3.22517	802.995	FALSE	2
2022-09-14	12:43:58	0.726781	3.23287	830.232	FALSE	2
2022-09-14	12:43:58	0.720623	3.20548	806.201	FALSE	2
2022-09-14	12:43:58	0.724542	3.22291	833.455	FALSE	2
2022-09-14	12:43:58	0.724389	3.22223	809.423	FALSE	2
2022-09-14	12:43:59	0.72388	3.21996	836.675	FALSE	2
2022-09-14	12:43:59	0.718028	3.19393	812.617	FALSE	2
2022-09-14	12:43:59	0.71701	3.1894	839.864	FALSE	2
2022-09-14	12:44:00	0.71813	3.19439	815.811	FALSE	2
2022-09-14	12:44:00	0.722965	3.21589	843.08	FALSE	2
2022-09-14	12:44:00	0.716857	3.18872	819	FALSE	2
2022-09-14	12:44:00	0.719351	3.19982	846.28	FALSE	2
2022-09-14	12:44:01	0.724084	3.22087	822.221	FALSE	2
2022-09-14	12:44:01	0.725305	3.2263	849.506	FALSE	2
2022-09-14	12:44:01	0.725	3.22494	825.446	FALSE	2
2022-09-14	12:44:01	0.728766	3.2417	852.748	FALSE	2
2022-09-14	12:44:02	0.717519	3.19167	828.638	FALSE	2
2022-09-14	12:44:02	0.720369	3.20435	855.952	FALSE	2
2022-09-14	12:44:02	0.727137	3.23445	831.872	FALSE	2
2022-09-14	12:44:02	0.720267	3.20389	859.156	FALSE	2
2022-09-14	12:44:03	0.725662	3.22789	835.1	FALSE	2
2022-09-14	12:44:03	0.725051	3.22517	862.381	FALSE	2
2022-09-14	12:44:03	0.720827	3.20638	838.306	FALSE	2
2022-09-14	12:44:04	0.731158	3.25234	865.634	FALSE	2
2022-09-14	12:44:04	0.727036	3.234	841.54	FALSE	2
2022-09-14	12:44:04	0.723066	3.21634	868.85	FALSE	2
2022-09-14	12:44:04	0.718995	3.19823	844.739	FALSE	2
2022-09-14	12:44:05	0.720165	3.20344	872.053	FALSE	2
2022-09-14	12:44:05	0.716501	3.18714	847.926	FALSE	2
2022-09-14	12:44:05	0.725102	3.2254	875.279	FALSE	2
2022-09-14	12:44:05	0.725204	3.22585	851.152	FALSE	2
2022-09-14	12:44:06	0.719606	3.20095	878.48	FALSE	2
2022-09-14	12:44:06	0.716857	3.18872	854.34	FALSE	2
2022-09-14	12:44:06	0.724186	3.22132	881.701	FALSE	2
2022-09-14	12:44:06	0.721997	3.21159	857.552	FALSE	2
2022-09-14	12:44:07	0.72388	3.21996	884.921	FALSE	2
2022-09-14	12:44:07	0.719046	3.19846	860.75	FALSE	2
2022-09-14	12:44:07	0.723779	3.21951	888.141	FALSE	2
2022-09-14	12:44:08	0.716705	3.18805	863.938	FALSE	2
2022-09-14	12:44:08	0.723931	3.22019	891.361	FALSE	2
2022-09-14	12:44:08	0.721336	3.20865	867.147	FALSE	2
2022-09-14	12:44:08	0.724033	3.22064	894.581	FALSE	2
2022-09-14	12:44:09	0.722252	3.21272	870.36	FALSE	2
2022-09-14	12:44:09	0.727545	3.23627	897.818	FALSE	2
2022-09-14	12:44:09	0.725204	3.22585	873.586	FALSE	2
2022-09-14	12:44:09	0.728919	3.24238	901.06	FALSE	2
2022-09-14	12:44:10	0.732328	3.25754	876.843	FALSE	2
2022-09-14	12:44:10	0.726272	3.2306	904.291	FALSE	2
2022-09-14	12:44:10	0.725509	3.22721	880.07	FALSE	2
2022-09-14	12:44:10	0.721794	3.21068	907.501	FALSE	2
2022-09-14	12:44:11	0.729835	3.24645	883.317	FALSE	2
2022-09-14	12:44:11	0.718232	3.19484	910.696	FALSE	2
2022-09-14	12:44:11	0.722303	3.21295	886.53	FALSE	2
2022-09-14	12:44:12	0.727036	3.234	913.93	FALSE	2
2022-09-14	12:44:12	0.723117	3.21657	889.746	FALSE	2
2022-09-14	12:44:12	0.71472	3.17922	917.109	FALSE	2
2022-09-14	12:44:12	0.725407	3.22676	892.973	FALSE	2
2022-09-14	12:44:13	0.719758	3.20163	920.311	FALSE	2
2022-09-14	12:44:13	0.728054	3.23853	896.212	FALSE	2
2022-09-14	12:44:13	0.729529	3.24509	923.556	FALSE	2
2022-09-14	12:44:13	0.727697	3.23694	899.449	FALSE	2
2022-09-14	12:44:14	0.724847	3.22426	926.78	FALSE	2
2022-09-14	12:44:14	0.723524	3.21838	902.667	FALSE	2
2022-09-14	12:44:14	0.725407	3.22676	930.007	FALSE	2
2022-09-14	12:44:14	0.724288	3.22178	905.889	FALSE	2
2022-09-14	12:44:15	0.719504	3.2005	933.208	FALSE	2
2022-09-14	12:44:15	0.718028	3.19393	909.083	FALSE	2
2022-09-14	12:44:15	0.733957	3.26479	936.472	FALSE	2
2022-09-14	12:44:16	0.730293	3.24849	912.331	FALSE	2
2022-09-14	12:44:16	0.725305	3.2263	939.699	FALSE	2
2022-09-14	12:44:16	0.720979	3.20706	915.538	FALSE	2
2022-09-14	12:44:16	0.721183	3.20797	942.907	FALSE	2
2022-09-14	12:44:17	0.72612	3.22993	918.768	FALSE	2
2022-09-14	12:44:17	0.724644	3.22336	946.13	FALSE	2
2022-09-14	12:44:17	0.728512	3.24057	922.009	FALSE	2
2022-09-14	12:44:17	0.721539	3.20955	949.34	FALSE	2
2022-09-14	12:44:18	0.718486	3.19597	925.205	FALSE	2
2022-09-14	12:44:18	0.718639	3.19665	952.536	FALSE	2
2022-09-14	12:44:18	0.721641	3.21	928.415	FALSE	2
2022-09-14	12:44:19	0.71757	3.19189	955.728	FALSE	2
2022-09-14	12:44:19	0.725611	3.22766	931.642	FALSE	2
2022-09-14	12:44:19	0.714516	3.17831	958.906	FALSE	2
2022-09-14	12:44:19	0.728512	3.24057	934.883	FALSE	2
2022-09-14	12:44:20	0.720165	3.20344	962.11	FALSE	2
2022-09-14	12:44:20	0.722252	3.21272	938.096	FALSE	2
2022-09-14	12:44:20	0.723066	3.21634	965.326	FALSE	2
2022-09-14	12:44:20	0.721692	3.21023	941.306	FALSE	2
2022-09-14	12:44:21	0.725356	3.22653	968.553	FALSE	2
2022-09-14	12:44:21	0.713397	3.17333	944.479	FALSE	2
2022-09-14	12:44:21	0.719504	3.2005	971.753	FALSE	2
2022-09-14	12:44:21	0.727545	3.23627	947.716	FALSE	2
2022-09-14	12:44:22	0.723626	3.21883	974.972	FALSE	2
2022-09-14	12:44:22	0.727697	3.23694	950.952	FALSE	2
2022-09-14	12:44:22	0.729377	3.24441	978.217	FALSE	2
2022-09-14	12:44:23	0.381438	1.69671	952.649	FALSE	2
2022-09-14	12:44:23	0.723168	3.2168	981.433	FALSE	2
2022-09-14	12:44:23	0.719809	3.20185	955.851	FALSE	2
2022-09-14	12:44:23	1.31452	5.84725	987.281	FALSE	2
2022-09-14	12:44:24	0.795891	3.54028	959.391	FALSE	2
2022-09-14	12:44:24	0.725662	3.22789	990.508	FALSE	2
2022-09-14	12:44:24	0.72841	3.24011	962.631	FALSE	2
2022-09-14	12:44:24	0.723779	3.21951	993.728	FALSE	2
2022-09-14	12:44:25	0.732786	3.25958	965.891	FALSE	2
2022-09-14	12:44:25	0.723219	3.21702	996.945	FALSE	2
2022-09-14	12:44:25	0.719504	3.2005	969.091	FALSE	2
2022-09-14	12:44:25	0.724796	3.22404	1000.17	FALSE	2
2022-09-14	12:44:26	0.726832	3.23309	972.325	FALSE	2
2022-09-14	12:44:26	0.722862	3.21543	1003.38	FALSE	2
2022-09-14	12:44:26	0.72271	3.21476	975.539	FALSE	2
2022-09-14	12:44:27	0.720318	3.20412	1006.59	FALSE	2
2022-09-14	12:44:27	0.728766	3.2417	978.781	FALSE	2
2022-09-14	12:44:27	0.726934	3.23355	1009.82	FALSE	2
2022-09-14	12:44:27	0.719707	3.2014	981.982	FALSE	2
2022-09-14	12:44:28	0.717672	3.19235	1013.01	FALSE	2
2022-09-14	12:44:28	0.715382	3.18216	985.165	FALSE	2
2022-09-14	12:44:28	0.719402	3.20004	1016.21	FALSE	2
2022-09-14	12:44:28	0.730598	3.24985	988.414	FALSE	2
2022-09-14	12:44:29	0.734466	3.26705	1019.48	FALSE	2
2022-09-14	12:44:29	0.731768	3.25505	991.67	FALSE	2
2022-09-14	12:44:29	0.729224	3.24373	1022.73	FALSE	2
2022-09-14	12:44:29	0.727137	3.23445	994.904	FALSE	2
2022-09-14	12:44:30	0.72958	3.24532	1025.97	FALSE	2
2022-09-14	12:44:30	0.723219	3.21702	998.121	FALSE	2
2022-09-14	12:44:30	0.729784	3.24623	1029.22	FALSE	2
2022-09-14	12:44:31	0.728359	3.23989	1001.36	FALSE	2
2022-09-14	12:44:31	0.729224	3.24373	1032.46	FALSE	2
2022-09-14	12:44:31	0.727697	3.23694	1004.6	FALSE	2
2022-09-14	12:44:31	0.729173	3.24351	1035.7	FALSE	2
2022-09-14	12:44:32	0.726323	3.23083	1007.83	FALSE	2
2022-09-14	12:44:32	0.723931	3.22019	1038.92	FALSE	2
2022-09-14	12:44:32	0.731107	3.25211	1011.08	FALSE	2
2022-09-14	12:44:32	0.720979	3.20706	1042.13	FALSE	2
2022-09-14	12:44:33	0.72902	3.24283	1014.32	FALSE	2
2022-09-14	12:44:33	0.717366	3.19099	1045.32	FALSE	2
2022-09-14	12:44:33	0.726221	3.23038	1017.55	FALSE	2
2022-09-14	12:44:33	0.728003	3.2383	1048.56	FALSE	2
2022-09-14	12:44:34	0.72327	3.21725	1020.77	FALSE	2
2022-09-14	12:44:34	0.784389	3.48912	1052.05	FALSE	2
2022-09-14	12:44:34	0.729682	3.24577	1024.02	FALSE	2
2022-09-14	12:44:35	0.73528	3.27067	1055.32	FALSE	2
2022-09-14	12:44:35	0.720979	3.20706	1027.22	FALSE	2
2022-09-14	12:44:35	0.72215	3.21227	1058.53	FALSE	2
2022-09-14	12:44:35	0.719758	3.20163	1030.43	FALSE	2
2022-09-14	12:44:36	0.722761	3.21499	1061.75	FALSE	2
2022-09-14	12:44:36	0.716908	3.18895	1033.61	FALSE	2
2022-09-14	12:44:36	0.719809	3.20185	1064.95	FALSE	2
2022-09-14	12:44:36	0.723982	3.22042	1036.84	FALSE	2
2022-09-14	12:44:37	0.717265	3.19054	1068.14	FALSE	2
2022-09-14	12:44:37	0.733702	3.26365	1040.1	FALSE	2
2022-09-14	12:44:37	0.726476	3.23151	1071.37	FALSE	2
2022-09-14	12:44:38	0.735483	3.27158	1043.37	FALSE	2
2022-09-14	12:44:38	0.726781	3.23287	1074.6	FALSE	2
2022-09-14	12:44:38	0.725254	3.22607	1046.6	FALSE	2
2022-09-14	12:44:38	0.729478	3.24486	1077.85	FALSE	2
2022-09-14	12:44:39	0.733397	3.2623	1049.86	FALSE	2
2022-09-14	12:44:39	0.728054	3.23853	1081.09	FALSE	2
2022-09-14	12:44:39	0.732837	3.25981	1053.12	FALSE	2
2022-09-14	12:44:39	0.721641	3.21	1084.3	FALSE	2
2022-09-14	12:44:40	0.722404	3.2134	1056.33	FALSE	2
2022-09-14	12:44:40	0.729275	3.24396	1087.54	FALSE	2
2022-09-14	12:44:40	0.7307	3.2503	1059.58	FALSE	2
2022-09-14	12:44:40	0.723677	3.21906	1090.76	FALSE	2
2022-09-14	12:44:41	0.735941	3.27361	1062.86	FALSE	2
2022-09-14	12:44:41	0.72556	3.22744	1093.99	FALSE	2
2022-09-14	12:44:41	0.725102	3.2254	1066.08	FALSE	2
2022-09-14	12:44:41	0.722456	3.21363	1097.2	FALSE	2
2022-09-14	12:44:42	0.721488	3.20932	1069.29	FALSE	2
2022-09-14	12:44:42	0.726934	3.23355	1100.44	FALSE	2
2022-09-14	12:44:42	0.725407	3.22676	1072.52	FALSE	2
2022-09-14	12:44:43	0.725407	3.22676	1103.66	FALSE	2
2022-09-14	12:44:43	0.723982	3.22042	1075.74	FALSE	2
2022-09-14	12:44:43	0.729326	3.24419	1106.91	FALSE	2
2022-09-14	12:44:43	0.774364	3.44453	1079.18	FALSE	2
2022-09-14	12:44:44	0.728512	3.24057	1110.15	FALSE	2
2022-09-14	12:44:44	0.726069	3.2297	1082.41	FALSE	2
2022-09-14	12:44:44	0.722252	3.21272	1113.36	FALSE	2
2022-09-14	12:44:44	0.728715	3.24147	1085.65	FALSE	2
2022-09-14	12:44:45	0.724542	3.22291	1116.58	FALSE	2
2022-09-14	12:44:45	0.726781	3.23287	1088.89	FALSE	2
2022-09-14	12:44:45	0.730903	3.2512	1119.83	FALSE	2
2022-09-14	12:44:46	0.728664	3.24124	1092.13	FALSE	2
2022-09-14	12:44:46	0.725916	3.22902	1123.06	FALSE	2
2022-09-14	12:44:46	0.726425	3.23128	1095.36	FALSE	2
2022-09-14	12:44:46	0.363779	1.61816	1124.68	FALSE	2
2022-09-14	12:44:47	0.693855	3.08641	1098.45	FALSE	2
2022-09-14	12:44:47	0.724542	3.22291	1127.9	FALSE	2
2022-09-14	12:44:47	0.728562	3.24079	1101.69	FALSE	2
2022-09-14	12:44:47	0.730343	3.24871	1131.15	FALSE	2
2022-09-14	12:44:48	0.733346	3.26207	1104.95	FALSE	2
2022-09-14	12:44:48	0.718791	3.19733	1134.35	FALSE	2
2022-09-14	12:44:48	0.725407	3.22676	1108.17	FALSE	2
2022-09-14	12:44:48	0.723931	3.22019	1137.57	FALSE	2
2022-09-14	12:44:49	0.720318	3.20412	1111.38	FALSE	2
2022-09-14	12:44:49	0.720267	3.20389	1140.77	FALSE	2
2022-09-14	12:44:49	0.724695	3.22359	1114.6	FALSE	2
2022-09-14	12:44:50	0.724746	3.22382	1144	FALSE	2
2022-09-14	12:44:50	0.719758	3.20163	1117.8	FALSE	2
2022-09-14	12:44:50	0.71757	3.19189	1147.19	FALSE	2
2022-09-14	12:44:50	0.703372	3.12874	1120.93	FALSE	2
2022-09-14	12:44:51	0.708664	3.15228	1150.34	FALSE	2
2022-09-14	12:44:51	0.696298	3.09727	1124.03	FALSE	2
2022-09-14	12:44:51	0.699198	3.11017	1153.45	FALSE	2
2022-09-14	12:44:51	0.699656	3.11221	1127.14	FALSE	2
2022-09-14	12:44:52	0.686374	3.05313	1156.51	FALSE	2
2022-09-14	12:44:52	0.671565	2.98726	1130.13	FALSE	2
2022-09-14	12:44:52	0.667341	2.96847	1159.47	FALSE	2
2022-09-14	12:44:52	0.66673	2.96575	1133.1	FALSE	2
2022-09-14	12:44:53	0.654364	2.91074	1162.38	FALSE	2
2022-09-14	12:44:53	0.637672	2.83649	1135.93	FALSE	2
2022-09-14	12:44:53	0.630547	2.8048	1165.19	FALSE	2
2022-09-14	12:44:54	0.617723	2.74776	1138.68	FALSE	2
2022-09-14	12:44:54	0.629326	2.79937	1167.99	FALSE	2
2022-09-14	12:44:54	0.727188	3.23468	1141.91	FALSE	2
2022-09-14	12:44:54	0.727545	3.23627	1171.22	FALSE	2
2022-09-14	12:44:55	0.726272	3.2306	1145.14	FALSE	2
2022-09-14	12:44:55	0.730394	3.24894	1174.47	FALSE	2
2022-09-14	12:44:55	0.730394	3.24894	1148.39	FALSE	2
2022-09-14	12:44:55	0.730089	3.24758	1177.72	FALSE	2
2022-09-14	12:44:56	0.724796	3.22404	1151.62	FALSE	2
2022-09-14	12:44:56	0.724389	3.22223	1180.94	FALSE	2
2022-09-14	12:44:56	0.721845	3.21091	1154.83	FALSE	2
2022-09-14	12:44:56	0.717621	3.19212	1184.14	FALSE	2
2022-09-14	12:44:57	0.733092	3.26094	1158.09	FALSE	2
2022-09-14	12:44:57	0.727748	3.23717	1187.37	FALSE	2
2022-09-14	12:44:57	0.724135	3.2211	1161.31	FALSE	2
2022-09-14	12:44:58	0.724542	3.22291	1190.6	FALSE	2
2022-09-14	12:44:58	0.714618	3.17876	1164.49	FALSE	2
2022-09-14	12:44:58	0.712685	3.17017	1193.77	FALSE	2
2022-09-14	12:44:58	0.709478	3.1559	1167.65	FALSE	2
2022-09-14	12:44:59	0.692125	3.07871	1196.84	FALSE	2
2022-09-14	12:44:59	0.69131	3.07509	1170.72	FALSE	2
2022-09-14	12:44:59	0.649784	2.89037	1199.74	FALSE	2
2022-09-14	12:44:59	0.64327	2.86139	1173.58	FALSE	2
2022-09-14	12:45:00	0.630242	2.80344	1202.54	FALSE	2
2022-09-14	12:45:00	0.626934	2.78873	1176.37	FALSE	2
2022-09-14	12:45:00	0.609224	2.70995	1205.25	FALSE	2
2022-09-14	12:45:00	0.579758	2.57888	1178.95	FALSE	2
2022-09-14	12:45:01	0.568308	2.52795	1207.78	FALSE	2
2022-09-14	12:45:01	0.527748	2.34753	1181.3	FALSE	2
2022-09-14	12:45:01	0.509682	2.26717	1210.04	FALSE	2
2022-09-14	12:45:02	0.522964	2.32625	1183.62	FALSE	2
2022-09-14	12:45:02	0.523015	2.32648	1212.37	FALSE	2
2022-09-14	12:45:02	0.505611	2.24906	1185.87	FALSE	2
2022-09-14	12:45:02	0.506272	2.252	1214.62	FALSE	2
2022-09-14	12:45:03	0.532684	2.36948	1188.24	FALSE	2
2022-09-14	12:45:03	0.538079	2.39348	1217.02	FALSE	2
2022-09-14	12:45:03	0.534211	2.37628	1190.62	FALSE	2
2022-09-14	12:45:03	0.598232	2.66106	1219.68	FALSE	2
2022-09-14	12:45:04	0.525305	2.33666	1192.95	FALSE	2
2022-09-14	12:45:04	0.579046	2.57571	1222.25	FALSE	2
2022-09-14	12:45:04	0.520165	2.3138	1195.27	FALSE	2
2022-09-14	12:45:04	0.484644	2.15579	1224.41	FALSE	2
2022-09-14	12:45:05	0.477621	2.12455	1197.39	FALSE	2
2022-09-14	12:45:05	0.437417	1.94572	1226.35	FALSE	2
2022-09-14	12:45:05	0.404186	1.7979	1199.19	FALSE	2
2022-09-14	12:45:06	0.337519	1.50135	1227.86	FALSE	2
2022-09-14	12:45:06	0.35126	1.56247	1200.75	FALSE	2
2022-09-14	12:45:06	0.309784	1.37798	1229.23	FALSE	2
2022-09-14	12:45:06	0.293295	1.30463	1202.06	FALSE	2
2022-09-14	12:45:07	0.293652	1.30622	1230.54	FALSE	2
2022-09-14	12:45:07	0.30673	1.3644	1203.42	FALSE	2
2022-09-14	12:45:07	0.362761	1.61363	1232.15	FALSE	2
2022-09-14	12:45:07	0.540063	2.40231	1205.82	FALSE	2
2022-09-14	12:45:08	0.849326	3.77797	1235.93	FALSE	2
2022-09-14	12:45:08	0.652175	2.901	1208.73	FALSE	2
2022-09-14	12:45:08	0.629478	2.80004	1238.73	FALSE	2
2022-09-14	12:45:08	0.401132	1.78432	1210.51	FALSE	2
2022-09-14	12:45:09	0.380624	1.69309	1240.42	FALSE	2
2022-09-14	12:45:09	0.405102	1.80197	1212.31	FALSE	2
2022-09-14	12:45:09	0.416552	1.85291	1242.28	FALSE	2
2022-09-14	12:45:10	0.419148	1.86445	1214.18	FALSE	2
2022-09-14	12:45:10	0.388359	1.7275	1244	FALSE	2
2022-09-14	12:45:10	0.421539	1.87509	1216.05	FALSE	2
2022-09-14	12:45:10	0.366425	1.62993	1245.63	FALSE	2
2022-09-14	12:45:11	0.360318	1.60277	1217.65	FALSE	2
2022-09-14	12:45:11	0.367443	1.63446	1247.27	FALSE	2
2022-09-14	12:45:11	0.351718	1.56451	1219.22	FALSE	2
2022-09-14	12:45:11	0.394211	1.75353	1249.02	FALSE	2
2022-09-14	12:45:12	0.351005	1.56134	1220.78	FALSE	2
2022-09-14	12:45:12	0.427545	1.90181	1250.92	FALSE	2
2022-09-14	12:45:12	0.404746	1.80039	1222.58	FALSE	2
2022-09-14	12:45:13	0.60729	2.70135	1253.63	FALSE	2
2022-09-14	12:45:13	0.706883	3.14436	1225.73	FALSE	2
2022-09-14	12:45:13	0.623779	2.77469	1256.4	FALSE	2
2022-09-14	12:45:13	0.620369	2.75953	1228.48	FALSE	2
2022-09-14	12:45:14	0.453397	2.0168	1258.42	FALSE	2
2022-09-14	12:45:14	0.567341	2.52365	1231.01	FALSE	2
2022-09-14	12:45:14	0.496705	2.20944	1260.63	FALSE	2
2022-09-14	12:45:14	0.499097	2.22008	1233.23	FALSE	2
2022-09-14	12:45:15	0.794669	3.53485	1264.16	FALSE	2
2022-09-14	12:45:15	0.411565	1.83072	1235.06	FALSE	2
2022-09-14	12:45:15	0.682405	3.03547	1267.2	FALSE	2
2022-09-14	12:45:15	0.438486	1.95047	1237.01	FALSE	2
2022-09-14	12:45:16	0.43411	1.93101	1269.13	FALSE	2
2022-09-14	12:45:16	0.194415	0.864797	1237.87	FALSE	2
2022-09-14	12:45:16	0.130445	0.580245	1269.71	FALSE	2
2022-09-14	12:45:17	0.121947	0.542445	1238.42	FALSE	2
2022-09-14	12:45:17	0.127341	0.566438	1270.27	FALSE	2
2022-09-14	12:45:17	0.11584	0.515279	1238.93	FALSE	2
2022-09-14	12:45:17	0.0914124	0.406621	1270.68	FALSE	2
2022-09-14	12:45:18	0.0775193	0.344821	1239.28	FALSE	2
2022-09-14	12:45:18	0.00164146	0.00730154	1270.69	FALSE	2
2022-09-14	12:45:18	-0.0620226	-0.275889	1239.28	FALSE	2
2022-09-14	12:45:18	-0.130267	-0.579454	1270.69	FALSE	2
2022-09-14	12:45:19	-0.125331	-0.557497	1239.28	FALSE	2
2022-09-14	12:45:19	-0.120038	-0.533953	1270.69	FALSE	2
2022-09-14	12:45:19	-0.182582	-0.812161	1239.28	FALSE	2
2022-09-14	12:45:19	-0.261208	-1.16191	1270.69	FALSE	2
2022-09-14	12:45:20	-0.292913	-1.30294	1239.28	FALSE	2
2022-09-14	12:45:20	-0.310318	-1.38036	1270.69	FALSE	2
2022-09-14	12:45:20	-0.216933	-0.964961	1239.28	FALSE	2
2022-09-14	12:45:21	0.729173	3.24351	1273.93	FALSE	2
2022-09-14	12:45:21	0.726476	3.23151	1242.51	FALSE	2
2022-09-14	12:45:21	0.725305	3.2263	1277.16	FALSE	2
2022-09-14	12:45:21	0.726425	3.23128	1245.74	FALSE	2
2022-09-14	12:45:22	0.688868	3.06422	1280.22	FALSE	2
2022-09-14	12:45:22	0.79757	3.54775	1249.29	FALSE	2
2022-09-14	12:45:22	0.72612	3.22993	1283.45	FALSE	2
2022-09-14	12:45:22	0.72617	3.23015	1252.52	FALSE	2
2022-09-14	12:45:23	0.728562	3.24079	1286.69	FALSE	2
2022-09-14	12:45:23	0.721641	3.21	1255.73	FALSE	2
2022-09-14	12:45:23	0.724491	3.22268	1289.92	FALSE	2
2022-09-14	12:45:23	0.718893	3.19778	1258.93	FALSE	2
2022-09-14	12:45:24	0.727443	3.23581	1293.15	FALSE	2
2022-09-14	12:45:24	0.723931	3.22019	1262.15	FALSE	2
2022-09-14	12:45:24	0.722354	3.21318	1296.36	FALSE	2
2022-09-14	12:45:25	0.730598	3.24985	1265.4	FALSE	2
2022-09-14	12:45:25	0.731463	3.25369	1299.62	FALSE	2
2022-09-14	12:45:25	0.728257	3.23943	1268.63	FALSE	2
2022-09-14	12:45:25	0.735891	3.27339	1302.89	FALSE	2
2022-09-14	12:45:26	0.728512	3.24057	1271.88	FALSE	2
2022-09-14	12:45:26	0.72271	3.21476	1306.11	FALSE	2
2022-09-14	12:45:26	0.725509	3.22721	1275.1	FALSE	2
2022-09-14	12:45:26	0.728206	3.23921	1309.35	FALSE	2
2022-09-14	12:45:27	0.56215	2.50056	1277.6	FALSE	2
2022-09-14	12:45:27	0.748562	3.32975	1312.68	FALSE	2
2022-09-14	12:45:27	0.730343	3.24871	1280.85	FALSE	2
2022-09-14	12:45:27	0.719402	3.20004	1315.88	FALSE	2
2022-09-14	12:45:28	0.727239	3.2349	1284.09	FALSE	2
2022-09-14	12:45:28	0.727392	3.23559	1319.11	FALSE	2
2022-09-14	12:45:28	0.725	3.22494	1287.31	FALSE	2
2022-09-14	12:45:29	0.727646	3.23671	1322.35	FALSE	2
2022-09-14	12:45:29	0.725865	3.22879	1290.54	FALSE	2
2022-09-14	12:45:29	0.720827	3.20638	1325.55	FALSE	2
2022-09-14	12:45:29	0.725967	3.22925	1293.77	FALSE	2
2022-09-14	12:45:30	0.728715	3.24147	1328.8	FALSE	2
2022-09-14	12:45:30	0.724491	3.22268	1296.99	FALSE	2
2022-09-14	12:45:30	0.721845	3.21091	1332.01	FALSE	2
2022-09-14	12:45:30	0.730801	3.25075	1300.24	FALSE	2
2022-09-14	12:45:31	0.725611	3.22766	1335.23	FALSE	2
2022-09-14	12:45:31	0.733142	3.26116	1303.5	FALSE	2
2022-09-14	12:45:31	0.736043	3.27407	1338.51	FALSE	2
2022-09-14	12:45:31	0.728664	3.24124	1306.75	FALSE	2
2022-09-14	12:45:32	0.722404	3.2134	1341.72	FALSE	2
2022-09-14	12:45:32	0.733957	3.26479	1310.01	FALSE	2
2022-09-14	12:45:32	0.726221	3.23038	1344.95	FALSE	2
2022-09-14	12:45:33	0.724338	3.222	1313.23	FALSE	2
2022-09-14	12:45:33	0.735178	3.27022	1348.22	FALSE	2
2022-09-14	12:45:33	0.727697	3.23694	1316.47	FALSE	2
2022-09-14	12:45:33	0.725967	3.22925	1351.45	FALSE	2
2022-09-14	12:45:34	0.724593	3.22313	1319.69	FALSE	2
2022-09-14	12:45:34	0.731768	3.25505	1354.71	FALSE	2
2022-09-14	12:45:34	0.73187	3.2555	1322.95	FALSE	2
2022-09-14	12:45:34	0.727646	3.23671	1357.94	FALSE	2
2022-09-14	12:45:35	0.725356	3.22653	1326.17	FALSE	2
2022-09-14	12:45:35	0.73014	3.24781	1361.19	FALSE	2
2022-09-14	12:45:35	0.734313	3.26637	1329.44	FALSE	2
2022-09-14	12:45:36	0.726679	3.23241	1364.42	FALSE	2
2022-09-14	12:45:36	0.728461	3.24034	1332.68	FALSE	2
2022-09-14	12:45:36	0.725407	3.22676	1367.65	FALSE	2
2022-09-14	12:45:36	0.72785	3.23762	1335.92	FALSE	2
2022-09-14	12:45:37	0.729784	3.24623	1370.9	FALSE	2
2022-09-14	12:45:37	0.731565	3.25415	1339.17	FALSE	2
2022-09-14	12:45:37	0.729326	3.24419	1374.14	FALSE	2
2022-09-14	12:45:37	0.728613	3.24102	1342.41	FALSE	2
2022-09-14	12:45:38	0.727392	3.23559	1377.38	FALSE	2
2022-09-14	12:45:38	0.729122	3.24328	1345.66	FALSE	2
2022-09-14	12:45:38	0.726425	3.23128	1380.61	FALSE	2
2022-09-14	12:45:38	0.730038	3.24736	1348.9	FALSE	2
2022-09-14	12:45:39	0.723779	3.21951	1383.83	FALSE	2
2022-09-14	12:45:39	0.726934	3.23355	1352.14	FALSE	2
2022-09-14	12:45:39	0.253906	1.12942	1384.96	FALSE	2
2022-09-14	12:45:40	-0.582175	-2.58963	1352.14	FALSE	2
2022-09-14	12:45:40	0.728054	3.23853	1388.2	FALSE	2
2022-09-14	12:45:40	0.724237	3.22155	1355.36	FALSE	2
2022-09-14	12:45:40	0.727087	3.23423	1391.43	FALSE	2
2022-09-14	12:45:41	0.733092	3.26094	1358.62	FALSE	2
2022-09-14	12:45:41	0.729326	3.24419	1394.67	FALSE	2
2022-09-14	12:45:41	0.72958	3.24532	1361.87	FALSE	2
2022-09-14	12:45:41	0.731972	3.25596	1397.93	FALSE	2
2022-09-14	12:45:42	0.731667	3.2546	1365.12	FALSE	2
2022-09-14	12:45:42	0.0684608	0.304527	1398.23	FALSE	2
2022-09-14	12:45:42	0.149784	0.666269	1365.79	FALSE	2
2022-09-14	12:45:42	0.649224	2.88788	1401.12	FALSE	2
2022-09-14	12:45:43	0.72612	3.22993	1369.02	FALSE	2
2022-09-14	12:45:43	0.726272	3.2306	1404.35	FALSE	2
2022-09-14	12:45:43	0.726374	3.23106	1372.25	FALSE	2
2022-09-14	12:45:44	0.726018	3.22947	1407.58	FALSE	2
2022-09-14	12:45:44	0.727443	3.23581	1375.48	FALSE	2
2022-09-14	12:45:44	0.725407	3.22676	1410.81	FALSE	2
2022-09-14	12:45:44	0.717112	3.18986	1378.67	FALSE	2
2022-09-14	12:45:45	0.729784	3.24623	1414.06	FALSE	2
2022-09-14	12:45:45	0.724746	3.22382	1381.9	FALSE	2
2022-09-14	12:45:45	0.72556	3.22744	1417.28	FALSE	2
2022-09-14	12:45:45	0.729987	3.24713	1385.14	FALSE	2
2022-09-14	12:45:46	0.723626	3.21883	1420.5	FALSE	2
2022-09-14	12:45:46	0.722252	3.21272	1388.36	FALSE	2
2022-09-14	12:45:46	0.722812	3.21521	1423.72	FALSE	2
2022-09-14	12:45:46	0.726221	3.23038	1391.59	FALSE	2
2022-09-14	12:45:47	0.722557	3.21408	1426.93	FALSE	2
2022-09-14	12:45:47	0.722557	3.21408	1394.8	FALSE	2
2022-09-14	12:45:47	0.729631	3.24554	1430.18	FALSE	2
2022-09-14	12:45:48	0.732735	3.25935	1398.06	FALSE	2
2022-09-14	12:45:48	0.736756	3.27724	1433.45	FALSE	2
2022-09-14	12:45:48	0.726323	3.23083	1401.29	FALSE	2
2022-09-14	12:45:48	0.725102	3.2254	1436.68	FALSE	2
2022-09-14	12:45:49	0.734313	3.26637	1404.56	FALSE	2
2022-09-14	12:45:49	0.724644	3.22336	1439.9	FALSE	2
2022-09-14	12:45:49	0.733295	3.26184	1407.82	FALSE	2
2022-09-14	12:45:49	0.708715	3.15251	1443.05	FALSE	2
2022-09-14	12:45:50	0.164542	0.731916	1408.55	FALSE	2
2022-09-14	12:45:50	-0.227977	-1.01409	1443.05	FALSE	2
2022-09-14	12:45:50	-0.172404	-0.766887	1408.55	FALSE	2
2022-09-14	12:45:50	0.726883	3.23332	1446.29	FALSE	2
2022-09-14	12:45:51	0.724491	3.22268	1411.77	FALSE	2
2022-09-14	12:45:51	0.731463	3.25369	1449.54	FALSE	2
2022-09-14	12:45:51	0.725407	3.22676	1415	FALSE	2
2022-09-14	12:45:52	0.720776	3.20616	1452.75	FALSE	2
2022-09-14	12:45:52	0.72444	3.22245	1418.22	FALSE	2
2022-09-14	12:45:52	0.723728	3.21929	1455.97	FALSE	2
2022-09-14	12:45:52	0.723066	3.21634	1421.44	FALSE	2
2022-09-14	12:45:53	0.728104	3.23875	1459.21	FALSE	2
2022-09-14	12:45:53	0.731107	3.25211	1424.69	FALSE	2
2022-09-14	12:45:53	0.728359	3.23989	1462.45	FALSE	2
2022-09-14	12:45:53	0.736857	3.27769	1427.97	FALSE	2
2022-09-14	12:45:54	0.727646	3.23671	1465.68	FALSE	2
2022-09-14	12:45:54	0.719351	3.19982	1431.17	FALSE	2
2022-09-14	12:45:54	0.721845	3.21091	1468.89	FALSE	2
2022-09-14	12:45:54	0.731768	3.25505	1434.42	FALSE	2
2022-09-14	12:45:55	0.729682	3.24577	1472.14	FALSE	2
2022-09-14	12:45:55	0.736145	3.27452	1437.7	FALSE	2
2022-09-14	12:45:55	0.726527	3.23174	1475.37	FALSE	2
2022-09-14	12:45:56	0.72902	3.24283	1440.94	FALSE	2
2022-09-14	12:45:56	0.730293	3.24849	1478.62	FALSE	2
2022-09-14	12:45:56	0.729835	3.24645	1444.19	FALSE	2
2022-09-14	12:45:56	0.728562	3.24079	1481.86	FALSE	2
2022-09-14	12:45:57	0.734975	3.26932	1447.46	FALSE	2
2022-09-14	12:45:57	0.72556	3.22744	1485.09	FALSE	2
2022-09-14	12:45:57	0.724695	3.22359	1450.68	FALSE	2
2022-09-14	12:45:57	0.566628	2.52047	1487.61	FALSE	2
2022-09-14	12:45:58	0.863931	3.84294	1454.52	FALSE	2
2022-09-14	12:45:58	0.444491	1.97718	1489.59	FALSE	2
2022-09-14	12:45:58	0.714415	3.17786	1457.7	FALSE	2
2022-09-14	12:45:58	0.72729	3.23513	1492.82	FALSE	2
2022-09-14	12:45:59	0.731667	3.2546	1460.96	FALSE	2
2022-09-14	12:45:59	0.722608	3.2143	1496.03	FALSE	2
2022-09-14	12:45:59	0.725458	3.22698	1464.18	FALSE	2
2022-09-14	12:46:00	0.728359	3.23989	1499.27	FALSE	2
2022-09-14	12:46:00	0.733244	3.26162	1467.45	FALSE	2
2022-09-14	12:46:00	0.730547	3.24962	1502.52	FALSE	2
2022-09-14	12:46:00	0.725611	3.22766	1470.67	FALSE	2
2022-09-14	12:46:01	0.726527	3.23174	1505.76	FALSE	2
2022-09-14	12:46:01	0.736349	3.27543	1473.95	FALSE	2
2022-09-14	12:46:01	0.727341	3.23536	1508.99	FALSE	2
2022-09-14	12:46:01	0.721488	3.20932	1477.16	FALSE	2
2022-09-14	12:46:02	0.724237	3.22155	1512.21	FALSE	2
2022-09-14	12:46:02	0.727545	3.23627	1480.39	FALSE	2
2022-09-14	12:46:02	0.726934	3.23355	1515.45	FALSE	2
2022-09-14	12:46:02	0.731056	3.25188	1483.65	FALSE	2
2022-09-14	12:46:03	0.729886	3.24668	1518.69	FALSE	2
2022-09-14	12:46:03	0.721692	3.21023	1486.86	FALSE	2
2022-09-14	12:46:03	0.727748	3.23717	1521.93	FALSE	2
2022-09-14	12:46:04	0.728664	3.24124	1490.1	FALSE	2
2022-09-14	12:46:04	0.725865	3.22879	1525.16	FALSE	2
2022-09-14	12:46:04	0.731768	3.25505	1493.35	FALSE	2
2022-09-14	12:46:04	0.725204	3.22585	1528.39	FALSE	2
2022-09-14	12:46:05	0.728919	3.24238	1496.59	FALSE	2
2022-09-14	12:46:05	0.727188	3.23468	1531.62	FALSE	2
2022-09-14	12:46:05	0.72388	3.21996	1499.81	FALSE	2
2022-09-14	12:46:05	0.724847	3.22426	1534.84	FALSE	2
2022-09-14	12:46:06	0.728512	3.24057	1503.06	FALSE	2
2022-09-14	12:46:06	0.727952	3.23808	1538.08	FALSE	2
2022-09-14	12:46:06	0.726832	3.23309	1506.29	FALSE	2
2022-09-14	12:46:06	0.731819	3.25528	1541.34	FALSE	2
2022-09-14	12:46:07	0.727596	3.23649	1509.53	FALSE	2
2022-09-14	12:46:07	0.728461	3.24034	1544.58	FALSE	2
2022-09-14	12:46:07	0.72958	3.24532	1512.77	FALSE	2
2022-09-14	12:46:08	0.724898	3.22449	1547.8	FALSE	2
2022-09-14	12:46:08	0.725611	3.22766	1516	FALSE	2
2022-09-14	12:46:08	0.730293	3.24849	1551.05	FALSE	2
2022-09-14	12:46:08	0.731412	3.25347	1519.25	FALSE	2
2022-09-14	12:46:09	0.725204	3.22585	1554.28	FALSE	2
2022-09-14	12:46:09	0.725051	3.22517	1522.48	FALSE	2
2022-09-14	12:46:09	0.728308	3.23966	1557.52	FALSE	2
2022-09-14	12:46:09	0.722252	3.21272	1525.69	FALSE	2
2022-09-14	12:46:10	0.727494	3.23604	1560.75	FALSE	2
2022-09-14	12:46:10	0.730598	3.24985	1528.94	FALSE	2
2022-09-14	12:46:10	0.724898	3.22449	1563.98	FALSE	2
2022-09-14	12:46:11	0.729275	3.24396	1532.18	FALSE	2
2022-09-14	12:46:11	0.725967	3.22925	1567.21	FALSE	2
2022-09-14	12:46:11	0.744745	3.31277	1535.5	FALSE	2
2022-09-14	12:46:11	0.72103	3.20729	1570.41	FALSE	2
2022-09-14	12:46:12	0.729529	3.24509	1538.74	FALSE	2
2022-09-14	12:46:12	0.721743	3.21046	1573.62	FALSE	2
2022-09-14	12:46:12	0.739606	3.28992	1542.03	FALSE	2
2022-09-14	12:46:12	0.728257	3.23943	1576.86	FALSE	2
2022-09-14	12:46:13	0.725102	3.2254	1545.26	FALSE	2
2022-09-14	12:46:13	0.739351	3.28878	1580.15	FALSE	2
2022-09-14	12:46:13	0.735534	3.2718	1548.53	FALSE	2
2022-09-14	12:46:13	0.73355	3.26298	1583.41	FALSE	2
2022-09-14	12:46:14	0.7307	3.2503	1551.78	FALSE	2
2022-09-14	12:46:14	0.713397	3.17333	1586.59	FALSE	2
2022-09-14	12:46:14	0.722965	3.21589	1554.99	FALSE	2
2022-09-14	12:46:15	0.725204	3.22585	1589.81	FALSE	2
2022-09-14	12:46:15	0.72729	3.23513	1558.23	FALSE	2
2022-09-14	12:46:15	0.73243	3.258	1593.07	FALSE	2
2022-09-14	12:46:15	0.72383	3.21974	1561.45	FALSE	2
2022-09-14	12:46:16	0.726781	3.23287	1596.3	FALSE	2
2022-09-14	12:46:16	0.726425	3.23128	1564.68	FALSE	2
2022-09-14	12:46:16	0.724135	3.2211	1599.53	FALSE	2
2022-09-14	12:46:16	0.722252	3.21272	1567.89	FALSE	2
2022-09-14	12:46:17	0.725763	3.22834	1602.75	FALSE	2
2022-09-14	12:46:17	0.734466	3.26705	1571.16	FALSE	2
2022-09-14	12:46:17	0.731616	3.25437	1606.01	FALSE	2
2022-09-14	12:46:17	0.730394	3.24894	1574.41	FALSE	2
2022-09-14	12:46:18	0.728461	3.24034	1609.25	FALSE	2
2022-09-14	12:46:18	0.718791	3.19733	1577.61	FALSE	2
2022-09-14	12:46:18	0.728512	3.24057	1612.49	FALSE	2
2022-09-14	12:46:19	0.729428	3.24464	1580.85	FALSE	2
2022-09-14	12:46:19	0.726323	3.23083	1615.72	FALSE	2
2022-09-14	12:46:19	0.725458	3.22698	1584.08	FALSE	2
2022-09-14	12:46:19	0.722608	3.2143	1618.93	FALSE	2
2022-09-14	12:46:20	0.735992	3.27384	1587.35	FALSE	2
2022-09-14	12:46:20	0.727443	3.23581	1622.17	FALSE	2
2022-09-14	12:46:20	0.726578	3.23196	1590.58	FALSE	2
2022-09-14	12:46:20	0.725254	3.22607	1625.4	FALSE	2
2022-09-14	12:46:21	0.725	3.22494	1593.81	FALSE	2
2022-09-14	12:46:21	0.72444	3.22245	1628.62	FALSE	2
2022-09-14	12:46:21	0.72388	3.21996	1597.03	FALSE	2
2022-09-14	12:46:21	0.728919	3.24238	1631.86	FALSE	2
2022-09-14	12:46:22	0.725204	3.22585	1600.25	FALSE	2
2022-09-14	12:46:22	0.730089	3.24758	1635.11	FALSE	2
2022-09-14	12:46:22	0.731005	3.25166	1603.51	FALSE	2
2022-09-14	12:46:23	0.725509	3.22721	1638.34	FALSE	2
2022-09-14	12:46:23	0.731717	3.25482	1606.76	FALSE	2
2022-09-14	12:46:23	0.732735	3.25935	1641.6	FALSE	2
2022-09-14	12:46:23	0.724949	3.22472	1609.99	FALSE	2
2022-09-14	12:46:24	0.724338	3.222	1644.82	FALSE	2
2022-09-14	12:46:24	0.725967	3.22925	1613.22	FALSE	2
2022-09-14	12:46:24	0.730954	3.25143	1648.07	FALSE	2
2022-09-14	12:46:24	0.728054	3.23853	1616.45	FALSE	2
2022-09-14	12:46:25	0.763066	3.39427	1651.46	FALSE	2
2022-09-14	12:46:25	5.58434	24.8403	1641.29	1	3
2022-09-14	12:46:25	4.82525	21.4637	1672.93	1	4
2022-09-14	12:46:25	2.18337	9.71207	1651.01	FALSE	4
2022-09-14	12:46:26	0.659962	2.93564	1675.86	FALSE	4
2022-09-14	12:46:26	0.804186	3.57718	1654.58	FALSE	4
2022-09-14	12:46:26	0.435585	1.93757	1677.8	FALSE	4
2022-09-14	12:46:27	0.664898	2.9576	1657.54	FALSE	4
2022-09-14	12:46:27	1.03625	4.60945	1682.41	FALSE	4
2022-09-14	12:46:27	0.972583	4.32624	1661.87	FALSE	4
2022-09-14	12:46:27	1.03742	4.61465	1687.02	FALSE	4
2022-09-14	12:46:28	1.30922	5.82367	1667.69	FALSE	4
2022-09-14	12:46:28	0.855178	3.804	1690.83	FALSE	4
2022-09-14	12:46:28	1.645	7.31729	1675.01	FALSE	4
2022-09-14	12:46:28	2.04317	9.08843	1699.92	FALSE	4
2022-09-14	12:46:29	3.18225	14.1553	1689.16	1	5
2022-09-14	12:46:29	2.5225	11.2206	1711.14	FALSE	5
2022-09-14	12:46:29	2.19676	9.77163	1698.93	FALSE	5
2022-09-14	12:46:29	2.52897	11.2494	1722.39	FALSE	5
2022-09-14	12:46:30	1.02485	4.55874	1703.49	FALSE	5
2022-09-14	12:46:30	1.37345	6.10938	1728.5	FALSE	5
2022-09-14	12:46:30	0.693346	3.08414	1706.58	FALSE	5
2022-09-14	12:46:31	1.79864	8.00071	1736.5	FALSE	5
2022-09-14	12:46:31	2.94332	13.0925	1719.67	FALSE	5
2022-09-14	12:46:31	5.01365	22.3017	1758.8	1	6
2022-09-14	12:46:31	4.73925	21.0811	1740.75	1	7
2022-09-14	12:46:32	2.63757	11.7324	1770.53	FALSE	7
2022-09-14	12:46:32	3.02062	13.4363	1754.19	1	8
2022-09-14	12:46:32	3.26149	14.5078	1785.04	1	9
2022-09-14	12:46:32	6.39594	28.4504	1782.64	1	10
2022-09-14	12:46:33	4.48571	19.9533	1804.99	1	11
2022-09-14	12:46:33	6.72286	29.9046	1812.54	1	12
2022-09-14	12:46:33	4.49375	19.9891	1824.98	1	13
2022-09-14	12:46:33	3.60556	16.0383	1828.58	1	14

## Sheet: KimChi_star_2022914124117 (2)
Date	Time	Lbs	Total force x time			**GoPro Fitting: 12:30
2022-09-14	12:41:17	-0.226806	0	FALSE	0
2022-09-14	12:41:17	-0.135661	0	FALSE	0
2022-09-14	12:41:17	0.118384	0.118384	FALSE	0
2022-09-14	12:41:18	0.0448475	0.163232	FALSE	0
2022-09-14	12:41:18	0.243881	0.407112	FALSE	0
2022-09-14	12:41:18	0.333244	0.740356	FALSE	0
2022-09-14	12:41:19	0.518893	1.25925	FALSE	0
2022-09-14	12:41:19	0.308461	1.56771	FALSE	0
2022-09-14	12:41:19	0.378232	1.94594	FALSE	0
2022-09-14	12:41:19	0.372735	2.31868	FALSE	0
2022-09-14	12:41:20	0.467036	2.78571	FALSE	0
2022-09-14	12:41:20	0.365204	3.15092	FALSE	0
2022-09-14	12:41:20	0.458282	3.6092	FALSE	0
2022-09-14	12:41:20	0.410038	4.01924	FALSE	0
2022-09-14	12:41:21	0.420878	4.44012	FALSE	0
2022-09-14	12:41:21	0.421539	4.86165	FALSE	0
2022-09-14	12:41:21	0.389631	5.25129	FALSE	0
2022-09-14	12:41:22	0.436807	5.68809	FALSE	0
2022-09-14	12:41:22	0.42902	6.11711	FALSE	0
2022-09-14	12:41:22	0.418944	6.53606	FALSE	0
2022-09-14	12:41:22	0.427545	6.9636	FALSE	0
2022-09-14	12:41:23	0.418741	7.38234	FALSE	0
2022-09-14	12:41:23	0.413143	7.79549	FALSE	0
2022-09-14	12:41:23	0.421489	8.21697	FALSE	0
2022-09-14	12:41:23	0.333957	8.55093	FALSE	0
2022-09-14	12:41:24	0.510038	9.06097	FALSE	0
2022-09-14	12:41:24	0.425051	9.48602	FALSE	0
2022-09-14	12:41:24	0.393397	9.87942	FALSE	0
2022-09-14	12:41:24	0.434466	10.3139	FALSE	0
2022-09-14	12:41:25	0.403575	10.7175	FALSE	0
2022-09-14	12:41:25	0.358486	11.0759	FALSE	0
2022-09-14	12:41:25	0.408868	11.4848	FALSE	0
2022-09-14	12:41:26	0.419402	11.9042	FALSE	0
2022-09-14	12:41:26	0.434008	12.3382	FALSE	0
2022-09-14	12:41:26	0.419657	12.7579	FALSE	0
2022-09-14	12:41:26	0.400013	13.1579	FALSE	0
2022-09-14	12:41:27	0.421896	13.5798	FALSE	0
2022-09-14	12:41:27	0.440624	14.0204	FALSE	0
2022-09-14	12:41:27	0.424542	14.445	FALSE	0
2022-09-14	12:41:27	0.360318	14.8053	FALSE	0
2022-09-14	12:41:28	0.455433	15.2607	FALSE	0
2022-09-14	12:41:28	0.411667	15.6724	FALSE	0
2022-09-14	12:41:28	0.340675	16.013	FALSE	0
2022-09-14	12:41:28	0.396196	16.4092	FALSE	0
2022-09-14	12:41:29	0.48612	16.8954	FALSE	0
2022-09-14	12:41:29	0.462863	17.3582	FALSE	0
2022-09-14	12:41:29	0.311616	17.6698	FALSE	0
2022-09-14	12:41:30	0.436959	18.1068	FALSE	0
2022-09-14	12:41:30	0.0877483	18.1945	FALSE	0
2022-09-14	12:41:30	0.216603	18.4112	FALSE	0
2022-09-14	12:41:30	0.467341	18.8785	FALSE	0
2022-09-14	12:41:31	0.357316	19.2358	FALSE	0
2022-09-14	12:41:31	0.22388	19.4597	FALSE	0
2022-09-14	12:41:31	-0.326501	19.4597	FALSE	0
2022-09-14	12:41:31	-0.0550506	19.4597	FALSE	0
2022-09-14	12:41:32	-0.00512696	19.4597	FALSE	0
2022-09-14	12:41:32	-0.172659	19.4597	FALSE	0
2022-09-14	12:41:32	0.0295804	19.4893	FALSE	0
2022-09-14	12:41:32	0.242608	19.7319	FALSE	0
2022-09-14	12:41:33	0.314415	20.0463	FALSE	0
2022-09-14	12:41:33	0.288664	20.335	FALSE	0
2022-09-14	12:41:33	-0.0512847	20.335	FALSE	0
2022-09-14	12:41:34	-0.365025	20.335	FALSE	0
2022-09-14	12:41:34	-0.450012	20.335	FALSE	0
2022-09-14	12:41:34	-0.215814	20.335	FALSE	0
2022-09-14	12:41:34	-0.259173	20.335	FALSE	0
2022-09-14	12:41:35	-0.159529	20.335	FALSE	0
2022-09-14	12:41:35	-0.0759158	20.335	FALSE	0
2022-09-14	12:41:35	0.324288	20.6592	FALSE	0
2022-09-14	12:41:35	0.441489	21.1007	FALSE	0
2022-09-14	12:41:36	0.350089	21.4508	FALSE	0
2022-09-14	12:41:36	0.322659	21.7735	FALSE	0
2022-09-14	12:41:36	0.221234	21.9947	FALSE	0
2022-09-14	12:41:37	0.258079	22.2528	FALSE	0
2022-09-14	12:41:37	0.432379	22.6852	FALSE	0
2022-09-14	12:41:37	0.330852	23.016	FALSE	0
2022-09-14	12:41:37	0.440573	23.4566	FALSE	0
2022-09-14	12:41:38	0.264288	23.7209	FALSE	0
2022-09-14	12:41:38	-0.0548471	23.7209	FALSE	0
2022-09-14	12:41:38	-0.319325	23.7209	FALSE	0
2022-09-14	12:41:38	0.00744298	23.7283	FALSE	0
2022-09-14	12:41:39	0.0291733	23.7575	FALSE	0
2022-09-14	12:41:39	0.132227	23.8897	FALSE	0
2022-09-14	12:41:39	0.531463	24.4212	FALSE	0
2022-09-14	12:41:39	0.388613	24.8098	FALSE	0
2022-09-14	12:41:40	0.640522	25.4503	FALSE	0
2022-09-14	12:41:40	1.56388	27.0142	FALSE	0
2022-09-14	12:41:40	1.92062	28.9348	FALSE	0
2022-09-14	12:41:41	1.971	30.9058	FALSE	0
2022-09-14	12:41:41	1.83859	32.7444	FALSE	0
2022-09-14	12:41:41	0.971514	33.7159	FALSE	0
2022-09-14	12:41:41	0.342964	34.0589	FALSE	0
2022-09-14	12:41:42	0.668664	34.7276	FALSE	0
2022-09-14	12:41:42	0.355382	35.0829	FALSE	0
2022-09-14	12:41:42	0.361896	35.4448	FALSE	0
2022-09-14	12:41:43	0.318384	35.7632	FALSE	0
2022-09-14	12:41:43	0.490293	36.2535	FALSE	0
2022-09-14	12:41:43	1.00464	37.2582	FALSE	0
2022-09-14	12:41:43	2.86927	40.1274	FALSE	0
2022-09-14	12:41:43	0.548054	40.6755	FALSE	0
2022-09-14	12:41:44	0.259555	40.935	FALSE	0
2022-09-14	12:41:44	0.376705	41.3117	FALSE	0
2022-09-14	12:41:44	0.138232	41.45	FALSE	0
2022-09-14	12:41:45	0.178842	41.6288	FALSE	0
2022-09-14	12:41:45	0.00530559	41.6341	FALSE	0
2022-09-14	12:41:45	0.133652	41.7678	FALSE	0
2022-09-14	12:41:45	0.177621	41.9454	FALSE	0
2022-09-14	12:41:46	0.0419468	41.9873	FALSE	0
2022-09-14	12:41:46	0.160624	42.148	FALSE	0
2022-09-14	12:41:46	0.103626	42.2516	FALSE	0
2022-09-14	12:41:46	0.97757	43.2292	FALSE	0
2022-09-14	12:41:47	1.7167	44.9459	FALSE	0
2022-09-14	12:41:47	2.89884	47.8447	FALSE	0
2022-09-14	12:41:47	1.47462	49.3193	FALSE	0
2022-09-14	12:41:47	1.6533	50.9726	FALSE	0
2022-09-14	12:41:48	0.641947	51.6146	FALSE	0
2022-09-14	12:41:48	0.794262	52.4088	FALSE	0
2022-09-14	12:41:48	1.1278	53.5366	FALSE	0
2022-09-14	12:41:49	0.207188	53.7438	FALSE	0
2022-09-14	12:41:49	0.214924	53.9587	FALSE	0
2022-09-14	12:41:49	0.18958	54.1483	FALSE	0
2022-09-14	12:41:49	0.440725	54.589	FALSE	0
2022-09-14	12:41:50	1.72286	56.3119	FALSE	0
2022-09-14	12:41:50	1.08963	57.4015	FALSE	0
2022-09-14	12:41:50	0.355331	57.7569	FALSE	0
2022-09-14	12:41:50	0.0149748	57.7718	FALSE	0
2022-09-14	12:41:51	0.0801656	57.852	FALSE	0
2022-09-14	12:41:51	0.0162979	57.8683	FALSE	0
2022-09-14	12:41:51	0.21126	58.0796	FALSE	0
2022-09-14	12:41:52	0.00301552	58.0826	FALSE	0
2022-09-14	12:41:52	0.223677	58.3063	FALSE	0
2022-09-14	12:41:52	0.262557	58.5688	FALSE	0
2022-09-14	12:41:52	0.873549	59.4424	FALSE	0
2022-09-14	12:41:53	0.213092	59.6555	FALSE	0
2022-09-14	12:41:53	0.178181	59.8336	FALSE	0
2022-09-14	12:41:53	0.231565	60.0652	FALSE	0
2022-09-14	12:41:53	0.0651529	60.1304	FALSE	0
2022-09-14	12:41:54	0.310853	60.4412	FALSE	0
2022-09-14	12:41:54	0.273193	60.7144	FALSE	0
2022-09-14	12:41:54	0.898028	61.6124	FALSE	0
2022-09-14	12:41:54	2.11182	63.7242	FALSE	0
2022-09-14	12:41:55	0.993906	64.7182	FALSE	0
2022-09-14	12:41:55	0.563015	65.2812	FALSE	0
2022-09-14	12:41:55	0.791921	66.0731	FALSE	0
2022-09-14	12:41:56	1.00363	67.0767	FALSE	0
2022-09-14	12:41:56	1.43462	68.5113	FALSE	0
2022-09-14	12:41:56	1.71182	70.2232	FALSE	0
2022-09-14	12:41:56	0.323473	70.5466	FALSE	0
2022-09-14	12:41:57	0.371209	70.9178	FALSE	0
2022-09-14	12:41:57	0.153194	71.071	FALSE	0
2022-09-14	12:41:57	0.270242	71.3413	FALSE	0
2022-09-14	12:41:57	-0.00471985	71.3413	FALSE	0
2022-09-14	12:41:58	0.147036	71.4883	FALSE	0
2022-09-14	12:41:58	-0.0865519	71.4883	FALSE	0
2022-09-14	12:41:58	-0.102939	71.4883	FALSE	0
2022-09-14	12:41:58	-0.040445	71.4883	FALSE	0
2022-09-14	12:41:59	0.148766	71.6371	FALSE	0
2022-09-14	12:41:59	1.1106	72.7477	FALSE	0
2022-09-14	12:41:59	1.43202	74.1797	FALSE	0
2022-09-14	12:42:00	0.414517	74.5942	FALSE	0
2022-09-14	12:42:00	0.145713	74.7399	FALSE	0
2022-09-14	12:42:00	0.202659	74.9426	FALSE	0
2022-09-14	12:42:00	0.0446949	74.9873	FALSE	0
2022-09-14	12:42:01	0.410598	75.3979	FALSE	0
2022-09-14	12:42:01	0.826679	76.2246	FALSE	0
2022-09-14	12:42:01	0.657265	76.8818	FALSE	0
2022-09-14	12:42:01	0.134822	77.0166	FALSE	0
2022-09-14	12:42:02	0.225814	77.2425	FALSE	0
2022-09-14	12:42:02	0.382354	77.6248	FALSE	0
2022-09-14	12:42:02	0.434211	78.059	FALSE	0
2022-09-14	12:42:02	0.437621	78.4966	FALSE	0
2022-09-14	12:42:03	0.688308	79.185	FALSE	0
2022-09-14	12:42:03	0.444237	79.6292	FALSE	0
2022-09-14	12:42:03	0.489784	80.119	FALSE	0
2022-09-14	12:42:04	0.460573	80.5795	FALSE	0
2022-09-14	12:42:04	0.364389	80.9439	FALSE	0
2022-09-14	12:42:04	0.335535	81.2795	FALSE	0
2022-09-14	12:42:04	0.329987	81.6095	FALSE	0
2022-09-14	12:42:05	0.321082	81.9305	FALSE	0
2022-09-14	12:42:05	0.161641	82.0922	FALSE	0
2022-09-14	12:42:05	-0.043244	82.0922	FALSE	0
2022-09-14	12:42:05	0.0493259	82.1415	FALSE	0
2022-09-14	12:42:06	0.0687152	82.2102	FALSE	0
2022-09-14	12:42:06	0.271616	82.4818	FALSE	0
2022-09-14	12:42:06	0.161336	82.6432	FALSE	0
2022-09-14	12:42:07	0.264237	82.9074	FALSE	0
2022-09-14	12:42:07	2.28327	85.1907	FALSE	0
2022-09-14	12:42:07	2.86571	88.0564	FALSE	0
2022-09-14	12:42:07	2.91884	90.9752	FALSE	0
2022-09-14	12:42:08	2.92658	93.9018	FALSE	0
2022-09-14	12:42:08	2.94195	96.8438	FALSE	0
2022-09-14	12:42:08	2.9135	99.7573	FALSE	0
2022-09-14	12:42:08	2.88296	102.64	FALSE	0
2022-09-14	12:42:09	2.85049	105.491	FALSE	0
2022-09-14	12:42:09	2.83716	108.328	FALSE	0
2022-09-14	12:42:09	2.82856	111.156	FALSE	0
2022-09-14	12:42:09	2.81935	113.976	FALSE	0
2022-09-14	12:42:10	2.80795	116.784	FALSE	0
2022-09-14	12:42:10	2.7851	119.569	FALSE	0
2022-09-14	12:42:10	2.75752	122.326	FALSE	0
2022-09-14	12:42:11	2.73304	125.059	FALSE	0
2022-09-14	12:42:11	2.59986	127.659	FALSE	0
2022-09-14	12:42:11	2.44785	130.107	FALSE	0
2022-09-14	12:42:11	2.31472	132.422	FALSE	0
2022-09-14	12:42:12	2.0506	134.472	FALSE	0
2022-09-14	12:42:12	1.05645	135.529	FALSE	0
2022-09-14	12:42:12	0.428715	135.958	FALSE	0
2022-09-14	12:42:12	0.46327	136.421	FALSE	0
2022-09-14	12:42:13	0.441031	136.862	FALSE	0
2022-09-14	12:42:13	0.453092	137.315	FALSE	0
2022-09-14	12:42:13	0.40271	137.718	FALSE	0
2022-09-14	12:42:13	0.385814	138.104	FALSE	0
2022-09-14	12:42:14	0.359911	138.463	FALSE	0
2022-09-14	12:42:14	0.395585	138.859	FALSE	0
2022-09-14	12:42:14	0.359758	139.219	FALSE	0
2022-09-14	12:42:15	0.369835	139.589	FALSE	0
2022-09-14	12:42:15	0.357468	139.946	FALSE	0
2022-09-14	12:42:15	0.358435	140.304	FALSE	0
2022-09-14	12:42:15	0.424848	140.729	FALSE	0
2022-09-14	12:42:16	0.436908	141.166	FALSE	0
2022-09-14	12:42:16	0.441285	141.608	FALSE	0
2022-09-14	12:42:16	0.445	142.053	FALSE	0
2022-09-14	12:42:16	0.450954	142.503	FALSE	0
2022-09-14	12:42:17	0.596145	143.1	FALSE	0
2022-09-14	12:42:17	0.972074	144.072	FALSE	0
2022-09-14	12:42:17	1.94286	146.015	FALSE	0
2022-09-14	12:42:17	2.57731	148.592	FALSE	0
2022-09-14	12:42:18	1.94505	150.537	FALSE	0
2022-09-14	12:42:18	1.29436	151.831	FALSE	0
2022-09-14	12:42:18	0.916857	152.748	FALSE	0
2022-09-14	12:42:19	0.705	153.453	FALSE	0
2022-09-14	12:42:19	0.54444	153.998	FALSE	0
2022-09-14	12:42:19	0.74673	154.744	FALSE	0
2022-09-14	12:42:19	0.852837	155.597	FALSE	0
2022-09-14	12:42:20	1.19207	156.789	FALSE	0
2022-09-14	12:42:20	1.51905	158.308	FALSE	0
2022-09-14	12:42:20	0.753092	159.061	FALSE	0
2022-09-14	12:42:20	1.03452	160.096	FALSE	0
2022-09-14	12:42:21	0.962354	161.058	FALSE	0
2022-09-14	12:42:21	1.14678	162.205	FALSE	0
2022-09-14	12:42:21	1.9508	164.156	FALSE	0
2022-09-14	12:42:22	2.22749	166.383	FALSE	0
2022-09-14	12:42:22	1.76831	168.152	FALSE	0
2022-09-14	12:42:22	0.894262	169.046	FALSE	0
2022-09-14	12:42:22	1.18093	170.227	FALSE	0
2022-09-14	12:42:23	0.294669	170.521	FALSE	0
2022-09-14	12:42:23	0.00433869	170.526	FALSE	0
2022-09-14	12:42:23	-0.238613	170.526	FALSE	0
2022-09-14	12:42:23	-0.11332	170.526	FALSE	0
2022-09-14	12:42:24	-0.480954	170.526	FALSE	0
2022-09-14	12:42:24	-0.554542	170.526	FALSE	0
2022-09-14	12:42:24	-0.588231	170.526	FALSE	0
2022-09-14	12:42:24	-0.371335	170.526	FALSE	0
2022-09-14	12:42:25	-0.180394	170.526	FALSE	0
2022-09-14	12:42:25	0.0448984	170.571	FALSE	0
2022-09-14	12:42:25	0.266985	170.838	FALSE	0
2022-09-14	12:42:26	0.667341	171.505	FALSE	0
2022-09-14	12:42:26	1.28897	172.794	FALSE	0
2022-09-14	12:42:26	2.21218	175.006	FALSE	0
2022-09-14	12:42:26	2.83889	177.845	FALSE	0
2022-09-14	12:42:27	3.09167	180.937	1	1
2022-09-14	12:42:27	4.65477	185.592	1	2
2022-09-14	12:42:27	2.59609	188.188	FALSE	2
2022-09-14	12:42:27	2.02408	190.212	FALSE	2
2022-09-14	12:42:28	1.2849	191.497	FALSE	2
2022-09-14	12:42:28	1.68195	193.179	FALSE	2
2022-09-14	12:42:28	1.27676	194.455	FALSE	2
2022-09-14	12:42:28	1.27732	195.733	FALSE	2
2022-09-14	12:42:29	0.974567	196.707	FALSE	2
2022-09-14	12:42:29	1.12571	197.833	FALSE	2
2022-09-14	12:42:29	0.735687	198.569	FALSE	2
2022-09-14	12:42:30	0.405662	198.974	FALSE	2
2022-09-14	12:42:30	0.357621	199.332	FALSE	2
2022-09-14	12:42:30	0.313092	199.645	FALSE	2
2022-09-14	12:42:30	0.320471	199.965	FALSE	2
2022-09-14	12:42:31	0.360827	200.326	FALSE	2
2022-09-14	12:42:31	0.536756	200.863	FALSE	2
2022-09-14	12:42:31	1.47747	202.34	FALSE	2
2022-09-14	12:42:31	1.79548	204.136	FALSE	2
2022-09-14	12:42:32	0.810242	204.946	FALSE	2
2022-09-14	12:42:32	0.311565	205.258	FALSE	2
2022-09-14	12:42:32	0.202608	205.46	FALSE	2
2022-09-14	12:42:32	0.186832	205.647	FALSE	2
2022-09-14	12:42:33	0.336603	205.984	FALSE	2
2022-09-14	12:42:33	0.709326	206.693	FALSE	2
2022-09-14	12:42:33	0.717774	207.411	FALSE	2
2022-09-14	12:42:34	0.624898	208.036	FALSE	2
2022-09-14	12:42:34	1.10592	209.142	FALSE	2
2022-09-14	12:42:34	1.26042	210.402	FALSE	2
2022-09-14	12:42:34	0.601946	211.004	FALSE	2
2022-09-14	12:42:35	0.611972	211.616	FALSE	2
2022-09-14	12:42:35	0.717163	212.333	FALSE	2
2022-09-14	12:42:35	0.706272	213.04	FALSE	2
2022-09-14	12:42:35	0.787188	213.827	FALSE	2
2022-09-14	12:42:36	0.734771	214.561	FALSE	2
2022-09-14	12:42:36	0.598384	215.16	FALSE	2
2022-09-14	12:42:36	0.360878	215.521	FALSE	2
2022-09-14	12:42:37	0.328511	215.849	FALSE	2
2022-09-14	12:42:37	0.303015	216.152	FALSE	2
2022-09-14	12:42:37	0.285255	216.438	FALSE	2
2022-09-14	12:42:37	0.302964	216.74	FALSE	2
2022-09-14	12:42:38	0.495687	217.236	FALSE	2
2022-09-14	12:42:38	1.22383	218.46	FALSE	2
2022-09-14	12:42:38	0.559504	219.019	FALSE	2
2022-09-14	12:42:38	0.338842	219.358	FALSE	2
2022-09-14	12:42:39	0.173753	219.532	FALSE	2
2022-09-14	12:42:39	0.147596	219.68	FALSE	2
2022-09-14	12:42:39	0.138079	219.818	FALSE	2
2022-09-14	12:42:39	0.0377738	219.856	FALSE	2
2022-09-14	12:42:40	-0.0240074	219.856	FALSE	2
2022-09-14	12:42:40	-0.207417	219.856	FALSE	2
2022-09-14	12:42:40	-0.211183	219.856	FALSE	2
2022-09-14	12:42:41	-0.0666028	219.856	FALSE	2
2022-09-14	12:42:41	0.102863	219.958	FALSE	2
2022-09-14	12:42:41	0.799707	220.758	FALSE	2
2022-09-14	12:42:41	0.823168	221.581	FALSE	2
2022-09-14	12:42:42	0.280522	221.862	FALSE	2
2022-09-14	12:42:42	0.381183	222.243	FALSE	2
2022-09-14	12:42:42	0.151565	222.395	FALSE	2
2022-09-14	12:42:42	0.18042	222.575	FALSE	2
2022-09-14	12:42:43	0.251972	222.827	FALSE	2
2022-09-14	12:42:43	0.637061	223.464	FALSE	2
2022-09-14	12:42:43	0.630954	224.095	FALSE	2
2022-09-14	12:42:43	0.512023	224.607	FALSE	2
2022-09-14	12:42:44	0.371972	224.979	FALSE	2
2022-09-14	12:42:44	0.455891	225.435	FALSE	2
2022-09-14	12:42:44	0.411921	225.847	FALSE	2
2022-09-14	12:42:45	0.419199	226.266	FALSE	2
2022-09-14	12:42:45	0.394822	226.661	FALSE	2
2022-09-14	12:42:45	0.395433	227.056	FALSE	2
2022-09-14	12:42:45	0.468919	227.525	FALSE	2
2022-09-14	12:42:46	0.49701	228.022	FALSE	2
2022-09-14	12:42:46	0.372277	228.394	FALSE	2
2022-09-14	12:42:46	0.252176	228.647	FALSE	2
2022-09-14	12:42:46	0.357366	229.004	FALSE	2
2022-09-14	12:42:47	0.36154	229.366	FALSE	2
2022-09-14	12:42:47	0.545611	229.911	FALSE	2
2022-09-14	12:42:47	0.629326	230.54	FALSE	2
2022-09-14	12:42:47	0.698792	231.239	FALSE	2
2022-09-14	12:42:48	0.599657	231.839	FALSE	2
2022-09-14	12:42:48	0.653091	232.492	FALSE	2
2022-09-14	12:42:48	0.63187	233.124	FALSE	2
2022-09-14	12:42:49	0.645763	233.77	FALSE	2
2022-09-14	12:42:49	0.743524	234.513	FALSE	2
2022-09-14	12:42:49	0.776247	235.289	FALSE	2
2022-09-14	12:42:49	0.697112	235.986	FALSE	2
2022-09-14	12:42:50	0.603066	236.59	FALSE	2
2022-09-14	12:42:50	0.643728	237.233	FALSE	2
2022-09-14	12:42:50	0.714313	237.948	FALSE	2
2022-09-14	12:42:50	0.624898	238.573	FALSE	2
2022-09-14	12:42:51	0.524491	239.097	FALSE	2
2022-09-14	12:42:51	0.447596	239.545	FALSE	2
2022-09-14	12:42:51	0.555585	240.1	FALSE	2
2022-09-14	12:42:52	0.424084	240.524	FALSE	2
2022-09-14	12:42:52	0.418283	240.943	FALSE	2
2022-09-14	12:42:52	0.713295	241.656	FALSE	2
2022-09-14	12:42:52	0.716705	242.373	FALSE	2
2022-09-14	12:42:53	0.713499	243.086	FALSE	2
2022-09-14	12:42:53	0.714516	243.801	FALSE	2
2022-09-14	12:42:53	0.716043	244.517	FALSE	2
2022-09-14	12:42:53	0.714364	245.231	FALSE	2
2022-09-14	12:42:54	0.720369	245.951	FALSE	2
2022-09-14	12:42:54	0.717875	246.669	FALSE	2
2022-09-14	12:42:54	0.715432	247.385	FALSE	2
2022-09-14	12:42:54	0.706934	248.092	FALSE	2
2022-09-14	12:42:55	0.106934	248.199	FALSE	2
2022-09-14	12:42:55	-0.0174934	248.199	FALSE	2
2022-09-14	12:42:55	-0.00207355	248.199	FALSE	2
2022-09-14	12:42:56	-0.0652287	248.199	FALSE	2
2022-09-14	12:42:56	-0.0689946	248.199	FALSE	2
2022-09-14	12:42:56	-0.120699	248.199	FALSE	2
2022-09-14	12:42:56	-0.205534	248.199	FALSE	2
2022-09-14	12:42:57	-0.125941	248.199	FALSE	2
2022-09-14	12:42:57	-0.0159158	248.199	FALSE	2
2022-09-14	12:42:57	0.245255	248.444	FALSE	2
2022-09-14	12:42:57	0.196349	248.64	FALSE	2
2022-09-14	12:42:58	0.441794	249.082	FALSE	2
2022-09-14	12:42:58	0.431107	249.513	FALSE	2
2022-09-14	12:42:58	0.478384	249.991	FALSE	2
2022-09-14	12:42:58	0.528003	250.519	FALSE	2
2022-09-14	12:42:59	0.54617	251.066	FALSE	2
2022-09-14	12:42:59	0.491361	251.557	FALSE	2
2022-09-14	12:42:59	0.48444	252.041	FALSE	2
2022-09-14	12:43:00	0.465102	252.506	FALSE	2
2022-09-14	12:43:00	0.442965	252.949	FALSE	2
2022-09-14	12:43:00	0.434415	253.384	FALSE	2
2022-09-14	12:43:00	0.442201	253.826	FALSE	2
2022-09-14	12:43:01	0.431412	254.257	FALSE	2
2022-09-14	12:43:01	0.409122	254.667	FALSE	2
2022-09-14	12:43:01	0.402456	255.069	FALSE	2
2022-09-14	12:43:01	0.420878	255.49	FALSE	2
2022-09-14	12:43:02	0.423677	255.914	FALSE	2
2022-09-14	12:43:02	0.412532	256.326	FALSE	2
2022-09-14	12:43:02	0.431463	256.758	FALSE	2
2022-09-14	12:43:02	0.48841	257.246	FALSE	2
2022-09-14	12:43:03	0.528206	257.774	FALSE	2
2022-09-14	12:43:03	0.473143	258.247	FALSE	2
2022-09-14	12:43:03	0.72215	258.97	FALSE	2
2022-09-14	12:43:04	0.723982	259.693	FALSE	2
2022-09-14	12:43:04	0.719249	260.413	FALSE	2
2022-09-14	12:43:04	0.716145	261.129	FALSE	2
2022-09-14	12:43:04	0.406985	261.536	FALSE	2
2022-09-14	12:43:05	0.360776	261.897	FALSE	2
2022-09-14	12:43:05	0.334924	262.232	FALSE	2
2022-09-14	12:43:05	0.325458	262.557	FALSE	2
2022-09-14	12:43:05	0.368053	262.925	FALSE	2
2022-09-14	12:43:06	0.34556	263.271	FALSE	2
2022-09-14	12:43:06	0.354313	263.625	FALSE	2
2022-09-14	12:43:06	0.348053	263.973	FALSE	2
2022-09-14	12:43:07	0.345204	264.318	FALSE	2
2022-09-14	12:43:07	0.326629	264.645	FALSE	2
2022-09-14	12:43:07	0.311667	264.957	FALSE	2
2022-09-14	12:43:07	0.311616	265.268	FALSE	2
2022-09-14	12:43:08	0.285	265.553	FALSE	2
2022-09-14	12:43:08	0.26383	265.817	FALSE	2
2022-09-14	12:43:08	0.278333	266.095	FALSE	2
2022-09-14	12:43:08	0.288512	266.384	FALSE	2
2022-09-14	12:43:09	0.303779	266.688	FALSE	2
2022-09-14	12:43:09	0.285255	266.973	FALSE	2
2022-09-14	12:43:09	0.289682	267.263	FALSE	2
2022-09-14	12:43:09	0.301743	267.564	FALSE	2
2022-09-14	12:43:10	0.30271	267.867	FALSE	2
2022-09-14	12:43:10	0.301641	268.169	FALSE	2
2022-09-14	12:43:10	0.308054	268.477	FALSE	2
2022-09-14	12:43:11	0.303931	268.781	FALSE	2
2022-09-14	12:43:11	0.309326	269.09	FALSE	2
2022-09-14	12:43:11	0.313957	269.404	FALSE	2
2022-09-14	12:43:11	0.31243	269.716	FALSE	2
2022-09-14	12:43:12	0.333957	270.05	FALSE	2
2022-09-14	12:43:12	0.315229	270.365	FALSE	2
2022-09-14	12:43:12	0.329733	270.695	FALSE	2
2022-09-14	12:43:12	0.328308	271.024	FALSE	2
2022-09-14	12:43:13	0.338232	271.362	FALSE	2
2022-09-14	12:43:13	0.351718	271.713	FALSE	2
2022-09-14	12:43:13	0.336501	272.05	FALSE	2
2022-09-14	12:43:13	0.332939	272.383	FALSE	2
2022-09-14	12:43:14	0.328206	272.711	FALSE	2
2022-09-14	12:43:14	0.341489	273.053	FALSE	2
2022-09-14	12:43:14	0.336247	273.389	FALSE	2
2022-09-14	12:43:15	0.391107	273.78	FALSE	2
2022-09-14	12:43:15	0.431769	274.212	FALSE	2
2022-09-14	12:43:15	0.45757	274.669	FALSE	2
2022-09-14	12:43:15	0.521234	275.191	FALSE	2
2022-09-14	12:43:16	0.556196	275.747	FALSE	2
2022-09-14	12:43:16	0.556603	276.303	FALSE	2
2022-09-14	12:43:16	0.563422	276.867	FALSE	2
2022-09-14	12:43:16	0.575789	277.443	FALSE	2
2022-09-14	12:43:17	0.722456	278.165	FALSE	2
2022-09-14	12:43:17	0.720776	278.886	FALSE	2
2022-09-14	12:43:17	0.719046	279.605	FALSE	2
2022-09-14	12:43:17	0.722303	280.327	FALSE	2
2022-09-14	12:43:18	0.724389	281.052	FALSE	2
2022-09-14	12:43:18	0.727392	281.779	FALSE	2
2022-09-14	12:43:18	0.716857	282.496	FALSE	2
2022-09-14	12:43:19	0.717723	283.213	FALSE	2
2022-09-14	12:43:19	0.715687	283.929	FALSE	2
2022-09-14	12:43:19	0.717672	284.647	FALSE	2
2022-09-14	12:43:19	0.717977	285.365	FALSE	2
2022-09-14	12:43:20	0.717672	286.082	FALSE	2
2022-09-14	12:43:20	0.722914	286.805	FALSE	2
2022-09-14	12:43:20	0.720013	287.525	FALSE	2
2022-09-14	12:43:20	0.719758	288.245	FALSE	2
2022-09-14	12:43:21	0.721336	288.967	FALSE	2
2022-09-14	12:43:21	0.717468	289.684	FALSE	2
2022-09-14	12:43:21	0.716654	290.401	FALSE	2
2022-09-14	12:43:21	0.722608	291.123	FALSE	2
2022-09-14	12:43:22	0.709071	291.832	FALSE	2
2022-09-14	12:43:22	0.718435	292.551	FALSE	2
2022-09-14	12:43:22	0.718639	293.269	FALSE	2
2022-09-14	12:43:23	0.716705	293.986	FALSE	2
2022-09-14	12:43:23	0.71757	294.704	FALSE	2
2022-09-14	12:43:23	0.717316	295.421	FALSE	2
2022-09-14	12:43:23	0.719707	296.141	FALSE	2
2022-09-14	12:43:24	0.716807	296.857	FALSE	2
2022-09-14	12:43:24	0.719962	297.577	FALSE	2
2022-09-14	12:43:24	0.722914	298.3	FALSE	2
2022-09-14	12:43:24	0.726781	299.027	FALSE	2
2022-09-14	12:43:25	0.715738	299.743	FALSE	2
2022-09-14	12:43:25	0.718486	300.461	FALSE	2
2022-09-14	12:43:25	0.715789	301.177	FALSE	2
2022-09-14	12:43:26	0.719707	301.897	FALSE	2
2022-09-14	12:43:26	0.716501	302.613	FALSE	2
2022-09-14	12:43:26	0.722761	303.336	FALSE	2
2022-09-14	12:43:26	0.717468	304.054	FALSE	2
2022-09-14	12:43:27	0.721387	304.775	FALSE	2
2022-09-14	12:43:27	0.719046	305.494	FALSE	2
2022-09-14	12:43:27	0.717824	306.212	FALSE	2
2022-09-14	12:43:27	0.423728	306.636	FALSE	2
2022-09-14	12:43:28	0.440878	307.076	FALSE	2
2022-09-14	12:43:28	0.461896	307.538	FALSE	2
2022-09-14	12:43:28	0.459758	307.998	FALSE	2
2022-09-14	12:43:28	0.460522	308.459	FALSE	2
2022-09-14	12:43:29	0.709682	309.168	FALSE	2
2022-09-14	12:43:29	0.717977	309.886	FALSE	2
2022-09-14	12:43:29	0.716349	310.603	FALSE	2
2022-09-14	12:43:30	0.719656	311.322	FALSE	2
2022-09-14	12:43:30	0.718232	312.041	FALSE	2
2022-09-14	12:43:30	0.715738	312.756	FALSE	2
2022-09-14	12:43:30	0.718232	313.475	FALSE	2
2022-09-14	12:43:31	0.713041	314.188	FALSE	2
2022-09-14	12:43:31	0.717468	314.905	FALSE	2
2022-09-14	12:43:31	0.714873	315.62	FALSE	2
2022-09-14	12:43:31	0.716959	316.337	FALSE	2
2022-09-14	12:43:32	0.718995	317.056	FALSE	2
2022-09-14	12:43:32	0.717468	317.773	FALSE	2
2022-09-14	12:43:32	0.716298	318.49	FALSE	2
2022-09-14	12:43:32	0.721081	319.211	FALSE	2
2022-09-14	12:43:33	0.71299	319.924	FALSE	2
2022-09-14	12:43:33	0.726221	320.65	FALSE	2
2022-09-14	12:43:33	0.71874	321.369	FALSE	2
2022-09-14	12:43:34	0.719046	322.088	FALSE	2
2022-09-14	12:43:34	0.718639	322.806	FALSE	2
2022-09-14	12:43:34	0.716399	323.523	FALSE	2
2022-09-14	12:43:34	0.721132	324.244	FALSE	2
2022-09-14	12:43:35	0.721285	324.965	FALSE	2
2022-09-14	12:43:35	0.718893	325.684	FALSE	2
2022-09-14	12:43:35	0.713346	326.397	FALSE	2
2022-09-14	12:43:35	0.715382	327.113	FALSE	2
2022-09-14	12:43:36	0.71813	327.831	FALSE	2
2022-09-14	12:43:36	0.720267	328.551	FALSE	2
2022-09-14	12:43:36	0.715534	329.267	FALSE	2
2022-09-14	12:43:36	0.719453	329.986	FALSE	2
2022-09-14	12:43:37	0.719606	330.706	FALSE	2
2022-09-14	12:43:37	0.720521	331.426	FALSE	2
2022-09-14	12:43:37	0.717926	332.144	FALSE	2
2022-09-14	12:43:38	0.724135	332.868	FALSE	2
2022-09-14	12:43:38	0.719148	333.587	FALSE	2
2022-09-14	12:43:38	0.723168	334.311	FALSE	2
2022-09-14	12:43:38	0.721539	335.032	FALSE	2
2022-09-14	12:43:39	0.722507	335.755	FALSE	2
2022-09-14	12:43:39	0.721591	336.476	FALSE	2
2022-09-14	12:43:39	0.716654	337.193	FALSE	2
2022-09-14	12:43:39	0.719911	337.913	FALSE	2
2022-09-14	12:43:40	0.721895	338.635	FALSE	2
2022-09-14	12:43:40	0.716501	339.351	FALSE	2
2022-09-14	12:43:40	0.711463	340.063	FALSE	2
2022-09-14	12:43:40	0.71757	340.78	FALSE	2
2022-09-14	12:43:41	0.708613	341.489	FALSE	2
2022-09-14	12:43:41	0.721387	342.21	FALSE	2
2022-09-14	12:43:41	0.721794	342.932	FALSE	2
2022-09-14	12:43:42	0.713143	343.645	FALSE	2
2022-09-14	12:43:42	0.721183	344.366	FALSE	2
2022-09-14	12:43:42	0.726069	345.092	FALSE	2
2022-09-14	12:43:42	0.71528	345.808	FALSE	2
2022-09-14	12:43:43	0.718079	346.526	FALSE	2
2022-09-14	12:43:43	0.719351	347.245	FALSE	2
2022-09-14	12:43:43	0.726629	347.972	FALSE	2
2022-09-14	12:43:43	0.727188	348.699	FALSE	2
2022-09-14	12:43:44	0.717061	349.416	FALSE	2
2022-09-14	12:43:44	0.714924	350.131	FALSE	2
2022-09-14	12:43:44	0.722201	350.853	FALSE	2
2022-09-14	12:43:45	0.716399	351.57	FALSE	2
2022-09-14	12:43:45	0.720114	352.29	FALSE	2
2022-09-14	12:43:45	0.72215	353.012	FALSE	2
2022-09-14	12:43:45	0.715992	353.728	FALSE	2
2022-09-14	12:43:46	0.716552	354.444	FALSE	2
2022-09-14	12:43:46	0.718079	355.162	FALSE	2
2022-09-14	12:43:46	0.721488	355.884	FALSE	2
2022-09-14	12:43:46	0.716603	356.601	FALSE	2
2022-09-14	12:43:47	0.719606	357.32	FALSE	2
2022-09-14	12:43:47	0.721692	358.042	FALSE	2
2022-09-14	12:43:47	0.728104	358.77	FALSE	2
2022-09-14	12:43:47	0.722862	359.493	FALSE	2
2022-09-14	12:43:48	0.721794	360.215	FALSE	2
2022-09-14	12:43:48	0.718893	360.934	FALSE	2
2022-09-14	12:43:48	0.725153	361.659	FALSE	2
2022-09-14	12:43:49	0.727443	362.386	FALSE	2
2022-09-14	12:43:49	0.717366	363.103	FALSE	2
2022-09-14	12:43:49	0.721234	363.825	FALSE	2
2022-09-14	12:43:49	0.716399	364.541	FALSE	2
2022-09-14	12:43:50	0.713855	365.255	FALSE	2
2022-09-14	12:43:50	0.729886	365.985	FALSE	2
2022-09-14	12:43:50	0.71355	366.698	FALSE	2
2022-09-14	12:43:50	0.717621	367.416	FALSE	2
2022-09-14	12:43:51	0.711107	368.127	FALSE	2
2022-09-14	12:43:51	0.725102	368.852	FALSE	2
2022-09-14	12:43:51	0.721591	369.574	FALSE	2
2022-09-14	12:43:51	0.71986	370.294	FALSE	2
2022-09-14	12:43:52	0.724338	371.018	FALSE	2
2022-09-14	12:43:52	0.721591	371.74	FALSE	2
2022-09-14	12:43:52	0.720114	372.46	FALSE	2
2022-09-14	12:43:53	0.721437	373.181	FALSE	2
2022-09-14	12:43:53	0.722761	373.904	FALSE	2
2022-09-14	12:43:53	0.716908	374.621	FALSE	2
2022-09-14	12:43:53	0.728461	375.349	FALSE	2
2022-09-14	12:43:54	0.715483	376.065	FALSE	2
2022-09-14	12:43:54	0.718486	376.783	FALSE	2
2022-09-14	12:43:54	0.719809	377.503	FALSE	2
2022-09-14	12:43:54	0.726272	378.229	FALSE	2
2022-09-14	12:43:55	0.715738	378.945	FALSE	2
2022-09-14	12:43:55	0.729784	379.675	FALSE	2
2022-09-14	12:43:55	0.725865	380.401	FALSE	2
2022-09-14	12:43:55	0.728562	381.129	FALSE	2
2022-09-14	12:43:56	0.720572	381.85	FALSE	2
2022-09-14	12:43:56	0.714974	382.565	FALSE	2
2022-09-14	12:43:56	0.726578	383.291	FALSE	2
2022-09-14	12:43:57	0.720114	384.012	FALSE	2
2022-09-14	12:43:57	0.719707	384.731	FALSE	2
2022-09-14	12:43:57	0.71472	385.446	FALSE	2
2022-09-14	12:43:57	0.725051	386.171	FALSE	2
2022-09-14	12:43:58	0.726781	386.898	FALSE	2
2022-09-14	12:43:58	0.720623	387.618	FALSE	2
2022-09-14	12:43:58	0.724542	388.343	FALSE	2
2022-09-14	12:43:58	0.724389	389.067	FALSE	2
2022-09-14	12:43:59	0.72388	389.791	FALSE	2
2022-09-14	12:43:59	0.718028	390.509	FALSE	2
2022-09-14	12:43:59	0.71701	391.226	FALSE	2
2022-09-14	12:44:00	0.71813	391.944	FALSE	2
2022-09-14	12:44:00	0.722965	392.667	FALSE	2
2022-09-14	12:44:00	0.716857	393.384	FALSE	2
2022-09-14	12:44:00	0.719351	394.104	FALSE	2
2022-09-14	12:44:01	0.724084	394.828	FALSE	2
2022-09-14	12:44:01	0.725305	395.553	FALSE	2
2022-09-14	12:44:01	0.725	396.278	FALSE	2
2022-09-14	12:44:01	0.728766	397.007	FALSE	2
2022-09-14	12:44:02	0.717519	397.724	FALSE	2
2022-09-14	12:44:02	0.720369	398.445	FALSE	2
2022-09-14	12:44:02	0.727137	399.172	FALSE	2
2022-09-14	12:44:02	0.720267	399.892	FALSE	2
2022-09-14	12:44:03	0.725662	400.618	FALSE	2
2022-09-14	12:44:03	0.725051	401.343	FALSE	2
2022-09-14	12:44:03	0.720827	402.064	FALSE	2
2022-09-14	12:44:04	0.731158	402.795	FALSE	2
2022-09-14	12:44:04	0.727036	403.522	FALSE	2
2022-09-14	12:44:04	0.723066	404.245	FALSE	2
2022-09-14	12:44:04	0.718995	404.964	FALSE	2
2022-09-14	12:44:05	0.720165	405.684	FALSE	2
2022-09-14	12:44:05	0.716501	406.4	FALSE	2
2022-09-14	12:44:05	0.725102	407.126	FALSE	2
2022-09-14	12:44:05	0.725204	407.851	FALSE	2
2022-09-14	12:44:06	0.719606	408.57	FALSE	2
2022-09-14	12:44:06	0.716857	409.287	FALSE	2
2022-09-14	12:44:06	0.724186	410.011	FALSE	2
2022-09-14	12:44:06	0.721997	410.733	FALSE	2
2022-09-14	12:44:07	0.72388	411.457	FALSE	2
2022-09-14	12:44:07	0.719046	412.176	FALSE	2
2022-09-14	12:44:07	0.723779	412.9	FALSE	2
2022-09-14	12:44:08	0.716705	413.617	FALSE	2
2022-09-14	12:44:08	0.723931	414.341	FALSE	2
2022-09-14	12:44:08	0.721336	415.062	FALSE	2
2022-09-14	12:44:08	0.724033	415.786	FALSE	2
2022-09-14	12:44:09	0.722252	416.508	FALSE	2
2022-09-14	12:44:09	0.727545	417.236	FALSE	2
2022-09-14	12:44:09	0.725204	417.961	FALSE	2
2022-09-14	12:44:09	0.728919	418.69	FALSE	2
2022-09-14	12:44:10	0.732328	419.422	FALSE	2
2022-09-14	12:44:10	0.726272	420.149	FALSE	2
2022-09-14	12:44:10	0.725509	420.874	FALSE	2
2022-09-14	12:44:10	0.721794	421.596	FALSE	2
2022-09-14	12:44:11	0.729835	422.326	FALSE	2
2022-09-14	12:44:11	0.718232	423.044	FALSE	2
2022-09-14	12:44:11	0.722303	423.766	FALSE	2
2022-09-14	12:44:12	0.727036	424.493	FALSE	2
2022-09-14	12:44:12	0.723117	425.216	FALSE	2
2022-09-14	12:44:12	0.71472	425.931	FALSE	2
2022-09-14	12:44:12	0.725407	426.657	FALSE	2
2022-09-14	12:44:13	0.719758	427.376	FALSE	2
2022-09-14	12:44:13	0.728054	428.104	FALSE	2
2022-09-14	12:44:13	0.729529	428.834	FALSE	2
2022-09-14	12:44:13	0.727697	429.562	FALSE	2
2022-09-14	12:44:14	0.724847	430.286	FALSE	2
2022-09-14	12:44:14	0.723524	431.01	FALSE	2
2022-09-14	12:44:14	0.725407	431.735	FALSE	2
2022-09-14	12:44:14	0.724288	432.46	FALSE	2
2022-09-14	12:44:15	0.719504	433.179	FALSE	2
2022-09-14	12:44:15	0.718028	433.897	FALSE	2
2022-09-14	12:44:15	0.733957	434.631	FALSE	2
2022-09-14	12:44:16	0.730293	435.361	FALSE	2
2022-09-14	12:44:16	0.725305	436.087	FALSE	2
2022-09-14	12:44:16	0.720979	436.808	FALSE	2
2022-09-14	12:44:16	0.721183	437.529	FALSE	2
2022-09-14	12:44:17	0.72612	438.255	FALSE	2
2022-09-14	12:44:17	0.724644	438.98	FALSE	2
2022-09-14	12:44:17	0.728512	439.708	FALSE	2
2022-09-14	12:44:17	0.721539	440.43	FALSE	2
2022-09-14	12:44:18	0.718486	441.148	FALSE	2
2022-09-14	12:44:18	0.718639	441.867	FALSE	2
2022-09-14	12:44:18	0.721641	442.589	FALSE	2
2022-09-14	12:44:19	0.71757	443.306	FALSE	2
2022-09-14	12:44:19	0.725611	444.032	FALSE	2
2022-09-14	12:44:19	0.714516	444.746	FALSE	2
2022-09-14	12:44:19	0.728512	445.475	FALSE	2
2022-09-14	12:44:20	0.720165	446.195	FALSE	2
2022-09-14	12:44:20	0.722252	446.917	FALSE	2
2022-09-14	12:44:20	0.723066	447.64	FALSE	2
2022-09-14	12:44:20	0.721692	448.362	FALSE	2
2022-09-14	12:44:21	0.725356	449.087	FALSE	2
2022-09-14	12:44:21	0.713397	449.801	FALSE	2
2022-09-14	12:44:21	0.719504	450.52	FALSE	2
2022-09-14	12:44:21	0.727545	451.248	FALSE	2
2022-09-14	12:44:22	0.723626	451.971	FALSE	2
2022-09-14	12:44:22	0.727697	452.699	FALSE	2
2022-09-14	12:44:22	0.729377	453.428	FALSE	2
2022-09-14	12:44:23	0.381438	453.81	FALSE	2
2022-09-14	12:44:23	0.723168	454.533	FALSE	2
2022-09-14	12:44:23	0.719809	455.253	FALSE	2
2022-09-14	12:44:23	1.31452	456.567	FALSE	2
2022-09-14	12:44:24	0.795891	457.363	FALSE	2
2022-09-14	12:44:24	0.725662	458.089	FALSE	2
2022-09-14	12:44:24	0.72841	458.817	FALSE	2
2022-09-14	12:44:24	0.723779	459.541	FALSE	2
2022-09-14	12:44:25	0.732786	460.274	FALSE	2
2022-09-14	12:44:25	0.723219	460.997	FALSE	2
2022-09-14	12:44:25	0.719504	461.717	FALSE	2
2022-09-14	12:44:25	0.724796	462.441	FALSE	2
2022-09-14	12:44:26	0.726832	463.168	FALSE	2
2022-09-14	12:44:26	0.722862	463.891	FALSE	2
2022-09-14	12:44:26	0.72271	464.614	FALSE	2
2022-09-14	12:44:27	0.720318	465.334	FALSE	2
2022-09-14	12:44:27	0.728766	466.063	FALSE	2
2022-09-14	12:44:27	0.726934	466.79	FALSE	2
2022-09-14	12:44:27	0.719707	467.51	FALSE	2
2022-09-14	12:44:28	0.717672	468.227	FALSE	2
2022-09-14	12:44:28	0.715382	468.943	FALSE	2
2022-09-14	12:44:28	0.719402	469.662	FALSE	2
2022-09-14	12:44:28	0.730598	470.393	FALSE	2
2022-09-14	12:44:29	0.734466	471.127	FALSE	2
2022-09-14	12:44:29	0.731768	471.859	FALSE	2
2022-09-14	12:44:29	0.729224	472.588	FALSE	2
2022-09-14	12:44:29	0.727137	473.315	FALSE	2
2022-09-14	12:44:30	0.72958	474.045	FALSE	2
2022-09-14	12:44:30	0.723219	474.768	FALSE	2
2022-09-14	12:44:30	0.729784	475.498	FALSE	2
2022-09-14	12:44:31	0.728359	476.226	FALSE	2
2022-09-14	12:44:31	0.729224	476.955	FALSE	2
2022-09-14	12:44:31	0.727697	477.683	FALSE	2
2022-09-14	12:44:31	0.729173	478.412	FALSE	2
2022-09-14	12:44:32	0.726323	479.139	FALSE	2
2022-09-14	12:44:32	0.723931	479.862	FALSE	2
2022-09-14	12:44:32	0.731107	480.594	FALSE	2
2022-09-14	12:44:32	0.720979	481.315	FALSE	2
2022-09-14	12:44:33	0.72902	482.044	FALSE	2
2022-09-14	12:44:33	0.717366	482.761	FALSE	2
2022-09-14	12:44:33	0.726221	483.487	FALSE	2
2022-09-14	12:44:33	0.728003	484.215	FALSE	2
2022-09-14	12:44:34	0.72327	484.938	FALSE	2
2022-09-14	12:44:34	0.784389	485.723	FALSE	2
2022-09-14	12:44:34	0.729682	486.453	FALSE	2
2022-09-14	12:44:35	0.73528	487.188	FALSE	2
2022-09-14	12:44:35	0.720979	487.909	FALSE	2
2022-09-14	12:44:35	0.72215	488.631	FALSE	2
2022-09-14	12:44:35	0.719758	489.351	FALSE	2
2022-09-14	12:44:36	0.722761	490.073	FALSE	2
2022-09-14	12:44:36	0.716908	490.79	FALSE	2
2022-09-14	12:44:36	0.719809	491.51	FALSE	2
2022-09-14	12:44:36	0.723982	492.234	FALSE	2
2022-09-14	12:44:37	0.717265	492.951	FALSE	2
2022-09-14	12:44:37	0.733702	493.685	FALSE	2
2022-09-14	12:44:37	0.726476	494.412	FALSE	2
2022-09-14	12:44:38	0.735483	495.147	FALSE	2
2022-09-14	12:44:38	0.726781	495.874	FALSE	2
2022-09-14	12:44:38	0.725254	496.599	FALSE	2
2022-09-14	12:44:38	0.729478	497.329	FALSE	2
2022-09-14	12:44:39	0.733397	498.062	FALSE	2
2022-09-14	12:44:39	0.728054	498.79	FALSE	2
2022-09-14	12:44:39	0.732837	499.523	FALSE	2
2022-09-14	12:44:39	0.721641	500.245	FALSE	2
2022-09-14	12:44:40	0.722404	500.967	FALSE	2
2022-09-14	12:44:40	0.729275	501.696	FALSE	2
2022-09-14	12:44:40	0.7307	502.427	FALSE	2
2022-09-14	12:44:40	0.723677	503.151	FALSE	2
2022-09-14	12:44:41	0.735941	503.887	FALSE	2
2022-09-14	12:44:41	0.72556	504.612	FALSE	2
2022-09-14	12:44:41	0.725102	505.337	FALSE	2
2022-09-14	12:44:41	0.722456	506.06	FALSE	2
2022-09-14	12:44:42	0.721488	506.781	FALSE	2
2022-09-14	12:44:42	0.726934	507.508	FALSE	2
2022-09-14	12:44:42	0.725407	508.233	FALSE	2
2022-09-14	12:44:43	0.725407	508.959	FALSE	2
2022-09-14	12:44:43	0.723982	509.683	FALSE	2
2022-09-14	12:44:43	0.729326	510.412	FALSE	2
2022-09-14	12:44:43	0.774364	511.187	FALSE	2
2022-09-14	12:44:44	0.728512	511.915	FALSE	2
2022-09-14	12:44:44	0.726069	512.641	FALSE	2
2022-09-14	12:44:44	0.722252	513.363	FALSE	2
2022-09-14	12:44:44	0.728715	514.092	FALSE	2
2022-09-14	12:44:45	0.724542	514.817	FALSE	2
2022-09-14	12:44:45	0.726781	515.543	FALSE	2
2022-09-14	12:44:45	0.730903	516.274	FALSE	2
2022-09-14	12:44:46	0.728664	517.003	FALSE	2
2022-09-14	12:44:46	0.725916	517.729	FALSE	2
2022-09-14	12:44:46	0.726425	518.455	FALSE	2
2022-09-14	12:44:46	0.363779	518.819	FALSE	2
2022-09-14	12:44:47	0.693855	519.513	FALSE	2
2022-09-14	12:44:47	0.724542	520.237	FALSE	2
2022-09-14	12:44:47	0.728562	520.966	FALSE	2
2022-09-14	12:44:47	0.730343	521.696	FALSE	2
2022-09-14	12:44:48	0.733346	522.43	FALSE	2
2022-09-14	12:44:48	0.718791	523.149	FALSE	2
2022-09-14	12:44:48	0.725407	523.874	FALSE	2
2022-09-14	12:44:48	0.723931	524.598	FALSE	2
2022-09-14	12:44:49	0.720318	525.318	FALSE	2
2022-09-14	12:44:49	0.720267	526.038	FALSE	2
2022-09-14	12:44:49	0.724695	526.763	FALSE	2
2022-09-14	12:44:50	0.724746	527.488	FALSE	2
2022-09-14	12:44:50	0.719758	528.208	FALSE	2
2022-09-14	12:44:50	0.71757	528.925	FALSE	2
2022-09-14	12:44:50	0.703372	529.629	FALSE	2
2022-09-14	12:44:51	0.708664	530.337	FALSE	2
2022-09-14	12:44:51	0.696298	531.034	FALSE	2
2022-09-14	12:44:51	0.699198	531.733	FALSE	2
2022-09-14	12:44:51	0.699656	532.432	FALSE	2
2022-09-14	12:44:52	0.686374	533.119	FALSE	2
2022-09-14	12:44:52	0.671565	533.79	FALSE	2
2022-09-14	12:44:52	0.667341	534.458	FALSE	2
2022-09-14	12:44:52	0.66673	535.124	FALSE	2
2022-09-14	12:44:53	0.654364	535.779	FALSE	2
2022-09-14	12:44:53	0.637672	536.416	FALSE	2
2022-09-14	12:44:53	0.630547	537.047	FALSE	2
2022-09-14	12:44:54	0.617723	537.665	FALSE	2
2022-09-14	12:44:54	0.629326	538.294	FALSE	2
2022-09-14	12:44:54	0.727188	539.021	FALSE	2
2022-09-14	12:44:54	0.727545	539.749	FALSE	2
2022-09-14	12:44:55	0.726272	540.475	FALSE	2
2022-09-14	12:44:55	0.730394	541.205	FALSE	2
2022-09-14	12:44:55	0.730394	541.936	FALSE	2
2022-09-14	12:44:55	0.730089	542.666	FALSE	2
2022-09-14	12:44:56	0.724796	543.391	FALSE	2
2022-09-14	12:44:56	0.724389	544.115	FALSE	2
2022-09-14	12:44:56	0.721845	544.837	FALSE	2
2022-09-14	12:44:56	0.717621	545.555	FALSE	2
2022-09-14	12:44:57	0.733092	546.288	FALSE	2
2022-09-14	12:44:57	0.727748	547.015	FALSE	2
2022-09-14	12:44:57	0.724135	547.74	FALSE	2
2022-09-14	12:44:58	0.724542	548.464	FALSE	2
2022-09-14	12:44:58	0.714618	549.179	FALSE	2
2022-09-14	12:44:58	0.712685	549.891	FALSE	2
2022-09-14	12:44:58	0.709478	550.601	FALSE	2
2022-09-14	12:44:59	0.692125	551.293	FALSE	2
2022-09-14	12:44:59	0.69131	551.984	FALSE	2
2022-09-14	12:44:59	0.649784	552.634	FALSE	2
2022-09-14	12:44:59	0.64327	553.277	FALSE	2
2022-09-14	12:45:00	0.630242	553.908	FALSE	2
2022-09-14	12:45:00	0.626934	554.535	FALSE	2
2022-09-14	12:45:00	0.609224	555.144	FALSE	2
2022-09-14	12:45:00	0.579758	555.724	FALSE	2
2022-09-14	12:45:01	0.568308	556.292	FALSE	2
2022-09-14	12:45:01	0.527748	556.82	FALSE	2
2022-09-14	12:45:01	0.509682	557.329	FALSE	2
2022-09-14	12:45:02	0.522964	557.852	FALSE	2
2022-09-14	12:45:02	0.523015	558.375	FALSE	2
2022-09-14	12:45:02	0.505611	558.881	FALSE	2
2022-09-14	12:45:02	0.506272	559.387	FALSE	2
2022-09-14	12:45:03	0.532684	559.92	FALSE	2
2022-09-14	12:45:03	0.538079	560.458	FALSE	2
2022-09-14	12:45:03	0.534211	560.992	FALSE	2
2022-09-14	12:45:03	0.598232	561.59	FALSE	2
2022-09-14	12:45:04	0.525305	562.116	FALSE	2
2022-09-14	12:45:04	0.579046	562.695	FALSE	2
2022-09-14	12:45:04	0.520165	563.215	FALSE	2
2022-09-14	12:45:04	0.484644	563.699	FALSE	2
2022-09-14	12:45:05	0.477621	564.177	FALSE	2
2022-09-14	12:45:05	0.437417	564.615	FALSE	2
2022-09-14	12:45:05	0.404186	565.019	FALSE	2
2022-09-14	12:45:06	0.337519	565.356	FALSE	2
2022-09-14	12:45:06	0.35126	565.707	FALSE	2
2022-09-14	12:45:06	0.309784	566.017	FALSE	2
2022-09-14	12:45:06	0.293295	566.311	FALSE	2
2022-09-14	12:45:07	0.293652	566.604	FALSE	2
2022-09-14	12:45:07	0.30673	566.911	FALSE	2
2022-09-14	12:45:07	0.362761	567.274	FALSE	2
2022-09-14	12:45:07	0.540063	567.814	FALSE	2
2022-09-14	12:45:08	0.849326	568.663	FALSE	2
2022-09-14	12:45:08	0.652175	569.315	FALSE	2
2022-09-14	12:45:08	0.629478	569.945	FALSE	2
2022-09-14	12:45:08	0.401132	570.346	FALSE	2
2022-09-14	12:45:09	0.380624	570.727	FALSE	2
2022-09-14	12:45:09	0.405102	571.132	FALSE	2
2022-09-14	12:45:09	0.416552	571.548	FALSE	2
2022-09-14	12:45:10	0.419148	571.967	FALSE	2
2022-09-14	12:45:10	0.388359	572.356	FALSE	2
2022-09-14	12:45:10	0.421539	572.777	FALSE	2
2022-09-14	12:45:10	0.366425	573.144	FALSE	2
2022-09-14	12:45:11	0.360318	573.504	FALSE	2
2022-09-14	12:45:11	0.367443	573.871	FALSE	2
2022-09-14	12:45:11	0.351718	574.223	FALSE	2
2022-09-14	12:45:11	0.394211	574.617	FALSE	2
2022-09-14	12:45:12	0.351005	574.968	FALSE	2
2022-09-14	12:45:12	0.427545	575.396	FALSE	2
2022-09-14	12:45:12	0.404746	575.801	FALSE	2
2022-09-14	12:45:13	0.60729	576.408	FALSE	2
2022-09-14	12:45:13	0.706883	577.115	FALSE	2
2022-09-14	12:45:13	0.623779	577.739	FALSE	2
2022-09-14	12:45:13	0.620369	578.359	FALSE	2
2022-09-14	12:45:14	0.453397	578.812	FALSE	2
2022-09-14	12:45:14	0.567341	579.38	FALSE	2
2022-09-14	12:45:14	0.496705	579.876	FALSE	2
2022-09-14	12:45:14	0.499097	580.375	FALSE	2
2022-09-14	12:45:15	0.794669	581.17	FALSE	2
2022-09-14	12:45:15	0.411565	581.582	FALSE	2
2022-09-14	12:45:15	0.682405	582.264	FALSE	2
2022-09-14	12:45:15	0.438486	582.703	FALSE	2
2022-09-14	12:45:16	0.43411	583.137	FALSE	2
2022-09-14	12:45:16	0.194415	583.331	FALSE	2
2022-09-14	12:45:16	0.130445	583.462	FALSE	2
2022-09-14	12:45:17	0.121947	583.584	FALSE	2
2022-09-14	12:45:17	0.127341	583.711	FALSE	2
2022-09-14	12:45:17	0.11584	583.827	FALSE	2
2022-09-14	12:45:17	0.0914124	583.918	FALSE	2
2022-09-14	12:45:18	0.0775193	583.996	FALSE	2
2022-09-14	12:45:18	0.00164146	583.997	FALSE	2
2022-09-14	12:45:18	-0.0620226	583.997	FALSE	2
2022-09-14	12:45:18	-0.130267	583.997	FALSE	2
2022-09-14	12:45:19	-0.125331	583.997	FALSE	2
2022-09-14	12:45:19	-0.120038	583.997	FALSE	2
2022-09-14	12:45:19	-0.182582	583.997	FALSE	2
2022-09-14	12:45:19	-0.261208	583.997	FALSE	2
2022-09-14	12:45:20	-0.292913	583.997	FALSE	2
2022-09-14	12:45:20	-0.310318	583.997	FALSE	2
2022-09-14	12:45:20	-0.216933	583.997	FALSE	2
2022-09-14	12:45:21	0.729173	584.726	FALSE	2
2022-09-14	12:45:21	0.726476	585.453	FALSE	2
2022-09-14	12:45:21	0.725305	586.178	FALSE	2
2022-09-14	12:45:21	0.726425	586.905	FALSE	2
2022-09-14	12:45:22	0.688868	587.594	FALSE	2
2022-09-14	12:45:22	0.79757	588.391	FALSE	2
2022-09-14	12:45:22	0.72612	589.117	FALSE	2
2022-09-14	12:45:22	0.72617	589.843	FALSE	2
2022-09-14	12:45:23	0.728562	590.572	FALSE	2
2022-09-14	12:45:23	0.721641	591.294	FALSE	2
2022-09-14	12:45:23	0.724491	592.018	FALSE	2
2022-09-14	12:45:23	0.718893	592.737	FALSE	2
2022-09-14	12:45:24	0.727443	593.464	FALSE	2
2022-09-14	12:45:24	0.723931	594.188	FALSE	2
2022-09-14	12:45:24	0.722354	594.911	FALSE	2
2022-09-14	12:45:25	0.730598	595.641	FALSE	2
2022-09-14	12:45:25	0.731463	596.373	FALSE	2
2022-09-14	12:45:25	0.728257	597.101	FALSE	2
2022-09-14	12:45:25	0.735891	597.837	FALSE	2
2022-09-14	12:45:26	0.728512	598.565	FALSE	2
2022-09-14	12:45:26	0.72271	599.288	FALSE	2
2022-09-14	12:45:26	0.725509	600.014	FALSE	2
2022-09-14	12:45:26	0.728206	600.742	FALSE	2
2022-09-14	12:45:27	0.56215	601.304	FALSE	2
2022-09-14	12:45:27	0.748562	602.053	FALSE	2
2022-09-14	12:45:27	0.730343	602.783	FALSE	2
2022-09-14	12:45:27	0.719402	603.502	FALSE	2
2022-09-14	12:45:28	0.727239	604.23	FALSE	2
2022-09-14	12:45:28	0.727392	604.957	FALSE	2
2022-09-14	12:45:28	0.725	605.682	FALSE	2
2022-09-14	12:45:29	0.727646	606.41	FALSE	2
2022-09-14	12:45:29	0.725865	607.135	FALSE	2
2022-09-14	12:45:29	0.720827	607.856	FALSE	2
2022-09-14	12:45:29	0.725967	608.582	FALSE	2
2022-09-14	12:45:30	0.728715	609.311	FALSE	2
2022-09-14	12:45:30	0.724491	610.035	FALSE	2
2022-09-14	12:45:30	0.721845	610.757	FALSE	2
2022-09-14	12:45:30	0.730801	611.488	FALSE	2
2022-09-14	12:45:31	0.725611	612.214	FALSE	2
2022-09-14	12:45:31	0.733142	612.947	FALSE	2
2022-09-14	12:45:31	0.736043	613.683	FALSE	2
2022-09-14	12:45:31	0.728664	614.412	FALSE	2
2022-09-14	12:45:32	0.722404	615.134	FALSE	2
2022-09-14	12:45:32	0.733957	615.868	FALSE	2
2022-09-14	12:45:32	0.726221	616.594	FALSE	2
2022-09-14	12:45:33	0.724338	617.318	FALSE	2
2022-09-14	12:45:33	0.735178	618.054	FALSE	2
2022-09-14	12:45:33	0.727697	618.781	FALSE	2
2022-09-14	12:45:33	0.725967	619.507	FALSE	2
2022-09-14	12:45:34	0.724593	620.232	FALSE	2
2022-09-14	12:45:34	0.731768	620.964	FALSE	2
2022-09-14	12:45:34	0.73187	621.696	FALSE	2
2022-09-14	12:45:34	0.727646	622.423	FALSE	2
2022-09-14	12:45:35	0.725356	623.149	FALSE	2
2022-09-14	12:45:35	0.73014	623.879	FALSE	2
2022-09-14	12:45:35	0.734313	624.613	FALSE	2
2022-09-14	12:45:36	0.726679	625.34	FALSE	2
2022-09-14	12:45:36	0.728461	626.068	FALSE	2
2022-09-14	12:45:36	0.725407	626.794	FALSE	2
2022-09-14	12:45:36	0.72785	627.521	FALSE	2
2022-09-14	12:45:37	0.729784	628.251	FALSE	2
2022-09-14	12:45:37	0.731565	628.983	FALSE	2
2022-09-14	12:45:37	0.729326	629.712	FALSE	2
2022-09-14	12:45:37	0.728613	630.441	FALSE	2
2022-09-14	12:45:38	0.727392	631.168	FALSE	2
2022-09-14	12:45:38	0.729122	631.897	FALSE	2
2022-09-14	12:45:38	0.726425	632.624	FALSE	2
2022-09-14	12:45:38	0.730038	633.354	FALSE	2
2022-09-14	12:45:39	0.723779	634.077	FALSE	2
2022-09-14	12:45:39	0.726934	634.804	FALSE	2
2022-09-14	12:45:39	0.253906	635.058	FALSE	2
2022-09-14	12:45:40	-0.582175	635.058	FALSE	2
2022-09-14	12:45:40	0.728054	635.786	FALSE	2
2022-09-14	12:45:40	0.724237	636.511	FALSE	2
2022-09-14	12:45:40	0.727087	637.238	FALSE	2
2022-09-14	12:45:41	0.733092	637.971	FALSE	2
2022-09-14	12:45:41	0.729326	638.7	FALSE	2
2022-09-14	12:45:41	0.72958	639.43	FALSE	2
2022-09-14	12:45:41	0.731972	640.162	FALSE	2
2022-09-14	12:45:42	0.731667	640.893	FALSE	2
2022-09-14	12:45:42	0.0684608	640.962	FALSE	2
2022-09-14	12:45:42	0.149784	641.112	FALSE	2
2022-09-14	12:45:42	0.649224	641.761	FALSE	2
2022-09-14	12:45:43	0.72612	642.487	FALSE	2
2022-09-14	12:45:43	0.726272	643.213	FALSE	2
2022-09-14	12:45:43	0.726374	643.94	FALSE	2
2022-09-14	12:45:44	0.726018	644.666	FALSE	2
2022-09-14	12:45:44	0.727443	645.393	FALSE	2
2022-09-14	12:45:44	0.725407	646.118	FALSE	2
2022-09-14	12:45:44	0.717112	646.836	FALSE	2
2022-09-14	12:45:45	0.729784	647.565	FALSE	2
2022-09-14	12:45:45	0.724746	648.29	FALSE	2
2022-09-14	12:45:45	0.72556	649.016	FALSE	2
2022-09-14	12:45:45	0.729987	649.746	FALSE	2
2022-09-14	12:45:46	0.723626	650.469	FALSE	2
2022-09-14	12:45:46	0.722252	651.191	FALSE	2
2022-09-14	12:45:46	0.722812	651.914	FALSE	2
2022-09-14	12:45:46	0.726221	652.641	FALSE	2
2022-09-14	12:45:47	0.722557	653.363	FALSE	2
2022-09-14	12:45:47	0.722557	654.086	FALSE	2
2022-09-14	12:45:47	0.729631	654.815	FALSE	2
2022-09-14	12:45:48	0.732735	655.548	FALSE	2
2022-09-14	12:45:48	0.736756	656.285	FALSE	2
2022-09-14	12:45:48	0.726323	657.011	FALSE	2
2022-09-14	12:45:48	0.725102	657.736	FALSE	2
2022-09-14	12:45:49	0.734313	658.47	FALSE	2
2022-09-14	12:45:49	0.724644	659.195	FALSE	2
2022-09-14	12:45:49	0.733295	659.928	FALSE	2
2022-09-14	12:45:49	0.708715	660.637	FALSE	2
2022-09-14	12:45:50	0.164542	660.802	FALSE	2
2022-09-14	12:45:50	-0.227977	660.802	FALSE	2
2022-09-14	12:45:50	-0.172404	660.802	FALSE	2
2022-09-14	12:45:50	0.726883	661.529	FALSE	2
2022-09-14	12:45:51	0.724491	662.253	FALSE	2
2022-09-14	12:45:51	0.731463	662.985	FALSE	2
2022-09-14	12:45:51	0.725407	663.71	FALSE	2
2022-09-14	12:45:52	0.720776	664.431	FALSE	2
2022-09-14	12:45:52	0.72444	665.155	FALSE	2
2022-09-14	12:45:52	0.723728	665.879	FALSE	2
2022-09-14	12:45:52	0.723066	666.602	FALSE	2
2022-09-14	12:45:53	0.728104	667.33	FALSE	2
2022-09-14	12:45:53	0.731107	668.061	FALSE	2
2022-09-14	12:45:53	0.728359	668.79	FALSE	2
2022-09-14	12:45:53	0.736857	669.526	FALSE	2
2022-09-14	12:45:54	0.727646	670.254	FALSE	2
2022-09-14	12:45:54	0.719351	670.973	FALSE	2
2022-09-14	12:45:54	0.721845	671.695	FALSE	2
2022-09-14	12:45:54	0.731768	672.427	FALSE	2
2022-09-14	12:45:55	0.729682	673.157	FALSE	2
2022-09-14	12:45:55	0.736145	673.893	FALSE	2
2022-09-14	12:45:55	0.726527	674.619	FALSE	2
2022-09-14	12:45:56	0.72902	675.348	FALSE	2
2022-09-14	12:45:56	0.730293	676.079	FALSE	2
2022-09-14	12:45:56	0.729835	676.808	FALSE	2
2022-09-14	12:45:56	0.728562	677.537	FALSE	2
2022-09-14	12:45:57	0.734975	678.272	FALSE	2
2022-09-14	12:45:57	0.72556	678.998	FALSE	2
2022-09-14	12:45:57	0.724695	679.722	FALSE	2
2022-09-14	12:45:57	0.566628	680.289	FALSE	2
2022-09-14	12:45:58	0.863931	681.153	FALSE	2
2022-09-14	12:45:58	0.444491	681.597	FALSE	2
2022-09-14	12:45:58	0.714415	682.312	FALSE	2
2022-09-14	12:45:58	0.72729	683.039	FALSE	2
2022-09-14	12:45:59	0.731667	683.771	FALSE	2
2022-09-14	12:45:59	0.722608	684.493	FALSE	2
2022-09-14	12:45:59	0.725458	685.219	FALSE	2
2022-09-14	12:46:00	0.728359	685.947	FALSE	2
2022-09-14	12:46:00	0.733244	686.68	FALSE	2
2022-09-14	12:46:00	0.730547	687.411	FALSE	2
2022-09-14	12:46:00	0.725611	688.137	FALSE	2
2022-09-14	12:46:01	0.726527	688.863	FALSE	2
2022-09-14	12:46:01	0.736349	689.599	FALSE	2
2022-09-14	12:46:01	0.727341	690.327	FALSE	2
2022-09-14	12:46:01	0.721488	691.048	FALSE	2
2022-09-14	12:46:02	0.724237	691.772	FALSE	2
2022-09-14	12:46:02	0.727545	692.5	FALSE	2
2022-09-14	12:46:02	0.726934	693.227	FALSE	2
2022-09-14	12:46:02	0.731056	693.958	FALSE	2
2022-09-14	12:46:03	0.729886	694.688	FALSE	2
2022-09-14	12:46:03	0.721692	695.41	FALSE	2
2022-09-14	12:46:03	0.727748	696.137	FALSE	2
2022-09-14	12:46:04	0.728664	696.866	FALSE	2
2022-09-14	12:46:04	0.725865	697.592	FALSE	2
2022-09-14	12:46:04	0.731768	698.324	FALSE	2
2022-09-14	12:46:04	0.725204	699.049	FALSE	2
2022-09-14	12:46:05	0.728919	699.778	FALSE	2
2022-09-14	12:46:05	0.727188	700.505	FALSE	2
2022-09-14	12:46:05	0.72388	701.229	FALSE	2
2022-09-14	12:46:05	0.724847	701.954	FALSE	2
2022-09-14	12:46:06	0.728512	702.682	FALSE	2
2022-09-14	12:46:06	0.727952	703.41	FALSE	2
2022-09-14	12:46:06	0.726832	704.137	FALSE	2
2022-09-14	12:46:06	0.731819	704.869	FALSE	2
2022-09-14	12:46:07	0.727596	705.596	FALSE	2
2022-09-14	12:46:07	0.728461	706.325	FALSE	2
2022-09-14	12:46:07	0.72958	707.054	FALSE	2
2022-09-14	12:46:08	0.724898	707.779	FALSE	2
2022-09-14	12:46:08	0.725611	708.505	FALSE	2
2022-09-14	12:46:08	0.730293	709.235	FALSE	2
2022-09-14	12:46:08	0.731412	709.967	FALSE	2
2022-09-14	12:46:09	0.725204	710.692	FALSE	2
2022-09-14	12:46:09	0.725051	711.417	FALSE	2
2022-09-14	12:46:09	0.728308	712.145	FALSE	2
2022-09-14	12:46:09	0.722252	712.867	FALSE	2
2022-09-14	12:46:10	0.727494	713.595	FALSE	2
2022-09-14	12:46:10	0.730598	714.326	FALSE	2
2022-09-14	12:46:10	0.724898	715.05	FALSE	2
2022-09-14	12:46:11	0.729275	715.78	FALSE	2
2022-09-14	12:46:11	0.725967	716.506	FALSE	2
2022-09-14	12:46:11	0.744745	717.25	FALSE	2
2022-09-14	12:46:11	0.72103	717.971	FALSE	2
2022-09-14	12:46:12	0.729529	718.701	FALSE	2
2022-09-14	12:46:12	0.721743	719.423	FALSE	2
2022-09-14	12:46:12	0.739606	720.162	FALSE	2
2022-09-14	12:46:12	0.728257	720.891	FALSE	2
2022-09-14	12:46:13	0.725102	721.616	FALSE	2
2022-09-14	12:46:13	0.739351	722.355	FALSE	2
2022-09-14	12:46:13	0.735534	723.091	FALSE	2
2022-09-14	12:46:13	0.73355	723.824	FALSE	2
2022-09-14	12:46:14	0.7307	724.555	FALSE	2
2022-09-14	12:46:14	0.713397	725.268	FALSE	2
2022-09-14	12:46:14	0.722965	725.991	FALSE	2
2022-09-14	12:46:15	0.725204	726.716	FALSE	2
2022-09-14	12:46:15	0.72729	727.444	FALSE	2
2022-09-14	12:46:15	0.73243	728.176	FALSE	2
2022-09-14	12:46:15	0.72383	728.9	FALSE	2
2022-09-14	12:46:16	0.726781	729.627	FALSE	2
2022-09-14	12:46:16	0.726425	730.353	FALSE	2
2022-09-14	12:46:16	0.724135	731.077	FALSE	2
2022-09-14	12:46:16	0.722252	731.8	FALSE	2
2022-09-14	12:46:17	0.725763	732.525	FALSE	2
2022-09-14	12:46:17	0.734466	733.26	FALSE	2
2022-09-14	12:46:17	0.731616	733.991	FALSE	2
2022-09-14	12:46:17	0.730394	734.722	FALSE	2
2022-09-14	12:46:18	0.728461	735.45	FALSE	2
2022-09-14	12:46:18	0.718791	736.169	FALSE	2
2022-09-14	12:46:18	0.728512	736.898	FALSE	2
2022-09-14	12:46:19	0.729428	737.627	FALSE	2
2022-09-14	12:46:19	0.726323	738.353	FALSE	2
2022-09-14	12:46:19	0.725458	739.079	FALSE	2
2022-09-14	12:46:19	0.722608	739.801	FALSE	2
2022-09-14	12:46:20	0.735992	740.537	FALSE	2
2022-09-14	12:46:20	0.727443	741.265	FALSE	2
2022-09-14	12:46:20	0.726578	741.991	FALSE	2
2022-09-14	12:46:20	0.725254	742.717	FALSE	2
2022-09-14	12:46:21	0.725	743.442	FALSE	2
2022-09-14	12:46:21	0.72444	744.166	FALSE	2
2022-09-14	12:46:21	0.72388	744.89	FALSE	2
2022-09-14	12:46:21	0.728919	745.619	FALSE	2
2022-09-14	12:46:22	0.725204	746.344	FALSE	2
2022-09-14	12:46:22	0.730089	747.074	FALSE	2
2022-09-14	12:46:22	0.731005	747.805	FALSE	2
2022-09-14	12:46:23	0.725509	748.531	FALSE	2
2022-09-14	12:46:23	0.731717	749.262	FALSE	2
2022-09-14	12:46:23	0.732735	749.995	FALSE	2
2022-09-14	12:46:23	0.724949	750.72	FALSE	2
2022-09-14	12:46:24	0.724338	751.444	FALSE	2
2022-09-14	12:46:24	0.725967	752.17	FALSE	2
2022-09-14	12:46:24	0.730954	752.901	FALSE	2
2022-09-14	12:46:24	0.728054	753.629	FALSE	2
2022-09-14	12:46:25	0.763066	754.392	FALSE	2
2022-09-14	12:46:25	5.58434	759.977	1	3
2022-09-14	12:46:25	4.82525	764.802	1	4
2022-09-14	12:46:25	2.18337	766.985	FALSE	4
2022-09-14	12:46:26	0.659962	767.645	FALSE	4
2022-09-14	12:46:26	0.804186	768.45	FALSE	4
2022-09-14	12:46:26	0.435585	768.885	FALSE	4
2022-09-14	12:46:27	0.664898	769.55	FALSE	4
2022-09-14	12:46:27	1.03625	770.586	FALSE	4
2022-09-14	12:46:27	0.972583	771.559	FALSE	4
2022-09-14	12:46:27	1.03742	772.596	FALSE	4
2022-09-14	12:46:28	1.30922	773.905	FALSE	4
2022-09-14	12:46:28	0.855178	774.761	FALSE	4
2022-09-14	12:46:28	1.645	776.406	FALSE	4
2022-09-14	12:46:28	2.04317	778.449	FALSE	4
2022-09-14	12:46:29	3.18225	781.631	1	5
2022-09-14	12:46:29	2.5225	784.154	FALSE	5
2022-09-14	12:46:29	2.19676	786.35	FALSE	5
2022-09-14	12:46:29	2.52897	788.879	FALSE	5
2022-09-14	12:46:30	1.02485	789.904	FALSE	5
2022-09-14	12:46:30	1.37345	791.278	FALSE	5
2022-09-14	12:46:30	0.693346	791.971	FALSE	5
2022-09-14	12:46:31	1.79864	793.77	FALSE	5
2022-09-14	12:46:31	2.94332	796.713	FALSE	5
2022-09-14	12:46:31	5.01365	801.727	1	6
2022-09-14	12:46:31	4.73925	806.466	1	7
2022-09-14	12:46:32	2.63757	809.103	FALSE	7
2022-09-14	12:46:32	3.02062	812.124	1	8
2022-09-14	12:46:32	3.26149	815.386	1	9
2022-09-14	12:46:32	6.39594	821.781	1	10
2022-09-14	12:46:33	4.48571	826.267	1	11
2022-09-14	12:46:33	6.72286	832.99	1	12
2022-09-14	12:46:33	4.49375	837.484	1	13
2022-09-14	12:46:33	3.60556	841.089	1	14
2022-09-14	12:46:34	1.40123	842.491	FALSE	14
2022-09-14	12:46:34	0.753702	843.244	FALSE	14
2022-09-14	12:46:34	0.233346	843.478	FALSE	14
2022-09-14	12:46:35	0.0805727	843.558	FALSE	14
2022-09-14	12:46:35	0.266832	843.825	FALSE	14
2022-09-14	12:46:35	0.0399621	843.865	FALSE	14
2022-09-14	12:46:35	0.381183	844.246	FALSE	14

## Sheet: KimChi_star_2022914124117
						**GoPro Fitting: 12:30
2022-09-14	12:41:17	-0.226806
2022-09-14	12:41:17	-0.135661
2022-09-14	12:41:17	0.118384
2022-09-14	12:41:18	0.0448475
2022-09-14	12:41:18	0.243881
2022-09-14	12:41:18	0.333244
2022-09-14	12:41:19	0.518893
2022-09-14	12:41:19	0.308461
2022-09-14	12:41:19	0.378232
2022-09-14	12:41:19	0.372735
2022-09-14	12:41:20	0.467036
2022-09-14	12:41:20	0.365204
2022-09-14	12:41:20	0.458282
2022-09-14	12:41:20	0.410038
2022-09-14	12:41:21	0.420878
2022-09-14	12:41:21	0.421539
2022-09-14	12:41:21	0.389631
2022-09-14	12:41:22	0.436807
2022-09-14	12:41:22	0.42902
2022-09-14	12:41:22	0.418944
2022-09-14	12:41:22	0.427545
2022-09-14	12:41:23	0.418741
2022-09-14	12:41:23	0.413143
2022-09-14	12:41:23	0.421489
2022-09-14	12:41:23	0.333957
2022-09-14	12:41:24	0.510038
2022-09-14	12:41:24	0.425051
2022-09-14	12:41:24	0.393397
2022-09-14	12:41:24	0.434466
2022-09-14	12:41:25	0.403575
2022-09-14	12:41:25	0.358486
2022-09-14	12:41:25	0.408868
2022-09-14	12:41:26	0.419402
2022-09-14	12:41:26	0.434008
2022-09-14	12:41:26	0.419657
2022-09-14	12:41:26	0.400013
2022-09-14	12:41:27	0.421896
2022-09-14	12:41:27	0.440624
2022-09-14	12:41:27	0.424542
2022-09-14	12:41:27	0.360318
2022-09-14	12:41:28	0.455433
2022-09-14	12:41:28	0.411667
2022-09-14	12:41:28	0.340675
2022-09-14	12:41:28	0.396196
2022-09-14	12:41:29	0.48612
2022-09-14	12:41:29	0.462863
2022-09-14	12:41:29	0.311616
2022-09-14	12:41:30	0.436959
2022-09-14	12:41:30	0.0877483
2022-09-14	12:41:30	0.216603
2022-09-14	12:41:30	0.467341
2022-09-14	12:41:31	0.357316
2022-09-14	12:41:31	0.22388
2022-09-14	12:41:31	-0.326501
2022-09-14	12:41:31	-0.0550506
2022-09-14	12:41:32	-0.00512696
2022-09-14	12:41:32	-0.172659
2022-09-14	12:41:32	0.0295804
2022-09-14	12:41:32	0.242608
2022-09-14	12:41:33	0.314415
2022-09-14	12:41:33	0.288664
2022-09-14	12:41:33	-0.0512847
2022-09-14	12:41:34	-0.365025
2022-09-14	12:41:34	-0.450012
2022-09-14	12:41:34	-0.215814
2022-09-14	12:41:34	-0.259173
2022-09-14	12:41:35	-0.159529
2022-09-14	12:41:35	-0.0759158
2022-09-14	12:41:35	0.324288
2022-09-14	12:41:35	0.441489
2022-09-14	12:41:36	0.350089
2022-09-14	12:41:36	0.322659
2022-09-14	12:41:36	0.221234
2022-09-14	12:41:37	0.258079
2022-09-14	12:41:37	0.432379
2022-09-14	12:41:37	0.330852
2022-09-14	12:41:37	0.440573
2022-09-14	12:41:38	0.264288
2022-09-14	12:41:38	-0.0548471
2022-09-14	12:41:38	-0.319325
2022-09-14	12:41:38	0.00744298
2022-09-14	12:41:39	0.0291733
2022-09-14	12:41:39	0.132227
2022-09-14	12:41:39	0.531463
2022-09-14	12:41:39	0.388613
2022-09-14	12:41:40	0.640522
2022-09-14	12:41:40	1.56388
2022-09-14	12:41:40	1.92062
2022-09-14	12:41:41	1.971
2022-09-14	12:41:41	1.83859
2022-09-14	12:41:41	0.971514
2022-09-14	12:41:41	0.342964
2022-09-14	12:41:42	0.668664
2022-09-14	12:41:42	0.355382
2022-09-14	12:41:42	0.361896
2022-09-14	12:41:43	0.318384
2022-09-14	12:41:43	0.490293
2022-09-14	12:41:43	1.00464
2022-09-14	12:41:43	2.86927
2022-09-14	12:41:43	0.548054
2022-09-14	12:41:44	0.259555
2022-09-14	12:41:44	0.376705
2022-09-14	12:41:44	0.138232
2022-09-14	12:41:45	0.178842
2022-09-14	12:41:45	0.00530559
2022-09-14	12:41:45	0.133652
2022-09-14	12:41:45	0.177621
2022-09-14	12:41:46	0.0419468
2022-09-14	12:41:46	0.160624
2022-09-14	12:41:46	0.103626
2022-09-14	12:41:46	0.97757
2022-09-14	12:41:47	1.7167
2022-09-14	12:41:47	2.89884
2022-09-14	12:41:47	1.47462
2022-09-14	12:41:47	1.6533
2022-09-14	12:41:48	0.641947
2022-09-14	12:41:48	0.794262
2022-09-14	12:41:48	1.1278
2022-09-14	12:41:49	0.207188
2022-09-14	12:41:49	0.214924
2022-09-14	12:41:49	0.18958
2022-09-14	12:41:49	0.440725
2022-09-14	12:41:50	1.72286
2022-09-14	12:41:50	1.08963
2022-09-14	12:41:50	0.355331
2022-09-14	12:41:50	0.0149748
2022-09-14	12:41:51	0.0801656
2022-09-14	12:41:51	0.0162979
2022-09-14	12:41:51	0.21126
2022-09-14	12:41:52	0.00301552
2022-09-14	12:41:52	0.223677
2022-09-14	12:41:52	0.262557
2022-09-14	12:41:52	0.873549
2022-09-14	12:41:53	0.213092
2022-09-14	12:41:53	0.178181
2022-09-14	12:41:53	0.231565
2022-09-14	12:41:53	0.0651529
2022-09-14	12:41:54	0.310853
2022-09-14	12:41:54	0.273193
2022-09-14	12:41:54	0.898028
2022-09-14	12:41:54	2.11182
2022-09-14	12:41:55	0.993906
2022-09-14	12:41:55	0.563015
2022-09-14	12:41:55	0.791921
2022-09-14	12:41:56	1.00363
2022-09-14	12:41:56	1.43462
2022-09-14	12:41:56	1.71182
2022-09-14	12:41:56	0.323473
2022-09-14	12:41:57	0.371209
2022-09-14	12:41:57	0.153194
2022-09-14	12:41:57	0.270242
2022-09-14	12:41:57	-0.00471985
2022-09-14	12:41:58	0.147036
2022-09-14	12:41:58	-0.0865519
2022-09-14	12:41:58	-0.102939
2022-09-14	12:41:58	-0.040445
2022-09-14	12:41:59	0.148766
2022-09-14	12:41:59	1.1106
2022-09-14	12:41:59	1.43202
2022-09-14	12:42:00	0.414517
2022-09-14	12:42:00	0.145713
2022-09-14	12:42:00	0.202659
2022-09-14	12:42:00	0.0446949
2022-09-14	12:42:01	0.410598
2022-09-14	12:42:01	0.826679
2022-09-14	12:42:01	0.657265
2022-09-14	12:42:01	0.134822
2022-09-14	12:42:02	0.225814
2022-09-14	12:42:02	0.382354
2022-09-14	12:42:02	0.434211
2022-09-14	12:42:02	0.437621
2022-09-14	12:42:03	0.688308
2022-09-14	12:42:03	0.444237
2022-09-14	12:42:03	0.489784
2022-09-14	12:42:04	0.460573
2022-09-14	12:42:04	0.364389
2022-09-14	12:42:04	0.335535
2022-09-14	12:42:04	0.329987
2022-09-14	12:42:05	0.321082
2022-09-14	12:42:05	0.161641
2022-09-14	12:42:05	-0.043244
2022-09-14	12:42:05	0.0493259
2022-09-14	12:42:06	0.0687152
2022-09-14	12:42:06	0.271616
2022-09-14	12:42:06	0.161336
2022-09-14	12:42:07	0.264237
2022-09-14	12:42:07	2.28327
2022-09-14	12:42:07	2.86571
2022-09-14	12:42:07	2.91884
2022-09-14	12:42:08	2.92658
2022-09-14	12:42:08	2.94195
2022-09-14	12:42:08	2.9135
2022-09-14	12:42:08	2.88296
2022-09-14	12:42:09	2.85049
2022-09-14	12:42:09	2.83716
2022-09-14	12:42:09	2.82856
2022-09-14	12:42:09	2.81935
2022-09-14	12:42:10	2.80795
2022-09-14	12:42:10	2.7851
2022-09-14	12:42:10	2.75752
2022-09-14	12:42:11	2.73304
2022-09-14	12:42:11	2.59986
2022-09-14	12:42:11	2.44785
2022-09-14	12:42:11	2.31472
2022-09-14	12:42:12	2.0506
2022-09-14	12:42:12	1.05645
2022-09-14	12:42:12	0.428715
2022-09-14	12:42:12	0.46327
2022-09-14	12:42:13	0.441031
2022-09-14	12:42:13	0.453092
2022-09-14	12:42:13	0.40271
2022-09-14	12:42:13	0.385814
2022-09-14	12:42:14	0.359911
2022-09-14	12:42:14	0.395585
2022-09-14	12:42:14	0.359758
2022-09-14	12:42:15	0.369835
2022-09-14	12:42:15	0.357468
2022-09-14	12:42:15	0.358435
2022-09-14	12:42:15	0.424848
2022-09-14	12:42:16	0.436908
2022-09-14	12:42:16	0.441285
2022-09-14	12:42:16	0.445
2022-09-14	12:42:16	0.450954
2022-09-14	12:42:17	0.596145
2022-09-14	12:42:17	0.972074
2022-09-14	12:42:17	1.94286
2022-09-14	12:42:17	2.57731
2022-09-14	12:42:18	1.94505
2022-09-14	12:42:18	1.29436
2022-09-14	12:42:18	0.916857
2022-09-14	12:42:19	0.705
2022-09-14	12:42:19	0.54444
2022-09-14	12:42:19	0.74673
2022-09-14	12:42:19	0.852837
2022-09-14	12:42:20	1.19207
2022-09-14	12:42:20	1.51905
2022-09-14	12:42:20	0.753092
2022-09-14	12:42:20	1.03452
2022-09-14	12:42:21	0.962354
2022-09-14	12:42:21	1.14678
2022-09-14	12:42:21	1.9508
2022-09-14	12:42:22	2.22749
2022-09-14	12:42:22	1.76831
2022-09-14	12:42:22	0.894262
2022-09-14	12:42:22	1.18093
2022-09-14	12:42:23	0.294669
2022-09-14	12:42:23	0.00433869
2022-09-14	12:42:23	-0.238613
2022-09-14	12:42:23	-0.11332
2022-09-14	12:42:24	-0.480954
2022-09-14	12:42:24	-0.554542
2022-09-14	12:42:24	-0.588231
2022-09-14	12:42:24	-0.371335
2022-09-14	12:42:25	-0.180394
2022-09-14	12:42:25	0.0448984
2022-09-14	12:42:25	0.266985
2022-09-14	12:42:26	0.667341
2022-09-14	12:42:26	1.28897
2022-09-14	12:42:26	2.21218
2022-09-14	12:42:26	2.83889
2022-09-14	12:42:27	3.09167
2022-09-14	12:42:27	4.65477
2022-09-14	12:42:27	2.59609
2022-09-14	12:42:27	2.02408
2022-09-14	12:42:28	1.2849
2022-09-14	12:42:28	1.68195
2022-09-14	12:42:28	1.27676
2022-09-14	12:42:28	1.27732
2022-09-14	12:42:29	0.974567
2022-09-14	12:42:29	1.12571
2022-09-14	12:42:29	0.735687
2022-09-14	12:42:30	0.405662
2022-09-14	12:42:30	0.357621
2022-09-14	12:42:30	0.313092
2022-09-14	12:42:30	0.320471
2022-09-14	12:42:31	0.360827
2022-09-14	12:42:31	0.536756
2022-09-14	12:42:31	1.47747
2022-09-14	12:42:31	1.79548
2022-09-14	12:42:32	0.810242
2022-09-14	12:42:32	0.311565
2022-09-14	12:42:32	0.202608
2022-09-14	12:42:32	0.186832
2022-09-14	12:42:33	0.336603
2022-09-14	12:42:33	0.709326
2022-09-14	12:42:33	0.717774
2022-09-14	12:42:34	0.624898
2022-09-14	12:42:34	1.10592
2022-09-14	12:42:34	1.26042
2022-09-14	12:42:34	0.601946
2022-09-14	12:42:35	0.611972
2022-09-14	12:42:35	0.717163
2022-09-14	12:42:35	0.706272
2022-09-14	12:42:35	0.787188
2022-09-14	12:42:36	0.734771
2022-09-14	12:42:36	0.598384
2022-09-14	12:42:36	0.360878
2022-09-14	12:42:37	0.328511
2022-09-14	12:42:37	0.303015
2022-09-14	12:42:37	0.285255
2022-09-14	12:42:37	0.302964
2022-09-14	12:42:38	0.495687
2022-09-14	12:42:38	1.22383
2022-09-14	12:42:38	0.559504
2022-09-14	12:42:38	0.338842
2022-09-14	12:42:39	0.173753
2022-09-14	12:42:39	0.147596
2022-09-14	12:42:39	0.138079
2022-09-14	12:42:39	0.0377738
2022-09-14	12:42:40	-0.0240074
2022-09-14	12:42:40	-0.207417
2022-09-14	12:42:40	-0.211183
2022-09-14	12:42:41	-0.0666028
2022-09-14	12:42:41	0.102863
2022-09-14	12:42:41	0.799707
2022-09-14	12:42:41	0.823168
2022-09-14	12:42:42	0.280522
2022-09-14	12:42:42	0.381183
2022-09-14	12:42:42	0.151565
2022-09-14	12:42:42	0.18042
2022-09-14	12:42:43	0.251972
2022-09-14	12:42:43	0.637061
2022-09-14	12:42:43	0.630954
2022-09-14	12:42:43	0.512023
2022-09-14	12:42:44	0.371972
2022-09-14	12:42:44	0.455891
2022-09-14	12:42:44	0.411921
2022-09-14	12:42:45	0.419199
2022-09-14	12:42:45	0.394822
2022-09-14	12:42:45	0.395433
2022-09-14	12:42:45	0.468919
2022-09-14	12:42:46	0.49701
2022-09-14	12:42:46	0.372277
2022-09-14	12:42:46	0.252176
2022-09-14	12:42:46	0.357366
2022-09-14	12:42:47	0.36154
2022-09-14	12:42:47	0.545611
2022-09-14	12:42:47	0.629326
2022-09-14	12:42:47	0.698792
2022-09-14	12:42:48	0.599657
2022-09-14	12:42:48	0.653091
2022-09-14	12:42:48	0.63187
2022-09-14	12:42:49	0.645763
2022-09-14	12:42:49	0.743524
2022-09-14	12:42:49	0.776247
2022-09-14	12:42:49	0.697112
2022-09-14	12:42:50	0.603066
2022-09-14	12:42:50	0.643728
2022-09-14	12:42:50	0.714313
2022-09-14	12:42:50	0.624898
2022-09-14	12:42:51	0.524491
2022-09-14	12:42:51	0.447596
2022-09-14	12:42:51	0.555585
2022-09-14	12:42:52	0.424084
2022-09-14	12:42:52	0.418283
2022-09-14	12:42:52	0.713295
2022-09-14	12:42:52	0.716705
2022-09-14	12:42:53	0.713499
2022-09-14	12:42:53	0.714516
2022-09-14	12:42:53	0.716043
2022-09-14	12:42:53	0.714364
2022-09-14	12:42:54	0.720369
2022-09-14	12:42:54	0.717875
2022-09-14	12:42:54	0.715432
2022-09-14	12:42:54	0.706934
2022-09-14	12:42:55	0.106934
2022-09-14	12:42:55	-0.0174934
2022-09-14	12:42:55	-0.00207355
2022-09-14	12:42:56	-0.0652287
2022-09-14	12:42:56	-0.0689946
2022-09-14	12:42:56	-0.120699
2022-09-14	12:42:56	-0.205534
2022-09-14	12:42:57	-0.125941
2022-09-14	12:42:57	-0.0159158
2022-09-14	12:42:57	0.245255
2022-09-14	12:42:57	0.196349
2022-09-14	12:42:58	0.441794
2022-09-14	12:42:58	0.431107
2022-09-14	12:42:58	0.478384
2022-09-14	12:42:58	0.528003
2022-09-14	12:42:59	0.54617
2022-09-14	12:42:59	0.491361
2022-09-14	12:42:59	0.48444
2022-09-14	12:43:00	0.465102
2022-09-14	12:43:00	0.442965
2022-09-14	12:43:00	0.434415
2022-09-14	12:43:00	0.442201
2022-09-14	12:43:01	0.431412
2022-09-14	12:43:01	0.409122
2022-09-14	12:43:01	0.402456
2022-09-14	12:43:01	0.420878
2022-09-14	12:43:02	0.423677
2022-09-14	12:43:02	0.412532
2022-09-14	12:43:02	0.431463
2022-09-14	12:43:02	0.48841
2022-09-14	12:43:03	0.528206
2022-09-14	12:43:03	0.473143
2022-09-14	12:43:03	0.72215
2022-09-14	12:43:04	0.723982
2022-09-14	12:43:04	0.719249
2022-09-14	12:43:04	0.716145
2022-09-14	12:43:04	0.406985
2022-09-14	12:43:05	0.360776
2022-09-14	12:43:05	0.334924
2022-09-14	12:43:05	0.325458
2022-09-14	12:43:05	0.368053
2022-09-14	12:43:06	0.34556
2022-09-14	12:43:06	0.354313
2022-09-14	12:43:06	0.348053
2022-09-14	12:43:07	0.345204
2022-09-14	12:43:07	0.326629
2022-09-14	12:43:07	0.311667
2022-09-14	12:43:07	0.311616
2022-09-14	12:43:08	0.285
2022-09-14	12:43:08	0.26383
2022-09-14	12:43:08	0.278333
2022-09-14	12:43:08	0.288512
2022-09-14	12:43:09	0.303779
2022-09-14	12:43:09	0.285255
2022-09-14	12:43:09	0.289682
2022-09-14	12:43:09	0.301743
2022-09-14	12:43:10	0.30271
2022-09-14	12:43:10	0.301641
2022-09-14	12:43:10	0.308054
2022-09-14	12:43:11	0.303931
2022-09-14	12:43:11	0.309326
2022-09-14	12:43:11	0.313957
2022-09-14	12:43:11	0.31243
2022-09-14	12:43:12	0.333957
2022-09-14	12:43:12	0.315229
2022-09-14	12:43:12	0.329733
2022-09-14	12:43:12	0.328308
2022-09-14	12:43:13	0.338232
2022-09-14	12:43:13	0.351718
2022-09-14	12:43:13	0.336501
2022-09-14	12:43:13	0.332939
2022-09-14	12:43:14	0.328206
2022-09-14	12:43:14	0.341489
2022-09-14	12:43:14	0.336247
2022-09-14	12:43:15	0.391107
2022-09-14	12:43:15	0.431769
2022-09-14	12:43:15	0.45757
2022-09-14	12:43:15	0.521234
2022-09-14	12:43:16	0.556196
2022-09-14	12:43:16	0.556603
2022-09-14	12:43:16	0.563422
2022-09-14	12:43:16	0.575789
2022-09-14	12:43:17	0.722456
2022-09-14	12:43:17	0.720776
2022-09-14	12:43:17	0.719046
2022-09-14	12:43:17	0.722303
2022-09-14	12:43:18	0.724389
2022-09-14	12:43:18	0.727392
2022-09-14	12:43:18	0.716857
2022-09-14	12:43:19	0.717723
2022-09-14	12:43:19	0.715687
2022-09-14	12:43:19	0.717672
2022-09-14	12:43:19	0.717977
2022-09-14	12:43:20	0.717672
2022-09-14	12:43:20	0.722914
2022-09-14	12:43:20	0.720013
2022-09-14	12:43:20	0.719758
2022-09-14	12:43:21	0.721336
2022-09-14	12:43:21	0.717468
2022-09-14	12:43:21	0.716654
2022-09-14	12:43:21	0.722608
2022-09-14	12:43:22	0.709071
2022-09-14	12:43:22	0.718435
2022-09-14	12:43:22	0.718639
2022-09-14	12:43:23	0.716705
2022-09-14	12:43:23	0.71757
2022-09-14	12:43:23	0.717316
2022-09-14	12:43:23	0.719707
2022-09-14	12:43:24	0.716807
2022-09-14	12:43:24	0.719962
2022-09-14	12:43:24	0.722914
2022-09-14	12:43:24	0.726781
2022-09-14	12:43:25	0.715738
2022-09-14	12:43:25	0.718486
2022-09-14	12:43:25	0.715789
2022-09-14	12:43:26	0.719707
2022-09-14	12:43:26	0.716501
2022-09-14	12:43:26	0.722761
2022-09-14	12:43:26	0.717468
2022-09-14	12:43:27	0.721387
2022-09-14	12:43:27	0.719046
2022-09-14	12:43:27	0.717824
2022-09-14	12:43:27	0.423728
2022-09-14	12:43:28	0.440878
2022-09-14	12:43:28	0.461896
2022-09-14	12:43:28	0.459758
2022-09-14	12:43:28	0.460522
2022-09-14	12:43:29	0.709682
2022-09-14	12:43:29	0.717977
2022-09-14	12:43:29	0.716349
2022-09-14	12:43:30	0.719656
2022-09-14	12:43:30	0.718232
2022-09-14	12:43:30	0.715738
2022-09-14	12:43:30	0.718232
2022-09-14	12:43:31	0.713041
2022-09-14	12:43:31	0.717468
2022-09-14	12:43:31	0.714873
2022-09-14	12:43:31	0.716959
2022-09-14	12:43:32	0.718995
2022-09-14	12:43:32	0.717468
2022-09-14	12:43:32	0.716298
2022-09-14	12:43:32	0.721081
2022-09-14	12:43:33	0.71299
2022-09-14	12:43:33	0.726221
2022-09-14	12:43:33	0.71874
2022-09-14	12:43:34	0.719046
2022-09-14	12:43:34	0.718639
2022-09-14	12:43:34	0.716399
2022-09-14	12:43:34	0.721132
2022-09-14	12:43:35	0.721285
2022-09-14	12:43:35	0.718893
2022-09-14	12:43:35	0.713346
2022-09-14	12:43:35	0.715382
2022-09-14	12:43:36	0.71813
2022-09-14	12:43:36	0.720267
2022-09-14	12:43:36	0.715534
2022-09-14	12:43:36	0.719453
2022-09-14	12:43:37	0.719606
2022-09-14	12:43:37	0.720521
2022-09-14	12:43:37	0.717926
2022-09-14	12:43:38	0.724135
2022-09-14	12:43:38	0.719148
2022-09-14	12:43:38	0.723168
2022-09-14	12:43:38	0.721539
2022-09-14	12:43:39	0.722507
2022-09-14	12:43:39	0.721591
2022-09-14	12:43:39	0.716654
2022-09-14	12:43:39	0.719911
2022-09-14	12:43:40	0.721895
2022-09-14	12:43:40	0.716501
2022-09-14	12:43:40	0.711463
2022-09-14	12:43:40	0.71757
2022-09-14	12:43:41	0.708613
2022-09-14	12:43:41	0.721387
2022-09-14	12:43:41	0.721794
2022-09-14	12:43:42	0.713143
2022-09-14	12:43:42	0.721183
2022-09-14	12:43:42	0.726069
2022-09-14	12:43:42	0.71528
2022-09-14	12:43:43	0.718079
2022-09-14	12:43:43	0.719351
2022-09-14	12:43:43	0.726629
2022-09-14	12:43:43	0.727188
2022-09-14	12:43:44	0.717061
2022-09-14	12:43:44	0.714924
2022-09-14	12:43:44	0.722201
2022-09-14	12:43:45	0.716399
2022-09-14	12:43:45	0.720114
2022-09-14	12:43:45	0.72215
2022-09-14	12:43:45	0.715992
2022-09-14	12:43:46	0.716552
2022-09-14	12:43:46	0.718079
2022-09-14	12:43:46	0.721488
2022-09-14	12:43:46	0.716603
2022-09-14	12:43:47	0.719606
2022-09-14	12:43:47	0.721692
2022-09-14	12:43:47	0.728104
2022-09-14	12:43:47	0.722862
2022-09-14	12:43:48	0.721794
2022-09-14	12:43:48	0.718893
2022-09-14	12:43:48	0.725153
2022-09-14	12:43:49	0.727443
2022-09-14	12:43:49	0.717366
2022-09-14	12:43:49	0.721234
2022-09-14	12:43:49	0.716399
2022-09-14	12:43:50	0.713855
2022-09-14	12:43:50	0.729886
2022-09-14	12:43:50	0.71355
2022-09-14	12:43:50	0.717621
2022-09-14	12:43:51	0.711107
2022-09-14	12:43:51	0.725102
2022-09-14	12:43:51	0.721591
2022-09-14	12:43:51	0.71986
2022-09-14	12:43:52	0.724338
2022-09-14	12:43:52	0.721591
2022-09-14	12:43:52	0.720114
2022-09-14	12:43:53	0.721437
2022-09-14	12:43:53	0.722761
2022-09-14	12:43:53	0.716908
2022-09-14	12:43:53	0.728461
2022-09-14	12:43:54	0.715483
2022-09-14	12:43:54	0.718486
2022-09-14	12:43:54	0.719809
2022-09-14	12:43:54	0.726272
2022-09-14	12:43:55	0.715738
2022-09-14	12:43:55	0.729784
2022-09-14	12:43:55	0.725865
2022-09-14	12:43:55	0.728562
2022-09-14	12:43:56	0.720572
2022-09-14	12:43:56	0.714974
2022-09-14	12:43:56	0.726578
2022-09-14	12:43:57	0.720114
2022-09-14	12:43:57	0.719707
2022-09-14	12:43:57	0.71472
2022-09-14	12:43:57	0.725051
2022-09-14	12:43:58	0.726781
2022-09-14	12:43:58	0.720623
2022-09-14	12:43:58	0.724542
2022-09-14	12:43:58	0.724389
2022-09-14	12:43:59	0.72388
2022-09-14	12:43:59	0.718028
2022-09-14	12:43:59	0.71701
2022-09-14	12:44:00	0.71813
2022-09-14	12:44:00	0.722965
2022-09-14	12:44:00	0.716857
2022-09-14	12:44:00	0.719351
2022-09-14	12:44:01	0.724084
2022-09-14	12:44:01	0.725305
2022-09-14	12:44:01	0.725
2022-09-14	12:44:01	0.728766
2022-09-14	12:44:02	0.717519
2022-09-14	12:44:02	0.720369
2022-09-14	12:44:02	0.727137
2022-09-14	12:44:02	0.720267
2022-09-14	12:44:03	0.725662
2022-09-14	12:44:03	0.725051
2022-09-14	12:44:03	0.720827
2022-09-14	12:44:04	0.731158
2022-09-14	12:44:04	0.727036
2022-09-14	12:44:04	0.723066
2022-09-14	12:44:04	0.718995
2022-09-14	12:44:05	0.720165
2022-09-14	12:44:05	0.716501
2022-09-14	12:44:05	0.725102
2022-09-14	12:44:05	0.725204
2022-09-14	12:44:06	0.719606
2022-09-14	12:44:06	0.716857
2022-09-14	12:44:06	0.724186
2022-09-14	12:44:06	0.721997
2022-09-14	12:44:07	0.72388
2022-09-14	12:44:07	0.719046
2022-09-14	12:44:07	0.723779
2022-09-14	12:44:08	0.716705
2022-09-14	12:44:08	0.723931
2022-09-14	12:44:08	0.721336
2022-09-14	12:44:08	0.724033
2022-09-14	12:44:09	0.722252
2022-09-14	12:44:09	0.727545
2022-09-14	12:44:09	0.725204
2022-09-14	12:44:09	0.728919
2022-09-14	12:44:10	0.732328
2022-09-14	12:44:10	0.726272
2022-09-14	12:44:10	0.725509
2022-09-14	12:44:10	0.721794
2022-09-14	12:44:11	0.729835
2022-09-14	12:44:11	0.718232
2022-09-14	12:44:11	0.722303
2022-09-14	12:44:12	0.727036
2022-09-14	12:44:12	0.723117
2022-09-14	12:44:12	0.71472
2022-09-14	12:44:12	0.725407
2022-09-14	12:44:13	0.719758
2022-09-14	12:44:13	0.728054
2022-09-14	12:44:13	0.729529
2022-09-14	12:44:13	0.727697
2022-09-14	12:44:14	0.724847
2022-09-14	12:44:14	0.723524
2022-09-14	12:44:14	0.725407
2022-09-14	12:44:14	0.724288
2022-09-14	12:44:15	0.719504
2022-09-14	12:44:15	0.718028
2022-09-14	12:44:15	0.733957
2022-09-14	12:44:16	0.730293
2022-09-14	12:44:16	0.725305
2022-09-14	12:44:16	0.720979
2022-09-14	12:44:16	0.721183
2022-09-14	12:44:17	0.72612
2022-09-14	12:44:17	0.724644
2022-09-14	12:44:17	0.728512
2022-09-14	12:44:17	0.721539
2022-09-14	12:44:18	0.718486
2022-09-14	12:44:18	0.718639
2022-09-14	12:44:18	0.721641
2022-09-14	12:44:19	0.71757
2022-09-14	12:44:19	0.725611
2022-09-14	12:44:19	0.714516
2022-09-14	12:44:19	0.728512
2022-09-14	12:44:20	0.720165
2022-09-14	12:44:20	0.722252
2022-09-14	12:44:20	0.723066
2022-09-14	12:44:20	0.721692
2022-09-14	12:44:21	0.725356
2022-09-14	12:44:21	0.713397
2022-09-14	12:44:21	0.719504
2022-09-14	12:44:21	0.727545
2022-09-14	12:44:22	0.723626
2022-09-14	12:44:22	0.727697
2022-09-14	12:44:22	0.729377
2022-09-14	12:44:23	0.381438
2022-09-14	12:44:23	0.723168
2022-09-14	12:44:23	0.719809
2022-09-14	12:44:23	1.31452
2022-09-14	12:44:24	0.795891
2022-09-14	12:44:24	0.725662
2022-09-14	12:44:24	0.72841
2022-09-14	12:44:24	0.723779
2022-09-14	12:44:25	0.732786
2022-09-14	12:44:25	0.723219
2022-09-14	12:44:25	0.719504
2022-09-14	12:44:25	0.724796
2022-09-14	12:44:26	0.726832
2022-09-14	12:44:26	0.722862
2022-09-14	12:44:26	0.72271
2022-09-14	12:44:27	0.720318
2022-09-14	12:44:27	0.728766
2022-09-14	12:44:27	0.726934
2022-09-14	12:44:27	0.719707
2022-09-14	12:44:28	0.717672
2022-09-14	12:44:28	0.715382
2022-09-14	12:44:28	0.719402
2022-09-14	12:44:28	0.730598
2022-09-14	12:44:29	0.734466
2022-09-14	12:44:29	0.731768
2022-09-14	12:44:29	0.729224
2022-09-14	12:44:29	0.727137
2022-09-14	12:44:30	0.72958
2022-09-14	12:44:30	0.723219
2022-09-14	12:44:30	0.729784
2022-09-14	12:44:31	0.728359
2022-09-14	12:44:31	0.729224
2022-09-14	12:44:31	0.727697
2022-09-14	12:44:31	0.729173
2022-09-14	12:44:32	0.726323
2022-09-14	12:44:32	0.723931
2022-09-14	12:44:32	0.731107
2022-09-14	12:44:32	0.720979
2022-09-14	12:44:33	0.72902
2022-09-14	12:44:33	0.717366
2022-09-14	12:44:33	0.726221
2022-09-14	12:44:33	0.728003
2022-09-14	12:44:34	0.72327
2022-09-14	12:44:34	0.784389
2022-09-14	12:44:34	0.729682
2022-09-14	12:44:35	0.73528
2022-09-14	12:44:35	0.720979
2022-09-14	12:44:35	0.72215
2022-09-14	12:44:35	0.719758
2022-09-14	12:44:36	0.722761
2022-09-14	12:44:36	0.716908
2022-09-14	12:44:36	0.719809
2022-09-14	12:44:36	0.723982
2022-09-14	12:44:37	0.717265
2022-09-14	12:44:37	0.733702
2022-09-14	12:44:37	0.726476
2022-09-14	12:44:38	0.735483
2022-09-14	12:44:38	0.726781
2022-09-14	12:44:38	0.725254
2022-09-14	12:44:38	0.729478
2022-09-14	12:44:39	0.733397
2022-09-14	12:44:39	0.728054
2022-09-14	12:44:39	0.732837
2022-09-14	12:44:39	0.721641
2022-09-14	12:44:40	0.722404
2022-09-14	12:44:40	0.729275
2022-09-14	12:44:40	0.7307
2022-09-14	12:44:40	0.723677
2022-09-14	12:44:41	0.735941
2022-09-14	12:44:41	0.72556
2022-09-14	12:44:41	0.725102
2022-09-14	12:44:41	0.722456
2022-09-14	12:44:42	0.721488
2022-09-14	12:44:42	0.726934
2022-09-14	12:44:42	0.725407
2022-09-14	12:44:43	0.725407
2022-09-14	12:44:43	0.723982
2022-09-14	12:44:43	0.729326
2022-09-14	12:44:43	0.774364
2022-09-14	12:44:44	0.728512
2022-09-14	12:44:44	0.726069
2022-09-14	12:44:44	0.722252
2022-09-14	12:44:44	0.728715
2022-09-14	12:44:45	0.724542
2022-09-14	12:44:45	0.726781
2022-09-14	12:44:45	0.730903
2022-09-14	12:44:46	0.728664
2022-09-14	12:44:46	0.725916
2022-09-14	12:44:46	0.726425
2022-09-14	12:44:46	0.363779
2022-09-14	12:44:47	0.693855
2022-09-14	12:44:47	0.724542
2022-09-14	12:44:47	0.728562
2022-09-14	12:44:47	0.730343
2022-09-14	12:44:48	0.733346
2022-09-14	12:44:48	0.718791
2022-09-14	12:44:48	0.725407
2022-09-14	12:44:48	0.723931
2022-09-14	12:44:49	0.720318
2022-09-14	12:44:49	0.720267
2022-09-14	12:44:49	0.724695
2022-09-14	12:44:50	0.724746
2022-09-14	12:44:50	0.719758
2022-09-14	12:44:50	0.71757
2022-09-14	12:44:50	0.703372
2022-09-14	12:44:51	0.708664
2022-09-14	12:44:51	0.696298
2022-09-14	12:44:51	0.699198
2022-09-14	12:44:51	0.699656
2022-09-14	12:44:52	0.686374
2022-09-14	12:44:52	0.671565
2022-09-14	12:44:52	0.667341
2022-09-14	12:44:52	0.66673
2022-09-14	12:44:53	0.654364
2022-09-14	12:44:53	0.637672
2022-09-14	12:44:53	0.630547
2022-09-14	12:44:54	0.617723
2022-09-14	12:44:54	0.629326
2022-09-14	12:44:54	0.727188
2022-09-14	12:44:54	0.727545
2022-09-14	12:44:55	0.726272
2022-09-14	12:44:55	0.730394
2022-09-14	12:44:55	0.730394
2022-09-14	12:44:55	0.730089
2022-09-14	12:44:56	0.724796
2022-09-14	12:44:56	0.724389
2022-09-14	12:44:56	0.721845
2022-09-14	12:44:56	0.717621
2022-09-14	12:44:57	0.733092
2022-09-14	12:44:57	0.727748
2022-09-14	12:44:57	0.724135
2022-09-14	12:44:58	0.724542
2022-09-14	12:44:58	0.714618
2022-09-14	12:44:58	0.712685
2022-09-14	12:44:58	0.709478
2022-09-14	12:44:59	0.692125
2022-09-14	12:44:59	0.69131
2022-09-14	12:44:59	0.649784
2022-09-14	12:44:59	0.64327
2022-09-14	12:45:00	0.630242
2022-09-14	12:45:00	0.626934
2022-09-14	12:45:00	0.609224
2022-09-14	12:45:00	0.579758
2022-09-14	12:45:01	0.568308
2022-09-14	12:45:01	0.527748
2022-09-14	12:45:01	0.509682
2022-09-14	12:45:02	0.522964
2022-09-14	12:45:02	0.523015
2022-09-14	12:45:02	0.505611
2022-09-14	12:45:02	0.506272
2022-09-14	12:45:03	0.532684
2022-09-14	12:45:03	0.538079
2022-09-14	12:45:03	0.534211
2022-09-14	12:45:03	0.598232
2022-09-14	12:45:04	0.525305
2022-09-14	12:45:04	0.579046
2022-09-14	12:45:04	0.520165
2022-09-14	12:45:04	0.484644
2022-09-14	12:45:05	0.477621
2022-09-14	12:45:05	0.437417
2022-09-14	12:45:05	0.404186
2022-09-14	12:45:06	0.337519
2022-09-14	12:45:06	0.35126
2022-09-14	12:45:06	0.309784
2022-09-14	12:45:06	0.293295
2022-09-14	12:45:07	0.293652
2022-09-14	12:45:07	0.30673
2022-09-14	12:45:07	0.362761
2022-09-14	12:45:07	0.540063
2022-09-14	12:45:08	0.849326
2022-09-14	12:45:08	0.652175
2022-09-14	12:45:08	0.629478
2022-09-14	12:45:08	0.401132
2022-09-14	12:45:09	0.380624
2022-09-14	12:45:09	0.405102
2022-09-14	12:45:09	0.416552
2022-09-14	12:45:10	0.419148
2022-09-14	12:45:10	0.388359
2022-09-14	12:45:10	0.421539
2022-09-14	12:45:10	0.366425
2022-09-14	12:45:11	0.360318
2022-09-14	12:45:11	0.367443
2022-09-14	12:45:11	0.351718
2022-09-14	12:45:11	0.394211
2022-09-14	12:45:12	0.351005
2022-09-14	12:45:12	0.427545
2022-09-14	12:45:12	0.404746
2022-09-14	12:45:13	0.60729
2022-09-14	12:45:13	0.706883
2022-09-14	12:45:13	0.623779
2022-09-14	12:45:13	0.620369
2022-09-14	12:45:14	0.453397
2022-09-14	12:45:14	0.567341
2022-09-14	12:45:14	0.496705
2022-09-14	12:45:14	0.499097
2022-09-14	12:45:15	0.794669
2022-09-14	12:45:15	0.411565
2022-09-14	12:45:15	0.682405
2022-09-14	12:45:15	0.438486
2022-09-14	12:45:16	0.43411
2022-09-14	12:45:16	0.194415
2022-09-14	12:45:16	0.130445
2022-09-14	12:45:17	0.121947
2022-09-14	12:45:17	0.127341
2022-09-14	12:45:17	0.11584
2022-09-14	12:45:17	0.0914124
2022-09-14	12:45:18	0.0775193
2022-09-14	12:45:18	0.00164146
2022-09-14	12:45:18	-0.0620226
2022-09-14	12:45:18	-0.130267
2022-09-14	12:45:19	-0.125331
2022-09-14	12:45:19	-0.120038
2022-09-14	12:45:19	-0.182582
2022-09-14	12:45:19	-0.261208
2022-09-14	12:45:20	-0.292913
2022-09-14	12:45:20	-0.310318
2022-09-14	12:45:20	-0.216933
2022-09-14	12:45:21	0.729173
2022-09-14	12:45:21	0.726476
2022-09-14	12:45:21	0.725305
2022-09-14	12:45:21	0.726425
2022-09-14	12:45:22	0.688868
2022-09-14	12:45:22	0.79757
2022-09-14	12:45:22	0.72612
2022-09-14	12:45:22	0.72617
2022-09-14	12:45:23	0.728562
2022-09-14	12:45:23	0.721641
2022-09-14	12:45:23	0.724491
2022-09-14	12:45:23	0.718893
2022-09-14	12:45:24	0.727443
2022-09-14	12:45:24	0.723931
2022-09-14	12:45:24	0.722354
2022-09-14	12:45:25	0.730598
2022-09-14	12:45:25	0.731463
2022-09-14	12:45:25	0.728257
2022-09-14	12:45:25	0.735891
2022-09-14	12:45:26	0.728512
2022-09-14	12:45:26	0.72271
2022-09-14	12:45:26	0.725509
2022-09-14	12:45:26	0.728206
2022-09-14	12:45:27	0.56215
2022-09-14	12:45:27	0.748562
2022-09-14	12:45:27	0.730343
2022-09-14	12:45:27	0.719402
2022-09-14	12:45:28	0.727239
2022-09-14	12:45:28	0.727392
2022-09-14	12:45:28	0.725
2022-09-14	12:45:29	0.727646
2022-09-14	12:45:29	0.725865
2022-09-14	12:45:29	0.720827
2022-09-14	12:45:29	0.725967
2022-09-14	12:45:30	0.728715
2022-09-14	12:45:30	0.724491
2022-09-14	12:45:30	0.721845
2022-09-14	12:45:30	0.730801
2022-09-14	12:45:31	0.725611
2022-09-14	12:45:31	0.733142
2022-09-14	12:45:31	0.736043
2022-09-14	12:45:31	0.728664
2022-09-14	12:45:32	0.722404
2022-09-14	12:45:32	0.733957
2022-09-14	12:45:32	0.726221
2022-09-14	12:45:33	0.724338
2022-09-14	12:45:33	0.735178
2022-09-14	12:45:33	0.727697
2022-09-14	12:45:33	0.725967
2022-09-14	12:45:34	0.724593
2022-09-14	12:45:34	0.731768
2022-09-14	12:45:34	0.73187
2022-09-14	12:45:34	0.727646
2022-09-14	12:45:35	0.725356
2022-09-14	12:45:35	0.73014
2022-09-14	12:45:35	0.734313
2022-09-14	12:45:36	0.726679
2022-09-14	12:45:36	0.728461
2022-09-14	12:45:36	0.725407
2022-09-14	12:45:36	0.72785
2022-09-14	12:45:37	0.729784
2022-09-14	12:45:37	0.731565
2022-09-14	12:45:37	0.729326
2022-09-14	12:45:37	0.728613
2022-09-14	12:45:38	0.727392
2022-09-14	12:45:38	0.729122
2022-09-14	12:45:38	0.726425
2022-09-14	12:45:38	0.730038
2022-09-14	12:45:39	0.723779
2022-09-14	12:45:39	0.726934
2022-09-14	12:45:39	0.253906
2022-09-14	12:45:40	-0.582175
2022-09-14	12:45:40	0.728054
2022-09-14	12:45:40	0.724237
2022-09-14	12:45:40	0.727087
2022-09-14	12:45:41	0.733092
2022-09-14	12:45:41	0.729326
2022-09-14	12:45:41	0.72958
2022-09-14	12:45:41	0.731972
2022-09-14	12:45:42	0.731667
2022-09-14	12:45:42	0.0684608
2022-09-14	12:45:42	0.149784
2022-09-14	12:45:42	0.649224
2022-09-14	12:45:43	0.72612
2022-09-14	12:45:43	0.726272
2022-09-14	12:45:43	0.726374
2022-09-14	12:45:44	0.726018
2022-09-14	12:45:44	0.727443
2022-09-14	12:45:44	0.725407
2022-09-14	12:45:44	0.717112
2022-09-14	12:45:45	0.729784
2022-09-14	12:45:45	0.724746
2022-09-14	12:45:45	0.72556
2022-09-14	12:45:45	0.729987
2022-09-14	12:45:46	0.723626
2022-09-14	12:45:46	0.722252
2022-09-14	12:45:46	0.722812
2022-09-14	12:45:46	0.726221
2022-09-14	12:45:47	0.722557
2022-09-14	12:45:47	0.722557
2022-09-14	12:45:47	0.729631
2022-09-14	12:45:48	0.732735
2022-09-14	12:45:48	0.736756
2022-09-14	12:45:48	0.726323
2022-09-14	12:45:48	0.725102
2022-09-14	12:45:49	0.734313
2022-09-14	12:45:49	0.724644
2022-09-14	12:45:49	0.733295
2022-09-14	12:45:49	0.708715
2022-09-14	12:45:50	0.164542
2022-09-14	12:45:50	-0.227977
2022-09-14	12:45:50	-0.172404
2022-09-14	12:45:50	0.726883
2022-09-14	12:45:51	0.724491
2022-09-14	12:45:51	0.731463
2022-09-14	12:45:51	0.725407
2022-09-14	12:45:52	0.720776
2022-09-14	12:45:52	0.72444
2022-09-14	12:45:52	0.723728
2022-09-14	12:45:52	0.723066
2022-09-14	12:45:53	0.728104
2022-09-14	12:45:53	0.731107
2022-09-14	12:45:53	0.728359
2022-09-14	12:45:53	0.736857
2022-09-14	12:45:54	0.727646
2022-09-14	12:45:54	0.719351
2022-09-14	12:45:54	0.721845
2022-09-14	12:45:54	0.731768
2022-09-14	12:45:55	0.729682
2022-09-14	12:45:55	0.736145
2022-09-14	12:45:55	0.726527
2022-09-14	12:45:56	0.72902
2022-09-14	12:45:56	0.730293
2022-09-14	12:45:56	0.729835
2022-09-14	12:45:56	0.728562
2022-09-14	12:45:57	0.734975
2022-09-14	12:45:57	0.72556
2022-09-14	12:45:57	0.724695
2022-09-14	12:45:57	0.566628
2022-09-14	12:45:58	0.863931
2022-09-14	12:45:58	0.444491
2022-09-14	12:45:58	0.714415
2022-09-14	12:45:58	0.72729
2022-09-14	12:45:59	0.731667
2022-09-14	12:45:59	0.722608
2022-09-14	12:45:59	0.725458
2022-09-14	12:46:00	0.728359
2022-09-14	12:46:00	0.733244
2022-09-14	12:46:00	0.730547
2022-09-14	12:46:00	0.725611
2022-09-14	12:46:01	0.726527
2022-09-14	12:46:01	0.736349
2022-09-14	12:46:01	0.727341
2022-09-14	12:46:01	0.721488
2022-09-14	12:46:02	0.724237
2022-09-14	12:46:02	0.727545
2022-09-14	12:46:02	0.726934
2022-09-14	12:46:02	0.731056
2022-09-14	12:46:03	0.729886
2022-09-14	12:46:03	0.721692
2022-09-14	12:46:03	0.727748
2022-09-14	12:46:04	0.728664
2022-09-14	12:46:04	0.725865
2022-09-14	12:46:04	0.731768
2022-09-14	12:46:04	0.725204
2022-09-14	12:46:05	0.728919
2022-09-14	12:46:05	0.727188
2022-09-14	12:46:05	0.72388
2022-09-14	12:46:05	0.724847
2022-09-14	12:46:06	0.728512
2022-09-14	12:46:06	0.727952
2022-09-14	12:46:06	0.726832
2022-09-14	12:46:06	0.731819
2022-09-14	12:46:07	0.727596
2022-09-14	12:46:07	0.728461
2022-09-14	12:46:07	0.72958
2022-09-14	12:46:08	0.724898
2022-09-14	12:46:08	0.725611
2022-09-14	12:46:08	0.730293
2022-09-14	12:46:08	0.731412
2022-09-14	12:46:09	0.725204
2022-09-14	12:46:09	0.725051
2022-09-14	12:46:09	0.728308
2022-09-14	12:46:09	0.722252
2022-09-14	12:46:10	0.727494
2022-09-14	12:46:10	0.730598
2022-09-14	12:46:10	0.724898
2022-09-14	12:46:11	0.729275
2022-09-14	12:46:11	0.725967
2022-09-14	12:46:11	0.744745
2022-09-14	12:46:11	0.72103
2022-09-14	12:46:12	0.729529
2022-09-14	12:46:12	0.721743
2022-09-14	12:46:12	0.739606
2022-09-14	12:46:12	0.728257
2022-09-14	12:46:13	0.725102
2022-09-14	12:46:13	0.739351
2022-09-14	12:46:13	0.735534
2022-09-14	12:46:13	0.73355
2022-09-14	12:46:14	0.7307
2022-09-14	12:46:14	0.713397
2022-09-14	12:46:14	0.722965
2022-09-14	12:46:15	0.725204
2022-09-14	12:46:15	0.72729
2022-09-14	12:46:15	0.73243
2022-09-14	12:46:15	0.72383
2022-09-14	12:46:16	0.726781
2022-09-14	12:46:16	0.726425
2022-09-14	12:46:16	0.724135
2022-09-14	12:46:16	0.722252
2022-09-14	12:46:17	0.725763
2022-09-14	12:46:17	0.734466
2022-09-14	12:46:17	0.731616
2022-09-14	12:46:17	0.730394
2022-09-14	12:46:18	0.728461
2022-09-14	12:46:18	0.718791
2022-09-14	12:46:18	0.728512
2022-09-14	12:46:19	0.729428
2022-09-14	12:46:19	0.726323
2022-09-14	12:46:19	0.725458
2022-09-14	12:46:19	0.722608
2022-09-14	12:46:20	0.735992
2022-09-14	12:46:20	0.727443
2022-09-14	12:46:20	0.726578
2022-09-14	12:46:20	0.725254
2022-09-14	12:46:21	0.725
2022-09-14	12:46:21	0.72444
2022-09-14	12:46:21	0.72388
2022-09-14	12:46:21	0.728919
2022-09-14	12:46:22	0.725204
2022-09-14	12:46:22	0.730089
2022-09-14	12:46:22	0.731005
2022-09-14	12:46:23	0.725509
2022-09-14	12:46:23	0.731717
2022-09-14	12:46:23	0.732735
2022-09-14	12:46:23	0.724949
2022-09-14	12:46:24	0.724338
2022-09-14	12:46:24	0.725967
2022-09-14	12:46:24	0.730954
2022-09-14	12:46:24	0.728054
2022-09-14	12:46:25	0.763066
2022-09-14	12:46:25	5.58434
2022-09-14	12:46:25	4.82525
2022-09-14	12:46:25	2.18337
2022-09-14	12:46:26	0.659962
2022-09-14	12:46:26	0.804186
2022-09-14	12:46:26	0.435585
2022-09-14	12:46:27	0.664898
2022-09-14	12:46:27	1.03625
2022-09-14	12:46:27	0.972583
2022-09-14	12:46:27	1.03742
2022-09-14	12:46:28	1.30922
2022-09-14	12:46:28	0.855178
2022-09-14	12:46:28	1.645
2022-09-14	12:46:28	2.04317
2022-09-14	12:46:29	3.18225
2022-09-14	12:46:29	2.5225
2022-09-14	12:46:29	2.19676
2022-09-14	12:46:29	2.52897
2022-09-14	12:46:30	1.02485
2022-09-14	12:46:30	1.37345
2022-09-14	12:46:30	0.693346
2022-09-14	12:46:31	1.79864
2022-09-14	12:46:31	2.94332
2022-09-14	12:46:31	5.01365
2022-09-14	12:46:31	4.73925
2022-09-14	12:46:32	2.63757
2022-09-14	12:46:32	3.02062
2022-09-14	12:46:32	3.26149
2022-09-14	12:46:32	6.39594
2022-09-14	12:46:33	4.48571
2022-09-14	12:46:33	6.72286
2022-09-14	12:46:33	4.49375
2022-09-14	12:46:33	3.60556
2022-09-14	12:46:34	1.40123
2022-09-14	12:46:34	0.753702
2022-09-14	12:46:34	0.233346
2022-09-14	12:46:35	0.0805727
2022-09-14	12:46:35	0.266832
2022-09-14	12:46:35	0.0399621
2022-09-14	12:46:35	0.381183
