# Supplementary material for: Comparing efficacy in reducing pulling and welfare impacts of four types of leash walking equipment
Source: PeerJ journal article supplement (doi:10.7717/peerj.18131), 2024-10-24
Supplement: Shelter_2_Tension_files.zip [file Klutz_harness_202291593924 copy.xlsx]

## Sheet: Averaged Newtons
Date	Time	Averaged newtons	Impulse	Total steps
2022-09-15	09:39:44	1.37538	1.37538	0		Impulse newtons	1753.19
2022-09-15	09:39:45	1.20243	2.57781	0		Total steps	45
2022-09-15	09:39:46	7.18773	9.76553	0		# > 5 sec	3
2022-09-15	09:39:47	1.67419	11.4397	0
2022-09-15	09:39:48	0.260837	11.7006	0
2022-09-15	09:39:49	1.13259	12.8332	0
2022-09-15	09:39:50	1.2786	14.1118	0
2022-09-15	09:39:51	-0.0561383	14.1118	0
2022-09-15	09:39:52	-2.23315	14.1118	0
2022-09-15	09:39:53	-2.98125	14.1118	0
2022-09-15	09:39:54	-1.95443	14.1118	0
2022-09-15	09:39:55	0.807016	14.9188	0
2022-09-15	09:39:56	0.000133001	14.9189	0
2022-09-15	09:39:57	2.13311	17.052	0
2022-09-15	09:39:58	3.21808	20.2701	0
2022-09-15	09:39:59	1.47011	21.7402	0
2022-09-15	09:40:00	-1.53927	21.7402	0
2022-09-15	09:40:01	-4.4804	21.7402	0
2022-09-15	09:40:02	-3.88063	21.7402	0
2022-09-15	09:40:03	-3.51594	21.7402	0
2022-09-15	09:40:04	-3.3675	21.7402	0
2022-09-15	09:40:05	-1.64153	21.7402	0
2022-09-15	09:40:06	1.78069	23.5209	0
2022-09-15	09:40:07	0.87487	24.3958	0
2022-09-15	09:40:08	-1.94266	24.3958	0
2022-09-15	09:40:09	-2.03423	24.3958	0
2022-09-15	09:40:10	-1.63955	24.3958	0
2022-09-15	09:40:11	-0.5687	24.3958	0
2022-09-15	09:40:12	0.337521	24.7333	0
2022-09-15	09:40:13	-1.19609	24.7333	0
2022-09-15	09:40:14	-3.18914	24.7333	0
2022-09-15	09:40:15	-2.78471	24.7333	0
2022-09-15	09:40:16	-2.61244	24.7333	0
2022-09-15	09:40:17	-0.896147	24.7333	0
2022-09-15	09:40:18	0.138371	24.8717	0
2022-09-15	09:40:19	2.42274	27.2944	0
2022-09-15	09:40:20	1.89892	29.1933	0
2022-09-15	09:40:21	-1.53316	29.1933	0
2022-09-15	09:40:22	-3.57857	29.1933	0
2022-09-15	09:40:23	6.95798	36.1513	0
2022-09-15	09:40:24	1.9347	38.086	0
2022-09-15	09:40:25	0.417939	38.5039	0
2022-09-15	09:40:26	-0.449817	38.5039	0
2022-09-15	09:40:27	-0.897279	38.5039	0
2022-09-15	09:40:28	1.50832	40.0123	0
2022-09-15	09:40:29	1.94595	41.9582	0
2022-09-15	09:40:30	4.11571	46.0739	0
2022-09-15	09:40:31	4.24537	50.3193	0
2022-09-15	09:40:32	-0.1747	50.3193	0
2022-09-15	09:40:33	0.433446	50.7527	0
2022-09-15	09:40:34	11.5543	62.3071	0
2022-09-15	09:40:35	13.6106	75.9177	1
2022-09-15	09:40:36	4.94859	80.8663	1
2022-09-15	09:40:37	2.82698	83.6932	1
2022-09-15	09:40:38	2.95911	86.6524	1
2022-09-15	09:40:39	2.45523	89.1076	1
2022-09-15	09:40:40	1.76666	90.8742	1
2022-09-15	09:40:41	2.09654	92.9708	1
2022-09-15	09:40:42	2.00262	94.9734	1
2022-09-15	09:40:43	1.78132	96.7547	1
2022-09-15	09:40:44	2.5868	99.3415	1
2022-09-15	09:40:45	1.47357	100.815	1
2022-09-15	09:40:46	1.28947	102.105	1
2022-09-15	09:40:47	2.33168	104.436	1
2022-09-15	09:40:48	0.198585	104.635	1
2022-09-15	09:40:49	1.05744	105.692	1
2022-09-15	09:40:50	1.65614	107.348	1
2022-09-15	09:40:51	-0.139086	107.348	1
2022-09-15	09:40:52	28.0643	135.413	2
2022-09-15	09:40:53	3.58193	138.995	2
2022-09-15	09:40:54	0.0564247	139.051	2
2022-09-15	09:40:55	-1.36662	139.051	2
2022-09-15	09:40:56	-2.94718	139.051	2
2022-09-15	09:40:57	-2.87429	139.051	2
2022-09-15	09:40:58	-1.1438	139.051	2
2022-09-15	09:40:59	0.185682	139.237	2
2022-09-15	09:41:00	2.22421	141.461	2
2022-09-15	09:41:01	2.46894	143.93	2
2022-09-15	09:41:02	1.73379	145.664	2
2022-09-15	09:41:03	1.92595	147.59	2
2022-09-15	09:41:04	2.22998	149.82	2
2022-09-15	09:41:05	3.34419	153.164	2
2022-09-15	09:41:06	2.51097	155.675	2
2022-09-15	09:41:07	2.56341	158.238	2
2022-09-15	09:41:08	2.64549	160.884	2
2022-09-15	09:41:09	2.69801	163.582	2
2022-09-15	09:41:10	6.93454	170.516	2
2022-09-15	09:41:11	10.1998	180.716	2
2022-09-15	09:41:12	4.25023	184.966	2
2022-09-15	09:41:13	12.1663	197.133	2
2022-09-15	09:41:14	6.95605	204.089	2
2022-09-15	09:41:15	4.88968	208.978	2
2022-09-15	09:41:16	4.78475	213.763	2
2022-09-15	09:41:17	4.02426	217.787	2
2022-09-15	09:41:18	2.93558	220.723	2
2022-09-15	09:41:19	2.78541	223.508	2
2022-09-15	09:41:20	2.88861	226.397	2
2022-09-15	09:41:21	3.05624	229.453	2
2022-09-15	09:41:22	2.24594	231.699	2
2022-09-15	09:41:23	3.67572	235.375	2
2022-09-15	09:41:24	8.78485	244.16	2
2022-09-15	09:41:25	14.7893	258.949	3
2022-09-15	09:41:26	10.251	269.2	3
2022-09-15	09:41:27	9.49732	278.697	3
2022-09-15	09:41:28	7.09809	285.795	3
2022-09-15	09:41:29	6.3702	292.166	3
2022-09-15	09:41:30	7.91609	300.082	3
2022-09-15	09:41:31	3.92979	304.011	3
2022-09-15	09:41:32	-1.08019	304.011	3
2022-09-15	09:41:33	-2.67944	304.011	3
2022-09-15	09:41:34	0.327731	304.339	3
2022-09-15	09:41:35	3.32711	307.666	3
2022-09-15	09:41:36	2.33762	310.004	3
2022-09-15	09:41:37	1.13927	311.143	3
2022-09-15	09:41:38	1.14804	312.291	3
2022-09-15	09:41:39	1.28524	313.576	3
2022-09-15	09:41:40	2.26117	315.838	3
2022-09-15	09:41:41	9.26601	325.104	3
2022-09-15	09:41:42	5.74175	330.845	3
2022-09-15	09:41:43	2.3052	333.151	3
2022-09-15	09:41:44	1.95562	335.106	3
2022-09-15	09:41:45	2.082	337.188	3
2022-09-15	09:41:46	1.41216	338.6	3
2022-09-15	09:41:47	3.69897	342.299	3
2022-09-15	09:41:48	3.34781	345.647	3
2022-09-15	09:41:49	3.08171	348.729	3
2022-09-15	09:41:50	7.91627	356.645	3
2022-09-15	09:41:51	4.07617	360.721	3
2022-09-15	09:41:52	1.48788	362.209	3
2022-09-15	09:41:53	1.12088	363.33	3
2022-09-15	09:41:54	2.23802	365.568	3
2022-09-15	09:41:55	1.54044	367.109	3
2022-09-15	09:41:56	3.65692	370.765	3
2022-09-15	09:41:57	12.5239	383.289	3
2022-09-15	09:41:58	6.71978	390.009	3
2022-09-15	09:41:59	1.63295	391.642	3
2022-09-15	09:42:00	2.7812	394.423	3
2022-09-15	09:42:01	4.35765	398.781	3
2022-09-15	09:42:02	2.24561	401.027	3
2022-09-15	09:42:03	1.36796	402.395	3
2022-09-15	09:42:04	1.5719	403.966	3
2022-09-15	09:42:05	1.99162	405.958	3
2022-09-15	09:42:06	9.00008	414.958	3
2022-09-15	09:42:07	12.2929	427.251	3
2022-09-15	09:42:08	13.4379	440.689	4
2022-09-15	09:42:09	11.1147	451.804	4
2022-09-15	09:42:10	1.48817	453.292	4
2022-09-15	09:42:11	1.77368	455.065	4
2022-09-15	09:42:12	7.07989	462.145	4
2022-09-15	09:42:13	29.3735	491.519	5
2022-09-15	09:42:14	21.0845	512.603	6
2022-09-15	09:42:15	23.0523	535.656	7
2022-09-15	09:42:16	30.7196	566.375	8
2022-09-15	09:42:17	44.5186	610.894	9
2022-09-15	09:42:18	27.7709	638.665	10
2022-09-15	09:42:19	23.0129	661.678	11
2022-09-15	09:42:20	22.6976	684.375	12
2022-09-15	09:42:21	20.7438	705.119	13
2022-09-15	09:42:22	20.2626	725.382	14
2022-09-15	09:42:23	19.6828	745.065	15
2022-09-15	09:42:24	18.9934	764.058	16
2022-09-15	09:42:25	19.0567	783.115	17
2022-09-15	09:42:26	19.5036	802.618	18
2022-09-15	09:42:27	15.6929	818.311	19
2022-09-15	09:42:28	-1.94387	818.311	19
2022-09-15	09:42:29	-4.08329	818.311	19
2022-09-15	09:42:30	-1.50186	818.311	19
2022-09-15	09:42:31	3.89953	822.211	19
2022-09-15	09:42:32	14.6387	836.849	20
2022-09-15	09:42:33	3.08675	839.936	20
2022-09-15	09:42:34	6.37762	846.314	20
2022-09-15	09:42:35	2.84888	849.163	20
2022-09-15	09:42:36	4.61064	853.773	20
2022-09-15	09:42:37	2.46614	856.239	20
2022-09-15	09:42:38	2.45992	858.699	20
2022-09-15	09:42:39	9.19102	867.89	20
2022-09-15	09:42:40	2.3421	870.233	20
2022-09-15	09:42:41	1.15172	871.384	20
2022-09-15	09:42:42	1.24001	872.624	20
2022-09-15	09:42:43	1.96966	874.594	20
2022-09-15	09:42:44	14.1077	888.702	21
2022-09-15	09:42:45	9.99119	898.693	21
2022-09-15	09:42:46	17.0171	915.71	22
2022-09-15	09:42:47	17.47	933.18	23
2022-09-15	09:42:48	14.5495	947.729	24
2022-09-15	09:42:49	13.7276	961.457	25
2022-09-15	09:42:50	13.0196	974.477	26
2022-09-15	09:42:51	11.8127	986.289	26
2022-09-15	09:42:52	13.6916	999.981	27
2022-09-15	09:42:53	14.1216	1014.1	28
2022-09-15	09:42:54	13.5674	1027.67	29
2022-09-15	09:42:55	13.3512	1041.02	30
2022-09-15	09:42:56	12.935	1053.96	30
2022-09-15	09:42:57	12.4752	1066.43	30
2022-09-15	09:42:58	13.0037	1079.44	31
2022-09-15	09:42:59	11.1644	1090.6	31
2022-09-15	09:43:00	9.74293	1100.34	31
2022-09-15	09:43:01	10.8247	1111.17	31
2022-09-15	09:43:02	9.98305	1121.15	31
2022-09-15	09:43:03	10.0152	1131.17	31
2022-09-15	09:43:04	9.49471	1140.66	31
2022-09-15	09:43:05	9.76316	1150.42	31
2022-09-15	09:43:06	9.17602	1159.6	31
2022-09-15	09:43:07	9.10653	1168.71	31
2022-09-15	09:43:08	4.48142	1173.19	31
2022-09-15	09:43:09	2.64521	1175.83	31
2022-09-15	09:43:10	32.4643	1208.3	32
2022-09-15	09:43:11	18.8129	1227.11	33
2022-09-15	09:43:12	21.6102	1248.72	34
2022-09-15	09:43:13	15.6863	1264.41	35
2022-09-15	09:43:14	2.14051	1266.55	35
2022-09-15	09:43:15	1.02501	1267.57	35
2022-09-15	09:43:16	-0.176343	1267.57	35
2022-09-15	09:43:17	-0.130785	1267.57	35
2022-09-15	09:43:18	0.0190729	1267.59	35
2022-09-15	09:43:19	0.346575	1267.94	35
2022-09-15	09:43:20	0.451385	1268.39	35
2022-09-15	09:43:21	1.64929	1270.04	35
2022-09-15	09:43:22	1.26985	1271.31	35
2022-09-15	09:43:23	1.43282	1272.74	35
2022-09-15	09:43:24	1.4743	1274.21	35
2022-09-15	09:43:25	1.07017	1275.28	35
2022-09-15	09:43:26	0.931274	1276.22	35
2022-09-15	09:43:27	1.78975	1278.01	35
2022-09-15	09:43:28	1.68964	1279.7	35
2022-09-15	09:43:29	0.583359	1280.28	35
2022-09-15	09:43:30	0.0632152	1280.34	35
2022-09-15	09:43:31	0.0519536	1280.39	35
2022-09-15	09:43:32	0.779964	1281.17	35
2022-09-15	09:43:33	5.2255	1286.4	35
2022-09-15	09:43:34	4.08206	1290.48	35
2022-09-15	09:43:35	3.01244	1293.49	35
2022-09-15	09:43:36	1.94233	1295.44	35
2022-09-15	09:43:37	2.69439	1298.13	35
2022-09-15	09:43:38	2.09512	1300.23	35
2022-09-15	09:43:39	2.32025	1302.55	35
2022-09-15	09:43:40	2.53853	1305.08	35
2022-09-15	09:43:41	3.55182	1308.64	35
2022-09-15	09:43:42	3.13146	1311.77	35
2022-09-15	09:43:43	2.88465	1314.65	35
2022-09-15	09:43:44	1.95449	1316.61	35
2022-09-15	09:43:45	2.68793	1319.3	35
2022-09-15	09:43:46	6.67492	1325.97	35
2022-09-15	09:43:47	28.4384	1354.41	36
2022-09-15	09:43:48	52.3612	1406.77	37
2022-09-15	09:43:49	35.0655	1441.84	38
2022-09-15	09:43:50	34.6445	1476.48	39
2022-09-15	09:43:51	24.4026	1500.88	40
2022-09-15	09:43:52	17.1391	1518.02	41
2022-09-15	09:43:53	19.0791	1537.1	42
2022-09-15	09:43:54	10.9888	1548.09	42
2022-09-15	09:43:55	0.674116	1548.76	42
2022-09-15	09:43:56	1.24363	1550.01	42
2022-09-15	09:43:57	27.2662	1577.27	43
2022-09-15	09:43:58	11.3245	1588.6	43
2022-09-15	09:43:59	12.2182	1600.82	43
2022-09-15	09:44:00	7.70772	1608.52	43
2022-09-15	09:44:01	3.57673	1612.1	43
2022-09-15	09:44:02	11.6378	1623.74	43
2022-09-15	09:44:03	31.7267	1655.46	44
2022-09-15	09:44:04	19.9775	1675.44	45
2022-09-15	09:44:05	6.62205	1682.06	45
2022-09-15	09:44:06	4.43156	1686.5	45
2022-09-15	09:44:07	3.73202	1690.23	45
2022-09-15	09:44:08	3.82443	1694.05	45
2022-09-15	09:44:09	4.42834	1698.48	45
2022-09-15	09:44:10	4.4156	1702.9	45
2022-09-15	09:44:11	2.50448	1705.4	45
2022-09-15	09:44:12	2.18822	1707.59	45
2022-09-15	09:44:13	10.4842	1718.07	45
2022-09-15	09:44:14	2.70078	1720.77	45
2022-09-15	09:44:15	0.615109	1721.39	45
2022-09-15	09:44:16	-0.919973	1721.39	45
2022-09-15	09:44:17	-1.3597	1721.39	45
2022-09-15	09:44:18	0.300112	1721.69	45
2022-09-15	09:44:19	0.697621	1722.39	45
2022-09-15	09:44:20	2.25668	1724.64	45
2022-09-15	09:44:21	1.44934	1726.09	45
2022-09-15	09:44:22	0.449801	1726.54	45
2022-09-15	09:44:23	-1.45942	1726.54	45
2022-09-15	09:44:24	-2.39344	1726.54	45
2022-09-15	09:44:25	-2.42291	1726.54	45
2022-09-15	09:44:26	-2.68691	1726.54	45
2022-09-15	09:44:27	-3.01476	1726.54	45
2022-09-15	09:44:28	-3.2234	1726.54	45
2022-09-15	09:44:29	-2.68386	1726.54	45
2022-09-15	09:44:30	-3.0954	1726.54	45
2022-09-15	09:44:31	-2.90938	1726.54	45
2022-09-15	09:44:32	-1.63367	1726.54	45
2022-09-15	09:44:33	-1.45251	1726.54	45
2022-09-15	09:44:34	-2.40174	1726.54	45
2022-09-15	09:44:35	-2.02053	1726.54	45
2022-09-15	09:44:36	-1.84057	1726.54	45
2022-09-15	09:44:37	2.70208	1729.24	45
2022-09-15	09:44:38	8.66368	1737.91	45
2022-09-15	09:44:39	1.42241	1739.33	45
2022-09-15	09:44:40	1.85577	1741.19	45
2022-09-15	09:44:41	1.36491	1742.55	45
2022-09-15	09:44:42	1.89994	1744.45	45
2022-09-15	09:44:43	2.29394	1746.75	45
2022-09-15	09:44:44	6.44507	1753.19	45

## Sheet: Klutz_harness_202291593924 (4)
Date	Time	Lbs	Newtons	Averaged newtons	Total force x time		total steps > 13.345	**GoPro Fitting: 929
2022-09-15	09:39:44	0.305051	1.35693	1.37538	1.35693	FALSE	0
2022-09-15	09:39:44	0.294364	1.30939	1.37538	1.30939	FALSE	0
2022-09-15	09:39:44	0.331463	1.47441	1.37538	2.83134	FALSE	0
2022-09-15	09:39:44	0.305916	1.36078	1.37538	2.67017	FALSE	0
2022-09-15	09:39:45	0.240471	1.06966	1.20243	3.901	FALSE	0
2022-09-15	09:39:45	0.263728	1.17311	1.20243	3.84328	FALSE	0
2022-09-15	09:39:45	0.318181	1.41533	1.20243	5.31634	FALSE	0
2022-09-15	09:39:45	0.258893	1.15161	1.20243	4.99489	FALSE	0
2022-09-15	09:39:46	1.48866	6.62186	7.18773	11.9382	FALSE	0
2022-09-15	09:39:46	1.89274	8.41929	7.18773	13.4142	FALSE	0
2022-09-15	09:39:46	1.46622	6.52204	7.18773	18.4602	FALSE	0
2022-09-15	09:39:47	0.889326	3.9559	1.67419	17.3701	FALSE	0
2022-09-15	09:39:47	0.262506	1.16768	1.67419	19.6279	FALSE	0
2022-09-15	09:39:47	0.252684	1.12399	1.67419	18.4941	FALSE	0
2022-09-15	09:39:47	0.10098	0.449179	1.67419	20.0771	FALSE	0
2022-09-15	09:39:48	0.197926	0.880414	0.260837	19.3745	FALSE	0
2022-09-15	09:39:48	0.0632699	0.281437	0.260837	20.3585	FALSE	0
2022-09-15	09:39:48	-0.0726587	-0.3232	0.260837	19.3745	FALSE	0
2022-09-15	09:39:48	0.046018	0.204697	0.260837	20.5632	FALSE	0
2022-09-15	09:39:49	0.195076	0.867737	1.13259	20.2422	FALSE	0
2022-09-15	09:39:49	0.0516669	0.229825	1.13259	20.7931	FALSE	0
2022-09-15	09:39:49	0.446578	1.98647	1.13259	22.2287	FALSE	0
2022-09-15	09:39:49	0.325153	1.44635	1.13259	22.2394	FALSE	0
2022-09-15	09:39:50	0.322608	1.43502	1.2786	23.6637	FALSE	0
2022-09-15	09:39:50	0.111005	0.493772	1.2786	22.7332	FALSE	0
2022-09-15	09:39:50	0.428715	1.90701	1.2786	25.5707	FALSE	0
2022-09-15	09:39:51	0.343779	1.5292	-0.0561383	24.2624	FALSE	0
2022-09-15	09:39:51	0.154415	0.686869	-0.0561383	26.2576	FALSE	0
2022-09-15	09:39:51	-0.0958648	-0.426426	-0.0561383	24.2624	FALSE	0
2022-09-15	09:39:51	-0.452811	-2.01419	-0.0561383	26.2576	FALSE	0
2022-09-15	09:39:52	-0.610623	-2.71617	-2.23315	24.2624	FALSE	0
2022-09-15	09:39:52	-0.45159	-2.00876	-2.23315	26.2576	FALSE	0
2022-09-15	09:39:52	-0.433931	-1.93021	-2.23315	24.2624	FALSE	0
2022-09-15	09:39:52	-0.511997	-2.27747	-2.23315	26.2576	FALSE	0
2022-09-15	09:39:53	-0.548384	-2.43932	-2.98125	24.2624	FALSE	0
2022-09-15	09:39:53	-0.67678	-3.01045	-2.98125	26.2576	FALSE	0
2022-09-15	09:39:53	-0.778562	-3.4632	-2.98125	24.2624	FALSE	0
2022-09-15	09:39:53	-0.677137	-3.01204	-2.98125	26.2576	FALSE	0
2022-09-15	09:39:54	-0.498155	-2.21589	-1.95443	24.2624	FALSE	0
2022-09-15	09:39:54	-0.401972	-1.78805	-1.95443	26.2576	FALSE	0
2022-09-15	09:39:54	-0.418002	-1.85936	-1.95443	24.2624	FALSE	0
2022-09-15	09:39:55	-0.121361	-0.539838	0.807016	26.2576	FALSE	0
2022-09-15	09:39:55	0.325967	1.44997	0.807016	25.7123	FALSE	0
2022-09-15	09:39:55	0.339097	1.50837	0.807016	27.766	FALSE	0
2022-09-15	09:39:55	0.181998	0.809564	0.807016	26.5219	FALSE	0
2022-09-15	09:39:56	-0.0258903	-0.115165	0.000133001	27.766	FALSE	0
2022-09-15	09:39:56	-0.125687	-0.559081	0.000133001	26.5219	FALSE	0
2022-09-15	09:39:56	0.151667	0.674645	0.000133001	28.4406	FALSE	0
2022-09-15	09:39:57	0.0173157	0.0770237	2.13311	26.5989	FALSE	0
2022-09-15	09:39:57	0.166018	0.738481	2.13311	29.1791	FALSE	0
2022-09-15	09:39:57	0.814618	3.62358	2.13311	30.2225	FALSE	0
2022-09-15	09:39:57	0.429835	1.91199	2.13311	31.0911	FALSE	0
2022-09-15	09:39:57	0.969936	4.31447	2.13311	34.537	FALSE	0
2022-09-15	09:39:58	0.470293	2.09196	3.21808	33.183	FALSE	0
2022-09-15	09:39:58	0.883728	3.931	3.21808	38.468	FALSE	0
2022-09-15	09:39:58	0.816349	3.63128	3.21808	36.8143	FALSE	0
2022-09-15	09:39:59	0.462303	2.05642	1.47011	40.5244	FALSE	0
2022-09-15	09:39:59	0.183626	0.816805	1.47011	37.6311	FALSE	0
2022-09-15	09:39:59	0.502659	2.23593	1.47011	42.7603	FALSE	0
2022-09-15	09:39:59	0.173397	0.771305	1.47011	38.4024	FALSE	0
2022-09-15	09:40:00	0.211769	0.941991	-1.53927	43.7023	FALSE	0
2022-09-15	09:40:00	-0.175356	-0.780019	-1.53927	38.4024	FALSE	0
2022-09-15	09:40:00	-0.508027	-2.25981	-1.53927	43.7023	FALSE	0
2022-09-15	09:40:00	-0.912556	-4.05923	-1.53927	38.4024	FALSE	0
2022-09-15	09:40:01	-1.01042	-4.49455	-4.4804	43.7023	FALSE	0
2022-09-15	09:40:01	-0.964872	-4.29194	-4.4804	38.4024	FALSE	0
2022-09-15	09:40:01	-0.979121	-4.35533	-4.4804	43.7023	FALSE	0
2022-09-15	09:40:01	-1.07454	-4.77977	-4.4804	38.4024	FALSE	0
2022-09-15	09:40:02	-0.869503	-3.86772	-3.88063	43.7023	FALSE	0
2022-09-15	09:40:02	-0.953931	-4.24328	-3.88063	38.4024	FALSE	0
2022-09-15	09:40:02	-0.793778	-3.53088	-3.88063	43.7023	FALSE	0
2022-09-15	09:40:03	-0.930012	-4.13688	-3.51594	38.4024	FALSE	0
2022-09-15	09:40:03	-0.685635	-3.04984	-3.51594	43.7023	FALSE	0
2022-09-15	09:40:03	-0.805941	-3.58499	-3.51594	38.4024	FALSE	0
2022-09-15	09:40:03	-0.740088	-3.29206	-3.51594	43.7023	FALSE	0
2022-09-15	09:40:04	-0.822989	-3.66082	-3.3675	38.4024	FALSE	0
2022-09-15	09:40:04	-0.727671	-3.23683	-3.3675	43.7023	FALSE	0
2022-09-15	09:40:04	-0.733676	-3.26354	-3.3675	38.4024	FALSE	0
2022-09-15	09:40:04	-0.743854	-3.30881	-3.3675	43.7023	FALSE	0
2022-09-15	09:40:05	-0.636271	-2.83026	-1.64153	38.4024	FALSE	0
2022-09-15	09:40:05	-0.342379	-1.52297	-1.64153	43.7023	FALSE	0
2022-09-15	09:40:05	-0.247112	-1.0992	-1.64153	38.4024	FALSE	0
2022-09-15	09:40:05	-0.250369	-1.11369	-1.64153	43.7023	FALSE	0
2022-09-15	09:40:06	-0.010216	-0.0454428	1.78069	38.4024	FALSE	0
2022-09-15	09:40:06	0.298486	1.32773	1.78069	45.03	FALSE	0
2022-09-15	09:40:06	0.912684	4.0598	1.78069	42.4622	FALSE	0
2022-09-15	09:40:07	0.515738	2.29411	0.87487	47.3241	FALSE	0
2022-09-15	09:40:07	0.26673	1.18647	0.87487	43.6487	FALSE	0
2022-09-15	09:40:07	0.21813	0.970286	0.87487	48.2944	FALSE	0
2022-09-15	09:40:07	-0.21388	-0.951381	0.87487	43.6487	FALSE	0
2022-09-15	09:40:08	-0.340699	-1.5155	-1.94266	48.2944	FALSE	0
2022-09-15	09:40:08	-0.42645	-1.89693	-1.94266	43.6487	FALSE	0
2022-09-15	09:40:08	-0.444974	-1.97933	-1.94266	48.2944	FALSE	0
2022-09-15	09:40:08	-0.534796	-2.37888	-1.94266	43.6487	FALSE	0
2022-09-15	09:40:09	-0.425483	-1.89263	-2.03423	48.2944	FALSE	0
2022-09-15	09:40:09	-0.437442	-1.94583	-2.03423	43.6487	FALSE	0
2022-09-15	09:40:09	-0.490827	-2.1833	-2.03423	48.2944	FALSE	0
2022-09-15	09:40:09	-0.475509	-2.11516	-2.03423	43.6487	FALSE	0
2022-09-15	09:40:10	-0.407213	-1.81136	-1.63955	48.2944	FALSE	0
2022-09-15	09:40:10	-0.335101	-1.4906	-1.63955	43.6487	FALSE	0
2022-09-15	09:40:10	-0.363447	-1.61668	-1.63955	48.2944	FALSE	0
2022-09-15	09:40:11	-0.124567	-0.554099	-0.5687	43.6487	FALSE	0
2022-09-15	09:40:11	-0.181157	-0.805823	-0.5687	48.2944	FALSE	0
2022-09-15	09:40:11	-0.0638547	-0.284038	-0.5687	43.6487	FALSE	0
2022-09-15	09:40:11	-0.141819	-0.630839	-0.5687	48.2944	FALSE	0
2022-09-15	09:40:12	0.0963997	0.428805	0.337521	44.0775	FALSE	0
2022-09-15	09:40:12	0.109377	0.486531	0.337521	48.781	FALSE	0
2022-09-15	09:40:12	0.0409798	0.182286	0.337521	44.2598	FALSE	0
2022-09-15	09:40:12	0.056756	0.252462	0.337521	49.0334	FALSE	0
2022-09-15	09:40:13	0.086985	0.386927	-1.19609	44.6467	FALSE	0
2022-09-15	09:40:13	-0.060445	-0.268871	-1.19609	49.0334	FALSE	0
2022-09-15	09:40:13	-0.389503	-1.73259	-1.19609	44.6467	FALSE	0
2022-09-15	09:40:13	-0.712608	-3.16982	-1.19609	49.0334	FALSE	0
2022-09-15	09:40:14	-0.687875	-3.05981	-3.18914	44.6467	FALSE	0
2022-09-15	09:40:14	-0.727111	-3.23434	-3.18914	49.0334	FALSE	0
2022-09-15	09:40:14	-0.735864	-3.27327	-3.18914	44.6467	FALSE	0
2022-09-15	09:40:15	-0.596577	-2.65369	-2.78471	49.0334	FALSE	0
2022-09-15	09:40:15	-0.602888	-2.68177	-2.78471	44.6467	FALSE	0
2022-09-15	09:40:15	-0.594745	-2.64554	-2.78471	49.0334	FALSE	0
2022-09-15	09:40:15	-0.70991	-3.15782	-2.78471	44.6467	FALSE	0
2022-09-15	09:40:16	-0.607773	-2.7035	-2.61244	49.0334	FALSE	0
2022-09-15	09:40:16	-0.661768	-2.94368	-2.61244	44.6467	FALSE	0
2022-09-15	09:40:16	-0.618409	-2.75081	-2.61244	49.0334	FALSE	0
2022-09-15	09:40:16	-0.461259	-2.05177	-2.61244	44.6467	FALSE	0
2022-09-15	09:40:17	-0.276628	-1.2305	-0.896147	49.0334	FALSE	0
2022-09-15	09:40:17	-0.179224	-0.797224	-0.896147	44.6467	FALSE	0
2022-09-15	09:40:17	-0.245534	-1.09218	-0.896147	49.0334	FALSE	0
2022-09-15	09:40:17	-0.104465	-0.464681	-0.896147	44.6467	FALSE	0
2022-09-15	09:40:18	-0.0279768	-0.124446	0.138371	49.0334	FALSE	0
2022-09-15	09:40:18	0.0700384	0.311545	0.138371	44.9583	FALSE	0
2022-09-15	09:40:18	0.0512597	0.228013	0.138371	49.2614	FALSE	0
2022-09-15	09:40:19	0.0271376	0.120713	2.42274	45.079	FALSE	0
2022-09-15	09:40:19	0.505967	2.25064	2.42274	51.5121	FALSE	0
2022-09-15	09:40:19	0.880929	3.91855	2.42274	48.9975	FALSE	0
2022-09-15	09:40:19	0.764593	3.40106	2.42274	54.9131	FALSE	0
2022-09-15	09:40:20	0.510089	2.26898	1.89892	51.2665	FALSE	0
2022-09-15	09:40:20	0.501692	2.23163	1.89892	57.1448	FALSE	0
2022-09-15	09:40:20	0.268766	1.19552	1.89892	52.462	FALSE	0
2022-09-15	09:40:20	0.427036	1.89954	1.89892	59.0443	FALSE	0
2022-09-15	09:40:21	0.297265	1.32229	-1.53316	53.7843	FALSE	0
2022-09-15	09:40:21	-0.150979	-0.671585	-1.53316	59.0443	FALSE	0
2022-09-15	09:40:21	-0.704567	-3.13405	-1.53316	53.7843	FALSE	0
2022-09-15	09:40:21	-0.820394	-3.64928	-1.53316	59.0443	FALSE	0
2022-09-15	09:40:22	-1.04156	-4.63307	-3.57857	53.7843	FALSE	0
2022-09-15	09:40:22	-0.720088	-3.2031	-3.57857	59.0443	FALSE	0
2022-09-15	09:40:22	-0.651844	-2.89953	-3.57857	53.7843	FALSE	0
2022-09-15	09:40:23	-0.212862	-0.946853	6.95798	59.0443	FALSE	0
2022-09-15	09:40:23	2.04612	9.10155	6.95798	62.8859	FALSE	0
2022-09-15	09:40:23	0.743575	3.30757	6.95798	62.3519	FALSE	0
2022-09-15	09:40:23	3.68006	16.3696	6.95798	79.2555	1	1
2022-09-15	09:40:24	0.418333	1.86083	1.9347	64.2127	FALSE	1
2022-09-15	09:40:24	0.48042	2.137	1.9347	81.3925	FALSE	1
2022-09-15	09:40:24	0.406069	1.80628	1.9347	66.019	FALSE	1
2022-09-15	09:40:25	0.109529	0.487207	0.417939	81.8797	FALSE	1
2022-09-15	09:40:25	0.269122	1.19711	0.417939	67.2161	FALSE	1
2022-09-15	09:40:25	-0.00690816	-0.0307289	0.417939	81.8797	FALSE	1
2022-09-15	09:40:25	0.0127356	0.0566505	0.417939	67.2727	FALSE	1
2022-09-15	09:40:25	0.0853056	0.379456	0.417939	82.2592	FALSE	1
2022-09-15	09:40:26	-0.0900633	-0.40062	-0.449817	67.2727	FALSE	1
2022-09-15	09:40:26	-0.054389	-0.241933	-0.449817	82.2592	FALSE	1
2022-09-15	09:40:26	-0.158918	-0.706899	-0.449817	67.2727	FALSE	1
2022-09-15	09:40:27	-0.116476	-0.518109	-0.897279	82.2592	FALSE	1
2022-09-15	09:40:27	-0.337493	-1.50124	-0.897279	67.2727	FALSE	1
2022-09-15	09:40:27	-0.169707	-0.754891	-0.897279	82.2592	FALSE	1
2022-09-15	09:40:27	-0.183193	-0.814879	-0.897279	67.2727	FALSE	1
2022-09-15	09:40:28	0.00449134	0.0199784	1.50832	82.2792	FALSE	1
2022-09-15	09:40:28	0.0722776	0.321505	1.50832	67.5942	FALSE	1
2022-09-15	09:40:28	0.00785013	0.0349189	1.50832	82.3141	FALSE	1
2022-09-15	09:40:28	1.27172	5.65686	1.50832	73.2511	FALSE	1
2022-09-15	09:40:29	0.0895804	0.398472	1.94595	82.7125	FALSE	1
2022-09-15	09:40:29	0.493346	2.1945	1.94595	75.4456	FALSE	1
2022-09-15	09:40:29	0.78215	3.47916	1.94595	86.1917	FALSE	1
2022-09-15	09:40:29	0.384797	1.71165	1.94595	77.1573	FALSE	1
2022-09-15	09:40:30	1.65192	7.34807	4.11571	93.5398	FALSE	1
2022-09-15	09:40:30	0.335076	1.49049	4.11571	78.6477	FALSE	1
2022-09-15	09:40:30	0.788766	3.50859	4.11571	97.0484	FALSE	1
2022-09-15	09:40:31	1.17996	5.2487	4.24537	83.8964	FALSE	1
2022-09-15	09:40:31	0.284593	1.26593	4.24537	98.3143	FALSE	1
2022-09-15	09:40:31	2.1306	9.47733	4.24537	93.3738	FALSE	1
2022-09-15	09:40:31	0.222456	0.989529	4.24537	99.3038	FALSE	1
2022-09-15	09:40:32	0.029275	0.130221	-0.1747	93.504	FALSE	1
2022-09-15	09:40:32	0.379606	1.68856	-0.1747	100.992	FALSE	1
2022-09-15	09:40:32	-0.135661	-0.603447	-0.1747	93.504	FALSE	1
2022-09-15	09:40:32	-0.430317	-1.91414	-0.1747	100.992	FALSE	1
2022-09-15	09:40:33	-0.208282	-0.92648	0.433446	93.504	FALSE	1
2022-09-15	09:40:33	0.0582827	0.259253	0.433446	101.252	FALSE	1
2022-09-15	09:40:33	0.26388	1.17379	0.433446	94.6778	FALSE	1
2022-09-15	09:40:33	0.275891	1.22722	0.433446	102.479	FALSE	1
2022-09-15	09:40:34	1.11869	4.97616	11.5543	99.654	FALSE	1
2022-09-15	09:40:34	2.66357	11.8481	11.5543	114.327	FALSE	1
2022-09-15	09:40:34	4.01034	17.8388	11.5543	117.493	1	2
2022-09-15	09:40:35	2.64943	11.7852	13.6106	126.112	FALSE	2
2022-09-15	09:40:35	3.60184	16.0217	13.6106	133.514	1	3
2022-09-15	09:40:35	3.17701	14.132	13.6106	140.244	1	4
2022-09-15	09:40:35	2.8109	12.5034	13.6106	146.018	FALSE	4
2022-09-15	09:40:36	1.93426	8.60398	4.94859	148.848	FALSE	4
2022-09-15	09:40:36	0.908206	4.03988	4.94859	150.058	FALSE	4
2022-09-15	09:40:36	0.723015	3.21612	4.94859	152.064	FALSE	4
2022-09-15	09:40:36	0.884491	3.93439	4.94859	153.992	FALSE	4
2022-09-15	09:40:37	0.943931	4.19879	2.82698	156.263	FALSE	4
2022-09-15	09:40:37	0.660267	2.937	2.82698	156.929	FALSE	4
2022-09-15	09:40:37	0.454568	2.02201	2.82698	158.285	FALSE	4
2022-09-15	09:40:37	0.483372	2.15014	2.82698	159.079	FALSE	4
2022-09-15	09:40:38	0.663626	2.95194	2.95911	161.237	FALSE	4
2022-09-15	09:40:38	0.665916	2.96213	2.95911	162.041	FALSE	4
2022-09-15	09:40:38	0.666171	2.96326	2.95911	164.2	FALSE	4
2022-09-15	09:40:39	0.8107	3.60616	2.45523	165.648	FALSE	4
2022-09-15	09:40:39	0.50444	2.24385	2.45523	166.444	FALSE	4
2022-09-15	09:40:39	0.447341	1.98986	2.45523	167.637	FALSE	4
2022-09-15	09:40:39	0.445356	1.98103	2.45523	168.425	FALSE	4
2022-09-15	09:40:40	0.413855	1.84091	1.76666	169.478	FALSE	4
2022-09-15	09:40:40	0.369631	1.64419	1.76666	170.069	FALSE	4
2022-09-15	09:40:40	0.397112	1.76643	1.76666	171.245	FALSE	4
2022-09-15	09:40:40	0.408053	1.8151	1.76666	171.884	FALSE	4
2022-09-15	09:40:41	0.458333	2.03876	2.09654	173.284	FALSE	4
2022-09-15	09:40:41	0.388919	1.72999	2.09654	173.614	FALSE	4
2022-09-15	09:40:41	0.539809	2.40118	2.09654	175.685	FALSE	4
2022-09-15	09:40:41	0.498232	2.21624	2.09654	175.831	FALSE	4
2022-09-15	09:40:42	0.451565	2.00865	2.00262	177.693	FALSE	4
2022-09-15	09:40:42	0.450293	2.00299	2.00262	177.834	FALSE	4
2022-09-15	09:40:42	0.448766	1.9962	2.00262	179.69	FALSE	4
2022-09-15	09:40:43	0.383015	1.70373	1.78132	179.537	FALSE	4
2022-09-15	09:40:43	0.340725	1.51561	1.78132	181.205	FALSE	4
2022-09-15	09:40:43	0.388766	1.72931	1.78132	181.267	FALSE	4
2022-09-15	09:40:43	0.489326	2.17662	1.78132	183.382	FALSE	4
2022-09-15	09:40:44	0.534466	2.37741	2.5868	183.644	FALSE	4
2022-09-15	09:40:44	0.613193	2.72761	2.5868	186.109	FALSE	4
2022-09-15	09:40:44	0.66785	2.97073	2.5868	186.615	FALSE	4
2022-09-15	09:40:44	0.510649	2.27147	2.5868	188.381	FALSE	4
2022-09-15	09:40:45	0.398283	1.77164	1.47357	188.386	FALSE	4
2022-09-15	09:40:45	0.346629	1.54188	1.47357	189.923	FALSE	4
2022-09-15	09:40:45	0.284084	1.26366	1.47357	189.65	FALSE	4
2022-09-15	09:40:45	0.296094	1.31709	1.47357	191.24	FALSE	4
2022-09-15	09:40:46	0.292786	1.30237	1.28947	190.952	FALSE	4
2022-09-15	09:40:46	0.290802	1.29355	1.28947	192.533	FALSE	4
2022-09-15	09:40:46	0.286069	1.27249	1.28947	192.225	FALSE	4
2022-09-15	09:40:47	0.447952	1.99258	2.33168	194.526	FALSE	4
2022-09-15	09:40:47	1.06235	4.72555	2.33168	196.951	FALSE	4
2022-09-15	09:40:47	0.379758	1.68924	2.33168	196.215	FALSE	4
2022-09-15	09:40:47	0.206679	0.91935	2.33168	197.87	FALSE	4
2022-09-15	09:40:48	0.188155	0.836951	0.198585	197.052	FALSE	4
2022-09-15	09:40:48	0.0859163	0.382173	0.198585	198.252	FALSE	4
2022-09-15	09:40:48	0.00449134	0.0199784	0.198585	197.072	FALSE	4
2022-09-15	09:40:48	-0.099987	-0.444762	0.198585	198.252	FALSE	4
2022-09-15	09:40:49	-0.121056	-0.538481	1.05744	197.072	FALSE	4
2022-09-15	09:40:49	0.1764	0.784662	1.05744	199.037	FALSE	4
2022-09-15	09:40:49	0.17416	0.774699	1.05744	197.847	FALSE	4
2022-09-15	09:40:49	0.721387	3.20887	1.05744	202.246	FALSE	4
2022-09-15	09:40:50	1.33518	5.93915	1.65614	203.786	FALSE	4
2022-09-15	09:40:50	0.627137	2.78963	1.65614	205.035	FALSE	4
2022-09-15	09:40:50	-0.267722	-1.19088	1.65614	203.786	FALSE	4
2022-09-15	09:40:50	-0.20533	-0.913349	1.65614	205.035	FALSE	4
2022-09-15	09:40:51	-0.363804	-1.61827	-0.139086	203.786	FALSE	4
2022-09-15	09:40:51	-0.379987	-1.69026	-0.139086	205.035	FALSE	4
2022-09-15	09:40:51	0.649987	2.89127	-0.139086	206.677	FALSE	4
2022-09-15	09:40:52	6.2024	27.5895	28.0643	232.625	1	5
2022-09-15	09:40:52	8.30459	36.9405	28.0643	243.618	1	6
2022-09-15	09:40:52	6.45981	28.7345	28.0643	261.359	1	7
2022-09-15	09:40:52	4.26978	18.9928	28.0643	262.611	1	8
2022-09-15	09:40:53	2.04347	9.08976	3.58193	270.449	FALSE	8
2022-09-15	09:40:53	0.881641	3.92172	3.58193	266.532	FALSE	8
2022-09-15	09:40:53	0.227901	1.01375	3.58193	271.463	FALSE	8
2022-09-15	09:40:53	0.0680027	0.30249	3.58193	266.835	FALSE	8
2022-09-15	09:40:54	0.129479	0.575948	0.0564247	272.039	FALSE	8
2022-09-15	09:40:54	-0.0766282	-0.340858	0.0564247	266.835	FALSE	8
2022-09-15	09:40:54	0.0394532	0.175496	0.0564247	272.214	FALSE	8
2022-09-15	09:40:54	-0.0415646	-0.184888	0.0564247	266.835	FALSE	8
2022-09-15	09:40:55	-0.202328	-0.899995	-1.36662	272.214	FALSE	8
2022-09-15	09:40:55	-0.372913	-1.65879	-1.36662	266.835	FALSE	8
2022-09-15	09:40:55	-0.34645	-1.54108	-1.36662	272.214	FALSE	8
2022-09-15	09:40:56	-0.398765	-1.77379	-2.94718	266.835	FALSE	8
2022-09-15	09:40:56	-0.6579	-2.92647	-2.94718	272.214	FALSE	8
2022-09-15	09:40:56	-0.705076	-3.13632	-2.94718	266.835	FALSE	8
2022-09-15	09:40:56	-0.888485	-3.95216	-2.94718	272.214	FALSE	8
2022-09-15	09:40:57	-0.714643	-3.17887	-2.87429	266.835	FALSE	8
2022-09-15	09:40:57	-0.676322	-3.00842	-2.87429	272.214	FALSE	8
2022-09-15	09:40:57	-0.645076	-2.86943	-2.87429	266.835	FALSE	8
2022-09-15	09:40:57	-0.548638	-2.44045	-2.87429	272.214	FALSE	8
2022-09-15	09:40:58	-0.451997	-2.01057	-1.1438	266.835	FALSE	8
2022-09-15	09:40:58	-0.239885	-1.06706	-1.1438	272.214	FALSE	8
2022-09-15	09:40:58	-0.302023	-1.34346	-1.1438	266.835	FALSE	8
2022-09-15	09:40:58	-0.0346435	-0.154101	-1.1438	272.214	FALSE	8
2022-09-15	09:40:59	0.0346185	0.15399	0.185682	266.989	FALSE	8
2022-09-15	09:40:59	0.0579773	0.257895	0.185682	272.472	FALSE	8
2022-09-15	09:40:59	0.0326338	0.145162	0.185682	267.134	FALSE	8
2022-09-15	09:41:00	0.519657	2.31154	2.22421	274.784	FALSE	8
2022-09-15	09:41:00	0.410751	1.8271	2.22421	268.961	FALSE	8
2022-09-15	09:41:00	0.382354	1.70079	2.22421	276.484	FALSE	8
2022-09-15	09:41:00	0.687341	3.05743	2.22421	272.018	FALSE	8
2022-09-15	09:41:01	0.695738	3.09478	2.46894	279.579	FALSE	8
2022-09-15	09:41:01	0.483372	2.15014	2.46894	274.169	FALSE	8
2022-09-15	09:41:01	0.486018	2.16191	2.46894	281.741	FALSE	8
2022-09-15	09:41:02	0.302659	1.34629	1.73379	275.515	FALSE	8
2022-09-15	09:41:02	0.172685	0.768137	1.73379	282.509	FALSE	8
2022-09-15	09:41:02	0.418944	1.86355	1.73379	277.378	FALSE	8
2022-09-15	09:41:02	0.556959	2.47747	1.73379	284.987	FALSE	8
2022-09-15	09:41:02	0.497621	2.21352	1.73379	279.592	FALSE	8
2022-09-15	09:41:03	0.486578	2.1644	1.92595	287.151	FALSE	8
2022-09-15	09:41:03	0.388257	1.72704	1.92595	281.319	FALSE	8
2022-09-15	09:41:03	0.424084	1.88641	1.92595	289.038	FALSE	8
2022-09-15	09:41:04	0.444338	1.9765	2.22998	283.296	FALSE	8
2022-09-15	09:41:04	0.399809	1.77843	2.22998	290.816	FALSE	8
2022-09-15	09:41:04	0.528003	2.34866	2.22998	285.644	FALSE	8
2022-09-15	09:41:04	0.633142	2.81634	2.22998	293.632	FALSE	8
2022-09-15	09:41:05	1.04989	4.67012	3.34419	290.314	FALSE	8
2022-09-15	09:41:05	0.692379	3.07984	3.34419	296.712	FALSE	8
2022-09-15	09:41:05	0.636348	2.8306	3.34419	293.145	FALSE	8
2022-09-15	09:41:05	0.628613	2.7962	3.34419	299.508	FALSE	8
2022-09-15	09:41:06	0.647392	2.87973	2.51097	296.025	FALSE	8
2022-09-15	09:41:06	0.541845	2.41023	2.51097	301.919	FALSE	8
2022-09-15	09:41:06	0.527443	2.34617	2.51097	298.371	FALSE	8
2022-09-15	09:41:06	0.541285	2.40774	2.51097	304.326	FALSE	8
2022-09-15	09:41:07	0.554669	2.46728	2.56341	300.838	FALSE	8
2022-09-15	09:41:07	0.585203	2.6031	2.56341	306.929	FALSE	8
2022-09-15	09:41:07	0.588969	2.61985	2.56341	303.458	FALSE	8
2022-09-15	09:41:08	0.596552	2.65358	2.64549	309.583	FALSE	8
2022-09-15	09:41:08	0.661896	2.94425	2.64549	306.402	FALSE	8
2022-09-15	09:41:08	0.594211	2.64317	2.64549	312.226	FALSE	8
2022-09-15	09:41:08	0.526272	2.34096	2.64549	308.743	FALSE	8
2022-09-15	09:41:09	0.50215	2.23366	2.69801	314.46	FALSE	8
2022-09-15	09:41:09	0.533041	2.37107	2.69801	311.114	FALSE	8
2022-09-15	09:41:09	0.641132	2.85188	2.69801	317.312	FALSE	8
2022-09-15	09:41:09	0.749835	3.33542	2.69801	314.45	FALSE	8
2022-09-15	09:41:10	0.912837	4.06048	6.93454	321.372	FALSE	8
2022-09-15	09:41:10	1.11472	4.9585	6.93454	319.408	FALSE	8
2022-09-15	09:41:10	1.43899	6.40092	6.93454	327.773	FALSE	8
2022-09-15	09:41:10	2.76927	12.3183	6.93454	331.726	FALSE	8
2022-09-15	09:41:11	2.71441	12.0742	10.1998	339.847	FALSE	8
2022-09-15	09:41:11	2.14388	9.53641	10.1998	341.263	FALSE	8
2022-09-15	09:41:11	2.02073	8.98861	10.1998	348.836	FALSE	8
2022-09-15	09:41:12	1.11034	4.93901	4.25023	346.202	FALSE	8
2022-09-15	09:41:12	0.802964	3.57174	4.25023	352.408	FALSE	8
2022-09-15	09:41:12	0.800572	3.5611	4.25023	349.763	FALSE	8
2022-09-15	09:41:12	1.1081	4.92905	4.25023	357.337	FALSE	8
2022-09-15	09:41:13	2.33996	10.4086	12.1663	360.172	FALSE	8
2022-09-15	09:41:13	2.7877	12.4002	12.1663	369.737	FALSE	8
2022-09-15	09:41:13	3.00622	13.3723	12.1663	373.544	1	9
2022-09-15	09:41:13	2.80653	12.484	12.1663	382.221	FALSE	9
2022-09-15	09:41:14	1.98327	8.82198	6.95605	382.366	FALSE	9
2022-09-15	09:41:14	1.56098	6.94355	6.95605	389.165	FALSE	9
2022-09-15	09:41:14	1.07426	4.77852	6.95605	387.144	FALSE	9
2022-09-15	09:41:14	1.63665	7.28015	6.95605	396.445	FALSE	9
2022-09-15	09:41:15	1.44129	6.41115	4.88968	393.555	FALSE	9
2022-09-15	09:41:15	1.09726	4.88083	4.88968	401.326	FALSE	9
2022-09-15	09:41:15	0.759198	3.37706	4.88968	396.933	FALSE	9
2022-09-15	09:41:16	1.03564	4.60673	4.78475	405.932	FALSE	9
2022-09-15	09:41:16	1.1081	4.92905	4.78475	401.862	FALSE	9
2022-09-15	09:41:16	1.00164	4.4555	4.78475	410.388	FALSE	9
2022-09-15	09:41:16	1.15726	5.14772	4.78475	407.009	FALSE	9
2022-09-15	09:41:17	0.832074	3.70123	4.02426	414.089	FALSE	9
2022-09-15	09:41:17	1.16149	5.16654	4.02426	412.176	FALSE	9
2022-09-15	09:41:17	0.947443	4.21442	4.02426	418.303	FALSE	9
2022-09-15	09:41:17	0.677773	3.01487	4.02426	415.191	FALSE	9
2022-09-15	09:41:18	0.591208	2.62981	2.93558	420.933	FALSE	9
2022-09-15	09:41:18	0.719707	3.2014	2.93558	418.392	FALSE	9
2022-09-15	09:41:18	0.602099	2.67826	2.93558	423.611	FALSE	9
2022-09-15	09:41:18	0.726781	3.23287	2.93558	421.625	FALSE	9
2022-09-15	09:41:19	0.621692	2.76541	2.78541	426.377	FALSE	9
2022-09-15	09:41:19	0.65645	2.92002	2.78541	424.545	FALSE	9
2022-09-15	09:41:19	0.60042	2.67079	2.78541	429.048	FALSE	9
2022-09-15	09:41:20	0.613091	2.72715	2.88861	427.272	FALSE	9
2022-09-15	09:41:20	0.632735	2.81453	2.88861	431.862	FALSE	9
2022-09-15	09:41:20	0.6707	2.98341	2.88861	430.256	FALSE	9
2022-09-15	09:41:20	0.681031	3.02936	2.88861	434.892	FALSE	9
2022-09-15	09:41:21	0.667494	2.96915	3.05624	433.225	FALSE	9
2022-09-15	09:41:21	0.719249	3.19936	3.05624	438.091	FALSE	9
2022-09-15	09:41:21	0.737875	3.28222	3.05624	436.507	FALSE	9
2022-09-15	09:41:21	0.623677	2.77424	3.05624	440.865	FALSE	9
2022-09-15	09:41:22	0.564847	2.51255	2.24594	439.019	FALSE	9
2022-09-15	09:41:22	0.474517	2.11075	2.24594	442.976	FALSE	9
2022-09-15	09:41:22	0.457417	2.03468	2.24594	441.054	FALSE	9
2022-09-15	09:41:22	0.522862	2.32579	2.24594	445.302	FALSE	9
2022-09-15	09:41:23	0.551616	2.4537	3.67572	443.508	FALSE	9
2022-09-15	09:41:23	1.15431	5.1346	3.67572	450.436	FALSE	9
2022-09-15	09:41:23	0.773092	3.43887	3.67572	446.947	FALSE	9
2022-09-15	09:41:24	0.543372	2.41703	8.78485	452.853	FALSE	9
2022-09-15	09:41:24	0.74729	3.3241	8.78485	450.271	FALSE	9
2022-09-15	09:41:24	2.46943	10.9845	8.78485	463.838	FALSE	9
2022-09-15	09:41:24	4.1396	18.4138	8.78485	468.685	1	10
2022-09-15	09:41:25	3.39996	15.1237	14.7893	478.962	1	11
2022-09-15	09:41:25	3.56383	15.8526	14.7893	484.537	1	12
2022-09-15	09:41:25	3.3678	14.9806	14.7893	493.942	1	13
2022-09-15	09:41:25	2.96754	13.2002	14.7893	497.737	FALSE	13
2022-09-15	09:41:26	1.87961	8.36088	10.251	502.303	FALSE	13
2022-09-15	09:41:26	2.82393	12.5614	10.251	510.299	FALSE	13
2022-09-15	09:41:26	1.89945	8.44913	10.251	510.752	FALSE	13
2022-09-15	09:41:26	2.61513	11.6326	10.251	521.931	FALSE	13
2022-09-15	09:41:27	2.38307	10.6004	9.49732	521.353	FALSE	13
2022-09-15	09:41:27	2.20729	9.81847	9.49732	531.75	FALSE	13
2022-09-15	09:41:27	1.81492	8.07313	9.49732	529.426	FALSE	13
2022-09-15	09:41:28	1.72525	7.67426	7.09809	539.424	FALSE	13
2022-09-15	09:41:28	1.59899	7.11263	7.09809	536.538	FALSE	13
2022-09-15	09:41:28	1.542	6.85912	7.09809	546.283	FALSE	13
2022-09-15	09:41:28	1.51665	6.74636	7.09809	543.285	FALSE	13
2022-09-15	09:41:29	1.1881	5.28491	6.3702	551.568	FALSE	13
2022-09-15	09:41:29	1.39991	6.22708	6.3702	549.512	FALSE	13
2022-09-15	09:41:29	1.54826	6.88697	6.3702	558.455	FALSE	13
2022-09-15	09:41:29	1.59207	7.08185	6.3702	556.594	FALSE	13
2022-09-15	09:41:30	1.75986	7.82821	7.91609	566.283	FALSE	13
2022-09-15	09:41:30	1.66556	7.40874	7.91609	564.002	FALSE	13
2022-09-15	09:41:30	1.98393	8.82492	7.91609	575.108	FALSE	13
2022-09-15	09:41:30	1.70912	7.60251	7.91609	571.605	FALSE	13
2022-09-15	09:41:31	1.39747	6.21623	3.92979	581.325	FALSE	13
2022-09-15	09:41:31	0.825763	3.67316	3.92979	575.278	FALSE	13
2022-09-15	09:41:31	0.427137	1.89999	3.92979	583.224	FALSE	13
2022-09-15	09:41:32	0.112736	0.501472	-1.08019	575.78	FALSE	13
2022-09-15	09:41:32	-0.0345926	-0.153875	-1.08019	583.224	FALSE	13
2022-09-15	09:41:32	-0.421056	-1.87294	-1.08019	575.78	FALSE	13
2022-09-15	09:41:32	-0.628434	-2.7954	-1.08019	583.224	FALSE	13
2022-09-15	09:41:33	-0.66131	-2.94164	-2.67944	575.78	FALSE	13
2022-09-15	09:41:33	-0.625839	-2.78386	-2.67944	583.224	FALSE	13
2022-09-15	09:41:33	-0.651539	-2.89818	-2.67944	575.78	FALSE	13
2022-09-15	09:41:33	-0.470776	-2.09411	-2.67944	583.224	FALSE	13
2022-09-15	09:41:34	-0.0727606	-0.323654	0.327731	575.78	FALSE	13
2022-09-15	09:41:34	-0.058104	-0.258458	0.327731	583.224	FALSE	13
2022-09-15	09:41:34	0.0500893	0.222807	0.327731	576.002	FALSE	13
2022-09-15	09:41:34	0.375484	1.67023	0.327731	584.895	FALSE	13
2022-09-15	09:41:35	0.891209	3.96428	3.32711	579.967	FALSE	13
2022-09-15	09:41:35	0.734109	3.26546	3.32711	588.16	FALSE	13
2022-09-15	09:41:35	0.618588	2.7516	3.32711	582.718	FALSE	13
2022-09-15	09:41:36	0.738333	3.28425	2.33762	591.444	FALSE	13
2022-09-15	09:41:36	0.701539	3.12059	2.33762	585.839	FALSE	13
2022-09-15	09:41:36	0.33528	1.49139	2.33762	592.936	FALSE	13
2022-09-15	09:41:36	0.326934	1.45427	2.33762	587.293	FALSE	13
2022-09-15	09:41:37	0.251616	1.11924	1.13927	594.055	FALSE	13
2022-09-15	09:41:37	0.292786	1.30237	1.13927	588.595	FALSE	13
2022-09-15	09:41:37	0.293448	1.30532	1.13927	595.36	FALSE	13
2022-09-15	09:41:37	0.186629	0.830163	1.13927	589.426	FALSE	13
2022-09-15	09:41:38	0.301387	1.34063	1.14804	596.701	FALSE	13
2022-09-15	09:41:38	0.365814	1.62721	1.14804	591.053	FALSE	13
2022-09-15	09:41:38	0.208664	0.928179	1.14804	597.629	FALSE	13
2022-09-15	09:41:38	0.156501	0.696148	1.14804	591.749	FALSE	13
2022-09-15	09:41:39	0.281794	1.25348	1.28524	598.883	FALSE	13
2022-09-15	09:41:39	0.220929	0.982736	1.28524	592.732	FALSE	13
2022-09-15	09:41:39	0.364084	1.61952	1.28524	600.502	FALSE	13
2022-09-15	09:41:40	0.298028	1.32569	2.26117	594.057	FALSE	13
2022-09-15	09:41:40	0.479046	2.13089	2.26117	602.633	FALSE	13
2022-09-15	09:41:40	0.896196	3.98646	2.26117	598.044	FALSE	13
2022-09-15	09:41:40	0.360064	1.60164	2.26117	604.235	FALSE	13
2022-09-15	09:41:41	1.63289	7.26342	9.26601	605.307	FALSE	13
2022-09-15	09:41:41	2.43258	10.8206	9.26601	615.055	FALSE	13
2022-09-15	09:41:41	1.85406	8.24723	9.26601	613.554	FALSE	13
2022-09-15	09:41:41	2.41284	10.7328	9.26601	625.788	FALSE	13
2022-09-15	09:41:42	0.589224	2.62099	5.74175	616.175	FALSE	13
2022-09-15	09:41:42	1.60556	7.14185	5.74175	632.93	FALSE	13
2022-09-15	09:41:42	2.51574	11.1905	5.74175	627.366	FALSE	13
2022-09-15	09:41:42	0.452685	2.01363	5.74175	634.944	FALSE	13
2022-09-15	09:41:43	0.706069	3.14074	2.3052	630.507	FALSE	13
2022-09-15	09:41:43	0.425102	1.89094	2.3052	636.835	FALSE	13
2022-09-15	09:41:43	0.423524	1.88392	2.3052	632.391	FALSE	13
2022-09-15	09:41:44	0.564338	2.51029	1.95562	639.345	FALSE	13
2022-09-15	09:41:44	0.383473	1.70576	1.95562	634.096	FALSE	13
2022-09-15	09:41:44	0.523371	2.32806	1.95562	641.673	FALSE	13
2022-09-15	09:41:44	0.287392	1.27838	1.95562	635.375	FALSE	13
2022-09-15	09:41:45	0.745102	3.31436	2.082	644.987	FALSE	13
2022-09-15	09:41:45	0.260064	1.15682	2.082	636.532	FALSE	13
2022-09-15	09:41:45	0.524135	2.33146	2.082	647.319	FALSE	13
2022-09-15	09:41:45	0.342914	1.52535	2.082	638.057	FALSE	13
2022-09-15	09:41:46	0.32444	1.44317	1.41216	648.762	FALSE	13
2022-09-15	09:41:46	0.277112	1.23265	1.41216	639.29	FALSE	13
2022-09-15	09:41:46	0.23126	1.02869	1.41216	649.791	FALSE	13
2022-09-15	09:41:46	0.437061	1.94413	1.41216	641.234	FALSE	13
2022-09-15	09:41:47	0.517061	2.29999	3.69897	652.091	FALSE	13
2022-09-15	09:41:47	0.771158	3.43027	3.69897	644.664	FALSE	13
2022-09-15	09:41:47	1.20648	5.36666	3.69897	657.457	FALSE	13
2022-09-15	09:41:48	1.42505	6.33891	3.34781	651.003	FALSE	13
2022-09-15	09:41:48	0.421234	1.87373	3.34781	659.331	FALSE	13
2022-09-15	09:41:48	0.751107	3.34107	3.34781	654.344	FALSE	13
2022-09-15	09:41:48	0.413092	1.83752	3.34781	661.168	FALSE	13
2022-09-15	09:41:49	0.584033	2.5979	3.08171	656.942	FALSE	13
2022-09-15	09:41:49	0.351158	1.56202	3.08171	662.73	FALSE	13
2022-09-15	09:41:49	1.24683	5.54615	3.08171	662.488	FALSE	13
2022-09-15	09:41:49	0.589173	2.62076	3.08171	665.351	FALSE	13
2022-09-15	09:41:50	1.33589	5.94231	7.91627	668.43	FALSE	13
2022-09-15	09:41:50	1.74841	7.77728	7.91627	673.129	FALSE	13
2022-09-15	09:41:50	2.26775	10.0874	7.91627	678.518	FALSE	13
2022-09-15	09:41:50	1.76658	7.8581	7.91627	680.987	FALSE	13
2022-09-15	09:41:51	1.22627	5.45469	4.07617	683.972	FALSE	13
2022-09-15	09:41:51	0.974262	4.33371	4.07617	685.32	FALSE	13
2022-09-15	09:41:51	0.548562	2.44011	4.07617	686.413	FALSE	13
2022-09-15	09:41:52	0.400725	1.7825	1.48788	687.103	FALSE	13
2022-09-15	09:41:52	0.348562	1.55047	1.48788	687.963	FALSE	13
2022-09-15	09:41:52	0.350802	1.56044	1.48788	688.663	FALSE	13
2022-09-15	09:41:52	0.237875	1.05812	1.48788	689.021	FALSE	13
2022-09-15	09:41:53	0.361794	1.60933	1.12088	690.273	FALSE	13
2022-09-15	09:41:53	0.136603	0.607637	1.12088	689.629	FALSE	13
2022-09-15	09:41:53	0.261998	1.16542	1.12088	691.438	FALSE	13
2022-09-15	09:41:53	0.247545	1.10113	1.12088	690.73	FALSE	13
2022-09-15	09:41:54	0.664033	2.95375	2.23802	694.392	FALSE	13
2022-09-15	09:41:54	0.362608	1.61295	2.23802	692.343	FALSE	13
2022-09-15	09:41:54	0.481743	2.14289	2.23802	696.535	FALSE	13
2022-09-15	09:41:54	0.504135	2.24249	2.23802	694.585	FALSE	13
2022-09-15	09:41:55	0.270954	1.20526	1.54044	697.74	FALSE	13
2022-09-15	09:41:55	0.46042	2.04804	1.54044	696.633	FALSE	13
2022-09-15	09:41:55	0.307545	1.36802	1.54044	699.108	FALSE	13
2022-09-15	09:41:56	0.79187	3.5224	3.65692	700.156	FALSE	13
2022-09-15	09:41:56	0.428155	1.90452	3.65692	701.012	FALSE	13
2022-09-15	09:41:56	1.13625	5.05427	3.65692	705.21	FALSE	13
2022-09-15	09:41:56	0.932176	4.14651	3.65692	705.159	FALSE	13
2022-09-15	09:41:57	1.87823	8.35474	12.5239	713.565	FALSE	13
2022-09-15	09:41:57	3.0224	13.4442	12.5239	718.603	1	14
2022-09-15	09:41:57	3.0107	13.3922	12.5239	726.957	1	15
2022-09-15	09:41:57	3.3507	14.9046	12.5239	733.508	1	16
2022-09-15	09:41:58	3.40291	15.1368	6.71978	742.094	1	17
2022-09-15	09:41:58	1.07268	4.7715	6.71978	738.279	FALSE	17
2022-09-15	09:41:58	1.25961	5.603	6.71978	747.697	FALSE	17
2022-09-15	09:41:58	0.307494	1.36779	6.71978	739.647	FALSE	17
2022-09-15	09:41:59	0.357875	1.5919	1.63295	749.289	FALSE	17
2022-09-15	09:41:59	0.47126	2.09626	1.63295	741.743	FALSE	17
2022-09-15	09:41:59	0.272176	1.21069	1.63295	750.499	FALSE	17
2022-09-15	09:42:00	0.432125	1.92218	2.7812	743.666	FALSE	17
2022-09-15	09:42:00	0.552277	2.45664	2.7812	752.956	FALSE	17
2022-09-15	09:42:00	0.703422	3.12896	2.7812	746.794	FALSE	17
2022-09-15	09:42:00	0.813143	3.61702	2.7812	756.573	FALSE	17
2022-09-15	09:42:01	1.33309	5.92985	4.35765	752.724	FALSE	17
2022-09-15	09:42:01	1.16877	5.19892	4.35765	761.772	FALSE	17
2022-09-15	09:42:01	0.823219	3.66184	4.35765	756.386	FALSE	17
2022-09-15	09:42:01	0.593499	2.64	4.35765	764.412	FALSE	17
2022-09-15	09:42:02	0.533397	2.37266	2.24561	758.759	FALSE	17
2022-09-15	09:42:02	0.728308	3.23966	2.24561	767.652	FALSE	17
2022-09-15	09:42:02	0.3164	1.40741	2.24561	760.166	FALSE	17
2022-09-15	09:42:02	0.441234	1.9627	2.24561	769.614	FALSE	17
2022-09-15	09:42:03	0.253346	1.12693	1.36796	761.293	FALSE	17
2022-09-15	09:42:03	0.297926	1.32523	1.36796	770.94	FALSE	17
2022-09-15	09:42:03	0.325814	1.44929	1.36796	762.742	FALSE	17
2022-09-15	09:42:03	0.353041	1.5704	1.36796	772.51	FALSE	17
2022-09-15	09:42:04	0.417163	1.85562	1.5719	764.598	FALSE	17
2022-09-15	09:42:04	0.19243	0.855967	1.5719	773.366	FALSE	17
2022-09-15	09:42:04	0.450547	2.00412	1.5719	766.602	FALSE	17
2022-09-15	09:42:05	0.299962	1.33429	1.99162	774.7	FALSE	17
2022-09-15	09:42:05	0.330395	1.46966	1.99162	768.072	FALSE	17
2022-09-15	09:42:05	0.592227	2.63434	1.99162	777.335	FALSE	17
2022-09-15	09:42:05	0.568359	2.52817	1.99162	770.6	FALSE	17
2022-09-15	09:42:06	1.55676	6.92478	9.00008	784.259	FALSE	17
2022-09-15	09:42:06	1.36398	6.06726	9.00008	776.667	FALSE	17
2022-09-15	09:42:06	2.49935	11.1176	9.00008	795.377	FALSE	17
2022-09-15	09:42:06	2.67314	11.8907	9.00008	788.558	FALSE	17
2022-09-15	09:42:07	4.48642	19.9565	12.2929	815.333	1	18
2022-09-15	09:42:07	1.44113	6.41043	12.2929	794.968	FALSE	18
2022-09-15	09:42:07	3.87904	17.2547	12.2929	832.588	1	19
2022-09-15	09:42:07	1.24765	5.5498	12.2929	800.518	FALSE	19
2022-09-15	09:42:08	2.38485	10.6083	13.4379	843.196	FALSE	19
2022-09-15	09:42:08	4.04403	17.9887	13.4379	818.507	1	20
2022-09-15	09:42:08	2.63406	11.7168	13.4379	854.913	FALSE	20
2022-09-15	09:42:09	4.48968	19.971	11.1147	838.478	1	21
2022-09-15	09:42:09	3.32398	14.7857	11.1147	869.699	1	22
2022-09-15	09:42:09	0.964847	4.29183	11.1147	842.77	FALSE	22
2022-09-15	09:42:09	1.21625	5.41012	11.1147	875.109	FALSE	22
2022-09-15	09:42:10	0.388715	1.72908	1.48817	844.499	FALSE	22
2022-09-15	09:42:10	0.321794	1.4314	1.48817	876.541	FALSE	22
2022-09-15	09:42:10	0.432939	1.9258	1.48817	846.425	FALSE	22
2022-09-15	09:42:10	0.194771	0.86638	1.48817	877.407	FALSE	22
2022-09-15	09:42:11	0.542914	2.41499	1.77368	848.84	FALSE	22
2022-09-15	09:42:11	0.21243	0.944931	1.77368	878.352	FALSE	22
2022-09-15	09:42:11	0.524695	2.33395	1.77368	851.174	FALSE	22
2022-09-15	09:42:11	0.314924	1.40084	1.77368	879.753	FALSE	22
2022-09-15	09:42:12	0.691209	3.07464	7.07989	854.248	FALSE	22
2022-09-15	09:42:12	1.22123	5.43228	7.07989	885.185	FALSE	22
2022-09-15	09:42:12	2.86245	12.7328	7.07989	866.981	FALSE	22
2022-09-15	09:42:13	6.3081	28.0597	29.3735	913.245	1	23
2022-09-15	09:42:13	6.40281	28.481	29.3735	895.462	1	24
2022-09-15	09:42:13	8.90113	39.594	29.3735	952.839	1	25
2022-09-15	09:42:13	4.80179	21.3593	29.3735	916.821	1	26
2022-09-15	09:42:14	4.8678	21.6529	21.0845	974.492	1	27
2022-09-15	09:42:14	3.2453	14.4357	21.0845	931.257	1	28
2022-09-15	09:42:14	6.55446	29.1555	21.0845	1003.65	1	29
2022-09-15	09:42:14	4.29248	19.0938	21.0845	950.351	1	30
2022-09-15	09:42:15	6.95843	30.9525	23.0523	1034.6	1	31
2022-09-15	09:42:15	3.4337	15.2738	23.0523	965.625	1	32
2022-09-15	09:42:15	5.12484	22.7963	23.0523	1057.4	1	33
2022-09-15	09:42:15	5.21258	23.1866	23.0523	988.811	1	34
2022-09-15	09:42:16	6.05894	26.9514	30.7196	1084.35	1	35
2022-09-15	09:42:16	7.6909	34.2107	30.7196	1023.02	1	36
2022-09-15	09:42:16	6.9684	30.9968	30.7196	1115.34	1	37
2022-09-15	09:42:17	11.2852	50.1988	44.5186	1073.22	1	38
2022-09-15	09:42:17	11.6154	51.6676	44.5186	1167.01	1	39
2022-09-15	09:42:17	9.03797	40.2027	44.5186	1113.42	1	40
2022-09-15	09:42:17	8.09431	36.0051	44.5186	1203.02	1	41
2022-09-15	09:42:18	6.4568	28.7211	27.7709	1142.14	1	42
2022-09-15	09:42:18	6.78316	30.1729	27.7709	1233.19	1	43
2022-09-15	09:42:18	6.07721	27.0326	27.7709	1169.18	1	44
2022-09-15	09:42:18	5.65558	25.1572	27.7709	1258.35	1	45
2022-09-15	09:42:19	5.37909	23.9273	23.0129	1193.1	1	46
2022-09-15	09:42:19	4.83406	21.5029	23.0129	1279.85	1	47
2022-09-15	09:42:19	4.7995	21.3491	23.0129	1214.45	1	48
2022-09-15	09:42:19	5.68149	25.2724	23.0129	1305.12	1	49
2022-09-15	09:42:20	5.13151	22.826	22.6976	1237.28	1	50
2022-09-15	09:42:20	5.36154	23.8492	22.6976	1328.97	1	51
2022-09-15	09:42:20	4.81492	21.4177	22.6976	1258.7	1	52
2022-09-15	09:42:21	4.72332	21.0103	20.7438	1349.98	1	53
2022-09-15	09:42:21	4.56464	20.3044	20.7438	1279	1	54
2022-09-15	09:42:21	4.68322	20.8319	20.7438	1370.81	1	55
2022-09-15	09:42:21	4.6825	20.8287	20.7438	1299.83	1	56
2022-09-15	09:42:22	4.67177	20.781	20.2626	1391.59	1	57
2022-09-15	09:42:22	4.51889	20.1009	20.2626	1319.93	1	58
2022-09-15	09:42:22	4.64388	20.6569	20.2626	1412.25	1	59
2022-09-15	09:42:22	4.38642	19.5117	20.2626	1339.44	1	60
2022-09-15	09:42:23	4.33243	19.2715	19.6828	1431.52	1	61
2022-09-15	09:42:23	4.26678	18.9795	19.6828	1358.42	1	62
2022-09-15	09:42:23	4.52133	20.1118	19.6828	1451.63	1	63
2022-09-15	09:42:23	4.57904	20.3685	19.6828	1378.79	1	64
2022-09-15	09:42:24	4.32932	19.2577	18.9934	1470.89	1	65
2022-09-15	09:42:24	4.27838	19.0311	18.9934	1397.82	1	66
2022-09-15	09:42:24	4.20205	18.6916	18.9934	1489.58	1	67
2022-09-15	09:42:25	4.05263	18.0269	19.0567	1415.85	1	68
2022-09-15	09:42:25	4.21599	18.7536	19.0567	1508.34	1	69
2022-09-15	09:42:25	4.32159	19.2233	19.0567	1435.07	1	70
2022-09-15	09:42:25	4.54632	20.2229	19.0567	1528.56	1	71
2022-09-15	09:42:26	4.01614	17.8646	19.5036	1452.94	1	72
2022-09-15	09:42:26	4.01833	17.8743	19.5036	1546.43	1	73
2022-09-15	09:42:26	4.00596	17.8193	19.5036	1470.76	1	74
2022-09-15	09:42:26	5.49802	24.4563	19.5036	1570.89	1	75
2022-09-15	09:42:27	4.19263	18.6497	15.6929	1489.41	1	76
2022-09-15	09:42:27	5.55059	24.6901	15.6929	1595.58	1	77
2022-09-15	09:42:27	4.21828	18.7638	15.6929	1508.17	1	78
2022-09-15	09:42:27	0.150191	0.66808	15.6929	1596.25	FALSE	78
2022-09-15	09:42:28	-0.181921	-0.809221	-1.94387	1508.17	FALSE	78
2022-09-15	09:42:28	-0.373778	-1.66264	-1.94387	1596.25	FALSE	78
2022-09-15	09:42:28	-0.755305	-3.35975	-1.94387	1508.17	FALSE	78
2022-09-15	09:42:29	-0.83388	-3.70927	-4.08329	1596.25	FALSE	78
2022-09-15	09:42:29	-0.997493	-4.43705	-4.08329	1508.17	FALSE	78
2022-09-15	09:42:29	-0.84477	-3.75771	-4.08329	1596.25	FALSE	78
2022-09-15	09:42:29	-0.995712	-4.42913	-4.08329	1508.17	FALSE	78
2022-09-15	09:42:30	-0.828587	-3.68572	-1.50186	1596.25	FALSE	78
2022-09-15	09:42:30	-0.494338	-2.19891	-1.50186	1508.17	FALSE	78
2022-09-15	09:42:30	-0.21561	-0.959076	-1.50186	1596.25	FALSE	78
2022-09-15	09:42:30	0.188003	0.836275	-1.50186	1509.01	FALSE	78
2022-09-15	09:42:31	0.519911	2.31267	3.89953	1598.56	FALSE	78
2022-09-15	09:42:31	0.231005	1.02756	3.89953	1510.03	FALSE	78
2022-09-15	09:42:31	1.92383	8.55758	3.89953	1607.12	FALSE	78
2022-09-15	09:42:31	0.83187	3.70032	3.89953	1513.73	FALSE	78
2022-09-15	09:42:32	6.21273	27.6355	14.6387	1634.76	1	79
2022-09-15	09:42:32	1.14968	5.11401	14.6387	1518.85	FALSE	79
2022-09-15	09:42:32	2.51034	11.1665	14.6387	1645.92	FALSE	79
2022-09-15	09:42:33	0.80617	3.58601	3.08675	1522.43	FALSE	79
2022-09-15	09:42:33	0.538384	2.39484	3.08675	1648.32	FALSE	79
2022-09-15	09:42:33	1.03218	4.59134	3.08675	1527.03	FALSE	79
2022-09-15	09:42:33	0.398995	1.77481	3.08675	1650.09	FALSE	79
2022-09-15	09:42:34	2.21614	9.85783	6.37762	1536.88	FALSE	79
2022-09-15	09:42:34	0.550649	2.4494	6.37762	1652.54	FALSE	79
2022-09-15	09:42:34	0.86958	3.86807	6.37762	1540.75	FALSE	79
2022-09-15	09:42:34	2.09864	9.33517	6.37762	1661.88	FALSE	79
2022-09-15	09:42:35	0.156196	0.694791	2.84888	1541.45	FALSE	79
2022-09-15	09:42:35	0.388104	1.72636	2.84888	1663.6	FALSE	79
2022-09-15	09:42:35	0.503677	2.24046	2.84888	1543.69	FALSE	79
2022-09-15	09:42:35	1.51385	6.73391	2.84888	1670.34	FALSE	79
2022-09-15	09:42:36	0.674211	2.99903	4.61064	1546.69	FALSE	79
2022-09-15	09:42:36	1.53055	6.80819	4.61064	1677.14	FALSE	79
2022-09-15	09:42:36	0.904796	4.02471	4.61064	1550.71	FALSE	79
2022-09-15	09:42:37	1.1366	5.05582	2.46614	1682.2	FALSE	79
2022-09-15	09:42:37	0.33645	1.4966	2.46614	1552.21	FALSE	79
2022-09-15	09:42:37	0.32042	1.42529	2.46614	1683.63	FALSE	79
2022-09-15	09:42:37	0.424186	1.88686	2.46614	1554.09	FALSE	79
2022-09-15	09:42:38	0.400318	1.78069	2.45992	1685.41	FALSE	79
2022-09-15	09:42:38	0.407646	1.81329	2.45992	1555.91	FALSE	79
2022-09-15	09:42:38	0.391769	1.74267	2.45992	1687.15	FALSE	79
2022-09-15	09:42:38	1.01233	4.50305	2.45992	1560.41	FALSE	79
2022-09-15	09:42:39	1.68912	7.51354	9.19102	1694.66	FALSE	79
2022-09-15	09:42:39	1.94729	8.66194	9.19102	1569.07	FALSE	79
2022-09-15	09:42:39	2.50724	11.1527	9.19102	1705.81	FALSE	79
2022-09-15	09:42:39	2.12128	9.43588	9.19102	1578.51	FALSE	79
2022-09-15	09:42:40	0.853702	3.79744	2.3421	1709.61	FALSE	79
2022-09-15	09:42:40	0.364644	1.62201	2.3421	1580.13	FALSE	79
2022-09-15	09:42:40	0.361234	1.60684	2.3421	1711.22	FALSE	79
2022-09-15	09:42:41	0.291361	1.29603	1.15172	1581.43	FALSE	79
2022-09-15	09:42:41	0.261794	1.16451	1.15172	1712.38	FALSE	79
2022-09-15	09:42:41	0.265255	1.17991	1.15172	1582.61	FALSE	79
2022-09-15	09:42:41	0.217265	0.966438	1.15172	1713.35	FALSE	79
2022-09-15	09:42:42	0.26958	1.19915	1.24001	1583.8	FALSE	79
2022-09-15	09:42:42	0.335026	1.49026	1.24001	1714.84	FALSE	79
2022-09-15	09:42:42	0.278639	1.23944	1.24001	1585.04	FALSE	79
2022-09-15	09:42:42	0.231819	1.03118	1.24001	1715.87	FALSE	79
2022-09-15	09:42:43	0.285	1.26774	1.96966	1586.31	FALSE	79
2022-09-15	09:42:43	0.322048	1.43253	1.96966	1717.3	FALSE	79
2022-09-15	09:42:43	0.458232	2.03831	1.96966	1588.35	FALSE	79
2022-09-15	09:42:43	0.705916	3.14006	1.96966	1720.44	FALSE	79
2022-09-15	09:42:44	0.891209	3.96428	14.1077	1592.31	FALSE	79
2022-09-15	09:42:44	3.28144	14.5965	14.1077	1735.04	1	80
2022-09-15	09:42:44	3.54561	15.7716	14.1077	1608.09	1	81
2022-09-15	09:42:44	4.96795	22.0984	14.1077	1757.14	1	82
2022-09-15	09:42:45	2.68815	11.9574	9.99119	1620.04	FALSE	82
2022-09-15	09:42:45	1.41396	6.28958	9.99119	1763.43	FALSE	82
2022-09-15	09:42:45	2.63625	11.7266	9.99119	1631.77	FALSE	82
2022-09-15	09:42:46	2.43747	10.8424	17.0171	1774.27	FALSE	82
2022-09-15	09:42:46	3.98922	17.7448	17.0171	1649.51	1	83
2022-09-15	09:42:46	4.42525	19.6844	17.0171	1793.96	1	84
2022-09-15	09:42:46	4.45054	19.7969	17.0171	1669.31	1	85
2022-09-15	09:42:47	4.25192	18.9134	17.47	1812.87	1	86
2022-09-15	09:42:47	3.95167	17.5778	17.47	1686.89	1	87
2022-09-15	09:42:47	3.86983	17.2138	17.47	1830.08	1	88
2022-09-15	09:42:47	3.6363	16.175	17.47	1703.06	1	89
2022-09-15	09:42:48	3.52439	15.6772	14.5495	1845.76	1	90
2022-09-15	09:42:48	3.35777	14.936	14.5495	1718	1	91
2022-09-15	09:42:48	3.09777	13.7795	14.5495	1859.54	1	92
2022-09-15	09:42:48	3.10357	13.8053	14.5495	1731.81	1	93
2022-09-15	09:42:49	3.20174	14.242	13.7276	1873.78	1	94
2022-09-15	09:42:49	3.07049	13.6582	13.7276	1745.46	1	95
2022-09-15	09:42:49	2.98607	13.2826	13.7276	1887.06	FALSE	95
2022-09-15	09:42:50	2.96047	13.1688	13.0196	1758.63	FALSE	95
2022-09-15	09:42:50	2.84062	12.6356	13.0196	1899.7	FALSE	95
2022-09-15	09:42:50	2.93563	13.0583	13.0196	1771.69	FALSE	95
2022-09-15	09:42:50	2.97105	13.2158	13.0196	1912.92	FALSE	95
2022-09-15	09:42:51	2.64469	11.7641	11.8127	1783.46	FALSE	95
2022-09-15	09:42:51	2.742	12.197	11.8127	1925.11	FALSE	95
2022-09-15	09:42:51	2.81396	12.5171	11.8127	1795.97	FALSE	95
2022-09-15	09:42:51	2.42184	10.7728	11.8127	1935.89	FALSE	95
2022-09-15	09:42:52	2.35441	10.4729	13.6916	1806.45	FALSE	95
2022-09-15	09:42:52	3.34001	14.857	13.6916	1950.74	1	96
2022-09-15	09:42:52	3.3024	14.6897	13.6916	1821.13	1	97
2022-09-15	09:42:52	3.31523	14.7468	13.6916	1965.49	1	98
2022-09-15	09:42:53	3.40123	15.1294	14.1216	1836.26	1	99
2022-09-15	09:42:53	3.12052	13.8807	14.1216	1979.37	1	100
2022-09-15	09:42:53	3.00225	13.3546	14.1216	1849.62	1	101
2022-09-15	09:42:54	2.99421	13.3188	13.5674	1992.69	FALSE	101
2022-09-15	09:42:54	3.07116	13.6611	13.5674	1863.28	1	102
2022-09-15	09:42:54	3.09335	13.7598	13.5674	2006.45	1	103
2022-09-15	09:42:54	3.04164	13.5298	13.5674	1876.81	1	104
2022-09-15	09:42:55	3.00327	13.3591	13.3512	2019.81	1	105
2022-09-15	09:42:55	2.9964	13.3286	13.3512	1890.14	FALSE	105
2022-09-15	09:42:55	3.00368	13.361	13.3512	2033.17	1	106
2022-09-15	09:42:55	3.00261	13.3562	13.3512	1903.49	1	107
2022-09-15	09:42:56	2.92444	13.0085	12.935	2046.18	FALSE	107
2022-09-15	09:42:56	2.88408	12.829	12.935	1916.32	FALSE	107
2022-09-15	09:42:56	2.89513	12.8781	12.935	2059.06	FALSE	107
2022-09-15	09:42:56	2.928	13.0243	12.935	1929.35	FALSE	107
2022-09-15	09:42:57	2.88317	12.8249	12.4752	2071.88	FALSE	107
2022-09-15	09:42:57	2.81818	12.5358	12.4752	1941.88	FALSE	107
2022-09-15	09:42:57	2.71228	12.0648	12.4752	2083.94	FALSE	107
2022-09-15	09:42:58	2.67584	11.9027	13.0037	1953.79	FALSE	107
2022-09-15	09:42:58	3.07599	13.6826	13.0037	2097.63	1	108
2022-09-15	09:42:58	3.03192	13.4866	13.0037	1967.27	1	109
2022-09-15	09:42:58	2.90968	12.9428	13.0037	2110.57	FALSE	109
2022-09-15	09:42:59	2.371	10.5467	11.1644	1977.82	FALSE	109
2022-09-15	09:42:59	2.23462	9.94004	11.1644	2120.51	FALSE	109
2022-09-15	09:42:59	2.50902	11.1606	11.1644	1988.98	FALSE	109
2022-09-15	09:42:59	2.9248	13.0101	11.1644	2133.52	FALSE	109
2022-09-15	09:43:00	2.21859	9.86873	9.74293	1998.85	FALSE	109
2022-09-15	09:43:00	2.1307	9.47778	9.74293	2143	FALSE	109
2022-09-15	09:43:00	1.58429	7.04724	9.74293	2005.9	FALSE	109
2022-09-15	09:43:00	2.82765	12.578	9.74293	2155.58	FALSE	109
2022-09-15	09:43:01	2.62103	11.6589	10.8247	2017.56	FALSE	109
2022-09-15	09:43:01	2.28724	10.1741	10.8247	2165.75	FALSE	109
2022-09-15	09:43:01	2.39223	10.6411	10.8247	2028.2	FALSE	109
2022-09-15	09:43:02	2.39579	10.657	9.98305	2176.41	FALSE	109
2022-09-15	09:43:02	2.20251	9.7972	9.98305	2037.99	FALSE	109
2022-09-15	09:43:02	2.21284	9.84315	9.98305	2186.25	FALSE	109
2022-09-15	09:43:02	2.16602	9.63489	9.98305	2047.63	FALSE	109
2022-09-15	09:43:03	2.24067	9.96695	10.0152	2196.22	FALSE	109
2022-09-15	09:43:03	2.29452	10.2065	10.0152	2057.83	FALSE	109
2022-09-15	09:43:03	2.25772	10.0428	10.0152	2206.26	FALSE	109
2022-09-15	09:43:03	2.21314	9.84449	10.0152	2067.68	FALSE	109
2022-09-15	09:43:04	2.14505	9.54161	9.49471	2215.8	FALSE	109
2022-09-15	09:43:04	2.10887	9.38068	9.49471	2077.06	FALSE	109
2022-09-15	09:43:04	2.12134	9.43614	9.49471	2225.24	FALSE	109
2022-09-15	09:43:04	2.16276	9.62039	9.49471	2086.68	FALSE	109
2022-09-15	09:43:05	2.13228	9.48481	9.76316	2234.72	FALSE	109
2022-09-15	09:43:05	2.19426	9.76051	9.76316	2096.44	FALSE	109
2022-09-15	09:43:05	2.25803	10.0442	9.76316	2244.77	FALSE	109
2022-09-15	09:43:06	2.20291	9.79898	9.17602	2106.24	FALSE	109
2022-09-15	09:43:06	2.05375	9.13549	9.17602	2253.9	FALSE	109
2022-09-15	09:43:06	2.07976	9.25119	9.17602	2115.49	FALSE	109
2022-09-15	09:43:06	1.91503	8.51844	9.17602	2262.42	FALSE	109
2022-09-15	09:43:07	1.96602	8.74525	9.10653	2124.24	FALSE	109
2022-09-15	09:43:07	1.9965	8.88083	9.10653	2271.3	FALSE	109
2022-09-15	09:43:07	2.07976	9.25119	9.10653	2133.49	FALSE	109
2022-09-15	09:43:07	2.14668	9.54886	9.10653	2280.85	FALSE	109
2022-09-15	09:43:08	1.53625	6.83355	4.48142	2140.32	FALSE	109
2022-09-15	09:43:08	1.39584	6.20898	4.48142	2287.06	FALSE	109
2022-09-15	09:43:08	0.672176	2.98997	4.48142	2143.31	FALSE	109
2022-09-15	09:43:08	0.425611	1.8932	4.48142	2288.95	FALSE	109
2022-09-15	09:43:09	0.489428	2.17707	2.64521	2145.49	FALSE	109
2022-09-15	09:43:09	0.297367	1.32275	2.64521	2290.28	FALSE	109
2022-09-15	09:43:09	0.997214	4.43581	2.64521	2149.92	FALSE	109
2022-09-15	09:43:10	0.884745	3.93552	32.4643	2294.21	FALSE	109
2022-09-15	09:43:10	4.90795	21.8315	32.4643	2171.76	1	110
2022-09-15	09:43:10	15.293	68.0263	32.4643	2362.24	1	111
2022-09-15	09:43:10	8.10749	36.0637	32.4643	2207.82	1	112
2022-09-15	09:43:11	2.56871	11.4261	18.8129	2373.66	FALSE	112
2022-09-15	09:43:11	3.77609	16.7968	18.8129	2224.62	1	113
2022-09-15	09:43:11	5.79014	25.7557	18.8129	2399.42	1	114
2022-09-15	09:43:11	4.78235	21.2728	18.8129	2245.89	1	115
2022-09-15	09:43:12	1.42943	6.35839	21.6102	2405.78	FALSE	115
2022-09-15	09:43:12	2.44536	10.8775	21.6102	2256.77	FALSE	115
2022-09-15	09:43:12	5.94026	26.4235	21.6102	2432.2	1	116
2022-09-15	09:43:12	9.61772	42.7815	21.6102	2299.55	1	117
2022-09-15	09:43:13	5.21446	23.195	15.6863	2455.4	1	118
2022-09-15	09:43:13	4.17355	18.5648	15.6863	2318.11	1	119
2022-09-15	09:43:13	1.19131	5.29919	15.6863	2460.7	FALSE	119
2022-09-15	09:43:14	0.736501	3.2761	2.14051	2321.39	FALSE	119
2022-09-15	09:43:14	0.736807	3.27746	2.14051	2463.97	FALSE	119
2022-09-15	09:43:14	0.32154	1.43027	2.14051	2322.82	FALSE	119
2022-09-15	09:43:14	0.129987	0.578208	2.14051	2464.55	FALSE	119
2022-09-15	09:43:15	0.366578	1.63061	1.02501	2324.45	FALSE	119
2022-09-15	09:43:15	0.137774	0.612846	1.02501	2465.16	FALSE	119
2022-09-15	09:43:15	0.288715	1.28426	1.02501	2325.73	FALSE	119
2022-09-15	09:43:15	0.128664	0.572323	1.02501	2465.74	FALSE	119
2022-09-15	09:43:16	0.138842	0.617597	-0.176343	2326.35	FALSE	119
2022-09-15	09:43:16	-0.120038	-0.533953	-0.176343	2465.74	FALSE	119
2022-09-15	09:43:16	-0.106552	-0.473965	-0.176343	2326.35	FALSE	119
2022-09-15	09:43:16	-0.0708267	-0.315051	-0.176343	2465.74	FALSE	119
2022-09-15	09:43:17	0.0800129	0.355913	-0.130785	2326.71	FALSE	119
2022-09-15	09:43:17	-0.0184603	-0.0821151	-0.130785	2465.74	FALSE	119
2022-09-15	09:43:17	-0.149758	-0.666154	-0.130785	2326.71	FALSE	119
2022-09-15	09:43:18	-0.219122	-0.974698	0.0190729	2465.74	FALSE	119
2022-09-15	09:43:18	0.0584353	0.259932	0.0190729	2326.97	FALSE	119
2022-09-15	09:43:18	0.174517	0.776287	0.0190729	2466.51	FALSE	119
2022-09-15	09:43:18	0.00332086	0.0147718	0.0190729	2326.98	FALSE	119
2022-09-15	09:43:19	0.109987	0.489244	0.346575	2467	FALSE	119
2022-09-15	09:43:19	0.0903946	0.402093	0.346575	2327.38	FALSE	119
2022-09-15	09:43:19	0.13355	0.594057	0.346575	2467.6	FALSE	119
2022-09-15	09:43:19	-0.0222771	-0.099093	0.346575	2327.38	FALSE	119
2022-09-15	09:43:20	0.0920231	0.409337	0.451385	2468	FALSE	119
2022-09-15	09:43:20	0.103677	0.461176	0.451385	2327.85	FALSE	119
2022-09-15	09:43:20	0.172379	0.766776	0.451385	2468.77	FALSE	119
2022-09-15	09:43:20	0.0378247	0.168252	0.451385	2328.01	FALSE	119
2022-09-15	09:43:21	0.31528	1.40243	1.64929	2470.17	FALSE	119
2022-09-15	09:43:21	0.392532	1.74606	1.64929	2329.76	FALSE	119
2022-09-15	09:43:21	0.386171	1.71777	1.64929	2471.89	FALSE	119
2022-09-15	09:43:21	0.389122	1.73089	1.64929	2331.49	FALSE	119
2022-09-15	09:43:22	0.406527	1.80831	1.26985	2473.7	FALSE	119
2022-09-15	09:43:22	0.180216	0.801637	1.26985	2332.29	FALSE	119
2022-09-15	09:43:22	0.269682	1.1996	1.26985	2474.9	FALSE	119
2022-09-15	09:43:23	0.239962	1.0674	1.43282	2333.36	FALSE	119
2022-09-15	09:43:23	0.290954	1.29422	1.43282	2476.19	FALSE	119
2022-09-15	09:43:23	0.351056	1.56157	1.43282	2334.92	FALSE	119
2022-09-15	09:43:23	0.406476	1.80809	1.43282	2478	FALSE	119
2022-09-15	09:43:24	0.26444	1.17628	1.4743	2336.1	FALSE	119
2022-09-15	09:43:24	0.425305	1.89184	1.4743	2479.89	FALSE	119
2022-09-15	09:43:24	0.206272	0.917539	1.4743	2337.01	FALSE	119
2022-09-15	09:43:24	0.429733	1.91154	1.4743	2481.81	FALSE	119
2022-09-15	09:43:25	0.138639	0.616694	1.07017	2337.63	FALSE	119
2022-09-15	09:43:25	0.386832	1.72071	1.07017	2483.53	FALSE	119
2022-09-15	09:43:25	0.212786	0.946515	1.07017	2338.58	FALSE	119
2022-09-15	09:43:25	0.224084	0.99677	1.07017	2484.52	FALSE	119
2022-09-15	09:43:26	0.0756873	0.336672	0.931274	2338.91	FALSE	119
2022-09-15	09:43:26	0.284949	1.26751	0.931274	2485.79	FALSE	119
2022-09-15	09:43:26	0.267443	1.18964	0.931274	2340.1	FALSE	119
2022-09-15	09:43:27	0.177519	0.78964	1.78975	2486.58	FALSE	119
2022-09-15	09:43:27	0.336196	1.49547	1.78975	2341.6	FALSE	119
2022-09-15	09:43:27	0.280064	1.24578	1.78975	2487.83	FALSE	119
2022-09-15	09:43:27	0.815636	3.62811	1.78975	2345.23	FALSE	119
2022-09-15	09:43:28	0.429631	1.91108	1.68964	2489.74	FALSE	119
2022-09-15	09:43:28	0.516399	2.29705	1.68964	2347.53	FALSE	119
2022-09-15	09:43:28	0.170547	0.758627	1.68964	2490.5	FALSE	119
2022-09-15	09:43:28	0.402812	1.79179	1.68964	2349.32	FALSE	119
2022-09-15	09:43:29	0.193244	0.859588	0.583359	2491.36	FALSE	119
2022-09-15	09:43:29	0.228664	1.01714	0.583359	2350.33	FALSE	119
2022-09-15	09:43:29	0.0481046	0.213979	0.583359	2491.57	FALSE	119
2022-09-15	09:43:29	0.0545676	0.242728	0.583359	2350.58	FALSE	119
2022-09-15	09:43:30	0.00830812	0.0369562	0.0632152	2491.61	FALSE	119
2022-09-15	09:43:30	0.0346185	0.15399	0.0632152	2350.73	FALSE	119
2022-09-15	09:43:30	-0.000292388	-0.0013006	0.0632152	2491.61	FALSE	119
2022-09-15	09:43:31	-0.0248216	-0.110411	0.0519536	2350.73	FALSE	119
2022-09-15	09:43:31	0.0338043	0.150368	0.0519536	2491.76	FALSE	119
2022-09-15	09:43:31	-0.0674679	-0.300111	0.0519536	2350.73	FALSE	119
2022-09-15	09:43:31	0.105204	0.467968	0.0519536	2492.22	FALSE	119
2022-09-15	09:43:32	-0.0833967	-0.370965	0.779964	2350.73	FALSE	119
2022-09-15	09:43:32	0.109021	0.484947	0.779964	2492.71	FALSE	119
2022-09-15	09:43:32	0.11757	0.522975	0.779964	2351.25	FALSE	119
2022-09-15	09:43:32	0.558181	2.4829	0.779964	2495.19	FALSE	119
2022-09-15	09:43:33	0.283015	1.25891	5.2255	2352.51	FALSE	119
2022-09-15	09:43:33	0.552227	2.45642	5.2255	2497.65	FALSE	119
2022-09-15	09:43:33	0.589071	2.62031	5.2255	2355.13	FALSE	119
2022-09-15	09:43:33	3.27467	14.5664	5.2255	2512.22	1	120
2022-09-15	09:43:34	0.658842	2.93066	4.08206	2358.06	FALSE	120
2022-09-15	09:43:34	1.41655	6.3011	4.08206	2518.52	FALSE	120
2022-09-15	09:43:34	0.677672	3.01442	4.08206	2361.08	FALSE	120
2022-09-15	09:43:35	0.597214	2.65653	3.01244	2521.17	FALSE	120
2022-09-15	09:43:35	0.877468	3.90315	3.01244	2364.98	FALSE	120
2022-09-15	09:43:35	0.597825	2.65925	3.01244	2523.83	FALSE	120
2022-09-15	09:43:35	0.6364	2.83083	3.01244	2367.81	FALSE	120
2022-09-15	09:43:36	0.575433	2.55964	1.94233	2526.39	FALSE	120
2022-09-15	09:43:36	0.269428	1.19847	1.94233	2369.01	FALSE	120
2022-09-15	09:43:36	0.71813	3.19439	1.94233	2529.59	FALSE	120
2022-09-15	09:43:36	0.183626	0.816805	1.94233	2369.83	FALSE	120
2022-09-15	09:43:37	0.661082	2.94062	2.69439	2532.53	FALSE	120
2022-09-15	09:43:37	0.550852	2.4503	2.69439	2372.28	FALSE	120
2022-09-15	09:43:37	0.516807	2.29886	2.69439	2534.83	FALSE	120
2022-09-15	09:43:37	0.69416	3.08776	2.69439	2375.37	FALSE	120
2022-09-15	09:43:38	0.46673	2.07611	2.09512	2536.9	FALSE	120
2022-09-15	09:43:38	0.556552	2.47565	2.09512	2377.84	FALSE	120
2022-09-15	09:43:38	0.389733	1.73361	2.09512	2538.64	FALSE	120
2022-09-15	09:43:39	0.796094	3.54119	2.32025	2381.38	FALSE	120
2022-09-15	09:43:39	0.354873	1.57855	2.32025	2540.21	FALSE	120
2022-09-15	09:43:39	0.563371	2.50599	2.32025	2383.89	FALSE	120
2022-09-15	09:43:39	0.372125	1.65529	2.32025	2541.87	FALSE	120
2022-09-15	09:43:40	0.57584	2.56145	2.53853	2386.45	FALSE	120
2022-09-15	09:43:40	0.464695	2.06706	2.53853	2543.94	FALSE	120
2022-09-15	09:43:40	0.584186	2.59858	2.53853	2389.05	FALSE	120
2022-09-15	09:43:40	0.658028	2.92704	2.53853	2546.86	FALSE	120
2022-09-15	09:43:41	0.669122	2.97639	3.55182	2392.02	FALSE	120
2022-09-15	09:43:41	0.724237	3.22155	3.55182	2550.08	FALSE	120
2022-09-15	09:43:41	1.29329	5.75281	3.55182	2397.78	FALSE	120
2022-09-15	09:43:41	0.50729	2.25653	3.55182	2552.34	FALSE	120
2022-09-15	09:43:42	0.721946	3.21136	3.13146	2400.99	FALSE	120
2022-09-15	09:43:42	1.09289	4.86139	3.13146	2557.2	FALSE	120
2022-09-15	09:43:42	0.297112	1.32161	3.13146	2402.31	FALSE	120
2022-09-15	09:43:43	0.897163	3.99076	2.88465	2561.19	FALSE	120
2022-09-15	09:43:43	0.434873	1.9344	2.88465	2404.24	FALSE	120
2022-09-15	09:43:43	0.603117	2.68279	2.88465	2563.88	FALSE	120
2022-09-15	09:43:43	0.658842	2.93066	2.88465	2407.18	FALSE	120
2022-09-15	09:43:44	0.503015	2.23751	1.95449	2566.11	FALSE	120
2022-09-15	09:43:44	0.471819	2.09875	1.95449	2409.27	FALSE	120
2022-09-15	09:43:44	0.402099	1.78862	1.95449	2567.9	FALSE	120
2022-09-15	09:43:44	0.380624	1.69309	1.95449	2410.97	FALSE	120
2022-09-15	09:43:45	0.459402	2.04351	2.68793	2569.95	FALSE	120
2022-09-15	09:43:45	0.543219	2.41635	2.68793	2413.38	FALSE	120
2022-09-15	09:43:45	0.648104	2.8829	2.68793	2572.83	FALSE	120
2022-09-15	09:43:45	0.766374	3.40898	2.68793	2416.79	FALSE	120
2022-09-15	09:43:46	0.989936	4.40343	6.67492	2577.23	FALSE	120
2022-09-15	09:43:46	1.09696	4.8795	6.67492	2421.67	FALSE	120
2022-09-15	09:43:46	2.41487	10.7418	6.67492	2587.97	FALSE	120
2022-09-15	09:43:47	2.58673	11.5063	28.4384	2433.18	FALSE	120
2022-09-15	09:43:47	5.55925	24.7287	28.4384	2612.7	1	121
2022-09-15	09:43:47	6.73421	29.9551	28.4384	2463.13	1	122
2022-09-15	09:43:47	10.6928	47.5637	28.4384	2660.27	1	123
2022-09-15	09:43:48	12.0356	53.5368	52.3612	2516.67	1	124
2022-09-15	09:43:48	12.7694	56.8008	52.3612	2717.07	1	125
2022-09-15	09:43:48	11.7085	52.0817	52.3612	2568.75	1	126
2022-09-15	09:43:48	10.5718	47.0255	52.3612	2764.09	1	127
2022-09-15	09:43:49	9.02372	40.1393	35.0655	2608.89	1	128
2022-09-15	09:43:49	6.88958	30.6462	35.0655	2794.74	1	129
2022-09-15	09:43:49	7.32856	32.5989	35.0655	2641.49	1	130
2022-09-15	09:43:49	8.29044	36.8775	35.0655	2831.62	1	131
2022-09-15	09:43:50	9.65049	42.9273	34.6445	2684.42	1	132
2022-09-15	09:43:50	6.77355	30.1301	34.6445	2861.75	1	133
2022-09-15	09:43:50	7.1338	31.7326	34.6445	2716.15	1	134
2022-09-15	09:43:50	7.59589	33.788	34.6445	2895.53	1	135
2022-09-15	09:43:51	6.84403	30.4436	24.4026	2746.59	1	136
2022-09-15	09:43:51	5.28444	23.5062	24.4026	2919.04	1	137
2022-09-15	09:43:51	4.32937	19.2579	24.4026	2765.85	1	138
2022-09-15	09:43:52	3.94266	17.5377	17.1391	2936.58	1	139
2022-09-15	09:43:52	3.54805	15.7824	17.1391	2781.63	1	140
2022-09-15	09:43:52	3.71116	16.508	17.1391	2953.09	1	141
2022-09-15	09:43:52	4.21029	18.7282	17.1391	2800.36	1	142
2022-09-15	09:43:53	3.66683	16.3108	19.0791	2969.4	1	143
2022-09-15	09:43:53	4.16556	18.5292	19.0791	2818.89	1	144
2022-09-15	09:43:53	4.63192	20.6037	19.0791	2990	1	145
2022-09-15	09:43:53	4.69238	20.8726	19.0791	2839.76	1	146
2022-09-15	09:43:54	3.73482	16.6132	10.9888	3006.61	1	147
2022-09-15	09:43:54	3.74953	16.6787	10.9888	2856.44	1	148
2022-09-15	09:43:54	1.44047	6.4075	10.9888	3013.02	FALSE	148
2022-09-15	09:43:54	0.956756	4.25584	10.9888	2860.7	FALSE	148
2022-09-15	09:43:55	0.245611	1.09253	0.674116	3014.11	FALSE	148
2022-09-15	09:43:55	0.142252	0.632765	0.674116	2861.33	FALSE	148
2022-09-15	09:43:55	0.0667814	0.297057	0.674116	3014.41	FALSE	148
2022-09-15	09:43:56	-0.0144908	-0.064458	1.24363	2861.33	FALSE	148
2022-09-15	09:43:56	0.0757381	0.336898	1.24363	3014.75	FALSE	148
2022-09-15	09:43:56	0.0325829	0.144935	1.24363	2861.48	FALSE	148
2022-09-15	09:43:56	1.02449	4.55714	1.24363	3019.31	FALSE	148
2022-09-15	09:43:57	6.48515	28.8472	27.2662	2890.32	1	149
2022-09-15	09:43:57	8.22499	36.5864	27.2662	3055.89	1	150
2022-09-15	09:43:57	4.9821	22.1614	27.2662	2912.48	1	151
2022-09-15	09:43:57	4.82658	21.4696	27.2662	3077.36	1	152
2022-09-15	09:43:58	1.81391	8.06863	11.3245	2920.55	FALSE	152
2022-09-15	09:43:58	2.47859	11.0253	11.3245	3088.39	FALSE	152
2022-09-15	09:43:58	2.21589	9.85672	11.3245	2930.41	FALSE	152
2022-09-15	09:43:58	3.67502	16.3472	11.3245	3104.73	1	153
2022-09-15	09:43:59	2.89212	12.8647	12.2182	2943.28	FALSE	153
2022-09-15	09:43:59	3.40505	15.1463	12.2182	3119.88	1	154
2022-09-15	09:43:59	1.94312	8.64339	12.2182	2951.92	FALSE	154
2022-09-15	09:44:00	2.22505	9.89747	7.70772	3129.78	FALSE	154
2022-09-15	09:44:00	1.76983	7.87256	7.70772	2959.79	FALSE	154
2022-09-15	09:44:00	1.63879	7.28967	7.70772	3137.07	FALSE	154
2022-09-15	09:44:00	1.29742	5.77118	7.70772	2965.56	FALSE	154
2022-09-15	09:44:01	0.930903	4.14084	3.57673	3141.21	FALSE	154
2022-09-15	09:44:01	0.945662	4.20649	3.57673	2969.77	FALSE	154
2022-09-15	09:44:01	0.711972	3.16699	3.57673	3144.38	FALSE	154
2022-09-15	09:44:01	0.627799	2.79258	3.57673	2972.56	FALSE	154
2022-09-15	09:44:02	1.68464	7.49362	11.6378	3151.87	FALSE	154
2022-09-15	09:44:02	1.40363	6.24363	11.6378	2978.8	FALSE	154
2022-09-15	09:44:02	2.6537	11.8042	11.6378	3163.67	FALSE	154
2022-09-15	09:44:02	4.72317	21.0096	11.6378	2999.81	1	155
2022-09-15	09:44:03	5.56983	24.7757	31.7267	3188.45	1	156
2022-09-15	09:44:03	7.77258	34.574	31.7267	3034.39	1	157
2022-09-15	09:44:03	8.05502	35.8303	31.7267	3224.28	1	158
2022-09-15	09:44:04	3.97803	17.6951	19.9775	3052.08	1	159
2022-09-15	09:44:04	6.02408	26.7963	19.9775	3251.08	1	160
2022-09-15	09:44:04	5.23182	23.2722	19.9775	3075.36	1	161
2022-09-15	09:44:04	2.7306	12.1463	19.9775	3263.22	FALSE	161
2022-09-15	09:44:05	2.72037	12.1007	6.62205	3087.46	FALSE	161
2022-09-15	09:44:05	1.36785	6.08447	6.62205	3269.31	FALSE	161
2022-09-15	09:44:05	0.989835	4.40298	6.62205	3091.86	FALSE	161
2022-09-15	09:44:05	0.876756	3.89999	6.62205	3273.21	FALSE	161
2022-09-15	09:44:06	0.971718	4.3224	4.43156	3096.18	FALSE	161
2022-09-15	09:44:06	0.994568	4.42404	4.43156	3277.63	FALSE	161
2022-09-15	09:44:06	1.03497	4.60375	4.43156	3100.79	FALSE	161
2022-09-15	09:44:06	0.983779	4.37605	4.43156	3282.01	FALSE	161
2022-09-15	09:44:07	0.907748	4.03784	3.73202	3104.82	FALSE	161
2022-09-15	09:44:07	0.88042	3.91628	3.73202	3285.92	FALSE	161
2022-09-15	09:44:07	0.728817	3.24192	3.73202	3108.07	FALSE	161
2022-09-15	09:44:08	0.782506	3.48074	3.82443	3289.4	FALSE	161
2022-09-15	09:44:08	0.828359	3.68471	3.82443	3111.75	FALSE	161
2022-09-15	09:44:08	0.880878	3.91832	3.82443	3293.32	FALSE	161
2022-09-15	09:44:08	0.947341	4.21396	3.82443	3115.96	FALSE	161
2022-09-15	09:44:09	0.91014	4.04848	4.42834	3297.37	FALSE	161
2022-09-15	09:44:09	0.990242	4.40479	4.42834	3120.37	FALSE	161
2022-09-15	09:44:09	1.00388	4.46546	4.42834	3301.84	FALSE	161
2022-09-15	09:44:09	1.07788	4.79463	4.42834	3125.16	FALSE	161
2022-09-15	09:44:10	1.01655	4.52182	4.4156	3306.36	FALSE	161
2022-09-15	09:44:10	1.05996	4.71491	4.4156	3129.88	FALSE	161
2022-09-15	09:44:10	1.05676	4.70068	4.4156	3311.06	FALSE	161
2022-09-15	09:44:10	0.837417	3.725	4.4156	3133.6	FALSE	161
2022-09-15	09:44:11	0.711921	3.16677	2.50448	3314.22	FALSE	161
2022-09-15	09:44:11	0.521743	2.32082	2.50448	3135.92	FALSE	161
2022-09-15	09:44:11	0.455433	2.02586	2.50448	3316.25	FALSE	161
2022-09-15	09:44:12	0.408155	1.81556	2.18822	3137.74	FALSE	161
2022-09-15	09:44:12	0.379402	1.68766	2.18822	3317.94	FALSE	161
2022-09-15	09:44:12	0.410344	1.82529	2.18822	3139.57	FALSE	161
2022-09-15	09:44:12	0.769835	3.42438	2.18822	3321.36	FALSE	161
2022-09-15	09:44:13	1.26424	5.62359	10.4842	3145.19	FALSE	161
2022-09-15	09:44:13	2.55909	11.3833	10.4842	3332.75	FALSE	161
2022-09-15	09:44:13	2.78943	12.4079	10.4842	3157.6	FALSE	161
2022-09-15	09:44:13	2.81502	12.5218	10.4842	3345.27	FALSE	161
2022-09-15	09:44:14	0.960674	4.27327	2.70078	3161.87	FALSE	161
2022-09-15	09:44:14	0.705255	3.13712	2.70078	3348.4	FALSE	161
2022-09-15	09:44:14	0.444389	1.97673	2.70078	3163.85	FALSE	161
2022-09-15	09:44:14	0.318334	1.41601	2.70078	3349.82	FALSE	161
2022-09-15	09:44:15	0.302506	1.34561	0.615109	3165.19	FALSE	161
2022-09-15	09:44:15	0.217214	0.966211	0.615109	3350.79	FALSE	161
2022-09-15	09:44:15	-0.104872	-0.466492	0.615109	3165.19	FALSE	161
2022-09-15	09:44:16	-0.140038	-0.622917	-0.919973	3350.79	FALSE	161
2022-09-15	09:44:16	-0.439631	-1.95557	-0.919973	3165.19	FALSE	161
2022-09-15	09:44:16	-0.00395648	-0.0175992	-0.919973	3350.79	FALSE	161
2022-09-15	09:44:16	-0.243651	-1.08381	-0.919973	3165.19	FALSE	161
2022-09-15	09:44:17	-0.265636	-1.1816	-1.3597	3350.79	FALSE	161
2022-09-15	09:44:17	-0.332251	-1.47792	-1.3597	3165.19	FALSE	161
2022-09-15	09:44:17	-0.396577	-1.76405	-1.3597	3350.79	FALSE	161
2022-09-15	09:44:17	-0.228231	-1.01522	-1.3597	3165.19	FALSE	161
2022-09-15	09:44:18	0.27701	1.2322	0.300112	3352.02	FALSE	161
2022-09-15	09:44:18	0.252379	1.12263	0.300112	3166.31	FALSE	161
2022-09-15	09:44:18	-0.154847	-0.68879	0.300112	3352.02	FALSE	161
2022-09-15	09:44:18	-0.104669	-0.465589	0.300112	3166.31	FALSE	161
2022-09-15	09:44:19	-0.163447	-0.727045	0.697621	3352.02	FALSE	161
2022-09-15	09:44:19	-0.0786638	-0.349912	0.697621	3166.31	FALSE	161
2022-09-15	09:44:19	0.28271	1.25755	0.697621	3353.28	FALSE	161
2022-09-15	09:44:19	0.58673	2.60989	0.697621	3168.92	FALSE	161
2022-09-15	09:44:20	0.740267	3.29286	2.25668	3356.57	FALSE	161
2022-09-15	09:44:20	0.240013	1.06763	2.25668	3169.99	FALSE	161
2022-09-15	09:44:20	0.541692	2.40955	2.25668	3358.98	FALSE	161
2022-09-15	09:44:21	0.51528	2.29207	1.44934	3172.28	FALSE	161
2022-09-15	09:44:21	0.300216	1.33542	1.44934	3360.31	FALSE	161
2022-09-15	09:44:21	0.245051	1.09004	1.44934	3173.37	FALSE	161
2022-09-15	09:44:21	0.242761	1.07985	1.44934	3361.39	FALSE	161
2022-09-15	09:44:22	0.0895295	0.398245	0.449801	3173.77	FALSE	161
2022-09-15	09:44:22	0.152278	0.677363	0.449801	3362.07	FALSE	161
2022-09-15	09:44:22	0.207188	0.921614	0.449801	3174.69	FALSE	161
2022-09-15	09:44:22	-0.0445163	-0.198017	0.449801	3362.07	FALSE	161
2022-09-15	09:44:23	-0.241666	-1.07498	-1.45942	3174.69	FALSE	161
2022-09-15	09:44:23	-0.281005	-1.24997	-1.45942	3362.07	FALSE	161
2022-09-15	09:44:23	-0.340852	-1.51618	-1.45942	3174.69	FALSE	161
2022-09-15	09:44:23	-0.448842	-1.99654	-1.45942	3362.07	FALSE	161
2022-09-15	09:44:24	-0.575356	-2.5593	-2.39344	3174.69	FALSE	161
2022-09-15	09:44:24	-0.467722	-2.08052	-2.39344	3362.07	FALSE	161
2022-09-15	09:44:24	-0.571132	-2.54051	-2.39344	3174.69	FALSE	161
2022-09-15	09:44:25	-0.581768	-2.58782	-2.42291	3362.07	FALSE	161
2022-09-15	09:44:25	-0.623447	-2.77322	-2.42291	3174.69	FALSE	161
2022-09-15	09:44:25	-0.466552	-2.07532	-2.42291	3362.07	FALSE	161
2022-09-15	09:44:25	-0.50701	-2.25528	-2.42291	3174.69	FALSE	161
2022-09-15	09:44:26	-0.576068	-2.56247	-2.68691	3362.07	FALSE	161
2022-09-15	09:44:26	-0.611335	-2.71934	-2.68691	3174.69	FALSE	161
2022-09-15	09:44:26	-0.550012	-2.44656	-2.68691	3362.07	FALSE	161
2022-09-15	09:44:26	-0.678765	-3.01928	-2.68691	3174.69	FALSE	161
2022-09-15	09:44:27	-0.686042	-3.05165	-3.01476	3362.07	FALSE	161
2022-09-15	09:44:27	-0.660903	-2.93983	-3.01476	3174.69	FALSE	161
2022-09-15	09:44:27	-0.666195	-2.96337	-3.01476	3362.07	FALSE	161
2022-09-15	09:44:27	-0.697849	-3.10417	-3.01476	3174.69	FALSE	161
2022-09-15	09:44:28	-0.767315	-3.41317	-3.2234	3362.07	FALSE	161
2022-09-15	09:44:28	-0.678969	-3.02019	-3.2234	3174.69	FALSE	161
2022-09-15	09:44:28	-0.727671	-3.23683	-3.2234	3362.07	FALSE	161
2022-09-15	09:44:29	-0.561819	-2.49908	-2.68386	3174.69	FALSE	161
2022-09-15	09:44:29	-0.721462	-3.20921	-2.68386	3362.07	FALSE	161
2022-09-15	09:44:29	-0.534287	-2.37662	-2.68386	3174.69	FALSE	161
2022-09-15	09:44:29	-0.595865	-2.65053	-2.68386	3362.07	FALSE	161
2022-09-15	09:44:30	-0.693371	-3.08425	-3.0954	3174.69	FALSE	161
2022-09-15	09:44:30	-0.706806	-3.14401	-3.0954	3362.07	FALSE	161
2022-09-15	09:44:30	-0.618613	-2.75171	-3.0954	3174.69	FALSE	161
2022-09-15	09:44:30	-0.764719	-3.40162	-3.0954	3362.07	FALSE	161
2022-09-15	09:44:31	-0.649554	-2.88935	-2.90938	3174.69	FALSE	161
2022-09-15	09:44:31	-0.787569	-3.50326	-2.90938	3362.07	FALSE	161
2022-09-15	09:44:31	-0.580241	-2.58103	-2.90938	3174.69	FALSE	161
2022-09-15	09:44:31	-0.598867	-2.66388	-2.90938	3362.07	FALSE	161
2022-09-15	09:44:32	-0.542379	-2.41261	-1.63367	3174.69	FALSE	161
2022-09-15	09:44:32	-0.296832	-1.32037	-1.63367	3362.07	FALSE	161
2022-09-15	09:44:32	-0.262582	-1.16802	-1.63367	3174.69	FALSE	161
2022-09-15	09:44:33	-0.238409	-1.06049	-1.45251	3362.07	FALSE	161
2022-09-15	09:44:33	-0.365178	-1.62438	-1.45251	3174.69	FALSE	161
2022-09-15	09:44:33	-0.263397	-1.17164	-1.45251	3362.07	FALSE	161
2022-09-15	09:44:33	-0.439173	-1.95353	-1.45251	3174.69	FALSE	161
2022-09-15	09:44:34	-0.519732	-2.31187	-2.40174	3362.07	FALSE	161
2022-09-15	09:44:34	-0.597697	-2.65868	-2.40174	3174.69	FALSE	161
2022-09-15	09:44:34	-0.496374	-2.20797	-2.40174	3362.07	FALSE	161
2022-09-15	09:44:34	-0.545941	-2.42845	-2.40174	3174.69	FALSE	161
2022-09-15	09:44:35	-0.514796	-2.28992	-2.02053	3362.07	FALSE	161
2022-09-15	09:44:35	-0.424974	-1.89037	-2.02053	3174.69	FALSE	161
2022-09-15	09:44:35	-0.450826	-2.00536	-2.02053	3362.07	FALSE	161
2022-09-15	09:44:35	-0.426348	-1.89648	-2.02053	3174.69	FALSE	161
2022-09-15	09:44:36	-0.532913	-2.3705	-1.84057	3362.07	FALSE	161
2022-09-15	09:44:36	-0.41388	-1.84102	-1.84057	3174.69	FALSE	161
2022-09-15	09:44:36	-0.294542	-1.31018	-1.84057	3362.07	FALSE	161
2022-09-15	09:44:37	-0.351997	-1.56575	2.70208	3174.69	FALSE	161
2022-09-15	09:44:37	0.00647607	0.0288069	2.70208	3362.1	FALSE	161
2022-09-15	09:44:37	0.695178	3.09229	2.70208	3177.79	FALSE	161
2022-09-15	09:44:37	2.08016	9.25297	2.70208	3371.35	FALSE	161
2022-09-15	09:44:38	4.1938	18.6549	8.66368	3196.44	1	162
2022-09-15	09:44:38	1.66398	7.40172	8.66368	3378.76	FALSE	162
2022-09-15	09:44:38	1.36291	6.0625	8.66368	3202.5	FALSE	162
2022-09-15	09:44:38	0.570038	2.53564	8.66368	3381.29	FALSE	162
2022-09-15	09:44:39	0.32729	1.45585	1.42241	3203.96	FALSE	162
2022-09-15	09:44:39	0.237112	1.05472	1.42241	3382.35	FALSE	162
2022-09-15	09:44:39	0.285051	1.26796	1.42241	3205.23	FALSE	162
2022-09-15	09:44:39	0.429631	1.91108	1.42241	3384.26	FALSE	162
2022-09-15	09:44:40	0.382557	1.70169	1.85577	3206.93	FALSE	162
2022-09-15	09:44:40	0.518282	2.30542	1.85577	3386.56	FALSE	162
2022-09-15	09:44:40	0.350751	1.56021	1.85577	3208.49	FALSE	162
2022-09-15	09:44:41	0.412685	1.83571	1.36491	3388.4	FALSE	162
2022-09-15	09:44:41	0.314771	1.40016	1.36491	3209.89	FALSE	162
2022-09-15	09:44:41	0.226221	1.00628	1.36491	3389.4	FALSE	162
2022-09-15	09:44:41	0.273702	1.21748	1.36491	3211.11	FALSE	162
2022-09-15	09:44:42	0.548868	2.44147	1.89994	3391.85	FALSE	162
2022-09-15	09:44:42	0.347646	1.5464	1.89994	3212.65	FALSE	162
2022-09-15	09:44:42	0.427087	1.89977	1.89994	3393.75	FALSE	162
2022-09-15	09:44:42	0.384898	1.7121	1.89994	3214.37	FALSE	162
2022-09-15	09:44:43	0.667799	2.9705	2.29394	3396.72	FALSE	162
2022-09-15	09:44:43	0.372786	1.65823	2.29394	3216.02	FALSE	162
2022-09-15	09:44:43	0.624033	2.77582	2.29394	3399.49	FALSE	162
2022-09-15	09:44:43	0.398181	1.77119	2.29394	3217.8	FALSE	162
2022-09-15	09:44:44	0.783015	3.48301	6.44507	3402.97	FALSE	162
2022-09-15	09:44:44	0.585661	2.60514	6.44507	3220.4	FALSE	162
2022-09-15	09:44:44	2.32057	10.3224	6.44507	3413.3	FALSE	162
2022-09-15	09:44:44	2.10642	9.36978	6.44507	3229.77	FALSE	162

## Sheet: Klutz_harness_202291593924 (3)
Date	Time	Lbs	Newtons	Total force x time		total steps > 13.345	**GoPro Fitting: 929
2022-09-15	09:39:44	0.305051	1.35693	1.35693	FALSE	0
2022-09-15	09:39:44	0.294364	1.30939	1.30939	FALSE	0
2022-09-15	09:39:44	0.331463	1.47441	2.83134	FALSE	0
2022-09-15	09:39:44	0.305916	1.36078	2.67017	FALSE	0
2022-09-15	09:39:45	0.240471	1.06966	3.901	FALSE	0
2022-09-15	09:39:45	0.263728	1.17311	3.84328	FALSE	0
2022-09-15	09:39:45	0.318181	1.41533	5.31634	FALSE	0
2022-09-15	09:39:45	0.258893	1.15161	4.99489	FALSE	0
2022-09-15	09:39:46	1.48866	6.62186	11.9382	FALSE	0
2022-09-15	09:39:46	1.89274	8.41929	13.4142	FALSE	0
2022-09-15	09:39:46	1.46622	6.52204	18.4602	FALSE	0
2022-09-15	09:39:47	0.889326	3.9559	17.3701	FALSE	0
2022-09-15	09:39:47	0.262506	1.16768	19.6279	FALSE	0
2022-09-15	09:39:47	0.252684	1.12399	18.4941	FALSE	0
2022-09-15	09:39:47	0.10098	0.449179	20.0771	FALSE	0
2022-09-15	09:39:48	0.197926	0.880414	19.3745	FALSE	0
2022-09-15	09:39:48	0.0632699	0.281437	20.3585	FALSE	0
2022-09-15	09:39:48	-0.0726587	-0.3232	19.3745	FALSE	0
2022-09-15	09:39:48	0.046018	0.204697	20.5632	FALSE	0
2022-09-15	09:39:49	0.195076	0.867737	20.2422	FALSE	0
2022-09-15	09:39:49	0.0516669	0.229825	20.7931	FALSE	0
2022-09-15	09:39:49	0.446578	1.98647	22.2287	FALSE	0
2022-09-15	09:39:49	0.325153	1.44635	22.2394	FALSE	0
2022-09-15	09:39:50	0.322608	1.43502	23.6637	FALSE	0
2022-09-15	09:39:50	0.111005	0.493772	22.7332	FALSE	0
2022-09-15	09:39:50	0.428715	1.90701	25.5707	FALSE	0
2022-09-15	09:39:51	0.343779	1.5292	24.2624	FALSE	0
2022-09-15	09:39:51	0.154415	0.686869	26.2576	FALSE	0
2022-09-15	09:39:51	-0.0958648	-0.426426	24.2624	FALSE	0
2022-09-15	09:39:51	-0.452811	-2.01419	26.2576	FALSE	0
2022-09-15	09:39:52	-0.610623	-2.71617	24.2624	FALSE	0
2022-09-15	09:39:52	-0.45159	-2.00876	26.2576	FALSE	0
2022-09-15	09:39:52	-0.433931	-1.93021	24.2624	FALSE	0
2022-09-15	09:39:52	-0.511997	-2.27747	26.2576	FALSE	0
2022-09-15	09:39:53	-0.548384	-2.43932	24.2624	FALSE	0
2022-09-15	09:39:53	-0.67678	-3.01045	26.2576	FALSE	0
2022-09-15	09:39:53	-0.778562	-3.4632	24.2624	FALSE	0
2022-09-15	09:39:53	-0.677137	-3.01204	26.2576	FALSE	0
2022-09-15	09:39:54	-0.498155	-2.21589	24.2624	FALSE	0
2022-09-15	09:39:54	-0.401972	-1.78805	26.2576	FALSE	0
2022-09-15	09:39:54	-0.418002	-1.85936	24.2624	FALSE	0
2022-09-15	09:39:55	-0.121361	-0.539838	26.2576	FALSE	0
2022-09-15	09:39:55	0.325967	1.44997	25.7123	FALSE	0
2022-09-15	09:39:55	0.339097	1.50837	27.766	FALSE	0
2022-09-15	09:39:55	0.181998	0.809564	26.5219	FALSE	0
2022-09-15	09:39:56	-0.0258903	-0.115165	27.766	FALSE	0
2022-09-15	09:39:56	-0.125687	-0.559081	26.5219	FALSE	0
2022-09-15	09:39:56	0.151667	0.674645	28.4406	FALSE	0
2022-09-15	09:39:57	0.0173157	0.0770237	26.5989	FALSE	0
2022-09-15	09:39:57	0.166018	0.738481	29.1791	FALSE	0
2022-09-15	09:39:57	0.814618	3.62358	30.2225	FALSE	0
2022-09-15	09:39:57	0.429835	1.91199	31.0911	FALSE	0
2022-09-15	09:39:57	0.969936	4.31447	34.537	FALSE	0
2022-09-15	09:39:58	0.470293	2.09196	33.183	FALSE	0
2022-09-15	09:39:58	0.883728	3.931	38.468	FALSE	0
2022-09-15	09:39:58	0.816349	3.63128	36.8143	FALSE	0
2022-09-15	09:39:59	0.462303	2.05642	40.5244	FALSE	0
2022-09-15	09:39:59	0.183626	0.816805	37.6311	FALSE	0
2022-09-15	09:39:59	0.502659	2.23593	42.7603	FALSE	0
2022-09-15	09:39:59	0.173397	0.771305	38.4024	FALSE	0
2022-09-15	09:40:00	0.211769	0.941991	43.7023	FALSE	0
2022-09-15	09:40:00	-0.175356	-0.780019	38.4024	FALSE	0
2022-09-15	09:40:00	-0.508027	-2.25981	43.7023	FALSE	0
2022-09-15	09:40:00	-0.912556	-4.05923	38.4024	FALSE	0
2022-09-15	09:40:01	-1.01042	-4.49455	43.7023	FALSE	0
2022-09-15	09:40:01	-0.964872	-4.29194	38.4024	FALSE	0
2022-09-15	09:40:01	-0.979121	-4.35533	43.7023	FALSE	0
2022-09-15	09:40:01	-1.07454	-4.77977	38.4024	FALSE	0
2022-09-15	09:40:02	-0.869503	-3.86772	43.7023	FALSE	0
2022-09-15	09:40:02	-0.953931	-4.24328	38.4024	FALSE	0
2022-09-15	09:40:02	-0.793778	-3.53088	43.7023	FALSE	0
2022-09-15	09:40:03	-0.930012	-4.13688	38.4024	FALSE	0
2022-09-15	09:40:03	-0.685635	-3.04984	43.7023	FALSE	0
2022-09-15	09:40:03	-0.805941	-3.58499	38.4024	FALSE	0
2022-09-15	09:40:03	-0.740088	-3.29206	43.7023	FALSE	0
2022-09-15	09:40:04	-0.822989	-3.66082	38.4024	FALSE	0
2022-09-15	09:40:04	-0.727671	-3.23683	43.7023	FALSE	0
2022-09-15	09:40:04	-0.733676	-3.26354	38.4024	FALSE	0
2022-09-15	09:40:04	-0.743854	-3.30881	43.7023	FALSE	0
2022-09-15	09:40:05	-0.636271	-2.83026	38.4024	FALSE	0
2022-09-15	09:40:05	-0.342379	-1.52297	43.7023	FALSE	0
2022-09-15	09:40:05	-0.247112	-1.0992	38.4024	FALSE	0
2022-09-15	09:40:05	-0.250369	-1.11369	43.7023	FALSE	0
2022-09-15	09:40:06	-0.010216	-0.0454428	38.4024	FALSE	0
2022-09-15	09:40:06	0.298486	1.32773	45.03	FALSE	0
2022-09-15	09:40:06	0.912684	4.0598	42.4622	FALSE	0
2022-09-15	09:40:07	0.515738	2.29411	47.3241	FALSE	0
2022-09-15	09:40:07	0.26673	1.18647	43.6487	FALSE	0
2022-09-15	09:40:07	0.21813	0.970286	48.2944	FALSE	0
2022-09-15	09:40:07	-0.21388	-0.951381	43.6487	FALSE	0
2022-09-15	09:40:08	-0.340699	-1.5155	48.2944	FALSE	0
2022-09-15	09:40:08	-0.42645	-1.89693	43.6487	FALSE	0
2022-09-15	09:40:08	-0.444974	-1.97933	48.2944	FALSE	0
2022-09-15	09:40:08	-0.534796	-2.37888	43.6487	FALSE	0
2022-09-15	09:40:09	-0.425483	-1.89263	48.2944	FALSE	0
2022-09-15	09:40:09	-0.437442	-1.94583	43.6487	FALSE	0
2022-09-15	09:40:09	-0.490827	-2.1833	48.2944	FALSE	0
2022-09-15	09:40:09	-0.475509	-2.11516	43.6487	FALSE	0
2022-09-15	09:40:10	-0.407213	-1.81136	48.2944	FALSE	0
2022-09-15	09:40:10	-0.335101	-1.4906	43.6487	FALSE	0
2022-09-15	09:40:10	-0.363447	-1.61668	48.2944	FALSE	0
2022-09-15	09:40:11	-0.124567	-0.554099	43.6487	FALSE	0
2022-09-15	09:40:11	-0.181157	-0.805823	48.2944	FALSE	0
2022-09-15	09:40:11	-0.0638547	-0.284038	43.6487	FALSE	0
2022-09-15	09:40:11	-0.141819	-0.630839	48.2944	FALSE	0
2022-09-15	09:40:12	0.0963997	0.428805	44.0775	FALSE	0
2022-09-15	09:40:12	0.109377	0.486531	48.781	FALSE	0
2022-09-15	09:40:12	0.0409798	0.182286	44.2598	FALSE	0
2022-09-15	09:40:12	0.056756	0.252462	49.0334	FALSE	0
2022-09-15	09:40:13	0.086985	0.386927	44.6467	FALSE	0
2022-09-15	09:40:13	-0.060445	-0.268871	49.0334	FALSE	0
2022-09-15	09:40:13	-0.389503	-1.73259	44.6467	FALSE	0
2022-09-15	09:40:13	-0.712608	-3.16982	49.0334	FALSE	0
2022-09-15	09:40:14	-0.687875	-3.05981	44.6467	FALSE	0
2022-09-15	09:40:14	-0.727111	-3.23434	49.0334	FALSE	0
2022-09-15	09:40:14	-0.735864	-3.27327	44.6467	FALSE	0
2022-09-15	09:40:15	-0.596577	-2.65369	49.0334	FALSE	0
2022-09-15	09:40:15	-0.602888	-2.68177	44.6467	FALSE	0
2022-09-15	09:40:15	-0.594745	-2.64554	49.0334	FALSE	0
2022-09-15	09:40:15	-0.70991	-3.15782	44.6467	FALSE	0
2022-09-15	09:40:16	-0.607773	-2.7035	49.0334	FALSE	0
2022-09-15	09:40:16	-0.661768	-2.94368	44.6467	FALSE	0
2022-09-15	09:40:16	-0.618409	-2.75081	49.0334	FALSE	0
2022-09-15	09:40:16	-0.461259	-2.05177	44.6467	FALSE	0
2022-09-15	09:40:17	-0.276628	-1.2305	49.0334	FALSE	0
2022-09-15	09:40:17	-0.179224	-0.797224	44.6467	FALSE	0
2022-09-15	09:40:17	-0.245534	-1.09218	49.0334	FALSE	0
2022-09-15	09:40:17	-0.104465	-0.464681	44.6467	FALSE	0
2022-09-15	09:40:18	-0.0279768	-0.124446	49.0334	FALSE	0
2022-09-15	09:40:18	0.0700384	0.311545	44.9583	FALSE	0
2022-09-15	09:40:18	0.0512597	0.228013	49.2614	FALSE	0
2022-09-15	09:40:19	0.0271376	0.120713	45.079	FALSE	0
2022-09-15	09:40:19	0.505967	2.25064	51.5121	FALSE	0
2022-09-15	09:40:19	0.880929	3.91855	48.9975	FALSE	0
2022-09-15	09:40:19	0.764593	3.40106	54.9131	FALSE	0
2022-09-15	09:40:20	0.510089	2.26898	51.2665	FALSE	0
2022-09-15	09:40:20	0.501692	2.23163	57.1448	FALSE	0
2022-09-15	09:40:20	0.268766	1.19552	52.462	FALSE	0
2022-09-15	09:40:20	0.427036	1.89954	59.0443	FALSE	0
2022-09-15	09:40:21	0.297265	1.32229	53.7843	FALSE	0
2022-09-15	09:40:21	-0.150979	-0.671585	59.0443	FALSE	0
2022-09-15	09:40:21	-0.704567	-3.13405	53.7843	FALSE	0
2022-09-15	09:40:21	-0.820394	-3.64928	59.0443	FALSE	0
2022-09-15	09:40:22	-1.04156	-4.63307	53.7843	FALSE	0
2022-09-15	09:40:22	-0.720088	-3.2031	59.0443	FALSE	0
2022-09-15	09:40:22	-0.651844	-2.89953	53.7843	FALSE	0
2022-09-15	09:40:23	-0.212862	-0.946853	59.0443	FALSE	0
2022-09-15	09:40:23	2.04612	9.10155	62.8859	FALSE	0
2022-09-15	09:40:23	0.743575	3.30757	62.3519	FALSE	0
2022-09-15	09:40:23	3.68006	16.3696	79.2555	1	1
2022-09-15	09:40:24	0.418333	1.86083	64.2127	FALSE	1
2022-09-15	09:40:24	0.48042	2.137	81.3925	FALSE	1
2022-09-15	09:40:24	0.406069	1.80628	66.019	FALSE	1
2022-09-15	09:40:25	0.109529	0.487207	81.8797	FALSE	1
2022-09-15	09:40:25	0.269122	1.19711	67.2161	FALSE	1
2022-09-15	09:40:25	-0.00690816	-0.0307289	81.8797	FALSE	1
2022-09-15	09:40:25	0.0127356	0.0566505	67.2727	FALSE	1
2022-09-15	09:40:25	0.0853056	0.379456	82.2592	FALSE	1
2022-09-15	09:40:26	-0.0900633	-0.40062	67.2727	FALSE	1
2022-09-15	09:40:26	-0.054389	-0.241933	82.2592	FALSE	1
2022-09-15	09:40:26	-0.158918	-0.706899	67.2727	FALSE	1
2022-09-15	09:40:27	-0.116476	-0.518109	82.2592	FALSE	1
2022-09-15	09:40:27	-0.337493	-1.50124	67.2727	FALSE	1
2022-09-15	09:40:27	-0.169707	-0.754891	82.2592	FALSE	1
2022-09-15	09:40:27	-0.183193	-0.814879	67.2727	FALSE	1
2022-09-15	09:40:28	0.00449134	0.0199784	82.2792	FALSE	1
2022-09-15	09:40:28	0.0722776	0.321505	67.5942	FALSE	1
2022-09-15	09:40:28	0.00785013	0.0349189	82.3141	FALSE	1
2022-09-15	09:40:28	1.27172	5.65686	73.2511	FALSE	1
2022-09-15	09:40:29	0.0895804	0.398472	82.7125	FALSE	1
2022-09-15	09:40:29	0.493346	2.1945	75.4456	FALSE	1
2022-09-15	09:40:29	0.78215	3.47916	86.1917	FALSE	1
2022-09-15	09:40:29	0.384797	1.71165	77.1573	FALSE	1
2022-09-15	09:40:30	1.65192	7.34807	93.5398	FALSE	1
2022-09-15	09:40:30	0.335076	1.49049	78.6477	FALSE	1
2022-09-15	09:40:30	0.788766	3.50859	97.0484	FALSE	1
2022-09-15	09:40:31	1.17996	5.2487	83.8964	FALSE	1
2022-09-15	09:40:31	0.284593	1.26593	98.3143	FALSE	1
2022-09-15	09:40:31	2.1306	9.47733	93.3738	FALSE	1
2022-09-15	09:40:31	0.222456	0.989529	99.3038	FALSE	1
2022-09-15	09:40:32	0.029275	0.130221	93.504	FALSE	1
2022-09-15	09:40:32	0.379606	1.68856	100.992	FALSE	1
2022-09-15	09:40:32	-0.135661	-0.603447	93.504	FALSE	1
2022-09-15	09:40:32	-0.430317	-1.91414	100.992	FALSE	1
2022-09-15	09:40:33	-0.208282	-0.92648	93.504	FALSE	1
2022-09-15	09:40:33	0.0582827	0.259253	101.252	FALSE	1
2022-09-15	09:40:33	0.26388	1.17379	94.6778	FALSE	1
2022-09-15	09:40:33	0.275891	1.22722	102.479	FALSE	1
2022-09-15	09:40:34	1.11869	4.97616	99.654	FALSE	1
2022-09-15	09:40:34	2.66357	11.8481	114.327	FALSE	1
2022-09-15	09:40:34	4.01034	17.8388	117.493	1	2
2022-09-15	09:40:35	2.64943	11.7852	126.112	FALSE	2
2022-09-15	09:40:35	3.60184	16.0217	133.514	1	3
2022-09-15	09:40:35	3.17701	14.132	140.244	1	4
2022-09-15	09:40:35	2.8109	12.5034	146.018	FALSE	4
2022-09-15	09:40:36	1.93426	8.60398	148.848	FALSE	4
2022-09-15	09:40:36	0.908206	4.03988	150.058	FALSE	4
2022-09-15	09:40:36	0.723015	3.21612	152.064	FALSE	4
2022-09-15	09:40:36	0.884491	3.93439	153.992	FALSE	4
2022-09-15	09:40:37	0.943931	4.19879	156.263	FALSE	4
2022-09-15	09:40:37	0.660267	2.937	156.929	FALSE	4
2022-09-15	09:40:37	0.454568	2.02201	158.285	FALSE	4
2022-09-15	09:40:37	0.483372	2.15014	159.079	FALSE	4
2022-09-15	09:40:38	0.663626	2.95194	161.237	FALSE	4
2022-09-15	09:40:38	0.665916	2.96213	162.041	FALSE	4
2022-09-15	09:40:38	0.666171	2.96326	164.2	FALSE	4
2022-09-15	09:40:39	0.8107	3.60616	165.648	FALSE	4
2022-09-15	09:40:39	0.50444	2.24385	166.444	FALSE	4
2022-09-15	09:40:39	0.447341	1.98986	167.637	FALSE	4
2022-09-15	09:40:39	0.445356	1.98103	168.425	FALSE	4
2022-09-15	09:40:40	0.413855	1.84091	169.478	FALSE	4
2022-09-15	09:40:40	0.369631	1.64419	170.069	FALSE	4
2022-09-15	09:40:40	0.397112	1.76643	171.245	FALSE	4
2022-09-15	09:40:40	0.408053	1.8151	171.884	FALSE	4
2022-09-15	09:40:41	0.458333	2.03876	173.284	FALSE	4
2022-09-15	09:40:41	0.388919	1.72999	173.614	FALSE	4
2022-09-15	09:40:41	0.539809	2.40118	175.685	FALSE	4
2022-09-15	09:40:41	0.498232	2.21624	175.831	FALSE	4
2022-09-15	09:40:42	0.451565	2.00865	177.693	FALSE	4
2022-09-15	09:40:42	0.450293	2.00299	177.834	FALSE	4
2022-09-15	09:40:42	0.448766	1.9962	179.69	FALSE	4
2022-09-15	09:40:43	0.383015	1.70373	179.537	FALSE	4
2022-09-15	09:40:43	0.340725	1.51561	181.205	FALSE	4
2022-09-15	09:40:43	0.388766	1.72931	181.267	FALSE	4
2022-09-15	09:40:43	0.489326	2.17662	183.382	FALSE	4
2022-09-15	09:40:44	0.534466	2.37741	183.644	FALSE	4
2022-09-15	09:40:44	0.613193	2.72761	186.109	FALSE	4
2022-09-15	09:40:44	0.66785	2.97073	186.615	FALSE	4
2022-09-15	09:40:44	0.510649	2.27147	188.381	FALSE	4
2022-09-15	09:40:45	0.398283	1.77164	188.386	FALSE	4
2022-09-15	09:40:45	0.346629	1.54188	189.923	FALSE	4
2022-09-15	09:40:45	0.284084	1.26366	189.65	FALSE	4
2022-09-15	09:40:45	0.296094	1.31709	191.24	FALSE	4
2022-09-15	09:40:46	0.292786	1.30237	190.952	FALSE	4
2022-09-15	09:40:46	0.290802	1.29355	192.533	FALSE	4
2022-09-15	09:40:46	0.286069	1.27249	192.225	FALSE	4
2022-09-15	09:40:47	0.447952	1.99258	194.526	FALSE	4
2022-09-15	09:40:47	1.06235	4.72555	196.951	FALSE	4
2022-09-15	09:40:47	0.379758	1.68924	196.215	FALSE	4
2022-09-15	09:40:47	0.206679	0.91935	197.87	FALSE	4
2022-09-15	09:40:48	0.188155	0.836951	197.052	FALSE	4
2022-09-15	09:40:48	0.0859163	0.382173	198.252	FALSE	4
2022-09-15	09:40:48	0.00449134	0.0199784	197.072	FALSE	4
2022-09-15	09:40:48	-0.099987	-0.444762	198.252	FALSE	4
2022-09-15	09:40:49	-0.121056	-0.538481	197.072	FALSE	4
2022-09-15	09:40:49	0.1764	0.784662	199.037	FALSE	4
2022-09-15	09:40:49	0.17416	0.774699	197.847	FALSE	4
2022-09-15	09:40:49	0.721387	3.20887	202.246	FALSE	4
2022-09-15	09:40:50	1.33518	5.93915	203.786	FALSE	4
2022-09-15	09:40:50	0.627137	2.78963	205.035	FALSE	4
2022-09-15	09:40:50	-0.267722	-1.19088	203.786	FALSE	4
2022-09-15	09:40:50	-0.20533	-0.913349	205.035	FALSE	4
2022-09-15	09:40:51	-0.363804	-1.61827	203.786	FALSE	4
2022-09-15	09:40:51	-0.379987	-1.69026	205.035	FALSE	4
2022-09-15	09:40:51	0.649987	2.89127	206.677	FALSE	4
2022-09-15	09:40:52	6.2024	27.5895	232.625	1	5
2022-09-15	09:40:52	8.30459	36.9405	243.618	1	6
2022-09-15	09:40:52	6.45981	28.7345	261.359	1	7
2022-09-15	09:40:52	4.26978	18.9928	262.611	1	8
2022-09-15	09:40:53	2.04347	9.08976	270.449	FALSE	8
2022-09-15	09:40:53	0.881641	3.92172	266.532	FALSE	8
2022-09-15	09:40:53	0.227901	1.01375	271.463	FALSE	8
2022-09-15	09:40:53	0.0680027	0.30249	266.835	FALSE	8
2022-09-15	09:40:54	0.129479	0.575948	272.039	FALSE	8
2022-09-15	09:40:54	-0.0766282	-0.340858	266.835	FALSE	8
2022-09-15	09:40:54	0.0394532	0.175496	272.214	FALSE	8
2022-09-15	09:40:54	-0.0415646	-0.184888	266.835	FALSE	8
2022-09-15	09:40:55	-0.202328	-0.899995	272.214	FALSE	8
2022-09-15	09:40:55	-0.372913	-1.65879	266.835	FALSE	8
2022-09-15	09:40:55	-0.34645	-1.54108	272.214	FALSE	8
2022-09-15	09:40:56	-0.398765	-1.77379	266.835	FALSE	8
2022-09-15	09:40:56	-0.6579	-2.92647	272.214	FALSE	8
2022-09-15	09:40:56	-0.705076	-3.13632	266.835	FALSE	8
2022-09-15	09:40:56	-0.888485	-3.95216	272.214	FALSE	8
2022-09-15	09:40:57	-0.714643	-3.17887	266.835	FALSE	8
2022-09-15	09:40:57	-0.676322	-3.00842	272.214	FALSE	8
2022-09-15	09:40:57	-0.645076	-2.86943	266.835	FALSE	8
2022-09-15	09:40:57	-0.548638	-2.44045	272.214	FALSE	8
2022-09-15	09:40:58	-0.451997	-2.01057	266.835	FALSE	8
2022-09-15	09:40:58	-0.239885	-1.06706	272.214	FALSE	8
2022-09-15	09:40:58	-0.302023	-1.34346	266.835	FALSE	8
2022-09-15	09:40:58	-0.0346435	-0.154101	272.214	FALSE	8
2022-09-15	09:40:59	0.0346185	0.15399	266.989	FALSE	8
2022-09-15	09:40:59	0.0579773	0.257895	272.472	FALSE	8
2022-09-15	09:40:59	0.0326338	0.145162	267.134	FALSE	8
2022-09-15	09:41:00	0.519657	2.31154	274.784	FALSE	8
2022-09-15	09:41:00	0.410751	1.8271	268.961	FALSE	8
2022-09-15	09:41:00	0.382354	1.70079	276.484	FALSE	8
2022-09-15	09:41:00	0.687341	3.05743	272.018	FALSE	8
2022-09-15	09:41:01	0.695738	3.09478	279.579	FALSE	8
2022-09-15	09:41:01	0.483372	2.15014	274.169	FALSE	8
2022-09-15	09:41:01	0.486018	2.16191	281.741	FALSE	8
2022-09-15	09:41:02	0.302659	1.34629	275.515	FALSE	8
2022-09-15	09:41:02	0.172685	0.768137	282.509	FALSE	8
2022-09-15	09:41:02	0.418944	1.86355	277.378	FALSE	8
2022-09-15	09:41:02	0.556959	2.47747	284.987	FALSE	8
2022-09-15	09:41:02	0.497621	2.21352	279.592	FALSE	8
2022-09-15	09:41:03	0.486578	2.1644	287.151	FALSE	8
2022-09-15	09:41:03	0.388257	1.72704	281.319	FALSE	8
2022-09-15	09:41:03	0.424084	1.88641	289.038	FALSE	8
2022-09-15	09:41:04	0.444338	1.9765	283.296	FALSE	8
2022-09-15	09:41:04	0.399809	1.77843	290.816	FALSE	8
2022-09-15	09:41:04	0.528003	2.34866	285.644	FALSE	8
2022-09-15	09:41:04	0.633142	2.81634	293.632	FALSE	8
2022-09-15	09:41:05	1.04989	4.67012	290.314	FALSE	8
2022-09-15	09:41:05	0.692379	3.07984	296.712	FALSE	8
2022-09-15	09:41:05	0.636348	2.8306	293.145	FALSE	8
2022-09-15	09:41:05	0.628613	2.7962	299.508	FALSE	8
2022-09-15	09:41:06	0.647392	2.87973	296.025	FALSE	8
2022-09-15	09:41:06	0.541845	2.41023	301.919	FALSE	8
2022-09-15	09:41:06	0.527443	2.34617	298.371	FALSE	8
2022-09-15	09:41:06	0.541285	2.40774	304.326	FALSE	8
2022-09-15	09:41:07	0.554669	2.46728	300.838	FALSE	8
2022-09-15	09:41:07	0.585203	2.6031	306.929	FALSE	8
2022-09-15	09:41:07	0.588969	2.61985	303.458	FALSE	8
2022-09-15	09:41:08	0.596552	2.65358	309.583	FALSE	8
2022-09-15	09:41:08	0.661896	2.94425	306.402	FALSE	8
2022-09-15	09:41:08	0.594211	2.64317	312.226	FALSE	8
2022-09-15	09:41:08	0.526272	2.34096	308.743	FALSE	8
2022-09-15	09:41:09	0.50215	2.23366	314.46	FALSE	8
2022-09-15	09:41:09	0.533041	2.37107	311.114	FALSE	8
2022-09-15	09:41:09	0.641132	2.85188	317.312	FALSE	8
2022-09-15	09:41:09	0.749835	3.33542	314.45	FALSE	8
2022-09-15	09:41:10	0.912837	4.06048	321.372	FALSE	8
2022-09-15	09:41:10	1.11472	4.9585	319.408	FALSE	8
2022-09-15	09:41:10	1.43899	6.40092	327.773	FALSE	8
2022-09-15	09:41:10	2.76927	12.3183	331.726	FALSE	8
2022-09-15	09:41:11	2.71441	12.0742	339.847	FALSE	8
2022-09-15	09:41:11	2.14388	9.53641	341.263	FALSE	8
2022-09-15	09:41:11	2.02073	8.98861	348.836	FALSE	8
2022-09-15	09:41:12	1.11034	4.93901	346.202	FALSE	8
2022-09-15	09:41:12	0.802964	3.57174	352.408	FALSE	8
2022-09-15	09:41:12	0.800572	3.5611	349.763	FALSE	8
2022-09-15	09:41:12	1.1081	4.92905	357.337	FALSE	8
2022-09-15	09:41:13	2.33996	10.4086	360.172	FALSE	8
2022-09-15	09:41:13	2.7877	12.4002	369.737	FALSE	8
2022-09-15	09:41:13	3.00622	13.3723	373.544	1	9
2022-09-15	09:41:13	2.80653	12.484	382.221	FALSE	9
2022-09-15	09:41:14	1.98327	8.82198	382.366	FALSE	9
2022-09-15	09:41:14	1.56098	6.94355	389.165	FALSE	9
2022-09-15	09:41:14	1.07426	4.77852	387.144	FALSE	9
2022-09-15	09:41:14	1.63665	7.28015	396.445	FALSE	9
2022-09-15	09:41:15	1.44129	6.41115	393.555	FALSE	9
2022-09-15	09:41:15	1.09726	4.88083	401.326	FALSE	9
2022-09-15	09:41:15	0.759198	3.37706	396.933	FALSE	9
2022-09-15	09:41:16	1.03564	4.60673	405.932	FALSE	9
2022-09-15	09:41:16	1.1081	4.92905	401.862	FALSE	9
2022-09-15	09:41:16	1.00164	4.4555	410.388	FALSE	9
2022-09-15	09:41:16	1.15726	5.14772	407.009	FALSE	9
2022-09-15	09:41:17	0.832074	3.70123	414.089	FALSE	9
2022-09-15	09:41:17	1.16149	5.16654	412.176	FALSE	9
2022-09-15	09:41:17	0.947443	4.21442	418.303	FALSE	9
2022-09-15	09:41:17	0.677773	3.01487	415.191	FALSE	9
2022-09-15	09:41:18	0.591208	2.62981	420.933	FALSE	9
2022-09-15	09:41:18	0.719707	3.2014	418.392	FALSE	9
2022-09-15	09:41:18	0.602099	2.67826	423.611	FALSE	9
2022-09-15	09:41:18	0.726781	3.23287	421.625	FALSE	9
2022-09-15	09:41:19	0.621692	2.76541	426.377	FALSE	9
2022-09-15	09:41:19	0.65645	2.92002	424.545	FALSE	9
2022-09-15	09:41:19	0.60042	2.67079	429.048	FALSE	9
2022-09-15	09:41:20	0.613091	2.72715	427.272	FALSE	9
2022-09-15	09:41:20	0.632735	2.81453	431.862	FALSE	9
2022-09-15	09:41:20	0.6707	2.98341	430.256	FALSE	9
2022-09-15	09:41:20	0.681031	3.02936	434.892	FALSE	9
2022-09-15	09:41:21	0.667494	2.96915	433.225	FALSE	9
2022-09-15	09:41:21	0.719249	3.19936	438.091	FALSE	9
2022-09-15	09:41:21	0.737875	3.28222	436.507	FALSE	9
2022-09-15	09:41:21	0.623677	2.77424	440.865	FALSE	9
2022-09-15	09:41:22	0.564847	2.51255	439.019	FALSE	9
2022-09-15	09:41:22	0.474517	2.11075	442.976	FALSE	9
2022-09-15	09:41:22	0.457417	2.03468	441.054	FALSE	9
2022-09-15	09:41:22	0.522862	2.32579	445.302	FALSE	9
2022-09-15	09:41:23	0.551616	2.4537	443.508	FALSE	9
2022-09-15	09:41:23	1.15431	5.1346	450.436	FALSE	9
2022-09-15	09:41:23	0.773092	3.43887	446.947	FALSE	9
2022-09-15	09:41:24	0.543372	2.41703	452.853	FALSE	9
2022-09-15	09:41:24	0.74729	3.3241	450.271	FALSE	9
2022-09-15	09:41:24	2.46943	10.9845	463.838	FALSE	9
2022-09-15	09:41:24	4.1396	18.4138	468.685	1	10
2022-09-15	09:41:25	3.39996	15.1237	478.962	1	11
2022-09-15	09:41:25	3.56383	15.8526	484.537	1	12
2022-09-15	09:41:25	3.3678	14.9806	493.942	1	13
2022-09-15	09:41:25	2.96754	13.2002	497.737	FALSE	13
2022-09-15	09:41:26	1.87961	8.36088	502.303	FALSE	13
2022-09-15	09:41:26	2.82393	12.5614	510.299	FALSE	13
2022-09-15	09:41:26	1.89945	8.44913	510.752	FALSE	13
2022-09-15	09:41:26	2.61513	11.6326	521.931	FALSE	13
2022-09-15	09:41:27	2.38307	10.6004	521.353	FALSE	13
2022-09-15	09:41:27	2.20729	9.81847	531.75	FALSE	13
2022-09-15	09:41:27	1.81492	8.07313	529.426	FALSE	13
2022-09-15	09:41:28	1.72525	7.67426	539.424	FALSE	13
2022-09-15	09:41:28	1.59899	7.11263	536.538	FALSE	13
2022-09-15	09:41:28	1.542	6.85912	546.283	FALSE	13
2022-09-15	09:41:28	1.51665	6.74636	543.285	FALSE	13
2022-09-15	09:41:29	1.1881	5.28491	551.568	FALSE	13
2022-09-15	09:41:29	1.39991	6.22708	549.512	FALSE	13
2022-09-15	09:41:29	1.54826	6.88697	558.455	FALSE	13
2022-09-15	09:41:29	1.59207	7.08185	556.594	FALSE	13
2022-09-15	09:41:30	1.75986	7.82821	566.283	FALSE	13
2022-09-15	09:41:30	1.66556	7.40874	564.002	FALSE	13
2022-09-15	09:41:30	1.98393	8.82492	575.108	FALSE	13
2022-09-15	09:41:30	1.70912	7.60251	571.605	FALSE	13
2022-09-15	09:41:31	1.39747	6.21623	581.325	FALSE	13
2022-09-15	09:41:31	0.825763	3.67316	575.278	FALSE	13
2022-09-15	09:41:31	0.427137	1.89999	583.224	FALSE	13
2022-09-15	09:41:32	0.112736	0.501472	575.78	FALSE	13
2022-09-15	09:41:32	-0.0345926	-0.153875	583.224	FALSE	13
2022-09-15	09:41:32	-0.421056	-1.87294	575.78	FALSE	13
2022-09-15	09:41:32	-0.628434	-2.7954	583.224	FALSE	13
2022-09-15	09:41:33	-0.66131	-2.94164	575.78	FALSE	13
2022-09-15	09:41:33	-0.625839	-2.78386	583.224	FALSE	13
2022-09-15	09:41:33	-0.651539	-2.89818	575.78	FALSE	13
2022-09-15	09:41:33	-0.470776	-2.09411	583.224	FALSE	13
2022-09-15	09:41:34	-0.0727606	-0.323654	575.78	FALSE	13
2022-09-15	09:41:34	-0.058104	-0.258458	583.224	FALSE	13
2022-09-15	09:41:34	0.0500893	0.222807	576.002	FALSE	13
2022-09-15	09:41:34	0.375484	1.67023	584.895	FALSE	13
2022-09-15	09:41:35	0.891209	3.96428	579.967	FALSE	13
2022-09-15	09:41:35	0.734109	3.26546	588.16	FALSE	13
2022-09-15	09:41:35	0.618588	2.7516	582.718	FALSE	13
2022-09-15	09:41:36	0.738333	3.28425	591.444	FALSE	13
2022-09-15	09:41:36	0.701539	3.12059	585.839	FALSE	13
2022-09-15	09:41:36	0.33528	1.49139	592.936	FALSE	13
2022-09-15	09:41:36	0.326934	1.45427	587.293	FALSE	13
2022-09-15	09:41:37	0.251616	1.11924	594.055	FALSE	13
2022-09-15	09:41:37	0.292786	1.30237	588.595	FALSE	13
2022-09-15	09:41:37	0.293448	1.30532	595.36	FALSE	13
2022-09-15	09:41:37	0.186629	0.830163	589.426	FALSE	13
2022-09-15	09:41:38	0.301387	1.34063	596.701	FALSE	13
2022-09-15	09:41:38	0.365814	1.62721	591.053	FALSE	13
2022-09-15	09:41:38	0.208664	0.928179	597.629	FALSE	13
2022-09-15	09:41:38	0.156501	0.696148	591.749	FALSE	13
2022-09-15	09:41:39	0.281794	1.25348	598.883	FALSE	13
2022-09-15	09:41:39	0.220929	0.982736	592.732	FALSE	13
2022-09-15	09:41:39	0.364084	1.61952	600.502	FALSE	13
2022-09-15	09:41:40	0.298028	1.32569	594.057	FALSE	13
2022-09-15	09:41:40	0.479046	2.13089	602.633	FALSE	13
2022-09-15	09:41:40	0.896196	3.98646	598.044	FALSE	13
2022-09-15	09:41:40	0.360064	1.60164	604.235	FALSE	13
2022-09-15	09:41:41	1.63289	7.26342	605.307	FALSE	13
2022-09-15	09:41:41	2.43258	10.8206	615.055	FALSE	13
2022-09-15	09:41:41	1.85406	8.24723	613.554	FALSE	13
2022-09-15	09:41:41	2.41284	10.7328	625.788	FALSE	13
2022-09-15	09:41:42	0.589224	2.62099	616.175	FALSE	13
2022-09-15	09:41:42	1.60556	7.14185	632.93	FALSE	13
2022-09-15	09:41:42	2.51574	11.1905	627.366	FALSE	13
2022-09-15	09:41:42	0.452685	2.01363	634.944	FALSE	13
2022-09-15	09:41:43	0.706069	3.14074	630.507	FALSE	13
2022-09-15	09:41:43	0.425102	1.89094	636.835	FALSE	13
2022-09-15	09:41:43	0.423524	1.88392	632.391	FALSE	13
2022-09-15	09:41:44	0.564338	2.51029	639.345	FALSE	13
2022-09-15	09:41:44	0.383473	1.70576	634.096	FALSE	13
2022-09-15	09:41:44	0.523371	2.32806	641.673	FALSE	13
2022-09-15	09:41:44	0.287392	1.27838	635.375	FALSE	13
2022-09-15	09:41:45	0.745102	3.31436	644.987	FALSE	13
2022-09-15	09:41:45	0.260064	1.15682	636.532	FALSE	13
2022-09-15	09:41:45	0.524135	2.33146	647.319	FALSE	13
2022-09-15	09:41:45	0.342914	1.52535	638.057	FALSE	13
2022-09-15	09:41:46	0.32444	1.44317	648.762	FALSE	13
2022-09-15	09:41:46	0.277112	1.23265	639.29	FALSE	13
2022-09-15	09:41:46	0.23126	1.02869	649.791	FALSE	13
2022-09-15	09:41:46	0.437061	1.94413	641.234	FALSE	13
2022-09-15	09:41:47	0.517061	2.29999	652.091	FALSE	13
2022-09-15	09:41:47	0.771158	3.43027	644.664	FALSE	13
2022-09-15	09:41:47	1.20648	5.36666	657.457	FALSE	13
2022-09-15	09:41:48	1.42505	6.33891	651.003	FALSE	13
2022-09-15	09:41:48	0.421234	1.87373	659.331	FALSE	13
2022-09-15	09:41:48	0.751107	3.34107	654.344	FALSE	13
2022-09-15	09:41:48	0.413092	1.83752	661.168	FALSE	13
2022-09-15	09:41:49	0.584033	2.5979	656.942	FALSE	13
2022-09-15	09:41:49	0.351158	1.56202	662.73	FALSE	13
2022-09-15	09:41:49	1.24683	5.54615	662.488	FALSE	13
2022-09-15	09:41:49	0.589173	2.62076	665.351	FALSE	13
2022-09-15	09:41:50	1.33589	5.94231	668.43	FALSE	13
2022-09-15	09:41:50	1.74841	7.77728	673.129	FALSE	13
2022-09-15	09:41:50	2.26775	10.0874	678.518	FALSE	13
2022-09-15	09:41:50	1.76658	7.8581	680.987	FALSE	13
2022-09-15	09:41:51	1.22627	5.45469	683.972	FALSE	13
2022-09-15	09:41:51	0.974262	4.33371	685.32	FALSE	13
2022-09-15	09:41:51	0.548562	2.44011	686.413	FALSE	13
2022-09-15	09:41:52	0.400725	1.7825	687.103	FALSE	13
2022-09-15	09:41:52	0.348562	1.55047	687.963	FALSE	13
2022-09-15	09:41:52	0.350802	1.56044	688.663	FALSE	13
2022-09-15	09:41:52	0.237875	1.05812	689.021	FALSE	13
2022-09-15	09:41:53	0.361794	1.60933	690.273	FALSE	13
2022-09-15	09:41:53	0.136603	0.607637	689.629	FALSE	13
2022-09-15	09:41:53	0.261998	1.16542	691.438	FALSE	13
2022-09-15	09:41:53	0.247545	1.10113	690.73	FALSE	13
2022-09-15	09:41:54	0.664033	2.95375	694.392	FALSE	13
2022-09-15	09:41:54	0.362608	1.61295	692.343	FALSE	13
2022-09-15	09:41:54	0.481743	2.14289	696.535	FALSE	13
2022-09-15	09:41:54	0.504135	2.24249	694.585	FALSE	13
2022-09-15	09:41:55	0.270954	1.20526	697.74	FALSE	13
2022-09-15	09:41:55	0.46042	2.04804	696.633	FALSE	13
2022-09-15	09:41:55	0.307545	1.36802	699.108	FALSE	13
2022-09-15	09:41:56	0.79187	3.5224	700.156	FALSE	13
2022-09-15	09:41:56	0.428155	1.90452	701.012	FALSE	13
2022-09-15	09:41:56	1.13625	5.05427	705.21	FALSE	13
2022-09-15	09:41:56	0.932176	4.14651	705.159	FALSE	13
2022-09-15	09:41:57	1.87823	8.35474	713.565	FALSE	13
2022-09-15	09:41:57	3.0224	13.4442	718.603	1	14
2022-09-15	09:41:57	3.0107	13.3922	726.957	1	15
2022-09-15	09:41:57	3.3507	14.9046	733.508	1	16
2022-09-15	09:41:58	3.40291	15.1368	742.094	1	17
2022-09-15	09:41:58	1.07268	4.7715	738.279	FALSE	17
2022-09-15	09:41:58	1.25961	5.603	747.697	FALSE	17
2022-09-15	09:41:58	0.307494	1.36779	739.647	FALSE	17
2022-09-15	09:41:59	0.357875	1.5919	749.289	FALSE	17
2022-09-15	09:41:59	0.47126	2.09626	741.743	FALSE	17
2022-09-15	09:41:59	0.272176	1.21069	750.499	FALSE	17
2022-09-15	09:42:00	0.432125	1.92218	743.666	FALSE	17
2022-09-15	09:42:00	0.552277	2.45664	752.956	FALSE	17
2022-09-15	09:42:00	0.703422	3.12896	746.794	FALSE	17
2022-09-15	09:42:00	0.813143	3.61702	756.573	FALSE	17
2022-09-15	09:42:01	1.33309	5.92985	752.724	FALSE	17
2022-09-15	09:42:01	1.16877	5.19892	761.772	FALSE	17
2022-09-15	09:42:01	0.823219	3.66184	756.386	FALSE	17
2022-09-15	09:42:01	0.593499	2.64	764.412	FALSE	17
2022-09-15	09:42:02	0.533397	2.37266	758.759	FALSE	17
2022-09-15	09:42:02	0.728308	3.23966	767.652	FALSE	17
2022-09-15	09:42:02	0.3164	1.40741	760.166	FALSE	17
2022-09-15	09:42:02	0.441234	1.9627	769.614	FALSE	17
2022-09-15	09:42:03	0.253346	1.12693	761.293	FALSE	17
2022-09-15	09:42:03	0.297926	1.32523	770.94	FALSE	17
2022-09-15	09:42:03	0.325814	1.44929	762.742	FALSE	17
2022-09-15	09:42:03	0.353041	1.5704	772.51	FALSE	17
2022-09-15	09:42:04	0.417163	1.85562	764.598	FALSE	17
2022-09-15	09:42:04	0.19243	0.855967	773.366	FALSE	17
2022-09-15	09:42:04	0.450547	2.00412	766.602	FALSE	17
2022-09-15	09:42:05	0.299962	1.33429	774.7	FALSE	17
2022-09-15	09:42:05	0.330395	1.46966	768.072	FALSE	17
2022-09-15	09:42:05	0.592227	2.63434	777.335	FALSE	17
2022-09-15	09:42:05	0.568359	2.52817	770.6	FALSE	17
2022-09-15	09:42:06	1.55676	6.92478	784.259	FALSE	17
2022-09-15	09:42:06	1.36398	6.06726	776.667	FALSE	17
2022-09-15	09:42:06	2.49935	11.1176	795.377	FALSE	17
2022-09-15	09:42:06	2.67314	11.8907	788.558	FALSE	17
2022-09-15	09:42:07	4.48642	19.9565	815.333	1	18
2022-09-15	09:42:07	1.44113	6.41043	794.968	FALSE	18
2022-09-15	09:42:07	3.87904	17.2547	832.588	1	19
2022-09-15	09:42:07	1.24765	5.5498	800.518	FALSE	19
2022-09-15	09:42:08	2.38485	10.6083	843.196	FALSE	19
2022-09-15	09:42:08	4.04403	17.9887	818.507	1	20
2022-09-15	09:42:08	2.63406	11.7168	854.913	FALSE	20
2022-09-15	09:42:09	4.48968	19.971	838.478	1	21
2022-09-15	09:42:09	3.32398	14.7857	869.699	1	22
2022-09-15	09:42:09	0.964847	4.29183	842.77	FALSE	22
2022-09-15	09:42:09	1.21625	5.41012	875.109	FALSE	22
2022-09-15	09:42:10	0.388715	1.72908	844.499	FALSE	22
2022-09-15	09:42:10	0.321794	1.4314	876.541	FALSE	22
2022-09-15	09:42:10	0.432939	1.9258	846.425	FALSE	22
2022-09-15	09:42:10	0.194771	0.86638	877.407	FALSE	22
2022-09-15	09:42:11	0.542914	2.41499	848.84	FALSE	22
2022-09-15	09:42:11	0.21243	0.944931	878.352	FALSE	22
2022-09-15	09:42:11	0.524695	2.33395	851.174	FALSE	22
2022-09-15	09:42:11	0.314924	1.40084	879.753	FALSE	22
2022-09-15	09:42:12	0.691209	3.07464	854.248	FALSE	22
2022-09-15	09:42:12	1.22123	5.43228	885.185	FALSE	22
2022-09-15	09:42:12	2.86245	12.7328	866.981	FALSE	22
2022-09-15	09:42:13	6.3081	28.0597	913.245	1	23
2022-09-15	09:42:13	6.40281	28.481	895.462	1	24
2022-09-15	09:42:13	8.90113	39.594	952.839	1	25
2022-09-15	09:42:13	4.80179	21.3593	916.821	1	26
2022-09-15	09:42:14	4.8678	21.6529	974.492	1	27
2022-09-15	09:42:14	3.2453	14.4357	931.257	1	28
2022-09-15	09:42:14	6.55446	29.1555	1003.65	1	29
2022-09-15	09:42:14	4.29248	19.0938	950.351	1	30
2022-09-15	09:42:15	6.95843	30.9525	1034.6	1	31
2022-09-15	09:42:15	3.4337	15.2738	965.625	1	32
2022-09-15	09:42:15	5.12484	22.7963	1057.4	1	33
2022-09-15	09:42:15	5.21258	23.1866	988.811	1	34
2022-09-15	09:42:16	6.05894	26.9514	1084.35	1	35
2022-09-15	09:42:16	7.6909	34.2107	1023.02	1	36
2022-09-15	09:42:16	6.9684	30.9968	1115.34	1	37
2022-09-15	09:42:17	11.2852	50.1988	1073.22	1	38
2022-09-15	09:42:17	11.6154	51.6676	1167.01	1	39
2022-09-15	09:42:17	9.03797	40.2027	1113.42	1	40
2022-09-15	09:42:17	8.09431	36.0051	1203.02	1	41
2022-09-15	09:42:18	6.4568	28.7211	1142.14	1	42
2022-09-15	09:42:18	6.78316	30.1729	1233.19	1	43
2022-09-15	09:42:18	6.07721	27.0326	1169.18	1	44
2022-09-15	09:42:18	5.65558	25.1572	1258.35	1	45
2022-09-15	09:42:19	5.37909	23.9273	1193.1	1	46
2022-09-15	09:42:19	4.83406	21.5029	1279.85	1	47
2022-09-15	09:42:19	4.7995	21.3491	1214.45	1	48
2022-09-15	09:42:19	5.68149	25.2724	1305.12	1	49
2022-09-15	09:42:20	5.13151	22.826	1237.28	1	50
2022-09-15	09:42:20	5.36154	23.8492	1328.97	1	51
2022-09-15	09:42:20	4.81492	21.4177	1258.7	1	52
2022-09-15	09:42:21	4.72332	21.0103	1349.98	1	53
2022-09-15	09:42:21	4.56464	20.3044	1279	1	54
2022-09-15	09:42:21	4.68322	20.8319	1370.81	1	55
2022-09-15	09:42:21	4.6825	20.8287	1299.83	1	56
2022-09-15	09:42:22	4.67177	20.781	1391.59	1	57
2022-09-15	09:42:22	4.51889	20.1009	1319.93	1	58
2022-09-15	09:42:22	4.64388	20.6569	1412.25	1	59
2022-09-15	09:42:22	4.38642	19.5117	1339.44	1	60
2022-09-15	09:42:23	4.33243	19.2715	1431.52	1	61
2022-09-15	09:42:23	4.26678	18.9795	1358.42	1	62
2022-09-15	09:42:23	4.52133	20.1118	1451.63	1	63
2022-09-15	09:42:23	4.57904	20.3685	1378.79	1	64
2022-09-15	09:42:24	4.32932	19.2577	1470.89	1	65
2022-09-15	09:42:24	4.27838	19.0311	1397.82	1	66
2022-09-15	09:42:24	4.20205	18.6916	1489.58	1	67
2022-09-15	09:42:25	4.05263	18.0269	1415.85	1	68
2022-09-15	09:42:25	4.21599	18.7536	1508.34	1	69
2022-09-15	09:42:25	4.32159	19.2233	1435.07	1	70
2022-09-15	09:42:25	4.54632	20.2229	1528.56	1	71
2022-09-15	09:42:26	4.01614	17.8646	1452.94	1	72
2022-09-15	09:42:26	4.01833	17.8743	1546.43	1	73
2022-09-15	09:42:26	4.00596	17.8193	1470.76	1	74
2022-09-15	09:42:26	5.49802	24.4563	1570.89	1	75
2022-09-15	09:42:27	4.19263	18.6497	1489.41	1	76
2022-09-15	09:42:27	5.55059	24.6901	1595.58	1	77
2022-09-15	09:42:27	4.21828	18.7638	1508.17	1	78
2022-09-15	09:42:27	0.150191	0.66808	1596.25	FALSE	78
2022-09-15	09:42:28	-0.181921	-0.809221	1508.17	FALSE	78
2022-09-15	09:42:28	-0.373778	-1.66264	1596.25	FALSE	78
2022-09-15	09:42:28	-0.755305	-3.35975	1508.17	FALSE	78
2022-09-15	09:42:29	-0.83388	-3.70927	1596.25	FALSE	78
2022-09-15	09:42:29	-0.997493	-4.43705	1508.17	FALSE	78
2022-09-15	09:42:29	-0.84477	-3.75771	1596.25	FALSE	78
2022-09-15	09:42:29	-0.995712	-4.42913	1508.17	FALSE	78
2022-09-15	09:42:30	-0.828587	-3.68572	1596.25	FALSE	78
2022-09-15	09:42:30	-0.494338	-2.19891	1508.17	FALSE	78
2022-09-15	09:42:30	-0.21561	-0.959076	1596.25	FALSE	78
2022-09-15	09:42:30	0.188003	0.836275	1509.01	FALSE	78
2022-09-15	09:42:31	0.519911	2.31267	1598.56	FALSE	78
2022-09-15	09:42:31	0.231005	1.02756	1510.03	FALSE	78
2022-09-15	09:42:31	1.92383	8.55758	1607.12	FALSE	78
2022-09-15	09:42:31	0.83187	3.70032	1513.73	FALSE	78
2022-09-15	09:42:32	6.21273	27.6355	1634.76	1	79
2022-09-15	09:42:32	1.14968	5.11401	1518.85	FALSE	79
2022-09-15	09:42:32	2.51034	11.1665	1645.92	FALSE	79
2022-09-15	09:42:33	0.80617	3.58601	1522.43	FALSE	79
2022-09-15	09:42:33	0.538384	2.39484	1648.32	FALSE	79
2022-09-15	09:42:33	1.03218	4.59134	1527.03	FALSE	79
2022-09-15	09:42:33	0.398995	1.77481	1650.09	FALSE	79
2022-09-15	09:42:34	2.21614	9.85783	1536.88	FALSE	79
2022-09-15	09:42:34	0.550649	2.4494	1652.54	FALSE	79
2022-09-15	09:42:34	0.86958	3.86807	1540.75	FALSE	79
2022-09-15	09:42:34	2.09864	9.33517	1661.88	FALSE	79
2022-09-15	09:42:35	0.156196	0.694791	1541.45	FALSE	79
2022-09-15	09:42:35	0.388104	1.72636	1663.6	FALSE	79
2022-09-15	09:42:35	0.503677	2.24046	1543.69	FALSE	79
2022-09-15	09:42:35	1.51385	6.73391	1670.34	FALSE	79
2022-09-15	09:42:36	0.674211	2.99903	1546.69	FALSE	79
2022-09-15	09:42:36	1.53055	6.80819	1677.14	FALSE	79
2022-09-15	09:42:36	0.904796	4.02471	1550.71	FALSE	79
2022-09-15	09:42:37	1.1366	5.05582	1682.2	FALSE	79
2022-09-15	09:42:37	0.33645	1.4966	1552.21	FALSE	79
2022-09-15	09:42:37	0.32042	1.42529	1683.63	FALSE	79
2022-09-15	09:42:37	0.424186	1.88686	1554.09	FALSE	79
2022-09-15	09:42:38	0.400318	1.78069	1685.41	FALSE	79
2022-09-15	09:42:38	0.407646	1.81329	1555.91	FALSE	79
2022-09-15	09:42:38	0.391769	1.74267	1687.15	FALSE	79
2022-09-15	09:42:38	1.01233	4.50305	1560.41	FALSE	79
2022-09-15	09:42:39	1.68912	7.51354	1694.66	FALSE	79
2022-09-15	09:42:39	1.94729	8.66194	1569.07	FALSE	79
2022-09-15	09:42:39	2.50724	11.1527	1705.81	FALSE	79
2022-09-15	09:42:39	2.12128	9.43588	1578.51	FALSE	79
2022-09-15	09:42:40	0.853702	3.79744	1709.61	FALSE	79
2022-09-15	09:42:40	0.364644	1.62201	1580.13	FALSE	79
2022-09-15	09:42:40	0.361234	1.60684	1711.22	FALSE	79
2022-09-15	09:42:41	0.291361	1.29603	1581.43	FALSE	79
2022-09-15	09:42:41	0.261794	1.16451	1712.38	FALSE	79
2022-09-15	09:42:41	0.265255	1.17991	1582.61	FALSE	79
2022-09-15	09:42:41	0.217265	0.966438	1713.35	FALSE	79
2022-09-15	09:42:42	0.26958	1.19915	1583.8	FALSE	79
2022-09-15	09:42:42	0.335026	1.49026	1714.84	FALSE	79
2022-09-15	09:42:42	0.278639	1.23944	1585.04	FALSE	79
2022-09-15	09:42:42	0.231819	1.03118	1715.87	FALSE	79
2022-09-15	09:42:43	0.285	1.26774	1586.31	FALSE	79
2022-09-15	09:42:43	0.322048	1.43253	1717.3	FALSE	79
2022-09-15	09:42:43	0.458232	2.03831	1588.35	FALSE	79
2022-09-15	09:42:43	0.705916	3.14006	1720.44	FALSE	79
2022-09-15	09:42:44	0.891209	3.96428	1592.31	FALSE	79
2022-09-15	09:42:44	3.28144	14.5965	1735.04	1	80
2022-09-15	09:42:44	3.54561	15.7716	1608.09	1	81
2022-09-15	09:42:44	4.96795	22.0984	1757.14	1	82
2022-09-15	09:42:45	2.68815	11.9574	1620.04	FALSE	82
2022-09-15	09:42:45	1.41396	6.28958	1763.43	FALSE	82
2022-09-15	09:42:45	2.63625	11.7266	1631.77	FALSE	82
2022-09-15	09:42:46	2.43747	10.8424	1774.27	FALSE	82
2022-09-15	09:42:46	3.98922	17.7448	1649.51	1	83
2022-09-15	09:42:46	4.42525	19.6844	1793.96	1	84
2022-09-15	09:42:46	4.45054	19.7969	1669.31	1	85
2022-09-15	09:42:47	4.25192	18.9134	1812.87	1	86
2022-09-15	09:42:47	3.95167	17.5778	1686.89	1	87
2022-09-15	09:42:47	3.86983	17.2138	1830.08	1	88
2022-09-15	09:42:47	3.6363	16.175	1703.06	1	89
2022-09-15	09:42:48	3.52439	15.6772	1845.76	1	90
2022-09-15	09:42:48	3.35777	14.936	1718	1	91
2022-09-15	09:42:48	3.09777	13.7795	1859.54	1	92
2022-09-15	09:42:48	3.10357	13.8053	1731.81	1	93
2022-09-15	09:42:49	3.20174	14.242	1873.78	1	94
2022-09-15	09:42:49	3.07049	13.6582	1745.46	1	95
2022-09-15	09:42:49	2.98607	13.2826	1887.06	FALSE	95
2022-09-15	09:42:50	2.96047	13.1688	1758.63	FALSE	95
2022-09-15	09:42:50	2.84062	12.6356	1899.7	FALSE	95
2022-09-15	09:42:50	2.93563	13.0583	1771.69	FALSE	95
2022-09-15	09:42:50	2.97105	13.2158	1912.92	FALSE	95
2022-09-15	09:42:51	2.64469	11.7641	1783.46	FALSE	95
2022-09-15	09:42:51	2.742	12.197	1925.11	FALSE	95
2022-09-15	09:42:51	2.81396	12.5171	1795.97	FALSE	95
2022-09-15	09:42:51	2.42184	10.7728	1935.89	FALSE	95
2022-09-15	09:42:52	2.35441	10.4729	1806.45	FALSE	95
2022-09-15	09:42:52	3.34001	14.857	1950.74	1	96
2022-09-15	09:42:52	3.3024	14.6897	1821.13	1	97
2022-09-15	09:42:52	3.31523	14.7468	1965.49	1	98
2022-09-15	09:42:53	3.40123	15.1294	1836.26	1	99
2022-09-15	09:42:53	3.12052	13.8807	1979.37	1	100
2022-09-15	09:42:53	3.00225	13.3546	1849.62	1	101
2022-09-15	09:42:54	2.99421	13.3188	1992.69	FALSE	101
2022-09-15	09:42:54	3.07116	13.6611	1863.28	1	102
2022-09-15	09:42:54	3.09335	13.7598	2006.45	1	103
2022-09-15	09:42:54	3.04164	13.5298	1876.81	1	104
2022-09-15	09:42:55	3.00327	13.3591	2019.81	1	105
2022-09-15	09:42:55	2.9964	13.3286	1890.14	FALSE	105
2022-09-15	09:42:55	3.00368	13.361	2033.17	1	106
2022-09-15	09:42:55	3.00261	13.3562	1903.49	1	107
2022-09-15	09:42:56	2.92444	13.0085	2046.18	FALSE	107
2022-09-15	09:42:56	2.88408	12.829	1916.32	FALSE	107
2022-09-15	09:42:56	2.89513	12.8781	2059.06	FALSE	107
2022-09-15	09:42:56	2.928	13.0243	1929.35	FALSE	107
2022-09-15	09:42:57	2.88317	12.8249	2071.88	FALSE	107
2022-09-15	09:42:57	2.81818	12.5358	1941.88	FALSE	107
2022-09-15	09:42:57	2.71228	12.0648	2083.94	FALSE	107
2022-09-15	09:42:58	2.67584	11.9027	1953.79	FALSE	107
2022-09-15	09:42:58	3.07599	13.6826	2097.63	1	108
2022-09-15	09:42:58	3.03192	13.4866	1967.27	1	109
2022-09-15	09:42:58	2.90968	12.9428	2110.57	FALSE	109
2022-09-15	09:42:59	2.371	10.5467	1977.82	FALSE	109
2022-09-15	09:42:59	2.23462	9.94004	2120.51	FALSE	109
2022-09-15	09:42:59	2.50902	11.1606	1988.98	FALSE	109
2022-09-15	09:42:59	2.9248	13.0101	2133.52	FALSE	109
2022-09-15	09:43:00	2.21859	9.86873	1998.85	FALSE	109
2022-09-15	09:43:00	2.1307	9.47778	2143	FALSE	109
2022-09-15	09:43:00	1.58429	7.04724	2005.9	FALSE	109
2022-09-15	09:43:00	2.82765	12.578	2155.58	FALSE	109
2022-09-15	09:43:01	2.62103	11.6589	2017.56	FALSE	109
2022-09-15	09:43:01	2.28724	10.1741	2165.75	FALSE	109
2022-09-15	09:43:01	2.39223	10.6411	2028.2	FALSE	109
2022-09-15	09:43:02	2.39579	10.657	2176.41	FALSE	109
2022-09-15	09:43:02	2.20251	9.7972	2037.99	FALSE	109
2022-09-15	09:43:02	2.21284	9.84315	2186.25	FALSE	109
2022-09-15	09:43:02	2.16602	9.63489	2047.63	FALSE	109
2022-09-15	09:43:03	2.24067	9.96695	2196.22	FALSE	109
2022-09-15	09:43:03	2.29452	10.2065	2057.83	FALSE	109
2022-09-15	09:43:03	2.25772	10.0428	2206.26	FALSE	109
2022-09-15	09:43:03	2.21314	9.84449	2067.68	FALSE	109
2022-09-15	09:43:04	2.14505	9.54161	2215.8	FALSE	109
2022-09-15	09:43:04	2.10887	9.38068	2077.06	FALSE	109
2022-09-15	09:43:04	2.12134	9.43614	2225.24	FALSE	109
2022-09-15	09:43:04	2.16276	9.62039	2086.68	FALSE	109
2022-09-15	09:43:05	2.13228	9.48481	2234.72	FALSE	109
2022-09-15	09:43:05	2.19426	9.76051	2096.44	FALSE	109
2022-09-15	09:43:05	2.25803	10.0442	2244.77	FALSE	109
2022-09-15	09:43:06	2.20291	9.79898	2106.24	FALSE	109
2022-09-15	09:43:06	2.05375	9.13549	2253.9	FALSE	109
2022-09-15	09:43:06	2.07976	9.25119	2115.49	FALSE	109
2022-09-15	09:43:06	1.91503	8.51844	2262.42	FALSE	109
2022-09-15	09:43:07	1.96602	8.74525	2124.24	FALSE	109
2022-09-15	09:43:07	1.9965	8.88083	2271.3	FALSE	109
2022-09-15	09:43:07	2.07976	9.25119	2133.49	FALSE	109
2022-09-15	09:43:07	2.14668	9.54886	2280.85	FALSE	109
2022-09-15	09:43:08	1.53625	6.83355	2140.32	FALSE	109
2022-09-15	09:43:08	1.39584	6.20898	2287.06	FALSE	109
2022-09-15	09:43:08	0.672176	2.98997	2143.31	FALSE	109
2022-09-15	09:43:08	0.425611	1.8932	2288.95	FALSE	109
2022-09-15	09:43:09	0.489428	2.17707	2145.49	FALSE	109
2022-09-15	09:43:09	0.297367	1.32275	2290.28	FALSE	109
2022-09-15	09:43:09	0.997214	4.43581	2149.92	FALSE	109
2022-09-15	09:43:10	0.884745	3.93552	2294.21	FALSE	109
2022-09-15	09:43:10	4.90795	21.8315	2171.76	1	110
2022-09-15	09:43:10	15.293	68.0263	2362.24	1	111
2022-09-15	09:43:10	8.10749	36.0637	2207.82	1	112
2022-09-15	09:43:11	2.56871	11.4261	2373.66	FALSE	112
2022-09-15	09:43:11	3.77609	16.7968	2224.62	1	113
2022-09-15	09:43:11	5.79014	25.7557	2399.42	1	114
2022-09-15	09:43:11	4.78235	21.2728	2245.89	1	115
2022-09-15	09:43:12	1.42943	6.35839	2405.78	FALSE	115
2022-09-15	09:43:12	2.44536	10.8775	2256.77	FALSE	115
2022-09-15	09:43:12	5.94026	26.4235	2432.2	1	116
2022-09-15	09:43:12	9.61772	42.7815	2299.55	1	117
2022-09-15	09:43:13	5.21446	23.195	2455.4	1	118
2022-09-15	09:43:13	4.17355	18.5648	2318.11	1	119
2022-09-15	09:43:13	1.19131	5.29919	2460.7	FALSE	119
2022-09-15	09:43:14	0.736501	3.2761	2321.39	FALSE	119
2022-09-15	09:43:14	0.736807	3.27746	2463.97	FALSE	119
2022-09-15	09:43:14	0.32154	1.43027	2322.82	FALSE	119
2022-09-15	09:43:14	0.129987	0.578208	2464.55	FALSE	119
2022-09-15	09:43:15	0.366578	1.63061	2324.45	FALSE	119
2022-09-15	09:43:15	0.137774	0.612846	2465.16	FALSE	119
2022-09-15	09:43:15	0.288715	1.28426	2325.73	FALSE	119
2022-09-15	09:43:15	0.128664	0.572323	2465.74	FALSE	119
2022-09-15	09:43:16	0.138842	0.617597	2326.35	FALSE	119
2022-09-15	09:43:16	-0.120038	-0.533953	2465.74	FALSE	119
2022-09-15	09:43:16	-0.106552	-0.473965	2326.35	FALSE	119
2022-09-15	09:43:16	-0.0708267	-0.315051	2465.74	FALSE	119
2022-09-15	09:43:17	0.0800129	0.355913	2326.71	FALSE	119
2022-09-15	09:43:17	-0.0184603	-0.0821151	2465.74	FALSE	119
2022-09-15	09:43:17	-0.149758	-0.666154	2326.71	FALSE	119
2022-09-15	09:43:18	-0.219122	-0.974698	2465.74	FALSE	119
2022-09-15	09:43:18	0.0584353	0.259932	2326.97	FALSE	119
2022-09-15	09:43:18	0.174517	0.776287	2466.51	FALSE	119
2022-09-15	09:43:18	0.00332086	0.0147718	2326.98	FALSE	119
2022-09-15	09:43:19	0.109987	0.489244	2467	FALSE	119
2022-09-15	09:43:19	0.0903946	0.402093	2327.38	FALSE	119
2022-09-15	09:43:19	0.13355	0.594057	2467.6	FALSE	119
2022-09-15	09:43:19	-0.0222771	-0.099093	2327.38	FALSE	119
2022-09-15	09:43:20	0.0920231	0.409337	2468	FALSE	119
2022-09-15	09:43:20	0.103677	0.461176	2327.85	FALSE	119
2022-09-15	09:43:20	0.172379	0.766776	2468.77	FALSE	119
2022-09-15	09:43:20	0.0378247	0.168252	2328.01	FALSE	119
2022-09-15	09:43:21	0.31528	1.40243	2470.17	FALSE	119
2022-09-15	09:43:21	0.392532	1.74606	2329.76	FALSE	119
2022-09-15	09:43:21	0.386171	1.71777	2471.89	FALSE	119
2022-09-15	09:43:21	0.389122	1.73089	2331.49	FALSE	119
2022-09-15	09:43:22	0.406527	1.80831	2473.7	FALSE	119
2022-09-15	09:43:22	0.180216	0.801637	2332.29	FALSE	119
2022-09-15	09:43:22	0.269682	1.1996	2474.9	FALSE	119
2022-09-15	09:43:23	0.239962	1.0674	2333.36	FALSE	119
2022-09-15	09:43:23	0.290954	1.29422	2476.19	FALSE	119
2022-09-15	09:43:23	0.351056	1.56157	2334.92	FALSE	119
2022-09-15	09:43:23	0.406476	1.80809	2478	FALSE	119
2022-09-15	09:43:24	0.26444	1.17628	2336.1	FALSE	119
2022-09-15	09:43:24	0.425305	1.89184	2479.89	FALSE	119
2022-09-15	09:43:24	0.206272	0.917539	2337.01	FALSE	119
2022-09-15	09:43:24	0.429733	1.91154	2481.81	FALSE	119
2022-09-15	09:43:25	0.138639	0.616694	2337.63	FALSE	119
2022-09-15	09:43:25	0.386832	1.72071	2483.53	FALSE	119
2022-09-15	09:43:25	0.212786	0.946515	2338.58	FALSE	119
2022-09-15	09:43:25	0.224084	0.99677	2484.52	FALSE	119
2022-09-15	09:43:26	0.0756873	0.336672	2338.91	FALSE	119
2022-09-15	09:43:26	0.284949	1.26751	2485.79	FALSE	119
2022-09-15	09:43:26	0.267443	1.18964	2340.1	FALSE	119
2022-09-15	09:43:27	0.177519	0.78964	2486.58	FALSE	119
2022-09-15	09:43:27	0.336196	1.49547	2341.6	FALSE	119
2022-09-15	09:43:27	0.280064	1.24578	2487.83	FALSE	119
2022-09-15	09:43:27	0.815636	3.62811	2345.23	FALSE	119
2022-09-15	09:43:28	0.429631	1.91108	2489.74	FALSE	119
2022-09-15	09:43:28	0.516399	2.29705	2347.53	FALSE	119
2022-09-15	09:43:28	0.170547	0.758627	2490.5	FALSE	119
2022-09-15	09:43:28	0.402812	1.79179	2349.32	FALSE	119
2022-09-15	09:43:29	0.193244	0.859588	2491.36	FALSE	119
2022-09-15	09:43:29	0.228664	1.01714	2350.33	FALSE	119
2022-09-15	09:43:29	0.0481046	0.213979	2491.57	FALSE	119
2022-09-15	09:43:29	0.0545676	0.242728	2350.58	FALSE	119
2022-09-15	09:43:30	0.00830812	0.0369562	2491.61	FALSE	119
2022-09-15	09:43:30	0.0346185	0.15399	2350.73	FALSE	119
2022-09-15	09:43:30	-0.000292388	-0.0013006	2491.61	FALSE	119
2022-09-15	09:43:31	-0.0248216	-0.110411	2350.73	FALSE	119
2022-09-15	09:43:31	0.0338043	0.150368	2491.76	FALSE	119
2022-09-15	09:43:31	-0.0674679	-0.300111	2350.73	FALSE	119
2022-09-15	09:43:31	0.105204	0.467968	2492.22	FALSE	119
2022-09-15	09:43:32	-0.0833967	-0.370965	2350.73	FALSE	119
2022-09-15	09:43:32	0.109021	0.484947	2492.71	FALSE	119
2022-09-15	09:43:32	0.11757	0.522975	2351.25	FALSE	119
2022-09-15	09:43:32	0.558181	2.4829	2495.19	FALSE	119
2022-09-15	09:43:33	0.283015	1.25891	2352.51	FALSE	119
2022-09-15	09:43:33	0.552227	2.45642	2497.65	FALSE	119
2022-09-15	09:43:33	0.589071	2.62031	2355.13	FALSE	119
2022-09-15	09:43:33	3.27467	14.5664	2512.22	1	120
2022-09-15	09:43:34	0.658842	2.93066	2358.06	FALSE	120
2022-09-15	09:43:34	1.41655	6.3011	2518.52	FALSE	120
2022-09-15	09:43:34	0.677672	3.01442	2361.08	FALSE	120
2022-09-15	09:43:35	0.597214	2.65653	2521.17	FALSE	120
2022-09-15	09:43:35	0.877468	3.90315	2364.98	FALSE	120
2022-09-15	09:43:35	0.597825	2.65925	2523.83	FALSE	120
2022-09-15	09:43:35	0.6364	2.83083	2367.81	FALSE	120
2022-09-15	09:43:36	0.575433	2.55964	2526.39	FALSE	120
2022-09-15	09:43:36	0.269428	1.19847	2369.01	FALSE	120
2022-09-15	09:43:36	0.71813	3.19439	2529.59	FALSE	120
2022-09-15	09:43:36	0.183626	0.816805	2369.83	FALSE	120
2022-09-15	09:43:37	0.661082	2.94062	2532.53	FALSE	120
2022-09-15	09:43:37	0.550852	2.4503	2372.28	FALSE	120
2022-09-15	09:43:37	0.516807	2.29886	2534.83	FALSE	120
2022-09-15	09:43:37	0.69416	3.08776	2375.37	FALSE	120
2022-09-15	09:43:38	0.46673	2.07611	2536.9	FALSE	120
2022-09-15	09:43:38	0.556552	2.47565	2377.84	FALSE	120
2022-09-15	09:43:38	0.389733	1.73361	2538.64	FALSE	120
2022-09-15	09:43:39	0.796094	3.54119	2381.38	FALSE	120
2022-09-15	09:43:39	0.354873	1.57855	2540.21	FALSE	120
2022-09-15	09:43:39	0.563371	2.50599	2383.89	FALSE	120
2022-09-15	09:43:39	0.372125	1.65529	2541.87	FALSE	120
2022-09-15	09:43:40	0.57584	2.56145	2386.45	FALSE	120
2022-09-15	09:43:40	0.464695	2.06706	2543.94	FALSE	120
2022-09-15	09:43:40	0.584186	2.59858	2389.05	FALSE	120
2022-09-15	09:43:40	0.658028	2.92704	2546.86	FALSE	120
2022-09-15	09:43:41	0.669122	2.97639	2392.02	FALSE	120
2022-09-15	09:43:41	0.724237	3.22155	2550.08	FALSE	120
2022-09-15	09:43:41	1.29329	5.75281	2397.78	FALSE	120
2022-09-15	09:43:41	0.50729	2.25653	2552.34	FALSE	120
2022-09-15	09:43:42	0.721946	3.21136	2400.99	FALSE	120
2022-09-15	09:43:42	1.09289	4.86139	2557.2	FALSE	120
2022-09-15	09:43:42	0.297112	1.32161	2402.31	FALSE	120
2022-09-15	09:43:43	0.897163	3.99076	2561.19	FALSE	120
2022-09-15	09:43:43	0.434873	1.9344	2404.24	FALSE	120
2022-09-15	09:43:43	0.603117	2.68279	2563.88	FALSE	120
2022-09-15	09:43:43	0.658842	2.93066	2407.18	FALSE	120
2022-09-15	09:43:44	0.503015	2.23751	2566.11	FALSE	120
2022-09-15	09:43:44	0.471819	2.09875	2409.27	FALSE	120
2022-09-15	09:43:44	0.402099	1.78862	2567.9	FALSE	120
2022-09-15	09:43:44	0.380624	1.69309	2410.97	FALSE	120
2022-09-15	09:43:45	0.459402	2.04351	2569.95	FALSE	120
2022-09-15	09:43:45	0.543219	2.41635	2413.38	FALSE	120
2022-09-15	09:43:45	0.648104	2.8829	2572.83	FALSE	120
2022-09-15	09:43:45	0.766374	3.40898	2416.79	FALSE	120
2022-09-15	09:43:46	0.989936	4.40343	2577.23	FALSE	120
2022-09-15	09:43:46	1.09696	4.8795	2421.67	FALSE	120
2022-09-15	09:43:46	2.41487	10.7418	2587.97	FALSE	120
2022-09-15	09:43:47	2.58673	11.5063	2433.18	FALSE	120
2022-09-15	09:43:47	5.55925	24.7287	2612.7	1	121
2022-09-15	09:43:47	6.73421	29.9551	2463.13	1	122
2022-09-15	09:43:47	10.6928	47.5637	2660.27	1	123
2022-09-15	09:43:48	12.0356	53.5368	2516.67	1	124
2022-09-15	09:43:48	12.7694	56.8008	2717.07	1	125
2022-09-15	09:43:48	11.7085	52.0817	2568.75	1	126
2022-09-15	09:43:48	10.5718	47.0255	2764.09	1	127
2022-09-15	09:43:49	9.02372	40.1393	2608.89	1	128
2022-09-15	09:43:49	6.88958	30.6462	2794.74	1	129
2022-09-15	09:43:49	7.32856	32.5989	2641.49	1	130
2022-09-15	09:43:49	8.29044	36.8775	2831.62	1	131
2022-09-15	09:43:50	9.65049	42.9273	2684.42	1	132
2022-09-15	09:43:50	6.77355	30.1301	2861.75	1	133
2022-09-15	09:43:50	7.1338	31.7326	2716.15	1	134
2022-09-15	09:43:50	7.59589	33.788	2895.53	1	135
2022-09-15	09:43:51	6.84403	30.4436	2746.59	1	136
2022-09-15	09:43:51	5.28444	23.5062	2919.04	1	137
2022-09-15	09:43:51	4.32937	19.2579	2765.85	1	138
2022-09-15	09:43:52	3.94266	17.5377	2936.58	1	139
2022-09-15	09:43:52	3.54805	15.7824	2781.63	1	140
2022-09-15	09:43:52	3.71116	16.508	2953.09	1	141
2022-09-15	09:43:52	4.21029	18.7282	2800.36	1	142
2022-09-15	09:43:53	3.66683	16.3108	2969.4	1	143
2022-09-15	09:43:53	4.16556	18.5292	2818.89	1	144
2022-09-15	09:43:53	4.63192	20.6037	2990	1	145
2022-09-15	09:43:53	4.69238	20.8726	2839.76	1	146
2022-09-15	09:43:54	3.73482	16.6132	3006.61	1	147
2022-09-15	09:43:54	3.74953	16.6787	2856.44	1	148
2022-09-15	09:43:54	1.44047	6.4075	3013.02	FALSE	148
2022-09-15	09:43:54	0.956756	4.25584	2860.7	FALSE	148
2022-09-15	09:43:55	0.245611	1.09253	3014.11	FALSE	148
2022-09-15	09:43:55	0.142252	0.632765	2861.33	FALSE	148
2022-09-15	09:43:55	0.0667814	0.297057	3014.41	FALSE	148
2022-09-15	09:43:56	-0.0144908	-0.064458	2861.33	FALSE	148
2022-09-15	09:43:56	0.0757381	0.336898	3014.75	FALSE	148
2022-09-15	09:43:56	0.0325829	0.144935	2861.48	FALSE	148
2022-09-15	09:43:56	1.02449	4.55714	3019.31	FALSE	148
2022-09-15	09:43:57	6.48515	28.8472	2890.32	1	149
2022-09-15	09:43:57	8.22499	36.5864	3055.89	1	150
2022-09-15	09:43:57	4.9821	22.1614	2912.48	1	151
2022-09-15	09:43:57	4.82658	21.4696	3077.36	1	152
2022-09-15	09:43:58	1.81391	8.06863	2920.55	FALSE	152
2022-09-15	09:43:58	2.47859	11.0253	3088.39	FALSE	152
2022-09-15	09:43:58	2.21589	9.85672	2930.41	FALSE	152
2022-09-15	09:43:58	3.67502	16.3472	3104.73	1	153
2022-09-15	09:43:59	2.89212	12.8647	2943.28	FALSE	153
2022-09-15	09:43:59	3.40505	15.1463	3119.88	1	154
2022-09-15	09:43:59	1.94312	8.64339	2951.92	FALSE	154
2022-09-15	09:44:00	2.22505	9.89747	3129.78	FALSE	154
2022-09-15	09:44:00	1.76983	7.87256	2959.79	FALSE	154
2022-09-15	09:44:00	1.63879	7.28967	3137.07	FALSE	154
2022-09-15	09:44:00	1.29742	5.77118	2965.56	FALSE	154
2022-09-15	09:44:01	0.930903	4.14084	3141.21	FALSE	154
2022-09-15	09:44:01	0.945662	4.20649	2969.77	FALSE	154
2022-09-15	09:44:01	0.711972	3.16699	3144.38	FALSE	154
2022-09-15	09:44:01	0.627799	2.79258	2972.56	FALSE	154
2022-09-15	09:44:02	1.68464	7.49362	3151.87	FALSE	154
2022-09-15	09:44:02	1.40363	6.24363	2978.8	FALSE	154
2022-09-15	09:44:02	2.6537	11.8042	3163.67	FALSE	154
2022-09-15	09:44:02	4.72317	21.0096	2999.81	1	155
2022-09-15	09:44:03	5.56983	24.7757	3188.45	1	156
2022-09-15	09:44:03	7.77258	34.574	3034.39	1	157
2022-09-15	09:44:03	8.05502	35.8303	3224.28	1	158
2022-09-15	09:44:04	3.97803	17.6951	3052.08	1	159
2022-09-15	09:44:04	6.02408	26.7963	3251.08	1	160
2022-09-15	09:44:04	5.23182	23.2722	3075.36	1	161
2022-09-15	09:44:04	2.7306	12.1463	3263.22	FALSE	161
2022-09-15	09:44:05	2.72037	12.1007	3087.46	FALSE	161
2022-09-15	09:44:05	1.36785	6.08447	3269.31	FALSE	161
2022-09-15	09:44:05	0.989835	4.40298	3091.86	FALSE	161
2022-09-15	09:44:05	0.876756	3.89999	3273.21	FALSE	161
2022-09-15	09:44:06	0.971718	4.3224	3096.18	FALSE	161
2022-09-15	09:44:06	0.994568	4.42404	3277.63	FALSE	161
2022-09-15	09:44:06	1.03497	4.60375	3100.79	FALSE	161
2022-09-15	09:44:06	0.983779	4.37605	3282.01	FALSE	161
2022-09-15	09:44:07	0.907748	4.03784	3104.82	FALSE	161
2022-09-15	09:44:07	0.88042	3.91628	3285.92	FALSE	161
2022-09-15	09:44:07	0.728817	3.24192	3108.07	FALSE	161
2022-09-15	09:44:08	0.782506	3.48074	3289.4	FALSE	161
2022-09-15	09:44:08	0.828359	3.68471	3111.75	FALSE	161
2022-09-15	09:44:08	0.880878	3.91832	3293.32	FALSE	161
2022-09-15	09:44:08	0.947341	4.21396	3115.96	FALSE	161
2022-09-15	09:44:09	0.91014	4.04848	3297.37	FALSE	161
2022-09-15	09:44:09	0.990242	4.40479	3120.37	FALSE	161
2022-09-15	09:44:09	1.00388	4.46546	3301.84	FALSE	161
2022-09-15	09:44:09	1.07788	4.79463	3125.16	FALSE	161
2022-09-15	09:44:10	1.01655	4.52182	3306.36	FALSE	161
2022-09-15	09:44:10	1.05996	4.71491	3129.88	FALSE	161
2022-09-15	09:44:10	1.05676	4.70068	3311.06	FALSE	161
2022-09-15	09:44:10	0.837417	3.725	3133.6	FALSE	161
2022-09-15	09:44:11	0.711921	3.16677	3314.22	FALSE	161
2022-09-15	09:44:11	0.521743	2.32082	3135.92	FALSE	161
2022-09-15	09:44:11	0.455433	2.02586	3316.25	FALSE	161
2022-09-15	09:44:12	0.408155	1.81556	3137.74	FALSE	161
2022-09-15	09:44:12	0.379402	1.68766	3317.94	FALSE	161
2022-09-15	09:44:12	0.410344	1.82529	3139.57	FALSE	161
2022-09-15	09:44:12	0.769835	3.42438	3321.36	FALSE	161
2022-09-15	09:44:13	1.26424	5.62359	3145.19	FALSE	161
2022-09-15	09:44:13	2.55909	11.3833	3332.75	FALSE	161
2022-09-15	09:44:13	2.78943	12.4079	3157.6	FALSE	161
2022-09-15	09:44:13	2.81502	12.5218	3345.27	FALSE	161
2022-09-15	09:44:14	0.960674	4.27327	3161.87	FALSE	161
2022-09-15	09:44:14	0.705255	3.13712	3348.4	FALSE	161
2022-09-15	09:44:14	0.444389	1.97673	3163.85	FALSE	161
2022-09-15	09:44:14	0.318334	1.41601	3349.82	FALSE	161
2022-09-15	09:44:15	0.302506	1.34561	3165.19	FALSE	161
2022-09-15	09:44:15	0.217214	0.966211	3350.79	FALSE	161
2022-09-15	09:44:15	-0.104872	-0.466492	3165.19	FALSE	161
2022-09-15	09:44:16	-0.140038	-0.622917	3350.79	FALSE	161
2022-09-15	09:44:16	-0.439631	-1.95557	3165.19	FALSE	161
2022-09-15	09:44:16	-0.00395648	-0.0175992	3350.79	FALSE	161
2022-09-15	09:44:16	-0.243651	-1.08381	3165.19	FALSE	161
2022-09-15	09:44:17	-0.265636	-1.1816	3350.79	FALSE	161
2022-09-15	09:44:17	-0.332251	-1.47792	3165.19	FALSE	161
2022-09-15	09:44:17	-0.396577	-1.76405	3350.79	FALSE	161
2022-09-15	09:44:17	-0.228231	-1.01522	3165.19	FALSE	161
2022-09-15	09:44:18	0.27701	1.2322	3352.02	FALSE	161
2022-09-15	09:44:18	0.252379	1.12263	3166.31	FALSE	161
2022-09-15	09:44:18	-0.154847	-0.68879	3352.02	FALSE	161
2022-09-15	09:44:18	-0.104669	-0.465589	3166.31	FALSE	161
2022-09-15	09:44:19	-0.163447	-0.727045	3352.02	FALSE	161
2022-09-15	09:44:19	-0.0786638	-0.349912	3166.31	FALSE	161
2022-09-15	09:44:19	0.28271	1.25755	3353.28	FALSE	161
2022-09-15	09:44:19	0.58673	2.60989	3168.92	FALSE	161
2022-09-15	09:44:20	0.740267	3.29286	3356.57	FALSE	161
2022-09-15	09:44:20	0.240013	1.06763	3169.99	FALSE	161
2022-09-15	09:44:20	0.541692	2.40955	3358.98	FALSE	161
2022-09-15	09:44:21	0.51528	2.29207	3172.28	FALSE	161
2022-09-15	09:44:21	0.300216	1.33542	3360.31	FALSE	161
2022-09-15	09:44:21	0.245051	1.09004	3173.37	FALSE	161
2022-09-15	09:44:21	0.242761	1.07985	3361.39	FALSE	161
2022-09-15	09:44:22	0.0895295	0.398245	3173.77	FALSE	161
2022-09-15	09:44:22	0.152278	0.677363	3362.07	FALSE	161
2022-09-15	09:44:22	0.207188	0.921614	3174.69	FALSE	161
2022-09-15	09:44:22	-0.0445163	-0.198017	3362.07	FALSE	161
2022-09-15	09:44:23	-0.241666	-1.07498	3174.69	FALSE	161
2022-09-15	09:44:23	-0.281005	-1.24997	3362.07	FALSE	161
2022-09-15	09:44:23	-0.340852	-1.51618	3174.69	FALSE	161
2022-09-15	09:44:23	-0.448842	-1.99654	3362.07	FALSE	161
2022-09-15	09:44:24	-0.575356	-2.5593	3174.69	FALSE	161
2022-09-15	09:44:24	-0.467722	-2.08052	3362.07	FALSE	161
2022-09-15	09:44:24	-0.571132	-2.54051	3174.69	FALSE	161
2022-09-15	09:44:25	-0.581768	-2.58782	3362.07	FALSE	161
2022-09-15	09:44:25	-0.623447	-2.77322	3174.69	FALSE	161
2022-09-15	09:44:25	-0.466552	-2.07532	3362.07	FALSE	161
2022-09-15	09:44:25	-0.50701	-2.25528	3174.69	FALSE	161
2022-09-15	09:44:26	-0.576068	-2.56247	3362.07	FALSE	161
2022-09-15	09:44:26	-0.611335	-2.71934	3174.69	FALSE	161
2022-09-15	09:44:26	-0.550012	-2.44656	3362.07	FALSE	161
2022-09-15	09:44:26	-0.678765	-3.01928	3174.69	FALSE	161
2022-09-15	09:44:27	-0.686042	-3.05165	3362.07	FALSE	161
2022-09-15	09:44:27	-0.660903	-2.93983	3174.69	FALSE	161
2022-09-15	09:44:27	-0.666195	-2.96337	3362.07	FALSE	161
2022-09-15	09:44:27	-0.697849	-3.10417	3174.69	FALSE	161
2022-09-15	09:44:28	-0.767315	-3.41317	3362.07	FALSE	161
2022-09-15	09:44:28	-0.678969	-3.02019	3174.69	FALSE	161
2022-09-15	09:44:28	-0.727671	-3.23683	3362.07	FALSE	161
2022-09-15	09:44:29	-0.561819	-2.49908	3174.69	FALSE	161
2022-09-15	09:44:29	-0.721462	-3.20921	3362.07	FALSE	161
2022-09-15	09:44:29	-0.534287	-2.37662	3174.69	FALSE	161
2022-09-15	09:44:29	-0.595865	-2.65053	3362.07	FALSE	161
2022-09-15	09:44:30	-0.693371	-3.08425	3174.69	FALSE	161
2022-09-15	09:44:30	-0.706806	-3.14401	3362.07	FALSE	161
2022-09-15	09:44:30	-0.618613	-2.75171	3174.69	FALSE	161
2022-09-15	09:44:30	-0.764719	-3.40162	3362.07	FALSE	161
2022-09-15	09:44:31	-0.649554	-2.88935	3174.69	FALSE	161
2022-09-15	09:44:31	-0.787569	-3.50326	3362.07	FALSE	161
2022-09-15	09:44:31	-0.580241	-2.58103	3174.69	FALSE	161
2022-09-15	09:44:31	-0.598867	-2.66388	3362.07	FALSE	161
2022-09-15	09:44:32	-0.542379	-2.41261	3174.69	FALSE	161
2022-09-15	09:44:32	-0.296832	-1.32037	3362.07	FALSE	161
2022-09-15	09:44:32	-0.262582	-1.16802	3174.69	FALSE	161
2022-09-15	09:44:33	-0.238409	-1.06049	3362.07	FALSE	161
2022-09-15	09:44:33	-0.365178	-1.62438	3174.69	FALSE	161
2022-09-15	09:44:33	-0.263397	-1.17164	3362.07	FALSE	161
2022-09-15	09:44:33	-0.439173	-1.95353	3174.69	FALSE	161
2022-09-15	09:44:34	-0.519732	-2.31187	3362.07	FALSE	161
2022-09-15	09:44:34	-0.597697	-2.65868	3174.69	FALSE	161
2022-09-15	09:44:34	-0.496374	-2.20797	3362.07	FALSE	161
2022-09-15	09:44:34	-0.545941	-2.42845	3174.69	FALSE	161
2022-09-15	09:44:35	-0.514796	-2.28992	3362.07	FALSE	161
2022-09-15	09:44:35	-0.424974	-1.89037	3174.69	FALSE	161
2022-09-15	09:44:35	-0.450826	-2.00536	3362.07	FALSE	161
2022-09-15	09:44:35	-0.426348	-1.89648	3174.69	FALSE	161
2022-09-15	09:44:36	-0.532913	-2.3705	3362.07	FALSE	161
2022-09-15	09:44:36	-0.41388	-1.84102	3174.69	FALSE	161
2022-09-15	09:44:36	-0.294542	-1.31018	3362.07	FALSE	161
2022-09-15	09:44:37	-0.351997	-1.56575	3174.69	FALSE	161
2022-09-15	09:44:37	0.00647607	0.0288069	3362.1	FALSE	161
2022-09-15	09:44:37	0.695178	3.09229	3177.79	FALSE	161
2022-09-15	09:44:37	2.08016	9.25297	3371.35	FALSE	161
2022-09-15	09:44:38	4.1938	18.6549	3196.44	1	162
2022-09-15	09:44:38	1.66398	7.40172	3378.76	FALSE	162
2022-09-15	09:44:38	1.36291	6.0625	3202.5	FALSE	162
2022-09-15	09:44:38	0.570038	2.53564	3381.29	FALSE	162
2022-09-15	09:44:39	0.32729	1.45585	3203.96	FALSE	162
2022-09-15	09:44:39	0.237112	1.05472	3382.35	FALSE	162
2022-09-15	09:44:39	0.285051	1.26796	3205.23	FALSE	162
2022-09-15	09:44:39	0.429631	1.91108	3384.26	FALSE	162
2022-09-15	09:44:40	0.382557	1.70169	3206.93	FALSE	162
2022-09-15	09:44:40	0.518282	2.30542	3386.56	FALSE	162
2022-09-15	09:44:40	0.350751	1.56021	3208.49	FALSE	162
2022-09-15	09:44:41	0.412685	1.83571	3388.4	FALSE	162
2022-09-15	09:44:41	0.314771	1.40016	3209.89	FALSE	162
2022-09-15	09:44:41	0.226221	1.00628	3389.4	FALSE	162
2022-09-15	09:44:41	0.273702	1.21748	3211.11	FALSE	162
2022-09-15	09:44:42	0.548868	2.44147	3391.85	FALSE	162
2022-09-15	09:44:42	0.347646	1.5464	3212.65	FALSE	162
2022-09-15	09:44:42	0.427087	1.89977	3393.75	FALSE	162
2022-09-15	09:44:42	0.384898	1.7121	3214.37	FALSE	162
2022-09-15	09:44:43	0.667799	2.9705	3396.72	FALSE	162
2022-09-15	09:44:43	0.372786	1.65823	3216.02	FALSE	162
2022-09-15	09:44:43	0.624033	2.77582	3399.49	FALSE	162
2022-09-15	09:44:43	0.398181	1.77119	3217.8	FALSE	162
2022-09-15	09:44:44	0.783015	3.48301	3402.97	FALSE	162
2022-09-15	09:44:44	0.585661	2.60514	3220.4	FALSE	162
2022-09-15	09:44:44	2.32057	10.3224	3413.3	FALSE	162
2022-09-15	09:44:44	2.10642	9.36978	3229.77	FALSE	162

## Sheet: Klutz_harness_202291593924 (2)
Date	Time	Lbs	Total force x time			**GoPro Fitting: 929
2022-09-15	09:39:25	0.120369	0.120369	FALSE	0
2022-09-15	09:39:25	0.172379	0.292748	FALSE	0
2022-09-15	09:39:25	0.17986	0.472608	FALSE	0
2022-09-15	09:39:25	0.196909	0.669517	FALSE	0
2022-09-15	09:39:25	0.161183	0.8307	FALSE	0
2022-09-15	09:39:26	-0.0169845	0.8307	FALSE	0
2022-09-15	09:39:26	0.111107	0.941807	FALSE	0
2022-09-15	09:39:26	0.0304455	0.972252	FALSE	0
2022-09-15	09:39:27	0.0555855	1.02784	FALSE	0
2022-09-15	09:39:27	0.134008	1.16185	FALSE	0
2022-09-15	09:39:27	0.0150765	1.17692	FALSE	0
2022-09-15	09:39:27	0.188919	1.36584	FALSE	0
2022-09-15	09:39:28	0.164491	1.53033	FALSE	0
2022-09-15	09:39:28	0.112634	1.64297	FALSE	0
2022-09-15	09:39:28	0.365865	2.00883	FALSE	0
2022-09-15	09:39:28	0.538232	2.54706	FALSE	0
2022-09-15	09:39:29	0.22729	2.77435	FALSE	0
2022-09-15	09:39:29	0.222405	2.99676	FALSE	0
2022-09-15	09:39:29	0.270191	3.26695	FALSE	0
2022-09-15	09:39:29	0.223168	3.49012	FALSE	0
2022-09-15	09:39:30	0.24958	3.7397	FALSE	0
2022-09-15	09:39:30	0.114924	3.85462	FALSE	0
2022-09-15	09:39:30	0.249682	4.1043	FALSE	0
2022-09-15	09:39:31	0.190089	4.29439	FALSE	0
2022-09-15	09:39:31	0.291972	4.58636	FALSE	0
2022-09-15	09:39:31	0.372176	4.95854	FALSE	0
2022-09-15	09:39:31	0.304695	5.26324	FALSE	0
2022-09-15	09:39:32	0.309886	5.57312	FALSE	0
2022-09-15	09:39:32	0.370649	5.94377	FALSE	0
2022-09-15	09:39:32	0.346629	6.2904	FALSE	0
2022-09-15	09:39:32	0.467901	6.7583	FALSE	0
2022-09-15	09:39:33	0.338639	7.09694	FALSE	0
2022-09-15	09:39:33	0.32673	7.42367	FALSE	0
2022-09-15	09:39:33	0.289733	7.7134	FALSE	0
2022-09-15	09:39:33	0.275331	7.98873	FALSE	0
2022-09-15	09:39:34	0.260929	8.24966	FALSE	0
2022-09-15	09:39:34	0.245763	8.49543	FALSE	0
2022-09-15	09:39:34	0.258944	8.75437	FALSE	0
2022-09-15	09:39:35	0.256196	9.01057	FALSE	0
2022-09-15	09:39:35	0.27813	9.2887	FALSE	0
2022-09-15	09:39:35	0.274924	9.56362	FALSE	0
2022-09-15	09:39:35	0.250344	9.81396	FALSE	0
2022-09-15	09:39:36	0.283524	10.0975	FALSE	0
2022-09-15	09:39:36	0.363728	10.4612	FALSE	0
2022-09-15	09:39:36	0.407748	10.869	FALSE	0
2022-09-15	09:39:36	0.400064	11.269	FALSE	0
2022-09-15	09:39:37	0.373652	11.6427	FALSE	0
2022-09-15	09:39:37	0.368257	12.0109	FALSE	0
2022-09-15	09:39:37	0.355534	12.3665	FALSE	0
2022-09-15	09:39:37	0.355178	12.7216	FALSE	0
2022-09-15	09:39:38	0.340165	13.0618	FALSE	0
2022-09-15	09:39:38	0.334771	13.3966	FALSE	0
2022-09-15	09:39:38	0.337621	13.7342	FALSE	0
2022-09-15	09:39:39	0.337519	14.0717	FALSE	0
2022-09-15	09:39:39	0.321998	14.3937	FALSE	0
2022-09-15	09:39:39	0.309682	14.7034	FALSE	0
2022-09-15	09:39:39	0.345255	15.0487	FALSE	0
2022-09-15	09:39:40	0.364389	15.413	FALSE	0
2022-09-15	09:39:40	0.402048	15.8151	FALSE	0
2022-09-15	09:39:40	0.373244	16.1883	FALSE	0
2022-09-15	09:39:40	0.382863	16.5712	FALSE	0
2022-09-15	09:39:41	0.363219	16.9344	FALSE	0
2022-09-15	09:39:41	0.324084	17.2585	FALSE	0
2022-09-15	09:39:41	0.298639	17.5571	FALSE	0
2022-09-15	09:39:41	0.293601	17.8507	FALSE	0
2022-09-15	09:39:42	0.27986	18.1306	FALSE	0
2022-09-15	09:39:42	0.279504	18.4101	FALSE	0
2022-09-15	09:39:42	0.297519	18.7076	FALSE	0
2022-09-15	09:39:43	0.298028	19.0057	FALSE	0
2022-09-15	09:39:43	0.306476	19.3121	FALSE	0
2022-09-15	09:39:43	0.298588	19.6107	FALSE	0
2022-09-15	09:39:43	0.298842	19.9096	FALSE	0
2022-09-15	09:39:44	0.305051	20.2146	FALSE	0
2022-09-15	09:39:44	0.294364	20.509	FALSE	0
2022-09-15	09:39:44	0.331463	20.8404	FALSE	0
2022-09-15	09:39:44	0.305916	21.1464	FALSE	0
2022-09-15	09:39:45	0.240471	21.3868	FALSE	0
2022-09-15	09:39:45	0.263728	21.6506	FALSE	0
2022-09-15	09:39:45	0.318181	21.9687	FALSE	0
2022-09-15	09:39:45	0.258893	22.2276	FALSE	0
2022-09-15	09:39:46	1.48866	23.7163	FALSE	0
2022-09-15	09:39:46	1.89274	25.609	FALSE	0
2022-09-15	09:39:46	1.46622	27.0753	FALSE	0
2022-09-15	09:39:47	0.889326	27.9646	FALSE	0
2022-09-15	09:39:47	0.262506	28.2271	FALSE	0
2022-09-15	09:39:47	0.252684	28.4798	FALSE	0
2022-09-15	09:39:47	0.10098	28.5807	FALSE	0
2022-09-15	09:39:48	0.197926	28.7787	FALSE	0
2022-09-15	09:39:48	0.0632699	28.8419	FALSE	0
2022-09-15	09:39:48	-0.0726587	28.8419	FALSE	0
2022-09-15	09:39:48	0.046018	28.888	FALSE	0
2022-09-15	09:39:49	0.195076	29.083	FALSE	0
2022-09-15	09:39:49	0.0516669	29.1347	FALSE	0
2022-09-15	09:39:49	0.446578	29.5813	FALSE	0
2022-09-15	09:39:49	0.325153	29.9064	FALSE	0
2022-09-15	09:39:50	0.322608	30.229	FALSE	0
2022-09-15	09:39:50	0.111005	30.34	FALSE	0
2022-09-15	09:39:50	0.428715	30.7688	FALSE	0
2022-09-15	09:39:51	0.343779	31.1125	FALSE	0
2022-09-15	09:39:51	0.154415	31.267	FALSE	0
2022-09-15	09:39:51	-0.0958648	31.267	FALSE	0
2022-09-15	09:39:51	-0.452811	31.267	FALSE	0
2022-09-15	09:39:52	-0.610623	31.267	FALSE	0
2022-09-15	09:39:52	-0.45159	31.267	FALSE	0
2022-09-15	09:39:52	-0.433931	31.267	FALSE	0
2022-09-15	09:39:52	-0.511997	31.267	FALSE	0
2022-09-15	09:39:53	-0.548384	31.267	FALSE	0
2022-09-15	09:39:53	-0.67678	31.267	FALSE	0
2022-09-15	09:39:53	-0.778562	31.267	FALSE	0
2022-09-15	09:39:53	-0.677137	31.267	FALSE	0
2022-09-15	09:39:54	-0.498155	31.267	FALSE	0
2022-09-15	09:39:54	-0.401972	31.267	FALSE	0
2022-09-15	09:39:54	-0.418002	31.267	FALSE	0
2022-09-15	09:39:55	-0.121361	31.267	FALSE	0
2022-09-15	09:39:55	0.325967	31.5929	FALSE	0
2022-09-15	09:39:55	0.339097	31.932	FALSE	0
2022-09-15	09:39:55	0.181998	32.114	FALSE	0
2022-09-15	09:39:56	-0.0258903	32.114	FALSE	0
2022-09-15	09:39:56	-0.125687	32.114	FALSE	0
2022-09-15	09:39:56	0.151667	32.2657	FALSE	0
2022-09-15	09:39:57	0.0173157	32.283	FALSE	0
2022-09-15	09:39:57	0.166018	32.449	FALSE	0
2022-09-15	09:39:57	0.814618	33.2636	FALSE	0
2022-09-15	09:39:57	0.429835	33.6935	FALSE	0
2022-09-15	09:39:57	0.969936	34.6634	FALSE	0
2022-09-15	09:39:58	0.470293	35.1337	FALSE	0
2022-09-15	09:39:58	0.883728	36.0174	FALSE	0
2022-09-15	09:39:58	0.816349	36.8338	FALSE	0
2022-09-15	09:39:59	0.462303	37.2961	FALSE	0
2022-09-15	09:39:59	0.183626	37.4797	FALSE	0
2022-09-15	09:39:59	0.502659	37.9824	FALSE	0
2022-09-15	09:39:59	0.173397	38.1558	FALSE	0
2022-09-15	09:40:00	0.211769	38.3675	FALSE	0
2022-09-15	09:40:00	-0.175356	38.3675	FALSE	0
2022-09-15	09:40:00	-0.508027	38.3675	FALSE	0
2022-09-15	09:40:00	-0.912556	38.3675	FALSE	0
2022-09-15	09:40:01	-1.01042	38.3675	FALSE	0
2022-09-15	09:40:01	-0.964872	38.3675	FALSE	0
2022-09-15	09:40:01	-0.979121	38.3675	FALSE	0
2022-09-15	09:40:01	-1.07454	38.3675	FALSE	0
2022-09-15	09:40:02	-0.869503	38.3675	FALSE	0
2022-09-15	09:40:02	-0.953931	38.3675	FALSE	0
2022-09-15	09:40:02	-0.793778	38.3675	FALSE	0
2022-09-15	09:40:03	-0.930012	38.3675	FALSE	0
2022-09-15	09:40:03	-0.685635	38.3675	FALSE	0
2022-09-15	09:40:03	-0.805941	38.3675	FALSE	0
2022-09-15	09:40:03	-0.740088	38.3675	FALSE	0
2022-09-15	09:40:04	-0.822989	38.3675	FALSE	0
2022-09-15	09:40:04	-0.727671	38.3675	FALSE	0
2022-09-15	09:40:04	-0.733676	38.3675	FALSE	0
2022-09-15	09:40:04	-0.743854	38.3675	FALSE	0
2022-09-15	09:40:05	-0.636271	38.3675	FALSE	0
2022-09-15	09:40:05	-0.342379	38.3675	FALSE	0
2022-09-15	09:40:05	-0.247112	38.3675	FALSE	0
2022-09-15	09:40:05	-0.250369	38.3675	FALSE	0
2022-09-15	09:40:06	-0.010216	38.3675	FALSE	0
2022-09-15	09:40:06	0.298486	38.666	FALSE	0
2022-09-15	09:40:06	0.912684	39.5787	FALSE	0
2022-09-15	09:40:07	0.515738	40.0944	FALSE	0
2022-09-15	09:40:07	0.26673	40.3612	FALSE	0
2022-09-15	09:40:07	0.21813	40.5793	FALSE	0
2022-09-15	09:40:07	-0.21388	40.5793	FALSE	0
2022-09-15	09:40:08	-0.340699	40.5793	FALSE	0
2022-09-15	09:40:08	-0.42645	40.5793	FALSE	0
2022-09-15	09:40:08	-0.444974	40.5793	FALSE	0
2022-09-15	09:40:08	-0.534796	40.5793	FALSE	0
2022-09-15	09:40:09	-0.425483	40.5793	FALSE	0
2022-09-15	09:40:09	-0.437442	40.5793	FALSE	0
2022-09-15	09:40:09	-0.490827	40.5793	FALSE	0
2022-09-15	09:40:09	-0.475509	40.5793	FALSE	0
2022-09-15	09:40:10	-0.407213	40.5793	FALSE	0
2022-09-15	09:40:10	-0.335101	40.5793	FALSE	0
2022-09-15	09:40:10	-0.363447	40.5793	FALSE	0
2022-09-15	09:40:11	-0.124567	40.5793	FALSE	0
2022-09-15	09:40:11	-0.181157	40.5793	FALSE	0
2022-09-15	09:40:11	-0.0638547	40.5793	FALSE	0
2022-09-15	09:40:11	-0.141819	40.5793	FALSE	0
2022-09-15	09:40:12	0.0963997	40.6757	FALSE	0
2022-09-15	09:40:12	0.109377	40.7851	FALSE	0
2022-09-15	09:40:12	0.0409798	40.8261	FALSE	0
2022-09-15	09:40:12	0.056756	40.8828	FALSE	0
2022-09-15	09:40:13	0.086985	40.9698	FALSE	0
2022-09-15	09:40:13	-0.060445	40.9698	FALSE	0
2022-09-15	09:40:13	-0.389503	40.9698	FALSE	0
2022-09-15	09:40:13	-0.712608	40.9698	FALSE	0
2022-09-15	09:40:14	-0.687875	40.9698	FALSE	0
2022-09-15	09:40:14	-0.727111	40.9698	FALSE	0
2022-09-15	09:40:14	-0.735864	40.9698	FALSE	0
2022-09-15	09:40:15	-0.596577	40.9698	FALSE	0
2022-09-15	09:40:15	-0.602888	40.9698	FALSE	0
2022-09-15	09:40:15	-0.594745	40.9698	FALSE	0
2022-09-15	09:40:15	-0.70991	40.9698	FALSE	0
2022-09-15	09:40:16	-0.607773	40.9698	FALSE	0
2022-09-15	09:40:16	-0.661768	40.9698	FALSE	0
2022-09-15	09:40:16	-0.618409	40.9698	FALSE	0
2022-09-15	09:40:16	-0.461259	40.9698	FALSE	0
2022-09-15	09:40:17	-0.276628	40.9698	FALSE	0
2022-09-15	09:40:17	-0.179224	40.9698	FALSE	0
2022-09-15	09:40:17	-0.245534	40.9698	FALSE	0
2022-09-15	09:40:17	-0.104465	40.9698	FALSE	0
2022-09-15	09:40:18	-0.0279768	40.9698	FALSE	0
2022-09-15	09:40:18	0.0700384	41.0398	FALSE	0
2022-09-15	09:40:18	0.0512597	41.0911	FALSE	0
2022-09-15	09:40:19	0.0271376	41.1182	FALSE	0
2022-09-15	09:40:19	0.505967	41.6242	FALSE	0
2022-09-15	09:40:19	0.880929	42.5051	FALSE	0
2022-09-15	09:40:19	0.764593	43.2697	FALSE	0
2022-09-15	09:40:20	0.510089	43.7798	FALSE	0
2022-09-15	09:40:20	0.501692	44.2815	FALSE	0
2022-09-15	09:40:20	0.268766	44.5503	FALSE	0
2022-09-15	09:40:20	0.427036	44.9773	FALSE	0
2022-09-15	09:40:21	0.297265	45.2746	FALSE	0
2022-09-15	09:40:21	-0.150979	45.2746	FALSE	0
2022-09-15	09:40:21	-0.704567	45.2746	FALSE	0
2022-09-15	09:40:21	-0.820394	45.2746	FALSE	0
2022-09-15	09:40:22	-1.04156	45.2746	FALSE	0
2022-09-15	09:40:22	-0.720088	45.2746	FALSE	0
2022-09-15	09:40:22	-0.651844	45.2746	FALSE	0
2022-09-15	09:40:23	-0.212862	45.2746	FALSE	0
2022-09-15	09:40:23	2.04612	47.3207	FALSE	0
2022-09-15	09:40:23	0.743575	48.0643	FALSE	0
2022-09-15	09:40:23	3.68006	51.7443	1	1
2022-09-15	09:40:24	0.418333	52.1627	FALSE	1
2022-09-15	09:40:24	0.48042	52.6431	FALSE	1
2022-09-15	09:40:24	0.406069	53.0491	FALSE	1
2022-09-15	09:40:25	0.109529	53.1587	FALSE	1
2022-09-15	09:40:25	0.269122	53.4278	FALSE	1
2022-09-15	09:40:25	-0.00690816	53.4278	FALSE	1
2022-09-15	09:40:25	0.0127356	53.4405	FALSE	1
2022-09-15	09:40:25	0.0853056	53.5258	FALSE	1
2022-09-15	09:40:26	-0.0900633	53.5258	FALSE	1
2022-09-15	09:40:26	-0.054389	53.5258	FALSE	1
2022-09-15	09:40:26	-0.158918	53.5258	FALSE	1
2022-09-15	09:40:27	-0.116476	53.5258	FALSE	1
2022-09-15	09:40:27	-0.337493	53.5258	FALSE	1
2022-09-15	09:40:27	-0.169707	53.5258	FALSE	1
2022-09-15	09:40:27	-0.183193	53.5258	FALSE	1
2022-09-15	09:40:28	0.00449134	53.5303	FALSE	1
2022-09-15	09:40:28	0.0722776	53.6026	FALSE	1
2022-09-15	09:40:28	0.00785013	53.6105	FALSE	1
2022-09-15	09:40:28	1.27172	54.8822	FALSE	1
2022-09-15	09:40:29	0.0895804	54.9718	FALSE	1
2022-09-15	09:40:29	0.493346	55.4651	FALSE	1
2022-09-15	09:40:29	0.78215	56.2473	FALSE	1
2022-09-15	09:40:29	0.384797	56.6321	FALSE	1
2022-09-15	09:40:30	1.65192	58.284	FALSE	1
2022-09-15	09:40:30	0.335076	58.619	FALSE	1
2022-09-15	09:40:30	0.788766	59.4078	FALSE	1
2022-09-15	09:40:31	1.17996	60.5878	FALSE	1
2022-09-15	09:40:31	0.284593	60.8724	FALSE	1
2022-09-15	09:40:31	2.1306	63.003	FALSE	1
2022-09-15	09:40:31	0.222456	63.2254	FALSE	1
2022-09-15	09:40:32	0.029275	63.2547	FALSE	1
2022-09-15	09:40:32	0.379606	63.6343	FALSE	1
2022-09-15	09:40:32	-0.135661	63.6343	FALSE	1
2022-09-15	09:40:32	-0.430317	63.6343	FALSE	1
2022-09-15	09:40:33	-0.208282	63.6343	FALSE	1
2022-09-15	09:40:33	0.0582827	63.6926	FALSE	1
2022-09-15	09:40:33	0.26388	63.9565	FALSE	1
2022-09-15	09:40:33	0.275891	64.2324	FALSE	1
2022-09-15	09:40:34	1.11869	65.351	FALSE	1
2022-09-15	09:40:34	2.66357	68.0146	FALSE	1
2022-09-15	09:40:34	4.01034	72.025	1	2
2022-09-15	09:40:35	2.64943	74.6744	FALSE	2
2022-09-15	09:40:35	3.60184	78.2762	1	3
2022-09-15	09:40:35	3.17701	81.4532	1	4
2022-09-15	09:40:35	2.8109	84.2641	FALSE	4
2022-09-15	09:40:36	1.93426	86.1984	FALSE	4
2022-09-15	09:40:36	0.908206	87.1066	FALSE	4
2022-09-15	09:40:36	0.723015	87.8296	FALSE	4
2022-09-15	09:40:36	0.884491	88.7141	FALSE	4
2022-09-15	09:40:37	0.943931	89.658	FALSE	4
2022-09-15	09:40:37	0.660267	90.3183	FALSE	4
2022-09-15	09:40:37	0.454568	90.7729	FALSE	4
2022-09-15	09:40:37	0.483372	91.2562	FALSE	4
2022-09-15	09:40:38	0.663626	91.9199	FALSE	4
2022-09-15	09:40:38	0.665916	92.5858	FALSE	4
2022-09-15	09:40:38	0.666171	93.252	FALSE	4
2022-09-15	09:40:39	0.8107	94.0627	FALSE	4
2022-09-15	09:40:39	0.50444	94.5671	FALSE	4
2022-09-15	09:40:39	0.447341	95.0144	FALSE	4
2022-09-15	09:40:39	0.445356	95.4598	FALSE	4
2022-09-15	09:40:40	0.413855	95.8737	FALSE	4
2022-09-15	09:40:40	0.369631	96.2433	FALSE	4
2022-09-15	09:40:40	0.397112	96.6404	FALSE	4
2022-09-15	09:40:40	0.408053	97.0484	FALSE	4
2022-09-15	09:40:41	0.458333	97.5068	FALSE	4
2022-09-15	09:40:41	0.388919	97.8957	FALSE	4
2022-09-15	09:40:41	0.539809	98.4355	FALSE	4
2022-09-15	09:40:41	0.498232	98.9337	FALSE	4
2022-09-15	09:40:42	0.451565	99.3853	FALSE	4
2022-09-15	09:40:42	0.450293	99.8356	FALSE	4
2022-09-15	09:40:42	0.448766	100.284	FALSE	4
2022-09-15	09:40:43	0.383015	100.667	FALSE	4
2022-09-15	09:40:43	0.340725	101.008	FALSE	4
2022-09-15	09:40:43	0.388766	101.397	FALSE	4
2022-09-15	09:40:43	0.489326	101.886	FALSE	4
2022-09-15	09:40:44	0.534466	102.421	FALSE	4
2022-09-15	09:40:44	0.613193	103.034	FALSE	4
2022-09-15	09:40:44	0.66785	103.702	FALSE	4
2022-09-15	09:40:44	0.510649	104.212	FALSE	4
2022-09-15	09:40:45	0.398283	104.611	FALSE	4
2022-09-15	09:40:45	0.346629	104.957	FALSE	4
2022-09-15	09:40:45	0.284084	105.241	FALSE	4
2022-09-15	09:40:45	0.296094	105.537	FALSE	4
2022-09-15	09:40:46	0.292786	105.83	FALSE	4
2022-09-15	09:40:46	0.290802	106.121	FALSE	4
2022-09-15	09:40:46	0.286069	106.407	FALSE	4
2022-09-15	09:40:47	0.447952	106.855	FALSE	4
2022-09-15	09:40:47	1.06235	107.917	FALSE	4
2022-09-15	09:40:47	0.379758	108.297	FALSE	4
2022-09-15	09:40:47	0.206679	108.504	FALSE	4
2022-09-15	09:40:48	0.188155	108.692	FALSE	4
2022-09-15	09:40:48	0.0859163	108.778	FALSE	4
2022-09-15	09:40:48	0.00449134	108.782	FALSE	4
2022-09-15	09:40:48	-0.099987	108.782	FALSE	4
2022-09-15	09:40:49	-0.121056	108.782	FALSE	4
2022-09-15	09:40:49	0.1764	108.959	FALSE	4
2022-09-15	09:40:49	0.17416	109.133	FALSE	4
2022-09-15	09:40:49	0.721387	109.854	FALSE	4
2022-09-15	09:40:50	1.33518	111.19	FALSE	4
2022-09-15	09:40:50	0.627137	111.817	FALSE	4
2022-09-15	09:40:50	-0.267722	111.817	FALSE	4
2022-09-15	09:40:50	-0.20533	111.817	FALSE	4
2022-09-15	09:40:51	-0.363804	111.817	FALSE	4
2022-09-15	09:40:51	-0.379987	111.817	FALSE	4
2022-09-15	09:40:51	0.649987	112.467	FALSE	4
2022-09-15	09:40:52	6.2024	118.669	1	5
2022-09-15	09:40:52	8.30459	126.974	1	6
2022-09-15	09:40:52	6.45981	133.433	1	7
2022-09-15	09:40:52	4.26978	137.703	1	8
2022-09-15	09:40:53	2.04347	139.747	FALSE	8
2022-09-15	09:40:53	0.881641	140.628	FALSE	8
2022-09-15	09:40:53	0.227901	140.856	FALSE	8
2022-09-15	09:40:53	0.0680027	140.924	FALSE	8
2022-09-15	09:40:54	0.129479	141.054	FALSE	8
2022-09-15	09:40:54	-0.0766282	141.054	FALSE	8
2022-09-15	09:40:54	0.0394532	141.093	FALSE	8
2022-09-15	09:40:54	-0.0415646	141.093	FALSE	8
2022-09-15	09:40:55	-0.202328	141.093	FALSE	8
2022-09-15	09:40:55	-0.372913	141.093	FALSE	8
2022-09-15	09:40:55	-0.34645	141.093	FALSE	8
2022-09-15	09:40:56	-0.398765	141.093	FALSE	8
2022-09-15	09:40:56	-0.6579	141.093	FALSE	8
2022-09-15	09:40:56	-0.705076	141.093	FALSE	8
2022-09-15	09:40:56	-0.888485	141.093	FALSE	8
2022-09-15	09:40:57	-0.714643	141.093	FALSE	8
2022-09-15	09:40:57	-0.676322	141.093	FALSE	8
2022-09-15	09:40:57	-0.645076	141.093	FALSE	8
2022-09-15	09:40:57	-0.548638	141.093	FALSE	8
2022-09-15	09:40:58	-0.451997	141.093	FALSE	8
2022-09-15	09:40:58	-0.239885	141.093	FALSE	8
2022-09-15	09:40:58	-0.302023	141.093	FALSE	8
2022-09-15	09:40:58	-0.0346435	141.093	FALSE	8
2022-09-15	09:40:59	0.0346185	141.128	FALSE	8
2022-09-15	09:40:59	0.0579773	141.186	FALSE	8
2022-09-15	09:40:59	0.0326338	141.218	FALSE	8
2022-09-15	09:41:00	0.519657	141.738	FALSE	8
2022-09-15	09:41:00	0.410751	142.149	FALSE	8
2022-09-15	09:41:00	0.382354	142.531	FALSE	8
2022-09-15	09:41:00	0.687341	143.219	FALSE	8
2022-09-15	09:41:01	0.695738	143.914	FALSE	8
2022-09-15	09:41:01	0.483372	144.398	FALSE	8
2022-09-15	09:41:01	0.486018	144.884	FALSE	8
2022-09-15	09:41:02	0.302659	145.186	FALSE	8
2022-09-15	09:41:02	0.172685	145.359	FALSE	8
2022-09-15	09:41:02	0.418944	145.778	FALSE	8
2022-09-15	09:41:02	0.556959	146.335	FALSE	8
2022-09-15	09:41:02	0.497621	146.833	FALSE	8
2022-09-15	09:41:03	0.486578	147.319	FALSE	8
2022-09-15	09:41:03	0.388257	147.707	FALSE	8
2022-09-15	09:41:03	0.424084	148.131	FALSE	8
2022-09-15	09:41:04	0.444338	148.576	FALSE	8
2022-09-15	09:41:04	0.399809	148.976	FALSE	8
2022-09-15	09:41:04	0.528003	149.504	FALSE	8
2022-09-15	09:41:04	0.633142	150.137	FALSE	8
2022-09-15	09:41:05	1.04989	151.187	FALSE	8
2022-09-15	09:41:05	0.692379	151.879	FALSE	8
2022-09-15	09:41:05	0.636348	152.515	FALSE	8
2022-09-15	09:41:05	0.628613	153.144	FALSE	8
2022-09-15	09:41:06	0.647392	153.791	FALSE	8
2022-09-15	09:41:06	0.541845	154.333	FALSE	8
2022-09-15	09:41:06	0.527443	154.861	FALSE	8
2022-09-15	09:41:06	0.541285	155.402	FALSE	8
2022-09-15	09:41:07	0.554669	155.957	FALSE	8
2022-09-15	09:41:07	0.585203	156.542	FALSE	8
2022-09-15	09:41:07	0.588969	157.131	FALSE	8
2022-09-15	09:41:08	0.596552	157.727	FALSE	8
2022-09-15	09:41:08	0.661896	158.389	FALSE	8
2022-09-15	09:41:08	0.594211	158.983	FALSE	8
2022-09-15	09:41:08	0.526272	159.51	FALSE	8
2022-09-15	09:41:09	0.50215	160.012	FALSE	8
2022-09-15	09:41:09	0.533041	160.545	FALSE	8
2022-09-15	09:41:09	0.641132	161.186	FALSE	8
2022-09-15	09:41:09	0.749835	161.936	FALSE	8
2022-09-15	09:41:10	0.912837	162.849	FALSE	8
2022-09-15	09:41:10	1.11472	163.963	FALSE	8
2022-09-15	09:41:10	1.43899	165.402	FALSE	8
2022-09-15	09:41:10	2.76927	168.172	FALSE	8
2022-09-15	09:41:11	2.71441	170.886	FALSE	8
2022-09-15	09:41:11	2.14388	173.03	FALSE	8
2022-09-15	09:41:11	2.02073	175.051	FALSE	8
2022-09-15	09:41:12	1.11034	176.161	FALSE	8
2022-09-15	09:41:12	0.802964	176.964	FALSE	8
2022-09-15	09:41:12	0.800572	177.765	FALSE	8
2022-09-15	09:41:12	1.1081	178.873	FALSE	8
2022-09-15	09:41:13	2.33996	181.213	FALSE	8
2022-09-15	09:41:13	2.7877	184	FALSE	8
2022-09-15	09:41:13	3.00622	187.007	1	9
2022-09-15	09:41:13	2.80653	189.813	FALSE	9
2022-09-15	09:41:14	1.98327	191.796	FALSE	9
2022-09-15	09:41:14	1.56098	193.357	FALSE	9
2022-09-15	09:41:14	1.07426	194.432	FALSE	9
2022-09-15	09:41:14	1.63665	196.068	FALSE	9
2022-09-15	09:41:15	1.44129	197.51	FALSE	9
2022-09-15	09:41:15	1.09726	198.607	FALSE	9
2022-09-15	09:41:15	0.759198	199.366	FALSE	9
2022-09-15	09:41:16	1.03564	200.402	FALSE	9
2022-09-15	09:41:16	1.1081	201.51	FALSE	9
2022-09-15	09:41:16	1.00164	202.511	FALSE	9
2022-09-15	09:41:16	1.15726	203.669	FALSE	9
2022-09-15	09:41:17	0.832074	204.501	FALSE	9
2022-09-15	09:41:17	1.16149	205.662	FALSE	9
2022-09-15	09:41:17	0.947443	206.61	FALSE	9
2022-09-15	09:41:17	0.677773	207.287	FALSE	9
2022-09-15	09:41:18	0.591208	207.879	FALSE	9
2022-09-15	09:41:18	0.719707	208.598	FALSE	9
2022-09-15	09:41:18	0.602099	209.2	FALSE	9
2022-09-15	09:41:18	0.726781	209.927	FALSE	9
2022-09-15	09:41:19	0.621692	210.549	FALSE	9
2022-09-15	09:41:19	0.65645	211.205	FALSE	9
2022-09-15	09:41:19	0.60042	211.806	FALSE	9
2022-09-15	09:41:20	0.613091	212.419	FALSE	9
2022-09-15	09:41:20	0.632735	213.052	FALSE	9
2022-09-15	09:41:20	0.6707	213.722	FALSE	9
2022-09-15	09:41:20	0.681031	214.403	FALSE	9
2022-09-15	09:41:21	0.667494	215.071	FALSE	9
2022-09-15	09:41:21	0.719249	215.79	FALSE	9
2022-09-15	09:41:21	0.737875	216.528	FALSE	9
2022-09-15	09:41:21	0.623677	217.152	FALSE	9
2022-09-15	09:41:22	0.564847	217.716	FALSE	9
2022-09-15	09:41:22	0.474517	218.191	FALSE	9
2022-09-15	09:41:22	0.457417	218.648	FALSE	9
2022-09-15	09:41:22	0.522862	219.171	FALSE	9
2022-09-15	09:41:23	0.551616	219.723	FALSE	9
2022-09-15	09:41:23	1.15431	220.877	FALSE	9
2022-09-15	09:41:23	0.773092	221.65	FALSE	9
2022-09-15	09:41:24	0.543372	222.194	FALSE	9
2022-09-15	09:41:24	0.74729	222.941	FALSE	9
2022-09-15	09:41:24	2.46943	225.41	FALSE	9
2022-09-15	09:41:24	4.1396	229.55	1	10
2022-09-15	09:41:25	3.39996	232.95	1	11
2022-09-15	09:41:25	3.56383	236.514	1	12
2022-09-15	09:41:25	3.3678	239.882	1	13
2022-09-15	09:41:25	2.96754	242.849	FALSE	13
2022-09-15	09:41:26	1.87961	244.729	FALSE	13
2022-09-15	09:41:26	2.82393	247.553	FALSE	13
2022-09-15	09:41:26	1.89945	249.452	FALSE	13
2022-09-15	09:41:26	2.61513	252.067	FALSE	13
2022-09-15	09:41:27	2.38307	254.45	FALSE	13
2022-09-15	09:41:27	2.20729	256.658	FALSE	13
2022-09-15	09:41:27	1.81492	258.472	FALSE	13
2022-09-15	09:41:28	1.72525	260.198	FALSE	13
2022-09-15	09:41:28	1.59899	261.797	FALSE	13
2022-09-15	09:41:28	1.542	263.339	FALSE	13
2022-09-15	09:41:28	1.51665	264.855	FALSE	13
2022-09-15	09:41:29	1.1881	266.043	FALSE	13
2022-09-15	09:41:29	1.39991	267.443	FALSE	13
2022-09-15	09:41:29	1.54826	268.992	FALSE	13
2022-09-15	09:41:29	1.59207	270.584	FALSE	13
2022-09-15	09:41:30	1.75986	272.344	FALSE	13
2022-09-15	09:41:30	1.66556	274.009	FALSE	13
2022-09-15	09:41:30	1.98393	275.993	FALSE	13
2022-09-15	09:41:30	1.70912	277.702	FALSE	13
2022-09-15	09:41:31	1.39747	279.1	FALSE	13
2022-09-15	09:41:31	0.825763	279.925	FALSE	13
2022-09-15	09:41:31	0.427137	280.353	FALSE	13
2022-09-15	09:41:32	0.112736	280.465	FALSE	13
2022-09-15	09:41:32	-0.0345926	280.465	FALSE	13
2022-09-15	09:41:32	-0.421056	280.465	FALSE	13
2022-09-15	09:41:32	-0.628434	280.465	FALSE	13
2022-09-15	09:41:33	-0.66131	280.465	FALSE	13
2022-09-15	09:41:33	-0.625839	280.465	FALSE	13
2022-09-15	09:41:33	-0.651539	280.465	FALSE	13
2022-09-15	09:41:33	-0.470776	280.465	FALSE	13
2022-09-15	09:41:34	-0.0727606	280.465	FALSE	13
2022-09-15	09:41:34	-0.058104	280.465	FALSE	13
2022-09-15	09:41:34	0.0500893	280.515	FALSE	13
2022-09-15	09:41:34	0.375484	280.891	FALSE	13
2022-09-15	09:41:35	0.891209	281.782	FALSE	13
2022-09-15	09:41:35	0.734109	282.516	FALSE	13
2022-09-15	09:41:35	0.618588	283.135	FALSE	13
2022-09-15	09:41:36	0.738333	283.873	FALSE	13
2022-09-15	09:41:36	0.701539	284.575	FALSE	13
2022-09-15	09:41:36	0.33528	284.91	FALSE	13
2022-09-15	09:41:36	0.326934	285.237	FALSE	13
2022-09-15	09:41:37	0.251616	285.488	FALSE	13
2022-09-15	09:41:37	0.292786	285.781	FALSE	13
2022-09-15	09:41:37	0.293448	286.075	FALSE	13
2022-09-15	09:41:37	0.186629	286.261	FALSE	13
2022-09-15	09:41:38	0.301387	286.563	FALSE	13
2022-09-15	09:41:38	0.365814	286.929	FALSE	13
2022-09-15	09:41:38	0.208664	287.137	FALSE	13
2022-09-15	09:41:38	0.156501	287.294	FALSE	13
2022-09-15	09:41:39	0.281794	287.576	FALSE	13
2022-09-15	09:41:39	0.220929	287.796	FALSE	13
2022-09-15	09:41:39	0.364084	288.161	FALSE	13
2022-09-15	09:41:40	0.298028	288.459	FALSE	13
2022-09-15	09:41:40	0.479046	288.938	FALSE	13
2022-09-15	09:41:40	0.896196	289.834	FALSE	13
2022-09-15	09:41:40	0.360064	290.194	FALSE	13
2022-09-15	09:41:41	1.63289	291.827	FALSE	13
2022-09-15	09:41:41	2.43258	294.259	FALSE	13
2022-09-15	09:41:41	1.85406	296.113	FALSE	13
2022-09-15	09:41:41	2.41284	298.526	FALSE	13
2022-09-15	09:41:42	0.589224	299.115	FALSE	13
2022-09-15	09:41:42	1.60556	300.721	FALSE	13
2022-09-15	09:41:42	2.51574	303.237	FALSE	13
2022-09-15	09:41:42	0.452685	303.689	FALSE	13
2022-09-15	09:41:43	0.706069	304.395	FALSE	13
2022-09-15	09:41:43	0.425102	304.821	FALSE	13
2022-09-15	09:41:43	0.423524	305.244	FALSE	13
2022-09-15	09:41:44	0.564338	305.808	FALSE	13
2022-09-15	09:41:44	0.383473	306.192	FALSE	13
2022-09-15	09:41:44	0.523371	306.715	FALSE	13
2022-09-15	09:41:44	0.287392	307.003	FALSE	13
2022-09-15	09:41:45	0.745102	307.748	FALSE	13
2022-09-15	09:41:45	0.260064	308.008	FALSE	13
2022-09-15	09:41:45	0.524135	308.532	FALSE	13
2022-09-15	09:41:45	0.342914	308.875	FALSE	13
2022-09-15	09:41:46	0.32444	309.199	FALSE	13
2022-09-15	09:41:46	0.277112	309.476	FALSE	13
2022-09-15	09:41:46	0.23126	309.708	FALSE	13
2022-09-15	09:41:46	0.437061	310.145	FALSE	13
2022-09-15	09:41:47	0.517061	310.662	FALSE	13
2022-09-15	09:41:47	0.771158	311.433	FALSE	13
2022-09-15	09:41:47	1.20648	312.639	FALSE	13
2022-09-15	09:41:48	1.42505	314.065	FALSE	13
2022-09-15	09:41:48	0.421234	314.486	FALSE	13
2022-09-15	09:41:48	0.751107	315.237	FALSE	13
2022-09-15	09:41:48	0.413092	315.65	FALSE	13
2022-09-15	09:41:49	0.584033	316.234	FALSE	13
2022-09-15	09:41:49	0.351158	316.585	FALSE	13
2022-09-15	09:41:49	1.24683	317.832	FALSE	13
2022-09-15	09:41:49	0.589173	318.421	FALSE	13
2022-09-15	09:41:50	1.33589	319.757	FALSE	13
2022-09-15	09:41:50	1.74841	321.505	FALSE	13
2022-09-15	09:41:50	2.26775	323.773	FALSE	13
2022-09-15	09:41:50	1.76658	325.54	FALSE	13
2022-09-15	09:41:51	1.22627	326.766	FALSE	13
2022-09-15	09:41:51	0.974262	327.74	FALSE	13
2022-09-15	09:41:51	0.548562	328.289	FALSE	13
2022-09-15	09:41:52	0.400725	328.69	FALSE	13
2022-09-15	09:41:52	0.348562	329.038	FALSE	13
2022-09-15	09:41:52	0.350802	329.389	FALSE	13
2022-09-15	09:41:52	0.237875	329.627	FALSE	13
2022-09-15	09:41:53	0.361794	329.989	FALSE	13
2022-09-15	09:41:53	0.136603	330.125	FALSE	13
2022-09-15	09:41:53	0.261998	330.387	FALSE	13
2022-09-15	09:41:53	0.247545	330.635	FALSE	13
2022-09-15	09:41:54	0.664033	331.299	FALSE	13
2022-09-15	09:41:54	0.362608	331.661	FALSE	13
2022-09-15	09:41:54	0.481743	332.143	FALSE	13
2022-09-15	09:41:54	0.504135	332.647	FALSE	13
2022-09-15	09:41:55	0.270954	332.918	FALSE	13
2022-09-15	09:41:55	0.46042	333.379	FALSE	13
2022-09-15	09:41:55	0.307545	333.686	FALSE	13
2022-09-15	09:41:56	0.79187	334.478	FALSE	13
2022-09-15	09:41:56	0.428155	334.906	FALSE	13
2022-09-15	09:41:56	1.13625	336.043	FALSE	13
2022-09-15	09:41:56	0.932176	336.975	FALSE	13
2022-09-15	09:41:57	1.87823	338.853	FALSE	13
2022-09-15	09:41:57	3.0224	341.875	1	14
2022-09-15	09:41:57	3.0107	344.886	1	15
2022-09-15	09:41:57	3.3507	348.237	1	16
2022-09-15	09:41:58	3.40291	351.64	1	17
2022-09-15	09:41:58	1.07268	352.712	FALSE	17
2022-09-15	09:41:58	1.25961	353.972	FALSE	17
2022-09-15	09:41:58	0.307494	354.279	FALSE	17
2022-09-15	09:41:59	0.357875	354.637	FALSE	17
2022-09-15	09:41:59	0.47126	355.109	FALSE	17
2022-09-15	09:41:59	0.272176	355.381	FALSE	17
2022-09-15	09:42:00	0.432125	355.813	FALSE	17
2022-09-15	09:42:00	0.552277	356.365	FALSE	17
2022-09-15	09:42:00	0.703422	357.069	FALSE	17
2022-09-15	09:42:00	0.813143	357.882	FALSE	17
2022-09-15	09:42:01	1.33309	359.215	FALSE	17
2022-09-15	09:42:01	1.16877	360.384	FALSE	17
2022-09-15	09:42:01	0.823219	361.207	FALSE	17
2022-09-15	09:42:01	0.593499	361.8	FALSE	17
2022-09-15	09:42:02	0.533397	362.334	FALSE	17
2022-09-15	09:42:02	0.728308	363.062	FALSE	17
2022-09-15	09:42:02	0.3164	363.378	FALSE	17
2022-09-15	09:42:02	0.441234	363.82	FALSE	17
2022-09-15	09:42:03	0.253346	364.073	FALSE	17
2022-09-15	09:42:03	0.297926	364.371	FALSE	17
2022-09-15	09:42:03	0.325814	364.697	FALSE	17
2022-09-15	09:42:03	0.353041	365.05	FALSE	17
2022-09-15	09:42:04	0.417163	365.467	FALSE	17
2022-09-15	09:42:04	0.19243	365.659	FALSE	17
2022-09-15	09:42:04	0.450547	366.11	FALSE	17
2022-09-15	09:42:05	0.299962	366.41	FALSE	17
2022-09-15	09:42:05	0.330395	366.74	FALSE	17
2022-09-15	09:42:05	0.592227	367.332	FALSE	17
2022-09-15	09:42:05	0.568359	367.901	FALSE	17
2022-09-15	09:42:06	1.55676	369.458	FALSE	17
2022-09-15	09:42:06	1.36398	370.822	FALSE	17
2022-09-15	09:42:06	2.49935	373.321	FALSE	17
2022-09-15	09:42:06	2.67314	375.994	FALSE	17
2022-09-15	09:42:07	4.48642	380.48	1	18
2022-09-15	09:42:07	1.44113	381.922	FALSE	18
2022-09-15	09:42:07	3.87904	385.801	1	19
2022-09-15	09:42:07	1.24765	387.048	FALSE	19
2022-09-15	09:42:08	2.38485	389.433	FALSE	19
2022-09-15	09:42:08	4.04403	393.477	1	20
2022-09-15	09:42:08	2.63406	396.111	FALSE	20
2022-09-15	09:42:09	4.48968	400.601	1	21
2022-09-15	09:42:09	3.32398	403.925	1	22
2022-09-15	09:42:09	0.964847	404.89	FALSE	22
2022-09-15	09:42:09	1.21625	406.106	FALSE	22
2022-09-15	09:42:10	0.388715	406.495	FALSE	22
2022-09-15	09:42:10	0.321794	406.816	FALSE	22
2022-09-15	09:42:10	0.432939	407.249	FALSE	22
2022-09-15	09:42:10	0.194771	407.444	FALSE	22
2022-09-15	09:42:11	0.542914	407.987	FALSE	22
2022-09-15	09:42:11	0.21243	408.2	FALSE	22
2022-09-15	09:42:11	0.524695	408.724	FALSE	22
2022-09-15	09:42:11	0.314924	409.039	FALSE	22
2022-09-15	09:42:12	0.691209	409.73	FALSE	22
2022-09-15	09:42:12	1.22123	410.952	FALSE	22
2022-09-15	09:42:12	2.86245	413.814	FALSE	22
2022-09-15	09:42:13	6.3081	420.122	1	23
2022-09-15	09:42:13	6.40281	426.525	1	24
2022-09-15	09:42:13	8.90113	435.426	1	25
2022-09-15	09:42:13	4.80179	440.228	1	26
2022-09-15	09:42:14	4.8678	445.096	1	27
2022-09-15	09:42:14	3.2453	448.341	1	28
2022-09-15	09:42:14	6.55446	454.895	1	29
2022-09-15	09:42:14	4.29248	459.188	1	30
2022-09-15	09:42:15	6.95843	466.146	1	31
2022-09-15	09:42:15	3.4337	469.58	1	32
2022-09-15	09:42:15	5.12484	474.705	1	33
2022-09-15	09:42:15	5.21258	479.917	1	34
2022-09-15	09:42:16	6.05894	485.976	1	35
2022-09-15	09:42:16	7.6909	493.667	1	36
2022-09-15	09:42:16	6.9684	500.636	1	37
2022-09-15	09:42:17	11.2852	511.921	1	38
2022-09-15	09:42:17	11.6154	523.536	1	39
2022-09-15	09:42:17	9.03797	532.574	1	40
2022-09-15	09:42:17	8.09431	540.669	1	41
2022-09-15	09:42:18	6.4568	547.125	1	42
2022-09-15	09:42:18	6.78316	553.909	1	43
2022-09-15	09:42:18	6.07721	559.986	1	44
2022-09-15	09:42:18	5.65558	565.641	1	45
2022-09-15	09:42:19	5.37909	571.02	1	46
2022-09-15	09:42:19	4.83406	575.854	1	47
2022-09-15	09:42:19	4.7995	580.654	1	48
2022-09-15	09:42:19	5.68149	586.335	1	49
2022-09-15	09:42:20	5.13151	591.467	1	50
2022-09-15	09:42:20	5.36154	596.829	1	51
2022-09-15	09:42:20	4.81492	601.643	1	52
2022-09-15	09:42:21	4.72332	606.367	1	53
2022-09-15	09:42:21	4.56464	610.931	1	54
2022-09-15	09:42:21	4.68322	615.615	1	55
2022-09-15	09:42:21	4.6825	620.297	1	56
2022-09-15	09:42:22	4.67177	624.969	1	57
2022-09-15	09:42:22	4.51889	629.488	1	58
2022-09-15	09:42:22	4.64388	634.132	1	59
2022-09-15	09:42:22	4.38642	638.518	1	60
2022-09-15	09:42:23	4.33243	642.851	1	61
2022-09-15	09:42:23	4.26678	647.117	1	62
2022-09-15	09:42:23	4.52133	651.639	1	63
2022-09-15	09:42:23	4.57904	656.218	1	64
2022-09-15	09:42:24	4.32932	660.547	1	65
2022-09-15	09:42:24	4.27838	664.825	1	66
2022-09-15	09:42:24	4.20205	669.027	1	67
2022-09-15	09:42:25	4.05263	673.08	1	68
2022-09-15	09:42:25	4.21599	677.296	1	69
2022-09-15	09:42:25	4.32159	681.618	1	70
2022-09-15	09:42:25	4.54632	686.164	1	71
2022-09-15	09:42:26	4.01614	690.18	1	72
2022-09-15	09:42:26	4.01833	694.198	1	73
2022-09-15	09:42:26	4.00596	698.204	1	74
2022-09-15	09:42:26	5.49802	703.702	1	75
2022-09-15	09:42:27	4.19263	707.895	1	76
2022-09-15	09:42:27	5.55059	713.446	1	77
2022-09-15	09:42:27	4.21828	717.664	1	78
2022-09-15	09:42:27	0.150191	717.814	FALSE	78
2022-09-15	09:42:28	-0.181921	717.814	FALSE	78
2022-09-15	09:42:28	-0.373778	717.814	FALSE	78
2022-09-15	09:42:28	-0.755305	717.814	FALSE	78
2022-09-15	09:42:29	-0.83388	717.814	FALSE	78
2022-09-15	09:42:29	-0.997493	717.814	FALSE	78
2022-09-15	09:42:29	-0.84477	717.814	FALSE	78
2022-09-15	09:42:29	-0.995712	717.814	FALSE	78
2022-09-15	09:42:30	-0.828587	717.814	FALSE	78
2022-09-15	09:42:30	-0.494338	717.814	FALSE	78
2022-09-15	09:42:30	-0.21561	717.814	FALSE	78
2022-09-15	09:42:30	0.188003	718.002	FALSE	78
2022-09-15	09:42:31	0.519911	718.522	FALSE	78
2022-09-15	09:42:31	0.231005	718.753	FALSE	78
2022-09-15	09:42:31	1.92383	720.677	FALSE	78
2022-09-15	09:42:31	0.83187	721.509	FALSE	78
2022-09-15	09:42:32	6.21273	727.721	1	79
2022-09-15	09:42:32	1.14968	728.871	FALSE	79
2022-09-15	09:42:32	2.51034	731.381	FALSE	79
2022-09-15	09:42:33	0.80617	732.188	FALSE	79
2022-09-15	09:42:33	0.538384	732.726	FALSE	79
2022-09-15	09:42:33	1.03218	733.758	FALSE	79
2022-09-15	09:42:33	0.398995	734.157	FALSE	79
2022-09-15	09:42:34	2.21614	736.373	FALSE	79
2022-09-15	09:42:34	0.550649	736.924	FALSE	79
2022-09-15	09:42:34	0.86958	737.794	FALSE	79
2022-09-15	09:42:34	2.09864	739.892	FALSE	79
2022-09-15	09:42:35	0.156196	740.048	FALSE	79
2022-09-15	09:42:35	0.388104	740.436	FALSE	79
2022-09-15	09:42:35	0.503677	740.94	FALSE	79
2022-09-15	09:42:35	1.51385	742.454	FALSE	79
2022-09-15	09:42:36	0.674211	743.128	FALSE	79
2022-09-15	09:42:36	1.53055	744.659	FALSE	79
2022-09-15	09:42:36	0.904796	745.564	FALSE	79
2022-09-15	09:42:37	1.1366	746.7	FALSE	79
2022-09-15	09:42:37	0.33645	747.037	FALSE	79
2022-09-15	09:42:37	0.32042	747.357	FALSE	79
2022-09-15	09:42:37	0.424186	747.781	FALSE	79
2022-09-15	09:42:38	0.400318	748.182	FALSE	79
2022-09-15	09:42:38	0.407646	748.589	FALSE	79
2022-09-15	09:42:38	0.391769	748.981	FALSE	79
2022-09-15	09:42:38	1.01233	749.993	FALSE	79
2022-09-15	09:42:39	1.68912	751.682	FALSE	79
2022-09-15	09:42:39	1.94729	753.63	FALSE	79
2022-09-15	09:42:39	2.50724	756.137	FALSE	79
2022-09-15	09:42:39	2.12128	758.258	FALSE	79
2022-09-15	09:42:40	0.853702	759.112	FALSE	79
2022-09-15	09:42:40	0.364644	759.477	FALSE	79
2022-09-15	09:42:40	0.361234	759.838	FALSE	79
2022-09-15	09:42:41	0.291361	760.129	FALSE	79
2022-09-15	09:42:41	0.261794	760.391	FALSE	79
2022-09-15	09:42:41	0.265255	760.656	FALSE	79
2022-09-15	09:42:41	0.217265	760.873	FALSE	79
2022-09-15	09:42:42	0.26958	761.143	FALSE	79
2022-09-15	09:42:42	0.335026	761.478	FALSE	79
2022-09-15	09:42:42	0.278639	761.757	FALSE	79
2022-09-15	09:42:42	0.231819	761.989	FALSE	79
2022-09-15	09:42:43	0.285	762.274	FALSE	79
2022-09-15	09:42:43	0.322048	762.596	FALSE	79
2022-09-15	09:42:43	0.458232	763.054	FALSE	79
2022-09-15	09:42:43	0.705916	763.76	FALSE	79
2022-09-15	09:42:44	0.891209	764.651	FALSE	79
2022-09-15	09:42:44	3.28144	767.932	1	80
2022-09-15	09:42:44	3.54561	771.478	1	81
2022-09-15	09:42:44	4.96795	776.446	1	82
2022-09-15	09:42:45	2.68815	779.134	FALSE	82
2022-09-15	09:42:45	1.41396	780.548	FALSE	82
2022-09-15	09:42:45	2.63625	783.184	FALSE	82
2022-09-15	09:42:46	2.43747	785.622	FALSE	82
2022-09-15	09:42:46	3.98922	789.611	1	83
2022-09-15	09:42:46	4.42525	794.036	1	84
2022-09-15	09:42:46	4.45054	798.487	1	85
2022-09-15	09:42:47	4.25192	802.739	1	86
2022-09-15	09:42:47	3.95167	806.69	1	87
2022-09-15	09:42:47	3.86983	810.56	1	88
2022-09-15	09:42:47	3.6363	814.197	1	89
2022-09-15	09:42:48	3.52439	817.721	1	90
2022-09-15	09:42:48	3.35777	821.079	1	91
2022-09-15	09:42:48	3.09777	824.176	1	92
2022-09-15	09:42:48	3.10357	827.28	1	93
2022-09-15	09:42:49	3.20174	830.482	1	94
2022-09-15	09:42:49	3.07049	833.552	1	95
2022-09-15	09:42:49	2.98607	836.538	FALSE	95
2022-09-15	09:42:50	2.96047	839.499	FALSE	95
2022-09-15	09:42:50	2.84062	842.339	FALSE	95
2022-09-15	09:42:50	2.93563	845.275	FALSE	95
2022-09-15	09:42:50	2.97105	848.246	FALSE	95
2022-09-15	09:42:51	2.64469	850.891	FALSE	95
2022-09-15	09:42:51	2.742	853.633	FALSE	95
2022-09-15	09:42:51	2.81396	856.447	FALSE	95
2022-09-15	09:42:51	2.42184	858.869	FALSE	95
2022-09-15	09:42:52	2.35441	861.223	FALSE	95
2022-09-15	09:42:52	3.34001	864.563	1	96
2022-09-15	09:42:52	3.3024	867.865	1	97
2022-09-15	09:42:52	3.31523	871.181	1	98
2022-09-15	09:42:53	3.40123	874.582	1	99
2022-09-15	09:42:53	3.12052	877.702	1	100
2022-09-15	09:42:53	3.00225	880.705	1	101
2022-09-15	09:42:54	2.99421	883.699	FALSE	101
2022-09-15	09:42:54	3.07116	886.77	1	102
2022-09-15	09:42:54	3.09335	889.863	1	103
2022-09-15	09:42:54	3.04164	892.905	1	104
2022-09-15	09:42:55	3.00327	895.908	1	105
2022-09-15	09:42:55	2.9964	898.905	FALSE	105
2022-09-15	09:42:55	3.00368	901.908	1	106
2022-09-15	09:42:55	3.00261	904.911	1	107
2022-09-15	09:42:56	2.92444	907.835	FALSE	107
2022-09-15	09:42:56	2.88408	910.719	FALSE	107
2022-09-15	09:42:56	2.89513	913.615	FALSE	107
2022-09-15	09:42:56	2.928	916.543	FALSE	107
2022-09-15	09:42:57	2.88317	919.426	FALSE	107
2022-09-15	09:42:57	2.81818	922.244	FALSE	107
2022-09-15	09:42:57	2.71228	924.956	FALSE	107
2022-09-15	09:42:58	2.67584	927.632	FALSE	107
2022-09-15	09:42:58	3.07599	930.708	1	108
2022-09-15	09:42:58	3.03192	933.74	1	109
2022-09-15	09:42:58	2.90968	936.65	FALSE	109
2022-09-15	09:42:59	2.371	939.021	FALSE	109
2022-09-15	09:42:59	2.23462	941.255	FALSE	109
2022-09-15	09:42:59	2.50902	943.764	FALSE	109
2022-09-15	09:42:59	2.9248	946.689	FALSE	109
2022-09-15	09:43:00	2.21859	948.908	FALSE	109
2022-09-15	09:43:00	2.1307	951.038	FALSE	109
2022-09-15	09:43:00	1.58429	952.623	FALSE	109
2022-09-15	09:43:00	2.82765	955.45	FALSE	109
2022-09-15	09:43:01	2.62103	958.071	FALSE	109
2022-09-15	09:43:01	2.28724	960.359	FALSE	109
2022-09-15	09:43:01	2.39223	962.751	FALSE	109
2022-09-15	09:43:02	2.39579	965.147	FALSE	109
2022-09-15	09:43:02	2.20251	967.349	FALSE	109
2022-09-15	09:43:02	2.21284	969.562	FALSE	109
2022-09-15	09:43:02	2.16602	971.728	FALSE	109
2022-09-15	09:43:03	2.24067	973.969	FALSE	109
2022-09-15	09:43:03	2.29452	976.263	FALSE	109
2022-09-15	09:43:03	2.25772	978.521	FALSE	109
2022-09-15	09:43:03	2.21314	980.734	FALSE	109
2022-09-15	09:43:04	2.14505	982.879	FALSE	109
2022-09-15	09:43:04	2.10887	984.988	FALSE	109
2022-09-15	09:43:04	2.12134	987.109	FALSE	109
2022-09-15	09:43:04	2.16276	989.272	FALSE	109
2022-09-15	09:43:05	2.13228	991.404	FALSE	109
2022-09-15	09:43:05	2.19426	993.599	FALSE	109
2022-09-15	09:43:05	2.25803	995.857	FALSE	109
2022-09-15	09:43:06	2.20291	998.06	FALSE	109
2022-09-15	09:43:06	2.05375	1000.11	FALSE	109
2022-09-15	09:43:06	2.07976	1002.19	FALSE	109
2022-09-15	09:43:06	1.91503	1004.11	FALSE	109
2022-09-15	09:43:07	1.96602	1006.07	FALSE	109
2022-09-15	09:43:07	1.9965	1008.07	FALSE	109
2022-09-15	09:43:07	2.07976	1010.15	FALSE	109
2022-09-15	09:43:07	2.14668	1012.3	FALSE	109
2022-09-15	09:43:08	1.53625	1013.83	FALSE	109
2022-09-15	09:43:08	1.39584	1015.23	FALSE	109
2022-09-15	09:43:08	0.672176	1015.9	FALSE	109
2022-09-15	09:43:08	0.425611	1016.33	FALSE	109
2022-09-15	09:43:09	0.489428	1016.82	FALSE	109
2022-09-15	09:43:09	0.297367	1017.11	FALSE	109
2022-09-15	09:43:09	0.997214	1018.11	FALSE	109
2022-09-15	09:43:10	0.884745	1019	FALSE	109
2022-09-15	09:43:10	4.90795	1023.9	1	110
2022-09-15	09:43:10	15.293	1039.2	1	111
2022-09-15	09:43:10	8.10749	1047.3	1	112
2022-09-15	09:43:11	2.56871	1049.87	FALSE	112
2022-09-15	09:43:11	3.77609	1053.65	1	113
2022-09-15	09:43:11	5.79014	1059.44	1	114
2022-09-15	09:43:11	4.78235	1064.22	1	115
2022-09-15	09:43:12	1.42943	1065.65	FALSE	115
2022-09-15	09:43:12	2.44536	1068.1	FALSE	115
2022-09-15	09:43:12	5.94026	1074.04	1	116
2022-09-15	09:43:12	9.61772	1083.65	1	117
2022-09-15	09:43:13	5.21446	1088.87	1	118
2022-09-15	09:43:13	4.17355	1093.04	1	119
2022-09-15	09:43:13	1.19131	1094.23	FALSE	119
2022-09-15	09:43:14	0.736501	1094.97	FALSE	119
2022-09-15	09:43:14	0.736807	1095.71	FALSE	119
2022-09-15	09:43:14	0.32154	1096.03	FALSE	119
2022-09-15	09:43:14	0.129987	1096.16	FALSE	119
2022-09-15	09:43:15	0.366578	1096.52	FALSE	119
2022-09-15	09:43:15	0.137774	1096.66	FALSE	119
2022-09-15	09:43:15	0.288715	1096.95	FALSE	119
2022-09-15	09:43:15	0.128664	1097.08	FALSE	119
2022-09-15	09:43:16	0.138842	1097.22	FALSE	119
2022-09-15	09:43:16	-0.120038	1097.22	FALSE	119
2022-09-15	09:43:16	-0.106552	1097.22	FALSE	119
2022-09-15	09:43:16	-0.0708267	1097.22	FALSE	119
2022-09-15	09:43:17	0.0800129	1097.3	FALSE	119
2022-09-15	09:43:17	-0.0184603	1097.3	FALSE	119
2022-09-15	09:43:17	-0.149758	1097.3	FALSE	119
2022-09-15	09:43:18	-0.219122	1097.3	FALSE	119
2022-09-15	09:43:18	0.0584353	1097.36	FALSE	119
2022-09-15	09:43:18	0.174517	1097.53	FALSE	119
2022-09-15	09:43:18	0.00332086	1097.54	FALSE	119
2022-09-15	09:43:19	0.109987	1097.65	FALSE	119
2022-09-15	09:43:19	0.0903946	1097.74	FALSE	119
2022-09-15	09:43:19	0.13355	1097.87	FALSE	119
2022-09-15	09:43:19	-0.0222771	1097.87	FALSE	119
2022-09-15	09:43:20	0.0920231	1097.96	FALSE	119
2022-09-15	09:43:20	0.103677	1098.06	FALSE	119
2022-09-15	09:43:20	0.172379	1098.24	FALSE	119
2022-09-15	09:43:20	0.0378247	1098.28	FALSE	119
2022-09-15	09:43:21	0.31528	1098.59	FALSE	119
2022-09-15	09:43:21	0.392532	1098.98	FALSE	119
2022-09-15	09:43:21	0.386171	1099.37	FALSE	119
2022-09-15	09:43:21	0.389122	1099.76	FALSE	119
2022-09-15	09:43:22	0.406527	1100.16	FALSE	119
2022-09-15	09:43:22	0.180216	1100.34	FALSE	119
2022-09-15	09:43:22	0.269682	1100.61	FALSE	119
2022-09-15	09:43:23	0.239962	1100.85	FALSE	119
2022-09-15	09:43:23	0.290954	1101.15	FALSE	119
2022-09-15	09:43:23	0.351056	1101.5	FALSE	119
2022-09-15	09:43:23	0.406476	1101.9	FALSE	119
2022-09-15	09:43:24	0.26444	1102.17	FALSE	119
2022-09-15	09:43:24	0.425305	1102.59	FALSE	119
2022-09-15	09:43:24	0.206272	1102.8	FALSE	119
2022-09-15	09:43:24	0.429733	1103.23	FALSE	119
2022-09-15	09:43:25	0.138639	1103.37	FALSE	119
2022-09-15	09:43:25	0.386832	1103.75	FALSE	119
2022-09-15	09:43:25	0.212786	1103.97	FALSE	119
2022-09-15	09:43:25	0.224084	1104.19	FALSE	119
2022-09-15	09:43:26	0.0756873	1104.27	FALSE	119
2022-09-15	09:43:26	0.284949	1104.55	FALSE	119
2022-09-15	09:43:26	0.267443	1104.82	FALSE	119
2022-09-15	09:43:27	0.177519	1105	FALSE	119
2022-09-15	09:43:27	0.336196	1105.33	FALSE	119
2022-09-15	09:43:27	0.280064	1105.61	FALSE	119
2022-09-15	09:43:27	0.815636	1106.43	FALSE	119
2022-09-15	09:43:28	0.429631	1106.86	FALSE	119
2022-09-15	09:43:28	0.516399	1107.37	FALSE	119
2022-09-15	09:43:28	0.170547	1107.55	FALSE	119
2022-09-15	09:43:28	0.402812	1107.95	FALSE	119
2022-09-15	09:43:29	0.193244	1108.14	FALSE	119
2022-09-15	09:43:29	0.228664	1108.37	FALSE	119
2022-09-15	09:43:29	0.0481046	1108.42	FALSE	119
2022-09-15	09:43:29	0.0545676	1108.47	FALSE	119
2022-09-15	09:43:30	0.00830812	1108.48	FALSE	119
2022-09-15	09:43:30	0.0346185	1108.52	FALSE	119
2022-09-15	09:43:30	-0.000292388	1108.52	FALSE	119
2022-09-15	09:43:31	-0.0248216	1108.52	FALSE	119
2022-09-15	09:43:31	0.0338043	1108.55	FALSE	119
2022-09-15	09:43:31	-0.0674679	1108.55	FALSE	119
2022-09-15	09:43:31	0.105204	1108.65	FALSE	119
2022-09-15	09:43:32	-0.0833967	1108.65	FALSE	119
2022-09-15	09:43:32	0.109021	1108.76	FALSE	119
2022-09-15	09:43:32	0.11757	1108.88	FALSE	119
2022-09-15	09:43:32	0.558181	1109.44	FALSE	119
2022-09-15	09:43:33	0.283015	1109.72	FALSE	119
2022-09-15	09:43:33	0.552227	1110.27	FALSE	119
2022-09-15	09:43:33	0.589071	1110.86	FALSE	119
2022-09-15	09:43:33	3.27467	1114.14	1	120
2022-09-15	09:43:34	0.658842	1114.8	FALSE	120
2022-09-15	09:43:34	1.41655	1116.21	FALSE	120
2022-09-15	09:43:34	0.677672	1116.89	FALSE	120
2022-09-15	09:43:35	0.597214	1117.49	FALSE	120
2022-09-15	09:43:35	0.877468	1118.37	FALSE	120
2022-09-15	09:43:35	0.597825	1118.96	FALSE	120
2022-09-15	09:43:35	0.6364	1119.6	FALSE	120
2022-09-15	09:43:36	0.575433	1120.18	FALSE	120
2022-09-15	09:43:36	0.269428	1120.45	FALSE	120
2022-09-15	09:43:36	0.71813	1121.16	FALSE	120
2022-09-15	09:43:36	0.183626	1121.35	FALSE	120
2022-09-15	09:43:37	0.661082	1122.01	FALSE	120
2022-09-15	09:43:37	0.550852	1122.56	FALSE	120
2022-09-15	09:43:37	0.516807	1123.08	FALSE	120
2022-09-15	09:43:37	0.69416	1123.77	FALSE	120
2022-09-15	09:43:38	0.46673	1124.24	FALSE	120
2022-09-15	09:43:38	0.556552	1124.79	FALSE	120
2022-09-15	09:43:38	0.389733	1125.18	FALSE	120
2022-09-15	09:43:39	0.796094	1125.98	FALSE	120
2022-09-15	09:43:39	0.354873	1126.33	FALSE	120
2022-09-15	09:43:39	0.563371	1126.9	FALSE	120
2022-09-15	09:43:39	0.372125	1127.27	FALSE	120
2022-09-15	09:43:40	0.57584	1127.85	FALSE	120
2022-09-15	09:43:40	0.464695	1128.31	FALSE	120
2022-09-15	09:43:40	0.584186	1128.89	FALSE	120
2022-09-15	09:43:40	0.658028	1129.55	FALSE	120
2022-09-15	09:43:41	0.669122	1130.22	FALSE	120
2022-09-15	09:43:41	0.724237	1130.95	FALSE	120
2022-09-15	09:43:41	1.29329	1132.24	FALSE	120
2022-09-15	09:43:41	0.50729	1132.75	FALSE	120
2022-09-15	09:43:42	0.721946	1133.47	FALSE	120
2022-09-15	09:43:42	1.09289	1134.56	FALSE	120
2022-09-15	09:43:42	0.297112	1134.86	FALSE	120
2022-09-15	09:43:43	0.897163	1135.75	FALSE	120
2022-09-15	09:43:43	0.434873	1136.19	FALSE	120
2022-09-15	09:43:43	0.603117	1136.79	FALSE	120
2022-09-15	09:43:43	0.658842	1137.45	FALSE	120
2022-09-15	09:43:44	0.503015	1137.95	FALSE	120
2022-09-15	09:43:44	0.471819	1138.43	FALSE	120
2022-09-15	09:43:44	0.402099	1138.83	FALSE	120
2022-09-15	09:43:44	0.380624	1139.21	FALSE	120
2022-09-15	09:43:45	0.459402	1139.67	FALSE	120
2022-09-15	09:43:45	0.543219	1140.21	FALSE	120
2022-09-15	09:43:45	0.648104	1140.86	FALSE	120
2022-09-15	09:43:45	0.766374	1141.63	FALSE	120
2022-09-15	09:43:46	0.989936	1142.62	FALSE	120
2022-09-15	09:43:46	1.09696	1143.71	FALSE	120
2022-09-15	09:43:46	2.41487	1146.13	FALSE	120
2022-09-15	09:43:47	2.58673	1148.71	FALSE	120
2022-09-15	09:43:47	5.55925	1154.27	1	121
2022-09-15	09:43:47	6.73421	1161.01	1	122
2022-09-15	09:43:47	10.6928	1171.7	1	123
2022-09-15	09:43:48	12.0356	1183.74	1	124
2022-09-15	09:43:48	12.7694	1196.51	1	125
2022-09-15	09:43:48	11.7085	1208.21	1	126
2022-09-15	09:43:48	10.5718	1218.79	1	127
2022-09-15	09:43:49	9.02372	1227.81	1	128
2022-09-15	09:43:49	6.88958	1234.7	1	129
2022-09-15	09:43:49	7.32856	1242.03	1	130
2022-09-15	09:43:49	8.29044	1250.32	1	131
2022-09-15	09:43:50	9.65049	1259.97	1	132
2022-09-15	09:43:50	6.77355	1266.74	1	133
2022-09-15	09:43:50	7.1338	1273.88	1	134
2022-09-15	09:43:50	7.59589	1281.47	1	135
2022-09-15	09:43:51	6.84403	1288.32	1	136
2022-09-15	09:43:51	5.28444	1293.6	1	137
2022-09-15	09:43:51	4.32937	1297.93	1	138
2022-09-15	09:43:52	3.94266	1301.87	1	139
2022-09-15	09:43:52	3.54805	1305.42	1	140
2022-09-15	09:43:52	3.71116	1309.13	1	141
2022-09-15	09:43:52	4.21029	1313.34	1	142
2022-09-15	09:43:53	3.66683	1317.01	1	143
2022-09-15	09:43:53	4.16556	1321.17	1	144
2022-09-15	09:43:53	4.63192	1325.81	1	145
2022-09-15	09:43:53	4.69238	1330.5	1	146
2022-09-15	09:43:54	3.73482	1334.23	1	147
2022-09-15	09:43:54	3.74953	1337.98	1	148
2022-09-15	09:43:54	1.44047	1339.42	FALSE	148
2022-09-15	09:43:54	0.956756	1340.38	FALSE	148
2022-09-15	09:43:55	0.245611	1340.63	FALSE	148
2022-09-15	09:43:55	0.142252	1340.77	FALSE	148
2022-09-15	09:43:55	0.0667814	1340.84	FALSE	148
2022-09-15	09:43:56	-0.0144908	1340.84	FALSE	148
2022-09-15	09:43:56	0.0757381	1340.91	FALSE	148
2022-09-15	09:43:56	0.0325829	1340.94	FALSE	148
2022-09-15	09:43:56	1.02449	1341.97	FALSE	148
2022-09-15	09:43:57	6.48515	1348.45	1	149
2022-09-15	09:43:57	8.22499	1356.68	1	150
2022-09-15	09:43:57	4.9821	1361.66	1	151
2022-09-15	09:43:57	4.82658	1366.49	1	152
2022-09-15	09:43:58	1.81391	1368.3	FALSE	152
2022-09-15	09:43:58	2.47859	1370.78	FALSE	152
2022-09-15	09:43:58	2.21589	1373	FALSE	152
2022-09-15	09:43:58	3.67502	1376.67	1	153
2022-09-15	09:43:59	2.89212	1379.56	FALSE	153
2022-09-15	09:43:59	3.40505	1382.97	1	154
2022-09-15	09:43:59	1.94312	1384.91	FALSE	154
2022-09-15	09:44:00	2.22505	1387.14	FALSE	154
2022-09-15	09:44:00	1.76983	1388.91	FALSE	154
2022-09-15	09:44:00	1.63879	1390.54	FALSE	154
2022-09-15	09:44:00	1.29742	1391.84	FALSE	154
2022-09-15	09:44:01	0.930903	1392.77	FALSE	154
2022-09-15	09:44:01	0.945662	1393.72	FALSE	154
2022-09-15	09:44:01	0.711972	1394.43	FALSE	154
2022-09-15	09:44:01	0.627799	1395.06	FALSE	154
2022-09-15	09:44:02	1.68464	1396.74	FALSE	154
2022-09-15	09:44:02	1.40363	1398.15	FALSE	154
2022-09-15	09:44:02	2.6537	1400.8	FALSE	154
2022-09-15	09:44:02	4.72317	1405.52	1	155
2022-09-15	09:44:03	5.56983	1411.09	1	156
2022-09-15	09:44:03	7.77258	1418.87	1	157
2022-09-15	09:44:03	8.05502	1426.92	1	158
2022-09-15	09:44:04	3.97803	1430.9	1	159
2022-09-15	09:44:04	6.02408	1436.92	1	160
2022-09-15	09:44:04	5.23182	1442.15	1	161
2022-09-15	09:44:04	2.7306	1444.89	FALSE	161
2022-09-15	09:44:05	2.72037	1447.61	FALSE	161
2022-09-15	09:44:05	1.36785	1448.97	FALSE	161
2022-09-15	09:44:05	0.989835	1449.96	FALSE	161
2022-09-15	09:44:05	0.876756	1450.84	FALSE	161
2022-09-15	09:44:06	0.971718	1451.81	FALSE	161
2022-09-15	09:44:06	0.994568	1452.81	FALSE	161
2022-09-15	09:44:06	1.03497	1453.84	FALSE	161
2022-09-15	09:44:06	0.983779	1454.83	FALSE	161
2022-09-15	09:44:07	0.907748	1455.73	FALSE	161
2022-09-15	09:44:07	0.88042	1456.61	FALSE	161
2022-09-15	09:44:07	0.728817	1457.34	FALSE	161
2022-09-15	09:44:08	0.782506	1458.12	FALSE	161
2022-09-15	09:44:08	0.828359	1458.95	FALSE	161
2022-09-15	09:44:08	0.880878	1459.83	FALSE	161
2022-09-15	09:44:08	0.947341	1460.78	FALSE	161
2022-09-15	09:44:09	0.91014	1461.69	FALSE	161
2022-09-15	09:44:09	0.990242	1462.68	FALSE	161
2022-09-15	09:44:09	1.00388	1463.69	FALSE	161
2022-09-15	09:44:09	1.07788	1464.76	FALSE	161
2022-09-15	09:44:10	1.01655	1465.78	FALSE	161
2022-09-15	09:44:10	1.05996	1466.84	FALSE	161
2022-09-15	09:44:10	1.05676	1467.9	FALSE	161
2022-09-15	09:44:10	0.837417	1468.73	FALSE	161
2022-09-15	09:44:11	0.711921	1469.45	FALSE	161
2022-09-15	09:44:11	0.521743	1469.97	FALSE	161
2022-09-15	09:44:11	0.455433	1470.42	FALSE	161
2022-09-15	09:44:12	0.408155	1470.83	FALSE	161
2022-09-15	09:44:12	0.379402	1471.21	FALSE	161
2022-09-15	09:44:12	0.410344	1471.62	FALSE	161
2022-09-15	09:44:12	0.769835	1472.39	FALSE	161
2022-09-15	09:44:13	1.26424	1473.66	FALSE	161
2022-09-15	09:44:13	2.55909	1476.21	FALSE	161
2022-09-15	09:44:13	2.78943	1479	FALSE	161
2022-09-15	09:44:13	2.81502	1481.82	FALSE	161
2022-09-15	09:44:14	0.960674	1482.78	FALSE	161
2022-09-15	09:44:14	0.705255	1483.48	FALSE	161
2022-09-15	09:44:14	0.444389	1483.93	FALSE	161
2022-09-15	09:44:14	0.318334	1484.25	FALSE	161
2022-09-15	09:44:15	0.302506	1484.55	FALSE	161
2022-09-15	09:44:15	0.217214	1484.77	FALSE	161
2022-09-15	09:44:15	-0.104872	1484.77	FALSE	161
2022-09-15	09:44:16	-0.140038	1484.77	FALSE	161
2022-09-15	09:44:16	-0.439631	1484.77	FALSE	161
2022-09-15	09:44:16	-0.00395648	1484.77	FALSE	161
2022-09-15	09:44:16	-0.243651	1484.77	FALSE	161
2022-09-15	09:44:17	-0.265636	1484.77	FALSE	161
2022-09-15	09:44:17	-0.332251	1484.77	FALSE	161
2022-09-15	09:44:17	-0.396577	1484.77	FALSE	161
2022-09-15	09:44:17	-0.228231	1484.77	FALSE	161
2022-09-15	09:44:18	0.27701	1485.04	FALSE	161
2022-09-15	09:44:18	0.252379	1485.3	FALSE	161
2022-09-15	09:44:18	-0.154847	1485.3	FALSE	161
2022-09-15	09:44:18	-0.104669	1485.3	FALSE	161
2022-09-15	09:44:19	-0.163447	1485.3	FALSE	161
2022-09-15	09:44:19	-0.0786638	1485.3	FALSE	161
2022-09-15	09:44:19	0.28271	1485.58	FALSE	161
2022-09-15	09:44:19	0.58673	1486.17	FALSE	161
2022-09-15	09:44:20	0.740267	1486.91	FALSE	161
2022-09-15	09:44:20	0.240013	1487.15	FALSE	161
2022-09-15	09:44:20	0.541692	1487.69	FALSE	161
2022-09-15	09:44:21	0.51528	1488.2	FALSE	161
2022-09-15	09:44:21	0.300216	1488.5	FALSE	161
2022-09-15	09:44:21	0.245051	1488.75	FALSE	161
2022-09-15	09:44:21	0.242761	1488.99	FALSE	161
2022-09-15	09:44:22	0.0895295	1489.08	FALSE	161
2022-09-15	09:44:22	0.152278	1489.23	FALSE	161
2022-09-15	09:44:22	0.207188	1489.44	FALSE	161
2022-09-15	09:44:22	-0.0445163	1489.44	FALSE	161
2022-09-15	09:44:23	-0.241666	1489.44	FALSE	161
2022-09-15	09:44:23	-0.281005	1489.44	FALSE	161
2022-09-15	09:44:23	-0.340852	1489.44	FALSE	161
2022-09-15	09:44:23	-0.448842	1489.44	FALSE	161
2022-09-15	09:44:24	-0.575356	1489.44	FALSE	161
2022-09-15	09:44:24	-0.467722	1489.44	FALSE	161
2022-09-15	09:44:24	-0.571132	1489.44	FALSE	161
2022-09-15	09:44:25	-0.581768	1489.44	FALSE	161
2022-09-15	09:44:25	-0.623447	1489.44	FALSE	161
2022-09-15	09:44:25	-0.466552	1489.44	FALSE	161
2022-09-15	09:44:25	-0.50701	1489.44	FALSE	161
2022-09-15	09:44:26	-0.576068	1489.44	FALSE	161
2022-09-15	09:44:26	-0.611335	1489.44	FALSE	161
2022-09-15	09:44:26	-0.550012	1489.44	FALSE	161
2022-09-15	09:44:26	-0.678765	1489.44	FALSE	161
2022-09-15	09:44:27	-0.686042	1489.44	FALSE	161
2022-09-15	09:44:27	-0.660903	1489.44	FALSE	161
2022-09-15	09:44:27	-0.666195	1489.44	FALSE	161
2022-09-15	09:44:27	-0.697849	1489.44	FALSE	161
2022-09-15	09:44:28	-0.767315	1489.44	FALSE	161
2022-09-15	09:44:28	-0.678969	1489.44	FALSE	161
2022-09-15	09:44:28	-0.727671	1489.44	FALSE	161
2022-09-15	09:44:29	-0.561819	1489.44	FALSE	161
2022-09-15	09:44:29	-0.721462	1489.44	FALSE	161
2022-09-15	09:44:29	-0.534287	1489.44	FALSE	161
2022-09-15	09:44:29	-0.595865	1489.44	FALSE	161
2022-09-15	09:44:30	-0.693371	1489.44	FALSE	161
2022-09-15	09:44:30	-0.706806	1489.44	FALSE	161
2022-09-15	09:44:30	-0.618613	1489.44	FALSE	161
2022-09-15	09:44:30	-0.764719	1489.44	FALSE	161
2022-09-15	09:44:31	-0.649554	1489.44	FALSE	161
2022-09-15	09:44:31	-0.787569	1489.44	FALSE	161
2022-09-15	09:44:31	-0.580241	1489.44	FALSE	161
2022-09-15	09:44:31	-0.598867	1489.44	FALSE	161
2022-09-15	09:44:32	-0.542379	1489.44	FALSE	161
2022-09-15	09:44:32	-0.296832	1489.44	FALSE	161
2022-09-15	09:44:32	-0.262582	1489.44	FALSE	161
2022-09-15	09:44:33	-0.238409	1489.44	FALSE	161
2022-09-15	09:44:33	-0.365178	1489.44	FALSE	161
2022-09-15	09:44:33	-0.263397	1489.44	FALSE	161
2022-09-15	09:44:33	-0.439173	1489.44	FALSE	161
2022-09-15	09:44:34	-0.519732	1489.44	FALSE	161
2022-09-15	09:44:34	-0.597697	1489.44	FALSE	161
2022-09-15	09:44:34	-0.496374	1489.44	FALSE	161
2022-09-15	09:44:34	-0.545941	1489.44	FALSE	161
2022-09-15	09:44:35	-0.514796	1489.44	FALSE	161
2022-09-15	09:44:35	-0.424974	1489.44	FALSE	161
2022-09-15	09:44:35	-0.450826	1489.44	FALSE	161
2022-09-15	09:44:35	-0.426348	1489.44	FALSE	161
2022-09-15	09:44:36	-0.532913	1489.44	FALSE	161
2022-09-15	09:44:36	-0.41388	1489.44	FALSE	161
2022-09-15	09:44:36	-0.294542	1489.44	FALSE	161
2022-09-15	09:44:37	-0.351997	1489.44	FALSE	161
2022-09-15	09:44:37	0.00647607	1489.45	FALSE	161
2022-09-15	09:44:37	0.695178	1490.14	FALSE	161
2022-09-15	09:44:37	2.08016	1492.22	FALSE	161
2022-09-15	09:44:38	4.1938	1496.42	1	162
2022-09-15	09:44:38	1.66398	1498.08	FALSE	162
2022-09-15	09:44:38	1.36291	1499.44	FALSE	162
2022-09-15	09:44:38	0.570038	1500.01	FALSE	162
2022-09-15	09:44:39	0.32729	1500.34	FALSE	162
2022-09-15	09:44:39	0.237112	1500.58	FALSE	162
2022-09-15	09:44:39	0.285051	1500.86	FALSE	162
2022-09-15	09:44:39	0.429631	1501.29	FALSE	162
2022-09-15	09:44:40	0.382557	1501.67	FALSE	162
2022-09-15	09:44:40	0.518282	1502.19	FALSE	162
2022-09-15	09:44:40	0.350751	1502.54	FALSE	162
2022-09-15	09:44:41	0.412685	1502.96	FALSE	162
2022-09-15	09:44:41	0.314771	1503.27	FALSE	162
2022-09-15	09:44:41	0.226221	1503.5	FALSE	162
2022-09-15	09:44:41	0.273702	1503.77	FALSE	162
2022-09-15	09:44:42	0.548868	1504.32	FALSE	162
2022-09-15	09:44:42	0.347646	1504.67	FALSE	162
2022-09-15	09:44:42	0.427087	1505.09	FALSE	162
2022-09-15	09:44:42	0.384898	1505.48	FALSE	162
2022-09-15	09:44:43	0.667799	1506.15	FALSE	162
2022-09-15	09:44:43	0.372786	1506.52	FALSE	162
2022-09-15	09:44:43	0.624033	1507.14	FALSE	162
2022-09-15	09:44:43	0.398181	1507.54	FALSE	162
2022-09-15	09:44:44	0.783015	1508.33	FALSE	162
2022-09-15	09:44:44	0.585661	1508.91	FALSE	162
2022-09-15	09:44:44	2.32057	1511.23	FALSE	162
2022-09-15	09:44:44	2.10642	1513.34	FALSE	162
2022-09-15	09:44:45	2.16871	1515.51	FALSE	162
2022-09-15	09:44:45	0.613652	1516.12	FALSE	162
2022-09-15	09:44:45	0.536603	1516.66	FALSE	162
2022-09-15	09:44:46	0.540522	1517.2	FALSE	162
2022-09-15	09:44:46	0.416756	1517.61	FALSE	162
2022-09-15	09:44:46	0.449835	1518.06	FALSE	162
2022-09-15	09:44:46	0.497621	1518.56	FALSE	162
2022-09-15	09:44:47	0.298384	1518.86	FALSE	162
2022-09-15	09:44:47	0.496399	1519.36	FALSE	162
2022-09-15	09:44:47	0.544491	1519.9	FALSE	162
2022-09-15	09:44:47	0.517723	1520.42	FALSE	162
2022-09-15	09:44:48	0.490547	1520.91	FALSE	162
2022-09-15	09:44:48	0.700827	1521.61	FALSE	162
2022-09-15	09:44:48	0.738639	1522.35	FALSE	162
2022-09-15	09:44:48	0.638842	1522.99	FALSE	162
2022-09-15	09:44:49	0.407952	1523.4	FALSE	162
2022-09-15	09:44:49	0.429122	1523.82	FALSE	162
2022-09-15	09:44:49	0.751819	1524.58	FALSE	162
2022-09-15	09:44:50	1.20581	1525.78	FALSE	162
2022-09-15	09:44:50	1.05375	1526.84	FALSE	162
2022-09-15	09:44:50	0.653448	1527.49	FALSE	162
2022-09-15	09:44:50	0.741234	1528.23	FALSE	162
2022-09-15	09:44:51	0.876247	1529.11	FALSE	162
2022-09-15	09:44:51	0.924949	1530.03	FALSE	162
2022-09-15	09:44:51	0.906628	1530.94	FALSE	162
2022-09-15	09:44:51	0.546883	1531.49	FALSE	162
2022-09-15	09:44:52	0.544491	1532.03	FALSE	162

## Sheet: Klutz_harness_202291593924
						**GoPro Fitting: 929
2022-09-15	09:39:25	0.120369
2022-09-15	09:39:25	0.172379
2022-09-15	09:39:25	0.17986
2022-09-15	09:39:25	0.196909
2022-09-15	09:39:25	0.161183
2022-09-15	09:39:26	-0.0169845
2022-09-15	09:39:26	0.111107
2022-09-15	09:39:26	0.0304455
2022-09-15	09:39:27	0.0555855
2022-09-15	09:39:27	0.134008
2022-09-15	09:39:27	0.0150765
2022-09-15	09:39:27	0.188919
2022-09-15	09:39:28	0.164491
2022-09-15	09:39:28	0.112634
2022-09-15	09:39:28	0.365865
2022-09-15	09:39:28	0.538232
2022-09-15	09:39:29	0.22729
2022-09-15	09:39:29	0.222405
2022-09-15	09:39:29	0.270191
2022-09-15	09:39:29	0.223168
2022-09-15	09:39:30	0.24958
2022-09-15	09:39:30	0.114924
2022-09-15	09:39:30	0.249682
2022-09-15	09:39:31	0.190089
2022-09-15	09:39:31	0.291972
2022-09-15	09:39:31	0.372176
2022-09-15	09:39:31	0.304695
2022-09-15	09:39:32	0.309886
2022-09-15	09:39:32	0.370649
2022-09-15	09:39:32	0.346629
2022-09-15	09:39:32	0.467901
2022-09-15	09:39:33	0.338639
2022-09-15	09:39:33	0.32673
2022-09-15	09:39:33	0.289733
2022-09-15	09:39:33	0.275331
2022-09-15	09:39:34	0.260929
2022-09-15	09:39:34	0.245763
2022-09-15	09:39:34	0.258944
2022-09-15	09:39:35	0.256196
2022-09-15	09:39:35	0.27813
2022-09-15	09:39:35	0.274924
2022-09-15	09:39:35	0.250344
2022-09-15	09:39:36	0.283524
2022-09-15	09:39:36	0.363728
2022-09-15	09:39:36	0.407748
2022-09-15	09:39:36	0.400064
2022-09-15	09:39:37	0.373652
2022-09-15	09:39:37	0.368257
2022-09-15	09:39:37	0.355534
2022-09-15	09:39:37	0.355178
2022-09-15	09:39:38	0.340165
2022-09-15	09:39:38	0.334771
2022-09-15	09:39:38	0.337621
2022-09-15	09:39:39	0.337519
2022-09-15	09:39:39	0.321998
2022-09-15	09:39:39	0.309682
2022-09-15	09:39:39	0.345255
2022-09-15	09:39:40	0.364389
2022-09-15	09:39:40	0.402048
2022-09-15	09:39:40	0.373244
2022-09-15	09:39:40	0.382863
2022-09-15	09:39:41	0.363219
2022-09-15	09:39:41	0.324084
2022-09-15	09:39:41	0.298639
2022-09-15	09:39:41	0.293601
2022-09-15	09:39:42	0.27986
2022-09-15	09:39:42	0.279504
2022-09-15	09:39:42	0.297519
2022-09-15	09:39:43	0.298028
2022-09-15	09:39:43	0.306476
2022-09-15	09:39:43	0.298588
2022-09-15	09:39:43	0.298842
2022-09-15	09:39:44	0.305051
2022-09-15	09:39:44	0.294364
2022-09-15	09:39:44	0.331463
2022-09-15	09:39:44	0.305916
2022-09-15	09:39:45	0.240471
2022-09-15	09:39:45	0.263728
2022-09-15	09:39:45	0.318181
2022-09-15	09:39:45	0.258893
2022-09-15	09:39:46	1.48866
2022-09-15	09:39:46	1.89274
2022-09-15	09:39:46	1.46622
2022-09-15	09:39:47	0.889326
2022-09-15	09:39:47	0.262506
2022-09-15	09:39:47	0.252684
2022-09-15	09:39:47	0.10098
2022-09-15	09:39:48	0.197926
2022-09-15	09:39:48	0.0632699
2022-09-15	09:39:48	-0.0726587
2022-09-15	09:39:48	0.046018
2022-09-15	09:39:49	0.195076
2022-09-15	09:39:49	0.0516669
2022-09-15	09:39:49	0.446578
2022-09-15	09:39:49	0.325153
2022-09-15	09:39:50	0.322608
2022-09-15	09:39:50	0.111005
2022-09-15	09:39:50	0.428715
2022-09-15	09:39:51	0.343779
2022-09-15	09:39:51	0.154415
2022-09-15	09:39:51	-0.0958648
2022-09-15	09:39:51	-0.452811
2022-09-15	09:39:52	-0.610623
2022-09-15	09:39:52	-0.45159
2022-09-15	09:39:52	-0.433931
2022-09-15	09:39:52	-0.511997
2022-09-15	09:39:53	-0.548384
2022-09-15	09:39:53	-0.67678
2022-09-15	09:39:53	-0.778562
2022-09-15	09:39:53	-0.677137
2022-09-15	09:39:54	-0.498155
2022-09-15	09:39:54	-0.401972
2022-09-15	09:39:54	-0.418002
2022-09-15	09:39:55	-0.121361
2022-09-15	09:39:55	0.325967
2022-09-15	09:39:55	0.339097
2022-09-15	09:39:55	0.181998
2022-09-15	09:39:56	-0.0258903
2022-09-15	09:39:56	-0.125687
2022-09-15	09:39:56	0.151667
2022-09-15	09:39:57	0.0173157
2022-09-15	09:39:57	0.166018
2022-09-15	09:39:57	0.814618
2022-09-15	09:39:57	0.429835
2022-09-15	09:39:57	0.969936
2022-09-15	09:39:58	0.470293
2022-09-15	09:39:58	0.883728
2022-09-15	09:39:58	0.816349
2022-09-15	09:39:59	0.462303
2022-09-15	09:39:59	0.183626
2022-09-15	09:39:59	0.502659
2022-09-15	09:39:59	0.173397
2022-09-15	09:40:00	0.211769
2022-09-15	09:40:00	-0.175356
2022-09-15	09:40:00	-0.508027
2022-09-15	09:40:00	-0.912556
2022-09-15	09:40:01	-1.01042
2022-09-15	09:40:01	-0.964872
2022-09-15	09:40:01	-0.979121
2022-09-15	09:40:01	-1.07454
2022-09-15	09:40:02	-0.869503
2022-09-15	09:40:02	-0.953931
2022-09-15	09:40:02	-0.793778
2022-09-15	09:40:03	-0.930012
2022-09-15	09:40:03	-0.685635
2022-09-15	09:40:03	-0.805941
2022-09-15	09:40:03	-0.740088
2022-09-15	09:40:04	-0.822989
2022-09-15	09:40:04	-0.727671
2022-09-15	09:40:04	-0.733676
2022-09-15	09:40:04	-0.743854
2022-09-15	09:40:05	-0.636271
2022-09-15	09:40:05	-0.342379
2022-09-15	09:40:05	-0.247112
2022-09-15	09:40:05	-0.250369
2022-09-15	09:40:06	-0.010216
2022-09-15	09:40:06	0.298486
2022-09-15	09:40:06	0.912684
2022-09-15	09:40:07	0.515738
2022-09-15	09:40:07	0.26673
2022-09-15	09:40:07	0.21813
2022-09-15	09:40:07	-0.21388
2022-09-15	09:40:08	-0.340699
2022-09-15	09:40:08	-0.42645
2022-09-15	09:40:08	-0.444974
2022-09-15	09:40:08	-0.534796
2022-09-15	09:40:09	-0.425483
2022-09-15	09:40:09	-0.437442
2022-09-15	09:40:09	-0.490827
2022-09-15	09:40:09	-0.475509
2022-09-15	09:40:10	-0.407213
2022-09-15	09:40:10	-0.335101
2022-09-15	09:40:10	-0.363447
2022-09-15	09:40:11	-0.124567
2022-09-15	09:40:11	-0.181157
2022-09-15	09:40:11	-0.0638547
2022-09-15	09:40:11	-0.141819
2022-09-15	09:40:12	0.0963997
2022-09-15	09:40:12	0.109377
2022-09-15	09:40:12	0.0409798
2022-09-15	09:40:12	0.056756
2022-09-15	09:40:13	0.086985
2022-09-15	09:40:13	-0.060445
2022-09-15	09:40:13	-0.389503
2022-09-15	09:40:13	-0.712608
2022-09-15	09:40:14	-0.687875
2022-09-15	09:40:14	-0.727111
2022-09-15	09:40:14	-0.735864
2022-09-15	09:40:15	-0.596577
2022-09-15	09:40:15	-0.602888
2022-09-15	09:40:15	-0.594745
2022-09-15	09:40:15	-0.70991
2022-09-15	09:40:16	-0.607773
2022-09-15	09:40:16	-0.661768
2022-09-15	09:40:16	-0.618409
2022-09-15	09:40:16	-0.461259
2022-09-15	09:40:17	-0.276628
2022-09-15	09:40:17	-0.179224
2022-09-15	09:40:17	-0.245534
2022-09-15	09:40:17	-0.104465
2022-09-15	09:40:18	-0.0279768
2022-09-15	09:40:18	0.0700384
2022-09-15	09:40:18	0.0512597
2022-09-15	09:40:19	0.0271376
2022-09-15	09:40:19	0.505967
2022-09-15	09:40:19	0.880929
2022-09-15	09:40:19	0.764593
2022-09-15	09:40:20	0.510089
2022-09-15	09:40:20	0.501692
2022-09-15	09:40:20	0.268766
2022-09-15	09:40:20	0.427036
2022-09-15	09:40:21	0.297265
2022-09-15	09:40:21	-0.150979
2022-09-15	09:40:21	-0.704567
2022-09-15	09:40:21	-0.820394
2022-09-15	09:40:22	-1.04156
2022-09-15	09:40:22	-0.720088
2022-09-15	09:40:22	-0.651844
2022-09-15	09:40:23	-0.212862
2022-09-15	09:40:23	2.04612
2022-09-15	09:40:23	0.743575
2022-09-15	09:40:23	3.68006
2022-09-15	09:40:24	0.418333
2022-09-15	09:40:24	0.48042
2022-09-15	09:40:24	0.406069
2022-09-15	09:40:25	0.109529
2022-09-15	09:40:25	0.269122
2022-09-15	09:40:25	-0.00690816
2022-09-15	09:40:25	0.0127356
2022-09-15	09:40:25	0.0853056
2022-09-15	09:40:26	-0.0900633
2022-09-15	09:40:26	-0.054389
2022-09-15	09:40:26	-0.158918
2022-09-15	09:40:27	-0.116476
2022-09-15	09:40:27	-0.337493
2022-09-15	09:40:27	-0.169707
2022-09-15	09:40:27	-0.183193
2022-09-15	09:40:28	0.00449134
2022-09-15	09:40:28	0.0722776
2022-09-15	09:40:28	0.00785013
2022-09-15	09:40:28	1.27172
2022-09-15	09:40:29	0.0895804
2022-09-15	09:40:29	0.493346
2022-09-15	09:40:29	0.78215
2022-09-15	09:40:29	0.384797
2022-09-15	09:40:30	1.65192
2022-09-15	09:40:30	0.335076
2022-09-15	09:40:30	0.788766
2022-09-15	09:40:31	1.17996
2022-09-15	09:40:31	0.284593
2022-09-15	09:40:31	2.1306
2022-09-15	09:40:31	0.222456
2022-09-15	09:40:32	0.029275
2022-09-15	09:40:32	0.379606
2022-09-15	09:40:32	-0.135661
2022-09-15	09:40:32	-0.430317
2022-09-15	09:40:33	-0.208282
2022-09-15	09:40:33	0.0582827
2022-09-15	09:40:33	0.26388
2022-09-15	09:40:33	0.275891
2022-09-15	09:40:34	1.11869
2022-09-15	09:40:34	2.66357
2022-09-15	09:40:34	4.01034
2022-09-15	09:40:35	2.64943
2022-09-15	09:40:35	3.60184
2022-09-15	09:40:35	3.17701
2022-09-15	09:40:35	2.8109
2022-09-15	09:40:36	1.93426
2022-09-15	09:40:36	0.908206
2022-09-15	09:40:36	0.723015
2022-09-15	09:40:36	0.884491
2022-09-15	09:40:37	0.943931
2022-09-15	09:40:37	0.660267
2022-09-15	09:40:37	0.454568
2022-09-15	09:40:37	0.483372
2022-09-15	09:40:38	0.663626
2022-09-15	09:40:38	0.665916
2022-09-15	09:40:38	0.666171
2022-09-15	09:40:39	0.8107
2022-09-15	09:40:39	0.50444
2022-09-15	09:40:39	0.447341
2022-09-15	09:40:39	0.445356
2022-09-15	09:40:40	0.413855
2022-09-15	09:40:40	0.369631
2022-09-15	09:40:40	0.397112
2022-09-15	09:40:40	0.408053
2022-09-15	09:40:41	0.458333
2022-09-15	09:40:41	0.388919
2022-09-15	09:40:41	0.539809
2022-09-15	09:40:41	0.498232
2022-09-15	09:40:42	0.451565
2022-09-15	09:40:42	0.450293
2022-09-15	09:40:42	0.448766
2022-09-15	09:40:43	0.383015
2022-09-15	09:40:43	0.340725
2022-09-15	09:40:43	0.388766
2022-09-15	09:40:43	0.489326
2022-09-15	09:40:44	0.534466
2022-09-15	09:40:44	0.613193
2022-09-15	09:40:44	0.66785
2022-09-15	09:40:44	0.510649
2022-09-15	09:40:45	0.398283
2022-09-15	09:40:45	0.346629
2022-09-15	09:40:45	0.284084
2022-09-15	09:40:45	0.296094
2022-09-15	09:40:46	0.292786
2022-09-15	09:40:46	0.290802
2022-09-15	09:40:46	0.286069
2022-09-15	09:40:47	0.447952
2022-09-15	09:40:47	1.06235
2022-09-15	09:40:47	0.379758
2022-09-15	09:40:47	0.206679
2022-09-15	09:40:48	0.188155
2022-09-15	09:40:48	0.0859163
2022-09-15	09:40:48	0.00449134
2022-09-15	09:40:48	-0.099987
2022-09-15	09:40:49	-0.121056
2022-09-15	09:40:49	0.1764
2022-09-15	09:40:49	0.17416
2022-09-15	09:40:49	0.721387
2022-09-15	09:40:50	1.33518
2022-09-15	09:40:50	0.627137
2022-09-15	09:40:50	-0.267722
2022-09-15	09:40:50	-0.20533
2022-09-15	09:40:51	-0.363804
2022-09-15	09:40:51	-0.379987
2022-09-15	09:40:51	0.649987
2022-09-15	09:40:52	6.2024
2022-09-15	09:40:52	8.30459
2022-09-15	09:40:52	6.45981
2022-09-15	09:40:52	4.26978
2022-09-15	09:40:53	2.04347
2022-09-15	09:40:53	0.881641
2022-09-15	09:40:53	0.227901
2022-09-15	09:40:53	0.0680027
2022-09-15	09:40:54	0.129479
2022-09-15	09:40:54	-0.0766282
2022-09-15	09:40:54	0.0394532
2022-09-15	09:40:54	-0.0415646
2022-09-15	09:40:55	-0.202328
2022-09-15	09:40:55	-0.372913
2022-09-15	09:40:55	-0.34645
2022-09-15	09:40:56	-0.398765
2022-09-15	09:40:56	-0.6579
2022-09-15	09:40:56	-0.705076
2022-09-15	09:40:56	-0.888485
2022-09-15	09:40:57	-0.714643
2022-09-15	09:40:57	-0.676322
2022-09-15	09:40:57	-0.645076
2022-09-15	09:40:57	-0.548638
2022-09-15	09:40:58	-0.451997
2022-09-15	09:40:58	-0.239885
2022-09-15	09:40:58	-0.302023
2022-09-15	09:40:58	-0.0346435
2022-09-15	09:40:59	0.0346185
2022-09-15	09:40:59	0.0579773
2022-09-15	09:40:59	0.0326338
2022-09-15	09:41:00	0.519657
2022-09-15	09:41:00	0.410751
2022-09-15	09:41:00	0.382354
2022-09-15	09:41:00	0.687341
2022-09-15	09:41:01	0.695738
2022-09-15	09:41:01	0.483372
2022-09-15	09:41:01	0.486018
2022-09-15	09:41:02	0.302659
2022-09-15	09:41:02	0.172685
2022-09-15	09:41:02	0.418944
2022-09-15	09:41:02	0.556959
2022-09-15	09:41:02	0.497621
2022-09-15	09:41:03	0.486578
2022-09-15	09:41:03	0.388257
2022-09-15	09:41:03	0.424084
2022-09-15	09:41:04	0.444338
2022-09-15	09:41:04	0.399809
2022-09-15	09:41:04	0.528003
2022-09-15	09:41:04	0.633142
2022-09-15	09:41:05	1.04989
2022-09-15	09:41:05	0.692379
2022-09-15	09:41:05	0.636348
2022-09-15	09:41:05	0.628613
2022-09-15	09:41:06	0.647392
2022-09-15	09:41:06	0.541845
2022-09-15	09:41:06	0.527443
2022-09-15	09:41:06	0.541285
2022-09-15	09:41:07	0.554669
2022-09-15	09:41:07	0.585203
2022-09-15	09:41:07	0.588969
2022-09-15	09:41:08	0.596552
2022-09-15	09:41:08	0.661896
2022-09-15	09:41:08	0.594211
2022-09-15	09:41:08	0.526272
2022-09-15	09:41:09	0.50215
2022-09-15	09:41:09	0.533041
2022-09-15	09:41:09	0.641132
2022-09-15	09:41:09	0.749835
2022-09-15	09:41:10	0.912837
2022-09-15	09:41:10	1.11472
2022-09-15	09:41:10	1.43899
2022-09-15	09:41:10	2.76927
2022-09-15	09:41:11	2.71441
2022-09-15	09:41:11	2.14388
2022-09-15	09:41:11	2.02073
2022-09-15	09:41:12	1.11034
2022-09-15	09:41:12	0.802964
2022-09-15	09:41:12	0.800572
2022-09-15	09:41:12	1.1081
2022-09-15	09:41:13	2.33996
2022-09-15	09:41:13	2.7877
2022-09-15	09:41:13	3.00622
2022-09-15	09:41:13	2.80653
2022-09-15	09:41:14	1.98327
2022-09-15	09:41:14	1.56098
2022-09-15	09:41:14	1.07426
2022-09-15	09:41:14	1.63665
2022-09-15	09:41:15	1.44129
2022-09-15	09:41:15	1.09726
2022-09-15	09:41:15	0.759198
2022-09-15	09:41:16	1.03564
2022-09-15	09:41:16	1.1081
2022-09-15	09:41:16	1.00164
2022-09-15	09:41:16	1.15726
2022-09-15	09:41:17	0.832074
2022-09-15	09:41:17	1.16149
2022-09-15	09:41:17	0.947443
2022-09-15	09:41:17	0.677773
2022-09-15	09:41:18	0.591208
2022-09-15	09:41:18	0.719707
2022-09-15	09:41:18	0.602099
2022-09-15	09:41:18	0.726781
2022-09-15	09:41:19	0.621692
2022-09-15	09:41:19	0.65645
2022-09-15	09:41:19	0.60042
2022-09-15	09:41:20	0.613091
2022-09-15	09:41:20	0.632735
2022-09-15	09:41:20	0.6707
2022-09-15	09:41:20	0.681031
2022-09-15	09:41:21	0.667494
2022-09-15	09:41:21	0.719249
2022-09-15	09:41:21	0.737875
2022-09-15	09:41:21	0.623677
2022-09-15	09:41:22	0.564847
2022-09-15	09:41:22	0.474517
2022-09-15	09:41:22	0.457417
2022-09-15	09:41:22	0.522862
2022-09-15	09:41:23	0.551616
2022-09-15	09:41:23	1.15431
2022-09-15	09:41:23	0.773092
2022-09-15	09:41:24	0.543372
2022-09-15	09:41:24	0.74729
2022-09-15	09:41:24	2.46943
2022-09-15	09:41:24	4.1396
2022-09-15	09:41:25	3.39996
2022-09-15	09:41:25	3.56383
2022-09-15	09:41:25	3.3678
2022-09-15	09:41:25	2.96754
2022-09-15	09:41:26	1.87961
2022-09-15	09:41:26	2.82393
2022-09-15	09:41:26	1.89945
2022-09-15	09:41:26	2.61513
2022-09-15	09:41:27	2.38307
2022-09-15	09:41:27	2.20729
2022-09-15	09:41:27	1.81492
2022-09-15	09:41:28	1.72525
2022-09-15	09:41:28	1.59899
2022-09-15	09:41:28	1.542
2022-09-15	09:41:28	1.51665
2022-09-15	09:41:29	1.1881
2022-09-15	09:41:29	1.39991
2022-09-15	09:41:29	1.54826
2022-09-15	09:41:29	1.59207
2022-09-15	09:41:30	1.75986
2022-09-15	09:41:30	1.66556
2022-09-15	09:41:30	1.98393
2022-09-15	09:41:30	1.70912
2022-09-15	09:41:31	1.39747
2022-09-15	09:41:31	0.825763
2022-09-15	09:41:31	0.427137
2022-09-15	09:41:32	0.112736
2022-09-15	09:41:32	-0.0345926
2022-09-15	09:41:32	-0.421056
2022-09-15	09:41:32	-0.628434
2022-09-15	09:41:33	-0.66131
2022-09-15	09:41:33	-0.625839
2022-09-15	09:41:33	-0.651539
2022-09-15	09:41:33	-0.470776
2022-09-15	09:41:34	-0.0727606
2022-09-15	09:41:34	-0.058104
2022-09-15	09:41:34	0.0500893
2022-09-15	09:41:34	0.375484
2022-09-15	09:41:35	0.891209
2022-09-15	09:41:35	0.734109
2022-09-15	09:41:35	0.618588
2022-09-15	09:41:36	0.738333
2022-09-15	09:41:36	0.701539
2022-09-15	09:41:36	0.33528
2022-09-15	09:41:36	0.326934
2022-09-15	09:41:37	0.251616
2022-09-15	09:41:37	0.292786
2022-09-15	09:41:37	0.293448
2022-09-15	09:41:37	0.186629
2022-09-15	09:41:38	0.301387
2022-09-15	09:41:38	0.365814
2022-09-15	09:41:38	0.208664
2022-09-15	09:41:38	0.156501
2022-09-15	09:41:39	0.281794
2022-09-15	09:41:39	0.220929
2022-09-15	09:41:39	0.364084
2022-09-15	09:41:40	0.298028
2022-09-15	09:41:40	0.479046
2022-09-15	09:41:40	0.896196
2022-09-15	09:41:40	0.360064
2022-09-15	09:41:41	1.63289
2022-09-15	09:41:41	2.43258
2022-09-15	09:41:41	1.85406
2022-09-15	09:41:41	2.41284
2022-09-15	09:41:42	0.589224
2022-09-15	09:41:42	1.60556
2022-09-15	09:41:42	2.51574
2022-09-15	09:41:42	0.452685
2022-09-15	09:41:43	0.706069
2022-09-15	09:41:43	0.425102
2022-09-15	09:41:43	0.423524
2022-09-15	09:41:44	0.564338
2022-09-15	09:41:44	0.383473
2022-09-15	09:41:44	0.523371
2022-09-15	09:41:44	0.287392
2022-09-15	09:41:45	0.745102
2022-09-15	09:41:45	0.260064
2022-09-15	09:41:45	0.524135
2022-09-15	09:41:45	0.342914
2022-09-15	09:41:46	0.32444
2022-09-15	09:41:46	0.277112
2022-09-15	09:41:46	0.23126
2022-09-15	09:41:46	0.437061
2022-09-15	09:41:47	0.517061
2022-09-15	09:41:47	0.771158
2022-09-15	09:41:47	1.20648
2022-09-15	09:41:48	1.42505
2022-09-15	09:41:48	0.421234
2022-09-15	09:41:48	0.751107
2022-09-15	09:41:48	0.413092
2022-09-15	09:41:49	0.584033
2022-09-15	09:41:49	0.351158
2022-09-15	09:41:49	1.24683
2022-09-15	09:41:49	0.589173
2022-09-15	09:41:50	1.33589
2022-09-15	09:41:50	1.74841
2022-09-15	09:41:50	2.26775
2022-09-15	09:41:50	1.76658
2022-09-15	09:41:51	1.22627
2022-09-15	09:41:51	0.974262
2022-09-15	09:41:51	0.548562
2022-09-15	09:41:52	0.400725
2022-09-15	09:41:52	0.348562
2022-09-15	09:41:52	0.350802
2022-09-15	09:41:52	0.237875
2022-09-15	09:41:53	0.361794
2022-09-15	09:41:53	0.136603
2022-09-15	09:41:53	0.261998
2022-09-15	09:41:53	0.247545
2022-09-15	09:41:54	0.664033
2022-09-15	09:41:54	0.362608
2022-09-15	09:41:54	0.481743
2022-09-15	09:41:54	0.504135
2022-09-15	09:41:55	0.270954
2022-09-15	09:41:55	0.46042
2022-09-15	09:41:55	0.307545
2022-09-15	09:41:56	0.79187
2022-09-15	09:41:56	0.428155
2022-09-15	09:41:56	1.13625
2022-09-15	09:41:56	0.932176
2022-09-15	09:41:57	1.87823
2022-09-15	09:41:57	3.0224
2022-09-15	09:41:57	3.0107
2022-09-15	09:41:57	3.3507
2022-09-15	09:41:58	3.40291
2022-09-15	09:41:58	1.07268
2022-09-15	09:41:58	1.25961
2022-09-15	09:41:58	0.307494
2022-09-15	09:41:59	0.357875
2022-09-15	09:41:59	0.47126
2022-09-15	09:41:59	0.272176
2022-09-15	09:42:00	0.432125
2022-09-15	09:42:00	0.552277
2022-09-15	09:42:00	0.703422
2022-09-15	09:42:00	0.813143
2022-09-15	09:42:01	1.33309
2022-09-15	09:42:01	1.16877
2022-09-15	09:42:01	0.823219
2022-09-15	09:42:01	0.593499
2022-09-15	09:42:02	0.533397
2022-09-15	09:42:02	0.728308
2022-09-15	09:42:02	0.3164
2022-09-15	09:42:02	0.441234
2022-09-15	09:42:03	0.253346
2022-09-15	09:42:03	0.297926
2022-09-15	09:42:03	0.325814
2022-09-15	09:42:03	0.353041
2022-09-15	09:42:04	0.417163
2022-09-15	09:42:04	0.19243
2022-09-15	09:42:04	0.450547
2022-09-15	09:42:05	0.299962
2022-09-15	09:42:05	0.330395
2022-09-15	09:42:05	0.592227
2022-09-15	09:42:05	0.568359
2022-09-15	09:42:06	1.55676
2022-09-15	09:42:06	1.36398
2022-09-15	09:42:06	2.49935
2022-09-15	09:42:06	2.67314
2022-09-15	09:42:07	4.48642
2022-09-15	09:42:07	1.44113
2022-09-15	09:42:07	3.87904
2022-09-15	09:42:07	1.24765
2022-09-15	09:42:08	2.38485
2022-09-15	09:42:08	4.04403
2022-09-15	09:42:08	2.63406
2022-09-15	09:42:09	4.48968
2022-09-15	09:42:09	3.32398
2022-09-15	09:42:09	0.964847
2022-09-15	09:42:09	1.21625
2022-09-15	09:42:10	0.388715
2022-09-15	09:42:10	0.321794
2022-09-15	09:42:10	0.432939
2022-09-15	09:42:10	0.194771
2022-09-15	09:42:11	0.542914
2022-09-15	09:42:11	0.21243
2022-09-15	09:42:11	0.524695
2022-09-15	09:42:11	0.314924
2022-09-15	09:42:12	0.691209
2022-09-15	09:42:12	1.22123
2022-09-15	09:42:12	2.86245
2022-09-15	09:42:13	6.3081
2022-09-15	09:42:13	6.40281
2022-09-15	09:42:13	8.90113
2022-09-15	09:42:13	4.80179
2022-09-15	09:42:14	4.8678
2022-09-15	09:42:14	3.2453
2022-09-15	09:42:14	6.55446
2022-09-15	09:42:14	4.29248
2022-09-15	09:42:15	6.95843
2022-09-15	09:42:15	3.4337
2022-09-15	09:42:15	5.12484
2022-09-15	09:42:15	5.21258
2022-09-15	09:42:16	6.05894
2022-09-15	09:42:16	7.6909
2022-09-15	09:42:16	6.9684
2022-09-15	09:42:17	11.2852
2022-09-15	09:42:17	11.6154
2022-09-15	09:42:17	9.03797
2022-09-15	09:42:17	8.09431
2022-09-15	09:42:18	6.4568
2022-09-15	09:42:18	6.78316
2022-09-15	09:42:18	6.07721
2022-09-15	09:42:18	5.65558
2022-09-15	09:42:19	5.37909
2022-09-15	09:42:19	4.83406
2022-09-15	09:42:19	4.7995
2022-09-15	09:42:19	5.68149
2022-09-15	09:42:20	5.13151
2022-09-15	09:42:20	5.36154
2022-09-15	09:42:20	4.81492
2022-09-15	09:42:21	4.72332
2022-09-15	09:42:21	4.56464
2022-09-15	09:42:21	4.68322
2022-09-15	09:42:21	4.6825
2022-09-15	09:42:22	4.67177
2022-09-15	09:42:22	4.51889
2022-09-15	09:42:22	4.64388
2022-09-15	09:42:22	4.38642
2022-09-15	09:42:23	4.33243
2022-09-15	09:42:23	4.26678
2022-09-15	09:42:23	4.52133
2022-09-15	09:42:23	4.57904
2022-09-15	09:42:24	4.32932
2022-09-15	09:42:24	4.27838
2022-09-15	09:42:24	4.20205
2022-09-15	09:42:25	4.05263
2022-09-15	09:42:25	4.21599
2022-09-15	09:42:25	4.32159
2022-09-15	09:42:25	4.54632
2022-09-15	09:42:26	4.01614
2022-09-15	09:42:26	4.01833
2022-09-15	09:42:26	4.00596
2022-09-15	09:42:26	5.49802
2022-09-15	09:42:27	4.19263
2022-09-15	09:42:27	5.55059
2022-09-15	09:42:27	4.21828
2022-09-15	09:42:27	0.150191
2022-09-15	09:42:28	-0.181921
2022-09-15	09:42:28	-0.373778
2022-09-15	09:42:28	-0.755305
2022-09-15	09:42:29	-0.83388
2022-09-15	09:42:29	-0.997493
2022-09-15	09:42:29	-0.84477
2022-09-15	09:42:29	-0.995712
2022-09-15	09:42:30	-0.828587
2022-09-15	09:42:30	-0.494338
2022-09-15	09:42:30	-0.21561
2022-09-15	09:42:30	0.188003
2022-09-15	09:42:31	0.519911
2022-09-15	09:42:31	0.231005
2022-09-15	09:42:31	1.92383
2022-09-15	09:42:31	0.83187
2022-09-15	09:42:32	6.21273
2022-09-15	09:42:32	1.14968
2022-09-15	09:42:32	2.51034
2022-09-15	09:42:33	0.80617
2022-09-15	09:42:33	0.538384
2022-09-15	09:42:33	1.03218
2022-09-15	09:42:33	0.398995
2022-09-15	09:42:34	2.21614
2022-09-15	09:42:34	0.550649
2022-09-15	09:42:34	0.86958
2022-09-15	09:42:34	2.09864
2022-09-15	09:42:35	0.156196
2022-09-15	09:42:35	0.388104
2022-09-15	09:42:35	0.503677
2022-09-15	09:42:35	1.51385
2022-09-15	09:42:36	0.674211
2022-09-15	09:42:36	1.53055
2022-09-15	09:42:36	0.904796
2022-09-15	09:42:37	1.1366
2022-09-15	09:42:37	0.33645
2022-09-15	09:42:37	0.32042
2022-09-15	09:42:37	0.424186
2022-09-15	09:42:38	0.400318
2022-09-15	09:42:38	0.407646
2022-09-15	09:42:38	0.391769
2022-09-15	09:42:38	1.01233
2022-09-15	09:42:39	1.68912
2022-09-15	09:42:39	1.94729
2022-09-15	09:42:39	2.50724
2022-09-15	09:42:39	2.12128
2022-09-15	09:42:40	0.853702
2022-09-15	09:42:40	0.364644
2022-09-15	09:42:40	0.361234
2022-09-15	09:42:41	0.291361
2022-09-15	09:42:41	0.261794
2022-09-15	09:42:41	0.265255
2022-09-15	09:42:41	0.217265
2022-09-15	09:42:42	0.26958
2022-09-15	09:42:42	0.335026
2022-09-15	09:42:42	0.278639
2022-09-15	09:42:42	0.231819
2022-09-15	09:42:43	0.285
2022-09-15	09:42:43	0.322048
2022-09-15	09:42:43	0.458232
2022-09-15	09:42:43	0.705916
2022-09-15	09:42:44	0.891209
2022-09-15	09:42:44	3.28144
2022-09-15	09:42:44	3.54561
2022-09-15	09:42:44	4.96795
2022-09-15	09:42:45	2.68815
2022-09-15	09:42:45	1.41396
2022-09-15	09:42:45	2.63625
2022-09-15	09:42:46	2.43747
2022-09-15	09:42:46	3.98922
2022-09-15	09:42:46	4.42525
2022-09-15	09:42:46	4.45054
2022-09-15	09:42:47	4.25192
2022-09-15	09:42:47	3.95167
2022-09-15	09:42:47	3.86983
2022-09-15	09:42:47	3.6363
2022-09-15	09:42:48	3.52439
2022-09-15	09:42:48	3.35777
2022-09-15	09:42:48	3.09777
2022-09-15	09:42:48	3.10357
2022-09-15	09:42:49	3.20174
2022-09-15	09:42:49	3.07049
2022-09-15	09:42:49	2.98607
2022-09-15	09:42:50	2.96047
2022-09-15	09:42:50	2.84062
2022-09-15	09:42:50	2.93563
2022-09-15	09:42:50	2.97105
2022-09-15	09:42:51	2.64469
2022-09-15	09:42:51	2.742
2022-09-15	09:42:51	2.81396
2022-09-15	09:42:51	2.42184
2022-09-15	09:42:52	2.35441
2022-09-15	09:42:52	3.34001
2022-09-15	09:42:52	3.3024
2022-09-15	09:42:52	3.31523
2022-09-15	09:42:53	3.40123
2022-09-15	09:42:53	3.12052
2022-09-15	09:42:53	3.00225
2022-09-15	09:42:54	2.99421
2022-09-15	09:42:54	3.07116
2022-09-15	09:42:54	3.09335
2022-09-15	09:42:54	3.04164
2022-09-15	09:42:55	3.00327
2022-09-15	09:42:55	2.9964
2022-09-15	09:42:55	3.00368
2022-09-15	09:42:55	3.00261
2022-09-15	09:42:56	2.92444
2022-09-15	09:42:56	2.88408
2022-09-15	09:42:56	2.89513
2022-09-15	09:42:56	2.928
2022-09-15	09:42:57	2.88317
2022-09-15	09:42:57	2.81818
2022-09-15	09:42:57	2.71228
2022-09-15	09:42:58	2.67584
2022-09-15	09:42:58	3.07599
2022-09-15	09:42:58	3.03192
2022-09-15	09:42:58	2.90968
2022-09-15	09:42:59	2.371
2022-09-15	09:42:59	2.23462
2022-09-15	09:42:59	2.50902
2022-09-15	09:42:59	2.9248
2022-09-15	09:43:00	2.21859
2022-09-15	09:43:00	2.1307
2022-09-15	09:43:00	1.58429
2022-09-15	09:43:00	2.82765
2022-09-15	09:43:01	2.62103
2022-09-15	09:43:01	2.28724
2022-09-15	09:43:01	2.39223
2022-09-15	09:43:02	2.39579
2022-09-15	09:43:02	2.20251
2022-09-15	09:43:02	2.21284
2022-09-15	09:43:02	2.16602
2022-09-15	09:43:03	2.24067
2022-09-15	09:43:03	2.29452
2022-09-15	09:43:03	2.25772
2022-09-15	09:43:03	2.21314
2022-09-15	09:43:04	2.14505
2022-09-15	09:43:04	2.10887
2022-09-15	09:43:04	2.12134
2022-09-15	09:43:04	2.16276
2022-09-15	09:43:05	2.13228
2022-09-15	09:43:05	2.19426
2022-09-15	09:43:05	2.25803
2022-09-15	09:43:06	2.20291
2022-09-15	09:43:06	2.05375
2022-09-15	09:43:06	2.07976
2022-09-15	09:43:06	1.91503
2022-09-15	09:43:07	1.96602
2022-09-15	09:43:07	1.9965
2022-09-15	09:43:07	2.07976
2022-09-15	09:43:07	2.14668
2022-09-15	09:43:08	1.53625
2022-09-15	09:43:08	1.39584
2022-09-15	09:43:08	0.672176
2022-09-15	09:43:08	0.425611
2022-09-15	09:43:09	0.489428
2022-09-15	09:43:09	0.297367
2022-09-15	09:43:09	0.997214
2022-09-15	09:43:10	0.884745
2022-09-15	09:43:10	4.90795
2022-09-15	09:43:10	15.293
2022-09-15	09:43:10	8.10749
2022-09-15	09:43:11	2.56871
2022-09-15	09:43:11	3.77609
2022-09-15	09:43:11	5.79014
2022-09-15	09:43:11	4.78235
2022-09-15	09:43:12	1.42943
2022-09-15	09:43:12	2.44536
2022-09-15	09:43:12	5.94026
2022-09-15	09:43:12	9.61772
2022-09-15	09:43:13	5.21446
2022-09-15	09:43:13	4.17355
2022-09-15	09:43:13	1.19131
2022-09-15	09:43:14	0.736501
2022-09-15	09:43:14	0.736807
2022-09-15	09:43:14	0.32154
2022-09-15	09:43:14	0.129987
2022-09-15	09:43:15	0.366578
2022-09-15	09:43:15	0.137774
2022-09-15	09:43:15	0.288715
2022-09-15	09:43:15	0.128664
2022-09-15	09:43:16	0.138842
2022-09-15	09:43:16	-0.120038
2022-09-15	09:43:16	-0.106552
2022-09-15	09:43:16	-0.0708267
2022-09-15	09:43:17	0.0800129
2022-09-15	09:43:17	-0.0184603
2022-09-15	09:43:17	-0.149758
2022-09-15	09:43:18	-0.219122
2022-09-15	09:43:18	0.0584353
2022-09-15	09:43:18	0.174517
2022-09-15	09:43:18	0.00332086
2022-09-15	09:43:19	0.109987
2022-09-15	09:43:19	0.0903946
2022-09-15	09:43:19	0.13355
2022-09-15	09:43:19	-0.0222771
2022-09-15	09:43:20	0.0920231
2022-09-15	09:43:20	0.103677
2022-09-15	09:43:20	0.172379
2022-09-15	09:43:20	0.0378247
2022-09-15	09:43:21	0.31528
2022-09-15	09:43:21	0.392532
2022-09-15	09:43:21	0.386171
2022-09-15	09:43:21	0.389122
2022-09-15	09:43:22	0.406527
2022-09-15	09:43:22	0.180216
2022-09-15	09:43:22	0.269682
2022-09-15	09:43:23	0.239962
2022-09-15	09:43:23	0.290954
2022-09-15	09:43:23	0.351056
2022-09-15	09:43:23	0.406476
2022-09-15	09:43:24	0.26444
2022-09-15	09:43:24	0.425305
2022-09-15	09:43:24	0.206272
2022-09-15	09:43:24	0.429733
2022-09-15	09:43:25	0.138639
2022-09-15	09:43:25	0.386832
2022-09-15	09:43:25	0.212786
2022-09-15	09:43:25	0.224084
2022-09-15	09:43:26	0.0756873
2022-09-15	09:43:26	0.284949
2022-09-15	09:43:26	0.267443
2022-09-15	09:43:27	0.177519
2022-09-15	09:43:27	0.336196
2022-09-15	09:43:27	0.280064
2022-09-15	09:43:27	0.815636
2022-09-15	09:43:28	0.429631
2022-09-15	09:43:28	0.516399
2022-09-15	09:43:28	0.170547
2022-09-15	09:43:28	0.402812
2022-09-15	09:43:29	0.193244
2022-09-15	09:43:29	0.228664
2022-09-15	09:43:29	0.0481046
2022-09-15	09:43:29	0.0545676
2022-09-15	09:43:30	0.00830812
2022-09-15	09:43:30	0.0346185
2022-09-15	09:43:30	-0.000292388
2022-09-15	09:43:31	-0.0248216
2022-09-15	09:43:31	0.0338043
2022-09-15	09:43:31	-0.0674679
2022-09-15	09:43:31	0.105204
2022-09-15	09:43:32	-0.0833967
2022-09-15	09:43:32	0.109021
2022-09-15	09:43:32	0.11757
2022-09-15	09:43:32	0.558181
2022-09-15	09:43:33	0.283015
2022-09-15	09:43:33	0.552227
2022-09-15	09:43:33	0.589071
2022-09-15	09:43:33	3.27467
2022-09-15	09:43:34	0.658842
2022-09-15	09:43:34	1.41655
2022-09-15	09:43:34	0.677672
2022-09-15	09:43:35	0.597214
2022-09-15	09:43:35	0.877468
2022-09-15	09:43:35	0.597825
2022-09-15	09:43:35	0.6364
2022-09-15	09:43:36	0.575433
2022-09-15	09:43:36	0.269428
2022-09-15	09:43:36	0.71813
2022-09-15	09:43:36	0.183626
2022-09-15	09:43:37	0.661082
2022-09-15	09:43:37	0.550852
2022-09-15	09:43:37	0.516807
2022-09-15	09:43:37	0.69416
2022-09-15	09:43:38	0.46673
2022-09-15	09:43:38	0.556552
2022-09-15	09:43:38	0.389733
2022-09-15	09:43:39	0.796094
2022-09-15	09:43:39	0.354873
2022-09-15	09:43:39	0.563371
2022-09-15	09:43:39	0.372125
2022-09-15	09:43:40	0.57584
2022-09-15	09:43:40	0.464695
2022-09-15	09:43:40	0.584186
2022-09-15	09:43:40	0.658028
2022-09-15	09:43:41	0.669122
2022-09-15	09:43:41	0.724237
2022-09-15	09:43:41	1.29329
2022-09-15	09:43:41	0.50729
2022-09-15	09:43:42	0.721946
2022-09-15	09:43:42	1.09289
2022-09-15	09:43:42	0.297112
2022-09-15	09:43:43	0.897163
2022-09-15	09:43:43	0.434873
2022-09-15	09:43:43	0.603117
2022-09-15	09:43:43	0.658842
2022-09-15	09:43:44	0.503015
2022-09-15	09:43:44	0.471819
2022-09-15	09:43:44	0.402099
2022-09-15	09:43:44	0.380624
2022-09-15	09:43:45	0.459402
2022-09-15	09:43:45	0.543219
2022-09-15	09:43:45	0.648104
2022-09-15	09:43:45	0.766374
2022-09-15	09:43:46	0.989936
2022-09-15	09:43:46	1.09696
2022-09-15	09:43:46	2.41487
2022-09-15	09:43:47	2.58673
2022-09-15	09:43:47	5.55925
2022-09-15	09:43:47	6.73421
2022-09-15	09:43:47	10.6928
2022-09-15	09:43:48	12.0356
2022-09-15	09:43:48	12.7694
2022-09-15	09:43:48	11.7085
2022-09-15	09:43:48	10.5718
2022-09-15	09:43:49	9.02372
2022-09-15	09:43:49	6.88958
2022-09-15	09:43:49	7.32856
2022-09-15	09:43:49	8.29044
2022-09-15	09:43:50	9.65049
2022-09-15	09:43:50	6.77355
2022-09-15	09:43:50	7.1338
2022-09-15	09:43:50	7.59589
2022-09-15	09:43:51	6.84403
2022-09-15	09:43:51	5.28444
2022-09-15	09:43:51	4.32937
2022-09-15	09:43:52	3.94266
2022-09-15	09:43:52	3.54805
2022-09-15	09:43:52	3.71116
2022-09-15	09:43:52	4.21029
2022-09-15	09:43:53	3.66683
2022-09-15	09:43:53	4.16556
2022-09-15	09:43:53	4.63192
2022-09-15	09:43:53	4.69238
2022-09-15	09:43:54	3.73482
2022-09-15	09:43:54	3.74953
2022-09-15	09:43:54	1.44047
2022-09-15	09:43:54	0.956756
2022-09-15	09:43:55	0.245611
2022-09-15	09:43:55	0.142252
2022-09-15	09:43:55	0.0667814
2022-09-15	09:43:56	-0.0144908
2022-09-15	09:43:56	0.0757381
2022-09-15	09:43:56	0.0325829
2022-09-15	09:43:56	1.02449
2022-09-15	09:43:57	6.48515
2022-09-15	09:43:57	8.22499
2022-09-15	09:43:57	4.9821
2022-09-15	09:43:57	4.82658
2022-09-15	09:43:58	1.81391
2022-09-15	09:43:58	2.47859
2022-09-15	09:43:58	2.21589
2022-09-15	09:43:58	3.67502
2022-09-15	09:43:59	2.89212
2022-09-15	09:43:59	3.40505
2022-09-15	09:43:59	1.94312
2022-09-15	09:44:00	2.22505
2022-09-15	09:44:00	1.76983
2022-09-15	09:44:00	1.63879
2022-09-15	09:44:00	1.29742
2022-09-15	09:44:01	0.930903
2022-09-15	09:44:01	0.945662
2022-09-15	09:44:01	0.711972
2022-09-15	09:44:01	0.627799
2022-09-15	09:44:02	1.68464
2022-09-15	09:44:02	1.40363
2022-09-15	09:44:02	2.6537
2022-09-15	09:44:02	4.72317
2022-09-15	09:44:03	5.56983
2022-09-15	09:44:03	7.77258
2022-09-15	09:44:03	8.05502
2022-09-15	09:44:04	3.97803
2022-09-15	09:44:04	6.02408
2022-09-15	09:44:04	5.23182
2022-09-15	09:44:04	2.7306
2022-09-15	09:44:05	2.72037
2022-09-15	09:44:05	1.36785
2022-09-15	09:44:05	0.989835
2022-09-15	09:44:05	0.876756
2022-09-15	09:44:06	0.971718
2022-09-15	09:44:06	0.994568
2022-09-15	09:44:06	1.03497
2022-09-15	09:44:06	0.983779
2022-09-15	09:44:07	0.907748
2022-09-15	09:44:07	0.88042
2022-09-15	09:44:07	0.728817
2022-09-15	09:44:08	0.782506
2022-09-15	09:44:08	0.828359
2022-09-15	09:44:08	0.880878
2022-09-15	09:44:08	0.947341
2022-09-15	09:44:09	0.91014
2022-09-15	09:44:09	0.990242
2022-09-15	09:44:09	1.00388
2022-09-15	09:44:09	1.07788
2022-09-15	09:44:10	1.01655
2022-09-15	09:44:10	1.05996
2022-09-15	09:44:10	1.05676
2022-09-15	09:44:10	0.837417
2022-09-15	09:44:11	0.711921
2022-09-15	09:44:11	0.521743
2022-09-15	09:44:11	0.455433
2022-09-15	09:44:12	0.408155
2022-09-15	09:44:12	0.379402
2022-09-15	09:44:12	0.410344
2022-09-15	09:44:12	0.769835
2022-09-15	09:44:13	1.26424
2022-09-15	09:44:13	2.55909
2022-09-15	09:44:13	2.78943
2022-09-15	09:44:13	2.81502
2022-09-15	09:44:14	0.960674
2022-09-15	09:44:14	0.705255
2022-09-15	09:44:14	0.444389
2022-09-15	09:44:14	0.318334
2022-09-15	09:44:15	0.302506
2022-09-15	09:44:15	0.217214
2022-09-15	09:44:15	-0.104872
2022-09-15	09:44:16	-0.140038
2022-09-15	09:44:16	-0.439631
2022-09-15	09:44:16	-0.00395648
2022-09-15	09:44:16	-0.243651
2022-09-15	09:44:17	-0.265636
2022-09-15	09:44:17	-0.332251
2022-09-15	09:44:17	-0.396577
2022-09-15	09:44:17	-0.228231
2022-09-15	09:44:18	0.27701
2022-09-15	09:44:18	0.252379
2022-09-15	09:44:18	-0.154847
2022-09-15	09:44:18	-0.104669
2022-09-15	09:44:19	-0.163447
2022-09-15	09:44:19	-0.0786638
2022-09-15	09:44:19	0.28271
2022-09-15	09:44:19	0.58673
2022-09-15	09:44:20	0.740267
2022-09-15	09:44:20	0.240013
2022-09-15	09:44:20	0.541692
2022-09-15	09:44:21	0.51528
2022-09-15	09:44:21	0.300216
2022-09-15	09:44:21	0.245051
2022-09-15	09:44:21	0.242761
2022-09-15	09:44:22	0.0895295
2022-09-15	09:44:22	0.152278
2022-09-15	09:44:22	0.207188
2022-09-15	09:44:22	-0.0445163
2022-09-15	09:44:23	-0.241666
2022-09-15	09:44:23	-0.281005
2022-09-15	09:44:23	-0.340852
2022-09-15	09:44:23	-0.448842
2022-09-15	09:44:24	-0.575356
2022-09-15	09:44:24	-0.467722
2022-09-15	09:44:24	-0.571132
2022-09-15	09:44:25	-0.581768
2022-09-15	09:44:25	-0.623447
2022-09-15	09:44:25	-0.466552
2022-09-15	09:44:25	-0.50701
2022-09-15	09:44:26	-0.576068
2022-09-15	09:44:26	-0.611335
2022-09-15	09:44:26	-0.550012
2022-09-15	09:44:26	-0.678765
2022-09-15	09:44:27	-0.686042
2022-09-15	09:44:27	-0.660903
2022-09-15	09:44:27	-0.666195
2022-09-15	09:44:27	-0.697849
2022-09-15	09:44:28	-0.767315
2022-09-15	09:44:28	-0.678969
2022-09-15	09:44:28	-0.727671
2022-09-15	09:44:29	-0.561819
2022-09-15	09:44:29	-0.721462
2022-09-15	09:44:29	-0.534287
2022-09-15	09:44:29	-0.595865
2022-09-15	09:44:30	-0.693371
2022-09-15	09:44:30	-0.706806
2022-09-15	09:44:30	-0.618613
2022-09-15	09:44:30	-0.764719
2022-09-15	09:44:31	-0.649554
2022-09-15	09:44:31	-0.787569
2022-09-15	09:44:31	-0.580241
2022-09-15	09:44:31	-0.598867
2022-09-15	09:44:32	-0.542379
2022-09-15	09:44:32	-0.296832
2022-09-15	09:44:32	-0.262582
2022-09-15	09:44:33	-0.238409
2022-09-15	09:44:33	-0.365178
2022-09-15	09:44:33	-0.263397
2022-09-15	09:44:33	-0.439173
2022-09-15	09:44:34	-0.519732
2022-09-15	09:44:34	-0.597697
2022-09-15	09:44:34	-0.496374
2022-09-15	09:44:34	-0.545941
2022-09-15	09:44:35	-0.514796
2022-09-15	09:44:35	-0.424974
2022-09-15	09:44:35	-0.450826
2022-09-15	09:44:35	-0.426348
2022-09-15	09:44:36	-0.532913
2022-09-15	09:44:36	-0.41388
2022-09-15	09:44:36	-0.294542
2022-09-15	09:44:37	-0.351997
2022-09-15	09:44:37	0.00647607
2022-09-15	09:44:37	0.695178
2022-09-15	09:44:37	2.08016
2022-09-15	09:44:38	4.1938
2022-09-15	09:44:38	1.66398
2022-09-15	09:44:38	1.36291
2022-09-15	09:44:38	0.570038
2022-09-15	09:44:39	0.32729
2022-09-15	09:44:39	0.237112
2022-09-15	09:44:39	0.285051
2022-09-15	09:44:39	0.429631
2022-09-15	09:44:40	0.382557
2022-09-15	09:44:40	0.518282
2022-09-15	09:44:40	0.350751
2022-09-15	09:44:41	0.412685
2022-09-15	09:44:41	0.314771
2022-09-15	09:44:41	0.226221
2022-09-15	09:44:41	0.273702
2022-09-15	09:44:42	0.548868
2022-09-15	09:44:42	0.347646
2022-09-15	09:44:42	0.427087
2022-09-15	09:44:42	0.384898
2022-09-15	09:44:43	0.667799
2022-09-15	09:44:43	0.372786
2022-09-15	09:44:43	0.624033
2022-09-15	09:44:43	0.398181
2022-09-15	09:44:44	0.783015
2022-09-15	09:44:44	0.585661
2022-09-15	09:44:44	2.32057
2022-09-15	09:44:44	2.10642
2022-09-15	09:44:45	2.16871
2022-09-15	09:44:45	0.613652
2022-09-15	09:44:45	0.536603
2022-09-15	09:44:46	0.540522
2022-09-15	09:44:46	0.416756
2022-09-15	09:44:46	0.449835
2022-09-15	09:44:46	0.497621
2022-09-15	09:44:47	0.298384
2022-09-15	09:44:47	0.496399
2022-09-15	09:44:47	0.544491
2022-09-15	09:44:47	0.517723
2022-09-15	09:44:48	0.490547
2022-09-15	09:44:48	0.700827
2022-09-15	09:44:48	0.738639
2022-09-15	09:44:48	0.638842
2022-09-15	09:44:49	0.407952
2022-09-15	09:44:49	0.429122
2022-09-15	09:44:49	0.751819
2022-09-15	09:44:50	1.20581
2022-09-15	09:44:50	1.05375
2022-09-15	09:44:50	0.653448
2022-09-15	09:44:50	0.741234
2022-09-15	09:44:51	0.876247
2022-09-15	09:44:51	0.924949
2022-09-15	09:44:51	0.906628
2022-09-15	09:44:51	0.546883
2022-09-15	09:44:52	0.544491
