# Supplementary material for: Comparing efficacy in reducing pulling and welfare impacts of four types of leash walking equipment
Source: PeerJ journal article supplement (doi:10.7717/peerj.18131), 2024-10-24
Supplement: Shelter_2_Tension_files.zip [file Klutz_martin_20229158380 copy.xlsx]

## Sheet: Sheet2
Date	Time	Averaged Newtons	Impulse	Total steps
2022-09-15	08:38:09	4.5864	4.5864	0
2022-09-15	08:38:10	1.66191	6.24831	0			Impulse newtons	3991.52
2022-09-15	08:38:11	1.76162	8.00993	0			Total steps	106
2022-09-15	08:38:12	1.86347	9.8734	0			# > 5 sec	5
2022-09-15	08:38:13	5.25414	15.1275	0
2022-09-15	08:38:14	5.01248	20.14	0
2022-09-15	08:38:15	4.27118	24.4112	0
2022-09-15	08:38:16	3.90843	28.3196	0
2022-09-15	08:38:17	3.99177	32.3114	0
2022-09-15	08:38:18	6.07621	38.3876	0
2022-09-15	08:38:19	1.25076	39.6384	0
2022-09-15	08:38:20	1.70622	41.3446	0
2022-09-15	08:38:21	15.5495	56.8941	1
2022-09-15	08:38:22	21.5415	78.4356	2
2022-09-15	08:38:23	1.37634	79.8119	2
2022-09-15	08:38:24	2.08658	81.8985	2
2022-09-15	08:38:25	2.04517	83.9437	2
2022-09-15	08:38:26	1.94334	85.887	2
2022-09-15	08:38:27	2.48154	88.3686	2
2022-09-15	08:38:28	1.75427	90.1228	2
2022-09-15	08:38:29	3.36469	93.4875	2
2022-09-15	08:38:30	26.4122	119.9	3
2022-09-15	08:38:31	31.0369	150.937	4
2022-09-15	08:38:32	10.6988	161.635	4
2022-09-15	08:38:33	16.9354	178.571	5
2022-09-15	08:38:34	21.6897	200.261	6
2022-09-15	08:38:35	29.3541	229.615	7
2022-09-15	08:38:36	29.8831	259.498	8
2022-09-15	08:38:37	52.0356	311.533	9
2022-09-15	08:38:38	61.1551	372.688	10
2022-09-15	08:38:39	13.2221	385.911	11
2022-09-15	08:38:40	18.6535	404.564	12
2022-09-15	08:38:41	11.3494	415.913	12
2022-09-15	08:38:42	14.1469	430.06	13
2022-09-15	08:38:43	7.56041	437.621	13
2022-09-15	08:38:44	5.88282	443.504	13
2022-09-15	08:38:45	4.32398	447.828	13
2022-09-15	08:38:46	3.88768	451.715	13
2022-09-15	08:38:47	9.61495	461.33	13
2022-09-15	08:38:48	22.9491	484.279	14
2022-09-15	08:38:49	15.5288	499.808	15
2022-09-15	08:38:50	10.3568	510.165	15
2022-09-15	08:38:51	7.77593	517.941	15
2022-09-15	08:38:52	4.09494	522.036	15
2022-09-15	08:38:53	3.25867	525.294	15
2022-09-15	08:38:54	1.70237	526.997	15
2022-09-15	08:38:55	7.26431	534.261	15
2022-09-15	08:38:56	8.30834	542.569	15
2022-09-15	08:38:57	1.71414	544.284	15
2022-09-15	08:38:58	2.64234	546.926	15
2022-09-15	08:38:59	18.5179	565.444	16
2022-09-15	08:39:00	24.8111	590.255	17
2022-09-15	08:39:01	10.7881	601.043	17
2022-09-15	08:39:02	2.73151	603.775	17
2022-09-15	08:39:03	2.42352	606.198	17
2022-09-15	08:39:04	2.83157	609.03	17
2022-09-15	08:39:05	1.86955	610.899	17
2022-09-15	08:39:06	2.03678	612.936	17
2022-09-15	08:39:07	1.01835	613.954	17
2022-09-15	08:39:08	0.392359	614.347	17
2022-09-15	08:39:09	0.163158	614.51	17
2022-09-15	08:39:10	0.0998873	614.61	17
2022-09-15	08:39:11	-0.667285	614.61	17
2022-09-15	08:39:12	-2.98969	614.61	17
2022-09-15	08:39:13	-3.56224	614.61	17
2022-09-15	08:39:14	0.0263173	614.636	17
2022-09-15	08:39:15	1.64291	616.279	17
2022-09-15	08:39:16	3.47424	619.753	17
2022-09-15	08:39:17	-1.02009	619.753	17
2022-09-15	08:39:18	-2.64175	619.753	17
2022-09-15	08:39:19	0.0646491	619.818	17
2022-09-15	08:39:20	0.752743	620.571	17
2022-09-15	08:39:21	6.31101	626.882	17
2022-09-15	08:39:22	10.5455	637.427	17
2022-09-15	08:39:23	12.8379	650.265	17
2022-09-15	08:39:24	12.8137	663.079	17
2022-09-15	08:39:25	17.7111	680.79	18
2022-09-15	08:39:26	17.3197	698.109	19
2022-09-15	08:39:27	15.8895	713.999	20
2022-09-15	08:39:28	15.3182	729.317	21
2022-09-15	08:39:29	4.77292	734.09	21
2022-09-15	08:39:30	0.0868154	734.177	21
2022-09-15	08:39:31	-0.844704	734.177	21
2022-09-15	08:39:32	1.167	735.344	21
2022-09-15	08:39:33	1.72433	737.068	21
2022-09-15	08:39:34	2.41951	739.488	21
2022-09-15	08:39:35	1.74991	741.238	21
2022-09-15	08:39:36	1.61227	742.85	21
2022-09-15	08:39:37	1.75902	744.609	21
2022-09-15	08:39:38	12.2402	756.849	21
2022-09-15	08:39:39	11.9138	768.763	21
2022-09-15	08:39:40	10.3732	779.136	21
2022-09-15	08:39:41	5.11967	784.256	21
2022-09-15	08:39:42	0.142671	784.398	21
2022-09-15	08:39:43	0.447311	784.846	21
2022-09-15	08:39:44	2.05483	786.901	21
2022-09-15	08:39:45	0.595565	787.496	21
2022-09-15	08:39:46	6.25426	793.75	21
2022-09-15	08:39:47	9.55	803.3	21
2022-09-15	08:39:48	0.722126	804.023	21
2022-09-15	08:39:49	1.42303	805.446	21
2022-09-15	08:39:50	1.76474	807.21	21
2022-09-15	08:39:51	4.81169	812.022	21
2022-09-15	08:39:52	12.152	824.174	21
2022-09-15	08:39:53	5.21557	829.39	21
2022-09-15	08:39:54	6.25815	835.648	21
2022-09-15	08:39:55	1.22139	836.869	21
2022-09-15	08:39:56	0.586473	837.456	21
2022-09-15	08:39:57	2.03468	839.49	21
2022-09-15	08:39:58	1.72903	841.219	21
2022-09-15	08:39:59	1.61941	842.839	21
2022-09-15	08:40:00	4.19693	847.036	21
2022-09-15	08:40:01	1.54131	848.577	21
2022-09-15	08:40:02	0.480041	849.057	21
2022-09-15	08:40:03	16.129	865.186	22
2022-09-15	08:40:04	5.84531	871.031	22
2022-09-15	08:40:05	13.1927	884.224	23
2022-09-15	08:40:06	45.919	930.143	24
2022-09-15	08:40:07	10.3113	940.454	24
2022-09-15	08:40:08	10.7813	951.236	24
2022-09-15	08:40:09	1.56864	952.804	24
2022-09-15	08:40:10	9.926	962.73	24
2022-09-15	08:40:11	0.698696	963.429	24
2022-09-15	08:40:12	0.945781	964.375	24
2022-09-15	08:40:13	3.29886	967.674	24
2022-09-15	08:40:14	0.635256	968.309	24
2022-09-15	08:40:15	0.899658	969.209	24
2022-09-15	08:40:16	2.28415	971.493	24
2022-09-15	08:40:17	0.632088	972.125	24
2022-09-15	08:40:18	2.64306	974.768	24
2022-09-15	08:40:19	3.99529	978.763	24
2022-09-15	08:40:20	17.3701	996.133	25
2022-09-15	08:40:21	20.1632	1016.3	26
2022-09-15	08:40:22	2.69592	1018.99	26
2022-09-15	08:40:23	17.9446	1036.94	27
2022-09-15	08:40:24	12.0564	1048.99	27
2022-09-15	08:40:25	1.12235	1050.12	27
2022-09-15	08:40:26	1.09241	1051.21	27
2022-09-15	08:40:27	1.60299	1052.81	27
2022-09-15	08:40:28	9.08575	1061.9	27
2022-09-15	08:40:29	4.08488	1065.98	27
2022-09-15	08:40:30	34.9747	1100.96	28
2022-09-15	08:40:31	11.975	1112.93	28
2022-09-15	08:40:32	11.6225	1124.55	28
2022-09-15	08:40:33	19.124	1143.68	29
2022-09-15	08:40:34	22.433	1166.11	30
2022-09-15	08:40:35	4.49942	1170.61	30
2022-09-15	08:40:36	20.269	1190.88	31
2022-09-15	08:40:37	3.50807	1194.39	31
2022-09-15	08:40:38	1.00481	1195.39	31
2022-09-15	08:40:39	2.71997	1198.11	31
2022-09-15	08:40:40	9.91061	1208.02	31
2022-09-15	08:40:41	19.4356	1227.46	32
2022-09-15	08:40:42	17.7502	1245.21	33
2022-09-15	08:40:43	22.2232	1267.43	34
2022-09-15	08:40:44	12.2647	1279.7	34
2022-09-15	08:40:45	15.1081	1294.8	35
2022-09-15	08:40:46	8.37235	1303.18	35
2022-09-15	08:40:47	1.74148	1304.92	35
2022-09-15	08:40:48	0.984545	1305.9	35
2022-09-15	08:40:49	1.39088	1307.29	35
2022-09-15	08:40:50	1.33169	1308.63	35
2022-09-15	08:40:51	1.32139	1309.95	35
2022-09-15	08:40:52	1.25861	1311.21	35
2022-09-15	08:40:53	1.98052	1313.19	35
2022-09-15	08:40:54	1.86026	1315.05	35
2022-09-15	08:40:55	1.81567	1316.86	35
2022-09-15	08:40:56	1.70933	1318.57	35
2022-09-15	08:40:57	1.75293	1320.32	35
2022-09-15	08:40:58	18.8498	1339.17	36
2022-09-15	08:40:59	32.2627	1371.44	37
2022-09-15	08:41:00	7.13534	1378.57	37
2022-09-15	08:41:01	5.44157	1384.01	37
2022-09-15	08:41:02	8.73058	1392.74	37
2022-09-15	08:41:03	28.5406	1421.28	38
2022-09-15	08:41:04	28.9404	1450.23	39
2022-09-15	08:41:05	15.5599	1465.79	40
2022-09-15	08:41:06	10.4455	1476.23	40
2022-09-15	08:41:07	5.82024	1482.05	40
2022-09-15	08:41:08	9.17846	1491.23	40
2022-09-15	08:41:09	1.11579	1492.35	40
2022-09-15	08:41:10	1.03488	1493.38	40
2022-09-15	08:41:11	36.1997	1529.58	41
2022-09-15	08:41:12	65.1724	1594.75	42
2022-09-15	08:41:13	40.0818	1634.83	43
2022-09-15	08:41:14	-0.618689	1634.83	43
2022-09-15	08:41:15	0.232257	1635.07	43
2022-09-15	08:41:16	0.863777	1635.93	43
2022-09-15	08:41:17	5.30065	1641.23	43
2022-09-15	08:41:18	6.1791	1647.41	43
2022-09-15	08:41:19	3.20899	1650.62	43
2022-09-15	08:41:20	3.06473	1653.68	43
2022-09-15	08:41:21	2.14674	1655.83	43
2022-09-15	08:41:22	1.67294	1657.5	43
2022-09-15	08:41:23	1.52903	1659.03	43
2022-09-15	08:41:24	2.51827	1661.55	43
2022-09-15	08:41:25	3.00944	1664.56	43
2022-09-15	08:41:26	2.16819	1666.73	43
2022-09-15	08:41:27	2.57873	1669.31	43
2022-09-15	08:41:28	2.83892	1672.15	43
2022-09-15	08:41:29	2.62715	1674.77	43
2022-09-15	08:41:30	7.02447	1681.8	43
2022-09-15	08:41:31	12.0875	1693.88	43
2022-09-15	08:41:32	4.05511	1697.94	43
2022-09-15	08:41:33	3.37463	1701.31	43
2022-09-15	08:41:34	4.98018	1706.29	43
2022-09-15	08:41:35	8.32547	1714.62	43
2022-09-15	08:41:36	14.3304	1728.95	44
2022-09-15	08:41:37	20.5892	1749.54	45
2022-09-15	08:41:38	33.5686	1783.11	46
2022-09-15	08:41:39	37.1509	1820.26	47
2022-09-15	08:41:40	36.2933	1856.55	48
2022-09-15	08:41:41	36.0641	1892.62	49
2022-09-15	08:41:42	20.88	1913.5	50
2022-09-15	08:41:43	19.709	1933.21	51
2022-09-15	08:41:44	17.0581	1950.26	52
2022-09-15	08:41:45	15.5025	1965.77	53
2022-09-15	08:41:46	20.0194	1985.79	54
2022-09-15	08:41:47	14.4848	2000.27	55
2022-09-15	08:41:48	12.0254	2012.3	55
2022-09-15	08:41:49	12.5809	2024.88	55
2022-09-15	08:41:50	3.40265	2028.28	55
2022-09-15	08:41:51	23.1245	2051.4	56
2022-09-15	08:41:52	3.24837	2054.65	56
2022-09-15	08:41:53	28.1096	2082.76	57
2022-09-15	08:41:54	51.175	2133.94	58
2022-09-15	08:41:55	37.6404	2171.58	59
2022-09-15	08:41:56	32.6023	2204.18	60
2022-09-15	08:41:57	31.2696	2235.45	61
2022-09-15	08:41:58	19.4524	2254.9	62
2022-09-15	08:41:59	1.94012	2256.84	62
2022-09-15	08:42:00	0.138597	2256.98	62
2022-09-15	08:42:01	19.7076	2276.69	63
2022-09-15	08:42:02	29.9662	2306.65	64
2022-09-15	08:42:03	6.26523	2312.92	64
2022-09-15	08:42:04	6.49029	2319.41	64
2022-09-15	08:42:05	7.44801	2326.86	64
2022-09-15	08:42:06	8.19691	2335.05	64
2022-09-15	08:42:07	10.3291	2345.38	64
2022-09-15	08:42:08	2.531	2347.91	64
2022-09-15	08:42:09	2.36304	2350.28	64
2022-09-15	08:42:10	37.9486	2388.23	65
2022-09-15	08:42:11	41.8387	2430.06	66
2022-09-15	08:42:12	29.8493	2459.91	67
2022-09-15	08:42:13	3.59167	2463.51	67
2022-09-15	08:42:14	2.18597	2465.69	67
2022-09-15	08:42:15	24.0791	2489.77	68
2022-09-15	08:42:16	13.1606	2502.93	69
2022-09-15	08:42:17	39.6673	2542.6	70
2022-09-15	08:42:18	51.1432	2593.74	71
2022-09-15	08:42:19	53.5533	2647.3	72
2022-09-15	08:42:20	70.1932	2717.49	73
2022-09-15	08:42:21	53.3417	2770.83	74
2022-09-15	08:42:22	57.5733	2828.4	75
2022-09-15	08:42:23	49.7652	2878.17	76
2022-09-15	08:42:24	59.8553	2938.02	77
2022-09-15	08:42:25	32.0377	2970.06	78
2022-09-15	08:42:26	28.3994	2998.46	79
2022-09-15	08:42:27	24.5638	3023.02	80
2022-09-15	08:42:28	30.594	3053.62	81
2022-09-15	08:42:29	38.9379	3092.56	82
2022-09-15	08:42:30	21.2298	3113.79	83
2022-09-15	08:42:31	14.9126	3128.7	84
2022-09-15	08:42:32	16.8774	3145.58	85
2022-09-15	08:42:33	8.51616	3154.09	85
2022-09-15	08:42:34	24.4142	3178.51	86
2022-09-15	08:42:35	62.212	3240.72	87
2022-09-15	08:42:36	52.1813	3292.9	88
2022-09-15	08:42:37	16.5744	3309.47	89
2022-09-15	08:42:38	19.7212	3329.2	90
2022-09-15	08:42:39	49.922	3379.12	91
2022-09-15	08:42:40	80.0282	3459.15	92
2022-09-15	08:42:41	98.0698	3557.22	93
2022-09-15	08:42:42	31.8091	3589.02	94
2022-09-15	08:42:43	42.0278	3631.05	95
2022-09-15	08:42:44	45.7837	3676.84	96
2022-09-15	08:42:45	29.622	3706.46	97
2022-09-15	08:42:46	26.2851	3732.74	98
2022-09-15	08:42:47	12.367	3745.11	98
2022-09-15	08:42:48	0.122694	3745.23	98
2022-09-15	08:42:49	-1.37319	3745.23	98
2022-09-15	08:42:50	1.44482	3746.68	98
2022-09-15	08:42:51	6.1169	3752.79	98
2022-09-15	08:42:52	3.3379	3756.13	98
2022-09-15	08:42:53	16.4708	3772.6	99
2022-09-15	08:42:54	16.8868	3789.49	100
2022-09-15	08:42:55	41.7808	3831.27	101
2022-09-15	08:42:56	11.7313	3843	101
2022-09-15	08:42:57	1.54919	3844.55	101
2022-09-15	08:42:58	7.30246	3851.85	101
2022-09-15	08:42:59	6.75357	3858.61	101
2022-09-15	08:43:00	2.64736	3861.25	101
2022-09-15	08:43:01	18.3904	3879.65	102
2022-09-15	08:43:02	41.7721	3921.42	103
2022-09-15	08:43:03	23.9041	3945.32	104
2022-09-15	08:43:04	29.626	3974.95	105
2022-09-15	08:43:05	16.5767	3991.52	106
2022-09-15	08:43:06	-0.734217	3991.52	106
2022-09-15	08:43:07	-3.33547	3991.52	106
2022-09-15	08:43:08	-3.64231	3991.52	106
2022-09-15	08:43:09	-3.60406	3991.52	106

## Sheet: Klutz_martin_20229158380 (4)
Date	Time	Lbs	Newtons	Averaged Newtons	Total force x time		total steps > 13.345	**GoPro Fitting: 827
2022-09-15	08:38:09	0.652379	2.90191	4.5864	2.90191	FALSE	0
2022-09-15	08:38:09	0.655178	2.91436	4.5864	2.91436	FALSE	0
2022-09-15	08:38:09	1.58017	7.02891	4.5864	9.93082	FALSE	0
2022-09-15	08:38:09	1.23655	5.50042	4.5864	8.41478	FALSE	0
2022-09-15	08:38:10	0.41528	1.84725	1.66191	11.7781	FALSE	0
2022-09-15	08:38:10	0.365967	1.62789	1.66191	10.0427	FALSE	0
2022-09-15	08:38:10	0.361132	1.60639	1.66191	13.3845	FALSE	0
2022-09-15	08:38:10	0.352074	1.5661	1.66191	11.6088	FALSE	0
2022-09-15	08:38:11	0.382099	1.69965	1.76162	15.0841	FALSE	0
2022-09-15	08:38:11	0.436247	1.94051	1.76162	13.5493	FALSE	0
2022-09-15	08:38:11	0.427952	1.90362	1.76162	16.9877	FALSE	0
2022-09-15	08:38:11	0.337824	1.50271	1.76162	15.052	FALSE	0
2022-09-15	08:38:12	0.441081	1.96202	1.86347	18.9497	FALSE	0
2022-09-15	08:38:12	0.314669	1.39971	1.86347	16.4517	FALSE	0
2022-09-15	08:38:12	0.50103	2.22868	1.86347	21.1784	FALSE	0
2022-09-15	08:38:13	0.418842	1.86309	5.25414	18.3148	FALSE	0
2022-09-15	08:38:13	0.84785	3.77141	5.25414	24.9498	FALSE	0
2022-09-15	08:38:13	1.38352	6.15417	5.25414	24.469	FALSE	0
2022-09-15	08:38:13	2.07452	9.22788	5.25414	34.1777	FALSE	0
2022-09-15	08:38:14	1.05039	4.67234	5.01248	29.1413	FALSE	0
2022-09-15	08:38:14	0.526578	2.34232	5.01248	36.52	FALSE	0
2022-09-15	08:38:14	0.895789	3.98465	5.01248	33.126	FALSE	0
2022-09-15	08:38:14	2.03467	9.05062	5.01248	45.5707	FALSE	0
2022-09-15	08:38:15	1.80307	8.02042	4.27118	41.1464	FALSE	0
2022-09-15	08:38:15	1.17945	5.24643	4.27118	50.8171	FALSE	0
2022-09-15	08:38:15	0.501234	2.22959	4.27118	43.376	FALSE	0
2022-09-15	08:38:15	0.357061	1.58828	4.27118	52.4054	FALSE	0
2022-09-15	08:38:16	0.64042	2.84872	3.90843	46.2247	FALSE	0
2022-09-15	08:38:16	0.690954	3.0735	3.90843	55.4789	FALSE	0
2022-09-15	08:38:16	1.30459	5.80308	3.90843	52.0278	FALSE	0
2022-09-15	08:38:17	1.42357	6.33232	3.99177	61.8112	FALSE	0
2022-09-15	08:38:17	0.833142	3.70598	3.99177	55.7337	FALSE	0
2022-09-15	08:38:17	0.689224	3.06581	3.99177	64.877	FALSE	0
2022-09-15	08:38:17	0.643626	2.86298	3.99177	58.5967	FALSE	0
2022-09-15	08:38:18	0.674669	3.00106	6.07621	67.8781	FALSE	0
2022-09-15	08:38:18	1.23615	5.49864	6.07621	64.0954	FALSE	0
2022-09-15	08:38:18	2.66301	11.8456	6.07621	79.7237	FALSE	0
2022-09-15	08:38:18	0.89014	3.95952	6.07621	68.0549	FALSE	0
2022-09-15	08:38:19	0.599911	2.66852	1.25076	82.3922	FALSE	0
2022-09-15	08:38:19	0.234313	1.04227	1.25076	69.0972	FALSE	0
2022-09-15	08:38:19	0.151412	0.673511	1.25076	83.0657	FALSE	0
2022-09-15	08:38:19	0.139097	0.618731	1.25076	69.7159	FALSE	0
2022-09-15	08:38:20	0.861438	3.83185	1.70622	86.8975	FALSE	0
2022-09-15	08:38:20	0.344186	1.53101	1.70622	71.2469	FALSE	0
2022-09-15	08:38:20	0.0192496	0.0856261	1.70622	86.9832	FALSE	0
2022-09-15	08:38:20	0.309427	1.37639	1.70622	72.6233	FALSE	0
2022-09-15	08:38:21	1.40291	6.24042	15.5495	93.2236	FALSE	0
2022-09-15	08:38:21	3.77843	16.8072	15.5495	89.4305	1	1
2022-09-15	08:38:21	5.30571	23.6009	15.5495	116.824	1	2
2022-09-15	08:38:22	8.4654	37.6558	21.5415	127.086	1	3
2022-09-15	08:38:22	5.87589	26.1371	21.5415	142.962	1	4
2022-09-15	08:38:22	3.92195	17.4456	21.5415	144.532	1	5
2022-09-15	08:38:22	1.10775	4.92749	21.5415	147.889	FALSE	5
2022-09-15	08:38:23	0.223677	0.99496	1.37634	145.527	FALSE	5
2022-09-15	08:38:23	0.399758	1.7782	1.37634	149.667	FALSE	5
2022-09-15	08:38:23	0.2964	1.31845	1.37634	146.845	FALSE	5
2022-09-15	08:38:23	0.317824	1.41374	1.37634	151.081	FALSE	5
2022-09-15	08:38:24	0.584084	2.59812	2.08658	149.443	FALSE	5
2022-09-15	08:38:24	0.200318	0.891055	2.08658	151.972	FALSE	5
2022-09-15	08:38:24	0.507341	2.25675	2.08658	151.7	FALSE	5
2022-09-15	08:38:24	0.584593	2.60039	2.08658	154.572	FALSE	5
2022-09-15	08:38:25	0.595738	2.64996	2.04517	154.35	FALSE	5
2022-09-15	08:38:25	0.382812	1.70282	2.04517	156.275	FALSE	5
2022-09-15	08:38:25	0.400776	1.78273	2.04517	156.133	FALSE	5
2022-09-15	08:38:26	0.381082	1.69513	1.94334	157.97	FALSE	5
2022-09-15	08:38:26	0.455331	2.0254	1.94334	158.158	FALSE	5
2022-09-15	08:38:26	0.447901	1.99235	1.94334	159.963	FALSE	5
2022-09-15	08:38:26	0.463219	2.06049	1.94334	160.219	FALSE	5
2022-09-15	08:38:27	0.519148	2.30927	2.48154	162.272	FALSE	5
2022-09-15	08:38:27	0.511718	2.27622	2.48154	162.495	FALSE	5
2022-09-15	08:38:27	0.528715	2.35183	2.48154	164.624	FALSE	5
2022-09-15	08:38:27	0.671921	2.98884	2.48154	165.484	FALSE	5
2022-09-15	08:38:28	0.412074	1.83299	1.75427	166.457	FALSE	5
2022-09-15	08:38:28	0.254313	1.13124	1.75427	166.615	FALSE	5
2022-09-15	08:38:28	0.247901	1.10271	1.75427	167.56	FALSE	5
2022-09-15	08:38:28	0.663219	2.95013	1.75427	169.565	FALSE	5
2022-09-15	08:38:29	1.07233	4.76994	3.36469	172.33	FALSE	5
2022-09-15	08:38:29	0.811514	3.60978	3.36469	173.175	FALSE	5
2022-09-15	08:38:29	0.385407	1.71437	3.36469	174.044	FALSE	5
2022-09-15	08:38:30	0.181285	0.806392	26.4122	173.981	FALSE	5
2022-09-15	08:38:30	1.31284	5.83977	26.4122	179.884	FALSE	5
2022-09-15	08:38:30	7.54189	33.5478	26.4122	207.529	1	6
2022-09-15	08:38:30	14.7149	65.4548	26.4122	245.338	1	7
2022-09-15	08:38:31	9.08917	40.4304	31.0369	247.96	1	8
2022-09-15	08:38:31	13.4009	59.6099	31.0369	304.948	1	9
2022-09-15	08:38:31	2.6049	11.5871	31.0369	259.547	FALSE	9
2022-09-15	08:38:31	2.81467	12.5202	31.0369	317.469	FALSE	9
2022-09-15	08:38:32	4.86383	21.6353	10.6988	281.182	1	10
2022-09-15	08:38:32	1.18576	5.2745	10.6988	322.743	FALSE	10
2022-09-15	08:38:32	1.55284	6.90734	10.6988	288.089	FALSE	10
2022-09-15	08:38:32	2.01838	8.97816	10.6988	331.721	FALSE	10
2022-09-15	08:38:33	3.2792	14.5865	16.9354	302.676	1	11
2022-09-15	08:38:33	4.56739	20.3167	16.9354	352.038	1	12
2022-09-15	08:38:33	3.57518	15.9031	16.9354	318.579	1	13
2022-09-15	08:38:34	5.91146	26.2954	21.6897	378.333	1	14
2022-09-15	08:38:34	4.25686	18.9354	21.6897	337.514	1	15
2022-09-15	08:38:34	5.49365	24.4369	21.6897	402.77	1	16
2022-09-15	08:38:34	3.84225	17.0911	21.6897	354.606	1	17
2022-09-15	08:38:35	4.06449	18.0797	29.3541	420.85	1	18
2022-09-15	08:38:35	7.32179	32.5688	29.3541	387.174	1	19
2022-09-15	08:38:35	8.09365	36.0022	29.3541	456.852	1	20
2022-09-15	08:38:35	6.9165	30.766	29.3541	417.94	1	21
2022-09-15	08:38:36	9.63319	42.8504	29.8831	499.702	1	22
2022-09-15	08:38:36	5.72296	25.4569	29.8831	443.397	1	23
2022-09-15	08:38:36	3.74408	16.6544	29.8831	516.357	1	24
2022-09-15	08:38:36	7.77182	34.5706	29.8831	477.968	1	25
2022-09-15	08:38:37	5.04337	22.4339	52.0356	538.791	1	26
2022-09-15	08:38:37	15.1825	67.5348	52.0356	545.503	1	27
2022-09-15	08:38:37	14.8685	66.1381	52.0356	604.929	1	28
2022-09-15	08:38:38	11.5474	51.3651	61.1551	596.868	1	29
2022-09-15	08:38:38	14.5359	64.6586	61.1551	669.587	1	30
2022-09-15	08:38:38	16.3389	72.6787	61.1551	669.546	1	31
2022-09-15	08:38:38	12.5709	55.9179	61.1551	725.505	1	32
2022-09-15	08:38:39	4.42342	19.6763	13.2221	689.223	1	33
2022-09-15	08:38:39	2.92418	13.0073	13.2221	738.513	FALSE	33
2022-09-15	08:38:39	2.39686	10.6617	13.2221	699.884	FALSE	33
2022-09-15	08:38:39	2.14541	9.54321	13.2221	748.056	FALSE	33
2022-09-15	08:38:40	7.03034	31.2724	18.6535	731.157	1	34
2022-09-15	08:38:40	5.84474	25.9986	18.6535	774.054	1	35
2022-09-15	08:38:40	1.50872	6.71109	18.6535	737.868	FALSE	35
2022-09-15	08:38:40	2.39019	10.632	18.6535	784.686	FALSE	35
2022-09-15	08:38:41	1.66027	7.38521	11.3494	745.253	FALSE	35
2022-09-15	08:38:41	2.57243	11.4427	11.3494	796.129	FALSE	35
2022-09-15	08:38:41	2.62454	11.6745	11.3494	756.928	FALSE	35
2022-09-15	08:38:41	3.34856	14.8951	11.3494	811.024	1	36
2022-09-15	08:38:42	3.45635	15.3745	14.1469	772.302	1	37
2022-09-15	08:38:42	3.55574	15.8166	14.1469	826.841	1	38
2022-09-15	08:38:42	2.52902	11.2496	14.1469	783.552	FALSE	38
2022-09-15	08:38:43	1.81233	8.06161	7.56041	834.902	FALSE	38
2022-09-15	08:38:43	1.75533	7.80806	7.56041	791.36	FALSE	38
2022-09-15	08:38:43	1.608	7.15271	7.56041	842.055	FALSE	38
2022-09-15	08:38:43	1.62296	7.21925	7.56041	798.579	FALSE	38
2022-09-15	08:38:44	1.48892	6.62301	5.88282	848.678	FALSE	38
2022-09-15	08:38:44	1.47604	6.56572	5.88282	805.145	FALSE	38
2022-09-15	08:38:44	1.47894	6.57862	5.88282	855.257	FALSE	38
2022-09-15	08:38:44	0.84617	3.76393	5.88282	808.909	FALSE	38
2022-09-15	08:38:45	1.03818	4.61803	4.32398	859.875	FALSE	38
2022-09-15	08:38:45	0.821132	3.65256	4.32398	812.561	FALSE	38
2022-09-15	08:38:45	0.970191	4.3156	4.32398	864.19	FALSE	38
2022-09-15	08:38:45	1.05879	4.70971	4.32398	817.271	FALSE	38
2022-09-15	08:38:46	1.04067	4.62911	3.88768	868.819	FALSE	38
2022-09-15	08:38:46	0.913549	4.06365	3.88768	821.335	FALSE	38
2022-09-15	08:38:46	0.667748	2.97028	3.88768	871.79	FALSE	38
2022-09-15	08:38:47	1.0138	4.50959	9.61495	825.844	FALSE	38
2022-09-15	08:38:47	1.81538	8.07517	9.61495	879.865	FALSE	38
2022-09-15	08:38:47	2.15279	9.57604	9.61495	835.42	FALSE	38
2022-09-15	08:38:47	3.66418	16.299	9.61495	896.164	1	39
2022-09-15	08:38:48	3.67793	16.3602	22.9491	851.78	1	40
2022-09-15	08:38:48	4.10541	18.2617	22.9491	914.426	1	41
2022-09-15	08:38:48	5.87197	26.1197	22.9491	877.9	1	42
2022-09-15	08:38:48	6.98143	31.0548	22.9491	945.48	1	43
2022-09-15	08:38:49	6.46708	28.7669	15.5288	906.667	1	44
2022-09-15	08:38:49	2.68749	11.9545	15.5288	957.435	FALSE	44
2022-09-15	08:38:49	2.2652	10.0761	15.5288	916.743	FALSE	44
2022-09-15	08:38:49	2.54439	11.318	15.5288	968.753	FALSE	44
2022-09-15	08:38:50	2.39604	10.6581	10.3568	927.401	FALSE	44
2022-09-15	08:38:50	2.23645	9.94818	10.3568	978.701	FALSE	44
2022-09-15	08:38:50	2.35243	10.4641	10.3568	937.865	FALSE	44
2022-09-15	08:38:51	3.23793	14.403	7.77593	993.104	1	45
2022-09-15	08:38:51	1.24826	5.55251	7.77593	943.418	FALSE	45
2022-09-15	08:38:51	2.05167	9.12624	7.77593	1002.23	FALSE	45
2022-09-15	08:38:51	0.454568	2.02201	7.77593	945.44	FALSE	45
2022-09-15	08:38:52	0.845611	3.76145	4.09494	1005.99	FALSE	45
2022-09-15	08:38:52	0.645967	2.87339	4.09494	948.313	FALSE	45
2022-09-15	08:38:52	1.27034	5.65073	4.09494	1011.64	FALSE	45
2022-09-15	08:38:52	0.92042	4.09421	4.09494	952.407	FALSE	45
2022-09-15	08:38:53	1.09385	4.86566	3.25867	1016.51	FALSE	45
2022-09-15	08:38:53	0.680674	3.02777	3.25867	955.435	FALSE	45
2022-09-15	08:38:53	0.655534	2.91595	3.25867	1019.42	FALSE	45
2022-09-15	08:38:53	0.500267	2.22529	3.25867	957.66	FALSE	45
2022-09-15	08:38:54	0.50444	2.24385	1.70237	1021.67	FALSE	45
2022-09-15	08:38:54	0.309682	1.37753	1.70237	959.038	FALSE	45
2022-09-15	08:38:54	0.334008	1.48573	1.70237	1023.15	FALSE	45
2022-09-15	08:38:55	0.298079	1.32592	7.26431	960.364	FALSE	45
2022-09-15	08:38:55	0.509224	2.26513	7.26431	1025.42	FALSE	45
2022-09-15	08:38:55	2.48525	11.0549	7.26431	971.419	FALSE	45
2022-09-15	08:38:55	3.23981	14.4113	7.26431	1039.83	1	46
2022-09-15	08:38:56	3.28978	14.6336	8.30834	986.052	1	47
2022-09-15	08:38:56	2.01014	8.9415	8.30834	1048.77	FALSE	47
2022-09-15	08:38:56	1.01981	4.53632	8.30834	990.589	FALSE	47
2022-09-15	08:38:56	1.15146	5.12192	8.30834	1053.89	FALSE	47
2022-09-15	08:38:57	0.374313	1.66502	1.71414	992.254	FALSE	47
2022-09-15	08:38:57	0.210242	0.935198	1.71414	1054.83	FALSE	47
2022-09-15	08:38:57	0.657417	2.92432	1.71414	995.178	FALSE	47
2022-09-15	08:38:57	0.299453	1.33203	1.71414	1056.16	FALSE	47
2022-09-15	08:38:58	0.0879518	0.391227	2.64234	995.569	FALSE	47
2022-09-15	08:38:58	0.0565524	0.251556	2.64234	1056.41	FALSE	47
2022-09-15	08:38:58	1.63757	7.28424	2.64234	1002.85	FALSE	47
2022-09-15	08:38:59	6.04866	26.9056	18.5179	1083.32	1	48
2022-09-15	08:38:59	3.15202	14.0208	18.5179	1016.87	1	49
2022-09-15	08:38:59	4.60418	20.4803	18.5179	1103.8	1	50
2022-09-15	08:38:59	2.84714	12.6646	18.5179	1029.54	FALSE	50
2022-09-15	08:39:00	7.57904	33.7131	24.8111	1137.51	1	51
2022-09-15	08:39:00	2.01594	8.9673	24.8111	1038.51	FALSE	51
2022-09-15	08:39:00	7.3566	32.7236	24.8111	1170.23	1	52
2022-09-15	08:39:00	5.35955	23.8404	24.8111	1062.35	1	53
2022-09-15	08:39:01	3.9853	17.7274	10.7881	1187.96	1	54
2022-09-15	08:39:01	3.49304	15.5377	10.7881	1077.88	1	55
2022-09-15	08:39:01	1.34261	5.9722	10.7881	1193.93	FALSE	55
2022-09-15	08:39:01	0.880115	3.91493	10.7881	1081.8	FALSE	55
2022-09-15	08:39:02	0.599911	2.66852	2.73151	1196.6	FALSE	55
2022-09-15	08:39:02	0.703321	3.12851	2.73151	1084.93	FALSE	55
2022-09-15	08:39:02	0.547494	2.43536	2.73151	1199.04	FALSE	55
2022-09-15	08:39:02	0.60556	2.69365	2.73151	1087.62	FALSE	55
2022-09-15	08:39:03	0.482049	2.14425	2.42352	1201.18	FALSE	55
2022-09-15	08:39:03	0.512023	2.27758	2.42352	1089.9	FALSE	55
2022-09-15	08:39:03	0.64042	2.84872	2.42352	1204.03	FALSE	55
2022-09-15	08:39:04	0.609224	2.70995	2.83157	1092.61	FALSE	55
2022-09-15	08:39:04	1.23971	5.51448	2.83157	1209.55	FALSE	55
2022-09-15	08:39:04	0.431412	1.91901	2.83157	1094.53	FALSE	55
2022-09-15	08:39:04	0.265916	1.18285	2.83157	1210.73	FALSE	55
2022-09-15	08:39:05	0.26729	1.18896	1.86955	1095.72	FALSE	55
2022-09-15	08:39:05	0.428155	1.90452	1.86955	1212.63	FALSE	55
2022-09-15	08:39:05	0.530802	2.36111	1.86955	1098.08	FALSE	55
2022-09-15	08:39:05	0.454924	2.02359	1.86955	1214.66	FALSE	55
2022-09-15	08:39:06	0.6364	2.83083	2.03678	1100.91	FALSE	55
2022-09-15	08:39:06	0.578995	2.57549	2.03678	1217.23	FALSE	55
2022-09-15	08:39:06	0.354669	1.57764	2.03678	1102.49	FALSE	55
2022-09-15	08:39:06	0.261489	1.16316	2.03678	1218.4	FALSE	55
2022-09-15	08:39:07	0.265916	1.18285	1.01835	1103.67	FALSE	55
2022-09-15	08:39:07	0.263117	1.1704	1.01835	1219.57	FALSE	55
2022-09-15	08:39:07	0.157774	0.70181	1.01835	1104.37	FALSE	55
2022-09-15	08:39:08	0.112328	0.499657	0.392359	1220.07	FALSE	55
2022-09-15	08:39:08	0.0969086	0.431069	0.392359	1104.8	FALSE	55
2022-09-15	08:39:08	0.0618959	0.275325	0.392359	1220.34	FALSE	55
2022-09-15	08:39:08	0.0816923	0.363384	0.392359	1105.17	FALSE	55
2022-09-15	08:39:09	0.0447967	0.199265	0.163158	1220.54	FALSE	55
2022-09-15	08:39:09	0.0296822	0.132032	0.163158	1105.3	FALSE	55
2022-09-15	08:39:09	0.0321249	0.142898	0.163158	1220.68	FALSE	55
2022-09-15	08:39:09	0.0401147	0.178438	0.163158	1105.48	FALSE	55
2022-09-15	08:39:10	0.038588	0.171647	0.0998873	1220.85	FALSE	55
2022-09-15	08:39:10	0.0243386	0.108263	0.0998873	1105.58	FALSE	55
2022-09-15	08:39:10	0.0226083	0.100566	0.0998873	1220.96	FALSE	55
2022-09-15	08:39:10	0.00428777	0.0190729	0.0998873	1105.6	FALSE	55
2022-09-15	08:39:11	0.000929014	0.00413244	-0.667285	1220.96	FALSE	55
2022-09-15	08:39:11	-0.0924043	-0.411033	-0.667285	1105.6	FALSE	55
2022-09-15	08:39:11	-0.358562	-1.59496	-0.667285	1220.96	FALSE	55
2022-09-15	08:39:12	-0.546043	-2.42891	-2.98969	1105.6	FALSE	55
2022-09-15	08:39:12	-0.616832	-2.74379	-2.98969	1220.96	FALSE	55
2022-09-15	08:39:12	-0.721768	-3.21057	-2.98969	1105.6	FALSE	55
2022-09-15	08:39:12	-0.803803	-3.57548	-2.98969	1220.96	FALSE	55
2022-09-15	08:39:13	-0.839274	-3.73326	-3.56224	1105.6	FALSE	55
2022-09-15	08:39:13	-0.978562	-4.35284	-3.56224	1220.96	FALSE	55
2022-09-15	08:39:13	-0.826043	-3.6744	-3.56224	1105.6	FALSE	55
2022-09-15	08:39:13	-0.559427	-2.48844	-3.56224	1220.96	FALSE	55
2022-09-15	08:39:14	-0.340089	-1.51278	0.0263173	1105.6	FALSE	55
2022-09-15	08:39:14	-0.0723534	-0.321842	0.0263173	1220.96	FALSE	55
2022-09-15	08:39:14	0.177825	0.791001	0.0263173	1106.39	FALSE	55
2022-09-15	08:39:14	0.258283	1.14889	0.0263173	1222.11	FALSE	55
2022-09-15	08:39:15	0.28729	1.27792	1.64291	1107.67	FALSE	55
2022-09-15	08:39:15	0.361438	1.60775	1.64291	1223.72	FALSE	55
2022-09-15	08:39:15	0.4593	2.04306	1.64291	1109.72	FALSE	55
2022-09-15	08:39:16	0.539605	2.40027	3.47424	1226.12	FALSE	55
2022-09-15	08:39:16	1.00378	4.46501	3.47424	1114.18	FALSE	55
2022-09-15	08:39:16	0.98444	4.37899	3.47424	1230.5	FALSE	55
2022-09-15	08:39:16	0.596349	2.65268	3.47424	1116.83	FALSE	55
2022-09-15	08:39:17	0.0970612	0.431748	-1.02009	1230.93	FALSE	55
2022-09-15	08:39:17	-0.18528	-0.824162	-1.02009	1116.83	FALSE	55
2022-09-15	08:39:17	-0.274796	-1.22235	-1.02009	1230.93	FALSE	55
2022-09-15	08:39:17	-0.554287	-2.46558	-1.02009	1116.83	FALSE	55
2022-09-15	08:39:18	-0.648231	-2.88346	-2.64175	1230.93	FALSE	55
2022-09-15	08:39:18	-0.704261	-3.13269	-2.64175	1116.83	FALSE	55
2022-09-15	08:39:18	-0.567213	-2.52308	-2.64175	1230.93	FALSE	55
2022-09-15	08:39:18	-0.455865	-2.02778	-2.64175	1116.83	FALSE	55
2022-09-15	08:39:19	-0.0344908	-0.153422	0.0646491	1230.93	FALSE	55
2022-09-15	08:39:19	0.0442369	0.196775	0.0646491	1117.03	FALSE	55
2022-09-15	08:39:19	0.0338552	0.150595	0.0646491	1231.08	FALSE	55
2022-09-15	08:39:20	0.150904	0.671251	0.752743	1117.7	FALSE	55
2022-09-15	08:39:20	0.363168	1.61544	0.752743	1232.69	FALSE	55
2022-09-15	08:39:20	-0.415457	-1.84804	0.752743	1117.7	FALSE	55
2022-09-15	08:39:20	0.578282	2.57231	0.752743	1235.27	FALSE	55
2022-09-15	08:39:21	0.99472	4.42471	6.31101	1122.13	FALSE	55
2022-09-15	08:39:21	1.32978	5.91513	6.31101	1241.18	FALSE	55
2022-09-15	08:39:21	1.56281	6.95169	6.31101	1129.08	FALSE	55
2022-09-15	08:39:21	1.7878	7.95249	6.31101	1249.13	FALSE	55
2022-09-15	08:39:22	2.09024	9.29781	10.5455	1138.38	FALSE	55
2022-09-15	08:39:22	2.30877	10.2699	10.5455	1259.4	FALSE	55
2022-09-15	08:39:22	2.62617	11.6817	10.5455	1150.06	FALSE	55
2022-09-15	08:39:22	2.45772	10.9324	10.5455	1270.34	FALSE	55
2022-09-15	08:39:23	2.83574	12.6139	12.8379	1162.67	FALSE	55
2022-09-15	08:39:23	2.87569	12.7916	12.8379	1283.13	FALSE	55
2022-09-15	08:39:23	2.77513	12.3443	12.8379	1175.02	FALSE	55
2022-09-15	08:39:23	3.05777	13.6016	12.8379	1296.73	1	56
2022-09-15	08:39:24	2.98841	13.293	12.8137	1188.31	FALSE	56
2022-09-15	08:39:24	2.7653	12.3006	12.8137	1309.03	FALSE	56
2022-09-15	08:39:24	2.88826	12.8476	12.8137	1201.16	FALSE	56
2022-09-15	08:39:25	3.71574	16.5284	17.7111	1325.56	1	57
2022-09-15	08:39:25	4.19553	18.6626	17.7111	1219.82	1	58
2022-09-15	08:39:25	3.95955	17.6129	17.7111	1343.17	1	59
2022-09-15	08:39:25	4.05574	18.0407	17.7111	1237.86	1	60
2022-09-15	08:39:26	4.05452	18.0353	17.3197	1361.21	1	61
2022-09-15	08:39:26	3.89859	17.3417	17.3197	1255.2	1	62
2022-09-15	08:39:26	4.10256	18.249	17.3197	1379.45	1	63
2022-09-15	08:39:26	3.51889	15.6527	17.3197	1270.85	1	64
2022-09-15	08:39:27	3.48714	15.5115	15.8895	1394.97	1	65
2022-09-15	08:39:27	3.54194	15.7553	15.8895	1286.61	1	66
2022-09-15	08:39:27	3.45095	15.3505	15.8895	1410.32	1	67
2022-09-15	08:39:27	3.80846	16.9408	15.8895	1303.55	1	68
2022-09-15	08:39:28	3.84525	17.1044	15.3182	1427.42	1	69
2022-09-15	08:39:28	4.13055	18.3735	15.3182	1321.92	1	70
2022-09-15	08:39:28	2.35528	10.4768	15.3182	1437.9	FALSE	70
2022-09-15	08:39:29	1.94586	8.65557	4.77292	1330.58	FALSE	70
2022-09-15	08:39:29	0.873142	3.88391	4.77292	1441.78	FALSE	70
2022-09-15	08:39:29	0.737977	3.28267	4.77292	1333.86	FALSE	70
2022-09-15	08:39:29	0.735026	3.26954	4.77292	1445.05	FALSE	70
2022-09-15	08:39:30	0.636858	2.83287	0.0868154	1336.69	FALSE	70
2022-09-15	08:39:30	0.00515291	0.0229212	0.0868154	1445.07	FALSE	70
2022-09-15	08:39:30	-0.195712	-0.870566	0.0868154	1336.69	FALSE	70
2022-09-15	08:39:30	-0.368231	-1.63797	0.0868154	1445.07	FALSE	70
2022-09-15	08:39:31	-0.426908	-1.89897	-0.844704	1336.69	FALSE	70
2022-09-15	08:39:31	-0.251539	-1.1189	-0.844704	1445.07	FALSE	70
2022-09-15	08:39:31	-0.0290964	-0.129427	-0.844704	1336.69	FALSE	70
2022-09-15	08:39:31	-0.0520481	-0.23152	-0.844704	1445.07	FALSE	70
2022-09-15	08:39:32	0.231972	1.03186	1.167	1337.73	FALSE	70
2022-09-15	08:39:32	0.215229	0.957382	1.167	1446.03	FALSE	70
2022-09-15	08:39:32	0.33986	1.51177	1.167	1339.24	FALSE	70
2022-09-15	08:39:33	0.513143	2.28256	1.72433	1448.31	FALSE	70
2022-09-15	08:39:33	0.0623539	0.277363	1.72433	1339.52	FALSE	70
2022-09-15	08:39:33	0.362659	1.61318	1.72433	1449.93	FALSE	70
2022-09-15	08:39:33	0.61243	2.72421	1.72433	1342.24	FALSE	70
2022-09-15	08:39:34	0.725458	3.22698	2.41951	1453.15	FALSE	70
2022-09-15	08:39:34	0.586527	2.60899	2.41951	1344.85	FALSE	70
2022-09-15	08:39:34	0.423931	1.88573	2.41951	1455.04	FALSE	70
2022-09-15	08:39:34	0.439809	1.95636	2.41951	1346.8	FALSE	70
2022-09-15	08:39:35	0.385407	1.71437	1.74991	1456.75	FALSE	70
2022-09-15	08:39:35	0.399809	1.77843	1.74991	1348.58	FALSE	70
2022-09-15	08:39:35	0.431565	1.91969	1.74991	1458.67	FALSE	70
2022-09-15	08:39:35	0.356807	1.58715	1.74991	1350.17	FALSE	70
2022-09-15	08:39:36	0.350445	1.55885	1.61227	1460.23	FALSE	70
2022-09-15	08:39:36	0.311616	1.38613	1.61227	1351.56	FALSE	70
2022-09-15	08:39:36	0.425305	1.89184	1.61227	1462.12	FALSE	70
2022-09-15	08:39:37	0.379707	1.68901	1.75902	1353.25	FALSE	70
2022-09-15	08:39:37	0.328715	1.46219	1.75902	1463.59	FALSE	70
2022-09-15	08:39:37	0.335585	1.49275	1.75902	1354.74	FALSE	70
2022-09-15	08:39:37	0.537774	2.39213	1.75902	1465.98	FALSE	70
2022-09-15	08:39:38	1.31518	5.85018	12.2402	1360.59	FALSE	70
2022-09-15	08:39:38	3.60413	16.0319	12.2402	1482.01	1	71
2022-09-15	08:39:38	3.22281	14.3357	12.2402	1374.92	1	72
2022-09-15	08:39:38	2.86479	12.7432	12.2402	1494.75	FALSE	72
2022-09-15	08:39:39	2.98729	13.2881	11.9138	1388.21	FALSE	72
2022-09-15	08:39:39	2.50943	11.1624	11.9138	1505.92	FALSE	72
2022-09-15	08:39:39	2.80871	12.4937	11.9138	1400.71	FALSE	72
2022-09-15	08:39:39	2.4079	10.7108	11.9138	1516.63	FALSE	72
2022-09-15	08:39:40	2.01014	8.9415	10.3732	1409.65	FALSE	72
2022-09-15	08:39:40	1.60118	7.12237	10.3732	1523.75	FALSE	72
2022-09-15	08:39:40	2.58917	11.5171	10.3732	1421.16	FALSE	72
2022-09-15	08:39:40	3.12749	13.9117	10.3732	1537.66	1	73
2022-09-15	08:39:41	2.631	11.7032	5.11967	1432.87	FALSE	73
2022-09-15	08:39:41	0.483524	2.15081	5.11967	1539.81	FALSE	73
2022-09-15	08:39:41	0.338333	1.50497	5.11967	1434.37	FALSE	73
2022-09-15	08:39:42	-0.0302669	-0.134633	0.142671	1539.81	FALSE	73
2022-09-15	08:39:42	0.124542	0.553988	0.142671	1434.93	FALSE	73
2022-09-15	08:39:42	0.00642519	0.0285805	0.142671	1539.84	FALSE	73
2022-09-15	08:39:42	0.0275956	0.122751	0.142671	1435.05	FALSE	73
2022-09-15	08:39:43	-0.108333	-0.481887	0.447311	1539.84	FALSE	73
2022-09-15	08:39:43	0.120725	0.537009	0.447311	1435.59	FALSE	73
2022-09-15	08:39:43	0.085102	0.378551	0.447311	1540.22	FALSE	73
2022-09-15	08:39:43	0.304746	1.35557	0.447311	1436.94	FALSE	73
2022-09-15	08:39:44	0.476349	2.1189	2.05483	1542.34	FALSE	73
2022-09-15	08:39:44	0.592023	2.63344	2.05483	1439.58	FALSE	73
2022-09-15	08:39:44	0.530751	2.36089	2.05483	1544.7	FALSE	73
2022-09-15	08:39:44	0.248664	1.10611	2.05483	1440.68	FALSE	73
2022-09-15	08:39:45	0.063219	0.281211	0.595565	1544.98	FALSE	73
2022-09-15	08:39:45	0.0627101	0.278947	0.595565	1440.96	FALSE	73
2022-09-15	08:39:45	0.275738	1.22654	0.595565	1546.21	FALSE	73
2022-09-15	08:39:46	0.380878	1.69422	6.25426	1442.65	FALSE	73
2022-09-15	08:39:46	1.06663	4.74458	6.25426	1550.95	FALSE	73
2022-09-15	08:39:46	1.44999	6.44985	6.25426	1449.1	FALSE	73
2022-09-15	08:39:46	2.72658	12.1284	6.25426	1563.08	FALSE	73
2022-09-15	08:39:47	3.28368	14.6065	9.55	1463.71	1	74
2022-09-15	08:39:47	3.2363	14.3957	9.55	1577.48	1	75
2022-09-15	08:39:47	1.04744	4.65922	9.55	1468.37	FALSE	75
2022-09-15	08:39:47	1.02032	4.53859	9.55	1582.01	FALSE	75
2022-09-15	08:39:48	0.213397	0.949233	0.722126	1469.32	FALSE	75
2022-09-15	08:39:48	0.263982	1.17424	0.722126	1583.19	FALSE	75
2022-09-15	08:39:48	0.0686135	0.305207	0.722126	1469.62	FALSE	75
2022-09-15	08:39:48	0.103372	0.459819	0.722126	1583.65	FALSE	75
2022-09-15	08:39:49	0.180827	0.804355	1.42303	1470.43	FALSE	75
2022-09-15	08:39:49	0.393193	1.749	1.42303	1585.4	FALSE	75
2022-09-15	08:39:49	0.385713	1.71573	1.42303	1472.14	FALSE	75
2022-09-15	08:39:50	0.685916	3.05109	1.76474	1588.45	FALSE	75
2022-09-15	08:39:50	0.416501	1.85268	1.76474	1474	FALSE	75
2022-09-15	08:39:50	0.249377	1.10928	1.76474	1589.56	FALSE	75
2022-09-15	08:39:50	0.235127	1.04589	1.76474	1475.04	FALSE	75
2022-09-15	08:39:51	0.420166	1.86898	4.81169	1591.43	FALSE	75
2022-09-15	08:39:51	0.556247	2.4743	4.81169	1477.52	FALSE	75
2022-09-15	08:39:51	0.513244	2.28301	4.81169	1593.71	FALSE	75
2022-09-15	08:39:51	2.83721	12.6205	4.81169	1490.14	FALSE	75
2022-09-15	08:39:52	2.73696	12.1745	12.152	1605.88	FALSE	75
2022-09-15	08:39:52	2.4024	10.6864	12.152	1500.82	FALSE	75
2022-09-15	08:39:52	3.18876	14.1842	12.152	1620.07	1	76
2022-09-15	08:39:52	2.59945	11.5629	12.152	1512.39	FALSE	76
2022-09-15	08:39:53	1.95212	8.68342	5.21557	1628.75	FALSE	76
2022-09-15	08:39:53	0.713448	3.17356	5.21557	1515.56	FALSE	76
2022-09-15	08:39:53	0.851972	3.78974	5.21557	1632.54	FALSE	76
2022-09-15	08:39:54	1.56474	6.96028	6.25815	1522.52	FALSE	76
2022-09-15	08:39:54	0.497367	2.21239	6.25815	1634.75	FALSE	76
2022-09-15	08:39:54	0.678842	3.01962	6.25815	1525.54	FALSE	76
2022-09-15	08:39:54	2.88663	12.8403	6.25815	1647.59	FALSE	76
2022-09-15	08:39:55	0.279046	1.24125	1.22139	1526.78	FALSE	76
2022-09-15	08:39:55	0.126069	0.56078	1.22139	1648.16	FALSE	76
2022-09-15	08:39:55	0.321336	1.42937	1.22139	1528.21	FALSE	76
2022-09-15	08:39:55	0.37187	1.65415	1.22139	1649.81	FALSE	76
2022-09-15	08:39:56	-0.0449743	-0.200055	0.586473	1528.21	FALSE	76
2022-09-15	08:39:56	0.017214	0.0765713	0.586473	1649.89	FALSE	76
2022-09-15	08:39:56	0.398944	1.77458	0.586473	1529.99	FALSE	76
2022-09-15	08:39:56	0.156196	0.694791	0.586473	1650.58	FALSE	76
2022-09-15	08:39:57	0.324237	1.44227	2.03468	1531.43	FALSE	76
2022-09-15	08:39:57	0.430191	1.91358	2.03468	1652.49	FALSE	76
2022-09-15	08:39:57	0.617824	2.7482	2.03468	1534.18	FALSE	76
2022-09-15	08:39:58	0.455789	2.02744	1.72903	1654.52	FALSE	76
2022-09-15	08:39:58	0.349835	1.55614	1.72903	1535.73	FALSE	76
2022-09-15	08:39:58	0.373804	1.66275	1.72903	1656.18	FALSE	76
2022-09-15	08:39:58	0.375382	1.66977	1.72903	1537.4	FALSE	76
2022-09-15	08:39:59	0.346832	1.54278	1.61941	1657.73	FALSE	76
2022-09-15	08:39:59	0.308613	1.37277	1.61941	1538.78	FALSE	76
2022-09-15	08:39:59	0.39299	1.7481	1.61941	1659.48	FALSE	76
2022-09-15	08:39:59	0.407799	1.81397	1.61941	1540.59	FALSE	76
2022-09-15	08:40:00	0.504033	2.24204	4.19693	1661.72	FALSE	76
2022-09-15	08:40:00	0.696145	3.09659	4.19693	1543.69	FALSE	76
2022-09-15	08:40:00	0.81187	3.61136	4.19693	1665.33	FALSE	76
2022-09-15	08:40:00	1.762	7.83773	4.19693	1551.52	FALSE	76
2022-09-15	08:40:01	0.636806	2.83264	1.54131	1668.16	FALSE	76
2022-09-15	08:40:01	0.324389	1.44295	1.54131	1552.97	FALSE	76
2022-09-15	08:40:01	0.181387	0.806846	1.54131	1668.97	FALSE	76
2022-09-15	08:40:01	0.243422	1.08279	1.54131	1554.05	FALSE	76
2022-09-15	08:40:02	0.238741	1.06197	0.480041	1670.03	FALSE	76
2022-09-15	08:40:02	0.0986389	0.438766	0.480041	1554.49	FALSE	76
2022-09-15	08:40:02	-0.0136257	-0.0606098	0.480041	1670.03	FALSE	76
2022-09-15	08:40:03	0.236705	1.05291	16.129	1555.54	FALSE	76
2022-09-15	08:40:03	3.94052	17.5282	16.129	1687.56	1	77
2022-09-15	08:40:03	6.60932	29.3996	16.129	1584.94	1	78
2022-09-15	08:40:03	3.71731	16.5353	16.129	1704.09	1	79
2022-09-15	08:40:04	2.19472	9.76255	5.84531	1594.7	FALSE	79
2022-09-15	08:40:04	1.36154	6.0564	5.84531	1710.15	FALSE	79
2022-09-15	08:40:04	1.10327	4.90757	5.84531	1599.61	FALSE	79
2022-09-15	08:40:04	0.596807	2.65472	5.84531	1712.8	FALSE	79
2022-09-15	08:40:05	0.295127	1.31278	13.1927	1600.92	FALSE	79
2022-09-15	08:40:05	0.195891	0.871362	13.1927	1713.68	FALSE	79
2022-09-15	08:40:05	2.17508	9.67519	13.1927	1610.6	FALSE	79
2022-09-15	08:40:05	9.19731	40.9115	13.1927	1754.59	1	80
2022-09-15	08:40:06	15.5056	68.972	45.919	1679.57	1	81
2022-09-15	08:40:06	8.95029	39.8127	45.919	1794.4	1	82
2022-09-15	08:40:06	6.51329	28.9724	45.919	1708.54	1	83
2022-09-15	08:40:07	2.25375	10.0251	10.3113	1804.43	FALSE	83
2022-09-15	08:40:07	3.35024	14.9025	10.3113	1723.45	1	84
2022-09-15	08:40:07	1.76408	7.84698	10.3113	1812.27	FALSE	84
2022-09-15	08:40:07	1.90429	8.47066	10.3113	1731.92	FALSE	84
2022-09-15	08:40:08	1.61243	7.17241	10.7813	1819.44	FALSE	84
2022-09-15	08:40:08	2.79462	12.431	10.7813	1744.35	FALSE	84
2022-09-15	08:40:08	2.79553	12.4351	10.7813	1831.88	FALSE	84
2022-09-15	08:40:08	2.49238	11.0866	10.7813	1755.43	FALSE	84
2022-09-15	08:40:09	0.827596	3.68131	1.56864	1835.56	FALSE	84
2022-09-15	08:40:09	0.372888	1.65868	1.56864	1757.09	FALSE	84
2022-09-15	08:40:09	0.0708017	0.31494	1.56864	1835.88	FALSE	84
2022-09-15	08:40:09	0.1393	0.619634	1.56864	1757.71	FALSE	84
2022-09-15	08:40:10	1.4963	6.65584	9.926	1842.53	FALSE	84
2022-09-15	08:40:10	3.39345	15.0947	9.926	1772.81	1	85
2022-09-15	08:40:10	1.80464	8.0274	9.926	1850.56	FALSE	85
2022-09-15	08:40:11	0.340318	1.5138	0.698696	1774.32	FALSE	85
2022-09-15	08:40:11	0.218639	0.97255	0.698696	1851.53	FALSE	85
2022-09-15	08:40:11	0.0812343	0.361346	0.698696	1774.68	FALSE	85
2022-09-15	08:40:11	-0.0118954	-0.0529131	0.698696	1851.53	FALSE	85
2022-09-15	08:40:12	0.16673	0.741648	0.945781	1775.42	FALSE	85
2022-09-15	08:40:12	0.19126	0.850763	0.945781	1852.38	FALSE	85
2022-09-15	08:40:12	0.195942	0.871589	0.945781	1776.3	FALSE	85
2022-09-15	08:40:12	0.296552	1.31912	0.945781	1853.7	FALSE	85
2022-09-15	08:40:13	0.611616	2.72059	3.29886	1779.02	FALSE	85
2022-09-15	08:40:13	0.743881	3.30893	3.29886	1857.01	FALSE	85
2022-09-15	08:40:13	0.892532	3.97016	3.29886	1782.99	FALSE	85
2022-09-15	08:40:13	0.718435	3.19574	3.29886	1860.21	FALSE	85
2022-09-15	08:40:14	0.175382	0.780134	0.635256	1783.77	FALSE	85
2022-09-15	08:40:14	0.12439	0.553312	0.635256	1860.76	FALSE	85
2022-09-15	08:40:14	0.128664	0.572323	0.635256	1784.34	FALSE	85
2022-09-15	08:40:15	0.186018	0.827445	0.899658	1861.59	FALSE	85
2022-09-15	08:40:15	-0.0341346	-0.151838	0.899658	1784.34	FALSE	85
2022-09-15	08:40:15	0.150751	0.670571	0.899658	1862.26	FALSE	85
2022-09-15	08:40:15	0.506374	2.25245	0.899658	1786.59	FALSE	85
2022-09-15	08:40:16	0.680064	3.02506	2.28415	1865.28	FALSE	85
2022-09-15	08:40:16	0.579147	2.57616	2.28415	1789.17	FALSE	85
2022-09-15	08:40:16	0.49187	2.18794	2.28415	1867.47	FALSE	85
2022-09-15	08:40:16	0.302914	1.34742	2.28415	1790.51	FALSE	85
2022-09-15	08:40:17	0.188512	0.838539	0.632088	1868.31	FALSE	85
2022-09-15	08:40:17	0.177265	0.78851	0.632088	1791.3	FALSE	85
2022-09-15	08:40:17	0.154059	0.685285	0.632088	1868.99	FALSE	85
2022-09-15	08:40:17	0.0485626	0.216016	0.632088	1791.52	FALSE	85
2022-09-15	08:40:18	0.129122	0.57436	2.64306	1869.57	FALSE	85
2022-09-15	08:40:18	0.641947	2.85551	2.64306	1794.37	FALSE	85
2022-09-15	08:40:18	0.703677	3.1301	2.64306	1872.7	FALSE	85
2022-09-15	08:40:18	0.901997	4.01226	2.64306	1798.39	FALSE	85
2022-09-15	08:40:19	0.418537	1.86174	3.99529	1874.56	FALSE	85
2022-09-15	08:40:19	0.602099	2.67826	3.99529	1801.07	FALSE	85
2022-09-15	08:40:19	1.67391	7.44589	3.99529	1882.01	FALSE	85
2022-09-15	08:40:20	2.86668	12.7516	17.3701	1813.82	FALSE	85
2022-09-15	08:40:20	4.57345	20.3436	17.3701	1902.35	1	86
2022-09-15	08:40:20	3.32724	14.8002	17.3701	1828.62	1	87
2022-09-15	08:40:20	4.85248	21.5848	17.3701	1923.94	1	88
2022-09-15	08:40:21	5.6164	24.9829	20.1632	1853.6	1	89
2022-09-15	08:40:21	5.7192	25.4401	20.1632	1949.38	1	90
2022-09-15	08:40:21	3.73131	16.5976	20.1632	1870.2	1	91
2022-09-15	08:40:21	3.06464	13.6321	20.1632	1963.01	1	92
2022-09-15	08:40:22	1.52475	6.78239	2.69592	1876.98	FALSE	92
2022-09-15	08:40:22	0.417519	1.85721	2.69592	1964.86	FALSE	92
2022-09-15	08:40:22	0.246069	1.09456	2.69592	1878.07	FALSE	92
2022-09-15	08:40:22	0.235942	1.04952	2.69592	1965.91	FALSE	92
2022-09-15	08:40:23	0.706883	3.14436	17.9446	1881.22	FALSE	92
2022-09-15	08:40:23	5.85762	26.0559	17.9446	1991.97	1	93
2022-09-15	08:40:23	5.53787	24.6336	17.9446	1905.85	1	94
2022-09-15	08:40:24	7.51513	33.4288	12.0564	2025.4	1	95
2022-09-15	08:40:24	2.47513	11.0099	12.0564	1916.86	FALSE	95
2022-09-15	08:40:24	0.491158	2.18477	12.0564	2027.58	FALSE	95
2022-09-15	08:40:24	0.360216	1.60231	12.0564	1918.46	FALSE	95
2022-09-15	08:40:25	0.215127	0.956928	1.12235	2028.54	FALSE	95
2022-09-15	08:40:25	0.281998	1.25438	1.12235	1919.72	FALSE	95
2022-09-15	08:40:25	0.278893	1.24057	1.12235	2029.78	FALSE	95
2022-09-15	08:40:25	0.233244	1.03752	1.12235	1920.76	FALSE	95
2022-09-15	08:40:26	0.32673	1.45336	1.09241	2031.23	FALSE	95
2022-09-15	08:40:26	0.10271	0.456875	1.09241	1921.21	FALSE	95
2022-09-15	08:40:26	0.262863	1.16927	1.09241	2032.4	FALSE	95
2022-09-15	08:40:26	0.290038	1.29015	1.09241	1922.5	FALSE	95
2022-09-15	08:40:27	0.434466	1.93259	1.60299	2034.34	FALSE	95
2022-09-15	08:40:27	0.272379	1.2116	1.60299	1923.71	FALSE	95
2022-09-15	08:40:27	0.374262	1.66479	1.60299	2036	FALSE	95
2022-09-15	08:40:28	0.508715	2.26287	9.08575	1925.98	FALSE	95
2022-09-15	08:40:28	1.32561	5.89658	9.08575	2041.9	FALSE	95
2022-09-15	08:40:28	3.20932	14.2757	9.08575	1940.25	1	96
2022-09-15	08:40:28	3.12663	13.9079	9.08575	2055.81	1	97
2022-09-15	08:40:29	0.93869	4.17548	4.08488	1944.43	FALSE	97
2022-09-15	08:40:29	0.82388	3.66478	4.08488	2059.47	FALSE	97
2022-09-15	08:40:29	0.623066	2.77152	4.08488	1947.2	FALSE	97
2022-09-15	08:40:29	1.28765	5.72772	4.08488	2065.2	FALSE	97
2022-09-15	08:40:30	4.56159	20.2909	34.9747	1967.49	1	98
2022-09-15	08:40:30	7.45823	33.1757	34.9747	2098.37	1	99
2022-09-15	08:40:30	10.9139	48.5472	34.9747	2016.04	1	100
2022-09-15	08:40:30	8.51696	37.8851	34.9747	2136.26	1	101
2022-09-15	08:40:31	4.93334	21.9445	11.975	2037.98	1	102
2022-09-15	08:40:31	2.11136	9.39175	11.975	2145.65	FALSE	102
2022-09-15	08:40:31	1.03162	4.58885	11.975	2042.57	FALSE	102
2022-09-15	08:40:32	0.805153	3.58148	11.6225	2149.23	FALSE	102
2022-09-15	08:40:32	1.56459	6.95961	11.6225	2049.53	FALSE	102
2022-09-15	08:40:32	4.44159	19.7571	11.6225	2168.99	1	103
2022-09-15	08:40:32	3.64006	16.1917	11.6225	2065.72	1	104
2022-09-15	08:40:33	3.04902	13.5627	19.124	2182.55	1	105
2022-09-15	08:40:33	4.4248	19.6824	19.124	2085.41	1	106
2022-09-15	08:40:33	4.06551	18.0842	19.124	2200.64	1	107
2022-09-15	08:40:33	5.65772	25.1667	19.124	2110.57	1	108
2022-09-15	08:40:34	12.4904	55.5598	22.433	2256.2	1	109
2022-09-15	08:40:34	2.73212	12.153	22.433	2122.73	FALSE	109
2022-09-15	08:40:34	2.70907	12.0505	22.433	2268.25	FALSE	109
2022-09-15	08:40:34	2.24108	9.96877	22.433	2132.69	FALSE	109
2022-09-15	08:40:35	0.599555	2.66694	4.49942	2270.91	FALSE	109
2022-09-15	08:40:35	0.830343	3.69353	4.49942	2136.39	FALSE	109
2022-09-15	08:40:35	1.37737	6.12682	4.49942	2277.04	FALSE	109
2022-09-15	08:40:35	1.23879	5.51039	4.49942	2141.9	FALSE	109
2022-09-15	08:40:36	4.46937	19.8807	20.269	2296.92	1	110
2022-09-15	08:40:36	4.62815	20.5869	20.269	2162.48	1	111
2022-09-15	08:40:36	4.57248	20.3393	20.269	2317.26	1	112
2022-09-15	08:40:37	1.87726	8.35043	3.50807	2170.84	FALSE	112
2022-09-15	08:40:37	0.468919	2.08585	3.50807	2319.35	FALSE	112
2022-09-15	08:40:37	0.618944	2.75319	3.50807	2173.59	FALSE	112
2022-09-15	08:40:37	0.189478	0.842836	3.50807	2320.19	FALSE	112
2022-09-15	08:40:38	0.29757	1.32365	1.00481	2174.91	FALSE	112
2022-09-15	08:40:38	0.0881045	0.391906	1.00481	2320.58	FALSE	112
2022-09-15	08:40:38	0.225967	1.00515	1.00481	2175.92	FALSE	112
2022-09-15	08:40:38	0.291921	1.29852	1.00481	2321.88	FALSE	112
2022-09-15	08:40:39	0.345713	1.5378	2.71997	2177.46	FALSE	112
2022-09-15	08:40:39	0.611718	2.72104	2.71997	2324.6	FALSE	112
2022-09-15	08:40:39	0.284288	1.26457	2.71997	2178.72	FALSE	112
2022-09-15	08:40:39	1.20419	5.35648	2.71997	2329.96	FALSE	112
2022-09-15	08:40:40	0.920522	4.09467	9.91061	2182.81	FALSE	112
2022-09-15	08:40:40	1.97121	8.76834	9.91061	2338.73	FALSE	112
2022-09-15	08:40:40	3.79228	16.8688	9.91061	2199.68	1	113
2022-09-15	08:40:41	3.7508	16.6843	19.4356	2355.41	1	114
2022-09-15	08:40:41	8.01522	35.6533	19.4356	2235.34	1	115
2022-09-15	08:40:41	2.97299	13.2245	19.4356	2368.63	FALSE	115
2022-09-15	08:40:41	2.73828	12.1804	19.4356	2247.52	FALSE	115
2022-09-15	08:40:42	2.92907	13.0291	17.7502	2381.66	FALSE	115
2022-09-15	08:40:42	2.57645	11.4606	17.7502	2258.98	FALSE	115
2022-09-15	08:40:42	4.10062	18.2404	17.7502	2399.9	1	116
2022-09-15	08:40:42	6.35558	28.2709	17.7502	2287.25	1	117
2022-09-15	08:40:43	3.65182	16.244	22.2232	2416.15	1	118
2022-09-15	08:40:43	9.64606	42.9076	22.2232	2330.16	1	119
2022-09-15	08:40:43	3.76291	16.7382	22.2232	2432.89	1	120
2022-09-15	08:40:43	2.92322	13.0031	22.2232	2343.16	FALSE	120
2022-09-15	08:40:44	1.58683	7.05854	12.2647	2439.94	FALSE	120
2022-09-15	08:40:44	1.96271	8.73053	12.2647	2351.89	FALSE	120
2022-09-15	08:40:44	4.72215	21.0051	12.2647	2460.95	1	121
2022-09-15	08:40:45	6.53161	29.0539	15.1081	2380.94	1	122
2022-09-15	08:40:45	3.52485	15.6792	15.1081	2476.63	1	123
2022-09-15	08:40:45	2.89446	12.8751	15.1081	2393.82	FALSE	123
2022-09-15	08:40:45	0.634873	2.82404	15.1081	2479.45	FALSE	123
2022-09-15	08:40:46	1.55024	6.89578	8.37235	2400.71	FALSE	123
2022-09-15	08:40:46	2.13075	9.478	8.37235	2488.93	FALSE	123
2022-09-15	08:40:46	1.68724	7.50518	8.37235	2408.22	FALSE	123
2022-09-15	08:40:46	2.16052	9.61043	8.37235	2498.54	FALSE	123
2022-09-15	08:40:47	0.602099	2.67826	1.74148	2410.9	FALSE	123
2022-09-15	08:40:47	0.464644	2.06683	1.74148	2500.61	FALSE	123
2022-09-15	08:40:47	0.257214	1.14414	1.74148	2412.04	FALSE	123
2022-09-15	08:40:47	0.242049	1.07668	1.74148	2501.68	FALSE	123
2022-09-15	08:40:48	0.118435	0.526823	0.984545	2412.57	FALSE	123
2022-09-15	08:40:48	0.354211	1.5756	0.984545	2503.26	FALSE	123
2022-09-15	08:40:48	0.191361	0.851212	0.984545	2413.42	FALSE	123
2022-09-15	08:40:49	0.269631	1.19937	1.39088	2504.46	FALSE	123
2022-09-15	08:40:49	0.438486	1.95047	1.39088	2415.37	FALSE	123
2022-09-15	08:40:49	0.106985	0.475891	1.39088	2504.94	FALSE	123
2022-09-15	08:40:49	0.435636	1.9378	1.39088	2417.31	FALSE	123
2022-09-15	08:40:50	0.290038	1.29015	1.33169	2506.23	FALSE	123
2022-09-15	08:40:50	0.308308	1.37142	1.33169	2418.68	FALSE	123
2022-09-15	08:40:50	0.377468	1.67905	1.33169	2507.9	FALSE	123
2022-09-15	08:40:50	0.221692	0.98613	1.33169	2419.67	FALSE	123
2022-09-15	08:40:51	0.544847	2.42359	1.32139	2510.33	FALSE	123
2022-09-15	08:40:51	0.171616	0.763382	1.32139	2420.43	FALSE	123
2022-09-15	08:40:51	0.293448	1.30532	1.32139	2511.63	FALSE	123
2022-09-15	08:40:51	0.178333	0.793261	1.32139	2421.22	FALSE	123
2022-09-15	08:40:52	0.131616	0.585454	1.25861	2512.22	FALSE	123
2022-09-15	08:40:52	0.344288	1.53146	1.25861	2422.75	FALSE	123
2022-09-15	08:40:52	0.372939	1.65891	1.25861	2513.88	FALSE	123
2022-09-15	08:40:53	0.411565	1.83072	1.98052	2424.58	FALSE	123
2022-09-15	08:40:53	0.450598	2.00435	1.98052	2515.88	FALSE	123
2022-09-15	08:40:53	0.349275	1.55365	1.98052	2426.14	FALSE	123
2022-09-15	08:40:53	0.569529	2.53338	1.98052	2518.42	FALSE	123
2022-09-15	08:40:54	0.518231	2.3052	1.86026	2428.44	FALSE	123
2022-09-15	08:40:54	0.418944	1.86355	1.86026	2520.28	FALSE	123
2022-09-15	08:40:54	0.342354	1.52286	1.86026	2429.97	FALSE	123
2022-09-15	08:40:54	0.393295	1.74945	1.86026	2522.03	FALSE	123
2022-09-15	08:40:55	0.424186	1.88686	1.81567	2431.85	FALSE	123
2022-09-15	08:40:55	0.401692	1.78681	1.81567	2523.82	FALSE	123
2022-09-15	08:40:55	0.405662	1.80447	1.81567	2433.66	FALSE	123
2022-09-15	08:40:55	0.401183	1.78454	1.81567	2525.6	FALSE	123
2022-09-15	08:40:56	0.396094	1.76191	1.70933	2435.42	FALSE	123
2022-09-15	08:40:56	0.374262	1.66479	1.70933	2527.26	FALSE	123
2022-09-15	08:40:56	0.390191	1.73565	1.70933	2437.16	FALSE	123
2022-09-15	08:40:56	0.376552	1.67498	1.70933	2528.94	FALSE	123
2022-09-15	08:40:57	0.377977	1.68132	1.75293	2438.84	FALSE	123
2022-09-15	08:40:57	0.377723	1.68019	1.75293	2530.62	FALSE	123
2022-09-15	08:40:57	0.426527	1.89728	1.75293	2440.73	FALSE	123
2022-09-15	08:40:58	0.488664	2.17368	18.8498	2532.79	FALSE	123
2022-09-15	08:40:58	1.72022	7.65188	18.8498	2448.39	FALSE	123
2022-09-15	08:40:58	6.29843	28.0167	18.8498	2560.81	1	124
2022-09-15	08:40:58	8.44316	37.5569	18.8498	2485.94	1	125
2022-09-15	08:40:59	7.52444	33.4702	32.2627	2594.28	1	126
2022-09-15	08:40:59	6.47095	28.7841	32.2627	2514.73	1	127
2022-09-15	08:40:59	9.02607	40.1498	32.2627	2634.43	1	128
2022-09-15	08:40:59	5.99049	26.6469	32.2627	2541.37	1	129
2022-09-15	08:41:00	2.73609	12.1707	7.13534	2646.6	FALSE	129
2022-09-15	08:41:00	1.40754	6.26102	7.13534	2547.63	FALSE	129
2022-09-15	08:41:00	1.125	5.00422	7.13534	2651.6	FALSE	129
2022-09-15	08:41:00	1.14775	5.10542	7.13534	2552.74	FALSE	129
2022-09-15	08:41:01	1.15426	5.13438	5.44157	2656.74	FALSE	129
2022-09-15	08:41:01	1.27146	5.65571	5.44157	2558.4	FALSE	129
2022-09-15	08:41:01	1.24424	5.53463	5.44157	2662.27	FALSE	129
2022-09-15	08:41:02	1.22602	5.45358	8.73058	2563.85	FALSE	129
2022-09-15	08:41:02	1.09808	4.88448	8.73058	2667.16	FALSE	129
2022-09-15	08:41:02	1.70719	7.59392	8.73058	2571.44	FALSE	129
2022-09-15	08:41:02	3.8196	16.9903	8.73058	2684.15	1	130
2022-09-15	08:41:03	6.06072	26.9593	28.5406	2598.4	1	131
2022-09-15	08:41:03	7.13986	31.7595	28.5406	2715.91	1	132
2022-09-15	08:41:03	6.0481	26.9032	28.5406	2625.31	1	133
2022-09-15	08:41:03	6.41619	28.5405	28.5406	2744.45	1	134
2022-09-15	08:41:04	6.28179	27.9427	28.9404	2653.25	1	135
2022-09-15	08:41:04	7.3851	32.8504	28.9404	2777.3	1	136
2022-09-15	08:41:04	6.98464	31.0691	28.9404	2684.32	1	137
2022-09-15	08:41:04	5.37283	23.8994	28.9404	2801.2	1	138
2022-09-15	08:41:05	3.73915	16.6325	15.5599	2700.95	1	139
2022-09-15	08:41:05	3.46322	15.4051	15.5599	2816.6	1	140
2022-09-15	08:41:05	3.29172	14.6422	15.5599	2715.59	1	141
2022-09-15	08:41:06	2.945	13.0999	10.4455	2829.7	FALSE	141
2022-09-15	08:41:06	2.73508	12.1662	10.4455	2727.76	FALSE	141
2022-09-15	08:41:06	1.90744	8.48467	10.4455	2838.19	FALSE	141
2022-09-15	08:41:06	1.80546	8.03105	10.4455	2735.79	FALSE	141
2022-09-15	08:41:07	0.732837	3.25981	5.82024	2841.45	FALSE	141
2022-09-15	08:41:07	-0.135865	-0.604355	5.82024	2735.79	FALSE	141
2022-09-15	08:41:07	2.02816	9.02166	5.82024	2850.47	FALSE	141
2022-09-15	08:41:07	2.60866	11.6038	5.82024	2747.39	FALSE	141
2022-09-15	08:41:08	3.63614	16.1743	9.17846	2866.64	1	142
2022-09-15	08:41:08	2.26271	10.065	9.17846	2757.46	FALSE	142
2022-09-15	08:41:08	1.63849	7.28833	9.17846	2873.93	FALSE	142
2022-09-15	08:41:08	0.716298	3.18624	9.17846	2760.64	FALSE	142
2022-09-15	08:41:09	0.464033	2.06411	1.11579	2876	FALSE	142
2022-09-15	08:41:09	0.252074	1.12128	1.11579	2761.77	FALSE	142
2022-09-15	08:41:09	0.0990969	0.440803	1.11579	2876.44	FALSE	142
2022-09-15	08:41:09	0.188155	0.836951	1.11579	2762.6	FALSE	142
2022-09-15	08:41:10	-0.0300633	-0.133728	1.03488	2876.44	FALSE	142
2022-09-15	08:41:10	0.210191	0.934972	1.03488	2763.54	FALSE	142
2022-09-15	08:41:10	0.517824	2.30338	1.03488	2878.74	FALSE	142
2022-09-15	08:41:11	0.4793	2.13202	36.1997	2765.67	FALSE	142
2022-09-15	08:41:11	2.30317	10.245	36.1997	2888.99	FALSE	142
2022-09-15	08:41:11	9.16281	40.758	36.1997	2806.43	1	143
2022-09-15	08:41:11	20.6069	91.6636	36.1997	2980.65	1	144
2022-09-15	08:41:12	16.0572	71.4256	65.1724	2877.85	1	145
2022-09-15	08:41:12	10.4034	46.2764	65.1724	3026.93	1	146
2022-09-15	08:41:12	15.2124	67.6678	65.1724	2945.52	1	147
2022-09-15	08:41:12	16.9326	75.3196	65.1724	3102.25	1	148
2022-09-15	08:41:13	11.7159	52.1147	40.0818	2997.64	1	149
2022-09-15	08:41:13	14.7639	65.6728	40.0818	3167.92	1	150
2022-09-15	08:41:13	5.71039	25.401	40.0818	3023.04	1	151
2022-09-15	08:41:13	3.85294	17.1386	40.0818	3185.06	1	152
2022-09-15	08:41:14	0.972735	4.32692	-0.618689	3027.36	FALSE	152
2022-09-15	08:41:14	-1.45286	-6.46261	-0.618689	3185.06	FALSE	152
2022-09-15	08:41:14	0.0628628	0.279626	-0.618689	3027.64	FALSE	152
2022-09-15	08:41:15	-0.120903	-0.537801	0.232257	3185.06	FALSE	152
2022-09-15	08:41:15	-0.0810048	-0.360326	0.232257	3027.64	FALSE	152
2022-09-15	08:41:15	0.223931	0.99609	0.232257	3186.05	FALSE	152
2022-09-15	08:41:15	0.186832	0.831066	0.232257	3028.47	FALSE	152
2022-09-15	08:41:16	0.297417	1.32297	0.863777	3187.38	FALSE	152
2022-09-15	08:41:16	0.0826083	0.367458	0.863777	3028.84	FALSE	152
2022-09-15	08:41:16	0.124084	0.55195	0.863777	3187.93	FALSE	152
2022-09-15	08:41:16	0.272634	1.21273	0.863777	3030.05	FALSE	152
2022-09-15	08:41:17	0.548715	2.44079	5.30065	3190.37	FALSE	152
2022-09-15	08:41:17	1.00357	4.46408	5.30065	3034.52	FALSE	152
2022-09-15	08:41:17	1.37655	6.12317	5.30065	3196.49	FALSE	152
2022-09-15	08:41:17	1.83772	8.17455	5.30065	3042.69	FALSE	152
2022-09-15	08:41:18	1.77579	7.89907	6.1791	3204.39	FALSE	152
2022-09-15	08:41:18	1.40943	6.26943	6.1791	3048.96	FALSE	152
2022-09-15	08:41:18	0.98215	4.3688	6.1791	3208.76	FALSE	152
2022-09-15	08:41:19	0.869733	3.86875	3.20899	3052.83	FALSE	152
2022-09-15	08:41:19	0.642608	2.85845	3.20899	3211.62	FALSE	152
2022-09-15	08:41:19	0.619453	2.75545	3.20899	3055.59	FALSE	152
2022-09-15	08:41:19	0.753855	3.3533	3.20899	3214.97	FALSE	152
2022-09-15	08:41:20	0.846476	3.76529	3.06473	3059.35	FALSE	152
2022-09-15	08:41:20	0.697315	3.1018	3.06473	3218.07	FALSE	152
2022-09-15	08:41:20	0.590038	2.62461	3.06473	3061.98	FALSE	152
2022-09-15	08:41:20	0.622099	2.76722	3.06473	3220.84	FALSE	152
2022-09-15	08:41:21	0.453702	2.01816	2.14674	3063.99	FALSE	152
2022-09-15	08:41:21	0.558995	2.48652	2.14674	3223.33	FALSE	152
2022-09-15	08:41:21	0.493957	2.19722	2.14674	3066.19	FALSE	152
2022-09-15	08:41:21	0.423779	1.88505	2.14674	3225.21	FALSE	152
2022-09-15	08:41:22	0.232227	1.03299	1.67294	3067.23	FALSE	152
2022-09-15	08:41:22	0.358842	1.5962	1.67294	3226.81	FALSE	152
2022-09-15	08:41:22	0.537214	2.38964	1.67294	3069.61	FALSE	152
2022-09-15	08:41:23	0.168308	0.748668	1.52903	3227.56	FALSE	152
2022-09-15	08:41:23	0.366527	1.63039	1.52903	3071.25	FALSE	152
2022-09-15	08:41:23	0.227494	1.01194	1.52903	3228.57	FALSE	152
2022-09-15	08:41:23	0.612633	2.72511	1.52903	3073.97	FALSE	152
2022-09-15	08:41:24	0.427392	1.90113	2.51827	3230.47	FALSE	152
2022-09-15	08:41:24	0.617112	2.74504	2.51827	3076.72	FALSE	152
2022-09-15	08:41:24	0.728766	3.2417	2.51827	3233.71	FALSE	152
2022-09-15	08:41:24	0.49126	2.18522	2.51827	3078.9	FALSE	152
2022-09-15	08:41:25	0.81986	3.6469	3.00944	3237.36	FALSE	152
2022-09-15	08:41:25	0.702455	3.12466	3.00944	3082.03	FALSE	152
2022-09-15	08:41:25	0.53874	2.39642	3.00944	3239.75	FALSE	152
2022-09-15	08:41:25	0.645153	2.86977	3.00944	3084.89	FALSE	152
2022-09-15	08:41:26	0.396552	1.76394	2.16819	3241.52	FALSE	152
2022-09-15	08:41:26	0.611209	2.71878	2.16819	3087.61	FALSE	152
2022-09-15	08:41:26	0.449478	1.99937	2.16819	3243.52	FALSE	152
2022-09-15	08:41:26	0.492481	2.19065	2.16819	3089.8	FALSE	152
2022-09-15	08:41:27	0.555687	2.47181	2.57873	3245.99	FALSE	152
2022-09-15	08:41:27	0.528512	2.35093	2.57873	3092.16	FALSE	152
2022-09-15	08:41:27	0.654974	2.91346	2.57873	3248.9	FALSE	152
2022-09-15	08:41:28	0.2793	1.24238	2.83892	3093.4	FALSE	152
2022-09-15	08:41:28	0.499351	2.22121	2.83892	3251.12	FALSE	152
2022-09-15	08:41:28	0.53243	2.36836	2.83892	3095.77	FALSE	152
2022-09-15	08:41:28	1.24179	5.52373	2.83892	3256.65	FALSE	152
2022-09-15	08:41:29	0.754873	3.35783	2.62715	3099.12	FALSE	152
2022-09-15	08:41:29	0.709885	3.15771	2.62715	3259.81	FALSE	152
2022-09-15	08:41:29	0.399046	1.77504	2.62715	3100.9	FALSE	152
2022-09-15	08:41:29	0.498639	2.21805	2.62715	3262.02	FALSE	152
2022-09-15	08:41:30	0.404389	1.7988	7.02447	3102.7	FALSE	152
2022-09-15	08:41:30	0.707087	3.14526	7.02447	3265.17	FALSE	152
2022-09-15	08:41:30	1.46398	6.51208	7.02447	3109.21	FALSE	152
2022-09-15	08:41:30	3.74123	16.6417	7.02447	3281.81	1	153
2022-09-15	08:41:31	3.73467	16.6126	12.0875	3125.82	1	154
2022-09-15	08:41:31	2.83446	12.6082	12.0875	3294.42	FALSE	154
2022-09-15	08:41:31	1.58307	7.04181	12.0875	3132.86	FALSE	154
2022-09-15	08:41:32	1.02271	4.54922	4.05511	3298.97	FALSE	154
2022-09-15	08:41:32	0.863779	3.84226	4.05511	3136.71	FALSE	154
2022-09-15	08:41:32	0.861285	3.83117	4.05511	3302.8	FALSE	154
2022-09-15	08:41:32	0.898741	3.99778	4.05511	3140.7	FALSE	154
2022-09-15	08:41:33	0.862099	3.83479	3.37463	3306.63	FALSE	154
2022-09-15	08:41:33	0.674364	2.99971	3.37463	3143.7	FALSE	154
2022-09-15	08:41:33	0.776552	3.45426	3.37463	3310.09	FALSE	154
2022-09-15	08:41:33	0.721591	3.20978	3.37463	3146.91	FALSE	154
2022-09-15	08:41:34	0.918181	4.08425	4.98018	3314.17	FALSE	154
2022-09-15	08:41:34	0.940064	4.18159	4.98018	3151.1	FALSE	154
2022-09-15	08:41:34	1.10322	4.90734	4.98018	3319.08	FALSE	154
2022-09-15	08:41:34	1.51691	6.74752	4.98018	3157.84	FALSE	154
2022-09-15	08:41:35	1.66103	7.38859	8.32547	3326.47	FALSE	154
2022-09-15	08:41:35	1.84668	8.2144	8.32547	3166.06	FALSE	154
2022-09-15	08:41:35	2.10724	9.37342	8.32547	3335.84	FALSE	154
2022-09-15	08:41:36	2.52994	11.2537	14.3304	3177.31	FALSE	154
2022-09-15	08:41:36	3.125	13.9006	14.3304	3349.74	1	155
2022-09-15	08:41:36	3.3739	15.0078	14.3304	3192.32	1	156
2022-09-15	08:41:36	3.85762	17.1595	14.3304	3366.9	1	157
2022-09-15	08:41:37	4.02362	17.8979	20.5892	3210.22	1	158
2022-09-15	08:41:37	4.19752	18.6714	20.5892	3385.57	1	159
2022-09-15	08:41:37	4.85228	21.5839	20.5892	3231.8	1	160
2022-09-15	08:41:37	5.44118	24.2035	20.5892	3409.78	1	161
2022-09-15	08:41:38	6.06103	26.9607	33.5686	3258.76	1	162
2022-09-15	08:41:38	6.20683	27.6092	33.5686	3437.39	1	163
2022-09-15	08:41:38	8.26327	36.7567	33.5686	3295.52	1	164
2022-09-15	08:41:38	9.65512	42.9479	33.5686	3480.33	1	165
2022-09-15	08:41:39	9.44378	42.0078	37.1509	3337.53	1	166
2022-09-15	08:41:39	8.12428	36.1384	37.1509	3516.47	1	167
2022-09-15	08:41:39	8.44001	37.5429	37.1509	3375.07	1	168
2022-09-15	08:41:39	7.39955	32.9147	37.1509	3549.39	1	169
2022-09-15	08:41:40	6.90774	30.727	36.2933	3405.8	1	170
2022-09-15	08:41:40	8.76291	38.9792	36.2933	3588.37	1	171
2022-09-15	08:41:40	8.80667	39.1738	36.2933	3444.97	1	172
2022-09-15	08:41:41	8.78082	39.0588	36.0641	3627.43	1	173
2022-09-15	08:41:41	9.20724	40.9556	36.0641	3485.92	1	174
2022-09-15	08:41:41	8.33986	37.0974	36.0641	3664.52	1	175
2022-09-15	08:41:41	6.10235	27.1445	36.0641	3513.07	1	176
2022-09-15	08:41:42	5.23121	23.2695	20.88	3687.79	1	177
2022-09-15	08:41:42	4.85752	21.6072	20.88	3534.68	1	178
2022-09-15	08:41:42	4.47284	19.8961	20.88	3707.69	1	179
2022-09-15	08:41:42	4.21457	18.7473	20.88	3553.42	1	180
2022-09-15	08:41:43	4.38434	19.5024	19.709	3727.19	1	181
2022-09-15	08:41:43	4.49172	19.9801	19.709	3573.4	1	182
2022-09-15	08:41:43	4.59594	20.4437	19.709	3747.63	1	183
2022-09-15	08:41:43	4.25116	18.91	19.709	3592.31	1	184
2022-09-15	08:41:44	4.23065	18.8188	17.0581	3766.45	1	185
2022-09-15	08:41:44	4.03228	17.9364	17.0581	3610.25	1	186
2022-09-15	08:41:44	3.24154	14.419	17.0581	3780.87	1	187
2022-09-15	08:41:45	2.91248	12.9553	15.5025	3623.21	FALSE	187
2022-09-15	08:41:45	3.16785	14.0912	15.5025	3794.96	1	188
2022-09-15	08:41:45	3.90108	17.3528	15.5025	3640.56	1	189
2022-09-15	08:41:45	3.95905	17.6106	15.5025	3812.57	1	190
2022-09-15	08:41:46	5.18377	23.0584	20.0194	3663.62	1	191
2022-09-15	08:41:46	4.8196	21.4385	20.0194	3834.01	1	192
2022-09-15	08:41:46	4.00617	17.8202	20.0194	3681.44	1	193
2022-09-15	08:41:46	3.99268	17.7602	20.0194	3851.77	1	194
2022-09-15	08:41:47	3.48276	15.492	14.4848	3696.93	1	195
2022-09-15	08:41:47	3.33645	14.8412	14.4848	3866.61	1	196
2022-09-15	08:41:47	2.83192	12.5969	14.4848	3709.53	FALSE	196
2022-09-15	08:41:47	3.37416	15.0089	14.4848	3881.62	1	197
2022-09-15	08:41:48	2.75747	12.2658	12.0254	3721.79	FALSE	197
2022-09-15	08:41:48	2.79706	12.4419	12.0254	3894.07	FALSE	197
2022-09-15	08:41:48	2.55574	11.3684	12.0254	3733.16	FALSE	197
2022-09-15	08:41:49	2.89477	12.8765	12.5809	3906.94	FALSE	197
2022-09-15	08:41:49	3.19009	14.1902	12.5809	3747.35	1	198
2022-09-15	08:41:49	3.25304	14.4702	12.5809	3921.41	1	199
2022-09-15	08:41:49	1.97533	8.78666	12.5809	3756.14	FALSE	199
2022-09-15	08:41:50	1.56658	6.96846	3.40265	3928.38	FALSE	199
2022-09-15	08:41:50	0.656145	2.91866	3.40265	3759.06	FALSE	199
2022-09-15	08:41:50	0.577112	2.56711	3.40265	3930.95	FALSE	199
2022-09-15	08:41:50	0.259962	1.15636	3.40265	3760.21	FALSE	199
2022-09-15	08:41:51	2.46179	10.9505	23.1245	3941.9	FALSE	199
2022-09-15	08:41:51	9.71044	43.194	23.1245	3803.41	1	200
2022-09-15	08:41:51	6.10596	27.1605	23.1245	3969.06	1	201
2022-09-15	08:41:51	2.51625	11.1928	23.1245	3814.6	FALSE	201
2022-09-15	08:41:52	0.866628	3.85493	3.24837	3972.91	FALSE	201
2022-09-15	08:41:52	1.56281	6.95169	3.24837	3821.55	FALSE	201
2022-09-15	08:41:52	0.312277	1.38907	3.24837	3974.3	FALSE	201
2022-09-15	08:41:52	0.179351	0.797789	3.24837	3822.35	FALSE	201
2022-09-15	08:41:53	1.12205	4.9911	28.1096	3979.29	FALSE	201
2022-09-15	08:41:53	6.59243	29.3244	28.1096	3851.67	1	202
2022-09-15	08:41:53	11.2435	50.0133	28.1096	4029.31	1	203
2022-09-15	08:41:54	9.80846	43.63	51.175	3895.3	1	204
2022-09-15	08:41:54	8.31909	37.005	51.175	4066.31	1	205
2022-09-15	08:41:54	11.9014	52.9398	51.175	3948.24	1	206
2022-09-15	08:41:54	15.9897	71.1254	51.175	4137.44	1	207
2022-09-15	08:41:55	13.2274	58.8381	37.6404	4007.08	1	208
2022-09-15	08:41:55	7.86123	34.9683	37.6404	4172.41	1	209
2022-09-15	08:41:55	4.84347	21.5447	37.6404	4028.63	1	210
2022-09-15	08:41:55	7.91563	35.2103	37.6404	4207.62	1	211
2022-09-15	08:41:56	8.1193	36.1163	32.6023	4064.74	1	212
2022-09-15	08:41:56	6.9312	30.8314	32.6023	4238.45	1	213
2022-09-15	08:41:56	6.90347	30.708	32.6023	4095.45	1	214
2022-09-15	08:41:56	7.36332	32.7535	32.6023	4271.2	1	215
2022-09-15	08:41:57	7.04545	31.3396	31.2696	4126.79	1	216
2022-09-15	08:41:57	7.21304	32.085	31.2696	4303.29	1	217
2022-09-15	08:41:57	6.8307	30.3843	31.2696	4157.17	1	218
2022-09-15	08:41:58	5.99044	26.6467	19.4524	4329.93	1	219
2022-09-15	08:41:58	5.08123	22.6023	19.4524	4179.78	1	220
2022-09-15	08:41:58	3.73217	16.6014	19.4524	4346.53	1	221
2022-09-15	08:41:58	2.68856	11.9593	19.4524	4191.74	FALSE	221
2022-09-15	08:41:59	0.615535	2.73802	1.94012	4349.27	FALSE	221
2022-09-15	08:41:59	0.474211	2.10939	1.94012	4193.84	FALSE	221
2022-09-15	08:41:59	0.435534	1.93734	1.94012	4351.21	FALSE	221
2022-09-15	08:41:59	0.219351	0.975717	1.94012	4194.82	FALSE	221
2022-09-15	08:42:00	-0.0670099	-0.298073	0.138597	4351.21	FALSE	221
2022-09-15	08:42:00	-0.16416	-0.730217	0.138597	4194.82	FALSE	221
2022-09-15	08:42:00	0.184593	0.821107	0.138597	4352.03	FALSE	221
2022-09-15	08:42:00	0.171209	0.761572	0.138597	4195.58	FALSE	221
2022-09-15	08:42:01	0.684288	3.04385	19.7076	4355.07	FALSE	221
2022-09-15	08:42:01	3.51004	15.6134	19.7076	4211.2	1	222
2022-09-15	08:42:01	9.09706	40.4655	19.7076	4395.54	1	223
2022-09-15	08:42:02	10.1178	45.006	29.9662	4256.2	1	224
2022-09-15	08:42:02	8.64118	38.4377	29.9662	4433.98	1	225
2022-09-15	08:42:02	5.33599	23.7356	29.9662	4279.94	1	226
2022-09-15	08:42:02	2.85187	12.6857	29.9662	4446.66	FALSE	226
2022-09-15	08:42:03	2.53579	11.2797	6.26523	4291.22	FALSE	226
2022-09-15	08:42:03	1.22266	5.43864	6.26523	4452.1	FALSE	226
2022-09-15	08:42:03	1.05085	4.67439	6.26523	4295.89	FALSE	226
2022-09-15	08:42:03	0.824644	3.66818	6.26523	4455.77	FALSE	226
2022-09-15	08:42:04	1.2478	5.55046	6.49029	4301.44	FALSE	226
2022-09-15	08:42:04	1.59614	7.09995	6.49029	4462.87	FALSE	226
2022-09-15	08:42:04	1.4367	6.39073	6.49029	4307.83	FALSE	226
2022-09-15	08:42:04	1.55569	6.92002	6.49029	4469.79	FALSE	226
2022-09-15	08:42:05	1.93614	8.61234	7.44801	4316.44	FALSE	226
2022-09-15	08:42:05	1.50958	6.71491	7.44801	4476.5	FALSE	226
2022-09-15	08:42:05	1.55513	6.91753	7.44801	4323.36	FALSE	226
2022-09-15	08:42:05	1.6967	7.54726	7.44801	4484.05	FALSE	226
2022-09-15	08:42:06	1.86607	8.30065	8.19691	4331.66	FALSE	226
2022-09-15	08:42:06	1.79284	7.97491	8.19691	4492.03	FALSE	226
2022-09-15	08:42:06	1.86933	8.31515	8.19691	4339.98	FALSE	226
2022-09-15	08:42:07	2.66948	11.8744	10.3291	4503.9	FALSE	226
2022-09-15	08:42:07	2.69426	11.9846	10.3291	4351.96	FALSE	226
2022-09-15	08:42:07	2.73441	12.1632	10.3291	4516.06	FALSE	226
2022-09-15	08:42:07	1.19019	5.2942	10.3291	4357.26	FALSE	226
2022-09-15	08:42:08	0.696145	3.09659	2.531	4519.16	FALSE	226
2022-09-15	08:42:08	0.597265	2.65675	2.531	4359.91	FALSE	226
2022-09-15	08:42:08	0.485763	2.16077	2.531	4521.32	FALSE	226
2022-09-15	08:42:08	0.496807	2.2099	2.531	4362.12	FALSE	226
2022-09-15	08:42:09	0.479758	2.13406	2.36304	4523.46	FALSE	226
2022-09-15	08:42:09	0.48444	2.15489	2.36304	4364.28	FALSE	226
2022-09-15	08:42:09	0.580318	2.58137	2.36304	4526.04	FALSE	226
2022-09-15	08:42:09	0.58042	2.58182	2.36304	4366.86	FALSE	226
2022-09-15	08:42:10	1.85808	8.26511	37.9486	4534.3	FALSE	226
2022-09-15	08:42:10	12.5441	55.7987	37.9486	4422.66	1	227
2022-09-15	08:42:10	11.1915	49.782	37.9486	4584.08	1	228
2022-09-15	08:42:11	9.59472	42.6792	41.8387	4465.34	1	229
2022-09-15	08:42:11	6.25049	27.8034	41.8387	4611.89	1	230
2022-09-15	08:42:11	11.5385	51.3256	41.8387	4516.66	1	231
2022-09-15	08:42:11	10.2393	45.5465	41.8387	4657.43	1	232
2022-09-15	08:42:12	10.4594	46.5255	29.8493	4563.19	1	233
2022-09-15	08:42:12	8.9395	39.7647	29.8493	4697.2	1	234
2022-09-15	08:42:12	5.10352	22.7015	29.8493	4585.89	1	235
2022-09-15	08:42:12	2.33925	10.4055	29.8493	4707.6	FALSE	235
2022-09-15	08:42:13	1.53976	6.84916	3.59167	4592.74	FALSE	235
2022-09-15	08:42:13	0.679453	3.02234	3.59167	4710.63	FALSE	235
2022-09-15	08:42:13	0.531209	2.36292	3.59167	4595.1	FALSE	235
2022-09-15	08:42:13	0.479351	2.13225	3.59167	4712.76	FALSE	235
2022-09-15	08:42:14	0.461132	2.05121	2.18597	4597.15	FALSE	235
2022-09-15	08:42:14	0.476501	2.11957	2.18597	4714.88	FALSE	235
2022-09-15	08:42:14	0.536654	2.38714	2.18597	4599.54	FALSE	235
2022-09-15	08:42:15	2.11665	9.41528	24.0791	4724.29	FALSE	235
2022-09-15	08:42:15	9.38652	41.7531	24.0791	4641.29	1	236
2022-09-15	08:42:15	8.8222	39.2429	24.0791	4763.54	1	237
2022-09-15	08:42:15	1.32754	5.90516	24.0791	4647.2	FALSE	237
2022-09-15	08:42:16	0.787188	3.50157	13.1606	4767.04	FALSE	237
2022-09-15	08:42:16	1.2336	5.4873	13.1606	4652.69	FALSE	237
2022-09-15	08:42:16	3.21604	14.3056	13.1606	4781.34	1	238
2022-09-15	08:42:16	6.59767	29.3478	13.1606	4682.03	1	239
2022-09-15	08:42:17	7.77273	34.5747	39.6673	4815.92	1	240
2022-09-15	08:42:17	10.4839	46.6345	39.6673	4728.67	1	241
2022-09-15	08:42:17	10.0902	44.8832	39.6673	4860.8	1	242
2022-09-15	08:42:17	7.32362	32.5769	39.6673	4761.25	1	243
2022-09-15	08:42:18	10.1991	45.3676	51.1432	4906.17	1	244
2022-09-15	08:42:18	10.5413	46.8898	51.1432	4808.14	1	245
2022-09-15	08:42:18	13.7521	61.1721	51.1432	4967.34	1	246
2022-09-15	08:42:19	13.2769	59.0583	53.5533	4867.19	1	247
2022-09-15	08:42:19	9.49517	42.2364	53.5533	5009.58	1	248
2022-09-15	08:42:19	15.8719	70.6014	53.5533	4937.79	1	249
2022-09-15	08:42:19	9.51329	42.317	53.5533	5051.9	1	250
2022-09-15	08:42:20	19.1316	85.1012	70.1932	5022.9	1	251
2022-09-15	08:42:20	13.8341	61.5368	70.1932	5113.43	1	252
2022-09-15	08:42:20	12.7736	56.8195	70.1932	5079.72	1	253
2022-09-15	08:42:20	17.3812	77.3151	70.1932	5190.75	1	254
2022-09-15	08:42:21	13.4114	59.6566	53.3417	5139.37	1	255
2022-09-15	08:42:21	12.0277	53.5016	53.3417	5244.25	1	256
2022-09-15	08:42:21	9.01517	40.1013	53.3417	5179.47	1	257
2022-09-15	08:42:21	13.5127	60.1072	53.3417	5304.36	1	258
2022-09-15	08:42:22	12.8009	56.941	57.5733	5236.41	1	259
2022-09-15	08:42:22	13.8102	61.4305	57.5733	5365.79	1	260
2022-09-15	08:42:22	8.86851	39.4489	57.5733	5275.86	1	261
2022-09-15	08:42:22	16.2926	72.4727	57.5733	5438.26	1	262
2022-09-15	08:42:23	9.53604	42.4182	49.7652	5318.28	1	263
2022-09-15	08:42:23	13.3001	59.1615	49.7652	5497.42	1	264
2022-09-15	08:42:23	10.727	47.7158	49.7652	5366	1	265
2022-09-15	08:42:24	12.598	56.0384	59.8553	5553.46	1	266
2022-09-15	08:42:24	14.7519	65.6194	59.8553	5431.62	1	267
2022-09-15	08:42:24	14.6756	65.28	59.8553	5618.74	1	268
2022-09-15	08:42:24	11.7988	52.4834	59.8553	5484.1	1	269
2022-09-15	08:42:25	10.2757	45.7084	32.0377	5664.45	1	270
2022-09-15	08:42:25	5.80103	25.8041	32.0377	5509.9	1	271
2022-09-15	08:42:25	5.2282	23.2561	32.0377	5687.7	1	272
2022-09-15	08:42:25	7.50469	33.3824	32.0377	5543.29	1	273
2022-09-15	08:42:26	9.27039	41.2365	28.3994	5728.94	1	274
2022-09-15	08:42:26	8.49528	37.7887	28.3994	5581.08	1	275
2022-09-15	08:42:26	4.99523	22.2198	28.3994	5751.16	1	276
2022-09-15	08:42:26	2.77696	12.3525	28.3994	5593.43	FALSE	276
2022-09-15	08:42:27	3.51731	15.6457	24.5638	5766.81	1	277
2022-09-15	08:42:27	4.80479	21.3727	24.5638	5614.8	1	278
2022-09-15	08:42:27	8.24449	36.6731	24.5638	5803.48	1	279
2022-09-15	08:42:28	7.74403	34.447	30.594	5649.25	1	280
2022-09-15	08:42:28	6.84759	30.4594	30.594	5833.94	1	281
2022-09-15	08:42:28	6.09517	27.1125	30.594	5676.36	1	282
2022-09-15	08:42:28	6.82454	30.3569	30.594	5864.29	1	283
2022-09-15	08:42:29	9.53726	42.4236	38.9379	5718.78	1	284
2022-09-15	08:42:29	9.86062	43.862	38.9379	5908.16	1	285
2022-09-15	08:42:29	8.31741	36.9975	38.9379	5755.78	1	286
2022-09-15	08:42:29	7.29925	32.4685	38.9379	5940.63	1	287
2022-09-15	08:42:30	5.548	24.6786	21.2298	5780.46	1	288
2022-09-15	08:42:30	4.69472	20.8831	21.2298	5961.51	1	289
2022-09-15	08:42:30	4.66815	20.7649	21.2298	5801.22	1	290
2022-09-15	08:42:30	4.17981	18.5926	21.2298	5980.1	1	291
2022-09-15	08:42:31	3.81635	16.9759	14.9126	5818.2	1	292
2022-09-15	08:42:31	3.51243	15.624	14.9126	5995.73	1	293
2022-09-15	08:42:31	2.72871	12.1378	14.9126	5830.34	FALSE	293
2022-09-15	08:42:32	2.39828	10.668	16.8774	6006.39	FALSE	293
2022-09-15	08:42:32	3.54179	15.7546	16.8774	5846.09	1	294
2022-09-15	08:42:32	3.99523	17.7716	16.8774	6024.16	1	295
2022-09-15	08:42:32	5.24154	23.3154	16.8774	5869.41	1	296
2022-09-15	08:42:33	1.94586	8.65557	8.51616	6032.82	FALSE	296
2022-09-15	08:42:33	2.09691	9.32748	8.51616	5878.74	FALSE	296
2022-09-15	08:42:33	1.58709	7.05969	8.51616	6039.88	FALSE	296
2022-09-15	08:42:33	2.02821	9.02188	8.51616	5887.76	FALSE	296
2022-09-15	08:42:34	2.94128	13.0834	24.4142	6052.96	FALSE	296
2022-09-15	08:42:34	3.86729	17.2025	24.4142	5904.96	1	297
2022-09-15	08:42:34	4.9797	22.1507	24.4142	6075.11	1	298
2022-09-15	08:42:34	10.166	45.2204	24.4142	5950.18	1	299
2022-09-15	08:42:35	12.4235	55.2622	62.212	6130.38	1	300
2022-09-15	08:42:35	13.8244	61.4937	62.212	6011.67	1	301
2022-09-15	08:42:35	14.9573	66.5331	62.212	6196.91	1	302
2022-09-15	08:42:35	14.7383	65.5589	62.212	6077.23	1	303
2022-09-15	08:42:36	13.4281	59.7309	52.1813	6256.64	1	304
2022-09-15	08:42:36	12.0586	53.6391	52.1813	6130.87	1	305
2022-09-15	08:42:36	9.70591	43.1738	52.1813	6299.81	1	306
2022-09-15	08:42:37	5.83981	25.9766	16.5744	6156.85	1	307
2022-09-15	08:42:37	2.48541	11.0556	16.5744	6310.87	FALSE	307
2022-09-15	08:42:37	2.40999	10.7201	16.5744	6167.57	FALSE	307
2022-09-15	08:42:37	4.16912	18.5451	16.5744	6329.41	1	308
2022-09-15	08:42:38	5.91747	26.3221	19.7212	6193.89	1	309
2022-09-15	08:42:38	3.87772	17.2489	19.7212	6346.66	1	310
2022-09-15	08:42:38	3.9993	17.7897	19.7212	6211.68	1	311
2022-09-15	08:42:38	3.9396	17.5241	19.7212	6364.19	1	312
2022-09-15	08:42:39	9.46835	42.1171	49.922	6253.8	1	313
2022-09-15	08:42:39	8.94352	39.7826	49.922	6403.97	1	314
2022-09-15	08:42:39	14.7362	65.5496	49.922	6319.35	1	315
2022-09-15	08:42:39	11.7438	52.2388	49.922	6456.21	1	316
2022-09-15	08:42:40	18.9677	84.3721	80.0282	6403.72	1	317
2022-09-15	08:42:40	18.8384	83.797	80.0282	6540.01	1	318
2022-09-15	08:42:40	16.1673	71.9154	80.0282	6475.64	1	319
2022-09-15	08:42:41	23.1429	102.944	98.0698	6642.95	1	320
2022-09-15	08:42:41	21.3787	95.0967	98.0698	6570.73	1	321
2022-09-15	08:42:41	27.25	121.213	98.0698	6764.16	1	322
2022-09-15	08:42:41	16.4167	73.0248	98.0698	6643.76	1	323
2022-09-15	08:42:42	12.468	55.4602	31.8091	6819.62	1	324
2022-09-15	08:42:42	5.34418	23.772	31.8091	6667.53	1	325
2022-09-15	08:42:42	3.64083	16.1951	31.8091	6835.82	1	326
2022-09-15	08:42:43	7.67131	34.1235	42.0278	6701.65	1	327
2022-09-15	08:42:43	7.71121	34.301	42.0278	6870.12	1	328
2022-09-15	08:42:43	6.71293	29.8605	42.0278	6731.51	1	329
2022-09-15	08:42:43	10.734	47.747	42.0278	6917.87	1	330
2022-09-15	08:42:43	14.4119	64.107	42.0278	6795.62	1	331
2022-09-15	08:42:44	14.2607	63.4344	45.7837	6981.3	1	332
2022-09-15	08:42:44	9.89645	44.0214	45.7837	6839.64	1	333
2022-09-15	08:42:44	6.72077	29.8953	45.7837	7011.2	1	334
2022-09-15	08:42:45	5.87446	26.1308	29.622	6865.77	1	335
2022-09-15	08:42:45	6.08479	27.0664	29.622	7038.26	1	336
2022-09-15	08:42:45	7.84917	34.9147	29.622	6900.69	1	337
2022-09-15	08:42:45	6.82887	30.3762	29.622	7068.64	1	338
2022-09-15	08:42:46	6.14841	27.3494	26.2851	6928.04	1	339
2022-09-15	08:42:46	6.94449	30.8905	26.2851	7099.53	1	340
2022-09-15	08:42:46	6.04082	26.8708	26.2851	6954.91	1	341
2022-09-15	08:42:46	4.50286	20.0296	26.2851	7119.56	1	342
2022-09-15	08:42:47	4.55029	20.2406	12.367	6975.15	1	343
2022-09-15	08:42:47	4.24225	18.8704	12.367	7138.43	1	344
2022-09-15	08:42:47	1.96994	8.76269	12.367	6983.91	FALSE	344
2022-09-15	08:42:47	0.358384	1.59416	12.367	7140.02	FALSE	344
2022-09-15	08:42:48	0.240674	1.07057	0.122694	6984.98	FALSE	344
2022-09-15	08:42:48	0.0647458	0.288002	0.122694	7140.31	FALSE	344
2022-09-15	08:42:48	-0.0615646	-0.273852	0.122694	6984.98	FALSE	344
2022-09-15	08:42:48	-0.133524	-0.593941	0.122694	7140.31	FALSE	344
2022-09-15	08:42:49	-0.191386	-0.851323	-1.37319	6984.98	FALSE	344
2022-09-15	08:42:49	-0.418409	-1.86117	-1.37319	7140.31	FALSE	344
2022-09-15	08:42:49	-0.316323	-1.40707	-1.37319	6984.98	FALSE	344
2022-09-15	08:42:50	0.159199	0.708149	1.44482	7141.02	FALSE	344
2022-09-15	08:42:50	0.299555	1.33248	1.44482	6986.31	FALSE	344
2022-09-15	08:42:50	0.257774	1.14663	1.44482	7142.17	FALSE	344
2022-09-15	08:42:50	0.58271	2.59201	1.44482	6988.9	FALSE	344
2022-09-15	08:42:51	1.95497	8.6961	6.1169	7150.86	FALSE	344
2022-09-15	08:42:51	1.6335	7.26613	6.1169	6996.17	FALSE	344
2022-09-15	08:42:51	1.66775	7.41849	6.1169	7158.28	FALSE	344
2022-09-15	08:42:51	0.244339	1.08687	6.1169	6997.26	FALSE	344
2022-09-15	08:42:52	0.557723	2.48086	3.3379	7160.76	FALSE	344
2022-09-15	08:42:52	0.315687	1.40424	3.3379	6998.66	FALSE	344
2022-09-15	08:42:52	0.772277	3.43524	3.3379	7164.2	FALSE	344
2022-09-15	08:42:52	1.35589	6.03127	3.3379	7004.69	FALSE	344
2022-09-15	08:42:53	3.73156	16.5987	16.4708	7180.8	1	345
2022-09-15	08:42:53	5.46785	24.3221	16.4708	7029.02	1	346
2022-09-15	08:42:53	1.90902	8.4917	16.4708	7189.29	FALSE	346
2022-09-15	08:42:54	2.29304	10.1999	16.8868	7039.22	FALSE	346
2022-09-15	08:42:54	2.73945	12.1856	16.8868	7201.47	FALSE	346
2022-09-15	08:42:54	4.28144	19.0447	16.8868	7058.26	1	347
2022-09-15	08:42:54	5.87136	26.117	16.8868	7227.59	1	348
2022-09-15	08:42:55	6.73864	29.9748	41.7808	7088.23	1	349
2022-09-15	08:42:55	8.69599	38.6815	41.7808	7266.27	1	350
2022-09-15	08:42:55	9.0027	40.0458	41.7808	7128.28	1	351
2022-09-15	08:42:55	13.1336	58.4209	41.7808	7324.69	1	352
2022-09-15	08:42:56	6.28423	27.9535	11.7313	7156.23	1	353
2022-09-15	08:42:56	3.17793	14.1361	11.7313	7338.83	1	354
2022-09-15	08:42:56	0.53701	2.38873	11.7313	7158.62	FALSE	354
2022-09-15	08:42:56	0.550089	2.44691	11.7313	7341.28	FALSE	354
2022-09-15	08:42:57	0.324746	1.44454	1.54919	7160.07	FALSE	354
2022-09-15	08:42:57	0.494567	2.19993	1.54919	7343.48	FALSE	354
2022-09-15	08:42:57	0.225509	1.00311	1.54919	7161.07	FALSE	354
2022-09-15	08:42:58	0.504084	2.24227	7.30246	7345.72	FALSE	354
2022-09-15	08:42:58	0.792939	3.52715	7.30246	7164.6	FALSE	354
2022-09-15	08:42:58	2.97818	13.2475	7.30246	7358.97	FALSE	354
2022-09-15	08:42:58	2.29146	10.1929	7.30246	7174.79	FALSE	354
2022-09-15	08:42:59	1.76067	7.83181	6.75357	7366.8	FALSE	354
2022-09-15	08:42:59	1.45767	6.48401	6.75357	7181.27	FALSE	354
2022-09-15	08:42:59	0.958537	4.26376	6.75357	7371.06	FALSE	354
2022-09-15	08:42:59	1.8962	8.43468	6.75357	7189.71	FALSE	354
2022-09-15	08:43:00	0.407443	1.81239	2.64736	7372.87	FALSE	354
2022-09-15	08:43:00	0.575687	2.56077	2.64736	7192.27	FALSE	354
2022-09-15	08:43:00	0.688308	3.06173	2.64736	7375.94	FALSE	354
2022-09-15	08:43:00	0.709173	3.15454	2.64736	7195.42	FALSE	354
2022-09-15	08:43:01	0.420216	1.8692	18.3904	7377.8	FALSE	354
2022-09-15	08:43:01	0.324644	1.44408	18.3904	7196.87	FALSE	354
2022-09-15	08:43:01	2.83543	12.6126	18.3904	7390.42	FALSE	354
2022-09-15	08:43:01	12.9571	57.6358	18.3904	7254.5	1	355
2022-09-15	08:43:02	17.151	76.2911	41.7721	7466.71	1	356
2022-09-15	08:43:02	8.22011	36.5647	41.7721	7291.07	1	357
2022-09-15	08:43:02	2.80128	12.4607	41.7721	7479.17	FALSE	357
2022-09-15	08:43:03	4.23126	18.8215	23.9041	7309.89	1	358
2022-09-15	08:43:03	2.09726	9.32903	23.9041	7488.5	FALSE	358
2022-09-15	08:43:03	5.48276	24.3884	23.9041	7334.28	1	359
2022-09-15	08:43:03	9.68428	43.0776	23.9041	7531.58	1	360
2022-09-15	08:43:04	6.01024	26.7347	29.626	7361.01	1	361
2022-09-15	08:43:04	9.53131	42.3972	29.626	7573.97	1	362
2022-09-15	08:43:04	6.99833	31.13	29.626	7392.14	1	363
2022-09-15	08:43:04	4.10098	18.242	29.626	7592.21	1	364
2022-09-15	08:43:05	9.88036	43.9498	16.5767	7436.09	1	365
2022-09-15	08:43:05	2.44963	10.8964	16.5767	7603.11	FALSE	365
2022-09-15	08:43:05	2.05177	9.12668	16.5767	7445.22	FALSE	365
2022-09-15	08:43:05	0.524695	2.33395	16.5767	7605.45	FALSE	365
2022-09-15	08:43:06	0.431361	1.91878	-0.734217	7447.14	FALSE	365
2022-09-15	08:43:06	-0.423346	-1.88313	-0.734217	7605.45	FALSE	365
2022-09-15	08:43:06	-0.503193	-2.2383	-0.734217	7447.14	FALSE	365
2022-09-15	08:43:07	-0.708587	-3.15194	-3.33547	7605.45	FALSE	365
2022-09-15	08:43:07	-0.660852	-2.9396	-3.33547	7447.14	FALSE	365
2022-09-15	08:43:07	-0.897951	-3.99427	-3.33547	7605.45	FALSE	365
2022-09-15	08:43:07	-0.731997	-3.25607	-3.33547	7447.14	FALSE	365
2022-09-15	08:43:08	-0.833218	-3.70632	-3.64231	7605.45	FALSE	365
2022-09-15	08:43:08	-0.871183	-3.8752	-3.64231	7447.14	FALSE	365
2022-09-15	08:43:08	-0.760037	-3.3808	-3.64231	7605.45	FALSE	365
2022-09-15	08:43:08	-0.810877	-3.60694	-3.64231	7447.14	FALSE	365
2022-09-15	08:43:09	-0.736984	-3.27825	-3.60406	7605.45	FALSE	365
2022-09-15	08:43:09	-0.967264	-4.30258	-3.60406	7447.14	FALSE	365
2022-09-15	08:43:09	-0.724312	-3.22188	-3.60406	7605.45	FALSE	365
2022-09-15	08:43:09	-0.812353	-3.61351	-3.60406	7447.14	FALSE	365

## Sheet: Klutz_martin_20229158380 (3)
Date	Time	Lbs	Newtons	Total force x time		total steps > 13.345	**GoPro Fitting: 827
2022-09-15	08:38:09	0.652379	2.90191	2.90191	FALSE	0
2022-09-15	08:38:09	0.655178	2.91436	2.91436	FALSE	0
2022-09-15	08:38:09	1.58017	7.02891	9.93082	FALSE	0
2022-09-15	08:38:09	1.23655	5.50042	8.41478	FALSE	0
2022-09-15	08:38:10	0.41528	1.84725	11.7781	FALSE	0
2022-09-15	08:38:10	0.365967	1.62789	10.0427	FALSE	0
2022-09-15	08:38:10	0.361132	1.60639	13.3845	FALSE	0
2022-09-15	08:38:10	0.352074	1.5661	11.6088	FALSE	0
2022-09-15	08:38:11	0.382099	1.69965	15.0841	FALSE	0
2022-09-15	08:38:11	0.436247	1.94051	13.5493	FALSE	0
2022-09-15	08:38:11	0.427952	1.90362	16.9877	FALSE	0
2022-09-15	08:38:11	0.337824	1.50271	15.052	FALSE	0
2022-09-15	08:38:12	0.441081	1.96202	18.9497	FALSE	0
2022-09-15	08:38:12	0.314669	1.39971	16.4517	FALSE	0
2022-09-15	08:38:12	0.50103	2.22868	21.1784	FALSE	0
2022-09-15	08:38:13	0.418842	1.86309	18.3148	FALSE	0
2022-09-15	08:38:13	0.84785	3.77141	24.9498	FALSE	0
2022-09-15	08:38:13	1.38352	6.15417	24.469	FALSE	0
2022-09-15	08:38:13	2.07452	9.22788	34.1777	FALSE	0
2022-09-15	08:38:14	1.05039	4.67234	29.1413	FALSE	0
2022-09-15	08:38:14	0.526578	2.34232	36.52	FALSE	0
2022-09-15	08:38:14	0.895789	3.98465	33.126	FALSE	0
2022-09-15	08:38:14	2.03467	9.05062	45.5707	FALSE	0
2022-09-15	08:38:15	1.80307	8.02042	41.1464	FALSE	0
2022-09-15	08:38:15	1.17945	5.24643	50.8171	FALSE	0
2022-09-15	08:38:15	0.501234	2.22959	43.376	FALSE	0
2022-09-15	08:38:15	0.357061	1.58828	52.4054	FALSE	0
2022-09-15	08:38:16	0.64042	2.84872	46.2247	FALSE	0
2022-09-15	08:38:16	0.690954	3.0735	55.4789	FALSE	0
2022-09-15	08:38:16	1.30459	5.80308	52.0278	FALSE	0
2022-09-15	08:38:17	1.42357	6.33232	61.8112	FALSE	0
2022-09-15	08:38:17	0.833142	3.70598	55.7337	FALSE	0
2022-09-15	08:38:17	0.689224	3.06581	64.877	FALSE	0
2022-09-15	08:38:17	0.643626	2.86298	58.5967	FALSE	0
2022-09-15	08:38:18	0.674669	3.00106	67.8781	FALSE	0
2022-09-15	08:38:18	1.23615	5.49864	64.0954	FALSE	0
2022-09-15	08:38:18	2.66301	11.8456	79.7237	FALSE	0
2022-09-15	08:38:18	0.89014	3.95952	68.0549	FALSE	0
2022-09-15	08:38:19	0.599911	2.66852	82.3922	FALSE	0
2022-09-15	08:38:19	0.234313	1.04227	69.0972	FALSE	0
2022-09-15	08:38:19	0.151412	0.673511	83.0657	FALSE	0
2022-09-15	08:38:19	0.139097	0.618731	69.7159	FALSE	0
2022-09-15	08:38:20	0.861438	3.83185	86.8975	FALSE	0
2022-09-15	08:38:20	0.344186	1.53101	71.2469	FALSE	0
2022-09-15	08:38:20	0.0192496	0.0856261	86.9832	FALSE	0
2022-09-15	08:38:20	0.309427	1.37639	72.6233	FALSE	0
2022-09-15	08:38:21	1.40291	6.24042	93.2236	FALSE	0
2022-09-15	08:38:21	3.77843	16.8072	89.4305	1	1
2022-09-15	08:38:21	5.30571	23.6009	116.824	1	2
2022-09-15	08:38:22	8.4654	37.6558	127.086	1	3
2022-09-15	08:38:22	5.87589	26.1371	142.962	1	4
2022-09-15	08:38:22	3.92195	17.4456	144.532	1	5
2022-09-15	08:38:22	1.10775	4.92749	147.889	FALSE	5
2022-09-15	08:38:23	0.223677	0.99496	145.527	FALSE	5
2022-09-15	08:38:23	0.399758	1.7782	149.667	FALSE	5
2022-09-15	08:38:23	0.2964	1.31845	146.845	FALSE	5
2022-09-15	08:38:23	0.317824	1.41374	151.081	FALSE	5
2022-09-15	08:38:24	0.584084	2.59812	149.443	FALSE	5
2022-09-15	08:38:24	0.200318	0.891055	151.972	FALSE	5
2022-09-15	08:38:24	0.507341	2.25675	151.7	FALSE	5
2022-09-15	08:38:24	0.584593	2.60039	154.572	FALSE	5
2022-09-15	08:38:25	0.595738	2.64996	154.35	FALSE	5
2022-09-15	08:38:25	0.382812	1.70282	156.275	FALSE	5
2022-09-15	08:38:25	0.400776	1.78273	156.133	FALSE	5
2022-09-15	08:38:26	0.381082	1.69513	157.97	FALSE	5
2022-09-15	08:38:26	0.455331	2.0254	158.158	FALSE	5
2022-09-15	08:38:26	0.447901	1.99235	159.963	FALSE	5
2022-09-15	08:38:26	0.463219	2.06049	160.219	FALSE	5
2022-09-15	08:38:27	0.519148	2.30927	162.272	FALSE	5
2022-09-15	08:38:27	0.511718	2.27622	162.495	FALSE	5
2022-09-15	08:38:27	0.528715	2.35183	164.624	FALSE	5
2022-09-15	08:38:27	0.671921	2.98884	165.484	FALSE	5
2022-09-15	08:38:28	0.412074	1.83299	166.457	FALSE	5
2022-09-15	08:38:28	0.254313	1.13124	166.615	FALSE	5
2022-09-15	08:38:28	0.247901	1.10271	167.56	FALSE	5
2022-09-15	08:38:28	0.663219	2.95013	169.565	FALSE	5
2022-09-15	08:38:29	1.07233	4.76994	172.33	FALSE	5
2022-09-15	08:38:29	0.811514	3.60978	173.175	FALSE	5
2022-09-15	08:38:29	0.385407	1.71437	174.044	FALSE	5
2022-09-15	08:38:30	0.181285	0.806392	173.981	FALSE	5
2022-09-15	08:38:30	1.31284	5.83977	179.884	FALSE	5
2022-09-15	08:38:30	7.54189	33.5478	207.529	1	6
2022-09-15	08:38:30	14.7149	65.4548	245.338	1	7
2022-09-15	08:38:31	9.08917	40.4304	247.96	1	8
2022-09-15	08:38:31	13.4009	59.6099	304.948	1	9
2022-09-15	08:38:31	2.6049	11.5871	259.547	FALSE	9
2022-09-15	08:38:31	2.81467	12.5202	317.469	FALSE	9
2022-09-15	08:38:32	4.86383	21.6353	281.182	1	10
2022-09-15	08:38:32	1.18576	5.2745	322.743	FALSE	10
2022-09-15	08:38:32	1.55284	6.90734	288.089	FALSE	10
2022-09-15	08:38:32	2.01838	8.97816	331.721	FALSE	10
2022-09-15	08:38:33	3.2792	14.5865	302.676	1	11
2022-09-15	08:38:33	4.56739	20.3167	352.038	1	12
2022-09-15	08:38:33	3.57518	15.9031	318.579	1	13
2022-09-15	08:38:34	5.91146	26.2954	378.333	1	14
2022-09-15	08:38:34	4.25686	18.9354	337.514	1	15
2022-09-15	08:38:34	5.49365	24.4369	402.77	1	16
2022-09-15	08:38:34	3.84225	17.0911	354.606	1	17
2022-09-15	08:38:35	4.06449	18.0797	420.85	1	18
2022-09-15	08:38:35	7.32179	32.5688	387.174	1	19
2022-09-15	08:38:35	8.09365	36.0022	456.852	1	20
2022-09-15	08:38:35	6.9165	30.766	417.94	1	21
2022-09-15	08:38:36	9.63319	42.8504	499.702	1	22
2022-09-15	08:38:36	5.72296	25.4569	443.397	1	23
2022-09-15	08:38:36	3.74408	16.6544	516.357	1	24
2022-09-15	08:38:36	7.77182	34.5706	477.968	1	25
2022-09-15	08:38:37	5.04337	22.4339	538.791	1	26
2022-09-15	08:38:37	15.1825	67.5348	545.503	1	27
2022-09-15	08:38:37	14.8685	66.1381	604.929	1	28
2022-09-15	08:38:38	11.5474	51.3651	596.868	1	29
2022-09-15	08:38:38	14.5359	64.6586	669.587	1	30
2022-09-15	08:38:38	16.3389	72.6787	669.546	1	31
2022-09-15	08:38:38	12.5709	55.9179	725.505	1	32
2022-09-15	08:38:39	4.42342	19.6763	689.223	1	33
2022-09-15	08:38:39	2.92418	13.0073	738.513	FALSE	33
2022-09-15	08:38:39	2.39686	10.6617	699.884	FALSE	33
2022-09-15	08:38:39	2.14541	9.54321	748.056	FALSE	33
2022-09-15	08:38:40	7.03034	31.2724	731.157	1	34
2022-09-15	08:38:40	5.84474	25.9986	774.054	1	35
2022-09-15	08:38:40	1.50872	6.71109	737.868	FALSE	35
2022-09-15	08:38:40	2.39019	10.632	784.686	FALSE	35
2022-09-15	08:38:41	1.66027	7.38521	745.253	FALSE	35
2022-09-15	08:38:41	2.57243	11.4427	796.129	FALSE	35
2022-09-15	08:38:41	2.62454	11.6745	756.928	FALSE	35
2022-09-15	08:38:41	3.34856	14.8951	811.024	1	36
2022-09-15	08:38:42	3.45635	15.3745	772.302	1	37
2022-09-15	08:38:42	3.55574	15.8166	826.841	1	38
2022-09-15	08:38:42	2.52902	11.2496	783.552	FALSE	38
2022-09-15	08:38:43	1.81233	8.06161	834.902	FALSE	38
2022-09-15	08:38:43	1.75533	7.80806	791.36	FALSE	38
2022-09-15	08:38:43	1.608	7.15271	842.055	FALSE	38
2022-09-15	08:38:43	1.62296	7.21925	798.579	FALSE	38
2022-09-15	08:38:44	1.48892	6.62301	848.678	FALSE	38
2022-09-15	08:38:44	1.47604	6.56572	805.145	FALSE	38
2022-09-15	08:38:44	1.47894	6.57862	855.257	FALSE	38
2022-09-15	08:38:44	0.84617	3.76393	808.909	FALSE	38
2022-09-15	08:38:45	1.03818	4.61803	859.875	FALSE	38
2022-09-15	08:38:45	0.821132	3.65256	812.561	FALSE	38
2022-09-15	08:38:45	0.970191	4.3156	864.19	FALSE	38
2022-09-15	08:38:45	1.05879	4.70971	817.271	FALSE	38
2022-09-15	08:38:46	1.04067	4.62911	868.819	FALSE	38
2022-09-15	08:38:46	0.913549	4.06365	821.335	FALSE	38
2022-09-15	08:38:46	0.667748	2.97028	871.79	FALSE	38
2022-09-15	08:38:47	1.0138	4.50959	825.844	FALSE	38
2022-09-15	08:38:47	1.81538	8.07517	879.865	FALSE	38
2022-09-15	08:38:47	2.15279	9.57604	835.42	FALSE	38
2022-09-15	08:38:47	3.66418	16.299	896.164	1	39
2022-09-15	08:38:48	3.67793	16.3602	851.78	1	40
2022-09-15	08:38:48	4.10541	18.2617	914.426	1	41
2022-09-15	08:38:48	5.87197	26.1197	877.9	1	42
2022-09-15	08:38:48	6.98143	31.0548	945.48	1	43
2022-09-15	08:38:49	6.46708	28.7669	906.667	1	44
2022-09-15	08:38:49	2.68749	11.9545	957.435	FALSE	44
2022-09-15	08:38:49	2.2652	10.0761	916.743	FALSE	44
2022-09-15	08:38:49	2.54439	11.318	968.753	FALSE	44
2022-09-15	08:38:50	2.39604	10.6581	927.401	FALSE	44
2022-09-15	08:38:50	2.23645	9.94818	978.701	FALSE	44
2022-09-15	08:38:50	2.35243	10.4641	937.865	FALSE	44
2022-09-15	08:38:51	3.23793	14.403	993.104	1	45
2022-09-15	08:38:51	1.24826	5.55251	943.418	FALSE	45
2022-09-15	08:38:51	2.05167	9.12624	1002.23	FALSE	45
2022-09-15	08:38:51	0.454568	2.02201	945.44	FALSE	45
2022-09-15	08:38:52	0.845611	3.76145	1005.99	FALSE	45
2022-09-15	08:38:52	0.645967	2.87339	948.313	FALSE	45
2022-09-15	08:38:52	1.27034	5.65073	1011.64	FALSE	45
2022-09-15	08:38:52	0.92042	4.09421	952.407	FALSE	45
2022-09-15	08:38:53	1.09385	4.86566	1016.51	FALSE	45
2022-09-15	08:38:53	0.680674	3.02777	955.435	FALSE	45
2022-09-15	08:38:53	0.655534	2.91595	1019.42	FALSE	45
2022-09-15	08:38:53	0.500267	2.22529	957.66	FALSE	45
2022-09-15	08:38:54	0.50444	2.24385	1021.67	FALSE	45
2022-09-15	08:38:54	0.309682	1.37753	959.038	FALSE	45
2022-09-15	08:38:54	0.334008	1.48573	1023.15	FALSE	45
2022-09-15	08:38:55	0.298079	1.32592	960.364	FALSE	45
2022-09-15	08:38:55	0.509224	2.26513	1025.42	FALSE	45
2022-09-15	08:38:55	2.48525	11.0549	971.419	FALSE	45
2022-09-15	08:38:55	3.23981	14.4113	1039.83	1	46
2022-09-15	08:38:56	3.28978	14.6336	986.052	1	47
2022-09-15	08:38:56	2.01014	8.9415	1048.77	FALSE	47
2022-09-15	08:38:56	1.01981	4.53632	990.589	FALSE	47
2022-09-15	08:38:56	1.15146	5.12192	1053.89	FALSE	47
2022-09-15	08:38:57	0.374313	1.66502	992.254	FALSE	47
2022-09-15	08:38:57	0.210242	0.935198	1054.83	FALSE	47
2022-09-15	08:38:57	0.657417	2.92432	995.178	FALSE	47
2022-09-15	08:38:57	0.299453	1.33203	1056.16	FALSE	47
2022-09-15	08:38:58	0.0879518	0.391227	995.569	FALSE	47
2022-09-15	08:38:58	0.0565524	0.251556	1056.41	FALSE	47
2022-09-15	08:38:58	1.63757	7.28424	1002.85	FALSE	47
2022-09-15	08:38:59	6.04866	26.9056	1083.32	1	48
2022-09-15	08:38:59	3.15202	14.0208	1016.87	1	49
2022-09-15	08:38:59	4.60418	20.4803	1103.8	1	50
2022-09-15	08:38:59	2.84714	12.6646	1029.54	FALSE	50
2022-09-15	08:39:00	7.57904	33.7131	1137.51	1	51
2022-09-15	08:39:00	2.01594	8.9673	1038.51	FALSE	51
2022-09-15	08:39:00	7.3566	32.7236	1170.23	1	52
2022-09-15	08:39:00	5.35955	23.8404	1062.35	1	53
2022-09-15	08:39:01	3.9853	17.7274	1187.96	1	54
2022-09-15	08:39:01	3.49304	15.5377	1077.88	1	55
2022-09-15	08:39:01	1.34261	5.9722	1193.93	FALSE	55
2022-09-15	08:39:01	0.880115	3.91493	1081.8	FALSE	55
2022-09-15	08:39:02	0.599911	2.66852	1196.6	FALSE	55
2022-09-15	08:39:02	0.703321	3.12851	1084.93	FALSE	55
2022-09-15	08:39:02	0.547494	2.43536	1199.04	FALSE	55
2022-09-15	08:39:02	0.60556	2.69365	1087.62	FALSE	55
2022-09-15	08:39:03	0.482049	2.14425	1201.18	FALSE	55
2022-09-15	08:39:03	0.512023	2.27758	1089.9	FALSE	55
2022-09-15	08:39:03	0.64042	2.84872	1204.03	FALSE	55
2022-09-15	08:39:04	0.609224	2.70995	1092.61	FALSE	55
2022-09-15	08:39:04	1.23971	5.51448	1209.55	FALSE	55
2022-09-15	08:39:04	0.431412	1.91901	1094.53	FALSE	55
2022-09-15	08:39:04	0.265916	1.18285	1210.73	FALSE	55
2022-09-15	08:39:05	0.26729	1.18896	1095.72	FALSE	55
2022-09-15	08:39:05	0.428155	1.90452	1212.63	FALSE	55
2022-09-15	08:39:05	0.530802	2.36111	1098.08	FALSE	55
2022-09-15	08:39:05	0.454924	2.02359	1214.66	FALSE	55
2022-09-15	08:39:06	0.6364	2.83083	1100.91	FALSE	55
2022-09-15	08:39:06	0.578995	2.57549	1217.23	FALSE	55
2022-09-15	08:39:06	0.354669	1.57764	1102.49	FALSE	55
2022-09-15	08:39:06	0.261489	1.16316	1218.4	FALSE	55
2022-09-15	08:39:07	0.265916	1.18285	1103.67	FALSE	55
2022-09-15	08:39:07	0.263117	1.1704	1219.57	FALSE	55
2022-09-15	08:39:07	0.157774	0.70181	1104.37	FALSE	55
2022-09-15	08:39:08	0.112328	0.499657	1220.07	FALSE	55
2022-09-15	08:39:08	0.0969086	0.431069	1104.8	FALSE	55
2022-09-15	08:39:08	0.0618959	0.275325	1220.34	FALSE	55
2022-09-15	08:39:08	0.0816923	0.363384	1105.17	FALSE	55
2022-09-15	08:39:09	0.0447967	0.199265	1220.54	FALSE	55
2022-09-15	08:39:09	0.0296822	0.132032	1105.3	FALSE	55
2022-09-15	08:39:09	0.0321249	0.142898	1220.68	FALSE	55
2022-09-15	08:39:09	0.0401147	0.178438	1105.48	FALSE	55
2022-09-15	08:39:10	0.038588	0.171647	1220.85	FALSE	55
2022-09-15	08:39:10	0.0243386	0.108263	1105.58	FALSE	55
2022-09-15	08:39:10	0.0226083	0.100566	1220.96	FALSE	55
2022-09-15	08:39:10	0.00428777	0.0190729	1105.6	FALSE	55
2022-09-15	08:39:11	0.000929014	0.00413244	1220.96	FALSE	55
2022-09-15	08:39:11	-0.0924043	-0.411033	1105.6	FALSE	55
2022-09-15	08:39:11	-0.358562	-1.59496	1220.96	FALSE	55
2022-09-15	08:39:12	-0.546043	-2.42891	1105.6	FALSE	55
2022-09-15	08:39:12	-0.616832	-2.74379	1220.96	FALSE	55
2022-09-15	08:39:12	-0.721768	-3.21057	1105.6	FALSE	55
2022-09-15	08:39:12	-0.803803	-3.57548	1220.96	FALSE	55
2022-09-15	08:39:13	-0.839274	-3.73326	1105.6	FALSE	55
2022-09-15	08:39:13	-0.978562	-4.35284	1220.96	FALSE	55
2022-09-15	08:39:13	-0.826043	-3.6744	1105.6	FALSE	55
2022-09-15	08:39:13	-0.559427	-2.48844	1220.96	FALSE	55
2022-09-15	08:39:14	-0.340089	-1.51278	1105.6	FALSE	55
2022-09-15	08:39:14	-0.0723534	-0.321842	1220.96	FALSE	55
2022-09-15	08:39:14	0.177825	0.791001	1106.39	FALSE	55
2022-09-15	08:39:14	0.258283	1.14889	1222.11	FALSE	55
2022-09-15	08:39:15	0.28729	1.27792	1107.67	FALSE	55
2022-09-15	08:39:15	0.361438	1.60775	1223.72	FALSE	55
2022-09-15	08:39:15	0.4593	2.04306	1109.72	FALSE	55
2022-09-15	08:39:16	0.539605	2.40027	1226.12	FALSE	55
2022-09-15	08:39:16	1.00378	4.46501	1114.18	FALSE	55
2022-09-15	08:39:16	0.98444	4.37899	1230.5	FALSE	55
2022-09-15	08:39:16	0.596349	2.65268	1116.83	FALSE	55
2022-09-15	08:39:17	0.0970612	0.431748	1230.93	FALSE	55
2022-09-15	08:39:17	-0.18528	-0.824162	1116.83	FALSE	55
2022-09-15	08:39:17	-0.274796	-1.22235	1230.93	FALSE	55
2022-09-15	08:39:17	-0.554287	-2.46558	1116.83	FALSE	55
2022-09-15	08:39:18	-0.648231	-2.88346	1230.93	FALSE	55
2022-09-15	08:39:18	-0.704261	-3.13269	1116.83	FALSE	55
2022-09-15	08:39:18	-0.567213	-2.52308	1230.93	FALSE	55
2022-09-15	08:39:18	-0.455865	-2.02778	1116.83	FALSE	55
2022-09-15	08:39:19	-0.0344908	-0.153422	1230.93	FALSE	55
2022-09-15	08:39:19	0.0442369	0.196775	1117.03	FALSE	55
2022-09-15	08:39:19	0.0338552	0.150595	1231.08	FALSE	55
2022-09-15	08:39:20	0.150904	0.671251	1117.7	FALSE	55
2022-09-15	08:39:20	0.363168	1.61544	1232.69	FALSE	55
2022-09-15	08:39:20	-0.415457	-1.84804	1117.7	FALSE	55
2022-09-15	08:39:20	0.578282	2.57231	1235.27	FALSE	55
2022-09-15	08:39:21	0.99472	4.42471	1122.13	FALSE	55
2022-09-15	08:39:21	1.32978	5.91513	1241.18	FALSE	55
2022-09-15	08:39:21	1.56281	6.95169	1129.08	FALSE	55
2022-09-15	08:39:21	1.7878	7.95249	1249.13	FALSE	55
2022-09-15	08:39:22	2.09024	9.29781	1138.38	FALSE	55
2022-09-15	08:39:22	2.30877	10.2699	1259.4	FALSE	55
2022-09-15	08:39:22	2.62617	11.6817	1150.06	FALSE	55
2022-09-15	08:39:22	2.45772	10.9324	1270.34	FALSE	55
2022-09-15	08:39:23	2.83574	12.6139	1162.67	FALSE	55
2022-09-15	08:39:23	2.87569	12.7916	1283.13	FALSE	55
2022-09-15	08:39:23	2.77513	12.3443	1175.02	FALSE	55
2022-09-15	08:39:23	3.05777	13.6016	1296.73	1	56
2022-09-15	08:39:24	2.98841	13.293	1188.31	FALSE	56
2022-09-15	08:39:24	2.7653	12.3006	1309.03	FALSE	56
2022-09-15	08:39:24	2.88826	12.8476	1201.16	FALSE	56
2022-09-15	08:39:25	3.71574	16.5284	1325.56	1	57
2022-09-15	08:39:25	4.19553	18.6626	1219.82	1	58
2022-09-15	08:39:25	3.95955	17.6129	1343.17	1	59
2022-09-15	08:39:25	4.05574	18.0407	1237.86	1	60
2022-09-15	08:39:26	4.05452	18.0353	1361.21	1	61
2022-09-15	08:39:26	3.89859	17.3417	1255.2	1	62
2022-09-15	08:39:26	4.10256	18.249	1379.45	1	63
2022-09-15	08:39:26	3.51889	15.6527	1270.85	1	64
2022-09-15	08:39:27	3.48714	15.5115	1394.97	1	65
2022-09-15	08:39:27	3.54194	15.7553	1286.61	1	66
2022-09-15	08:39:27	3.45095	15.3505	1410.32	1	67
2022-09-15	08:39:27	3.80846	16.9408	1303.55	1	68
2022-09-15	08:39:28	3.84525	17.1044	1427.42	1	69
2022-09-15	08:39:28	4.13055	18.3735	1321.92	1	70
2022-09-15	08:39:28	2.35528	10.4768	1437.9	FALSE	70
2022-09-15	08:39:29	1.94586	8.65557	1330.58	FALSE	70
2022-09-15	08:39:29	0.873142	3.88391	1441.78	FALSE	70
2022-09-15	08:39:29	0.737977	3.28267	1333.86	FALSE	70
2022-09-15	08:39:29	0.735026	3.26954	1445.05	FALSE	70
2022-09-15	08:39:30	0.636858	2.83287	1336.69	FALSE	70
2022-09-15	08:39:30	0.00515291	0.0229212	1445.07	FALSE	70
2022-09-15	08:39:30	-0.195712	-0.870566	1336.69	FALSE	70
2022-09-15	08:39:30	-0.368231	-1.63797	1445.07	FALSE	70
2022-09-15	08:39:31	-0.426908	-1.89897	1336.69	FALSE	70
2022-09-15	08:39:31	-0.251539	-1.1189	1445.07	FALSE	70
2022-09-15	08:39:31	-0.0290964	-0.129427	1336.69	FALSE	70
2022-09-15	08:39:31	-0.0520481	-0.23152	1445.07	FALSE	70
2022-09-15	08:39:32	0.231972	1.03186	1337.73	FALSE	70
2022-09-15	08:39:32	0.215229	0.957382	1446.03	FALSE	70
2022-09-15	08:39:32	0.33986	1.51177	1339.24	FALSE	70
2022-09-15	08:39:33	0.513143	2.28256	1448.31	FALSE	70
2022-09-15	08:39:33	0.0623539	0.277363	1339.52	FALSE	70
2022-09-15	08:39:33	0.362659	1.61318	1449.93	FALSE	70
2022-09-15	08:39:33	0.61243	2.72421	1342.24	FALSE	70
2022-09-15	08:39:34	0.725458	3.22698	1453.15	FALSE	70
2022-09-15	08:39:34	0.586527	2.60899	1344.85	FALSE	70
2022-09-15	08:39:34	0.423931	1.88573	1455.04	FALSE	70
2022-09-15	08:39:34	0.439809	1.95636	1346.8	FALSE	70
2022-09-15	08:39:35	0.385407	1.71437	1456.75	FALSE	70
2022-09-15	08:39:35	0.399809	1.77843	1348.58	FALSE	70
2022-09-15	08:39:35	0.431565	1.91969	1458.67	FALSE	70
2022-09-15	08:39:35	0.356807	1.58715	1350.17	FALSE	70
2022-09-15	08:39:36	0.350445	1.55885	1460.23	FALSE	70
2022-09-15	08:39:36	0.311616	1.38613	1351.56	FALSE	70
2022-09-15	08:39:36	0.425305	1.89184	1462.12	FALSE	70
2022-09-15	08:39:37	0.379707	1.68901	1353.25	FALSE	70
2022-09-15	08:39:37	0.328715	1.46219	1463.59	FALSE	70
2022-09-15	08:39:37	0.335585	1.49275	1354.74	FALSE	70
2022-09-15	08:39:37	0.537774	2.39213	1465.98	FALSE	70
2022-09-15	08:39:38	1.31518	5.85018	1360.59	FALSE	70
2022-09-15	08:39:38	3.60413	16.0319	1482.01	1	71
2022-09-15	08:39:38	3.22281	14.3357	1374.92	1	72
2022-09-15	08:39:38	2.86479	12.7432	1494.75	FALSE	72
2022-09-15	08:39:39	2.98729	13.2881	1388.21	FALSE	72
2022-09-15	08:39:39	2.50943	11.1624	1505.92	FALSE	72
2022-09-15	08:39:39	2.80871	12.4937	1400.71	FALSE	72
2022-09-15	08:39:39	2.4079	10.7108	1516.63	FALSE	72
2022-09-15	08:39:40	2.01014	8.9415	1409.65	FALSE	72
2022-09-15	08:39:40	1.60118	7.12237	1523.75	FALSE	72
2022-09-15	08:39:40	2.58917	11.5171	1421.16	FALSE	72
2022-09-15	08:39:40	3.12749	13.9117	1537.66	1	73
2022-09-15	08:39:41	2.631	11.7032	1432.87	FALSE	73
2022-09-15	08:39:41	0.483524	2.15081	1539.81	FALSE	73
2022-09-15	08:39:41	0.338333	1.50497	1434.37	FALSE	73
2022-09-15	08:39:42	-0.0302669	-0.134633	1539.81	FALSE	73
2022-09-15	08:39:42	0.124542	0.553988	1434.93	FALSE	73
2022-09-15	08:39:42	0.00642519	0.0285805	1539.84	FALSE	73
2022-09-15	08:39:42	0.0275956	0.122751	1435.05	FALSE	73
2022-09-15	08:39:43	-0.108333	-0.481887	1539.84	FALSE	73
2022-09-15	08:39:43	0.120725	0.537009	1435.59	FALSE	73
2022-09-15	08:39:43	0.085102	0.378551	1540.22	FALSE	73
2022-09-15	08:39:43	0.304746	1.35557	1436.94	FALSE	73
2022-09-15	08:39:44	0.476349	2.1189	1542.34	FALSE	73
2022-09-15	08:39:44	0.592023	2.63344	1439.58	FALSE	73
2022-09-15	08:39:44	0.530751	2.36089	1544.7	FALSE	73
2022-09-15	08:39:44	0.248664	1.10611	1440.68	FALSE	73
2022-09-15	08:39:45	0.063219	0.281211	1544.98	FALSE	73
2022-09-15	08:39:45	0.0627101	0.278947	1440.96	FALSE	73
2022-09-15	08:39:45	0.275738	1.22654	1546.21	FALSE	73
2022-09-15	08:39:46	0.380878	1.69422	1442.65	FALSE	73
2022-09-15	08:39:46	1.06663	4.74458	1550.95	FALSE	73
2022-09-15	08:39:46	1.44999	6.44985	1449.1	FALSE	73
2022-09-15	08:39:46	2.72658	12.1284	1563.08	FALSE	73
2022-09-15	08:39:47	3.28368	14.6065	1463.71	1	74
2022-09-15	08:39:47	3.2363	14.3957	1577.48	1	75
2022-09-15	08:39:47	1.04744	4.65922	1468.37	FALSE	75
2022-09-15	08:39:47	1.02032	4.53859	1582.01	FALSE	75
2022-09-15	08:39:48	0.213397	0.949233	1469.32	FALSE	75
2022-09-15	08:39:48	0.263982	1.17424	1583.19	FALSE	75
2022-09-15	08:39:48	0.0686135	0.305207	1469.62	FALSE	75
2022-09-15	08:39:48	0.103372	0.459819	1583.65	FALSE	75
2022-09-15	08:39:49	0.180827	0.804355	1470.43	FALSE	75
2022-09-15	08:39:49	0.393193	1.749	1585.4	FALSE	75
2022-09-15	08:39:49	0.385713	1.71573	1472.14	FALSE	75
2022-09-15	08:39:50	0.685916	3.05109	1588.45	FALSE	75
2022-09-15	08:39:50	0.416501	1.85268	1474	FALSE	75
2022-09-15	08:39:50	0.249377	1.10928	1589.56	FALSE	75
2022-09-15	08:39:50	0.235127	1.04589	1475.04	FALSE	75
2022-09-15	08:39:51	0.420166	1.86898	1591.43	FALSE	75
2022-09-15	08:39:51	0.556247	2.4743	1477.52	FALSE	75
2022-09-15	08:39:51	0.513244	2.28301	1593.71	FALSE	75
2022-09-15	08:39:51	2.83721	12.6205	1490.14	FALSE	75
2022-09-15	08:39:52	2.73696	12.1745	1605.88	FALSE	75
2022-09-15	08:39:52	2.4024	10.6864	1500.82	FALSE	75
2022-09-15	08:39:52	3.18876	14.1842	1620.07	1	76
2022-09-15	08:39:52	2.59945	11.5629	1512.39	FALSE	76
2022-09-15	08:39:53	1.95212	8.68342	1628.75	FALSE	76
2022-09-15	08:39:53	0.713448	3.17356	1515.56	FALSE	76
2022-09-15	08:39:53	0.851972	3.78974	1632.54	FALSE	76
2022-09-15	08:39:54	1.56474	6.96028	1522.52	FALSE	76
2022-09-15	08:39:54	0.497367	2.21239	1634.75	FALSE	76
2022-09-15	08:39:54	0.678842	3.01962	1525.54	FALSE	76
2022-09-15	08:39:54	2.88663	12.8403	1647.59	FALSE	76
2022-09-15	08:39:55	0.279046	1.24125	1526.78	FALSE	76
2022-09-15	08:39:55	0.126069	0.56078	1648.16	FALSE	76
2022-09-15	08:39:55	0.321336	1.42937	1528.21	FALSE	76
2022-09-15	08:39:55	0.37187	1.65415	1649.81	FALSE	76
2022-09-15	08:39:56	-0.0449743	-0.200055	1528.21	FALSE	76
2022-09-15	08:39:56	0.017214	0.0765713	1649.89	FALSE	76
2022-09-15	08:39:56	0.398944	1.77458	1529.99	FALSE	76
2022-09-15	08:39:56	0.156196	0.694791	1650.58	FALSE	76
2022-09-15	08:39:57	0.324237	1.44227	1531.43	FALSE	76
2022-09-15	08:39:57	0.430191	1.91358	1652.49	FALSE	76
2022-09-15	08:39:57	0.617824	2.7482	1534.18	FALSE	76
2022-09-15	08:39:58	0.455789	2.02744	1654.52	FALSE	76
2022-09-15	08:39:58	0.349835	1.55614	1535.73	FALSE	76
2022-09-15	08:39:58	0.373804	1.66275	1656.18	FALSE	76
2022-09-15	08:39:58	0.375382	1.66977	1537.4	FALSE	76
2022-09-15	08:39:59	0.346832	1.54278	1657.73	FALSE	76
2022-09-15	08:39:59	0.308613	1.37277	1538.78	FALSE	76
2022-09-15	08:39:59	0.39299	1.7481	1659.48	FALSE	76
2022-09-15	08:39:59	0.407799	1.81397	1540.59	FALSE	76
2022-09-15	08:40:00	0.504033	2.24204	1661.72	FALSE	76
2022-09-15	08:40:00	0.696145	3.09659	1543.69	FALSE	76
2022-09-15	08:40:00	0.81187	3.61136	1665.33	FALSE	76
2022-09-15	08:40:00	1.762	7.83773	1551.52	FALSE	76
2022-09-15	08:40:01	0.636806	2.83264	1668.16	FALSE	76
2022-09-15	08:40:01	0.324389	1.44295	1552.97	FALSE	76
2022-09-15	08:40:01	0.181387	0.806846	1668.97	FALSE	76
2022-09-15	08:40:01	0.243422	1.08279	1554.05	FALSE	76
2022-09-15	08:40:02	0.238741	1.06197	1670.03	FALSE	76
2022-09-15	08:40:02	0.0986389	0.438766	1554.49	FALSE	76
2022-09-15	08:40:02	-0.0136257	-0.0606098	1670.03	FALSE	76
2022-09-15	08:40:03	0.236705	1.05291	1555.54	FALSE	76
2022-09-15	08:40:03	3.94052	17.5282	1687.56	1	77
2022-09-15	08:40:03	6.60932	29.3996	1584.94	1	78
2022-09-15	08:40:03	3.71731	16.5353	1704.09	1	79
2022-09-15	08:40:04	2.19472	9.76255	1594.7	FALSE	79
2022-09-15	08:40:04	1.36154	6.0564	1710.15	FALSE	79
2022-09-15	08:40:04	1.10327	4.90757	1599.61	FALSE	79
2022-09-15	08:40:04	0.596807	2.65472	1712.8	FALSE	79
2022-09-15	08:40:05	0.295127	1.31278	1600.92	FALSE	79
2022-09-15	08:40:05	0.195891	0.871362	1713.68	FALSE	79
2022-09-15	08:40:05	2.17508	9.67519	1610.6	FALSE	79
2022-09-15	08:40:05	9.19731	40.9115	1754.59	1	80
2022-09-15	08:40:06	15.5056	68.972	1679.57	1	81
2022-09-15	08:40:06	8.95029	39.8127	1794.4	1	82
2022-09-15	08:40:06	6.51329	28.9724	1708.54	1	83
2022-09-15	08:40:07	2.25375	10.0251	1804.43	FALSE	83
2022-09-15	08:40:07	3.35024	14.9025	1723.45	1	84
2022-09-15	08:40:07	1.76408	7.84698	1812.27	FALSE	84
2022-09-15	08:40:07	1.90429	8.47066	1731.92	FALSE	84
2022-09-15	08:40:08	1.61243	7.17241	1819.44	FALSE	84
2022-09-15	08:40:08	2.79462	12.431	1744.35	FALSE	84
2022-09-15	08:40:08	2.79553	12.4351	1831.88	FALSE	84
2022-09-15	08:40:08	2.49238	11.0866	1755.43	FALSE	84
2022-09-15	08:40:09	0.827596	3.68131	1835.56	FALSE	84
2022-09-15	08:40:09	0.372888	1.65868	1757.09	FALSE	84
2022-09-15	08:40:09	0.0708017	0.31494	1835.88	FALSE	84
2022-09-15	08:40:09	0.1393	0.619634	1757.71	FALSE	84
2022-09-15	08:40:10	1.4963	6.65584	1842.53	FALSE	84
2022-09-15	08:40:10	3.39345	15.0947	1772.81	1	85
2022-09-15	08:40:10	1.80464	8.0274	1850.56	FALSE	85
2022-09-15	08:40:11	0.340318	1.5138	1774.32	FALSE	85
2022-09-15	08:40:11	0.218639	0.97255	1851.53	FALSE	85
2022-09-15	08:40:11	0.0812343	0.361346	1774.68	FALSE	85
2022-09-15	08:40:11	-0.0118954	-0.0529131	1851.53	FALSE	85
2022-09-15	08:40:12	0.16673	0.741648	1775.42	FALSE	85
2022-09-15	08:40:12	0.19126	0.850763	1852.38	FALSE	85
2022-09-15	08:40:12	0.195942	0.871589	1776.3	FALSE	85
2022-09-15	08:40:12	0.296552	1.31912	1853.7	FALSE	85
2022-09-15	08:40:13	0.611616	2.72059	1779.02	FALSE	85
2022-09-15	08:40:13	0.743881	3.30893	1857.01	FALSE	85
2022-09-15	08:40:13	0.892532	3.97016	1782.99	FALSE	85
2022-09-15	08:40:13	0.718435	3.19574	1860.21	FALSE	85
2022-09-15	08:40:14	0.175382	0.780134	1783.77	FALSE	85
2022-09-15	08:40:14	0.12439	0.553312	1860.76	FALSE	85
2022-09-15	08:40:14	0.128664	0.572323	1784.34	FALSE	85
2022-09-15	08:40:15	0.186018	0.827445	1861.59	FALSE	85
2022-09-15	08:40:15	-0.0341346	-0.151838	1784.34	FALSE	85
2022-09-15	08:40:15	0.150751	0.670571	1862.26	FALSE	85
2022-09-15	08:40:15	0.506374	2.25245	1786.59	FALSE	85
2022-09-15	08:40:16	0.680064	3.02506	1865.28	FALSE	85
2022-09-15	08:40:16	0.579147	2.57616	1789.17	FALSE	85
2022-09-15	08:40:16	0.49187	2.18794	1867.47	FALSE	85
2022-09-15	08:40:16	0.302914	1.34742	1790.51	FALSE	85
2022-09-15	08:40:17	0.188512	0.838539	1868.31	FALSE	85
2022-09-15	08:40:17	0.177265	0.78851	1791.3	FALSE	85
2022-09-15	08:40:17	0.154059	0.685285	1868.99	FALSE	85
2022-09-15	08:40:17	0.0485626	0.216016	1791.52	FALSE	85
2022-09-15	08:40:18	0.129122	0.57436	1869.57	FALSE	85
2022-09-15	08:40:18	0.641947	2.85551	1794.37	FALSE	85
2022-09-15	08:40:18	0.703677	3.1301	1872.7	FALSE	85
2022-09-15	08:40:18	0.901997	4.01226	1798.39	FALSE	85
2022-09-15	08:40:19	0.418537	1.86174	1874.56	FALSE	85
2022-09-15	08:40:19	0.602099	2.67826	1801.07	FALSE	85
2022-09-15	08:40:19	1.67391	7.44589	1882.01	FALSE	85
2022-09-15	08:40:20	2.86668	12.7516	1813.82	FALSE	85
2022-09-15	08:40:20	4.57345	20.3436	1902.35	1	86
2022-09-15	08:40:20	3.32724	14.8002	1828.62	1	87
2022-09-15	08:40:20	4.85248	21.5848	1923.94	1	88
2022-09-15	08:40:21	5.6164	24.9829	1853.6	1	89
2022-09-15	08:40:21	5.7192	25.4401	1949.38	1	90
2022-09-15	08:40:21	3.73131	16.5976	1870.2	1	91
2022-09-15	08:40:21	3.06464	13.6321	1963.01	1	92
2022-09-15	08:40:22	1.52475	6.78239	1876.98	FALSE	92
2022-09-15	08:40:22	0.417519	1.85721	1964.86	FALSE	92
2022-09-15	08:40:22	0.246069	1.09456	1878.07	FALSE	92
2022-09-15	08:40:22	0.235942	1.04952	1965.91	FALSE	92
2022-09-15	08:40:23	0.706883	3.14436	1881.22	FALSE	92
2022-09-15	08:40:23	5.85762	26.0559	1991.97	1	93
2022-09-15	08:40:23	5.53787	24.6336	1905.85	1	94
2022-09-15	08:40:24	7.51513	33.4288	2025.4	1	95
2022-09-15	08:40:24	2.47513	11.0099	1916.86	FALSE	95
2022-09-15	08:40:24	0.491158	2.18477	2027.58	FALSE	95
2022-09-15	08:40:24	0.360216	1.60231	1918.46	FALSE	95
2022-09-15	08:40:25	0.215127	0.956928	2028.54	FALSE	95
2022-09-15	08:40:25	0.281998	1.25438	1919.72	FALSE	95
2022-09-15	08:40:25	0.278893	1.24057	2029.78	FALSE	95
2022-09-15	08:40:25	0.233244	1.03752	1920.76	FALSE	95
2022-09-15	08:40:26	0.32673	1.45336	2031.23	FALSE	95
2022-09-15	08:40:26	0.10271	0.456875	1921.21	FALSE	95
2022-09-15	08:40:26	0.262863	1.16927	2032.4	FALSE	95
2022-09-15	08:40:26	0.290038	1.29015	1922.5	FALSE	95
2022-09-15	08:40:27	0.434466	1.93259	2034.34	FALSE	95
2022-09-15	08:40:27	0.272379	1.2116	1923.71	FALSE	95
2022-09-15	08:40:27	0.374262	1.66479	2036	FALSE	95
2022-09-15	08:40:28	0.508715	2.26287	1925.98	FALSE	95
2022-09-15	08:40:28	1.32561	5.89658	2041.9	FALSE	95
2022-09-15	08:40:28	3.20932	14.2757	1940.25	1	96
2022-09-15	08:40:28	3.12663	13.9079	2055.81	1	97
2022-09-15	08:40:29	0.93869	4.17548	1944.43	FALSE	97
2022-09-15	08:40:29	0.82388	3.66478	2059.47	FALSE	97
2022-09-15	08:40:29	0.623066	2.77152	1947.2	FALSE	97
2022-09-15	08:40:29	1.28765	5.72772	2065.2	FALSE	97
2022-09-15	08:40:30	4.56159	20.2909	1967.49	1	98
2022-09-15	08:40:30	7.45823	33.1757	2098.37	1	99
2022-09-15	08:40:30	10.9139	48.5472	2016.04	1	100
2022-09-15	08:40:30	8.51696	37.8851	2136.26	1	101
2022-09-15	08:40:31	4.93334	21.9445	2037.98	1	102
2022-09-15	08:40:31	2.11136	9.39175	2145.65	FALSE	102
2022-09-15	08:40:31	1.03162	4.58885	2042.57	FALSE	102
2022-09-15	08:40:32	0.805153	3.58148	2149.23	FALSE	102
2022-09-15	08:40:32	1.56459	6.95961	2049.53	FALSE	102
2022-09-15	08:40:32	4.44159	19.7571	2168.99	1	103
2022-09-15	08:40:32	3.64006	16.1917	2065.72	1	104
2022-09-15	08:40:33	3.04902	13.5627	2182.55	1	105
2022-09-15	08:40:33	4.4248	19.6824	2085.41	1	106
2022-09-15	08:40:33	4.06551	18.0842	2200.64	1	107
2022-09-15	08:40:33	5.65772	25.1667	2110.57	1	108
2022-09-15	08:40:34	12.4904	55.5598	2256.2	1	109
2022-09-15	08:40:34	2.73212	12.153	2122.73	FALSE	109
2022-09-15	08:40:34	2.70907	12.0505	2268.25	FALSE	109
2022-09-15	08:40:34	2.24108	9.96877	2132.69	FALSE	109
2022-09-15	08:40:35	0.599555	2.66694	2270.91	FALSE	109
2022-09-15	08:40:35	0.830343	3.69353	2136.39	FALSE	109
2022-09-15	08:40:35	1.37737	6.12682	2277.04	FALSE	109
2022-09-15	08:40:35	1.23879	5.51039	2141.9	FALSE	109
2022-09-15	08:40:36	4.46937	19.8807	2296.92	1	110
2022-09-15	08:40:36	4.62815	20.5869	2162.48	1	111
2022-09-15	08:40:36	4.57248	20.3393	2317.26	1	112
2022-09-15	08:40:37	1.87726	8.35043	2170.84	FALSE	112
2022-09-15	08:40:37	0.468919	2.08585	2319.35	FALSE	112
2022-09-15	08:40:37	0.618944	2.75319	2173.59	FALSE	112
2022-09-15	08:40:37	0.189478	0.842836	2320.19	FALSE	112
2022-09-15	08:40:38	0.29757	1.32365	2174.91	FALSE	112
2022-09-15	08:40:38	0.0881045	0.391906	2320.58	FALSE	112
2022-09-15	08:40:38	0.225967	1.00515	2175.92	FALSE	112
2022-09-15	08:40:38	0.291921	1.29852	2321.88	FALSE	112
2022-09-15	08:40:39	0.345713	1.5378	2177.46	FALSE	112
2022-09-15	08:40:39	0.611718	2.72104	2324.6	FALSE	112
2022-09-15	08:40:39	0.284288	1.26457	2178.72	FALSE	112
2022-09-15	08:40:39	1.20419	5.35648	2329.96	FALSE	112
2022-09-15	08:40:40	0.920522	4.09467	2182.81	FALSE	112
2022-09-15	08:40:40	1.97121	8.76834	2338.73	FALSE	112
2022-09-15	08:40:40	3.79228	16.8688	2199.68	1	113
2022-09-15	08:40:41	3.7508	16.6843	2355.41	1	114
2022-09-15	08:40:41	8.01522	35.6533	2235.34	1	115
2022-09-15	08:40:41	2.97299	13.2245	2368.63	FALSE	115
2022-09-15	08:40:41	2.73828	12.1804	2247.52	FALSE	115
2022-09-15	08:40:42	2.92907	13.0291	2381.66	FALSE	115
2022-09-15	08:40:42	2.57645	11.4606	2258.98	FALSE	115
2022-09-15	08:40:42	4.10062	18.2404	2399.9	1	116
2022-09-15	08:40:42	6.35558	28.2709	2287.25	1	117
2022-09-15	08:40:43	3.65182	16.244	2416.15	1	118
2022-09-15	08:40:43	9.64606	42.9076	2330.16	1	119
2022-09-15	08:40:43	3.76291	16.7382	2432.89	1	120
2022-09-15	08:40:43	2.92322	13.0031	2343.16	FALSE	120
2022-09-15	08:40:44	1.58683	7.05854	2439.94	FALSE	120
2022-09-15	08:40:44	1.96271	8.73053	2351.89	FALSE	120
2022-09-15	08:40:44	4.72215	21.0051	2460.95	1	121
2022-09-15	08:40:45	6.53161	29.0539	2380.94	1	122
2022-09-15	08:40:45	3.52485	15.6792	2476.63	1	123
2022-09-15	08:40:45	2.89446	12.8751	2393.82	FALSE	123
2022-09-15	08:40:45	0.634873	2.82404	2479.45	FALSE	123
2022-09-15	08:40:46	1.55024	6.89578	2400.71	FALSE	123
2022-09-15	08:40:46	2.13075	9.478	2488.93	FALSE	123
2022-09-15	08:40:46	1.68724	7.50518	2408.22	FALSE	123
2022-09-15	08:40:46	2.16052	9.61043	2498.54	FALSE	123
2022-09-15	08:40:47	0.602099	2.67826	2410.9	FALSE	123
2022-09-15	08:40:47	0.464644	2.06683	2500.61	FALSE	123
2022-09-15	08:40:47	0.257214	1.14414	2412.04	FALSE	123
2022-09-15	08:40:47	0.242049	1.07668	2501.68	FALSE	123
2022-09-15	08:40:48	0.118435	0.526823	2412.57	FALSE	123
2022-09-15	08:40:48	0.354211	1.5756	2503.26	FALSE	123
2022-09-15	08:40:48	0.191361	0.851212	2413.42	FALSE	123
2022-09-15	08:40:49	0.269631	1.19937	2504.46	FALSE	123
2022-09-15	08:40:49	0.438486	1.95047	2415.37	FALSE	123
2022-09-15	08:40:49	0.106985	0.475891	2504.94	FALSE	123
2022-09-15	08:40:49	0.435636	1.9378	2417.31	FALSE	123
2022-09-15	08:40:50	0.290038	1.29015	2506.23	FALSE	123
2022-09-15	08:40:50	0.308308	1.37142	2418.68	FALSE	123
2022-09-15	08:40:50	0.377468	1.67905	2507.9	FALSE	123
2022-09-15	08:40:50	0.221692	0.98613	2419.67	FALSE	123
2022-09-15	08:40:51	0.544847	2.42359	2510.33	FALSE	123
2022-09-15	08:40:51	0.171616	0.763382	2420.43	FALSE	123
2022-09-15	08:40:51	0.293448	1.30532	2511.63	FALSE	123
2022-09-15	08:40:51	0.178333	0.793261	2421.22	FALSE	123
2022-09-15	08:40:52	0.131616	0.585454	2512.22	FALSE	123
2022-09-15	08:40:52	0.344288	1.53146	2422.75	FALSE	123
2022-09-15	08:40:52	0.372939	1.65891	2513.88	FALSE	123
2022-09-15	08:40:53	0.411565	1.83072	2424.58	FALSE	123
2022-09-15	08:40:53	0.450598	2.00435	2515.88	FALSE	123
2022-09-15	08:40:53	0.349275	1.55365	2426.14	FALSE	123
2022-09-15	08:40:53	0.569529	2.53338	2518.42	FALSE	123
2022-09-15	08:40:54	0.518231	2.3052	2428.44	FALSE	123
2022-09-15	08:40:54	0.418944	1.86355	2520.28	FALSE	123
2022-09-15	08:40:54	0.342354	1.52286	2429.97	FALSE	123
2022-09-15	08:40:54	0.393295	1.74945	2522.03	FALSE	123
2022-09-15	08:40:55	0.424186	1.88686	2431.85	FALSE	123
2022-09-15	08:40:55	0.401692	1.78681	2523.82	FALSE	123
2022-09-15	08:40:55	0.405662	1.80447	2433.66	FALSE	123
2022-09-15	08:40:55	0.401183	1.78454	2525.6	FALSE	123
2022-09-15	08:40:56	0.396094	1.76191	2435.42	FALSE	123
2022-09-15	08:40:56	0.374262	1.66479	2527.26	FALSE	123
2022-09-15	08:40:56	0.390191	1.73565	2437.16	FALSE	123
2022-09-15	08:40:56	0.376552	1.67498	2528.94	FALSE	123
2022-09-15	08:40:57	0.377977	1.68132	2438.84	FALSE	123
2022-09-15	08:40:57	0.377723	1.68019	2530.62	FALSE	123
2022-09-15	08:40:57	0.426527	1.89728	2440.73	FALSE	123
2022-09-15	08:40:58	0.488664	2.17368	2532.79	FALSE	123
2022-09-15	08:40:58	1.72022	7.65188	2448.39	FALSE	123
2022-09-15	08:40:58	6.29843	28.0167	2560.81	1	124
2022-09-15	08:40:58	8.44316	37.5569	2485.94	1	125
2022-09-15	08:40:59	7.52444	33.4702	2594.28	1	126
2022-09-15	08:40:59	6.47095	28.7841	2514.73	1	127
2022-09-15	08:40:59	9.02607	40.1498	2634.43	1	128
2022-09-15	08:40:59	5.99049	26.6469	2541.37	1	129
2022-09-15	08:41:00	2.73609	12.1707	2646.6	FALSE	129
2022-09-15	08:41:00	1.40754	6.26102	2547.63	FALSE	129
2022-09-15	08:41:00	1.125	5.00422	2651.6	FALSE	129
2022-09-15	08:41:00	1.14775	5.10542	2552.74	FALSE	129
2022-09-15	08:41:01	1.15426	5.13438	2656.74	FALSE	129
2022-09-15	08:41:01	1.27146	5.65571	2558.4	FALSE	129
2022-09-15	08:41:01	1.24424	5.53463	2662.27	FALSE	129
2022-09-15	08:41:02	1.22602	5.45358	2563.85	FALSE	129
2022-09-15	08:41:02	1.09808	4.88448	2667.16	FALSE	129
2022-09-15	08:41:02	1.70719	7.59392	2571.44	FALSE	129
2022-09-15	08:41:02	3.8196	16.9903	2684.15	1	130
2022-09-15	08:41:03	6.06072	26.9593	2598.4	1	131
2022-09-15	08:41:03	7.13986	31.7595	2715.91	1	132
2022-09-15	08:41:03	6.0481	26.9032	2625.31	1	133
2022-09-15	08:41:03	6.41619	28.5405	2744.45	1	134
2022-09-15	08:41:04	6.28179	27.9427	2653.25	1	135
2022-09-15	08:41:04	7.3851	32.8504	2777.3	1	136
2022-09-15	08:41:04	6.98464	31.0691	2684.32	1	137
2022-09-15	08:41:04	5.37283	23.8994	2801.2	1	138
2022-09-15	08:41:05	3.73915	16.6325	2700.95	1	139
2022-09-15	08:41:05	3.46322	15.4051	2816.6	1	140
2022-09-15	08:41:05	3.29172	14.6422	2715.59	1	141
2022-09-15	08:41:06	2.945	13.0999	2829.7	FALSE	141
2022-09-15	08:41:06	2.73508	12.1662	2727.76	FALSE	141
2022-09-15	08:41:06	1.90744	8.48467	2838.19	FALSE	141
2022-09-15	08:41:06	1.80546	8.03105	2735.79	FALSE	141
2022-09-15	08:41:07	0.732837	3.25981	2841.45	FALSE	141
2022-09-15	08:41:07	-0.135865	-0.604355	2735.79	FALSE	141
2022-09-15	08:41:07	2.02816	9.02166	2850.47	FALSE	141
2022-09-15	08:41:07	2.60866	11.6038	2747.39	FALSE	141
2022-09-15	08:41:08	3.63614	16.1743	2866.64	1	142
2022-09-15	08:41:08	2.26271	10.065	2757.46	FALSE	142
2022-09-15	08:41:08	1.63849	7.28833	2873.93	FALSE	142
2022-09-15	08:41:08	0.716298	3.18624	2760.64	FALSE	142
2022-09-15	08:41:09	0.464033	2.06411	2876	FALSE	142
2022-09-15	08:41:09	0.252074	1.12128	2761.77	FALSE	142
2022-09-15	08:41:09	0.0990969	0.440803	2876.44	FALSE	142
2022-09-15	08:41:09	0.188155	0.836951	2762.6	FALSE	142
2022-09-15	08:41:10	-0.0300633	-0.133728	2876.44	FALSE	142
2022-09-15	08:41:10	0.210191	0.934972	2763.54	FALSE	142
2022-09-15	08:41:10	0.517824	2.30338	2878.74	FALSE	142
2022-09-15	08:41:11	0.4793	2.13202	2765.67	FALSE	142
2022-09-15	08:41:11	2.30317	10.245	2888.99	FALSE	142
2022-09-15	08:41:11	9.16281	40.758	2806.43	1	143
2022-09-15	08:41:11	20.6069	91.6636	2980.65	1	144
2022-09-15	08:41:12	16.0572	71.4256	2877.85	1	145
2022-09-15	08:41:12	10.4034	46.2764	3026.93	1	146
2022-09-15	08:41:12	15.2124	67.6678	2945.52	1	147
2022-09-15	08:41:12	16.9326	75.3196	3102.25	1	148
2022-09-15	08:41:13	11.7159	52.1147	2997.64	1	149
2022-09-15	08:41:13	14.7639	65.6728	3167.92	1	150
2022-09-15	08:41:13	5.71039	25.401	3023.04	1	151
2022-09-15	08:41:13	3.85294	17.1386	3185.06	1	152
2022-09-15	08:41:14	0.972735	4.32692	3027.36	FALSE	152
2022-09-15	08:41:14	-1.45286	-6.46261	3185.06	FALSE	152
2022-09-15	08:41:14	0.0628628	0.279626	3027.64	FALSE	152
2022-09-15	08:41:15	-0.120903	-0.537801	3185.06	FALSE	152
2022-09-15	08:41:15	-0.0810048	-0.360326	3027.64	FALSE	152
2022-09-15	08:41:15	0.223931	0.99609	3186.05	FALSE	152
2022-09-15	08:41:15	0.186832	0.831066	3028.47	FALSE	152
2022-09-15	08:41:16	0.297417	1.32297	3187.38	FALSE	152
2022-09-15	08:41:16	0.0826083	0.367458	3028.84	FALSE	152
2022-09-15	08:41:16	0.124084	0.55195	3187.93	FALSE	152
2022-09-15	08:41:16	0.272634	1.21273	3030.05	FALSE	152
2022-09-15	08:41:17	0.548715	2.44079	3190.37	FALSE	152
2022-09-15	08:41:17	1.00357	4.46408	3034.52	FALSE	152
2022-09-15	08:41:17	1.37655	6.12317	3196.49	FALSE	152
2022-09-15	08:41:17	1.83772	8.17455	3042.69	FALSE	152
2022-09-15	08:41:18	1.77579	7.89907	3204.39	FALSE	152
2022-09-15	08:41:18	1.40943	6.26943	3048.96	FALSE	152
2022-09-15	08:41:18	0.98215	4.3688	3208.76	FALSE	152
2022-09-15	08:41:19	0.869733	3.86875	3052.83	FALSE	152
2022-09-15	08:41:19	0.642608	2.85845	3211.62	FALSE	152
2022-09-15	08:41:19	0.619453	2.75545	3055.59	FALSE	152
2022-09-15	08:41:19	0.753855	3.3533	3214.97	FALSE	152
2022-09-15	08:41:20	0.846476	3.76529	3059.35	FALSE	152
2022-09-15	08:41:20	0.697315	3.1018	3218.07	FALSE	152
2022-09-15	08:41:20	0.590038	2.62461	3061.98	FALSE	152
2022-09-15	08:41:20	0.622099	2.76722	3220.84	FALSE	152
2022-09-15	08:41:21	0.453702	2.01816	3063.99	FALSE	152
2022-09-15	08:41:21	0.558995	2.48652	3223.33	FALSE	152
2022-09-15	08:41:21	0.493957	2.19722	3066.19	FALSE	152
2022-09-15	08:41:21	0.423779	1.88505	3225.21	FALSE	152
2022-09-15	08:41:22	0.232227	1.03299	3067.23	FALSE	152
2022-09-15	08:41:22	0.358842	1.5962	3226.81	FALSE	152
2022-09-15	08:41:22	0.537214	2.38964	3069.61	FALSE	152
2022-09-15	08:41:23	0.168308	0.748668	3227.56	FALSE	152
2022-09-15	08:41:23	0.366527	1.63039	3071.25	FALSE	152
2022-09-15	08:41:23	0.227494	1.01194	3228.57	FALSE	152
2022-09-15	08:41:23	0.612633	2.72511	3073.97	FALSE	152
2022-09-15	08:41:24	0.427392	1.90113	3230.47	FALSE	152
2022-09-15	08:41:24	0.617112	2.74504	3076.72	FALSE	152
2022-09-15	08:41:24	0.728766	3.2417	3233.71	FALSE	152
2022-09-15	08:41:24	0.49126	2.18522	3078.9	FALSE	152
2022-09-15	08:41:25	0.81986	3.6469	3237.36	FALSE	152
2022-09-15	08:41:25	0.702455	3.12466	3082.03	FALSE	152
2022-09-15	08:41:25	0.53874	2.39642	3239.75	FALSE	152
2022-09-15	08:41:25	0.645153	2.86977	3084.89	FALSE	152
2022-09-15	08:41:26	0.396552	1.76394	3241.52	FALSE	152
2022-09-15	08:41:26	0.611209	2.71878	3087.61	FALSE	152
2022-09-15	08:41:26	0.449478	1.99937	3243.52	FALSE	152
2022-09-15	08:41:26	0.492481	2.19065	3089.8	FALSE	152
2022-09-15	08:41:27	0.555687	2.47181	3245.99	FALSE	152
2022-09-15	08:41:27	0.528512	2.35093	3092.16	FALSE	152
2022-09-15	08:41:27	0.654974	2.91346	3248.9	FALSE	152
2022-09-15	08:41:28	0.2793	1.24238	3093.4	FALSE	152
2022-09-15	08:41:28	0.499351	2.22121	3251.12	FALSE	152
2022-09-15	08:41:28	0.53243	2.36836	3095.77	FALSE	152
2022-09-15	08:41:28	1.24179	5.52373	3256.65	FALSE	152
2022-09-15	08:41:29	0.754873	3.35783	3099.12	FALSE	152
2022-09-15	08:41:29	0.709885	3.15771	3259.81	FALSE	152
2022-09-15	08:41:29	0.399046	1.77504	3100.9	FALSE	152
2022-09-15	08:41:29	0.498639	2.21805	3262.02	FALSE	152
2022-09-15	08:41:30	0.404389	1.7988	3102.7	FALSE	152
2022-09-15	08:41:30	0.707087	3.14526	3265.17	FALSE	152
2022-09-15	08:41:30	1.46398	6.51208	3109.21	FALSE	152
2022-09-15	08:41:30	3.74123	16.6417	3281.81	1	153
2022-09-15	08:41:31	3.73467	16.6126	3125.82	1	154
2022-09-15	08:41:31	2.83446	12.6082	3294.42	FALSE	154
2022-09-15	08:41:31	1.58307	7.04181	3132.86	FALSE	154
2022-09-15	08:41:32	1.02271	4.54922	3298.97	FALSE	154
2022-09-15	08:41:32	0.863779	3.84226	3136.71	FALSE	154
2022-09-15	08:41:32	0.861285	3.83117	3302.8	FALSE	154
2022-09-15	08:41:32	0.898741	3.99778	3140.7	FALSE	154
2022-09-15	08:41:33	0.862099	3.83479	3306.63	FALSE	154
2022-09-15	08:41:33	0.674364	2.99971	3143.7	FALSE	154
2022-09-15	08:41:33	0.776552	3.45426	3310.09	FALSE	154
2022-09-15	08:41:33	0.721591	3.20978	3146.91	FALSE	154
2022-09-15	08:41:34	0.918181	4.08425	3314.17	FALSE	154
2022-09-15	08:41:34	0.940064	4.18159	3151.1	FALSE	154
2022-09-15	08:41:34	1.10322	4.90734	3319.08	FALSE	154
2022-09-15	08:41:34	1.51691	6.74752	3157.84	FALSE	154
2022-09-15	08:41:35	1.66103	7.38859	3326.47	FALSE	154
2022-09-15	08:41:35	1.84668	8.2144	3166.06	FALSE	154
2022-09-15	08:41:35	2.10724	9.37342	3335.84	FALSE	154
2022-09-15	08:41:36	2.52994	11.2537	3177.31	FALSE	154
2022-09-15	08:41:36	3.125	13.9006	3349.74	1	155
2022-09-15	08:41:36	3.3739	15.0078	3192.32	1	156
2022-09-15	08:41:36	3.85762	17.1595	3366.9	1	157
2022-09-15	08:41:37	4.02362	17.8979	3210.22	1	158
2022-09-15	08:41:37	4.19752	18.6714	3385.57	1	159
2022-09-15	08:41:37	4.85228	21.5839	3231.8	1	160
2022-09-15	08:41:37	5.44118	24.2035	3409.78	1	161
2022-09-15	08:41:38	6.06103	26.9607	3258.76	1	162
2022-09-15	08:41:38	6.20683	27.6092	3437.39	1	163
2022-09-15	08:41:38	8.26327	36.7567	3295.52	1	164
2022-09-15	08:41:38	9.65512	42.9479	3480.33	1	165
2022-09-15	08:41:39	9.44378	42.0078	3337.53	1	166
2022-09-15	08:41:39	8.12428	36.1384	3516.47	1	167
2022-09-15	08:41:39	8.44001	37.5429	3375.07	1	168
2022-09-15	08:41:39	7.39955	32.9147	3549.39	1	169
2022-09-15	08:41:40	6.90774	30.727	3405.8	1	170
2022-09-15	08:41:40	8.76291	38.9792	3588.37	1	171
2022-09-15	08:41:40	8.80667	39.1738	3444.97	1	172
2022-09-15	08:41:41	8.78082	39.0588	3627.43	1	173
2022-09-15	08:41:41	9.20724	40.9556	3485.92	1	174
2022-09-15	08:41:41	8.33986	37.0974	3664.52	1	175
2022-09-15	08:41:41	6.10235	27.1445	3513.07	1	176
2022-09-15	08:41:42	5.23121	23.2695	3687.79	1	177
2022-09-15	08:41:42	4.85752	21.6072	3534.68	1	178
2022-09-15	08:41:42	4.47284	19.8961	3707.69	1	179
2022-09-15	08:41:42	4.21457	18.7473	3553.42	1	180
2022-09-15	08:41:43	4.38434	19.5024	3727.19	1	181
2022-09-15	08:41:43	4.49172	19.9801	3573.4	1	182
2022-09-15	08:41:43	4.59594	20.4437	3747.63	1	183
2022-09-15	08:41:43	4.25116	18.91	3592.31	1	184
2022-09-15	08:41:44	4.23065	18.8188	3766.45	1	185
2022-09-15	08:41:44	4.03228	17.9364	3610.25	1	186
2022-09-15	08:41:44	3.24154	14.419	3780.87	1	187
2022-09-15	08:41:45	2.91248	12.9553	3623.21	FALSE	187
2022-09-15	08:41:45	3.16785	14.0912	3794.96	1	188
2022-09-15	08:41:45	3.90108	17.3528	3640.56	1	189
2022-09-15	08:41:45	3.95905	17.6106	3812.57	1	190
2022-09-15	08:41:46	5.18377	23.0584	3663.62	1	191
2022-09-15	08:41:46	4.8196	21.4385	3834.01	1	192
2022-09-15	08:41:46	4.00617	17.8202	3681.44	1	193
2022-09-15	08:41:46	3.99268	17.7602	3851.77	1	194
2022-09-15	08:41:47	3.48276	15.492	3696.93	1	195
2022-09-15	08:41:47	3.33645	14.8412	3866.61	1	196
2022-09-15	08:41:47	2.83192	12.5969	3709.53	FALSE	196
2022-09-15	08:41:47	3.37416	15.0089	3881.62	1	197
2022-09-15	08:41:48	2.75747	12.2658	3721.79	FALSE	197
2022-09-15	08:41:48	2.79706	12.4419	3894.07	FALSE	197
2022-09-15	08:41:48	2.55574	11.3684	3733.16	FALSE	197
2022-09-15	08:41:49	2.89477	12.8765	3906.94	FALSE	197
2022-09-15	08:41:49	3.19009	14.1902	3747.35	1	198
2022-09-15	08:41:49	3.25304	14.4702	3921.41	1	199
2022-09-15	08:41:49	1.97533	8.78666	3756.14	FALSE	199
2022-09-15	08:41:50	1.56658	6.96846	3928.38	FALSE	199
2022-09-15	08:41:50	0.656145	2.91866	3759.06	FALSE	199
2022-09-15	08:41:50	0.577112	2.56711	3930.95	FALSE	199
2022-09-15	08:41:50	0.259962	1.15636	3760.21	FALSE	199
2022-09-15	08:41:51	2.46179	10.9505	3941.9	FALSE	199
2022-09-15	08:41:51	9.71044	43.194	3803.41	1	200
2022-09-15	08:41:51	6.10596	27.1605	3969.06	1	201
2022-09-15	08:41:51	2.51625	11.1928	3814.6	FALSE	201
2022-09-15	08:41:52	0.866628	3.85493	3972.91	FALSE	201
2022-09-15	08:41:52	1.56281	6.95169	3821.55	FALSE	201
2022-09-15	08:41:52	0.312277	1.38907	3974.3	FALSE	201
2022-09-15	08:41:52	0.179351	0.797789	3822.35	FALSE	201
2022-09-15	08:41:53	1.12205	4.9911	3979.29	FALSE	201
2022-09-15	08:41:53	6.59243	29.3244	3851.67	1	202
2022-09-15	08:41:53	11.2435	50.0133	4029.31	1	203
2022-09-15	08:41:54	9.80846	43.63	3895.3	1	204
2022-09-15	08:41:54	8.31909	37.005	4066.31	1	205
2022-09-15	08:41:54	11.9014	52.9398	3948.24	1	206
2022-09-15	08:41:54	15.9897	71.1254	4137.44	1	207
2022-09-15	08:41:55	13.2274	58.8381	4007.08	1	208
2022-09-15	08:41:55	7.86123	34.9683	4172.41	1	209
2022-09-15	08:41:55	4.84347	21.5447	4028.63	1	210
2022-09-15	08:41:55	7.91563	35.2103	4207.62	1	211
2022-09-15	08:41:56	8.1193	36.1163	4064.74	1	212
2022-09-15	08:41:56	6.9312	30.8314	4238.45	1	213
2022-09-15	08:41:56	6.90347	30.708	4095.45	1	214
2022-09-15	08:41:56	7.36332	32.7535	4271.2	1	215
2022-09-15	08:41:57	7.04545	31.3396	4126.79	1	216
2022-09-15	08:41:57	7.21304	32.085	4303.29	1	217
2022-09-15	08:41:57	6.8307	30.3843	4157.17	1	218
2022-09-15	08:41:58	5.99044	26.6467	4329.93	1	219
2022-09-15	08:41:58	5.08123	22.6023	4179.78	1	220
2022-09-15	08:41:58	3.73217	16.6014	4346.53	1	221
2022-09-15	08:41:58	2.68856	11.9593	4191.74	FALSE	221
2022-09-15	08:41:59	0.615535	2.73802	4349.27	FALSE	221
2022-09-15	08:41:59	0.474211	2.10939	4193.84	FALSE	221
2022-09-15	08:41:59	0.435534	1.93734	4351.21	FALSE	221
2022-09-15	08:41:59	0.219351	0.975717	4194.82	FALSE	221
2022-09-15	08:42:00	-0.0670099	-0.298073	4351.21	FALSE	221
2022-09-15	08:42:00	-0.16416	-0.730217	4194.82	FALSE	221
2022-09-15	08:42:00	0.184593	0.821107	4352.03	FALSE	221
2022-09-15	08:42:00	0.171209	0.761572	4195.58	FALSE	221
2022-09-15	08:42:01	0.684288	3.04385	4355.07	FALSE	221
2022-09-15	08:42:01	3.51004	15.6134	4211.2	1	222
2022-09-15	08:42:01	9.09706	40.4655	4395.54	1	223
2022-09-15	08:42:02	10.1178	45.006	4256.2	1	224
2022-09-15	08:42:02	8.64118	38.4377	4433.98	1	225
2022-09-15	08:42:02	5.33599	23.7356	4279.94	1	226
2022-09-15	08:42:02	2.85187	12.6857	4446.66	FALSE	226
2022-09-15	08:42:03	2.53579	11.2797	4291.22	FALSE	226
2022-09-15	08:42:03	1.22266	5.43864	4452.1	FALSE	226
2022-09-15	08:42:03	1.05085	4.67439	4295.89	FALSE	226
2022-09-15	08:42:03	0.824644	3.66818	4455.77	FALSE	226
2022-09-15	08:42:04	1.2478	5.55046	4301.44	FALSE	226
2022-09-15	08:42:04	1.59614	7.09995	4462.87	FALSE	226
2022-09-15	08:42:04	1.4367	6.39073	4307.83	FALSE	226
2022-09-15	08:42:04	1.55569	6.92002	4469.79	FALSE	226
2022-09-15	08:42:05	1.93614	8.61234	4316.44	FALSE	226
2022-09-15	08:42:05	1.50958	6.71491	4476.5	FALSE	226
2022-09-15	08:42:05	1.55513	6.91753	4323.36	FALSE	226
2022-09-15	08:42:05	1.6967	7.54726	4484.05	FALSE	226
2022-09-15	08:42:06	1.86607	8.30065	4331.66	FALSE	226
2022-09-15	08:42:06	1.79284	7.97491	4492.03	FALSE	226
2022-09-15	08:42:06	1.86933	8.31515	4339.98	FALSE	226
2022-09-15	08:42:07	2.66948	11.8744	4503.9	FALSE	226
2022-09-15	08:42:07	2.69426	11.9846	4351.96	FALSE	226
2022-09-15	08:42:07	2.73441	12.1632	4516.06	FALSE	226
2022-09-15	08:42:07	1.19019	5.2942	4357.26	FALSE	226
2022-09-15	08:42:08	0.696145	3.09659	4519.16	FALSE	226
2022-09-15	08:42:08	0.597265	2.65675	4359.91	FALSE	226
2022-09-15	08:42:08	0.485763	2.16077	4521.32	FALSE	226
2022-09-15	08:42:08	0.496807	2.2099	4362.12	FALSE	226
2022-09-15	08:42:09	0.479758	2.13406	4523.46	FALSE	226
2022-09-15	08:42:09	0.48444	2.15489	4364.28	FALSE	226
2022-09-15	08:42:09	0.580318	2.58137	4526.04	FALSE	226
2022-09-15	08:42:09	0.58042	2.58182	4366.86	FALSE	226
2022-09-15	08:42:10	1.85808	8.26511	4534.3	FALSE	226
2022-09-15	08:42:10	12.5441	55.7987	4422.66	1	227
2022-09-15	08:42:10	11.1915	49.782	4584.08	1	228
2022-09-15	08:42:11	9.59472	42.6792	4465.34	1	229
2022-09-15	08:42:11	6.25049	27.8034	4611.89	1	230
2022-09-15	08:42:11	11.5385	51.3256	4516.66	1	231
2022-09-15	08:42:11	10.2393	45.5465	4657.43	1	232
2022-09-15	08:42:12	10.4594	46.5255	4563.19	1	233
2022-09-15	08:42:12	8.9395	39.7647	4697.2	1	234
2022-09-15	08:42:12	5.10352	22.7015	4585.89	1	235
2022-09-15	08:42:12	2.33925	10.4055	4707.6	FALSE	235
2022-09-15	08:42:13	1.53976	6.84916	4592.74	FALSE	235
2022-09-15	08:42:13	0.679453	3.02234	4710.63	FALSE	235
2022-09-15	08:42:13	0.531209	2.36292	4595.1	FALSE	235
2022-09-15	08:42:13	0.479351	2.13225	4712.76	FALSE	235
2022-09-15	08:42:14	0.461132	2.05121	4597.15	FALSE	235
2022-09-15	08:42:14	0.476501	2.11957	4714.88	FALSE	235
2022-09-15	08:42:14	0.536654	2.38714	4599.54	FALSE	235
2022-09-15	08:42:15	2.11665	9.41528	4724.29	FALSE	235
2022-09-15	08:42:15	9.38652	41.7531	4641.29	1	236
2022-09-15	08:42:15	8.8222	39.2429	4763.54	1	237
2022-09-15	08:42:15	1.32754	5.90516	4647.2	FALSE	237
2022-09-15	08:42:16	0.787188	3.50157	4767.04	FALSE	237
2022-09-15	08:42:16	1.2336	5.4873	4652.69	FALSE	237
2022-09-15	08:42:16	3.21604	14.3056	4781.34	1	238
2022-09-15	08:42:16	6.59767	29.3478	4682.03	1	239
2022-09-15	08:42:17	7.77273	34.5747	4815.92	1	240
2022-09-15	08:42:17	10.4839	46.6345	4728.67	1	241
2022-09-15	08:42:17	10.0902	44.8832	4860.8	1	242
2022-09-15	08:42:17	7.32362	32.5769	4761.25	1	243
2022-09-15	08:42:18	10.1991	45.3676	4906.17	1	244
2022-09-15	08:42:18	10.5413	46.8898	4808.14	1	245
2022-09-15	08:42:18	13.7521	61.1721	4967.34	1	246
2022-09-15	08:42:19	13.2769	59.0583	4867.19	1	247
2022-09-15	08:42:19	9.49517	42.2364	5009.58	1	248
2022-09-15	08:42:19	15.8719	70.6014	4937.79	1	249
2022-09-15	08:42:19	9.51329	42.317	5051.9	1	250
2022-09-15	08:42:20	19.1316	85.1012	5022.9	1	251
2022-09-15	08:42:20	13.8341	61.5368	5113.43	1	252
2022-09-15	08:42:20	12.7736	56.8195	5079.72	1	253
2022-09-15	08:42:20	17.3812	77.3151	5190.75	1	254
2022-09-15	08:42:21	13.4114	59.6566	5139.37	1	255
2022-09-15	08:42:21	12.0277	53.5016	5244.25	1	256
2022-09-15	08:42:21	9.01517	40.1013	5179.47	1	257
2022-09-15	08:42:21	13.5127	60.1072	5304.36	1	258
2022-09-15	08:42:22	12.8009	56.941	5236.41	1	259
2022-09-15	08:42:22	13.8102	61.4305	5365.79	1	260
2022-09-15	08:42:22	8.86851	39.4489	5275.86	1	261
2022-09-15	08:42:22	16.2926	72.4727	5438.26	1	262
2022-09-15	08:42:23	9.53604	42.4182	5318.28	1	263
2022-09-15	08:42:23	13.3001	59.1615	5497.42	1	264
2022-09-15	08:42:23	10.727	47.7158	5366	1	265
2022-09-15	08:42:24	12.598	56.0384	5553.46	1	266
2022-09-15	08:42:24	14.7519	65.6194	5431.62	1	267
2022-09-15	08:42:24	14.6756	65.28	5618.74	1	268
2022-09-15	08:42:24	11.7988	52.4834	5484.1	1	269
2022-09-15	08:42:25	10.2757	45.7084	5664.45	1	270
2022-09-15	08:42:25	5.80103	25.8041	5509.9	1	271
2022-09-15	08:42:25	5.2282	23.2561	5687.7	1	272
2022-09-15	08:42:25	7.50469	33.3824	5543.29	1	273
2022-09-15	08:42:26	9.27039	41.2365	5728.94	1	274
2022-09-15	08:42:26	8.49528	37.7887	5581.08	1	275
2022-09-15	08:42:26	4.99523	22.2198	5751.16	1	276
2022-09-15	08:42:26	2.77696	12.3525	5593.43	FALSE	276
2022-09-15	08:42:27	3.51731	15.6457	5766.81	1	277
2022-09-15	08:42:27	4.80479	21.3727	5614.8	1	278
2022-09-15	08:42:27	8.24449	36.6731	5803.48	1	279
2022-09-15	08:42:28	7.74403	34.447	5649.25	1	280
2022-09-15	08:42:28	6.84759	30.4594	5833.94	1	281
2022-09-15	08:42:28	6.09517	27.1125	5676.36	1	282
2022-09-15	08:42:28	6.82454	30.3569	5864.29	1	283
2022-09-15	08:42:29	9.53726	42.4236	5718.78	1	284
2022-09-15	08:42:29	9.86062	43.862	5908.16	1	285
2022-09-15	08:42:29	8.31741	36.9975	5755.78	1	286
2022-09-15	08:42:29	7.29925	32.4685	5940.63	1	287
2022-09-15	08:42:30	5.548	24.6786	5780.46	1	288
2022-09-15	08:42:30	4.69472	20.8831	5961.51	1	289
2022-09-15	08:42:30	4.66815	20.7649	5801.22	1	290
2022-09-15	08:42:30	4.17981	18.5926	5980.1	1	291
2022-09-15	08:42:31	3.81635	16.9759	5818.2	1	292
2022-09-15	08:42:31	3.51243	15.624	5995.73	1	293
2022-09-15	08:42:31	2.72871	12.1378	5830.34	FALSE	293
2022-09-15	08:42:32	2.39828	10.668	6006.39	FALSE	293
2022-09-15	08:42:32	3.54179	15.7546	5846.09	1	294
2022-09-15	08:42:32	3.99523	17.7716	6024.16	1	295
2022-09-15	08:42:32	5.24154	23.3154	5869.41	1	296
2022-09-15	08:42:33	1.94586	8.65557	6032.82	FALSE	296
2022-09-15	08:42:33	2.09691	9.32748	5878.74	FALSE	296
2022-09-15	08:42:33	1.58709	7.05969	6039.88	FALSE	296
2022-09-15	08:42:33	2.02821	9.02188	5887.76	FALSE	296
2022-09-15	08:42:34	2.94128	13.0834	6052.96	FALSE	296
2022-09-15	08:42:34	3.86729	17.2025	5904.96	1	297
2022-09-15	08:42:34	4.9797	22.1507	6075.11	1	298
2022-09-15	08:42:34	10.166	45.2204	5950.18	1	299
2022-09-15	08:42:35	12.4235	55.2622	6130.38	1	300
2022-09-15	08:42:35	13.8244	61.4937	6011.67	1	301
2022-09-15	08:42:35	14.9573	66.5331	6196.91	1	302
2022-09-15	08:42:35	14.7383	65.5589	6077.23	1	303
2022-09-15	08:42:36	13.4281	59.7309	6256.64	1	304
2022-09-15	08:42:36	12.0586	53.6391	6130.87	1	305
2022-09-15	08:42:36	9.70591	43.1738	6299.81	1	306
2022-09-15	08:42:37	5.83981	25.9766	6156.85	1	307
2022-09-15	08:42:37	2.48541	11.0556	6310.87	FALSE	307
2022-09-15	08:42:37	2.40999	10.7201	6167.57	FALSE	307
2022-09-15	08:42:37	4.16912	18.5451	6329.41	1	308
2022-09-15	08:42:38	5.91747	26.3221	6193.89	1	309
2022-09-15	08:42:38	3.87772	17.2489	6346.66	1	310
2022-09-15	08:42:38	3.9993	17.7897	6211.68	1	311
2022-09-15	08:42:38	3.9396	17.5241	6364.19	1	312
2022-09-15	08:42:39	9.46835	42.1171	6253.8	1	313
2022-09-15	08:42:39	8.94352	39.7826	6403.97	1	314
2022-09-15	08:42:39	14.7362	65.5496	6319.35	1	315
2022-09-15	08:42:39	11.7438	52.2388	6456.21	1	316
2022-09-15	08:42:40	18.9677	84.3721	6403.72	1	317
2022-09-15	08:42:40	18.8384	83.797	6540.01	1	318
2022-09-15	08:42:40	16.1673	71.9154	6475.64	1	319
2022-09-15	08:42:41	23.1429	102.944	6642.95	1	320
2022-09-15	08:42:41	21.3787	95.0967	6570.73	1	321
2022-09-15	08:42:41	27.25	121.213	6764.16	1	322
2022-09-15	08:42:41	16.4167	73.0248	6643.76	1	323
2022-09-15	08:42:42	12.468	55.4602	6819.62	1	324
2022-09-15	08:42:42	5.34418	23.772	6667.53	1	325
2022-09-15	08:42:42	3.64083	16.1951	6835.82	1	326
2022-09-15	08:42:43	7.67131	34.1235	6701.65	1	327
2022-09-15	08:42:43	7.71121	34.301	6870.12	1	328
2022-09-15	08:42:43	6.71293	29.8605	6731.51	1	329
2022-09-15	08:42:43	10.734	47.747	6917.87	1	330
2022-09-15	08:42:43	14.4119	64.107	6795.62	1	331
2022-09-15	08:42:44	14.2607	63.4344	6981.3	1	332
2022-09-15	08:42:44	9.89645	44.0214	6839.64	1	333
2022-09-15	08:42:44	6.72077	29.8953	7011.2	1	334
2022-09-15	08:42:45	5.87446	26.1308	6865.77	1	335
2022-09-15	08:42:45	6.08479	27.0664	7038.26	1	336
2022-09-15	08:42:45	7.84917	34.9147	6900.69	1	337
2022-09-15	08:42:45	6.82887	30.3762	7068.64	1	338
2022-09-15	08:42:46	6.14841	27.3494	6928.04	1	339
2022-09-15	08:42:46	6.94449	30.8905	7099.53	1	340
2022-09-15	08:42:46	6.04082	26.8708	6954.91	1	341
2022-09-15	08:42:46	4.50286	20.0296	7119.56	1	342
2022-09-15	08:42:47	4.55029	20.2406	6975.15	1	343
2022-09-15	08:42:47	4.24225	18.8704	7138.43	1	344
2022-09-15	08:42:47	1.96994	8.76269	6983.91	FALSE	344
2022-09-15	08:42:47	0.358384	1.59416	7140.02	FALSE	344
2022-09-15	08:42:48	0.240674	1.07057	6984.98	FALSE	344
2022-09-15	08:42:48	0.0647458	0.288002	7140.31	FALSE	344
2022-09-15	08:42:48	-0.0615646	-0.273852	6984.98	FALSE	344
2022-09-15	08:42:48	-0.133524	-0.593941	7140.31	FALSE	344
2022-09-15	08:42:49	-0.191386	-0.851323	6984.98	FALSE	344
2022-09-15	08:42:49	-0.418409	-1.86117	7140.31	FALSE	344
2022-09-15	08:42:49	-0.316323	-1.40707	6984.98	FALSE	344
2022-09-15	08:42:50	0.159199	0.708149	7141.02	FALSE	344
2022-09-15	08:42:50	0.299555	1.33248	6986.31	FALSE	344
2022-09-15	08:42:50	0.257774	1.14663	7142.17	FALSE	344
2022-09-15	08:42:50	0.58271	2.59201	6988.9	FALSE	344
2022-09-15	08:42:51	1.95497	8.6961	7150.86	FALSE	344
2022-09-15	08:42:51	1.6335	7.26613	6996.17	FALSE	344
2022-09-15	08:42:51	1.66775	7.41849	7158.28	FALSE	344
2022-09-15	08:42:51	0.244339	1.08687	6997.26	FALSE	344
2022-09-15	08:42:52	0.557723	2.48086	7160.76	FALSE	344
2022-09-15	08:42:52	0.315687	1.40424	6998.66	FALSE	344
2022-09-15	08:42:52	0.772277	3.43524	7164.2	FALSE	344
2022-09-15	08:42:52	1.35589	6.03127	7004.69	FALSE	344
2022-09-15	08:42:53	3.73156	16.5987	7180.8	1	345
2022-09-15	08:42:53	5.46785	24.3221	7029.02	1	346
2022-09-15	08:42:53	1.90902	8.4917	7189.29	FALSE	346
2022-09-15	08:42:54	2.29304	10.1999	7039.22	FALSE	346
2022-09-15	08:42:54	2.73945	12.1856	7201.47	FALSE	346
2022-09-15	08:42:54	4.28144	19.0447	7058.26	1	347
2022-09-15	08:42:54	5.87136	26.117	7227.59	1	348
2022-09-15	08:42:55	6.73864	29.9748	7088.23	1	349
2022-09-15	08:42:55	8.69599	38.6815	7266.27	1	350
2022-09-15	08:42:55	9.0027	40.0458	7128.28	1	351
2022-09-15	08:42:55	13.1336	58.4209	7324.69	1	352
2022-09-15	08:42:56	6.28423	27.9535	7156.23	1	353
2022-09-15	08:42:56	3.17793	14.1361	7338.83	1	354
2022-09-15	08:42:56	0.53701	2.38873	7158.62	FALSE	354
2022-09-15	08:42:56	0.550089	2.44691	7341.28	FALSE	354
2022-09-15	08:42:57	0.324746	1.44454	7160.07	FALSE	354
2022-09-15	08:42:57	0.494567	2.19993	7343.48	FALSE	354
2022-09-15	08:42:57	0.225509	1.00311	7161.07	FALSE	354
2022-09-15	08:42:58	0.504084	2.24227	7345.72	FALSE	354
2022-09-15	08:42:58	0.792939	3.52715	7164.6	FALSE	354
2022-09-15	08:42:58	2.97818	13.2475	7358.97	FALSE	354
2022-09-15	08:42:58	2.29146	10.1929	7174.79	FALSE	354
2022-09-15	08:42:59	1.76067	7.83181	7366.8	FALSE	354
2022-09-15	08:42:59	1.45767	6.48401	7181.27	FALSE	354
2022-09-15	08:42:59	0.958537	4.26376	7371.06	FALSE	354
2022-09-15	08:42:59	1.8962	8.43468	7189.71	FALSE	354
2022-09-15	08:43:00	0.407443	1.81239	7372.87	FALSE	354
2022-09-15	08:43:00	0.575687	2.56077	7192.27	FALSE	354
2022-09-15	08:43:00	0.688308	3.06173	7375.94	FALSE	354
2022-09-15	08:43:00	0.709173	3.15454	7195.42	FALSE	354
2022-09-15	08:43:01	0.420216	1.8692	7377.8	FALSE	354
2022-09-15	08:43:01	0.324644	1.44408	7196.87	FALSE	354
2022-09-15	08:43:01	2.83543	12.6126	7390.42	FALSE	354
2022-09-15	08:43:01	12.9571	57.6358	7254.5	1	355
2022-09-15	08:43:02	17.151	76.2911	7466.71	1	356
2022-09-15	08:43:02	8.22011	36.5647	7291.07	1	357
2022-09-15	08:43:02	2.80128	12.4607	7479.17	FALSE	357
2022-09-15	08:43:03	4.23126	18.8215	7309.89	1	358
2022-09-15	08:43:03	2.09726	9.32903	7488.5	FALSE	358
2022-09-15	08:43:03	5.48276	24.3884	7334.28	1	359
2022-09-15	08:43:03	9.68428	43.0776	7531.58	1	360
2022-09-15	08:43:04	6.01024	26.7347	7361.01	1	361
2022-09-15	08:43:04	9.53131	42.3972	7573.97	1	362
2022-09-15	08:43:04	6.99833	31.13	7392.14	1	363
2022-09-15	08:43:04	4.10098	18.242	7592.21	1	364
2022-09-15	08:43:05	9.88036	43.9498	7436.09	1	365
2022-09-15	08:43:05	2.44963	10.8964	7603.11	FALSE	365
2022-09-15	08:43:05	2.05177	9.12668	7445.22	FALSE	365
2022-09-15	08:43:05	0.524695	2.33395	7605.45	FALSE	365
2022-09-15	08:43:06	0.431361	1.91878	7447.14	FALSE	365
2022-09-15	08:43:06	-0.423346	-1.88313	7605.45	FALSE	365
2022-09-15	08:43:06	-0.503193	-2.2383	7447.14	FALSE	365
2022-09-15	08:43:07	-0.708587	-3.15194	7605.45	FALSE	365
2022-09-15	08:43:07	-0.660852	-2.9396	7447.14	FALSE	365
2022-09-15	08:43:07	-0.897951	-3.99427	7605.45	FALSE	365
2022-09-15	08:43:07	-0.731997	-3.25607	7447.14	FALSE	365
2022-09-15	08:43:08	-0.833218	-3.70632	7605.45	FALSE	365
2022-09-15	08:43:08	-0.871183	-3.8752	7447.14	FALSE	365
2022-09-15	08:43:08	-0.760037	-3.3808	7605.45	FALSE	365
2022-09-15	08:43:08	-0.810877	-3.60694	7447.14	FALSE	365
2022-09-15	08:43:09	-0.736984	-3.27825	7605.45	FALSE	365
2022-09-15	08:43:09	-0.967264	-4.30258	7447.14	FALSE	365
2022-09-15	08:43:09	-0.724312	-3.22188	7605.45	FALSE	365
2022-09-15	08:43:09	-0.812353	-3.61351	7447.14	FALSE	365

## Sheet: Klutz_martin_20229158380 (2)
Date	Time	Lbs	Total force x time			**GoPro Fitting: 827
2022-09-15	08:38:00	0.312481	0.312481	FALSE	0
2022-09-15	08:38:00	0.3193	0.631781	FALSE	0
2022-09-15	08:38:01	0.311158	0.942939	FALSE	0
2022-09-15	08:38:01	0.311361	1.2543	FALSE	0
2022-09-15	08:38:01	0.316043	1.57034	FALSE	0
2022-09-15	08:38:01	0.352634	1.92298	FALSE	0
2022-09-15	08:38:02	0.491667	2.41464	FALSE	0
2022-09-15	08:38:02	0.453855	2.8685	FALSE	0
2022-09-15	08:38:02	0.481031	3.34953	FALSE	0
2022-09-15	08:38:02	0.753142	4.10267	FALSE	0
2022-09-15	08:38:03	0.936705	5.03938	FALSE	0
2022-09-15	08:38:03	1.14032	6.1797	FALSE	0
2022-09-15	08:38:03	0.962405	7.1421	FALSE	0
2022-09-15	08:38:03	0.884338	8.02644	FALSE	0
2022-09-15	08:38:04	0.798537	8.82498	FALSE	0
2022-09-15	08:38:04	0.611616	9.43659	FALSE	0
2022-09-15	08:38:04	0.644796	10.0814	FALSE	0
2022-09-15	08:38:05	0.632226	10.7136	FALSE	0
2022-09-15	08:38:05	0.767087	11.4807	FALSE	0
2022-09-15	08:38:05	0.699758	12.1805	FALSE	0
2022-09-15	08:38:05	0.775483	12.9559	FALSE	0
2022-09-15	08:38:06	0.666425	13.6224	FALSE	0
2022-09-15	08:38:06	0.671259	14.2936	FALSE	0
2022-09-15	08:38:06	0.478181	14.7718	FALSE	0
2022-09-15	08:38:06	0.534618	15.3064	FALSE	0
2022-09-15	08:38:07	0.495178	15.8016	FALSE	0
2022-09-15	08:38:07	0.497417	16.299	FALSE	0
2022-09-15	08:38:07	0.519555	16.8186	FALSE	0
2022-09-15	08:38:07	0.50958	17.3282	FALSE	0
2022-09-15	08:38:08	0.478486	17.8066	FALSE	0
2022-09-15	08:38:08	0.439606	18.2462	FALSE	0
2022-09-15	08:38:08	0.540522	18.7868	FALSE	0
2022-09-15	08:38:09	0.652379	19.4391	FALSE	0
2022-09-15	08:38:09	0.655178	20.0943	FALSE	0
2022-09-15	08:38:09	1.58017	21.6745	FALSE	0
2022-09-15	08:38:09	1.23655	22.911	FALSE	0
2022-09-15	08:38:10	0.41528	23.3263	FALSE	0
2022-09-15	08:38:10	0.365967	23.6923	FALSE	0
2022-09-15	08:38:10	0.361132	24.0534	FALSE	0
2022-09-15	08:38:10	0.352074	24.4055	FALSE	0
2022-09-15	08:38:11	0.382099	24.7876	FALSE	0
2022-09-15	08:38:11	0.436247	25.2238	FALSE	0
2022-09-15	08:38:11	0.427952	25.6518	FALSE	0
2022-09-15	08:38:11	0.337824	25.9896	FALSE	0
2022-09-15	08:38:12	0.441081	26.4307	FALSE	0
2022-09-15	08:38:12	0.314669	26.7454	FALSE	0
2022-09-15	08:38:12	0.50103	27.2464	FALSE	0
2022-09-15	08:38:13	0.418842	27.6652	FALSE	0
2022-09-15	08:38:13	0.84785	28.5131	FALSE	0
2022-09-15	08:38:13	1.38352	29.8966	FALSE	0
2022-09-15	08:38:13	2.07452	31.9711	FALSE	0
2022-09-15	08:38:14	1.05039	33.0215	FALSE	0
2022-09-15	08:38:14	0.526578	33.5481	FALSE	0
2022-09-15	08:38:14	0.895789	34.4439	FALSE	0
2022-09-15	08:38:14	2.03467	36.4786	FALSE	0
2022-09-15	08:38:15	1.80307	38.2816	FALSE	0
2022-09-15	08:38:15	1.17945	39.4611	FALSE	0
2022-09-15	08:38:15	0.501234	39.9623	FALSE	0
2022-09-15	08:38:15	0.357061	40.3194	FALSE	0
2022-09-15	08:38:16	0.64042	40.9598	FALSE	0
2022-09-15	08:38:16	0.690954	41.6507	FALSE	0
2022-09-15	08:38:16	1.30459	42.9553	FALSE	0
2022-09-15	08:38:17	1.42357	44.3789	FALSE	0
2022-09-15	08:38:17	0.833142	45.2121	FALSE	0
2022-09-15	08:38:17	0.689224	45.9013	FALSE	0
2022-09-15	08:38:17	0.643626	46.5449	FALSE	0
2022-09-15	08:38:18	0.674669	47.2196	FALSE	0
2022-09-15	08:38:18	1.23615	48.4557	FALSE	0
2022-09-15	08:38:18	2.66301	51.1187	FALSE	0
2022-09-15	08:38:18	0.89014	52.0089	FALSE	0
2022-09-15	08:38:19	0.599911	52.6088	FALSE	0
2022-09-15	08:38:19	0.234313	52.8431	FALSE	0
2022-09-15	08:38:19	0.151412	52.9945	FALSE	0
2022-09-15	08:38:19	0.139097	53.1336	FALSE	0
2022-09-15	08:38:20	0.861438	53.995	FALSE	0
2022-09-15	08:38:20	0.344186	54.3392	FALSE	0
2022-09-15	08:38:20	0.0192496	54.3585	FALSE	0
2022-09-15	08:38:20	0.309427	54.6679	FALSE	0
2022-09-15	08:38:21	1.40291	56.0708	FALSE	0
2022-09-15	08:38:21	3.77843	59.8492	1	1
2022-09-15	08:38:21	5.30571	65.155	1	2
2022-09-15	08:38:22	8.4654	73.6204	1	3
2022-09-15	08:38:22	5.87589	79.4962	1	4
2022-09-15	08:38:22	3.92195	83.4182	1	5
2022-09-15	08:38:22	1.10775	84.5259	FALSE	5
2022-09-15	08:38:23	0.223677	84.7496	FALSE	5
2022-09-15	08:38:23	0.399758	85.1494	FALSE	5
2022-09-15	08:38:23	0.2964	85.4458	FALSE	5
2022-09-15	08:38:23	0.317824	85.7636	FALSE	5
2022-09-15	08:38:24	0.584084	86.3477	FALSE	5
2022-09-15	08:38:24	0.200318	86.548	FALSE	5
2022-09-15	08:38:24	0.507341	87.0553	FALSE	5
2022-09-15	08:38:24	0.584593	87.6399	FALSE	5
2022-09-15	08:38:25	0.595738	88.2357	FALSE	5
2022-09-15	08:38:25	0.382812	88.6185	FALSE	5
2022-09-15	08:38:25	0.400776	89.0193	FALSE	5
2022-09-15	08:38:26	0.381082	89.4003	FALSE	5
2022-09-15	08:38:26	0.455331	89.8557	FALSE	5
2022-09-15	08:38:26	0.447901	90.3036	FALSE	5
2022-09-15	08:38:26	0.463219	90.7668	FALSE	5
2022-09-15	08:38:27	0.519148	91.2859	FALSE	5
2022-09-15	08:38:27	0.511718	91.7977	FALSE	5
2022-09-15	08:38:27	0.528715	92.3264	FALSE	5
2022-09-15	08:38:27	0.671921	92.9983	FALSE	5
2022-09-15	08:38:28	0.412074	93.4104	FALSE	5
2022-09-15	08:38:28	0.254313	93.6647	FALSE	5
2022-09-15	08:38:28	0.247901	93.9126	FALSE	5
2022-09-15	08:38:28	0.663219	94.5758	FALSE	5
2022-09-15	08:38:29	1.07233	95.6481	FALSE	5
2022-09-15	08:38:29	0.811514	96.4597	FALSE	5
2022-09-15	08:38:29	0.385407	96.8451	FALSE	5
2022-09-15	08:38:30	0.181285	97.0263	FALSE	5
2022-09-15	08:38:30	1.31284	98.3392	FALSE	5
2022-09-15	08:38:30	7.54189	105.881	1	6
2022-09-15	08:38:30	14.7149	120.596	1	7
2022-09-15	08:38:31	9.08917	129.685	1	8
2022-09-15	08:38:31	13.4009	143.086	1	9
2022-09-15	08:38:31	2.6049	145.691	FALSE	9
2022-09-15	08:38:31	2.81467	148.506	FALSE	9
2022-09-15	08:38:32	4.86383	153.369	1	10
2022-09-15	08:38:32	1.18576	154.555	FALSE	10
2022-09-15	08:38:32	1.55284	156.108	FALSE	10
2022-09-15	08:38:32	2.01838	158.126	FALSE	10
2022-09-15	08:38:33	3.2792	161.406	1	11
2022-09-15	08:38:33	4.56739	165.973	1	12
2022-09-15	08:38:33	3.57518	169.548	1	13
2022-09-15	08:38:34	5.91146	175.46	1	14
2022-09-15	08:38:34	4.25686	179.717	1	15
2022-09-15	08:38:34	5.49365	185.21	1	16
2022-09-15	08:38:34	3.84225	189.052	1	17
2022-09-15	08:38:35	4.06449	193.117	1	18
2022-09-15	08:38:35	7.32179	200.439	1	19
2022-09-15	08:38:35	8.09365	208.532	1	20
2022-09-15	08:38:35	6.9165	215.449	1	21
2022-09-15	08:38:36	9.63319	225.082	1	22
2022-09-15	08:38:36	5.72296	230.805	1	23
2022-09-15	08:38:36	3.74408	234.549	1	24
2022-09-15	08:38:36	7.77182	242.321	1	25
2022-09-15	08:38:37	5.04337	247.364	1	26
2022-09-15	08:38:37	15.1825	262.547	1	27
2022-09-15	08:38:37	14.8685	277.415	1	28
2022-09-15	08:38:38	11.5474	288.963	1	29
2022-09-15	08:38:38	14.5359	303.499	1	30
2022-09-15	08:38:38	16.3389	319.837	1	31
2022-09-15	08:38:38	12.5709	332.408	1	32
2022-09-15	08:38:39	4.42342	336.832	1	33
2022-09-15	08:38:39	2.92418	339.756	FALSE	33
2022-09-15	08:38:39	2.39686	342.153	FALSE	33
2022-09-15	08:38:39	2.14541	344.298	FALSE	33
2022-09-15	08:38:40	7.03034	351.329	1	34
2022-09-15	08:38:40	5.84474	357.173	1	35
2022-09-15	08:38:40	1.50872	358.682	FALSE	35
2022-09-15	08:38:40	2.39019	361.072	FALSE	35
2022-09-15	08:38:41	1.66027	362.732	FALSE	35
2022-09-15	08:38:41	2.57243	365.305	FALSE	35
2022-09-15	08:38:41	2.62454	367.929	FALSE	35
2022-09-15	08:38:41	3.34856	371.278	1	36
2022-09-15	08:38:42	3.45635	374.734	1	37
2022-09-15	08:38:42	3.55574	378.29	1	38
2022-09-15	08:38:42	2.52902	380.819	FALSE	38
2022-09-15	08:38:43	1.81233	382.631	FALSE	38
2022-09-15	08:38:43	1.75533	384.387	FALSE	38
2022-09-15	08:38:43	1.608	385.995	FALSE	38
2022-09-15	08:38:43	1.62296	387.618	FALSE	38
2022-09-15	08:38:44	1.48892	389.107	FALSE	38
2022-09-15	08:38:44	1.47604	390.583	FALSE	38
2022-09-15	08:38:44	1.47894	392.062	FALSE	38
2022-09-15	08:38:44	0.84617	392.908	FALSE	38
2022-09-15	08:38:45	1.03818	393.946	FALSE	38
2022-09-15	08:38:45	0.821132	394.767	FALSE	38
2022-09-15	08:38:45	0.970191	395.737	FALSE	38
2022-09-15	08:38:45	1.05879	396.796	FALSE	38
2022-09-15	08:38:46	1.04067	397.837	FALSE	38
2022-09-15	08:38:46	0.913549	398.75	FALSE	38
2022-09-15	08:38:46	0.667748	399.418	FALSE	38
2022-09-15	08:38:47	1.0138	400.432	FALSE	38
2022-09-15	08:38:47	1.81538	402.247	FALSE	38
2022-09-15	08:38:47	2.15279	404.4	FALSE	38
2022-09-15	08:38:47	3.66418	408.064	1	39
2022-09-15	08:38:48	3.67793	411.742	1	40
2022-09-15	08:38:48	4.10541	415.848	1	41
2022-09-15	08:38:48	5.87197	421.72	1	42
2022-09-15	08:38:48	6.98143	428.701	1	43
2022-09-15	08:38:49	6.46708	435.168	1	44
2022-09-15	08:38:49	2.68749	437.856	FALSE	44
2022-09-15	08:38:49	2.2652	440.121	FALSE	44
2022-09-15	08:38:49	2.54439	442.665	FALSE	44
2022-09-15	08:38:50	2.39604	445.061	FALSE	44
2022-09-15	08:38:50	2.23645	447.298	FALSE	44
2022-09-15	08:38:50	2.35243	449.65	FALSE	44
2022-09-15	08:38:51	3.23793	452.888	1	45
2022-09-15	08:38:51	1.24826	454.136	FALSE	45
2022-09-15	08:38:51	2.05167	456.188	FALSE	45
2022-09-15	08:38:51	0.454568	456.642	FALSE	45
2022-09-15	08:38:52	0.845611	457.488	FALSE	45
2022-09-15	08:38:52	0.645967	458.134	FALSE	45
2022-09-15	08:38:52	1.27034	459.404	FALSE	45
2022-09-15	08:38:52	0.92042	460.325	FALSE	45
2022-09-15	08:38:53	1.09385	461.419	FALSE	45
2022-09-15	08:38:53	0.680674	462.099	FALSE	45
2022-09-15	08:38:53	0.655534	462.755	FALSE	45
2022-09-15	08:38:53	0.500267	463.255	FALSE	45
2022-09-15	08:38:54	0.50444	463.76	FALSE	45
2022-09-15	08:38:54	0.309682	464.069	FALSE	45
2022-09-15	08:38:54	0.334008	464.403	FALSE	45
2022-09-15	08:38:55	0.298079	464.701	FALSE	45
2022-09-15	08:38:55	0.509224	465.211	FALSE	45
2022-09-15	08:38:55	2.48525	467.696	FALSE	45
2022-09-15	08:38:55	3.23981	470.936	1	46
2022-09-15	08:38:56	3.28978	474.225	1	47
2022-09-15	08:38:56	2.01014	476.236	FALSE	47
2022-09-15	08:38:56	1.01981	477.255	FALSE	47
2022-09-15	08:38:56	1.15146	478.407	FALSE	47
2022-09-15	08:38:57	0.374313	478.781	FALSE	47
2022-09-15	08:38:57	0.210242	478.991	FALSE	47
2022-09-15	08:38:57	0.657417	479.649	FALSE	47
2022-09-15	08:38:57	0.299453	479.948	FALSE	47
2022-09-15	08:38:58	0.0879518	480.036	FALSE	47
2022-09-15	08:38:58	0.0565524	480.093	FALSE	47
2022-09-15	08:38:58	1.63757	481.73	FALSE	47
2022-09-15	08:38:59	6.04866	487.779	1	48
2022-09-15	08:38:59	3.15202	490.931	1	49
2022-09-15	08:38:59	4.60418	495.535	1	50
2022-09-15	08:38:59	2.84714	498.382	FALSE	50
2022-09-15	08:39:00	7.57904	505.961	1	51
2022-09-15	08:39:00	2.01594	507.977	FALSE	51
2022-09-15	08:39:00	7.3566	515.334	1	52
2022-09-15	08:39:00	5.35955	520.693	1	53
2022-09-15	08:39:01	3.9853	524.679	1	54
2022-09-15	08:39:01	3.49304	528.172	1	55
2022-09-15	08:39:01	1.34261	529.514	FALSE	55
2022-09-15	08:39:01	0.880115	530.395	FALSE	55
2022-09-15	08:39:02	0.599911	530.994	FALSE	55
2022-09-15	08:39:02	0.703321	531.698	FALSE	55
2022-09-15	08:39:02	0.547494	532.245	FALSE	55
2022-09-15	08:39:02	0.60556	532.851	FALSE	55
2022-09-15	08:39:03	0.482049	533.333	FALSE	55
2022-09-15	08:39:03	0.512023	533.845	FALSE	55
2022-09-15	08:39:03	0.64042	534.485	FALSE	55
2022-09-15	08:39:04	0.609224	535.095	FALSE	55
2022-09-15	08:39:04	1.23971	536.334	FALSE	55
2022-09-15	08:39:04	0.431412	536.766	FALSE	55
2022-09-15	08:39:04	0.265916	537.032	FALSE	55
2022-09-15	08:39:05	0.26729	537.299	FALSE	55
2022-09-15	08:39:05	0.428155	537.727	FALSE	55
2022-09-15	08:39:05	0.530802	538.258	FALSE	55
2022-09-15	08:39:05	0.454924	538.713	FALSE	55
2022-09-15	08:39:06	0.6364	539.349	FALSE	55
2022-09-15	08:39:06	0.578995	539.928	FALSE	55
2022-09-15	08:39:06	0.354669	540.283	FALSE	55
2022-09-15	08:39:06	0.261489	540.544	FALSE	55
2022-09-15	08:39:07	0.265916	540.81	FALSE	55
2022-09-15	08:39:07	0.263117	541.073	FALSE	55
2022-09-15	08:39:07	0.157774	541.231	FALSE	55
2022-09-15	08:39:08	0.112328	541.343	FALSE	55
2022-09-15	08:39:08	0.0969086	541.44	FALSE	55
2022-09-15	08:39:08	0.0618959	541.502	FALSE	55
2022-09-15	08:39:08	0.0816923	541.584	FALSE	55
2022-09-15	08:39:09	0.0447967	541.629	FALSE	55
2022-09-15	08:39:09	0.0296822	541.658	FALSE	55
2022-09-15	08:39:09	0.0321249	541.691	FALSE	55
2022-09-15	08:39:09	0.0401147	541.731	FALSE	55
2022-09-15	08:39:10	0.038588	541.769	FALSE	55
2022-09-15	08:39:10	0.0243386	541.794	FALSE	55
2022-09-15	08:39:10	0.0226083	541.816	FALSE	55
2022-09-15	08:39:10	0.00428777	541.82	FALSE	55
2022-09-15	08:39:11	0.000929014	541.821	FALSE	55
2022-09-15	08:39:11	-0.0924043	541.821	FALSE	55
2022-09-15	08:39:11	-0.358562	541.821	FALSE	55
2022-09-15	08:39:12	-0.546043	541.821	FALSE	55
2022-09-15	08:39:12	-0.616832	541.821	FALSE	55
2022-09-15	08:39:12	-0.721768	541.821	FALSE	55
2022-09-15	08:39:12	-0.803803	541.821	FALSE	55
2022-09-15	08:39:13	-0.839274	541.821	FALSE	55
2022-09-15	08:39:13	-0.978562	541.821	FALSE	55
2022-09-15	08:39:13	-0.826043	541.821	FALSE	55
2022-09-15	08:39:13	-0.559427	541.821	FALSE	55
2022-09-15	08:39:14	-0.340089	541.821	FALSE	55
2022-09-15	08:39:14	-0.0723534	541.821	FALSE	55
2022-09-15	08:39:14	0.177825	541.999	FALSE	55
2022-09-15	08:39:14	0.258283	542.257	FALSE	55
2022-09-15	08:39:15	0.28729	542.545	FALSE	55
2022-09-15	08:39:15	0.361438	542.906	FALSE	55
2022-09-15	08:39:15	0.4593	543.366	FALSE	55
2022-09-15	08:39:16	0.539605	543.905	FALSE	55
2022-09-15	08:39:16	1.00378	544.909	FALSE	55
2022-09-15	08:39:16	0.98444	545.893	FALSE	55
2022-09-15	08:39:16	0.596349	546.49	FALSE	55
2022-09-15	08:39:17	0.0970612	546.587	FALSE	55
2022-09-15	08:39:17	-0.18528	546.587	FALSE	55
2022-09-15	08:39:17	-0.274796	546.587	FALSE	55
2022-09-15	08:39:17	-0.554287	546.587	FALSE	55
2022-09-15	08:39:18	-0.648231	546.587	FALSE	55
2022-09-15	08:39:18	-0.704261	546.587	FALSE	55
2022-09-15	08:39:18	-0.567213	546.587	FALSE	55
2022-09-15	08:39:18	-0.455865	546.587	FALSE	55
2022-09-15	08:39:19	-0.0344908	546.587	FALSE	55
2022-09-15	08:39:19	0.0442369	546.631	FALSE	55
2022-09-15	08:39:19	0.0338552	546.665	FALSE	55
2022-09-15	08:39:20	0.150904	546.816	FALSE	55
2022-09-15	08:39:20	0.363168	547.179	FALSE	55
2022-09-15	08:39:20	-0.415457	547.179	FALSE	55
2022-09-15	08:39:20	0.578282	547.757	FALSE	55
2022-09-15	08:39:21	0.99472	548.752	FALSE	55
2022-09-15	08:39:21	1.32978	550.082	FALSE	55
2022-09-15	08:39:21	1.56281	551.645	FALSE	55
2022-09-15	08:39:21	1.7878	553.432	FALSE	55
2022-09-15	08:39:22	2.09024	555.523	FALSE	55
2022-09-15	08:39:22	2.30877	557.831	FALSE	55
2022-09-15	08:39:22	2.62617	560.457	FALSE	55
2022-09-15	08:39:22	2.45772	562.915	FALSE	55
2022-09-15	08:39:23	2.83574	565.751	FALSE	55
2022-09-15	08:39:23	2.87569	568.627	FALSE	55
2022-09-15	08:39:23	2.77513	571.402	FALSE	55
2022-09-15	08:39:23	3.05777	574.46	1	56
2022-09-15	08:39:24	2.98841	577.448	FALSE	56
2022-09-15	08:39:24	2.7653	580.213	FALSE	56
2022-09-15	08:39:24	2.88826	583.102	FALSE	56
2022-09-15	08:39:25	3.71574	586.817	1	57
2022-09-15	08:39:25	4.19553	591.013	1	58
2022-09-15	08:39:25	3.95955	594.972	1	59
2022-09-15	08:39:25	4.05574	599.028	1	60
2022-09-15	08:39:26	4.05452	603.083	1	61
2022-09-15	08:39:26	3.89859	606.981	1	62
2022-09-15	08:39:26	4.10256	611.084	1	63
2022-09-15	08:39:26	3.51889	614.603	1	64
2022-09-15	08:39:27	3.48714	618.09	1	65
2022-09-15	08:39:27	3.54194	621.632	1	66
2022-09-15	08:39:27	3.45095	625.083	1	67
2022-09-15	08:39:27	3.80846	628.891	1	68
2022-09-15	08:39:28	3.84525	632.736	1	69
2022-09-15	08:39:28	4.13055	636.867	1	70
2022-09-15	08:39:28	2.35528	639.222	FALSE	70
2022-09-15	08:39:29	1.94586	641.168	FALSE	70
2022-09-15	08:39:29	0.873142	642.041	FALSE	70
2022-09-15	08:39:29	0.737977	642.779	FALSE	70
2022-09-15	08:39:29	0.735026	643.514	FALSE	70
2022-09-15	08:39:30	0.636858	644.151	FALSE	70
2022-09-15	08:39:30	0.00515291	644.156	FALSE	70
2022-09-15	08:39:30	-0.195712	644.156	FALSE	70
2022-09-15	08:39:30	-0.368231	644.156	FALSE	70
2022-09-15	08:39:31	-0.426908	644.156	FALSE	70
2022-09-15	08:39:31	-0.251539	644.156	FALSE	70
2022-09-15	08:39:31	-0.0290964	644.156	FALSE	70
2022-09-15	08:39:31	-0.0520481	644.156	FALSE	70
2022-09-15	08:39:32	0.231972	644.388	FALSE	70
2022-09-15	08:39:32	0.215229	644.603	FALSE	70
2022-09-15	08:39:32	0.33986	644.943	FALSE	70
2022-09-15	08:39:33	0.513143	645.456	FALSE	70
2022-09-15	08:39:33	0.0623539	645.519	FALSE	70
2022-09-15	08:39:33	0.362659	645.881	FALSE	70
2022-09-15	08:39:33	0.61243	646.494	FALSE	70
2022-09-15	08:39:34	0.725458	647.219	FALSE	70
2022-09-15	08:39:34	0.586527	647.806	FALSE	70
2022-09-15	08:39:34	0.423931	648.23	FALSE	70
2022-09-15	08:39:34	0.439809	648.67	FALSE	70
2022-09-15	08:39:35	0.385407	649.055	FALSE	70
2022-09-15	08:39:35	0.399809	649.455	FALSE	70
2022-09-15	08:39:35	0.431565	649.886	FALSE	70
2022-09-15	08:39:35	0.356807	650.243	FALSE	70
2022-09-15	08:39:36	0.350445	650.594	FALSE	70
2022-09-15	08:39:36	0.311616	650.905	FALSE	70
2022-09-15	08:39:36	0.425305	651.331	FALSE	70
2022-09-15	08:39:37	0.379707	651.71	FALSE	70
2022-09-15	08:39:37	0.328715	652.039	FALSE	70
2022-09-15	08:39:37	0.335585	652.375	FALSE	70
2022-09-15	08:39:37	0.537774	652.912	FALSE	70
2022-09-15	08:39:38	1.31518	654.228	FALSE	70
2022-09-15	08:39:38	3.60413	657.832	1	71
2022-09-15	08:39:38	3.22281	661.054	1	72
2022-09-15	08:39:38	2.86479	663.919	FALSE	72
2022-09-15	08:39:39	2.98729	666.907	FALSE	72
2022-09-15	08:39:39	2.50943	669.416	FALSE	72
2022-09-15	08:39:39	2.80871	672.225	FALSE	72
2022-09-15	08:39:39	2.4079	674.633	FALSE	72
2022-09-15	08:39:40	2.01014	676.643	FALSE	72
2022-09-15	08:39:40	1.60118	678.244	FALSE	72
2022-09-15	08:39:40	2.58917	680.833	FALSE	72
2022-09-15	08:39:40	3.12749	683.961	1	73
2022-09-15	08:39:41	2.631	686.592	FALSE	73
2022-09-15	08:39:41	0.483524	687.075	FALSE	73
2022-09-15	08:39:41	0.338333	687.413	FALSE	73
2022-09-15	08:39:42	-0.0302669	687.413	FALSE	73
2022-09-15	08:39:42	0.124542	687.538	FALSE	73
2022-09-15	08:39:42	0.00642519	687.544	FALSE	73
2022-09-15	08:39:42	0.0275956	687.572	FALSE	73
2022-09-15	08:39:43	-0.108333	687.572	FALSE	73
2022-09-15	08:39:43	0.120725	687.693	FALSE	73
2022-09-15	08:39:43	0.085102	687.778	FALSE	73
2022-09-15	08:39:43	0.304746	688.083	FALSE	73
2022-09-15	08:39:44	0.476349	688.559	FALSE	73
2022-09-15	08:39:44	0.592023	689.151	FALSE	73
2022-09-15	08:39:44	0.530751	689.682	FALSE	73
2022-09-15	08:39:44	0.248664	689.93	FALSE	73
2022-09-15	08:39:45	0.063219	689.994	FALSE	73
2022-09-15	08:39:45	0.0627101	690.056	FALSE	73
2022-09-15	08:39:45	0.275738	690.332	FALSE	73
2022-09-15	08:39:46	0.380878	690.713	FALSE	73
2022-09-15	08:39:46	1.06663	691.78	FALSE	73
2022-09-15	08:39:46	1.44999	693.229	FALSE	73
2022-09-15	08:39:46	2.72658	695.956	FALSE	73
2022-09-15	08:39:47	3.28368	699.24	1	74
2022-09-15	08:39:47	3.2363	702.476	1	75
2022-09-15	08:39:47	1.04744	703.523	FALSE	75
2022-09-15	08:39:47	1.02032	704.544	FALSE	75
2022-09-15	08:39:48	0.213397	704.757	FALSE	75
2022-09-15	08:39:48	0.263982	705.021	FALSE	75
2022-09-15	08:39:48	0.0686135	705.09	FALSE	75
2022-09-15	08:39:48	0.103372	705.193	FALSE	75
2022-09-15	08:39:49	0.180827	705.374	FALSE	75
2022-09-15	08:39:49	0.393193	705.767	FALSE	75
2022-09-15	08:39:49	0.385713	706.153	FALSE	75
2022-09-15	08:39:50	0.685916	706.839	FALSE	75
2022-09-15	08:39:50	0.416501	707.255	FALSE	75
2022-09-15	08:39:50	0.249377	707.505	FALSE	75
2022-09-15	08:39:50	0.235127	707.74	FALSE	75
2022-09-15	08:39:51	0.420166	708.16	FALSE	75
2022-09-15	08:39:51	0.556247	708.716	FALSE	75
2022-09-15	08:39:51	0.513244	709.229	FALSE	75
2022-09-15	08:39:51	2.83721	712.067	FALSE	75
2022-09-15	08:39:52	2.73696	714.804	FALSE	75
2022-09-15	08:39:52	2.4024	717.206	FALSE	75
2022-09-15	08:39:52	3.18876	720.395	1	76
2022-09-15	08:39:52	2.59945	722.994	FALSE	76
2022-09-15	08:39:53	1.95212	724.946	FALSE	76
2022-09-15	08:39:53	0.713448	725.66	FALSE	76
2022-09-15	08:39:53	0.851972	726.512	FALSE	76
2022-09-15	08:39:54	1.56474	728.077	FALSE	76
2022-09-15	08:39:54	0.497367	728.574	FALSE	76
2022-09-15	08:39:54	0.678842	729.253	FALSE	76
2022-09-15	08:39:54	2.88663	732.139	FALSE	76
2022-09-15	08:39:55	0.279046	732.418	FALSE	76
2022-09-15	08:39:55	0.126069	732.545	FALSE	76
2022-09-15	08:39:55	0.321336	732.866	FALSE	76
2022-09-15	08:39:55	0.37187	733.238	FALSE	76
2022-09-15	08:39:56	-0.0449743	733.238	FALSE	76
2022-09-15	08:39:56	0.017214	733.255	FALSE	76
2022-09-15	08:39:56	0.398944	733.654	FALSE	76
2022-09-15	08:39:56	0.156196	733.81	FALSE	76
2022-09-15	08:39:57	0.324237	734.134	FALSE	76
2022-09-15	08:39:57	0.430191	734.564	FALSE	76
2022-09-15	08:39:57	0.617824	735.182	FALSE	76
2022-09-15	08:39:58	0.455789	735.638	FALSE	76
2022-09-15	08:39:58	0.349835	735.988	FALSE	76
2022-09-15	08:39:58	0.373804	736.362	FALSE	76
2022-09-15	08:39:58	0.375382	736.737	FALSE	76
2022-09-15	08:39:59	0.346832	737.084	FALSE	76
2022-09-15	08:39:59	0.308613	737.393	FALSE	76
2022-09-15	08:39:59	0.39299	737.786	FALSE	76
2022-09-15	08:39:59	0.407799	738.193	FALSE	76
2022-09-15	08:40:00	0.504033	738.697	FALSE	76
2022-09-15	08:40:00	0.696145	739.394	FALSE	76
2022-09-15	08:40:00	0.81187	740.205	FALSE	76
2022-09-15	08:40:00	1.762	741.967	FALSE	76
2022-09-15	08:40:01	0.636806	742.604	FALSE	76
2022-09-15	08:40:01	0.324389	742.929	FALSE	76
2022-09-15	08:40:01	0.181387	743.11	FALSE	76
2022-09-15	08:40:01	0.243422	743.353	FALSE	76
2022-09-15	08:40:02	0.238741	743.592	FALSE	76
2022-09-15	08:40:02	0.0986389	743.691	FALSE	76
2022-09-15	08:40:02	-0.0136257	743.691	FALSE	76
2022-09-15	08:40:03	0.236705	743.927	FALSE	76
2022-09-15	08:40:03	3.94052	747.868	1	77
2022-09-15	08:40:03	6.60932	754.477	1	78
2022-09-15	08:40:03	3.71731	758.195	1	79
2022-09-15	08:40:04	2.19472	760.389	FALSE	79
2022-09-15	08:40:04	1.36154	761.751	FALSE	79
2022-09-15	08:40:04	1.10327	762.854	FALSE	79
2022-09-15	08:40:04	0.596807	763.451	FALSE	79
2022-09-15	08:40:05	0.295127	763.746	FALSE	79
2022-09-15	08:40:05	0.195891	763.942	FALSE	79
2022-09-15	08:40:05	2.17508	766.117	FALSE	79
2022-09-15	08:40:05	9.19731	775.314	1	80
2022-09-15	08:40:06	15.5056	790.82	1	81
2022-09-15	08:40:06	8.95029	799.77	1	82
2022-09-15	08:40:06	6.51329	806.284	1	83
2022-09-15	08:40:07	2.25375	808.537	FALSE	83
2022-09-15	08:40:07	3.35024	811.888	1	84
2022-09-15	08:40:07	1.76408	813.652	FALSE	84
2022-09-15	08:40:07	1.90429	815.556	FALSE	84
2022-09-15	08:40:08	1.61243	817.168	FALSE	84
2022-09-15	08:40:08	2.79462	819.963	FALSE	84
2022-09-15	08:40:08	2.79553	822.759	FALSE	84
2022-09-15	08:40:08	2.49238	825.251	FALSE	84
2022-09-15	08:40:09	0.827596	826.078	FALSE	84
2022-09-15	08:40:09	0.372888	826.451	FALSE	84
2022-09-15	08:40:09	0.0708017	826.522	FALSE	84
2022-09-15	08:40:09	0.1393	826.661	FALSE	84
2022-09-15	08:40:10	1.4963	828.158	FALSE	84
2022-09-15	08:40:10	3.39345	831.551	1	85
2022-09-15	08:40:10	1.80464	833.356	FALSE	85
2022-09-15	08:40:11	0.340318	833.696	FALSE	85
2022-09-15	08:40:11	0.218639	833.915	FALSE	85
2022-09-15	08:40:11	0.0812343	833.996	FALSE	85
2022-09-15	08:40:11	-0.0118954	833.996	FALSE	85
2022-09-15	08:40:12	0.16673	834.163	FALSE	85
2022-09-15	08:40:12	0.19126	834.354	FALSE	85
2022-09-15	08:40:12	0.195942	834.55	FALSE	85
2022-09-15	08:40:12	0.296552	834.847	FALSE	85
2022-09-15	08:40:13	0.611616	835.458	FALSE	85
2022-09-15	08:40:13	0.743881	836.202	FALSE	85
2022-09-15	08:40:13	0.892532	837.095	FALSE	85
2022-09-15	08:40:13	0.718435	837.813	FALSE	85
2022-09-15	08:40:14	0.175382	837.988	FALSE	85
2022-09-15	08:40:14	0.12439	838.113	FALSE	85
2022-09-15	08:40:14	0.128664	838.241	FALSE	85
2022-09-15	08:40:15	0.186018	838.427	FALSE	85
2022-09-15	08:40:15	-0.0341346	838.427	FALSE	85
2022-09-15	08:40:15	0.150751	838.578	FALSE	85
2022-09-15	08:40:15	0.506374	839.085	FALSE	85
2022-09-15	08:40:16	0.680064	839.765	FALSE	85
2022-09-15	08:40:16	0.579147	840.344	FALSE	85
2022-09-15	08:40:16	0.49187	840.836	FALSE	85
2022-09-15	08:40:16	0.302914	841.139	FALSE	85
2022-09-15	08:40:17	0.188512	841.327	FALSE	85
2022-09-15	08:40:17	0.177265	841.504	FALSE	85
2022-09-15	08:40:17	0.154059	841.658	FALSE	85
2022-09-15	08:40:17	0.0485626	841.707	FALSE	85
2022-09-15	08:40:18	0.129122	841.836	FALSE	85
2022-09-15	08:40:18	0.641947	842.478	FALSE	85
2022-09-15	08:40:18	0.703677	843.182	FALSE	85
2022-09-15	08:40:18	0.901997	844.084	FALSE	85
2022-09-15	08:40:19	0.418537	844.502	FALSE	85
2022-09-15	08:40:19	0.602099	845.104	FALSE	85
2022-09-15	08:40:19	1.67391	846.778	FALSE	85
2022-09-15	08:40:20	2.86668	849.645	FALSE	85
2022-09-15	08:40:20	4.57345	854.218	1	86
2022-09-15	08:40:20	3.32724	857.546	1	87
2022-09-15	08:40:20	4.85248	862.398	1	88
2022-09-15	08:40:21	5.6164	868.015	1	89
2022-09-15	08:40:21	5.7192	873.734	1	90
2022-09-15	08:40:21	3.73131	877.465	1	91
2022-09-15	08:40:21	3.06464	880.53	1	92
2022-09-15	08:40:22	1.52475	882.054	FALSE	92
2022-09-15	08:40:22	0.417519	882.472	FALSE	92
2022-09-15	08:40:22	0.246069	882.718	FALSE	92
2022-09-15	08:40:22	0.235942	882.954	FALSE	92
2022-09-15	08:40:23	0.706883	883.661	FALSE	92
2022-09-15	08:40:23	5.85762	889.518	1	93
2022-09-15	08:40:23	5.53787	895.056	1	94
2022-09-15	08:40:24	7.51513	902.571	1	95
2022-09-15	08:40:24	2.47513	905.047	FALSE	95
2022-09-15	08:40:24	0.491158	905.538	FALSE	95
2022-09-15	08:40:24	0.360216	905.898	FALSE	95
2022-09-15	08:40:25	0.215127	906.113	FALSE	95
2022-09-15	08:40:25	0.281998	906.395	FALSE	95
2022-09-15	08:40:25	0.278893	906.674	FALSE	95
2022-09-15	08:40:25	0.233244	906.907	FALSE	95
2022-09-15	08:40:26	0.32673	907.234	FALSE	95
2022-09-15	08:40:26	0.10271	907.337	FALSE	95
2022-09-15	08:40:26	0.262863	907.6	FALSE	95
2022-09-15	08:40:26	0.290038	907.89	FALSE	95
2022-09-15	08:40:27	0.434466	908.324	FALSE	95
2022-09-15	08:40:27	0.272379	908.596	FALSE	95
2022-09-15	08:40:27	0.374262	908.971	FALSE	95
2022-09-15	08:40:28	0.508715	909.479	FALSE	95
2022-09-15	08:40:28	1.32561	910.805	FALSE	95
2022-09-15	08:40:28	3.20932	914.014	1	96
2022-09-15	08:40:28	3.12663	917.141	1	97
2022-09-15	08:40:29	0.93869	918.08	FALSE	97
2022-09-15	08:40:29	0.82388	918.904	FALSE	97
2022-09-15	08:40:29	0.623066	919.527	FALSE	97
2022-09-15	08:40:29	1.28765	920.814	FALSE	97
2022-09-15	08:40:30	4.56159	925.376	1	98
2022-09-15	08:40:30	7.45823	932.834	1	99
2022-09-15	08:40:30	10.9139	943.748	1	100
2022-09-15	08:40:30	8.51696	952.265	1	101
2022-09-15	08:40:31	4.93334	957.198	1	102
2022-09-15	08:40:31	2.11136	959.31	FALSE	102
2022-09-15	08:40:31	1.03162	960.341	FALSE	102
2022-09-15	08:40:32	0.805153	961.146	FALSE	102
2022-09-15	08:40:32	1.56459	962.711	FALSE	102
2022-09-15	08:40:32	4.44159	967.153	1	103
2022-09-15	08:40:32	3.64006	970.793	1	104
2022-09-15	08:40:33	3.04902	973.842	1	105
2022-09-15	08:40:33	4.4248	978.266	1	106
2022-09-15	08:40:33	4.06551	982.332	1	107
2022-09-15	08:40:33	5.65772	987.99	1	108
2022-09-15	08:40:34	12.4904	1000.48	1	109
2022-09-15	08:40:34	2.73212	1003.21	FALSE	109
2022-09-15	08:40:34	2.70907	1005.92	FALSE	109
2022-09-15	08:40:34	2.24108	1008.16	FALSE	109
2022-09-15	08:40:35	0.599555	1008.76	FALSE	109
2022-09-15	08:40:35	0.830343	1009.59	FALSE	109
2022-09-15	08:40:35	1.37737	1010.97	FALSE	109
2022-09-15	08:40:35	1.23879	1012.21	FALSE	109
2022-09-15	08:40:36	4.46937	1016.68	1	110
2022-09-15	08:40:36	4.62815	1021.31	1	111
2022-09-15	08:40:36	4.57248	1025.88	1	112
2022-09-15	08:40:37	1.87726	1027.76	FALSE	112
2022-09-15	08:40:37	0.468919	1028.22	FALSE	112
2022-09-15	08:40:37	0.618944	1028.84	FALSE	112
2022-09-15	08:40:37	0.189478	1029.03	FALSE	112
2022-09-15	08:40:38	0.29757	1029.33	FALSE	112
2022-09-15	08:40:38	0.0881045	1029.42	FALSE	112
2022-09-15	08:40:38	0.225967	1029.64	FALSE	112
2022-09-15	08:40:38	0.291921	1029.94	FALSE	112
2022-09-15	08:40:39	0.345713	1030.28	FALSE	112
2022-09-15	08:40:39	0.611718	1030.89	FALSE	112
2022-09-15	08:40:39	0.284288	1031.18	FALSE	112
2022-09-15	08:40:39	1.20419	1032.38	FALSE	112
2022-09-15	08:40:40	0.920522	1033.3	FALSE	112
2022-09-15	08:40:40	1.97121	1035.27	FALSE	112
2022-09-15	08:40:40	3.79228	1039.07	1	113
2022-09-15	08:40:41	3.7508	1042.82	1	114
2022-09-15	08:40:41	8.01522	1050.83	1	115
2022-09-15	08:40:41	2.97299	1053.81	FALSE	115
2022-09-15	08:40:41	2.73828	1056.54	FALSE	115
2022-09-15	08:40:42	2.92907	1059.47	FALSE	115
2022-09-15	08:40:42	2.57645	1062.05	FALSE	115
2022-09-15	08:40:42	4.10062	1066.15	1	116
2022-09-15	08:40:42	6.35558	1072.51	1	117
2022-09-15	08:40:43	3.65182	1076.16	1	118
2022-09-15	08:40:43	9.64606	1085.8	1	119
2022-09-15	08:40:43	3.76291	1089.57	1	120
2022-09-15	08:40:43	2.92322	1092.49	FALSE	120
2022-09-15	08:40:44	1.58683	1094.08	FALSE	120
2022-09-15	08:40:44	1.96271	1096.04	FALSE	120
2022-09-15	08:40:44	4.72215	1100.76	1	121
2022-09-15	08:40:45	6.53161	1107.29	1	122
2022-09-15	08:40:45	3.52485	1110.82	1	123
2022-09-15	08:40:45	2.89446	1113.71	FALSE	123
2022-09-15	08:40:45	0.634873	1114.35	FALSE	123
2022-09-15	08:40:46	1.55024	1115.9	FALSE	123
2022-09-15	08:40:46	2.13075	1118.03	FALSE	123
2022-09-15	08:40:46	1.68724	1119.72	FALSE	123
2022-09-15	08:40:46	2.16052	1121.88	FALSE	123
2022-09-15	08:40:47	0.602099	1122.48	FALSE	123
2022-09-15	08:40:47	0.464644	1122.94	FALSE	123
2022-09-15	08:40:47	0.257214	1123.2	FALSE	123
2022-09-15	08:40:47	0.242049	1123.44	FALSE	123
2022-09-15	08:40:48	0.118435	1123.56	FALSE	123
2022-09-15	08:40:48	0.354211	1123.91	FALSE	123
2022-09-15	08:40:48	0.191361	1124.11	FALSE	123
2022-09-15	08:40:49	0.269631	1124.38	FALSE	123
2022-09-15	08:40:49	0.438486	1124.81	FALSE	123
2022-09-15	08:40:49	0.106985	1124.92	FALSE	123
2022-09-15	08:40:49	0.435636	1125.36	FALSE	123
2022-09-15	08:40:50	0.290038	1125.65	FALSE	123
2022-09-15	08:40:50	0.308308	1125.95	FALSE	123
2022-09-15	08:40:50	0.377468	1126.33	FALSE	123
2022-09-15	08:40:50	0.221692	1126.55	FALSE	123
2022-09-15	08:40:51	0.544847	1127.1	FALSE	123
2022-09-15	08:40:51	0.171616	1127.27	FALSE	123
2022-09-15	08:40:51	0.293448	1127.56	FALSE	123
2022-09-15	08:40:51	0.178333	1127.74	FALSE	123
2022-09-15	08:40:52	0.131616	1127.87	FALSE	123
2022-09-15	08:40:52	0.344288	1128.22	FALSE	123
2022-09-15	08:40:52	0.372939	1128.59	FALSE	123
2022-09-15	08:40:53	0.411565	1129	FALSE	123
2022-09-15	08:40:53	0.450598	1129.45	FALSE	123
2022-09-15	08:40:53	0.349275	1129.8	FALSE	123
2022-09-15	08:40:53	0.569529	1130.37	FALSE	123
2022-09-15	08:40:54	0.518231	1130.89	FALSE	123
2022-09-15	08:40:54	0.418944	1131.31	FALSE	123
2022-09-15	08:40:54	0.342354	1131.65	FALSE	123
2022-09-15	08:40:54	0.393295	1132.04	FALSE	123
2022-09-15	08:40:55	0.424186	1132.47	FALSE	123
2022-09-15	08:40:55	0.401692	1132.87	FALSE	123
2022-09-15	08:40:55	0.405662	1133.28	FALSE	123
2022-09-15	08:40:55	0.401183	1133.68	FALSE	123
2022-09-15	08:40:56	0.396094	1134.07	FALSE	123
2022-09-15	08:40:56	0.374262	1134.45	FALSE	123
2022-09-15	08:40:56	0.390191	1134.84	FALSE	123
2022-09-15	08:40:56	0.376552	1135.21	FALSE	123
2022-09-15	08:40:57	0.377977	1135.59	FALSE	123
2022-09-15	08:40:57	0.377723	1135.97	FALSE	123
2022-09-15	08:40:57	0.426527	1136.4	FALSE	123
2022-09-15	08:40:58	0.488664	1136.89	FALSE	123
2022-09-15	08:40:58	1.72022	1138.61	FALSE	123
2022-09-15	08:40:58	6.29843	1144.9	1	124
2022-09-15	08:40:58	8.44316	1153.35	1	125
2022-09-15	08:40:59	7.52444	1160.87	1	126
2022-09-15	08:40:59	6.47095	1167.34	1	127
2022-09-15	08:40:59	9.02607	1176.37	1	128
2022-09-15	08:40:59	5.99049	1182.36	1	129
2022-09-15	08:41:00	2.73609	1185.1	FALSE	129
2022-09-15	08:41:00	1.40754	1186.5	FALSE	129
2022-09-15	08:41:00	1.125	1187.63	FALSE	129
2022-09-15	08:41:00	1.14775	1188.78	FALSE	129
2022-09-15	08:41:01	1.15426	1189.93	FALSE	129
2022-09-15	08:41:01	1.27146	1191.2	FALSE	129
2022-09-15	08:41:01	1.24424	1192.45	FALSE	129
2022-09-15	08:41:02	1.22602	1193.67	FALSE	129
2022-09-15	08:41:02	1.09808	1194.77	FALSE	129
2022-09-15	08:41:02	1.70719	1196.48	FALSE	129
2022-09-15	08:41:02	3.8196	1200.3	1	130
2022-09-15	08:41:03	6.06072	1206.36	1	131
2022-09-15	08:41:03	7.13986	1213.5	1	132
2022-09-15	08:41:03	6.0481	1219.55	1	133
2022-09-15	08:41:03	6.41619	1225.96	1	134
2022-09-15	08:41:04	6.28179	1232.24	1	135
2022-09-15	08:41:04	7.3851	1239.63	1	136
2022-09-15	08:41:04	6.98464	1246.61	1	137
2022-09-15	08:41:04	5.37283	1251.99	1	138
2022-09-15	08:41:05	3.73915	1255.72	1	139
2022-09-15	08:41:05	3.46322	1259.19	1	140
2022-09-15	08:41:05	3.29172	1262.48	1	141
2022-09-15	08:41:06	2.945	1265.42	FALSE	141
2022-09-15	08:41:06	2.73508	1268.16	FALSE	141
2022-09-15	08:41:06	1.90744	1270.07	FALSE	141
2022-09-15	08:41:06	1.80546	1271.87	FALSE	141
2022-09-15	08:41:07	0.732837	1272.61	FALSE	141
2022-09-15	08:41:07	-0.135865	1272.61	FALSE	141
2022-09-15	08:41:07	2.02816	1274.63	FALSE	141
2022-09-15	08:41:07	2.60866	1277.24	FALSE	141
2022-09-15	08:41:08	3.63614	1280.88	1	142
2022-09-15	08:41:08	2.26271	1283.14	FALSE	142
2022-09-15	08:41:08	1.63849	1284.78	FALSE	142
2022-09-15	08:41:08	0.716298	1285.5	FALSE	142
2022-09-15	08:41:09	0.464033	1285.96	FALSE	142
2022-09-15	08:41:09	0.252074	1286.21	FALSE	142
2022-09-15	08:41:09	0.0990969	1286.31	FALSE	142
2022-09-15	08:41:09	0.188155	1286.5	FALSE	142
2022-09-15	08:41:10	-0.0300633	1286.5	FALSE	142
2022-09-15	08:41:10	0.210191	1286.71	FALSE	142
2022-09-15	08:41:10	0.517824	1287.23	FALSE	142
2022-09-15	08:41:11	0.4793	1287.71	FALSE	142
2022-09-15	08:41:11	2.30317	1290.01	FALSE	142
2022-09-15	08:41:11	9.16281	1299.17	1	143
2022-09-15	08:41:11	20.6069	1319.78	1	144
2022-09-15	08:41:12	16.0572	1335.84	1	145
2022-09-15	08:41:12	10.4034	1346.24	1	146
2022-09-15	08:41:12	15.2124	1361.45	1	147
2022-09-15	08:41:12	16.9326	1378.39	1	148
2022-09-15	08:41:13	11.7159	1390.1	1	149
2022-09-15	08:41:13	14.7639	1404.87	1	150
2022-09-15	08:41:13	5.71039	1410.58	1	151
2022-09-15	08:41:13	3.85294	1414.43	1	152
2022-09-15	08:41:14	0.972735	1415.4	FALSE	152
2022-09-15	08:41:14	-1.45286	1415.4	FALSE	152
2022-09-15	08:41:14	0.0628628	1415.46	FALSE	152
2022-09-15	08:41:15	-0.120903	1415.46	FALSE	152
2022-09-15	08:41:15	-0.0810048	1415.46	FALSE	152
2022-09-15	08:41:15	0.223931	1415.69	FALSE	152
2022-09-15	08:41:15	0.186832	1415.87	FALSE	152
2022-09-15	08:41:16	0.297417	1416.17	FALSE	152
2022-09-15	08:41:16	0.0826083	1416.25	FALSE	152
2022-09-15	08:41:16	0.124084	1416.38	FALSE	152
2022-09-15	08:41:16	0.272634	1416.65	FALSE	152
2022-09-15	08:41:17	0.548715	1417.2	FALSE	152
2022-09-15	08:41:17	1.00357	1418.2	FALSE	152
2022-09-15	08:41:17	1.37655	1419.58	FALSE	152
2022-09-15	08:41:17	1.83772	1421.42	FALSE	152
2022-09-15	08:41:18	1.77579	1423.19	FALSE	152
2022-09-15	08:41:18	1.40943	1424.6	FALSE	152
2022-09-15	08:41:18	0.98215	1425.59	FALSE	152
2022-09-15	08:41:19	0.869733	1426.46	FALSE	152
2022-09-15	08:41:19	0.642608	1427.1	FALSE	152
2022-09-15	08:41:19	0.619453	1427.72	FALSE	152
2022-09-15	08:41:19	0.753855	1428.47	FALSE	152
2022-09-15	08:41:20	0.846476	1429.32	FALSE	152
2022-09-15	08:41:20	0.697315	1430.01	FALSE	152
2022-09-15	08:41:20	0.590038	1430.6	FALSE	152
2022-09-15	08:41:20	0.622099	1431.23	FALSE	152
2022-09-15	08:41:21	0.453702	1431.68	FALSE	152
2022-09-15	08:41:21	0.558995	1432.24	FALSE	152
2022-09-15	08:41:21	0.493957	1432.73	FALSE	152
2022-09-15	08:41:21	0.423779	1433.16	FALSE	152
2022-09-15	08:41:22	0.232227	1433.39	FALSE	152
2022-09-15	08:41:22	0.358842	1433.75	FALSE	152
2022-09-15	08:41:22	0.537214	1434.29	FALSE	152
2022-09-15	08:41:23	0.168308	1434.45	FALSE	152
2022-09-15	08:41:23	0.366527	1434.82	FALSE	152
2022-09-15	08:41:23	0.227494	1435.05	FALSE	152
2022-09-15	08:41:23	0.612633	1435.66	FALSE	152
2022-09-15	08:41:24	0.427392	1436.09	FALSE	152
2022-09-15	08:41:24	0.617112	1436.71	FALSE	152
2022-09-15	08:41:24	0.728766	1437.43	FALSE	152
2022-09-15	08:41:24	0.49126	1437.93	FALSE	152
2022-09-15	08:41:25	0.81986	1438.75	FALSE	152
2022-09-15	08:41:25	0.702455	1439.45	FALSE	152
2022-09-15	08:41:25	0.53874	1439.99	FALSE	152
2022-09-15	08:41:25	0.645153	1440.63	FALSE	152
2022-09-15	08:41:26	0.396552	1441.03	FALSE	152
2022-09-15	08:41:26	0.611209	1441.64	FALSE	152
2022-09-15	08:41:26	0.449478	1442.09	FALSE	152
2022-09-15	08:41:26	0.492481	1442.58	FALSE	152
2022-09-15	08:41:27	0.555687	1443.14	FALSE	152
2022-09-15	08:41:27	0.528512	1443.67	FALSE	152
2022-09-15	08:41:27	0.654974	1444.32	FALSE	152
2022-09-15	08:41:28	0.2793	1444.6	FALSE	152
2022-09-15	08:41:28	0.499351	1445.1	FALSE	152
2022-09-15	08:41:28	0.53243	1445.63	FALSE	152
2022-09-15	08:41:28	1.24179	1446.87	FALSE	152
2022-09-15	08:41:29	0.754873	1447.63	FALSE	152
2022-09-15	08:41:29	0.709885	1448.34	FALSE	152
2022-09-15	08:41:29	0.399046	1448.74	FALSE	152
2022-09-15	08:41:29	0.498639	1449.24	FALSE	152
2022-09-15	08:41:30	0.404389	1449.64	FALSE	152
2022-09-15	08:41:30	0.707087	1450.35	FALSE	152
2022-09-15	08:41:30	1.46398	1451.81	FALSE	152
2022-09-15	08:41:30	3.74123	1455.55	1	153
2022-09-15	08:41:31	3.73467	1459.29	1	154
2022-09-15	08:41:31	2.83446	1462.12	FALSE	154
2022-09-15	08:41:31	1.58307	1463.7	FALSE	154
2022-09-15	08:41:32	1.02271	1464.73	FALSE	154
2022-09-15	08:41:32	0.863779	1465.59	FALSE	154
2022-09-15	08:41:32	0.861285	1466.45	FALSE	154
2022-09-15	08:41:32	0.898741	1467.35	FALSE	154
2022-09-15	08:41:33	0.862099	1468.21	FALSE	154
2022-09-15	08:41:33	0.674364	1468.89	FALSE	154
2022-09-15	08:41:33	0.776552	1469.66	FALSE	154
2022-09-15	08:41:33	0.721591	1470.39	FALSE	154
2022-09-15	08:41:34	0.918181	1471.3	FALSE	154
2022-09-15	08:41:34	0.940064	1472.24	FALSE	154
2022-09-15	08:41:34	1.10322	1473.35	FALSE	154
2022-09-15	08:41:34	1.51691	1474.86	FALSE	154
2022-09-15	08:41:35	1.66103	1476.53	FALSE	154
2022-09-15	08:41:35	1.84668	1478.37	FALSE	154
2022-09-15	08:41:35	2.10724	1480.48	FALSE	154
2022-09-15	08:41:36	2.52994	1483.01	FALSE	154
2022-09-15	08:41:36	3.125	1486.13	1	155
2022-09-15	08:41:36	3.3739	1489.51	1	156
2022-09-15	08:41:36	3.85762	1493.37	1	157
2022-09-15	08:41:37	4.02362	1497.39	1	158
2022-09-15	08:41:37	4.19752	1501.59	1	159
2022-09-15	08:41:37	4.85228	1506.44	1	160
2022-09-15	08:41:37	5.44118	1511.88	1	161
2022-09-15	08:41:38	6.06103	1517.94	1	162
2022-09-15	08:41:38	6.20683	1524.15	1	163
2022-09-15	08:41:38	8.26327	1532.41	1	164
2022-09-15	08:41:38	9.65512	1542.07	1	165
2022-09-15	08:41:39	9.44378	1551.51	1	166
2022-09-15	08:41:39	8.12428	1559.63	1	167
2022-09-15	08:41:39	8.44001	1568.07	1	168
2022-09-15	08:41:39	7.39955	1575.47	1	169
2022-09-15	08:41:40	6.90774	1582.38	1	170
2022-09-15	08:41:40	8.76291	1591.14	1	171
2022-09-15	08:41:40	8.80667	1599.95	1	172
2022-09-15	08:41:41	8.78082	1608.73	1	173
2022-09-15	08:41:41	9.20724	1617.94	1	174
2022-09-15	08:41:41	8.33986	1626.28	1	175
2022-09-15	08:41:41	6.10235	1632.38	1	176
2022-09-15	08:41:42	5.23121	1637.61	1	177
2022-09-15	08:41:42	4.85752	1642.47	1	178
2022-09-15	08:41:42	4.47284	1646.94	1	179
2022-09-15	08:41:42	4.21457	1651.16	1	180
2022-09-15	08:41:43	4.38434	1655.54	1	181
2022-09-15	08:41:43	4.49172	1660.03	1	182
2022-09-15	08:41:43	4.59594	1664.63	1	183
2022-09-15	08:41:43	4.25116	1668.88	1	184
2022-09-15	08:41:44	4.23065	1673.11	1	185
2022-09-15	08:41:44	4.03228	1677.14	1	186
2022-09-15	08:41:44	3.24154	1680.39	1	187
2022-09-15	08:41:45	2.91248	1683.3	FALSE	187
2022-09-15	08:41:45	3.16785	1686.47	1	188
2022-09-15	08:41:45	3.90108	1690.37	1	189
2022-09-15	08:41:45	3.95905	1694.33	1	190
2022-09-15	08:41:46	5.18377	1699.51	1	191
2022-09-15	08:41:46	4.8196	1704.33	1	192
2022-09-15	08:41:46	4.00617	1708.34	1	193
2022-09-15	08:41:46	3.99268	1712.33	1	194
2022-09-15	08:41:47	3.48276	1715.81	1	195
2022-09-15	08:41:47	3.33645	1719.15	1	196
2022-09-15	08:41:47	2.83192	1721.98	FALSE	196
2022-09-15	08:41:47	3.37416	1725.35	1	197
2022-09-15	08:41:48	2.75747	1728.11	FALSE	197
2022-09-15	08:41:48	2.79706	1730.91	FALSE	197
2022-09-15	08:41:48	2.55574	1733.46	FALSE	197
2022-09-15	08:41:49	2.89477	1736.36	FALSE	197
2022-09-15	08:41:49	3.19009	1739.55	1	198
2022-09-15	08:41:49	3.25304	1742.8	1	199
2022-09-15	08:41:49	1.97533	1744.78	FALSE	199
2022-09-15	08:41:50	1.56658	1746.34	FALSE	199
2022-09-15	08:41:50	0.656145	1747	FALSE	199
2022-09-15	08:41:50	0.577112	1747.58	FALSE	199
2022-09-15	08:41:50	0.259962	1747.84	FALSE	199
2022-09-15	08:41:51	2.46179	1750.3	FALSE	199
2022-09-15	08:41:51	9.71044	1760.01	1	200
2022-09-15	08:41:51	6.10596	1766.11	1	201
2022-09-15	08:41:51	2.51625	1768.63	FALSE	201
2022-09-15	08:41:52	0.866628	1769.5	FALSE	201
2022-09-15	08:41:52	1.56281	1771.06	FALSE	201
2022-09-15	08:41:52	0.312277	1771.37	FALSE	201
2022-09-15	08:41:52	0.179351	1771.55	FALSE	201
2022-09-15	08:41:53	1.12205	1772.67	FALSE	201
2022-09-15	08:41:53	6.59243	1779.27	1	202
2022-09-15	08:41:53	11.2435	1790.51	1	203
2022-09-15	08:41:54	9.80846	1800.32	1	204
2022-09-15	08:41:54	8.31909	1808.64	1	205
2022-09-15	08:41:54	11.9014	1820.54	1	206
2022-09-15	08:41:54	15.9897	1836.53	1	207
2022-09-15	08:41:55	13.2274	1849.76	1	208
2022-09-15	08:41:55	7.86123	1857.62	1	209
2022-09-15	08:41:55	4.84347	1862.46	1	210
2022-09-15	08:41:55	7.91563	1870.38	1	211
2022-09-15	08:41:56	8.1193	1878.5	1	212
2022-09-15	08:41:56	6.9312	1885.43	1	213
2022-09-15	08:41:56	6.90347	1892.33	1	214
2022-09-15	08:41:56	7.36332	1899.69	1	215
2022-09-15	08:41:57	7.04545	1906.74	1	216
2022-09-15	08:41:57	7.21304	1913.95	1	217
2022-09-15	08:41:57	6.8307	1920.78	1	218
2022-09-15	08:41:58	5.99044	1926.77	1	219
2022-09-15	08:41:58	5.08123	1931.85	1	220
2022-09-15	08:41:58	3.73217	1935.59	1	221
2022-09-15	08:41:58	2.68856	1938.28	FALSE	221
2022-09-15	08:41:59	0.615535	1938.89	FALSE	221
2022-09-15	08:41:59	0.474211	1939.37	FALSE	221
2022-09-15	08:41:59	0.435534	1939.8	FALSE	221
2022-09-15	08:41:59	0.219351	1940.02	FALSE	221
2022-09-15	08:42:00	-0.0670099	1940.02	FALSE	221
2022-09-15	08:42:00	-0.16416	1940.02	FALSE	221
2022-09-15	08:42:00	0.184593	1940.2	FALSE	221
2022-09-15	08:42:00	0.171209	1940.38	FALSE	221
2022-09-15	08:42:01	0.684288	1941.06	FALSE	221
2022-09-15	08:42:01	3.51004	1944.57	1	222
2022-09-15	08:42:01	9.09706	1953.67	1	223
2022-09-15	08:42:02	10.1178	1963.78	1	224
2022-09-15	08:42:02	8.64118	1972.43	1	225
2022-09-15	08:42:02	5.33599	1977.76	1	226
2022-09-15	08:42:02	2.85187	1980.61	FALSE	226
2022-09-15	08:42:03	2.53579	1983.15	FALSE	226
2022-09-15	08:42:03	1.22266	1984.37	FALSE	226
2022-09-15	08:42:03	1.05085	1985.42	FALSE	226
2022-09-15	08:42:03	0.824644	1986.25	FALSE	226
2022-09-15	08:42:04	1.2478	1987.5	FALSE	226
2022-09-15	08:42:04	1.59614	1989.09	FALSE	226
2022-09-15	08:42:04	1.4367	1990.53	FALSE	226
2022-09-15	08:42:04	1.55569	1992.08	FALSE	226
2022-09-15	08:42:05	1.93614	1994.02	FALSE	226
2022-09-15	08:42:05	1.50958	1995.53	FALSE	226
2022-09-15	08:42:05	1.55513	1997.09	FALSE	226
2022-09-15	08:42:05	1.6967	1998.78	FALSE	226
2022-09-15	08:42:06	1.86607	2000.65	FALSE	226
2022-09-15	08:42:06	1.79284	2002.44	FALSE	226
2022-09-15	08:42:06	1.86933	2004.31	FALSE	226
2022-09-15	08:42:07	2.66948	2006.98	FALSE	226
2022-09-15	08:42:07	2.69426	2009.67	FALSE	226
2022-09-15	08:42:07	2.73441	2012.41	FALSE	226
2022-09-15	08:42:07	1.19019	2013.6	FALSE	226
2022-09-15	08:42:08	0.696145	2014.29	FALSE	226
2022-09-15	08:42:08	0.597265	2014.89	FALSE	226
2022-09-15	08:42:08	0.485763	2015.38	FALSE	226
2022-09-15	08:42:08	0.496807	2015.87	FALSE	226
2022-09-15	08:42:09	0.479758	2016.35	FALSE	226
2022-09-15	08:42:09	0.48444	2016.84	FALSE	226
2022-09-15	08:42:09	0.580318	2017.42	FALSE	226
2022-09-15	08:42:09	0.58042	2018	FALSE	226
2022-09-15	08:42:10	1.85808	2019.86	FALSE	226
2022-09-15	08:42:10	12.5441	2032.4	1	227
2022-09-15	08:42:10	11.1915	2043.59	1	228
2022-09-15	08:42:11	9.59472	2053.19	1	229
2022-09-15	08:42:11	6.25049	2059.44	1	230
2022-09-15	08:42:11	11.5385	2070.98	1	231
2022-09-15	08:42:11	10.2393	2081.22	1	232
2022-09-15	08:42:12	10.4594	2091.68	1	233
2022-09-15	08:42:12	8.9395	2100.61	1	234
2022-09-15	08:42:12	5.10352	2105.72	1	235
2022-09-15	08:42:12	2.33925	2108.06	FALSE	235
2022-09-15	08:42:13	1.53976	2109.6	FALSE	235
2022-09-15	08:42:13	0.679453	2110.28	FALSE	235
2022-09-15	08:42:13	0.531209	2110.81	FALSE	235
2022-09-15	08:42:13	0.479351	2111.29	FALSE	235
2022-09-15	08:42:14	0.461132	2111.75	FALSE	235
2022-09-15	08:42:14	0.476501	2112.23	FALSE	235
2022-09-15	08:42:14	0.536654	2112.76	FALSE	235
2022-09-15	08:42:15	2.11665	2114.88	FALSE	235
2022-09-15	08:42:15	9.38652	2124.26	1	236
2022-09-15	08:42:15	8.8222	2133.09	1	237
2022-09-15	08:42:15	1.32754	2134.41	FALSE	237
2022-09-15	08:42:16	0.787188	2135.2	FALSE	237
2022-09-15	08:42:16	1.2336	2136.44	FALSE	237
2022-09-15	08:42:16	3.21604	2139.65	1	238
2022-09-15	08:42:16	6.59767	2146.25	1	239
2022-09-15	08:42:17	7.77273	2154.02	1	240
2022-09-15	08:42:17	10.4839	2164.51	1	241
2022-09-15	08:42:17	10.0902	2174.6	1	242
2022-09-15	08:42:17	7.32362	2181.92	1	243
2022-09-15	08:42:18	10.1991	2192.12	1	244
2022-09-15	08:42:18	10.5413	2202.66	1	245
2022-09-15	08:42:18	13.7521	2216.41	1	246
2022-09-15	08:42:19	13.2769	2229.69	1	247
2022-09-15	08:42:19	9.49517	2239.18	1	248
2022-09-15	08:42:19	15.8719	2255.06	1	249
2022-09-15	08:42:19	9.51329	2264.57	1	250
2022-09-15	08:42:20	19.1316	2283.7	1	251
2022-09-15	08:42:20	13.8341	2297.54	1	252
2022-09-15	08:42:20	12.7736	2310.31	1	253
2022-09-15	08:42:20	17.3812	2327.69	1	254
2022-09-15	08:42:21	13.4114	2341.1	1	255
2022-09-15	08:42:21	12.0277	2353.13	1	256
2022-09-15	08:42:21	9.01517	2362.14	1	257
2022-09-15	08:42:21	13.5127	2375.66	1	258
2022-09-15	08:42:22	12.8009	2388.46	1	259
2022-09-15	08:42:22	13.8102	2402.27	1	260
2022-09-15	08:42:22	8.86851	2411.14	1	261
2022-09-15	08:42:22	16.2926	2427.43	1	262
2022-09-15	08:42:23	9.53604	2436.97	1	263
2022-09-15	08:42:23	13.3001	2450.27	1	264
2022-09-15	08:42:23	10.727	2460.99	1	265
2022-09-15	08:42:24	12.598	2473.59	1	266
2022-09-15	08:42:24	14.7519	2488.34	1	267
2022-09-15	08:42:24	14.6756	2503.02	1	268
2022-09-15	08:42:24	11.7988	2514.82	1	269
2022-09-15	08:42:25	10.2757	2525.09	1	270
2022-09-15	08:42:25	5.80103	2530.89	1	271
2022-09-15	08:42:25	5.2282	2536.12	1	272
2022-09-15	08:42:25	7.50469	2543.63	1	273
2022-09-15	08:42:26	9.27039	2552.9	1	274
2022-09-15	08:42:26	8.49528	2561.39	1	275
2022-09-15	08:42:26	4.99523	2566.39	1	276
2022-09-15	08:42:26	2.77696	2569.16	FALSE	276
2022-09-15	08:42:27	3.51731	2572.68	1	277
2022-09-15	08:42:27	4.80479	2577.49	1	278
2022-09-15	08:42:27	8.24449	2585.73	1	279
2022-09-15	08:42:28	7.74403	2593.47	1	280
2022-09-15	08:42:28	6.84759	2600.32	1	281
2022-09-15	08:42:28	6.09517	2606.42	1	282
2022-09-15	08:42:28	6.82454	2613.24	1	283
2022-09-15	08:42:29	9.53726	2622.78	1	284
2022-09-15	08:42:29	9.86062	2632.64	1	285
2022-09-15	08:42:29	8.31741	2640.96	1	286
2022-09-15	08:42:29	7.29925	2648.26	1	287
2022-09-15	08:42:30	5.548	2653.8	1	288
2022-09-15	08:42:30	4.69472	2658.5	1	289
2022-09-15	08:42:30	4.66815	2663.17	1	290
2022-09-15	08:42:30	4.17981	2667.35	1	291
2022-09-15	08:42:31	3.81635	2671.16	1	292
2022-09-15	08:42:31	3.51243	2674.68	1	293
2022-09-15	08:42:31	2.72871	2677.4	FALSE	293
2022-09-15	08:42:32	2.39828	2679.8	FALSE	293
2022-09-15	08:42:32	3.54179	2683.34	1	294
2022-09-15	08:42:32	3.99523	2687.34	1	295
2022-09-15	08:42:32	5.24154	2692.58	1	296
2022-09-15	08:42:33	1.94586	2694.53	FALSE	296
2022-09-15	08:42:33	2.09691	2696.62	FALSE	296
2022-09-15	08:42:33	1.58709	2698.21	FALSE	296
2022-09-15	08:42:33	2.02821	2700.24	FALSE	296
2022-09-15	08:42:34	2.94128	2703.18	FALSE	296
2022-09-15	08:42:34	3.86729	2707.05	1	297
2022-09-15	08:42:34	4.9797	2712.03	1	298
2022-09-15	08:42:34	10.166	2722.19	1	299
2022-09-15	08:42:35	12.4235	2734.62	1	300
2022-09-15	08:42:35	13.8244	2748.44	1	301
2022-09-15	08:42:35	14.9573	2763.4	1	302
2022-09-15	08:42:35	14.7383	2778.14	1	303
2022-09-15	08:42:36	13.4281	2791.57	1	304
2022-09-15	08:42:36	12.0586	2803.62	1	305
2022-09-15	08:42:36	9.70591	2813.33	1	306
2022-09-15	08:42:37	5.83981	2819.17	1	307
2022-09-15	08:42:37	2.48541	2821.66	FALSE	307
2022-09-15	08:42:37	2.40999	2824.07	FALSE	307
2022-09-15	08:42:37	4.16912	2828.23	1	308
2022-09-15	08:42:38	5.91747	2834.15	1	309
2022-09-15	08:42:38	3.87772	2838.03	1	310
2022-09-15	08:42:38	3.9993	2842.03	1	311
2022-09-15	08:42:38	3.9396	2845.97	1	312
2022-09-15	08:42:39	9.46835	2855.44	1	313
2022-09-15	08:42:39	8.94352	2864.38	1	314
2022-09-15	08:42:39	14.7362	2879.12	1	315
2022-09-15	08:42:39	11.7438	2890.86	1	316
2022-09-15	08:42:40	18.9677	2909.83	1	317
2022-09-15	08:42:40	18.8384	2928.67	1	318
2022-09-15	08:42:40	16.1673	2944.83	1	319
2022-09-15	08:42:41	23.1429	2967.98	1	320
2022-09-15	08:42:41	21.3787	2989.36	1	321
2022-09-15	08:42:41	27.25	3016.61	1	322
2022-09-15	08:42:41	16.4167	3033.02	1	323
2022-09-15	08:42:42	12.468	3045.49	1	324
2022-09-15	08:42:42	5.34418	3050.83	1	325
2022-09-15	08:42:42	3.64083	3054.47	1	326
2022-09-15	08:42:43	7.67131	3062.15	1	327
2022-09-15	08:42:43	7.71121	3069.86	1	328
2022-09-15	08:42:43	6.71293	3076.57	1	329
2022-09-15	08:42:43	10.734	3087.3	1	330
2022-09-15	08:42:43	14.4119	3101.72	1	331
2022-09-15	08:42:44	14.2607	3115.98	1	332
2022-09-15	08:42:44	9.89645	3125.87	1	333
2022-09-15	08:42:44	6.72077	3132.59	1	334
2022-09-15	08:42:45	5.87446	3138.47	1	335
2022-09-15	08:42:45	6.08479	3144.55	1	336
2022-09-15	08:42:45	7.84917	3152.4	1	337
2022-09-15	08:42:45	6.82887	3159.23	1	338
2022-09-15	08:42:46	6.14841	3165.38	1	339
2022-09-15	08:42:46	6.94449	3172.32	1	340
2022-09-15	08:42:46	6.04082	3178.37	1	341
2022-09-15	08:42:46	4.50286	3182.87	1	342
2022-09-15	08:42:47	4.55029	3187.42	1	343
2022-09-15	08:42:47	4.24225	3191.66	1	344
2022-09-15	08:42:47	1.96994	3193.63	FALSE	344
2022-09-15	08:42:47	0.358384	3193.99	FALSE	344
2022-09-15	08:42:48	0.240674	3194.23	FALSE	344
2022-09-15	08:42:48	0.0647458	3194.29	FALSE	344
2022-09-15	08:42:48	-0.0615646	3194.29	FALSE	344
2022-09-15	08:42:48	-0.133524	3194.29	FALSE	344
2022-09-15	08:42:49	-0.191386	3194.29	FALSE	344
2022-09-15	08:42:49	-0.418409	3194.29	FALSE	344
2022-09-15	08:42:49	-0.316323	3194.29	FALSE	344
2022-09-15	08:42:50	0.159199	3194.45	FALSE	344
2022-09-15	08:42:50	0.299555	3194.75	FALSE	344
2022-09-15	08:42:50	0.257774	3195.01	FALSE	344
2022-09-15	08:42:50	0.58271	3195.59	FALSE	344
2022-09-15	08:42:51	1.95497	3197.55	FALSE	344
2022-09-15	08:42:51	1.6335	3199.18	FALSE	344
2022-09-15	08:42:51	1.66775	3200.85	FALSE	344
2022-09-15	08:42:51	0.244339	3201.09	FALSE	344
2022-09-15	08:42:52	0.557723	3201.65	FALSE	344
2022-09-15	08:42:52	0.315687	3201.97	FALSE	344
2022-09-15	08:42:52	0.772277	3202.74	FALSE	344
2022-09-15	08:42:52	1.35589	3204.1	FALSE	344
2022-09-15	08:42:53	3.73156	3207.83	1	345
2022-09-15	08:42:53	5.46785	3213.3	1	346
2022-09-15	08:42:53	1.90902	3215.2	FALSE	346
2022-09-15	08:42:54	2.29304	3217.5	FALSE	346
2022-09-15	08:42:54	2.73945	3220.24	FALSE	346
2022-09-15	08:42:54	4.28144	3224.52	1	347
2022-09-15	08:42:54	5.87136	3230.39	1	348
2022-09-15	08:42:55	6.73864	3237.13	1	349
2022-09-15	08:42:55	8.69599	3245.82	1	350
2022-09-15	08:42:55	9.0027	3254.83	1	351
2022-09-15	08:42:55	13.1336	3267.96	1	352
2022-09-15	08:42:56	6.28423	3274.24	1	353
2022-09-15	08:42:56	3.17793	3277.42	1	354
2022-09-15	08:42:56	0.53701	3277.96	FALSE	354
2022-09-15	08:42:56	0.550089	3278.51	FALSE	354
2022-09-15	08:42:57	0.324746	3278.83	FALSE	354
2022-09-15	08:42:57	0.494567	3279.33	FALSE	354
2022-09-15	08:42:57	0.225509	3279.55	FALSE	354
2022-09-15	08:42:58	0.504084	3280.06	FALSE	354
2022-09-15	08:42:58	0.792939	3280.85	FALSE	354
2022-09-15	08:42:58	2.97818	3283.83	FALSE	354
2022-09-15	08:42:58	2.29146	3286.12	FALSE	354
2022-09-15	08:42:59	1.76067	3287.88	FALSE	354
2022-09-15	08:42:59	1.45767	3289.34	FALSE	354
2022-09-15	08:42:59	0.958537	3290.3	FALSE	354
2022-09-15	08:42:59	1.8962	3292.19	FALSE	354
2022-09-15	08:43:00	0.407443	3292.6	FALSE	354
2022-09-15	08:43:00	0.575687	3293.18	FALSE	354
2022-09-15	08:43:00	0.688308	3293.87	FALSE	354
2022-09-15	08:43:00	0.709173	3294.57	FALSE	354
2022-09-15	08:43:01	0.420216	3294.99	FALSE	354
2022-09-15	08:43:01	0.324644	3295.32	FALSE	354
2022-09-15	08:43:01	2.83543	3298.16	FALSE	354
2022-09-15	08:43:01	12.9571	3311.11	1	355
2022-09-15	08:43:02	17.151	3328.26	1	356
2022-09-15	08:43:02	8.22011	3336.48	1	357
2022-09-15	08:43:02	2.80128	3339.28	FALSE	357
2022-09-15	08:43:03	4.23126	3343.52	1	358
2022-09-15	08:43:03	2.09726	3345.61	FALSE	358
2022-09-15	08:43:03	5.48276	3351.1	1	359
2022-09-15	08:43:03	9.68428	3360.78	1	360
2022-09-15	08:43:04	6.01024	3366.79	1	361
2022-09-15	08:43:04	9.53131	3376.32	1	362
2022-09-15	08:43:04	6.99833	3383.32	1	363
2022-09-15	08:43:04	4.10098	3387.42	1	364
2022-09-15	08:43:05	9.88036	3397.3	1	365
2022-09-15	08:43:05	2.44963	3399.75	FALSE	365
2022-09-15	08:43:05	2.05177	3401.8	FALSE	365
2022-09-15	08:43:05	0.524695	3402.33	FALSE	365
2022-09-15	08:43:06	0.431361	3402.76	FALSE	365
2022-09-15	08:43:06	-0.423346	3402.76	FALSE	365
2022-09-15	08:43:06	-0.503193	3402.76	FALSE	365
2022-09-15	08:43:07	-0.708587	3402.76	FALSE	365
2022-09-15	08:43:07	-0.660852	3402.76	FALSE	365
2022-09-15	08:43:07	-0.897951	3402.76	FALSE	365
2022-09-15	08:43:07	-0.731997	3402.76	FALSE	365
2022-09-15	08:43:08	-0.833218	3402.76	FALSE	365
2022-09-15	08:43:08	-0.871183	3402.76	FALSE	365
2022-09-15	08:43:08	-0.760037	3402.76	FALSE	365
2022-09-15	08:43:08	-0.810877	3402.76	FALSE	365
2022-09-15	08:43:09	-0.736984	3402.76	FALSE	365
2022-09-15	08:43:09	-0.967264	3402.76	FALSE	365
2022-09-15	08:43:09	-0.724312	3402.76	FALSE	365
2022-09-15	08:43:09	-0.812353	3402.76	FALSE	365
2022-09-15	08:43:10	-0.563854	3402.76	FALSE	365
2022-09-15	08:43:10	-0.501361	3402.76	FALSE	365
2022-09-15	08:43:10	-0.136934	3402.76	FALSE	365
2022-09-15	08:43:11	0.206425	3402.97	FALSE	365
2022-09-15	08:43:11	0.312685	3403.28	FALSE	365
2022-09-15	08:43:11	1.07075	3404.35	FALSE	365
2022-09-15	08:43:11	0.547137	3404.9	FALSE	365
2022-09-15	08:43:12	0.652023	3405.55	FALSE	365
2022-09-15	08:43:12	1.04953	3406.6	FALSE	365
2022-09-15	08:43:12	0.934313	3407.53	FALSE	365
2022-09-15	08:43:12	0.491412	3408.02	FALSE	365
2022-09-15	08:43:13	0.241081	3408.26	FALSE	365
2022-09-15	08:43:13	0.381692	3408.65	FALSE	365
2022-09-15	08:43:13	0.291718	3408.94	FALSE	365
2022-09-15	08:43:13	0.435382	3409.37	FALSE	365
2022-09-15	08:43:14	0.118893	3409.49	FALSE	365
2022-09-15	08:43:14	0.498944	3409.99	FALSE	365
2022-09-15	08:43:14	0.486272	3410.48	FALSE	365
2022-09-15	08:43:14	0.453244	3410.93	FALSE	365
2022-09-15	08:43:15	1.13156	3412.06	FALSE	365
2022-09-15	08:43:15	1.13029	3413.19	FALSE	365
2022-09-15	08:43:15	1.11167	3414.3	FALSE	365
2022-09-15	08:43:16	0.752939	3415.06	FALSE	365
2022-09-15	08:43:16	0.623219	3415.68	FALSE	365
2022-09-15	08:43:16	0.529987	3416.21	FALSE	365
2022-09-15	08:43:16	0.340165	3416.55	FALSE	365
2022-09-15	08:43:17	0.742201	3417.29	FALSE	365
2022-09-15	08:43:17	0.526679	3417.82	FALSE	365
2022-09-15	08:43:17	0.507035	3418.33	FALSE	365
2022-09-15	08:43:17	0.504237	3418.83	FALSE	365
2022-09-15	08:43:18	0.490496	3419.32	FALSE	365
2022-09-15	08:43:18	0.502863	3419.82	FALSE	365
2022-09-15	08:43:18	0.52439	3420.35	FALSE	365
2022-09-15	08:43:18	0.604797	3420.95	FALSE	365
2022-09-15	08:43:19	0.640776	3421.59	FALSE	365
2022-09-15	08:43:19	0.574415	3422.17	FALSE	365
2022-09-15	08:43:19	0.576807	3422.74	FALSE	365
2022-09-15	08:43:20	0.536501	3423.28	FALSE	365
2022-09-15	08:43:20	0.52388	3423.81	FALSE	365
2022-09-15	08:43:20	0.54159	3424.35	FALSE	365
2022-09-15	08:43:20	0.551972	3424.9	FALSE	365
2022-09-15	08:43:21	0.590649	3425.49	FALSE	365
2022-09-15	08:43:21	0.721081	3426.21	FALSE	365
2022-09-15	08:43:21	0.648817	3426.86	FALSE	365
2022-09-15	08:43:21	0.594364	3427.45	FALSE	365
2022-09-15	08:43:22	0.53472	3427.99	FALSE	365
2022-09-15	08:43:22	0.523626	3428.51	FALSE	365
2022-09-15	08:43:22	0.50668	3429.02	FALSE	365
2022-09-15	08:43:22	0.519097	3429.54	FALSE	365
2022-09-15	08:43:23	0.555992	3430.09	FALSE	365
2022-09-15	08:43:23	0.599351	3430.69	FALSE	365
2022-09-15	08:43:23	0.614313	3431.31	FALSE	365
2022-09-15	08:43:24	0.629529	3431.94	FALSE	365
2022-09-15	08:43:24	0.617672	3432.55	FALSE	365
2022-09-15	08:43:24	0.610802	3433.17	FALSE	365
2022-09-15	08:43:24	0.633906	3433.8	FALSE	365
2022-09-15	08:43:25	0.650547	3434.45	FALSE	365
2022-09-15	08:43:25	0.620573	3435.07	FALSE	365
2022-09-15	08:43:25	0.58271	3435.65	FALSE	365
2022-09-15	08:43:25	0.533346	3436.19	FALSE	365
2022-09-15	08:43:26	0.510649	3436.7	FALSE	365

## Sheet: Klutz_martin_20229158380
						**GoPro Fitting: 827
2022-09-15	08:38:00	0.312481
2022-09-15	08:38:00	0.3193
2022-09-15	08:38:01	0.311158
2022-09-15	08:38:01	0.311361
2022-09-15	08:38:01	0.316043
2022-09-15	08:38:01	0.352634
2022-09-15	08:38:02	0.491667
2022-09-15	08:38:02	0.453855
2022-09-15	08:38:02	0.481031
2022-09-15	08:38:02	0.753142
2022-09-15	08:38:03	0.936705
2022-09-15	08:38:03	1.14032
2022-09-15	08:38:03	0.962405
2022-09-15	08:38:03	0.884338
2022-09-15	08:38:04	0.798537
2022-09-15	08:38:04	0.611616
2022-09-15	08:38:04	0.644796
2022-09-15	08:38:05	0.632226
2022-09-15	08:38:05	0.767087
2022-09-15	08:38:05	0.699758
2022-09-15	08:38:05	0.775483
2022-09-15	08:38:06	0.666425
2022-09-15	08:38:06	0.671259
2022-09-15	08:38:06	0.478181
2022-09-15	08:38:06	0.534618
2022-09-15	08:38:07	0.495178
2022-09-15	08:38:07	0.497417
2022-09-15	08:38:07	0.519555
2022-09-15	08:38:07	0.50958
2022-09-15	08:38:08	0.478486
2022-09-15	08:38:08	0.439606
2022-09-15	08:38:08	0.540522
2022-09-15	08:38:09	0.652379
2022-09-15	08:38:09	0.655178
2022-09-15	08:38:09	1.58017
2022-09-15	08:38:09	1.23655
2022-09-15	08:38:10	0.41528
2022-09-15	08:38:10	0.365967
2022-09-15	08:38:10	0.361132
2022-09-15	08:38:10	0.352074
2022-09-15	08:38:11	0.382099
2022-09-15	08:38:11	0.436247
2022-09-15	08:38:11	0.427952
2022-09-15	08:38:11	0.337824
2022-09-15	08:38:12	0.441081
2022-09-15	08:38:12	0.314669
2022-09-15	08:38:12	0.50103
2022-09-15	08:38:13	0.418842
2022-09-15	08:38:13	0.84785
2022-09-15	08:38:13	1.38352
2022-09-15	08:38:13	2.07452
2022-09-15	08:38:14	1.05039
2022-09-15	08:38:14	0.526578
2022-09-15	08:38:14	0.895789
2022-09-15	08:38:14	2.03467
2022-09-15	08:38:15	1.80307
2022-09-15	08:38:15	1.17945
2022-09-15	08:38:15	0.501234
2022-09-15	08:38:15	0.357061
2022-09-15	08:38:16	0.64042
2022-09-15	08:38:16	0.690954
2022-09-15	08:38:16	1.30459
2022-09-15	08:38:17	1.42357
2022-09-15	08:38:17	0.833142
2022-09-15	08:38:17	0.689224
2022-09-15	08:38:17	0.643626
2022-09-15	08:38:18	0.674669
2022-09-15	08:38:18	1.23615
2022-09-15	08:38:18	2.66301
2022-09-15	08:38:18	0.89014
2022-09-15	08:38:19	0.599911
2022-09-15	08:38:19	0.234313
2022-09-15	08:38:19	0.151412
2022-09-15	08:38:19	0.139097
2022-09-15	08:38:20	0.861438
2022-09-15	08:38:20	0.344186
2022-09-15	08:38:20	0.0192496
2022-09-15	08:38:20	0.309427
2022-09-15	08:38:21	1.40291
2022-09-15	08:38:21	3.77843
2022-09-15	08:38:21	5.30571
2022-09-15	08:38:22	8.4654
2022-09-15	08:38:22	5.87589
2022-09-15	08:38:22	3.92195
2022-09-15	08:38:22	1.10775
2022-09-15	08:38:23	0.223677
2022-09-15	08:38:23	0.399758
2022-09-15	08:38:23	0.2964
2022-09-15	08:38:23	0.317824
2022-09-15	08:38:24	0.584084
2022-09-15	08:38:24	0.200318
2022-09-15	08:38:24	0.507341
2022-09-15	08:38:24	0.584593
2022-09-15	08:38:25	0.595738
2022-09-15	08:38:25	0.382812
2022-09-15	08:38:25	0.400776
2022-09-15	08:38:26	0.381082
2022-09-15	08:38:26	0.455331
2022-09-15	08:38:26	0.447901
2022-09-15	08:38:26	0.463219
2022-09-15	08:38:27	0.519148
2022-09-15	08:38:27	0.511718
2022-09-15	08:38:27	0.528715
2022-09-15	08:38:27	0.671921
2022-09-15	08:38:28	0.412074
2022-09-15	08:38:28	0.254313
2022-09-15	08:38:28	0.247901
2022-09-15	08:38:28	0.663219
2022-09-15	08:38:29	1.07233
2022-09-15	08:38:29	0.811514
2022-09-15	08:38:29	0.385407
2022-09-15	08:38:30	0.181285
2022-09-15	08:38:30	1.31284
2022-09-15	08:38:30	7.54189
2022-09-15	08:38:30	14.7149
2022-09-15	08:38:31	9.08917
2022-09-15	08:38:31	13.4009
2022-09-15	08:38:31	2.6049
2022-09-15	08:38:31	2.81467
2022-09-15	08:38:32	4.86383
2022-09-15	08:38:32	1.18576
2022-09-15	08:38:32	1.55284
2022-09-15	08:38:32	2.01838
2022-09-15	08:38:33	3.2792
2022-09-15	08:38:33	4.56739
2022-09-15	08:38:33	3.57518
2022-09-15	08:38:34	5.91146
2022-09-15	08:38:34	4.25686
2022-09-15	08:38:34	5.49365
2022-09-15	08:38:34	3.84225
2022-09-15	08:38:35	4.06449
2022-09-15	08:38:35	7.32179
2022-09-15	08:38:35	8.09365
2022-09-15	08:38:35	6.9165
2022-09-15	08:38:36	9.63319
2022-09-15	08:38:36	5.72296
2022-09-15	08:38:36	3.74408
2022-09-15	08:38:36	7.77182
2022-09-15	08:38:37	5.04337
2022-09-15	08:38:37	15.1825
2022-09-15	08:38:37	14.8685
2022-09-15	08:38:38	11.5474
2022-09-15	08:38:38	14.5359
2022-09-15	08:38:38	16.3389
2022-09-15	08:38:38	12.5709
2022-09-15	08:38:39	4.42342
2022-09-15	08:38:39	2.92418
2022-09-15	08:38:39	2.39686
2022-09-15	08:38:39	2.14541
2022-09-15	08:38:40	7.03034
2022-09-15	08:38:40	5.84474
2022-09-15	08:38:40	1.50872
2022-09-15	08:38:40	2.39019
2022-09-15	08:38:41	1.66027
2022-09-15	08:38:41	2.57243
2022-09-15	08:38:41	2.62454
2022-09-15	08:38:41	3.34856
2022-09-15	08:38:42	3.45635
2022-09-15	08:38:42	3.55574
2022-09-15	08:38:42	2.52902
2022-09-15	08:38:43	1.81233
2022-09-15	08:38:43	1.75533
2022-09-15	08:38:43	1.608
2022-09-15	08:38:43	1.62296
2022-09-15	08:38:44	1.48892
2022-09-15	08:38:44	1.47604
2022-09-15	08:38:44	1.47894
2022-09-15	08:38:44	0.84617
2022-09-15	08:38:45	1.03818
2022-09-15	08:38:45	0.821132
2022-09-15	08:38:45	0.970191
2022-09-15	08:38:45	1.05879
2022-09-15	08:38:46	1.04067
2022-09-15	08:38:46	0.913549
2022-09-15	08:38:46	0.667748
2022-09-15	08:38:47	1.0138
2022-09-15	08:38:47	1.81538
2022-09-15	08:38:47	2.15279
2022-09-15	08:38:47	3.66418
2022-09-15	08:38:48	3.67793
2022-09-15	08:38:48	4.10541
2022-09-15	08:38:48	5.87197
2022-09-15	08:38:48	6.98143
2022-09-15	08:38:49	6.46708
2022-09-15	08:38:49	2.68749
2022-09-15	08:38:49	2.2652
2022-09-15	08:38:49	2.54439
2022-09-15	08:38:50	2.39604
2022-09-15	08:38:50	2.23645
2022-09-15	08:38:50	2.35243
2022-09-15	08:38:51	3.23793
2022-09-15	08:38:51	1.24826
2022-09-15	08:38:51	2.05167
2022-09-15	08:38:51	0.454568
2022-09-15	08:38:52	0.845611
2022-09-15	08:38:52	0.645967
2022-09-15	08:38:52	1.27034
2022-09-15	08:38:52	0.92042
2022-09-15	08:38:53	1.09385
2022-09-15	08:38:53	0.680674
2022-09-15	08:38:53	0.655534
2022-09-15	08:38:53	0.500267
2022-09-15	08:38:54	0.50444
2022-09-15	08:38:54	0.309682
2022-09-15	08:38:54	0.334008
2022-09-15	08:38:55	0.298079
2022-09-15	08:38:55	0.509224
2022-09-15	08:38:55	2.48525
2022-09-15	08:38:55	3.23981
2022-09-15	08:38:56	3.28978
2022-09-15	08:38:56	2.01014
2022-09-15	08:38:56	1.01981
2022-09-15	08:38:56	1.15146
2022-09-15	08:38:57	0.374313
2022-09-15	08:38:57	0.210242
2022-09-15	08:38:57	0.657417
2022-09-15	08:38:57	0.299453
2022-09-15	08:38:58	0.0879518
2022-09-15	08:38:58	0.0565524
2022-09-15	08:38:58	1.63757
2022-09-15	08:38:59	6.04866
2022-09-15	08:38:59	3.15202
2022-09-15	08:38:59	4.60418
2022-09-15	08:38:59	2.84714
2022-09-15	08:39:00	7.57904
2022-09-15	08:39:00	2.01594
2022-09-15	08:39:00	7.3566
2022-09-15	08:39:00	5.35955
2022-09-15	08:39:01	3.9853
2022-09-15	08:39:01	3.49304
2022-09-15	08:39:01	1.34261
2022-09-15	08:39:01	0.880115
2022-09-15	08:39:02	0.599911
2022-09-15	08:39:02	0.703321
2022-09-15	08:39:02	0.547494
2022-09-15	08:39:02	0.60556
2022-09-15	08:39:03	0.482049
2022-09-15	08:39:03	0.512023
2022-09-15	08:39:03	0.64042
2022-09-15	08:39:04	0.609224
2022-09-15	08:39:04	1.23971
2022-09-15	08:39:04	0.431412
2022-09-15	08:39:04	0.265916
2022-09-15	08:39:05	0.26729
2022-09-15	08:39:05	0.428155
2022-09-15	08:39:05	0.530802
2022-09-15	08:39:05	0.454924
2022-09-15	08:39:06	0.6364
2022-09-15	08:39:06	0.578995
2022-09-15	08:39:06	0.354669
2022-09-15	08:39:06	0.261489
2022-09-15	08:39:07	0.265916
2022-09-15	08:39:07	0.263117
2022-09-15	08:39:07	0.157774
2022-09-15	08:39:08	0.112328
2022-09-15	08:39:08	0.0969086
2022-09-15	08:39:08	0.0618959
2022-09-15	08:39:08	0.0816923
2022-09-15	08:39:09	0.0447967
2022-09-15	08:39:09	0.0296822
2022-09-15	08:39:09	0.0321249
2022-09-15	08:39:09	0.0401147
2022-09-15	08:39:10	0.038588
2022-09-15	08:39:10	0.0243386
2022-09-15	08:39:10	0.0226083
2022-09-15	08:39:10	0.00428777
2022-09-15	08:39:11	0.000929014
2022-09-15	08:39:11	-0.0924043
2022-09-15	08:39:11	-0.358562
2022-09-15	08:39:12	-0.546043
2022-09-15	08:39:12	-0.616832
2022-09-15	08:39:12	-0.721768
2022-09-15	08:39:12	-0.803803
2022-09-15	08:39:13	-0.839274
2022-09-15	08:39:13	-0.978562
2022-09-15	08:39:13	-0.826043
2022-09-15	08:39:13	-0.559427
2022-09-15	08:39:14	-0.340089
2022-09-15	08:39:14	-0.0723534
2022-09-15	08:39:14	0.177825
2022-09-15	08:39:14	0.258283
2022-09-15	08:39:15	0.28729
2022-09-15	08:39:15	0.361438
2022-09-15	08:39:15	0.4593
2022-09-15	08:39:16	0.539605
2022-09-15	08:39:16	1.00378
2022-09-15	08:39:16	0.98444
2022-09-15	08:39:16	0.596349
2022-09-15	08:39:17	0.0970612
2022-09-15	08:39:17	-0.18528
2022-09-15	08:39:17	-0.274796
2022-09-15	08:39:17	-0.554287
2022-09-15	08:39:18	-0.648231
2022-09-15	08:39:18	-0.704261
2022-09-15	08:39:18	-0.567213
2022-09-15	08:39:18	-0.455865
2022-09-15	08:39:19	-0.0344908
2022-09-15	08:39:19	0.0442369
2022-09-15	08:39:19	0.0338552
2022-09-15	08:39:20	0.150904
2022-09-15	08:39:20	0.363168
2022-09-15	08:39:20	-0.415457
2022-09-15	08:39:20	0.578282
2022-09-15	08:39:21	0.99472
2022-09-15	08:39:21	1.32978
2022-09-15	08:39:21	1.56281
2022-09-15	08:39:21	1.7878
2022-09-15	08:39:22	2.09024
2022-09-15	08:39:22	2.30877
2022-09-15	08:39:22	2.62617
2022-09-15	08:39:22	2.45772
2022-09-15	08:39:23	2.83574
2022-09-15	08:39:23	2.87569
2022-09-15	08:39:23	2.77513
2022-09-15	08:39:23	3.05777
2022-09-15	08:39:24	2.98841
2022-09-15	08:39:24	2.7653
2022-09-15	08:39:24	2.88826
2022-09-15	08:39:25	3.71574
2022-09-15	08:39:25	4.19553
2022-09-15	08:39:25	3.95955
2022-09-15	08:39:25	4.05574
2022-09-15	08:39:26	4.05452
2022-09-15	08:39:26	3.89859
2022-09-15	08:39:26	4.10256
2022-09-15	08:39:26	3.51889
2022-09-15	08:39:27	3.48714
2022-09-15	08:39:27	3.54194
2022-09-15	08:39:27	3.45095
2022-09-15	08:39:27	3.80846
2022-09-15	08:39:28	3.84525
2022-09-15	08:39:28	4.13055
2022-09-15	08:39:28	2.35528
2022-09-15	08:39:29	1.94586
2022-09-15	08:39:29	0.873142
2022-09-15	08:39:29	0.737977
2022-09-15	08:39:29	0.735026
2022-09-15	08:39:30	0.636858
2022-09-15	08:39:30	0.00515291
2022-09-15	08:39:30	-0.195712
2022-09-15	08:39:30	-0.368231
2022-09-15	08:39:31	-0.426908
2022-09-15	08:39:31	-0.251539
2022-09-15	08:39:31	-0.0290964
2022-09-15	08:39:31	-0.0520481
2022-09-15	08:39:32	0.231972
2022-09-15	08:39:32	0.215229
2022-09-15	08:39:32	0.33986
2022-09-15	08:39:33	0.513143
2022-09-15	08:39:33	0.0623539
2022-09-15	08:39:33	0.362659
2022-09-15	08:39:33	0.61243
2022-09-15	08:39:34	0.725458
2022-09-15	08:39:34	0.586527
2022-09-15	08:39:34	0.423931
2022-09-15	08:39:34	0.439809
2022-09-15	08:39:35	0.385407
2022-09-15	08:39:35	0.399809
2022-09-15	08:39:35	0.431565
2022-09-15	08:39:35	0.356807
2022-09-15	08:39:36	0.350445
2022-09-15	08:39:36	0.311616
2022-09-15	08:39:36	0.425305
2022-09-15	08:39:37	0.379707
2022-09-15	08:39:37	0.328715
2022-09-15	08:39:37	0.335585
2022-09-15	08:39:37	0.537774
2022-09-15	08:39:38	1.31518
2022-09-15	08:39:38	3.60413
2022-09-15	08:39:38	3.22281
2022-09-15	08:39:38	2.86479
2022-09-15	08:39:39	2.98729
2022-09-15	08:39:39	2.50943
2022-09-15	08:39:39	2.80871
2022-09-15	08:39:39	2.4079
2022-09-15	08:39:40	2.01014
2022-09-15	08:39:40	1.60118
2022-09-15	08:39:40	2.58917
2022-09-15	08:39:40	3.12749
2022-09-15	08:39:41	2.631
2022-09-15	08:39:41	0.483524
2022-09-15	08:39:41	0.338333
2022-09-15	08:39:42	-0.0302669
2022-09-15	08:39:42	0.124542
2022-09-15	08:39:42	0.00642519
2022-09-15	08:39:42	0.0275956
2022-09-15	08:39:43	-0.108333
2022-09-15	08:39:43	0.120725
2022-09-15	08:39:43	0.085102
2022-09-15	08:39:43	0.304746
2022-09-15	08:39:44	0.476349
2022-09-15	08:39:44	0.592023
2022-09-15	08:39:44	0.530751
2022-09-15	08:39:44	0.248664
2022-09-15	08:39:45	0.063219
2022-09-15	08:39:45	0.0627101
2022-09-15	08:39:45	0.275738
2022-09-15	08:39:46	0.380878
2022-09-15	08:39:46	1.06663
2022-09-15	08:39:46	1.44999
2022-09-15	08:39:46	2.72658
2022-09-15	08:39:47	3.28368
2022-09-15	08:39:47	3.2363
2022-09-15	08:39:47	1.04744
2022-09-15	08:39:47	1.02032
2022-09-15	08:39:48	0.213397
2022-09-15	08:39:48	0.263982
2022-09-15	08:39:48	0.0686135
2022-09-15	08:39:48	0.103372
2022-09-15	08:39:49	0.180827
2022-09-15	08:39:49	0.393193
2022-09-15	08:39:49	0.385713
2022-09-15	08:39:50	0.685916
2022-09-15	08:39:50	0.416501
2022-09-15	08:39:50	0.249377
2022-09-15	08:39:50	0.235127
2022-09-15	08:39:51	0.420166
2022-09-15	08:39:51	0.556247
2022-09-15	08:39:51	0.513244
2022-09-15	08:39:51	2.83721
2022-09-15	08:39:52	2.73696
2022-09-15	08:39:52	2.4024
2022-09-15	08:39:52	3.18876
2022-09-15	08:39:52	2.59945
2022-09-15	08:39:53	1.95212
2022-09-15	08:39:53	0.713448
2022-09-15	08:39:53	0.851972
2022-09-15	08:39:54	1.56474
2022-09-15	08:39:54	0.497367
2022-09-15	08:39:54	0.678842
2022-09-15	08:39:54	2.88663
2022-09-15	08:39:55	0.279046
2022-09-15	08:39:55	0.126069
2022-09-15	08:39:55	0.321336
2022-09-15	08:39:55	0.37187
2022-09-15	08:39:56	-0.0449743
2022-09-15	08:39:56	0.017214
2022-09-15	08:39:56	0.398944
2022-09-15	08:39:56	0.156196
2022-09-15	08:39:57	0.324237
2022-09-15	08:39:57	0.430191
2022-09-15	08:39:57	0.617824
2022-09-15	08:39:58	0.455789
2022-09-15	08:39:58	0.349835
2022-09-15	08:39:58	0.373804
2022-09-15	08:39:58	0.375382
2022-09-15	08:39:59	0.346832
2022-09-15	08:39:59	0.308613
2022-09-15	08:39:59	0.39299
2022-09-15	08:39:59	0.407799
2022-09-15	08:40:00	0.504033
2022-09-15	08:40:00	0.696145
2022-09-15	08:40:00	0.81187
2022-09-15	08:40:00	1.762
2022-09-15	08:40:01	0.636806
2022-09-15	08:40:01	0.324389
2022-09-15	08:40:01	0.181387
2022-09-15	08:40:01	0.243422
2022-09-15	08:40:02	0.238741
2022-09-15	08:40:02	0.0986389
2022-09-15	08:40:02	-0.0136257
2022-09-15	08:40:03	0.236705
2022-09-15	08:40:03	3.94052
2022-09-15	08:40:03	6.60932
2022-09-15	08:40:03	3.71731
2022-09-15	08:40:04	2.19472
2022-09-15	08:40:04	1.36154
2022-09-15	08:40:04	1.10327
2022-09-15	08:40:04	0.596807
2022-09-15	08:40:05	0.295127
2022-09-15	08:40:05	0.195891
2022-09-15	08:40:05	2.17508
2022-09-15	08:40:05	9.19731
2022-09-15	08:40:06	15.5056
2022-09-15	08:40:06	8.95029
2022-09-15	08:40:06	6.51329
2022-09-15	08:40:07	2.25375
2022-09-15	08:40:07	3.35024
2022-09-15	08:40:07	1.76408
2022-09-15	08:40:07	1.90429
2022-09-15	08:40:08	1.61243
2022-09-15	08:40:08	2.79462
2022-09-15	08:40:08	2.79553
2022-09-15	08:40:08	2.49238
2022-09-15	08:40:09	0.827596
2022-09-15	08:40:09	0.372888
2022-09-15	08:40:09	0.0708017
2022-09-15	08:40:09	0.1393
2022-09-15	08:40:10	1.4963
2022-09-15	08:40:10	3.39345
2022-09-15	08:40:10	1.80464
2022-09-15	08:40:11	0.340318
2022-09-15	08:40:11	0.218639
2022-09-15	08:40:11	0.0812343
2022-09-15	08:40:11	-0.0118954
2022-09-15	08:40:12	0.16673
2022-09-15	08:40:12	0.19126
2022-09-15	08:40:12	0.195942
2022-09-15	08:40:12	0.296552
2022-09-15	08:40:13	0.611616
2022-09-15	08:40:13	0.743881
2022-09-15	08:40:13	0.892532
2022-09-15	08:40:13	0.718435
2022-09-15	08:40:14	0.175382
2022-09-15	08:40:14	0.12439
2022-09-15	08:40:14	0.128664
2022-09-15	08:40:15	0.186018
2022-09-15	08:40:15	-0.0341346
2022-09-15	08:40:15	0.150751
2022-09-15	08:40:15	0.506374
2022-09-15	08:40:16	0.680064
2022-09-15	08:40:16	0.579147
2022-09-15	08:40:16	0.49187
2022-09-15	08:40:16	0.302914
2022-09-15	08:40:17	0.188512
2022-09-15	08:40:17	0.177265
2022-09-15	08:40:17	0.154059
2022-09-15	08:40:17	0.0485626
2022-09-15	08:40:18	0.129122
2022-09-15	08:40:18	0.641947
2022-09-15	08:40:18	0.703677
2022-09-15	08:40:18	0.901997
2022-09-15	08:40:19	0.418537
2022-09-15	08:40:19	0.602099
2022-09-15	08:40:19	1.67391
2022-09-15	08:40:20	2.86668
2022-09-15	08:40:20	4.57345
2022-09-15	08:40:20	3.32724
2022-09-15	08:40:20	4.85248
2022-09-15	08:40:21	5.6164
2022-09-15	08:40:21	5.7192
2022-09-15	08:40:21	3.73131
2022-09-15	08:40:21	3.06464
2022-09-15	08:40:22	1.52475
2022-09-15	08:40:22	0.417519
2022-09-15	08:40:22	0.246069
2022-09-15	08:40:22	0.235942
2022-09-15	08:40:23	0.706883
2022-09-15	08:40:23	5.85762
2022-09-15	08:40:23	5.53787
2022-09-15	08:40:24	7.51513
2022-09-15	08:40:24	2.47513
2022-09-15	08:40:24	0.491158
2022-09-15	08:40:24	0.360216
2022-09-15	08:40:25	0.215127
2022-09-15	08:40:25	0.281998
2022-09-15	08:40:25	0.278893
2022-09-15	08:40:25	0.233244
2022-09-15	08:40:26	0.32673
2022-09-15	08:40:26	0.10271
2022-09-15	08:40:26	0.262863
2022-09-15	08:40:26	0.290038
2022-09-15	08:40:27	0.434466
2022-09-15	08:40:27	0.272379
2022-09-15	08:40:27	0.374262
2022-09-15	08:40:28	0.508715
2022-09-15	08:40:28	1.32561
2022-09-15	08:40:28	3.20932
2022-09-15	08:40:28	3.12663
2022-09-15	08:40:29	0.93869
2022-09-15	08:40:29	0.82388
2022-09-15	08:40:29	0.623066
2022-09-15	08:40:29	1.28765
2022-09-15	08:40:30	4.56159
2022-09-15	08:40:30	7.45823
2022-09-15	08:40:30	10.9139
2022-09-15	08:40:30	8.51696
2022-09-15	08:40:31	4.93334
2022-09-15	08:40:31	2.11136
2022-09-15	08:40:31	1.03162
2022-09-15	08:40:32	0.805153
2022-09-15	08:40:32	1.56459
2022-09-15	08:40:32	4.44159
2022-09-15	08:40:32	3.64006
2022-09-15	08:40:33	3.04902
2022-09-15	08:40:33	4.4248
2022-09-15	08:40:33	4.06551
2022-09-15	08:40:33	5.65772
2022-09-15	08:40:34	12.4904
2022-09-15	08:40:34	2.73212
2022-09-15	08:40:34	2.70907
2022-09-15	08:40:34	2.24108
2022-09-15	08:40:35	0.599555
2022-09-15	08:40:35	0.830343
2022-09-15	08:40:35	1.37737
2022-09-15	08:40:35	1.23879
2022-09-15	08:40:36	4.46937
2022-09-15	08:40:36	4.62815
2022-09-15	08:40:36	4.57248
2022-09-15	08:40:37	1.87726
2022-09-15	08:40:37	0.468919
2022-09-15	08:40:37	0.618944
2022-09-15	08:40:37	0.189478
2022-09-15	08:40:38	0.29757
2022-09-15	08:40:38	0.0881045
2022-09-15	08:40:38	0.225967
2022-09-15	08:40:38	0.291921
2022-09-15	08:40:39	0.345713
2022-09-15	08:40:39	0.611718
2022-09-15	08:40:39	0.284288
2022-09-15	08:40:39	1.20419
2022-09-15	08:40:40	0.920522
2022-09-15	08:40:40	1.97121
2022-09-15	08:40:40	3.79228
2022-09-15	08:40:41	3.7508
2022-09-15	08:40:41	8.01522
2022-09-15	08:40:41	2.97299
2022-09-15	08:40:41	2.73828
2022-09-15	08:40:42	2.92907
2022-09-15	08:40:42	2.57645
2022-09-15	08:40:42	4.10062
2022-09-15	08:40:42	6.35558
2022-09-15	08:40:43	3.65182
2022-09-15	08:40:43	9.64606
2022-09-15	08:40:43	3.76291
2022-09-15	08:40:43	2.92322
2022-09-15	08:40:44	1.58683
2022-09-15	08:40:44	1.96271
2022-09-15	08:40:44	4.72215
2022-09-15	08:40:45	6.53161
2022-09-15	08:40:45	3.52485
2022-09-15	08:40:45	2.89446
2022-09-15	08:40:45	0.634873
2022-09-15	08:40:46	1.55024
2022-09-15	08:40:46	2.13075
2022-09-15	08:40:46	1.68724
2022-09-15	08:40:46	2.16052
2022-09-15	08:40:47	0.602099
2022-09-15	08:40:47	0.464644
2022-09-15	08:40:47	0.257214
2022-09-15	08:40:47	0.242049
2022-09-15	08:40:48	0.118435
2022-09-15	08:40:48	0.354211
2022-09-15	08:40:48	0.191361
2022-09-15	08:40:49	0.269631
2022-09-15	08:40:49	0.438486
2022-09-15	08:40:49	0.106985
2022-09-15	08:40:49	0.435636
2022-09-15	08:40:50	0.290038
2022-09-15	08:40:50	0.308308
2022-09-15	08:40:50	0.377468
2022-09-15	08:40:50	0.221692
2022-09-15	08:40:51	0.544847
2022-09-15	08:40:51	0.171616
2022-09-15	08:40:51	0.293448
2022-09-15	08:40:51	0.178333
2022-09-15	08:40:52	0.131616
2022-09-15	08:40:52	0.344288
2022-09-15	08:40:52	0.372939
2022-09-15	08:40:53	0.411565
2022-09-15	08:40:53	0.450598
2022-09-15	08:40:53	0.349275
2022-09-15	08:40:53	0.569529
2022-09-15	08:40:54	0.518231
2022-09-15	08:40:54	0.418944
2022-09-15	08:40:54	0.342354
2022-09-15	08:40:54	0.393295
2022-09-15	08:40:55	0.424186
2022-09-15	08:40:55	0.401692
2022-09-15	08:40:55	0.405662
2022-09-15	08:40:55	0.401183
2022-09-15	08:40:56	0.396094
2022-09-15	08:40:56	0.374262
2022-09-15	08:40:56	0.390191
2022-09-15	08:40:56	0.376552
2022-09-15	08:40:57	0.377977
2022-09-15	08:40:57	0.377723
2022-09-15	08:40:57	0.426527
2022-09-15	08:40:58	0.488664
2022-09-15	08:40:58	1.72022
2022-09-15	08:40:58	6.29843
2022-09-15	08:40:58	8.44316
2022-09-15	08:40:59	7.52444
2022-09-15	08:40:59	6.47095
2022-09-15	08:40:59	9.02607
2022-09-15	08:40:59	5.99049
2022-09-15	08:41:00	2.73609
2022-09-15	08:41:00	1.40754
2022-09-15	08:41:00	1.125
2022-09-15	08:41:00	1.14775
2022-09-15	08:41:01	1.15426
2022-09-15	08:41:01	1.27146
2022-09-15	08:41:01	1.24424
2022-09-15	08:41:02	1.22602
2022-09-15	08:41:02	1.09808
2022-09-15	08:41:02	1.70719
2022-09-15	08:41:02	3.8196
2022-09-15	08:41:03	6.06072
2022-09-15	08:41:03	7.13986
2022-09-15	08:41:03	6.0481
2022-09-15	08:41:03	6.41619
2022-09-15	08:41:04	6.28179
2022-09-15	08:41:04	7.3851
2022-09-15	08:41:04	6.98464
2022-09-15	08:41:04	5.37283
2022-09-15	08:41:05	3.73915
2022-09-15	08:41:05	3.46322
2022-09-15	08:41:05	3.29172
2022-09-15	08:41:06	2.945
2022-09-15	08:41:06	2.73508
2022-09-15	08:41:06	1.90744
2022-09-15	08:41:06	1.80546
2022-09-15	08:41:07	0.732837
2022-09-15	08:41:07	-0.135865
2022-09-15	08:41:07	2.02816
2022-09-15	08:41:07	2.60866
2022-09-15	08:41:08	3.63614
2022-09-15	08:41:08	2.26271
2022-09-15	08:41:08	1.63849
2022-09-15	08:41:08	0.716298
2022-09-15	08:41:09	0.464033
2022-09-15	08:41:09	0.252074
2022-09-15	08:41:09	0.0990969
2022-09-15	08:41:09	0.188155
2022-09-15	08:41:10	-0.0300633
2022-09-15	08:41:10	0.210191
2022-09-15	08:41:10	0.517824
2022-09-15	08:41:11	0.4793
2022-09-15	08:41:11	2.30317
2022-09-15	08:41:11	9.16281
2022-09-15	08:41:11	20.6069
2022-09-15	08:41:12	16.0572
2022-09-15	08:41:12	10.4034
2022-09-15	08:41:12	15.2124
2022-09-15	08:41:12	16.9326
2022-09-15	08:41:13	11.7159
2022-09-15	08:41:13	14.7639
2022-09-15	08:41:13	5.71039
2022-09-15	08:41:13	3.85294
2022-09-15	08:41:14	0.972735
2022-09-15	08:41:14	-1.45286
2022-09-15	08:41:14	0.0628628
2022-09-15	08:41:15	-0.120903
2022-09-15	08:41:15	-0.0810048
2022-09-15	08:41:15	0.223931
2022-09-15	08:41:15	0.186832
2022-09-15	08:41:16	0.297417
2022-09-15	08:41:16	0.0826083
2022-09-15	08:41:16	0.124084
2022-09-15	08:41:16	0.272634
2022-09-15	08:41:17	0.548715
2022-09-15	08:41:17	1.00357
2022-09-15	08:41:17	1.37655
2022-09-15	08:41:17	1.83772
2022-09-15	08:41:18	1.77579
2022-09-15	08:41:18	1.40943
2022-09-15	08:41:18	0.98215
2022-09-15	08:41:19	0.869733
2022-09-15	08:41:19	0.642608
2022-09-15	08:41:19	0.619453
2022-09-15	08:41:19	0.753855
2022-09-15	08:41:20	0.846476
2022-09-15	08:41:20	0.697315
2022-09-15	08:41:20	0.590038
2022-09-15	08:41:20	0.622099
2022-09-15	08:41:21	0.453702
2022-09-15	08:41:21	0.558995
2022-09-15	08:41:21	0.493957
2022-09-15	08:41:21	0.423779
2022-09-15	08:41:22	0.232227
2022-09-15	08:41:22	0.358842
2022-09-15	08:41:22	0.537214
2022-09-15	08:41:23	0.168308
2022-09-15	08:41:23	0.366527
2022-09-15	08:41:23	0.227494
2022-09-15	08:41:23	0.612633
2022-09-15	08:41:24	0.427392
2022-09-15	08:41:24	0.617112
2022-09-15	08:41:24	0.728766
2022-09-15	08:41:24	0.49126
2022-09-15	08:41:25	0.81986
2022-09-15	08:41:25	0.702455
2022-09-15	08:41:25	0.53874
2022-09-15	08:41:25	0.645153
2022-09-15	08:41:26	0.396552
2022-09-15	08:41:26	0.611209
2022-09-15	08:41:26	0.449478
2022-09-15	08:41:26	0.492481
2022-09-15	08:41:27	0.555687
2022-09-15	08:41:27	0.528512
2022-09-15	08:41:27	0.654974
2022-09-15	08:41:28	0.2793
2022-09-15	08:41:28	0.499351
2022-09-15	08:41:28	0.53243
2022-09-15	08:41:28	1.24179
2022-09-15	08:41:29	0.754873
2022-09-15	08:41:29	0.709885
2022-09-15	08:41:29	0.399046
2022-09-15	08:41:29	0.498639
2022-09-15	08:41:30	0.404389
2022-09-15	08:41:30	0.707087
2022-09-15	08:41:30	1.46398
2022-09-15	08:41:30	3.74123
2022-09-15	08:41:31	3.73467
2022-09-15	08:41:31	2.83446
2022-09-15	08:41:31	1.58307
2022-09-15	08:41:32	1.02271
2022-09-15	08:41:32	0.863779
2022-09-15	08:41:32	0.861285
2022-09-15	08:41:32	0.898741
2022-09-15	08:41:33	0.862099
2022-09-15	08:41:33	0.674364
2022-09-15	08:41:33	0.776552
2022-09-15	08:41:33	0.721591
2022-09-15	08:41:34	0.918181
2022-09-15	08:41:34	0.940064
2022-09-15	08:41:34	1.10322
2022-09-15	08:41:34	1.51691
2022-09-15	08:41:35	1.66103
2022-09-15	08:41:35	1.84668
2022-09-15	08:41:35	2.10724
2022-09-15	08:41:36	2.52994
2022-09-15	08:41:36	3.125
2022-09-15	08:41:36	3.3739
2022-09-15	08:41:36	3.85762
2022-09-15	08:41:37	4.02362
2022-09-15	08:41:37	4.19752
2022-09-15	08:41:37	4.85228
2022-09-15	08:41:37	5.44118
2022-09-15	08:41:38	6.06103
2022-09-15	08:41:38	6.20683
2022-09-15	08:41:38	8.26327
2022-09-15	08:41:38	9.65512
2022-09-15	08:41:39	9.44378
2022-09-15	08:41:39	8.12428
2022-09-15	08:41:39	8.44001
2022-09-15	08:41:39	7.39955
2022-09-15	08:41:40	6.90774
2022-09-15	08:41:40	8.76291
2022-09-15	08:41:40	8.80667
2022-09-15	08:41:41	8.78082
2022-09-15	08:41:41	9.20724
2022-09-15	08:41:41	8.33986
2022-09-15	08:41:41	6.10235
2022-09-15	08:41:42	5.23121
2022-09-15	08:41:42	4.85752
2022-09-15	08:41:42	4.47284
2022-09-15	08:41:42	4.21457
2022-09-15	08:41:43	4.38434
2022-09-15	08:41:43	4.49172
2022-09-15	08:41:43	4.59594
2022-09-15	08:41:43	4.25116
2022-09-15	08:41:44	4.23065
2022-09-15	08:41:44	4.03228
2022-09-15	08:41:44	3.24154
2022-09-15	08:41:45	2.91248
2022-09-15	08:41:45	3.16785
2022-09-15	08:41:45	3.90108
2022-09-15	08:41:45	3.95905
2022-09-15	08:41:46	5.18377
2022-09-15	08:41:46	4.8196
2022-09-15	08:41:46	4.00617
2022-09-15	08:41:46	3.99268
2022-09-15	08:41:47	3.48276
2022-09-15	08:41:47	3.33645
2022-09-15	08:41:47	2.83192
2022-09-15	08:41:47	3.37416
2022-09-15	08:41:48	2.75747
2022-09-15	08:41:48	2.79706
2022-09-15	08:41:48	2.55574
2022-09-15	08:41:49	2.89477
2022-09-15	08:41:49	3.19009
2022-09-15	08:41:49	3.25304
2022-09-15	08:41:49	1.97533
2022-09-15	08:41:50	1.56658
2022-09-15	08:41:50	0.656145
2022-09-15	08:41:50	0.577112
2022-09-15	08:41:50	0.259962
2022-09-15	08:41:51	2.46179
2022-09-15	08:41:51	9.71044
2022-09-15	08:41:51	6.10596
2022-09-15	08:41:51	2.51625
2022-09-15	08:41:52	0.866628
2022-09-15	08:41:52	1.56281
2022-09-15	08:41:52	0.312277
2022-09-15	08:41:52	0.179351
2022-09-15	08:41:53	1.12205
2022-09-15	08:41:53	6.59243
2022-09-15	08:41:53	11.2435
2022-09-15	08:41:54	9.80846
2022-09-15	08:41:54	8.31909
2022-09-15	08:41:54	11.9014
2022-09-15	08:41:54	15.9897
2022-09-15	08:41:55	13.2274
2022-09-15	08:41:55	7.86123
2022-09-15	08:41:55	4.84347
2022-09-15	08:41:55	7.91563
2022-09-15	08:41:56	8.1193
2022-09-15	08:41:56	6.9312
2022-09-15	08:41:56	6.90347
2022-09-15	08:41:56	7.36332
2022-09-15	08:41:57	7.04545
2022-09-15	08:41:57	7.21304
2022-09-15	08:41:57	6.8307
2022-09-15	08:41:58	5.99044
2022-09-15	08:41:58	5.08123
2022-09-15	08:41:58	3.73217
2022-09-15	08:41:58	2.68856
2022-09-15	08:41:59	0.615535
2022-09-15	08:41:59	0.474211
2022-09-15	08:41:59	0.435534
2022-09-15	08:41:59	0.219351
2022-09-15	08:42:00	-0.0670099
2022-09-15	08:42:00	-0.16416
2022-09-15	08:42:00	0.184593
2022-09-15	08:42:00	0.171209
2022-09-15	08:42:01	0.684288
2022-09-15	08:42:01	3.51004
2022-09-15	08:42:01	9.09706
2022-09-15	08:42:02	10.1178
2022-09-15	08:42:02	8.64118
2022-09-15	08:42:02	5.33599
2022-09-15	08:42:02	2.85187
2022-09-15	08:42:03	2.53579
2022-09-15	08:42:03	1.22266
2022-09-15	08:42:03	1.05085
2022-09-15	08:42:03	0.824644
2022-09-15	08:42:04	1.2478
2022-09-15	08:42:04	1.59614
2022-09-15	08:42:04	1.4367
2022-09-15	08:42:04	1.55569
2022-09-15	08:42:05	1.93614
2022-09-15	08:42:05	1.50958
2022-09-15	08:42:05	1.55513
2022-09-15	08:42:05	1.6967
2022-09-15	08:42:06	1.86607
2022-09-15	08:42:06	1.79284
2022-09-15	08:42:06	1.86933
2022-09-15	08:42:07	2.66948
2022-09-15	08:42:07	2.69426
2022-09-15	08:42:07	2.73441
2022-09-15	08:42:07	1.19019
2022-09-15	08:42:08	0.696145
2022-09-15	08:42:08	0.597265
2022-09-15	08:42:08	0.485763
2022-09-15	08:42:08	0.496807
2022-09-15	08:42:09	0.479758
2022-09-15	08:42:09	0.48444
2022-09-15	08:42:09	0.580318
2022-09-15	08:42:09	0.58042
2022-09-15	08:42:10	1.85808
2022-09-15	08:42:10	12.5441
2022-09-15	08:42:10	11.1915
2022-09-15	08:42:11	9.59472
2022-09-15	08:42:11	6.25049
2022-09-15	08:42:11	11.5385
2022-09-15	08:42:11	10.2393
2022-09-15	08:42:12	10.4594
2022-09-15	08:42:12	8.9395
2022-09-15	08:42:12	5.10352
2022-09-15	08:42:12	2.33925
2022-09-15	08:42:13	1.53976
2022-09-15	08:42:13	0.679453
2022-09-15	08:42:13	0.531209
2022-09-15	08:42:13	0.479351
2022-09-15	08:42:14	0.461132
2022-09-15	08:42:14	0.476501
2022-09-15	08:42:14	0.536654
2022-09-15	08:42:15	2.11665
2022-09-15	08:42:15	9.38652
2022-09-15	08:42:15	8.8222
2022-09-15	08:42:15	1.32754
2022-09-15	08:42:16	0.787188
2022-09-15	08:42:16	1.2336
2022-09-15	08:42:16	3.21604
2022-09-15	08:42:16	6.59767
2022-09-15	08:42:17	7.77273
2022-09-15	08:42:17	10.4839
2022-09-15	08:42:17	10.0902
2022-09-15	08:42:17	7.32362
2022-09-15	08:42:18	10.1991
2022-09-15	08:42:18	10.5413
2022-09-15	08:42:18	13.7521
2022-09-15	08:42:19	13.2769
2022-09-15	08:42:19	9.49517
2022-09-15	08:42:19	15.8719
2022-09-15	08:42:19	9.51329
2022-09-15	08:42:20	19.1316
2022-09-15	08:42:20	13.8341
2022-09-15	08:42:20	12.7736
2022-09-15	08:42:20	17.3812
2022-09-15	08:42:21	13.4114
2022-09-15	08:42:21	12.0277
2022-09-15	08:42:21	9.01517
2022-09-15	08:42:21	13.5127
2022-09-15	08:42:22	12.8009
2022-09-15	08:42:22	13.8102
2022-09-15	08:42:22	8.86851
2022-09-15	08:42:22	16.2926
2022-09-15	08:42:23	9.53604
2022-09-15	08:42:23	13.3001
2022-09-15	08:42:23	10.727
2022-09-15	08:42:24	12.598
2022-09-15	08:42:24	14.7519
2022-09-15	08:42:24	14.6756
2022-09-15	08:42:24	11.7988
2022-09-15	08:42:25	10.2757
2022-09-15	08:42:25	5.80103
2022-09-15	08:42:25	5.2282
2022-09-15	08:42:25	7.50469
2022-09-15	08:42:26	9.27039
2022-09-15	08:42:26	8.49528
2022-09-15	08:42:26	4.99523
2022-09-15	08:42:26	2.77696
2022-09-15	08:42:27	3.51731
2022-09-15	08:42:27	4.80479
2022-09-15	08:42:27	8.24449
2022-09-15	08:42:28	7.74403
2022-09-15	08:42:28	6.84759
2022-09-15	08:42:28	6.09517
2022-09-15	08:42:28	6.82454
2022-09-15	08:42:29	9.53726
2022-09-15	08:42:29	9.86062
2022-09-15	08:42:29	8.31741
2022-09-15	08:42:29	7.29925
2022-09-15	08:42:30	5.548
2022-09-15	08:42:30	4.69472
2022-09-15	08:42:30	4.66815
2022-09-15	08:42:30	4.17981
2022-09-15	08:42:31	3.81635
2022-09-15	08:42:31	3.51243
2022-09-15	08:42:31	2.72871
2022-09-15	08:42:32	2.39828
2022-09-15	08:42:32	3.54179
2022-09-15	08:42:32	3.99523
2022-09-15	08:42:32	5.24154
2022-09-15	08:42:33	1.94586
2022-09-15	08:42:33	2.09691
2022-09-15	08:42:33	1.58709
2022-09-15	08:42:33	2.02821
2022-09-15	08:42:34	2.94128
2022-09-15	08:42:34	3.86729
2022-09-15	08:42:34	4.9797
2022-09-15	08:42:34	10.166
2022-09-15	08:42:35	12.4235
2022-09-15	08:42:35	13.8244
2022-09-15	08:42:35	14.9573
2022-09-15	08:42:35	14.7383
2022-09-15	08:42:36	13.4281
2022-09-15	08:42:36	12.0586
2022-09-15	08:42:36	9.70591
2022-09-15	08:42:37	5.83981
2022-09-15	08:42:37	2.48541
2022-09-15	08:42:37	2.40999
2022-09-15	08:42:37	4.16912
2022-09-15	08:42:38	5.91747
2022-09-15	08:42:38	3.87772
2022-09-15	08:42:38	3.9993
2022-09-15	08:42:38	3.9396
2022-09-15	08:42:39	9.46835
2022-09-15	08:42:39	8.94352
2022-09-15	08:42:39	14.7362
2022-09-15	08:42:39	11.7438
2022-09-15	08:42:40	18.9677
2022-09-15	08:42:40	18.8384
2022-09-15	08:42:40	16.1673
2022-09-15	08:42:41	23.1429
2022-09-15	08:42:41	21.3787
2022-09-15	08:42:41	27.25
2022-09-15	08:42:41	16.4167
2022-09-15	08:42:42	12.468
2022-09-15	08:42:42	5.34418
2022-09-15	08:42:42	3.64083
2022-09-15	08:42:43	7.67131
2022-09-15	08:42:43	7.71121
2022-09-15	08:42:43	6.71293
2022-09-15	08:42:43	10.734
2022-09-15	08:42:43	14.4119
2022-09-15	08:42:44	14.2607
2022-09-15	08:42:44	9.89645
2022-09-15	08:42:44	6.72077
2022-09-15	08:42:45	5.87446
2022-09-15	08:42:45	6.08479
2022-09-15	08:42:45	7.84917
2022-09-15	08:42:45	6.82887
2022-09-15	08:42:46	6.14841
2022-09-15	08:42:46	6.94449
2022-09-15	08:42:46	6.04082
2022-09-15	08:42:46	4.50286
2022-09-15	08:42:47	4.55029
2022-09-15	08:42:47	4.24225
2022-09-15	08:42:47	1.96994
2022-09-15	08:42:47	0.358384
2022-09-15	08:42:48	0.240674
2022-09-15	08:42:48	0.0647458
2022-09-15	08:42:48	-0.0615646
2022-09-15	08:42:48	-0.133524
2022-09-15	08:42:49	-0.191386
2022-09-15	08:42:49	-0.418409
2022-09-15	08:42:49	-0.316323
2022-09-15	08:42:50	0.159199
2022-09-15	08:42:50	0.299555
2022-09-15	08:42:50	0.257774
2022-09-15	08:42:50	0.58271
2022-09-15	08:42:51	1.95497
2022-09-15	08:42:51	1.6335
2022-09-15	08:42:51	1.66775
2022-09-15	08:42:51	0.244339
2022-09-15	08:42:52	0.557723
2022-09-15	08:42:52	0.315687
2022-09-15	08:42:52	0.772277
2022-09-15	08:42:52	1.35589
2022-09-15	08:42:53	3.73156
2022-09-15	08:42:53	5.46785
2022-09-15	08:42:53	1.90902
2022-09-15	08:42:54	2.29304
2022-09-15	08:42:54	2.73945
2022-09-15	08:42:54	4.28144
2022-09-15	08:42:54	5.87136
2022-09-15	08:42:55	6.73864
2022-09-15	08:42:55	8.69599
2022-09-15	08:42:55	9.0027
2022-09-15	08:42:55	13.1336
2022-09-15	08:42:56	6.28423
2022-09-15	08:42:56	3.17793
2022-09-15	08:42:56	0.53701
2022-09-15	08:42:56	0.550089
2022-09-15	08:42:57	0.324746
2022-09-15	08:42:57	0.494567
2022-09-15	08:42:57	0.225509
2022-09-15	08:42:58	0.504084
2022-09-15	08:42:58	0.792939
2022-09-15	08:42:58	2.97818
2022-09-15	08:42:58	2.29146
2022-09-15	08:42:59	1.76067
2022-09-15	08:42:59	1.45767
2022-09-15	08:42:59	0.958537
2022-09-15	08:42:59	1.8962
2022-09-15	08:43:00	0.407443
2022-09-15	08:43:00	0.575687
2022-09-15	08:43:00	0.688308
2022-09-15	08:43:00	0.709173
2022-09-15	08:43:01	0.420216
2022-09-15	08:43:01	0.324644
2022-09-15	08:43:01	2.83543
2022-09-15	08:43:01	12.9571
2022-09-15	08:43:02	17.151
2022-09-15	08:43:02	8.22011
2022-09-15	08:43:02	2.80128
2022-09-15	08:43:03	4.23126
2022-09-15	08:43:03	2.09726
2022-09-15	08:43:03	5.48276
2022-09-15	08:43:03	9.68428
2022-09-15	08:43:04	6.01024
2022-09-15	08:43:04	9.53131
2022-09-15	08:43:04	6.99833
2022-09-15	08:43:04	4.10098
2022-09-15	08:43:05	9.88036
2022-09-15	08:43:05	2.44963
2022-09-15	08:43:05	2.05177
2022-09-15	08:43:05	0.524695
2022-09-15	08:43:06	0.431361
2022-09-15	08:43:06	-0.423346
2022-09-15	08:43:06	-0.503193
2022-09-15	08:43:07	-0.708587
2022-09-15	08:43:07	-0.660852
2022-09-15	08:43:07	-0.897951
2022-09-15	08:43:07	-0.731997
2022-09-15	08:43:08	-0.833218
2022-09-15	08:43:08	-0.871183
2022-09-15	08:43:08	-0.760037
2022-09-15	08:43:08	-0.810877
2022-09-15	08:43:09	-0.736984
2022-09-15	08:43:09	-0.967264
2022-09-15	08:43:09	-0.724312
2022-09-15	08:43:09	-0.812353
2022-09-15	08:43:10	-0.563854
2022-09-15	08:43:10	-0.501361
2022-09-15	08:43:10	-0.136934
2022-09-15	08:43:11	0.206425
2022-09-15	08:43:11	0.312685
2022-09-15	08:43:11	1.07075
2022-09-15	08:43:11	0.547137
2022-09-15	08:43:12	0.652023
2022-09-15	08:43:12	1.04953
2022-09-15	08:43:12	0.934313
2022-09-15	08:43:12	0.491412
2022-09-15	08:43:13	0.241081
2022-09-15	08:43:13	0.381692
2022-09-15	08:43:13	0.291718
2022-09-15	08:43:13	0.435382
2022-09-15	08:43:14	0.118893
2022-09-15	08:43:14	0.498944
2022-09-15	08:43:14	0.486272
2022-09-15	08:43:14	0.453244
2022-09-15	08:43:15	1.13156
2022-09-15	08:43:15	1.13029
2022-09-15	08:43:15	1.11167
2022-09-15	08:43:16	0.752939
2022-09-15	08:43:16	0.623219
2022-09-15	08:43:16	0.529987
2022-09-15	08:43:16	0.340165
2022-09-15	08:43:17	0.742201
2022-09-15	08:43:17	0.526679
2022-09-15	08:43:17	0.507035
2022-09-15	08:43:17	0.504237
2022-09-15	08:43:18	0.490496
2022-09-15	08:43:18	0.502863
2022-09-15	08:43:18	0.52439
2022-09-15	08:43:18	0.604797
2022-09-15	08:43:19	0.640776
2022-09-15	08:43:19	0.574415
2022-09-15	08:43:19	0.576807
2022-09-15	08:43:20	0.536501
2022-09-15	08:43:20	0.52388
2022-09-15	08:43:20	0.54159
2022-09-15	08:43:20	0.551972
2022-09-15	08:43:21	0.590649
2022-09-15	08:43:21	0.721081
2022-09-15	08:43:21	0.648817
2022-09-15	08:43:21	0.594364
2022-09-15	08:43:22	0.53472
2022-09-15	08:43:22	0.523626
2022-09-15	08:43:22	0.50668
2022-09-15	08:43:22	0.519097
2022-09-15	08:43:23	0.555992
2022-09-15	08:43:23	0.599351
2022-09-15	08:43:23	0.614313
2022-09-15	08:43:24	0.629529
2022-09-15	08:43:24	0.617672
2022-09-15	08:43:24	0.610802
2022-09-15	08:43:24	0.633906
2022-09-15	08:43:25	0.650547
2022-09-15	08:43:25	0.620573
2022-09-15	08:43:25	0.58271
2022-09-15	08:43:25	0.533346
2022-09-15	08:43:26	0.510649
