# Supplementary material for: Comparing efficacy in reducing pulling and welfare impacts of four types of leash walking equipment
Source: PeerJ journal article supplement (doi:10.7717/peerj.18131), 2024-10-24
Supplement: Shelter_2_Tension_files.zip [file Klutz_prong_2022915113947 copy.xlsx]

## Sheet: Averaged Newtons
Date	Time	Averaged Newtons	Impulse	Total steps
2022-09-15	11:39:54	16.0835	16.0835	1			Impulse newtons	1648.69
2022-09-15	11:39:55	15.4048	31.4883	2			Total steps	29
2022-09-15	11:39:56	17.6575	49.1458	3			# > 5 sec	1
2022-09-15	11:39:57	13.6115	62.7574	4
2022-09-15	11:39:58	1.68618	64.4436	4
2022-09-15	11:39:59	1.81397	66.2575	4
2022-09-15	11:40:00	1.67362	67.9311	4
2022-09-15	11:40:01	0.421391	68.3525	4
2022-09-15	11:40:02	-2.31131	68.3525	4
2022-09-15	11:40:03	1.89456	70.2471	4
2022-09-15	11:40:04	-3.29042	70.2471	4
2022-09-15	11:40:05	-0.431519	70.2471	4
2022-09-15	11:40:06	80.523	150.77	5
2022-09-15	11:40:07	18.3235	169.094	6
2022-09-15	11:40:08	51.2084	220.302	7
2022-09-15	11:40:09	48.9871	269.289	8
2022-09-15	11:40:10	4.58594	273.875	8
2022-09-15	11:40:11	51.7861	325.661	9
2022-09-15	11:40:12	40.1242	365.785	10
2022-09-15	11:40:13	57.6691	423.454	11
2022-09-15	11:40:14	64.2021	487.657	12
2022-09-15	11:40:15	64.0836	551.74	13
2022-09-15	11:40:16	6.42873	558.169	13
2022-09-15	11:40:17	-3.56863	558.169	13
2022-09-15	11:40:18	-0.148385	558.169	13
2022-09-15	11:40:19	-1.67977	558.169	13
2022-09-15	11:40:20	11.4316	569.601	13
2022-09-15	11:40:21	16.2695	585.87	14
2022-09-15	11:40:22	-1.50752	585.87	14
2022-09-15	11:40:23	-0.0305025	585.87	14
2022-09-15	11:40:24	-1.43265	585.87	14
2022-09-15	11:40:25	-0.871584	585.87	14
2022-09-15	11:40:26	5.66833	591.538	14
2022-09-15	11:40:27	6.73846	598.277	14
2022-09-15	11:40:28	0.259649	598.536	14
2022-09-15	11:40:29	-1.15964	598.536	14
2022-09-15	11:40:30	1.38574	599.922	14
2022-09-15	11:40:31	-1.53738	599.922	14
2022-09-15	11:40:32	-2.17028	599.922	14
2022-09-15	11:40:33	-1.39371	599.922	14
2022-09-15	11:40:34	-2.51125	599.922	14
2022-09-15	11:40:35	-1.28898	599.922	14
2022-09-15	11:40:36	9.74885	609.671	14
2022-09-15	11:40:37	4.51741	614.188	14
2022-09-15	11:40:38	5.91967	620.108	14
2022-09-15	11:40:39	0.360139	620.468	14
2022-09-15	11:40:40	-0.50294	620.468	14
2022-09-15	11:40:41	0.123939	620.592	14
2022-09-15	11:40:42	9.65225	630.244	14
2022-09-15	11:40:43	1.78945	632.034	14
2022-09-15	11:40:44	3.79619	635.83	14
2022-09-15	11:40:45	6.76154	642.592	14
2022-09-15	11:40:46	2.25279	644.844	14
2022-09-15	11:40:47	7.57679	652.421	14
2022-09-15	11:40:48	2.44074	654.862	14
2022-09-15	11:40:49	8.3792	663.241	14
2022-09-15	11:40:50	6.12397	669.365	14
2022-09-15	11:40:51	3.82188	673.187	14
2022-09-15	11:40:52	7.58491	680.772	14
2022-09-15	11:40:53	9.25944	690.031	14
2022-09-15	11:40:54	12.6859	702.717	14
2022-09-15	11:40:55	2.53678	705.254	14
2022-09-15	11:40:56	14.8506	720.105	15
2022-09-15	11:40:57	5.39114	725.496	15
2022-09-15	11:40:58	2.67177	728.168	15
2022-09-15	11:40:59	4.97157	733.139	15
2022-09-15	11:41:00	-0.43848	733.139	15
2022-09-15	11:41:01	-3.45245	733.139	15
2022-09-15	11:41:02	-1.59639	733.139	15
2022-09-15	11:41:03	1.49394	734.633	15
2022-09-15	11:41:04	1.87311	736.506	15
2022-09-15	11:41:05	17.5342	754.04	16
2022-09-15	11:41:06	6.87784	760.918	16
2022-09-15	11:41:07	1.87526	762.793	16
2022-09-15	11:41:08	1.61895	764.412	16
2022-09-15	11:41:09	14.7768	779.189	17
2022-09-15	11:41:10	5.10224	784.291	17
2022-09-15	11:41:11	2.01499	786.306	17
2022-09-15	11:41:12	2.99026	789.297	17
2022-09-15	11:41:13	9.15633	798.453	17
2022-09-15	11:41:14	14.7845	813.238	18
2022-09-15	11:41:15	13.0532	826.291	19
2022-09-15	11:41:16	14.2899	840.581	20
2022-09-15	11:41:17	5.30744	845.888	20
2022-09-15	11:41:18	4.76797	850.656	20
2022-09-15	11:41:19	1.46994	852.126	20
2022-09-15	11:41:20	2.87984	855.006	20
2022-09-15	11:41:21	0.483077	855.489	20
2022-09-15	11:41:22	-1.51867	855.489	20
2022-09-15	11:41:23	-1.23503	855.489	20
2022-09-15	11:41:24	1.25897	856.748	20
2022-09-15	11:41:25	1.75364	858.502	20
2022-09-15	11:41:26	1.30864	859.81	20
2022-09-15	11:41:27	1.52891	861.339	20
2022-09-15	11:41:28	1.94312	863.282	20
2022-09-15	11:41:29	1.19173	864.474	20
2022-09-15	11:41:30	1.33527	865.809	20
2022-09-15	11:41:31	1.51822	867.327	20
2022-09-15	11:41:32	2.25772	869.585	20
2022-09-15	11:41:33	1.21409	870.799	20
2022-09-15	11:41:34	1.18911	871.988	20
2022-09-15	11:41:35	1.35551	873.344	20
2022-09-15	11:41:36	2.7014	876.045	20
2022-09-15	11:41:37	3.0713	879.117	20
2022-09-15	11:41:38	2.20197	881.319	20
2022-09-15	11:41:39	2.23282	883.551	20
2022-09-15	11:41:40	2.20225	885.754	20
2022-09-15	11:41:41	2.16909	887.923	20
2022-09-15	11:41:42	2.21103	890.134	20
2022-09-15	11:41:43	1.84	891.974	20
2022-09-15	11:41:44	1.70265	893.676	20
2022-09-15	11:41:45	1.52829	895.205	20
2022-09-15	11:41:46	1.60262	896.807	20
2022-09-15	11:41:47	2.03904	898.846	20
2022-09-15	11:41:48	2.24476	901.091	20
2022-09-15	11:41:49	1.80537	902.896	20
2022-09-15	11:41:50	2.17169	905.068	20
2022-09-15	11:41:51	6.83161	911.9	20
2022-09-15	11:41:52	4.37169	916.271	20
2022-09-15	11:41:53	6.27891	922.55	20
2022-09-15	11:41:54	4.35891	926.909	20
2022-09-15	11:41:55	1.84165	928.751	20
2022-09-15	11:41:56	3.19869	931.95	20
2022-09-15	11:41:57	5.22946	937.179	20
2022-09-15	11:41:58	5.97499	943.154	20
2022-09-15	11:41:59	7.99821	951.152	20
2022-09-15	11:42:00	-0.995015	951.152	20
2022-09-15	11:42:01	-1.76202	951.152	20
2022-09-15	11:42:02	-1.29066	951.152	20
2022-09-15	11:42:03	0.0663288	951.219	20
2022-09-15	11:42:04	9.12051	960.339	20
2022-09-15	11:42:05	20.879	981.218	21
2022-09-15	11:42:06	2.03129	983.249	21
2022-09-15	11:42:07	1.2236	984.473	21
2022-09-15	11:42:08	0.889358	985.362	21
2022-09-15	11:42:09	-0.144254	985.362	21
2022-09-15	11:42:10	-0.858946	985.362	21
2022-09-15	11:42:11	-1.33418	985.362	21
2022-09-15	11:42:12	-2.08482	985.362	21
2022-09-15	11:42:13	-1.8164	985.362	21
2022-09-15	11:42:14	-1.11112	985.362	21
2022-09-15	11:42:15	0.130618	985.493	21
2022-09-15	11:42:16	1.83174	987.325	21
2022-09-15	11:42:17	1.69099	989.016	21
2022-09-15	11:42:18	0.749045	989.765	21
2022-09-15	11:42:19	0.272496	990.037	21
2022-09-15	11:42:20	0.240407	990.278	21
2022-09-15	11:42:21	0.283815	990.561	21
2022-09-15	11:42:22	-0.0402369	990.561	21
2022-09-15	11:42:23	0.13124	990.693	21
2022-09-15	11:42:24	5.43574	996.128	21
2022-09-15	11:42:25	8.36068	1004.49	21
2022-09-15	11:42:26	5.3573	1009.85	21
2022-09-15	11:42:27	2.36287	1012.21	21
2022-09-15	11:42:28	1.08873	1013.3	21
2022-09-15	11:42:29	0.741085	1014.04	21
2022-09-15	11:42:30	2.88539	1016.92	21
2022-09-15	11:42:31	6.46211	1023.39	21
2022-09-15	11:42:32	5.08396	1028.47	21
2022-09-15	11:42:33	0.164403	1028.63	21
2022-09-15	11:42:34	6.13804	1034.77	21
2022-09-15	11:42:35	7.05561	1041.83	21
2022-09-15	11:42:36	8.99022	1050.82	21
2022-09-15	11:42:37	8.50217	1059.32	21
2022-09-15	11:42:38	4.93466	1064.26	21
2022-09-15	11:42:39	-0.37023	1064.26	21
2022-09-15	11:42:40	-0.732707	1064.26	21
2022-09-15	11:42:41	0.00407577	1064.26	21
2022-09-15	11:42:42	3.34387	1067.6	21
2022-09-15	11:42:43	-1.68114	1067.6	21
2022-09-15	11:42:44	-2.56756	1067.6	21
2022-09-15	11:42:45	-2.2357	1067.6	21
2022-09-15	11:42:46	-2.62344	1067.6	21
2022-09-15	11:42:47	-1.93151	1067.6	21
2022-09-15	11:42:48	-1.93678	1067.6	21
2022-09-15	11:42:49	-1.33836	1067.6	21
2022-09-15	11:42:50	-0.476228	1067.6	21
2022-09-15	11:42:51	0.741877	1068.35	21
2022-09-15	11:42:52	2.48432	1070.83	21
2022-09-15	11:42:53	1.05235	1071.88	21
2022-09-15	11:42:54	-0.550251	1071.88	21
2022-09-15	11:42:55	-0.94889	1071.88	21
2022-09-15	11:42:56	-2.81889	1071.88	21
2022-09-15	11:42:57	2.94577	1074.83	21
2022-09-15	11:42:58	11.2668	1086.09	21
2022-09-15	11:42:59	7.94858	1094.04	21
2022-09-15	11:43:00	9.54598	1103.59	21
2022-09-15	11:43:01	5.04657	1108.64	21
2022-09-15	11:43:02	5.4092	1114.04	21
2022-09-15	11:43:03	4.59868	1118.64	21
2022-09-15	11:43:04	3.90893	1122.55	21
2022-09-15	11:43:05	3.32127	1125.87	21
2022-09-15	11:43:06	5.64411	1131.52	21
2022-09-15	11:43:07	11.2832	1142.8	21
2022-09-15	11:43:08	13.2221	1156.02	22
2022-09-15	11:43:09	4.31793	1160.34	22
2022-09-15	11:43:10	4.26935	1164.61	22
2022-09-15	11:43:11	5.45674	1170.07	22
2022-09-15	11:43:12	4.89009	1174.96	22
2022-09-15	11:43:13	10.3308	1185.29	22
2022-09-15	11:43:14	7.82044	1193.11	22
2022-09-15	11:43:15	6.81146	1199.92	22
2022-09-15	11:43:16	5.55193	1205.47	22
2022-09-15	11:43:17	7.16341	1212.64	22
2022-09-15	11:43:18	6.39158	1219.03	22
2022-09-15	11:43:19	5.82289	1224.85	22
2022-09-15	11:43:20	1.86021	1226.71	22
2022-09-15	11:43:21	2.18335	1228.89	22
2022-09-15	11:43:22	3.26818	1232.16	22
2022-09-15	11:43:23	1.46666	1233.63	22
2022-09-15	11:43:24	2.26932	1235.9	22
2022-09-15	11:43:25	13.5055	1249.4	23
2022-09-15	11:43:26	7.3938	1256.8	23
2022-09-15	11:43:27	9.86166	1266.66	23
2022-09-15	11:43:28	5.93471	1272.59	23
2022-09-15	11:43:29	6.61401	1279.21	23
2022-09-15	11:43:30	4.86743	1284.07	23
2022-09-15	11:43:31	14.2445	1298.32	24
2022-09-15	11:43:32	5.72002	1304.04	24
2022-09-15	11:43:33	3.10667	1307.15	24
2022-09-15	11:43:34	11.1663	1318.31	24
2022-09-15	11:43:35	4.14633	1322.46	24
2022-09-15	11:43:36	1.51969	1323.98	24
2022-09-15	11:43:37	10.9183	1334.9	24
2022-09-15	11:43:38	3.91433	1338.81	24
2022-09-15	11:43:39	12.8213	1351.63	24
2022-09-15	11:43:40	30.0781	1381.71	25
2022-09-15	11:43:41	9.36187	1391.07	25
2022-09-15	11:43:42	-0.248272	1391.07	25
2022-09-15	11:43:43	-2.27571	1391.07	25
2022-09-15	11:43:44	-4.87547	1391.07	25
2022-09-15	11:43:45	-4.03762	1391.07	25
2022-09-15	11:43:46	3.79269	1394.86	25
2022-09-15	11:43:47	5.54213	1400.41	25
2022-09-15	11:43:48	-0.221333	1400.41	25
2022-09-15	11:43:49	1.10023	1401.51	25
2022-09-15	11:43:50	9.91747	1411.42	25
2022-09-15	11:43:51	1.89564	1413.32	25
2022-09-15	11:43:52	-1.86513	1413.32	25
2022-09-15	11:43:53	-3.53286	1413.32	25
2022-09-15	11:43:54	-3.59834	1413.32	25
2022-09-15	11:43:55	-4.56138	1413.32	25
2022-09-15	11:43:56	1.99971	1415.32	25
2022-09-15	11:43:57	14.6199	1429.94	26
2022-09-15	11:43:58	3.87456	1433.81	26
2022-09-15	11:43:59	8.6127	1442.43	26
2022-09-15	11:44:00	1.02569	1443.45	26
2022-09-15	11:44:01	1.15133	1444.6	26
2022-09-15	11:44:02	3.10399	1447.71	26
2022-09-15	11:44:03	11.3597	1459.07	26
2022-09-15	11:44:04	10.5442	1469.61	26
2022-09-15	11:44:05	2.11714	1471.73	26
2022-09-15	11:44:06	1.04423	1472.77	26
2022-09-15	11:44:07	1.95873	1474.73	26
2022-09-15	11:44:08	6.96194	1481.69	26
2022-09-15	11:44:09	8.69069	1490.38	26
2022-09-15	11:44:10	13.6059	1503.99	27
2022-09-15	11:44:11	5.75057	1509.74	27
2022-09-15	11:44:12	9.20597	1518.95	27
2022-09-15	11:44:13	6.37383	1525.32	27
2022-09-15	11:44:14	0.847063	1526.17	27
2022-09-15	11:44:15	0.190266	1526.36	27
2022-09-15	11:44:16	0.789187	1527.15	27
2022-09-15	11:44:17	0.981773	1528.13	27
2022-09-15	11:44:18	-0.185643	1528.13	27
2022-09-15	11:44:19	1.76734	1529.9	27
2022-09-15	11:44:20	5.65193	1535.55	27
2022-09-15	11:44:21	-0.406166	1535.55	27
2022-09-15	11:44:22	-2.44498	1535.55	27
2022-09-15	11:44:23	-3.41096	1535.55	27
2022-09-15	11:44:24	-2.08035	1535.55	27
2022-09-15	11:44:25	-1.04289	1535.55	27
2022-09-15	11:44:26	-0.542479	1535.55	27
2022-09-15	11:44:27	0.94646	1536.5	27
2022-09-15	11:44:28	3.8156	1540.31	27
2022-09-15	11:44:29	4.56286	1544.87	27
2022-09-15	11:44:30	4.72783	1549.6	27
2022-09-15	11:44:31	0.711543	1550.31	27
2022-09-15	11:44:32	-0.107356	1550.31	27
2022-09-15	11:44:33	-0.288792	1550.31	27
2022-09-15	11:44:34	-0.788395	1550.31	27
2022-09-15	11:44:35	1.72042	1552.03	27
2022-09-15	11:44:36	9.09833	1561.13	27
2022-09-15	11:44:37	0.756422	1561.89	27
2022-09-15	11:44:38	-0.0686838	1561.89	27
2022-09-15	11:44:39	-0.541139	1561.89	27
2022-09-15	11:44:40	-0.550308	1561.89	27
2022-09-15	11:44:41	-0.398583	1561.89	27
2022-09-15	11:44:42	2.66181	1564.55	27
2022-09-15	11:44:43	9.2917	1573.84	27
2022-09-15	11:44:44	-1.94464	1573.84	27
2022-09-15	11:44:45	-2.24764	1573.84	27
2022-09-15	11:44:46	8.51366	1582.36	27
2022-09-15	11:44:47	3.71059	1586.07	27
2022-09-15	11:44:48	2.2095	1588.28	27
2022-09-15	11:44:49	4.50151	1592.78	27
2022-09-15	11:44:50	4.78295	1597.56	27
2022-09-15	11:44:51	11.7414	1609.3	27
2022-09-15	11:44:52	24.0034	1633.3	28
2022-09-15	11:44:53	14.607	1647.91	29
2022-09-15	11:44:54	0.780477	1648.69	29

## Sheet: Klutz_prong_2022915113947 (4)
Date	Time	Lbs	Newtons	Averaged Newtons	Total force x time		total steps > 13.345	**GoPro Fitting: 1129
									*Big surge in pulling due to dog pulling at dog reacting to her in nearby yard
2022-09-15	11:39:54	3.66963	16.3232	16.0835	16.3232	1	1
2022-09-15	11:39:54	3.60444	16.0333	16.0835	16.0333	1	2
2022-09-15	11:39:54	3.59324	15.9835	16.0835	32.3067	1	3
2022-09-15	11:39:54	3.59563	15.9941	16.0835	32.0274	1	4
2022-09-15	11:39:55	3.66922	16.3214	15.4048	48.6281	1	5
2022-09-15	11:39:55	3.38083	15.0386	15.4048	47.066	1	6
2022-09-15	11:39:55	3.3394	14.8543	15.4048	63.4824	1	7
2022-09-15	11:39:56	3.69436	16.4333	17.6575	63.4992	1	8
2022-09-15	11:39:56	4.07197	18.1129	17.6575	81.5954	1	9
2022-09-15	11:39:56	4.03976	17.9697	17.6575	81.4689	1	10
2022-09-15	11:39:56	4.07228	18.1143	17.6575	99.7097	1	11
2022-09-15	11:39:57	3.86688	17.2007	13.6115	98.6695	1	12
2022-09-15	11:39:57	3.84927	17.1223	13.6115	116.832	1	13
2022-09-15	11:39:57	3.85848	17.1633	13.6115	115.833	1	14
2022-09-15	11:39:57	0.665407	2.95986	13.6115	119.792	FALSE	14
2022-09-15	11:39:58	0.33813	1.50407	1.68618	117.337	FALSE	14
2022-09-15	11:39:58	0.382608	1.70192	1.68618	121.494	FALSE	14
2022-09-15	11:39:58	0.427901	1.90339	1.68618	119.24	FALSE	14
2022-09-15	11:39:58	0.367646	1.63536	1.68618	123.129	FALSE	14
2022-09-15	11:39:59	0.40958	1.82189	1.81397	121.062	FALSE	14
2022-09-15	11:39:59	0.400216	1.78024	1.81397	124.909	FALSE	14
2022-09-15	11:39:59	0.413601	1.83978	1.81397	122.902	FALSE	14
2022-09-15	11:40:00	0.409224	1.82031	1.67362	126.73	FALSE	14
2022-09-15	11:40:00	0.370802	1.6494	1.67362	124.551	FALSE	14
2022-09-15	11:40:00	0.375382	1.66977	1.67362	128.399	FALSE	14
2022-09-15	11:40:00	0.34958	1.555	1.67362	126.106	FALSE	14
2022-09-15	11:40:01	0.216959	0.965077	0.421391	129.365	FALSE	14
2022-09-15	11:40:01	0.418486	1.86151	0.421391	127.968	FALSE	14
2022-09-15	11:40:01	-0.0248725	-0.110638	0.421391	129.365	FALSE	14
2022-09-15	11:40:01	-0.231641	-1.03039	0.421391	127.968	FALSE	14
2022-09-15	11:40:02	-0.386603	-1.71969	-2.31131	129.365	FALSE	14
2022-09-15	11:40:02	-0.492302	-2.18986	-2.31131	127.968	FALSE	14
2022-09-15	11:40:02	-0.597188	-2.65641	-2.31131	129.365	FALSE	14
2022-09-15	11:40:02	-0.602328	-2.67928	-2.31131	127.968	FALSE	14
2022-09-15	11:40:03	0.982455	4.37016	1.89456	133.735	FALSE	14
2022-09-15	11:40:03	0.400573	1.78183	1.89456	129.75	FALSE	14
2022-09-15	11:40:03	-0.10528	-0.468306	1.89456	133.735	FALSE	14
2022-09-15	11:40:04	-0.595763	-2.65007	-3.29042	129.75	FALSE	14
2022-09-15	11:40:04	-0.756221	-3.36382	-3.29042	133.735	FALSE	14
2022-09-15	11:40:04	-0.835712	-3.71741	-3.29042	129.75	FALSE	14
2022-09-15	11:40:04	-0.771182	-3.43037	-3.29042	133.735	FALSE	14
2022-09-15	11:40:05	-0.695508	-3.09376	-0.431519	129.75	FALSE	14
2022-09-15	11:40:05	-0.0896053	-0.398582	-0.431519	133.735	FALSE	14
2022-09-15	11:40:05	0.192074	0.854384	-0.431519	130.604	FALSE	14
2022-09-15	11:40:05	0.205	0.911881	-0.431519	134.647	FALSE	14
2022-09-15	11:40:06	6.00739	26.7221	80.523	157.326	1	15
2022-09-15	11:40:06	42.212	187.767	80.523	322.414	1	16
2022-09-15	11:40:06	21.6947	96.5024	80.523	253.829	1	17
2022-09-15	11:40:06	2.49538	11.0999	80.523	333.514	FALSE	17
2022-09-15	11:40:07	2.05482	9.14025	18.3235	262.969	FALSE	17
2022-09-15	11:40:07	2.3253	10.3434	18.3235	343.857	FALSE	17
2022-09-15	11:40:07	7.97782	35.4869	18.3235	298.456	1	18
2022-09-15	11:40:08	13.8989	61.8251	51.2084	405.682	1	19
2022-09-15	11:40:08	7.66759	34.107	51.2084	332.563	1	20
2022-09-15	11:40:08	11.3256	50.3785	51.2084	456.061	1	21
2022-09-15	11:40:08	13.1566	58.5232	51.2084	391.086	1	22
2022-09-15	11:40:09	14.5296	64.6306	48.9871	520.692	1	23
2022-09-15	11:40:09	14.4461	64.2591	48.9871	455.345	1	24
2022-09-15	11:40:09	12.7488	56.7092	48.9871	577.401	1	25
2022-09-15	11:40:09	2.32668	10.3495	48.9871	465.695	FALSE	25
2022-09-15	11:40:10	1.60469	7.13798	4.58594	584.539	FALSE	25
2022-09-15	11:40:10	1.14958	5.11356	4.58594	470.808	FALSE	25
2022-09-15	11:40:10	0.224491	0.998581	4.58594	585.537	FALSE	25
2022-09-15	11:40:10	1.1451	5.09363	4.58594	475.902	FALSE	25
2022-09-15	11:40:11	11.1654	49.6659	51.7861	635.203	1	26
2022-09-15	11:40:11	13.0505	58.0512	51.7861	533.953	1	27
2022-09-15	11:40:11	10.7102	47.6411	51.7861	682.844	1	28
2022-09-15	11:40:12	10.8943	48.46	40.1242	582.413	1	29
2022-09-15	11:40:12	11.5644	51.4408	40.1242	734.285	1	30
2022-09-15	11:40:12	6.85965	30.5131	40.1242	612.926	1	31
2022-09-15	11:40:12	6.76291	30.0828	40.1242	764.368	1	32
2022-09-15	11:40:13	18.739	83.3548	57.6691	696.281	1	33
2022-09-15	11:40:13	17.1784	76.413	57.6691	840.781	1	34
2022-09-15	11:40:13	9.27309	41.2486	57.6691	737.529	1	35
2022-09-15	11:40:13	6.6679	29.6602	57.6691	870.441	1	36
2022-09-15	11:40:14	7.78174	34.6147	64.2021	772.144	1	37
2022-09-15	11:40:14	14.2318	63.3059	64.2021	933.747	1	38
2022-09-15	11:40:14	16.7626	74.5634	64.2021	846.708	1	39
2022-09-15	11:40:14	18.957	84.3245	64.2021	1018.07	1	40
2022-09-15	11:40:15	11.1205	49.4662	64.0836	896.174	1	41
2022-09-15	11:40:15	15.6445	69.5899	64.0836	1087.66	1	42
2022-09-15	11:40:15	16.4549	73.1947	64.0836	969.369	1	43
2022-09-15	11:40:16	5.61874	24.9933	6.42873	1112.65	1	44
2022-09-15	11:40:16	0.502405	2.2348	6.42873	971.603	FALSE	44
2022-09-15	11:40:16	-0.127315	-0.566323	6.42873	1112.65	FALSE	44
2022-09-15	11:40:16	-0.212862	-0.946853	6.42873	971.603	FALSE	44
2022-09-15	11:40:17	-0.386094	-1.71742	-3.56863	1112.65	FALSE	44
2022-09-15	11:40:17	-0.826501	-3.67644	-3.56863	971.603	FALSE	44
2022-09-15	11:40:17	-0.980699	-4.36235	-3.56863	1112.65	FALSE	44
2022-09-15	11:40:17	-1.01576	-4.5183	-3.56863	971.603	FALSE	44
2022-09-15	11:40:18	-0.760088	-3.38102	-0.148385	1112.65	FALSE	44
2022-09-15	11:40:18	0.295942	1.31641	-0.148385	972.92	FALSE	44
2022-09-15	11:40:18	0.275687	1.22631	-0.148385	1113.88	FALSE	44
2022-09-15	11:40:18	0.0550257	0.244765	-0.148385	973.164	FALSE	44
2022-09-15	11:40:19	-0.106654	-0.474418	-1.67977	1113.88	FALSE	44
2022-09-15	11:40:19	-0.258206	-1.14855	-1.67977	973.164	FALSE	44
2022-09-15	11:40:19	-0.768027	-3.41634	-1.67977	1113.88	FALSE	44
2022-09-15	11:40:20	-0.689605	-3.0675	11.4316	973.164	FALSE	44
2022-09-15	11:40:20	0.29126	1.29558	11.4316	1115.18	FALSE	44
2022-09-15	11:40:20	2.0933	9.31142	11.4316	982.476	FALSE	44
2022-09-15	11:40:20	8.58479	38.1869	11.4316	1153.36	1	45
2022-09-15	11:40:21	8.49105	37.7699	16.2695	1020.25	1	46
2022-09-15	11:40:21	4.43889	19.7451	16.2695	1173.11	1	47
2022-09-15	11:40:21	1.46464	6.51501	16.2695	1026.76	FALSE	47
2022-09-15	11:40:21	0.235636	1.04816	16.2695	1174.16	FALSE	47
2022-09-15	11:40:22	-0.0853305	-0.379567	-1.50752	1026.76	FALSE	47
2022-09-15	11:40:22	-0.273829	-1.21805	-1.50752	1174.16	FALSE	47
2022-09-15	11:40:22	-0.523345	-2.32794	-1.50752	1026.76	FALSE	47
2022-09-15	11:40:22	-0.473117	-2.10452	-1.50752	1174.16	FALSE	47
2022-09-15	11:40:23	0.0724302	0.322184	-0.0305025	1027.08	FALSE	47
2022-09-15	11:40:23	0.104186	0.46344	-0.0305025	1174.62	FALSE	47
2022-09-15	11:40:23	-0.197188	-0.877132	-0.0305025	1027.08	FALSE	47
2022-09-15	11:40:24	-0.346043	-1.53927	-1.43265	1174.62	FALSE	47
2022-09-15	11:40:24	-0.366246	-1.62914	-1.43265	1027.08	FALSE	47
2022-09-15	11:40:24	-0.227519	-1.01205	-1.43265	1174.62	FALSE	47
2022-09-15	11:40:24	-0.348486	-1.55014	-1.43265	1027.08	FALSE	47
2022-09-15	11:40:25	-0.445788	-1.98295	-0.871584	1174.62	FALSE	47
2022-09-15	11:40:25	-0.0546944	-0.243292	-0.871584	1027.08	FALSE	47
2022-09-15	11:40:25	0.124797	0.555122	-0.871584	1175.18	FALSE	47
2022-09-15	11:40:25	-0.408078	-1.81521	-0.871584	1027.08	FALSE	47
2022-09-15	11:40:26	0.0738552	0.328523	5.66833	1175.5	FALSE	47
2022-09-15	11:40:26	0.880776	3.91787	5.66833	1031	FALSE	47
2022-09-15	11:40:26	1.23207	5.48049	5.66833	1180.98	FALSE	47
2022-09-15	11:40:26	2.91049	12.9464	5.66833	1043.95	FALSE	47
2022-09-15	11:40:27	2.49202	11.085	6.73846	1192.07	FALSE	47
2022-09-15	11:40:27	1.08765	4.83808	6.73846	1048.79	FALSE	47
2022-09-15	11:40:27	0.964949	4.29229	6.73846	1196.36	FALSE	47
2022-09-15	11:40:28	0.36556	1.62608	0.259649	1050.41	FALSE	47
2022-09-15	11:40:28	-0.0217173	-0.0966029	0.259649	1196.36	FALSE	47
2022-09-15	11:40:28	-0.119733	-0.532596	0.259649	1050.41	FALSE	47
2022-09-15	11:40:28	0.00937683	0.04171	0.259649	1196.4	FALSE	47
2022-09-15	11:40:29	-0.210521	-0.93644	-1.15964	1050.41	FALSE	47
2022-09-15	11:40:29	-0.213473	-0.949571	-1.15964	1196.4	FALSE	47
2022-09-15	11:40:29	-0.223855	-0.995752	-1.15964	1050.41	FALSE	47
2022-09-15	11:40:29	-0.394949	-1.75681	-1.15964	1196.4	FALSE	47
2022-09-15	11:40:30	-0.163956	-0.729309	1.38574	1050.41	FALSE	47
2022-09-15	11:40:30	0.214822	0.955571	1.38574	1197.36	FALSE	47
2022-09-15	11:40:30	1.27218	5.65891	1.38574	1056.07	FALSE	47
2022-09-15	11:40:30	-0.0769335	-0.342216	1.38574	1197.36	FALSE	47
2022-09-15	11:40:31	-0.0890455	-0.396092	-1.53738	1056.07	FALSE	47
2022-09-15	11:40:31	-0.431692	-1.92025	-1.53738	1197.36	FALSE	47
2022-09-15	11:40:31	-0.516119	-2.2958	-1.53738	1056.07	FALSE	47
2022-09-15	11:40:32	-0.571793	-2.54345	-2.17028	1197.36	FALSE	47
2022-09-15	11:40:32	-0.77561	-3.45007	-2.17028	1056.07	FALSE	47
2022-09-15	11:40:32	-0.329351	-1.46502	-2.17028	1197.36	FALSE	47
2022-09-15	11:40:32	-0.274847	-1.22257	-2.17028	1056.07	FALSE	47
2022-09-15	11:40:33	-0.276526	-1.23004	-1.39371	1197.36	FALSE	47
2022-09-15	11:40:33	-0.244618	-1.08811	-1.39371	1056.07	FALSE	47
2022-09-15	11:40:33	-0.298766	-1.32897	-1.39371	1197.36	FALSE	47
2022-09-15	11:40:33	-0.433371	-1.92772	-1.39371	1056.07	FALSE	47
2022-09-15	11:40:34	-0.612251	-2.72341	-2.51125	1197.36	FALSE	47
2022-09-15	11:40:34	-0.734898	-3.26897	-2.51125	1056.07	FALSE	47
2022-09-15	11:40:34	-0.426552	-1.89739	-2.51125	1197.36	FALSE	47
2022-09-15	11:40:34	-0.484516	-2.15522	-2.51125	1056.07	FALSE	47
2022-09-15	11:40:35	-0.520597	-2.31572	-1.28898	1197.36	FALSE	47
2022-09-15	11:40:35	-0.290419	-1.29184	-1.28898	1056.07	FALSE	47
2022-09-15	11:40:35	-0.0583076	-0.259364	-1.28898	1197.36	FALSE	47
2022-09-15	11:40:36	2.00062	8.89916	9.74885	1064.97	FALSE	47
2022-09-15	11:40:36	1.85141	8.23544	9.74885	1205.59	FALSE	47
2022-09-15	11:40:36	2.22276	9.88728	9.74885	1074.86	FALSE	47
2022-09-15	11:40:36	2.69177	11.9735	9.74885	1217.57	FALSE	47
2022-09-15	11:40:37	1.05518	4.69365	4.51741	1079.55	FALSE	47
2022-09-15	11:40:37	1.16459	5.18033	4.51741	1222.75	FALSE	47
2022-09-15	11:40:37	0.915789	4.07361	4.51741	1083.62	FALSE	47
2022-09-15	11:40:37	0.926679	4.12205	4.51741	1226.87	FALSE	47
2022-09-15	11:40:38	0.705865	3.13983	5.91967	1086.76	FALSE	47
2022-09-15	11:40:38	2.11711	9.41733	5.91967	1236.29	FALSE	47
2022-09-15	11:40:38	1.01915	4.53338	5.91967	1091.3	FALSE	47
2022-09-15	11:40:38	1.48108	6.58814	5.91967	1242.88	FALSE	47
2022-09-15	11:40:39	0.00479668	0.0213366	0.360139	1091.32	FALSE	47
2022-09-15	11:40:39	0.117621	0.523202	0.360139	1243.4	FALSE	47
2022-09-15	11:40:39	0.120471	0.535879	0.360139	1091.85	FALSE	47
2022-09-15	11:40:40	0.0765015	0.340294	-0.50294	1243.74	FALSE	47
2022-09-15	11:40:40	-0.223346	-0.993488	-0.50294	1091.85	FALSE	47
2022-09-15	11:40:40	-0.179122	-0.79677	-0.50294	1243.74	FALSE	47
2022-09-15	11:40:40	-0.126297	-0.561794	-0.50294	1091.85	FALSE	47
2022-09-15	11:40:41	-0.0473662	-0.210694	0.123939	1243.74	FALSE	47
2022-09-15	11:40:41	-0.0941854	-0.418955	0.123939	1091.85	FALSE	47
2022-09-15	11:40:41	0.0535498	0.2382	0.123939	1243.98	FALSE	47
2022-09-15	11:40:41	0.199453	0.887207	0.123939	1092.74	FALSE	47
2022-09-15	11:40:42	2.09452	9.31684	9.65225	1253.29	FALSE	47
2022-09-15	11:40:42	4.05166	18.0226	9.65225	1110.76	1	48
2022-09-15	11:40:42	2.16887	9.64757	9.65225	1262.94	FALSE	48
2022-09-15	11:40:42	0.364644	1.62201	9.65225	1112.39	FALSE	48
2022-09-15	11:40:43	0.0471885	0.209904	1.78945	1263.15	FALSE	48
2022-09-15	11:40:43	0.966069	4.29727	1.78945	1116.68	FALSE	48
2022-09-15	11:40:43	0.193601	0.861176	1.78945	1264.01	FALSE	48
2022-09-15	11:40:44	0.78846	3.50723	3.79619	1120.19	FALSE	48
2022-09-15	11:40:44	0.954262	4.24475	3.79619	1268.26	FALSE	48
2022-09-15	11:40:44	1.09813	4.8847	3.79619	1125.08	FALSE	48
2022-09-15	11:40:44	0.572837	2.54809	3.79619	1270.81	FALSE	48
2022-09-15	11:40:45	1.29782	5.77296	6.76154	1130.85	FALSE	48
2022-09-15	11:40:45	1.56408	6.95734	6.76154	1277.76	FALSE	48
2022-09-15	11:40:45	1.55696	6.92567	6.76154	1137.77	FALSE	48
2022-09-15	11:40:45	1.66139	7.39019	6.76154	1285.15	FALSE	48
2022-09-15	11:40:46	0.549478	2.44419	2.25279	1140.22	FALSE	48
2022-09-15	11:40:46	0.548817	2.44125	2.25279	1287.59	FALSE	48
2022-09-15	11:40:46	0.419148	1.86445	2.25279	1142.08	FALSE	48
2022-09-15	11:40:46	0.508359	2.26128	2.25279	1289.86	FALSE	48
2022-09-15	11:40:47	0.728562	3.24079	7.57679	1145.32	FALSE	48
2022-09-15	11:40:47	2.83538	12.6123	7.57679	1302.47	FALSE	48
2022-09-15	11:40:47	1.54607	6.87723	7.57679	1152.2	FALSE	48
2022-09-15	11:40:48	0.670293	2.9816	2.44074	1305.45	FALSE	48
2022-09-15	11:40:48	0.560623	2.49376	2.44074	1154.69	FALSE	48
2022-09-15	11:40:48	0.227239	1.0108	2.44074	1306.46	FALSE	48
2022-09-15	11:40:48	0.736654	3.27678	2.44074	1157.97	FALSE	48
2022-09-15	11:40:49	1.00536	4.47204	8.3792	1310.93	FALSE	48
2022-09-15	11:40:49	2.68846	11.9588	8.3792	1169.93	FALSE	48
2022-09-15	11:40:49	2.47273	10.9992	8.3792	1321.93	FALSE	48
2022-09-15	11:40:49	1.36836	6.08674	8.3792	1176.02	FALSE	48
2022-09-15	11:40:50	2.30617	10.2583	6.12397	1332.19	FALSE	48
2022-09-15	11:40:50	2.20184	9.79422	6.12397	1185.81	FALSE	48
2022-09-15	11:40:50	0.624135	2.77628	6.12397	1334.97	FALSE	48
2022-09-15	11:40:50	0.374771	1.66706	6.12397	1187.48	FALSE	48
2022-09-15	11:40:51	0.740369	3.29331	3.82188	1338.26	FALSE	48
2022-09-15	11:40:51	0.581234	2.58545	3.82188	1190.06	FALSE	48
2022-09-15	11:40:51	1.25599	5.58689	3.82188	1343.85	FALSE	48
2022-09-15	11:40:52	1.17385	5.22152	7.58491	1195.29	FALSE	48
2022-09-15	11:40:52	1.91543	8.52022	7.58491	1352.37	FALSE	48
2022-09-15	11:40:52	1.83233	8.15057	7.58491	1203.44	FALSE	48
2022-09-15	11:40:52	1.89905	8.44735	7.58491	1360.81	FALSE	48
2022-09-15	11:40:53	1.22744	5.4599	9.25944	1208.9	FALSE	48
2022-09-15	11:40:53	1.4735	6.55442	9.25944	1367.37	FALSE	48
2022-09-15	11:40:53	2.42688	10.7952	9.25944	1219.69	FALSE	48
2022-09-15	11:40:53	3.19864	14.2282	9.25944	1381.6	1	49
2022-09-15	11:40:54	4.01808	17.8732	12.6859	1237.56	1	50
2022-09-15	11:40:54	4.5936	20.4333	12.6859	1402.03	1	51
2022-09-15	11:40:54	2.38765	10.6207	12.6859	1248.18	FALSE	51
2022-09-15	11:40:54	0.408308	1.81624	12.6859	1403.85	FALSE	51
2022-09-15	11:40:55	0.861539	3.8323	2.53678	1252.02	FALSE	51
2022-09-15	11:40:55	0.109021	0.484947	2.53678	1404.33	FALSE	51
2022-09-15	11:40:55	0.740318	3.29308	2.53678	1255.31	FALSE	51
2022-09-15	11:40:56	1.33574	5.94164	14.8506	1410.27	FALSE	51
2022-09-15	11:40:56	3.4451	15.3245	14.8506	1270.63	1	52
2022-09-15	11:40:56	3.81736	16.9804	14.8506	1427.25	1	53
2022-09-15	11:40:56	4.75604	21.1558	14.8506	1291.79	1	54
2022-09-15	11:40:57	2.0338	9.04675	5.39114	1436.3	FALSE	54
2022-09-15	11:40:57	1.61594	7.18802	5.39114	1298.98	FALSE	54
2022-09-15	11:40:57	0.470903	2.09467	5.39114	1438.39	FALSE	54
2022-09-15	11:40:57	0.72729	3.23513	5.39114	1302.21	FALSE	54
2022-09-15	11:40:58	0.545305	2.42563	2.67177	1440.82	FALSE	54
2022-09-15	11:40:58	0.204237	0.908487	2.67177	1303.12	FALSE	54
2022-09-15	11:40:58	1.05238	4.6812	2.67177	1445.5	FALSE	54
2022-09-15	11:40:59	3.33874	14.8514	4.97157	1317.97	1	55
2022-09-15	11:40:59	0.999758	4.44712	4.97157	1449.95	FALSE	55
2022-09-15	11:40:59	-0.022786	-0.101357	4.97157	1317.97	FALSE	55
2022-09-15	11:40:59	0.154924	0.689133	4.97157	1450.64	FALSE	55
2022-09-15	11:41:00	0.12271	0.545839	-0.43848	1318.52	FALSE	55
2022-09-15	11:41:00	-0.118969	-0.529198	-0.43848	1450.64	FALSE	55
2022-09-15	11:41:00	-0.101157	-0.449967	-0.43848	1318.52	FALSE	55
2022-09-15	11:41:00	-0.296883	-1.32059	-0.43848	1450.64	FALSE	55
2022-09-15	11:41:01	-0.614542	-2.73361	-3.45245	1318.52	FALSE	55
2022-09-15	11:41:01	-0.789351	-3.51119	-3.45245	1450.64	FALSE	55
2022-09-15	11:41:01	-0.890673	-3.96189	-3.45245	1318.52	FALSE	55
2022-09-15	11:41:01	-0.810012	-3.6031	-3.45245	1450.64	FALSE	55
2022-09-15	11:41:02	-0.721462	-3.20921	-1.59639	1318.52	FALSE	55
2022-09-15	11:41:02	-0.353524	-1.57255	-1.59639	1450.64	FALSE	55
2022-09-15	11:41:02	-0.0016664	-0.00741248	-1.59639	1318.52	FALSE	55
2022-09-15	11:41:03	0.200725	0.892865	1.49394	1451.53	FALSE	55
2022-09-15	11:41:03	0.387036	1.72161	1.49394	1320.24	FALSE	55
2022-09-15	11:41:03	0.444847	1.97877	1.49394	1453.51	FALSE	55
2022-09-15	11:41:03	0.310802	1.38251	1.49394	1321.62	FALSE	55
2022-09-15	11:41:04	-0.01444	-0.064232	1.87311	1453.51	FALSE	55
2022-09-15	11:41:04	0.161082	0.716525	1.87311	1322.34	FALSE	55
2022-09-15	11:41:04	0.319148	1.41963	1.87311	1454.93	FALSE	55
2022-09-15	11:41:04	1.21859	5.42053	1.87311	1327.76	FALSE	55
2022-09-15	11:41:05	3.27599	14.5723	17.5342	1469.5	1	56
2022-09-15	11:41:05	3.49904	15.5644	17.5342	1343.32	1	57
2022-09-15	11:41:05	5.04276	22.4312	17.5342	1491.93	1	58
2022-09-15	11:41:05	3.94968	17.569	17.5342	1360.89	1	59
2022-09-15	11:41:06	2.4277	10.7989	6.87784	1502.73	FALSE	59
2022-09-15	11:41:06	1.83335	8.15511	6.87784	1369.05	FALSE	59
2022-09-15	11:41:06	0.37757	1.67951	6.87784	1504.41	FALSE	59
2022-09-15	11:41:07	0.700929	3.11787	1.87526	1372.17	FALSE	59
2022-09-15	11:41:07	0.321183	1.42869	1.87526	1505.84	FALSE	59
2022-09-15	11:41:07	0.379555	1.68834	1.87526	1373.86	FALSE	59
2022-09-15	11:41:07	0.284644	1.26615	1.87526	1507.11	FALSE	59
2022-09-15	11:41:08	0.285611	1.27045	1.61895	1375.13	FALSE	59
2022-09-15	11:41:08	0.393448	1.75014	1.61895	1508.86	FALSE	59
2022-09-15	11:41:08	0.151412	0.673511	1.61895	1375.8	FALSE	59
2022-09-15	11:41:08	0.625356	2.78171	1.61895	1511.64	FALSE	59
2022-09-15	11:41:09	0.834924	3.71391	14.7768	1379.51	FALSE	59
2022-09-15	11:41:09	4.17304	18.5625	14.7768	1530.2	1	60
2022-09-15	11:41:09	3.73024	16.5929	14.7768	1396.11	1	61
2022-09-15	11:41:09	4.54968	20.2379	14.7768	1550.44	1	62
2022-09-15	11:41:10	1.81966	8.09421	5.10224	1404.2	FALSE	62
2022-09-15	11:41:10	1.15156	5.12237	5.10224	1555.56	FALSE	62
2022-09-15	11:41:10	0.469886	2.09015	5.10224	1406.29	FALSE	62
2022-09-15	11:41:11	0.449682	2.00028	2.01499	1557.56	FALSE	62
2022-09-15	11:41:11	0.488461	2.17277	2.01499	1408.46	FALSE	62
2022-09-15	11:41:11	0.366883	1.63197	2.01499	1559.19	FALSE	62
2022-09-15	11:41:11	0.506934	2.25494	2.01499	1410.72	FALSE	62
2022-09-15	11:41:12	0.374771	1.66706	2.99026	1560.86	FALSE	62
2022-09-15	11:41:12	0.537672	2.39167	2.99026	1413.11	FALSE	62
2022-09-15	11:41:12	0.589478	2.62212	2.99026	1563.48	FALSE	62
2022-09-15	11:41:12	1.18704	5.28019	2.99026	1418.39	FALSE	62
2022-09-15	11:41:13	2.10648	9.37004	9.15633	1572.85	FALSE	62
2022-09-15	11:41:13	2.21538	9.85445	9.15633	1428.24	FALSE	62
2022-09-15	11:41:13	2.54831	11.3354	9.15633	1584.19	FALSE	62
2022-09-15	11:41:13	1.36357	6.06543	9.15633	1434.31	FALSE	62
2022-09-15	11:41:14	2.93716	13.0651	14.7845	1597.25	FALSE	62
2022-09-15	11:41:14	2.65711	11.8194	14.7845	1446.13	FALSE	62
2022-09-15	11:41:14	4.37686	19.4691	14.7845	1616.72	1	63
2022-09-15	11:41:15	4.11085	18.2859	13.0532	1464.42	1	64
2022-09-15	11:41:15	2.56108	11.3922	13.0532	1628.11	FALSE	64
2022-09-15	11:41:15	2.83798	12.6239	13.0532	1477.04	FALSE	64
2022-09-15	11:41:15	2.22805	9.91081	13.0532	1638.02	FALSE	64
2022-09-15	11:41:16	4.4224	19.6717	14.2899	1496.71	1	65
2022-09-15	11:41:16	3.29131	14.6404	14.2899	1652.66	1	66
2022-09-15	11:41:16	3.07996	13.7003	14.2899	1510.41	1	67
2022-09-15	11:41:16	2.0564	9.14728	14.2899	1661.81	FALSE	67
2022-09-15	11:41:17	2.27609	10.1245	5.30744	1520.54	FALSE	67
2022-09-15	11:41:17	0.279809	1.24465	5.30744	1663.06	FALSE	67
2022-09-15	11:41:17	1.08235	4.81451	5.30744	1525.35	FALSE	67
2022-09-15	11:41:17	1.13441	5.04608	5.30744	1668.1	FALSE	67
2022-09-15	11:41:18	0.804389	3.57808	4.76797	1528.93	FALSE	67
2022-09-15	11:41:18	1.46592	6.52071	4.76797	1674.62	FALSE	67
2022-09-15	11:41:18	0.945356	4.20513	4.76797	1533.13	FALSE	67
2022-09-15	11:41:19	0.335331	1.49162	1.46994	1676.11	FALSE	67
2022-09-15	11:41:19	0.312481	1.38998	1.46994	1534.52	FALSE	67
2022-09-15	11:41:19	0.388054	1.72614	1.46994	1677.84	FALSE	67
2022-09-15	11:41:19	0.285967	1.27204	1.46994	1535.8	FALSE	67
2022-09-15	11:41:20	0.300624	1.33724	2.87984	1679.18	FALSE	67
2022-09-15	11:41:20	0.314211	1.39767	2.87984	1537.19	FALSE	67
2022-09-15	11:41:20	0.795076	3.53666	2.87984	1682.71	FALSE	67
2022-09-15	11:41:20	1.17976	5.24781	2.87984	1542.44	FALSE	67
2022-09-15	11:41:21	0.162201	0.721502	0.483077	1683.44	FALSE	67
2022-09-15	11:41:21	0.215585	0.958965	0.483077	1543.4	FALSE	67
2022-09-15	11:41:21	-0.018155	-0.0807571	0.483077	1683.44	FALSE	67
2022-09-15	11:41:21	0.0747712	0.332597	0.483077	1543.73	FALSE	67
2022-09-15	11:41:22	-0.26701	-1.18771	-1.51867	1683.44	FALSE	67
2022-09-15	11:41:22	-0.307671	-1.36858	-1.51867	1543.73	FALSE	67
2022-09-15	11:41:22	-0.449554	-1.99971	-1.51867	1683.44	FALSE	67
2022-09-15	11:41:23	-0.4693	-2.08754	-1.23503	1543.73	FALSE	67
2022-09-15	11:41:23	-0.393931	-1.75228	-1.23503	1683.44	FALSE	67
2022-09-15	11:41:23	-0.1693	-0.75308	-1.23503	1543.73	FALSE	67
2022-09-15	11:41:23	-0.0780531	-0.347196	-1.23503	1683.44	FALSE	67
2022-09-15	11:41:24	0.255178	1.13508	1.25897	1544.87	FALSE	67
2022-09-15	11:41:24	0.211565	0.941083	1.25897	1684.38	FALSE	67
2022-09-15	11:41:24	0.246221	1.09524	1.25897	1545.96	FALSE	67
2022-09-15	11:41:24	0.419148	1.86445	1.25897	1686.24	FALSE	67
2022-09-15	11:41:25	0.342506	1.52354	1.75364	1547.49	FALSE	67
2022-09-15	11:41:25	0.485356	2.15896	1.75364	1688.4	FALSE	67
2022-09-15	11:41:25	0.261031	1.16112	1.75364	1548.65	FALSE	67
2022-09-15	11:41:25	0.488054	2.17096	1.75364	1690.57	FALSE	67
2022-09-15	11:41:26	0.211158	0.939273	1.30864	1549.59	FALSE	67
2022-09-15	11:41:26	0.455992	2.02834	1.30864	1692.6	FALSE	67
2022-09-15	11:41:26	0.215433	0.958289	1.30864	1550.54	FALSE	67
2022-09-15	11:41:27	0.408461	1.81692	1.52891	1694.42	FALSE	67
2022-09-15	11:41:27	0.263372	1.17153	1.52891	1551.72	FALSE	67
2022-09-15	11:41:27	0.432277	1.92285	1.52891	1696.34	FALSE	67
2022-09-15	11:41:27	0.270751	1.20435	1.52891	1552.92	FALSE	67
2022-09-15	11:41:28	0.448613	1.99552	1.94312	1698.34	FALSE	67
2022-09-15	11:41:28	0.343168	1.52648	1.94312	1554.45	FALSE	67
2022-09-15	11:41:28	0.505051	2.24657	1.94312	1700.58	FALSE	67
2022-09-15	11:41:28	0.450496	2.0039	1.94312	1556.45	FALSE	67
2022-09-15	11:41:29	0.393244	1.74923	1.19173	1702.33	FALSE	67
2022-09-15	11:41:29	0.175992	0.782848	1.19173	1557.23	FALSE	67
2022-09-15	11:41:29	0.203117	0.903505	1.19173	1703.23	FALSE	67
2022-09-15	11:41:29	0.2993	1.33135	1.19173	1558.57	FALSE	67
2022-09-15	11:41:30	0.678384	3.01759	1.33527	1706.25	FALSE	67
2022-09-15	11:41:30	0.030242	0.134522	1.33527	1558.7	FALSE	67
2022-09-15	11:41:30	0.191921	0.853703	1.33527	1707.11	FALSE	67
2022-09-15	11:41:31	0.265662	1.18172	1.51822	1559.88	FALSE	67
2022-09-15	11:41:31	0.320522	1.42575	1.51822	1708.53	FALSE	67
2022-09-15	11:41:31	0.394161	1.75331	1.51822	1561.63	FALSE	67
2022-09-15	11:41:31	0.384898	1.7121	1.51822	1710.24	FALSE	67
2022-09-15	11:41:32	0.452328	2.01205	2.25772	1563.65	FALSE	67
2022-09-15	11:41:32	0.586628	2.60944	2.25772	1712.85	FALSE	67
2022-09-15	11:41:32	0.557723	2.48086	2.25772	1566.13	FALSE	67
2022-09-15	11:41:32	0.43355	1.92852	2.25772	1714.78	FALSE	67
2022-09-15	11:41:33	0.152736	0.6794	1.21409	1566.81	FALSE	67
2022-09-15	11:41:33	0.294415	1.30962	1.21409	1716.09	FALSE	67
2022-09-15	11:41:33	0.324389	1.44295	1.21409	1568.25	FALSE	67
2022-09-15	11:41:33	0.320216	1.42438	1.21409	1717.52	FALSE	67
2022-09-15	11:41:34	0.308003	1.37006	1.18911	1569.62	FALSE	67
2022-09-15	11:41:34	0.109071	0.48517	1.18911	1718	FALSE	67
2022-09-15	11:41:34	0.384898	1.7121	1.18911	1571.33	FALSE	67
2022-09-15	11:41:35	0.335382	1.49185	1.35551	1719.49	FALSE	67
2022-09-15	11:41:35	0.268766	1.19552	1.35551	1572.53	FALSE	67
2022-09-15	11:41:35	0.280369	1.24714	1.35551	1720.74	FALSE	67
2022-09-15	11:41:35	0.334415	1.48754	1.35551	1574.02	FALSE	67
2022-09-15	11:41:36	0.348664	1.55093	2.7014	1722.29	FALSE	67
2022-09-15	11:41:36	0.622812	2.77039	2.7014	1576.79	FALSE	67
2022-09-15	11:41:36	0.724593	3.22313	2.7014	1725.51	FALSE	67
2022-09-15	11:41:36	0.733142	3.26116	2.7014	1580.05	FALSE	67
2022-09-15	11:41:37	0.735026	3.26954	3.0713	1728.78	FALSE	67
2022-09-15	11:41:37	0.726323	3.23083	3.0713	1583.28	FALSE	67
2022-09-15	11:41:37	0.657366	2.9241	3.0713	1731.71	FALSE	67
2022-09-15	11:41:37	0.643117	2.86071	3.0713	1586.14	FALSE	67
2022-09-15	11:41:38	0.471209	2.09603	2.20197	1733.8	FALSE	67
2022-09-15	11:41:38	0.518944	2.30837	2.20197	1588.45	FALSE	67
2022-09-15	11:41:38	0.494924	2.20152	2.20197	1736.01	FALSE	67
2022-09-15	11:41:39	0.524236	2.33191	2.23282	1590.78	FALSE	67
2022-09-15	11:41:39	0.509987	2.26852	2.23282	1738.27	FALSE	67
2022-09-15	11:41:39	0.483372	2.15014	2.23282	1592.93	FALSE	67
2022-09-15	11:41:39	0.490242	2.18069	2.23282	1740.45	FALSE	67
2022-09-15	11:41:40	0.487697	2.16937	2.20225	1595.1	FALSE	67
2022-09-15	11:41:40	0.498232	2.21624	2.20225	1742.67	FALSE	67
2022-09-15	11:41:40	0.501997	2.23298	2.20225	1597.33	FALSE	67
2022-09-15	11:41:40	0.49243	2.19043	2.20225	1744.86	FALSE	67
2022-09-15	11:41:41	0.474924	2.11256	2.16909	1599.44	FALSE	67
2022-09-15	11:41:41	0.47472	2.11165	2.16909	1746.97	FALSE	67
2022-09-15	11:41:41	0.485916	2.16145	2.16909	1601.61	FALSE	67
2022-09-15	11:41:41	0.514975	2.29071	2.16909	1749.26	FALSE	67
2022-09-15	11:41:42	0.519249	2.30972	2.21103	1603.91	FALSE	67
2022-09-15	11:41:42	0.503982	2.24181	2.21103	1751.51	FALSE	67
2022-09-15	11:41:42	0.467952	2.08154	2.21103	1606	FALSE	67
2022-09-15	11:41:43	0.431412	1.91901	1.84	1753.42	FALSE	67
2022-09-15	11:41:43	0.408104	1.81533	1.84	1607.81	FALSE	67
2022-09-15	11:41:43	0.382048	1.69943	1.84	1755.12	FALSE	67
2022-09-15	11:41:43	0.433041	1.92625	1.84	1609.74	FALSE	67
2022-09-15	11:41:44	0.393092	1.74855	1.70265	1756.87	FALSE	67
2022-09-15	11:41:44	0.373193	1.66004	1.70265	1611.4	FALSE	67
2022-09-15	11:41:44	0.335127	1.49071	1.70265	1758.36	FALSE	67
2022-09-15	11:41:44	0.429682	1.91131	1.70265	1613.31	FALSE	67
2022-09-15	11:41:45	0.431158	1.91788	1.52829	1760.28	FALSE	67
2022-09-15	11:41:45	0.274364	1.22043	1.52829	1614.53	FALSE	67
2022-09-15	11:41:45	0.291412	1.29626	1.52829	1761.58	FALSE	67
2022-09-15	11:41:45	0.377367	1.6786	1.52829	1616.21	FALSE	67
2022-09-15	11:41:46	0.374771	1.66706	1.60262	1763.24	FALSE	67
2022-09-15	11:41:46	0.445509	1.98171	1.60262	1618.19	FALSE	67
2022-09-15	11:41:46	0.260573	1.15908	1.60262	1764.4	FALSE	67
2022-09-15	11:41:47	0.270751	1.20435	2.03904	1619.39	FALSE	67
2022-09-15	11:41:47	0.422965	1.88143	2.03904	1766.28	FALSE	67
2022-09-15	11:41:47	0.572481	2.54651	2.03904	1621.94	FALSE	67
2022-09-15	11:41:47	0.567392	2.52387	2.03904	1768.81	FALSE	67
2022-09-15	11:41:48	0.688919	3.06445	2.24476	1625.01	FALSE	67
2022-09-15	11:41:48	0.660369	2.93745	2.24476	1771.75	FALSE	67
2022-09-15	11:41:48	0.357265	1.58919	2.24476	1626.59	FALSE	67
2022-09-15	11:41:48	0.312023	1.38794	2.24476	1773.13	FALSE	67
2022-09-15	11:41:49	0.408817	1.8185	1.80537	1628.41	FALSE	67
2022-09-15	11:41:49	0.464033	2.06411	1.80537	1775.2	FALSE	67
2022-09-15	11:41:49	0.344746	1.5335	1.80537	1629.95	FALSE	67
2022-09-15	11:41:50	0.338842	1.50724	2.17169	1776.71	FALSE	67
2022-09-15	11:41:50	0.449886	2.00118	2.17169	1631.95	FALSE	67
2022-09-15	11:41:50	0.568002	2.52659	2.17169	1779.23	FALSE	67
2022-09-15	11:41:50	0.596145	2.65177	2.17169	1634.6	FALSE	67
2022-09-15	11:41:51	0.76785	3.41555	6.83161	1782.65	FALSE	67
2022-09-15	11:41:51	1.13416	5.04497	6.83161	1639.64	FALSE	67
2022-09-15	11:41:51	2.15248	9.57466	6.83161	1792.22	FALSE	67
2022-09-15	11:41:51	2.08877	9.29127	6.83161	1648.94	FALSE	67
2022-09-15	11:41:52	1.05782	4.70539	4.37169	1796.93	FALSE	67
2022-09-15	11:41:52	0.796807	3.54436	4.37169	1652.48	FALSE	67
2022-09-15	11:41:52	0.529478	2.35522	4.37169	1799.28	FALSE	67
2022-09-15	11:41:52	1.54709	6.88177	4.37169	1659.36	FALSE	67
2022-09-15	11:41:53	1.89039	8.40883	6.27891	1807.69	FALSE	67
2022-09-15	11:41:53	1.35034	6.00658	6.27891	1665.37	FALSE	67
2022-09-15	11:41:53	1.33401	5.93394	6.27891	1813.63	FALSE	67
2022-09-15	11:41:53	1.07151	4.76629	6.27891	1670.13	FALSE	67
2022-09-15	11:41:54	0.842303	3.74673	4.35891	1817.37	FALSE	67
2022-09-15	11:41:54	1.07472	4.78057	4.35891	1674.92	FALSE	67
2022-09-15	11:41:54	1.02276	4.54944	4.35891	1821.92	FALSE	67
2022-09-15	11:41:55	0.421031	1.87283	1.84165	1676.79	FALSE	67
2022-09-15	11:41:55	0.260115	1.15704	1.84165	1823.08	FALSE	67
2022-09-15	11:41:55	0.729428	3.24464	1.84165	1680.03	FALSE	67
2022-09-15	11:41:55	0.245509	1.09207	1.84165	1824.17	FALSE	67
2022-09-15	11:41:56	1.03177	4.58952	3.19869	1684.62	FALSE	67
2022-09-15	11:41:56	0.575076	2.55805	3.19869	1826.73	FALSE	67
2022-09-15	11:41:56	0.71472	3.17922	3.19869	1687.8	FALSE	67
2022-09-15	11:41:56	0.554822	2.46796	3.19869	1829.2	FALSE	67
2022-09-15	11:41:57	0.763779	3.39744	5.22946	1691.2	FALSE	67
2022-09-15	11:41:57	1.49375	6.6445	5.22946	1835.84	FALSE	67
2022-09-15	11:41:57	1.26296	5.6179	5.22946	1696.82	FALSE	67
2022-09-15	11:41:57	1.18205	5.25799	5.22946	1841.1	FALSE	67
2022-09-15	11:41:58	0.968511	4.30813	5.97499	1701.13	FALSE	67
2022-09-15	11:41:58	1.32663	5.90112	5.97499	1847	FALSE	67
2022-09-15	11:41:58	1.73457	7.71571	5.97499	1708.84	FALSE	67
2022-09-15	11:41:59	1.3509	6.00907	7.99821	1853.01	FALSE	67
2022-09-15	11:41:59	1.5163	6.74481	7.99821	1715.59	FALSE	67
2022-09-15	11:41:59	2.70703	12.0414	7.99821	1865.05	FALSE	67
2022-09-15	11:41:59	1.61808	7.19754	7.99821	1722.78	FALSE	67
2022-09-15	11:42:00	0.000216527	0.000963155	-0.995015	1865.05	FALSE	67
2022-09-15	11:42:00	-0.310878	-1.38285	-0.995015	1722.78	FALSE	67
2022-09-15	11:42:00	-0.31729	-1.41137	-0.995015	1865.05	FALSE	67
2022-09-15	11:42:00	-0.266806	-1.18681	-0.995015	1722.78	FALSE	67
2022-09-15	11:42:01	-0.267061	-1.18794	-1.76202	1865.05	FALSE	67
2022-09-15	11:42:01	-0.502887	-2.23694	-1.76202	1722.78	FALSE	67
2022-09-15	11:42:01	-0.418409	-1.86117	-1.76202	1865.05	FALSE	67
2022-09-15	11:42:02	-0.244058	-1.08562	-1.29066	1722.78	FALSE	67
2022-09-15	11:42:02	-0.0734221	-0.326596	-1.29066	1865.05	FALSE	67
2022-09-15	11:42:02	-0.473829	-2.10769	-1.29066	1722.78	FALSE	67
2022-09-15	11:42:02	-0.3693	-1.64272	-1.29066	1865.05	FALSE	67
2022-09-15	11:42:03	-0.142124	-0.632196	0.0663288	1722.78	FALSE	67
2022-09-15	11:42:03	-0.0326079	-0.145046	0.0663288	1865.05	FALSE	67
2022-09-15	11:42:03	0.0291224	0.129542	0.0663288	1722.91	FALSE	67
2022-09-15	11:42:03	0.205255	0.913015	0.0663288	1865.97	FALSE	67
2022-09-15	11:42:04	0.340064	1.51267	9.12051	1724.43	FALSE	67
2022-09-15	11:42:04	0.351921	1.56541	9.12051	1867.53	FALSE	67
2022-09-15	11:42:04	1.75289	7.79721	9.12051	1732.22	FALSE	67
2022-09-15	11:42:04	5.75665	25.6067	9.12051	1893.14	1	68
2022-09-15	11:42:05	8.55706	38.0635	20.879	1770.29	1	69
2022-09-15	11:42:05	4.80001	21.3514	20.879	1914.49	1	70
2022-09-15	11:42:05	0.724338	3.222	20.879	1773.51	FALSE	70
2022-09-15	11:42:06	0.550903	2.45053	2.03129	1916.94	FALSE	70
2022-09-15	11:42:06	0.403321	1.79405	2.03129	1775.3	FALSE	70
2022-09-15	11:42:06	0.433499	1.92829	2.03129	1918.87	FALSE	70
2022-09-15	11:42:06	0.438893	1.95228	2.03129	1777.25	FALSE	70
2022-09-15	11:42:07	0.247087	1.09909	1.2236	1919.97	FALSE	70
2022-09-15	11:42:07	0.391361	1.74085	1.2236	1779	FALSE	70
2022-09-15	11:42:07	0.0968069	0.430616	1.2236	1920.4	FALSE	70
2022-09-15	11:42:07	0.365051	1.62382	1.2236	1780.62	FALSE	70
2022-09-15	11:42:08	0.281998	1.25438	0.889358	1921.65	FALSE	70
2022-09-15	11:42:08	0.256552	1.14119	0.889358	1781.76	FALSE	70
2022-09-15	11:42:08	0.130242	0.579342	0.889358	1922.23	FALSE	70
2022-09-15	11:42:08	0.130954	0.58251	0.889358	1782.34	FALSE	70
2022-09-15	11:42:09	-0.069758	-0.310298	-0.144254	1922.23	FALSE	70
2022-09-15	11:42:09	0.125306	0.557386	-0.144254	1782.9	FALSE	70
2022-09-15	11:42:09	-0.108842	-0.484151	-0.144254	1922.23	FALSE	70
2022-09-15	11:42:09	-0.0764246	-0.339952	-0.144254	1782.9	FALSE	70
2022-09-15	11:42:10	-0.169147	-0.7524	-0.858946	1922.23	FALSE	70
2022-09-15	11:42:10	-0.124618	-0.554326	-0.858946	1782.9	FALSE	70
2022-09-15	11:42:10	-0.285534	-1.27011	-0.858946	1922.23	FALSE	70
2022-09-15	11:42:11	-0.197493	-0.878488	-1.33418	1782.9	FALSE	70
2022-09-15	11:42:11	-0.221768	-0.986468	-1.33418	1922.23	FALSE	70
2022-09-15	11:42:11	-0.246501	-1.09649	-1.33418	1782.9	FALSE	70
2022-09-15	11:42:11	-0.533982	-2.37526	-1.33418	1922.23	FALSE	70
2022-09-15	11:42:12	-0.462022	-2.05517	-2.08482	1782.9	FALSE	70
2022-09-15	11:42:12	-0.486806	-2.16541	-2.08482	1922.23	FALSE	70
2022-09-15	11:42:12	-0.396832	-1.76519	-2.08482	1782.9	FALSE	70
2022-09-15	11:42:12	-0.529096	-2.35352	-2.08482	1922.23	FALSE	70
2022-09-15	11:42:13	-0.386552	-1.71946	-1.8164	1782.9	FALSE	70
2022-09-15	11:42:13	-0.439987	-1.95715	-1.8164	1922.23	FALSE	70
2022-09-15	11:42:13	-0.3836	-1.70633	-1.8164	1782.9	FALSE	70
2022-09-15	11:42:13	-0.423244	-1.88267	-1.8164	1922.23	FALSE	70
2022-09-15	11:42:14	-0.223956	-0.996201	-1.11112	1782.9	FALSE	70
2022-09-15	11:42:14	-0.269453	-1.19858	-1.11112	1922.23	FALSE	70
2022-09-15	11:42:14	-0.255967	-1.13859	-1.11112	1782.9	FALSE	70
2022-09-15	11:42:15	-0.220038	-0.978773	0.130618	1922.23	FALSE	70
2022-09-15	11:42:15	-0.0920481	-0.409448	0.130618	1782.9	FALSE	70
2022-09-15	11:42:15	0.101998	0.453708	0.130618	1922.68	FALSE	70
2022-09-15	11:42:15	0.327545	1.45699	0.130618	1784.36	FALSE	70
2022-09-15	11:42:16	0.532532	2.36881	1.83174	1925.05	FALSE	70
2022-09-15	11:42:16	0.323422	1.43865	1.83174	1785.8	FALSE	70
2022-09-15	11:42:16	0.506527	2.25313	1.83174	1927.31	FALSE	70
2022-09-15	11:42:16	0.284695	1.26638	1.83174	1787.06	FALSE	70
2022-09-15	11:42:17	0.575433	2.55964	1.69099	1929.87	FALSE	70
2022-09-15	11:42:17	0.306679	1.36417	1.69099	1788.43	FALSE	70
2022-09-15	11:42:17	0.44388	1.97447	1.69099	1931.84	FALSE	70
2022-09-15	11:42:17	0.194618	0.8657	1.69099	1789.29	FALSE	70
2022-09-15	11:42:18	0.292532	1.30124	0.749045	1933.14	FALSE	70
2022-09-15	11:42:18	0.0640333	0.284833	0.749045	1789.58	FALSE	70
2022-09-15	11:42:18	0.148613	0.66106	0.749045	1933.8	FALSE	70
2022-09-15	11:42:19	0.0183336	0.0815515	0.272496	1789.66	FALSE	70
2022-09-15	11:42:19	0.140115	0.62326	0.272496	1934.43	FALSE	70
2022-09-15	11:42:19	-0.00578856	-0.0257487	0.272496	1789.66	FALSE	70
2022-09-15	11:42:19	0.0923793	0.410922	0.272496	1934.84	FALSE	70
2022-09-15	11:42:20	0.0231681	0.103056	0.240407	1789.76	FALSE	70
2022-09-15	11:42:20	0.148104	0.658796	0.240407	1935.5	FALSE	70
2022-09-15	11:42:20	-0.0344908	-0.153422	0.240407	1789.76	FALSE	70
2022-09-15	11:42:20	0.0794022	0.353197	0.240407	1935.85	FALSE	70
2022-09-15	11:42:21	0.118435	0.526823	0.283815	1790.29	FALSE	70
2022-09-15	11:42:21	0.261947	1.16519	0.283815	1937.01	FALSE	70
2022-09-15	11:42:21	-0.0123535	-0.0549508	0.283815	1790.29	FALSE	70
2022-09-15	11:42:21	-0.112811	-0.501806	0.283815	1937.01	FALSE	70
2022-09-15	11:42:22	-0.113117	-0.503167	-0.0402369	1790.29	FALSE	70
2022-09-15	11:42:22	0.105967	0.471362	-0.0402369	1937.49	FALSE	70
2022-09-15	11:42:22	-0.019987	-0.0889062	-0.0402369	1790.29	FALSE	70
2022-09-15	11:42:23	0.0686644	0.305433	0.13124	1937.79	FALSE	70
2022-09-15	11:42:23	-0.0696053	-0.309618	0.13124	1790.29	FALSE	70
2022-09-15	11:42:23	0.0646949	0.287776	0.13124	1938.08	FALSE	70
2022-09-15	11:42:23	0.0542623	0.24137	0.13124	1790.53	FALSE	70
2022-09-15	11:42:24	0.214313	0.953307	5.43574	1939.03	FALSE	70
2022-09-15	11:42:24	0.495026	2.20197	5.43574	1792.73	FALSE	70
2022-09-15	11:42:24	1.44826	6.44215	5.43574	1945.47	FALSE	70
2022-09-15	11:42:24	2.73044	12.1455	5.43574	1804.88	FALSE	70
2022-09-15	11:42:25	2.18963	9.73991	8.36068	1955.21	FALSE	70
2022-09-15	11:42:25	2.60388	11.5826	8.36068	1816.46	FALSE	70
2022-09-15	11:42:25	1.23502	5.49362	8.36068	1960.71	FALSE	70
2022-09-15	11:42:25	1.48973	6.62662	8.36068	1823.09	FALSE	70
2022-09-15	11:42:26	1.75162	7.79156	5.3573	1968.5	FALSE	70
2022-09-15	11:42:26	0.986629	4.38872	5.3573	1827.48	FALSE	70
2022-09-15	11:42:26	0.874873	3.89161	5.3573	1972.39	FALSE	70
2022-09-15	11:42:27	1.14943	5.11289	2.36287	1832.59	FALSE	70
2022-09-15	11:42:27	0.459351	2.04329	2.36287	1974.43	FALSE	70
2022-09-15	11:42:27	0.317061	1.41035	2.36287	1834	FALSE	70
2022-09-15	11:42:27	0.198944	0.884943	2.36287	1975.32	FALSE	70
2022-09-15	11:42:28	0.294211	1.30871	1.08873	1835.31	FALSE	70
2022-09-15	11:42:28	0.165356	0.735537	1.08873	1976.05	FALSE	70
2022-09-15	11:42:28	0.295636	1.31505	1.08873	1836.62	FALSE	70
2022-09-15	11:42:28	0.22383	0.995641	1.08873	1977.05	FALSE	70
2022-09-15	11:42:29	0.258791	1.15115	0.741085	1837.77	FALSE	70
2022-09-15	11:42:29	0.141082	0.627561	0.741085	1977.68	FALSE	70
2022-09-15	11:42:29	0.107596	0.478609	0.741085	1838.25	FALSE	70
2022-09-15	11:42:29	0.158944	0.707015	0.741085	1978.38	FALSE	70
2022-09-15	11:42:30	0.763626	3.39676	2.88539	1841.65	FALSE	70
2022-09-15	11:42:30	0.262099	1.16587	2.88539	1979.55	FALSE	70
2022-09-15	11:42:30	0.920267	4.09353	2.88539	1845.74	FALSE	70
2022-09-15	11:42:31	1.50393	6.68978	6.46211	1986.24	FALSE	70
2022-09-15	11:42:31	2.14765	9.55318	6.46211	1855.3	FALSE	70
2022-09-15	11:42:31	1.16184	5.1681	6.46211	1991.41	FALSE	70
2022-09-15	11:42:31	0.99757	4.43739	6.46211	1859.73	FALSE	70
2022-09-15	11:42:32	2.09818	9.33312	5.08396	2000.74	FALSE	70
2022-09-15	11:42:32	1.67375	7.44517	5.08396	1867.18	FALSE	70
2022-09-15	11:42:32	0.451819	2.00978	5.08396	2002.75	FALSE	70
2022-09-15	11:42:32	0.347952	1.54776	5.08396	1868.73	FALSE	70
2022-09-15	11:42:33	0.349071	1.55274	0.164403	2004.3	FALSE	70
2022-09-15	11:42:33	0.00530559	0.0236003	0.164403	1868.75	FALSE	70
2022-09-15	11:42:33	-0.0712338	-0.316862	0.164403	2004.3	FALSE	70
2022-09-15	11:42:33	-0.135305	-0.601864	0.164403	1868.75	FALSE	70
2022-09-15	11:42:34	0.125306	0.557386	6.13804	2004.86	FALSE	70
2022-09-15	11:42:34	1.32388	5.88888	6.13804	1874.64	FALSE	70
2022-09-15	11:42:34	2.69049	11.9678	6.13804	2016.83	FALSE	70
2022-09-15	11:42:35	2.00398	8.9141	7.05561	1883.55	FALSE	70
2022-09-15	11:42:35	1.25742	5.59326	7.05561	2022.42	FALSE	70
2022-09-15	11:42:35	2.01447	8.96077	7.05561	1892.51	FALSE	70
2022-09-15	11:42:35	1.06882	4.75433	7.05561	2027.18	FALSE	70
2022-09-15	11:42:36	2.4081	10.7117	8.99022	1903.22	FALSE	70
2022-09-15	11:42:36	1.79589	7.98848	8.99022	2035.17	FALSE	70
2022-09-15	11:42:36	2.13579	9.50042	8.99022	1912.73	FALSE	70
2022-09-15	11:42:36	1.74459	7.76029	8.99022	2042.93	FALSE	70
2022-09-15	11:42:37	2.52775	11.2439	8.50217	1923.97	FALSE	70
2022-09-15	11:42:37	0.718537	3.1962	8.50217	2046.12	FALSE	70
2022-09-15	11:42:37	2.66525	11.8556	8.50217	1935.82	FALSE	70
2022-09-15	11:42:37	1.73396	7.713	8.50217	2053.84	FALSE	70
2022-09-15	11:42:38	1.1963	5.32138	4.93466	1941.15	FALSE	70
2022-09-15	11:42:38	1.63447	7.27045	4.93466	2061.11	FALSE	70
2022-09-15	11:42:38	0.497316	2.21216	4.93466	1943.36	FALSE	70
2022-09-15	11:42:39	0.119606	0.532031	-0.37023	2061.64	FALSE	70
2022-09-15	11:42:39	-0.0960175	-0.427105	-0.37023	1943.36	FALSE	70
2022-09-15	11:42:39	-0.155	-0.689471	-0.37023	2061.64	FALSE	70
2022-09-15	11:42:39	-0.201514	-0.896375	-0.37023	1943.36	FALSE	70
2022-09-15	11:42:40	-0.279325	-1.24249	-0.732707	2061.64	FALSE	70
2022-09-15	11:42:40	-0.298257	-1.32671	-0.732707	1943.36	FALSE	70
2022-09-15	11:42:40	-0.0238547	-0.10611	-0.732707	2061.64	FALSE	70
2022-09-15	11:42:40	-0.0574425	-0.255516	-0.732707	1943.36	FALSE	70
2022-09-15	11:42:41	-0.0407504	-0.181266	0.00407577	2061.64	FALSE	70
2022-09-15	11:42:41	-0.0749997	-0.333614	0.00407577	1943.36	FALSE	70
2022-09-15	11:42:41	0.0745168	0.331466	0.00407577	2061.97	FALSE	70
2022-09-15	11:42:41	0.0448984	0.199717	0.00407577	1943.56	FALSE	70
2022-09-15	11:42:42	0.925662	4.11753	3.34387	2066.09	FALSE	70
2022-09-15	11:42:42	1.03813	4.61781	3.34387	1948.18	FALSE	70
2022-09-15	11:42:42	0.291412	1.29626	3.34387	2067.38	FALSE	70
2022-09-15	11:42:43	-0.173269	-0.770735	-1.68114	1948.18	FALSE	70
2022-09-15	11:42:43	-0.352506	-1.56802	-1.68114	2067.38	FALSE	70
2022-09-15	11:42:43	-0.442582	-1.96869	-1.68114	1948.18	FALSE	70
2022-09-15	11:42:43	-0.543396	-2.41713	-1.68114	2067.38	FALSE	70
2022-09-15	11:42:44	-0.661666	-2.94322	-2.56756	1948.18	FALSE	70
2022-09-15	11:42:44	-0.580343	-2.58148	-2.56756	2067.38	FALSE	70
2022-09-15	11:42:44	-0.540648	-2.40491	-2.56756	1948.18	FALSE	70
2022-09-15	11:42:44	-0.526196	-2.34063	-2.56756	2067.38	FALSE	70
2022-09-15	11:42:45	-0.493575	-2.19552	-2.2357	1948.18	FALSE	70
2022-09-15	11:42:45	-0.450114	-2.0022	-2.2357	2067.38	FALSE	70
2022-09-15	11:42:45	-0.459427	-2.04362	-2.2357	1948.18	FALSE	70
2022-09-15	11:42:45	-0.607315	-2.70146	-2.2357	2067.38	FALSE	70
2022-09-15	11:42:46	-0.600547	-2.67135	-2.62344	1948.18	FALSE	70
2022-09-15	11:42:46	-0.568333	-2.52806	-2.62344	2067.38	FALSE	70
2022-09-15	11:42:46	-0.600445	-2.6709	-2.62344	1948.18	FALSE	70
2022-09-15	11:42:47	-0.479274	-2.13191	-1.93151	2067.38	FALSE	70
2022-09-15	11:42:47	-0.420139	-1.86886	-1.93151	1948.18	FALSE	70
2022-09-15	11:42:47	-0.421005	-1.87271	-1.93151	2067.38	FALSE	70
2022-09-15	11:42:47	-0.416475	-1.85256	-1.93151	1948.18	FALSE	70
2022-09-15	11:42:48	-0.467315	-2.07871	-1.93678	2067.38	FALSE	70
2022-09-15	11:42:48	-0.468995	-2.08618	-1.93678	1948.18	FALSE	70
2022-09-15	11:42:48	-0.428129	-1.9044	-1.93678	2067.38	FALSE	70
2022-09-15	11:42:48	-0.377188	-1.67781	-1.93678	1948.18	FALSE	70
2022-09-15	11:42:49	-0.354491	-1.57685	-1.33836	2067.38	FALSE	70
2022-09-15	11:42:49	-0.260496	-1.15874	-1.33836	1948.18	FALSE	70
2022-09-15	11:42:49	-0.307264	-1.36677	-1.33836	2067.38	FALSE	70
2022-09-15	11:42:49	-0.281259	-1.2511	-1.33836	1948.18	FALSE	70
2022-09-15	11:42:50	-0.194898	-0.866945	-0.476228	2067.38	FALSE	70
2022-09-15	11:42:50	-0.102684	-0.456759	-0.476228	1948.18	FALSE	70
2022-09-15	11:42:50	-0.0236003	-0.104979	-0.476228	2067.38	FALSE	70
2022-09-15	11:42:51	-0.00105572	-0.00469605	0.741877	1948.18	FALSE	70
2022-09-15	11:42:51	0.015331	0.0681954	0.741877	2067.45	FALSE	70
2022-09-15	11:42:51	0.218995	0.974134	0.741877	1949.15	FALSE	70
2022-09-15	11:42:51	0.433855	1.92987	0.741877	2069.38	FALSE	70
2022-09-15	11:42:52	0.43411	1.93101	2.48432	1951.08	FALSE	70
2022-09-15	11:42:52	0.702201	3.12353	2.48432	2072.5	FALSE	70
2022-09-15	11:42:52	0.588766	2.61895	2.48432	1953.7	FALSE	70
2022-09-15	11:42:52	0.508919	2.26377	2.48432	2074.77	FALSE	70
2022-09-15	11:42:53	0.301845	1.34267	1.05235	1955.04	FALSE	70
2022-09-15	11:42:53	0.369886	1.64533	1.05235	2076.41	FALSE	70
2022-09-15	11:42:53	0.210802	0.937689	1.05235	1955.98	FALSE	70
2022-09-15	11:42:53	0.0637788	0.283701	1.05235	2076.7	FALSE	70
2022-09-15	11:42:54	-0.070216	-0.312335	-0.550251	1955.98	FALSE	70
2022-09-15	11:42:54	-0.123906	-0.551159	-0.550251	2076.7	FALSE	70
2022-09-15	11:42:54	-0.176984	-0.78726	-0.550251	1955.98	FALSE	70
2022-09-15	11:42:55	-0.131895	-0.586695	-0.94889	2076.7	FALSE	70
2022-09-15	11:42:55	-0.169605	-0.754437	-0.94889	1955.98	FALSE	70
2022-09-15	11:42:55	-0.177086	-0.787714	-0.94889	2076.7	FALSE	70
2022-09-15	11:42:55	-0.374694	-1.66671	-0.94889	1955.98	FALSE	70
2022-09-15	11:42:56	-0.554847	-2.46807	-2.81889	2076.7	FALSE	70
2022-09-15	11:42:56	-0.627417	-2.79088	-2.81889	1955.98	FALSE	70
2022-09-15	11:42:56	-0.664923	-2.95771	-2.81889	2076.7	FALSE	70
2022-09-15	11:42:56	-0.687671	-3.0589	-2.81889	1955.98	FALSE	70
2022-09-15	11:42:57	-0.431692	-1.92025	2.94577	2076.7	FALSE	70
2022-09-15	11:42:57	-0.266196	-1.18409	2.94577	1955.98	FALSE	70
2022-09-15	11:42:57	0.578079	2.57141	2.94577	2079.27	FALSE	70
2022-09-15	11:42:57	2.76876	12.316	2.94577	1968.3	FALSE	70
2022-09-15	11:42:58	4.22591	18.7977	11.2668	2098.07	1	71
2022-09-15	11:42:58	1.36978	6.09306	11.2668	1974.39	FALSE	71
2022-09-15	11:42:58	2.00296	8.90957	11.2668	2106.98	FALSE	71
2022-09-15	11:42:59	1.33844	5.95365	7.94858	1980.34	FALSE	71
2022-09-15	11:42:59	1.96698	8.74952	7.94858	2115.73	FALSE	71
2022-09-15	11:42:59	1.79945	8.00431	7.94858	1988.35	FALSE	71
2022-09-15	11:42:59	2.04281	9.08683	7.94858	2124.81	FALSE	71
2022-09-15	11:43:00	3.8878	17.2937	9.54598	2005.64	1	72
2022-09-15	11:43:00	1.79024	7.96335	9.54598	2132.78	FALSE	72
2022-09-15	11:43:00	2.01859	8.97909	9.54598	2014.62	FALSE	72
2022-09-15	11:43:00	0.887494	3.94775	9.54598	2136.72	FALSE	72
2022-09-15	11:43:01	2.03676	9.05992	5.04657	2023.68	FALSE	72
2022-09-15	11:43:01	0.631514	2.8091	5.04657	2139.53	FALSE	72
2022-09-15	11:43:01	1.17101	5.20889	5.04657	2028.89	FALSE	72
2022-09-15	11:43:01	0.698792	3.10837	5.04657	2142.64	FALSE	72
2022-09-15	11:43:02	1.22805	5.46261	5.4092	2034.35	FALSE	72
2022-09-15	11:43:02	0.974109	4.33303	5.4092	2146.97	FALSE	72
2022-09-15	11:43:02	1.44597	6.43196	5.4092	2040.78	FALSE	72
2022-09-15	11:43:03	0.652888	2.90418	4.59868	2149.88	FALSE	72
2022-09-15	11:43:03	1.42398	6.33415	4.59868	2047.12	FALSE	72
2022-09-15	11:43:03	1.12933	5.02349	4.59868	2154.9	FALSE	72
2022-09-15	11:43:03	0.929122	4.13292	4.59868	2051.25	FALSE	72
2022-09-15	11:43:04	0.878944	3.90972	3.90893	2158.81	FALSE	72
2022-09-15	11:43:04	1.25513	5.58307	3.90893	2056.83	FALSE	72
2022-09-15	11:43:04	0.796807	3.54436	3.90893	2162.36	FALSE	72
2022-09-15	11:43:04	0.584186	2.59858	3.90893	2059.43	FALSE	72
2022-09-15	11:43:05	0.865509	3.84996	3.32127	2166.21	FALSE	72
2022-09-15	11:43:05	0.669885	2.97978	3.32127	2062.41	FALSE	72
2022-09-15	11:43:05	0.853753	3.79766	3.32127	2170	FALSE	72
2022-09-15	11:43:05	0.597468	2.65766	3.32127	2065.07	FALSE	72
2022-09-15	11:43:06	0.987086	4.39076	5.64411	2174.39	FALSE	72
2022-09-15	11:43:06	1.25055	5.5627	5.64411	2070.63	FALSE	72
2022-09-15	11:43:06	1.56892	6.97887	5.64411	2181.37	FALSE	72
2022-09-15	11:43:07	1.02129	4.5429	11.2832	2075.18	FALSE	72
2022-09-15	11:43:07	2.42871	10.8034	11.2832	2192.18	FALSE	72
2022-09-15	11:43:07	2.3851	10.6094	11.2832	2085.78	FALSE	72
2022-09-15	11:43:07	4.31121	19.1771	11.2832	2211.35	1	73
2022-09-15	11:43:08	2.70841	12.0475	13.2221	2097.83	FALSE	73
2022-09-15	11:43:08	4.86118	21.6235	13.2221	2232.98	1	74
2022-09-15	11:43:08	1.22164	5.4341	13.2221	2103.27	FALSE	74
2022-09-15	11:43:08	3.09864	13.7834	13.2221	2246.76	1	75
2022-09-15	11:43:09	0.806221	3.58623	4.31793	2106.85	FALSE	75
2022-09-15	11:43:09	1.59457	7.09297	4.31793	2253.85	FALSE	75
2022-09-15	11:43:09	0.784033	3.48754	4.31793	2110.34	FALSE	75
2022-09-15	11:43:09	0.698028	3.10497	4.31793	2256.96	FALSE	75
2022-09-15	11:43:10	1.11146	4.944	4.26935	2115.28	FALSE	75
2022-09-15	11:43:10	1.26363	5.62088	4.26935	2262.58	FALSE	75
2022-09-15	11:43:10	0.504288	2.24317	4.26935	2117.53	FALSE	75
2022-09-15	11:43:11	2.24251	9.97513	5.45674	2272.55	FALSE	75
2022-09-15	11:43:11	0.812582	3.61453	5.45674	2121.14	FALSE	75
2022-09-15	11:43:11	0.89701	3.99008	5.45674	2276.54	FALSE	75
2022-09-15	11:43:11	0.954822	4.24724	5.45674	2125.39	FALSE	75
2022-09-15	11:43:12	1.14816	5.10725	4.89009	2281.65	FALSE	75
2022-09-15	11:43:12	0.903626	4.01951	4.89009	2129.41	FALSE	75
2022-09-15	11:43:12	0.979606	4.35748	4.89009	2286.01	FALSE	75
2022-09-15	11:43:12	1.36597	6.07611	4.89009	2135.48	FALSE	75
2022-09-15	11:43:13	1.84429	8.20377	10.3308	2294.21	FALSE	75
2022-09-15	11:43:13	2.78658	12.3953	10.3308	2147.88	FALSE	75
2022-09-15	11:43:13	3.21233	14.2891	10.3308	2308.5	1	76
2022-09-15	11:43:13	1.44663	6.4349	10.3308	2154.31	FALSE	76
2022-09-15	11:43:14	1.91268	8.50798	7.82044	2317.01	FALSE	76
2022-09-15	11:43:14	2.17564	9.67768	7.82044	2163.99	FALSE	76
2022-09-15	11:43:14	1.18602	5.27565	7.82044	2322.29	FALSE	76
2022-09-15	11:43:15	1.53676	6.83582	6.81146	2170.83	FALSE	76
2022-09-15	11:43:15	1.01228	4.50282	6.81146	2326.79	FALSE	76
2022-09-15	11:43:15	1.37151	6.10075	6.81146	2176.93	FALSE	76
2022-09-15	11:43:15	2.20459	9.80646	6.81146	2336.59	FALSE	76
2022-09-15	11:43:16	0.482456	2.14606	5.55193	2179.07	FALSE	76
2022-09-15	11:43:16	2.2337	9.93594	5.55193	2346.53	FALSE	76
2022-09-15	11:43:16	1.45676	6.47996	5.55193	2185.55	FALSE	76
2022-09-15	11:43:16	0.819606	3.64577	5.55193	2350.18	FALSE	76
2022-09-15	11:43:17	2.03752	9.0633	7.16341	2194.62	FALSE	76
2022-09-15	11:43:17	1.74724	7.77207	7.16341	2357.95	FALSE	76
2022-09-15	11:43:17	1.08088	4.80797	7.16341	2199.43	FALSE	76
2022-09-15	11:43:17	1.57599	7.01032	7.16341	2364.96	FALSE	76
2022-09-15	11:43:18	0.984491	4.37921	6.39158	2203.81	FALSE	76
2022-09-15	11:43:18	1.0337	4.5981	6.39158	2369.56	FALSE	76
2022-09-15	11:43:18	2.29248	10.1974	6.39158	2214	FALSE	76
2022-09-15	11:43:19	1.21701	5.4135	5.82289	2374.97	FALSE	76
2022-09-15	11:43:19	1.7652	7.85196	5.82289	2221.85	FALSE	76
2022-09-15	11:43:19	1.25594	5.58667	5.82289	2380.56	FALSE	76
2022-09-15	11:43:19	0.998028	4.43943	5.82289	2226.29	FALSE	76
2022-09-15	11:43:20	0.458232	2.03831	1.86021	2382.6	FALSE	76
2022-09-15	11:43:20	0.489886	2.17911	1.86021	2228.47	FALSE	76
2022-09-15	11:43:20	0.265305	1.18013	1.86021	2383.78	FALSE	76
2022-09-15	11:43:20	0.459351	2.04329	1.86021	2230.52	FALSE	76
2022-09-15	11:43:21	0.261387	1.1627	2.18335	2384.94	FALSE	76
2022-09-15	11:43:21	0.725509	3.22721	2.18335	2233.74	FALSE	76
2022-09-15	11:43:21	0.506984	2.25517	2.18335	2387.19	FALSE	76
2022-09-15	11:43:21	0.469479	2.08834	2.18335	2235.83	FALSE	76
2022-09-15	11:43:22	0.920063	4.09262	3.26818	2391.29	FALSE	76
2022-09-15	11:43:22	0.585254	2.60333	3.26818	2238.44	FALSE	76
2022-09-15	11:43:22	0.698842	3.10859	3.26818	2394.39	FALSE	76
2022-09-15	11:43:23	0.30042	1.33633	1.46666	2239.77	FALSE	76
2022-09-15	11:43:23	0.388817	1.72954	1.46666	2396.12	FALSE	76
2022-09-15	11:43:23	0.218537	0.972096	1.46666	2240.74	FALSE	76
2022-09-15	11:43:23	0.411107	1.82869	1.46666	2397.95	FALSE	76
2022-09-15	11:43:24	0.254313	1.13124	2.26932	2241.88	FALSE	76
2022-09-15	11:43:24	0.465102	2.06887	2.26932	2400.02	FALSE	76
2022-09-15	11:43:24	0.155331	0.690943	2.26932	2242.57	FALSE	76
2022-09-15	11:43:24	1.16592	5.18625	2.26932	2405.21	FALSE	76
2022-09-15	11:43:25	1.22429	5.44589	13.5055	2248.01	FALSE	76
2022-09-15	11:43:25	4.71711	20.9826	13.5055	2426.19	1	77
2022-09-15	11:43:25	3.02505	13.456	13.5055	2261.47	1	78
2022-09-15	11:43:25	3.17823	14.1374	13.5055	2440.33	1	79
2022-09-15	11:43:26	1.53604	6.83261	7.3938	2268.3	FALSE	79
2022-09-15	11:43:26	2.18271	9.70913	7.3938	2450.04	FALSE	79
2022-09-15	11:43:26	1.26785	5.63965	7.3938	2273.94	FALSE	79
2022-09-15	11:43:27	2.37279	10.5546	9.86166	2460.59	FALSE	79
2022-09-15	11:43:27	1.90154	8.45843	9.86166	2282.4	FALSE	79
2022-09-15	11:43:27	3.79172	16.8663	9.86166	2477.46	1	80
2022-09-15	11:43:27	0.801947	3.56722	9.86166	2285.97	FALSE	80
2022-09-15	11:43:28	2.10586	9.36729	5.93471	2486.83	FALSE	80
2022-09-15	11:43:28	0.693193	3.08346	5.93471	2289.05	FALSE	80
2022-09-15	11:43:28	1.14164	5.07824	5.93471	2491.9	FALSE	80
2022-09-15	11:43:28	1.39604	6.20987	5.93471	2295.26	FALSE	80
2022-09-15	11:43:29	0.50383	2.24114	6.61401	2494.14	FALSE	80
2022-09-15	11:43:29	2.00164	8.9037	6.61401	2304.16	FALSE	80
2022-09-15	11:43:29	2.92388	13.006	6.61401	2507.15	FALSE	80
2022-09-15	11:43:29	0.518231	2.3052	6.61401	2306.47	FALSE	80
2022-09-15	11:43:30	1.00663	4.47769	4.86743	2511.63	FALSE	80
2022-09-15	11:43:30	1.59696	7.1036	4.86743	2313.57	FALSE	80
2022-09-15	11:43:30	0.679148	3.02099	4.86743	2514.65	FALSE	80
2022-09-15	11:43:31	1.97538	8.78689	14.2445	2322.36	FALSE	80
2022-09-15	11:43:31	2.69614	11.993	14.2445	2526.64	FALSE	80
2022-09-15	11:43:31	2.70683	12.0405	14.2445	2334.4	FALSE	80
2022-09-15	11:43:31	5.4309	24.1577	14.2445	2550.8	1	81
2022-09-15	11:43:32	1.91289	8.50892	5.72002	2342.91	FALSE	81
2022-09-15	11:43:32	1.38531	6.16214	5.72002	2556.96	FALSE	81
2022-09-15	11:43:32	0.934618	4.15737	5.72002	2347.07	FALSE	81
2022-09-15	11:43:32	0.910852	4.05165	5.72002	2561.01	FALSE	81
2022-09-15	11:43:33	0.499453	2.22167	3.10667	2349.29	FALSE	81
2022-09-15	11:43:33	0.874516	3.89002	3.10667	2564.9	FALSE	81
2022-09-15	11:43:33	0.423473	1.88369	3.10667	2351.17	FALSE	81
2022-09-15	11:43:33	0.996196	4.43128	3.10667	2569.34	FALSE	81
2022-09-15	11:43:34	1.29141	5.74445	11.1663	2356.92	FALSE	81
2022-09-15	11:43:34	1.75375	7.80103	11.1663	2577.14	FALSE	81
2022-09-15	11:43:34	4.48571	19.9533	11.1663	2376.87	1	82
2022-09-15	11:43:35	1.44459	6.42583	4.14633	2583.56	FALSE	82
2022-09-15	11:43:35	1.70296	7.57511	4.14633	2384.44	FALSE	82
2022-09-15	11:43:35	0.338944	1.50769	4.14633	2585.07	FALSE	82
2022-09-15	11:43:35	0.242049	1.07668	4.14633	2385.52	FALSE	82
2022-09-15	11:43:36	0.0577738	0.256989	1.51969	2585.33	FALSE	82
2022-09-15	11:43:36	-0.0328114	-0.145952	1.51969	2385.52	FALSE	82
2022-09-15	11:43:36	0.107443	0.477928	1.51969	2585.8	FALSE	82
2022-09-15	11:43:36	1.23416	5.48979	1.51969	2391.01	FALSE	82
2022-09-15	11:43:37	2.49599	11.1027	10.9183	2596.91	FALSE	82
2022-09-15	11:43:37	3.27406	14.5637	10.9183	2405.57	1	83
2022-09-15	11:43:37	2.39726	10.6635	10.9183	2607.57	FALSE	83
2022-09-15	11:43:37	1.6509	7.34353	10.9183	2412.92	FALSE	83
2022-09-15	11:43:38	0.5193	2.30995	3.91433	2609.88	FALSE	83
2022-09-15	11:43:38	1.0478	4.66082	3.91433	2417.58	FALSE	83
2022-09-15	11:43:38	1.07284	4.77221	3.91433	2614.65	FALSE	83
2022-09-15	11:43:39	2.54693	11.3293	12.8213	2428.91	FALSE	83
2022-09-15	11:43:39	1.79162	7.96948	12.8213	2622.62	FALSE	83
2022-09-15	11:43:39	2.6279	11.6894	12.8213	2440.6	FALSE	83
2022-09-15	11:43:39	4.56301	20.2972	12.8213	2642.92	1	84
2022-09-15	11:43:40	3.04632	13.5506	30.0781	2454.15	1	85
2022-09-15	11:43:40	6.77411	30.1326	30.0781	2673.05	1	86
2022-09-15	11:43:40	10.1635	45.2093	30.0781	2499.36	1	87
2022-09-15	11:43:40	7.06352	31.4199	30.0781	2704.47	1	88
2022-09-15	11:43:41	4.53472	20.1713	9.36187	2519.53	1	89
2022-09-15	11:43:41	3.06871	13.6502	9.36187	2718.12	1	90
2022-09-15	11:43:41	0.566425	2.51957	9.36187	2522.05	FALSE	90
2022-09-15	11:43:41	0.248715	1.10633	9.36187	2719.23	FALSE	90
2022-09-15	11:43:42	0.252328	1.12241	-0.248272	2523.17	FALSE	90
2022-09-15	11:43:42	-0.191539	-0.852004	-0.248272	2719.23	FALSE	90
2022-09-15	11:43:42	-0.228231	-1.01522	-0.248272	2523.17	FALSE	90
2022-09-15	11:43:43	-0.34986	-1.55625	-2.27571	2719.23	FALSE	90
2022-09-15	11:43:43	-0.491997	-2.1885	-2.27571	2523.17	FALSE	90
2022-09-15	11:43:43	-0.496068	-2.20661	-2.27571	2719.23	FALSE	90
2022-09-15	11:43:43	-0.708485	-3.15148	-2.27571	2523.17	FALSE	90
2022-09-15	11:43:44	-0.96762	-4.30417	-4.87547	2719.23	FALSE	90
2022-09-15	11:43:44	-1.10416	-4.91152	-4.87547	2523.17	FALSE	90
2022-09-15	11:43:44	-1.15703	-5.1467	-4.87547	2719.23	FALSE	90
2022-09-15	11:43:44	-1.15541	-5.13949	-4.87547	2523.17	FALSE	90
2022-09-15	11:43:45	-1.2581	-5.59628	-4.03762	2719.23	FALSE	90
2022-09-15	11:43:45	-1.24106	-5.52048	-4.03762	2523.17	FALSE	90
2022-09-15	11:43:45	-0.665534	-2.96043	-4.03762	2719.23	FALSE	90
2022-09-15	11:43:45	-0.466094	-2.07328	-4.03762	2523.17	FALSE	90
2022-09-15	11:43:46	0.0709036	0.315393	3.79269	2719.54	FALSE	90
2022-09-15	11:43:46	0.724491	3.22268	3.79269	2526.39	FALSE	90
2022-09-15	11:43:46	1.76251	7.84	3.79269	2727.38	FALSE	90
2022-09-15	11:43:47	2.71436	12.074	5.54213	2538.47	FALSE	90
2022-09-15	11:43:47	1.45197	6.45865	5.54213	2733.84	FALSE	90
2022-09-15	11:43:47	0.460623	2.04894	5.54213	2540.52	FALSE	90
2022-09-15	11:43:47	0.356756	1.58692	5.54213	2735.43	FALSE	90
2022-09-15	11:43:48	0.155891	0.693434	-0.221333	2541.21	FALSE	90
2022-09-15	11:43:48	0.0734481	0.326712	-0.221333	2735.76	FALSE	90
2022-09-15	11:43:48	-0.216832	-0.964512	-0.221333	2541.21	FALSE	90
2022-09-15	11:43:48	-0.211539	-0.940968	-0.221333	2735.76	FALSE	90
2022-09-15	11:43:49	-0.44589	-1.98341	1.10023	2541.21	FALSE	90
2022-09-15	11:43:49	-0.433676	-1.92908	1.10023	2735.76	FALSE	90
2022-09-15	11:43:49	-0.107366	-0.477585	1.10023	2541.21	FALSE	90
2022-09-15	11:43:49	1.9763	8.79098	1.10023	2744.55	FALSE	90
2022-09-15	11:43:50	3.84225	17.0911	9.91747	2558.3	1	91
2022-09-15	11:43:50	2.09014	9.29736	9.91747	2753.84	FALSE	91
2022-09-15	11:43:50	0.756247	3.36394	9.91747	2561.66	FALSE	91
2022-09-15	11:43:51	0.485611	2.16009	1.89564	2756	FALSE	91
2022-09-15	11:43:51	0.515025	2.29093	1.89564	2563.96	FALSE	91
2022-09-15	11:43:51	0.320624	1.4262	1.89564	2757.43	FALSE	91
2022-09-15	11:43:51	0.383372	1.70532	1.89564	2565.66	FALSE	91
2022-09-15	11:43:52	0.0791478	0.352065	-1.86513	2757.78	FALSE	91
2022-09-15	11:43:52	-0.342582	-1.52387	-1.86513	2565.66	FALSE	91
2022-09-15	11:43:52	-0.597137	-2.65618	-1.86513	2757.78	FALSE	91
2022-09-15	11:43:52	-0.816628	-3.63252	-1.86513	2565.66	FALSE	91
2022-09-15	11:43:53	-0.679325	-3.02177	-3.53286	2757.78	FALSE	91
2022-09-15	11:43:53	-0.846806	-3.76676	-3.53286	2565.66	FALSE	91
2022-09-15	11:43:53	-0.747315	-3.32421	-3.53286	2757.78	FALSE	91
2022-09-15	11:43:53	-0.903447	-4.01871	-3.53286	2565.66	FALSE	91
2022-09-15	11:43:54	-0.735915	-3.2735	-3.59834	2757.78	FALSE	91
2022-09-15	11:43:54	-0.840597	-3.73914	-3.59834	2565.66	FALSE	91
2022-09-15	11:43:54	-0.850317	-3.78238	-3.59834	2757.78	FALSE	91
2022-09-15	11:43:55	-0.989554	-4.40173	-4.56138	2565.66	FALSE	91
2022-09-15	11:43:55	-0.843854	-3.75363	-4.56138	2757.78	FALSE	91
2022-09-15	11:43:55	-1.06955	-4.75757	-4.56138	2565.66	FALSE	91
2022-09-15	11:43:55	-1.19882	-5.33259	-4.56138	2757.78	FALSE	91
2022-09-15	11:43:56	-0.851641	-3.78827	1.99971	2565.66	FALSE	91
2022-09-15	11:43:56	-0.101157	-0.449967	1.99971	2757.78	FALSE	91
2022-09-15	11:43:56	0.309631	1.3773	1.99971	2567.04	FALSE	91
2022-09-15	11:43:56	2.44139	10.8598	1.99971	2768.64	FALSE	91
2022-09-15	11:43:57	5.76332	25.6364	14.6199	2592.67	1	92
2022-09-15	11:43:57	4.10851	18.2755	14.6199	2786.92	1	93
2022-09-15	11:43:57	2.33772	10.3986	14.6199	2603.07	FALSE	93
2022-09-15	11:43:57	0.937265	4.16914	14.6199	2791.09	FALSE	93
2022-09-15	11:43:58	0.767697	3.41487	3.87456	2606.49	FALSE	93
2022-09-15	11:43:58	0.734262	3.26614	3.87456	2794.35	FALSE	93
2022-09-15	11:43:58	1.11116	4.94266	3.87456	2611.43	FALSE	93
2022-09-15	11:43:59	2.29004	10.1866	8.6127	2804.54	FALSE	93
2022-09-15	11:43:59	4.40978	19.6156	8.6127	2631.05	1	94
2022-09-15	11:43:59	0.87126	3.87554	8.6127	2808.42	FALSE	94
2022-09-15	11:43:59	0.173804	0.773115	8.6127	2631.82	FALSE	94
2022-09-15	11:44:00	0.258181	1.14844	1.02569	2809.56	FALSE	94
2022-09-15	11:44:00	0.22612	1.00583	1.02569	2632.82	FALSE	94
2022-09-15	11:44:00	0.187087	0.8322	1.02569	2810.4	FALSE	94
2022-09-15	11:44:00	0.250954	1.11629	1.02569	2633.94	FALSE	94
2022-09-15	11:44:01	0.294262	1.30894	1.15133	2811.71	FALSE	94
2022-09-15	11:44:01	0.152074	0.676456	1.15133	2634.62	FALSE	94
2022-09-15	11:44:01	0.251616	1.11924	1.15133	2812.82	FALSE	94
2022-09-15	11:44:01	0.337366	1.50067	1.15133	2636.12	FALSE	94
2022-09-15	11:44:02	0.438791	1.95183	3.10399	2814.78	FALSE	94
2022-09-15	11:44:02	0.829275	3.68878	3.10399	2639.81	FALSE	94
2022-09-15	11:44:02	0.825356	3.67135	3.10399	2818.45	FALSE	94
2022-09-15	11:44:03	1.08729	4.83648	11.3597	2644.64	FALSE	94
2022-09-15	11:44:03	2.57365	11.4481	11.3597	2829.9	FALSE	94
2022-09-15	11:44:03	2.84454	12.6531	11.3597	2657.3	FALSE	94
2022-09-15	11:44:03	3.70958	16.501	11.3597	2846.4	1	95
2022-09-15	11:44:04	2.81772	12.5338	10.5442	2669.83	FALSE	95
2022-09-15	11:44:04	0.754567	3.35646	10.5442	2849.75	FALSE	95
2022-09-15	11:44:04	3.22663	14.3527	10.5442	2684.18	1	96
2022-09-15	11:44:04	2.68281	11.9337	10.5442	2861.69	FALSE	96
2022-09-15	11:44:05	0.83701	3.72319	2.11714	2687.91	FALSE	96
2022-09-15	11:44:05	0.488766	2.17413	2.11714	2863.86	FALSE	96
2022-09-15	11:44:05	0.330038	1.46808	2.11714	2689.37	FALSE	96
2022-09-15	11:44:05	0.248003	1.10317	2.11714	2864.96	FALSE	96
2022-09-15	11:44:06	0.169071	0.752062	1.04423	2690.13	FALSE	96
2022-09-15	11:44:06	0.408003	1.81488	1.04423	2866.78	FALSE	96
2022-09-15	11:44:06	0.127189	0.565762	1.04423	2690.69	FALSE	96
2022-09-15	11:44:07	0.34902	1.55251	1.95873	2868.33	FALSE	96
2022-09-15	11:44:07	0.311819	1.38703	1.95873	2692.08	FALSE	96
2022-09-15	11:44:07	0.524338	2.33236	1.95873	2870.66	FALSE	96
2022-09-15	11:44:07	0.576196	2.56304	1.95873	2694.64	FALSE	96
2022-09-15	11:44:08	1.31665	5.85672	6.96194	2876.52	FALSE	96
2022-09-15	11:44:08	1.13574	5.052	6.96194	2699.69	FALSE	96
2022-09-15	11:44:08	1.80602	8.03354	6.96194	2884.55	FALSE	96
2022-09-15	11:44:08	2.00205	8.90552	6.96194	2708.6	FALSE	96
2022-09-15	11:44:09	0.725254	3.22607	8.69069	2887.78	FALSE	96
2022-09-15	11:44:09	1.50256	6.68369	8.69069	2715.28	FALSE	96
2022-09-15	11:44:09	2.06566	9.18847	8.69069	2896.97	FALSE	96
2022-09-15	11:44:09	3.52154	15.6645	8.69069	2730.95	1	97
2022-09-15	11:44:10	3.39614	15.1067	13.6059	2912.08	1	98
2022-09-15	11:44:10	2.80408	12.4731	13.6059	2743.42	FALSE	98
2022-09-15	11:44:10	2.97604	13.238	13.6059	2925.31	FALSE	98
2022-09-15	11:44:11	1.45996	6.49419	5.75057	2749.92	FALSE	98
2022-09-15	11:44:11	1.84093	8.18882	5.75057	2933.5	FALSE	98
2022-09-15	11:44:11	0.864084	3.84362	5.75057	2753.76	FALSE	98
2022-09-15	11:44:11	1.00617	4.47565	5.75057	2937.98	FALSE	98
2022-09-15	11:44:12	1.70164	7.56924	9.20597	2761.33	FALSE	98
2022-09-15	11:44:12	2.2878	10.1766	9.20597	2948.15	FALSE	98
2022-09-15	11:44:12	1.86134	8.27961	9.20597	2769.61	FALSE	98
2022-09-15	11:44:12	2.4276	10.7985	9.20597	2958.95	FALSE	98
2022-09-15	11:44:13	3.4677	15.425	6.37383	2785.03	1	99
2022-09-15	11:44:13	1.43309	6.37467	6.37383	2965.33	FALSE	99
2022-09-15	11:44:13	0.657366	2.9241	6.37383	2787.96	FALSE	99
2022-09-15	11:44:13	0.173448	0.771531	6.37383	2966.1	FALSE	99
2022-09-15	11:44:14	0.221081	0.983413	0.847063	2788.94	FALSE	99
2022-09-15	11:44:14	0.150089	0.667626	0.847063	2966.77	FALSE	99
2022-09-15	11:44:14	0.200115	0.890152	0.847063	2789.83	FALSE	99
2022-09-15	11:44:15	0.0754327	0.33554	0.190266	2967.1	FALSE	99
2022-09-15	11:44:15	-0.0496053	-0.220654	0.190266	2789.83	FALSE	99
2022-09-15	11:44:15	0.102812	0.457328	0.190266	2967.56	FALSE	99
2022-09-15	11:44:15	0.0424557	0.188851	0.190266	2790.02	FALSE	99
2022-09-15	11:44:16	0.242099	1.0769	0.789187	2968.64	FALSE	99
2022-09-15	11:44:16	-0.00136106	-0.00605427	0.789187	2790.02	FALSE	99
2022-09-15	11:44:16	0.266883	1.18715	0.789187	2969.82	FALSE	99
2022-09-15	11:44:16	0.202048	0.89875	0.789187	2790.92	FALSE	99
2022-09-15	11:44:17	0.309122	1.37504	0.981773	2971.2	FALSE	99
2022-09-15	11:44:17	0.135535	0.602887	0.981773	2791.52	FALSE	99
2022-09-15	11:44:17	0.245458	1.09185	0.981773	2972.29	FALSE	99
2022-09-15	11:44:17	0.192735	0.857324	0.981773	2792.38	FALSE	99
2022-09-15	11:44:18	0.174568	0.776513	-0.185643	2973.07	FALSE	99
2022-09-15	11:44:18	0.016247	0.0722699	-0.185643	2792.45	FALSE	99
2022-09-15	11:44:18	-0.316018	-1.40571	-0.185643	2973.07	FALSE	99
2022-09-15	11:44:19	-0.15444	-0.68698	1.76734	2792.45	FALSE	99
2022-09-15	11:44:19	-0.127112	-0.56542	1.76734	2973.07	FALSE	99
2022-09-15	11:44:19	0.426781	1.89841	1.76734	2794.35	FALSE	99
2022-09-15	11:44:19	1.44403	6.42333	1.76734	2979.49	FALSE	99
2022-09-15	11:44:20	1.11594	4.96392	5.65193	2799.31	FALSE	99
2022-09-15	11:44:20	2.32678	10.35	5.65193	2989.84	FALSE	99
2022-09-15	11:44:20	1.42968	6.3595	5.65193	2805.67	FALSE	99
2022-09-15	11:44:20	0.210038	0.934291	5.65193	2990.77	FALSE	99
2022-09-15	11:44:21	0.0677992	0.301584	-0.406166	2805.97	FALSE	99
2022-09-15	11:44:21	0.0479519	0.2133	-0.406166	2990.99	FALSE	99
2022-09-15	11:44:21	-0.224618	-0.999146	-0.406166	2805.97	FALSE	99
2022-09-15	11:44:21	-0.256374	-1.1404	-0.406166	2990.99	FALSE	99
2022-09-15	11:44:22	-0.344109	-1.53067	-2.44498	2805.97	FALSE	99
2022-09-15	11:44:22	-0.541412	-2.40831	-2.44498	2990.99	FALSE	99
2022-09-15	11:44:22	-0.763447	-3.39596	-2.44498	2805.97	FALSE	99
2022-09-15	11:44:23	-0.782429	-3.4804	-3.41096	2990.99	FALSE	99
2022-09-15	11:44:23	-0.813473	-3.61849	-3.41096	2805.97	FALSE	99
2022-09-15	11:44:23	-0.751641	-3.34345	-3.41096	2990.99	FALSE	99
2022-09-15	11:44:23	-0.719732	-3.20151	-3.41096	2805.97	FALSE	99
2022-09-15	11:44:24	-0.64935	-2.88844	-2.08035	2990.99	FALSE	99
2022-09-15	11:44:24	-0.414898	-1.84555	-2.08035	2805.97	FALSE	99
2022-09-15	11:44:24	-0.391183	-1.74006	-2.08035	2990.99	FALSE	99
2022-09-15	11:44:24	-0.415305	-1.84736	-2.08035	2805.97	FALSE	99
2022-09-15	11:44:25	-0.26304	-1.17005	-1.04289	2990.99	FALSE	99
2022-09-15	11:44:25	-0.256526	-1.14108	-1.04289	2805.97	FALSE	99
2022-09-15	11:44:25	-0.119682	-0.532369	-1.04289	2990.99	FALSE	99
2022-09-15	11:44:25	-0.298562	-1.32806	-1.04289	2805.97	FALSE	99
2022-09-15	11:44:26	-0.147163	-0.65461	-0.542479	2990.99	FALSE	99
2022-09-15	11:44:26	-0.12589	-0.559984	-0.542479	2805.97	FALSE	99
2022-09-15	11:44:26	-0.0928114	-0.412844	-0.542479	2990.99	FALSE	99
2022-09-15	11:44:27	-0.100089	-0.445216	0.94646	2805.97	FALSE	99
2022-09-15	11:44:27	-0.0540328	-0.240349	0.94646	2990.99	FALSE	99
2022-09-15	11:44:27	0.0738043	0.328296	0.94646	2806.3	FALSE	99
2022-09-15	11:44:27	0.931412	4.14311	0.94646	2995.13	FALSE	99
2022-09-15	11:44:28	2.33243	10.3751	3.8156	2816.68	FALSE	99
2022-09-15	11:44:28	0.662455	2.94673	3.8156	2998.08	FALSE	99
2022-09-15	11:44:28	0.216807	0.964401	3.8156	2817.64	FALSE	99
2022-09-15	11:44:28	0.219453	0.976171	3.8156	2999.05	FALSE	99
2022-09-15	11:44:29	0.366323	1.62948	4.56286	2819.27	FALSE	99
2022-09-15	11:44:29	1.15192	5.12397	4.56286	3004.18	FALSE	99
2022-09-15	11:44:29	1.35207	6.01428	4.56286	2825.29	FALSE	99
2022-09-15	11:44:29	1.23279	5.4837	4.56286	3009.66	FALSE	99
2022-09-15	11:44:30	1.26597	5.63129	4.72783	2830.92	FALSE	99
2022-09-15	11:44:30	1.54714	6.88199	4.72783	3016.54	FALSE	99
2022-09-15	11:44:30	0.375484	1.67023	4.72783	2832.59	FALSE	99
2022-09-15	11:44:31	0.269886	1.20051	0.711543	3017.74	FALSE	99
2022-09-15	11:44:31	0.137621	0.612166	0.711543	2833.2	FALSE	99
2022-09-15	11:44:31	0.0789952	0.351386	0.711543	3018.1	FALSE	99
2022-09-15	11:44:31	0.153346	0.682114	0.711543	2833.88	FALSE	99
2022-09-15	11:44:32	0.00540736	0.024053	-0.107356	3018.12	FALSE	99
2022-09-15	11:44:32	-0.0134731	-0.059931	-0.107356	2833.88	FALSE	99
2022-09-15	11:44:32	-0.0372898	-0.165872	-0.107356	3018.12	FALSE	99
2022-09-15	11:44:32	-0.0511829	-0.227672	-0.107356	2833.88	FALSE	99
2022-09-15	11:44:33	-0.0695035	-0.309165	-0.288792	3018.12	FALSE	99
2022-09-15	11:44:33	-0.0583076	-0.259364	-0.288792	2833.88	FALSE	99
2022-09-15	11:44:33	-0.0670608	-0.2983	-0.288792	3018.12	FALSE	99
2022-09-15	11:44:33	-0.0648216	-0.288339	-0.288792	2833.88	FALSE	99
2022-09-15	11:44:34	-0.055814	-0.248272	-0.788395	3018.12	FALSE	99
2022-09-15	11:44:34	-0.180038	-0.800845	-0.788395	2833.88	FALSE	99
2022-09-15	11:44:34	-0.295865	-1.31607	-0.788395	3018.12	FALSE	99
2022-09-15	11:44:35	-0.00919824	-0.0409156	1.72042	2833.88	FALSE	99
2022-09-15	11:44:35	0.264695	1.17742	1.72042	3019.3	FALSE	99
2022-09-15	11:44:35	0.66902	2.97593	1.72042	2836.86	FALSE	99
2022-09-15	11:44:35	0.622557	2.76926	1.72042	3022.07	FALSE	99
2022-09-15	11:44:36	2.62592	11.6806	9.09833	2848.54	FALSE	99
2022-09-15	11:44:36	2.60846	11.603	9.09833	3033.67	FALSE	99
2022-09-15	11:44:36	1.77925	7.91446	9.09833	2856.45	FALSE	99
2022-09-15	11:44:36	1.16795	5.19528	9.09833	3038.86	FALSE	99
2022-09-15	11:44:37	0.442456	1.96813	0.756422	2858.42	FALSE	99
2022-09-15	11:44:37	0.0830664	0.369496	0.756422	3039.23	FALSE	99
2022-09-15	11:44:37	0.134161	0.596775	0.756422	2859.02	FALSE	99
2022-09-15	11:44:37	0.0205219	0.0912855	0.756422	3039.33	FALSE	99
2022-09-15	11:44:38	0.0506491	0.225297	-0.0686838	2859.24	FALSE	99
2022-09-15	11:44:38	-0.023244	-0.103394	-0.0686838	3039.33	FALSE	99
2022-09-15	11:44:38	-0.0737275	-0.327955	-0.0686838	2859.24	FALSE	99
2022-09-15	11:44:39	-0.100394	-0.446573	-0.541139	3039.33	FALSE	99
2022-09-15	11:44:39	-0.118969	-0.529198	-0.541139	2859.24	FALSE	99
2022-09-15	11:44:39	-0.13047	-0.580357	-0.541139	3039.33	FALSE	99
2022-09-15	11:44:39	-0.136781	-0.608429	-0.541139	2859.24	FALSE	99
2022-09-15	11:44:40	-0.123804	-0.550705	-0.550308	3039.33	FALSE	99
2022-09-15	11:44:40	-0.12131	-0.539611	-0.550308	2859.24	FALSE	99
2022-09-15	11:44:40	-0.127977	-0.569267	-0.550308	3039.33	FALSE	99
2022-09-15	11:44:40	-0.121768	-0.541648	-0.550308	2859.24	FALSE	99
2022-09-15	11:44:41	-0.110776	-0.492754	-0.398583	3039.33	FALSE	99
2022-09-15	11:44:41	-0.0984094	-0.437745	-0.398583	2859.24	FALSE	99
2022-09-15	11:44:41	-0.0762211	-0.339047	-0.398583	3039.33	FALSE	99
2022-09-15	11:44:41	-0.0730149	-0.324785	-0.398583	2859.24	FALSE	99
2022-09-15	11:44:42	-0.0508267	-0.226087	2.66181	3039.33	FALSE	99
2022-09-15	11:44:42	0.111769	0.497171	2.66181	2859.74	FALSE	99
2022-09-15	11:44:42	1.73426	7.71434	2.66181	3047.04	FALSE	99
2022-09-15	11:44:43	4.79619	21.3344	9.2917	2881.07	1	100
2022-09-15	11:44:43	3.00144	13.351	9.2917	3060.39	1	101
2022-09-15	11:44:43	0.472023	2.09965	9.2917	2883.17	FALSE	101
2022-09-15	11:44:43	0.0858144	0.38172	9.2917	3060.77	FALSE	101
2022-09-15	11:44:44	-0.222481	-0.98964	-1.94464	2883.17	FALSE	101
2022-09-15	11:44:44	-0.410623	-1.82653	-1.94464	3060.77	FALSE	101
2022-09-15	11:44:44	-0.500852	-2.22789	-1.94464	2883.17	FALSE	101
2022-09-15	11:44:44	-0.614745	-2.73451	-1.94464	3060.77	FALSE	101
2022-09-15	11:44:45	-0.618715	-2.75217	-2.24764	2883.17	FALSE	101
2022-09-15	11:44:45	-0.499325	-2.2211	-2.24764	3060.77	FALSE	101
2022-09-15	11:44:45	-0.466603	-2.07554	-2.24764	2883.17	FALSE	101
2022-09-15	11:44:45	-0.436526	-1.94175	-2.24764	3060.77	FALSE	101
2022-09-15	11:44:46	-0.303091	-1.34821	8.51366	2883.17	FALSE	101
2022-09-15	11:44:46	0.16098	0.716071	8.51366	3061.49	FALSE	101
2022-09-15	11:44:46	3.31019	14.7244	8.51366	2897.9	1	102
2022-09-15	11:44:46	4.48775	19.9624	8.51366	3081.45	1	103
2022-09-15	11:44:47	1.66108	7.38882	3.71059	2905.29	FALSE	103
2022-09-15	11:44:47	0.467392	2.07905	3.71059	3083.53	FALSE	103
2022-09-15	11:44:47	0.374059	1.66389	3.71059	2906.95	FALSE	103
2022-09-15	11:44:48	0.353906	1.57424	2.2095	3085.1	FALSE	103
2022-09-15	11:44:48	0.419046	1.864	2.2095	2908.81	FALSE	103
2022-09-15	11:44:48	0.584593	2.60039	2.2095	3087.7	FALSE	103
2022-09-15	11:44:48	0.629326	2.79937	2.2095	2911.61	FALSE	103
2022-09-15	11:44:49	0.856501	3.80989	4.50151	3091.51	FALSE	103
2022-09-15	11:44:49	1.09813	4.8847	4.50151	2916.5	FALSE	103
2022-09-15	11:44:49	1.25874	5.59913	4.50151	3097.11	FALSE	103
2022-09-15	11:44:49	0.834568	3.71233	4.50151	2920.21	FALSE	103
2022-09-15	11:44:50	1.07788	4.79463	4.78295	3101.91	FALSE	103
2022-09-15	11:44:50	0.745255	3.31504	4.78295	2923.53	FALSE	103
2022-09-15	11:44:50	1.24281	5.52827	4.78295	3107.44	FALSE	103
2022-09-15	11:44:50	1.23508	5.49388	4.78295	2929.02	FALSE	103
2022-09-15	11:44:51	2.38118	10.592	11.7414	3118.03	FALSE	103
2022-09-15	11:44:51	2.92663	13.0182	11.7414	2942.04	FALSE	103
2022-09-15	11:44:51	2.61095	11.614	11.7414	3129.64	FALSE	103
2022-09-15	11:44:52	3.2764	14.5741	24.0034	2956.61	1	104
2022-09-15	11:44:52	5.20708	23.1621	24.0034	3152.8	1	105
2022-09-15	11:44:52	5.43762	24.1876	24.0034	2980.8	1	106
2022-09-15	11:44:52	7.66372	34.0898	24.0034	3186.89	1	107
2022-09-15	11:44:53	4.63635	20.6234	14.607	3001.42	1	108
2022-09-15	11:44:53	3.2452	14.4353	14.607	3201.33	1	109
2022-09-15	11:44:53	1.25472	5.58125	14.607	3007	FALSE	109
2022-09-15	11:44:53	3.99894	17.7881	14.607	3219.12	1	110
2022-09-15	11:44:54	1.17335	5.2193	0.780477	3012.22	FALSE	110
2022-09-15	11:44:54	0.360165	1.60209	0.780477	3220.72	FALSE	110
2022-09-15	11:44:54	-0.283804	-1.26242	0.780477	3012.22	FALSE	110
2022-09-15	11:44:54	-0.547875	-2.43706	0.780477	3220.72	FALSE	110

## Sheet: Klutz_prong_2022915113947 (3)
Date	Time	Lbs	Newtons	Total force x time		total steps > 13.345	**GoPro Fitting: 1129
								*Big surge in pulling due to dog pulling at dog reacting to her in nearby yard
2022-09-15	11:39:54	3.66963	16.3232	16.3232	1	1
2022-09-15	11:39:54	3.60444	16.0333	16.0333	1	2
2022-09-15	11:39:54	3.59324	15.9835	32.3067	1	3
2022-09-15	11:39:54	3.59563	15.9941	32.0274	1	4
2022-09-15	11:39:55	3.66922	16.3214	48.6281	1	5
2022-09-15	11:39:55	3.38083	15.0386	47.066	1	6
2022-09-15	11:39:55	3.3394	14.8543	63.4824	1	7
2022-09-15	11:39:56	3.69436	16.4333	63.4992	1	8
2022-09-15	11:39:56	4.07197	18.1129	81.5954	1	9
2022-09-15	11:39:56	4.03976	17.9697	81.4689	1	10
2022-09-15	11:39:56	4.07228	18.1143	99.7097	1	11
2022-09-15	11:39:57	3.86688	17.2007	98.6695	1	12
2022-09-15	11:39:57	3.84927	17.1223	116.832	1	13
2022-09-15	11:39:57	3.85848	17.1633	115.833	1	14
2022-09-15	11:39:57	0.665407	2.95986	119.792	FALSE	14
2022-09-15	11:39:58	0.33813	1.50407	117.337	FALSE	14
2022-09-15	11:39:58	0.382608	1.70192	121.494	FALSE	14
2022-09-15	11:39:58	0.427901	1.90339	119.24	FALSE	14
2022-09-15	11:39:58	0.367646	1.63536	123.129	FALSE	14
2022-09-15	11:39:59	0.40958	1.82189	121.062	FALSE	14
2022-09-15	11:39:59	0.400216	1.78024	124.909	FALSE	14
2022-09-15	11:39:59	0.413601	1.83978	122.902	FALSE	14
2022-09-15	11:40:00	0.409224	1.82031	126.73	FALSE	14
2022-09-15	11:40:00	0.370802	1.6494	124.551	FALSE	14
2022-09-15	11:40:00	0.375382	1.66977	128.399	FALSE	14
2022-09-15	11:40:00	0.34958	1.555	126.106	FALSE	14
2022-09-15	11:40:01	0.216959	0.965077	129.365	FALSE	14
2022-09-15	11:40:01	0.418486	1.86151	127.968	FALSE	14
2022-09-15	11:40:01	-0.0248725	-0.110638	129.365	FALSE	14
2022-09-15	11:40:01	-0.231641	-1.03039	127.968	FALSE	14
2022-09-15	11:40:02	-0.386603	-1.71969	129.365	FALSE	14
2022-09-15	11:40:02	-0.492302	-2.18986	127.968	FALSE	14
2022-09-15	11:40:02	-0.597188	-2.65641	129.365	FALSE	14
2022-09-15	11:40:02	-0.602328	-2.67928	127.968	FALSE	14
2022-09-15	11:40:03	0.982455	4.37016	133.735	FALSE	14
2022-09-15	11:40:03	0.400573	1.78183	129.75	FALSE	14
2022-09-15	11:40:03	-0.10528	-0.468306	133.735	FALSE	14
2022-09-15	11:40:04	-0.595763	-2.65007	129.75	FALSE	14
2022-09-15	11:40:04	-0.756221	-3.36382	133.735	FALSE	14
2022-09-15	11:40:04	-0.835712	-3.71741	129.75	FALSE	14
2022-09-15	11:40:04	-0.771182	-3.43037	133.735	FALSE	14
2022-09-15	11:40:05	-0.695508	-3.09376	129.75	FALSE	14
2022-09-15	11:40:05	-0.0896053	-0.398582	133.735	FALSE	14
2022-09-15	11:40:05	0.192074	0.854384	130.604	FALSE	14
2022-09-15	11:40:05	0.205	0.911881	134.647	FALSE	14
2022-09-15	11:40:06	6.00739	26.7221	157.326	1	15
2022-09-15	11:40:06	42.212	187.767	322.414	1	16
2022-09-15	11:40:06	21.6947	96.5024	253.829	1	17
2022-09-15	11:40:06	2.49538	11.0999	333.514	FALSE	17
2022-09-15	11:40:07	2.05482	9.14025	262.969	FALSE	17
2022-09-15	11:40:07	2.3253	10.3434	343.857	FALSE	17
2022-09-15	11:40:07	7.97782	35.4869	298.456	1	18
2022-09-15	11:40:08	13.8989	61.8251	405.682	1	19
2022-09-15	11:40:08	7.66759	34.107	332.563	1	20
2022-09-15	11:40:08	11.3256	50.3785	456.061	1	21
2022-09-15	11:40:08	13.1566	58.5232	391.086	1	22
2022-09-15	11:40:09	14.5296	64.6306	520.692	1	23
2022-09-15	11:40:09	14.4461	64.2591	455.345	1	24
2022-09-15	11:40:09	12.7488	56.7092	577.401	1	25
2022-09-15	11:40:09	2.32668	10.3495	465.695	FALSE	25
2022-09-15	11:40:10	1.60469	7.13798	584.539	FALSE	25
2022-09-15	11:40:10	1.14958	5.11356	470.808	FALSE	25
2022-09-15	11:40:10	0.224491	0.998581	585.537	FALSE	25
2022-09-15	11:40:10	1.1451	5.09363	475.902	FALSE	25
2022-09-15	11:40:11	11.1654	49.6659	635.203	1	26
2022-09-15	11:40:11	13.0505	58.0512	533.953	1	27
2022-09-15	11:40:11	10.7102	47.6411	682.844	1	28
2022-09-15	11:40:12	10.8943	48.46	582.413	1	29
2022-09-15	11:40:12	11.5644	51.4408	734.285	1	30
2022-09-15	11:40:12	6.85965	30.5131	612.926	1	31
2022-09-15	11:40:12	6.76291	30.0828	764.368	1	32
2022-09-15	11:40:13	18.739	83.3548	696.281	1	33
2022-09-15	11:40:13	17.1784	76.413	840.781	1	34
2022-09-15	11:40:13	9.27309	41.2486	737.529	1	35
2022-09-15	11:40:13	6.6679	29.6602	870.441	1	36
2022-09-15	11:40:14	7.78174	34.6147	772.144	1	37
2022-09-15	11:40:14	14.2318	63.3059	933.747	1	38
2022-09-15	11:40:14	16.7626	74.5634	846.708	1	39
2022-09-15	11:40:14	18.957	84.3245	1018.07	1	40
2022-09-15	11:40:15	11.1205	49.4662	896.174	1	41
2022-09-15	11:40:15	15.6445	69.5899	1087.66	1	42
2022-09-15	11:40:15	16.4549	73.1947	969.369	1	43
2022-09-15	11:40:16	5.61874	24.9933	1112.65	1	44
2022-09-15	11:40:16	0.502405	2.2348	971.603	FALSE	44
2022-09-15	11:40:16	-0.127315	-0.566323	1112.65	FALSE	44
2022-09-15	11:40:16	-0.212862	-0.946853	971.603	FALSE	44
2022-09-15	11:40:17	-0.386094	-1.71742	1112.65	FALSE	44
2022-09-15	11:40:17	-0.826501	-3.67644	971.603	FALSE	44
2022-09-15	11:40:17	-0.980699	-4.36235	1112.65	FALSE	44
2022-09-15	11:40:17	-1.01576	-4.5183	971.603	FALSE	44
2022-09-15	11:40:18	-0.760088	-3.38102	1112.65	FALSE	44
2022-09-15	11:40:18	0.295942	1.31641	972.92	FALSE	44
2022-09-15	11:40:18	0.275687	1.22631	1113.88	FALSE	44
2022-09-15	11:40:18	0.0550257	0.244765	973.164	FALSE	44
2022-09-15	11:40:19	-0.106654	-0.474418	1113.88	FALSE	44
2022-09-15	11:40:19	-0.258206	-1.14855	973.164	FALSE	44
2022-09-15	11:40:19	-0.768027	-3.41634	1113.88	FALSE	44
2022-09-15	11:40:20	-0.689605	-3.0675	973.164	FALSE	44
2022-09-15	11:40:20	0.29126	1.29558	1115.18	FALSE	44
2022-09-15	11:40:20	2.0933	9.31142	982.476	FALSE	44
2022-09-15	11:40:20	8.58479	38.1869	1153.36	1	45
2022-09-15	11:40:21	8.49105	37.7699	1020.25	1	46
2022-09-15	11:40:21	4.43889	19.7451	1173.11	1	47
2022-09-15	11:40:21	1.46464	6.51501	1026.76	FALSE	47
2022-09-15	11:40:21	0.235636	1.04816	1174.16	FALSE	47
2022-09-15	11:40:22	-0.0853305	-0.379567	1026.76	FALSE	47
2022-09-15	11:40:22	-0.273829	-1.21805	1174.16	FALSE	47
2022-09-15	11:40:22	-0.523345	-2.32794	1026.76	FALSE	47
2022-09-15	11:40:22	-0.473117	-2.10452	1174.16	FALSE	47
2022-09-15	11:40:23	0.0724302	0.322184	1027.08	FALSE	47
2022-09-15	11:40:23	0.104186	0.46344	1174.62	FALSE	47
2022-09-15	11:40:23	-0.197188	-0.877132	1027.08	FALSE	47
2022-09-15	11:40:24	-0.346043	-1.53927	1174.62	FALSE	47
2022-09-15	11:40:24	-0.366246	-1.62914	1027.08	FALSE	47
2022-09-15	11:40:24	-0.227519	-1.01205	1174.62	FALSE	47
2022-09-15	11:40:24	-0.348486	-1.55014	1027.08	FALSE	47
2022-09-15	11:40:25	-0.445788	-1.98295	1174.62	FALSE	47
2022-09-15	11:40:25	-0.0546944	-0.243292	1027.08	FALSE	47
2022-09-15	11:40:25	0.124797	0.555122	1175.18	FALSE	47
2022-09-15	11:40:25	-0.408078	-1.81521	1027.08	FALSE	47
2022-09-15	11:40:26	0.0738552	0.328523	1175.5	FALSE	47
2022-09-15	11:40:26	0.880776	3.91787	1031	FALSE	47
2022-09-15	11:40:26	1.23207	5.48049	1180.98	FALSE	47
2022-09-15	11:40:26	2.91049	12.9464	1043.95	FALSE	47
2022-09-15	11:40:27	2.49202	11.085	1192.07	FALSE	47
2022-09-15	11:40:27	1.08765	4.83808	1048.79	FALSE	47
2022-09-15	11:40:27	0.964949	4.29229	1196.36	FALSE	47
2022-09-15	11:40:28	0.36556	1.62608	1050.41	FALSE	47
2022-09-15	11:40:28	-0.0217173	-0.0966029	1196.36	FALSE	47
2022-09-15	11:40:28	-0.119733	-0.532596	1050.41	FALSE	47
2022-09-15	11:40:28	0.00937683	0.04171	1196.4	FALSE	47
2022-09-15	11:40:29	-0.210521	-0.93644	1050.41	FALSE	47
2022-09-15	11:40:29	-0.213473	-0.949571	1196.4	FALSE	47
2022-09-15	11:40:29	-0.223855	-0.995752	1050.41	FALSE	47
2022-09-15	11:40:29	-0.394949	-1.75681	1196.4	FALSE	47
2022-09-15	11:40:30	-0.163956	-0.729309	1050.41	FALSE	47
2022-09-15	11:40:30	0.214822	0.955571	1197.36	FALSE	47
2022-09-15	11:40:30	1.27218	5.65891	1056.07	FALSE	47
2022-09-15	11:40:30	-0.0769335	-0.342216	1197.36	FALSE	47
2022-09-15	11:40:31	-0.0890455	-0.396092	1056.07	FALSE	47
2022-09-15	11:40:31	-0.431692	-1.92025	1197.36	FALSE	47
2022-09-15	11:40:31	-0.516119	-2.2958	1056.07	FALSE	47
2022-09-15	11:40:32	-0.571793	-2.54345	1197.36	FALSE	47
2022-09-15	11:40:32	-0.77561	-3.45007	1056.07	FALSE	47
2022-09-15	11:40:32	-0.329351	-1.46502	1197.36	FALSE	47
2022-09-15	11:40:32	-0.274847	-1.22257	1056.07	FALSE	47
2022-09-15	11:40:33	-0.276526	-1.23004	1197.36	FALSE	47
2022-09-15	11:40:33	-0.244618	-1.08811	1056.07	FALSE	47
2022-09-15	11:40:33	-0.298766	-1.32897	1197.36	FALSE	47
2022-09-15	11:40:33	-0.433371	-1.92772	1056.07	FALSE	47
2022-09-15	11:40:34	-0.612251	-2.72341	1197.36	FALSE	47
2022-09-15	11:40:34	-0.734898	-3.26897	1056.07	FALSE	47
2022-09-15	11:40:34	-0.426552	-1.89739	1197.36	FALSE	47
2022-09-15	11:40:34	-0.484516	-2.15522	1056.07	FALSE	47
2022-09-15	11:40:35	-0.520597	-2.31572	1197.36	FALSE	47
2022-09-15	11:40:35	-0.290419	-1.29184	1056.07	FALSE	47
2022-09-15	11:40:35	-0.0583076	-0.259364	1197.36	FALSE	47
2022-09-15	11:40:36	2.00062	8.89916	1064.97	FALSE	47
2022-09-15	11:40:36	1.85141	8.23544	1205.59	FALSE	47
2022-09-15	11:40:36	2.22276	9.88728	1074.86	FALSE	47
2022-09-15	11:40:36	2.69177	11.9735	1217.57	FALSE	47
2022-09-15	11:40:37	1.05518	4.69365	1079.55	FALSE	47
2022-09-15	11:40:37	1.16459	5.18033	1222.75	FALSE	47
2022-09-15	11:40:37	0.915789	4.07361	1083.62	FALSE	47
2022-09-15	11:40:37	0.926679	4.12205	1226.87	FALSE	47
2022-09-15	11:40:38	0.705865	3.13983	1086.76	FALSE	47
2022-09-15	11:40:38	2.11711	9.41733	1236.29	FALSE	47
2022-09-15	11:40:38	1.01915	4.53338	1091.3	FALSE	47
2022-09-15	11:40:38	1.48108	6.58814	1242.88	FALSE	47
2022-09-15	11:40:39	0.00479668	0.0213366	1091.32	FALSE	47
2022-09-15	11:40:39	0.117621	0.523202	1243.4	FALSE	47
2022-09-15	11:40:39	0.120471	0.535879	1091.85	FALSE	47
2022-09-15	11:40:40	0.0765015	0.340294	1243.74	FALSE	47
2022-09-15	11:40:40	-0.223346	-0.993488	1091.85	FALSE	47
2022-09-15	11:40:40	-0.179122	-0.79677	1243.74	FALSE	47
2022-09-15	11:40:40	-0.126297	-0.561794	1091.85	FALSE	47
2022-09-15	11:40:41	-0.0473662	-0.210694	1243.74	FALSE	47
2022-09-15	11:40:41	-0.0941854	-0.418955	1091.85	FALSE	47
2022-09-15	11:40:41	0.0535498	0.2382	1243.98	FALSE	47
2022-09-15	11:40:41	0.199453	0.887207	1092.74	FALSE	47
2022-09-15	11:40:42	2.09452	9.31684	1253.29	FALSE	47
2022-09-15	11:40:42	4.05166	18.0226	1110.76	1	48
2022-09-15	11:40:42	2.16887	9.64757	1262.94	FALSE	48
2022-09-15	11:40:42	0.364644	1.62201	1112.39	FALSE	48
2022-09-15	11:40:43	0.0471885	0.209904	1263.15	FALSE	48
2022-09-15	11:40:43	0.966069	4.29727	1116.68	FALSE	48
2022-09-15	11:40:43	0.193601	0.861176	1264.01	FALSE	48
2022-09-15	11:40:44	0.78846	3.50723	1120.19	FALSE	48
2022-09-15	11:40:44	0.954262	4.24475	1268.26	FALSE	48
2022-09-15	11:40:44	1.09813	4.8847	1125.08	FALSE	48
2022-09-15	11:40:44	0.572837	2.54809	1270.81	FALSE	48
2022-09-15	11:40:45	1.29782	5.77296	1130.85	FALSE	48
2022-09-15	11:40:45	1.56408	6.95734	1277.76	FALSE	48
2022-09-15	11:40:45	1.55696	6.92567	1137.77	FALSE	48
2022-09-15	11:40:45	1.66139	7.39019	1285.15	FALSE	48
2022-09-15	11:40:46	0.549478	2.44419	1140.22	FALSE	48
2022-09-15	11:40:46	0.548817	2.44125	1287.59	FALSE	48
2022-09-15	11:40:46	0.419148	1.86445	1142.08	FALSE	48
2022-09-15	11:40:46	0.508359	2.26128	1289.86	FALSE	48
2022-09-15	11:40:47	0.728562	3.24079	1145.32	FALSE	48
2022-09-15	11:40:47	2.83538	12.6123	1302.47	FALSE	48
2022-09-15	11:40:47	1.54607	6.87723	1152.2	FALSE	48
2022-09-15	11:40:48	0.670293	2.9816	1305.45	FALSE	48
2022-09-15	11:40:48	0.560623	2.49376	1154.69	FALSE	48
2022-09-15	11:40:48	0.227239	1.0108	1306.46	FALSE	48
2022-09-15	11:40:48	0.736654	3.27678	1157.97	FALSE	48
2022-09-15	11:40:49	1.00536	4.47204	1310.93	FALSE	48
2022-09-15	11:40:49	2.68846	11.9588	1169.93	FALSE	48
2022-09-15	11:40:49	2.47273	10.9992	1321.93	FALSE	48
2022-09-15	11:40:49	1.36836	6.08674	1176.02	FALSE	48
2022-09-15	11:40:50	2.30617	10.2583	1332.19	FALSE	48
2022-09-15	11:40:50	2.20184	9.79422	1185.81	FALSE	48
2022-09-15	11:40:50	0.624135	2.77628	1334.97	FALSE	48
2022-09-15	11:40:50	0.374771	1.66706	1187.48	FALSE	48
2022-09-15	11:40:51	0.740369	3.29331	1338.26	FALSE	48
2022-09-15	11:40:51	0.581234	2.58545	1190.06	FALSE	48
2022-09-15	11:40:51	1.25599	5.58689	1343.85	FALSE	48
2022-09-15	11:40:52	1.17385	5.22152	1195.29	FALSE	48
2022-09-15	11:40:52	1.91543	8.52022	1352.37	FALSE	48
2022-09-15	11:40:52	1.83233	8.15057	1203.44	FALSE	48
2022-09-15	11:40:52	1.89905	8.44735	1360.81	FALSE	48
2022-09-15	11:40:53	1.22744	5.4599	1208.9	FALSE	48
2022-09-15	11:40:53	1.4735	6.55442	1367.37	FALSE	48
2022-09-15	11:40:53	2.42688	10.7952	1219.69	FALSE	48
2022-09-15	11:40:53	3.19864	14.2282	1381.6	1	49
2022-09-15	11:40:54	4.01808	17.8732	1237.56	1	50
2022-09-15	11:40:54	4.5936	20.4333	1402.03	1	51
2022-09-15	11:40:54	2.38765	10.6207	1248.18	FALSE	51
2022-09-15	11:40:54	0.408308	1.81624	1403.85	FALSE	51
2022-09-15	11:40:55	0.861539	3.8323	1252.02	FALSE	51
2022-09-15	11:40:55	0.109021	0.484947	1404.33	FALSE	51
2022-09-15	11:40:55	0.740318	3.29308	1255.31	FALSE	51
2022-09-15	11:40:56	1.33574	5.94164	1410.27	FALSE	51
2022-09-15	11:40:56	3.4451	15.3245	1270.63	1	52
2022-09-15	11:40:56	3.81736	16.9804	1427.25	1	53
2022-09-15	11:40:56	4.75604	21.1558	1291.79	1	54
2022-09-15	11:40:57	2.0338	9.04675	1436.3	FALSE	54
2022-09-15	11:40:57	1.61594	7.18802	1298.98	FALSE	54
2022-09-15	11:40:57	0.470903	2.09467	1438.39	FALSE	54
2022-09-15	11:40:57	0.72729	3.23513	1302.21	FALSE	54
2022-09-15	11:40:58	0.545305	2.42563	1440.82	FALSE	54
2022-09-15	11:40:58	0.204237	0.908487	1303.12	FALSE	54
2022-09-15	11:40:58	1.05238	4.6812	1445.5	FALSE	54
2022-09-15	11:40:59	3.33874	14.8514	1317.97	1	55
2022-09-15	11:40:59	0.999758	4.44712	1449.95	FALSE	55
2022-09-15	11:40:59	-0.022786	-0.101357	1317.97	FALSE	55
2022-09-15	11:40:59	0.154924	0.689133	1450.64	FALSE	55
2022-09-15	11:41:00	0.12271	0.545839	1318.52	FALSE	55
2022-09-15	11:41:00	-0.118969	-0.529198	1450.64	FALSE	55
2022-09-15	11:41:00	-0.101157	-0.449967	1318.52	FALSE	55
2022-09-15	11:41:00	-0.296883	-1.32059	1450.64	FALSE	55
2022-09-15	11:41:01	-0.614542	-2.73361	1318.52	FALSE	55
2022-09-15	11:41:01	-0.789351	-3.51119	1450.64	FALSE	55
2022-09-15	11:41:01	-0.890673	-3.96189	1318.52	FALSE	55
2022-09-15	11:41:01	-0.810012	-3.6031	1450.64	FALSE	55
2022-09-15	11:41:02	-0.721462	-3.20921	1318.52	FALSE	55
2022-09-15	11:41:02	-0.353524	-1.57255	1450.64	FALSE	55
2022-09-15	11:41:02	-0.0016664	-0.00741248	1318.52	FALSE	55
2022-09-15	11:41:03	0.200725	0.892865	1451.53	FALSE	55
2022-09-15	11:41:03	0.387036	1.72161	1320.24	FALSE	55
2022-09-15	11:41:03	0.444847	1.97877	1453.51	FALSE	55
2022-09-15	11:41:03	0.310802	1.38251	1321.62	FALSE	55
2022-09-15	11:41:04	-0.01444	-0.064232	1453.51	FALSE	55
2022-09-15	11:41:04	0.161082	0.716525	1322.34	FALSE	55
2022-09-15	11:41:04	0.319148	1.41963	1454.93	FALSE	55
2022-09-15	11:41:04	1.21859	5.42053	1327.76	FALSE	55
2022-09-15	11:41:05	3.27599	14.5723	1469.5	1	56
2022-09-15	11:41:05	3.49904	15.5644	1343.32	1	57
2022-09-15	11:41:05	5.04276	22.4312	1491.93	1	58
2022-09-15	11:41:05	3.94968	17.569	1360.89	1	59
2022-09-15	11:41:06	2.4277	10.7989	1502.73	FALSE	59
2022-09-15	11:41:06	1.83335	8.15511	1369.05	FALSE	59
2022-09-15	11:41:06	0.37757	1.67951	1504.41	FALSE	59
2022-09-15	11:41:07	0.700929	3.11787	1372.17	FALSE	59
2022-09-15	11:41:07	0.321183	1.42869	1505.84	FALSE	59
2022-09-15	11:41:07	0.379555	1.68834	1373.86	FALSE	59
2022-09-15	11:41:07	0.284644	1.26615	1507.11	FALSE	59
2022-09-15	11:41:08	0.285611	1.27045	1375.13	FALSE	59
2022-09-15	11:41:08	0.393448	1.75014	1508.86	FALSE	59
2022-09-15	11:41:08	0.151412	0.673511	1375.8	FALSE	59
2022-09-15	11:41:08	0.625356	2.78171	1511.64	FALSE	59
2022-09-15	11:41:09	0.834924	3.71391	1379.51	FALSE	59
2022-09-15	11:41:09	4.17304	18.5625	1530.2	1	60
2022-09-15	11:41:09	3.73024	16.5929	1396.11	1	61
2022-09-15	11:41:09	4.54968	20.2379	1550.44	1	62
2022-09-15	11:41:10	1.81966	8.09421	1404.2	FALSE	62
2022-09-15	11:41:10	1.15156	5.12237	1555.56	FALSE	62
2022-09-15	11:41:10	0.469886	2.09015	1406.29	FALSE	62
2022-09-15	11:41:11	0.449682	2.00028	1557.56	FALSE	62
2022-09-15	11:41:11	0.488461	2.17277	1408.46	FALSE	62
2022-09-15	11:41:11	0.366883	1.63197	1559.19	FALSE	62
2022-09-15	11:41:11	0.506934	2.25494	1410.72	FALSE	62
2022-09-15	11:41:12	0.374771	1.66706	1560.86	FALSE	62
2022-09-15	11:41:12	0.537672	2.39167	1413.11	FALSE	62
2022-09-15	11:41:12	0.589478	2.62212	1563.48	FALSE	62
2022-09-15	11:41:12	1.18704	5.28019	1418.39	FALSE	62
2022-09-15	11:41:13	2.10648	9.37004	1572.85	FALSE	62
2022-09-15	11:41:13	2.21538	9.85445	1428.24	FALSE	62
2022-09-15	11:41:13	2.54831	11.3354	1584.19	FALSE	62
2022-09-15	11:41:13	1.36357	6.06543	1434.31	FALSE	62
2022-09-15	11:41:14	2.93716	13.0651	1597.25	FALSE	62
2022-09-15	11:41:14	2.65711	11.8194	1446.13	FALSE	62
2022-09-15	11:41:14	4.37686	19.4691	1616.72	1	63
2022-09-15	11:41:15	4.11085	18.2859	1464.42	1	64
2022-09-15	11:41:15	2.56108	11.3922	1628.11	FALSE	64
2022-09-15	11:41:15	2.83798	12.6239	1477.04	FALSE	64
2022-09-15	11:41:15	2.22805	9.91081	1638.02	FALSE	64
2022-09-15	11:41:16	4.4224	19.6717	1496.71	1	65
2022-09-15	11:41:16	3.29131	14.6404	1652.66	1	66
2022-09-15	11:41:16	3.07996	13.7003	1510.41	1	67
2022-09-15	11:41:16	2.0564	9.14728	1661.81	FALSE	67
2022-09-15	11:41:17	2.27609	10.1245	1520.54	FALSE	67
2022-09-15	11:41:17	0.279809	1.24465	1663.06	FALSE	67
2022-09-15	11:41:17	1.08235	4.81451	1525.35	FALSE	67
2022-09-15	11:41:17	1.13441	5.04608	1668.1	FALSE	67
2022-09-15	11:41:18	0.804389	3.57808	1528.93	FALSE	67
2022-09-15	11:41:18	1.46592	6.52071	1674.62	FALSE	67
2022-09-15	11:41:18	0.945356	4.20513	1533.13	FALSE	67
2022-09-15	11:41:19	0.335331	1.49162	1676.11	FALSE	67
2022-09-15	11:41:19	0.312481	1.38998	1534.52	FALSE	67
2022-09-15	11:41:19	0.388054	1.72614	1677.84	FALSE	67
2022-09-15	11:41:19	0.285967	1.27204	1535.8	FALSE	67
2022-09-15	11:41:20	0.300624	1.33724	1679.18	FALSE	67
2022-09-15	11:41:20	0.314211	1.39767	1537.19	FALSE	67
2022-09-15	11:41:20	0.795076	3.53666	1682.71	FALSE	67
2022-09-15	11:41:20	1.17976	5.24781	1542.44	FALSE	67
2022-09-15	11:41:21	0.162201	0.721502	1683.44	FALSE	67
2022-09-15	11:41:21	0.215585	0.958965	1543.4	FALSE	67
2022-09-15	11:41:21	-0.018155	-0.0807571	1683.44	FALSE	67
2022-09-15	11:41:21	0.0747712	0.332597	1543.73	FALSE	67
2022-09-15	11:41:22	-0.26701	-1.18771	1683.44	FALSE	67
2022-09-15	11:41:22	-0.307671	-1.36858	1543.73	FALSE	67
2022-09-15	11:41:22	-0.449554	-1.99971	1683.44	FALSE	67
2022-09-15	11:41:23	-0.4693	-2.08754	1543.73	FALSE	67
2022-09-15	11:41:23	-0.393931	-1.75228	1683.44	FALSE	67
2022-09-15	11:41:23	-0.1693	-0.75308	1543.73	FALSE	67
2022-09-15	11:41:23	-0.0780531	-0.347196	1683.44	FALSE	67
2022-09-15	11:41:24	0.255178	1.13508	1544.87	FALSE	67
2022-09-15	11:41:24	0.211565	0.941083	1684.38	FALSE	67
2022-09-15	11:41:24	0.246221	1.09524	1545.96	FALSE	67
2022-09-15	11:41:24	0.419148	1.86445	1686.24	FALSE	67
2022-09-15	11:41:25	0.342506	1.52354	1547.49	FALSE	67
2022-09-15	11:41:25	0.485356	2.15896	1688.4	FALSE	67
2022-09-15	11:41:25	0.261031	1.16112	1548.65	FALSE	67
2022-09-15	11:41:25	0.488054	2.17096	1690.57	FALSE	67
2022-09-15	11:41:26	0.211158	0.939273	1549.59	FALSE	67
2022-09-15	11:41:26	0.455992	2.02834	1692.6	FALSE	67
2022-09-15	11:41:26	0.215433	0.958289	1550.54	FALSE	67
2022-09-15	11:41:27	0.408461	1.81692	1694.42	FALSE	67
2022-09-15	11:41:27	0.263372	1.17153	1551.72	FALSE	67
2022-09-15	11:41:27	0.432277	1.92285	1696.34	FALSE	67
2022-09-15	11:41:27	0.270751	1.20435	1552.92	FALSE	67
2022-09-15	11:41:28	0.448613	1.99552	1698.34	FALSE	67
2022-09-15	11:41:28	0.343168	1.52648	1554.45	FALSE	67
2022-09-15	11:41:28	0.505051	2.24657	1700.58	FALSE	67
2022-09-15	11:41:28	0.450496	2.0039	1556.45	FALSE	67
2022-09-15	11:41:29	0.393244	1.74923	1702.33	FALSE	67
2022-09-15	11:41:29	0.175992	0.782848	1557.23	FALSE	67
2022-09-15	11:41:29	0.203117	0.903505	1703.23	FALSE	67
2022-09-15	11:41:29	0.2993	1.33135	1558.57	FALSE	67
2022-09-15	11:41:30	0.678384	3.01759	1706.25	FALSE	67
2022-09-15	11:41:30	0.030242	0.134522	1558.7	FALSE	67
2022-09-15	11:41:30	0.191921	0.853703	1707.11	FALSE	67
2022-09-15	11:41:31	0.265662	1.18172	1559.88	FALSE	67
2022-09-15	11:41:31	0.320522	1.42575	1708.53	FALSE	67
2022-09-15	11:41:31	0.394161	1.75331	1561.63	FALSE	67
2022-09-15	11:41:31	0.384898	1.7121	1710.24	FALSE	67
2022-09-15	11:41:32	0.452328	2.01205	1563.65	FALSE	67
2022-09-15	11:41:32	0.586628	2.60944	1712.85	FALSE	67
2022-09-15	11:41:32	0.557723	2.48086	1566.13	FALSE	67
2022-09-15	11:41:32	0.43355	1.92852	1714.78	FALSE	67
2022-09-15	11:41:33	0.152736	0.6794	1566.81	FALSE	67
2022-09-15	11:41:33	0.294415	1.30962	1716.09	FALSE	67
2022-09-15	11:41:33	0.324389	1.44295	1568.25	FALSE	67
2022-09-15	11:41:33	0.320216	1.42438	1717.52	FALSE	67
2022-09-15	11:41:34	0.308003	1.37006	1569.62	FALSE	67
2022-09-15	11:41:34	0.109071	0.48517	1718	FALSE	67
2022-09-15	11:41:34	0.384898	1.7121	1571.33	FALSE	67
2022-09-15	11:41:35	0.335382	1.49185	1719.49	FALSE	67
2022-09-15	11:41:35	0.268766	1.19552	1572.53	FALSE	67
2022-09-15	11:41:35	0.280369	1.24714	1720.74	FALSE	67
2022-09-15	11:41:35	0.334415	1.48754	1574.02	FALSE	67
2022-09-15	11:41:36	0.348664	1.55093	1722.29	FALSE	67
2022-09-15	11:41:36	0.622812	2.77039	1576.79	FALSE	67
2022-09-15	11:41:36	0.724593	3.22313	1725.51	FALSE	67
2022-09-15	11:41:36	0.733142	3.26116	1580.05	FALSE	67
2022-09-15	11:41:37	0.735026	3.26954	1728.78	FALSE	67
2022-09-15	11:41:37	0.726323	3.23083	1583.28	FALSE	67
2022-09-15	11:41:37	0.657366	2.9241	1731.71	FALSE	67
2022-09-15	11:41:37	0.643117	2.86071	1586.14	FALSE	67
2022-09-15	11:41:38	0.471209	2.09603	1733.8	FALSE	67
2022-09-15	11:41:38	0.518944	2.30837	1588.45	FALSE	67
2022-09-15	11:41:38	0.494924	2.20152	1736.01	FALSE	67
2022-09-15	11:41:39	0.524236	2.33191	1590.78	FALSE	67
2022-09-15	11:41:39	0.509987	2.26852	1738.27	FALSE	67
2022-09-15	11:41:39	0.483372	2.15014	1592.93	FALSE	67
2022-09-15	11:41:39	0.490242	2.18069	1740.45	FALSE	67
2022-09-15	11:41:40	0.487697	2.16937	1595.1	FALSE	67
2022-09-15	11:41:40	0.498232	2.21624	1742.67	FALSE	67
2022-09-15	11:41:40	0.501997	2.23298	1597.33	FALSE	67
2022-09-15	11:41:40	0.49243	2.19043	1744.86	FALSE	67
2022-09-15	11:41:41	0.474924	2.11256	1599.44	FALSE	67
2022-09-15	11:41:41	0.47472	2.11165	1746.97	FALSE	67
2022-09-15	11:41:41	0.485916	2.16145	1601.61	FALSE	67
2022-09-15	11:41:41	0.514975	2.29071	1749.26	FALSE	67
2022-09-15	11:41:42	0.519249	2.30972	1603.91	FALSE	67
2022-09-15	11:41:42	0.503982	2.24181	1751.51	FALSE	67
2022-09-15	11:41:42	0.467952	2.08154	1606	FALSE	67
2022-09-15	11:41:43	0.431412	1.91901	1753.42	FALSE	67
2022-09-15	11:41:43	0.408104	1.81533	1607.81	FALSE	67
2022-09-15	11:41:43	0.382048	1.69943	1755.12	FALSE	67
2022-09-15	11:41:43	0.433041	1.92625	1609.74	FALSE	67
2022-09-15	11:41:44	0.393092	1.74855	1756.87	FALSE	67
2022-09-15	11:41:44	0.373193	1.66004	1611.4	FALSE	67
2022-09-15	11:41:44	0.335127	1.49071	1758.36	FALSE	67
2022-09-15	11:41:44	0.429682	1.91131	1613.31	FALSE	67
2022-09-15	11:41:45	0.431158	1.91788	1760.28	FALSE	67
2022-09-15	11:41:45	0.274364	1.22043	1614.53	FALSE	67
2022-09-15	11:41:45	0.291412	1.29626	1761.58	FALSE	67
2022-09-15	11:41:45	0.377367	1.6786	1616.21	FALSE	67
2022-09-15	11:41:46	0.374771	1.66706	1763.24	FALSE	67
2022-09-15	11:41:46	0.445509	1.98171	1618.19	FALSE	67
2022-09-15	11:41:46	0.260573	1.15908	1764.4	FALSE	67
2022-09-15	11:41:47	0.270751	1.20435	1619.39	FALSE	67
2022-09-15	11:41:47	0.422965	1.88143	1766.28	FALSE	67
2022-09-15	11:41:47	0.572481	2.54651	1621.94	FALSE	67
2022-09-15	11:41:47	0.567392	2.52387	1768.81	FALSE	67
2022-09-15	11:41:48	0.688919	3.06445	1625.01	FALSE	67
2022-09-15	11:41:48	0.660369	2.93745	1771.75	FALSE	67
2022-09-15	11:41:48	0.357265	1.58919	1626.59	FALSE	67
2022-09-15	11:41:48	0.312023	1.38794	1773.13	FALSE	67
2022-09-15	11:41:49	0.408817	1.8185	1628.41	FALSE	67
2022-09-15	11:41:49	0.464033	2.06411	1775.2	FALSE	67
2022-09-15	11:41:49	0.344746	1.5335	1629.95	FALSE	67
2022-09-15	11:41:50	0.338842	1.50724	1776.71	FALSE	67
2022-09-15	11:41:50	0.449886	2.00118	1631.95	FALSE	67
2022-09-15	11:41:50	0.568002	2.52659	1779.23	FALSE	67
2022-09-15	11:41:50	0.596145	2.65177	1634.6	FALSE	67
2022-09-15	11:41:51	0.76785	3.41555	1782.65	FALSE	67
2022-09-15	11:41:51	1.13416	5.04497	1639.64	FALSE	67
2022-09-15	11:41:51	2.15248	9.57466	1792.22	FALSE	67
2022-09-15	11:41:51	2.08877	9.29127	1648.94	FALSE	67
2022-09-15	11:41:52	1.05782	4.70539	1796.93	FALSE	67
2022-09-15	11:41:52	0.796807	3.54436	1652.48	FALSE	67
2022-09-15	11:41:52	0.529478	2.35522	1799.28	FALSE	67
2022-09-15	11:41:52	1.54709	6.88177	1659.36	FALSE	67
2022-09-15	11:41:53	1.89039	8.40883	1807.69	FALSE	67
2022-09-15	11:41:53	1.35034	6.00658	1665.37	FALSE	67
2022-09-15	11:41:53	1.33401	5.93394	1813.63	FALSE	67
2022-09-15	11:41:53	1.07151	4.76629	1670.13	FALSE	67
2022-09-15	11:41:54	0.842303	3.74673	1817.37	FALSE	67
2022-09-15	11:41:54	1.07472	4.78057	1674.92	FALSE	67
2022-09-15	11:41:54	1.02276	4.54944	1821.92	FALSE	67
2022-09-15	11:41:55	0.421031	1.87283	1676.79	FALSE	67
2022-09-15	11:41:55	0.260115	1.15704	1823.08	FALSE	67
2022-09-15	11:41:55	0.729428	3.24464	1680.03	FALSE	67
2022-09-15	11:41:55	0.245509	1.09207	1824.17	FALSE	67
2022-09-15	11:41:56	1.03177	4.58952	1684.62	FALSE	67
2022-09-15	11:41:56	0.575076	2.55805	1826.73	FALSE	67
2022-09-15	11:41:56	0.71472	3.17922	1687.8	FALSE	67
2022-09-15	11:41:56	0.554822	2.46796	1829.2	FALSE	67
2022-09-15	11:41:57	0.763779	3.39744	1691.2	FALSE	67
2022-09-15	11:41:57	1.49375	6.6445	1835.84	FALSE	67
2022-09-15	11:41:57	1.26296	5.6179	1696.82	FALSE	67
2022-09-15	11:41:57	1.18205	5.25799	1841.1	FALSE	67
2022-09-15	11:41:58	0.968511	4.30813	1701.13	FALSE	67
2022-09-15	11:41:58	1.32663	5.90112	1847	FALSE	67
2022-09-15	11:41:58	1.73457	7.71571	1708.84	FALSE	67
2022-09-15	11:41:59	1.3509	6.00907	1853.01	FALSE	67
2022-09-15	11:41:59	1.5163	6.74481	1715.59	FALSE	67
2022-09-15	11:41:59	2.70703	12.0414	1865.05	FALSE	67
2022-09-15	11:41:59	1.61808	7.19754	1722.78	FALSE	67
2022-09-15	11:42:00	0.000216527	0.000963155	1865.05	FALSE	67
2022-09-15	11:42:00	-0.310878	-1.38285	1722.78	FALSE	67
2022-09-15	11:42:00	-0.31729	-1.41137	1865.05	FALSE	67
2022-09-15	11:42:00	-0.266806	-1.18681	1722.78	FALSE	67
2022-09-15	11:42:01	-0.267061	-1.18794	1865.05	FALSE	67
2022-09-15	11:42:01	-0.502887	-2.23694	1722.78	FALSE	67
2022-09-15	11:42:01	-0.418409	-1.86117	1865.05	FALSE	67
2022-09-15	11:42:02	-0.244058	-1.08562	1722.78	FALSE	67
2022-09-15	11:42:02	-0.0734221	-0.326596	1865.05	FALSE	67
2022-09-15	11:42:02	-0.473829	-2.10769	1722.78	FALSE	67
2022-09-15	11:42:02	-0.3693	-1.64272	1865.05	FALSE	67
2022-09-15	11:42:03	-0.142124	-0.632196	1722.78	FALSE	67
2022-09-15	11:42:03	-0.0326079	-0.145046	1865.05	FALSE	67
2022-09-15	11:42:03	0.0291224	0.129542	1722.91	FALSE	67
2022-09-15	11:42:03	0.205255	0.913015	1865.97	FALSE	67
2022-09-15	11:42:04	0.340064	1.51267	1724.43	FALSE	67
2022-09-15	11:42:04	0.351921	1.56541	1867.53	FALSE	67
2022-09-15	11:42:04	1.75289	7.79721	1732.22	FALSE	67
2022-09-15	11:42:04	5.75665	25.6067	1893.14	1	68
2022-09-15	11:42:05	8.55706	38.0635	1770.29	1	69
2022-09-15	11:42:05	4.80001	21.3514	1914.49	1	70
2022-09-15	11:42:05	0.724338	3.222	1773.51	FALSE	70
2022-09-15	11:42:06	0.550903	2.45053	1916.94	FALSE	70
2022-09-15	11:42:06	0.403321	1.79405	1775.3	FALSE	70
2022-09-15	11:42:06	0.433499	1.92829	1918.87	FALSE	70
2022-09-15	11:42:06	0.438893	1.95228	1777.25	FALSE	70
2022-09-15	11:42:07	0.247087	1.09909	1919.97	FALSE	70
2022-09-15	11:42:07	0.391361	1.74085	1779	FALSE	70
2022-09-15	11:42:07	0.0968069	0.430616	1920.4	FALSE	70
2022-09-15	11:42:07	0.365051	1.62382	1780.62	FALSE	70
2022-09-15	11:42:08	0.281998	1.25438	1921.65	FALSE	70
2022-09-15	11:42:08	0.256552	1.14119	1781.76	FALSE	70
2022-09-15	11:42:08	0.130242	0.579342	1922.23	FALSE	70
2022-09-15	11:42:08	0.130954	0.58251	1782.34	FALSE	70
2022-09-15	11:42:09	-0.069758	-0.310298	1922.23	FALSE	70
2022-09-15	11:42:09	0.125306	0.557386	1782.9	FALSE	70
2022-09-15	11:42:09	-0.108842	-0.484151	1922.23	FALSE	70
2022-09-15	11:42:09	-0.0764246	-0.339952	1782.9	FALSE	70
2022-09-15	11:42:10	-0.169147	-0.7524	1922.23	FALSE	70
2022-09-15	11:42:10	-0.124618	-0.554326	1782.9	FALSE	70
2022-09-15	11:42:10	-0.285534	-1.27011	1922.23	FALSE	70
2022-09-15	11:42:11	-0.197493	-0.878488	1782.9	FALSE	70
2022-09-15	11:42:11	-0.221768	-0.986468	1922.23	FALSE	70
2022-09-15	11:42:11	-0.246501	-1.09649	1782.9	FALSE	70
2022-09-15	11:42:11	-0.533982	-2.37526	1922.23	FALSE	70
2022-09-15	11:42:12	-0.462022	-2.05517	1782.9	FALSE	70
2022-09-15	11:42:12	-0.486806	-2.16541	1922.23	FALSE	70
2022-09-15	11:42:12	-0.396832	-1.76519	1782.9	FALSE	70
2022-09-15	11:42:12	-0.529096	-2.35352	1922.23	FALSE	70
2022-09-15	11:42:13	-0.386552	-1.71946	1782.9	FALSE	70
2022-09-15	11:42:13	-0.439987	-1.95715	1922.23	FALSE	70
2022-09-15	11:42:13	-0.3836	-1.70633	1782.9	FALSE	70
2022-09-15	11:42:13	-0.423244	-1.88267	1922.23	FALSE	70
2022-09-15	11:42:14	-0.223956	-0.996201	1782.9	FALSE	70
2022-09-15	11:42:14	-0.269453	-1.19858	1922.23	FALSE	70
2022-09-15	11:42:14	-0.255967	-1.13859	1782.9	FALSE	70
2022-09-15	11:42:15	-0.220038	-0.978773	1922.23	FALSE	70
2022-09-15	11:42:15	-0.0920481	-0.409448	1782.9	FALSE	70
2022-09-15	11:42:15	0.101998	0.453708	1922.68	FALSE	70
2022-09-15	11:42:15	0.327545	1.45699	1784.36	FALSE	70
2022-09-15	11:42:16	0.532532	2.36881	1925.05	FALSE	70
2022-09-15	11:42:16	0.323422	1.43865	1785.8	FALSE	70
2022-09-15	11:42:16	0.506527	2.25313	1927.31	FALSE	70
2022-09-15	11:42:16	0.284695	1.26638	1787.06	FALSE	70
2022-09-15	11:42:17	0.575433	2.55964	1929.87	FALSE	70
2022-09-15	11:42:17	0.306679	1.36417	1788.43	FALSE	70
2022-09-15	11:42:17	0.44388	1.97447	1931.84	FALSE	70
2022-09-15	11:42:17	0.194618	0.8657	1789.29	FALSE	70
2022-09-15	11:42:18	0.292532	1.30124	1933.14	FALSE	70
2022-09-15	11:42:18	0.0640333	0.284833	1789.58	FALSE	70
2022-09-15	11:42:18	0.148613	0.66106	1933.8	FALSE	70
2022-09-15	11:42:19	0.0183336	0.0815515	1789.66	FALSE	70
2022-09-15	11:42:19	0.140115	0.62326	1934.43	FALSE	70
2022-09-15	11:42:19	-0.00578856	-0.0257487	1789.66	FALSE	70
2022-09-15	11:42:19	0.0923793	0.410922	1934.84	FALSE	70
2022-09-15	11:42:20	0.0231681	0.103056	1789.76	FALSE	70
2022-09-15	11:42:20	0.148104	0.658796	1935.5	FALSE	70
2022-09-15	11:42:20	-0.0344908	-0.153422	1789.76	FALSE	70
2022-09-15	11:42:20	0.0794022	0.353197	1935.85	FALSE	70
2022-09-15	11:42:21	0.118435	0.526823	1790.29	FALSE	70
2022-09-15	11:42:21	0.261947	1.16519	1937.01	FALSE	70
2022-09-15	11:42:21	-0.0123535	-0.0549508	1790.29	FALSE	70
2022-09-15	11:42:21	-0.112811	-0.501806	1937.01	FALSE	70
2022-09-15	11:42:22	-0.113117	-0.503167	1790.29	FALSE	70
2022-09-15	11:42:22	0.105967	0.471362	1937.49	FALSE	70
2022-09-15	11:42:22	-0.019987	-0.0889062	1790.29	FALSE	70
2022-09-15	11:42:23	0.0686644	0.305433	1937.79	FALSE	70
2022-09-15	11:42:23	-0.0696053	-0.309618	1790.29	FALSE	70
2022-09-15	11:42:23	0.0646949	0.287776	1938.08	FALSE	70
2022-09-15	11:42:23	0.0542623	0.24137	1790.53	FALSE	70
2022-09-15	11:42:24	0.214313	0.953307	1939.03	FALSE	70
2022-09-15	11:42:24	0.495026	2.20197	1792.73	FALSE	70
2022-09-15	11:42:24	1.44826	6.44215	1945.47	FALSE	70
2022-09-15	11:42:24	2.73044	12.1455	1804.88	FALSE	70
2022-09-15	11:42:25	2.18963	9.73991	1955.21	FALSE	70
2022-09-15	11:42:25	2.60388	11.5826	1816.46	FALSE	70
2022-09-15	11:42:25	1.23502	5.49362	1960.71	FALSE	70
2022-09-15	11:42:25	1.48973	6.62662	1823.09	FALSE	70
2022-09-15	11:42:26	1.75162	7.79156	1968.5	FALSE	70
2022-09-15	11:42:26	0.986629	4.38872	1827.48	FALSE	70
2022-09-15	11:42:26	0.874873	3.89161	1972.39	FALSE	70
2022-09-15	11:42:27	1.14943	5.11289	1832.59	FALSE	70
2022-09-15	11:42:27	0.459351	2.04329	1974.43	FALSE	70
2022-09-15	11:42:27	0.317061	1.41035	1834	FALSE	70
2022-09-15	11:42:27	0.198944	0.884943	1975.32	FALSE	70
2022-09-15	11:42:28	0.294211	1.30871	1835.31	FALSE	70
2022-09-15	11:42:28	0.165356	0.735537	1976.05	FALSE	70
2022-09-15	11:42:28	0.295636	1.31505	1836.62	FALSE	70
2022-09-15	11:42:28	0.22383	0.995641	1977.05	FALSE	70
2022-09-15	11:42:29	0.258791	1.15115	1837.77	FALSE	70
2022-09-15	11:42:29	0.141082	0.627561	1977.68	FALSE	70
2022-09-15	11:42:29	0.107596	0.478609	1838.25	FALSE	70
2022-09-15	11:42:29	0.158944	0.707015	1978.38	FALSE	70
2022-09-15	11:42:30	0.763626	3.39676	1841.65	FALSE	70
2022-09-15	11:42:30	0.262099	1.16587	1979.55	FALSE	70
2022-09-15	11:42:30	0.920267	4.09353	1845.74	FALSE	70
2022-09-15	11:42:31	1.50393	6.68978	1986.24	FALSE	70
2022-09-15	11:42:31	2.14765	9.55318	1855.3	FALSE	70
2022-09-15	11:42:31	1.16184	5.1681	1991.41	FALSE	70
2022-09-15	11:42:31	0.99757	4.43739	1859.73	FALSE	70
2022-09-15	11:42:32	2.09818	9.33312	2000.74	FALSE	70
2022-09-15	11:42:32	1.67375	7.44517	1867.18	FALSE	70
2022-09-15	11:42:32	0.451819	2.00978	2002.75	FALSE	70
2022-09-15	11:42:32	0.347952	1.54776	1868.73	FALSE	70
2022-09-15	11:42:33	0.349071	1.55274	2004.3	FALSE	70
2022-09-15	11:42:33	0.00530559	0.0236003	1868.75	FALSE	70
2022-09-15	11:42:33	-0.0712338	-0.316862	2004.3	FALSE	70
2022-09-15	11:42:33	-0.135305	-0.601864	1868.75	FALSE	70
2022-09-15	11:42:34	0.125306	0.557386	2004.86	FALSE	70
2022-09-15	11:42:34	1.32388	5.88888	1874.64	FALSE	70
2022-09-15	11:42:34	2.69049	11.9678	2016.83	FALSE	70
2022-09-15	11:42:35	2.00398	8.9141	1883.55	FALSE	70
2022-09-15	11:42:35	1.25742	5.59326	2022.42	FALSE	70
2022-09-15	11:42:35	2.01447	8.96077	1892.51	FALSE	70
2022-09-15	11:42:35	1.06882	4.75433	2027.18	FALSE	70
2022-09-15	11:42:36	2.4081	10.7117	1903.22	FALSE	70
2022-09-15	11:42:36	1.79589	7.98848	2035.17	FALSE	70
2022-09-15	11:42:36	2.13579	9.50042	1912.73	FALSE	70
2022-09-15	11:42:36	1.74459	7.76029	2042.93	FALSE	70
2022-09-15	11:42:37	2.52775	11.2439	1923.97	FALSE	70
2022-09-15	11:42:37	0.718537	3.1962	2046.12	FALSE	70
2022-09-15	11:42:37	2.66525	11.8556	1935.82	FALSE	70
2022-09-15	11:42:37	1.73396	7.713	2053.84	FALSE	70
2022-09-15	11:42:38	1.1963	5.32138	1941.15	FALSE	70
2022-09-15	11:42:38	1.63447	7.27045	2061.11	FALSE	70
2022-09-15	11:42:38	0.497316	2.21216	1943.36	FALSE	70
2022-09-15	11:42:39	0.119606	0.532031	2061.64	FALSE	70
2022-09-15	11:42:39	-0.0960175	-0.427105	1943.36	FALSE	70
2022-09-15	11:42:39	-0.155	-0.689471	2061.64	FALSE	70
2022-09-15	11:42:39	-0.201514	-0.896375	1943.36	FALSE	70
2022-09-15	11:42:40	-0.279325	-1.24249	2061.64	FALSE	70
2022-09-15	11:42:40	-0.298257	-1.32671	1943.36	FALSE	70
2022-09-15	11:42:40	-0.0238547	-0.10611	2061.64	FALSE	70
2022-09-15	11:42:40	-0.0574425	-0.255516	1943.36	FALSE	70
2022-09-15	11:42:41	-0.0407504	-0.181266	2061.64	FALSE	70
2022-09-15	11:42:41	-0.0749997	-0.333614	1943.36	FALSE	70
2022-09-15	11:42:41	0.0745168	0.331466	2061.97	FALSE	70
2022-09-15	11:42:41	0.0448984	0.199717	1943.56	FALSE	70
2022-09-15	11:42:42	0.925662	4.11753	2066.09	FALSE	70
2022-09-15	11:42:42	1.03813	4.61781	1948.18	FALSE	70
2022-09-15	11:42:42	0.291412	1.29626	2067.38	FALSE	70
2022-09-15	11:42:43	-0.173269	-0.770735	1948.18	FALSE	70
2022-09-15	11:42:43	-0.352506	-1.56802	2067.38	FALSE	70
2022-09-15	11:42:43	-0.442582	-1.96869	1948.18	FALSE	70
2022-09-15	11:42:43	-0.543396	-2.41713	2067.38	FALSE	70
2022-09-15	11:42:44	-0.661666	-2.94322	1948.18	FALSE	70
2022-09-15	11:42:44	-0.580343	-2.58148	2067.38	FALSE	70
2022-09-15	11:42:44	-0.540648	-2.40491	1948.18	FALSE	70
2022-09-15	11:42:44	-0.526196	-2.34063	2067.38	FALSE	70
2022-09-15	11:42:45	-0.493575	-2.19552	1948.18	FALSE	70
2022-09-15	11:42:45	-0.450114	-2.0022	2067.38	FALSE	70
2022-09-15	11:42:45	-0.459427	-2.04362	1948.18	FALSE	70
2022-09-15	11:42:45	-0.607315	-2.70146	2067.38	FALSE	70
2022-09-15	11:42:46	-0.600547	-2.67135	1948.18	FALSE	70
2022-09-15	11:42:46	-0.568333	-2.52806	2067.38	FALSE	70
2022-09-15	11:42:46	-0.600445	-2.6709	1948.18	FALSE	70
2022-09-15	11:42:47	-0.479274	-2.13191	2067.38	FALSE	70
2022-09-15	11:42:47	-0.420139	-1.86886	1948.18	FALSE	70
2022-09-15	11:42:47	-0.421005	-1.87271	2067.38	FALSE	70
2022-09-15	11:42:47	-0.416475	-1.85256	1948.18	FALSE	70
2022-09-15	11:42:48	-0.467315	-2.07871	2067.38	FALSE	70
2022-09-15	11:42:48	-0.468995	-2.08618	1948.18	FALSE	70
2022-09-15	11:42:48	-0.428129	-1.9044	2067.38	FALSE	70
2022-09-15	11:42:48	-0.377188	-1.67781	1948.18	FALSE	70
2022-09-15	11:42:49	-0.354491	-1.57685	2067.38	FALSE	70
2022-09-15	11:42:49	-0.260496	-1.15874	1948.18	FALSE	70
2022-09-15	11:42:49	-0.307264	-1.36677	2067.38	FALSE	70
2022-09-15	11:42:49	-0.281259	-1.2511	1948.18	FALSE	70
2022-09-15	11:42:50	-0.194898	-0.866945	2067.38	FALSE	70
2022-09-15	11:42:50	-0.102684	-0.456759	1948.18	FALSE	70
2022-09-15	11:42:50	-0.0236003	-0.104979	2067.38	FALSE	70
2022-09-15	11:42:51	-0.00105572	-0.00469605	1948.18	FALSE	70
2022-09-15	11:42:51	0.015331	0.0681954	2067.45	FALSE	70
2022-09-15	11:42:51	0.218995	0.974134	1949.15	FALSE	70
2022-09-15	11:42:51	0.433855	1.92987	2069.38	FALSE	70
2022-09-15	11:42:52	0.43411	1.93101	1951.08	FALSE	70
2022-09-15	11:42:52	0.702201	3.12353	2072.5	FALSE	70
2022-09-15	11:42:52	0.588766	2.61895	1953.7	FALSE	70
2022-09-15	11:42:52	0.508919	2.26377	2074.77	FALSE	70
2022-09-15	11:42:53	0.301845	1.34267	1955.04	FALSE	70
2022-09-15	11:42:53	0.369886	1.64533	2076.41	FALSE	70
2022-09-15	11:42:53	0.210802	0.937689	1955.98	FALSE	70
2022-09-15	11:42:53	0.0637788	0.283701	2076.7	FALSE	70
2022-09-15	11:42:54	-0.070216	-0.312335	1955.98	FALSE	70
2022-09-15	11:42:54	-0.123906	-0.551159	2076.7	FALSE	70
2022-09-15	11:42:54	-0.176984	-0.78726	1955.98	FALSE	70
2022-09-15	11:42:55	-0.131895	-0.586695	2076.7	FALSE	70
2022-09-15	11:42:55	-0.169605	-0.754437	1955.98	FALSE	70
2022-09-15	11:42:55	-0.177086	-0.787714	2076.7	FALSE	70
2022-09-15	11:42:55	-0.374694	-1.66671	1955.98	FALSE	70
2022-09-15	11:42:56	-0.554847	-2.46807	2076.7	FALSE	70
2022-09-15	11:42:56	-0.627417	-2.79088	1955.98	FALSE	70
2022-09-15	11:42:56	-0.664923	-2.95771	2076.7	FALSE	70
2022-09-15	11:42:56	-0.687671	-3.0589	1955.98	FALSE	70
2022-09-15	11:42:57	-0.431692	-1.92025	2076.7	FALSE	70
2022-09-15	11:42:57	-0.266196	-1.18409	1955.98	FALSE	70
2022-09-15	11:42:57	0.578079	2.57141	2079.27	FALSE	70
2022-09-15	11:42:57	2.76876	12.316	1968.3	FALSE	70
2022-09-15	11:42:58	4.22591	18.7977	2098.07	1	71
2022-09-15	11:42:58	1.36978	6.09306	1974.39	FALSE	71
2022-09-15	11:42:58	2.00296	8.90957	2106.98	FALSE	71
2022-09-15	11:42:59	1.33844	5.95365	1980.34	FALSE	71
2022-09-15	11:42:59	1.96698	8.74952	2115.73	FALSE	71
2022-09-15	11:42:59	1.79945	8.00431	1988.35	FALSE	71
2022-09-15	11:42:59	2.04281	9.08683	2124.81	FALSE	71
2022-09-15	11:43:00	3.8878	17.2937	2005.64	1	72
2022-09-15	11:43:00	1.79024	7.96335	2132.78	FALSE	72
2022-09-15	11:43:00	2.01859	8.97909	2014.62	FALSE	72
2022-09-15	11:43:00	0.887494	3.94775	2136.72	FALSE	72
2022-09-15	11:43:01	2.03676	9.05992	2023.68	FALSE	72
2022-09-15	11:43:01	0.631514	2.8091	2139.53	FALSE	72
2022-09-15	11:43:01	1.17101	5.20889	2028.89	FALSE	72
2022-09-15	11:43:01	0.698792	3.10837	2142.64	FALSE	72
2022-09-15	11:43:02	1.22805	5.46261	2034.35	FALSE	72
2022-09-15	11:43:02	0.974109	4.33303	2146.97	FALSE	72
2022-09-15	11:43:02	1.44597	6.43196	2040.78	FALSE	72
2022-09-15	11:43:03	0.652888	2.90418	2149.88	FALSE	72
2022-09-15	11:43:03	1.42398	6.33415	2047.12	FALSE	72
2022-09-15	11:43:03	1.12933	5.02349	2154.9	FALSE	72
2022-09-15	11:43:03	0.929122	4.13292	2051.25	FALSE	72
2022-09-15	11:43:04	0.878944	3.90972	2158.81	FALSE	72
2022-09-15	11:43:04	1.25513	5.58307	2056.83	FALSE	72
2022-09-15	11:43:04	0.796807	3.54436	2162.36	FALSE	72
2022-09-15	11:43:04	0.584186	2.59858	2059.43	FALSE	72
2022-09-15	11:43:05	0.865509	3.84996	2166.21	FALSE	72
2022-09-15	11:43:05	0.669885	2.97978	2062.41	FALSE	72
2022-09-15	11:43:05	0.853753	3.79766	2170	FALSE	72
2022-09-15	11:43:05	0.597468	2.65766	2065.07	FALSE	72
2022-09-15	11:43:06	0.987086	4.39076	2174.39	FALSE	72
2022-09-15	11:43:06	1.25055	5.5627	2070.63	FALSE	72
2022-09-15	11:43:06	1.56892	6.97887	2181.37	FALSE	72
2022-09-15	11:43:07	1.02129	4.5429	2075.18	FALSE	72
2022-09-15	11:43:07	2.42871	10.8034	2192.18	FALSE	72
2022-09-15	11:43:07	2.3851	10.6094	2085.78	FALSE	72
2022-09-15	11:43:07	4.31121	19.1771	2211.35	1	73
2022-09-15	11:43:08	2.70841	12.0475	2097.83	FALSE	73
2022-09-15	11:43:08	4.86118	21.6235	2232.98	1	74
2022-09-15	11:43:08	1.22164	5.4341	2103.27	FALSE	74
2022-09-15	11:43:08	3.09864	13.7834	2246.76	1	75
2022-09-15	11:43:09	0.806221	3.58623	2106.85	FALSE	75
2022-09-15	11:43:09	1.59457	7.09297	2253.85	FALSE	75
2022-09-15	11:43:09	0.784033	3.48754	2110.34	FALSE	75
2022-09-15	11:43:09	0.698028	3.10497	2256.96	FALSE	75
2022-09-15	11:43:10	1.11146	4.944	2115.28	FALSE	75
2022-09-15	11:43:10	1.26363	5.62088	2262.58	FALSE	75
2022-09-15	11:43:10	0.504288	2.24317	2117.53	FALSE	75
2022-09-15	11:43:11	2.24251	9.97513	2272.55	FALSE	75
2022-09-15	11:43:11	0.812582	3.61453	2121.14	FALSE	75
2022-09-15	11:43:11	0.89701	3.99008	2276.54	FALSE	75
2022-09-15	11:43:11	0.954822	4.24724	2125.39	FALSE	75
2022-09-15	11:43:12	1.14816	5.10725	2281.65	FALSE	75
2022-09-15	11:43:12	0.903626	4.01951	2129.41	FALSE	75
2022-09-15	11:43:12	0.979606	4.35748	2286.01	FALSE	75
2022-09-15	11:43:12	1.36597	6.07611	2135.48	FALSE	75
2022-09-15	11:43:13	1.84429	8.20377	2294.21	FALSE	75
2022-09-15	11:43:13	2.78658	12.3953	2147.88	FALSE	75
2022-09-15	11:43:13	3.21233	14.2891	2308.5	1	76
2022-09-15	11:43:13	1.44663	6.4349	2154.31	FALSE	76
2022-09-15	11:43:14	1.91268	8.50798	2317.01	FALSE	76
2022-09-15	11:43:14	2.17564	9.67768	2163.99	FALSE	76
2022-09-15	11:43:14	1.18602	5.27565	2322.29	FALSE	76
2022-09-15	11:43:15	1.53676	6.83582	2170.83	FALSE	76
2022-09-15	11:43:15	1.01228	4.50282	2326.79	FALSE	76
2022-09-15	11:43:15	1.37151	6.10075	2176.93	FALSE	76
2022-09-15	11:43:15	2.20459	9.80646	2336.59	FALSE	76
2022-09-15	11:43:16	0.482456	2.14606	2179.07	FALSE	76
2022-09-15	11:43:16	2.2337	9.93594	2346.53	FALSE	76
2022-09-15	11:43:16	1.45676	6.47996	2185.55	FALSE	76
2022-09-15	11:43:16	0.819606	3.64577	2350.18	FALSE	76
2022-09-15	11:43:17	2.03752	9.0633	2194.62	FALSE	76
2022-09-15	11:43:17	1.74724	7.77207	2357.95	FALSE	76
2022-09-15	11:43:17	1.08088	4.80797	2199.43	FALSE	76
2022-09-15	11:43:17	1.57599	7.01032	2364.96	FALSE	76
2022-09-15	11:43:18	0.984491	4.37921	2203.81	FALSE	76
2022-09-15	11:43:18	1.0337	4.5981	2369.56	FALSE	76
2022-09-15	11:43:18	2.29248	10.1974	2214	FALSE	76
2022-09-15	11:43:19	1.21701	5.4135	2374.97	FALSE	76
2022-09-15	11:43:19	1.7652	7.85196	2221.85	FALSE	76
2022-09-15	11:43:19	1.25594	5.58667	2380.56	FALSE	76
2022-09-15	11:43:19	0.998028	4.43943	2226.29	FALSE	76
2022-09-15	11:43:20	0.458232	2.03831	2382.6	FALSE	76
2022-09-15	11:43:20	0.489886	2.17911	2228.47	FALSE	76
2022-09-15	11:43:20	0.265305	1.18013	2383.78	FALSE	76
2022-09-15	11:43:20	0.459351	2.04329	2230.52	FALSE	76
2022-09-15	11:43:21	0.261387	1.1627	2384.94	FALSE	76
2022-09-15	11:43:21	0.725509	3.22721	2233.74	FALSE	76
2022-09-15	11:43:21	0.506984	2.25517	2387.19	FALSE	76
2022-09-15	11:43:21	0.469479	2.08834	2235.83	FALSE	76
2022-09-15	11:43:22	0.920063	4.09262	2391.29	FALSE	76
2022-09-15	11:43:22	0.585254	2.60333	2238.44	FALSE	76
2022-09-15	11:43:22	0.698842	3.10859	2394.39	FALSE	76
2022-09-15	11:43:23	0.30042	1.33633	2239.77	FALSE	76
2022-09-15	11:43:23	0.388817	1.72954	2396.12	FALSE	76
2022-09-15	11:43:23	0.218537	0.972096	2240.74	FALSE	76
2022-09-15	11:43:23	0.411107	1.82869	2397.95	FALSE	76
2022-09-15	11:43:24	0.254313	1.13124	2241.88	FALSE	76
2022-09-15	11:43:24	0.465102	2.06887	2400.02	FALSE	76
2022-09-15	11:43:24	0.155331	0.690943	2242.57	FALSE	76
2022-09-15	11:43:24	1.16592	5.18625	2405.21	FALSE	76
2022-09-15	11:43:25	1.22429	5.44589	2248.01	FALSE	76
2022-09-15	11:43:25	4.71711	20.9826	2426.19	1	77
2022-09-15	11:43:25	3.02505	13.456	2261.47	1	78
2022-09-15	11:43:25	3.17823	14.1374	2440.33	1	79
2022-09-15	11:43:26	1.53604	6.83261	2268.3	FALSE	79
2022-09-15	11:43:26	2.18271	9.70913	2450.04	FALSE	79
2022-09-15	11:43:26	1.26785	5.63965	2273.94	FALSE	79
2022-09-15	11:43:27	2.37279	10.5546	2460.59	FALSE	79
2022-09-15	11:43:27	1.90154	8.45843	2282.4	FALSE	79
2022-09-15	11:43:27	3.79172	16.8663	2477.46	1	80
2022-09-15	11:43:27	0.801947	3.56722	2285.97	FALSE	80
2022-09-15	11:43:28	2.10586	9.36729	2486.83	FALSE	80
2022-09-15	11:43:28	0.693193	3.08346	2289.05	FALSE	80
2022-09-15	11:43:28	1.14164	5.07824	2491.9	FALSE	80
2022-09-15	11:43:28	1.39604	6.20987	2295.26	FALSE	80
2022-09-15	11:43:29	0.50383	2.24114	2494.14	FALSE	80
2022-09-15	11:43:29	2.00164	8.9037	2304.16	FALSE	80
2022-09-15	11:43:29	2.92388	13.006	2507.15	FALSE	80
2022-09-15	11:43:29	0.518231	2.3052	2306.47	FALSE	80
2022-09-15	11:43:30	1.00663	4.47769	2511.63	FALSE	80
2022-09-15	11:43:30	1.59696	7.1036	2313.57	FALSE	80
2022-09-15	11:43:30	0.679148	3.02099	2514.65	FALSE	80
2022-09-15	11:43:31	1.97538	8.78689	2322.36	FALSE	80
2022-09-15	11:43:31	2.69614	11.993	2526.64	FALSE	80
2022-09-15	11:43:31	2.70683	12.0405	2334.4	FALSE	80
2022-09-15	11:43:31	5.4309	24.1577	2550.8	1	81
2022-09-15	11:43:32	1.91289	8.50892	2342.91	FALSE	81
2022-09-15	11:43:32	1.38531	6.16214	2556.96	FALSE	81
2022-09-15	11:43:32	0.934618	4.15737	2347.07	FALSE	81
2022-09-15	11:43:32	0.910852	4.05165	2561.01	FALSE	81
2022-09-15	11:43:33	0.499453	2.22167	2349.29	FALSE	81
2022-09-15	11:43:33	0.874516	3.89002	2564.9	FALSE	81
2022-09-15	11:43:33	0.423473	1.88369	2351.17	FALSE	81
2022-09-15	11:43:33	0.996196	4.43128	2569.34	FALSE	81
2022-09-15	11:43:34	1.29141	5.74445	2356.92	FALSE	81
2022-09-15	11:43:34	1.75375	7.80103	2577.14	FALSE	81
2022-09-15	11:43:34	4.48571	19.9533	2376.87	1	82
2022-09-15	11:43:35	1.44459	6.42583	2583.56	FALSE	82
2022-09-15	11:43:35	1.70296	7.57511	2384.44	FALSE	82
2022-09-15	11:43:35	0.338944	1.50769	2585.07	FALSE	82
2022-09-15	11:43:35	0.242049	1.07668	2385.52	FALSE	82
2022-09-15	11:43:36	0.0577738	0.256989	2585.33	FALSE	82
2022-09-15	11:43:36	-0.0328114	-0.145952	2385.52	FALSE	82
2022-09-15	11:43:36	0.107443	0.477928	2585.8	FALSE	82
2022-09-15	11:43:36	1.23416	5.48979	2391.01	FALSE	82
2022-09-15	11:43:37	2.49599	11.1027	2596.91	FALSE	82
2022-09-15	11:43:37	3.27406	14.5637	2405.57	1	83
2022-09-15	11:43:37	2.39726	10.6635	2607.57	FALSE	83
2022-09-15	11:43:37	1.6509	7.34353	2412.92	FALSE	83
2022-09-15	11:43:38	0.5193	2.30995	2609.88	FALSE	83
2022-09-15	11:43:38	1.0478	4.66082	2417.58	FALSE	83
2022-09-15	11:43:38	1.07284	4.77221	2614.65	FALSE	83
2022-09-15	11:43:39	2.54693	11.3293	2428.91	FALSE	83
2022-09-15	11:43:39	1.79162	7.96948	2622.62	FALSE	83
2022-09-15	11:43:39	2.6279	11.6894	2440.6	FALSE	83
2022-09-15	11:43:39	4.56301	20.2972	2642.92	1	84
2022-09-15	11:43:40	3.04632	13.5506	2454.15	1	85
2022-09-15	11:43:40	6.77411	30.1326	2673.05	1	86
2022-09-15	11:43:40	10.1635	45.2093	2499.36	1	87
2022-09-15	11:43:40	7.06352	31.4199	2704.47	1	88
2022-09-15	11:43:41	4.53472	20.1713	2519.53	1	89
2022-09-15	11:43:41	3.06871	13.6502	2718.12	1	90
2022-09-15	11:43:41	0.566425	2.51957	2522.05	FALSE	90
2022-09-15	11:43:41	0.248715	1.10633	2719.23	FALSE	90
2022-09-15	11:43:42	0.252328	1.12241	2523.17	FALSE	90
2022-09-15	11:43:42	-0.191539	-0.852004	2719.23	FALSE	90
2022-09-15	11:43:42	-0.228231	-1.01522	2523.17	FALSE	90
2022-09-15	11:43:43	-0.34986	-1.55625	2719.23	FALSE	90
2022-09-15	11:43:43	-0.491997	-2.1885	2523.17	FALSE	90
2022-09-15	11:43:43	-0.496068	-2.20661	2719.23	FALSE	90
2022-09-15	11:43:43	-0.708485	-3.15148	2523.17	FALSE	90
2022-09-15	11:43:44	-0.96762	-4.30417	2719.23	FALSE	90
2022-09-15	11:43:44	-1.10416	-4.91152	2523.17	FALSE	90
2022-09-15	11:43:44	-1.15703	-5.1467	2719.23	FALSE	90
2022-09-15	11:43:44	-1.15541	-5.13949	2523.17	FALSE	90
2022-09-15	11:43:45	-1.2581	-5.59628	2719.23	FALSE	90
2022-09-15	11:43:45	-1.24106	-5.52048	2523.17	FALSE	90
2022-09-15	11:43:45	-0.665534	-2.96043	2719.23	FALSE	90
2022-09-15	11:43:45	-0.466094	-2.07328	2523.17	FALSE	90
2022-09-15	11:43:46	0.0709036	0.315393	2719.54	FALSE	90
2022-09-15	11:43:46	0.724491	3.22268	2526.39	FALSE	90
2022-09-15	11:43:46	1.76251	7.84	2727.38	FALSE	90
2022-09-15	11:43:47	2.71436	12.074	2538.47	FALSE	90
2022-09-15	11:43:47	1.45197	6.45865	2733.84	FALSE	90
2022-09-15	11:43:47	0.460623	2.04894	2540.52	FALSE	90
2022-09-15	11:43:47	0.356756	1.58692	2735.43	FALSE	90
2022-09-15	11:43:48	0.155891	0.693434	2541.21	FALSE	90
2022-09-15	11:43:48	0.0734481	0.326712	2735.76	FALSE	90
2022-09-15	11:43:48	-0.216832	-0.964512	2541.21	FALSE	90
2022-09-15	11:43:48	-0.211539	-0.940968	2735.76	FALSE	90
2022-09-15	11:43:49	-0.44589	-1.98341	2541.21	FALSE	90
2022-09-15	11:43:49	-0.433676	-1.92908	2735.76	FALSE	90
2022-09-15	11:43:49	-0.107366	-0.477585	2541.21	FALSE	90
2022-09-15	11:43:49	1.9763	8.79098	2744.55	FALSE	90
2022-09-15	11:43:50	3.84225	17.0911	2558.3	1	91
2022-09-15	11:43:50	2.09014	9.29736	2753.84	FALSE	91
2022-09-15	11:43:50	0.756247	3.36394	2561.66	FALSE	91
2022-09-15	11:43:51	0.485611	2.16009	2756	FALSE	91
2022-09-15	11:43:51	0.515025	2.29093	2563.96	FALSE	91
2022-09-15	11:43:51	0.320624	1.4262	2757.43	FALSE	91
2022-09-15	11:43:51	0.383372	1.70532	2565.66	FALSE	91
2022-09-15	11:43:52	0.0791478	0.352065	2757.78	FALSE	91
2022-09-15	11:43:52	-0.342582	-1.52387	2565.66	FALSE	91
2022-09-15	11:43:52	-0.597137	-2.65618	2757.78	FALSE	91
2022-09-15	11:43:52	-0.816628	-3.63252	2565.66	FALSE	91
2022-09-15	11:43:53	-0.679325	-3.02177	2757.78	FALSE	91
2022-09-15	11:43:53	-0.846806	-3.76676	2565.66	FALSE	91
2022-09-15	11:43:53	-0.747315	-3.32421	2757.78	FALSE	91
2022-09-15	11:43:53	-0.903447	-4.01871	2565.66	FALSE	91
2022-09-15	11:43:54	-0.735915	-3.2735	2757.78	FALSE	91
2022-09-15	11:43:54	-0.840597	-3.73914	2565.66	FALSE	91
2022-09-15	11:43:54	-0.850317	-3.78238	2757.78	FALSE	91
2022-09-15	11:43:55	-0.989554	-4.40173	2565.66	FALSE	91
2022-09-15	11:43:55	-0.843854	-3.75363	2757.78	FALSE	91
2022-09-15	11:43:55	-1.06955	-4.75757	2565.66	FALSE	91
2022-09-15	11:43:55	-1.19882	-5.33259	2757.78	FALSE	91
2022-09-15	11:43:56	-0.851641	-3.78827	2565.66	FALSE	91
2022-09-15	11:43:56	-0.101157	-0.449967	2757.78	FALSE	91
2022-09-15	11:43:56	0.309631	1.3773	2567.04	FALSE	91
2022-09-15	11:43:56	2.44139	10.8598	2768.64	FALSE	91
2022-09-15	11:43:57	5.76332	25.6364	2592.67	1	92
2022-09-15	11:43:57	4.10851	18.2755	2786.92	1	93
2022-09-15	11:43:57	2.33772	10.3986	2603.07	FALSE	93
2022-09-15	11:43:57	0.937265	4.16914	2791.09	FALSE	93
2022-09-15	11:43:58	0.767697	3.41487	2606.49	FALSE	93
2022-09-15	11:43:58	0.734262	3.26614	2794.35	FALSE	93
2022-09-15	11:43:58	1.11116	4.94266	2611.43	FALSE	93
2022-09-15	11:43:59	2.29004	10.1866	2804.54	FALSE	93
2022-09-15	11:43:59	4.40978	19.6156	2631.05	1	94
2022-09-15	11:43:59	0.87126	3.87554	2808.42	FALSE	94
2022-09-15	11:43:59	0.173804	0.773115	2631.82	FALSE	94
2022-09-15	11:44:00	0.258181	1.14844	2809.56	FALSE	94
2022-09-15	11:44:00	0.22612	1.00583	2632.82	FALSE	94
2022-09-15	11:44:00	0.187087	0.8322	2810.4	FALSE	94
2022-09-15	11:44:00	0.250954	1.11629	2633.94	FALSE	94
2022-09-15	11:44:01	0.294262	1.30894	2811.71	FALSE	94
2022-09-15	11:44:01	0.152074	0.676456	2634.62	FALSE	94
2022-09-15	11:44:01	0.251616	1.11924	2812.82	FALSE	94
2022-09-15	11:44:01	0.337366	1.50067	2636.12	FALSE	94
2022-09-15	11:44:02	0.438791	1.95183	2814.78	FALSE	94
2022-09-15	11:44:02	0.829275	3.68878	2639.81	FALSE	94
2022-09-15	11:44:02	0.825356	3.67135	2818.45	FALSE	94
2022-09-15	11:44:03	1.08729	4.83648	2644.64	FALSE	94
2022-09-15	11:44:03	2.57365	11.4481	2829.9	FALSE	94
2022-09-15	11:44:03	2.84454	12.6531	2657.3	FALSE	94
2022-09-15	11:44:03	3.70958	16.501	2846.4	1	95
2022-09-15	11:44:04	2.81772	12.5338	2669.83	FALSE	95
2022-09-15	11:44:04	0.754567	3.35646	2849.75	FALSE	95
2022-09-15	11:44:04	3.22663	14.3527	2684.18	1	96
2022-09-15	11:44:04	2.68281	11.9337	2861.69	FALSE	96
2022-09-15	11:44:05	0.83701	3.72319	2687.91	FALSE	96
2022-09-15	11:44:05	0.488766	2.17413	2863.86	FALSE	96
2022-09-15	11:44:05	0.330038	1.46808	2689.37	FALSE	96
2022-09-15	11:44:05	0.248003	1.10317	2864.96	FALSE	96
2022-09-15	11:44:06	0.169071	0.752062	2690.13	FALSE	96
2022-09-15	11:44:06	0.408003	1.81488	2866.78	FALSE	96
2022-09-15	11:44:06	0.127189	0.565762	2690.69	FALSE	96
2022-09-15	11:44:07	0.34902	1.55251	2868.33	FALSE	96
2022-09-15	11:44:07	0.311819	1.38703	2692.08	FALSE	96
2022-09-15	11:44:07	0.524338	2.33236	2870.66	FALSE	96
2022-09-15	11:44:07	0.576196	2.56304	2694.64	FALSE	96
2022-09-15	11:44:08	1.31665	5.85672	2876.52	FALSE	96
2022-09-15	11:44:08	1.13574	5.052	2699.69	FALSE	96
2022-09-15	11:44:08	1.80602	8.03354	2884.55	FALSE	96
2022-09-15	11:44:08	2.00205	8.90552	2708.6	FALSE	96
2022-09-15	11:44:09	0.725254	3.22607	2887.78	FALSE	96
2022-09-15	11:44:09	1.50256	6.68369	2715.28	FALSE	96
2022-09-15	11:44:09	2.06566	9.18847	2896.97	FALSE	96
2022-09-15	11:44:09	3.52154	15.6645	2730.95	1	97
2022-09-15	11:44:10	3.39614	15.1067	2912.08	1	98
2022-09-15	11:44:10	2.80408	12.4731	2743.42	FALSE	98
2022-09-15	11:44:10	2.97604	13.238	2925.31	FALSE	98
2022-09-15	11:44:11	1.45996	6.49419	2749.92	FALSE	98
2022-09-15	11:44:11	1.84093	8.18882	2933.5	FALSE	98
2022-09-15	11:44:11	0.864084	3.84362	2753.76	FALSE	98
2022-09-15	11:44:11	1.00617	4.47565	2937.98	FALSE	98
2022-09-15	11:44:12	1.70164	7.56924	2761.33	FALSE	98
2022-09-15	11:44:12	2.2878	10.1766	2948.15	FALSE	98
2022-09-15	11:44:12	1.86134	8.27961	2769.61	FALSE	98
2022-09-15	11:44:12	2.4276	10.7985	2958.95	FALSE	98
2022-09-15	11:44:13	3.4677	15.425	2785.03	1	99
2022-09-15	11:44:13	1.43309	6.37467	2965.33	FALSE	99
2022-09-15	11:44:13	0.657366	2.9241	2787.96	FALSE	99
2022-09-15	11:44:13	0.173448	0.771531	2966.1	FALSE	99
2022-09-15	11:44:14	0.221081	0.983413	2788.94	FALSE	99
2022-09-15	11:44:14	0.150089	0.667626	2966.77	FALSE	99
2022-09-15	11:44:14	0.200115	0.890152	2789.83	FALSE	99
2022-09-15	11:44:15	0.0754327	0.33554	2967.1	FALSE	99
2022-09-15	11:44:15	-0.0496053	-0.220654	2789.83	FALSE	99
2022-09-15	11:44:15	0.102812	0.457328	2967.56	FALSE	99
2022-09-15	11:44:15	0.0424557	0.188851	2790.02	FALSE	99
2022-09-15	11:44:16	0.242099	1.0769	2968.64	FALSE	99
2022-09-15	11:44:16	-0.00136106	-0.00605427	2790.02	FALSE	99
2022-09-15	11:44:16	0.266883	1.18715	2969.82	FALSE	99
2022-09-15	11:44:16	0.202048	0.89875	2790.92	FALSE	99
2022-09-15	11:44:17	0.309122	1.37504	2971.2	FALSE	99
2022-09-15	11:44:17	0.135535	0.602887	2791.52	FALSE	99
2022-09-15	11:44:17	0.245458	1.09185	2972.29	FALSE	99
2022-09-15	11:44:17	0.192735	0.857324	2792.38	FALSE	99
2022-09-15	11:44:18	0.174568	0.776513	2973.07	FALSE	99
2022-09-15	11:44:18	0.016247	0.0722699	2792.45	FALSE	99
2022-09-15	11:44:18	-0.316018	-1.40571	2973.07	FALSE	99
2022-09-15	11:44:19	-0.15444	-0.68698	2792.45	FALSE	99
2022-09-15	11:44:19	-0.127112	-0.56542	2973.07	FALSE	99
2022-09-15	11:44:19	0.426781	1.89841	2794.35	FALSE	99
2022-09-15	11:44:19	1.44403	6.42333	2979.49	FALSE	99
2022-09-15	11:44:20	1.11594	4.96392	2799.31	FALSE	99
2022-09-15	11:44:20	2.32678	10.35	2989.84	FALSE	99
2022-09-15	11:44:20	1.42968	6.3595	2805.67	FALSE	99
2022-09-15	11:44:20	0.210038	0.934291	2990.77	FALSE	99
2022-09-15	11:44:21	0.0677992	0.301584	2805.97	FALSE	99
2022-09-15	11:44:21	0.0479519	0.2133	2990.99	FALSE	99
2022-09-15	11:44:21	-0.224618	-0.999146	2805.97	FALSE	99
2022-09-15	11:44:21	-0.256374	-1.1404	2990.99	FALSE	99
2022-09-15	11:44:22	-0.344109	-1.53067	2805.97	FALSE	99
2022-09-15	11:44:22	-0.541412	-2.40831	2990.99	FALSE	99
2022-09-15	11:44:22	-0.763447	-3.39596	2805.97	FALSE	99
2022-09-15	11:44:23	-0.782429	-3.4804	2990.99	FALSE	99
2022-09-15	11:44:23	-0.813473	-3.61849	2805.97	FALSE	99
2022-09-15	11:44:23	-0.751641	-3.34345	2990.99	FALSE	99
2022-09-15	11:44:23	-0.719732	-3.20151	2805.97	FALSE	99
2022-09-15	11:44:24	-0.64935	-2.88844	2990.99	FALSE	99
2022-09-15	11:44:24	-0.414898	-1.84555	2805.97	FALSE	99
2022-09-15	11:44:24	-0.391183	-1.74006	2990.99	FALSE	99
2022-09-15	11:44:24	-0.415305	-1.84736	2805.97	FALSE	99
2022-09-15	11:44:25	-0.26304	-1.17005	2990.99	FALSE	99
2022-09-15	11:44:25	-0.256526	-1.14108	2805.97	FALSE	99
2022-09-15	11:44:25	-0.119682	-0.532369	2990.99	FALSE	99
2022-09-15	11:44:25	-0.298562	-1.32806	2805.97	FALSE	99
2022-09-15	11:44:26	-0.147163	-0.65461	2990.99	FALSE	99
2022-09-15	11:44:26	-0.12589	-0.559984	2805.97	FALSE	99
2022-09-15	11:44:26	-0.0928114	-0.412844	2990.99	FALSE	99
2022-09-15	11:44:27	-0.100089	-0.445216	2805.97	FALSE	99
2022-09-15	11:44:27	-0.0540328	-0.240349	2990.99	FALSE	99
2022-09-15	11:44:27	0.0738043	0.328296	2806.3	FALSE	99
2022-09-15	11:44:27	0.931412	4.14311	2995.13	FALSE	99
2022-09-15	11:44:28	2.33243	10.3751	2816.68	FALSE	99
2022-09-15	11:44:28	0.662455	2.94673	2998.08	FALSE	99
2022-09-15	11:44:28	0.216807	0.964401	2817.64	FALSE	99
2022-09-15	11:44:28	0.219453	0.976171	2999.05	FALSE	99
2022-09-15	11:44:29	0.366323	1.62948	2819.27	FALSE	99
2022-09-15	11:44:29	1.15192	5.12397	3004.18	FALSE	99
2022-09-15	11:44:29	1.35207	6.01428	2825.29	FALSE	99
2022-09-15	11:44:29	1.23279	5.4837	3009.66	FALSE	99
2022-09-15	11:44:30	1.26597	5.63129	2830.92	FALSE	99
2022-09-15	11:44:30	1.54714	6.88199	3016.54	FALSE	99
2022-09-15	11:44:30	0.375484	1.67023	2832.59	FALSE	99
2022-09-15	11:44:31	0.269886	1.20051	3017.74	FALSE	99
2022-09-15	11:44:31	0.137621	0.612166	2833.2	FALSE	99
2022-09-15	11:44:31	0.0789952	0.351386	3018.1	FALSE	99
2022-09-15	11:44:31	0.153346	0.682114	2833.88	FALSE	99
2022-09-15	11:44:32	0.00540736	0.024053	3018.12	FALSE	99
2022-09-15	11:44:32	-0.0134731	-0.059931	2833.88	FALSE	99
2022-09-15	11:44:32	-0.0372898	-0.165872	3018.12	FALSE	99
2022-09-15	11:44:32	-0.0511829	-0.227672	2833.88	FALSE	99
2022-09-15	11:44:33	-0.0695035	-0.309165	3018.12	FALSE	99
2022-09-15	11:44:33	-0.0583076	-0.259364	2833.88	FALSE	99
2022-09-15	11:44:33	-0.0670608	-0.2983	3018.12	FALSE	99
2022-09-15	11:44:33	-0.0648216	-0.288339	2833.88	FALSE	99
2022-09-15	11:44:34	-0.055814	-0.248272	3018.12	FALSE	99
2022-09-15	11:44:34	-0.180038	-0.800845	2833.88	FALSE	99
2022-09-15	11:44:34	-0.295865	-1.31607	3018.12	FALSE	99
2022-09-15	11:44:35	-0.00919824	-0.0409156	2833.88	FALSE	99
2022-09-15	11:44:35	0.264695	1.17742	3019.3	FALSE	99
2022-09-15	11:44:35	0.66902	2.97593	2836.86	FALSE	99
2022-09-15	11:44:35	0.622557	2.76926	3022.07	FALSE	99
2022-09-15	11:44:36	2.62592	11.6806	2848.54	FALSE	99
2022-09-15	11:44:36	2.60846	11.603	3033.67	FALSE	99
2022-09-15	11:44:36	1.77925	7.91446	2856.45	FALSE	99
2022-09-15	11:44:36	1.16795	5.19528	3038.86	FALSE	99
2022-09-15	11:44:37	0.442456	1.96813	2858.42	FALSE	99
2022-09-15	11:44:37	0.0830664	0.369496	3039.23	FALSE	99
2022-09-15	11:44:37	0.134161	0.596775	2859.02	FALSE	99
2022-09-15	11:44:37	0.0205219	0.0912855	3039.33	FALSE	99
2022-09-15	11:44:38	0.0506491	0.225297	2859.24	FALSE	99
2022-09-15	11:44:38	-0.023244	-0.103394	3039.33	FALSE	99
2022-09-15	11:44:38	-0.0737275	-0.327955	2859.24	FALSE	99
2022-09-15	11:44:39	-0.100394	-0.446573	3039.33	FALSE	99
2022-09-15	11:44:39	-0.118969	-0.529198	2859.24	FALSE	99
2022-09-15	11:44:39	-0.13047	-0.580357	3039.33	FALSE	99
2022-09-15	11:44:39	-0.136781	-0.608429	2859.24	FALSE	99
2022-09-15	11:44:40	-0.123804	-0.550705	3039.33	FALSE	99
2022-09-15	11:44:40	-0.12131	-0.539611	2859.24	FALSE	99
2022-09-15	11:44:40	-0.127977	-0.569267	3039.33	FALSE	99
2022-09-15	11:44:40	-0.121768	-0.541648	2859.24	FALSE	99
2022-09-15	11:44:41	-0.110776	-0.492754	3039.33	FALSE	99
2022-09-15	11:44:41	-0.0984094	-0.437745	2859.24	FALSE	99
2022-09-15	11:44:41	-0.0762211	-0.339047	3039.33	FALSE	99
2022-09-15	11:44:41	-0.0730149	-0.324785	2859.24	FALSE	99
2022-09-15	11:44:42	-0.0508267	-0.226087	3039.33	FALSE	99
2022-09-15	11:44:42	0.111769	0.497171	2859.74	FALSE	99
2022-09-15	11:44:42	1.73426	7.71434	3047.04	FALSE	99
2022-09-15	11:44:43	4.79619	21.3344	2881.07	1	100
2022-09-15	11:44:43	3.00144	13.351	3060.39	1	101
2022-09-15	11:44:43	0.472023	2.09965	2883.17	FALSE	101
2022-09-15	11:44:43	0.0858144	0.38172	3060.77	FALSE	101
2022-09-15	11:44:44	-0.222481	-0.98964	2883.17	FALSE	101
2022-09-15	11:44:44	-0.410623	-1.82653	3060.77	FALSE	101
2022-09-15	11:44:44	-0.500852	-2.22789	2883.17	FALSE	101
2022-09-15	11:44:44	-0.614745	-2.73451	3060.77	FALSE	101
2022-09-15	11:44:45	-0.618715	-2.75217	2883.17	FALSE	101
2022-09-15	11:44:45	-0.499325	-2.2211	3060.77	FALSE	101
2022-09-15	11:44:45	-0.466603	-2.07554	2883.17	FALSE	101
2022-09-15	11:44:45	-0.436526	-1.94175	3060.77	FALSE	101
2022-09-15	11:44:46	-0.303091	-1.34821	2883.17	FALSE	101
2022-09-15	11:44:46	0.16098	0.716071	3061.49	FALSE	101
2022-09-15	11:44:46	3.31019	14.7244	2897.9	1	102
2022-09-15	11:44:46	4.48775	19.9624	3081.45	1	103
2022-09-15	11:44:47	1.66108	7.38882	2905.29	FALSE	103
2022-09-15	11:44:47	0.467392	2.07905	3083.53	FALSE	103
2022-09-15	11:44:47	0.374059	1.66389	2906.95	FALSE	103
2022-09-15	11:44:48	0.353906	1.57424	3085.1	FALSE	103
2022-09-15	11:44:48	0.419046	1.864	2908.81	FALSE	103
2022-09-15	11:44:48	0.584593	2.60039	3087.7	FALSE	103
2022-09-15	11:44:48	0.629326	2.79937	2911.61	FALSE	103
2022-09-15	11:44:49	0.856501	3.80989	3091.51	FALSE	103
2022-09-15	11:44:49	1.09813	4.8847	2916.5	FALSE	103
2022-09-15	11:44:49	1.25874	5.59913	3097.11	FALSE	103
2022-09-15	11:44:49	0.834568	3.71233	2920.21	FALSE	103
2022-09-15	11:44:50	1.07788	4.79463	3101.91	FALSE	103
2022-09-15	11:44:50	0.745255	3.31504	2923.53	FALSE	103
2022-09-15	11:44:50	1.24281	5.52827	3107.44	FALSE	103
2022-09-15	11:44:50	1.23508	5.49388	2929.02	FALSE	103
2022-09-15	11:44:51	2.38118	10.592	3118.03	FALSE	103
2022-09-15	11:44:51	2.92663	13.0182	2942.04	FALSE	103
2022-09-15	11:44:51	2.61095	11.614	3129.64	FALSE	103
2022-09-15	11:44:52	3.2764	14.5741	2956.61	1	104
2022-09-15	11:44:52	5.20708	23.1621	3152.8	1	105
2022-09-15	11:44:52	5.43762	24.1876	2980.8	1	106
2022-09-15	11:44:52	7.66372	34.0898	3186.89	1	107
2022-09-15	11:44:53	4.63635	20.6234	3001.42	1	108
2022-09-15	11:44:53	3.2452	14.4353	3201.33	1	109
2022-09-15	11:44:53	1.25472	5.58125	3007	FALSE	109
2022-09-15	11:44:53	3.99894	17.7881	3219.12	1	110
2022-09-15	11:44:54	1.17335	5.2193	3012.22	FALSE	110
2022-09-15	11:44:54	0.360165	1.60209	3220.72	FALSE	110
2022-09-15	11:44:54	-0.283804	-1.26242	3012.22	FALSE	110
2022-09-15	11:44:54	-0.547875	-2.43706	3220.72	FALSE	110

## Sheet: Klutz_prong_2022915113947 (2)
Date	Time	Lbs	Total force x time			**GoPro Fitting: 1129
2022-09-15	11:39:47	2.97909	2.97909	FALSE	0
2022-09-15	11:39:48	0.295229	3.27432	FALSE	0
2022-09-15	11:39:48	0.202965	3.47728	FALSE	0
2022-09-15	11:39:48	0.189275	3.66656	FALSE	0
2022-09-15	11:39:48	0.403168	4.06973	FALSE	0
2022-09-15	11:39:49	0.89472	4.96445	FALSE	0
2022-09-15	11:39:49	1.73401	6.69846	FALSE	0
2022-09-15	11:39:49	2.9051	9.60356	FALSE	0
2022-09-15	11:39:49	3.29843	12.902	1	1
2022-09-15	11:39:50	3.19681	16.0988	1	2
2022-09-15	11:39:50	3.6511	19.7499	1	3
2022-09-15	11:39:50	3.61019	23.3601	1	4
2022-09-15	11:39:50	3.66485	27.0249	1	5
2022-09-15	11:39:51	3.71467	30.7396	1	6
2022-09-15	11:39:51	3.7053	34.4449	1	7
2022-09-15	11:39:51	3.72586	38.1708	1	8
2022-09-15	11:39:52	3.66698	41.8377	1	9
2022-09-15	11:39:52	3.65976	45.4975	1	10
2022-09-15	11:39:52	3.65558	49.1531	1	11
2022-09-15	11:39:52	3.64632	52.7994	1	12
2022-09-15	11:39:53	3.69803	56.4974	1	13
2022-09-15	11:39:53	3.76001	60.2574	1	14
2022-09-15	11:39:53	3.6993	63.9567	1	15
2022-09-15	11:39:53	3.71818	67.6749	1	16
2022-09-15	11:39:54	3.66963	71.3446	1	17
2022-09-15	11:39:54	3.60444	74.949	1	18
2022-09-15	11:39:54	3.59324	78.5422	1	19
2022-09-15	11:39:54	3.59563	82.1379	1	20
2022-09-15	11:39:55	3.66922	85.8071	1	21
2022-09-15	11:39:55	3.38083	89.1879	1	22
2022-09-15	11:39:55	3.3394	92.5273	1	23
2022-09-15	11:39:56	3.69436	96.2217	1	24
2022-09-15	11:39:56	4.07197	100.294	1	25
2022-09-15	11:39:56	4.03976	104.333	1	26
2022-09-15	11:39:56	4.07228	108.406	1	27
2022-09-15	11:39:57	3.86688	112.273	1	28
2022-09-15	11:39:57	3.84927	116.122	1	29
2022-09-15	11:39:57	3.85848	119.98	1	30
2022-09-15	11:39:57	0.665407	120.646	FALSE	30
2022-09-15	11:39:58	0.33813	120.984	FALSE	30
2022-09-15	11:39:58	0.382608	121.366	FALSE	30
2022-09-15	11:39:58	0.427901	121.794	FALSE	30
2022-09-15	11:39:58	0.367646	122.162	FALSE	30
2022-09-15	11:39:59	0.40958	122.572	FALSE	30
2022-09-15	11:39:59	0.400216	122.972	FALSE	30
2022-09-15	11:39:59	0.413601	123.385	FALSE	30
2022-09-15	11:40:00	0.409224	123.795	FALSE	30
2022-09-15	11:40:00	0.370802	124.165	FALSE	30
2022-09-15	11:40:00	0.375382	124.541	FALSE	30
2022-09-15	11:40:00	0.34958	124.89	FALSE	30
2022-09-15	11:40:01	0.216959	125.107	FALSE	30
2022-09-15	11:40:01	0.418486	125.526	FALSE	30
2022-09-15	11:40:01	-0.0248725	125.526	FALSE	30
2022-09-15	11:40:01	-0.231641	125.526	FALSE	30
2022-09-15	11:40:02	-0.386603	125.526	FALSE	30
2022-09-15	11:40:02	-0.492302	125.526	FALSE	30
2022-09-15	11:40:02	-0.597188	125.526	FALSE	30
2022-09-15	11:40:02	-0.602328	125.526	FALSE	30
2022-09-15	11:40:03	0.982455	126.508	FALSE	30
2022-09-15	11:40:03	0.400573	126.909	FALSE	30
2022-09-15	11:40:03	-0.10528	126.909	FALSE	30
2022-09-15	11:40:04	-0.595763	126.909	FALSE	30
2022-09-15	11:40:04	-0.756221	126.909	FALSE	30
2022-09-15	11:40:04	-0.835712	126.909	FALSE	30
2022-09-15	11:40:04	-0.771182	126.909	FALSE	30
2022-09-15	11:40:05	-0.695508	126.909	FALSE	30
2022-09-15	11:40:05	-0.0896053	126.909	FALSE	30
2022-09-15	11:40:05	0.192074	127.101	FALSE	30
2022-09-15	11:40:05	0.205	127.306	FALSE	30
2022-09-15	11:40:06	6.00739	133.313	1	31
2022-09-15	11:40:06	42.212	175.525	1	32
2022-09-15	11:40:06	21.6947	197.22	1	33
2022-09-15	11:40:06	2.49538	199.715	FALSE	33
2022-09-15	11:40:07	2.05482	201.77	FALSE	33
2022-09-15	11:40:07	2.3253	204.096	FALSE	33
2022-09-15	11:40:07	7.97782	212.073	1	34
2022-09-15	11:40:08	13.8989	225.972	1	35
2022-09-15	11:40:08	7.66759	233.64	1	36
2022-09-15	11:40:08	11.3256	244.965	1	37
2022-09-15	11:40:08	13.1566	258.122	1	38
2022-09-15	11:40:09	14.5296	272.652	1	39
2022-09-15	11:40:09	14.4461	287.098	1	40
2022-09-15	11:40:09	12.7488	299.847	1	41
2022-09-15	11:40:09	2.32668	302.173	FALSE	41
2022-09-15	11:40:10	1.60469	303.778	FALSE	41
2022-09-15	11:40:10	1.14958	304.927	FALSE	41
2022-09-15	11:40:10	0.224491	305.152	FALSE	41
2022-09-15	11:40:10	1.1451	306.297	FALSE	41
2022-09-15	11:40:11	11.1654	317.462	1	42
2022-09-15	11:40:11	13.0505	330.513	1	43
2022-09-15	11:40:11	10.7102	341.223	1	44
2022-09-15	11:40:12	10.8943	352.117	1	45
2022-09-15	11:40:12	11.5644	363.682	1	46
2022-09-15	11:40:12	6.85965	370.542	1	47
2022-09-15	11:40:12	6.76291	377.304	1	48
2022-09-15	11:40:13	18.739	396.043	1	49
2022-09-15	11:40:13	17.1784	413.222	1	50
2022-09-15	11:40:13	9.27309	422.495	1	51
2022-09-15	11:40:13	6.6679	429.163	1	52
2022-09-15	11:40:14	7.78174	436.945	1	53
2022-09-15	11:40:14	14.2318	451.176	1	54
2022-09-15	11:40:14	16.7626	467.939	1	55
2022-09-15	11:40:14	18.957	486.896	1	56
2022-09-15	11:40:15	11.1205	498.016	1	57
2022-09-15	11:40:15	15.6445	513.661	1	58
2022-09-15	11:40:15	16.4549	530.116	1	59
2022-09-15	11:40:16	5.61874	535.735	1	60
2022-09-15	11:40:16	0.502405	536.237	FALSE	60
2022-09-15	11:40:16	-0.127315	536.237	FALSE	60
2022-09-15	11:40:16	-0.212862	536.237	FALSE	60
2022-09-15	11:40:17	-0.386094	536.237	FALSE	60
2022-09-15	11:40:17	-0.826501	536.237	FALSE	60
2022-09-15	11:40:17	-0.980699	536.237	FALSE	60
2022-09-15	11:40:17	-1.01576	536.237	FALSE	60
2022-09-15	11:40:18	-0.760088	536.237	FALSE	60
2022-09-15	11:40:18	0.295942	536.533	FALSE	60
2022-09-15	11:40:18	0.275687	536.809	FALSE	60
2022-09-15	11:40:18	0.0550257	536.864	FALSE	60
2022-09-15	11:40:19	-0.106654	536.864	FALSE	60
2022-09-15	11:40:19	-0.258206	536.864	FALSE	60
2022-09-15	11:40:19	-0.768027	536.864	FALSE	60
2022-09-15	11:40:20	-0.689605	536.864	FALSE	60
2022-09-15	11:40:20	0.29126	537.155	FALSE	60
2022-09-15	11:40:20	2.0933	539.248	FALSE	60
2022-09-15	11:40:20	8.58479	547.833	1	61
2022-09-15	11:40:21	8.49105	556.324	1	62
2022-09-15	11:40:21	4.43889	560.763	1	63
2022-09-15	11:40:21	1.46464	562.228	FALSE	63
2022-09-15	11:40:21	0.235636	562.463	FALSE	63
2022-09-15	11:40:22	-0.0853305	562.463	FALSE	63
2022-09-15	11:40:22	-0.273829	562.463	FALSE	63
2022-09-15	11:40:22	-0.523345	562.463	FALSE	63
2022-09-15	11:40:22	-0.473117	562.463	FALSE	63
2022-09-15	11:40:23	0.0724302	562.536	FALSE	63
2022-09-15	11:40:23	0.104186	562.64	FALSE	63
2022-09-15	11:40:23	-0.197188	562.64	FALSE	63
2022-09-15	11:40:24	-0.346043	562.64	FALSE	63
2022-09-15	11:40:24	-0.366246	562.64	FALSE	63
2022-09-15	11:40:24	-0.227519	562.64	FALSE	63
2022-09-15	11:40:24	-0.348486	562.64	FALSE	63
2022-09-15	11:40:25	-0.445788	562.64	FALSE	63
2022-09-15	11:40:25	-0.0546944	562.64	FALSE	63
2022-09-15	11:40:25	0.124797	562.765	FALSE	63
2022-09-15	11:40:25	-0.408078	562.765	FALSE	63
2022-09-15	11:40:26	0.0738552	562.839	FALSE	63
2022-09-15	11:40:26	0.880776	563.719	FALSE	63
2022-09-15	11:40:26	1.23207	564.951	FALSE	63
2022-09-15	11:40:26	2.91049	567.862	FALSE	63
2022-09-15	11:40:27	2.49202	570.354	FALSE	63
2022-09-15	11:40:27	1.08765	571.442	FALSE	63
2022-09-15	11:40:27	0.964949	572.406	FALSE	63
2022-09-15	11:40:28	0.36556	572.772	FALSE	63
2022-09-15	11:40:28	-0.0217173	572.772	FALSE	63
2022-09-15	11:40:28	-0.119733	572.772	FALSE	63
2022-09-15	11:40:28	0.00937683	572.781	FALSE	63
2022-09-15	11:40:29	-0.210521	572.781	FALSE	63
2022-09-15	11:40:29	-0.213473	572.781	FALSE	63
2022-09-15	11:40:29	-0.223855	572.781	FALSE	63
2022-09-15	11:40:29	-0.394949	572.781	FALSE	63
2022-09-15	11:40:30	-0.163956	572.781	FALSE	63
2022-09-15	11:40:30	0.214822	572.996	FALSE	63
2022-09-15	11:40:30	1.27218	574.268	FALSE	63
2022-09-15	11:40:30	-0.0769335	574.268	FALSE	63
2022-09-15	11:40:31	-0.0890455	574.268	FALSE	63
2022-09-15	11:40:31	-0.431692	574.268	FALSE	63
2022-09-15	11:40:31	-0.516119	574.268	FALSE	63
2022-09-15	11:40:32	-0.571793	574.268	FALSE	63
2022-09-15	11:40:32	-0.77561	574.268	FALSE	63
2022-09-15	11:40:32	-0.329351	574.268	FALSE	63
2022-09-15	11:40:32	-0.274847	574.268	FALSE	63
2022-09-15	11:40:33	-0.276526	574.268	FALSE	63
2022-09-15	11:40:33	-0.244618	574.268	FALSE	63
2022-09-15	11:40:33	-0.298766	574.268	FALSE	63
2022-09-15	11:40:33	-0.433371	574.268	FALSE	63
2022-09-15	11:40:34	-0.612251	574.268	FALSE	63
2022-09-15	11:40:34	-0.734898	574.268	FALSE	63
2022-09-15	11:40:34	-0.426552	574.268	FALSE	63
2022-09-15	11:40:34	-0.484516	574.268	FALSE	63
2022-09-15	11:40:35	-0.520597	574.268	FALSE	63
2022-09-15	11:40:35	-0.290419	574.268	FALSE	63
2022-09-15	11:40:35	-0.0583076	574.268	FALSE	63
2022-09-15	11:40:36	2.00062	576.269	FALSE	63
2022-09-15	11:40:36	1.85141	578.12	FALSE	63
2022-09-15	11:40:36	2.22276	580.343	FALSE	63
2022-09-15	11:40:36	2.69177	583.035	FALSE	63
2022-09-15	11:40:37	1.05518	584.09	FALSE	63
2022-09-15	11:40:37	1.16459	585.255	FALSE	63
2022-09-15	11:40:37	0.915789	586.171	FALSE	63
2022-09-15	11:40:37	0.926679	587.097	FALSE	63
2022-09-15	11:40:38	0.705865	587.803	FALSE	63
2022-09-15	11:40:38	2.11711	589.92	FALSE	63
2022-09-15	11:40:38	1.01915	590.939	FALSE	63
2022-09-15	11:40:38	1.48108	592.42	FALSE	63
2022-09-15	11:40:39	0.00479668	592.425	FALSE	63
2022-09-15	11:40:39	0.117621	592.543	FALSE	63
2022-09-15	11:40:39	0.120471	592.663	FALSE	63
2022-09-15	11:40:40	0.0765015	592.74	FALSE	63
2022-09-15	11:40:40	-0.223346	592.74	FALSE	63
2022-09-15	11:40:40	-0.179122	592.74	FALSE	63
2022-09-15	11:40:40	-0.126297	592.74	FALSE	63
2022-09-15	11:40:41	-0.0473662	592.74	FALSE	63
2022-09-15	11:40:41	-0.0941854	592.74	FALSE	63
2022-09-15	11:40:41	0.0535498	592.793	FALSE	63
2022-09-15	11:40:41	0.199453	592.993	FALSE	63
2022-09-15	11:40:42	2.09452	595.087	FALSE	63
2022-09-15	11:40:42	4.05166	599.139	1	64
2022-09-15	11:40:42	2.16887	601.308	FALSE	64
2022-09-15	11:40:42	0.364644	601.672	FALSE	64
2022-09-15	11:40:43	0.0471885	601.72	FALSE	64
2022-09-15	11:40:43	0.966069	602.686	FALSE	64
2022-09-15	11:40:43	0.193601	602.879	FALSE	64
2022-09-15	11:40:44	0.78846	603.668	FALSE	64
2022-09-15	11:40:44	0.954262	604.622	FALSE	64
2022-09-15	11:40:44	1.09813	605.72	FALSE	64
2022-09-15	11:40:44	0.572837	606.293	FALSE	64
2022-09-15	11:40:45	1.29782	607.591	FALSE	64
2022-09-15	11:40:45	1.56408	609.155	FALSE	64
2022-09-15	11:40:45	1.55696	610.712	FALSE	64
2022-09-15	11:40:45	1.66139	612.373	FALSE	64
2022-09-15	11:40:46	0.549478	612.923	FALSE	64
2022-09-15	11:40:46	0.548817	613.472	FALSE	64
2022-09-15	11:40:46	0.419148	613.891	FALSE	64
2022-09-15	11:40:46	0.508359	614.399	FALSE	64
2022-09-15	11:40:47	0.728562	615.128	FALSE	64
2022-09-15	11:40:47	2.83538	617.963	FALSE	64
2022-09-15	11:40:47	1.54607	619.509	FALSE	64
2022-09-15	11:40:48	0.670293	620.179	FALSE	64
2022-09-15	11:40:48	0.560623	620.74	FALSE	64
2022-09-15	11:40:48	0.227239	620.967	FALSE	64
2022-09-15	11:40:48	0.736654	621.704	FALSE	64
2022-09-15	11:40:49	1.00536	622.709	FALSE	64
2022-09-15	11:40:49	2.68846	625.398	FALSE	64
2022-09-15	11:40:49	2.47273	627.87	FALSE	64
2022-09-15	11:40:49	1.36836	629.239	FALSE	64
2022-09-15	11:40:50	2.30617	631.545	FALSE	64
2022-09-15	11:40:50	2.20184	633.747	FALSE	64
2022-09-15	11:40:50	0.624135	634.371	FALSE	64
2022-09-15	11:40:50	0.374771	634.746	FALSE	64
2022-09-15	11:40:51	0.740369	635.486	FALSE	64
2022-09-15	11:40:51	0.581234	636.067	FALSE	64
2022-09-15	11:40:51	1.25599	637.323	FALSE	64
2022-09-15	11:40:52	1.17385	638.497	FALSE	64
2022-09-15	11:40:52	1.91543	640.413	FALSE	64
2022-09-15	11:40:52	1.83233	642.245	FALSE	64
2022-09-15	11:40:52	1.89905	644.144	FALSE	64
2022-09-15	11:40:53	1.22744	645.371	FALSE	64
2022-09-15	11:40:53	1.4735	646.845	FALSE	64
2022-09-15	11:40:53	2.42688	649.272	FALSE	64
2022-09-15	11:40:53	3.19864	652.47	1	65
2022-09-15	11:40:54	4.01808	656.489	1	66
2022-09-15	11:40:54	4.5936	661.082	1	67
2022-09-15	11:40:54	2.38765	663.47	FALSE	67
2022-09-15	11:40:54	0.408308	663.878	FALSE	67
2022-09-15	11:40:55	0.861539	664.74	FALSE	67
2022-09-15	11:40:55	0.109021	664.849	FALSE	67
2022-09-15	11:40:55	0.740318	665.589	FALSE	67
2022-09-15	11:40:56	1.33574	666.925	FALSE	67
2022-09-15	11:40:56	3.4451	670.37	1	68
2022-09-15	11:40:56	3.81736	674.187	1	69
2022-09-15	11:40:56	4.75604	678.943	1	70
2022-09-15	11:40:57	2.0338	680.977	FALSE	70
2022-09-15	11:40:57	1.61594	682.593	FALSE	70
2022-09-15	11:40:57	0.470903	683.064	FALSE	70
2022-09-15	11:40:57	0.72729	683.791	FALSE	70
2022-09-15	11:40:58	0.545305	684.336	FALSE	70
2022-09-15	11:40:58	0.204237	684.541	FALSE	70
2022-09-15	11:40:58	1.05238	685.593	FALSE	70
2022-09-15	11:40:59	3.33874	688.932	1	71
2022-09-15	11:40:59	0.999758	689.932	FALSE	71
2022-09-15	11:40:59	-0.022786	689.932	FALSE	71
2022-09-15	11:40:59	0.154924	690.086	FALSE	71
2022-09-15	11:41:00	0.12271	690.209	FALSE	71
2022-09-15	11:41:00	-0.118969	690.209	FALSE	71
2022-09-15	11:41:00	-0.101157	690.209	FALSE	71
2022-09-15	11:41:00	-0.296883	690.209	FALSE	71
2022-09-15	11:41:01	-0.614542	690.209	FALSE	71
2022-09-15	11:41:01	-0.789351	690.209	FALSE	71
2022-09-15	11:41:01	-0.890673	690.209	FALSE	71
2022-09-15	11:41:01	-0.810012	690.209	FALSE	71
2022-09-15	11:41:02	-0.721462	690.209	FALSE	71
2022-09-15	11:41:02	-0.353524	690.209	FALSE	71
2022-09-15	11:41:02	-0.0016664	690.209	FALSE	71
2022-09-15	11:41:03	0.200725	690.41	FALSE	71
2022-09-15	11:41:03	0.387036	690.797	FALSE	71
2022-09-15	11:41:03	0.444847	691.242	FALSE	71
2022-09-15	11:41:03	0.310802	691.553	FALSE	71
2022-09-15	11:41:04	-0.01444	691.553	FALSE	71
2022-09-15	11:41:04	0.161082	691.714	FALSE	71
2022-09-15	11:41:04	0.319148	692.033	FALSE	71
2022-09-15	11:41:04	1.21859	693.251	FALSE	71
2022-09-15	11:41:05	3.27599	696.527	1	72
2022-09-15	11:41:05	3.49904	700.026	1	73
2022-09-15	11:41:05	5.04276	705.069	1	74
2022-09-15	11:41:05	3.94968	709.019	1	75
2022-09-15	11:41:06	2.4277	711.447	FALSE	75
2022-09-15	11:41:06	1.83335	713.28	FALSE	75
2022-09-15	11:41:06	0.37757	713.658	FALSE	75
2022-09-15	11:41:07	0.700929	714.358	FALSE	75
2022-09-15	11:41:07	0.321183	714.68	FALSE	75
2022-09-15	11:41:07	0.379555	715.059	FALSE	75
2022-09-15	11:41:07	0.284644	715.344	FALSE	75
2022-09-15	11:41:08	0.285611	715.629	FALSE	75
2022-09-15	11:41:08	0.393448	716.023	FALSE	75
2022-09-15	11:41:08	0.151412	716.174	FALSE	75
2022-09-15	11:41:08	0.625356	716.8	FALSE	75
2022-09-15	11:41:09	0.834924	717.635	FALSE	75
2022-09-15	11:41:09	4.17304	721.808	1	76
2022-09-15	11:41:09	3.73024	725.538	1	77
2022-09-15	11:41:09	4.54968	730.088	1	78
2022-09-15	11:41:10	1.81966	731.907	FALSE	78
2022-09-15	11:41:10	1.15156	733.059	FALSE	78
2022-09-15	11:41:10	0.469886	733.529	FALSE	78
2022-09-15	11:41:11	0.449682	733.978	FALSE	78
2022-09-15	11:41:11	0.488461	734.467	FALSE	78
2022-09-15	11:41:11	0.366883	734.834	FALSE	78
2022-09-15	11:41:11	0.506934	735.341	FALSE	78
2022-09-15	11:41:12	0.374771	735.715	FALSE	78
2022-09-15	11:41:12	0.537672	736.253	FALSE	78
2022-09-15	11:41:12	0.589478	736.843	FALSE	78
2022-09-15	11:41:12	1.18704	738.03	FALSE	78
2022-09-15	11:41:13	2.10648	740.136	FALSE	78
2022-09-15	11:41:13	2.21538	742.351	FALSE	78
2022-09-15	11:41:13	2.54831	744.9	FALSE	78
2022-09-15	11:41:13	1.36357	746.263	FALSE	78
2022-09-15	11:41:14	2.93716	749.2	FALSE	78
2022-09-15	11:41:14	2.65711	751.858	FALSE	78
2022-09-15	11:41:14	4.37686	756.234	1	79
2022-09-15	11:41:15	4.11085	760.345	1	80
2022-09-15	11:41:15	2.56108	762.906	FALSE	80
2022-09-15	11:41:15	2.83798	765.744	FALSE	80
2022-09-15	11:41:15	2.22805	767.972	FALSE	80
2022-09-15	11:41:16	4.4224	772.395	1	81
2022-09-15	11:41:16	3.29131	775.686	1	82
2022-09-15	11:41:16	3.07996	778.766	1	83
2022-09-15	11:41:16	2.0564	780.822	FALSE	83
2022-09-15	11:41:17	2.27609	783.099	FALSE	83
2022-09-15	11:41:17	0.279809	783.378	FALSE	83
2022-09-15	11:41:17	1.08235	784.461	FALSE	83
2022-09-15	11:41:17	1.13441	785.595	FALSE	83
2022-09-15	11:41:18	0.804389	786.4	FALSE	83
2022-09-15	11:41:18	1.46592	787.865	FALSE	83
2022-09-15	11:41:18	0.945356	788.811	FALSE	83
2022-09-15	11:41:19	0.335331	789.146	FALSE	83
2022-09-15	11:41:19	0.312481	789.459	FALSE	83
2022-09-15	11:41:19	0.388054	789.847	FALSE	83
2022-09-15	11:41:19	0.285967	790.133	FALSE	83
2022-09-15	11:41:20	0.300624	790.433	FALSE	83
2022-09-15	11:41:20	0.314211	790.747	FALSE	83
2022-09-15	11:41:20	0.795076	791.543	FALSE	83
2022-09-15	11:41:20	1.17976	792.722	FALSE	83
2022-09-15	11:41:21	0.162201	792.884	FALSE	83
2022-09-15	11:41:21	0.215585	793.1	FALSE	83
2022-09-15	11:41:21	-0.018155	793.1	FALSE	83
2022-09-15	11:41:21	0.0747712	793.175	FALSE	83
2022-09-15	11:41:22	-0.26701	793.175	FALSE	83
2022-09-15	11:41:22	-0.307671	793.175	FALSE	83
2022-09-15	11:41:22	-0.449554	793.175	FALSE	83
2022-09-15	11:41:23	-0.4693	793.175	FALSE	83
2022-09-15	11:41:23	-0.393931	793.175	FALSE	83
2022-09-15	11:41:23	-0.1693	793.175	FALSE	83
2022-09-15	11:41:23	-0.0780531	793.175	FALSE	83
2022-09-15	11:41:24	0.255178	793.43	FALSE	83
2022-09-15	11:41:24	0.211565	793.642	FALSE	83
2022-09-15	11:41:24	0.246221	793.888	FALSE	83
2022-09-15	11:41:24	0.419148	794.307	FALSE	83
2022-09-15	11:41:25	0.342506	794.649	FALSE	83
2022-09-15	11:41:25	0.485356	795.135	FALSE	83
2022-09-15	11:41:25	0.261031	795.396	FALSE	83
2022-09-15	11:41:25	0.488054	795.884	FALSE	83
2022-09-15	11:41:26	0.211158	796.095	FALSE	83
2022-09-15	11:41:26	0.455992	796.551	FALSE	83
2022-09-15	11:41:26	0.215433	796.766	FALSE	83
2022-09-15	11:41:27	0.408461	797.175	FALSE	83
2022-09-15	11:41:27	0.263372	797.438	FALSE	83
2022-09-15	11:41:27	0.432277	797.871	FALSE	83
2022-09-15	11:41:27	0.270751	798.141	FALSE	83
2022-09-15	11:41:28	0.448613	798.59	FALSE	83
2022-09-15	11:41:28	0.343168	798.933	FALSE	83
2022-09-15	11:41:28	0.505051	799.438	FALSE	83
2022-09-15	11:41:28	0.450496	799.889	FALSE	83
2022-09-15	11:41:29	0.393244	800.282	FALSE	83
2022-09-15	11:41:29	0.175992	800.458	FALSE	83
2022-09-15	11:41:29	0.203117	800.661	FALSE	83
2022-09-15	11:41:29	0.2993	800.96	FALSE	83
2022-09-15	11:41:30	0.678384	801.639	FALSE	83
2022-09-15	11:41:30	0.030242	801.669	FALSE	83
2022-09-15	11:41:30	0.191921	801.861	FALSE	83
2022-09-15	11:41:31	0.265662	802.127	FALSE	83
2022-09-15	11:41:31	0.320522	802.447	FALSE	83
2022-09-15	11:41:31	0.394161	802.841	FALSE	83
2022-09-15	11:41:31	0.384898	803.226	FALSE	83
2022-09-15	11:41:32	0.452328	803.678	FALSE	83
2022-09-15	11:41:32	0.586628	804.265	FALSE	83
2022-09-15	11:41:32	0.557723	804.823	FALSE	83
2022-09-15	11:41:32	0.43355	805.256	FALSE	83
2022-09-15	11:41:33	0.152736	805.409	FALSE	83
2022-09-15	11:41:33	0.294415	805.704	FALSE	83
2022-09-15	11:41:33	0.324389	806.028	FALSE	83
2022-09-15	11:41:33	0.320216	806.348	FALSE	83
2022-09-15	11:41:34	0.308003	806.656	FALSE	83
2022-09-15	11:41:34	0.109071	806.765	FALSE	83
2022-09-15	11:41:34	0.384898	807.15	FALSE	83
2022-09-15	11:41:35	0.335382	807.485	FALSE	83
2022-09-15	11:41:35	0.268766	807.754	FALSE	83
2022-09-15	11:41:35	0.280369	808.035	FALSE	83
2022-09-15	11:41:35	0.334415	808.369	FALSE	83
2022-09-15	11:41:36	0.348664	808.718	FALSE	83
2022-09-15	11:41:36	0.622812	809.34	FALSE	83
2022-09-15	11:41:36	0.724593	810.065	FALSE	83
2022-09-15	11:41:36	0.733142	810.798	FALSE	83
2022-09-15	11:41:37	0.735026	811.533	FALSE	83
2022-09-15	11:41:37	0.726323	812.26	FALSE	83
2022-09-15	11:41:37	0.657366	812.917	FALSE	83
2022-09-15	11:41:37	0.643117	813.56	FALSE	83
2022-09-15	11:41:38	0.471209	814.031	FALSE	83
2022-09-15	11:41:38	0.518944	814.55	FALSE	83
2022-09-15	11:41:38	0.494924	815.045	FALSE	83
2022-09-15	11:41:39	0.524236	815.569	FALSE	83
2022-09-15	11:41:39	0.509987	816.079	FALSE	83
2022-09-15	11:41:39	0.483372	816.563	FALSE	83
2022-09-15	11:41:39	0.490242	817.053	FALSE	83
2022-09-15	11:41:40	0.487697	817.541	FALSE	83
2022-09-15	11:41:40	0.498232	818.039	FALSE	83
2022-09-15	11:41:40	0.501997	818.541	FALSE	83
2022-09-15	11:41:40	0.49243	819.033	FALSE	83
2022-09-15	11:41:41	0.474924	819.508	FALSE	83
2022-09-15	11:41:41	0.47472	819.983	FALSE	83
2022-09-15	11:41:41	0.485916	820.469	FALSE	83
2022-09-15	11:41:41	0.514975	820.984	FALSE	83
2022-09-15	11:41:42	0.519249	821.503	FALSE	83
2022-09-15	11:41:42	0.503982	822.007	FALSE	83
2022-09-15	11:41:42	0.467952	822.475	FALSE	83
2022-09-15	11:41:43	0.431412	822.906	FALSE	83
2022-09-15	11:41:43	0.408104	823.315	FALSE	83
2022-09-15	11:41:43	0.382048	823.697	FALSE	83
2022-09-15	11:41:43	0.433041	824.13	FALSE	83
2022-09-15	11:41:44	0.393092	824.523	FALSE	83
2022-09-15	11:41:44	0.373193	824.896	FALSE	83
2022-09-15	11:41:44	0.335127	825.231	FALSE	83
2022-09-15	11:41:44	0.429682	825.661	FALSE	83
2022-09-15	11:41:45	0.431158	826.092	FALSE	83
2022-09-15	11:41:45	0.274364	826.366	FALSE	83
2022-09-15	11:41:45	0.291412	826.658	FALSE	83
2022-09-15	11:41:45	0.377367	827.035	FALSE	83
2022-09-15	11:41:46	0.374771	827.41	FALSE	83
2022-09-15	11:41:46	0.445509	827.855	FALSE	83
2022-09-15	11:41:46	0.260573	828.116	FALSE	83
2022-09-15	11:41:47	0.270751	828.387	FALSE	83
2022-09-15	11:41:47	0.422965	828.81	FALSE	83
2022-09-15	11:41:47	0.572481	829.382	FALSE	83
2022-09-15	11:41:47	0.567392	829.949	FALSE	83
2022-09-15	11:41:48	0.688919	830.638	FALSE	83
2022-09-15	11:41:48	0.660369	831.299	FALSE	83
2022-09-15	11:41:48	0.357265	831.656	FALSE	83
2022-09-15	11:41:48	0.312023	831.968	FALSE	83
2022-09-15	11:41:49	0.408817	832.377	FALSE	83
2022-09-15	11:41:49	0.464033	832.841	FALSE	83
2022-09-15	11:41:49	0.344746	833.186	FALSE	83
2022-09-15	11:41:50	0.338842	833.524	FALSE	83
2022-09-15	11:41:50	0.449886	833.974	FALSE	83
2022-09-15	11:41:50	0.568002	834.542	FALSE	83
2022-09-15	11:41:50	0.596145	835.139	FALSE	83
2022-09-15	11:41:51	0.76785	835.906	FALSE	83
2022-09-15	11:41:51	1.13416	837.041	FALSE	83
2022-09-15	11:41:51	2.15248	839.193	FALSE	83
2022-09-15	11:41:51	2.08877	841.282	FALSE	83
2022-09-15	11:41:52	1.05782	842.34	FALSE	83
2022-09-15	11:41:52	0.796807	843.136	FALSE	83
2022-09-15	11:41:52	0.529478	843.666	FALSE	83
2022-09-15	11:41:52	1.54709	845.213	FALSE	83
2022-09-15	11:41:53	1.89039	847.103	FALSE	83
2022-09-15	11:41:53	1.35034	848.454	FALSE	83
2022-09-15	11:41:53	1.33401	849.788	FALSE	83
2022-09-15	11:41:53	1.07151	850.859	FALSE	83
2022-09-15	11:41:54	0.842303	851.702	FALSE	83
2022-09-15	11:41:54	1.07472	852.776	FALSE	83
2022-09-15	11:41:54	1.02276	853.799	FALSE	83
2022-09-15	11:41:55	0.421031	854.22	FALSE	83
2022-09-15	11:41:55	0.260115	854.48	FALSE	83
2022-09-15	11:41:55	0.729428	855.21	FALSE	83
2022-09-15	11:41:55	0.245509	855.455	FALSE	83
2022-09-15	11:41:56	1.03177	856.487	FALSE	83
2022-09-15	11:41:56	0.575076	857.062	FALSE	83
2022-09-15	11:41:56	0.71472	857.777	FALSE	83
2022-09-15	11:41:56	0.554822	858.331	FALSE	83
2022-09-15	11:41:57	0.763779	859.095	FALSE	83
2022-09-15	11:41:57	1.49375	860.589	FALSE	83
2022-09-15	11:41:57	1.26296	861.852	FALSE	83
2022-09-15	11:41:57	1.18205	863.034	FALSE	83
2022-09-15	11:41:58	0.968511	864.003	FALSE	83
2022-09-15	11:41:58	1.32663	865.329	FALSE	83
2022-09-15	11:41:58	1.73457	867.064	FALSE	83
2022-09-15	11:41:59	1.3509	868.415	FALSE	83
2022-09-15	11:41:59	1.5163	869.931	FALSE	83
2022-09-15	11:41:59	2.70703	872.638	FALSE	83
2022-09-15	11:41:59	1.61808	874.256	FALSE	83
2022-09-15	11:42:00	0.000216527	874.256	FALSE	83
2022-09-15	11:42:00	-0.310878	874.256	FALSE	83
2022-09-15	11:42:00	-0.31729	874.256	FALSE	83
2022-09-15	11:42:00	-0.266806	874.256	FALSE	83
2022-09-15	11:42:01	-0.267061	874.256	FALSE	83
2022-09-15	11:42:01	-0.502887	874.256	FALSE	83
2022-09-15	11:42:01	-0.418409	874.256	FALSE	83
2022-09-15	11:42:02	-0.244058	874.256	FALSE	83
2022-09-15	11:42:02	-0.0734221	874.256	FALSE	83
2022-09-15	11:42:02	-0.473829	874.256	FALSE	83
2022-09-15	11:42:02	-0.3693	874.256	FALSE	83
2022-09-15	11:42:03	-0.142124	874.256	FALSE	83
2022-09-15	11:42:03	-0.0326079	874.256	FALSE	83
2022-09-15	11:42:03	0.0291224	874.285	FALSE	83
2022-09-15	11:42:03	0.205255	874.491	FALSE	83
2022-09-15	11:42:04	0.340064	874.831	FALSE	83
2022-09-15	11:42:04	0.351921	875.183	FALSE	83
2022-09-15	11:42:04	1.75289	876.936	FALSE	83
2022-09-15	11:42:04	5.75665	882.692	1	84
2022-09-15	11:42:05	8.55706	891.249	1	85
2022-09-15	11:42:05	4.80001	896.049	1	86
2022-09-15	11:42:05	0.724338	896.774	FALSE	86
2022-09-15	11:42:06	0.550903	897.324	FALSE	86
2022-09-15	11:42:06	0.403321	897.728	FALSE	86
2022-09-15	11:42:06	0.433499	898.161	FALSE	86
2022-09-15	11:42:06	0.438893	898.6	FALSE	86
2022-09-15	11:42:07	0.247087	898.847	FALSE	86
2022-09-15	11:42:07	0.391361	899.239	FALSE	86
2022-09-15	11:42:07	0.0968069	899.335	FALSE	86
2022-09-15	11:42:07	0.365051	899.7	FALSE	86
2022-09-15	11:42:08	0.281998	899.982	FALSE	86
2022-09-15	11:42:08	0.256552	900.239	FALSE	86
2022-09-15	11:42:08	0.130242	900.369	FALSE	86
2022-09-15	11:42:08	0.130954	900.5	FALSE	86
2022-09-15	11:42:09	-0.069758	900.5	FALSE	86
2022-09-15	11:42:09	0.125306	900.626	FALSE	86
2022-09-15	11:42:09	-0.108842	900.626	FALSE	86
2022-09-15	11:42:09	-0.0764246	900.626	FALSE	86
2022-09-15	11:42:10	-0.169147	900.626	FALSE	86
2022-09-15	11:42:10	-0.124618	900.626	FALSE	86
2022-09-15	11:42:10	-0.285534	900.626	FALSE	86
2022-09-15	11:42:11	-0.197493	900.626	FALSE	86
2022-09-15	11:42:11	-0.221768	900.626	FALSE	86
2022-09-15	11:42:11	-0.246501	900.626	FALSE	86
2022-09-15	11:42:11	-0.533982	900.626	FALSE	86
2022-09-15	11:42:12	-0.462022	900.626	FALSE	86
2022-09-15	11:42:12	-0.486806	900.626	FALSE	86
2022-09-15	11:42:12	-0.396832	900.626	FALSE	86
2022-09-15	11:42:12	-0.529096	900.626	FALSE	86
2022-09-15	11:42:13	-0.386552	900.626	FALSE	86
2022-09-15	11:42:13	-0.439987	900.626	FALSE	86
2022-09-15	11:42:13	-0.3836	900.626	FALSE	86
2022-09-15	11:42:13	-0.423244	900.626	FALSE	86
2022-09-15	11:42:14	-0.223956	900.626	FALSE	86
2022-09-15	11:42:14	-0.269453	900.626	FALSE	86
2022-09-15	11:42:14	-0.255967	900.626	FALSE	86
2022-09-15	11:42:15	-0.220038	900.626	FALSE	86
2022-09-15	11:42:15	-0.0920481	900.626	FALSE	86
2022-09-15	11:42:15	0.101998	900.728	FALSE	86
2022-09-15	11:42:15	0.327545	901.055	FALSE	86
2022-09-15	11:42:16	0.532532	901.588	FALSE	86
2022-09-15	11:42:16	0.323422	901.911	FALSE	86
2022-09-15	11:42:16	0.506527	902.418	FALSE	86
2022-09-15	11:42:16	0.284695	902.702	FALSE	86
2022-09-15	11:42:17	0.575433	903.278	FALSE	86
2022-09-15	11:42:17	0.306679	903.584	FALSE	86
2022-09-15	11:42:17	0.44388	904.028	FALSE	86
2022-09-15	11:42:17	0.194618	904.223	FALSE	86
2022-09-15	11:42:18	0.292532	904.515	FALSE	86
2022-09-15	11:42:18	0.0640333	904.579	FALSE	86
2022-09-15	11:42:18	0.148613	904.728	FALSE	86
2022-09-15	11:42:19	0.0183336	904.746	FALSE	86
2022-09-15	11:42:19	0.140115	904.887	FALSE	86
2022-09-15	11:42:19	-0.00578856	904.887	FALSE	86
2022-09-15	11:42:19	0.0923793	904.979	FALSE	86
2022-09-15	11:42:20	0.0231681	905.002	FALSE	86
2022-09-15	11:42:20	0.148104	905.15	FALSE	86
2022-09-15	11:42:20	-0.0344908	905.15	FALSE	86
2022-09-15	11:42:20	0.0794022	905.23	FALSE	86
2022-09-15	11:42:21	0.118435	905.348	FALSE	86
2022-09-15	11:42:21	0.261947	905.61	FALSE	86
2022-09-15	11:42:21	-0.0123535	905.61	FALSE	86
2022-09-15	11:42:21	-0.112811	905.61	FALSE	86
2022-09-15	11:42:22	-0.113117	905.61	FALSE	86
2022-09-15	11:42:22	0.105967	905.716	FALSE	86
2022-09-15	11:42:22	-0.019987	905.716	FALSE	86
2022-09-15	11:42:23	0.0686644	905.785	FALSE	86
2022-09-15	11:42:23	-0.0696053	905.785	FALSE	86
2022-09-15	11:42:23	0.0646949	905.849	FALSE	86
2022-09-15	11:42:23	0.0542623	905.904	FALSE	86
2022-09-15	11:42:24	0.214313	906.118	FALSE	86
2022-09-15	11:42:24	0.495026	906.613	FALSE	86
2022-09-15	11:42:24	1.44826	908.061	FALSE	86
2022-09-15	11:42:24	2.73044	910.792	FALSE	86
2022-09-15	11:42:25	2.18963	912.981	FALSE	86
2022-09-15	11:42:25	2.60388	915.585	FALSE	86
2022-09-15	11:42:25	1.23502	916.82	FALSE	86
2022-09-15	11:42:25	1.48973	918.31	FALSE	86
2022-09-15	11:42:26	1.75162	920.061	FALSE	86
2022-09-15	11:42:26	0.986629	921.048	FALSE	86
2022-09-15	11:42:26	0.874873	921.923	FALSE	86
2022-09-15	11:42:27	1.14943	923.072	FALSE	86
2022-09-15	11:42:27	0.459351	923.532	FALSE	86
2022-09-15	11:42:27	0.317061	923.849	FALSE	86
2022-09-15	11:42:27	0.198944	924.048	FALSE	86
2022-09-15	11:42:28	0.294211	924.342	FALSE	86
2022-09-15	11:42:28	0.165356	924.507	FALSE	86
2022-09-15	11:42:28	0.295636	924.803	FALSE	86
2022-09-15	11:42:28	0.22383	925.027	FALSE	86
2022-09-15	11:42:29	0.258791	925.286	FALSE	86
2022-09-15	11:42:29	0.141082	925.427	FALSE	86
2022-09-15	11:42:29	0.107596	925.534	FALSE	86
2022-09-15	11:42:29	0.158944	925.693	FALSE	86
2022-09-15	11:42:30	0.763626	926.457	FALSE	86
2022-09-15	11:42:30	0.262099	926.719	FALSE	86
2022-09-15	11:42:30	0.920267	927.639	FALSE	86
2022-09-15	11:42:31	1.50393	929.143	FALSE	86
2022-09-15	11:42:31	2.14765	931.291	FALSE	86
2022-09-15	11:42:31	1.16184	932.453	FALSE	86
2022-09-15	11:42:31	0.99757	933.45	FALSE	86
2022-09-15	11:42:32	2.09818	935.548	FALSE	86
2022-09-15	11:42:32	1.67375	937.222	FALSE	86
2022-09-15	11:42:32	0.451819	937.674	FALSE	86
2022-09-15	11:42:32	0.347952	938.022	FALSE	86
2022-09-15	11:42:33	0.349071	938.371	FALSE	86
2022-09-15	11:42:33	0.00530559	938.376	FALSE	86
2022-09-15	11:42:33	-0.0712338	938.376	FALSE	86
2022-09-15	11:42:33	-0.135305	938.376	FALSE	86
2022-09-15	11:42:34	0.125306	938.502	FALSE	86
2022-09-15	11:42:34	1.32388	939.825	FALSE	86
2022-09-15	11:42:34	2.69049	942.516	FALSE	86
2022-09-15	11:42:35	2.00398	944.52	FALSE	86
2022-09-15	11:42:35	1.25742	945.777	FALSE	86
2022-09-15	11:42:35	2.01447	947.792	FALSE	86
2022-09-15	11:42:35	1.06882	948.861	FALSE	86
2022-09-15	11:42:36	2.4081	951.269	FALSE	86
2022-09-15	11:42:36	1.79589	953.065	FALSE	86
2022-09-15	11:42:36	2.13579	955.2	FALSE	86
2022-09-15	11:42:36	1.74459	956.945	FALSE	86
2022-09-15	11:42:37	2.52775	959.473	FALSE	86
2022-09-15	11:42:37	0.718537	960.191	FALSE	86
2022-09-15	11:42:37	2.66525	962.857	FALSE	86
2022-09-15	11:42:37	1.73396	964.59	FALSE	86
2022-09-15	11:42:38	1.1963	965.787	FALSE	86
2022-09-15	11:42:38	1.63447	967.421	FALSE	86
2022-09-15	11:42:38	0.497316	967.919	FALSE	86
2022-09-15	11:42:39	0.119606	968.038	FALSE	86
2022-09-15	11:42:39	-0.0960175	968.038	FALSE	86
2022-09-15	11:42:39	-0.155	968.038	FALSE	86
2022-09-15	11:42:39	-0.201514	968.038	FALSE	86
2022-09-15	11:42:40	-0.279325	968.038	FALSE	86
2022-09-15	11:42:40	-0.298257	968.038	FALSE	86
2022-09-15	11:42:40	-0.0238547	968.038	FALSE	86
2022-09-15	11:42:40	-0.0574425	968.038	FALSE	86
2022-09-15	11:42:41	-0.0407504	968.038	FALSE	86
2022-09-15	11:42:41	-0.0749997	968.038	FALSE	86
2022-09-15	11:42:41	0.0745168	968.113	FALSE	86
2022-09-15	11:42:41	0.0448984	968.158	FALSE	86
2022-09-15	11:42:42	0.925662	969.083	FALSE	86
2022-09-15	11:42:42	1.03813	970.121	FALSE	86
2022-09-15	11:42:42	0.291412	970.413	FALSE	86
2022-09-15	11:42:43	-0.173269	970.413	FALSE	86
2022-09-15	11:42:43	-0.352506	970.413	FALSE	86
2022-09-15	11:42:43	-0.442582	970.413	FALSE	86
2022-09-15	11:42:43	-0.543396	970.413	FALSE	86
2022-09-15	11:42:44	-0.661666	970.413	FALSE	86
2022-09-15	11:42:44	-0.580343	970.413	FALSE	86
2022-09-15	11:42:44	-0.540648	970.413	FALSE	86
2022-09-15	11:42:44	-0.526196	970.413	FALSE	86
2022-09-15	11:42:45	-0.493575	970.413	FALSE	86
2022-09-15	11:42:45	-0.450114	970.413	FALSE	86
2022-09-15	11:42:45	-0.459427	970.413	FALSE	86
2022-09-15	11:42:45	-0.607315	970.413	FALSE	86
2022-09-15	11:42:46	-0.600547	970.413	FALSE	86
2022-09-15	11:42:46	-0.568333	970.413	FALSE	86
2022-09-15	11:42:46	-0.600445	970.413	FALSE	86
2022-09-15	11:42:47	-0.479274	970.413	FALSE	86
2022-09-15	11:42:47	-0.420139	970.413	FALSE	86
2022-09-15	11:42:47	-0.421005	970.413	FALSE	86
2022-09-15	11:42:47	-0.416475	970.413	FALSE	86
2022-09-15	11:42:48	-0.467315	970.413	FALSE	86
2022-09-15	11:42:48	-0.468995	970.413	FALSE	86
2022-09-15	11:42:48	-0.428129	970.413	FALSE	86
2022-09-15	11:42:48	-0.377188	970.413	FALSE	86
2022-09-15	11:42:49	-0.354491	970.413	FALSE	86
2022-09-15	11:42:49	-0.260496	970.413	FALSE	86
2022-09-15	11:42:49	-0.307264	970.413	FALSE	86
2022-09-15	11:42:49	-0.281259	970.413	FALSE	86
2022-09-15	11:42:50	-0.194898	970.413	FALSE	86
2022-09-15	11:42:50	-0.102684	970.413	FALSE	86
2022-09-15	11:42:50	-0.0236003	970.413	FALSE	86
2022-09-15	11:42:51	-0.00105572	970.413	FALSE	86
2022-09-15	11:42:51	0.015331	970.428	FALSE	86
2022-09-15	11:42:51	0.218995	970.647	FALSE	86
2022-09-15	11:42:51	0.433855	971.081	FALSE	86
2022-09-15	11:42:52	0.43411	971.515	FALSE	86
2022-09-15	11:42:52	0.702201	972.217	FALSE	86
2022-09-15	11:42:52	0.588766	972.806	FALSE	86
2022-09-15	11:42:52	0.508919	973.315	FALSE	86
2022-09-15	11:42:53	0.301845	973.617	FALSE	86
2022-09-15	11:42:53	0.369886	973.987	FALSE	86
2022-09-15	11:42:53	0.210802	974.197	FALSE	86
2022-09-15	11:42:53	0.0637788	974.261	FALSE	86
2022-09-15	11:42:54	-0.070216	974.261	FALSE	86
2022-09-15	11:42:54	-0.123906	974.261	FALSE	86
2022-09-15	11:42:54	-0.176984	974.261	FALSE	86
2022-09-15	11:42:55	-0.131895	974.261	FALSE	86
2022-09-15	11:42:55	-0.169605	974.261	FALSE	86
2022-09-15	11:42:55	-0.177086	974.261	FALSE	86
2022-09-15	11:42:55	-0.374694	974.261	FALSE	86
2022-09-15	11:42:56	-0.554847	974.261	FALSE	86
2022-09-15	11:42:56	-0.627417	974.261	FALSE	86
2022-09-15	11:42:56	-0.664923	974.261	FALSE	86
2022-09-15	11:42:56	-0.687671	974.261	FALSE	86
2022-09-15	11:42:57	-0.431692	974.261	FALSE	86
2022-09-15	11:42:57	-0.266196	974.261	FALSE	86
2022-09-15	11:42:57	0.578079	974.839	FALSE	86
2022-09-15	11:42:57	2.76876	977.608	FALSE	86
2022-09-15	11:42:58	4.22591	981.834	1	87
2022-09-15	11:42:58	1.36978	983.204	FALSE	87
2022-09-15	11:42:58	2.00296	985.207	FALSE	87
2022-09-15	11:42:59	1.33844	986.545	FALSE	87
2022-09-15	11:42:59	1.96698	988.512	FALSE	87
2022-09-15	11:42:59	1.79945	990.312	FALSE	87
2022-09-15	11:42:59	2.04281	992.354	FALSE	87
2022-09-15	11:43:00	3.8878	996.242	1	88
2022-09-15	11:43:00	1.79024	998.032	FALSE	88
2022-09-15	11:43:00	2.01859	1000.05	FALSE	88
2022-09-15	11:43:00	0.887494	1000.94	FALSE	88
2022-09-15	11:43:01	2.03676	1002.98	FALSE	88
2022-09-15	11:43:01	0.631514	1003.61	FALSE	88
2022-09-15	11:43:01	1.17101	1004.78	FALSE	88
2022-09-15	11:43:01	0.698792	1005.48	FALSE	88
2022-09-15	11:43:02	1.22805	1006.7	FALSE	88
2022-09-15	11:43:02	0.974109	1007.68	FALSE	88
2022-09-15	11:43:02	1.44597	1009.12	FALSE	88
2022-09-15	11:43:03	0.652888	1009.78	FALSE	88
2022-09-15	11:43:03	1.42398	1011.2	FALSE	88
2022-09-15	11:43:03	1.12933	1012.33	FALSE	88
2022-09-15	11:43:03	0.929122	1013.26	FALSE	88
2022-09-15	11:43:04	0.878944	1014.14	FALSE	88
2022-09-15	11:43:04	1.25513	1015.39	FALSE	88
2022-09-15	11:43:04	0.796807	1016.19	FALSE	88
2022-09-15	11:43:04	0.584186	1016.78	FALSE	88
2022-09-15	11:43:05	0.865509	1017.64	FALSE	88
2022-09-15	11:43:05	0.669885	1018.31	FALSE	88
2022-09-15	11:43:05	0.853753	1019.16	FALSE	88
2022-09-15	11:43:05	0.597468	1019.76	FALSE	88
2022-09-15	11:43:06	0.987086	1020.75	FALSE	88
2022-09-15	11:43:06	1.25055	1022	FALSE	88
2022-09-15	11:43:06	1.56892	1023.57	FALSE	88
2022-09-15	11:43:07	1.02129	1024.59	FALSE	88
2022-09-15	11:43:07	2.42871	1027.02	FALSE	88
2022-09-15	11:43:07	2.3851	1029.4	FALSE	88
2022-09-15	11:43:07	4.31121	1033.71	1	89
2022-09-15	11:43:08	2.70841	1036.42	FALSE	89
2022-09-15	11:43:08	4.86118	1041.28	1	90
2022-09-15	11:43:08	1.22164	1042.51	FALSE	90
2022-09-15	11:43:08	3.09864	1045.6	1	91
2022-09-15	11:43:09	0.806221	1046.41	FALSE	91
2022-09-15	11:43:09	1.59457	1048.01	FALSE	91
2022-09-15	11:43:09	0.784033	1048.79	FALSE	91
2022-09-15	11:43:09	0.698028	1049.49	FALSE	91
2022-09-15	11:43:10	1.11146	1050.6	FALSE	91
2022-09-15	11:43:10	1.26363	1051.86	FALSE	91
2022-09-15	11:43:10	0.504288	1052.37	FALSE	91
2022-09-15	11:43:11	2.24251	1054.61	FALSE	91
2022-09-15	11:43:11	0.812582	1055.42	FALSE	91
2022-09-15	11:43:11	0.89701	1056.32	FALSE	91
2022-09-15	11:43:11	0.954822	1057.27	FALSE	91
2022-09-15	11:43:12	1.14816	1058.42	FALSE	91
2022-09-15	11:43:12	0.903626	1059.33	FALSE	91
2022-09-15	11:43:12	0.979606	1060.31	FALSE	91
2022-09-15	11:43:12	1.36597	1061.67	FALSE	91
2022-09-15	11:43:13	1.84429	1063.52	FALSE	91
2022-09-15	11:43:13	2.78658	1066.3	FALSE	91
2022-09-15	11:43:13	3.21233	1069.51	1	92
2022-09-15	11:43:13	1.44663	1070.96	FALSE	92
2022-09-15	11:43:14	1.91268	1072.87	FALSE	92
2022-09-15	11:43:14	2.17564	1075.05	FALSE	92
2022-09-15	11:43:14	1.18602	1076.24	FALSE	92
2022-09-15	11:43:15	1.53676	1077.77	FALSE	92
2022-09-15	11:43:15	1.01228	1078.78	FALSE	92
2022-09-15	11:43:15	1.37151	1080.16	FALSE	92
2022-09-15	11:43:15	2.20459	1082.36	FALSE	92
2022-09-15	11:43:16	0.482456	1082.84	FALSE	92
2022-09-15	11:43:16	2.2337	1085.08	FALSE	92
2022-09-15	11:43:16	1.45676	1086.53	FALSE	92
2022-09-15	11:43:16	0.819606	1087.35	FALSE	92
2022-09-15	11:43:17	2.03752	1089.39	FALSE	92
2022-09-15	11:43:17	1.74724	1091.14	FALSE	92
2022-09-15	11:43:17	1.08088	1092.22	FALSE	92
2022-09-15	11:43:17	1.57599	1093.79	FALSE	92
2022-09-15	11:43:18	0.984491	1094.78	FALSE	92
2022-09-15	11:43:18	1.0337	1095.81	FALSE	92
2022-09-15	11:43:18	2.29248	1098.11	FALSE	92
2022-09-15	11:43:19	1.21701	1099.32	FALSE	92
2022-09-15	11:43:19	1.7652	1101.09	FALSE	92
2022-09-15	11:43:19	1.25594	1102.34	FALSE	92
2022-09-15	11:43:19	0.998028	1103.34	FALSE	92
2022-09-15	11:43:20	0.458232	1103.8	FALSE	92
2022-09-15	11:43:20	0.489886	1104.29	FALSE	92
2022-09-15	11:43:20	0.265305	1104.55	FALSE	92
2022-09-15	11:43:20	0.459351	1105.01	FALSE	92
2022-09-15	11:43:21	0.261387	1105.28	FALSE	92
2022-09-15	11:43:21	0.725509	1106	FALSE	92
2022-09-15	11:43:21	0.506984	1106.51	FALSE	92
2022-09-15	11:43:21	0.469479	1106.98	FALSE	92
2022-09-15	11:43:22	0.920063	1107.9	FALSE	92
2022-09-15	11:43:22	0.585254	1108.48	FALSE	92
2022-09-15	11:43:22	0.698842	1109.18	FALSE	92
2022-09-15	11:43:23	0.30042	1109.48	FALSE	92
2022-09-15	11:43:23	0.388817	1109.87	FALSE	92
2022-09-15	11:43:23	0.218537	1110.09	FALSE	92
2022-09-15	11:43:23	0.411107	1110.5	FALSE	92
2022-09-15	11:43:24	0.254313	1110.75	FALSE	92
2022-09-15	11:43:24	0.465102	1111.22	FALSE	92
2022-09-15	11:43:24	0.155331	1111.38	FALSE	92
2022-09-15	11:43:24	1.16592	1112.54	FALSE	92
2022-09-15	11:43:25	1.22429	1113.77	FALSE	92
2022-09-15	11:43:25	4.71711	1118.48	1	93
2022-09-15	11:43:25	3.02505	1121.51	1	94
2022-09-15	11:43:25	3.17823	1124.69	1	95
2022-09-15	11:43:26	1.53604	1126.22	FALSE	95
2022-09-15	11:43:26	2.18271	1128.4	FALSE	95
2022-09-15	11:43:26	1.26785	1129.67	FALSE	95
2022-09-15	11:43:27	2.37279	1132.05	FALSE	95
2022-09-15	11:43:27	1.90154	1133.95	FALSE	95
2022-09-15	11:43:27	3.79172	1137.74	1	96
2022-09-15	11:43:27	0.801947	1138.54	FALSE	96
2022-09-15	11:43:28	2.10586	1140.65	FALSE	96
2022-09-15	11:43:28	0.693193	1141.34	FALSE	96
2022-09-15	11:43:28	1.14164	1142.48	FALSE	96
2022-09-15	11:43:28	1.39604	1143.88	FALSE	96
2022-09-15	11:43:29	0.50383	1144.38	FALSE	96
2022-09-15	11:43:29	2.00164	1146.38	FALSE	96
2022-09-15	11:43:29	2.92388	1149.31	FALSE	96
2022-09-15	11:43:29	0.518231	1149.82	FALSE	96
2022-09-15	11:43:30	1.00663	1150.83	FALSE	96
2022-09-15	11:43:30	1.59696	1152.43	FALSE	96
2022-09-15	11:43:30	0.679148	1153.11	FALSE	96
2022-09-15	11:43:31	1.97538	1155.08	FALSE	96
2022-09-15	11:43:31	2.69614	1157.78	FALSE	96
2022-09-15	11:43:31	2.70683	1160.49	FALSE	96
2022-09-15	11:43:31	5.4309	1165.92	1	97
2022-09-15	11:43:32	1.91289	1167.83	FALSE	97
2022-09-15	11:43:32	1.38531	1169.21	FALSE	97
2022-09-15	11:43:32	0.934618	1170.15	FALSE	97
2022-09-15	11:43:32	0.910852	1171.06	FALSE	97
2022-09-15	11:43:33	0.499453	1171.56	FALSE	97
2022-09-15	11:43:33	0.874516	1172.43	FALSE	97
2022-09-15	11:43:33	0.423473	1172.86	FALSE	97
2022-09-15	11:43:33	0.996196	1173.85	FALSE	97
2022-09-15	11:43:34	1.29141	1175.15	FALSE	97
2022-09-15	11:43:34	1.75375	1176.9	FALSE	97
2022-09-15	11:43:34	4.48571	1181.38	1	98
2022-09-15	11:43:35	1.44459	1182.83	FALSE	98
2022-09-15	11:43:35	1.70296	1184.53	FALSE	98
2022-09-15	11:43:35	0.338944	1184.87	FALSE	98
2022-09-15	11:43:35	0.242049	1185.11	FALSE	98
2022-09-15	11:43:36	0.0577738	1185.17	FALSE	98
2022-09-15	11:43:36	-0.0328114	1185.17	FALSE	98
2022-09-15	11:43:36	0.107443	1185.28	FALSE	98
2022-09-15	11:43:36	1.23416	1186.51	FALSE	98
2022-09-15	11:43:37	2.49599	1189.01	FALSE	98
2022-09-15	11:43:37	3.27406	1192.28	1	99
2022-09-15	11:43:37	2.39726	1194.68	FALSE	99
2022-09-15	11:43:37	1.6509	1196.33	FALSE	99
2022-09-15	11:43:38	0.5193	1196.85	FALSE	99
2022-09-15	11:43:38	1.0478	1197.9	FALSE	99
2022-09-15	11:43:38	1.07284	1198.97	FALSE	99
2022-09-15	11:43:39	2.54693	1201.52	FALSE	99
2022-09-15	11:43:39	1.79162	1203.31	FALSE	99
2022-09-15	11:43:39	2.6279	1205.94	FALSE	99
2022-09-15	11:43:39	4.56301	1210.5	1	100
2022-09-15	11:43:40	3.04632	1213.55	1	101
2022-09-15	11:43:40	6.77411	1220.32	1	102
2022-09-15	11:43:40	10.1635	1230.48	1	103
2022-09-15	11:43:40	7.06352	1237.55	1	104
2022-09-15	11:43:41	4.53472	1242.08	1	105
2022-09-15	11:43:41	3.06871	1245.15	1	106
2022-09-15	11:43:41	0.566425	1245.72	FALSE	106
2022-09-15	11:43:41	0.248715	1245.97	FALSE	106
2022-09-15	11:43:42	0.252328	1246.22	FALSE	106
2022-09-15	11:43:42	-0.191539	1246.22	FALSE	106
2022-09-15	11:43:42	-0.228231	1246.22	FALSE	106
2022-09-15	11:43:43	-0.34986	1246.22	FALSE	106
2022-09-15	11:43:43	-0.491997	1246.22	FALSE	106
2022-09-15	11:43:43	-0.496068	1246.22	FALSE	106
2022-09-15	11:43:43	-0.708485	1246.22	FALSE	106
2022-09-15	11:43:44	-0.96762	1246.22	FALSE	106
2022-09-15	11:43:44	-1.10416	1246.22	FALSE	106
2022-09-15	11:43:44	-1.15703	1246.22	FALSE	106
2022-09-15	11:43:44	-1.15541	1246.22	FALSE	106
2022-09-15	11:43:45	-1.2581	1246.22	FALSE	106
2022-09-15	11:43:45	-1.24106	1246.22	FALSE	106
2022-09-15	11:43:45	-0.665534	1246.22	FALSE	106
2022-09-15	11:43:45	-0.466094	1246.22	FALSE	106
2022-09-15	11:43:46	0.0709036	1246.29	FALSE	106
2022-09-15	11:43:46	0.724491	1247.01	FALSE	106
2022-09-15	11:43:46	1.76251	1248.78	FALSE	106
2022-09-15	11:43:47	2.71436	1251.49	FALSE	106
2022-09-15	11:43:47	1.45197	1252.94	FALSE	106
2022-09-15	11:43:47	0.460623	1253.4	FALSE	106
2022-09-15	11:43:47	0.356756	1253.76	FALSE	106
2022-09-15	11:43:48	0.155891	1253.92	FALSE	106
2022-09-15	11:43:48	0.0734481	1253.99	FALSE	106
2022-09-15	11:43:48	-0.216832	1253.99	FALSE	106
2022-09-15	11:43:48	-0.211539	1253.99	FALSE	106
2022-09-15	11:43:49	-0.44589	1253.99	FALSE	106
2022-09-15	11:43:49	-0.433676	1253.99	FALSE	106
2022-09-15	11:43:49	-0.107366	1253.99	FALSE	106
2022-09-15	11:43:49	1.9763	1255.97	FALSE	106
2022-09-15	11:43:50	3.84225	1259.81	1	107
2022-09-15	11:43:50	2.09014	1261.9	FALSE	107
2022-09-15	11:43:50	0.756247	1262.65	FALSE	107
2022-09-15	11:43:51	0.485611	1263.14	FALSE	107
2022-09-15	11:43:51	0.515025	1263.66	FALSE	107
2022-09-15	11:43:51	0.320624	1263.98	FALSE	107
2022-09-15	11:43:51	0.383372	1264.36	FALSE	107
2022-09-15	11:43:52	0.0791478	1264.44	FALSE	107
2022-09-15	11:43:52	-0.342582	1264.44	FALSE	107
2022-09-15	11:43:52	-0.597137	1264.44	FALSE	107
2022-09-15	11:43:52	-0.816628	1264.44	FALSE	107
2022-09-15	11:43:53	-0.679325	1264.44	FALSE	107
2022-09-15	11:43:53	-0.846806	1264.44	FALSE	107
2022-09-15	11:43:53	-0.747315	1264.44	FALSE	107
2022-09-15	11:43:53	-0.903447	1264.44	FALSE	107
2022-09-15	11:43:54	-0.735915	1264.44	FALSE	107
2022-09-15	11:43:54	-0.840597	1264.44	FALSE	107
2022-09-15	11:43:54	-0.850317	1264.44	FALSE	107
2022-09-15	11:43:55	-0.989554	1264.44	FALSE	107
2022-09-15	11:43:55	-0.843854	1264.44	FALSE	107
2022-09-15	11:43:55	-1.06955	1264.44	FALSE	107
2022-09-15	11:43:55	-1.19882	1264.44	FALSE	107
2022-09-15	11:43:56	-0.851641	1264.44	FALSE	107
2022-09-15	11:43:56	-0.101157	1264.44	FALSE	107
2022-09-15	11:43:56	0.309631	1264.75	FALSE	107
2022-09-15	11:43:56	2.44139	1267.19	FALSE	107
2022-09-15	11:43:57	5.76332	1272.95	1	108
2022-09-15	11:43:57	4.10851	1277.06	1	109
2022-09-15	11:43:57	2.33772	1279.4	FALSE	109
2022-09-15	11:43:57	0.937265	1280.34	FALSE	109
2022-09-15	11:43:58	0.767697	1281.1	FALSE	109
2022-09-15	11:43:58	0.734262	1281.84	FALSE	109
2022-09-15	11:43:58	1.11116	1282.95	FALSE	109
2022-09-15	11:43:59	2.29004	1285.24	FALSE	109
2022-09-15	11:43:59	4.40978	1289.65	1	110
2022-09-15	11:43:59	0.87126	1290.52	FALSE	110
2022-09-15	11:43:59	0.173804	1290.69	FALSE	110
2022-09-15	11:44:00	0.258181	1290.95	FALSE	110
2022-09-15	11:44:00	0.22612	1291.18	FALSE	110
2022-09-15	11:44:00	0.187087	1291.37	FALSE	110
2022-09-15	11:44:00	0.250954	1291.62	FALSE	110
2022-09-15	11:44:01	0.294262	1291.91	FALSE	110
2022-09-15	11:44:01	0.152074	1292.06	FALSE	110
2022-09-15	11:44:01	0.251616	1292.31	FALSE	110
2022-09-15	11:44:01	0.337366	1292.65	FALSE	110
2022-09-15	11:44:02	0.438791	1293.09	FALSE	110
2022-09-15	11:44:02	0.829275	1293.92	FALSE	110
2022-09-15	11:44:02	0.825356	1294.75	FALSE	110
2022-09-15	11:44:03	1.08729	1295.83	FALSE	110
2022-09-15	11:44:03	2.57365	1298.41	FALSE	110
2022-09-15	11:44:03	2.84454	1301.25	FALSE	110
2022-09-15	11:44:03	3.70958	1304.96	1	111
2022-09-15	11:44:04	2.81772	1307.78	FALSE	111
2022-09-15	11:44:04	0.754567	1308.53	FALSE	111
2022-09-15	11:44:04	3.22663	1311.76	1	112
2022-09-15	11:44:04	2.68281	1314.44	FALSE	112
2022-09-15	11:44:05	0.83701	1315.28	FALSE	112
2022-09-15	11:44:05	0.488766	1315.77	FALSE	112
2022-09-15	11:44:05	0.330038	1316.1	FALSE	112
2022-09-15	11:44:05	0.248003	1316.35	FALSE	112
2022-09-15	11:44:06	0.169071	1316.52	FALSE	112
2022-09-15	11:44:06	0.408003	1316.92	FALSE	112
2022-09-15	11:44:06	0.127189	1317.05	FALSE	112
2022-09-15	11:44:07	0.34902	1317.4	FALSE	112
2022-09-15	11:44:07	0.311819	1317.71	FALSE	112
2022-09-15	11:44:07	0.524338	1318.24	FALSE	112
2022-09-15	11:44:07	0.576196	1318.81	FALSE	112
2022-09-15	11:44:08	1.31665	1320.13	FALSE	112
2022-09-15	11:44:08	1.13574	1321.26	FALSE	112
2022-09-15	11:44:08	1.80602	1323.07	FALSE	112
2022-09-15	11:44:08	2.00205	1325.07	FALSE	112
2022-09-15	11:44:09	0.725254	1325.8	FALSE	112
2022-09-15	11:44:09	1.50256	1327.3	FALSE	112
2022-09-15	11:44:09	2.06566	1329.37	FALSE	112
2022-09-15	11:44:09	3.52154	1332.89	1	113
2022-09-15	11:44:10	3.39614	1336.28	1	114
2022-09-15	11:44:10	2.80408	1339.09	FALSE	114
2022-09-15	11:44:10	2.97604	1342.06	FALSE	114
2022-09-15	11:44:11	1.45996	1343.52	FALSE	114
2022-09-15	11:44:11	1.84093	1345.36	FALSE	114
2022-09-15	11:44:11	0.864084	1346.23	FALSE	114
2022-09-15	11:44:11	1.00617	1347.23	FALSE	114
2022-09-15	11:44:12	1.70164	1348.94	FALSE	114
2022-09-15	11:44:12	2.2878	1351.22	FALSE	114
2022-09-15	11:44:12	1.86134	1353.09	FALSE	114
2022-09-15	11:44:12	2.4276	1355.51	FALSE	114
2022-09-15	11:44:13	3.4677	1358.98	1	115
2022-09-15	11:44:13	1.43309	1360.41	FALSE	115
2022-09-15	11:44:13	0.657366	1361.07	FALSE	115
2022-09-15	11:44:13	0.173448	1361.24	FALSE	115
2022-09-15	11:44:14	0.221081	1361.47	FALSE	115
2022-09-15	11:44:14	0.150089	1361.62	FALSE	115
2022-09-15	11:44:14	0.200115	1361.82	FALSE	115
2022-09-15	11:44:15	0.0754327	1361.89	FALSE	115
2022-09-15	11:44:15	-0.0496053	1361.89	FALSE	115
2022-09-15	11:44:15	0.102812	1361.99	FALSE	115
2022-09-15	11:44:15	0.0424557	1362.04	FALSE	115
2022-09-15	11:44:16	0.242099	1362.28	FALSE	115
2022-09-15	11:44:16	-0.00136106	1362.28	FALSE	115
2022-09-15	11:44:16	0.266883	1362.55	FALSE	115
2022-09-15	11:44:16	0.202048	1362.75	FALSE	115
2022-09-15	11:44:17	0.309122	1363.06	FALSE	115
2022-09-15	11:44:17	0.135535	1363.19	FALSE	115
2022-09-15	11:44:17	0.245458	1363.44	FALSE	115
2022-09-15	11:44:17	0.192735	1363.63	FALSE	115
2022-09-15	11:44:18	0.174568	1363.8	FALSE	115
2022-09-15	11:44:18	0.016247	1363.82	FALSE	115
2022-09-15	11:44:18	-0.316018	1363.82	FALSE	115
2022-09-15	11:44:19	-0.15444	1363.82	FALSE	115
2022-09-15	11:44:19	-0.127112	1363.82	FALSE	115
2022-09-15	11:44:19	0.426781	1364.25	FALSE	115
2022-09-15	11:44:19	1.44403	1365.69	FALSE	115
2022-09-15	11:44:20	1.11594	1366.81	FALSE	115
2022-09-15	11:44:20	2.32678	1369.13	FALSE	115
2022-09-15	11:44:20	1.42968	1370.56	FALSE	115
2022-09-15	11:44:20	0.210038	1370.77	FALSE	115
2022-09-15	11:44:21	0.0677992	1370.84	FALSE	115
2022-09-15	11:44:21	0.0479519	1370.89	FALSE	115
2022-09-15	11:44:21	-0.224618	1370.89	FALSE	115
2022-09-15	11:44:21	-0.256374	1370.89	FALSE	115
2022-09-15	11:44:22	-0.344109	1370.89	FALSE	115
2022-09-15	11:44:22	-0.541412	1370.89	FALSE	115
2022-09-15	11:44:22	-0.763447	1370.89	FALSE	115
2022-09-15	11:44:23	-0.782429	1370.89	FALSE	115
2022-09-15	11:44:23	-0.813473	1370.89	FALSE	115
2022-09-15	11:44:23	-0.751641	1370.89	FALSE	115
2022-09-15	11:44:23	-0.719732	1370.89	FALSE	115
2022-09-15	11:44:24	-0.64935	1370.89	FALSE	115
2022-09-15	11:44:24	-0.414898	1370.89	FALSE	115
2022-09-15	11:44:24	-0.391183	1370.89	FALSE	115
2022-09-15	11:44:24	-0.415305	1370.89	FALSE	115
2022-09-15	11:44:25	-0.26304	1370.89	FALSE	115
2022-09-15	11:44:25	-0.256526	1370.89	FALSE	115
2022-09-15	11:44:25	-0.119682	1370.89	FALSE	115
2022-09-15	11:44:25	-0.298562	1370.89	FALSE	115
2022-09-15	11:44:26	-0.147163	1370.89	FALSE	115
2022-09-15	11:44:26	-0.12589	1370.89	FALSE	115
2022-09-15	11:44:26	-0.0928114	1370.89	FALSE	115
2022-09-15	11:44:27	-0.100089	1370.89	FALSE	115
2022-09-15	11:44:27	-0.0540328	1370.89	FALSE	115
2022-09-15	11:44:27	0.0738043	1370.96	FALSE	115
2022-09-15	11:44:27	0.931412	1371.9	FALSE	115
2022-09-15	11:44:28	2.33243	1374.23	FALSE	115
2022-09-15	11:44:28	0.662455	1374.89	FALSE	115
2022-09-15	11:44:28	0.216807	1375.11	FALSE	115
2022-09-15	11:44:28	0.219453	1375.33	FALSE	115
2022-09-15	11:44:29	0.366323	1375.69	FALSE	115
2022-09-15	11:44:29	1.15192	1376.84	FALSE	115
2022-09-15	11:44:29	1.35207	1378.2	FALSE	115
2022-09-15	11:44:29	1.23279	1379.43	FALSE	115
2022-09-15	11:44:30	1.26597	1380.7	FALSE	115
2022-09-15	11:44:30	1.54714	1382.24	FALSE	115
2022-09-15	11:44:30	0.375484	1382.62	FALSE	115
2022-09-15	11:44:31	0.269886	1382.89	FALSE	115
2022-09-15	11:44:31	0.137621	1383.03	FALSE	115
2022-09-15	11:44:31	0.0789952	1383.1	FALSE	115
2022-09-15	11:44:31	0.153346	1383.26	FALSE	115
2022-09-15	11:44:32	0.00540736	1383.26	FALSE	115
2022-09-15	11:44:32	-0.0134731	1383.26	FALSE	115
2022-09-15	11:44:32	-0.0372898	1383.26	FALSE	115
2022-09-15	11:44:32	-0.0511829	1383.26	FALSE	115
2022-09-15	11:44:33	-0.0695035	1383.26	FALSE	115
2022-09-15	11:44:33	-0.0583076	1383.26	FALSE	115
2022-09-15	11:44:33	-0.0670608	1383.26	FALSE	115
2022-09-15	11:44:33	-0.0648216	1383.26	FALSE	115
2022-09-15	11:44:34	-0.055814	1383.26	FALSE	115
2022-09-15	11:44:34	-0.180038	1383.26	FALSE	115
2022-09-15	11:44:34	-0.295865	1383.26	FALSE	115
2022-09-15	11:44:35	-0.00919824	1383.26	FALSE	115
2022-09-15	11:44:35	0.264695	1383.53	FALSE	115
2022-09-15	11:44:35	0.66902	1384.2	FALSE	115
2022-09-15	11:44:35	0.622557	1384.82	FALSE	115
2022-09-15	11:44:36	2.62592	1387.45	FALSE	115
2022-09-15	11:44:36	2.60846	1390.05	FALSE	115
2022-09-15	11:44:36	1.77925	1391.83	FALSE	115
2022-09-15	11:44:36	1.16795	1393	FALSE	115
2022-09-15	11:44:37	0.442456	1393.44	FALSE	115
2022-09-15	11:44:37	0.0830664	1393.53	FALSE	115
2022-09-15	11:44:37	0.134161	1393.66	FALSE	115
2022-09-15	11:44:37	0.0205219	1393.68	FALSE	115
2022-09-15	11:44:38	0.0506491	1393.73	FALSE	115
2022-09-15	11:44:38	-0.023244	1393.73	FALSE	115
2022-09-15	11:44:38	-0.0737275	1393.73	FALSE	115
2022-09-15	11:44:39	-0.100394	1393.73	FALSE	115
2022-09-15	11:44:39	-0.118969	1393.73	FALSE	115
2022-09-15	11:44:39	-0.13047	1393.73	FALSE	115
2022-09-15	11:44:39	-0.136781	1393.73	FALSE	115
2022-09-15	11:44:40	-0.123804	1393.73	FALSE	115
2022-09-15	11:44:40	-0.12131	1393.73	FALSE	115
2022-09-15	11:44:40	-0.127977	1393.73	FALSE	115
2022-09-15	11:44:40	-0.121768	1393.73	FALSE	115
2022-09-15	11:44:41	-0.110776	1393.73	FALSE	115
2022-09-15	11:44:41	-0.0984094	1393.73	FALSE	115
2022-09-15	11:44:41	-0.0762211	1393.73	FALSE	115
2022-09-15	11:44:41	-0.0730149	1393.73	FALSE	115
2022-09-15	11:44:42	-0.0508267	1393.73	FALSE	115
2022-09-15	11:44:42	0.111769	1393.84	FALSE	115
2022-09-15	11:44:42	1.73426	1395.58	FALSE	115
2022-09-15	11:44:43	4.79619	1400.37	1	116
2022-09-15	11:44:43	3.00144	1403.38	1	117
2022-09-15	11:44:43	0.472023	1403.85	FALSE	117
2022-09-15	11:44:43	0.0858144	1403.93	FALSE	117
2022-09-15	11:44:44	-0.222481	1403.93	FALSE	117
2022-09-15	11:44:44	-0.410623	1403.93	FALSE	117
2022-09-15	11:44:44	-0.500852	1403.93	FALSE	117
2022-09-15	11:44:44	-0.614745	1403.93	FALSE	117
2022-09-15	11:44:45	-0.618715	1403.93	FALSE	117
2022-09-15	11:44:45	-0.499325	1403.93	FALSE	117
2022-09-15	11:44:45	-0.466603	1403.93	FALSE	117
2022-09-15	11:44:45	-0.436526	1403.93	FALSE	117
2022-09-15	11:44:46	-0.303091	1403.93	FALSE	117
2022-09-15	11:44:46	0.16098	1404.09	FALSE	117
2022-09-15	11:44:46	3.31019	1407.4	1	118
2022-09-15	11:44:46	4.48775	1411.89	1	119
2022-09-15	11:44:47	1.66108	1413.55	FALSE	119
2022-09-15	11:44:47	0.467392	1414.02	FALSE	119
2022-09-15	11:44:47	0.374059	1414.4	FALSE	119
2022-09-15	11:44:48	0.353906	1414.75	FALSE	119
2022-09-15	11:44:48	0.419046	1415.17	FALSE	119
2022-09-15	11:44:48	0.584593	1415.75	FALSE	119
2022-09-15	11:44:48	0.629326	1416.38	FALSE	119
2022-09-15	11:44:49	0.856501	1417.24	FALSE	119
2022-09-15	11:44:49	1.09813	1418.34	FALSE	119
2022-09-15	11:44:49	1.25874	1419.6	FALSE	119
2022-09-15	11:44:49	0.834568	1420.43	FALSE	119
2022-09-15	11:44:50	1.07788	1421.51	FALSE	119
2022-09-15	11:44:50	0.745255	1422.25	FALSE	119
2022-09-15	11:44:50	1.24281	1423.5	FALSE	119
2022-09-15	11:44:50	1.23508	1424.73	FALSE	119
2022-09-15	11:44:51	2.38118	1427.11	FALSE	119
2022-09-15	11:44:51	2.92663	1430.04	FALSE	119
2022-09-15	11:44:51	2.61095	1432.65	FALSE	119
2022-09-15	11:44:52	3.2764	1435.93	1	120
2022-09-15	11:44:52	5.20708	1441.13	1	121
2022-09-15	11:44:52	5.43762	1446.57	1	122
2022-09-15	11:44:52	7.66372	1454.23	1	123
2022-09-15	11:44:53	4.63635	1458.87	1	124
2022-09-15	11:44:53	3.2452	1462.12	1	125
2022-09-15	11:44:53	1.25472	1463.37	FALSE	125
2022-09-15	11:44:53	3.99894	1467.37	1	126
2022-09-15	11:44:54	1.17335	1468.54	FALSE	126
2022-09-15	11:44:54	0.360165	1468.9	FALSE	126
2022-09-15	11:44:54	-0.283804	1468.9	FALSE	126
2022-09-15	11:44:54	-0.547875	1468.9	FALSE	126
2022-09-15	11:44:55	-0.967824	1468.9	FALSE	126
2022-09-15	11:44:55	-0.967875	1468.9	FALSE	126
2022-09-15	11:44:55	-0.808638	1468.9	FALSE	126
2022-09-15	11:44:56	-1.0352	1468.9	FALSE	126
2022-09-15	11:44:56	-1.01724	1468.9	FALSE	126
2022-09-15	11:44:56	-0.697238	1468.9	FALSE	126
2022-09-15	11:44:56	-0.693829	1468.9	FALSE	126
2022-09-15	11:44:57	-0.767416	1468.9	FALSE	126
2022-09-15	11:44:57	-0.223804	1468.9	FALSE	126
2022-09-15	11:44:57	0.0030664	1468.91	FALSE	126
2022-09-15	11:44:57	0.329937	1469.24	FALSE	126
2022-09-15	11:44:58	1.27095	1470.51	FALSE	126
2022-09-15	11:44:58	1.31151	1471.82	FALSE	126
2022-09-15	11:44:58	0.162201	1471.98	FALSE	126
2022-09-15	11:44:58	-0.0780022	1471.98	FALSE	126
2022-09-15	11:44:59	-0.219325	1471.98	FALSE	126
2022-09-15	11:44:59	-0.321055	1471.98	FALSE	126
2022-09-15	11:44:59	-0.186094	1471.98	FALSE	126
2022-09-15	11:45:00	-0.293117	1471.98	FALSE	126
2022-09-15	11:45:00	-0.1579	1471.98	FALSE	126
2022-09-15	11:45:00	-0.25958	1471.98	FALSE	126
2022-09-15	11:45:00	-0.245738	1471.98	FALSE	126

## Sheet: Klutz_prong_2022915113947
						**GoPro Fitting: 1129
2022-09-15	11:39:47	2.97909
2022-09-15	11:39:48	0.295229
2022-09-15	11:39:48	0.202965
2022-09-15	11:39:48	0.189275
2022-09-15	11:39:48	0.403168
2022-09-15	11:39:49	0.89472
2022-09-15	11:39:49	1.73401
2022-09-15	11:39:49	2.9051
2022-09-15	11:39:49	3.29843
2022-09-15	11:39:50	3.19681
2022-09-15	11:39:50	3.6511
2022-09-15	11:39:50	3.61019
2022-09-15	11:39:50	3.66485
2022-09-15	11:39:51	3.71467
2022-09-15	11:39:51	3.7053
2022-09-15	11:39:51	3.72586
2022-09-15	11:39:52	3.66698
2022-09-15	11:39:52	3.65976
2022-09-15	11:39:52	3.65558
2022-09-15	11:39:52	3.64632
2022-09-15	11:39:53	3.69803
2022-09-15	11:39:53	3.76001
2022-09-15	11:39:53	3.6993
2022-09-15	11:39:53	3.71818
2022-09-15	11:39:54	3.66963
2022-09-15	11:39:54	3.60444
2022-09-15	11:39:54	3.59324
2022-09-15	11:39:54	3.59563
2022-09-15	11:39:55	3.66922
2022-09-15	11:39:55	3.38083
2022-09-15	11:39:55	3.3394
2022-09-15	11:39:56	3.69436
2022-09-15	11:39:56	4.07197
2022-09-15	11:39:56	4.03976
2022-09-15	11:39:56	4.07228
2022-09-15	11:39:57	3.86688
2022-09-15	11:39:57	3.84927
2022-09-15	11:39:57	3.85848
2022-09-15	11:39:57	0.665407
2022-09-15	11:39:58	0.33813
2022-09-15	11:39:58	0.382608
2022-09-15	11:39:58	0.427901
2022-09-15	11:39:58	0.367646
2022-09-15	11:39:59	0.40958
2022-09-15	11:39:59	0.400216
2022-09-15	11:39:59	0.413601
2022-09-15	11:40:00	0.409224
2022-09-15	11:40:00	0.370802
2022-09-15	11:40:00	0.375382
2022-09-15	11:40:00	0.34958
2022-09-15	11:40:01	0.216959
2022-09-15	11:40:01	0.418486
2022-09-15	11:40:01	-0.0248725
2022-09-15	11:40:01	-0.231641
2022-09-15	11:40:02	-0.386603
2022-09-15	11:40:02	-0.492302
2022-09-15	11:40:02	-0.597188
2022-09-15	11:40:02	-0.602328
2022-09-15	11:40:03	0.982455
2022-09-15	11:40:03	0.400573
2022-09-15	11:40:03	-0.10528
2022-09-15	11:40:04	-0.595763
2022-09-15	11:40:04	-0.756221
2022-09-15	11:40:04	-0.835712
2022-09-15	11:40:04	-0.771182
2022-09-15	11:40:05	-0.695508
2022-09-15	11:40:05	-0.0896053
2022-09-15	11:40:05	0.192074
2022-09-15	11:40:05	0.205
2022-09-15	11:40:06	6.00739
2022-09-15	11:40:06	42.212
2022-09-15	11:40:06	21.6947
2022-09-15	11:40:06	2.49538
2022-09-15	11:40:07	2.05482
2022-09-15	11:40:07	2.3253
2022-09-15	11:40:07	7.97782
2022-09-15	11:40:08	13.8989
2022-09-15	11:40:08	7.66759
2022-09-15	11:40:08	11.3256
2022-09-15	11:40:08	13.1566
2022-09-15	11:40:09	14.5296
2022-09-15	11:40:09	14.4461
2022-09-15	11:40:09	12.7488
2022-09-15	11:40:09	2.32668
2022-09-15	11:40:10	1.60469
2022-09-15	11:40:10	1.14958
2022-09-15	11:40:10	0.224491
2022-09-15	11:40:10	1.1451
2022-09-15	11:40:11	11.1654
2022-09-15	11:40:11	13.0505
2022-09-15	11:40:11	10.7102
2022-09-15	11:40:12	10.8943
2022-09-15	11:40:12	11.5644
2022-09-15	11:40:12	6.85965
2022-09-15	11:40:12	6.76291
2022-09-15	11:40:13	18.739
2022-09-15	11:40:13	17.1784
2022-09-15	11:40:13	9.27309
2022-09-15	11:40:13	6.6679
2022-09-15	11:40:14	7.78174
2022-09-15	11:40:14	14.2318
2022-09-15	11:40:14	16.7626
2022-09-15	11:40:14	18.957
2022-09-15	11:40:15	11.1205
2022-09-15	11:40:15	15.6445
2022-09-15	11:40:15	16.4549
2022-09-15	11:40:16	5.61874
2022-09-15	11:40:16	0.502405
2022-09-15	11:40:16	-0.127315
2022-09-15	11:40:16	-0.212862
2022-09-15	11:40:17	-0.386094
2022-09-15	11:40:17	-0.826501
2022-09-15	11:40:17	-0.980699
2022-09-15	11:40:17	-1.01576
2022-09-15	11:40:18	-0.760088
2022-09-15	11:40:18	0.295942
2022-09-15	11:40:18	0.275687
2022-09-15	11:40:18	0.0550257
2022-09-15	11:40:19	-0.106654
2022-09-15	11:40:19	-0.258206
2022-09-15	11:40:19	-0.768027
2022-09-15	11:40:20	-0.689605
2022-09-15	11:40:20	0.29126
2022-09-15	11:40:20	2.0933
2022-09-15	11:40:20	8.58479
2022-09-15	11:40:21	8.49105
2022-09-15	11:40:21	4.43889
2022-09-15	11:40:21	1.46464
2022-09-15	11:40:21	0.235636
2022-09-15	11:40:22	-0.0853305
2022-09-15	11:40:22	-0.273829
2022-09-15	11:40:22	-0.523345
2022-09-15	11:40:22	-0.473117
2022-09-15	11:40:23	0.0724302
2022-09-15	11:40:23	0.104186
2022-09-15	11:40:23	-0.197188
2022-09-15	11:40:24	-0.346043
2022-09-15	11:40:24	-0.366246
2022-09-15	11:40:24	-0.227519
2022-09-15	11:40:24	-0.348486
2022-09-15	11:40:25	-0.445788
2022-09-15	11:40:25	-0.0546944
2022-09-15	11:40:25	0.124797
2022-09-15	11:40:25	-0.408078
2022-09-15	11:40:26	0.0738552
2022-09-15	11:40:26	0.880776
2022-09-15	11:40:26	1.23207
2022-09-15	11:40:26	2.91049
2022-09-15	11:40:27	2.49202
2022-09-15	11:40:27	1.08765
2022-09-15	11:40:27	0.964949
2022-09-15	11:40:28	0.36556
2022-09-15	11:40:28	-0.0217173
2022-09-15	11:40:28	-0.119733
2022-09-15	11:40:28	0.00937683
2022-09-15	11:40:29	-0.210521
2022-09-15	11:40:29	-0.213473
2022-09-15	11:40:29	-0.223855
2022-09-15	11:40:29	-0.394949
2022-09-15	11:40:30	-0.163956
2022-09-15	11:40:30	0.214822
2022-09-15	11:40:30	1.27218
2022-09-15	11:40:30	-0.0769335
2022-09-15	11:40:31	-0.0890455
2022-09-15	11:40:31	-0.431692
2022-09-15	11:40:31	-0.516119
2022-09-15	11:40:32	-0.571793
2022-09-15	11:40:32	-0.77561
2022-09-15	11:40:32	-0.329351
2022-09-15	11:40:32	-0.274847
2022-09-15	11:40:33	-0.276526
2022-09-15	11:40:33	-0.244618
2022-09-15	11:40:33	-0.298766
2022-09-15	11:40:33	-0.433371
2022-09-15	11:40:34	-0.612251
2022-09-15	11:40:34	-0.734898
2022-09-15	11:40:34	-0.426552
2022-09-15	11:40:34	-0.484516
2022-09-15	11:40:35	-0.520597
2022-09-15	11:40:35	-0.290419
2022-09-15	11:40:35	-0.0583076
2022-09-15	11:40:36	2.00062
2022-09-15	11:40:36	1.85141
2022-09-15	11:40:36	2.22276
2022-09-15	11:40:36	2.69177
2022-09-15	11:40:37	1.05518
2022-09-15	11:40:37	1.16459
2022-09-15	11:40:37	0.915789
2022-09-15	11:40:37	0.926679
2022-09-15	11:40:38	0.705865
2022-09-15	11:40:38	2.11711
2022-09-15	11:40:38	1.01915
2022-09-15	11:40:38	1.48108
2022-09-15	11:40:39	0.00479668
2022-09-15	11:40:39	0.117621
2022-09-15	11:40:39	0.120471
2022-09-15	11:40:40	0.0765015
2022-09-15	11:40:40	-0.223346
2022-09-15	11:40:40	-0.179122
2022-09-15	11:40:40	-0.126297
2022-09-15	11:40:41	-0.0473662
2022-09-15	11:40:41	-0.0941854
2022-09-15	11:40:41	0.0535498
2022-09-15	11:40:41	0.199453
2022-09-15	11:40:42	2.09452
2022-09-15	11:40:42	4.05166
2022-09-15	11:40:42	2.16887
2022-09-15	11:40:42	0.364644
2022-09-15	11:40:43	0.0471885
2022-09-15	11:40:43	0.966069
2022-09-15	11:40:43	0.193601
2022-09-15	11:40:44	0.78846
2022-09-15	11:40:44	0.954262
2022-09-15	11:40:44	1.09813
2022-09-15	11:40:44	0.572837
2022-09-15	11:40:45	1.29782
2022-09-15	11:40:45	1.56408
2022-09-15	11:40:45	1.55696
2022-09-15	11:40:45	1.66139
2022-09-15	11:40:46	0.549478
2022-09-15	11:40:46	0.548817
2022-09-15	11:40:46	0.419148
2022-09-15	11:40:46	0.508359
2022-09-15	11:40:47	0.728562
2022-09-15	11:40:47	2.83538
2022-09-15	11:40:47	1.54607
2022-09-15	11:40:48	0.670293
2022-09-15	11:40:48	0.560623
2022-09-15	11:40:48	0.227239
2022-09-15	11:40:48	0.736654
2022-09-15	11:40:49	1.00536
2022-09-15	11:40:49	2.68846
2022-09-15	11:40:49	2.47273
2022-09-15	11:40:49	1.36836
2022-09-15	11:40:50	2.30617
2022-09-15	11:40:50	2.20184
2022-09-15	11:40:50	0.624135
2022-09-15	11:40:50	0.374771
2022-09-15	11:40:51	0.740369
2022-09-15	11:40:51	0.581234
2022-09-15	11:40:51	1.25599
2022-09-15	11:40:52	1.17385
2022-09-15	11:40:52	1.91543
2022-09-15	11:40:52	1.83233
2022-09-15	11:40:52	1.89905
2022-09-15	11:40:53	1.22744
2022-09-15	11:40:53	1.4735
2022-09-15	11:40:53	2.42688
2022-09-15	11:40:53	3.19864
2022-09-15	11:40:54	4.01808
2022-09-15	11:40:54	4.5936
2022-09-15	11:40:54	2.38765
2022-09-15	11:40:54	0.408308
2022-09-15	11:40:55	0.861539
2022-09-15	11:40:55	0.109021
2022-09-15	11:40:55	0.740318
2022-09-15	11:40:56	1.33574
2022-09-15	11:40:56	3.4451
2022-09-15	11:40:56	3.81736
2022-09-15	11:40:56	4.75604
2022-09-15	11:40:57	2.0338
2022-09-15	11:40:57	1.61594
2022-09-15	11:40:57	0.470903
2022-09-15	11:40:57	0.72729
2022-09-15	11:40:58	0.545305
2022-09-15	11:40:58	0.204237
2022-09-15	11:40:58	1.05238
2022-09-15	11:40:59	3.33874
2022-09-15	11:40:59	0.999758
2022-09-15	11:40:59	-0.022786
2022-09-15	11:40:59	0.154924
2022-09-15	11:41:00	0.12271
2022-09-15	11:41:00	-0.118969
2022-09-15	11:41:00	-0.101157
2022-09-15	11:41:00	-0.296883
2022-09-15	11:41:01	-0.614542
2022-09-15	11:41:01	-0.789351
2022-09-15	11:41:01	-0.890673
2022-09-15	11:41:01	-0.810012
2022-09-15	11:41:02	-0.721462
2022-09-15	11:41:02	-0.353524
2022-09-15	11:41:02	-0.0016664
2022-09-15	11:41:03	0.200725
2022-09-15	11:41:03	0.387036
2022-09-15	11:41:03	0.444847
2022-09-15	11:41:03	0.310802
2022-09-15	11:41:04	-0.01444
2022-09-15	11:41:04	0.161082
2022-09-15	11:41:04	0.319148
2022-09-15	11:41:04	1.21859
2022-09-15	11:41:05	3.27599
2022-09-15	11:41:05	3.49904
2022-09-15	11:41:05	5.04276
2022-09-15	11:41:05	3.94968
2022-09-15	11:41:06	2.4277
2022-09-15	11:41:06	1.83335
2022-09-15	11:41:06	0.37757
2022-09-15	11:41:07	0.700929
2022-09-15	11:41:07	0.321183
2022-09-15	11:41:07	0.379555
2022-09-15	11:41:07	0.284644
2022-09-15	11:41:08	0.285611
2022-09-15	11:41:08	0.393448
2022-09-15	11:41:08	0.151412
2022-09-15	11:41:08	0.625356
2022-09-15	11:41:09	0.834924
2022-09-15	11:41:09	4.17304
2022-09-15	11:41:09	3.73024
2022-09-15	11:41:09	4.54968
2022-09-15	11:41:10	1.81966
2022-09-15	11:41:10	1.15156
2022-09-15	11:41:10	0.469886
2022-09-15	11:41:11	0.449682
2022-09-15	11:41:11	0.488461
2022-09-15	11:41:11	0.366883
2022-09-15	11:41:11	0.506934
2022-09-15	11:41:12	0.374771
2022-09-15	11:41:12	0.537672
2022-09-15	11:41:12	0.589478
2022-09-15	11:41:12	1.18704
2022-09-15	11:41:13	2.10648
2022-09-15	11:41:13	2.21538
2022-09-15	11:41:13	2.54831
2022-09-15	11:41:13	1.36357
2022-09-15	11:41:14	2.93716
2022-09-15	11:41:14	2.65711
2022-09-15	11:41:14	4.37686
2022-09-15	11:41:15	4.11085
2022-09-15	11:41:15	2.56108
2022-09-15	11:41:15	2.83798
2022-09-15	11:41:15	2.22805
2022-09-15	11:41:16	4.4224
2022-09-15	11:41:16	3.29131
2022-09-15	11:41:16	3.07996
2022-09-15	11:41:16	2.0564
2022-09-15	11:41:17	2.27609
2022-09-15	11:41:17	0.279809
2022-09-15	11:41:17	1.08235
2022-09-15	11:41:17	1.13441
2022-09-15	11:41:18	0.804389
2022-09-15	11:41:18	1.46592
2022-09-15	11:41:18	0.945356
2022-09-15	11:41:19	0.335331
2022-09-15	11:41:19	0.312481
2022-09-15	11:41:19	0.388054
2022-09-15	11:41:19	0.285967
2022-09-15	11:41:20	0.300624
2022-09-15	11:41:20	0.314211
2022-09-15	11:41:20	0.795076
2022-09-15	11:41:20	1.17976
2022-09-15	11:41:21	0.162201
2022-09-15	11:41:21	0.215585
2022-09-15	11:41:21	-0.018155
2022-09-15	11:41:21	0.0747712
2022-09-15	11:41:22	-0.26701
2022-09-15	11:41:22	-0.307671
2022-09-15	11:41:22	-0.449554
2022-09-15	11:41:23	-0.4693
2022-09-15	11:41:23	-0.393931
2022-09-15	11:41:23	-0.1693
2022-09-15	11:41:23	-0.0780531
2022-09-15	11:41:24	0.255178
2022-09-15	11:41:24	0.211565
2022-09-15	11:41:24	0.246221
2022-09-15	11:41:24	0.419148
2022-09-15	11:41:25	0.342506
2022-09-15	11:41:25	0.485356
2022-09-15	11:41:25	0.261031
2022-09-15	11:41:25	0.488054
2022-09-15	11:41:26	0.211158
2022-09-15	11:41:26	0.455992
2022-09-15	11:41:26	0.215433
2022-09-15	11:41:27	0.408461
2022-09-15	11:41:27	0.263372
2022-09-15	11:41:27	0.432277
2022-09-15	11:41:27	0.270751
2022-09-15	11:41:28	0.448613
2022-09-15	11:41:28	0.343168
2022-09-15	11:41:28	0.505051
2022-09-15	11:41:28	0.450496
2022-09-15	11:41:29	0.393244
2022-09-15	11:41:29	0.175992
2022-09-15	11:41:29	0.203117
2022-09-15	11:41:29	0.2993
2022-09-15	11:41:30	0.678384
2022-09-15	11:41:30	0.030242
2022-09-15	11:41:30	0.191921
2022-09-15	11:41:31	0.265662
2022-09-15	11:41:31	0.320522
2022-09-15	11:41:31	0.394161
2022-09-15	11:41:31	0.384898
2022-09-15	11:41:32	0.452328
2022-09-15	11:41:32	0.586628
2022-09-15	11:41:32	0.557723
2022-09-15	11:41:32	0.43355
2022-09-15	11:41:33	0.152736
2022-09-15	11:41:33	0.294415
2022-09-15	11:41:33	0.324389
2022-09-15	11:41:33	0.320216
2022-09-15	11:41:34	0.308003
2022-09-15	11:41:34	0.109071
2022-09-15	11:41:34	0.384898
2022-09-15	11:41:35	0.335382
2022-09-15	11:41:35	0.268766
2022-09-15	11:41:35	0.280369
2022-09-15	11:41:35	0.334415
2022-09-15	11:41:36	0.348664
2022-09-15	11:41:36	0.622812
2022-09-15	11:41:36	0.724593
2022-09-15	11:41:36	0.733142
2022-09-15	11:41:37	0.735026
2022-09-15	11:41:37	0.726323
2022-09-15	11:41:37	0.657366
2022-09-15	11:41:37	0.643117
2022-09-15	11:41:38	0.471209
2022-09-15	11:41:38	0.518944
2022-09-15	11:41:38	0.494924
2022-09-15	11:41:39	0.524236
2022-09-15	11:41:39	0.509987
2022-09-15	11:41:39	0.483372
2022-09-15	11:41:39	0.490242
2022-09-15	11:41:40	0.487697
2022-09-15	11:41:40	0.498232
2022-09-15	11:41:40	0.501997
2022-09-15	11:41:40	0.49243
2022-09-15	11:41:41	0.474924
2022-09-15	11:41:41	0.47472
2022-09-15	11:41:41	0.485916
2022-09-15	11:41:41	0.514975
2022-09-15	11:41:42	0.519249
2022-09-15	11:41:42	0.503982
2022-09-15	11:41:42	0.467952
2022-09-15	11:41:43	0.431412
2022-09-15	11:41:43	0.408104
2022-09-15	11:41:43	0.382048
2022-09-15	11:41:43	0.433041
2022-09-15	11:41:44	0.393092
2022-09-15	11:41:44	0.373193
2022-09-15	11:41:44	0.335127
2022-09-15	11:41:44	0.429682
2022-09-15	11:41:45	0.431158
2022-09-15	11:41:45	0.274364
2022-09-15	11:41:45	0.291412
2022-09-15	11:41:45	0.377367
2022-09-15	11:41:46	0.374771
2022-09-15	11:41:46	0.445509
2022-09-15	11:41:46	0.260573
2022-09-15	11:41:47	0.270751
2022-09-15	11:41:47	0.422965
2022-09-15	11:41:47	0.572481
2022-09-15	11:41:47	0.567392
2022-09-15	11:41:48	0.688919
2022-09-15	11:41:48	0.660369
2022-09-15	11:41:48	0.357265
2022-09-15	11:41:48	0.312023
2022-09-15	11:41:49	0.408817
2022-09-15	11:41:49	0.464033
2022-09-15	11:41:49	0.344746
2022-09-15	11:41:50	0.338842
2022-09-15	11:41:50	0.449886
2022-09-15	11:41:50	0.568002
2022-09-15	11:41:50	0.596145
2022-09-15	11:41:51	0.76785
2022-09-15	11:41:51	1.13416
2022-09-15	11:41:51	2.15248
2022-09-15	11:41:51	2.08877
2022-09-15	11:41:52	1.05782
2022-09-15	11:41:52	0.796807
2022-09-15	11:41:52	0.529478
2022-09-15	11:41:52	1.54709
2022-09-15	11:41:53	1.89039
2022-09-15	11:41:53	1.35034
2022-09-15	11:41:53	1.33401
2022-09-15	11:41:53	1.07151
2022-09-15	11:41:54	0.842303
2022-09-15	11:41:54	1.07472
2022-09-15	11:41:54	1.02276
2022-09-15	11:41:55	0.421031
2022-09-15	11:41:55	0.260115
2022-09-15	11:41:55	0.729428
2022-09-15	11:41:55	0.245509
2022-09-15	11:41:56	1.03177
2022-09-15	11:41:56	0.575076
2022-09-15	11:41:56	0.71472
2022-09-15	11:41:56	0.554822
2022-09-15	11:41:57	0.763779
2022-09-15	11:41:57	1.49375
2022-09-15	11:41:57	1.26296
2022-09-15	11:41:57	1.18205
2022-09-15	11:41:58	0.968511
2022-09-15	11:41:58	1.32663
2022-09-15	11:41:58	1.73457
2022-09-15	11:41:59	1.3509
2022-09-15	11:41:59	1.5163
2022-09-15	11:41:59	2.70703
2022-09-15	11:41:59	1.61808
2022-09-15	11:42:00	0.000216527
2022-09-15	11:42:00	-0.310878
2022-09-15	11:42:00	-0.31729
2022-09-15	11:42:00	-0.266806
2022-09-15	11:42:01	-0.267061
2022-09-15	11:42:01	-0.502887
2022-09-15	11:42:01	-0.418409
2022-09-15	11:42:02	-0.244058
2022-09-15	11:42:02	-0.0734221
2022-09-15	11:42:02	-0.473829
2022-09-15	11:42:02	-0.3693
2022-09-15	11:42:03	-0.142124
2022-09-15	11:42:03	-0.0326079
2022-09-15	11:42:03	0.0291224
2022-09-15	11:42:03	0.205255
2022-09-15	11:42:04	0.340064
2022-09-15	11:42:04	0.351921
2022-09-15	11:42:04	1.75289
2022-09-15	11:42:04	5.75665
2022-09-15	11:42:05	8.55706
2022-09-15	11:42:05	4.80001
2022-09-15	11:42:05	0.724338
2022-09-15	11:42:06	0.550903
2022-09-15	11:42:06	0.403321
2022-09-15	11:42:06	0.433499
2022-09-15	11:42:06	0.438893
2022-09-15	11:42:07	0.247087
2022-09-15	11:42:07	0.391361
2022-09-15	11:42:07	0.0968069
2022-09-15	11:42:07	0.365051
2022-09-15	11:42:08	0.281998
2022-09-15	11:42:08	0.256552
2022-09-15	11:42:08	0.130242
2022-09-15	11:42:08	0.130954
2022-09-15	11:42:09	-0.069758
2022-09-15	11:42:09	0.125306
2022-09-15	11:42:09	-0.108842
2022-09-15	11:42:09	-0.0764246
2022-09-15	11:42:10	-0.169147
2022-09-15	11:42:10	-0.124618
2022-09-15	11:42:10	-0.285534
2022-09-15	11:42:11	-0.197493
2022-09-15	11:42:11	-0.221768
2022-09-15	11:42:11	-0.246501
2022-09-15	11:42:11	-0.533982
2022-09-15	11:42:12	-0.462022
2022-09-15	11:42:12	-0.486806
2022-09-15	11:42:12	-0.396832
2022-09-15	11:42:12	-0.529096
2022-09-15	11:42:13	-0.386552
2022-09-15	11:42:13	-0.439987
2022-09-15	11:42:13	-0.3836
2022-09-15	11:42:13	-0.423244
2022-09-15	11:42:14	-0.223956
2022-09-15	11:42:14	-0.269453
2022-09-15	11:42:14	-0.255967
2022-09-15	11:42:15	-0.220038
2022-09-15	11:42:15	-0.0920481
2022-09-15	11:42:15	0.101998
2022-09-15	11:42:15	0.327545
2022-09-15	11:42:16	0.532532
2022-09-15	11:42:16	0.323422
2022-09-15	11:42:16	0.506527
2022-09-15	11:42:16	0.284695
2022-09-15	11:42:17	0.575433
2022-09-15	11:42:17	0.306679
2022-09-15	11:42:17	0.44388
2022-09-15	11:42:17	0.194618
2022-09-15	11:42:18	0.292532
2022-09-15	11:42:18	0.0640333
2022-09-15	11:42:18	0.148613
2022-09-15	11:42:19	0.0183336
2022-09-15	11:42:19	0.140115
2022-09-15	11:42:19	-0.00578856
2022-09-15	11:42:19	0.0923793
2022-09-15	11:42:20	0.0231681
2022-09-15	11:42:20	0.148104
2022-09-15	11:42:20	-0.0344908
2022-09-15	11:42:20	0.0794022
2022-09-15	11:42:21	0.118435
2022-09-15	11:42:21	0.261947
2022-09-15	11:42:21	-0.0123535
2022-09-15	11:42:21	-0.112811
2022-09-15	11:42:22	-0.113117
2022-09-15	11:42:22	0.105967
2022-09-15	11:42:22	-0.019987
2022-09-15	11:42:23	0.0686644
2022-09-15	11:42:23	-0.0696053
2022-09-15	11:42:23	0.0646949
2022-09-15	11:42:23	0.0542623
2022-09-15	11:42:24	0.214313
2022-09-15	11:42:24	0.495026
2022-09-15	11:42:24	1.44826
2022-09-15	11:42:24	2.73044
2022-09-15	11:42:25	2.18963
2022-09-15	11:42:25	2.60388
2022-09-15	11:42:25	1.23502
2022-09-15	11:42:25	1.48973
2022-09-15	11:42:26	1.75162
2022-09-15	11:42:26	0.986629
2022-09-15	11:42:26	0.874873
2022-09-15	11:42:27	1.14943
2022-09-15	11:42:27	0.459351
2022-09-15	11:42:27	0.317061
2022-09-15	11:42:27	0.198944
2022-09-15	11:42:28	0.294211
2022-09-15	11:42:28	0.165356
2022-09-15	11:42:28	0.295636
2022-09-15	11:42:28	0.22383
2022-09-15	11:42:29	0.258791
2022-09-15	11:42:29	0.141082
2022-09-15	11:42:29	0.107596
2022-09-15	11:42:29	0.158944
2022-09-15	11:42:30	0.763626
2022-09-15	11:42:30	0.262099
2022-09-15	11:42:30	0.920267
2022-09-15	11:42:31	1.50393
2022-09-15	11:42:31	2.14765
2022-09-15	11:42:31	1.16184
2022-09-15	11:42:31	0.99757
2022-09-15	11:42:32	2.09818
2022-09-15	11:42:32	1.67375
2022-09-15	11:42:32	0.451819
2022-09-15	11:42:32	0.347952
2022-09-15	11:42:33	0.349071
2022-09-15	11:42:33	0.00530559
2022-09-15	11:42:33	-0.0712338
2022-09-15	11:42:33	-0.135305
2022-09-15	11:42:34	0.125306
2022-09-15	11:42:34	1.32388
2022-09-15	11:42:34	2.69049
2022-09-15	11:42:35	2.00398
2022-09-15	11:42:35	1.25742
2022-09-15	11:42:35	2.01447
2022-09-15	11:42:35	1.06882
2022-09-15	11:42:36	2.4081
2022-09-15	11:42:36	1.79589
2022-09-15	11:42:36	2.13579
2022-09-15	11:42:36	1.74459
2022-09-15	11:42:37	2.52775
2022-09-15	11:42:37	0.718537
2022-09-15	11:42:37	2.66525
2022-09-15	11:42:37	1.73396
2022-09-15	11:42:38	1.1963
2022-09-15	11:42:38	1.63447
2022-09-15	11:42:38	0.497316
2022-09-15	11:42:39	0.119606
2022-09-15	11:42:39	-0.0960175
2022-09-15	11:42:39	-0.155
2022-09-15	11:42:39	-0.201514
2022-09-15	11:42:40	-0.279325
2022-09-15	11:42:40	-0.298257
2022-09-15	11:42:40	-0.0238547
2022-09-15	11:42:40	-0.0574425
2022-09-15	11:42:41	-0.0407504
2022-09-15	11:42:41	-0.0749997
2022-09-15	11:42:41	0.0745168
2022-09-15	11:42:41	0.0448984
2022-09-15	11:42:42	0.925662
2022-09-15	11:42:42	1.03813
2022-09-15	11:42:42	0.291412
2022-09-15	11:42:43	-0.173269
2022-09-15	11:42:43	-0.352506
2022-09-15	11:42:43	-0.442582
2022-09-15	11:42:43	-0.543396
2022-09-15	11:42:44	-0.661666
2022-09-15	11:42:44	-0.580343
2022-09-15	11:42:44	-0.540648
2022-09-15	11:42:44	-0.526196
2022-09-15	11:42:45	-0.493575
2022-09-15	11:42:45	-0.450114
2022-09-15	11:42:45	-0.459427
2022-09-15	11:42:45	-0.607315
2022-09-15	11:42:46	-0.600547
2022-09-15	11:42:46	-0.568333
2022-09-15	11:42:46	-0.600445
2022-09-15	11:42:47	-0.479274
2022-09-15	11:42:47	-0.420139
2022-09-15	11:42:47	-0.421005
2022-09-15	11:42:47	-0.416475
2022-09-15	11:42:48	-0.467315
2022-09-15	11:42:48	-0.468995
2022-09-15	11:42:48	-0.428129
2022-09-15	11:42:48	-0.377188
2022-09-15	11:42:49	-0.354491
2022-09-15	11:42:49	-0.260496
2022-09-15	11:42:49	-0.307264
2022-09-15	11:42:49	-0.281259
2022-09-15	11:42:50	-0.194898
2022-09-15	11:42:50	-0.102684
2022-09-15	11:42:50	-0.0236003
2022-09-15	11:42:51	-0.00105572
2022-09-15	11:42:51	0.015331
2022-09-15	11:42:51	0.218995
2022-09-15	11:42:51	0.433855
2022-09-15	11:42:52	0.43411
2022-09-15	11:42:52	0.702201
2022-09-15	11:42:52	0.588766
2022-09-15	11:42:52	0.508919
2022-09-15	11:42:53	0.301845
2022-09-15	11:42:53	0.369886
2022-09-15	11:42:53	0.210802
2022-09-15	11:42:53	0.0637788
2022-09-15	11:42:54	-0.070216
2022-09-15	11:42:54	-0.123906
2022-09-15	11:42:54	-0.176984
2022-09-15	11:42:55	-0.131895
2022-09-15	11:42:55	-0.169605
2022-09-15	11:42:55	-0.177086
2022-09-15	11:42:55	-0.374694
2022-09-15	11:42:56	-0.554847
2022-09-15	11:42:56	-0.627417
2022-09-15	11:42:56	-0.664923
2022-09-15	11:42:56	-0.687671
2022-09-15	11:42:57	-0.431692
2022-09-15	11:42:57	-0.266196
2022-09-15	11:42:57	0.578079
2022-09-15	11:42:57	2.76876
2022-09-15	11:42:58	4.22591
2022-09-15	11:42:58	1.36978
2022-09-15	11:42:58	2.00296
2022-09-15	11:42:59	1.33844
2022-09-15	11:42:59	1.96698
2022-09-15	11:42:59	1.79945
2022-09-15	11:42:59	2.04281
2022-09-15	11:43:00	3.8878
2022-09-15	11:43:00	1.79024
2022-09-15	11:43:00	2.01859
2022-09-15	11:43:00	0.887494
2022-09-15	11:43:01	2.03676
2022-09-15	11:43:01	0.631514
2022-09-15	11:43:01	1.17101
2022-09-15	11:43:01	0.698792
2022-09-15	11:43:02	1.22805
2022-09-15	11:43:02	0.974109
2022-09-15	11:43:02	1.44597
2022-09-15	11:43:03	0.652888
2022-09-15	11:43:03	1.42398
2022-09-15	11:43:03	1.12933
2022-09-15	11:43:03	0.929122
2022-09-15	11:43:04	0.878944
2022-09-15	11:43:04	1.25513
2022-09-15	11:43:04	0.796807
2022-09-15	11:43:04	0.584186
2022-09-15	11:43:05	0.865509
2022-09-15	11:43:05	0.669885
2022-09-15	11:43:05	0.853753
2022-09-15	11:43:05	0.597468
2022-09-15	11:43:06	0.987086
2022-09-15	11:43:06	1.25055
2022-09-15	11:43:06	1.56892
2022-09-15	11:43:07	1.02129
2022-09-15	11:43:07	2.42871
2022-09-15	11:43:07	2.3851
2022-09-15	11:43:07	4.31121
2022-09-15	11:43:08	2.70841
2022-09-15	11:43:08	4.86118
2022-09-15	11:43:08	1.22164
2022-09-15	11:43:08	3.09864
2022-09-15	11:43:09	0.806221
2022-09-15	11:43:09	1.59457
2022-09-15	11:43:09	0.784033
2022-09-15	11:43:09	0.698028
2022-09-15	11:43:10	1.11146
2022-09-15	11:43:10	1.26363
2022-09-15	11:43:10	0.504288
2022-09-15	11:43:11	2.24251
2022-09-15	11:43:11	0.812582
2022-09-15	11:43:11	0.89701
2022-09-15	11:43:11	0.954822
2022-09-15	11:43:12	1.14816
2022-09-15	11:43:12	0.903626
2022-09-15	11:43:12	0.979606
2022-09-15	11:43:12	1.36597
2022-09-15	11:43:13	1.84429
2022-09-15	11:43:13	2.78658
2022-09-15	11:43:13	3.21233
2022-09-15	11:43:13	1.44663
2022-09-15	11:43:14	1.91268
2022-09-15	11:43:14	2.17564
2022-09-15	11:43:14	1.18602
2022-09-15	11:43:15	1.53676
2022-09-15	11:43:15	1.01228
2022-09-15	11:43:15	1.37151
2022-09-15	11:43:15	2.20459
2022-09-15	11:43:16	0.482456
2022-09-15	11:43:16	2.2337
2022-09-15	11:43:16	1.45676
2022-09-15	11:43:16	0.819606
2022-09-15	11:43:17	2.03752
2022-09-15	11:43:17	1.74724
2022-09-15	11:43:17	1.08088
2022-09-15	11:43:17	1.57599
2022-09-15	11:43:18	0.984491
2022-09-15	11:43:18	1.0337
2022-09-15	11:43:18	2.29248
2022-09-15	11:43:19	1.21701
2022-09-15	11:43:19	1.7652
2022-09-15	11:43:19	1.25594
2022-09-15	11:43:19	0.998028
2022-09-15	11:43:20	0.458232
2022-09-15	11:43:20	0.489886
2022-09-15	11:43:20	0.265305
2022-09-15	11:43:20	0.459351
2022-09-15	11:43:21	0.261387
2022-09-15	11:43:21	0.725509
2022-09-15	11:43:21	0.506984
2022-09-15	11:43:21	0.469479
2022-09-15	11:43:22	0.920063
2022-09-15	11:43:22	0.585254
2022-09-15	11:43:22	0.698842
2022-09-15	11:43:23	0.30042
2022-09-15	11:43:23	0.388817
2022-09-15	11:43:23	0.218537
2022-09-15	11:43:23	0.411107
2022-09-15	11:43:24	0.254313
2022-09-15	11:43:24	0.465102
2022-09-15	11:43:24	0.155331
2022-09-15	11:43:24	1.16592
2022-09-15	11:43:25	1.22429
2022-09-15	11:43:25	4.71711
2022-09-15	11:43:25	3.02505
2022-09-15	11:43:25	3.17823
2022-09-15	11:43:26	1.53604
2022-09-15	11:43:26	2.18271
2022-09-15	11:43:26	1.26785
2022-09-15	11:43:27	2.37279
2022-09-15	11:43:27	1.90154
2022-09-15	11:43:27	3.79172
2022-09-15	11:43:27	0.801947
2022-09-15	11:43:28	2.10586
2022-09-15	11:43:28	0.693193
2022-09-15	11:43:28	1.14164
2022-09-15	11:43:28	1.39604
2022-09-15	11:43:29	0.50383
2022-09-15	11:43:29	2.00164
2022-09-15	11:43:29	2.92388
2022-09-15	11:43:29	0.518231
2022-09-15	11:43:30	1.00663
2022-09-15	11:43:30	1.59696
2022-09-15	11:43:30	0.679148
2022-09-15	11:43:31	1.97538
2022-09-15	11:43:31	2.69614
2022-09-15	11:43:31	2.70683
2022-09-15	11:43:31	5.4309
2022-09-15	11:43:32	1.91289
2022-09-15	11:43:32	1.38531
2022-09-15	11:43:32	0.934618
2022-09-15	11:43:32	0.910852
2022-09-15	11:43:33	0.499453
2022-09-15	11:43:33	0.874516
2022-09-15	11:43:33	0.423473
2022-09-15	11:43:33	0.996196
2022-09-15	11:43:34	1.29141
2022-09-15	11:43:34	1.75375
2022-09-15	11:43:34	4.48571
2022-09-15	11:43:35	1.44459
2022-09-15	11:43:35	1.70296
2022-09-15	11:43:35	0.338944
2022-09-15	11:43:35	0.242049
2022-09-15	11:43:36	0.0577738
2022-09-15	11:43:36	-0.0328114
2022-09-15	11:43:36	0.107443
2022-09-15	11:43:36	1.23416
2022-09-15	11:43:37	2.49599
2022-09-15	11:43:37	3.27406
2022-09-15	11:43:37	2.39726
2022-09-15	11:43:37	1.6509
2022-09-15	11:43:38	0.5193
2022-09-15	11:43:38	1.0478
2022-09-15	11:43:38	1.07284
2022-09-15	11:43:39	2.54693
2022-09-15	11:43:39	1.79162
2022-09-15	11:43:39	2.6279
2022-09-15	11:43:39	4.56301
2022-09-15	11:43:40	3.04632
2022-09-15	11:43:40	6.77411
2022-09-15	11:43:40	10.1635
2022-09-15	11:43:40	7.06352
2022-09-15	11:43:41	4.53472
2022-09-15	11:43:41	3.06871
2022-09-15	11:43:41	0.566425
2022-09-15	11:43:41	0.248715
2022-09-15	11:43:42	0.252328
2022-09-15	11:43:42	-0.191539
2022-09-15	11:43:42	-0.228231
2022-09-15	11:43:43	-0.34986
2022-09-15	11:43:43	-0.491997
2022-09-15	11:43:43	-0.496068
2022-09-15	11:43:43	-0.708485
2022-09-15	11:43:44	-0.96762
2022-09-15	11:43:44	-1.10416
2022-09-15	11:43:44	-1.15703
2022-09-15	11:43:44	-1.15541
2022-09-15	11:43:45	-1.2581
2022-09-15	11:43:45	-1.24106
2022-09-15	11:43:45	-0.665534
2022-09-15	11:43:45	-0.466094
2022-09-15	11:43:46	0.0709036
2022-09-15	11:43:46	0.724491
2022-09-15	11:43:46	1.76251
2022-09-15	11:43:47	2.71436
2022-09-15	11:43:47	1.45197
2022-09-15	11:43:47	0.460623
2022-09-15	11:43:47	0.356756
2022-09-15	11:43:48	0.155891
2022-09-15	11:43:48	0.0734481
2022-09-15	11:43:48	-0.216832
2022-09-15	11:43:48	-0.211539
2022-09-15	11:43:49	-0.44589
2022-09-15	11:43:49	-0.433676
2022-09-15	11:43:49	-0.107366
2022-09-15	11:43:49	1.9763
2022-09-15	11:43:50	3.84225
2022-09-15	11:43:50	2.09014
2022-09-15	11:43:50	0.756247
2022-09-15	11:43:51	0.485611
2022-09-15	11:43:51	0.515025
2022-09-15	11:43:51	0.320624
2022-09-15	11:43:51	0.383372
2022-09-15	11:43:52	0.0791478
2022-09-15	11:43:52	-0.342582
2022-09-15	11:43:52	-0.597137
2022-09-15	11:43:52	-0.816628
2022-09-15	11:43:53	-0.679325
2022-09-15	11:43:53	-0.846806
2022-09-15	11:43:53	-0.747315
2022-09-15	11:43:53	-0.903447
2022-09-15	11:43:54	-0.735915
2022-09-15	11:43:54	-0.840597
2022-09-15	11:43:54	-0.850317
2022-09-15	11:43:55	-0.989554
2022-09-15	11:43:55	-0.843854
2022-09-15	11:43:55	-1.06955
2022-09-15	11:43:55	-1.19882
2022-09-15	11:43:56	-0.851641
2022-09-15	11:43:56	-0.101157
2022-09-15	11:43:56	0.309631
2022-09-15	11:43:56	2.44139
2022-09-15	11:43:57	5.76332
2022-09-15	11:43:57	4.10851
2022-09-15	11:43:57	2.33772
2022-09-15	11:43:57	0.937265
2022-09-15	11:43:58	0.767697
2022-09-15	11:43:58	0.734262
2022-09-15	11:43:58	1.11116
2022-09-15	11:43:59	2.29004
2022-09-15	11:43:59	4.40978
2022-09-15	11:43:59	0.87126
2022-09-15	11:43:59	0.173804
2022-09-15	11:44:00	0.258181
2022-09-15	11:44:00	0.22612
2022-09-15	11:44:00	0.187087
2022-09-15	11:44:00	0.250954
2022-09-15	11:44:01	0.294262
2022-09-15	11:44:01	0.152074
2022-09-15	11:44:01	0.251616
2022-09-15	11:44:01	0.337366
2022-09-15	11:44:02	0.438791
2022-09-15	11:44:02	0.829275
2022-09-15	11:44:02	0.825356
2022-09-15	11:44:03	1.08729
2022-09-15	11:44:03	2.57365
2022-09-15	11:44:03	2.84454
2022-09-15	11:44:03	3.70958
2022-09-15	11:44:04	2.81772
2022-09-15	11:44:04	0.754567
2022-09-15	11:44:04	3.22663
2022-09-15	11:44:04	2.68281
2022-09-15	11:44:05	0.83701
2022-09-15	11:44:05	0.488766
2022-09-15	11:44:05	0.330038
2022-09-15	11:44:05	0.248003
2022-09-15	11:44:06	0.169071
2022-09-15	11:44:06	0.408003
2022-09-15	11:44:06	0.127189
2022-09-15	11:44:07	0.34902
2022-09-15	11:44:07	0.311819
2022-09-15	11:44:07	0.524338
2022-09-15	11:44:07	0.576196
2022-09-15	11:44:08	1.31665
2022-09-15	11:44:08	1.13574
2022-09-15	11:44:08	1.80602
2022-09-15	11:44:08	2.00205
2022-09-15	11:44:09	0.725254
2022-09-15	11:44:09	1.50256
2022-09-15	11:44:09	2.06566
2022-09-15	11:44:09	3.52154
2022-09-15	11:44:10	3.39614
2022-09-15	11:44:10	2.80408
2022-09-15	11:44:10	2.97604
2022-09-15	11:44:11	1.45996
2022-09-15	11:44:11	1.84093
2022-09-15	11:44:11	0.864084
2022-09-15	11:44:11	1.00617
2022-09-15	11:44:12	1.70164
2022-09-15	11:44:12	2.2878
2022-09-15	11:44:12	1.86134
2022-09-15	11:44:12	2.4276
2022-09-15	11:44:13	3.4677
2022-09-15	11:44:13	1.43309
2022-09-15	11:44:13	0.657366
2022-09-15	11:44:13	0.173448
2022-09-15	11:44:14	0.221081
2022-09-15	11:44:14	0.150089
2022-09-15	11:44:14	0.200115
2022-09-15	11:44:15	0.0754327
2022-09-15	11:44:15	-0.0496053
2022-09-15	11:44:15	0.102812
2022-09-15	11:44:15	0.0424557
2022-09-15	11:44:16	0.242099
2022-09-15	11:44:16	-0.00136106
2022-09-15	11:44:16	0.266883
2022-09-15	11:44:16	0.202048
2022-09-15	11:44:17	0.309122
2022-09-15	11:44:17	0.135535
2022-09-15	11:44:17	0.245458
2022-09-15	11:44:17	0.192735
2022-09-15	11:44:18	0.174568
2022-09-15	11:44:18	0.016247
2022-09-15	11:44:18	-0.316018
2022-09-15	11:44:19	-0.15444
2022-09-15	11:44:19	-0.127112
2022-09-15	11:44:19	0.426781
2022-09-15	11:44:19	1.44403
2022-09-15	11:44:20	1.11594
2022-09-15	11:44:20	2.32678
2022-09-15	11:44:20	1.42968
2022-09-15	11:44:20	0.210038
2022-09-15	11:44:21	0.0677992
2022-09-15	11:44:21	0.0479519
2022-09-15	11:44:21	-0.224618
2022-09-15	11:44:21	-0.256374
2022-09-15	11:44:22	-0.344109
2022-09-15	11:44:22	-0.541412
2022-09-15	11:44:22	-0.763447
2022-09-15	11:44:23	-0.782429
2022-09-15	11:44:23	-0.813473
2022-09-15	11:44:23	-0.751641
2022-09-15	11:44:23	-0.719732
2022-09-15	11:44:24	-0.64935
2022-09-15	11:44:24	-0.414898
2022-09-15	11:44:24	-0.391183
2022-09-15	11:44:24	-0.415305
2022-09-15	11:44:25	-0.26304
2022-09-15	11:44:25	-0.256526
2022-09-15	11:44:25	-0.119682
2022-09-15	11:44:25	-0.298562
2022-09-15	11:44:26	-0.147163
2022-09-15	11:44:26	-0.12589
2022-09-15	11:44:26	-0.0928114
2022-09-15	11:44:27	-0.100089
2022-09-15	11:44:27	-0.0540328
2022-09-15	11:44:27	0.0738043
2022-09-15	11:44:27	0.931412
2022-09-15	11:44:28	2.33243
2022-09-15	11:44:28	0.662455
2022-09-15	11:44:28	0.216807
2022-09-15	11:44:28	0.219453
2022-09-15	11:44:29	0.366323
2022-09-15	11:44:29	1.15192
2022-09-15	11:44:29	1.35207
2022-09-15	11:44:29	1.23279
2022-09-15	11:44:30	1.26597
2022-09-15	11:44:30	1.54714
2022-09-15	11:44:30	0.375484
2022-09-15	11:44:31	0.269886
2022-09-15	11:44:31	0.137621
2022-09-15	11:44:31	0.0789952
2022-09-15	11:44:31	0.153346
2022-09-15	11:44:32	0.00540736
2022-09-15	11:44:32	-0.0134731
2022-09-15	11:44:32	-0.0372898
2022-09-15	11:44:32	-0.0511829
2022-09-15	11:44:33	-0.0695035
2022-09-15	11:44:33	-0.0583076
2022-09-15	11:44:33	-0.0670608
2022-09-15	11:44:33	-0.0648216
2022-09-15	11:44:34	-0.055814
2022-09-15	11:44:34	-0.180038
2022-09-15	11:44:34	-0.295865
2022-09-15	11:44:35	-0.00919824
2022-09-15	11:44:35	0.264695
2022-09-15	11:44:35	0.66902
2022-09-15	11:44:35	0.622557
2022-09-15	11:44:36	2.62592
2022-09-15	11:44:36	2.60846
2022-09-15	11:44:36	1.77925
2022-09-15	11:44:36	1.16795
2022-09-15	11:44:37	0.442456
2022-09-15	11:44:37	0.0830664
2022-09-15	11:44:37	0.134161
2022-09-15	11:44:37	0.0205219
2022-09-15	11:44:38	0.0506491
2022-09-15	11:44:38	-0.023244
2022-09-15	11:44:38	-0.0737275
2022-09-15	11:44:39	-0.100394
2022-09-15	11:44:39	-0.118969
2022-09-15	11:44:39	-0.13047
2022-09-15	11:44:39	-0.136781
2022-09-15	11:44:40	-0.123804
2022-09-15	11:44:40	-0.12131
2022-09-15	11:44:40	-0.127977
2022-09-15	11:44:40	-0.121768
2022-09-15	11:44:41	-0.110776
2022-09-15	11:44:41	-0.0984094
2022-09-15	11:44:41	-0.0762211
2022-09-15	11:44:41	-0.0730149
2022-09-15	11:44:42	-0.0508267
2022-09-15	11:44:42	0.111769
2022-09-15	11:44:42	1.73426
2022-09-15	11:44:43	4.79619
2022-09-15	11:44:43	3.00144
2022-09-15	11:44:43	0.472023
2022-09-15	11:44:43	0.0858144
2022-09-15	11:44:44	-0.222481
2022-09-15	11:44:44	-0.410623
2022-09-15	11:44:44	-0.500852
2022-09-15	11:44:44	-0.614745
2022-09-15	11:44:45	-0.618715
2022-09-15	11:44:45	-0.499325
2022-09-15	11:44:45	-0.466603
2022-09-15	11:44:45	-0.436526
2022-09-15	11:44:46	-0.303091
2022-09-15	11:44:46	0.16098
2022-09-15	11:44:46	3.31019
2022-09-15	11:44:46	4.48775
2022-09-15	11:44:47	1.66108
2022-09-15	11:44:47	0.467392
2022-09-15	11:44:47	0.374059
2022-09-15	11:44:48	0.353906
2022-09-15	11:44:48	0.419046
2022-09-15	11:44:48	0.584593
2022-09-15	11:44:48	0.629326
2022-09-15	11:44:49	0.856501
2022-09-15	11:44:49	1.09813
2022-09-15	11:44:49	1.25874
2022-09-15	11:44:49	0.834568
2022-09-15	11:44:50	1.07788
2022-09-15	11:44:50	0.745255
2022-09-15	11:44:50	1.24281
2022-09-15	11:44:50	1.23508
2022-09-15	11:44:51	2.38118
2022-09-15	11:44:51	2.92663
2022-09-15	11:44:51	2.61095
2022-09-15	11:44:52	3.2764
2022-09-15	11:44:52	5.20708
2022-09-15	11:44:52	5.43762
2022-09-15	11:44:52	7.66372
2022-09-15	11:44:53	4.63635
2022-09-15	11:44:53	3.2452
2022-09-15	11:44:53	1.25472
2022-09-15	11:44:53	3.99894
2022-09-15	11:44:54	1.17335
2022-09-15	11:44:54	0.360165
2022-09-15	11:44:54	-0.283804
2022-09-15	11:44:54	-0.547875
2022-09-15	11:44:55	-0.967824
2022-09-15	11:44:55	-0.967875
2022-09-15	11:44:55	-0.808638
2022-09-15	11:44:56	-1.0352
2022-09-15	11:44:56	-1.01724
2022-09-15	11:44:56	-0.697238
2022-09-15	11:44:56	-0.693829
2022-09-15	11:44:57	-0.767416
2022-09-15	11:44:57	-0.223804
2022-09-15	11:44:57	0.0030664
2022-09-15	11:44:57	0.329937
2022-09-15	11:44:58	1.27095
2022-09-15	11:44:58	1.31151
2022-09-15	11:44:58	0.162201
2022-09-15	11:44:58	-0.0780022
2022-09-15	11:44:59	-0.219325
2022-09-15	11:44:59	-0.321055
2022-09-15	11:44:59	-0.186094
2022-09-15	11:45:00	-0.293117
2022-09-15	11:45:00	-0.1579
2022-09-15	11:45:00	-0.25958
2022-09-15	11:45:00	-0.245738
