# Supplementary material for: Comparing efficacy in reducing pulling and welfare impacts of four types of leash walking equipment
Source: PeerJ journal article supplement (doi:10.7717/peerj.18131), 2024-10-24
Supplement: Shelter_2_Tension_files.zip [file Klutz_star_202291511622 copy.xlsx]

## Sheet: Averaged Newtons
Date	Time	Averaged Newtons	Impulse	Total steps
2022-09-15	11:06:30	1.77356	1.77356	0		Impulse	1357.54
2022-09-15	11:06:31	1.71567	3.48923	0		Total Steps	36
2022-09-15	11:06:32	2.36151	5.85074	0		# > 5 sec	1
2022-09-15	11:06:33	3.11289	8.96363	0
2022-09-15	11:06:34	1.89903	10.8627	0
2022-09-15	11:06:35	1.48573	12.3484	0
2022-09-15	11:06:36	1.25401	13.6024	0
2022-09-15	11:06:37	0.115677	13.7181	0
2022-09-15	11:06:38	-0.903446	13.7181	0
2022-09-15	11:06:39	-1.55443	13.7181	0
2022-09-15	11:06:40	-0.526785	13.7181	0
2022-09-15	11:06:41	1.68171	15.3998	0
2022-09-15	11:06:42	21.5082	36.908	1
2022-09-15	11:06:43	-5.48102	36.908	1
2022-09-15	11:06:44	-20.6978	36.908	1
2022-09-15	11:06:45	-8.77976	36.908	1
2022-09-15	11:06:46	13.7101	50.6181	2
2022-09-15	11:06:47	3.4928	54.1109	2
2022-09-15	11:06:48	0.0823065	54.1932	2
2022-09-15	11:06:49	0.424617	54.6178	2
2022-09-15	11:06:50	11.1295	65.7473	2
2022-09-15	11:06:51	27.0822	92.8295	3
2022-09-15	11:06:52	1.95721	94.7867	3
2022-09-15	11:06:53	0.898978	95.6857	3
2022-09-15	11:06:54	1.10034	96.786	3
2022-09-15	11:06:55	0.40315	97.1891	3
2022-09-15	11:06:56	33.3368	130.526	4
2022-09-15	11:06:57	7.08622	137.612	4
2022-09-15	11:06:58	-1.32467	137.612	4
2022-09-15	11:06:59	-2.6131	137.612	4
2022-09-15	11:07:00	-2.54962	137.612	4
2022-09-15	11:07:01	-1.11448	137.612	4
2022-09-15	11:07:02	-0.996541	137.612	4
2022-09-15	11:07:03	-2.1999	137.612	4
2022-09-15	11:07:04	-0.171815	137.612	4
2022-09-15	11:07:05	2.68562	140.298	4
2022-09-15	11:07:06	9.42006	149.718	4
2022-09-15	11:07:07	9.8166	159.534	4
2022-09-15	11:07:08	9.67658	169.211	4
2022-09-15	11:07:09	2.59795	171.809	4
2022-09-15	11:07:10	-2.12293	171.809	4
2022-09-15	11:07:11	-3.88063	171.809	4
2022-09-15	11:07:12	4.4276	176.237	4
2022-09-15	11:07:13	8.81739	185.054	4
2022-09-15	11:07:14	-0.539687	185.054	4
2022-09-15	11:07:15	-3.43377	185.054	4
2022-09-15	11:07:16	3.45477	188.509	4
2022-09-15	11:07:17	4.04305	192.552	4
2022-09-15	11:07:18	2.18198	194.734	4
2022-09-15	11:07:19	-1.2142	194.734	4
2022-09-15	11:07:20	-2.48488	194.734	4
2022-09-15	11:07:21	-4.53553	194.734	4
2022-09-15	11:07:22	4.36693	199.101	4
2022-09-15	11:07:23	9.16221	208.263	4
2022-09-15	11:07:24	1.78624	210.049	4
2022-09-15	11:07:25	-1.02729	210.049	4
2022-09-15	11:07:26	5.2671	215.316	4
2022-09-15	11:07:27	10.6434	225.96	4
2022-09-15	11:07:28	17.9673	243.927	5
2022-09-15	11:07:29	9.7021	253.629	5
2022-09-15	11:07:30	19.0051	272.634	6
2022-09-15	11:07:31	14.4432	287.077	7
2022-09-15	11:07:32	0.303679	287.381	7
2022-09-15	11:07:33	-0.80673	287.381	7
2022-09-15	11:07:34	5.81481	293.196	7
2022-09-15	11:07:35	3.82076	297.017	7
2022-09-15	11:07:36	1.09283	298.109	7
2022-09-15	11:07:37	1.18002	299.289	7
2022-09-15	11:07:38	0.63933	299.929	7
2022-09-15	11:07:39	1.63271	301.561	7
2022-09-15	11:07:40	2.54772	304.109	7
2022-09-15	11:07:41	2.79625	306.905	7
2022-09-15	11:07:42	3.04385	309.949	7
2022-09-15	11:07:43	3.73123	313.681	7
2022-09-15	11:07:44	2.67826	316.359	7
2022-09-15	11:07:45	1.38234	317.741	7
2022-09-15	11:07:46	-0.563889	317.741	7
2022-09-15	11:07:47	-1.82806	317.741	7
2022-09-15	11:07:48	-2.89327	317.741	7
2022-09-15	11:07:49	-3.80666	317.741	7
2022-09-15	11:07:50	-3.43134	317.741	7
2022-09-15	11:07:51	-2.01917	317.741	7
2022-09-15	11:07:52	3.99664	321.738	7
2022-09-15	11:07:53	7.10683	328.845	7
2022-09-15	11:07:54	3.08538	331.93	7
2022-09-15	11:07:55	0.594282	332.524	7
2022-09-15	11:07:56	0.712335	333.237	7
2022-09-15	11:07:57	-0.970339	333.237	7
2022-09-15	11:07:58	-2.41063	333.237	7
2022-09-15	11:07:59	-1.06472	333.237	7
2022-09-15	11:08:00	5.69867	338.935	7
2022-09-15	11:08:01	4.85765	343.793	7
2022-09-15	11:08:02	1.79388	345.587	7
2022-09-15	11:08:03	0.166516	345.753	7
2022-09-15	11:08:04	1.42591	347.179	7
2022-09-15	11:08:05	2.73485	349.914	7
2022-09-15	11:08:06	2.35251	352.267	7
2022-09-15	11:08:07	2.7925	355.059	7
2022-09-15	11:08:08	1.73423	356.793	7
2022-09-15	11:08:09	2.20735	359.001	7
2022-09-15	11:08:10	1.15976	360.16	7
2022-09-15	11:08:11	0.679285	360.84	7
2022-09-15	11:08:12	1.35065	362.19	7
2022-09-15	11:08:13	1.39773	363.588	7
2022-09-15	11:08:14	1.2199	364.808	7
2022-09-15	11:08:15	1.83525	366.643	7
2022-09-15	11:08:16	1.94102	368.584	7
2022-09-15	11:08:17	2.00939	370.594	7
2022-09-15	11:08:18	1.9707	372.564	7
2022-09-15	11:08:19	2.34776	374.912	7
2022-09-15	11:08:20	3.67089	378.583	7
2022-09-15	11:08:21	4.2705	382.853	7
2022-09-15	11:08:22	0.703771	383.557	7
2022-09-15	11:08:23	-0.320258	383.557	7
2022-09-15	11:08:24	1.08438	384.642	7
2022-09-15	11:08:25	1.78734	386.429	7
2022-09-15	11:08:26	1.28783	387.717	7
2022-09-15	11:08:27	1.55483	389.272	7
2022-09-15	11:08:28	1.46711	390.739	7
2022-09-15	11:08:29	1.51312	392.252	7
2022-09-15	11:08:30	2.69207	394.944	7
2022-09-15	11:08:31	19.4288	414.373	8
2022-09-15	11:08:32	15.1929	429.566	9
2022-09-15	11:08:33	2.18281	431.748	9
2022-09-15	11:08:34	1.34527	433.094	9
2022-09-15	11:08:35	11.6482	444.742	9
2022-09-15	11:08:36	17.8726	462.614	10
2022-09-15	11:08:37	13.5118	476.126	11
2022-09-15	11:08:38	5.48611	481.612	11
2022-09-15	11:08:39	1.2897	482.902	11
2022-09-15	11:08:40	1.75596	484.658	11
2022-09-15	11:08:41	1.66034	486.318	11
2022-09-15	11:08:42	11.7561	498.075	11
2022-09-15	11:08:43	16.9088	514.983	12
2022-09-15	11:08:44	12.6971	527.68	12
2022-09-15	11:08:45	14.641	542.321	13
2022-09-15	11:08:46	5.51152	547.833	13
2022-09-15	11:08:47	3.83066	551.664	13
2022-09-15	11:08:48	1.81231	553.476	13
2022-09-15	11:08:49	2.75568	556.232	13
2022-09-15	11:08:50	24.797	581.029	14
2022-09-15	11:08:51	29.2823	610.311	15
2022-09-15	11:08:52	4.33945	614.65	15
2022-09-15	11:08:53	2.57214	617.223	15
2022-09-15	11:08:54	1.89371	619.116	15
2022-09-15	11:08:55	3.20745	622.324	15
2022-09-15	11:08:56	5.51348	627.837	15
2022-09-15	11:08:57	4.88119	632.718	15
2022-09-15	11:08:58	4.98566	637.704	15
2022-09-15	11:08:59	2.96988	640.674	15
2022-09-15	11:09:00	2.15277	642.827	15
2022-09-15	11:09:01	2.01929	644.846	15
2022-09-15	11:09:02	2.12755	646.974	15
2022-09-15	11:09:03	2.18986	649.163	15
2022-09-15	11:09:04	2.03657	651.2	15
2022-09-15	11:09:05	1.87068	653.071	15
2022-09-15	11:09:06	1.52065	654.591	15
2022-09-15	11:09:07	1.38839	655.98	15
2022-09-15	11:09:08	1.40522	657.385	15
2022-09-15	11:09:09	1.3829	658.768	15
2022-09-15	11:09:10	5.16404	663.932	15
2022-09-15	11:09:11	8.66562	672.598	15
2022-09-15	11:09:12	4.5588	677.156	15
2022-09-15	11:09:13	9.45309	686.609	15
2022-09-15	11:09:14	2.6516	689.261	15
2022-09-15	11:09:15	16.3542	705.615	16
2022-09-15	11:09:16	22.0191	727.634	17
2022-09-15	11:09:17	12.8857	740.52	17
2022-09-15	11:09:18	6.03025	746.55	17
2022-09-15	11:09:19	13.9424	760.493	18
2022-09-15	11:09:20	-2.31289	760.493	18
2022-09-15	11:09:21	-3.47571	760.493	18
2022-09-15	11:09:22	-5.91531	760.493	18
2022-09-15	11:09:23	-10.1978	760.493	18
2022-09-15	11:09:24	-11.8458	760.493	18
2022-09-15	11:09:25	-10.9242	760.493	18
2022-09-15	11:09:26	-10.2579	760.493	18
2022-09-15	11:09:27	-10.5434	760.493	18
2022-09-15	11:09:28	-10.4725	760.493	18
2022-09-15	11:09:29	-10.4881	760.493	18
2022-09-15	11:09:30	-12.1687	760.493	18
2022-09-15	11:09:31	-12.1352	760.493	18
2022-09-15	11:09:32	-11.883	760.493	18
2022-09-15	11:09:33	-10.1108	760.493	18
2022-09-15	11:09:34	-8.87314	760.493	18
2022-09-15	11:09:35	-11.2976	760.493	18
2022-09-15	11:09:36	-11.7772	760.493	18
2022-09-15	11:09:37	-12.0712	760.493	18
2022-09-15	11:09:38	-12.0947	760.493	18
2022-09-15	11:09:39	-12.0709	760.493	18
2022-09-15	11:09:40	-12.7705	760.493	18
2022-09-15	11:09:41	-13.6714	760.493	18
2022-09-15	11:09:42	-13.3069	760.493	18
2022-09-15	11:09:43	-12.7512	760.493	18
2022-09-15	11:09:44	-12.5508	760.493	18
2022-09-15	11:09:45	-10.6623	760.493	18
2022-09-15	11:09:46	-6.30393	760.493	18
2022-09-15	11:09:47	-11.8534	760.493	18
2022-09-15	11:09:48	-10.8807	760.493	18
2022-09-15	11:09:49	-7.44123	760.493	18
2022-09-15	11:09:50	-6.59173	760.493	18
2022-09-15	11:09:51	-6.57982	760.493	18
2022-09-15	11:09:52	4.53082	765.023	18
2022-09-15	11:09:53	-1.89637	765.023	18
2022-09-15	11:09:54	-12.111	765.023	18
2022-09-15	11:09:55	-12.9226	765.023	18
2022-09-15	11:09:56	-13.9235	765.023	18
2022-09-15	11:09:57	-15.1359	765.023	18
2022-09-15	11:09:58	-11.2924	765.023	18
2022-09-15	11:09:59	-2.93206	765.023	18
2022-09-15	11:10:00	16.4826	781.506	19
2022-09-15	11:10:01	24.5772	806.083	20
2022-09-15	11:10:02	15.9362	822.02	21
2022-09-15	11:10:03	3.55216	825.572	21
2022-09-15	11:10:04	4.19206	829.764	21
2022-09-15	11:10:05	5.31288	835.077	21
2022-09-15	11:10:06	3.1396	838.216	21
2022-09-15	11:10:07	2.35975	840.576	21
2022-09-15	11:10:08	3.67735	844.253	21
2022-09-15	11:10:09	3.17192	847.425	21
2022-09-15	11:10:10	-0.377599	847.425	21
2022-09-15	11:10:11	0.992924	848.418	21
2022-09-15	11:10:12	-0.500845	848.418	21
2022-09-15	11:10:13	0.751327	849.17	21
2022-09-15	11:10:14	0.212242	849.382	21
2022-09-15	11:10:15	-0.842836	849.382	21
2022-09-15	11:10:16	-0.715276	849.382	21
2022-09-15	11:10:17	3.89302	853.275	21
2022-09-15	11:10:18	-1.16327	853.275	21
2022-09-15	11:10:19	0.985622	854.26	21
2022-09-15	11:10:20	6.16902	860.429	21
2022-09-15	11:10:21	13.2293	873.659	22
2022-09-15	11:10:22	12.6511	886.31	22
2022-09-15	11:10:23	16.2839	902.594	23
2022-09-15	11:10:24	11.6534	914.247	23
2022-09-15	11:10:25	4.82305	919.07	23
2022-09-15	11:10:26	6.75922	925.829	23
2022-09-15	11:10:27	3.007	928.836	23
2022-09-15	11:10:28	1.25353	930.09	23
2022-09-15	11:10:29	-0.234237	930.09	23
2022-09-15	11:10:30	-1.0142	930.09	23
2022-09-15	11:10:31	-1.56819	930.09	23
2022-09-15	11:10:32	-1.20877	930.09	23
2022-09-15	11:10:33	-0.181266	930.09	23
2022-09-15	11:10:34	10.6649	940.755	23
2022-09-15	11:10:35	5.75017	946.505	23
2022-09-15	11:10:36	1.05376	947.559	23
2022-09-15	11:10:37	1.06763	948.626	23
2022-09-15	11:10:38	2.36349	950.99	23
2022-09-15	11:10:39	0.333729	951.324	23
2022-09-15	11:10:40	0.0144883	951.338	23
2022-09-15	11:10:41	-0.139312	951.338	23
2022-09-15	11:10:42	-0.297565	951.338	23
2022-09-15	11:10:43	-0.294338	951.338	23
2022-09-15	11:10:44	-0.866323	951.338	23
2022-09-15	11:10:45	-0.324181	951.338	23
2022-09-15	11:10:46	0.121902	951.46	23
2022-09-15	11:10:47	-0.407524	951.46	23
2022-09-15	11:10:48	1.61624	953.076	23
2022-09-15	11:10:49	7.42943	960.506	23
2022-09-15	11:10:50	3.43337	963.939	23
2022-09-15	11:10:51	-0.447988	963.939	23
2022-09-15	11:10:52	-1.34945	963.939	23
2022-09-15	11:10:53	-1.25698	963.939	23
2022-09-15	11:10:54	-1.11895	963.939	23
2022-09-15	11:10:55	-0.936724	963.939	23
2022-09-15	11:10:56	-0.772321	963.939	23
2022-09-15	11:10:57	-0.135011	963.939	23
2022-09-15	11:10:58	0.0108668	963.95	23
2022-09-15	11:10:59	11.1119	975.062	23
2022-09-15	11:11:00	13.3165	988.378	24
2022-09-15	11:11:01	11.4104	999.789	24
2022-09-15	11:11:02	2.56484	1002.35	24
2022-09-15	11:11:03	1.00707	1003.36	24
2022-09-15	11:11:04	-1.93129	1003.36	24
2022-09-15	11:11:05	-2.424	1003.36	24
2022-09-15	11:11:06	-1.57571	1003.36	24
2022-09-15	11:11:07	0.431862	1003.79	24
2022-09-15	11:11:08	2.71159	1006.5	24
2022-09-15	11:11:09	0.36693	1006.87	24
2022-09-15	11:11:10	5.42143	1012.29	24
2022-09-15	11:11:11	20.6937	1032.99	25
2022-09-15	11:11:12	2.51329	1035.5	25
2022-09-15	11:11:13	-0.607825	1035.5	25
2022-09-15	11:11:14	-0.763777	1035.5	25
2022-09-15	11:11:15	-1.65613	1035.5	25
2022-09-15	11:11:16	-0.794656	1035.5	25
2022-09-15	11:11:17	-0.664851	1035.5	25
2022-09-15	11:11:18	-0.423483	1035.5	25
2022-09-15	11:11:19	28.9664	1064.47	26
2022-09-15	11:11:20	30.3045	1094.77	27
2022-09-15	11:11:21	18.6895	1113.46	28
2022-09-15	11:11:22	24.2352	1137.69	29
2022-09-15	11:11:23	6.38979	1144.08	29
2022-09-15	11:11:24	17.0717	1161.16	30
2022-09-15	11:11:25	31.4913	1192.65	31
2022-09-15	11:11:26	14.639	1207.29	32
2022-09-15	11:11:27	42.7546	1250.04	33
2022-09-15	11:11:28	60.9306	1310.97	34
2022-09-15	11:11:29	26.9873	1337.96	35
2022-09-15	11:11:30	19.5841	1357.54	36

## Sheet: Klutz_star_202291511622 (4)
Date	Time	Lbs	Newtons	Averaged Newtons	Total force x time		total steps > 13.345	**GoPro Fitting: 1055
2022-09-15	11:06:30	0.371158	1.65099	1.77356	1.65099	FALSE	0
2022-09-15	11:06:30	0.388104	1.72636	1.77356	1.72636	FALSE	0
2022-09-15	11:06:30	0.399606	1.77753	1.77356	3.42851	FALSE	0
2022-09-15	11:06:30	0.435992	1.93938	1.77356	3.66574	FALSE	0
2022-09-15	11:06:31	0.391819	1.74289	1.71567	5.1714	FALSE	0
2022-09-15	11:06:31	0.376756	1.67589	1.71567	5.34163	FALSE	0
2022-09-15	11:06:31	0.384797	1.71165	1.71567	6.88306	FALSE	0
2022-09-15	11:06:31	0.389428	1.73225	1.71567	7.07388	FALSE	0
2022-09-15	11:06:32	0.394466	1.75466	2.36151	8.63772	FALSE	0
2022-09-15	11:06:32	0.40958	1.82189	2.36151	8.89578	FALSE	0
2022-09-15	11:06:32	0.545611	2.42699	2.36151	11.0647	FALSE	0
2022-09-15	11:06:32	0.773906	3.44249	2.36151	12.3383	FALSE	0
2022-09-15	11:06:33	0.850649	3.78386	3.11289	14.8486	FALSE	0
2022-09-15	11:06:33	0.699656	3.11221	3.11289	15.4505	FALSE	0
2022-09-15	11:06:33	0.549122	2.4426	3.11289	17.2912	FALSE	0
2022-09-15	11:06:34	0.411972	1.83253	1.89903	17.283	FALSE	0
2022-09-15	11:06:34	0.431005	1.9172	1.89903	19.2084	FALSE	0
2022-09-15	11:06:34	0.43874	1.9516	1.89903	19.2346	FALSE	0
2022-09-15	11:06:34	0.425967	1.89479	1.89903	21.1032	FALSE	0
2022-09-15	11:06:35	0.351921	1.56541	1.48573	20.8	FALSE	0
2022-09-15	11:06:35	0.209173	0.930443	1.48573	22.0336	FALSE	0
2022-09-15	11:06:35	0.376959	1.67679	1.48573	22.4768	FALSE	0
2022-09-15	11:06:35	0.397977	1.77028	1.48573	23.8039	FALSE	0
2022-09-15	11:06:36	0.194924	0.867061	1.25401	23.3439	FALSE	0
2022-09-15	11:06:36	0.483219	2.14945	1.25401	25.9533	FALSE	0
2022-09-15	11:06:36	0.167596	0.745501	1.25401	24.0894	FALSE	0
2022-09-15	11:06:37	-0.0798343	-0.355119	0.115677	25.9533	FALSE	0
2022-09-15	11:06:37	0.309377	1.37617	0.115677	25.4655	FALSE	0
2022-09-15	11:06:37	0.0327356	0.145614	0.115677	26.0989	FALSE	0
2022-09-15	11:06:37	-0.158257	-0.703959	0.115677	25.4655	FALSE	0
2022-09-15	11:06:38	-0.0458903	-0.204129	-0.903446	26.0989	FALSE	0
2022-09-15	11:06:38	-0.0777478	-0.345838	-0.903446	25.4655	FALSE	0
2022-09-15	11:06:38	-0.190012	-0.845211	-0.903446	26.0989	FALSE	0
2022-09-15	11:06:38	-0.498765	-2.21861	-0.903446	25.4655	FALSE	0
2022-09-15	11:06:39	-0.508536	-2.26207	-1.55443	26.0989	FALSE	0
2022-09-15	11:06:39	-0.312811	-1.39145	-1.55443	25.4655	FALSE	0
2022-09-15	11:06:39	-0.298969	-1.32987	-1.55443	26.0989	FALSE	0
2022-09-15	11:06:39	-0.277493	-1.23434	-1.55443	25.4655	FALSE	0
2022-09-15	11:06:40	-0.194847	-0.866718	-0.526785	26.0989	FALSE	0
2022-09-15	11:06:40	-0.106196	-0.472381	-0.526785	25.4655	FALSE	0
2022-09-15	11:06:40	-0.0542364	-0.241254	-0.526785	26.0989	FALSE	0
2022-09-15	11:06:41	0.012074	0.0537076	1.68171	25.5193	FALSE	0
2022-09-15	11:06:41	0.238384	1.06038	1.68171	27.1593	FALSE	0
2022-09-15	11:06:41	0.212685	0.946065	1.68171	26.4653	FALSE	0
2022-09-15	11:06:41	1.04912	4.6667	1.68171	31.826	FALSE	0
2022-09-15	11:06:42	2.4194	10.762	21.5082	37.2273	FALSE	0
2022-09-15	11:06:42	3.57055	15.8825	21.5082	47.7085	1	1
2022-09-15	11:06:42	6.22886	27.7072	21.5082	64.9345	1	2
2022-09-15	11:06:42	7.1222	31.681	21.5082	79.3895	1	3
2022-09-15	11:06:43	3.25116	14.4618	-5.48102	79.3963	1	4
2022-09-15	11:06:43	0.436196	1.94029	-5.48102	81.3298	FALSE	4
2022-09-15	11:06:43	-4.10859	-18.2758	-5.48102	79.3963	FALSE	4
2022-09-15	11:06:43	-4.50752	-20.0504	-5.48102	81.3298	FALSE	4
2022-09-15	11:06:44	-4.66955	-20.7711	-20.6978	79.3963	FALSE	4
2022-09-15	11:06:44	-4.7149	-20.9728	-20.6978	81.3298	FALSE	4
2022-09-15	11:06:44	-4.57474	-20.3494	-20.6978	79.3963	FALSE	4
2022-09-15	11:06:45	-4.46675	-19.869	-8.77976	81.3298	FALSE	4
2022-09-15	11:06:45	-3.98737	-17.7366	-8.77976	79.3963	FALSE	4
2022-09-15	11:06:45	0.438079	1.94866	-8.77976	83.2785	FALSE	4
2022-09-15	11:06:45	0.120929	0.537916	-8.77976	79.9342	FALSE	4
2022-09-15	11:06:46	3.04759	13.5563	13.7101	96.8348	1	5
2022-09-15	11:06:46	2.46444	10.9623	13.7101	90.8966	FALSE	5
2022-09-15	11:06:46	3.1848	14.1666	13.7101	111.001	1	6
2022-09-15	11:06:46	3.63187	16.1553	13.7101	107.052	1	7
2022-09-15	11:06:47	1.46439	6.5139	3.4928	117.515	FALSE	7
2022-09-15	11:06:47	0.664389	2.95534	3.4928	110.007	FALSE	7
2022-09-15	11:06:47	0.337468	1.50113	3.4928	119.016	FALSE	7
2022-09-15	11:06:47	0.674618	3.00084	3.4928	113.008	FALSE	7
2022-09-15	11:06:48	0.324186	1.44204	0.0823065	120.458	FALSE	7
2022-09-15	11:06:48	-0.13902	-0.618389	0.0823065	113.008	FALSE	7
2022-09-15	11:06:48	-0.129656	-0.576736	0.0823065	120.458	FALSE	7
2022-09-15	11:06:49	-0.126297	-0.561794	0.424617	113.008	FALSE	7
2022-09-15	11:06:49	0.203779	0.90645	0.424617	121.365	FALSE	7
2022-09-15	11:06:49	0.171565	0.763155	0.424617	113.771	FALSE	7
2022-09-15	11:06:49	0.132786	0.590659	0.424617	121.956	FALSE	7
2022-09-15	11:06:50	0.79701	3.54526	11.1295	117.316	FALSE	7
2022-09-15	11:06:50	1.62887	7.24554	11.1295	129.201	FALSE	7
2022-09-15	11:06:50	2.89991	12.8994	11.1295	130.216	FALSE	7
2022-09-15	11:06:50	4.6823	20.8278	11.1295	150.029	1	8
2022-09-15	11:06:51	6.18678	27.52	27.0822	157.736	1	9
2022-09-15	11:06:51	9.7307	43.2841	27.0822	193.313	1	10
2022-09-15	11:06:51	2.34754	10.4423	27.0822	168.178	FALSE	10
2022-09-15	11:06:52	1.01014	4.4933	1.95721	197.806	FALSE	10
2022-09-15	11:06:52	0.40612	1.8065	1.95721	169.985	FALSE	10
2022-09-15	11:06:52	0.0297839	0.132485	1.95721	197.939	FALSE	10
2022-09-15	11:06:52	0.313957	1.39654	1.95721	171.381	FALSE	10
2022-09-15	11:06:53	0.253448	1.12739	0.898978	199.066	FALSE	10
2022-09-15	11:06:53	0.118944	0.529087	0.898978	171.91	FALSE	10
2022-09-15	11:06:53	0.30785	1.36938	0.898978	200.436	FALSE	10
2022-09-15	11:06:53	0.128155	0.570059	0.898978	172.48	FALSE	10
2022-09-15	11:06:54	0.303321	1.34923	1.10034	201.785	FALSE	10
2022-09-15	11:06:54	0.194517	0.865251	1.10034	173.346	FALSE	10
2022-09-15	11:06:54	0.100166	0.445558	1.10034	202.23	FALSE	10
2022-09-15	11:06:54	0.391463	1.74131	1.10034	175.087	FALSE	10
2022-09-15	11:06:55	0.046018	0.204697	0.40315	202.435	FALSE	10
2022-09-15	11:06:55	0.138588	0.616467	0.40315	175.703	FALSE	10
2022-09-15	11:06:55	0.0872903	0.388285	0.40315	202.823	FALSE	10
2022-09-15	11:06:56	0.16154	0.718562	33.3368	176.422	FALSE	10
2022-09-15	11:06:56	1.93788	8.62008	33.3368	211.443	FALSE	10
2022-09-15	11:06:56	12.3902	55.1141	33.3368	231.536	1	11
2022-09-15	11:06:56	15.4882	68.8946	33.3368	280.338	1	12
2022-09-15	11:06:57	3.84225	17.0911	7.08622	248.627	1	13
2022-09-15	11:06:57	2.19457	9.76189	7.08622	290.1	FALSE	13
2022-09-15	11:06:57	0.211667	0.941537	7.08622	249.569	FALSE	13
2022-09-15	11:06:57	0.123728	0.550367	7.08622	290.65	FALSE	13
2022-09-15	11:06:58	0.0262725	0.116865	-1.32467	249.686	FALSE	13
2022-09-15	11:06:58	-0.368333	-1.63842	-1.32467	290.65	FALSE	13
2022-09-15	11:06:58	-0.453727	-2.01827	-1.32467	249.686	FALSE	13
2022-09-15	11:06:58	-0.395407	-1.75885	-1.32467	290.65	FALSE	13
2022-09-15	11:06:59	-0.451183	-2.00695	-2.6131	249.686	FALSE	13
2022-09-15	11:06:59	-0.710724	-3.16144	-2.6131	290.65	FALSE	13
2022-09-15	11:06:59	-0.600445	-2.6709	-2.6131	249.686	FALSE	13
2022-09-15	11:07:00	-0.698154	-3.10553	-2.54962	290.65	FALSE	13
2022-09-15	11:07:00	-0.614847	-2.73496	-2.54962	249.686	FALSE	13
2022-09-15	11:07:00	-0.481412	-2.14142	-2.54962	290.65	FALSE	13
2022-09-15	11:07:00	-0.498307	-2.21657	-2.54962	249.686	FALSE	13
2022-09-15	11:07:01	-0.343702	-1.52886	-1.11448	290.65	FALSE	13
2022-09-15	11:07:01	-0.349147	-1.55308	-1.11448	249.686	FALSE	13
2022-09-15	11:07:01	-0.19215	-0.854722	-1.11448	290.65	FALSE	13
2022-09-15	11:07:01	-0.117188	-0.521276	-1.11448	249.686	FALSE	13
2022-09-15	11:07:02	-0.173269	-0.770735	-0.996541	290.65	FALSE	13
2022-09-15	11:07:02	-0.155458	-0.691508	-0.996541	249.686	FALSE	13
2022-09-15	11:07:02	-0.239783	-1.0666	-0.996541	290.65	FALSE	13
2022-09-15	11:07:02	-0.32762	-1.45732	-0.996541	249.686	FALSE	13
2022-09-15	11:07:03	-0.513066	-2.28222	-2.1999	290.65	FALSE	13
2022-09-15	11:07:03	-0.49902	-2.21974	-2.1999	249.686	FALSE	13
2022-09-15	11:07:03	-0.47159	-2.09773	-2.1999	290.65	FALSE	13
2022-09-15	11:07:04	-0.320496	-1.42563	-0.171815	249.686	FALSE	13
2022-09-15	11:07:04	0.125255	0.557159	-0.171815	291.207	FALSE	13
2022-09-15	11:07:04	0.0742623	0.330334	-0.171815	250.016	FALSE	13
2022-09-15	11:07:04	-0.0335239	-0.149121	-0.171815	291.207	FALSE	13
2022-09-15	11:07:05	0.108919	0.484493	2.68562	250.5	FALSE	13
2022-09-15	11:07:05	0.747494	3.325	2.68562	294.532	FALSE	13
2022-09-15	11:07:05	0.571209	2.54085	2.68562	253.041	FALSE	13
2022-09-15	11:07:05	0.987392	4.39212	2.68562	298.925	FALSE	13
2022-09-15	11:07:06	1.9451	8.65219	9.42006	261.693	FALSE	13
2022-09-15	11:07:06	2.12495	9.4522	9.42006	308.377	FALSE	13
2022-09-15	11:07:06	2.28312	10.1558	9.42006	271.849	FALSE	13
2022-09-15	11:07:07	4.44703	19.7813	9.8166	328.158	1	14
2022-09-15	11:07:07	0.765	3.40287	9.8166	275.252	FALSE	14
2022-09-15	11:07:07	2.30256	10.2422	9.8166	338.4	FALSE	14
2022-09-15	11:07:07	1.31289	5.84	9.8166	281.092	FALSE	14
2022-09-15	11:07:08	1.7309	7.69939	9.67658	346.1	FALSE	14
2022-09-15	11:07:08	2.48052	11.0338	9.67658	292.126	FALSE	14
2022-09-15	11:07:08	2.67487	11.8984	9.67658	357.998	FALSE	14
2022-09-15	11:07:08	1.81528	8.07473	9.67658	300.201	FALSE	14
2022-09-15	11:07:09	1.30439	5.80219	2.59795	363.8	FALSE	14
2022-09-15	11:07:09	0.639606	2.8451	2.59795	303.046	FALSE	14
2022-09-15	11:07:09	0.197621	0.879058	2.59795	364.679	FALSE	14
2022-09-15	11:07:09	0.194568	0.865477	2.59795	303.911	FALSE	14
2022-09-15	11:07:10	-0.210165	-0.934856	-2.12293	364.679	FALSE	14
2022-09-15	11:07:10	-0.519987	-2.31301	-2.12293	303.911	FALSE	14
2022-09-15	11:07:10	-0.701615	-3.12092	-2.12293	364.679	FALSE	14
2022-09-15	11:07:11	-0.757747	-3.37061	-3.88063	303.911	FALSE	14
2022-09-15	11:07:11	-0.853523	-3.79664	-3.88063	364.679	FALSE	14
2022-09-15	11:07:11	-1.00177	-4.45607	-3.88063	303.911	FALSE	14
2022-09-15	11:07:11	-0.876577	-3.89919	-3.88063	364.679	FALSE	14
2022-09-15	11:07:12	-1.06197	-4.72385	4.4276	303.911	FALSE	14
2022-09-15	11:07:12	-0.0954068	-0.424389	4.4276	364.679	FALSE	14
2022-09-15	11:07:12	1.64286	7.30777	4.4276	311.219	FALSE	14
2022-09-15	11:07:12	3.49599	15.5509	4.4276	380.23	1	15
2022-09-15	11:07:13	3.55823	15.8277	8.81739	327.047	1	16
2022-09-15	11:07:13	2.21401	9.84836	8.81739	390.078	FALSE	16
2022-09-15	11:07:13	1.11553	4.9621	8.81739	332.009	FALSE	16
2022-09-15	11:07:13	1.04118	4.63138	8.81739	394.71	FALSE	16
2022-09-15	11:07:14	0.10215	0.454384	-0.539687	332.463	FALSE	16
2022-09-15	11:07:14	-0.117493	-0.522632	-0.539687	394.71	FALSE	16
2022-09-15	11:07:14	-0.348638	-1.55081	-0.539687	332.463	FALSE	16
2022-09-15	11:07:15	-0.789554	-3.51209	-3.43377	394.71	FALSE	16
2022-09-15	11:07:15	-0.892964	-3.97208	-3.43377	332.463	FALSE	16
2022-09-15	11:07:15	-0.850266	-3.78215	-3.43377	394.71	FALSE	16
2022-09-15	11:07:15	-0.555	-2.46875	-3.43377	332.463	FALSE	16
2022-09-15	11:07:16	0.151667	0.674645	3.45477	395.385	FALSE	16
2022-09-15	11:07:16	0.512176	2.27826	3.45477	334.741	FALSE	16
2022-09-15	11:07:16	0.973499	4.33032	3.45477	399.715	FALSE	16
2022-09-15	11:07:16	1.46933	6.53587	3.45477	341.277	FALSE	16
2022-09-15	11:07:17	1.36444	6.0693	4.04305	405.784	FALSE	16
2022-09-15	11:07:17	0.872735	3.8821	4.04305	345.159	FALSE	16
2022-09-15	11:07:17	0.888715	3.95318	4.04305	409.737	FALSE	16
2022-09-15	11:07:17	0.509784	2.26762	4.04305	347.427	FALSE	16
2022-09-15	11:07:18	0.530547	2.35998	2.18198	412.097	FALSE	16
2022-09-15	11:07:18	0.49299	2.19292	2.18198	349.62	FALSE	16
2022-09-15	11:07:18	0.448053	1.99303	2.18198	414.09	FALSE	16
2022-09-15	11:07:19	0.360827	1.60503	-1.2142	351.225	FALSE	16
2022-09-15	11:07:19	0.389886	1.73429	-1.2142	415.825	FALSE	16
2022-09-15	11:07:19	-0.859986	-3.82539	-1.2142	351.225	FALSE	16
2022-09-15	11:07:19	-0.982582	-4.37072	-1.2142	415.825	FALSE	16
2022-09-15	11:07:20	0.102608	0.456421	-2.48488	351.681	FALSE	16
2022-09-15	11:07:20	-0.476272	-2.11855	-2.48488	415.825	FALSE	16
2022-09-15	11:07:20	-0.838256	-3.72873	-2.48488	351.681	FALSE	16
2022-09-15	11:07:20	-1.02258	-4.54864	-2.48488	415.825	FALSE	16
2022-09-15	11:07:21	-0.891386	-3.96506	-4.53553	351.681	FALSE	16
2022-09-15	11:07:21	-1.08401	-4.82189	-4.53553	415.825	FALSE	16
2022-09-15	11:07:21	-1.0835	-4.81962	-4.53553	351.681	FALSE	16
2022-09-15	11:07:22	-0.595101	-2.64713	4.36693	415.825	FALSE	16
2022-09-15	11:07:22	-0.204872	-0.911312	4.36693	351.681	FALSE	16
2022-09-15	11:07:22	1.36927	6.09079	4.36693	421.915	FALSE	16
2022-09-15	11:07:22	3.35762	14.9354	4.36693	366.617	1	17
2022-09-15	11:07:23	2.20566	9.81122	9.16221	431.727	FALSE	17
2022-09-15	11:07:23	3.3765	15.0193	9.16221	381.636	1	18
2022-09-15	11:07:23	1.06139	4.72127	9.16221	436.448	FALSE	18
2022-09-15	11:07:23	1.59548	7.09701	9.16221	388.733	FALSE	18
2022-09-15	11:07:24	1.16602	5.18669	1.78624	441.635	FALSE	18
2022-09-15	11:07:24	0.301438	1.34086	1.78624	390.074	FALSE	18
2022-09-15	11:07:24	0.135942	0.604697	1.78624	442.239	FALSE	18
2022-09-15	11:07:24	0.00286283	0.0127344	1.78624	390.087	FALSE	18
2022-09-15	11:07:25	-0.14472	-0.643744	-1.02729	442.239	FALSE	18
2022-09-15	11:07:25	-0.287926	-1.28075	-1.02729	390.087	FALSE	18
2022-09-15	11:07:25	-0.26019	-1.15738	-1.02729	442.239	FALSE	18
2022-09-15	11:07:26	-0.0587147	-0.261175	5.2671	390.087	FALSE	18
2022-09-15	11:07:26	0.247596	1.10136	5.2671	443.341	FALSE	18
2022-09-15	11:07:26	0.985102	4.38193	5.2671	394.469	FALSE	18
2022-09-15	11:07:26	3.5624	15.8463	5.2671	459.187	1	19
2022-09-15	11:07:27	3.45467	15.3671	10.6434	409.836	1	20
2022-09-15	11:07:27	2.18703	9.72835	10.6434	468.915	FALSE	20
2022-09-15	11:07:27	1.8305	8.14243	10.6434	417.978	FALSE	20
2022-09-15	11:07:27	2.09874	9.33562	10.6434	478.251	FALSE	20
2022-09-15	11:07:28	2.62082	11.6579	17.9673	429.636	FALSE	20
2022-09-15	11:07:28	4.00994	17.837	17.9673	496.088	1	21
2022-09-15	11:07:28	5.69176	25.3181	17.9673	454.954	1	22
2022-09-15	11:07:28	3.83441	17.0562	17.9673	513.144	1	23
2022-09-15	11:07:29	2.55085	11.3467	9.7021	466.301	FALSE	23
2022-09-15	11:07:29	1.75599	7.81099	9.7021	520.955	FALSE	23
2022-09-15	11:07:29	2.23655	9.94862	9.7021	476.249	FALSE	23
2022-09-15	11:07:30	2.95833	13.1592	19.0051	534.114	FALSE	23
2022-09-15	11:07:30	4.60312	20.4756	19.0051	496.725	1	24
2022-09-15	11:07:30	4.87609	21.6898	19.0051	555.804	1	25
2022-09-15	11:07:30	4.65258	20.6956	19.0051	517.421	1	26
2022-09-15	11:07:31	4.1906	18.6406	14.4432	574.445	1	27
2022-09-15	11:07:31	4.13044	18.373	14.4432	535.794	1	28
2022-09-15	11:07:31	3.06653	13.6405	14.4432	588.085	1	29
2022-09-15	11:07:31	1.60037	7.11877	14.4432	542.912	FALSE	29
2022-09-15	11:07:32	0.421132	1.87328	0.303679	589.959	FALSE	29
2022-09-15	11:07:32	0.2307	1.0262	0.303679	543.939	FALSE	29
2022-09-15	11:07:32	-0.200394	-0.891393	0.303679	589.959	FALSE	29
2022-09-15	11:07:32	-0.178358	-0.793372	0.303679	543.939	FALSE	29
2022-09-15	11:07:33	-0.593829	-2.64147	-0.80673	589.959	FALSE	29
2022-09-15	11:07:33	-0.504974	-2.24623	-0.80673	543.939	FALSE	29
2022-09-15	11:07:33	0.55472	2.46751	-0.80673	592.426	FALSE	29
2022-09-15	11:07:34	2.72892	12.1388	5.81481	556.077	FALSE	29
2022-09-15	11:07:34	1.03223	4.59157	5.81481	597.018	FALSE	29
2022-09-15	11:07:34	0.630954	2.80661	5.81481	558.884	FALSE	29
2022-09-15	11:07:34	0.836806	3.72228	5.81481	600.74	FALSE	29
2022-09-15	11:07:35	1.21655	5.41146	3.82076	564.296	FALSE	29
2022-09-15	11:07:35	1.13844	5.06401	3.82076	605.804	FALSE	29
2022-09-15	11:07:35	0.645712	2.87226	3.82076	567.168	FALSE	29
2022-09-15	11:07:35	0.435076	1.93531	3.82076	607.739	FALSE	29
2022-09-15	11:07:36	0.257977	1.14753	1.09283	568.315	FALSE	29
2022-09-15	11:07:36	0.234517	1.04318	1.09283	608.782	FALSE	29
2022-09-15	11:07:36	0.244542	1.08777	1.09283	569.403	FALSE	29
2022-09-15	11:07:37	0.344491	1.53236	1.18002	610.315	FALSE	29
2022-09-15	11:07:37	0.25584	1.13803	1.18002	570.541	FALSE	29
2022-09-15	11:07:37	0.225662	1.00379	1.18002	611.319	FALSE	29
2022-09-15	11:07:37	0.235127	1.04589	1.18002	571.587	FALSE	29
2022-09-15	11:07:38	0.175331	0.779907	0.63933	612.099	FALSE	29
2022-09-15	11:07:38	0.126883	0.564401	0.63933	572.151	FALSE	29
2022-09-15	11:07:38	0.105916	0.471136	0.63933	612.57	FALSE	29
2022-09-15	11:07:38	0.166781	0.741875	0.63933	572.893	FALSE	29
2022-09-15	11:07:39	0.24785	1.10249	1.63271	613.672	FALSE	29
2022-09-15	11:07:39	0.383881	1.70758	1.63271	574.601	FALSE	29
2022-09-15	11:07:39	0.371412	1.65211	1.63271	615.324	FALSE	29
2022-09-15	11:07:39	0.465051	2.06864	1.63271	576.669	FALSE	29
2022-09-15	11:07:40	0.441489	1.96383	2.54772	617.288	FALSE	29
2022-09-15	11:07:40	0.597214	2.65653	2.54772	579.326	FALSE	29
2022-09-15	11:07:40	0.679555	3.0228	2.54772	620.311	FALSE	29
2022-09-15	11:07:41	0.617468	2.74662	2.79625	582.073	FALSE	29
2022-09-15	11:07:41	0.585509	2.60446	2.79625	622.915	FALSE	29
2022-09-15	11:07:41	0.722608	3.2143	2.79625	585.287	FALSE	29
2022-09-15	11:07:41	0.588919	2.61963	2.79625	625.535	FALSE	29
2022-09-15	11:07:42	0.636552	2.83151	3.04385	588.118	FALSE	29
2022-09-15	11:07:42	0.699147	3.10995	3.04385	628.645	FALSE	29
2022-09-15	11:07:42	0.674262	2.99925	3.04385	591.118	FALSE	29
2022-09-15	11:07:42	0.727188	3.23468	3.04385	631.88	FALSE	29
2022-09-15	11:07:43	0.673244	2.99472	3.73123	594.112	FALSE	29
2022-09-15	11:07:43	0.715534	3.18284	3.73123	635.062	FALSE	29
2022-09-15	11:07:43	1.01457	4.51301	3.73123	598.625	FALSE	29
2022-09-15	11:07:43	0.951921	4.23433	3.73123	639.297	FALSE	29
2022-09-15	11:07:44	0.879453	3.91198	2.67826	602.537	FALSE	29
2022-09-15	11:07:44	0.572379	2.54606	2.67826	641.843	FALSE	29
2022-09-15	11:07:44	0.354466	1.57674	2.67826	604.114	FALSE	29
2022-09-15	11:07:45	0.360115	1.60186	1.38234	643.445	FALSE	29
2022-09-15	11:07:45	0.431667	1.92014	1.38234	606.034	FALSE	29
2022-09-15	11:07:45	0.344084	1.53055	1.38234	644.975	FALSE	29
2022-09-15	11:07:45	0.107189	0.476798	1.38234	606.511	FALSE	29
2022-09-15	11:07:46	0.037214	0.165535	-0.563889	645.141	FALSE	29
2022-09-15	11:07:46	-0.153269	-0.681771	-0.563889	606.511	FALSE	29
2022-09-15	11:07:46	-0.134643	-0.598919	-0.563889	645.141	FALSE	29
2022-09-15	11:07:46	-0.256374	-1.1404	-0.563889	606.511	FALSE	29
2022-09-15	11:07:47	-0.308486	-1.37221	-1.82806	645.141	FALSE	29
2022-09-15	11:07:47	-0.304771	-1.35568	-1.82806	606.511	FALSE	29
2022-09-15	11:07:47	-0.502277	-2.23423	-1.82806	645.141	FALSE	29
2022-09-15	11:07:47	-0.528333	-2.35013	-1.82806	606.511	FALSE	29
2022-09-15	11:07:48	-0.699885	-3.11323	-2.89327	645.141	FALSE	29
2022-09-15	11:07:48	-0.487162	-2.16699	-2.89327	606.511	FALSE	29
2022-09-15	11:07:48	-0.764261	-3.39959	-2.89327	645.141	FALSE	29
2022-09-15	11:07:49	-0.722531	-3.21396	-3.80666	606.511	FALSE	29
2022-09-15	11:07:49	-0.895966	-3.98544	-3.80666	645.141	FALSE	29
2022-09-15	11:07:49	-0.840546	-3.73892	-3.80666	606.511	FALSE	29
2022-09-15	11:07:49	-0.964058	-4.28832	-3.80666	645.141	FALSE	29
2022-09-15	11:07:50	-0.766653	-3.41023	-3.43134	606.511	FALSE	29
2022-09-15	11:07:50	-0.951742	-4.23354	-3.43134	645.141	FALSE	29
2022-09-15	11:07:50	-0.68075	-3.02811	-3.43134	606.511	FALSE	29
2022-09-15	11:07:50	-0.68645	-3.05347	-3.43134	645.141	FALSE	29
2022-09-15	11:07:51	-0.552099	-2.45585	-2.01917	606.511	FALSE	29
2022-09-15	11:07:51	-0.421157	-1.87339	-2.01917	645.141	FALSE	29
2022-09-15	11:07:51	-0.388536	-1.72829	-2.01917	606.511	FALSE	29
2022-09-15	11:07:52	-0.321921	-1.43197	3.99664	645.141	FALSE	29
2022-09-15	11:07:52	-0.0852796	-0.379341	3.99664	606.511	FALSE	29
2022-09-15	11:07:52	1.21604	5.40919	3.99664	650.55	FALSE	29
2022-09-15	11:07:52	2.7851	12.3887	3.99664	618.9	FALSE	29
2022-09-15	11:07:53	2.92663	13.0182	7.10683	663.568	FALSE	29
2022-09-15	11:07:53	1.66882	7.42325	7.10683	626.323	FALSE	29
2022-09-15	11:07:53	1.24139	5.52195	7.10683	669.09	FALSE	29
2022-09-15	11:07:53	0.553906	2.46388	7.10683	628.787	FALSE	29
2022-09-15	11:07:54	0.802659	3.57039	3.08538	672.661	FALSE	29
2022-09-15	11:07:54	1.06581	4.74094	3.08538	633.528	FALSE	29
2022-09-15	11:07:54	0.708053	3.14956	3.08538	675.81	FALSE	29
2022-09-15	11:07:54	0.197977	0.880641	3.08538	634.408	FALSE	29
2022-09-15	11:07:55	-0.0129133	-0.0574409	0.594282	675.81	FALSE	29
2022-09-15	11:07:55	0.126781	0.563947	0.594282	634.972	FALSE	29
2022-09-15	11:07:55	0.286934	1.27634	0.594282	677.086	FALSE	29
2022-09-15	11:07:56	0.295636	1.31505	0.712335	636.287	FALSE	29
2022-09-15	11:07:56	0.0822012	0.365647	0.712335	677.452	FALSE	29
2022-09-15	11:07:56	0.199606	0.887887	0.712335	637.175	FALSE	29
2022-09-15	11:07:56	0.0631173	0.280758	0.712335	677.733	FALSE	29
2022-09-15	11:07:57	0.201743	0.897393	-0.970339	638.073	FALSE	29
2022-09-15	11:07:57	-0.156475	-0.696032	-0.970339	677.733	FALSE	29
2022-09-15	11:07:57	-0.495763	-2.20525	-0.970339	638.073	FALSE	29
2022-09-15	11:07:57	-0.422073	-1.87747	-0.970339	677.733	FALSE	29
2022-09-15	11:07:58	-0.502328	-2.23446	-2.41063	638.073	FALSE	29
2022-09-15	11:07:58	-0.568944	-2.53078	-2.41063	677.733	FALSE	29
2022-09-15	11:07:58	-0.646958	-2.8778	-2.41063	638.073	FALSE	29
2022-09-15	11:07:58	-0.449503	-1.99948	-2.41063	677.733	FALSE	29
2022-09-15	11:07:59	-0.286348	-1.27373	-1.06472	638.073	FALSE	29
2022-09-15	11:07:59	-0.393218	-1.74911	-1.06472	677.733	FALSE	29
2022-09-15	11:07:59	-0.0385112	-0.171306	-1.06472	638.073	FALSE	29
2022-09-15	11:08:00	0.43355	1.92852	5.69867	679.661	FALSE	29
2022-09-15	11:08:00	1.43095	6.36515	5.69867	644.438	FALSE	29
2022-09-15	11:08:00	2.06917	9.20408	5.69867	688.865	FALSE	29
2022-09-15	11:08:00	1.1908	5.29692	5.69867	649.735	FALSE	29
2022-09-15	11:08:01	3.28337	14.6051	4.85765	703.471	1	30
2022-09-15	11:08:01	0.961997	4.27916	4.85765	654.014	FALSE	30
2022-09-15	11:08:01	-0.416017	-1.85053	4.85765	703.471	FALSE	30
2022-09-15	11:08:01	0.538842	2.39688	4.85765	656.411	FALSE	30
2022-09-15	11:08:02	0.594008	2.64227	1.79388	706.113	FALSE	30
2022-09-15	11:08:02	0.679962	3.02461	1.79388	659.435	FALSE	30
2022-09-15	11:08:02	0.114669	0.510071	1.79388	706.623	FALSE	30
2022-09-15	11:08:02	0.224491	0.998581	1.79388	660.434	FALSE	30
2022-09-15	11:08:03	0.0743641	0.330786	0.166516	706.954	FALSE	30
2022-09-15	11:08:03	0.191158	0.850309	0.166516	661.284	FALSE	30
2022-09-15	11:08:03	-0.153219	-0.681549	0.166516	706.954	FALSE	30
2022-09-15	11:08:04	0.143779	0.639558	1.42591	661.924	FALSE	30
2022-09-15	11:08:04	0.191769	0.853027	1.42591	707.807	FALSE	30
2022-09-15	11:08:04	0.214313	0.953307	1.42591	662.877	FALSE	30
2022-09-15	11:08:04	0.732379	3.25777	1.42591	711.064	FALSE	30
2022-09-15	11:08:05	0.373143	1.65981	2.73485	664.537	FALSE	30
2022-09-15	11:08:05	0.96215	4.27984	2.73485	715.344	FALSE	30
2022-09-15	11:08:05	0.55986	2.49037	2.73485	667.027	FALSE	30
2022-09-15	11:08:05	0.564135	2.50939	2.73485	717.854	FALSE	30
2022-09-15	11:08:06	0.496043	2.2065	2.35251	669.234	FALSE	30
2022-09-15	11:08:06	0.540114	2.40254	2.35251	720.256	FALSE	30
2022-09-15	11:08:06	0.413193	1.83797	2.35251	671.072	FALSE	30
2022-09-15	11:08:06	0.66612	2.96303	2.35251	723.219	FALSE	30
2022-09-15	11:08:07	0.624593	2.77831	2.7925	673.85	FALSE	30
2022-09-15	11:08:07	0.532277	2.36767	2.7925	725.587	FALSE	30
2022-09-15	11:08:07	0.726476	3.23151	2.7925	677.082	FALSE	30
2022-09-15	11:08:08	0.501692	2.23163	1.73423	727.819	FALSE	30
2022-09-15	11:08:08	0.394008	1.75263	1.73423	678.834	FALSE	30
2022-09-15	11:08:08	0.207748	0.924105	1.73423	728.743	FALSE	30
2022-09-15	11:08:08	0.456043	2.02857	1.73423	680.863	FALSE	30
2022-09-15	11:08:09	0.413397	1.83887	2.20735	730.582	FALSE	30
2022-09-15	11:08:09	0.73355	3.26298	2.20735	684.126	FALSE	30
2022-09-15	11:08:09	0.352074	1.5661	2.20735	732.148	FALSE	30
2022-09-15	11:08:09	0.485916	2.16145	2.20735	686.287	FALSE	30
2022-09-15	11:08:10	0.365051	1.62382	1.15976	733.771	FALSE	30
2022-09-15	11:08:10	0.269071	1.19688	1.15976	687.484	FALSE	30
2022-09-15	11:08:10	0.148054	0.658574	1.15976	734.43	FALSE	30
2022-09-15	11:08:11	0.189733	0.84397	0.679285	688.328	FALSE	30
2022-09-15	11:08:11	0.158334	0.704301	0.679285	735.134	FALSE	30
2022-09-15	11:08:11	0.0899366	0.400056	0.679285	688.728	FALSE	30
2022-09-15	11:08:11	0.172837	0.768814	0.679285	735.903	FALSE	30
2022-09-15	11:08:12	0.146069	0.649744	1.35065	689.378	FALSE	30
2022-09-15	11:08:12	0.274415	1.22065	1.35065	737.124	FALSE	30
2022-09-15	11:08:12	0.397723	1.76915	1.35065	691.147	FALSE	30
2022-09-15	11:08:12	0.396349	1.76304	1.35065	738.887	FALSE	30
2022-09-15	11:08:13	0.285	1.26774	1.39773	692.415	FALSE	30
2022-09-15	11:08:13	0.420827	1.87192	1.39773	740.759	FALSE	30
2022-09-15	11:08:13	0.28556	1.27023	1.39773	693.685	FALSE	30
2022-09-15	11:08:13	0.265509	1.18104	1.39773	741.94	FALSE	30
2022-09-15	11:08:14	0.298028	1.32569	1.2199	695.011	FALSE	30
2022-09-15	11:08:14	0.278537	1.23899	1.2199	743.179	FALSE	30
2022-09-15	11:08:14	0.246171	1.09502	1.2199	696.106	FALSE	30
2022-09-15	11:08:15	0.317672	1.41307	1.83525	744.592	FALSE	30
2022-09-15	11:08:15	0.216705	0.963947	1.83525	697.07	FALSE	30
2022-09-15	11:08:15	0.567799	2.52568	1.83525	747.118	FALSE	30
2022-09-15	11:08:15	0.548155	2.4383	1.83525	699.508	FALSE	30
2022-09-15	11:08:16	0.4736	2.10667	1.94102	749.224	FALSE	30
2022-09-15	11:08:16	0.384797	1.71165	1.94102	701.22	FALSE	30
2022-09-15	11:08:16	0.418232	1.86038	1.94102	751.085	FALSE	30
2022-09-15	11:08:16	0.468817	2.08539	1.94102	703.305	FALSE	30
2022-09-15	11:08:17	0.457468	2.03491	2.00939	753.119	FALSE	30
2022-09-15	11:08:17	0.454873	2.02337	2.00939	705.328	FALSE	30
2022-09-15	11:08:17	0.454059	2.01975	2.00939	755.139	FALSE	30
2022-09-15	11:08:17	0.440522	1.95953	2.00939	707.288	FALSE	30
2022-09-15	11:08:18	0.443219	1.97153	1.9707	757.111	FALSE	30
2022-09-15	11:08:18	0.438028	1.94844	1.9707	709.236	FALSE	30
2022-09-15	11:08:18	0.44785	1.99213	1.9707	759.103	FALSE	30
2022-09-15	11:08:19	0.450242	2.00277	2.34776	711.239	FALSE	30
2022-09-15	11:08:19	0.468308	2.08313	2.34776	761.186	FALSE	30
2022-09-15	11:08:19	0.59472	2.64543	2.34776	713.885	FALSE	30
2022-09-15	11:08:19	0.597926	2.65969	2.34776	763.846	FALSE	30
2022-09-15	11:08:20	0.645254	2.87022	3.67089	716.755	FALSE	30
2022-09-15	11:08:20	0.683117	3.03864	3.67089	766.884	FALSE	30
2022-09-15	11:08:20	1.02622	4.56483	3.67089	721.32	FALSE	30
2022-09-15	11:08:20	0.946425	4.20989	3.67089	771.094	FALSE	30
2022-09-15	11:08:21	1.17121	5.20978	4.2705	726.529	FALSE	30
2022-09-15	11:08:21	1.30011	5.78315	4.2705	776.877	FALSE	30
2022-09-15	11:08:21	0.948359	4.21849	4.2705	730.748	FALSE	30
2022-09-15	11:08:21	0.420522	1.87057	4.2705	778.748	FALSE	30
2022-09-15	11:08:22	0.239351	1.06468	0.703771	731.813	FALSE	30
2022-09-15	11:08:22	0.192685	0.857101	0.703771	779.605	FALSE	30
2022-09-15	11:08:22	0.0426084	0.189531	0.703771	732.002	FALSE	30
2022-09-15	11:08:23	-0.0224807	-0.0999986	-0.320258	779.605	FALSE	30
2022-09-15	11:08:23	-0.129249	-0.574925	-0.320258	732.002	FALSE	30
2022-09-15	11:08:23	-0.127417	-0.566776	-0.320258	779.605	FALSE	30
2022-09-15	11:08:23	-0.00884198	-0.0393309	-0.320258	732.002	FALSE	30
2022-09-15	11:08:24	0.174517	0.776287	1.08438	780.381	FALSE	30
2022-09-15	11:08:24	0.198283	0.882002	1.08438	732.884	FALSE	30
2022-09-15	11:08:24	0.286069	1.27249	1.08438	781.654	FALSE	30
2022-09-15	11:08:24	0.316247	1.40673	1.08438	734.291	FALSE	30
2022-09-15	11:08:25	0.366883	1.63197	1.78734	783.286	FALSE	30
2022-09-15	11:08:25	0.363626	1.61748	1.78734	735.908	FALSE	30
2022-09-15	11:08:25	0.474924	2.11256	1.78734	785.398	FALSE	30
2022-09-15	11:08:26	0.0502929	0.223713	1.28783	736.132	FALSE	30
2022-09-15	11:08:26	0.387595	1.7241	1.28783	787.122	FALSE	30
2022-09-15	11:08:26	0.363677	1.61771	1.28783	737.75	FALSE	30
2022-09-15	11:08:26	0.356501	1.58579	1.28783	788.708	FALSE	30
2022-09-15	11:08:27	0.382761	1.7026	1.55483	739.452	FALSE	30
2022-09-15	11:08:27	0.29472	1.31097	1.55483	790.019	FALSE	30
2022-09-15	11:08:27	0.304033	1.3524	1.55483	740.805	FALSE	30
2022-09-15	11:08:27	0.416654	1.85336	1.55483	791.873	FALSE	30
2022-09-15	11:08:28	0.319351	1.42054	1.46711	742.225	FALSE	30
2022-09-15	11:08:28	0.385254	1.71369	1.46711	793.586	FALSE	30
2022-09-15	11:08:28	0.331361	1.47396	1.46711	743.699	FALSE	30
2022-09-15	11:08:28	0.283321	1.26027	1.46711	794.847	FALSE	30
2022-09-15	11:08:29	0.333295	1.48256	1.51312	745.182	FALSE	30
2022-09-15	11:08:29	0.314517	1.39903	1.51312	796.246	FALSE	30
2022-09-15	11:08:29	0.372685	1.65778	1.51312	746.84	FALSE	30
2022-09-15	11:08:30	0.500369	2.22574	2.69207	798.471	FALSE	30
2022-09-15	11:08:30	0.591361	2.63049	2.69207	749.47	FALSE	30
2022-09-15	11:08:30	0.781539	3.47644	2.69207	801.948	FALSE	30
2022-09-15	11:08:30	0.547544	2.43559	2.69207	751.906	FALSE	30
2022-09-15	11:08:31	1.58352	7.04381	19.4288	808.992	FALSE	30
2022-09-15	11:08:31	1.78057	7.92033	19.4288	759.826	FALSE	30
2022-09-15	11:08:31	5.80403	25.8175	19.4288	834.809	1	31
2022-09-15	11:08:31	8.30301	36.9334	19.4288	796.759	1	32
2022-09-15	11:08:32	7.67843	34.1552	15.1929	868.964	1	33
2022-09-15	11:08:32	4.2878	19.073	15.1929	815.832	1	34
2022-09-15	11:08:32	1.12602	5.00876	15.1929	873.973	FALSE	34
2022-09-15	11:08:32	0.569834	2.53474	15.1929	818.367	FALSE	34
2022-09-15	11:08:33	0.563931	2.50848	2.18281	876.481	FALSE	34
2022-09-15	11:08:33	0.487392	2.16802	2.18281	820.535	FALSE	34
2022-09-15	11:08:33	0.420827	1.87192	2.18281	878.353	FALSE	34
2022-09-15	11:08:34	0.254415	1.13169	1.34527	821.667	FALSE	34
2022-09-15	11:08:34	0.379758	1.68924	1.34527	880.043	FALSE	34
2022-09-15	11:08:34	0.265763	1.18217	1.34527	822.849	FALSE	34
2022-09-15	11:08:34	0.309784	1.37798	1.34527	881.421	FALSE	34
2022-09-15	11:08:35	0.500267	2.22529	11.6482	825.074	FALSE	34
2022-09-15	11:08:35	1.9824	8.81811	11.6482	890.239	FALSE	34
2022-09-15	11:08:35	3.45523	15.3696	11.6482	840.444	1	35
2022-09-15	11:08:35	4.53665	20.1799	11.6482	910.419	1	36
2022-09-15	11:08:36	6.02566	26.8033	17.8726	867.247	1	37
2022-09-15	11:08:36	3.49487	15.5459	17.8726	925.965	1	38
2022-09-15	11:08:36	3.18764	14.1793	17.8726	881.427	1	39
2022-09-15	11:08:36	3.36357	14.9618	17.8726	940.926	1	40
2022-09-15	11:08:37	2.99574	13.3257	13.5118	894.752	FALSE	40
2022-09-15	11:08:37	3.6649	16.3022	13.5118	957.229	1	41
2022-09-15	11:08:37	2.45212	10.9075	13.5118	905.66	FALSE	41
2022-09-15	11:08:38	2.99044	13.3021	5.48611	970.531	FALSE	41
2022-09-15	11:08:38	1.10994	4.93724	5.48611	910.597	FALSE	41
2022-09-15	11:08:38	0.409631	1.82212	5.48611	972.353	FALSE	41
2022-09-15	11:08:38	0.423321	1.88302	5.48611	912.48	FALSE	41
2022-09-15	11:08:39	0.231718	1.03073	1.2897	973.384	FALSE	41
2022-09-15	11:08:39	0.351768	1.56473	1.2897	914.045	FALSE	41
2022-09-15	11:08:39	0.301998	1.34335	1.2897	974.727	FALSE	41
2022-09-15	11:08:39	0.274262	1.21997	1.2897	915.265	FALSE	41
2022-09-15	11:08:40	0.427646	1.90225	1.75596	976.629	FALSE	41
2022-09-15	11:08:40	0.281845	1.2537	1.75596	916.518	FALSE	41
2022-09-15	11:08:40	0.604237	2.68777	1.75596	979.317	FALSE	41
2022-09-15	11:08:40	0.265305	1.18013	1.75596	917.698	FALSE	41
2022-09-15	11:08:41	0.394161	1.75331	1.66034	981.07	FALSE	41
2022-09-15	11:08:41	0.353804	1.57379	1.66034	919.272	FALSE	41
2022-09-15	11:08:41	0.371819	1.65393	1.66034	982.724	FALSE	41
2022-09-15	11:08:42	0.87986	3.91379	11.7561	923.186	FALSE	41
2022-09-15	11:08:42	1.63477	7.27178	11.7561	989.996	FALSE	41
2022-09-15	11:08:42	4.22413	18.7898	11.7561	941.976	1	42
2022-09-15	11:08:42	3.83284	17.0492	11.7561	1007.05	1	43
2022-09-15	11:08:43	4.97538	22.1315	16.9088	964.107	1	44
2022-09-15	11:08:43	3.63945	16.189	16.9088	1023.23	1	45
2022-09-15	11:08:43	3.49782	15.559	16.9088	979.666	1	46
2022-09-15	11:08:43	3.09243	13.7557	16.9088	1036.99	1	47
2022-09-15	11:08:44	2.22485	9.89658	12.6971	989.563	FALSE	47
2022-09-15	11:08:44	4.27854	19.0318	12.6971	1056.02	1	48
2022-09-15	11:08:44	2.24266	9.9758	12.6971	999.539	FALSE	48
2022-09-15	11:08:44	2.67172	11.8843	12.6971	1067.91	FALSE	48
2022-09-15	11:08:45	3.47879	15.4744	14.641	1015.01	1	49
2022-09-15	11:08:45	3.39436	15.0988	14.641	1083	1	50
2022-09-15	11:08:45	3.00118	13.3498	14.641	1028.36	1	51
2022-09-15	11:08:46	1.36622	6.07722	5.51152	1089.08	FALSE	51
2022-09-15	11:08:46	1.41874	6.31084	5.51152	1034.67	FALSE	51
2022-09-15	11:08:46	1.29859	5.77639	5.51152	1094.86	FALSE	51
2022-09-15	11:08:46	0.872633	3.88165	5.51152	1038.56	FALSE	51
2022-09-15	11:08:47	0.60612	2.69614	3.83066	1097.55	FALSE	51
2022-09-15	11:08:47	1.09594	4.87496	3.83066	1043.43	FALSE	51
2022-09-15	11:08:47	0.976094	4.34186	3.83066	1101.9	FALSE	51
2022-09-15	11:08:47	0.766527	3.40967	3.83066	1046.84	FALSE	51
2022-09-15	11:08:48	0.580776	2.58341	1.81231	1104.48	FALSE	51
2022-09-15	11:08:48	0.275636	1.22608	1.81231	1048.07	FALSE	51
2022-09-15	11:08:48	0.365865	1.62744	1.81231	1106.11	FALSE	51
2022-09-15	11:08:49	0.245967	1.09411	2.75568	1049.16	FALSE	51
2022-09-15	11:08:49	0.415789	1.84951	2.75568	1107.96	FALSE	51
2022-09-15	11:08:49	0.531718	2.36519	2.75568	1051.53	FALSE	51
2022-09-15	11:08:49	1.28454	5.71389	2.75568	1113.67	FALSE	51
2022-09-15	11:08:50	6.1737	27.4619	24.797	1078.99	1	52
2022-09-15	11:08:50	7.95757	35.3969	24.797	1149.07	1	53
2022-09-15	11:08:50	6.11665	27.2081	24.797	1106.2	1	54
2022-09-15	11:08:50	2.05055	9.12126	24.797	1158.19	FALSE	54
2022-09-15	11:08:51	4.2906	19.0854	29.2823	1125.28	1	55
2022-09-15	11:08:51	6.3709	28.339	29.2823	1186.53	1	56
2022-09-15	11:08:51	7.97507	35.4747	29.2823	1160.76	1	57
2022-09-15	11:08:51	7.69528	34.2301	29.2823	1220.76	1	58
2022-09-15	11:08:52	1.40093	6.23162	4.33945	1166.99	FALSE	58
2022-09-15	11:08:52	0.732837	3.25981	4.33945	1224.02	FALSE	58
2022-09-15	11:08:52	0.792888	3.52692	4.33945	1170.51	FALSE	58
2022-09-15	11:08:53	0.283677	1.26185	2.57214	1225.28	FALSE	58
2022-09-15	11:08:53	0.936552	4.16597	2.57214	1174.68	FALSE	58
2022-09-15	11:08:53	0.409936	1.82348	2.57214	1227.1	FALSE	58
2022-09-15	11:08:53	0.682811	3.03728	2.57214	1177.72	FALSE	58
2022-09-15	11:08:54	0.59584	2.65042	1.89371	1229.75	FALSE	58
2022-09-15	11:08:54	0.334618	1.48845	1.89371	1179.21	FALSE	58
2022-09-15	11:08:54	0.492583	2.19111	1.89371	1231.94	FALSE	58
2022-09-15	11:08:54	0.27986	1.24487	1.89371	1180.45	FALSE	58
2022-09-15	11:08:55	0.689784	3.0683	3.20745	1235.01	FALSE	58
2022-09-15	11:08:55	0.35187	1.56519	3.20745	1182.02	FALSE	58
2022-09-15	11:08:55	1.02291	4.55011	3.20745	1239.56	FALSE	58
2022-09-15	11:08:55	0.819707	3.64622	3.20745	1185.66	FALSE	58
2022-09-15	11:08:56	1.35574	6.0306	5.51348	1245.59	FALSE	58
2022-09-15	11:08:56	1.09365	4.86477	5.51348	1190.53	FALSE	58
2022-09-15	11:08:56	1.26907	5.64508	5.51348	1251.24	FALSE	58
2022-09-15	11:08:57	1.08378	4.82087	4.88119	1195.35	FALSE	58
2022-09-15	11:08:57	1.06505	4.73756	4.88119	1255.98	FALSE	58
2022-09-15	11:08:57	1.13487	5.04813	4.88119	1200.4	FALSE	58
2022-09-15	11:08:57	1.10566	4.9182	4.88119	1260.89	FALSE	58
2022-09-15	11:08:58	1.21579	5.40808	4.98566	1205.8	FALSE	58
2022-09-15	11:08:58	1.05126	4.67621	4.98566	1265.57	FALSE	58
2022-09-15	11:08:58	1.09146	4.85503	4.98566	1210.66	FALSE	58
2022-09-15	11:08:58	1.1248	5.00334	4.98566	1270.57	FALSE	58
2022-09-15	11:08:59	0.879758	3.91334	2.96988	1214.57	FALSE	58
2022-09-15	11:08:59	0.703779	3.13055	2.96988	1273.7	FALSE	58
2022-09-15	11:08:59	0.606985	2.69999	2.96988	1217.27	FALSE	58
2022-09-15	11:08:59	0.480115	2.13565	2.96988	1275.84	FALSE	58
2022-09-15	11:09:00	0.46958	2.08879	2.15277	1219.36	FALSE	58
2022-09-15	11:09:00	0.525814	2.33893	2.15277	1278.18	FALSE	58
2022-09-15	11:09:00	0.456501	2.03061	2.15277	1221.39	FALSE	58
2022-09-15	11:09:01	0.445305	1.98081	2.01929	1280.16	FALSE	58
2022-09-15	11:09:01	0.435891	1.93893	2.01929	1223.33	FALSE	58
2022-09-15	11:09:01	0.471209	2.09603	2.01929	1282.26	FALSE	58
2022-09-15	11:09:01	0.463422	2.06139	2.01929	1225.39	FALSE	58
2022-09-15	11:09:02	0.487545	2.1687	2.12755	1284.42	FALSE	58
2022-09-15	11:09:02	0.489122	2.17571	2.12755	1227.57	FALSE	58
2022-09-15	11:09:02	0.47243	2.10146	2.12755	1286.53	FALSE	58
2022-09-15	11:09:02	0.464084	2.06434	2.12755	1229.63	FALSE	58
2022-09-15	11:09:03	0.467341	2.07883	2.18986	1288.6	FALSE	58
2022-09-15	11:09:03	0.486883	2.16575	2.18986	1231.8	FALSE	58
2022-09-15	11:09:03	0.511972	2.27735	2.18986	1290.88	FALSE	58
2022-09-15	11:09:03	0.503015	2.23751	2.18986	1234.04	FALSE	58
2022-09-15	11:09:04	0.504847	2.24566	2.03657	1293.13	FALSE	58
2022-09-15	11:09:04	0.444593	1.97764	2.03657	1236.01	FALSE	58
2022-09-15	11:09:04	0.424084	1.88641	2.03657	1295.01	FALSE	58
2022-09-15	11:09:05	0.407137	1.81103	1.87068	1237.82	FALSE	58
2022-09-15	11:09:05	0.427901	1.90339	1.87068	1296.92	FALSE	58
2022-09-15	11:09:05	0.413601	1.83978	1.87068	1239.66	FALSE	58
2022-09-15	11:09:05	0.43355	1.92852	1.87068	1298.85	FALSE	58
2022-09-15	11:09:06	0.458893	2.04125	1.52065	1241.7	FALSE	58
2022-09-15	11:09:06	0.415076	1.84634	1.52065	1300.69	FALSE	58
2022-09-15	11:09:06	0.267138	1.18828	1.52065	1242.89	FALSE	58
2022-09-15	11:09:06	0.226323	1.00673	1.52065	1301.7	FALSE	58
2022-09-15	11:09:07	0.366985	1.63242	1.38839	1244.53	FALSE	58
2022-09-15	11:09:07	0.126731	0.563725	1.38839	1302.26	FALSE	58
2022-09-15	11:09:07	0.404135	1.79767	1.38839	1246.32	FALSE	58
2022-09-15	11:09:07	0.350649	1.55976	1.38839	1303.82	FALSE	58
2022-09-15	11:09:08	0.473244	2.10508	1.40522	1248.43	FALSE	58
2022-09-15	11:09:08	0.231972	1.03186	1.40522	1304.85	FALSE	58
2022-09-15	11:09:08	0.242507	1.07872	1.40522	1249.51	FALSE	58
2022-09-15	11:09:09	0.252226	1.12195	1.3829	1305.98	FALSE	58
2022-09-15	11:09:09	0.285509	1.27	1.3829	1250.78	FALSE	58
2022-09-15	11:09:09	0.53187	2.36586	1.3829	1308.34	FALSE	58
2022-09-15	11:09:09	0.173957	0.773796	1.3829	1251.55	FALSE	58
2022-09-15	11:09:10	0.23925	1.06423	5.16404	1309.41	FALSE	58
2022-09-15	11:09:10	0.622812	2.77039	5.16404	1254.32	FALSE	58
2022-09-15	11:09:10	1.64174	7.30279	5.16404	1316.71	FALSE	58
2022-09-15	11:09:10	2.13991	9.51875	5.16404	1263.84	FALSE	58
2022-09-15	11:09:11	1.19538	5.31729	8.66562	1322.03	FALSE	58
2022-09-15	11:09:11	2.45635	10.9263	8.66562	1274.77	FALSE	58
2022-09-15	11:09:11	2.21966	9.87349	8.66562	1331.9	FALSE	58
2022-09-15	11:09:11	1.92108	8.54535	8.66562	1283.31	FALSE	58
2022-09-15	11:09:12	1.10373	4.90961	4.5588	1336.81	FALSE	58
2022-09-15	11:09:12	0.971565	4.32172	4.5588	1287.63	FALSE	58
2022-09-15	11:09:12	0.9993	4.44509	4.5588	1341.26	FALSE	58
2022-09-15	11:09:13	2.29787	10.2214	9.45309	1297.85	FALSE	58
2022-09-15	11:09:13	3.18118	14.1505	9.45309	1355.41	1	59
2022-09-15	11:09:13	2.20785	9.82096	9.45309	1307.68	FALSE	59
2022-09-15	11:09:13	0.813702	3.61951	9.45309	1359.03	FALSE	59
2022-09-15	11:09:14	0.41355	1.83955	2.6516	1309.52	FALSE	59
2022-09-15	11:09:14	0.378741	1.68472	2.6516	1360.71	FALSE	59
2022-09-15	11:09:14	0.446476	1.98601	2.6516	1311.5	FALSE	59
2022-09-15	11:09:14	1.14566	5.09612	2.6516	1365.81	FALSE	59
2022-09-15	11:09:15	1.56683	6.96957	16.3542	1318.47	FALSE	59
2022-09-15	11:09:15	3.94541	17.55	16.3542	1383.36	1	60
2022-09-15	11:09:15	5.51752	24.543	16.3542	1343.01	1	61
2022-09-15	11:09:16	6.22499	27.69	22.0191	1411.05	1	62
2022-09-15	11:09:16	3.77884	16.809	22.0191	1359.82	1	63
2022-09-15	11:09:16	3.63737	16.1797	22.0191	1427.23	1	64
2022-09-15	11:09:16	6.15924	27.3975	22.0191	1387.22	1	65
2022-09-15	11:09:17	4.46815	19.8752	12.8857	1447.1	1	66
2022-09-15	11:09:17	2.2219	9.88346	12.8857	1397.1	FALSE	66
2022-09-15	11:09:17	2.5162	11.1926	12.8857	1458.29	FALSE	66
2022-09-15	11:09:17	2.38108	10.5915	12.8857	1407.7	FALSE	66
2022-09-15	11:09:18	1.49182	6.63591	6.03025	1464.93	FALSE	66
2022-09-15	11:09:18	1.85034	8.23068	6.03025	1415.93	FALSE	66
2022-09-15	11:09:18	1.0338	4.59855	6.03025	1469.53	FALSE	66
2022-09-15	11:09:18	1.04668	4.65584	6.03025	1420.58	FALSE	66
2022-09-15	11:09:19	2.50653	11.1495	13.9424	1480.68	FALSE	66
2022-09-15	11:09:19	3.31533	14.7473	13.9424	1435.33	1	67
2022-09-15	11:09:19	3.58133	15.9305	13.9424	1496.61	1	68
2022-09-15	11:09:20	1.02597	4.56372	-2.31289	1439.89	FALSE	68
2022-09-15	11:09:20	-0.66706	-2.96722	-2.31289	1496.61	FALSE	68
2022-09-15	11:09:20	-0.910826	-4.05154	-2.31289	1439.89	FALSE	68
2022-09-15	11:09:20	-1.52793	-6.79654	-2.31289	1496.61	FALSE	68
2022-09-15	11:09:21	-1.36686	-6.08007	-3.47571	1439.89	FALSE	68
2022-09-15	11:09:21	-0.712862	-3.17095	-3.47571	1496.61	FALSE	68
2022-09-15	11:09:21	-0.53332	-2.37231	-3.47571	1439.89	FALSE	68
2022-09-15	11:09:21	-0.512455	-2.2795	-3.47571	1496.61	FALSE	68
2022-09-15	11:09:22	-0.295508	-1.31448	-5.91531	1439.89	FALSE	68
2022-09-15	11:09:22	-1.52513	-6.78408	-5.91531	1496.61	FALSE	68
2022-09-15	11:09:22	-1.71266	-7.61825	-5.91531	1439.89	FALSE	68
2022-09-15	11:09:22	-1.78599	-7.94444	-5.91531	1496.61	FALSE	68
2022-09-15	11:09:23	-2.31597	-10.3019	-10.1978	1439.89	FALSE	68
2022-09-15	11:09:23	-2.25281	-10.0209	-10.1978	1496.61	FALSE	68
2022-09-15	11:09:23	-2.30894	-10.2706	-10.1978	1439.89	FALSE	68
2022-09-15	11:09:24	-2.62574	-11.6798	-11.8458	1496.61	FALSE	68
2022-09-15	11:09:24	-2.5607	-11.3905	-11.8458	1439.89	FALSE	68
2022-09-15	11:09:24	-2.80385	-12.4721	-11.8458	1496.61	FALSE	68
2022-09-15	11:09:24	-2.66192	-11.8408	-11.8458	1439.89	FALSE	68
2022-09-15	11:09:25	-2.56202	-11.3964	-10.9242	1496.61	FALSE	68
2022-09-15	11:09:25	-2.50182	-11.1286	-10.9242	1439.89	FALSE	68
2022-09-15	11:09:25	-2.48696	-11.0625	-10.9242	1496.61	FALSE	68
2022-09-15	11:09:25	-2.27271	-10.1095	-10.9242	1439.89	FALSE	68
2022-09-15	11:09:26	-2.33413	-10.3827	-10.2579	1496.61	FALSE	68
2022-09-15	11:09:26	-2.24462	-9.98452	-10.2579	1439.89	FALSE	68
2022-09-15	11:09:26	-2.36614	-10.5251	-10.2579	1496.61	FALSE	68
2022-09-15	11:09:26	-2.27943	-10.1394	-10.2579	1439.89	FALSE	68
2022-09-15	11:09:27	-2.36396	-10.5154	-10.5434	1496.61	FALSE	68
2022-09-15	11:09:27	-2.3863	-10.6147	-10.5434	1439.89	FALSE	68
2022-09-15	11:09:27	-2.3605	-10.5	-10.5434	1496.61	FALSE	68
2022-09-15	11:09:28	-2.36757	-10.5314	-10.4725	1439.89	FALSE	68
2022-09-15	11:09:28	-2.35866	-10.4918	-10.4725	1496.61	FALSE	68
2022-09-15	11:09:28	-2.33831	-10.4013	-10.4725	1439.89	FALSE	68
2022-09-15	11:09:28	-2.35276	-10.4655	-10.4725	1496.61	FALSE	68
2022-09-15	11:09:29	-2.34034	-10.4103	-10.4881	1439.89	FALSE	68
2022-09-15	11:09:29	-2.30955	-10.2733	-10.4881	1496.61	FALSE	68
2022-09-15	11:09:29	-2.38767	-10.6208	-10.4881	1439.89	FALSE	68
2022-09-15	11:09:29	-2.39373	-10.6478	-10.4881	1496.61	FALSE	68
2022-09-15	11:09:30	-2.30487	-10.2525	-12.1687	1439.89	FALSE	68
2022-09-15	11:09:30	-2.96854	-13.2047	-12.1687	1496.61	FALSE	68
2022-09-15	11:09:30	-2.82243	-12.5547	-12.1687	1439.89	FALSE	68
2022-09-15	11:09:30	-2.84675	-12.6629	-12.1687	1496.61	FALSE	68
2022-09-15	11:09:31	-2.98477	-13.2769	-12.1352	1439.89	FALSE	68
2022-09-15	11:09:31	-2.49449	-11.096	-12.1352	1496.61	FALSE	68
2022-09-15	11:09:31	-2.70508	-12.0327	-12.1352	1439.89	FALSE	68
2022-09-15	11:09:32	-2.46869	-10.9812	-11.883	1496.61	FALSE	68
2022-09-15	11:09:32	-2.80126	-12.4606	-11.883	1439.89	FALSE	68
2022-09-15	11:09:32	-2.71591	-12.0809	-11.883	1496.61	FALSE	68
2022-09-15	11:09:32	-2.69978	-12.0092	-11.883	1439.89	FALSE	68
2022-09-15	11:09:33	-2.78324	-12.3804	-10.1108	1496.61	FALSE	68
2022-09-15	11:09:33	-1.99785	-8.88684	-10.1108	1439.89	FALSE	68
2022-09-15	11:09:33	-2.26044	-10.0549	-10.1108	1496.61	FALSE	68
2022-09-15	11:09:33	-2.05047	-9.1209	-10.1108	1439.89	FALSE	68
2022-09-15	11:09:34	-1.88385	-8.37974	-8.87314	1496.61	FALSE	68
2022-09-15	11:09:34	-2.08248	-9.26329	-8.87314	1439.89	FALSE	68
2022-09-15	11:09:34	-1.99851	-8.88977	-8.87314	1496.61	FALSE	68
2022-09-15	11:09:34	-2.01424	-8.95974	-8.87314	1439.89	FALSE	68
2022-09-15	11:09:35	-2.28131	-10.1477	-11.2976	1496.61	FALSE	68
2022-09-15	11:09:35	-2.70034	-12.0117	-11.2976	1439.89	FALSE	68
2022-09-15	11:09:35	-2.6378	-11.7335	-11.2976	1496.61	FALSE	68
2022-09-15	11:09:36	-2.73032	-12.145	-11.7772	1439.89	FALSE	68
2022-09-15	11:09:36	-2.65169	-11.7952	-11.7772	1496.61	FALSE	68
2022-09-15	11:09:36	-2.56233	-11.3978	-11.7772	1439.89	FALSE	68
2022-09-15	11:09:36	-2.64619	-11.7708	-11.7772	1496.61	FALSE	68
2022-09-15	11:09:37	-2.63617	-11.7262	-12.0712	1439.89	FALSE	68
2022-09-15	11:09:37	-2.75876	-12.2715	-12.0712	1496.61	FALSE	68
2022-09-15	11:09:37	-2.73551	-12.1681	-12.0712	1439.89	FALSE	68
2022-09-15	11:09:37	-2.72446	-12.1189	-12.0712	1496.61	FALSE	68
2022-09-15	11:09:38	-2.72752	-12.1326	-12.0947	1439.89	FALSE	68
2022-09-15	11:09:38	-2.70523	-12.0334	-12.0947	1496.61	FALSE	68
2022-09-15	11:09:38	-2.6864	-11.9496	-12.0947	1439.89	FALSE	68
2022-09-15	11:09:38	-2.75688	-12.2632	-12.0947	1496.61	FALSE	68
2022-09-15	11:09:39	-2.67759	-11.9105	-12.0709	1439.89	FALSE	68
2022-09-15	11:09:39	-2.7606	-12.2797	-12.0709	1496.61	FALSE	68
2022-09-15	11:09:39	-2.70278	-12.0225	-12.0709	1439.89	FALSE	68
2022-09-15	11:09:40	-2.72258	-12.1106	-12.7705	1496.61	FALSE	68
2022-09-15	11:09:40	-2.91133	-12.9502	-12.7705	1439.89	FALSE	68
2022-09-15	11:09:40	-2.95098	-13.1265	-12.7705	1496.61	FALSE	68
2022-09-15	11:09:40	-2.89882	-12.8945	-12.7705	1439.89	FALSE	68
2022-09-15	11:09:41	-3.06467	-13.6323	-13.6714	1496.61	FALSE	68
2022-09-15	11:09:41	-3.03047	-13.4801	-13.6714	1439.89	FALSE	68
2022-09-15	11:09:41	-3.11042	-13.8358	-13.6714	1496.61	FALSE	68
2022-09-15	11:09:41	-3.08828	-13.7373	-13.6714	1439.89	FALSE	68
2022-09-15	11:09:42	-3.08396	-13.7181	-13.3069	1496.61	FALSE	68
2022-09-15	11:09:42	-2.99805	-13.3359	-13.3069	1439.89	FALSE	68
2022-09-15	11:09:42	-2.96431	-13.1858	-13.3069	1496.61	FALSE	68
2022-09-15	11:09:42	-2.91978	-12.9878	-13.3069	1439.89	FALSE	68
2022-09-15	11:09:43	-2.90772	-12.9341	-12.7512	1496.61	FALSE	68
2022-09-15	11:09:43	-2.83999	-12.6328	-12.7512	1439.89	FALSE	68
2022-09-15	11:09:43	-2.8521	-12.6867	-12.7512	1496.61	FALSE	68
2022-09-15	11:09:44	-2.86477	-12.7431	-12.5508	1439.89	FALSE	68
2022-09-15	11:09:44	-2.86823	-12.7585	-12.5508	1496.61	FALSE	68
2022-09-15	11:09:44	-2.77932	-12.363	-12.5508	1439.89	FALSE	68
2022-09-15	11:09:44	-2.77383	-12.3386	-12.5508	1496.61	FALSE	68
2022-09-15	11:09:45	-2.7124	-12.0653	-10.6623	1439.89	FALSE	68
2022-09-15	11:09:45	-2.54385	-11.3156	-10.6623	1496.61	FALSE	68
2022-09-15	11:09:45	-2.26808	-10.0889	-10.6623	1439.89	FALSE	68
2022-09-15	11:09:45	-2.06365	-9.17953	-10.6623	1496.61	FALSE	68
2022-09-15	11:09:46	-1.72385	-7.66803	-6.30393	1439.89	FALSE	68
2022-09-15	11:09:46	-1.20121	-5.34322	-6.30393	1496.61	FALSE	68
2022-09-15	11:09:46	-1.3265	-5.90054	-6.30393	1439.89	FALSE	68
2022-09-15	11:09:47	-2.44584	-10.8796	-11.8534	1496.61	FALSE	68
2022-09-15	11:09:47	-2.52513	-11.2323	-11.8534	1439.89	FALSE	68
2022-09-15	11:09:47	-2.79362	-12.4266	-11.8534	1496.61	FALSE	68
2022-09-15	11:09:47	-2.89449	-12.8753	-11.8534	1439.89	FALSE	68
2022-09-15	11:09:48	-2.60675	-11.5953	-10.8807	1496.61	FALSE	68
2022-09-15	11:09:48	-2.55871	-11.3817	-10.8807	1439.89	FALSE	68
2022-09-15	11:09:48	-2.33368	-10.3807	-10.8807	1496.61	FALSE	68
2022-09-15	11:09:48	-2.28518	-10.1649	-10.8807	1439.89	FALSE	68
2022-09-15	11:09:49	-2.19088	-9.74547	-7.44123	1496.61	FALSE	68
2022-09-15	11:09:49	-1.63714	-7.28233	-7.44123	1439.89	FALSE	68
2022-09-15	11:09:49	-1.64095	-7.29927	-7.44123	1496.61	FALSE	68
2022-09-15	11:09:49	-1.22248	-5.43784	-7.44123	1439.89	FALSE	68
2022-09-15	11:09:50	-1.3948	-6.20435	-6.59173	1496.61	FALSE	68
2022-09-15	11:09:50	-1.6408	-7.29861	-6.59173	1439.89	FALSE	68
2022-09-15	11:09:50	-1.41006	-6.27223	-6.59173	1496.61	FALSE	68
2022-09-15	11:09:51	-1.06411	-4.73337	-6.57982	1439.89	FALSE	68
2022-09-15	11:09:51	-1.52543	-6.78542	-6.57982	1496.61	FALSE	68
2022-09-15	11:09:51	-1.91927	-8.5373	-6.57982	1439.89	FALSE	68
2022-09-15	11:09:51	-1.40803	-6.2632	-6.57982	1496.61	FALSE	68
2022-09-15	11:09:52	-1.1662	-5.18749	4.53082	1439.89	FALSE	68
2022-09-15	11:09:52	0.397977	1.77028	4.53082	1498.38	FALSE	68
2022-09-15	11:09:52	1.71116	7.61158	4.53082	1447.5	FALSE	68
2022-09-15	11:09:52	3.13136	13.9289	4.53082	1512.31	1	69
2022-09-15	11:09:53	1.64846	7.33268	-1.89637	1454.84	FALSE	69
2022-09-15	11:09:53	-0.311285	-1.38466	-1.89637	1512.31	FALSE	69
2022-09-15	11:09:53	-1.41851	-6.30982	-1.89637	1454.84	FALSE	69
2022-09-15	11:09:53	-1.62396	-7.2237	-1.89637	1512.31	FALSE	69
2022-09-15	11:09:54	-2.69647	-11.9944	-12.111	1454.84	FALSE	69
2022-09-15	11:09:54	-2.40996	-10.72	-12.111	1512.31	FALSE	69
2022-09-15	11:09:54	-3.06161	-13.6187	-12.111	1454.84	FALSE	69
2022-09-15	11:09:55	-2.67866	-11.9152	-12.9226	1512.31	FALSE	69
2022-09-15	11:09:55	-3.06126	-13.6171	-12.9226	1454.84	FALSE	69
2022-09-15	11:09:55	-2.87174	-12.7741	-12.9226	1512.31	FALSE	69
2022-09-15	11:09:55	-3.00884	-13.3839	-12.9226	1454.84	FALSE	69
2022-09-15	11:09:56	-2.97968	-13.2542	-13.9235	1512.31	FALSE	69
2022-09-15	11:09:56	-3.03296	-13.4912	-13.9235	1454.84	FALSE	69
2022-09-15	11:09:56	-3.19154	-14.1966	-13.9235	1512.31	FALSE	69
2022-09-15	11:09:56	-3.31637	-14.7519	-13.9235	1454.84	FALSE	69
2022-09-15	11:09:57	-3.29612	-14.6618	-15.1359	1512.31	FALSE	69
2022-09-15	11:09:57	-3.35647	-14.9302	-15.1359	1454.84	FALSE	69
2022-09-15	11:09:57	-3.38223	-15.0448	-15.1359	1512.31	FALSE	69
2022-09-15	11:09:57	-3.57602	-15.9069	-15.1359	1454.84	FALSE	69
2022-09-15	11:09:58	-3.96385	-17.632	-11.2924	1512.31	FALSE	69
2022-09-15	11:09:58	-2.28625	-10.1697	-11.2924	1454.84	FALSE	69
2022-09-15	11:09:58	-1.36584	-6.07553	-11.2924	1512.31	FALSE	69
2022-09-15	11:09:59	-1.07413	-4.77795	-2.93206	1454.84	FALSE	69
2022-09-15	11:09:59	-0.286959	-1.27645	-2.93206	1512.31	FALSE	69
2022-09-15	11:09:59	-2.29637	-10.2147	-2.93206	1454.84	FALSE	69
2022-09-15	11:09:59	1.02083	4.54086	-2.93206	1516.85	FALSE	69
2022-09-15	11:10:00	6.93436	30.8454	16.4826	1485.68	1	70
2022-09-15	11:10:00	2.97004	13.2113	16.4826	1530.06	FALSE	70
2022-09-15	11:10:00	2.28246	10.1528	16.4826	1495.84	FALSE	70
2022-09-15	11:10:00	2.63497	11.7209	16.4826	1541.78	FALSE	70
2022-09-15	11:10:01	4.36703	19.4254	24.5772	1515.26	1	71
2022-09-15	11:10:01	6.64403	29.554	24.5772	1571.33	1	72
2022-09-15	11:10:01	5.82637	25.9169	24.5772	1541.18	1	73
2022-09-15	11:10:01	5.26337	23.4125	24.5772	1594.75	1	74
2022-09-15	11:10:02	4.62006	20.551	15.9362	1561.73	1	75
2022-09-15	11:10:02	3.77228	16.7799	15.9362	1611.53	1	76
2022-09-15	11:10:02	2.35553	10.4779	15.9362	1572.21	FALSE	76
2022-09-15	11:10:03	1.39772	6.21734	3.55216	1617.74	FALSE	76
2022-09-15	11:10:03	0.540929	2.40616	3.55216	1574.61	FALSE	76
2022-09-15	11:10:03	0.432583	1.92422	3.55216	1619.67	FALSE	76
2022-09-15	11:10:03	0.823015	3.66094	3.55216	1578.27	FALSE	76
2022-09-15	11:10:04	0.961285	4.27599	4.19206	1623.94	FALSE	76
2022-09-15	11:10:04	0.880013	3.91447	4.19206	1582.19	FALSE	76
2022-09-15	11:10:04	0.861692	3.83298	4.19206	1627.78	FALSE	76
2022-09-15	11:10:04	1.06668	4.74481	4.19206	1586.93	FALSE	76
2022-09-15	11:10:05	1.52607	6.78826	5.31288	1634.57	FALSE	76
2022-09-15	11:10:05	0.855738	3.80649	5.31288	1590.74	FALSE	76
2022-09-15	11:10:05	1.5681	6.97522	5.31288	1641.54	FALSE	76
2022-09-15	11:10:05	0.827646	3.68153	5.31288	1594.42	FALSE	76
2022-09-15	11:10:06	1.10337	4.90801	3.1396	1646.45	FALSE	76
2022-09-15	11:10:06	0.454975	2.02382	3.1396	1596.44	FALSE	76
2022-09-15	11:10:06	0.559097	2.48698	3.1396	1648.94	FALSE	76
2022-09-15	11:10:07	0.467647	2.08019	2.35975	1598.53	FALSE	76
2022-09-15	11:10:07	0.537112	2.38918	2.35975	1651.32	FALSE	76
2022-09-15	11:10:07	0.508817	2.26332	2.35975	1600.79	FALSE	76
2022-09-15	11:10:07	0.60841	2.70633	2.35975	1654.03	FALSE	76
2022-09-15	11:10:08	0.651158	2.89648	3.67735	1603.68	FALSE	76
2022-09-15	11:10:08	0.848155	3.77276	3.67735	1657.8	FALSE	76
2022-09-15	11:10:08	1.27559	5.67408	3.67735	1609.36	FALSE	76
2022-09-15	11:10:08	0.531921	2.36609	3.67735	1660.17	FALSE	76
2022-09-15	11:10:09	1.56047	6.94128	3.17192	1616.3	FALSE	76
2022-09-15	11:10:09	0.375942	1.67227	3.17192	1661.84	FALSE	76
2022-09-15	11:10:09	0.731361	3.25324	3.17192	1619.55	FALSE	76
2022-09-15	11:10:09	0.184542	0.82088	3.17192	1662.66	FALSE	76
2022-09-15	11:10:10	-1.00441	-4.46782	-0.377599	1619.55	FALSE	76
2022-09-15	11:10:10	0.340878	1.51629	-0.377599	1664.18	FALSE	76
2022-09-15	11:10:10	0.408868	1.81873	-0.377599	1621.37	FALSE	76
2022-09-15	11:10:11	0.552227	2.45642	0.992924	1666.64	FALSE	76
2022-09-15	11:10:11	0.288868	1.28494	0.992924	1622.66	FALSE	76
2022-09-15	11:10:11	0.0835753	0.37176	0.992924	1667.01	FALSE	76
2022-09-15	11:10:11	-0.0317936	-0.141424	0.992924	1622.66	FALSE	76
2022-09-15	11:10:12	-0.320903	-1.42744	-0.500845	1667.01	FALSE	76
2022-09-15	11:10:12	-0.349096	-1.55285	-0.500845	1622.66	FALSE	76
2022-09-15	11:10:12	0.0274939	0.122298	-0.500845	1667.13	FALSE	76
2022-09-15	11:10:12	0.192125	0.85461	-0.500845	1623.51	FALSE	76
2022-09-15	11:10:13	0.322201	1.43321	0.751327	1668.56	FALSE	76
2022-09-15	11:10:13	0.0187407	0.0833624	0.751327	1623.6	FALSE	76
2022-09-15	11:10:13	0.194771	0.86638	0.751327	1669.43	FALSE	76
2022-09-15	11:10:13	0.139911	0.622352	0.751327	1624.22	FALSE	76
2022-09-15	11:10:14	0.10215	0.454384	0.212242	1669.88	FALSE	76
2022-09-15	11:10:14	-0.0602415	-0.267966	0.212242	1624.22	FALSE	76
2022-09-15	11:10:14	0.101234	0.450309	0.212242	1670.33	FALSE	76
2022-09-15	11:10:15	0.082761	0.368137	-0.842836	1624.59	FALSE	76
2022-09-15	11:10:15	-0.180699	-0.803785	-0.842836	1670.33	FALSE	76
2022-09-15	11:10:15	-0.327773	-1.458	-0.842836	1624.59	FALSE	76
2022-09-15	11:10:15	-0.332201	-1.4777	-0.842836	1670.33	FALSE	76
2022-09-15	11:10:16	-0.265636	-1.1816	-0.715276	1624.59	FALSE	76
2022-09-15	11:10:16	-0.395203	-1.75794	-0.715276	1670.33	FALSE	76
2022-09-15	11:10:16	-0.0602415	-0.267966	-0.715276	1624.59	FALSE	76
2022-09-15	11:10:16	0.0778756	0.346406	-0.715276	1670.68	FALSE	76
2022-09-15	11:10:17	1.82693	8.12655	3.89302	1632.71	FALSE	76
2022-09-15	11:10:17	1.9194	8.53788	3.89302	1679.22	FALSE	76
2022-09-15	11:10:17	0.549987	2.44645	3.89302	1635.16	FALSE	76
2022-09-15	11:10:17	-0.795559	-3.53881	3.89302	1679.22	FALSE	76
2022-09-15	11:10:18	-0.200445	-0.891619	-1.16327	1635.16	FALSE	76
2022-09-15	11:10:18	-0.313575	-1.39484	-1.16327	1679.22	FALSE	76
2022-09-15	11:10:18	-0.270521	-1.20333	-1.16327	1635.16	FALSE	76
2022-09-15	11:10:19	-0.106297	-0.47283	0.985622	1679.22	FALSE	76
2022-09-15	11:10:19	-0.0444654	-0.197791	0.985622	1635.16	FALSE	76
2022-09-15	11:10:19	0.322099	1.43276	0.985622	1680.65	FALSE	76
2022-09-15	11:10:19	0.714974	3.18035	0.985622	1638.34	FALSE	76
2022-09-15	11:10:20	1.19976	5.33677	6.16902	1685.99	FALSE	76
2022-09-15	11:10:20	1.44704	6.43672	6.16902	1644.78	FALSE	76
2022-09-15	11:10:20	1.33192	5.92465	6.16902	1691.91	FALSE	76
2022-09-15	11:10:20	1.56871	6.97794	6.16902	1651.75	FALSE	76
2022-09-15	11:10:21	1.5881	7.06419	13.2293	1698.98	FALSE	76
2022-09-15	11:10:21	2.219	9.87056	13.2293	1661.62	FALSE	76
2022-09-15	11:10:21	4.08958	18.1913	13.2293	1717.17	1	77
2022-09-15	11:10:21	3.99965	17.7912	13.2293	1679.42	1	78
2022-09-15	11:10:22	3.27691	14.5764	12.6511	1731.74	1	79
2022-09-15	11:10:22	2.7253	12.1227	12.6511	1691.54	FALSE	79
2022-09-15	11:10:22	2.53009	11.2543	12.6511	1743	FALSE	79
2022-09-15	11:10:23	2.35874	10.4921	16.2839	1702.03	FALSE	79
2022-09-15	11:10:23	3.1194	13.8757	16.2839	1756.87	1	80
2022-09-15	11:10:23	4.04454	17.9909	16.2839	1720.02	1	81
2022-09-15	11:10:23	5.12042	22.7767	16.2839	1779.65	1	82
2022-09-15	11:10:24	3.84749	17.1144	11.6534	1737.14	1	83
2022-09-15	11:10:24	3.09182	13.753	11.6534	1793.4	1	84
2022-09-15	11:10:24	1.86592	8.29999	11.6534	1745.44	FALSE	84
2022-09-15	11:10:24	1.67396	7.44611	11.6534	1800.85	FALSE	84
2022-09-15	11:10:25	1.30531	5.80628	4.82305	1751.24	FALSE	84
2022-09-15	11:10:25	1.02469	4.55803	4.82305	1805.41	FALSE	84
2022-09-15	11:10:25	0.922812	4.10485	4.82305	1755.35	FALSE	84
2022-09-15	11:10:26	2.53253	11.2652	6.75922	1816.67	FALSE	84
2022-09-15	11:10:26	1.05996	4.71491	6.75922	1760.06	FALSE	84
2022-09-15	11:10:26	1.77416	7.89182	6.75922	1824.57	FALSE	84
2022-09-15	11:10:26	0.711514	3.16496	6.75922	1763.23	FALSE	84
2022-09-15	11:10:27	1.06123	4.72056	3.007	1829.29	FALSE	84
2022-09-15	11:10:27	0.530445	2.35953	3.007	1765.59	FALSE	84
2022-09-15	11:10:27	0.622557	2.76926	3.007	1832.06	FALSE	84
2022-09-15	11:10:27	0.489784	2.17866	3.007	1767.76	FALSE	84
2022-09-15	11:10:28	0.350903	1.56089	1.25353	1833.62	FALSE	84
2022-09-15	11:10:28	0.296908	1.32071	1.25353	1769.09	FALSE	84
2022-09-15	11:10:28	0.277417	1.23401	1.25353	1834.85	FALSE	84
2022-09-15	11:10:28	0.201998	0.898528	1.25353	1769.98	FALSE	84
2022-09-15	11:10:29	0.0833717	0.370854	-0.234237	1835.22	FALSE	84
2022-09-15	11:10:29	-0.218766	-0.973115	-0.234237	1769.98	FALSE	84
2022-09-15	11:10:29	-0.0225824	-0.100451	-0.234237	1835.22	FALSE	84
2022-09-15	11:10:30	-0.0709793	-0.31573	-1.0142	1769.98	FALSE	84
2022-09-15	11:10:30	-0.163855	-0.72886	-1.0142	1835.22	FALSE	84
2022-09-15	11:10:30	-0.373168	-1.65993	-1.0142	1769.98	FALSE	84
2022-09-15	11:10:30	-0.304007	-1.35228	-1.0142	1835.22	FALSE	84
2022-09-15	11:10:31	-0.35561	-1.58182	-1.56819	1769.98	FALSE	84
2022-09-15	11:10:31	-0.367926	-1.63661	-1.56819	1835.22	FALSE	84
2022-09-15	11:10:31	-0.384262	-1.70927	-1.56819	1769.98	FALSE	84
2022-09-15	11:10:31	-0.302379	-1.34504	-1.56819	1835.22	FALSE	84
2022-09-15	11:10:32	-0.228282	-1.01544	-1.20877	1769.98	FALSE	84
2022-09-15	11:10:32	-0.359071	-1.59722	-1.20877	1835.22	FALSE	84
2022-09-15	11:10:32	-0.237341	-1.05574	-1.20877	1769.98	FALSE	84
2022-09-15	11:10:32	-0.262277	-1.16666	-1.20877	1835.22	FALSE	84
2022-09-15	11:10:33	-0.138562	-0.616351	-0.181266	1769.98	FALSE	84
2022-09-15	11:10:33	-0.238002	-1.05868	-0.181266	1835.22	FALSE	84
2022-09-15	11:10:33	0.254313	1.13124	-0.181266	1771.12	FALSE	84
2022-09-15	11:10:34	1.44622	6.43308	10.6649	1841.65	FALSE	84
2022-09-15	11:10:34	2.31874	10.3142	10.6649	1781.43	FALSE	84
2022-09-15	11:10:34	3.15996	14.0561	10.6649	1855.71	1	85
2022-09-15	11:10:34	2.66541	11.8563	10.6649	1793.29	FALSE	85
2022-09-15	11:10:35	3.53563	15.7272	5.75017	1871.44	1	86
2022-09-15	11:10:35	0.523524	2.32874	5.75017	1795.61	FALSE	86
2022-09-15	11:10:35	0.434059	1.93078	5.75017	1873.37	FALSE	86
2022-09-15	11:10:35	0.67757	3.01397	5.75017	1798.63	FALSE	86
2022-09-15	11:10:36	0.314822	1.40039	1.05376	1874.77	FALSE	86
2022-09-15	11:10:36	0.509936	2.2683	1.05376	1800.9	FALSE	86
2022-09-15	11:10:36	-0.046959	-0.208883	1.05376	1874.77	FALSE	86
2022-09-15	11:10:36	0.169784	0.755233	1.05376	1801.65	FALSE	86
2022-09-15	11:10:37	0.0263234	0.117092	1.06763	1874.89	FALSE	86
2022-09-15	11:10:37	0.195484	0.869552	1.06763	1802.52	FALSE	86
2022-09-15	11:10:37	0.498232	2.21624	1.06763	1877.1	FALSE	86
2022-09-15	11:10:38	0.732583	3.25868	2.36349	1805.78	FALSE	86
2022-09-15	11:10:38	0.386578	1.71958	2.36349	1878.82	FALSE	86
2022-09-15	11:10:38	0.409478	1.82144	2.36349	1807.6	FALSE	86
2022-09-15	11:10:38	0.596705	2.65426	2.36349	1881.48	FALSE	86
2022-09-15	11:10:39	0.476654	2.12025	0.333729	1809.72	FALSE	86
2022-09-15	11:10:39	-0.314491	-1.39892	0.333729	1881.48	FALSE	86
2022-09-15	11:10:39	0.166629	0.741199	0.333729	1810.46	FALSE	86
2022-09-15	11:10:39	-0.0286893	-0.127616	0.333729	1881.48	FALSE	86
2022-09-15	11:10:40	0.0421503	0.187493	0.0144883	1810.65	FALSE	86
2022-09-15	11:10:40	-0.00706081	-0.0314079	0.0144883	1881.48	FALSE	86
2022-09-15	11:10:40	0.106832	0.47521	0.0144883	1811.13	FALSE	86
2022-09-15	11:10:40	-0.128893	-0.573342	0.0144883	1881.48	FALSE	86
2022-09-15	11:10:41	-0.0192746	-0.0857373	-0.139312	1811.13	FALSE	86
2022-09-15	11:10:41	0.0227102	0.10102	-0.139312	1881.58	FALSE	86
2022-09-15	11:10:41	-0.0973915	-0.433217	-0.139312	1811.13	FALSE	86
2022-09-15	11:10:42	-0.0557631	-0.248045	-0.297565	1881.58	FALSE	86
2022-09-15	11:10:42	-0.0967809	-0.430501	-0.297565	1811.13	FALSE	86
2022-09-15	11:10:42	0.05299	0.23571	-0.297565	1881.81	FALSE	86
2022-09-15	11:10:42	-0.168028	-0.747422	-0.297565	1811.13	FALSE	86
2022-09-15	11:10:43	0.0217941	0.0969445	-0.294338	1881.91	FALSE	86
2022-09-15	11:10:43	-0.0119463	-0.0531395	-0.294338	1811.13	FALSE	86
2022-09-15	11:10:43	-0.0845672	-0.376172	-0.294338	1881.91	FALSE	86
2022-09-15	11:10:43	-0.189961	-0.844985	-0.294338	1811.13	FALSE	86
2022-09-15	11:10:44	-0.175101	-0.778884	-0.866323	1881.91	FALSE	86
2022-09-15	11:10:44	-0.187417	-0.833668	-0.866323	1811.13	FALSE	86
2022-09-15	11:10:44	-0.215916	-0.960438	-0.866323	1881.91	FALSE	86
2022-09-15	11:10:44	-0.200598	-0.8923	-0.866323	1811.13	FALSE	86
2022-09-15	11:10:45	-0.138867	-0.617708	-0.324181	1881.91	FALSE	86
2022-09-15	11:10:45	-0.0775951	-0.345159	-0.324181	1811.13	FALSE	86
2022-09-15	11:10:45	-0.00217532	-0.00967626	-0.324181	1881.91	FALSE	86
2022-09-15	11:10:46	-0.0865519	-0.385	0.121902	1811.13	FALSE	86
2022-09-15	11:10:46	0.055789	0.248161	0.121902	1882.16	FALSE	86
2022-09-15	11:10:46	0.143728	0.639331	0.121902	1811.77	FALSE	86
2022-09-15	11:10:46	-0.0033458	-0.0148828	0.121902	1882.16	FALSE	86
2022-09-15	11:10:47	-0.103804	-0.461741	-0.407524	1811.77	FALSE	86
2022-09-15	11:10:47	-0.100801	-0.448383	-0.407524	1882.16	FALSE	86
2022-09-15	11:10:47	-0.105178	-0.467853	-0.407524	1811.77	FALSE	86
2022-09-15	11:10:47	-0.0566791	-0.25212	-0.407524	1882.16	FALSE	86
2022-09-15	11:10:48	-0.00288781	-0.0128456	1.61624	1811.77	FALSE	86
2022-09-15	11:10:48	0.123473	0.549233	1.61624	1882.71	FALSE	86
2022-09-15	11:10:48	0.277774	1.23559	1.61624	1813	FALSE	86
2022-09-15	11:10:48	1.05503	4.69298	1.61624	1887.4	FALSE	86
2022-09-15	11:10:49	1.27065	5.65211	7.42943	1818.65	FALSE	86
2022-09-15	11:10:49	2.22541	9.89907	7.42943	1897.3	FALSE	86
2022-09-15	11:10:49	1.51457	6.73711	7.42943	1825.39	FALSE	86
2022-09-15	11:10:50	2.01843	8.97838	3.43337	1906.28	FALSE	86
2022-09-15	11:10:50	0.596298	2.65245	3.43337	1828.04	FALSE	86
2022-09-15	11:10:50	0.267341	1.18919	3.43337	1907.47	FALSE	86
2022-09-15	11:10:50	0.205356	0.913465	3.43337	1828.96	FALSE	86
2022-09-15	11:10:51	0.0713106	0.317204	-0.447988	1907.78	FALSE	86
2022-09-15	11:10:51	-0.0952542	-0.42371	-0.447988	1828.96	FALSE	86
2022-09-15	11:10:51	-0.1379	-0.613407	-0.447988	1907.78	FALSE	86
2022-09-15	11:10:51	-0.241005	-1.07204	-0.447988	1828.96	FALSE	86
2022-09-15	11:10:52	-0.207519	-0.923086	-1.34945	1907.78	FALSE	86
2022-09-15	11:10:52	-0.303702	-1.35093	-1.34945	1828.96	FALSE	86
2022-09-15	11:10:52	-0.274643	-1.22167	-1.34945	1907.78	FALSE	86
2022-09-15	11:10:52	-0.42762	-1.90214	-1.34945	1828.96	FALSE	86
2022-09-15	11:10:53	-0.324007	-1.44125	-1.25698	1907.78	FALSE	86
2022-09-15	11:10:53	-0.32248	-1.43446	-1.25698	1828.96	FALSE	86
2022-09-15	11:10:53	-0.201259	-0.89524	-1.25698	1907.78	FALSE	86
2022-09-15	11:10:54	-0.350012	-1.55692	-1.11895	1828.96	FALSE	86
2022-09-15	11:10:54	-0.211946	-0.942778	-1.11895	1907.78	FALSE	86
2022-09-15	11:10:54	-0.276679	-1.23072	-1.11895	1828.96	FALSE	86
2022-09-15	11:10:54	-0.16757	-0.745385	-1.11895	1907.78	FALSE	86
2022-09-15	11:10:55	-0.317137	-1.41069	-0.936724	1828.96	FALSE	86
2022-09-15	11:10:55	-0.120801	-0.537347	-0.936724	1907.78	FALSE	86
2022-09-15	11:10:55	-0.231743	-1.03084	-0.936724	1828.96	FALSE	86
2022-09-15	11:10:55	-0.172659	-0.768022	-0.936724	1907.78	FALSE	86
2022-09-15	11:10:56	-0.279732	-1.2443	-0.772321	1828.96	FALSE	86
2022-09-15	11:10:56	-0.143193	-0.636951	-0.772321	1907.78	FALSE	86
2022-09-15	11:10:56	-0.109402	-0.486642	-0.772321	1828.96	FALSE	86
2022-09-15	11:10:56	-0.162175	-0.721387	-0.772321	1907.78	FALSE	86
2022-09-15	11:10:57	-0.0719972	-0.320258	-0.135011	1828.96	FALSE	86
2022-09-15	11:10:57	-0.111183	-0.494564	-0.135011	1907.78	FALSE	86
2022-09-15	11:10:57	0.0921249	0.40979	-0.135011	1829.37	FALSE	86
2022-09-15	11:10:58	-0.0826333	-0.367569	0.0108668	1907.78	FALSE	86
2022-09-15	11:10:58	0.0146695	0.0652529	0.0108668	1829.43	FALSE	86
2022-09-15	11:10:58	-0.0291473	-0.129653	0.0108668	1907.78	FALSE	86
2022-09-15	11:10:58	0.106883	0.475437	0.0108668	1829.91	FALSE	86
2022-09-15	11:10:59	0.764338	3.39993	11.1119	1911.18	FALSE	86
2022-09-15	11:10:59	1.73441	7.715	11.1119	1837.62	FALSE	86
2022-09-15	11:10:59	3.73126	16.5974	11.1119	1927.78	1	87
2022-09-15	11:10:59	3.76225	16.7352	11.1119	1854.36	1	88
2022-09-15	11:11:00	3.91151	17.3992	13.3165	1945.18	1	89
2022-09-15	11:11:00	1.94754	8.66305	13.3165	1863.02	FALSE	89
2022-09-15	11:11:00	4.97238	22.1181	13.3165	1967.3	1	90
2022-09-15	11:11:00	1.14327	5.08549	13.3165	1868.11	FALSE	90
2022-09-15	11:11:01	3.81849	16.9854	11.4104	1984.28	1	91
2022-09-15	11:11:01	1.39289	6.19585	11.4104	1874.3	FALSE	91
2022-09-15	11:11:01	2.48413	11.0499	11.4104	1995.33	FALSE	91
2022-09-15	11:11:02	0.363168	1.61544	2.56484	1875.92	FALSE	91
2022-09-15	11:11:02	0.365967	1.62789	2.56484	1996.96	FALSE	91
2022-09-15	11:11:02	0.505153	2.24702	2.56484	1878.16	FALSE	91
2022-09-15	11:11:02	1.07212	4.769	2.56484	2001.73	FALSE	91
2022-09-15	11:11:03	0.598842	2.66377	1.00707	1880.83	FALSE	91
2022-09-15	11:11:03	0.327748	1.45789	1.00707	2003.19	FALSE	91
2022-09-15	11:11:03	0.0922267	0.410243	1.00707	1881.24	FALSE	91
2022-09-15	11:11:03	-0.113219	-0.503621	1.00707	2003.19	FALSE	91
2022-09-15	11:11:04	-0.425483	-1.89263	-1.93129	1881.24	FALSE	91
2022-09-15	11:11:04	-0.396933	-1.76564	-1.93129	2003.19	FALSE	91
2022-09-15	11:11:04	-0.444974	-1.97933	-1.93129	1881.24	FALSE	91
2022-09-15	11:11:04	-0.4693	-2.08754	-1.93129	2003.19	FALSE	91
2022-09-15	11:11:05	-0.573066	-2.54911	-2.424	1881.24	FALSE	91
2022-09-15	11:11:05	-0.536068	-2.38454	-2.424	2003.19	FALSE	91
2022-09-15	11:11:05	-0.525687	-2.33836	-2.424	1881.24	FALSE	91
2022-09-15	11:11:06	-0.592099	-2.63377	-1.57571	2003.19	FALSE	91
2022-09-15	11:11:06	-0.322226	-1.43333	-1.57571	1881.24	FALSE	91
2022-09-15	11:11:06	-0.311844	-1.38714	-1.57571	2003.19	FALSE	91
2022-09-15	11:11:06	-0.190776	-0.84861	-1.57571	1881.24	FALSE	91
2022-09-15	11:11:07	-0.285432	-1.26966	0.431862	2003.19	FALSE	91
2022-09-15	11:11:07	-0.0610048	-0.271362	0.431862	1881.24	FALSE	91
2022-09-15	11:11:07	0.188257	0.837405	0.431862	2004.03	FALSE	91
2022-09-15	11:11:07	0.546527	2.43106	0.431862	1883.67	FALSE	91
2022-09-15	11:11:08	0.66327	2.95036	2.71159	2006.98	FALSE	91
2022-09-15	11:11:08	1.03569	4.60696	2.71159	1888.28	FALSE	91
2022-09-15	11:11:08	0.491972	2.18839	2.71159	2009.16	FALSE	91
2022-09-15	11:11:08	0.247443	1.10068	2.71159	1889.38	FALSE	91
2022-09-15	11:11:09	0.175789	0.781945	0.36693	2009.95	FALSE	91
2022-09-15	11:11:09	-0.0436002	-0.193942	0.36693	1889.38	FALSE	91
2022-09-15	11:11:09	0.11528	0.512788	0.36693	2010.46	FALSE	91
2022-09-15	11:11:10	-0.129249	-0.574925	5.42143	1889.38	FALSE	91
2022-09-15	11:11:10	0.173244	0.770624	5.42143	2011.23	FALSE	91
2022-09-15	11:11:10	0.748562	3.32975	5.42143	1892.71	FALSE	91
2022-09-15	11:11:10	4.08261	18.1603	5.42143	2029.39	1	92
2022-09-15	11:11:11	6.03797	26.8581	20.6937	1919.56	1	93
2022-09-15	11:11:11	4.87034	21.6642	20.6937	2051.05	1	94
2022-09-15	11:11:11	6.38902	28.4196	20.6937	1947.98	1	95
2022-09-15	11:11:11	1.31126	5.83275	20.6937	2056.89	FALSE	95
2022-09-15	11:11:12	1.45004	6.45007	2.51329	1954.43	FALSE	95
2022-09-15	11:11:12	0.985814	4.3851	2.51329	2061.27	FALSE	95
2022-09-15	11:11:12	-0.221666	-0.986015	2.51329	1954.43	FALSE	95
2022-09-15	11:11:12	0.0458654	0.204018	2.51329	2061.48	FALSE	95
2022-09-15	11:11:13	-0.129045	-0.574018	-0.607825	1954.43	FALSE	95
2022-09-15	11:11:13	-0.0802414	-0.35693	-0.607825	2061.48	FALSE	95
2022-09-15	11:11:13	-0.200649	-0.892527	-0.607825	1954.43	FALSE	95
2022-09-15	11:11:14	-0.151641	-0.674529	-0.763777	2061.48	FALSE	95
2022-09-15	11:11:14	-0.0839565	-0.373455	-0.763777	1954.43	FALSE	95
2022-09-15	11:11:14	-0.261972	-1.1653	-0.763777	2061.48	FALSE	95
2022-09-15	11:11:14	-0.189249	-0.841817	-0.763777	1954.43	FALSE	95
2022-09-15	11:11:15	-0.290216	-1.29094	-1.65613	2061.48	FALSE	95
2022-09-15	11:11:15	-0.331641	-1.47521	-1.65613	1954.43	FALSE	95
2022-09-15	11:11:15	-0.511946	-2.27724	-1.65613	2061.48	FALSE	95
2022-09-15	11:11:15	-0.355457	-1.58114	-1.65613	1954.43	FALSE	95
2022-09-15	11:11:16	-0.163956	-0.729309	-0.794656	2061.48	FALSE	95
2022-09-15	11:11:16	-0.283702	-1.26196	-0.794656	1954.43	FALSE	95
2022-09-15	11:11:16	-0.0882822	-0.392697	-0.794656	2061.48	FALSE	95
2022-09-15	11:11:17	-0.162633	-0.723424	-0.664851	1954.43	FALSE	95
2022-09-15	11:11:17	-0.107366	-0.477585	-0.664851	2061.48	FALSE	95
2022-09-15	11:11:17	-0.2236	-0.994618	-0.664851	1954.43	FALSE	95
2022-09-15	11:11:17	-0.104262	-0.463778	-0.664851	2061.48	FALSE	95
2022-09-15	11:11:18	-0.0218191	-0.0970557	-0.423483	1954.43	FALSE	95
2022-09-15	11:11:18	-0.191234	-0.850647	-0.423483	2061.48	FALSE	95
2022-09-15	11:11:18	-0.107824	-0.479623	-0.423483	1954.43	FALSE	95
2022-09-15	11:11:18	-0.0599361	-0.266608	-0.423483	2061.48	FALSE	95
2022-09-15	11:11:19	0.763168	3.39472	28.9664	1957.83	FALSE	95
2022-09-15	11:11:19	6.10072	27.1372	28.9664	2088.61	1	96
2022-09-15	11:11:19	12.6719	56.3671	28.9664	2014.2	1	97
2022-09-15	11:11:20	10.2435	45.5651	30.3045	2134.18	1	98
2022-09-15	11:11:20	9.92209	44.1354	30.3045	2058.33	1	99
2022-09-15	11:11:20	4.87584	21.6887	30.3045	2155.87	1	100
2022-09-15	11:11:20	2.20963	9.82888	30.3045	2068.16	FALSE	100
2022-09-15	11:11:21	3.69996	16.4582	18.6895	2172.33	1	101
2022-09-15	11:11:21	2.13874	9.51354	18.6895	2077.67	FALSE	101
2022-09-15	11:11:21	4.43355	19.7213	18.6895	2192.05	1	102
2022-09-15	11:11:21	6.53411	29.065	18.6895	2106.74	1	103
2022-09-15	11:11:22	7.06683	31.4347	24.2352	2223.48	1	104
2022-09-15	11:11:22	6.82001	30.3368	24.2352	2137.08	1	105
2022-09-15	11:11:22	4.025	17.904	24.2352	2241.39	1	106
2022-09-15	11:11:22	3.88138	17.2652	24.2352	2154.34	1	107
2022-09-15	11:11:23	2.26347	10.0684	6.38979	2251.45	FALSE	107
2022-09-15	11:11:23	0.761896	3.38907	6.38979	2157.73	FALSE	107
2022-09-15	11:11:23	1.06887	4.75455	6.38979	2256.21	FALSE	107
2022-09-15	11:11:23	1.65172	7.34718	6.38979	2165.08	FALSE	107
2022-09-15	11:11:24	1.88581	8.38846	17.0717	2264.6	FALSE	107
2022-09-15	11:11:24	4.32006	19.2165	17.0717	2184.29	1	108
2022-09-15	11:11:24	5.3078	23.6102	17.0717	2288.21	1	109
2022-09-15	11:11:25	5.73523	25.5115	31.4913	2209.8	1	110
2022-09-15	11:11:25	0.313448	1.39428	31.4913	2289.6	FALSE	110
2022-09-15	11:11:25	6.8884	30.641	31.4913	2240.45	1	111
2022-09-15	11:11:25	15.3812	68.4187	31.4913	2358.02	1	112
2022-09-15	11:11:26	5.77146	25.6726	14.639	2266.12	1	113
2022-09-15	11:11:26	2.92795	13.0241	14.639	2371.04	FALSE	113
2022-09-15	11:11:26	1.30836	5.81985	14.639	2271.94	FALSE	113
2022-09-15	11:11:26	3.15619	14.0394	14.639	2385.08	1	114
2022-09-15	11:11:27	9.05629	40.2842	42.7546	2312.22	1	115
2022-09-15	11:11:27	12.9215	57.4774	42.7546	2442.56	1	116
2022-09-15	11:11:27	7.21324	32.0859	42.7546	2344.31	1	117
2022-09-15	11:11:27	9.25558	41.1707	42.7546	2483.73	1	118
2022-09-15	11:11:28	15.7785	70.1859	60.9306	2414.49	1	119
2022-09-15	11:11:28	16.4078	72.9852	60.9306	2556.72	1	120
2022-09-15	11:11:28	8.90713	39.6207	60.9306	2454.11	1	121
2022-09-15	11:11:29	8.19599	36.4574	26.9873	2593.17	1	122
2022-09-15	11:11:29	7.04459	31.3357	26.9873	2485.45	1	123
2022-09-15	11:11:29	4.85792	21.609	26.9873	2614.78	1	124
2022-09-15	11:11:29	4.16958	18.5471	26.9873	2504	1	125
2022-09-15	11:11:30	4.44225	19.76	19.5841	2634.54	1	126
2022-09-15	11:11:30	4.49161	19.9796	19.5841	2523.98	1	127
2022-09-15	11:11:30	4.4995	20.0147	19.5841	2654.56	1	128
2022-09-15	11:11:30	4.17747	18.5822	19.5841	2542.56	1	129

## Sheet: Klutz_star_202291511622 (3)
Date	Time	Lbs	Newtons	Total force x time		total steps > 13.345	**GoPro Fitting: 1055
2022-09-15	11:06:30	0.371158	1.65099	1.65099	FALSE	0
2022-09-15	11:06:30	0.388104	1.72636	1.72636	FALSE	0
2022-09-15	11:06:30	0.399606	1.77753	3.42851	FALSE	0
2022-09-15	11:06:30	0.435992	1.93938	3.66574	FALSE	0
2022-09-15	11:06:31	0.391819	1.74289	5.1714	FALSE	0
2022-09-15	11:06:31	0.376756	1.67589	5.34163	FALSE	0
2022-09-15	11:06:31	0.384797	1.71165	6.88306	FALSE	0
2022-09-15	11:06:31	0.389428	1.73225	7.07388	FALSE	0
2022-09-15	11:06:32	0.394466	1.75466	8.63772	FALSE	0
2022-09-15	11:06:32	0.40958	1.82189	8.89578	FALSE	0
2022-09-15	11:06:32	0.545611	2.42699	11.0647	FALSE	0
2022-09-15	11:06:32	0.773906	3.44249	12.3383	FALSE	0
2022-09-15	11:06:33	0.850649	3.78386	14.8486	FALSE	0
2022-09-15	11:06:33	0.699656	3.11221	15.4505	FALSE	0
2022-09-15	11:06:33	0.549122	2.4426	17.2912	FALSE	0
2022-09-15	11:06:34	0.411972	1.83253	17.283	FALSE	0
2022-09-15	11:06:34	0.431005	1.9172	19.2084	FALSE	0
2022-09-15	11:06:34	0.43874	1.9516	19.2346	FALSE	0
2022-09-15	11:06:34	0.425967	1.89479	21.1032	FALSE	0
2022-09-15	11:06:35	0.351921	1.56541	20.8	FALSE	0
2022-09-15	11:06:35	0.209173	0.930443	22.0336	FALSE	0
2022-09-15	11:06:35	0.376959	1.67679	22.4768	FALSE	0
2022-09-15	11:06:35	0.397977	1.77028	23.8039	FALSE	0
2022-09-15	11:06:36	0.194924	0.867061	23.3439	FALSE	0
2022-09-15	11:06:36	0.483219	2.14945	25.9533	FALSE	0
2022-09-15	11:06:36	0.167596	0.745501	24.0894	FALSE	0
2022-09-15	11:06:37	-0.0798343	-0.355119	25.9533	FALSE	0
2022-09-15	11:06:37	0.309377	1.37617	25.4655	FALSE	0
2022-09-15	11:06:37	0.0327356	0.145614	26.0989	FALSE	0
2022-09-15	11:06:37	-0.158257	-0.703959	25.4655	FALSE	0
2022-09-15	11:06:38	-0.0458903	-0.204129	26.0989	FALSE	0
2022-09-15	11:06:38	-0.0777478	-0.345838	25.4655	FALSE	0
2022-09-15	11:06:38	-0.190012	-0.845211	26.0989	FALSE	0
2022-09-15	11:06:38	-0.498765	-2.21861	25.4655	FALSE	0
2022-09-15	11:06:39	-0.508536	-2.26207	26.0989	FALSE	0
2022-09-15	11:06:39	-0.312811	-1.39145	25.4655	FALSE	0
2022-09-15	11:06:39	-0.298969	-1.32987	26.0989	FALSE	0
2022-09-15	11:06:39	-0.277493	-1.23434	25.4655	FALSE	0
2022-09-15	11:06:40	-0.194847	-0.866718	26.0989	FALSE	0
2022-09-15	11:06:40	-0.106196	-0.472381	25.4655	FALSE	0
2022-09-15	11:06:40	-0.0542364	-0.241254	26.0989	FALSE	0
2022-09-15	11:06:41	0.012074	0.0537076	25.5193	FALSE	0
2022-09-15	11:06:41	0.238384	1.06038	27.1593	FALSE	0
2022-09-15	11:06:41	0.212685	0.946065	26.4653	FALSE	0
2022-09-15	11:06:41	1.04912	4.6667	31.826	FALSE	0
2022-09-15	11:06:42	2.4194	10.762	37.2273	FALSE	0
2022-09-15	11:06:42	3.57055	15.8825	47.7085	1	1
2022-09-15	11:06:42	6.22886	27.7072	64.9345	1	2
2022-09-15	11:06:42	7.1222	31.681	79.3895	1	3
2022-09-15	11:06:43	3.25116	14.4618	79.3963	1	4
2022-09-15	11:06:43	0.436196	1.94029	81.3298	FALSE	4
2022-09-15	11:06:43	-4.10859	-18.2758	79.3963	FALSE	4
2022-09-15	11:06:43	-4.50752	-20.0504	81.3298	FALSE	4
2022-09-15	11:06:44	-4.66955	-20.7711	79.3963	FALSE	4
2022-09-15	11:06:44	-4.7149	-20.9728	81.3298	FALSE	4
2022-09-15	11:06:44	-4.57474	-20.3494	79.3963	FALSE	4
2022-09-15	11:06:45	-4.46675	-19.869	81.3298	FALSE	4
2022-09-15	11:06:45	-3.98737	-17.7366	79.3963	FALSE	4
2022-09-15	11:06:45	0.438079	1.94866	83.2785	FALSE	4
2022-09-15	11:06:45	0.120929	0.537916	79.9342	FALSE	4
2022-09-15	11:06:46	3.04759	13.5563	96.8348	1	5
2022-09-15	11:06:46	2.46444	10.9623	90.8966	FALSE	5
2022-09-15	11:06:46	3.1848	14.1666	111.001	1	6
2022-09-15	11:06:46	3.63187	16.1553	107.052	1	7
2022-09-15	11:06:47	1.46439	6.5139	117.515	FALSE	7
2022-09-15	11:06:47	0.664389	2.95534	110.007	FALSE	7
2022-09-15	11:06:47	0.337468	1.50113	119.016	FALSE	7
2022-09-15	11:06:47	0.674618	3.00084	113.008	FALSE	7
2022-09-15	11:06:48	0.324186	1.44204	120.458	FALSE	7
2022-09-15	11:06:48	-0.13902	-0.618389	113.008	FALSE	7
2022-09-15	11:06:48	-0.129656	-0.576736	120.458	FALSE	7
2022-09-15	11:06:49	-0.126297	-0.561794	113.008	FALSE	7
2022-09-15	11:06:49	0.203779	0.90645	121.365	FALSE	7
2022-09-15	11:06:49	0.171565	0.763155	113.771	FALSE	7
2022-09-15	11:06:49	0.132786	0.590659	121.956	FALSE	7
2022-09-15	11:06:50	0.79701	3.54526	117.316	FALSE	7
2022-09-15	11:06:50	1.62887	7.24554	129.201	FALSE	7
2022-09-15	11:06:50	2.89991	12.8994	130.216	FALSE	7
2022-09-15	11:06:50	4.6823	20.8278	150.029	1	8
2022-09-15	11:06:51	6.18678	27.52	157.736	1	9
2022-09-15	11:06:51	9.7307	43.2841	193.313	1	10
2022-09-15	11:06:51	2.34754	10.4423	168.178	FALSE	10
2022-09-15	11:06:52	1.01014	4.4933	197.806	FALSE	10
2022-09-15	11:06:52	0.40612	1.8065	169.985	FALSE	10
2022-09-15	11:06:52	0.0297839	0.132485	197.939	FALSE	10
2022-09-15	11:06:52	0.313957	1.39654	171.381	FALSE	10
2022-09-15	11:06:53	0.253448	1.12739	199.066	FALSE	10
2022-09-15	11:06:53	0.118944	0.529087	171.91	FALSE	10
2022-09-15	11:06:53	0.30785	1.36938	200.436	FALSE	10
2022-09-15	11:06:53	0.128155	0.570059	172.48	FALSE	10
2022-09-15	11:06:54	0.303321	1.34923	201.785	FALSE	10
2022-09-15	11:06:54	0.194517	0.865251	173.346	FALSE	10
2022-09-15	11:06:54	0.100166	0.445558	202.23	FALSE	10
2022-09-15	11:06:54	0.391463	1.74131	175.087	FALSE	10
2022-09-15	11:06:55	0.046018	0.204697	202.435	FALSE	10
2022-09-15	11:06:55	0.138588	0.616467	175.703	FALSE	10
2022-09-15	11:06:55	0.0872903	0.388285	202.823	FALSE	10
2022-09-15	11:06:56	0.16154	0.718562	176.422	FALSE	10
2022-09-15	11:06:56	1.93788	8.62008	211.443	FALSE	10
2022-09-15	11:06:56	12.3902	55.1141	231.536	1	11
2022-09-15	11:06:56	15.4882	68.8946	280.338	1	12
2022-09-15	11:06:57	3.84225	17.0911	248.627	1	13
2022-09-15	11:06:57	2.19457	9.76189	290.1	FALSE	13
2022-09-15	11:06:57	0.211667	0.941537	249.569	FALSE	13
2022-09-15	11:06:57	0.123728	0.550367	290.65	FALSE	13
2022-09-15	11:06:58	0.0262725	0.116865	249.686	FALSE	13
2022-09-15	11:06:58	-0.368333	-1.63842	290.65	FALSE	13
2022-09-15	11:06:58	-0.453727	-2.01827	249.686	FALSE	13
2022-09-15	11:06:58	-0.395407	-1.75885	290.65	FALSE	13
2022-09-15	11:06:59	-0.451183	-2.00695	249.686	FALSE	13
2022-09-15	11:06:59	-0.710724	-3.16144	290.65	FALSE	13
2022-09-15	11:06:59	-0.600445	-2.6709	249.686	FALSE	13
2022-09-15	11:07:00	-0.698154	-3.10553	290.65	FALSE	13
2022-09-15	11:07:00	-0.614847	-2.73496	249.686	FALSE	13
2022-09-15	11:07:00	-0.481412	-2.14142	290.65	FALSE	13
2022-09-15	11:07:00	-0.498307	-2.21657	249.686	FALSE	13
2022-09-15	11:07:01	-0.343702	-1.52886	290.65	FALSE	13
2022-09-15	11:07:01	-0.349147	-1.55308	249.686	FALSE	13
2022-09-15	11:07:01	-0.19215	-0.854722	290.65	FALSE	13
2022-09-15	11:07:01	-0.117188	-0.521276	249.686	FALSE	13
2022-09-15	11:07:02	-0.173269	-0.770735	290.65	FALSE	13
2022-09-15	11:07:02	-0.155458	-0.691508	249.686	FALSE	13
2022-09-15	11:07:02	-0.239783	-1.0666	290.65	FALSE	13
2022-09-15	11:07:02	-0.32762	-1.45732	249.686	FALSE	13
2022-09-15	11:07:03	-0.513066	-2.28222	290.65	FALSE	13
2022-09-15	11:07:03	-0.49902	-2.21974	249.686	FALSE	13
2022-09-15	11:07:03	-0.47159	-2.09773	290.65	FALSE	13
2022-09-15	11:07:04	-0.320496	-1.42563	249.686	FALSE	13
2022-09-15	11:07:04	0.125255	0.557159	291.207	FALSE	13
2022-09-15	11:07:04	0.0742623	0.330334	250.016	FALSE	13
2022-09-15	11:07:04	-0.0335239	-0.149121	291.207	FALSE	13
2022-09-15	11:07:05	0.108919	0.484493	250.5	FALSE	13
2022-09-15	11:07:05	0.747494	3.325	294.532	FALSE	13
2022-09-15	11:07:05	0.571209	2.54085	253.041	FALSE	13
2022-09-15	11:07:05	0.987392	4.39212	298.925	FALSE	13
2022-09-15	11:07:06	1.9451	8.65219	261.693	FALSE	13
2022-09-15	11:07:06	2.12495	9.4522	308.377	FALSE	13
2022-09-15	11:07:06	2.28312	10.1558	271.849	FALSE	13
2022-09-15	11:07:07	4.44703	19.7813	328.158	1	14
2022-09-15	11:07:07	0.765	3.40287	275.252	FALSE	14
2022-09-15	11:07:07	2.30256	10.2422	338.4	FALSE	14
2022-09-15	11:07:07	1.31289	5.84	281.092	FALSE	14
2022-09-15	11:07:08	1.7309	7.69939	346.1	FALSE	14
2022-09-15	11:07:08	2.48052	11.0338	292.126	FALSE	14
2022-09-15	11:07:08	2.67487	11.8984	357.998	FALSE	14
2022-09-15	11:07:08	1.81528	8.07473	300.201	FALSE	14
2022-09-15	11:07:09	1.30439	5.80219	363.8	FALSE	14
2022-09-15	11:07:09	0.639606	2.8451	303.046	FALSE	14
2022-09-15	11:07:09	0.197621	0.879058	364.679	FALSE	14
2022-09-15	11:07:09	0.194568	0.865477	303.911	FALSE	14
2022-09-15	11:07:10	-0.210165	-0.934856	364.679	FALSE	14
2022-09-15	11:07:10	-0.519987	-2.31301	303.911	FALSE	14
2022-09-15	11:07:10	-0.701615	-3.12092	364.679	FALSE	14
2022-09-15	11:07:11	-0.757747	-3.37061	303.911	FALSE	14
2022-09-15	11:07:11	-0.853523	-3.79664	364.679	FALSE	14
2022-09-15	11:07:11	-1.00177	-4.45607	303.911	FALSE	14
2022-09-15	11:07:11	-0.876577	-3.89919	364.679	FALSE	14
2022-09-15	11:07:12	-1.06197	-4.72385	303.911	FALSE	14
2022-09-15	11:07:12	-0.0954068	-0.424389	364.679	FALSE	14
2022-09-15	11:07:12	1.64286	7.30777	311.219	FALSE	14
2022-09-15	11:07:12	3.49599	15.5509	380.23	1	15
2022-09-15	11:07:13	3.55823	15.8277	327.047	1	16
2022-09-15	11:07:13	2.21401	9.84836	390.078	FALSE	16
2022-09-15	11:07:13	1.11553	4.9621	332.009	FALSE	16
2022-09-15	11:07:13	1.04118	4.63138	394.71	FALSE	16
2022-09-15	11:07:14	0.10215	0.454384	332.463	FALSE	16
2022-09-15	11:07:14	-0.117493	-0.522632	394.71	FALSE	16
2022-09-15	11:07:14	-0.348638	-1.55081	332.463	FALSE	16
2022-09-15	11:07:15	-0.789554	-3.51209	394.71	FALSE	16
2022-09-15	11:07:15	-0.892964	-3.97208	332.463	FALSE	16
2022-09-15	11:07:15	-0.850266	-3.78215	394.71	FALSE	16
2022-09-15	11:07:15	-0.555	-2.46875	332.463	FALSE	16
2022-09-15	11:07:16	0.151667	0.674645	395.385	FALSE	16
2022-09-15	11:07:16	0.512176	2.27826	334.741	FALSE	16
2022-09-15	11:07:16	0.973499	4.33032	399.715	FALSE	16
2022-09-15	11:07:16	1.46933	6.53587	341.277	FALSE	16
2022-09-15	11:07:17	1.36444	6.0693	405.784	FALSE	16
2022-09-15	11:07:17	0.872735	3.8821	345.159	FALSE	16
2022-09-15	11:07:17	0.888715	3.95318	409.737	FALSE	16
2022-09-15	11:07:17	0.509784	2.26762	347.427	FALSE	16
2022-09-15	11:07:18	0.530547	2.35998	412.097	FALSE	16
2022-09-15	11:07:18	0.49299	2.19292	349.62	FALSE	16
2022-09-15	11:07:18	0.448053	1.99303	414.09	FALSE	16
2022-09-15	11:07:19	0.360827	1.60503	351.225	FALSE	16
2022-09-15	11:07:19	0.389886	1.73429	415.825	FALSE	16
2022-09-15	11:07:19	-0.859986	-3.82539	351.225	FALSE	16
2022-09-15	11:07:19	-0.982582	-4.37072	415.825	FALSE	16
2022-09-15	11:07:20	0.102608	0.456421	351.681	FALSE	16
2022-09-15	11:07:20	-0.476272	-2.11855	415.825	FALSE	16
2022-09-15	11:07:20	-0.838256	-3.72873	351.681	FALSE	16
2022-09-15	11:07:20	-1.02258	-4.54864	415.825	FALSE	16
2022-09-15	11:07:21	-0.891386	-3.96506	351.681	FALSE	16
2022-09-15	11:07:21	-1.08401	-4.82189	415.825	FALSE	16
2022-09-15	11:07:21	-1.0835	-4.81962	351.681	FALSE	16
2022-09-15	11:07:22	-0.595101	-2.64713	415.825	FALSE	16
2022-09-15	11:07:22	-0.204872	-0.911312	351.681	FALSE	16
2022-09-15	11:07:22	1.36927	6.09079	421.915	FALSE	16
2022-09-15	11:07:22	3.35762	14.9354	366.617	1	17
2022-09-15	11:07:23	2.20566	9.81122	431.727	FALSE	17
2022-09-15	11:07:23	3.3765	15.0193	381.636	1	18
2022-09-15	11:07:23	1.06139	4.72127	436.448	FALSE	18
2022-09-15	11:07:23	1.59548	7.09701	388.733	FALSE	18
2022-09-15	11:07:24	1.16602	5.18669	441.635	FALSE	18
2022-09-15	11:07:24	0.301438	1.34086	390.074	FALSE	18
2022-09-15	11:07:24	0.135942	0.604697	442.239	FALSE	18
2022-09-15	11:07:24	0.00286283	0.0127344	390.087	FALSE	18
2022-09-15	11:07:25	-0.14472	-0.643744	442.239	FALSE	18
2022-09-15	11:07:25	-0.287926	-1.28075	390.087	FALSE	18
2022-09-15	11:07:25	-0.26019	-1.15738	442.239	FALSE	18
2022-09-15	11:07:26	-0.0587147	-0.261175	390.087	FALSE	18
2022-09-15	11:07:26	0.247596	1.10136	443.341	FALSE	18
2022-09-15	11:07:26	0.985102	4.38193	394.469	FALSE	18
2022-09-15	11:07:26	3.5624	15.8463	459.187	1	19
2022-09-15	11:07:27	3.45467	15.3671	409.836	1	20
2022-09-15	11:07:27	2.18703	9.72835	468.915	FALSE	20
2022-09-15	11:07:27	1.8305	8.14243	417.978	FALSE	20
2022-09-15	11:07:27	2.09874	9.33562	478.251	FALSE	20
2022-09-15	11:07:28	2.62082	11.6579	429.636	FALSE	20
2022-09-15	11:07:28	4.00994	17.837	496.088	1	21
2022-09-15	11:07:28	5.69176	25.3181	454.954	1	22
2022-09-15	11:07:28	3.83441	17.0562	513.144	1	23
2022-09-15	11:07:29	2.55085	11.3467	466.301	FALSE	23
2022-09-15	11:07:29	1.75599	7.81099	520.955	FALSE	23
2022-09-15	11:07:29	2.23655	9.94862	476.249	FALSE	23
2022-09-15	11:07:30	2.95833	13.1592	534.114	FALSE	23
2022-09-15	11:07:30	4.60312	20.4756	496.725	1	24
2022-09-15	11:07:30	4.87609	21.6898	555.804	1	25
2022-09-15	11:07:30	4.65258	20.6956	517.421	1	26
2022-09-15	11:07:31	4.1906	18.6406	574.445	1	27
2022-09-15	11:07:31	4.13044	18.373	535.794	1	28
2022-09-15	11:07:31	3.06653	13.6405	588.085	1	29
2022-09-15	11:07:31	1.60037	7.11877	542.912	FALSE	29
2022-09-15	11:07:32	0.421132	1.87328	589.959	FALSE	29
2022-09-15	11:07:32	0.2307	1.0262	543.939	FALSE	29
2022-09-15	11:07:32	-0.200394	-0.891393	589.959	FALSE	29
2022-09-15	11:07:32	-0.178358	-0.793372	543.939	FALSE	29
2022-09-15	11:07:33	-0.593829	-2.64147	589.959	FALSE	29
2022-09-15	11:07:33	-0.504974	-2.24623	543.939	FALSE	29
2022-09-15	11:07:33	0.55472	2.46751	592.426	FALSE	29
2022-09-15	11:07:34	2.72892	12.1388	556.077	FALSE	29
2022-09-15	11:07:34	1.03223	4.59157	597.018	FALSE	29
2022-09-15	11:07:34	0.630954	2.80661	558.884	FALSE	29
2022-09-15	11:07:34	0.836806	3.72228	600.74	FALSE	29
2022-09-15	11:07:35	1.21655	5.41146	564.296	FALSE	29
2022-09-15	11:07:35	1.13844	5.06401	605.804	FALSE	29
2022-09-15	11:07:35	0.645712	2.87226	567.168	FALSE	29
2022-09-15	11:07:35	0.435076	1.93531	607.739	FALSE	29
2022-09-15	11:07:36	0.257977	1.14753	568.315	FALSE	29
2022-09-15	11:07:36	0.234517	1.04318	608.782	FALSE	29
2022-09-15	11:07:36	0.244542	1.08777	569.403	FALSE	29
2022-09-15	11:07:37	0.344491	1.53236	610.315	FALSE	29
2022-09-15	11:07:37	0.25584	1.13803	570.541	FALSE	29
2022-09-15	11:07:37	0.225662	1.00379	611.319	FALSE	29
2022-09-15	11:07:37	0.235127	1.04589	571.587	FALSE	29
2022-09-15	11:07:38	0.175331	0.779907	612.099	FALSE	29
2022-09-15	11:07:38	0.126883	0.564401	572.151	FALSE	29
2022-09-15	11:07:38	0.105916	0.471136	612.57	FALSE	29
2022-09-15	11:07:38	0.166781	0.741875	572.893	FALSE	29
2022-09-15	11:07:39	0.24785	1.10249	613.672	FALSE	29
2022-09-15	11:07:39	0.383881	1.70758	574.601	FALSE	29
2022-09-15	11:07:39	0.371412	1.65211	615.324	FALSE	29
2022-09-15	11:07:39	0.465051	2.06864	576.669	FALSE	29
2022-09-15	11:07:40	0.441489	1.96383	617.288	FALSE	29
2022-09-15	11:07:40	0.597214	2.65653	579.326	FALSE	29
2022-09-15	11:07:40	0.679555	3.0228	620.311	FALSE	29
2022-09-15	11:07:41	0.617468	2.74662	582.073	FALSE	29
2022-09-15	11:07:41	0.585509	2.60446	622.915	FALSE	29
2022-09-15	11:07:41	0.722608	3.2143	585.287	FALSE	29
2022-09-15	11:07:41	0.588919	2.61963	625.535	FALSE	29
2022-09-15	11:07:42	0.636552	2.83151	588.118	FALSE	29
2022-09-15	11:07:42	0.699147	3.10995	628.645	FALSE	29
2022-09-15	11:07:42	0.674262	2.99925	591.118	FALSE	29
2022-09-15	11:07:42	0.727188	3.23468	631.88	FALSE	29
2022-09-15	11:07:43	0.673244	2.99472	594.112	FALSE	29
2022-09-15	11:07:43	0.715534	3.18284	635.062	FALSE	29
2022-09-15	11:07:43	1.01457	4.51301	598.625	FALSE	29
2022-09-15	11:07:43	0.951921	4.23433	639.297	FALSE	29
2022-09-15	11:07:44	0.879453	3.91198	602.537	FALSE	29
2022-09-15	11:07:44	0.572379	2.54606	641.843	FALSE	29
2022-09-15	11:07:44	0.354466	1.57674	604.114	FALSE	29
2022-09-15	11:07:45	0.360115	1.60186	643.445	FALSE	29
2022-09-15	11:07:45	0.431667	1.92014	606.034	FALSE	29
2022-09-15	11:07:45	0.344084	1.53055	644.975	FALSE	29
2022-09-15	11:07:45	0.107189	0.476798	606.511	FALSE	29
2022-09-15	11:07:46	0.037214	0.165535	645.141	FALSE	29
2022-09-15	11:07:46	-0.153269	-0.681771	606.511	FALSE	29
2022-09-15	11:07:46	-0.134643	-0.598919	645.141	FALSE	29
2022-09-15	11:07:46	-0.256374	-1.1404	606.511	FALSE	29
2022-09-15	11:07:47	-0.308486	-1.37221	645.141	FALSE	29
2022-09-15	11:07:47	-0.304771	-1.35568	606.511	FALSE	29
2022-09-15	11:07:47	-0.502277	-2.23423	645.141	FALSE	29
2022-09-15	11:07:47	-0.528333	-2.35013	606.511	FALSE	29
2022-09-15	11:07:48	-0.699885	-3.11323	645.141	FALSE	29
2022-09-15	11:07:48	-0.487162	-2.16699	606.511	FALSE	29
2022-09-15	11:07:48	-0.764261	-3.39959	645.141	FALSE	29
2022-09-15	11:07:49	-0.722531	-3.21396	606.511	FALSE	29
2022-09-15	11:07:49	-0.895966	-3.98544	645.141	FALSE	29
2022-09-15	11:07:49	-0.840546	-3.73892	606.511	FALSE	29
2022-09-15	11:07:49	-0.964058	-4.28832	645.141	FALSE	29
2022-09-15	11:07:50	-0.766653	-3.41023	606.511	FALSE	29
2022-09-15	11:07:50	-0.951742	-4.23354	645.141	FALSE	29
2022-09-15	11:07:50	-0.68075	-3.02811	606.511	FALSE	29
2022-09-15	11:07:50	-0.68645	-3.05347	645.141	FALSE	29
2022-09-15	11:07:51	-0.552099	-2.45585	606.511	FALSE	29
2022-09-15	11:07:51	-0.421157	-1.87339	645.141	FALSE	29
2022-09-15	11:07:51	-0.388536	-1.72829	606.511	FALSE	29
2022-09-15	11:07:52	-0.321921	-1.43197	645.141	FALSE	29
2022-09-15	11:07:52	-0.0852796	-0.379341	606.511	FALSE	29
2022-09-15	11:07:52	1.21604	5.40919	650.55	FALSE	29
2022-09-15	11:07:52	2.7851	12.3887	618.9	FALSE	29
2022-09-15	11:07:53	2.92663	13.0182	663.568	FALSE	29
2022-09-15	11:07:53	1.66882	7.42325	626.323	FALSE	29
2022-09-15	11:07:53	1.24139	5.52195	669.09	FALSE	29
2022-09-15	11:07:53	0.553906	2.46388	628.787	FALSE	29
2022-09-15	11:07:54	0.802659	3.57039	672.661	FALSE	29
2022-09-15	11:07:54	1.06581	4.74094	633.528	FALSE	29
2022-09-15	11:07:54	0.708053	3.14956	675.81	FALSE	29
2022-09-15	11:07:54	0.197977	0.880641	634.408	FALSE	29
2022-09-15	11:07:55	-0.0129133	-0.0574409	675.81	FALSE	29
2022-09-15	11:07:55	0.126781	0.563947	634.972	FALSE	29
2022-09-15	11:07:55	0.286934	1.27634	677.086	FALSE	29
2022-09-15	11:07:56	0.295636	1.31505	636.287	FALSE	29
2022-09-15	11:07:56	0.0822012	0.365647	677.452	FALSE	29
2022-09-15	11:07:56	0.199606	0.887887	637.175	FALSE	29
2022-09-15	11:07:56	0.0631173	0.280758	677.733	FALSE	29
2022-09-15	11:07:57	0.201743	0.897393	638.073	FALSE	29
2022-09-15	11:07:57	-0.156475	-0.696032	677.733	FALSE	29
2022-09-15	11:07:57	-0.495763	-2.20525	638.073	FALSE	29
2022-09-15	11:07:57	-0.422073	-1.87747	677.733	FALSE	29
2022-09-15	11:07:58	-0.502328	-2.23446	638.073	FALSE	29
2022-09-15	11:07:58	-0.568944	-2.53078	677.733	FALSE	29
2022-09-15	11:07:58	-0.646958	-2.8778	638.073	FALSE	29
2022-09-15	11:07:58	-0.449503	-1.99948	677.733	FALSE	29
2022-09-15	11:07:59	-0.286348	-1.27373	638.073	FALSE	29
2022-09-15	11:07:59	-0.393218	-1.74911	677.733	FALSE	29
2022-09-15	11:07:59	-0.0385112	-0.171306	638.073	FALSE	29
2022-09-15	11:08:00	0.43355	1.92852	679.661	FALSE	29
2022-09-15	11:08:00	1.43095	6.36515	644.438	FALSE	29
2022-09-15	11:08:00	2.06917	9.20408	688.865	FALSE	29
2022-09-15	11:08:00	1.1908	5.29692	649.735	FALSE	29
2022-09-15	11:08:01	3.28337	14.6051	703.471	1	30
2022-09-15	11:08:01	0.961997	4.27916	654.014	FALSE	30
2022-09-15	11:08:01	-0.416017	-1.85053	703.471	FALSE	30
2022-09-15	11:08:01	0.538842	2.39688	656.411	FALSE	30
2022-09-15	11:08:02	0.594008	2.64227	706.113	FALSE	30
2022-09-15	11:08:02	0.679962	3.02461	659.435	FALSE	30
2022-09-15	11:08:02	0.114669	0.510071	706.623	FALSE	30
2022-09-15	11:08:02	0.224491	0.998581	660.434	FALSE	30
2022-09-15	11:08:03	0.0743641	0.330786	706.954	FALSE	30
2022-09-15	11:08:03	0.191158	0.850309	661.284	FALSE	30
2022-09-15	11:08:03	-0.153219	-0.681549	706.954	FALSE	30
2022-09-15	11:08:04	0.143779	0.639558	661.924	FALSE	30
2022-09-15	11:08:04	0.191769	0.853027	707.807	FALSE	30
2022-09-15	11:08:04	0.214313	0.953307	662.877	FALSE	30
2022-09-15	11:08:04	0.732379	3.25777	711.064	FALSE	30
2022-09-15	11:08:05	0.373143	1.65981	664.537	FALSE	30
2022-09-15	11:08:05	0.96215	4.27984	715.344	FALSE	30
2022-09-15	11:08:05	0.55986	2.49037	667.027	FALSE	30
2022-09-15	11:08:05	0.564135	2.50939	717.854	FALSE	30
2022-09-15	11:08:06	0.496043	2.2065	669.234	FALSE	30
2022-09-15	11:08:06	0.540114	2.40254	720.256	FALSE	30
2022-09-15	11:08:06	0.413193	1.83797	671.072	FALSE	30
2022-09-15	11:08:06	0.66612	2.96303	723.219	FALSE	30
2022-09-15	11:08:07	0.624593	2.77831	673.85	FALSE	30
2022-09-15	11:08:07	0.532277	2.36767	725.587	FALSE	30
2022-09-15	11:08:07	0.726476	3.23151	677.082	FALSE	30
2022-09-15	11:08:08	0.501692	2.23163	727.819	FALSE	30
2022-09-15	11:08:08	0.394008	1.75263	678.834	FALSE	30
2022-09-15	11:08:08	0.207748	0.924105	728.743	FALSE	30
2022-09-15	11:08:08	0.456043	2.02857	680.863	FALSE	30
2022-09-15	11:08:09	0.413397	1.83887	730.582	FALSE	30
2022-09-15	11:08:09	0.73355	3.26298	684.126	FALSE	30
2022-09-15	11:08:09	0.352074	1.5661	732.148	FALSE	30
2022-09-15	11:08:09	0.485916	2.16145	686.287	FALSE	30
2022-09-15	11:08:10	0.365051	1.62382	733.771	FALSE	30
2022-09-15	11:08:10	0.269071	1.19688	687.484	FALSE	30
2022-09-15	11:08:10	0.148054	0.658574	734.43	FALSE	30
2022-09-15	11:08:11	0.189733	0.84397	688.328	FALSE	30
2022-09-15	11:08:11	0.158334	0.704301	735.134	FALSE	30
2022-09-15	11:08:11	0.0899366	0.400056	688.728	FALSE	30
2022-09-15	11:08:11	0.172837	0.768814	735.903	FALSE	30
2022-09-15	11:08:12	0.146069	0.649744	689.378	FALSE	30
2022-09-15	11:08:12	0.274415	1.22065	737.124	FALSE	30
2022-09-15	11:08:12	0.397723	1.76915	691.147	FALSE	30
2022-09-15	11:08:12	0.396349	1.76304	738.887	FALSE	30
2022-09-15	11:08:13	0.285	1.26774	692.415	FALSE	30
2022-09-15	11:08:13	0.420827	1.87192	740.759	FALSE	30
2022-09-15	11:08:13	0.28556	1.27023	693.685	FALSE	30
2022-09-15	11:08:13	0.265509	1.18104	741.94	FALSE	30
2022-09-15	11:08:14	0.298028	1.32569	695.011	FALSE	30
2022-09-15	11:08:14	0.278537	1.23899	743.179	FALSE	30
2022-09-15	11:08:14	0.246171	1.09502	696.106	FALSE	30
2022-09-15	11:08:15	0.317672	1.41307	744.592	FALSE	30
2022-09-15	11:08:15	0.216705	0.963947	697.07	FALSE	30
2022-09-15	11:08:15	0.567799	2.52568	747.118	FALSE	30
2022-09-15	11:08:15	0.548155	2.4383	699.508	FALSE	30
2022-09-15	11:08:16	0.4736	2.10667	749.224	FALSE	30
2022-09-15	11:08:16	0.384797	1.71165	701.22	FALSE	30
2022-09-15	11:08:16	0.418232	1.86038	751.085	FALSE	30
2022-09-15	11:08:16	0.468817	2.08539	703.305	FALSE	30
2022-09-15	11:08:17	0.457468	2.03491	753.119	FALSE	30
2022-09-15	11:08:17	0.454873	2.02337	705.328	FALSE	30
2022-09-15	11:08:17	0.454059	2.01975	755.139	FALSE	30
2022-09-15	11:08:17	0.440522	1.95953	707.288	FALSE	30
2022-09-15	11:08:18	0.443219	1.97153	757.111	FALSE	30
2022-09-15	11:08:18	0.438028	1.94844	709.236	FALSE	30
2022-09-15	11:08:18	0.44785	1.99213	759.103	FALSE	30
2022-09-15	11:08:19	0.450242	2.00277	711.239	FALSE	30
2022-09-15	11:08:19	0.468308	2.08313	761.186	FALSE	30
2022-09-15	11:08:19	0.59472	2.64543	713.885	FALSE	30
2022-09-15	11:08:19	0.597926	2.65969	763.846	FALSE	30
2022-09-15	11:08:20	0.645254	2.87022	716.755	FALSE	30
2022-09-15	11:08:20	0.683117	3.03864	766.884	FALSE	30
2022-09-15	11:08:20	1.02622	4.56483	721.32	FALSE	30
2022-09-15	11:08:20	0.946425	4.20989	771.094	FALSE	30
2022-09-15	11:08:21	1.17121	5.20978	726.529	FALSE	30
2022-09-15	11:08:21	1.30011	5.78315	776.877	FALSE	30
2022-09-15	11:08:21	0.948359	4.21849	730.748	FALSE	30
2022-09-15	11:08:21	0.420522	1.87057	778.748	FALSE	30
2022-09-15	11:08:22	0.239351	1.06468	731.813	FALSE	30
2022-09-15	11:08:22	0.192685	0.857101	779.605	FALSE	30
2022-09-15	11:08:22	0.0426084	0.189531	732.002	FALSE	30
2022-09-15	11:08:23	-0.0224807	-0.0999986	779.605	FALSE	30
2022-09-15	11:08:23	-0.129249	-0.574925	732.002	FALSE	30
2022-09-15	11:08:23	-0.127417	-0.566776	779.605	FALSE	30
2022-09-15	11:08:23	-0.00884198	-0.0393309	732.002	FALSE	30
2022-09-15	11:08:24	0.174517	0.776287	780.381	FALSE	30
2022-09-15	11:08:24	0.198283	0.882002	732.884	FALSE	30
2022-09-15	11:08:24	0.286069	1.27249	781.654	FALSE	30
2022-09-15	11:08:24	0.316247	1.40673	734.291	FALSE	30
2022-09-15	11:08:25	0.366883	1.63197	783.286	FALSE	30
2022-09-15	11:08:25	0.363626	1.61748	735.908	FALSE	30
2022-09-15	11:08:25	0.474924	2.11256	785.398	FALSE	30
2022-09-15	11:08:26	0.0502929	0.223713	736.132	FALSE	30
2022-09-15	11:08:26	0.387595	1.7241	787.122	FALSE	30
2022-09-15	11:08:26	0.363677	1.61771	737.75	FALSE	30
2022-09-15	11:08:26	0.356501	1.58579	788.708	FALSE	30
2022-09-15	11:08:27	0.382761	1.7026	739.452	FALSE	30
2022-09-15	11:08:27	0.29472	1.31097	790.019	FALSE	30
2022-09-15	11:08:27	0.304033	1.3524	740.805	FALSE	30
2022-09-15	11:08:27	0.416654	1.85336	791.873	FALSE	30
2022-09-15	11:08:28	0.319351	1.42054	742.225	FALSE	30
2022-09-15	11:08:28	0.385254	1.71369	793.586	FALSE	30
2022-09-15	11:08:28	0.331361	1.47396	743.699	FALSE	30
2022-09-15	11:08:28	0.283321	1.26027	794.847	FALSE	30
2022-09-15	11:08:29	0.333295	1.48256	745.182	FALSE	30
2022-09-15	11:08:29	0.314517	1.39903	796.246	FALSE	30
2022-09-15	11:08:29	0.372685	1.65778	746.84	FALSE	30
2022-09-15	11:08:30	0.500369	2.22574	798.471	FALSE	30
2022-09-15	11:08:30	0.591361	2.63049	749.47	FALSE	30
2022-09-15	11:08:30	0.781539	3.47644	801.948	FALSE	30
2022-09-15	11:08:30	0.547544	2.43559	751.906	FALSE	30
2022-09-15	11:08:31	1.58352	7.04381	808.992	FALSE	30
2022-09-15	11:08:31	1.78057	7.92033	759.826	FALSE	30
2022-09-15	11:08:31	5.80403	25.8175	834.809	1	31
2022-09-15	11:08:31	8.30301	36.9334	796.759	1	32
2022-09-15	11:08:32	7.67843	34.1552	868.964	1	33
2022-09-15	11:08:32	4.2878	19.073	815.832	1	34
2022-09-15	11:08:32	1.12602	5.00876	873.973	FALSE	34
2022-09-15	11:08:32	0.569834	2.53474	818.367	FALSE	34
2022-09-15	11:08:33	0.563931	2.50848	876.481	FALSE	34
2022-09-15	11:08:33	0.487392	2.16802	820.535	FALSE	34
2022-09-15	11:08:33	0.420827	1.87192	878.353	FALSE	34
2022-09-15	11:08:34	0.254415	1.13169	821.667	FALSE	34
2022-09-15	11:08:34	0.379758	1.68924	880.043	FALSE	34
2022-09-15	11:08:34	0.265763	1.18217	822.849	FALSE	34
2022-09-15	11:08:34	0.309784	1.37798	881.421	FALSE	34
2022-09-15	11:08:35	0.500267	2.22529	825.074	FALSE	34
2022-09-15	11:08:35	1.9824	8.81811	890.239	FALSE	34
2022-09-15	11:08:35	3.45523	15.3696	840.444	1	35
2022-09-15	11:08:35	4.53665	20.1799	910.419	1	36
2022-09-15	11:08:36	6.02566	26.8033	867.247	1	37
2022-09-15	11:08:36	3.49487	15.5459	925.965	1	38
2022-09-15	11:08:36	3.18764	14.1793	881.427	1	39
2022-09-15	11:08:36	3.36357	14.9618	940.926	1	40
2022-09-15	11:08:37	2.99574	13.3257	894.752	FALSE	40
2022-09-15	11:08:37	3.6649	16.3022	957.229	1	41
2022-09-15	11:08:37	2.45212	10.9075	905.66	FALSE	41
2022-09-15	11:08:38	2.99044	13.3021	970.531	FALSE	41
2022-09-15	11:08:38	1.10994	4.93724	910.597	FALSE	41
2022-09-15	11:08:38	0.409631	1.82212	972.353	FALSE	41
2022-09-15	11:08:38	0.423321	1.88302	912.48	FALSE	41
2022-09-15	11:08:39	0.231718	1.03073	973.384	FALSE	41
2022-09-15	11:08:39	0.351768	1.56473	914.045	FALSE	41
2022-09-15	11:08:39	0.301998	1.34335	974.727	FALSE	41
2022-09-15	11:08:39	0.274262	1.21997	915.265	FALSE	41
2022-09-15	11:08:40	0.427646	1.90225	976.629	FALSE	41
2022-09-15	11:08:40	0.281845	1.2537	916.518	FALSE	41
2022-09-15	11:08:40	0.604237	2.68777	979.317	FALSE	41
2022-09-15	11:08:40	0.265305	1.18013	917.698	FALSE	41
2022-09-15	11:08:41	0.394161	1.75331	981.07	FALSE	41
2022-09-15	11:08:41	0.353804	1.57379	919.272	FALSE	41
2022-09-15	11:08:41	0.371819	1.65393	982.724	FALSE	41
2022-09-15	11:08:42	0.87986	3.91379	923.186	FALSE	41
2022-09-15	11:08:42	1.63477	7.27178	989.996	FALSE	41
2022-09-15	11:08:42	4.22413	18.7898	941.976	1	42
2022-09-15	11:08:42	3.83284	17.0492	1007.05	1	43
2022-09-15	11:08:43	4.97538	22.1315	964.107	1	44
2022-09-15	11:08:43	3.63945	16.189	1023.23	1	45
2022-09-15	11:08:43	3.49782	15.559	979.666	1	46
2022-09-15	11:08:43	3.09243	13.7557	1036.99	1	47
2022-09-15	11:08:44	2.22485	9.89658	989.563	FALSE	47
2022-09-15	11:08:44	4.27854	19.0318	1056.02	1	48
2022-09-15	11:08:44	2.24266	9.9758	999.539	FALSE	48
2022-09-15	11:08:44	2.67172	11.8843	1067.91	FALSE	48
2022-09-15	11:08:45	3.47879	15.4744	1015.01	1	49
2022-09-15	11:08:45	3.39436	15.0988	1083	1	50
2022-09-15	11:08:45	3.00118	13.3498	1028.36	1	51
2022-09-15	11:08:46	1.36622	6.07722	1089.08	FALSE	51
2022-09-15	11:08:46	1.41874	6.31084	1034.67	FALSE	51
2022-09-15	11:08:46	1.29859	5.77639	1094.86	FALSE	51
2022-09-15	11:08:46	0.872633	3.88165	1038.56	FALSE	51
2022-09-15	11:08:47	0.60612	2.69614	1097.55	FALSE	51
2022-09-15	11:08:47	1.09594	4.87496	1043.43	FALSE	51
2022-09-15	11:08:47	0.976094	4.34186	1101.9	FALSE	51
2022-09-15	11:08:47	0.766527	3.40967	1046.84	FALSE	51
2022-09-15	11:08:48	0.580776	2.58341	1104.48	FALSE	51
2022-09-15	11:08:48	0.275636	1.22608	1048.07	FALSE	51
2022-09-15	11:08:48	0.365865	1.62744	1106.11	FALSE	51
2022-09-15	11:08:49	0.245967	1.09411	1049.16	FALSE	51
2022-09-15	11:08:49	0.415789	1.84951	1107.96	FALSE	51
2022-09-15	11:08:49	0.531718	2.36519	1051.53	FALSE	51
2022-09-15	11:08:49	1.28454	5.71389	1113.67	FALSE	51
2022-09-15	11:08:50	6.1737	27.4619	1078.99	1	52
2022-09-15	11:08:50	7.95757	35.3969	1149.07	1	53
2022-09-15	11:08:50	6.11665	27.2081	1106.2	1	54
2022-09-15	11:08:50	2.05055	9.12126	1158.19	FALSE	54
2022-09-15	11:08:51	4.2906	19.0854	1125.28	1	55
2022-09-15	11:08:51	6.3709	28.339	1186.53	1	56
2022-09-15	11:08:51	7.97507	35.4747	1160.76	1	57
2022-09-15	11:08:51	7.69528	34.2301	1220.76	1	58
2022-09-15	11:08:52	1.40093	6.23162	1166.99	FALSE	58
2022-09-15	11:08:52	0.732837	3.25981	1224.02	FALSE	58
2022-09-15	11:08:52	0.792888	3.52692	1170.51	FALSE	58
2022-09-15	11:08:53	0.283677	1.26185	1225.28	FALSE	58
2022-09-15	11:08:53	0.936552	4.16597	1174.68	FALSE	58
2022-09-15	11:08:53	0.409936	1.82348	1227.1	FALSE	58
2022-09-15	11:08:53	0.682811	3.03728	1177.72	FALSE	58
2022-09-15	11:08:54	0.59584	2.65042	1229.75	FALSE	58
2022-09-15	11:08:54	0.334618	1.48845	1179.21	FALSE	58
2022-09-15	11:08:54	0.492583	2.19111	1231.94	FALSE	58
2022-09-15	11:08:54	0.27986	1.24487	1180.45	FALSE	58
2022-09-15	11:08:55	0.689784	3.0683	1235.01	FALSE	58
2022-09-15	11:08:55	0.35187	1.56519	1182.02	FALSE	58
2022-09-15	11:08:55	1.02291	4.55011	1239.56	FALSE	58
2022-09-15	11:08:55	0.819707	3.64622	1185.66	FALSE	58
2022-09-15	11:08:56	1.35574	6.0306	1245.59	FALSE	58
2022-09-15	11:08:56	1.09365	4.86477	1190.53	FALSE	58
2022-09-15	11:08:56	1.26907	5.64508	1251.24	FALSE	58
2022-09-15	11:08:57	1.08378	4.82087	1195.35	FALSE	58
2022-09-15	11:08:57	1.06505	4.73756	1255.98	FALSE	58
2022-09-15	11:08:57	1.13487	5.04813	1200.4	FALSE	58
2022-09-15	11:08:57	1.10566	4.9182	1260.89	FALSE	58
2022-09-15	11:08:58	1.21579	5.40808	1205.8	FALSE	58
2022-09-15	11:08:58	1.05126	4.67621	1265.57	FALSE	58
2022-09-15	11:08:58	1.09146	4.85503	1210.66	FALSE	58
2022-09-15	11:08:58	1.1248	5.00334	1270.57	FALSE	58
2022-09-15	11:08:59	0.879758	3.91334	1214.57	FALSE	58
2022-09-15	11:08:59	0.703779	3.13055	1273.7	FALSE	58
2022-09-15	11:08:59	0.606985	2.69999	1217.27	FALSE	58
2022-09-15	11:08:59	0.480115	2.13565	1275.84	FALSE	58
2022-09-15	11:09:00	0.46958	2.08879	1219.36	FALSE	58
2022-09-15	11:09:00	0.525814	2.33893	1278.18	FALSE	58
2022-09-15	11:09:00	0.456501	2.03061	1221.39	FALSE	58
2022-09-15	11:09:01	0.445305	1.98081	1280.16	FALSE	58
2022-09-15	11:09:01	0.435891	1.93893	1223.33	FALSE	58
2022-09-15	11:09:01	0.471209	2.09603	1282.26	FALSE	58
2022-09-15	11:09:01	0.463422	2.06139	1225.39	FALSE	58
2022-09-15	11:09:02	0.487545	2.1687	1284.42	FALSE	58
2022-09-15	11:09:02	0.489122	2.17571	1227.57	FALSE	58
2022-09-15	11:09:02	0.47243	2.10146	1286.53	FALSE	58
2022-09-15	11:09:02	0.464084	2.06434	1229.63	FALSE	58
2022-09-15	11:09:03	0.467341	2.07883	1288.6	FALSE	58
2022-09-15	11:09:03	0.486883	2.16575	1231.8	FALSE	58
2022-09-15	11:09:03	0.511972	2.27735	1290.88	FALSE	58
2022-09-15	11:09:03	0.503015	2.23751	1234.04	FALSE	58
2022-09-15	11:09:04	0.504847	2.24566	1293.13	FALSE	58
2022-09-15	11:09:04	0.444593	1.97764	1236.01	FALSE	58
2022-09-15	11:09:04	0.424084	1.88641	1295.01	FALSE	58
2022-09-15	11:09:05	0.407137	1.81103	1237.82	FALSE	58
2022-09-15	11:09:05	0.427901	1.90339	1296.92	FALSE	58
2022-09-15	11:09:05	0.413601	1.83978	1239.66	FALSE	58
2022-09-15	11:09:05	0.43355	1.92852	1298.85	FALSE	58
2022-09-15	11:09:06	0.458893	2.04125	1241.7	FALSE	58
2022-09-15	11:09:06	0.415076	1.84634	1300.69	FALSE	58
2022-09-15	11:09:06	0.267138	1.18828	1242.89	FALSE	58
2022-09-15	11:09:06	0.226323	1.00673	1301.7	FALSE	58
2022-09-15	11:09:07	0.366985	1.63242	1244.53	FALSE	58
2022-09-15	11:09:07	0.126731	0.563725	1302.26	FALSE	58
2022-09-15	11:09:07	0.404135	1.79767	1246.32	FALSE	58
2022-09-15	11:09:07	0.350649	1.55976	1303.82	FALSE	58
2022-09-15	11:09:08	0.473244	2.10508	1248.43	FALSE	58
2022-09-15	11:09:08	0.231972	1.03186	1304.85	FALSE	58
2022-09-15	11:09:08	0.242507	1.07872	1249.51	FALSE	58
2022-09-15	11:09:09	0.252226	1.12195	1305.98	FALSE	58
2022-09-15	11:09:09	0.285509	1.27	1250.78	FALSE	58
2022-09-15	11:09:09	0.53187	2.36586	1308.34	FALSE	58
2022-09-15	11:09:09	0.173957	0.773796	1251.55	FALSE	58
2022-09-15	11:09:10	0.23925	1.06423	1309.41	FALSE	58
2022-09-15	11:09:10	0.622812	2.77039	1254.32	FALSE	58
2022-09-15	11:09:10	1.64174	7.30279	1316.71	FALSE	58
2022-09-15	11:09:10	2.13991	9.51875	1263.84	FALSE	58
2022-09-15	11:09:11	1.19538	5.31729	1322.03	FALSE	58
2022-09-15	11:09:11	2.45635	10.9263	1274.77	FALSE	58
2022-09-15	11:09:11	2.21966	9.87349	1331.9	FALSE	58
2022-09-15	11:09:11	1.92108	8.54535	1283.31	FALSE	58
2022-09-15	11:09:12	1.10373	4.90961	1336.81	FALSE	58
2022-09-15	11:09:12	0.971565	4.32172	1287.63	FALSE	58
2022-09-15	11:09:12	0.9993	4.44509	1341.26	FALSE	58
2022-09-15	11:09:13	2.29787	10.2214	1297.85	FALSE	58
2022-09-15	11:09:13	3.18118	14.1505	1355.41	1	59
2022-09-15	11:09:13	2.20785	9.82096	1307.68	FALSE	59
2022-09-15	11:09:13	0.813702	3.61951	1359.03	FALSE	59
2022-09-15	11:09:14	0.41355	1.83955	1309.52	FALSE	59
2022-09-15	11:09:14	0.378741	1.68472	1360.71	FALSE	59
2022-09-15	11:09:14	0.446476	1.98601	1311.5	FALSE	59
2022-09-15	11:09:14	1.14566	5.09612	1365.81	FALSE	59
2022-09-15	11:09:15	1.56683	6.96957	1318.47	FALSE	59
2022-09-15	11:09:15	3.94541	17.55	1383.36	1	60
2022-09-15	11:09:15	5.51752	24.543	1343.01	1	61
2022-09-15	11:09:16	6.22499	27.69	1411.05	1	62
2022-09-15	11:09:16	3.77884	16.809	1359.82	1	63
2022-09-15	11:09:16	3.63737	16.1797	1427.23	1	64
2022-09-15	11:09:16	6.15924	27.3975	1387.22	1	65
2022-09-15	11:09:17	4.46815	19.8752	1447.1	1	66
2022-09-15	11:09:17	2.2219	9.88346	1397.1	FALSE	66
2022-09-15	11:09:17	2.5162	11.1926	1458.29	FALSE	66
2022-09-15	11:09:17	2.38108	10.5915	1407.7	FALSE	66
2022-09-15	11:09:18	1.49182	6.63591	1464.93	FALSE	66
2022-09-15	11:09:18	1.85034	8.23068	1415.93	FALSE	66
2022-09-15	11:09:18	1.0338	4.59855	1469.53	FALSE	66
2022-09-15	11:09:18	1.04668	4.65584	1420.58	FALSE	66
2022-09-15	11:09:19	2.50653	11.1495	1480.68	FALSE	66
2022-09-15	11:09:19	3.31533	14.7473	1435.33	1	67
2022-09-15	11:09:19	3.58133	15.9305	1496.61	1	68
2022-09-15	11:09:20	1.02597	4.56372	1439.89	FALSE	68
2022-09-15	11:09:20	-0.66706	-2.96722	1496.61	FALSE	68
2022-09-15	11:09:20	-0.910826	-4.05154	1439.89	FALSE	68
2022-09-15	11:09:20	-1.52793	-6.79654	1496.61	FALSE	68
2022-09-15	11:09:21	-1.36686	-6.08007	1439.89	FALSE	68
2022-09-15	11:09:21	-0.712862	-3.17095	1496.61	FALSE	68
2022-09-15	11:09:21	-0.53332	-2.37231	1439.89	FALSE	68
2022-09-15	11:09:21	-0.512455	-2.2795	1496.61	FALSE	68
2022-09-15	11:09:22	-0.295508	-1.31448	1439.89	FALSE	68
2022-09-15	11:09:22	-1.52513	-6.78408	1496.61	FALSE	68
2022-09-15	11:09:22	-1.71266	-7.61825	1439.89	FALSE	68
2022-09-15	11:09:22	-1.78599	-7.94444	1496.61	FALSE	68
2022-09-15	11:09:23	-2.31597	-10.3019	1439.89	FALSE	68
2022-09-15	11:09:23	-2.25281	-10.0209	1496.61	FALSE	68
2022-09-15	11:09:23	-2.30894	-10.2706	1439.89	FALSE	68
2022-09-15	11:09:24	-2.62574	-11.6798	1496.61	FALSE	68
2022-09-15	11:09:24	-2.5607	-11.3905	1439.89	FALSE	68
2022-09-15	11:09:24	-2.80385	-12.4721	1496.61	FALSE	68
2022-09-15	11:09:24	-2.66192	-11.8408	1439.89	FALSE	68
2022-09-15	11:09:25	-2.56202	-11.3964	1496.61	FALSE	68
2022-09-15	11:09:25	-2.50182	-11.1286	1439.89	FALSE	68
2022-09-15	11:09:25	-2.48696	-11.0625	1496.61	FALSE	68
2022-09-15	11:09:25	-2.27271	-10.1095	1439.89	FALSE	68
2022-09-15	11:09:26	-2.33413	-10.3827	1496.61	FALSE	68
2022-09-15	11:09:26	-2.24462	-9.98452	1439.89	FALSE	68
2022-09-15	11:09:26	-2.36614	-10.5251	1496.61	FALSE	68
2022-09-15	11:09:26	-2.27943	-10.1394	1439.89	FALSE	68
2022-09-15	11:09:27	-2.36396	-10.5154	1496.61	FALSE	68
2022-09-15	11:09:27	-2.3863	-10.6147	1439.89	FALSE	68
2022-09-15	11:09:27	-2.3605	-10.5	1496.61	FALSE	68
2022-09-15	11:09:28	-2.36757	-10.5314	1439.89	FALSE	68
2022-09-15	11:09:28	-2.35866	-10.4918	1496.61	FALSE	68
2022-09-15	11:09:28	-2.33831	-10.4013	1439.89	FALSE	68
2022-09-15	11:09:28	-2.35276	-10.4655	1496.61	FALSE	68
2022-09-15	11:09:29	-2.34034	-10.4103	1439.89	FALSE	68
2022-09-15	11:09:29	-2.30955	-10.2733	1496.61	FALSE	68
2022-09-15	11:09:29	-2.38767	-10.6208	1439.89	FALSE	68
2022-09-15	11:09:29	-2.39373	-10.6478	1496.61	FALSE	68
2022-09-15	11:09:30	-2.30487	-10.2525	1439.89	FALSE	68
2022-09-15	11:09:30	-2.96854	-13.2047	1496.61	FALSE	68
2022-09-15	11:09:30	-2.82243	-12.5547	1439.89	FALSE	68
2022-09-15	11:09:30	-2.84675	-12.6629	1496.61	FALSE	68
2022-09-15	11:09:31	-2.98477	-13.2769	1439.89	FALSE	68
2022-09-15	11:09:31	-2.49449	-11.096	1496.61	FALSE	68
2022-09-15	11:09:31	-2.70508	-12.0327	1439.89	FALSE	68
2022-09-15	11:09:32	-2.46869	-10.9812	1496.61	FALSE	68
2022-09-15	11:09:32	-2.80126	-12.4606	1439.89	FALSE	68
2022-09-15	11:09:32	-2.71591	-12.0809	1496.61	FALSE	68
2022-09-15	11:09:32	-2.69978	-12.0092	1439.89	FALSE	68
2022-09-15	11:09:33	-2.78324	-12.3804	1496.61	FALSE	68
2022-09-15	11:09:33	-1.99785	-8.88684	1439.89	FALSE	68
2022-09-15	11:09:33	-2.26044	-10.0549	1496.61	FALSE	68
2022-09-15	11:09:33	-2.05047	-9.1209	1439.89	FALSE	68
2022-09-15	11:09:34	-1.88385	-8.37974	1496.61	FALSE	68
2022-09-15	11:09:34	-2.08248	-9.26329	1439.89	FALSE	68
2022-09-15	11:09:34	-1.99851	-8.88977	1496.61	FALSE	68
2022-09-15	11:09:34	-2.01424	-8.95974	1439.89	FALSE	68
2022-09-15	11:09:35	-2.28131	-10.1477	1496.61	FALSE	68
2022-09-15	11:09:35	-2.70034	-12.0117	1439.89	FALSE	68
2022-09-15	11:09:35	-2.6378	-11.7335	1496.61	FALSE	68
2022-09-15	11:09:36	-2.73032	-12.145	1439.89	FALSE	68
2022-09-15	11:09:36	-2.65169	-11.7952	1496.61	FALSE	68
2022-09-15	11:09:36	-2.56233	-11.3978	1439.89	FALSE	68
2022-09-15	11:09:36	-2.64619	-11.7708	1496.61	FALSE	68
2022-09-15	11:09:37	-2.63617	-11.7262	1439.89	FALSE	68
2022-09-15	11:09:37	-2.75876	-12.2715	1496.61	FALSE	68
2022-09-15	11:09:37	-2.73551	-12.1681	1439.89	FALSE	68
2022-09-15	11:09:37	-2.72446	-12.1189	1496.61	FALSE	68
2022-09-15	11:09:38	-2.72752	-12.1326	1439.89	FALSE	68
2022-09-15	11:09:38	-2.70523	-12.0334	1496.61	FALSE	68
2022-09-15	11:09:38	-2.6864	-11.9496	1439.89	FALSE	68
2022-09-15	11:09:38	-2.75688	-12.2632	1496.61	FALSE	68
2022-09-15	11:09:39	-2.67759	-11.9105	1439.89	FALSE	68
2022-09-15	11:09:39	-2.7606	-12.2797	1496.61	FALSE	68
2022-09-15	11:09:39	-2.70278	-12.0225	1439.89	FALSE	68
2022-09-15	11:09:40	-2.72258	-12.1106	1496.61	FALSE	68
2022-09-15	11:09:40	-2.91133	-12.9502	1439.89	FALSE	68
2022-09-15	11:09:40	-2.95098	-13.1265	1496.61	FALSE	68
2022-09-15	11:09:40	-2.89882	-12.8945	1439.89	FALSE	68
2022-09-15	11:09:41	-3.06467	-13.6323	1496.61	FALSE	68
2022-09-15	11:09:41	-3.03047	-13.4801	1439.89	FALSE	68
2022-09-15	11:09:41	-3.11042	-13.8358	1496.61	FALSE	68
2022-09-15	11:09:41	-3.08828	-13.7373	1439.89	FALSE	68
2022-09-15	11:09:42	-3.08396	-13.7181	1496.61	FALSE	68
2022-09-15	11:09:42	-2.99805	-13.3359	1439.89	FALSE	68
2022-09-15	11:09:42	-2.96431	-13.1858	1496.61	FALSE	68
2022-09-15	11:09:42	-2.91978	-12.9878	1439.89	FALSE	68
2022-09-15	11:09:43	-2.90772	-12.9341	1496.61	FALSE	68
2022-09-15	11:09:43	-2.83999	-12.6328	1439.89	FALSE	68
2022-09-15	11:09:43	-2.8521	-12.6867	1496.61	FALSE	68
2022-09-15	11:09:44	-2.86477	-12.7431	1439.89	FALSE	68
2022-09-15	11:09:44	-2.86823	-12.7585	1496.61	FALSE	68
2022-09-15	11:09:44	-2.77932	-12.363	1439.89	FALSE	68
2022-09-15	11:09:44	-2.77383	-12.3386	1496.61	FALSE	68
2022-09-15	11:09:45	-2.7124	-12.0653	1439.89	FALSE	68
2022-09-15	11:09:45	-2.54385	-11.3156	1496.61	FALSE	68
2022-09-15	11:09:45	-2.26808	-10.0889	1439.89	FALSE	68
2022-09-15	11:09:45	-2.06365	-9.17953	1496.61	FALSE	68
2022-09-15	11:09:46	-1.72385	-7.66803	1439.89	FALSE	68
2022-09-15	11:09:46	-1.20121	-5.34322	1496.61	FALSE	68
2022-09-15	11:09:46	-1.3265	-5.90054	1439.89	FALSE	68
2022-09-15	11:09:47	-2.44584	-10.8796	1496.61	FALSE	68
2022-09-15	11:09:47	-2.52513	-11.2323	1439.89	FALSE	68
2022-09-15	11:09:47	-2.79362	-12.4266	1496.61	FALSE	68
2022-09-15	11:09:47	-2.89449	-12.8753	1439.89	FALSE	68
2022-09-15	11:09:48	-2.60675	-11.5953	1496.61	FALSE	68
2022-09-15	11:09:48	-2.55871	-11.3817	1439.89	FALSE	68
2022-09-15	11:09:48	-2.33368	-10.3807	1496.61	FALSE	68
2022-09-15	11:09:48	-2.28518	-10.1649	1439.89	FALSE	68
2022-09-15	11:09:49	-2.19088	-9.74547	1496.61	FALSE	68
2022-09-15	11:09:49	-1.63714	-7.28233	1439.89	FALSE	68
2022-09-15	11:09:49	-1.64095	-7.29927	1496.61	FALSE	68
2022-09-15	11:09:49	-1.22248	-5.43784	1439.89	FALSE	68
2022-09-15	11:09:50	-1.3948	-6.20435	1496.61	FALSE	68
2022-09-15	11:09:50	-1.6408	-7.29861	1439.89	FALSE	68
2022-09-15	11:09:50	-1.41006	-6.27223	1496.61	FALSE	68
2022-09-15	11:09:51	-1.06411	-4.73337	1439.89	FALSE	68
2022-09-15	11:09:51	-1.52543	-6.78542	1496.61	FALSE	68
2022-09-15	11:09:51	-1.91927	-8.5373	1439.89	FALSE	68
2022-09-15	11:09:51	-1.40803	-6.2632	1496.61	FALSE	68
2022-09-15	11:09:52	-1.1662	-5.18749	1439.89	FALSE	68
2022-09-15	11:09:52	0.397977	1.77028	1498.38	FALSE	68
2022-09-15	11:09:52	1.71116	7.61158	1447.5	FALSE	68
2022-09-15	11:09:52	3.13136	13.9289	1512.31	1	69
2022-09-15	11:09:53	1.64846	7.33268	1454.84	FALSE	69
2022-09-15	11:09:53	-0.311285	-1.38466	1512.31	FALSE	69
2022-09-15	11:09:53	-1.41851	-6.30982	1454.84	FALSE	69
2022-09-15	11:09:53	-1.62396	-7.2237	1512.31	FALSE	69
2022-09-15	11:09:54	-2.69647	-11.9944	1454.84	FALSE	69
2022-09-15	11:09:54	-2.40996	-10.72	1512.31	FALSE	69
2022-09-15	11:09:54	-3.06161	-13.6187	1454.84	FALSE	69
2022-09-15	11:09:55	-2.67866	-11.9152	1512.31	FALSE	69
2022-09-15	11:09:55	-3.06126	-13.6171	1454.84	FALSE	69
2022-09-15	11:09:55	-2.87174	-12.7741	1512.31	FALSE	69
2022-09-15	11:09:55	-3.00884	-13.3839	1454.84	FALSE	69
2022-09-15	11:09:56	-2.97968	-13.2542	1512.31	FALSE	69
2022-09-15	11:09:56	-3.03296	-13.4912	1454.84	FALSE	69
2022-09-15	11:09:56	-3.19154	-14.1966	1512.31	FALSE	69
2022-09-15	11:09:56	-3.31637	-14.7519	1454.84	FALSE	69
2022-09-15	11:09:57	-3.29612	-14.6618	1512.31	FALSE	69
2022-09-15	11:09:57	-3.35647	-14.9302	1454.84	FALSE	69
2022-09-15	11:09:57	-3.38223	-15.0448	1512.31	FALSE	69
2022-09-15	11:09:57	-3.57602	-15.9069	1454.84	FALSE	69
2022-09-15	11:09:58	-3.96385	-17.632	1512.31	FALSE	69
2022-09-15	11:09:58	-2.28625	-10.1697	1454.84	FALSE	69
2022-09-15	11:09:58	-1.36584	-6.07553	1512.31	FALSE	69
2022-09-15	11:09:59	-1.07413	-4.77795	1454.84	FALSE	69
2022-09-15	11:09:59	-0.286959	-1.27645	1512.31	FALSE	69
2022-09-15	11:09:59	-2.29637	-10.2147	1454.84	FALSE	69
2022-09-15	11:09:59	1.02083	4.54086	1516.85	FALSE	69
2022-09-15	11:10:00	6.93436	30.8454	1485.68	1	70
2022-09-15	11:10:00	2.97004	13.2113	1530.06	FALSE	70
2022-09-15	11:10:00	2.28246	10.1528	1495.84	FALSE	70
2022-09-15	11:10:00	2.63497	11.7209	1541.78	FALSE	70
2022-09-15	11:10:01	4.36703	19.4254	1515.26	1	71
2022-09-15	11:10:01	6.64403	29.554	1571.33	1	72
2022-09-15	11:10:01	5.82637	25.9169	1541.18	1	73
2022-09-15	11:10:01	5.26337	23.4125	1594.75	1	74
2022-09-15	11:10:02	4.62006	20.551	1561.73	1	75
2022-09-15	11:10:02	3.77228	16.7799	1611.53	1	76
2022-09-15	11:10:02	2.35553	10.4779	1572.21	FALSE	76
2022-09-15	11:10:03	1.39772	6.21734	1617.74	FALSE	76
2022-09-15	11:10:03	0.540929	2.40616	1574.61	FALSE	76
2022-09-15	11:10:03	0.432583	1.92422	1619.67	FALSE	76
2022-09-15	11:10:03	0.823015	3.66094	1578.27	FALSE	76
2022-09-15	11:10:04	0.961285	4.27599	1623.94	FALSE	76
2022-09-15	11:10:04	0.880013	3.91447	1582.19	FALSE	76
2022-09-15	11:10:04	0.861692	3.83298	1627.78	FALSE	76
2022-09-15	11:10:04	1.06668	4.74481	1586.93	FALSE	76
2022-09-15	11:10:05	1.52607	6.78826	1634.57	FALSE	76
2022-09-15	11:10:05	0.855738	3.80649	1590.74	FALSE	76
2022-09-15	11:10:05	1.5681	6.97522	1641.54	FALSE	76
2022-09-15	11:10:05	0.827646	3.68153	1594.42	FALSE	76
2022-09-15	11:10:06	1.10337	4.90801	1646.45	FALSE	76
2022-09-15	11:10:06	0.454975	2.02382	1596.44	FALSE	76
2022-09-15	11:10:06	0.559097	2.48698	1648.94	FALSE	76
2022-09-15	11:10:07	0.467647	2.08019	1598.53	FALSE	76
2022-09-15	11:10:07	0.537112	2.38918	1651.32	FALSE	76
2022-09-15	11:10:07	0.508817	2.26332	1600.79	FALSE	76
2022-09-15	11:10:07	0.60841	2.70633	1654.03	FALSE	76
2022-09-15	11:10:08	0.651158	2.89648	1603.68	FALSE	76
2022-09-15	11:10:08	0.848155	3.77276	1657.8	FALSE	76
2022-09-15	11:10:08	1.27559	5.67408	1609.36	FALSE	76
2022-09-15	11:10:08	0.531921	2.36609	1660.17	FALSE	76
2022-09-15	11:10:09	1.56047	6.94128	1616.3	FALSE	76
2022-09-15	11:10:09	0.375942	1.67227	1661.84	FALSE	76
2022-09-15	11:10:09	0.731361	3.25324	1619.55	FALSE	76
2022-09-15	11:10:09	0.184542	0.82088	1662.66	FALSE	76
2022-09-15	11:10:10	-1.00441	-4.46782	1619.55	FALSE	76
2022-09-15	11:10:10	0.340878	1.51629	1664.18	FALSE	76
2022-09-15	11:10:10	0.408868	1.81873	1621.37	FALSE	76
2022-09-15	11:10:11	0.552227	2.45642	1666.64	FALSE	76
2022-09-15	11:10:11	0.288868	1.28494	1622.66	FALSE	76
2022-09-15	11:10:11	0.0835753	0.37176	1667.01	FALSE	76
2022-09-15	11:10:11	-0.0317936	-0.141424	1622.66	FALSE	76
2022-09-15	11:10:12	-0.320903	-1.42744	1667.01	FALSE	76
2022-09-15	11:10:12	-0.349096	-1.55285	1622.66	FALSE	76
2022-09-15	11:10:12	0.0274939	0.122298	1667.13	FALSE	76
2022-09-15	11:10:12	0.192125	0.85461	1623.51	FALSE	76
2022-09-15	11:10:13	0.322201	1.43321	1668.56	FALSE	76
2022-09-15	11:10:13	0.0187407	0.0833624	1623.6	FALSE	76
2022-09-15	11:10:13	0.194771	0.86638	1669.43	FALSE	76
2022-09-15	11:10:13	0.139911	0.622352	1624.22	FALSE	76
2022-09-15	11:10:14	0.10215	0.454384	1669.88	FALSE	76
2022-09-15	11:10:14	-0.0602415	-0.267966	1624.22	FALSE	76
2022-09-15	11:10:14	0.101234	0.450309	1670.33	FALSE	76
2022-09-15	11:10:15	0.082761	0.368137	1624.59	FALSE	76
2022-09-15	11:10:15	-0.180699	-0.803785	1670.33	FALSE	76
2022-09-15	11:10:15	-0.327773	-1.458	1624.59	FALSE	76
2022-09-15	11:10:15	-0.332201	-1.4777	1670.33	FALSE	76
2022-09-15	11:10:16	-0.265636	-1.1816	1624.59	FALSE	76
2022-09-15	11:10:16	-0.395203	-1.75794	1670.33	FALSE	76
2022-09-15	11:10:16	-0.0602415	-0.267966	1624.59	FALSE	76
2022-09-15	11:10:16	0.0778756	0.346406	1670.68	FALSE	76
2022-09-15	11:10:17	1.82693	8.12655	1632.71	FALSE	76
2022-09-15	11:10:17	1.9194	8.53788	1679.22	FALSE	76
2022-09-15	11:10:17	0.549987	2.44645	1635.16	FALSE	76
2022-09-15	11:10:17	-0.795559	-3.53881	1679.22	FALSE	76
2022-09-15	11:10:18	-0.200445	-0.891619	1635.16	FALSE	76
2022-09-15	11:10:18	-0.313575	-1.39484	1679.22	FALSE	76
2022-09-15	11:10:18	-0.270521	-1.20333	1635.16	FALSE	76
2022-09-15	11:10:19	-0.106297	-0.47283	1679.22	FALSE	76
2022-09-15	11:10:19	-0.0444654	-0.197791	1635.16	FALSE	76
2022-09-15	11:10:19	0.322099	1.43276	1680.65	FALSE	76
2022-09-15	11:10:19	0.714974	3.18035	1638.34	FALSE	76
2022-09-15	11:10:20	1.19976	5.33677	1685.99	FALSE	76
2022-09-15	11:10:20	1.44704	6.43672	1644.78	FALSE	76
2022-09-15	11:10:20	1.33192	5.92465	1691.91	FALSE	76
2022-09-15	11:10:20	1.56871	6.97794	1651.75	FALSE	76
2022-09-15	11:10:21	1.5881	7.06419	1698.98	FALSE	76
2022-09-15	11:10:21	2.219	9.87056	1661.62	FALSE	76
2022-09-15	11:10:21	4.08958	18.1913	1717.17	1	77
2022-09-15	11:10:21	3.99965	17.7912	1679.42	1	78
2022-09-15	11:10:22	3.27691	14.5764	1731.74	1	79
2022-09-15	11:10:22	2.7253	12.1227	1691.54	FALSE	79
2022-09-15	11:10:22	2.53009	11.2543	1743	FALSE	79
2022-09-15	11:10:23	2.35874	10.4921	1702.03	FALSE	79
2022-09-15	11:10:23	3.1194	13.8757	1756.87	1	80
2022-09-15	11:10:23	4.04454	17.9909	1720.02	1	81
2022-09-15	11:10:23	5.12042	22.7767	1779.65	1	82
2022-09-15	11:10:24	3.84749	17.1144	1737.14	1	83
2022-09-15	11:10:24	3.09182	13.753	1793.4	1	84
2022-09-15	11:10:24	1.86592	8.29999	1745.44	FALSE	84
2022-09-15	11:10:24	1.67396	7.44611	1800.85	FALSE	84
2022-09-15	11:10:25	1.30531	5.80628	1751.24	FALSE	84
2022-09-15	11:10:25	1.02469	4.55803	1805.41	FALSE	84
2022-09-15	11:10:25	0.922812	4.10485	1755.35	FALSE	84
2022-09-15	11:10:26	2.53253	11.2652	1816.67	FALSE	84
2022-09-15	11:10:26	1.05996	4.71491	1760.06	FALSE	84
2022-09-15	11:10:26	1.77416	7.89182	1824.57	FALSE	84
2022-09-15	11:10:26	0.711514	3.16496	1763.23	FALSE	84
2022-09-15	11:10:27	1.06123	4.72056	1829.29	FALSE	84
2022-09-15	11:10:27	0.530445	2.35953	1765.59	FALSE	84
2022-09-15	11:10:27	0.622557	2.76926	1832.06	FALSE	84
2022-09-15	11:10:27	0.489784	2.17866	1767.76	FALSE	84
2022-09-15	11:10:28	0.350903	1.56089	1833.62	FALSE	84
2022-09-15	11:10:28	0.296908	1.32071	1769.09	FALSE	84
2022-09-15	11:10:28	0.277417	1.23401	1834.85	FALSE	84
2022-09-15	11:10:28	0.201998	0.898528	1769.98	FALSE	84
2022-09-15	11:10:29	0.0833717	0.370854	1835.22	FALSE	84
2022-09-15	11:10:29	-0.218766	-0.973115	1769.98	FALSE	84
2022-09-15	11:10:29	-0.0225824	-0.100451	1835.22	FALSE	84
2022-09-15	11:10:30	-0.0709793	-0.31573	1769.98	FALSE	84
2022-09-15	11:10:30	-0.163855	-0.72886	1835.22	FALSE	84
2022-09-15	11:10:30	-0.373168	-1.65993	1769.98	FALSE	84
2022-09-15	11:10:30	-0.304007	-1.35228	1835.22	FALSE	84
2022-09-15	11:10:31	-0.35561	-1.58182	1769.98	FALSE	84
2022-09-15	11:10:31	-0.367926	-1.63661	1835.22	FALSE	84
2022-09-15	11:10:31	-0.384262	-1.70927	1769.98	FALSE	84
2022-09-15	11:10:31	-0.302379	-1.34504	1835.22	FALSE	84
2022-09-15	11:10:32	-0.228282	-1.01544	1769.98	FALSE	84
2022-09-15	11:10:32	-0.359071	-1.59722	1835.22	FALSE	84
2022-09-15	11:10:32	-0.237341	-1.05574	1769.98	FALSE	84
2022-09-15	11:10:32	-0.262277	-1.16666	1835.22	FALSE	84
2022-09-15	11:10:33	-0.138562	-0.616351	1769.98	FALSE	84
2022-09-15	11:10:33	-0.238002	-1.05868	1835.22	FALSE	84
2022-09-15	11:10:33	0.254313	1.13124	1771.12	FALSE	84
2022-09-15	11:10:34	1.44622	6.43308	1841.65	FALSE	84
2022-09-15	11:10:34	2.31874	10.3142	1781.43	FALSE	84
2022-09-15	11:10:34	3.15996	14.0561	1855.71	1	85
2022-09-15	11:10:34	2.66541	11.8563	1793.29	FALSE	85
2022-09-15	11:10:35	3.53563	15.7272	1871.44	1	86
2022-09-15	11:10:35	0.523524	2.32874	1795.61	FALSE	86
2022-09-15	11:10:35	0.434059	1.93078	1873.37	FALSE	86
2022-09-15	11:10:35	0.67757	3.01397	1798.63	FALSE	86
2022-09-15	11:10:36	0.314822	1.40039	1874.77	FALSE	86
2022-09-15	11:10:36	0.509936	2.2683	1800.9	FALSE	86
2022-09-15	11:10:36	-0.046959	-0.208883	1874.77	FALSE	86
2022-09-15	11:10:36	0.169784	0.755233	1801.65	FALSE	86
2022-09-15	11:10:37	0.0263234	0.117092	1874.89	FALSE	86
2022-09-15	11:10:37	0.195484	0.869552	1802.52	FALSE	86
2022-09-15	11:10:37	0.498232	2.21624	1877.1	FALSE	86
2022-09-15	11:10:38	0.732583	3.25868	1805.78	FALSE	86
2022-09-15	11:10:38	0.386578	1.71958	1878.82	FALSE	86
2022-09-15	11:10:38	0.409478	1.82144	1807.6	FALSE	86
2022-09-15	11:10:38	0.596705	2.65426	1881.48	FALSE	86
2022-09-15	11:10:39	0.476654	2.12025	1809.72	FALSE	86
2022-09-15	11:10:39	-0.314491	-1.39892	1881.48	FALSE	86
2022-09-15	11:10:39	0.166629	0.741199	1810.46	FALSE	86
2022-09-15	11:10:39	-0.0286893	-0.127616	1881.48	FALSE	86
2022-09-15	11:10:40	0.0421503	0.187493	1810.65	FALSE	86
2022-09-15	11:10:40	-0.00706081	-0.0314079	1881.48	FALSE	86
2022-09-15	11:10:40	0.106832	0.47521	1811.13	FALSE	86
2022-09-15	11:10:40	-0.128893	-0.573342	1881.48	FALSE	86
2022-09-15	11:10:41	-0.0192746	-0.0857373	1811.13	FALSE	86
2022-09-15	11:10:41	0.0227102	0.10102	1881.58	FALSE	86
2022-09-15	11:10:41	-0.0973915	-0.433217	1811.13	FALSE	86
2022-09-15	11:10:42	-0.0557631	-0.248045	1881.58	FALSE	86
2022-09-15	11:10:42	-0.0967809	-0.430501	1811.13	FALSE	86
2022-09-15	11:10:42	0.05299	0.23571	1881.81	FALSE	86
2022-09-15	11:10:42	-0.168028	-0.747422	1811.13	FALSE	86
2022-09-15	11:10:43	0.0217941	0.0969445	1881.91	FALSE	86
2022-09-15	11:10:43	-0.0119463	-0.0531395	1811.13	FALSE	86
2022-09-15	11:10:43	-0.0845672	-0.376172	1881.91	FALSE	86
2022-09-15	11:10:43	-0.189961	-0.844985	1811.13	FALSE	86
2022-09-15	11:10:44	-0.175101	-0.778884	1881.91	FALSE	86
2022-09-15	11:10:44	-0.187417	-0.833668	1811.13	FALSE	86
2022-09-15	11:10:44	-0.215916	-0.960438	1881.91	FALSE	86
2022-09-15	11:10:44	-0.200598	-0.8923	1811.13	FALSE	86
2022-09-15	11:10:45	-0.138867	-0.617708	1881.91	FALSE	86
2022-09-15	11:10:45	-0.0775951	-0.345159	1811.13	FALSE	86
2022-09-15	11:10:45	-0.00217532	-0.00967626	1881.91	FALSE	86
2022-09-15	11:10:46	-0.0865519	-0.385	1811.13	FALSE	86
2022-09-15	11:10:46	0.055789	0.248161	1882.16	FALSE	86
2022-09-15	11:10:46	0.143728	0.639331	1811.77	FALSE	86
2022-09-15	11:10:46	-0.0033458	-0.0148828	1882.16	FALSE	86
2022-09-15	11:10:47	-0.103804	-0.461741	1811.77	FALSE	86
2022-09-15	11:10:47	-0.100801	-0.448383	1882.16	FALSE	86
2022-09-15	11:10:47	-0.105178	-0.467853	1811.77	FALSE	86
2022-09-15	11:10:47	-0.0566791	-0.25212	1882.16	FALSE	86
2022-09-15	11:10:48	-0.00288781	-0.0128456	1811.77	FALSE	86
2022-09-15	11:10:48	0.123473	0.549233	1882.71	FALSE	86
2022-09-15	11:10:48	0.277774	1.23559	1813	FALSE	86
2022-09-15	11:10:48	1.05503	4.69298	1887.4	FALSE	86
2022-09-15	11:10:49	1.27065	5.65211	1818.65	FALSE	86
2022-09-15	11:10:49	2.22541	9.89907	1897.3	FALSE	86
2022-09-15	11:10:49	1.51457	6.73711	1825.39	FALSE	86
2022-09-15	11:10:50	2.01843	8.97838	1906.28	FALSE	86
2022-09-15	11:10:50	0.596298	2.65245	1828.04	FALSE	86
2022-09-15	11:10:50	0.267341	1.18919	1907.47	FALSE	86
2022-09-15	11:10:50	0.205356	0.913465	1828.96	FALSE	86
2022-09-15	11:10:51	0.0713106	0.317204	1907.78	FALSE	86
2022-09-15	11:10:51	-0.0952542	-0.42371	1828.96	FALSE	86
2022-09-15	11:10:51	-0.1379	-0.613407	1907.78	FALSE	86
2022-09-15	11:10:51	-0.241005	-1.07204	1828.96	FALSE	86
2022-09-15	11:10:52	-0.207519	-0.923086	1907.78	FALSE	86
2022-09-15	11:10:52	-0.303702	-1.35093	1828.96	FALSE	86
2022-09-15	11:10:52	-0.274643	-1.22167	1907.78	FALSE	86
2022-09-15	11:10:52	-0.42762	-1.90214	1828.96	FALSE	86
2022-09-15	11:10:53	-0.324007	-1.44125	1907.78	FALSE	86
2022-09-15	11:10:53	-0.32248	-1.43446	1828.96	FALSE	86
2022-09-15	11:10:53	-0.201259	-0.89524	1907.78	FALSE	86
2022-09-15	11:10:54	-0.350012	-1.55692	1828.96	FALSE	86
2022-09-15	11:10:54	-0.211946	-0.942778	1907.78	FALSE	86
2022-09-15	11:10:54	-0.276679	-1.23072	1828.96	FALSE	86
2022-09-15	11:10:54	-0.16757	-0.745385	1907.78	FALSE	86
2022-09-15	11:10:55	-0.317137	-1.41069	1828.96	FALSE	86
2022-09-15	11:10:55	-0.120801	-0.537347	1907.78	FALSE	86
2022-09-15	11:10:55	-0.231743	-1.03084	1828.96	FALSE	86
2022-09-15	11:10:55	-0.172659	-0.768022	1907.78	FALSE	86
2022-09-15	11:10:56	-0.279732	-1.2443	1828.96	FALSE	86
2022-09-15	11:10:56	-0.143193	-0.636951	1907.78	FALSE	86
2022-09-15	11:10:56	-0.109402	-0.486642	1828.96	FALSE	86
2022-09-15	11:10:56	-0.162175	-0.721387	1907.78	FALSE	86
2022-09-15	11:10:57	-0.0719972	-0.320258	1828.96	FALSE	86
2022-09-15	11:10:57	-0.111183	-0.494564	1907.78	FALSE	86
2022-09-15	11:10:57	0.0921249	0.40979	1829.37	FALSE	86
2022-09-15	11:10:58	-0.0826333	-0.367569	1907.78	FALSE	86
2022-09-15	11:10:58	0.0146695	0.0652529	1829.43	FALSE	86
2022-09-15	11:10:58	-0.0291473	-0.129653	1907.78	FALSE	86
2022-09-15	11:10:58	0.106883	0.475437	1829.91	FALSE	86
2022-09-15	11:10:59	0.764338	3.39993	1911.18	FALSE	86
2022-09-15	11:10:59	1.73441	7.715	1837.62	FALSE	86
2022-09-15	11:10:59	3.73126	16.5974	1927.78	1	87
2022-09-15	11:10:59	3.76225	16.7352	1854.36	1	88
2022-09-15	11:11:00	3.91151	17.3992	1945.18	1	89
2022-09-15	11:11:00	1.94754	8.66305	1863.02	FALSE	89
2022-09-15	11:11:00	4.97238	22.1181	1967.3	1	90
2022-09-15	11:11:00	1.14327	5.08549	1868.11	FALSE	90
2022-09-15	11:11:01	3.81849	16.9854	1984.28	1	91
2022-09-15	11:11:01	1.39289	6.19585	1874.3	FALSE	91
2022-09-15	11:11:01	2.48413	11.0499	1995.33	FALSE	91
2022-09-15	11:11:02	0.363168	1.61544	1875.92	FALSE	91
2022-09-15	11:11:02	0.365967	1.62789	1996.96	FALSE	91
2022-09-15	11:11:02	0.505153	2.24702	1878.16	FALSE	91
2022-09-15	11:11:02	1.07212	4.769	2001.73	FALSE	91
2022-09-15	11:11:03	0.598842	2.66377	1880.83	FALSE	91
2022-09-15	11:11:03	0.327748	1.45789	2003.19	FALSE	91
2022-09-15	11:11:03	0.0922267	0.410243	1881.24	FALSE	91
2022-09-15	11:11:03	-0.113219	-0.503621	2003.19	FALSE	91
2022-09-15	11:11:04	-0.425483	-1.89263	1881.24	FALSE	91
2022-09-15	11:11:04	-0.396933	-1.76564	2003.19	FALSE	91
2022-09-15	11:11:04	-0.444974	-1.97933	1881.24	FALSE	91
2022-09-15	11:11:04	-0.4693	-2.08754	2003.19	FALSE	91
2022-09-15	11:11:05	-0.573066	-2.54911	1881.24	FALSE	91
2022-09-15	11:11:05	-0.536068	-2.38454	2003.19	FALSE	91
2022-09-15	11:11:05	-0.525687	-2.33836	1881.24	FALSE	91
2022-09-15	11:11:06	-0.592099	-2.63377	2003.19	FALSE	91
2022-09-15	11:11:06	-0.322226	-1.43333	1881.24	FALSE	91
2022-09-15	11:11:06	-0.311844	-1.38714	2003.19	FALSE	91
2022-09-15	11:11:06	-0.190776	-0.84861	1881.24	FALSE	91
2022-09-15	11:11:07	-0.285432	-1.26966	2003.19	FALSE	91
2022-09-15	11:11:07	-0.0610048	-0.271362	1881.24	FALSE	91
2022-09-15	11:11:07	0.188257	0.837405	2004.03	FALSE	91
2022-09-15	11:11:07	0.546527	2.43106	1883.67	FALSE	91
2022-09-15	11:11:08	0.66327	2.95036	2006.98	FALSE	91
2022-09-15	11:11:08	1.03569	4.60696	1888.28	FALSE	91
2022-09-15	11:11:08	0.491972	2.18839	2009.16	FALSE	91
2022-09-15	11:11:08	0.247443	1.10068	1889.38	FALSE	91
2022-09-15	11:11:09	0.175789	0.781945	2009.95	FALSE	91
2022-09-15	11:11:09	-0.0436002	-0.193942	1889.38	FALSE	91
2022-09-15	11:11:09	0.11528	0.512788	2010.46	FALSE	91
2022-09-15	11:11:10	-0.129249	-0.574925	1889.38	FALSE	91
2022-09-15	11:11:10	0.173244	0.770624	2011.23	FALSE	91
2022-09-15	11:11:10	0.748562	3.32975	1892.71	FALSE	91
2022-09-15	11:11:10	4.08261	18.1603	2029.39	1	92
2022-09-15	11:11:11	6.03797	26.8581	1919.56	1	93
2022-09-15	11:11:11	4.87034	21.6642	2051.05	1	94
2022-09-15	11:11:11	6.38902	28.4196	1947.98	1	95
2022-09-15	11:11:11	1.31126	5.83275	2056.89	FALSE	95
2022-09-15	11:11:12	1.45004	6.45007	1954.43	FALSE	95
2022-09-15	11:11:12	0.985814	4.3851	2061.27	FALSE	95
2022-09-15	11:11:12	-0.221666	-0.986015	1954.43	FALSE	95
2022-09-15	11:11:12	0.0458654	0.204018	2061.48	FALSE	95
2022-09-15	11:11:13	-0.129045	-0.574018	1954.43	FALSE	95
2022-09-15	11:11:13	-0.0802414	-0.35693	2061.48	FALSE	95
2022-09-15	11:11:13	-0.200649	-0.892527	1954.43	FALSE	95
2022-09-15	11:11:14	-0.151641	-0.674529	2061.48	FALSE	95
2022-09-15	11:11:14	-0.0839565	-0.373455	1954.43	FALSE	95
2022-09-15	11:11:14	-0.261972	-1.1653	2061.48	FALSE	95
2022-09-15	11:11:14	-0.189249	-0.841817	1954.43	FALSE	95
2022-09-15	11:11:15	-0.290216	-1.29094	2061.48	FALSE	95
2022-09-15	11:11:15	-0.331641	-1.47521	1954.43	FALSE	95
2022-09-15	11:11:15	-0.511946	-2.27724	2061.48	FALSE	95
2022-09-15	11:11:15	-0.355457	-1.58114	1954.43	FALSE	95
2022-09-15	11:11:16	-0.163956	-0.729309	2061.48	FALSE	95
2022-09-15	11:11:16	-0.283702	-1.26196	1954.43	FALSE	95
2022-09-15	11:11:16	-0.0882822	-0.392697	2061.48	FALSE	95
2022-09-15	11:11:17	-0.162633	-0.723424	1954.43	FALSE	95
2022-09-15	11:11:17	-0.107366	-0.477585	2061.48	FALSE	95
2022-09-15	11:11:17	-0.2236	-0.994618	1954.43	FALSE	95
2022-09-15	11:11:17	-0.104262	-0.463778	2061.48	FALSE	95
2022-09-15	11:11:18	-0.0218191	-0.0970557	1954.43	FALSE	95
2022-09-15	11:11:18	-0.191234	-0.850647	2061.48	FALSE	95
2022-09-15	11:11:18	-0.107824	-0.479623	1954.43	FALSE	95
2022-09-15	11:11:18	-0.0599361	-0.266608	2061.48	FALSE	95
2022-09-15	11:11:19	0.763168	3.39472	1957.83	FALSE	95
2022-09-15	11:11:19	6.10072	27.1372	2088.61	1	96
2022-09-15	11:11:19	12.6719	56.3671	2014.2	1	97
2022-09-15	11:11:20	10.2435	45.5651	2134.18	1	98
2022-09-15	11:11:20	9.92209	44.1354	2058.33	1	99
2022-09-15	11:11:20	4.87584	21.6887	2155.87	1	100
2022-09-15	11:11:20	2.20963	9.82888	2068.16	FALSE	100
2022-09-15	11:11:21	3.69996	16.4582	2172.33	1	101
2022-09-15	11:11:21	2.13874	9.51354	2077.67	FALSE	101
2022-09-15	11:11:21	4.43355	19.7213	2192.05	1	102
2022-09-15	11:11:21	6.53411	29.065	2106.74	1	103
2022-09-15	11:11:22	7.06683	31.4347	2223.48	1	104
2022-09-15	11:11:22	6.82001	30.3368	2137.08	1	105
2022-09-15	11:11:22	4.025	17.904	2241.39	1	106
2022-09-15	11:11:22	3.88138	17.2652	2154.34	1	107
2022-09-15	11:11:23	2.26347	10.0684	2251.45	FALSE	107
2022-09-15	11:11:23	0.761896	3.38907	2157.73	FALSE	107
2022-09-15	11:11:23	1.06887	4.75455	2256.21	FALSE	107
2022-09-15	11:11:23	1.65172	7.34718	2165.08	FALSE	107
2022-09-15	11:11:24	1.88581	8.38846	2264.6	FALSE	107
2022-09-15	11:11:24	4.32006	19.2165	2184.29	1	108
2022-09-15	11:11:24	5.3078	23.6102	2288.21	1	109
2022-09-15	11:11:25	5.73523	25.5115	2209.8	1	110
2022-09-15	11:11:25	0.313448	1.39428	2289.6	FALSE	110
2022-09-15	11:11:25	6.8884	30.641	2240.45	1	111
2022-09-15	11:11:25	15.3812	68.4187	2358.02	1	112
2022-09-15	11:11:26	5.77146	25.6726	2266.12	1	113
2022-09-15	11:11:26	2.92795	13.0241	2371.04	FALSE	113
2022-09-15	11:11:26	1.30836	5.81985	2271.94	FALSE	113
2022-09-15	11:11:26	3.15619	14.0394	2385.08	1	114
2022-09-15	11:11:27	9.05629	40.2842	2312.22	1	115
2022-09-15	11:11:27	12.9215	57.4774	2442.56	1	116
2022-09-15	11:11:27	7.21324	32.0859	2344.31	1	117
2022-09-15	11:11:27	9.25558	41.1707	2483.73	1	118
2022-09-15	11:11:28	15.7785	70.1859	2414.49	1	119
2022-09-15	11:11:28	16.4078	72.9852	2556.72	1	120
2022-09-15	11:11:28	8.90713	39.6207	2454.11	1	121
2022-09-15	11:11:29	8.19599	36.4574	2593.17	1	122
2022-09-15	11:11:29	7.04459	31.3357	2485.45	1	123
2022-09-15	11:11:29	4.85792	21.609	2614.78	1	124
2022-09-15	11:11:29	4.16958	18.5471	2504	1	125
2022-09-15	11:11:30	4.44225	19.76	2634.54	1	126
2022-09-15	11:11:30	4.49161	19.9796	2523.98	1	127
2022-09-15	11:11:30	4.4995	20.0147	2654.56	1	128
2022-09-15	11:11:30	4.17747	18.5822	2542.56	1	129

## Sheet: Klutz_star_202291511622 (2)
Date	Time	Lbs	Total force x time			**GoPro Fitting: 1055
2022-09-15	11:06:23	0.312583	0.312583	FALSE	0
2022-09-15	11:06:23	0.317112	0.629695	FALSE	0
2022-09-15	11:06:23	0.308512	0.938207	FALSE	0
2022-09-15	11:06:23	0.293652	1.23186	FALSE	0
2022-09-15	11:06:24	0.260064	1.49192	FALSE	0
2022-09-15	11:06:24	0.3193	1.81122	FALSE	0
2022-09-15	11:06:24	0.32729	2.13851	FALSE	0
2022-09-15	11:06:24	0.361947	2.50046	FALSE	0
2022-09-15	11:06:25	0.378028	2.87849	FALSE	0
2022-09-15	11:06:25	0.314109	3.1926	FALSE	0
2022-09-15	11:06:25	0.203575	3.39617	FALSE	0
2022-09-15	11:06:26	0.21187	3.60804	FALSE	0
2022-09-15	11:06:26	0.339758	3.9478	FALSE	0
2022-09-15	11:06:26	0.369733	4.31753	FALSE	0
2022-09-15	11:06:26	0.353244	4.67078	FALSE	0
2022-09-15	11:06:27	0.39243	5.06321	FALSE	0
2022-09-15	11:06:27	0.447545	5.51075	FALSE	0
2022-09-15	11:06:27	0.35813	5.86888	FALSE	0
2022-09-15	11:06:27	0.368155	6.23704	FALSE	0
2022-09-15	11:06:28	0.390344	6.62738	FALSE	0
2022-09-15	11:06:28	0.449835	7.07722	FALSE	0
2022-09-15	11:06:28	0.613142	7.69036	FALSE	0
2022-09-15	11:06:28	0.635127	8.32549	FALSE	0
2022-09-15	11:06:29	0.435484	8.76097	FALSE	0
2022-09-15	11:06:29	0.427036	9.18801	FALSE	0
2022-09-15	11:06:29	0.457875	9.64588	FALSE	0
2022-09-15	11:06:30	0.371158	10.017	FALSE	0
2022-09-15	11:06:30	0.388104	10.4051	FALSE	0
2022-09-15	11:06:30	0.399606	10.8047	FALSE	0
2022-09-15	11:06:30	0.435992	11.2407	FALSE	0
2022-09-15	11:06:31	0.391819	11.6326	FALSE	0
2022-09-15	11:06:31	0.376756	12.0093	FALSE	0
2022-09-15	11:06:31	0.384797	12.3941	FALSE	0
2022-09-15	11:06:31	0.389428	12.7835	FALSE	0
2022-09-15	11:06:32	0.394466	13.178	FALSE	0
2022-09-15	11:06:32	0.40958	13.5876	FALSE	0
2022-09-15	11:06:32	0.545611	14.1332	FALSE	0
2022-09-15	11:06:32	0.773906	14.9071	FALSE	0
2022-09-15	11:06:33	0.850649	15.7578	FALSE	0
2022-09-15	11:06:33	0.699656	16.4574	FALSE	0
2022-09-15	11:06:33	0.549122	17.0065	FALSE	0
2022-09-15	11:06:34	0.411972	17.4185	FALSE	0
2022-09-15	11:06:34	0.431005	17.8495	FALSE	0
2022-09-15	11:06:34	0.43874	18.2882	FALSE	0
2022-09-15	11:06:34	0.425967	18.7142	FALSE	0
2022-09-15	11:06:35	0.351921	19.0661	FALSE	0
2022-09-15	11:06:35	0.209173	19.2753	FALSE	0
2022-09-15	11:06:35	0.376959	19.6523	FALSE	0
2022-09-15	11:06:35	0.397977	20.0502	FALSE	0
2022-09-15	11:06:36	0.194924	20.2452	FALSE	0
2022-09-15	11:06:36	0.483219	20.7284	FALSE	0
2022-09-15	11:06:36	0.167596	20.896	FALSE	0
2022-09-15	11:06:37	-0.0798343	20.896	FALSE	0
2022-09-15	11:06:37	0.309377	21.2054	FALSE	0
2022-09-15	11:06:37	0.0327356	21.2381	FALSE	0
2022-09-15	11:06:37	-0.158257	21.2381	FALSE	0
2022-09-15	11:06:38	-0.0458903	21.2381	FALSE	0
2022-09-15	11:06:38	-0.0777478	21.2381	FALSE	0
2022-09-15	11:06:38	-0.190012	21.2381	FALSE	0
2022-09-15	11:06:38	-0.498765	21.2381	FALSE	0
2022-09-15	11:06:39	-0.508536	21.2381	FALSE	0
2022-09-15	11:06:39	-0.312811	21.2381	FALSE	0
2022-09-15	11:06:39	-0.298969	21.2381	FALSE	0
2022-09-15	11:06:39	-0.277493	21.2381	FALSE	0
2022-09-15	11:06:40	-0.194847	21.2381	FALSE	0
2022-09-15	11:06:40	-0.106196	21.2381	FALSE	0
2022-09-15	11:06:40	-0.0542364	21.2381	FALSE	0
2022-09-15	11:06:41	0.012074	21.2502	FALSE	0
2022-09-15	11:06:41	0.238384	21.4886	FALSE	0
2022-09-15	11:06:41	0.212685	21.7012	FALSE	0
2022-09-15	11:06:41	1.04912	22.7504	FALSE	0
2022-09-15	11:06:42	2.4194	25.1698	FALSE	0
2022-09-15	11:06:42	3.57055	28.7403	1	1
2022-09-15	11:06:42	6.22886	34.9692	1	2
2022-09-15	11:06:42	7.1222	42.0914	1	3
2022-09-15	11:06:43	3.25116	45.3425	1	4
2022-09-15	11:06:43	0.436196	45.7787	FALSE	4
2022-09-15	11:06:43	-4.10859	45.7787	FALSE	4
2022-09-15	11:06:43	-4.50752	45.7787	FALSE	4
2022-09-15	11:06:44	-4.66955	45.7787	FALSE	4
2022-09-15	11:06:44	-4.7149	45.7787	FALSE	4
2022-09-15	11:06:44	-4.57474	45.7787	FALSE	4
2022-09-15	11:06:45	-4.46675	45.7787	FALSE	4
2022-09-15	11:06:45	-3.98737	45.7787	FALSE	4
2022-09-15	11:06:45	0.438079	46.2168	FALSE	4
2022-09-15	11:06:45	0.120929	46.3377	FALSE	4
2022-09-15	11:06:46	3.04759	49.3853	1	5
2022-09-15	11:06:46	2.46444	51.8498	FALSE	5
2022-09-15	11:06:46	3.1848	55.0346	1	6
2022-09-15	11:06:46	3.63187	58.6664	1	7
2022-09-15	11:06:47	1.46439	60.1308	FALSE	7
2022-09-15	11:06:47	0.664389	60.7952	FALSE	7
2022-09-15	11:06:47	0.337468	61.1327	FALSE	7
2022-09-15	11:06:47	0.674618	61.8073	FALSE	7
2022-09-15	11:06:48	0.324186	62.1315	FALSE	7
2022-09-15	11:06:48	-0.13902	62.1315	FALSE	7
2022-09-15	11:06:48	-0.129656	62.1315	FALSE	7
2022-09-15	11:06:49	-0.126297	62.1315	FALSE	7
2022-09-15	11:06:49	0.203779	62.3353	FALSE	7
2022-09-15	11:06:49	0.171565	62.5068	FALSE	7
2022-09-15	11:06:49	0.132786	62.6396	FALSE	7
2022-09-15	11:06:50	0.79701	63.4366	FALSE	7
2022-09-15	11:06:50	1.62887	65.0655	FALSE	7
2022-09-15	11:06:50	2.89991	67.9654	FALSE	7
2022-09-15	11:06:50	4.6823	72.6477	1	8
2022-09-15	11:06:51	6.18678	78.8345	1	9
2022-09-15	11:06:51	9.7307	88.5652	1	10
2022-09-15	11:06:51	2.34754	90.9127	FALSE	10
2022-09-15	11:06:52	1.01014	91.9229	FALSE	10
2022-09-15	11:06:52	0.40612	92.329	FALSE	10
2022-09-15	11:06:52	0.0297839	92.3588	FALSE	10
2022-09-15	11:06:52	0.313957	92.6727	FALSE	10
2022-09-15	11:06:53	0.253448	92.9262	FALSE	10
2022-09-15	11:06:53	0.118944	93.0451	FALSE	10
2022-09-15	11:06:53	0.30785	93.353	FALSE	10
2022-09-15	11:06:53	0.128155	93.4811	FALSE	10
2022-09-15	11:06:54	0.303321	93.7844	FALSE	10
2022-09-15	11:06:54	0.194517	93.979	FALSE	10
2022-09-15	11:06:54	0.100166	94.0791	FALSE	10
2022-09-15	11:06:54	0.391463	94.4706	FALSE	10
2022-09-15	11:06:55	0.046018	94.5166	FALSE	10
2022-09-15	11:06:55	0.138588	94.6552	FALSE	10
2022-09-15	11:06:55	0.0872903	94.7425	FALSE	10
2022-09-15	11:06:56	0.16154	94.904	FALSE	10
2022-09-15	11:06:56	1.93788	96.8419	FALSE	10
2022-09-15	11:06:56	12.3902	109.232	1	11
2022-09-15	11:06:56	15.4882	124.72	1	12
2022-09-15	11:06:57	3.84225	128.563	1	13
2022-09-15	11:06:57	2.19457	130.757	FALSE	13
2022-09-15	11:06:57	0.211667	130.969	FALSE	13
2022-09-15	11:06:57	0.123728	131.093	FALSE	13
2022-09-15	11:06:58	0.0262725	131.119	FALSE	13
2022-09-15	11:06:58	-0.368333	131.119	FALSE	13
2022-09-15	11:06:58	-0.453727	131.119	FALSE	13
2022-09-15	11:06:58	-0.395407	131.119	FALSE	13
2022-09-15	11:06:59	-0.451183	131.119	FALSE	13
2022-09-15	11:06:59	-0.710724	131.119	FALSE	13
2022-09-15	11:06:59	-0.600445	131.119	FALSE	13
2022-09-15	11:07:00	-0.698154	131.119	FALSE	13
2022-09-15	11:07:00	-0.614847	131.119	FALSE	13
2022-09-15	11:07:00	-0.481412	131.119	FALSE	13
2022-09-15	11:07:00	-0.498307	131.119	FALSE	13
2022-09-15	11:07:01	-0.343702	131.119	FALSE	13
2022-09-15	11:07:01	-0.349147	131.119	FALSE	13
2022-09-15	11:07:01	-0.19215	131.119	FALSE	13
2022-09-15	11:07:01	-0.117188	131.119	FALSE	13
2022-09-15	11:07:02	-0.173269	131.119	FALSE	13
2022-09-15	11:07:02	-0.155458	131.119	FALSE	13
2022-09-15	11:07:02	-0.239783	131.119	FALSE	13
2022-09-15	11:07:02	-0.32762	131.119	FALSE	13
2022-09-15	11:07:03	-0.513066	131.119	FALSE	13
2022-09-15	11:07:03	-0.49902	131.119	FALSE	13
2022-09-15	11:07:03	-0.47159	131.119	FALSE	13
2022-09-15	11:07:04	-0.320496	131.119	FALSE	13
2022-09-15	11:07:04	0.125255	131.244	FALSE	13
2022-09-15	11:07:04	0.0742623	131.318	FALSE	13
2022-09-15	11:07:04	-0.0335239	131.318	FALSE	13
2022-09-15	11:07:05	0.108919	131.427	FALSE	13
2022-09-15	11:07:05	0.747494	132.175	FALSE	13
2022-09-15	11:07:05	0.571209	132.746	FALSE	13
2022-09-15	11:07:05	0.987392	133.733	FALSE	13
2022-09-15	11:07:06	1.9451	135.678	FALSE	13
2022-09-15	11:07:06	2.12495	137.803	FALSE	13
2022-09-15	11:07:06	2.28312	140.086	FALSE	13
2022-09-15	11:07:07	4.44703	144.534	1	14
2022-09-15	11:07:07	0.765	145.299	FALSE	14
2022-09-15	11:07:07	2.30256	147.601	FALSE	14
2022-09-15	11:07:07	1.31289	148.914	FALSE	14
2022-09-15	11:07:08	1.7309	150.645	FALSE	14
2022-09-15	11:07:08	2.48052	153.125	FALSE	14
2022-09-15	11:07:08	2.67487	155.8	FALSE	14
2022-09-15	11:07:08	1.81528	157.616	FALSE	14
2022-09-15	11:07:09	1.30439	158.92	FALSE	14
2022-09-15	11:07:09	0.639606	159.56	FALSE	14
2022-09-15	11:07:09	0.197621	159.757	FALSE	14
2022-09-15	11:07:09	0.194568	159.952	FALSE	14
2022-09-15	11:07:10	-0.210165	159.952	FALSE	14
2022-09-15	11:07:10	-0.519987	159.952	FALSE	14
2022-09-15	11:07:10	-0.701615	159.952	FALSE	14
2022-09-15	11:07:11	-0.757747	159.952	FALSE	14
2022-09-15	11:07:11	-0.853523	159.952	FALSE	14
2022-09-15	11:07:11	-1.00177	159.952	FALSE	14
2022-09-15	11:07:11	-0.876577	159.952	FALSE	14
2022-09-15	11:07:12	-1.06197	159.952	FALSE	14
2022-09-15	11:07:12	-0.0954068	159.952	FALSE	14
2022-09-15	11:07:12	1.64286	161.595	FALSE	14
2022-09-15	11:07:12	3.49599	165.091	1	15
2022-09-15	11:07:13	3.55823	168.649	1	16
2022-09-15	11:07:13	2.21401	170.863	FALSE	16
2022-09-15	11:07:13	1.11553	171.978	FALSE	16
2022-09-15	11:07:13	1.04118	173.02	FALSE	16
2022-09-15	11:07:14	0.10215	173.122	FALSE	16
2022-09-15	11:07:14	-0.117493	173.122	FALSE	16
2022-09-15	11:07:14	-0.348638	173.122	FALSE	16
2022-09-15	11:07:15	-0.789554	173.122	FALSE	16
2022-09-15	11:07:15	-0.892964	173.122	FALSE	16
2022-09-15	11:07:15	-0.850266	173.122	FALSE	16
2022-09-15	11:07:15	-0.555	173.122	FALSE	16
2022-09-15	11:07:16	0.151667	173.273	FALSE	16
2022-09-15	11:07:16	0.512176	173.786	FALSE	16
2022-09-15	11:07:16	0.973499	174.759	FALSE	16
2022-09-15	11:07:16	1.46933	176.228	FALSE	16
2022-09-15	11:07:17	1.36444	177.593	FALSE	16
2022-09-15	11:07:17	0.872735	178.466	FALSE	16
2022-09-15	11:07:17	0.888715	179.354	FALSE	16
2022-09-15	11:07:17	0.509784	179.864	FALSE	16
2022-09-15	11:07:18	0.530547	180.395	FALSE	16
2022-09-15	11:07:18	0.49299	180.888	FALSE	16
2022-09-15	11:07:18	0.448053	181.336	FALSE	16
2022-09-15	11:07:19	0.360827	181.696	FALSE	16
2022-09-15	11:07:19	0.389886	182.086	FALSE	16
2022-09-15	11:07:19	-0.859986	182.086	FALSE	16
2022-09-15	11:07:19	-0.982582	182.086	FALSE	16
2022-09-15	11:07:20	0.102608	182.189	FALSE	16
2022-09-15	11:07:20	-0.476272	182.189	FALSE	16
2022-09-15	11:07:20	-0.838256	182.189	FALSE	16
2022-09-15	11:07:20	-1.02258	182.189	FALSE	16
2022-09-15	11:07:21	-0.891386	182.189	FALSE	16
2022-09-15	11:07:21	-1.08401	182.189	FALSE	16
2022-09-15	11:07:21	-1.0835	182.189	FALSE	16
2022-09-15	11:07:22	-0.595101	182.189	FALSE	16
2022-09-15	11:07:22	-0.204872	182.189	FALSE	16
2022-09-15	11:07:22	1.36927	183.558	FALSE	16
2022-09-15	11:07:22	3.35762	186.916	1	17
2022-09-15	11:07:23	2.20566	189.121	FALSE	17
2022-09-15	11:07:23	3.3765	192.498	1	18
2022-09-15	11:07:23	1.06139	193.559	FALSE	18
2022-09-15	11:07:23	1.59548	195.155	FALSE	18
2022-09-15	11:07:24	1.16602	196.321	FALSE	18
2022-09-15	11:07:24	0.301438	196.622	FALSE	18
2022-09-15	11:07:24	0.135942	196.758	FALSE	18
2022-09-15	11:07:24	0.00286283	196.761	FALSE	18
2022-09-15	11:07:25	-0.14472	196.761	FALSE	18
2022-09-15	11:07:25	-0.287926	196.761	FALSE	18
2022-09-15	11:07:25	-0.26019	196.761	FALSE	18
2022-09-15	11:07:26	-0.0587147	196.761	FALSE	18
2022-09-15	11:07:26	0.247596	197.009	FALSE	18
2022-09-15	11:07:26	0.985102	197.994	FALSE	18
2022-09-15	11:07:26	3.5624	201.556	1	19
2022-09-15	11:07:27	3.45467	205.011	1	20
2022-09-15	11:07:27	2.18703	207.198	FALSE	20
2022-09-15	11:07:27	1.8305	209.028	FALSE	20
2022-09-15	11:07:27	2.09874	211.127	FALSE	20
2022-09-15	11:07:28	2.62082	213.748	FALSE	20
2022-09-15	11:07:28	4.00994	217.758	1	21
2022-09-15	11:07:28	5.69176	223.45	1	22
2022-09-15	11:07:28	3.83441	227.284	1	23
2022-09-15	11:07:29	2.55085	229.835	FALSE	23
2022-09-15	11:07:29	1.75599	231.591	FALSE	23
2022-09-15	11:07:29	2.23655	233.827	FALSE	23
2022-09-15	11:07:30	2.95833	236.786	FALSE	23
2022-09-15	11:07:30	4.60312	241.389	1	24
2022-09-15	11:07:30	4.87609	246.265	1	25
2022-09-15	11:07:30	4.65258	250.918	1	26
2022-09-15	11:07:31	4.1906	255.108	1	27
2022-09-15	11:07:31	4.13044	259.239	1	28
2022-09-15	11:07:31	3.06653	262.305	1	29
2022-09-15	11:07:31	1.60037	263.906	FALSE	29
2022-09-15	11:07:32	0.421132	264.327	FALSE	29
2022-09-15	11:07:32	0.2307	264.557	FALSE	29
2022-09-15	11:07:32	-0.200394	264.557	FALSE	29
2022-09-15	11:07:32	-0.178358	264.557	FALSE	29
2022-09-15	11:07:33	-0.593829	264.557	FALSE	29
2022-09-15	11:07:33	-0.504974	264.557	FALSE	29
2022-09-15	11:07:33	0.55472	265.112	FALSE	29
2022-09-15	11:07:34	2.72892	267.841	FALSE	29
2022-09-15	11:07:34	1.03223	268.873	FALSE	29
2022-09-15	11:07:34	0.630954	269.504	FALSE	29
2022-09-15	11:07:34	0.836806	270.341	FALSE	29
2022-09-15	11:07:35	1.21655	271.558	FALSE	29
2022-09-15	11:07:35	1.13844	272.696	FALSE	29
2022-09-15	11:07:35	0.645712	273.342	FALSE	29
2022-09-15	11:07:35	0.435076	273.777	FALSE	29
2022-09-15	11:07:36	0.257977	274.035	FALSE	29
2022-09-15	11:07:36	0.234517	274.269	FALSE	29
2022-09-15	11:07:36	0.244542	274.514	FALSE	29
2022-09-15	11:07:37	0.344491	274.858	FALSE	29
2022-09-15	11:07:37	0.25584	275.114	FALSE	29
2022-09-15	11:07:37	0.225662	275.34	FALSE	29
2022-09-15	11:07:37	0.235127	275.575	FALSE	29
2022-09-15	11:07:38	0.175331	275.75	FALSE	29
2022-09-15	11:07:38	0.126883	275.877	FALSE	29
2022-09-15	11:07:38	0.105916	275.983	FALSE	29
2022-09-15	11:07:38	0.166781	276.15	FALSE	29
2022-09-15	11:07:39	0.24785	276.398	FALSE	29
2022-09-15	11:07:39	0.383881	276.782	FALSE	29
2022-09-15	11:07:39	0.371412	277.153	FALSE	29
2022-09-15	11:07:39	0.465051	277.618	FALSE	29
2022-09-15	11:07:40	0.441489	278.06	FALSE	29
2022-09-15	11:07:40	0.597214	278.657	FALSE	29
2022-09-15	11:07:40	0.679555	279.336	FALSE	29
2022-09-15	11:07:41	0.617468	279.954	FALSE	29
2022-09-15	11:07:41	0.585509	280.539	FALSE	29
2022-09-15	11:07:41	0.722608	281.262	FALSE	29
2022-09-15	11:07:41	0.588919	281.851	FALSE	29
2022-09-15	11:07:42	0.636552	282.487	FALSE	29
2022-09-15	11:07:42	0.699147	283.186	FALSE	29
2022-09-15	11:07:42	0.674262	283.861	FALSE	29
2022-09-15	11:07:42	0.727188	284.588	FALSE	29
2022-09-15	11:07:43	0.673244	285.261	FALSE	29
2022-09-15	11:07:43	0.715534	285.977	FALSE	29
2022-09-15	11:07:43	1.01457	286.991	FALSE	29
2022-09-15	11:07:43	0.951921	287.943	FALSE	29
2022-09-15	11:07:44	0.879453	288.823	FALSE	29
2022-09-15	11:07:44	0.572379	289.395	FALSE	29
2022-09-15	11:07:44	0.354466	289.75	FALSE	29
2022-09-15	11:07:45	0.360115	290.11	FALSE	29
2022-09-15	11:07:45	0.431667	290.541	FALSE	29
2022-09-15	11:07:45	0.344084	290.885	FALSE	29
2022-09-15	11:07:45	0.107189	290.993	FALSE	29
2022-09-15	11:07:46	0.037214	291.03	FALSE	29
2022-09-15	11:07:46	-0.153269	291.03	FALSE	29
2022-09-15	11:07:46	-0.134643	291.03	FALSE	29
2022-09-15	11:07:46	-0.256374	291.03	FALSE	29
2022-09-15	11:07:47	-0.308486	291.03	FALSE	29
2022-09-15	11:07:47	-0.304771	291.03	FALSE	29
2022-09-15	11:07:47	-0.502277	291.03	FALSE	29
2022-09-15	11:07:47	-0.528333	291.03	FALSE	29
2022-09-15	11:07:48	-0.699885	291.03	FALSE	29
2022-09-15	11:07:48	-0.487162	291.03	FALSE	29
2022-09-15	11:07:48	-0.764261	291.03	FALSE	29
2022-09-15	11:07:49	-0.722531	291.03	FALSE	29
2022-09-15	11:07:49	-0.895966	291.03	FALSE	29
2022-09-15	11:07:49	-0.840546	291.03	FALSE	29
2022-09-15	11:07:49	-0.964058	291.03	FALSE	29
2022-09-15	11:07:50	-0.766653	291.03	FALSE	29
2022-09-15	11:07:50	-0.951742	291.03	FALSE	29
2022-09-15	11:07:50	-0.68075	291.03	FALSE	29
2022-09-15	11:07:50	-0.68645	291.03	FALSE	29
2022-09-15	11:07:51	-0.552099	291.03	FALSE	29
2022-09-15	11:07:51	-0.421157	291.03	FALSE	29
2022-09-15	11:07:51	-0.388536	291.03	FALSE	29
2022-09-15	11:07:52	-0.321921	291.03	FALSE	29
2022-09-15	11:07:52	-0.0852796	291.03	FALSE	29
2022-09-15	11:07:52	1.21604	292.246	FALSE	29
2022-09-15	11:07:52	2.7851	295.031	FALSE	29
2022-09-15	11:07:53	2.92663	297.958	FALSE	29
2022-09-15	11:07:53	1.66882	299.626	FALSE	29
2022-09-15	11:07:53	1.24139	300.868	FALSE	29
2022-09-15	11:07:53	0.553906	301.422	FALSE	29
2022-09-15	11:07:54	0.802659	302.224	FALSE	29
2022-09-15	11:07:54	1.06581	303.29	FALSE	29
2022-09-15	11:07:54	0.708053	303.998	FALSE	29
2022-09-15	11:07:54	0.197977	304.196	FALSE	29
2022-09-15	11:07:55	-0.0129133	304.196	FALSE	29
2022-09-15	11:07:55	0.126781	304.323	FALSE	29
2022-09-15	11:07:55	0.286934	304.61	FALSE	29
2022-09-15	11:07:56	0.295636	304.906	FALSE	29
2022-09-15	11:07:56	0.0822012	304.988	FALSE	29
2022-09-15	11:07:56	0.199606	305.187	FALSE	29
2022-09-15	11:07:56	0.0631173	305.25	FALSE	29
2022-09-15	11:07:57	0.201743	305.452	FALSE	29
2022-09-15	11:07:57	-0.156475	305.452	FALSE	29
2022-09-15	11:07:57	-0.495763	305.452	FALSE	29
2022-09-15	11:07:57	-0.422073	305.452	FALSE	29
2022-09-15	11:07:58	-0.502328	305.452	FALSE	29
2022-09-15	11:07:58	-0.568944	305.452	FALSE	29
2022-09-15	11:07:58	-0.646958	305.452	FALSE	29
2022-09-15	11:07:58	-0.449503	305.452	FALSE	29
2022-09-15	11:07:59	-0.286348	305.452	FALSE	29
2022-09-15	11:07:59	-0.393218	305.452	FALSE	29
2022-09-15	11:07:59	-0.0385112	305.452	FALSE	29
2022-09-15	11:08:00	0.43355	305.886	FALSE	29
2022-09-15	11:08:00	1.43095	307.317	FALSE	29
2022-09-15	11:08:00	2.06917	309.386	FALSE	29
2022-09-15	11:08:00	1.1908	310.577	FALSE	29
2022-09-15	11:08:01	3.28337	313.86	1	30
2022-09-15	11:08:01	0.961997	314.822	FALSE	30
2022-09-15	11:08:01	-0.416017	314.822	FALSE	30
2022-09-15	11:08:01	0.538842	315.361	FALSE	30
2022-09-15	11:08:02	0.594008	315.955	FALSE	30
2022-09-15	11:08:02	0.679962	316.635	FALSE	30
2022-09-15	11:08:02	0.114669	316.75	FALSE	30
2022-09-15	11:08:02	0.224491	316.974	FALSE	30
2022-09-15	11:08:03	0.0743641	317.048	FALSE	30
2022-09-15	11:08:03	0.191158	317.24	FALSE	30
2022-09-15	11:08:03	-0.153219	317.24	FALSE	30
2022-09-15	11:08:04	0.143779	317.383	FALSE	30
2022-09-15	11:08:04	0.191769	317.575	FALSE	30
2022-09-15	11:08:04	0.214313	317.789	FALSE	30
2022-09-15	11:08:04	0.732379	318.522	FALSE	30
2022-09-15	11:08:05	0.373143	318.895	FALSE	30
2022-09-15	11:08:05	0.96215	319.857	FALSE	30
2022-09-15	11:08:05	0.55986	320.417	FALSE	30
2022-09-15	11:08:05	0.564135	320.981	FALSE	30
2022-09-15	11:08:06	0.496043	321.477	FALSE	30
2022-09-15	11:08:06	0.540114	322.017	FALSE	30
2022-09-15	11:08:06	0.413193	322.43	FALSE	30
2022-09-15	11:08:06	0.66612	323.097	FALSE	30
2022-09-15	11:08:07	0.624593	323.721	FALSE	30
2022-09-15	11:08:07	0.532277	324.253	FALSE	30
2022-09-15	11:08:07	0.726476	324.98	FALSE	30
2022-09-15	11:08:08	0.501692	325.482	FALSE	30
2022-09-15	11:08:08	0.394008	325.876	FALSE	30
2022-09-15	11:08:08	0.207748	326.083	FALSE	30
2022-09-15	11:08:08	0.456043	326.539	FALSE	30
2022-09-15	11:08:09	0.413397	326.953	FALSE	30
2022-09-15	11:08:09	0.73355	327.686	FALSE	30
2022-09-15	11:08:09	0.352074	328.038	FALSE	30
2022-09-15	11:08:09	0.485916	328.524	FALSE	30
2022-09-15	11:08:10	0.365051	328.889	FALSE	30
2022-09-15	11:08:10	0.269071	329.158	FALSE	30
2022-09-15	11:08:10	0.148054	329.306	FALSE	30
2022-09-15	11:08:11	0.189733	329.496	FALSE	30
2022-09-15	11:08:11	0.158334	329.655	FALSE	30
2022-09-15	11:08:11	0.0899366	329.744	FALSE	30
2022-09-15	11:08:11	0.172837	329.917	FALSE	30
2022-09-15	11:08:12	0.146069	330.063	FALSE	30
2022-09-15	11:08:12	0.274415	330.338	FALSE	30
2022-09-15	11:08:12	0.397723	330.736	FALSE	30
2022-09-15	11:08:12	0.396349	331.132	FALSE	30
2022-09-15	11:08:13	0.285	331.417	FALSE	30
2022-09-15	11:08:13	0.420827	331.838	FALSE	30
2022-09-15	11:08:13	0.28556	332.123	FALSE	30
2022-09-15	11:08:13	0.265509	332.389	FALSE	30
2022-09-15	11:08:14	0.298028	332.687	FALSE	30
2022-09-15	11:08:14	0.278537	332.965	FALSE	30
2022-09-15	11:08:14	0.246171	333.211	FALSE	30
2022-09-15	11:08:15	0.317672	333.529	FALSE	30
2022-09-15	11:08:15	0.216705	333.746	FALSE	30
2022-09-15	11:08:15	0.567799	334.314	FALSE	30
2022-09-15	11:08:15	0.548155	334.862	FALSE	30
2022-09-15	11:08:16	0.4736	335.335	FALSE	30
2022-09-15	11:08:16	0.384797	335.72	FALSE	30
2022-09-15	11:08:16	0.418232	336.138	FALSE	30
2022-09-15	11:08:16	0.468817	336.607	FALSE	30
2022-09-15	11:08:17	0.457468	337.065	FALSE	30
2022-09-15	11:08:17	0.454873	337.52	FALSE	30
2022-09-15	11:08:17	0.454059	337.974	FALSE	30
2022-09-15	11:08:17	0.440522	338.414	FALSE	30
2022-09-15	11:08:18	0.443219	338.857	FALSE	30
2022-09-15	11:08:18	0.438028	339.295	FALSE	30
2022-09-15	11:08:18	0.44785	339.743	FALSE	30
2022-09-15	11:08:19	0.450242	340.194	FALSE	30
2022-09-15	11:08:19	0.468308	340.662	FALSE	30
2022-09-15	11:08:19	0.59472	341.257	FALSE	30
2022-09-15	11:08:19	0.597926	341.854	FALSE	30
2022-09-15	11:08:20	0.645254	342.5	FALSE	30
2022-09-15	11:08:20	0.683117	343.183	FALSE	30
2022-09-15	11:08:20	1.02622	344.209	FALSE	30
2022-09-15	11:08:20	0.946425	345.156	FALSE	30
2022-09-15	11:08:21	1.17121	346.327	FALSE	30
2022-09-15	11:08:21	1.30011	347.627	FALSE	30
2022-09-15	11:08:21	0.948359	348.575	FALSE	30
2022-09-15	11:08:21	0.420522	348.996	FALSE	30
2022-09-15	11:08:22	0.239351	349.235	FALSE	30
2022-09-15	11:08:22	0.192685	349.428	FALSE	30
2022-09-15	11:08:22	0.0426084	349.47	FALSE	30
2022-09-15	11:08:23	-0.0224807	349.47	FALSE	30
2022-09-15	11:08:23	-0.129249	349.47	FALSE	30
2022-09-15	11:08:23	-0.127417	349.47	FALSE	30
2022-09-15	11:08:23	-0.00884198	349.47	FALSE	30
2022-09-15	11:08:24	0.174517	349.645	FALSE	30
2022-09-15	11:08:24	0.198283	349.843	FALSE	30
2022-09-15	11:08:24	0.286069	350.129	FALSE	30
2022-09-15	11:08:24	0.316247	350.445	FALSE	30
2022-09-15	11:08:25	0.366883	350.812	FALSE	30
2022-09-15	11:08:25	0.363626	351.176	FALSE	30
2022-09-15	11:08:25	0.474924	351.651	FALSE	30
2022-09-15	11:08:26	0.0502929	351.701	FALSE	30
2022-09-15	11:08:26	0.387595	352.089	FALSE	30
2022-09-15	11:08:26	0.363677	352.452	FALSE	30
2022-09-15	11:08:26	0.356501	352.809	FALSE	30
2022-09-15	11:08:27	0.382761	353.192	FALSE	30
2022-09-15	11:08:27	0.29472	353.486	FALSE	30
2022-09-15	11:08:27	0.304033	353.79	FALSE	30
2022-09-15	11:08:27	0.416654	354.207	FALSE	30
2022-09-15	11:08:28	0.319351	354.526	FALSE	30
2022-09-15	11:08:28	0.385254	354.912	FALSE	30
2022-09-15	11:08:28	0.331361	355.243	FALSE	30
2022-09-15	11:08:28	0.283321	355.526	FALSE	30
2022-09-15	11:08:29	0.333295	355.86	FALSE	30
2022-09-15	11:08:29	0.314517	356.174	FALSE	30
2022-09-15	11:08:29	0.372685	356.547	FALSE	30
2022-09-15	11:08:30	0.500369	357.047	FALSE	30
2022-09-15	11:08:30	0.591361	357.639	FALSE	30
2022-09-15	11:08:30	0.781539	358.42	FALSE	30
2022-09-15	11:08:30	0.547544	358.968	FALSE	30
2022-09-15	11:08:31	1.58352	360.551	FALSE	30
2022-09-15	11:08:31	1.78057	362.332	FALSE	30
2022-09-15	11:08:31	5.80403	368.136	1	31
2022-09-15	11:08:31	8.30301	376.439	1	32
2022-09-15	11:08:32	7.67843	384.117	1	33
2022-09-15	11:08:32	4.2878	388.405	1	34
2022-09-15	11:08:32	1.12602	389.531	FALSE	34
2022-09-15	11:08:32	0.569834	390.101	FALSE	34
2022-09-15	11:08:33	0.563931	390.665	FALSE	34
2022-09-15	11:08:33	0.487392	391.152	FALSE	34
2022-09-15	11:08:33	0.420827	391.573	FALSE	34
2022-09-15	11:08:34	0.254415	391.828	FALSE	34
2022-09-15	11:08:34	0.379758	392.207	FALSE	34
2022-09-15	11:08:34	0.265763	392.473	FALSE	34
2022-09-15	11:08:34	0.309784	392.783	FALSE	34
2022-09-15	11:08:35	0.500267	393.283	FALSE	34
2022-09-15	11:08:35	1.9824	395.265	FALSE	34
2022-09-15	11:08:35	3.45523	398.721	1	35
2022-09-15	11:08:35	4.53665	403.257	1	36
2022-09-15	11:08:36	6.02566	409.283	1	37
2022-09-15	11:08:36	3.49487	412.778	1	38
2022-09-15	11:08:36	3.18764	415.966	1	39
2022-09-15	11:08:36	3.36357	419.329	1	40
2022-09-15	11:08:37	2.99574	422.325	FALSE	40
2022-09-15	11:08:37	3.6649	425.99	1	41
2022-09-15	11:08:37	2.45212	428.442	FALSE	41
2022-09-15	11:08:38	2.99044	431.432	FALSE	41
2022-09-15	11:08:38	1.10994	432.542	FALSE	41
2022-09-15	11:08:38	0.409631	432.952	FALSE	41
2022-09-15	11:08:38	0.423321	433.375	FALSE	41
2022-09-15	11:08:39	0.231718	433.607	FALSE	41
2022-09-15	11:08:39	0.351768	433.959	FALSE	41
2022-09-15	11:08:39	0.301998	434.261	FALSE	41
2022-09-15	11:08:39	0.274262	434.535	FALSE	41
2022-09-15	11:08:40	0.427646	434.963	FALSE	41
2022-09-15	11:08:40	0.281845	435.244	FALSE	41
2022-09-15	11:08:40	0.604237	435.849	FALSE	41
2022-09-15	11:08:40	0.265305	436.114	FALSE	41
2022-09-15	11:08:41	0.394161	436.508	FALSE	41
2022-09-15	11:08:41	0.353804	436.862	FALSE	41
2022-09-15	11:08:41	0.371819	437.234	FALSE	41
2022-09-15	11:08:42	0.87986	438.114	FALSE	41
2022-09-15	11:08:42	1.63477	439.748	FALSE	41
2022-09-15	11:08:42	4.22413	443.973	1	42
2022-09-15	11:08:42	3.83284	447.805	1	43
2022-09-15	11:08:43	4.97538	452.781	1	44
2022-09-15	11:08:43	3.63945	456.42	1	45
2022-09-15	11:08:43	3.49782	459.918	1	46
2022-09-15	11:08:43	3.09243	463.01	1	47
2022-09-15	11:08:44	2.22485	465.235	FALSE	47
2022-09-15	11:08:44	4.27854	469.514	1	48
2022-09-15	11:08:44	2.24266	471.756	FALSE	48
2022-09-15	11:08:44	2.67172	474.428	FALSE	48
2022-09-15	11:08:45	3.47879	477.907	1	49
2022-09-15	11:08:45	3.39436	481.301	1	50
2022-09-15	11:08:45	3.00118	484.303	1	51
2022-09-15	11:08:46	1.36622	485.669	FALSE	51
2022-09-15	11:08:46	1.41874	487.087	FALSE	51
2022-09-15	11:08:46	1.29859	488.386	FALSE	51
2022-09-15	11:08:46	0.872633	489.259	FALSE	51
2022-09-15	11:08:47	0.60612	489.865	FALSE	51
2022-09-15	11:08:47	1.09594	490.961	FALSE	51
2022-09-15	11:08:47	0.976094	491.937	FALSE	51
2022-09-15	11:08:47	0.766527	492.703	FALSE	51
2022-09-15	11:08:48	0.580776	493.284	FALSE	51
2022-09-15	11:08:48	0.275636	493.56	FALSE	51
2022-09-15	11:08:48	0.365865	493.926	FALSE	51
2022-09-15	11:08:49	0.245967	494.172	FALSE	51
2022-09-15	11:08:49	0.415789	494.587	FALSE	51
2022-09-15	11:08:49	0.531718	495.119	FALSE	51
2022-09-15	11:08:49	1.28454	496.404	FALSE	51
2022-09-15	11:08:50	6.1737	502.577	1	52
2022-09-15	11:08:50	7.95757	510.535	1	53
2022-09-15	11:08:50	6.11665	516.652	1	54
2022-09-15	11:08:50	2.05055	518.702	FALSE	54
2022-09-15	11:08:51	4.2906	522.993	1	55
2022-09-15	11:08:51	6.3709	529.364	1	56
2022-09-15	11:08:51	7.97507	537.339	1	57
2022-09-15	11:08:51	7.69528	545.034	1	58
2022-09-15	11:08:52	1.40093	546.435	FALSE	58
2022-09-15	11:08:52	0.732837	547.168	FALSE	58
2022-09-15	11:08:52	0.792888	547.961	FALSE	58
2022-09-15	11:08:53	0.283677	548.244	FALSE	58
2022-09-15	11:08:53	0.936552	549.181	FALSE	58
2022-09-15	11:08:53	0.409936	549.591	FALSE	58
2022-09-15	11:08:53	0.682811	550.274	FALSE	58
2022-09-15	11:08:54	0.59584	550.869	FALSE	58
2022-09-15	11:08:54	0.334618	551.204	FALSE	58
2022-09-15	11:08:54	0.492583	551.697	FALSE	58
2022-09-15	11:08:54	0.27986	551.977	FALSE	58
2022-09-15	11:08:55	0.689784	552.666	FALSE	58
2022-09-15	11:08:55	0.35187	553.018	FALSE	58
2022-09-15	11:08:55	1.02291	554.041	FALSE	58
2022-09-15	11:08:55	0.819707	554.861	FALSE	58
2022-09-15	11:08:56	1.35574	556.217	FALSE	58
2022-09-15	11:08:56	1.09365	557.31	FALSE	58
2022-09-15	11:08:56	1.26907	558.579	FALSE	58
2022-09-15	11:08:57	1.08378	559.663	FALSE	58
2022-09-15	11:08:57	1.06505	560.728	FALSE	58
2022-09-15	11:08:57	1.13487	561.863	FALSE	58
2022-09-15	11:08:57	1.10566	562.969	FALSE	58
2022-09-15	11:08:58	1.21579	564.184	FALSE	58
2022-09-15	11:08:58	1.05126	565.236	FALSE	58
2022-09-15	11:08:58	1.09146	566.327	FALSE	58
2022-09-15	11:08:58	1.1248	567.452	FALSE	58
2022-09-15	11:08:59	0.879758	568.332	FALSE	58
2022-09-15	11:08:59	0.703779	569.035	FALSE	58
2022-09-15	11:08:59	0.606985	569.642	FALSE	58
2022-09-15	11:08:59	0.480115	570.123	FALSE	58
2022-09-15	11:09:00	0.46958	570.592	FALSE	58
2022-09-15	11:09:00	0.525814	571.118	FALSE	58
2022-09-15	11:09:00	0.456501	571.574	FALSE	58
2022-09-15	11:09:01	0.445305	572.02	FALSE	58
2022-09-15	11:09:01	0.435891	572.456	FALSE	58
2022-09-15	11:09:01	0.471209	572.927	FALSE	58
2022-09-15	11:09:01	0.463422	573.39	FALSE	58
2022-09-15	11:09:02	0.487545	573.878	FALSE	58
2022-09-15	11:09:02	0.489122	574.367	FALSE	58
2022-09-15	11:09:02	0.47243	574.839	FALSE	58
2022-09-15	11:09:02	0.464084	575.303	FALSE	58
2022-09-15	11:09:03	0.467341	575.771	FALSE	58
2022-09-15	11:09:03	0.486883	576.258	FALSE	58
2022-09-15	11:09:03	0.511972	576.77	FALSE	58
2022-09-15	11:09:03	0.503015	577.273	FALSE	58
2022-09-15	11:09:04	0.504847	577.778	FALSE	58
2022-09-15	11:09:04	0.444593	578.222	FALSE	58
2022-09-15	11:09:04	0.424084	578.646	FALSE	58
2022-09-15	11:09:05	0.407137	579.053	FALSE	58
2022-09-15	11:09:05	0.427901	579.481	FALSE	58
2022-09-15	11:09:05	0.413601	579.895	FALSE	58
2022-09-15	11:09:05	0.43355	580.328	FALSE	58
2022-09-15	11:09:06	0.458893	580.787	FALSE	58
2022-09-15	11:09:06	0.415076	581.202	FALSE	58
2022-09-15	11:09:06	0.267138	581.47	FALSE	58
2022-09-15	11:09:06	0.226323	581.696	FALSE	58
2022-09-15	11:09:07	0.366985	582.063	FALSE	58
2022-09-15	11:09:07	0.126731	582.19	FALSE	58
2022-09-15	11:09:07	0.404135	582.594	FALSE	58
2022-09-15	11:09:07	0.350649	582.944	FALSE	58
2022-09-15	11:09:08	0.473244	583.418	FALSE	58
2022-09-15	11:09:08	0.231972	583.65	FALSE	58
2022-09-15	11:09:08	0.242507	583.892	FALSE	58
2022-09-15	11:09:09	0.252226	584.144	FALSE	58
2022-09-15	11:09:09	0.285509	584.43	FALSE	58
2022-09-15	11:09:09	0.53187	584.962	FALSE	58
2022-09-15	11:09:09	0.173957	585.136	FALSE	58
2022-09-15	11:09:10	0.23925	585.375	FALSE	58
2022-09-15	11:09:10	0.622812	585.998	FALSE	58
2022-09-15	11:09:10	1.64174	587.639	FALSE	58
2022-09-15	11:09:10	2.13991	589.779	FALSE	58
2022-09-15	11:09:11	1.19538	590.975	FALSE	58
2022-09-15	11:09:11	2.45635	593.431	FALSE	58
2022-09-15	11:09:11	2.21966	595.651	FALSE	58
2022-09-15	11:09:11	1.92108	597.572	FALSE	58
2022-09-15	11:09:12	1.10373	598.676	FALSE	58
2022-09-15	11:09:12	0.971565	599.647	FALSE	58
2022-09-15	11:09:12	0.9993	600.646	FALSE	58
2022-09-15	11:09:13	2.29787	602.944	FALSE	58
2022-09-15	11:09:13	3.18118	606.125	1	59
2022-09-15	11:09:13	2.20785	608.333	FALSE	59
2022-09-15	11:09:13	0.813702	609.147	FALSE	59
2022-09-15	11:09:14	0.41355	609.561	FALSE	59
2022-09-15	11:09:14	0.378741	609.939	FALSE	59
2022-09-15	11:09:14	0.446476	610.386	FALSE	59
2022-09-15	11:09:14	1.14566	611.531	FALSE	59
2022-09-15	11:09:15	1.56683	613.098	FALSE	59
2022-09-15	11:09:15	3.94541	617.044	1	60
2022-09-15	11:09:15	5.51752	622.561	1	61
2022-09-15	11:09:16	6.22499	628.786	1	62
2022-09-15	11:09:16	3.77884	632.565	1	63
2022-09-15	11:09:16	3.63737	636.202	1	64
2022-09-15	11:09:16	6.15924	642.362	1	65
2022-09-15	11:09:17	4.46815	646.83	1	66
2022-09-15	11:09:17	2.2219	649.052	FALSE	66
2022-09-15	11:09:17	2.5162	651.568	FALSE	66
2022-09-15	11:09:17	2.38108	653.949	FALSE	66
2022-09-15	11:09:18	1.49182	655.441	FALSE	66
2022-09-15	11:09:18	1.85034	657.291	FALSE	66
2022-09-15	11:09:18	1.0338	658.325	FALSE	66
2022-09-15	11:09:18	1.04668	659.372	FALSE	66
2022-09-15	11:09:19	2.50653	661.878	FALSE	66
2022-09-15	11:09:19	3.31533	665.193	1	67
2022-09-15	11:09:19	3.58133	668.775	1	68
2022-09-15	11:09:20	1.02597	669.801	FALSE	68
2022-09-15	11:09:20	-0.66706	669.801	FALSE	68
2022-09-15	11:09:20	-0.910826	669.801	FALSE	68
2022-09-15	11:09:20	-1.52793	669.801	FALSE	68
2022-09-15	11:09:21	-1.36686	669.801	FALSE	68
2022-09-15	11:09:21	-0.712862	669.801	FALSE	68
2022-09-15	11:09:21	-0.53332	669.801	FALSE	68
2022-09-15	11:09:21	-0.512455	669.801	FALSE	68
2022-09-15	11:09:22	-0.295508	669.801	FALSE	68
2022-09-15	11:09:22	-1.52513	669.801	FALSE	68
2022-09-15	11:09:22	-1.71266	669.801	FALSE	68
2022-09-15	11:09:22	-1.78599	669.801	FALSE	68
2022-09-15	11:09:23	-2.31597	669.801	FALSE	68
2022-09-15	11:09:23	-2.25281	669.801	FALSE	68
2022-09-15	11:09:23	-2.30894	669.801	FALSE	68
2022-09-15	11:09:24	-2.62574	669.801	FALSE	68
2022-09-15	11:09:24	-2.5607	669.801	FALSE	68
2022-09-15	11:09:24	-2.80385	669.801	FALSE	68
2022-09-15	11:09:24	-2.66192	669.801	FALSE	68
2022-09-15	11:09:25	-2.56202	669.801	FALSE	68
2022-09-15	11:09:25	-2.50182	669.801	FALSE	68
2022-09-15	11:09:25	-2.48696	669.801	FALSE	68
2022-09-15	11:09:25	-2.27271	669.801	FALSE	68
2022-09-15	11:09:26	-2.33413	669.801	FALSE	68
2022-09-15	11:09:26	-2.24462	669.801	FALSE	68
2022-09-15	11:09:26	-2.36614	669.801	FALSE	68
2022-09-15	11:09:26	-2.27943	669.801	FALSE	68
2022-09-15	11:09:27	-2.36396	669.801	FALSE	68
2022-09-15	11:09:27	-2.3863	669.801	FALSE	68
2022-09-15	11:09:27	-2.3605	669.801	FALSE	68
2022-09-15	11:09:28	-2.36757	669.801	FALSE	68
2022-09-15	11:09:28	-2.35866	669.801	FALSE	68
2022-09-15	11:09:28	-2.33831	669.801	FALSE	68
2022-09-15	11:09:28	-2.35276	669.801	FALSE	68
2022-09-15	11:09:29	-2.34034	669.801	FALSE	68
2022-09-15	11:09:29	-2.30955	669.801	FALSE	68
2022-09-15	11:09:29	-2.38767	669.801	FALSE	68
2022-09-15	11:09:29	-2.39373	669.801	FALSE	68
2022-09-15	11:09:30	-2.30487	669.801	FALSE	68
2022-09-15	11:09:30	-2.96854	669.801	FALSE	68
2022-09-15	11:09:30	-2.82243	669.801	FALSE	68
2022-09-15	11:09:30	-2.84675	669.801	FALSE	68
2022-09-15	11:09:31	-2.98477	669.801	FALSE	68
2022-09-15	11:09:31	-2.49449	669.801	FALSE	68
2022-09-15	11:09:31	-2.70508	669.801	FALSE	68
2022-09-15	11:09:32	-2.46869	669.801	FALSE	68
2022-09-15	11:09:32	-2.80126	669.801	FALSE	68
2022-09-15	11:09:32	-2.71591	669.801	FALSE	68
2022-09-15	11:09:32	-2.69978	669.801	FALSE	68
2022-09-15	11:09:33	-2.78324	669.801	FALSE	68
2022-09-15	11:09:33	-1.99785	669.801	FALSE	68
2022-09-15	11:09:33	-2.26044	669.801	FALSE	68
2022-09-15	11:09:33	-2.05047	669.801	FALSE	68
2022-09-15	11:09:34	-1.88385	669.801	FALSE	68
2022-09-15	11:09:34	-2.08248	669.801	FALSE	68
2022-09-15	11:09:34	-1.99851	669.801	FALSE	68
2022-09-15	11:09:34	-2.01424	669.801	FALSE	68
2022-09-15	11:09:35	-2.28131	669.801	FALSE	68
2022-09-15	11:09:35	-2.70034	669.801	FALSE	68
2022-09-15	11:09:35	-2.6378	669.801	FALSE	68
2022-09-15	11:09:36	-2.73032	669.801	FALSE	68
2022-09-15	11:09:36	-2.65169	669.801	FALSE	68
2022-09-15	11:09:36	-2.56233	669.801	FALSE	68
2022-09-15	11:09:36	-2.64619	669.801	FALSE	68
2022-09-15	11:09:37	-2.63617	669.801	FALSE	68
2022-09-15	11:09:37	-2.75876	669.801	FALSE	68
2022-09-15	11:09:37	-2.73551	669.801	FALSE	68
2022-09-15	11:09:37	-2.72446	669.801	FALSE	68
2022-09-15	11:09:38	-2.72752	669.801	FALSE	68
2022-09-15	11:09:38	-2.70523	669.801	FALSE	68
2022-09-15	11:09:38	-2.6864	669.801	FALSE	68
2022-09-15	11:09:38	-2.75688	669.801	FALSE	68
2022-09-15	11:09:39	-2.67759	669.801	FALSE	68
2022-09-15	11:09:39	-2.7606	669.801	FALSE	68
2022-09-15	11:09:39	-2.70278	669.801	FALSE	68
2022-09-15	11:09:40	-2.72258	669.801	FALSE	68
2022-09-15	11:09:40	-2.91133	669.801	FALSE	68
2022-09-15	11:09:40	-2.95098	669.801	FALSE	68
2022-09-15	11:09:40	-2.89882	669.801	FALSE	68
2022-09-15	11:09:41	-3.06467	669.801	FALSE	68
2022-09-15	11:09:41	-3.03047	669.801	FALSE	68
2022-09-15	11:09:41	-3.11042	669.801	FALSE	68
2022-09-15	11:09:41	-3.08828	669.801	FALSE	68
2022-09-15	11:09:42	-3.08396	669.801	FALSE	68
2022-09-15	11:09:42	-2.99805	669.801	FALSE	68
2022-09-15	11:09:42	-2.96431	669.801	FALSE	68
2022-09-15	11:09:42	-2.91978	669.801	FALSE	68
2022-09-15	11:09:43	-2.90772	669.801	FALSE	68
2022-09-15	11:09:43	-2.83999	669.801	FALSE	68
2022-09-15	11:09:43	-2.8521	669.801	FALSE	68
2022-09-15	11:09:44	-2.86477	669.801	FALSE	68
2022-09-15	11:09:44	-2.86823	669.801	FALSE	68
2022-09-15	11:09:44	-2.77932	669.801	FALSE	68
2022-09-15	11:09:44	-2.77383	669.801	FALSE	68
2022-09-15	11:09:45	-2.7124	669.801	FALSE	68
2022-09-15	11:09:45	-2.54385	669.801	FALSE	68
2022-09-15	11:09:45	-2.26808	669.801	FALSE	68
2022-09-15	11:09:45	-2.06365	669.801	FALSE	68
2022-09-15	11:09:46	-1.72385	669.801	FALSE	68
2022-09-15	11:09:46	-1.20121	669.801	FALSE	68
2022-09-15	11:09:46	-1.3265	669.801	FALSE	68
2022-09-15	11:09:47	-2.44584	669.801	FALSE	68
2022-09-15	11:09:47	-2.52513	669.801	FALSE	68
2022-09-15	11:09:47	-2.79362	669.801	FALSE	68
2022-09-15	11:09:47	-2.89449	669.801	FALSE	68
2022-09-15	11:09:48	-2.60675	669.801	FALSE	68
2022-09-15	11:09:48	-2.55871	669.801	FALSE	68
2022-09-15	11:09:48	-2.33368	669.801	FALSE	68
2022-09-15	11:09:48	-2.28518	669.801	FALSE	68
2022-09-15	11:09:49	-2.19088	669.801	FALSE	68
2022-09-15	11:09:49	-1.63714	669.801	FALSE	68
2022-09-15	11:09:49	-1.64095	669.801	FALSE	68
2022-09-15	11:09:49	-1.22248	669.801	FALSE	68
2022-09-15	11:09:50	-1.3948	669.801	FALSE	68
2022-09-15	11:09:50	-1.6408	669.801	FALSE	68
2022-09-15	11:09:50	-1.41006	669.801	FALSE	68
2022-09-15	11:09:51	-1.06411	669.801	FALSE	68
2022-09-15	11:09:51	-1.52543	669.801	FALSE	68
2022-09-15	11:09:51	-1.91927	669.801	FALSE	68
2022-09-15	11:09:51	-1.40803	669.801	FALSE	68
2022-09-15	11:09:52	-1.1662	669.801	FALSE	68
2022-09-15	11:09:52	0.397977	670.199	FALSE	68
2022-09-15	11:09:52	1.71116	671.91	FALSE	68
2022-09-15	11:09:52	3.13136	675.041	1	69
2022-09-15	11:09:53	1.64846	676.69	FALSE	69
2022-09-15	11:09:53	-0.311285	676.69	FALSE	69
2022-09-15	11:09:53	-1.41851	676.69	FALSE	69
2022-09-15	11:09:53	-1.62396	676.69	FALSE	69
2022-09-15	11:09:54	-2.69647	676.69	FALSE	69
2022-09-15	11:09:54	-2.40996	676.69	FALSE	69
2022-09-15	11:09:54	-3.06161	676.69	FALSE	69
2022-09-15	11:09:55	-2.67866	676.69	FALSE	69
2022-09-15	11:09:55	-3.06126	676.69	FALSE	69
2022-09-15	11:09:55	-2.87174	676.69	FALSE	69
2022-09-15	11:09:55	-3.00884	676.69	FALSE	69
2022-09-15	11:09:56	-2.97968	676.69	FALSE	69
2022-09-15	11:09:56	-3.03296	676.69	FALSE	69
2022-09-15	11:09:56	-3.19154	676.69	FALSE	69
2022-09-15	11:09:56	-3.31637	676.69	FALSE	69
2022-09-15	11:09:57	-3.29612	676.69	FALSE	69
2022-09-15	11:09:57	-3.35647	676.69	FALSE	69
2022-09-15	11:09:57	-3.38223	676.69	FALSE	69
2022-09-15	11:09:57	-3.57602	676.69	FALSE	69
2022-09-15	11:09:58	-3.96385	676.69	FALSE	69
2022-09-15	11:09:58	-2.28625	676.69	FALSE	69
2022-09-15	11:09:58	-1.36584	676.69	FALSE	69
2022-09-15	11:09:59	-1.07413	676.69	FALSE	69
2022-09-15	11:09:59	-0.286959	676.69	FALSE	69
2022-09-15	11:09:59	-2.29637	676.69	FALSE	69
2022-09-15	11:09:59	1.02083	677.711	FALSE	69
2022-09-15	11:10:00	6.93436	684.645	1	70
2022-09-15	11:10:00	2.97004	687.615	FALSE	70
2022-09-15	11:10:00	2.28246	689.897	FALSE	70
2022-09-15	11:10:00	2.63497	692.532	FALSE	70
2022-09-15	11:10:01	4.36703	696.899	1	71
2022-09-15	11:10:01	6.64403	703.543	1	72
2022-09-15	11:10:01	5.82637	709.37	1	73
2022-09-15	11:10:01	5.26337	714.633	1	74
2022-09-15	11:10:02	4.62006	719.253	1	75
2022-09-15	11:10:02	3.77228	723.026	1	76
2022-09-15	11:10:02	2.35553	725.381	FALSE	76
2022-09-15	11:10:03	1.39772	726.779	FALSE	76
2022-09-15	11:10:03	0.540929	727.32	FALSE	76
2022-09-15	11:10:03	0.432583	727.752	FALSE	76
2022-09-15	11:10:03	0.823015	728.575	FALSE	76
2022-09-15	11:10:04	0.961285	729.537	FALSE	76
2022-09-15	11:10:04	0.880013	730.417	FALSE	76
2022-09-15	11:10:04	0.861692	731.278	FALSE	76
2022-09-15	11:10:04	1.06668	732.345	FALSE	76
2022-09-15	11:10:05	1.52607	733.871	FALSE	76
2022-09-15	11:10:05	0.855738	734.727	FALSE	76
2022-09-15	11:10:05	1.5681	736.295	FALSE	76
2022-09-15	11:10:05	0.827646	737.123	FALSE	76
2022-09-15	11:10:06	1.10337	738.226	FALSE	76
2022-09-15	11:10:06	0.454975	738.681	FALSE	76
2022-09-15	11:10:06	0.559097	739.24	FALSE	76
2022-09-15	11:10:07	0.467647	739.708	FALSE	76
2022-09-15	11:10:07	0.537112	740.245	FALSE	76
2022-09-15	11:10:07	0.508817	740.754	FALSE	76
2022-09-15	11:10:07	0.60841	741.362	FALSE	76
2022-09-15	11:10:08	0.651158	742.013	FALSE	76
2022-09-15	11:10:08	0.848155	742.861	FALSE	76
2022-09-15	11:10:08	1.27559	744.137	FALSE	76
2022-09-15	11:10:08	0.531921	744.669	FALSE	76
2022-09-15	11:10:09	1.56047	746.229	FALSE	76
2022-09-15	11:10:09	0.375942	746.605	FALSE	76
2022-09-15	11:10:09	0.731361	747.337	FALSE	76
2022-09-15	11:10:09	0.184542	747.521	FALSE	76
2022-09-15	11:10:10	-1.00441	747.521	FALSE	76
2022-09-15	11:10:10	0.340878	747.862	FALSE	76
2022-09-15	11:10:10	0.408868	748.271	FALSE	76
2022-09-15	11:10:11	0.552227	748.823	FALSE	76
2022-09-15	11:10:11	0.288868	749.112	FALSE	76
2022-09-15	11:10:11	0.0835753	749.195	FALSE	76
2022-09-15	11:10:11	-0.0317936	749.195	FALSE	76
2022-09-15	11:10:12	-0.320903	749.195	FALSE	76
2022-09-15	11:10:12	-0.349096	749.195	FALSE	76
2022-09-15	11:10:12	0.0274939	749.223	FALSE	76
2022-09-15	11:10:12	0.192125	749.415	FALSE	76
2022-09-15	11:10:13	0.322201	749.737	FALSE	76
2022-09-15	11:10:13	0.0187407	749.756	FALSE	76
2022-09-15	11:10:13	0.194771	749.951	FALSE	76
2022-09-15	11:10:13	0.139911	750.091	FALSE	76
2022-09-15	11:10:14	0.10215	750.193	FALSE	76
2022-09-15	11:10:14	-0.0602415	750.193	FALSE	76
2022-09-15	11:10:14	0.101234	750.294	FALSE	76
2022-09-15	11:10:15	0.082761	750.377	FALSE	76
2022-09-15	11:10:15	-0.180699	750.377	FALSE	76
2022-09-15	11:10:15	-0.327773	750.377	FALSE	76
2022-09-15	11:10:15	-0.332201	750.377	FALSE	76
2022-09-15	11:10:16	-0.265636	750.377	FALSE	76
2022-09-15	11:10:16	-0.395203	750.377	FALSE	76
2022-09-15	11:10:16	-0.0602415	750.377	FALSE	76
2022-09-15	11:10:16	0.0778756	750.455	FALSE	76
2022-09-15	11:10:17	1.82693	752.282	FALSE	76
2022-09-15	11:10:17	1.9194	754.201	FALSE	76
2022-09-15	11:10:17	0.549987	754.751	FALSE	76
2022-09-15	11:10:17	-0.795559	754.751	FALSE	76
2022-09-15	11:10:18	-0.200445	754.751	FALSE	76
2022-09-15	11:10:18	-0.313575	754.751	FALSE	76
2022-09-15	11:10:18	-0.270521	754.751	FALSE	76
2022-09-15	11:10:19	-0.106297	754.751	FALSE	76
2022-09-15	11:10:19	-0.0444654	754.751	FALSE	76
2022-09-15	11:10:19	0.322099	755.073	FALSE	76
2022-09-15	11:10:19	0.714974	755.788	FALSE	76
2022-09-15	11:10:20	1.19976	756.988	FALSE	76
2022-09-15	11:10:20	1.44704	758.435	FALSE	76
2022-09-15	11:10:20	1.33192	759.767	FALSE	76
2022-09-15	11:10:20	1.56871	761.336	FALSE	76
2022-09-15	11:10:21	1.5881	762.924	FALSE	76
2022-09-15	11:10:21	2.219	765.143	FALSE	76
2022-09-15	11:10:21	4.08958	769.232	1	77
2022-09-15	11:10:21	3.99965	773.232	1	78
2022-09-15	11:10:22	3.27691	776.509	1	79
2022-09-15	11:10:22	2.7253	779.234	FALSE	79
2022-09-15	11:10:22	2.53009	781.764	FALSE	79
2022-09-15	11:10:23	2.35874	784.123	FALSE	79
2022-09-15	11:10:23	3.1194	787.242	1	80
2022-09-15	11:10:23	4.04454	791.287	1	81
2022-09-15	11:10:23	5.12042	796.407	1	82
2022-09-15	11:10:24	3.84749	800.255	1	83
2022-09-15	11:10:24	3.09182	803.347	1	84
2022-09-15	11:10:24	1.86592	805.213	FALSE	84
2022-09-15	11:10:24	1.67396	806.887	FALSE	84
2022-09-15	11:10:25	1.30531	808.192	FALSE	84
2022-09-15	11:10:25	1.02469	809.217	FALSE	84
2022-09-15	11:10:25	0.922812	810.139	FALSE	84
2022-09-15	11:10:26	2.53253	812.672	FALSE	84
2022-09-15	11:10:26	1.05996	813.732	FALSE	84
2022-09-15	11:10:26	1.77416	815.506	FALSE	84
2022-09-15	11:10:26	0.711514	816.217	FALSE	84
2022-09-15	11:10:27	1.06123	817.279	FALSE	84
2022-09-15	11:10:27	0.530445	817.809	FALSE	84
2022-09-15	11:10:27	0.622557	818.432	FALSE	84
2022-09-15	11:10:27	0.489784	818.921	FALSE	84
2022-09-15	11:10:28	0.350903	819.272	FALSE	84
2022-09-15	11:10:28	0.296908	819.569	FALSE	84
2022-09-15	11:10:28	0.277417	819.847	FALSE	84
2022-09-15	11:10:28	0.201998	820.049	FALSE	84
2022-09-15	11:10:29	0.0833717	820.132	FALSE	84
2022-09-15	11:10:29	-0.218766	820.132	FALSE	84
2022-09-15	11:10:29	-0.0225824	820.132	FALSE	84
2022-09-15	11:10:30	-0.0709793	820.132	FALSE	84
2022-09-15	11:10:30	-0.163855	820.132	FALSE	84
2022-09-15	11:10:30	-0.373168	820.132	FALSE	84
2022-09-15	11:10:30	-0.304007	820.132	FALSE	84
2022-09-15	11:10:31	-0.35561	820.132	FALSE	84
2022-09-15	11:10:31	-0.367926	820.132	FALSE	84
2022-09-15	11:10:31	-0.384262	820.132	FALSE	84
2022-09-15	11:10:31	-0.302379	820.132	FALSE	84
2022-09-15	11:10:32	-0.228282	820.132	FALSE	84
2022-09-15	11:10:32	-0.359071	820.132	FALSE	84
2022-09-15	11:10:32	-0.237341	820.132	FALSE	84
2022-09-15	11:10:32	-0.262277	820.132	FALSE	84
2022-09-15	11:10:33	-0.138562	820.132	FALSE	84
2022-09-15	11:10:33	-0.238002	820.132	FALSE	84
2022-09-15	11:10:33	0.254313	820.386	FALSE	84
2022-09-15	11:10:34	1.44622	821.833	FALSE	84
2022-09-15	11:10:34	2.31874	824.151	FALSE	84
2022-09-15	11:10:34	3.15996	827.311	1	85
2022-09-15	11:10:34	2.66541	829.977	FALSE	85
2022-09-15	11:10:35	3.53563	833.512	1	86
2022-09-15	11:10:35	0.523524	834.036	FALSE	86
2022-09-15	11:10:35	0.434059	834.47	FALSE	86
2022-09-15	11:10:35	0.67757	835.148	FALSE	86
2022-09-15	11:10:36	0.314822	835.462	FALSE	86
2022-09-15	11:10:36	0.509936	835.972	FALSE	86
2022-09-15	11:10:36	-0.046959	835.972	FALSE	86
2022-09-15	11:10:36	0.169784	836.142	FALSE	86
2022-09-15	11:10:37	0.0263234	836.168	FALSE	86
2022-09-15	11:10:37	0.195484	836.364	FALSE	86
2022-09-15	11:10:37	0.498232	836.862	FALSE	86
2022-09-15	11:10:38	0.732583	837.595	FALSE	86
2022-09-15	11:10:38	0.386578	837.981	FALSE	86
2022-09-15	11:10:38	0.409478	838.391	FALSE	86
2022-09-15	11:10:38	0.596705	838.987	FALSE	86
2022-09-15	11:10:39	0.476654	839.464	FALSE	86
2022-09-15	11:10:39	-0.314491	839.464	FALSE	86
2022-09-15	11:10:39	0.166629	839.631	FALSE	86
2022-09-15	11:10:39	-0.0286893	839.631	FALSE	86
2022-09-15	11:10:40	0.0421503	839.673	FALSE	86
2022-09-15	11:10:40	-0.00706081	839.673	FALSE	86
2022-09-15	11:10:40	0.106832	839.78	FALSE	86
2022-09-15	11:10:40	-0.128893	839.78	FALSE	86
2022-09-15	11:10:41	-0.0192746	839.78	FALSE	86
2022-09-15	11:10:41	0.0227102	839.802	FALSE	86
2022-09-15	11:10:41	-0.0973915	839.802	FALSE	86
2022-09-15	11:10:42	-0.0557631	839.802	FALSE	86
2022-09-15	11:10:42	-0.0967809	839.802	FALSE	86
2022-09-15	11:10:42	0.05299	839.855	FALSE	86
2022-09-15	11:10:42	-0.168028	839.855	FALSE	86
2022-09-15	11:10:43	0.0217941	839.877	FALSE	86
2022-09-15	11:10:43	-0.0119463	839.877	FALSE	86
2022-09-15	11:10:43	-0.0845672	839.877	FALSE	86
2022-09-15	11:10:43	-0.189961	839.877	FALSE	86
2022-09-15	11:10:44	-0.175101	839.877	FALSE	86
2022-09-15	11:10:44	-0.187417	839.877	FALSE	86
2022-09-15	11:10:44	-0.215916	839.877	FALSE	86
2022-09-15	11:10:44	-0.200598	839.877	FALSE	86
2022-09-15	11:10:45	-0.138867	839.877	FALSE	86
2022-09-15	11:10:45	-0.0775951	839.877	FALSE	86
2022-09-15	11:10:45	-0.00217532	839.877	FALSE	86
2022-09-15	11:10:46	-0.0865519	839.877	FALSE	86
2022-09-15	11:10:46	0.055789	839.933	FALSE	86
2022-09-15	11:10:46	0.143728	840.077	FALSE	86
2022-09-15	11:10:46	-0.0033458	840.077	FALSE	86
2022-09-15	11:10:47	-0.103804	840.077	FALSE	86
2022-09-15	11:10:47	-0.100801	840.077	FALSE	86
2022-09-15	11:10:47	-0.105178	840.077	FALSE	86
2022-09-15	11:10:47	-0.0566791	840.077	FALSE	86
2022-09-15	11:10:48	-0.00288781	840.077	FALSE	86
2022-09-15	11:10:48	0.123473	840.2	FALSE	86
2022-09-15	11:10:48	0.277774	840.478	FALSE	86
2022-09-15	11:10:48	1.05503	841.533	FALSE	86
2022-09-15	11:10:49	1.27065	842.804	FALSE	86
2022-09-15	11:10:49	2.22541	845.029	FALSE	86
2022-09-15	11:10:49	1.51457	846.544	FALSE	86
2022-09-15	11:10:50	2.01843	848.562	FALSE	86
2022-09-15	11:10:50	0.596298	849.158	FALSE	86
2022-09-15	11:10:50	0.267341	849.426	FALSE	86
2022-09-15	11:10:50	0.205356	849.631	FALSE	86
2022-09-15	11:10:51	0.0713106	849.702	FALSE	86
2022-09-15	11:10:51	-0.0952542	849.702	FALSE	86
2022-09-15	11:10:51	-0.1379	849.702	FALSE	86
2022-09-15	11:10:51	-0.241005	849.702	FALSE	86
2022-09-15	11:10:52	-0.207519	849.702	FALSE	86
2022-09-15	11:10:52	-0.303702	849.702	FALSE	86
2022-09-15	11:10:52	-0.274643	849.702	FALSE	86
2022-09-15	11:10:52	-0.42762	849.702	FALSE	86
2022-09-15	11:10:53	-0.324007	849.702	FALSE	86
2022-09-15	11:10:53	-0.32248	849.702	FALSE	86
2022-09-15	11:10:53	-0.201259	849.702	FALSE	86
2022-09-15	11:10:54	-0.350012	849.702	FALSE	86
2022-09-15	11:10:54	-0.211946	849.702	FALSE	86
2022-09-15	11:10:54	-0.276679	849.702	FALSE	86
2022-09-15	11:10:54	-0.16757	849.702	FALSE	86
2022-09-15	11:10:55	-0.317137	849.702	FALSE	86
2022-09-15	11:10:55	-0.120801	849.702	FALSE	86
2022-09-15	11:10:55	-0.231743	849.702	FALSE	86
2022-09-15	11:10:55	-0.172659	849.702	FALSE	86
2022-09-15	11:10:56	-0.279732	849.702	FALSE	86
2022-09-15	11:10:56	-0.143193	849.702	FALSE	86
2022-09-15	11:10:56	-0.109402	849.702	FALSE	86
2022-09-15	11:10:56	-0.162175	849.702	FALSE	86
2022-09-15	11:10:57	-0.0719972	849.702	FALSE	86
2022-09-15	11:10:57	-0.111183	849.702	FALSE	86
2022-09-15	11:10:57	0.0921249	849.794	FALSE	86
2022-09-15	11:10:58	-0.0826333	849.794	FALSE	86
2022-09-15	11:10:58	0.0146695	849.809	FALSE	86
2022-09-15	11:10:58	-0.0291473	849.809	FALSE	86
2022-09-15	11:10:58	0.106883	849.916	FALSE	86
2022-09-15	11:10:59	0.764338	850.68	FALSE	86
2022-09-15	11:10:59	1.73441	852.415	FALSE	86
2022-09-15	11:10:59	3.73126	856.146	1	87
2022-09-15	11:10:59	3.76225	859.908	1	88
2022-09-15	11:11:00	3.91151	863.82	1	89
2022-09-15	11:11:00	1.94754	865.767	FALSE	89
2022-09-15	11:11:00	4.97238	870.74	1	90
2022-09-15	11:11:00	1.14327	871.883	FALSE	90
2022-09-15	11:11:01	3.81849	875.701	1	91
2022-09-15	11:11:01	1.39289	877.094	FALSE	91
2022-09-15	11:11:01	2.48413	879.579	FALSE	91
2022-09-15	11:11:02	0.363168	879.942	FALSE	91
2022-09-15	11:11:02	0.365967	880.308	FALSE	91
2022-09-15	11:11:02	0.505153	880.813	FALSE	91
2022-09-15	11:11:02	1.07212	881.885	FALSE	91
2022-09-15	11:11:03	0.598842	882.484	FALSE	91
2022-09-15	11:11:03	0.327748	882.812	FALSE	91
2022-09-15	11:11:03	0.0922267	882.904	FALSE	91
2022-09-15	11:11:03	-0.113219	882.904	FALSE	91
2022-09-15	11:11:04	-0.425483	882.904	FALSE	91
2022-09-15	11:11:04	-0.396933	882.904	FALSE	91
2022-09-15	11:11:04	-0.444974	882.904	FALSE	91
2022-09-15	11:11:04	-0.4693	882.904	FALSE	91
2022-09-15	11:11:05	-0.573066	882.904	FALSE	91
2022-09-15	11:11:05	-0.536068	882.904	FALSE	91
2022-09-15	11:11:05	-0.525687	882.904	FALSE	91
2022-09-15	11:11:06	-0.592099	882.904	FALSE	91
2022-09-15	11:11:06	-0.322226	882.904	FALSE	91
2022-09-15	11:11:06	-0.311844	882.904	FALSE	91
2022-09-15	11:11:06	-0.190776	882.904	FALSE	91
2022-09-15	11:11:07	-0.285432	882.904	FALSE	91
2022-09-15	11:11:07	-0.0610048	882.904	FALSE	91
2022-09-15	11:11:07	0.188257	883.092	FALSE	91
2022-09-15	11:11:07	0.546527	883.639	FALSE	91
2022-09-15	11:11:08	0.66327	884.302	FALSE	91
2022-09-15	11:11:08	1.03569	885.337	FALSE	91
2022-09-15	11:11:08	0.491972	885.829	FALSE	91
2022-09-15	11:11:08	0.247443	886.077	FALSE	91
2022-09-15	11:11:09	0.175789	886.253	FALSE	91
2022-09-15	11:11:09	-0.0436002	886.253	FALSE	91
2022-09-15	11:11:09	0.11528	886.368	FALSE	91
2022-09-15	11:11:10	-0.129249	886.368	FALSE	91
2022-09-15	11:11:10	0.173244	886.541	FALSE	91
2022-09-15	11:11:10	0.748562	887.29	FALSE	91
2022-09-15	11:11:10	4.08261	891.372	1	92
2022-09-15	11:11:11	6.03797	897.41	1	93
2022-09-15	11:11:11	4.87034	902.281	1	94
2022-09-15	11:11:11	6.38902	908.67	1	95
2022-09-15	11:11:11	1.31126	909.981	FALSE	95
2022-09-15	11:11:12	1.45004	911.431	FALSE	95
2022-09-15	11:11:12	0.985814	912.417	FALSE	95
2022-09-15	11:11:12	-0.221666	912.417	FALSE	95
2022-09-15	11:11:12	0.0458654	912.463	FALSE	95
2022-09-15	11:11:13	-0.129045	912.463	FALSE	95
2022-09-15	11:11:13	-0.0802414	912.463	FALSE	95
2022-09-15	11:11:13	-0.200649	912.463	FALSE	95
2022-09-15	11:11:14	-0.151641	912.463	FALSE	95
2022-09-15	11:11:14	-0.0839565	912.463	FALSE	95
2022-09-15	11:11:14	-0.261972	912.463	FALSE	95
2022-09-15	11:11:14	-0.189249	912.463	FALSE	95
2022-09-15	11:11:15	-0.290216	912.463	FALSE	95
2022-09-15	11:11:15	-0.331641	912.463	FALSE	95
2022-09-15	11:11:15	-0.511946	912.463	FALSE	95
2022-09-15	11:11:15	-0.355457	912.463	FALSE	95
2022-09-15	11:11:16	-0.163956	912.463	FALSE	95
2022-09-15	11:11:16	-0.283702	912.463	FALSE	95
2022-09-15	11:11:16	-0.0882822	912.463	FALSE	95
2022-09-15	11:11:17	-0.162633	912.463	FALSE	95
2022-09-15	11:11:17	-0.107366	912.463	FALSE	95
2022-09-15	11:11:17	-0.2236	912.463	FALSE	95
2022-09-15	11:11:17	-0.104262	912.463	FALSE	95
2022-09-15	11:11:18	-0.0218191	912.463	FALSE	95
2022-09-15	11:11:18	-0.191234	912.463	FALSE	95
2022-09-15	11:11:18	-0.107824	912.463	FALSE	95
2022-09-15	11:11:18	-0.0599361	912.463	FALSE	95
2022-09-15	11:11:19	0.763168	913.226	FALSE	95
2022-09-15	11:11:19	6.10072	919.327	1	96
2022-09-15	11:11:19	12.6719	931.998	1	97
2022-09-15	11:11:20	10.2435	942.242	1	98
2022-09-15	11:11:20	9.92209	952.164	1	99
2022-09-15	11:11:20	4.87584	957.04	1	100
2022-09-15	11:11:20	2.20963	959.25	FALSE	100
2022-09-15	11:11:21	3.69996	962.949	1	101
2022-09-15	11:11:21	2.13874	965.088	FALSE	101
2022-09-15	11:11:21	4.43355	969.522	1	102
2022-09-15	11:11:21	6.53411	976.056	1	103
2022-09-15	11:11:22	7.06683	983.123	1	104
2022-09-15	11:11:22	6.82001	989.943	1	105
2022-09-15	11:11:22	4.025	993.968	1	106
2022-09-15	11:11:22	3.88138	997.849	1	107
2022-09-15	11:11:23	2.26347	1000.11	FALSE	107
2022-09-15	11:11:23	0.761896	1000.87	FALSE	107
2022-09-15	11:11:23	1.06887	1001.94	FALSE	107
2022-09-15	11:11:23	1.65172	1003.6	FALSE	107
2022-09-15	11:11:24	1.88581	1005.48	FALSE	107
2022-09-15	11:11:24	4.32006	1009.8	1	108
2022-09-15	11:11:24	5.3078	1015.11	1	109
2022-09-15	11:11:25	5.73523	1020.84	1	110
2022-09-15	11:11:25	0.313448	1021.16	FALSE	110
2022-09-15	11:11:25	6.8884	1028.05	1	111
2022-09-15	11:11:25	15.3812	1043.43	1	112
2022-09-15	11:11:26	5.77146	1049.2	1	113
2022-09-15	11:11:26	2.92795	1052.13	FALSE	113
2022-09-15	11:11:26	1.30836	1053.43	FALSE	113
2022-09-15	11:11:26	3.15619	1056.59	1	114
2022-09-15	11:11:27	9.05629	1065.65	1	115
2022-09-15	11:11:27	12.9215	1078.57	1	116
2022-09-15	11:11:27	7.21324	1085.78	1	117
2022-09-15	11:11:27	9.25558	1095.04	1	118
2022-09-15	11:11:28	15.7785	1110.82	1	119
2022-09-15	11:11:28	16.4078	1127.22	1	120
2022-09-15	11:11:28	8.90713	1136.13	1	121
2022-09-15	11:11:29	8.19599	1144.33	1	122
2022-09-15	11:11:29	7.04459	1151.37	1	123
2022-09-15	11:11:29	4.85792	1156.23	1	124
2022-09-15	11:11:29	4.16958	1160.4	1	125
2022-09-15	11:11:30	4.44225	1164.84	1	126
2022-09-15	11:11:30	4.49161	1169.33	1	127
2022-09-15	11:11:30	4.4995	1173.83	1	128
2022-09-15	11:11:30	4.17747	1178.01	1	129
2022-09-15	11:11:31	3.83935	1181.85	1	130
2022-09-15	11:11:31	3.505	1185.35	1	131
2022-09-15	11:11:31	3.47589	1188.83	1	132
2022-09-15	11:11:31	3.72703	1192.56	1	133
2022-09-15	11:11:32	3.57187	1196.13	1	134
2022-09-15	11:11:32	3.40938	1199.54	1	135
2022-09-15	11:11:32	3.39762	1202.94	1	136
2022-09-15	11:11:33	3.72072	1206.66	1	137
2022-09-15	11:11:33	3.37564	1210.03	1	138
2022-09-15	11:11:33	3.19757	1213.23	1	139
2022-09-15	11:11:33	3.16775	1216.4	1	140
2022-09-15	11:11:34	3.07492	1219.47	1	141
2022-09-15	11:11:34	3.55324	1223.03	1	142
2022-09-15	11:11:34	2.94617	1225.97	FALSE	142
2022-09-15	11:11:35	2.82016	1228.79	FALSE	142
2022-09-15	11:11:35	1.05151	1229.84	FALSE	142
2022-09-15	11:11:35	0.50902	1230.35	FALSE	142
2022-09-15	11:11:35	0.421082	1230.77	FALSE	142
2022-09-15	11:11:35	0.485713	1231.26	FALSE	142
2022-09-15	11:11:36	0.354364	1231.61	FALSE	142
2022-09-15	11:11:36	0.502354	1232.12	FALSE	142
2022-09-15	11:11:36	0.33472	1232.45	FALSE	142
2022-09-15	11:11:37	0.498181	1232.95	FALSE	142
2022-09-15	11:11:37	0.318842	1233.27	FALSE	142
2022-09-15	11:11:37	0.495942	1233.76	FALSE	142
2022-09-15	11:11:37	0.324288	1234.09	FALSE	142
2022-09-15	11:11:38	0.494415	1234.58	FALSE	142
2022-09-15	11:11:38	0.377977	1234.96	FALSE	142
2022-09-15	11:11:38	0.474466	1235.44	FALSE	142
2022-09-15	11:11:38	0.376349	1235.81	FALSE	142
2022-09-15	11:11:39	0.494313	1236.31	FALSE	142
2022-09-15	11:11:39	0.327596	1236.63	FALSE	142
2022-09-15	11:11:39	0.385407	1237.02	FALSE	142
2022-09-15	11:11:39	0.183931	1237.2	FALSE	142
2022-09-15	11:11:40	0.362099	1237.56	FALSE	142
2022-09-15	11:11:40	0.187545	1237.75	FALSE	142
2022-09-15	11:11:40	0.55757	1238.31	FALSE	142
2022-09-15	11:11:41	0.757774	1239.07	FALSE	142
2022-09-15	11:11:41	0.748562	1239.82	FALSE	142
2022-09-15	11:11:41	0.649835	1240.47	FALSE	142
2022-09-15	11:11:41	0.285967	1240.75	FALSE	142

## Sheet: Klutz_star_202291511622
						**GoPro Fitting: 1055
2022-09-15	11:06:23	0.312583
2022-09-15	11:06:23	0.317112
2022-09-15	11:06:23	0.308512
2022-09-15	11:06:23	0.293652
2022-09-15	11:06:24	0.260064
2022-09-15	11:06:24	0.3193
2022-09-15	11:06:24	0.32729
2022-09-15	11:06:24	0.361947
2022-09-15	11:06:25	0.378028
2022-09-15	11:06:25	0.314109
2022-09-15	11:06:25	0.203575
2022-09-15	11:06:26	0.21187
2022-09-15	11:06:26	0.339758
2022-09-15	11:06:26	0.369733
2022-09-15	11:06:26	0.353244
2022-09-15	11:06:27	0.39243
2022-09-15	11:06:27	0.447545
2022-09-15	11:06:27	0.35813
2022-09-15	11:06:27	0.368155
2022-09-15	11:06:28	0.390344
2022-09-15	11:06:28	0.449835
2022-09-15	11:06:28	0.613142
2022-09-15	11:06:28	0.635127
2022-09-15	11:06:29	0.435484
2022-09-15	11:06:29	0.427036
2022-09-15	11:06:29	0.457875
2022-09-15	11:06:30	0.371158
2022-09-15	11:06:30	0.388104
2022-09-15	11:06:30	0.399606
2022-09-15	11:06:30	0.435992
2022-09-15	11:06:31	0.391819
2022-09-15	11:06:31	0.376756
2022-09-15	11:06:31	0.384797
2022-09-15	11:06:31	0.389428
2022-09-15	11:06:32	0.394466
2022-09-15	11:06:32	0.40958
2022-09-15	11:06:32	0.545611
2022-09-15	11:06:32	0.773906
2022-09-15	11:06:33	0.850649
2022-09-15	11:06:33	0.699656
2022-09-15	11:06:33	0.549122
2022-09-15	11:06:34	0.411972
2022-09-15	11:06:34	0.431005
2022-09-15	11:06:34	0.43874
2022-09-15	11:06:34	0.425967
2022-09-15	11:06:35	0.351921
2022-09-15	11:06:35	0.209173
2022-09-15	11:06:35	0.376959
2022-09-15	11:06:35	0.397977
2022-09-15	11:06:36	0.194924
2022-09-15	11:06:36	0.483219
2022-09-15	11:06:36	0.167596
2022-09-15	11:06:37	-0.0798343
2022-09-15	11:06:37	0.309377
2022-09-15	11:06:37	0.0327356
2022-09-15	11:06:37	-0.158257
2022-09-15	11:06:38	-0.0458903
2022-09-15	11:06:38	-0.0777478
2022-09-15	11:06:38	-0.190012
2022-09-15	11:06:38	-0.498765
2022-09-15	11:06:39	-0.508536
2022-09-15	11:06:39	-0.312811
2022-09-15	11:06:39	-0.298969
2022-09-15	11:06:39	-0.277493
2022-09-15	11:06:40	-0.194847
2022-09-15	11:06:40	-0.106196
2022-09-15	11:06:40	-0.0542364
2022-09-15	11:06:41	0.012074
2022-09-15	11:06:41	0.238384
2022-09-15	11:06:41	0.212685
2022-09-15	11:06:41	1.04912
2022-09-15	11:06:42	2.4194
2022-09-15	11:06:42	3.57055
2022-09-15	11:06:42	6.22886
2022-09-15	11:06:42	7.1222
2022-09-15	11:06:43	3.25116
2022-09-15	11:06:43	0.436196
2022-09-15	11:06:43	-4.10859
2022-09-15	11:06:43	-4.50752
2022-09-15	11:06:44	-4.66955
2022-09-15	11:06:44	-4.7149
2022-09-15	11:06:44	-4.57474
2022-09-15	11:06:45	-4.46675
2022-09-15	11:06:45	-3.98737
2022-09-15	11:06:45	0.438079
2022-09-15	11:06:45	0.120929
2022-09-15	11:06:46	3.04759
2022-09-15	11:06:46	2.46444
2022-09-15	11:06:46	3.1848
2022-09-15	11:06:46	3.63187
2022-09-15	11:06:47	1.46439
2022-09-15	11:06:47	0.664389
2022-09-15	11:06:47	0.337468
2022-09-15	11:06:47	0.674618
2022-09-15	11:06:48	0.324186
2022-09-15	11:06:48	-0.13902
2022-09-15	11:06:48	-0.129656
2022-09-15	11:06:49	-0.126297
2022-09-15	11:06:49	0.203779
2022-09-15	11:06:49	0.171565
2022-09-15	11:06:49	0.132786
2022-09-15	11:06:50	0.79701
2022-09-15	11:06:50	1.62887
2022-09-15	11:06:50	2.89991
2022-09-15	11:06:50	4.6823
2022-09-15	11:06:51	6.18678
2022-09-15	11:06:51	9.7307
2022-09-15	11:06:51	2.34754
2022-09-15	11:06:52	1.01014
2022-09-15	11:06:52	0.40612
2022-09-15	11:06:52	0.0297839
2022-09-15	11:06:52	0.313957
2022-09-15	11:06:53	0.253448
2022-09-15	11:06:53	0.118944
2022-09-15	11:06:53	0.30785
2022-09-15	11:06:53	0.128155
2022-09-15	11:06:54	0.303321
2022-09-15	11:06:54	0.194517
2022-09-15	11:06:54	0.100166
2022-09-15	11:06:54	0.391463
2022-09-15	11:06:55	0.046018
2022-09-15	11:06:55	0.138588
2022-09-15	11:06:55	0.0872903
2022-09-15	11:06:56	0.16154
2022-09-15	11:06:56	1.93788
2022-09-15	11:06:56	12.3902
2022-09-15	11:06:56	15.4882
2022-09-15	11:06:57	3.84225
2022-09-15	11:06:57	2.19457
2022-09-15	11:06:57	0.211667
2022-09-15	11:06:57	0.123728
2022-09-15	11:06:58	0.0262725
2022-09-15	11:06:58	-0.368333
2022-09-15	11:06:58	-0.453727
2022-09-15	11:06:58	-0.395407
2022-09-15	11:06:59	-0.451183
2022-09-15	11:06:59	-0.710724
2022-09-15	11:06:59	-0.600445
2022-09-15	11:07:00	-0.698154
2022-09-15	11:07:00	-0.614847
2022-09-15	11:07:00	-0.481412
2022-09-15	11:07:00	-0.498307
2022-09-15	11:07:01	-0.343702
2022-09-15	11:07:01	-0.349147
2022-09-15	11:07:01	-0.19215
2022-09-15	11:07:01	-0.117188
2022-09-15	11:07:02	-0.173269
2022-09-15	11:07:02	-0.155458
2022-09-15	11:07:02	-0.239783
2022-09-15	11:07:02	-0.32762
2022-09-15	11:07:03	-0.513066
2022-09-15	11:07:03	-0.49902
2022-09-15	11:07:03	-0.47159
2022-09-15	11:07:04	-0.320496
2022-09-15	11:07:04	0.125255
2022-09-15	11:07:04	0.0742623
2022-09-15	11:07:04	-0.0335239
2022-09-15	11:07:05	0.108919
2022-09-15	11:07:05	0.747494
2022-09-15	11:07:05	0.571209
2022-09-15	11:07:05	0.987392
2022-09-15	11:07:06	1.9451
2022-09-15	11:07:06	2.12495
2022-09-15	11:07:06	2.28312
2022-09-15	11:07:07	4.44703
2022-09-15	11:07:07	0.765
2022-09-15	11:07:07	2.30256
2022-09-15	11:07:07	1.31289
2022-09-15	11:07:08	1.7309
2022-09-15	11:07:08	2.48052
2022-09-15	11:07:08	2.67487
2022-09-15	11:07:08	1.81528
2022-09-15	11:07:09	1.30439
2022-09-15	11:07:09	0.639606
2022-09-15	11:07:09	0.197621
2022-09-15	11:07:09	0.194568
2022-09-15	11:07:10	-0.210165
2022-09-15	11:07:10	-0.519987
2022-09-15	11:07:10	-0.701615
2022-09-15	11:07:11	-0.757747
2022-09-15	11:07:11	-0.853523
2022-09-15	11:07:11	-1.00177
2022-09-15	11:07:11	-0.876577
2022-09-15	11:07:12	-1.06197
2022-09-15	11:07:12	-0.0954068
2022-09-15	11:07:12	1.64286
2022-09-15	11:07:12	3.49599
2022-09-15	11:07:13	3.55823
2022-09-15	11:07:13	2.21401
2022-09-15	11:07:13	1.11553
2022-09-15	11:07:13	1.04118
2022-09-15	11:07:14	0.10215
2022-09-15	11:07:14	-0.117493
2022-09-15	11:07:14	-0.348638
2022-09-15	11:07:15	-0.789554
2022-09-15	11:07:15	-0.892964
2022-09-15	11:07:15	-0.850266
2022-09-15	11:07:15	-0.555
2022-09-15	11:07:16	0.151667
2022-09-15	11:07:16	0.512176
2022-09-15	11:07:16	0.973499
2022-09-15	11:07:16	1.46933
2022-09-15	11:07:17	1.36444
2022-09-15	11:07:17	0.872735
2022-09-15	11:07:17	0.888715
2022-09-15	11:07:17	0.509784
2022-09-15	11:07:18	0.530547
2022-09-15	11:07:18	0.49299
2022-09-15	11:07:18	0.448053
2022-09-15	11:07:19	0.360827
2022-09-15	11:07:19	0.389886
2022-09-15	11:07:19	-0.859986
2022-09-15	11:07:19	-0.982582
2022-09-15	11:07:20	0.102608
2022-09-15	11:07:20	-0.476272
2022-09-15	11:07:20	-0.838256
2022-09-15	11:07:20	-1.02258
2022-09-15	11:07:21	-0.891386
2022-09-15	11:07:21	-1.08401
2022-09-15	11:07:21	-1.0835
2022-09-15	11:07:22	-0.595101
2022-09-15	11:07:22	-0.204872
2022-09-15	11:07:22	1.36927
2022-09-15	11:07:22	3.35762
2022-09-15	11:07:23	2.20566
2022-09-15	11:07:23	3.3765
2022-09-15	11:07:23	1.06139
2022-09-15	11:07:23	1.59548
2022-09-15	11:07:24	1.16602
2022-09-15	11:07:24	0.301438
2022-09-15	11:07:24	0.135942
2022-09-15	11:07:24	0.00286283
2022-09-15	11:07:25	-0.14472
2022-09-15	11:07:25	-0.287926
2022-09-15	11:07:25	-0.26019
2022-09-15	11:07:26	-0.0587147
2022-09-15	11:07:26	0.247596
2022-09-15	11:07:26	0.985102
2022-09-15	11:07:26	3.5624
2022-09-15	11:07:27	3.45467
2022-09-15	11:07:27	2.18703
2022-09-15	11:07:27	1.8305
2022-09-15	11:07:27	2.09874
2022-09-15	11:07:28	2.62082
2022-09-15	11:07:28	4.00994
2022-09-15	11:07:28	5.69176
2022-09-15	11:07:28	3.83441
2022-09-15	11:07:29	2.55085
2022-09-15	11:07:29	1.75599
2022-09-15	11:07:29	2.23655
2022-09-15	11:07:30	2.95833
2022-09-15	11:07:30	4.60312
2022-09-15	11:07:30	4.87609
2022-09-15	11:07:30	4.65258
2022-09-15	11:07:31	4.1906
2022-09-15	11:07:31	4.13044
2022-09-15	11:07:31	3.06653
2022-09-15	11:07:31	1.60037
2022-09-15	11:07:32	0.421132
2022-09-15	11:07:32	0.2307
2022-09-15	11:07:32	-0.200394
2022-09-15	11:07:32	-0.178358
2022-09-15	11:07:33	-0.593829
2022-09-15	11:07:33	-0.504974
2022-09-15	11:07:33	0.55472
2022-09-15	11:07:34	2.72892
2022-09-15	11:07:34	1.03223
2022-09-15	11:07:34	0.630954
2022-09-15	11:07:34	0.836806
2022-09-15	11:07:35	1.21655
2022-09-15	11:07:35	1.13844
2022-09-15	11:07:35	0.645712
2022-09-15	11:07:35	0.435076
2022-09-15	11:07:36	0.257977
2022-09-15	11:07:36	0.234517
2022-09-15	11:07:36	0.244542
2022-09-15	11:07:37	0.344491
2022-09-15	11:07:37	0.25584
2022-09-15	11:07:37	0.225662
2022-09-15	11:07:37	0.235127
2022-09-15	11:07:38	0.175331
2022-09-15	11:07:38	0.126883
2022-09-15	11:07:38	0.105916
2022-09-15	11:07:38	0.166781
2022-09-15	11:07:39	0.24785
2022-09-15	11:07:39	0.383881
2022-09-15	11:07:39	0.371412
2022-09-15	11:07:39	0.465051
2022-09-15	11:07:40	0.441489
2022-09-15	11:07:40	0.597214
2022-09-15	11:07:40	0.679555
2022-09-15	11:07:41	0.617468
2022-09-15	11:07:41	0.585509
2022-09-15	11:07:41	0.722608
2022-09-15	11:07:41	0.588919
2022-09-15	11:07:42	0.636552
2022-09-15	11:07:42	0.699147
2022-09-15	11:07:42	0.674262
2022-09-15	11:07:42	0.727188
2022-09-15	11:07:43	0.673244
2022-09-15	11:07:43	0.715534
2022-09-15	11:07:43	1.01457
2022-09-15	11:07:43	0.951921
2022-09-15	11:07:44	0.879453
2022-09-15	11:07:44	0.572379
2022-09-15	11:07:44	0.354466
2022-09-15	11:07:45	0.360115
2022-09-15	11:07:45	0.431667
2022-09-15	11:07:45	0.344084
2022-09-15	11:07:45	0.107189
2022-09-15	11:07:46	0.037214
2022-09-15	11:07:46	-0.153269
2022-09-15	11:07:46	-0.134643
2022-09-15	11:07:46	-0.256374
2022-09-15	11:07:47	-0.308486
2022-09-15	11:07:47	-0.304771
2022-09-15	11:07:47	-0.502277
2022-09-15	11:07:47	-0.528333
2022-09-15	11:07:48	-0.699885
2022-09-15	11:07:48	-0.487162
2022-09-15	11:07:48	-0.764261
2022-09-15	11:07:49	-0.722531
2022-09-15	11:07:49	-0.895966
2022-09-15	11:07:49	-0.840546
2022-09-15	11:07:49	-0.964058
2022-09-15	11:07:50	-0.766653
2022-09-15	11:07:50	-0.951742
2022-09-15	11:07:50	-0.68075
2022-09-15	11:07:50	-0.68645
2022-09-15	11:07:51	-0.552099
2022-09-15	11:07:51	-0.421157
2022-09-15	11:07:51	-0.388536
2022-09-15	11:07:52	-0.321921
2022-09-15	11:07:52	-0.0852796
2022-09-15	11:07:52	1.21604
2022-09-15	11:07:52	2.7851
2022-09-15	11:07:53	2.92663
2022-09-15	11:07:53	1.66882
2022-09-15	11:07:53	1.24139
2022-09-15	11:07:53	0.553906
2022-09-15	11:07:54	0.802659
2022-09-15	11:07:54	1.06581
2022-09-15	11:07:54	0.708053
2022-09-15	11:07:54	0.197977
2022-09-15	11:07:55	-0.0129133
2022-09-15	11:07:55	0.126781
2022-09-15	11:07:55	0.286934
2022-09-15	11:07:56	0.295636
2022-09-15	11:07:56	0.0822012
2022-09-15	11:07:56	0.199606
2022-09-15	11:07:56	0.0631173
2022-09-15	11:07:57	0.201743
2022-09-15	11:07:57	-0.156475
2022-09-15	11:07:57	-0.495763
2022-09-15	11:07:57	-0.422073
2022-09-15	11:07:58	-0.502328
2022-09-15	11:07:58	-0.568944
2022-09-15	11:07:58	-0.646958
2022-09-15	11:07:58	-0.449503
2022-09-15	11:07:59	-0.286348
2022-09-15	11:07:59	-0.393218
2022-09-15	11:07:59	-0.0385112
2022-09-15	11:08:00	0.43355
2022-09-15	11:08:00	1.43095
2022-09-15	11:08:00	2.06917
2022-09-15	11:08:00	1.1908
2022-09-15	11:08:01	3.28337
2022-09-15	11:08:01	0.961997
2022-09-15	11:08:01	-0.416017
2022-09-15	11:08:01	0.538842
2022-09-15	11:08:02	0.594008
2022-09-15	11:08:02	0.679962
2022-09-15	11:08:02	0.114669
2022-09-15	11:08:02	0.224491
2022-09-15	11:08:03	0.0743641
2022-09-15	11:08:03	0.191158
2022-09-15	11:08:03	-0.153219
2022-09-15	11:08:04	0.143779
2022-09-15	11:08:04	0.191769
2022-09-15	11:08:04	0.214313
2022-09-15	11:08:04	0.732379
2022-09-15	11:08:05	0.373143
2022-09-15	11:08:05	0.96215
2022-09-15	11:08:05	0.55986
2022-09-15	11:08:05	0.564135
2022-09-15	11:08:06	0.496043
2022-09-15	11:08:06	0.540114
2022-09-15	11:08:06	0.413193
2022-09-15	11:08:06	0.66612
2022-09-15	11:08:07	0.624593
2022-09-15	11:08:07	0.532277
2022-09-15	11:08:07	0.726476
2022-09-15	11:08:08	0.501692
2022-09-15	11:08:08	0.394008
2022-09-15	11:08:08	0.207748
2022-09-15	11:08:08	0.456043
2022-09-15	11:08:09	0.413397
2022-09-15	11:08:09	0.73355
2022-09-15	11:08:09	0.352074
2022-09-15	11:08:09	0.485916
2022-09-15	11:08:10	0.365051
2022-09-15	11:08:10	0.269071
2022-09-15	11:08:10	0.148054
2022-09-15	11:08:11	0.189733
2022-09-15	11:08:11	0.158334
2022-09-15	11:08:11	0.0899366
2022-09-15	11:08:11	0.172837
2022-09-15	11:08:12	0.146069
2022-09-15	11:08:12	0.274415
2022-09-15	11:08:12	0.397723
2022-09-15	11:08:12	0.396349
2022-09-15	11:08:13	0.285
2022-09-15	11:08:13	0.420827
2022-09-15	11:08:13	0.28556
2022-09-15	11:08:13	0.265509
2022-09-15	11:08:14	0.298028
2022-09-15	11:08:14	0.278537
2022-09-15	11:08:14	0.246171
2022-09-15	11:08:15	0.317672
2022-09-15	11:08:15	0.216705
2022-09-15	11:08:15	0.567799
2022-09-15	11:08:15	0.548155
2022-09-15	11:08:16	0.4736
2022-09-15	11:08:16	0.384797
2022-09-15	11:08:16	0.418232
2022-09-15	11:08:16	0.468817
2022-09-15	11:08:17	0.457468
2022-09-15	11:08:17	0.454873
2022-09-15	11:08:17	0.454059
2022-09-15	11:08:17	0.440522
2022-09-15	11:08:18	0.443219
2022-09-15	11:08:18	0.438028
2022-09-15	11:08:18	0.44785
2022-09-15	11:08:19	0.450242
2022-09-15	11:08:19	0.468308
2022-09-15	11:08:19	0.59472
2022-09-15	11:08:19	0.597926
2022-09-15	11:08:20	0.645254
2022-09-15	11:08:20	0.683117
2022-09-15	11:08:20	1.02622
2022-09-15	11:08:20	0.946425
2022-09-15	11:08:21	1.17121
2022-09-15	11:08:21	1.30011
2022-09-15	11:08:21	0.948359
2022-09-15	11:08:21	0.420522
2022-09-15	11:08:22	0.239351
2022-09-15	11:08:22	0.192685
2022-09-15	11:08:22	0.0426084
2022-09-15	11:08:23	-0.0224807
2022-09-15	11:08:23	-0.129249
2022-09-15	11:08:23	-0.127417
2022-09-15	11:08:23	-0.00884198
2022-09-15	11:08:24	0.174517
2022-09-15	11:08:24	0.198283
2022-09-15	11:08:24	0.286069
2022-09-15	11:08:24	0.316247
2022-09-15	11:08:25	0.366883
2022-09-15	11:08:25	0.363626
2022-09-15	11:08:25	0.474924
2022-09-15	11:08:26	0.0502929
2022-09-15	11:08:26	0.387595
2022-09-15	11:08:26	0.363677
2022-09-15	11:08:26	0.356501
2022-09-15	11:08:27	0.382761
2022-09-15	11:08:27	0.29472
2022-09-15	11:08:27	0.304033
2022-09-15	11:08:27	0.416654
2022-09-15	11:08:28	0.319351
2022-09-15	11:08:28	0.385254
2022-09-15	11:08:28	0.331361
2022-09-15	11:08:28	0.283321
2022-09-15	11:08:29	0.333295
2022-09-15	11:08:29	0.314517
2022-09-15	11:08:29	0.372685
2022-09-15	11:08:30	0.500369
2022-09-15	11:08:30	0.591361
2022-09-15	11:08:30	0.781539
2022-09-15	11:08:30	0.547544
2022-09-15	11:08:31	1.58352
2022-09-15	11:08:31	1.78057
2022-09-15	11:08:31	5.80403
2022-09-15	11:08:31	8.30301
2022-09-15	11:08:32	7.67843
2022-09-15	11:08:32	4.2878
2022-09-15	11:08:32	1.12602
2022-09-15	11:08:32	0.569834
2022-09-15	11:08:33	0.563931
2022-09-15	11:08:33	0.487392
2022-09-15	11:08:33	0.420827
2022-09-15	11:08:34	0.254415
2022-09-15	11:08:34	0.379758
2022-09-15	11:08:34	0.265763
2022-09-15	11:08:34	0.309784
2022-09-15	11:08:35	0.500267
2022-09-15	11:08:35	1.9824
2022-09-15	11:08:35	3.45523
2022-09-15	11:08:35	4.53665
2022-09-15	11:08:36	6.02566
2022-09-15	11:08:36	3.49487
2022-09-15	11:08:36	3.18764
2022-09-15	11:08:36	3.36357
2022-09-15	11:08:37	2.99574
2022-09-15	11:08:37	3.6649
2022-09-15	11:08:37	2.45212
2022-09-15	11:08:38	2.99044
2022-09-15	11:08:38	1.10994
2022-09-15	11:08:38	0.409631
2022-09-15	11:08:38	0.423321
2022-09-15	11:08:39	0.231718
2022-09-15	11:08:39	0.351768
2022-09-15	11:08:39	0.301998
2022-09-15	11:08:39	0.274262
2022-09-15	11:08:40	0.427646
2022-09-15	11:08:40	0.281845
2022-09-15	11:08:40	0.604237
2022-09-15	11:08:40	0.265305
2022-09-15	11:08:41	0.394161
2022-09-15	11:08:41	0.353804
2022-09-15	11:08:41	0.371819
2022-09-15	11:08:42	0.87986
2022-09-15	11:08:42	1.63477
2022-09-15	11:08:42	4.22413
2022-09-15	11:08:42	3.83284
2022-09-15	11:08:43	4.97538
2022-09-15	11:08:43	3.63945
2022-09-15	11:08:43	3.49782
2022-09-15	11:08:43	3.09243
2022-09-15	11:08:44	2.22485
2022-09-15	11:08:44	4.27854
2022-09-15	11:08:44	2.24266
2022-09-15	11:08:44	2.67172
2022-09-15	11:08:45	3.47879
2022-09-15	11:08:45	3.39436
2022-09-15	11:08:45	3.00118
2022-09-15	11:08:46	1.36622
2022-09-15	11:08:46	1.41874
2022-09-15	11:08:46	1.29859
2022-09-15	11:08:46	0.872633
2022-09-15	11:08:47	0.60612
2022-09-15	11:08:47	1.09594
2022-09-15	11:08:47	0.976094
2022-09-15	11:08:47	0.766527
2022-09-15	11:08:48	0.580776
2022-09-15	11:08:48	0.275636
2022-09-15	11:08:48	0.365865
2022-09-15	11:08:49	0.245967
2022-09-15	11:08:49	0.415789
2022-09-15	11:08:49	0.531718
2022-09-15	11:08:49	1.28454
2022-09-15	11:08:50	6.1737
2022-09-15	11:08:50	7.95757
2022-09-15	11:08:50	6.11665
2022-09-15	11:08:50	2.05055
2022-09-15	11:08:51	4.2906
2022-09-15	11:08:51	6.3709
2022-09-15	11:08:51	7.97507
2022-09-15	11:08:51	7.69528
2022-09-15	11:08:52	1.40093
2022-09-15	11:08:52	0.732837
2022-09-15	11:08:52	0.792888
2022-09-15	11:08:53	0.283677
2022-09-15	11:08:53	0.936552
2022-09-15	11:08:53	0.409936
2022-09-15	11:08:53	0.682811
2022-09-15	11:08:54	0.59584
2022-09-15	11:08:54	0.334618
2022-09-15	11:08:54	0.492583
2022-09-15	11:08:54	0.27986
2022-09-15	11:08:55	0.689784
2022-09-15	11:08:55	0.35187
2022-09-15	11:08:55	1.02291
2022-09-15	11:08:55	0.819707
2022-09-15	11:08:56	1.35574
2022-09-15	11:08:56	1.09365
2022-09-15	11:08:56	1.26907
2022-09-15	11:08:57	1.08378
2022-09-15	11:08:57	1.06505
2022-09-15	11:08:57	1.13487
2022-09-15	11:08:57	1.10566
2022-09-15	11:08:58	1.21579
2022-09-15	11:08:58	1.05126
2022-09-15	11:08:58	1.09146
2022-09-15	11:08:58	1.1248
2022-09-15	11:08:59	0.879758
2022-09-15	11:08:59	0.703779
2022-09-15	11:08:59	0.606985
2022-09-15	11:08:59	0.480115
2022-09-15	11:09:00	0.46958
2022-09-15	11:09:00	0.525814
2022-09-15	11:09:00	0.456501
2022-09-15	11:09:01	0.445305
2022-09-15	11:09:01	0.435891
2022-09-15	11:09:01	0.471209
2022-09-15	11:09:01	0.463422
2022-09-15	11:09:02	0.487545
2022-09-15	11:09:02	0.489122
2022-09-15	11:09:02	0.47243
2022-09-15	11:09:02	0.464084
2022-09-15	11:09:03	0.467341
2022-09-15	11:09:03	0.486883
2022-09-15	11:09:03	0.511972
2022-09-15	11:09:03	0.503015
2022-09-15	11:09:04	0.504847
2022-09-15	11:09:04	0.444593
2022-09-15	11:09:04	0.424084
2022-09-15	11:09:05	0.407137
2022-09-15	11:09:05	0.427901
2022-09-15	11:09:05	0.413601
2022-09-15	11:09:05	0.43355
2022-09-15	11:09:06	0.458893
2022-09-15	11:09:06	0.415076
2022-09-15	11:09:06	0.267138
2022-09-15	11:09:06	0.226323
2022-09-15	11:09:07	0.366985
2022-09-15	11:09:07	0.126731
2022-09-15	11:09:07	0.404135
2022-09-15	11:09:07	0.350649
2022-09-15	11:09:08	0.473244
2022-09-15	11:09:08	0.231972
2022-09-15	11:09:08	0.242507
2022-09-15	11:09:09	0.252226
2022-09-15	11:09:09	0.285509
2022-09-15	11:09:09	0.53187
2022-09-15	11:09:09	0.173957
2022-09-15	11:09:10	0.23925
2022-09-15	11:09:10	0.622812
2022-09-15	11:09:10	1.64174
2022-09-15	11:09:10	2.13991
2022-09-15	11:09:11	1.19538
2022-09-15	11:09:11	2.45635
2022-09-15	11:09:11	2.21966
2022-09-15	11:09:11	1.92108
2022-09-15	11:09:12	1.10373
2022-09-15	11:09:12	0.971565
2022-09-15	11:09:12	0.9993
2022-09-15	11:09:13	2.29787
2022-09-15	11:09:13	3.18118
2022-09-15	11:09:13	2.20785
2022-09-15	11:09:13	0.813702
2022-09-15	11:09:14	0.41355
2022-09-15	11:09:14	0.378741
2022-09-15	11:09:14	0.446476
2022-09-15	11:09:14	1.14566
2022-09-15	11:09:15	1.56683
2022-09-15	11:09:15	3.94541
2022-09-15	11:09:15	5.51752
2022-09-15	11:09:16	6.22499
2022-09-15	11:09:16	3.77884
2022-09-15	11:09:16	3.63737
2022-09-15	11:09:16	6.15924
2022-09-15	11:09:17	4.46815
2022-09-15	11:09:17	2.2219
2022-09-15	11:09:17	2.5162
2022-09-15	11:09:17	2.38108
2022-09-15	11:09:18	1.49182
2022-09-15	11:09:18	1.85034
2022-09-15	11:09:18	1.0338
2022-09-15	11:09:18	1.04668
2022-09-15	11:09:19	2.50653
2022-09-15	11:09:19	3.31533
2022-09-15	11:09:19	3.58133
2022-09-15	11:09:20	1.02597
2022-09-15	11:09:20	-0.66706
2022-09-15	11:09:20	-0.910826
2022-09-15	11:09:20	-1.52793
2022-09-15	11:09:21	-1.36686
2022-09-15	11:09:21	-0.712862
2022-09-15	11:09:21	-0.53332
2022-09-15	11:09:21	-0.512455
2022-09-15	11:09:22	-0.295508
2022-09-15	11:09:22	-1.52513
2022-09-15	11:09:22	-1.71266
2022-09-15	11:09:22	-1.78599
2022-09-15	11:09:23	-2.31597
2022-09-15	11:09:23	-2.25281
2022-09-15	11:09:23	-2.30894
2022-09-15	11:09:24	-2.62574
2022-09-15	11:09:24	-2.5607
2022-09-15	11:09:24	-2.80385
2022-09-15	11:09:24	-2.66192
2022-09-15	11:09:25	-2.56202
2022-09-15	11:09:25	-2.50182
2022-09-15	11:09:25	-2.48696
2022-09-15	11:09:25	-2.27271
2022-09-15	11:09:26	-2.33413
2022-09-15	11:09:26	-2.24462
2022-09-15	11:09:26	-2.36614
2022-09-15	11:09:26	-2.27943
2022-09-15	11:09:27	-2.36396
2022-09-15	11:09:27	-2.3863
2022-09-15	11:09:27	-2.3605
2022-09-15	11:09:28	-2.36757
2022-09-15	11:09:28	-2.35866
2022-09-15	11:09:28	-2.33831
2022-09-15	11:09:28	-2.35276
2022-09-15	11:09:29	-2.34034
2022-09-15	11:09:29	-2.30955
2022-09-15	11:09:29	-2.38767
2022-09-15	11:09:29	-2.39373
2022-09-15	11:09:30	-2.30487
2022-09-15	11:09:30	-2.96854
2022-09-15	11:09:30	-2.82243
2022-09-15	11:09:30	-2.84675
2022-09-15	11:09:31	-2.98477
2022-09-15	11:09:31	-2.49449
2022-09-15	11:09:31	-2.70508
2022-09-15	11:09:32	-2.46869
2022-09-15	11:09:32	-2.80126
2022-09-15	11:09:32	-2.71591
2022-09-15	11:09:32	-2.69978
2022-09-15	11:09:33	-2.78324
2022-09-15	11:09:33	-1.99785
2022-09-15	11:09:33	-2.26044
2022-09-15	11:09:33	-2.05047
2022-09-15	11:09:34	-1.88385
2022-09-15	11:09:34	-2.08248
2022-09-15	11:09:34	-1.99851
2022-09-15	11:09:34	-2.01424
2022-09-15	11:09:35	-2.28131
2022-09-15	11:09:35	-2.70034
2022-09-15	11:09:35	-2.6378
2022-09-15	11:09:36	-2.73032
2022-09-15	11:09:36	-2.65169
2022-09-15	11:09:36	-2.56233
2022-09-15	11:09:36	-2.64619
2022-09-15	11:09:37	-2.63617
2022-09-15	11:09:37	-2.75876
2022-09-15	11:09:37	-2.73551
2022-09-15	11:09:37	-2.72446
2022-09-15	11:09:38	-2.72752
2022-09-15	11:09:38	-2.70523
2022-09-15	11:09:38	-2.6864
2022-09-15	11:09:38	-2.75688
2022-09-15	11:09:39	-2.67759
2022-09-15	11:09:39	-2.7606
2022-09-15	11:09:39	-2.70278
2022-09-15	11:09:40	-2.72258
2022-09-15	11:09:40	-2.91133
2022-09-15	11:09:40	-2.95098
2022-09-15	11:09:40	-2.89882
2022-09-15	11:09:41	-3.06467
2022-09-15	11:09:41	-3.03047
2022-09-15	11:09:41	-3.11042
2022-09-15	11:09:41	-3.08828
2022-09-15	11:09:42	-3.08396
2022-09-15	11:09:42	-2.99805
2022-09-15	11:09:42	-2.96431
2022-09-15	11:09:42	-2.91978
2022-09-15	11:09:43	-2.90772
2022-09-15	11:09:43	-2.83999
2022-09-15	11:09:43	-2.8521
2022-09-15	11:09:44	-2.86477
2022-09-15	11:09:44	-2.86823
2022-09-15	11:09:44	-2.77932
2022-09-15	11:09:44	-2.77383
2022-09-15	11:09:45	-2.7124
2022-09-15	11:09:45	-2.54385
2022-09-15	11:09:45	-2.26808
2022-09-15	11:09:45	-2.06365
2022-09-15	11:09:46	-1.72385
2022-09-15	11:09:46	-1.20121
2022-09-15	11:09:46	-1.3265
2022-09-15	11:09:47	-2.44584
2022-09-15	11:09:47	-2.52513
2022-09-15	11:09:47	-2.79362
2022-09-15	11:09:47	-2.89449
2022-09-15	11:09:48	-2.60675
2022-09-15	11:09:48	-2.55871
2022-09-15	11:09:48	-2.33368
2022-09-15	11:09:48	-2.28518
2022-09-15	11:09:49	-2.19088
2022-09-15	11:09:49	-1.63714
2022-09-15	11:09:49	-1.64095
2022-09-15	11:09:49	-1.22248
2022-09-15	11:09:50	-1.3948
2022-09-15	11:09:50	-1.6408
2022-09-15	11:09:50	-1.41006
2022-09-15	11:09:51	-1.06411
2022-09-15	11:09:51	-1.52543
2022-09-15	11:09:51	-1.91927
2022-09-15	11:09:51	-1.40803
2022-09-15	11:09:52	-1.1662
2022-09-15	11:09:52	0.397977
2022-09-15	11:09:52	1.71116
2022-09-15	11:09:52	3.13136
2022-09-15	11:09:53	1.64846
2022-09-15	11:09:53	-0.311285
2022-09-15	11:09:53	-1.41851
2022-09-15	11:09:53	-1.62396
2022-09-15	11:09:54	-2.69647
2022-09-15	11:09:54	-2.40996
2022-09-15	11:09:54	-3.06161
2022-09-15	11:09:55	-2.67866
2022-09-15	11:09:55	-3.06126
2022-09-15	11:09:55	-2.87174
2022-09-15	11:09:55	-3.00884
2022-09-15	11:09:56	-2.97968
2022-09-15	11:09:56	-3.03296
2022-09-15	11:09:56	-3.19154
2022-09-15	11:09:56	-3.31637
2022-09-15	11:09:57	-3.29612
2022-09-15	11:09:57	-3.35647
2022-09-15	11:09:57	-3.38223
2022-09-15	11:09:57	-3.57602
2022-09-15	11:09:58	-3.96385
2022-09-15	11:09:58	-2.28625
2022-09-15	11:09:58	-1.36584
2022-09-15	11:09:59	-1.07413
2022-09-15	11:09:59	-0.286959
2022-09-15	11:09:59	-2.29637
2022-09-15	11:09:59	1.02083
2022-09-15	11:10:00	6.93436
2022-09-15	11:10:00	2.97004
2022-09-15	11:10:00	2.28246
2022-09-15	11:10:00	2.63497
2022-09-15	11:10:01	4.36703
2022-09-15	11:10:01	6.64403
2022-09-15	11:10:01	5.82637
2022-09-15	11:10:01	5.26337
2022-09-15	11:10:02	4.62006
2022-09-15	11:10:02	3.77228
2022-09-15	11:10:02	2.35553
2022-09-15	11:10:03	1.39772
2022-09-15	11:10:03	0.540929
2022-09-15	11:10:03	0.432583
2022-09-15	11:10:03	0.823015
2022-09-15	11:10:04	0.961285
2022-09-15	11:10:04	0.880013
2022-09-15	11:10:04	0.861692
2022-09-15	11:10:04	1.06668
2022-09-15	11:10:05	1.52607
2022-09-15	11:10:05	0.855738
2022-09-15	11:10:05	1.5681
2022-09-15	11:10:05	0.827646
2022-09-15	11:10:06	1.10337
2022-09-15	11:10:06	0.454975
2022-09-15	11:10:06	0.559097
2022-09-15	11:10:07	0.467647
2022-09-15	11:10:07	0.537112
2022-09-15	11:10:07	0.508817
2022-09-15	11:10:07	0.60841
2022-09-15	11:10:08	0.651158
2022-09-15	11:10:08	0.848155
2022-09-15	11:10:08	1.27559
2022-09-15	11:10:08	0.531921
2022-09-15	11:10:09	1.56047
2022-09-15	11:10:09	0.375942
2022-09-15	11:10:09	0.731361
2022-09-15	11:10:09	0.184542
2022-09-15	11:10:10	-1.00441
2022-09-15	11:10:10	0.340878
2022-09-15	11:10:10	0.408868
2022-09-15	11:10:11	0.552227
2022-09-15	11:10:11	0.288868
2022-09-15	11:10:11	0.0835753
2022-09-15	11:10:11	-0.0317936
2022-09-15	11:10:12	-0.320903
2022-09-15	11:10:12	-0.349096
2022-09-15	11:10:12	0.0274939
2022-09-15	11:10:12	0.192125
2022-09-15	11:10:13	0.322201
2022-09-15	11:10:13	0.0187407
2022-09-15	11:10:13	0.194771
2022-09-15	11:10:13	0.139911
2022-09-15	11:10:14	0.10215
2022-09-15	11:10:14	-0.0602415
2022-09-15	11:10:14	0.101234
2022-09-15	11:10:15	0.082761
2022-09-15	11:10:15	-0.180699
2022-09-15	11:10:15	-0.327773
2022-09-15	11:10:15	-0.332201
2022-09-15	11:10:16	-0.265636
2022-09-15	11:10:16	-0.395203
2022-09-15	11:10:16	-0.0602415
2022-09-15	11:10:16	0.0778756
2022-09-15	11:10:17	1.82693
2022-09-15	11:10:17	1.9194
2022-09-15	11:10:17	0.549987
2022-09-15	11:10:17	-0.795559
2022-09-15	11:10:18	-0.200445
2022-09-15	11:10:18	-0.313575
2022-09-15	11:10:18	-0.270521
2022-09-15	11:10:19	-0.106297
2022-09-15	11:10:19	-0.0444654
2022-09-15	11:10:19	0.322099
2022-09-15	11:10:19	0.714974
2022-09-15	11:10:20	1.19976
2022-09-15	11:10:20	1.44704
2022-09-15	11:10:20	1.33192
2022-09-15	11:10:20	1.56871
2022-09-15	11:10:21	1.5881
2022-09-15	11:10:21	2.219
2022-09-15	11:10:21	4.08958
2022-09-15	11:10:21	3.99965
2022-09-15	11:10:22	3.27691
2022-09-15	11:10:22	2.7253
2022-09-15	11:10:22	2.53009
2022-09-15	11:10:23	2.35874
2022-09-15	11:10:23	3.1194
2022-09-15	11:10:23	4.04454
2022-09-15	11:10:23	5.12042
2022-09-15	11:10:24	3.84749
2022-09-15	11:10:24	3.09182
2022-09-15	11:10:24	1.86592
2022-09-15	11:10:24	1.67396
2022-09-15	11:10:25	1.30531
2022-09-15	11:10:25	1.02469
2022-09-15	11:10:25	0.922812
2022-09-15	11:10:26	2.53253
2022-09-15	11:10:26	1.05996
2022-09-15	11:10:26	1.77416
2022-09-15	11:10:26	0.711514
2022-09-15	11:10:27	1.06123
2022-09-15	11:10:27	0.530445
2022-09-15	11:10:27	0.622557
2022-09-15	11:10:27	0.489784
2022-09-15	11:10:28	0.350903
2022-09-15	11:10:28	0.296908
2022-09-15	11:10:28	0.277417
2022-09-15	11:10:28	0.201998
2022-09-15	11:10:29	0.0833717
2022-09-15	11:10:29	-0.218766
2022-09-15	11:10:29	-0.0225824
2022-09-15	11:10:30	-0.0709793
2022-09-15	11:10:30	-0.163855
2022-09-15	11:10:30	-0.373168
2022-09-15	11:10:30	-0.304007
2022-09-15	11:10:31	-0.35561
2022-09-15	11:10:31	-0.367926
2022-09-15	11:10:31	-0.384262
2022-09-15	11:10:31	-0.302379
2022-09-15	11:10:32	-0.228282
2022-09-15	11:10:32	-0.359071
2022-09-15	11:10:32	-0.237341
2022-09-15	11:10:32	-0.262277
2022-09-15	11:10:33	-0.138562
2022-09-15	11:10:33	-0.238002
2022-09-15	11:10:33	0.254313
2022-09-15	11:10:34	1.44622
2022-09-15	11:10:34	2.31874
2022-09-15	11:10:34	3.15996
2022-09-15	11:10:34	2.66541
2022-09-15	11:10:35	3.53563
2022-09-15	11:10:35	0.523524
2022-09-15	11:10:35	0.434059
2022-09-15	11:10:35	0.67757
2022-09-15	11:10:36	0.314822
2022-09-15	11:10:36	0.509936
2022-09-15	11:10:36	-0.046959
2022-09-15	11:10:36	0.169784
2022-09-15	11:10:37	0.0263234
2022-09-15	11:10:37	0.195484
2022-09-15	11:10:37	0.498232
2022-09-15	11:10:38	0.732583
2022-09-15	11:10:38	0.386578
2022-09-15	11:10:38	0.409478
2022-09-15	11:10:38	0.596705
2022-09-15	11:10:39	0.476654
2022-09-15	11:10:39	-0.314491
2022-09-15	11:10:39	0.166629
2022-09-15	11:10:39	-0.0286893
2022-09-15	11:10:40	0.0421503
2022-09-15	11:10:40	-0.00706081
2022-09-15	11:10:40	0.106832
2022-09-15	11:10:40	-0.128893
2022-09-15	11:10:41	-0.0192746
2022-09-15	11:10:41	0.0227102
2022-09-15	11:10:41	-0.0973915
2022-09-15	11:10:42	-0.0557631
2022-09-15	11:10:42	-0.0967809
2022-09-15	11:10:42	0.05299
2022-09-15	11:10:42	-0.168028
2022-09-15	11:10:43	0.0217941
2022-09-15	11:10:43	-0.0119463
2022-09-15	11:10:43	-0.0845672
2022-09-15	11:10:43	-0.189961
2022-09-15	11:10:44	-0.175101
2022-09-15	11:10:44	-0.187417
2022-09-15	11:10:44	-0.215916
2022-09-15	11:10:44	-0.200598
2022-09-15	11:10:45	-0.138867
2022-09-15	11:10:45	-0.0775951
2022-09-15	11:10:45	-0.00217532
2022-09-15	11:10:46	-0.0865519
2022-09-15	11:10:46	0.055789
2022-09-15	11:10:46	0.143728
2022-09-15	11:10:46	-0.0033458
2022-09-15	11:10:47	-0.103804
2022-09-15	11:10:47	-0.100801
2022-09-15	11:10:47	-0.105178
2022-09-15	11:10:47	-0.0566791
2022-09-15	11:10:48	-0.00288781
2022-09-15	11:10:48	0.123473
2022-09-15	11:10:48	0.277774
2022-09-15	11:10:48	1.05503
2022-09-15	11:10:49	1.27065
2022-09-15	11:10:49	2.22541
2022-09-15	11:10:49	1.51457
2022-09-15	11:10:50	2.01843
2022-09-15	11:10:50	0.596298
2022-09-15	11:10:50	0.267341
2022-09-15	11:10:50	0.205356
2022-09-15	11:10:51	0.0713106
2022-09-15	11:10:51	-0.0952542
2022-09-15	11:10:51	-0.1379
2022-09-15	11:10:51	-0.241005
2022-09-15	11:10:52	-0.207519
2022-09-15	11:10:52	-0.303702
2022-09-15	11:10:52	-0.274643
2022-09-15	11:10:52	-0.42762
2022-09-15	11:10:53	-0.324007
2022-09-15	11:10:53	-0.32248
2022-09-15	11:10:53	-0.201259
2022-09-15	11:10:54	-0.350012
2022-09-15	11:10:54	-0.211946
2022-09-15	11:10:54	-0.276679
2022-09-15	11:10:54	-0.16757
2022-09-15	11:10:55	-0.317137
2022-09-15	11:10:55	-0.120801
2022-09-15	11:10:55	-0.231743
2022-09-15	11:10:55	-0.172659
2022-09-15	11:10:56	-0.279732
2022-09-15	11:10:56	-0.143193
2022-09-15	11:10:56	-0.109402
2022-09-15	11:10:56	-0.162175
2022-09-15	11:10:57	-0.0719972
2022-09-15	11:10:57	-0.111183
2022-09-15	11:10:57	0.0921249
2022-09-15	11:10:58	-0.0826333
2022-09-15	11:10:58	0.0146695
2022-09-15	11:10:58	-0.0291473
2022-09-15	11:10:58	0.106883
2022-09-15	11:10:59	0.764338
2022-09-15	11:10:59	1.73441
2022-09-15	11:10:59	3.73126
2022-09-15	11:10:59	3.76225
2022-09-15	11:11:00	3.91151
2022-09-15	11:11:00	1.94754
2022-09-15	11:11:00	4.97238
2022-09-15	11:11:00	1.14327
2022-09-15	11:11:01	3.81849
2022-09-15	11:11:01	1.39289
2022-09-15	11:11:01	2.48413
2022-09-15	11:11:02	0.363168
2022-09-15	11:11:02	0.365967
2022-09-15	11:11:02	0.505153
2022-09-15	11:11:02	1.07212
2022-09-15	11:11:03	0.598842
2022-09-15	11:11:03	0.327748
2022-09-15	11:11:03	0.0922267
2022-09-15	11:11:03	-0.113219
2022-09-15	11:11:04	-0.425483
2022-09-15	11:11:04	-0.396933
2022-09-15	11:11:04	-0.444974
2022-09-15	11:11:04	-0.4693
2022-09-15	11:11:05	-0.573066
2022-09-15	11:11:05	-0.536068
2022-09-15	11:11:05	-0.525687
2022-09-15	11:11:06	-0.592099
2022-09-15	11:11:06	-0.322226
2022-09-15	11:11:06	-0.311844
2022-09-15	11:11:06	-0.190776
2022-09-15	11:11:07	-0.285432
2022-09-15	11:11:07	-0.0610048
2022-09-15	11:11:07	0.188257
2022-09-15	11:11:07	0.546527
2022-09-15	11:11:08	0.66327
2022-09-15	11:11:08	1.03569
2022-09-15	11:11:08	0.491972
2022-09-15	11:11:08	0.247443
2022-09-15	11:11:09	0.175789
2022-09-15	11:11:09	-0.0436002
2022-09-15	11:11:09	0.11528
2022-09-15	11:11:10	-0.129249
2022-09-15	11:11:10	0.173244
2022-09-15	11:11:10	0.748562
2022-09-15	11:11:10	4.08261
2022-09-15	11:11:11	6.03797
2022-09-15	11:11:11	4.87034
2022-09-15	11:11:11	6.38902
2022-09-15	11:11:11	1.31126
2022-09-15	11:11:12	1.45004
2022-09-15	11:11:12	0.985814
2022-09-15	11:11:12	-0.221666
2022-09-15	11:11:12	0.0458654
2022-09-15	11:11:13	-0.129045
2022-09-15	11:11:13	-0.0802414
2022-09-15	11:11:13	-0.200649
2022-09-15	11:11:14	-0.151641
2022-09-15	11:11:14	-0.0839565
2022-09-15	11:11:14	-0.261972
2022-09-15	11:11:14	-0.189249
2022-09-15	11:11:15	-0.290216
2022-09-15	11:11:15	-0.331641
2022-09-15	11:11:15	-0.511946
2022-09-15	11:11:15	-0.355457
2022-09-15	11:11:16	-0.163956
2022-09-15	11:11:16	-0.283702
2022-09-15	11:11:16	-0.0882822
2022-09-15	11:11:17	-0.162633
2022-09-15	11:11:17	-0.107366
2022-09-15	11:11:17	-0.2236
2022-09-15	11:11:17	-0.104262
2022-09-15	11:11:18	-0.0218191
2022-09-15	11:11:18	-0.191234
2022-09-15	11:11:18	-0.107824
2022-09-15	11:11:18	-0.0599361
2022-09-15	11:11:19	0.763168
2022-09-15	11:11:19	6.10072
2022-09-15	11:11:19	12.6719
2022-09-15	11:11:20	10.2435
2022-09-15	11:11:20	9.92209
2022-09-15	11:11:20	4.87584
2022-09-15	11:11:20	2.20963
2022-09-15	11:11:21	3.69996
2022-09-15	11:11:21	2.13874
2022-09-15	11:11:21	4.43355
2022-09-15	11:11:21	6.53411
2022-09-15	11:11:22	7.06683
2022-09-15	11:11:22	6.82001
2022-09-15	11:11:22	4.025
2022-09-15	11:11:22	3.88138
2022-09-15	11:11:23	2.26347
2022-09-15	11:11:23	0.761896
2022-09-15	11:11:23	1.06887
2022-09-15	11:11:23	1.65172
2022-09-15	11:11:24	1.88581
2022-09-15	11:11:24	4.32006
2022-09-15	11:11:24	5.3078
2022-09-15	11:11:25	5.73523
2022-09-15	11:11:25	0.313448
2022-09-15	11:11:25	6.8884
2022-09-15	11:11:25	15.3812
2022-09-15	11:11:26	5.77146
2022-09-15	11:11:26	2.92795
2022-09-15	11:11:26	1.30836
2022-09-15	11:11:26	3.15619
2022-09-15	11:11:27	9.05629
2022-09-15	11:11:27	12.9215
2022-09-15	11:11:27	7.21324
2022-09-15	11:11:27	9.25558
2022-09-15	11:11:28	15.7785
2022-09-15	11:11:28	16.4078
2022-09-15	11:11:28	8.90713
2022-09-15	11:11:29	8.19599
2022-09-15	11:11:29	7.04459
2022-09-15	11:11:29	4.85792
2022-09-15	11:11:29	4.16958
2022-09-15	11:11:30	4.44225
2022-09-15	11:11:30	4.49161
2022-09-15	11:11:30	4.4995
2022-09-15	11:11:30	4.17747
2022-09-15	11:11:31	3.83935
2022-09-15	11:11:31	3.505
2022-09-15	11:11:31	3.47589
2022-09-15	11:11:31	3.72703
2022-09-15	11:11:32	3.57187
2022-09-15	11:11:32	3.40938
2022-09-15	11:11:32	3.39762
2022-09-15	11:11:33	3.72072
2022-09-15	11:11:33	3.37564
2022-09-15	11:11:33	3.19757
2022-09-15	11:11:33	3.16775
2022-09-15	11:11:34	3.07492
2022-09-15	11:11:34	3.55324
2022-09-15	11:11:34	2.94617
2022-09-15	11:11:35	2.82016
2022-09-15	11:11:35	1.05151
2022-09-15	11:11:35	0.50902
2022-09-15	11:11:35	0.421082
2022-09-15	11:11:35	0.485713
2022-09-15	11:11:36	0.354364
2022-09-15	11:11:36	0.502354
2022-09-15	11:11:36	0.33472
2022-09-15	11:11:37	0.498181
2022-09-15	11:11:37	0.318842
2022-09-15	11:11:37	0.495942
2022-09-15	11:11:37	0.324288
2022-09-15	11:11:38	0.494415
2022-09-15	11:11:38	0.377977
2022-09-15	11:11:38	0.474466
2022-09-15	11:11:38	0.376349
2022-09-15	11:11:39	0.494313
2022-09-15	11:11:39	0.327596
2022-09-15	11:11:39	0.385407
2022-09-15	11:11:39	0.183931
2022-09-15	11:11:40	0.362099
2022-09-15	11:11:40	0.187545
2022-09-15	11:11:40	0.55757
2022-09-15	11:11:41	0.757774
2022-09-15	11:11:41	0.748562
2022-09-15	11:11:41	0.649835
2022-09-15	11:11:41	0.285967
