# Supplementary material for: Comparing efficacy in reducing pulling and welfare impacts of four types of leash walking equipment
Source: PeerJ journal article supplement (doi:10.7717/peerj.18131), 2024-10-24
Supplement: Shelter_2_Tension_files.zip [file MsPotato_harness_2022914111331 copy.xlsx]

## Sheet: Averaged Newtons
Date	Time	Averaged Newtons
2022-09-14	11:13:47	-0.573793	0	0		Impulse	711.445
2022-09-14	11:13:48	-1.2022	0	0		Total steps	0
2022-09-14	11:13:49	-0.309995	0	0
2022-09-14	11:13:50	2.44425	2.44425	0
2022-09-14	11:13:51	1.45189	3.89614	0
2022-09-14	11:13:52	1.05127	4.94741	0
2022-09-14	11:13:53	0.186588	5.134	0
2022-09-14	11:13:54	-0.179398	5.134	0
2022-09-14	11:13:55	1.16519	6.29919	0
2022-09-14	11:13:56	1.67385	7.97303	0
2022-09-14	11:13:57	1.56859	9.54162	0
2022-09-14	11:13:58	1.56536	11.107	0
2022-09-14	11:13:59	1.32699	12.434	0
2022-09-14	11:14:00	1.31545	13.7494	0
2022-09-14	11:14:01	1.85532	15.6047	0
2022-09-14	11:14:02	2.17277	17.7775	0
2022-09-14	11:14:03	2.34244	20.1199	0
2022-09-14	11:14:04	2.08454	22.2045	0
2022-09-14	11:14:05	2.23163	24.4361	0
2022-09-14	11:14:06	2.16355	26.5997	0
2022-09-14	11:14:07	2.40401	29.0037	0
2022-09-14	11:14:08	2.24051	31.2442	0
2022-09-14	11:14:09	1.74463	32.9888	0
2022-09-14	11:14:10	1.28896	34.2778	0
2022-09-14	11:14:11	1.92218	36.2	0
2022-09-14	11:14:12	0.340294	36.5402	0
2022-09-14	11:14:13	0.831972	37.3722	0
2022-09-14	11:14:14	0.84199	38.2142	0
2022-09-14	11:14:15	2.11052	40.3247	0
2022-09-14	11:14:16	1.07193	41.3966	0
2022-09-14	11:14:17	0.849685	42.2463	0
2022-09-14	11:14:18	0.497848	42.7442	0
2022-09-14	11:14:19	0.451838	43.196	0
2022-09-14	11:14:20	0.46774	43.6638	0
2022-09-14	11:14:21	-0.611711	43.6638	0
2022-09-14	11:14:22	0.0238261	43.6876	0
2022-09-14	11:14:23	0.542501	44.2301	0
2022-09-14	11:14:24	4.74685	48.9769	0
2022-09-14	11:14:25	2.52059	51.4975	0
2022-09-14	11:14:26	0.603563	52.1011	0
2022-09-14	11:14:27	1.25461	53.3557	0
2022-09-14	11:14:28	3.24871	56.6044	0
2022-09-14	11:14:29	3.243	59.8474	0
2022-09-14	11:14:30	3.22947	63.0769	0
2022-09-14	11:14:31	3.21425	66.2911	0
2022-09-14	11:14:32	3.19589	69.487	0
2022-09-14	11:14:33	3.21827	72.7053	0
2022-09-14	11:14:34	3.228	75.9333	0
2022-09-14	11:14:35	3.24209	79.1754	0
2022-09-14	11:14:36	3.22932	82.4047	0
2022-09-14	11:14:37	3.23858	85.6433	0
2022-09-14	11:14:38	3.23134	88.8746	0
2022-09-14	11:14:39	3.23496	92.1096	0
2022-09-14	11:14:40	3.24343	95.353	0
2022-09-14	11:14:41	3.23841	98.5914	0
2022-09-14	11:14:42	3.24379	101.835	0
2022-09-14	11:14:43	3.23191	105.067	0
2022-09-14	11:14:44	3.23	108.297	0
2022-09-14	11:14:45	3.24051	111.538	0
2022-09-14	11:14:46	3.22766	114.765	0
2022-09-14	11:14:47	3.23558	118.001	0
2022-09-14	11:14:48	3.23355	121.234	0
2022-09-14	11:14:49	3.23536	124.47	0
2022-09-14	11:14:50	3.24617	127.716	0
2022-09-14	11:14:51	3.22523	130.941	0
2022-09-14	11:14:52	3.23445	134.176	0
2022-09-14	11:14:53	3.23089	137.407	0
2022-09-14	11:14:54	3.23044	140.637	0
2022-09-14	11:14:55	3.21763	143.855	0
2022-09-14	11:14:56	3.23604	147.091	0
2022-09-14	11:14:57	3.22806	150.319	0
2022-09-14	11:14:58	3.2306	153.549	0
2022-09-14	11:14:59	3.21244	156.762	0
2022-09-14	11:15:00	3.2248	159.987	0
2022-09-14	11:15:01	3.23219	163.219	0
2022-09-14	11:15:02	3.22506	166.444	0
2022-09-14	11:15:03	3.22042	169.664	0
2022-09-14	11:15:04	3.237	172.901	0
2022-09-14	11:15:05	3.22132	176.122	0
2022-09-14	11:15:06	3.23474	179.357	0
2022-09-14	11:15:07	3.2211	182.578	0
2022-09-14	11:15:08	3.22081	185.799	0
2022-09-14	11:15:09	1.65687	187.456	0
2022-09-14	11:15:10	3.24068	190.697	0
2022-09-14	11:15:11	3.238	193.935	0
2022-09-14	11:15:12	3.24656	197.181	0
2022-09-14	11:15:13	3.23779	200.419	0
2022-09-14	11:15:14	3.25386	203.673	0
2022-09-14	11:15:15	3.23136	206.904	0
2022-09-14	11:15:16	3.22585	210.13	0
2022-09-14	11:15:17	3.25015	213.38	0
2022-09-14	11:15:18	3.24532	216.626	0
2022-09-14	11:15:19	3.22276	219.848	0
2022-09-14	11:15:20	3.23875	223.087	0
2022-09-14	11:15:21	3.24928	226.336	0
2022-09-14	11:15:22	3.23196	229.568	0
2022-09-14	11:15:23	3.22012	232.788	0
2022-09-14	11:15:24	3.2409	236.029	0
2022-09-14	11:15:25	3.23819	239.268	0
2022-09-14	11:15:26	3.24306	242.511	0
2022-09-14	11:15:27	3.24532	245.756	0
2022-09-14	11:15:28	3.23383	248.99	0
2022-09-14	11:15:29	3.24577	252.236	0
2022-09-14	11:15:30	3.24956	255.485	0
2022-09-14	11:15:31	3.22623	258.711	0
2022-09-14	11:15:32	3.24702	261.958	0
2022-09-14	11:15:33	3.23457	265.193	0
2022-09-14	11:15:34	3.23938	268.432	0
2022-09-14	11:15:35	3.23996	271.672	0
2022-09-14	11:15:36	3.23626	274.908	0
2022-09-14	11:15:37	3.23343	278.142	0
2022-09-14	11:15:38	3.22913	281.371	0
2022-09-14	11:15:39	3.23898	284.61	0
2022-09-14	11:15:40	3.22896	287.839	0
2022-09-14	11:15:41	3.21663	291.056	0
2022-09-14	11:15:42	3.23326	294.289	0
2022-09-14	11:15:43	3.2506	297.539	0
2022-09-14	11:15:44	3.23587	300.775	0
2022-09-14	11:15:45	3.22976	304.005	0
2022-09-14	11:15:46	3.23626	307.241	0
2022-09-14	11:15:47	3.24922	310.491	0
2022-09-14	11:15:48	3.23507	313.726	0
2022-09-14	11:15:49	3.24481	316.97	0
2022-09-14	11:15:50	3.23023	320.201	0
2022-09-14	11:15:51	3.22019	323.421	0
2022-09-14	11:15:52	3.24837	326.669	0
2022-09-14	11:15:53	3.23971	329.909	0
2022-09-14	11:15:54	3.23	333.139	0
2022-09-14	11:15:55	3.2482	336.387	0
2022-09-14	11:15:56	3.24147	339.629	0
2022-09-14	11:15:57	3.24305	342.872	0
2022-09-14	11:15:58	3.23302	346.105	0
2022-09-14	11:15:59	3.23276	349.337	0
2022-09-14	11:16:00	3.24792	352.585	0
2022-09-14	11:16:01	3.243	355.828	0
2022-09-14	11:16:02	3.21808	359.046	0
2022-09-14	11:16:03	3.23643	362.283	0
2022-09-14	11:16:04	3.24577	365.529	0
2022-09-14	11:16:05	3.23451	368.763	0
2022-09-14	11:16:06	3.24419	372.007	0
2022-09-14	11:16:07	3.22019	375.228	0
2022-09-14	11:16:08	3.2327	378.46	0
2022-09-14	11:16:09	3.24215	381.702	0
2022-09-14	11:16:10	3.23845	384.941	0
2022-09-14	11:16:11	3.23972	388.181	0
2022-09-14	11:16:12	3.25443	391.435	0
2022-09-14	11:16:13	3.23683	394.672	0
2022-09-14	11:16:14	3.25641	397.928	0
2022-09-14	11:16:15	3.26739	401.196	0
2022-09-14	11:16:16	3.24011	404.436	0
2022-09-14	11:16:17	3.24753	407.683	0
2022-09-14	11:16:18	3.2291	410.912	0
2022-09-14	11:16:19	3.24588	414.158	0
2022-09-14	11:16:20	3.24967	417.408	0
2022-09-14	11:16:21	3.2512	420.659	0
2022-09-14	11:16:22	3.26471	423.924	0
2022-09-14	11:16:23	3.25709	427.181	0
2022-09-14	11:16:24	3.2512	430.432	0
2022-09-14	11:16:25	3.25805	433.69	0
2022-09-14	11:16:26	3.25724	436.947	0
2022-09-14	11:16:27	3.24928	440.197	0
2022-09-14	11:16:28	3.23502	443.432	0
2022-09-14	11:16:29	3.24209	446.674	0
2022-09-14	11:16:30	3.25279	449.927	0
2022-09-14	11:16:31	3.23462	453.161	0
2022-09-14	11:16:32	3.24209	456.403	0
2022-09-14	11:16:33	3.25019	459.654	0
2022-09-14	11:16:34	3.25807	462.912	0
2022-09-14	11:16:35	3.26145	466.173	0
2022-09-14	11:16:36	3.25964	469.433	0
2022-09-14	11:16:37	3.26071	472.693	0
2022-09-14	11:16:38	3.24396	475.937	0
2022-09-14	11:16:39	3.24617	479.184	0
2022-09-14	11:16:40	3.25126	482.435	0
2022-09-14	11:16:41	3.255	485.69	0
2022-09-14	11:16:42	3.24856	488.938	0
2022-09-14	11:16:43	3.24062	492.179	0
2022-09-14	11:16:44	3.26343	495.442	0
2022-09-14	11:16:45	3.25686	498.699	0
2022-09-14	11:16:46	3.23853	501.938	0
2022-09-14	11:16:47	3.249	505.187	0
2022-09-14	11:16:48	3.252	508.439	0
2022-09-14	11:16:49	3.24781	511.687	0
2022-09-14	11:16:50	3.24645	514.933	0
2022-09-14	11:16:51	3.26445	518.197	0
2022-09-14	11:16:52	3.26869	521.466	0
2022-09-14	11:16:53	3.24605	524.712	0
2022-09-14	11:16:54	3.2629	527.975	0
2022-09-14	11:16:55	3.26043	531.236	0
2022-09-14	11:16:56	3.25698	534.493	0
2022-09-14	11:16:57	3.24124	537.734	0
2022-09-14	11:16:58	3.2583	540.992	0
2022-09-14	11:16:59	3.26439	544.256	0
2022-09-14	11:17:00	3.25432	547.511	0
2022-09-14	11:17:01	3.25177	550.763	0
2022-09-14	11:17:02	3.26071	554.023	0
2022-09-14	11:17:03	3.26507	557.288	0
2022-09-14	11:17:04	3.26037	560.549	0
2022-09-14	11:17:05	3.26337	563.812	0
2022-09-14	11:17:06	3.25317	567.065	0
2022-09-14	11:17:07	3.25403	570.319	0
2022-09-14	11:17:08	3.25364	573.573	0
2022-09-14	11:17:09	3.25675	576.83	0
2022-09-14	11:17:10	3.24645	580.076	0
2022-09-14	11:17:11	3.25183	583.328	0
2022-09-14	11:17:12	3.25551	586.583	0
2022-09-14	11:17:13	3.26139	589.845	0
2022-09-14	11:17:14	3.25777	593.103	0
2022-09-14	11:17:15	3.24322	596.346	0
2022-09-14	11:17:16	3.25443	599.6	0
2022-09-14	11:17:17	3.25941	602.86	0
2022-09-14	11:17:18	3.25286	606.113	0
2022-09-14	11:17:19	3.25171	609.364	0
2022-09-14	11:17:20	3.25664	612.621	0
2022-09-14	11:17:21	3.24039	615.861	0
2022-09-14	11:17:22	3.24321	619.104	0
2022-09-14	11:17:23	3.25268	622.357	0
2022-09-14	11:17:24	3.26343	625.621	0
2022-09-14	11:17:25	3.24583	628.866	0
2022-09-14	11:17:26	3.24577	632.112	0
2022-09-14	11:17:27	3.25058	635.363	0
2022-09-14	11:17:28	3.26733	638.63	0
2022-09-14	11:17:29	3.25568	641.886	0
2022-09-14	11:17:30	3.25211	645.138	0
2022-09-14	11:17:31	3.25613	648.394	0
2022-09-14	11:17:32	3.25907	651.653	0
2022-09-14	11:17:33	3.25341	654.906	0
2022-09-14	11:17:34	3.26162	658.168	0
2022-09-14	11:17:35	3.26694	661.435	0
2022-09-14	11:17:36	3.25171	664.687	0
2022-09-14	11:17:37	5.05216	669.739	0
2022-09-14	11:17:38	4.2824	674.021	0
2022-09-14	11:17:39	-2.75227	674.021	0
2022-09-14	11:17:40	3.68912	677.71	0
2022-09-14	11:17:41	-0.884547	677.71	0
2022-09-14	11:17:42	-2.98413	677.71	0
2022-09-14	11:17:43	-2.14787	677.71	0
2022-09-14	11:17:44	-3.34894	677.71	0
2022-09-14	11:17:45	-3.3993	677.71	0
2022-09-14	11:17:46	-2.27558	677.71	0
2022-09-14	11:17:47	-3.03366	677.71	0
2022-09-14	11:17:48	-3.67084	677.71	0
2022-09-14	11:17:49	-4.98363	677.71	0
2022-09-14	11:17:50	-5.40809	677.71	0
2022-09-14	11:17:51	-5.68107	677.71	0
2022-09-14	11:17:52	-6.13302	677.71	0
2022-09-14	11:17:53	-10.1222	677.71	0
2022-09-14	11:17:54	-11.968	677.71	0
2022-09-14	11:17:55	-12.6712	677.71	0
2022-09-14	11:17:56	-13.3231	677.71	0
2022-09-14	11:17:57	-13.6409	677.71	0
2022-09-14	11:17:58	-14.4196	677.71	0
2022-09-14	11:17:59	-15.4173	677.71	0
2022-09-14	11:18:00	-15.9494	677.71	0
2022-09-14	11:18:01	-16.2312	677.71	0
2022-09-14	11:18:02	-17.0932	677.71	0
2022-09-14	11:18:03	-17.2189	677.71	0
2022-09-14	11:18:04	-18.0998	677.71	0
2022-09-14	11:18:05	-18.6687	677.71	0
2022-09-14	11:18:06	-18.8651	677.71	0
2022-09-14	11:18:07	-19.0436	677.71	0
2022-09-14	11:18:08	-19.2342	677.71	0
2022-09-14	11:18:09	-19.8456	677.71	0
2022-09-14	11:18:10	-19.8472	677.71	0
2022-09-14	11:18:11	-18.6653	677.71	0
2022-09-14	11:18:12	-11.732	677.71	0
2022-09-14	11:18:13	-1.20095	677.71	0
2022-09-14	11:18:14	2.73048	680.441	0
2022-09-14	11:18:15	0.865815	681.307	0
2022-09-14	11:18:16	-0.00814743	681.307	0
2022-09-14	11:18:17	1.076	682.383	0
2022-09-14	11:18:18	1.25529	683.638	0
2022-09-14	11:18:19	2.3185	685.957	0
2022-09-14	11:18:20	-0.968807	685.957	0
2022-09-14	11:18:21	-11.1612	685.957	0
2022-09-14	11:18:22	-12.3161	685.957	0
2022-09-14	11:18:23	-11.3721	685.957	0
2022-09-14	11:18:24	-11.9344	685.957	0
2022-09-14	11:18:25	-1.12761	685.957	0
2022-09-14	11:18:26	-13.5674	685.957	0
2022-09-14	11:18:27	-10.8396	685.957	0
2022-09-14	11:18:28	-16.4838	685.957	0
2022-09-14	11:18:29	-8.66877	685.957	0
2022-09-14	11:18:30	-21.6529	685.957	0
2022-09-14	11:18:31	-9.49809	685.957	0
2022-09-14	11:18:32	1.02195	686.978	0
2022-09-14	11:18:33	0.709959	687.688	0
2022-09-14	11:18:34	0.544632	688.233	0
2022-09-14	11:18:35	1.89773	690.131	0
2022-09-14	11:18:36	1.75523	691.886	0
2022-09-14	11:18:37	-3.62703	691.886	0
2022-09-14	11:18:38	-4.0006	691.886	0
2022-09-14	11:18:39	-4.25963	691.886	0
2022-09-14	11:18:40	-5.2427	691.886	0
2022-09-14	11:18:41	-0.170799	691.886	0
2022-09-14	11:18:42	3.24758	695.134	0
2022-09-14	11:18:43	3.26003	698.394	0
2022-09-14	11:18:44	3.25307	701.647	0
2022-09-14	11:18:45	3.26784	704.915	0
2022-09-14	11:18:46	3.2632	708.178	0
2022-09-14	11:18:47	3.26756	711.445	0

## Sheet: MsPotato_harness_2022914111 (4)
Date	Time	Lbs	Newtons	Averaged Newtons	Total force x time		total steps > 13.345	**GoPro Fitting: 11:03
2022-09-14	11:13:47	0.254568	1.13237	-0.573793	1.13237	FALSE	0
2022-09-14	11:13:47	-0.0066537	-0.029597	-0.573793	0	FALSE	0
2022-09-14	11:13:47	-0.177035	-0.787487	-0.573793	1.13237	FALSE	0
2022-09-14	11:13:47	-0.586857	-2.61046	-0.573793	0	FALSE	0
2022-09-14	11:13:48	-0.544567	-2.42234	-1.2022	1.13237	FALSE	0
2022-09-14	11:13:48	-0.402582	-1.79077	-1.2022	0	FALSE	0
2022-09-14	11:13:48	-0.15047	-0.669321	-1.2022	1.13237	FALSE	0
2022-09-14	11:13:48	0.0165524	0.0736284	-1.2022	0.0736284	FALSE	0
2022-09-14	11:13:49	-0.0952542	-0.42371	-0.309995	1.13237	FALSE	0
2022-09-14	11:13:49	-0.127264	-0.566096	-0.309995	0.0736284	FALSE	0
2022-09-14	11:13:49	0.0134481	0.0598198	-0.309995	1.19219	FALSE	0
2022-09-14	11:13:50	0.113397	0.504413	2.44425	0.578041	FALSE	0
2022-09-14	11:13:50	0.453244	2.01612	2.44425	3.20831	FALSE	0
2022-09-14	11:13:50	1.08602	4.83083	2.44425	5.40888	FALSE	0
2022-09-14	11:13:50	0.545305	2.42563	2.44425	5.63393	FALSE	0
2022-09-14	11:13:51	0.556247	2.4743	1.45189	7.88317	FALSE	0
2022-09-14	11:13:51	0.241845	1.07577	1.45189	6.70971	FALSE	0
2022-09-14	11:13:51	-0.0280277	-0.124673	1.45189	7.88317	FALSE	0
2022-09-14	11:13:51	0.535534	2.38216	1.45189	9.09187	FALSE	0
2022-09-14	11:13:52	0.231158	1.02824	1.05127	8.91141	FALSE	0
2022-09-14	11:13:52	0.154822	0.688679	1.05127	9.78055	FALSE	0
2022-09-14	11:13:52	0.37014	1.64646	1.05127	10.5579	FALSE	0
2022-09-14	11:13:52	0.189224	0.841706	1.05127	10.6223	FALSE	0
2022-09-14	11:13:53	-0.0579005	-0.257553	0.186588	10.5579	FALSE	0
2022-09-14	11:13:53	0.166476	0.740519	0.186588	11.3628	FALSE	0
2022-09-14	11:13:53	0.0172649	0.0767977	0.186588	10.6347	FALSE	0
2022-09-14	11:13:54	-0.0894018	-0.397677	-0.179398	11.3628	FALSE	0
2022-09-14	11:13:54	0.0248984	0.110753	-0.179398	10.7454	FALSE	0
2022-09-14	11:13:54	-0.039071	-0.173796	-0.179398	11.3628	FALSE	0
2022-09-14	11:13:54	-0.0577478	-0.256874	-0.179398	10.7454	FALSE	0
2022-09-14	11:13:55	-0.00212443	-0.00944989	1.16519	11.3628	FALSE	0
2022-09-14	11:13:55	0.355738	1.58239	1.16519	12.3278	FALSE	0
2022-09-14	11:13:55	0.289682	1.28856	1.16519	12.6513	FALSE	0
2022-09-14	11:13:55	0.404491	1.79926	1.16519	14.1271	FALSE	0
2022-09-14	11:13:56	0.259809	1.15568	1.67385	13.807	FALSE	0
2022-09-14	11:13:56	0.525102	2.33576	1.67385	16.4628	FALSE	0
2022-09-14	11:13:56	0.40042	1.78115	1.67385	15.5882	FALSE	0
2022-09-14	11:13:56	0.31986	1.4228	1.67385	17.8856	FALSE	0
2022-09-14	11:13:57	0.31243	1.38975	1.56859	16.9779	FALSE	0
2022-09-14	11:13:57	0.204746	0.910751	1.56859	18.7964	FALSE	0
2022-09-14	11:13:57	0.540725	2.40525	1.56859	19.3832	FALSE	0
2022-09-14	11:13:58	0.255942	1.13848	1.56536	19.9349	FALSE	0
2022-09-14	11:13:58	0.456552	2.03083	1.56536	21.414	FALSE	0
2022-09-14	11:13:58	0.340573	1.51494	1.56536	21.4498	FALSE	0
2022-09-14	11:13:58	0.354568	1.57719	1.56536	22.9912	FALSE	0
2022-09-14	11:13:59	0.197723	0.879511	1.32699	22.3293	FALSE	0
2022-09-14	11:13:59	0.349428	1.55433	1.32699	24.5455	FALSE	0
2022-09-14	11:13:59	0.403626	1.79541	1.32699	24.1247	FALSE	0
2022-09-14	11:13:59	0.242507	1.07872	1.32699	25.6242	FALSE	0
2022-09-14	11:14:00	0.422863	1.88098	1.31545	26.0057	FALSE	0
2022-09-14	11:14:00	0.258842	1.15138	1.31545	26.7756	FALSE	0
2022-09-14	11:14:00	0.342405	1.52309	1.31545	27.5288	FALSE	0
2022-09-14	11:14:00	0.158792	0.706339	1.31545	27.482	FALSE	0
2022-09-14	11:14:01	0.466883	2.07679	1.85532	29.6056	FALSE	0
2022-09-14	11:14:01	0.228613	1.01692	1.85532	28.4989	FALSE	0
2022-09-14	11:14:01	0.555789	2.47226	1.85532	32.0778	FALSE	0
2022-09-14	11:14:02	0.182914	0.813638	2.17277	29.3125	FALSE	0
2022-09-14	11:14:02	0.684695	3.04566	2.17277	35.1235	FALSE	0
2022-09-14	11:14:02	0.221031	0.98319	2.17277	30.2957	FALSE	0
2022-09-14	11:14:02	0.865204	3.8486	2.17277	38.9721	FALSE	0
2022-09-14	11:14:03	0.37584	1.67181	2.34244	31.9675	FALSE	0
2022-09-14	11:14:03	0.545	2.42427	2.34244	41.3964	FALSE	0
2022-09-14	11:14:03	0.598028	2.66015	2.34244	34.6277	FALSE	0
2022-09-14	11:14:03	0.587545	2.61352	2.34244	44.0099	FALSE	0
2022-09-14	11:14:04	0.472023	2.09965	2.08454	36.7273	FALSE	0
2022-09-14	11:14:04	0.445305	1.98081	2.08454	45.9907	FALSE	0
2022-09-14	11:14:04	0.531158	2.3627	2.08454	39.09	FALSE	0
2022-09-14	11:14:04	0.426018	1.89501	2.08454	47.8857	FALSE	0
2022-09-14	11:14:05	0.495026	2.20197	2.23163	41.292	FALSE	0
2022-09-14	11:14:05	0.469886	2.09015	2.23163	49.9758	FALSE	0
2022-09-14	11:14:05	0.540165	2.40276	2.23163	43.6948	FALSE	0
2022-09-14	11:14:06	0.435229	1.93599	2.16355	51.9118	FALSE	0
2022-09-14	11:14:06	0.504542	2.2443	2.16355	45.9391	FALSE	0
2022-09-14	11:14:06	0.430802	1.91629	2.16355	53.8281	FALSE	0
2022-09-14	11:14:06	0.574975	2.5576	2.16355	48.4967	FALSE	0
2022-09-14	11:14:07	0.436654	1.94232	2.40401	55.7704	FALSE	0
2022-09-14	11:14:07	0.581641	2.58726	2.40401	51.0839	FALSE	0
2022-09-14	11:14:07	0.440878	1.96111	2.40401	57.7316	FALSE	0
2022-09-14	11:14:07	0.702608	3.12534	2.40401	54.2093	FALSE	0
2022-09-14	11:14:08	0.367494	1.63469	2.24051	59.3662	FALSE	0
2022-09-14	11:14:08	0.664898	2.9576	2.24051	57.1669	FALSE	0
2022-09-14	11:14:08	0.35757	1.59054	2.24051	60.9568	FALSE	0
2022-09-14	11:14:08	0.624796	2.77922	2.24051	59.9461	FALSE	0
2022-09-14	11:14:09	0.310293	1.38025	1.74463	62.337	FALSE	0
2022-09-14	11:14:09	0.590903	2.62845	1.74463	62.5745	FALSE	0
2022-09-14	11:14:09	0.275433	1.22518	1.74463	63.5622	FALSE	0
2022-09-14	11:14:10	0.315331	1.40266	1.28896	63.9772	FALSE	0
2022-09-14	11:14:10	0.0125829	0.0559713	1.28896	63.6182	FALSE	0
2022-09-14	11:14:10	0.373601	1.66185	1.28896	65.639	FALSE	0
2022-09-14	11:14:10	0.45757	2.03536	1.28896	65.6536	FALSE	0
2022-09-14	11:14:11	0.524644	2.33372	1.92218	67.9728	FALSE	0
2022-09-14	11:14:11	0.258028	1.14776	1.92218	66.8013	FALSE	0
2022-09-14	11:14:11	0.659351	2.93293	1.92218	70.9057	FALSE	0
2022-09-14	11:14:11	0.286476	1.2743	1.92218	68.0756	FALSE	0
2022-09-14	11:14:12	0.206171	0.91709	0.340294	71.8228	FALSE	0
2022-09-14	11:14:12	-0.00629748	-0.0280125	0.340294	68.0756	FALSE	0
2022-09-14	11:14:12	0.0453565	0.201755	0.340294	72.0245	FALSE	0
2022-09-14	11:14:12	0.0607763	0.270345	0.340294	68.346	FALSE	0
2022-09-14	11:14:13	0.190191	0.846008	0.831972	72.8705	FALSE	0
2022-09-14	11:14:13	0.142099	0.632085	0.831972	68.978	FALSE	0
2022-09-14	11:14:13	0.228817	1.01782	0.831972	73.8884	FALSE	0
2022-09-14	11:14:14	0.0846949	0.37674	0.84199	69.3548	FALSE	0
2022-09-14	11:14:14	0.222201	0.988394	0.84199	74.8768	FALSE	0
2022-09-14	11:14:14	0.212583	0.945612	0.84199	70.3004	FALSE	0
2022-09-14	11:14:14	0.237672	1.05721	0.84199	75.934	FALSE	0
2022-09-14	11:14:15	0.291972	1.29875	2.11052	71.5991	FALSE	0
2022-09-14	11:14:15	0.524338	2.33236	2.11052	78.2663	FALSE	0
2022-09-14	11:14:15	0.619707	2.75658	2.11052	74.3557	FALSE	0
2022-09-14	11:14:15	0.461845	2.05438	2.11052	80.3207	FALSE	0
2022-09-14	11:14:16	0.19299	0.858458	1.07193	75.2142	FALSE	0
2022-09-14	11:14:16	0.297824	1.32478	1.07193	81.6455	FALSE	0
2022-09-14	11:14:16	0.232125	1.03254	1.07193	76.2467	FALSE	0
2022-09-14	11:14:17	0.269936	1.20073	0.849685	82.8462	FALSE	0
2022-09-14	11:14:17	0.133295	0.592923	0.849685	76.8396	FALSE	0
2022-09-14	11:14:17	0.368715	1.64012	0.849685	84.4863	FALSE	0
2022-09-14	11:14:17	-0.00787507	-0.0350299	0.849685	76.8396	FALSE	0
2022-09-14	11:14:18	0.234924	1.04499	0.497848	85.5313	FALSE	0
2022-09-14	11:14:18	0.00347355	0.015451	0.497848	76.8551	FALSE	0
2022-09-14	11:14:18	0.224949	1.00062	0.497848	86.5319	FALSE	0
2022-09-14	11:14:18	-0.0156613	-0.0696646	0.497848	76.8551	FALSE	0
2022-09-14	11:14:19	-0.0708267	-0.315051	0.451838	86.5319	FALSE	0
2022-09-14	11:14:19	0.0551783	0.245444	0.451838	77.1005	FALSE	0
2022-09-14	11:14:19	0.108206	0.481322	0.451838	87.0133	FALSE	0
2022-09-14	11:14:19	0.313753	1.39564	0.451838	78.4962	FALSE	0
2022-09-14	11:14:20	0.135331	0.601979	0.46774	87.6152	FALSE	0
2022-09-14	11:14:20	0.0766032	0.340746	0.46774	78.8369	FALSE	0
2022-09-14	11:14:20	0.103524	0.460495	0.46774	88.0757	FALSE	0
2022-09-14	11:14:21	-0.0631422	-0.280869	-0.611711	78.8369	FALSE	0
2022-09-14	11:14:21	-0.192506	-0.856305	-0.611711	88.0757	FALSE	0
2022-09-14	11:14:21	-0.0834475	-0.371191	-0.611711	78.8369	FALSE	0
2022-09-14	11:14:21	-0.210979	-0.938477	-0.611711	88.0757	FALSE	0
2022-09-14	11:14:22	0.0235244	0.104641	0.0238261	78.9416	FALSE	0
2022-09-14	11:14:22	0.251361	1.1181	0.0238261	89.1938	FALSE	0
2022-09-14	11:14:22	0.354211	1.5756	0.0238261	80.5172	FALSE	0
2022-09-14	11:14:22	-0.607671	-2.70304	0.0238261	89.1938	FALSE	0
2022-09-14	11:14:23	-0.639936	-2.84656	0.542501	80.5172	FALSE	0
2022-09-14	11:14:23	-0.0244145	-0.108601	0.542501	89.1938	FALSE	0
2022-09-14	11:14:23	0.350293	1.55817	0.542501	82.0753	FALSE	0
2022-09-14	11:14:23	0.801896	3.56699	0.542501	92.7608	FALSE	0
2022-09-14	11:14:24	1.05742	4.70362	4.74685	86.779	FALSE	0
2022-09-14	11:14:24	0.868817	3.86467	4.74685	96.6255	FALSE	0
2022-09-14	11:14:24	1.27518	5.67226	4.74685	92.4512	FALSE	0
2022-09-14	11:14:25	0.835839	3.71798	2.52059	100.343	FALSE	0
2022-09-14	11:14:25	0.624898	2.77967	2.52059	95.2309	FALSE	0
2022-09-14	11:14:25	0.381132	1.69535	2.52059	102.039	FALSE	0
2022-09-14	11:14:25	0.424746	1.88936	2.52059	97.1202	FALSE	0
2022-09-14	11:14:26	0.92159	4.09942	0.603563	106.138	FALSE	0
2022-09-14	11:14:26	0.0719722	0.320147	0.603563	97.4404	FALSE	0
2022-09-14	11:14:26	-0.170267	-0.757382	0.603563	106.138	FALSE	0
2022-09-14	11:14:26	-0.280547	-1.24793	0.603563	97.4404	FALSE	0
2022-09-14	11:14:27	-0.239427	-1.06502	1.25461	106.138	FALSE	0
2022-09-14	11:14:27	-0.0944399	-0.420088	1.25461	97.4404	FALSE	0
2022-09-14	11:14:27	0.724796	3.22404	1.25461	109.362	FALSE	0
2022-09-14	11:14:27	0.737265	3.2795	1.25461	100.72	FALSE	0
2022-09-14	11:14:28	0.73874	3.28606	3.24871	112.648	FALSE	0
2022-09-14	11:14:28	0.726374	3.23106	3.24871	103.951	FALSE	0
2022-09-14	11:14:28	0.725916	3.22902	3.24871	115.877	FALSE	0
2022-09-14	11:14:29	0.730547	3.24962	3.243	107.201	FALSE	0
2022-09-14	11:14:29	0.734008	3.26501	3.243	119.142	FALSE	0
2022-09-14	11:14:29	0.726425	3.23128	3.243	110.432	FALSE	0
2022-09-14	11:14:29	0.725254	3.22607	3.243	122.368	FALSE	0
2022-09-14	11:14:30	0.71757	3.19189	3.22947	113.624	FALSE	0
2022-09-14	11:14:30	0.730343	3.24871	3.22947	125.617	FALSE	0
2022-09-14	11:14:30	0.727799	3.2374	3.22947	116.861	FALSE	0
2022-09-14	11:14:30	0.728359	3.23989	3.22947	128.857	FALSE	0
2022-09-14	11:14:31	0.727596	3.23649	3.21425	120.098	FALSE	0
2022-09-14	11:14:31	0.717214	3.19031	3.21425	132.047	FALSE	0
2022-09-14	11:14:31	0.724491	3.22268	3.21425	123.32	FALSE	0
2022-09-14	11:14:31	0.721081	3.20751	3.21425	135.255	FALSE	0
2022-09-14	11:14:32	0.711463	3.16473	3.19589	126.485	FALSE	0
2022-09-14	11:14:32	0.722812	3.21521	3.19589	138.47	FALSE	0
2022-09-14	11:14:32	0.721132	3.20774	3.19589	129.693	FALSE	0
2022-09-14	11:14:33	0.723677	3.21906	3.21827	141.689	FALSE	0
2022-09-14	11:14:33	0.72388	3.21996	3.21827	132.913	FALSE	0
2022-09-14	11:14:33	0.724288	3.22178	3.21827	144.911	FALSE	0
2022-09-14	11:14:33	0.72215	3.21227	3.21827	136.125	FALSE	0
2022-09-14	11:14:34	0.725	3.22494	3.228	148.136	FALSE	0
2022-09-14	11:14:34	0.724898	3.22449	3.228	139.35	FALSE	0
2022-09-14	11:14:34	0.7307	3.2503	3.228	151.386	FALSE	0
2022-09-14	11:14:34	0.72215	3.21227	3.228	142.562	FALSE	0
2022-09-14	11:14:35	0.734313	3.26637	3.24209	154.653	FALSE	0
2022-09-14	11:14:35	0.729173	3.24351	3.24209	145.805	FALSE	0
2022-09-14	11:14:35	0.732379	3.25777	3.24209	157.91	FALSE	0
2022-09-14	11:14:35	0.719555	3.20072	3.24209	149.006	FALSE	0
2022-09-14	11:14:36	0.728155	3.23898	3.22932	161.149	FALSE	0
2022-09-14	11:14:36	0.726374	3.23106	3.22932	152.237	FALSE	0
2022-09-14	11:14:36	0.723422	3.21793	3.22932	164.367	FALSE	0
2022-09-14	11:14:37	0.729936	3.2469	3.23858	155.484	FALSE	0
2022-09-14	11:14:37	0.727341	3.23536	3.23858	167.603	FALSE	0
2022-09-14	11:14:37	0.727188	3.23468	3.23858	158.719	FALSE	0
2022-09-14	11:14:37	0.727799	3.2374	3.23858	170.84	FALSE	0
2022-09-14	11:14:38	0.729936	3.2469	3.23134	161.966	FALSE	0
2022-09-14	11:14:38	0.724847	3.22426	3.23134	174.064	FALSE	0
2022-09-14	11:14:38	0.729936	3.2469	3.23134	165.212	FALSE	0
2022-09-14	11:14:38	0.72103	3.20729	3.23134	177.272	FALSE	0
2022-09-14	11:14:39	0.720114	3.20321	3.23496	168.416	FALSE	0
2022-09-14	11:14:39	0.730649	3.25007	3.23496	180.522	FALSE	0
2022-09-14	11:14:39	0.726476	3.23151	3.23496	171.647	FALSE	0
2022-09-14	11:14:39	0.731768	3.25505	3.23496	183.777	FALSE	0
2022-09-14	11:14:40	0.729173	3.24351	3.24343	174.891	FALSE	0
2022-09-14	11:14:40	0.732175	3.25686	3.24343	187.034	FALSE	0
2022-09-14	11:14:40	0.72612	3.22993	3.24343	178.121	FALSE	0
2022-09-14	11:14:41	0.731463	3.25369	3.23841	190.287	FALSE	0
2022-09-14	11:14:41	0.725305	3.2263	3.23841	181.347	FALSE	0
2022-09-14	11:14:41	0.728613	3.24102	3.23841	193.528	FALSE	0
2022-09-14	11:14:41	0.72673	3.23264	3.23841	184.58	FALSE	0
2022-09-14	11:14:42	0.733601	3.2632	3.24379	196.791	FALSE	0
2022-09-14	11:14:42	0.728003	3.2383	3.24379	187.818	FALSE	0
2022-09-14	11:14:42	0.726069	3.2297	3.24379	200.021	FALSE	0
2022-09-14	11:14:42	0.729275	3.24396	3.24379	191.062	FALSE	0
2022-09-14	11:14:43	0.727239	3.2349	3.23191	203.256	FALSE	0
2022-09-14	11:14:43	0.725356	3.22653	3.23191	194.288	FALSE	0
2022-09-14	11:14:43	0.731514	3.25392	3.23191	206.51	FALSE	0
2022-09-14	11:14:43	0.72215	3.21227	3.23191	197.501	FALSE	0
2022-09-14	11:14:44	0.729936	3.2469	3.23	209.757	FALSE	0
2022-09-14	11:14:44	0.724135	3.2211	3.23	200.722	FALSE	0
2022-09-14	11:14:44	0.724338	3.222	3.23	212.979	FALSE	0
2022-09-14	11:14:45	0.729173	3.24351	3.24051	203.965	FALSE	0
2022-09-14	11:14:45	0.728817	3.24192	3.24051	216.221	FALSE	0
2022-09-14	11:14:45	0.725051	3.22517	3.24051	207.19	FALSE	0
2022-09-14	11:14:45	0.730954	3.25143	3.24051	219.472	FALSE	0
2022-09-14	11:14:46	0.726425	3.23128	3.22766	210.422	FALSE	0
2022-09-14	11:14:46	0.729224	3.24373	3.22766	222.716	FALSE	0
2022-09-14	11:14:46	0.719148	3.19891	3.22766	213.621	FALSE	0
2022-09-14	11:14:46	0.727646	3.23671	3.22766	225.953	FALSE	0
2022-09-14	11:14:47	0.725254	3.22607	3.23558	216.847	FALSE	0
2022-09-14	11:14:47	0.72444	3.22245	3.23558	229.175	FALSE	0
2022-09-14	11:14:47	0.727697	3.23694	3.23558	220.084	FALSE	0
2022-09-14	11:14:47	0.732175	3.25686	3.23558	232.432	FALSE	0
2022-09-14	11:14:48	0.724898	3.22449	3.23355	223.308	FALSE	0
2022-09-14	11:14:48	0.731921	3.25573	3.23355	235.688	FALSE	0
2022-09-14	11:14:48	0.723982	3.22042	3.23355	226.528	FALSE	0
2022-09-14	11:14:49	0.726425	3.23128	3.23536	238.919	FALSE	0
2022-09-14	11:14:49	0.732226	3.25709	3.23536	229.786	FALSE	0
2022-09-14	11:14:49	0.724949	3.22472	3.23536	242.144	FALSE	0
2022-09-14	11:14:49	0.725763	3.22834	3.23536	233.014	FALSE	0
2022-09-14	11:14:50	0.731158	3.25234	3.24617	245.396	FALSE	0
2022-09-14	11:14:50	0.726323	3.23083	3.24617	236.245	FALSE	0
2022-09-14	11:14:50	0.729428	3.24464	3.24617	248.641	FALSE	0
2022-09-14	11:14:50	0.732175	3.25686	3.24617	239.502	FALSE	0
2022-09-14	11:14:51	0.724847	3.22426	3.22523	251.865	FALSE	0
2022-09-14	11:14:51	0.724542	3.22291	3.22523	242.725	FALSE	0
2022-09-14	11:14:51	0.728461	3.24034	3.22523	255.105	FALSE	0
2022-09-14	11:14:51	0.722404	3.2134	3.22523	245.938	FALSE	0
2022-09-14	11:14:52	0.725662	3.22789	3.23445	258.333	FALSE	0
2022-09-14	11:14:52	0.725407	3.22676	3.23445	249.165	FALSE	0
2022-09-14	11:14:52	0.730343	3.24871	3.23445	261.582	FALSE	0
2022-09-14	11:14:53	0.733346	3.26207	3.23089	252.427	FALSE	0
2022-09-14	11:14:53	0.728766	3.2417	3.23089	264.824	FALSE	0
2022-09-14	11:14:53	0.722456	3.21363	3.23089	255.64	FALSE	0
2022-09-14	11:14:53	0.720776	3.20616	3.23089	268.03	FALSE	0
2022-09-14	11:14:54	0.72841	3.24011	3.23044	258.88	FALSE	0
2022-09-14	11:14:54	0.724084	3.22087	3.23044	271.251	FALSE	0
2022-09-14	11:14:54	0.724593	3.22313	3.23044	262.104	FALSE	0
2022-09-14	11:14:54	0.72785	3.23762	3.23044	274.488	FALSE	0
2022-09-14	11:14:55	0.718435	3.19574	3.21763	265.299	FALSE	0
2022-09-14	11:14:55	0.723677	3.21906	3.21763	277.707	FALSE	0
2022-09-14	11:14:55	0.727952	3.23808	3.21763	268.537	FALSE	0
2022-09-14	11:14:56	0.727239	3.2349	3.23604	280.942	FALSE	0
2022-09-14	11:14:56	0.723931	3.22019	3.23604	271.758	FALSE	0
2022-09-14	11:14:56	0.728003	3.2383	3.23604	284.181	FALSE	0
2022-09-14	11:14:56	0.730801	3.25075	3.23604	275.008	FALSE	0
2022-09-14	11:14:57	0.734364	3.2666	3.22806	287.447	FALSE	0
2022-09-14	11:14:57	0.723168	3.2168	3.22806	278.225	FALSE	0
2022-09-14	11:14:57	0.726221	3.23038	3.22806	290.677	FALSE	0
2022-09-14	11:14:57	0.719046	3.19846	3.22806	281.424	FALSE	0
2022-09-14	11:14:58	0.729529	3.24509	3.2306	293.923	FALSE	0
2022-09-14	11:14:58	0.716756	3.18827	3.2306	284.612	FALSE	0
2022-09-14	11:14:58	0.726374	3.23106	3.2306	297.154	FALSE	0
2022-09-14	11:14:58	0.73243	3.258	3.2306	287.87	FALSE	0
2022-09-14	11:14:59	0.721387	3.20887	3.21244	300.362	FALSE	0
2022-09-14	11:14:59	0.721997	3.21159	3.21244	291.081	FALSE	0
2022-09-14	11:14:59	0.725458	3.22698	3.21244	303.589	FALSE	0
2022-09-14	11:14:59	0.719911	3.20231	3.21244	294.284	FALSE	0
2022-09-14	11:15:00	0.724237	3.22155	3.2248	306.811	FALSE	0
2022-09-14	11:15:00	0.725153	3.22563	3.2248	297.509	FALSE	0
2022-09-14	11:15:00	0.725509	3.22721	3.2248	310.038	FALSE	0
2022-09-14	11:15:01	0.721946	3.21136	3.23219	300.721	FALSE	0
2022-09-14	11:15:01	0.727596	3.23649	3.23219	313.275	FALSE	0
2022-09-14	11:15:01	0.728766	3.2417	3.23219	303.962	FALSE	0
2022-09-14	11:15:01	0.728206	3.23921	3.23219	316.514	FALSE	0
2022-09-14	11:15:02	0.724796	3.22404	3.22506	307.187	FALSE	0
2022-09-14	11:15:02	0.724746	3.22382	3.22506	319.738	FALSE	0
2022-09-14	11:15:02	0.725458	3.22698	3.22506	310.414	FALSE	0
2022-09-14	11:15:02	0.725102	3.2254	3.22506	322.963	FALSE	0
2022-09-14	11:15:03	0.724644	3.22336	3.22042	313.637	FALSE	0
2022-09-14	11:15:03	0.724898	3.22449	3.22042	326.188	FALSE	0
2022-09-14	11:15:03	0.722404	3.2134	3.22042	316.85	FALSE	0
2022-09-14	11:15:04	0.73131	3.25301	3.237	329.441	FALSE	0
2022-09-14	11:15:04	0.728664	3.24124	3.237	320.092	FALSE	0
2022-09-14	11:15:04	0.723626	3.21883	3.237	332.659	FALSE	0
2022-09-14	11:15:04	0.727239	3.2349	3.237	323.326	FALSE	0
2022-09-14	11:15:05	0.723422	3.21793	3.22132	335.877	FALSE	0
2022-09-14	11:15:05	0.728766	3.2417	3.22132	326.568	FALSE	0
2022-09-14	11:15:05	0.720013	3.20276	3.22132	339.08	FALSE	0
2022-09-14	11:15:05	0.724542	3.22291	3.22132	329.791	FALSE	0
2022-09-14	11:15:06	0.724644	3.22336	3.23474	342.304	FALSE	0
2022-09-14	11:15:06	0.732074	3.25641	3.23474	333.047	FALSE	0
2022-09-14	11:15:06	0.725407	3.22676	3.23474	345.53	FALSE	0
2022-09-14	11:15:06	0.726679	3.23241	3.23474	336.28	FALSE	0
2022-09-14	11:15:07	0.721591	3.20978	3.2211	348.74	FALSE	0
2022-09-14	11:15:07	0.722965	3.21589	3.2211	339.496	FALSE	0
2022-09-14	11:15:07	0.72785	3.23762	3.2211	351.978	FALSE	0
2022-09-14	11:15:08	0.729631	3.24554	3.22081	342.741	FALSE	0
2022-09-14	11:15:08	0.720827	3.20638	3.22081	355.184	FALSE	0
2022-09-14	11:15:08	0.724389	3.22223	3.22081	345.964	FALSE	0
2022-09-14	11:15:08	0.721437	3.2091	3.22081	358.393	FALSE	0
2022-09-14	11:15:09	0.287952	1.28087	1.65687	347.244	FALSE	0
2022-09-14	11:15:09	0.387036	1.72161	1.65687	360.115	FALSE	0
2022-09-14	11:15:09	0.30617	1.36191	1.65687	348.606	FALSE	0
2022-09-14	11:15:09	0.508766	2.26309	1.65687	362.378	FALSE	0
2022-09-14	11:15:10	0.730954	3.25143	3.24068	351.858	FALSE	0
2022-09-14	11:15:10	0.728359	3.23989	3.24068	365.618	FALSE	0
2022-09-14	11:15:10	0.730649	3.25007	3.24068	355.108	FALSE	0
2022-09-14	11:15:10	0.724186	3.22132	3.24068	368.839	FALSE	0
2022-09-14	11:15:11	0.727137	3.23445	3.238	358.342	FALSE	0
2022-09-14	11:15:11	0.722099	3.21204	3.238	372.051	FALSE	0
2022-09-14	11:15:11	0.734568	3.26751	3.238	361.61	FALSE	0
2022-09-14	11:15:12	0.731107	3.25211	3.24656	375.303	FALSE	0
2022-09-14	11:15:12	0.724847	3.22426	3.24656	364.834	FALSE	0
2022-09-14	11:15:12	0.727392	3.23559	3.24656	378.539	FALSE	0
2022-09-14	11:15:12	0.736094	3.27429	3.24656	368.108	FALSE	0
2022-09-14	11:15:13	0.730547	3.24962	3.23779	381.788	FALSE	0
2022-09-14	11:15:13	0.729478	3.24486	3.23779	371.353	FALSE	0
2022-09-14	11:15:13	0.725458	3.22698	3.23779	385.015	FALSE	0
2022-09-14	11:15:13	0.726069	3.2297	3.23779	374.583	FALSE	0
2022-09-14	11:15:14	0.73528	3.27067	3.25386	388.286	FALSE	0
2022-09-14	11:15:14	0.730954	3.25143	3.25386	377.834	FALSE	0
2022-09-14	11:15:14	0.727392	3.23559	3.25386	391.522	FALSE	0
2022-09-14	11:15:14	0.732379	3.25777	3.25386	381.092	FALSE	0
2022-09-14	11:15:15	0.726476	3.23151	3.23136	394.753	FALSE	0
2022-09-14	11:15:15	0.724084	3.22087	3.23136	384.313	FALSE	0
2022-09-14	11:15:15	0.728766	3.2417	3.23136	397.995	FALSE	0
2022-09-14	11:15:16	0.726629	3.23219	3.22585	387.545	FALSE	0
2022-09-14	11:15:16	0.721946	3.21136	3.22585	401.206	FALSE	0
2022-09-14	11:15:16	0.723473	3.21815	3.22585	390.763	FALSE	0
2022-09-14	11:15:16	0.728766	3.2417	3.22585	404.448	FALSE	0
2022-09-14	11:15:17	0.730242	3.24826	3.25015	394.012	FALSE	0
2022-09-14	11:15:17	0.72897	3.2426	3.25015	407.691	FALSE	0
2022-09-14	11:15:17	0.732786	3.25958	3.25015	397.271	FALSE	0
2022-09-14	11:15:18	0.734618	3.26773	3.24532	410.958	FALSE	0
2022-09-14	11:15:18	0.728817	3.24192	3.24532	400.513	FALSE	0
2022-09-14	11:15:18	0.726425	3.23128	3.24532	414.19	FALSE	0
2022-09-14	11:15:18	0.73187	3.2555	3.24532	403.769	FALSE	0
2022-09-14	11:15:18	0.72617	3.23015	3.24532	417.42	FALSE	0
2022-09-14	11:15:19	0.727239	3.2349	3.22276	407.003	FALSE	0
2022-09-14	11:15:19	0.720064	3.20299	3.22276	420.623	FALSE	0
2022-09-14	11:15:19	0.726221	3.23038	3.22276	410.234	FALSE	0
2022-09-14	11:15:20	0.725662	3.22789	3.23875	423.851	FALSE	0
2022-09-14	11:15:20	0.728715	3.24147	3.23875	413.475	FALSE	0
2022-09-14	11:15:20	0.732583	3.25868	3.23875	427.109	FALSE	0
2022-09-14	11:15:20	0.725458	3.22698	3.23875	416.702	FALSE	0
2022-09-14	11:15:21	0.732939	3.26026	3.24928	430.37	FALSE	0
2022-09-14	11:15:21	0.731921	3.25573	3.24928	419.958	FALSE	0
2022-09-14	11:15:21	0.730191	3.24804	3.24928	433.618	FALSE	0
2022-09-14	11:15:21	0.726832	3.23309	3.24928	423.191	FALSE	0
2022-09-14	11:15:22	0.724186	3.22132	3.23196	436.839	FALSE	0
2022-09-14	11:15:22	0.726476	3.23151	3.23196	426.423	FALSE	0
2022-09-14	11:15:22	0.728104	3.23875	3.23196	440.078	FALSE	0
2022-09-14	11:15:22	0.727545	3.23627	3.23196	429.659	FALSE	0
2022-09-14	11:15:23	0.725763	3.22834	3.22012	443.306	FALSE	0
2022-09-14	11:15:23	0.721336	3.20865	3.22012	432.868	FALSE	0
2022-09-14	11:15:23	0.724644	3.22336	3.22012	446.529	FALSE	0
2022-09-14	11:15:24	0.728613	3.24102	3.2409	436.109	FALSE	0
2022-09-14	11:15:24	0.728766	3.2417	3.2409	449.771	FALSE	0
2022-09-14	11:15:24	0.726527	3.23174	3.2409	439.34	FALSE	0
2022-09-14	11:15:24	0.730445	3.24917	3.2409	453.02	FALSE	0
2022-09-14	11:15:25	0.728512	3.24057	3.23819	442.581	FALSE	0
2022-09-14	11:15:25	0.728817	3.24192	3.23819	456.262	FALSE	0
2022-09-14	11:15:25	0.729478	3.24486	3.23819	445.826	FALSE	0
2022-09-14	11:15:25	0.725102	3.2254	3.23819	459.488	FALSE	0
2022-09-14	11:15:26	0.72897	3.2426	3.24306	449.068	FALSE	0
2022-09-14	11:15:26	0.73243	3.258	3.24306	462.746	FALSE	0
2022-09-14	11:15:26	0.730191	3.24804	3.24306	452.316	FALSE	0
2022-09-14	11:15:26	0.724695	3.22359	3.24306	465.969	FALSE	0
2022-09-14	11:15:27	0.733957	3.26479	3.24532	455.581	FALSE	0
2022-09-14	11:15:27	0.731616	3.25437	3.24532	469.223	FALSE	0
2022-09-14	11:15:27	0.723168	3.2168	3.24532	458.798	FALSE	0
2022-09-14	11:15:28	0.732125	3.25664	3.23383	472.48	FALSE	0
2022-09-14	11:15:28	0.731158	3.25234	3.23383	462.05	FALSE	0
2022-09-14	11:15:28	0.720064	3.20299	3.23383	475.683	FALSE	0
2022-09-14	11:15:28	0.724644	3.22336	3.23383	465.274	FALSE	0
2022-09-14	11:15:29	0.738995	3.2872	3.24577	478.97	FALSE	0
2022-09-14	11:15:29	0.726679	3.23241	3.24577	468.506	FALSE	0
2022-09-14	11:15:29	0.725458	3.22698	3.24577	482.197	FALSE	0
2022-09-14	11:15:29	0.727596	3.23649	3.24577	471.743	FALSE	0
2022-09-14	11:15:30	0.732175	3.25686	3.24956	485.454	FALSE	0
2022-09-14	11:15:30	0.733448	3.26252	3.24956	475.005	FALSE	0
2022-09-14	11:15:30	0.730903	3.2512	3.24956	488.705	FALSE	0
2022-09-14	11:15:30	0.725611	3.22766	3.24956	478.233	FALSE	0
2022-09-14	11:15:31	0.723931	3.22019	3.22623	491.926	FALSE	0
2022-09-14	11:15:31	0.727443	3.23581	3.22623	481.469	FALSE	0
2022-09-14	11:15:31	0.724491	3.22268	3.22623	495.148	FALSE	0
2022-09-14	11:15:32	0.730038	3.24736	3.24702	484.716	FALSE	0
2022-09-14	11:15:32	0.726221	3.23038	3.24702	498.379	FALSE	0
2022-09-14	11:15:32	0.7307	3.2503	3.24702	487.966	FALSE	0
2022-09-14	11:15:32	0.732888	3.26003	3.24702	501.639	FALSE	0
2022-09-14	11:15:33	0.728562	3.24079	3.23457	491.207	FALSE	0
2022-09-14	11:15:33	0.72444	3.22245	3.23457	504.861	FALSE	0
2022-09-14	11:15:33	0.732735	3.25935	3.23457	494.466	FALSE	0
2022-09-14	11:15:33	0.722914	3.21567	3.23457	508.077	FALSE	0
2022-09-14	11:15:34	0.726781	3.23287	3.23938	497.699	FALSE	0
2022-09-14	11:15:34	0.73299	3.26049	3.23938	511.337	FALSE	0
2022-09-14	11:15:34	0.725916	3.22902	3.23938	500.928	FALSE	0
2022-09-14	11:15:34	0.72729	3.23513	3.23938	514.572	FALSE	0
2022-09-14	11:15:35	0.733906	3.26456	3.23996	504.193	FALSE	0
2022-09-14	11:15:35	0.726425	3.23128	3.23996	517.804	FALSE	0
2022-09-14	11:15:35	0.724796	3.22404	3.23996	507.417	FALSE	0
2022-09-14	11:15:36	0.729377	3.24441	3.23626	521.048	FALSE	0
2022-09-14	11:15:36	0.732532	3.25845	3.23626	510.675	FALSE	0
2022-09-14	11:15:36	0.726018	3.22947	3.23626	524.278	FALSE	0
2022-09-14	11:15:36	0.722252	3.21272	3.23626	513.888	FALSE	0
2022-09-14	11:15:37	0.730343	3.24871	3.23343	527.526	FALSE	0
2022-09-14	11:15:37	0.726679	3.23241	3.23343	517.12	FALSE	0
2022-09-14	11:15:37	0.728206	3.23921	3.23343	530.765	FALSE	0
2022-09-14	11:15:37	0.722404	3.2134	3.23343	520.334	FALSE	0
2022-09-14	11:15:38	0.729631	3.24554	3.22913	534.011	FALSE	0
2022-09-14	11:15:38	0.724389	3.22223	3.22913	523.556	FALSE	0
2022-09-14	11:15:38	0.723422	3.21793	3.22913	537.229	FALSE	0
2022-09-14	11:15:38	0.726323	3.23083	3.22913	526.787	FALSE	0
2022-09-14	11:15:39	0.732226	3.25709	3.23898	540.486	FALSE	0
2022-09-14	11:15:39	0.729071	3.24305	3.23898	530.03	FALSE	0
2022-09-14	11:15:39	0.723168	3.2168	3.23898	543.703	FALSE	0
2022-09-14	11:15:40	0.724644	3.22336	3.22896	533.253	FALSE	0
2022-09-14	11:15:40	0.725356	3.22653	3.22896	546.929	FALSE	0
2022-09-14	11:15:40	0.730038	3.24736	3.22896	536.501	FALSE	0
2022-09-14	11:15:40	0.723575	3.21861	3.22896	550.148	FALSE	0
2022-09-14	11:15:41	0.718435	3.19574	3.21663	539.696	FALSE	0
2022-09-14	11:15:41	0.729936	3.2469	3.21663	553.395	FALSE	0
2022-09-14	11:15:41	0.723321	3.21748	3.21663	542.914	FALSE	0
2022-09-14	11:15:41	0.720827	3.20638	3.21663	556.601	FALSE	0
2022-09-14	11:15:42	0.724593	3.22313	3.23326	546.137	FALSE	0
2022-09-14	11:15:42	0.726221	3.23038	3.23326	559.832	FALSE	0
2022-09-14	11:15:42	0.730394	3.24894	3.23326	549.386	FALSE	0
2022-09-14	11:15:42	0.726272	3.2306	3.23326	563.062	FALSE	0
2022-09-14	11:15:43	0.735789	3.27294	3.2506	552.659	FALSE	0
2022-09-14	11:15:43	0.721437	3.2091	3.2506	566.271	FALSE	0
2022-09-14	11:15:43	0.735076	3.26977	3.2506	555.929	FALSE	0
2022-09-14	11:15:44	0.732583	3.25868	3.23587	569.53	FALSE	0
2022-09-14	11:15:44	0.724491	3.22268	3.23587	559.151	FALSE	0
2022-09-14	11:15:44	0.72388	3.21996	3.23587	572.75	FALSE	0
2022-09-14	11:15:44	0.728868	3.24215	3.23587	562.393	FALSE	0
2022-09-14	11:15:45	0.728766	3.2417	3.22976	575.992	FALSE	0
2022-09-14	11:15:45	0.726934	3.23355	3.22976	565.627	FALSE	0
2022-09-14	11:15:45	0.723677	3.21906	3.22976	579.211	FALSE	0
2022-09-14	11:15:45	0.724949	3.22472	3.22976	568.852	FALSE	0
2022-09-14	11:15:46	0.731107	3.25211	3.23626	582.463	FALSE	0
2022-09-14	11:15:46	0.730903	3.2512	3.23626	572.103	FALSE	0
2022-09-14	11:15:46	0.720623	3.20548	3.23626	585.668	FALSE	0
2022-09-14	11:15:47	0.736145	3.27452	3.24922	575.377	FALSE	0
2022-09-14	11:15:47	0.73299	3.26049	3.24922	588.929	FALSE	0
2022-09-14	11:15:47	0.727036	3.234	3.24922	578.611	FALSE	0
2022-09-14	11:15:47	0.725662	3.22789	3.24922	592.157	FALSE	0
2022-09-14	11:15:48	0.718842	3.19755	3.23507	581.809	FALSE	0
2022-09-14	11:15:48	0.727443	3.23581	3.23507	595.392	FALSE	0
2022-09-14	11:15:48	0.729987	3.24713	3.23507	585.056	FALSE	0
2022-09-14	11:15:48	0.732837	3.25981	3.23507	598.652	FALSE	0
2022-09-14	11:15:49	0.734618	3.26773	3.24481	588.324	FALSE	0
2022-09-14	11:15:49	0.722456	3.21363	3.24481	601.866	FALSE	0
2022-09-14	11:15:49	0.72897	3.2426	3.24481	591.566	FALSE	0
2022-09-14	11:15:49	0.731819	3.25528	3.24481	605.121	FALSE	0
2022-09-14	11:15:50	0.724237	3.22155	3.23023	594.788	FALSE	0
2022-09-14	11:15:50	0.722456	3.21363	3.23023	608.335	FALSE	0
2022-09-14	11:15:50	0.73187	3.2555	3.23023	598.044	FALSE	0
2022-09-14	11:15:51	0.719351	3.19982	3.22019	611.535	FALSE	0
2022-09-14	11:15:51	0.717366	3.19099	3.22019	601.234	FALSE	0
2022-09-14	11:15:51	0.733142	3.26116	3.22019	614.796	FALSE	0
2022-09-14	11:15:51	0.725865	3.22879	3.22019	604.463	FALSE	0
2022-09-14	11:15:52	0.731158	3.25234	3.24837	618.048	FALSE	0
2022-09-14	11:15:52	0.728155	3.23898	3.24837	607.702	FALSE	0
2022-09-14	11:15:52	0.733092	3.26094	3.24837	621.309	FALSE	0
2022-09-14	11:15:52	0.728664	3.24124	3.24837	610.944	FALSE	0
2022-09-14	11:15:53	0.731717	3.25482	3.23971	624.564	FALSE	0
2022-09-14	11:15:53	0.723575	3.21861	3.23971	614.162	FALSE	0
2022-09-14	11:15:53	0.726221	3.23038	3.23971	627.794	FALSE	0
2022-09-14	11:15:53	0.731768	3.25505	3.23971	617.417	FALSE	0
2022-09-14	11:15:54	0.72958	3.24532	3.23	631.04	FALSE	0
2022-09-14	11:15:54	0.72388	3.21996	3.23	620.637	FALSE	0
2022-09-14	11:15:54	0.724949	3.22472	3.23	634.264	FALSE	0
2022-09-14	11:15:55	0.728664	3.24124	3.2482	623.878	FALSE	0
2022-09-14	11:15:55	0.731463	3.25369	3.2482	637.518	FALSE	0
2022-09-14	11:15:55	0.737214	3.27928	3.2482	627.158	FALSE	0
2022-09-14	11:15:55	0.723575	3.21861	3.2482	640.737	FALSE	0
2022-09-14	11:15:56	0.726832	3.23309	3.24147	630.391	FALSE	0
2022-09-14	11:15:56	0.731361	3.25324	3.24147	643.99	FALSE	0
2022-09-14	11:15:56	0.737366	3.27995	3.24147	633.671	FALSE	0
2022-09-14	11:15:56	0.7193	3.19959	3.24147	647.189	FALSE	0
2022-09-14	11:15:57	0.732583	3.25868	3.24305	636.929	FALSE	0
2022-09-14	11:15:57	0.725814	3.22857	3.24305	650.418	FALSE	0
2022-09-14	11:15:57	0.723219	3.21702	3.24305	640.146	FALSE	0
2022-09-14	11:15:57	0.734669	3.26795	3.24305	653.686	FALSE	0
2022-09-14	11:15:58	0.733295	3.26184	3.23302	643.408	FALSE	0
2022-09-14	11:15:58	0.71813	3.19439	3.23302	656.88	FALSE	0
2022-09-14	11:15:58	0.72902	3.24283	3.23302	646.651	FALSE	0
2022-09-14	11:15:59	0.725051	3.22517	3.23276	660.106	FALSE	0
2022-09-14	11:15:59	0.725204	3.22585	3.23276	649.877	FALSE	0
2022-09-14	11:15:59	0.729682	3.24577	3.23276	663.351	FALSE	0
2022-09-14	11:15:59	0.727087	3.23423	3.23276	653.111	FALSE	0
2022-09-14	11:16:00	0.72841	3.24011	3.24792	666.591	FALSE	0
2022-09-14	11:16:00	0.736959	3.27814	3.24792	656.389	FALSE	0
2022-09-14	11:16:00	0.72673	3.23264	3.24792	669.824	FALSE	0
2022-09-14	11:16:00	0.728562	3.24079	3.24792	659.63	FALSE	0
2022-09-14	11:16:01	0.725865	3.22879	3.243	673.053	FALSE	0
2022-09-14	11:16:01	0.725407	3.22676	3.243	662.857	FALSE	0
2022-09-14	11:16:01	0.730852	3.25098	3.243	676.304	FALSE	0
2022-09-14	11:16:01	0.734109	3.26546	3.243	666.122	FALSE	0
2022-09-14	11:16:02	0.723372	3.2177	3.21808	679.522	FALSE	0
2022-09-14	11:16:02	0.725916	3.22902	3.21808	669.351	FALSE	0
2022-09-14	11:16:02	0.721081	3.20751	3.21808	682.729	FALSE	0
2022-09-14	11:16:03	0.726476	3.23151	3.23643	672.583	FALSE	0
2022-09-14	11:16:03	0.729275	3.24396	3.23643	685.973	FALSE	0
2022-09-14	11:16:03	0.726985	3.23377	3.23643	675.817	FALSE	0
2022-09-14	11:16:03	0.727596	3.23649	3.23643	689.209	FALSE	0
2022-09-14	11:16:04	0.729886	3.24668	3.24577	679.063	FALSE	0
2022-09-14	11:16:04	0.72383	3.21974	3.24577	692.429	FALSE	0
2022-09-14	11:16:04	0.732532	3.25845	3.24577	682.322	FALSE	0
2022-09-14	11:16:04	0.732481	3.25822	3.24577	695.687	FALSE	0
2022-09-14	11:16:05	0.73014	3.24781	3.23451	685.57	FALSE	0
2022-09-14	11:16:05	0.729478	3.24486	3.23451	698.932	FALSE	0
2022-09-14	11:16:05	0.723372	3.2177	3.23451	688.787	FALSE	0
2022-09-14	11:16:05	0.725611	3.22766	3.23451	702.16	FALSE	0
2022-09-14	11:16:06	0.737214	3.27928	3.24419	692.067	FALSE	0
2022-09-14	11:16:06	0.725967	3.22925	3.24419	705.389	FALSE	0
2022-09-14	11:16:06	0.724796	3.22404	3.24419	695.291	FALSE	0
2022-09-14	11:16:07	0.721641	3.21	3.22019	708.599	FALSE	0
2022-09-14	11:16:07	0.723677	3.21906	3.22019	698.51	FALSE	0
2022-09-14	11:16:07	0.722099	3.21204	3.22019	711.811	FALSE	0
2022-09-14	11:16:07	0.728308	3.23966	3.22019	701.749	FALSE	0
2022-09-14	11:16:08	0.725305	3.2263	3.2327	715.038	FALSE	0
2022-09-14	11:16:08	0.731259	3.25279	3.2327	705.002	FALSE	0
2022-09-14	11:16:08	0.723728	3.21929	3.2327	718.257	FALSE	0
2022-09-14	11:16:08	0.726679	3.23241	3.2327	708.234	FALSE	0
2022-09-14	11:16:09	0.733651	3.26343	3.24215	721.52	FALSE	0
2022-09-14	11:16:09	0.728817	3.24192	3.24215	711.476	FALSE	0
2022-09-14	11:16:09	0.729478	3.24486	3.24215	724.765	FALSE	0
2022-09-14	11:16:09	0.723524	3.21838	3.24215	714.695	FALSE	0
2022-09-14	11:16:10	0.727392	3.23559	3.23845	728.001	FALSE	0
2022-09-14	11:16:10	0.73243	3.258	3.23845	717.953	FALSE	0
2022-09-14	11:16:10	0.724288	3.22178	3.23845	731.223	FALSE	0
2022-09-14	11:16:11	0.723422	3.21793	3.23972	721.171	FALSE	0
2022-09-14	11:16:11	0.72841	3.24011	3.23972	734.463	FALSE	0
2022-09-14	11:16:11	0.732328	3.25754	3.23972	724.428	FALSE	0
2022-09-14	11:16:11	0.729122	3.24328	3.23972	737.706	FALSE	0
2022-09-14	11:16:12	0.732735	3.25935	3.25443	727.688	FALSE	0
2022-09-14	11:16:12	0.735636	3.27226	3.25443	740.978	FALSE	0
2022-09-14	11:16:12	0.727545	3.23627	3.25443	730.924	FALSE	0
2022-09-14	11:16:12	0.730598	3.24985	3.25443	744.228	FALSE	0
2022-09-14	11:16:13	0.73757	3.28086	3.23683	734.205	FALSE	0
2022-09-14	11:16:13	0.729377	3.24441	3.23683	747.472	FALSE	0
2022-09-14	11:16:13	0.722404	3.2134	3.23683	737.418	FALSE	0
2022-09-14	11:16:13	0.721336	3.20865	3.23683	750.681	FALSE	0
2022-09-14	11:16:14	0.732735	3.25935	3.25641	740.677	FALSE	0
2022-09-14	11:16:14	0.727646	3.23671	3.25641	753.918	FALSE	0
2022-09-14	11:16:14	0.73584	3.27316	3.25641	743.951	FALSE	0
2022-09-14	11:16:15	0.730343	3.24871	3.26739	757.166	FALSE	0
2022-09-14	11:16:15	0.73701	3.27837	3.26739	747.229	FALSE	0
2022-09-14	11:16:15	0.735483	3.27158	3.26739	760.438	FALSE	0
2022-09-14	11:16:15	0.735331	3.2709	3.26739	750.5	FALSE	0
2022-09-14	11:16:16	0.729987	3.24713	3.24011	763.685	FALSE	0
2022-09-14	11:16:16	0.729224	3.24373	3.24011	753.744	FALSE	0
2022-09-14	11:16:16	0.730496	3.24939	3.24011	766.935	FALSE	0
2022-09-14	11:16:16	0.723931	3.22019	3.24011	756.964	FALSE	0
2022-09-14	11:16:17	0.733142	3.26116	3.24753	770.196	FALSE	0
2022-09-14	11:16:17	0.726832	3.23309	3.24753	760.197	FALSE	0
2022-09-14	11:16:17	0.733397	3.2623	3.24753	773.458	FALSE	0
2022-09-14	11:16:17	0.726934	3.23355	3.24753	763.43	FALSE	0
2022-09-14	11:16:18	0.722354	3.21318	3.2291	776.671	FALSE	0
2022-09-14	11:16:18	0.730445	3.24917	3.2291	766.68	FALSE	0
2022-09-14	11:16:18	0.725	3.22494	3.2291	779.896	FALSE	0
2022-09-14	11:16:19	0.726476	3.23151	3.24588	769.911	FALSE	0
2022-09-14	11:16:19	0.728613	3.24102	3.24588	783.137	FALSE	0
2022-09-14	11:16:19	0.732634	3.2589	3.24588	773.17	FALSE	0
2022-09-14	11:16:19	0.731107	3.25211	3.24588	786.389	FALSE	0
2022-09-14	11:16:20	0.733193	3.26139	3.24967	776.431	FALSE	0
2022-09-14	11:16:20	0.727646	3.23671	3.24967	789.626	FALSE	0
2022-09-14	11:16:20	0.72673	3.23264	3.24967	779.664	FALSE	0
2022-09-14	11:16:20	0.734669	3.26795	3.24967	792.894	FALSE	0
2022-09-14	11:16:21	0.729071	3.24305	3.2512	782.907	FALSE	0
2022-09-14	11:16:21	0.732888	3.26003	3.2512	796.154	FALSE	0
2022-09-14	11:16:21	0.725763	3.22834	3.2512	786.135	FALSE	0
2022-09-14	11:16:21	0.735891	3.27339	3.2512	799.427	FALSE	0
2022-09-14	11:16:22	0.731463	3.25369	3.26471	789.389	FALSE	0
2022-09-14	11:16:22	0.737621	3.28109	3.26471	802.708	FALSE	0
2022-09-14	11:16:22	0.732735	3.25935	3.26471	792.649	FALSE	0
2022-09-14	11:16:23	0.73014	3.24781	3.25709	805.956	FALSE	0
2022-09-14	11:16:23	0.737417	3.28018	3.25709	795.929	FALSE	0
2022-09-14	11:16:23	0.730343	3.24871	3.25709	809.205	FALSE	0
2022-09-14	11:16:23	0.731005	3.25166	3.25709	799.18	FALSE	0
2022-09-14	11:16:24	0.733041	3.26071	3.2512	812.466	FALSE	0
2022-09-14	11:16:24	0.731667	3.2546	3.2512	802.435	FALSE	0
2022-09-14	11:16:24	0.727697	3.23694	3.2512	815.703	FALSE	0
2022-09-14	11:16:24	0.731209	3.25256	3.2512	805.687	FALSE	0
2022-09-14	11:16:25	0.728054	3.23853	3.25805	818.941	FALSE	0
2022-09-14	11:16:25	0.733804	3.26411	3.25805	808.952	FALSE	0
2022-09-14	11:16:25	0.73187	3.2555	3.25805	822.197	FALSE	0
2022-09-14	11:16:25	0.736043	3.27407	3.25805	812.226	FALSE	0
2022-09-14	11:16:26	0.733041	3.26071	3.25724	825.457	FALSE	0
2022-09-14	11:16:26	0.733702	3.26365	3.25724	815.489	FALSE	0
2022-09-14	11:16:26	0.730038	3.24736	3.25724	828.705	FALSE	0
2022-09-14	11:16:27	0.725814	3.22857	3.24928	818.718	FALSE	0
2022-09-14	11:16:27	0.727697	3.23694	3.24928	831.942	FALSE	0
2022-09-14	11:16:27	0.731463	3.25369	3.24928	821.972	FALSE	0
2022-09-14	11:16:27	0.736908	3.27791	3.24928	835.22	FALSE	0
2022-09-14	11:16:28	0.730598	3.24985	3.23502	825.221	FALSE	0
2022-09-14	11:16:28	0.726272	3.2306	3.23502	838.45	FALSE	0
2022-09-14	11:16:28	0.728919	3.24238	3.23502	828.464	FALSE	0
2022-09-14	11:16:28	0.72327	3.21725	3.23502	841.667	FALSE	0
2022-09-14	11:16:29	0.730903	3.2512	3.24209	831.715	FALSE	0
2022-09-14	11:16:29	0.725407	3.22676	3.24209	844.894	FALSE	0
2022-09-14	11:16:29	0.728003	3.2383	3.24209	834.953	FALSE	0
2022-09-14	11:16:29	0.731107	3.25211	3.24209	848.146	FALSE	0
2022-09-14	11:16:30	0.730801	3.25075	3.25279	838.204	FALSE	0
2022-09-14	11:16:30	0.733092	3.26094	3.25279	851.407	FALSE	0
2022-09-14	11:16:30	0.729886	3.24668	3.25279	841.451	FALSE	0
2022-09-14	11:16:31	0.728155	3.23898	3.23462	854.646	FALSE	0
2022-09-14	11:16:31	0.722812	3.21521	3.23462	844.666	FALSE	0
2022-09-14	11:16:31	0.730496	3.24939	3.23462	857.896	FALSE	0
2022-09-14	11:16:31	0.727239	3.2349	3.23462	847.901	FALSE	0
2022-09-14	11:16:32	0.731768	3.25505	3.24209	861.151	FALSE	0
2022-09-14	11:16:32	0.730038	3.24736	3.24209	851.148	FALSE	0
2022-09-14	11:16:32	0.72841	3.24011	3.24209	864.391	FALSE	0
2022-09-14	11:16:32	0.725204	3.22585	3.24209	854.374	FALSE	0
2022-09-14	11:16:33	0.728766	3.2417	3.25019	867.632	FALSE	0
2022-09-14	11:16:33	0.730242	3.24826	3.25019	857.622	FALSE	0
2022-09-14	11:16:33	0.733142	3.26116	3.25019	870.894	FALSE	0
2022-09-14	11:16:33	0.730547	3.24962	3.25019	860.872	FALSE	0
2022-09-14	11:16:34	0.733041	3.26071	3.25807	874.154	FALSE	0
2022-09-14	11:16:34	0.72958	3.24532	3.25807	864.117	FALSE	0
2022-09-14	11:16:34	0.73472	3.26818	3.25807	877.423	FALSE	0
2022-09-14	11:16:35	0.733702	3.26365	3.26145	867.381	FALSE	0
2022-09-14	11:16:35	0.734211	3.26592	3.26145	880.688	FALSE	0
2022-09-14	11:16:35	0.732532	3.25845	3.26145	870.639	FALSE	0
2022-09-14	11:16:35	0.732379	3.25777	3.26145	883.946	FALSE	0
2022-09-14	11:16:36	0.734568	3.26751	3.25964	873.907	FALSE	0
2022-09-14	11:16:36	0.729733	3.246	3.25964	887.192	FALSE	0
2022-09-14	11:16:36	0.732532	3.25845	3.25964	877.165	FALSE	0
2022-09-14	11:16:36	0.734364	3.2666	3.25964	890.459	FALSE	0
2022-09-14	11:16:37	0.73416	3.26569	3.26071	880.431	FALSE	0
2022-09-14	11:16:37	0.733957	3.26479	3.26071	893.724	FALSE	0
2022-09-14	11:16:37	0.731005	3.25166	3.26071	883.683	FALSE	0
2022-09-14	11:16:38	0.728461	3.24034	3.24396	896.964	FALSE	0
2022-09-14	11:16:38	0.734313	3.26637	3.24396	886.949	FALSE	0
2022-09-14	11:16:38	0.727596	3.23649	3.24396	900.2	FALSE	0
2022-09-14	11:16:38	0.72673	3.23264	3.24396	890.182	FALSE	0
2022-09-14	11:16:39	0.732634	3.2589	3.24617	903.459	FALSE	0
2022-09-14	11:16:39	0.72612	3.22993	3.24617	893.412	FALSE	0
2022-09-14	11:16:39	0.732888	3.26003	3.24617	906.719	FALSE	0
2022-09-14	11:16:39	0.727443	3.23581	3.24617	896.647	FALSE	0
2022-09-14	11:16:40	0.740878	3.29557	3.25126	910.015	FALSE	0
2022-09-14	11:16:40	0.726578	3.23196	3.25126	899.879	FALSE	0
2022-09-14	11:16:40	0.729173	3.24351	3.25126	913.258	FALSE	0
2022-09-14	11:16:40	0.727036	3.234	3.25126	903.113	FALSE	0
2022-09-14	11:16:41	0.731514	3.25392	3.255	916.512	FALSE	0
2022-09-14	11:16:41	0.727952	3.23808	3.255	906.351	FALSE	0
2022-09-14	11:16:41	0.730293	3.24849	3.255	919.761	FALSE	0
2022-09-14	11:16:41	0.737265	3.2795	3.255	909.631	FALSE	0
2022-09-14	11:16:42	0.732226	3.25709	3.24856	923.018	FALSE	0
2022-09-14	11:16:42	0.730852	3.25098	3.24856	912.882	FALSE	0
2022-09-14	11:16:42	0.72785	3.23762	3.24856	926.256	FALSE	0
2022-09-14	11:16:43	0.73472	3.26818	3.24062	916.15	FALSE	0
2022-09-14	11:16:43	0.726476	3.23151	3.24062	929.487	FALSE	0
2022-09-14	11:16:43	0.720114	3.20321	3.24062	919.353	FALSE	0
2022-09-14	11:16:43	0.732786	3.25958	3.24062	932.747	FALSE	0
2022-09-14	11:16:44	0.731209	3.25256	3.26343	922.606	FALSE	0
2022-09-14	11:16:44	0.731768	3.25505	3.26343	936.002	FALSE	0
2022-09-14	11:16:44	0.736298	3.2752	3.26343	925.881	FALSE	0
2022-09-14	11:16:44	0.735331	3.2709	3.26343	939.273	FALSE	0
2022-09-14	11:16:45	0.734109	3.26546	3.25686	929.147	FALSE	0
2022-09-14	11:16:45	0.730445	3.24917	3.25686	942.522	FALSE	0
2022-09-14	11:16:45	0.733448	3.26252	3.25686	932.409	FALSE	0
2022-09-14	11:16:45	0.7307	3.2503	3.25686	945.772	FALSE	0
2022-09-14	11:16:46	0.728054	3.23853	3.23853	935.648	FALSE	0
2022-09-14	11:16:46	0.72958	3.24532	3.23853	949.017	FALSE	0
2022-09-14	11:16:46	0.726527	3.23174	3.23853	938.879	FALSE	0
2022-09-14	11:16:47	0.730343	3.24871	3.249	952.266	FALSE	0
2022-09-14	11:16:47	0.730801	3.25075	3.249	942.13	FALSE	0
2022-09-14	11:16:47	0.733448	3.26252	3.249	955.529	FALSE	0
2022-09-14	11:16:47	0.727036	3.234	3.249	945.364	FALSE	0
2022-09-14	11:16:48	0.735891	3.27339	3.252	958.802	FALSE	0
2022-09-14	11:16:48	0.733702	3.26365	3.252	948.628	FALSE	0
2022-09-14	11:16:48	0.728715	3.24147	3.252	962.044	FALSE	0
2022-09-14	11:16:48	0.726018	3.22947	3.252	951.857	FALSE	0
2022-09-14	11:16:49	0.730598	3.24985	3.24781	965.293	FALSE	0
2022-09-14	11:16:49	0.73472	3.26818	3.24781	955.125	FALSE	0
2022-09-14	11:16:49	0.724491	3.22268	3.24781	968.516	FALSE	0
2022-09-14	11:16:49	0.730751	3.25053	3.24781	958.376	FALSE	0
2022-09-14	11:16:50	0.720114	3.20321	3.24645	971.719	FALSE	0
2022-09-14	11:16:50	0.729682	3.24577	3.24645	961.622	FALSE	0
2022-09-14	11:16:50	0.739707	3.29036	3.24645	975.01	FALSE	0
2022-09-14	11:16:51	0.730293	3.24849	3.26445	964.87	FALSE	0
2022-09-14	11:16:51	0.732684	3.25912	3.26445	978.269	FALSE	0
2022-09-14	11:16:51	0.736654	3.27678	3.26445	968.147	FALSE	0
2022-09-14	11:16:51	0.735891	3.27339	3.26445	981.542	FALSE	0
2022-09-14	11:16:52	0.732735	3.25935	3.26869	971.406	FALSE	0
2022-09-14	11:16:52	0.738435	3.28471	3.26869	984.827	FALSE	0
2022-09-14	11:16:52	0.732125	3.25664	3.26869	974.663	FALSE	0
2022-09-14	11:16:52	0.736043	3.27407	3.26869	988.101	FALSE	0
2022-09-14	11:16:53	0.727952	3.23808	3.24605	977.901	FALSE	0
2022-09-14	11:16:53	0.727188	3.23468	3.24605	991.336	FALSE	0
2022-09-14	11:16:53	0.731259	3.25279	3.24605	981.154	FALSE	0
2022-09-14	11:16:53	0.732583	3.25868	3.24605	994.594	FALSE	0
2022-09-14	11:16:54	0.734109	3.26546	3.2629	984.419	FALSE	0
2022-09-14	11:16:54	0.735992	3.27384	3.2629	997.868	FALSE	0
2022-09-14	11:16:54	0.730496	3.24939	3.2629	987.669	FALSE	0
2022-09-14	11:16:55	0.729784	3.24623	3.26043	1001.11	FALSE	0
2022-09-14	11:16:55	0.730801	3.25075	3.26043	990.919	FALSE	0
2022-09-14	11:16:55	0.735941	3.27361	3.26043	1004.39	FALSE	0
2022-09-14	11:16:55	0.735382	3.27113	3.26043	994.191	FALSE	0
2022-09-14	11:16:56	0.73645	3.27588	3.25698	1007.66	FALSE	0
2022-09-14	11:16:56	0.735891	3.27339	3.25698	997.464	FALSE	0
2022-09-14	11:16:56	0.732125	3.25664	3.25698	1010.92	FALSE	0
2022-09-14	11:16:56	0.724338	3.222	3.25698	1000.69	FALSE	0
2022-09-14	11:16:57	0.726221	3.23038	3.24124	1014.15	FALSE	0
2022-09-14	11:16:57	0.727545	3.23627	3.24124	1003.92	FALSE	0
2022-09-14	11:16:57	0.731819	3.25528	3.24124	1017.41	FALSE	0
2022-09-14	11:16:57	0.729071	3.24305	3.24124	1007.17	FALSE	0
2022-09-14	11:16:58	0.733244	3.26162	3.2583	1020.67	FALSE	0
2022-09-14	11:16:58	0.731056	3.25188	3.2583	1010.42	FALSE	0
2022-09-14	11:16:58	0.733193	3.26139	3.2583	1023.93	FALSE	0
2022-09-14	11:16:59	0.73131	3.25301	3.26439	1013.67	FALSE	0
2022-09-14	11:16:59	0.728868	3.24215	3.26439	1027.17	FALSE	0
2022-09-14	11:16:59	0.741438	3.29806	3.26439	1016.97	FALSE	0
2022-09-14	11:16:59	0.733855	3.26433	3.26439	1030.44	FALSE	0
2022-09-14	11:17:00	0.730343	3.24871	3.25432	1020.22	FALSE	0
2022-09-14	11:17:00	0.735433	3.27135	3.25432	1033.71	FALSE	0
2022-09-14	11:17:00	0.735127	3.26999	3.25432	1023.49	FALSE	0
2022-09-14	11:17:00	0.725509	3.22721	3.25432	1036.93	FALSE	0
2022-09-14	11:17:01	0.72958	3.24532	3.25177	1026.73	FALSE	0
2022-09-14	11:17:01	0.732684	3.25912	3.25177	1040.19	FALSE	0
2022-09-14	11:17:01	0.727646	3.23671	3.25177	1029.97	FALSE	0
2022-09-14	11:17:01	0.734211	3.26592	3.25177	1043.46	FALSE	0
2022-09-14	11:17:02	0.733702	3.26365	3.26071	1033.23	FALSE	0
2022-09-14	11:17:02	0.733702	3.26365	3.26071	1046.72	FALSE	0
2022-09-14	11:17:02	0.731717	3.25482	3.26071	1036.49	FALSE	0
2022-09-14	11:17:03	0.733753	3.26388	3.26507	1049.99	FALSE	0
2022-09-14	11:17:03	0.734262	3.26614	3.26507	1039.75	FALSE	0
2022-09-14	11:17:03	0.73701	3.27837	3.26507	1053.27	FALSE	0
2022-09-14	11:17:03	0.731056	3.25188	3.26507	1043.01	FALSE	0
2022-09-14	11:17:04	0.728155	3.23898	3.26037	1056.5	FALSE	0
2022-09-14	11:17:04	0.735026	3.26954	3.26037	1046.28	FALSE	0
2022-09-14	11:17:04	0.735433	3.27135	3.26037	1059.78	FALSE	0
2022-09-14	11:17:04	0.733244	3.26162	3.26037	1049.54	FALSE	0
2022-09-14	11:17:05	0.736399	3.27565	3.26337	1063.05	FALSE	0
2022-09-14	11:17:05	0.729224	3.24373	3.26337	1052.78	FALSE	0
2022-09-14	11:17:05	0.736094	3.27429	3.26337	1066.33	FALSE	0
2022-09-14	11:17:05	0.732837	3.25981	3.26337	1056.04	FALSE	0
2022-09-14	11:17:06	0.737112	3.27882	3.25317	1069.6	FALSE	0
2022-09-14	11:17:06	0.729529	3.24509	3.25317	1059.29	FALSE	0
2022-09-14	11:17:06	0.727392	3.23559	3.25317	1072.84	FALSE	0
2022-09-14	11:17:07	0.732735	3.25935	3.25403	1062.54	FALSE	0
2022-09-14	11:17:07	0.733702	3.26365	3.25403	1076.1	FALSE	0
2022-09-14	11:17:07	0.725407	3.22676	3.25403	1065.77	FALSE	0
2022-09-14	11:17:07	0.734313	3.26637	3.25403	1079.37	FALSE	0
2022-09-14	11:17:08	0.732277	3.25731	3.25364	1069.03	FALSE	0
2022-09-14	11:17:08	0.733957	3.26479	3.25364	1082.63	FALSE	0
2022-09-14	11:17:08	0.729173	3.24351	3.25364	1072.27	FALSE	0
2022-09-14	11:17:08	0.730394	3.24894	3.25364	1085.88	FALSE	0
2022-09-14	11:17:09	0.734109	3.26546	3.25675	1075.54	FALSE	0
2022-09-14	11:17:09	0.73131	3.25301	3.25675	1089.14	FALSE	0
2022-09-14	11:17:09	0.729326	3.24419	3.25675	1078.78	FALSE	0
2022-09-14	11:17:09	0.733855	3.26433	3.25675	1092.4	FALSE	0
2022-09-14	11:17:10	0.727697	3.23694	3.24645	1082.02	FALSE	0
2022-09-14	11:17:10	0.729224	3.24373	3.24645	1095.64	FALSE	0
2022-09-14	11:17:10	0.732583	3.25868	3.24645	1085.28	FALSE	0
2022-09-14	11:17:11	0.729071	3.24305	3.25183	1098.89	FALSE	0
2022-09-14	11:17:11	0.725662	3.22789	3.25183	1088.51	FALSE	0
2022-09-14	11:17:11	0.736603	3.27656	3.25183	1102.16	FALSE	0
2022-09-14	11:17:11	0.732837	3.25981	3.25183	1091.77	FALSE	0
2022-09-14	11:17:12	0.734109	3.26546	3.25551	1105.43	FALSE	0
2022-09-14	11:17:12	0.732481	3.25822	3.25551	1095.02	FALSE	0
2022-09-14	11:17:12	0.730751	3.25053	3.25551	1108.68	FALSE	0
2022-09-14	11:17:12	0.73014	3.24781	3.25551	1098.27	FALSE	0
2022-09-14	11:17:13	0.734262	3.26614	3.26139	1111.95	FALSE	0
2022-09-14	11:17:13	0.736908	3.27791	3.26139	1101.55	FALSE	0
2022-09-14	11:17:13	0.730496	3.24939	3.26139	1115.2	FALSE	0
2022-09-14	11:17:13	0.731107	3.25211	3.26139	1104.8	FALSE	0
2022-09-14	11:17:14	0.727697	3.23694	3.25777	1118.43	FALSE	0
2022-09-14	11:17:14	0.730394	3.24894	3.25777	1108.05	FALSE	0
2022-09-14	11:17:14	0.739046	3.28742	3.25777	1121.72	FALSE	0
2022-09-14	11:17:15	0.73243	3.258	3.24322	1111.31	FALSE	0
2022-09-14	11:17:15	0.729478	3.24486	3.24322	1124.96	FALSE	0
2022-09-14	11:17:15	0.730191	3.24804	3.24322	1114.56	FALSE	0
2022-09-14	11:17:15	0.724338	3.222	3.24322	1128.19	FALSE	0
2022-09-14	11:17:16	0.727596	3.23649	3.25443	1117.79	FALSE	0
2022-09-14	11:17:16	0.736145	3.27452	3.25443	1131.46	FALSE	0
2022-09-14	11:17:16	0.732888	3.26003	3.25443	1121.05	FALSE	0
2022-09-14	11:17:16	0.729886	3.24668	3.25443	1134.71	FALSE	0
2022-09-14	11:17:17	0.733244	3.26162	3.25941	1124.31	FALSE	0
2022-09-14	11:17:17	0.734262	3.26614	3.25941	1137.97	FALSE	0
2022-09-14	11:17:17	0.73187	3.2555	3.25941	1127.57	FALSE	0
2022-09-14	11:17:17	0.731616	3.25437	3.25941	1141.23	FALSE	0
2022-09-14	11:17:18	0.729682	3.24577	3.25286	1130.82	FALSE	0
2022-09-14	11:17:18	0.732583	3.25868	3.25286	1144.49	FALSE	0
2022-09-14	11:17:18	0.731565	3.25415	3.25286	1134.07	FALSE	0
2022-09-14	11:17:19	0.735687	3.27248	3.25171	1147.76	FALSE	0
2022-09-14	11:17:19	0.727443	3.23581	3.25171	1137.31	FALSE	0
2022-09-14	11:17:19	0.7307	3.2503	3.25171	1151.01	FALSE	0
2022-09-14	11:17:19	0.730242	3.24826	3.25171	1140.55	FALSE	0
2022-09-14	11:17:20	0.726883	3.23332	3.25664	1154.24	FALSE	0
2022-09-14	11:17:20	0.737214	3.27928	3.25664	1143.83	FALSE	0
2022-09-14	11:17:20	0.724237	3.22155	3.25664	1157.47	FALSE	0
2022-09-14	11:17:20	0.740165	3.2924	3.25664	1147.13	FALSE	0
2022-09-14	11:17:21	0.728308	3.23966	3.24039	1160.7	FALSE	0
2022-09-14	11:17:21	0.724949	3.22472	3.24039	1150.35	FALSE	0
2022-09-14	11:17:21	0.728308	3.23966	3.24039	1163.94	FALSE	0
2022-09-14	11:17:21	0.732328	3.25754	3.24039	1153.61	FALSE	0
2022-09-14	11:17:22	0.73014	3.24781	3.24321	1167.19	FALSE	0
2022-09-14	11:17:22	0.732583	3.25868	3.24321	1156.87	FALSE	0
2022-09-14	11:17:22	0.724593	3.22313	3.24321	1170.42	FALSE	0
2022-09-14	11:17:23	0.73243	3.258	3.25268	1160.12	FALSE	0
2022-09-14	11:17:23	0.72958	3.24532	3.25268	1173.66	FALSE	0
2022-09-14	11:17:23	0.733193	3.26139	3.25268	1163.39	FALSE	0
2022-09-14	11:17:23	0.729733	3.246	3.25268	1176.91	FALSE	0
2022-09-14	11:17:24	0.730038	3.24736	3.26343	1166.63	FALSE	0
2022-09-14	11:17:24	0.734771	3.26841	3.26343	1180.18	FALSE	0
2022-09-14	11:17:24	0.735127	3.26999	3.26343	1169.9	FALSE	0
2022-09-14	11:17:24	0.734669	3.26795	3.26343	1183.44	FALSE	0
2022-09-14	11:17:25	0.734618	3.26773	3.24583	1173.17	FALSE	0
2022-09-14	11:17:25	0.727748	3.23717	3.24583	1186.68	FALSE	0
2022-09-14	11:17:25	0.727494	3.23604	3.24583	1176.41	FALSE	0
2022-09-14	11:17:25	0.728919	3.24238	3.24583	1189.92	FALSE	0
2022-09-14	11:17:26	0.726374	3.23106	3.24577	1179.64	FALSE	0
2022-09-14	11:17:26	0.732684	3.25912	3.24577	1193.18	FALSE	0
2022-09-14	11:17:26	0.729987	3.24713	3.24577	1182.89	FALSE	0
2022-09-14	11:17:27	0.725916	3.22902	3.25058	1196.41	FALSE	0
2022-09-14	11:17:27	0.730649	3.25007	3.25058	1186.14	FALSE	0
2022-09-14	11:17:27	0.733142	3.26116	3.25058	1199.67	FALSE	0
2022-09-14	11:17:27	0.733346	3.26207	3.25058	1189.4	FALSE	0
2022-09-14	11:17:28	0.734568	3.26751	3.26733	1202.94	FALSE	0
2022-09-14	11:17:28	0.737672	3.28131	3.26733	1192.68	FALSE	0
2022-09-14	11:17:28	0.731158	3.25234	3.26733	1206.19	FALSE	0
2022-09-14	11:17:28	0.73472	3.26818	3.26733	1195.95	FALSE	0
2022-09-14	11:17:29	0.729631	3.24554	3.25568	1209.44	FALSE	0
2022-09-14	11:17:29	0.7307	3.2503	3.25568	1199.2	FALSE	0
2022-09-14	11:17:29	0.732786	3.25958	3.25568	1212.7	FALSE	0
2022-09-14	11:17:29	0.734517	3.26728	3.25568	1202.46	FALSE	0
2022-09-14	11:17:30	0.734262	3.26614	3.25211	1215.96	FALSE	0
2022-09-14	11:17:30	0.726221	3.23038	3.25211	1205.69	FALSE	0
2022-09-14	11:17:30	0.732837	3.25981	3.25211	1219.22	FALSE	0
2022-09-14	11:17:31	0.734618	3.26773	3.25613	1208.96	FALSE	0
2022-09-14	11:17:31	0.727036	3.234	3.25613	1222.46	FALSE	0
2022-09-14	11:17:31	0.734262	3.26614	3.25613	1212.23	FALSE	0
2022-09-14	11:17:31	0.732125	3.25664	3.25613	1225.71	FALSE	0
2022-09-14	11:17:32	0.734262	3.26614	3.25907	1215.49	FALSE	0
2022-09-14	11:17:32	0.731514	3.25392	3.25907	1228.97	FALSE	0
2022-09-14	11:17:32	0.734873	3.26886	3.25907	1218.76	FALSE	0
2022-09-14	11:17:32	0.730038	3.24736	3.25907	1232.21	FALSE	0
2022-09-14	11:17:33	0.734313	3.26637	3.25341	1222.03	FALSE	0
2022-09-14	11:17:33	0.73243	3.258	3.25341	1235.47	FALSE	0
2022-09-14	11:17:33	0.731361	3.25324	3.25341	1225.28	FALSE	0
2022-09-14	11:17:33	0.727494	3.23604	3.25341	1238.71	FALSE	0
2022-09-14	11:17:34	0.730343	3.24871	3.26162	1228.53	FALSE	0
2022-09-14	11:17:34	0.730038	3.24736	3.26162	1241.96	FALSE	0
2022-09-14	11:17:34	0.739351	3.28878	3.26162	1231.82	FALSE	0
2022-09-14	11:17:35	0.736349	3.27543	3.26694	1245.23	FALSE	0
2022-09-14	11:17:35	0.726425	3.23128	3.26694	1235.05	FALSE	0
2022-09-14	11:17:35	0.743575	3.30757	3.26694	1248.54	FALSE	0
2022-09-14	11:17:35	0.731412	3.25347	3.26694	1238.31	FALSE	0
2022-09-14	11:17:36	0.736501	3.2761	3.25171	1251.82	FALSE	0
2022-09-14	11:17:36	0.727799	3.2374	3.25171	1241.54	FALSE	0
2022-09-14	11:17:36	0.729936	3.2469	3.25171	1255.06	FALSE	0
2022-09-14	11:17:36	0.729835	3.24645	3.25171	1244.79	FALSE	0
2022-09-14	11:17:37	0.733855	3.26433	5.05216	1258.33	FALSE	0
2022-09-14	11:17:37	0.730852	3.25098	5.05216	1248.04	FALSE	0
2022-09-14	11:17:37	0.760318	3.38205	5.05216	1261.71	FALSE	0
2022-09-14	11:17:37	2.31808	10.3113	5.05216	1258.35	FALSE	0
2022-09-14	11:17:38	3.1482	14.0038	4.2824	1275.71	1	1
2022-09-14	11:17:38	1.21635	5.41057	4.2824	1263.76	FALSE	1
2022-09-14	11:17:38	-1.47637	-6.56719	4.2824	1275.71	FALSE	1
2022-09-14	11:17:39	-1.92441	-8.56016	-2.75227	1263.76	FALSE	1
2022-09-14	11:17:39	-0.950521	-4.22811	-2.75227	1275.71	FALSE	1
2022-09-14	11:17:39	0.0245422	0.109169	-2.75227	1263.87	FALSE	1
2022-09-14	11:17:39	0.375433	1.67	-2.75227	1277.38	FALSE	1
2022-09-14	11:17:40	1.99284	8.86455	3.68912	1272.74	FALSE	1
2022-09-14	11:17:40	2.31599	10.302	3.68912	1287.68	FALSE	1
2022-09-14	11:17:40	0.809631	3.6014	3.68912	1276.34	FALSE	1
2022-09-14	11:17:40	-1.80106	-8.01148	3.68912	1287.68	FALSE	1
2022-09-14	11:17:41	-0.248638	-1.10599	-0.884547	1276.34	FALSE	1
2022-09-14	11:17:41	-1.34065	-5.96348	-0.884547	1287.68	FALSE	1
2022-09-14	11:17:41	0.249784	1.11109	-0.884547	1277.45	FALSE	1
2022-09-14	11:17:41	0.544084	2.42019	-0.884547	1290.1	FALSE	1
2022-09-14	11:17:42	0.387188	1.72229	-2.98413	1279.17	FALSE	1
2022-09-14	11:17:42	-1.82625	-8.12353	-2.98413	1290.1	FALSE	1
2022-09-14	11:17:42	-0.573524	-2.55115	-2.98413	1279.17	FALSE	1
2022-09-14	11:17:43	2.78256	12.3774	-2.14787	1302.48	FALSE	1
2022-09-14	11:17:43	-0.741717	-3.29931	-2.14787	1279.17	FALSE	1
2022-09-14	11:17:43	-1.92136	-8.54659	-2.14787	1302.48	FALSE	1
2022-09-14	11:17:43	-2.05093	-9.12295	-2.14787	1279.17	FALSE	1
2022-09-14	11:17:44	-2.22849	-9.91277	-3.34894	1302.48	FALSE	1
2022-09-14	11:17:44	-0.586094	-2.60706	-3.34894	1279.17	FALSE	1
2022-09-14	11:17:44	0.526425	2.34164	-3.34894	1304.82	FALSE	1
2022-09-14	11:17:44	-0.723345	-3.21758	-3.34894	1279.17	FALSE	1
2022-09-14	11:17:45	-1.05113	-4.67564	-3.3993	1304.82	FALSE	1
2022-09-14	11:17:45	-1.22248	-5.43784	-3.3993	1279.17	FALSE	1
2022-09-14	11:17:45	-0.549656	-2.44498	-3.3993	1304.82	FALSE	1
2022-09-14	11:17:45	-0.233524	-1.03876	-3.3993	1279.17	FALSE	1
2022-09-14	11:17:46	-0.449656	-2.00016	-2.27558	1304.82	FALSE	1
2022-09-14	11:17:46	-0.513575	-2.28448	-2.27558	1279.17	FALSE	1
2022-09-14	11:17:46	-0.571488	-2.54209	-2.27558	1304.82	FALSE	1
2022-09-14	11:17:47	-0.637442	-2.83547	-3.03366	1279.17	FALSE	1
2022-09-14	11:17:47	-0.664109	-2.95409	-3.03366	1304.82	FALSE	1
2022-09-14	11:17:47	-0.699681	-3.11232	-3.03366	1279.17	FALSE	1
2022-09-14	11:17:47	-0.726755	-3.23275	-3.03366	1304.82	FALSE	1
2022-09-14	11:17:48	-0.81734	-3.63569	-3.67084	1279.17	FALSE	1
2022-09-14	11:17:48	-0.791386	-3.52024	-3.67084	1304.82	FALSE	1
2022-09-14	11:17:48	-0.854592	-3.8014	-3.67084	1279.17	FALSE	1
2022-09-14	11:17:48	-0.837646	-3.72602	-3.67084	1304.82	FALSE	1
2022-09-14	11:17:49	-1.01719	-4.52466	-4.98363	1279.17	FALSE	1
2022-09-14	11:17:49	-1.17963	-5.24723	-4.98363	1304.82	FALSE	1
2022-09-14	11:17:49	-1.15159	-5.1225	-4.98363	1279.17	FALSE	1
2022-09-14	11:17:49	-1.13307	-5.04012	-4.98363	1304.82	FALSE	1
2022-09-14	11:17:50	-1.25978	-5.60375	-5.40809	1279.17	FALSE	1
2022-09-14	11:17:50	-1.15464	-5.13607	-5.40809	1304.82	FALSE	1
2022-09-14	11:17:50	-1.23296	-5.48445	-5.40809	1279.17	FALSE	1
2022-09-14	11:17:51	-1.07347	-4.77501	-5.68107	1304.82	FALSE	1
2022-09-14	11:17:51	-1.43821	-6.39745	-5.68107	1279.17	FALSE	1
2022-09-14	11:17:51	-1.23164	-5.47858	-5.68107	1304.82	FALSE	1
2022-09-14	11:17:51	-1.36533	-6.07326	-5.68107	1279.17	FALSE	1
2022-09-14	11:17:52	-1.26904	-5.64494	-6.13302	1304.82	FALSE	1
2022-09-14	11:17:52	-1.30849	-5.82043	-6.13302	1279.17	FALSE	1
2022-09-14	11:17:52	-1.43729	-6.39335	-6.13302	1304.82	FALSE	1
2022-09-14	11:17:52	-1.50024	-6.67337	-6.13302	1279.17	FALSE	1
2022-09-14	11:17:53	-1.46838	-6.53165	-10.1222	1304.82	FALSE	1
2022-09-14	11:17:53	-2.53251	-11.2651	-10.1222	1279.17	FALSE	1
2022-09-14	11:17:53	-2.52411	-11.2277	-10.1222	1304.82	FALSE	1
2022-09-14	11:17:53	-2.57729	-11.4643	-10.1222	1279.17	FALSE	1
2022-09-14	11:17:54	-2.59719	-11.5528	-11.968	1304.82	FALSE	1
2022-09-14	11:17:54	-2.75378	-12.2494	-11.968	1279.17	FALSE	1
2022-09-14	11:17:54	-2.7206	-12.1018	-11.968	1304.82	FALSE	1
2022-09-14	11:17:55	-2.78441	-12.3856	-12.6712	1279.17	FALSE	1
2022-09-14	11:17:55	-2.80029	-12.4562	-12.6712	1304.82	FALSE	1
2022-09-14	11:17:55	-2.89505	-12.8778	-12.6712	1279.17	FALSE	1
2022-09-14	11:17:55	-2.91469	-12.9651	-12.6712	1304.82	FALSE	1
2022-09-14	11:17:56	-2.98309	-13.2694	-13.3231	1279.17	FALSE	1
2022-09-14	11:17:56	-2.95902	-13.1623	-13.3231	1304.82	FALSE	1
2022-09-14	11:17:56	-3.03301	-13.4914	-13.3231	1279.17	FALSE	1
2022-09-14	11:17:56	-3.00558	-13.3694	-13.3231	1304.82	FALSE	1
2022-09-14	11:17:57	-3.02894	-13.4733	-13.6409	1279.17	FALSE	1
2022-09-14	11:17:57	-3.04538	-13.5465	-13.6409	1304.82	FALSE	1
2022-09-14	11:17:57	-3.09383	-13.762	-13.6409	1279.17	FALSE	1
2022-09-14	11:17:57	-3.09831	-13.7819	-13.6409	1304.82	FALSE	1
2022-09-14	11:17:58	-3.16726	-14.0886	-14.4196	1279.17	FALSE	1
2022-09-14	11:17:58	-3.21057	-14.2813	-14.4196	1304.82	FALSE	1
2022-09-14	11:17:58	-3.34721	-14.8891	-14.4196	1279.17	FALSE	1
2022-09-14	11:17:59	-3.41576	-15.194	-15.4173	1304.82	FALSE	1
2022-09-14	11:17:59	-3.46421	-15.4095	-15.4173	1279.17	FALSE	1
2022-09-14	11:17:59	-3.55612	-15.8183	-15.4173	1304.82	FALSE	1
2022-09-14	11:17:59	-3.42777	-15.2474	-15.4173	1279.17	FALSE	1
2022-09-14	11:18:00	-3.55245	-15.802	-15.9494	1304.82	FALSE	1
2022-09-14	11:18:00	-3.48238	-15.4903	-15.9494	1279.17	FALSE	1
2022-09-14	11:18:00	-3.641	-16.1959	-15.9494	1304.82	FALSE	1
2022-09-14	11:18:00	-3.6665	-16.3093	-15.9494	1279.17	FALSE	1
2022-09-14	11:18:01	-3.60828	-16.0504	-16.2312	1304.82	FALSE	1
2022-09-14	11:18:01	-3.67072	-16.3281	-16.2312	1279.17	FALSE	1
2022-09-14	11:18:01	-3.57235	-15.8905	-16.2312	1304.82	FALSE	1
2022-09-14	11:18:01	-3.74441	-16.6559	-16.2312	1279.17	FALSE	1
2022-09-14	11:18:02	-3.7351	-16.6145	-17.0932	1304.82	FALSE	1
2022-09-14	11:18:02	-3.86971	-17.2132	-17.0932	1279.17	FALSE	1
2022-09-14	11:18:02	-3.92334	-17.4518	-17.0932	1304.82	FALSE	1
2022-09-14	11:18:03	-3.89958	-17.3461	-17.2189	1279.17	FALSE	1
2022-09-14	11:18:03	-3.82965	-17.035	-17.2189	1304.82	FALSE	1
2022-09-14	11:18:03	-3.86284	-17.1827	-17.2189	1279.17	FALSE	1
2022-09-14	11:18:03	-3.89184	-17.3117	-17.2189	1304.82	FALSE	1
2022-09-14	11:18:04	-3.96009	-17.6153	-18.0998	1279.17	FALSE	1
2022-09-14	11:18:04	-3.99943	-17.7903	-18.0998	1304.82	FALSE	1
2022-09-14	11:18:04	-4.11907	-18.3224	-18.0998	1279.17	FALSE	1
2022-09-14	11:18:04	-4.19749	-18.6713	-18.0998	1304.82	FALSE	1
2022-09-14	11:18:05	-4.201	-18.6869	-18.6687	1279.17	FALSE	1
2022-09-14	11:18:05	-4.21047	-18.729	-18.6687	1304.82	FALSE	1
2022-09-14	11:18:05	-4.1382	-18.4075	-18.6687	1279.17	FALSE	1
2022-09-14	11:18:05	-4.238	-18.8515	-18.6687	1304.82	FALSE	1
2022-09-14	11:18:06	-4.21444	-18.7467	-18.8651	1279.17	FALSE	1
2022-09-14	11:18:06	-4.26518	-18.9724	-18.8651	1304.82	FALSE	1
2022-09-14	11:18:06	-4.24355	-18.8762	-18.8651	1279.17	FALSE	1
2022-09-14	11:18:07	-4.25571	-18.9302	-19.0436	1304.82	FALSE	1
2022-09-14	11:18:07	-4.25337	-18.9198	-19.0436	1279.17	FALSE	1
2022-09-14	11:18:07	-4.31927	-19.213	-19.0436	1304.82	FALSE	1
2022-09-14	11:18:07	-4.29642	-19.1113	-19.0436	1279.17	FALSE	1
2022-09-14	11:18:08	-4.26065	-18.9522	-19.2342	1304.82	FALSE	1
2022-09-14	11:18:08	-4.30044	-19.1292	-19.2342	1279.17	FALSE	1
2022-09-14	11:18:08	-4.33459	-19.2811	-19.2342	1304.82	FALSE	1
2022-09-14	11:18:08	-4.40049	-19.5743	-19.2342	1279.17	FALSE	1
2022-09-14	11:18:09	-4.33942	-19.3026	-19.8456	1304.82	FALSE	1
2022-09-14	11:18:09	-4.46166	-19.8464	-19.8456	1279.17	FALSE	1
2022-09-14	11:18:09	-4.48339	-19.943	-19.8456	1304.82	FALSE	1
2022-09-14	11:18:09	-4.56146	-20.2903	-19.8456	1279.17	FALSE	1
2022-09-14	11:18:10	-4.62365	-20.5669	-19.8472	1304.82	FALSE	1
2022-09-14	11:18:10	-4.44894	-19.7898	-19.8472	1279.17	FALSE	1
2022-09-14	11:18:10	-4.31296	-19.1849	-19.8472	1304.82	FALSE	1
2022-09-14	11:18:11	-4.2754	-19.0178	-18.6653	1279.17	FALSE	1
2022-09-14	11:18:11	-4.2095	-18.7247	-18.6653	1304.82	FALSE	1
2022-09-14	11:18:11	-4.18019	-18.5943	-18.6653	1279.17	FALSE	1
2022-09-14	11:18:11	-4.11953	-18.3245	-18.6653	1304.82	FALSE	1
2022-09-14	11:18:12	-2.64752	-11.7767	-11.732	1279.17	FALSE	1
2022-09-14	11:18:12	-2.5036	-11.1365	-11.732	1304.82	FALSE	1
2022-09-14	11:18:12	-2.76299	-12.2903	-11.732	1279.17	FALSE	1
2022-09-14	11:18:12	-2.63581	-11.7246	-11.732	1304.82	FALSE	1
2022-09-14	11:18:13	-3.26217	-14.5108	-1.20095	1279.17	FALSE	1
2022-09-14	11:18:13	0.713244	3.17265	-1.20095	1308	FALSE	1
2022-09-14	11:18:13	0.733244	3.26162	-1.20095	1282.43	FALSE	1
2022-09-14	11:18:13	0.735738	3.27271	-1.20095	1311.27	FALSE	1
2022-09-14	11:18:14	0.734924	3.26909	2.73048	1285.7	FALSE	1
2022-09-14	11:18:14	0.683168	3.03887	2.73048	1314.31	FALSE	1
2022-09-14	11:18:14	0.423423	1.88347	2.73048	1287.58	FALSE	1
2022-09-14	11:18:15	0.457875	2.03672	0.865815	1316.34	FALSE	1
2022-09-14	11:18:15	0.293804	1.3069	0.865815	1288.89	FALSE	1
2022-09-14	11:18:15	0.112125	0.498754	0.865815	1316.84	FALSE	1
2022-09-14	11:18:15	-0.0852287	-0.379114	0.865815	1288.89	FALSE	1
2022-09-14	11:18:16	-0.107671	-0.478942	-0.00814743	1316.84	FALSE	1
2022-09-14	11:18:16	-0.137137	-0.610013	-0.00814743	1288.89	FALSE	1
2022-09-14	11:18:16	0.167952	0.747084	-0.00814743	1317.59	FALSE	1
2022-09-14	11:18:16	0.0695295	0.309281	-0.00814743	1289.2	FALSE	1
2022-09-14	11:18:17	0.304644	1.35512	1.076	1318.95	FALSE	1
2022-09-14	11:18:17	0.184847	0.822236	1.076	1290.02	FALSE	1
2022-09-14	11:18:17	0.296349	1.31822	1.076	1320.26	FALSE	1
2022-09-14	11:18:17	0.181743	0.808429	1.076	1290.83	FALSE	1
2022-09-14	11:18:18	0.303321	1.34923	1.25529	1321.61	FALSE	1
2022-09-14	11:18:18	0.234924	1.04499	1.25529	1291.88	FALSE	1
2022-09-14	11:18:18	0.308359	1.37164	1.25529	1322.98	FALSE	1
2022-09-14	11:18:19	0.294109	1.30826	2.3185	1293.18	FALSE	1
2022-09-14	11:18:19	0.33472	1.4889	2.3185	1324.47	FALSE	1
2022-09-14	11:18:19	0.799402	3.5559	2.3185	1296.74	FALSE	1
2022-09-14	11:18:19	0.656654	2.92093	2.3185	1327.39	FALSE	1
2022-09-14	11:18:20	1.22139	5.43299	-0.968807	1302.17	FALSE	1
2022-09-14	11:18:20	1.73177	7.70326	-0.968807	1335.1	FALSE	1
2022-09-14	11:18:20	-1.68838	-7.51025	-0.968807	1302.17	FALSE	1
2022-09-14	11:18:20	-2.13597	-9.50122	-0.968807	1335.1	FALSE	1
2022-09-14	11:18:21	-2.34731	-10.4413	-11.1612	1302.17	FALSE	1
2022-09-14	11:18:21	-2.47352	-11.0027	-11.1612	1335.1	FALSE	1
2022-09-14	11:18:21	-2.54899	-11.3384	-11.1612	1302.17	FALSE	1
2022-09-14	11:18:21	-2.66675	-11.8622	-11.1612	1335.1	FALSE	1
2022-09-14	11:18:22	-2.71724	-12.0868	-12.3161	1302.17	FALSE	1
2022-09-14	11:18:22	-2.78339	-12.3811	-12.3161	1335.1	FALSE	1
2022-09-14	11:18:22	-2.80569	-12.4803	-12.3161	1302.17	FALSE	1
2022-09-14	11:18:23	-2.77805	-12.3573	-11.3721	1335.1	FALSE	1
2022-09-14	11:18:23	-2.36258	-10.5092	-11.3721	1302.17	FALSE	1
2022-09-14	11:18:23	-2.47541	-11.0111	-11.3721	1335.1	FALSE	1
2022-09-14	11:18:23	-2.61021	-11.6107	-11.3721	1302.17	FALSE	1
2022-09-14	11:18:24	-2.69306	-11.9793	-11.9344	1335.1	FALSE	1
2022-09-14	11:18:24	-2.67057	-11.8792	-11.9344	1302.17	FALSE	1
2022-09-14	11:18:24	-2.6835	-11.9367	-11.9344	1335.1	FALSE	1
2022-09-14	11:18:24	-2.68477	-11.9424	-11.9344	1302.17	FALSE	1
2022-09-14	11:18:25	-0.17042	-0.758062	-1.12761	1335.1	FALSE	1
2022-09-14	11:18:25	0.724389	3.22223	-1.12761	1305.4	FALSE	1
2022-09-14	11:18:25	0.702812	3.12625	-1.12761	1338.22	FALSE	1
2022-09-14	11:18:25	-2.27077	-10.1008	-1.12761	1305.4	FALSE	1
2022-09-14	11:18:26	-2.68874	-11.9601	-13.5674	1338.22	FALSE	1
2022-09-14	11:18:26	-3.19337	-14.2047	-13.5674	1305.4	FALSE	1
2022-09-14	11:18:26	-3.26818	-14.5375	-13.5674	1338.22	FALSE	1
2022-09-14	11:18:27	0.530954	2.36179	-10.8396	1307.76	FALSE	1
2022-09-14	11:18:27	-2.40116	-10.6808	-10.8396	1338.22	FALSE	1
2022-09-14	11:18:27	-4.00283	-17.8054	-10.8396	1307.76	FALSE	1
2022-09-14	11:18:27	-3.87439	-17.2341	-10.8396	1338.22	FALSE	1
2022-09-14	11:18:28	-3.92248	-17.448	-16.4838	1307.76	FALSE	1
2022-09-14	11:18:28	-4.18202	-18.6025	-16.4838	1338.22	FALSE	1
2022-09-14	11:18:28	-3.83179	-17.0446	-16.4838	1307.76	FALSE	1
2022-09-14	11:18:28	-2.8866	-12.8402	-16.4838	1338.22	FALSE	1
2022-09-14	11:18:29	-1.55363	-6.91086	-8.66877	1307.76	FALSE	1
2022-09-14	11:18:29	-1.08721	-4.83613	-8.66877	1338.22	FALSE	1
2022-09-14	11:18:29	-1.67057	-7.43103	-8.66877	1307.76	FALSE	1
2022-09-14	11:18:29	-3.4839	-15.4971	-8.66877	1338.22	FALSE	1
2022-09-14	11:18:30	-4.85973	-21.6171	-21.6529	1307.76	FALSE	1
2022-09-14	11:18:30	-4.87205	-21.6719	-21.6529	1338.22	FALSE	1
2022-09-14	11:18:30	-4.87159	-21.6698	-21.6529	1307.76	FALSE	1
2022-09-14	11:18:31	-4.73403	-21.0579	-9.49809	1338.22	FALSE	1
2022-09-14	11:18:31	-4.56538	-20.3077	-9.49809	1307.76	FALSE	1
2022-09-14	11:18:31	0.393092	1.74855	-9.49809	1339.97	FALSE	1
2022-09-14	11:18:31	0.365255	1.62473	-9.49809	1309.38	FALSE	1
2022-09-14	11:18:32	0.367748	1.63582	1.02195	1341.61	FALSE	1
2022-09-14	11:18:32	0.16556	0.736444	1.02195	1310.12	FALSE	1
2022-09-14	11:18:32	0.156603	0.696601	1.02195	1342.3	FALSE	1
2022-09-14	11:18:32	0.229071	1.01895	1.02195	1311.14	FALSE	1
2022-09-14	11:18:33	0.0896312	0.398698	0.709959	1342.7	FALSE	1
2022-09-14	11:18:33	0.142761	0.635029	0.709959	1311.77	FALSE	1
2022-09-14	11:18:33	0.161336	0.717655	0.709959	1343.42	FALSE	1
2022-09-14	11:18:33	0.244695	1.08845	0.709959	1312.86	FALSE	1
2022-09-14	11:18:34	0.184237	0.819523	0.544632	1344.24	FALSE	1
2022-09-14	11:18:34	0.0659671	0.293435	0.544632	1313.15	FALSE	1
2022-09-14	11:18:34	0.117112	0.520938	0.544632	1344.76	FALSE	1
2022-09-14	11:18:35	0.000572752	0.00254772	1.89773	1313.16	FALSE	1
2022-09-14	11:18:35	0.355942	1.5833	1.89773	1346.34	FALSE	1
2022-09-14	11:18:35	0.392583	1.74629	1.89773	1314.9	FALSE	1
2022-09-14	11:18:35	0.957417	4.25878	1.89773	1350.6	FALSE	1
2022-09-14	11:18:36	1.16841	5.19732	1.75523	1320.1	FALSE	1
2022-09-14	11:18:36	1.30739	5.81553	1.75523	1356.42	FALSE	1
2022-09-14	11:18:36	-0.43215	-1.92229	1.75523	1320.1	FALSE	1
2022-09-14	11:18:36	-0.465279	-2.06965	1.75523	1356.42	FALSE	1
2022-09-14	11:18:37	-0.694032	-3.08719	-3.62703	1320.1	FALSE	1
2022-09-14	11:18:37	-0.759121	-3.37672	-3.62703	1356.42	FALSE	1
2022-09-14	11:18:37	-0.888027	-3.95012	-3.62703	1320.1	FALSE	1
2022-09-14	11:18:37	-0.920394	-4.0941	-3.62703	1356.42	FALSE	1
2022-09-14	11:18:38	-0.745636	-3.31674	-4.0006	1320.1	FALSE	1
2022-09-14	11:18:38	-0.988078	-4.39517	-4.0006	1356.42	FALSE	1
2022-09-14	11:18:38	-0.964414	-4.28991	-4.0006	1320.1	FALSE	1
2022-09-14	11:18:39	-1.02207	-4.54637	-4.25963	1356.42	FALSE	1
2022-09-14	11:18:39	-1.04538	-4.65006	-4.25963	1320.1	FALSE	1
2022-09-14	11:18:39	-0.833371	-3.707	-4.25963	1356.42	FALSE	1
2022-09-14	11:18:39	-0.929605	-4.13507	-4.25963	1320.1	FALSE	1
2022-09-14	11:18:40	-0.981208	-4.36461	-5.2427	1356.42	FALSE	1
2022-09-14	11:18:40	-1.12462	-5.00253	-5.2427	1320.1	FALSE	1
2022-09-14	11:18:40	-1.23932	-5.51274	-5.2427	1356.42	FALSE	1
2022-09-14	11:18:40	-1.3693	-6.09092	-5.2427	1320.1	FALSE	1
2022-09-14	11:18:41	-1.39261	-6.19461	-0.170799	1356.42	FALSE	1
2022-09-14	11:18:41	0.0812343	0.361346	-0.170799	1320.46	FALSE	1
2022-09-14	11:18:41	0.428766	1.90724	-0.170799	1358.33	FALSE	1
2022-09-14	11:18:41	0.72902	3.24283	-0.170799	1323.71	FALSE	1
2022-09-14	11:18:42	0.729733	3.246	3.24758	1361.57	FALSE	1
2022-09-14	11:18:42	0.725458	3.22698	3.24758	1326.93	FALSE	1
2022-09-14	11:18:42	0.735076	3.26977	3.24758	1364.84	FALSE	1
2022-09-14	11:18:43	0.733397	3.2623	3.26003	1330.19	FALSE	1
2022-09-14	11:18:43	0.734924	3.26909	3.26003	1368.11	FALSE	1
2022-09-14	11:18:43	0.737315	3.27972	3.26003	1333.47	FALSE	1
2022-09-14	11:18:43	0.725916	3.22902	3.26003	1371.34	FALSE	1
2022-09-14	11:18:44	0.72958	3.24532	3.25307	1336.72	FALSE	1
2022-09-14	11:18:44	0.725153	3.22563	3.25307	1374.57	FALSE	1
2022-09-14	11:18:44	0.733142	3.26116	3.25307	1339.98	FALSE	1
2022-09-14	11:18:44	0.737417	3.28018	3.25307	1377.85	FALSE	1
2022-09-14	11:18:45	0.733041	3.26071	3.26784	1343.24	FALSE	1
2022-09-14	11:18:45	0.737519	3.28063	3.26784	1381.13	FALSE	1
2022-09-14	11:18:45	0.731565	3.25415	3.26784	1346.5	FALSE	1
2022-09-14	11:18:45	0.73645	3.27588	3.26784	1384.4	FALSE	1
2022-09-14	11:18:46	0.732634	3.2589	3.2632	1349.75	FALSE	1
2022-09-14	11:18:46	0.735534	3.2718	3.2632	1387.67	FALSE	1
2022-09-14	11:18:46	0.732634	3.2589	3.2632	1353.01	FALSE	1
2022-09-14	11:18:47	0.730089	3.24758	3.26756	1390.92	FALSE	1
2022-09-14	11:18:47	0.730496	3.24939	3.26756	1356.26	FALSE	1
2022-09-14	11:18:47	0.741539	3.29851	3.26756	1394.22	FALSE	1
2022-09-14	11:18:47	0.736196	3.27475	3.26756	1359.54	FALSE	1

## Sheet: MsPotato_harness_2022914111 (3)
Date	Time	Lbs	Newtons	Total force x time		total steps > 13.345	**GoPro Fitting: 11:03
2022-09-14	11:13:47	0.254568	1.13237	1.13237	FALSE	0
2022-09-14	11:13:47	-0.0066537	-0.029597	0	FALSE	0
2022-09-14	11:13:47	-0.177035	-0.787487	1.13237	FALSE	0
2022-09-14	11:13:47	-0.586857	-2.61046	0	FALSE	0
2022-09-14	11:13:48	-0.544567	-2.42234	1.13237	FALSE	0
2022-09-14	11:13:48	-0.402582	-1.79077	0	FALSE	0
2022-09-14	11:13:48	-0.15047	-0.669321	1.13237	FALSE	0
2022-09-14	11:13:48	0.0165524	0.0736284	0.0736284	FALSE	0
2022-09-14	11:13:49	-0.0952542	-0.42371	1.13237	FALSE	0
2022-09-14	11:13:49	-0.127264	-0.566096	0.0736284	FALSE	0
2022-09-14	11:13:49	0.0134481	0.0598198	1.19219	FALSE	0
2022-09-14	11:13:50	0.113397	0.504413	0.578041	FALSE	0
2022-09-14	11:13:50	0.453244	2.01612	3.20831	FALSE	0
2022-09-14	11:13:50	1.08602	4.83083	5.40888	FALSE	0
2022-09-14	11:13:50	0.545305	2.42563	5.63393	FALSE	0
2022-09-14	11:13:51	0.556247	2.4743	7.88317	FALSE	0
2022-09-14	11:13:51	0.241845	1.07577	6.70971	FALSE	0
2022-09-14	11:13:51	-0.0280277	-0.124673	7.88317	FALSE	0
2022-09-14	11:13:51	0.535534	2.38216	9.09187	FALSE	0
2022-09-14	11:13:52	0.231158	1.02824	8.91141	FALSE	0
2022-09-14	11:13:52	0.154822	0.688679	9.78055	FALSE	0
2022-09-14	11:13:52	0.37014	1.64646	10.5579	FALSE	0
2022-09-14	11:13:52	0.189224	0.841706	10.6223	FALSE	0
2022-09-14	11:13:53	-0.0579005	-0.257553	10.5579	FALSE	0
2022-09-14	11:13:53	0.166476	0.740519	11.3628	FALSE	0
2022-09-14	11:13:53	0.0172649	0.0767977	10.6347	FALSE	0
2022-09-14	11:13:54	-0.0894018	-0.397677	11.3628	FALSE	0
2022-09-14	11:13:54	0.0248984	0.110753	10.7454	FALSE	0
2022-09-14	11:13:54	-0.039071	-0.173796	11.3628	FALSE	0
2022-09-14	11:13:54	-0.0577478	-0.256874	10.7454	FALSE	0
2022-09-14	11:13:55	-0.00212443	-0.00944989	11.3628	FALSE	0
2022-09-14	11:13:55	0.355738	1.58239	12.3278	FALSE	0
2022-09-14	11:13:55	0.289682	1.28856	12.6513	FALSE	0
2022-09-14	11:13:55	0.404491	1.79926	14.1271	FALSE	0
2022-09-14	11:13:56	0.259809	1.15568	13.807	FALSE	0
2022-09-14	11:13:56	0.525102	2.33576	16.4628	FALSE	0
2022-09-14	11:13:56	0.40042	1.78115	15.5882	FALSE	0
2022-09-14	11:13:56	0.31986	1.4228	17.8856	FALSE	0
2022-09-14	11:13:57	0.31243	1.38975	16.9779	FALSE	0
2022-09-14	11:13:57	0.204746	0.910751	18.7964	FALSE	0
2022-09-14	11:13:57	0.540725	2.40525	19.3832	FALSE	0
2022-09-14	11:13:58	0.255942	1.13848	19.9349	FALSE	0
2022-09-14	11:13:58	0.456552	2.03083	21.414	FALSE	0
2022-09-14	11:13:58	0.340573	1.51494	21.4498	FALSE	0
2022-09-14	11:13:58	0.354568	1.57719	22.9912	FALSE	0
2022-09-14	11:13:59	0.197723	0.879511	22.3293	FALSE	0
2022-09-14	11:13:59	0.349428	1.55433	24.5455	FALSE	0
2022-09-14	11:13:59	0.403626	1.79541	24.1247	FALSE	0
2022-09-14	11:13:59	0.242507	1.07872	25.6242	FALSE	0
2022-09-14	11:14:00	0.422863	1.88098	26.0057	FALSE	0
2022-09-14	11:14:00	0.258842	1.15138	26.7756	FALSE	0
2022-09-14	11:14:00	0.342405	1.52309	27.5288	FALSE	0
2022-09-14	11:14:00	0.158792	0.706339	27.482	FALSE	0
2022-09-14	11:14:01	0.466883	2.07679	29.6056	FALSE	0
2022-09-14	11:14:01	0.228613	1.01692	28.4989	FALSE	0
2022-09-14	11:14:01	0.555789	2.47226	32.0778	FALSE	0
2022-09-14	11:14:02	0.182914	0.813638	29.3125	FALSE	0
2022-09-14	11:14:02	0.684695	3.04566	35.1235	FALSE	0
2022-09-14	11:14:02	0.221031	0.98319	30.2957	FALSE	0
2022-09-14	11:14:02	0.865204	3.8486	38.9721	FALSE	0
2022-09-14	11:14:03	0.37584	1.67181	31.9675	FALSE	0
2022-09-14	11:14:03	0.545	2.42427	41.3964	FALSE	0
2022-09-14	11:14:03	0.598028	2.66015	34.6277	FALSE	0
2022-09-14	11:14:03	0.587545	2.61352	44.0099	FALSE	0
2022-09-14	11:14:04	0.472023	2.09965	36.7273	FALSE	0
2022-09-14	11:14:04	0.445305	1.98081	45.9907	FALSE	0
2022-09-14	11:14:04	0.531158	2.3627	39.09	FALSE	0
2022-09-14	11:14:04	0.426018	1.89501	47.8857	FALSE	0
2022-09-14	11:14:05	0.495026	2.20197	41.292	FALSE	0
2022-09-14	11:14:05	0.469886	2.09015	49.9758	FALSE	0
2022-09-14	11:14:05	0.540165	2.40276	43.6948	FALSE	0
2022-09-14	11:14:06	0.435229	1.93599	51.9118	FALSE	0
2022-09-14	11:14:06	0.504542	2.2443	45.9391	FALSE	0
2022-09-14	11:14:06	0.430802	1.91629	53.8281	FALSE	0
2022-09-14	11:14:06	0.574975	2.5576	48.4967	FALSE	0
2022-09-14	11:14:07	0.436654	1.94232	55.7704	FALSE	0
2022-09-14	11:14:07	0.581641	2.58726	51.0839	FALSE	0
2022-09-14	11:14:07	0.440878	1.96111	57.7316	FALSE	0
2022-09-14	11:14:07	0.702608	3.12534	54.2093	FALSE	0
2022-09-14	11:14:08	0.367494	1.63469	59.3662	FALSE	0
2022-09-14	11:14:08	0.664898	2.9576	57.1669	FALSE	0
2022-09-14	11:14:08	0.35757	1.59054	60.9568	FALSE	0
2022-09-14	11:14:08	0.624796	2.77922	59.9461	FALSE	0
2022-09-14	11:14:09	0.310293	1.38025	62.337	FALSE	0
2022-09-14	11:14:09	0.590903	2.62845	62.5745	FALSE	0
2022-09-14	11:14:09	0.275433	1.22518	63.5622	FALSE	0
2022-09-14	11:14:10	0.315331	1.40266	63.9772	FALSE	0
2022-09-14	11:14:10	0.0125829	0.0559713	63.6182	FALSE	0
2022-09-14	11:14:10	0.373601	1.66185	65.639	FALSE	0
2022-09-14	11:14:10	0.45757	2.03536	65.6536	FALSE	0
2022-09-14	11:14:11	0.524644	2.33372	67.9728	FALSE	0
2022-09-14	11:14:11	0.258028	1.14776	66.8013	FALSE	0
2022-09-14	11:14:11	0.659351	2.93293	70.9057	FALSE	0
2022-09-14	11:14:11	0.286476	1.2743	68.0756	FALSE	0
2022-09-14	11:14:12	0.206171	0.91709	71.8228	FALSE	0
2022-09-14	11:14:12	-0.00629748	-0.0280125	68.0756	FALSE	0
2022-09-14	11:14:12	0.0453565	0.201755	72.0245	FALSE	0
2022-09-14	11:14:12	0.0607763	0.270345	68.346	FALSE	0
2022-09-14	11:14:13	0.190191	0.846008	72.8705	FALSE	0
2022-09-14	11:14:13	0.142099	0.632085	68.978	FALSE	0
2022-09-14	11:14:13	0.228817	1.01782	73.8884	FALSE	0
2022-09-14	11:14:14	0.0846949	0.37674	69.3548	FALSE	0
2022-09-14	11:14:14	0.222201	0.988394	74.8768	FALSE	0
2022-09-14	11:14:14	0.212583	0.945612	70.3004	FALSE	0
2022-09-14	11:14:14	0.237672	1.05721	75.934	FALSE	0
2022-09-14	11:14:15	0.291972	1.29875	71.5991	FALSE	0
2022-09-14	11:14:15	0.524338	2.33236	78.2663	FALSE	0
2022-09-14	11:14:15	0.619707	2.75658	74.3557	FALSE	0
2022-09-14	11:14:15	0.461845	2.05438	80.3207	FALSE	0
2022-09-14	11:14:16	0.19299	0.858458	75.2142	FALSE	0
2022-09-14	11:14:16	0.297824	1.32478	81.6455	FALSE	0
2022-09-14	11:14:16	0.232125	1.03254	76.2467	FALSE	0
2022-09-14	11:14:17	0.269936	1.20073	82.8462	FALSE	0
2022-09-14	11:14:17	0.133295	0.592923	76.8396	FALSE	0
2022-09-14	11:14:17	0.368715	1.64012	84.4863	FALSE	0
2022-09-14	11:14:17	-0.00787507	-0.0350299	76.8396	FALSE	0
2022-09-14	11:14:18	0.234924	1.04499	85.5313	FALSE	0
2022-09-14	11:14:18	0.00347355	0.015451	76.8551	FALSE	0
2022-09-14	11:14:18	0.224949	1.00062	86.5319	FALSE	0
2022-09-14	11:14:18	-0.0156613	-0.0696646	76.8551	FALSE	0
2022-09-14	11:14:19	-0.0708267	-0.315051	86.5319	FALSE	0
2022-09-14	11:14:19	0.0551783	0.245444	77.1005	FALSE	0
2022-09-14	11:14:19	0.108206	0.481322	87.0133	FALSE	0
2022-09-14	11:14:19	0.313753	1.39564	78.4962	FALSE	0
2022-09-14	11:14:20	0.135331	0.601979	87.6152	FALSE	0
2022-09-14	11:14:20	0.0766032	0.340746	78.8369	FALSE	0
2022-09-14	11:14:20	0.103524	0.460495	88.0757	FALSE	0
2022-09-14	11:14:21	-0.0631422	-0.280869	78.8369	FALSE	0
2022-09-14	11:14:21	-0.192506	-0.856305	88.0757	FALSE	0
2022-09-14	11:14:21	-0.0834475	-0.371191	78.8369	FALSE	0
2022-09-14	11:14:21	-0.210979	-0.938477	88.0757	FALSE	0
2022-09-14	11:14:22	0.0235244	0.104641	78.9416	FALSE	0
2022-09-14	11:14:22	0.251361	1.1181	89.1938	FALSE	0
2022-09-14	11:14:22	0.354211	1.5756	80.5172	FALSE	0
2022-09-14	11:14:22	-0.607671	-2.70304	89.1938	FALSE	0
2022-09-14	11:14:23	-0.639936	-2.84656	80.5172	FALSE	0
2022-09-14	11:14:23	-0.0244145	-0.108601	89.1938	FALSE	0
2022-09-14	11:14:23	0.350293	1.55817	82.0753	FALSE	0
2022-09-14	11:14:23	0.801896	3.56699	92.7608	FALSE	0
2022-09-14	11:14:24	1.05742	4.70362	86.779	FALSE	0
2022-09-14	11:14:24	0.868817	3.86467	96.6255	FALSE	0
2022-09-14	11:14:24	1.27518	5.67226	92.4512	FALSE	0
2022-09-14	11:14:25	0.835839	3.71798	100.343	FALSE	0
2022-09-14	11:14:25	0.624898	2.77967	95.2309	FALSE	0
2022-09-14	11:14:25	0.381132	1.69535	102.039	FALSE	0
2022-09-14	11:14:25	0.424746	1.88936	97.1202	FALSE	0
2022-09-14	11:14:26	0.92159	4.09942	106.138	FALSE	0
2022-09-14	11:14:26	0.0719722	0.320147	97.4404	FALSE	0
2022-09-14	11:14:26	-0.170267	-0.757382	106.138	FALSE	0
2022-09-14	11:14:26	-0.280547	-1.24793	97.4404	FALSE	0
2022-09-14	11:14:27	-0.239427	-1.06502	106.138	FALSE	0
2022-09-14	11:14:27	-0.0944399	-0.420088	97.4404	FALSE	0
2022-09-14	11:14:27	0.724796	3.22404	109.362	FALSE	0
2022-09-14	11:14:27	0.737265	3.2795	100.72	FALSE	0
2022-09-14	11:14:28	0.73874	3.28606	112.648	FALSE	0
2022-09-14	11:14:28	0.726374	3.23106	103.951	FALSE	0
2022-09-14	11:14:28	0.725916	3.22902	115.877	FALSE	0
2022-09-14	11:14:29	0.730547	3.24962	107.201	FALSE	0
2022-09-14	11:14:29	0.734008	3.26501	119.142	FALSE	0
2022-09-14	11:14:29	0.726425	3.23128	110.432	FALSE	0
2022-09-14	11:14:29	0.725254	3.22607	122.368	FALSE	0
2022-09-14	11:14:30	0.71757	3.19189	113.624	FALSE	0
2022-09-14	11:14:30	0.730343	3.24871	125.617	FALSE	0
2022-09-14	11:14:30	0.727799	3.2374	116.861	FALSE	0
2022-09-14	11:14:30	0.728359	3.23989	128.857	FALSE	0
2022-09-14	11:14:31	0.727596	3.23649	120.098	FALSE	0
2022-09-14	11:14:31	0.717214	3.19031	132.047	FALSE	0
2022-09-14	11:14:31	0.724491	3.22268	123.32	FALSE	0
2022-09-14	11:14:31	0.721081	3.20751	135.255	FALSE	0
2022-09-14	11:14:32	0.711463	3.16473	126.485	FALSE	0
2022-09-14	11:14:32	0.722812	3.21521	138.47	FALSE	0
2022-09-14	11:14:32	0.721132	3.20774	129.693	FALSE	0
2022-09-14	11:14:33	0.723677	3.21906	141.689	FALSE	0
2022-09-14	11:14:33	0.72388	3.21996	132.913	FALSE	0
2022-09-14	11:14:33	0.724288	3.22178	144.911	FALSE	0
2022-09-14	11:14:33	0.72215	3.21227	136.125	FALSE	0
2022-09-14	11:14:34	0.725	3.22494	148.136	FALSE	0
2022-09-14	11:14:34	0.724898	3.22449	139.35	FALSE	0
2022-09-14	11:14:34	0.7307	3.2503	151.386	FALSE	0
2022-09-14	11:14:34	0.72215	3.21227	142.562	FALSE	0
2022-09-14	11:14:35	0.734313	3.26637	154.653	FALSE	0
2022-09-14	11:14:35	0.729173	3.24351	145.805	FALSE	0
2022-09-14	11:14:35	0.732379	3.25777	157.91	FALSE	0
2022-09-14	11:14:35	0.719555	3.20072	149.006	FALSE	0
2022-09-14	11:14:36	0.728155	3.23898	161.149	FALSE	0
2022-09-14	11:14:36	0.726374	3.23106	152.237	FALSE	0
2022-09-14	11:14:36	0.723422	3.21793	164.367	FALSE	0
2022-09-14	11:14:37	0.729936	3.2469	155.484	FALSE	0
2022-09-14	11:14:37	0.727341	3.23536	167.603	FALSE	0
2022-09-14	11:14:37	0.727188	3.23468	158.719	FALSE	0
2022-09-14	11:14:37	0.727799	3.2374	170.84	FALSE	0
2022-09-14	11:14:38	0.729936	3.2469	161.966	FALSE	0
2022-09-14	11:14:38	0.724847	3.22426	174.064	FALSE	0
2022-09-14	11:14:38	0.729936	3.2469	165.212	FALSE	0
2022-09-14	11:14:38	0.72103	3.20729	177.272	FALSE	0
2022-09-14	11:14:39	0.720114	3.20321	168.416	FALSE	0
2022-09-14	11:14:39	0.730649	3.25007	180.522	FALSE	0
2022-09-14	11:14:39	0.726476	3.23151	171.647	FALSE	0
2022-09-14	11:14:39	0.731768	3.25505	183.777	FALSE	0
2022-09-14	11:14:40	0.729173	3.24351	174.891	FALSE	0
2022-09-14	11:14:40	0.732175	3.25686	187.034	FALSE	0
2022-09-14	11:14:40	0.72612	3.22993	178.121	FALSE	0
2022-09-14	11:14:41	0.731463	3.25369	190.287	FALSE	0
2022-09-14	11:14:41	0.725305	3.2263	181.347	FALSE	0
2022-09-14	11:14:41	0.728613	3.24102	193.528	FALSE	0
2022-09-14	11:14:41	0.72673	3.23264	184.58	FALSE	0
2022-09-14	11:14:42	0.733601	3.2632	196.791	FALSE	0
2022-09-14	11:14:42	0.728003	3.2383	187.818	FALSE	0
2022-09-14	11:14:42	0.726069	3.2297	200.021	FALSE	0
2022-09-14	11:14:42	0.729275	3.24396	191.062	FALSE	0
2022-09-14	11:14:43	0.727239	3.2349	203.256	FALSE	0
2022-09-14	11:14:43	0.725356	3.22653	194.288	FALSE	0
2022-09-14	11:14:43	0.731514	3.25392	206.51	FALSE	0
2022-09-14	11:14:43	0.72215	3.21227	197.501	FALSE	0
2022-09-14	11:14:44	0.729936	3.2469	209.757	FALSE	0
2022-09-14	11:14:44	0.724135	3.2211	200.722	FALSE	0
2022-09-14	11:14:44	0.724338	3.222	212.979	FALSE	0
2022-09-14	11:14:45	0.729173	3.24351	203.965	FALSE	0
2022-09-14	11:14:45	0.728817	3.24192	216.221	FALSE	0
2022-09-14	11:14:45	0.725051	3.22517	207.19	FALSE	0
2022-09-14	11:14:45	0.730954	3.25143	219.472	FALSE	0
2022-09-14	11:14:46	0.726425	3.23128	210.422	FALSE	0
2022-09-14	11:14:46	0.729224	3.24373	222.716	FALSE	0
2022-09-14	11:14:46	0.719148	3.19891	213.621	FALSE	0
2022-09-14	11:14:46	0.727646	3.23671	225.953	FALSE	0
2022-09-14	11:14:47	0.725254	3.22607	216.847	FALSE	0
2022-09-14	11:14:47	0.72444	3.22245	229.175	FALSE	0
2022-09-14	11:14:47	0.727697	3.23694	220.084	FALSE	0
2022-09-14	11:14:47	0.732175	3.25686	232.432	FALSE	0
2022-09-14	11:14:48	0.724898	3.22449	223.308	FALSE	0
2022-09-14	11:14:48	0.731921	3.25573	235.688	FALSE	0
2022-09-14	11:14:48	0.723982	3.22042	226.528	FALSE	0
2022-09-14	11:14:49	0.726425	3.23128	238.919	FALSE	0
2022-09-14	11:14:49	0.732226	3.25709	229.786	FALSE	0
2022-09-14	11:14:49	0.724949	3.22472	242.144	FALSE	0
2022-09-14	11:14:49	0.725763	3.22834	233.014	FALSE	0
2022-09-14	11:14:50	0.731158	3.25234	245.396	FALSE	0
2022-09-14	11:14:50	0.726323	3.23083	236.245	FALSE	0
2022-09-14	11:14:50	0.729428	3.24464	248.641	FALSE	0
2022-09-14	11:14:50	0.732175	3.25686	239.502	FALSE	0
2022-09-14	11:14:51	0.724847	3.22426	251.865	FALSE	0
2022-09-14	11:14:51	0.724542	3.22291	242.725	FALSE	0
2022-09-14	11:14:51	0.728461	3.24034	255.105	FALSE	0
2022-09-14	11:14:51	0.722404	3.2134	245.938	FALSE	0
2022-09-14	11:14:52	0.725662	3.22789	258.333	FALSE	0
2022-09-14	11:14:52	0.725407	3.22676	249.165	FALSE	0
2022-09-14	11:14:52	0.730343	3.24871	261.582	FALSE	0
2022-09-14	11:14:53	0.733346	3.26207	252.427	FALSE	0
2022-09-14	11:14:53	0.728766	3.2417	264.824	FALSE	0
2022-09-14	11:14:53	0.722456	3.21363	255.64	FALSE	0
2022-09-14	11:14:53	0.720776	3.20616	268.03	FALSE	0
2022-09-14	11:14:54	0.72841	3.24011	258.88	FALSE	0
2022-09-14	11:14:54	0.724084	3.22087	271.251	FALSE	0
2022-09-14	11:14:54	0.724593	3.22313	262.104	FALSE	0
2022-09-14	11:14:54	0.72785	3.23762	274.488	FALSE	0
2022-09-14	11:14:55	0.718435	3.19574	265.299	FALSE	0
2022-09-14	11:14:55	0.723677	3.21906	277.707	FALSE	0
2022-09-14	11:14:55	0.727952	3.23808	268.537	FALSE	0
2022-09-14	11:14:56	0.727239	3.2349	280.942	FALSE	0
2022-09-14	11:14:56	0.723931	3.22019	271.758	FALSE	0
2022-09-14	11:14:56	0.728003	3.2383	284.181	FALSE	0
2022-09-14	11:14:56	0.730801	3.25075	275.008	FALSE	0
2022-09-14	11:14:57	0.734364	3.2666	287.447	FALSE	0
2022-09-14	11:14:57	0.723168	3.2168	278.225	FALSE	0
2022-09-14	11:14:57	0.726221	3.23038	290.677	FALSE	0
2022-09-14	11:14:57	0.719046	3.19846	281.424	FALSE	0
2022-09-14	11:14:58	0.729529	3.24509	293.923	FALSE	0
2022-09-14	11:14:58	0.716756	3.18827	284.612	FALSE	0
2022-09-14	11:14:58	0.726374	3.23106	297.154	FALSE	0
2022-09-14	11:14:58	0.73243	3.258	287.87	FALSE	0
2022-09-14	11:14:59	0.721387	3.20887	300.362	FALSE	0
2022-09-14	11:14:59	0.721997	3.21159	291.081	FALSE	0
2022-09-14	11:14:59	0.725458	3.22698	303.589	FALSE	0
2022-09-14	11:14:59	0.719911	3.20231	294.284	FALSE	0
2022-09-14	11:15:00	0.724237	3.22155	306.811	FALSE	0
2022-09-14	11:15:00	0.725153	3.22563	297.509	FALSE	0
2022-09-14	11:15:00	0.725509	3.22721	310.038	FALSE	0
2022-09-14	11:15:01	0.721946	3.21136	300.721	FALSE	0
2022-09-14	11:15:01	0.727596	3.23649	313.275	FALSE	0
2022-09-14	11:15:01	0.728766	3.2417	303.962	FALSE	0
2022-09-14	11:15:01	0.728206	3.23921	316.514	FALSE	0
2022-09-14	11:15:02	0.724796	3.22404	307.187	FALSE	0
2022-09-14	11:15:02	0.724746	3.22382	319.738	FALSE	0
2022-09-14	11:15:02	0.725458	3.22698	310.414	FALSE	0
2022-09-14	11:15:02	0.725102	3.2254	322.963	FALSE	0
2022-09-14	11:15:03	0.724644	3.22336	313.637	FALSE	0
2022-09-14	11:15:03	0.724898	3.22449	326.188	FALSE	0
2022-09-14	11:15:03	0.722404	3.2134	316.85	FALSE	0
2022-09-14	11:15:04	0.73131	3.25301	329.441	FALSE	0
2022-09-14	11:15:04	0.728664	3.24124	320.092	FALSE	0
2022-09-14	11:15:04	0.723626	3.21883	332.659	FALSE	0
2022-09-14	11:15:04	0.727239	3.2349	323.326	FALSE	0
2022-09-14	11:15:05	0.723422	3.21793	335.877	FALSE	0
2022-09-14	11:15:05	0.728766	3.2417	326.568	FALSE	0
2022-09-14	11:15:05	0.720013	3.20276	339.08	FALSE	0
2022-09-14	11:15:05	0.724542	3.22291	329.791	FALSE	0
2022-09-14	11:15:06	0.724644	3.22336	342.304	FALSE	0
2022-09-14	11:15:06	0.732074	3.25641	333.047	FALSE	0
2022-09-14	11:15:06	0.725407	3.22676	345.53	FALSE	0
2022-09-14	11:15:06	0.726679	3.23241	336.28	FALSE	0
2022-09-14	11:15:07	0.721591	3.20978	348.74	FALSE	0
2022-09-14	11:15:07	0.722965	3.21589	339.496	FALSE	0
2022-09-14	11:15:07	0.72785	3.23762	351.978	FALSE	0
2022-09-14	11:15:08	0.729631	3.24554	342.741	FALSE	0
2022-09-14	11:15:08	0.720827	3.20638	355.184	FALSE	0
2022-09-14	11:15:08	0.724389	3.22223	345.964	FALSE	0
2022-09-14	11:15:08	0.721437	3.2091	358.393	FALSE	0
2022-09-14	11:15:09	0.287952	1.28087	347.244	FALSE	0
2022-09-14	11:15:09	0.387036	1.72161	360.115	FALSE	0
2022-09-14	11:15:09	0.30617	1.36191	348.606	FALSE	0
2022-09-14	11:15:09	0.508766	2.26309	362.378	FALSE	0
2022-09-14	11:15:10	0.730954	3.25143	351.858	FALSE	0
2022-09-14	11:15:10	0.728359	3.23989	365.618	FALSE	0
2022-09-14	11:15:10	0.730649	3.25007	355.108	FALSE	0
2022-09-14	11:15:10	0.724186	3.22132	368.839	FALSE	0
2022-09-14	11:15:11	0.727137	3.23445	358.342	FALSE	0
2022-09-14	11:15:11	0.722099	3.21204	372.051	FALSE	0
2022-09-14	11:15:11	0.734568	3.26751	361.61	FALSE	0
2022-09-14	11:15:12	0.731107	3.25211	375.303	FALSE	0
2022-09-14	11:15:12	0.724847	3.22426	364.834	FALSE	0
2022-09-14	11:15:12	0.727392	3.23559	378.539	FALSE	0
2022-09-14	11:15:12	0.736094	3.27429	368.108	FALSE	0
2022-09-14	11:15:13	0.730547	3.24962	381.788	FALSE	0
2022-09-14	11:15:13	0.729478	3.24486	371.353	FALSE	0
2022-09-14	11:15:13	0.725458	3.22698	385.015	FALSE	0
2022-09-14	11:15:13	0.726069	3.2297	374.583	FALSE	0
2022-09-14	11:15:14	0.73528	3.27067	388.286	FALSE	0
2022-09-14	11:15:14	0.730954	3.25143	377.834	FALSE	0
2022-09-14	11:15:14	0.727392	3.23559	391.522	FALSE	0
2022-09-14	11:15:14	0.732379	3.25777	381.092	FALSE	0
2022-09-14	11:15:15	0.726476	3.23151	394.753	FALSE	0
2022-09-14	11:15:15	0.724084	3.22087	384.313	FALSE	0
2022-09-14	11:15:15	0.728766	3.2417	397.995	FALSE	0
2022-09-14	11:15:16	0.726629	3.23219	387.545	FALSE	0
2022-09-14	11:15:16	0.721946	3.21136	401.206	FALSE	0
2022-09-14	11:15:16	0.723473	3.21815	390.763	FALSE	0
2022-09-14	11:15:16	0.728766	3.2417	404.448	FALSE	0
2022-09-14	11:15:17	0.730242	3.24826	394.012	FALSE	0
2022-09-14	11:15:17	0.72897	3.2426	407.691	FALSE	0
2022-09-14	11:15:17	0.732786	3.25958	397.271	FALSE	0
2022-09-14	11:15:18	0.734618	3.26773	410.958	FALSE	0
2022-09-14	11:15:18	0.728817	3.24192	400.513	FALSE	0
2022-09-14	11:15:18	0.726425	3.23128	414.19	FALSE	0
2022-09-14	11:15:18	0.73187	3.2555	403.769	FALSE	0
2022-09-14	11:15:18	0.72617	3.23015	417.42	FALSE	0
2022-09-14	11:15:19	0.727239	3.2349	407.003	FALSE	0
2022-09-14	11:15:19	0.720064	3.20299	420.623	FALSE	0
2022-09-14	11:15:19	0.726221	3.23038	410.234	FALSE	0
2022-09-14	11:15:20	0.725662	3.22789	423.851	FALSE	0
2022-09-14	11:15:20	0.728715	3.24147	413.475	FALSE	0
2022-09-14	11:15:20	0.732583	3.25868	427.109	FALSE	0
2022-09-14	11:15:20	0.725458	3.22698	416.702	FALSE	0
2022-09-14	11:15:21	0.732939	3.26026	430.37	FALSE	0
2022-09-14	11:15:21	0.731921	3.25573	419.958	FALSE	0
2022-09-14	11:15:21	0.730191	3.24804	433.618	FALSE	0
2022-09-14	11:15:21	0.726832	3.23309	423.191	FALSE	0
2022-09-14	11:15:22	0.724186	3.22132	436.839	FALSE	0
2022-09-14	11:15:22	0.726476	3.23151	426.423	FALSE	0
2022-09-14	11:15:22	0.728104	3.23875	440.078	FALSE	0
2022-09-14	11:15:22	0.727545	3.23627	429.659	FALSE	0
2022-09-14	11:15:23	0.725763	3.22834	443.306	FALSE	0
2022-09-14	11:15:23	0.721336	3.20865	432.868	FALSE	0
2022-09-14	11:15:23	0.724644	3.22336	446.529	FALSE	0
2022-09-14	11:15:24	0.728613	3.24102	436.109	FALSE	0
2022-09-14	11:15:24	0.728766	3.2417	449.771	FALSE	0
2022-09-14	11:15:24	0.726527	3.23174	439.34	FALSE	0
2022-09-14	11:15:24	0.730445	3.24917	453.02	FALSE	0
2022-09-14	11:15:25	0.728512	3.24057	442.581	FALSE	0
2022-09-14	11:15:25	0.728817	3.24192	456.262	FALSE	0
2022-09-14	11:15:25	0.729478	3.24486	445.826	FALSE	0
2022-09-14	11:15:25	0.725102	3.2254	459.488	FALSE	0
2022-09-14	11:15:26	0.72897	3.2426	449.068	FALSE	0
2022-09-14	11:15:26	0.73243	3.258	462.746	FALSE	0
2022-09-14	11:15:26	0.730191	3.24804	452.316	FALSE	0
2022-09-14	11:15:26	0.724695	3.22359	465.969	FALSE	0
2022-09-14	11:15:27	0.733957	3.26479	455.581	FALSE	0
2022-09-14	11:15:27	0.731616	3.25437	469.223	FALSE	0
2022-09-14	11:15:27	0.723168	3.2168	458.798	FALSE	0
2022-09-14	11:15:28	0.732125	3.25664	472.48	FALSE	0
2022-09-14	11:15:28	0.731158	3.25234	462.05	FALSE	0
2022-09-14	11:15:28	0.720064	3.20299	475.683	FALSE	0
2022-09-14	11:15:28	0.724644	3.22336	465.274	FALSE	0
2022-09-14	11:15:29	0.738995	3.2872	478.97	FALSE	0
2022-09-14	11:15:29	0.726679	3.23241	468.506	FALSE	0
2022-09-14	11:15:29	0.725458	3.22698	482.197	FALSE	0
2022-09-14	11:15:29	0.727596	3.23649	471.743	FALSE	0
2022-09-14	11:15:30	0.732175	3.25686	485.454	FALSE	0
2022-09-14	11:15:30	0.733448	3.26252	475.005	FALSE	0
2022-09-14	11:15:30	0.730903	3.2512	488.705	FALSE	0
2022-09-14	11:15:30	0.725611	3.22766	478.233	FALSE	0
2022-09-14	11:15:31	0.723931	3.22019	491.926	FALSE	0
2022-09-14	11:15:31	0.727443	3.23581	481.469	FALSE	0
2022-09-14	11:15:31	0.724491	3.22268	495.148	FALSE	0
2022-09-14	11:15:32	0.730038	3.24736	484.716	FALSE	0
2022-09-14	11:15:32	0.726221	3.23038	498.379	FALSE	0
2022-09-14	11:15:32	0.7307	3.2503	487.966	FALSE	0
2022-09-14	11:15:32	0.732888	3.26003	501.639	FALSE	0
2022-09-14	11:15:33	0.728562	3.24079	491.207	FALSE	0
2022-09-14	11:15:33	0.72444	3.22245	504.861	FALSE	0
2022-09-14	11:15:33	0.732735	3.25935	494.466	FALSE	0
2022-09-14	11:15:33	0.722914	3.21567	508.077	FALSE	0
2022-09-14	11:15:34	0.726781	3.23287	497.699	FALSE	0
2022-09-14	11:15:34	0.73299	3.26049	511.337	FALSE	0
2022-09-14	11:15:34	0.725916	3.22902	500.928	FALSE	0
2022-09-14	11:15:34	0.72729	3.23513	514.572	FALSE	0
2022-09-14	11:15:35	0.733906	3.26456	504.193	FALSE	0
2022-09-14	11:15:35	0.726425	3.23128	517.804	FALSE	0
2022-09-14	11:15:35	0.724796	3.22404	507.417	FALSE	0
2022-09-14	11:15:36	0.729377	3.24441	521.048	FALSE	0
2022-09-14	11:15:36	0.732532	3.25845	510.675	FALSE	0
2022-09-14	11:15:36	0.726018	3.22947	524.278	FALSE	0
2022-09-14	11:15:36	0.722252	3.21272	513.888	FALSE	0
2022-09-14	11:15:37	0.730343	3.24871	527.526	FALSE	0
2022-09-14	11:15:37	0.726679	3.23241	517.12	FALSE	0
2022-09-14	11:15:37	0.728206	3.23921	530.765	FALSE	0
2022-09-14	11:15:37	0.722404	3.2134	520.334	FALSE	0
2022-09-14	11:15:38	0.729631	3.24554	534.011	FALSE	0
2022-09-14	11:15:38	0.724389	3.22223	523.556	FALSE	0
2022-09-14	11:15:38	0.723422	3.21793	537.229	FALSE	0
2022-09-14	11:15:38	0.726323	3.23083	526.787	FALSE	0
2022-09-14	11:15:39	0.732226	3.25709	540.486	FALSE	0
2022-09-14	11:15:39	0.729071	3.24305	530.03	FALSE	0
2022-09-14	11:15:39	0.723168	3.2168	543.703	FALSE	0
2022-09-14	11:15:40	0.724644	3.22336	533.253	FALSE	0
2022-09-14	11:15:40	0.725356	3.22653	546.929	FALSE	0
2022-09-14	11:15:40	0.730038	3.24736	536.501	FALSE	0
2022-09-14	11:15:40	0.723575	3.21861	550.148	FALSE	0
2022-09-14	11:15:41	0.718435	3.19574	539.696	FALSE	0
2022-09-14	11:15:41	0.729936	3.2469	553.395	FALSE	0
2022-09-14	11:15:41	0.723321	3.21748	542.914	FALSE	0
2022-09-14	11:15:41	0.720827	3.20638	556.601	FALSE	0
2022-09-14	11:15:42	0.724593	3.22313	546.137	FALSE	0
2022-09-14	11:15:42	0.726221	3.23038	559.832	FALSE	0
2022-09-14	11:15:42	0.730394	3.24894	549.386	FALSE	0
2022-09-14	11:15:42	0.726272	3.2306	563.062	FALSE	0
2022-09-14	11:15:43	0.735789	3.27294	552.659	FALSE	0
2022-09-14	11:15:43	0.721437	3.2091	566.271	FALSE	0
2022-09-14	11:15:43	0.735076	3.26977	555.929	FALSE	0
2022-09-14	11:15:44	0.732583	3.25868	569.53	FALSE	0
2022-09-14	11:15:44	0.724491	3.22268	559.151	FALSE	0
2022-09-14	11:15:44	0.72388	3.21996	572.75	FALSE	0
2022-09-14	11:15:44	0.728868	3.24215	562.393	FALSE	0
2022-09-14	11:15:45	0.728766	3.2417	575.992	FALSE	0
2022-09-14	11:15:45	0.726934	3.23355	565.627	FALSE	0
2022-09-14	11:15:45	0.723677	3.21906	579.211	FALSE	0
2022-09-14	11:15:45	0.724949	3.22472	568.852	FALSE	0
2022-09-14	11:15:46	0.731107	3.25211	582.463	FALSE	0
2022-09-14	11:15:46	0.730903	3.2512	572.103	FALSE	0
2022-09-14	11:15:46	0.720623	3.20548	585.668	FALSE	0
2022-09-14	11:15:47	0.736145	3.27452	575.377	FALSE	0
2022-09-14	11:15:47	0.73299	3.26049	588.929	FALSE	0
2022-09-14	11:15:47	0.727036	3.234	578.611	FALSE	0
2022-09-14	11:15:47	0.725662	3.22789	592.157	FALSE	0
2022-09-14	11:15:48	0.718842	3.19755	581.809	FALSE	0
2022-09-14	11:15:48	0.727443	3.23581	595.392	FALSE	0
2022-09-14	11:15:48	0.729987	3.24713	585.056	FALSE	0
2022-09-14	11:15:48	0.732837	3.25981	598.652	FALSE	0
2022-09-14	11:15:49	0.734618	3.26773	588.324	FALSE	0
2022-09-14	11:15:49	0.722456	3.21363	601.866	FALSE	0
2022-09-14	11:15:49	0.72897	3.2426	591.566	FALSE	0
2022-09-14	11:15:49	0.731819	3.25528	605.121	FALSE	0
2022-09-14	11:15:50	0.724237	3.22155	594.788	FALSE	0
2022-09-14	11:15:50	0.722456	3.21363	608.335	FALSE	0
2022-09-14	11:15:50	0.73187	3.2555	598.044	FALSE	0
2022-09-14	11:15:51	0.719351	3.19982	611.535	FALSE	0
2022-09-14	11:15:51	0.717366	3.19099	601.234	FALSE	0
2022-09-14	11:15:51	0.733142	3.26116	614.796	FALSE	0
2022-09-14	11:15:51	0.725865	3.22879	604.463	FALSE	0
2022-09-14	11:15:52	0.731158	3.25234	618.048	FALSE	0
2022-09-14	11:15:52	0.728155	3.23898	607.702	FALSE	0
2022-09-14	11:15:52	0.733092	3.26094	621.309	FALSE	0
2022-09-14	11:15:52	0.728664	3.24124	610.944	FALSE	0
2022-09-14	11:15:53	0.731717	3.25482	624.564	FALSE	0
2022-09-14	11:15:53	0.723575	3.21861	614.162	FALSE	0
2022-09-14	11:15:53	0.726221	3.23038	627.794	FALSE	0
2022-09-14	11:15:53	0.731768	3.25505	617.417	FALSE	0
2022-09-14	11:15:54	0.72958	3.24532	631.04	FALSE	0
2022-09-14	11:15:54	0.72388	3.21996	620.637	FALSE	0
2022-09-14	11:15:54	0.724949	3.22472	634.264	FALSE	0
2022-09-14	11:15:55	0.728664	3.24124	623.878	FALSE	0
2022-09-14	11:15:55	0.731463	3.25369	637.518	FALSE	0
2022-09-14	11:15:55	0.737214	3.27928	627.158	FALSE	0
2022-09-14	11:15:55	0.723575	3.21861	640.737	FALSE	0
2022-09-14	11:15:56	0.726832	3.23309	630.391	FALSE	0
2022-09-14	11:15:56	0.731361	3.25324	643.99	FALSE	0
2022-09-14	11:15:56	0.737366	3.27995	633.671	FALSE	0
2022-09-14	11:15:56	0.7193	3.19959	647.189	FALSE	0
2022-09-14	11:15:57	0.732583	3.25868	636.929	FALSE	0
2022-09-14	11:15:57	0.725814	3.22857	650.418	FALSE	0
2022-09-14	11:15:57	0.723219	3.21702	640.146	FALSE	0
2022-09-14	11:15:57	0.734669	3.26795	653.686	FALSE	0
2022-09-14	11:15:58	0.733295	3.26184	643.408	FALSE	0
2022-09-14	11:15:58	0.71813	3.19439	656.88	FALSE	0
2022-09-14	11:15:58	0.72902	3.24283	646.651	FALSE	0
2022-09-14	11:15:59	0.725051	3.22517	660.106	FALSE	0
2022-09-14	11:15:59	0.725204	3.22585	649.877	FALSE	0
2022-09-14	11:15:59	0.729682	3.24577	663.351	FALSE	0
2022-09-14	11:15:59	0.727087	3.23423	653.111	FALSE	0
2022-09-14	11:16:00	0.72841	3.24011	666.591	FALSE	0
2022-09-14	11:16:00	0.736959	3.27814	656.389	FALSE	0
2022-09-14	11:16:00	0.72673	3.23264	669.824	FALSE	0
2022-09-14	11:16:00	0.728562	3.24079	659.63	FALSE	0
2022-09-14	11:16:01	0.725865	3.22879	673.053	FALSE	0
2022-09-14	11:16:01	0.725407	3.22676	662.857	FALSE	0
2022-09-14	11:16:01	0.730852	3.25098	676.304	FALSE	0
2022-09-14	11:16:01	0.734109	3.26546	666.122	FALSE	0
2022-09-14	11:16:02	0.723372	3.2177	679.522	FALSE	0
2022-09-14	11:16:02	0.725916	3.22902	669.351	FALSE	0
2022-09-14	11:16:02	0.721081	3.20751	682.729	FALSE	0
2022-09-14	11:16:03	0.726476	3.23151	672.583	FALSE	0
2022-09-14	11:16:03	0.729275	3.24396	685.973	FALSE	0
2022-09-14	11:16:03	0.726985	3.23377	675.817	FALSE	0
2022-09-14	11:16:03	0.727596	3.23649	689.209	FALSE	0
2022-09-14	11:16:04	0.729886	3.24668	679.063	FALSE	0
2022-09-14	11:16:04	0.72383	3.21974	692.429	FALSE	0
2022-09-14	11:16:04	0.732532	3.25845	682.322	FALSE	0
2022-09-14	11:16:04	0.732481	3.25822	695.687	FALSE	0
2022-09-14	11:16:05	0.73014	3.24781	685.57	FALSE	0
2022-09-14	11:16:05	0.729478	3.24486	698.932	FALSE	0
2022-09-14	11:16:05	0.723372	3.2177	688.787	FALSE	0
2022-09-14	11:16:05	0.725611	3.22766	702.16	FALSE	0
2022-09-14	11:16:06	0.737214	3.27928	692.067	FALSE	0
2022-09-14	11:16:06	0.725967	3.22925	705.389	FALSE	0
2022-09-14	11:16:06	0.724796	3.22404	695.291	FALSE	0
2022-09-14	11:16:07	0.721641	3.21	708.599	FALSE	0
2022-09-14	11:16:07	0.723677	3.21906	698.51	FALSE	0
2022-09-14	11:16:07	0.722099	3.21204	711.811	FALSE	0
2022-09-14	11:16:07	0.728308	3.23966	701.749	FALSE	0
2022-09-14	11:16:08	0.725305	3.2263	715.038	FALSE	0
2022-09-14	11:16:08	0.731259	3.25279	705.002	FALSE	0
2022-09-14	11:16:08	0.723728	3.21929	718.257	FALSE	0
2022-09-14	11:16:08	0.726679	3.23241	708.234	FALSE	0
2022-09-14	11:16:09	0.733651	3.26343	721.52	FALSE	0
2022-09-14	11:16:09	0.728817	3.24192	711.476	FALSE	0
2022-09-14	11:16:09	0.729478	3.24486	724.765	FALSE	0
2022-09-14	11:16:09	0.723524	3.21838	714.695	FALSE	0
2022-09-14	11:16:10	0.727392	3.23559	728.001	FALSE	0
2022-09-14	11:16:10	0.73243	3.258	717.953	FALSE	0
2022-09-14	11:16:10	0.724288	3.22178	731.223	FALSE	0
2022-09-14	11:16:11	0.723422	3.21793	721.171	FALSE	0
2022-09-14	11:16:11	0.72841	3.24011	734.463	FALSE	0
2022-09-14	11:16:11	0.732328	3.25754	724.428	FALSE	0
2022-09-14	11:16:11	0.729122	3.24328	737.706	FALSE	0
2022-09-14	11:16:12	0.732735	3.25935	727.688	FALSE	0
2022-09-14	11:16:12	0.735636	3.27226	740.978	FALSE	0
2022-09-14	11:16:12	0.727545	3.23627	730.924	FALSE	0
2022-09-14	11:16:12	0.730598	3.24985	744.228	FALSE	0
2022-09-14	11:16:13	0.73757	3.28086	734.205	FALSE	0
2022-09-14	11:16:13	0.729377	3.24441	747.472	FALSE	0
2022-09-14	11:16:13	0.722404	3.2134	737.418	FALSE	0
2022-09-14	11:16:13	0.721336	3.20865	750.681	FALSE	0
2022-09-14	11:16:14	0.732735	3.25935	740.677	FALSE	0
2022-09-14	11:16:14	0.727646	3.23671	753.918	FALSE	0
2022-09-14	11:16:14	0.73584	3.27316	743.951	FALSE	0
2022-09-14	11:16:15	0.730343	3.24871	757.166	FALSE	0
2022-09-14	11:16:15	0.73701	3.27837	747.229	FALSE	0
2022-09-14	11:16:15	0.735483	3.27158	760.438	FALSE	0
2022-09-14	11:16:15	0.735331	3.2709	750.5	FALSE	0
2022-09-14	11:16:16	0.729987	3.24713	763.685	FALSE	0
2022-09-14	11:16:16	0.729224	3.24373	753.744	FALSE	0
2022-09-14	11:16:16	0.730496	3.24939	766.935	FALSE	0
2022-09-14	11:16:16	0.723931	3.22019	756.964	FALSE	0
2022-09-14	11:16:17	0.733142	3.26116	770.196	FALSE	0
2022-09-14	11:16:17	0.726832	3.23309	760.197	FALSE	0
2022-09-14	11:16:17	0.733397	3.2623	773.458	FALSE	0
2022-09-14	11:16:17	0.726934	3.23355	763.43	FALSE	0
2022-09-14	11:16:18	0.722354	3.21318	776.671	FALSE	0
2022-09-14	11:16:18	0.730445	3.24917	766.68	FALSE	0
2022-09-14	11:16:18	0.725	3.22494	779.896	FALSE	0
2022-09-14	11:16:19	0.726476	3.23151	769.911	FALSE	0
2022-09-14	11:16:19	0.728613	3.24102	783.137	FALSE	0
2022-09-14	11:16:19	0.732634	3.2589	773.17	FALSE	0
2022-09-14	11:16:19	0.731107	3.25211	786.389	FALSE	0
2022-09-14	11:16:20	0.733193	3.26139	776.431	FALSE	0
2022-09-14	11:16:20	0.727646	3.23671	789.626	FALSE	0
2022-09-14	11:16:20	0.72673	3.23264	779.664	FALSE	0
2022-09-14	11:16:20	0.734669	3.26795	792.894	FALSE	0
2022-09-14	11:16:21	0.729071	3.24305	782.907	FALSE	0
2022-09-14	11:16:21	0.732888	3.26003	796.154	FALSE	0
2022-09-14	11:16:21	0.725763	3.22834	786.135	FALSE	0
2022-09-14	11:16:21	0.735891	3.27339	799.427	FALSE	0
2022-09-14	11:16:22	0.731463	3.25369	789.389	FALSE	0
2022-09-14	11:16:22	0.737621	3.28109	802.708	FALSE	0
2022-09-14	11:16:22	0.732735	3.25935	792.649	FALSE	0
2022-09-14	11:16:23	0.73014	3.24781	805.956	FALSE	0
2022-09-14	11:16:23	0.737417	3.28018	795.929	FALSE	0
2022-09-14	11:16:23	0.730343	3.24871	809.205	FALSE	0
2022-09-14	11:16:23	0.731005	3.25166	799.18	FALSE	0
2022-09-14	11:16:24	0.733041	3.26071	812.466	FALSE	0
2022-09-14	11:16:24	0.731667	3.2546	802.435	FALSE	0
2022-09-14	11:16:24	0.727697	3.23694	815.703	FALSE	0
2022-09-14	11:16:24	0.731209	3.25256	805.687	FALSE	0
2022-09-14	11:16:25	0.728054	3.23853	818.941	FALSE	0
2022-09-14	11:16:25	0.733804	3.26411	808.952	FALSE	0
2022-09-14	11:16:25	0.73187	3.2555	822.197	FALSE	0
2022-09-14	11:16:25	0.736043	3.27407	812.226	FALSE	0
2022-09-14	11:16:26	0.733041	3.26071	825.457	FALSE	0
2022-09-14	11:16:26	0.733702	3.26365	815.489	FALSE	0
2022-09-14	11:16:26	0.730038	3.24736	828.705	FALSE	0
2022-09-14	11:16:27	0.725814	3.22857	818.718	FALSE	0
2022-09-14	11:16:27	0.727697	3.23694	831.942	FALSE	0
2022-09-14	11:16:27	0.731463	3.25369	821.972	FALSE	0
2022-09-14	11:16:27	0.736908	3.27791	835.22	FALSE	0
2022-09-14	11:16:28	0.730598	3.24985	825.221	FALSE	0
2022-09-14	11:16:28	0.726272	3.2306	838.45	FALSE	0
2022-09-14	11:16:28	0.728919	3.24238	828.464	FALSE	0
2022-09-14	11:16:28	0.72327	3.21725	841.667	FALSE	0
2022-09-14	11:16:29	0.730903	3.2512	831.715	FALSE	0
2022-09-14	11:16:29	0.725407	3.22676	844.894	FALSE	0
2022-09-14	11:16:29	0.728003	3.2383	834.953	FALSE	0
2022-09-14	11:16:29	0.731107	3.25211	848.146	FALSE	0
2022-09-14	11:16:30	0.730801	3.25075	838.204	FALSE	0
2022-09-14	11:16:30	0.733092	3.26094	851.407	FALSE	0
2022-09-14	11:16:30	0.729886	3.24668	841.451	FALSE	0
2022-09-14	11:16:31	0.728155	3.23898	854.646	FALSE	0
2022-09-14	11:16:31	0.722812	3.21521	844.666	FALSE	0
2022-09-14	11:16:31	0.730496	3.24939	857.896	FALSE	0
2022-09-14	11:16:31	0.727239	3.2349	847.901	FALSE	0
2022-09-14	11:16:32	0.731768	3.25505	861.151	FALSE	0
2022-09-14	11:16:32	0.730038	3.24736	851.148	FALSE	0
2022-09-14	11:16:32	0.72841	3.24011	864.391	FALSE	0
2022-09-14	11:16:32	0.725204	3.22585	854.374	FALSE	0
2022-09-14	11:16:33	0.728766	3.2417	867.632	FALSE	0
2022-09-14	11:16:33	0.730242	3.24826	857.622	FALSE	0
2022-09-14	11:16:33	0.733142	3.26116	870.894	FALSE	0
2022-09-14	11:16:33	0.730547	3.24962	860.872	FALSE	0
2022-09-14	11:16:34	0.733041	3.26071	874.154	FALSE	0
2022-09-14	11:16:34	0.72958	3.24532	864.117	FALSE	0
2022-09-14	11:16:34	0.73472	3.26818	877.423	FALSE	0
2022-09-14	11:16:35	0.733702	3.26365	867.381	FALSE	0
2022-09-14	11:16:35	0.734211	3.26592	880.688	FALSE	0
2022-09-14	11:16:35	0.732532	3.25845	870.639	FALSE	0
2022-09-14	11:16:35	0.732379	3.25777	883.946	FALSE	0
2022-09-14	11:16:36	0.734568	3.26751	873.907	FALSE	0
2022-09-14	11:16:36	0.729733	3.246	887.192	FALSE	0
2022-09-14	11:16:36	0.732532	3.25845	877.165	FALSE	0
2022-09-14	11:16:36	0.734364	3.2666	890.459	FALSE	0
2022-09-14	11:16:37	0.73416	3.26569	880.431	FALSE	0
2022-09-14	11:16:37	0.733957	3.26479	893.724	FALSE	0
2022-09-14	11:16:37	0.731005	3.25166	883.683	FALSE	0
2022-09-14	11:16:38	0.728461	3.24034	896.964	FALSE	0
2022-09-14	11:16:38	0.734313	3.26637	886.949	FALSE	0
2022-09-14	11:16:38	0.727596	3.23649	900.2	FALSE	0
2022-09-14	11:16:38	0.72673	3.23264	890.182	FALSE	0
2022-09-14	11:16:39	0.732634	3.2589	903.459	FALSE	0
2022-09-14	11:16:39	0.72612	3.22993	893.412	FALSE	0
2022-09-14	11:16:39	0.732888	3.26003	906.719	FALSE	0
2022-09-14	11:16:39	0.727443	3.23581	896.647	FALSE	0
2022-09-14	11:16:40	0.740878	3.29557	910.015	FALSE	0
2022-09-14	11:16:40	0.726578	3.23196	899.879	FALSE	0
2022-09-14	11:16:40	0.729173	3.24351	913.258	FALSE	0
2022-09-14	11:16:40	0.727036	3.234	903.113	FALSE	0
2022-09-14	11:16:41	0.731514	3.25392	916.512	FALSE	0
2022-09-14	11:16:41	0.727952	3.23808	906.351	FALSE	0
2022-09-14	11:16:41	0.730293	3.24849	919.761	FALSE	0
2022-09-14	11:16:41	0.737265	3.2795	909.631	FALSE	0
2022-09-14	11:16:42	0.732226	3.25709	923.018	FALSE	0
2022-09-14	11:16:42	0.730852	3.25098	912.882	FALSE	0
2022-09-14	11:16:42	0.72785	3.23762	926.256	FALSE	0
2022-09-14	11:16:43	0.73472	3.26818	916.15	FALSE	0
2022-09-14	11:16:43	0.726476	3.23151	929.487	FALSE	0
2022-09-14	11:16:43	0.720114	3.20321	919.353	FALSE	0
2022-09-14	11:16:43	0.732786	3.25958	932.747	FALSE	0
2022-09-14	11:16:44	0.731209	3.25256	922.606	FALSE	0
2022-09-14	11:16:44	0.731768	3.25505	936.002	FALSE	0
2022-09-14	11:16:44	0.736298	3.2752	925.881	FALSE	0
2022-09-14	11:16:44	0.735331	3.2709	939.273	FALSE	0
2022-09-14	11:16:45	0.734109	3.26546	929.147	FALSE	0
2022-09-14	11:16:45	0.730445	3.24917	942.522	FALSE	0
2022-09-14	11:16:45	0.733448	3.26252	932.409	FALSE	0
2022-09-14	11:16:45	0.7307	3.2503	945.772	FALSE	0
2022-09-14	11:16:46	0.728054	3.23853	935.648	FALSE	0
2022-09-14	11:16:46	0.72958	3.24532	949.017	FALSE	0
2022-09-14	11:16:46	0.726527	3.23174	938.879	FALSE	0
2022-09-14	11:16:47	0.730343	3.24871	952.266	FALSE	0
2022-09-14	11:16:47	0.730801	3.25075	942.13	FALSE	0
2022-09-14	11:16:47	0.733448	3.26252	955.529	FALSE	0
2022-09-14	11:16:47	0.727036	3.234	945.364	FALSE	0
2022-09-14	11:16:48	0.735891	3.27339	958.802	FALSE	0
2022-09-14	11:16:48	0.733702	3.26365	948.628	FALSE	0
2022-09-14	11:16:48	0.728715	3.24147	962.044	FALSE	0
2022-09-14	11:16:48	0.726018	3.22947	951.857	FALSE	0
2022-09-14	11:16:49	0.730598	3.24985	965.293	FALSE	0
2022-09-14	11:16:49	0.73472	3.26818	955.125	FALSE	0
2022-09-14	11:16:49	0.724491	3.22268	968.516	FALSE	0
2022-09-14	11:16:49	0.730751	3.25053	958.376	FALSE	0
2022-09-14	11:16:50	0.720114	3.20321	971.719	FALSE	0
2022-09-14	11:16:50	0.729682	3.24577	961.622	FALSE	0
2022-09-14	11:16:50	0.739707	3.29036	975.01	FALSE	0
2022-09-14	11:16:51	0.730293	3.24849	964.87	FALSE	0
2022-09-14	11:16:51	0.732684	3.25912	978.269	FALSE	0
2022-09-14	11:16:51	0.736654	3.27678	968.147	FALSE	0
2022-09-14	11:16:51	0.735891	3.27339	981.542	FALSE	0
2022-09-14	11:16:52	0.732735	3.25935	971.406	FALSE	0
2022-09-14	11:16:52	0.738435	3.28471	984.827	FALSE	0
2022-09-14	11:16:52	0.732125	3.25664	974.663	FALSE	0
2022-09-14	11:16:52	0.736043	3.27407	988.101	FALSE	0
2022-09-14	11:16:53	0.727952	3.23808	977.901	FALSE	0
2022-09-14	11:16:53	0.727188	3.23468	991.336	FALSE	0
2022-09-14	11:16:53	0.731259	3.25279	981.154	FALSE	0
2022-09-14	11:16:53	0.732583	3.25868	994.594	FALSE	0
2022-09-14	11:16:54	0.734109	3.26546	984.419	FALSE	0
2022-09-14	11:16:54	0.735992	3.27384	997.868	FALSE	0
2022-09-14	11:16:54	0.730496	3.24939	987.669	FALSE	0
2022-09-14	11:16:55	0.729784	3.24623	1001.11	FALSE	0
2022-09-14	11:16:55	0.730801	3.25075	990.919	FALSE	0
2022-09-14	11:16:55	0.735941	3.27361	1004.39	FALSE	0
2022-09-14	11:16:55	0.735382	3.27113	994.191	FALSE	0
2022-09-14	11:16:56	0.73645	3.27588	1007.66	FALSE	0
2022-09-14	11:16:56	0.735891	3.27339	997.464	FALSE	0
2022-09-14	11:16:56	0.732125	3.25664	1010.92	FALSE	0
2022-09-14	11:16:56	0.724338	3.222	1000.69	FALSE	0
2022-09-14	11:16:57	0.726221	3.23038	1014.15	FALSE	0
2022-09-14	11:16:57	0.727545	3.23627	1003.92	FALSE	0
2022-09-14	11:16:57	0.731819	3.25528	1017.41	FALSE	0
2022-09-14	11:16:57	0.729071	3.24305	1007.17	FALSE	0
2022-09-14	11:16:58	0.733244	3.26162	1020.67	FALSE	0
2022-09-14	11:16:58	0.731056	3.25188	1010.42	FALSE	0
2022-09-14	11:16:58	0.733193	3.26139	1023.93	FALSE	0
2022-09-14	11:16:59	0.73131	3.25301	1013.67	FALSE	0
2022-09-14	11:16:59	0.728868	3.24215	1027.17	FALSE	0
2022-09-14	11:16:59	0.741438	3.29806	1016.97	FALSE	0
2022-09-14	11:16:59	0.733855	3.26433	1030.44	FALSE	0
2022-09-14	11:17:00	0.730343	3.24871	1020.22	FALSE	0
2022-09-14	11:17:00	0.735433	3.27135	1033.71	FALSE	0
2022-09-14	11:17:00	0.735127	3.26999	1023.49	FALSE	0
2022-09-14	11:17:00	0.725509	3.22721	1036.93	FALSE	0
2022-09-14	11:17:01	0.72958	3.24532	1026.73	FALSE	0
2022-09-14	11:17:01	0.732684	3.25912	1040.19	FALSE	0
2022-09-14	11:17:01	0.727646	3.23671	1029.97	FALSE	0
2022-09-14	11:17:01	0.734211	3.26592	1043.46	FALSE	0
2022-09-14	11:17:02	0.733702	3.26365	1033.23	FALSE	0
2022-09-14	11:17:02	0.733702	3.26365	1046.72	FALSE	0
2022-09-14	11:17:02	0.731717	3.25482	1036.49	FALSE	0
2022-09-14	11:17:03	0.733753	3.26388	1049.99	FALSE	0
2022-09-14	11:17:03	0.734262	3.26614	1039.75	FALSE	0
2022-09-14	11:17:03	0.73701	3.27837	1053.27	FALSE	0
2022-09-14	11:17:03	0.731056	3.25188	1043.01	FALSE	0
2022-09-14	11:17:04	0.728155	3.23898	1056.5	FALSE	0
2022-09-14	11:17:04	0.735026	3.26954	1046.28	FALSE	0
2022-09-14	11:17:04	0.735433	3.27135	1059.78	FALSE	0
2022-09-14	11:17:04	0.733244	3.26162	1049.54	FALSE	0
2022-09-14	11:17:05	0.736399	3.27565	1063.05	FALSE	0
2022-09-14	11:17:05	0.729224	3.24373	1052.78	FALSE	0
2022-09-14	11:17:05	0.736094	3.27429	1066.33	FALSE	0
2022-09-14	11:17:05	0.732837	3.25981	1056.04	FALSE	0
2022-09-14	11:17:06	0.737112	3.27882	1069.6	FALSE	0
2022-09-14	11:17:06	0.729529	3.24509	1059.29	FALSE	0
2022-09-14	11:17:06	0.727392	3.23559	1072.84	FALSE	0
2022-09-14	11:17:07	0.732735	3.25935	1062.54	FALSE	0
2022-09-14	11:17:07	0.733702	3.26365	1076.1	FALSE	0
2022-09-14	11:17:07	0.725407	3.22676	1065.77	FALSE	0
2022-09-14	11:17:07	0.734313	3.26637	1079.37	FALSE	0
2022-09-14	11:17:08	0.732277	3.25731	1069.03	FALSE	0
2022-09-14	11:17:08	0.733957	3.26479	1082.63	FALSE	0
2022-09-14	11:17:08	0.729173	3.24351	1072.27	FALSE	0
2022-09-14	11:17:08	0.730394	3.24894	1085.88	FALSE	0
2022-09-14	11:17:09	0.734109	3.26546	1075.54	FALSE	0
2022-09-14	11:17:09	0.73131	3.25301	1089.14	FALSE	0
2022-09-14	11:17:09	0.729326	3.24419	1078.78	FALSE	0
2022-09-14	11:17:09	0.733855	3.26433	1092.4	FALSE	0
2022-09-14	11:17:10	0.727697	3.23694	1082.02	FALSE	0
2022-09-14	11:17:10	0.729224	3.24373	1095.64	FALSE	0
2022-09-14	11:17:10	0.732583	3.25868	1085.28	FALSE	0
2022-09-14	11:17:11	0.729071	3.24305	1098.89	FALSE	0
2022-09-14	11:17:11	0.725662	3.22789	1088.51	FALSE	0
2022-09-14	11:17:11	0.736603	3.27656	1102.16	FALSE	0
2022-09-14	11:17:11	0.732837	3.25981	1091.77	FALSE	0
2022-09-14	11:17:12	0.734109	3.26546	1105.43	FALSE	0
2022-09-14	11:17:12	0.732481	3.25822	1095.02	FALSE	0
2022-09-14	11:17:12	0.730751	3.25053	1108.68	FALSE	0
2022-09-14	11:17:12	0.73014	3.24781	1098.27	FALSE	0
2022-09-14	11:17:13	0.734262	3.26614	1111.95	FALSE	0
2022-09-14	11:17:13	0.736908	3.27791	1101.55	FALSE	0
2022-09-14	11:17:13	0.730496	3.24939	1115.2	FALSE	0
2022-09-14	11:17:13	0.731107	3.25211	1104.8	FALSE	0
2022-09-14	11:17:14	0.727697	3.23694	1118.43	FALSE	0
2022-09-14	11:17:14	0.730394	3.24894	1108.05	FALSE	0
2022-09-14	11:17:14	0.739046	3.28742	1121.72	FALSE	0
2022-09-14	11:17:15	0.73243	3.258	1111.31	FALSE	0
2022-09-14	11:17:15	0.729478	3.24486	1124.96	FALSE	0
2022-09-14	11:17:15	0.730191	3.24804	1114.56	FALSE	0
2022-09-14	11:17:15	0.724338	3.222	1128.19	FALSE	0
2022-09-14	11:17:16	0.727596	3.23649	1117.79	FALSE	0
2022-09-14	11:17:16	0.736145	3.27452	1131.46	FALSE	0
2022-09-14	11:17:16	0.732888	3.26003	1121.05	FALSE	0
2022-09-14	11:17:16	0.729886	3.24668	1134.71	FALSE	0
2022-09-14	11:17:17	0.733244	3.26162	1124.31	FALSE	0
2022-09-14	11:17:17	0.734262	3.26614	1137.97	FALSE	0
2022-09-14	11:17:17	0.73187	3.2555	1127.57	FALSE	0
2022-09-14	11:17:17	0.731616	3.25437	1141.23	FALSE	0
2022-09-14	11:17:18	0.729682	3.24577	1130.82	FALSE	0
2022-09-14	11:17:18	0.732583	3.25868	1144.49	FALSE	0
2022-09-14	11:17:18	0.731565	3.25415	1134.07	FALSE	0
2022-09-14	11:17:19	0.735687	3.27248	1147.76	FALSE	0
2022-09-14	11:17:19	0.727443	3.23581	1137.31	FALSE	0
2022-09-14	11:17:19	0.7307	3.2503	1151.01	FALSE	0
2022-09-14	11:17:19	0.730242	3.24826	1140.55	FALSE	0
2022-09-14	11:17:20	0.726883	3.23332	1154.24	FALSE	0
2022-09-14	11:17:20	0.737214	3.27928	1143.83	FALSE	0
2022-09-14	11:17:20	0.724237	3.22155	1157.47	FALSE	0
2022-09-14	11:17:20	0.740165	3.2924	1147.13	FALSE	0
2022-09-14	11:17:21	0.728308	3.23966	1160.7	FALSE	0
2022-09-14	11:17:21	0.724949	3.22472	1150.35	FALSE	0
2022-09-14	11:17:21	0.728308	3.23966	1163.94	FALSE	0
2022-09-14	11:17:21	0.732328	3.25754	1153.61	FALSE	0
2022-09-14	11:17:22	0.73014	3.24781	1167.19	FALSE	0
2022-09-14	11:17:22	0.732583	3.25868	1156.87	FALSE	0
2022-09-14	11:17:22	0.724593	3.22313	1170.42	FALSE	0
2022-09-14	11:17:23	0.73243	3.258	1160.12	FALSE	0
2022-09-14	11:17:23	0.72958	3.24532	1173.66	FALSE	0
2022-09-14	11:17:23	0.733193	3.26139	1163.39	FALSE	0
2022-09-14	11:17:23	0.729733	3.246	1176.91	FALSE	0
2022-09-14	11:17:24	0.730038	3.24736	1166.63	FALSE	0
2022-09-14	11:17:24	0.734771	3.26841	1180.18	FALSE	0
2022-09-14	11:17:24	0.735127	3.26999	1169.9	FALSE	0
2022-09-14	11:17:24	0.734669	3.26795	1183.44	FALSE	0
2022-09-14	11:17:25	0.734618	3.26773	1173.17	FALSE	0
2022-09-14	11:17:25	0.727748	3.23717	1186.68	FALSE	0
2022-09-14	11:17:25	0.727494	3.23604	1176.41	FALSE	0
2022-09-14	11:17:25	0.728919	3.24238	1189.92	FALSE	0
2022-09-14	11:17:26	0.726374	3.23106	1179.64	FALSE	0
2022-09-14	11:17:26	0.732684	3.25912	1193.18	FALSE	0
2022-09-14	11:17:26	0.729987	3.24713	1182.89	FALSE	0
2022-09-14	11:17:27	0.725916	3.22902	1196.41	FALSE	0
2022-09-14	11:17:27	0.730649	3.25007	1186.14	FALSE	0
2022-09-14	11:17:27	0.733142	3.26116	1199.67	FALSE	0
2022-09-14	11:17:27	0.733346	3.26207	1189.4	FALSE	0
2022-09-14	11:17:28	0.734568	3.26751	1202.94	FALSE	0
2022-09-14	11:17:28	0.737672	3.28131	1192.68	FALSE	0
2022-09-14	11:17:28	0.731158	3.25234	1206.19	FALSE	0
2022-09-14	11:17:28	0.73472	3.26818	1195.95	FALSE	0
2022-09-14	11:17:29	0.729631	3.24554	1209.44	FALSE	0
2022-09-14	11:17:29	0.7307	3.2503	1199.2	FALSE	0
2022-09-14	11:17:29	0.732786	3.25958	1212.7	FALSE	0
2022-09-14	11:17:29	0.734517	3.26728	1202.46	FALSE	0
2022-09-14	11:17:30	0.734262	3.26614	1215.96	FALSE	0
2022-09-14	11:17:30	0.726221	3.23038	1205.69	FALSE	0
2022-09-14	11:17:30	0.732837	3.25981	1219.22	FALSE	0
2022-09-14	11:17:31	0.734618	3.26773	1208.96	FALSE	0
2022-09-14	11:17:31	0.727036	3.234	1222.46	FALSE	0
2022-09-14	11:17:31	0.734262	3.26614	1212.23	FALSE	0
2022-09-14	11:17:31	0.732125	3.25664	1225.71	FALSE	0
2022-09-14	11:17:32	0.734262	3.26614	1215.49	FALSE	0
2022-09-14	11:17:32	0.731514	3.25392	1228.97	FALSE	0
2022-09-14	11:17:32	0.734873	3.26886	1218.76	FALSE	0
2022-09-14	11:17:32	0.730038	3.24736	1232.21	FALSE	0
2022-09-14	11:17:33	0.734313	3.26637	1222.03	FALSE	0
2022-09-14	11:17:33	0.73243	3.258	1235.47	FALSE	0
2022-09-14	11:17:33	0.731361	3.25324	1225.28	FALSE	0
2022-09-14	11:17:33	0.727494	3.23604	1238.71	FALSE	0
2022-09-14	11:17:34	0.730343	3.24871	1228.53	FALSE	0
2022-09-14	11:17:34	0.730038	3.24736	1241.96	FALSE	0
2022-09-14	11:17:34	0.739351	3.28878	1231.82	FALSE	0
2022-09-14	11:17:35	0.736349	3.27543	1245.23	FALSE	0
2022-09-14	11:17:35	0.726425	3.23128	1235.05	FALSE	0
2022-09-14	11:17:35	0.743575	3.30757	1248.54	FALSE	0
2022-09-14	11:17:35	0.731412	3.25347	1238.31	FALSE	0
2022-09-14	11:17:36	0.736501	3.2761	1251.82	FALSE	0
2022-09-14	11:17:36	0.727799	3.2374	1241.54	FALSE	0
2022-09-14	11:17:36	0.729936	3.2469	1255.06	FALSE	0
2022-09-14	11:17:36	0.729835	3.24645	1244.79	FALSE	0
2022-09-14	11:17:37	0.733855	3.26433	1258.33	FALSE	0
2022-09-14	11:17:37	0.730852	3.25098	1248.04	FALSE	0
2022-09-14	11:17:37	0.760318	3.38205	1261.71	FALSE	0
2022-09-14	11:17:37	2.31808	10.3113	1258.35	FALSE	0
2022-09-14	11:17:38	3.1482	14.0038	1275.71	1	1
2022-09-14	11:17:38	1.21635	5.41057	1263.76	FALSE	1
2022-09-14	11:17:38	-1.47637	-6.56719	1275.71	FALSE	1
2022-09-14	11:17:39	-1.92441	-8.56016	1263.76	FALSE	1
2022-09-14	11:17:39	-0.950521	-4.22811	1275.71	FALSE	1
2022-09-14	11:17:39	0.0245422	0.109169	1263.87	FALSE	1
2022-09-14	11:17:39	0.375433	1.67	1277.38	FALSE	1
2022-09-14	11:17:40	1.99284	8.86455	1272.74	FALSE	1
2022-09-14	11:17:40	2.31599	10.302	1287.68	FALSE	1
2022-09-14	11:17:40	0.809631	3.6014	1276.34	FALSE	1
2022-09-14	11:17:40	-1.80106	-8.01148	1287.68	FALSE	1
2022-09-14	11:17:41	-0.248638	-1.10599	1276.34	FALSE	1
2022-09-14	11:17:41	-1.34065	-5.96348	1287.68	FALSE	1
2022-09-14	11:17:41	0.249784	1.11109	1277.45	FALSE	1
2022-09-14	11:17:41	0.544084	2.42019	1290.1	FALSE	1
2022-09-14	11:17:42	0.387188	1.72229	1279.17	FALSE	1
2022-09-14	11:17:42	-1.82625	-8.12353	1290.1	FALSE	1
2022-09-14	11:17:42	-0.573524	-2.55115	1279.17	FALSE	1
2022-09-14	11:17:43	2.78256	12.3774	1302.48	FALSE	1
2022-09-14	11:17:43	-0.741717	-3.29931	1279.17	FALSE	1
2022-09-14	11:17:43	-1.92136	-8.54659	1302.48	FALSE	1
2022-09-14	11:17:43	-2.05093	-9.12295	1279.17	FALSE	1
2022-09-14	11:17:44	-2.22849	-9.91277	1302.48	FALSE	1
2022-09-14	11:17:44	-0.586094	-2.60706	1279.17	FALSE	1
2022-09-14	11:17:44	0.526425	2.34164	1304.82	FALSE	1
2022-09-14	11:17:44	-0.723345	-3.21758	1279.17	FALSE	1
2022-09-14	11:17:45	-1.05113	-4.67564	1304.82	FALSE	1
2022-09-14	11:17:45	-1.22248	-5.43784	1279.17	FALSE	1
2022-09-14	11:17:45	-0.549656	-2.44498	1304.82	FALSE	1
2022-09-14	11:17:45	-0.233524	-1.03876	1279.17	FALSE	1
2022-09-14	11:17:46	-0.449656	-2.00016	1304.82	FALSE	1
2022-09-14	11:17:46	-0.513575	-2.28448	1279.17	FALSE	1
2022-09-14	11:17:46	-0.571488	-2.54209	1304.82	FALSE	1
2022-09-14	11:17:47	-0.637442	-2.83547	1279.17	FALSE	1
2022-09-14	11:17:47	-0.664109	-2.95409	1304.82	FALSE	1
2022-09-14	11:17:47	-0.699681	-3.11232	1279.17	FALSE	1
2022-09-14	11:17:47	-0.726755	-3.23275	1304.82	FALSE	1
2022-09-14	11:17:48	-0.81734	-3.63569	1279.17	FALSE	1
2022-09-14	11:17:48	-0.791386	-3.52024	1304.82	FALSE	1
2022-09-14	11:17:48	-0.854592	-3.8014	1279.17	FALSE	1
2022-09-14	11:17:48	-0.837646	-3.72602	1304.82	FALSE	1
2022-09-14	11:17:49	-1.01719	-4.52466	1279.17	FALSE	1
2022-09-14	11:17:49	-1.17963	-5.24723	1304.82	FALSE	1
2022-09-14	11:17:49	-1.15159	-5.1225	1279.17	FALSE	1
2022-09-14	11:17:49	-1.13307	-5.04012	1304.82	FALSE	1
2022-09-14	11:17:50	-1.25978	-5.60375	1279.17	FALSE	1
2022-09-14	11:17:50	-1.15464	-5.13607	1304.82	FALSE	1
2022-09-14	11:17:50	-1.23296	-5.48445	1279.17	FALSE	1
2022-09-14	11:17:51	-1.07347	-4.77501	1304.82	FALSE	1
2022-09-14	11:17:51	-1.43821	-6.39745	1279.17	FALSE	1
2022-09-14	11:17:51	-1.23164	-5.47858	1304.82	FALSE	1
2022-09-14	11:17:51	-1.36533	-6.07326	1279.17	FALSE	1
2022-09-14	11:17:52	-1.26904	-5.64494	1304.82	FALSE	1
2022-09-14	11:17:52	-1.30849	-5.82043	1279.17	FALSE	1
2022-09-14	11:17:52	-1.43729	-6.39335	1304.82	FALSE	1
2022-09-14	11:17:52	-1.50024	-6.67337	1279.17	FALSE	1
2022-09-14	11:17:53	-1.46838	-6.53165	1304.82	FALSE	1
2022-09-14	11:17:53	-2.53251	-11.2651	1279.17	FALSE	1
2022-09-14	11:17:53	-2.52411	-11.2277	1304.82	FALSE	1
2022-09-14	11:17:53	-2.57729	-11.4643	1279.17	FALSE	1
2022-09-14	11:17:54	-2.59719	-11.5528	1304.82	FALSE	1
2022-09-14	11:17:54	-2.75378	-12.2494	1279.17	FALSE	1
2022-09-14	11:17:54	-2.7206	-12.1018	1304.82	FALSE	1
2022-09-14	11:17:55	-2.78441	-12.3856	1279.17	FALSE	1
2022-09-14	11:17:55	-2.80029	-12.4562	1304.82	FALSE	1
2022-09-14	11:17:55	-2.89505	-12.8778	1279.17	FALSE	1
2022-09-14	11:17:55	-2.91469	-12.9651	1304.82	FALSE	1
2022-09-14	11:17:56	-2.98309	-13.2694	1279.17	FALSE	1
2022-09-14	11:17:56	-2.95902	-13.1623	1304.82	FALSE	1
2022-09-14	11:17:56	-3.03301	-13.4914	1279.17	FALSE	1
2022-09-14	11:17:56	-3.00558	-13.3694	1304.82	FALSE	1
2022-09-14	11:17:57	-3.02894	-13.4733	1279.17	FALSE	1
2022-09-14	11:17:57	-3.04538	-13.5465	1304.82	FALSE	1
2022-09-14	11:17:57	-3.09383	-13.762	1279.17	FALSE	1
2022-09-14	11:17:57	-3.09831	-13.7819	1304.82	FALSE	1
2022-09-14	11:17:58	-3.16726	-14.0886	1279.17	FALSE	1
2022-09-14	11:17:58	-3.21057	-14.2813	1304.82	FALSE	1
2022-09-14	11:17:58	-3.34721	-14.8891	1279.17	FALSE	1
2022-09-14	11:17:59	-3.41576	-15.194	1304.82	FALSE	1
2022-09-14	11:17:59	-3.46421	-15.4095	1279.17	FALSE	1
2022-09-14	11:17:59	-3.55612	-15.8183	1304.82	FALSE	1
2022-09-14	11:17:59	-3.42777	-15.2474	1279.17	FALSE	1
2022-09-14	11:18:00	-3.55245	-15.802	1304.82	FALSE	1
2022-09-14	11:18:00	-3.48238	-15.4903	1279.17	FALSE	1
2022-09-14	11:18:00	-3.641	-16.1959	1304.82	FALSE	1
2022-09-14	11:18:00	-3.6665	-16.3093	1279.17	FALSE	1
2022-09-14	11:18:01	-3.60828	-16.0504	1304.82	FALSE	1
2022-09-14	11:18:01	-3.67072	-16.3281	1279.17	FALSE	1
2022-09-14	11:18:01	-3.57235	-15.8905	1304.82	FALSE	1
2022-09-14	11:18:01	-3.74441	-16.6559	1279.17	FALSE	1
2022-09-14	11:18:02	-3.7351	-16.6145	1304.82	FALSE	1
2022-09-14	11:18:02	-3.86971	-17.2132	1279.17	FALSE	1
2022-09-14	11:18:02	-3.92334	-17.4518	1304.82	FALSE	1
2022-09-14	11:18:03	-3.89958	-17.3461	1279.17	FALSE	1
2022-09-14	11:18:03	-3.82965	-17.035	1304.82	FALSE	1
2022-09-14	11:18:03	-3.86284	-17.1827	1279.17	FALSE	1
2022-09-14	11:18:03	-3.89184	-17.3117	1304.82	FALSE	1
2022-09-14	11:18:04	-3.96009	-17.6153	1279.17	FALSE	1
2022-09-14	11:18:04	-3.99943	-17.7903	1304.82	FALSE	1
2022-09-14	11:18:04	-4.11907	-18.3224	1279.17	FALSE	1
2022-09-14	11:18:04	-4.19749	-18.6713	1304.82	FALSE	1
2022-09-14	11:18:05	-4.201	-18.6869	1279.17	FALSE	1
2022-09-14	11:18:05	-4.21047	-18.729	1304.82	FALSE	1
2022-09-14	11:18:05	-4.1382	-18.4075	1279.17	FALSE	1
2022-09-14	11:18:05	-4.238	-18.8515	1304.82	FALSE	1
2022-09-14	11:18:06	-4.21444	-18.7467	1279.17	FALSE	1
2022-09-14	11:18:06	-4.26518	-18.9724	1304.82	FALSE	1
2022-09-14	11:18:06	-4.24355	-18.8762	1279.17	FALSE	1
2022-09-14	11:18:07	-4.25571	-18.9302	1304.82	FALSE	1
2022-09-14	11:18:07	-4.25337	-18.9198	1279.17	FALSE	1
2022-09-14	11:18:07	-4.31927	-19.213	1304.82	FALSE	1
2022-09-14	11:18:07	-4.29642	-19.1113	1279.17	FALSE	1
2022-09-14	11:18:08	-4.26065	-18.9522	1304.82	FALSE	1
2022-09-14	11:18:08	-4.30044	-19.1292	1279.17	FALSE	1
2022-09-14	11:18:08	-4.33459	-19.2811	1304.82	FALSE	1
2022-09-14	11:18:08	-4.40049	-19.5743	1279.17	FALSE	1
2022-09-14	11:18:09	-4.33942	-19.3026	1304.82	FALSE	1
2022-09-14	11:18:09	-4.46166	-19.8464	1279.17	FALSE	1
2022-09-14	11:18:09	-4.48339	-19.943	1304.82	FALSE	1
2022-09-14	11:18:09	-4.56146	-20.2903	1279.17	FALSE	1
2022-09-14	11:18:10	-4.62365	-20.5669	1304.82	FALSE	1
2022-09-14	11:18:10	-4.44894	-19.7898	1279.17	FALSE	1
2022-09-14	11:18:10	-4.31296	-19.1849	1304.82	FALSE	1
2022-09-14	11:18:11	-4.2754	-19.0178	1279.17	FALSE	1
2022-09-14	11:18:11	-4.2095	-18.7247	1304.82	FALSE	1
2022-09-14	11:18:11	-4.18019	-18.5943	1279.17	FALSE	1
2022-09-14	11:18:11	-4.11953	-18.3245	1304.82	FALSE	1
2022-09-14	11:18:12	-2.64752	-11.7767	1279.17	FALSE	1
2022-09-14	11:18:12	-2.5036	-11.1365	1304.82	FALSE	1
2022-09-14	11:18:12	-2.76299	-12.2903	1279.17	FALSE	1
2022-09-14	11:18:12	-2.63581	-11.7246	1304.82	FALSE	1
2022-09-14	11:18:13	-3.26217	-14.5108	1279.17	FALSE	1
2022-09-14	11:18:13	0.713244	3.17265	1308	FALSE	1
2022-09-14	11:18:13	0.733244	3.26162	1282.43	FALSE	1
2022-09-14	11:18:13	0.735738	3.27271	1311.27	FALSE	1
2022-09-14	11:18:14	0.734924	3.26909	1285.7	FALSE	1
2022-09-14	11:18:14	0.683168	3.03887	1314.31	FALSE	1
2022-09-14	11:18:14	0.423423	1.88347	1287.58	FALSE	1
2022-09-14	11:18:15	0.457875	2.03672	1316.34	FALSE	1
2022-09-14	11:18:15	0.293804	1.3069	1288.89	FALSE	1
2022-09-14	11:18:15	0.112125	0.498754	1316.84	FALSE	1
2022-09-14	11:18:15	-0.0852287	-0.379114	1288.89	FALSE	1
2022-09-14	11:18:16	-0.107671	-0.478942	1316.84	FALSE	1
2022-09-14	11:18:16	-0.137137	-0.610013	1288.89	FALSE	1
2022-09-14	11:18:16	0.167952	0.747084	1317.59	FALSE	1
2022-09-14	11:18:16	0.0695295	0.309281	1289.2	FALSE	1
2022-09-14	11:18:17	0.304644	1.35512	1318.95	FALSE	1
2022-09-14	11:18:17	0.184847	0.822236	1290.02	FALSE	1
2022-09-14	11:18:17	0.296349	1.31822	1320.26	FALSE	1
2022-09-14	11:18:17	0.181743	0.808429	1290.83	FALSE	1
2022-09-14	11:18:18	0.303321	1.34923	1321.61	FALSE	1
2022-09-14	11:18:18	0.234924	1.04499	1291.88	FALSE	1
2022-09-14	11:18:18	0.308359	1.37164	1322.98	FALSE	1
2022-09-14	11:18:19	0.294109	1.30826	1293.18	FALSE	1
2022-09-14	11:18:19	0.33472	1.4889	1324.47	FALSE	1
2022-09-14	11:18:19	0.799402	3.5559	1296.74	FALSE	1
2022-09-14	11:18:19	0.656654	2.92093	1327.39	FALSE	1
2022-09-14	11:18:20	1.22139	5.43299	1302.17	FALSE	1
2022-09-14	11:18:20	1.73177	7.70326	1335.1	FALSE	1
2022-09-14	11:18:20	-1.68838	-7.51025	1302.17	FALSE	1
2022-09-14	11:18:20	-2.13597	-9.50122	1335.1	FALSE	1
2022-09-14	11:18:21	-2.34731	-10.4413	1302.17	FALSE	1
2022-09-14	11:18:21	-2.47352	-11.0027	1335.1	FALSE	1
2022-09-14	11:18:21	-2.54899	-11.3384	1302.17	FALSE	1
2022-09-14	11:18:21	-2.66675	-11.8622	1335.1	FALSE	1
2022-09-14	11:18:22	-2.71724	-12.0868	1302.17	FALSE	1
2022-09-14	11:18:22	-2.78339	-12.3811	1335.1	FALSE	1
2022-09-14	11:18:22	-2.80569	-12.4803	1302.17	FALSE	1
2022-09-14	11:18:23	-2.77805	-12.3573	1335.1	FALSE	1
2022-09-14	11:18:23	-2.36258	-10.5092	1302.17	FALSE	1
2022-09-14	11:18:23	-2.47541	-11.0111	1335.1	FALSE	1
2022-09-14	11:18:23	-2.61021	-11.6107	1302.17	FALSE	1
2022-09-14	11:18:24	-2.69306	-11.9793	1335.1	FALSE	1
2022-09-14	11:18:24	-2.67057	-11.8792	1302.17	FALSE	1
2022-09-14	11:18:24	-2.6835	-11.9367	1335.1	FALSE	1
2022-09-14	11:18:24	-2.68477	-11.9424	1302.17	FALSE	1
2022-09-14	11:18:25	-0.17042	-0.758062	1335.1	FALSE	1
2022-09-14	11:18:25	0.724389	3.22223	1305.4	FALSE	1
2022-09-14	11:18:25	0.702812	3.12625	1338.22	FALSE	1
2022-09-14	11:18:25	-2.27077	-10.1008	1305.4	FALSE	1
2022-09-14	11:18:26	-2.68874	-11.9601	1338.22	FALSE	1
2022-09-14	11:18:26	-3.19337	-14.2047	1305.4	FALSE	1
2022-09-14	11:18:26	-3.26818	-14.5375	1338.22	FALSE	1
2022-09-14	11:18:27	0.530954	2.36179	1307.76	FALSE	1
2022-09-14	11:18:27	-2.40116	-10.6808	1338.22	FALSE	1
2022-09-14	11:18:27	-4.00283	-17.8054	1307.76	FALSE	1
2022-09-14	11:18:27	-3.87439	-17.2341	1338.22	FALSE	1
2022-09-14	11:18:28	-3.92248	-17.448	1307.76	FALSE	1
2022-09-14	11:18:28	-4.18202	-18.6025	1338.22	FALSE	1
2022-09-14	11:18:28	-3.83179	-17.0446	1307.76	FALSE	1
2022-09-14	11:18:28	-2.8866	-12.8402	1338.22	FALSE	1
2022-09-14	11:18:29	-1.55363	-6.91086	1307.76	FALSE	1
2022-09-14	11:18:29	-1.08721	-4.83613	1338.22	FALSE	1
2022-09-14	11:18:29	-1.67057	-7.43103	1307.76	FALSE	1
2022-09-14	11:18:29	-3.4839	-15.4971	1338.22	FALSE	1
2022-09-14	11:18:30	-4.85973	-21.6171	1307.76	FALSE	1
2022-09-14	11:18:30	-4.87205	-21.6719	1338.22	FALSE	1
2022-09-14	11:18:30	-4.87159	-21.6698	1307.76	FALSE	1
2022-09-14	11:18:31	-4.73403	-21.0579	1338.22	FALSE	1
2022-09-14	11:18:31	-4.56538	-20.3077	1307.76	FALSE	1
2022-09-14	11:18:31	0.393092	1.74855	1339.97	FALSE	1
2022-09-14	11:18:31	0.365255	1.62473	1309.38	FALSE	1
2022-09-14	11:18:32	0.367748	1.63582	1341.61	FALSE	1
2022-09-14	11:18:32	0.16556	0.736444	1310.12	FALSE	1
2022-09-14	11:18:32	0.156603	0.696601	1342.3	FALSE	1
2022-09-14	11:18:32	0.229071	1.01895	1311.14	FALSE	1
2022-09-14	11:18:33	0.0896312	0.398698	1342.7	FALSE	1
2022-09-14	11:18:33	0.142761	0.635029	1311.77	FALSE	1
2022-09-14	11:18:33	0.161336	0.717655	1343.42	FALSE	1
2022-09-14	11:18:33	0.244695	1.08845	1312.86	FALSE	1
2022-09-14	11:18:34	0.184237	0.819523	1344.24	FALSE	1
2022-09-14	11:18:34	0.0659671	0.293435	1313.15	FALSE	1
2022-09-14	11:18:34	0.117112	0.520938	1344.76	FALSE	1
2022-09-14	11:18:35	0.000572752	0.00254772	1313.16	FALSE	1
2022-09-14	11:18:35	0.355942	1.5833	1346.34	FALSE	1
2022-09-14	11:18:35	0.392583	1.74629	1314.9	FALSE	1
2022-09-14	11:18:35	0.957417	4.25878	1350.6	FALSE	1
2022-09-14	11:18:36	1.16841	5.19732	1320.1	FALSE	1
2022-09-14	11:18:36	1.30739	5.81553	1356.42	FALSE	1
2022-09-14	11:18:36	-0.43215	-1.92229	1320.1	FALSE	1
2022-09-14	11:18:36	-0.465279	-2.06965	1356.42	FALSE	1
2022-09-14	11:18:37	-0.694032	-3.08719	1320.1	FALSE	1
2022-09-14	11:18:37	-0.759121	-3.37672	1356.42	FALSE	1
2022-09-14	11:18:37	-0.888027	-3.95012	1320.1	FALSE	1
2022-09-14	11:18:37	-0.920394	-4.0941	1356.42	FALSE	1
2022-09-14	11:18:38	-0.745636	-3.31674	1320.1	FALSE	1
2022-09-14	11:18:38	-0.988078	-4.39517	1356.42	FALSE	1
2022-09-14	11:18:38	-0.964414	-4.28991	1320.1	FALSE	1
2022-09-14	11:18:39	-1.02207	-4.54637	1356.42	FALSE	1
2022-09-14	11:18:39	-1.04538	-4.65006	1320.1	FALSE	1
2022-09-14	11:18:39	-0.833371	-3.707	1356.42	FALSE	1
2022-09-14	11:18:39	-0.929605	-4.13507	1320.1	FALSE	1
2022-09-14	11:18:40	-0.981208	-4.36461	1356.42	FALSE	1
2022-09-14	11:18:40	-1.12462	-5.00253	1320.1	FALSE	1
2022-09-14	11:18:40	-1.23932	-5.51274	1356.42	FALSE	1
2022-09-14	11:18:40	-1.3693	-6.09092	1320.1	FALSE	1
2022-09-14	11:18:41	-1.39261	-6.19461	1356.42	FALSE	1
2022-09-14	11:18:41	0.0812343	0.361346	1320.46	FALSE	1
2022-09-14	11:18:41	0.428766	1.90724	1358.33	FALSE	1
2022-09-14	11:18:41	0.72902	3.24283	1323.71	FALSE	1
2022-09-14	11:18:42	0.729733	3.246	1361.57	FALSE	1
2022-09-14	11:18:42	0.725458	3.22698	1326.93	FALSE	1
2022-09-14	11:18:42	0.735076	3.26977	1364.84	FALSE	1
2022-09-14	11:18:43	0.733397	3.2623	1330.19	FALSE	1
2022-09-14	11:18:43	0.734924	3.26909	1368.11	FALSE	1
2022-09-14	11:18:43	0.737315	3.27972	1333.47	FALSE	1
2022-09-14	11:18:43	0.725916	3.22902	1371.34	FALSE	1
2022-09-14	11:18:44	0.72958	3.24532	1336.72	FALSE	1
2022-09-14	11:18:44	0.725153	3.22563	1374.57	FALSE	1
2022-09-14	11:18:44	0.733142	3.26116	1339.98	FALSE	1
2022-09-14	11:18:44	0.737417	3.28018	1377.85	FALSE	1
2022-09-14	11:18:45	0.733041	3.26071	1343.24	FALSE	1
2022-09-14	11:18:45	0.737519	3.28063	1381.13	FALSE	1
2022-09-14	11:18:45	0.731565	3.25415	1346.5	FALSE	1
2022-09-14	11:18:45	0.73645	3.27588	1384.4	FALSE	1
2022-09-14	11:18:46	0.732634	3.2589	1349.75	FALSE	1
2022-09-14	11:18:46	0.735534	3.2718	1387.67	FALSE	1
2022-09-14	11:18:46	0.732634	3.2589	1353.01	FALSE	1
2022-09-14	11:18:47	0.730089	3.24758	1390.92	FALSE	1
2022-09-14	11:18:47	0.730496	3.24939	1356.26	FALSE	1
2022-09-14	11:18:47	0.741539	3.29851	1394.22	FALSE	1
2022-09-14	11:18:47	0.736196	3.27475	1359.54	FALSE	1

## Sheet: MsPotato_harness_2022914111 (2)
Date	Time	Lbs	Total force x time			**GoPro Fitting: 11:03
2022-09-14	11:13:32	0.2907	0.2907	FALSE	0
2022-09-14	11:13:32	0.201641	0.492341	FALSE	0
2022-09-14	11:13:32	0.211056	0.703397	FALSE	0
2022-09-14	11:13:32	0.212685	0.916082	FALSE	0
2022-09-14	11:13:32	0.339402	1.25548	FALSE	0
2022-09-14	11:13:33	0.373092	1.62858	FALSE	0
2022-09-14	11:13:33	0.414008	2.04258	FALSE	0
2022-09-14	11:13:33	0.382761	2.42535	FALSE	0
2022-09-14	11:13:34	0.499707	2.92505	FALSE	0
2022-09-14	11:13:34	0.349275	3.27433	FALSE	0
2022-09-14	11:13:34	0.163219	3.43755	FALSE	0
2022-09-14	11:13:34	0.208359	3.64591	FALSE	0
2022-09-14	11:13:35	0.25813	3.90404	FALSE	0
2022-09-14	11:13:35	0.376552	4.28059	FALSE	0
2022-09-14	11:13:35	0.261489	4.54208	FALSE	0
2022-09-14	11:13:35	0.28612	4.8282	FALSE	0
2022-09-14	11:13:36	0.308155	5.13635	FALSE	0
2022-09-14	11:13:36	0.286171	5.42252	FALSE	0
2022-09-14	11:13:36	0.284593	5.70712	FALSE	0
2022-09-14	11:13:36	0.280573	5.98769	FALSE	0
2022-09-14	11:13:37	0.298639	6.28633	FALSE	0
2022-09-14	11:13:37	0.266985	6.55331	FALSE	0
2022-09-14	11:13:37	0.26958	6.82289	FALSE	0
2022-09-14	11:13:38	0.274466	7.09736	FALSE	0
2022-09-14	11:13:38	0.271056	7.36841	FALSE	0
2022-09-14	11:13:38	0.27014	7.63855	FALSE	0
2022-09-14	11:13:38	0.277875	7.91643	FALSE	0
2022-09-14	11:13:39	0.277163	8.19359	FALSE	0
2022-09-14	11:13:39	0.265102	8.45869	FALSE	0
2022-09-14	11:13:39	0.229631	8.68833	FALSE	0
2022-09-14	11:13:39	0.253753	8.94208	FALSE	0
2022-09-14	11:13:40	0.25757	9.19965	FALSE	0
2022-09-14	11:13:40	0.234059	9.43371	FALSE	0
2022-09-14	11:13:40	0.536909	9.97062	FALSE	0
2022-09-14	11:13:40	0.213652	10.1843	FALSE	0
2022-09-14	11:13:41	0.295992	10.4803	FALSE	0
2022-09-14	11:13:41	0.324237	10.8045	FALSE	0
2022-09-14	11:13:41	0.382048	11.1865	FALSE	0
2022-09-14	11:13:42	0.300776	11.4873	FALSE	0
2022-09-14	11:13:42	0.268817	11.7561	FALSE	0
2022-09-14	11:13:42	0.27528	12.0314	FALSE	0
2022-09-14	11:13:42	0.28841	12.3198	FALSE	0
2022-09-14	11:13:43	0.264695	12.5845	FALSE	0
2022-09-14	11:13:43	0.286832	12.8714	FALSE	0
2022-09-14	11:13:43	0.273092	13.1444	FALSE	0
2022-09-14	11:13:43	0.270751	13.4152	FALSE	0
2022-09-14	11:13:44	0.308715	13.7239	FALSE	0
2022-09-14	11:13:44	0.322608	14.0465	FALSE	0
2022-09-14	11:13:44	0.250802	14.2973	FALSE	0
2022-09-14	11:13:44	0.2993	14.5966	FALSE	0
2022-09-14	11:13:45	0.181998	14.7786	FALSE	0
2022-09-14	11:13:45	0.350038	15.1287	FALSE	0
2022-09-14	11:13:45	0.318588	15.4472	FALSE	0
2022-09-14	11:13:46	0.15416	15.6014	FALSE	0
2022-09-14	11:13:46	0.0198094	15.6212	FALSE	0
2022-09-14	11:13:46	0.267545	15.8888	FALSE	0
2022-09-14	11:13:46	0.155738	16.0445	FALSE	0
2022-09-14	11:13:47	0.254568	16.2991	FALSE	0
2022-09-14	11:13:47	-0.0066537	16.2991	FALSE	0
2022-09-14	11:13:47	-0.177035	16.2991	FALSE	0
2022-09-14	11:13:47	-0.586857	16.2991	FALSE	0
2022-09-14	11:13:48	-0.544567	16.2991	FALSE	0
2022-09-14	11:13:48	-0.402582	16.2991	FALSE	0
2022-09-14	11:13:48	-0.15047	16.2991	FALSE	0
2022-09-14	11:13:48	0.0165524	16.3156	FALSE	0
2022-09-14	11:13:49	-0.0952542	16.3156	FALSE	0
2022-09-14	11:13:49	-0.127264	16.3156	FALSE	0
2022-09-14	11:13:49	0.0134481	16.3291	FALSE	0
2022-09-14	11:13:50	0.113397	16.4425	FALSE	0
2022-09-14	11:13:50	0.453244	16.8957	FALSE	0
2022-09-14	11:13:50	1.08602	17.9817	FALSE	0
2022-09-14	11:13:50	0.545305	18.527	FALSE	0
2022-09-14	11:13:51	0.556247	19.0833	FALSE	0
2022-09-14	11:13:51	0.241845	19.3251	FALSE	0
2022-09-14	11:13:51	-0.0280277	19.3251	FALSE	0
2022-09-14	11:13:51	0.535534	19.8607	FALSE	0
2022-09-14	11:13:52	0.231158	20.0918	FALSE	0
2022-09-14	11:13:52	0.154822	20.2466	FALSE	0
2022-09-14	11:13:52	0.37014	20.6168	FALSE	0
2022-09-14	11:13:52	0.189224	20.806	FALSE	0
2022-09-14	11:13:53	-0.0579005	20.806	FALSE	0
2022-09-14	11:13:53	0.166476	20.9725	FALSE	0
2022-09-14	11:13:53	0.0172649	20.9897	FALSE	0
2022-09-14	11:13:54	-0.0894018	20.9897	FALSE	0
2022-09-14	11:13:54	0.0248984	21.0146	FALSE	0
2022-09-14	11:13:54	-0.039071	21.0146	FALSE	0
2022-09-14	11:13:54	-0.0577478	21.0146	FALSE	0
2022-09-14	11:13:55	-0.00212443	21.0146	FALSE	0
2022-09-14	11:13:55	0.355738	21.3704	FALSE	0
2022-09-14	11:13:55	0.289682	21.6601	FALSE	0
2022-09-14	11:13:55	0.404491	22.0646	FALSE	0
2022-09-14	11:13:56	0.259809	22.3244	FALSE	0
2022-09-14	11:13:56	0.525102	22.8495	FALSE	0
2022-09-14	11:13:56	0.40042	23.2499	FALSE	0
2022-09-14	11:13:56	0.31986	23.5697	FALSE	0
2022-09-14	11:13:57	0.31243	23.8822	FALSE	0
2022-09-14	11:13:57	0.204746	24.0869	FALSE	0
2022-09-14	11:13:57	0.540725	24.6276	FALSE	0
2022-09-14	11:13:58	0.255942	24.8836	FALSE	0
2022-09-14	11:13:58	0.456552	25.3401	FALSE	0
2022-09-14	11:13:58	0.340573	25.6807	FALSE	0
2022-09-14	11:13:58	0.354568	26.0353	FALSE	0
2022-09-14	11:13:59	0.197723	26.233	FALSE	0
2022-09-14	11:13:59	0.349428	26.5824	FALSE	0
2022-09-14	11:13:59	0.403626	26.9861	FALSE	0
2022-09-14	11:13:59	0.242507	27.2286	FALSE	0
2022-09-14	11:14:00	0.422863	27.6514	FALSE	0
2022-09-14	11:14:00	0.258842	27.9103	FALSE	0
2022-09-14	11:14:00	0.342405	28.2527	FALSE	0
2022-09-14	11:14:00	0.158792	28.4115	FALSE	0
2022-09-14	11:14:01	0.466883	28.8784	FALSE	0
2022-09-14	11:14:01	0.228613	29.107	FALSE	0
2022-09-14	11:14:01	0.555789	29.6628	FALSE	0
2022-09-14	11:14:02	0.182914	29.8457	FALSE	0
2022-09-14	11:14:02	0.684695	30.5304	FALSE	0
2022-09-14	11:14:02	0.221031	30.7514	FALSE	0
2022-09-14	11:14:02	0.865204	31.6166	FALSE	0
2022-09-14	11:14:03	0.37584	31.9924	FALSE	0
2022-09-14	11:14:03	0.545	32.5374	FALSE	0
2022-09-14	11:14:03	0.598028	33.1355	FALSE	0
2022-09-14	11:14:03	0.587545	33.723	FALSE	0
2022-09-14	11:14:04	0.472023	34.195	FALSE	0
2022-09-14	11:14:04	0.445305	34.6403	FALSE	0
2022-09-14	11:14:04	0.531158	35.1715	FALSE	0
2022-09-14	11:14:04	0.426018	35.5975	FALSE	0
2022-09-14	11:14:05	0.495026	36.0925	FALSE	0
2022-09-14	11:14:05	0.469886	36.5624	FALSE	0
2022-09-14	11:14:05	0.540165	37.1026	FALSE	0
2022-09-14	11:14:06	0.435229	37.5378	FALSE	0
2022-09-14	11:14:06	0.504542	38.0424	FALSE	0
2022-09-14	11:14:06	0.430802	38.4732	FALSE	0
2022-09-14	11:14:06	0.574975	39.0481	FALSE	0
2022-09-14	11:14:07	0.436654	39.4848	FALSE	0
2022-09-14	11:14:07	0.581641	40.0664	FALSE	0
2022-09-14	11:14:07	0.440878	40.5073	FALSE	0
2022-09-14	11:14:07	0.702608	41.2099	FALSE	0
2022-09-14	11:14:08	0.367494	41.5774	FALSE	0
2022-09-14	11:14:08	0.664898	42.2423	FALSE	0
2022-09-14	11:14:08	0.35757	42.5999	FALSE	0
2022-09-14	11:14:08	0.624796	43.2247	FALSE	0
2022-09-14	11:14:09	0.310293	43.535	FALSE	0
2022-09-14	11:14:09	0.590903	44.1259	FALSE	0
2022-09-14	11:14:09	0.275433	44.4013	FALSE	0
2022-09-14	11:14:10	0.315331	44.7166	FALSE	0
2022-09-14	11:14:10	0.0125829	44.7292	FALSE	0
2022-09-14	11:14:10	0.373601	45.1028	FALSE	0
2022-09-14	11:14:10	0.45757	45.5604	FALSE	0
2022-09-14	11:14:11	0.524644	46.085	FALSE	0
2022-09-14	11:14:11	0.258028	46.3431	FALSE	0
2022-09-14	11:14:11	0.659351	47.0024	FALSE	0
2022-09-14	11:14:11	0.286476	47.2889	FALSE	0
2022-09-14	11:14:12	0.206171	47.4951	FALSE	0
2022-09-14	11:14:12	-0.00629748	47.4951	FALSE	0
2022-09-14	11:14:12	0.0453565	47.5404	FALSE	0
2022-09-14	11:14:12	0.0607763	47.6012	FALSE	0
2022-09-14	11:14:13	0.190191	47.7914	FALSE	0
2022-09-14	11:14:13	0.142099	47.9335	FALSE	0
2022-09-14	11:14:13	0.228817	48.1623	FALSE	0
2022-09-14	11:14:14	0.0846949	48.247	FALSE	0
2022-09-14	11:14:14	0.222201	48.4692	FALSE	0
2022-09-14	11:14:14	0.212583	48.6818	FALSE	0
2022-09-14	11:14:14	0.237672	48.9195	FALSE	0
2022-09-14	11:14:15	0.291972	49.2114	FALSE	0
2022-09-14	11:14:15	0.524338	49.7358	FALSE	0
2022-09-14	11:14:15	0.619707	50.3555	FALSE	0
2022-09-14	11:14:15	0.461845	50.8173	FALSE	0
2022-09-14	11:14:16	0.19299	51.0103	FALSE	0
2022-09-14	11:14:16	0.297824	51.3081	FALSE	0
2022-09-14	11:14:16	0.232125	51.5403	FALSE	0
2022-09-14	11:14:17	0.269936	51.8102	FALSE	0
2022-09-14	11:14:17	0.133295	51.9435	FALSE	0
2022-09-14	11:14:17	0.368715	52.3122	FALSE	0
2022-09-14	11:14:17	-0.00787507	52.3122	FALSE	0
2022-09-14	11:14:18	0.234924	52.5471	FALSE	0
2022-09-14	11:14:18	0.00347355	52.5506	FALSE	0
2022-09-14	11:14:18	0.224949	52.7755	FALSE	0
2022-09-14	11:14:18	-0.0156613	52.7755	FALSE	0
2022-09-14	11:14:19	-0.0708267	52.7755	FALSE	0
2022-09-14	11:14:19	0.0551783	52.8307	FALSE	0
2022-09-14	11:14:19	0.108206	52.9389	FALSE	0
2022-09-14	11:14:19	0.313753	53.2527	FALSE	0
2022-09-14	11:14:20	0.135331	53.388	FALSE	0
2022-09-14	11:14:20	0.0766032	53.4646	FALSE	0
2022-09-14	11:14:20	0.103524	53.5681	FALSE	0
2022-09-14	11:14:21	-0.0631422	53.5681	FALSE	0
2022-09-14	11:14:21	-0.192506	53.5681	FALSE	0
2022-09-14	11:14:21	-0.0834475	53.5681	FALSE	0
2022-09-14	11:14:21	-0.210979	53.5681	FALSE	0
2022-09-14	11:14:22	0.0235244	53.5917	FALSE	0
2022-09-14	11:14:22	0.251361	53.843	FALSE	0
2022-09-14	11:14:22	0.354211	54.1972	FALSE	0
2022-09-14	11:14:22	-0.607671	54.1972	FALSE	0
2022-09-14	11:14:23	-0.639936	54.1972	FALSE	0
2022-09-14	11:14:23	-0.0244145	54.1972	FALSE	0
2022-09-14	11:14:23	0.350293	54.5475	FALSE	0
2022-09-14	11:14:23	0.801896	55.3494	FALSE	0
2022-09-14	11:14:24	1.05742	56.4068	FALSE	0
2022-09-14	11:14:24	0.868817	57.2757	FALSE	0
2022-09-14	11:14:24	1.27518	58.5508	FALSE	0
2022-09-14	11:14:25	0.835839	59.3867	FALSE	0
2022-09-14	11:14:25	0.624898	60.0116	FALSE	0
2022-09-14	11:14:25	0.381132	60.3927	FALSE	0
2022-09-14	11:14:25	0.424746	60.8175	FALSE	0
2022-09-14	11:14:26	0.92159	61.739	FALSE	0
2022-09-14	11:14:26	0.0719722	61.811	FALSE	0
2022-09-14	11:14:26	-0.170267	61.811	FALSE	0
2022-09-14	11:14:26	-0.280547	61.811	FALSE	0
2022-09-14	11:14:27	-0.239427	61.811	FALSE	0
2022-09-14	11:14:27	-0.0944399	61.811	FALSE	0
2022-09-14	11:14:27	0.724796	62.5358	FALSE	0
2022-09-14	11:14:27	0.737265	63.2731	FALSE	0
2022-09-14	11:14:28	0.73874	64.0118	FALSE	0
2022-09-14	11:14:28	0.726374	64.7382	FALSE	0
2022-09-14	11:14:28	0.725916	65.4641	FALSE	0
2022-09-14	11:14:29	0.730547	66.1947	FALSE	0
2022-09-14	11:14:29	0.734008	66.9287	FALSE	0
2022-09-14	11:14:29	0.726425	67.6551	FALSE	0
2022-09-14	11:14:29	0.725254	68.3803	FALSE	0
2022-09-14	11:14:30	0.71757	69.0979	FALSE	0
2022-09-14	11:14:30	0.730343	69.8283	FALSE	0
2022-09-14	11:14:30	0.727799	70.5561	FALSE	0
2022-09-14	11:14:30	0.728359	71.2844	FALSE	0
2022-09-14	11:14:31	0.727596	72.012	FALSE	0
2022-09-14	11:14:31	0.717214	72.7292	FALSE	0
2022-09-14	11:14:31	0.724491	73.4537	FALSE	0
2022-09-14	11:14:31	0.721081	74.1748	FALSE	0
2022-09-14	11:14:32	0.711463	74.8863	FALSE	0
2022-09-14	11:14:32	0.722812	75.6091	FALSE	0
2022-09-14	11:14:32	0.721132	76.3302	FALSE	0
2022-09-14	11:14:33	0.723677	77.0539	FALSE	0
2022-09-14	11:14:33	0.72388	77.7778	FALSE	0
2022-09-14	11:14:33	0.724288	78.5021	FALSE	0
2022-09-14	11:14:33	0.72215	79.2242	FALSE	0
2022-09-14	11:14:34	0.725	79.9492	FALSE	0
2022-09-14	11:14:34	0.724898	80.6741	FALSE	0
2022-09-14	11:14:34	0.7307	81.4048	FALSE	0
2022-09-14	11:14:34	0.72215	82.1269	FALSE	0
2022-09-14	11:14:35	0.734313	82.8613	FALSE	0
2022-09-14	11:14:35	0.729173	83.5904	FALSE	0
2022-09-14	11:14:35	0.732379	84.3228	FALSE	0
2022-09-14	11:14:35	0.719555	85.0424	FALSE	0
2022-09-14	11:14:36	0.728155	85.7705	FALSE	0
2022-09-14	11:14:36	0.726374	86.4969	FALSE	0
2022-09-14	11:14:36	0.723422	87.2203	FALSE	0
2022-09-14	11:14:37	0.729936	87.9503	FALSE	0
2022-09-14	11:14:37	0.727341	88.6776	FALSE	0
2022-09-14	11:14:37	0.727188	89.4048	FALSE	0
2022-09-14	11:14:37	0.727799	90.1326	FALSE	0
2022-09-14	11:14:38	0.729936	90.8625	FALSE	0
2022-09-14	11:14:38	0.724847	91.5874	FALSE	0
2022-09-14	11:14:38	0.729936	92.3173	FALSE	0
2022-09-14	11:14:38	0.72103	93.0383	FALSE	0
2022-09-14	11:14:39	0.720114	93.7584	FALSE	0
2022-09-14	11:14:39	0.730649	94.4891	FALSE	0
2022-09-14	11:14:39	0.726476	95.2156	FALSE	0
2022-09-14	11:14:39	0.731768	95.9473	FALSE	0
2022-09-14	11:14:40	0.729173	96.6765	FALSE	0
2022-09-14	11:14:40	0.732175	97.4087	FALSE	0
2022-09-14	11:14:40	0.72612	98.1348	FALSE	0
2022-09-14	11:14:41	0.731463	98.8663	FALSE	0
2022-09-14	11:14:41	0.725305	99.5916	FALSE	0
2022-09-14	11:14:41	0.728613	100.32	FALSE	0
2022-09-14	11:14:41	0.72673	101.047	FALSE	0
2022-09-14	11:14:42	0.733601	101.781	FALSE	0
2022-09-14	11:14:42	0.728003	102.509	FALSE	0
2022-09-14	11:14:42	0.726069	103.235	FALSE	0
2022-09-14	11:14:42	0.729275	103.964	FALSE	0
2022-09-14	11:14:43	0.727239	104.691	FALSE	0
2022-09-14	11:14:43	0.725356	105.416	FALSE	0
2022-09-14	11:14:43	0.731514	106.148	FALSE	0
2022-09-14	11:14:43	0.72215	106.87	FALSE	0
2022-09-14	11:14:44	0.729936	107.6	FALSE	0
2022-09-14	11:14:44	0.724135	108.324	FALSE	0
2022-09-14	11:14:44	0.724338	109.049	FALSE	0
2022-09-14	11:14:45	0.729173	109.778	FALSE	0
2022-09-14	11:14:45	0.728817	110.507	FALSE	0
2022-09-14	11:14:45	0.725051	111.232	FALSE	0
2022-09-14	11:14:45	0.730954	111.963	FALSE	0
2022-09-14	11:14:46	0.726425	112.689	FALSE	0
2022-09-14	11:14:46	0.729224	113.418	FALSE	0
2022-09-14	11:14:46	0.719148	114.137	FALSE	0
2022-09-14	11:14:46	0.727646	114.865	FALSE	0
2022-09-14	11:14:47	0.725254	115.59	FALSE	0
2022-09-14	11:14:47	0.72444	116.315	FALSE	0
2022-09-14	11:14:47	0.727697	117.042	FALSE	0
2022-09-14	11:14:47	0.732175	117.775	FALSE	0
2022-09-14	11:14:48	0.724898	118.499	FALSE	0
2022-09-14	11:14:48	0.731921	119.231	FALSE	0
2022-09-14	11:14:48	0.723982	119.955	FALSE	0
2022-09-14	11:14:49	0.726425	120.682	FALSE	0
2022-09-14	11:14:49	0.732226	121.414	FALSE	0
2022-09-14	11:14:49	0.724949	122.139	FALSE	0
2022-09-14	11:14:49	0.725763	122.865	FALSE	0
2022-09-14	11:14:50	0.731158	123.596	FALSE	0
2022-09-14	11:14:50	0.726323	124.322	FALSE	0
2022-09-14	11:14:50	0.729428	125.052	FALSE	0
2022-09-14	11:14:50	0.732175	125.784	FALSE	0
2022-09-14	11:14:51	0.724847	126.509	FALSE	0
2022-09-14	11:14:51	0.724542	127.233	FALSE	0
2022-09-14	11:14:51	0.728461	127.962	FALSE	0
2022-09-14	11:14:51	0.722404	128.684	FALSE	0
2022-09-14	11:14:52	0.725662	129.41	FALSE	0
2022-09-14	11:14:52	0.725407	130.135	FALSE	0
2022-09-14	11:14:52	0.730343	130.865	FALSE	0
2022-09-14	11:14:53	0.733346	131.599	FALSE	0
2022-09-14	11:14:53	0.728766	132.328	FALSE	0
2022-09-14	11:14:53	0.722456	133.05	FALSE	0
2022-09-14	11:14:53	0.720776	133.771	FALSE	0
2022-09-14	11:14:54	0.72841	134.499	FALSE	0
2022-09-14	11:14:54	0.724084	135.223	FALSE	0
2022-09-14	11:14:54	0.724593	135.948	FALSE	0
2022-09-14	11:14:54	0.72785	136.676	FALSE	0
2022-09-14	11:14:55	0.718435	137.394	FALSE	0
2022-09-14	11:14:55	0.723677	138.118	FALSE	0
2022-09-14	11:14:55	0.727952	138.846	FALSE	0
2022-09-14	11:14:56	0.727239	139.573	FALSE	0
2022-09-14	11:14:56	0.723931	140.297	FALSE	0
2022-09-14	11:14:56	0.728003	141.025	FALSE	0
2022-09-14	11:14:56	0.730801	141.756	FALSE	0
2022-09-14	11:14:57	0.734364	142.49	FALSE	0
2022-09-14	11:14:57	0.723168	143.213	FALSE	0
2022-09-14	11:14:57	0.726221	143.94	FALSE	0
2022-09-14	11:14:57	0.719046	144.659	FALSE	0
2022-09-14	11:14:58	0.729529	145.388	FALSE	0
2022-09-14	11:14:58	0.716756	146.105	FALSE	0
2022-09-14	11:14:58	0.726374	146.831	FALSE	0
2022-09-14	11:14:58	0.73243	147.564	FALSE	0
2022-09-14	11:14:59	0.721387	148.285	FALSE	0
2022-09-14	11:14:59	0.721997	149.007	FALSE	0
2022-09-14	11:14:59	0.725458	149.733	FALSE	0
2022-09-14	11:14:59	0.719911	150.452	FALSE	0
2022-09-14	11:15:00	0.724237	151.177	FALSE	0
2022-09-14	11:15:00	0.725153	151.902	FALSE	0
2022-09-14	11:15:00	0.725509	152.627	FALSE	0
2022-09-14	11:15:01	0.721946	153.349	FALSE	0
2022-09-14	11:15:01	0.727596	154.077	FALSE	0
2022-09-14	11:15:01	0.728766	154.806	FALSE	0
2022-09-14	11:15:01	0.728206	155.534	FALSE	0
2022-09-14	11:15:02	0.724796	156.259	FALSE	0
2022-09-14	11:15:02	0.724746	156.983	FALSE	0
2022-09-14	11:15:02	0.725458	157.709	FALSE	0
2022-09-14	11:15:02	0.725102	158.434	FALSE	0
2022-09-14	11:15:03	0.724644	159.159	FALSE	0
2022-09-14	11:15:03	0.724898	159.883	FALSE	0
2022-09-14	11:15:03	0.722404	160.606	FALSE	0
2022-09-14	11:15:04	0.73131	161.337	FALSE	0
2022-09-14	11:15:04	0.728664	162.066	FALSE	0
2022-09-14	11:15:04	0.723626	162.789	FALSE	0
2022-09-14	11:15:04	0.727239	163.517	FALSE	0
2022-09-14	11:15:05	0.723422	164.24	FALSE	0
2022-09-14	11:15:05	0.728766	164.969	FALSE	0
2022-09-14	11:15:05	0.720013	165.689	FALSE	0
2022-09-14	11:15:05	0.724542	166.413	FALSE	0
2022-09-14	11:15:06	0.724644	167.138	FALSE	0
2022-09-14	11:15:06	0.732074	167.87	FALSE	0
2022-09-14	11:15:06	0.725407	168.596	FALSE	0
2022-09-14	11:15:06	0.726679	169.322	FALSE	0
2022-09-14	11:15:07	0.721591	170.044	FALSE	0
2022-09-14	11:15:07	0.722965	170.767	FALSE	0
2022-09-14	11:15:07	0.72785	171.495	FALSE	0
2022-09-14	11:15:08	0.729631	172.224	FALSE	0
2022-09-14	11:15:08	0.720827	172.945	FALSE	0
2022-09-14	11:15:08	0.724389	173.67	FALSE	0
2022-09-14	11:15:08	0.721437	174.391	FALSE	0
2022-09-14	11:15:09	0.287952	174.679	FALSE	0
2022-09-14	11:15:09	0.387036	175.066	FALSE	0
2022-09-14	11:15:09	0.30617	175.372	FALSE	0
2022-09-14	11:15:09	0.508766	175.881	FALSE	0
2022-09-14	11:15:10	0.730954	176.612	FALSE	0
2022-09-14	11:15:10	0.728359	177.34	FALSE	0
2022-09-14	11:15:10	0.730649	178.071	FALSE	0
2022-09-14	11:15:10	0.724186	178.795	FALSE	0
2022-09-14	11:15:11	0.727137	179.522	FALSE	0
2022-09-14	11:15:11	0.722099	180.244	FALSE	0
2022-09-14	11:15:11	0.734568	180.979	FALSE	0
2022-09-14	11:15:12	0.731107	181.71	FALSE	0
2022-09-14	11:15:12	0.724847	182.435	FALSE	0
2022-09-14	11:15:12	0.727392	183.162	FALSE	0
2022-09-14	11:15:12	0.736094	183.898	FALSE	0
2022-09-14	11:15:13	0.730547	184.629	FALSE	0
2022-09-14	11:15:13	0.729478	185.358	FALSE	0
2022-09-14	11:15:13	0.725458	186.084	FALSE	0
2022-09-14	11:15:13	0.726069	186.81	FALSE	0
2022-09-14	11:15:14	0.73528	187.545	FALSE	0
2022-09-14	11:15:14	0.730954	188.276	FALSE	0
2022-09-14	11:15:14	0.727392	189.003	FALSE	0
2022-09-14	11:15:14	0.732379	189.736	FALSE	0
2022-09-14	11:15:15	0.726476	190.462	FALSE	0
2022-09-14	11:15:15	0.724084	191.186	FALSE	0
2022-09-14	11:15:15	0.728766	191.915	FALSE	0
2022-09-14	11:15:16	0.726629	192.642	FALSE	0
2022-09-14	11:15:16	0.721946	193.364	FALSE	0
2022-09-14	11:15:16	0.723473	194.087	FALSE	0
2022-09-14	11:15:16	0.728766	194.816	FALSE	0
2022-09-14	11:15:17	0.730242	195.546	FALSE	0
2022-09-14	11:15:17	0.72897	196.275	FALSE	0
2022-09-14	11:15:17	0.732786	197.008	FALSE	0
2022-09-14	11:15:18	0.734618	197.743	FALSE	0
2022-09-14	11:15:18	0.728817	198.471	FALSE	0
2022-09-14	11:15:18	0.726425	199.198	FALSE	0
2022-09-14	11:15:18	0.73187	199.93	FALSE	0
2022-09-14	11:15:18	0.72617	200.656	FALSE	0
2022-09-14	11:15:19	0.727239	201.383	FALSE	0
2022-09-14	11:15:19	0.720064	202.103	FALSE	0
2022-09-14	11:15:19	0.726221	202.829	FALSE	0
2022-09-14	11:15:20	0.725662	203.555	FALSE	0
2022-09-14	11:15:20	0.728715	204.284	FALSE	0
2022-09-14	11:15:20	0.732583	205.016	FALSE	0
2022-09-14	11:15:20	0.725458	205.742	FALSE	0
2022-09-14	11:15:21	0.732939	206.475	FALSE	0
2022-09-14	11:15:21	0.731921	207.207	FALSE	0
2022-09-14	11:15:21	0.730191	207.937	FALSE	0
2022-09-14	11:15:21	0.726832	208.664	FALSE	0
2022-09-14	11:15:22	0.724186	209.388	FALSE	0
2022-09-14	11:15:22	0.726476	210.114	FALSE	0
2022-09-14	11:15:22	0.728104	210.842	FALSE	0
2022-09-14	11:15:22	0.727545	211.57	FALSE	0
2022-09-14	11:15:23	0.725763	212.296	FALSE	0
2022-09-14	11:15:23	0.721336	213.017	FALSE	0
2022-09-14	11:15:23	0.724644	213.742	FALSE	0
2022-09-14	11:15:24	0.728613	214.47	FALSE	0
2022-09-14	11:15:24	0.728766	215.199	FALSE	0
2022-09-14	11:15:24	0.726527	215.926	FALSE	0
2022-09-14	11:15:24	0.730445	216.656	FALSE	0
2022-09-14	11:15:25	0.728512	217.385	FALSE	0
2022-09-14	11:15:25	0.728817	218.113	FALSE	0
2022-09-14	11:15:25	0.729478	218.843	FALSE	0
2022-09-14	11:15:25	0.725102	219.568	FALSE	0
2022-09-14	11:15:26	0.72897	220.297	FALSE	0
2022-09-14	11:15:26	0.73243	221.029	FALSE	0
2022-09-14	11:15:26	0.730191	221.76	FALSE	0
2022-09-14	11:15:26	0.724695	222.484	FALSE	0
2022-09-14	11:15:27	0.733957	223.218	FALSE	0
2022-09-14	11:15:27	0.731616	223.95	FALSE	0
2022-09-14	11:15:27	0.723168	224.673	FALSE	0
2022-09-14	11:15:28	0.732125	225.405	FALSE	0
2022-09-14	11:15:28	0.731158	226.136	FALSE	0
2022-09-14	11:15:28	0.720064	226.856	FALSE	0
2022-09-14	11:15:28	0.724644	227.581	FALSE	0
2022-09-14	11:15:29	0.738995	228.32	FALSE	0
2022-09-14	11:15:29	0.726679	229.047	FALSE	0
2022-09-14	11:15:29	0.725458	229.772	FALSE	0
2022-09-14	11:15:29	0.727596	230.5	FALSE	0
2022-09-14	11:15:30	0.732175	231.232	FALSE	0
2022-09-14	11:15:30	0.733448	231.965	FALSE	0
2022-09-14	11:15:30	0.730903	232.696	FALSE	0
2022-09-14	11:15:30	0.725611	233.422	FALSE	0
2022-09-14	11:15:31	0.723931	234.146	FALSE	0
2022-09-14	11:15:31	0.727443	234.873	FALSE	0
2022-09-14	11:15:31	0.724491	235.598	FALSE	0
2022-09-14	11:15:32	0.730038	236.328	FALSE	0
2022-09-14	11:15:32	0.726221	237.054	FALSE	0
2022-09-14	11:15:32	0.7307	237.785	FALSE	0
2022-09-14	11:15:32	0.732888	238.518	FALSE	0
2022-09-14	11:15:33	0.728562	239.246	FALSE	0
2022-09-14	11:15:33	0.72444	239.971	FALSE	0
2022-09-14	11:15:33	0.732735	240.703	FALSE	0
2022-09-14	11:15:33	0.722914	241.426	FALSE	0
2022-09-14	11:15:34	0.726781	242.153	FALSE	0
2022-09-14	11:15:34	0.73299	242.886	FALSE	0
2022-09-14	11:15:34	0.725916	243.612	FALSE	0
2022-09-14	11:15:34	0.72729	244.339	FALSE	0
2022-09-14	11:15:35	0.733906	245.073	FALSE	0
2022-09-14	11:15:35	0.726425	245.8	FALSE	0
2022-09-14	11:15:35	0.724796	246.524	FALSE	0
2022-09-14	11:15:36	0.729377	247.254	FALSE	0
2022-09-14	11:15:36	0.732532	247.986	FALSE	0
2022-09-14	11:15:36	0.726018	248.712	FALSE	0
2022-09-14	11:15:36	0.722252	249.435	FALSE	0
2022-09-14	11:15:37	0.730343	250.165	FALSE	0
2022-09-14	11:15:37	0.726679	250.892	FALSE	0
2022-09-14	11:15:37	0.728206	251.62	FALSE	0
2022-09-14	11:15:37	0.722404	252.342	FALSE	0
2022-09-14	11:15:38	0.729631	253.072	FALSE	0
2022-09-14	11:15:38	0.724389	253.796	FALSE	0
2022-09-14	11:15:38	0.723422	254.52	FALSE	0
2022-09-14	11:15:38	0.726323	255.246	FALSE	0
2022-09-14	11:15:39	0.732226	255.978	FALSE	0
2022-09-14	11:15:39	0.729071	256.707	FALSE	0
2022-09-14	11:15:39	0.723168	257.43	FALSE	0
2022-09-14	11:15:40	0.724644	258.155	FALSE	0
2022-09-14	11:15:40	0.725356	258.88	FALSE	0
2022-09-14	11:15:40	0.730038	259.61	FALSE	0
2022-09-14	11:15:40	0.723575	260.334	FALSE	0
2022-09-14	11:15:41	0.718435	261.052	FALSE	0
2022-09-14	11:15:41	0.729936	261.782	FALSE	0
2022-09-14	11:15:41	0.723321	262.506	FALSE	0
2022-09-14	11:15:41	0.720827	263.227	FALSE	0
2022-09-14	11:15:42	0.724593	263.951	FALSE	0
2022-09-14	11:15:42	0.726221	264.677	FALSE	0
2022-09-14	11:15:42	0.730394	265.408	FALSE	0
2022-09-14	11:15:42	0.726272	266.134	FALSE	0
2022-09-14	11:15:43	0.735789	266.87	FALSE	0
2022-09-14	11:15:43	0.721437	267.591	FALSE	0
2022-09-14	11:15:43	0.735076	268.326	FALSE	0
2022-09-14	11:15:44	0.732583	269.059	FALSE	0
2022-09-14	11:15:44	0.724491	269.783	FALSE	0
2022-09-14	11:15:44	0.72388	270.507	FALSE	0
2022-09-14	11:15:44	0.728868	271.236	FALSE	0
2022-09-14	11:15:45	0.728766	271.965	FALSE	0
2022-09-14	11:15:45	0.726934	272.692	FALSE	0
2022-09-14	11:15:45	0.723677	273.416	FALSE	0
2022-09-14	11:15:45	0.724949	274.14	FALSE	0
2022-09-14	11:15:46	0.731107	274.872	FALSE	0
2022-09-14	11:15:46	0.730903	275.602	FALSE	0
2022-09-14	11:15:46	0.720623	276.323	FALSE	0
2022-09-14	11:15:47	0.736145	277.059	FALSE	0
2022-09-14	11:15:47	0.73299	277.792	FALSE	0
2022-09-14	11:15:47	0.727036	278.519	FALSE	0
2022-09-14	11:15:47	0.725662	279.245	FALSE	0
2022-09-14	11:15:48	0.718842	279.964	FALSE	0
2022-09-14	11:15:48	0.727443	280.691	FALSE	0
2022-09-14	11:15:48	0.729987	281.421	FALSE	0
2022-09-14	11:15:48	0.732837	282.154	FALSE	0
2022-09-14	11:15:49	0.734618	282.889	FALSE	0
2022-09-14	11:15:49	0.722456	283.611	FALSE	0
2022-09-14	11:15:49	0.72897	284.34	FALSE	0
2022-09-14	11:15:49	0.731819	285.072	FALSE	0
2022-09-14	11:15:50	0.724237	285.796	FALSE	0
2022-09-14	11:15:50	0.722456	286.519	FALSE	0
2022-09-14	11:15:50	0.73187	287.25	FALSE	0
2022-09-14	11:15:51	0.719351	287.97	FALSE	0
2022-09-14	11:15:51	0.717366	288.687	FALSE	0
2022-09-14	11:15:51	0.733142	289.42	FALSE	0
2022-09-14	11:15:51	0.725865	290.146	FALSE	0
2022-09-14	11:15:52	0.731158	290.877	FALSE	0
2022-09-14	11:15:52	0.728155	291.605	FALSE	0
2022-09-14	11:15:52	0.733092	292.339	FALSE	0
2022-09-14	11:15:52	0.728664	293.067	FALSE	0
2022-09-14	11:15:53	0.731717	293.799	FALSE	0
2022-09-14	11:15:53	0.723575	294.523	FALSE	0
2022-09-14	11:15:53	0.726221	295.249	FALSE	0
2022-09-14	11:15:53	0.731768	295.981	FALSE	0
2022-09-14	11:15:54	0.72958	296.71	FALSE	0
2022-09-14	11:15:54	0.72388	297.434	FALSE	0
2022-09-14	11:15:54	0.724949	298.159	FALSE	0
2022-09-14	11:15:55	0.728664	298.888	FALSE	0
2022-09-14	11:15:55	0.731463	299.619	FALSE	0
2022-09-14	11:15:55	0.737214	300.356	FALSE	0
2022-09-14	11:15:55	0.723575	301.08	FALSE	0
2022-09-14	11:15:56	0.726832	301.807	FALSE	0
2022-09-14	11:15:56	0.731361	302.538	FALSE	0
2022-09-14	11:15:56	0.737366	303.275	FALSE	0
2022-09-14	11:15:56	0.7193	303.995	FALSE	0
2022-09-14	11:15:57	0.732583	304.727	FALSE	0
2022-09-14	11:15:57	0.725814	305.453	FALSE	0
2022-09-14	11:15:57	0.723219	306.176	FALSE	0
2022-09-14	11:15:57	0.734669	306.911	FALSE	0
2022-09-14	11:15:58	0.733295	307.644	FALSE	0
2022-09-14	11:15:58	0.71813	308.362	FALSE	0
2022-09-14	11:15:58	0.72902	309.091	FALSE	0
2022-09-14	11:15:59	0.725051	309.816	FALSE	0
2022-09-14	11:15:59	0.725204	310.542	FALSE	0
2022-09-14	11:15:59	0.729682	311.271	FALSE	0
2022-09-14	11:15:59	0.727087	311.998	FALSE	0
2022-09-14	11:16:00	0.72841	312.727	FALSE	0
2022-09-14	11:16:00	0.736959	313.464	FALSE	0
2022-09-14	11:16:00	0.72673	314.191	FALSE	0
2022-09-14	11:16:00	0.728562	314.919	FALSE	0
2022-09-14	11:16:01	0.725865	315.645	FALSE	0
2022-09-14	11:16:01	0.725407	316.37	FALSE	0
2022-09-14	11:16:01	0.730852	317.101	FALSE	0
2022-09-14	11:16:01	0.734109	317.835	FALSE	0
2022-09-14	11:16:02	0.723372	318.559	FALSE	0
2022-09-14	11:16:02	0.725916	319.285	FALSE	0
2022-09-14	11:16:02	0.721081	320.006	FALSE	0
2022-09-14	11:16:03	0.726476	320.732	FALSE	0
2022-09-14	11:16:03	0.729275	321.461	FALSE	0
2022-09-14	11:16:03	0.726985	322.188	FALSE	0
2022-09-14	11:16:03	0.727596	322.916	FALSE	0
2022-09-14	11:16:04	0.729886	323.646	FALSE	0
2022-09-14	11:16:04	0.72383	324.37	FALSE	0
2022-09-14	11:16:04	0.732532	325.102	FALSE	0
2022-09-14	11:16:04	0.732481	325.835	FALSE	0
2022-09-14	11:16:05	0.73014	326.565	FALSE	0
2022-09-14	11:16:05	0.729478	327.294	FALSE	0
2022-09-14	11:16:05	0.723372	328.018	FALSE	0
2022-09-14	11:16:05	0.725611	328.743	FALSE	0
2022-09-14	11:16:06	0.737214	329.481	FALSE	0
2022-09-14	11:16:06	0.725967	330.207	FALSE	0
2022-09-14	11:16:06	0.724796	330.931	FALSE	0
2022-09-14	11:16:07	0.721641	331.653	FALSE	0
2022-09-14	11:16:07	0.723677	332.377	FALSE	0
2022-09-14	11:16:07	0.722099	333.099	FALSE	0
2022-09-14	11:16:07	0.728308	333.827	FALSE	0
2022-09-14	11:16:08	0.725305	334.552	FALSE	0
2022-09-14	11:16:08	0.731259	335.284	FALSE	0
2022-09-14	11:16:08	0.723728	336.007	FALSE	0
2022-09-14	11:16:08	0.726679	336.734	FALSE	0
2022-09-14	11:16:09	0.733651	337.468	FALSE	0
2022-09-14	11:16:09	0.728817	338.197	FALSE	0
2022-09-14	11:16:09	0.729478	338.926	FALSE	0
2022-09-14	11:16:09	0.723524	339.65	FALSE	0
2022-09-14	11:16:10	0.727392	340.377	FALSE	0
2022-09-14	11:16:10	0.73243	341.109	FALSE	0
2022-09-14	11:16:10	0.724288	341.834	FALSE	0
2022-09-14	11:16:11	0.723422	342.557	FALSE	0
2022-09-14	11:16:11	0.72841	343.285	FALSE	0
2022-09-14	11:16:11	0.732328	344.018	FALSE	0
2022-09-14	11:16:11	0.729122	344.747	FALSE	0
2022-09-14	11:16:12	0.732735	345.48	FALSE	0
2022-09-14	11:16:12	0.735636	346.215	FALSE	0
2022-09-14	11:16:12	0.727545	346.943	FALSE	0
2022-09-14	11:16:12	0.730598	347.673	FALSE	0
2022-09-14	11:16:13	0.73757	348.411	FALSE	0
2022-09-14	11:16:13	0.729377	349.14	FALSE	0
2022-09-14	11:16:13	0.722404	349.863	FALSE	0
2022-09-14	11:16:13	0.721336	350.584	FALSE	0
2022-09-14	11:16:14	0.732735	351.317	FALSE	0
2022-09-14	11:16:14	0.727646	352.045	FALSE	0
2022-09-14	11:16:14	0.73584	352.78	FALSE	0
2022-09-14	11:16:15	0.730343	353.511	FALSE	0
2022-09-14	11:16:15	0.73701	354.248	FALSE	0
2022-09-14	11:16:15	0.735483	354.983	FALSE	0
2022-09-14	11:16:15	0.735331	355.719	FALSE	0
2022-09-14	11:16:16	0.729987	356.449	FALSE	0
2022-09-14	11:16:16	0.729224	357.178	FALSE	0
2022-09-14	11:16:16	0.730496	357.908	FALSE	0
2022-09-14	11:16:16	0.723931	358.632	FALSE	0
2022-09-14	11:16:17	0.733142	359.365	FALSE	0
2022-09-14	11:16:17	0.726832	360.092	FALSE	0
2022-09-14	11:16:17	0.733397	360.826	FALSE	0
2022-09-14	11:16:17	0.726934	361.552	FALSE	0
2022-09-14	11:16:18	0.722354	362.275	FALSE	0
2022-09-14	11:16:18	0.730445	363.005	FALSE	0
2022-09-14	11:16:18	0.725	363.73	FALSE	0
2022-09-14	11:16:19	0.726476	364.457	FALSE	0
2022-09-14	11:16:19	0.728613	365.185	FALSE	0
2022-09-14	11:16:19	0.732634	365.918	FALSE	0
2022-09-14	11:16:19	0.731107	366.649	FALSE	0
2022-09-14	11:16:20	0.733193	367.382	FALSE	0
2022-09-14	11:16:20	0.727646	368.11	FALSE	0
2022-09-14	11:16:20	0.72673	368.837	FALSE	0
2022-09-14	11:16:20	0.734669	369.571	FALSE	0
2022-09-14	11:16:21	0.729071	370.3	FALSE	0
2022-09-14	11:16:21	0.732888	371.033	FALSE	0
2022-09-14	11:16:21	0.725763	371.759	FALSE	0
2022-09-14	11:16:21	0.735891	372.495	FALSE	0
2022-09-14	11:16:22	0.731463	373.226	FALSE	0
2022-09-14	11:16:22	0.737621	373.964	FALSE	0
2022-09-14	11:16:22	0.732735	374.697	FALSE	0
2022-09-14	11:16:23	0.73014	375.427	FALSE	0
2022-09-14	11:16:23	0.737417	376.164	FALSE	0
2022-09-14	11:16:23	0.730343	376.895	FALSE	0
2022-09-14	11:16:23	0.731005	377.626	FALSE	0
2022-09-14	11:16:24	0.733041	378.359	FALSE	0
2022-09-14	11:16:24	0.731667	379.09	FALSE	0
2022-09-14	11:16:24	0.727697	379.818	FALSE	0
2022-09-14	11:16:24	0.731209	380.549	FALSE	0
2022-09-14	11:16:25	0.728054	381.277	FALSE	0
2022-09-14	11:16:25	0.733804	382.011	FALSE	0
2022-09-14	11:16:25	0.73187	382.743	FALSE	0
2022-09-14	11:16:25	0.736043	383.479	FALSE	0
2022-09-14	11:16:26	0.733041	384.212	FALSE	0
2022-09-14	11:16:26	0.733702	384.946	FALSE	0
2022-09-14	11:16:26	0.730038	385.676	FALSE	0
2022-09-14	11:16:27	0.725814	386.402	FALSE	0
2022-09-14	11:16:27	0.727697	387.129	FALSE	0
2022-09-14	11:16:27	0.731463	387.861	FALSE	0
2022-09-14	11:16:27	0.736908	388.598	FALSE	0
2022-09-14	11:16:28	0.730598	389.328	FALSE	0
2022-09-14	11:16:28	0.726272	390.055	FALSE	0
2022-09-14	11:16:28	0.728919	390.783	FALSE	0
2022-09-14	11:16:28	0.72327	391.507	FALSE	0
2022-09-14	11:16:29	0.730903	392.238	FALSE	0
2022-09-14	11:16:29	0.725407	392.963	FALSE	0
2022-09-14	11:16:29	0.728003	393.691	FALSE	0
2022-09-14	11:16:29	0.731107	394.422	FALSE	0
2022-09-14	11:16:30	0.730801	395.153	FALSE	0
2022-09-14	11:16:30	0.733092	395.886	FALSE	0
2022-09-14	11:16:30	0.729886	396.616	FALSE	0
2022-09-14	11:16:31	0.728155	397.344	FALSE	0
2022-09-14	11:16:31	0.722812	398.067	FALSE	0
2022-09-14	11:16:31	0.730496	398.797	FALSE	0
2022-09-14	11:16:31	0.727239	399.525	FALSE	0
2022-09-14	11:16:32	0.731768	400.256	FALSE	0
2022-09-14	11:16:32	0.730038	400.986	FALSE	0
2022-09-14	11:16:32	0.72841	401.715	FALSE	0
2022-09-14	11:16:32	0.725204	402.44	FALSE	0
2022-09-14	11:16:33	0.728766	403.169	FALSE	0
2022-09-14	11:16:33	0.730242	403.899	FALSE	0
2022-09-14	11:16:33	0.733142	404.632	FALSE	0
2022-09-14	11:16:33	0.730547	405.363	FALSE	0
2022-09-14	11:16:34	0.733041	406.096	FALSE	0
2022-09-14	11:16:34	0.72958	406.825	FALSE	0
2022-09-14	11:16:34	0.73472	407.56	FALSE	0
2022-09-14	11:16:35	0.733702	408.294	FALSE	0
2022-09-14	11:16:35	0.734211	409.028	FALSE	0
2022-09-14	11:16:35	0.732532	409.761	FALSE	0
2022-09-14	11:16:35	0.732379	410.493	FALSE	0
2022-09-14	11:16:36	0.734568	411.228	FALSE	0
2022-09-14	11:16:36	0.729733	411.957	FALSE	0
2022-09-14	11:16:36	0.732532	412.69	FALSE	0
2022-09-14	11:16:36	0.734364	413.424	FALSE	0
2022-09-14	11:16:37	0.73416	414.158	FALSE	0
2022-09-14	11:16:37	0.733957	414.892	FALSE	0
2022-09-14	11:16:37	0.731005	415.623	FALSE	0
2022-09-14	11:16:38	0.728461	416.352	FALSE	0
2022-09-14	11:16:38	0.734313	417.086	FALSE	0
2022-09-14	11:16:38	0.727596	417.814	FALSE	0
2022-09-14	11:16:38	0.72673	418.54	FALSE	0
2022-09-14	11:16:39	0.732634	419.273	FALSE	0
2022-09-14	11:16:39	0.72612	419.999	FALSE	0
2022-09-14	11:16:39	0.732888	420.732	FALSE	0
2022-09-14	11:16:39	0.727443	421.459	FALSE	0
2022-09-14	11:16:40	0.740878	422.2	FALSE	0
2022-09-14	11:16:40	0.726578	422.927	FALSE	0
2022-09-14	11:16:40	0.729173	423.656	FALSE	0
2022-09-14	11:16:40	0.727036	424.383	FALSE	0
2022-09-14	11:16:41	0.731514	425.115	FALSE	0
2022-09-14	11:16:41	0.727952	425.843	FALSE	0
2022-09-14	11:16:41	0.730293	426.573	FALSE	0
2022-09-14	11:16:41	0.737265	427.31	FALSE	0
2022-09-14	11:16:42	0.732226	428.042	FALSE	0
2022-09-14	11:16:42	0.730852	428.773	FALSE	0
2022-09-14	11:16:42	0.72785	429.501	FALSE	0
2022-09-14	11:16:43	0.73472	430.236	FALSE	0
2022-09-14	11:16:43	0.726476	430.962	FALSE	0
2022-09-14	11:16:43	0.720114	431.682	FALSE	0
2022-09-14	11:16:43	0.732786	432.415	FALSE	0
2022-09-14	11:16:44	0.731209	433.146	FALSE	0
2022-09-14	11:16:44	0.731768	433.878	FALSE	0
2022-09-14	11:16:44	0.736298	434.614	FALSE	0
2022-09-14	11:16:44	0.735331	435.35	FALSE	0
2022-09-14	11:16:45	0.734109	436.084	FALSE	0
2022-09-14	11:16:45	0.730445	436.814	FALSE	0
2022-09-14	11:16:45	0.733448	437.548	FALSE	0
2022-09-14	11:16:45	0.7307	438.278	FALSE	0
2022-09-14	11:16:46	0.728054	439.007	FALSE	0
2022-09-14	11:16:46	0.72958	439.736	FALSE	0
2022-09-14	11:16:46	0.726527	440.463	FALSE	0
2022-09-14	11:16:47	0.730343	441.193	FALSE	0
2022-09-14	11:16:47	0.730801	441.924	FALSE	0
2022-09-14	11:16:47	0.733448	442.657	FALSE	0
2022-09-14	11:16:47	0.727036	443.384	FALSE	0
2022-09-14	11:16:48	0.735891	444.12	FALSE	0
2022-09-14	11:16:48	0.733702	444.854	FALSE	0
2022-09-14	11:16:48	0.728715	445.583	FALSE	0
2022-09-14	11:16:48	0.726018	446.309	FALSE	0
2022-09-14	11:16:49	0.730598	447.039	FALSE	0
2022-09-14	11:16:49	0.73472	447.774	FALSE	0
2022-09-14	11:16:49	0.724491	448.498	FALSE	0
2022-09-14	11:16:49	0.730751	449.229	FALSE	0
2022-09-14	11:16:50	0.720114	449.949	FALSE	0
2022-09-14	11:16:50	0.729682	450.679	FALSE	0
2022-09-14	11:16:50	0.739707	451.419	FALSE	0
2022-09-14	11:16:51	0.730293	452.149	FALSE	0
2022-09-14	11:16:51	0.732684	452.882	FALSE	0
2022-09-14	11:16:51	0.736654	453.618	FALSE	0
2022-09-14	11:16:51	0.735891	454.354	FALSE	0
2022-09-14	11:16:52	0.732735	455.087	FALSE	0
2022-09-14	11:16:52	0.738435	455.825	FALSE	0
2022-09-14	11:16:52	0.732125	456.557	FALSE	0
2022-09-14	11:16:52	0.736043	457.294	FALSE	0
2022-09-14	11:16:53	0.727952	458.021	FALSE	0
2022-09-14	11:16:53	0.727188	458.749	FALSE	0
2022-09-14	11:16:53	0.731259	459.48	FALSE	0
2022-09-14	11:16:53	0.732583	460.212	FALSE	0
2022-09-14	11:16:54	0.734109	460.947	FALSE	0
2022-09-14	11:16:54	0.735992	461.683	FALSE	0
2022-09-14	11:16:54	0.730496	462.413	FALSE	0
2022-09-14	11:16:55	0.729784	463.143	FALSE	0
2022-09-14	11:16:55	0.730801	463.874	FALSE	0
2022-09-14	11:16:55	0.735941	464.61	FALSE	0
2022-09-14	11:16:55	0.735382	465.345	FALSE	0
2022-09-14	11:16:56	0.73645	466.081	FALSE	0
2022-09-14	11:16:56	0.735891	466.817	FALSE	0
2022-09-14	11:16:56	0.732125	467.549	FALSE	0
2022-09-14	11:16:56	0.724338	468.274	FALSE	0
2022-09-14	11:16:57	0.726221	469	FALSE	0
2022-09-14	11:16:57	0.727545	469.728	FALSE	0
2022-09-14	11:16:57	0.731819	470.459	FALSE	0
2022-09-14	11:16:57	0.729071	471.188	FALSE	0
2022-09-14	11:16:58	0.733244	471.922	FALSE	0
2022-09-14	11:16:58	0.731056	472.653	FALSE	0
2022-09-14	11:16:58	0.733193	473.386	FALSE	0
2022-09-14	11:16:59	0.73131	474.117	FALSE	0
2022-09-14	11:16:59	0.728868	474.846	FALSE	0
2022-09-14	11:16:59	0.741438	475.588	FALSE	0
2022-09-14	11:16:59	0.733855	476.321	FALSE	0
2022-09-14	11:17:00	0.730343	477.052	FALSE	0
2022-09-14	11:17:00	0.735433	477.787	FALSE	0
2022-09-14	11:17:00	0.735127	478.522	FALSE	0
2022-09-14	11:17:00	0.725509	479.248	FALSE	0
2022-09-14	11:17:01	0.72958	479.977	FALSE	0
2022-09-14	11:17:01	0.732684	480.71	FALSE	0
2022-09-14	11:17:01	0.727646	481.438	FALSE	0
2022-09-14	11:17:01	0.734211	482.172	FALSE	0
2022-09-14	11:17:02	0.733702	482.906	FALSE	0
2022-09-14	11:17:02	0.733702	483.639	FALSE	0
2022-09-14	11:17:02	0.731717	484.371	FALSE	0
2022-09-14	11:17:03	0.733753	485.105	FALSE	0
2022-09-14	11:17:03	0.734262	485.839	FALSE	0
2022-09-14	11:17:03	0.73701	486.576	FALSE	0
2022-09-14	11:17:03	0.731056	487.307	FALSE	0
2022-09-14	11:17:04	0.728155	488.035	FALSE	0
2022-09-14	11:17:04	0.735026	488.77	FALSE	0
2022-09-14	11:17:04	0.735433	489.506	FALSE	0
2022-09-14	11:17:04	0.733244	490.239	FALSE	0
2022-09-14	11:17:05	0.736399	490.975	FALSE	0
2022-09-14	11:17:05	0.729224	491.705	FALSE	0
2022-09-14	11:17:05	0.736094	492.441	FALSE	0
2022-09-14	11:17:05	0.732837	493.174	FALSE	0
2022-09-14	11:17:06	0.737112	493.911	FALSE	0
2022-09-14	11:17:06	0.729529	494.64	FALSE	0
2022-09-14	11:17:06	0.727392	495.368	FALSE	0
2022-09-14	11:17:07	0.732735	496.1	FALSE	0
2022-09-14	11:17:07	0.733702	496.834	FALSE	0
2022-09-14	11:17:07	0.725407	497.559	FALSE	0
2022-09-14	11:17:07	0.734313	498.294	FALSE	0
2022-09-14	11:17:08	0.732277	499.026	FALSE	0
2022-09-14	11:17:08	0.733957	499.76	FALSE	0
2022-09-14	11:17:08	0.729173	500.489	FALSE	0
2022-09-14	11:17:08	0.730394	501.22	FALSE	0
2022-09-14	11:17:09	0.734109	501.954	FALSE	0
2022-09-14	11:17:09	0.73131	502.685	FALSE	0
2022-09-14	11:17:09	0.729326	503.414	FALSE	0
2022-09-14	11:17:09	0.733855	504.148	FALSE	0
2022-09-14	11:17:10	0.727697	504.876	FALSE	0
2022-09-14	11:17:10	0.729224	505.605	FALSE	0
2022-09-14	11:17:10	0.732583	506.338	FALSE	0
2022-09-14	11:17:11	0.729071	507.067	FALSE	0
2022-09-14	11:17:11	0.725662	507.792	FALSE	0
2022-09-14	11:17:11	0.736603	508.529	FALSE	0
2022-09-14	11:17:11	0.732837	509.262	FALSE	0
2022-09-14	11:17:12	0.734109	509.996	FALSE	0
2022-09-14	11:17:12	0.732481	510.728	FALSE	0
2022-09-14	11:17:12	0.730751	511.459	FALSE	0
2022-09-14	11:17:12	0.73014	512.189	FALSE	0
2022-09-14	11:17:13	0.734262	512.924	FALSE	0
2022-09-14	11:17:13	0.736908	513.66	FALSE	0
2022-09-14	11:17:13	0.730496	514.391	FALSE	0
2022-09-14	11:17:13	0.731107	515.122	FALSE	0
2022-09-14	11:17:14	0.727697	515.85	FALSE	0
2022-09-14	11:17:14	0.730394	516.58	FALSE	0
2022-09-14	11:17:14	0.739046	517.319	FALSE	0
2022-09-14	11:17:15	0.73243	518.052	FALSE	0
2022-09-14	11:17:15	0.729478	518.781	FALSE	0
2022-09-14	11:17:15	0.730191	519.511	FALSE	0
2022-09-14	11:17:15	0.724338	520.236	FALSE	0
2022-09-14	11:17:16	0.727596	520.963	FALSE	0
2022-09-14	11:17:16	0.736145	521.699	FALSE	0
2022-09-14	11:17:16	0.732888	522.432	FALSE	0
2022-09-14	11:17:16	0.729886	523.162	FALSE	0
2022-09-14	11:17:17	0.733244	523.895	FALSE	0
2022-09-14	11:17:17	0.734262	524.63	FALSE	0
2022-09-14	11:17:17	0.73187	525.362	FALSE	0
2022-09-14	11:17:17	0.731616	526.093	FALSE	0
2022-09-14	11:17:18	0.729682	526.823	FALSE	0
2022-09-14	11:17:18	0.732583	527.555	FALSE	0
2022-09-14	11:17:18	0.731565	528.287	FALSE	0
2022-09-14	11:17:19	0.735687	529.023	FALSE	0
2022-09-14	11:17:19	0.727443	529.75	FALSE	0
2022-09-14	11:17:19	0.7307	530.481	FALSE	0
2022-09-14	11:17:19	0.730242	531.211	FALSE	0
2022-09-14	11:17:20	0.726883	531.938	FALSE	0
2022-09-14	11:17:20	0.737214	532.675	FALSE	0
2022-09-14	11:17:20	0.724237	533.399	FALSE	0
2022-09-14	11:17:20	0.740165	534.14	FALSE	0
2022-09-14	11:17:21	0.728308	534.868	FALSE	0
2022-09-14	11:17:21	0.724949	535.593	FALSE	0
2022-09-14	11:17:21	0.728308	536.321	FALSE	0
2022-09-14	11:17:21	0.732328	537.053	FALSE	0
2022-09-14	11:17:22	0.73014	537.784	FALSE	0
2022-09-14	11:17:22	0.732583	538.516	FALSE	0
2022-09-14	11:17:22	0.724593	539.241	FALSE	0
2022-09-14	11:17:23	0.73243	539.973	FALSE	0
2022-09-14	11:17:23	0.72958	540.703	FALSE	0
2022-09-14	11:17:23	0.733193	541.436	FALSE	0
2022-09-14	11:17:23	0.729733	542.166	FALSE	0
2022-09-14	11:17:24	0.730038	542.896	FALSE	0
2022-09-14	11:17:24	0.734771	543.631	FALSE	0
2022-09-14	11:17:24	0.735127	544.366	FALSE	0
2022-09-14	11:17:24	0.734669	545.1	FALSE	0
2022-09-14	11:17:25	0.734618	545.835	FALSE	0
2022-09-14	11:17:25	0.727748	546.563	FALSE	0
2022-09-14	11:17:25	0.727494	547.29	FALSE	0
2022-09-14	11:17:25	0.728919	548.019	FALSE	0
2022-09-14	11:17:26	0.726374	548.745	FALSE	0
2022-09-14	11:17:26	0.732684	549.478	FALSE	0
2022-09-14	11:17:26	0.729987	550.208	FALSE	0
2022-09-14	11:17:27	0.725916	550.934	FALSE	0
2022-09-14	11:17:27	0.730649	551.665	FALSE	0
2022-09-14	11:17:27	0.733142	552.398	FALSE	0
2022-09-14	11:17:27	0.733346	553.131	FALSE	0
2022-09-14	11:17:28	0.734568	553.866	FALSE	0
2022-09-14	11:17:28	0.737672	554.603	FALSE	0
2022-09-14	11:17:28	0.731158	555.335	FALSE	0
2022-09-14	11:17:28	0.73472	556.069	FALSE	0
2022-09-14	11:17:29	0.729631	556.799	FALSE	0
2022-09-14	11:17:29	0.7307	557.53	FALSE	0
2022-09-14	11:17:29	0.732786	558.262	FALSE	0
2022-09-14	11:17:29	0.734517	558.997	FALSE	0
2022-09-14	11:17:30	0.734262	559.731	FALSE	0
2022-09-14	11:17:30	0.726221	560.457	FALSE	0
2022-09-14	11:17:30	0.732837	561.19	FALSE	0
2022-09-14	11:17:31	0.734618	561.925	FALSE	0
2022-09-14	11:17:31	0.727036	562.652	FALSE	0
2022-09-14	11:17:31	0.734262	563.386	FALSE	0
2022-09-14	11:17:31	0.732125	564.118	FALSE	0
2022-09-14	11:17:32	0.734262	564.853	FALSE	0
2022-09-14	11:17:32	0.731514	565.584	FALSE	0
2022-09-14	11:17:32	0.734873	566.319	FALSE	0
2022-09-14	11:17:32	0.730038	567.049	FALSE	0
2022-09-14	11:17:33	0.734313	567.783	FALSE	0
2022-09-14	11:17:33	0.73243	568.516	FALSE	0
2022-09-14	11:17:33	0.731361	569.247	FALSE	0
2022-09-14	11:17:33	0.727494	569.975	FALSE	0
2022-09-14	11:17:34	0.730343	570.705	FALSE	0
2022-09-14	11:17:34	0.730038	571.435	FALSE	0
2022-09-14	11:17:34	0.739351	572.174	FALSE	0
2022-09-14	11:17:35	0.736349	572.911	FALSE	0
2022-09-14	11:17:35	0.726425	573.637	FALSE	0
2022-09-14	11:17:35	0.743575	574.381	FALSE	0
2022-09-14	11:17:35	0.731412	575.112	FALSE	0
2022-09-14	11:17:36	0.736501	575.849	FALSE	0
2022-09-14	11:17:36	0.727799	576.576	FALSE	0
2022-09-14	11:17:36	0.729936	577.306	FALSE	0
2022-09-14	11:17:36	0.729835	578.036	FALSE	0
2022-09-14	11:17:37	0.733855	578.77	FALSE	0
2022-09-14	11:17:37	0.730852	579.501	FALSE	0
2022-09-14	11:17:37	0.760318	580.261	FALSE	0
2022-09-14	11:17:37	2.31808	582.579	FALSE	0
2022-09-14	11:17:38	3.1482	585.727	1	1
2022-09-14	11:17:38	1.21635	586.944	FALSE	1
2022-09-14	11:17:38	-1.47637	586.944	FALSE	1
2022-09-14	11:17:39	-1.92441	586.944	FALSE	1
2022-09-14	11:17:39	-0.950521	586.944	FALSE	1
2022-09-14	11:17:39	0.0245422	586.968	FALSE	1
2022-09-14	11:17:39	0.375433	587.344	FALSE	1
2022-09-14	11:17:40	1.99284	589.337	FALSE	1
2022-09-14	11:17:40	2.31599	591.653	FALSE	1
2022-09-14	11:17:40	0.809631	592.462	FALSE	1
2022-09-14	11:17:40	-1.80106	592.462	FALSE	1
2022-09-14	11:17:41	-0.248638	592.462	FALSE	1
2022-09-14	11:17:41	-1.34065	592.462	FALSE	1
2022-09-14	11:17:41	0.249784	592.712	FALSE	1
2022-09-14	11:17:41	0.544084	593.256	FALSE	1
2022-09-14	11:17:42	0.387188	593.643	FALSE	1
2022-09-14	11:17:42	-1.82625	593.643	FALSE	1
2022-09-14	11:17:42	-0.573524	593.643	FALSE	1
2022-09-14	11:17:43	2.78256	596.426	FALSE	1
2022-09-14	11:17:43	-0.741717	596.426	FALSE	1
2022-09-14	11:17:43	-1.92136	596.426	FALSE	1
2022-09-14	11:17:43	-2.05093	596.426	FALSE	1
2022-09-14	11:17:44	-2.22849	596.426	FALSE	1
2022-09-14	11:17:44	-0.586094	596.426	FALSE	1
2022-09-14	11:17:44	0.526425	596.952	FALSE	1
2022-09-14	11:17:44	-0.723345	596.952	FALSE	1
2022-09-14	11:17:45	-1.05113	596.952	FALSE	1
2022-09-14	11:17:45	-1.22248	596.952	FALSE	1
2022-09-14	11:17:45	-0.549656	596.952	FALSE	1
2022-09-14	11:17:45	-0.233524	596.952	FALSE	1
2022-09-14	11:17:46	-0.449656	596.952	FALSE	1
2022-09-14	11:17:46	-0.513575	596.952	FALSE	1
2022-09-14	11:17:46	-0.571488	596.952	FALSE	1
2022-09-14	11:17:47	-0.637442	596.952	FALSE	1
2022-09-14	11:17:47	-0.664109	596.952	FALSE	1
2022-09-14	11:17:47	-0.699681	596.952	FALSE	1
2022-09-14	11:17:47	-0.726755	596.952	FALSE	1
2022-09-14	11:17:48	-0.81734	596.952	FALSE	1
2022-09-14	11:17:48	-0.791386	596.952	FALSE	1
2022-09-14	11:17:48	-0.854592	596.952	FALSE	1
2022-09-14	11:17:48	-0.837646	596.952	FALSE	1
2022-09-14	11:17:49	-1.01719	596.952	FALSE	1
2022-09-14	11:17:49	-1.17963	596.952	FALSE	1
2022-09-14	11:17:49	-1.15159	596.952	FALSE	1
2022-09-14	11:17:49	-1.13307	596.952	FALSE	1
2022-09-14	11:17:50	-1.25978	596.952	FALSE	1
2022-09-14	11:17:50	-1.15464	596.952	FALSE	1
2022-09-14	11:17:50	-1.23296	596.952	FALSE	1
2022-09-14	11:17:51	-1.07347	596.952	FALSE	1
2022-09-14	11:17:51	-1.43821	596.952	FALSE	1
2022-09-14	11:17:51	-1.23164	596.952	FALSE	1
2022-09-14	11:17:51	-1.36533	596.952	FALSE	1
2022-09-14	11:17:52	-1.26904	596.952	FALSE	1
2022-09-14	11:17:52	-1.30849	596.952	FALSE	1
2022-09-14	11:17:52	-1.43729	596.952	FALSE	1
2022-09-14	11:17:52	-1.50024	596.952	FALSE	1
2022-09-14	11:17:53	-1.46838	596.952	FALSE	1
2022-09-14	11:17:53	-2.53251	596.952	FALSE	1
2022-09-14	11:17:53	-2.52411	596.952	FALSE	1
2022-09-14	11:17:53	-2.57729	596.952	FALSE	1
2022-09-14	11:17:54	-2.59719	596.952	FALSE	1
2022-09-14	11:17:54	-2.75378	596.952	FALSE	1
2022-09-14	11:17:54	-2.7206	596.952	FALSE	1
2022-09-14	11:17:55	-2.78441	596.952	FALSE	1
2022-09-14	11:17:55	-2.80029	596.952	FALSE	1
2022-09-14	11:17:55	-2.89505	596.952	FALSE	1
2022-09-14	11:17:55	-2.91469	596.952	FALSE	1
2022-09-14	11:17:56	-2.98309	596.952	FALSE	1
2022-09-14	11:17:56	-2.95902	596.952	FALSE	1
2022-09-14	11:17:56	-3.03301	596.952	FALSE	1
2022-09-14	11:17:56	-3.00558	596.952	FALSE	1
2022-09-14	11:17:57	-3.02894	596.952	FALSE	1
2022-09-14	11:17:57	-3.04538	596.952	FALSE	1
2022-09-14	11:17:57	-3.09383	596.952	FALSE	1
2022-09-14	11:17:57	-3.09831	596.952	FALSE	1
2022-09-14	11:17:58	-3.16726	596.952	FALSE	1
2022-09-14	11:17:58	-3.21057	596.952	FALSE	1
2022-09-14	11:17:58	-3.34721	596.952	FALSE	1
2022-09-14	11:17:59	-3.41576	596.952	FALSE	1
2022-09-14	11:17:59	-3.46421	596.952	FALSE	1
2022-09-14	11:17:59	-3.55612	596.952	FALSE	1
2022-09-14	11:17:59	-3.42777	596.952	FALSE	1
2022-09-14	11:18:00	-3.55245	596.952	FALSE	1
2022-09-14	11:18:00	-3.48238	596.952	FALSE	1
2022-09-14	11:18:00	-3.641	596.952	FALSE	1
2022-09-14	11:18:00	-3.6665	596.952	FALSE	1
2022-09-14	11:18:01	-3.60828	596.952	FALSE	1
2022-09-14	11:18:01	-3.67072	596.952	FALSE	1
2022-09-14	11:18:01	-3.57235	596.952	FALSE	1
2022-09-14	11:18:01	-3.74441	596.952	FALSE	1
2022-09-14	11:18:02	-3.7351	596.952	FALSE	1
2022-09-14	11:18:02	-3.86971	596.952	FALSE	1
2022-09-14	11:18:02	-3.92334	596.952	FALSE	1
2022-09-14	11:18:03	-3.89958	596.952	FALSE	1
2022-09-14	11:18:03	-3.82965	596.952	FALSE	1
2022-09-14	11:18:03	-3.86284	596.952	FALSE	1
2022-09-14	11:18:03	-3.89184	596.952	FALSE	1
2022-09-14	11:18:04	-3.96009	596.952	FALSE	1
2022-09-14	11:18:04	-3.99943	596.952	FALSE	1
2022-09-14	11:18:04	-4.11907	596.952	FALSE	1
2022-09-14	11:18:04	-4.19749	596.952	FALSE	1
2022-09-14	11:18:05	-4.201	596.952	FALSE	1
2022-09-14	11:18:05	-4.21047	596.952	FALSE	1
2022-09-14	11:18:05	-4.1382	596.952	FALSE	1
2022-09-14	11:18:05	-4.238	596.952	FALSE	1
2022-09-14	11:18:06	-4.21444	596.952	FALSE	1
2022-09-14	11:18:06	-4.26518	596.952	FALSE	1
2022-09-14	11:18:06	-4.24355	596.952	FALSE	1
2022-09-14	11:18:07	-4.25571	596.952	FALSE	1
2022-09-14	11:18:07	-4.25337	596.952	FALSE	1
2022-09-14	11:18:07	-4.31927	596.952	FALSE	1
2022-09-14	11:18:07	-4.29642	596.952	FALSE	1
2022-09-14	11:18:08	-4.26065	596.952	FALSE	1
2022-09-14	11:18:08	-4.30044	596.952	FALSE	1
2022-09-14	11:18:08	-4.33459	596.952	FALSE	1
2022-09-14	11:18:08	-4.40049	596.952	FALSE	1
2022-09-14	11:18:09	-4.33942	596.952	FALSE	1
2022-09-14	11:18:09	-4.46166	596.952	FALSE	1
2022-09-14	11:18:09	-4.48339	596.952	FALSE	1
2022-09-14	11:18:09	-4.56146	596.952	FALSE	1
2022-09-14	11:18:10	-4.62365	596.952	FALSE	1
2022-09-14	11:18:10	-4.44894	596.952	FALSE	1
2022-09-14	11:18:10	-4.31296	596.952	FALSE	1
2022-09-14	11:18:11	-4.2754	596.952	FALSE	1
2022-09-14	11:18:11	-4.2095	596.952	FALSE	1
2022-09-14	11:18:11	-4.18019	596.952	FALSE	1
2022-09-14	11:18:11	-4.11953	596.952	FALSE	1
2022-09-14	11:18:12	-2.64752	596.952	FALSE	1
2022-09-14	11:18:12	-2.5036	596.952	FALSE	1
2022-09-14	11:18:12	-2.76299	596.952	FALSE	1
2022-09-14	11:18:12	-2.63581	596.952	FALSE	1
2022-09-14	11:18:13	-3.26217	596.952	FALSE	1
2022-09-14	11:18:13	0.713244	597.666	FALSE	1
2022-09-14	11:18:13	0.733244	598.399	FALSE	1
2022-09-14	11:18:13	0.735738	599.135	FALSE	1
2022-09-14	11:18:14	0.734924	599.869	FALSE	1
2022-09-14	11:18:14	0.683168	600.553	FALSE	1
2022-09-14	11:18:14	0.423423	600.976	FALSE	1
2022-09-14	11:18:15	0.457875	601.434	FALSE	1
2022-09-14	11:18:15	0.293804	601.728	FALSE	1
2022-09-14	11:18:15	0.112125	601.84	FALSE	1
2022-09-14	11:18:15	-0.0852287	601.84	FALSE	1
2022-09-14	11:18:16	-0.107671	601.84	FALSE	1
2022-09-14	11:18:16	-0.137137	601.84	FALSE	1
2022-09-14	11:18:16	0.167952	602.008	FALSE	1
2022-09-14	11:18:16	0.0695295	602.077	FALSE	1
2022-09-14	11:18:17	0.304644	602.382	FALSE	1
2022-09-14	11:18:17	0.184847	602.567	FALSE	1
2022-09-14	11:18:17	0.296349	602.863	FALSE	1
2022-09-14	11:18:17	0.181743	603.045	FALSE	1
2022-09-14	11:18:18	0.303321	603.348	FALSE	1
2022-09-14	11:18:18	0.234924	603.583	FALSE	1
2022-09-14	11:18:18	0.308359	603.892	FALSE	1
2022-09-14	11:18:19	0.294109	604.186	FALSE	1
2022-09-14	11:18:19	0.33472	604.52	FALSE	1
2022-09-14	11:18:19	0.799402	605.32	FALSE	1
2022-09-14	11:18:19	0.656654	605.976	FALSE	1
2022-09-14	11:18:20	1.22139	607.198	FALSE	1
2022-09-14	11:18:20	1.73177	608.93	FALSE	1
2022-09-14	11:18:20	-1.68838	608.93	FALSE	1
2022-09-14	11:18:20	-2.13597	608.93	FALSE	1
2022-09-14	11:18:21	-2.34731	608.93	FALSE	1
2022-09-14	11:18:21	-2.47352	608.93	FALSE	1
2022-09-14	11:18:21	-2.54899	608.93	FALSE	1
2022-09-14	11:18:21	-2.66675	608.93	FALSE	1
2022-09-14	11:18:22	-2.71724	608.93	FALSE	1
2022-09-14	11:18:22	-2.78339	608.93	FALSE	1
2022-09-14	11:18:22	-2.80569	608.93	FALSE	1
2022-09-14	11:18:23	-2.77805	608.93	FALSE	1
2022-09-14	11:18:23	-2.36258	608.93	FALSE	1
2022-09-14	11:18:23	-2.47541	608.93	FALSE	1
2022-09-14	11:18:23	-2.61021	608.93	FALSE	1
2022-09-14	11:18:24	-2.69306	608.93	FALSE	1
2022-09-14	11:18:24	-2.67057	608.93	FALSE	1
2022-09-14	11:18:24	-2.6835	608.93	FALSE	1
2022-09-14	11:18:24	-2.68477	608.93	FALSE	1
2022-09-14	11:18:25	-0.17042	608.93	FALSE	1
2022-09-14	11:18:25	0.724389	609.654	FALSE	1
2022-09-14	11:18:25	0.702812	610.357	FALSE	1
2022-09-14	11:18:25	-2.27077	610.357	FALSE	1
2022-09-14	11:18:26	-2.68874	610.357	FALSE	1
2022-09-14	11:18:26	-3.19337	610.357	FALSE	1
2022-09-14	11:18:26	-3.26818	610.357	FALSE	1
2022-09-14	11:18:27	0.530954	610.888	FALSE	1
2022-09-14	11:18:27	-2.40116	610.888	FALSE	1
2022-09-14	11:18:27	-4.00283	610.888	FALSE	1
2022-09-14	11:18:27	-3.87439	610.888	FALSE	1
2022-09-14	11:18:28	-3.92248	610.888	FALSE	1
2022-09-14	11:18:28	-4.18202	610.888	FALSE	1
2022-09-14	11:18:28	-3.83179	610.888	FALSE	1
2022-09-14	11:18:28	-2.8866	610.888	FALSE	1
2022-09-14	11:18:29	-1.55363	610.888	FALSE	1
2022-09-14	11:18:29	-1.08721	610.888	FALSE	1
2022-09-14	11:18:29	-1.67057	610.888	FALSE	1
2022-09-14	11:18:29	-3.4839	610.888	FALSE	1
2022-09-14	11:18:30	-4.85973	610.888	FALSE	1
2022-09-14	11:18:30	-4.87205	610.888	FALSE	1
2022-09-14	11:18:30	-4.87159	610.888	FALSE	1
2022-09-14	11:18:31	-4.73403	610.888	FALSE	1
2022-09-14	11:18:31	-4.56538	610.888	FALSE	1
2022-09-14	11:18:31	0.393092	611.281	FALSE	1
2022-09-14	11:18:31	0.365255	611.646	FALSE	1
2022-09-14	11:18:32	0.367748	612.014	FALSE	1
2022-09-14	11:18:32	0.16556	612.179	FALSE	1
2022-09-14	11:18:32	0.156603	612.336	FALSE	1
2022-09-14	11:18:32	0.229071	612.565	FALSE	1
2022-09-14	11:18:33	0.0896312	612.655	FALSE	1
2022-09-14	11:18:33	0.142761	612.797	FALSE	1
2022-09-14	11:18:33	0.161336	612.959	FALSE	1
2022-09-14	11:18:33	0.244695	613.203	FALSE	1
2022-09-14	11:18:34	0.184237	613.388	FALSE	1
2022-09-14	11:18:34	0.0659671	613.454	FALSE	1
2022-09-14	11:18:34	0.117112	613.571	FALSE	1
2022-09-14	11:18:35	0.000572752	613.571	FALSE	1
2022-09-14	11:18:35	0.355942	613.927	FALSE	1
2022-09-14	11:18:35	0.392583	614.32	FALSE	1
2022-09-14	11:18:35	0.957417	615.277	FALSE	1
2022-09-14	11:18:36	1.16841	616.446	FALSE	1
2022-09-14	11:18:36	1.30739	617.753	FALSE	1
2022-09-14	11:18:36	-0.43215	617.753	FALSE	1
2022-09-14	11:18:36	-0.465279	617.753	FALSE	1
2022-09-14	11:18:37	-0.694032	617.753	FALSE	1
2022-09-14	11:18:37	-0.759121	617.753	FALSE	1
2022-09-14	11:18:37	-0.888027	617.753	FALSE	1
2022-09-14	11:18:37	-0.920394	617.753	FALSE	1
2022-09-14	11:18:38	-0.745636	617.753	FALSE	1
2022-09-14	11:18:38	-0.988078	617.753	FALSE	1
2022-09-14	11:18:38	-0.964414	617.753	FALSE	1
2022-09-14	11:18:39	-1.02207	617.753	FALSE	1
2022-09-14	11:18:39	-1.04538	617.753	FALSE	1
2022-09-14	11:18:39	-0.833371	617.753	FALSE	1
2022-09-14	11:18:39	-0.929605	617.753	FALSE	1
2022-09-14	11:18:40	-0.981208	617.753	FALSE	1
2022-09-14	11:18:40	-1.12462	617.753	FALSE	1
2022-09-14	11:18:40	-1.23932	617.753	FALSE	1
2022-09-14	11:18:40	-1.3693	617.753	FALSE	1
2022-09-14	11:18:41	-1.39261	617.753	FALSE	1
2022-09-14	11:18:41	0.0812343	617.834	FALSE	1
2022-09-14	11:18:41	0.428766	618.263	FALSE	1
2022-09-14	11:18:41	0.72902	618.992	FALSE	1
2022-09-14	11:18:42	0.729733	619.722	FALSE	1
2022-09-14	11:18:42	0.725458	620.447	FALSE	1
2022-09-14	11:18:42	0.735076	621.182	FALSE	1
2022-09-14	11:18:43	0.733397	621.916	FALSE	1
2022-09-14	11:18:43	0.734924	622.651	FALSE	1
2022-09-14	11:18:43	0.737315	623.388	FALSE	1
2022-09-14	11:18:43	0.725916	624.114	FALSE	1
2022-09-14	11:18:44	0.72958	624.844	FALSE	1
2022-09-14	11:18:44	0.725153	625.569	FALSE	1
2022-09-14	11:18:44	0.733142	626.302	FALSE	1
2022-09-14	11:18:44	0.737417	627.039	FALSE	1
2022-09-14	11:18:45	0.733041	627.772	FALSE	1
2022-09-14	11:18:45	0.737519	628.51	FALSE	1
2022-09-14	11:18:45	0.731565	629.241	FALSE	1
2022-09-14	11:18:45	0.73645	629.978	FALSE	1
2022-09-14	11:18:46	0.732634	630.71	FALSE	1
2022-09-14	11:18:46	0.735534	631.446	FALSE	1
2022-09-14	11:18:46	0.732634	632.179	FALSE	1
2022-09-14	11:18:47	0.730089	632.909	FALSE	1
2022-09-14	11:18:47	0.730496	633.639	FALSE	1
2022-09-14	11:18:47	0.741539	634.381	FALSE	1
2022-09-14	11:18:47	0.736196	635.117	FALSE	1
2022-09-14	11:18:48	0.733295	635.85	FALSE	1
2022-09-14	11:18:48	0.731565	636.582	FALSE	1
2022-09-14	11:18:48	0.735738	637.318	FALSE	1
2022-09-14	11:18:48	0.735331	638.053	FALSE	1
2022-09-14	11:18:49	-0.167417	638.053	FALSE	1
2022-09-14	11:18:49	0.673092	638.726	FALSE	1
2022-09-14	11:18:49	0.73131	639.457	FALSE	1
2022-09-14	11:18:49	0.733295	640.191	FALSE	1
2022-09-14	11:18:50	0.72902	640.92	FALSE	1
2022-09-14	11:18:50	0.736552	641.656	FALSE	1
2022-09-14	11:18:50	0.72902	642.385	FALSE	1
2022-09-14	11:18:51	0.549377	642.935	FALSE	1
2022-09-14	11:18:51	0.661183	643.596	FALSE	1
2022-09-14	11:18:51	-2.7867	643.596	FALSE	1
2022-09-14	11:18:51	-3.01764	643.596	FALSE	1
2022-09-14	11:18:52	-3.15917	643.596	FALSE	1

## Sheet: MsPotato_harness_2022914111331
						**GoPro Fitting: 11:03
2022-09-14	11:13:32	0.2907
2022-09-14	11:13:32	0.201641
2022-09-14	11:13:32	0.211056
2022-09-14	11:13:32	0.212685
2022-09-14	11:13:32	0.339402
2022-09-14	11:13:33	0.373092
2022-09-14	11:13:33	0.414008
2022-09-14	11:13:33	0.382761
2022-09-14	11:13:34	0.499707
2022-09-14	11:13:34	0.349275
2022-09-14	11:13:34	0.163219
2022-09-14	11:13:34	0.208359
2022-09-14	11:13:35	0.25813
2022-09-14	11:13:35	0.376552
2022-09-14	11:13:35	0.261489
2022-09-14	11:13:35	0.28612
2022-09-14	11:13:36	0.308155
2022-09-14	11:13:36	0.286171
2022-09-14	11:13:36	0.284593
2022-09-14	11:13:36	0.280573
2022-09-14	11:13:37	0.298639
2022-09-14	11:13:37	0.266985
2022-09-14	11:13:37	0.26958
2022-09-14	11:13:38	0.274466
2022-09-14	11:13:38	0.271056
2022-09-14	11:13:38	0.27014
2022-09-14	11:13:38	0.277875
2022-09-14	11:13:39	0.277163
2022-09-14	11:13:39	0.265102
2022-09-14	11:13:39	0.229631
2022-09-14	11:13:39	0.253753
2022-09-14	11:13:40	0.25757
2022-09-14	11:13:40	0.234059
2022-09-14	11:13:40	0.536909
2022-09-14	11:13:40	0.213652
2022-09-14	11:13:41	0.295992
2022-09-14	11:13:41	0.324237
2022-09-14	11:13:41	0.382048
2022-09-14	11:13:42	0.300776
2022-09-14	11:13:42	0.268817
2022-09-14	11:13:42	0.27528
2022-09-14	11:13:42	0.28841
2022-09-14	11:13:43	0.264695
2022-09-14	11:13:43	0.286832
2022-09-14	11:13:43	0.273092
2022-09-14	11:13:43	0.270751
2022-09-14	11:13:44	0.308715
2022-09-14	11:13:44	0.322608
2022-09-14	11:13:44	0.250802
2022-09-14	11:13:44	0.2993
2022-09-14	11:13:45	0.181998
2022-09-14	11:13:45	0.350038
2022-09-14	11:13:45	0.318588
2022-09-14	11:13:46	0.15416
2022-09-14	11:13:46	0.0198094
2022-09-14	11:13:46	0.267545
2022-09-14	11:13:46	0.155738
2022-09-14	11:13:47	0.254568
2022-09-14	11:13:47	-0.0066537
2022-09-14	11:13:47	-0.177035
2022-09-14	11:13:47	-0.586857
2022-09-14	11:13:48	-0.544567
2022-09-14	11:13:48	-0.402582
2022-09-14	11:13:48	-0.15047
2022-09-14	11:13:48	0.0165524
2022-09-14	11:13:49	-0.0952542
2022-09-14	11:13:49	-0.127264
2022-09-14	11:13:49	0.0134481
2022-09-14	11:13:50	0.113397
2022-09-14	11:13:50	0.453244
2022-09-14	11:13:50	1.08602
2022-09-14	11:13:50	0.545305
2022-09-14	11:13:51	0.556247
2022-09-14	11:13:51	0.241845
2022-09-14	11:13:51	-0.0280277
2022-09-14	11:13:51	0.535534
2022-09-14	11:13:52	0.231158
2022-09-14	11:13:52	0.154822
2022-09-14	11:13:52	0.37014
2022-09-14	11:13:52	0.189224
2022-09-14	11:13:53	-0.0579005
2022-09-14	11:13:53	0.166476
2022-09-14	11:13:53	0.0172649
2022-09-14	11:13:54	-0.0894018
2022-09-14	11:13:54	0.0248984
2022-09-14	11:13:54	-0.039071
2022-09-14	11:13:54	-0.0577478
2022-09-14	11:13:55	-0.00212443
2022-09-14	11:13:55	0.355738
2022-09-14	11:13:55	0.289682
2022-09-14	11:13:55	0.404491
2022-09-14	11:13:56	0.259809
2022-09-14	11:13:56	0.525102
2022-09-14	11:13:56	0.40042
2022-09-14	11:13:56	0.31986
2022-09-14	11:13:57	0.31243
2022-09-14	11:13:57	0.204746
2022-09-14	11:13:57	0.540725
2022-09-14	11:13:58	0.255942
2022-09-14	11:13:58	0.456552
2022-09-14	11:13:58	0.340573
2022-09-14	11:13:58	0.354568
2022-09-14	11:13:59	0.197723
2022-09-14	11:13:59	0.349428
2022-09-14	11:13:59	0.403626
2022-09-14	11:13:59	0.242507
2022-09-14	11:14:00	0.422863
2022-09-14	11:14:00	0.258842
2022-09-14	11:14:00	0.342405
2022-09-14	11:14:00	0.158792
2022-09-14	11:14:01	0.466883
2022-09-14	11:14:01	0.228613
2022-09-14	11:14:01	0.555789
2022-09-14	11:14:02	0.182914
2022-09-14	11:14:02	0.684695
2022-09-14	11:14:02	0.221031
2022-09-14	11:14:02	0.865204
2022-09-14	11:14:03	0.37584
2022-09-14	11:14:03	0.545
2022-09-14	11:14:03	0.598028
2022-09-14	11:14:03	0.587545
2022-09-14	11:14:04	0.472023
2022-09-14	11:14:04	0.445305
2022-09-14	11:14:04	0.531158
2022-09-14	11:14:04	0.426018
2022-09-14	11:14:05	0.495026
2022-09-14	11:14:05	0.469886
2022-09-14	11:14:05	0.540165
2022-09-14	11:14:06	0.435229
2022-09-14	11:14:06	0.504542
2022-09-14	11:14:06	0.430802
2022-09-14	11:14:06	0.574975
2022-09-14	11:14:07	0.436654
2022-09-14	11:14:07	0.581641
2022-09-14	11:14:07	0.440878
2022-09-14	11:14:07	0.702608
2022-09-14	11:14:08	0.367494
2022-09-14	11:14:08	0.664898
2022-09-14	11:14:08	0.35757
2022-09-14	11:14:08	0.624796
2022-09-14	11:14:09	0.310293
2022-09-14	11:14:09	0.590903
2022-09-14	11:14:09	0.275433
2022-09-14	11:14:10	0.315331
2022-09-14	11:14:10	0.0125829
2022-09-14	11:14:10	0.373601
2022-09-14	11:14:10	0.45757
2022-09-14	11:14:11	0.524644
2022-09-14	11:14:11	0.258028
2022-09-14	11:14:11	0.659351
2022-09-14	11:14:11	0.286476
2022-09-14	11:14:12	0.206171
2022-09-14	11:14:12	-0.00629748
2022-09-14	11:14:12	0.0453565
2022-09-14	11:14:12	0.0607763
2022-09-14	11:14:13	0.190191
2022-09-14	11:14:13	0.142099
2022-09-14	11:14:13	0.228817
2022-09-14	11:14:14	0.0846949
2022-09-14	11:14:14	0.222201
2022-09-14	11:14:14	0.212583
2022-09-14	11:14:14	0.237672
2022-09-14	11:14:15	0.291972
2022-09-14	11:14:15	0.524338
2022-09-14	11:14:15	0.619707
2022-09-14	11:14:15	0.461845
2022-09-14	11:14:16	0.19299
2022-09-14	11:14:16	0.297824
2022-09-14	11:14:16	0.232125
2022-09-14	11:14:17	0.269936
2022-09-14	11:14:17	0.133295
2022-09-14	11:14:17	0.368715
2022-09-14	11:14:17	-0.00787507
2022-09-14	11:14:18	0.234924
2022-09-14	11:14:18	0.00347355
2022-09-14	11:14:18	0.224949
2022-09-14	11:14:18	-0.0156613
2022-09-14	11:14:19	-0.0708267
2022-09-14	11:14:19	0.0551783
2022-09-14	11:14:19	0.108206
2022-09-14	11:14:19	0.313753
2022-09-14	11:14:20	0.135331
2022-09-14	11:14:20	0.0766032
2022-09-14	11:14:20	0.103524
2022-09-14	11:14:21	-0.0631422
2022-09-14	11:14:21	-0.192506
2022-09-14	11:14:21	-0.0834475
2022-09-14	11:14:21	-0.210979
2022-09-14	11:14:22	0.0235244
2022-09-14	11:14:22	0.251361
2022-09-14	11:14:22	0.354211
2022-09-14	11:14:22	-0.607671
2022-09-14	11:14:23	-0.639936
2022-09-14	11:14:23	-0.0244145
2022-09-14	11:14:23	0.350293
2022-09-14	11:14:23	0.801896
2022-09-14	11:14:24	1.05742
2022-09-14	11:14:24	0.868817
2022-09-14	11:14:24	1.27518
2022-09-14	11:14:25	0.835839
2022-09-14	11:14:25	0.624898
2022-09-14	11:14:25	0.381132
2022-09-14	11:14:25	0.424746
2022-09-14	11:14:26	0.92159
2022-09-14	11:14:26	0.0719722
2022-09-14	11:14:26	-0.170267
2022-09-14	11:14:26	-0.280547
2022-09-14	11:14:27	-0.239427
2022-09-14	11:14:27	-0.0944399
2022-09-14	11:14:27	0.724796
2022-09-14	11:14:27	0.737265
2022-09-14	11:14:28	0.73874
2022-09-14	11:14:28	0.726374
2022-09-14	11:14:28	0.725916
2022-09-14	11:14:29	0.730547
2022-09-14	11:14:29	0.734008
2022-09-14	11:14:29	0.726425
2022-09-14	11:14:29	0.725254
2022-09-14	11:14:30	0.71757
2022-09-14	11:14:30	0.730343
2022-09-14	11:14:30	0.727799
2022-09-14	11:14:30	0.728359
2022-09-14	11:14:31	0.727596
2022-09-14	11:14:31	0.717214
2022-09-14	11:14:31	0.724491
2022-09-14	11:14:31	0.721081
2022-09-14	11:14:32	0.711463
2022-09-14	11:14:32	0.722812
2022-09-14	11:14:32	0.721132
2022-09-14	11:14:33	0.723677
2022-09-14	11:14:33	0.72388
2022-09-14	11:14:33	0.724288
2022-09-14	11:14:33	0.72215
2022-09-14	11:14:34	0.725
2022-09-14	11:14:34	0.724898
2022-09-14	11:14:34	0.7307
2022-09-14	11:14:34	0.72215
2022-09-14	11:14:35	0.734313
2022-09-14	11:14:35	0.729173
2022-09-14	11:14:35	0.732379
2022-09-14	11:14:35	0.719555
2022-09-14	11:14:36	0.728155
2022-09-14	11:14:36	0.726374
2022-09-14	11:14:36	0.723422
2022-09-14	11:14:37	0.729936
2022-09-14	11:14:37	0.727341
2022-09-14	11:14:37	0.727188
2022-09-14	11:14:37	0.727799
2022-09-14	11:14:38	0.729936
2022-09-14	11:14:38	0.724847
2022-09-14	11:14:38	0.729936
2022-09-14	11:14:38	0.72103
2022-09-14	11:14:39	0.720114
2022-09-14	11:14:39	0.730649
2022-09-14	11:14:39	0.726476
2022-09-14	11:14:39	0.731768
2022-09-14	11:14:40	0.729173
2022-09-14	11:14:40	0.732175
2022-09-14	11:14:40	0.72612
2022-09-14	11:14:41	0.731463
2022-09-14	11:14:41	0.725305
2022-09-14	11:14:41	0.728613
2022-09-14	11:14:41	0.72673
2022-09-14	11:14:42	0.733601
2022-09-14	11:14:42	0.728003
2022-09-14	11:14:42	0.726069
2022-09-14	11:14:42	0.729275
2022-09-14	11:14:43	0.727239
2022-09-14	11:14:43	0.725356
2022-09-14	11:14:43	0.731514
2022-09-14	11:14:43	0.72215
2022-09-14	11:14:44	0.729936
2022-09-14	11:14:44	0.724135
2022-09-14	11:14:44	0.724338
2022-09-14	11:14:45	0.729173
2022-09-14	11:14:45	0.728817
2022-09-14	11:14:45	0.725051
2022-09-14	11:14:45	0.730954
2022-09-14	11:14:46	0.726425
2022-09-14	11:14:46	0.729224
2022-09-14	11:14:46	0.719148
2022-09-14	11:14:46	0.727646
2022-09-14	11:14:47	0.725254
2022-09-14	11:14:47	0.72444
2022-09-14	11:14:47	0.727697
2022-09-14	11:14:47	0.732175
2022-09-14	11:14:48	0.724898
2022-09-14	11:14:48	0.731921
2022-09-14	11:14:48	0.723982
2022-09-14	11:14:49	0.726425
2022-09-14	11:14:49	0.732226
2022-09-14	11:14:49	0.724949
2022-09-14	11:14:49	0.725763
2022-09-14	11:14:50	0.731158
2022-09-14	11:14:50	0.726323
2022-09-14	11:14:50	0.729428
2022-09-14	11:14:50	0.732175
2022-09-14	11:14:51	0.724847
2022-09-14	11:14:51	0.724542
2022-09-14	11:14:51	0.728461
2022-09-14	11:14:51	0.722404
2022-09-14	11:14:52	0.725662
2022-09-14	11:14:52	0.725407
2022-09-14	11:14:52	0.730343
2022-09-14	11:14:53	0.733346
2022-09-14	11:14:53	0.728766
2022-09-14	11:14:53	0.722456
2022-09-14	11:14:53	0.720776
2022-09-14	11:14:54	0.72841
2022-09-14	11:14:54	0.724084
2022-09-14	11:14:54	0.724593
2022-09-14	11:14:54	0.72785
2022-09-14	11:14:55	0.718435
2022-09-14	11:14:55	0.723677
2022-09-14	11:14:55	0.727952
2022-09-14	11:14:56	0.727239
2022-09-14	11:14:56	0.723931
2022-09-14	11:14:56	0.728003
2022-09-14	11:14:56	0.730801
2022-09-14	11:14:57	0.734364
2022-09-14	11:14:57	0.723168
2022-09-14	11:14:57	0.726221
2022-09-14	11:14:57	0.719046
2022-09-14	11:14:58	0.729529
2022-09-14	11:14:58	0.716756
2022-09-14	11:14:58	0.726374
2022-09-14	11:14:58	0.73243
2022-09-14	11:14:59	0.721387
2022-09-14	11:14:59	0.721997
2022-09-14	11:14:59	0.725458
2022-09-14	11:14:59	0.719911
2022-09-14	11:15:00	0.724237
2022-09-14	11:15:00	0.725153
2022-09-14	11:15:00	0.725509
2022-09-14	11:15:01	0.721946
2022-09-14	11:15:01	0.727596
2022-09-14	11:15:01	0.728766
2022-09-14	11:15:01	0.728206
2022-09-14	11:15:02	0.724796
2022-09-14	11:15:02	0.724746
2022-09-14	11:15:02	0.725458
2022-09-14	11:15:02	0.725102
2022-09-14	11:15:03	0.724644
2022-09-14	11:15:03	0.724898
2022-09-14	11:15:03	0.722404
2022-09-14	11:15:04	0.73131
2022-09-14	11:15:04	0.728664
2022-09-14	11:15:04	0.723626
2022-09-14	11:15:04	0.727239
2022-09-14	11:15:05	0.723422
2022-09-14	11:15:05	0.728766
2022-09-14	11:15:05	0.720013
2022-09-14	11:15:05	0.724542
2022-09-14	11:15:06	0.724644
2022-09-14	11:15:06	0.732074
2022-09-14	11:15:06	0.725407
2022-09-14	11:15:06	0.726679
2022-09-14	11:15:07	0.721591
2022-09-14	11:15:07	0.722965
2022-09-14	11:15:07	0.72785
2022-09-14	11:15:08	0.729631
2022-09-14	11:15:08	0.720827
2022-09-14	11:15:08	0.724389
2022-09-14	11:15:08	0.721437
2022-09-14	11:15:09	0.287952
2022-09-14	11:15:09	0.387036
2022-09-14	11:15:09	0.30617
2022-09-14	11:15:09	0.508766
2022-09-14	11:15:10	0.730954
2022-09-14	11:15:10	0.728359
2022-09-14	11:15:10	0.730649
2022-09-14	11:15:10	0.724186
2022-09-14	11:15:11	0.727137
2022-09-14	11:15:11	0.722099
2022-09-14	11:15:11	0.734568
2022-09-14	11:15:12	0.731107
2022-09-14	11:15:12	0.724847
2022-09-14	11:15:12	0.727392
2022-09-14	11:15:12	0.736094
2022-09-14	11:15:13	0.730547
2022-09-14	11:15:13	0.729478
2022-09-14	11:15:13	0.725458
2022-09-14	11:15:13	0.726069
2022-09-14	11:15:14	0.73528
2022-09-14	11:15:14	0.730954
2022-09-14	11:15:14	0.727392
2022-09-14	11:15:14	0.732379
2022-09-14	11:15:15	0.726476
2022-09-14	11:15:15	0.724084
2022-09-14	11:15:15	0.728766
2022-09-14	11:15:16	0.726629
2022-09-14	11:15:16	0.721946
2022-09-14	11:15:16	0.723473
2022-09-14	11:15:16	0.728766
2022-09-14	11:15:17	0.730242
2022-09-14	11:15:17	0.72897
2022-09-14	11:15:17	0.732786
2022-09-14	11:15:18	0.734618
2022-09-14	11:15:18	0.728817
2022-09-14	11:15:18	0.726425
2022-09-14	11:15:18	0.73187
2022-09-14	11:15:18	0.72617
2022-09-14	11:15:19	0.727239
2022-09-14	11:15:19	0.720064
2022-09-14	11:15:19	0.726221
2022-09-14	11:15:20	0.725662
2022-09-14	11:15:20	0.728715
2022-09-14	11:15:20	0.732583
2022-09-14	11:15:20	0.725458
2022-09-14	11:15:21	0.732939
2022-09-14	11:15:21	0.731921
2022-09-14	11:15:21	0.730191
2022-09-14	11:15:21	0.726832
2022-09-14	11:15:22	0.724186
2022-09-14	11:15:22	0.726476
2022-09-14	11:15:22	0.728104
2022-09-14	11:15:22	0.727545
2022-09-14	11:15:23	0.725763
2022-09-14	11:15:23	0.721336
2022-09-14	11:15:23	0.724644
2022-09-14	11:15:24	0.728613
2022-09-14	11:15:24	0.728766
2022-09-14	11:15:24	0.726527
2022-09-14	11:15:24	0.730445
2022-09-14	11:15:25	0.728512
2022-09-14	11:15:25	0.728817
2022-09-14	11:15:25	0.729478
2022-09-14	11:15:25	0.725102
2022-09-14	11:15:26	0.72897
2022-09-14	11:15:26	0.73243
2022-09-14	11:15:26	0.730191
2022-09-14	11:15:26	0.724695
2022-09-14	11:15:27	0.733957
2022-09-14	11:15:27	0.731616
2022-09-14	11:15:27	0.723168
2022-09-14	11:15:28	0.732125
2022-09-14	11:15:28	0.731158
2022-09-14	11:15:28	0.720064
2022-09-14	11:15:28	0.724644
2022-09-14	11:15:29	0.738995
2022-09-14	11:15:29	0.726679
2022-09-14	11:15:29	0.725458
2022-09-14	11:15:29	0.727596
2022-09-14	11:15:30	0.732175
2022-09-14	11:15:30	0.733448
2022-09-14	11:15:30	0.730903
2022-09-14	11:15:30	0.725611
2022-09-14	11:15:31	0.723931
2022-09-14	11:15:31	0.727443
2022-09-14	11:15:31	0.724491
2022-09-14	11:15:32	0.730038
2022-09-14	11:15:32	0.726221
2022-09-14	11:15:32	0.7307
2022-09-14	11:15:32	0.732888
2022-09-14	11:15:33	0.728562
2022-09-14	11:15:33	0.72444
2022-09-14	11:15:33	0.732735
2022-09-14	11:15:33	0.722914
2022-09-14	11:15:34	0.726781
2022-09-14	11:15:34	0.73299
2022-09-14	11:15:34	0.725916
2022-09-14	11:15:34	0.72729
2022-09-14	11:15:35	0.733906
2022-09-14	11:15:35	0.726425
2022-09-14	11:15:35	0.724796
2022-09-14	11:15:36	0.729377
2022-09-14	11:15:36	0.732532
2022-09-14	11:15:36	0.726018
2022-09-14	11:15:36	0.722252
2022-09-14	11:15:37	0.730343
2022-09-14	11:15:37	0.726679
2022-09-14	11:15:37	0.728206
2022-09-14	11:15:37	0.722404
2022-09-14	11:15:38	0.729631
2022-09-14	11:15:38	0.724389
2022-09-14	11:15:38	0.723422
2022-09-14	11:15:38	0.726323
2022-09-14	11:15:39	0.732226
2022-09-14	11:15:39	0.729071
2022-09-14	11:15:39	0.723168
2022-09-14	11:15:40	0.724644
2022-09-14	11:15:40	0.725356
2022-09-14	11:15:40	0.730038
2022-09-14	11:15:40	0.723575
2022-09-14	11:15:41	0.718435
2022-09-14	11:15:41	0.729936
2022-09-14	11:15:41	0.723321
2022-09-14	11:15:41	0.720827
2022-09-14	11:15:42	0.724593
2022-09-14	11:15:42	0.726221
2022-09-14	11:15:42	0.730394
2022-09-14	11:15:42	0.726272
2022-09-14	11:15:43	0.735789
2022-09-14	11:15:43	0.721437
2022-09-14	11:15:43	0.735076
2022-09-14	11:15:44	0.732583
2022-09-14	11:15:44	0.724491
2022-09-14	11:15:44	0.72388
2022-09-14	11:15:44	0.728868
2022-09-14	11:15:45	0.728766
2022-09-14	11:15:45	0.726934
2022-09-14	11:15:45	0.723677
2022-09-14	11:15:45	0.724949
2022-09-14	11:15:46	0.731107
2022-09-14	11:15:46	0.730903
2022-09-14	11:15:46	0.720623
2022-09-14	11:15:47	0.736145
2022-09-14	11:15:47	0.73299
2022-09-14	11:15:47	0.727036
2022-09-14	11:15:47	0.725662
2022-09-14	11:15:48	0.718842
2022-09-14	11:15:48	0.727443
2022-09-14	11:15:48	0.729987
2022-09-14	11:15:48	0.732837
2022-09-14	11:15:49	0.734618
2022-09-14	11:15:49	0.722456
2022-09-14	11:15:49	0.72897
2022-09-14	11:15:49	0.731819
2022-09-14	11:15:50	0.724237
2022-09-14	11:15:50	0.722456
2022-09-14	11:15:50	0.73187
2022-09-14	11:15:51	0.719351
2022-09-14	11:15:51	0.717366
2022-09-14	11:15:51	0.733142
2022-09-14	11:15:51	0.725865
2022-09-14	11:15:52	0.731158
2022-09-14	11:15:52	0.728155
2022-09-14	11:15:52	0.733092
2022-09-14	11:15:52	0.728664
2022-09-14	11:15:53	0.731717
2022-09-14	11:15:53	0.723575
2022-09-14	11:15:53	0.726221
2022-09-14	11:15:53	0.731768
2022-09-14	11:15:54	0.72958
2022-09-14	11:15:54	0.72388
2022-09-14	11:15:54	0.724949
2022-09-14	11:15:55	0.728664
2022-09-14	11:15:55	0.731463
2022-09-14	11:15:55	0.737214
2022-09-14	11:15:55	0.723575
2022-09-14	11:15:56	0.726832
2022-09-14	11:15:56	0.731361
2022-09-14	11:15:56	0.737366
2022-09-14	11:15:56	0.7193
2022-09-14	11:15:57	0.732583
2022-09-14	11:15:57	0.725814
2022-09-14	11:15:57	0.723219
2022-09-14	11:15:57	0.734669
2022-09-14	11:15:58	0.733295
2022-09-14	11:15:58	0.71813
2022-09-14	11:15:58	0.72902
2022-09-14	11:15:59	0.725051
2022-09-14	11:15:59	0.725204
2022-09-14	11:15:59	0.729682
2022-09-14	11:15:59	0.727087
2022-09-14	11:16:00	0.72841
2022-09-14	11:16:00	0.736959
2022-09-14	11:16:00	0.72673
2022-09-14	11:16:00	0.728562
2022-09-14	11:16:01	0.725865
2022-09-14	11:16:01	0.725407
2022-09-14	11:16:01	0.730852
2022-09-14	11:16:01	0.734109
2022-09-14	11:16:02	0.723372
2022-09-14	11:16:02	0.725916
2022-09-14	11:16:02	0.721081
2022-09-14	11:16:03	0.726476
2022-09-14	11:16:03	0.729275
2022-09-14	11:16:03	0.726985
2022-09-14	11:16:03	0.727596
2022-09-14	11:16:04	0.729886
2022-09-14	11:16:04	0.72383
2022-09-14	11:16:04	0.732532
2022-09-14	11:16:04	0.732481
2022-09-14	11:16:05	0.73014
2022-09-14	11:16:05	0.729478
2022-09-14	11:16:05	0.723372
2022-09-14	11:16:05	0.725611
2022-09-14	11:16:06	0.737214
2022-09-14	11:16:06	0.725967
2022-09-14	11:16:06	0.724796
2022-09-14	11:16:07	0.721641
2022-09-14	11:16:07	0.723677
2022-09-14	11:16:07	0.722099
2022-09-14	11:16:07	0.728308
2022-09-14	11:16:08	0.725305
2022-09-14	11:16:08	0.731259
2022-09-14	11:16:08	0.723728
2022-09-14	11:16:08	0.726679
2022-09-14	11:16:09	0.733651
2022-09-14	11:16:09	0.728817
2022-09-14	11:16:09	0.729478
2022-09-14	11:16:09	0.723524
2022-09-14	11:16:10	0.727392
2022-09-14	11:16:10	0.73243
2022-09-14	11:16:10	0.724288
2022-09-14	11:16:11	0.723422
2022-09-14	11:16:11	0.72841
2022-09-14	11:16:11	0.732328
2022-09-14	11:16:11	0.729122
2022-09-14	11:16:12	0.732735
2022-09-14	11:16:12	0.735636
2022-09-14	11:16:12	0.727545
2022-09-14	11:16:12	0.730598
2022-09-14	11:16:13	0.73757
2022-09-14	11:16:13	0.729377
2022-09-14	11:16:13	0.722404
2022-09-14	11:16:13	0.721336
2022-09-14	11:16:14	0.732735
2022-09-14	11:16:14	0.727646
2022-09-14	11:16:14	0.73584
2022-09-14	11:16:15	0.730343
2022-09-14	11:16:15	0.73701
2022-09-14	11:16:15	0.735483
2022-09-14	11:16:15	0.735331
2022-09-14	11:16:16	0.729987
2022-09-14	11:16:16	0.729224
2022-09-14	11:16:16	0.730496
2022-09-14	11:16:16	0.723931
2022-09-14	11:16:17	0.733142
2022-09-14	11:16:17	0.726832
2022-09-14	11:16:17	0.733397
2022-09-14	11:16:17	0.726934
2022-09-14	11:16:18	0.722354
2022-09-14	11:16:18	0.730445
2022-09-14	11:16:18	0.725
2022-09-14	11:16:19	0.726476
2022-09-14	11:16:19	0.728613
2022-09-14	11:16:19	0.732634
2022-09-14	11:16:19	0.731107
2022-09-14	11:16:20	0.733193
2022-09-14	11:16:20	0.727646
2022-09-14	11:16:20	0.72673
2022-09-14	11:16:20	0.734669
2022-09-14	11:16:21	0.729071
2022-09-14	11:16:21	0.732888
2022-09-14	11:16:21	0.725763
2022-09-14	11:16:21	0.735891
2022-09-14	11:16:22	0.731463
2022-09-14	11:16:22	0.737621
2022-09-14	11:16:22	0.732735
2022-09-14	11:16:23	0.73014
2022-09-14	11:16:23	0.737417
2022-09-14	11:16:23	0.730343
2022-09-14	11:16:23	0.731005
2022-09-14	11:16:24	0.733041
2022-09-14	11:16:24	0.731667
2022-09-14	11:16:24	0.727697
2022-09-14	11:16:24	0.731209
2022-09-14	11:16:25	0.728054
2022-09-14	11:16:25	0.733804
2022-09-14	11:16:25	0.73187
2022-09-14	11:16:25	0.736043
2022-09-14	11:16:26	0.733041
2022-09-14	11:16:26	0.733702
2022-09-14	11:16:26	0.730038
2022-09-14	11:16:27	0.725814
2022-09-14	11:16:27	0.727697
2022-09-14	11:16:27	0.731463
2022-09-14	11:16:27	0.736908
2022-09-14	11:16:28	0.730598
2022-09-14	11:16:28	0.726272
2022-09-14	11:16:28	0.728919
2022-09-14	11:16:28	0.72327
2022-09-14	11:16:29	0.730903
2022-09-14	11:16:29	0.725407
2022-09-14	11:16:29	0.728003
2022-09-14	11:16:29	0.731107
2022-09-14	11:16:30	0.730801
2022-09-14	11:16:30	0.733092
2022-09-14	11:16:30	0.729886
2022-09-14	11:16:31	0.728155
2022-09-14	11:16:31	0.722812
2022-09-14	11:16:31	0.730496
2022-09-14	11:16:31	0.727239
2022-09-14	11:16:32	0.731768
2022-09-14	11:16:32	0.730038
2022-09-14	11:16:32	0.72841
2022-09-14	11:16:32	0.725204
2022-09-14	11:16:33	0.728766
2022-09-14	11:16:33	0.730242
2022-09-14	11:16:33	0.733142
2022-09-14	11:16:33	0.730547
2022-09-14	11:16:34	0.733041
2022-09-14	11:16:34	0.72958
2022-09-14	11:16:34	0.73472
2022-09-14	11:16:35	0.733702
2022-09-14	11:16:35	0.734211
2022-09-14	11:16:35	0.732532
2022-09-14	11:16:35	0.732379
2022-09-14	11:16:36	0.734568
2022-09-14	11:16:36	0.729733
2022-09-14	11:16:36	0.732532
2022-09-14	11:16:36	0.734364
2022-09-14	11:16:37	0.73416
2022-09-14	11:16:37	0.733957
2022-09-14	11:16:37	0.731005
2022-09-14	11:16:38	0.728461
2022-09-14	11:16:38	0.734313
2022-09-14	11:16:38	0.727596
2022-09-14	11:16:38	0.72673
2022-09-14	11:16:39	0.732634
2022-09-14	11:16:39	0.72612
2022-09-14	11:16:39	0.732888
2022-09-14	11:16:39	0.727443
2022-09-14	11:16:40	0.740878
2022-09-14	11:16:40	0.726578
2022-09-14	11:16:40	0.729173
2022-09-14	11:16:40	0.727036
2022-09-14	11:16:41	0.731514
2022-09-14	11:16:41	0.727952
2022-09-14	11:16:41	0.730293
2022-09-14	11:16:41	0.737265
2022-09-14	11:16:42	0.732226
2022-09-14	11:16:42	0.730852
2022-09-14	11:16:42	0.72785
2022-09-14	11:16:43	0.73472
2022-09-14	11:16:43	0.726476
2022-09-14	11:16:43	0.720114
2022-09-14	11:16:43	0.732786
2022-09-14	11:16:44	0.731209
2022-09-14	11:16:44	0.731768
2022-09-14	11:16:44	0.736298
2022-09-14	11:16:44	0.735331
2022-09-14	11:16:45	0.734109
2022-09-14	11:16:45	0.730445
2022-09-14	11:16:45	0.733448
2022-09-14	11:16:45	0.7307
2022-09-14	11:16:46	0.728054
2022-09-14	11:16:46	0.72958
2022-09-14	11:16:46	0.726527
2022-09-14	11:16:47	0.730343
2022-09-14	11:16:47	0.730801
2022-09-14	11:16:47	0.733448
2022-09-14	11:16:47	0.727036
2022-09-14	11:16:48	0.735891
2022-09-14	11:16:48	0.733702
2022-09-14	11:16:48	0.728715
2022-09-14	11:16:48	0.726018
2022-09-14	11:16:49	0.730598
2022-09-14	11:16:49	0.73472
2022-09-14	11:16:49	0.724491
2022-09-14	11:16:49	0.730751
2022-09-14	11:16:50	0.720114
2022-09-14	11:16:50	0.729682
2022-09-14	11:16:50	0.739707
2022-09-14	11:16:51	0.730293
2022-09-14	11:16:51	0.732684
2022-09-14	11:16:51	0.736654
2022-09-14	11:16:51	0.735891
2022-09-14	11:16:52	0.732735
2022-09-14	11:16:52	0.738435
2022-09-14	11:16:52	0.732125
2022-09-14	11:16:52	0.736043
2022-09-14	11:16:53	0.727952
2022-09-14	11:16:53	0.727188
2022-09-14	11:16:53	0.731259
2022-09-14	11:16:53	0.732583
2022-09-14	11:16:54	0.734109
2022-09-14	11:16:54	0.735992
2022-09-14	11:16:54	0.730496
2022-09-14	11:16:55	0.729784
2022-09-14	11:16:55	0.730801
2022-09-14	11:16:55	0.735941
2022-09-14	11:16:55	0.735382
2022-09-14	11:16:56	0.73645
2022-09-14	11:16:56	0.735891
2022-09-14	11:16:56	0.732125
2022-09-14	11:16:56	0.724338
2022-09-14	11:16:57	0.726221
2022-09-14	11:16:57	0.727545
2022-09-14	11:16:57	0.731819
2022-09-14	11:16:57	0.729071
2022-09-14	11:16:58	0.733244
2022-09-14	11:16:58	0.731056
2022-09-14	11:16:58	0.733193
2022-09-14	11:16:59	0.73131
2022-09-14	11:16:59	0.728868
2022-09-14	11:16:59	0.741438
2022-09-14	11:16:59	0.733855
2022-09-14	11:17:00	0.730343
2022-09-14	11:17:00	0.735433
2022-09-14	11:17:00	0.735127
2022-09-14	11:17:00	0.725509
2022-09-14	11:17:01	0.72958
2022-09-14	11:17:01	0.732684
2022-09-14	11:17:01	0.727646
2022-09-14	11:17:01	0.734211
2022-09-14	11:17:02	0.733702
2022-09-14	11:17:02	0.733702
2022-09-14	11:17:02	0.731717
2022-09-14	11:17:03	0.733753
2022-09-14	11:17:03	0.734262
2022-09-14	11:17:03	0.73701
2022-09-14	11:17:03	0.731056
2022-09-14	11:17:04	0.728155
2022-09-14	11:17:04	0.735026
2022-09-14	11:17:04	0.735433
2022-09-14	11:17:04	0.733244
2022-09-14	11:17:05	0.736399
2022-09-14	11:17:05	0.729224
2022-09-14	11:17:05	0.736094
2022-09-14	11:17:05	0.732837
2022-09-14	11:17:06	0.737112
2022-09-14	11:17:06	0.729529
2022-09-14	11:17:06	0.727392
2022-09-14	11:17:07	0.732735
2022-09-14	11:17:07	0.733702
2022-09-14	11:17:07	0.725407
2022-09-14	11:17:07	0.734313
2022-09-14	11:17:08	0.732277
2022-09-14	11:17:08	0.733957
2022-09-14	11:17:08	0.729173
2022-09-14	11:17:08	0.730394
2022-09-14	11:17:09	0.734109
2022-09-14	11:17:09	0.73131
2022-09-14	11:17:09	0.729326
2022-09-14	11:17:09	0.733855
2022-09-14	11:17:10	0.727697
2022-09-14	11:17:10	0.729224
2022-09-14	11:17:10	0.732583
2022-09-14	11:17:11	0.729071
2022-09-14	11:17:11	0.725662
2022-09-14	11:17:11	0.736603
2022-09-14	11:17:11	0.732837
2022-09-14	11:17:12	0.734109
2022-09-14	11:17:12	0.732481
2022-09-14	11:17:12	0.730751
2022-09-14	11:17:12	0.73014
2022-09-14	11:17:13	0.734262
2022-09-14	11:17:13	0.736908
2022-09-14	11:17:13	0.730496
2022-09-14	11:17:13	0.731107
2022-09-14	11:17:14	0.727697
2022-09-14	11:17:14	0.730394
2022-09-14	11:17:14	0.739046
2022-09-14	11:17:15	0.73243
2022-09-14	11:17:15	0.729478
2022-09-14	11:17:15	0.730191
2022-09-14	11:17:15	0.724338
2022-09-14	11:17:16	0.727596
2022-09-14	11:17:16	0.736145
2022-09-14	11:17:16	0.732888
2022-09-14	11:17:16	0.729886
2022-09-14	11:17:17	0.733244
2022-09-14	11:17:17	0.734262
2022-09-14	11:17:17	0.73187
2022-09-14	11:17:17	0.731616
2022-09-14	11:17:18	0.729682
2022-09-14	11:17:18	0.732583
2022-09-14	11:17:18	0.731565
2022-09-14	11:17:19	0.735687
2022-09-14	11:17:19	0.727443
2022-09-14	11:17:19	0.7307
2022-09-14	11:17:19	0.730242
2022-09-14	11:17:20	0.726883
2022-09-14	11:17:20	0.737214
2022-09-14	11:17:20	0.724237
2022-09-14	11:17:20	0.740165
2022-09-14	11:17:21	0.728308
2022-09-14	11:17:21	0.724949
2022-09-14	11:17:21	0.728308
2022-09-14	11:17:21	0.732328
2022-09-14	11:17:22	0.73014
2022-09-14	11:17:22	0.732583
2022-09-14	11:17:22	0.724593
2022-09-14	11:17:23	0.73243
2022-09-14	11:17:23	0.72958
2022-09-14	11:17:23	0.733193
2022-09-14	11:17:23	0.729733
2022-09-14	11:17:24	0.730038
2022-09-14	11:17:24	0.734771
2022-09-14	11:17:24	0.735127
2022-09-14	11:17:24	0.734669
2022-09-14	11:17:25	0.734618
2022-09-14	11:17:25	0.727748
2022-09-14	11:17:25	0.727494
2022-09-14	11:17:25	0.728919
2022-09-14	11:17:26	0.726374
2022-09-14	11:17:26	0.732684
2022-09-14	11:17:26	0.729987
2022-09-14	11:17:27	0.725916
2022-09-14	11:17:27	0.730649
2022-09-14	11:17:27	0.733142
2022-09-14	11:17:27	0.733346
2022-09-14	11:17:28	0.734568
2022-09-14	11:17:28	0.737672
2022-09-14	11:17:28	0.731158
2022-09-14	11:17:28	0.73472
2022-09-14	11:17:29	0.729631
2022-09-14	11:17:29	0.7307
2022-09-14	11:17:29	0.732786
2022-09-14	11:17:29	0.734517
2022-09-14	11:17:30	0.734262
2022-09-14	11:17:30	0.726221
2022-09-14	11:17:30	0.732837
2022-09-14	11:17:31	0.734618
2022-09-14	11:17:31	0.727036
2022-09-14	11:17:31	0.734262
2022-09-14	11:17:31	0.732125
2022-09-14	11:17:32	0.734262
2022-09-14	11:17:32	0.731514
2022-09-14	11:17:32	0.734873
2022-09-14	11:17:32	0.730038
2022-09-14	11:17:33	0.734313
2022-09-14	11:17:33	0.73243
2022-09-14	11:17:33	0.731361
2022-09-14	11:17:33	0.727494
2022-09-14	11:17:34	0.730343
2022-09-14	11:17:34	0.730038
2022-09-14	11:17:34	0.739351
2022-09-14	11:17:35	0.736349
2022-09-14	11:17:35	0.726425
2022-09-14	11:17:35	0.743575
2022-09-14	11:17:35	0.731412
2022-09-14	11:17:36	0.736501
2022-09-14	11:17:36	0.727799
2022-09-14	11:17:36	0.729936
2022-09-14	11:17:36	0.729835
2022-09-14	11:17:37	0.733855
2022-09-14	11:17:37	0.730852
2022-09-14	11:17:37	0.760318
2022-09-14	11:17:37	2.31808
2022-09-14	11:17:38	3.1482
2022-09-14	11:17:38	1.21635
2022-09-14	11:17:38	-1.47637
2022-09-14	11:17:39	-1.92441
2022-09-14	11:17:39	-0.950521
2022-09-14	11:17:39	0.0245422
2022-09-14	11:17:39	0.375433
2022-09-14	11:17:40	1.99284
2022-09-14	11:17:40	2.31599
2022-09-14	11:17:40	0.809631
2022-09-14	11:17:40	-1.80106
2022-09-14	11:17:41	-0.248638
2022-09-14	11:17:41	-1.34065
2022-09-14	11:17:41	0.249784
2022-09-14	11:17:41	0.544084
2022-09-14	11:17:42	0.387188
2022-09-14	11:17:42	-1.82625
2022-09-14	11:17:42	-0.573524
2022-09-14	11:17:43	2.78256
2022-09-14	11:17:43	-0.741717
2022-09-14	11:17:43	-1.92136
2022-09-14	11:17:43	-2.05093
2022-09-14	11:17:44	-2.22849
2022-09-14	11:17:44	-0.586094
2022-09-14	11:17:44	0.526425
2022-09-14	11:17:44	-0.723345
2022-09-14	11:17:45	-1.05113
2022-09-14	11:17:45	-1.22248
2022-09-14	11:17:45	-0.549656
2022-09-14	11:17:45	-0.233524
2022-09-14	11:17:46	-0.449656
2022-09-14	11:17:46	-0.513575
2022-09-14	11:17:46	-0.571488
2022-09-14	11:17:47	-0.637442
2022-09-14	11:17:47	-0.664109
2022-09-14	11:17:47	-0.699681
2022-09-14	11:17:47	-0.726755
2022-09-14	11:17:48	-0.81734
2022-09-14	11:17:48	-0.791386
2022-09-14	11:17:48	-0.854592
2022-09-14	11:17:48	-0.837646
2022-09-14	11:17:49	-1.01719
2022-09-14	11:17:49	-1.17963
2022-09-14	11:17:49	-1.15159
2022-09-14	11:17:49	-1.13307
2022-09-14	11:17:50	-1.25978
2022-09-14	11:17:50	-1.15464
2022-09-14	11:17:50	-1.23296
2022-09-14	11:17:51	-1.07347
2022-09-14	11:17:51	-1.43821
2022-09-14	11:17:51	-1.23164
2022-09-14	11:17:51	-1.36533
2022-09-14	11:17:52	-1.26904
2022-09-14	11:17:52	-1.30849
2022-09-14	11:17:52	-1.43729
2022-09-14	11:17:52	-1.50024
2022-09-14	11:17:53	-1.46838
2022-09-14	11:17:53	-2.53251
2022-09-14	11:17:53	-2.52411
2022-09-14	11:17:53	-2.57729
2022-09-14	11:17:54	-2.59719
2022-09-14	11:17:54	-2.75378
2022-09-14	11:17:54	-2.7206
2022-09-14	11:17:55	-2.78441
2022-09-14	11:17:55	-2.80029
2022-09-14	11:17:55	-2.89505
2022-09-14	11:17:55	-2.91469
2022-09-14	11:17:56	-2.98309
2022-09-14	11:17:56	-2.95902
2022-09-14	11:17:56	-3.03301
2022-09-14	11:17:56	-3.00558
2022-09-14	11:17:57	-3.02894
2022-09-14	11:17:57	-3.04538
2022-09-14	11:17:57	-3.09383
2022-09-14	11:17:57	-3.09831
2022-09-14	11:17:58	-3.16726
2022-09-14	11:17:58	-3.21057
2022-09-14	11:17:58	-3.34721
2022-09-14	11:17:59	-3.41576
2022-09-14	11:17:59	-3.46421
2022-09-14	11:17:59	-3.55612
2022-09-14	11:17:59	-3.42777
2022-09-14	11:18:00	-3.55245
2022-09-14	11:18:00	-3.48238
2022-09-14	11:18:00	-3.641
2022-09-14	11:18:00	-3.6665
2022-09-14	11:18:01	-3.60828
2022-09-14	11:18:01	-3.67072
2022-09-14	11:18:01	-3.57235
2022-09-14	11:18:01	-3.74441
2022-09-14	11:18:02	-3.7351
2022-09-14	11:18:02	-3.86971
2022-09-14	11:18:02	-3.92334
2022-09-14	11:18:03	-3.89958
2022-09-14	11:18:03	-3.82965
2022-09-14	11:18:03	-3.86284
2022-09-14	11:18:03	-3.89184
2022-09-14	11:18:04	-3.96009
2022-09-14	11:18:04	-3.99943
2022-09-14	11:18:04	-4.11907
2022-09-14	11:18:04	-4.19749
2022-09-14	11:18:05	-4.201
2022-09-14	11:18:05	-4.21047
2022-09-14	11:18:05	-4.1382
2022-09-14	11:18:05	-4.238
2022-09-14	11:18:06	-4.21444
2022-09-14	11:18:06	-4.26518
2022-09-14	11:18:06	-4.24355
2022-09-14	11:18:07	-4.25571
2022-09-14	11:18:07	-4.25337
2022-09-14	11:18:07	-4.31927
2022-09-14	11:18:07	-4.29642
2022-09-14	11:18:08	-4.26065
2022-09-14	11:18:08	-4.30044
2022-09-14	11:18:08	-4.33459
2022-09-14	11:18:08	-4.40049
2022-09-14	11:18:09	-4.33942
2022-09-14	11:18:09	-4.46166
2022-09-14	11:18:09	-4.48339
2022-09-14	11:18:09	-4.56146
2022-09-14	11:18:10	-4.62365
2022-09-14	11:18:10	-4.44894
2022-09-14	11:18:10	-4.31296
2022-09-14	11:18:11	-4.2754
2022-09-14	11:18:11	-4.2095
2022-09-14	11:18:11	-4.18019
2022-09-14	11:18:11	-4.11953
2022-09-14	11:18:12	-2.64752
2022-09-14	11:18:12	-2.5036
2022-09-14	11:18:12	-2.76299
2022-09-14	11:18:12	-2.63581
2022-09-14	11:18:13	-3.26217
2022-09-14	11:18:13	0.713244
2022-09-14	11:18:13	0.733244
2022-09-14	11:18:13	0.735738
2022-09-14	11:18:14	0.734924
2022-09-14	11:18:14	0.683168
2022-09-14	11:18:14	0.423423
2022-09-14	11:18:15	0.457875
2022-09-14	11:18:15	0.293804
2022-09-14	11:18:15	0.112125
2022-09-14	11:18:15	-0.0852287
2022-09-14	11:18:16	-0.107671
2022-09-14	11:18:16	-0.137137
2022-09-14	11:18:16	0.167952
2022-09-14	11:18:16	0.0695295
2022-09-14	11:18:17	0.304644
2022-09-14	11:18:17	0.184847
2022-09-14	11:18:17	0.296349
2022-09-14	11:18:17	0.181743
2022-09-14	11:18:18	0.303321
2022-09-14	11:18:18	0.234924
2022-09-14	11:18:18	0.308359
2022-09-14	11:18:19	0.294109
2022-09-14	11:18:19	0.33472
2022-09-14	11:18:19	0.799402
2022-09-14	11:18:19	0.656654
2022-09-14	11:18:20	1.22139
2022-09-14	11:18:20	1.73177
2022-09-14	11:18:20	-1.68838
2022-09-14	11:18:20	-2.13597
2022-09-14	11:18:21	-2.34731
2022-09-14	11:18:21	-2.47352
2022-09-14	11:18:21	-2.54899
2022-09-14	11:18:21	-2.66675
2022-09-14	11:18:22	-2.71724
2022-09-14	11:18:22	-2.78339
2022-09-14	11:18:22	-2.80569
2022-09-14	11:18:23	-2.77805
2022-09-14	11:18:23	-2.36258
2022-09-14	11:18:23	-2.47541
2022-09-14	11:18:23	-2.61021
2022-09-14	11:18:24	-2.69306
2022-09-14	11:18:24	-2.67057
2022-09-14	11:18:24	-2.6835
2022-09-14	11:18:24	-2.68477
2022-09-14	11:18:25	-0.17042
2022-09-14	11:18:25	0.724389
2022-09-14	11:18:25	0.702812
2022-09-14	11:18:25	-2.27077
2022-09-14	11:18:26	-2.68874
2022-09-14	11:18:26	-3.19337
2022-09-14	11:18:26	-3.26818
2022-09-14	11:18:27	0.530954
2022-09-14	11:18:27	-2.40116
2022-09-14	11:18:27	-4.00283
2022-09-14	11:18:27	-3.87439
2022-09-14	11:18:28	-3.92248
2022-09-14	11:18:28	-4.18202
2022-09-14	11:18:28	-3.83179
2022-09-14	11:18:28	-2.8866
2022-09-14	11:18:29	-1.55363
2022-09-14	11:18:29	-1.08721
2022-09-14	11:18:29	-1.67057
2022-09-14	11:18:29	-3.4839
2022-09-14	11:18:30	-4.85973
2022-09-14	11:18:30	-4.87205
2022-09-14	11:18:30	-4.87159
2022-09-14	11:18:31	-4.73403
2022-09-14	11:18:31	-4.56538
2022-09-14	11:18:31	0.393092
2022-09-14	11:18:31	0.365255
2022-09-14	11:18:32	0.367748
2022-09-14	11:18:32	0.16556
2022-09-14	11:18:32	0.156603
2022-09-14	11:18:32	0.229071
2022-09-14	11:18:33	0.0896312
2022-09-14	11:18:33	0.142761
2022-09-14	11:18:33	0.161336
2022-09-14	11:18:33	0.244695
2022-09-14	11:18:34	0.184237
2022-09-14	11:18:34	0.0659671
2022-09-14	11:18:34	0.117112
2022-09-14	11:18:35	0.000572752
2022-09-14	11:18:35	0.355942
2022-09-14	11:18:35	0.392583
2022-09-14	11:18:35	0.957417
2022-09-14	11:18:36	1.16841
2022-09-14	11:18:36	1.30739
2022-09-14	11:18:36	-0.43215
2022-09-14	11:18:36	-0.465279
2022-09-14	11:18:37	-0.694032
2022-09-14	11:18:37	-0.759121
2022-09-14	11:18:37	-0.888027
2022-09-14	11:18:37	-0.920394
2022-09-14	11:18:38	-0.745636
2022-09-14	11:18:38	-0.988078
2022-09-14	11:18:38	-0.964414
2022-09-14	11:18:39	-1.02207
2022-09-14	11:18:39	-1.04538
2022-09-14	11:18:39	-0.833371
2022-09-14	11:18:39	-0.929605
2022-09-14	11:18:40	-0.981208
2022-09-14	11:18:40	-1.12462
2022-09-14	11:18:40	-1.23932
2022-09-14	11:18:40	-1.3693
2022-09-14	11:18:41	-1.39261
2022-09-14	11:18:41	0.0812343
2022-09-14	11:18:41	0.428766
2022-09-14	11:18:41	0.72902
2022-09-14	11:18:42	0.729733
2022-09-14	11:18:42	0.725458
2022-09-14	11:18:42	0.735076
2022-09-14	11:18:43	0.733397
2022-09-14	11:18:43	0.734924
2022-09-14	11:18:43	0.737315
2022-09-14	11:18:43	0.725916
2022-09-14	11:18:44	0.72958
2022-09-14	11:18:44	0.725153
2022-09-14	11:18:44	0.733142
2022-09-14	11:18:44	0.737417
2022-09-14	11:18:45	0.733041
2022-09-14	11:18:45	0.737519
2022-09-14	11:18:45	0.731565
2022-09-14	11:18:45	0.73645
2022-09-14	11:18:46	0.732634
2022-09-14	11:18:46	0.735534
2022-09-14	11:18:46	0.732634
2022-09-14	11:18:47	0.730089
2022-09-14	11:18:47	0.730496
2022-09-14	11:18:47	0.741539
2022-09-14	11:18:47	0.736196
2022-09-14	11:18:48	0.733295
2022-09-14	11:18:48	0.731565
2022-09-14	11:18:48	0.735738
2022-09-14	11:18:48	0.735331
2022-09-14	11:18:49	-0.167417
2022-09-14	11:18:49	0.673092
2022-09-14	11:18:49	0.73131
2022-09-14	11:18:49	0.733295
2022-09-14	11:18:50	0.72902
2022-09-14	11:18:50	0.736552
2022-09-14	11:18:50	0.72902
2022-09-14	11:18:51	0.549377
2022-09-14	11:18:51	0.661183
2022-09-14	11:18:51	-2.7867
2022-09-14	11:18:51	-3.01764
2022-09-14	11:18:52	-3.15917
