# Supplementary material for: Comparing efficacy in reducing pulling and welfare impacts of four types of leash walking equipment
Source: PeerJ journal article supplement (doi:10.7717/peerj.18131), 2024-10-24
Supplement: Shelter_2_Tension_files.zip [file MsPotato_martin_202291410345 copy.xlsx]

## Sheet: Averaged Newtons
Date	Time	Averaged Newtons
2022-09-14	10:04:02	0.510224	0.510224	0		Impulse	1081.23
2022-09-14	10:04:03	2.40362	2.91384	0		Total steps	11
2022-09-14	10:04:04	6.77557	9.68941	0		# > 5 sec	0
2022-09-14	10:04:05	1.25648	10.9459	0
2022-09-14	10:04:06	1.18164	12.1275	0
2022-09-14	10:04:07	1.2151	13.3426	0
2022-09-14	10:04:08	0.955006	14.2976	0
2022-09-14	10:04:09	0.630333	14.928	0
2022-09-14	10:04:10	0.686944	15.6149	0
2022-09-14	10:04:11	0.542105	16.157	0
2022-09-14	10:04:12	1.28506	17.4421	0
2022-09-14	10:04:13	1.72642	19.1685	0
2022-09-14	10:04:14	0.677926	19.8464	0
2022-09-14	10:04:15	7.34197	27.1884	0
2022-09-14	10:04:16	5.19375	32.3821	0
2022-09-14	10:04:17	19.9322	52.3143	1
2022-09-14	10:04:18	4.225	56.5393	1
2022-09-14	10:04:19	2.98318	59.5225	1
2022-09-14	10:04:20	1.71176	61.2342	1
2022-09-14	10:04:21	0.929199	62.1634	1
2022-09-14	10:04:22	0.984376	63.1478	1
2022-09-14	10:04:23	1.4892	64.637	1
2022-09-14	10:04:24	1.31477	65.9518	1
2022-09-14	10:04:25	0.820824	66.7726	1
2022-09-14	10:04:26	3.3143	70.0869	1
2022-09-14	10:04:27	3.052	73.1389	1
2022-09-14	10:04:28	13.888	87.027	2
2022-09-14	10:04:29	21.5774	108.604	3
2022-09-14	10:04:30	2.42925	111.034	3
2022-09-14	10:04:31	2.56017	113.594	3
2022-09-14	10:04:32	3.22608	116.82	3
2022-09-14	10:04:33	2.7945	119.614	3
2022-09-14	10:04:34	3.04215	122.657	3
2022-09-14	10:04:35	1.86219	124.519	3
2022-09-14	10:04:36	2.49863	127.017	3
2022-09-14	10:04:37	2.44464	129.462	3
2022-09-14	10:04:38	2.28573	131.748	3
2022-09-14	10:04:39	1.89645	133.644	3
2022-09-14	10:04:40	1.69824	135.342	3
2022-09-14	10:04:41	2.72353	138.066	3
2022-09-14	10:04:42	1.80356	139.87	3
2022-09-14	10:04:43	1.68358	141.553	3
2022-09-14	10:04:44	1.87841	143.432	3
2022-09-14	10:04:45	-1.51165	143.432	3
2022-09-14	10:04:46	-1.29066	143.432	3
2022-09-14	10:04:47	-0.472605	143.432	3
2022-09-14	10:04:48	0.672608	144.104	3
2022-09-14	10:04:49	0.196831	144.301	3
2022-09-14	10:04:50	-2.14476	144.301	3
2022-09-14	10:04:51	0.435878	144.737	3
2022-09-14	10:04:52	7.36263	152.099	3
2022-09-14	10:04:53	4.3005	156.4	3
2022-09-14	10:04:54	2.18539	158.585	3
2022-09-14	10:04:55	1.78358	160.369	3
2022-09-14	10:04:56	2.07143	162.44	3
2022-09-14	10:04:57	1.02218	163.463	3
2022-09-14	10:04:58	0.241822	163.704	3
2022-09-14	10:04:59	1.22252	164.927	3
2022-09-14	10:05:00	0.39734	165.324	3
2022-09-14	10:05:01	6.62295	171.947	3
2022-09-14	10:05:02	-0.237745	171.947	3
2022-09-14	10:05:03	-0.101639	171.947	3
2022-09-14	10:05:04	1.31611	173.263	3
2022-09-14	10:05:05	2.22953	175.493	3
2022-09-14	10:05:06	0.00650894	175.499	3
2022-09-14	10:05:07	-1.03276	175.499	3
2022-09-14	10:05:08	0.210696	175.71	3
2022-09-14	10:05:09	6.51532	182.225	3
2022-09-14	10:05:10	9.01655	191.242	3
2022-09-14	10:05:11	3.5499	194.792	3
2022-09-14	10:05:12	7.00569	201.797	3
2022-09-14	10:05:13	7.90878	209.706	3
2022-09-14	10:05:14	6.7544	216.461	3
2022-09-14	10:05:15	6.98753	223.448	3
2022-09-14	10:05:16	5.04543	228.494	3
2022-09-14	10:05:17	2.98288	231.477	3
2022-09-14	10:05:18	5.2684	236.745	3
2022-09-14	10:05:19	3.33689	240.082	3
2022-09-14	10:05:20	3.25137	243.333	3
2022-09-14	10:05:21	1.57273	244.906	3
2022-09-14	10:05:22	8.77173	253.678	3
2022-09-14	10:05:23	4.50417	258.182	3
2022-09-14	10:05:24	3.27107	261.453	3
2022-09-14	10:05:25	3.26501	264.718	3
2022-09-14	10:05:26	3.26218	267.98	3
2022-09-14	10:05:27	3.01544	270.995	3
2022-09-14	10:05:28	6.56115	277.557	3
2022-09-14	10:05:29	3.40514	280.962	3
2022-09-14	10:05:30	1.79903	282.761	3
2022-09-14	10:05:31	0.910863	283.672	3
2022-09-14	10:05:32	0.827218	284.499	3
2022-09-14	10:05:33	0.599761	285.099	3
2022-09-14	10:05:34	-0.505808	285.099	3
2022-09-14	10:05:35	2.9795	288.078	3
2022-09-14	10:05:36	13.3689	301.447	4
2022-09-14	10:05:37	18.1313	319.578	5
2022-09-14	10:05:38	14.3539	333.932	6
2022-09-14	10:05:39	3.40078	337.333	6
2022-09-14	10:05:40	2.55324	339.886	6
2022-09-14	10:05:41	1.83785	341.724	6
2022-09-14	10:05:42	3.26079	344.985	6
2022-09-14	10:05:43	2.58493	347.57	6
2022-09-14	10:05:44	0.784264	348.354	6
2022-09-14	10:05:45	1.29575	349.65	6
2022-09-14	10:05:46	0.966588	350.617	6
2022-09-14	10:05:47	4.51848	355.135	6
2022-09-14	10:05:48	2.53078	357.666	6
2022-09-14	10:05:49	2.20837	359.874	6
2022-09-14	10:05:50	2.06736	361.941	6
2022-09-14	10:05:51	2.09818	364.04	6
2022-09-14	10:05:52	2.04464	366.084	6
2022-09-14	10:05:53	3.14322	369.228	6
2022-09-14	10:05:54	3.26826	372.496	6
2022-09-14	10:05:55	3.27882	375.775	6
2022-09-14	10:05:56	2.98918	378.764	6
2022-09-14	10:05:57	2.47724	381.241	6
2022-09-14	10:05:58	5.43966	386.681	6
2022-09-14	10:05:59	11.0509	397.732	6
2022-09-14	10:06:00	7.22968	404.961	6
2022-09-14	10:06:01	4.41283	409.374	6
2022-09-14	10:06:02	10.21	419.584	6
2022-09-14	10:06:03	10.7747	430.359	6
2022-09-14	10:06:04	4.13439	434.493	6
2022-09-14	10:06:05	7.54841	442.042	6
2022-09-14	10:06:06	3.77933	445.821	6
2022-09-14	10:06:07	5.72538	451.546	6
2022-09-14	10:06:08	5.90778	457.454	6
2022-09-14	10:06:09	8.08571	465.54	6
2022-09-14	10:06:10	11.6089	477.149	6
2022-09-14	10:06:11	2.60537	479.754	6
2022-09-14	10:06:12	7.64784	487.402	6
2022-09-14	10:06:13	3.30944	490.711	6
2022-09-14	10:06:14	1.84974	492.561	6
2022-09-14	10:06:15	11.0974	503.658	6
2022-09-14	10:06:16	15.6369	519.295	7
2022-09-14	10:06:17	7.04049	526.336	7
2022-09-14	10:06:18	5.08747	531.423	7
2022-09-14	10:06:19	3.26331	534.687	7
2022-09-14	10:06:20	7.01516	541.702	7
2022-09-14	10:06:21	8.76307	550.465	7
2022-09-14	10:06:22	6.20891	556.674	7
2022-09-14	10:06:23	1.56344	558.237	7
2022-09-14	10:06:24	1.6749	559.912	7
2022-09-14	10:06:25	1.99122	561.903	7
2022-09-14	10:06:26	2.0636	563.967	7
2022-09-14	10:06:27	1.97028	565.937	7
2022-09-14	10:06:28	1.78756	567.725	7
2022-09-14	10:06:29	2.51816	570.243	7
2022-09-14	10:06:30	1.91386	572.157	7
2022-09-14	10:06:31	1.82603	573.983	7
2022-09-14	10:06:32	1.79865	575.781	7
2022-09-14	10:06:33	12.7409	588.522	7
2022-09-14	10:06:34	8.30687	596.829	7
2022-09-14	10:06:35	4.98385	601.813	7
2022-09-14	10:06:36	5.18863	607.002	7
2022-09-14	10:06:37	4.96868	611.97	7
2022-09-14	10:06:38	5.27072	617.241	7
2022-09-14	10:06:39	5.51028	622.751	7
2022-09-14	10:06:40	8.1596	630.911	7
2022-09-14	10:06:41	5.59588	636.507	7
2022-09-14	10:06:42	5.37089	641.878	7
2022-09-14	10:06:43	5.42862	647.306	7
2022-09-14	10:06:44	5.2993	652.606	7
2022-09-14	10:06:45	5.05425	657.66	7
2022-09-14	10:06:46	4.91555	662.575	7
2022-09-14	10:06:47	4.82652	667.402	7
2022-09-14	10:06:48	2.5224	669.924	7
2022-09-14	10:06:49	1.85623	671.781	7
2022-09-14	10:06:50	1.36734	673.148	7
2022-09-14	10:06:51	-2.67152	673.148	7
2022-09-14	10:06:52	0.145958	673.294	7
2022-09-14	10:06:53	16.5329	689.827	8
2022-09-14	10:06:54	8.83314	698.66	8
2022-09-14	10:06:55	3.99398	702.654	8
2022-09-14	10:06:56	3.52738	706.181	8
2022-09-14	10:06:57	5.18525	711.367	8
2022-09-14	10:06:58	7.14881	718.515	8
2022-09-14	10:06:59	2.87826	721.394	8
2022-09-14	10:07:00	3.55743	724.951	8
2022-09-14	10:07:01	3.29948	728.25	8
2022-09-14	10:07:02	3.27882	731.529	8
2022-09-14	10:07:03	3.28782	734.817	8
2022-09-14	10:07:04	4.18945	739.007	8
2022-09-14	10:07:05	3.23524	742.242	8
2022-09-14	10:07:06	3.27867	745.52	8
2022-09-14	10:07:07	3.28929	748.81	8
2022-09-14	10:07:08	3.29704	752.107	8
2022-09-14	10:07:09	4.95765	757.064	8
2022-09-14	10:07:10	3.36212	760.427	8
2022-09-14	10:07:11	8.19469	768.621	8
2022-09-14	10:07:12	3.53968	772.161	8
2022-09-14	10:07:13	1.70708	773.868	8
2022-09-14	10:07:14	-0.971528	773.868	8
2022-09-14	10:07:15	4.27911	778.147	8
2022-09-14	10:07:16	1.77809	779.925	8
2022-09-14	10:07:17	1.85251	781.778	8
2022-09-14	10:07:18	3.02076	784.799	8
2022-09-14	10:07:19	2.79189	787.59	8
2022-09-14	10:07:20	1.85257	789.443	8
2022-09-14	10:07:21	2.56688	792.01	8
2022-09-14	10:07:22	3.59387	795.604	8
2022-09-14	10:07:23	2.78933	798.393	8
2022-09-14	10:07:24	2.15098	800.544	8
2022-09-14	10:07:25	2.25676	802.801	8
2022-09-14	10:07:26	2.4533	805.254	8
2022-09-14	10:07:27	2.83121	808.085	8
2022-09-14	10:07:28	3.29857	811.384	8
2022-09-14	10:07:29	5.38895	816.773	8
2022-09-14	10:07:30	7.50648	824.279	8
2022-09-14	10:07:31	3.88896	828.168	8
2022-09-14	10:07:32	6.32934	834.498	8
2022-09-14	10:07:33	8.36781	842.865	8
2022-09-14	10:07:34	12.0873	854.953	8
2022-09-14	10:07:35	12.7153	867.668	8
2022-09-14	10:07:36	12.1847	879.853	8
2022-09-14	10:07:37	9.78864	889.641	8
2022-09-14	10:07:38	5.723	895.364	8
2022-09-14	10:07:39	1.18166	896.546	8
2022-09-14	10:07:40	-0.0603842	896.546	8
2022-09-14	10:07:41	0.34352	896.89	8
2022-09-14	10:07:42	0.202717	897.092	8
2022-09-14	10:07:43	0.558573	897.651	8
2022-09-14	10:07:44	0.0789851	897.73	8
2022-09-14	10:07:45	-1.06881	897.73	8
2022-09-14	10:07:46	-0.491847	897.73	8
2022-09-14	10:07:47	0.013074	897.743	8
2022-09-14	10:07:48	0.531275	898.274	8
2022-09-14	10:07:49	4.2272	902.501	8
2022-09-14	10:07:50	2.52025	905.022	8
2022-09-14	10:07:51	-0.522407	905.022	8
2022-09-14	10:07:52	-0.0465743	905.022	8
2022-09-14	10:07:53	4.20174	909.223	8
2022-09-14	10:07:54	9.60465	918.828	8
2022-09-14	10:07:55	5.13711	923.965	8
2022-09-14	10:07:56	14.1424	938.108	9
2022-09-14	10:07:57	11.4305	949.538	9
2022-09-14	10:07:58	2.47362	952.012	9
2022-09-14	10:07:59	-0.867793	952.012	9
2022-09-14	10:08:00	-0.118052	952.012	9
2022-09-14	10:08:01	1.07042	953.082	9
2022-09-14	10:08:02	1.98749	955.07	9
2022-09-14	10:08:03	2.94707	958.017	9
2022-09-14	10:08:04	2.03514	960.052	9
2022-09-14	10:08:05	0.939347	960.991	9
2022-09-14	10:08:06	1.13769	962.129	9
2022-09-14	10:08:07	0.837179	962.966	9
2022-09-14	10:08:08	-1.52131	962.966	9
2022-09-14	10:08:09	-2.89099	962.966	9
2022-09-14	10:08:10	-1.89756	962.966	9
2022-09-14	10:08:11	0.765646	963.732	9
2022-09-14	10:08:12	1.59547	965.327	9
2022-09-14	10:08:13	-1.33021	965.327	9
2022-09-14	10:08:14	-2.91613	965.327	9
2022-09-14	10:08:15	-2.61063	965.327	9
2022-09-14	10:08:16	-2.51414	965.327	9
2022-09-14	10:08:17	-2.59093	965.327	9
2022-09-14	10:08:18	-2.08429	965.327	9
2022-09-14	10:08:19	5.2439	970.571	9
2022-09-14	10:08:20	3.26812	973.839	9
2022-09-14	10:08:21	0.771248	974.61	9
2022-09-14	10:08:22	0.809636	975.42	9
2022-09-14	10:08:23	0.650027	976.07	9
2022-09-14	10:08:24	0.464119	976.534	9
2022-09-14	10:08:25	0.507356	977.042	9
2022-09-14	10:08:26	0.212904	977.254	9
2022-09-14	10:08:27	-0.910936	977.254	9
2022-09-14	10:08:28	-1.02156	977.254	9
2022-09-14	10:08:29	-0.278832	977.254	9
2022-09-14	10:08:30	0.488907	977.743	9
2022-09-14	10:08:31	0.0305424	977.774	9
2022-09-14	10:08:32	0.471306	978.245	9
2022-09-14	10:08:33	0.661911	978.907	9
2022-09-14	10:08:34	1.80678	980.714	9
2022-09-14	10:08:35	4.6818	985.396	9
2022-09-14	10:08:36	3.22206	988.618	9
2022-09-14	10:08:37	2.39173	991.009	9
2022-09-14	10:08:38	1.9026	992.912	9
2022-09-14	10:08:39	1.76394	994.676	9
2022-09-14	10:08:40	1.83383	996.51	9
2022-09-14	10:08:41	1.70396	998.214	9
2022-09-14	10:08:42	1.5262	999.74	9
2022-09-14	10:08:43	2.79433	1002.53	9
2022-09-14	10:08:44	2.90735	1005.44	9
2022-09-14	10:08:45	3.61227	1009.05	9
2022-09-14	10:08:46	3.6344	1012.69	9
2022-09-14	10:08:47	2.14198	1014.83	9
2022-09-14	10:08:48	1.90362	1016.73	9
2022-09-14	10:08:49	1.4507	1018.18	9
2022-09-14	10:08:50	1.48449	1019.67	9
2022-09-14	10:08:51	2.47905	1022.15	9
2022-09-14	10:08:52	13.3065	1035.45	10
2022-09-14	10:08:53	8.75712	1044.21	10
2022-09-14	10:08:54	2.08369	1046.3	10
2022-09-14	10:08:55	1.72286	1048.02	10
2022-09-14	10:08:56	0.0023961	1048.02	10
2022-09-14	10:08:57	-0.314315	1048.02	10
2022-09-14	10:08:58	0.922917	1048.94	10
2022-09-14	10:08:59	1.78426	1050.73	10
2022-09-14	10:09:00	2.14595	1052.87	10
2022-09-14	10:09:01	8.55893	1061.43	10
2022-09-14	10:09:02	19.7948	1081.23	11

## Sheet: MsPotato_martin_20229141034 (4)
Date	Time	Lbs	Newtons	Averaged Newtons	Total force x time		total steps > 13.345	**GoPro Fitting: 9:52
2022-09-14	10:04:02	0.0666287	0.296378	0.510224	0.296378	FALSE	0
2022-09-14	10:04:02	0.0853564	0.379682	0.510224	0.379682	FALSE	0
2022-09-14	10:04:02	0.192125	0.85461	0.510224	1.15099	FALSE	0
2022-09-14	10:04:03	0.126527	0.562817	2.40362	0.9425	FALSE	0
2022-09-14	10:04:03	0.197977	0.880641	2.40362	2.03163	FALSE	0
2022-09-14	10:04:03	0.565865	2.51708	2.40362	3.45958	FALSE	0
2022-09-14	10:04:03	1.27106	5.65393	2.40362	7.68556	FALSE	0
2022-09-14	10:04:04	2.55787	11.3779	6.77557	14.8375	FALSE	0
2022-09-14	10:04:04	2.06698	9.19434	6.77557	16.8799	FALSE	0
2022-09-14	10:04:04	0.903168	4.01747	6.77557	18.855	FALSE	0
2022-09-14	10:04:04	0.564847	2.51255	6.77557	19.3925	FALSE	0
2022-09-14	10:04:05	0.256705	1.14188	1.25648	19.9968	FALSE	0
2022-09-14	10:04:05	0.209529	0.932027	1.25648	20.3245	FALSE	0
2022-09-14	10:04:05	0.24729	1.1	1.25648	21.0968	FALSE	0
2022-09-14	10:04:05	0.416349	1.852	1.25648	22.1765	FALSE	0
2022-09-14	10:04:06	0.313702	1.39541	1.18164	22.4922	FALSE	0
2022-09-14	10:04:06	0.26271	1.16859	1.18164	23.3451	FALSE	0
2022-09-14	10:04:06	0.220522	0.980926	1.18164	23.4732	FALSE	0
2022-09-14	10:04:07	0.228562	1.01669	1.2151	24.3618	FALSE	0
2022-09-14	10:04:07	0.346272	1.54029	1.2151	25.0135	FALSE	0
2022-09-14	10:04:07	0.290954	1.29422	1.2151	25.656	FALSE	0
2022-09-14	10:04:07	0.226883	1.00922	1.2151	26.0227	FALSE	0
2022-09-14	10:04:08	0.214568	0.954441	0.955006	26.6104	FALSE	0
2022-09-14	10:04:08	0.211769	0.941991	0.955006	26.9647	FALSE	0
2022-09-14	10:04:08	0.256196	1.13961	0.955006	27.75	FALSE	0
2022-09-14	10:04:08	0.176247	0.783982	0.955006	27.7487	FALSE	0
2022-09-14	10:04:09	0.117418	0.522299	0.630333	28.2723	FALSE	0
2022-09-14	10:04:09	0.140929	0.62688	0.630333	28.3755	FALSE	0
2022-09-14	10:04:09	0.150649	0.670117	0.630333	28.9424	FALSE	0
2022-09-14	10:04:09	0.157825	0.702037	0.630333	29.0776	FALSE	0
2022-09-14	10:04:10	0.15813	0.703394	0.686944	29.6458	FALSE	0
2022-09-14	10:04:10	0.156247	0.695018	0.686944	29.7726	FALSE	0
2022-09-14	10:04:10	0.148919	0.662421	0.686944	30.3083	FALSE	0
2022-09-14	10:04:11	0.184797	0.822014	0.542105	30.5946	FALSE	0
2022-09-14	10:04:11	0.174975	0.778324	0.542105	31.0866	FALSE	0
2022-09-14	10:04:11	0.0742623	0.330334	0.542105	30.9249	FALSE	0
2022-09-14	10:04:11	0.0534481	0.237748	0.542105	31.3243	FALSE	0
2022-09-14	10:04:12	-0.0331168	-0.14731	1.28506	30.9249	FALSE	0
2022-09-14	10:04:12	0.274466	1.22088	1.28506	32.5452	FALSE	0
2022-09-14	10:04:12	0.581896	2.58839	1.28506	33.5133	FALSE	0
2022-09-14	10:04:12	0.332328	1.47826	1.28506	34.0235	FALSE	0
2022-09-14	10:04:13	0.527748	2.34753	1.72642	35.8609	FALSE	0
2022-09-14	10:04:13	0.229835	1.02235	1.72642	35.0458	FALSE	0
2022-09-14	10:04:13	0.2793	1.24238	1.72642	37.1032	FALSE	0
2022-09-14	10:04:13	0.515585	2.29343	1.72642	37.3393	FALSE	0
2022-09-14	10:04:14	0.310445	1.38092	0.677926	38.4842	FALSE	0
2022-09-14	10:04:14	-0.00716262	-0.0318608	0.677926	37.3393	FALSE	0
2022-09-14	10:04:14	0.0919722	0.409111	0.677926	38.8933	FALSE	0
2022-09-14	10:04:14	0.214364	0.953534	0.677926	38.2928	FALSE	0
2022-09-14	10:04:15	0.394415	1.75444	7.34197	40.6477	FALSE	0
2022-09-14	10:04:15	2.53625	11.2817	7.34197	49.5745	FALSE	0
2022-09-14	10:04:15	2.02098	8.98972	7.34197	49.6374	FALSE	0
2022-09-14	10:04:16	1.38352	6.15417	5.19375	55.7287	FALSE	0
2022-09-14	10:04:16	0.967697	4.30451	5.19375	53.9419	FALSE	0
2022-09-14	10:04:16	0.854262	3.79993	5.19375	59.5286	FALSE	0
2022-09-14	10:04:16	1.46495	6.51639	5.19375	60.4583	FALSE	0
2022-09-14	10:04:17	1.31182	5.83524	19.9322	65.3639	FALSE	0
2022-09-14	10:04:17	5.79278	25.7674	19.9322	86.2258	1	1
2022-09-14	10:04:17	6.53685	29.0772	19.9322	94.4411	1	2
2022-09-14	10:04:17	4.28235	19.0487	19.9322	105.275	1	3
2022-09-14	10:04:18	1.55467	6.91548	4.225	101.357	FALSE	3
2022-09-14	10:04:18	1.28037	5.69534	4.225	110.97	FALSE	3
2022-09-14	10:04:18	0.487494	2.16847	4.225	103.525	FALSE	3
2022-09-14	10:04:18	0.476756	2.12071	4.225	113.091	FALSE	3
2022-09-14	10:04:19	0.543931	2.41951	2.98318	105.945	FALSE	3
2022-09-14	10:04:19	0.992837	4.41634	2.98318	117.507	FALSE	3
2022-09-14	10:04:19	0.475178	2.11369	2.98318	108.058	FALSE	3
2022-09-14	10:04:20	0.729987	3.24713	1.71176	120.754	FALSE	3
2022-09-14	10:04:20	0.275025	1.22337	1.71176	109.282	FALSE	3
2022-09-14	10:04:20	0.304644	1.35512	1.71176	122.109	FALSE	3
2022-09-14	10:04:20	0.229631	1.02144	1.71176	110.303	FALSE	3
2022-09-14	10:04:21	0.172125	0.765646	0.929199	122.875	FALSE	3
2022-09-14	10:04:21	0.050191	0.22326	0.929199	110.526	FALSE	3
2022-09-14	10:04:21	0.211158	0.939273	0.929199	123.814	FALSE	3
2022-09-14	10:04:21	0.402099	1.78862	0.929199	112.315	FALSE	3
2022-09-14	10:04:22	0.243422	1.08279	0.984376	124.897	FALSE	3
2022-09-14	10:04:22	0.139911	0.622352	0.984376	112.937	FALSE	3
2022-09-14	10:04:22	0.337824	1.50271	0.984376	126.4	FALSE	3
2022-09-14	10:04:22	0.164033	0.729652	0.984376	113.667	FALSE	3
2022-09-14	10:04:23	0.355738	1.58239	1.4892	127.982	FALSE	3
2022-09-14	10:04:23	0.224033	0.996544	1.4892	114.663	FALSE	3
2022-09-14	10:04:23	0.424593	1.88867	1.4892	129.871	FALSE	3
2022-09-14	10:04:24	0.221081	0.983413	1.31477	115.647	FALSE	3
2022-09-14	10:04:24	0.412481	1.8348	1.31477	131.705	FALSE	3
2022-09-14	10:04:24	0.180624	0.803452	1.31477	116.45	FALSE	3
2022-09-14	10:04:24	0.368104	1.6374	1.31477	133.343	FALSE	3
2022-09-14	10:04:25	0.0845422	0.376061	0.820824	116.826	FALSE	3
2022-09-14	10:04:25	0.481641	2.14244	0.820824	135.485	FALSE	3
2022-09-14	10:04:25	0.122507	0.544936	0.820824	117.371	FALSE	3
2022-09-14	10:04:25	0.0494277	0.219864	0.820824	135.705	FALSE	3
2022-09-14	10:04:26	0.257316	1.14459	3.3143	118.516	FALSE	3
2022-09-14	10:04:26	0.421234	1.87373	3.3143	137.579	FALSE	3
2022-09-14	10:04:26	0.962506	4.28142	3.3143	122.797	FALSE	3
2022-09-14	10:04:26	1.3393	5.95747	3.3143	143.536	FALSE	3
2022-09-14	10:04:27	0.586119	2.60717	3.052	125.405	FALSE	3
2022-09-14	10:04:27	0.61243	2.72421	3.052	146.261	FALSE	3
2022-09-14	10:04:27	0.859809	3.8246	3.052	129.229	FALSE	3
2022-09-14	10:04:28	1.32413	5.89	13.888	152.151	FALSE	3
2022-09-14	10:04:28	1.75187	7.79267	13.888	137.022	FALSE	3
2022-09-14	10:04:28	3.39716	15.1112	13.888	167.262	1	4
2022-09-14	10:04:28	6.01553	26.7583	13.888	163.78	1	5
2022-09-14	10:04:29	7.40164	32.924	21.5774	200.186	1	6
2022-09-14	10:04:29	9.12398	40.5853	21.5774	204.365	1	7
2022-09-14	10:04:29	1.46413	6.51274	21.5774	206.699	FALSE	7
2022-09-14	10:04:29	1.41355	6.28775	21.5774	210.653	FALSE	7
2022-09-14	10:04:30	0.837214	3.7241	2.42925	210.423	FALSE	7
2022-09-14	10:04:30	0.398181	1.77119	2.42925	212.424	FALSE	7
2022-09-14	10:04:30	0.562354	2.50146	2.42925	212.924	FALSE	7
2022-09-14	10:04:30	0.38673	1.72025	2.42925	214.145	FALSE	7
2022-09-14	10:04:31	0.484949	2.15715	2.56017	215.081	FALSE	7
2022-09-14	10:04:31	0.545407	2.42608	2.56017	216.571	FALSE	7
2022-09-14	10:04:31	0.696298	3.09727	2.56017	218.179	FALSE	7
2022-09-14	10:04:32	0.802354	3.56903	3.22608	220.14	FALSE	7
2022-09-14	10:04:32	0.613397	2.72851	3.22608	220.907	FALSE	7
2022-09-14	10:04:32	0.727036	3.234	3.22608	223.374	FALSE	7
2022-09-14	10:04:32	0.758232	3.37277	3.22608	224.28	FALSE	7
2022-09-14	10:04:33	0.543219	2.41635	2.7945	225.79	FALSE	7
2022-09-14	10:04:33	0.746985	3.32274	2.7945	227.603	FALSE	7
2022-09-14	10:04:33	0.528104	2.34911	2.7945	228.139	FALSE	7
2022-09-14	10:04:33	0.694618	3.0898	2.7945	230.692	FALSE	7
2022-09-14	10:04:34	0.388868	1.72976	3.04215	229.869	FALSE	7
2022-09-14	10:04:34	0.621031	2.76247	3.04215	233.455	FALSE	7
2022-09-14	10:04:34	0.657926	2.92659	3.04215	232.795	FALSE	7
2022-09-14	10:04:34	1.0678	4.74979	3.04215	238.205	FALSE	7
2022-09-14	10:04:35	0.31355	1.39473	1.86219	234.19	FALSE	7
2022-09-14	10:04:35	0.429886	1.91222	1.86219	240.117	FALSE	7
2022-09-14	10:04:35	0.512481	2.27962	1.86219	236.47	FALSE	7
2022-09-14	10:04:36	0.814618	3.62358	2.49863	243.74	FALSE	7
2022-09-14	10:04:36	0.414822	1.84521	2.49863	238.315	FALSE	7
2022-09-14	10:04:36	0.551921	2.45505	2.49863	246.195	FALSE	7
2022-09-14	10:04:36	0.465509	2.07068	2.49863	240.386	FALSE	7
2022-09-14	10:04:37	0.513041	2.28211	2.44464	248.478	FALSE	7
2022-09-14	10:04:37	0.631208	2.80774	2.44464	243.193	FALSE	7
2022-09-14	10:04:37	0.545102	2.42472	2.44464	250.902	FALSE	7
2022-09-14	10:04:37	0.50897	2.264	2.44464	245.457	FALSE	7
2022-09-14	10:04:38	0.736247	3.27497	2.28573	254.177	FALSE	7
2022-09-14	10:04:38	0.436756	1.94278	2.28573	247.4	FALSE	7
2022-09-14	10:04:38	0.442608	1.96881	2.28573	256.146	FALSE	7
2022-09-14	10:04:38	0.439809	1.95636	2.28573	249.357	FALSE	7
2022-09-14	10:04:39	0.44897	1.99711	1.89645	258.143	FALSE	7
2022-09-14	10:04:39	0.467952	2.08154	1.89645	251.438	FALSE	7
2022-09-14	10:04:39	0.362099	1.61069	1.89645	259.754	FALSE	7
2022-09-14	10:04:40	0.391463	1.74131	1.69824	253.179	FALSE	7
2022-09-14	10:04:40	0.350445	1.55885	1.69824	261.313	FALSE	7
2022-09-14	10:04:40	0.342761	1.52467	1.69824	254.704	FALSE	7
2022-09-14	10:04:40	0.442456	1.96813	1.69824	263.281	FALSE	7
2022-09-14	10:04:41	0.596094	2.65155	2.72353	257.356	FALSE	7
2022-09-14	10:04:41	0.602455	2.67984	2.72353	265.961	FALSE	7
2022-09-14	10:04:41	0.616959	2.74436	2.72353	260.1	FALSE	7
2022-09-14	10:04:41	0.633601	2.81838	2.72353	268.779	FALSE	7
2022-09-14	10:04:42	0.366578	1.63061	1.80356	261.731	FALSE	7
2022-09-14	10:04:42	0.470038	2.09082	1.80356	270.87	FALSE	7
2022-09-14	10:04:42	0.341998	1.52128	1.80356	263.252	FALSE	7
2022-09-14	10:04:42	0.443219	1.97153	1.80356	272.841	FALSE	7
2022-09-14	10:04:43	0.360725	1.60458	1.68358	264.856	FALSE	7
2022-09-14	10:04:43	0.423677	1.8846	1.68358	274.726	FALSE	7
2022-09-14	10:04:43	0.373957	1.66344	1.68358	266.52	FALSE	7
2022-09-14	10:04:43	0.355585	1.58171	1.68358	276.308	FALSE	7
2022-09-14	10:04:44	0.489784	2.17866	1.87841	268.699	FALSE	7
2022-09-14	10:04:44	0.57355	2.55127	1.87841	278.859	FALSE	7
2022-09-14	10:04:44	0.203524	0.905315	1.87841	269.604	FALSE	7
2022-09-14	10:04:45	0.069733	0.310186	-1.51165	279.169	FALSE	7
2022-09-14	10:04:45	-0.313727	-1.39552	-1.51165	269.604	FALSE	7
2022-09-14	10:04:45	-0.519681	-2.31165	-1.51165	279.169	FALSE	7
2022-09-14	10:04:45	-0.595661	-2.64962	-1.51165	269.604	FALSE	7
2022-09-14	10:04:46	-0.564109	-2.50927	-1.29066	279.169	FALSE	7
2022-09-14	10:04:46	-0.273269	-1.21556	-1.29066	269.604	FALSE	7
2022-09-14	10:04:46	-0.225025	-1.00096	-1.29066	279.169	FALSE	7
2022-09-14	10:04:46	-0.0982058	-0.436839	-1.29066	269.604	FALSE	7
2022-09-14	10:04:47	-0.12243	-0.544593	-0.472605	279.169	FALSE	7
2022-09-14	10:04:47	-0.122633	-0.545496	-0.472605	269.604	FALSE	7
2022-09-14	10:04:47	-0.0796817	-0.35444	-0.472605	279.169	FALSE	7
2022-09-14	10:04:47	-0.100241	-0.445892	-0.472605	269.604	FALSE	7
2022-09-14	10:04:48	0.114517	0.509395	0.672608	279.679	FALSE	7
2022-09-14	10:04:48	0.20383	0.906677	0.672608	270.511	FALSE	7
2022-09-14	10:04:48	0.13528	0.601752	0.672608	280.28	FALSE	7
2022-09-14	10:04:49	0.0754837	0.335767	0.196831	270.846	FALSE	7
2022-09-14	10:04:49	0.00255749	0.0113762	0.196831	280.292	FALSE	7
2022-09-14	10:04:49	0.134975	0.600396	0.196831	271.447	FALSE	7
2022-09-14	10:04:49	-0.0360176	-0.160213	0.196831	280.292	FALSE	7
2022-09-14	10:04:50	-0.374592	-1.66626	-2.14476	271.447	FALSE	7
2022-09-14	10:04:50	-0.427417	-1.90124	-2.14476	280.292	FALSE	7
2022-09-14	10:04:50	-0.595407	-2.64849	-2.14476	271.447	FALSE	7
2022-09-14	10:04:50	-0.531234	-2.36304	-2.14476	280.292	FALSE	7
2022-09-14	10:04:51	-0.22528	-1.00209	0.435878	271.447	FALSE	7
2022-09-14	10:04:51	-0.121616	-0.540972	0.435878	280.292	FALSE	7
2022-09-14	10:04:51	0.0398094	0.17708	0.435878	271.624	FALSE	7
2022-09-14	10:04:51	0.699046	3.1095	0.435878	283.401	FALSE	7
2022-09-14	10:04:52	1.18439	5.2684	7.36263	276.892	FALSE	7
2022-09-14	10:04:52	1.80693	8.03759	7.36263	291.439	FALSE	7
2022-09-14	10:04:52	1.97426	8.7819	7.36263	285.674	FALSE	7
2022-09-14	10:04:53	1.84017	8.18544	4.3005	299.624	FALSE	7
2022-09-14	10:04:53	1.13945	5.0685	4.3005	290.743	FALSE	7
2022-09-14	10:04:53	0.392227	1.7447	4.3005	301.369	FALSE	7
2022-09-14	10:04:53	0.495331	2.20333	4.3005	292.946	FALSE	7
2022-09-14	10:04:54	0.467239	2.07837	2.18539	303.447	FALSE	7
2022-09-14	10:04:54	0.449886	2.00118	2.18539	294.947	FALSE	7
2022-09-14	10:04:54	0.477672	2.12478	2.18539	305.572	FALSE	7
2022-09-14	10:04:54	0.570395	2.53723	2.18539	297.484	FALSE	7
2022-09-14	10:04:55	0.43757	1.9464	1.78358	307.518	FALSE	7
2022-09-14	10:04:55	0.425916	1.89456	1.78358	299.379	FALSE	7
2022-09-14	10:04:55	0.343423	1.52761	1.78358	309.046	FALSE	7
2022-09-14	10:04:55	0.396959	1.76575	1.78358	301.145	FALSE	7
2022-09-14	10:04:56	0.308104	1.37051	2.07143	310.417	FALSE	7
2022-09-14	10:04:56	0.658537	2.9293	2.07143	304.074	FALSE	7
2022-09-14	10:04:56	0.430395	1.91448	2.07143	312.331	FALSE	7
2022-09-14	10:04:57	0.66215	2.94538	1.02218	307.019	FALSE	7
2022-09-14	10:04:57	0.192786	0.857551	1.02218	313.189	FALSE	7
2022-09-14	10:04:57	0.270089	1.20141	1.02218	308.221	FALSE	7
2022-09-14	10:04:57	-0.205839	-0.915613	1.02218	313.189	FALSE	7
2022-09-14	10:04:58	-0.369351	-1.64295	0.241822	308.221	FALSE	7
2022-09-14	10:04:58	-0.1379	-0.613407	0.241822	313.189	FALSE	7
2022-09-14	10:04:58	0.373804	1.66275	0.241822	309.884	FALSE	7
2022-09-14	10:04:58	0.350903	1.56089	0.241822	314.75	FALSE	7
2022-09-14	10:04:59	0.628613	2.7962	1.22252	312.68	FALSE	7
2022-09-14	10:04:59	0.291311	1.29581	1.22252	316.045	FALSE	7
2022-09-14	10:04:59	0.149224	0.663778	1.22252	313.343	FALSE	7
2022-09-14	10:04:59	0.0301911	0.134296	1.22252	316.18	FALSE	7
2022-09-14	10:05:00	0.12897	0.573684	0.39734	313.917	FALSE	7
2022-09-14	10:05:00	-0.0436002	-0.193942	0.39734	316.18	FALSE	7
2022-09-14	10:05:00	0.182608	0.812277	0.39734	314.729	FALSE	7
2022-09-14	10:05:01	0.377265	1.67815	6.62295	317.858	FALSE	7
2022-09-14	10:05:01	1.63248	7.2616	6.62295	321.991	FALSE	7
2022-09-14	10:05:01	2.3051	10.2535	6.62295	328.111	FALSE	7
2022-09-14	10:05:01	1.64078	7.29852	6.62295	329.29	FALSE	7
2022-09-14	10:05:02	0.247494	1.1009	-0.237745	329.212	FALSE	7
2022-09-14	10:05:02	0.0143132	0.063668	-0.237745	329.353	FALSE	7
2022-09-14	10:05:02	-0.174389	-0.775717	-0.237745	329.212	FALSE	7
2022-09-14	10:05:02	-0.301208	-1.33983	-0.237745	329.353	FALSE	7
2022-09-14	10:05:03	-0.109147	-0.485508	-0.101639	329.212	FALSE	7
2022-09-14	10:05:03	0.0722776	0.321505	-0.101639	329.675	FALSE	7
2022-09-14	10:05:03	0.000165643	0.000736813	-0.101639	329.213	FALSE	7
2022-09-14	10:05:03	-0.0546944	-0.243292	-0.101639	329.675	FALSE	7
2022-09-14	10:05:04	0.114059	0.507357	1.31611	329.72	FALSE	7
2022-09-14	10:05:04	0.360216	1.60231	1.31611	331.277	FALSE	7
2022-09-14	10:05:04	0.413346	1.83865	1.31611	331.559	FALSE	7
2022-09-14	10:05:05	0.512074	2.27781	2.22953	333.555	FALSE	7
2022-09-14	10:05:05	0.633753	2.81906	2.22953	334.378	FALSE	7
2022-09-14	10:05:05	0.549173	2.44283	2.22953	335.998	FALSE	7
2022-09-14	10:05:05	0.309886	1.37843	2.22953	335.756	FALSE	7
2022-09-14	10:05:06	0.171463	0.762702	0.00650894	336.76	FALSE	7
2022-09-14	10:05:06	-0.0516919	-0.229936	0.00650894	335.756	FALSE	7
2022-09-14	10:05:06	-0.0818699	-0.364174	0.00650894	336.76	FALSE	7
2022-09-14	10:05:06	-0.0320481	-0.142556	0.00650894	335.756	FALSE	7
2022-09-14	10:05:07	-0.200547	-0.892073	-1.03276	336.76	FALSE	7
2022-09-14	10:05:07	-0.298816	-1.32919	-1.03276	335.756	FALSE	7
2022-09-14	10:05:07	-0.159376	-0.708936	-1.03276	336.76	FALSE	7
2022-09-14	10:05:07	-0.269961	-1.20084	-1.03276	335.756	FALSE	7
2022-09-14	10:05:08	-0.0346435	-0.154101	0.210696	336.76	FALSE	7
2022-09-14	10:05:08	-0.106755	-0.474868	0.210696	335.756	FALSE	7
2022-09-14	10:05:08	0.154364	0.686642	0.210696	337.447	FALSE	7
2022-09-14	10:05:08	0.176501	0.785112	0.210696	336.542	FALSE	7
2022-09-14	10:05:09	1.17894	5.24416	6.51532	342.691	FALSE	7
2022-09-14	10:05:09	1.17681	5.23469	6.51532	341.776	FALSE	7
2022-09-14	10:05:09	2.03838	9.06712	6.51532	351.758	FALSE	7
2022-09-14	10:05:10	1.37874	6.13291	9.01655	347.909	FALSE	7
2022-09-14	10:05:10	3.13752	13.9563	9.01655	365.715	1	8
2022-09-14	10:05:10	1.79986	8.00614	9.01655	355.915	FALSE	8
2022-09-14	10:05:10	1.79192	7.97082	9.01655	373.685	FALSE	8
2022-09-14	10:05:11	0.541997	2.41091	3.5499	358.326	FALSE	8
2022-09-14	10:05:11	0.766221	3.4083	3.5499	377.094	FALSE	8
2022-09-14	10:05:11	0.556807	2.47679	3.5499	360.803	FALSE	8
2022-09-14	10:05:11	1.32719	5.90361	3.5499	382.997	FALSE	8
2022-09-14	10:05:12	0.611718	2.72104	7.00569	363.524	FALSE	8
2022-09-14	10:05:12	1.50276	6.68458	7.00569	389.682	FALSE	8
2022-09-14	10:05:12	1.03187	4.58996	7.00569	368.114	FALSE	8
2022-09-14	10:05:12	3.15345	14.0272	7.00569	403.709	1	9
2022-09-14	10:05:13	1.21324	5.39673	7.90878	373.511	FALSE	9
2022-09-14	10:05:13	3.088	13.736	7.90878	417.445	1	10
2022-09-14	10:05:13	1.03268	4.59357	7.90878	378.104	FALSE	10
2022-09-14	10:05:14	2.03731	9.06236	6.7544	426.508	FALSE	10
2022-09-14	10:05:14	1.24271	5.52782	6.7544	383.632	FALSE	10
2022-09-14	10:05:14	1.13034	5.02798	6.7544	431.536	FALSE	10
2022-09-14	10:05:14	1.66347	7.39945	6.7544	391.032	FALSE	10
2022-09-14	10:05:15	0.918384	4.08516	6.98753	435.621	FALSE	10
2022-09-14	10:05:15	2.01452	8.96099	6.98753	399.993	FALSE	10
2022-09-14	10:05:15	1.03482	4.60309	6.98753	440.224	FALSE	10
2022-09-14	10:05:15	2.31574	10.3009	6.98753	410.293	FALSE	10
2022-09-14	10:05:16	0.951463	4.2323	5.04543	444.456	FALSE	10
2022-09-14	10:05:16	1.74144	7.74627	5.04543	418.04	FALSE	10
2022-09-14	10:05:16	0.620267	2.75907	5.04543	447.215	FALSE	10
2022-09-14	10:05:16	1.22388	5.44406	5.04543	423.484	FALSE	10
2022-09-14	10:05:17	0.467647	2.08019	2.98288	449.295	FALSE	10
2022-09-14	10:05:17	0.917468	4.08108	2.98288	427.565	FALSE	10
2022-09-14	10:05:17	0.626629	2.78737	2.98288	452.083	FALSE	10
2022-09-14	10:05:18	1.95955	8.71647	5.2684	436.281	FALSE	10
2022-09-14	10:05:18	0.476043	2.11753	5.2684	454.2	FALSE	10
2022-09-14	10:05:18	1.17274	5.21658	5.2684	441.498	FALSE	10
2022-09-14	10:05:18	1.12922	5.023	5.2684	459.223	FALSE	10
2022-09-14	10:05:19	1.18902	5.289	3.33689	446.787	FALSE	10
2022-09-14	10:05:19	0.408257	1.81601	3.33689	461.039	FALSE	10
2022-09-14	10:05:19	0.678079	3.01623	3.33689	449.803	FALSE	10
2022-09-14	10:05:19	0.725305	3.2263	3.33689	464.266	FALSE	10
2022-09-14	10:05:20	0.822099	3.65686	3.25137	453.46	FALSE	10
2022-09-14	10:05:20	1.21772	5.41666	3.25137	469.682	FALSE	10
2022-09-14	10:05:20	0.697519	3.1027	3.25137	456.563	FALSE	10
2022-09-14	10:05:20	0.186425	0.829256	3.25137	470.511	FALSE	10
2022-09-14	10:05:21	0.349478	1.55455	1.57273	458.117	FALSE	10
2022-09-14	10:05:21	0.748613	3.32998	1.57273	473.841	FALSE	10
2022-09-14	10:05:21	-0.0373916	-0.166325	1.57273	458.117	FALSE	10
2022-09-14	10:05:22	0.0130918	0.0582349	8.77173	473.9	FALSE	10
2022-09-14	10:05:22	0.736756	3.27724	8.77173	461.394	FALSE	10
2022-09-14	10:05:22	3.38663	15.0644	8.77173	488.964	1	11
2022-09-14	10:05:22	3.75141	16.687	8.77173	478.082	1	12
2022-09-14	10:05:23	1.85996	8.27347	4.50417	497.238	FALSE	12
2022-09-14	10:05:23	0.730801	3.25075	4.50417	481.332	FALSE	12
2022-09-14	10:05:23	0.728919	3.24238	4.50417	500.48	FALSE	12
2022-09-14	10:05:23	0.730649	3.25007	4.50417	484.582	FALSE	12
2022-09-14	10:05:24	0.737672	3.28131	3.27107	503.761	FALSE	12
2022-09-14	10:05:24	0.734517	3.26728	3.27107	487.85	FALSE	12
2022-09-14	10:05:24	0.728919	3.24238	3.27107	507.004	FALSE	12
2022-09-14	10:05:24	0.740369	3.29331	3.27107	491.143	FALSE	12
2022-09-14	10:05:25	0.731209	3.25256	3.26501	510.256	FALSE	12
2022-09-14	10:05:25	0.732634	3.2589	3.26501	494.402	FALSE	12
2022-09-14	10:05:25	0.738181	3.28358	3.26501	513.54	FALSE	12
2022-09-14	10:05:26	0.734924	3.26909	3.26218	497.671	FALSE	12
2022-09-14	10:05:26	0.728461	3.24034	3.26218	516.78	FALSE	12
2022-09-14	10:05:26	0.736552	3.27633	3.26218	500.947	FALSE	12
2022-09-14	10:05:26	0.73355	3.26298	3.26218	520.043	FALSE	12
2022-09-14	10:05:27	0.733601	3.2632	3.01544	504.21	FALSE	12
2022-09-14	10:05:27	0.736145	3.27452	3.01544	523.318	FALSE	12
2022-09-14	10:05:27	0.734822	3.26864	3.01544	507.479	FALSE	12
2022-09-14	10:05:27	0.507035	2.25539	3.01544	525.573	FALSE	12
2022-09-14	10:05:28	0.16444	0.731462	6.56115	508.211	FALSE	12
2022-09-14	10:05:28	0.298028	1.32569	6.56115	526.899	FALSE	12
2022-09-14	10:05:28	3.25177	14.4645	6.56115	522.675	1	13
2022-09-14	10:05:28	2.18581	9.72292	6.56115	536.622	FALSE	13
2022-09-14	10:05:29	0.808308	3.59552	3.40514	526.271	FALSE	13
2022-09-14	10:05:29	0.870903	3.87395	3.40514	540.496	FALSE	13
2022-09-14	10:05:29	0.617316	2.74595	3.40514	529.017	FALSE	13
2022-09-14	10:05:30	0.737621	3.28109	1.79903	543.777	FALSE	13
2022-09-14	10:05:30	0.176552	0.785339	1.79903	529.802	FALSE	13
2022-09-14	10:05:30	0.471158	2.09581	1.79903	545.872	FALSE	13
2022-09-14	10:05:30	0.23243	1.0339	1.79903	530.836	FALSE	13
2022-09-14	10:05:31	0.260471	1.15863	0.910863	547.031	FALSE	13
2022-09-14	10:05:31	0.174466	0.77606	0.910863	531.612	FALSE	13
2022-09-14	10:05:31	0.187392	0.833557	0.910863	547.865	FALSE	13
2022-09-14	10:05:31	0.196756	0.87521	0.910863	532.487	FALSE	13
2022-09-14	10:05:32	0.185458	0.824954	0.827218	548.69	FALSE	13
2022-09-14	10:05:32	0.183066	0.814314	0.827218	533.301	FALSE	13
2022-09-14	10:05:32	0.189377	0.842387	0.827218	549.532	FALSE	13
2022-09-14	10:05:33	0.208766	0.928633	0.599761	534.23	FALSE	13
2022-09-14	10:05:33	0.434262	1.93168	0.599761	551.464	FALSE	13
2022-09-14	10:05:33	0.106527	0.473853	0.599761	534.704	FALSE	13
2022-09-14	10:05:33	-0.00293869	-0.0130719	0.599761	551.464	FALSE	13
2022-09-14	10:05:33	-0.0724552	-0.322295	0.599761	534.704	FALSE	13
2022-09-14	10:05:34	-0.104618	-0.465362	-0.505808	551.464	FALSE	13
2022-09-14	10:05:34	-0.101107	-0.449744	-0.505808	534.704	FALSE	13
2022-09-14	10:05:34	-0.135407	-0.602317	-0.505808	551.464	FALSE	13
2022-09-14	10:05:35	-0.186297	-0.828686	2.9795	534.704	FALSE	13
2022-09-14	10:05:35	-0.275101	-1.2237	2.9795	551.464	FALSE	13
2022-09-14	10:05:35	-0.132455	-0.589186	2.9795	534.704	FALSE	13
2022-09-14	10:05:35	3.27314	14.5596	2.9795	566.023	1	14
2022-09-14	10:05:36	4.83599	21.5115	13.3689	556.215	1	15
2022-09-14	10:05:36	2.37564	10.5673	13.3689	576.591	FALSE	15
2022-09-14	10:05:36	2.6136	11.6258	13.3689	567.841	FALSE	15
2022-09-14	10:05:36	2.19665	9.77114	13.3689	586.362	FALSE	15
2022-09-14	10:05:37	4.37314	19.4526	18.1313	587.294	1	16
2022-09-14	10:05:37	2.98495	13.2777	18.1313	599.639	FALSE	16
2022-09-14	10:05:37	5.61721	24.9865	18.1313	612.28	1	17
2022-09-14	10:05:37	3.32912	14.8086	18.1313	614.448	1	18
2022-09-14	10:05:38	3.8766	17.2439	14.3539	629.524	1	19
2022-09-14	10:05:38	4.10592	18.264	14.3539	632.712	1	20
2022-09-14	10:05:38	1.69818	7.55384	14.3539	637.078	FALSE	20
2022-09-14	10:05:39	1.22286	5.43953	3.40078	638.151	FALSE	20
2022-09-14	10:05:39	0.409021	1.81941	3.40078	638.897	FALSE	20
2022-09-14	10:05:39	0.69818	3.10564	3.40078	641.257	FALSE	20
2022-09-14	10:05:39	0.728054	3.23853	3.40078	642.136	FALSE	20
2022-09-14	10:05:40	0.738282	3.28403	2.55324	644.541	FALSE	20
2022-09-14	10:05:40	0.707036	3.14504	2.55324	645.281	FALSE	20
2022-09-14	10:05:40	0.467443	2.07928	2.55324	646.62	FALSE	20
2022-09-14	10:05:40	0.383219	1.70463	2.55324	646.986	FALSE	20
2022-09-14	10:05:41	0.448104	1.99326	1.83785	648.614	FALSE	20
2022-09-14	10:05:41	0.429326	1.90973	1.83785	648.895	FALSE	20
2022-09-14	10:05:41	0.35355	1.57266	1.83785	650.186	FALSE	20
2022-09-14	10:05:41	0.421692	1.87577	1.83785	650.771	FALSE	20
2022-09-14	10:05:42	0.485153	2.15806	3.26079	652.344	FALSE	20
2022-09-14	10:05:42	0.673651	2.99653	3.26079	653.768	FALSE	20
2022-09-14	10:05:42	1.04037	4.62777	3.26079	656.972	FALSE	20
2022-09-14	10:05:43	1.11095	4.94173	2.58493	658.709	FALSE	20
2022-09-14	10:05:43	0.856043	3.80785	2.58493	660.78	FALSE	20
2022-09-14	10:05:43	0.190496	0.847364	2.58493	659.557	FALSE	20
2022-09-14	10:05:43	0.166985	0.742783	2.58493	661.523	FALSE	20
2022-09-14	10:05:44	0.171921	0.764739	0.784264	660.321	FALSE	20
2022-09-14	10:05:44	0.173906	0.773569	0.784264	662.296	FALSE	20
2022-09-14	10:05:44	0.171667	0.763609	0.784264	661.085	FALSE	20
2022-09-14	10:05:44	0.187748	0.835141	0.784264	663.131	FALSE	20
2022-09-14	10:05:45	0.242405	1.07827	1.29575	662.163	FALSE	20
2022-09-14	10:05:45	0.745102	3.31436	1.29575	666.446	FALSE	20
2022-09-14	10:05:45	0.213244	0.948552	1.29575	663.112	FALSE	20
2022-09-14	10:05:45	-0.0355595	-0.158176	1.29575	666.446	FALSE	20
2022-09-14	10:05:46	0.200471	0.891735	0.966588	664.004	FALSE	20
2022-09-14	10:05:46	0.391565	1.74176	0.966588	668.188	FALSE	20
2022-09-14	10:05:46	0.0598603	0.266271	0.966588	664.27	FALSE	20
2022-09-14	10:05:47	0.207901	0.924785	4.51848	669.112	FALSE	20
2022-09-14	10:05:47	1.23609	5.49838	4.51848	669.768	FALSE	20
2022-09-14	10:05:47	1.89202	8.41608	4.51848	677.528	FALSE	20
2022-09-14	10:05:47	0.727188	3.23468	4.51848	673.003	FALSE	20
2022-09-14	10:05:48	0.589936	2.62415	2.53078	680.153	FALSE	20
2022-09-14	10:05:48	0.592837	2.63706	2.53078	675.64	FALSE	20
2022-09-14	10:05:48	0.540878	2.40593	2.53078	682.559	FALSE	20
2022-09-14	10:05:48	0.552125	2.45596	2.53078	678.096	FALSE	20
2022-09-14	10:05:49	0.502913	2.23706	2.20837	684.796	FALSE	20
2022-09-14	10:05:49	0.506374	2.25245	2.20837	680.348	FALSE	20
2022-09-14	10:05:49	0.47416	2.10916	2.20837	686.905	FALSE	20
2022-09-14	10:05:49	0.502405	2.2348	2.20837	682.583	FALSE	20
2022-09-14	10:05:50	0.498282	2.21646	2.06736	689.121	FALSE	20
2022-09-14	10:05:50	0.440827	1.96089	2.06736	684.544	FALSE	20
2022-09-14	10:05:50	0.455178	2.02472	2.06736	691.146	FALSE	20
2022-09-14	10:05:51	0.388613	1.72863	2.09818	686.273	FALSE	20
2022-09-14	10:05:51	0.457977	2.03717	2.09818	693.183	FALSE	20
2022-09-14	10:05:51	0.679504	3.02257	2.09818	689.295	FALSE	20
2022-09-14	10:05:51	0.360674	1.60435	2.09818	694.787	FALSE	20
2022-09-14	10:05:52	0.380725	1.69354	2.04464	690.989	FALSE	20
2022-09-14	10:05:52	0.541234	2.40752	2.04464	697.195	FALSE	20
2022-09-14	10:05:52	0.487239	2.16734	2.04464	693.156	FALSE	20
2022-09-14	10:05:52	0.429428	1.91018	2.04464	699.105	FALSE	20
2022-09-14	10:05:53	0.672888	2.99314	3.14322	696.149	FALSE	20
2022-09-14	10:05:53	0.668664	2.97435	3.14322	702.079	FALSE	20
2022-09-14	10:05:53	0.744898	3.31346	3.14322	699.463	FALSE	20
2022-09-14	10:05:53	0.740064	3.29195	3.14322	705.371	FALSE	20
2022-09-14	10:05:54	0.738435	3.28471	3.26826	702.747	FALSE	20
2022-09-14	10:05:54	0.733753	3.26388	3.26826	708.635	FALSE	20
2022-09-14	10:05:54	0.732023	3.25618	3.26826	706.004	FALSE	20
2022-09-14	10:05:55	0.738639	3.28561	3.27882	711.921	FALSE	20
2022-09-14	10:05:55	0.729784	3.24623	3.27882	709.25	FALSE	20
2022-09-14	10:05:55	0.744694	3.31255	3.27882	715.233	FALSE	20
2022-09-14	10:05:55	0.735331	3.2709	3.27882	712.521	FALSE	20
2022-09-14	10:05:56	0.739147	3.28787	2.98918	718.521	FALSE	20
2022-09-14	10:05:56	0.737061	3.27859	2.98918	715.799	FALSE	20
2022-09-14	10:05:56	0.664084	2.95398	2.98918	721.475	FALSE	20
2022-09-14	10:05:56	0.547697	2.43627	2.98918	718.236	FALSE	20
2022-09-14	10:05:57	0.365204	1.6245	2.47724	723.1	FALSE	20
2022-09-14	10:05:57	0.580827	2.58363	2.47724	720.819	FALSE	20
2022-09-14	10:05:57	0.560776	2.49444	2.47724	725.594	FALSE	20
2022-09-14	10:05:57	0.720827	3.20638	2.47724	724.026	FALSE	20
2022-09-14	10:05:58	0.775127	3.44792	5.43966	729.042	FALSE	20
2022-09-14	10:05:58	0.86327	3.84	5.43966	727.866	FALSE	20
2022-09-14	10:05:58	1.27355	5.66501	5.43966	734.707	FALSE	20
2022-09-14	10:05:58	1.97961	8.8057	5.43966	736.671	FALSE	20
2022-09-14	10:05:59	2.29477	10.2076	11.0509	744.915	FALSE	20
2022-09-14	10:05:59	3.57406	15.8981	11.0509	752.569	1	21
2022-09-14	10:05:59	1.58424	7.04702	11.0509	751.962	FALSE	21
2022-09-14	10:06:00	3.26607	14.5281	7.22968	767.098	1	22
2022-09-14	10:06:00	1.43833	6.39798	7.22968	758.36	FALSE	22
2022-09-14	10:06:00	1.27441	5.66883	7.22968	772.766	FALSE	22
2022-09-14	10:06:00	0.522404	2.32376	7.22968	760.684	FALSE	22
2022-09-14	10:06:01	0.501387	2.23027	4.41283	774.997	FALSE	22
2022-09-14	10:06:01	0.854109	3.79925	4.41283	764.483	FALSE	22
2022-09-14	10:06:01	1.25981	5.60389	4.41283	780.601	FALSE	22
2022-09-14	10:06:01	1.35289	6.01793	4.41283	770.501	FALSE	22
2022-09-14	10:06:02	1.46291	6.50732	10.21	787.108	FALSE	22
2022-09-14	10:06:02	1.87029	8.31942	10.21	778.82	FALSE	22
2022-09-14	10:06:02	2.47762	11.0209	10.21	798.129	FALSE	22
2022-09-14	10:06:02	3.37039	14.9922	10.21	793.812	1	23
2022-09-14	10:06:03	2.84485	12.6545	10.7747	810.783	FALSE	23
2022-09-14	10:06:03	2.04551	9.09884	10.7747	802.911	FALSE	23
2022-09-14	10:06:03	2.3764	10.5707	10.7747	821.354	FALSE	23
2022-09-14	10:06:04	0.874313	3.88912	4.13439	806.8	FALSE	23
2022-09-14	10:06:04	1.18515	5.27178	4.13439	826.626	FALSE	23
2022-09-14	10:06:04	0.681183	3.03004	4.13439	809.83	FALSE	23
2022-09-14	10:06:04	0.977163	4.34662	4.13439	830.972	FALSE	23
2022-09-14	10:06:05	1.08454	4.82425	7.54841	814.655	FALSE	23
2022-09-14	10:06:05	1.80627	8.03465	7.54841	839.007	FALSE	23
2022-09-14	10:06:05	2.57594	11.4583	7.54841	826.113	FALSE	23
2022-09-14	10:06:05	1.32108	5.87643	7.54841	844.883	FALSE	23
2022-09-14	10:06:06	1.51569	6.74209	3.77933	832.855	FALSE	23
2022-09-14	10:06:06	0.697824	3.10406	3.77933	847.988	FALSE	23
2022-09-14	10:06:06	0.471209	2.09603	3.77933	834.951	FALSE	23
2022-09-14	10:06:06	0.713804	3.17514	3.77933	851.163	FALSE	23
2022-09-14	10:06:07	0.774568	3.44543	5.72538	838.396	FALSE	23
2022-09-14	10:06:07	1.19177	5.30123	5.72538	856.464	FALSE	23
2022-09-14	10:06:07	1.89503	8.42947	5.72538	846.826	FALSE	23
2022-09-14	10:06:08	1.64973	7.33833	5.90778	863.802	FALSE	23
2022-09-14	10:06:08	1.32276	5.8839	5.90778	852.71	FALSE	23
2022-09-14	10:06:08	1.55808	6.93065	5.90778	870.733	FALSE	23
2022-09-14	10:06:08	0.781946	3.47825	5.90778	856.188	FALSE	23
2022-09-14	10:06:09	0.786374	3.49795	8.08571	874.231	FALSE	23
2022-09-14	10:06:09	0.959198	4.2667	8.08571	860.455	FALSE	23
2022-09-14	10:06:09	1.02276	4.54944	8.08571	878.78	FALSE	23
2022-09-14	10:06:09	4.50266	20.0287	8.08571	880.483	1	24
2022-09-14	10:06:10	3.86597	17.1966	11.6089	895.977	1	25
2022-09-14	10:06:10	4.67289	20.7859	11.6089	901.269	1	26
2022-09-14	10:06:10	1.34602	5.98737	11.6089	901.964	FALSE	26
2022-09-14	10:06:10	0.554313	2.4657	11.6089	903.735	FALSE	26
2022-09-14	10:06:11	0.759148	3.37684	2.60537	905.341	FALSE	26
2022-09-14	10:06:11	0.38042	1.69218	2.60537	905.427	FALSE	26
2022-09-14	10:06:11	0.61757	2.74707	2.60537	908.088	FALSE	26
2022-09-14	10:06:12	1.58128	7.03385	7.64784	912.461	FALSE	26
2022-09-14	10:06:12	1.39742	6.216	7.64784	914.304	FALSE	26
2022-09-14	10:06:12	3.03309	13.4918	7.64784	925.953	1	27
2022-09-14	10:06:12	0.865458	3.84973	7.64784	918.154	FALSE	27
2022-09-14	10:06:13	1.69543	7.54161	3.30944	933.495	FALSE	27
2022-09-14	10:06:13	0.381896	1.69875	3.30944	919.853	FALSE	27
2022-09-14	10:06:13	0.669733	2.97911	3.30944	936.474	FALSE	27
2022-09-14	10:06:13	0.228919	1.01828	3.30944	920.871	FALSE	27
2022-09-14	10:06:14	0.442914	1.97017	1.84974	938.444	FALSE	27
2022-09-14	10:06:14	0.305763	1.36009	1.84974	922.231	FALSE	27
2022-09-14	10:06:14	0.312227	1.38885	1.84974	939.833	FALSE	27
2022-09-14	10:06:14	0.602455	2.67984	1.84974	924.911	FALSE	27
2022-09-14	10:06:15	0.433295	1.92738	11.0974	941.76	FALSE	27
2022-09-14	10:06:15	2.12525	9.45354	11.0974	934.364	FALSE	27
2022-09-14	10:06:15	4.92586	21.9112	11.0974	963.671	1	28
2022-09-14	10:06:16	5.70362	25.3708	15.6369	959.735	1	29
2022-09-14	10:06:16	3.2078	14.2689	15.6369	977.94	1	30
2022-09-14	10:06:16	3.24342	14.4274	15.6369	974.163	1	31
2022-09-14	10:06:16	1.90653	8.48063	15.6369	986.421	FALSE	31
2022-09-14	10:06:17	1.90724	8.48378	7.04049	982.646	FALSE	31
2022-09-14	10:06:17	2.22551	9.89951	7.04049	996.32	FALSE	31
2022-09-14	10:06:17	1.14739	5.10382	7.04049	987.75	FALSE	31
2022-09-14	10:06:17	1.05095	4.67484	7.04049	1001	FALSE	31
2022-09-14	10:06:18	0.352328	1.56723	5.08747	989.317	FALSE	31
2022-09-14	10:06:18	1.9878	8.84213	5.08747	1009.84	FALSE	31
2022-09-14	10:06:18	1.19655	5.32249	5.08747	994.64	FALSE	31
2022-09-14	10:06:18	1.03818	4.61803	5.08747	1014.46	FALSE	31
2022-09-14	10:06:19	0.584491	2.59993	3.26331	997.24	FALSE	31
2022-09-14	10:06:19	0.6107	2.71652	3.26331	1017.17	FALSE	31
2022-09-14	10:06:19	1.05843	4.70811	3.26331	1001.95	FALSE	31
2022-09-14	10:06:19	0.680878	3.02868	3.26331	1020.2	FALSE	31
2022-09-14	10:06:20	2.34734	10.4414	7.01516	1012.39	FALSE	31
2022-09-14	10:06:20	0.571616	2.54266	7.01516	1022.74	FALSE	31
2022-09-14	10:06:20	1.81228	8.06138	7.01516	1020.45	FALSE	31
2022-09-14	10:06:21	1.10556	4.91775	8.76307	1027.66	FALSE	31
2022-09-14	10:06:21	1.43599	6.38757	8.76307	1026.84	FALSE	31
2022-09-14	10:06:21	2.78027	12.3672	8.76307	1040.03	FALSE	31
2022-09-14	10:06:21	2.55828	11.3797	8.76307	1038.22	FALSE	31
2022-09-14	10:06:22	2.97258	13.2226	6.20891	1053.25	FALSE	31
2022-09-14	10:06:22	1.07543	4.78373	6.20891	1043	FALSE	31
2022-09-14	10:06:22	0.930954	4.14107	6.20891	1057.39	FALSE	31
2022-09-14	10:06:22	0.604338	2.68822	6.20891	1045.69	FALSE	31
2022-09-14	10:06:23	0.498028	2.21533	1.56344	1059.61	FALSE	31
2022-09-14	10:06:23	0.233194	1.03729	1.56344	1046.73	FALSE	31
2022-09-14	10:06:23	0.392939	1.74787	1.56344	1061.36	FALSE	31
2022-09-14	10:06:23	0.281743	1.25325	1.56344	1047.98	FALSE	31
2022-09-14	10:06:24	0.365204	1.6245	1.6749	1062.98	FALSE	31
2022-09-14	10:06:24	0.334364	1.48732	1.6749	1049.47	FALSE	31
2022-09-14	10:06:24	0.430038	1.9129	1.6749	1064.89	FALSE	31
2022-09-14	10:06:25	0.301743	1.34221	1.99122	1050.81	FALSE	31
2022-09-14	10:06:25	0.465458	2.07045	1.99122	1066.96	FALSE	31
2022-09-14	10:06:25	0.329733	1.46672	1.99122	1052.28	FALSE	31
2022-09-14	10:06:25	0.693651	3.0855	1.99122	1070.05	FALSE	31
2022-09-14	10:06:26	0.327036	1.45472	2.0636	1053.73	FALSE	31
2022-09-14	10:06:26	0.673448	2.99563	2.0636	1073.04	FALSE	31
2022-09-14	10:06:26	0.397265	1.76711	2.0636	1055.5	FALSE	31
2022-09-14	10:06:26	0.457926	2.03695	2.0636	1075.08	FALSE	31
2022-09-14	10:06:27	0.561539	2.49784	1.97028	1058	FALSE	31
2022-09-14	10:06:27	0.343881	1.52965	1.97028	1076.61	FALSE	31
2022-09-14	10:06:27	0.412735	1.83593	1.97028	1059.83	FALSE	31
2022-09-14	10:06:27	0.453601	2.01771	1.97028	1078.63	FALSE	31
2022-09-14	10:06:28	0.465102	2.06887	1.78756	1061.9	FALSE	31
2022-09-14	10:06:28	0.336501	1.49682	1.78756	1080.13	FALSE	31
2022-09-14	10:06:28	0.403982	1.79699	1.78756	1063.7	FALSE	31
2022-09-14	10:06:29	0.649936	2.89105	2.51816	1083.02	FALSE	31
2022-09-14	10:06:29	0.505865	2.25019	2.51816	1065.95	FALSE	31
2022-09-14	10:06:29	0.623779	2.77469	2.51816	1085.79	FALSE	31
2022-09-14	10:06:29	0.484847	2.1567	2.51816	1068.11	FALSE	31
2022-09-14	10:06:30	0.515127	2.29139	1.91386	1088.08	FALSE	31
2022-09-14	10:06:30	0.410954	1.82801	1.91386	1069.93	FALSE	31
2022-09-14	10:06:30	0.374466	1.6657	1.91386	1089.75	FALSE	31
2022-09-14	10:06:30	0.420471	1.87034	1.91386	1071.8	FALSE	31
2022-09-14	10:06:31	0.335331	1.49162	1.82603	1091.24	FALSE	31
2022-09-14	10:06:31	0.334517	1.488	1.82603	1073.29	FALSE	31
2022-09-14	10:06:31	0.43869	1.95138	1.82603	1093.19	FALSE	31
2022-09-14	10:06:31	0.533499	2.37311	1.82603	1075.66	FALSE	31
2022-09-14	10:06:32	0.342863	1.52512	1.79865	1094.72	FALSE	31
2022-09-14	10:06:32	0.429428	1.91018	1.79865	1077.57	FALSE	31
2022-09-14	10:06:32	0.440776	1.96066	1.79865	1096.68	FALSE	31
2022-09-14	10:06:33	1.01864	4.53111	12.7409	1082.11	FALSE	31
2022-09-14	10:06:33	2.55161	11.3501	12.7409	1108.03	FALSE	31
2022-09-14	10:06:33	3.5394	15.744	12.7409	1097.85	1	32
2022-09-14	10:06:33	4.34744	19.3383	12.7409	1127.37	1	33
2022-09-14	10:06:34	3.29436	14.654	8.30687	1112.5	1	34
2022-09-14	10:06:34	2.21172	9.83817	8.30687	1137.2	FALSE	34
2022-09-14	10:06:34	1.27284	5.66185	8.30687	1118.17	FALSE	34
2022-09-14	10:06:34	0.690954	3.0735	8.30687	1140.28	FALSE	34
2022-09-14	10:06:35	1.00607	4.4752	4.98385	1122.64	FALSE	34
2022-09-14	10:06:35	1.05721	4.70268	4.98385	1144.98	FALSE	34
2022-09-14	10:06:35	1.20449	5.35781	4.98385	1128	FALSE	34
2022-09-14	10:06:35	1.21391	5.39971	4.98385	1150.38	FALSE	34
2022-09-14	10:06:36	1.19945	5.33539	5.18863	1133.33	FALSE	34
2022-09-14	10:06:36	1.15075	5.11877	5.18863	1155.5	FALSE	34
2022-09-14	10:06:36	1.14917	5.11174	5.18863	1138.45	FALSE	34
2022-09-14	10:06:37	1.17268	5.21632	4.96868	1160.71	FALSE	34
2022-09-14	10:06:37	1.13564	5.05155	4.96868	1143.5	FALSE	34
2022-09-14	10:06:37	1.07243	4.77038	4.96868	1165.48	FALSE	34
2022-09-14	10:06:37	1.08729	4.83648	4.96868	1148.33	FALSE	34
2022-09-14	10:06:38	1.13248	5.0375	5.27072	1170.52	FALSE	34
2022-09-14	10:06:38	1.18128	5.25457	5.27072	1153.59	FALSE	34
2022-09-14	10:06:38	1.18607	5.27588	5.27072	1175.8	FALSE	34
2022-09-14	10:06:38	1.23981	5.51492	5.27072	1159.1	FALSE	34
2022-09-14	10:06:39	0.817468	3.63626	5.51028	1179.43	FALSE	34
2022-09-14	10:06:39	0.727341	3.23536	5.51028	1162.34	FALSE	34
2022-09-14	10:06:39	1.01844	4.53022	5.51028	1183.96	FALSE	34
2022-09-14	10:06:39	2.39182	10.6393	5.51028	1172.98	FALSE	34
2022-09-14	10:06:40	2.09268	9.30866	8.1596	1193.27	FALSE	34
2022-09-14	10:06:40	2.01548	8.96526	8.1596	1181.94	FALSE	34
2022-09-14	10:06:40	1.5967	7.10244	8.1596	1200.38	FALSE	34
2022-09-14	10:06:40	1.63258	7.26204	8.1596	1189.21	FALSE	34
2022-09-14	10:06:41	1.30424	5.80152	5.59588	1206.18	FALSE	34
2022-09-14	10:06:41	1.30683	5.81304	5.59588	1195.02	FALSE	34
2022-09-14	10:06:41	1.16296	5.17308	5.59588	1211.35	FALSE	34
2022-09-14	10:06:42	1.25141	5.56652	5.37089	1200.58	FALSE	34
2022-09-14	10:06:42	1.19477	5.31458	5.37089	1216.66	FALSE	34
2022-09-14	10:06:42	1.18999	5.29331	5.37089	1205.88	FALSE	34
2022-09-14	10:06:42	1.19355	5.30915	5.37089	1221.97	FALSE	34
2022-09-14	10:06:43	1.2735	5.66478	5.42862	1211.54	FALSE	34
2022-09-14	10:06:43	1.22983	5.47053	5.42862	1227.44	FALSE	34
2022-09-14	10:06:43	1.18724	5.28108	5.42862	1216.82	FALSE	34
2022-09-14	10:06:43	1.19106	5.29807	5.42862	1232.74	FALSE	34
2022-09-14	10:06:44	1.23029	5.47258	5.2993	1222.3	FALSE	34
2022-09-14	10:06:44	1.20597	5.3644	5.2993	1238.11	FALSE	34
2022-09-14	10:06:44	1.18357	5.26476	5.2993	1227.56	FALSE	34
2022-09-14	10:06:44	1.14551	5.09546	5.2993	1243.2	FALSE	34
2022-09-14	10:06:45	1.14342	5.08616	5.05425	1232.65	FALSE	34
2022-09-14	10:06:45	1.13533	5.05017	5.05425	1248.25	FALSE	34
2022-09-14	10:06:45	1.12999	5.02642	5.05425	1237.67	FALSE	34
2022-09-14	10:06:46	1.12327	4.99653	4.91555	1253.25	FALSE	34
2022-09-14	10:06:46	1.12134	4.98794	4.91555	1242.66	FALSE	34
2022-09-14	10:06:46	1.05961	4.71336	4.91555	1257.96	FALSE	34
2022-09-14	10:06:46	1.11604	4.96437	4.91555	1247.63	FALSE	34
2022-09-14	10:06:47	1.06006	4.71536	4.82652	1262.68	FALSE	34
2022-09-14	10:06:47	1.11095	4.94173	4.82652	1252.57	FALSE	34
2022-09-14	10:06:47	1.08088	4.80797	4.82652	1267.49	FALSE	34
2022-09-14	10:06:47	1.08831	4.84102	4.82652	1257.41	FALSE	34
2022-09-14	10:06:48	0.951158	4.23094	2.5224	1271.72	FALSE	34
2022-09-14	10:06:48	0.543015	2.41544	2.5224	1259.82	FALSE	34
2022-09-14	10:06:48	0.459657	2.04465	2.5224	1273.76	FALSE	34
2022-09-14	10:06:48	0.314415	1.39858	2.5224	1261.22	FALSE	34
2022-09-14	10:06:49	0.308817	1.37368	1.85623	1275.14	FALSE	34
2022-09-14	10:06:49	0.397367	1.76757	1.85623	1262.99	FALSE	34
2022-09-14	10:06:49	0.545712	2.42744	1.85623	1277.56	FALSE	34
2022-09-14	10:06:50	0.414313	1.84295	1.36734	1264.83	FALSE	34
2022-09-14	10:06:50	0.451463	2.0082	1.36734	1279.57	FALSE	34
2022-09-14	10:06:50	0.368562	1.63944	1.36734	1266.47	FALSE	34
2022-09-14	10:06:50	-0.00477074	-0.0212212	1.36734	1279.57	FALSE	34
2022-09-14	10:06:51	-0.255916	-1.13837	-2.67152	1266.47	FALSE	34
2022-09-14	10:06:51	-0.670114	-2.9808	-2.67152	1279.57	FALSE	34
2022-09-14	10:06:51	-0.596628	-2.65392	-2.67152	1266.47	FALSE	34
2022-09-14	10:06:51	-0.879681	-3.913	-2.67152	1279.57	FALSE	34
2022-09-14	10:06:52	-0.815203	-3.62619	0.145958	1266.47	FALSE	34
2022-09-14	10:06:52	-0.464974	-2.0683	0.145958	1279.57	FALSE	34
2022-09-14	10:06:52	0.0728883	0.324222	0.145958	1266.8	FALSE	34
2022-09-14	10:06:52	1.33854	5.95409	0.145958	1285.52	FALSE	34
2022-09-14	10:06:53	1.94246	8.64045	16.5329	1275.44	FALSE	34
2022-09-14	10:06:53	4.52627	20.1338	16.5329	1305.66	1	35
2022-09-14	10:06:53	4.68154	20.8244	16.5329	1296.26	1	36
2022-09-14	10:06:54	1.94256	8.6409	8.83314	1314.3	FALSE	36
2022-09-14	10:06:54	1.33055	5.91855	8.83314	1302.18	FALSE	36
2022-09-14	10:06:54	2.75584	12.2585	8.83314	1326.56	FALSE	36
2022-09-14	10:06:54	1.91416	8.51457	8.83314	1310.7	FALSE	36
2022-09-14	10:06:55	1.53497	6.82785	3.99398	1333.39	FALSE	36
2022-09-14	10:06:55	0.59701	2.65562	3.99398	1313.35	FALSE	36
2022-09-14	10:06:55	0.73584	3.27316	3.99398	1336.66	FALSE	36
2022-09-14	10:06:55	0.723728	3.21929	3.99398	1316.57	FALSE	36
2022-09-14	10:06:56	1.04958	4.66874	3.52738	1341.33	FALSE	36
2022-09-14	10:06:56	0.682557	3.03615	3.52738	1319.61	FALSE	36
2022-09-14	10:06:56	0.719809	3.20185	3.52738	1344.53	FALSE	36
2022-09-14	10:06:56	0.720013	3.20276	3.52738	1322.81	FALSE	36
2022-09-14	10:06:57	0.933601	4.15284	5.18525	1348.68	FALSE	36
2022-09-14	10:06:57	0.538435	2.39507	5.18525	1325.2	FALSE	36
2022-09-14	10:06:57	2.02505	9.00783	5.18525	1357.69	FALSE	36
2022-09-14	10:06:58	2.06296	9.17646	7.14881	1334.38	FALSE	36
2022-09-14	10:06:58	1.13793	5.06174	7.14881	1362.75	FALSE	36
2022-09-14	10:06:58	2.38958	10.6293	7.14881	1345.01	FALSE	36
2022-09-14	10:06:58	0.838028	3.72772	7.14881	1366.48	FALSE	36
2022-09-14	10:06:59	0.73584	3.27316	2.87826	1348.28	FALSE	36
2022-09-14	10:06:59	0.739707	3.29036	2.87826	1369.77	FALSE	36
2022-09-14	10:06:59	0.366272	1.62925	2.87826	1349.91	FALSE	36
2022-09-14	10:06:59	0.746425	3.32025	2.87826	1373.09	FALSE	36
2022-09-14	10:07:00	0.735687	3.27248	3.55743	1353.18	FALSE	36
2022-09-14	10:07:00	0.745051	3.31414	3.55743	1376.4	FALSE	36
2022-09-14	10:07:00	0.74098	3.29603	3.55743	1356.48	FALSE	36
2022-09-14	10:07:00	0.977265	4.34707	3.55743	1380.75	FALSE	36
2022-09-14	10:07:01	0.739758	3.29059	3.29948	1359.77	FALSE	36
2022-09-14	10:07:01	0.745763	3.3173	3.29948	1384.07	FALSE	36
2022-09-14	10:07:01	0.741845	3.29987	3.29948	1363.07	FALSE	36
2022-09-14	10:07:01	0.739656	3.29014	3.29948	1387.36	FALSE	36
2022-09-14	10:07:02	0.736349	3.27543	3.27882	1366.35	FALSE	36
2022-09-14	10:07:02	0.736756	3.27724	3.27882	1390.64	FALSE	36
2022-09-14	10:07:02	0.738231	3.2838	3.27882	1369.63	FALSE	36
2022-09-14	10:07:03	0.738028	3.2829	3.28782	1393.92	FALSE	36
2022-09-14	10:07:03	0.741489	3.29829	3.28782	1372.93	FALSE	36
2022-09-14	10:07:03	0.739707	3.29036	3.28782	1397.21	FALSE	36
2022-09-14	10:07:03	0.737315	3.27972	3.28782	1376.21	FALSE	36
2022-09-14	10:07:04	1.29604	5.76505	4.18945	1402.97	FALSE	36
2022-09-14	10:07:04	0.74841	3.32908	4.18945	1379.54	FALSE	36
2022-09-14	10:07:04	0.874211	3.88867	4.18945	1406.86	FALSE	36
2022-09-14	10:07:04	0.848664	3.77503	4.18945	1383.31	FALSE	36
2022-09-14	10:07:05	0.69243	3.08007	3.23524	1409.94	FALSE	36
2022-09-14	10:07:05	0.743778	3.30847	3.23524	1386.62	FALSE	36
2022-09-14	10:07:05	0.737417	3.28018	3.23524	1413.22	FALSE	36
2022-09-14	10:07:05	0.735636	3.27226	3.23524	1389.89	FALSE	36
2022-09-14	10:07:06	0.736247	3.27497	3.27867	1416.5	FALSE	36
2022-09-14	10:07:06	0.738486	3.28493	3.27867	1393.18	FALSE	36
2022-09-14	10:07:06	0.736501	3.2761	3.27867	1419.77	FALSE	36
2022-09-14	10:07:07	0.742099	3.301	3.28929	1396.48	FALSE	36
2022-09-14	10:07:07	0.745713	3.31708	3.28929	1423.09	FALSE	36
2022-09-14	10:07:07	0.735331	3.2709	3.28929	1399.75	FALSE	36
2022-09-14	10:07:07	0.73472	3.26818	3.28929	1426.36	FALSE	36
2022-09-14	10:07:08	0.741489	3.29829	3.29704	1403.05	FALSE	36
2022-09-14	10:07:08	0.74215	3.30123	3.29704	1429.66	FALSE	36
2022-09-14	10:07:08	0.744797	3.31301	3.29704	1406.36	FALSE	36
2022-09-14	10:07:08	0.736399	3.27565	3.29704	1432.94	FALSE	36
2022-09-14	10:07:09	0.733957	3.26479	4.95765	1409.63	FALSE	36
2022-09-14	10:07:09	0.739046	3.28742	4.95765	1436.22	FALSE	36
2022-09-14	10:07:09	0.738842	3.28652	4.95765	1412.91	FALSE	36
2022-09-14	10:07:09	2.24627	9.99186	4.95765	1446.22	FALSE	36
2022-09-14	10:07:10	0.786679	3.49931	3.36212	1416.41	FALSE	36
2022-09-14	10:07:10	0.742913	3.30463	3.36212	1449.52	FALSE	36
2022-09-14	10:07:10	0.737926	3.28244	3.36212	1419.69	FALSE	36
2022-09-14	10:07:11	0.740165	3.2924	8.19469	1452.81	FALSE	36
2022-09-14	10:07:11	1.70291	7.57488	8.19469	1427.27	FALSE	36
2022-09-14	10:07:11	1.0481	4.66216	8.19469	1457.48	FALSE	36
2022-09-14	10:07:11	3.87782	17.2493	8.19469	1444.52	1	37
2022-09-14	10:07:12	0.904033	4.02132	3.53968	1461.5	FALSE	37
2022-09-14	10:07:12	0.735178	3.27022	3.53968	1447.79	FALSE	37
2022-09-14	10:07:12	0.748053	3.32749	3.53968	1464.82	FALSE	37
2022-09-14	10:07:13	0.73813	3.28335	1.70708	1451.07	FALSE	37
2022-09-14	10:07:13	0.713143	3.1722	1.70708	1468	FALSE	37
2022-09-14	10:07:13	0.267545	1.19009	1.70708	1452.26	FALSE	37
2022-09-14	10:07:13	0.137163	0.610128	1.70708	1468.61	FALSE	37
2022-09-14	10:07:13	0.0628628	0.279626	1.70708	1452.54	FALSE	37
2022-09-14	10:07:14	-0.0597326	-0.265703	-0.971528	1468.61	FALSE	37
2022-09-14	10:07:14	-0.265992	-1.18319	-0.971528	1452.54	FALSE	37
2022-09-14	10:07:14	-0.329503	-1.4657	-0.971528	1468.61	FALSE	37
2022-09-14	10:07:15	-0.187926	-0.835932	4.27911	1452.54	FALSE	37
2022-09-14	10:07:15	0.936502	4.16575	4.27911	1472.77	FALSE	37
2022-09-14	10:07:15	1.16826	5.19665	4.27911	1457.74	FALSE	37
2022-09-14	10:07:15	1.93111	8.58996	4.27911	1481.36	FALSE	37
2022-09-14	10:07:16	0.159199	0.708149	1.77809	1458.45	FALSE	37
2022-09-14	10:07:16	0.437112	1.94436	1.77809	1483.31	FALSE	37
2022-09-14	10:07:16	0.436858	1.94323	1.77809	1460.39	FALSE	37
2022-09-14	10:07:16	0.565763	2.51663	1.77809	1485.82	FALSE	37
2022-09-14	10:07:17	0.367799	1.63604	1.85251	1462.03	FALSE	37
2022-09-14	10:07:17	0.439046	1.95296	1.85251	1487.78	FALSE	37
2022-09-14	10:07:17	0.463372	2.06117	1.85251	1464.09	FALSE	37
2022-09-14	10:07:17	0.395636	1.75987	1.85251	1489.54	FALSE	37
2022-09-14	10:07:18	0.553855	2.46366	3.02076	1466.55	FALSE	37
2022-09-14	10:07:18	0.693499	3.08482	3.02076	1492.62	FALSE	37
2022-09-14	10:07:18	0.832634	3.70372	3.02076	1470.25	FALSE	37
2022-09-14	10:07:18	0.6364	2.83083	3.02076	1495.45	FALSE	37
2022-09-14	10:07:19	0.888511	3.95227	2.79189	1474.21	FALSE	37
2022-09-14	10:07:19	0.613142	2.72738	2.79189	1498.18	FALSE	37
2022-09-14	10:07:19	0.381285	1.69603	2.79189	1475.9	FALSE	37
2022-09-14	10:07:20	0.490751	2.18296	1.85257	1500.36	FALSE	37
2022-09-14	10:07:20	0.360165	1.60209	1.85257	1477.51	FALSE	37
2022-09-14	10:07:20	0.452074	2.01092	1.85257	1502.37	FALSE	37
2022-09-14	10:07:20	0.362913	1.61431	1.85257	1479.12	FALSE	37
2022-09-14	10:07:21	0.466323	2.0743	2.56688	1504.45	FALSE	37
2022-09-14	10:07:21	0.520522	2.31539	2.56688	1481.43	FALSE	37
2022-09-14	10:07:21	0.491311	2.18545	2.56688	1506.63	FALSE	37
2022-09-14	10:07:21	0.830089	3.6924	2.56688	1485.13	FALSE	37
2022-09-14	10:07:22	0.889376	3.95612	3.59387	1510.59	FALSE	37
2022-09-14	10:07:22	0.827596	3.68131	3.59387	1488.81	FALSE	37
2022-09-14	10:07:22	0.881794	3.9224	3.59387	1514.51	FALSE	37
2022-09-14	10:07:22	0.63299	2.81567	3.59387	1491.62	FALSE	37
2022-09-14	10:07:23	0.671972	2.98907	2.78933	1517.5	FALSE	37
2022-09-14	10:07:23	0.612481	2.72444	2.78933	1494.35	FALSE	37
2022-09-14	10:07:23	0.596756	2.65449	2.78933	1520.15	FALSE	37
2022-09-14	10:07:24	0.571005	2.53994	2.15098	1496.89	FALSE	37
2022-09-14	10:07:24	0.459453	2.04374	2.15098	1522.2	FALSE	37
2022-09-14	10:07:24	0.448257	1.99394	2.15098	1498.88	FALSE	37
2022-09-14	10:07:24	0.455534	2.02631	2.15098	1524.22	FALSE	37
2022-09-14	10:07:25	0.47126	2.09626	2.25676	1500.98	FALSE	37
2022-09-14	10:07:25	0.465611	2.07113	2.25676	1526.3	FALSE	37
2022-09-14	10:07:25	0.518639	2.30701	2.25676	1503.29	FALSE	37
2022-09-14	10:07:25	0.573855	2.55262	2.25676	1528.85	FALSE	37
2022-09-14	10:07:26	0.370903	1.64985	2.4533	1504.94	FALSE	37
2022-09-14	10:07:26	0.488715	2.1739	2.4533	1531.02	FALSE	37
2022-09-14	10:07:26	0.616196	2.74096	2.4533	1507.68	FALSE	37
2022-09-14	10:07:26	0.730293	3.24849	2.4533	1534.27	FALSE	37
2022-09-14	10:07:27	0.502048	2.23321	2.83121	1509.91	FALSE	37
2022-09-14	10:07:27	0.700776	3.11719	2.83121	1537.39	FALSE	37
2022-09-14	10:07:27	0.706629	3.14323	2.83121	1513.05	FALSE	37
2022-09-14	10:07:28	0.697621	3.10316	3.29857	1540.49	FALSE	37
2022-09-14	10:07:28	0.742608	3.30327	3.29857	1516.36	FALSE	37
2022-09-14	10:07:28	0.651819	2.89942	3.29857	1543.39	FALSE	37
2022-09-14	10:07:28	0.87416	3.88844	3.29857	1520.24	FALSE	37
2022-09-14	10:07:29	0.878639	3.90836	5.38895	1547.3	FALSE	37
2022-09-14	10:07:29	1.10449	4.91299	5.38895	1525.16	FALSE	37
2022-09-14	10:07:29	1.24419	5.53441	5.38895	1552.83	FALSE	37
2022-09-14	10:07:29	1.61864	7.20003	5.38895	1532.36	FALSE	37
2022-09-14	10:07:30	1.70434	7.58125	7.50648	1560.41	FALSE	37
2022-09-14	10:07:30	2.12627	9.45807	7.50648	1541.82	FALSE	37
2022-09-14	10:07:30	1.93742	8.61803	7.50648	1569.03	FALSE	37
2022-09-14	10:07:30	0.982099	4.36857	7.50648	1546.18	FALSE	37
2022-09-14	10:07:31	1.0224	4.54784	3.88896	1573.58	FALSE	37
2022-09-14	10:07:31	0.799198	3.55499	3.88896	1549.74	FALSE	37
2022-09-14	10:07:31	0.801234	3.56405	3.88896	1577.14	FALSE	37
2022-09-14	10:07:32	1.04042	4.628	6.32934	1554.37	FALSE	37
2022-09-14	10:07:32	1.20637	5.36618	6.32934	1582.51	FALSE	37
2022-09-14	10:07:32	1.56856	6.97727	6.32934	1561.34	FALSE	37
2022-09-14	10:07:32	1.87625	8.34594	6.32934	1590.86	FALSE	37
2022-09-14	10:07:33	1.59548	7.09701	8.36781	1568.44	FALSE	37
2022-09-14	10:07:33	2.09487	9.3184	8.36781	1600.17	FALSE	37
2022-09-14	10:07:33	1.79589	7.98848	8.36781	1576.43	FALSE	37
2022-09-14	10:07:33	2.03843	9.06734	8.36781	1609.24	FALSE	37
2022-09-14	10:07:34	2.4848	11.0529	12.0873	1587.48	FALSE	37
2022-09-14	10:07:34	2.5682	11.4239	12.0873	1620.67	FALSE	37
2022-09-14	10:07:34	2.78515	12.3889	12.0873	1599.87	FALSE	37
2022-09-14	10:07:34	3.03121	13.4834	12.0873	1634.15	1	38
2022-09-14	10:07:35	3.07141	13.6622	12.7153	1613.53	1	39
2022-09-14	10:07:35	2.72607	12.1261	12.7153	1646.28	FALSE	39
2022-09-14	10:07:35	2.77808	12.3575	12.7153	1625.89	FALSE	39
2022-09-14	10:07:36	2.61309	11.6235	12.1847	1657.9	FALSE	39
2022-09-14	10:07:36	2.77182	12.3296	12.1847	1638.22	FALSE	39
2022-09-14	10:07:36	2.79197	12.4192	12.1847	1670.32	FALSE	39
2022-09-14	10:07:36	2.78011	12.3665	12.1847	1650.59	FALSE	39
2022-09-14	10:07:37	2.73121	12.149	9.78864	1682.47	FALSE	39
2022-09-14	10:07:37	2.31192	10.2839	9.78864	1660.87	FALSE	39
2022-09-14	10:07:37	1.99319	8.86611	9.78864	1691.33	FALSE	39
2022-09-14	10:07:37	1.76602	7.85561	9.78864	1668.73	FALSE	39
2022-09-14	10:07:38	1.65258	7.35101	5.723	1698.68	FALSE	39
2022-09-14	10:07:38	1.48698	6.61438	5.723	1675.34	FALSE	39
2022-09-14	10:07:38	1.36342	6.06476	5.723	1704.75	FALSE	39
2022-09-14	10:07:38	0.643372	2.86185	5.723	1678.2	FALSE	39
2022-09-14	10:07:39	0.408461	1.81692	1.18166	1706.57	FALSE	39
2022-09-14	10:07:39	0.393448	1.75014	1.18166	1679.95	FALSE	39
2022-09-14	10:07:39	0.289529	1.28788	1.18166	1707.85	FALSE	39
2022-09-14	10:07:39	-0.028842	-0.128295	1.18166	1679.95	FALSE	39
2022-09-14	10:07:40	-0.120649	-0.536671	-0.0603842	1707.85	FALSE	39
2022-09-14	10:07:40	0.0597585	0.265818	-0.0603842	1680.22	FALSE	39
2022-09-14	10:07:40	0.0201656	0.0897006	-0.0603842	1707.94	FALSE	39
2022-09-14	10:07:41	0.237621	1.05699	0.34352	1681.28	FALSE	39
2022-09-14	10:07:41	-0.027417	-0.121956	0.34352	1707.94	FALSE	39
2022-09-14	10:07:41	0.0419468	0.186588	0.34352	1681.46	FALSE	39
2022-09-14	10:07:41	0.056756	0.252462	0.34352	1708.2	FALSE	39
2022-09-14	10:07:42	0.130649	0.581153	0.202717	1682.04	FALSE	39
2022-09-14	10:07:42	0.0413361	0.183871	0.202717	1708.38	FALSE	39
2022-09-14	10:07:42	0.0691733	0.307697	0.202717	1682.35	FALSE	39
2022-09-14	10:07:42	-0.0588674	-0.261854	0.202717	1708.38	FALSE	39
2022-09-14	10:07:43	0.0733463	0.326259	0.558573	1682.68	FALSE	39
2022-09-14	10:07:43	0.08042	0.357724	0.558573	1708.74	FALSE	39
2022-09-14	10:07:43	0.200115	0.890152	0.558573	1683.57	FALSE	39
2022-09-14	10:07:43	0.14841	0.660157	0.558573	1709.4	FALSE	39
2022-09-14	10:07:44	0.179911	0.80028	0.0789851	1684.37	FALSE	39
2022-09-14	10:07:44	0.0456109	0.202886	0.0789851	1709.6	FALSE	39
2022-09-14	10:07:44	-0.172252	-0.766211	0.0789851	1684.37	FALSE	39
2022-09-14	10:07:45	-0.373626	-1.66196	-1.06881	1709.6	FALSE	39
2022-09-14	10:07:45	-0.109605	-0.487545	-1.06881	1684.37	FALSE	39
2022-09-14	10:07:45	-0.230369	-1.02473	-1.06881	1709.6	FALSE	39
2022-09-14	10:07:45	-0.247519	-1.10101	-1.06881	1684.37	FALSE	39
2022-09-14	10:07:46	-0.299274	-1.33123	-0.491847	1709.6	FALSE	39
2022-09-14	10:07:46	-0.0471117	-0.209562	-0.491847	1684.37	FALSE	39
2022-09-14	10:07:46	-0.0861447	-0.383189	-0.491847	1709.6	FALSE	39
2022-09-14	10:07:46	-0.00975804	-0.0434057	-0.491847	1684.37	FALSE	39
2022-09-14	10:07:47	-0.100496	-0.447026	0.013074	1709.6	FALSE	39
2022-09-14	10:07:47	0.0681046	0.302943	0.013074	1684.67	FALSE	39
2022-09-14	10:07:47	-0.0164756	-0.0732868	0.013074	1709.6	FALSE	39
2022-09-14	10:07:47	0.0606237	0.269666	0.013074	1684.94	FALSE	39
2022-09-14	10:07:48	-0.0453814	-0.201866	0.531275	1709.6	FALSE	39
2022-09-14	10:07:48	0.144898	0.644535	0.531275	1685.59	FALSE	39
2022-09-14	10:07:48	0.258791	1.15115	0.531275	1710.75	FALSE	39
2022-09-14	10:07:49	1.04276	4.63841	4.2272	1690.22	FALSE	39
2022-09-14	10:07:49	1.02296	4.55033	4.2272	1715.3	FALSE	39
2022-09-14	10:07:49	0.734771	3.26841	4.2272	1693.49	FALSE	39
2022-09-14	10:07:49	1.00078	4.45167	4.2272	1719.75	FALSE	39
2022-09-14	10:07:50	0.96958	4.31289	2.52025	1697.81	FALSE	39
2022-09-14	10:07:50	0.379809	1.68947	2.52025	1721.44	FALSE	39
2022-09-14	10:07:50	0.665051	2.95828	2.52025	1700.76	FALSE	39
2022-09-14	10:07:50	0.25187	1.12037	2.52025	1722.56	FALSE	39
2022-09-14	10:07:51	0.0124303	0.0552925	-0.522407	1700.82	FALSE	39
2022-09-14	10:07:51	-0.151794	-0.67521	-0.522407	1722.56	FALSE	39
2022-09-14	10:07:51	-0.1036	-0.460834	-0.522407	1700.82	FALSE	39
2022-09-14	10:07:51	-0.226806	-1.00888	-0.522407	1722.56	FALSE	39
2022-09-14	10:07:52	-0.352099	-1.56621	-0.0465743	1700.82	FALSE	39
2022-09-14	10:07:52	-0.388689	-1.72897	-0.0465743	1722.56	FALSE	39
2022-09-14	10:07:52	-0.0206995	-0.0920755	-0.0465743	1700.82	FALSE	39
2022-09-14	10:07:52	0.719606	3.20095	-0.0465743	1725.76	FALSE	39
2022-09-14	10:07:53	0.507239	2.2563	4.20174	1703.08	FALSE	39
2022-09-14	10:07:53	1.22424	5.44566	4.20174	1731.21	FALSE	39
2022-09-14	10:07:53	1.1023	4.90325	4.20174	1707.98	FALSE	39
2022-09-14	10:07:54	2.14047	9.52124	9.60465	1740.73	FALSE	39
2022-09-14	10:07:54	3.3563	14.9295	9.60465	1722.91	1	40
2022-09-14	10:07:54	1.3709	6.09804	9.60465	1746.83	FALSE	40
2022-09-14	10:07:54	1.76922	7.86984	9.60465	1730.78	FALSE	40
2022-09-14	10:07:55	0.783066	3.48323	5.13711	1750.31	FALSE	40
2022-09-14	10:07:55	1.35294	6.01815	5.13711	1736.8	FALSE	40
2022-09-14	10:07:55	0.723219	3.21702	5.13711	1753.53	FALSE	40
2022-09-14	10:07:55	1.76027	7.83003	5.13711	1744.63	FALSE	40
2022-09-14	10:07:56	2.56693	11.4182	14.1424	1764.95	FALSE	40
2022-09-14	10:07:56	3.70393	16.4758	14.1424	1761.1	1	41
2022-09-14	10:07:56	3.41859	15.2066	14.1424	1780.15	1	42
2022-09-14	10:07:56	3.028	13.4691	14.1424	1774.57	1	43
2022-09-14	10:07:57	3.88938	17.3007	11.4305	1797.46	1	44
2022-09-14	10:07:57	1.73335	7.71029	11.4305	1782.28	FALSE	44
2022-09-14	10:07:57	2.08637	9.28059	11.4305	1806.74	FALSE	44
2022-09-14	10:07:58	1.17981	5.24803	2.47362	1787.53	FALSE	44
2022-09-14	10:07:58	0.62785	2.7928	2.47362	1809.53	FALSE	44
2022-09-14	10:07:58	0.0993004	0.441708	2.47362	1787.97	FALSE	44
2022-09-14	10:07:58	0.317417	1.41193	2.47362	1810.94	FALSE	44
2022-09-14	10:07:59	-0.135305	-0.601864	-0.867793	1787.97	FALSE	44
2022-09-14	10:07:59	-0.369707	-1.64453	-0.867793	1810.94	FALSE	44
2022-09-14	10:07:59	-0.180699	-0.803785	-0.867793	1787.97	FALSE	44
2022-09-14	10:07:59	-0.0946435	-0.420993	-0.867793	1810.94	FALSE	44
2022-09-14	10:08:00	-0.317493	-1.41227	-0.118052	1787.97	FALSE	44
2022-09-14	10:08:00	-0.213422	-0.949344	-0.118052	1810.94	FALSE	44
2022-09-14	10:08:00	0.204491	0.909617	-0.118052	1788.88	FALSE	44
2022-09-14	10:08:00	0.220267	0.979792	-0.118052	1811.92	FALSE	44
2022-09-14	10:08:01	0.170802	0.759761	1.07042	1789.64	FALSE	44
2022-09-14	10:08:01	0.22159	0.985677	1.07042	1812.91	FALSE	44
2022-09-14	10:08:01	0.329529	1.46581	1.07042	1791.11	FALSE	44
2022-09-14	10:08:02	0.333041	1.48143	1.98749	1814.39	FALSE	44
2022-09-14	10:08:02	0.409377	1.82099	1.98749	1792.93	FALSE	44
2022-09-14	10:08:02	0.399555	1.7773	1.98749	1816.17	FALSE	44
2022-09-14	10:08:02	0.645254	2.87022	1.98749	1795.8	FALSE	44
2022-09-14	10:08:03	0.737417	3.28018	2.94707	1819.45	FALSE	44
2022-09-14	10:08:03	0.733295	3.26184	2.94707	1799.06	FALSE	44
2022-09-14	10:08:03	0.735229	3.27045	2.94707	1822.72	FALSE	44
2022-09-14	10:08:03	0.444186	1.97583	2.94707	1801.04	FALSE	44
2022-09-14	10:08:04	0.254669	1.13282	2.03514	1823.85	FALSE	44
2022-09-14	10:08:04	0.735585	3.27203	2.03514	1804.31	FALSE	44
2022-09-14	10:08:04	0.602354	2.67939	2.03514	1826.53	FALSE	44
2022-09-14	10:08:04	0.237468	1.05631	2.03514	1805.36	FALSE	44
2022-09-14	10:08:05	0.174873	0.77787	0.939347	1827.31	FALSE	44
2022-09-14	10:08:05	0.251819	1.12014	0.939347	1806.48	FALSE	44
2022-09-14	10:08:05	0.206832	0.92003	0.939347	1828.23	FALSE	44
2022-09-14	10:08:06	0.172227	0.7661	1.13769	1807.25	FALSE	44
2022-09-14	10:08:06	0.306476	1.36327	1.13769	1829.59	FALSE	44
2022-09-14	10:08:06	0.290598	1.29264	1.13769	1808.54	FALSE	44
2022-09-14	10:08:06	0.253753	1.12874	1.13769	1830.72	FALSE	44
2022-09-14	10:08:07	0.321438	1.42982	0.837179	1809.97	FALSE	44
2022-09-14	10:08:07	0.145407	0.646799	0.837179	1831.36	FALSE	44
2022-09-14	10:08:07	0.138588	0.616467	0.837179	1810.59	FALSE	44
2022-09-14	10:08:07	0.147392	0.655629	0.837179	1832.02	FALSE	44
2022-09-14	10:08:08	-0.0376461	-0.167457	-1.52131	1810.59	FALSE	44
2022-09-14	10:08:08	-0.3693	-1.64272	-1.52131	1832.02	FALSE	44
2022-09-14	10:08:08	-0.619071	-2.75375	-1.52131	1810.59	FALSE	44
2022-09-14	10:08:09	-0.7179	-3.19336	-2.89099	1832.02	FALSE	44
2022-09-14	10:08:09	-0.708689	-3.15239	-2.89099	1810.59	FALSE	44
2022-09-14	10:08:09	-0.603498	-2.68448	-2.89099	1832.02	FALSE	44
2022-09-14	10:08:09	-0.569605	-2.53372	-2.89099	1810.59	FALSE	44
2022-09-14	10:08:10	-0.393371	-1.74979	-1.89756	1832.02	FALSE	44
2022-09-14	10:08:10	-0.498257	-2.21635	-1.89756	1810.59	FALSE	44
2022-09-14	10:08:10	-0.477697	-2.12489	-1.89756	1832.02	FALSE	44
2022-09-14	10:08:10	-0.337035	-1.4992	-1.89756	1810.59	FALSE	44
2022-09-14	10:08:11	-0.210216	-0.935083	0.765646	1832.02	FALSE	44
2022-09-14	10:08:11	0.146578	0.652008	0.765646	1811.24	FALSE	44
2022-09-14	10:08:11	0.38383	1.70735	0.765646	1833.73	FALSE	44
2022-09-14	10:08:11	0.368308	1.63831	0.765646	1812.88	FALSE	44
2022-09-14	10:08:12	0.402659	1.79111	1.59547	1835.52	FALSE	44
2022-09-14	10:08:12	0.323168	1.43752	1.59547	1814.32	FALSE	44
2022-09-14	10:08:12	0.498028	2.21533	1.59547	1837.73	FALSE	44
2022-09-14	10:08:12	0.210853	0.937916	1.59547	1815.25	FALSE	44
2022-09-14	10:08:13	0.043219	0.192247	-1.33021	1837.93	FALSE	44
2022-09-14	10:08:13	-0.255509	-1.13656	-1.33021	1815.25	FALSE	44
2022-09-14	10:08:13	-0.451793	-2.00967	-1.33021	1837.93	FALSE	44
2022-09-14	10:08:13	-0.532099	-2.36688	-1.33021	1815.25	FALSE	44
2022-09-14	10:08:14	-0.633727	-2.81894	-2.91613	1837.93	FALSE	44
2022-09-14	10:08:14	-0.684312	-3.04396	-2.91613	1815.25	FALSE	44
2022-09-14	10:08:14	-0.648689	-2.8855	-2.91613	1837.93	FALSE	44
2022-09-14	10:08:15	-0.726501	-3.23162	-2.61063	1815.25	FALSE	44
2022-09-14	10:08:15	-0.565737	-2.51651	-2.61063	1837.93	FALSE	44
2022-09-14	10:08:15	-0.528282	-2.3499	-2.61063	1815.25	FALSE	44
2022-09-14	10:08:15	-0.527061	-2.34447	-2.61063	1837.93	FALSE	44
2022-09-14	10:08:16	-0.52528	-2.33655	-2.51414	1815.25	FALSE	44
2022-09-14	10:08:16	-0.628231	-2.7945	-2.51414	1837.93	FALSE	44
2022-09-14	10:08:16	-0.521259	-2.31866	-2.51414	1815.25	FALSE	44
2022-09-14	10:08:16	-0.586043	-2.60684	-2.51414	1837.93	FALSE	44
2022-09-14	10:08:17	-0.549045	-2.44226	-2.59093	1815.25	FALSE	44
2022-09-14	10:08:17	-0.604669	-2.68969	-2.59093	1837.93	FALSE	44
2022-09-14	10:08:17	-0.66416	-2.95432	-2.59093	1815.25	FALSE	44
2022-09-14	10:08:17	-0.511997	-2.27747	-2.59093	1837.93	FALSE	44
2022-09-14	10:08:18	-0.57332	-2.55024	-2.08429	1815.25	FALSE	44
2022-09-14	10:08:18	-0.435254	-1.9361	-2.08429	1837.93	FALSE	44
2022-09-14	10:08:18	-0.397137	-1.76654	-2.08429	1815.25	FALSE	44
2022-09-14	10:08:19	0.0236771	0.10532	5.2439	1838.03	FALSE	44
2022-09-14	10:08:19	1.67294	7.44157	5.2439	1822.7	FALSE	44
2022-09-14	10:08:19	2.11681	9.41599	5.2439	1847.45	FALSE	44
2022-09-14	10:08:19	0.902099	4.01272	5.2439	1826.71	FALSE	44
2022-09-14	10:08:20	1.54352	6.86589	3.26812	1854.31	FALSE	44
2022-09-14	10:08:20	0.910344	4.04939	3.26812	1830.76	FALSE	44
2022-09-14	10:08:20	0.295891	1.31618	3.26812	1855.63	FALSE	44
2022-09-14	10:08:20	0.189071	0.841026	3.26812	1831.6	FALSE	44
2022-09-14	10:08:21	0.185967	0.827218	0.771248	1856.46	FALSE	44
2022-09-14	10:08:21	0.169835	0.75546	0.771248	1832.35	FALSE	44
2022-09-14	10:08:21	0.129529	0.576171	0.771248	1857.03	FALSE	44
2022-09-14	10:08:21	0.208206	0.926142	0.771248	1833.28	FALSE	44
2022-09-14	10:08:22	0.124949	0.555798	0.809636	1857.59	FALSE	44
2022-09-14	10:08:22	0.238944	1.06287	0.809636	1834.34	FALSE	44
2022-09-14	10:08:22	0.18215	0.81024	0.809636	1858.4	FALSE	44
2022-09-14	10:08:23	0.226221	1.00628	0.650027	1835.35	FALSE	44
2022-09-14	10:08:23	0.121947	0.542445	0.650027	1858.94	FALSE	44
2022-09-14	10:08:23	0.0938551	0.417486	0.650027	1835.77	FALSE	44
2022-09-14	10:08:23	0.142507	0.6339	0.650027	1859.58	FALSE	44
2022-09-14	10:08:24	0.093957	0.41794	0.464119	1836.19	FALSE	44
2022-09-14	10:08:24	0.121234	0.539273	0.464119	1860.11	FALSE	44
2022-09-14	10:08:24	0.0271885	0.12094	0.464119	1836.31	FALSE	44
2022-09-14	10:08:24	0.174975	0.778324	0.464119	1860.89	FALSE	44
2022-09-14	10:08:25	0.102914	0.457782	0.507356	1836.76	FALSE	44
2022-09-14	10:08:25	0.148359	0.659931	0.507356	1861.55	FALSE	44
2022-09-14	10:08:25	0.110649	0.492189	0.507356	1837.26	FALSE	44
2022-09-14	10:08:25	0.0943131	0.419524	0.507356	1861.97	FALSE	44
2022-09-14	10:08:26	0.159199	0.708149	0.212904	1837.96	FALSE	44
2022-09-14	10:08:26	0.0973666	0.433106	0.212904	1862.41	FALSE	44
2022-09-14	10:08:26	0.0566033	0.251783	0.212904	1838.22	FALSE	44
2022-09-14	10:08:26	-0.121717	-0.541422	0.212904	1862.41	FALSE	44
2022-09-14	10:08:27	-0.188079	-0.836613	-0.910936	1838.22	FALSE	44
2022-09-14	10:08:27	-0.152862	-0.679961	-0.910936	1862.41	FALSE	44
2022-09-14	10:08:27	-0.273422	-1.21624	-0.910936	1838.22	FALSE	44
2022-09-14	10:08:28	-0.195254	-0.868529	-1.02156	1862.41	FALSE	44
2022-09-14	10:08:28	-0.309554	-1.37696	-1.02156	1838.22	FALSE	44
2022-09-14	10:08:28	-0.204313	-0.908825	-1.02156	1862.41	FALSE	44
2022-09-14	10:08:28	-0.209503	-0.931911	-1.02156	1838.22	FALSE	44
2022-09-14	10:08:29	-0.12014	-0.534407	-0.278832	1862.41	FALSE	44
2022-09-14	10:08:29	-0.215814	-0.959984	-0.278832	1838.22	FALSE	44
2022-09-14	10:08:29	-0.0124043	-0.0551768	-0.278832	1862.41	FALSE	44
2022-09-14	10:08:29	0.097621	0.434238	-0.278832	1838.65	FALSE	44
2022-09-14	10:08:30	0.240471	1.06966	0.488907	1863.48	FALSE	44
2022-09-14	10:08:30	-0.0416664	-0.18534	0.488907	1838.65	FALSE	44
2022-09-14	10:08:30	0.226476	1.00741	0.488907	1864.48	FALSE	44
2022-09-14	10:08:30	0.0143641	0.0638944	0.488907	1838.71	FALSE	44
2022-09-14	10:08:31	0.0463743	0.206282	0.0305424	1864.69	FALSE	44
2022-09-14	10:08:31	-0.0208013	-0.0925283	0.0305424	1838.71	FALSE	44
2022-09-14	10:08:31	-0.00497431	-0.0221267	0.0305424	1864.69	FALSE	44
2022-09-14	10:08:32	0.104186	0.46344	0.471306	1839.18	FALSE	44
2022-09-14	10:08:32	0.119911	0.533388	0.471306	1865.22	FALSE	44
2022-09-14	10:08:32	0.157977	0.702713	0.471306	1839.88	FALSE	44
2022-09-14	10:08:32	0.0417432	0.185682	0.471306	1865.41	FALSE	44
2022-09-14	10:08:33	0.185611	0.825635	0.661911	1840.71	FALSE	44
2022-09-14	10:08:33	0.132837	0.590886	0.661911	1866	FALSE	44
2022-09-14	10:08:33	0.221387	0.984774	0.661911	1841.69	FALSE	44
2022-09-14	10:08:33	0.0553819	0.24635	0.661911	1866.25	FALSE	44
2022-09-14	10:08:34	0.164491	0.731689	1.80678	1842.42	FALSE	44
2022-09-14	10:08:34	0.334822	1.48936	1.80678	1867.73	FALSE	44
2022-09-14	10:08:34	0.607646	2.70293	1.80678	1845.13	FALSE	44
2022-09-14	10:08:34	0.517773	2.30316	1.80678	1870.04	FALSE	44
2022-09-14	10:08:35	1.21747	5.41555	4.6818	1850.54	FALSE	44
2022-09-14	10:08:35	1.03284	4.59428	4.6818	1874.63	FALSE	44
2022-09-14	10:08:35	0.907239	4.03558	4.6818	1854.58	FALSE	44
2022-09-14	10:08:36	0.63075	2.8057	3.22206	1877.44	FALSE	44
2022-09-14	10:08:36	1.4736	6.55487	3.22206	1861.13	FALSE	44
2022-09-14	10:08:36	0.31131	1.38477	3.22206	1878.82	FALSE	44
2022-09-14	10:08:36	0.481743	2.14289	3.22206	1863.27	FALSE	44
2022-09-14	10:08:37	0.595891	2.65064	2.39173	1881.47	FALSE	44
2022-09-14	10:08:37	0.565916	2.51731	2.39173	1865.79	FALSE	44
2022-09-14	10:08:37	0.499198	2.22053	2.39173	1883.69	FALSE	44
2022-09-14	10:08:37	0.489733	2.17843	2.39173	1867.97	FALSE	44
2022-09-14	10:08:38	0.42897	1.90814	1.9026	1885.6	FALSE	44
2022-09-14	10:08:38	0.452532	2.01295	1.9026	1869.98	FALSE	44
2022-09-14	10:08:38	0.38958	1.73293	1.9026	1887.33	FALSE	44
2022-09-14	10:08:38	0.439809	1.95636	1.9026	1871.94	FALSE	44
2022-09-14	10:08:39	0.372023	1.65483	1.76394	1888.99	FALSE	44
2022-09-14	10:08:39	0.428868	1.90769	1.76394	1873.85	FALSE	44
2022-09-14	10:08:39	0.388766	1.72931	1.76394	1890.72	FALSE	44
2022-09-14	10:08:40	0.436705	1.94255	1.83383	1875.79	FALSE	44
2022-09-14	10:08:40	0.388562	1.7284	1.83383	1892.45	FALSE	44
2022-09-14	10:08:40	0.431412	1.91901	1.83383	1877.71	FALSE	44
2022-09-14	10:08:40	0.392379	1.74538	1.83383	1894.19	FALSE	44
2022-09-14	10:08:41	0.415076	1.84634	1.70396	1879.55	FALSE	44
2022-09-14	10:08:41	0.366527	1.63039	1.70396	1895.82	FALSE	44
2022-09-14	10:08:41	0.389631	1.73316	1.70396	1881.29	FALSE	44
2022-09-14	10:08:41	0.361031	1.60594	1.70396	1897.43	FALSE	44
2022-09-14	10:08:42	0.395687	1.76009	1.5262	1883.05	FALSE	44
2022-09-14	10:08:42	0.237672	1.05721	1.5262	1898.49	FALSE	44
2022-09-14	10:08:42	0.41701	1.85494	1.5262	1884.9	FALSE	44
2022-09-14	10:08:42	0.322048	1.43253	1.5262	1899.92	FALSE	44
2022-09-14	10:08:43	0.568206	2.52749	2.79433	1887.43	FALSE	44
2022-09-14	10:08:43	0.628155	2.79416	2.79433	1902.71	FALSE	44
2022-09-14	10:08:43	0.64673	2.87678	2.79433	1890.31	FALSE	44
2022-09-14	10:08:43	0.669682	2.97888	2.79433	1905.69	FALSE	44
2022-09-14	10:08:44	0.658486	2.92908	2.90735	1893.24	FALSE	44
2022-09-14	10:08:44	0.668308	2.97277	2.90735	1908.66	FALSE	44
2022-09-14	10:08:44	0.634008	2.82019	2.90735	1896.06	FALSE	44
2022-09-14	10:08:45	0.658028	2.92704	3.61227	1911.59	FALSE	44
2022-09-14	10:08:45	0.624287	2.77695	3.61227	1898.83	FALSE	44
2022-09-14	10:08:45	0.662761	2.94809	3.61227	1914.54	FALSE	44
2022-09-14	10:08:45	1.30322	5.79698	3.61227	1904.63	FALSE	44
2022-09-14	10:08:46	1.61355	7.17739	3.6344	1921.72	FALSE	44
2022-09-14	10:08:46	0.622761	2.77017	3.6344	1907.4	FALSE	44
2022-09-14	10:08:46	0.617316	2.74595	3.6344	1924.46	FALSE	44
2022-09-14	10:08:46	0.414568	1.84408	3.6344	1909.24	FALSE	44
2022-09-14	10:08:47	0.425814	1.89411	2.14198	1926.36	FALSE	44
2022-09-14	10:08:47	0.506323	2.25223	2.14198	1911.5	FALSE	44
2022-09-14	10:08:47	0.510343	2.27011	2.14198	1928.63	FALSE	44
2022-09-14	10:08:47	0.483677	2.15149	2.14198	1913.65	FALSE	44
2022-09-14	10:08:48	0.460166	2.04691	1.90362	1930.67	FALSE	44
2022-09-14	10:08:48	0.36556	1.62608	1.90362	1915.27	FALSE	44
2022-09-14	10:08:48	0.45813	2.03785	1.90362	1932.71	FALSE	44
2022-09-14	10:08:49	0.315026	1.4013	1.4507	1916.68	FALSE	44
2022-09-14	10:08:49	0.407036	1.81058	1.4507	1934.52	FALSE	44
2022-09-14	10:08:49	0.273652	1.21726	1.4507	1917.89	FALSE	44
2022-09-14	10:08:49	0.308817	1.37368	1.4507	1935.9	FALSE	44
2022-09-14	10:08:50	0.261641	1.16383	1.48449	1919.06	FALSE	44
2022-09-14	10:08:50	0.380573	1.69286	1.48449	1937.59	FALSE	44
2022-09-14	10:08:50	0.248868	1.10701	1.48449	1920.16	FALSE	44
2022-09-14	10:08:50	0.44383	1.97424	1.48449	1939.56	FALSE	44
2022-09-14	10:08:51	0.221183	0.983866	2.47905	1921.15	FALSE	44
2022-09-14	10:08:51	0.683423	3.04	2.47905	1942.6	FALSE	44
2022-09-14	10:08:51	0.344644	1.53305	2.47905	1922.68	FALSE	44
2022-09-14	10:08:51	0.980013	4.35929	2.47905	1946.96	FALSE	44
2022-09-14	10:08:52	1.86047	8.27574	13.3065	1930.96	FALSE	44
2022-09-14	10:08:52	3.24938	14.4539	13.3065	1961.42	1	45
2022-09-14	10:08:52	3.86444	17.1898	13.3065	1948.15	1	46
2022-09-14	10:08:53	4.14993	18.4597	8.75712	1979.88	1	47
2022-09-14	10:08:53	1.95197	8.68275	8.75712	1956.83	FALSE	47
2022-09-14	10:08:53	1.33004	5.91628	8.75712	1985.79	FALSE	47
2022-09-14	10:08:53	0.442812	1.96972	8.75712	1958.8	FALSE	47
2022-09-14	10:08:54	0.487697	2.16937	2.08369	1987.96	FALSE	47
2022-09-14	10:08:54	0.467239	2.07837	2.08369	1960.88	FALSE	47
2022-09-14	10:08:54	0.488715	2.1739	2.08369	1990.14	FALSE	47
2022-09-14	10:08:54	0.430089	1.91312	2.08369	1962.79	FALSE	47
2022-09-14	10:08:55	0.421794	1.87622	1.72286	1992.01	FALSE	47
2022-09-14	10:08:55	0.344339	1.53169	1.72286	1964.32	FALSE	47
2022-09-14	10:08:55	0.466476	2.07498	1.72286	1994.09	FALSE	47
2022-09-14	10:08:55	0.316654	1.40854	1.72286	1965.73	FALSE	47
2022-09-14	10:08:56	0.490547	2.18205	0.0023961	1996.27	FALSE	47
2022-09-14	10:08:56	-0.156883	-0.697847	0.0023961	1965.73	FALSE	47
2022-09-14	10:08:56	-0.332048	-1.47702	0.0023961	1996.27	FALSE	47
2022-09-14	10:08:57	-0.337951	-1.50327	-0.314315	1965.73	FALSE	47
2022-09-14	10:08:57	-0.215559	-0.95885	-0.314315	1996.27	FALSE	47
2022-09-14	10:08:57	-0.0884857	-0.393602	-0.314315	1965.73	FALSE	47
2022-09-14	10:08:57	0.359351	1.59847	-0.314315	1997.87	FALSE	47
2022-09-14	10:08:58	0.301692	1.34199	0.922917	1967.07	FALSE	47
2022-09-14	10:08:58	0.398995	1.77481	0.922917	1999.64	FALSE	47
2022-09-14	10:08:58	0.0614888	0.273514	0.922917	1967.35	FALSE	47
2022-09-14	10:08:58	0.0677483	0.301358	0.922917	1999.94	FALSE	47
2022-09-14	10:08:59	0.925255	4.11572	1.78426	1971.46	FALSE	47
2022-09-14	10:08:59	0.31472	1.39994	1.78426	2001.34	FALSE	47
2022-09-14	10:08:59	0.221387	0.984774	1.78426	1972.45	FALSE	47
2022-09-14	10:08:59	0.143117	0.636613	1.78426	2001.98	FALSE	47
2022-09-14	10:09:00	0.0583845	0.259706	2.14595	1972.71	FALSE	47
2022-09-14	10:09:00	0.0610816	0.271703	2.14595	2002.25	FALSE	47
2022-09-14	10:09:00	0.300216	1.33542	2.14595	1974.04	FALSE	47
2022-09-14	10:09:00	1.51004	6.71696	2.14595	2008.97	FALSE	47
2022-09-14	10:09:01	1.26922	5.64574	8.55893	1979.69	FALSE	47
2022-09-14	10:09:01	1.98729	8.83986	8.55893	2017.81	FALSE	47
2022-09-14	10:09:01	2.51589	11.1912	8.55893	1990.88	FALSE	47
2022-09-14	10:09:02	4.00927	17.834	19.7948	2035.64	1	48
2022-09-14	10:09:02	6.56235	29.1906	19.7948	2020.07	1	49
2022-09-14	10:09:02	3.93935	17.523	19.7948	2053.17	1	50
2022-09-14	10:09:02	3.28927	14.6313	19.7948	2034.7	1	51

## Sheet: MsPotato_martin_20229141034 (3)
Date	Time	Lbs	Newtons	Total force x time		total steps > 13.345	**GoPro Fitting: 9:52
2022-09-14	10:04:02	0.0666287	0.296378	0.296378	FALSE	0
2022-09-14	10:04:02	0.0853564	0.379682	0.379682	FALSE	0
2022-09-14	10:04:02	0.192125	0.85461	1.15099	FALSE	0
2022-09-14	10:04:03	0.126527	0.562817	0.9425	FALSE	0
2022-09-14	10:04:03	0.197977	0.880641	2.03163	FALSE	0
2022-09-14	10:04:03	0.565865	2.51708	3.45958	FALSE	0
2022-09-14	10:04:03	1.27106	5.65393	7.68556	FALSE	0
2022-09-14	10:04:04	2.55787	11.3779	14.8375	FALSE	0
2022-09-14	10:04:04	2.06698	9.19434	16.8799	FALSE	0
2022-09-14	10:04:04	0.903168	4.01747	18.855	FALSE	0
2022-09-14	10:04:04	0.564847	2.51255	19.3925	FALSE	0
2022-09-14	10:04:05	0.256705	1.14188	19.9968	FALSE	0
2022-09-14	10:04:05	0.209529	0.932027	20.3245	FALSE	0
2022-09-14	10:04:05	0.24729	1.1	21.0968	FALSE	0
2022-09-14	10:04:05	0.416349	1.852	22.1765	FALSE	0
2022-09-14	10:04:06	0.313702	1.39541	22.4922	FALSE	0
2022-09-14	10:04:06	0.26271	1.16859	23.3451	FALSE	0
2022-09-14	10:04:06	0.220522	0.980926	23.4732	FALSE	0
2022-09-14	10:04:07	0.228562	1.01669	24.3618	FALSE	0
2022-09-14	10:04:07	0.346272	1.54029	25.0135	FALSE	0
2022-09-14	10:04:07	0.290954	1.29422	25.656	FALSE	0
2022-09-14	10:04:07	0.226883	1.00922	26.0227	FALSE	0
2022-09-14	10:04:08	0.214568	0.954441	26.6104	FALSE	0
2022-09-14	10:04:08	0.211769	0.941991	26.9647	FALSE	0
2022-09-14	10:04:08	0.256196	1.13961	27.75	FALSE	0
2022-09-14	10:04:08	0.176247	0.783982	27.7487	FALSE	0
2022-09-14	10:04:09	0.117418	0.522299	28.2723	FALSE	0
2022-09-14	10:04:09	0.140929	0.62688	28.3755	FALSE	0
2022-09-14	10:04:09	0.150649	0.670117	28.9424	FALSE	0
2022-09-14	10:04:09	0.157825	0.702037	29.0776	FALSE	0
2022-09-14	10:04:10	0.15813	0.703394	29.6458	FALSE	0
2022-09-14	10:04:10	0.156247	0.695018	29.7726	FALSE	0
2022-09-14	10:04:10	0.148919	0.662421	30.3083	FALSE	0
2022-09-14	10:04:11	0.184797	0.822014	30.5946	FALSE	0
2022-09-14	10:04:11	0.174975	0.778324	31.0866	FALSE	0
2022-09-14	10:04:11	0.0742623	0.330334	30.9249	FALSE	0
2022-09-14	10:04:11	0.0534481	0.237748	31.3243	FALSE	0
2022-09-14	10:04:12	-0.0331168	-0.14731	30.9249	FALSE	0
2022-09-14	10:04:12	0.274466	1.22088	32.5452	FALSE	0
2022-09-14	10:04:12	0.581896	2.58839	33.5133	FALSE	0
2022-09-14	10:04:12	0.332328	1.47826	34.0235	FALSE	0
2022-09-14	10:04:13	0.527748	2.34753	35.8609	FALSE	0
2022-09-14	10:04:13	0.229835	1.02235	35.0458	FALSE	0
2022-09-14	10:04:13	0.2793	1.24238	37.1032	FALSE	0
2022-09-14	10:04:13	0.515585	2.29343	37.3393	FALSE	0
2022-09-14	10:04:14	0.310445	1.38092	38.4842	FALSE	0
2022-09-14	10:04:14	-0.00716262	-0.0318608	37.3393	FALSE	0
2022-09-14	10:04:14	0.0919722	0.409111	38.8933	FALSE	0
2022-09-14	10:04:14	0.214364	0.953534	38.2928	FALSE	0
2022-09-14	10:04:15	0.394415	1.75444	40.6477	FALSE	0
2022-09-14	10:04:15	2.53625	11.2817	49.5745	FALSE	0
2022-09-14	10:04:15	2.02098	8.98972	49.6374	FALSE	0
2022-09-14	10:04:16	1.38352	6.15417	55.7287	FALSE	0
2022-09-14	10:04:16	0.967697	4.30451	53.9419	FALSE	0
2022-09-14	10:04:16	0.854262	3.79993	59.5286	FALSE	0
2022-09-14	10:04:16	1.46495	6.51639	60.4583	FALSE	0
2022-09-14	10:04:17	1.31182	5.83524	65.3639	FALSE	0
2022-09-14	10:04:17	5.79278	25.7674	86.2258	1	1
2022-09-14	10:04:17	6.53685	29.0772	94.4411	1	2
2022-09-14	10:04:17	4.28235	19.0487	105.275	1	3
2022-09-14	10:04:18	1.55467	6.91548	101.357	FALSE	3
2022-09-14	10:04:18	1.28037	5.69534	110.97	FALSE	3
2022-09-14	10:04:18	0.487494	2.16847	103.525	FALSE	3
2022-09-14	10:04:18	0.476756	2.12071	113.091	FALSE	3
2022-09-14	10:04:19	0.543931	2.41951	105.945	FALSE	3
2022-09-14	10:04:19	0.992837	4.41634	117.507	FALSE	3
2022-09-14	10:04:19	0.475178	2.11369	108.058	FALSE	3
2022-09-14	10:04:20	0.729987	3.24713	120.754	FALSE	3
2022-09-14	10:04:20	0.275025	1.22337	109.282	FALSE	3
2022-09-14	10:04:20	0.304644	1.35512	122.109	FALSE	3
2022-09-14	10:04:20	0.229631	1.02144	110.303	FALSE	3
2022-09-14	10:04:21	0.172125	0.765646	122.875	FALSE	3
2022-09-14	10:04:21	0.050191	0.22326	110.526	FALSE	3
2022-09-14	10:04:21	0.211158	0.939273	123.814	FALSE	3
2022-09-14	10:04:21	0.402099	1.78862	112.315	FALSE	3
2022-09-14	10:04:22	0.243422	1.08279	124.897	FALSE	3
2022-09-14	10:04:22	0.139911	0.622352	112.937	FALSE	3
2022-09-14	10:04:22	0.337824	1.50271	126.4	FALSE	3
2022-09-14	10:04:22	0.164033	0.729652	113.667	FALSE	3
2022-09-14	10:04:23	0.355738	1.58239	127.982	FALSE	3
2022-09-14	10:04:23	0.224033	0.996544	114.663	FALSE	3
2022-09-14	10:04:23	0.424593	1.88867	129.871	FALSE	3
2022-09-14	10:04:24	0.221081	0.983413	115.647	FALSE	3
2022-09-14	10:04:24	0.412481	1.8348	131.705	FALSE	3
2022-09-14	10:04:24	0.180624	0.803452	116.45	FALSE	3
2022-09-14	10:04:24	0.368104	1.6374	133.343	FALSE	3
2022-09-14	10:04:25	0.0845422	0.376061	116.826	FALSE	3
2022-09-14	10:04:25	0.481641	2.14244	135.485	FALSE	3
2022-09-14	10:04:25	0.122507	0.544936	117.371	FALSE	3
2022-09-14	10:04:25	0.0494277	0.219864	135.705	FALSE	3
2022-09-14	10:04:26	0.257316	1.14459	118.516	FALSE	3
2022-09-14	10:04:26	0.421234	1.87373	137.579	FALSE	3
2022-09-14	10:04:26	0.962506	4.28142	122.797	FALSE	3
2022-09-14	10:04:26	1.3393	5.95747	143.536	FALSE	3
2022-09-14	10:04:27	0.586119	2.60717	125.405	FALSE	3
2022-09-14	10:04:27	0.61243	2.72421	146.261	FALSE	3
2022-09-14	10:04:27	0.859809	3.8246	129.229	FALSE	3
2022-09-14	10:04:28	1.32413	5.89	152.151	FALSE	3
2022-09-14	10:04:28	1.75187	7.79267	137.022	FALSE	3
2022-09-14	10:04:28	3.39716	15.1112	167.262	1	4
2022-09-14	10:04:28	6.01553	26.7583	163.78	1	5
2022-09-14	10:04:29	7.40164	32.924	200.186	1	6
2022-09-14	10:04:29	9.12398	40.5853	204.365	1	7
2022-09-14	10:04:29	1.46413	6.51274	206.699	FALSE	7
2022-09-14	10:04:29	1.41355	6.28775	210.653	FALSE	7
2022-09-14	10:04:30	0.837214	3.7241	210.423	FALSE	7
2022-09-14	10:04:30	0.398181	1.77119	212.424	FALSE	7
2022-09-14	10:04:30	0.562354	2.50146	212.924	FALSE	7
2022-09-14	10:04:30	0.38673	1.72025	214.145	FALSE	7
2022-09-14	10:04:31	0.484949	2.15715	215.081	FALSE	7
2022-09-14	10:04:31	0.545407	2.42608	216.571	FALSE	7
2022-09-14	10:04:31	0.696298	3.09727	218.179	FALSE	7
2022-09-14	10:04:32	0.802354	3.56903	220.14	FALSE	7
2022-09-14	10:04:32	0.613397	2.72851	220.907	FALSE	7
2022-09-14	10:04:32	0.727036	3.234	223.374	FALSE	7
2022-09-14	10:04:32	0.758232	3.37277	224.28	FALSE	7
2022-09-14	10:04:33	0.543219	2.41635	225.79	FALSE	7
2022-09-14	10:04:33	0.746985	3.32274	227.603	FALSE	7
2022-09-14	10:04:33	0.528104	2.34911	228.139	FALSE	7
2022-09-14	10:04:33	0.694618	3.0898	230.692	FALSE	7
2022-09-14	10:04:34	0.388868	1.72976	229.869	FALSE	7
2022-09-14	10:04:34	0.621031	2.76247	233.455	FALSE	7
2022-09-14	10:04:34	0.657926	2.92659	232.795	FALSE	7
2022-09-14	10:04:34	1.0678	4.74979	238.205	FALSE	7
2022-09-14	10:04:35	0.31355	1.39473	234.19	FALSE	7
2022-09-14	10:04:35	0.429886	1.91222	240.117	FALSE	7
2022-09-14	10:04:35	0.512481	2.27962	236.47	FALSE	7
2022-09-14	10:04:36	0.814618	3.62358	243.74	FALSE	7
2022-09-14	10:04:36	0.414822	1.84521	238.315	FALSE	7
2022-09-14	10:04:36	0.551921	2.45505	246.195	FALSE	7
2022-09-14	10:04:36	0.465509	2.07068	240.386	FALSE	7
2022-09-14	10:04:37	0.513041	2.28211	248.478	FALSE	7
2022-09-14	10:04:37	0.631208	2.80774	243.193	FALSE	7
2022-09-14	10:04:37	0.545102	2.42472	250.902	FALSE	7
2022-09-14	10:04:37	0.50897	2.264	245.457	FALSE	7
2022-09-14	10:04:38	0.736247	3.27497	254.177	FALSE	7
2022-09-14	10:04:38	0.436756	1.94278	247.4	FALSE	7
2022-09-14	10:04:38	0.442608	1.96881	256.146	FALSE	7
2022-09-14	10:04:38	0.439809	1.95636	249.357	FALSE	7
2022-09-14	10:04:39	0.44897	1.99711	258.143	FALSE	7
2022-09-14	10:04:39	0.467952	2.08154	251.438	FALSE	7
2022-09-14	10:04:39	0.362099	1.61069	259.754	FALSE	7
2022-09-14	10:04:40	0.391463	1.74131	253.179	FALSE	7
2022-09-14	10:04:40	0.350445	1.55885	261.313	FALSE	7
2022-09-14	10:04:40	0.342761	1.52467	254.704	FALSE	7
2022-09-14	10:04:40	0.442456	1.96813	263.281	FALSE	7
2022-09-14	10:04:41	0.596094	2.65155	257.356	FALSE	7
2022-09-14	10:04:41	0.602455	2.67984	265.961	FALSE	7
2022-09-14	10:04:41	0.616959	2.74436	260.1	FALSE	7
2022-09-14	10:04:41	0.633601	2.81838	268.779	FALSE	7
2022-09-14	10:04:42	0.366578	1.63061	261.731	FALSE	7
2022-09-14	10:04:42	0.470038	2.09082	270.87	FALSE	7
2022-09-14	10:04:42	0.341998	1.52128	263.252	FALSE	7
2022-09-14	10:04:42	0.443219	1.97153	272.841	FALSE	7
2022-09-14	10:04:43	0.360725	1.60458	264.856	FALSE	7
2022-09-14	10:04:43	0.423677	1.8846	274.726	FALSE	7
2022-09-14	10:04:43	0.373957	1.66344	266.52	FALSE	7
2022-09-14	10:04:43	0.355585	1.58171	276.308	FALSE	7
2022-09-14	10:04:44	0.489784	2.17866	268.699	FALSE	7
2022-09-14	10:04:44	0.57355	2.55127	278.859	FALSE	7
2022-09-14	10:04:44	0.203524	0.905315	269.604	FALSE	7
2022-09-14	10:04:45	0.069733	0.310186	279.169	FALSE	7
2022-09-14	10:04:45	-0.313727	-1.39552	269.604	FALSE	7
2022-09-14	10:04:45	-0.519681	-2.31165	279.169	FALSE	7
2022-09-14	10:04:45	-0.595661	-2.64962	269.604	FALSE	7
2022-09-14	10:04:46	-0.564109	-2.50927	279.169	FALSE	7
2022-09-14	10:04:46	-0.273269	-1.21556	269.604	FALSE	7
2022-09-14	10:04:46	-0.225025	-1.00096	279.169	FALSE	7
2022-09-14	10:04:46	-0.0982058	-0.436839	269.604	FALSE	7
2022-09-14	10:04:47	-0.12243	-0.544593	279.169	FALSE	7
2022-09-14	10:04:47	-0.122633	-0.545496	269.604	FALSE	7
2022-09-14	10:04:47	-0.0796817	-0.35444	279.169	FALSE	7
2022-09-14	10:04:47	-0.100241	-0.445892	269.604	FALSE	7
2022-09-14	10:04:48	0.114517	0.509395	279.679	FALSE	7
2022-09-14	10:04:48	0.20383	0.906677	270.511	FALSE	7
2022-09-14	10:04:48	0.13528	0.601752	280.28	FALSE	7
2022-09-14	10:04:49	0.0754837	0.335767	270.846	FALSE	7
2022-09-14	10:04:49	0.00255749	0.0113762	280.292	FALSE	7
2022-09-14	10:04:49	0.134975	0.600396	271.447	FALSE	7
2022-09-14	10:04:49	-0.0360176	-0.160213	280.292	FALSE	7
2022-09-14	10:04:50	-0.374592	-1.66626	271.447	FALSE	7
2022-09-14	10:04:50	-0.427417	-1.90124	280.292	FALSE	7
2022-09-14	10:04:50	-0.595407	-2.64849	271.447	FALSE	7
2022-09-14	10:04:50	-0.531234	-2.36304	280.292	FALSE	7
2022-09-14	10:04:51	-0.22528	-1.00209	271.447	FALSE	7
2022-09-14	10:04:51	-0.121616	-0.540972	280.292	FALSE	7
2022-09-14	10:04:51	0.0398094	0.17708	271.624	FALSE	7
2022-09-14	10:04:51	0.699046	3.1095	283.401	FALSE	7
2022-09-14	10:04:52	1.18439	5.2684	276.892	FALSE	7
2022-09-14	10:04:52	1.80693	8.03759	291.439	FALSE	7
2022-09-14	10:04:52	1.97426	8.7819	285.674	FALSE	7
2022-09-14	10:04:53	1.84017	8.18544	299.624	FALSE	7
2022-09-14	10:04:53	1.13945	5.0685	290.743	FALSE	7
2022-09-14	10:04:53	0.392227	1.7447	301.369	FALSE	7
2022-09-14	10:04:53	0.495331	2.20333	292.946	FALSE	7
2022-09-14	10:04:54	0.467239	2.07837	303.447	FALSE	7
2022-09-14	10:04:54	0.449886	2.00118	294.947	FALSE	7
2022-09-14	10:04:54	0.477672	2.12478	305.572	FALSE	7
2022-09-14	10:04:54	0.570395	2.53723	297.484	FALSE	7
2022-09-14	10:04:55	0.43757	1.9464	307.518	FALSE	7
2022-09-14	10:04:55	0.425916	1.89456	299.379	FALSE	7
2022-09-14	10:04:55	0.343423	1.52761	309.046	FALSE	7
2022-09-14	10:04:55	0.396959	1.76575	301.145	FALSE	7
2022-09-14	10:04:56	0.308104	1.37051	310.417	FALSE	7
2022-09-14	10:04:56	0.658537	2.9293	304.074	FALSE	7
2022-09-14	10:04:56	0.430395	1.91448	312.331	FALSE	7
2022-09-14	10:04:57	0.66215	2.94538	307.019	FALSE	7
2022-09-14	10:04:57	0.192786	0.857551	313.189	FALSE	7
2022-09-14	10:04:57	0.270089	1.20141	308.221	FALSE	7
2022-09-14	10:04:57	-0.205839	-0.915613	313.189	FALSE	7
2022-09-14	10:04:58	-0.369351	-1.64295	308.221	FALSE	7
2022-09-14	10:04:58	-0.1379	-0.613407	313.189	FALSE	7
2022-09-14	10:04:58	0.373804	1.66275	309.884	FALSE	7
2022-09-14	10:04:58	0.350903	1.56089	314.75	FALSE	7
2022-09-14	10:04:59	0.628613	2.7962	312.68	FALSE	7
2022-09-14	10:04:59	0.291311	1.29581	316.045	FALSE	7
2022-09-14	10:04:59	0.149224	0.663778	313.343	FALSE	7
2022-09-14	10:04:59	0.0301911	0.134296	316.18	FALSE	7
2022-09-14	10:05:00	0.12897	0.573684	313.917	FALSE	7
2022-09-14	10:05:00	-0.0436002	-0.193942	316.18	FALSE	7
2022-09-14	10:05:00	0.182608	0.812277	314.729	FALSE	7
2022-09-14	10:05:01	0.377265	1.67815	317.858	FALSE	7
2022-09-14	10:05:01	1.63248	7.2616	321.991	FALSE	7
2022-09-14	10:05:01	2.3051	10.2535	328.111	FALSE	7
2022-09-14	10:05:01	1.64078	7.29852	329.29	FALSE	7
2022-09-14	10:05:02	0.247494	1.1009	329.212	FALSE	7
2022-09-14	10:05:02	0.0143132	0.063668	329.353	FALSE	7
2022-09-14	10:05:02	-0.174389	-0.775717	329.212	FALSE	7
2022-09-14	10:05:02	-0.301208	-1.33983	329.353	FALSE	7
2022-09-14	10:05:03	-0.109147	-0.485508	329.212	FALSE	7
2022-09-14	10:05:03	0.0722776	0.321505	329.675	FALSE	7
2022-09-14	10:05:03	0.000165643	0.000736813	329.213	FALSE	7
2022-09-14	10:05:03	-0.0546944	-0.243292	329.675	FALSE	7
2022-09-14	10:05:04	0.114059	0.507357	329.72	FALSE	7
2022-09-14	10:05:04	0.360216	1.60231	331.277	FALSE	7
2022-09-14	10:05:04	0.413346	1.83865	331.559	FALSE	7
2022-09-14	10:05:05	0.512074	2.27781	333.555	FALSE	7
2022-09-14	10:05:05	0.633753	2.81906	334.378	FALSE	7
2022-09-14	10:05:05	0.549173	2.44283	335.998	FALSE	7
2022-09-14	10:05:05	0.309886	1.37843	335.756	FALSE	7
2022-09-14	10:05:06	0.171463	0.762702	336.76	FALSE	7
2022-09-14	10:05:06	-0.0516919	-0.229936	335.756	FALSE	7
2022-09-14	10:05:06	-0.0818699	-0.364174	336.76	FALSE	7
2022-09-14	10:05:06	-0.0320481	-0.142556	335.756	FALSE	7
2022-09-14	10:05:07	-0.200547	-0.892073	336.76	FALSE	7
2022-09-14	10:05:07	-0.298816	-1.32919	335.756	FALSE	7
2022-09-14	10:05:07	-0.159376	-0.708936	336.76	FALSE	7
2022-09-14	10:05:07	-0.269961	-1.20084	335.756	FALSE	7
2022-09-14	10:05:08	-0.0346435	-0.154101	336.76	FALSE	7
2022-09-14	10:05:08	-0.106755	-0.474868	335.756	FALSE	7
2022-09-14	10:05:08	0.154364	0.686642	337.447	FALSE	7
2022-09-14	10:05:08	0.176501	0.785112	336.542	FALSE	7
2022-09-14	10:05:09	1.17894	5.24416	342.691	FALSE	7
2022-09-14	10:05:09	1.17681	5.23469	341.776	FALSE	7
2022-09-14	10:05:09	2.03838	9.06712	351.758	FALSE	7
2022-09-14	10:05:10	1.37874	6.13291	347.909	FALSE	7
2022-09-14	10:05:10	3.13752	13.9563	365.715	1	8
2022-09-14	10:05:10	1.79986	8.00614	355.915	FALSE	8
2022-09-14	10:05:10	1.79192	7.97082	373.685	FALSE	8
2022-09-14	10:05:11	0.541997	2.41091	358.326	FALSE	8
2022-09-14	10:05:11	0.766221	3.4083	377.094	FALSE	8
2022-09-14	10:05:11	0.556807	2.47679	360.803	FALSE	8
2022-09-14	10:05:11	1.32719	5.90361	382.997	FALSE	8
2022-09-14	10:05:12	0.611718	2.72104	363.524	FALSE	8
2022-09-14	10:05:12	1.50276	6.68458	389.682	FALSE	8
2022-09-14	10:05:12	1.03187	4.58996	368.114	FALSE	8
2022-09-14	10:05:12	3.15345	14.0272	403.709	1	9
2022-09-14	10:05:13	1.21324	5.39673	373.511	FALSE	9
2022-09-14	10:05:13	3.088	13.736	417.445	1	10
2022-09-14	10:05:13	1.03268	4.59357	378.104	FALSE	10
2022-09-14	10:05:14	2.03731	9.06236	426.508	FALSE	10
2022-09-14	10:05:14	1.24271	5.52782	383.632	FALSE	10
2022-09-14	10:05:14	1.13034	5.02798	431.536	FALSE	10
2022-09-14	10:05:14	1.66347	7.39945	391.032	FALSE	10
2022-09-14	10:05:15	0.918384	4.08516	435.621	FALSE	10
2022-09-14	10:05:15	2.01452	8.96099	399.993	FALSE	10
2022-09-14	10:05:15	1.03482	4.60309	440.224	FALSE	10
2022-09-14	10:05:15	2.31574	10.3009	410.293	FALSE	10
2022-09-14	10:05:16	0.951463	4.2323	444.456	FALSE	10
2022-09-14	10:05:16	1.74144	7.74627	418.04	FALSE	10
2022-09-14	10:05:16	0.620267	2.75907	447.215	FALSE	10
2022-09-14	10:05:16	1.22388	5.44406	423.484	FALSE	10
2022-09-14	10:05:17	0.467647	2.08019	449.295	FALSE	10
2022-09-14	10:05:17	0.917468	4.08108	427.565	FALSE	10
2022-09-14	10:05:17	0.626629	2.78737	452.083	FALSE	10
2022-09-14	10:05:18	1.95955	8.71647	436.281	FALSE	10
2022-09-14	10:05:18	0.476043	2.11753	454.2	FALSE	10
2022-09-14	10:05:18	1.17274	5.21658	441.498	FALSE	10
2022-09-14	10:05:18	1.12922	5.023	459.223	FALSE	10
2022-09-14	10:05:19	1.18902	5.289	446.787	FALSE	10
2022-09-14	10:05:19	0.408257	1.81601	461.039	FALSE	10
2022-09-14	10:05:19	0.678079	3.01623	449.803	FALSE	10
2022-09-14	10:05:19	0.725305	3.2263	464.266	FALSE	10
2022-09-14	10:05:20	0.822099	3.65686	453.46	FALSE	10
2022-09-14	10:05:20	1.21772	5.41666	469.682	FALSE	10
2022-09-14	10:05:20	0.697519	3.1027	456.563	FALSE	10
2022-09-14	10:05:20	0.186425	0.829256	470.511	FALSE	10
2022-09-14	10:05:21	0.349478	1.55455	458.117	FALSE	10
2022-09-14	10:05:21	0.748613	3.32998	473.841	FALSE	10
2022-09-14	10:05:21	-0.0373916	-0.166325	458.117	FALSE	10
2022-09-14	10:05:22	0.0130918	0.0582349	473.9	FALSE	10
2022-09-14	10:05:22	0.736756	3.27724	461.394	FALSE	10
2022-09-14	10:05:22	3.38663	15.0644	488.964	1	11
2022-09-14	10:05:22	3.75141	16.687	478.082	1	12
2022-09-14	10:05:23	1.85996	8.27347	497.238	FALSE	12
2022-09-14	10:05:23	0.730801	3.25075	481.332	FALSE	12
2022-09-14	10:05:23	0.728919	3.24238	500.48	FALSE	12
2022-09-14	10:05:23	0.730649	3.25007	484.582	FALSE	12
2022-09-14	10:05:24	0.737672	3.28131	503.761	FALSE	12
2022-09-14	10:05:24	0.734517	3.26728	487.85	FALSE	12
2022-09-14	10:05:24	0.728919	3.24238	507.004	FALSE	12
2022-09-14	10:05:24	0.740369	3.29331	491.143	FALSE	12
2022-09-14	10:05:25	0.731209	3.25256	510.256	FALSE	12
2022-09-14	10:05:25	0.732634	3.2589	494.402	FALSE	12
2022-09-14	10:05:25	0.738181	3.28358	513.54	FALSE	12
2022-09-14	10:05:26	0.734924	3.26909	497.671	FALSE	12
2022-09-14	10:05:26	0.728461	3.24034	516.78	FALSE	12
2022-09-14	10:05:26	0.736552	3.27633	500.947	FALSE	12
2022-09-14	10:05:26	0.73355	3.26298	520.043	FALSE	12
2022-09-14	10:05:27	0.733601	3.2632	504.21	FALSE	12
2022-09-14	10:05:27	0.736145	3.27452	523.318	FALSE	12
2022-09-14	10:05:27	0.734822	3.26864	507.479	FALSE	12
2022-09-14	10:05:27	0.507035	2.25539	525.573	FALSE	12
2022-09-14	10:05:28	0.16444	0.731462	508.211	FALSE	12
2022-09-14	10:05:28	0.298028	1.32569	526.899	FALSE	12
2022-09-14	10:05:28	3.25177	14.4645	522.675	1	13
2022-09-14	10:05:28	2.18581	9.72292	536.622	FALSE	13
2022-09-14	10:05:29	0.808308	3.59552	526.271	FALSE	13
2022-09-14	10:05:29	0.870903	3.87395	540.496	FALSE	13
2022-09-14	10:05:29	0.617316	2.74595	529.017	FALSE	13
2022-09-14	10:05:30	0.737621	3.28109	543.777	FALSE	13
2022-09-14	10:05:30	0.176552	0.785339	529.802	FALSE	13
2022-09-14	10:05:30	0.471158	2.09581	545.872	FALSE	13
2022-09-14	10:05:30	0.23243	1.0339	530.836	FALSE	13
2022-09-14	10:05:31	0.260471	1.15863	547.031	FALSE	13
2022-09-14	10:05:31	0.174466	0.77606	531.612	FALSE	13
2022-09-14	10:05:31	0.187392	0.833557	547.865	FALSE	13
2022-09-14	10:05:31	0.196756	0.87521	532.487	FALSE	13
2022-09-14	10:05:32	0.185458	0.824954	548.69	FALSE	13
2022-09-14	10:05:32	0.183066	0.814314	533.301	FALSE	13
2022-09-14	10:05:32	0.189377	0.842387	549.532	FALSE	13
2022-09-14	10:05:33	0.208766	0.928633	534.23	FALSE	13
2022-09-14	10:05:33	0.434262	1.93168	551.464	FALSE	13
2022-09-14	10:05:33	0.106527	0.473853	534.704	FALSE	13
2022-09-14	10:05:33	-0.00293869	-0.0130719	551.464	FALSE	13
2022-09-14	10:05:33	-0.0724552	-0.322295	534.704	FALSE	13
2022-09-14	10:05:34	-0.104618	-0.465362	551.464	FALSE	13
2022-09-14	10:05:34	-0.101107	-0.449744	534.704	FALSE	13
2022-09-14	10:05:34	-0.135407	-0.602317	551.464	FALSE	13
2022-09-14	10:05:35	-0.186297	-0.828686	534.704	FALSE	13
2022-09-14	10:05:35	-0.275101	-1.2237	551.464	FALSE	13
2022-09-14	10:05:35	-0.132455	-0.589186	534.704	FALSE	13
2022-09-14	10:05:35	3.27314	14.5596	566.023	1	14
2022-09-14	10:05:36	4.83599	21.5115	556.215	1	15
2022-09-14	10:05:36	2.37564	10.5673	576.591	FALSE	15
2022-09-14	10:05:36	2.6136	11.6258	567.841	FALSE	15
2022-09-14	10:05:36	2.19665	9.77114	586.362	FALSE	15
2022-09-14	10:05:37	4.37314	19.4526	587.294	1	16
2022-09-14	10:05:37	2.98495	13.2777	599.639	FALSE	16
2022-09-14	10:05:37	5.61721	24.9865	612.28	1	17
2022-09-14	10:05:37	3.32912	14.8086	614.448	1	18
2022-09-14	10:05:38	3.8766	17.2439	629.524	1	19
2022-09-14	10:05:38	4.10592	18.264	632.712	1	20
2022-09-14	10:05:38	1.69818	7.55384	637.078	FALSE	20
2022-09-14	10:05:39	1.22286	5.43953	638.151	FALSE	20
2022-09-14	10:05:39	0.409021	1.81941	638.897	FALSE	20
2022-09-14	10:05:39	0.69818	3.10564	641.257	FALSE	20
2022-09-14	10:05:39	0.728054	3.23853	642.136	FALSE	20
2022-09-14	10:05:40	0.738282	3.28403	644.541	FALSE	20
2022-09-14	10:05:40	0.707036	3.14504	645.281	FALSE	20
2022-09-14	10:05:40	0.467443	2.07928	646.62	FALSE	20
2022-09-14	10:05:40	0.383219	1.70463	646.986	FALSE	20
2022-09-14	10:05:41	0.448104	1.99326	648.614	FALSE	20
2022-09-14	10:05:41	0.429326	1.90973	648.895	FALSE	20
2022-09-14	10:05:41	0.35355	1.57266	650.186	FALSE	20
2022-09-14	10:05:41	0.421692	1.87577	650.771	FALSE	20
2022-09-14	10:05:42	0.485153	2.15806	652.344	FALSE	20
2022-09-14	10:05:42	0.673651	2.99653	653.768	FALSE	20
2022-09-14	10:05:42	1.04037	4.62777	656.972	FALSE	20
2022-09-14	10:05:43	1.11095	4.94173	658.709	FALSE	20
2022-09-14	10:05:43	0.856043	3.80785	660.78	FALSE	20
2022-09-14	10:05:43	0.190496	0.847364	659.557	FALSE	20
2022-09-14	10:05:43	0.166985	0.742783	661.523	FALSE	20
2022-09-14	10:05:44	0.171921	0.764739	660.321	FALSE	20
2022-09-14	10:05:44	0.173906	0.773569	662.296	FALSE	20
2022-09-14	10:05:44	0.171667	0.763609	661.085	FALSE	20
2022-09-14	10:05:44	0.187748	0.835141	663.131	FALSE	20
2022-09-14	10:05:45	0.242405	1.07827	662.163	FALSE	20
2022-09-14	10:05:45	0.745102	3.31436	666.446	FALSE	20
2022-09-14	10:05:45	0.213244	0.948552	663.112	FALSE	20
2022-09-14	10:05:45	-0.0355595	-0.158176	666.446	FALSE	20
2022-09-14	10:05:46	0.200471	0.891735	664.004	FALSE	20
2022-09-14	10:05:46	0.391565	1.74176	668.188	FALSE	20
2022-09-14	10:05:46	0.0598603	0.266271	664.27	FALSE	20
2022-09-14	10:05:47	0.207901	0.924785	669.112	FALSE	20
2022-09-14	10:05:47	1.23609	5.49838	669.768	FALSE	20
2022-09-14	10:05:47	1.89202	8.41608	677.528	FALSE	20
2022-09-14	10:05:47	0.727188	3.23468	673.003	FALSE	20
2022-09-14	10:05:48	0.589936	2.62415	680.153	FALSE	20
2022-09-14	10:05:48	0.592837	2.63706	675.64	FALSE	20
2022-09-14	10:05:48	0.540878	2.40593	682.559	FALSE	20
2022-09-14	10:05:48	0.552125	2.45596	678.096	FALSE	20
2022-09-14	10:05:49	0.502913	2.23706	684.796	FALSE	20
2022-09-14	10:05:49	0.506374	2.25245	680.348	FALSE	20
2022-09-14	10:05:49	0.47416	2.10916	686.905	FALSE	20
2022-09-14	10:05:49	0.502405	2.2348	682.583	FALSE	20
2022-09-14	10:05:50	0.498282	2.21646	689.121	FALSE	20
2022-09-14	10:05:50	0.440827	1.96089	684.544	FALSE	20
2022-09-14	10:05:50	0.455178	2.02472	691.146	FALSE	20
2022-09-14	10:05:51	0.388613	1.72863	686.273	FALSE	20
2022-09-14	10:05:51	0.457977	2.03717	693.183	FALSE	20
2022-09-14	10:05:51	0.679504	3.02257	689.295	FALSE	20
2022-09-14	10:05:51	0.360674	1.60435	694.787	FALSE	20
2022-09-14	10:05:52	0.380725	1.69354	690.989	FALSE	20
2022-09-14	10:05:52	0.541234	2.40752	697.195	FALSE	20
2022-09-14	10:05:52	0.487239	2.16734	693.156	FALSE	20
2022-09-14	10:05:52	0.429428	1.91018	699.105	FALSE	20
2022-09-14	10:05:53	0.672888	2.99314	696.149	FALSE	20
2022-09-14	10:05:53	0.668664	2.97435	702.079	FALSE	20
2022-09-14	10:05:53	0.744898	3.31346	699.463	FALSE	20
2022-09-14	10:05:53	0.740064	3.29195	705.371	FALSE	20
2022-09-14	10:05:54	0.738435	3.28471	702.747	FALSE	20
2022-09-14	10:05:54	0.733753	3.26388	708.635	FALSE	20
2022-09-14	10:05:54	0.732023	3.25618	706.004	FALSE	20
2022-09-14	10:05:55	0.738639	3.28561	711.921	FALSE	20
2022-09-14	10:05:55	0.729784	3.24623	709.25	FALSE	20
2022-09-14	10:05:55	0.744694	3.31255	715.233	FALSE	20
2022-09-14	10:05:55	0.735331	3.2709	712.521	FALSE	20
2022-09-14	10:05:56	0.739147	3.28787	718.521	FALSE	20
2022-09-14	10:05:56	0.737061	3.27859	715.799	FALSE	20
2022-09-14	10:05:56	0.664084	2.95398	721.475	FALSE	20
2022-09-14	10:05:56	0.547697	2.43627	718.236	FALSE	20
2022-09-14	10:05:57	0.365204	1.6245	723.1	FALSE	20
2022-09-14	10:05:57	0.580827	2.58363	720.819	FALSE	20
2022-09-14	10:05:57	0.560776	2.49444	725.594	FALSE	20
2022-09-14	10:05:57	0.720827	3.20638	724.026	FALSE	20
2022-09-14	10:05:58	0.775127	3.44792	729.042	FALSE	20
2022-09-14	10:05:58	0.86327	3.84	727.866	FALSE	20
2022-09-14	10:05:58	1.27355	5.66501	734.707	FALSE	20
2022-09-14	10:05:58	1.97961	8.8057	736.671	FALSE	20
2022-09-14	10:05:59	2.29477	10.2076	744.915	FALSE	20
2022-09-14	10:05:59	3.57406	15.8981	752.569	1	21
2022-09-14	10:05:59	1.58424	7.04702	751.962	FALSE	21
2022-09-14	10:06:00	3.26607	14.5281	767.098	1	22
2022-09-14	10:06:00	1.43833	6.39798	758.36	FALSE	22
2022-09-14	10:06:00	1.27441	5.66883	772.766	FALSE	22
2022-09-14	10:06:00	0.522404	2.32376	760.684	FALSE	22
2022-09-14	10:06:01	0.501387	2.23027	774.997	FALSE	22
2022-09-14	10:06:01	0.854109	3.79925	764.483	FALSE	22
2022-09-14	10:06:01	1.25981	5.60389	780.601	FALSE	22
2022-09-14	10:06:01	1.35289	6.01793	770.501	FALSE	22
2022-09-14	10:06:02	1.46291	6.50732	787.108	FALSE	22
2022-09-14	10:06:02	1.87029	8.31942	778.82	FALSE	22
2022-09-14	10:06:02	2.47762	11.0209	798.129	FALSE	22
2022-09-14	10:06:02	3.37039	14.9922	793.812	1	23
2022-09-14	10:06:03	2.84485	12.6545	810.783	FALSE	23
2022-09-14	10:06:03	2.04551	9.09884	802.911	FALSE	23
2022-09-14	10:06:03	2.3764	10.5707	821.354	FALSE	23
2022-09-14	10:06:04	0.874313	3.88912	806.8	FALSE	23
2022-09-14	10:06:04	1.18515	5.27178	826.626	FALSE	23
2022-09-14	10:06:04	0.681183	3.03004	809.83	FALSE	23
2022-09-14	10:06:04	0.977163	4.34662	830.972	FALSE	23
2022-09-14	10:06:05	1.08454	4.82425	814.655	FALSE	23
2022-09-14	10:06:05	1.80627	8.03465	839.007	FALSE	23
2022-09-14	10:06:05	2.57594	11.4583	826.113	FALSE	23
2022-09-14	10:06:05	1.32108	5.87643	844.883	FALSE	23
2022-09-14	10:06:06	1.51569	6.74209	832.855	FALSE	23
2022-09-14	10:06:06	0.697824	3.10406	847.988	FALSE	23
2022-09-14	10:06:06	0.471209	2.09603	834.951	FALSE	23
2022-09-14	10:06:06	0.713804	3.17514	851.163	FALSE	23
2022-09-14	10:06:07	0.774568	3.44543	838.396	FALSE	23
2022-09-14	10:06:07	1.19177	5.30123	856.464	FALSE	23
2022-09-14	10:06:07	1.89503	8.42947	846.826	FALSE	23
2022-09-14	10:06:08	1.64973	7.33833	863.802	FALSE	23
2022-09-14	10:06:08	1.32276	5.8839	852.71	FALSE	23
2022-09-14	10:06:08	1.55808	6.93065	870.733	FALSE	23
2022-09-14	10:06:08	0.781946	3.47825	856.188	FALSE	23
2022-09-14	10:06:09	0.786374	3.49795	874.231	FALSE	23
2022-09-14	10:06:09	0.959198	4.2667	860.455	FALSE	23
2022-09-14	10:06:09	1.02276	4.54944	878.78	FALSE	23
2022-09-14	10:06:09	4.50266	20.0287	880.483	1	24
2022-09-14	10:06:10	3.86597	17.1966	895.977	1	25
2022-09-14	10:06:10	4.67289	20.7859	901.269	1	26
2022-09-14	10:06:10	1.34602	5.98737	901.964	FALSE	26
2022-09-14	10:06:10	0.554313	2.4657	903.735	FALSE	26
2022-09-14	10:06:11	0.759148	3.37684	905.341	FALSE	26
2022-09-14	10:06:11	0.38042	1.69218	905.427	FALSE	26
2022-09-14	10:06:11	0.61757	2.74707	908.088	FALSE	26
2022-09-14	10:06:12	1.58128	7.03385	912.461	FALSE	26
2022-09-14	10:06:12	1.39742	6.216	914.304	FALSE	26
2022-09-14	10:06:12	3.03309	13.4918	925.953	1	27
2022-09-14	10:06:12	0.865458	3.84973	918.154	FALSE	27
2022-09-14	10:06:13	1.69543	7.54161	933.495	FALSE	27
2022-09-14	10:06:13	0.381896	1.69875	919.853	FALSE	27
2022-09-14	10:06:13	0.669733	2.97911	936.474	FALSE	27
2022-09-14	10:06:13	0.228919	1.01828	920.871	FALSE	27
2022-09-14	10:06:14	0.442914	1.97017	938.444	FALSE	27
2022-09-14	10:06:14	0.305763	1.36009	922.231	FALSE	27
2022-09-14	10:06:14	0.312227	1.38885	939.833	FALSE	27
2022-09-14	10:06:14	0.602455	2.67984	924.911	FALSE	27
2022-09-14	10:06:15	0.433295	1.92738	941.76	FALSE	27
2022-09-14	10:06:15	2.12525	9.45354	934.364	FALSE	27
2022-09-14	10:06:15	4.92586	21.9112	963.671	1	28
2022-09-14	10:06:16	5.70362	25.3708	959.735	1	29
2022-09-14	10:06:16	3.2078	14.2689	977.94	1	30
2022-09-14	10:06:16	3.24342	14.4274	974.163	1	31
2022-09-14	10:06:16	1.90653	8.48063	986.421	FALSE	31
2022-09-14	10:06:17	1.90724	8.48378	982.646	FALSE	31
2022-09-14	10:06:17	2.22551	9.89951	996.32	FALSE	31
2022-09-14	10:06:17	1.14739	5.10382	987.75	FALSE	31
2022-09-14	10:06:17	1.05095	4.67484	1001	FALSE	31
2022-09-14	10:06:18	0.352328	1.56723	989.317	FALSE	31
2022-09-14	10:06:18	1.9878	8.84213	1009.84	FALSE	31
2022-09-14	10:06:18	1.19655	5.32249	994.64	FALSE	31
2022-09-14	10:06:18	1.03818	4.61803	1014.46	FALSE	31
2022-09-14	10:06:19	0.584491	2.59993	997.24	FALSE	31
2022-09-14	10:06:19	0.6107	2.71652	1017.17	FALSE	31
2022-09-14	10:06:19	1.05843	4.70811	1001.95	FALSE	31
2022-09-14	10:06:19	0.680878	3.02868	1020.2	FALSE	31
2022-09-14	10:06:20	2.34734	10.4414	1012.39	FALSE	31
2022-09-14	10:06:20	0.571616	2.54266	1022.74	FALSE	31
2022-09-14	10:06:20	1.81228	8.06138	1020.45	FALSE	31
2022-09-14	10:06:21	1.10556	4.91775	1027.66	FALSE	31
2022-09-14	10:06:21	1.43599	6.38757	1026.84	FALSE	31
2022-09-14	10:06:21	2.78027	12.3672	1040.03	FALSE	31
2022-09-14	10:06:21	2.55828	11.3797	1038.22	FALSE	31
2022-09-14	10:06:22	2.97258	13.2226	1053.25	FALSE	31
2022-09-14	10:06:22	1.07543	4.78373	1043	FALSE	31
2022-09-14	10:06:22	0.930954	4.14107	1057.39	FALSE	31
2022-09-14	10:06:22	0.604338	2.68822	1045.69	FALSE	31
2022-09-14	10:06:23	0.498028	2.21533	1059.61	FALSE	31
2022-09-14	10:06:23	0.233194	1.03729	1046.73	FALSE	31
2022-09-14	10:06:23	0.392939	1.74787	1061.36	FALSE	31
2022-09-14	10:06:23	0.281743	1.25325	1047.98	FALSE	31
2022-09-14	10:06:24	0.365204	1.6245	1062.98	FALSE	31
2022-09-14	10:06:24	0.334364	1.48732	1049.47	FALSE	31
2022-09-14	10:06:24	0.430038	1.9129	1064.89	FALSE	31
2022-09-14	10:06:25	0.301743	1.34221	1050.81	FALSE	31
2022-09-14	10:06:25	0.465458	2.07045	1066.96	FALSE	31
2022-09-14	10:06:25	0.329733	1.46672	1052.28	FALSE	31
2022-09-14	10:06:25	0.693651	3.0855	1070.05	FALSE	31
2022-09-14	10:06:26	0.327036	1.45472	1053.73	FALSE	31
2022-09-14	10:06:26	0.673448	2.99563	1073.04	FALSE	31
2022-09-14	10:06:26	0.397265	1.76711	1055.5	FALSE	31
2022-09-14	10:06:26	0.457926	2.03695	1075.08	FALSE	31
2022-09-14	10:06:27	0.561539	2.49784	1058	FALSE	31
2022-09-14	10:06:27	0.343881	1.52965	1076.61	FALSE	31
2022-09-14	10:06:27	0.412735	1.83593	1059.83	FALSE	31
2022-09-14	10:06:27	0.453601	2.01771	1078.63	FALSE	31
2022-09-14	10:06:28	0.465102	2.06887	1061.9	FALSE	31
2022-09-14	10:06:28	0.336501	1.49682	1080.13	FALSE	31
2022-09-14	10:06:28	0.403982	1.79699	1063.7	FALSE	31
2022-09-14	10:06:29	0.649936	2.89105	1083.02	FALSE	31
2022-09-14	10:06:29	0.505865	2.25019	1065.95	FALSE	31
2022-09-14	10:06:29	0.623779	2.77469	1085.79	FALSE	31
2022-09-14	10:06:29	0.484847	2.1567	1068.11	FALSE	31
2022-09-14	10:06:30	0.515127	2.29139	1088.08	FALSE	31
2022-09-14	10:06:30	0.410954	1.82801	1069.93	FALSE	31
2022-09-14	10:06:30	0.374466	1.6657	1089.75	FALSE	31
2022-09-14	10:06:30	0.420471	1.87034	1071.8	FALSE	31
2022-09-14	10:06:31	0.335331	1.49162	1091.24	FALSE	31
2022-09-14	10:06:31	0.334517	1.488	1073.29	FALSE	31
2022-09-14	10:06:31	0.43869	1.95138	1093.19	FALSE	31
2022-09-14	10:06:31	0.533499	2.37311	1075.66	FALSE	31
2022-09-14	10:06:32	0.342863	1.52512	1094.72	FALSE	31
2022-09-14	10:06:32	0.429428	1.91018	1077.57	FALSE	31
2022-09-14	10:06:32	0.440776	1.96066	1096.68	FALSE	31
2022-09-14	10:06:33	1.01864	4.53111	1082.11	FALSE	31
2022-09-14	10:06:33	2.55161	11.3501	1108.03	FALSE	31
2022-09-14	10:06:33	3.5394	15.744	1097.85	1	32
2022-09-14	10:06:33	4.34744	19.3383	1127.37	1	33
2022-09-14	10:06:34	3.29436	14.654	1112.5	1	34
2022-09-14	10:06:34	2.21172	9.83817	1137.2	FALSE	34
2022-09-14	10:06:34	1.27284	5.66185	1118.17	FALSE	34
2022-09-14	10:06:34	0.690954	3.0735	1140.28	FALSE	34
2022-09-14	10:06:35	1.00607	4.4752	1122.64	FALSE	34
2022-09-14	10:06:35	1.05721	4.70268	1144.98	FALSE	34
2022-09-14	10:06:35	1.20449	5.35781	1128	FALSE	34
2022-09-14	10:06:35	1.21391	5.39971	1150.38	FALSE	34
2022-09-14	10:06:36	1.19945	5.33539	1133.33	FALSE	34
2022-09-14	10:06:36	1.15075	5.11877	1155.5	FALSE	34
2022-09-14	10:06:36	1.14917	5.11174	1138.45	FALSE	34
2022-09-14	10:06:37	1.17268	5.21632	1160.71	FALSE	34
2022-09-14	10:06:37	1.13564	5.05155	1143.5	FALSE	34
2022-09-14	10:06:37	1.07243	4.77038	1165.48	FALSE	34
2022-09-14	10:06:37	1.08729	4.83648	1148.33	FALSE	34
2022-09-14	10:06:38	1.13248	5.0375	1170.52	FALSE	34
2022-09-14	10:06:38	1.18128	5.25457	1153.59	FALSE	34
2022-09-14	10:06:38	1.18607	5.27588	1175.8	FALSE	34
2022-09-14	10:06:38	1.23981	5.51492	1159.1	FALSE	34
2022-09-14	10:06:39	0.817468	3.63626	1179.43	FALSE	34
2022-09-14	10:06:39	0.727341	3.23536	1162.34	FALSE	34
2022-09-14	10:06:39	1.01844	4.53022	1183.96	FALSE	34
2022-09-14	10:06:39	2.39182	10.6393	1172.98	FALSE	34
2022-09-14	10:06:40	2.09268	9.30866	1193.27	FALSE	34
2022-09-14	10:06:40	2.01548	8.96526	1181.94	FALSE	34
2022-09-14	10:06:40	1.5967	7.10244	1200.38	FALSE	34
2022-09-14	10:06:40	1.63258	7.26204	1189.21	FALSE	34
2022-09-14	10:06:41	1.30424	5.80152	1206.18	FALSE	34
2022-09-14	10:06:41	1.30683	5.81304	1195.02	FALSE	34
2022-09-14	10:06:41	1.16296	5.17308	1211.35	FALSE	34
2022-09-14	10:06:42	1.25141	5.56652	1200.58	FALSE	34
2022-09-14	10:06:42	1.19477	5.31458	1216.66	FALSE	34
2022-09-14	10:06:42	1.18999	5.29331	1205.88	FALSE	34
2022-09-14	10:06:42	1.19355	5.30915	1221.97	FALSE	34
2022-09-14	10:06:43	1.2735	5.66478	1211.54	FALSE	34
2022-09-14	10:06:43	1.22983	5.47053	1227.44	FALSE	34
2022-09-14	10:06:43	1.18724	5.28108	1216.82	FALSE	34
2022-09-14	10:06:43	1.19106	5.29807	1232.74	FALSE	34
2022-09-14	10:06:44	1.23029	5.47258	1222.3	FALSE	34
2022-09-14	10:06:44	1.20597	5.3644	1238.11	FALSE	34
2022-09-14	10:06:44	1.18357	5.26476	1227.56	FALSE	34
2022-09-14	10:06:44	1.14551	5.09546	1243.2	FALSE	34
2022-09-14	10:06:45	1.14342	5.08616	1232.65	FALSE	34
2022-09-14	10:06:45	1.13533	5.05017	1248.25	FALSE	34
2022-09-14	10:06:45	1.12999	5.02642	1237.67	FALSE	34
2022-09-14	10:06:46	1.12327	4.99653	1253.25	FALSE	34
2022-09-14	10:06:46	1.12134	4.98794	1242.66	FALSE	34
2022-09-14	10:06:46	1.05961	4.71336	1257.96	FALSE	34
2022-09-14	10:06:46	1.11604	4.96437	1247.63	FALSE	34
2022-09-14	10:06:47	1.06006	4.71536	1262.68	FALSE	34
2022-09-14	10:06:47	1.11095	4.94173	1252.57	FALSE	34
2022-09-14	10:06:47	1.08088	4.80797	1267.49	FALSE	34
2022-09-14	10:06:47	1.08831	4.84102	1257.41	FALSE	34
2022-09-14	10:06:48	0.951158	4.23094	1271.72	FALSE	34
2022-09-14	10:06:48	0.543015	2.41544	1259.82	FALSE	34
2022-09-14	10:06:48	0.459657	2.04465	1273.76	FALSE	34
2022-09-14	10:06:48	0.314415	1.39858	1261.22	FALSE	34
2022-09-14	10:06:49	0.308817	1.37368	1275.14	FALSE	34
2022-09-14	10:06:49	0.397367	1.76757	1262.99	FALSE	34
2022-09-14	10:06:49	0.545712	2.42744	1277.56	FALSE	34
2022-09-14	10:06:50	0.414313	1.84295	1264.83	FALSE	34
2022-09-14	10:06:50	0.451463	2.0082	1279.57	FALSE	34
2022-09-14	10:06:50	0.368562	1.63944	1266.47	FALSE	34
2022-09-14	10:06:50	-0.00477074	-0.0212212	1279.57	FALSE	34
2022-09-14	10:06:51	-0.255916	-1.13837	1266.47	FALSE	34
2022-09-14	10:06:51	-0.670114	-2.9808	1279.57	FALSE	34
2022-09-14	10:06:51	-0.596628	-2.65392	1266.47	FALSE	34
2022-09-14	10:06:51	-0.879681	-3.913	1279.57	FALSE	34
2022-09-14	10:06:52	-0.815203	-3.62619	1266.47	FALSE	34
2022-09-14	10:06:52	-0.464974	-2.0683	1279.57	FALSE	34
2022-09-14	10:06:52	0.0728883	0.324222	1266.8	FALSE	34
2022-09-14	10:06:52	1.33854	5.95409	1285.52	FALSE	34
2022-09-14	10:06:53	1.94246	8.64045	1275.44	FALSE	34
2022-09-14	10:06:53	4.52627	20.1338	1305.66	1	35
2022-09-14	10:06:53	4.68154	20.8244	1296.26	1	36
2022-09-14	10:06:54	1.94256	8.6409	1314.3	FALSE	36
2022-09-14	10:06:54	1.33055	5.91855	1302.18	FALSE	36
2022-09-14	10:06:54	2.75584	12.2585	1326.56	FALSE	36
2022-09-14	10:06:54	1.91416	8.51457	1310.7	FALSE	36
2022-09-14	10:06:55	1.53497	6.82785	1333.39	FALSE	36
2022-09-14	10:06:55	0.59701	2.65562	1313.35	FALSE	36
2022-09-14	10:06:55	0.73584	3.27316	1336.66	FALSE	36
2022-09-14	10:06:55	0.723728	3.21929	1316.57	FALSE	36
2022-09-14	10:06:56	1.04958	4.66874	1341.33	FALSE	36
2022-09-14	10:06:56	0.682557	3.03615	1319.61	FALSE	36
2022-09-14	10:06:56	0.719809	3.20185	1344.53	FALSE	36
2022-09-14	10:06:56	0.720013	3.20276	1322.81	FALSE	36
2022-09-14	10:06:57	0.933601	4.15284	1348.68	FALSE	36
2022-09-14	10:06:57	0.538435	2.39507	1325.2	FALSE	36
2022-09-14	10:06:57	2.02505	9.00783	1357.69	FALSE	36
2022-09-14	10:06:58	2.06296	9.17646	1334.38	FALSE	36
2022-09-14	10:06:58	1.13793	5.06174	1362.75	FALSE	36
2022-09-14	10:06:58	2.38958	10.6293	1345.01	FALSE	36
2022-09-14	10:06:58	0.838028	3.72772	1366.48	FALSE	36
2022-09-14	10:06:59	0.73584	3.27316	1348.28	FALSE	36
2022-09-14	10:06:59	0.739707	3.29036	1369.77	FALSE	36
2022-09-14	10:06:59	0.366272	1.62925	1349.91	FALSE	36
2022-09-14	10:06:59	0.746425	3.32025	1373.09	FALSE	36
2022-09-14	10:07:00	0.735687	3.27248	1353.18	FALSE	36
2022-09-14	10:07:00	0.745051	3.31414	1376.4	FALSE	36
2022-09-14	10:07:00	0.74098	3.29603	1356.48	FALSE	36
2022-09-14	10:07:00	0.977265	4.34707	1380.75	FALSE	36
2022-09-14	10:07:01	0.739758	3.29059	1359.77	FALSE	36
2022-09-14	10:07:01	0.745763	3.3173	1384.07	FALSE	36
2022-09-14	10:07:01	0.741845	3.29987	1363.07	FALSE	36
2022-09-14	10:07:01	0.739656	3.29014	1387.36	FALSE	36
2022-09-14	10:07:02	0.736349	3.27543	1366.35	FALSE	36
2022-09-14	10:07:02	0.736756	3.27724	1390.64	FALSE	36
2022-09-14	10:07:02	0.738231	3.2838	1369.63	FALSE	36
2022-09-14	10:07:03	0.738028	3.2829	1393.92	FALSE	36
2022-09-14	10:07:03	0.741489	3.29829	1372.93	FALSE	36
2022-09-14	10:07:03	0.739707	3.29036	1397.21	FALSE	36
2022-09-14	10:07:03	0.737315	3.27972	1376.21	FALSE	36
2022-09-14	10:07:04	1.29604	5.76505	1402.97	FALSE	36
2022-09-14	10:07:04	0.74841	3.32908	1379.54	FALSE	36
2022-09-14	10:07:04	0.874211	3.88867	1406.86	FALSE	36
2022-09-14	10:07:04	0.848664	3.77503	1383.31	FALSE	36
2022-09-14	10:07:05	0.69243	3.08007	1409.94	FALSE	36
2022-09-14	10:07:05	0.743778	3.30847	1386.62	FALSE	36
2022-09-14	10:07:05	0.737417	3.28018	1413.22	FALSE	36
2022-09-14	10:07:05	0.735636	3.27226	1389.89	FALSE	36
2022-09-14	10:07:06	0.736247	3.27497	1416.5	FALSE	36
2022-09-14	10:07:06	0.738486	3.28493	1393.18	FALSE	36
2022-09-14	10:07:06	0.736501	3.2761	1419.77	FALSE	36
2022-09-14	10:07:07	0.742099	3.301	1396.48	FALSE	36
2022-09-14	10:07:07	0.745713	3.31708	1423.09	FALSE	36
2022-09-14	10:07:07	0.735331	3.2709	1399.75	FALSE	36
2022-09-14	10:07:07	0.73472	3.26818	1426.36	FALSE	36
2022-09-14	10:07:08	0.741489	3.29829	1403.05	FALSE	36
2022-09-14	10:07:08	0.74215	3.30123	1429.66	FALSE	36
2022-09-14	10:07:08	0.744797	3.31301	1406.36	FALSE	36
2022-09-14	10:07:08	0.736399	3.27565	1432.94	FALSE	36
2022-09-14	10:07:09	0.733957	3.26479	1409.63	FALSE	36
2022-09-14	10:07:09	0.739046	3.28742	1436.22	FALSE	36
2022-09-14	10:07:09	0.738842	3.28652	1412.91	FALSE	36
2022-09-14	10:07:09	2.24627	9.99186	1446.22	FALSE	36
2022-09-14	10:07:10	0.786679	3.49931	1416.41	FALSE	36
2022-09-14	10:07:10	0.742913	3.30463	1449.52	FALSE	36
2022-09-14	10:07:10	0.737926	3.28244	1419.69	FALSE	36
2022-09-14	10:07:11	0.740165	3.2924	1452.81	FALSE	36
2022-09-14	10:07:11	1.70291	7.57488	1427.27	FALSE	36
2022-09-14	10:07:11	1.0481	4.66216	1457.48	FALSE	36
2022-09-14	10:07:11	3.87782	17.2493	1444.52	1	37
2022-09-14	10:07:12	0.904033	4.02132	1461.5	FALSE	37
2022-09-14	10:07:12	0.735178	3.27022	1447.79	FALSE	37
2022-09-14	10:07:12	0.748053	3.32749	1464.82	FALSE	37
2022-09-14	10:07:13	0.73813	3.28335	1451.07	FALSE	37
2022-09-14	10:07:13	0.713143	3.1722	1468	FALSE	37
2022-09-14	10:07:13	0.267545	1.19009	1452.26	FALSE	37
2022-09-14	10:07:13	0.137163	0.610128	1468.61	FALSE	37
2022-09-14	10:07:13	0.0628628	0.279626	1452.54	FALSE	37
2022-09-14	10:07:14	-0.0597326	-0.265703	1468.61	FALSE	37
2022-09-14	10:07:14	-0.265992	-1.18319	1452.54	FALSE	37
2022-09-14	10:07:14	-0.329503	-1.4657	1468.61	FALSE	37
2022-09-14	10:07:15	-0.187926	-0.835932	1452.54	FALSE	37
2022-09-14	10:07:15	0.936502	4.16575	1472.77	FALSE	37
2022-09-14	10:07:15	1.16826	5.19665	1457.74	FALSE	37
2022-09-14	10:07:15	1.93111	8.58996	1481.36	FALSE	37
2022-09-14	10:07:16	0.159199	0.708149	1458.45	FALSE	37
2022-09-14	10:07:16	0.437112	1.94436	1483.31	FALSE	37
2022-09-14	10:07:16	0.436858	1.94323	1460.39	FALSE	37
2022-09-14	10:07:16	0.565763	2.51663	1485.82	FALSE	37
2022-09-14	10:07:17	0.367799	1.63604	1462.03	FALSE	37
2022-09-14	10:07:17	0.439046	1.95296	1487.78	FALSE	37
2022-09-14	10:07:17	0.463372	2.06117	1464.09	FALSE	37
2022-09-14	10:07:17	0.395636	1.75987	1489.54	FALSE	37
2022-09-14	10:07:18	0.553855	2.46366	1466.55	FALSE	37
2022-09-14	10:07:18	0.693499	3.08482	1492.62	FALSE	37
2022-09-14	10:07:18	0.832634	3.70372	1470.25	FALSE	37
2022-09-14	10:07:18	0.6364	2.83083	1495.45	FALSE	37
2022-09-14	10:07:19	0.888511	3.95227	1474.21	FALSE	37
2022-09-14	10:07:19	0.613142	2.72738	1498.18	FALSE	37
2022-09-14	10:07:19	0.381285	1.69603	1475.9	FALSE	37
2022-09-14	10:07:20	0.490751	2.18296	1500.36	FALSE	37
2022-09-14	10:07:20	0.360165	1.60209	1477.51	FALSE	37
2022-09-14	10:07:20	0.452074	2.01092	1502.37	FALSE	37
2022-09-14	10:07:20	0.362913	1.61431	1479.12	FALSE	37
2022-09-14	10:07:21	0.466323	2.0743	1504.45	FALSE	37
2022-09-14	10:07:21	0.520522	2.31539	1481.43	FALSE	37
2022-09-14	10:07:21	0.491311	2.18545	1506.63	FALSE	37
2022-09-14	10:07:21	0.830089	3.6924	1485.13	FALSE	37
2022-09-14	10:07:22	0.889376	3.95612	1510.59	FALSE	37
2022-09-14	10:07:22	0.827596	3.68131	1488.81	FALSE	37
2022-09-14	10:07:22	0.881794	3.9224	1514.51	FALSE	37
2022-09-14	10:07:22	0.63299	2.81567	1491.62	FALSE	37
2022-09-14	10:07:23	0.671972	2.98907	1517.5	FALSE	37
2022-09-14	10:07:23	0.612481	2.72444	1494.35	FALSE	37
2022-09-14	10:07:23	0.596756	2.65449	1520.15	FALSE	37
2022-09-14	10:07:24	0.571005	2.53994	1496.89	FALSE	37
2022-09-14	10:07:24	0.459453	2.04374	1522.2	FALSE	37
2022-09-14	10:07:24	0.448257	1.99394	1498.88	FALSE	37
2022-09-14	10:07:24	0.455534	2.02631	1524.22	FALSE	37
2022-09-14	10:07:25	0.47126	2.09626	1500.98	FALSE	37
2022-09-14	10:07:25	0.465611	2.07113	1526.3	FALSE	37
2022-09-14	10:07:25	0.518639	2.30701	1503.29	FALSE	37
2022-09-14	10:07:25	0.573855	2.55262	1528.85	FALSE	37
2022-09-14	10:07:26	0.370903	1.64985	1504.94	FALSE	37
2022-09-14	10:07:26	0.488715	2.1739	1531.02	FALSE	37
2022-09-14	10:07:26	0.616196	2.74096	1507.68	FALSE	37
2022-09-14	10:07:26	0.730293	3.24849	1534.27	FALSE	37
2022-09-14	10:07:27	0.502048	2.23321	1509.91	FALSE	37
2022-09-14	10:07:27	0.700776	3.11719	1537.39	FALSE	37
2022-09-14	10:07:27	0.706629	3.14323	1513.05	FALSE	37
2022-09-14	10:07:28	0.697621	3.10316	1540.49	FALSE	37
2022-09-14	10:07:28	0.742608	3.30327	1516.36	FALSE	37
2022-09-14	10:07:28	0.651819	2.89942	1543.39	FALSE	37
2022-09-14	10:07:28	0.87416	3.88844	1520.24	FALSE	37
2022-09-14	10:07:29	0.878639	3.90836	1547.3	FALSE	37
2022-09-14	10:07:29	1.10449	4.91299	1525.16	FALSE	37
2022-09-14	10:07:29	1.24419	5.53441	1552.83	FALSE	37
2022-09-14	10:07:29	1.61864	7.20003	1532.36	FALSE	37
2022-09-14	10:07:30	1.70434	7.58125	1560.41	FALSE	37
2022-09-14	10:07:30	2.12627	9.45807	1541.82	FALSE	37
2022-09-14	10:07:30	1.93742	8.61803	1569.03	FALSE	37
2022-09-14	10:07:30	0.982099	4.36857	1546.18	FALSE	37
2022-09-14	10:07:31	1.0224	4.54784	1573.58	FALSE	37
2022-09-14	10:07:31	0.799198	3.55499	1549.74	FALSE	37
2022-09-14	10:07:31	0.801234	3.56405	1577.14	FALSE	37
2022-09-14	10:07:32	1.04042	4.628	1554.37	FALSE	37
2022-09-14	10:07:32	1.20637	5.36618	1582.51	FALSE	37
2022-09-14	10:07:32	1.56856	6.97727	1561.34	FALSE	37
2022-09-14	10:07:32	1.87625	8.34594	1590.86	FALSE	37
2022-09-14	10:07:33	1.59548	7.09701	1568.44	FALSE	37
2022-09-14	10:07:33	2.09487	9.3184	1600.17	FALSE	37
2022-09-14	10:07:33	1.79589	7.98848	1576.43	FALSE	37
2022-09-14	10:07:33	2.03843	9.06734	1609.24	FALSE	37
2022-09-14	10:07:34	2.4848	11.0529	1587.48	FALSE	37
2022-09-14	10:07:34	2.5682	11.4239	1620.67	FALSE	37
2022-09-14	10:07:34	2.78515	12.3889	1599.87	FALSE	37
2022-09-14	10:07:34	3.03121	13.4834	1634.15	1	38
2022-09-14	10:07:35	3.07141	13.6622	1613.53	1	39
2022-09-14	10:07:35	2.72607	12.1261	1646.28	FALSE	39
2022-09-14	10:07:35	2.77808	12.3575	1625.89	FALSE	39
2022-09-14	10:07:36	2.61309	11.6235	1657.9	FALSE	39
2022-09-14	10:07:36	2.77182	12.3296	1638.22	FALSE	39
2022-09-14	10:07:36	2.79197	12.4192	1670.32	FALSE	39
2022-09-14	10:07:36	2.78011	12.3665	1650.59	FALSE	39
2022-09-14	10:07:37	2.73121	12.149	1682.47	FALSE	39
2022-09-14	10:07:37	2.31192	10.2839	1660.87	FALSE	39
2022-09-14	10:07:37	1.99319	8.86611	1691.33	FALSE	39
2022-09-14	10:07:37	1.76602	7.85561	1668.73	FALSE	39
2022-09-14	10:07:38	1.65258	7.35101	1698.68	FALSE	39
2022-09-14	10:07:38	1.48698	6.61438	1675.34	FALSE	39
2022-09-14	10:07:38	1.36342	6.06476	1704.75	FALSE	39
2022-09-14	10:07:38	0.643372	2.86185	1678.2	FALSE	39
2022-09-14	10:07:39	0.408461	1.81692	1706.57	FALSE	39
2022-09-14	10:07:39	0.393448	1.75014	1679.95	FALSE	39
2022-09-14	10:07:39	0.289529	1.28788	1707.85	FALSE	39
2022-09-14	10:07:39	-0.028842	-0.128295	1679.95	FALSE	39
2022-09-14	10:07:40	-0.120649	-0.536671	1707.85	FALSE	39
2022-09-14	10:07:40	0.0597585	0.265818	1680.22	FALSE	39
2022-09-14	10:07:40	0.0201656	0.0897006	1707.94	FALSE	39
2022-09-14	10:07:41	0.237621	1.05699	1681.28	FALSE	39
2022-09-14	10:07:41	-0.027417	-0.121956	1707.94	FALSE	39
2022-09-14	10:07:41	0.0419468	0.186588	1681.46	FALSE	39
2022-09-14	10:07:41	0.056756	0.252462	1708.2	FALSE	39
2022-09-14	10:07:42	0.130649	0.581153	1682.04	FALSE	39
2022-09-14	10:07:42	0.0413361	0.183871	1708.38	FALSE	39
2022-09-14	10:07:42	0.0691733	0.307697	1682.35	FALSE	39
2022-09-14	10:07:42	-0.0588674	-0.261854	1708.38	FALSE	39
2022-09-14	10:07:43	0.0733463	0.326259	1682.68	FALSE	39
2022-09-14	10:07:43	0.08042	0.357724	1708.74	FALSE	39
2022-09-14	10:07:43	0.200115	0.890152	1683.57	FALSE	39
2022-09-14	10:07:43	0.14841	0.660157	1709.4	FALSE	39
2022-09-14	10:07:44	0.179911	0.80028	1684.37	FALSE	39
2022-09-14	10:07:44	0.0456109	0.202886	1709.6	FALSE	39
2022-09-14	10:07:44	-0.172252	-0.766211	1684.37	FALSE	39
2022-09-14	10:07:45	-0.373626	-1.66196	1709.6	FALSE	39
2022-09-14	10:07:45	-0.109605	-0.487545	1684.37	FALSE	39
2022-09-14	10:07:45	-0.230369	-1.02473	1709.6	FALSE	39
2022-09-14	10:07:45	-0.247519	-1.10101	1684.37	FALSE	39
2022-09-14	10:07:46	-0.299274	-1.33123	1709.6	FALSE	39
2022-09-14	10:07:46	-0.0471117	-0.209562	1684.37	FALSE	39
2022-09-14	10:07:46	-0.0861447	-0.383189	1709.6	FALSE	39
2022-09-14	10:07:46	-0.00975804	-0.0434057	1684.37	FALSE	39
2022-09-14	10:07:47	-0.100496	-0.447026	1709.6	FALSE	39
2022-09-14	10:07:47	0.0681046	0.302943	1684.67	FALSE	39
2022-09-14	10:07:47	-0.0164756	-0.0732868	1709.6	FALSE	39
2022-09-14	10:07:47	0.0606237	0.269666	1684.94	FALSE	39
2022-09-14	10:07:48	-0.0453814	-0.201866	1709.6	FALSE	39
2022-09-14	10:07:48	0.144898	0.644535	1685.59	FALSE	39
2022-09-14	10:07:48	0.258791	1.15115	1710.75	FALSE	39
2022-09-14	10:07:49	1.04276	4.63841	1690.22	FALSE	39
2022-09-14	10:07:49	1.02296	4.55033	1715.3	FALSE	39
2022-09-14	10:07:49	0.734771	3.26841	1693.49	FALSE	39
2022-09-14	10:07:49	1.00078	4.45167	1719.75	FALSE	39
2022-09-14	10:07:50	0.96958	4.31289	1697.81	FALSE	39
2022-09-14	10:07:50	0.379809	1.68947	1721.44	FALSE	39
2022-09-14	10:07:50	0.665051	2.95828	1700.76	FALSE	39
2022-09-14	10:07:50	0.25187	1.12037	1722.56	FALSE	39
2022-09-14	10:07:51	0.0124303	0.0552925	1700.82	FALSE	39
2022-09-14	10:07:51	-0.151794	-0.67521	1722.56	FALSE	39
2022-09-14	10:07:51	-0.1036	-0.460834	1700.82	FALSE	39
2022-09-14	10:07:51	-0.226806	-1.00888	1722.56	FALSE	39
2022-09-14	10:07:52	-0.352099	-1.56621	1700.82	FALSE	39
2022-09-14	10:07:52	-0.388689	-1.72897	1722.56	FALSE	39
2022-09-14	10:07:52	-0.0206995	-0.0920755	1700.82	FALSE	39
2022-09-14	10:07:52	0.719606	3.20095	1725.76	FALSE	39
2022-09-14	10:07:53	0.507239	2.2563	1703.08	FALSE	39
2022-09-14	10:07:53	1.22424	5.44566	1731.21	FALSE	39
2022-09-14	10:07:53	1.1023	4.90325	1707.98	FALSE	39
2022-09-14	10:07:54	2.14047	9.52124	1740.73	FALSE	39
2022-09-14	10:07:54	3.3563	14.9295	1722.91	1	40
2022-09-14	10:07:54	1.3709	6.09804	1746.83	FALSE	40
2022-09-14	10:07:54	1.76922	7.86984	1730.78	FALSE	40
2022-09-14	10:07:55	0.783066	3.48323	1750.31	FALSE	40
2022-09-14	10:07:55	1.35294	6.01815	1736.8	FALSE	40
2022-09-14	10:07:55	0.723219	3.21702	1753.53	FALSE	40
2022-09-14	10:07:55	1.76027	7.83003	1744.63	FALSE	40
2022-09-14	10:07:56	2.56693	11.4182	1764.95	FALSE	40
2022-09-14	10:07:56	3.70393	16.4758	1761.1	1	41
2022-09-14	10:07:56	3.41859	15.2066	1780.15	1	42
2022-09-14	10:07:56	3.028	13.4691	1774.57	1	43
2022-09-14	10:07:57	3.88938	17.3007	1797.46	1	44
2022-09-14	10:07:57	1.73335	7.71029	1782.28	FALSE	44
2022-09-14	10:07:57	2.08637	9.28059	1806.74	FALSE	44
2022-09-14	10:07:58	1.17981	5.24803	1787.53	FALSE	44
2022-09-14	10:07:58	0.62785	2.7928	1809.53	FALSE	44
2022-09-14	10:07:58	0.0993004	0.441708	1787.97	FALSE	44
2022-09-14	10:07:58	0.317417	1.41193	1810.94	FALSE	44
2022-09-14	10:07:59	-0.135305	-0.601864	1787.97	FALSE	44
2022-09-14	10:07:59	-0.369707	-1.64453	1810.94	FALSE	44
2022-09-14	10:07:59	-0.180699	-0.803785	1787.97	FALSE	44
2022-09-14	10:07:59	-0.0946435	-0.420993	1810.94	FALSE	44
2022-09-14	10:08:00	-0.317493	-1.41227	1787.97	FALSE	44
2022-09-14	10:08:00	-0.213422	-0.949344	1810.94	FALSE	44
2022-09-14	10:08:00	0.204491	0.909617	1788.88	FALSE	44
2022-09-14	10:08:00	0.220267	0.979792	1811.92	FALSE	44
2022-09-14	10:08:01	0.170802	0.759761	1789.64	FALSE	44
2022-09-14	10:08:01	0.22159	0.985677	1812.91	FALSE	44
2022-09-14	10:08:01	0.329529	1.46581	1791.11	FALSE	44
2022-09-14	10:08:02	0.333041	1.48143	1814.39	FALSE	44
2022-09-14	10:08:02	0.409377	1.82099	1792.93	FALSE	44
2022-09-14	10:08:02	0.399555	1.7773	1816.17	FALSE	44
2022-09-14	10:08:02	0.645254	2.87022	1795.8	FALSE	44
2022-09-14	10:08:03	0.737417	3.28018	1819.45	FALSE	44
2022-09-14	10:08:03	0.733295	3.26184	1799.06	FALSE	44
2022-09-14	10:08:03	0.735229	3.27045	1822.72	FALSE	44
2022-09-14	10:08:03	0.444186	1.97583	1801.04	FALSE	44
2022-09-14	10:08:04	0.254669	1.13282	1823.85	FALSE	44
2022-09-14	10:08:04	0.735585	3.27203	1804.31	FALSE	44
2022-09-14	10:08:04	0.602354	2.67939	1826.53	FALSE	44
2022-09-14	10:08:04	0.237468	1.05631	1805.36	FALSE	44
2022-09-14	10:08:05	0.174873	0.77787	1827.31	FALSE	44
2022-09-14	10:08:05	0.251819	1.12014	1806.48	FALSE	44
2022-09-14	10:08:05	0.206832	0.92003	1828.23	FALSE	44
2022-09-14	10:08:06	0.172227	0.7661	1807.25	FALSE	44
2022-09-14	10:08:06	0.306476	1.36327	1829.59	FALSE	44
2022-09-14	10:08:06	0.290598	1.29264	1808.54	FALSE	44
2022-09-14	10:08:06	0.253753	1.12874	1830.72	FALSE	44
2022-09-14	10:08:07	0.321438	1.42982	1809.97	FALSE	44
2022-09-14	10:08:07	0.145407	0.646799	1831.36	FALSE	44
2022-09-14	10:08:07	0.138588	0.616467	1810.59	FALSE	44
2022-09-14	10:08:07	0.147392	0.655629	1832.02	FALSE	44
2022-09-14	10:08:08	-0.0376461	-0.167457	1810.59	FALSE	44
2022-09-14	10:08:08	-0.3693	-1.64272	1832.02	FALSE	44
2022-09-14	10:08:08	-0.619071	-2.75375	1810.59	FALSE	44
2022-09-14	10:08:09	-0.7179	-3.19336	1832.02	FALSE	44
2022-09-14	10:08:09	-0.708689	-3.15239	1810.59	FALSE	44
2022-09-14	10:08:09	-0.603498	-2.68448	1832.02	FALSE	44
2022-09-14	10:08:09	-0.569605	-2.53372	1810.59	FALSE	44
2022-09-14	10:08:10	-0.393371	-1.74979	1832.02	FALSE	44
2022-09-14	10:08:10	-0.498257	-2.21635	1810.59	FALSE	44
2022-09-14	10:08:10	-0.477697	-2.12489	1832.02	FALSE	44
2022-09-14	10:08:10	-0.337035	-1.4992	1810.59	FALSE	44
2022-09-14	10:08:11	-0.210216	-0.935083	1832.02	FALSE	44
2022-09-14	10:08:11	0.146578	0.652008	1811.24	FALSE	44
2022-09-14	10:08:11	0.38383	1.70735	1833.73	FALSE	44
2022-09-14	10:08:11	0.368308	1.63831	1812.88	FALSE	44
2022-09-14	10:08:12	0.402659	1.79111	1835.52	FALSE	44
2022-09-14	10:08:12	0.323168	1.43752	1814.32	FALSE	44
2022-09-14	10:08:12	0.498028	2.21533	1837.73	FALSE	44
2022-09-14	10:08:12	0.210853	0.937916	1815.25	FALSE	44
2022-09-14	10:08:13	0.043219	0.192247	1837.93	FALSE	44
2022-09-14	10:08:13	-0.255509	-1.13656	1815.25	FALSE	44
2022-09-14	10:08:13	-0.451793	-2.00967	1837.93	FALSE	44
2022-09-14	10:08:13	-0.532099	-2.36688	1815.25	FALSE	44
2022-09-14	10:08:14	-0.633727	-2.81894	1837.93	FALSE	44
2022-09-14	10:08:14	-0.684312	-3.04396	1815.25	FALSE	44
2022-09-14	10:08:14	-0.648689	-2.8855	1837.93	FALSE	44
2022-09-14	10:08:15	-0.726501	-3.23162	1815.25	FALSE	44
2022-09-14	10:08:15	-0.565737	-2.51651	1837.93	FALSE	44
2022-09-14	10:08:15	-0.528282	-2.3499	1815.25	FALSE	44
2022-09-14	10:08:15	-0.527061	-2.34447	1837.93	FALSE	44
2022-09-14	10:08:16	-0.52528	-2.33655	1815.25	FALSE	44
2022-09-14	10:08:16	-0.628231	-2.7945	1837.93	FALSE	44
2022-09-14	10:08:16	-0.521259	-2.31866	1815.25	FALSE	44
2022-09-14	10:08:16	-0.586043	-2.60684	1837.93	FALSE	44
2022-09-14	10:08:17	-0.549045	-2.44226	1815.25	FALSE	44
2022-09-14	10:08:17	-0.604669	-2.68969	1837.93	FALSE	44
2022-09-14	10:08:17	-0.66416	-2.95432	1815.25	FALSE	44
2022-09-14	10:08:17	-0.511997	-2.27747	1837.93	FALSE	44
2022-09-14	10:08:18	-0.57332	-2.55024	1815.25	FALSE	44
2022-09-14	10:08:18	-0.435254	-1.9361	1837.93	FALSE	44
2022-09-14	10:08:18	-0.397137	-1.76654	1815.25	FALSE	44
2022-09-14	10:08:19	0.0236771	0.10532	1838.03	FALSE	44
2022-09-14	10:08:19	1.67294	7.44157	1822.7	FALSE	44
2022-09-14	10:08:19	2.11681	9.41599	1847.45	FALSE	44
2022-09-14	10:08:19	0.902099	4.01272	1826.71	FALSE	44
2022-09-14	10:08:20	1.54352	6.86589	1854.31	FALSE	44
2022-09-14	10:08:20	0.910344	4.04939	1830.76	FALSE	44
2022-09-14	10:08:20	0.295891	1.31618	1855.63	FALSE	44
2022-09-14	10:08:20	0.189071	0.841026	1831.6	FALSE	44
2022-09-14	10:08:21	0.185967	0.827218	1856.46	FALSE	44
2022-09-14	10:08:21	0.169835	0.75546	1832.35	FALSE	44
2022-09-14	10:08:21	0.129529	0.576171	1857.03	FALSE	44
2022-09-14	10:08:21	0.208206	0.926142	1833.28	FALSE	44
2022-09-14	10:08:22	0.124949	0.555798	1857.59	FALSE	44
2022-09-14	10:08:22	0.238944	1.06287	1834.34	FALSE	44
2022-09-14	10:08:22	0.18215	0.81024	1858.4	FALSE	44
2022-09-14	10:08:23	0.226221	1.00628	1835.35	FALSE	44
2022-09-14	10:08:23	0.121947	0.542445	1858.94	FALSE	44
2022-09-14	10:08:23	0.0938551	0.417486	1835.77	FALSE	44
2022-09-14	10:08:23	0.142507	0.6339	1859.58	FALSE	44
2022-09-14	10:08:24	0.093957	0.41794	1836.19	FALSE	44
2022-09-14	10:08:24	0.121234	0.539273	1860.11	FALSE	44
2022-09-14	10:08:24	0.0271885	0.12094	1836.31	FALSE	44
2022-09-14	10:08:24	0.174975	0.778324	1860.89	FALSE	44
2022-09-14	10:08:25	0.102914	0.457782	1836.76	FALSE	44
2022-09-14	10:08:25	0.148359	0.659931	1861.55	FALSE	44
2022-09-14	10:08:25	0.110649	0.492189	1837.26	FALSE	44
2022-09-14	10:08:25	0.0943131	0.419524	1861.97	FALSE	44
2022-09-14	10:08:26	0.159199	0.708149	1837.96	FALSE	44
2022-09-14	10:08:26	0.0973666	0.433106	1862.41	FALSE	44
2022-09-14	10:08:26	0.0566033	0.251783	1838.22	FALSE	44
2022-09-14	10:08:26	-0.121717	-0.541422	1862.41	FALSE	44
2022-09-14	10:08:27	-0.188079	-0.836613	1838.22	FALSE	44
2022-09-14	10:08:27	-0.152862	-0.679961	1862.41	FALSE	44
2022-09-14	10:08:27	-0.273422	-1.21624	1838.22	FALSE	44
2022-09-14	10:08:28	-0.195254	-0.868529	1862.41	FALSE	44
2022-09-14	10:08:28	-0.309554	-1.37696	1838.22	FALSE	44
2022-09-14	10:08:28	-0.204313	-0.908825	1862.41	FALSE	44
2022-09-14	10:08:28	-0.209503	-0.931911	1838.22	FALSE	44
2022-09-14	10:08:29	-0.12014	-0.534407	1862.41	FALSE	44
2022-09-14	10:08:29	-0.215814	-0.959984	1838.22	FALSE	44
2022-09-14	10:08:29	-0.0124043	-0.0551768	1862.41	FALSE	44
2022-09-14	10:08:29	0.097621	0.434238	1838.65	FALSE	44
2022-09-14	10:08:30	0.240471	1.06966	1863.48	FALSE	44
2022-09-14	10:08:30	-0.0416664	-0.18534	1838.65	FALSE	44
2022-09-14	10:08:30	0.226476	1.00741	1864.48	FALSE	44
2022-09-14	10:08:30	0.0143641	0.0638944	1838.71	FALSE	44
2022-09-14	10:08:31	0.0463743	0.206282	1864.69	FALSE	44
2022-09-14	10:08:31	-0.0208013	-0.0925283	1838.71	FALSE	44
2022-09-14	10:08:31	-0.00497431	-0.0221267	1864.69	FALSE	44
2022-09-14	10:08:32	0.104186	0.46344	1839.18	FALSE	44
2022-09-14	10:08:32	0.119911	0.533388	1865.22	FALSE	44
2022-09-14	10:08:32	0.157977	0.702713	1839.88	FALSE	44
2022-09-14	10:08:32	0.0417432	0.185682	1865.41	FALSE	44
2022-09-14	10:08:33	0.185611	0.825635	1840.71	FALSE	44
2022-09-14	10:08:33	0.132837	0.590886	1866	FALSE	44
2022-09-14	10:08:33	0.221387	0.984774	1841.69	FALSE	44
2022-09-14	10:08:33	0.0553819	0.24635	1866.25	FALSE	44
2022-09-14	10:08:34	0.164491	0.731689	1842.42	FALSE	44
2022-09-14	10:08:34	0.334822	1.48936	1867.73	FALSE	44
2022-09-14	10:08:34	0.607646	2.70293	1845.13	FALSE	44
2022-09-14	10:08:34	0.517773	2.30316	1870.04	FALSE	44
2022-09-14	10:08:35	1.21747	5.41555	1850.54	FALSE	44
2022-09-14	10:08:35	1.03284	4.59428	1874.63	FALSE	44
2022-09-14	10:08:35	0.907239	4.03558	1854.58	FALSE	44
2022-09-14	10:08:36	0.63075	2.8057	1877.44	FALSE	44
2022-09-14	10:08:36	1.4736	6.55487	1861.13	FALSE	44
2022-09-14	10:08:36	0.31131	1.38477	1878.82	FALSE	44
2022-09-14	10:08:36	0.481743	2.14289	1863.27	FALSE	44
2022-09-14	10:08:37	0.595891	2.65064	1881.47	FALSE	44
2022-09-14	10:08:37	0.565916	2.51731	1865.79	FALSE	44
2022-09-14	10:08:37	0.499198	2.22053	1883.69	FALSE	44
2022-09-14	10:08:37	0.489733	2.17843	1867.97	FALSE	44
2022-09-14	10:08:38	0.42897	1.90814	1885.6	FALSE	44
2022-09-14	10:08:38	0.452532	2.01295	1869.98	FALSE	44
2022-09-14	10:08:38	0.38958	1.73293	1887.33	FALSE	44
2022-09-14	10:08:38	0.439809	1.95636	1871.94	FALSE	44
2022-09-14	10:08:39	0.372023	1.65483	1888.99	FALSE	44
2022-09-14	10:08:39	0.428868	1.90769	1873.85	FALSE	44
2022-09-14	10:08:39	0.388766	1.72931	1890.72	FALSE	44
2022-09-14	10:08:40	0.436705	1.94255	1875.79	FALSE	44
2022-09-14	10:08:40	0.388562	1.7284	1892.45	FALSE	44
2022-09-14	10:08:40	0.431412	1.91901	1877.71	FALSE	44
2022-09-14	10:08:40	0.392379	1.74538	1894.19	FALSE	44
2022-09-14	10:08:41	0.415076	1.84634	1879.55	FALSE	44
2022-09-14	10:08:41	0.366527	1.63039	1895.82	FALSE	44
2022-09-14	10:08:41	0.389631	1.73316	1881.29	FALSE	44
2022-09-14	10:08:41	0.361031	1.60594	1897.43	FALSE	44
2022-09-14	10:08:42	0.395687	1.76009	1883.05	FALSE	44
2022-09-14	10:08:42	0.237672	1.05721	1898.49	FALSE	44
2022-09-14	10:08:42	0.41701	1.85494	1884.9	FALSE	44
2022-09-14	10:08:42	0.322048	1.43253	1899.92	FALSE	44
2022-09-14	10:08:43	0.568206	2.52749	1887.43	FALSE	44
2022-09-14	10:08:43	0.628155	2.79416	1902.71	FALSE	44
2022-09-14	10:08:43	0.64673	2.87678	1890.31	FALSE	44
2022-09-14	10:08:43	0.669682	2.97888	1905.69	FALSE	44
2022-09-14	10:08:44	0.658486	2.92908	1893.24	FALSE	44
2022-09-14	10:08:44	0.668308	2.97277	1908.66	FALSE	44
2022-09-14	10:08:44	0.634008	2.82019	1896.06	FALSE	44
2022-09-14	10:08:45	0.658028	2.92704	1911.59	FALSE	44
2022-09-14	10:08:45	0.624287	2.77695	1898.83	FALSE	44
2022-09-14	10:08:45	0.662761	2.94809	1914.54	FALSE	44
2022-09-14	10:08:45	1.30322	5.79698	1904.63	FALSE	44
2022-09-14	10:08:46	1.61355	7.17739	1921.72	FALSE	44
2022-09-14	10:08:46	0.622761	2.77017	1907.4	FALSE	44
2022-09-14	10:08:46	0.617316	2.74595	1924.46	FALSE	44
2022-09-14	10:08:46	0.414568	1.84408	1909.24	FALSE	44
2022-09-14	10:08:47	0.425814	1.89411	1926.36	FALSE	44
2022-09-14	10:08:47	0.506323	2.25223	1911.5	FALSE	44
2022-09-14	10:08:47	0.510343	2.27011	1928.63	FALSE	44
2022-09-14	10:08:47	0.483677	2.15149	1913.65	FALSE	44
2022-09-14	10:08:48	0.460166	2.04691	1930.67	FALSE	44
2022-09-14	10:08:48	0.36556	1.62608	1915.27	FALSE	44
2022-09-14	10:08:48	0.45813	2.03785	1932.71	FALSE	44
2022-09-14	10:08:49	0.315026	1.4013	1916.68	FALSE	44
2022-09-14	10:08:49	0.407036	1.81058	1934.52	FALSE	44
2022-09-14	10:08:49	0.273652	1.21726	1917.89	FALSE	44
2022-09-14	10:08:49	0.308817	1.37368	1935.9	FALSE	44
2022-09-14	10:08:50	0.261641	1.16383	1919.06	FALSE	44
2022-09-14	10:08:50	0.380573	1.69286	1937.59	FALSE	44
2022-09-14	10:08:50	0.248868	1.10701	1920.16	FALSE	44
2022-09-14	10:08:50	0.44383	1.97424	1939.56	FALSE	44
2022-09-14	10:08:51	0.221183	0.983866	1921.15	FALSE	44
2022-09-14	10:08:51	0.683423	3.04	1942.6	FALSE	44
2022-09-14	10:08:51	0.344644	1.53305	1922.68	FALSE	44
2022-09-14	10:08:51	0.980013	4.35929	1946.96	FALSE	44
2022-09-14	10:08:52	1.86047	8.27574	1930.96	FALSE	44
2022-09-14	10:08:52	3.24938	14.4539	1961.42	1	45
2022-09-14	10:08:52	3.86444	17.1898	1948.15	1	46
2022-09-14	10:08:53	4.14993	18.4597	1979.88	1	47
2022-09-14	10:08:53	1.95197	8.68275	1956.83	FALSE	47
2022-09-14	10:08:53	1.33004	5.91628	1985.79	FALSE	47
2022-09-14	10:08:53	0.442812	1.96972	1958.8	FALSE	47
2022-09-14	10:08:54	0.487697	2.16937	1987.96	FALSE	47
2022-09-14	10:08:54	0.467239	2.07837	1960.88	FALSE	47
2022-09-14	10:08:54	0.488715	2.1739	1990.14	FALSE	47
2022-09-14	10:08:54	0.430089	1.91312	1962.79	FALSE	47
2022-09-14	10:08:55	0.421794	1.87622	1992.01	FALSE	47
2022-09-14	10:08:55	0.344339	1.53169	1964.32	FALSE	47
2022-09-14	10:08:55	0.466476	2.07498	1994.09	FALSE	47
2022-09-14	10:08:55	0.316654	1.40854	1965.73	FALSE	47
2022-09-14	10:08:56	0.490547	2.18205	1996.27	FALSE	47
2022-09-14	10:08:56	-0.156883	-0.697847	1965.73	FALSE	47
2022-09-14	10:08:56	-0.332048	-1.47702	1996.27	FALSE	47
2022-09-14	10:08:57	-0.337951	-1.50327	1965.73	FALSE	47
2022-09-14	10:08:57	-0.215559	-0.95885	1996.27	FALSE	47
2022-09-14	10:08:57	-0.0884857	-0.393602	1965.73	FALSE	47
2022-09-14	10:08:57	0.359351	1.59847	1997.87	FALSE	47
2022-09-14	10:08:58	0.301692	1.34199	1967.07	FALSE	47
2022-09-14	10:08:58	0.398995	1.77481	1999.64	FALSE	47
2022-09-14	10:08:58	0.0614888	0.273514	1967.35	FALSE	47
2022-09-14	10:08:58	0.0677483	0.301358	1999.94	FALSE	47
2022-09-14	10:08:59	0.925255	4.11572	1971.46	FALSE	47
2022-09-14	10:08:59	0.31472	1.39994	2001.34	FALSE	47
2022-09-14	10:08:59	0.221387	0.984774	1972.45	FALSE	47
2022-09-14	10:08:59	0.143117	0.636613	2001.98	FALSE	47
2022-09-14	10:09:00	0.0583845	0.259706	1972.71	FALSE	47
2022-09-14	10:09:00	0.0610816	0.271703	2002.25	FALSE	47
2022-09-14	10:09:00	0.300216	1.33542	1974.04	FALSE	47
2022-09-14	10:09:00	1.51004	6.71696	2008.97	FALSE	47
2022-09-14	10:09:01	1.26922	5.64574	1979.69	FALSE	47
2022-09-14	10:09:01	1.98729	8.83986	2017.81	FALSE	47
2022-09-14	10:09:01	2.51589	11.1912	1990.88	FALSE	47
2022-09-14	10:09:02	4.00927	17.834	2035.64	1	48
2022-09-14	10:09:02	6.56235	29.1906	2020.07	1	49
2022-09-14	10:09:02	3.93935	17.523	2053.17	1	50
2022-09-14	10:09:02	3.28927	14.6313	2034.7	1	51

## Sheet: MsPotato_martin_20229141034 (2)
Date	Time	Lbs	Total force x time			**GoPro Fitting: 9:52
2022-09-14	10:03:45	0.139453	0.139453	FALSE	0
2022-09-14	10:03:46	0.191056	0.330509	FALSE	0
2022-09-14	10:03:46	0.321743	0.652252	FALSE	0
2022-09-14	10:03:46	0.212328	0.86458	FALSE	0
2022-09-14	10:03:46	0.333193	1.19777	FALSE	0
2022-09-14	10:03:47	9.22713	10.4249	1	1
2022-09-14	10:03:47	1.15818	11.5831	FALSE	1
2022-09-14	10:03:47	0.352786	11.9359	FALSE	1
2022-09-14	10:03:47	0.449682	12.3856	FALSE	1
2022-09-14	10:03:48	0.386934	12.7725	FALSE	1
2022-09-14	10:03:48	0.417061	13.1895	FALSE	1
2022-09-14	10:03:48	0.360522	13.5501	FALSE	1
2022-09-14	10:03:48	0.475687	14.0258	FALSE	1
2022-09-14	10:03:49	0.497367	14.5231	FALSE	1
2022-09-14	10:03:49	0.545865	15.069	FALSE	1
2022-09-14	10:03:49	1.01014	16.0791	FALSE	1
2022-09-14	10:03:49	0.71813	16.7973	FALSE	1
2022-09-14	10:03:50	0.764033	17.5613	FALSE	1
2022-09-14	10:03:50	0.280522	17.8418	FALSE	1
2022-09-14	10:03:50	0.362455	18.2043	FALSE	1
2022-09-14	10:03:51	0.305713	18.51	FALSE	1
2022-09-14	10:03:51	0.366629	18.8766	FALSE	1
2022-09-14	10:03:51	0.769835	19.6464	FALSE	1
2022-09-14	10:03:51	1.34373	20.9902	FALSE	1
2022-09-14	10:03:52	0.207443	21.1976	FALSE	1
2022-09-14	10:03:52	-0.136679	21.1976	FALSE	1
2022-09-14	10:03:52	0.156094	21.3537	FALSE	1
2022-09-14	10:03:52	-0.0189183	21.3537	FALSE	1
2022-09-14	10:03:53	0.219606	21.5733	FALSE	1
2022-09-14	10:03:53	0.138028	21.7113	FALSE	1
2022-09-14	10:03:53	0.279453	21.9908	FALSE	1
2022-09-14	10:03:53	0.160776	22.1516	FALSE	1
2022-09-14	10:03:54	0.226629	22.3782	FALSE	1
2022-09-14	10:03:54	0.0579264	22.4361	FALSE	1
2022-09-14	10:03:54	0.120369	22.5565	FALSE	1
2022-09-14	10:03:55	0.128563	22.6851	FALSE	1
2022-09-14	10:03:55	0.397214	23.0823	FALSE	1
2022-09-14	10:03:55	0.193804	23.2761	FALSE	1
2022-09-14	10:03:55	0.407137	23.6832	FALSE	1
2022-09-14	10:03:56	0.223728	23.9069	FALSE	1
2022-09-14	10:03:56	0.378181	24.2851	FALSE	1
2022-09-14	10:03:56	0.30042	24.5855	FALSE	1
2022-09-14	10:03:56	0.280878	24.8664	FALSE	1
2022-09-14	10:03:57	0.318893	25.1853	FALSE	1
2022-09-14	10:03:57	0.25701	25.4423	FALSE	1
2022-09-14	10:03:57	0.321031	25.7634	FALSE	1
2022-09-14	10:03:57	0.279351	26.0427	FALSE	1
2022-09-14	10:03:58	0.278028	26.3207	FALSE	1
2022-09-14	10:03:58	0.54042	26.8612	FALSE	1
2022-09-14	10:03:58	1.24469	28.1058	FALSE	1
2022-09-14	10:03:59	2.45238	30.5582	FALSE	1
2022-09-14	10:03:59	1.23177	31.79	FALSE	1
2022-09-14	10:03:59	0.455789	32.2458	FALSE	1
2022-09-14	10:03:59	0.328969	32.5748	FALSE	1
2022-09-14	10:04:00	0.303372	32.8781	FALSE	1
2022-09-14	10:04:00	0.343626	33.2218	FALSE	1
2022-09-14	10:04:00	0.301845	33.5236	FALSE	1
2022-09-14	10:04:00	0.26444	33.788	FALSE	1
2022-09-14	10:04:01	0.304542	34.0926	FALSE	1
2022-09-14	10:04:01	0.218741	34.3113	FALSE	1
2022-09-14	10:04:01	-0.0157122	34.3113	FALSE	1
2022-09-14	10:04:01	-0.0397326	34.3113	FALSE	1
2022-09-14	10:04:02	0.0666287	34.3779	FALSE	1
2022-09-14	10:04:02	0.0853564	34.4633	FALSE	1
2022-09-14	10:04:02	0.192125	34.6554	FALSE	1
2022-09-14	10:04:03	0.126527	34.782	FALSE	1
2022-09-14	10:04:03	0.197977	34.9799	FALSE	1
2022-09-14	10:04:03	0.565865	35.5458	FALSE	1
2022-09-14	10:04:03	1.27106	36.8169	FALSE	1
2022-09-14	10:04:04	2.55787	39.3747	FALSE	1
2022-09-14	10:04:04	2.06698	41.4417	FALSE	1
2022-09-14	10:04:04	0.903168	42.3449	FALSE	1
2022-09-14	10:04:04	0.564847	42.9097	FALSE	1
2022-09-14	10:04:05	0.256705	43.1664	FALSE	1
2022-09-14	10:04:05	0.209529	43.376	FALSE	1
2022-09-14	10:04:05	0.24729	43.6232	FALSE	1
2022-09-14	10:04:05	0.416349	44.0396	FALSE	1
2022-09-14	10:04:06	0.313702	44.3533	FALSE	1
2022-09-14	10:04:06	0.26271	44.616	FALSE	1
2022-09-14	10:04:06	0.220522	44.8365	FALSE	1
2022-09-14	10:04:07	0.228562	45.0651	FALSE	1
2022-09-14	10:04:07	0.346272	45.4114	FALSE	1
2022-09-14	10:04:07	0.290954	45.7023	FALSE	1
2022-09-14	10:04:07	0.226883	45.9292	FALSE	1
2022-09-14	10:04:08	0.214568	46.1438	FALSE	1
2022-09-14	10:04:08	0.211769	46.3555	FALSE	1
2022-09-14	10:04:08	0.256196	46.6117	FALSE	1
2022-09-14	10:04:08	0.176247	46.788	FALSE	1
2022-09-14	10:04:09	0.117418	46.9054	FALSE	1
2022-09-14	10:04:09	0.140929	47.0463	FALSE	1
2022-09-14	10:04:09	0.150649	47.197	FALSE	1
2022-09-14	10:04:09	0.157825	47.3548	FALSE	1
2022-09-14	10:04:10	0.15813	47.5129	FALSE	1
2022-09-14	10:04:10	0.156247	47.6692	FALSE	1
2022-09-14	10:04:10	0.148919	47.8181	FALSE	1
2022-09-14	10:04:11	0.184797	48.0029	FALSE	1
2022-09-14	10:04:11	0.174975	48.1779	FALSE	1
2022-09-14	10:04:11	0.0742623	48.2521	FALSE	1
2022-09-14	10:04:11	0.0534481	48.3056	FALSE	1
2022-09-14	10:04:12	-0.0331168	48.3056	FALSE	1
2022-09-14	10:04:12	0.274466	48.58	FALSE	1
2022-09-14	10:04:12	0.581896	49.1619	FALSE	1
2022-09-14	10:04:12	0.332328	49.4943	FALSE	1
2022-09-14	10:04:13	0.527748	50.022	FALSE	1
2022-09-14	10:04:13	0.229835	50.2519	FALSE	1
2022-09-14	10:04:13	0.2793	50.5312	FALSE	1
2022-09-14	10:04:13	0.515585	51.0467	FALSE	1
2022-09-14	10:04:14	0.310445	51.3572	FALSE	1
2022-09-14	10:04:14	-0.00716262	51.3572	FALSE	1
2022-09-14	10:04:14	0.0919722	51.4492	FALSE	1
2022-09-14	10:04:14	0.214364	51.6635	FALSE	1
2022-09-14	10:04:15	0.394415	52.0579	FALSE	1
2022-09-14	10:04:15	2.53625	54.5942	FALSE	1
2022-09-14	10:04:15	2.02098	56.6152	FALSE	1
2022-09-14	10:04:16	1.38352	57.9987	FALSE	1
2022-09-14	10:04:16	0.967697	58.9664	FALSE	1
2022-09-14	10:04:16	0.854262	59.8206	FALSE	1
2022-09-14	10:04:16	1.46495	61.2856	FALSE	1
2022-09-14	10:04:17	1.31182	62.5974	FALSE	1
2022-09-14	10:04:17	5.79278	68.3902	1	2
2022-09-14	10:04:17	6.53685	74.927	1	3
2022-09-14	10:04:17	4.28235	79.2094	1	4
2022-09-14	10:04:18	1.55467	80.7641	FALSE	4
2022-09-14	10:04:18	1.28037	82.0444	FALSE	4
2022-09-14	10:04:18	0.487494	82.5319	FALSE	4
2022-09-14	10:04:18	0.476756	83.0087	FALSE	4
2022-09-14	10:04:19	0.543931	83.5526	FALSE	4
2022-09-14	10:04:19	0.992837	84.5455	FALSE	4
2022-09-14	10:04:19	0.475178	85.0206	FALSE	4
2022-09-14	10:04:20	0.729987	85.7506	FALSE	4
2022-09-14	10:04:20	0.275025	86.0256	FALSE	4
2022-09-14	10:04:20	0.304644	86.3303	FALSE	4
2022-09-14	10:04:20	0.229631	86.5599	FALSE	4
2022-09-14	10:04:21	0.172125	86.732	FALSE	4
2022-09-14	10:04:21	0.050191	86.7822	FALSE	4
2022-09-14	10:04:21	0.211158	86.9934	FALSE	4
2022-09-14	10:04:21	0.402099	87.3955	FALSE	4
2022-09-14	10:04:22	0.243422	87.6389	FALSE	4
2022-09-14	10:04:22	0.139911	87.7788	FALSE	4
2022-09-14	10:04:22	0.337824	88.1166	FALSE	4
2022-09-14	10:04:22	0.164033	88.2807	FALSE	4
2022-09-14	10:04:23	0.355738	88.6364	FALSE	4
2022-09-14	10:04:23	0.224033	88.8605	FALSE	4
2022-09-14	10:04:23	0.424593	89.285	FALSE	4
2022-09-14	10:04:24	0.221081	89.5061	FALSE	4
2022-09-14	10:04:24	0.412481	89.9186	FALSE	4
2022-09-14	10:04:24	0.180624	90.0992	FALSE	4
2022-09-14	10:04:24	0.368104	90.4673	FALSE	4
2022-09-14	10:04:25	0.0845422	90.5519	FALSE	4
2022-09-14	10:04:25	0.481641	91.0335	FALSE	4
2022-09-14	10:04:25	0.122507	91.156	FALSE	4
2022-09-14	10:04:25	0.0494277	91.2055	FALSE	4
2022-09-14	10:04:26	0.257316	91.4628	FALSE	4
2022-09-14	10:04:26	0.421234	91.884	FALSE	4
2022-09-14	10:04:26	0.962506	92.8465	FALSE	4
2022-09-14	10:04:26	1.3393	94.1858	FALSE	4
2022-09-14	10:04:27	0.586119	94.7719	FALSE	4
2022-09-14	10:04:27	0.61243	95.3844	FALSE	4
2022-09-14	10:04:27	0.859809	96.2442	FALSE	4
2022-09-14	10:04:28	1.32413	97.5683	FALSE	4
2022-09-14	10:04:28	1.75187	99.3202	FALSE	4
2022-09-14	10:04:28	3.39716	102.717	1	5
2022-09-14	10:04:28	6.01553	108.733	1	6
2022-09-14	10:04:29	7.40164	116.134	1	7
2022-09-14	10:04:29	9.12398	125.258	1	8
2022-09-14	10:04:29	1.46413	126.723	FALSE	8
2022-09-14	10:04:29	1.41355	128.136	FALSE	8
2022-09-14	10:04:30	0.837214	128.973	FALSE	8
2022-09-14	10:04:30	0.398181	129.372	FALSE	8
2022-09-14	10:04:30	0.562354	129.934	FALSE	8
2022-09-14	10:04:30	0.38673	130.321	FALSE	8
2022-09-14	10:04:31	0.484949	130.806	FALSE	8
2022-09-14	10:04:31	0.545407	131.351	FALSE	8
2022-09-14	10:04:31	0.696298	132.047	FALSE	8
2022-09-14	10:04:32	0.802354	132.85	FALSE	8
2022-09-14	10:04:32	0.613397	133.463	FALSE	8
2022-09-14	10:04:32	0.727036	134.19	FALSE	8
2022-09-14	10:04:32	0.758232	134.948	FALSE	8
2022-09-14	10:04:33	0.543219	135.492	FALSE	8
2022-09-14	10:04:33	0.746985	136.239	FALSE	8
2022-09-14	10:04:33	0.528104	136.767	FALSE	8
2022-09-14	10:04:33	0.694618	137.461	FALSE	8
2022-09-14	10:04:34	0.388868	137.85	FALSE	8
2022-09-14	10:04:34	0.621031	138.471	FALSE	8
2022-09-14	10:04:34	0.657926	139.129	FALSE	8
2022-09-14	10:04:34	1.0678	140.197	FALSE	8
2022-09-14	10:04:35	0.31355	140.51	FALSE	8
2022-09-14	10:04:35	0.429886	140.94	FALSE	8
2022-09-14	10:04:35	0.512481	141.453	FALSE	8
2022-09-14	10:04:36	0.814618	142.267	FALSE	8
2022-09-14	10:04:36	0.414822	142.682	FALSE	8
2022-09-14	10:04:36	0.551921	143.234	FALSE	8
2022-09-14	10:04:36	0.465509	143.7	FALSE	8
2022-09-14	10:04:37	0.513041	144.213	FALSE	8
2022-09-14	10:04:37	0.631208	144.844	FALSE	8
2022-09-14	10:04:37	0.545102	145.389	FALSE	8
2022-09-14	10:04:37	0.50897	145.898	FALSE	8
2022-09-14	10:04:38	0.736247	146.634	FALSE	8
2022-09-14	10:04:38	0.436756	147.071	FALSE	8
2022-09-14	10:04:38	0.442608	147.514	FALSE	8
2022-09-14	10:04:38	0.439809	147.953	FALSE	8
2022-09-14	10:04:39	0.44897	148.402	FALSE	8
2022-09-14	10:04:39	0.467952	148.87	FALSE	8
2022-09-14	10:04:39	0.362099	149.232	FALSE	8
2022-09-14	10:04:40	0.391463	149.624	FALSE	8
2022-09-14	10:04:40	0.350445	149.974	FALSE	8
2022-09-14	10:04:40	0.342761	150.317	FALSE	8
2022-09-14	10:04:40	0.442456	150.76	FALSE	8
2022-09-14	10:04:41	0.596094	151.356	FALSE	8
2022-09-14	10:04:41	0.602455	151.958	FALSE	8
2022-09-14	10:04:41	0.616959	152.575	FALSE	8
2022-09-14	10:04:41	0.633601	153.209	FALSE	8
2022-09-14	10:04:42	0.366578	153.575	FALSE	8
2022-09-14	10:04:42	0.470038	154.045	FALSE	8
2022-09-14	10:04:42	0.341998	154.387	FALSE	8
2022-09-14	10:04:42	0.443219	154.83	FALSE	8
2022-09-14	10:04:43	0.360725	155.191	FALSE	8
2022-09-14	10:04:43	0.423677	155.615	FALSE	8
2022-09-14	10:04:43	0.373957	155.989	FALSE	8
2022-09-14	10:04:43	0.355585	156.344	FALSE	8
2022-09-14	10:04:44	0.489784	156.834	FALSE	8
2022-09-14	10:04:44	0.57355	157.408	FALSE	8
2022-09-14	10:04:44	0.203524	157.611	FALSE	8
2022-09-14	10:04:45	0.069733	157.681	FALSE	8
2022-09-14	10:04:45	-0.313727	157.681	FALSE	8
2022-09-14	10:04:45	-0.519681	157.681	FALSE	8
2022-09-14	10:04:45	-0.595661	157.681	FALSE	8
2022-09-14	10:04:46	-0.564109	157.681	FALSE	8
2022-09-14	10:04:46	-0.273269	157.681	FALSE	8
2022-09-14	10:04:46	-0.225025	157.681	FALSE	8
2022-09-14	10:04:46	-0.0982058	157.681	FALSE	8
2022-09-14	10:04:47	-0.12243	157.681	FALSE	8
2022-09-14	10:04:47	-0.122633	157.681	FALSE	8
2022-09-14	10:04:47	-0.0796817	157.681	FALSE	8
2022-09-14	10:04:47	-0.100241	157.681	FALSE	8
2022-09-14	10:04:48	0.114517	157.796	FALSE	8
2022-09-14	10:04:48	0.20383	157.999	FALSE	8
2022-09-14	10:04:48	0.13528	158.135	FALSE	8
2022-09-14	10:04:49	0.0754837	158.21	FALSE	8
2022-09-14	10:04:49	0.00255749	158.213	FALSE	8
2022-09-14	10:04:49	0.134975	158.348	FALSE	8
2022-09-14	10:04:49	-0.0360176	158.348	FALSE	8
2022-09-14	10:04:50	-0.374592	158.348	FALSE	8
2022-09-14	10:04:50	-0.427417	158.348	FALSE	8
2022-09-14	10:04:50	-0.595407	158.348	FALSE	8
2022-09-14	10:04:50	-0.531234	158.348	FALSE	8
2022-09-14	10:04:51	-0.22528	158.348	FALSE	8
2022-09-14	10:04:51	-0.121616	158.348	FALSE	8
2022-09-14	10:04:51	0.0398094	158.387	FALSE	8
2022-09-14	10:04:51	0.699046	159.087	FALSE	8
2022-09-14	10:04:52	1.18439	160.271	FALSE	8
2022-09-14	10:04:52	1.80693	162.078	FALSE	8
2022-09-14	10:04:52	1.97426	164.052	FALSE	8
2022-09-14	10:04:53	1.84017	165.892	FALSE	8
2022-09-14	10:04:53	1.13945	167.032	FALSE	8
2022-09-14	10:04:53	0.392227	167.424	FALSE	8
2022-09-14	10:04:53	0.495331	167.919	FALSE	8
2022-09-14	10:04:54	0.467239	168.387	FALSE	8
2022-09-14	10:04:54	0.449886	168.836	FALSE	8
2022-09-14	10:04:54	0.477672	169.314	FALSE	8
2022-09-14	10:04:54	0.570395	169.884	FALSE	8
2022-09-14	10:04:55	0.43757	170.322	FALSE	8
2022-09-14	10:04:55	0.425916	170.748	FALSE	8
2022-09-14	10:04:55	0.343423	171.091	FALSE	8
2022-09-14	10:04:55	0.396959	171.488	FALSE	8
2022-09-14	10:04:56	0.308104	171.796	FALSE	8
2022-09-14	10:04:56	0.658537	172.455	FALSE	8
2022-09-14	10:04:56	0.430395	172.885	FALSE	8
2022-09-14	10:04:57	0.66215	173.548	FALSE	8
2022-09-14	10:04:57	0.192786	173.74	FALSE	8
2022-09-14	10:04:57	0.270089	174.01	FALSE	8
2022-09-14	10:04:57	-0.205839	174.01	FALSE	8
2022-09-14	10:04:58	-0.369351	174.01	FALSE	8
2022-09-14	10:04:58	-0.1379	174.01	FALSE	8
2022-09-14	10:04:58	0.373804	174.384	FALSE	8
2022-09-14	10:04:58	0.350903	174.735	FALSE	8
2022-09-14	10:04:59	0.628613	175.364	FALSE	8
2022-09-14	10:04:59	0.291311	175.655	FALSE	8
2022-09-14	10:04:59	0.149224	175.804	FALSE	8
2022-09-14	10:04:59	0.0301911	175.834	FALSE	8
2022-09-14	10:05:00	0.12897	175.963	FALSE	8
2022-09-14	10:05:00	-0.0436002	175.963	FALSE	8
2022-09-14	10:05:00	0.182608	176.146	FALSE	8
2022-09-14	10:05:01	0.377265	176.523	FALSE	8
2022-09-14	10:05:01	1.63248	178.156	FALSE	8
2022-09-14	10:05:01	2.3051	180.461	FALSE	8
2022-09-14	10:05:01	1.64078	182.102	FALSE	8
2022-09-14	10:05:02	0.247494	182.349	FALSE	8
2022-09-14	10:05:02	0.0143132	182.363	FALSE	8
2022-09-14	10:05:02	-0.174389	182.363	FALSE	8
2022-09-14	10:05:02	-0.301208	182.363	FALSE	8
2022-09-14	10:05:03	-0.109147	182.363	FALSE	8
2022-09-14	10:05:03	0.0722776	182.436	FALSE	8
2022-09-14	10:05:03	0.000165643	182.436	FALSE	8
2022-09-14	10:05:03	-0.0546944	182.436	FALSE	8
2022-09-14	10:05:04	0.114059	182.55	FALSE	8
2022-09-14	10:05:04	0.360216	182.91	FALSE	8
2022-09-14	10:05:04	0.413346	183.324	FALSE	8
2022-09-14	10:05:05	0.512074	183.836	FALSE	8
2022-09-14	10:05:05	0.633753	184.469	FALSE	8
2022-09-14	10:05:05	0.549173	185.019	FALSE	8
2022-09-14	10:05:05	0.309886	185.328	FALSE	8
2022-09-14	10:05:06	0.171463	185.5	FALSE	8
2022-09-14	10:05:06	-0.0516919	185.5	FALSE	8
2022-09-14	10:05:06	-0.0818699	185.5	FALSE	8
2022-09-14	10:05:06	-0.0320481	185.5	FALSE	8
2022-09-14	10:05:07	-0.200547	185.5	FALSE	8
2022-09-14	10:05:07	-0.298816	185.5	FALSE	8
2022-09-14	10:05:07	-0.159376	185.5	FALSE	8
2022-09-14	10:05:07	-0.269961	185.5	FALSE	8
2022-09-14	10:05:08	-0.0346435	185.5	FALSE	8
2022-09-14	10:05:08	-0.106755	185.5	FALSE	8
2022-09-14	10:05:08	0.154364	185.654	FALSE	8
2022-09-14	10:05:08	0.176501	185.831	FALSE	8
2022-09-14	10:05:09	1.17894	187.01	FALSE	8
2022-09-14	10:05:09	1.17681	188.186	FALSE	8
2022-09-14	10:05:09	2.03838	190.225	FALSE	8
2022-09-14	10:05:10	1.37874	191.604	FALSE	8
2022-09-14	10:05:10	3.13752	194.741	1	9
2022-09-14	10:05:10	1.79986	196.541	FALSE	9
2022-09-14	10:05:10	1.79192	198.333	FALSE	9
2022-09-14	10:05:11	0.541997	198.875	FALSE	9
2022-09-14	10:05:11	0.766221	199.641	FALSE	9
2022-09-14	10:05:11	0.556807	200.198	FALSE	9
2022-09-14	10:05:11	1.32719	201.525	FALSE	9
2022-09-14	10:05:12	0.611718	202.137	FALSE	9
2022-09-14	10:05:12	1.50276	203.64	FALSE	9
2022-09-14	10:05:12	1.03187	204.671	FALSE	9
2022-09-14	10:05:12	3.15345	207.825	1	10
2022-09-14	10:05:13	1.21324	209.038	FALSE	10
2022-09-14	10:05:13	3.088	212.126	1	11
2022-09-14	10:05:13	1.03268	213.159	FALSE	11
2022-09-14	10:05:14	2.03731	215.196	FALSE	11
2022-09-14	10:05:14	1.24271	216.439	FALSE	11
2022-09-14	10:05:14	1.13034	217.569	FALSE	11
2022-09-14	10:05:14	1.66347	219.233	FALSE	11
2022-09-14	10:05:15	0.918384	220.151	FALSE	11
2022-09-14	10:05:15	2.01452	222.166	FALSE	11
2022-09-14	10:05:15	1.03482	223.2	FALSE	11
2022-09-14	10:05:15	2.31574	225.516	FALSE	11
2022-09-14	10:05:16	0.951463	226.468	FALSE	11
2022-09-14	10:05:16	1.74144	228.209	FALSE	11
2022-09-14	10:05:16	0.620267	228.829	FALSE	11
2022-09-14	10:05:16	1.22388	230.053	FALSE	11
2022-09-14	10:05:17	0.467647	230.521	FALSE	11
2022-09-14	10:05:17	0.917468	231.438	FALSE	11
2022-09-14	10:05:17	0.626629	232.065	FALSE	11
2022-09-14	10:05:18	1.95955	234.024	FALSE	11
2022-09-14	10:05:18	0.476043	234.501	FALSE	11
2022-09-14	10:05:18	1.17274	235.673	FALSE	11
2022-09-14	10:05:18	1.12922	236.802	FALSE	11
2022-09-14	10:05:19	1.18902	237.991	FALSE	11
2022-09-14	10:05:19	0.408257	238.4	FALSE	11
2022-09-14	10:05:19	0.678079	239.078	FALSE	11
2022-09-14	10:05:19	0.725305	239.803	FALSE	11
2022-09-14	10:05:20	0.822099	240.625	FALSE	11
2022-09-14	10:05:20	1.21772	241.843	FALSE	11
2022-09-14	10:05:20	0.697519	242.54	FALSE	11
2022-09-14	10:05:20	0.186425	242.727	FALSE	11
2022-09-14	10:05:21	0.349478	243.076	FALSE	11
2022-09-14	10:05:21	0.748613	243.825	FALSE	11
2022-09-14	10:05:21	-0.0373916	243.825	FALSE	11
2022-09-14	10:05:22	0.0130918	243.838	FALSE	11
2022-09-14	10:05:22	0.736756	244.575	FALSE	11
2022-09-14	10:05:22	3.38663	247.961	1	12
2022-09-14	10:05:22	3.75141	251.713	1	13
2022-09-14	10:05:23	1.85996	253.573	FALSE	13
2022-09-14	10:05:23	0.730801	254.304	FALSE	13
2022-09-14	10:05:23	0.728919	255.033	FALSE	13
2022-09-14	10:05:23	0.730649	255.763	FALSE	13
2022-09-14	10:05:24	0.737672	256.501	FALSE	13
2022-09-14	10:05:24	0.734517	257.235	FALSE	13
2022-09-14	10:05:24	0.728919	257.964	FALSE	13
2022-09-14	10:05:24	0.740369	258.705	FALSE	13
2022-09-14	10:05:25	0.731209	259.436	FALSE	13
2022-09-14	10:05:25	0.732634	260.169	FALSE	13
2022-09-14	10:05:25	0.738181	260.907	FALSE	13
2022-09-14	10:05:26	0.734924	261.642	FALSE	13
2022-09-14	10:05:26	0.728461	262.37	FALSE	13
2022-09-14	10:05:26	0.736552	263.107	FALSE	13
2022-09-14	10:05:26	0.73355	263.84	FALSE	13
2022-09-14	10:05:27	0.733601	264.574	FALSE	13
2022-09-14	10:05:27	0.736145	265.31	FALSE	13
2022-09-14	10:05:27	0.734822	266.045	FALSE	13
2022-09-14	10:05:27	0.507035	266.552	FALSE	13
2022-09-14	10:05:28	0.16444	266.716	FALSE	13
2022-09-14	10:05:28	0.298028	267.014	FALSE	13
2022-09-14	10:05:28	3.25177	270.266	1	14
2022-09-14	10:05:28	2.18581	272.452	FALSE	14
2022-09-14	10:05:29	0.808308	273.26	FALSE	14
2022-09-14	10:05:29	0.870903	274.131	FALSE	14
2022-09-14	10:05:29	0.617316	274.748	FALSE	14
2022-09-14	10:05:30	0.737621	275.486	FALSE	14
2022-09-14	10:05:30	0.176552	275.663	FALSE	14
2022-09-14	10:05:30	0.471158	276.134	FALSE	14
2022-09-14	10:05:30	0.23243	276.366	FALSE	14
2022-09-14	10:05:31	0.260471	276.627	FALSE	14
2022-09-14	10:05:31	0.174466	276.801	FALSE	14
2022-09-14	10:05:31	0.187392	276.988	FALSE	14
2022-09-14	10:05:31	0.196756	277.185	FALSE	14
2022-09-14	10:05:32	0.185458	277.371	FALSE	14
2022-09-14	10:05:32	0.183066	277.554	FALSE	14
2022-09-14	10:05:32	0.189377	277.743	FALSE	14
2022-09-14	10:05:33	0.208766	277.952	FALSE	14
2022-09-14	10:05:33	0.434262	278.386	FALSE	14
2022-09-14	10:05:33	0.106527	278.493	FALSE	14
2022-09-14	10:05:33	-0.00293869	278.493	FALSE	14
2022-09-14	10:05:33	-0.0724552	278.493	FALSE	14
2022-09-14	10:05:34	-0.104618	278.493	FALSE	14
2022-09-14	10:05:34	-0.101107	278.493	FALSE	14
2022-09-14	10:05:34	-0.135407	278.493	FALSE	14
2022-09-14	10:05:35	-0.186297	278.493	FALSE	14
2022-09-14	10:05:35	-0.275101	278.493	FALSE	14
2022-09-14	10:05:35	-0.132455	278.493	FALSE	14
2022-09-14	10:05:35	3.27314	281.766	1	15
2022-09-14	10:05:36	4.83599	286.602	1	16
2022-09-14	10:05:36	2.37564	288.977	FALSE	16
2022-09-14	10:05:36	2.6136	291.591	FALSE	16
2022-09-14	10:05:36	2.19665	293.788	FALSE	16
2022-09-14	10:05:37	4.37314	298.161	1	17
2022-09-14	10:05:37	2.98495	301.146	FALSE	17
2022-09-14	10:05:37	5.61721	306.763	1	18
2022-09-14	10:05:37	3.32912	310.092	1	19
2022-09-14	10:05:38	3.8766	313.969	1	20
2022-09-14	10:05:38	4.10592	318.075	1	21
2022-09-14	10:05:38	1.69818	319.773	FALSE	21
2022-09-14	10:05:39	1.22286	320.996	FALSE	21
2022-09-14	10:05:39	0.409021	321.405	FALSE	21
2022-09-14	10:05:39	0.69818	322.103	FALSE	21
2022-09-14	10:05:39	0.728054	322.831	FALSE	21
2022-09-14	10:05:40	0.738282	323.569	FALSE	21
2022-09-14	10:05:40	0.707036	324.276	FALSE	21
2022-09-14	10:05:40	0.467443	324.744	FALSE	21
2022-09-14	10:05:40	0.383219	325.127	FALSE	21
2022-09-14	10:05:41	0.448104	325.575	FALSE	21
2022-09-14	10:05:41	0.429326	326.004	FALSE	21
2022-09-14	10:05:41	0.35355	326.358	FALSE	21
2022-09-14	10:05:41	0.421692	326.78	FALSE	21
2022-09-14	10:05:42	0.485153	327.265	FALSE	21
2022-09-14	10:05:42	0.673651	327.938	FALSE	21
2022-09-14	10:05:42	1.04037	328.979	FALSE	21
2022-09-14	10:05:43	1.11095	330.09	FALSE	21
2022-09-14	10:05:43	0.856043	330.946	FALSE	21
2022-09-14	10:05:43	0.190496	331.136	FALSE	21
2022-09-14	10:05:43	0.166985	331.303	FALSE	21
2022-09-14	10:05:44	0.171921	331.475	FALSE	21
2022-09-14	10:05:44	0.173906	331.649	FALSE	21
2022-09-14	10:05:44	0.171667	331.821	FALSE	21
2022-09-14	10:05:44	0.187748	332.008	FALSE	21
2022-09-14	10:05:45	0.242405	332.251	FALSE	21
2022-09-14	10:05:45	0.745102	332.996	FALSE	21
2022-09-14	10:05:45	0.213244	333.209	FALSE	21
2022-09-14	10:05:45	-0.0355595	333.209	FALSE	21
2022-09-14	10:05:46	0.200471	333.41	FALSE	21
2022-09-14	10:05:46	0.391565	333.801	FALSE	21
2022-09-14	10:05:46	0.0598603	333.861	FALSE	21
2022-09-14	10:05:47	0.207901	334.069	FALSE	21
2022-09-14	10:05:47	1.23609	335.305	FALSE	21
2022-09-14	10:05:47	1.89202	337.197	FALSE	21
2022-09-14	10:05:47	0.727188	337.924	FALSE	21
2022-09-14	10:05:48	0.589936	338.514	FALSE	21
2022-09-14	10:05:48	0.592837	339.107	FALSE	21
2022-09-14	10:05:48	0.540878	339.648	FALSE	21
2022-09-14	10:05:48	0.552125	340.2	FALSE	21
2022-09-14	10:05:49	0.502913	340.703	FALSE	21
2022-09-14	10:05:49	0.506374	341.209	FALSE	21
2022-09-14	10:05:49	0.47416	341.684	FALSE	21
2022-09-14	10:05:49	0.502405	342.186	FALSE	21
2022-09-14	10:05:50	0.498282	342.684	FALSE	21
2022-09-14	10:05:50	0.440827	343.125	FALSE	21
2022-09-14	10:05:50	0.455178	343.58	FALSE	21
2022-09-14	10:05:51	0.388613	343.969	FALSE	21
2022-09-14	10:05:51	0.457977	344.427	FALSE	21
2022-09-14	10:05:51	0.679504	345.106	FALSE	21
2022-09-14	10:05:51	0.360674	345.467	FALSE	21
2022-09-14	10:05:52	0.380725	345.848	FALSE	21
2022-09-14	10:05:52	0.541234	346.389	FALSE	21
2022-09-14	10:05:52	0.487239	346.876	FALSE	21
2022-09-14	10:05:52	0.429428	347.306	FALSE	21
2022-09-14	10:05:53	0.672888	347.979	FALSE	21
2022-09-14	10:05:53	0.668664	348.647	FALSE	21
2022-09-14	10:05:53	0.744898	349.392	FALSE	21
2022-09-14	10:05:53	0.740064	350.132	FALSE	21
2022-09-14	10:05:54	0.738435	350.871	FALSE	21
2022-09-14	10:05:54	0.733753	351.604	FALSE	21
2022-09-14	10:05:54	0.732023	352.336	FALSE	21
2022-09-14	10:05:55	0.738639	353.075	FALSE	21
2022-09-14	10:05:55	0.729784	353.805	FALSE	21
2022-09-14	10:05:55	0.744694	354.549	FALSE	21
2022-09-14	10:05:55	0.735331	355.285	FALSE	21
2022-09-14	10:05:56	0.739147	356.024	FALSE	21
2022-09-14	10:05:56	0.737061	356.761	FALSE	21
2022-09-14	10:05:56	0.664084	357.425	FALSE	21
2022-09-14	10:05:56	0.547697	357.973	FALSE	21
2022-09-14	10:05:57	0.365204	358.338	FALSE	21
2022-09-14	10:05:57	0.580827	358.919	FALSE	21
2022-09-14	10:05:57	0.560776	359.48	FALSE	21
2022-09-14	10:05:57	0.720827	360.2	FALSE	21
2022-09-14	10:05:58	0.775127	360.976	FALSE	21
2022-09-14	10:05:58	0.86327	361.839	FALSE	21
2022-09-14	10:05:58	1.27355	363.112	FALSE	21
2022-09-14	10:05:58	1.97961	365.092	FALSE	21
2022-09-14	10:05:59	2.29477	367.387	FALSE	21
2022-09-14	10:05:59	3.57406	370.961	1	22
2022-09-14	10:05:59	1.58424	372.545	FALSE	22
2022-09-14	10:06:00	3.26607	375.811	1	23
2022-09-14	10:06:00	1.43833	377.249	FALSE	23
2022-09-14	10:06:00	1.27441	378.524	FALSE	23
2022-09-14	10:06:00	0.522404	379.046	FALSE	23
2022-09-14	10:06:01	0.501387	379.548	FALSE	23
2022-09-14	10:06:01	0.854109	380.402	FALSE	23
2022-09-14	10:06:01	1.25981	381.662	FALSE	23
2022-09-14	10:06:01	1.35289	383.014	FALSE	23
2022-09-14	10:06:02	1.46291	384.477	FALSE	23
2022-09-14	10:06:02	1.87029	386.348	FALSE	23
2022-09-14	10:06:02	2.47762	388.825	FALSE	23
2022-09-14	10:06:02	3.37039	392.196	1	24
2022-09-14	10:06:03	2.84485	395.041	FALSE	24
2022-09-14	10:06:03	2.04551	397.086	FALSE	24
2022-09-14	10:06:03	2.3764	399.462	FALSE	24
2022-09-14	10:06:04	0.874313	400.337	FALSE	24
2022-09-14	10:06:04	1.18515	401.522	FALSE	24
2022-09-14	10:06:04	0.681183	402.203	FALSE	24
2022-09-14	10:06:04	0.977163	403.18	FALSE	24
2022-09-14	10:06:05	1.08454	404.265	FALSE	24
2022-09-14	10:06:05	1.80627	406.071	FALSE	24
2022-09-14	10:06:05	2.57594	408.647	FALSE	24
2022-09-14	10:06:05	1.32108	409.968	FALSE	24
2022-09-14	10:06:06	1.51569	411.484	FALSE	24
2022-09-14	10:06:06	0.697824	412.182	FALSE	24
2022-09-14	10:06:06	0.471209	412.653	FALSE	24
2022-09-14	10:06:06	0.713804	413.367	FALSE	24
2022-09-14	10:06:07	0.774568	414.141	FALSE	24
2022-09-14	10:06:07	1.19177	415.333	FALSE	24
2022-09-14	10:06:07	1.89503	417.228	FALSE	24
2022-09-14	10:06:08	1.64973	418.878	FALSE	24
2022-09-14	10:06:08	1.32276	420.2	FALSE	24
2022-09-14	10:06:08	1.55808	421.759	FALSE	24
2022-09-14	10:06:08	0.781946	422.54	FALSE	24
2022-09-14	10:06:09	0.786374	423.327	FALSE	24
2022-09-14	10:06:09	0.959198	424.286	FALSE	24
2022-09-14	10:06:09	1.02276	425.309	FALSE	24
2022-09-14	10:06:09	4.50266	429.811	1	25
2022-09-14	10:06:10	3.86597	433.677	1	26
2022-09-14	10:06:10	4.67289	438.35	1	27
2022-09-14	10:06:10	1.34602	439.696	FALSE	27
2022-09-14	10:06:10	0.554313	440.251	FALSE	27
2022-09-14	10:06:11	0.759148	441.01	FALSE	27
2022-09-14	10:06:11	0.38042	441.39	FALSE	27
2022-09-14	10:06:11	0.61757	442.008	FALSE	27
2022-09-14	10:06:12	1.58128	443.589	FALSE	27
2022-09-14	10:06:12	1.39742	444.986	FALSE	27
2022-09-14	10:06:12	3.03309	448.02	1	28
2022-09-14	10:06:12	0.865458	448.885	FALSE	28
2022-09-14	10:06:13	1.69543	450.58	FALSE	28
2022-09-14	10:06:13	0.381896	450.962	FALSE	28
2022-09-14	10:06:13	0.669733	451.632	FALSE	28
2022-09-14	10:06:13	0.228919	451.861	FALSE	28
2022-09-14	10:06:14	0.442914	452.304	FALSE	28
2022-09-14	10:06:14	0.305763	452.61	FALSE	28
2022-09-14	10:06:14	0.312227	452.922	FALSE	28
2022-09-14	10:06:14	0.602455	453.524	FALSE	28
2022-09-14	10:06:15	0.433295	453.958	FALSE	28
2022-09-14	10:06:15	2.12525	456.083	FALSE	28
2022-09-14	10:06:15	4.92586	461.009	1	29
2022-09-14	10:06:16	5.70362	466.712	1	30
2022-09-14	10:06:16	3.2078	469.92	1	31
2022-09-14	10:06:16	3.24342	473.164	1	32
2022-09-14	10:06:16	1.90653	475.07	FALSE	32
2022-09-14	10:06:17	1.90724	476.977	FALSE	32
2022-09-14	10:06:17	2.22551	479.203	FALSE	32
2022-09-14	10:06:17	1.14739	480.35	FALSE	32
2022-09-14	10:06:17	1.05095	481.401	FALSE	32
2022-09-14	10:06:18	0.352328	481.754	FALSE	32
2022-09-14	10:06:18	1.9878	483.741	FALSE	32
2022-09-14	10:06:18	1.19655	484.938	FALSE	32
2022-09-14	10:06:18	1.03818	485.976	FALSE	32
2022-09-14	10:06:19	0.584491	486.561	FALSE	32
2022-09-14	10:06:19	0.6107	487.171	FALSE	32
2022-09-14	10:06:19	1.05843	488.23	FALSE	32
2022-09-14	10:06:19	0.680878	488.911	FALSE	32
2022-09-14	10:06:20	2.34734	491.258	FALSE	32
2022-09-14	10:06:20	0.571616	491.83	FALSE	32
2022-09-14	10:06:20	1.81228	493.642	FALSE	32
2022-09-14	10:06:21	1.10556	494.747	FALSE	32
2022-09-14	10:06:21	1.43599	496.183	FALSE	32
2022-09-14	10:06:21	2.78027	498.964	FALSE	32
2022-09-14	10:06:21	2.55828	501.522	FALSE	32
2022-09-14	10:06:22	2.97258	504.495	FALSE	32
2022-09-14	10:06:22	1.07543	505.57	FALSE	32
2022-09-14	10:06:22	0.930954	506.501	FALSE	32
2022-09-14	10:06:22	0.604338	507.105	FALSE	32
2022-09-14	10:06:23	0.498028	507.603	FALSE	32
2022-09-14	10:06:23	0.233194	507.836	FALSE	32
2022-09-14	10:06:23	0.392939	508.229	FALSE	32
2022-09-14	10:06:23	0.281743	508.511	FALSE	32
2022-09-14	10:06:24	0.365204	508.876	FALSE	32
2022-09-14	10:06:24	0.334364	509.211	FALSE	32
2022-09-14	10:06:24	0.430038	509.641	FALSE	32
2022-09-14	10:06:25	0.301743	509.942	FALSE	32
2022-09-14	10:06:25	0.465458	510.408	FALSE	32
2022-09-14	10:06:25	0.329733	510.738	FALSE	32
2022-09-14	10:06:25	0.693651	511.431	FALSE	32
2022-09-14	10:06:26	0.327036	511.758	FALSE	32
2022-09-14	10:06:26	0.673448	512.432	FALSE	32
2022-09-14	10:06:26	0.397265	512.829	FALSE	32
2022-09-14	10:06:26	0.457926	513.287	FALSE	32
2022-09-14	10:06:27	0.561539	513.849	FALSE	32
2022-09-14	10:06:27	0.343881	514.192	FALSE	32
2022-09-14	10:06:27	0.412735	514.605	FALSE	32
2022-09-14	10:06:27	0.453601	515.059	FALSE	32
2022-09-14	10:06:28	0.465102	515.524	FALSE	32
2022-09-14	10:06:28	0.336501	515.86	FALSE	32
2022-09-14	10:06:28	0.403982	516.264	FALSE	32
2022-09-14	10:06:29	0.649936	516.914	FALSE	32
2022-09-14	10:06:29	0.505865	517.42	FALSE	32
2022-09-14	10:06:29	0.623779	518.044	FALSE	32
2022-09-14	10:06:29	0.484847	518.529	FALSE	32
2022-09-14	10:06:30	0.515127	519.044	FALSE	32
2022-09-14	10:06:30	0.410954	519.455	FALSE	32
2022-09-14	10:06:30	0.374466	519.829	FALSE	32
2022-09-14	10:06:30	0.420471	520.25	FALSE	32
2022-09-14	10:06:31	0.335331	520.585	FALSE	32
2022-09-14	10:06:31	0.334517	520.92	FALSE	32
2022-09-14	10:06:31	0.43869	521.358	FALSE	32
2022-09-14	10:06:31	0.533499	521.892	FALSE	32
2022-09-14	10:06:32	0.342863	522.235	FALSE	32
2022-09-14	10:06:32	0.429428	522.664	FALSE	32
2022-09-14	10:06:32	0.440776	523.105	FALSE	32
2022-09-14	10:06:33	1.01864	524.124	FALSE	32
2022-09-14	10:06:33	2.55161	526.675	FALSE	32
2022-09-14	10:06:33	3.5394	530.215	1	33
2022-09-14	10:06:33	4.34744	534.562	1	34
2022-09-14	10:06:34	3.29436	537.856	1	35
2022-09-14	10:06:34	2.21172	540.068	FALSE	35
2022-09-14	10:06:34	1.27284	541.341	FALSE	35
2022-09-14	10:06:34	0.690954	542.032	FALSE	35
2022-09-14	10:06:35	1.00607	543.038	FALSE	35
2022-09-14	10:06:35	1.05721	544.095	FALSE	35
2022-09-14	10:06:35	1.20449	545.3	FALSE	35
2022-09-14	10:06:35	1.21391	546.514	FALSE	35
2022-09-14	10:06:36	1.19945	547.713	FALSE	35
2022-09-14	10:06:36	1.15075	548.864	FALSE	35
2022-09-14	10:06:36	1.14917	550.013	FALSE	35
2022-09-14	10:06:37	1.17268	551.186	FALSE	35
2022-09-14	10:06:37	1.13564	552.321	FALSE	35
2022-09-14	10:06:37	1.07243	553.394	FALSE	35
2022-09-14	10:06:37	1.08729	554.481	FALSE	35
2022-09-14	10:06:38	1.13248	555.613	FALSE	35
2022-09-14	10:06:38	1.18128	556.795	FALSE	35
2022-09-14	10:06:38	1.18607	557.981	FALSE	35
2022-09-14	10:06:38	1.23981	559.221	FALSE	35
2022-09-14	10:06:39	0.817468	560.038	FALSE	35
2022-09-14	10:06:39	0.727341	560.765	FALSE	35
2022-09-14	10:06:39	1.01844	561.784	FALSE	35
2022-09-14	10:06:39	2.39182	564.176	FALSE	35
2022-09-14	10:06:40	2.09268	566.268	FALSE	35
2022-09-14	10:06:40	2.01548	568.284	FALSE	35
2022-09-14	10:06:40	1.5967	569.881	FALSE	35
2022-09-14	10:06:40	1.63258	571.513	FALSE	35
2022-09-14	10:06:41	1.30424	572.817	FALSE	35
2022-09-14	10:06:41	1.30683	574.124	FALSE	35
2022-09-14	10:06:41	1.16296	575.287	FALSE	35
2022-09-14	10:06:42	1.25141	576.539	FALSE	35
2022-09-14	10:06:42	1.19477	577.733	FALSE	35
2022-09-14	10:06:42	1.18999	578.923	FALSE	35
2022-09-14	10:06:42	1.19355	580.117	FALSE	35
2022-09-14	10:06:43	1.2735	581.39	FALSE	35
2022-09-14	10:06:43	1.22983	582.62	FALSE	35
2022-09-14	10:06:43	1.18724	583.807	FALSE	35
2022-09-14	10:06:43	1.19106	584.998	FALSE	35
2022-09-14	10:06:44	1.23029	586.229	FALSE	35
2022-09-14	10:06:44	1.20597	587.435	FALSE	35
2022-09-14	10:06:44	1.18357	588.618	FALSE	35
2022-09-14	10:06:44	1.14551	589.764	FALSE	35
2022-09-14	10:06:45	1.14342	590.907	FALSE	35
2022-09-14	10:06:45	1.13533	592.043	FALSE	35
2022-09-14	10:06:45	1.12999	593.173	FALSE	35
2022-09-14	10:06:46	1.12327	594.296	FALSE	35
2022-09-14	10:06:46	1.12134	595.417	FALSE	35
2022-09-14	10:06:46	1.05961	596.477	FALSE	35
2022-09-14	10:06:46	1.11604	597.593	FALSE	35
2022-09-14	10:06:47	1.06006	598.653	FALSE	35
2022-09-14	10:06:47	1.11095	599.764	FALSE	35
2022-09-14	10:06:47	1.08088	600.845	FALSE	35
2022-09-14	10:06:47	1.08831	601.933	FALSE	35
2022-09-14	10:06:48	0.951158	602.884	FALSE	35
2022-09-14	10:06:48	0.543015	603.427	FALSE	35
2022-09-14	10:06:48	0.459657	603.887	FALSE	35
2022-09-14	10:06:48	0.314415	604.201	FALSE	35
2022-09-14	10:06:49	0.308817	604.51	FALSE	35
2022-09-14	10:06:49	0.397367	604.907	FALSE	35
2022-09-14	10:06:49	0.545712	605.453	FALSE	35
2022-09-14	10:06:50	0.414313	605.867	FALSE	35
2022-09-14	10:06:50	0.451463	606.319	FALSE	35
2022-09-14	10:06:50	0.368562	606.688	FALSE	35
2022-09-14	10:06:50	-0.00477074	606.688	FALSE	35
2022-09-14	10:06:51	-0.255916	606.688	FALSE	35
2022-09-14	10:06:51	-0.670114	606.688	FALSE	35
2022-09-14	10:06:51	-0.596628	606.688	FALSE	35
2022-09-14	10:06:51	-0.879681	606.688	FALSE	35
2022-09-14	10:06:52	-0.815203	606.688	FALSE	35
2022-09-14	10:06:52	-0.464974	606.688	FALSE	35
2022-09-14	10:06:52	0.0728883	606.76	FALSE	35
2022-09-14	10:06:52	1.33854	608.099	FALSE	35
2022-09-14	10:06:53	1.94246	610.041	FALSE	35
2022-09-14	10:06:53	4.52627	614.568	1	36
2022-09-14	10:06:53	4.68154	619.249	1	37
2022-09-14	10:06:54	1.94256	621.192	FALSE	37
2022-09-14	10:06:54	1.33055	622.522	FALSE	37
2022-09-14	10:06:54	2.75584	625.278	FALSE	37
2022-09-14	10:06:54	1.91416	627.192	FALSE	37
2022-09-14	10:06:55	1.53497	628.727	FALSE	37
2022-09-14	10:06:55	0.59701	629.324	FALSE	37
2022-09-14	10:06:55	0.73584	630.06	FALSE	37
2022-09-14	10:06:55	0.723728	630.784	FALSE	37
2022-09-14	10:06:56	1.04958	631.833	FALSE	37
2022-09-14	10:06:56	0.682557	632.516	FALSE	37
2022-09-14	10:06:56	0.719809	633.236	FALSE	37
2022-09-14	10:06:56	0.720013	633.956	FALSE	37
2022-09-14	10:06:57	0.933601	634.889	FALSE	37
2022-09-14	10:06:57	0.538435	635.428	FALSE	37
2022-09-14	10:06:57	2.02505	637.453	FALSE	37
2022-09-14	10:06:58	2.06296	639.516	FALSE	37
2022-09-14	10:06:58	1.13793	640.654	FALSE	37
2022-09-14	10:06:58	2.38958	643.043	FALSE	37
2022-09-14	10:06:58	0.838028	643.881	FALSE	37
2022-09-14	10:06:59	0.73584	644.617	FALSE	37
2022-09-14	10:06:59	0.739707	645.357	FALSE	37
2022-09-14	10:06:59	0.366272	645.723	FALSE	37
2022-09-14	10:06:59	0.746425	646.47	FALSE	37
2022-09-14	10:07:00	0.735687	647.205	FALSE	37
2022-09-14	10:07:00	0.745051	647.95	FALSE	37
2022-09-14	10:07:00	0.74098	648.691	FALSE	37
2022-09-14	10:07:00	0.977265	649.669	FALSE	37
2022-09-14	10:07:01	0.739758	650.408	FALSE	37
2022-09-14	10:07:01	0.745763	651.154	FALSE	37
2022-09-14	10:07:01	0.741845	651.896	FALSE	37
2022-09-14	10:07:01	0.739656	652.636	FALSE	37
2022-09-14	10:07:02	0.736349	653.372	FALSE	37
2022-09-14	10:07:02	0.736756	654.109	FALSE	37
2022-09-14	10:07:02	0.738231	654.847	FALSE	37
2022-09-14	10:07:03	0.738028	655.585	FALSE	37
2022-09-14	10:07:03	0.741489	656.327	FALSE	37
2022-09-14	10:07:03	0.739707	657.066	FALSE	37
2022-09-14	10:07:03	0.737315	657.804	FALSE	37
2022-09-14	10:07:04	1.29604	659.1	FALSE	37
2022-09-14	10:07:04	0.74841	659.848	FALSE	37
2022-09-14	10:07:04	0.874211	660.722	FALSE	37
2022-09-14	10:07:04	0.848664	661.571	FALSE	37
2022-09-14	10:07:05	0.69243	662.263	FALSE	37
2022-09-14	10:07:05	0.743778	663.007	FALSE	37
2022-09-14	10:07:05	0.737417	663.744	FALSE	37
2022-09-14	10:07:05	0.735636	664.48	FALSE	37
2022-09-14	10:07:06	0.736247	665.216	FALSE	37
2022-09-14	10:07:06	0.738486	665.955	FALSE	37
2022-09-14	10:07:06	0.736501	666.691	FALSE	37
2022-09-14	10:07:07	0.742099	667.433	FALSE	37
2022-09-14	10:07:07	0.745713	668.179	FALSE	37
2022-09-14	10:07:07	0.735331	668.914	FALSE	37
2022-09-14	10:07:07	0.73472	669.649	FALSE	37
2022-09-14	10:07:08	0.741489	670.391	FALSE	37
2022-09-14	10:07:08	0.74215	671.133	FALSE	37
2022-09-14	10:07:08	0.744797	671.878	FALSE	37
2022-09-14	10:07:08	0.736399	672.614	FALSE	37
2022-09-14	10:07:09	0.733957	673.348	FALSE	37
2022-09-14	10:07:09	0.739046	674.087	FALSE	37
2022-09-14	10:07:09	0.738842	674.826	FALSE	37
2022-09-14	10:07:09	2.24627	677.072	FALSE	37
2022-09-14	10:07:10	0.786679	677.859	FALSE	37
2022-09-14	10:07:10	0.742913	678.602	FALSE	37
2022-09-14	10:07:10	0.737926	679.34	FALSE	37
2022-09-14	10:07:11	0.740165	680.08	FALSE	37
2022-09-14	10:07:11	1.70291	681.783	FALSE	37
2022-09-14	10:07:11	1.0481	682.831	FALSE	37
2022-09-14	10:07:11	3.87782	686.709	1	38
2022-09-14	10:07:12	0.904033	687.613	FALSE	38
2022-09-14	10:07:12	0.735178	688.348	FALSE	38
2022-09-14	10:07:12	0.748053	689.096	FALSE	38
2022-09-14	10:07:13	0.73813	689.834	FALSE	38
2022-09-14	10:07:13	0.713143	690.547	FALSE	38
2022-09-14	10:07:13	0.267545	690.815	FALSE	38
2022-09-14	10:07:13	0.137163	690.952	FALSE	38
2022-09-14	10:07:13	0.0628628	691.015	FALSE	38
2022-09-14	10:07:14	-0.0597326	691.015	FALSE	38
2022-09-14	10:07:14	-0.265992	691.015	FALSE	38
2022-09-14	10:07:14	-0.329503	691.015	FALSE	38
2022-09-14	10:07:15	-0.187926	691.015	FALSE	38
2022-09-14	10:07:15	0.936502	691.951	FALSE	38
2022-09-14	10:07:15	1.16826	693.12	FALSE	38
2022-09-14	10:07:15	1.93111	695.051	FALSE	38
2022-09-14	10:07:16	0.159199	695.21	FALSE	38
2022-09-14	10:07:16	0.437112	695.647	FALSE	38
2022-09-14	10:07:16	0.436858	696.084	FALSE	38
2022-09-14	10:07:16	0.565763	696.65	FALSE	38
2022-09-14	10:07:17	0.367799	697.017	FALSE	38
2022-09-14	10:07:17	0.439046	697.456	FALSE	38
2022-09-14	10:07:17	0.463372	697.92	FALSE	38
2022-09-14	10:07:17	0.395636	698.315	FALSE	38
2022-09-14	10:07:18	0.553855	698.869	FALSE	38
2022-09-14	10:07:18	0.693499	699.563	FALSE	38
2022-09-14	10:07:18	0.832634	700.395	FALSE	38
2022-09-14	10:07:18	0.6364	701.032	FALSE	38
2022-09-14	10:07:19	0.888511	701.92	FALSE	38
2022-09-14	10:07:19	0.613142	702.533	FALSE	38
2022-09-14	10:07:19	0.381285	702.915	FALSE	38
2022-09-14	10:07:20	0.490751	703.406	FALSE	38
2022-09-14	10:07:20	0.360165	703.766	FALSE	38
2022-09-14	10:07:20	0.452074	704.218	FALSE	38
2022-09-14	10:07:20	0.362913	704.581	FALSE	38
2022-09-14	10:07:21	0.466323	705.047	FALSE	38
2022-09-14	10:07:21	0.520522	705.568	FALSE	38
2022-09-14	10:07:21	0.491311	706.059	FALSE	38
2022-09-14	10:07:21	0.830089	706.889	FALSE	38
2022-09-14	10:07:22	0.889376	707.778	FALSE	38
2022-09-14	10:07:22	0.827596	708.606	FALSE	38
2022-09-14	10:07:22	0.881794	709.488	FALSE	38
2022-09-14	10:07:22	0.63299	710.121	FALSE	38
2022-09-14	10:07:23	0.671972	710.793	FALSE	38
2022-09-14	10:07:23	0.612481	711.405	FALSE	38
2022-09-14	10:07:23	0.596756	712.002	FALSE	38
2022-09-14	10:07:24	0.571005	712.573	FALSE	38
2022-09-14	10:07:24	0.459453	713.032	FALSE	38
2022-09-14	10:07:24	0.448257	713.481	FALSE	38
2022-09-14	10:07:24	0.455534	713.936	FALSE	38
2022-09-14	10:07:25	0.47126	714.407	FALSE	38
2022-09-14	10:07:25	0.465611	714.873	FALSE	38
2022-09-14	10:07:25	0.518639	715.392	FALSE	38
2022-09-14	10:07:25	0.573855	715.965	FALSE	38
2022-09-14	10:07:26	0.370903	716.336	FALSE	38
2022-09-14	10:07:26	0.488715	716.825	FALSE	38
2022-09-14	10:07:26	0.616196	717.441	FALSE	38
2022-09-14	10:07:26	0.730293	718.172	FALSE	38
2022-09-14	10:07:27	0.502048	718.674	FALSE	38
2022-09-14	10:07:27	0.700776	719.374	FALSE	38
2022-09-14	10:07:27	0.706629	720.081	FALSE	38
2022-09-14	10:07:28	0.697621	720.779	FALSE	38
2022-09-14	10:07:28	0.742608	721.521	FALSE	38
2022-09-14	10:07:28	0.651819	722.173	FALSE	38
2022-09-14	10:07:28	0.87416	723.047	FALSE	38
2022-09-14	10:07:29	0.878639	723.926	FALSE	38
2022-09-14	10:07:29	1.10449	725.03	FALSE	38
2022-09-14	10:07:29	1.24419	726.275	FALSE	38
2022-09-14	10:07:29	1.61864	727.893	FALSE	38
2022-09-14	10:07:30	1.70434	729.598	FALSE	38
2022-09-14	10:07:30	2.12627	731.724	FALSE	38
2022-09-14	10:07:30	1.93742	733.661	FALSE	38
2022-09-14	10:07:30	0.982099	734.643	FALSE	38
2022-09-14	10:07:31	1.0224	735.666	FALSE	38
2022-09-14	10:07:31	0.799198	736.465	FALSE	38
2022-09-14	10:07:31	0.801234	737.266	FALSE	38
2022-09-14	10:07:32	1.04042	738.307	FALSE	38
2022-09-14	10:07:32	1.20637	739.513	FALSE	38
2022-09-14	10:07:32	1.56856	741.082	FALSE	38
2022-09-14	10:07:32	1.87625	742.958	FALSE	38
2022-09-14	10:07:33	1.59548	744.553	FALSE	38
2022-09-14	10:07:33	2.09487	746.648	FALSE	38
2022-09-14	10:07:33	1.79589	748.444	FALSE	38
2022-09-14	10:07:33	2.03843	750.482	FALSE	38
2022-09-14	10:07:34	2.4848	752.967	FALSE	38
2022-09-14	10:07:34	2.5682	755.535	FALSE	38
2022-09-14	10:07:34	2.78515	758.321	FALSE	38
2022-09-14	10:07:34	3.03121	761.352	1	39
2022-09-14	10:07:35	3.07141	764.423	1	40
2022-09-14	10:07:35	2.72607	767.149	FALSE	40
2022-09-14	10:07:35	2.77808	769.927	FALSE	40
2022-09-14	10:07:36	2.61309	772.54	FALSE	40
2022-09-14	10:07:36	2.77182	775.312	FALSE	40
2022-09-14	10:07:36	2.79197	778.104	FALSE	40
2022-09-14	10:07:36	2.78011	780.884	FALSE	40
2022-09-14	10:07:37	2.73121	783.616	FALSE	40
2022-09-14	10:07:37	2.31192	785.927	FALSE	40
2022-09-14	10:07:37	1.99319	787.921	FALSE	40
2022-09-14	10:07:37	1.76602	789.687	FALSE	40
2022-09-14	10:07:38	1.65258	791.339	FALSE	40
2022-09-14	10:07:38	1.48698	792.826	FALSE	40
2022-09-14	10:07:38	1.36342	794.19	FALSE	40
2022-09-14	10:07:38	0.643372	794.833	FALSE	40
2022-09-14	10:07:39	0.408461	795.242	FALSE	40
2022-09-14	10:07:39	0.393448	795.635	FALSE	40
2022-09-14	10:07:39	0.289529	795.924	FALSE	40
2022-09-14	10:07:39	-0.028842	795.924	FALSE	40
2022-09-14	10:07:40	-0.120649	795.924	FALSE	40
2022-09-14	10:07:40	0.0597585	795.984	FALSE	40
2022-09-14	10:07:40	0.0201656	796.004	FALSE	40
2022-09-14	10:07:41	0.237621	796.242	FALSE	40
2022-09-14	10:07:41	-0.027417	796.242	FALSE	40
2022-09-14	10:07:41	0.0419468	796.284	FALSE	40
2022-09-14	10:07:41	0.056756	796.341	FALSE	40
2022-09-14	10:07:42	0.130649	796.471	FALSE	40
2022-09-14	10:07:42	0.0413361	796.513	FALSE	40
2022-09-14	10:07:42	0.0691733	796.582	FALSE	40
2022-09-14	10:07:42	-0.0588674	796.582	FALSE	40
2022-09-14	10:07:43	0.0733463	796.655	FALSE	40
2022-09-14	10:07:43	0.08042	796.736	FALSE	40
2022-09-14	10:07:43	0.200115	796.936	FALSE	40
2022-09-14	10:07:43	0.14841	797.084	FALSE	40
2022-09-14	10:07:44	0.179911	797.264	FALSE	40
2022-09-14	10:07:44	0.0456109	797.31	FALSE	40
2022-09-14	10:07:44	-0.172252	797.31	FALSE	40
2022-09-14	10:07:45	-0.373626	797.31	FALSE	40
2022-09-14	10:07:45	-0.109605	797.31	FALSE	40
2022-09-14	10:07:45	-0.230369	797.31	FALSE	40
2022-09-14	10:07:45	-0.247519	797.31	FALSE	40
2022-09-14	10:07:46	-0.299274	797.31	FALSE	40
2022-09-14	10:07:46	-0.0471117	797.31	FALSE	40
2022-09-14	10:07:46	-0.0861447	797.31	FALSE	40
2022-09-14	10:07:46	-0.00975804	797.31	FALSE	40
2022-09-14	10:07:47	-0.100496	797.31	FALSE	40
2022-09-14	10:07:47	0.0681046	797.378	FALSE	40
2022-09-14	10:07:47	-0.0164756	797.378	FALSE	40
2022-09-14	10:07:47	0.0606237	797.438	FALSE	40
2022-09-14	10:07:48	-0.0453814	797.438	FALSE	40
2022-09-14	10:07:48	0.144898	797.583	FALSE	40
2022-09-14	10:07:48	0.258791	797.842	FALSE	40
2022-09-14	10:07:49	1.04276	798.885	FALSE	40
2022-09-14	10:07:49	1.02296	799.908	FALSE	40
2022-09-14	10:07:49	0.734771	800.643	FALSE	40
2022-09-14	10:07:49	1.00078	801.643	FALSE	40
2022-09-14	10:07:50	0.96958	802.613	FALSE	40
2022-09-14	10:07:50	0.379809	802.993	FALSE	40
2022-09-14	10:07:50	0.665051	803.658	FALSE	40
2022-09-14	10:07:50	0.25187	803.91	FALSE	40
2022-09-14	10:07:51	0.0124303	803.922	FALSE	40
2022-09-14	10:07:51	-0.151794	803.922	FALSE	40
2022-09-14	10:07:51	-0.1036	803.922	FALSE	40
2022-09-14	10:07:51	-0.226806	803.922	FALSE	40
2022-09-14	10:07:52	-0.352099	803.922	FALSE	40
2022-09-14	10:07:52	-0.388689	803.922	FALSE	40
2022-09-14	10:07:52	-0.0206995	803.922	FALSE	40
2022-09-14	10:07:52	0.719606	804.642	FALSE	40
2022-09-14	10:07:53	0.507239	805.149	FALSE	40
2022-09-14	10:07:53	1.22424	806.373	FALSE	40
2022-09-14	10:07:53	1.1023	807.476	FALSE	40
2022-09-14	10:07:54	2.14047	809.616	FALSE	40
2022-09-14	10:07:54	3.3563	812.972	1	41
2022-09-14	10:07:54	1.3709	814.343	FALSE	41
2022-09-14	10:07:54	1.76922	816.112	FALSE	41
2022-09-14	10:07:55	0.783066	816.895	FALSE	41
2022-09-14	10:07:55	1.35294	818.248	FALSE	41
2022-09-14	10:07:55	0.723219	818.972	FALSE	41
2022-09-14	10:07:55	1.76027	820.732	FALSE	41
2022-09-14	10:07:56	2.56693	823.299	FALSE	41
2022-09-14	10:07:56	3.70393	827.003	1	42
2022-09-14	10:07:56	3.41859	830.421	1	43
2022-09-14	10:07:56	3.028	833.449	1	44
2022-09-14	10:07:57	3.88938	837.339	1	45
2022-09-14	10:07:57	1.73335	839.072	FALSE	45
2022-09-14	10:07:57	2.08637	841.158	FALSE	45
2022-09-14	10:07:58	1.17981	842.338	FALSE	45
2022-09-14	10:07:58	0.62785	842.966	FALSE	45
2022-09-14	10:07:58	0.0993004	843.065	FALSE	45
2022-09-14	10:07:58	0.317417	843.383	FALSE	45
2022-09-14	10:07:59	-0.135305	843.383	FALSE	45
2022-09-14	10:07:59	-0.369707	843.383	FALSE	45
2022-09-14	10:07:59	-0.180699	843.383	FALSE	45
2022-09-14	10:07:59	-0.0946435	843.383	FALSE	45
2022-09-14	10:08:00	-0.317493	843.383	FALSE	45
2022-09-14	10:08:00	-0.213422	843.383	FALSE	45
2022-09-14	10:08:00	0.204491	843.587	FALSE	45
2022-09-14	10:08:00	0.220267	843.808	FALSE	45
2022-09-14	10:08:01	0.170802	843.978	FALSE	45
2022-09-14	10:08:01	0.22159	844.2	FALSE	45
2022-09-14	10:08:01	0.329529	844.53	FALSE	45
2022-09-14	10:08:02	0.333041	844.863	FALSE	45
2022-09-14	10:08:02	0.409377	845.272	FALSE	45
2022-09-14	10:08:02	0.399555	845.671	FALSE	45
2022-09-14	10:08:02	0.645254	846.317	FALSE	45
2022-09-14	10:08:03	0.737417	847.054	FALSE	45
2022-09-14	10:08:03	0.733295	847.787	FALSE	45
2022-09-14	10:08:03	0.735229	848.523	FALSE	45
2022-09-14	10:08:03	0.444186	848.967	FALSE	45
2022-09-14	10:08:04	0.254669	849.222	FALSE	45
2022-09-14	10:08:04	0.735585	849.957	FALSE	45
2022-09-14	10:08:04	0.602354	850.559	FALSE	45
2022-09-14	10:08:04	0.237468	850.797	FALSE	45
2022-09-14	10:08:05	0.174873	850.972	FALSE	45
2022-09-14	10:08:05	0.251819	851.224	FALSE	45
2022-09-14	10:08:05	0.206832	851.43	FALSE	45
2022-09-14	10:08:06	0.172227	851.603	FALSE	45
2022-09-14	10:08:06	0.306476	851.909	FALSE	45
2022-09-14	10:08:06	0.290598	852.2	FALSE	45
2022-09-14	10:08:06	0.253753	852.454	FALSE	45
2022-09-14	10:08:07	0.321438	852.775	FALSE	45
2022-09-14	10:08:07	0.145407	852.92	FALSE	45
2022-09-14	10:08:07	0.138588	853.059	FALSE	45
2022-09-14	10:08:07	0.147392	853.206	FALSE	45
2022-09-14	10:08:08	-0.0376461	853.206	FALSE	45
2022-09-14	10:08:08	-0.3693	853.206	FALSE	45
2022-09-14	10:08:08	-0.619071	853.206	FALSE	45
2022-09-14	10:08:09	-0.7179	853.206	FALSE	45
2022-09-14	10:08:09	-0.708689	853.206	FALSE	45
2022-09-14	10:08:09	-0.603498	853.206	FALSE	45
2022-09-14	10:08:09	-0.569605	853.206	FALSE	45
2022-09-14	10:08:10	-0.393371	853.206	FALSE	45
2022-09-14	10:08:10	-0.498257	853.206	FALSE	45
2022-09-14	10:08:10	-0.477697	853.206	FALSE	45
2022-09-14	10:08:10	-0.337035	853.206	FALSE	45
2022-09-14	10:08:11	-0.210216	853.206	FALSE	45
2022-09-14	10:08:11	0.146578	853.353	FALSE	45
2022-09-14	10:08:11	0.38383	853.737	FALSE	45
2022-09-14	10:08:11	0.368308	854.105	FALSE	45
2022-09-14	10:08:12	0.402659	854.508	FALSE	45
2022-09-14	10:08:12	0.323168	854.831	FALSE	45
2022-09-14	10:08:12	0.498028	855.329	FALSE	45
2022-09-14	10:08:12	0.210853	855.54	FALSE	45
2022-09-14	10:08:13	0.043219	855.583	FALSE	45
2022-09-14	10:08:13	-0.255509	855.583	FALSE	45
2022-09-14	10:08:13	-0.451793	855.583	FALSE	45
2022-09-14	10:08:13	-0.532099	855.583	FALSE	45
2022-09-14	10:08:14	-0.633727	855.583	FALSE	45
2022-09-14	10:08:14	-0.684312	855.583	FALSE	45
2022-09-14	10:08:14	-0.648689	855.583	FALSE	45
2022-09-14	10:08:15	-0.726501	855.583	FALSE	45
2022-09-14	10:08:15	-0.565737	855.583	FALSE	45
2022-09-14	10:08:15	-0.528282	855.583	FALSE	45
2022-09-14	10:08:15	-0.527061	855.583	FALSE	45
2022-09-14	10:08:16	-0.52528	855.583	FALSE	45
2022-09-14	10:08:16	-0.628231	855.583	FALSE	45
2022-09-14	10:08:16	-0.521259	855.583	FALSE	45
2022-09-14	10:08:16	-0.586043	855.583	FALSE	45
2022-09-14	10:08:17	-0.549045	855.583	FALSE	45
2022-09-14	10:08:17	-0.604669	855.583	FALSE	45
2022-09-14	10:08:17	-0.66416	855.583	FALSE	45
2022-09-14	10:08:17	-0.511997	855.583	FALSE	45
2022-09-14	10:08:18	-0.57332	855.583	FALSE	45
2022-09-14	10:08:18	-0.435254	855.583	FALSE	45
2022-09-14	10:08:18	-0.397137	855.583	FALSE	45
2022-09-14	10:08:19	0.0236771	855.607	FALSE	45
2022-09-14	10:08:19	1.67294	857.28	FALSE	45
2022-09-14	10:08:19	2.11681	859.396	FALSE	45
2022-09-14	10:08:19	0.902099	860.299	FALSE	45
2022-09-14	10:08:20	1.54352	861.842	FALSE	45
2022-09-14	10:08:20	0.910344	862.752	FALSE	45
2022-09-14	10:08:20	0.295891	863.048	FALSE	45
2022-09-14	10:08:20	0.189071	863.237	FALSE	45
2022-09-14	10:08:21	0.185967	863.423	FALSE	45
2022-09-14	10:08:21	0.169835	863.593	FALSE	45
2022-09-14	10:08:21	0.129529	863.723	FALSE	45
2022-09-14	10:08:21	0.208206	863.931	FALSE	45
2022-09-14	10:08:22	0.124949	864.056	FALSE	45
2022-09-14	10:08:22	0.238944	864.295	FALSE	45
2022-09-14	10:08:22	0.18215	864.477	FALSE	45
2022-09-14	10:08:23	0.226221	864.703	FALSE	45
2022-09-14	10:08:23	0.121947	864.825	FALSE	45
2022-09-14	10:08:23	0.0938551	864.919	FALSE	45
2022-09-14	10:08:23	0.142507	865.061	FALSE	45
2022-09-14	10:08:24	0.093957	865.155	FALSE	45
2022-09-14	10:08:24	0.121234	865.277	FALSE	45
2022-09-14	10:08:24	0.0271885	865.304	FALSE	45
2022-09-14	10:08:24	0.174975	865.479	FALSE	45
2022-09-14	10:08:25	0.102914	865.582	FALSE	45
2022-09-14	10:08:25	0.148359	865.73	FALSE	45
2022-09-14	10:08:25	0.110649	865.841	FALSE	45
2022-09-14	10:08:25	0.0943131	865.935	FALSE	45
2022-09-14	10:08:26	0.159199	866.094	FALSE	45
2022-09-14	10:08:26	0.0973666	866.192	FALSE	45
2022-09-14	10:08:26	0.0566033	866.248	FALSE	45
2022-09-14	10:08:26	-0.121717	866.248	FALSE	45
2022-09-14	10:08:27	-0.188079	866.248	FALSE	45
2022-09-14	10:08:27	-0.152862	866.248	FALSE	45
2022-09-14	10:08:27	-0.273422	866.248	FALSE	45
2022-09-14	10:08:28	-0.195254	866.248	FALSE	45
2022-09-14	10:08:28	-0.309554	866.248	FALSE	45
2022-09-14	10:08:28	-0.204313	866.248	FALSE	45
2022-09-14	10:08:28	-0.209503	866.248	FALSE	45
2022-09-14	10:08:29	-0.12014	866.248	FALSE	45
2022-09-14	10:08:29	-0.215814	866.248	FALSE	45
2022-09-14	10:08:29	-0.0124043	866.248	FALSE	45
2022-09-14	10:08:29	0.097621	866.346	FALSE	45
2022-09-14	10:08:30	0.240471	866.586	FALSE	45
2022-09-14	10:08:30	-0.0416664	866.586	FALSE	45
2022-09-14	10:08:30	0.226476	866.813	FALSE	45
2022-09-14	10:08:30	0.0143641	866.827	FALSE	45
2022-09-14	10:08:31	0.0463743	866.874	FALSE	45
2022-09-14	10:08:31	-0.0208013	866.874	FALSE	45
2022-09-14	10:08:31	-0.00497431	866.874	FALSE	45
2022-09-14	10:08:32	0.104186	866.978	FALSE	45
2022-09-14	10:08:32	0.119911	867.098	FALSE	45
2022-09-14	10:08:32	0.157977	867.256	FALSE	45
2022-09-14	10:08:32	0.0417432	867.297	FALSE	45
2022-09-14	10:08:33	0.185611	867.483	FALSE	45
2022-09-14	10:08:33	0.132837	867.616	FALSE	45
2022-09-14	10:08:33	0.221387	867.837	FALSE	45
2022-09-14	10:08:33	0.0553819	867.893	FALSE	45
2022-09-14	10:08:34	0.164491	868.057	FALSE	45
2022-09-14	10:08:34	0.334822	868.392	FALSE	45
2022-09-14	10:08:34	0.607646	869	FALSE	45
2022-09-14	10:08:34	0.517773	869.517	FALSE	45
2022-09-14	10:08:35	1.21747	870.735	FALSE	45
2022-09-14	10:08:35	1.03284	871.768	FALSE	45
2022-09-14	10:08:35	0.907239	872.675	FALSE	45
2022-09-14	10:08:36	0.63075	873.306	FALSE	45
2022-09-14	10:08:36	1.4736	874.779	FALSE	45
2022-09-14	10:08:36	0.31131	875.09	FALSE	45
2022-09-14	10:08:36	0.481743	875.572	FALSE	45
2022-09-14	10:08:37	0.595891	876.168	FALSE	45
2022-09-14	10:08:37	0.565916	876.734	FALSE	45
2022-09-14	10:08:37	0.499198	877.233	FALSE	45
2022-09-14	10:08:37	0.489733	877.723	FALSE	45
2022-09-14	10:08:38	0.42897	878.152	FALSE	45
2022-09-14	10:08:38	0.452532	878.604	FALSE	45
2022-09-14	10:08:38	0.38958	878.994	FALSE	45
2022-09-14	10:08:38	0.439809	879.434	FALSE	45
2022-09-14	10:08:39	0.372023	879.806	FALSE	45
2022-09-14	10:08:39	0.428868	880.235	FALSE	45
2022-09-14	10:08:39	0.388766	880.624	FALSE	45
2022-09-14	10:08:40	0.436705	881.06	FALSE	45
2022-09-14	10:08:40	0.388562	881.449	FALSE	45
2022-09-14	10:08:40	0.431412	881.88	FALSE	45
2022-09-14	10:08:40	0.392379	882.273	FALSE	45
2022-09-14	10:08:41	0.415076	882.688	FALSE	45
2022-09-14	10:08:41	0.366527	883.054	FALSE	45
2022-09-14	10:08:41	0.389631	883.444	FALSE	45
2022-09-14	10:08:41	0.361031	883.805	FALSE	45
2022-09-14	10:08:42	0.395687	884.201	FALSE	45
2022-09-14	10:08:42	0.237672	884.438	FALSE	45
2022-09-14	10:08:42	0.41701	884.855	FALSE	45
2022-09-14	10:08:42	0.322048	885.177	FALSE	45
2022-09-14	10:08:43	0.568206	885.745	FALSE	45
2022-09-14	10:08:43	0.628155	886.374	FALSE	45
2022-09-14	10:08:43	0.64673	887.02	FALSE	45
2022-09-14	10:08:43	0.669682	887.69	FALSE	45
2022-09-14	10:08:44	0.658486	888.349	FALSE	45
2022-09-14	10:08:44	0.668308	889.017	FALSE	45
2022-09-14	10:08:44	0.634008	889.651	FALSE	45
2022-09-14	10:08:45	0.658028	890.309	FALSE	45
2022-09-14	10:08:45	0.624287	890.933	FALSE	45
2022-09-14	10:08:45	0.662761	891.596	FALSE	45
2022-09-14	10:08:45	1.30322	892.899	FALSE	45
2022-09-14	10:08:46	1.61355	894.513	FALSE	45
2022-09-14	10:08:46	0.622761	895.135	FALSE	45
2022-09-14	10:08:46	0.617316	895.753	FALSE	45
2022-09-14	10:08:46	0.414568	896.167	FALSE	45
2022-09-14	10:08:47	0.425814	896.593	FALSE	45
2022-09-14	10:08:47	0.506323	897.099	FALSE	45
2022-09-14	10:08:47	0.510343	897.61	FALSE	45
2022-09-14	10:08:47	0.483677	898.093	FALSE	45
2022-09-14	10:08:48	0.460166	898.554	FALSE	45
2022-09-14	10:08:48	0.36556	898.919	FALSE	45
2022-09-14	10:08:48	0.45813	899.377	FALSE	45
2022-09-14	10:08:49	0.315026	899.692	FALSE	45
2022-09-14	10:08:49	0.407036	900.099	FALSE	45
2022-09-14	10:08:49	0.273652	900.373	FALSE	45
2022-09-14	10:08:49	0.308817	900.682	FALSE	45
2022-09-14	10:08:50	0.261641	900.944	FALSE	45
2022-09-14	10:08:50	0.380573	901.324	FALSE	45
2022-09-14	10:08:50	0.248868	901.573	FALSE	45
2022-09-14	10:08:50	0.44383	902.017	FALSE	45
2022-09-14	10:08:51	0.221183	902.238	FALSE	45
2022-09-14	10:08:51	0.683423	902.921	FALSE	45
2022-09-14	10:08:51	0.344644	903.266	FALSE	45
2022-09-14	10:08:51	0.980013	904.246	FALSE	45
2022-09-14	10:08:52	1.86047	906.107	FALSE	45
2022-09-14	10:08:52	3.24938	909.356	1	46
2022-09-14	10:08:52	3.86444	913.22	1	47
2022-09-14	10:08:53	4.14993	917.37	1	48
2022-09-14	10:08:53	1.95197	919.322	FALSE	48
2022-09-14	10:08:53	1.33004	920.652	FALSE	48
2022-09-14	10:08:53	0.442812	921.095	FALSE	48
2022-09-14	10:08:54	0.487697	921.583	FALSE	48
2022-09-14	10:08:54	0.467239	922.05	FALSE	48
2022-09-14	10:08:54	0.488715	922.539	FALSE	48
2022-09-14	10:08:54	0.430089	922.969	FALSE	48
2022-09-14	10:08:55	0.421794	923.391	FALSE	48
2022-09-14	10:08:55	0.344339	923.735	FALSE	48
2022-09-14	10:08:55	0.466476	924.201	FALSE	48
2022-09-14	10:08:55	0.316654	924.518	FALSE	48
2022-09-14	10:08:56	0.490547	925.009	FALSE	48
2022-09-14	10:08:56	-0.156883	925.009	FALSE	48
2022-09-14	10:08:56	-0.332048	925.009	FALSE	48
2022-09-14	10:08:57	-0.337951	925.009	FALSE	48
2022-09-14	10:08:57	-0.215559	925.009	FALSE	48
2022-09-14	10:08:57	-0.0884857	925.009	FALSE	48
2022-09-14	10:08:57	0.359351	925.368	FALSE	48
2022-09-14	10:08:58	0.301692	925.67	FALSE	48
2022-09-14	10:08:58	0.398995	926.069	FALSE	48
2022-09-14	10:08:58	0.0614888	926.13	FALSE	48
2022-09-14	10:08:58	0.0677483	926.198	FALSE	48
2022-09-14	10:08:59	0.925255	927.123	FALSE	48
2022-09-14	10:08:59	0.31472	927.438	FALSE	48
2022-09-14	10:08:59	0.221387	927.659	FALSE	48
2022-09-14	10:08:59	0.143117	927.802	FALSE	48
2022-09-14	10:09:00	0.0583845	927.861	FALSE	48
2022-09-14	10:09:00	0.0610816	927.922	FALSE	48
2022-09-14	10:09:00	0.300216	928.222	FALSE	48
2022-09-14	10:09:00	1.51004	929.732	FALSE	48
2022-09-14	10:09:01	1.26922	931.001	FALSE	48
2022-09-14	10:09:01	1.98729	932.989	FALSE	48
2022-09-14	10:09:01	2.51589	935.505	FALSE	48
2022-09-14	10:09:02	4.00927	939.514	1	49
2022-09-14	10:09:02	6.56235	946.076	1	50
2022-09-14	10:09:02	3.93935	950.015	1	51
2022-09-14	10:09:02	3.28927	953.305	1	52
2022-09-14	10:09:03	3.74988	957.055	1	53
2022-09-14	10:09:03	2.73497	959.79	FALSE	53
2022-09-14	10:09:03	2.30413	962.094	FALSE	53
2022-09-14	10:09:03	2.74291	964.837	FALSE	53
2022-09-14	10:09:04	2.15874	966.995	FALSE	53
2022-09-14	10:09:04	1.00027	967.996	FALSE	53
2022-09-14	10:09:04	0.687952	968.684	FALSE	53
2022-09-14	10:09:04	0.555076	969.239	FALSE	53
2022-09-14	10:09:05	0.51014	969.749	FALSE	53
2022-09-14	10:09:05	0.48729	970.236	FALSE	53
2022-09-14	10:09:05	0.482252	970.718	FALSE	53
2022-09-14	10:09:06	0.492328	971.211	FALSE	53
2022-09-14	10:09:06	0.486425	971.697	FALSE	53
2022-09-14	10:09:06	0.477316	972.174	FALSE	53
2022-09-14	10:09:06	0.454618	972.629	FALSE	53
2022-09-14	10:09:07	0.44785	973.077	FALSE	53
2022-09-14	10:09:07	0.527799	973.605	FALSE	53
2022-09-14	10:09:07	0.590293	974.195	FALSE	53
2022-09-14	10:09:07	0.446069	974.641	FALSE	53
2022-09-14	10:09:08	0.349071	974.99	FALSE	53
2022-09-14	10:09:08	0.398333	975.388	FALSE	53

## Sheet: MsPotato_martin_202291410345
						**GoPro Fitting: 9:52
2022-09-14	10:03:45	0.139453
2022-09-14	10:03:46	0.191056
2022-09-14	10:03:46	0.321743
2022-09-14	10:03:46	0.212328
2022-09-14	10:03:46	0.333193
2022-09-14	10:03:47	9.22713
2022-09-14	10:03:47	1.15818
2022-09-14	10:03:47	0.352786
2022-09-14	10:03:47	0.449682
2022-09-14	10:03:48	0.386934
2022-09-14	10:03:48	0.417061
2022-09-14	10:03:48	0.360522
2022-09-14	10:03:48	0.475687
2022-09-14	10:03:49	0.497367
2022-09-14	10:03:49	0.545865
2022-09-14	10:03:49	1.01014
2022-09-14	10:03:49	0.71813
2022-09-14	10:03:50	0.764033
2022-09-14	10:03:50	0.280522
2022-09-14	10:03:50	0.362455
2022-09-14	10:03:51	0.305713
2022-09-14	10:03:51	0.366629
2022-09-14	10:03:51	0.769835
2022-09-14	10:03:51	1.34373
2022-09-14	10:03:52	0.207443
2022-09-14	10:03:52	-0.136679
2022-09-14	10:03:52	0.156094
2022-09-14	10:03:52	-0.0189183
2022-09-14	10:03:53	0.219606
2022-09-14	10:03:53	0.138028
2022-09-14	10:03:53	0.279453
2022-09-14	10:03:53	0.160776
2022-09-14	10:03:54	0.226629
2022-09-14	10:03:54	0.0579264
2022-09-14	10:03:54	0.120369
2022-09-14	10:03:55	0.128563
2022-09-14	10:03:55	0.397214
2022-09-14	10:03:55	0.193804
2022-09-14	10:03:55	0.407137
2022-09-14	10:03:56	0.223728
2022-09-14	10:03:56	0.378181
2022-09-14	10:03:56	0.30042
2022-09-14	10:03:56	0.280878
2022-09-14	10:03:57	0.318893
2022-09-14	10:03:57	0.25701
2022-09-14	10:03:57	0.321031
2022-09-14	10:03:57	0.279351
2022-09-14	10:03:58	0.278028
2022-09-14	10:03:58	0.54042
2022-09-14	10:03:58	1.24469
2022-09-14	10:03:59	2.45238
2022-09-14	10:03:59	1.23177
2022-09-14	10:03:59	0.455789
2022-09-14	10:03:59	0.328969
2022-09-14	10:04:00	0.303372
2022-09-14	10:04:00	0.343626
2022-09-14	10:04:00	0.301845
2022-09-14	10:04:00	0.26444
2022-09-14	10:04:01	0.304542
2022-09-14	10:04:01	0.218741
2022-09-14	10:04:01	-0.0157122
2022-09-14	10:04:01	-0.0397326
2022-09-14	10:04:02	0.0666287
2022-09-14	10:04:02	0.0853564
2022-09-14	10:04:02	0.192125
2022-09-14	10:04:03	0.126527
2022-09-14	10:04:03	0.197977
2022-09-14	10:04:03	0.565865
2022-09-14	10:04:03	1.27106
2022-09-14	10:04:04	2.55787
2022-09-14	10:04:04	2.06698
2022-09-14	10:04:04	0.903168
2022-09-14	10:04:04	0.564847
2022-09-14	10:04:05	0.256705
2022-09-14	10:04:05	0.209529
2022-09-14	10:04:05	0.24729
2022-09-14	10:04:05	0.416349
2022-09-14	10:04:06	0.313702
2022-09-14	10:04:06	0.26271
2022-09-14	10:04:06	0.220522
2022-09-14	10:04:07	0.228562
2022-09-14	10:04:07	0.346272
2022-09-14	10:04:07	0.290954
2022-09-14	10:04:07	0.226883
2022-09-14	10:04:08	0.214568
2022-09-14	10:04:08	0.211769
2022-09-14	10:04:08	0.256196
2022-09-14	10:04:08	0.176247
2022-09-14	10:04:09	0.117418
2022-09-14	10:04:09	0.140929
2022-09-14	10:04:09	0.150649
2022-09-14	10:04:09	0.157825
2022-09-14	10:04:10	0.15813
2022-09-14	10:04:10	0.156247
2022-09-14	10:04:10	0.148919
2022-09-14	10:04:11	0.184797
2022-09-14	10:04:11	0.174975
2022-09-14	10:04:11	0.0742623
2022-09-14	10:04:11	0.0534481
2022-09-14	10:04:12	-0.0331168
2022-09-14	10:04:12	0.274466
2022-09-14	10:04:12	0.581896
2022-09-14	10:04:12	0.332328
2022-09-14	10:04:13	0.527748
2022-09-14	10:04:13	0.229835
2022-09-14	10:04:13	0.2793
2022-09-14	10:04:13	0.515585
2022-09-14	10:04:14	0.310445
2022-09-14	10:04:14	-0.00716262
2022-09-14	10:04:14	0.0919722
2022-09-14	10:04:14	0.214364
2022-09-14	10:04:15	0.394415
2022-09-14	10:04:15	2.53625
2022-09-14	10:04:15	2.02098
2022-09-14	10:04:16	1.38352
2022-09-14	10:04:16	0.967697
2022-09-14	10:04:16	0.854262
2022-09-14	10:04:16	1.46495
2022-09-14	10:04:17	1.31182
2022-09-14	10:04:17	5.79278
2022-09-14	10:04:17	6.53685
2022-09-14	10:04:17	4.28235
2022-09-14	10:04:18	1.55467
2022-09-14	10:04:18	1.28037
2022-09-14	10:04:18	0.487494
2022-09-14	10:04:18	0.476756
2022-09-14	10:04:19	0.543931
2022-09-14	10:04:19	0.992837
2022-09-14	10:04:19	0.475178
2022-09-14	10:04:20	0.729987
2022-09-14	10:04:20	0.275025
2022-09-14	10:04:20	0.304644
2022-09-14	10:04:20	0.229631
2022-09-14	10:04:21	0.172125
2022-09-14	10:04:21	0.050191
2022-09-14	10:04:21	0.211158
2022-09-14	10:04:21	0.402099
2022-09-14	10:04:22	0.243422
2022-09-14	10:04:22	0.139911
2022-09-14	10:04:22	0.337824
2022-09-14	10:04:22	0.164033
2022-09-14	10:04:23	0.355738
2022-09-14	10:04:23	0.224033
2022-09-14	10:04:23	0.424593
2022-09-14	10:04:24	0.221081
2022-09-14	10:04:24	0.412481
2022-09-14	10:04:24	0.180624
2022-09-14	10:04:24	0.368104
2022-09-14	10:04:25	0.0845422
2022-09-14	10:04:25	0.481641
2022-09-14	10:04:25	0.122507
2022-09-14	10:04:25	0.0494277
2022-09-14	10:04:26	0.257316
2022-09-14	10:04:26	0.421234
2022-09-14	10:04:26	0.962506
2022-09-14	10:04:26	1.3393
2022-09-14	10:04:27	0.586119
2022-09-14	10:04:27	0.61243
2022-09-14	10:04:27	0.859809
2022-09-14	10:04:28	1.32413
2022-09-14	10:04:28	1.75187
2022-09-14	10:04:28	3.39716
2022-09-14	10:04:28	6.01553
2022-09-14	10:04:29	7.40164
2022-09-14	10:04:29	9.12398
2022-09-14	10:04:29	1.46413
2022-09-14	10:04:29	1.41355
2022-09-14	10:04:30	0.837214
2022-09-14	10:04:30	0.398181
2022-09-14	10:04:30	0.562354
2022-09-14	10:04:30	0.38673
2022-09-14	10:04:31	0.484949
2022-09-14	10:04:31	0.545407
2022-09-14	10:04:31	0.696298
2022-09-14	10:04:32	0.802354
2022-09-14	10:04:32	0.613397
2022-09-14	10:04:32	0.727036
2022-09-14	10:04:32	0.758232
2022-09-14	10:04:33	0.543219
2022-09-14	10:04:33	0.746985
2022-09-14	10:04:33	0.528104
2022-09-14	10:04:33	0.694618
2022-09-14	10:04:34	0.388868
2022-09-14	10:04:34	0.621031
2022-09-14	10:04:34	0.657926
2022-09-14	10:04:34	1.0678
2022-09-14	10:04:35	0.31355
2022-09-14	10:04:35	0.429886
2022-09-14	10:04:35	0.512481
2022-09-14	10:04:36	0.814618
2022-09-14	10:04:36	0.414822
2022-09-14	10:04:36	0.551921
2022-09-14	10:04:36	0.465509
2022-09-14	10:04:37	0.513041
2022-09-14	10:04:37	0.631208
2022-09-14	10:04:37	0.545102
2022-09-14	10:04:37	0.50897
2022-09-14	10:04:38	0.736247
2022-09-14	10:04:38	0.436756
2022-09-14	10:04:38	0.442608
2022-09-14	10:04:38	0.439809
2022-09-14	10:04:39	0.44897
2022-09-14	10:04:39	0.467952
2022-09-14	10:04:39	0.362099
2022-09-14	10:04:40	0.391463
2022-09-14	10:04:40	0.350445
2022-09-14	10:04:40	0.342761
2022-09-14	10:04:40	0.442456
2022-09-14	10:04:41	0.596094
2022-09-14	10:04:41	0.602455
2022-09-14	10:04:41	0.616959
2022-09-14	10:04:41	0.633601
2022-09-14	10:04:42	0.366578
2022-09-14	10:04:42	0.470038
2022-09-14	10:04:42	0.341998
2022-09-14	10:04:42	0.443219
2022-09-14	10:04:43	0.360725
2022-09-14	10:04:43	0.423677
2022-09-14	10:04:43	0.373957
2022-09-14	10:04:43	0.355585
2022-09-14	10:04:44	0.489784
2022-09-14	10:04:44	0.57355
2022-09-14	10:04:44	0.203524
2022-09-14	10:04:45	0.069733
2022-09-14	10:04:45	-0.313727
2022-09-14	10:04:45	-0.519681
2022-09-14	10:04:45	-0.595661
2022-09-14	10:04:46	-0.564109
2022-09-14	10:04:46	-0.273269
2022-09-14	10:04:46	-0.225025
2022-09-14	10:04:46	-0.0982058
2022-09-14	10:04:47	-0.12243
2022-09-14	10:04:47	-0.122633
2022-09-14	10:04:47	-0.0796817
2022-09-14	10:04:47	-0.100241
2022-09-14	10:04:48	0.114517
2022-09-14	10:04:48	0.20383
2022-09-14	10:04:48	0.13528
2022-09-14	10:04:49	0.0754837
2022-09-14	10:04:49	0.00255749
2022-09-14	10:04:49	0.134975
2022-09-14	10:04:49	-0.0360176
2022-09-14	10:04:50	-0.374592
2022-09-14	10:04:50	-0.427417
2022-09-14	10:04:50	-0.595407
2022-09-14	10:04:50	-0.531234
2022-09-14	10:04:51	-0.22528
2022-09-14	10:04:51	-0.121616
2022-09-14	10:04:51	0.0398094
2022-09-14	10:04:51	0.699046
2022-09-14	10:04:52	1.18439
2022-09-14	10:04:52	1.80693
2022-09-14	10:04:52	1.97426
2022-09-14	10:04:53	1.84017
2022-09-14	10:04:53	1.13945
2022-09-14	10:04:53	0.392227
2022-09-14	10:04:53	0.495331
2022-09-14	10:04:54	0.467239
2022-09-14	10:04:54	0.449886
2022-09-14	10:04:54	0.477672
2022-09-14	10:04:54	0.570395
2022-09-14	10:04:55	0.43757
2022-09-14	10:04:55	0.425916
2022-09-14	10:04:55	0.343423
2022-09-14	10:04:55	0.396959
2022-09-14	10:04:56	0.308104
2022-09-14	10:04:56	0.658537
2022-09-14	10:04:56	0.430395
2022-09-14	10:04:57	0.66215
2022-09-14	10:04:57	0.192786
2022-09-14	10:04:57	0.270089
2022-09-14	10:04:57	-0.205839
2022-09-14	10:04:58	-0.369351
2022-09-14	10:04:58	-0.1379
2022-09-14	10:04:58	0.373804
2022-09-14	10:04:58	0.350903
2022-09-14	10:04:59	0.628613
2022-09-14	10:04:59	0.291311
2022-09-14	10:04:59	0.149224
2022-09-14	10:04:59	0.0301911
2022-09-14	10:05:00	0.12897
2022-09-14	10:05:00	-0.0436002
2022-09-14	10:05:00	0.182608
2022-09-14	10:05:01	0.377265
2022-09-14	10:05:01	1.63248
2022-09-14	10:05:01	2.3051
2022-09-14	10:05:01	1.64078
2022-09-14	10:05:02	0.247494
2022-09-14	10:05:02	0.0143132
2022-09-14	10:05:02	-0.174389
2022-09-14	10:05:02	-0.301208
2022-09-14	10:05:03	-0.109147
2022-09-14	10:05:03	0.0722776
2022-09-14	10:05:03	0.000165643
2022-09-14	10:05:03	-0.0546944
2022-09-14	10:05:04	0.114059
2022-09-14	10:05:04	0.360216
2022-09-14	10:05:04	0.413346
2022-09-14	10:05:05	0.512074
2022-09-14	10:05:05	0.633753
2022-09-14	10:05:05	0.549173
2022-09-14	10:05:05	0.309886
2022-09-14	10:05:06	0.171463
2022-09-14	10:05:06	-0.0516919
2022-09-14	10:05:06	-0.0818699
2022-09-14	10:05:06	-0.0320481
2022-09-14	10:05:07	-0.200547
2022-09-14	10:05:07	-0.298816
2022-09-14	10:05:07	-0.159376
2022-09-14	10:05:07	-0.269961
2022-09-14	10:05:08	-0.0346435
2022-09-14	10:05:08	-0.106755
2022-09-14	10:05:08	0.154364
2022-09-14	10:05:08	0.176501
2022-09-14	10:05:09	1.17894
2022-09-14	10:05:09	1.17681
2022-09-14	10:05:09	2.03838
2022-09-14	10:05:10	1.37874
2022-09-14	10:05:10	3.13752
2022-09-14	10:05:10	1.79986
2022-09-14	10:05:10	1.79192
2022-09-14	10:05:11	0.541997
2022-09-14	10:05:11	0.766221
2022-09-14	10:05:11	0.556807
2022-09-14	10:05:11	1.32719
2022-09-14	10:05:12	0.611718
2022-09-14	10:05:12	1.50276
2022-09-14	10:05:12	1.03187
2022-09-14	10:05:12	3.15345
2022-09-14	10:05:13	1.21324
2022-09-14	10:05:13	3.088
2022-09-14	10:05:13	1.03268
2022-09-14	10:05:14	2.03731
2022-09-14	10:05:14	1.24271
2022-09-14	10:05:14	1.13034
2022-09-14	10:05:14	1.66347
2022-09-14	10:05:15	0.918384
2022-09-14	10:05:15	2.01452
2022-09-14	10:05:15	1.03482
2022-09-14	10:05:15	2.31574
2022-09-14	10:05:16	0.951463
2022-09-14	10:05:16	1.74144
2022-09-14	10:05:16	0.620267
2022-09-14	10:05:16	1.22388
2022-09-14	10:05:17	0.467647
2022-09-14	10:05:17	0.917468
2022-09-14	10:05:17	0.626629
2022-09-14	10:05:18	1.95955
2022-09-14	10:05:18	0.476043
2022-09-14	10:05:18	1.17274
2022-09-14	10:05:18	1.12922
2022-09-14	10:05:19	1.18902
2022-09-14	10:05:19	0.408257
2022-09-14	10:05:19	0.678079
2022-09-14	10:05:19	0.725305
2022-09-14	10:05:20	0.822099
2022-09-14	10:05:20	1.21772
2022-09-14	10:05:20	0.697519
2022-09-14	10:05:20	0.186425
2022-09-14	10:05:21	0.349478
2022-09-14	10:05:21	0.748613
2022-09-14	10:05:21	-0.0373916
2022-09-14	10:05:22	0.0130918
2022-09-14	10:05:22	0.736756
2022-09-14	10:05:22	3.38663
2022-09-14	10:05:22	3.75141
2022-09-14	10:05:23	1.85996
2022-09-14	10:05:23	0.730801
2022-09-14	10:05:23	0.728919
2022-09-14	10:05:23	0.730649
2022-09-14	10:05:24	0.737672
2022-09-14	10:05:24	0.734517
2022-09-14	10:05:24	0.728919
2022-09-14	10:05:24	0.740369
2022-09-14	10:05:25	0.731209
2022-09-14	10:05:25	0.732634
2022-09-14	10:05:25	0.738181
2022-09-14	10:05:26	0.734924
2022-09-14	10:05:26	0.728461
2022-09-14	10:05:26	0.736552
2022-09-14	10:05:26	0.73355
2022-09-14	10:05:27	0.733601
2022-09-14	10:05:27	0.736145
2022-09-14	10:05:27	0.734822
2022-09-14	10:05:27	0.507035
2022-09-14	10:05:28	0.16444
2022-09-14	10:05:28	0.298028
2022-09-14	10:05:28	3.25177
2022-09-14	10:05:28	2.18581
2022-09-14	10:05:29	0.808308
2022-09-14	10:05:29	0.870903
2022-09-14	10:05:29	0.617316
2022-09-14	10:05:30	0.737621
2022-09-14	10:05:30	0.176552
2022-09-14	10:05:30	0.471158
2022-09-14	10:05:30	0.23243
2022-09-14	10:05:31	0.260471
2022-09-14	10:05:31	0.174466
2022-09-14	10:05:31	0.187392
2022-09-14	10:05:31	0.196756
2022-09-14	10:05:32	0.185458
2022-09-14	10:05:32	0.183066
2022-09-14	10:05:32	0.189377
2022-09-14	10:05:33	0.208766
2022-09-14	10:05:33	0.434262
2022-09-14	10:05:33	0.106527
2022-09-14	10:05:33	-0.00293869
2022-09-14	10:05:33	-0.0724552
2022-09-14	10:05:34	-0.104618
2022-09-14	10:05:34	-0.101107
2022-09-14	10:05:34	-0.135407
2022-09-14	10:05:35	-0.186297
2022-09-14	10:05:35	-0.275101
2022-09-14	10:05:35	-0.132455
2022-09-14	10:05:35	3.27314
2022-09-14	10:05:36	4.83599
2022-09-14	10:05:36	2.37564
2022-09-14	10:05:36	2.6136
2022-09-14	10:05:36	2.19665
2022-09-14	10:05:37	4.37314
2022-09-14	10:05:37	2.98495
2022-09-14	10:05:37	5.61721
2022-09-14	10:05:37	3.32912
2022-09-14	10:05:38	3.8766
2022-09-14	10:05:38	4.10592
2022-09-14	10:05:38	1.69818
2022-09-14	10:05:39	1.22286
2022-09-14	10:05:39	0.409021
2022-09-14	10:05:39	0.69818
2022-09-14	10:05:39	0.728054
2022-09-14	10:05:40	0.738282
2022-09-14	10:05:40	0.707036
2022-09-14	10:05:40	0.467443
2022-09-14	10:05:40	0.383219
2022-09-14	10:05:41	0.448104
2022-09-14	10:05:41	0.429326
2022-09-14	10:05:41	0.35355
2022-09-14	10:05:41	0.421692
2022-09-14	10:05:42	0.485153
2022-09-14	10:05:42	0.673651
2022-09-14	10:05:42	1.04037
2022-09-14	10:05:43	1.11095
2022-09-14	10:05:43	0.856043
2022-09-14	10:05:43	0.190496
2022-09-14	10:05:43	0.166985
2022-09-14	10:05:44	0.171921
2022-09-14	10:05:44	0.173906
2022-09-14	10:05:44	0.171667
2022-09-14	10:05:44	0.187748
2022-09-14	10:05:45	0.242405
2022-09-14	10:05:45	0.745102
2022-09-14	10:05:45	0.213244
2022-09-14	10:05:45	-0.0355595
2022-09-14	10:05:46	0.200471
2022-09-14	10:05:46	0.391565
2022-09-14	10:05:46	0.0598603
2022-09-14	10:05:47	0.207901
2022-09-14	10:05:47	1.23609
2022-09-14	10:05:47	1.89202
2022-09-14	10:05:47	0.727188
2022-09-14	10:05:48	0.589936
2022-09-14	10:05:48	0.592837
2022-09-14	10:05:48	0.540878
2022-09-14	10:05:48	0.552125
2022-09-14	10:05:49	0.502913
2022-09-14	10:05:49	0.506374
2022-09-14	10:05:49	0.47416
2022-09-14	10:05:49	0.502405
2022-09-14	10:05:50	0.498282
2022-09-14	10:05:50	0.440827
2022-09-14	10:05:50	0.455178
2022-09-14	10:05:51	0.388613
2022-09-14	10:05:51	0.457977
2022-09-14	10:05:51	0.679504
2022-09-14	10:05:51	0.360674
2022-09-14	10:05:52	0.380725
2022-09-14	10:05:52	0.541234
2022-09-14	10:05:52	0.487239
2022-09-14	10:05:52	0.429428
2022-09-14	10:05:53	0.672888
2022-09-14	10:05:53	0.668664
2022-09-14	10:05:53	0.744898
2022-09-14	10:05:53	0.740064
2022-09-14	10:05:54	0.738435
2022-09-14	10:05:54	0.733753
2022-09-14	10:05:54	0.732023
2022-09-14	10:05:55	0.738639
2022-09-14	10:05:55	0.729784
2022-09-14	10:05:55	0.744694
2022-09-14	10:05:55	0.735331
2022-09-14	10:05:56	0.739147
2022-09-14	10:05:56	0.737061
2022-09-14	10:05:56	0.664084
2022-09-14	10:05:56	0.547697
2022-09-14	10:05:57	0.365204
2022-09-14	10:05:57	0.580827
2022-09-14	10:05:57	0.560776
2022-09-14	10:05:57	0.720827
2022-09-14	10:05:58	0.775127
2022-09-14	10:05:58	0.86327
2022-09-14	10:05:58	1.27355
2022-09-14	10:05:58	1.97961
2022-09-14	10:05:59	2.29477
2022-09-14	10:05:59	3.57406
2022-09-14	10:05:59	1.58424
2022-09-14	10:06:00	3.26607
2022-09-14	10:06:00	1.43833
2022-09-14	10:06:00	1.27441
2022-09-14	10:06:00	0.522404
2022-09-14	10:06:01	0.501387
2022-09-14	10:06:01	0.854109
2022-09-14	10:06:01	1.25981
2022-09-14	10:06:01	1.35289
2022-09-14	10:06:02	1.46291
2022-09-14	10:06:02	1.87029
2022-09-14	10:06:02	2.47762
2022-09-14	10:06:02	3.37039
2022-09-14	10:06:03	2.84485
2022-09-14	10:06:03	2.04551
2022-09-14	10:06:03	2.3764
2022-09-14	10:06:04	0.874313
2022-09-14	10:06:04	1.18515
2022-09-14	10:06:04	0.681183
2022-09-14	10:06:04	0.977163
2022-09-14	10:06:05	1.08454
2022-09-14	10:06:05	1.80627
2022-09-14	10:06:05	2.57594
2022-09-14	10:06:05	1.32108
2022-09-14	10:06:06	1.51569
2022-09-14	10:06:06	0.697824
2022-09-14	10:06:06	0.471209
2022-09-14	10:06:06	0.713804
2022-09-14	10:06:07	0.774568
2022-09-14	10:06:07	1.19177
2022-09-14	10:06:07	1.89503
2022-09-14	10:06:08	1.64973
2022-09-14	10:06:08	1.32276
2022-09-14	10:06:08	1.55808
2022-09-14	10:06:08	0.781946
2022-09-14	10:06:09	0.786374
2022-09-14	10:06:09	0.959198
2022-09-14	10:06:09	1.02276
2022-09-14	10:06:09	4.50266
2022-09-14	10:06:10	3.86597
2022-09-14	10:06:10	4.67289
2022-09-14	10:06:10	1.34602
2022-09-14	10:06:10	0.554313
2022-09-14	10:06:11	0.759148
2022-09-14	10:06:11	0.38042
2022-09-14	10:06:11	0.61757
2022-09-14	10:06:12	1.58128
2022-09-14	10:06:12	1.39742
2022-09-14	10:06:12	3.03309
2022-09-14	10:06:12	0.865458
2022-09-14	10:06:13	1.69543
2022-09-14	10:06:13	0.381896
2022-09-14	10:06:13	0.669733
2022-09-14	10:06:13	0.228919
2022-09-14	10:06:14	0.442914
2022-09-14	10:06:14	0.305763
2022-09-14	10:06:14	0.312227
2022-09-14	10:06:14	0.602455
2022-09-14	10:06:15	0.433295
2022-09-14	10:06:15	2.12525
2022-09-14	10:06:15	4.92586
2022-09-14	10:06:16	5.70362
2022-09-14	10:06:16	3.2078
2022-09-14	10:06:16	3.24342
2022-09-14	10:06:16	1.90653
2022-09-14	10:06:17	1.90724
2022-09-14	10:06:17	2.22551
2022-09-14	10:06:17	1.14739
2022-09-14	10:06:17	1.05095
2022-09-14	10:06:18	0.352328
2022-09-14	10:06:18	1.9878
2022-09-14	10:06:18	1.19655
2022-09-14	10:06:18	1.03818
2022-09-14	10:06:19	0.584491
2022-09-14	10:06:19	0.6107
2022-09-14	10:06:19	1.05843
2022-09-14	10:06:19	0.680878
2022-09-14	10:06:20	2.34734
2022-09-14	10:06:20	0.571616
2022-09-14	10:06:20	1.81228
2022-09-14	10:06:21	1.10556
2022-09-14	10:06:21	1.43599
2022-09-14	10:06:21	2.78027
2022-09-14	10:06:21	2.55828
2022-09-14	10:06:22	2.97258
2022-09-14	10:06:22	1.07543
2022-09-14	10:06:22	0.930954
2022-09-14	10:06:22	0.604338
2022-09-14	10:06:23	0.498028
2022-09-14	10:06:23	0.233194
2022-09-14	10:06:23	0.392939
2022-09-14	10:06:23	0.281743
2022-09-14	10:06:24	0.365204
2022-09-14	10:06:24	0.334364
2022-09-14	10:06:24	0.430038
2022-09-14	10:06:25	0.301743
2022-09-14	10:06:25	0.465458
2022-09-14	10:06:25	0.329733
2022-09-14	10:06:25	0.693651
2022-09-14	10:06:26	0.327036
2022-09-14	10:06:26	0.673448
2022-09-14	10:06:26	0.397265
2022-09-14	10:06:26	0.457926
2022-09-14	10:06:27	0.561539
2022-09-14	10:06:27	0.343881
2022-09-14	10:06:27	0.412735
2022-09-14	10:06:27	0.453601
2022-09-14	10:06:28	0.465102
2022-09-14	10:06:28	0.336501
2022-09-14	10:06:28	0.403982
2022-09-14	10:06:29	0.649936
2022-09-14	10:06:29	0.505865
2022-09-14	10:06:29	0.623779
2022-09-14	10:06:29	0.484847
2022-09-14	10:06:30	0.515127
2022-09-14	10:06:30	0.410954
2022-09-14	10:06:30	0.374466
2022-09-14	10:06:30	0.420471
2022-09-14	10:06:31	0.335331
2022-09-14	10:06:31	0.334517
2022-09-14	10:06:31	0.43869
2022-09-14	10:06:31	0.533499
2022-09-14	10:06:32	0.342863
2022-09-14	10:06:32	0.429428
2022-09-14	10:06:32	0.440776
2022-09-14	10:06:33	1.01864
2022-09-14	10:06:33	2.55161
2022-09-14	10:06:33	3.5394
2022-09-14	10:06:33	4.34744
2022-09-14	10:06:34	3.29436
2022-09-14	10:06:34	2.21172
2022-09-14	10:06:34	1.27284
2022-09-14	10:06:34	0.690954
2022-09-14	10:06:35	1.00607
2022-09-14	10:06:35	1.05721
2022-09-14	10:06:35	1.20449
2022-09-14	10:06:35	1.21391
2022-09-14	10:06:36	1.19945
2022-09-14	10:06:36	1.15075
2022-09-14	10:06:36	1.14917
2022-09-14	10:06:37	1.17268
2022-09-14	10:06:37	1.13564
2022-09-14	10:06:37	1.07243
2022-09-14	10:06:37	1.08729
2022-09-14	10:06:38	1.13248
2022-09-14	10:06:38	1.18128
2022-09-14	10:06:38	1.18607
2022-09-14	10:06:38	1.23981
2022-09-14	10:06:39	0.817468
2022-09-14	10:06:39	0.727341
2022-09-14	10:06:39	1.01844
2022-09-14	10:06:39	2.39182
2022-09-14	10:06:40	2.09268
2022-09-14	10:06:40	2.01548
2022-09-14	10:06:40	1.5967
2022-09-14	10:06:40	1.63258
2022-09-14	10:06:41	1.30424
2022-09-14	10:06:41	1.30683
2022-09-14	10:06:41	1.16296
2022-09-14	10:06:42	1.25141
2022-09-14	10:06:42	1.19477
2022-09-14	10:06:42	1.18999
2022-09-14	10:06:42	1.19355
2022-09-14	10:06:43	1.2735
2022-09-14	10:06:43	1.22983
2022-09-14	10:06:43	1.18724
2022-09-14	10:06:43	1.19106
2022-09-14	10:06:44	1.23029
2022-09-14	10:06:44	1.20597
2022-09-14	10:06:44	1.18357
2022-09-14	10:06:44	1.14551
2022-09-14	10:06:45	1.14342
2022-09-14	10:06:45	1.13533
2022-09-14	10:06:45	1.12999
2022-09-14	10:06:46	1.12327
2022-09-14	10:06:46	1.12134
2022-09-14	10:06:46	1.05961
2022-09-14	10:06:46	1.11604
2022-09-14	10:06:47	1.06006
2022-09-14	10:06:47	1.11095
2022-09-14	10:06:47	1.08088
2022-09-14	10:06:47	1.08831
2022-09-14	10:06:48	0.951158
2022-09-14	10:06:48	0.543015
2022-09-14	10:06:48	0.459657
2022-09-14	10:06:48	0.314415
2022-09-14	10:06:49	0.308817
2022-09-14	10:06:49	0.397367
2022-09-14	10:06:49	0.545712
2022-09-14	10:06:50	0.414313
2022-09-14	10:06:50	0.451463
2022-09-14	10:06:50	0.368562
2022-09-14	10:06:50	-0.00477074
2022-09-14	10:06:51	-0.255916
2022-09-14	10:06:51	-0.670114
2022-09-14	10:06:51	-0.596628
2022-09-14	10:06:51	-0.879681
2022-09-14	10:06:52	-0.815203
2022-09-14	10:06:52	-0.464974
2022-09-14	10:06:52	0.0728883
2022-09-14	10:06:52	1.33854
2022-09-14	10:06:53	1.94246
2022-09-14	10:06:53	4.52627
2022-09-14	10:06:53	4.68154
2022-09-14	10:06:54	1.94256
2022-09-14	10:06:54	1.33055
2022-09-14	10:06:54	2.75584
2022-09-14	10:06:54	1.91416
2022-09-14	10:06:55	1.53497
2022-09-14	10:06:55	0.59701
2022-09-14	10:06:55	0.73584
2022-09-14	10:06:55	0.723728
2022-09-14	10:06:56	1.04958
2022-09-14	10:06:56	0.682557
2022-09-14	10:06:56	0.719809
2022-09-14	10:06:56	0.720013
2022-09-14	10:06:57	0.933601
2022-09-14	10:06:57	0.538435
2022-09-14	10:06:57	2.02505
2022-09-14	10:06:58	2.06296
2022-09-14	10:06:58	1.13793
2022-09-14	10:06:58	2.38958
2022-09-14	10:06:58	0.838028
2022-09-14	10:06:59	0.73584
2022-09-14	10:06:59	0.739707
2022-09-14	10:06:59	0.366272
2022-09-14	10:06:59	0.746425
2022-09-14	10:07:00	0.735687
2022-09-14	10:07:00	0.745051
2022-09-14	10:07:00	0.74098
2022-09-14	10:07:00	0.977265
2022-09-14	10:07:01	0.739758
2022-09-14	10:07:01	0.745763
2022-09-14	10:07:01	0.741845
2022-09-14	10:07:01	0.739656
2022-09-14	10:07:02	0.736349
2022-09-14	10:07:02	0.736756
2022-09-14	10:07:02	0.738231
2022-09-14	10:07:03	0.738028
2022-09-14	10:07:03	0.741489
2022-09-14	10:07:03	0.739707
2022-09-14	10:07:03	0.737315
2022-09-14	10:07:04	1.29604
2022-09-14	10:07:04	0.74841
2022-09-14	10:07:04	0.874211
2022-09-14	10:07:04	0.848664
2022-09-14	10:07:05	0.69243
2022-09-14	10:07:05	0.743778
2022-09-14	10:07:05	0.737417
2022-09-14	10:07:05	0.735636
2022-09-14	10:07:06	0.736247
2022-09-14	10:07:06	0.738486
2022-09-14	10:07:06	0.736501
2022-09-14	10:07:07	0.742099
2022-09-14	10:07:07	0.745713
2022-09-14	10:07:07	0.735331
2022-09-14	10:07:07	0.73472
2022-09-14	10:07:08	0.741489
2022-09-14	10:07:08	0.74215
2022-09-14	10:07:08	0.744797
2022-09-14	10:07:08	0.736399
2022-09-14	10:07:09	0.733957
2022-09-14	10:07:09	0.739046
2022-09-14	10:07:09	0.738842
2022-09-14	10:07:09	2.24627
2022-09-14	10:07:10	0.786679
2022-09-14	10:07:10	0.742913
2022-09-14	10:07:10	0.737926
2022-09-14	10:07:11	0.740165
2022-09-14	10:07:11	1.70291
2022-09-14	10:07:11	1.0481
2022-09-14	10:07:11	3.87782
2022-09-14	10:07:12	0.904033
2022-09-14	10:07:12	0.735178
2022-09-14	10:07:12	0.748053
2022-09-14	10:07:13	0.73813
2022-09-14	10:07:13	0.713143
2022-09-14	10:07:13	0.267545
2022-09-14	10:07:13	0.137163
2022-09-14	10:07:13	0.0628628
2022-09-14	10:07:14	-0.0597326
2022-09-14	10:07:14	-0.265992
2022-09-14	10:07:14	-0.329503
2022-09-14	10:07:15	-0.187926
2022-09-14	10:07:15	0.936502
2022-09-14	10:07:15	1.16826
2022-09-14	10:07:15	1.93111
2022-09-14	10:07:16	0.159199
2022-09-14	10:07:16	0.437112
2022-09-14	10:07:16	0.436858
2022-09-14	10:07:16	0.565763
2022-09-14	10:07:17	0.367799
2022-09-14	10:07:17	0.439046
2022-09-14	10:07:17	0.463372
2022-09-14	10:07:17	0.395636
2022-09-14	10:07:18	0.553855
2022-09-14	10:07:18	0.693499
2022-09-14	10:07:18	0.832634
2022-09-14	10:07:18	0.6364
2022-09-14	10:07:19	0.888511
2022-09-14	10:07:19	0.613142
2022-09-14	10:07:19	0.381285
2022-09-14	10:07:20	0.490751
2022-09-14	10:07:20	0.360165
2022-09-14	10:07:20	0.452074
2022-09-14	10:07:20	0.362913
2022-09-14	10:07:21	0.466323
2022-09-14	10:07:21	0.520522
2022-09-14	10:07:21	0.491311
2022-09-14	10:07:21	0.830089
2022-09-14	10:07:22	0.889376
2022-09-14	10:07:22	0.827596
2022-09-14	10:07:22	0.881794
2022-09-14	10:07:22	0.63299
2022-09-14	10:07:23	0.671972
2022-09-14	10:07:23	0.612481
2022-09-14	10:07:23	0.596756
2022-09-14	10:07:24	0.571005
2022-09-14	10:07:24	0.459453
2022-09-14	10:07:24	0.448257
2022-09-14	10:07:24	0.455534
2022-09-14	10:07:25	0.47126
2022-09-14	10:07:25	0.465611
2022-09-14	10:07:25	0.518639
2022-09-14	10:07:25	0.573855
2022-09-14	10:07:26	0.370903
2022-09-14	10:07:26	0.488715
2022-09-14	10:07:26	0.616196
2022-09-14	10:07:26	0.730293
2022-09-14	10:07:27	0.502048
2022-09-14	10:07:27	0.700776
2022-09-14	10:07:27	0.706629
2022-09-14	10:07:28	0.697621
2022-09-14	10:07:28	0.742608
2022-09-14	10:07:28	0.651819
2022-09-14	10:07:28	0.87416
2022-09-14	10:07:29	0.878639
2022-09-14	10:07:29	1.10449
2022-09-14	10:07:29	1.24419
2022-09-14	10:07:29	1.61864
2022-09-14	10:07:30	1.70434
2022-09-14	10:07:30	2.12627
2022-09-14	10:07:30	1.93742
2022-09-14	10:07:30	0.982099
2022-09-14	10:07:31	1.0224
2022-09-14	10:07:31	0.799198
2022-09-14	10:07:31	0.801234
2022-09-14	10:07:32	1.04042
2022-09-14	10:07:32	1.20637
2022-09-14	10:07:32	1.56856
2022-09-14	10:07:32	1.87625
2022-09-14	10:07:33	1.59548
2022-09-14	10:07:33	2.09487
2022-09-14	10:07:33	1.79589
2022-09-14	10:07:33	2.03843
2022-09-14	10:07:34	2.4848
2022-09-14	10:07:34	2.5682
2022-09-14	10:07:34	2.78515
2022-09-14	10:07:34	3.03121
2022-09-14	10:07:35	3.07141
2022-09-14	10:07:35	2.72607
2022-09-14	10:07:35	2.77808
2022-09-14	10:07:36	2.61309
2022-09-14	10:07:36	2.77182
2022-09-14	10:07:36	2.79197
2022-09-14	10:07:36	2.78011
2022-09-14	10:07:37	2.73121
2022-09-14	10:07:37	2.31192
2022-09-14	10:07:37	1.99319
2022-09-14	10:07:37	1.76602
2022-09-14	10:07:38	1.65258
2022-09-14	10:07:38	1.48698
2022-09-14	10:07:38	1.36342
2022-09-14	10:07:38	0.643372
2022-09-14	10:07:39	0.408461
2022-09-14	10:07:39	0.393448
2022-09-14	10:07:39	0.289529
2022-09-14	10:07:39	-0.028842
2022-09-14	10:07:40	-0.120649
2022-09-14	10:07:40	0.0597585
2022-09-14	10:07:40	0.0201656
2022-09-14	10:07:41	0.237621
2022-09-14	10:07:41	-0.027417
2022-09-14	10:07:41	0.0419468
2022-09-14	10:07:41	0.056756
2022-09-14	10:07:42	0.130649
2022-09-14	10:07:42	0.0413361
2022-09-14	10:07:42	0.0691733
2022-09-14	10:07:42	-0.0588674
2022-09-14	10:07:43	0.0733463
2022-09-14	10:07:43	0.08042
2022-09-14	10:07:43	0.200115
2022-09-14	10:07:43	0.14841
2022-09-14	10:07:44	0.179911
2022-09-14	10:07:44	0.0456109
2022-09-14	10:07:44	-0.172252
2022-09-14	10:07:45	-0.373626
2022-09-14	10:07:45	-0.109605
2022-09-14	10:07:45	-0.230369
2022-09-14	10:07:45	-0.247519
2022-09-14	10:07:46	-0.299274
2022-09-14	10:07:46	-0.0471117
2022-09-14	10:07:46	-0.0861447
2022-09-14	10:07:46	-0.00975804
2022-09-14	10:07:47	-0.100496
2022-09-14	10:07:47	0.0681046
2022-09-14	10:07:47	-0.0164756
2022-09-14	10:07:47	0.0606237
2022-09-14	10:07:48	-0.0453814
2022-09-14	10:07:48	0.144898
2022-09-14	10:07:48	0.258791
2022-09-14	10:07:49	1.04276
2022-09-14	10:07:49	1.02296
2022-09-14	10:07:49	0.734771
2022-09-14	10:07:49	1.00078
2022-09-14	10:07:50	0.96958
2022-09-14	10:07:50	0.379809
2022-09-14	10:07:50	0.665051
2022-09-14	10:07:50	0.25187
2022-09-14	10:07:51	0.0124303
2022-09-14	10:07:51	-0.151794
2022-09-14	10:07:51	-0.1036
2022-09-14	10:07:51	-0.226806
2022-09-14	10:07:52	-0.352099
2022-09-14	10:07:52	-0.388689
2022-09-14	10:07:52	-0.0206995
2022-09-14	10:07:52	0.719606
2022-09-14	10:07:53	0.507239
2022-09-14	10:07:53	1.22424
2022-09-14	10:07:53	1.1023
2022-09-14	10:07:54	2.14047
2022-09-14	10:07:54	3.3563
2022-09-14	10:07:54	1.3709
2022-09-14	10:07:54	1.76922
2022-09-14	10:07:55	0.783066
2022-09-14	10:07:55	1.35294
2022-09-14	10:07:55	0.723219
2022-09-14	10:07:55	1.76027
2022-09-14	10:07:56	2.56693
2022-09-14	10:07:56	3.70393
2022-09-14	10:07:56	3.41859
2022-09-14	10:07:56	3.028
2022-09-14	10:07:57	3.88938
2022-09-14	10:07:57	1.73335
2022-09-14	10:07:57	2.08637
2022-09-14	10:07:58	1.17981
2022-09-14	10:07:58	0.62785
2022-09-14	10:07:58	0.0993004
2022-09-14	10:07:58	0.317417
2022-09-14	10:07:59	-0.135305
2022-09-14	10:07:59	-0.369707
2022-09-14	10:07:59	-0.180699
2022-09-14	10:07:59	-0.0946435
2022-09-14	10:08:00	-0.317493
2022-09-14	10:08:00	-0.213422
2022-09-14	10:08:00	0.204491
2022-09-14	10:08:00	0.220267
2022-09-14	10:08:01	0.170802
2022-09-14	10:08:01	0.22159
2022-09-14	10:08:01	0.329529
2022-09-14	10:08:02	0.333041
2022-09-14	10:08:02	0.409377
2022-09-14	10:08:02	0.399555
2022-09-14	10:08:02	0.645254
2022-09-14	10:08:03	0.737417
2022-09-14	10:08:03	0.733295
2022-09-14	10:08:03	0.735229
2022-09-14	10:08:03	0.444186
2022-09-14	10:08:04	0.254669
2022-09-14	10:08:04	0.735585
2022-09-14	10:08:04	0.602354
2022-09-14	10:08:04	0.237468
2022-09-14	10:08:05	0.174873
2022-09-14	10:08:05	0.251819
2022-09-14	10:08:05	0.206832
2022-09-14	10:08:06	0.172227
2022-09-14	10:08:06	0.306476
2022-09-14	10:08:06	0.290598
2022-09-14	10:08:06	0.253753
2022-09-14	10:08:07	0.321438
2022-09-14	10:08:07	0.145407
2022-09-14	10:08:07	0.138588
2022-09-14	10:08:07	0.147392
2022-09-14	10:08:08	-0.0376461
2022-09-14	10:08:08	-0.3693
2022-09-14	10:08:08	-0.619071
2022-09-14	10:08:09	-0.7179
2022-09-14	10:08:09	-0.708689
2022-09-14	10:08:09	-0.603498
2022-09-14	10:08:09	-0.569605
2022-09-14	10:08:10	-0.393371
2022-09-14	10:08:10	-0.498257
2022-09-14	10:08:10	-0.477697
2022-09-14	10:08:10	-0.337035
2022-09-14	10:08:11	-0.210216
2022-09-14	10:08:11	0.146578
2022-09-14	10:08:11	0.38383
2022-09-14	10:08:11	0.368308
2022-09-14	10:08:12	0.402659
2022-09-14	10:08:12	0.323168
2022-09-14	10:08:12	0.498028
2022-09-14	10:08:12	0.210853
2022-09-14	10:08:13	0.043219
2022-09-14	10:08:13	-0.255509
2022-09-14	10:08:13	-0.451793
2022-09-14	10:08:13	-0.532099
2022-09-14	10:08:14	-0.633727
2022-09-14	10:08:14	-0.684312
2022-09-14	10:08:14	-0.648689
2022-09-14	10:08:15	-0.726501
2022-09-14	10:08:15	-0.565737
2022-09-14	10:08:15	-0.528282
2022-09-14	10:08:15	-0.527061
2022-09-14	10:08:16	-0.52528
2022-09-14	10:08:16	-0.628231
2022-09-14	10:08:16	-0.521259
2022-09-14	10:08:16	-0.586043
2022-09-14	10:08:17	-0.549045
2022-09-14	10:08:17	-0.604669
2022-09-14	10:08:17	-0.66416
2022-09-14	10:08:17	-0.511997
2022-09-14	10:08:18	-0.57332
2022-09-14	10:08:18	-0.435254
2022-09-14	10:08:18	-0.397137
2022-09-14	10:08:19	0.0236771
2022-09-14	10:08:19	1.67294
2022-09-14	10:08:19	2.11681
2022-09-14	10:08:19	0.902099
2022-09-14	10:08:20	1.54352
2022-09-14	10:08:20	0.910344
2022-09-14	10:08:20	0.295891
2022-09-14	10:08:20	0.189071
2022-09-14	10:08:21	0.185967
2022-09-14	10:08:21	0.169835
2022-09-14	10:08:21	0.129529
2022-09-14	10:08:21	0.208206
2022-09-14	10:08:22	0.124949
2022-09-14	10:08:22	0.238944
2022-09-14	10:08:22	0.18215
2022-09-14	10:08:23	0.226221
2022-09-14	10:08:23	0.121947
2022-09-14	10:08:23	0.0938551
2022-09-14	10:08:23	0.142507
2022-09-14	10:08:24	0.093957
2022-09-14	10:08:24	0.121234
2022-09-14	10:08:24	0.0271885
2022-09-14	10:08:24	0.174975
2022-09-14	10:08:25	0.102914
2022-09-14	10:08:25	0.148359
2022-09-14	10:08:25	0.110649
2022-09-14	10:08:25	0.0943131
2022-09-14	10:08:26	0.159199
2022-09-14	10:08:26	0.0973666
2022-09-14	10:08:26	0.0566033
2022-09-14	10:08:26	-0.121717
2022-09-14	10:08:27	-0.188079
2022-09-14	10:08:27	-0.152862
2022-09-14	10:08:27	-0.273422
2022-09-14	10:08:28	-0.195254
2022-09-14	10:08:28	-0.309554
2022-09-14	10:08:28	-0.204313
2022-09-14	10:08:28	-0.209503
2022-09-14	10:08:29	-0.12014
2022-09-14	10:08:29	-0.215814
2022-09-14	10:08:29	-0.0124043
2022-09-14	10:08:29	0.097621
2022-09-14	10:08:30	0.240471
2022-09-14	10:08:30	-0.0416664
2022-09-14	10:08:30	0.226476
2022-09-14	10:08:30	0.0143641
2022-09-14	10:08:31	0.0463743
2022-09-14	10:08:31	-0.0208013
2022-09-14	10:08:31	-0.00497431
2022-09-14	10:08:32	0.104186
2022-09-14	10:08:32	0.119911
2022-09-14	10:08:32	0.157977
2022-09-14	10:08:32	0.0417432
2022-09-14	10:08:33	0.185611
2022-09-14	10:08:33	0.132837
2022-09-14	10:08:33	0.221387
2022-09-14	10:08:33	0.0553819
2022-09-14	10:08:34	0.164491
2022-09-14	10:08:34	0.334822
2022-09-14	10:08:34	0.607646
2022-09-14	10:08:34	0.517773
2022-09-14	10:08:35	1.21747
2022-09-14	10:08:35	1.03284
2022-09-14	10:08:35	0.907239
2022-09-14	10:08:36	0.63075
2022-09-14	10:08:36	1.4736
2022-09-14	10:08:36	0.31131
2022-09-14	10:08:36	0.481743
2022-09-14	10:08:37	0.595891
2022-09-14	10:08:37	0.565916
2022-09-14	10:08:37	0.499198
2022-09-14	10:08:37	0.489733
2022-09-14	10:08:38	0.42897
2022-09-14	10:08:38	0.452532
2022-09-14	10:08:38	0.38958
2022-09-14	10:08:38	0.439809
2022-09-14	10:08:39	0.372023
2022-09-14	10:08:39	0.428868
2022-09-14	10:08:39	0.388766
2022-09-14	10:08:40	0.436705
2022-09-14	10:08:40	0.388562
2022-09-14	10:08:40	0.431412
2022-09-14	10:08:40	0.392379
2022-09-14	10:08:41	0.415076
2022-09-14	10:08:41	0.366527
2022-09-14	10:08:41	0.389631
2022-09-14	10:08:41	0.361031
2022-09-14	10:08:42	0.395687
2022-09-14	10:08:42	0.237672
2022-09-14	10:08:42	0.41701
2022-09-14	10:08:42	0.322048
2022-09-14	10:08:43	0.568206
2022-09-14	10:08:43	0.628155
2022-09-14	10:08:43	0.64673
2022-09-14	10:08:43	0.669682
2022-09-14	10:08:44	0.658486
2022-09-14	10:08:44	0.668308
2022-09-14	10:08:44	0.634008
2022-09-14	10:08:45	0.658028
2022-09-14	10:08:45	0.624287
2022-09-14	10:08:45	0.662761
2022-09-14	10:08:45	1.30322
2022-09-14	10:08:46	1.61355
2022-09-14	10:08:46	0.622761
2022-09-14	10:08:46	0.617316
2022-09-14	10:08:46	0.414568
2022-09-14	10:08:47	0.425814
2022-09-14	10:08:47	0.506323
2022-09-14	10:08:47	0.510343
2022-09-14	10:08:47	0.483677
2022-09-14	10:08:48	0.460166
2022-09-14	10:08:48	0.36556
2022-09-14	10:08:48	0.45813
2022-09-14	10:08:49	0.315026
2022-09-14	10:08:49	0.407036
2022-09-14	10:08:49	0.273652
2022-09-14	10:08:49	0.308817
2022-09-14	10:08:50	0.261641
2022-09-14	10:08:50	0.380573
2022-09-14	10:08:50	0.248868
2022-09-14	10:08:50	0.44383
2022-09-14	10:08:51	0.221183
2022-09-14	10:08:51	0.683423
2022-09-14	10:08:51	0.344644
2022-09-14	10:08:51	0.980013
2022-09-14	10:08:52	1.86047
2022-09-14	10:08:52	3.24938
2022-09-14	10:08:52	3.86444
2022-09-14	10:08:53	4.14993
2022-09-14	10:08:53	1.95197
2022-09-14	10:08:53	1.33004
2022-09-14	10:08:53	0.442812
2022-09-14	10:08:54	0.487697
2022-09-14	10:08:54	0.467239
2022-09-14	10:08:54	0.488715
2022-09-14	10:08:54	0.430089
2022-09-14	10:08:55	0.421794
2022-09-14	10:08:55	0.344339
2022-09-14	10:08:55	0.466476
2022-09-14	10:08:55	0.316654
2022-09-14	10:08:56	0.490547
2022-09-14	10:08:56	-0.156883
2022-09-14	10:08:56	-0.332048
2022-09-14	10:08:57	-0.337951
2022-09-14	10:08:57	-0.215559
2022-09-14	10:08:57	-0.0884857
2022-09-14	10:08:57	0.359351
2022-09-14	10:08:58	0.301692
2022-09-14	10:08:58	0.398995
2022-09-14	10:08:58	0.0614888
2022-09-14	10:08:58	0.0677483
2022-09-14	10:08:59	0.925255
2022-09-14	10:08:59	0.31472
2022-09-14	10:08:59	0.221387
2022-09-14	10:08:59	0.143117
2022-09-14	10:09:00	0.0583845
2022-09-14	10:09:00	0.0610816
2022-09-14	10:09:00	0.300216
2022-09-14	10:09:00	1.51004
2022-09-14	10:09:01	1.26922
2022-09-14	10:09:01	1.98729
2022-09-14	10:09:01	2.51589
2022-09-14	10:09:02	4.00927
2022-09-14	10:09:02	6.56235
2022-09-14	10:09:02	3.93935
2022-09-14	10:09:02	3.28927
2022-09-14	10:09:03	3.74988
2022-09-14	10:09:03	2.73497
2022-09-14	10:09:03	2.30413
2022-09-14	10:09:03	2.74291
2022-09-14	10:09:04	2.15874
2022-09-14	10:09:04	1.00027
2022-09-14	10:09:04	0.687952
2022-09-14	10:09:04	0.555076
2022-09-14	10:09:05	0.51014
2022-09-14	10:09:05	0.48729
2022-09-14	10:09:05	0.482252
2022-09-14	10:09:06	0.492328
2022-09-14	10:09:06	0.486425
2022-09-14	10:09:06	0.477316
2022-09-14	10:09:06	0.454618
2022-09-14	10:09:07	0.44785
2022-09-14	10:09:07	0.527799
2022-09-14	10:09:07	0.590293
2022-09-14	10:09:07	0.446069
2022-09-14	10:09:08	0.349071
2022-09-14	10:09:08	0.398333
