# Supplementary material for: Comparing efficacy in reducing pulling and welfare impacts of four types of leash walking equipment
Source: PeerJ journal article supplement (doi:10.7717/peerj.18131), 2024-10-24
Supplement: Shelter_2_Tension_files.zip [file MsPotato_prong_2022914131756 copy.xlsx]

## Sheet: Averaged Newtons
Date	Time	Averaged Newtons	Impulse	Total steps
2022-09-14	13:18:12	0.968757	0.968757	0		Impulse Newtons	744.96
2022-09-14	13:18:13	1.23995	2.20871	0		Total steps	0
2022-09-14	13:18:14	-0.304111	2.20871	0
2022-09-14	13:18:15	0.0742505	2.28296	0
2022-09-14	13:18:16	0.64182	2.92478	0
2022-09-14	13:18:17	-0.871132	2.92478	0
2022-09-14	13:18:18	1.45374	4.37852	0
2022-09-14	13:18:19	1.69756	6.07608	0
2022-09-14	13:18:20	1.5048	7.58088	0
2022-09-14	13:18:21	3.00635	10.5872	0
2022-09-14	13:18:22	3.93026	14.5175	0
2022-09-14	13:18:23	1.9576	16.4751	0
2022-09-14	13:18:24	1.85653	18.3316	0
2022-09-14	13:18:25	1.75995	20.0916	0
2022-09-14	13:18:26	1.57973	21.6713	0
2022-09-14	13:18:27	1.63899	23.3103	0
2022-09-14	13:18:28	1.79988	25.1102	0
2022-09-14	13:18:29	1.57409	26.6843	0
2022-09-14	13:18:30	1.59615	28.2804	0
2022-09-14	13:18:31	1.49004	29.7704	0
2022-09-14	13:18:32	0.045673	29.8161	0
2022-09-14	13:18:33	10.3583	40.1744	0
2022-09-14	13:18:34	5.28945	45.4638	0
2022-09-14	13:18:35	1.86491	47.3287	0
2022-09-14	13:18:36	1.85166	49.1804	0
2022-09-14	13:18:37	1.88747	51.0679	0
2022-09-14	13:18:38	3.57163	54.6395	0
2022-09-14	13:18:39	4.17242	58.8119	0
2022-09-14	13:18:40	1.82929	60.6412	0
2022-09-14	13:18:41	1.86683	62.508	0
2022-09-14	13:18:42	1.76089	64.2689	0
2022-09-14	13:18:43	2.25545	66.5244	0
2022-09-14	13:18:44	2.52666	69.051	0
2022-09-14	13:18:45	2.54108	71.5921	0
2022-09-14	13:18:46	1.29479	72.8869	0
2022-09-14	13:18:47	0.681605	73.5685	0
2022-09-14	13:18:48	1.05434	74.6229	0
2022-09-14	13:18:49	1.20928	75.8321	0
2022-09-14	13:18:50	1.76536	77.5975	0
2022-09-14	13:18:51	2.12167	79.7192	0
2022-09-14	13:18:52	4.52409	84.2433	0
2022-09-14	13:18:53	3.79936	88.0426	0
2022-09-14	13:18:54	2.85104	90.8936	0
2022-09-14	13:18:55	5.62962	96.5233	0
2022-09-14	13:18:56	4.46297	100.986	0
2022-09-14	13:18:57	2.96496	103.951	0
2022-09-14	13:18:58	1.78086	105.732	0
2022-09-14	13:18:59	1.85442	107.586	0
2022-09-14	13:19:00	3.05302	110.639	0
2022-09-14	13:19:01	3.20797	113.847	0
2022-09-14	13:19:02	3.21136	117.059	0
2022-09-14	13:19:03	3.23702	120.296	0
2022-09-14	13:19:04	3.2065	123.502	0
2022-09-14	13:19:05	3.22602	126.728	0
2022-09-14	13:19:06	3.22449	129.953	0
2022-09-14	13:19:07	3.22344	133.176	0
2022-09-14	13:19:08	3.2211	136.397	0
2022-09-14	13:19:09	3.21849	139.616	0
2022-09-14	13:19:10	3.20406	142.82	0
2022-09-14	13:19:11	3.20638	146.026	0
2022-09-14	13:19:12	3.19778	149.224	0
2022-09-14	13:19:13	3.21634	152.44	0
2022-09-14	13:19:14	3.21017	155.651	0
2022-09-14	13:19:15	3.21423	158.865	0
2022-09-14	13:19:16	3.21391	162.079	0
2022-09-14	13:19:17	3.21934	165.298	0
2022-09-14	13:19:18	3.2054	168.503	0
2022-09-14	13:19:19	3.23558	171.739	0
2022-09-14	13:19:20	3.22591	174.965	0
2022-09-14	13:19:21	3.2094	178.174	0
2022-09-14	13:19:22	3.2181	181.392	0
2022-09-14	13:19:23	3.21957	184.612	0
2022-09-14	13:19:24	3.21527	187.827	0
2022-09-14	13:19:25	3.20955	191.037	0
2022-09-14	13:19:26	3.20902	194.246	0
2022-09-14	13:19:27	3.21827	197.464	0
2022-09-14	13:19:28	3.22013	200.684	0
2022-09-14	13:19:29	3.22212	203.906	0
2022-09-14	13:19:30	3.22306	207.129	0
2022-09-14	13:19:31	3.19965	210.329	0
2022-09-14	13:19:32	3.20989	213.539	0
2022-09-14	13:19:33	3.21595	216.755	0
2022-09-14	13:19:34	3.22653	219.981	0
2022-09-14	13:19:35	3.21249	223.194	0
2022-09-14	13:19:36	3.21334	226.407	0
2022-09-14	13:19:37	3.19484	229.602	0
2022-09-14	13:19:38	3.21106	232.813	0
2022-09-14	13:19:39	3.20225	236.015	0
2022-09-14	13:19:40	3.20842	239.224	0
2022-09-14	13:19:41	3.21204	242.436	0
2022-09-14	13:19:42	3.2048	245.641	0
2022-09-14	13:19:43	3.21487	248.856	0
2022-09-14	13:19:44	3.20672	252.062	0
2022-09-14	13:19:45	3.16458	255.227	0
2022-09-14	13:19:46	3.2207	258.448	0
2022-09-14	13:19:47	3.22093	261.669	0
2022-09-14	13:19:48	3.22149	264.89	0
2022-09-14	13:19:49	3.19189	268.082	0
2022-09-14	13:19:50	3.22217	271.304	0
2022-09-14	13:19:51	3.207	274.511	0
2022-09-14	13:19:52	3.2181	277.729	0
2022-09-14	13:19:53	3.22057	280.95	0
2022-09-14	13:19:54	3.20938	284.159	0
2022-09-14	13:19:55	3.20734	287.366	0
2022-09-14	13:19:56	3.21221	290.579	0
2022-09-14	13:19:57	3.22087	293.8	0
2022-09-14	13:19:58	3.21199	297.012	0
2022-09-14	13:19:59	3.21516	300.227	0
2022-09-14	13:20:00	3.21265	303.439	0
2022-09-14	13:20:01	3.22098	306.66	0
2022-09-14	13:20:02	3.21566	309.876	0
2022-09-14	13:20:03	3.20944	313.085	0
2022-09-14	13:20:04	3.2128	316.298	0
2022-09-14	13:20:05	3.20916	319.507	0
2022-09-14	13:20:06	3.22851	322.736	0
2022-09-14	13:20:07	2.79908	325.535	0
2022-09-14	13:20:08	3.2337	328.769	0
2022-09-14	13:20:09	3.2108	331.979	0
2022-09-14	13:20:10	3.21329	335.193	0
2022-09-14	13:20:11	3.19987	338.393	0
2022-09-14	13:20:12	-1.22982	338.393	0
2022-09-14	13:20:13	-1.78918	338.393	0
2022-09-14	13:20:14	-1.16411	338.393	0
2022-09-14	13:20:15	-1.76671	338.393	0
2022-09-14	13:20:16	-1.77537	338.393	0
2022-09-14	13:20:17	-1.78941	338.393	0
2022-09-14	13:20:18	-1.8112	338.393	0
2022-09-14	13:20:19	-1.75968	338.393	0
2022-09-14	13:20:20	-1.80887	338.393	0
2022-09-14	13:20:21	-1.90661	338.393	0
2022-09-14	13:20:22	-1.85528	338.393	0
2022-09-14	13:20:23	-1.86268	338.393	0
2022-09-14	13:20:24	-2.04719	338.393	0
2022-09-14	13:20:25	-1.79948	338.393	0
2022-09-14	13:20:26	-1.21606	338.393	0
2022-09-14	13:20:27	-0.828763	338.393	0
2022-09-14	13:20:28	-1.80927	338.393	0
2022-09-14	13:20:29	-3.00729	338.393	0
2022-09-14	13:20:30	-3.20519	338.393	0
2022-09-14	13:20:31	-2.89855	338.393	0
2022-09-14	13:20:32	-2.98923	338.393	0
2022-09-14	13:20:33	-2.44017	338.393	0
2022-09-14	13:20:34	3.20525	341.598	0
2022-09-14	13:20:35	3.21061	344.809	0
2022-09-14	13:20:36	3.2147	348.023	0
2022-09-14	13:20:37	3.22574	351.249	0
2022-09-14	13:20:38	3.21355	354.462	0
2022-09-14	13:20:39	3.22489	357.687	0
2022-09-14	13:20:40	3.20525	360.893	0
2022-09-14	13:20:41	3.22681	364.119	0
2022-09-14	13:20:42	3.22789	367.347	0
2022-09-14	13:20:43	3.20038	370.548	0
2022-09-14	13:20:44	3.23417	373.782	0
2022-09-14	13:20:45	3.21936	377.001	0
2022-09-14	13:20:46	3.23038	380.232	0
2022-09-14	13:20:47	3.24005	383.472	0
2022-09-14	13:20:48	3.22336	386.695	0
2022-09-14	13:20:49	3.15958	389.855	0
2022-09-14	13:20:50	-1.18771	389.855	0
2022-09-14	13:20:51	1.30684	391.161	0
2022-09-14	13:20:52	3.21566	394.377	0
2022-09-14	13:20:53	3.23643	397.614	0
2022-09-14	13:20:54	3.21136	400.825	0
2022-09-14	13:20:55	3.22217	404.047	0
2022-09-14	13:20:56	3.22494	407.272	0
2022-09-14	13:20:57	3.23066	410.503	0
2022-09-14	13:20:58	3.23755	413.74	0
2022-09-14	13:20:59	3.23077	416.971	0
2022-09-14	13:21:00	3.22851	420.2	0
2022-09-14	13:21:01	3.23181	423.431	0
2022-09-14	13:21:02	3.22478	426.656	0
2022-09-14	13:21:03	3.23751	429.894	0
2022-09-14	13:21:04	3.23134	433.125	0
2022-09-14	13:21:05	3.22449	436.349	0
2022-09-14	13:21:06	3.22845	439.578	0
2022-09-14	13:21:07	3.23083	442.809	0
2022-09-14	13:21:08	3.22562	446.034	0
2022-09-14	13:21:09	3.22761	449.262	0
2022-09-14	13:21:10	3.21612	452.478	0
2022-09-14	13:21:11	3.22981	455.708	0
2022-09-14	13:21:12	3.22478	458.933	0
2022-09-14	13:21:13	3.21861	462.151	0
2022-09-14	13:21:14	3.22806	465.379	0
2022-09-14	13:21:15	1.8215	467.201	0
2022-09-14	13:21:16	-0.848552	467.201	0
2022-09-14	13:21:17	-0.803937	467.201	0
2022-09-14	13:21:18	-1.06174	467.201	0
2022-09-14	13:21:19	-0.356533	467.201	0
2022-09-14	13:21:20	-0.509391	467.201	0
2022-09-14	13:21:21	0.371834	467.573	0
2022-09-14	13:21:22	0.0425579	467.615	0
2022-09-14	13:21:23	1.72625	469.341	0
2022-09-14	13:21:24	2.85332	472.195	0
2022-09-14	13:21:25	2.97373	475.169	0
2022-09-14	13:21:26	3.21482	478.383	0
2022-09-14	13:21:27	3.21827	481.602	0
2022-09-14	13:21:28	3.20751	484.809	0
2022-09-14	13:21:29	3.19501	488.004	0
2022-09-14	13:21:30	3.21917	491.223	0
2022-09-14	13:21:31	3.24815	494.471	0
2022-09-14	13:21:32	3.22223	497.694	0
2022-09-14	13:21:33	3.22568	500.919	0
2022-09-14	13:21:34	3.23485	504.154	0
2022-09-14	13:21:35	2.92466	507.079	0
2022-09-14	13:21:36	3.23287	510.312	0
2022-09-14	13:21:37	2.90554	513.217	0
2022-09-14	13:21:38	2.94187	516.159	0
2022-09-14	13:21:39	3.23621	519.395	0
2022-09-14	13:21:40	3.23883	522.634	0
2022-09-14	13:21:41	3.21674	525.851	0
2022-09-14	13:21:42	3.23241	529.083	0
2022-09-14	13:21:43	3.23151	532.315	0
2022-09-14	13:21:44	-11.2831	532.315	0
2022-09-14	13:21:45	0.608602	532.923	0
2022-09-14	13:21:46	3.22795	536.151	0
2022-09-14	13:21:47	3.09597	539.247	0
2022-09-14	13:21:48	2.81906	542.066	0
2022-09-14	13:21:49	1.67057	543.737	0
2022-09-14	13:21:50	1.77804	545.515	0
2022-09-14	13:21:51	2.45747	547.972	0
2022-09-14	13:21:52	0.422413	548.395	0
2022-09-14	13:21:53	1.91578	550.311	0
2022-09-14	13:21:54	1.83186	552.143	0
2022-09-14	13:21:55	1.84981	553.992	0
2022-09-14	13:21:56	1.82506	555.817	0
2022-09-14	13:21:57	1.56123	557.379	0
2022-09-14	13:21:58	0.794168	558.173	0
2022-09-14	13:21:59	0.362931	558.536	0
2022-09-14	13:22:00	1.87498	560.411	0
2022-09-14	13:22:01	1.96377	562.374	0
2022-09-14	13:22:02	1.98551	564.36	0
2022-09-14	13:22:03	1.41526	565.775	0
2022-09-14	13:22:04	1.20837	566.984	0
2022-09-14	13:22:05	0.933614	567.917	0
2022-09-14	13:22:06	0.126203	568.043	0
2022-09-14	13:22:07	0.0704592	568.114	0
2022-09-14	13:22:08	1.05608	569.17	0
2022-09-14	13:22:09	1.1953	570.365	0
2022-09-14	13:22:10	1.31641	571.682	0
2022-09-14	13:22:11	1.33859	573.02	0
2022-09-14	13:22:12	1.40345	574.424	0
2022-09-14	13:22:13	1.30498	575.729	0
2022-09-14	13:22:14	1.66706	577.396	0
2022-09-14	13:22:15	1.75132	579.147	0
2022-09-14	13:22:16	1.8494	580.996	0
2022-09-14	13:22:17	0.725408	581.722	0
2022-09-14	13:22:18	2.53474	584.257	0
2022-09-14	13:22:19	2.31787	586.575	0
2022-09-14	13:22:20	1.28064	587.855	0
2022-09-14	13:22:21	1.3035	589.159	0
2022-09-14	13:22:22	2.22446	591.383	0
2022-09-14	13:22:23	3.23943	594.623	0
2022-09-14	13:22:24	3.22483	597.847	0
2022-09-14	13:22:25	3.24164	601.089	0
2022-09-14	13:22:26	3.23619	604.325	0
2022-09-14	13:22:27	3.219	607.544	0
2022-09-14	13:22:28	3.24153	610.786	0
2022-09-14	13:22:29	3.24866	614.034	0
2022-09-14	13:22:30	3.23573	617.27	0
2022-09-14	13:22:31	3.24538	620.515	0
2022-09-14	13:22:32	3.24334	623.759	0
2022-09-14	13:22:33	3.22959	626.988	0
2022-09-14	13:22:34	3.21355	630.202	0
2022-09-14	13:22:35	3.21606	633.418	0
2022-09-14	13:22:36	3.21278	636.631	0
2022-09-14	13:22:37	3.24317	639.874	0
2022-09-14	13:22:38	3.22826	643.102	0
2022-09-14	13:22:39	3.29659	646.399	0
2022-09-14	13:22:40	3.24979	649.649	0
2022-09-14	13:22:41	3.228	652.877	0
2022-09-14	13:22:42	3.22563	656.102	0
2022-09-14	13:22:43	3.24073	659.343	0
2022-09-14	13:22:44	3.23162	662.575	0
2022-09-14	13:22:45	3.23272	665.807	0
2022-09-14	13:22:46	3.24356	669.051	0
2022-09-14	13:22:47	3.24877	672.3	0
2022-09-14	13:22:48	3.24413	675.544	0
2022-09-14	13:22:49	3.23143	678.775	0
2022-09-14	13:22:50	3.22591	682.001	0
2022-09-14	13:22:51	3.2383	685.239	0
2022-09-14	13:22:52	3.22817	688.468	0
2022-09-14	13:22:53	3.24049	691.708	0
2022-09-14	13:22:54	3.25268	694.961	0
2022-09-14	13:22:55	3.24	698.201	0
2022-09-14	13:22:56	3.23162	701.432	0
2022-09-14	13:22:57	3.22683	704.659	0
2022-09-14	13:22:58	3.22511	707.884	0
2022-09-14	13:22:59	3.23462	711.119	0
2022-09-14	13:23:00	2.3275	713.446	0
2022-09-14	13:23:01	3.2509	716.697	0
2022-09-14	13:23:02	3.21606	719.913	0
2022-09-14	13:23:03	6.42442	726.338	0
2022-09-14	13:23:04	6.42883	732.767	0
2022-09-14	13:23:05	-2.35255	732.767	0
2022-09-14	13:23:06	-17.8039	732.767	0
2022-09-14	13:23:07	-18.9246	732.767	0
2022-09-14	13:23:08	-20.0886	732.767	0
2022-09-14	13:23:09	-11.6156	732.767	0
2022-09-14	13:23:10	2.78477	735.551	0
2022-09-14	13:23:11	6.67275	742.224	0
2022-09-14	13:23:12	2.73545	744.96	0

## Sheet: MsPotato_prong_202291413175 (4)
Date	Time	Lbs	Newtons	Averaged Newtons	Total force x time		total steps > 13.345	**GoPro Fitting: 13:07
2022-09-14	13:18:12	0.182659	0.812504	0.968757	0.812504	FALSE	0
2022-09-14	13:18:12	0.246272	1.09547	0.968757	1.09547	FALSE	0
2022-09-14	13:18:12	0.174364	0.775606	0.968757	1.58811	FALSE	0
2022-09-14	13:18:12	0.26785	1.19145	0.968757	2.28692	FALSE	0
2022-09-14	13:18:13	0.233244	1.03752	1.23995	2.62563	FALSE	0
2022-09-14	13:18:13	0.328308	1.46038	1.23995	3.7473	FALSE	0
2022-09-14	13:18:13	0.23299	1.03639	1.23995	3.66201	FALSE	0
2022-09-14	13:18:13	0.320471	1.42552	1.23995	5.17282	FALSE	0
2022-09-14	13:18:14	-0.000292388	-0.0013006	-0.304111	3.66201	FALSE	0
2022-09-14	13:18:14	-0.087417	-0.388848	-0.304111	5.17282	FALSE	0
2022-09-14	13:18:14	-0.117392	-0.522183	-0.304111	3.66201	FALSE	0
2022-09-14	13:18:15	0.225814	1.00447	0.0742505	6.17728	FALSE	0
2022-09-14	13:18:15	0.15584	0.693207	0.0742505	4.35522	FALSE	0
2022-09-14	13:18:15	0.113804	0.506223	0.0742505	6.68351	FALSE	0
2022-09-14	13:18:15	-0.428689	-1.90689	0.0742505	4.35522	FALSE	0
2022-09-14	13:18:16	0.443066	1.97085	0.64182	8.65435	FALSE	0
2022-09-14	13:18:16	0.240878	1.07147	0.64182	5.42669	FALSE	0
2022-09-14	13:18:16	0.0379264	0.168704	0.64182	8.82306	FALSE	0
2022-09-14	13:18:16	-0.14472	-0.643744	0.64182	5.42669	FALSE	0
2022-09-14	13:18:17	-0.39444	-1.75455	-0.871132	8.82306	FALSE	0
2022-09-14	13:18:17	-0.392709	-1.74685	-0.871132	5.42669	FALSE	0
2022-09-14	13:18:17	-0.182328	-0.811031	-0.871132	8.82306	FALSE	0
2022-09-14	13:18:17	0.18612	0.827899	-0.871132	6.25459	FALSE	0
2022-09-14	13:18:18	0.346069	1.53938	1.45374	10.3624	FALSE	0
2022-09-14	13:18:18	0.238944	1.06287	1.45374	7.31746	FALSE	0
2022-09-14	13:18:18	0.395433	1.75897	1.45374	12.1214	FALSE	0
2022-09-14	13:18:19	0.340522	1.51471	1.69756	8.83217	FALSE	0
2022-09-14	13:18:19	0.494975	2.20175	1.69756	14.3232	FALSE	0
2022-09-14	13:18:19	0.250344	1.11358	1.69756	9.94575	FALSE	0
2022-09-14	13:18:19	0.440674	1.96021	1.69756	16.2834	FALSE	0
2022-09-14	13:18:20	0.252328	1.12241	1.5048	11.0682	FALSE	0
2022-09-14	13:18:20	0.384644	1.71097	1.5048	17.9943	FALSE	0
2022-09-14	13:18:20	0.229784	1.02213	1.5048	12.0903	FALSE	0
2022-09-14	13:18:20	0.486425	2.16372	1.5048	20.158	FALSE	0
2022-09-14	13:18:21	0.292379	1.30056	3.00635	13.3908	FALSE	0
2022-09-14	13:18:21	0.541641	2.40933	3.00635	22.5674	FALSE	0
2022-09-14	13:18:21	1.19355	5.30915	3.00635	18.7	FALSE	0
2022-09-14	13:18:22	1.48398	6.60104	3.93026	29.1684	FALSE	0
2022-09-14	13:18:22	0.849478	3.77865	3.93026	22.4786	FALSE	0
2022-09-14	13:18:22	0.658231	2.92794	3.93026	32.0964	FALSE	0
2022-09-14	13:18:22	0.542557	2.4134	3.93026	24.892	FALSE	0
2022-09-14	13:18:23	0.438079	1.94866	1.9576	34.045	FALSE	0
2022-09-14	13:18:23	0.548664	2.44057	1.9576	27.3326	FALSE	0
2022-09-14	13:18:23	0.291616	1.29717	1.9576	35.3422	FALSE	0
2022-09-14	13:18:23	0.481997	2.14402	1.9576	29.4766	FALSE	0
2022-09-14	13:18:24	0.356654	1.58647	1.85653	36.9287	FALSE	0
2022-09-14	13:18:24	0.432125	1.92218	1.85653	31.3988	FALSE	0
2022-09-14	13:18:24	0.488817	2.17436	1.85653	39.103	FALSE	0
2022-09-14	13:18:24	0.39187	1.74312	1.85653	33.1419	FALSE	0
2022-09-14	13:18:25	0.481387	2.14131	1.75995	41.2443	FALSE	0
2022-09-14	13:18:25	0.247799	1.10226	1.75995	34.2442	FALSE	0
2022-09-14	13:18:25	0.457774	2.03627	1.75995	43.2806	FALSE	0
2022-09-14	13:18:26	0.29472	1.31097	1.57973	35.5552	FALSE	0
2022-09-14	13:18:26	0.400776	1.78273	1.57973	45.0633	FALSE	0
2022-09-14	13:18:26	0.328817	1.46264	1.57973	37.0178	FALSE	0
2022-09-14	13:18:26	0.396247	1.76259	1.57973	46.8259	FALSE	0
2022-09-14	13:18:27	0.415585	1.84861	1.63899	38.8664	FALSE	0
2022-09-14	13:18:27	0.351412	1.56315	1.63899	48.3891	FALSE	0
2022-09-14	13:18:27	0.404898	1.80107	1.63899	40.6675	FALSE	0
2022-09-14	13:18:27	0.301947	1.34312	1.63899	49.7322	FALSE	0
2022-09-14	13:18:28	0.515738	2.29411	1.79988	42.9616	FALSE	0
2022-09-14	13:18:28	0.188919	0.840349	1.79988	50.5725	FALSE	0
2022-09-14	13:18:28	0.516807	2.29886	1.79988	45.2604	FALSE	0
2022-09-14	13:18:28	0.397061	1.76621	1.79988	52.3387	FALSE	0
2022-09-14	13:18:29	0.430649	1.91561	1.57409	47.1761	FALSE	0
2022-09-14	13:18:29	0.306476	1.36327	1.57409	53.702	FALSE	0
2022-09-14	13:18:29	0.324491	1.4434	1.57409	48.6195	FALSE	0
2022-09-14	13:18:30	0.372481	1.65687	1.59615	55.3589	FALSE	0
2022-09-14	13:18:30	0.377926	1.68109	1.59615	50.3005	FALSE	0
2022-09-14	13:18:30	0.376298	1.67385	1.59615	57.0327	FALSE	0
2022-09-14	13:18:30	0.308613	1.37277	1.59615	51.6733	FALSE	0
2022-09-14	13:18:31	0.431311	1.91856	1.49004	58.9513	FALSE	0
2022-09-14	13:18:31	0.277265	1.23333	1.49004	52.9066	FALSE	0
2022-09-14	13:18:31	0.445713	1.98262	1.49004	60.9339	FALSE	0
2022-09-14	13:18:31	0.185611	0.825635	1.49004	53.7323	FALSE	0
2022-09-14	13:18:32	0.284288	1.26457	0.045673	62.1985	FALSE	0
2022-09-14	13:18:32	-0.121157	-0.538931	0.045673	53.7323	FALSE	0
2022-09-14	13:18:32	-0.341768	-1.52025	0.045673	62.1985	FALSE	0
2022-09-14	13:18:32	0.219708	0.977305	0.045673	54.7096	FALSE	0
2022-09-14	13:18:33	0.990343	4.40524	10.3583	66.6037	FALSE	0
2022-09-14	13:18:33	2.58286	11.4891	10.3583	66.1987	FALSE	0
2022-09-14	13:18:33	3.41273	15.1805	10.3583	81.7842	1	1
2022-09-14	13:18:34	1.89788	8.44215	5.28945	74.6408	FALSE	1
2022-09-14	13:18:34	1.22072	5.43001	5.28945	87.2142	FALSE	1
2022-09-14	13:18:34	1.08006	4.80432	5.28945	79.4451	FALSE	1
2022-09-14	13:18:34	0.557824	2.48131	5.28945	89.6955	FALSE	1
2022-09-14	13:18:35	0.476959	2.12161	1.86491	81.5667	FALSE	1
2022-09-14	13:18:35	0.445102	1.9799	1.86491	91.6754	FALSE	1
2022-09-14	13:18:35	0.307392	1.36734	1.86491	82.9341	FALSE	1
2022-09-14	13:18:35	0.447545	1.99077	1.86491	93.6662	FALSE	1
2022-09-14	13:18:36	0.385305	1.71391	1.85166	84.648	FALSE	1
2022-09-14	13:18:36	0.49187	2.18794	1.85166	95.8541	FALSE	1
2022-09-14	13:18:36	0.376501	1.67475	1.85166	86.3228	FALSE	1
2022-09-14	13:18:36	0.411412	1.83004	1.85166	97.6842	FALSE	1
2022-09-14	13:18:37	0.406985	1.81035	1.88747	88.1331	FALSE	1
2022-09-14	13:18:37	0.420725	1.87147	1.88747	99.5557	FALSE	1
2022-09-14	13:18:37	0.445255	1.98058	1.88747	90.1137	FALSE	1
2022-09-14	13:18:38	0.494822	2.20107	3.57163	101.757	FALSE	1
2022-09-14	13:18:38	0.531921	2.36609	3.57163	92.4798	FALSE	1
2022-09-14	13:18:38	0.694008	3.08709	3.57163	104.844	FALSE	1
2022-09-14	13:18:38	1.491	6.63227	3.57163	99.112	FALSE	1
2022-09-14	13:18:39	1.44785	6.44033	4.17242	111.284	FALSE	1
2022-09-14	13:18:39	1.11238	4.94809	4.17242	104.06	FALSE	1
2022-09-14	13:18:39	0.692125	3.07871	4.17242	114.363	FALSE	1
2022-09-14	13:18:39	0.499656	2.22257	4.17242	106.283	FALSE	1
2022-09-14	13:18:40	0.471769	2.09852	1.82929	116.461	FALSE	1
2022-09-14	13:18:40	0.382303	1.70056	1.82929	107.983	FALSE	1
2022-09-14	13:18:40	0.379657	1.68879	1.82929	118.15	FALSE	1
2022-09-14	13:18:41	0.415636	1.84883	1.86683	109.832	FALSE	1
2022-09-14	13:18:41	0.38841	1.72773	1.86683	119.878	FALSE	1
2022-09-14	13:18:41	0.383473	1.70576	1.86683	111.538	FALSE	1
2022-09-14	13:18:41	0.491209	2.185	1.86683	122.063	FALSE	1
2022-09-14	13:18:42	0.283473	1.26094	1.76089	112.799	FALSE	1
2022-09-14	13:18:42	0.501387	2.23027	1.76089	124.293	FALSE	1
2022-09-14	13:18:42	0.290903	1.29399	1.76089	114.093	FALSE	1
2022-09-14	13:18:42	0.507697	2.25834	1.76089	126.551	FALSE	1
2022-09-14	13:18:43	0.33416	1.48641	2.25545	115.579	FALSE	1
2022-09-14	13:18:43	0.561488	2.49761	2.25545	129.049	FALSE	1
2022-09-14	13:18:43	0.446629	1.9867	2.25545	117.566	FALSE	1
2022-09-14	13:18:43	0.685916	3.05109	2.25545	132.1	FALSE	1
2022-09-14	13:18:44	0.509529	2.26649	2.52666	119.832	FALSE	1
2022-09-14	13:18:44	0.678486	3.01804	2.52666	135.118	FALSE	1
2022-09-14	13:18:44	0.516043	2.29546	2.52666	122.128	FALSE	1
2022-09-14	13:18:45	0.537824	2.39235	2.54108	137.511	FALSE	1
2022-09-14	13:18:45	0.610293	2.71471	2.54108	124.843	FALSE	1
2022-09-14	13:18:45	0.654415	2.91097	2.54108	140.422	FALSE	1
2022-09-14	13:18:45	0.482507	2.14629	2.54108	126.989	FALSE	1
2022-09-14	13:18:46	0.561183	2.49625	1.29479	142.918	FALSE	1
2022-09-14	13:18:46	0.623931	2.77537	1.29479	129.764	FALSE	1
2022-09-14	13:18:46	0.0946694	0.421108	1.29479	143.339	FALSE	1
2022-09-14	13:18:46	-0.115458	-0.51358	1.29479	129.764	FALSE	1
2022-09-14	13:18:47	0.00825724	0.0367299	0.681605	143.376	FALSE	1
2022-09-14	13:18:47	0.252837	1.12467	0.681605	130.889	FALSE	1
2022-09-14	13:18:47	0.186883	0.831293	0.681605	144.207	FALSE	1
2022-09-14	13:18:47	0.164949	0.733726	0.681605	131.623	FALSE	1
2022-09-14	13:18:48	0.129886	0.577759	1.05434	144.785	FALSE	1
2022-09-14	13:18:48	0.268919	1.19621	1.05434	132.819	FALSE	1
2022-09-14	13:18:48	0.312277	1.38907	1.05434	146.174	FALSE	1
2022-09-14	13:18:49	0.257774	1.14663	1.20928	133.965	FALSE	1
2022-09-14	13:18:49	0.275687	1.22631	1.20928	147.4	FALSE	1
2022-09-14	13:18:49	0.220725	0.981829	1.20928	134.947	FALSE	1
2022-09-14	13:18:49	0.333244	1.48234	1.20928	148.882	FALSE	1
2022-09-14	13:18:50	0.314415	1.39858	1.76536	136.346	FALSE	1
2022-09-14	13:18:50	0.365814	1.62721	1.76536	150.51	FALSE	1
2022-09-14	13:18:50	0.455382	2.02563	1.76536	138.371	FALSE	1
2022-09-14	13:18:50	0.45187	2.01001	1.76536	152.52	FALSE	1
2022-09-14	13:18:51	0.704593	3.13417	2.12167	141.506	FALSE	1
2022-09-14	13:18:51	0.395992	1.76145	2.12167	154.281	FALSE	1
2022-09-14	13:18:51	0.429377	1.90995	2.12167	143.416	FALSE	1
2022-09-14	13:18:51	0.377926	1.68109	2.12167	155.962	FALSE	1
2022-09-14	13:18:52	0.669733	2.97911	4.52409	146.395	FALSE	1
2022-09-14	13:18:52	1.20933	5.37934	4.52409	161.342	FALSE	1
2022-09-14	13:18:52	1.17212	5.21382	4.52409	151.609	FALSE	1
2022-09-14	13:18:53	0.789122	3.51017	3.79936	164.852	FALSE	1
2022-09-14	13:18:53	0.879046	3.91017	3.79936	155.519	FALSE	1
2022-09-14	13:18:53	1.02357	4.55304	3.79936	169.405	FALSE	1
2022-09-14	13:18:53	0.724796	3.22404	3.79936	158.743	FALSE	1
2022-09-14	13:18:54	0.620878	2.76179	2.85104	172.167	FALSE	1
2022-09-14	13:18:54	0.67472	3.00129	2.85104	161.744	FALSE	1
2022-09-14	13:18:54	0.597926	2.65969	2.85104	174.826	FALSE	1
2022-09-14	13:18:54	0.670242	2.98137	2.85104	164.725	FALSE	1
2022-09-14	13:18:55	1.06846	4.75272	5.62962	179.579	FALSE	1
2022-09-14	13:18:55	1.13268	5.03839	5.62962	169.764	FALSE	1
2022-09-14	13:18:55	1.43207	6.37013	5.62962	185.949	FALSE	1
2022-09-14	13:18:55	1.42917	6.35723	5.62962	176.121	FALSE	1
2022-09-14	13:18:56	1.07192	4.76811	4.46297	190.717	FALSE	1
2022-09-14	13:18:56	1.04856	4.6642	4.46297	180.785	FALSE	1
2022-09-14	13:18:56	0.889478	3.95658	4.46297	194.674	FALSE	1
2022-09-14	13:18:57	0.888562	3.9525	2.96496	184.738	FALSE	1
2022-09-14	13:18:57	0.773601	3.44113	2.96496	198.115	FALSE	1
2022-09-14	13:18:57	0.465051	2.06864	2.96496	186.806	FALSE	1
2022-09-14	13:18:57	0.538995	2.39756	2.96496	200.512	FALSE	1
2022-09-14	13:18:58	0.363982	1.61906	1.78086	188.425	FALSE	1
2022-09-14	13:18:58	0.358842	1.5962	1.78086	202.109	FALSE	1
2022-09-14	13:18:58	0.416552	1.85291	1.78086	190.278	FALSE	1
2022-09-14	13:18:58	0.462049	2.05529	1.78086	204.164	FALSE	1
2022-09-14	13:18:59	0.444746	1.97832	1.85442	192.257	FALSE	1
2022-09-14	13:18:59	0.419708	1.86695	1.85442	206.031	FALSE	1
2022-09-14	13:18:59	0.386222	1.71799	1.85442	193.975	FALSE	1
2022-09-14	13:19:00	0.384288	1.70939	3.05302	207.74	FALSE	1
2022-09-14	13:19:00	0.390852	1.73859	3.05302	195.713	FALSE	1
2022-09-14	13:19:00	0.893957	3.9765	3.05302	211.717	FALSE	1
2022-09-14	13:19:00	1.0763	4.7876	3.05302	200.501	FALSE	1
2022-09-14	13:19:01	0.724593	3.22313	3.20797	214.94	FALSE	1
2022-09-14	13:19:01	0.72042	3.20457	3.20797	203.705	FALSE	1
2022-09-14	13:19:01	0.725051	3.22517	3.20797	218.165	FALSE	1
2022-09-14	13:19:01	0.714669	3.17899	3.20797	206.884	FALSE	1
2022-09-14	13:19:02	0.722507	3.21386	3.21136	221.379	FALSE	1
2022-09-14	13:19:02	0.723168	3.2168	3.21136	210.101	FALSE	1
2022-09-14	13:19:02	0.72383	3.21974	3.21136	224.599	FALSE	1
2022-09-14	13:19:02	0.718282	3.19506	3.21136	213.296	FALSE	1
2022-09-14	13:19:03	0.729631	3.24554	3.23702	227.844	FALSE	1
2022-09-14	13:19:03	0.722099	3.21204	3.23702	216.508	FALSE	1
2022-09-14	13:19:03	0.731412	3.25347	3.23702	231.098	FALSE	1
2022-09-14	13:19:04	0.723066	3.21634	3.2065	219.725	FALSE	1
2022-09-14	13:19:04	0.71813	3.19439	3.2065	234.292	FALSE	1
2022-09-14	13:19:04	0.717774	3.1928	3.2065	222.917	FALSE	1
2022-09-14	13:19:04	0.72444	3.22245	3.2065	237.515	FALSE	1
2022-09-14	13:19:05	0.728257	3.23943	3.22602	226.157	FALSE	1
2022-09-14	13:19:05	0.726221	3.23038	3.22602	240.745	FALSE	1
2022-09-14	13:19:05	0.722507	3.21386	3.22602	229.371	FALSE	1
2022-09-14	13:19:05	0.723982	3.22042	3.22602	243.965	FALSE	1
2022-09-14	13:19:06	0.727036	3.234	3.22449	232.605	FALSE	1
2022-09-14	13:19:06	0.726476	3.23151	3.22449	247.197	FALSE	1
2022-09-14	13:19:06	0.719809	3.20185	3.22449	235.807	FALSE	1
2022-09-14	13:19:06	0.726272	3.2306	3.22449	250.427	FALSE	1
2022-09-14	13:19:07	0.723117	3.21657	3.22344	239.023	FALSE	1
2022-09-14	13:19:07	0.729122	3.24328	3.22344	253.671	FALSE	1
2022-09-14	13:19:07	0.721743	3.21046	3.22344	242.234	FALSE	1
2022-09-14	13:19:08	0.720521	3.20502	3.2211	256.876	FALSE	1
2022-09-14	13:19:08	0.724084	3.22087	3.2211	245.454	FALSE	1
2022-09-14	13:19:08	0.727494	3.23604	3.2211	260.112	FALSE	1
2022-09-14	13:19:08	0.72444	3.22245	3.2211	248.677	FALSE	1
2022-09-14	13:19:09	0.722303	3.21295	3.21849	263.325	FALSE	1
2022-09-14	13:19:09	0.721132	3.20774	3.21849	251.885	FALSE	1
2022-09-14	13:19:09	0.72673	3.23264	3.21849	266.557	FALSE	1
2022-09-14	13:19:09	0.724033	3.22064	3.21849	255.105	FALSE	1
2022-09-14	13:19:10	0.718282	3.19506	3.20406	269.752	FALSE	1
2022-09-14	13:19:10	0.720878	3.20661	3.20406	258.312	FALSE	1
2022-09-14	13:19:10	0.718791	3.19733	3.20406	272.95	FALSE	1
2022-09-14	13:19:10	0.72327	3.21725	3.20406	261.529	FALSE	1
2022-09-14	13:19:11	0.725509	3.22721	3.20638	276.177	FALSE	1
2022-09-14	13:19:11	0.719962	3.20253	3.20638	264.732	FALSE	1
2022-09-14	13:19:11	0.71701	3.1894	3.20638	279.366	FALSE	1
2022-09-14	13:19:12	0.720572	3.20525	3.19778	267.937	FALSE	1
2022-09-14	13:19:12	0.719198	3.19914	3.19778	282.566	FALSE	1
2022-09-14	13:19:12	0.717316	3.19077	3.19778	271.128	FALSE	1
2022-09-14	13:19:12	0.718486	3.19597	3.19778	285.761	FALSE	1
2022-09-14	13:19:13	0.723982	3.22042	3.21634	274.348	FALSE	1
2022-09-14	13:19:13	0.722099	3.21204	3.21634	288.974	FALSE	1
2022-09-14	13:19:13	0.725712	3.22811	3.21634	277.576	FALSE	1
2022-09-14	13:19:13	0.720471	3.2048	3.21634	292.178	FALSE	1
2022-09-14	13:19:14	0.725407	3.22676	3.21017	280.803	FALSE	1
2022-09-14	13:19:14	0.716247	3.18601	3.21017	295.364	FALSE	1
2022-09-14	13:19:14	0.722456	3.21363	3.21017	284.017	FALSE	1
2022-09-14	13:19:14	0.722608	3.2143	3.21017	298.579	FALSE	1
2022-09-14	13:19:15	0.721641	3.21	3.21423	287.227	FALSE	1
2022-09-14	13:19:15	0.72617	3.23015	3.21423	301.809	FALSE	1
2022-09-14	13:19:15	0.719962	3.20253	3.21423	290.429	FALSE	1
2022-09-14	13:19:16	0.720623	3.20548	3.21391	305.014	FALSE	1
2022-09-14	13:19:16	0.720064	3.20299	3.21391	293.632	FALSE	1
2022-09-14	13:19:16	0.728054	3.23853	3.21391	308.253	FALSE	1
2022-09-14	13:19:16	0.721336	3.20865	3.21391	296.841	FALSE	1
2022-09-14	13:19:17	0.724186	3.22132	3.21934	311.474	FALSE	1
2022-09-14	13:19:17	0.72785	3.23762	3.21934	300.078	FALSE	1
2022-09-14	13:19:17	0.721132	3.20774	3.21934	314.682	FALSE	1
2022-09-14	13:19:17	0.721794	3.21068	3.21934	303.289	FALSE	1
2022-09-14	13:19:18	0.71584	3.1842	3.2054	317.866	FALSE	1
2022-09-14	13:19:18	0.725865	3.22879	3.2054	306.518	FALSE	1
2022-09-14	13:19:18	0.720114	3.20321	3.2054	321.069	FALSE	1
2022-09-14	13:19:19	0.730445	3.24917	3.23558	309.767	FALSE	1
2022-09-14	13:19:19	0.725662	3.22789	3.23558	324.297	FALSE	1
2022-09-14	13:19:19	0.731361	3.25324	3.23558	313.02	FALSE	1
2022-09-14	13:19:19	0.722099	3.21204	3.23558	327.509	FALSE	1
2022-09-14	13:19:20	0.722862	3.21543	3.22591	316.236	FALSE	1
2022-09-14	13:19:20	0.725967	3.22925	3.22591	330.738	FALSE	1
2022-09-14	13:19:20	0.727494	3.23604	3.22591	319.472	FALSE	1
2022-09-14	13:19:20	0.724542	3.22291	3.22591	333.961	FALSE	1
2022-09-14	13:19:21	0.719758	3.20163	3.2094	322.673	FALSE	1
2022-09-14	13:19:21	0.726069	3.2297	3.2094	337.191	FALSE	1
2022-09-14	13:19:21	0.71869	3.19688	3.2094	325.87	FALSE	1
2022-09-14	13:19:22	0.717366	3.19099	3.2181	340.382	FALSE	1
2022-09-14	13:19:22	0.731616	3.25437	3.2181	329.125	FALSE	1
2022-09-14	13:19:22	0.724237	3.22155	3.2181	343.604	FALSE	1
2022-09-14	13:19:22	0.720623	3.20548	3.2181	332.33	FALSE	1
2022-09-14	13:19:23	0.728155	3.23898	3.21957	346.843	FALSE	1
2022-09-14	13:19:23	0.72902	3.24283	3.21957	335.573	FALSE	1
2022-09-14	13:19:23	0.716908	3.18895	3.21957	350.032	FALSE	1
2022-09-14	13:19:23	0.721081	3.20751	3.21957	338.78	FALSE	1
2022-09-14	13:19:24	0.721183	3.20797	3.21527	353.239	FALSE	1
2022-09-14	13:19:24	0.72271	3.21476	3.21527	341.995	FALSE	1
2022-09-14	13:19:24	0.72388	3.21996	3.21527	356.459	FALSE	1
2022-09-14	13:19:24	0.723524	3.21838	3.21527	345.214	FALSE	1
2022-09-14	13:19:25	0.721081	3.20751	3.20955	359.667	FALSE	1
2022-09-14	13:19:25	0.72785	3.23762	3.20955	348.451	FALSE	1
2022-09-14	13:19:25	0.718181	3.19461	3.20955	362.862	FALSE	1
2022-09-14	13:19:25	0.719046	3.19846	3.20955	351.65	FALSE	1
2022-09-14	13:19:26	0.71584	3.1842	3.20902	366.046	FALSE	1
2022-09-14	13:19:26	0.721946	3.21136	3.20902	354.861	FALSE	1
2022-09-14	13:19:26	0.726476	3.23151	3.20902	369.277	FALSE	1
2022-09-14	13:19:27	0.72388	3.21996	3.21827	358.081	FALSE	1
2022-09-14	13:19:27	0.718944	3.19801	3.21827	372.475	FALSE	1
2022-09-14	13:19:27	0.726985	3.23377	3.21827	361.315	FALSE	1
2022-09-14	13:19:27	0.724186	3.22132	3.21827	375.697	FALSE	1
2022-09-14	13:19:28	0.721692	3.21023	3.22013	364.525	FALSE	1
2022-09-14	13:19:28	0.725407	3.22676	3.22013	378.923	FALSE	1
2022-09-14	13:19:28	0.721285	3.20842	3.22013	367.733	FALSE	1
2022-09-14	13:19:28	0.72729	3.23513	3.22013	382.158	FALSE	1
2022-09-14	13:19:29	0.722507	3.21386	3.22212	370.947	FALSE	1
2022-09-14	13:19:29	0.725916	3.22902	3.22212	385.388	FALSE	1
2022-09-14	13:19:29	0.721591	3.20978	3.22212	374.157	FALSE	1
2022-09-14	13:19:29	0.727443	3.23581	3.22212	388.623	FALSE	1
2022-09-14	13:19:30	0.72556	3.22744	3.22306	377.385	FALSE	1
2022-09-14	13:19:30	0.723321	3.21748	3.22306	391.841	FALSE	1
2022-09-14	13:19:30	0.724847	3.22426	3.22306	380.609	FALSE	1
2022-09-14	13:19:31	0.717112	3.18986	3.19965	395.031	FALSE	1
2022-09-14	13:19:31	0.72612	3.22993	3.19965	383.839	FALSE	1
2022-09-14	13:19:31	0.716908	3.18895	3.19965	398.22	FALSE	1
2022-09-14	13:19:31	0.717112	3.18986	3.19965	387.029	FALSE	1
2022-09-14	13:19:32	0.714669	3.17899	3.20989	401.399	FALSE	1
2022-09-14	13:19:32	0.722049	3.21182	3.20989	390.24	FALSE	1
2022-09-14	13:19:32	0.723168	3.2168	3.20989	404.615	FALSE	1
2022-09-14	13:19:32	0.726578	3.23196	3.20989	393.472	FALSE	1
2022-09-14	13:19:33	0.722507	3.21386	3.21595	407.829	FALSE	1
2022-09-14	13:19:33	0.722862	3.21543	3.21595	396.688	FALSE	1
2022-09-14	13:19:33	0.721285	3.20842	3.21595	411.038	FALSE	1
2022-09-14	13:19:33	0.725254	3.22607	3.21595	399.914	FALSE	1
2022-09-14	13:19:34	0.720979	3.20706	3.22653	414.245	FALSE	1
2022-09-14	13:19:34	0.729886	3.24668	3.22653	403.161	FALSE	1
2022-09-14	13:19:34	0.725204	3.22585	3.22653	417.471	FALSE	1
2022-09-14	13:19:35	0.721488	3.20932	3.21249	406.37	FALSE	1
2022-09-14	13:19:35	0.716756	3.18827	3.21249	420.659	FALSE	1
2022-09-14	13:19:35	0.726476	3.23151	3.21249	409.601	FALSE	1
2022-09-14	13:19:35	0.724084	3.22087	3.21249	423.88	FALSE	1
2022-09-14	13:19:36	0.726374	3.23106	3.21334	412.832	FALSE	1
2022-09-14	13:19:36	0.721132	3.20774	3.21334	427.087	FALSE	1
2022-09-14	13:19:36	0.718028	3.19393	3.21334	416.026	FALSE	1
2022-09-14	13:19:36	0.724033	3.22064	3.21334	430.308	FALSE	1
2022-09-14	13:19:37	0.71813	3.19439	3.19484	419.221	FALSE	1
2022-09-14	13:19:37	0.719097	3.19869	3.19484	433.507	FALSE	1
2022-09-14	13:19:37	0.71757	3.19189	3.19484	422.413	FALSE	1
2022-09-14	13:19:37	0.71813	3.19439	3.19484	436.701	FALSE	1
2022-09-14	13:19:38	0.723066	3.21634	3.21106	425.629	FALSE	1
2022-09-14	13:19:38	0.721132	3.20774	3.21106	439.909	FALSE	1
2022-09-14	13:19:38	0.721437	3.2091	3.21106	428.838	FALSE	1
2022-09-14	13:19:39	0.717824	3.19302	3.20225	443.102	FALSE	1
2022-09-14	13:19:39	0.718791	3.19733	3.20225	432.035	FALSE	1
2022-09-14	13:19:39	0.723066	3.21634	3.20225	446.318	FALSE	1
2022-09-14	13:19:39	0.719911	3.20231	3.20225	435.238	FALSE	1
2022-09-14	13:19:40	0.719504	3.2005	3.20842	449.519	FALSE	1
2022-09-14	13:19:40	0.716501	3.18714	3.20842	438.425	FALSE	1
2022-09-14	13:19:40	0.72444	3.22245	3.20842	452.741	FALSE	1
2022-09-14	13:19:40	0.724695	3.22359	3.20842	441.648	FALSE	1
2022-09-14	13:19:41	0.724237	3.22155	3.21204	455.963	FALSE	1
2022-09-14	13:19:41	0.724389	3.22223	3.21204	444.871	FALSE	1
2022-09-14	13:19:41	0.717672	3.19235	3.21204	459.155	FALSE	1
2022-09-14	13:19:42	0.715585	3.18307	3.2048	448.054	FALSE	1
2022-09-14	13:19:42	0.723117	3.21657	3.2048	462.372	FALSE	1
2022-09-14	13:19:42	0.724237	3.22155	3.2048	451.275	FALSE	1
2022-09-14	13:19:42	0.718944	3.19801	3.2048	465.57	FALSE	1
2022-09-14	13:19:43	0.722507	3.21386	3.21487	454.489	FALSE	1
2022-09-14	13:19:43	0.721285	3.20842	3.21487	468.778	FALSE	1
2022-09-14	13:19:43	0.71701	3.1894	3.21487	457.679	FALSE	1
2022-09-14	13:19:43	0.73014	3.24781	3.21487	472.026	FALSE	1
2022-09-14	13:19:44	0.720572	3.20525	3.20672	460.884	FALSE	1
2022-09-14	13:19:44	0.720216	3.20366	3.20672	475.23	FALSE	1
2022-09-14	13:19:44	0.718435	3.19574	3.20672	464.08	FALSE	1
2022-09-14	13:19:44	0.724389	3.22223	3.20672	478.452	FALSE	1
2022-09-14	13:19:45	0.715941	3.18465	3.16458	467.264	FALSE	1
2022-09-14	13:19:45	0.691972	3.07803	3.16458	481.53	FALSE	1
2022-09-14	13:19:45	0.726374	3.23106	3.16458	470.495	FALSE	1
2022-09-14	13:19:46	0.71986	3.20208	3.2207	484.732	FALSE	1
2022-09-14	13:19:46	0.727901	3.23785	3.2207	473.733	FALSE	1
2022-09-14	13:19:46	0.726425	3.23128	3.2207	487.963	FALSE	1
2022-09-14	13:19:46	0.721997	3.21159	3.2207	476.945	FALSE	1
2022-09-14	13:19:47	0.726374	3.23106	3.22093	491.194	FALSE	1
2022-09-14	13:19:47	0.723473	3.21815	3.22093	480.163	FALSE	1
2022-09-14	13:19:47	0.719656	3.20117	3.22093	494.395	FALSE	1
2022-09-14	13:19:47	0.726883	3.23332	3.22093	483.396	FALSE	1
2022-09-14	13:19:48	0.728003	3.2383	3.22149	497.634	FALSE	1
2022-09-14	13:19:48	0.720878	3.20661	3.22149	486.603	FALSE	1
2022-09-14	13:19:48	0.722812	3.21521	3.22149	500.849	FALSE	1
2022-09-14	13:19:48	0.725204	3.22585	3.22149	489.829	FALSE	1
2022-09-14	13:19:49	0.720674	3.2057	3.19189	504.055	FALSE	1
2022-09-14	13:19:49	0.722557	3.21408	3.19189	493.043	FALSE	1
2022-09-14	13:19:49	0.709478	3.1559	3.19189	507.211	FALSE	1
2022-09-14	13:19:50	0.725407	3.22676	3.22217	496.269	FALSE	1
2022-09-14	13:19:50	0.725712	3.22811	3.22217	510.439	FALSE	1
2022-09-14	13:19:50	0.721234	3.20819	3.22217	499.478	FALSE	1
2022-09-14	13:19:50	0.725153	3.22563	3.22217	513.664	FALSE	1
2022-09-14	13:19:51	0.72103	3.20729	3.207	502.685	FALSE	1
2022-09-14	13:19:51	0.724389	3.22223	3.207	516.887	FALSE	1
2022-09-14	13:19:51	0.721794	3.21068	3.207	505.896	FALSE	1
2022-09-14	13:19:51	0.716654	3.18782	3.207	520.074	FALSE	1
2022-09-14	13:19:52	0.725916	3.22902	3.2181	509.125	FALSE	1
2022-09-14	13:19:52	0.71813	3.19439	3.2181	523.269	FALSE	1
2022-09-14	13:19:52	0.727036	3.234	3.2181	512.359	FALSE	1
2022-09-14	13:19:52	0.722761	3.21499	3.2181	526.484	FALSE	1
2022-09-14	13:19:53	0.722303	3.21295	3.22057	515.572	FALSE	1
2022-09-14	13:19:53	0.724898	3.22449	3.22057	529.708	FALSE	1
2022-09-14	13:19:53	0.724847	3.22426	3.22057	518.796	FALSE	1
2022-09-14	13:19:54	0.718893	3.19778	3.20938	532.906	FALSE	1
2022-09-14	13:19:54	0.728104	3.23875	3.20938	522.035	FALSE	1
2022-09-14	13:19:54	0.719351	3.19982	3.20938	536.106	FALSE	1
2022-09-14	13:19:54	0.719656	3.20117	3.20938	525.236	FALSE	1
2022-09-14	13:19:55	0.719351	3.19982	3.20734	539.306	FALSE	1
2022-09-14	13:19:55	0.721692	3.21023	3.20734	528.446	FALSE	1
2022-09-14	13:19:55	0.725458	3.22698	3.20734	542.533	FALSE	1
2022-09-14	13:19:55	0.717672	3.19235	3.20734	531.638	FALSE	1
2022-09-14	13:19:56	0.722354	3.21318	3.21221	545.746	FALSE	1
2022-09-14	13:19:56	0.72042	3.20457	3.21221	534.843	FALSE	1
2022-09-14	13:19:56	0.720572	3.20525	3.21221	548.951	FALSE	1
2022-09-14	13:19:56	0.725204	3.22585	3.21221	538.069	FALSE	1
2022-09-14	13:19:57	0.724644	3.22336	3.22087	552.174	FALSE	1
2022-09-14	13:19:57	0.726272	3.2306	3.22087	541.299	FALSE	1
2022-09-14	13:19:57	0.721336	3.20865	3.22087	555.383	FALSE	1
2022-09-14	13:19:58	0.724389	3.22223	3.21199	544.522	FALSE	1
2022-09-14	13:19:58	0.71986	3.20208	3.21199	558.585	FALSE	1
2022-09-14	13:19:58	0.722965	3.21589	3.21199	547.738	FALSE	1
2022-09-14	13:19:58	0.721132	3.20774	3.21199	561.793	FALSE	1
2022-09-14	13:19:59	0.720878	3.20661	3.21516	550.944	FALSE	1
2022-09-14	13:19:59	0.726985	3.23377	3.21516	565.027	FALSE	1
2022-09-14	13:19:59	0.719046	3.19846	3.21516	554.143	FALSE	1
2022-09-14	13:19:59	0.724288	3.22178	3.21516	568.248	FALSE	1
2022-09-14	13:20:00	0.725509	3.22721	3.21265	557.37	FALSE	1
2022-09-14	13:20:00	0.721641	3.21	3.21265	571.458	FALSE	1
2022-09-14	13:20:00	0.719555	3.20072	3.21265	560.571	FALSE	1
2022-09-14	13:20:01	0.722812	3.21521	3.22098	574.674	FALSE	1
2022-09-14	13:20:01	0.718384	3.19552	3.22098	563.766	FALSE	1
2022-09-14	13:20:01	0.726679	3.23241	3.22098	577.906	FALSE	1
2022-09-14	13:20:01	0.728562	3.24079	3.22098	567.007	FALSE	1
2022-09-14	13:20:02	0.720725	3.20593	3.21566	581.112	FALSE	1
2022-09-14	13:20:02	0.718995	3.19823	3.21566	570.205	FALSE	1
2022-09-14	13:20:02	0.726679	3.23241	3.21566	584.344	FALSE	1
2022-09-14	13:20:02	0.725254	3.22607	3.21566	573.431	FALSE	1
2022-09-14	13:20:03	0.720674	3.2057	3.20944	587.55	FALSE	1
2022-09-14	13:20:03	0.726679	3.23241	3.20944	576.664	FALSE	1
2022-09-14	13:20:03	0.720114	3.20321	3.20944	590.753	FALSE	1
2022-09-14	13:20:03	0.718588	3.19642	3.20944	579.86	FALSE	1
2022-09-14	13:20:04	0.723677	3.21906	3.2128	593.972	FALSE	1
2022-09-14	13:20:04	0.719504	3.2005	3.2128	583.06	FALSE	1
2022-09-14	13:20:04	0.723626	3.21883	3.2128	597.191	FALSE	1
2022-09-14	13:20:05	0.724949	3.22472	3.20916	586.285	FALSE	1
2022-09-14	13:20:05	0.722099	3.21204	3.20916	600.403	FALSE	1
2022-09-14	13:20:05	0.723168	3.2168	3.20916	589.502	FALSE	1
2022-09-14	13:20:05	0.715585	3.18307	3.20916	603.586	FALSE	1
2022-09-14	13:20:06	0.732379	3.25777	3.22851	592.76	FALSE	1
2022-09-14	13:20:06	0.719809	3.20185	3.22851	606.788	FALSE	1
2022-09-14	13:20:06	0.726018	3.22947	3.22851	595.989	FALSE	1
2022-09-14	13:20:06	0.725	3.22494	3.22851	610.013	FALSE	1
2022-09-14	13:20:07	0.724186	3.22132	2.79908	599.211	FALSE	1
2022-09-14	13:20:07	0.729631	3.24554	2.79908	613.259	FALSE	1
2022-09-14	13:20:07	0.724746	3.22382	2.79908	602.434	FALSE	1
2022-09-14	13:20:07	0.338486	1.50565	2.79908	614.764	FALSE	1
2022-09-14	13:20:08	0.728155	3.23898	3.2337	605.673	FALSE	1
2022-09-14	13:20:08	0.730445	3.24917	3.2337	618.013	FALSE	1
2022-09-14	13:20:08	0.722303	3.21295	3.2337	608.886	FALSE	1
2022-09-14	13:20:09	0.716705	3.18805	3.2108	621.202	FALSE	1
2022-09-14	13:20:09	0.724695	3.22359	3.2108	612.11	FALSE	1
2022-09-14	13:20:09	0.721845	3.21091	3.2108	624.412	FALSE	1
2022-09-14	13:20:09	0.724033	3.22064	3.2108	615.331	FALSE	1
2022-09-14	13:20:10	0.715687	3.18352	3.21329	627.596	FALSE	1
2022-09-14	13:20:10	0.720776	3.20616	3.21329	618.537	FALSE	1
2022-09-14	13:20:10	0.725611	3.22766	3.21329	630.824	FALSE	1
2022-09-14	13:20:10	0.727443	3.23581	3.21329	621.772	FALSE	1
2022-09-14	13:20:11	0.71701	3.1894	3.19987	634.013	FALSE	1
2022-09-14	13:20:11	0.723931	3.22019	3.19987	624.993	FALSE	1
2022-09-14	13:20:11	0.719962	3.20253	3.19987	637.216	FALSE	1
2022-09-14	13:20:11	0.716552	3.18737	3.19987	628.18	FALSE	1
2022-09-14	13:20:12	0.157977	0.702713	-1.22982	637.918	FALSE	1
2022-09-14	13:20:12	-0.495203	-2.20276	-1.22982	628.18	FALSE	1
2022-09-14	13:20:12	-0.4922	-2.1894	-1.22982	637.918	FALSE	1
2022-09-14	13:20:13	-0.495101	-2.20231	-1.78918	628.18	FALSE	1
2022-09-14	13:20:13	-0.397798	-1.76949	-1.78918	637.918	FALSE	1
2022-09-14	13:20:13	-0.367264	-1.63366	-1.78918	628.18	FALSE	1
2022-09-14	13:20:13	-0.34874	-1.55127	-1.78918	637.918	FALSE	1
2022-09-14	13:20:14	-0.413829	-1.84079	-1.16411	628.18	FALSE	1
2022-09-14	13:20:14	0.123677	0.55014	-1.16411	638.468	FALSE	1
2022-09-14	13:20:14	-0.368078	-1.63728	-1.16411	628.18	FALSE	1
2022-09-14	13:20:14	-0.388587	-1.72851	-1.16411	638.468	FALSE	1
2022-09-14	13:20:15	-0.392811	-1.7473	-1.76671	628.18	FALSE	1
2022-09-14	13:20:15	-0.395305	-1.7584	-1.76671	638.468	FALSE	1
2022-09-14	13:20:15	-0.399885	-1.77877	-1.76671	628.18	FALSE	1
2022-09-14	13:20:15	-0.400699	-1.78239	-1.76671	638.468	FALSE	1
2022-09-14	13:20:16	-0.39734	-1.76745	-1.77537	628.18	FALSE	1
2022-09-14	13:20:16	-0.393829	-1.75183	-1.77537	638.468	FALSE	1
2022-09-14	13:20:16	-0.406195	-1.80684	-1.77537	628.18	FALSE	1
2022-09-14	13:20:17	-0.398918	-1.77447	-1.78941	638.468	FALSE	1
2022-09-14	13:20:17	-0.400547	-1.78171	-1.78941	628.18	FALSE	1
2022-09-14	13:20:17	-0.400139	-1.7799	-1.78941	638.468	FALSE	1
2022-09-14	13:20:17	-0.409503	-1.82155	-1.78941	628.18	FALSE	1
2022-09-14	13:20:18	-0.417188	-1.85574	-1.8112	638.468	FALSE	1
2022-09-14	13:20:18	-0.413676	-1.84011	-1.8112	628.18	FALSE	1
2022-09-14	13:20:18	-0.398307	-1.77175	-1.8112	638.468	FALSE	1
2022-09-14	13:20:18	-0.399529	-1.77718	-1.8112	628.18	FALSE	1
2022-09-14	13:20:19	-0.39958	-1.77741	-1.75968	638.468	FALSE	1
2022-09-14	13:20:19	-0.388384	-1.72761	-1.75968	628.18	FALSE	1
2022-09-14	13:20:19	-0.398816	-1.77401	-1.75968	638.468	FALSE	1
2022-09-14	13:20:20	-0.405432	-1.80344	-1.80887	628.18	FALSE	1
2022-09-14	13:20:20	-0.41047	-1.82585	-1.80887	638.468	FALSE	1
2022-09-14	13:20:20	-0.402531	-1.79054	-1.80887	628.18	FALSE	1
2022-09-14	13:20:20	-0.40818	-1.81567	-1.80887	638.468	FALSE	1
2022-09-14	13:20:21	-0.417849	-1.85868	-1.90661	628.18	FALSE	1
2022-09-14	13:20:21	-0.431844	-1.92093	-1.90661	638.468	FALSE	1
2022-09-14	13:20:21	-0.43215	-1.92229	-1.90661	628.18	FALSE	1
2022-09-14	13:20:21	-0.432659	-1.92455	-1.90661	638.468	FALSE	1
2022-09-14	13:20:22	-0.409045	-1.81951	-1.85528	628.18	FALSE	1
2022-09-14	13:20:22	-0.414287	-1.84283	-1.85528	638.468	FALSE	1
2022-09-14	13:20:22	-0.415101	-1.84645	-1.85528	628.18	FALSE	1
2022-09-14	13:20:22	-0.429911	-1.91233	-1.85528	638.468	FALSE	1
2022-09-14	13:20:23	-0.423804	-1.88516	-1.86268	628.18	FALSE	1
2022-09-14	13:20:23	-0.408791	-1.81838	-1.86268	638.468	FALSE	1
2022-09-14	13:20:23	-0.423651	-1.88448	-1.86268	628.18	FALSE	1
2022-09-14	13:20:24	-0.435407	-1.93678	-2.04719	638.468	FALSE	1
2022-09-14	13:20:24	-0.462073	-2.05539	-2.04719	628.18	FALSE	1
2022-09-14	13:20:24	-0.476272	-2.11855	-2.04719	638.468	FALSE	1
2022-09-14	13:20:24	-0.467162	-2.07803	-2.04719	628.18	FALSE	1
2022-09-14	13:20:25	-0.409045	-1.81951	-1.79948	638.468	FALSE	1
2022-09-14	13:20:25	-0.39561	-1.75975	-1.79948	628.18	FALSE	1
2022-09-14	13:20:25	-0.429452	-1.91029	-1.79948	638.468	FALSE	1
2022-09-14	13:20:25	-0.384058	-1.70837	-1.79948	628.18	FALSE	1
2022-09-14	13:20:26	-0.396933	-1.76564	-1.21606	638.468	FALSE	1
2022-09-14	13:20:26	-0.338307	-1.50486	-1.21606	628.18	FALSE	1
2022-09-14	13:20:26	-0.174694	-0.777074	-1.21606	638.468	FALSE	1
2022-09-14	13:20:26	-0.1836	-0.81669	-1.21606	628.18	FALSE	1
2022-09-14	13:20:27	-0.288689	-1.28415	-0.828763	638.468	FALSE	1
2022-09-14	13:20:27	-0.107468	-0.478039	-0.828763	628.18	FALSE	1
2022-09-14	13:20:27	-0.162786	-0.724105	-0.828763	638.468	FALSE	1
2022-09-14	13:20:28	-0.24075	-1.0709	-1.80927	628.18	FALSE	1
2022-09-14	13:20:28	-0.375152	-1.66875	-1.80927	638.468	FALSE	1
2022-09-14	13:20:28	-0.464567	-2.06649	-1.80927	628.18	FALSE	1
2022-09-14	13:20:28	-0.546501	-2.43095	-1.80927	638.468	FALSE	1
2022-09-14	13:20:29	-0.666348	-2.96405	-3.00729	628.18	FALSE	1
2022-09-14	13:20:29	-0.605839	-2.69489	-3.00729	638.468	FALSE	1
2022-09-14	13:20:29	-0.650623	-2.8941	-3.00729	628.18	FALSE	1
2022-09-14	13:20:29	-0.781462	-3.4761	-3.00729	638.468	FALSE	1
2022-09-14	13:20:30	-0.708587	-3.15194	-3.20519	628.18	FALSE	1
2022-09-14	13:20:30	-0.815966	-3.62958	-3.20519	638.468	FALSE	1
2022-09-14	13:20:30	-0.680037	-3.02494	-3.20519	628.18	FALSE	1
2022-09-14	13:20:30	-0.677645	-3.0143	-3.20519	638.468	FALSE	1
2022-09-14	13:20:31	-0.711641	-3.16552	-2.89855	628.18	FALSE	1
2022-09-14	13:20:31	-0.581259	-2.58556	-2.89855	638.468	FALSE	1
2022-09-14	13:20:31	-0.661971	-2.94458	-2.89855	628.18	FALSE	1
2022-09-14	13:20:32	-0.632099	-2.8117	-2.98923	638.468	FALSE	1
2022-09-14	13:20:32	-0.671844	-2.9885	-2.98923	628.18	FALSE	1
2022-09-14	13:20:32	-0.76416	-3.39914	-2.98923	638.468	FALSE	1
2022-09-14	13:20:32	-0.619936	-2.7576	-2.98923	628.18	FALSE	1
2022-09-14	13:20:33	-0.684312	-3.04396	-2.44017	638.468	FALSE	1
2022-09-14	13:20:33	-0.672048	-2.9894	-2.44017	628.18	FALSE	1
2022-09-14	13:20:33	-0.578918	-2.57514	-2.44017	638.468	FALSE	1
2022-09-14	13:20:33	-0.25902	-1.15217	-2.44017	628.18	FALSE	1
2022-09-14	13:20:34	0.716399	3.18669	3.20525	641.655	FALSE	1
2022-09-14	13:20:34	0.720216	3.20366	3.20525	631.384	FALSE	1
2022-09-14	13:20:34	0.716399	3.18669	3.20525	644.842	FALSE	1
2022-09-14	13:20:34	0.729275	3.24396	3.20525	634.628	FALSE	1
2022-09-14	13:20:35	0.719758	3.20163	3.21061	648.043	FALSE	1
2022-09-14	13:20:35	0.721488	3.20932	3.21061	637.837	FALSE	1
2022-09-14	13:20:35	0.724084	3.22087	3.21061	651.264	FALSE	1
2022-09-14	13:20:36	0.726578	3.23196	3.2147	641.069	FALSE	1
2022-09-14	13:20:36	0.722608	3.2143	3.2147	654.479	FALSE	1
2022-09-14	13:20:36	0.716756	3.18827	3.2147	644.257	FALSE	1
2022-09-14	13:20:36	0.724847	3.22426	3.2147	657.703	FALSE	1
2022-09-14	13:20:37	0.725305	3.2263	3.22574	647.484	FALSE	1
2022-09-14	13:20:37	0.730496	3.24939	3.22574	660.952	FALSE	1
2022-09-14	13:20:37	0.721641	3.21	3.22574	650.694	FALSE	1
2022-09-14	13:20:37	0.72327	3.21725	3.22574	664.169	FALSE	1
2022-09-14	13:20:38	0.721692	3.21023	3.21355	653.904	FALSE	1
2022-09-14	13:20:38	0.726374	3.23106	3.21355	667.401	FALSE	1
2022-09-14	13:20:38	0.719249	3.19936	3.21355	657.103	FALSE	1
2022-09-14	13:20:39	0.724033	3.22064	3.22489	670.621	FALSE	1
2022-09-14	13:20:39	0.729987	3.24713	3.22489	660.35	FALSE	1
2022-09-14	13:20:39	0.722761	3.21499	3.22489	673.836	FALSE	1
2022-09-14	13:20:39	0.723168	3.2168	3.22489	663.567	FALSE	1
2022-09-14	13:20:40	0.717468	3.19144	3.20525	677.028	FALSE	1
2022-09-14	13:20:40	0.726578	3.23196	3.20525	666.799	FALSE	1
2022-09-14	13:20:40	0.717112	3.18986	3.20525	680.217	FALSE	1
2022-09-14	13:20:40	0.721132	3.20774	3.20525	670.007	FALSE	1
2022-09-14	13:20:41	0.72383	3.21974	3.22681	683.437	FALSE	1
2022-09-14	13:20:41	0.72729	3.23513	3.22681	673.242	FALSE	1
2022-09-14	13:20:41	0.721743	3.21046	3.22681	686.648	FALSE	1
2022-09-14	13:20:41	0.728817	3.24192	3.22681	676.484	FALSE	1
2022-09-14	13:20:42	0.723117	3.21657	3.22789	689.864	FALSE	1
2022-09-14	13:20:42	0.729478	3.24486	3.22789	679.729	FALSE	1
2022-09-14	13:20:42	0.724389	3.22223	3.22789	693.086	FALSE	1
2022-09-14	13:20:43	0.72327	3.21725	3.20038	682.946	FALSE	1
2022-09-14	13:20:43	0.714008	3.17605	3.20038	696.263	FALSE	1
2022-09-14	13:20:43	0.719504	3.2005	3.20038	686.146	FALSE	1
2022-09-14	13:20:43	0.721132	3.20774	3.20038	699.47	FALSE	1
2022-09-14	13:20:44	0.729326	3.24419	3.23417	689.391	FALSE	1
2022-09-14	13:20:44	0.73299	3.26049	3.23417	702.731	FALSE	1
2022-09-14	13:20:44	0.721591	3.20978	3.23417	692.6	FALSE	1
2022-09-14	13:20:44	0.724389	3.22223	3.23417	705.953	FALSE	1
2022-09-14	13:20:45	0.727646	3.23671	3.21936	695.837	FALSE	1
2022-09-14	13:20:45	0.721437	3.2091	3.21936	709.162	FALSE	1
2022-09-14	13:20:45	0.72215	3.21227	3.21936	699.049	FALSE	1
2022-09-14	13:20:46	0.730038	3.24736	3.23038	712.409	FALSE	1
2022-09-14	13:20:46	0.725356	3.22653	3.23038	702.276	FALSE	1
2022-09-14	13:20:46	0.722761	3.21499	3.23038	715.624	FALSE	1
2022-09-14	13:20:46	0.72673	3.23264	3.23038	705.509	FALSE	1
2022-09-14	13:20:47	0.726221	3.23038	3.24005	718.855	FALSE	1
2022-09-14	13:20:47	0.726832	3.23309	3.24005	708.742	FALSE	1
2022-09-14	13:20:47	0.728359	3.23989	3.24005	722.095	FALSE	1
2022-09-14	13:20:47	0.732175	3.25686	3.24005	711.999	FALSE	1
2022-09-14	13:20:48	0.721895	3.21113	3.22336	725.306	FALSE	1
2022-09-14	13:20:48	0.73131	3.25301	3.22336	715.252	FALSE	1
2022-09-14	13:20:48	0.72444	3.22245	3.22336	728.528	FALSE	1
2022-09-14	13:20:48	0.720929	3.20684	3.22336	718.458	FALSE	1
2022-09-14	13:20:49	0.716349	3.18646	3.15958	731.715	FALSE	1
2022-09-14	13:20:49	0.722456	3.21363	3.15958	721.672	FALSE	1
2022-09-14	13:20:49	0.720216	3.20366	3.15958	734.918	FALSE	1
2022-09-14	13:20:49	0.682201	3.03457	3.15958	724.707	FALSE	1
2022-09-14	13:20:50	-0.194847	-0.866718	-1.18771	734.918	FALSE	1
2022-09-14	13:20:50	-0.261361	-1.16259	-1.18771	724.707	FALSE	1
2022-09-14	13:20:50	-0.344821	-1.53383	-1.18771	734.918	FALSE	1
2022-09-14	13:20:51	-0.494033	-2.19756	1.30684	724.707	FALSE	1
2022-09-14	13:20:51	0.251921	1.12059	1.30684	736.039	FALSE	1
2022-09-14	13:20:51	0.691768	3.07712	1.30684	727.784	FALSE	1
2022-09-14	13:20:51	0.725509	3.22721	1.30684	739.266	FALSE	1
2022-09-14	13:20:52	0.708613	3.15205	3.21566	730.936	FALSE	1
2022-09-14	13:20:52	0.726323	3.23083	3.21566	742.497	FALSE	1
2022-09-14	13:20:52	0.72958	3.24532	3.21566	734.181	FALSE	1
2022-09-14	13:20:52	0.727137	3.23445	3.21566	745.731	FALSE	1
2022-09-14	13:20:53	0.733397	3.2623	3.23643	737.443	FALSE	1
2022-09-14	13:20:53	0.728613	3.24102	3.23643	748.972	FALSE	1
2022-09-14	13:20:53	0.725967	3.22925	3.23643	740.673	FALSE	1
2022-09-14	13:20:53	0.722354	3.21318	3.23643	752.186	FALSE	1
2022-09-14	13:20:54	0.726374	3.23106	3.21136	743.904	FALSE	1
2022-09-14	13:20:54	0.72215	3.21227	3.21136	755.398	FALSE	1
2022-09-14	13:20:54	0.717316	3.19077	3.21136	747.094	FALSE	1
2022-09-14	13:20:55	0.718791	3.19733	3.22217	758.595	FALSE	1
2022-09-14	13:20:55	0.726018	3.22947	3.22217	750.324	FALSE	1
2022-09-14	13:20:55	0.726781	3.23287	3.22217	761.828	FALSE	1
2022-09-14	13:20:55	0.725916	3.22902	3.22217	753.553	FALSE	1
2022-09-14	13:20:56	0.722914	3.21567	3.22494	765.044	FALSE	1
2022-09-14	13:20:56	0.726272	3.2306	3.22494	756.784	FALSE	1
2022-09-14	13:20:56	0.726934	3.23355	3.22494	768.277	FALSE	1
2022-09-14	13:20:56	0.72388	3.21996	3.22494	760.003	FALSE	1
2022-09-14	13:20:57	0.727646	3.23671	3.23066	771.514	FALSE	1
2022-09-14	13:20:57	0.724237	3.22155	3.23066	763.225	FALSE	1
2022-09-14	13:20:57	0.726679	3.23241	3.23066	774.746	FALSE	1
2022-09-14	13:20:57	0.726578	3.23196	3.23066	766.457	FALSE	1
2022-09-14	13:20:58	0.722456	3.21363	3.23755	777.96	FALSE	1
2022-09-14	13:20:58	0.73416	3.26569	3.23755	769.723	FALSE	1
2022-09-14	13:20:58	0.726883	3.23332	3.23755	781.193	FALSE	1
2022-09-14	13:20:59	0.725865	3.22879	3.23077	772.951	FALSE	1
2022-09-14	13:20:59	0.723219	3.21702	3.23077	784.41	FALSE	1
2022-09-14	13:20:59	0.731361	3.25324	3.23077	776.205	FALSE	1
2022-09-14	13:20:59	0.724796	3.22404	3.23077	787.634	FALSE	1
2022-09-14	13:21:00	0.726272	3.2306	3.22851	779.435	FALSE	1
2022-09-14	13:21:00	0.726679	3.23241	3.22851	790.867	FALSE	1
2022-09-14	13:21:00	0.731005	3.25166	3.22851	782.687	FALSE	1
2022-09-14	13:21:00	0.719249	3.19936	3.22851	794.066	FALSE	1
2022-09-14	13:21:01	0.729071	3.24305	3.23181	785.93	FALSE	1
2022-09-14	13:21:01	0.719656	3.20117	3.23181	797.267	FALSE	1
2022-09-14	13:21:01	0.730903	3.2512	3.23181	789.181	FALSE	1
2022-09-14	13:21:02	0.723372	3.2177	3.22478	800.485	FALSE	1
2022-09-14	13:21:02	0.722507	3.21386	3.22478	792.395	FALSE	1
2022-09-14	13:21:02	0.728613	3.24102	3.22478	803.726	FALSE	1
2022-09-14	13:21:02	0.725356	3.22653	3.22478	795.622	FALSE	1
2022-09-14	13:21:03	0.722862	3.21543	3.23751	806.942	FALSE	1
2022-09-14	13:21:03	0.724796	3.22404	3.23751	798.846	FALSE	1
2022-09-14	13:21:03	0.732583	3.25868	3.23751	810.2	FALSE	1
2022-09-14	13:21:03	0.731056	3.25188	3.23751	802.098	FALSE	1
2022-09-14	13:21:04	0.725611	3.22766	3.23134	813.428	FALSE	1
2022-09-14	13:21:04	0.72215	3.21227	3.23134	805.31	FALSE	1
2022-09-14	13:21:04	0.735026	3.26954	3.23134	816.697	FALSE	1
2022-09-14	13:21:04	0.722965	3.21589	3.23134	808.526	FALSE	1
2022-09-14	13:21:05	0.724796	3.22404	3.22449	819.921	FALSE	1
2022-09-14	13:21:05	0.726527	3.23174	3.22449	811.757	FALSE	1
2022-09-14	13:21:05	0.723372	3.2177	3.22449	823.139	FALSE	1
2022-09-14	13:21:06	0.728257	3.23943	3.22845	814.997	FALSE	1
2022-09-14	13:21:06	0.724847	3.22426	3.22845	826.363	FALSE	1
2022-09-14	13:21:06	0.728613	3.24102	3.22845	818.238	FALSE	1
2022-09-14	13:21:06	0.721437	3.2091	3.22845	829.573	FALSE	1
2022-09-14	13:21:07	0.724491	3.22268	3.23083	821.461	FALSE	1
2022-09-14	13:21:07	0.730343	3.24871	3.23083	832.821	FALSE	1
2022-09-14	13:21:07	0.723779	3.21951	3.23083	824.68	FALSE	1
2022-09-14	13:21:07	0.726679	3.23241	3.23083	836.054	FALSE	1
2022-09-14	13:21:08	0.72612	3.22993	3.22562	827.91	FALSE	1
2022-09-14	13:21:08	0.723575	3.21861	3.22562	839.272	FALSE	1
2022-09-14	13:21:08	0.725763	3.22834	3.22562	831.138	FALSE	1
2022-09-14	13:21:09	0.724847	3.22426	3.22761	842.497	FALSE	1
2022-09-14	13:21:09	0.720725	3.20593	3.22761	834.344	FALSE	1
2022-09-14	13:21:09	0.728766	3.2417	3.22761	845.738	FALSE	1
2022-09-14	13:21:09	0.728054	3.23853	3.22761	837.583	FALSE	1
2022-09-14	13:21:10	0.721488	3.20932	3.21612	848.948	FALSE	1
2022-09-14	13:21:10	0.723677	3.21906	3.21612	840.802	FALSE	1
2022-09-14	13:21:10	0.724186	3.22132	3.21612	852.169	FALSE	1
2022-09-14	13:21:10	0.72271	3.21476	3.21612	844.017	FALSE	1
2022-09-14	13:21:11	0.724186	3.22132	3.22981	855.39	FALSE	1
2022-09-14	13:21:11	0.72785	3.23762	3.22981	847.254	FALSE	1
2022-09-14	13:21:11	0.721539	3.20955	3.22981	858.6	FALSE	1
2022-09-14	13:21:11	0.730801	3.25075	3.22981	850.505	FALSE	1
2022-09-14	13:21:12	0.722049	3.21182	3.22478	861.812	FALSE	1
2022-09-14	13:21:12	0.724237	3.22155	3.22478	853.727	FALSE	1
2022-09-14	13:21:12	0.726781	3.23287	3.22478	865.044	FALSE	1
2022-09-14	13:21:12	0.726781	3.23287	3.22478	856.959	FALSE	1
2022-09-14	13:21:13	0.726883	3.23332	3.21861	868.278	FALSE	1
2022-09-14	13:21:13	0.723524	3.21838	3.21861	860.178	FALSE	1
2022-09-14	13:21:13	0.720318	3.20412	3.21861	871.482	FALSE	1
2022-09-14	13:21:14	0.723575	3.21861	3.22806	863.396	FALSE	1
2022-09-14	13:21:14	0.727239	3.2349	3.22806	874.717	FALSE	1
2022-09-14	13:21:14	0.72841	3.24011	3.22806	866.636	FALSE	1
2022-09-14	13:21:14	0.723575	3.21861	3.22806	877.935	FALSE	1
2022-09-14	13:21:15	0.720725	3.20593	1.8215	869.842	FALSE	1
2022-09-14	13:21:15	0.361947	1.61001	1.8215	879.545	FALSE	1
2022-09-14	13:21:15	0.259809	1.15568	1.8215	870.998	FALSE	1
2022-09-14	13:21:15	0.295484	1.31437	1.8215	880.86	FALSE	1
2022-09-14	13:21:16	0.072532	0.322637	-0.848552	871.321	FALSE	1
2022-09-14	13:21:16	-0.181412	-0.806957	-0.848552	880.86	FALSE	1
2022-09-14	13:21:16	-0.417493	-1.85709	-0.848552	871.321	FALSE	1
2022-09-14	13:21:16	-0.236679	-1.0528	-0.848552	880.86	FALSE	1
2022-09-14	13:21:17	-0.248638	-1.10599	-0.803937	871.321	FALSE	1
2022-09-14	13:21:17	-0.101666	-0.452231	-0.803937	880.86	FALSE	1
2022-09-14	13:21:17	-0.191895	-0.853587	-0.803937	871.321	FALSE	1
2022-09-14	13:21:18	-0.260648	-1.15941	-1.06174	880.86	FALSE	1
2022-09-14	13:21:18	-0.261819	-1.16462	-1.06174	871.321	FALSE	1
2022-09-14	13:21:18	-0.206959	-0.920595	-1.06174	880.86	FALSE	1
2022-09-14	13:21:18	-0.22533	-1.00231	-1.06174	871.321	FALSE	1
2022-09-14	13:21:19	-0.25276	-1.12433	-0.356533	880.86	FALSE	1
2022-09-14	13:21:19	-0.0454323	-0.202092	-0.356533	871.321	FALSE	1
2022-09-14	13:21:19	-0.0806486	-0.358741	-0.356533	880.86	FALSE	1
2022-09-14	13:21:19	0.0582317	0.259026	-0.356533	871.58	FALSE	1
2022-09-14	13:21:20	-0.156832	-0.69762	-0.509391	880.86	FALSE	1
2022-09-14	13:21:20	-0.167926	-0.746968	-0.509391	871.58	FALSE	1
2022-09-14	13:21:20	0.0287661	0.127957	-0.509391	880.988	FALSE	1
2022-09-14	13:21:20	-0.162073	-0.720933	-0.509391	871.58	FALSE	1
2022-09-14	13:21:21	0.261081	1.16134	0.371834	882.149	FALSE	1
2022-09-14	13:21:21	-0.180292	-0.801975	0.371834	871.58	FALSE	1
2022-09-14	13:21:21	0.169987	0.756136	0.371834	882.905	FALSE	1
2022-09-14	13:21:22	-0.0379005	-0.168589	0.0425579	871.58	FALSE	1
2022-09-14	13:21:22	-0.147163	-0.65461	0.0425579	882.905	FALSE	1
2022-09-14	13:21:22	0.233702	1.03955	0.0425579	872.619	FALSE	1
2022-09-14	13:21:22	-0.0103687	-0.0461221	0.0425579	882.905	FALSE	1
2022-09-14	13:21:23	0.383575	1.70622	1.72625	874.326	FALSE	1
2022-09-14	13:21:23	0.266985	1.1876	1.72625	884.093	FALSE	1
2022-09-14	13:21:23	0.184033	0.818616	1.72625	875.144	FALSE	1
2022-09-14	13:21:23	0.717723	3.19258	1.72625	887.285	FALSE	1
2022-09-14	13:21:24	0.708155	3.15002	2.85332	878.294	FALSE	1
2022-09-14	13:21:24	0.723473	3.21815	2.85332	890.504	FALSE	1
2022-09-14	13:21:24	0.492735	2.19178	2.85332	880.486	FALSE	1
2022-09-14	13:21:25	0.595941	2.65086	2.97373	893.154	FALSE	1
2022-09-14	13:21:25	0.67528	3.00378	2.97373	883.49	FALSE	1
2022-09-14	13:21:25	0.67696	3.01125	2.97373	896.166	FALSE	1
2022-09-14	13:21:25	0.725916	3.22902	2.97373	886.719	FALSE	1
2022-09-14	13:21:26	0.722201	3.21249	3.21482	899.378	FALSE	1
2022-09-14	13:21:26	0.726221	3.23038	3.21482	889.949	FALSE	1
2022-09-14	13:21:26	0.727545	3.23627	3.21482	902.614	FALSE	1
2022-09-14	13:21:26	0.714924	3.18012	3.21482	893.129	FALSE	1
2022-09-14	13:21:27	0.728206	3.23921	3.21827	905.854	FALSE	1
2022-09-14	13:21:27	0.719707	3.2014	3.21827	896.331	FALSE	1
2022-09-14	13:21:27	0.721895	3.21113	3.21827	909.065	FALSE	1
2022-09-14	13:21:27	0.724186	3.22132	3.21827	899.552	FALSE	1
2022-09-14	13:21:28	0.721692	3.21023	3.20751	912.275	FALSE	1
2022-09-14	13:21:28	0.715992	3.18488	3.20751	902.737	FALSE	1
2022-09-14	13:21:28	0.72556	3.22744	3.20751	915.502	FALSE	1
2022-09-14	13:21:29	0.727646	3.23671	3.19501	905.974	FALSE	1
2022-09-14	13:21:29	0.701285	3.11946	3.19501	918.622	FALSE	1
2022-09-14	13:21:29	0.726018	3.22947	3.19501	909.203	FALSE	1
2022-09-14	13:21:29	0.71813	3.19439	3.19501	921.816	FALSE	1
2022-09-14	13:21:30	0.724084	3.22087	3.21917	912.424	FALSE	1
2022-09-14	13:21:30	0.72103	3.20729	3.21917	925.024	FALSE	1
2022-09-14	13:21:30	0.721488	3.20932	3.21917	915.633	FALSE	1
2022-09-14	13:21:30	0.728206	3.23921	3.21917	928.263	FALSE	1
2022-09-14	13:21:31	0.735076	3.26977	3.24815	918.903	FALSE	1
2022-09-14	13:21:31	0.733448	3.26252	3.24815	931.525	FALSE	1
2022-09-14	13:21:31	0.728664	3.24124	3.24815	922.144	FALSE	1
2022-09-14	13:21:31	0.723677	3.21906	3.24815	934.744	FALSE	1
2022-09-14	13:21:32	0.732939	3.26026	3.22223	925.405	FALSE	1
2022-09-14	13:21:32	0.716603	3.18759	3.22223	937.932	FALSE	1
2022-09-14	13:21:32	0.723626	3.21883	3.22223	928.623	FALSE	1
2022-09-14	13:21:33	0.724135	3.2211	3.22568	941.153	FALSE	1
2022-09-14	13:21:33	0.723524	3.21838	3.22568	931.842	FALSE	1
2022-09-14	13:21:33	0.720623	3.20548	3.22568	944.359	FALSE	1
2022-09-14	13:21:33	0.732379	3.25777	3.22568	935.099	FALSE	1
2022-09-14	13:21:34	0.72271	3.21476	3.23485	947.573	FALSE	1
2022-09-14	13:21:34	0.725407	3.22676	3.23485	938.326	FALSE	1
2022-09-14	13:21:34	0.728766	3.2417	3.23485	950.815	FALSE	1
2022-09-14	13:21:34	0.732023	3.25618	3.23485	941.582	FALSE	1
2022-09-14	13:21:35	0.728206	3.23921	2.92466	954.054	FALSE	1
2022-09-14	13:21:35	0.727087	3.23423	2.92466	944.817	FALSE	1
2022-09-14	13:21:35	0.466171	2.07362	2.92466	956.128	FALSE	1
2022-09-14	13:21:35	0.708511	3.1516	2.92466	947.968	FALSE	1
2022-09-14	13:21:36	0.727596	3.23649	3.23287	959.364	FALSE	1
2022-09-14	13:21:36	0.728817	3.24192	3.23287	951.21	FALSE	1
2022-09-14	13:21:36	0.723931	3.22019	3.23287	962.584	FALSE	1
2022-09-14	13:21:37	0.703982	3.13145	2.90554	954.342	FALSE	1
2022-09-14	13:21:37	0.691921	3.0778	2.90554	965.662	FALSE	1
2022-09-14	13:21:37	0.488054	2.17096	2.90554	956.513	FALSE	1
2022-09-14	13:21:37	0.728817	3.24192	2.90554	968.904	FALSE	1
2022-09-14	13:21:38	0.529631	2.3559	2.94187	958.869	FALSE	1
2022-09-14	13:21:38	0.703219	3.12806	2.94187	972.032	FALSE	1
2022-09-14	13:21:38	0.685407	3.04883	2.94187	961.917	FALSE	1
2022-09-14	13:21:38	0.727188	3.23468	2.94187	975.267	FALSE	1
2022-09-14	13:21:39	0.730038	3.24736	3.23621	965.165	FALSE	1
2022-09-14	13:21:39	0.730496	3.24939	3.23621	978.516	FALSE	1
2022-09-14	13:21:39	0.722914	3.21567	3.23621	968.38	FALSE	1
2022-09-14	13:21:39	0.726679	3.23241	3.23621	981.749	FALSE	1
2022-09-14	13:21:40	0.731514	3.25392	3.23883	971.634	FALSE	1
2022-09-14	13:21:40	0.723677	3.21906	3.23883	984.968	FALSE	1
2022-09-14	13:21:40	0.729173	3.24351	3.23883	974.878	FALSE	1
2022-09-14	13:21:41	0.723677	3.21906	3.21674	988.187	FALSE	1
2022-09-14	13:21:41	0.722557	3.21408	3.21674	978.092	FALSE	1
2022-09-14	13:21:41	0.724135	3.2211	3.21674	991.408	FALSE	1
2022-09-14	13:21:41	0.722252	3.21272	3.21674	981.305	FALSE	1
2022-09-14	13:21:42	0.722812	3.21521	3.23241	994.623	FALSE	1
2022-09-14	13:21:42	0.725254	3.22607	3.23241	984.531	FALSE	1
2022-09-14	13:21:42	0.729071	3.24305	3.23241	997.866	FALSE	1
2022-09-14	13:21:42	0.72958	3.24532	3.23241	987.776	FALSE	1
2022-09-14	13:21:43	0.730751	3.25053	3.23151	1001.12	FALSE	1
2022-09-14	13:21:43	0.722659	3.21453	3.23151	990.991	FALSE	1
2022-09-14	13:21:43	0.726476	3.23151	3.23151	1004.35	FALSE	1
2022-09-14	13:21:43	0.726018	3.22947	3.23151	994.22	FALSE	1
2022-09-14	13:21:44	0.302303	1.3447	-11.2831	1005.69	FALSE	1
2022-09-14	13:21:44	0.295178	1.31301	-11.2831	995.533	FALSE	1
2022-09-14	13:21:44	-8.20716	-36.5071	-11.2831	1005.69	FALSE	1
2022-09-14	13:21:45	-0.787111	-3.50123	0.608602	995.533	FALSE	1
2022-09-14	13:21:45	0.322608	1.43502	0.608602	1007.13	FALSE	1
2022-09-14	13:21:45	0.282405	1.25619	0.608602	996.789	FALSE	1
2022-09-14	13:21:45	0.729377	3.24441	0.608602	1010.37	FALSE	1
2022-09-14	13:21:46	0.728919	3.24238	3.22795	1000.03	FALSE	1
2022-09-14	13:21:46	0.724542	3.22291	3.22795	1013.6	FALSE	1
2022-09-14	13:21:46	0.723372	3.2177	3.22795	1003.25	FALSE	1
2022-09-14	13:21:46	0.725865	3.22879	3.22795	1016.82	FALSE	1
2022-09-14	13:21:47	0.731463	3.25369	3.09597	1006.5	FALSE	1
2022-09-14	13:21:47	0.72383	3.21974	3.09597	1020.04	FALSE	1
2022-09-14	13:21:47	0.724593	3.22313	3.09597	1009.73	FALSE	1
2022-09-14	13:21:47	0.604135	2.68731	3.09597	1022.73	FALSE	1
2022-09-14	13:21:48	0.726476	3.23151	2.81906	1012.96	FALSE	1
2022-09-14	13:21:48	0.71869	3.19688	2.81906	1025.93	FALSE	1
2022-09-14	13:21:48	0.456094	2.0288	2.81906	1014.99	FALSE	1
2022-09-14	13:21:49	0.318741	1.41782	1.67057	1027.35	FALSE	1
2022-09-14	13:21:49	0.396247	1.76259	1.67057	1016.75	FALSE	1
2022-09-14	13:21:49	0.389631	1.73316	1.67057	1029.08	FALSE	1
2022-09-14	13:21:49	0.397621	1.7687	1.67057	1018.52	FALSE	1
2022-09-14	13:21:50	0.403219	1.7936	1.77804	1030.87	FALSE	1
2022-09-14	13:21:50	0.402608	1.79088	1.77804	1020.31	FALSE	1
2022-09-14	13:21:50	0.38785	1.72523	1.77804	1032.6	FALSE	1
2022-09-14	13:21:50	0.405204	1.80243	1.77804	1022.11	FALSE	1
2022-09-14	13:21:51	0.409173	1.82008	2.45747	1034.42	FALSE	1
2022-09-14	13:21:51	0.712023	3.16722	2.45747	1025.28	FALSE	1
2022-09-14	13:21:51	0.536196	2.38511	2.45747	1036.8	FALSE	1
2022-09-14	13:21:52	0.71589	3.18442	0.422413	1028.46	FALSE	1
2022-09-14	13:21:52	0.638944	2.84215	0.422413	1039.65	FALSE	1
2022-09-14	13:21:52	-1.02833	-4.57422	0.422413	1028.46	FALSE	1
2022-09-14	13:21:52	0.0533463	0.237295	0.422413	1039.88	FALSE	1
2022-09-14	13:21:53	0.40159	1.78635	1.91578	1030.25	FALSE	1
2022-09-14	13:21:53	0.432023	1.92172	1.91578	1041.8	FALSE	1
2022-09-14	13:21:53	0.45014	2.00231	1.91578	1032.25	FALSE	1
2022-09-14	13:21:53	0.438995	1.95274	1.91578	1043.76	FALSE	1
2022-09-14	13:21:54	0.411667	1.83118	1.83186	1034.08	FALSE	1
2022-09-14	13:21:54	0.399657	1.77775	1.83186	1045.53	FALSE	1
2022-09-14	13:21:54	0.40785	1.8142	1.83186	1035.9	FALSE	1
2022-09-14	13:21:54	0.428104	1.90429	1.83186	1047.44	FALSE	1
2022-09-14	13:21:55	0.412379	1.83434	1.84981	1037.73	FALSE	1
2022-09-14	13:21:55	0.404949	1.80129	1.84981	1049.24	FALSE	1
2022-09-14	13:21:55	0.430242	1.9138	1.84981	1039.64	FALSE	1
2022-09-14	13:21:56	0.421336	1.87419	1.82506	1051.11	FALSE	1
2022-09-14	13:21:56	0.398079	1.77074	1.82506	1041.42	FALSE	1
2022-09-14	13:21:56	0.403779	1.79609	1.82506	1052.91	FALSE	1
2022-09-14	13:21:56	0.417977	1.85925	1.82506	1043.27	FALSE	1
2022-09-14	13:21:57	0.34271	1.52444	1.56123	1054.44	FALSE	1
2022-09-14	13:21:57	0.364339	1.62065	1.56123	1044.9	FALSE	1
2022-09-14	13:21:57	0.415026	1.84612	1.56123	1056.28	FALSE	1
2022-09-14	13:21:57	0.281845	1.2537	1.56123	1046.15	FALSE	1
2022-09-14	13:21:58	0.215789	0.959873	0.794168	1057.24	FALSE	1
2022-09-14	13:21:58	0.161743	0.719465	0.794168	1046.87	FALSE	1
2022-09-14	13:21:58	0.196298	0.873173	0.794168	1058.11	FALSE	1
2022-09-14	13:21:58	0.140318	0.624163	0.794168	1047.49	FALSE	1
2022-09-14	13:21:59	0.0667305	0.296831	0.362931	1058.41	FALSE	1
2022-09-14	13:21:59	0.12556	0.558516	0.362931	1048.05	FALSE	1
2022-09-14	13:21:59	0.0524811	0.233446	0.362931	1058.64	FALSE	1
2022-09-14	13:22:00	0.339657	1.51086	1.87498	1049.56	FALSE	1
2022-09-14	13:22:00	0.384898	1.7121	1.87498	1060.36	FALSE	1
2022-09-14	13:22:00	0.437723	1.94708	1.87498	1051.51	FALSE	1
2022-09-14	13:22:00	0.523778	2.32987	1.87498	1062.69	FALSE	1
2022-09-14	13:22:01	0.334313	1.48709	1.96377	1053	FALSE	1
2022-09-14	13:22:01	0.424491	1.88822	1.96377	1064.57	FALSE	1
2022-09-14	13:22:01	0.523371	2.32806	1.96377	1055.32	FALSE	1
2022-09-14	13:22:01	0.483728	2.15172	1.96377	1066.73	FALSE	1
2022-09-14	13:22:02	0.611565	2.72036	1.98551	1058.04	FALSE	1
2022-09-14	13:22:02	0.400166	1.78002	1.98551	1068.51	FALSE	1
2022-09-14	13:22:02	0.452634	2.01341	1.98551	1060.06	FALSE	1
2022-09-14	13:22:02	0.321082	1.42824	1.98551	1069.93	FALSE	1
2022-09-14	13:22:03	0.304949	1.35647	1.41526	1061.41	FALSE	1
2022-09-14	13:22:03	0.448664	1.99575	1.41526	1071.93	FALSE	1
2022-09-14	13:22:03	0.200878	0.893546	1.41526	1062.31	FALSE	1
2022-09-14	13:22:04	0.234771	1.04431	1.20837	1072.97	FALSE	1
2022-09-14	13:22:04	0.417112	1.8554	1.20837	1064.16	FALSE	1
2022-09-14	13:22:04	0.232023	1.03208	1.20837	1074.01	FALSE	1
2022-09-14	13:22:04	0.20271	0.901695	1.20837	1065.07	FALSE	1
2022-09-14	13:22:05	0.305305	1.35806	0.933614	1075.36	FALSE	1
2022-09-14	13:22:05	0.161082	0.716525	0.933614	1065.78	FALSE	1
2022-09-14	13:22:05	0.267901	1.19168	0.933614	1076.56	FALSE	1
2022-09-14	13:22:05	0.105255	0.468195	0.933614	1066.25	FALSE	1
2022-09-14	13:22:06	0.177875	0.791224	0.126203	1077.35	FALSE	1
2022-09-14	13:22:06	0.0150257	0.0668373	0.126203	1066.32	FALSE	1
2022-09-14	13:22:06	-0.098562	-0.438423	0.126203	1077.35	FALSE	1
2022-09-14	13:22:06	0.0191478	0.0851732	0.126203	1066.4	FALSE	1
2022-09-14	13:22:07	-0.0296562	-0.131917	0.0704592	1077.35	FALSE	1
2022-09-14	13:22:07	0.0906491	0.403225	0.0704592	1066.81	FALSE	1
2022-09-14	13:22:07	-0.0134731	-0.059931	0.0704592	1077.35	FALSE	1
2022-09-14	13:22:08	0.112532	0.500565	1.05608	1067.31	FALSE	1
2022-09-14	13:22:08	0.199555	0.887661	1.05608	1078.24	FALSE	1
2022-09-14	13:22:08	0.359046	1.59711	1.05608	1068.9	FALSE	1
2022-09-14	13:22:08	0.278537	1.23899	1.05608	1079.47	FALSE	1
2022-09-14	13:22:09	0.262659	1.16836	1.1953	1070.07	FALSE	1
2022-09-14	13:22:09	0.33299	1.48121	1.1953	1080.96	FALSE	1
2022-09-14	13:22:09	0.191158	0.850309	1.1953	1070.92	FALSE	1
2022-09-14	13:22:09	0.288054	1.28132	1.1953	1082.24	FALSE	1
2022-09-14	13:22:10	0.15584	0.693207	1.31641	1071.61	FALSE	1
2022-09-14	13:22:10	0.373499	1.6614	1.31641	1083.9	FALSE	1
2022-09-14	13:22:10	0.251514	1.11878	1.31641	1072.73	FALSE	1
2022-09-14	13:22:10	0.402914	1.79224	1.31641	1085.69	FALSE	1
2022-09-14	13:22:11	0.27187	1.20933	1.33859	1073.94	FALSE	1
2022-09-14	13:22:11	0.286934	1.27634	1.33859	1086.97	FALSE	1
2022-09-14	13:22:11	0.343982	1.5301	1.33859	1075.47	FALSE	1
2022-09-14	13:22:12	0.299809	1.33361	1.40345	1088.3	FALSE	1
2022-09-14	13:22:12	0.427697	1.90248	1.40345	1077.38	FALSE	1
2022-09-14	13:22:12	0.299707	1.33316	1.40345	1089.63	FALSE	1
2022-09-14	13:22:12	0.234822	1.04454	1.40345	1078.42	FALSE	1
2022-09-14	13:22:13	0.354364	1.57628	1.30498	1091.21	FALSE	1
2022-09-14	13:22:13	0.206883	0.920257	1.30498	1079.34	FALSE	1
2022-09-14	13:22:13	0.305916	1.36078	1.30498	1092.57	FALSE	1
2022-09-14	13:22:13	0.306323	1.36259	1.30498	1080.7	FALSE	1
2022-09-14	13:22:14	0.317265	1.41126	1.66706	1093.98	FALSE	1
2022-09-14	13:22:14	0.42841	1.90565	1.66706	1082.61	FALSE	1
2022-09-14	13:22:14	0.378639	1.68426	1.66706	1095.67	FALSE	1
2022-09-14	13:22:15	0.456858	2.0322	1.75132	1084.64	FALSE	1
2022-09-14	13:22:15	0.334517	1.488	1.75132	1097.15	FALSE	1
2022-09-14	13:22:15	0.422252	1.87826	1.75132	1086.52	FALSE	1
2022-09-14	13:22:15	0.361234	1.60684	1.75132	1098.76	FALSE	1
2022-09-14	13:22:16	0.363982	1.61906	1.8494	1088.14	FALSE	1
2022-09-14	13:22:16	0.433957	1.93033	1.8494	1100.69	FALSE	1
2022-09-14	13:22:16	0.482608	2.14674	1.8494	1090.28	FALSE	1
2022-09-14	13:22:16	0.382506	1.70146	1.8494	1102.39	FALSE	1
2022-09-14	13:22:17	0.608257	2.70565	0.725408	1092.99	FALSE	1
2022-09-14	13:22:17	0.40215	1.78884	0.725408	1104.18	FALSE	1
2022-09-14	13:22:17	-0.960852	-4.27406	0.725408	1092.99	FALSE	1
2022-09-14	13:22:17	0.602761	2.6812	0.725408	1106.86	FALSE	1
2022-09-14	13:22:18	0.594771	2.64566	2.53474	1095.64	FALSE	1
2022-09-14	13:22:18	0.575942	2.56191	2.53474	1109.42	FALSE	1
2022-09-14	13:22:18	0.538791	2.39665	2.53474	1098.03	FALSE	1
2022-09-14	13:22:19	0.559453	2.48856	2.31787	1111.91	FALSE	1
2022-09-14	13:22:19	0.516552	2.29773	2.31787	1100.33	FALSE	1
2022-09-14	13:22:19	0.503371	2.23909	2.31787	1114.15	FALSE	1
2022-09-14	13:22:19	0.504949	2.24611	2.31787	1102.58	FALSE	1
2022-09-14	13:22:20	0.471514	2.09739	1.28064	1116.25	FALSE	1
2022-09-14	13:22:20	0.46388	2.06343	1.28064	1104.64	FALSE	1
2022-09-14	13:22:20	-0.0400888	-0.178323	1.28064	1116.25	FALSE	1
2022-09-14	13:22:20	0.256298	1.14006	1.28064	1105.78	FALSE	1
2022-09-14	13:22:21	0.281641	1.2528	1.3035	1117.5	FALSE	1
2022-09-14	13:22:21	0.287341	1.27815	1.3035	1107.06	FALSE	1
2022-09-14	13:22:21	0.293397	1.30509	1.3035	1118.81	FALSE	1
2022-09-14	13:22:21	0.309784	1.37798	1.3035	1108.44	FALSE	1
2022-09-14	13:22:22	0.04556	0.20266	2.22446	1119.01	FALSE	1
2022-09-14	13:22:22	0.727596	3.23649	2.22446	1111.67	FALSE	1
2022-09-14	13:22:22	0.727087	3.23423	2.22446	1122.24	FALSE	1
2022-09-14	13:22:23	0.730954	3.25143	3.23943	1114.92	FALSE	1
2022-09-14	13:22:23	0.726985	3.23377	3.23943	1125.48	FALSE	1
2022-09-14	13:22:23	0.728461	3.24034	3.23943	1118.16	FALSE	1
2022-09-14	13:22:23	0.726629	3.23219	3.23943	1128.71	FALSE	1
2022-09-14	13:22:24	0.720114	3.20321	3.22483	1121.37	FALSE	1
2022-09-14	13:22:24	0.726934	3.23355	3.22483	1131.94	FALSE	1
2022-09-14	13:22:24	0.723117	3.21657	3.22483	1124.58	FALSE	1
2022-09-14	13:22:24	0.729733	3.246	3.22483	1135.19	FALSE	1
2022-09-14	13:22:25	0.723473	3.21815	3.24164	1127.8	FALSE	1
2022-09-14	13:22:25	0.728206	3.23921	3.24164	1138.43	FALSE	1
2022-09-14	13:22:25	0.732837	3.25981	3.24164	1131.06	FALSE	1
2022-09-14	13:22:25	0.730496	3.24939	3.24164	1141.68	FALSE	1
2022-09-14	13:22:26	0.729835	3.24645	3.23619	1134.31	FALSE	1
2022-09-14	13:22:26	0.728461	3.24034	3.23619	1144.92	FALSE	1
2022-09-14	13:22:26	0.724288	3.22178	3.23619	1137.53	FALSE	1
2022-09-14	13:22:27	0.728155	3.23898	3.219	1148.16	FALSE	1
2022-09-14	13:22:27	0.721641	3.21	3.219	1140.74	FALSE	1
2022-09-14	13:22:27	0.722608	3.2143	3.219	1151.37	FALSE	1
2022-09-14	13:22:27	0.722252	3.21272	3.219	1143.95	FALSE	1
2022-09-14	13:22:28	0.727392	3.23559	3.24153	1154.61	FALSE	1
2022-09-14	13:22:28	0.726323	3.23083	3.24153	1147.18	FALSE	1
2022-09-14	13:22:28	0.725407	3.22676	3.24153	1157.83	FALSE	1
2022-09-14	13:22:28	0.735789	3.27294	3.24153	1150.46	FALSE	1
2022-09-14	13:22:29	0.72729	3.23513	3.24866	1161.07	FALSE	1
2022-09-14	13:22:29	0.734822	3.26864	3.24866	1153.73	FALSE	1
2022-09-14	13:22:29	0.727799	3.2374	3.24866	1164.31	FALSE	1
2022-09-14	13:22:29	0.731412	3.25347	3.24866	1156.98	FALSE	1
2022-09-14	13:22:30	0.727239	3.2349	3.23573	1167.54	FALSE	1
2022-09-14	13:22:30	0.727697	3.23694	3.23573	1160.22	FALSE	1
2022-09-14	13:22:30	0.727341	3.23536	3.23573	1170.78	FALSE	1
2022-09-14	13:22:31	0.724644	3.22336	3.24538	1163.44	FALSE	1
2022-09-14	13:22:31	0.733142	3.26116	3.24538	1174.04	FALSE	1
2022-09-14	13:22:31	0.727087	3.23423	3.24538	1166.67	FALSE	1
2022-09-14	13:22:31	0.733499	3.26275	3.24538	1177.3	FALSE	1
2022-09-14	13:22:32	0.734415	3.26682	3.24334	1169.94	FALSE	1
2022-09-14	13:22:32	0.732023	3.25618	3.24334	1180.56	FALSE	1
2022-09-14	13:22:32	0.726985	3.23377	3.24334	1173.17	FALSE	1
2022-09-14	13:22:32	0.723117	3.21657	3.24334	1183.77	FALSE	1
2022-09-14	13:22:33	0.723321	3.21748	3.22959	1176.39	FALSE	1
2022-09-14	13:22:33	0.72271	3.21476	3.22959	1186.99	FALSE	1
2022-09-14	13:22:33	0.728664	3.24124	3.22959	1179.63	FALSE	1
2022-09-14	13:22:33	0.729478	3.24486	3.22959	1190.23	FALSE	1
2022-09-14	13:22:34	0.720827	3.20638	3.21355	1182.84	FALSE	1
2022-09-14	13:22:34	0.725407	3.22676	3.21355	1193.46	FALSE	1
2022-09-14	13:22:34	0.721081	3.20751	3.21355	1186.05	FALSE	1
2022-09-14	13:22:35	0.725611	3.22766	3.21606	1196.69	FALSE	1
2022-09-14	13:22:35	0.728308	3.23966	3.21606	1189.29	FALSE	1
2022-09-14	13:22:35	0.726272	3.2306	3.21606	1199.92	FALSE	1
2022-09-14	13:22:35	0.711819	3.16631	3.21606	1192.45	FALSE	1
2022-09-14	13:22:36	0.698079	3.1052	3.21278	1203.02	FALSE	1
2022-09-14	13:22:36	0.736145	3.27452	3.21278	1195.73	FALSE	1
2022-09-14	13:22:36	0.730751	3.25053	3.21278	1206.27	FALSE	1
2022-09-14	13:22:36	0.724084	3.22087	3.21278	1198.95	FALSE	1
2022-09-14	13:22:37	0.72897	3.2426	3.24317	1209.52	FALSE	1
2022-09-14	13:22:37	0.726985	3.23377	3.24317	1202.18	FALSE	1
2022-09-14	13:22:37	0.727545	3.23627	3.24317	1212.75	FALSE	1
2022-09-14	13:22:37	0.732888	3.26003	3.24317	1205.44	FALSE	1
2022-09-14	13:22:38	0.725916	3.22902	3.22826	1215.98	FALSE	1
2022-09-14	13:22:38	0.724338	3.222	3.22826	1208.66	FALSE	1
2022-09-14	13:22:38	0.726985	3.23377	3.22826	1219.22	FALSE	1
2022-09-14	13:22:39	0.729326	3.24419	3.29659	1211.91	FALSE	1
2022-09-14	13:22:39	0.65126	2.89693	3.29659	1222.11	FALSE	1
2022-09-14	13:22:39	0.851463	3.78748	3.29659	1215.7	FALSE	1
2022-09-14	13:22:39	0.732379	3.25777	3.29659	1225.37	FALSE	1
2022-09-14	13:22:40	0.72556	3.22744	3.24979	1218.92	FALSE	1
2022-09-14	13:22:40	0.732583	3.25868	3.24979	1228.63	FALSE	1
2022-09-14	13:22:40	0.734109	3.26546	3.24979	1222.19	FALSE	1
2022-09-14	13:22:40	0.730089	3.24758	3.24979	1231.88	FALSE	1
2022-09-14	13:22:41	0.729071	3.24305	3.228	1225.43	FALSE	1
2022-09-14	13:22:41	0.723473	3.21815	3.228	1235.1	FALSE	1
2022-09-14	13:22:41	0.72215	3.21227	3.228	1228.64	FALSE	1
2022-09-14	13:22:41	0.728054	3.23853	3.228	1238.33	FALSE	1
2022-09-14	13:22:42	0.722049	3.21182	3.22563	1231.86	FALSE	1
2022-09-14	13:22:42	0.725356	3.22653	3.22563	1241.56	FALSE	1
2022-09-14	13:22:42	0.728054	3.23853	3.22563	1235.09	FALSE	1
2022-09-14	13:22:43	0.723422	3.21793	3.24073	1244.78	FALSE	1
2022-09-14	13:22:43	0.734109	3.26546	3.24073	1238.36	FALSE	1
2022-09-14	13:22:43	0.725712	3.22811	3.24073	1248.01	FALSE	1
2022-09-14	13:22:43	0.730954	3.25143	3.24073	1241.61	FALSE	1
2022-09-14	13:22:44	0.731565	3.25415	3.23162	1251.26	FALSE	1
2022-09-14	13:22:44	0.729886	3.24668	3.23162	1244.86	FALSE	1
2022-09-14	13:22:44	0.723422	3.21793	3.23162	1254.48	FALSE	1
2022-09-14	13:22:44	0.721132	3.20774	3.23162	1248.07	FALSE	1
2022-09-14	13:22:45	0.725458	3.22698	3.23272	1257.71	FALSE	1
2022-09-14	13:22:45	0.722456	3.21363	3.23272	1251.28	FALSE	1
2022-09-14	13:22:45	0.732328	3.25754	3.23272	1260.96	FALSE	1
2022-09-14	13:22:46	0.731514	3.25392	3.24356	1254.53	FALSE	1
2022-09-14	13:22:46	0.726781	3.23287	3.24356	1264.2	FALSE	1
2022-09-14	13:22:46	0.72897	3.2426	3.24356	1257.78	FALSE	1
2022-09-14	13:22:46	0.729478	3.24486	3.24356	1267.44	FALSE	1
2022-09-14	13:22:47	0.730751	3.25053	3.24877	1261.03	FALSE	1
2022-09-14	13:22:47	0.729835	3.24645	3.24877	1270.69	FALSE	1
2022-09-14	13:22:47	0.731158	3.25234	3.24877	1264.28	FALSE	1
2022-09-14	13:22:47	0.729682	3.24577	3.24877	1273.93	FALSE	1
2022-09-14	13:22:48	0.731972	3.25596	3.24413	1267.53	FALSE	1
2022-09-14	13:22:48	0.729428	3.24464	3.24413	1277.18	FALSE	1
2022-09-14	13:22:48	0.724593	3.22313	3.24413	1270.76	FALSE	1
2022-09-14	13:22:48	0.731259	3.25279	3.24413	1280.43	FALSE	1
2022-09-14	13:22:49	0.726018	3.22947	3.23143	1273.99	FALSE	1
2022-09-14	13:22:49	0.725407	3.22676	3.23143	1283.66	FALSE	1
2022-09-14	13:22:49	0.727952	3.23808	3.23143	1277.23	FALSE	1
2022-09-14	13:22:50	0.731107	3.25211	3.22591	1286.91	FALSE	1
2022-09-14	13:22:50	0.729936	3.2469	3.22591	1280.47	FALSE	1
2022-09-14	13:22:50	0.717977	3.19371	3.22591	1290.1	FALSE	1
2022-09-14	13:22:50	0.721845	3.21091	3.22591	1283.68	FALSE	1
2022-09-14	13:22:51	0.727036	3.234	3.2383	1293.34	FALSE	1
2022-09-14	13:22:51	0.727596	3.23649	3.2383	1286.92	FALSE	1
2022-09-14	13:22:51	0.731463	3.25369	3.2383	1296.59	FALSE	1
2022-09-14	13:22:51	0.725916	3.22902	3.2383	1290.15	FALSE	1
2022-09-14	13:22:52	0.728715	3.24147	3.22817	1299.83	FALSE	1
2022-09-14	13:22:52	0.722557	3.21408	3.22817	1293.36	FALSE	1
2022-09-14	13:22:52	0.725967	3.22925	3.22817	1303.06	FALSE	1
2022-09-14	13:22:52	0.725662	3.22789	3.22817	1296.59	FALSE	1
2022-09-14	13:22:53	0.727697	3.23694	3.24049	1306.3	FALSE	1
2022-09-14	13:22:53	0.727036	3.234	3.24049	1299.82	FALSE	1
2022-09-14	13:22:53	0.730751	3.25053	3.24049	1309.55	FALSE	1
2022-09-14	13:22:54	0.727697	3.23694	3.25268	1303.06	FALSE	1
2022-09-14	13:22:54	0.740573	3.29422	3.25268	1312.84	FALSE	1
2022-09-14	13:22:54	0.727646	3.23671	3.25268	1306.3	FALSE	1
2022-09-14	13:22:54	0.72902	3.24283	3.25268	1316.09	FALSE	1
2022-09-14	13:22:55	0.726679	3.23241	3.24	1309.53	FALSE	1
2022-09-14	13:22:55	0.724186	3.22132	3.24	1319.31	FALSE	1
2022-09-14	13:22:55	0.73416	3.26569	3.24	1312.8	FALSE	1
2022-09-14	13:22:55	0.728512	3.24057	3.24	1322.55	FALSE	1
2022-09-14	13:22:56	0.72841	3.24011	3.23162	1316.04	FALSE	1
2022-09-14	13:22:56	0.728359	3.23989	3.23162	1325.79	FALSE	1
2022-09-14	13:22:56	0.723372	3.2177	3.23162	1319.25	FALSE	1
2022-09-14	13:22:56	0.725865	3.22879	3.23162	1329.02	FALSE	1
2022-09-14	13:22:57	0.723728	3.21929	3.22683	1322.47	FALSE	1
2022-09-14	13:22:57	0.724186	3.22132	3.22683	1332.24	FALSE	1
2022-09-14	13:22:57	0.728359	3.23989	3.22683	1325.71	FALSE	1
2022-09-14	13:22:58	0.725356	3.22653	3.22511	1335.46	FALSE	1
2022-09-14	13:22:58	0.723219	3.21702	3.22511	1328.93	FALSE	1
2022-09-14	13:22:58	0.720776	3.20616	3.22511	1338.67	FALSE	1
2022-09-14	13:22:58	0.730801	3.25075	3.22511	1332.18	FALSE	1
2022-09-14	13:22:59	0.725814	3.22857	3.23462	1341.9	FALSE	1
2022-09-14	13:22:59	0.733092	3.26094	3.23462	1335.44	FALSE	1
2022-09-14	13:22:59	0.727748	3.23717	3.23462	1345.14	FALSE	1
2022-09-14	13:22:59	0.722049	3.21182	3.23462	1338.65	FALSE	1
2022-09-14	13:23:00	-0.102633	-0.456532	2.3275	1345.14	FALSE	1
2022-09-14	13:23:00	0.730852	3.25098	2.3275	1341.9	FALSE	1
2022-09-14	13:23:00	0.733906	3.26456	2.3275	1348.4	FALSE	1
2022-09-14	13:23:00	0.730852	3.25098	2.3275	1345.16	FALSE	1
2022-09-14	13:23:01	0.732634	3.2589	3.2509	1351.66	FALSE	1
2022-09-14	13:23:01	0.730903	3.2512	3.2509	1348.41	FALSE	1
2022-09-14	13:23:01	0.72897	3.2426	3.2509	1354.9	FALSE	1
2022-09-14	13:23:02	0.721081	3.20751	3.21606	1351.61	FALSE	1
2022-09-14	13:23:02	0.724288	3.22178	3.21606	1358.12	FALSE	1
2022-09-14	13:23:02	0.718333	3.19529	3.21606	1354.81	FALSE	1
2022-09-14	13:23:02	0.728308	3.23966	3.21606	1361.36	FALSE	1
2022-09-14	13:23:03	0.725	3.22494	6.42442	1358.03	FALSE	1
2022-09-14	13:23:03	0.710802	3.16179	6.42442	1364.53	FALSE	1
2022-09-14	13:23:03	1.23665	5.50087	6.42442	1363.54	FALSE	1
2022-09-14	13:23:03	3.10464	13.8101	6.42442	1378.34	1	2
2022-09-14	13:23:04	3.81197	16.9564	6.42883	1380.49	1	3
2022-09-14	13:23:04	1.10291	4.90596	6.42883	1383.24	FALSE	3
2022-09-14	13:23:04	0.547748	2.43649	6.42883	1382.93	FALSE	3
2022-09-14	13:23:04	0.318435	1.41646	6.42883	1384.66	FALSE	3
2022-09-14	13:23:05	0.490751	2.18296	-2.35255	1385.11	FALSE	3
2022-09-14	13:23:05	0.211921	0.942667	-2.35255	1385.6	FALSE	3
2022-09-14	13:23:05	-2.2893	-10.1833	-2.35255	1385.11	FALSE	3
2022-09-14	13:23:06	-4.11317	-18.2962	-17.8039	1385.6	FALSE	3
2022-09-14	13:23:06	-3.80553	-16.9278	-17.8039	1385.11	FALSE	3
2022-09-14	13:23:06	-4.13271	-18.3831	-17.8039	1385.6	FALSE	3
2022-09-14	13:23:06	-3.95861	-17.6087	-17.8039	1385.11	FALSE	3
2022-09-14	13:23:07	-4.27281	-19.0063	-18.9246	1385.6	FALSE	3
2022-09-14	13:23:07	-4.15306	-18.4736	-18.9246	1385.11	FALSE	3
2022-09-14	13:23:07	-4.25795	-18.9402	-18.9246	1385.6	FALSE	3
2022-09-14	13:23:07	-4.33398	-19.2784	-18.9246	1385.11	FALSE	3
2022-09-14	13:23:08	-4.24619	-18.8879	-20.0886	1385.6	FALSE	3
2022-09-14	13:23:08	-4.55189	-20.2477	-20.0886	1385.11	FALSE	3
2022-09-14	13:23:08	-4.44915	-19.7907	-20.0886	1385.6	FALSE	3
2022-09-14	13:23:08	-4.81729	-21.4283	-20.0886	1385.11	FALSE	3
2022-09-14	13:23:09	-4.93189	-21.938	-11.6156	1385.6	FALSE	3
2022-09-14	13:23:09	-4.96075	-22.0664	-11.6156	1385.11	FALSE	3
2022-09-14	13:23:09	2.05874	9.15769	-11.6156	1394.76	FALSE	3
2022-09-14	13:23:10	0.775789	3.45086	2.78477	1388.56	FALSE	3
2022-09-14	13:23:10	0.717926	3.19348	2.78477	1397.95	FALSE	3
2022-09-14	13:23:10	0.523932	2.33055	2.78477	1390.89	FALSE	3
2022-09-14	13:23:10	0.486527	2.16417	2.78477	1400.12	FALSE	3
2022-09-14	13:23:11	0.553906	2.46388	6.67275	1393.36	FALSE	3
2022-09-14	13:23:11	2.41431	10.7393	6.67275	1410.86	FALSE	3
2022-09-14	13:23:11	2.3851	10.6094	6.67275	1403.97	FALSE	3
2022-09-14	13:23:11	0.647086	2.87837	6.67275	1413.73	FALSE	3
2022-09-14	13:23:12	0.668206	2.97231	2.73545	1406.94	FALSE	3
2022-09-14	13:23:12	0.634415	2.822	2.73545	1416.56	FALSE	3
2022-09-14	13:23:12	0.542252	2.41205	2.73545	1409.35	FALSE	3

## Sheet: MsPotato_prong_202291413175 (3)
Date	Time	Lbs	Newtons	Total force x time		total steps > 13.345	**GoPro Fitting: 13:07
2022-09-14	13:18:12	0.182659	0.812504	0.812504	FALSE	0
2022-09-14	13:18:12	0.246272	1.09547	1.09547	FALSE	0
2022-09-14	13:18:12	0.174364	0.775606	1.58811	FALSE	0
2022-09-14	13:18:12	0.26785	1.19145	2.28692	FALSE	0
2022-09-14	13:18:13	0.233244	1.03752	2.62563	FALSE	0
2022-09-14	13:18:13	0.328308	1.46038	3.7473	FALSE	0
2022-09-14	13:18:13	0.23299	1.03639	3.66201	FALSE	0
2022-09-14	13:18:13	0.320471	1.42552	5.17282	FALSE	0
2022-09-14	13:18:14	-0.000292388	-0.0013006	3.66201	FALSE	0
2022-09-14	13:18:14	-0.087417	-0.388848	5.17282	FALSE	0
2022-09-14	13:18:14	-0.117392	-0.522183	3.66201	FALSE	0
2022-09-14	13:18:15	0.225814	1.00447	6.17728	FALSE	0
2022-09-14	13:18:15	0.15584	0.693207	4.35522	FALSE	0
2022-09-14	13:18:15	0.113804	0.506223	6.68351	FALSE	0
2022-09-14	13:18:15	-0.428689	-1.90689	4.35522	FALSE	0
2022-09-14	13:18:16	0.443066	1.97085	8.65435	FALSE	0
2022-09-14	13:18:16	0.240878	1.07147	5.42669	FALSE	0
2022-09-14	13:18:16	0.0379264	0.168704	8.82306	FALSE	0
2022-09-14	13:18:16	-0.14472	-0.643744	5.42669	FALSE	0
2022-09-14	13:18:17	-0.39444	-1.75455	8.82306	FALSE	0
2022-09-14	13:18:17	-0.392709	-1.74685	5.42669	FALSE	0
2022-09-14	13:18:17	-0.182328	-0.811031	8.82306	FALSE	0
2022-09-14	13:18:17	0.18612	0.827899	6.25459	FALSE	0
2022-09-14	13:18:18	0.346069	1.53938	10.3624	FALSE	0
2022-09-14	13:18:18	0.238944	1.06287	7.31746	FALSE	0
2022-09-14	13:18:18	0.395433	1.75897	12.1214	FALSE	0
2022-09-14	13:18:19	0.340522	1.51471	8.83217	FALSE	0
2022-09-14	13:18:19	0.494975	2.20175	14.3232	FALSE	0
2022-09-14	13:18:19	0.250344	1.11358	9.94575	FALSE	0
2022-09-14	13:18:19	0.440674	1.96021	16.2834	FALSE	0
2022-09-14	13:18:20	0.252328	1.12241	11.0682	FALSE	0
2022-09-14	13:18:20	0.384644	1.71097	17.9943	FALSE	0
2022-09-14	13:18:20	0.229784	1.02213	12.0903	FALSE	0
2022-09-14	13:18:20	0.486425	2.16372	20.158	FALSE	0
2022-09-14	13:18:21	0.292379	1.30056	13.3908	FALSE	0
2022-09-14	13:18:21	0.541641	2.40933	22.5674	FALSE	0
2022-09-14	13:18:21	1.19355	5.30915	18.7	FALSE	0
2022-09-14	13:18:22	1.48398	6.60104	29.1684	FALSE	0
2022-09-14	13:18:22	0.849478	3.77865	22.4786	FALSE	0
2022-09-14	13:18:22	0.658231	2.92794	32.0964	FALSE	0
2022-09-14	13:18:22	0.542557	2.4134	24.892	FALSE	0
2022-09-14	13:18:23	0.438079	1.94866	34.045	FALSE	0
2022-09-14	13:18:23	0.548664	2.44057	27.3326	FALSE	0
2022-09-14	13:18:23	0.291616	1.29717	35.3422	FALSE	0
2022-09-14	13:18:23	0.481997	2.14402	29.4766	FALSE	0
2022-09-14	13:18:24	0.356654	1.58647	36.9287	FALSE	0
2022-09-14	13:18:24	0.432125	1.92218	31.3988	FALSE	0
2022-09-14	13:18:24	0.488817	2.17436	39.103	FALSE	0
2022-09-14	13:18:24	0.39187	1.74312	33.1419	FALSE	0
2022-09-14	13:18:25	0.481387	2.14131	41.2443	FALSE	0
2022-09-14	13:18:25	0.247799	1.10226	34.2442	FALSE	0
2022-09-14	13:18:25	0.457774	2.03627	43.2806	FALSE	0
2022-09-14	13:18:26	0.29472	1.31097	35.5552	FALSE	0
2022-09-14	13:18:26	0.400776	1.78273	45.0633	FALSE	0
2022-09-14	13:18:26	0.328817	1.46264	37.0178	FALSE	0
2022-09-14	13:18:26	0.396247	1.76259	46.8259	FALSE	0
2022-09-14	13:18:27	0.415585	1.84861	38.8664	FALSE	0
2022-09-14	13:18:27	0.351412	1.56315	48.3891	FALSE	0
2022-09-14	13:18:27	0.404898	1.80107	40.6675	FALSE	0
2022-09-14	13:18:27	0.301947	1.34312	49.7322	FALSE	0
2022-09-14	13:18:28	0.515738	2.29411	42.9616	FALSE	0
2022-09-14	13:18:28	0.188919	0.840349	50.5725	FALSE	0
2022-09-14	13:18:28	0.516807	2.29886	45.2604	FALSE	0
2022-09-14	13:18:28	0.397061	1.76621	52.3387	FALSE	0
2022-09-14	13:18:29	0.430649	1.91561	47.1761	FALSE	0
2022-09-14	13:18:29	0.306476	1.36327	53.702	FALSE	0
2022-09-14	13:18:29	0.324491	1.4434	48.6195	FALSE	0
2022-09-14	13:18:30	0.372481	1.65687	55.3589	FALSE	0
2022-09-14	13:18:30	0.377926	1.68109	50.3005	FALSE	0
2022-09-14	13:18:30	0.376298	1.67385	57.0327	FALSE	0
2022-09-14	13:18:30	0.308613	1.37277	51.6733	FALSE	0
2022-09-14	13:18:31	0.431311	1.91856	58.9513	FALSE	0
2022-09-14	13:18:31	0.277265	1.23333	52.9066	FALSE	0
2022-09-14	13:18:31	0.445713	1.98262	60.9339	FALSE	0
2022-09-14	13:18:31	0.185611	0.825635	53.7323	FALSE	0
2022-09-14	13:18:32	0.284288	1.26457	62.1985	FALSE	0
2022-09-14	13:18:32	-0.121157	-0.538931	53.7323	FALSE	0
2022-09-14	13:18:32	-0.341768	-1.52025	62.1985	FALSE	0
2022-09-14	13:18:32	0.219708	0.977305	54.7096	FALSE	0
2022-09-14	13:18:33	0.990343	4.40524	66.6037	FALSE	0
2022-09-14	13:18:33	2.58286	11.4891	66.1987	FALSE	0
2022-09-14	13:18:33	3.41273	15.1805	81.7842	1	1
2022-09-14	13:18:34	1.89788	8.44215	74.6408	FALSE	1
2022-09-14	13:18:34	1.22072	5.43001	87.2142	FALSE	1
2022-09-14	13:18:34	1.08006	4.80432	79.4451	FALSE	1
2022-09-14	13:18:34	0.557824	2.48131	89.6955	FALSE	1
2022-09-14	13:18:35	0.476959	2.12161	81.5667	FALSE	1
2022-09-14	13:18:35	0.445102	1.9799	91.6754	FALSE	1
2022-09-14	13:18:35	0.307392	1.36734	82.9341	FALSE	1
2022-09-14	13:18:35	0.447545	1.99077	93.6662	FALSE	1
2022-09-14	13:18:36	0.385305	1.71391	84.648	FALSE	1
2022-09-14	13:18:36	0.49187	2.18794	95.8541	FALSE	1
2022-09-14	13:18:36	0.376501	1.67475	86.3228	FALSE	1
2022-09-14	13:18:36	0.411412	1.83004	97.6842	FALSE	1
2022-09-14	13:18:37	0.406985	1.81035	88.1331	FALSE	1
2022-09-14	13:18:37	0.420725	1.87147	99.5557	FALSE	1
2022-09-14	13:18:37	0.445255	1.98058	90.1137	FALSE	1
2022-09-14	13:18:38	0.494822	2.20107	101.757	FALSE	1
2022-09-14	13:18:38	0.531921	2.36609	92.4798	FALSE	1
2022-09-14	13:18:38	0.694008	3.08709	104.844	FALSE	1
2022-09-14	13:18:38	1.491	6.63227	99.112	FALSE	1
2022-09-14	13:18:39	1.44785	6.44033	111.284	FALSE	1
2022-09-14	13:18:39	1.11238	4.94809	104.06	FALSE	1
2022-09-14	13:18:39	0.692125	3.07871	114.363	FALSE	1
2022-09-14	13:18:39	0.499656	2.22257	106.283	FALSE	1
2022-09-14	13:18:40	0.471769	2.09852	116.461	FALSE	1
2022-09-14	13:18:40	0.382303	1.70056	107.983	FALSE	1
2022-09-14	13:18:40	0.379657	1.68879	118.15	FALSE	1
2022-09-14	13:18:41	0.415636	1.84883	109.832	FALSE	1
2022-09-14	13:18:41	0.38841	1.72773	119.878	FALSE	1
2022-09-14	13:18:41	0.383473	1.70576	111.538	FALSE	1
2022-09-14	13:18:41	0.491209	2.185	122.063	FALSE	1
2022-09-14	13:18:42	0.283473	1.26094	112.799	FALSE	1
2022-09-14	13:18:42	0.501387	2.23027	124.293	FALSE	1
2022-09-14	13:18:42	0.290903	1.29399	114.093	FALSE	1
2022-09-14	13:18:42	0.507697	2.25834	126.551	FALSE	1
2022-09-14	13:18:43	0.33416	1.48641	115.579	FALSE	1
2022-09-14	13:18:43	0.561488	2.49761	129.049	FALSE	1
2022-09-14	13:18:43	0.446629	1.9867	117.566	FALSE	1
2022-09-14	13:18:43	0.685916	3.05109	132.1	FALSE	1
2022-09-14	13:18:44	0.509529	2.26649	119.832	FALSE	1
2022-09-14	13:18:44	0.678486	3.01804	135.118	FALSE	1
2022-09-14	13:18:44	0.516043	2.29546	122.128	FALSE	1
2022-09-14	13:18:45	0.537824	2.39235	137.511	FALSE	1
2022-09-14	13:18:45	0.610293	2.71471	124.843	FALSE	1
2022-09-14	13:18:45	0.654415	2.91097	140.422	FALSE	1
2022-09-14	13:18:45	0.482507	2.14629	126.989	FALSE	1
2022-09-14	13:18:46	0.561183	2.49625	142.918	FALSE	1
2022-09-14	13:18:46	0.623931	2.77537	129.764	FALSE	1
2022-09-14	13:18:46	0.0946694	0.421108	143.339	FALSE	1
2022-09-14	13:18:46	-0.115458	-0.51358	129.764	FALSE	1
2022-09-14	13:18:47	0.00825724	0.0367299	143.376	FALSE	1
2022-09-14	13:18:47	0.252837	1.12467	130.889	FALSE	1
2022-09-14	13:18:47	0.186883	0.831293	144.207	FALSE	1
2022-09-14	13:18:47	0.164949	0.733726	131.623	FALSE	1
2022-09-14	13:18:48	0.129886	0.577759	144.785	FALSE	1
2022-09-14	13:18:48	0.268919	1.19621	132.819	FALSE	1
2022-09-14	13:18:48	0.312277	1.38907	146.174	FALSE	1
2022-09-14	13:18:49	0.257774	1.14663	133.965	FALSE	1
2022-09-14	13:18:49	0.275687	1.22631	147.4	FALSE	1
2022-09-14	13:18:49	0.220725	0.981829	134.947	FALSE	1
2022-09-14	13:18:49	0.333244	1.48234	148.882	FALSE	1
2022-09-14	13:18:50	0.314415	1.39858	136.346	FALSE	1
2022-09-14	13:18:50	0.365814	1.62721	150.51	FALSE	1
2022-09-14	13:18:50	0.455382	2.02563	138.371	FALSE	1
2022-09-14	13:18:50	0.45187	2.01001	152.52	FALSE	1
2022-09-14	13:18:51	0.704593	3.13417	141.506	FALSE	1
2022-09-14	13:18:51	0.395992	1.76145	154.281	FALSE	1
2022-09-14	13:18:51	0.429377	1.90995	143.416	FALSE	1
2022-09-14	13:18:51	0.377926	1.68109	155.962	FALSE	1
2022-09-14	13:18:52	0.669733	2.97911	146.395	FALSE	1
2022-09-14	13:18:52	1.20933	5.37934	161.342	FALSE	1
2022-09-14	13:18:52	1.17212	5.21382	151.609	FALSE	1
2022-09-14	13:18:53	0.789122	3.51017	164.852	FALSE	1
2022-09-14	13:18:53	0.879046	3.91017	155.519	FALSE	1
2022-09-14	13:18:53	1.02357	4.55304	169.405	FALSE	1
2022-09-14	13:18:53	0.724796	3.22404	158.743	FALSE	1
2022-09-14	13:18:54	0.620878	2.76179	172.167	FALSE	1
2022-09-14	13:18:54	0.67472	3.00129	161.744	FALSE	1
2022-09-14	13:18:54	0.597926	2.65969	174.826	FALSE	1
2022-09-14	13:18:54	0.670242	2.98137	164.725	FALSE	1
2022-09-14	13:18:55	1.06846	4.75272	179.579	FALSE	1
2022-09-14	13:18:55	1.13268	5.03839	169.764	FALSE	1
2022-09-14	13:18:55	1.43207	6.37013	185.949	FALSE	1
2022-09-14	13:18:55	1.42917	6.35723	176.121	FALSE	1
2022-09-14	13:18:56	1.07192	4.76811	190.717	FALSE	1
2022-09-14	13:18:56	1.04856	4.6642	180.785	FALSE	1
2022-09-14	13:18:56	0.889478	3.95658	194.674	FALSE	1
2022-09-14	13:18:57	0.888562	3.9525	184.738	FALSE	1
2022-09-14	13:18:57	0.773601	3.44113	198.115	FALSE	1
2022-09-14	13:18:57	0.465051	2.06864	186.806	FALSE	1
2022-09-14	13:18:57	0.538995	2.39756	200.512	FALSE	1
2022-09-14	13:18:58	0.363982	1.61906	188.425	FALSE	1
2022-09-14	13:18:58	0.358842	1.5962	202.109	FALSE	1
2022-09-14	13:18:58	0.416552	1.85291	190.278	FALSE	1
2022-09-14	13:18:58	0.462049	2.05529	204.164	FALSE	1
2022-09-14	13:18:59	0.444746	1.97832	192.257	FALSE	1
2022-09-14	13:18:59	0.419708	1.86695	206.031	FALSE	1
2022-09-14	13:18:59	0.386222	1.71799	193.975	FALSE	1
2022-09-14	13:19:00	0.384288	1.70939	207.74	FALSE	1
2022-09-14	13:19:00	0.390852	1.73859	195.713	FALSE	1
2022-09-14	13:19:00	0.893957	3.9765	211.717	FALSE	1
2022-09-14	13:19:00	1.0763	4.7876	200.501	FALSE	1
2022-09-14	13:19:01	0.724593	3.22313	214.94	FALSE	1
2022-09-14	13:19:01	0.72042	3.20457	203.705	FALSE	1
2022-09-14	13:19:01	0.725051	3.22517	218.165	FALSE	1
2022-09-14	13:19:01	0.714669	3.17899	206.884	FALSE	1
2022-09-14	13:19:02	0.722507	3.21386	221.379	FALSE	1
2022-09-14	13:19:02	0.723168	3.2168	210.101	FALSE	1
2022-09-14	13:19:02	0.72383	3.21974	224.599	FALSE	1
2022-09-14	13:19:02	0.718282	3.19506	213.296	FALSE	1
2022-09-14	13:19:03	0.729631	3.24554	227.844	FALSE	1
2022-09-14	13:19:03	0.722099	3.21204	216.508	FALSE	1
2022-09-14	13:19:03	0.731412	3.25347	231.098	FALSE	1
2022-09-14	13:19:04	0.723066	3.21634	219.725	FALSE	1
2022-09-14	13:19:04	0.71813	3.19439	234.292	FALSE	1
2022-09-14	13:19:04	0.717774	3.1928	222.917	FALSE	1
2022-09-14	13:19:04	0.72444	3.22245	237.515	FALSE	1
2022-09-14	13:19:05	0.728257	3.23943	226.157	FALSE	1
2022-09-14	13:19:05	0.726221	3.23038	240.745	FALSE	1
2022-09-14	13:19:05	0.722507	3.21386	229.371	FALSE	1
2022-09-14	13:19:05	0.723982	3.22042	243.965	FALSE	1
2022-09-14	13:19:06	0.727036	3.234	232.605	FALSE	1
2022-09-14	13:19:06	0.726476	3.23151	247.197	FALSE	1
2022-09-14	13:19:06	0.719809	3.20185	235.807	FALSE	1
2022-09-14	13:19:06	0.726272	3.2306	250.427	FALSE	1
2022-09-14	13:19:07	0.723117	3.21657	239.023	FALSE	1
2022-09-14	13:19:07	0.729122	3.24328	253.671	FALSE	1
2022-09-14	13:19:07	0.721743	3.21046	242.234	FALSE	1
2022-09-14	13:19:08	0.720521	3.20502	256.876	FALSE	1
2022-09-14	13:19:08	0.724084	3.22087	245.454	FALSE	1
2022-09-14	13:19:08	0.727494	3.23604	260.112	FALSE	1
2022-09-14	13:19:08	0.72444	3.22245	248.677	FALSE	1
2022-09-14	13:19:09	0.722303	3.21295	263.325	FALSE	1
2022-09-14	13:19:09	0.721132	3.20774	251.885	FALSE	1
2022-09-14	13:19:09	0.72673	3.23264	266.557	FALSE	1
2022-09-14	13:19:09	0.724033	3.22064	255.105	FALSE	1
2022-09-14	13:19:10	0.718282	3.19506	269.752	FALSE	1
2022-09-14	13:19:10	0.720878	3.20661	258.312	FALSE	1
2022-09-14	13:19:10	0.718791	3.19733	272.95	FALSE	1
2022-09-14	13:19:10	0.72327	3.21725	261.529	FALSE	1
2022-09-14	13:19:11	0.725509	3.22721	276.177	FALSE	1
2022-09-14	13:19:11	0.719962	3.20253	264.732	FALSE	1
2022-09-14	13:19:11	0.71701	3.1894	279.366	FALSE	1
2022-09-14	13:19:12	0.720572	3.20525	267.937	FALSE	1
2022-09-14	13:19:12	0.719198	3.19914	282.566	FALSE	1
2022-09-14	13:19:12	0.717316	3.19077	271.128	FALSE	1
2022-09-14	13:19:12	0.718486	3.19597	285.761	FALSE	1
2022-09-14	13:19:13	0.723982	3.22042	274.348	FALSE	1
2022-09-14	13:19:13	0.722099	3.21204	288.974	FALSE	1
2022-09-14	13:19:13	0.725712	3.22811	277.576	FALSE	1
2022-09-14	13:19:13	0.720471	3.2048	292.178	FALSE	1
2022-09-14	13:19:14	0.725407	3.22676	280.803	FALSE	1
2022-09-14	13:19:14	0.716247	3.18601	295.364	FALSE	1
2022-09-14	13:19:14	0.722456	3.21363	284.017	FALSE	1
2022-09-14	13:19:14	0.722608	3.2143	298.579	FALSE	1
2022-09-14	13:19:15	0.721641	3.21	287.227	FALSE	1
2022-09-14	13:19:15	0.72617	3.23015	301.809	FALSE	1
2022-09-14	13:19:15	0.719962	3.20253	290.429	FALSE	1
2022-09-14	13:19:16	0.720623	3.20548	305.014	FALSE	1
2022-09-14	13:19:16	0.720064	3.20299	293.632	FALSE	1
2022-09-14	13:19:16	0.728054	3.23853	308.253	FALSE	1
2022-09-14	13:19:16	0.721336	3.20865	296.841	FALSE	1
2022-09-14	13:19:17	0.724186	3.22132	311.474	FALSE	1
2022-09-14	13:19:17	0.72785	3.23762	300.078	FALSE	1
2022-09-14	13:19:17	0.721132	3.20774	314.682	FALSE	1
2022-09-14	13:19:17	0.721794	3.21068	303.289	FALSE	1
2022-09-14	13:19:18	0.71584	3.1842	317.866	FALSE	1
2022-09-14	13:19:18	0.725865	3.22879	306.518	FALSE	1
2022-09-14	13:19:18	0.720114	3.20321	321.069	FALSE	1
2022-09-14	13:19:19	0.730445	3.24917	309.767	FALSE	1
2022-09-14	13:19:19	0.725662	3.22789	324.297	FALSE	1
2022-09-14	13:19:19	0.731361	3.25324	313.02	FALSE	1
2022-09-14	13:19:19	0.722099	3.21204	327.509	FALSE	1
2022-09-14	13:19:20	0.722862	3.21543	316.236	FALSE	1
2022-09-14	13:19:20	0.725967	3.22925	330.738	FALSE	1
2022-09-14	13:19:20	0.727494	3.23604	319.472	FALSE	1
2022-09-14	13:19:20	0.724542	3.22291	333.961	FALSE	1
2022-09-14	13:19:21	0.719758	3.20163	322.673	FALSE	1
2022-09-14	13:19:21	0.726069	3.2297	337.191	FALSE	1
2022-09-14	13:19:21	0.71869	3.19688	325.87	FALSE	1
2022-09-14	13:19:22	0.717366	3.19099	340.382	FALSE	1
2022-09-14	13:19:22	0.731616	3.25437	329.125	FALSE	1
2022-09-14	13:19:22	0.724237	3.22155	343.604	FALSE	1
2022-09-14	13:19:22	0.720623	3.20548	332.33	FALSE	1
2022-09-14	13:19:23	0.728155	3.23898	346.843	FALSE	1
2022-09-14	13:19:23	0.72902	3.24283	335.573	FALSE	1
2022-09-14	13:19:23	0.716908	3.18895	350.032	FALSE	1
2022-09-14	13:19:23	0.721081	3.20751	338.78	FALSE	1
2022-09-14	13:19:24	0.721183	3.20797	353.239	FALSE	1
2022-09-14	13:19:24	0.72271	3.21476	341.995	FALSE	1
2022-09-14	13:19:24	0.72388	3.21996	356.459	FALSE	1
2022-09-14	13:19:24	0.723524	3.21838	345.214	FALSE	1
2022-09-14	13:19:25	0.721081	3.20751	359.667	FALSE	1
2022-09-14	13:19:25	0.72785	3.23762	348.451	FALSE	1
2022-09-14	13:19:25	0.718181	3.19461	362.862	FALSE	1
2022-09-14	13:19:25	0.719046	3.19846	351.65	FALSE	1
2022-09-14	13:19:26	0.71584	3.1842	366.046	FALSE	1
2022-09-14	13:19:26	0.721946	3.21136	354.861	FALSE	1
2022-09-14	13:19:26	0.726476	3.23151	369.277	FALSE	1
2022-09-14	13:19:27	0.72388	3.21996	358.081	FALSE	1
2022-09-14	13:19:27	0.718944	3.19801	372.475	FALSE	1
2022-09-14	13:19:27	0.726985	3.23377	361.315	FALSE	1
2022-09-14	13:19:27	0.724186	3.22132	375.697	FALSE	1
2022-09-14	13:19:28	0.721692	3.21023	364.525	FALSE	1
2022-09-14	13:19:28	0.725407	3.22676	378.923	FALSE	1
2022-09-14	13:19:28	0.721285	3.20842	367.733	FALSE	1
2022-09-14	13:19:28	0.72729	3.23513	382.158	FALSE	1
2022-09-14	13:19:29	0.722507	3.21386	370.947	FALSE	1
2022-09-14	13:19:29	0.725916	3.22902	385.388	FALSE	1
2022-09-14	13:19:29	0.721591	3.20978	374.157	FALSE	1
2022-09-14	13:19:29	0.727443	3.23581	388.623	FALSE	1
2022-09-14	13:19:30	0.72556	3.22744	377.385	FALSE	1
2022-09-14	13:19:30	0.723321	3.21748	391.841	FALSE	1
2022-09-14	13:19:30	0.724847	3.22426	380.609	FALSE	1
2022-09-14	13:19:31	0.717112	3.18986	395.031	FALSE	1
2022-09-14	13:19:31	0.72612	3.22993	383.839	FALSE	1
2022-09-14	13:19:31	0.716908	3.18895	398.22	FALSE	1
2022-09-14	13:19:31	0.717112	3.18986	387.029	FALSE	1
2022-09-14	13:19:32	0.714669	3.17899	401.399	FALSE	1
2022-09-14	13:19:32	0.722049	3.21182	390.24	FALSE	1
2022-09-14	13:19:32	0.723168	3.2168	404.615	FALSE	1
2022-09-14	13:19:32	0.726578	3.23196	393.472	FALSE	1
2022-09-14	13:19:33	0.722507	3.21386	407.829	FALSE	1
2022-09-14	13:19:33	0.722862	3.21543	396.688	FALSE	1
2022-09-14	13:19:33	0.721285	3.20842	411.038	FALSE	1
2022-09-14	13:19:33	0.725254	3.22607	399.914	FALSE	1
2022-09-14	13:19:34	0.720979	3.20706	414.245	FALSE	1
2022-09-14	13:19:34	0.729886	3.24668	403.161	FALSE	1
2022-09-14	13:19:34	0.725204	3.22585	417.471	FALSE	1
2022-09-14	13:19:35	0.721488	3.20932	406.37	FALSE	1
2022-09-14	13:19:35	0.716756	3.18827	420.659	FALSE	1
2022-09-14	13:19:35	0.726476	3.23151	409.601	FALSE	1
2022-09-14	13:19:35	0.724084	3.22087	423.88	FALSE	1
2022-09-14	13:19:36	0.726374	3.23106	412.832	FALSE	1
2022-09-14	13:19:36	0.721132	3.20774	427.087	FALSE	1
2022-09-14	13:19:36	0.718028	3.19393	416.026	FALSE	1
2022-09-14	13:19:36	0.724033	3.22064	430.308	FALSE	1
2022-09-14	13:19:37	0.71813	3.19439	419.221	FALSE	1
2022-09-14	13:19:37	0.719097	3.19869	433.507	FALSE	1
2022-09-14	13:19:37	0.71757	3.19189	422.413	FALSE	1
2022-09-14	13:19:37	0.71813	3.19439	436.701	FALSE	1
2022-09-14	13:19:38	0.723066	3.21634	425.629	FALSE	1
2022-09-14	13:19:38	0.721132	3.20774	439.909	FALSE	1
2022-09-14	13:19:38	0.721437	3.2091	428.838	FALSE	1
2022-09-14	13:19:39	0.717824	3.19302	443.102	FALSE	1
2022-09-14	13:19:39	0.718791	3.19733	432.035	FALSE	1
2022-09-14	13:19:39	0.723066	3.21634	446.318	FALSE	1
2022-09-14	13:19:39	0.719911	3.20231	435.238	FALSE	1
2022-09-14	13:19:40	0.719504	3.2005	449.519	FALSE	1
2022-09-14	13:19:40	0.716501	3.18714	438.425	FALSE	1
2022-09-14	13:19:40	0.72444	3.22245	452.741	FALSE	1
2022-09-14	13:19:40	0.724695	3.22359	441.648	FALSE	1
2022-09-14	13:19:41	0.724237	3.22155	455.963	FALSE	1
2022-09-14	13:19:41	0.724389	3.22223	444.871	FALSE	1
2022-09-14	13:19:41	0.717672	3.19235	459.155	FALSE	1
2022-09-14	13:19:42	0.715585	3.18307	448.054	FALSE	1
2022-09-14	13:19:42	0.723117	3.21657	462.372	FALSE	1
2022-09-14	13:19:42	0.724237	3.22155	451.275	FALSE	1
2022-09-14	13:19:42	0.718944	3.19801	465.57	FALSE	1
2022-09-14	13:19:43	0.722507	3.21386	454.489	FALSE	1
2022-09-14	13:19:43	0.721285	3.20842	468.778	FALSE	1
2022-09-14	13:19:43	0.71701	3.1894	457.679	FALSE	1
2022-09-14	13:19:43	0.73014	3.24781	472.026	FALSE	1
2022-09-14	13:19:44	0.720572	3.20525	460.884	FALSE	1
2022-09-14	13:19:44	0.720216	3.20366	475.23	FALSE	1
2022-09-14	13:19:44	0.718435	3.19574	464.08	FALSE	1
2022-09-14	13:19:44	0.724389	3.22223	478.452	FALSE	1
2022-09-14	13:19:45	0.715941	3.18465	467.264	FALSE	1
2022-09-14	13:19:45	0.691972	3.07803	481.53	FALSE	1
2022-09-14	13:19:45	0.726374	3.23106	470.495	FALSE	1
2022-09-14	13:19:46	0.71986	3.20208	484.732	FALSE	1
2022-09-14	13:19:46	0.727901	3.23785	473.733	FALSE	1
2022-09-14	13:19:46	0.726425	3.23128	487.963	FALSE	1
2022-09-14	13:19:46	0.721997	3.21159	476.945	FALSE	1
2022-09-14	13:19:47	0.726374	3.23106	491.194	FALSE	1
2022-09-14	13:19:47	0.723473	3.21815	480.163	FALSE	1
2022-09-14	13:19:47	0.719656	3.20117	494.395	FALSE	1
2022-09-14	13:19:47	0.726883	3.23332	483.396	FALSE	1
2022-09-14	13:19:48	0.728003	3.2383	497.634	FALSE	1
2022-09-14	13:19:48	0.720878	3.20661	486.603	FALSE	1
2022-09-14	13:19:48	0.722812	3.21521	500.849	FALSE	1
2022-09-14	13:19:48	0.725204	3.22585	489.829	FALSE	1
2022-09-14	13:19:49	0.720674	3.2057	504.055	FALSE	1
2022-09-14	13:19:49	0.722557	3.21408	493.043	FALSE	1
2022-09-14	13:19:49	0.709478	3.1559	507.211	FALSE	1
2022-09-14	13:19:50	0.725407	3.22676	496.269	FALSE	1
2022-09-14	13:19:50	0.725712	3.22811	510.439	FALSE	1
2022-09-14	13:19:50	0.721234	3.20819	499.478	FALSE	1
2022-09-14	13:19:50	0.725153	3.22563	513.664	FALSE	1
2022-09-14	13:19:51	0.72103	3.20729	502.685	FALSE	1
2022-09-14	13:19:51	0.724389	3.22223	516.887	FALSE	1
2022-09-14	13:19:51	0.721794	3.21068	505.896	FALSE	1
2022-09-14	13:19:51	0.716654	3.18782	520.074	FALSE	1
2022-09-14	13:19:52	0.725916	3.22902	509.125	FALSE	1
2022-09-14	13:19:52	0.71813	3.19439	523.269	FALSE	1
2022-09-14	13:19:52	0.727036	3.234	512.359	FALSE	1
2022-09-14	13:19:52	0.722761	3.21499	526.484	FALSE	1
2022-09-14	13:19:53	0.722303	3.21295	515.572	FALSE	1
2022-09-14	13:19:53	0.724898	3.22449	529.708	FALSE	1
2022-09-14	13:19:53	0.724847	3.22426	518.796	FALSE	1
2022-09-14	13:19:54	0.718893	3.19778	532.906	FALSE	1
2022-09-14	13:19:54	0.728104	3.23875	522.035	FALSE	1
2022-09-14	13:19:54	0.719351	3.19982	536.106	FALSE	1
2022-09-14	13:19:54	0.719656	3.20117	525.236	FALSE	1
2022-09-14	13:19:55	0.719351	3.19982	539.306	FALSE	1
2022-09-14	13:19:55	0.721692	3.21023	528.446	FALSE	1
2022-09-14	13:19:55	0.725458	3.22698	542.533	FALSE	1
2022-09-14	13:19:55	0.717672	3.19235	531.638	FALSE	1
2022-09-14	13:19:56	0.722354	3.21318	545.746	FALSE	1
2022-09-14	13:19:56	0.72042	3.20457	534.843	FALSE	1
2022-09-14	13:19:56	0.720572	3.20525	548.951	FALSE	1
2022-09-14	13:19:56	0.725204	3.22585	538.069	FALSE	1
2022-09-14	13:19:57	0.724644	3.22336	552.174	FALSE	1
2022-09-14	13:19:57	0.726272	3.2306	541.299	FALSE	1
2022-09-14	13:19:57	0.721336	3.20865	555.383	FALSE	1
2022-09-14	13:19:58	0.724389	3.22223	544.522	FALSE	1
2022-09-14	13:19:58	0.71986	3.20208	558.585	FALSE	1
2022-09-14	13:19:58	0.722965	3.21589	547.738	FALSE	1
2022-09-14	13:19:58	0.721132	3.20774	561.793	FALSE	1
2022-09-14	13:19:59	0.720878	3.20661	550.944	FALSE	1
2022-09-14	13:19:59	0.726985	3.23377	565.027	FALSE	1
2022-09-14	13:19:59	0.719046	3.19846	554.143	FALSE	1
2022-09-14	13:19:59	0.724288	3.22178	568.248	FALSE	1
2022-09-14	13:20:00	0.725509	3.22721	557.37	FALSE	1
2022-09-14	13:20:00	0.721641	3.21	571.458	FALSE	1
2022-09-14	13:20:00	0.719555	3.20072	560.571	FALSE	1
2022-09-14	13:20:01	0.722812	3.21521	574.674	FALSE	1
2022-09-14	13:20:01	0.718384	3.19552	563.766	FALSE	1
2022-09-14	13:20:01	0.726679	3.23241	577.906	FALSE	1
2022-09-14	13:20:01	0.728562	3.24079	567.007	FALSE	1
2022-09-14	13:20:02	0.720725	3.20593	581.112	FALSE	1
2022-09-14	13:20:02	0.718995	3.19823	570.205	FALSE	1
2022-09-14	13:20:02	0.726679	3.23241	584.344	FALSE	1
2022-09-14	13:20:02	0.725254	3.22607	573.431	FALSE	1
2022-09-14	13:20:03	0.720674	3.2057	587.55	FALSE	1
2022-09-14	13:20:03	0.726679	3.23241	576.664	FALSE	1
2022-09-14	13:20:03	0.720114	3.20321	590.753	FALSE	1
2022-09-14	13:20:03	0.718588	3.19642	579.86	FALSE	1
2022-09-14	13:20:04	0.723677	3.21906	593.972	FALSE	1
2022-09-14	13:20:04	0.719504	3.2005	583.06	FALSE	1
2022-09-14	13:20:04	0.723626	3.21883	597.191	FALSE	1
2022-09-14	13:20:05	0.724949	3.22472	586.285	FALSE	1
2022-09-14	13:20:05	0.722099	3.21204	600.403	FALSE	1
2022-09-14	13:20:05	0.723168	3.2168	589.502	FALSE	1
2022-09-14	13:20:05	0.715585	3.18307	603.586	FALSE	1
2022-09-14	13:20:06	0.732379	3.25777	592.76	FALSE	1
2022-09-14	13:20:06	0.719809	3.20185	606.788	FALSE	1
2022-09-14	13:20:06	0.726018	3.22947	595.989	FALSE	1
2022-09-14	13:20:06	0.725	3.22494	610.013	FALSE	1
2022-09-14	13:20:07	0.724186	3.22132	599.211	FALSE	1
2022-09-14	13:20:07	0.729631	3.24554	613.259	FALSE	1
2022-09-14	13:20:07	0.724746	3.22382	602.434	FALSE	1
2022-09-14	13:20:07	0.338486	1.50565	614.764	FALSE	1
2022-09-14	13:20:08	0.728155	3.23898	605.673	FALSE	1
2022-09-14	13:20:08	0.730445	3.24917	618.013	FALSE	1
2022-09-14	13:20:08	0.722303	3.21295	608.886	FALSE	1
2022-09-14	13:20:09	0.716705	3.18805	621.202	FALSE	1
2022-09-14	13:20:09	0.724695	3.22359	612.11	FALSE	1
2022-09-14	13:20:09	0.721845	3.21091	624.412	FALSE	1
2022-09-14	13:20:09	0.724033	3.22064	615.331	FALSE	1
2022-09-14	13:20:10	0.715687	3.18352	627.596	FALSE	1
2022-09-14	13:20:10	0.720776	3.20616	618.537	FALSE	1
2022-09-14	13:20:10	0.725611	3.22766	630.824	FALSE	1
2022-09-14	13:20:10	0.727443	3.23581	621.772	FALSE	1
2022-09-14	13:20:11	0.71701	3.1894	634.013	FALSE	1
2022-09-14	13:20:11	0.723931	3.22019	624.993	FALSE	1
2022-09-14	13:20:11	0.719962	3.20253	637.216	FALSE	1
2022-09-14	13:20:11	0.716552	3.18737	628.18	FALSE	1
2022-09-14	13:20:12	0.157977	0.702713	637.918	FALSE	1
2022-09-14	13:20:12	-0.495203	-2.20276	628.18	FALSE	1
2022-09-14	13:20:12	-0.4922	-2.1894	637.918	FALSE	1
2022-09-14	13:20:13	-0.495101	-2.20231	628.18	FALSE	1
2022-09-14	13:20:13	-0.397798	-1.76949	637.918	FALSE	1
2022-09-14	13:20:13	-0.367264	-1.63366	628.18	FALSE	1
2022-09-14	13:20:13	-0.34874	-1.55127	637.918	FALSE	1
2022-09-14	13:20:14	-0.413829	-1.84079	628.18	FALSE	1
2022-09-14	13:20:14	0.123677	0.55014	638.468	FALSE	1
2022-09-14	13:20:14	-0.368078	-1.63728	628.18	FALSE	1
2022-09-14	13:20:14	-0.388587	-1.72851	638.468	FALSE	1
2022-09-14	13:20:15	-0.392811	-1.7473	628.18	FALSE	1
2022-09-14	13:20:15	-0.395305	-1.7584	638.468	FALSE	1
2022-09-14	13:20:15	-0.399885	-1.77877	628.18	FALSE	1
2022-09-14	13:20:15	-0.400699	-1.78239	638.468	FALSE	1
2022-09-14	13:20:16	-0.39734	-1.76745	628.18	FALSE	1
2022-09-14	13:20:16	-0.393829	-1.75183	638.468	FALSE	1
2022-09-14	13:20:16	-0.406195	-1.80684	628.18	FALSE	1
2022-09-14	13:20:17	-0.398918	-1.77447	638.468	FALSE	1
2022-09-14	13:20:17	-0.400547	-1.78171	628.18	FALSE	1
2022-09-14	13:20:17	-0.400139	-1.7799	638.468	FALSE	1
2022-09-14	13:20:17	-0.409503	-1.82155	628.18	FALSE	1
2022-09-14	13:20:18	-0.417188	-1.85574	638.468	FALSE	1
2022-09-14	13:20:18	-0.413676	-1.84011	628.18	FALSE	1
2022-09-14	13:20:18	-0.398307	-1.77175	638.468	FALSE	1
2022-09-14	13:20:18	-0.399529	-1.77718	628.18	FALSE	1
2022-09-14	13:20:19	-0.39958	-1.77741	638.468	FALSE	1
2022-09-14	13:20:19	-0.388384	-1.72761	628.18	FALSE	1
2022-09-14	13:20:19	-0.398816	-1.77401	638.468	FALSE	1
2022-09-14	13:20:20	-0.405432	-1.80344	628.18	FALSE	1
2022-09-14	13:20:20	-0.41047	-1.82585	638.468	FALSE	1
2022-09-14	13:20:20	-0.402531	-1.79054	628.18	FALSE	1
2022-09-14	13:20:20	-0.40818	-1.81567	638.468	FALSE	1
2022-09-14	13:20:21	-0.417849	-1.85868	628.18	FALSE	1
2022-09-14	13:20:21	-0.431844	-1.92093	638.468	FALSE	1
2022-09-14	13:20:21	-0.43215	-1.92229	628.18	FALSE	1
2022-09-14	13:20:21	-0.432659	-1.92455	638.468	FALSE	1
2022-09-14	13:20:22	-0.409045	-1.81951	628.18	FALSE	1
2022-09-14	13:20:22	-0.414287	-1.84283	638.468	FALSE	1
2022-09-14	13:20:22	-0.415101	-1.84645	628.18	FALSE	1
2022-09-14	13:20:22	-0.429911	-1.91233	638.468	FALSE	1
2022-09-14	13:20:23	-0.423804	-1.88516	628.18	FALSE	1
2022-09-14	13:20:23	-0.408791	-1.81838	638.468	FALSE	1
2022-09-14	13:20:23	-0.423651	-1.88448	628.18	FALSE	1
2022-09-14	13:20:24	-0.435407	-1.93678	638.468	FALSE	1
2022-09-14	13:20:24	-0.462073	-2.05539	628.18	FALSE	1
2022-09-14	13:20:24	-0.476272	-2.11855	638.468	FALSE	1
2022-09-14	13:20:24	-0.467162	-2.07803	628.18	FALSE	1
2022-09-14	13:20:25	-0.409045	-1.81951	638.468	FALSE	1
2022-09-14	13:20:25	-0.39561	-1.75975	628.18	FALSE	1
2022-09-14	13:20:25	-0.429452	-1.91029	638.468	FALSE	1
2022-09-14	13:20:25	-0.384058	-1.70837	628.18	FALSE	1
2022-09-14	13:20:26	-0.396933	-1.76564	638.468	FALSE	1
2022-09-14	13:20:26	-0.338307	-1.50486	628.18	FALSE	1
2022-09-14	13:20:26	-0.174694	-0.777074	638.468	FALSE	1
2022-09-14	13:20:26	-0.1836	-0.81669	628.18	FALSE	1
2022-09-14	13:20:27	-0.288689	-1.28415	638.468	FALSE	1
2022-09-14	13:20:27	-0.107468	-0.478039	628.18	FALSE	1
2022-09-14	13:20:27	-0.162786	-0.724105	638.468	FALSE	1
2022-09-14	13:20:28	-0.24075	-1.0709	628.18	FALSE	1
2022-09-14	13:20:28	-0.375152	-1.66875	638.468	FALSE	1
2022-09-14	13:20:28	-0.464567	-2.06649	628.18	FALSE	1
2022-09-14	13:20:28	-0.546501	-2.43095	638.468	FALSE	1
2022-09-14	13:20:29	-0.666348	-2.96405	628.18	FALSE	1
2022-09-14	13:20:29	-0.605839	-2.69489	638.468	FALSE	1
2022-09-14	13:20:29	-0.650623	-2.8941	628.18	FALSE	1
2022-09-14	13:20:29	-0.781462	-3.4761	638.468	FALSE	1
2022-09-14	13:20:30	-0.708587	-3.15194	628.18	FALSE	1
2022-09-14	13:20:30	-0.815966	-3.62958	638.468	FALSE	1
2022-09-14	13:20:30	-0.680037	-3.02494	628.18	FALSE	1
2022-09-14	13:20:30	-0.677645	-3.0143	638.468	FALSE	1
2022-09-14	13:20:31	-0.711641	-3.16552	628.18	FALSE	1
2022-09-14	13:20:31	-0.581259	-2.58556	638.468	FALSE	1
2022-09-14	13:20:31	-0.661971	-2.94458	628.18	FALSE	1
2022-09-14	13:20:32	-0.632099	-2.8117	638.468	FALSE	1
2022-09-14	13:20:32	-0.671844	-2.9885	628.18	FALSE	1
2022-09-14	13:20:32	-0.76416	-3.39914	638.468	FALSE	1
2022-09-14	13:20:32	-0.619936	-2.7576	628.18	FALSE	1
2022-09-14	13:20:33	-0.684312	-3.04396	638.468	FALSE	1
2022-09-14	13:20:33	-0.672048	-2.9894	628.18	FALSE	1
2022-09-14	13:20:33	-0.578918	-2.57514	638.468	FALSE	1
2022-09-14	13:20:33	-0.25902	-1.15217	628.18	FALSE	1
2022-09-14	13:20:34	0.716399	3.18669	641.655	FALSE	1
2022-09-14	13:20:34	0.720216	3.20366	631.384	FALSE	1
2022-09-14	13:20:34	0.716399	3.18669	644.842	FALSE	1
2022-09-14	13:20:34	0.729275	3.24396	634.628	FALSE	1
2022-09-14	13:20:35	0.719758	3.20163	648.043	FALSE	1
2022-09-14	13:20:35	0.721488	3.20932	637.837	FALSE	1
2022-09-14	13:20:35	0.724084	3.22087	651.264	FALSE	1
2022-09-14	13:20:36	0.726578	3.23196	641.069	FALSE	1
2022-09-14	13:20:36	0.722608	3.2143	654.479	FALSE	1
2022-09-14	13:20:36	0.716756	3.18827	644.257	FALSE	1
2022-09-14	13:20:36	0.724847	3.22426	657.703	FALSE	1
2022-09-14	13:20:37	0.725305	3.2263	647.484	FALSE	1
2022-09-14	13:20:37	0.730496	3.24939	660.952	FALSE	1
2022-09-14	13:20:37	0.721641	3.21	650.694	FALSE	1
2022-09-14	13:20:37	0.72327	3.21725	664.169	FALSE	1
2022-09-14	13:20:38	0.721692	3.21023	653.904	FALSE	1
2022-09-14	13:20:38	0.726374	3.23106	667.401	FALSE	1
2022-09-14	13:20:38	0.719249	3.19936	657.103	FALSE	1
2022-09-14	13:20:39	0.724033	3.22064	670.621	FALSE	1
2022-09-14	13:20:39	0.729987	3.24713	660.35	FALSE	1
2022-09-14	13:20:39	0.722761	3.21499	673.836	FALSE	1
2022-09-14	13:20:39	0.723168	3.2168	663.567	FALSE	1
2022-09-14	13:20:40	0.717468	3.19144	677.028	FALSE	1
2022-09-14	13:20:40	0.726578	3.23196	666.799	FALSE	1
2022-09-14	13:20:40	0.717112	3.18986	680.217	FALSE	1
2022-09-14	13:20:40	0.721132	3.20774	670.007	FALSE	1
2022-09-14	13:20:41	0.72383	3.21974	683.437	FALSE	1
2022-09-14	13:20:41	0.72729	3.23513	673.242	FALSE	1
2022-09-14	13:20:41	0.721743	3.21046	686.648	FALSE	1
2022-09-14	13:20:41	0.728817	3.24192	676.484	FALSE	1
2022-09-14	13:20:42	0.723117	3.21657	689.864	FALSE	1
2022-09-14	13:20:42	0.729478	3.24486	679.729	FALSE	1
2022-09-14	13:20:42	0.724389	3.22223	693.086	FALSE	1
2022-09-14	13:20:43	0.72327	3.21725	682.946	FALSE	1
2022-09-14	13:20:43	0.714008	3.17605	696.263	FALSE	1
2022-09-14	13:20:43	0.719504	3.2005	686.146	FALSE	1
2022-09-14	13:20:43	0.721132	3.20774	699.47	FALSE	1
2022-09-14	13:20:44	0.729326	3.24419	689.391	FALSE	1
2022-09-14	13:20:44	0.73299	3.26049	702.731	FALSE	1
2022-09-14	13:20:44	0.721591	3.20978	692.6	FALSE	1
2022-09-14	13:20:44	0.724389	3.22223	705.953	FALSE	1
2022-09-14	13:20:45	0.727646	3.23671	695.837	FALSE	1
2022-09-14	13:20:45	0.721437	3.2091	709.162	FALSE	1
2022-09-14	13:20:45	0.72215	3.21227	699.049	FALSE	1
2022-09-14	13:20:46	0.730038	3.24736	712.409	FALSE	1
2022-09-14	13:20:46	0.725356	3.22653	702.276	FALSE	1
2022-09-14	13:20:46	0.722761	3.21499	715.624	FALSE	1
2022-09-14	13:20:46	0.72673	3.23264	705.509	FALSE	1
2022-09-14	13:20:47	0.726221	3.23038	718.855	FALSE	1
2022-09-14	13:20:47	0.726832	3.23309	708.742	FALSE	1
2022-09-14	13:20:47	0.728359	3.23989	722.095	FALSE	1
2022-09-14	13:20:47	0.732175	3.25686	711.999	FALSE	1
2022-09-14	13:20:48	0.721895	3.21113	725.306	FALSE	1
2022-09-14	13:20:48	0.73131	3.25301	715.252	FALSE	1
2022-09-14	13:20:48	0.72444	3.22245	728.528	FALSE	1
2022-09-14	13:20:48	0.720929	3.20684	718.458	FALSE	1
2022-09-14	13:20:49	0.716349	3.18646	731.715	FALSE	1
2022-09-14	13:20:49	0.722456	3.21363	721.672	FALSE	1
2022-09-14	13:20:49	0.720216	3.20366	734.918	FALSE	1
2022-09-14	13:20:49	0.682201	3.03457	724.707	FALSE	1
2022-09-14	13:20:50	-0.194847	-0.866718	734.918	FALSE	1
2022-09-14	13:20:50	-0.261361	-1.16259	724.707	FALSE	1
2022-09-14	13:20:50	-0.344821	-1.53383	734.918	FALSE	1
2022-09-14	13:20:51	-0.494033	-2.19756	724.707	FALSE	1
2022-09-14	13:20:51	0.251921	1.12059	736.039	FALSE	1
2022-09-14	13:20:51	0.691768	3.07712	727.784	FALSE	1
2022-09-14	13:20:51	0.725509	3.22721	739.266	FALSE	1
2022-09-14	13:20:52	0.708613	3.15205	730.936	FALSE	1
2022-09-14	13:20:52	0.726323	3.23083	742.497	FALSE	1
2022-09-14	13:20:52	0.72958	3.24532	734.181	FALSE	1
2022-09-14	13:20:52	0.727137	3.23445	745.731	FALSE	1
2022-09-14	13:20:53	0.733397	3.2623	737.443	FALSE	1
2022-09-14	13:20:53	0.728613	3.24102	748.972	FALSE	1
2022-09-14	13:20:53	0.725967	3.22925	740.673	FALSE	1
2022-09-14	13:20:53	0.722354	3.21318	752.186	FALSE	1
2022-09-14	13:20:54	0.726374	3.23106	743.904	FALSE	1
2022-09-14	13:20:54	0.72215	3.21227	755.398	FALSE	1
2022-09-14	13:20:54	0.717316	3.19077	747.094	FALSE	1
2022-09-14	13:20:55	0.718791	3.19733	758.595	FALSE	1
2022-09-14	13:20:55	0.726018	3.22947	750.324	FALSE	1
2022-09-14	13:20:55	0.726781	3.23287	761.828	FALSE	1
2022-09-14	13:20:55	0.725916	3.22902	753.553	FALSE	1
2022-09-14	13:20:56	0.722914	3.21567	765.044	FALSE	1
2022-09-14	13:20:56	0.726272	3.2306	756.784	FALSE	1
2022-09-14	13:20:56	0.726934	3.23355	768.277	FALSE	1
2022-09-14	13:20:56	0.72388	3.21996	760.003	FALSE	1
2022-09-14	13:20:57	0.727646	3.23671	771.514	FALSE	1
2022-09-14	13:20:57	0.724237	3.22155	763.225	FALSE	1
2022-09-14	13:20:57	0.726679	3.23241	774.746	FALSE	1
2022-09-14	13:20:57	0.726578	3.23196	766.457	FALSE	1
2022-09-14	13:20:58	0.722456	3.21363	777.96	FALSE	1
2022-09-14	13:20:58	0.73416	3.26569	769.723	FALSE	1
2022-09-14	13:20:58	0.726883	3.23332	781.193	FALSE	1
2022-09-14	13:20:59	0.725865	3.22879	772.951	FALSE	1
2022-09-14	13:20:59	0.723219	3.21702	784.41	FALSE	1
2022-09-14	13:20:59	0.731361	3.25324	776.205	FALSE	1
2022-09-14	13:20:59	0.724796	3.22404	787.634	FALSE	1
2022-09-14	13:21:00	0.726272	3.2306	779.435	FALSE	1
2022-09-14	13:21:00	0.726679	3.23241	790.867	FALSE	1
2022-09-14	13:21:00	0.731005	3.25166	782.687	FALSE	1
2022-09-14	13:21:00	0.719249	3.19936	794.066	FALSE	1
2022-09-14	13:21:01	0.729071	3.24305	785.93	FALSE	1
2022-09-14	13:21:01	0.719656	3.20117	797.267	FALSE	1
2022-09-14	13:21:01	0.730903	3.2512	789.181	FALSE	1
2022-09-14	13:21:02	0.723372	3.2177	800.485	FALSE	1
2022-09-14	13:21:02	0.722507	3.21386	792.395	FALSE	1
2022-09-14	13:21:02	0.728613	3.24102	803.726	FALSE	1
2022-09-14	13:21:02	0.725356	3.22653	795.622	FALSE	1
2022-09-14	13:21:03	0.722862	3.21543	806.942	FALSE	1
2022-09-14	13:21:03	0.724796	3.22404	798.846	FALSE	1
2022-09-14	13:21:03	0.732583	3.25868	810.2	FALSE	1
2022-09-14	13:21:03	0.731056	3.25188	802.098	FALSE	1
2022-09-14	13:21:04	0.725611	3.22766	813.428	FALSE	1
2022-09-14	13:21:04	0.72215	3.21227	805.31	FALSE	1
2022-09-14	13:21:04	0.735026	3.26954	816.697	FALSE	1
2022-09-14	13:21:04	0.722965	3.21589	808.526	FALSE	1
2022-09-14	13:21:05	0.724796	3.22404	819.921	FALSE	1
2022-09-14	13:21:05	0.726527	3.23174	811.757	FALSE	1
2022-09-14	13:21:05	0.723372	3.2177	823.139	FALSE	1
2022-09-14	13:21:06	0.728257	3.23943	814.997	FALSE	1
2022-09-14	13:21:06	0.724847	3.22426	826.363	FALSE	1
2022-09-14	13:21:06	0.728613	3.24102	818.238	FALSE	1
2022-09-14	13:21:06	0.721437	3.2091	829.573	FALSE	1
2022-09-14	13:21:07	0.724491	3.22268	821.461	FALSE	1
2022-09-14	13:21:07	0.730343	3.24871	832.821	FALSE	1
2022-09-14	13:21:07	0.723779	3.21951	824.68	FALSE	1
2022-09-14	13:21:07	0.726679	3.23241	836.054	FALSE	1
2022-09-14	13:21:08	0.72612	3.22993	827.91	FALSE	1
2022-09-14	13:21:08	0.723575	3.21861	839.272	FALSE	1
2022-09-14	13:21:08	0.725763	3.22834	831.138	FALSE	1
2022-09-14	13:21:09	0.724847	3.22426	842.497	FALSE	1
2022-09-14	13:21:09	0.720725	3.20593	834.344	FALSE	1
2022-09-14	13:21:09	0.728766	3.2417	845.738	FALSE	1
2022-09-14	13:21:09	0.728054	3.23853	837.583	FALSE	1
2022-09-14	13:21:10	0.721488	3.20932	848.948	FALSE	1
2022-09-14	13:21:10	0.723677	3.21906	840.802	FALSE	1
2022-09-14	13:21:10	0.724186	3.22132	852.169	FALSE	1
2022-09-14	13:21:10	0.72271	3.21476	844.017	FALSE	1
2022-09-14	13:21:11	0.724186	3.22132	855.39	FALSE	1
2022-09-14	13:21:11	0.72785	3.23762	847.254	FALSE	1
2022-09-14	13:21:11	0.721539	3.20955	858.6	FALSE	1
2022-09-14	13:21:11	0.730801	3.25075	850.505	FALSE	1
2022-09-14	13:21:12	0.722049	3.21182	861.812	FALSE	1
2022-09-14	13:21:12	0.724237	3.22155	853.727	FALSE	1
2022-09-14	13:21:12	0.726781	3.23287	865.044	FALSE	1
2022-09-14	13:21:12	0.726781	3.23287	856.959	FALSE	1
2022-09-14	13:21:13	0.726883	3.23332	868.278	FALSE	1
2022-09-14	13:21:13	0.723524	3.21838	860.178	FALSE	1
2022-09-14	13:21:13	0.720318	3.20412	871.482	FALSE	1
2022-09-14	13:21:14	0.723575	3.21861	863.396	FALSE	1
2022-09-14	13:21:14	0.727239	3.2349	874.717	FALSE	1
2022-09-14	13:21:14	0.72841	3.24011	866.636	FALSE	1
2022-09-14	13:21:14	0.723575	3.21861	877.935	FALSE	1
2022-09-14	13:21:15	0.720725	3.20593	869.842	FALSE	1
2022-09-14	13:21:15	0.361947	1.61001	879.545	FALSE	1
2022-09-14	13:21:15	0.259809	1.15568	870.998	FALSE	1
2022-09-14	13:21:15	0.295484	1.31437	880.86	FALSE	1
2022-09-14	13:21:16	0.072532	0.322637	871.321	FALSE	1
2022-09-14	13:21:16	-0.181412	-0.806957	880.86	FALSE	1
2022-09-14	13:21:16	-0.417493	-1.85709	871.321	FALSE	1
2022-09-14	13:21:16	-0.236679	-1.0528	880.86	FALSE	1
2022-09-14	13:21:17	-0.248638	-1.10599	871.321	FALSE	1
2022-09-14	13:21:17	-0.101666	-0.452231	880.86	FALSE	1
2022-09-14	13:21:17	-0.191895	-0.853587	871.321	FALSE	1
2022-09-14	13:21:18	-0.260648	-1.15941	880.86	FALSE	1
2022-09-14	13:21:18	-0.261819	-1.16462	871.321	FALSE	1
2022-09-14	13:21:18	-0.206959	-0.920595	880.86	FALSE	1
2022-09-14	13:21:18	-0.22533	-1.00231	871.321	FALSE	1
2022-09-14	13:21:19	-0.25276	-1.12433	880.86	FALSE	1
2022-09-14	13:21:19	-0.0454323	-0.202092	871.321	FALSE	1
2022-09-14	13:21:19	-0.0806486	-0.358741	880.86	FALSE	1
2022-09-14	13:21:19	0.0582317	0.259026	871.58	FALSE	1
2022-09-14	13:21:20	-0.156832	-0.69762	880.86	FALSE	1
2022-09-14	13:21:20	-0.167926	-0.746968	871.58	FALSE	1
2022-09-14	13:21:20	0.0287661	0.127957	880.988	FALSE	1
2022-09-14	13:21:20	-0.162073	-0.720933	871.58	FALSE	1
2022-09-14	13:21:21	0.261081	1.16134	882.149	FALSE	1
2022-09-14	13:21:21	-0.180292	-0.801975	871.58	FALSE	1
2022-09-14	13:21:21	0.169987	0.756136	882.905	FALSE	1
2022-09-14	13:21:22	-0.0379005	-0.168589	871.58	FALSE	1
2022-09-14	13:21:22	-0.147163	-0.65461	882.905	FALSE	1
2022-09-14	13:21:22	0.233702	1.03955	872.619	FALSE	1
2022-09-14	13:21:22	-0.0103687	-0.0461221	882.905	FALSE	1
2022-09-14	13:21:23	0.383575	1.70622	874.326	FALSE	1
2022-09-14	13:21:23	0.266985	1.1876	884.093	FALSE	1
2022-09-14	13:21:23	0.184033	0.818616	875.144	FALSE	1
2022-09-14	13:21:23	0.717723	3.19258	887.285	FALSE	1
2022-09-14	13:21:24	0.708155	3.15002	878.294	FALSE	1
2022-09-14	13:21:24	0.723473	3.21815	890.504	FALSE	1
2022-09-14	13:21:24	0.492735	2.19178	880.486	FALSE	1
2022-09-14	13:21:25	0.595941	2.65086	893.154	FALSE	1
2022-09-14	13:21:25	0.67528	3.00378	883.49	FALSE	1
2022-09-14	13:21:25	0.67696	3.01125	896.166	FALSE	1
2022-09-14	13:21:25	0.725916	3.22902	886.719	FALSE	1
2022-09-14	13:21:26	0.722201	3.21249	899.378	FALSE	1
2022-09-14	13:21:26	0.726221	3.23038	889.949	FALSE	1
2022-09-14	13:21:26	0.727545	3.23627	902.614	FALSE	1
2022-09-14	13:21:26	0.714924	3.18012	893.129	FALSE	1
2022-09-14	13:21:27	0.728206	3.23921	905.854	FALSE	1
2022-09-14	13:21:27	0.719707	3.2014	896.331	FALSE	1
2022-09-14	13:21:27	0.721895	3.21113	909.065	FALSE	1
2022-09-14	13:21:27	0.724186	3.22132	899.552	FALSE	1
2022-09-14	13:21:28	0.721692	3.21023	912.275	FALSE	1
2022-09-14	13:21:28	0.715992	3.18488	902.737	FALSE	1
2022-09-14	13:21:28	0.72556	3.22744	915.502	FALSE	1
2022-09-14	13:21:29	0.727646	3.23671	905.974	FALSE	1
2022-09-14	13:21:29	0.701285	3.11946	918.622	FALSE	1
2022-09-14	13:21:29	0.726018	3.22947	909.203	FALSE	1
2022-09-14	13:21:29	0.71813	3.19439	921.816	FALSE	1
2022-09-14	13:21:30	0.724084	3.22087	912.424	FALSE	1
2022-09-14	13:21:30	0.72103	3.20729	925.024	FALSE	1
2022-09-14	13:21:30	0.721488	3.20932	915.633	FALSE	1
2022-09-14	13:21:30	0.728206	3.23921	928.263	FALSE	1
2022-09-14	13:21:31	0.735076	3.26977	918.903	FALSE	1
2022-09-14	13:21:31	0.733448	3.26252	931.525	FALSE	1
2022-09-14	13:21:31	0.728664	3.24124	922.144	FALSE	1
2022-09-14	13:21:31	0.723677	3.21906	934.744	FALSE	1
2022-09-14	13:21:32	0.732939	3.26026	925.405	FALSE	1
2022-09-14	13:21:32	0.716603	3.18759	937.932	FALSE	1
2022-09-14	13:21:32	0.723626	3.21883	928.623	FALSE	1
2022-09-14	13:21:33	0.724135	3.2211	941.153	FALSE	1
2022-09-14	13:21:33	0.723524	3.21838	931.842	FALSE	1
2022-09-14	13:21:33	0.720623	3.20548	944.359	FALSE	1
2022-09-14	13:21:33	0.732379	3.25777	935.099	FALSE	1
2022-09-14	13:21:34	0.72271	3.21476	947.573	FALSE	1
2022-09-14	13:21:34	0.725407	3.22676	938.326	FALSE	1
2022-09-14	13:21:34	0.728766	3.2417	950.815	FALSE	1
2022-09-14	13:21:34	0.732023	3.25618	941.582	FALSE	1
2022-09-14	13:21:35	0.728206	3.23921	954.054	FALSE	1
2022-09-14	13:21:35	0.727087	3.23423	944.817	FALSE	1
2022-09-14	13:21:35	0.466171	2.07362	956.128	FALSE	1
2022-09-14	13:21:35	0.708511	3.1516	947.968	FALSE	1
2022-09-14	13:21:36	0.727596	3.23649	959.364	FALSE	1
2022-09-14	13:21:36	0.728817	3.24192	951.21	FALSE	1
2022-09-14	13:21:36	0.723931	3.22019	962.584	FALSE	1
2022-09-14	13:21:37	0.703982	3.13145	954.342	FALSE	1
2022-09-14	13:21:37	0.691921	3.0778	965.662	FALSE	1
2022-09-14	13:21:37	0.488054	2.17096	956.513	FALSE	1
2022-09-14	13:21:37	0.728817	3.24192	968.904	FALSE	1
2022-09-14	13:21:38	0.529631	2.3559	958.869	FALSE	1
2022-09-14	13:21:38	0.703219	3.12806	972.032	FALSE	1
2022-09-14	13:21:38	0.685407	3.04883	961.917	FALSE	1
2022-09-14	13:21:38	0.727188	3.23468	975.267	FALSE	1
2022-09-14	13:21:39	0.730038	3.24736	965.165	FALSE	1
2022-09-14	13:21:39	0.730496	3.24939	978.516	FALSE	1
2022-09-14	13:21:39	0.722914	3.21567	968.38	FALSE	1
2022-09-14	13:21:39	0.726679	3.23241	981.749	FALSE	1
2022-09-14	13:21:40	0.731514	3.25392	971.634	FALSE	1
2022-09-14	13:21:40	0.723677	3.21906	984.968	FALSE	1
2022-09-14	13:21:40	0.729173	3.24351	974.878	FALSE	1
2022-09-14	13:21:41	0.723677	3.21906	988.187	FALSE	1
2022-09-14	13:21:41	0.722557	3.21408	978.092	FALSE	1
2022-09-14	13:21:41	0.724135	3.2211	991.408	FALSE	1
2022-09-14	13:21:41	0.722252	3.21272	981.305	FALSE	1
2022-09-14	13:21:42	0.722812	3.21521	994.623	FALSE	1
2022-09-14	13:21:42	0.725254	3.22607	984.531	FALSE	1
2022-09-14	13:21:42	0.729071	3.24305	997.866	FALSE	1
2022-09-14	13:21:42	0.72958	3.24532	987.776	FALSE	1
2022-09-14	13:21:43	0.730751	3.25053	1001.12	FALSE	1
2022-09-14	13:21:43	0.722659	3.21453	990.991	FALSE	1
2022-09-14	13:21:43	0.726476	3.23151	1004.35	FALSE	1
2022-09-14	13:21:43	0.726018	3.22947	994.22	FALSE	1
2022-09-14	13:21:44	0.302303	1.3447	1005.69	FALSE	1
2022-09-14	13:21:44	0.295178	1.31301	995.533	FALSE	1
2022-09-14	13:21:44	-8.20716	-36.5071	1005.69	FALSE	1
2022-09-14	13:21:45	-0.787111	-3.50123	995.533	FALSE	1
2022-09-14	13:21:45	0.322608	1.43502	1007.13	FALSE	1
2022-09-14	13:21:45	0.282405	1.25619	996.789	FALSE	1
2022-09-14	13:21:45	0.729377	3.24441	1010.37	FALSE	1
2022-09-14	13:21:46	0.728919	3.24238	1000.03	FALSE	1
2022-09-14	13:21:46	0.724542	3.22291	1013.6	FALSE	1
2022-09-14	13:21:46	0.723372	3.2177	1003.25	FALSE	1
2022-09-14	13:21:46	0.725865	3.22879	1016.82	FALSE	1
2022-09-14	13:21:47	0.731463	3.25369	1006.5	FALSE	1
2022-09-14	13:21:47	0.72383	3.21974	1020.04	FALSE	1
2022-09-14	13:21:47	0.724593	3.22313	1009.73	FALSE	1
2022-09-14	13:21:47	0.604135	2.68731	1022.73	FALSE	1
2022-09-14	13:21:48	0.726476	3.23151	1012.96	FALSE	1
2022-09-14	13:21:48	0.71869	3.19688	1025.93	FALSE	1
2022-09-14	13:21:48	0.456094	2.0288	1014.99	FALSE	1
2022-09-14	13:21:49	0.318741	1.41782	1027.35	FALSE	1
2022-09-14	13:21:49	0.396247	1.76259	1016.75	FALSE	1
2022-09-14	13:21:49	0.389631	1.73316	1029.08	FALSE	1
2022-09-14	13:21:49	0.397621	1.7687	1018.52	FALSE	1
2022-09-14	13:21:50	0.403219	1.7936	1030.87	FALSE	1
2022-09-14	13:21:50	0.402608	1.79088	1020.31	FALSE	1
2022-09-14	13:21:50	0.38785	1.72523	1032.6	FALSE	1
2022-09-14	13:21:50	0.405204	1.80243	1022.11	FALSE	1
2022-09-14	13:21:51	0.409173	1.82008	1034.42	FALSE	1
2022-09-14	13:21:51	0.712023	3.16722	1025.28	FALSE	1
2022-09-14	13:21:51	0.536196	2.38511	1036.8	FALSE	1
2022-09-14	13:21:52	0.71589	3.18442	1028.46	FALSE	1
2022-09-14	13:21:52	0.638944	2.84215	1039.65	FALSE	1
2022-09-14	13:21:52	-1.02833	-4.57422	1028.46	FALSE	1
2022-09-14	13:21:52	0.0533463	0.237295	1039.88	FALSE	1
2022-09-14	13:21:53	0.40159	1.78635	1030.25	FALSE	1
2022-09-14	13:21:53	0.432023	1.92172	1041.8	FALSE	1
2022-09-14	13:21:53	0.45014	2.00231	1032.25	FALSE	1
2022-09-14	13:21:53	0.438995	1.95274	1043.76	FALSE	1
2022-09-14	13:21:54	0.411667	1.83118	1034.08	FALSE	1
2022-09-14	13:21:54	0.399657	1.77775	1045.53	FALSE	1
2022-09-14	13:21:54	0.40785	1.8142	1035.9	FALSE	1
2022-09-14	13:21:54	0.428104	1.90429	1047.44	FALSE	1
2022-09-14	13:21:55	0.412379	1.83434	1037.73	FALSE	1
2022-09-14	13:21:55	0.404949	1.80129	1049.24	FALSE	1
2022-09-14	13:21:55	0.430242	1.9138	1039.64	FALSE	1
2022-09-14	13:21:56	0.421336	1.87419	1051.11	FALSE	1
2022-09-14	13:21:56	0.398079	1.77074	1041.42	FALSE	1
2022-09-14	13:21:56	0.403779	1.79609	1052.91	FALSE	1
2022-09-14	13:21:56	0.417977	1.85925	1043.27	FALSE	1
2022-09-14	13:21:57	0.34271	1.52444	1054.44	FALSE	1
2022-09-14	13:21:57	0.364339	1.62065	1044.9	FALSE	1
2022-09-14	13:21:57	0.415026	1.84612	1056.28	FALSE	1
2022-09-14	13:21:57	0.281845	1.2537	1046.15	FALSE	1
2022-09-14	13:21:58	0.215789	0.959873	1057.24	FALSE	1
2022-09-14	13:21:58	0.161743	0.719465	1046.87	FALSE	1
2022-09-14	13:21:58	0.196298	0.873173	1058.11	FALSE	1
2022-09-14	13:21:58	0.140318	0.624163	1047.49	FALSE	1
2022-09-14	13:21:59	0.0667305	0.296831	1058.41	FALSE	1
2022-09-14	13:21:59	0.12556	0.558516	1048.05	FALSE	1
2022-09-14	13:21:59	0.0524811	0.233446	1058.64	FALSE	1
2022-09-14	13:22:00	0.339657	1.51086	1049.56	FALSE	1
2022-09-14	13:22:00	0.384898	1.7121	1060.36	FALSE	1
2022-09-14	13:22:00	0.437723	1.94708	1051.51	FALSE	1
2022-09-14	13:22:00	0.523778	2.32987	1062.69	FALSE	1
2022-09-14	13:22:01	0.334313	1.48709	1053	FALSE	1
2022-09-14	13:22:01	0.424491	1.88822	1064.57	FALSE	1
2022-09-14	13:22:01	0.523371	2.32806	1055.32	FALSE	1
2022-09-14	13:22:01	0.483728	2.15172	1066.73	FALSE	1
2022-09-14	13:22:02	0.611565	2.72036	1058.04	FALSE	1
2022-09-14	13:22:02	0.400166	1.78002	1068.51	FALSE	1
2022-09-14	13:22:02	0.452634	2.01341	1060.06	FALSE	1
2022-09-14	13:22:02	0.321082	1.42824	1069.93	FALSE	1
2022-09-14	13:22:03	0.304949	1.35647	1061.41	FALSE	1
2022-09-14	13:22:03	0.448664	1.99575	1071.93	FALSE	1
2022-09-14	13:22:03	0.200878	0.893546	1062.31	FALSE	1
2022-09-14	13:22:04	0.234771	1.04431	1072.97	FALSE	1
2022-09-14	13:22:04	0.417112	1.8554	1064.16	FALSE	1
2022-09-14	13:22:04	0.232023	1.03208	1074.01	FALSE	1
2022-09-14	13:22:04	0.20271	0.901695	1065.07	FALSE	1
2022-09-14	13:22:05	0.305305	1.35806	1075.36	FALSE	1
2022-09-14	13:22:05	0.161082	0.716525	1065.78	FALSE	1
2022-09-14	13:22:05	0.267901	1.19168	1076.56	FALSE	1
2022-09-14	13:22:05	0.105255	0.468195	1066.25	FALSE	1
2022-09-14	13:22:06	0.177875	0.791224	1077.35	FALSE	1
2022-09-14	13:22:06	0.0150257	0.0668373	1066.32	FALSE	1
2022-09-14	13:22:06	-0.098562	-0.438423	1077.35	FALSE	1
2022-09-14	13:22:06	0.0191478	0.0851732	1066.4	FALSE	1
2022-09-14	13:22:07	-0.0296562	-0.131917	1077.35	FALSE	1
2022-09-14	13:22:07	0.0906491	0.403225	1066.81	FALSE	1
2022-09-14	13:22:07	-0.0134731	-0.059931	1077.35	FALSE	1
2022-09-14	13:22:08	0.112532	0.500565	1067.31	FALSE	1
2022-09-14	13:22:08	0.199555	0.887661	1078.24	FALSE	1
2022-09-14	13:22:08	0.359046	1.59711	1068.9	FALSE	1
2022-09-14	13:22:08	0.278537	1.23899	1079.47	FALSE	1
2022-09-14	13:22:09	0.262659	1.16836	1070.07	FALSE	1
2022-09-14	13:22:09	0.33299	1.48121	1080.96	FALSE	1
2022-09-14	13:22:09	0.191158	0.850309	1070.92	FALSE	1
2022-09-14	13:22:09	0.288054	1.28132	1082.24	FALSE	1
2022-09-14	13:22:10	0.15584	0.693207	1071.61	FALSE	1
2022-09-14	13:22:10	0.373499	1.6614	1083.9	FALSE	1
2022-09-14	13:22:10	0.251514	1.11878	1072.73	FALSE	1
2022-09-14	13:22:10	0.402914	1.79224	1085.69	FALSE	1
2022-09-14	13:22:11	0.27187	1.20933	1073.94	FALSE	1
2022-09-14	13:22:11	0.286934	1.27634	1086.97	FALSE	1
2022-09-14	13:22:11	0.343982	1.5301	1075.47	FALSE	1
2022-09-14	13:22:12	0.299809	1.33361	1088.3	FALSE	1
2022-09-14	13:22:12	0.427697	1.90248	1077.38	FALSE	1
2022-09-14	13:22:12	0.299707	1.33316	1089.63	FALSE	1
2022-09-14	13:22:12	0.234822	1.04454	1078.42	FALSE	1
2022-09-14	13:22:13	0.354364	1.57628	1091.21	FALSE	1
2022-09-14	13:22:13	0.206883	0.920257	1079.34	FALSE	1
2022-09-14	13:22:13	0.305916	1.36078	1092.57	FALSE	1
2022-09-14	13:22:13	0.306323	1.36259	1080.7	FALSE	1
2022-09-14	13:22:14	0.317265	1.41126	1093.98	FALSE	1
2022-09-14	13:22:14	0.42841	1.90565	1082.61	FALSE	1
2022-09-14	13:22:14	0.378639	1.68426	1095.67	FALSE	1
2022-09-14	13:22:15	0.456858	2.0322	1084.64	FALSE	1
2022-09-14	13:22:15	0.334517	1.488	1097.15	FALSE	1
2022-09-14	13:22:15	0.422252	1.87826	1086.52	FALSE	1
2022-09-14	13:22:15	0.361234	1.60684	1098.76	FALSE	1
2022-09-14	13:22:16	0.363982	1.61906	1088.14	FALSE	1
2022-09-14	13:22:16	0.433957	1.93033	1100.69	FALSE	1
2022-09-14	13:22:16	0.482608	2.14674	1090.28	FALSE	1
2022-09-14	13:22:16	0.382506	1.70146	1102.39	FALSE	1
2022-09-14	13:22:17	0.608257	2.70565	1092.99	FALSE	1
2022-09-14	13:22:17	0.40215	1.78884	1104.18	FALSE	1
2022-09-14	13:22:17	-0.960852	-4.27406	1092.99	FALSE	1
2022-09-14	13:22:17	0.602761	2.6812	1106.86	FALSE	1
2022-09-14	13:22:18	0.594771	2.64566	1095.64	FALSE	1
2022-09-14	13:22:18	0.575942	2.56191	1109.42	FALSE	1
2022-09-14	13:22:18	0.538791	2.39665	1098.03	FALSE	1
2022-09-14	13:22:19	0.559453	2.48856	1111.91	FALSE	1
2022-09-14	13:22:19	0.516552	2.29773	1100.33	FALSE	1
2022-09-14	13:22:19	0.503371	2.23909	1114.15	FALSE	1
2022-09-14	13:22:19	0.504949	2.24611	1102.58	FALSE	1
2022-09-14	13:22:20	0.471514	2.09739	1116.25	FALSE	1
2022-09-14	13:22:20	0.46388	2.06343	1104.64	FALSE	1
2022-09-14	13:22:20	-0.0400888	-0.178323	1116.25	FALSE	1
2022-09-14	13:22:20	0.256298	1.14006	1105.78	FALSE	1
2022-09-14	13:22:21	0.281641	1.2528	1117.5	FALSE	1
2022-09-14	13:22:21	0.287341	1.27815	1107.06	FALSE	1
2022-09-14	13:22:21	0.293397	1.30509	1118.81	FALSE	1
2022-09-14	13:22:21	0.309784	1.37798	1108.44	FALSE	1
2022-09-14	13:22:22	0.04556	0.20266	1119.01	FALSE	1
2022-09-14	13:22:22	0.727596	3.23649	1111.67	FALSE	1
2022-09-14	13:22:22	0.727087	3.23423	1122.24	FALSE	1
2022-09-14	13:22:23	0.730954	3.25143	1114.92	FALSE	1
2022-09-14	13:22:23	0.726985	3.23377	1125.48	FALSE	1
2022-09-14	13:22:23	0.728461	3.24034	1118.16	FALSE	1
2022-09-14	13:22:23	0.726629	3.23219	1128.71	FALSE	1
2022-09-14	13:22:24	0.720114	3.20321	1121.37	FALSE	1
2022-09-14	13:22:24	0.726934	3.23355	1131.94	FALSE	1
2022-09-14	13:22:24	0.723117	3.21657	1124.58	FALSE	1
2022-09-14	13:22:24	0.729733	3.246	1135.19	FALSE	1
2022-09-14	13:22:25	0.723473	3.21815	1127.8	FALSE	1
2022-09-14	13:22:25	0.728206	3.23921	1138.43	FALSE	1
2022-09-14	13:22:25	0.732837	3.25981	1131.06	FALSE	1
2022-09-14	13:22:25	0.730496	3.24939	1141.68	FALSE	1
2022-09-14	13:22:26	0.729835	3.24645	1134.31	FALSE	1
2022-09-14	13:22:26	0.728461	3.24034	1144.92	FALSE	1
2022-09-14	13:22:26	0.724288	3.22178	1137.53	FALSE	1
2022-09-14	13:22:27	0.728155	3.23898	1148.16	FALSE	1
2022-09-14	13:22:27	0.721641	3.21	1140.74	FALSE	1
2022-09-14	13:22:27	0.722608	3.2143	1151.37	FALSE	1
2022-09-14	13:22:27	0.722252	3.21272	1143.95	FALSE	1
2022-09-14	13:22:28	0.727392	3.23559	1154.61	FALSE	1
2022-09-14	13:22:28	0.726323	3.23083	1147.18	FALSE	1
2022-09-14	13:22:28	0.725407	3.22676	1157.83	FALSE	1
2022-09-14	13:22:28	0.735789	3.27294	1150.46	FALSE	1
2022-09-14	13:22:29	0.72729	3.23513	1161.07	FALSE	1
2022-09-14	13:22:29	0.734822	3.26864	1153.73	FALSE	1
2022-09-14	13:22:29	0.727799	3.2374	1164.31	FALSE	1
2022-09-14	13:22:29	0.731412	3.25347	1156.98	FALSE	1
2022-09-14	13:22:30	0.727239	3.2349	1167.54	FALSE	1
2022-09-14	13:22:30	0.727697	3.23694	1160.22	FALSE	1
2022-09-14	13:22:30	0.727341	3.23536	1170.78	FALSE	1
2022-09-14	13:22:31	0.724644	3.22336	1163.44	FALSE	1
2022-09-14	13:22:31	0.733142	3.26116	1174.04	FALSE	1
2022-09-14	13:22:31	0.727087	3.23423	1166.67	FALSE	1
2022-09-14	13:22:31	0.733499	3.26275	1177.3	FALSE	1
2022-09-14	13:22:32	0.734415	3.26682	1169.94	FALSE	1
2022-09-14	13:22:32	0.732023	3.25618	1180.56	FALSE	1
2022-09-14	13:22:32	0.726985	3.23377	1173.17	FALSE	1
2022-09-14	13:22:32	0.723117	3.21657	1183.77	FALSE	1
2022-09-14	13:22:33	0.723321	3.21748	1176.39	FALSE	1
2022-09-14	13:22:33	0.72271	3.21476	1186.99	FALSE	1
2022-09-14	13:22:33	0.728664	3.24124	1179.63	FALSE	1
2022-09-14	13:22:33	0.729478	3.24486	1190.23	FALSE	1
2022-09-14	13:22:34	0.720827	3.20638	1182.84	FALSE	1
2022-09-14	13:22:34	0.725407	3.22676	1193.46	FALSE	1
2022-09-14	13:22:34	0.721081	3.20751	1186.05	FALSE	1
2022-09-14	13:22:35	0.725611	3.22766	1196.69	FALSE	1
2022-09-14	13:22:35	0.728308	3.23966	1189.29	FALSE	1
2022-09-14	13:22:35	0.726272	3.2306	1199.92	FALSE	1
2022-09-14	13:22:35	0.711819	3.16631	1192.45	FALSE	1
2022-09-14	13:22:36	0.698079	3.1052	1203.02	FALSE	1
2022-09-14	13:22:36	0.736145	3.27452	1195.73	FALSE	1
2022-09-14	13:22:36	0.730751	3.25053	1206.27	FALSE	1
2022-09-14	13:22:36	0.724084	3.22087	1198.95	FALSE	1
2022-09-14	13:22:37	0.72897	3.2426	1209.52	FALSE	1
2022-09-14	13:22:37	0.726985	3.23377	1202.18	FALSE	1
2022-09-14	13:22:37	0.727545	3.23627	1212.75	FALSE	1
2022-09-14	13:22:37	0.732888	3.26003	1205.44	FALSE	1
2022-09-14	13:22:38	0.725916	3.22902	1215.98	FALSE	1
2022-09-14	13:22:38	0.724338	3.222	1208.66	FALSE	1
2022-09-14	13:22:38	0.726985	3.23377	1219.22	FALSE	1
2022-09-14	13:22:39	0.729326	3.24419	1211.91	FALSE	1
2022-09-14	13:22:39	0.65126	2.89693	1222.11	FALSE	1
2022-09-14	13:22:39	0.851463	3.78748	1215.7	FALSE	1
2022-09-14	13:22:39	0.732379	3.25777	1225.37	FALSE	1
2022-09-14	13:22:40	0.72556	3.22744	1218.92	FALSE	1
2022-09-14	13:22:40	0.732583	3.25868	1228.63	FALSE	1
2022-09-14	13:22:40	0.734109	3.26546	1222.19	FALSE	1
2022-09-14	13:22:40	0.730089	3.24758	1231.88	FALSE	1
2022-09-14	13:22:41	0.729071	3.24305	1225.43	FALSE	1
2022-09-14	13:22:41	0.723473	3.21815	1235.1	FALSE	1
2022-09-14	13:22:41	0.72215	3.21227	1228.64	FALSE	1
2022-09-14	13:22:41	0.728054	3.23853	1238.33	FALSE	1
2022-09-14	13:22:42	0.722049	3.21182	1231.86	FALSE	1
2022-09-14	13:22:42	0.725356	3.22653	1241.56	FALSE	1
2022-09-14	13:22:42	0.728054	3.23853	1235.09	FALSE	1
2022-09-14	13:22:43	0.723422	3.21793	1244.78	FALSE	1
2022-09-14	13:22:43	0.734109	3.26546	1238.36	FALSE	1
2022-09-14	13:22:43	0.725712	3.22811	1248.01	FALSE	1
2022-09-14	13:22:43	0.730954	3.25143	1241.61	FALSE	1
2022-09-14	13:22:44	0.731565	3.25415	1251.26	FALSE	1
2022-09-14	13:22:44	0.729886	3.24668	1244.86	FALSE	1
2022-09-14	13:22:44	0.723422	3.21793	1254.48	FALSE	1
2022-09-14	13:22:44	0.721132	3.20774	1248.07	FALSE	1
2022-09-14	13:22:45	0.725458	3.22698	1257.71	FALSE	1
2022-09-14	13:22:45	0.722456	3.21363	1251.28	FALSE	1
2022-09-14	13:22:45	0.732328	3.25754	1260.96	FALSE	1
2022-09-14	13:22:46	0.731514	3.25392	1254.53	FALSE	1
2022-09-14	13:22:46	0.726781	3.23287	1264.2	FALSE	1
2022-09-14	13:22:46	0.72897	3.2426	1257.78	FALSE	1
2022-09-14	13:22:46	0.729478	3.24486	1267.44	FALSE	1
2022-09-14	13:22:47	0.730751	3.25053	1261.03	FALSE	1
2022-09-14	13:22:47	0.729835	3.24645	1270.69	FALSE	1
2022-09-14	13:22:47	0.731158	3.25234	1264.28	FALSE	1
2022-09-14	13:22:47	0.729682	3.24577	1273.93	FALSE	1
2022-09-14	13:22:48	0.731972	3.25596	1267.53	FALSE	1
2022-09-14	13:22:48	0.729428	3.24464	1277.18	FALSE	1
2022-09-14	13:22:48	0.724593	3.22313	1270.76	FALSE	1
2022-09-14	13:22:48	0.731259	3.25279	1280.43	FALSE	1
2022-09-14	13:22:49	0.726018	3.22947	1273.99	FALSE	1
2022-09-14	13:22:49	0.725407	3.22676	1283.66	FALSE	1
2022-09-14	13:22:49	0.727952	3.23808	1277.23	FALSE	1
2022-09-14	13:22:50	0.731107	3.25211	1286.91	FALSE	1
2022-09-14	13:22:50	0.729936	3.2469	1280.47	FALSE	1
2022-09-14	13:22:50	0.717977	3.19371	1290.1	FALSE	1
2022-09-14	13:22:50	0.721845	3.21091	1283.68	FALSE	1
2022-09-14	13:22:51	0.727036	3.234	1293.34	FALSE	1
2022-09-14	13:22:51	0.727596	3.23649	1286.92	FALSE	1
2022-09-14	13:22:51	0.731463	3.25369	1296.59	FALSE	1
2022-09-14	13:22:51	0.725916	3.22902	1290.15	FALSE	1
2022-09-14	13:22:52	0.728715	3.24147	1299.83	FALSE	1
2022-09-14	13:22:52	0.722557	3.21408	1293.36	FALSE	1
2022-09-14	13:22:52	0.725967	3.22925	1303.06	FALSE	1
2022-09-14	13:22:52	0.725662	3.22789	1296.59	FALSE	1
2022-09-14	13:22:53	0.727697	3.23694	1306.3	FALSE	1
2022-09-14	13:22:53	0.727036	3.234	1299.82	FALSE	1
2022-09-14	13:22:53	0.730751	3.25053	1309.55	FALSE	1
2022-09-14	13:22:54	0.727697	3.23694	1303.06	FALSE	1
2022-09-14	13:22:54	0.740573	3.29422	1312.84	FALSE	1
2022-09-14	13:22:54	0.727646	3.23671	1306.3	FALSE	1
2022-09-14	13:22:54	0.72902	3.24283	1316.09	FALSE	1
2022-09-14	13:22:55	0.726679	3.23241	1309.53	FALSE	1
2022-09-14	13:22:55	0.724186	3.22132	1319.31	FALSE	1
2022-09-14	13:22:55	0.73416	3.26569	1312.8	FALSE	1
2022-09-14	13:22:55	0.728512	3.24057	1322.55	FALSE	1
2022-09-14	13:22:56	0.72841	3.24011	1316.04	FALSE	1
2022-09-14	13:22:56	0.728359	3.23989	1325.79	FALSE	1
2022-09-14	13:22:56	0.723372	3.2177	1319.25	FALSE	1
2022-09-14	13:22:56	0.725865	3.22879	1329.02	FALSE	1
2022-09-14	13:22:57	0.723728	3.21929	1322.47	FALSE	1
2022-09-14	13:22:57	0.724186	3.22132	1332.24	FALSE	1
2022-09-14	13:22:57	0.728359	3.23989	1325.71	FALSE	1
2022-09-14	13:22:58	0.725356	3.22653	1335.46	FALSE	1
2022-09-14	13:22:58	0.723219	3.21702	1328.93	FALSE	1
2022-09-14	13:22:58	0.720776	3.20616	1338.67	FALSE	1
2022-09-14	13:22:58	0.730801	3.25075	1332.18	FALSE	1
2022-09-14	13:22:59	0.725814	3.22857	1341.9	FALSE	1
2022-09-14	13:22:59	0.733092	3.26094	1335.44	FALSE	1
2022-09-14	13:22:59	0.727748	3.23717	1345.14	FALSE	1
2022-09-14	13:22:59	0.722049	3.21182	1338.65	FALSE	1
2022-09-14	13:23:00	-0.102633	-0.456532	1345.14	FALSE	1
2022-09-14	13:23:00	0.730852	3.25098	1341.9	FALSE	1
2022-09-14	13:23:00	0.733906	3.26456	1348.4	FALSE	1
2022-09-14	13:23:00	0.730852	3.25098	1345.16	FALSE	1
2022-09-14	13:23:01	0.732634	3.2589	1351.66	FALSE	1
2022-09-14	13:23:01	0.730903	3.2512	1348.41	FALSE	1
2022-09-14	13:23:01	0.72897	3.2426	1354.9	FALSE	1
2022-09-14	13:23:02	0.721081	3.20751	1351.61	FALSE	1
2022-09-14	13:23:02	0.724288	3.22178	1358.12	FALSE	1
2022-09-14	13:23:02	0.718333	3.19529	1354.81	FALSE	1
2022-09-14	13:23:02	0.728308	3.23966	1361.36	FALSE	1
2022-09-14	13:23:03	0.725	3.22494	1358.03	FALSE	1
2022-09-14	13:23:03	0.710802	3.16179	1364.53	FALSE	1
2022-09-14	13:23:03	1.23665	5.50087	1363.54	FALSE	1
2022-09-14	13:23:03	3.10464	13.8101	1378.34	1	2
2022-09-14	13:23:04	3.81197	16.9564	1380.49	1	3
2022-09-14	13:23:04	1.10291	4.90596	1383.24	FALSE	3
2022-09-14	13:23:04	0.547748	2.43649	1382.93	FALSE	3
2022-09-14	13:23:04	0.318435	1.41646	1384.66	FALSE	3
2022-09-14	13:23:05	0.490751	2.18296	1385.11	FALSE	3
2022-09-14	13:23:05	0.211921	0.942667	1385.6	FALSE	3
2022-09-14	13:23:05	-2.2893	-10.1833	1385.11	FALSE	3
2022-09-14	13:23:06	-4.11317	-18.2962	1385.6	FALSE	3
2022-09-14	13:23:06	-3.80553	-16.9278	1385.11	FALSE	3
2022-09-14	13:23:06	-4.13271	-18.3831	1385.6	FALSE	3
2022-09-14	13:23:06	-3.95861	-17.6087	1385.11	FALSE	3
2022-09-14	13:23:07	-4.27281	-19.0063	1385.6	FALSE	3
2022-09-14	13:23:07	-4.15306	-18.4736	1385.11	FALSE	3
2022-09-14	13:23:07	-4.25795	-18.9402	1385.6	FALSE	3
2022-09-14	13:23:07	-4.33398	-19.2784	1385.11	FALSE	3
2022-09-14	13:23:08	-4.24619	-18.8879	1385.6	FALSE	3
2022-09-14	13:23:08	-4.55189	-20.2477	1385.11	FALSE	3
2022-09-14	13:23:08	-4.44915	-19.7907	1385.6	FALSE	3
2022-09-14	13:23:08	-4.81729	-21.4283	1385.11	FALSE	3
2022-09-14	13:23:09	-4.93189	-21.938	1385.6	FALSE	3
2022-09-14	13:23:09	-4.96075	-22.0664	1385.11	FALSE	3
2022-09-14	13:23:09	2.05874	9.15769	1394.76	FALSE	3
2022-09-14	13:23:10	0.775789	3.45086	1388.56	FALSE	3
2022-09-14	13:23:10	0.717926	3.19348	1397.95	FALSE	3
2022-09-14	13:23:10	0.523932	2.33055	1390.89	FALSE	3
2022-09-14	13:23:10	0.486527	2.16417	1400.12	FALSE	3
2022-09-14	13:23:11	0.553906	2.46388	1393.36	FALSE	3
2022-09-14	13:23:11	2.41431	10.7393	1410.86	FALSE	3
2022-09-14	13:23:11	2.3851	10.6094	1403.97	FALSE	3
2022-09-14	13:23:11	0.647086	2.87837	1413.73	FALSE	3
2022-09-14	13:23:12	0.668206	2.97231	1406.94	FALSE	3
2022-09-14	13:23:12	0.634415	2.822	1416.56	FALSE	3
2022-09-14	13:23:12	0.542252	2.41205	1409.35	FALSE	3

## Sheet: MsPotato_prong_202291413175 (2)
Date	Time	Lbs	Total force x time			**GoPro Fitting: 13:07
2022-09-14	13:17:57	-0.0227351	0	FALSE	0
2022-09-14	13:17:57	-0.011183	0	FALSE	0
2022-09-14	13:17:57	0.0528883	0.0528883	FALSE	0
2022-09-14	13:17:57	0.152634	0.205522	FALSE	0
2022-09-14	13:17:58	0.430191	0.635713	FALSE	0
2022-09-14	13:17:58	0.296349	0.932062	FALSE	0
2022-09-14	13:17:58	0.331311	1.26337	FALSE	0
2022-09-14	13:17:59	0.305814	1.56919	FALSE	0
2022-09-14	13:17:59	0.343626	1.91281	FALSE	0
2022-09-14	13:17:59	0.35182	2.26463	FALSE	0
2022-09-14	13:17:59	0.529783	2.79442	FALSE	0
2022-09-14	13:18:00	0.409784	3.2042	FALSE	0
2022-09-14	13:18:00	0.381692	3.58589	FALSE	0
2022-09-14	13:18:00	0.433651	4.01954	FALSE	0
2022-09-14	13:18:00	0.389835	4.40938	FALSE	0
2022-09-14	13:18:01	0.453652	4.86303	FALSE	0
2022-09-14	13:18:01	0.57187	5.4349	FALSE	0
2022-09-14	13:18:01	0.549275	5.98418	FALSE	0
2022-09-14	13:18:01	0.655941	6.64012	FALSE	0
2022-09-14	13:18:02	0.563015	7.20313	FALSE	0
2022-09-14	13:18:02	0.51416	7.71729	FALSE	0
2022-09-14	13:18:02	0.481591	8.19888	FALSE	0
2022-09-14	13:18:03	0.507951	8.70683	FALSE	0
2022-09-14	13:18:03	0.542099	9.24893	FALSE	0
2022-09-14	13:18:03	0.5507	9.79963	FALSE	0
2022-09-14	13:18:03	0.490853	10.2905	FALSE	0
2022-09-14	13:18:04	0.525254	10.8157	FALSE	0
2022-09-14	13:18:04	0.547799	11.3635	FALSE	0
2022-09-14	13:18:04	0.532277	11.8958	FALSE	0
2022-09-14	13:18:04	0.538333	12.4341	FALSE	0
2022-09-14	13:18:05	0.52444	12.9586	FALSE	0
2022-09-14	13:18:05	0.56159	13.5202	FALSE	0
2022-09-14	13:18:05	0.544847	14.065	FALSE	0
2022-09-14	13:18:05	0.536247	14.6013	FALSE	0
2022-09-14	13:18:06	0.49813	15.0994	FALSE	0
2022-09-14	13:18:06	0.485611	15.585	FALSE	0
2022-09-14	13:18:06	0.514975	16.1	FALSE	0
2022-09-14	13:18:07	0.509173	16.6092	FALSE	0
2022-09-14	13:18:07	0.509784	17.1189	FALSE	0
2022-09-14	13:18:07	0.502201	17.6211	FALSE	0
2022-09-14	13:18:07	0.514568	18.1357	FALSE	0
2022-09-14	13:18:08	0.551107	18.6868	FALSE	0
2022-09-14	13:18:08	0.51014	19.197	FALSE	0
2022-09-14	13:18:08	0.459911	19.6569	FALSE	0
2022-09-14	13:18:08	0.54729	20.2042	FALSE	0
2022-09-14	13:18:09	0.43411	20.6383	FALSE	0
2022-09-14	13:18:09	0.467188	21.1055	FALSE	0
2022-09-14	13:18:09	0.432685	21.5381	FALSE	0
2022-09-14	13:18:09	0.24673	21.7849	FALSE	0
2022-09-14	13:18:10	-0.0152033	21.7849	FALSE	0
2022-09-14	13:18:10	-0.188028	21.7849	FALSE	0
2022-09-14	13:18:10	-0.0928623	21.7849	FALSE	0
2022-09-14	13:18:11	-0.306399	21.7849	FALSE	0
2022-09-14	13:18:11	-0.38986	21.7849	FALSE	0
2022-09-14	13:18:11	-0.0896053	21.7849	FALSE	0
2022-09-14	13:18:11	0.24327	22.0281	FALSE	0
2022-09-14	13:18:12	0.182659	22.2108	FALSE	0
2022-09-14	13:18:12	0.246272	22.4571	FALSE	0
2022-09-14	13:18:12	0.174364	22.6314	FALSE	0
2022-09-14	13:18:12	0.26785	22.8993	FALSE	0
2022-09-14	13:18:13	0.233244	23.1325	FALSE	0
2022-09-14	13:18:13	0.328308	23.4608	FALSE	0
2022-09-14	13:18:13	0.23299	23.6938	FALSE	0
2022-09-14	13:18:13	0.320471	24.0143	FALSE	0
2022-09-14	13:18:14	-0.000292388	24.0143	FALSE	0
2022-09-14	13:18:14	-0.087417	24.0143	FALSE	0
2022-09-14	13:18:14	-0.117392	24.0143	FALSE	0
2022-09-14	13:18:15	0.225814	24.2401	FALSE	0
2022-09-14	13:18:15	0.15584	24.396	FALSE	0
2022-09-14	13:18:15	0.113804	24.5098	FALSE	0
2022-09-14	13:18:15	-0.428689	24.5098	FALSE	0
2022-09-14	13:18:16	0.443066	24.9528	FALSE	0
2022-09-14	13:18:16	0.240878	25.1937	FALSE	0
2022-09-14	13:18:16	0.0379264	25.2316	FALSE	0
2022-09-14	13:18:16	-0.14472	25.2316	FALSE	0
2022-09-14	13:18:17	-0.39444	25.2316	FALSE	0
2022-09-14	13:18:17	-0.392709	25.2316	FALSE	0
2022-09-14	13:18:17	-0.182328	25.2316	FALSE	0
2022-09-14	13:18:17	0.18612	25.4178	FALSE	0
2022-09-14	13:18:18	0.346069	25.7638	FALSE	0
2022-09-14	13:18:18	0.238944	26.0028	FALSE	0
2022-09-14	13:18:18	0.395433	26.3982	FALSE	0
2022-09-14	13:18:19	0.340522	26.7387	FALSE	0
2022-09-14	13:18:19	0.494975	27.2337	FALSE	0
2022-09-14	13:18:19	0.250344	27.484	FALSE	0
2022-09-14	13:18:19	0.440674	27.9247	FALSE	0
2022-09-14	13:18:20	0.252328	28.177	FALSE	0
2022-09-14	13:18:20	0.384644	28.5617	FALSE	0
2022-09-14	13:18:20	0.229784	28.7915	FALSE	0
2022-09-14	13:18:20	0.486425	29.2779	FALSE	0
2022-09-14	13:18:21	0.292379	29.5703	FALSE	0
2022-09-14	13:18:21	0.541641	30.1119	FALSE	0
2022-09-14	13:18:21	1.19355	31.3055	FALSE	0
2022-09-14	13:18:22	1.48398	32.7894	FALSE	0
2022-09-14	13:18:22	0.849478	33.6389	FALSE	0
2022-09-14	13:18:22	0.658231	34.2972	FALSE	0
2022-09-14	13:18:22	0.542557	34.8397	FALSE	0
2022-09-14	13:18:23	0.438079	35.2778	FALSE	0
2022-09-14	13:18:23	0.548664	35.8265	FALSE	0
2022-09-14	13:18:23	0.291616	36.1181	FALSE	0
2022-09-14	13:18:23	0.481997	36.6001	FALSE	0
2022-09-14	13:18:24	0.356654	36.9567	FALSE	0
2022-09-14	13:18:24	0.432125	37.3888	FALSE	0
2022-09-14	13:18:24	0.488817	37.8777	FALSE	0
2022-09-14	13:18:24	0.39187	38.2695	FALSE	0
2022-09-14	13:18:25	0.481387	38.7509	FALSE	0
2022-09-14	13:18:25	0.247799	38.9987	FALSE	0
2022-09-14	13:18:25	0.457774	39.4565	FALSE	0
2022-09-14	13:18:26	0.29472	39.7512	FALSE	0
2022-09-14	13:18:26	0.400776	40.152	FALSE	0
2022-09-14	13:18:26	0.328817	40.4808	FALSE	0
2022-09-14	13:18:26	0.396247	40.8771	FALSE	0
2022-09-14	13:18:27	0.415585	41.2926	FALSE	0
2022-09-14	13:18:27	0.351412	41.644	FALSE	0
2022-09-14	13:18:27	0.404898	42.0489	FALSE	0
2022-09-14	13:18:27	0.301947	42.3509	FALSE	0
2022-09-14	13:18:28	0.515738	42.8666	FALSE	0
2022-09-14	13:18:28	0.188919	43.0556	FALSE	0
2022-09-14	13:18:28	0.516807	43.5724	FALSE	0
2022-09-14	13:18:28	0.397061	43.9694	FALSE	0
2022-09-14	13:18:29	0.430649	44.4001	FALSE	0
2022-09-14	13:18:29	0.306476	44.7065	FALSE	0
2022-09-14	13:18:29	0.324491	45.031	FALSE	0
2022-09-14	13:18:30	0.372481	45.4035	FALSE	0
2022-09-14	13:18:30	0.377926	45.7814	FALSE	0
2022-09-14	13:18:30	0.376298	46.1577	FALSE	0
2022-09-14	13:18:30	0.308613	46.4664	FALSE	0
2022-09-14	13:18:31	0.431311	46.8977	FALSE	0
2022-09-14	13:18:31	0.277265	47.1749	FALSE	0
2022-09-14	13:18:31	0.445713	47.6206	FALSE	0
2022-09-14	13:18:31	0.185611	47.8063	FALSE	0
2022-09-14	13:18:32	0.284288	48.0905	FALSE	0
2022-09-14	13:18:32	-0.121157	48.0905	FALSE	0
2022-09-14	13:18:32	-0.341768	48.0905	FALSE	0
2022-09-14	13:18:32	0.219708	48.3102	FALSE	0
2022-09-14	13:18:33	0.990343	49.3006	FALSE	0
2022-09-14	13:18:33	2.58286	51.8835	FALSE	0
2022-09-14	13:18:33	3.41273	55.2962	1	1
2022-09-14	13:18:34	1.89788	57.1941	FALSE	1
2022-09-14	13:18:34	1.22072	58.4148	FALSE	1
2022-09-14	13:18:34	1.08006	59.4948	FALSE	1
2022-09-14	13:18:34	0.557824	60.0527	FALSE	1
2022-09-14	13:18:35	0.476959	60.5296	FALSE	1
2022-09-14	13:18:35	0.445102	60.9747	FALSE	1
2022-09-14	13:18:35	0.307392	61.2821	FALSE	1
2022-09-14	13:18:35	0.447545	61.7297	FALSE	1
2022-09-14	13:18:36	0.385305	62.115	FALSE	1
2022-09-14	13:18:36	0.49187	62.6068	FALSE	1
2022-09-14	13:18:36	0.376501	62.9833	FALSE	1
2022-09-14	13:18:36	0.411412	63.3948	FALSE	1
2022-09-14	13:18:37	0.406985	63.8017	FALSE	1
2022-09-14	13:18:37	0.420725	64.2225	FALSE	1
2022-09-14	13:18:37	0.445255	64.6677	FALSE	1
2022-09-14	13:18:38	0.494822	65.1625	FALSE	1
2022-09-14	13:18:38	0.531921	65.6945	FALSE	1
2022-09-14	13:18:38	0.694008	66.3885	FALSE	1
2022-09-14	13:18:38	1.491	67.8795	FALSE	1
2022-09-14	13:18:39	1.44785	69.3273	FALSE	1
2022-09-14	13:18:39	1.11238	70.4397	FALSE	1
2022-09-14	13:18:39	0.692125	71.1318	FALSE	1
2022-09-14	13:18:39	0.499656	71.6315	FALSE	1
2022-09-14	13:18:40	0.471769	72.1032	FALSE	1
2022-09-14	13:18:40	0.382303	72.4856	FALSE	1
2022-09-14	13:18:40	0.379657	72.8652	FALSE	1
2022-09-14	13:18:41	0.415636	73.2808	FALSE	1
2022-09-14	13:18:41	0.38841	73.6693	FALSE	1
2022-09-14	13:18:41	0.383473	74.0527	FALSE	1
2022-09-14	13:18:41	0.491209	74.5439	FALSE	1
2022-09-14	13:18:42	0.283473	74.8274	FALSE	1
2022-09-14	13:18:42	0.501387	75.3288	FALSE	1
2022-09-14	13:18:42	0.290903	75.6197	FALSE	1
2022-09-14	13:18:42	0.507697	76.1274	FALSE	1
2022-09-14	13:18:43	0.33416	76.4616	FALSE	1
2022-09-14	13:18:43	0.561488	77.023	FALSE	1
2022-09-14	13:18:43	0.446629	77.4697	FALSE	1
2022-09-14	13:18:43	0.685916	78.1556	FALSE	1
2022-09-14	13:18:44	0.509529	78.6651	FALSE	1
2022-09-14	13:18:44	0.678486	79.3436	FALSE	1
2022-09-14	13:18:44	0.516043	79.8596	FALSE	1
2022-09-14	13:18:45	0.537824	80.3975	FALSE	1
2022-09-14	13:18:45	0.610293	81.0078	FALSE	1
2022-09-14	13:18:45	0.654415	81.6622	FALSE	1
2022-09-14	13:18:45	0.482507	82.1447	FALSE	1
2022-09-14	13:18:46	0.561183	82.7059	FALSE	1
2022-09-14	13:18:46	0.623931	83.3298	FALSE	1
2022-09-14	13:18:46	0.0946694	83.4245	FALSE	1
2022-09-14	13:18:46	-0.115458	83.4245	FALSE	1
2022-09-14	13:18:47	0.00825724	83.4327	FALSE	1
2022-09-14	13:18:47	0.252837	83.6856	FALSE	1
2022-09-14	13:18:47	0.186883	83.8724	FALSE	1
2022-09-14	13:18:47	0.164949	84.0374	FALSE	1
2022-09-14	13:18:48	0.129886	84.1673	FALSE	1
2022-09-14	13:18:48	0.268919	84.4362	FALSE	1
2022-09-14	13:18:48	0.312277	84.7485	FALSE	1
2022-09-14	13:18:49	0.257774	85.0063	FALSE	1
2022-09-14	13:18:49	0.275687	85.2819	FALSE	1
2022-09-14	13:18:49	0.220725	85.5027	FALSE	1
2022-09-14	13:18:49	0.333244	85.8359	FALSE	1
2022-09-14	13:18:50	0.314415	86.1503	FALSE	1
2022-09-14	13:18:50	0.365814	86.5161	FALSE	1
2022-09-14	13:18:50	0.455382	86.9715	FALSE	1
2022-09-14	13:18:50	0.45187	87.4234	FALSE	1
2022-09-14	13:18:51	0.704593	88.128	FALSE	1
2022-09-14	13:18:51	0.395992	88.524	FALSE	1
2022-09-14	13:18:51	0.429377	88.9534	FALSE	1
2022-09-14	13:18:51	0.377926	89.3313	FALSE	1
2022-09-14	13:18:52	0.669733	90.001	FALSE	1
2022-09-14	13:18:52	1.20933	91.2103	FALSE	1
2022-09-14	13:18:52	1.17212	92.3825	FALSE	1
2022-09-14	13:18:53	0.789122	93.1716	FALSE	1
2022-09-14	13:18:53	0.879046	94.0506	FALSE	1
2022-09-14	13:18:53	1.02357	95.0742	FALSE	1
2022-09-14	13:18:53	0.724796	95.799	FALSE	1
2022-09-14	13:18:54	0.620878	96.4199	FALSE	1
2022-09-14	13:18:54	0.67472	97.0946	FALSE	1
2022-09-14	13:18:54	0.597926	97.6925	FALSE	1
2022-09-14	13:18:54	0.670242	98.3628	FALSE	1
2022-09-14	13:18:55	1.06846	99.4312	FALSE	1
2022-09-14	13:18:55	1.13268	100.564	FALSE	1
2022-09-14	13:18:55	1.43207	101.996	FALSE	1
2022-09-14	13:18:55	1.42917	103.425	FALSE	1
2022-09-14	13:18:56	1.07192	104.497	FALSE	1
2022-09-14	13:18:56	1.04856	105.546	FALSE	1
2022-09-14	13:18:56	0.889478	106.435	FALSE	1
2022-09-14	13:18:57	0.888562	107.324	FALSE	1
2022-09-14	13:18:57	0.773601	108.097	FALSE	1
2022-09-14	13:18:57	0.465051	108.562	FALSE	1
2022-09-14	13:18:57	0.538995	109.101	FALSE	1
2022-09-14	13:18:58	0.363982	109.465	FALSE	1
2022-09-14	13:18:58	0.358842	109.824	FALSE	1
2022-09-14	13:18:58	0.416552	110.241	FALSE	1
2022-09-14	13:18:58	0.462049	110.703	FALSE	1
2022-09-14	13:18:59	0.444746	111.147	FALSE	1
2022-09-14	13:18:59	0.419708	111.567	FALSE	1
2022-09-14	13:18:59	0.386222	111.953	FALSE	1
2022-09-14	13:19:00	0.384288	112.338	FALSE	1
2022-09-14	13:19:00	0.390852	112.729	FALSE	1
2022-09-14	13:19:00	0.893957	113.623	FALSE	1
2022-09-14	13:19:00	1.0763	114.699	FALSE	1
2022-09-14	13:19:01	0.724593	115.423	FALSE	1
2022-09-14	13:19:01	0.72042	116.144	FALSE	1
2022-09-14	13:19:01	0.725051	116.869	FALSE	1
2022-09-14	13:19:01	0.714669	117.584	FALSE	1
2022-09-14	13:19:02	0.722507	118.306	FALSE	1
2022-09-14	13:19:02	0.723168	119.029	FALSE	1
2022-09-14	13:19:02	0.72383	119.753	FALSE	1
2022-09-14	13:19:02	0.718282	120.471	FALSE	1
2022-09-14	13:19:03	0.729631	121.201	FALSE	1
2022-09-14	13:19:03	0.722099	121.923	FALSE	1
2022-09-14	13:19:03	0.731412	122.654	FALSE	1
2022-09-14	13:19:04	0.723066	123.378	FALSE	1
2022-09-14	13:19:04	0.71813	124.096	FALSE	1
2022-09-14	13:19:04	0.717774	124.813	FALSE	1
2022-09-14	13:19:04	0.72444	125.538	FALSE	1
2022-09-14	13:19:05	0.728257	126.266	FALSE	1
2022-09-14	13:19:05	0.726221	126.992	FALSE	1
2022-09-14	13:19:05	0.722507	127.715	FALSE	1
2022-09-14	13:19:05	0.723982	128.439	FALSE	1
2022-09-14	13:19:06	0.727036	129.166	FALSE	1
2022-09-14	13:19:06	0.726476	129.892	FALSE	1
2022-09-14	13:19:06	0.719809	130.612	FALSE	1
2022-09-14	13:19:06	0.726272	131.338	FALSE	1
2022-09-14	13:19:07	0.723117	132.062	FALSE	1
2022-09-14	13:19:07	0.729122	132.791	FALSE	1
2022-09-14	13:19:07	0.721743	133.512	FALSE	1
2022-09-14	13:19:08	0.720521	134.233	FALSE	1
2022-09-14	13:19:08	0.724084	134.957	FALSE	1
2022-09-14	13:19:08	0.727494	135.685	FALSE	1
2022-09-14	13:19:08	0.72444	136.409	FALSE	1
2022-09-14	13:19:09	0.722303	137.131	FALSE	1
2022-09-14	13:19:09	0.721132	137.852	FALSE	1
2022-09-14	13:19:09	0.72673	138.579	FALSE	1
2022-09-14	13:19:09	0.724033	139.303	FALSE	1
2022-09-14	13:19:10	0.718282	140.021	FALSE	1
2022-09-14	13:19:10	0.720878	140.742	FALSE	1
2022-09-14	13:19:10	0.718791	141.461	FALSE	1
2022-09-14	13:19:10	0.72327	142.184	FALSE	1
2022-09-14	13:19:11	0.725509	142.91	FALSE	1
2022-09-14	13:19:11	0.719962	143.63	FALSE	1
2022-09-14	13:19:11	0.71701	144.347	FALSE	1
2022-09-14	13:19:12	0.720572	145.067	FALSE	1
2022-09-14	13:19:12	0.719198	145.787	FALSE	1
2022-09-14	13:19:12	0.717316	146.504	FALSE	1
2022-09-14	13:19:12	0.718486	147.222	FALSE	1
2022-09-14	13:19:13	0.723982	147.946	FALSE	1
2022-09-14	13:19:13	0.722099	148.669	FALSE	1
2022-09-14	13:19:13	0.725712	149.394	FALSE	1
2022-09-14	13:19:13	0.720471	150.115	FALSE	1
2022-09-14	13:19:14	0.725407	150.84	FALSE	1
2022-09-14	13:19:14	0.716247	151.556	FALSE	1
2022-09-14	13:19:14	0.722456	152.279	FALSE	1
2022-09-14	13:19:14	0.722608	153.001	FALSE	1
2022-09-14	13:19:15	0.721641	153.723	FALSE	1
2022-09-14	13:19:15	0.72617	154.449	FALSE	1
2022-09-14	13:19:15	0.719962	155.169	FALSE	1
2022-09-14	13:19:16	0.720623	155.89	FALSE	1
2022-09-14	13:19:16	0.720064	156.61	FALSE	1
2022-09-14	13:19:16	0.728054	157.338	FALSE	1
2022-09-14	13:19:16	0.721336	158.059	FALSE	1
2022-09-14	13:19:17	0.724186	158.783	FALSE	1
2022-09-14	13:19:17	0.72785	159.511	FALSE	1
2022-09-14	13:19:17	0.721132	160.232	FALSE	1
2022-09-14	13:19:17	0.721794	160.954	FALSE	1
2022-09-14	13:19:18	0.71584	161.67	FALSE	1
2022-09-14	13:19:18	0.725865	162.396	FALSE	1
2022-09-14	13:19:18	0.720114	163.116	FALSE	1
2022-09-14	13:19:19	0.730445	163.846	FALSE	1
2022-09-14	13:19:19	0.725662	164.572	FALSE	1
2022-09-14	13:19:19	0.731361	165.304	FALSE	1
2022-09-14	13:19:19	0.722099	166.026	FALSE	1
2022-09-14	13:19:20	0.722862	166.748	FALSE	1
2022-09-14	13:19:20	0.725967	167.474	FALSE	1
2022-09-14	13:19:20	0.727494	168.202	FALSE	1
2022-09-14	13:19:20	0.724542	168.926	FALSE	1
2022-09-14	13:19:21	0.719758	169.646	FALSE	1
2022-09-14	13:19:21	0.726069	170.372	FALSE	1
2022-09-14	13:19:21	0.71869	171.091	FALSE	1
2022-09-14	13:19:22	0.717366	171.808	FALSE	1
2022-09-14	13:19:22	0.731616	172.54	FALSE	1
2022-09-14	13:19:22	0.724237	173.264	FALSE	1
2022-09-14	13:19:22	0.720623	173.985	FALSE	1
2022-09-14	13:19:23	0.728155	174.713	FALSE	1
2022-09-14	13:19:23	0.72902	175.442	FALSE	1
2022-09-14	13:19:23	0.716908	176.159	FALSE	1
2022-09-14	13:19:23	0.721081	176.88	FALSE	1
2022-09-14	13:19:24	0.721183	177.601	FALSE	1
2022-09-14	13:19:24	0.72271	178.324	FALSE	1
2022-09-14	13:19:24	0.72388	179.048	FALSE	1
2022-09-14	13:19:24	0.723524	179.771	FALSE	1
2022-09-14	13:19:25	0.721081	180.492	FALSE	1
2022-09-14	13:19:25	0.72785	181.22	FALSE	1
2022-09-14	13:19:25	0.718181	181.938	FALSE	1
2022-09-14	13:19:25	0.719046	182.657	FALSE	1
2022-09-14	13:19:26	0.71584	183.373	FALSE	1
2022-09-14	13:19:26	0.721946	184.095	FALSE	1
2022-09-14	13:19:26	0.726476	184.822	FALSE	1
2022-09-14	13:19:27	0.72388	185.546	FALSE	1
2022-09-14	13:19:27	0.718944	186.265	FALSE	1
2022-09-14	13:19:27	0.726985	186.992	FALSE	1
2022-09-14	13:19:27	0.724186	187.716	FALSE	1
2022-09-14	13:19:28	0.721692	188.437	FALSE	1
2022-09-14	13:19:28	0.725407	189.163	FALSE	1
2022-09-14	13:19:28	0.721285	189.884	FALSE	1
2022-09-14	13:19:28	0.72729	190.611	FALSE	1
2022-09-14	13:19:29	0.722507	191.334	FALSE	1
2022-09-14	13:19:29	0.725916	192.06	FALSE	1
2022-09-14	13:19:29	0.721591	192.781	FALSE	1
2022-09-14	13:19:29	0.727443	193.509	FALSE	1
2022-09-14	13:19:30	0.72556	194.234	FALSE	1
2022-09-14	13:19:30	0.723321	194.958	FALSE	1
2022-09-14	13:19:30	0.724847	195.683	FALSE	1
2022-09-14	13:19:31	0.717112	196.4	FALSE	1
2022-09-14	13:19:31	0.72612	197.126	FALSE	1
2022-09-14	13:19:31	0.716908	197.843	FALSE	1
2022-09-14	13:19:31	0.717112	198.56	FALSE	1
2022-09-14	13:19:32	0.714669	199.274	FALSE	1
2022-09-14	13:19:32	0.722049	199.997	FALSE	1
2022-09-14	13:19:32	0.723168	200.72	FALSE	1
2022-09-14	13:19:32	0.726578	201.446	FALSE	1
2022-09-14	13:19:33	0.722507	202.169	FALSE	1
2022-09-14	13:19:33	0.722862	202.892	FALSE	1
2022-09-14	13:19:33	0.721285	203.613	FALSE	1
2022-09-14	13:19:33	0.725254	204.338	FALSE	1
2022-09-14	13:19:34	0.720979	205.059	FALSE	1
2022-09-14	13:19:34	0.729886	205.789	FALSE	1
2022-09-14	13:19:34	0.725204	206.514	FALSE	1
2022-09-14	13:19:35	0.721488	207.236	FALSE	1
2022-09-14	13:19:35	0.716756	207.953	FALSE	1
2022-09-14	13:19:35	0.726476	208.679	FALSE	1
2022-09-14	13:19:35	0.724084	209.403	FALSE	1
2022-09-14	13:19:36	0.726374	210.129	FALSE	1
2022-09-14	13:19:36	0.721132	210.851	FALSE	1
2022-09-14	13:19:36	0.718028	211.569	FALSE	1
2022-09-14	13:19:36	0.724033	212.293	FALSE	1
2022-09-14	13:19:37	0.71813	213.011	FALSE	1
2022-09-14	13:19:37	0.719097	213.73	FALSE	1
2022-09-14	13:19:37	0.71757	214.447	FALSE	1
2022-09-14	13:19:37	0.71813	215.166	FALSE	1
2022-09-14	13:19:38	0.723066	215.889	FALSE	1
2022-09-14	13:19:38	0.721132	216.61	FALSE	1
2022-09-14	13:19:38	0.721437	217.331	FALSE	1
2022-09-14	13:19:39	0.717824	218.049	FALSE	1
2022-09-14	13:19:39	0.718791	218.768	FALSE	1
2022-09-14	13:19:39	0.723066	219.491	FALSE	1
2022-09-14	13:19:39	0.719911	220.211	FALSE	1
2022-09-14	13:19:40	0.719504	220.93	FALSE	1
2022-09-14	13:19:40	0.716501	221.647	FALSE	1
2022-09-14	13:19:40	0.72444	222.371	FALSE	1
2022-09-14	13:19:40	0.724695	223.096	FALSE	1
2022-09-14	13:19:41	0.724237	223.82	FALSE	1
2022-09-14	13:19:41	0.724389	224.545	FALSE	1
2022-09-14	13:19:41	0.717672	225.262	FALSE	1
2022-09-14	13:19:42	0.715585	225.978	FALSE	1
2022-09-14	13:19:42	0.723117	226.701	FALSE	1
2022-09-14	13:19:42	0.724237	227.425	FALSE	1
2022-09-14	13:19:42	0.718944	228.144	FALSE	1
2022-09-14	13:19:43	0.722507	228.867	FALSE	1
2022-09-14	13:19:43	0.721285	229.588	FALSE	1
2022-09-14	13:19:43	0.71701	230.305	FALSE	1
2022-09-14	13:19:43	0.73014	231.035	FALSE	1
2022-09-14	13:19:44	0.720572	231.756	FALSE	1
2022-09-14	13:19:44	0.720216	232.476	FALSE	1
2022-09-14	13:19:44	0.718435	233.194	FALSE	1
2022-09-14	13:19:44	0.724389	233.919	FALSE	1
2022-09-14	13:19:45	0.715941	234.635	FALSE	1
2022-09-14	13:19:45	0.691972	235.327	FALSE	1
2022-09-14	13:19:45	0.726374	236.053	FALSE	1
2022-09-14	13:19:46	0.71986	236.773	FALSE	1
2022-09-14	13:19:46	0.727901	237.501	FALSE	1
2022-09-14	13:19:46	0.726425	238.227	FALSE	1
2022-09-14	13:19:46	0.721997	238.949	FALSE	1
2022-09-14	13:19:47	0.726374	239.676	FALSE	1
2022-09-14	13:19:47	0.723473	240.399	FALSE	1
2022-09-14	13:19:47	0.719656	241.119	FALSE	1
2022-09-14	13:19:47	0.726883	241.846	FALSE	1
2022-09-14	13:19:48	0.728003	242.574	FALSE	1
2022-09-14	13:19:48	0.720878	243.294	FALSE	1
2022-09-14	13:19:48	0.722812	244.017	FALSE	1
2022-09-14	13:19:48	0.725204	244.742	FALSE	1
2022-09-14	13:19:49	0.720674	245.463	FALSE	1
2022-09-14	13:19:49	0.722557	246.186	FALSE	1
2022-09-14	13:19:49	0.709478	246.895	FALSE	1
2022-09-14	13:19:50	0.725407	247.621	FALSE	1
2022-09-14	13:19:50	0.725712	248.346	FALSE	1
2022-09-14	13:19:50	0.721234	249.067	FALSE	1
2022-09-14	13:19:50	0.725153	249.793	FALSE	1
2022-09-14	13:19:51	0.72103	250.514	FALSE	1
2022-09-14	13:19:51	0.724389	251.238	FALSE	1
2022-09-14	13:19:51	0.721794	251.96	FALSE	1
2022-09-14	13:19:51	0.716654	252.676	FALSE	1
2022-09-14	13:19:52	0.725916	253.402	FALSE	1
2022-09-14	13:19:52	0.71813	254.121	FALSE	1
2022-09-14	13:19:52	0.727036	254.848	FALSE	1
2022-09-14	13:19:52	0.722761	255.57	FALSE	1
2022-09-14	13:19:53	0.722303	256.293	FALSE	1
2022-09-14	13:19:53	0.724898	257.018	FALSE	1
2022-09-14	13:19:53	0.724847	257.742	FALSE	1
2022-09-14	13:19:54	0.718893	258.461	FALSE	1
2022-09-14	13:19:54	0.728104	259.189	FALSE	1
2022-09-14	13:19:54	0.719351	259.909	FALSE	1
2022-09-14	13:19:54	0.719656	260.628	FALSE	1
2022-09-14	13:19:55	0.719351	261.348	FALSE	1
2022-09-14	13:19:55	0.721692	262.069	FALSE	1
2022-09-14	13:19:55	0.725458	262.795	FALSE	1
2022-09-14	13:19:55	0.717672	263.513	FALSE	1
2022-09-14	13:19:56	0.722354	264.235	FALSE	1
2022-09-14	13:19:56	0.72042	264.955	FALSE	1
2022-09-14	13:19:56	0.720572	265.676	FALSE	1
2022-09-14	13:19:56	0.725204	266.401	FALSE	1
2022-09-14	13:19:57	0.724644	267.126	FALSE	1
2022-09-14	13:19:57	0.726272	267.852	FALSE	1
2022-09-14	13:19:57	0.721336	268.573	FALSE	1
2022-09-14	13:19:58	0.724389	269.298	FALSE	1
2022-09-14	13:19:58	0.71986	270.018	FALSE	1
2022-09-14	13:19:58	0.722965	270.741	FALSE	1
2022-09-14	13:19:58	0.721132	271.462	FALSE	1
2022-09-14	13:19:59	0.720878	272.183	FALSE	1
2022-09-14	13:19:59	0.726985	272.91	FALSE	1
2022-09-14	13:19:59	0.719046	273.629	FALSE	1
2022-09-14	13:19:59	0.724288	274.353	FALSE	1
2022-09-14	13:20:00	0.725509	275.078	FALSE	1
2022-09-14	13:20:00	0.721641	275.8	FALSE	1
2022-09-14	13:20:00	0.719555	276.52	FALSE	1
2022-09-14	13:20:01	0.722812	277.242	FALSE	1
2022-09-14	13:20:01	0.718384	277.961	FALSE	1
2022-09-14	13:20:01	0.726679	278.687	FALSE	1
2022-09-14	13:20:01	0.728562	279.416	FALSE	1
2022-09-14	13:20:02	0.720725	280.137	FALSE	1
2022-09-14	13:20:02	0.718995	280.856	FALSE	1
2022-09-14	13:20:02	0.726679	281.582	FALSE	1
2022-09-14	13:20:02	0.725254	282.308	FALSE	1
2022-09-14	13:20:03	0.720674	283.028	FALSE	1
2022-09-14	13:20:03	0.726679	283.755	FALSE	1
2022-09-14	13:20:03	0.720114	284.475	FALSE	1
2022-09-14	13:20:03	0.718588	285.194	FALSE	1
2022-09-14	13:20:04	0.723677	285.917	FALSE	1
2022-09-14	13:20:04	0.719504	286.637	FALSE	1
2022-09-14	13:20:04	0.723626	287.361	FALSE	1
2022-09-14	13:20:05	0.724949	288.086	FALSE	1
2022-09-14	13:20:05	0.722099	288.808	FALSE	1
2022-09-14	13:20:05	0.723168	289.531	FALSE	1
2022-09-14	13:20:05	0.715585	290.246	FALSE	1
2022-09-14	13:20:06	0.732379	290.979	FALSE	1
2022-09-14	13:20:06	0.719809	291.699	FALSE	1
2022-09-14	13:20:06	0.726018	292.425	FALSE	1
2022-09-14	13:20:06	0.725	293.15	FALSE	1
2022-09-14	13:20:07	0.724186	293.874	FALSE	1
2022-09-14	13:20:07	0.729631	294.603	FALSE	1
2022-09-14	13:20:07	0.724746	295.328	FALSE	1
2022-09-14	13:20:07	0.338486	295.667	FALSE	1
2022-09-14	13:20:08	0.728155	296.395	FALSE	1
2022-09-14	13:20:08	0.730445	297.125	FALSE	1
2022-09-14	13:20:08	0.722303	297.848	FALSE	1
2022-09-14	13:20:09	0.716705	298.564	FALSE	1
2022-09-14	13:20:09	0.724695	299.289	FALSE	1
2022-09-14	13:20:09	0.721845	300.011	FALSE	1
2022-09-14	13:20:09	0.724033	300.735	FALSE	1
2022-09-14	13:20:10	0.715687	301.45	FALSE	1
2022-09-14	13:20:10	0.720776	302.171	FALSE	1
2022-09-14	13:20:10	0.725611	302.897	FALSE	1
2022-09-14	13:20:10	0.727443	303.624	FALSE	1
2022-09-14	13:20:11	0.71701	304.341	FALSE	1
2022-09-14	13:20:11	0.723931	305.065	FALSE	1
2022-09-14	13:20:11	0.719962	305.785	FALSE	1
2022-09-14	13:20:11	0.716552	306.502	FALSE	1
2022-09-14	13:20:12	0.157977	306.66	FALSE	1
2022-09-14	13:20:12	-0.495203	306.66	FALSE	1
2022-09-14	13:20:12	-0.4922	306.66	FALSE	1
2022-09-14	13:20:13	-0.495101	306.66	FALSE	1
2022-09-14	13:20:13	-0.397798	306.66	FALSE	1
2022-09-14	13:20:13	-0.367264	306.66	FALSE	1
2022-09-14	13:20:13	-0.34874	306.66	FALSE	1
2022-09-14	13:20:14	-0.413829	306.66	FALSE	1
2022-09-14	13:20:14	0.123677	306.783	FALSE	1
2022-09-14	13:20:14	-0.368078	306.783	FALSE	1
2022-09-14	13:20:14	-0.388587	306.783	FALSE	1
2022-09-14	13:20:15	-0.392811	306.783	FALSE	1
2022-09-14	13:20:15	-0.395305	306.783	FALSE	1
2022-09-14	13:20:15	-0.399885	306.783	FALSE	1
2022-09-14	13:20:15	-0.400699	306.783	FALSE	1
2022-09-14	13:20:16	-0.39734	306.783	FALSE	1
2022-09-14	13:20:16	-0.393829	306.783	FALSE	1
2022-09-14	13:20:16	-0.406195	306.783	FALSE	1
2022-09-14	13:20:17	-0.398918	306.783	FALSE	1
2022-09-14	13:20:17	-0.400547	306.783	FALSE	1
2022-09-14	13:20:17	-0.400139	306.783	FALSE	1
2022-09-14	13:20:17	-0.409503	306.783	FALSE	1
2022-09-14	13:20:18	-0.417188	306.783	FALSE	1
2022-09-14	13:20:18	-0.413676	306.783	FALSE	1
2022-09-14	13:20:18	-0.398307	306.783	FALSE	1
2022-09-14	13:20:18	-0.399529	306.783	FALSE	1
2022-09-14	13:20:19	-0.39958	306.783	FALSE	1
2022-09-14	13:20:19	-0.388384	306.783	FALSE	1
2022-09-14	13:20:19	-0.398816	306.783	FALSE	1
2022-09-14	13:20:20	-0.405432	306.783	FALSE	1
2022-09-14	13:20:20	-0.41047	306.783	FALSE	1
2022-09-14	13:20:20	-0.402531	306.783	FALSE	1
2022-09-14	13:20:20	-0.40818	306.783	FALSE	1
2022-09-14	13:20:21	-0.417849	306.783	FALSE	1
2022-09-14	13:20:21	-0.431844	306.783	FALSE	1
2022-09-14	13:20:21	-0.43215	306.783	FALSE	1
2022-09-14	13:20:21	-0.432659	306.783	FALSE	1
2022-09-14	13:20:22	-0.409045	306.783	FALSE	1
2022-09-14	13:20:22	-0.414287	306.783	FALSE	1
2022-09-14	13:20:22	-0.415101	306.783	FALSE	1
2022-09-14	13:20:22	-0.429911	306.783	FALSE	1
2022-09-14	13:20:23	-0.423804	306.783	FALSE	1
2022-09-14	13:20:23	-0.408791	306.783	FALSE	1
2022-09-14	13:20:23	-0.423651	306.783	FALSE	1
2022-09-14	13:20:24	-0.435407	306.783	FALSE	1
2022-09-14	13:20:24	-0.462073	306.783	FALSE	1
2022-09-14	13:20:24	-0.476272	306.783	FALSE	1
2022-09-14	13:20:24	-0.467162	306.783	FALSE	1
2022-09-14	13:20:25	-0.409045	306.783	FALSE	1
2022-09-14	13:20:25	-0.39561	306.783	FALSE	1
2022-09-14	13:20:25	-0.429452	306.783	FALSE	1
2022-09-14	13:20:25	-0.384058	306.783	FALSE	1
2022-09-14	13:20:26	-0.396933	306.783	FALSE	1
2022-09-14	13:20:26	-0.338307	306.783	FALSE	1
2022-09-14	13:20:26	-0.174694	306.783	FALSE	1
2022-09-14	13:20:26	-0.1836	306.783	FALSE	1
2022-09-14	13:20:27	-0.288689	306.783	FALSE	1
2022-09-14	13:20:27	-0.107468	306.783	FALSE	1
2022-09-14	13:20:27	-0.162786	306.783	FALSE	1
2022-09-14	13:20:28	-0.24075	306.783	FALSE	1
2022-09-14	13:20:28	-0.375152	306.783	FALSE	1
2022-09-14	13:20:28	-0.464567	306.783	FALSE	1
2022-09-14	13:20:28	-0.546501	306.783	FALSE	1
2022-09-14	13:20:29	-0.666348	306.783	FALSE	1
2022-09-14	13:20:29	-0.605839	306.783	FALSE	1
2022-09-14	13:20:29	-0.650623	306.783	FALSE	1
2022-09-14	13:20:29	-0.781462	306.783	FALSE	1
2022-09-14	13:20:30	-0.708587	306.783	FALSE	1
2022-09-14	13:20:30	-0.815966	306.783	FALSE	1
2022-09-14	13:20:30	-0.680037	306.783	FALSE	1
2022-09-14	13:20:30	-0.677645	306.783	FALSE	1
2022-09-14	13:20:31	-0.711641	306.783	FALSE	1
2022-09-14	13:20:31	-0.581259	306.783	FALSE	1
2022-09-14	13:20:31	-0.661971	306.783	FALSE	1
2022-09-14	13:20:32	-0.632099	306.783	FALSE	1
2022-09-14	13:20:32	-0.671844	306.783	FALSE	1
2022-09-14	13:20:32	-0.76416	306.783	FALSE	1
2022-09-14	13:20:32	-0.619936	306.783	FALSE	1
2022-09-14	13:20:33	-0.684312	306.783	FALSE	1
2022-09-14	13:20:33	-0.672048	306.783	FALSE	1
2022-09-14	13:20:33	-0.578918	306.783	FALSE	1
2022-09-14	13:20:33	-0.25902	306.783	FALSE	1
2022-09-14	13:20:34	0.716399	307.5	FALSE	1
2022-09-14	13:20:34	0.720216	308.22	FALSE	1
2022-09-14	13:20:34	0.716399	308.936	FALSE	1
2022-09-14	13:20:34	0.729275	309.666	FALSE	1
2022-09-14	13:20:35	0.719758	310.385	FALSE	1
2022-09-14	13:20:35	0.721488	311.107	FALSE	1
2022-09-14	13:20:35	0.724084	311.831	FALSE	1
2022-09-14	13:20:36	0.726578	312.558	FALSE	1
2022-09-14	13:20:36	0.722608	313.28	FALSE	1
2022-09-14	13:20:36	0.716756	313.997	FALSE	1
2022-09-14	13:20:36	0.724847	314.722	FALSE	1
2022-09-14	13:20:37	0.725305	315.447	FALSE	1
2022-09-14	13:20:37	0.730496	316.178	FALSE	1
2022-09-14	13:20:37	0.721641	316.899	FALSE	1
2022-09-14	13:20:37	0.72327	317.623	FALSE	1
2022-09-14	13:20:38	0.721692	318.344	FALSE	1
2022-09-14	13:20:38	0.726374	319.071	FALSE	1
2022-09-14	13:20:38	0.719249	319.79	FALSE	1
2022-09-14	13:20:39	0.724033	320.514	FALSE	1
2022-09-14	13:20:39	0.729987	321.244	FALSE	1
2022-09-14	13:20:39	0.722761	321.967	FALSE	1
2022-09-14	13:20:39	0.723168	322.69	FALSE	1
2022-09-14	13:20:40	0.717468	323.407	FALSE	1
2022-09-14	13:20:40	0.726578	324.134	FALSE	1
2022-09-14	13:20:40	0.717112	324.851	FALSE	1
2022-09-14	13:20:40	0.721132	325.572	FALSE	1
2022-09-14	13:20:41	0.72383	326.296	FALSE	1
2022-09-14	13:20:41	0.72729	327.023	FALSE	1
2022-09-14	13:20:41	0.721743	327.745	FALSE	1
2022-09-14	13:20:41	0.728817	328.474	FALSE	1
2022-09-14	13:20:42	0.723117	329.197	FALSE	1
2022-09-14	13:20:42	0.729478	329.926	FALSE	1
2022-09-14	13:20:42	0.724389	330.651	FALSE	1
2022-09-14	13:20:43	0.72327	331.374	FALSE	1
2022-09-14	13:20:43	0.714008	332.088	FALSE	1
2022-09-14	13:20:43	0.719504	332.808	FALSE	1
2022-09-14	13:20:43	0.721132	333.529	FALSE	1
2022-09-14	13:20:44	0.729326	334.258	FALSE	1
2022-09-14	13:20:44	0.73299	334.991	FALSE	1
2022-09-14	13:20:44	0.721591	335.713	FALSE	1
2022-09-14	13:20:44	0.724389	336.437	FALSE	1
2022-09-14	13:20:45	0.727646	337.165	FALSE	1
2022-09-14	13:20:45	0.721437	337.886	FALSE	1
2022-09-14	13:20:45	0.72215	338.608	FALSE	1
2022-09-14	13:20:46	0.730038	339.338	FALSE	1
2022-09-14	13:20:46	0.725356	340.064	FALSE	1
2022-09-14	13:20:46	0.722761	340.786	FALSE	1
2022-09-14	13:20:46	0.72673	341.513	FALSE	1
2022-09-14	13:20:47	0.726221	342.239	FALSE	1
2022-09-14	13:20:47	0.726832	342.966	FALSE	1
2022-09-14	13:20:47	0.728359	343.695	FALSE	1
2022-09-14	13:20:47	0.732175	344.427	FALSE	1
2022-09-14	13:20:48	0.721895	345.149	FALSE	1
2022-09-14	13:20:48	0.73131	345.88	FALSE	1
2022-09-14	13:20:48	0.72444	346.604	FALSE	1
2022-09-14	13:20:48	0.720929	347.325	FALSE	1
2022-09-14	13:20:49	0.716349	348.042	FALSE	1
2022-09-14	13:20:49	0.722456	348.764	FALSE	1
2022-09-14	13:20:49	0.720216	349.484	FALSE	1
2022-09-14	13:20:49	0.682201	350.166	FALSE	1
2022-09-14	13:20:50	-0.194847	350.166	FALSE	1
2022-09-14	13:20:50	-0.261361	350.166	FALSE	1
2022-09-14	13:20:50	-0.344821	350.166	FALSE	1
2022-09-14	13:20:51	-0.494033	350.166	FALSE	1
2022-09-14	13:20:51	0.251921	350.418	FALSE	1
2022-09-14	13:20:51	0.691768	351.11	FALSE	1
2022-09-14	13:20:51	0.725509	351.836	FALSE	1
2022-09-14	13:20:52	0.708613	352.544	FALSE	1
2022-09-14	13:20:52	0.726323	353.271	FALSE	1
2022-09-14	13:20:52	0.72958	354	FALSE	1
2022-09-14	13:20:52	0.727137	354.727	FALSE	1
2022-09-14	13:20:53	0.733397	355.461	FALSE	1
2022-09-14	13:20:53	0.728613	356.189	FALSE	1
2022-09-14	13:20:53	0.725967	356.915	FALSE	1
2022-09-14	13:20:53	0.722354	357.638	FALSE	1
2022-09-14	13:20:54	0.726374	358.364	FALSE	1
2022-09-14	13:20:54	0.72215	359.086	FALSE	1
2022-09-14	13:20:54	0.717316	359.804	FALSE	1
2022-09-14	13:20:55	0.718791	360.522	FALSE	1
2022-09-14	13:20:55	0.726018	361.248	FALSE	1
2022-09-14	13:20:55	0.726781	361.975	FALSE	1
2022-09-14	13:20:55	0.725916	362.701	FALSE	1
2022-09-14	13:20:56	0.722914	363.424	FALSE	1
2022-09-14	13:20:56	0.726272	364.15	FALSE	1
2022-09-14	13:20:56	0.726934	364.877	FALSE	1
2022-09-14	13:20:56	0.72388	365.601	FALSE	1
2022-09-14	13:20:57	0.727646	366.329	FALSE	1
2022-09-14	13:20:57	0.724237	367.053	FALSE	1
2022-09-14	13:20:57	0.726679	367.78	FALSE	1
2022-09-14	13:20:57	0.726578	368.506	FALSE	1
2022-09-14	13:20:58	0.722456	369.229	FALSE	1
2022-09-14	13:20:58	0.73416	369.963	FALSE	1
2022-09-14	13:20:58	0.726883	370.69	FALSE	1
2022-09-14	13:20:59	0.725865	371.416	FALSE	1
2022-09-14	13:20:59	0.723219	372.139	FALSE	1
2022-09-14	13:20:59	0.731361	372.87	FALSE	1
2022-09-14	13:20:59	0.724796	373.595	FALSE	1
2022-09-14	13:21:00	0.726272	374.321	FALSE	1
2022-09-14	13:21:00	0.726679	375.048	FALSE	1
2022-09-14	13:21:00	0.731005	375.779	FALSE	1
2022-09-14	13:21:00	0.719249	376.498	FALSE	1
2022-09-14	13:21:01	0.729071	377.227	FALSE	1
2022-09-14	13:21:01	0.719656	377.947	FALSE	1
2022-09-14	13:21:01	0.730903	378.678	FALSE	1
2022-09-14	13:21:02	0.723372	379.401	FALSE	1
2022-09-14	13:21:02	0.722507	380.124	FALSE	1
2022-09-14	13:21:02	0.728613	380.852	FALSE	1
2022-09-14	13:21:02	0.725356	381.578	FALSE	1
2022-09-14	13:21:03	0.722862	382.3	FALSE	1
2022-09-14	13:21:03	0.724796	383.025	FALSE	1
2022-09-14	13:21:03	0.732583	383.758	FALSE	1
2022-09-14	13:21:03	0.731056	384.489	FALSE	1
2022-09-14	13:21:04	0.725611	385.214	FALSE	1
2022-09-14	13:21:04	0.72215	385.937	FALSE	1
2022-09-14	13:21:04	0.735026	386.672	FALSE	1
2022-09-14	13:21:04	0.722965	387.395	FALSE	1
2022-09-14	13:21:05	0.724796	388.119	FALSE	1
2022-09-14	13:21:05	0.726527	388.846	FALSE	1
2022-09-14	13:21:05	0.723372	389.569	FALSE	1
2022-09-14	13:21:06	0.728257	390.298	FALSE	1
2022-09-14	13:21:06	0.724847	391.022	FALSE	1
2022-09-14	13:21:06	0.728613	391.751	FALSE	1
2022-09-14	13:21:06	0.721437	392.472	FALSE	1
2022-09-14	13:21:07	0.724491	393.197	FALSE	1
2022-09-14	13:21:07	0.730343	393.927	FALSE	1
2022-09-14	13:21:07	0.723779	394.651	FALSE	1
2022-09-14	13:21:07	0.726679	395.378	FALSE	1
2022-09-14	13:21:08	0.72612	396.104	FALSE	1
2022-09-14	13:21:08	0.723575	396.827	FALSE	1
2022-09-14	13:21:08	0.725763	397.553	FALSE	1
2022-09-14	13:21:09	0.724847	398.278	FALSE	1
2022-09-14	13:21:09	0.720725	398.999	FALSE	1
2022-09-14	13:21:09	0.728766	399.728	FALSE	1
2022-09-14	13:21:09	0.728054	400.456	FALSE	1
2022-09-14	13:21:10	0.721488	401.177	FALSE	1
2022-09-14	13:21:10	0.723677	401.901	FALSE	1
2022-09-14	13:21:10	0.724186	402.625	FALSE	1
2022-09-14	13:21:10	0.72271	403.348	FALSE	1
2022-09-14	13:21:11	0.724186	404.072	FALSE	1
2022-09-14	13:21:11	0.72785	404.8	FALSE	1
2022-09-14	13:21:11	0.721539	405.521	FALSE	1
2022-09-14	13:21:11	0.730801	406.252	FALSE	1
2022-09-14	13:21:12	0.722049	406.974	FALSE	1
2022-09-14	13:21:12	0.724237	407.698	FALSE	1
2022-09-14	13:21:12	0.726781	408.425	FALSE	1
2022-09-14	13:21:12	0.726781	409.152	FALSE	1
2022-09-14	13:21:13	0.726883	409.879	FALSE	1
2022-09-14	13:21:13	0.723524	410.602	FALSE	1
2022-09-14	13:21:13	0.720318	411.323	FALSE	1
2022-09-14	13:21:14	0.723575	412.046	FALSE	1
2022-09-14	13:21:14	0.727239	412.773	FALSE	1
2022-09-14	13:21:14	0.72841	413.502	FALSE	1
2022-09-14	13:21:14	0.723575	414.225	FALSE	1
2022-09-14	13:21:15	0.720725	414.946	FALSE	1
2022-09-14	13:21:15	0.361947	415.308	FALSE	1
2022-09-14	13:21:15	0.259809	415.568	FALSE	1
2022-09-14	13:21:15	0.295484	415.863	FALSE	1
2022-09-14	13:21:16	0.072532	415.936	FALSE	1
2022-09-14	13:21:16	-0.181412	415.936	FALSE	1
2022-09-14	13:21:16	-0.417493	415.936	FALSE	1
2022-09-14	13:21:16	-0.236679	415.936	FALSE	1
2022-09-14	13:21:17	-0.248638	415.936	FALSE	1
2022-09-14	13:21:17	-0.101666	415.936	FALSE	1
2022-09-14	13:21:17	-0.191895	415.936	FALSE	1
2022-09-14	13:21:18	-0.260648	415.936	FALSE	1
2022-09-14	13:21:18	-0.261819	415.936	FALSE	1
2022-09-14	13:21:18	-0.206959	415.936	FALSE	1
2022-09-14	13:21:18	-0.22533	415.936	FALSE	1
2022-09-14	13:21:19	-0.25276	415.936	FALSE	1
2022-09-14	13:21:19	-0.0454323	415.936	FALSE	1
2022-09-14	13:21:19	-0.0806486	415.936	FALSE	1
2022-09-14	13:21:19	0.0582317	415.994	FALSE	1
2022-09-14	13:21:20	-0.156832	415.994	FALSE	1
2022-09-14	13:21:20	-0.167926	415.994	FALSE	1
2022-09-14	13:21:20	0.0287661	416.023	FALSE	1
2022-09-14	13:21:20	-0.162073	416.023	FALSE	1
2022-09-14	13:21:21	0.261081	416.284	FALSE	1
2022-09-14	13:21:21	-0.180292	416.284	FALSE	1
2022-09-14	13:21:21	0.169987	416.454	FALSE	1
2022-09-14	13:21:22	-0.0379005	416.454	FALSE	1
2022-09-14	13:21:22	-0.147163	416.454	FALSE	1
2022-09-14	13:21:22	0.233702	416.688	FALSE	1
2022-09-14	13:21:22	-0.0103687	416.688	FALSE	1
2022-09-14	13:21:23	0.383575	417.071	FALSE	1
2022-09-14	13:21:23	0.266985	417.338	FALSE	1
2022-09-14	13:21:23	0.184033	417.522	FALSE	1
2022-09-14	13:21:23	0.717723	418.24	FALSE	1
2022-09-14	13:21:24	0.708155	418.948	FALSE	1
2022-09-14	13:21:24	0.723473	419.672	FALSE	1
2022-09-14	13:21:24	0.492735	420.164	FALSE	1
2022-09-14	13:21:25	0.595941	420.76	FALSE	1
2022-09-14	13:21:25	0.67528	421.436	FALSE	1
2022-09-14	13:21:25	0.67696	422.113	FALSE	1
2022-09-14	13:21:25	0.725916	422.838	FALSE	1
2022-09-14	13:21:26	0.722201	423.561	FALSE	1
2022-09-14	13:21:26	0.726221	424.287	FALSE	1
2022-09-14	13:21:26	0.727545	425.014	FALSE	1
2022-09-14	13:21:26	0.714924	425.729	FALSE	1
2022-09-14	13:21:27	0.728206	426.458	FALSE	1
2022-09-14	13:21:27	0.719707	427.177	FALSE	1
2022-09-14	13:21:27	0.721895	427.899	FALSE	1
2022-09-14	13:21:27	0.724186	428.623	FALSE	1
2022-09-14	13:21:28	0.721692	429.345	FALSE	1
2022-09-14	13:21:28	0.715992	430.061	FALSE	1
2022-09-14	13:21:28	0.72556	430.787	FALSE	1
2022-09-14	13:21:29	0.727646	431.514	FALSE	1
2022-09-14	13:21:29	0.701285	432.216	FALSE	1
2022-09-14	13:21:29	0.726018	432.942	FALSE	1
2022-09-14	13:21:29	0.71813	433.66	FALSE	1
2022-09-14	13:21:30	0.724084	434.384	FALSE	1
2022-09-14	13:21:30	0.72103	435.105	FALSE	1
2022-09-14	13:21:30	0.721488	435.826	FALSE	1
2022-09-14	13:21:30	0.728206	436.554	FALSE	1
2022-09-14	13:21:31	0.735076	437.29	FALSE	1
2022-09-14	13:21:31	0.733448	438.023	FALSE	1
2022-09-14	13:21:31	0.728664	438.752	FALSE	1
2022-09-14	13:21:31	0.723677	439.475	FALSE	1
2022-09-14	13:21:32	0.732939	440.208	FALSE	1
2022-09-14	13:21:32	0.716603	440.925	FALSE	1
2022-09-14	13:21:32	0.723626	441.649	FALSE	1
2022-09-14	13:21:33	0.724135	442.373	FALSE	1
2022-09-14	13:21:33	0.723524	443.096	FALSE	1
2022-09-14	13:21:33	0.720623	443.817	FALSE	1
2022-09-14	13:21:33	0.732379	444.549	FALSE	1
2022-09-14	13:21:34	0.72271	445.272	FALSE	1
2022-09-14	13:21:34	0.725407	445.997	FALSE	1
2022-09-14	13:21:34	0.728766	446.726	FALSE	1
2022-09-14	13:21:34	0.732023	447.458	FALSE	1
2022-09-14	13:21:35	0.728206	448.186	FALSE	1
2022-09-14	13:21:35	0.727087	448.913	FALSE	1
2022-09-14	13:21:35	0.466171	449.38	FALSE	1
2022-09-14	13:21:35	0.708511	450.088	FALSE	1
2022-09-14	13:21:36	0.727596	450.816	FALSE	1
2022-09-14	13:21:36	0.728817	451.544	FALSE	1
2022-09-14	13:21:36	0.723931	452.268	FALSE	1
2022-09-14	13:21:37	0.703982	452.972	FALSE	1
2022-09-14	13:21:37	0.691921	453.664	FALSE	1
2022-09-14	13:21:37	0.488054	454.152	FALSE	1
2022-09-14	13:21:37	0.728817	454.881	FALSE	1
2022-09-14	13:21:38	0.529631	455.411	FALSE	1
2022-09-14	13:21:38	0.703219	456.114	FALSE	1
2022-09-14	13:21:38	0.685407	456.799	FALSE	1
2022-09-14	13:21:38	0.727188	457.527	FALSE	1
2022-09-14	13:21:39	0.730038	458.257	FALSE	1
2022-09-14	13:21:39	0.730496	458.987	FALSE	1
2022-09-14	13:21:39	0.722914	459.71	FALSE	1
2022-09-14	13:21:39	0.726679	460.437	FALSE	1
2022-09-14	13:21:40	0.731514	461.168	FALSE	1
2022-09-14	13:21:40	0.723677	461.892	FALSE	1
2022-09-14	13:21:40	0.729173	462.621	FALSE	1
2022-09-14	13:21:41	0.723677	463.345	FALSE	1
2022-09-14	13:21:41	0.722557	464.067	FALSE	1
2022-09-14	13:21:41	0.724135	464.791	FALSE	1
2022-09-14	13:21:41	0.722252	465.514	FALSE	1
2022-09-14	13:21:42	0.722812	466.237	FALSE	1
2022-09-14	13:21:42	0.725254	466.962	FALSE	1
2022-09-14	13:21:42	0.729071	467.691	FALSE	1
2022-09-14	13:21:42	0.72958	468.42	FALSE	1
2022-09-14	13:21:43	0.730751	469.151	FALSE	1
2022-09-14	13:21:43	0.722659	469.874	FALSE	1
2022-09-14	13:21:43	0.726476	470.6	FALSE	1
2022-09-14	13:21:43	0.726018	471.326	FALSE	1
2022-09-14	13:21:44	0.302303	471.629	FALSE	1
2022-09-14	13:21:44	0.295178	471.924	FALSE	1
2022-09-14	13:21:44	-8.20716	471.924	FALSE	1
2022-09-14	13:21:45	-0.787111	471.924	FALSE	1
2022-09-14	13:21:45	0.322608	472.246	FALSE	1
2022-09-14	13:21:45	0.282405	472.529	FALSE	1
2022-09-14	13:21:45	0.729377	473.258	FALSE	1
2022-09-14	13:21:46	0.728919	473.987	FALSE	1
2022-09-14	13:21:46	0.724542	474.712	FALSE	1
2022-09-14	13:21:46	0.723372	475.435	FALSE	1
2022-09-14	13:21:46	0.725865	476.161	FALSE	1
2022-09-14	13:21:47	0.731463	476.892	FALSE	1
2022-09-14	13:21:47	0.72383	477.616	FALSE	1
2022-09-14	13:21:47	0.724593	478.341	FALSE	1
2022-09-14	13:21:47	0.604135	478.945	FALSE	1
2022-09-14	13:21:48	0.726476	479.671	FALSE	1
2022-09-14	13:21:48	0.71869	480.39	FALSE	1
2022-09-14	13:21:48	0.456094	480.846	FALSE	1
2022-09-14	13:21:49	0.318741	481.165	FALSE	1
2022-09-14	13:21:49	0.396247	481.561	FALSE	1
2022-09-14	13:21:49	0.389631	481.951	FALSE	1
2022-09-14	13:21:49	0.397621	482.348	FALSE	1
2022-09-14	13:21:50	0.403219	482.752	FALSE	1
2022-09-14	13:21:50	0.402608	483.154	FALSE	1
2022-09-14	13:21:50	0.38785	483.542	FALSE	1
2022-09-14	13:21:50	0.405204	483.947	FALSE	1
2022-09-14	13:21:51	0.409173	484.356	FALSE	1
2022-09-14	13:21:51	0.712023	485.069	FALSE	1
2022-09-14	13:21:51	0.536196	485.605	FALSE	1
2022-09-14	13:21:52	0.71589	486.321	FALSE	1
2022-09-14	13:21:52	0.638944	486.96	FALSE	1
2022-09-14	13:21:52	-1.02833	486.96	FALSE	1
2022-09-14	13:21:52	0.0533463	487.013	FALSE	1
2022-09-14	13:21:53	0.40159	487.414	FALSE	1
2022-09-14	13:21:53	0.432023	487.847	FALSE	1
2022-09-14	13:21:53	0.45014	488.297	FALSE	1
2022-09-14	13:21:53	0.438995	488.736	FALSE	1
2022-09-14	13:21:54	0.411667	489.147	FALSE	1
2022-09-14	13:21:54	0.399657	489.547	FALSE	1
2022-09-14	13:21:54	0.40785	489.955	FALSE	1
2022-09-14	13:21:54	0.428104	490.383	FALSE	1
2022-09-14	13:21:55	0.412379	490.795	FALSE	1
2022-09-14	13:21:55	0.404949	491.2	FALSE	1
2022-09-14	13:21:55	0.430242	491.63	FALSE	1
2022-09-14	13:21:56	0.421336	492.052	FALSE	1
2022-09-14	13:21:56	0.398079	492.45	FALSE	1
2022-09-14	13:21:56	0.403779	492.854	FALSE	1
2022-09-14	13:21:56	0.417977	493.272	FALSE	1
2022-09-14	13:21:57	0.34271	493.614	FALSE	1
2022-09-14	13:21:57	0.364339	493.979	FALSE	1
2022-09-14	13:21:57	0.415026	494.394	FALSE	1
2022-09-14	13:21:57	0.281845	494.676	FALSE	1
2022-09-14	13:21:58	0.215789	494.891	FALSE	1
2022-09-14	13:21:58	0.161743	495.053	FALSE	1
2022-09-14	13:21:58	0.196298	495.249	FALSE	1
2022-09-14	13:21:58	0.140318	495.39	FALSE	1
2022-09-14	13:21:59	0.0667305	495.456	FALSE	1
2022-09-14	13:21:59	0.12556	495.582	FALSE	1
2022-09-14	13:21:59	0.0524811	495.634	FALSE	1
2022-09-14	13:22:00	0.339657	495.974	FALSE	1
2022-09-14	13:22:00	0.384898	496.359	FALSE	1
2022-09-14	13:22:00	0.437723	496.797	FALSE	1
2022-09-14	13:22:00	0.523778	497.321	FALSE	1
2022-09-14	13:22:01	0.334313	497.655	FALSE	1
2022-09-14	13:22:01	0.424491	498.079	FALSE	1
2022-09-14	13:22:01	0.523371	498.603	FALSE	1
2022-09-14	13:22:01	0.483728	499.086	FALSE	1
2022-09-14	13:22:02	0.611565	499.698	FALSE	1
2022-09-14	13:22:02	0.400166	500.098	FALSE	1
2022-09-14	13:22:02	0.452634	500.551	FALSE	1
2022-09-14	13:22:02	0.321082	500.872	FALSE	1
2022-09-14	13:22:03	0.304949	501.177	FALSE	1
2022-09-14	13:22:03	0.448664	501.626	FALSE	1
2022-09-14	13:22:03	0.200878	501.826	FALSE	1
2022-09-14	13:22:04	0.234771	502.061	FALSE	1
2022-09-14	13:22:04	0.417112	502.478	FALSE	1
2022-09-14	13:22:04	0.232023	502.71	FALSE	1
2022-09-14	13:22:04	0.20271	502.913	FALSE	1
2022-09-14	13:22:05	0.305305	503.218	FALSE	1
2022-09-14	13:22:05	0.161082	503.379	FALSE	1
2022-09-14	13:22:05	0.267901	503.647	FALSE	1
2022-09-14	13:22:05	0.105255	503.753	FALSE	1
2022-09-14	13:22:06	0.177875	503.93	FALSE	1
2022-09-14	13:22:06	0.0150257	503.945	FALSE	1
2022-09-14	13:22:06	-0.098562	503.945	FALSE	1
2022-09-14	13:22:06	0.0191478	503.965	FALSE	1
2022-09-14	13:22:07	-0.0296562	503.965	FALSE	1
2022-09-14	13:22:07	0.0906491	504.055	FALSE	1
2022-09-14	13:22:07	-0.0134731	504.055	FALSE	1
2022-09-14	13:22:08	0.112532	504.168	FALSE	1
2022-09-14	13:22:08	0.199555	504.367	FALSE	1
2022-09-14	13:22:08	0.359046	504.726	FALSE	1
2022-09-14	13:22:08	0.278537	505.005	FALSE	1
2022-09-14	13:22:09	0.262659	505.268	FALSE	1
2022-09-14	13:22:09	0.33299	505.601	FALSE	1
2022-09-14	13:22:09	0.191158	505.792	FALSE	1
2022-09-14	13:22:09	0.288054	506.08	FALSE	1
2022-09-14	13:22:10	0.15584	506.236	FALSE	1
2022-09-14	13:22:10	0.373499	506.609	FALSE	1
2022-09-14	13:22:10	0.251514	506.861	FALSE	1
2022-09-14	13:22:10	0.402914	507.264	FALSE	1
2022-09-14	13:22:11	0.27187	507.535	FALSE	1
2022-09-14	13:22:11	0.286934	507.822	FALSE	1
2022-09-14	13:22:11	0.343982	508.166	FALSE	1
2022-09-14	13:22:12	0.299809	508.466	FALSE	1
2022-09-14	13:22:12	0.427697	508.894	FALSE	1
2022-09-14	13:22:12	0.299707	509.194	FALSE	1
2022-09-14	13:22:12	0.234822	509.428	FALSE	1
2022-09-14	13:22:13	0.354364	509.783	FALSE	1
2022-09-14	13:22:13	0.206883	509.99	FALSE	1
2022-09-14	13:22:13	0.305916	510.296	FALSE	1
2022-09-14	13:22:13	0.306323	510.602	FALSE	1
2022-09-14	13:22:14	0.317265	510.919	FALSE	1
2022-09-14	13:22:14	0.42841	511.348	FALSE	1
2022-09-14	13:22:14	0.378639	511.726	FALSE	1
2022-09-14	13:22:15	0.456858	512.183	FALSE	1
2022-09-14	13:22:15	0.334517	512.518	FALSE	1
2022-09-14	13:22:15	0.422252	512.94	FALSE	1
2022-09-14	13:22:15	0.361234	513.301	FALSE	1
2022-09-14	13:22:16	0.363982	513.665	FALSE	1
2022-09-14	13:22:16	0.433957	514.099	FALSE	1
2022-09-14	13:22:16	0.482608	514.582	FALSE	1
2022-09-14	13:22:16	0.382506	514.964	FALSE	1
2022-09-14	13:22:17	0.608257	515.572	FALSE	1
2022-09-14	13:22:17	0.40215	515.974	FALSE	1
2022-09-14	13:22:17	-0.960852	515.974	FALSE	1
2022-09-14	13:22:17	0.602761	516.577	FALSE	1
2022-09-14	13:22:18	0.594771	517.172	FALSE	1
2022-09-14	13:22:18	0.575942	517.748	FALSE	1
2022-09-14	13:22:18	0.538791	518.287	FALSE	1
2022-09-14	13:22:19	0.559453	518.846	FALSE	1
2022-09-14	13:22:19	0.516552	519.363	FALSE	1
2022-09-14	13:22:19	0.503371	519.866	FALSE	1
2022-09-14	13:22:19	0.504949	520.371	FALSE	1
2022-09-14	13:22:20	0.471514	520.843	FALSE	1
2022-09-14	13:22:20	0.46388	521.306	FALSE	1
2022-09-14	13:22:20	-0.0400888	521.306	FALSE	1
2022-09-14	13:22:20	0.256298	521.563	FALSE	1
2022-09-14	13:22:21	0.281641	521.844	FALSE	1
2022-09-14	13:22:21	0.287341	522.132	FALSE	1
2022-09-14	13:22:21	0.293397	522.425	FALSE	1
2022-09-14	13:22:21	0.309784	522.735	FALSE	1
2022-09-14	13:22:22	0.04556	522.78	FALSE	1
2022-09-14	13:22:22	0.727596	523.508	FALSE	1
2022-09-14	13:22:22	0.727087	524.235	FALSE	1
2022-09-14	13:22:23	0.730954	524.966	FALSE	1
2022-09-14	13:22:23	0.726985	525.693	FALSE	1
2022-09-14	13:22:23	0.728461	526.422	FALSE	1
2022-09-14	13:22:23	0.726629	527.148	FALSE	1
2022-09-14	13:22:24	0.720114	527.868	FALSE	1
2022-09-14	13:22:24	0.726934	528.595	FALSE	1
2022-09-14	13:22:24	0.723117	529.318	FALSE	1
2022-09-14	13:22:24	0.729733	530.048	FALSE	1
2022-09-14	13:22:25	0.723473	530.772	FALSE	1
2022-09-14	13:22:25	0.728206	531.5	FALSE	1
2022-09-14	13:22:25	0.732837	532.233	FALSE	1
2022-09-14	13:22:25	0.730496	532.963	FALSE	1
2022-09-14	13:22:26	0.729835	533.693	FALSE	1
2022-09-14	13:22:26	0.728461	534.421	FALSE	1
2022-09-14	13:22:26	0.724288	535.146	FALSE	1
2022-09-14	13:22:27	0.728155	535.874	FALSE	1
2022-09-14	13:22:27	0.721641	536.595	FALSE	1
2022-09-14	13:22:27	0.722608	537.318	FALSE	1
2022-09-14	13:22:27	0.722252	538.04	FALSE	1
2022-09-14	13:22:28	0.727392	538.768	FALSE	1
2022-09-14	13:22:28	0.726323	539.494	FALSE	1
2022-09-14	13:22:28	0.725407	540.219	FALSE	1
2022-09-14	13:22:28	0.735789	540.955	FALSE	1
2022-09-14	13:22:29	0.72729	541.683	FALSE	1
2022-09-14	13:22:29	0.734822	542.417	FALSE	1
2022-09-14	13:22:29	0.727799	543.145	FALSE	1
2022-09-14	13:22:29	0.731412	543.877	FALSE	1
2022-09-14	13:22:30	0.727239	544.604	FALSE	1
2022-09-14	13:22:30	0.727697	545.332	FALSE	1
2022-09-14	13:22:30	0.727341	546.059	FALSE	1
2022-09-14	13:22:31	0.724644	546.784	FALSE	1
2022-09-14	13:22:31	0.733142	547.517	FALSE	1
2022-09-14	13:22:31	0.727087	548.244	FALSE	1
2022-09-14	13:22:31	0.733499	548.977	FALSE	1
2022-09-14	13:22:32	0.734415	549.712	FALSE	1
2022-09-14	13:22:32	0.732023	550.444	FALSE	1
2022-09-14	13:22:32	0.726985	551.171	FALSE	1
2022-09-14	13:22:32	0.723117	551.894	FALSE	1
2022-09-14	13:22:33	0.723321	552.617	FALSE	1
2022-09-14	13:22:33	0.72271	553.34	FALSE	1
2022-09-14	13:22:33	0.728664	554.068	FALSE	1
2022-09-14	13:22:33	0.729478	554.798	FALSE	1
2022-09-14	13:22:34	0.720827	555.519	FALSE	1
2022-09-14	13:22:34	0.725407	556.244	FALSE	1
2022-09-14	13:22:34	0.721081	556.965	FALSE	1
2022-09-14	13:22:35	0.725611	557.691	FALSE	1
2022-09-14	13:22:35	0.728308	558.419	FALSE	1
2022-09-14	13:22:35	0.726272	559.145	FALSE	1
2022-09-14	13:22:35	0.711819	559.857	FALSE	1
2022-09-14	13:22:36	0.698079	560.555	FALSE	1
2022-09-14	13:22:36	0.736145	561.292	FALSE	1
2022-09-14	13:22:36	0.730751	562.022	FALSE	1
2022-09-14	13:22:36	0.724084	562.746	FALSE	1
2022-09-14	13:22:37	0.72897	563.475	FALSE	1
2022-09-14	13:22:37	0.726985	564.202	FALSE	1
2022-09-14	13:22:37	0.727545	564.93	FALSE	1
2022-09-14	13:22:37	0.732888	565.663	FALSE	1
2022-09-14	13:22:38	0.725916	566.389	FALSE	1
2022-09-14	13:22:38	0.724338	567.113	FALSE	1
2022-09-14	13:22:38	0.726985	567.84	FALSE	1
2022-09-14	13:22:39	0.729326	568.569	FALSE	1
2022-09-14	13:22:39	0.65126	569.221	FALSE	1
2022-09-14	13:22:39	0.851463	570.072	FALSE	1
2022-09-14	13:22:39	0.732379	570.804	FALSE	1
2022-09-14	13:22:40	0.72556	571.53	FALSE	1
2022-09-14	13:22:40	0.732583	572.263	FALSE	1
2022-09-14	13:22:40	0.734109	572.997	FALSE	1
2022-09-14	13:22:40	0.730089	573.727	FALSE	1
2022-09-14	13:22:41	0.729071	574.456	FALSE	1
2022-09-14	13:22:41	0.723473	575.179	FALSE	1
2022-09-14	13:22:41	0.72215	575.901	FALSE	1
2022-09-14	13:22:41	0.728054	576.629	FALSE	1
2022-09-14	13:22:42	0.722049	577.352	FALSE	1
2022-09-14	13:22:42	0.725356	578.077	FALSE	1
2022-09-14	13:22:42	0.728054	578.805	FALSE	1
2022-09-14	13:22:43	0.723422	579.528	FALSE	1
2022-09-14	13:22:43	0.734109	580.262	FALSE	1
2022-09-14	13:22:43	0.725712	580.988	FALSE	1
2022-09-14	13:22:43	0.730954	581.719	FALSE	1
2022-09-14	13:22:44	0.731565	582.451	FALSE	1
2022-09-14	13:22:44	0.729886	583.181	FALSE	1
2022-09-14	13:22:44	0.723422	583.904	FALSE	1
2022-09-14	13:22:44	0.721132	584.625	FALSE	1
2022-09-14	13:22:45	0.725458	585.351	FALSE	1
2022-09-14	13:22:45	0.722456	586.073	FALSE	1
2022-09-14	13:22:45	0.732328	586.805	FALSE	1
2022-09-14	13:22:46	0.731514	587.537	FALSE	1
2022-09-14	13:22:46	0.726781	588.264	FALSE	1
2022-09-14	13:22:46	0.72897	588.993	FALSE	1
2022-09-14	13:22:46	0.729478	589.722	FALSE	1
2022-09-14	13:22:47	0.730751	590.453	FALSE	1
2022-09-14	13:22:47	0.729835	591.183	FALSE	1
2022-09-14	13:22:47	0.731158	591.914	FALSE	1
2022-09-14	13:22:47	0.729682	592.644	FALSE	1
2022-09-14	13:22:48	0.731972	593.376	FALSE	1
2022-09-14	13:22:48	0.729428	594.105	FALSE	1
2022-09-14	13:22:48	0.724593	594.83	FALSE	1
2022-09-14	13:22:48	0.731259	595.561	FALSE	1
2022-09-14	13:22:49	0.726018	596.287	FALSE	1
2022-09-14	13:22:49	0.725407	597.012	FALSE	1
2022-09-14	13:22:49	0.727952	597.74	FALSE	1
2022-09-14	13:22:50	0.731107	598.471	FALSE	1
2022-09-14	13:22:50	0.729936	599.201	FALSE	1
2022-09-14	13:22:50	0.717977	599.919	FALSE	1
2022-09-14	13:22:50	0.721845	600.641	FALSE	1
2022-09-14	13:22:51	0.727036	601.368	FALSE	1
2022-09-14	13:22:51	0.727596	602.096	FALSE	1
2022-09-14	13:22:51	0.731463	602.827	FALSE	1
2022-09-14	13:22:51	0.725916	603.553	FALSE	1
2022-09-14	13:22:52	0.728715	604.282	FALSE	1
2022-09-14	13:22:52	0.722557	605.004	FALSE	1
2022-09-14	13:22:52	0.725967	605.73	FALSE	1
2022-09-14	13:22:52	0.725662	606.456	FALSE	1
2022-09-14	13:22:53	0.727697	607.184	FALSE	1
2022-09-14	13:22:53	0.727036	607.911	FALSE	1
2022-09-14	13:22:53	0.730751	608.641	FALSE	1
2022-09-14	13:22:54	0.727697	609.369	FALSE	1
2022-09-14	13:22:54	0.740573	610.11	FALSE	1
2022-09-14	13:22:54	0.727646	610.837	FALSE	1
2022-09-14	13:22:54	0.72902	611.566	FALSE	1
2022-09-14	13:22:55	0.726679	612.293	FALSE	1
2022-09-14	13:22:55	0.724186	613.017	FALSE	1
2022-09-14	13:22:55	0.73416	613.751	FALSE	1
2022-09-14	13:22:55	0.728512	614.48	FALSE	1
2022-09-14	13:22:56	0.72841	615.208	FALSE	1
2022-09-14	13:22:56	0.728359	615.937	FALSE	1
2022-09-14	13:22:56	0.723372	616.66	FALSE	1
2022-09-14	13:22:56	0.725865	617.386	FALSE	1
2022-09-14	13:22:57	0.723728	618.11	FALSE	1
2022-09-14	13:22:57	0.724186	618.834	FALSE	1
2022-09-14	13:22:57	0.728359	619.562	FALSE	1
2022-09-14	13:22:58	0.725356	620.288	FALSE	1
2022-09-14	13:22:58	0.723219	621.011	FALSE	1
2022-09-14	13:22:58	0.720776	621.732	FALSE	1
2022-09-14	13:22:58	0.730801	622.462	FALSE	1
2022-09-14	13:22:59	0.725814	623.188	FALSE	1
2022-09-14	13:22:59	0.733092	623.921	FALSE	1
2022-09-14	13:22:59	0.727748	624.649	FALSE	1
2022-09-14	13:22:59	0.722049	625.371	FALSE	1
2022-09-14	13:23:00	-0.102633	625.371	FALSE	1
2022-09-14	13:23:00	0.730852	626.102	FALSE	1
2022-09-14	13:23:00	0.733906	626.836	FALSE	1
2022-09-14	13:23:00	0.730852	627.567	FALSE	1
2022-09-14	13:23:01	0.732634	628.299	FALSE	1
2022-09-14	13:23:01	0.730903	629.03	FALSE	1
2022-09-14	13:23:01	0.72897	629.759	FALSE	1
2022-09-14	13:23:02	0.721081	630.48	FALSE	1
2022-09-14	13:23:02	0.724288	631.205	FALSE	1
2022-09-14	13:23:02	0.718333	631.923	FALSE	1
2022-09-14	13:23:02	0.728308	632.651	FALSE	1
2022-09-14	13:23:03	0.725	633.376	FALSE	1
2022-09-14	13:23:03	0.710802	634.087	FALSE	1
2022-09-14	13:23:03	1.23665	635.324	FALSE	1
2022-09-14	13:23:03	3.10464	638.428	1	2
2022-09-14	13:23:04	3.81197	642.24	1	3
2022-09-14	13:23:04	1.10291	643.343	FALSE	3
2022-09-14	13:23:04	0.547748	643.891	FALSE	3
2022-09-14	13:23:04	0.318435	644.209	FALSE	3
2022-09-14	13:23:05	0.490751	644.7	FALSE	3
2022-09-14	13:23:05	0.211921	644.912	FALSE	3
2022-09-14	13:23:05	-2.2893	644.912	FALSE	3
2022-09-14	13:23:06	-4.11317	644.912	FALSE	3
2022-09-14	13:23:06	-3.80553	644.912	FALSE	3
2022-09-14	13:23:06	-4.13271	644.912	FALSE	3
2022-09-14	13:23:06	-3.95861	644.912	FALSE	3
2022-09-14	13:23:07	-4.27281	644.912	FALSE	3
2022-09-14	13:23:07	-4.15306	644.912	FALSE	3
2022-09-14	13:23:07	-4.25795	644.912	FALSE	3
2022-09-14	13:23:07	-4.33398	644.912	FALSE	3
2022-09-14	13:23:08	-4.24619	644.912	FALSE	3
2022-09-14	13:23:08	-4.55189	644.912	FALSE	3
2022-09-14	13:23:08	-4.44915	644.912	FALSE	3
2022-09-14	13:23:08	-4.81729	644.912	FALSE	3
2022-09-14	13:23:09	-4.93189	644.912	FALSE	3
2022-09-14	13:23:09	-4.96075	644.912	FALSE	3
2022-09-14	13:23:09	2.05874	646.971	FALSE	3
2022-09-14	13:23:10	0.775789	647.747	FALSE	3
2022-09-14	13:23:10	0.717926	648.464	FALSE	3
2022-09-14	13:23:10	0.523932	648.988	FALSE	3
2022-09-14	13:23:10	0.486527	649.475	FALSE	3
2022-09-14	13:23:11	0.553906	650.029	FALSE	3
2022-09-14	13:23:11	2.41431	652.443	FALSE	3
2022-09-14	13:23:11	2.3851	654.828	FALSE	3
2022-09-14	13:23:11	0.647086	655.475	FALSE	3
2022-09-14	13:23:12	0.668206	656.144	FALSE	3
2022-09-14	13:23:12	0.634415	656.778	FALSE	3
2022-09-14	13:23:12	0.542252	657.32	FALSE	3
2022-09-14	13:23:13	0.559606	657.88	FALSE	3
2022-09-14	13:23:13	0.560878	658.441	FALSE	3
2022-09-14	13:23:13	0.641794	659.082	FALSE	3
2022-09-14	13:23:13	0.595433	659.678	FALSE	3

## Sheet: MsPotato_prong_2022914131756
						**GoPro Fitting: 13:07
2022-09-14	13:17:57	-0.0227351
2022-09-14	13:17:57	-0.011183
2022-09-14	13:17:57	0.0528883
2022-09-14	13:17:57	0.152634
2022-09-14	13:17:58	0.430191
2022-09-14	13:17:58	0.296349
2022-09-14	13:17:58	0.331311
2022-09-14	13:17:59	0.305814
2022-09-14	13:17:59	0.343626
2022-09-14	13:17:59	0.35182
2022-09-14	13:17:59	0.529783
2022-09-14	13:18:00	0.409784
2022-09-14	13:18:00	0.381692
2022-09-14	13:18:00	0.433651
2022-09-14	13:18:00	0.389835
2022-09-14	13:18:01	0.453652
2022-09-14	13:18:01	0.57187
2022-09-14	13:18:01	0.549275
2022-09-14	13:18:01	0.655941
2022-09-14	13:18:02	0.563015
2022-09-14	13:18:02	0.51416
2022-09-14	13:18:02	0.481591
2022-09-14	13:18:03	0.507951
2022-09-14	13:18:03	0.542099
2022-09-14	13:18:03	0.5507
2022-09-14	13:18:03	0.490853
2022-09-14	13:18:04	0.525254
2022-09-14	13:18:04	0.547799
2022-09-14	13:18:04	0.532277
2022-09-14	13:18:04	0.538333
2022-09-14	13:18:05	0.52444
2022-09-14	13:18:05	0.56159
2022-09-14	13:18:05	0.544847
2022-09-14	13:18:05	0.536247
2022-09-14	13:18:06	0.49813
2022-09-14	13:18:06	0.485611
2022-09-14	13:18:06	0.514975
2022-09-14	13:18:07	0.509173
2022-09-14	13:18:07	0.509784
2022-09-14	13:18:07	0.502201
2022-09-14	13:18:07	0.514568
2022-09-14	13:18:08	0.551107
2022-09-14	13:18:08	0.51014
2022-09-14	13:18:08	0.459911
2022-09-14	13:18:08	0.54729
2022-09-14	13:18:09	0.43411
2022-09-14	13:18:09	0.467188
2022-09-14	13:18:09	0.432685
2022-09-14	13:18:09	0.24673
2022-09-14	13:18:10	-0.0152033
2022-09-14	13:18:10	-0.188028
2022-09-14	13:18:10	-0.0928623
2022-09-14	13:18:11	-0.306399
2022-09-14	13:18:11	-0.38986
2022-09-14	13:18:11	-0.0896053
2022-09-14	13:18:11	0.24327
2022-09-14	13:18:12	0.182659
2022-09-14	13:18:12	0.246272
2022-09-14	13:18:12	0.174364
2022-09-14	13:18:12	0.26785
2022-09-14	13:18:13	0.233244
2022-09-14	13:18:13	0.328308
2022-09-14	13:18:13	0.23299
2022-09-14	13:18:13	0.320471
2022-09-14	13:18:14	-0.000292388
2022-09-14	13:18:14	-0.087417
2022-09-14	13:18:14	-0.117392
2022-09-14	13:18:15	0.225814
2022-09-14	13:18:15	0.15584
2022-09-14	13:18:15	0.113804
2022-09-14	13:18:15	-0.428689
2022-09-14	13:18:16	0.443066
2022-09-14	13:18:16	0.240878
2022-09-14	13:18:16	0.0379264
2022-09-14	13:18:16	-0.14472
2022-09-14	13:18:17	-0.39444
2022-09-14	13:18:17	-0.392709
2022-09-14	13:18:17	-0.182328
2022-09-14	13:18:17	0.18612
2022-09-14	13:18:18	0.346069
2022-09-14	13:18:18	0.238944
2022-09-14	13:18:18	0.395433
2022-09-14	13:18:19	0.340522
2022-09-14	13:18:19	0.494975
2022-09-14	13:18:19	0.250344
2022-09-14	13:18:19	0.440674
2022-09-14	13:18:20	0.252328
2022-09-14	13:18:20	0.384644
2022-09-14	13:18:20	0.229784
2022-09-14	13:18:20	0.486425
2022-09-14	13:18:21	0.292379
2022-09-14	13:18:21	0.541641
2022-09-14	13:18:21	1.19355
2022-09-14	13:18:22	1.48398
2022-09-14	13:18:22	0.849478
2022-09-14	13:18:22	0.658231
2022-09-14	13:18:22	0.542557
2022-09-14	13:18:23	0.438079
2022-09-14	13:18:23	0.548664
2022-09-14	13:18:23	0.291616
2022-09-14	13:18:23	0.481997
2022-09-14	13:18:24	0.356654
2022-09-14	13:18:24	0.432125
2022-09-14	13:18:24	0.488817
2022-09-14	13:18:24	0.39187
2022-09-14	13:18:25	0.481387
2022-09-14	13:18:25	0.247799
2022-09-14	13:18:25	0.457774
2022-09-14	13:18:26	0.29472
2022-09-14	13:18:26	0.400776
2022-09-14	13:18:26	0.328817
2022-09-14	13:18:26	0.396247
2022-09-14	13:18:27	0.415585
2022-09-14	13:18:27	0.351412
2022-09-14	13:18:27	0.404898
2022-09-14	13:18:27	0.301947
2022-09-14	13:18:28	0.515738
2022-09-14	13:18:28	0.188919
2022-09-14	13:18:28	0.516807
2022-09-14	13:18:28	0.397061
2022-09-14	13:18:29	0.430649
2022-09-14	13:18:29	0.306476
2022-09-14	13:18:29	0.324491
2022-09-14	13:18:30	0.372481
2022-09-14	13:18:30	0.377926
2022-09-14	13:18:30	0.376298
2022-09-14	13:18:30	0.308613
2022-09-14	13:18:31	0.431311
2022-09-14	13:18:31	0.277265
2022-09-14	13:18:31	0.445713
2022-09-14	13:18:31	0.185611
2022-09-14	13:18:32	0.284288
2022-09-14	13:18:32	-0.121157
2022-09-14	13:18:32	-0.341768
2022-09-14	13:18:32	0.219708
2022-09-14	13:18:33	0.990343
2022-09-14	13:18:33	2.58286
2022-09-14	13:18:33	3.41273
2022-09-14	13:18:34	1.89788
2022-09-14	13:18:34	1.22072
2022-09-14	13:18:34	1.08006
2022-09-14	13:18:34	0.557824
2022-09-14	13:18:35	0.476959
2022-09-14	13:18:35	0.445102
2022-09-14	13:18:35	0.307392
2022-09-14	13:18:35	0.447545
2022-09-14	13:18:36	0.385305
2022-09-14	13:18:36	0.49187
2022-09-14	13:18:36	0.376501
2022-09-14	13:18:36	0.411412
2022-09-14	13:18:37	0.406985
2022-09-14	13:18:37	0.420725
2022-09-14	13:18:37	0.445255
2022-09-14	13:18:38	0.494822
2022-09-14	13:18:38	0.531921
2022-09-14	13:18:38	0.694008
2022-09-14	13:18:38	1.491
2022-09-14	13:18:39	1.44785
2022-09-14	13:18:39	1.11238
2022-09-14	13:18:39	0.692125
2022-09-14	13:18:39	0.499656
2022-09-14	13:18:40	0.471769
2022-09-14	13:18:40	0.382303
2022-09-14	13:18:40	0.379657
2022-09-14	13:18:41	0.415636
2022-09-14	13:18:41	0.38841
2022-09-14	13:18:41	0.383473
2022-09-14	13:18:41	0.491209
2022-09-14	13:18:42	0.283473
2022-09-14	13:18:42	0.501387
2022-09-14	13:18:42	0.290903
2022-09-14	13:18:42	0.507697
2022-09-14	13:18:43	0.33416
2022-09-14	13:18:43	0.561488
2022-09-14	13:18:43	0.446629
2022-09-14	13:18:43	0.685916
2022-09-14	13:18:44	0.509529
2022-09-14	13:18:44	0.678486
2022-09-14	13:18:44	0.516043
2022-09-14	13:18:45	0.537824
2022-09-14	13:18:45	0.610293
2022-09-14	13:18:45	0.654415
2022-09-14	13:18:45	0.482507
2022-09-14	13:18:46	0.561183
2022-09-14	13:18:46	0.623931
2022-09-14	13:18:46	0.0946694
2022-09-14	13:18:46	-0.115458
2022-09-14	13:18:47	0.00825724
2022-09-14	13:18:47	0.252837
2022-09-14	13:18:47	0.186883
2022-09-14	13:18:47	0.164949
2022-09-14	13:18:48	0.129886
2022-09-14	13:18:48	0.268919
2022-09-14	13:18:48	0.312277
2022-09-14	13:18:49	0.257774
2022-09-14	13:18:49	0.275687
2022-09-14	13:18:49	0.220725
2022-09-14	13:18:49	0.333244
2022-09-14	13:18:50	0.314415
2022-09-14	13:18:50	0.365814
2022-09-14	13:18:50	0.455382
2022-09-14	13:18:50	0.45187
2022-09-14	13:18:51	0.704593
2022-09-14	13:18:51	0.395992
2022-09-14	13:18:51	0.429377
2022-09-14	13:18:51	0.377926
2022-09-14	13:18:52	0.669733
2022-09-14	13:18:52	1.20933
2022-09-14	13:18:52	1.17212
2022-09-14	13:18:53	0.789122
2022-09-14	13:18:53	0.879046
2022-09-14	13:18:53	1.02357
2022-09-14	13:18:53	0.724796
2022-09-14	13:18:54	0.620878
2022-09-14	13:18:54	0.67472
2022-09-14	13:18:54	0.597926
2022-09-14	13:18:54	0.670242
2022-09-14	13:18:55	1.06846
2022-09-14	13:18:55	1.13268
2022-09-14	13:18:55	1.43207
2022-09-14	13:18:55	1.42917
2022-09-14	13:18:56	1.07192
2022-09-14	13:18:56	1.04856
2022-09-14	13:18:56	0.889478
2022-09-14	13:18:57	0.888562
2022-09-14	13:18:57	0.773601
2022-09-14	13:18:57	0.465051
2022-09-14	13:18:57	0.538995
2022-09-14	13:18:58	0.363982
2022-09-14	13:18:58	0.358842
2022-09-14	13:18:58	0.416552
2022-09-14	13:18:58	0.462049
2022-09-14	13:18:59	0.444746
2022-09-14	13:18:59	0.419708
2022-09-14	13:18:59	0.386222
2022-09-14	13:19:00	0.384288
2022-09-14	13:19:00	0.390852
2022-09-14	13:19:00	0.893957
2022-09-14	13:19:00	1.0763
2022-09-14	13:19:01	0.724593
2022-09-14	13:19:01	0.72042
2022-09-14	13:19:01	0.725051
2022-09-14	13:19:01	0.714669
2022-09-14	13:19:02	0.722507
2022-09-14	13:19:02	0.723168
2022-09-14	13:19:02	0.72383
2022-09-14	13:19:02	0.718282
2022-09-14	13:19:03	0.729631
2022-09-14	13:19:03	0.722099
2022-09-14	13:19:03	0.731412
2022-09-14	13:19:04	0.723066
2022-09-14	13:19:04	0.71813
2022-09-14	13:19:04	0.717774
2022-09-14	13:19:04	0.72444
2022-09-14	13:19:05	0.728257
2022-09-14	13:19:05	0.726221
2022-09-14	13:19:05	0.722507
2022-09-14	13:19:05	0.723982
2022-09-14	13:19:06	0.727036
2022-09-14	13:19:06	0.726476
2022-09-14	13:19:06	0.719809
2022-09-14	13:19:06	0.726272
2022-09-14	13:19:07	0.723117
2022-09-14	13:19:07	0.729122
2022-09-14	13:19:07	0.721743
2022-09-14	13:19:08	0.720521
2022-09-14	13:19:08	0.724084
2022-09-14	13:19:08	0.727494
2022-09-14	13:19:08	0.72444
2022-09-14	13:19:09	0.722303
2022-09-14	13:19:09	0.721132
2022-09-14	13:19:09	0.72673
2022-09-14	13:19:09	0.724033
2022-09-14	13:19:10	0.718282
2022-09-14	13:19:10	0.720878
2022-09-14	13:19:10	0.718791
2022-09-14	13:19:10	0.72327
2022-09-14	13:19:11	0.725509
2022-09-14	13:19:11	0.719962
2022-09-14	13:19:11	0.71701
2022-09-14	13:19:12	0.720572
2022-09-14	13:19:12	0.719198
2022-09-14	13:19:12	0.717316
2022-09-14	13:19:12	0.718486
2022-09-14	13:19:13	0.723982
2022-09-14	13:19:13	0.722099
2022-09-14	13:19:13	0.725712
2022-09-14	13:19:13	0.720471
2022-09-14	13:19:14	0.725407
2022-09-14	13:19:14	0.716247
2022-09-14	13:19:14	0.722456
2022-09-14	13:19:14	0.722608
2022-09-14	13:19:15	0.721641
2022-09-14	13:19:15	0.72617
2022-09-14	13:19:15	0.719962
2022-09-14	13:19:16	0.720623
2022-09-14	13:19:16	0.720064
2022-09-14	13:19:16	0.728054
2022-09-14	13:19:16	0.721336
2022-09-14	13:19:17	0.724186
2022-09-14	13:19:17	0.72785
2022-09-14	13:19:17	0.721132
2022-09-14	13:19:17	0.721794
2022-09-14	13:19:18	0.71584
2022-09-14	13:19:18	0.725865
2022-09-14	13:19:18	0.720114
2022-09-14	13:19:19	0.730445
2022-09-14	13:19:19	0.725662
2022-09-14	13:19:19	0.731361
2022-09-14	13:19:19	0.722099
2022-09-14	13:19:20	0.722862
2022-09-14	13:19:20	0.725967
2022-09-14	13:19:20	0.727494
2022-09-14	13:19:20	0.724542
2022-09-14	13:19:21	0.719758
2022-09-14	13:19:21	0.726069
2022-09-14	13:19:21	0.71869
2022-09-14	13:19:22	0.717366
2022-09-14	13:19:22	0.731616
2022-09-14	13:19:22	0.724237
2022-09-14	13:19:22	0.720623
2022-09-14	13:19:23	0.728155
2022-09-14	13:19:23	0.72902
2022-09-14	13:19:23	0.716908
2022-09-14	13:19:23	0.721081
2022-09-14	13:19:24	0.721183
2022-09-14	13:19:24	0.72271
2022-09-14	13:19:24	0.72388
2022-09-14	13:19:24	0.723524
2022-09-14	13:19:25	0.721081
2022-09-14	13:19:25	0.72785
2022-09-14	13:19:25	0.718181
2022-09-14	13:19:25	0.719046
2022-09-14	13:19:26	0.71584
2022-09-14	13:19:26	0.721946
2022-09-14	13:19:26	0.726476
2022-09-14	13:19:27	0.72388
2022-09-14	13:19:27	0.718944
2022-09-14	13:19:27	0.726985
2022-09-14	13:19:27	0.724186
2022-09-14	13:19:28	0.721692
2022-09-14	13:19:28	0.725407
2022-09-14	13:19:28	0.721285
2022-09-14	13:19:28	0.72729
2022-09-14	13:19:29	0.722507
2022-09-14	13:19:29	0.725916
2022-09-14	13:19:29	0.721591
2022-09-14	13:19:29	0.727443
2022-09-14	13:19:30	0.72556
2022-09-14	13:19:30	0.723321
2022-09-14	13:19:30	0.724847
2022-09-14	13:19:31	0.717112
2022-09-14	13:19:31	0.72612
2022-09-14	13:19:31	0.716908
2022-09-14	13:19:31	0.717112
2022-09-14	13:19:32	0.714669
2022-09-14	13:19:32	0.722049
2022-09-14	13:19:32	0.723168
2022-09-14	13:19:32	0.726578
2022-09-14	13:19:33	0.722507
2022-09-14	13:19:33	0.722862
2022-09-14	13:19:33	0.721285
2022-09-14	13:19:33	0.725254
2022-09-14	13:19:34	0.720979
2022-09-14	13:19:34	0.729886
2022-09-14	13:19:34	0.725204
2022-09-14	13:19:35	0.721488
2022-09-14	13:19:35	0.716756
2022-09-14	13:19:35	0.726476
2022-09-14	13:19:35	0.724084
2022-09-14	13:19:36	0.726374
2022-09-14	13:19:36	0.721132
2022-09-14	13:19:36	0.718028
2022-09-14	13:19:36	0.724033
2022-09-14	13:19:37	0.71813
2022-09-14	13:19:37	0.719097
2022-09-14	13:19:37	0.71757
2022-09-14	13:19:37	0.71813
2022-09-14	13:19:38	0.723066
2022-09-14	13:19:38	0.721132
2022-09-14	13:19:38	0.721437
2022-09-14	13:19:39	0.717824
2022-09-14	13:19:39	0.718791
2022-09-14	13:19:39	0.723066
2022-09-14	13:19:39	0.719911
2022-09-14	13:19:40	0.719504
2022-09-14	13:19:40	0.716501
2022-09-14	13:19:40	0.72444
2022-09-14	13:19:40	0.724695
2022-09-14	13:19:41	0.724237
2022-09-14	13:19:41	0.724389
2022-09-14	13:19:41	0.717672
2022-09-14	13:19:42	0.715585
2022-09-14	13:19:42	0.723117
2022-09-14	13:19:42	0.724237
2022-09-14	13:19:42	0.718944
2022-09-14	13:19:43	0.722507
2022-09-14	13:19:43	0.721285
2022-09-14	13:19:43	0.71701
2022-09-14	13:19:43	0.73014
2022-09-14	13:19:44	0.720572
2022-09-14	13:19:44	0.720216
2022-09-14	13:19:44	0.718435
2022-09-14	13:19:44	0.724389
2022-09-14	13:19:45	0.715941
2022-09-14	13:19:45	0.691972
2022-09-14	13:19:45	0.726374
2022-09-14	13:19:46	0.71986
2022-09-14	13:19:46	0.727901
2022-09-14	13:19:46	0.726425
2022-09-14	13:19:46	0.721997
2022-09-14	13:19:47	0.726374
2022-09-14	13:19:47	0.723473
2022-09-14	13:19:47	0.719656
2022-09-14	13:19:47	0.726883
2022-09-14	13:19:48	0.728003
2022-09-14	13:19:48	0.720878
2022-09-14	13:19:48	0.722812
2022-09-14	13:19:48	0.725204
2022-09-14	13:19:49	0.720674
2022-09-14	13:19:49	0.722557
2022-09-14	13:19:49	0.709478
2022-09-14	13:19:50	0.725407
2022-09-14	13:19:50	0.725712
2022-09-14	13:19:50	0.721234
2022-09-14	13:19:50	0.725153
2022-09-14	13:19:51	0.72103
2022-09-14	13:19:51	0.724389
2022-09-14	13:19:51	0.721794
2022-09-14	13:19:51	0.716654
2022-09-14	13:19:52	0.725916
2022-09-14	13:19:52	0.71813
2022-09-14	13:19:52	0.727036
2022-09-14	13:19:52	0.722761
2022-09-14	13:19:53	0.722303
2022-09-14	13:19:53	0.724898
2022-09-14	13:19:53	0.724847
2022-09-14	13:19:54	0.718893
2022-09-14	13:19:54	0.728104
2022-09-14	13:19:54	0.719351
2022-09-14	13:19:54	0.719656
2022-09-14	13:19:55	0.719351
2022-09-14	13:19:55	0.721692
2022-09-14	13:19:55	0.725458
2022-09-14	13:19:55	0.717672
2022-09-14	13:19:56	0.722354
2022-09-14	13:19:56	0.72042
2022-09-14	13:19:56	0.720572
2022-09-14	13:19:56	0.725204
2022-09-14	13:19:57	0.724644
2022-09-14	13:19:57	0.726272
2022-09-14	13:19:57	0.721336
2022-09-14	13:19:58	0.724389
2022-09-14	13:19:58	0.71986
2022-09-14	13:19:58	0.722965
2022-09-14	13:19:58	0.721132
2022-09-14	13:19:59	0.720878
2022-09-14	13:19:59	0.726985
2022-09-14	13:19:59	0.719046
2022-09-14	13:19:59	0.724288
2022-09-14	13:20:00	0.725509
2022-09-14	13:20:00	0.721641
2022-09-14	13:20:00	0.719555
2022-09-14	13:20:01	0.722812
2022-09-14	13:20:01	0.718384
2022-09-14	13:20:01	0.726679
2022-09-14	13:20:01	0.728562
2022-09-14	13:20:02	0.720725
2022-09-14	13:20:02	0.718995
2022-09-14	13:20:02	0.726679
2022-09-14	13:20:02	0.725254
2022-09-14	13:20:03	0.720674
2022-09-14	13:20:03	0.726679
2022-09-14	13:20:03	0.720114
2022-09-14	13:20:03	0.718588
2022-09-14	13:20:04	0.723677
2022-09-14	13:20:04	0.719504
2022-09-14	13:20:04	0.723626
2022-09-14	13:20:05	0.724949
2022-09-14	13:20:05	0.722099
2022-09-14	13:20:05	0.723168
2022-09-14	13:20:05	0.715585
2022-09-14	13:20:06	0.732379
2022-09-14	13:20:06	0.719809
2022-09-14	13:20:06	0.726018
2022-09-14	13:20:06	0.725
2022-09-14	13:20:07	0.724186
2022-09-14	13:20:07	0.729631
2022-09-14	13:20:07	0.724746
2022-09-14	13:20:07	0.338486
2022-09-14	13:20:08	0.728155
2022-09-14	13:20:08	0.730445
2022-09-14	13:20:08	0.722303
2022-09-14	13:20:09	0.716705
2022-09-14	13:20:09	0.724695
2022-09-14	13:20:09	0.721845
2022-09-14	13:20:09	0.724033
2022-09-14	13:20:10	0.715687
2022-09-14	13:20:10	0.720776
2022-09-14	13:20:10	0.725611
2022-09-14	13:20:10	0.727443
2022-09-14	13:20:11	0.71701
2022-09-14	13:20:11	0.723931
2022-09-14	13:20:11	0.719962
2022-09-14	13:20:11	0.716552
2022-09-14	13:20:12	0.157977
2022-09-14	13:20:12	-0.495203
2022-09-14	13:20:12	-0.4922
2022-09-14	13:20:13	-0.495101
2022-09-14	13:20:13	-0.397798
2022-09-14	13:20:13	-0.367264
2022-09-14	13:20:13	-0.34874
2022-09-14	13:20:14	-0.413829
2022-09-14	13:20:14	0.123677
2022-09-14	13:20:14	-0.368078
2022-09-14	13:20:14	-0.388587
2022-09-14	13:20:15	-0.392811
2022-09-14	13:20:15	-0.395305
2022-09-14	13:20:15	-0.399885
2022-09-14	13:20:15	-0.400699
2022-09-14	13:20:16	-0.39734
2022-09-14	13:20:16	-0.393829
2022-09-14	13:20:16	-0.406195
2022-09-14	13:20:17	-0.398918
2022-09-14	13:20:17	-0.400547
2022-09-14	13:20:17	-0.400139
2022-09-14	13:20:17	-0.409503
2022-09-14	13:20:18	-0.417188
2022-09-14	13:20:18	-0.413676
2022-09-14	13:20:18	-0.398307
2022-09-14	13:20:18	-0.399529
2022-09-14	13:20:19	-0.39958
2022-09-14	13:20:19	-0.388384
2022-09-14	13:20:19	-0.398816
2022-09-14	13:20:20	-0.405432
2022-09-14	13:20:20	-0.41047
2022-09-14	13:20:20	-0.402531
2022-09-14	13:20:20	-0.40818
2022-09-14	13:20:21	-0.417849
2022-09-14	13:20:21	-0.431844
2022-09-14	13:20:21	-0.43215
2022-09-14	13:20:21	-0.432659
2022-09-14	13:20:22	-0.409045
2022-09-14	13:20:22	-0.414287
2022-09-14	13:20:22	-0.415101
2022-09-14	13:20:22	-0.429911
2022-09-14	13:20:23	-0.423804
2022-09-14	13:20:23	-0.408791
2022-09-14	13:20:23	-0.423651
2022-09-14	13:20:24	-0.435407
2022-09-14	13:20:24	-0.462073
2022-09-14	13:20:24	-0.476272
2022-09-14	13:20:24	-0.467162
2022-09-14	13:20:25	-0.409045
2022-09-14	13:20:25	-0.39561
2022-09-14	13:20:25	-0.429452
2022-09-14	13:20:25	-0.384058
2022-09-14	13:20:26	-0.396933
2022-09-14	13:20:26	-0.338307
2022-09-14	13:20:26	-0.174694
2022-09-14	13:20:26	-0.1836
2022-09-14	13:20:27	-0.288689
2022-09-14	13:20:27	-0.107468
2022-09-14	13:20:27	-0.162786
2022-09-14	13:20:28	-0.24075
2022-09-14	13:20:28	-0.375152
2022-09-14	13:20:28	-0.464567
2022-09-14	13:20:28	-0.546501
2022-09-14	13:20:29	-0.666348
2022-09-14	13:20:29	-0.605839
2022-09-14	13:20:29	-0.650623
2022-09-14	13:20:29	-0.781462
2022-09-14	13:20:30	-0.708587
2022-09-14	13:20:30	-0.815966
2022-09-14	13:20:30	-0.680037
2022-09-14	13:20:30	-0.677645
2022-09-14	13:20:31	-0.711641
2022-09-14	13:20:31	-0.581259
2022-09-14	13:20:31	-0.661971
2022-09-14	13:20:32	-0.632099
2022-09-14	13:20:32	-0.671844
2022-09-14	13:20:32	-0.76416
2022-09-14	13:20:32	-0.619936
2022-09-14	13:20:33	-0.684312
2022-09-14	13:20:33	-0.672048
2022-09-14	13:20:33	-0.578918
2022-09-14	13:20:33	-0.25902
2022-09-14	13:20:34	0.716399
2022-09-14	13:20:34	0.720216
2022-09-14	13:20:34	0.716399
2022-09-14	13:20:34	0.729275
2022-09-14	13:20:35	0.719758
2022-09-14	13:20:35	0.721488
2022-09-14	13:20:35	0.724084
2022-09-14	13:20:36	0.726578
2022-09-14	13:20:36	0.722608
2022-09-14	13:20:36	0.716756
2022-09-14	13:20:36	0.724847
2022-09-14	13:20:37	0.725305
2022-09-14	13:20:37	0.730496
2022-09-14	13:20:37	0.721641
2022-09-14	13:20:37	0.72327
2022-09-14	13:20:38	0.721692
2022-09-14	13:20:38	0.726374
2022-09-14	13:20:38	0.719249
2022-09-14	13:20:39	0.724033
2022-09-14	13:20:39	0.729987
2022-09-14	13:20:39	0.722761
2022-09-14	13:20:39	0.723168
2022-09-14	13:20:40	0.717468
2022-09-14	13:20:40	0.726578
2022-09-14	13:20:40	0.717112
2022-09-14	13:20:40	0.721132
2022-09-14	13:20:41	0.72383
2022-09-14	13:20:41	0.72729
2022-09-14	13:20:41	0.721743
2022-09-14	13:20:41	0.728817
2022-09-14	13:20:42	0.723117
2022-09-14	13:20:42	0.729478
2022-09-14	13:20:42	0.724389
2022-09-14	13:20:43	0.72327
2022-09-14	13:20:43	0.714008
2022-09-14	13:20:43	0.719504
2022-09-14	13:20:43	0.721132
2022-09-14	13:20:44	0.729326
2022-09-14	13:20:44	0.73299
2022-09-14	13:20:44	0.721591
2022-09-14	13:20:44	0.724389
2022-09-14	13:20:45	0.727646
2022-09-14	13:20:45	0.721437
2022-09-14	13:20:45	0.72215
2022-09-14	13:20:46	0.730038
2022-09-14	13:20:46	0.725356
2022-09-14	13:20:46	0.722761
2022-09-14	13:20:46	0.72673
2022-09-14	13:20:47	0.726221
2022-09-14	13:20:47	0.726832
2022-09-14	13:20:47	0.728359
2022-09-14	13:20:47	0.732175
2022-09-14	13:20:48	0.721895
2022-09-14	13:20:48	0.73131
2022-09-14	13:20:48	0.72444
2022-09-14	13:20:48	0.720929
2022-09-14	13:20:49	0.716349
2022-09-14	13:20:49	0.722456
2022-09-14	13:20:49	0.720216
2022-09-14	13:20:49	0.682201
2022-09-14	13:20:50	-0.194847
2022-09-14	13:20:50	-0.261361
2022-09-14	13:20:50	-0.344821
2022-09-14	13:20:51	-0.494033
2022-09-14	13:20:51	0.251921
2022-09-14	13:20:51	0.691768
2022-09-14	13:20:51	0.725509
2022-09-14	13:20:52	0.708613
2022-09-14	13:20:52	0.726323
2022-09-14	13:20:52	0.72958
2022-09-14	13:20:52	0.727137
2022-09-14	13:20:53	0.733397
2022-09-14	13:20:53	0.728613
2022-09-14	13:20:53	0.725967
2022-09-14	13:20:53	0.722354
2022-09-14	13:20:54	0.726374
2022-09-14	13:20:54	0.72215
2022-09-14	13:20:54	0.717316
2022-09-14	13:20:55	0.718791
2022-09-14	13:20:55	0.726018
2022-09-14	13:20:55	0.726781
2022-09-14	13:20:55	0.725916
2022-09-14	13:20:56	0.722914
2022-09-14	13:20:56	0.726272
2022-09-14	13:20:56	0.726934
2022-09-14	13:20:56	0.72388
2022-09-14	13:20:57	0.727646
2022-09-14	13:20:57	0.724237
2022-09-14	13:20:57	0.726679
2022-09-14	13:20:57	0.726578
2022-09-14	13:20:58	0.722456
2022-09-14	13:20:58	0.73416
2022-09-14	13:20:58	0.726883
2022-09-14	13:20:59	0.725865
2022-09-14	13:20:59	0.723219
2022-09-14	13:20:59	0.731361
2022-09-14	13:20:59	0.724796
2022-09-14	13:21:00	0.726272
2022-09-14	13:21:00	0.726679
2022-09-14	13:21:00	0.731005
2022-09-14	13:21:00	0.719249
2022-09-14	13:21:01	0.729071
2022-09-14	13:21:01	0.719656
2022-09-14	13:21:01	0.730903
2022-09-14	13:21:02	0.723372
2022-09-14	13:21:02	0.722507
2022-09-14	13:21:02	0.728613
2022-09-14	13:21:02	0.725356
2022-09-14	13:21:03	0.722862
2022-09-14	13:21:03	0.724796
2022-09-14	13:21:03	0.732583
2022-09-14	13:21:03	0.731056
2022-09-14	13:21:04	0.725611
2022-09-14	13:21:04	0.72215
2022-09-14	13:21:04	0.735026
2022-09-14	13:21:04	0.722965
2022-09-14	13:21:05	0.724796
2022-09-14	13:21:05	0.726527
2022-09-14	13:21:05	0.723372
2022-09-14	13:21:06	0.728257
2022-09-14	13:21:06	0.724847
2022-09-14	13:21:06	0.728613
2022-09-14	13:21:06	0.721437
2022-09-14	13:21:07	0.724491
2022-09-14	13:21:07	0.730343
2022-09-14	13:21:07	0.723779
2022-09-14	13:21:07	0.726679
2022-09-14	13:21:08	0.72612
2022-09-14	13:21:08	0.723575
2022-09-14	13:21:08	0.725763
2022-09-14	13:21:09	0.724847
2022-09-14	13:21:09	0.720725
2022-09-14	13:21:09	0.728766
2022-09-14	13:21:09	0.728054
2022-09-14	13:21:10	0.721488
2022-09-14	13:21:10	0.723677
2022-09-14	13:21:10	0.724186
2022-09-14	13:21:10	0.72271
2022-09-14	13:21:11	0.724186
2022-09-14	13:21:11	0.72785
2022-09-14	13:21:11	0.721539
2022-09-14	13:21:11	0.730801
2022-09-14	13:21:12	0.722049
2022-09-14	13:21:12	0.724237
2022-09-14	13:21:12	0.726781
2022-09-14	13:21:12	0.726781
2022-09-14	13:21:13	0.726883
2022-09-14	13:21:13	0.723524
2022-09-14	13:21:13	0.720318
2022-09-14	13:21:14	0.723575
2022-09-14	13:21:14	0.727239
2022-09-14	13:21:14	0.72841
2022-09-14	13:21:14	0.723575
2022-09-14	13:21:15	0.720725
2022-09-14	13:21:15	0.361947
2022-09-14	13:21:15	0.259809
2022-09-14	13:21:15	0.295484
2022-09-14	13:21:16	0.072532
2022-09-14	13:21:16	-0.181412
2022-09-14	13:21:16	-0.417493
2022-09-14	13:21:16	-0.236679
2022-09-14	13:21:17	-0.248638
2022-09-14	13:21:17	-0.101666
2022-09-14	13:21:17	-0.191895
2022-09-14	13:21:18	-0.260648
2022-09-14	13:21:18	-0.261819
2022-09-14	13:21:18	-0.206959
2022-09-14	13:21:18	-0.22533
2022-09-14	13:21:19	-0.25276
2022-09-14	13:21:19	-0.0454323
2022-09-14	13:21:19	-0.0806486
2022-09-14	13:21:19	0.0582317
2022-09-14	13:21:20	-0.156832
2022-09-14	13:21:20	-0.167926
2022-09-14	13:21:20	0.0287661
2022-09-14	13:21:20	-0.162073
2022-09-14	13:21:21	0.261081
2022-09-14	13:21:21	-0.180292
2022-09-14	13:21:21	0.169987
2022-09-14	13:21:22	-0.0379005
2022-09-14	13:21:22	-0.147163
2022-09-14	13:21:22	0.233702
2022-09-14	13:21:22	-0.0103687
2022-09-14	13:21:23	0.383575
2022-09-14	13:21:23	0.266985
2022-09-14	13:21:23	0.184033
2022-09-14	13:21:23	0.717723
2022-09-14	13:21:24	0.708155
2022-09-14	13:21:24	0.723473
2022-09-14	13:21:24	0.492735
2022-09-14	13:21:25	0.595941
2022-09-14	13:21:25	0.67528
2022-09-14	13:21:25	0.67696
2022-09-14	13:21:25	0.725916
2022-09-14	13:21:26	0.722201
2022-09-14	13:21:26	0.726221
2022-09-14	13:21:26	0.727545
2022-09-14	13:21:26	0.714924
2022-09-14	13:21:27	0.728206
2022-09-14	13:21:27	0.719707
2022-09-14	13:21:27	0.721895
2022-09-14	13:21:27	0.724186
2022-09-14	13:21:28	0.721692
2022-09-14	13:21:28	0.715992
2022-09-14	13:21:28	0.72556
2022-09-14	13:21:29	0.727646
2022-09-14	13:21:29	0.701285
2022-09-14	13:21:29	0.726018
2022-09-14	13:21:29	0.71813
2022-09-14	13:21:30	0.724084
2022-09-14	13:21:30	0.72103
2022-09-14	13:21:30	0.721488
2022-09-14	13:21:30	0.728206
2022-09-14	13:21:31	0.735076
2022-09-14	13:21:31	0.733448
2022-09-14	13:21:31	0.728664
2022-09-14	13:21:31	0.723677
2022-09-14	13:21:32	0.732939
2022-09-14	13:21:32	0.716603
2022-09-14	13:21:32	0.723626
2022-09-14	13:21:33	0.724135
2022-09-14	13:21:33	0.723524
2022-09-14	13:21:33	0.720623
2022-09-14	13:21:33	0.732379
2022-09-14	13:21:34	0.72271
2022-09-14	13:21:34	0.725407
2022-09-14	13:21:34	0.728766
2022-09-14	13:21:34	0.732023
2022-09-14	13:21:35	0.728206
2022-09-14	13:21:35	0.727087
2022-09-14	13:21:35	0.466171
2022-09-14	13:21:35	0.708511
2022-09-14	13:21:36	0.727596
2022-09-14	13:21:36	0.728817
2022-09-14	13:21:36	0.723931
2022-09-14	13:21:37	0.703982
2022-09-14	13:21:37	0.691921
2022-09-14	13:21:37	0.488054
2022-09-14	13:21:37	0.728817
2022-09-14	13:21:38	0.529631
2022-09-14	13:21:38	0.703219
2022-09-14	13:21:38	0.685407
2022-09-14	13:21:38	0.727188
2022-09-14	13:21:39	0.730038
2022-09-14	13:21:39	0.730496
2022-09-14	13:21:39	0.722914
2022-09-14	13:21:39	0.726679
2022-09-14	13:21:40	0.731514
2022-09-14	13:21:40	0.723677
2022-09-14	13:21:40	0.729173
2022-09-14	13:21:41	0.723677
2022-09-14	13:21:41	0.722557
2022-09-14	13:21:41	0.724135
2022-09-14	13:21:41	0.722252
2022-09-14	13:21:42	0.722812
2022-09-14	13:21:42	0.725254
2022-09-14	13:21:42	0.729071
2022-09-14	13:21:42	0.72958
2022-09-14	13:21:43	0.730751
2022-09-14	13:21:43	0.722659
2022-09-14	13:21:43	0.726476
2022-09-14	13:21:43	0.726018
2022-09-14	13:21:44	0.302303
2022-09-14	13:21:44	0.295178
2022-09-14	13:21:44	-8.20716
2022-09-14	13:21:45	-0.787111
2022-09-14	13:21:45	0.322608
2022-09-14	13:21:45	0.282405
2022-09-14	13:21:45	0.729377
2022-09-14	13:21:46	0.728919
2022-09-14	13:21:46	0.724542
2022-09-14	13:21:46	0.723372
2022-09-14	13:21:46	0.725865
2022-09-14	13:21:47	0.731463
2022-09-14	13:21:47	0.72383
2022-09-14	13:21:47	0.724593
2022-09-14	13:21:47	0.604135
2022-09-14	13:21:48	0.726476
2022-09-14	13:21:48	0.71869
2022-09-14	13:21:48	0.456094
2022-09-14	13:21:49	0.318741
2022-09-14	13:21:49	0.396247
2022-09-14	13:21:49	0.389631
2022-09-14	13:21:49	0.397621
2022-09-14	13:21:50	0.403219
2022-09-14	13:21:50	0.402608
2022-09-14	13:21:50	0.38785
2022-09-14	13:21:50	0.405204
2022-09-14	13:21:51	0.409173
2022-09-14	13:21:51	0.712023
2022-09-14	13:21:51	0.536196
2022-09-14	13:21:52	0.71589
2022-09-14	13:21:52	0.638944
2022-09-14	13:21:52	-1.02833
2022-09-14	13:21:52	0.0533463
2022-09-14	13:21:53	0.40159
2022-09-14	13:21:53	0.432023
2022-09-14	13:21:53	0.45014
2022-09-14	13:21:53	0.438995
2022-09-14	13:21:54	0.411667
2022-09-14	13:21:54	0.399657
2022-09-14	13:21:54	0.40785
2022-09-14	13:21:54	0.428104
2022-09-14	13:21:55	0.412379
2022-09-14	13:21:55	0.404949
2022-09-14	13:21:55	0.430242
2022-09-14	13:21:56	0.421336
2022-09-14	13:21:56	0.398079
2022-09-14	13:21:56	0.403779
2022-09-14	13:21:56	0.417977
2022-09-14	13:21:57	0.34271
2022-09-14	13:21:57	0.364339
2022-09-14	13:21:57	0.415026
2022-09-14	13:21:57	0.281845
2022-09-14	13:21:58	0.215789
2022-09-14	13:21:58	0.161743
2022-09-14	13:21:58	0.196298
2022-09-14	13:21:58	0.140318
2022-09-14	13:21:59	0.0667305
2022-09-14	13:21:59	0.12556
2022-09-14	13:21:59	0.0524811
2022-09-14	13:22:00	0.339657
2022-09-14	13:22:00	0.384898
2022-09-14	13:22:00	0.437723
2022-09-14	13:22:00	0.523778
2022-09-14	13:22:01	0.334313
2022-09-14	13:22:01	0.424491
2022-09-14	13:22:01	0.523371
2022-09-14	13:22:01	0.483728
2022-09-14	13:22:02	0.611565
2022-09-14	13:22:02	0.400166
2022-09-14	13:22:02	0.452634
2022-09-14	13:22:02	0.321082
2022-09-14	13:22:03	0.304949
2022-09-14	13:22:03	0.448664
2022-09-14	13:22:03	0.200878
2022-09-14	13:22:04	0.234771
2022-09-14	13:22:04	0.417112
2022-09-14	13:22:04	0.232023
2022-09-14	13:22:04	0.20271
2022-09-14	13:22:05	0.305305
2022-09-14	13:22:05	0.161082
2022-09-14	13:22:05	0.267901
2022-09-14	13:22:05	0.105255
2022-09-14	13:22:06	0.177875
2022-09-14	13:22:06	0.0150257
2022-09-14	13:22:06	-0.098562
2022-09-14	13:22:06	0.0191478
2022-09-14	13:22:07	-0.0296562
2022-09-14	13:22:07	0.0906491
2022-09-14	13:22:07	-0.0134731
2022-09-14	13:22:08	0.112532
2022-09-14	13:22:08	0.199555
2022-09-14	13:22:08	0.359046
2022-09-14	13:22:08	0.278537
2022-09-14	13:22:09	0.262659
2022-09-14	13:22:09	0.33299
2022-09-14	13:22:09	0.191158
2022-09-14	13:22:09	0.288054
2022-09-14	13:22:10	0.15584
2022-09-14	13:22:10	0.373499
2022-09-14	13:22:10	0.251514
2022-09-14	13:22:10	0.402914
2022-09-14	13:22:11	0.27187
2022-09-14	13:22:11	0.286934
2022-09-14	13:22:11	0.343982
2022-09-14	13:22:12	0.299809
2022-09-14	13:22:12	0.427697
2022-09-14	13:22:12	0.299707
2022-09-14	13:22:12	0.234822
2022-09-14	13:22:13	0.354364
2022-09-14	13:22:13	0.206883
2022-09-14	13:22:13	0.305916
2022-09-14	13:22:13	0.306323
2022-09-14	13:22:14	0.317265
2022-09-14	13:22:14	0.42841
2022-09-14	13:22:14	0.378639
2022-09-14	13:22:15	0.456858
2022-09-14	13:22:15	0.334517
2022-09-14	13:22:15	0.422252
2022-09-14	13:22:15	0.361234
2022-09-14	13:22:16	0.363982
2022-09-14	13:22:16	0.433957
2022-09-14	13:22:16	0.482608
2022-09-14	13:22:16	0.382506
2022-09-14	13:22:17	0.608257
2022-09-14	13:22:17	0.40215
2022-09-14	13:22:17	-0.960852
2022-09-14	13:22:17	0.602761
2022-09-14	13:22:18	0.594771
2022-09-14	13:22:18	0.575942
2022-09-14	13:22:18	0.538791
2022-09-14	13:22:19	0.559453
2022-09-14	13:22:19	0.516552
2022-09-14	13:22:19	0.503371
2022-09-14	13:22:19	0.504949
2022-09-14	13:22:20	0.471514
2022-09-14	13:22:20	0.46388
2022-09-14	13:22:20	-0.0400888
2022-09-14	13:22:20	0.256298
2022-09-14	13:22:21	0.281641
2022-09-14	13:22:21	0.287341
2022-09-14	13:22:21	0.293397
2022-09-14	13:22:21	0.309784
2022-09-14	13:22:22	0.04556
2022-09-14	13:22:22	0.727596
2022-09-14	13:22:22	0.727087
2022-09-14	13:22:23	0.730954
2022-09-14	13:22:23	0.726985
2022-09-14	13:22:23	0.728461
2022-09-14	13:22:23	0.726629
2022-09-14	13:22:24	0.720114
2022-09-14	13:22:24	0.726934
2022-09-14	13:22:24	0.723117
2022-09-14	13:22:24	0.729733
2022-09-14	13:22:25	0.723473
2022-09-14	13:22:25	0.728206
2022-09-14	13:22:25	0.732837
2022-09-14	13:22:25	0.730496
2022-09-14	13:22:26	0.729835
2022-09-14	13:22:26	0.728461
2022-09-14	13:22:26	0.724288
2022-09-14	13:22:27	0.728155
2022-09-14	13:22:27	0.721641
2022-09-14	13:22:27	0.722608
2022-09-14	13:22:27	0.722252
2022-09-14	13:22:28	0.727392
2022-09-14	13:22:28	0.726323
2022-09-14	13:22:28	0.725407
2022-09-14	13:22:28	0.735789
2022-09-14	13:22:29	0.72729
2022-09-14	13:22:29	0.734822
2022-09-14	13:22:29	0.727799
2022-09-14	13:22:29	0.731412
2022-09-14	13:22:30	0.727239
2022-09-14	13:22:30	0.727697
2022-09-14	13:22:30	0.727341
2022-09-14	13:22:31	0.724644
2022-09-14	13:22:31	0.733142
2022-09-14	13:22:31	0.727087
2022-09-14	13:22:31	0.733499
2022-09-14	13:22:32	0.734415
2022-09-14	13:22:32	0.732023
2022-09-14	13:22:32	0.726985
2022-09-14	13:22:32	0.723117
2022-09-14	13:22:33	0.723321
2022-09-14	13:22:33	0.72271
2022-09-14	13:22:33	0.728664
2022-09-14	13:22:33	0.729478
2022-09-14	13:22:34	0.720827
2022-09-14	13:22:34	0.725407
2022-09-14	13:22:34	0.721081
2022-09-14	13:22:35	0.725611
2022-09-14	13:22:35	0.728308
2022-09-14	13:22:35	0.726272
2022-09-14	13:22:35	0.711819
2022-09-14	13:22:36	0.698079
2022-09-14	13:22:36	0.736145
2022-09-14	13:22:36	0.730751
2022-09-14	13:22:36	0.724084
2022-09-14	13:22:37	0.72897
2022-09-14	13:22:37	0.726985
2022-09-14	13:22:37	0.727545
2022-09-14	13:22:37	0.732888
2022-09-14	13:22:38	0.725916
2022-09-14	13:22:38	0.724338
2022-09-14	13:22:38	0.726985
2022-09-14	13:22:39	0.729326
2022-09-14	13:22:39	0.65126
2022-09-14	13:22:39	0.851463
2022-09-14	13:22:39	0.732379
2022-09-14	13:22:40	0.72556
2022-09-14	13:22:40	0.732583
2022-09-14	13:22:40	0.734109
2022-09-14	13:22:40	0.730089
2022-09-14	13:22:41	0.729071
2022-09-14	13:22:41	0.723473
2022-09-14	13:22:41	0.72215
2022-09-14	13:22:41	0.728054
2022-09-14	13:22:42	0.722049
2022-09-14	13:22:42	0.725356
2022-09-14	13:22:42	0.728054
2022-09-14	13:22:43	0.723422
2022-09-14	13:22:43	0.734109
2022-09-14	13:22:43	0.725712
2022-09-14	13:22:43	0.730954
2022-09-14	13:22:44	0.731565
2022-09-14	13:22:44	0.729886
2022-09-14	13:22:44	0.723422
2022-09-14	13:22:44	0.721132
2022-09-14	13:22:45	0.725458
2022-09-14	13:22:45	0.722456
2022-09-14	13:22:45	0.732328
2022-09-14	13:22:46	0.731514
2022-09-14	13:22:46	0.726781
2022-09-14	13:22:46	0.72897
2022-09-14	13:22:46	0.729478
2022-09-14	13:22:47	0.730751
2022-09-14	13:22:47	0.729835
2022-09-14	13:22:47	0.731158
2022-09-14	13:22:47	0.729682
2022-09-14	13:22:48	0.731972
2022-09-14	13:22:48	0.729428
2022-09-14	13:22:48	0.724593
2022-09-14	13:22:48	0.731259
2022-09-14	13:22:49	0.726018
2022-09-14	13:22:49	0.725407
2022-09-14	13:22:49	0.727952
2022-09-14	13:22:50	0.731107
2022-09-14	13:22:50	0.729936
2022-09-14	13:22:50	0.717977
2022-09-14	13:22:50	0.721845
2022-09-14	13:22:51	0.727036
2022-09-14	13:22:51	0.727596
2022-09-14	13:22:51	0.731463
2022-09-14	13:22:51	0.725916
2022-09-14	13:22:52	0.728715
2022-09-14	13:22:52	0.722557
2022-09-14	13:22:52	0.725967
2022-09-14	13:22:52	0.725662
2022-09-14	13:22:53	0.727697
2022-09-14	13:22:53	0.727036
2022-09-14	13:22:53	0.730751
2022-09-14	13:22:54	0.727697
2022-09-14	13:22:54	0.740573
2022-09-14	13:22:54	0.727646
2022-09-14	13:22:54	0.72902
2022-09-14	13:22:55	0.726679
2022-09-14	13:22:55	0.724186
2022-09-14	13:22:55	0.73416
2022-09-14	13:22:55	0.728512
2022-09-14	13:22:56	0.72841
2022-09-14	13:22:56	0.728359
2022-09-14	13:22:56	0.723372
2022-09-14	13:22:56	0.725865
2022-09-14	13:22:57	0.723728
2022-09-14	13:22:57	0.724186
2022-09-14	13:22:57	0.728359
2022-09-14	13:22:58	0.725356
2022-09-14	13:22:58	0.723219
2022-09-14	13:22:58	0.720776
2022-09-14	13:22:58	0.730801
2022-09-14	13:22:59	0.725814
2022-09-14	13:22:59	0.733092
2022-09-14	13:22:59	0.727748
2022-09-14	13:22:59	0.722049
2022-09-14	13:23:00	-0.102633
2022-09-14	13:23:00	0.730852
2022-09-14	13:23:00	0.733906
2022-09-14	13:23:00	0.730852
2022-09-14	13:23:01	0.732634
2022-09-14	13:23:01	0.730903
2022-09-14	13:23:01	0.72897
2022-09-14	13:23:02	0.721081
2022-09-14	13:23:02	0.724288
2022-09-14	13:23:02	0.718333
2022-09-14	13:23:02	0.728308
2022-09-14	13:23:03	0.725
2022-09-14	13:23:03	0.710802
2022-09-14	13:23:03	1.23665
2022-09-14	13:23:03	3.10464
2022-09-14	13:23:04	3.81197
2022-09-14	13:23:04	1.10291
2022-09-14	13:23:04	0.547748
2022-09-14	13:23:04	0.318435
2022-09-14	13:23:05	0.490751
2022-09-14	13:23:05	0.211921
2022-09-14	13:23:05	-2.2893
2022-09-14	13:23:06	-4.11317
2022-09-14	13:23:06	-3.80553
2022-09-14	13:23:06	-4.13271
2022-09-14	13:23:06	-3.95861
2022-09-14	13:23:07	-4.27281
2022-09-14	13:23:07	-4.15306
2022-09-14	13:23:07	-4.25795
2022-09-14	13:23:07	-4.33398
2022-09-14	13:23:08	-4.24619
2022-09-14	13:23:08	-4.55189
2022-09-14	13:23:08	-4.44915
2022-09-14	13:23:08	-4.81729
2022-09-14	13:23:09	-4.93189
2022-09-14	13:23:09	-4.96075
2022-09-14	13:23:09	2.05874
2022-09-14	13:23:10	0.775789
2022-09-14	13:23:10	0.717926
2022-09-14	13:23:10	0.523932
2022-09-14	13:23:10	0.486527
2022-09-14	13:23:11	0.553906
2022-09-14	13:23:11	2.41431
2022-09-14	13:23:11	2.3851
2022-09-14	13:23:11	0.647086
2022-09-14	13:23:12	0.668206
2022-09-14	13:23:12	0.634415
2022-09-14	13:23:12	0.542252
2022-09-14	13:23:13	0.559606
2022-09-14	13:23:13	0.560878
2022-09-14	13:23:13	0.641794
2022-09-14	13:23:13	0.595433
