# Supplementary material for: Comparing efficacy in reducing pulling and welfare impacts of four types of leash walking equipment
Source: PeerJ journal article supplement (doi:10.7717/peerj.18131), 2024-10-24
Supplement: Shelter_2_Tension_files.zip [file MsPotato_star_202291412179 copy.xlsx]

## Sheet: Averaged newtons
Date	Time	Averaged Newtons	Impulse	Total steps
2022-09-14	12:17:24	-0.31409	0	0		Impulse newtons	568.877
2022-09-14	12:17:25	-0.142783	0	0		Total steps	2
2022-09-14	12:17:26	0.670872	0.670872	0
2022-09-14	12:17:27	0.177985	0.848857	0
2022-09-14	12:17:28	0.547367	1.39622	0
2022-09-14	12:17:29	1.35076	2.74698	0
2022-09-14	12:17:30	0.507883	3.25487	0
2022-09-14	12:17:31	1.46089	4.71576	0
2022-09-14	12:17:32	1.12224	5.83799	0
2022-09-14	12:17:33	0.52456	6.36255	0
2022-09-14	12:17:34	-0.539536	6.36255	0
2022-09-14	12:17:35	-1.16887	6.36255	0
2022-09-14	12:17:36	-1.06598	6.36255	0
2022-09-14	12:17:37	-1.07226	6.36255	0
2022-09-14	12:17:38	-2.70966	6.36255	0
2022-09-14	12:17:39	-1.45268	6.36255	0
2022-09-14	12:17:40	0.797337	7.15989	0
2022-09-14	12:17:41	0.552103	7.71199	0
2022-09-14	12:17:42	0.629879	8.34187	0
2022-09-14	12:17:43	0.672268	9.01414	0
2022-09-14	12:17:44	1.40481	10.4189	0
2022-09-14	12:17:45	6.18045	16.5994	0
2022-09-14	12:17:46	8.53352	25.1329	0
2022-09-14	12:17:47	8.71711	33.85	0
2022-09-14	12:17:48	1.23933	35.0894	0
2022-09-14	12:17:49	0.882378	35.9717	0
2022-09-14	12:17:50	0.36593	36.3377	0
2022-09-14	12:17:51	-0.0319739	36.3377	0
2022-09-14	12:17:52	0.4412	36.7789	0
2022-09-14	12:17:53	1.08626	37.8651	0
2022-09-14	12:17:54	1.47611	39.3412	0
2022-09-14	12:17:55	1.31777	40.659	0
2022-09-14	12:17:56	0.686133	41.3451	0
2022-09-14	12:17:57	0.880114	42.2252	0
2022-09-14	12:17:58	0.856194	43.0814	0
2022-09-14	12:17:59	1.39032	44.4718	0
2022-09-14	12:18:00	19.9107	64.3824	1
2022-09-14	12:18:01	14.4093	78.7917	2
2022-09-14	12:18:02	2.98148	81.7732	2
2022-09-14	12:18:03	-0.143631	81.7732	2
2022-09-14	12:18:04	-1.52337	81.7732	2
2022-09-14	12:18:05	-0.186926	81.7732	2
2022-09-14	12:18:06	1.5112	83.2844	2
2022-09-14	12:18:07	2.46949	85.7539	2
2022-09-14	12:18:08	1.96979	87.7237	2
2022-09-14	12:18:09	1.80497	89.5286	2
2022-09-14	12:18:10	2.37764	91.9063	2
2022-09-14	12:18:11	4.23473	96.141	2
2022-09-14	12:18:12	7.24749	103.388	2
2022-09-14	12:18:13	3.30837	106.697	2
2022-09-14	12:18:14	1.76168	108.459	2
2022-09-14	12:18:15	1.67968	110.138	2
2022-09-14	12:18:16	1.82242	111.961	2
2022-09-14	12:18:17	2.89438	114.855	2
2022-09-14	12:18:18	3.79014	118.645	2
2022-09-14	12:18:19	1.90288	120.548	2
2022-09-14	12:18:20	0.634502	121.183	2
2022-09-14	12:18:21	-0.897788	121.183	2
2022-09-14	12:18:22	-0.827104	121.183	2
2022-09-14	12:18:23	-0.324898	121.183	2
2022-09-14	12:18:24	0.63254	121.815	2
2022-09-14	12:18:25	-0.186076	121.815	2
2022-09-14	12:18:26	-1.49099	121.815	2
2022-09-14	12:18:27	1.26225	123.077	2
2022-09-14	12:18:28	1.91871	124.996	2
2022-09-14	12:18:29	1.50124	126.497	2
2022-09-14	12:18:30	2.02801	128.525	2
2022-09-14	12:18:31	3.21815	131.743	2
2022-09-14	12:18:32	3.24207	134.986	2
2022-09-14	12:18:33	3.24317	138.229	2
2022-09-14	12:18:34	1.65715	139.886	2
2022-09-14	12:18:35	3.15805	143.044	2
2022-09-14	12:18:36	-0.450269	143.044	2
2022-09-14	12:18:37	0.722068	143.766	2
2022-09-14	12:18:38	1.25574	145.022	2
2022-09-14	12:18:39	1.31392	146.336	2
2022-09-14	12:18:40	1.34148	147.677	2
2022-09-14	12:18:41	-1.36649	147.677	2
2022-09-14	12:18:42	-2.91028	147.677	2
2022-09-14	12:18:43	-3.60762	147.677	2
2022-09-14	12:18:44	-8.66323	147.677	2
2022-09-14	12:18:45	-8.65702	147.677	2
2022-09-14	12:18:46	-6.79516	147.677	2
2022-09-14	12:18:47	-5.36684	147.677	2
2022-09-14	12:18:48	-4.80795	147.677	2
2022-09-14	12:18:49	-4.47044	147.677	2
2022-09-14	12:18:50	-3.64939	147.677	2
2022-09-14	12:18:51	1.38703	149.064	2
2022-09-14	12:18:52	1.62099	150.685	2
2022-09-14	12:18:53	1.7181	152.403	2
2022-09-14	12:18:54	2.11867	154.522	2
2022-09-14	12:18:55	-0.47238	154.522	2
2022-09-14	12:18:56	0.447651	154.97	2
2022-09-14	12:18:57	1.297	156.267	2
2022-09-14	12:18:58	1.51318	157.78	2
2022-09-14	12:18:59	1.75828	159.538	2
2022-09-14	12:19:00	1.66717	161.205	2
2022-09-14	12:19:01	1.56027	162.765	2
2022-09-14	12:19:02	1.61278	164.378	2
2022-09-14	12:19:03	1.91312	166.291	2
2022-09-14	12:19:04	1.8129	168.104	2
2022-09-14	12:19:05	1.75127	169.855	2
2022-09-14	12:19:06	1.70214	171.558	2
2022-09-14	12:19:07	1.65702	173.215	2
2022-09-14	12:19:08	1.94895	175.164	2
2022-09-14	12:19:09	1.85579	177.019	2
2022-09-14	12:19:10	1.77134	178.791	2
2022-09-14	12:19:11	1.5447	180.335	2
2022-09-14	12:19:12	1.74719	182.083	2
2022-09-14	12:19:13	1.71703	183.8	2
2022-09-14	12:19:14	1.79413	185.594	2
2022-09-14	12:19:15	1.56242	187.156	2
2022-09-14	12:19:16	1.70226	188.858	2
2022-09-14	12:19:17	1.81199	190.67	2
2022-09-14	12:19:18	2.56884	193.239	2
2022-09-14	12:19:19	0.64182	193.881	2
2022-09-14	12:19:20	-1.86705	193.881	2
2022-09-14	12:19:21	0.465703	194.347	2
2022-09-14	12:19:22	0.984547	195.331	2
2022-09-14	12:19:23	1.56802	196.899	2
2022-09-14	12:19:24	1.59416	198.494	2
2022-09-14	12:19:25	1.61182	200.105	2
2022-09-14	12:19:26	1.62669	201.732	2
2022-09-14	12:19:27	1.57345	203.306	2
2022-09-14	12:19:28	1.49694	204.802	2
2022-09-14	12:19:29	1.5305	206.333	2
2022-09-14	12:19:30	1.82008	208.153	2
2022-09-14	12:19:31	1.70333	209.856	2
2022-09-14	12:19:32	1.80214	211.659	2
2022-09-14	12:19:33	1.66638	213.325	2
2022-09-14	12:19:34	1.48747	214.812	2
2022-09-14	12:19:35	0.55031	215.363	2
2022-09-14	12:19:36	1.49694	216.86	2
2022-09-14	12:19:37	1.37192	218.232	2
2022-09-14	12:19:38	1.8234	220.055	2
2022-09-14	12:19:39	1.6511	221.706	2
2022-09-14	12:19:40	3.23785	224.944	2
2022-09-14	12:19:41	3.23875	228.183	2
2022-09-14	12:19:42	3.25558	231.438	2
2022-09-14	12:19:43	2.19139	233.63	2
2022-09-14	12:19:44	3.22681	236.856	2
2022-09-14	12:19:45	3.23717	240.094	2
2022-09-14	12:19:46	-0.35676	240.094	2
2022-09-14	12:19:47	-4.24571	240.094	2
2022-09-14	12:19:48	-5.57559	240.094	2
2022-09-14	12:19:49	-6.59767	240.094	2
2022-09-14	12:19:50	-6.2281	240.094	2
2022-09-14	12:19:51	-3.7834	240.094	2
2022-09-14	12:19:52	0.528522	240.622	2
2022-09-14	12:19:53	2.69026	243.312	2
2022-09-14	12:19:54	3.23813	246.55	2
2022-09-14	12:19:55	2.8018	249.352	2
2022-09-14	12:19:56	3.24487	252.597	2
2022-09-14	12:19:57	3.24547	255.843	2
2022-09-14	12:19:58	3.05483	258.897	2
2022-09-14	12:19:59	3.1932	262.091	2
2022-09-14	12:20:00	1.11415	263.205	2
2022-09-14	12:20:01	3.2386	266.443	2
2022-09-14	12:20:02	3.2297	269.673	2
2022-09-14	12:20:03	3.23558	272.909	2
2022-09-14	12:20:04	3.1864	276.095	2
2022-09-14	12:20:05	3.22336	279.318	2
2022-09-14	12:20:06	3.24622	282.565	2
2022-09-14	12:20:07	3.24328	285.808	2
2022-09-14	12:20:08	3.24096	289.049	2
2022-09-14	12:20:09	3.23913	292.288	2
2022-09-14	12:20:10	3.24068	295.529	2
2022-09-14	12:20:11	3.22693	298.756	2
2022-09-14	12:20:12	3.24566	302.001	2
2022-09-14	12:20:13	3.25098	305.252	2
2022-09-14	12:20:14	3.24175	308.494	2
2022-09-14	12:20:15	3.24141	311.735	2
2022-09-14	12:20:16	3.24798	314.983	2
2022-09-14	12:20:17	3.22261	318.206	2
2022-09-14	12:20:18	3.23298	321.439	2
2022-09-14	12:20:19	3.2387	324.678	2
2022-09-14	12:20:20	3.23304	327.911	2
2022-09-14	12:20:21	3.23392	331.145	2
2022-09-14	12:20:22	3.22959	334.374	2
2022-09-14	12:20:23	3.23111	337.605	2
2022-09-14	12:20:24	3.22328	340.829	2
2022-09-14	12:20:25	3.23751	344.066	2
2022-09-14	12:20:26	3.23745	347.304	2
2022-09-14	12:20:27	3.23943	350.543	2
2022-09-14	12:20:28	2.47882	353.022	2
2022-09-14	12:20:29	0.389586	353.411	2
2022-09-14	12:20:30	0.212677	353.624	2
2022-09-14	12:20:31	2.47566	356.1	2
2022-09-14	12:20:32	3.22713	359.327	2
2022-09-14	12:20:33	3.23168	362.559	2
2022-09-14	12:20:34	3.23864	365.797	2
2022-09-14	12:20:35	3.22653	369.024	2
2022-09-14	12:20:36	3.24924	372.273	2
2022-09-14	12:20:37	3.22421	375.497	2
2022-09-14	12:20:38	3.23745	378.735	2
2022-09-14	12:20:39	3.23032	381.965	2
2022-09-14	12:20:40	3.22849	385.193	2
2022-09-14	12:20:41	2.00248	387.196	2
2022-09-14	12:20:42	1.78398	388.98	2
2022-09-14	12:20:43	1.7859	390.766	2
2022-09-14	12:20:44	1.70501	392.471	2
2022-09-14	12:20:45	1.69117	394.162	2
2022-09-14	12:20:46	1.70039	395.862	2
2022-09-14	12:20:47	1.72518	397.588	2
2022-09-14	12:20:48	1.7075	399.295	2
2022-09-14	12:20:49	1.73186	401.027	2
2022-09-14	12:20:50	1.74861	402.776	2
2022-09-14	12:20:51	1.72744	404.503	2
2022-09-14	12:20:52	1.74402	406.247	2
2022-09-14	12:20:53	1.75608	408.003	2
2022-09-14	12:20:54	1.76547	409.769	2
2022-09-14	12:20:55	1.76513	411.534	2
2022-09-14	12:20:56	1.76779	413.302	2
2022-09-14	12:20:57	1.78155	415.083	2
2022-09-14	12:20:58	1.77877	416.862	2
2022-09-14	12:20:59	1.77956	418.641	2
2022-09-14	12:21:00	1.80273	420.444	2
2022-09-14	12:21:01	1.82031	422.264	2
2022-09-14	12:21:02	1.83463	424.099	2
2022-09-14	12:21:03	1.80497	425.904	2
2022-09-14	12:21:04	1.81367	427.718	2
2022-09-14	12:21:05	1.8447	429.562	2
2022-09-14	12:21:06	1.86225	431.425	2
2022-09-14	12:21:07	1.84142	433.266	2
2022-09-14	12:21:08	1.81103	435.077	2
2022-09-14	12:21:09	1.83814	436.915	2
2022-09-14	12:21:10	1.83231	438.748	2
2022-09-14	12:21:11	2.42416	441.172	2
2022-09-14	12:21:12	3.23634	444.408	2
2022-09-14	12:21:13	3.24622	447.654	2
2022-09-14	12:21:14	3.24515	450.899	2
2022-09-14	12:21:15	3.2552	454.155	2
2022-09-14	12:21:16	3.25036	457.405	2
2022-09-14	12:21:17	3.2675	460.672	2
2022-09-14	12:21:18	3.2533	463.926	2
2022-09-14	12:21:19	3.24954	467.175	2
2022-09-14	12:21:20	3.23643	470.412	2
2022-09-14	12:21:21	3.24781	473.66	2
2022-09-14	12:21:22	3.24634	476.906	2
2022-09-14	12:21:23	2.84351	479.749	2
2022-09-14	12:21:24	3.23694	482.986	2
2022-09-14	12:21:25	3.24362	486.23	2
2022-09-14	12:21:26	3.25477	489.485	2
2022-09-14	12:21:27	3.07063	492.555	2
2022-09-14	12:21:28	-4.62522	492.555	2
2022-09-14	12:21:29	-1.97521	492.555	2
2022-09-14	12:21:30	0.0503127	492.606	2
2022-09-14	12:21:31	-5.94589	492.606	2
2022-09-14	12:21:32	-16.3836	492.606	2
2022-09-14	12:21:33	-16.8047	492.606	2
2022-09-14	12:21:34	-17.5434	492.606	2
2022-09-14	12:21:35	-17.6296	492.606	2
2022-09-14	12:21:36	-17.8773	492.606	2
2022-09-14	12:21:37	-18.3864	492.606	2
2022-09-14	12:21:38	-18.3413	492.606	2
2022-09-14	12:21:39	-20.651	492.606	2
2022-09-14	12:21:40	-20.4979	492.606	2
2022-09-14	12:21:41	-20.9295	492.606	2
2022-09-14	12:21:42	-21.7481	492.606	2
2022-09-14	12:21:43	-23.9236	492.606	2
2022-09-14	12:21:44	-26.3466	492.606	2
2022-09-14	12:21:45	-27.223	492.606	2
2022-09-14	12:21:46	-10.7198	492.606	2
2022-09-14	12:21:47	-4.13869	492.606	2
2022-09-14	12:21:48	-7.41456	492.606	2
2022-09-14	12:21:49	2.71142	495.317	2
2022-09-14	12:21:50	3.22964	498.547	2
2022-09-14	12:21:51	3.27195	501.819	2
2022-09-14	12:21:52	3.25777	505.076	2
2022-09-14	12:21:53	-18.8729	505.076	2
2022-09-14	12:21:54	-20.9891	505.076	2
2022-09-14	12:21:55	-20.9793	505.076	2
2022-09-14	12:21:56	-0.385001	505.076	2
2022-09-14	12:21:57	-3.73445	505.076	2
2022-09-14	12:21:58	-6.70902	505.076	2
2022-09-14	12:21:59	-7.68088	505.076	2
2022-09-14	12:22:00	-8.89899	505.076	2
2022-09-14	12:22:01	-9.07466	505.076	2
2022-09-14	12:22:02	-9.4445	505.076	2
2022-09-14	12:22:03	-9.70599	505.076	2
2022-09-14	12:22:04	3.24905	508.326	2
2022-09-14	12:22:05	3.20768	511.533	2
2022-09-14	12:22:06	3.22887	514.762	2
2022-09-14	12:22:07	3.24894	518.011	2
2022-09-14	12:22:08	3.18822	521.199	2
2022-09-14	12:22:09	-2.14662	521.199	2
2022-09-14	12:22:10	2.25562	523.455	2
2022-09-14	12:22:11	3.22285	526.678	2
2022-09-14	12:22:12	3.24894	529.927	2
2022-09-14	12:22:13	3.24668	533.173	2
2022-09-14	12:22:14	3.26388	536.437	2
2022-09-14	12:22:15	3.24572	539.683	2
2022-09-14	12:22:16	3.24758	542.93	2
2022-09-14	12:22:17	3.23768	546.168	2
2022-09-14	12:22:18	3.24992	549.418	2
2022-09-14	12:22:19	3.23757	552.656	2
2022-09-14	12:22:20	3.24566	555.901	2
2022-09-14	12:22:21	3.23853	559.14	2
2022-09-14	12:22:22	3.25905	562.399	2
2022-09-14	12:22:23	3.23044	565.629	2
2022-09-14	12:22:24	3.24724	568.877	2

## Sheet: MsPotato_star_202291412179 (4)
Date	Time	Lbs	Newtons	Averaged Newtons	Total force x time		total steps > 13.345	**GoPro Fitting: 12:06
2022-09-14	12:17:24	0.165102	0.734407	-0.31409	0.734407	FALSE	0
2022-09-14	12:17:24	-0.13332	-0.593034	-0.31409	0	FALSE	0
2022-09-14	12:17:24	-0.188028	-0.836386	-0.31409	0.734407	FALSE	0
2022-09-14	12:17:24	-0.126196	-0.561345	-0.31409	0	FALSE	0
2022-09-14	12:17:25	-0.0346435	-0.154101	-0.142783	0.734407	FALSE	0
2022-09-14	12:17:25	-0.0640583	-0.284944	-0.142783	0	FALSE	0
2022-09-14	12:17:25	-0.0792745	-0.352629	-0.142783	0.734407	FALSE	0
2022-09-14	12:17:25	0.0495803	0.220543	-0.142783	0.220543	FALSE	0
2022-09-14	12:17:26	0.143219	0.637067	0.670872	1.37147	FALSE	0
2022-09-14	12:17:26	0.174262	0.775152	0.670872	0.995695	FALSE	0
2022-09-14	12:17:26	0.134975	0.600396	0.670872	1.97187	FALSE	0
2022-09-14	12:17:27	0.0690206	0.307017	0.177985	1.30271	FALSE	0
2022-09-14	12:17:27	-0.00894378	-0.0397837	0.177985	1.97187	FALSE	0
2022-09-14	12:17:27	0.112888	0.502148	0.177985	1.80486	FALSE	0
2022-09-14	12:17:27	-0.0129133	-0.0574409	0.177985	1.97187	FALSE	0
2022-09-14	12:17:28	0.124084	0.55195	0.547367	2.35681	FALSE	0
2022-09-14	12:17:28	-0.0157122	-0.069891	0.547367	1.97187	FALSE	0
2022-09-14	12:17:28	0.124644	0.554441	0.547367	2.91125	FALSE	0
2022-09-14	12:17:28	0.259199	1.15297	0.547367	3.12484	FALSE	0
2022-09-14	12:17:29	0.446832	1.9876	1.35076	4.89885	FALSE	0
2022-09-14	12:17:29	0.321692	1.43095	1.35076	4.55579	FALSE	0
2022-09-14	12:17:29	0.238792	1.06219	1.35076	5.96105	FALSE	0
2022-09-14	12:17:29	0.207341	0.922294	1.35076	5.47808	FALSE	0
2022-09-14	12:17:30	0.247646	1.10158	0.507883	7.06262	FALSE	0
2022-09-14	12:17:30	0.0303946	0.135201	0.507883	5.61328	FALSE	0
2022-09-14	12:17:30	0.0644913	0.28687	0.507883	7.34949	FALSE	0
2022-09-14	12:17:31	0.127341	0.566438	1.46089	6.17972	FALSE	0
2022-09-14	12:17:31	0.297977	1.32546	1.46089	8.67496	FALSE	0
2022-09-14	12:17:31	0.487901	2.17028	1.46089	8.35	FALSE	0
2022-09-14	12:17:31	0.400471	1.78138	1.46089	10.4563	FALSE	0
2022-09-14	12:17:32	0.406018	1.80605	1.12224	10.1561	FALSE	0
2022-09-14	12:17:32	0.219809	0.977754	1.12224	11.4341	FALSE	0
2022-09-14	12:17:32	0.241132	1.0726	1.12224	11.2287	FALSE	0
2022-09-14	12:17:32	0.142201	0.632538	1.12224	12.0666	FALSE	0
2022-09-14	12:17:33	0.294415	1.30962	0.52456	12.5383	FALSE	0
2022-09-14	12:17:33	0.042812	0.190436	0.52456	12.2571	FALSE	0
2022-09-14	12:17:33	0.135229	0.601526	0.52456	13.1398	FALSE	0
2022-09-14	12:17:33	-0.000750381	-0.00333784	0.52456	12.2571	FALSE	0
2022-09-14	12:17:34	0.158792	0.706339	-0.539536	13.8461	FALSE	0
2022-09-14	12:17:34	-0.233066	-1.03672	-0.539536	12.2571	FALSE	0
2022-09-14	12:17:34	-0.289605	-1.28822	-0.539536	13.8461	FALSE	0
2022-09-14	12:17:35	-0.285687	-1.27079	-1.16887	12.2571	FALSE	0
2022-09-14	12:17:35	-0.283448	-1.26083	-1.16887	13.8461	FALSE	0
2022-09-14	12:17:35	-0.310827	-1.38262	-1.16887	12.2571	FALSE	0
2022-09-14	12:17:35	-0.171132	-0.761229	-1.16887	13.8461	FALSE	0
2022-09-14	12:17:36	-0.248944	-1.10735	-1.06598	12.2571	FALSE	0
2022-09-14	12:17:36	-0.244872	-1.08924	-1.06598	13.8461	FALSE	0
2022-09-14	12:17:36	-0.233829	-1.04012	-1.06598	12.2571	FALSE	0
2022-09-14	12:17:36	-0.230928	-1.02721	-1.06598	13.8461	FALSE	0
2022-09-14	12:17:37	-0.18818	-0.837062	-1.07226	12.2571	FALSE	0
2022-09-14	12:17:37	-0.213117	-0.947987	-1.07226	13.8461	FALSE	0
2022-09-14	12:17:37	-0.32187	-1.43174	-1.07226	12.2571	FALSE	0
2022-09-14	12:17:38	-0.474847	-2.11221	-2.70966	13.8461	FALSE	0
2022-09-14	12:17:38	-0.688434	-3.06229	-2.70966	12.2571	FALSE	0
2022-09-14	12:17:38	-0.67505	-3.00276	-2.70966	13.8461	FALSE	0
2022-09-14	12:17:38	-0.598307	-2.66139	-2.70966	12.2571	FALSE	0
2022-09-14	12:17:39	-0.498918	-2.21929	-1.45268	13.8461	FALSE	0
2022-09-14	12:17:39	-0.55734	-2.47916	-1.45268	12.2571	FALSE	0
2022-09-14	12:17:39	-0.41729	-1.85619	-1.45268	13.8461	FALSE	0
2022-09-14	12:17:39	0.167239	0.743913	-1.45268	13.001	FALSE	0
2022-09-14	12:17:40	0.0648476	0.288455	0.797337	14.1346	FALSE	0
2022-09-14	12:17:40	0.263728	1.17311	0.797337	14.1741	FALSE	0
2022-09-14	12:17:40	0.166781	0.741875	0.797337	14.8765	FALSE	0
2022-09-14	12:17:40	0.221641	0.985903	0.797337	15.16	FALSE	0
2022-09-14	12:17:41	0.126222	0.561461	0.552103	15.4379	FALSE	0
2022-09-14	12:17:41	0.0758399	0.337351	0.552103	15.4973	FALSE	0
2022-09-14	12:17:41	0.170293	0.757497	0.552103	16.1954	FALSE	0
2022-09-14	12:17:42	0.14215	0.632312	0.629879	16.1297	FALSE	0
2022-09-14	12:17:42	0.218588	0.972323	0.629879	17.1677	FALSE	0
2022-09-14	12:17:42	0.0272903	0.121393	0.629879	16.251	FALSE	0
2022-09-14	12:17:42	0.178384	0.793488	0.629879	17.9612	FALSE	0
2022-09-14	12:17:43	0.16958	0.754326	0.672268	17.0054	FALSE	0
2022-09-14	12:17:43	0.186171	0.828126	0.672268	18.7894	FALSE	0
2022-09-14	12:17:43	0.0739061	0.328749	0.672268	17.3341	FALSE	0
2022-09-14	12:17:43	0.174873	0.77787	0.672268	19.5672	FALSE	0
2022-09-14	12:17:44	0.195942	0.871589	1.40481	18.2057	FALSE	0
2022-09-14	12:17:44	0.118995	0.529314	1.40481	20.0965	FALSE	0
2022-09-14	12:17:44	0.212074	0.943348	1.40481	19.1491	FALSE	0
2022-09-14	12:17:44	0.736247	3.27497	1.40481	23.3715	FALSE	0
2022-09-14	12:17:45	1.32449	5.8916	6.18045	25.0407	FALSE	0
2022-09-14	12:17:45	1.90597	8.47814	6.18045	31.8497	FALSE	0
2022-09-14	12:17:45	0.937824	4.17163	6.18045	29.2123	FALSE	0
2022-09-14	12:17:46	1.20429	5.35692	8.53352	37.2066	FALSE	0
2022-09-14	12:17:46	1.65212	7.34896	8.53352	36.5612	FALSE	0
2022-09-14	12:17:46	2.00464	8.91704	8.53352	46.1236	FALSE	0
2022-09-14	12:17:46	2.81263	12.5111	8.53352	49.0724	FALSE	0
2022-09-14	12:17:47	3.02413	13.4519	8.71711	59.5756	1	1
2022-09-14	12:17:47	3.32729	14.8005	8.71711	63.8728	1	2
2022-09-14	12:17:47	0.73131	3.25301	8.71711	62.8286	FALSE	2
2022-09-14	12:17:47	0.756043	3.36303	8.71711	67.2359	FALSE	2
2022-09-14	12:17:48	0.386171	1.71777	1.23933	64.5463	FALSE	2
2022-09-14	12:17:48	0.421031	1.87283	1.23933	69.1087	FALSE	2
2022-09-14	12:17:48	0.138537	0.61624	1.23933	65.1626	FALSE	2
2022-09-14	12:17:48	0.168715	0.750478	1.23933	69.8592	FALSE	2
2022-09-14	12:17:49	0.168664	0.750251	0.882378	65.9128	FALSE	2
2022-09-14	12:17:49	0.324593	1.44385	0.882378	71.303	FALSE	2
2022-09-14	12:17:49	0.101845	0.453027	0.882378	66.3659	FALSE	2
2022-09-14	12:17:50	0.199758	0.888564	0.36593	72.1916	FALSE	2
2022-09-14	12:17:50	0.0253056	0.112564	0.36593	66.4784	FALSE	2
2022-09-14	12:17:50	0.155331	0.690943	0.36593	72.8825	FALSE	2
2022-09-14	12:17:50	-0.0513356	-0.228351	0.36593	66.4784	FALSE	2
2022-09-14	12:17:51	0.0619468	0.275552	-0.0319739	73.1581	FALSE	2
2022-09-14	12:17:51	-0.0503687	-0.22405	-0.0319739	66.4784	FALSE	2
2022-09-14	12:17:51	0.052074	0.231636	-0.0319739	73.3897	FALSE	2
2022-09-14	12:17:51	-0.0924043	-0.411033	-0.0319739	66.4784	FALSE	2
2022-09-14	12:17:52	0.0746185	0.331918	0.4412	73.7216	FALSE	2
2022-09-14	12:17:52	0.0878501	0.390775	0.4412	66.8692	FALSE	2
2022-09-14	12:17:52	0.117418	0.522299	0.4412	74.2439	FALSE	2
2022-09-14	12:17:52	0.116858	0.519808	0.4412	67.389	FALSE	2
2022-09-14	12:17:53	0.183473	0.816125	1.08626	75.0601	FALSE	2
2022-09-14	12:17:53	0.253601	1.12807	1.08626	68.5171	FALSE	2
2022-09-14	12:17:53	0.295534	1.31459	1.08626	76.3747	FALSE	2
2022-09-14	12:17:54	0.602455	2.67984	1.47611	71.1969	FALSE	2
2022-09-14	12:17:54	0.334109	1.48618	1.47611	77.8608	FALSE	2
2022-09-14	12:17:54	0.274975	1.22314	1.47611	72.42	FALSE	2
2022-09-14	12:17:54	0.11584	0.515279	1.47611	78.3761	FALSE	2
2022-09-14	12:17:55	0.197316	0.877701	1.31777	73.2978	FALSE	2
2022-09-14	12:17:55	0.179046	0.796432	1.31777	79.1726	FALSE	2
2022-09-14	12:17:55	0.58388	2.59722	1.31777	75.895	FALSE	2
2022-09-14	12:17:55	0.224746	0.999715	1.31777	80.1723	FALSE	2
2022-09-14	12:17:56	0.148664	0.661287	0.686133	76.5563	FALSE	2
2022-09-14	12:17:56	0.107596	0.478609	0.686133	80.6509	FALSE	2
2022-09-14	12:17:56	0.24673	1.0975	0.686133	77.6538	FALSE	2
2022-09-14	12:17:56	0.114008	0.50713	0.686133	81.158	FALSE	2
2022-09-14	12:17:57	0.257774	1.14663	0.880114	78.8004	FALSE	2
2022-09-14	12:17:57	0.260369	1.15817	0.880114	82.3162	FALSE	2
2022-09-14	12:17:57	0.0754327	0.33554	0.880114	79.1359	FALSE	2
2022-09-14	12:17:58	0.130853	0.58206	0.856194	82.8982	FALSE	2
2022-09-14	12:17:58	0.21014	0.934745	0.856194	80.0707	FALSE	2
2022-09-14	12:17:58	0.33472	1.4889	0.856194	84.3871	FALSE	2
2022-09-14	12:17:58	0.0942114	0.419071	0.856194	80.4897	FALSE	2
2022-09-14	12:17:59	0.265356	1.18036	1.39032	85.5675	FALSE	2
2022-09-14	12:17:59	0.0572649	0.254726	1.39032	80.7445	FALSE	2
2022-09-14	12:17:59	0.317112	1.41058	1.39032	86.9781	FALSE	2
2022-09-14	12:17:59	0.610496	2.71561	1.39032	83.4601	FALSE	2
2022-09-14	12:18:00	1.85406	8.24723	19.9107	95.2253	FALSE	2
2022-09-14	12:18:00	5.65538	25.1563	19.9107	108.616	1	3
2022-09-14	12:18:00	7.18556	31.9628	19.9107	127.188	1	4
2022-09-14	12:18:00	3.20948	14.2764	19.9107	122.893	1	5
2022-09-14	12:18:01	3.90703	17.3793	14.4093	144.567	1	6
2022-09-14	12:18:01	3.2624	14.5118	14.4093	137.405	1	7
2022-09-14	12:18:01	2.54861	11.3367	14.4093	155.904	FALSE	7
2022-09-14	12:18:02	1.6023	7.12735	2.98148	144.532	FALSE	7
2022-09-14	12:18:02	0.393906	1.75217	2.98148	157.656	FALSE	7
2022-09-14	12:18:02	0.258741	1.15093	2.98148	145.683	FALSE	7
2022-09-14	12:18:02	0.42612	1.89547	2.98148	159.552	FALSE	7
2022-09-14	12:18:03	0.498588	2.21782	-0.143631	147.901	FALSE	7
2022-09-14	12:18:03	-0.0674679	-0.300111	-0.143631	159.552	FALSE	7
2022-09-14	12:18:03	-0.176883	-0.786811	-0.143631	147.901	FALSE	7
2022-09-14	12:18:03	-0.383396	-1.70542	-0.143631	159.552	FALSE	7
2022-09-14	12:18:04	-0.374694	-1.66671	-1.52337	147.901	FALSE	7
2022-09-14	12:18:04	-0.279682	-1.24408	-1.52337	159.552	FALSE	7
2022-09-14	12:18:04	-0.389961	-1.73462	-1.52337	147.901	FALSE	7
2022-09-14	12:18:04	-0.325534	-1.44804	-1.52337	159.552	FALSE	7
2022-09-14	12:18:05	-0.225076	-1.00118	-0.186926	147.901	FALSE	7
2022-09-14	12:18:05	-0.0914883	-0.406958	-0.186926	159.552	FALSE	7
2022-09-14	12:18:05	0.190496	0.847364	-0.186926	148.748	FALSE	7
2022-09-14	12:18:06	0.0866287	0.385342	1.5112	159.937	FALSE	7
2022-09-14	12:18:06	0.328613	1.46174	1.5112	150.21	FALSE	7
2022-09-14	12:18:06	0.345	1.53463	1.5112	161.472	FALSE	7
2022-09-14	12:18:06	0.59869	2.66309	1.5112	152.873	FALSE	7
2022-09-14	12:18:07	0.281285	1.25121	2.46949	162.723	FALSE	7
2022-09-14	12:18:07	0.785305	3.49319	2.46949	156.366	FALSE	7
2022-09-14	12:18:07	0.510751	2.27192	2.46949	164.995	FALSE	7
2022-09-14	12:18:07	0.643321	2.86162	2.46949	159.228	FALSE	7
2022-09-14	12:18:08	0.364542	1.62156	1.96979	166.616	FALSE	7
2022-09-14	12:18:08	0.603728	2.6855	1.96979	161.913	FALSE	7
2022-09-14	12:18:08	0.360216	1.60231	1.96979	168.219	FALSE	7
2022-09-14	12:18:09	0.513652	2.28483	1.80497	164.198	FALSE	7
2022-09-14	12:18:09	0.27757	1.23469	1.80497	169.453	FALSE	7
2022-09-14	12:18:09	0.476298	2.11867	1.80497	166.317	FALSE	7
2022-09-14	12:18:09	0.355585	1.58171	1.80497	171.035	FALSE	7
2022-09-14	12:18:10	0.49355	2.19541	2.37764	168.512	FALSE	7
2022-09-14	12:18:10	0.31813	1.41511	2.37764	172.45	FALSE	7
2022-09-14	12:18:10	1.0077	4.48245	2.37764	172.995	FALSE	7
2022-09-14	12:18:10	0.31869	1.4176	2.37764	173.868	FALSE	7
2022-09-14	12:18:11	1.3422	5.97037	4.23473	178.965	FALSE	7
2022-09-14	12:18:11	0.204542	0.909844	4.23473	174.778	FALSE	7
2022-09-14	12:18:11	1.61604	7.18847	4.23473	186.153	FALSE	7
2022-09-14	12:18:11	0.645254	2.87022	4.23473	177.648	FALSE	7
2022-09-14	12:18:12	2.52963	11.2523	7.24749	197.406	FALSE	7
2022-09-14	12:18:12	0.792328	3.52443	7.24749	181.172	FALSE	7
2022-09-14	12:18:12	1.56597	6.96575	7.24749	204.371	FALSE	7
2022-09-14	12:18:13	1.10531	4.91664	3.30837	186.089	FALSE	7
2022-09-14	12:18:13	0.842506	3.74764	3.30837	208.119	FALSE	7
2022-09-14	12:18:13	0.664186	2.95443	3.30837	189.043	FALSE	7
2022-09-14	12:18:13	0.363015	1.61476	3.30837	209.734	FALSE	7
2022-09-14	12:18:14	0.496145	2.20695	1.76168	191.25	FALSE	7
2022-09-14	12:18:14	0.318334	1.41601	1.76168	211.15	FALSE	7
2022-09-14	12:18:14	0.419962	1.86807	1.76168	193.118	FALSE	7
2022-09-14	12:18:14	0.349733	1.55568	1.76168	212.706	FALSE	7
2022-09-14	12:18:15	0.501743	2.23185	1.67968	195.35	FALSE	7
2022-09-14	12:18:15	0.292481	1.30101	1.67968	214.007	FALSE	7
2022-09-14	12:18:15	0.449886	2.00118	1.67968	197.351	FALSE	7
2022-09-14	12:18:15	0.266323	1.18466	1.67968	215.191	FALSE	7
2022-09-14	12:18:16	0.479707	2.13383	1.82242	199.485	FALSE	7
2022-09-14	12:18:16	0.338944	1.50769	1.82242	216.699	FALSE	7
2022-09-14	12:18:16	0.410445	1.82574	1.82242	201.311	FALSE	7
2022-09-14	12:18:17	0.322506	1.43457	2.89438	218.133	FALSE	7
2022-09-14	12:18:17	0.506577	2.25336	2.89438	203.564	FALSE	7
2022-09-14	12:18:17	0.967341	4.30293	2.89438	222.436	FALSE	7
2022-09-14	12:18:17	0.806323	3.58669	2.89438	207.151	FALSE	7
2022-09-14	12:18:18	0.829733	3.69082	3.79014	226.127	FALSE	7
2022-09-14	12:18:18	0.944186	4.19993	3.79014	211.351	FALSE	7
2022-09-14	12:18:18	0.902506	4.01453	3.79014	230.142	FALSE	7
2022-09-14	12:18:18	0.731819	3.25528	3.79014	214.606	FALSE	7
2022-09-14	12:18:19	0.410751	1.8271	1.90288	231.969	FALSE	7
2022-09-14	12:18:19	0.528308	2.35002	1.90288	216.956	FALSE	7
2022-09-14	12:18:19	0.249071	1.10792	1.90288	233.077	FALSE	7
2022-09-14	12:18:19	0.523015	2.32648	1.90288	219.283	FALSE	7
2022-09-14	12:18:20	0.347952	1.54776	0.634502	234.624	FALSE	7
2022-09-14	12:18:20	0.247646	1.10158	0.634502	220.384	FALSE	7
2022-09-14	12:18:20	-0.167671	-0.745834	0.634502	234.624	FALSE	7
2022-09-14	12:18:21	-0.232252	-1.0331	-0.897788	220.384	FALSE	7
2022-09-14	12:18:21	-0.169554	-0.75421	-0.897788	234.624	FALSE	7
2022-09-14	12:18:21	-0.116781	-0.519465	-0.897788	220.384	FALSE	7
2022-09-14	12:18:21	-0.28874	-1.28437	-0.897788	234.624	FALSE	7
2022-09-14	12:18:22	-0.117341	-0.521956	-0.827104	220.384	FALSE	7
2022-09-14	12:18:22	-0.253269	-1.12659	-0.827104	234.624	FALSE	7
2022-09-14	12:18:22	-0.164211	-0.730443	-0.827104	220.384	FALSE	7
2022-09-14	12:18:22	-0.208944	-0.929425	-0.827104	234.624	FALSE	7
2022-09-14	12:18:23	-0.0481295	-0.21409	-0.324898	220.384	FALSE	7
2022-09-14	12:18:23	-0.189249	-0.841817	-0.324898	234.624	FALSE	7
2022-09-14	12:18:23	0.00545825	0.0242794	-0.324898	220.409	FALSE	7
2022-09-14	12:18:23	-0.0602415	-0.267966	-0.324898	234.624	FALSE	7
2022-09-14	12:18:24	0.117367	0.522072	0.63254	220.931	FALSE	7
2022-09-14	12:18:24	0.020471	0.0910591	0.63254	234.716	FALSE	7
2022-09-14	12:18:24	0.288766	1.28449	0.63254	222.215	FALSE	7
2022-09-14	12:18:25	-0.0235494	-0.104752	-0.186076	234.716	FALSE	7
2022-09-14	12:18:25	0.0943131	0.419524	-0.186076	222.635	FALSE	7
2022-09-14	12:18:25	-0.0955595	-0.425068	-0.186076	234.716	FALSE	7
2022-09-14	12:18:25	-0.142531	-0.634006	-0.186076	222.635	FALSE	7
2022-09-14	12:18:26	-0.477646	-2.12466	-1.49099	234.716	FALSE	7
2022-09-14	12:18:26	-0.592099	-2.63377	-1.49099	222.635	FALSE	7
2022-09-14	12:18:26	-0.162582	-0.723197	-1.49099	234.716	FALSE	7
2022-09-14	12:18:26	-0.108435	-0.482341	-1.49099	222.635	FALSE	7
2022-09-14	12:18:27	-0.00441451	-0.0196366	1.26225	234.716	FALSE	7
2022-09-14	12:18:27	0.325458	1.4477	1.26225	224.082	FALSE	7
2022-09-14	12:18:27	0.446883	1.98782	1.26225	236.703	FALSE	7
2022-09-14	12:18:27	0.367138	1.6331	1.26225	225.716	FALSE	7
2022-09-14	12:18:28	0.253295	1.12671	1.91871	237.83	FALSE	7
2022-09-14	12:18:28	0.428003	1.90384	1.91871	227.619	FALSE	7
2022-09-14	12:18:28	0.612735	2.72557	1.91871	240.556	FALSE	7
2022-09-14	12:18:29	0.373855	1.66298	1.50124	229.282	FALSE	7
2022-09-14	12:18:29	0.358893	1.59643	1.50124	242.152	FALSE	7
2022-09-14	12:18:29	0.238435	1.06061	1.50124	230.343	FALSE	7
2022-09-14	12:18:29	0.378791	1.68494	1.50124	243.837	FALSE	7
2022-09-14	12:18:30	0.362455	1.61227	2.02801	231.955	FALSE	7
2022-09-14	12:18:30	0.456807	2.03197	2.02801	245.869	FALSE	7
2022-09-14	12:18:30	0.429122	1.90882	2.02801	233.864	FALSE	7
2022-09-14	12:18:30	0.57528	2.55896	2.02801	248.428	FALSE	7
2022-09-14	12:18:31	0.721692	3.21023	3.21815	237.074	FALSE	7
2022-09-14	12:18:31	0.726781	3.23287	3.21815	251.661	FALSE	7
2022-09-14	12:18:31	0.723372	3.2177	3.21815	240.292	FALSE	7
2022-09-14	12:18:31	0.722049	3.21182	3.21815	254.873	FALSE	7
2022-09-14	12:18:32	0.726018	3.22947	3.24207	243.521	FALSE	7
2022-09-14	12:18:32	0.726425	3.23128	3.24207	258.104	FALSE	7
2022-09-14	12:18:32	0.734109	3.26546	3.24207	246.787	FALSE	7
2022-09-14	12:18:33	0.726323	3.23083	3.24317	261.335	FALSE	7
2022-09-14	12:18:33	0.731463	3.25369	3.24317	250.041	FALSE	7
2022-09-14	12:18:33	0.728562	3.24079	3.24317	264.576	FALSE	7
2022-09-14	12:18:33	0.730038	3.24736	3.24317	253.288	FALSE	7
2022-09-14	12:18:34	0.689682	3.06784	1.65715	267.643	FALSE	7
2022-09-14	12:18:34	0.269835	1.20028	1.65715	254.488	FALSE	7
2022-09-14	12:18:34	0.252277	1.12218	1.65715	268.766	FALSE	7
2022-09-14	12:18:34	0.278384	1.23831	1.65715	255.727	FALSE	7
2022-09-14	12:18:35	0.321489	1.43005	3.15805	270.196	FALSE	7
2022-09-14	12:18:35	0.348206	1.54889	3.15805	257.275	FALSE	7
2022-09-14	12:18:35	0.721743	3.21046	3.15805	273.406	FALSE	7
2022-09-14	12:18:35	1.44841	6.44282	3.15805	263.718	FALSE	7
2022-09-14	12:18:36	0.0149748	0.0666109	-0.450269	273.473	FALSE	7
2022-09-14	12:18:36	-0.1779	-0.791335	-0.450269	263.718	FALSE	7
2022-09-14	12:18:36	-0.14075	-0.626084	-0.450269	273.473	FALSE	7
2022-09-14	12:18:37	-0.0822771	-0.365985	0.722068	263.718	FALSE	7
2022-09-14	12:18:37	0.212583	0.945612	0.722068	274.418	FALSE	7
2022-09-14	12:18:37	0.18388	0.817935	0.722068	264.536	FALSE	7
2022-09-14	12:18:37	0.335127	1.49071	0.722068	275.909	FALSE	7
2022-09-14	12:18:38	0.244746	1.08868	1.25574	265.625	FALSE	7
2022-09-14	12:18:38	0.293753	1.30667	1.25574	277.216	FALSE	7
2022-09-14	12:18:38	0.309479	1.37662	1.25574	267.001	FALSE	7
2022-09-14	12:18:38	0.281234	1.25099	1.25574	278.467	FALSE	7
2022-09-14	12:18:39	0.267188	1.18851	1.31392	268.19	FALSE	7
2022-09-14	12:18:39	0.365458	1.62563	1.31392	280.092	FALSE	7
2022-09-14	12:18:39	0.253499	1.12761	1.31392	269.318	FALSE	7
2022-09-14	12:18:40	0.24271	1.07962	1.34148	281.172	FALSE	7
2022-09-14	12:18:40	0.33014	1.46853	1.34148	270.786	FALSE	7
2022-09-14	12:18:40	0.464491	2.06615	1.34148	283.238	FALSE	7
2022-09-14	12:18:40	0.16897	0.751612	1.34148	271.538	FALSE	7
2022-09-14	12:18:41	0.408053	1.8151	-1.36649	285.053	FALSE	7
2022-09-14	12:18:41	-0.545127	-2.42483	-1.36649	271.538	FALSE	7
2022-09-14	12:18:41	-0.355916	-1.58319	-1.36649	285.053	FALSE	7
2022-09-14	12:18:41	-0.735814	-3.27305	-1.36649	271.538	FALSE	7
2022-09-14	12:18:42	-0.642938	-2.85992	-2.91028	285.053	FALSE	7
2022-09-14	12:18:42	-0.670419	-2.98216	-2.91028	271.538	FALSE	7
2022-09-14	12:18:42	-0.639783	-2.84588	-2.91028	285.053	FALSE	7
2022-09-14	12:18:42	-0.663905	-2.95318	-2.91028	271.538	FALSE	7
2022-09-14	12:18:43	-0.687162	-3.05663	-3.60762	285.053	FALSE	7
2022-09-14	12:18:43	-0.869299	-3.86682	-3.60762	271.538	FALSE	7
2022-09-14	12:18:43	-0.876628	-3.89942	-3.60762	285.053	FALSE	7
2022-09-14	12:18:44	-1.30996	-5.82696	-8.66323	271.538	FALSE	7
2022-09-14	12:18:44	-2.18502	-9.71941	-8.66323	285.053	FALSE	7
2022-09-14	12:18:44	-2.14838	-9.55642	-8.66323	271.538	FALSE	7
2022-09-14	12:18:44	-2.14696	-9.55011	-8.66323	285.053	FALSE	7
2022-09-14	12:18:45	-2.07882	-9.24701	-8.65702	271.538	FALSE	7
2022-09-14	12:18:45	-2.07958	-9.25039	-8.65702	285.053	FALSE	7
2022-09-14	12:18:45	-1.8064	-8.03523	-8.65702	271.538	FALSE	7
2022-09-14	12:18:45	-1.81994	-8.09546	-8.65702	285.053	FALSE	7
2022-09-14	12:18:46	-1.68462	-7.49353	-6.79516	271.538	FALSE	7
2022-09-14	12:18:46	-1.61434	-7.18091	-6.79516	285.053	FALSE	7
2022-09-14	12:18:46	-1.42935	-6.35803	-6.79516	271.538	FALSE	7
2022-09-14	12:18:46	-1.38217	-6.14817	-6.79516	285.053	FALSE	7
2022-09-14	12:18:47	-1.28004	-5.69387	-5.36684	271.538	FALSE	7
2022-09-14	12:18:47	-1.22762	-5.4607	-5.36684	285.053	FALSE	7
2022-09-14	12:18:47	-1.1119	-4.94595	-5.36684	271.538	FALSE	7
2022-09-14	12:18:48	-1.1438	-5.08785	-4.80795	285.053	FALSE	7
2022-09-14	12:18:48	-1.0864	-4.83252	-4.80795	271.538	FALSE	7
2022-09-14	12:18:48	-1.08945	-4.84609	-4.80795	285.053	FALSE	7
2022-09-14	12:18:48	-1.00385	-4.46533	-4.80795	271.538	FALSE	7
2022-09-14	12:18:49	-1.08289	-4.81691	-4.47044	285.053	FALSE	7
2022-09-14	12:18:49	-0.937391	-4.1697	-4.47044	271.538	FALSE	7
2022-09-14	12:18:49	-1.00686	-4.47871	-4.47044	285.053	FALSE	7
2022-09-14	12:18:49	-0.992862	-4.41645	-4.47044	271.538	FALSE	7
2022-09-14	12:18:50	-1.18828	-5.28571	-3.64939	285.053	FALSE	7
2022-09-14	12:18:50	-1.2208	-5.43036	-3.64939	271.538	FALSE	7
2022-09-14	12:18:50	-1.24762	-5.54966	-3.64939	285.053	FALSE	7
2022-09-14	12:18:50	0.375026	1.66819	-3.64939	273.206	FALSE	7
2022-09-14	12:18:51	0.267138	1.18828	1.38703	286.241	FALSE	7
2022-09-14	12:18:51	0.339249	1.50905	1.38703	274.715	FALSE	7
2022-09-14	12:18:51	0.329071	1.46377	1.38703	287.705	FALSE	7
2022-09-14	12:18:52	0.350191	1.55772	1.62099	276.273	FALSE	7
2022-09-14	12:18:52	0.380165	1.69105	1.62099	289.396	FALSE	7
2022-09-14	12:18:52	0.301845	1.34267	1.62099	277.615	FALSE	7
2022-09-14	12:18:52	0.425458	1.89252	1.62099	291.289	FALSE	7
2022-09-14	12:18:53	0.204593	0.910071	1.7181	278.525	FALSE	7
2022-09-14	12:18:53	0.392379	1.74538	1.7181	293.034	FALSE	7
2022-09-14	12:18:53	0.23472	1.04408	1.7181	279.57	FALSE	7
2022-09-14	12:18:53	0.713295	3.17288	1.7181	296.207	FALSE	7
2022-09-14	12:18:54	0.552074	2.45574	2.11867	282.025	FALSE	7
2022-09-14	12:18:54	0.510852	2.27237	2.11867	298.479	FALSE	7
2022-09-14	12:18:54	0.418486	1.86151	2.11867	283.887	FALSE	7
2022-09-14	12:18:54	0.423779	1.88505	2.11867	300.364	FALSE	7
2022-09-14	12:18:55	0.15243	0.678039	-0.47238	284.565	FALSE	7
2022-09-14	12:18:55	-0.208791	-0.928744	-0.47238	300.364	FALSE	7
2022-09-14	12:18:55	-0.262226	-1.16643	-0.47238	284.565	FALSE	7
2022-09-14	12:18:56	0.0297331	0.132259	0.447651	300.497	FALSE	7
2022-09-14	12:18:56	-0.0244654	-0.108827	0.447651	284.565	FALSE	7
2022-09-14	12:18:56	0.120827	0.537463	0.447651	301.034	FALSE	7
2022-09-14	12:18:56	0.276451	1.22971	0.447651	285.795	FALSE	7
2022-09-14	12:18:57	0.444796	1.97854	1.297	303.013	FALSE	7
2022-09-14	12:18:57	0.154059	0.685285	1.297	286.48	FALSE	7
2022-09-14	12:18:57	0.31701	1.41012	1.297	304.423	FALSE	7
2022-09-14	12:18:57	0.250445	1.11403	1.297	287.594	FALSE	7
2022-09-14	12:18:58	0.382048	1.69943	1.51318	306.122	FALSE	7
2022-09-14	12:18:58	0.293244	1.30441	1.51318	288.898	FALSE	7
2022-09-14	12:18:58	0.397519	1.76824	1.51318	307.891	FALSE	7
2022-09-14	12:18:58	0.287901	1.28064	1.51318	290.179	FALSE	7
2022-09-14	12:18:59	0.423728	1.88483	1.75828	309.775	FALSE	7
2022-09-14	12:18:59	0.33645	1.4966	1.75828	291.675	FALSE	7
2022-09-14	12:18:59	0.425662	1.89343	1.75828	311.669	FALSE	7
2022-09-14	12:19:00	0.349936	1.55659	1.66717	293.232	FALSE	7
2022-09-14	12:19:00	0.399657	1.77775	1.66717	313.447	FALSE	7
2022-09-14	12:19:00	0.411056	1.82846	1.66717	295.061	FALSE	7
2022-09-14	12:19:00	0.338537	1.50588	1.66717	314.952	FALSE	7
2022-09-14	12:19:01	0.406832	1.80967	1.56027	296.87	FALSE	7
2022-09-14	12:19:01	0.290598	1.29264	1.56027	316.245	FALSE	7
2022-09-14	12:19:01	0.441031	1.96179	1.56027	298.832	FALSE	7
2022-09-14	12:19:01	0.264593	1.17696	1.56027	317.422	FALSE	7
2022-09-14	12:19:02	0.454975	2.02382	1.61278	300.856	FALSE	7
2022-09-14	12:19:02	0.26383	1.17357	1.61278	318.596	FALSE	7
2022-09-14	12:19:02	0.47584	2.11663	1.61278	302.972	FALSE	7
2022-09-14	12:19:02	0.255636	1.13712	1.61278	319.733	FALSE	7
2022-09-14	12:19:03	0.476094	2.11776	1.91312	305.09	FALSE	7
2022-09-14	12:19:03	0.288206	1.282	1.91312	321.015	FALSE	7
2022-09-14	12:19:03	0.525967	2.33961	1.91312	307.43	FALSE	7
2022-09-14	12:19:04	0.242659	1.0794	1.8129	322.094	FALSE	7
2022-09-14	12:19:04	0.512685	2.28053	1.8129	309.71	FALSE	7
2022-09-14	12:19:04	0.351921	1.56541	1.8129	323.66	FALSE	7
2022-09-14	12:19:04	0.522964	2.32625	1.8129	312.037	FALSE	7
2022-09-14	12:19:05	0.321438	1.42982	1.75127	325.089	FALSE	7
2022-09-14	12:19:05	0.447647	1.99122	1.75127	314.028	FALSE	7
2022-09-14	12:19:05	0.273193	1.21522	1.75127	326.305	FALSE	7
2022-09-14	12:19:05	0.532532	2.36881	1.75127	316.397	FALSE	7
2022-09-14	12:19:06	0.258537	1.15002	1.70214	327.455	FALSE	7
2022-09-14	12:19:06	0.484237	2.15398	1.70214	318.551	FALSE	7
2022-09-14	12:19:06	0.264593	1.17696	1.70214	328.632	FALSE	7
2022-09-14	12:19:06	0.52327	2.32761	1.70214	320.878	FALSE	7
2022-09-14	12:19:07	0.292735	1.30214	1.65702	329.934	FALSE	7
2022-09-14	12:19:07	0.491463	2.18613	1.65702	323.064	FALSE	7
2022-09-14	12:19:07	0.333346	1.48279	1.65702	331.416	FALSE	7
2022-09-14	12:19:08	0.486272	2.16304	1.94895	325.227	FALSE	7
2022-09-14	12:19:08	0.426832	1.89863	1.94895	333.315	FALSE	7
2022-09-14	12:19:08	0.438181	1.94912	1.94895	327.176	FALSE	7
2022-09-14	12:19:08	0.401285	1.785	1.94895	335.1	FALSE	7
2022-09-14	12:19:09	0.445255	1.98058	1.85579	329.157	FALSE	7
2022-09-14	12:19:09	0.422965	1.88143	1.85579	336.982	FALSE	7
2022-09-14	12:19:09	0.408715	1.81805	1.85579	330.975	FALSE	7
2022-09-14	12:19:09	0.39187	1.74312	1.85579	338.725	FALSE	7
2022-09-14	12:19:10	0.394211	1.75353	1.77134	332.729	FALSE	7
2022-09-14	12:19:10	0.396705	1.76462	1.77134	340.489	FALSE	7
2022-09-14	12:19:10	0.403728	1.79586	1.77134	334.525	FALSE	7
2022-09-14	12:19:11	0.32841	1.46083	1.5447	341.95	FALSE	7
2022-09-14	12:19:11	0.3764	1.6743	1.5447	336.199	FALSE	7
2022-09-14	12:19:11	0.327901	1.45857	1.5447	343.409	FALSE	7
2022-09-14	12:19:11	0.356349	1.58511	1.5447	337.784	FALSE	7
2022-09-14	12:19:12	0.481997	2.14402	1.74719	345.553	FALSE	7
2022-09-14	12:19:12	0.291718	1.29762	1.74719	339.082	FALSE	7
2022-09-14	12:19:12	0.500063	2.22438	1.74719	347.777	FALSE	7
2022-09-14	12:19:12	0.297367	1.32275	1.74719	340.404	FALSE	7
2022-09-14	12:19:13	0.476959	2.12161	1.71703	349.899	FALSE	7
2022-09-14	12:19:13	0.294822	1.31143	1.71703	341.716	FALSE	7
2022-09-14	12:19:13	0.4907	2.18273	1.71703	352.081	FALSE	7
2022-09-14	12:19:13	0.28154	1.25235	1.71703	342.968	FALSE	7
2022-09-14	12:19:14	0.476145	2.11799	1.79413	354.199	FALSE	7
2022-09-14	12:19:14	0.25355	1.12784	1.79413	344.096	FALSE	7
2022-09-14	12:19:14	0.480318	2.13655	1.79413	356.336	FALSE	7
2022-09-14	12:19:15	0.263677	1.17289	1.56242	345.269	FALSE	7
2022-09-14	12:19:15	0.483066	2.14877	1.56242	358.485	FALSE	7
2022-09-14	12:19:15	0.202303	0.899884	1.56242	346.169	FALSE	7
2022-09-14	12:19:15	0.455942	2.02812	1.56242	360.513	FALSE	7
2022-09-14	12:19:16	0.210751	0.937463	1.70226	347.106	FALSE	7
2022-09-14	12:19:16	0.537468	2.39077	1.70226	362.904	FALSE	7
2022-09-14	12:19:16	0.245	1.08981	1.70226	348.196	FALSE	7
2022-09-14	12:19:16	0.537519	2.39099	1.70226	365.295	FALSE	7
2022-09-14	12:19:17	0.145356	0.646573	1.81199	348.843	FALSE	7
2022-09-14	12:19:17	0.210445	0.936101	1.81199	366.231	FALSE	7
2022-09-14	12:19:17	0.491616	2.18681	1.81199	351.029	FALSE	7
2022-09-14	12:19:17	0.781997	3.47848	1.81199	369.709	FALSE	7
2022-09-14	12:19:18	0.714211	3.17695	2.56884	354.206	FALSE	7
2022-09-14	12:19:18	0.483422	2.15036	2.56884	371.86	FALSE	7
2022-09-14	12:19:18	0.534873	2.37922	2.56884	356.585	FALSE	7
2022-09-14	12:19:19	0.251361	1.1181	0.64182	372.978	FALSE	7
2022-09-14	12:19:19	0.226323	1.00673	0.64182	357.592	FALSE	7
2022-09-14	12:19:19	0.127545	0.567346	0.64182	373.545	FALSE	7
2022-09-14	12:19:19	-0.0280786	-0.124899	0.64182	357.592	FALSE	7
2022-09-14	12:19:20	-0.391081	-1.73961	-1.86705	373.545	FALSE	7
2022-09-14	12:19:20	-0.421056	-1.87294	-1.86705	357.592	FALSE	7
2022-09-14	12:19:20	-0.536475	-2.38635	-1.86705	373.545	FALSE	7
2022-09-14	12:19:20	-0.330318	-1.46932	-1.86705	357.592	FALSE	7
2022-09-14	12:19:21	-0.139427	-0.620199	0.465703	373.545	FALSE	7
2022-09-14	12:19:21	0.174771	0.777416	0.465703	358.37	FALSE	7
2022-09-14	12:19:21	0.116552	0.518447	0.465703	374.063	FALSE	7
2022-09-14	12:19:21	0.266883	1.18715	0.465703	359.557	FALSE	7
2022-09-14	12:19:22	0.0448984	0.199717	0.984547	374.263	FALSE	7
2022-09-14	12:19:22	0.279453	1.24306	0.984547	360.8	FALSE	7
2022-09-14	12:19:22	0.339657	1.51086	0.984547	375.774	FALSE	7
2022-09-14	12:19:23	0.395026	1.75715	1.56802	362.557	FALSE	7
2022-09-14	12:19:23	0.26668	1.18625	1.56802	376.96	FALSE	7
2022-09-14	12:19:23	0.45813	2.03785	1.56802	364.595	FALSE	7
2022-09-14	12:19:23	0.290191	1.29083	1.56802	378.251	FALSE	7
2022-09-14	12:19:24	0.460929	2.0503	1.59416	366.645	FALSE	7
2022-09-14	12:19:24	0.236043	1.04997	1.59416	379.301	FALSE	7
2022-09-14	12:19:24	0.431921	1.92127	1.59416	368.566	FALSE	7
2022-09-14	12:19:24	0.304644	1.35512	1.59416	380.656	FALSE	7
2022-09-14	12:19:25	0.470191	2.0915	1.61182	370.658	FALSE	7
2022-09-14	12:19:25	0.268817	1.19575	1.61182	381.852	FALSE	7
2022-09-14	12:19:25	0.441234	1.9627	1.61182	372.621	FALSE	7
2022-09-14	12:19:25	0.269173	1.19734	1.61182	383.049	FALSE	7
2022-09-14	12:19:26	0.432735	1.92489	1.62669	374.546	FALSE	7
2022-09-14	12:19:26	0.223677	0.99496	1.62669	384.044	FALSE	7
2022-09-14	12:19:26	0.440674	1.96021	1.62669	376.506	FALSE	7
2022-09-14	12:19:27	0.289122	1.28607	1.57345	385.33	FALSE	7
2022-09-14	12:19:27	0.470344	2.09218	1.57345	378.598	FALSE	7
2022-09-14	12:19:27	0.261285	1.16225	1.57345	386.493	FALSE	7
2022-09-14	12:19:27	0.394161	1.75331	1.57345	380.351	FALSE	7
2022-09-14	12:19:28	0.262405	1.16723	1.49694	387.66	FALSE	7
2022-09-14	12:19:28	0.416399	1.85223	1.49694	382.203	FALSE	7
2022-09-14	12:19:28	0.333041	1.48143	1.49694	389.141	FALSE	7
2022-09-14	12:19:28	0.334262	1.48686	1.49694	383.69	FALSE	7
2022-09-14	12:19:29	0.339351	1.5095	1.5305	390.651	FALSE	7
2022-09-14	12:19:29	0.303677	1.35082	1.5305	385.041	FALSE	7
2022-09-14	12:19:29	0.386476	1.71912	1.5305	392.37	FALSE	7
2022-09-14	12:19:29	0.346781	1.54255	1.5305	386.584	FALSE	7
2022-09-14	12:19:30	0.412532	1.83502	1.82008	394.205	FALSE	7
2022-09-14	12:19:30	0.310496	1.38115	1.82008	387.965	FALSE	7
2022-09-14	12:19:30	0.504491	2.24408	1.82008	396.449	FALSE	7
2022-09-14	12:19:31	0.339199	1.50882	1.70333	389.474	FALSE	7
2022-09-14	12:19:31	0.411921	1.83231	1.70333	398.281	FALSE	7
2022-09-14	12:19:31	0.405764	1.80492	1.70333	391.279	FALSE	7
2022-09-14	12:19:31	0.374822	1.66728	1.70333	399.949	FALSE	7
2022-09-14	12:19:32	0.382048	1.69943	1.80214	392.978	FALSE	7
2022-09-14	12:19:32	0.319606	1.42167	1.80214	401.37	FALSE	7
2022-09-14	12:19:32	0.487952	2.17051	1.80214	395.149	FALSE	7
2022-09-14	12:19:32	0.430954	1.91697	1.80214	403.287	FALSE	7
2022-09-14	12:19:33	0.420318	1.86966	1.66638	397.018	FALSE	7
2022-09-14	12:19:33	0.384695	1.7112	1.66638	404.998	FALSE	7
2022-09-14	12:19:33	0.348359	1.54957	1.66638	398.568	FALSE	7
2022-09-14	12:19:33	0.345102	1.53508	1.66638	406.533	FALSE	7
2022-09-14	12:19:34	0.34556	1.53712	1.48747	400.105	FALSE	7
2022-09-14	12:19:34	0.366272	1.62925	1.48747	408.163	FALSE	7
2022-09-14	12:19:34	0.291361	1.29603	1.48747	401.401	FALSE	7
2022-09-14	12:19:35	-0.716475	-3.18702	0.55031	408.163	FALSE	7
2022-09-14	12:19:35	0.425865	1.89433	0.55031	403.295	FALSE	7
2022-09-14	12:19:35	0.404389	1.7988	0.55031	409.962	FALSE	7
2022-09-14	12:19:35	0.381082	1.69513	0.55031	404.99	FALSE	7
2022-09-14	12:19:36	0.343372	1.52739	1.49694	411.489	FALSE	7
2022-09-14	12:19:36	0.359809	1.6005	1.49694	406.591	FALSE	7
2022-09-14	12:19:36	0.638333	2.83943	1.49694	414.328	FALSE	7
2022-09-14	12:19:36	0.00459311	0.0204311	1.49694	406.611	FALSE	7
2022-09-14	12:19:37	0.317519	1.41239	1.37192	415.741	FALSE	7
2022-09-14	12:19:37	0.306018	1.36123	1.37192	407.973	FALSE	7
2022-09-14	12:19:37	0.308206	1.37096	1.37192	417.112	FALSE	7
2022-09-14	12:19:37	0.301947	1.34312	1.37192	409.316	FALSE	7
2022-09-14	12:19:38	0.300318	1.33587	1.8234	418.448	FALSE	7
2022-09-14	12:19:38	0.277214	1.2331	1.8234	410.549	FALSE	7
2022-09-14	12:19:38	0.652226	2.90123	1.8234	421.349	FALSE	7
2022-09-14	12:19:39	0.730751	3.25053	1.6511	413.799	FALSE	7
2022-09-14	12:19:39	-0.504719	-2.24509	1.6511	421.349	FALSE	7
2022-09-14	12:19:39	0.528206	2.34957	1.6511	416.149	FALSE	7
2022-09-14	12:19:39	0.730496	3.24939	1.6511	424.598	FALSE	7
2022-09-14	12:19:40	0.728919	3.24238	3.23785	419.391	FALSE	7
2022-09-14	12:19:40	0.728613	3.24102	3.23785	427.839	FALSE	7
2022-09-14	12:19:40	0.730038	3.24736	3.23785	422.639	FALSE	7
2022-09-14	12:19:40	0.724033	3.22064	3.23785	431.06	FALSE	7
2022-09-14	12:19:41	0.72897	3.2426	3.23875	425.881	FALSE	7
2022-09-14	12:19:41	0.726018	3.22947	3.23875	434.289	FALSE	7
2022-09-14	12:19:41	0.725865	3.22879	3.23875	429.11	FALSE	7
2022-09-14	12:19:41	0.731565	3.25415	3.23875	437.543	FALSE	7
2022-09-14	12:19:42	0.732532	3.25845	3.25558	432.368	FALSE	7
2022-09-14	12:19:42	0.730343	3.24871	3.25558	440.792	FALSE	7
2022-09-14	12:19:42	0.732786	3.25958	3.25558	435.628	FALSE	7
2022-09-14	12:19:43	0.71014	3.15884	2.19139	443.951	FALSE	7
2022-09-14	12:19:43	0.726883	3.23332	2.19139	438.861	FALSE	7
2022-09-14	12:19:43	-0.185687	-0.825973	2.19139	443.951	FALSE	7
2022-09-14	12:19:43	0.719249	3.19936	2.19139	442.061	FALSE	7
2022-09-14	12:19:44	0.726476	3.23151	3.22681	447.183	FALSE	7
2022-09-14	12:19:44	0.726883	3.23332	3.22681	445.294	FALSE	7
2022-09-14	12:19:44	0.725458	3.22698	3.22681	450.41	FALSE	7
2022-09-14	12:19:44	0.722862	3.21543	3.22681	448.509	FALSE	7
2022-09-14	12:19:45	0.720674	3.2057	3.23717	453.615	FALSE	7
2022-09-14	12:19:45	0.734059	3.26524	3.23717	451.775	FALSE	7
2022-09-14	12:19:45	0.728512	3.24057	3.23717	456.856	FALSE	7
2022-09-14	12:19:46	0.722099	3.21204	-0.35676	454.987	FALSE	7
2022-09-14	12:19:46	0.559911	2.4906	-0.35676	459.346	FALSE	7
2022-09-14	12:19:46	-0.774338	-3.44441	-0.35676	454.987	FALSE	7
2022-09-14	12:19:46	-0.828485	-3.68527	-0.35676	459.346	FALSE	7
2022-09-14	12:19:47	-0.860495	-3.82765	-4.24571	454.987	FALSE	7
2022-09-14	12:19:47	-0.954439	-4.24554	-4.24571	459.346	FALSE	7
2022-09-14	12:19:47	-0.968638	-4.3087	-4.24571	454.987	FALSE	7
2022-09-14	12:19:47	-1.03434	-4.60095	-4.24571	459.346	FALSE	7
2022-09-14	12:19:48	-1.02976	-4.58058	-5.57559	454.987	FALSE	7
2022-09-14	12:19:48	-1.05179	-4.67857	-5.57559	459.346	FALSE	7
2022-09-14	12:19:48	-1.36543	-6.07371	-5.57559	454.987	FALSE	7
2022-09-14	12:19:48	-1.56681	-6.96948	-5.57559	459.346	FALSE	7
2022-09-14	12:19:49	-1.53917	-6.84654	-6.59767	454.987	FALSE	7
2022-09-14	12:19:49	-1.48894	-6.6231	-6.59767	459.346	FALSE	7
2022-09-14	12:19:49	-1.42156	-6.32338	-6.59767	454.987	FALSE	7
2022-09-14	12:19:50	-1.47658	-6.56812	-6.2281	459.346	FALSE	7
2022-09-14	12:19:50	-1.34599	-5.98723	-6.2281	454.987	FALSE	7
2022-09-14	12:19:50	-1.42228	-6.32659	-6.2281	459.346	FALSE	7
2022-09-14	12:19:50	-1.35571	-6.03047	-6.2281	454.987	FALSE	7
2022-09-14	12:19:51	-1.36609	-6.07664	-3.7834	459.346	FALSE	7
2022-09-14	12:19:51	-1.05225	-4.68062	-3.7834	454.987	FALSE	7
2022-09-14	12:19:51	-0.814083	-3.6212	-3.7834	459.346	FALSE	7
2022-09-14	12:19:51	-0.169758	-0.755118	-3.7834	454.987	FALSE	7
2022-09-14	12:19:52	-0.00100484	-0.00446973	0.528522	459.346	FALSE	7
2022-09-14	12:19:52	0.165102	0.734407	0.528522	455.721	FALSE	7
2022-09-14	12:19:52	0.189886	0.844651	0.528522	460.191	FALSE	7
2022-09-14	12:19:52	0.121285	0.5395	0.528522	456.261	FALSE	7
2022-09-14	12:19:53	0.39187	1.74312	2.69026	461.934	FALSE	7
2022-09-14	12:19:53	0.697417	3.10225	2.69026	459.363	FALSE	7
2022-09-14	12:19:53	0.725102	3.2254	2.69026	465.16	FALSE	7
2022-09-14	12:19:54	0.730903	3.2512	3.23813	462.614	FALSE	7
2022-09-14	12:19:54	0.726272	3.2306	3.23813	468.39	FALSE	7
2022-09-14	12:19:54	0.730903	3.2512	3.23813	465.865	FALSE	7
2022-09-14	12:19:54	0.723779	3.21951	3.23813	471.61	FALSE	7
2022-09-14	12:19:55	0.72327	3.21725	2.8018	469.083	FALSE	7
2022-09-14	12:19:55	0.340216	1.51335	2.8018	473.123	FALSE	7
2022-09-14	12:19:55	0.728054	3.23853	2.8018	472.321	FALSE	7
2022-09-14	12:19:55	0.727952	3.23808	2.8018	476.361	FALSE	7
2022-09-14	12:19:56	0.726425	3.23128	3.24487	475.552	FALSE	7
2022-09-14	12:19:56	0.736603	3.27656	3.24487	479.638	FALSE	7
2022-09-14	12:19:56	0.726883	3.23332	3.24487	478.786	FALSE	7
2022-09-14	12:19:56	0.728003	3.2383	3.24487	482.876	FALSE	7
2022-09-14	12:19:57	0.727392	3.23559	3.24547	482.021	FALSE	7
2022-09-14	12:19:57	0.728817	3.24192	3.24547	486.118	FALSE	7
2022-09-14	12:19:57	0.732634	3.2589	3.24547	485.28	FALSE	7
2022-09-14	12:19:58	0.719707	3.2014	3.05483	489.319	FALSE	7
2022-09-14	12:19:58	0.576349	2.56372	3.05483	487.844	FALSE	7
2022-09-14	12:19:58	0.722761	3.21499	3.05483	492.534	FALSE	7
2022-09-14	12:19:58	0.728206	3.23921	3.05483	491.083	FALSE	7
2022-09-14	12:19:59	0.72388	3.21996	3.1932	495.754	FALSE	7
2022-09-14	12:19:59	0.724949	3.22472	3.1932	494.308	FALSE	7
2022-09-14	12:19:59	0.734924	3.26909	3.1932	499.023	FALSE	7
2022-09-14	12:19:59	0.687697	3.05901	3.1932	497.367	FALSE	7
2022-09-14	12:20:00	-0.413676	-1.84011	1.11415	499.023	FALSE	7
2022-09-14	12:20:00	0.471718	2.0983	1.11415	499.465	FALSE	7
2022-09-14	12:20:00	0.305204	1.35761	1.11415	500.381	FALSE	7
2022-09-14	12:20:00	0.638639	2.84079	1.11415	502.306	FALSE	7
2022-09-14	12:20:01	0.721591	3.20978	3.2386	503.591	FALSE	7
2022-09-14	12:20:01	0.734517	3.26728	3.2386	505.573	FALSE	7
2022-09-14	12:20:01	0.728104	3.23875	3.2386	506.829	FALSE	7
2022-09-14	12:20:02	0.727646	3.23671	3.2297	508.81	FALSE	7
2022-09-14	12:20:02	0.72444	3.22245	3.2297	510.052	FALSE	7
2022-09-14	12:20:02	0.729428	3.24464	3.2297	512.055	FALSE	7
2022-09-14	12:20:02	0.722761	3.21499	3.2297	513.267	FALSE	7
2022-09-14	12:20:03	0.732786	3.25958	3.23558	515.314	FALSE	7
2022-09-14	12:20:03	0.729631	3.24554	3.23558	516.512	FALSE	7
2022-09-14	12:20:03	0.725305	3.2263	3.23558	518.54	FALSE	7
2022-09-14	12:20:03	0.721845	3.21091	3.23558	519.723	FALSE	7
2022-09-14	12:20:04	0.681437	3.03117	3.1864	521.572	FALSE	7
2022-09-14	12:20:04	0.726985	3.23377	3.1864	522.957	FALSE	7
2022-09-14	12:20:04	0.727697	3.23694	3.1864	524.809	FALSE	7
2022-09-14	12:20:04	0.729224	3.24373	3.1864	526.201	FALSE	7
2022-09-14	12:20:05	0.726679	3.23241	3.22336	528.041	FALSE	7
2022-09-14	12:20:05	0.725102	3.2254	3.22336	529.426	FALSE	7
2022-09-14	12:20:05	0.72215	3.21227	3.22336	531.253	FALSE	7
2022-09-14	12:20:06	0.732786	3.25958	3.24622	532.686	FALSE	7
2022-09-14	12:20:06	0.730852	3.25098	3.24622	534.504	FALSE	7
2022-09-14	12:20:06	0.726272	3.2306	3.24622	535.916	FALSE	7
2022-09-14	12:20:06	0.729224	3.24373	3.24622	537.748	FALSE	7
2022-09-14	12:20:07	0.727239	3.2349	3.24328	539.151	FALSE	7
2022-09-14	12:20:07	0.724695	3.22359	3.24328	540.971	FALSE	7
2022-09-14	12:20:07	0.734262	3.26614	3.24328	542.417	FALSE	7
2022-09-14	12:20:07	0.730293	3.24849	3.24328	544.22	FALSE	7
2022-09-14	12:20:08	0.723982	3.22042	3.24096	545.638	FALSE	7
2022-09-14	12:20:08	0.732939	3.26026	3.24096	547.48	FALSE	7
2022-09-14	12:20:08	0.723372	3.2177	3.24096	548.856	FALSE	7
2022-09-14	12:20:08	0.734109	3.26546	3.24096	550.746	FALSE	7
2022-09-14	12:20:09	0.729224	3.24373	3.23913	552.099	FALSE	7
2022-09-14	12:20:09	0.731005	3.25166	3.23913	553.997	FALSE	7
2022-09-14	12:20:09	0.724338	3.222	3.23913	555.321	FALSE	7
2022-09-14	12:20:10	0.729377	3.24441	3.24068	557.242	FALSE	7
2022-09-14	12:20:10	0.725967	3.22925	3.24068	558.551	FALSE	7
2022-09-14	12:20:10	0.729733	3.246	3.24068	560.488	FALSE	7
2022-09-14	12:20:10	0.729071	3.24305	3.24068	561.794	FALSE	7
2022-09-14	12:20:11	0.726578	3.23196	3.22693	563.72	FALSE	7
2022-09-14	12:20:11	0.724389	3.22223	3.22693	565.016	FALSE	7
2022-09-14	12:20:11	0.720572	3.20525	3.22693	566.925	FALSE	7
2022-09-14	12:20:11	0.730242	3.24826	3.22693	568.264	FALSE	7
2022-09-14	12:20:12	0.72556	3.22744	3.24566	570.152	FALSE	7
2022-09-14	12:20:12	0.727239	3.2349	3.24566	571.499	FALSE	7
2022-09-14	12:20:12	0.731412	3.25347	3.24566	573.406	FALSE	7
2022-09-14	12:20:12	0.734415	3.26682	3.24566	574.766	FALSE	7
2022-09-14	12:20:13	0.732939	3.26026	3.25098	576.666	FALSE	7
2022-09-14	12:20:13	0.727137	3.23445	3.25098	578	FALSE	7
2022-09-14	12:20:13	0.732481	3.25822	3.25098	579.924	FALSE	7
2022-09-14	12:20:14	0.732888	3.26003	3.24175	581.26	FALSE	7
2022-09-14	12:20:14	0.729173	3.24351	3.24175	583.168	FALSE	7
2022-09-14	12:20:14	0.724847	3.22426	3.24175	584.485	FALSE	7
2022-09-14	12:20:14	0.728206	3.23921	3.24175	586.407	FALSE	7
2022-09-14	12:20:15	0.728359	3.23989	3.24141	587.724	FALSE	7
2022-09-14	12:20:15	0.727799	3.2374	3.24141	589.644	FALSE	7
2022-09-14	12:20:15	0.72556	3.22744	3.24141	590.952	FALSE	7
2022-09-14	12:20:15	0.733092	3.26094	3.24141	592.905	FALSE	7
2022-09-14	12:20:16	0.739351	3.28878	3.24798	594.241	FALSE	7
2022-09-14	12:20:16	0.731819	3.25528	3.24798	596.161	FALSE	7
2022-09-14	12:20:16	0.720827	3.20638	3.24798	597.447	FALSE	7
2022-09-14	12:20:16	0.728715	3.24147	3.24798	599.402	FALSE	7
2022-09-14	12:20:17	0.72103	3.20729	3.22261	600.654	FALSE	7
2022-09-14	12:20:17	0.727799	3.2374	3.22261	602.64	FALSE	7
2022-09-14	12:20:17	0.724593	3.22313	3.22261	603.878	FALSE	7
2022-09-14	12:20:18	0.729682	3.24577	3.23298	605.885	FALSE	7
2022-09-14	12:20:18	0.725916	3.22902	3.23298	607.107	FALSE	7
2022-09-14	12:20:18	0.725611	3.22766	3.23298	609.113	FALSE	7
2022-09-14	12:20:18	0.726018	3.22947	3.23298	610.336	FALSE	7
2022-09-14	12:20:19	0.724389	3.22223	3.2387	612.335	FALSE	7
2022-09-14	12:20:19	0.730089	3.24758	3.2387	613.584	FALSE	7
2022-09-14	12:20:19	0.730598	3.24985	3.2387	615.585	FALSE	7
2022-09-14	12:20:19	0.72729	3.23513	3.2387	616.819	FALSE	7
2022-09-14	12:20:20	0.72612	3.22993	3.23304	618.815	FALSE	7
2022-09-14	12:20:20	0.723931	3.22019	3.23304	620.039	FALSE	7
2022-09-14	12:20:20	0.72612	3.22993	3.23304	622.045	FALSE	7
2022-09-14	12:20:20	0.731107	3.25211	3.23304	623.291	FALSE	7
2022-09-14	12:20:21	0.731565	3.25415	3.23392	625.299	FALSE	7
2022-09-14	12:20:21	0.726018	3.22947	3.23392	626.52	FALSE	7
2022-09-14	12:20:21	0.723473	3.21815	3.23392	628.517	FALSE	7
2022-09-14	12:20:22	0.733041	3.26071	3.22959	629.781	FALSE	7
2022-09-14	12:20:22	0.724491	3.22268	3.22959	631.74	FALSE	7
2022-09-14	12:20:22	0.723779	3.21951	3.22959	633.001	FALSE	7
2022-09-14	12:20:22	0.722862	3.21543	3.22959	634.955	FALSE	7
2022-09-14	12:20:23	0.72785	3.23762	3.23111	636.238	FALSE	7
2022-09-14	12:20:23	0.725509	3.22721	3.23111	638.183	FALSE	7
2022-09-14	12:20:23	0.724186	3.22132	3.23111	639.46	FALSE	7
2022-09-14	12:20:23	0.728003	3.2383	3.23111	641.421	FALSE	7
2022-09-14	12:20:24	0.726985	3.23377	3.22328	642.693	FALSE	7
2022-09-14	12:20:24	0.727239	3.2349	3.22328	644.656	FALSE	7
2022-09-14	12:20:24	0.719656	3.20117	3.22328	645.895	FALSE	7
2022-09-14	12:20:25	0.733804	3.26411	3.23751	647.92	FALSE	7
2022-09-14	12:20:25	0.724338	3.222	3.23751	649.117	FALSE	7
2022-09-14	12:20:25	0.727036	3.234	3.23751	651.154	FALSE	7
2022-09-14	12:20:25	0.72612	3.22993	3.23751	652.347	FALSE	7
2022-09-14	12:20:26	0.72388	3.21996	3.23745	654.374	FALSE	7
2022-09-14	12:20:26	0.73243	3.258	3.23745	655.605	FALSE	7
2022-09-14	12:20:26	0.725204	3.22585	3.23745	657.6	FALSE	7
2022-09-14	12:20:26	0.729733	3.246	3.23745	658.851	FALSE	7
2022-09-14	12:20:27	0.728308	3.23966	3.23943	660.839	FALSE	7
2022-09-14	12:20:27	0.729733	3.246	3.23943	662.097	FALSE	7
2022-09-14	12:20:27	0.728308	3.23966	3.23943	664.079	FALSE	7
2022-09-14	12:20:27	0.726679	3.23241	3.23943	665.329	FALSE	7
2022-09-14	12:20:28	0.727188	3.23468	2.47882	667.314	FALSE	7
2022-09-14	12:20:28	0.727494	3.23604	2.47882	668.565	FALSE	7
2022-09-14	12:20:28	0.217112	0.965758	2.47882	668.279	FALSE	7
2022-09-14	12:20:29	0.0486644	0.216469	0.389586	668.781	FALSE	7
2022-09-14	12:20:29	0.21187	0.94244	0.389586	669.222	FALSE	7
2022-09-14	12:20:29	0.00372797	0.0165828	0.389586	668.798	FALSE	7
2022-09-14	12:20:29	0.0860689	0.382852	0.389586	669.605	FALSE	7
2022-09-14	12:20:30	0.0319214	0.141993	0.212677	668.94	FALSE	7
2022-09-14	12:20:30	0.0438806	0.19519	0.212677	669.8	FALSE	7
2022-09-14	12:20:30	0.0815905	0.362931	0.212677	669.303	FALSE	7
2022-09-14	12:20:30	0.0338552	0.150595	0.212677	669.951	FALSE	7
2022-09-14	12:20:31	0.0712089	0.316751	2.47566	669.62	FALSE	7
2022-09-14	12:20:31	0.705611	3.1387	2.47566	673.089	FALSE	7
2022-09-14	12:20:31	0.72271	3.21476	2.47566	672.834	FALSE	7
2022-09-14	12:20:31	0.726679	3.23241	2.47566	676.322	FALSE	7
2022-09-14	12:20:32	0.727545	3.23627	3.22713	676.071	FALSE	7
2022-09-14	12:20:32	0.722659	3.21453	3.22713	679.536	FALSE	7
2022-09-14	12:20:32	0.726272	3.2306	3.22713	679.301	FALSE	7
2022-09-14	12:20:33	0.73187	3.2555	3.23168	682.792	FALSE	7
2022-09-14	12:20:33	0.725153	3.22563	3.23168	682.527	FALSE	7
2022-09-14	12:20:33	0.722303	3.21295	3.23168	686.005	FALSE	7
2022-09-14	12:20:33	0.72673	3.23264	3.23168	685.76	FALSE	7
2022-09-14	12:20:34	0.722862	3.21543	3.23864	689.22	FALSE	7
2022-09-14	12:20:34	0.736043	3.27407	3.23864	689.034	FALSE	7
2022-09-14	12:20:34	0.724898	3.22449	3.23864	692.445	FALSE	7
2022-09-14	12:20:34	0.728512	3.24057	3.23864	692.274	FALSE	7
2022-09-14	12:20:35	0.723066	3.21634	3.22653	695.661	FALSE	7
2022-09-14	12:20:35	0.721641	3.21	3.22653	695.484	FALSE	7
2022-09-14	12:20:35	0.727799	3.2374	3.22653	698.898	FALSE	7
2022-09-14	12:20:35	0.728919	3.24238	3.22653	698.727	FALSE	7
2022-09-14	12:20:36	0.736501	3.2761	3.24924	702.174	FALSE	7
2022-09-14	12:20:36	0.727748	3.23717	3.24924	701.964	FALSE	7
2022-09-14	12:20:36	0.727137	3.23445	3.24924	705.409	FALSE	7
2022-09-14	12:20:37	0.72958	3.24532	3.22421	705.209	FALSE	7
2022-09-14	12:20:37	0.720114	3.20321	3.22421	708.612	FALSE	7
2022-09-14	12:20:37	0.72383	3.21974	3.22421	708.429	FALSE	7
2022-09-14	12:20:37	0.725814	3.22857	3.22421	711.841	FALSE	7
2022-09-14	12:20:38	0.727545	3.23627	3.23745	711.665	FALSE	7
2022-09-14	12:20:38	0.72897	3.2426	3.23745	715.083	FALSE	7
2022-09-14	12:20:38	0.724338	3.222	3.23745	714.887	FALSE	7
2022-09-14	12:20:38	0.730394	3.24894	3.23745	718.332	FALSE	7
2022-09-14	12:20:39	0.727697	3.23694	3.23032	718.124	FALSE	7
2022-09-14	12:20:39	0.729122	3.24328	3.23032	721.575	FALSE	7
2022-09-14	12:20:39	0.721845	3.21091	3.23032	721.335	FALSE	7
2022-09-14	12:20:39	0.72617	3.23015	3.23032	724.806	FALSE	7
2022-09-14	12:20:40	0.726679	3.23241	3.22849	724.567	FALSE	7
2022-09-14	12:20:40	0.725356	3.22653	3.22849	728.032	FALSE	7
2022-09-14	12:20:40	0.725356	3.22653	3.22849	727.794	FALSE	7
2022-09-14	12:20:41	0.656552	2.92047	2.00248	730.953	FALSE	7
2022-09-14	12:20:41	0.635331	2.82608	2.00248	730.62	FALSE	7
2022-09-14	12:20:41	0.726374	3.23106	2.00248	734.184	FALSE	7
2022-09-14	12:20:41	-0.217544	-0.967679	2.00248	730.62	FALSE	7
2022-09-14	12:20:42	0.350344	1.5584	1.78398	735.742	FALSE	7
2022-09-14	12:20:42	0.398944	1.77458	1.78398	732.395	FALSE	7
2022-09-14	12:20:42	0.458028	2.0374	1.78398	737.779	FALSE	7
2022-09-14	12:20:42	0.396909	1.76553	1.78398	734.16	FALSE	7
2022-09-14	12:20:43	0.412634	1.83548	1.7859	739.615	FALSE	7
2022-09-14	12:20:43	0.43411	1.93101	1.7859	736.091	FALSE	7
2022-09-14	12:20:43	0.373092	1.65959	1.7859	741.275	FALSE	7
2022-09-14	12:20:43	0.38612	1.71754	1.7859	737.809	FALSE	7
2022-09-14	12:20:44	0.388512	1.72818	1.70501	743.003	FALSE	7
2022-09-14	12:20:44	0.383321	1.70509	1.70501	739.514	FALSE	7
2022-09-14	12:20:44	0.378079	1.68177	1.70501	744.684	FALSE	7
2022-09-14	12:20:45	0.383881	1.70758	1.69117	741.221	FALSE	7
2022-09-14	12:20:45	0.380369	1.69196	1.69117	746.376	FALSE	7
2022-09-14	12:20:45	0.376654	1.67543	1.69117	742.897	FALSE	7
2022-09-14	12:20:45	0.37986	1.68969	1.69117	748.066	FALSE	7
2022-09-14	12:20:46	0.38215	1.69988	1.70039	744.597	FALSE	7
2022-09-14	12:20:46	0.382405	1.70101	1.70039	749.767	FALSE	7
2022-09-14	12:20:46	0.382099	1.69965	1.70039	746.296	FALSE	7
2022-09-14	12:20:46	0.382405	1.70101	1.70039	751.468	FALSE	7
2022-09-14	12:20:47	0.387901	1.72546	1.72518	748.022	FALSE	7
2022-09-14	12:20:47	0.385153	1.71324	1.72518	753.181	FALSE	7
2022-09-14	12:20:47	0.394313	1.75398	1.72518	749.776	FALSE	7
2022-09-14	12:20:47	0.383982	1.70803	1.72518	754.889	FALSE	7
2022-09-14	12:20:48	0.379758	1.68924	1.7075	751.465	FALSE	7
2022-09-14	12:20:48	0.386781	1.72048	1.7075	756.61	FALSE	7
2022-09-14	12:20:48	0.385051	1.71278	1.7075	753.178	FALSE	7
2022-09-14	12:20:49	0.388512	1.72818	1.73186	758.338	FALSE	7
2022-09-14	12:20:49	0.389275	1.73157	1.73186	754.909	FALSE	7
2022-09-14	12:20:49	0.388003	1.72591	1.73186	760.064	FALSE	7
2022-09-14	12:20:49	0.391565	1.74176	1.73186	756.651	FALSE	7
2022-09-14	12:20:50	0.391769	1.74267	1.74861	761.807	FALSE	7
2022-09-14	12:20:50	0.393855	1.75195	1.74861	758.403	FALSE	7
2022-09-14	12:20:50	0.394618	1.75534	1.74861	763.562	FALSE	7
2022-09-14	12:20:50	0.392176	1.74448	1.74861	760.147	FALSE	7
2022-09-14	12:20:51	0.389733	1.73361	1.72744	765.296	FALSE	7
2022-09-14	12:20:51	0.388461	1.72795	1.72744	761.875	FALSE	7
2022-09-14	12:20:51	0.386323	1.71844	1.72744	767.014	FALSE	7
2022-09-14	12:20:51	0.388868	1.72976	1.72744	763.605	FALSE	7
2022-09-14	12:20:52	0.391463	1.74131	1.74402	768.755	FALSE	7
2022-09-14	12:20:52	0.390649	1.73768	1.74402	765.343	FALSE	7
2022-09-14	12:20:52	0.394109	1.75308	1.74402	770.508	FALSE	7
2022-09-14	12:20:53	0.390852	1.73859	1.75608	767.081	FALSE	7
2022-09-14	12:20:53	0.395127	1.7576	1.75608	772.266	FALSE	7
2022-09-14	12:20:53	0.395585	1.75964	1.75608	768.841	FALSE	7
2022-09-14	12:20:53	0.39757	1.76847	1.75608	774.034	FALSE	7
2022-09-14	12:20:54	0.397163	1.76666	1.76547	770.608	FALSE	7
2022-09-14	12:20:54	0.395942	1.76123	1.76547	775.796	FALSE	7
2022-09-14	12:20:54	0.395484	1.75919	1.76547	772.367	FALSE	7
2022-09-14	12:20:54	0.398995	1.77481	1.76547	777.571	FALSE	7
2022-09-14	12:20:55	0.399199	1.77572	1.76513	774.143	FALSE	7
2022-09-14	12:20:55	0.397672	1.76892	1.76513	779.339	FALSE	7
2022-09-14	12:20:55	0.393601	1.75082	1.76513	775.894	FALSE	7
2022-09-14	12:20:55	0.396807	1.76508	1.76513	781.105	FALSE	7
2022-09-14	12:20:56	0.399809	1.77843	1.76779	777.672	FALSE	7
2022-09-14	12:20:56	0.396654	1.7644	1.76779	782.869	FALSE	7
2022-09-14	12:20:56	0.395789	1.76055	1.76779	779.432	FALSE	7
2022-09-14	12:20:57	0.394873	1.75647	1.78155	784.625	FALSE	7
2022-09-14	12:20:57	0.405713	1.80469	1.78155	781.237	FALSE	7
2022-09-14	12:20:57	0.403321	1.79405	1.78155	786.419	FALSE	7
2022-09-14	12:20:57	0.39813	1.77096	1.78155	783.008	FALSE	7
2022-09-14	12:20:58	0.399402	1.77662	1.77877	788.196	FALSE	7
2022-09-14	12:20:58	0.394211	1.75353	1.77877	784.762	FALSE	7
2022-09-14	12:20:58	0.403117	1.79315	1.77877	789.989	FALSE	7
2022-09-14	12:20:58	0.402812	1.79179	1.77877	786.553	FALSE	7
2022-09-14	12:20:59	0.399657	1.77775	1.77956	791.767	FALSE	7
2022-09-14	12:20:59	0.396298	1.76281	1.77956	788.316	FALSE	7
2022-09-14	12:20:59	0.393753	1.75149	1.77956	793.518	FALSE	7
2022-09-14	12:20:59	0.410547	1.8262	1.77956	790.142	FALSE	7
2022-09-14	12:21:00	0.400318	1.78069	1.80273	795.299	FALSE	7
2022-09-14	12:21:00	0.405	1.80152	1.80273	791.944	FALSE	7
2022-09-14	12:21:00	0.410496	1.82597	1.80273	797.125	FALSE	7
2022-09-14	12:21:01	0.406527	1.80831	1.82031	793.752	FALSE	7
2022-09-14	12:21:01	0.400674	1.78228	1.82031	798.907	FALSE	7
2022-09-14	12:21:01	0.414568	1.84408	1.82031	795.596	FALSE	7
2022-09-14	12:21:01	0.415127	1.84657	1.82031	800.754	FALSE	7
2022-09-14	12:21:02	0.411463	1.83027	1.83463	797.427	FALSE	7
2022-09-14	12:21:02	0.418588	1.86196	1.83463	802.616	FALSE	7
2022-09-14	12:21:02	0.411718	1.8314	1.83463	799.258	FALSE	7
2022-09-14	12:21:02	0.408003	1.81488	1.83463	804.431	FALSE	7
2022-09-14	12:21:03	0.410802	1.82733	1.80497	801.085	FALSE	7
2022-09-14	12:21:03	0.403168	1.79337	1.80497	806.224	FALSE	7
2022-09-14	12:21:03	0.40271	1.79133	1.80497	802.877	FALSE	7
2022-09-14	12:21:03	0.406425	1.80786	1.80497	808.032	FALSE	7
2022-09-14	12:21:04	0.407545	1.81284	1.81367	804.69	FALSE	7
2022-09-14	12:21:04	0.411056	1.82846	1.81367	809.861	FALSE	7
2022-09-14	12:21:04	0.404593	1.79971	1.81367	806.489	FALSE	7
2022-09-14	12:21:05	0.412786	1.83615	1.8447	811.697	FALSE	7
2022-09-14	12:21:05	0.418079	1.8597	1.8447	808.349	FALSE	7
2022-09-14	12:21:05	0.415127	1.84657	1.8447	813.543	FALSE	7
2022-09-14	12:21:05	0.412837	1.83638	1.8447	810.185	FALSE	7
2022-09-14	12:21:06	0.413906	1.84114	1.86225	815.384	FALSE	7
2022-09-14	12:21:06	0.422761	1.88053	1.86225	812.066	FALSE	7
2022-09-14	12:21:06	0.421387	1.87441	1.86225	817.259	FALSE	7
2022-09-14	12:21:06	0.416552	1.85291	1.86225	813.919	FALSE	7
2022-09-14	12:21:07	0.420573	1.87079	1.84142	819.13	FALSE	7
2022-09-14	12:21:07	0.415026	1.84612	1.84142	815.765	FALSE	7
2022-09-14	12:21:07	0.41126	1.82937	1.84142	820.959	FALSE	7
2022-09-14	12:21:07	0.409021	1.81941	1.84142	817.584	FALSE	7
2022-09-14	12:21:08	0.410089	1.82416	1.81103	822.783	FALSE	7
2022-09-14	12:21:08	0.408257	1.81601	1.81103	819.4	FALSE	7
2022-09-14	12:21:08	0.403066	1.79292	1.81103	824.576	FALSE	7
2022-09-14	12:21:09	0.406934	1.81012	1.83814	821.21	FALSE	7
2022-09-14	12:21:09	0.407646	1.81329	1.83814	826.389	FALSE	7
2022-09-14	12:21:09	0.413702	1.84023	1.83814	823.051	FALSE	7
2022-09-14	12:21:09	0.424644	1.8889	1.83814	828.278	FALSE	7
2022-09-14	12:21:10	0.412634	1.83548	1.83231	824.886	FALSE	7
2022-09-14	12:21:10	0.411921	1.83231	1.83231	830.111	FALSE	7
2022-09-14	12:21:10	0.410242	1.82484	1.83231	826.711	FALSE	7
2022-09-14	12:21:10	0.412888	1.83661	1.83231	831.947	FALSE	7
2022-09-14	12:21:11	0.41355	1.83955	2.42416	828.551	FALSE	7
2022-09-14	12:21:11	0.401947	1.78794	2.42416	833.735	FALSE	7
2022-09-14	12:21:11	0.642099	2.85618	2.42416	831.407	FALSE	7
2022-09-14	12:21:11	0.722303	3.21295	2.42416	836.948	FALSE	7
2022-09-14	12:21:12	0.725407	3.22676	3.23634	834.633	FALSE	7
2022-09-14	12:21:12	0.726323	3.23083	3.23634	840.179	FALSE	7
2022-09-14	12:21:12	0.730954	3.25143	3.23634	837.885	FALSE	7
2022-09-14	12:21:13	0.723931	3.22019	3.24622	843.399	FALSE	7
2022-09-14	12:21:13	0.730191	3.24804	3.24622	841.133	FALSE	7
2022-09-14	12:21:13	0.730293	3.24849	3.24622	846.648	FALSE	7
2022-09-14	12:21:13	0.73472	3.26818	3.24622	844.401	FALSE	7
2022-09-14	12:21:14	0.734262	3.26614	3.24515	849.914	FALSE	7
2022-09-14	12:21:14	0.728104	3.23875	3.24515	847.64	FALSE	7
2022-09-14	12:21:14	0.729682	3.24577	3.24515	853.159	FALSE	7
2022-09-14	12:21:14	0.72612	3.22993	3.24515	850.87	FALSE	7
2022-09-14	12:21:15	0.729326	3.24419	3.2552	856.404	FALSE	7
2022-09-14	12:21:15	0.731259	3.25279	3.2552	854.123	FALSE	7
2022-09-14	12:21:15	0.734822	3.26864	3.2552	859.672	FALSE	7
2022-09-14	12:21:16	0.736145	3.27452	3.25036	857.397	FALSE	7
2022-09-14	12:21:16	0.72617	3.23015	3.25036	862.902	FALSE	7
2022-09-14	12:21:16	0.726476	3.23151	3.25036	860.629	FALSE	7
2022-09-14	12:21:16	0.734059	3.26524	3.25036	866.168	FALSE	7
2022-09-14	12:21:17	0.737214	3.27928	3.2675	863.908	FALSE	7
2022-09-14	12:21:17	0.731768	3.25505	3.2675	869.423	FALSE	7
2022-09-14	12:21:17	0.734771	3.26841	3.2675	867.176	FALSE	7
2022-09-14	12:21:17	0.734517	3.26728	3.2675	872.69	FALSE	7
2022-09-14	12:21:18	0.730343	3.24871	3.2533	870.425	FALSE	7
2022-09-14	12:21:18	0.730903	3.2512	3.2533	875.941	FALSE	7
2022-09-14	12:21:18	0.73645	3.27588	3.2533	873.701	FALSE	7
2022-09-14	12:21:18	0.727799	3.2374	3.2533	879.179	FALSE	7
2022-09-14	12:21:19	0.728817	3.24192	3.24954	876.943	FALSE	7
2022-09-14	12:21:19	0.733142	3.26116	3.24954	882.44	FALSE	7
2022-09-14	12:21:19	0.729631	3.24554	3.24954	880.188	FALSE	7
2022-09-14	12:21:20	0.720623	3.20548	3.23643	885.645	FALSE	7
2022-09-14	12:21:20	0.72612	3.22993	3.23643	883.418	FALSE	7
2022-09-14	12:21:20	0.736196	3.27475	3.23643	888.92	FALSE	7
2022-09-14	12:21:20	0.727392	3.23559	3.23643	886.654	FALSE	7
2022-09-14	12:21:21	0.734262	3.26614	3.24781	892.186	FALSE	7
2022-09-14	12:21:21	0.731717	3.25482	3.24781	889.909	FALSE	7
2022-09-14	12:21:21	0.730547	3.24962	3.24781	895.436	FALSE	7
2022-09-14	12:21:21	0.724033	3.22064	3.24781	893.129	FALSE	7
2022-09-14	12:21:22	0.726069	3.2297	3.24634	898.665	FALSE	7
2022-09-14	12:21:22	0.731768	3.25505	3.24634	896.384	FALSE	7
2022-09-14	12:21:22	0.72785	3.23762	3.24634	901.903	FALSE	7
2022-09-14	12:21:22	0.73355	3.26298	3.24634	899.647	FALSE	7
2022-09-14	12:21:23	0.727596	3.23649	2.84351	905.14	FALSE	7
2022-09-14	12:21:23	0.725967	3.22925	2.84351	902.877	FALSE	7
2022-09-14	12:21:23	0.464186	2.06479	2.84351	907.204	FALSE	7
2022-09-14	12:21:24	0.724644	3.22336	3.23694	906.1	FALSE	7
2022-09-14	12:21:24	0.733855	3.26433	3.23694	910.469	FALSE	7
2022-09-14	12:21:24	0.72612	3.22993	3.23694	909.33	FALSE	7
2022-09-14	12:21:24	0.72617	3.23015	3.23694	913.699	FALSE	7
2022-09-14	12:21:25	0.725102	3.2254	3.24362	912.555	FALSE	7
2022-09-14	12:21:25	0.728766	3.2417	3.24362	916.941	FALSE	7
2022-09-14	12:21:25	0.734364	3.2666	3.24362	915.822	FALSE	7
2022-09-14	12:21:25	0.728562	3.24079	3.24362	920.181	FALSE	7
2022-09-14	12:21:26	0.729071	3.24305	3.25477	919.065	FALSE	7
2022-09-14	12:21:26	0.735178	3.27022	3.25477	923.452	FALSE	7
2022-09-14	12:21:26	0.731616	3.25437	3.25477	922.319	FALSE	7
2022-09-14	12:21:26	0.730954	3.25143	3.25477	926.703	FALSE	7
2022-09-14	12:21:27	0.732583	3.25868	3.07063	925.578	FALSE	7
2022-09-14	12:21:27	0.730801	3.25075	3.07063	929.954	FALSE	7
2022-09-14	12:21:27	0.607544	2.70248	3.07063	928.28	FALSE	7
2022-09-14	12:21:28	-0.623549	-2.77367	-4.62522	929.954	FALSE	7
2022-09-14	12:21:28	-1.22884	-5.46613	-4.62522	928.28	FALSE	7
2022-09-14	12:21:28	-1.235	-5.49353	-4.62522	929.954	FALSE	7
2022-09-14	12:21:28	-1.07179	-4.76754	-4.62522	928.28	FALSE	7
2022-09-14	12:21:29	-1.02223	-4.54708	-1.97521	929.954	FALSE	7
2022-09-14	12:21:29	-0.255101	-1.13474	-1.97521	928.28	FALSE	7
2022-09-14	12:21:29	-0.362989	-1.61465	-1.97521	929.954	FALSE	7
2022-09-14	12:21:29	-0.135865	-0.604355	-1.97521	928.28	FALSE	7
2022-09-14	12:21:30	-0.0532694	-0.236953	0.0503127	929.954	FALSE	7
2022-09-14	12:21:30	0.0144659	0.0643472	0.0503127	928.345	FALSE	7
2022-09-14	12:21:30	-0.0189183	-0.0841524	0.0503127	929.954	FALSE	7
2022-09-14	12:21:30	0.102965	0.458009	0.0503127	928.803	FALSE	7
2022-09-14	12:21:31	-0.0933203	-0.415107	-5.94589	929.954	FALSE	7
2022-09-14	12:21:31	-0.891997	-3.96778	-5.94589	928.803	FALSE	7
2022-09-14	12:21:31	-3.02477	-13.4548	-5.94589	929.954	FALSE	7
2022-09-14	12:21:32	-3.71434	-16.5221	-16.3836	928.803	FALSE	7
2022-09-14	12:21:32	-3.53973	-15.7454	-16.3836	929.954	FALSE	7
2022-09-14	12:21:32	-3.79184	-16.8669	-16.3836	928.803	FALSE	7
2022-09-14	12:21:32	-3.68686	-16.3999	-16.3836	929.954	FALSE	7
2022-09-14	12:21:33	-3.78589	-16.8404	-16.8047	928.803	FALSE	7
2022-09-14	12:21:33	-3.75953	-16.7231	-16.8047	929.954	FALSE	7
2022-09-14	12:21:33	-3.71342	-16.518	-16.8047	928.803	FALSE	7
2022-09-14	12:21:33	-3.85266	-17.1374	-16.8047	929.954	FALSE	7
2022-09-14	12:21:34	-3.75826	-16.7175	-17.5434	928.803	FALSE	7
2022-09-14	12:21:34	-4.0893	-18.19	-17.5434	929.954	FALSE	7
2022-09-14	12:21:34	-3.88686	-17.2895	-17.5434	928.803	FALSE	7
2022-09-14	12:21:34	-4.04131	-17.9766	-17.5434	929.954	FALSE	7
2022-09-14	12:21:35	-3.821	-16.9966	-17.6296	928.803	FALSE	7
2022-09-14	12:21:35	-4.01067	-17.8403	-17.6296	929.954	FALSE	7
2022-09-14	12:21:35	-4.05825	-18.0519	-17.6296	928.803	FALSE	7
2022-09-14	12:21:36	-3.94024	-17.527	-17.8773	929.954	FALSE	7
2022-09-14	12:21:36	-4.10752	-18.2711	-17.8773	928.803	FALSE	7
2022-09-14	12:21:36	-3.92945	-17.479	-17.8773	929.954	FALSE	7
2022-09-14	12:21:36	-4.09876	-18.2321	-17.8773	928.803	FALSE	7
2022-09-14	12:21:37	-4.04049	-17.9729	-18.3864	929.954	FALSE	7
2022-09-14	12:21:37	-4.06141	-18.066	-18.3864	928.803	FALSE	7
2022-09-14	12:21:37	-4.18518	-18.6165	-18.3864	929.954	FALSE	7
2022-09-14	12:21:37	-4.24675	-18.8904	-18.3864	928.803	FALSE	7
2022-09-14	12:21:38	-4.37546	-19.4629	-18.3413	929.954	FALSE	7
2022-09-14	12:21:38	-4.3866	-19.5125	-18.3413	928.803	FALSE	7
2022-09-14	12:21:38	-4.51144	-20.0678	-18.3413	929.954	FALSE	7
2022-09-14	12:21:38	-3.21973	-14.322	-18.3413	928.803	FALSE	7
2022-09-14	12:21:39	-4.61561	-20.5312	-20.651	929.954	FALSE	7
2022-09-14	12:21:39	-4.71184	-20.9592	-20.651	928.803	FALSE	7
2022-09-14	12:21:39	-4.60019	-20.4626	-20.651	929.954	FALSE	7
2022-09-14	12:21:40	-4.71902	-20.9911	-20.4979	928.803	FALSE	7
2022-09-14	12:21:40	-4.53428	-20.1694	-20.4979	929.954	FALSE	7
2022-09-14	12:21:40	-4.58426	-20.3917	-20.4979	928.803	FALSE	7
2022-09-14	12:21:40	-4.595	-20.4395	-20.4979	929.954	FALSE	7
2022-09-14	12:21:41	-4.68614	-20.8449	-20.9295	928.803	FALSE	7
2022-09-14	12:21:41	-4.65668	-20.7138	-20.9295	929.954	FALSE	7
2022-09-14	12:21:41	-4.69057	-20.8646	-20.9295	928.803	FALSE	7
2022-09-14	12:21:41	-4.78726	-21.2947	-20.9295	929.954	FALSE	7
2022-09-14	12:21:42	-4.78686	-21.2929	-21.7481	928.803	FALSE	7
2022-09-14	12:21:42	-4.93551	-21.9541	-21.7481	929.954	FALSE	7
2022-09-14	12:21:42	-4.89754	-21.7852	-21.7481	928.803	FALSE	7
2022-09-14	12:21:42	-4.93688	-21.9602	-21.7481	929.954	FALSE	7
2022-09-14	12:21:43	-5.05429	-22.4825	-23.9236	928.803	FALSE	7
2022-09-14	12:21:43	-5.23174	-23.2718	-23.9236	929.954	FALSE	7
2022-09-14	12:21:43	-5.84874	-26.0164	-23.9236	928.803	FALSE	7
2022-09-14	12:21:44	-5.77719	-25.6981	-26.3466	929.954	FALSE	7
2022-09-14	12:21:44	-5.88166	-26.1628	-26.3466	928.803	FALSE	7
2022-09-14	12:21:44	-5.97098	-26.5601	-26.3466	929.954	FALSE	7
2022-09-14	12:21:44	-6.06207	-26.9653	-26.3466	928.803	FALSE	7
2022-09-14	12:21:45	-6.14543	-27.3361	-27.223	929.954	FALSE	7
2022-09-14	12:21:45	-6.07032	-27.002	-27.223	928.803	FALSE	7
2022-09-14	12:21:45	-6.12828	-27.2598	-27.223	929.954	FALSE	7
2022-09-14	12:21:45	-6.13596	-27.294	-27.223	928.803	FALSE	7
2022-09-14	12:21:46	-4.87556	-21.6875	-10.7198	929.954	FALSE	7
2022-09-14	12:21:46	-2.13047	-9.47676	-10.7198	928.803	FALSE	7
2022-09-14	12:21:46	-1.57195	-6.99235	-10.7198	929.954	FALSE	7
2022-09-14	12:21:46	-1.06167	-4.72252	-10.7198	928.803	FALSE	7
2022-09-14	12:21:47	-0.970877	-4.31866	-4.13869	929.954	FALSE	7
2022-09-14	12:21:47	-0.788893	-3.50915	-4.13869	928.803	FALSE	7
2022-09-14	12:21:47	-1.03149	-4.58827	-4.13869	929.954	FALSE	7
2022-09-14	12:21:48	-1.15846	-5.15306	-7.41456	928.803	FALSE	7
2022-09-14	12:21:48	-2.77907	-12.3619	-7.41456	929.954	FALSE	7
2022-09-14	12:21:48	-3.21937	-14.3204	-7.41456	928.803	FALSE	7
2022-09-14	12:21:48	0.489428	2.17707	-7.41456	932.131	FALSE	7
2022-09-14	12:21:49	0.363372	1.61635	2.71142	930.419	FALSE	7
2022-09-14	12:21:49	0.635178	2.8254	2.71142	934.956	FALSE	7
2022-09-14	12:21:49	0.713092	3.17198	2.71142	933.591	FALSE	7
2022-09-14	12:21:49	0.726578	3.23196	2.71142	938.188	FALSE	7
2022-09-14	12:21:50	0.723677	3.21906	3.22964	936.81	FALSE	7
2022-09-14	12:21:50	0.725509	3.22721	3.22964	941.415	FALSE	7
2022-09-14	12:21:50	0.726781	3.23287	3.22964	940.043	FALSE	7
2022-09-14	12:21:50	0.728257	3.23943	3.22964	944.655	FALSE	7
2022-09-14	12:21:51	0.73472	3.26818	3.27195	943.311	FALSE	7
2022-09-14	12:21:51	0.735483	3.27158	3.27195	947.926	FALSE	7
2022-09-14	12:21:51	0.736501	3.2761	3.27195	946.587	FALSE	7
2022-09-14	12:21:52	0.73131	3.25301	3.25777	951.179	FALSE	7
2022-09-14	12:21:52	0.734568	3.26751	3.25777	949.855	FALSE	7
2022-09-14	12:21:52	0.73014	3.24781	3.25777	954.427	FALSE	7
2022-09-14	12:21:52	0.733499	3.26275	3.25777	953.118	FALSE	7
2022-09-14	12:21:53	-2.10391	-9.35861	-18.8729	954.427	FALSE	7
2022-09-14	12:21:53	-5.14176	-22.8716	-18.8729	953.118	FALSE	7
2022-09-14	12:21:53	-5.052	-22.4723	-18.8729	954.427	FALSE	7
2022-09-14	12:21:53	-4.67357	-20.789	-18.8729	953.118	FALSE	7
2022-09-14	12:21:54	-4.69663	-20.8915	-20.9891	954.427	FALSE	7
2022-09-14	12:21:54	-4.71067	-20.954	-20.9891	953.118	FALSE	7
2022-09-14	12:21:54	-4.70467	-20.9273	-20.9891	954.427	FALSE	7
2022-09-14	12:21:54	-4.76228	-21.1836	-20.9891	953.118	FALSE	7
2022-09-14	12:21:55	-4.73082	-21.0436	-20.9793	954.427	FALSE	7
2022-09-14	12:21:55	-4.73978	-21.0835	-20.9793	953.118	FALSE	7
2022-09-14	12:21:55	-4.67846	-20.8107	-20.9793	954.427	FALSE	7
2022-09-14	12:21:56	0.276196	1.22858	-0.385001	954.346	FALSE	7
2022-09-14	12:21:56	0.0709544	0.315619	-0.385001	954.743	FALSE	7
2022-09-14	12:21:56	-0.247163	-1.09943	-0.385001	954.346	FALSE	7
2022-09-14	12:21:56	-0.446196	-1.98477	-0.385001	954.743	FALSE	7
2022-09-14	12:21:57	-0.60874	-2.7078	-3.73445	954.346	FALSE	7
2022-09-14	12:21:57	-0.749401	-3.33349	-3.73445	954.743	FALSE	7
2022-09-14	12:21:57	-0.752353	-3.34662	-3.73445	954.346	FALSE	7
2022-09-14	12:21:57	-1.24767	-5.54989	-3.73445	954.743	FALSE	7
2022-09-14	12:21:58	-1.43352	-6.37658	-6.70902	954.346	FALSE	7
2022-09-14	12:21:58	-1.54823	-6.88684	-6.70902	954.743	FALSE	7
2022-09-14	12:21:58	-1.452	-6.45879	-6.70902	954.346	FALSE	7
2022-09-14	12:21:58	-1.59927	-7.11387	-6.70902	954.743	FALSE	7
2022-09-14	12:21:59	-1.5407	-6.85334	-7.68088	954.346	FALSE	7
2022-09-14	12:21:59	-1.88686	-8.39313	-7.68088	954.743	FALSE	7
2022-09-14	12:21:59	-1.75266	-7.79618	-7.68088	954.346	FALSE	7
2022-09-14	12:22:00	-1.82411	-8.11401	-8.89899	954.743	FALSE	7
2022-09-14	12:22:00	-2.06777	-9.19785	-8.89899	954.346	FALSE	7
2022-09-14	12:22:00	-2.05352	-9.13447	-8.89899	954.743	FALSE	7
2022-09-14	12:22:00	-2.05693	-9.14964	-8.89899	954.346	FALSE	7
2022-09-14	12:22:01	-1.93744	-8.61812	-9.07466	954.743	FALSE	7
2022-09-14	12:22:01	-2.01617	-8.96833	-9.07466	954.346	FALSE	7
2022-09-14	12:22:01	-2.03795	-9.06521	-9.07466	954.743	FALSE	7
2022-09-14	12:22:01	-2.16874	-9.64699	-9.07466	954.346	FALSE	7
2022-09-14	12:22:02	-2.11805	-9.42151	-9.4445	954.743	FALSE	7
2022-09-14	12:22:02	-2.03973	-9.07313	-9.4445	954.346	FALSE	7
2022-09-14	12:22:02	-2.20518	-9.80908	-9.4445	954.743	FALSE	7
2022-09-14	12:22:02	-2.12991	-9.47427	-9.4445	954.346	FALSE	7
2022-09-14	12:22:03	-3.8524	-17.1362	-9.70599	954.743	FALSE	7
2022-09-14	12:22:03	-3.35836	-14.9387	-9.70599	954.346	FALSE	7
2022-09-14	12:22:03	0.664746	2.95692	-9.70599	957.7	FALSE	7
2022-09-14	12:22:04	0.726934	3.23355	3.24905	957.58	FALSE	7
2022-09-14	12:22:04	0.730343	3.24871	3.24905	960.948	FALSE	7
2022-09-14	12:22:04	0.728562	3.24079	3.24905	960.821	FALSE	7
2022-09-14	12:22:04	0.73584	3.27316	3.24905	964.222	FALSE	7
2022-09-14	12:22:05	0.70159	3.12081	3.20768	963.941	FALSE	7
2022-09-14	12:22:05	0.726883	3.23332	3.20768	967.455	FALSE	7
2022-09-14	12:22:05	0.726476	3.23151	3.20768	967.173	FALSE	7
2022-09-14	12:22:05	0.729529	3.24509	3.20768	970.7	FALSE	7
2022-09-14	12:22:06	0.727188	3.23468	3.22887	970.408	FALSE	7
2022-09-14	12:22:06	0.725509	3.22721	3.22887	973.927	FALSE	7
2022-09-14	12:22:06	0.724949	3.22472	3.22887	973.632	FALSE	7
2022-09-14	12:22:07	0.728359	3.23989	3.24894	977.167	FALSE	7
2022-09-14	12:22:07	0.729936	3.2469	3.24894	976.879	FALSE	7
2022-09-14	12:22:07	0.735483	3.27158	3.24894	980.439	FALSE	7
2022-09-14	12:22:07	0.727799	3.2374	3.24894	980.117	FALSE	7
2022-09-14	12:22:08	0.729173	3.24351	3.18822	983.682	FALSE	7
2022-09-14	12:22:08	0.735127	3.26999	3.18822	983.387	FALSE	7
2022-09-14	12:22:08	0.727443	3.23581	3.18822	986.918	FALSE	7
2022-09-14	12:22:08	0.675229	3.00355	3.18822	986.39	FALSE	7
2022-09-14	12:22:09	0.728257	3.23943	-2.14662	990.157	FALSE	7
2022-09-14	12:22:09	-1.08309	-4.8178	-2.14662	986.39	FALSE	7
2022-09-14	12:22:09	0.724288	3.22178	-2.14662	993.379	FALSE	7
2022-09-14	12:22:09	-2.29978	-10.2299	-2.14662	986.39	FALSE	7
2022-09-14	12:22:10	0.705102	3.13643	2.25562	996.516	FALSE	7
2022-09-14	12:22:10	0.725051	3.22517	2.25562	989.615	FALSE	7
2022-09-14	12:22:10	0.0911071	0.405263	2.25562	996.921	FALSE	7
2022-09-14	12:22:11	0.704847	3.1353	3.22285	992.751	FALSE	7
2022-09-14	12:22:11	0.731972	3.25596	3.22285	1000.18	FALSE	7
2022-09-14	12:22:11	0.729631	3.24554	3.22285	995.996	FALSE	7
2022-09-14	12:22:11	0.731667	3.2546	3.22285	1003.43	FALSE	7
2022-09-14	12:22:12	0.728613	3.24102	3.24894	999.237	FALSE	7
2022-09-14	12:22:12	0.734109	3.26546	3.24894	1006.7	FALSE	7
2022-09-14	12:22:12	0.727087	3.23423	3.24894	1002.47	FALSE	7
2022-09-14	12:22:12	0.731768	3.25505	3.24894	1009.95	FALSE	7
2022-09-14	12:22:13	0.730547	3.24962	3.24668	1005.72	FALSE	7
2022-09-14	12:22:13	0.729987	3.24713	3.24668	1013.2	FALSE	7
2022-09-14	12:22:13	0.728613	3.24102	3.24668	1008.96	FALSE	7
2022-09-14	12:22:13	0.730394	3.24894	3.24668	1016.45	FALSE	7
2022-09-14	12:22:14	0.733448	3.26252	3.26388	1012.22	FALSE	7
2022-09-14	12:22:14	0.732023	3.25618	3.26388	1019.7	FALSE	7
2022-09-14	12:22:14	0.735789	3.27294	3.26388	1015.5	FALSE	7
2022-09-14	12:22:15	0.728461	3.24034	3.24572	1022.94	FALSE	7
2022-09-14	12:22:15	0.728003	3.2383	3.24572	1018.74	FALSE	7
2022-09-14	12:22:15	0.735331	3.2709	3.24572	1026.22	FALSE	7
2022-09-14	12:22:15	0.726883	3.23332	3.24572	1021.97	FALSE	7
2022-09-14	12:22:16	0.729529	3.24509	3.24758	1029.46	FALSE	7
2022-09-14	12:22:16	0.72902	3.24283	3.24758	1025.21	FALSE	7
2022-09-14	12:22:16	0.732481	3.25822	3.24758	1032.72	FALSE	7
2022-09-14	12:22:16	0.729326	3.24419	3.24758	1028.46	FALSE	7
2022-09-14	12:22:17	0.727545	3.23627	3.23768	1035.96	FALSE	7
2022-09-14	12:22:17	0.723219	3.21702	3.23768	1031.67	FALSE	7
2022-09-14	12:22:17	0.728919	3.24238	3.23768	1039.2	FALSE	7
2022-09-14	12:22:17	0.731768	3.25505	3.23768	1034.93	FALSE	7
2022-09-14	12:22:18	0.730242	3.24826	3.24992	1042.45	FALSE	7
2022-09-14	12:22:18	0.731972	3.25596	3.24992	1038.18	FALSE	7
2022-09-14	12:22:18	0.729631	3.24554	3.24992	1045.69	FALSE	7
2022-09-14	12:22:19	0.728766	3.2417	3.23757	1041.43	FALSE	7
2022-09-14	12:22:19	0.724491	3.22268	3.23757	1048.91	FALSE	7
2022-09-14	12:22:19	0.728817	3.24192	3.23757	1044.67	FALSE	7
2022-09-14	12:22:19	0.729275	3.24396	3.23757	1052.16	FALSE	7
2022-09-14	12:22:20	0.729326	3.24419	3.24566	1047.91	FALSE	7
2022-09-14	12:22:20	0.731361	3.25324	3.24566	1055.41	FALSE	7
2022-09-14	12:22:20	0.726323	3.23083	3.24566	1051.14	FALSE	7
2022-09-14	12:22:20	0.731616	3.25437	3.24566	1058.67	FALSE	7
2022-09-14	12:22:21	0.726374	3.23106	3.23853	1054.37	FALSE	7
2022-09-14	12:22:21	0.729478	3.24486	3.23853	1061.91	FALSE	7
2022-09-14	12:22:21	0.725865	3.22879	3.23853	1057.6	FALSE	7
2022-09-14	12:22:21	0.730496	3.24939	3.23853	1065.16	FALSE	7
2022-09-14	12:22:22	0.731209	3.25256	3.25905	1060.86	FALSE	7
2022-09-14	12:22:22	0.73014	3.24781	3.25905	1068.41	FALSE	7
2022-09-14	12:22:22	0.736654	3.27678	3.25905	1064.13	FALSE	7
2022-09-14	12:22:23	0.729631	3.24554	3.23044	1071.65	FALSE	7
2022-09-14	12:22:23	0.724084	3.22087	3.23044	1067.35	FALSE	7
2022-09-14	12:22:23	0.724746	3.22382	3.23044	1074.88	FALSE	7
2022-09-14	12:22:23	0.726476	3.23151	3.23044	1070.58	FALSE	7
2022-09-14	12:22:24	0.729835	3.24645	3.24724	1078.12	FALSE	7
2022-09-14	12:22:24	0.734415	3.26682	3.24724	1073.85	FALSE	7
2022-09-14	12:22:24	0.730547	3.24962	3.24724	1081.37	FALSE	7
2022-09-14	12:22:24	0.725254	3.22607	3.24724	1077.08	FALSE	7

## Sheet: MsPotato_star_202291412179 (3)
Date	Time	Lbs	Newtons	Total force x time		total steps > 13.345	**GoPro Fitting: 12:06
2022-09-14	12:17:24	0.165102	0.734407	0.734407	FALSE	0
2022-09-14	12:17:24	-0.13332	-0.593034	0	FALSE	0
2022-09-14	12:17:24	-0.188028	-0.836386	0.734407	FALSE	0
2022-09-14	12:17:24	-0.126196	-0.561345	0	FALSE	0
2022-09-14	12:17:25	-0.0346435	-0.154101	0.734407	FALSE	0
2022-09-14	12:17:25	-0.0640583	-0.284944	0	FALSE	0
2022-09-14	12:17:25	-0.0792745	-0.352629	0.734407	FALSE	0
2022-09-14	12:17:25	0.0495803	0.220543	0.220543	FALSE	0
2022-09-14	12:17:26	0.143219	0.637067	1.37147	FALSE	0
2022-09-14	12:17:26	0.174262	0.775152	0.995695	FALSE	0
2022-09-14	12:17:26	0.134975	0.600396	1.97187	FALSE	0
2022-09-14	12:17:27	0.0690206	0.307017	1.30271	FALSE	0
2022-09-14	12:17:27	-0.00894378	-0.0397837	1.97187	FALSE	0
2022-09-14	12:17:27	0.112888	0.502148	1.80486	FALSE	0
2022-09-14	12:17:27	-0.0129133	-0.0574409	1.97187	FALSE	0
2022-09-14	12:17:28	0.124084	0.55195	2.35681	FALSE	0
2022-09-14	12:17:28	-0.0157122	-0.069891	1.97187	FALSE	0
2022-09-14	12:17:28	0.124644	0.554441	2.91125	FALSE	0
2022-09-14	12:17:28	0.259199	1.15297	3.12484	FALSE	0
2022-09-14	12:17:29	0.446832	1.9876	4.89885	FALSE	0
2022-09-14	12:17:29	0.321692	1.43095	4.55579	FALSE	0
2022-09-14	12:17:29	0.238792	1.06219	5.96105	FALSE	0
2022-09-14	12:17:29	0.207341	0.922294	5.47808	FALSE	0
2022-09-14	12:17:30	0.247646	1.10158	7.06262	FALSE	0
2022-09-14	12:17:30	0.0303946	0.135201	5.61328	FALSE	0
2022-09-14	12:17:30	0.0644913	0.28687	7.34949	FALSE	0
2022-09-14	12:17:31	0.127341	0.566438	6.17972	FALSE	0
2022-09-14	12:17:31	0.297977	1.32546	8.67496	FALSE	0
2022-09-14	12:17:31	0.487901	2.17028	8.35	FALSE	0
2022-09-14	12:17:31	0.400471	1.78138	10.4563	FALSE	0
2022-09-14	12:17:32	0.406018	1.80605	10.1561	FALSE	0
2022-09-14	12:17:32	0.219809	0.977754	11.4341	FALSE	0
2022-09-14	12:17:32	0.241132	1.0726	11.2287	FALSE	0
2022-09-14	12:17:32	0.142201	0.632538	12.0666	FALSE	0
2022-09-14	12:17:33	0.294415	1.30962	12.5383	FALSE	0
2022-09-14	12:17:33	0.042812	0.190436	12.2571	FALSE	0
2022-09-14	12:17:33	0.135229	0.601526	13.1398	FALSE	0
2022-09-14	12:17:33	-0.000750381	-0.00333784	12.2571	FALSE	0
2022-09-14	12:17:34	0.158792	0.706339	13.8461	FALSE	0
2022-09-14	12:17:34	-0.233066	-1.03672	12.2571	FALSE	0
2022-09-14	12:17:34	-0.289605	-1.28822	13.8461	FALSE	0
2022-09-14	12:17:35	-0.285687	-1.27079	12.2571	FALSE	0
2022-09-14	12:17:35	-0.283448	-1.26083	13.8461	FALSE	0
2022-09-14	12:17:35	-0.310827	-1.38262	12.2571	FALSE	0
2022-09-14	12:17:35	-0.171132	-0.761229	13.8461	FALSE	0
2022-09-14	12:17:36	-0.248944	-1.10735	12.2571	FALSE	0
2022-09-14	12:17:36	-0.244872	-1.08924	13.8461	FALSE	0
2022-09-14	12:17:36	-0.233829	-1.04012	12.2571	FALSE	0
2022-09-14	12:17:36	-0.230928	-1.02721	13.8461	FALSE	0
2022-09-14	12:17:37	-0.18818	-0.837062	12.2571	FALSE	0
2022-09-14	12:17:37	-0.213117	-0.947987	13.8461	FALSE	0
2022-09-14	12:17:37	-0.32187	-1.43174	12.2571	FALSE	0
2022-09-14	12:17:38	-0.474847	-2.11221	13.8461	FALSE	0
2022-09-14	12:17:38	-0.688434	-3.06229	12.2571	FALSE	0
2022-09-14	12:17:38	-0.67505	-3.00276	13.8461	FALSE	0
2022-09-14	12:17:38	-0.598307	-2.66139	12.2571	FALSE	0
2022-09-14	12:17:39	-0.498918	-2.21929	13.8461	FALSE	0
2022-09-14	12:17:39	-0.55734	-2.47916	12.2571	FALSE	0
2022-09-14	12:17:39	-0.41729	-1.85619	13.8461	FALSE	0
2022-09-14	12:17:39	0.167239	0.743913	13.001	FALSE	0
2022-09-14	12:17:40	0.0648476	0.288455	14.1346	FALSE	0
2022-09-14	12:17:40	0.263728	1.17311	14.1741	FALSE	0
2022-09-14	12:17:40	0.166781	0.741875	14.8765	FALSE	0
2022-09-14	12:17:40	0.221641	0.985903	15.16	FALSE	0
2022-09-14	12:17:41	0.126222	0.561461	15.4379	FALSE	0
2022-09-14	12:17:41	0.0758399	0.337351	15.4973	FALSE	0
2022-09-14	12:17:41	0.170293	0.757497	16.1954	FALSE	0
2022-09-14	12:17:42	0.14215	0.632312	16.1297	FALSE	0
2022-09-14	12:17:42	0.218588	0.972323	17.1677	FALSE	0
2022-09-14	12:17:42	0.0272903	0.121393	16.251	FALSE	0
2022-09-14	12:17:42	0.178384	0.793488	17.9612	FALSE	0
2022-09-14	12:17:43	0.16958	0.754326	17.0054	FALSE	0
2022-09-14	12:17:43	0.186171	0.828126	18.7894	FALSE	0
2022-09-14	12:17:43	0.0739061	0.328749	17.3341	FALSE	0
2022-09-14	12:17:43	0.174873	0.77787	19.5672	FALSE	0
2022-09-14	12:17:44	0.195942	0.871589	18.2057	FALSE	0
2022-09-14	12:17:44	0.118995	0.529314	20.0965	FALSE	0
2022-09-14	12:17:44	0.212074	0.943348	19.1491	FALSE	0
2022-09-14	12:17:44	0.736247	3.27497	23.3715	FALSE	0
2022-09-14	12:17:45	1.32449	5.8916	25.0407	FALSE	0
2022-09-14	12:17:45	1.90597	8.47814	31.8497	FALSE	0
2022-09-14	12:17:45	0.937824	4.17163	29.2123	FALSE	0
2022-09-14	12:17:46	1.20429	5.35692	37.2066	FALSE	0
2022-09-14	12:17:46	1.65212	7.34896	36.5612	FALSE	0
2022-09-14	12:17:46	2.00464	8.91704	46.1236	FALSE	0
2022-09-14	12:17:46	2.81263	12.5111	49.0724	FALSE	0
2022-09-14	12:17:47	3.02413	13.4519	59.5756	1	1
2022-09-14	12:17:47	3.32729	14.8005	63.8728	1	2
2022-09-14	12:17:47	0.73131	3.25301	62.8286	FALSE	2
2022-09-14	12:17:47	0.756043	3.36303	67.2359	FALSE	2
2022-09-14	12:17:48	0.386171	1.71777	64.5463	FALSE	2
2022-09-14	12:17:48	0.421031	1.87283	69.1087	FALSE	2
2022-09-14	12:17:48	0.138537	0.61624	65.1626	FALSE	2
2022-09-14	12:17:48	0.168715	0.750478	69.8592	FALSE	2
2022-09-14	12:17:49	0.168664	0.750251	65.9128	FALSE	2
2022-09-14	12:17:49	0.324593	1.44385	71.303	FALSE	2
2022-09-14	12:17:49	0.101845	0.453027	66.3659	FALSE	2
2022-09-14	12:17:50	0.199758	0.888564	72.1916	FALSE	2
2022-09-14	12:17:50	0.0253056	0.112564	66.4784	FALSE	2
2022-09-14	12:17:50	0.155331	0.690943	72.8825	FALSE	2
2022-09-14	12:17:50	-0.0513356	-0.228351	66.4784	FALSE	2
2022-09-14	12:17:51	0.0619468	0.275552	73.1581	FALSE	2
2022-09-14	12:17:51	-0.0503687	-0.22405	66.4784	FALSE	2
2022-09-14	12:17:51	0.052074	0.231636	73.3897	FALSE	2
2022-09-14	12:17:51	-0.0924043	-0.411033	66.4784	FALSE	2
2022-09-14	12:17:52	0.0746185	0.331918	73.7216	FALSE	2
2022-09-14	12:17:52	0.0878501	0.390775	66.8692	FALSE	2
2022-09-14	12:17:52	0.117418	0.522299	74.2439	FALSE	2
2022-09-14	12:17:52	0.116858	0.519808	67.389	FALSE	2
2022-09-14	12:17:53	0.183473	0.816125	75.0601	FALSE	2
2022-09-14	12:17:53	0.253601	1.12807	68.5171	FALSE	2
2022-09-14	12:17:53	0.295534	1.31459	76.3747	FALSE	2
2022-09-14	12:17:54	0.602455	2.67984	71.1969	FALSE	2
2022-09-14	12:17:54	0.334109	1.48618	77.8608	FALSE	2
2022-09-14	12:17:54	0.274975	1.22314	72.42	FALSE	2
2022-09-14	12:17:54	0.11584	0.515279	78.3761	FALSE	2
2022-09-14	12:17:55	0.197316	0.877701	73.2978	FALSE	2
2022-09-14	12:17:55	0.179046	0.796432	79.1726	FALSE	2
2022-09-14	12:17:55	0.58388	2.59722	75.895	FALSE	2
2022-09-14	12:17:55	0.224746	0.999715	80.1723	FALSE	2
2022-09-14	12:17:56	0.148664	0.661287	76.5563	FALSE	2
2022-09-14	12:17:56	0.107596	0.478609	80.6509	FALSE	2
2022-09-14	12:17:56	0.24673	1.0975	77.6538	FALSE	2
2022-09-14	12:17:56	0.114008	0.50713	81.158	FALSE	2
2022-09-14	12:17:57	0.257774	1.14663	78.8004	FALSE	2
2022-09-14	12:17:57	0.260369	1.15817	82.3162	FALSE	2
2022-09-14	12:17:57	0.0754327	0.33554	79.1359	FALSE	2
2022-09-14	12:17:58	0.130853	0.58206	82.8982	FALSE	2
2022-09-14	12:17:58	0.21014	0.934745	80.0707	FALSE	2
2022-09-14	12:17:58	0.33472	1.4889	84.3871	FALSE	2
2022-09-14	12:17:58	0.0942114	0.419071	80.4897	FALSE	2
2022-09-14	12:17:59	0.265356	1.18036	85.5675	FALSE	2
2022-09-14	12:17:59	0.0572649	0.254726	80.7445	FALSE	2
2022-09-14	12:17:59	0.317112	1.41058	86.9781	FALSE	2
2022-09-14	12:17:59	0.610496	2.71561	83.4601	FALSE	2
2022-09-14	12:18:00	1.85406	8.24723	95.2253	FALSE	2
2022-09-14	12:18:00	5.65538	25.1563	108.616	1	3
2022-09-14	12:18:00	7.18556	31.9628	127.188	1	4
2022-09-14	12:18:00	3.20948	14.2764	122.893	1	5
2022-09-14	12:18:01	3.90703	17.3793	144.567	1	6
2022-09-14	12:18:01	3.2624	14.5118	137.405	1	7
2022-09-14	12:18:01	2.54861	11.3367	155.904	FALSE	7
2022-09-14	12:18:02	1.6023	7.12735	144.532	FALSE	7
2022-09-14	12:18:02	0.393906	1.75217	157.656	FALSE	7
2022-09-14	12:18:02	0.258741	1.15093	145.683	FALSE	7
2022-09-14	12:18:02	0.42612	1.89547	159.552	FALSE	7
2022-09-14	12:18:03	0.498588	2.21782	147.901	FALSE	7
2022-09-14	12:18:03	-0.0674679	-0.300111	159.552	FALSE	7
2022-09-14	12:18:03	-0.176883	-0.786811	147.901	FALSE	7
2022-09-14	12:18:03	-0.383396	-1.70542	159.552	FALSE	7
2022-09-14	12:18:04	-0.374694	-1.66671	147.901	FALSE	7
2022-09-14	12:18:04	-0.279682	-1.24408	159.552	FALSE	7
2022-09-14	12:18:04	-0.389961	-1.73462	147.901	FALSE	7
2022-09-14	12:18:04	-0.325534	-1.44804	159.552	FALSE	7
2022-09-14	12:18:05	-0.225076	-1.00118	147.901	FALSE	7
2022-09-14	12:18:05	-0.0914883	-0.406958	159.552	FALSE	7
2022-09-14	12:18:05	0.190496	0.847364	148.748	FALSE	7
2022-09-14	12:18:06	0.0866287	0.385342	159.937	FALSE	7
2022-09-14	12:18:06	0.328613	1.46174	150.21	FALSE	7
2022-09-14	12:18:06	0.345	1.53463	161.472	FALSE	7
2022-09-14	12:18:06	0.59869	2.66309	152.873	FALSE	7
2022-09-14	12:18:07	0.281285	1.25121	162.723	FALSE	7
2022-09-14	12:18:07	0.785305	3.49319	156.366	FALSE	7
2022-09-14	12:18:07	0.510751	2.27192	164.995	FALSE	7
2022-09-14	12:18:07	0.643321	2.86162	159.228	FALSE	7
2022-09-14	12:18:08	0.364542	1.62156	166.616	FALSE	7
2022-09-14	12:18:08	0.603728	2.6855	161.913	FALSE	7
2022-09-14	12:18:08	0.360216	1.60231	168.219	FALSE	7
2022-09-14	12:18:09	0.513652	2.28483	164.198	FALSE	7
2022-09-14	12:18:09	0.27757	1.23469	169.453	FALSE	7
2022-09-14	12:18:09	0.476298	2.11867	166.317	FALSE	7
2022-09-14	12:18:09	0.355585	1.58171	171.035	FALSE	7
2022-09-14	12:18:10	0.49355	2.19541	168.512	FALSE	7
2022-09-14	12:18:10	0.31813	1.41511	172.45	FALSE	7
2022-09-14	12:18:10	1.0077	4.48245	172.995	FALSE	7
2022-09-14	12:18:10	0.31869	1.4176	173.868	FALSE	7
2022-09-14	12:18:11	1.3422	5.97037	178.965	FALSE	7
2022-09-14	12:18:11	0.204542	0.909844	174.778	FALSE	7
2022-09-14	12:18:11	1.61604	7.18847	186.153	FALSE	7
2022-09-14	12:18:11	0.645254	2.87022	177.648	FALSE	7
2022-09-14	12:18:12	2.52963	11.2523	197.406	FALSE	7
2022-09-14	12:18:12	0.792328	3.52443	181.172	FALSE	7
2022-09-14	12:18:12	1.56597	6.96575	204.371	FALSE	7
2022-09-14	12:18:13	1.10531	4.91664	186.089	FALSE	7
2022-09-14	12:18:13	0.842506	3.74764	208.119	FALSE	7
2022-09-14	12:18:13	0.664186	2.95443	189.043	FALSE	7
2022-09-14	12:18:13	0.363015	1.61476	209.734	FALSE	7
2022-09-14	12:18:14	0.496145	2.20695	191.25	FALSE	7
2022-09-14	12:18:14	0.318334	1.41601	211.15	FALSE	7
2022-09-14	12:18:14	0.419962	1.86807	193.118	FALSE	7
2022-09-14	12:18:14	0.349733	1.55568	212.706	FALSE	7
2022-09-14	12:18:15	0.501743	2.23185	195.35	FALSE	7
2022-09-14	12:18:15	0.292481	1.30101	214.007	FALSE	7
2022-09-14	12:18:15	0.449886	2.00118	197.351	FALSE	7
2022-09-14	12:18:15	0.266323	1.18466	215.191	FALSE	7
2022-09-14	12:18:16	0.479707	2.13383	199.485	FALSE	7
2022-09-14	12:18:16	0.338944	1.50769	216.699	FALSE	7
2022-09-14	12:18:16	0.410445	1.82574	201.311	FALSE	7
2022-09-14	12:18:17	0.322506	1.43457	218.133	FALSE	7
2022-09-14	12:18:17	0.506577	2.25336	203.564	FALSE	7
2022-09-14	12:18:17	0.967341	4.30293	222.436	FALSE	7
2022-09-14	12:18:17	0.806323	3.58669	207.151	FALSE	7
2022-09-14	12:18:18	0.829733	3.69082	226.127	FALSE	7
2022-09-14	12:18:18	0.944186	4.19993	211.351	FALSE	7
2022-09-14	12:18:18	0.902506	4.01453	230.142	FALSE	7
2022-09-14	12:18:18	0.731819	3.25528	214.606	FALSE	7
2022-09-14	12:18:19	0.410751	1.8271	231.969	FALSE	7
2022-09-14	12:18:19	0.528308	2.35002	216.956	FALSE	7
2022-09-14	12:18:19	0.249071	1.10792	233.077	FALSE	7
2022-09-14	12:18:19	0.523015	2.32648	219.283	FALSE	7
2022-09-14	12:18:20	0.347952	1.54776	234.624	FALSE	7
2022-09-14	12:18:20	0.247646	1.10158	220.384	FALSE	7
2022-09-14	12:18:20	-0.167671	-0.745834	234.624	FALSE	7
2022-09-14	12:18:21	-0.232252	-1.0331	220.384	FALSE	7
2022-09-14	12:18:21	-0.169554	-0.75421	234.624	FALSE	7
2022-09-14	12:18:21	-0.116781	-0.519465	220.384	FALSE	7
2022-09-14	12:18:21	-0.28874	-1.28437	234.624	FALSE	7
2022-09-14	12:18:22	-0.117341	-0.521956	220.384	FALSE	7
2022-09-14	12:18:22	-0.253269	-1.12659	234.624	FALSE	7
2022-09-14	12:18:22	-0.164211	-0.730443	220.384	FALSE	7
2022-09-14	12:18:22	-0.208944	-0.929425	234.624	FALSE	7
2022-09-14	12:18:23	-0.0481295	-0.21409	220.384	FALSE	7
2022-09-14	12:18:23	-0.189249	-0.841817	234.624	FALSE	7
2022-09-14	12:18:23	0.00545825	0.0242794	220.409	FALSE	7
2022-09-14	12:18:23	-0.0602415	-0.267966	234.624	FALSE	7
2022-09-14	12:18:24	0.117367	0.522072	220.931	FALSE	7
2022-09-14	12:18:24	0.020471	0.0910591	234.716	FALSE	7
2022-09-14	12:18:24	0.288766	1.28449	222.215	FALSE	7
2022-09-14	12:18:25	-0.0235494	-0.104752	234.716	FALSE	7
2022-09-14	12:18:25	0.0943131	0.419524	222.635	FALSE	7
2022-09-14	12:18:25	-0.0955595	-0.425068	234.716	FALSE	7
2022-09-14	12:18:25	-0.142531	-0.634006	222.635	FALSE	7
2022-09-14	12:18:26	-0.477646	-2.12466	234.716	FALSE	7
2022-09-14	12:18:26	-0.592099	-2.63377	222.635	FALSE	7
2022-09-14	12:18:26	-0.162582	-0.723197	234.716	FALSE	7
2022-09-14	12:18:26	-0.108435	-0.482341	222.635	FALSE	7
2022-09-14	12:18:27	-0.00441451	-0.0196366	234.716	FALSE	7
2022-09-14	12:18:27	0.325458	1.4477	224.082	FALSE	7
2022-09-14	12:18:27	0.446883	1.98782	236.703	FALSE	7
2022-09-14	12:18:27	0.367138	1.6331	225.716	FALSE	7
2022-09-14	12:18:28	0.253295	1.12671	237.83	FALSE	7
2022-09-14	12:18:28	0.428003	1.90384	227.619	FALSE	7
2022-09-14	12:18:28	0.612735	2.72557	240.556	FALSE	7
2022-09-14	12:18:29	0.373855	1.66298	229.282	FALSE	7
2022-09-14	12:18:29	0.358893	1.59643	242.152	FALSE	7
2022-09-14	12:18:29	0.238435	1.06061	230.343	FALSE	7
2022-09-14	12:18:29	0.378791	1.68494	243.837	FALSE	7
2022-09-14	12:18:30	0.362455	1.61227	231.955	FALSE	7
2022-09-14	12:18:30	0.456807	2.03197	245.869	FALSE	7
2022-09-14	12:18:30	0.429122	1.90882	233.864	FALSE	7
2022-09-14	12:18:30	0.57528	2.55896	248.428	FALSE	7
2022-09-14	12:18:31	0.721692	3.21023	237.074	FALSE	7
2022-09-14	12:18:31	0.726781	3.23287	251.661	FALSE	7
2022-09-14	12:18:31	0.723372	3.2177	240.292	FALSE	7
2022-09-14	12:18:31	0.722049	3.21182	254.873	FALSE	7
2022-09-14	12:18:32	0.726018	3.22947	243.521	FALSE	7
2022-09-14	12:18:32	0.726425	3.23128	258.104	FALSE	7
2022-09-14	12:18:32	0.734109	3.26546	246.787	FALSE	7
2022-09-14	12:18:33	0.726323	3.23083	261.335	FALSE	7
2022-09-14	12:18:33	0.731463	3.25369	250.041	FALSE	7
2022-09-14	12:18:33	0.728562	3.24079	264.576	FALSE	7
2022-09-14	12:18:33	0.730038	3.24736	253.288	FALSE	7
2022-09-14	12:18:34	0.689682	3.06784	267.643	FALSE	7
2022-09-14	12:18:34	0.269835	1.20028	254.488	FALSE	7
2022-09-14	12:18:34	0.252277	1.12218	268.766	FALSE	7
2022-09-14	12:18:34	0.278384	1.23831	255.727	FALSE	7
2022-09-14	12:18:35	0.321489	1.43005	270.196	FALSE	7
2022-09-14	12:18:35	0.348206	1.54889	257.275	FALSE	7
2022-09-14	12:18:35	0.721743	3.21046	273.406	FALSE	7
2022-09-14	12:18:35	1.44841	6.44282	263.718	FALSE	7
2022-09-14	12:18:36	0.0149748	0.0666109	273.473	FALSE	7
2022-09-14	12:18:36	-0.1779	-0.791335	263.718	FALSE	7
2022-09-14	12:18:36	-0.14075	-0.626084	273.473	FALSE	7
2022-09-14	12:18:37	-0.0822771	-0.365985	263.718	FALSE	7
2022-09-14	12:18:37	0.212583	0.945612	274.418	FALSE	7
2022-09-14	12:18:37	0.18388	0.817935	264.536	FALSE	7
2022-09-14	12:18:37	0.335127	1.49071	275.909	FALSE	7
2022-09-14	12:18:38	0.244746	1.08868	265.625	FALSE	7
2022-09-14	12:18:38	0.293753	1.30667	277.216	FALSE	7
2022-09-14	12:18:38	0.309479	1.37662	267.001	FALSE	7
2022-09-14	12:18:38	0.281234	1.25099	278.467	FALSE	7
2022-09-14	12:18:39	0.267188	1.18851	268.19	FALSE	7
2022-09-14	12:18:39	0.365458	1.62563	280.092	FALSE	7
2022-09-14	12:18:39	0.253499	1.12761	269.318	FALSE	7
2022-09-14	12:18:40	0.24271	1.07962	281.172	FALSE	7
2022-09-14	12:18:40	0.33014	1.46853	270.786	FALSE	7
2022-09-14	12:18:40	0.464491	2.06615	283.238	FALSE	7
2022-09-14	12:18:40	0.16897	0.751612	271.538	FALSE	7
2022-09-14	12:18:41	0.408053	1.8151	285.053	FALSE	7
2022-09-14	12:18:41	-0.545127	-2.42483	271.538	FALSE	7
2022-09-14	12:18:41	-0.355916	-1.58319	285.053	FALSE	7
2022-09-14	12:18:41	-0.735814	-3.27305	271.538	FALSE	7
2022-09-14	12:18:42	-0.642938	-2.85992	285.053	FALSE	7
2022-09-14	12:18:42	-0.670419	-2.98216	271.538	FALSE	7
2022-09-14	12:18:42	-0.639783	-2.84588	285.053	FALSE	7
2022-09-14	12:18:42	-0.663905	-2.95318	271.538	FALSE	7
2022-09-14	12:18:43	-0.687162	-3.05663	285.053	FALSE	7
2022-09-14	12:18:43	-0.869299	-3.86682	271.538	FALSE	7
2022-09-14	12:18:43	-0.876628	-3.89942	285.053	FALSE	7
2022-09-14	12:18:44	-1.30996	-5.82696	271.538	FALSE	7
2022-09-14	12:18:44	-2.18502	-9.71941	285.053	FALSE	7
2022-09-14	12:18:44	-2.14838	-9.55642	271.538	FALSE	7
2022-09-14	12:18:44	-2.14696	-9.55011	285.053	FALSE	7
2022-09-14	12:18:45	-2.07882	-9.24701	271.538	FALSE	7
2022-09-14	12:18:45	-2.07958	-9.25039	285.053	FALSE	7
2022-09-14	12:18:45	-1.8064	-8.03523	271.538	FALSE	7
2022-09-14	12:18:45	-1.81994	-8.09546	285.053	FALSE	7
2022-09-14	12:18:46	-1.68462	-7.49353	271.538	FALSE	7
2022-09-14	12:18:46	-1.61434	-7.18091	285.053	FALSE	7
2022-09-14	12:18:46	-1.42935	-6.35803	271.538	FALSE	7
2022-09-14	12:18:46	-1.38217	-6.14817	285.053	FALSE	7
2022-09-14	12:18:47	-1.28004	-5.69387	271.538	FALSE	7
2022-09-14	12:18:47	-1.22762	-5.4607	285.053	FALSE	7
2022-09-14	12:18:47	-1.1119	-4.94595	271.538	FALSE	7
2022-09-14	12:18:48	-1.1438	-5.08785	285.053	FALSE	7
2022-09-14	12:18:48	-1.0864	-4.83252	271.538	FALSE	7
2022-09-14	12:18:48	-1.08945	-4.84609	285.053	FALSE	7
2022-09-14	12:18:48	-1.00385	-4.46533	271.538	FALSE	7
2022-09-14	12:18:49	-1.08289	-4.81691	285.053	FALSE	7
2022-09-14	12:18:49	-0.937391	-4.1697	271.538	FALSE	7
2022-09-14	12:18:49	-1.00686	-4.47871	285.053	FALSE	7
2022-09-14	12:18:49	-0.992862	-4.41645	271.538	FALSE	7
2022-09-14	12:18:50	-1.18828	-5.28571	285.053	FALSE	7
2022-09-14	12:18:50	-1.2208	-5.43036	271.538	FALSE	7
2022-09-14	12:18:50	-1.24762	-5.54966	285.053	FALSE	7
2022-09-14	12:18:50	0.375026	1.66819	273.206	FALSE	7
2022-09-14	12:18:51	0.267138	1.18828	286.241	FALSE	7
2022-09-14	12:18:51	0.339249	1.50905	274.715	FALSE	7
2022-09-14	12:18:51	0.329071	1.46377	287.705	FALSE	7
2022-09-14	12:18:52	0.350191	1.55772	276.273	FALSE	7
2022-09-14	12:18:52	0.380165	1.69105	289.396	FALSE	7
2022-09-14	12:18:52	0.301845	1.34267	277.615	FALSE	7
2022-09-14	12:18:52	0.425458	1.89252	291.289	FALSE	7
2022-09-14	12:18:53	0.204593	0.910071	278.525	FALSE	7
2022-09-14	12:18:53	0.392379	1.74538	293.034	FALSE	7
2022-09-14	12:18:53	0.23472	1.04408	279.57	FALSE	7
2022-09-14	12:18:53	0.713295	3.17288	296.207	FALSE	7
2022-09-14	12:18:54	0.552074	2.45574	282.025	FALSE	7
2022-09-14	12:18:54	0.510852	2.27237	298.479	FALSE	7
2022-09-14	12:18:54	0.418486	1.86151	283.887	FALSE	7
2022-09-14	12:18:54	0.423779	1.88505	300.364	FALSE	7
2022-09-14	12:18:55	0.15243	0.678039	284.565	FALSE	7
2022-09-14	12:18:55	-0.208791	-0.928744	300.364	FALSE	7
2022-09-14	12:18:55	-0.262226	-1.16643	284.565	FALSE	7
2022-09-14	12:18:56	0.0297331	0.132259	300.497	FALSE	7
2022-09-14	12:18:56	-0.0244654	-0.108827	284.565	FALSE	7
2022-09-14	12:18:56	0.120827	0.537463	301.034	FALSE	7
2022-09-14	12:18:56	0.276451	1.22971	285.795	FALSE	7
2022-09-14	12:18:57	0.444796	1.97854	303.013	FALSE	7
2022-09-14	12:18:57	0.154059	0.685285	286.48	FALSE	7
2022-09-14	12:18:57	0.31701	1.41012	304.423	FALSE	7
2022-09-14	12:18:57	0.250445	1.11403	287.594	FALSE	7
2022-09-14	12:18:58	0.382048	1.69943	306.122	FALSE	7
2022-09-14	12:18:58	0.293244	1.30441	288.898	FALSE	7
2022-09-14	12:18:58	0.397519	1.76824	307.891	FALSE	7
2022-09-14	12:18:58	0.287901	1.28064	290.179	FALSE	7
2022-09-14	12:18:59	0.423728	1.88483	309.775	FALSE	7
2022-09-14	12:18:59	0.33645	1.4966	291.675	FALSE	7
2022-09-14	12:18:59	0.425662	1.89343	311.669	FALSE	7
2022-09-14	12:19:00	0.349936	1.55659	293.232	FALSE	7
2022-09-14	12:19:00	0.399657	1.77775	313.447	FALSE	7
2022-09-14	12:19:00	0.411056	1.82846	295.061	FALSE	7
2022-09-14	12:19:00	0.338537	1.50588	314.952	FALSE	7
2022-09-14	12:19:01	0.406832	1.80967	296.87	FALSE	7
2022-09-14	12:19:01	0.290598	1.29264	316.245	FALSE	7
2022-09-14	12:19:01	0.441031	1.96179	298.832	FALSE	7
2022-09-14	12:19:01	0.264593	1.17696	317.422	FALSE	7
2022-09-14	12:19:02	0.454975	2.02382	300.856	FALSE	7
2022-09-14	12:19:02	0.26383	1.17357	318.596	FALSE	7
2022-09-14	12:19:02	0.47584	2.11663	302.972	FALSE	7
2022-09-14	12:19:02	0.255636	1.13712	319.733	FALSE	7
2022-09-14	12:19:03	0.476094	2.11776	305.09	FALSE	7
2022-09-14	12:19:03	0.288206	1.282	321.015	FALSE	7
2022-09-14	12:19:03	0.525967	2.33961	307.43	FALSE	7
2022-09-14	12:19:04	0.242659	1.0794	322.094	FALSE	7
2022-09-14	12:19:04	0.512685	2.28053	309.71	FALSE	7
2022-09-14	12:19:04	0.351921	1.56541	323.66	FALSE	7
2022-09-14	12:19:04	0.522964	2.32625	312.037	FALSE	7
2022-09-14	12:19:05	0.321438	1.42982	325.089	FALSE	7
2022-09-14	12:19:05	0.447647	1.99122	314.028	FALSE	7
2022-09-14	12:19:05	0.273193	1.21522	326.305	FALSE	7
2022-09-14	12:19:05	0.532532	2.36881	316.397	FALSE	7
2022-09-14	12:19:06	0.258537	1.15002	327.455	FALSE	7
2022-09-14	12:19:06	0.484237	2.15398	318.551	FALSE	7
2022-09-14	12:19:06	0.264593	1.17696	328.632	FALSE	7
2022-09-14	12:19:06	0.52327	2.32761	320.878	FALSE	7
2022-09-14	12:19:07	0.292735	1.30214	329.934	FALSE	7
2022-09-14	12:19:07	0.491463	2.18613	323.064	FALSE	7
2022-09-14	12:19:07	0.333346	1.48279	331.416	FALSE	7
2022-09-14	12:19:08	0.486272	2.16304	325.227	FALSE	7
2022-09-14	12:19:08	0.426832	1.89863	333.315	FALSE	7
2022-09-14	12:19:08	0.438181	1.94912	327.176	FALSE	7
2022-09-14	12:19:08	0.401285	1.785	335.1	FALSE	7
2022-09-14	12:19:09	0.445255	1.98058	329.157	FALSE	7
2022-09-14	12:19:09	0.422965	1.88143	336.982	FALSE	7
2022-09-14	12:19:09	0.408715	1.81805	330.975	FALSE	7
2022-09-14	12:19:09	0.39187	1.74312	338.725	FALSE	7
2022-09-14	12:19:10	0.394211	1.75353	332.729	FALSE	7
2022-09-14	12:19:10	0.396705	1.76462	340.489	FALSE	7
2022-09-14	12:19:10	0.403728	1.79586	334.525	FALSE	7
2022-09-14	12:19:11	0.32841	1.46083	341.95	FALSE	7
2022-09-14	12:19:11	0.3764	1.6743	336.199	FALSE	7
2022-09-14	12:19:11	0.327901	1.45857	343.409	FALSE	7
2022-09-14	12:19:11	0.356349	1.58511	337.784	FALSE	7
2022-09-14	12:19:12	0.481997	2.14402	345.553	FALSE	7
2022-09-14	12:19:12	0.291718	1.29762	339.082	FALSE	7
2022-09-14	12:19:12	0.500063	2.22438	347.777	FALSE	7
2022-09-14	12:19:12	0.297367	1.32275	340.404	FALSE	7
2022-09-14	12:19:13	0.476959	2.12161	349.899	FALSE	7
2022-09-14	12:19:13	0.294822	1.31143	341.716	FALSE	7
2022-09-14	12:19:13	0.4907	2.18273	352.081	FALSE	7
2022-09-14	12:19:13	0.28154	1.25235	342.968	FALSE	7
2022-09-14	12:19:14	0.476145	2.11799	354.199	FALSE	7
2022-09-14	12:19:14	0.25355	1.12784	344.096	FALSE	7
2022-09-14	12:19:14	0.480318	2.13655	356.336	FALSE	7
2022-09-14	12:19:15	0.263677	1.17289	345.269	FALSE	7
2022-09-14	12:19:15	0.483066	2.14877	358.485	FALSE	7
2022-09-14	12:19:15	0.202303	0.899884	346.169	FALSE	7
2022-09-14	12:19:15	0.455942	2.02812	360.513	FALSE	7
2022-09-14	12:19:16	0.210751	0.937463	347.106	FALSE	7
2022-09-14	12:19:16	0.537468	2.39077	362.904	FALSE	7
2022-09-14	12:19:16	0.245	1.08981	348.196	FALSE	7
2022-09-14	12:19:16	0.537519	2.39099	365.295	FALSE	7
2022-09-14	12:19:17	0.145356	0.646573	348.843	FALSE	7
2022-09-14	12:19:17	0.210445	0.936101	366.231	FALSE	7
2022-09-14	12:19:17	0.491616	2.18681	351.029	FALSE	7
2022-09-14	12:19:17	0.781997	3.47848	369.709	FALSE	7
2022-09-14	12:19:18	0.714211	3.17695	354.206	FALSE	7
2022-09-14	12:19:18	0.483422	2.15036	371.86	FALSE	7
2022-09-14	12:19:18	0.534873	2.37922	356.585	FALSE	7
2022-09-14	12:19:19	0.251361	1.1181	372.978	FALSE	7
2022-09-14	12:19:19	0.226323	1.00673	357.592	FALSE	7
2022-09-14	12:19:19	0.127545	0.567346	373.545	FALSE	7
2022-09-14	12:19:19	-0.0280786	-0.124899	357.592	FALSE	7
2022-09-14	12:19:20	-0.391081	-1.73961	373.545	FALSE	7
2022-09-14	12:19:20	-0.421056	-1.87294	357.592	FALSE	7
2022-09-14	12:19:20	-0.536475	-2.38635	373.545	FALSE	7
2022-09-14	12:19:20	-0.330318	-1.46932	357.592	FALSE	7
2022-09-14	12:19:21	-0.139427	-0.620199	373.545	FALSE	7
2022-09-14	12:19:21	0.174771	0.777416	358.37	FALSE	7
2022-09-14	12:19:21	0.116552	0.518447	374.063	FALSE	7
2022-09-14	12:19:21	0.266883	1.18715	359.557	FALSE	7
2022-09-14	12:19:22	0.0448984	0.199717	374.263	FALSE	7
2022-09-14	12:19:22	0.279453	1.24306	360.8	FALSE	7
2022-09-14	12:19:22	0.339657	1.51086	375.774	FALSE	7
2022-09-14	12:19:23	0.395026	1.75715	362.557	FALSE	7
2022-09-14	12:19:23	0.26668	1.18625	376.96	FALSE	7
2022-09-14	12:19:23	0.45813	2.03785	364.595	FALSE	7
2022-09-14	12:19:23	0.290191	1.29083	378.251	FALSE	7
2022-09-14	12:19:24	0.460929	2.0503	366.645	FALSE	7
2022-09-14	12:19:24	0.236043	1.04997	379.301	FALSE	7
2022-09-14	12:19:24	0.431921	1.92127	368.566	FALSE	7
2022-09-14	12:19:24	0.304644	1.35512	380.656	FALSE	7
2022-09-14	12:19:25	0.470191	2.0915	370.658	FALSE	7
2022-09-14	12:19:25	0.268817	1.19575	381.852	FALSE	7
2022-09-14	12:19:25	0.441234	1.9627	372.621	FALSE	7
2022-09-14	12:19:25	0.269173	1.19734	383.049	FALSE	7
2022-09-14	12:19:26	0.432735	1.92489	374.546	FALSE	7
2022-09-14	12:19:26	0.223677	0.99496	384.044	FALSE	7
2022-09-14	12:19:26	0.440674	1.96021	376.506	FALSE	7
2022-09-14	12:19:27	0.289122	1.28607	385.33	FALSE	7
2022-09-14	12:19:27	0.470344	2.09218	378.598	FALSE	7
2022-09-14	12:19:27	0.261285	1.16225	386.493	FALSE	7
2022-09-14	12:19:27	0.394161	1.75331	380.351	FALSE	7
2022-09-14	12:19:28	0.262405	1.16723	387.66	FALSE	7
2022-09-14	12:19:28	0.416399	1.85223	382.203	FALSE	7
2022-09-14	12:19:28	0.333041	1.48143	389.141	FALSE	7
2022-09-14	12:19:28	0.334262	1.48686	383.69	FALSE	7
2022-09-14	12:19:29	0.339351	1.5095	390.651	FALSE	7
2022-09-14	12:19:29	0.303677	1.35082	385.041	FALSE	7
2022-09-14	12:19:29	0.386476	1.71912	392.37	FALSE	7
2022-09-14	12:19:29	0.346781	1.54255	386.584	FALSE	7
2022-09-14	12:19:30	0.412532	1.83502	394.205	FALSE	7
2022-09-14	12:19:30	0.310496	1.38115	387.965	FALSE	7
2022-09-14	12:19:30	0.504491	2.24408	396.449	FALSE	7
2022-09-14	12:19:31	0.339199	1.50882	389.474	FALSE	7
2022-09-14	12:19:31	0.411921	1.83231	398.281	FALSE	7
2022-09-14	12:19:31	0.405764	1.80492	391.279	FALSE	7
2022-09-14	12:19:31	0.374822	1.66728	399.949	FALSE	7
2022-09-14	12:19:32	0.382048	1.69943	392.978	FALSE	7
2022-09-14	12:19:32	0.319606	1.42167	401.37	FALSE	7
2022-09-14	12:19:32	0.487952	2.17051	395.149	FALSE	7
2022-09-14	12:19:32	0.430954	1.91697	403.287	FALSE	7
2022-09-14	12:19:33	0.420318	1.86966	397.018	FALSE	7
2022-09-14	12:19:33	0.384695	1.7112	404.998	FALSE	7
2022-09-14	12:19:33	0.348359	1.54957	398.568	FALSE	7
2022-09-14	12:19:33	0.345102	1.53508	406.533	FALSE	7
2022-09-14	12:19:34	0.34556	1.53712	400.105	FALSE	7
2022-09-14	12:19:34	0.366272	1.62925	408.163	FALSE	7
2022-09-14	12:19:34	0.291361	1.29603	401.401	FALSE	7
2022-09-14	12:19:35	-0.716475	-3.18702	408.163	FALSE	7
2022-09-14	12:19:35	0.425865	1.89433	403.295	FALSE	7
2022-09-14	12:19:35	0.404389	1.7988	409.962	FALSE	7
2022-09-14	12:19:35	0.381082	1.69513	404.99	FALSE	7
2022-09-14	12:19:36	0.343372	1.52739	411.489	FALSE	7
2022-09-14	12:19:36	0.359809	1.6005	406.591	FALSE	7
2022-09-14	12:19:36	0.638333	2.83943	414.328	FALSE	7
2022-09-14	12:19:36	0.00459311	0.0204311	406.611	FALSE	7
2022-09-14	12:19:37	0.317519	1.41239	415.741	FALSE	7
2022-09-14	12:19:37	0.306018	1.36123	407.973	FALSE	7
2022-09-14	12:19:37	0.308206	1.37096	417.112	FALSE	7
2022-09-14	12:19:37	0.301947	1.34312	409.316	FALSE	7
2022-09-14	12:19:38	0.300318	1.33587	418.448	FALSE	7
2022-09-14	12:19:38	0.277214	1.2331	410.549	FALSE	7
2022-09-14	12:19:38	0.652226	2.90123	421.349	FALSE	7
2022-09-14	12:19:39	0.730751	3.25053	413.799	FALSE	7
2022-09-14	12:19:39	-0.504719	-2.24509	421.349	FALSE	7
2022-09-14	12:19:39	0.528206	2.34957	416.149	FALSE	7
2022-09-14	12:19:39	0.730496	3.24939	424.598	FALSE	7
2022-09-14	12:19:40	0.728919	3.24238	419.391	FALSE	7
2022-09-14	12:19:40	0.728613	3.24102	427.839	FALSE	7
2022-09-14	12:19:40	0.730038	3.24736	422.639	FALSE	7
2022-09-14	12:19:40	0.724033	3.22064	431.06	FALSE	7
2022-09-14	12:19:41	0.72897	3.2426	425.881	FALSE	7
2022-09-14	12:19:41	0.726018	3.22947	434.289	FALSE	7
2022-09-14	12:19:41	0.725865	3.22879	429.11	FALSE	7
2022-09-14	12:19:41	0.731565	3.25415	437.543	FALSE	7
2022-09-14	12:19:42	0.732532	3.25845	432.368	FALSE	7
2022-09-14	12:19:42	0.730343	3.24871	440.792	FALSE	7
2022-09-14	12:19:42	0.732786	3.25958	435.628	FALSE	7
2022-09-14	12:19:43	0.71014	3.15884	443.951	FALSE	7
2022-09-14	12:19:43	0.726883	3.23332	438.861	FALSE	7
2022-09-14	12:19:43	-0.185687	-0.825973	443.951	FALSE	7
2022-09-14	12:19:43	0.719249	3.19936	442.061	FALSE	7
2022-09-14	12:19:44	0.726476	3.23151	447.183	FALSE	7
2022-09-14	12:19:44	0.726883	3.23332	445.294	FALSE	7
2022-09-14	12:19:44	0.725458	3.22698	450.41	FALSE	7
2022-09-14	12:19:44	0.722862	3.21543	448.509	FALSE	7
2022-09-14	12:19:45	0.720674	3.2057	453.615	FALSE	7
2022-09-14	12:19:45	0.734059	3.26524	451.775	FALSE	7
2022-09-14	12:19:45	0.728512	3.24057	456.856	FALSE	7
2022-09-14	12:19:46	0.722099	3.21204	454.987	FALSE	7
2022-09-14	12:19:46	0.559911	2.4906	459.346	FALSE	7
2022-09-14	12:19:46	-0.774338	-3.44441	454.987	FALSE	7
2022-09-14	12:19:46	-0.828485	-3.68527	459.346	FALSE	7
2022-09-14	12:19:47	-0.860495	-3.82765	454.987	FALSE	7
2022-09-14	12:19:47	-0.954439	-4.24554	459.346	FALSE	7
2022-09-14	12:19:47	-0.968638	-4.3087	454.987	FALSE	7
2022-09-14	12:19:47	-1.03434	-4.60095	459.346	FALSE	7
2022-09-14	12:19:48	-1.02976	-4.58058	454.987	FALSE	7
2022-09-14	12:19:48	-1.05179	-4.67857	459.346	FALSE	7
2022-09-14	12:19:48	-1.36543	-6.07371	454.987	FALSE	7
2022-09-14	12:19:48	-1.56681	-6.96948	459.346	FALSE	7
2022-09-14	12:19:49	-1.53917	-6.84654	454.987	FALSE	7
2022-09-14	12:19:49	-1.48894	-6.6231	459.346	FALSE	7
2022-09-14	12:19:49	-1.42156	-6.32338	454.987	FALSE	7
2022-09-14	12:19:50	-1.47658	-6.56812	459.346	FALSE	7
2022-09-14	12:19:50	-1.34599	-5.98723	454.987	FALSE	7
2022-09-14	12:19:50	-1.42228	-6.32659	459.346	FALSE	7
2022-09-14	12:19:50	-1.35571	-6.03047	454.987	FALSE	7
2022-09-14	12:19:51	-1.36609	-6.07664	459.346	FALSE	7
2022-09-14	12:19:51	-1.05225	-4.68062	454.987	FALSE	7
2022-09-14	12:19:51	-0.814083	-3.6212	459.346	FALSE	7
2022-09-14	12:19:51	-0.169758	-0.755118	454.987	FALSE	7
2022-09-14	12:19:52	-0.00100484	-0.00446973	459.346	FALSE	7
2022-09-14	12:19:52	0.165102	0.734407	455.721	FALSE	7
2022-09-14	12:19:52	0.189886	0.844651	460.191	FALSE	7
2022-09-14	12:19:52	0.121285	0.5395	456.261	FALSE	7
2022-09-14	12:19:53	0.39187	1.74312	461.934	FALSE	7
2022-09-14	12:19:53	0.697417	3.10225	459.363	FALSE	7
2022-09-14	12:19:53	0.725102	3.2254	465.16	FALSE	7
2022-09-14	12:19:54	0.730903	3.2512	462.614	FALSE	7
2022-09-14	12:19:54	0.726272	3.2306	468.39	FALSE	7
2022-09-14	12:19:54	0.730903	3.2512	465.865	FALSE	7
2022-09-14	12:19:54	0.723779	3.21951	471.61	FALSE	7
2022-09-14	12:19:55	0.72327	3.21725	469.083	FALSE	7
2022-09-14	12:19:55	0.340216	1.51335	473.123	FALSE	7
2022-09-14	12:19:55	0.728054	3.23853	472.321	FALSE	7
2022-09-14	12:19:55	0.727952	3.23808	476.361	FALSE	7
2022-09-14	12:19:56	0.726425	3.23128	475.552	FALSE	7
2022-09-14	12:19:56	0.736603	3.27656	479.638	FALSE	7
2022-09-14	12:19:56	0.726883	3.23332	478.786	FALSE	7
2022-09-14	12:19:56	0.728003	3.2383	482.876	FALSE	7
2022-09-14	12:19:57	0.727392	3.23559	482.021	FALSE	7
2022-09-14	12:19:57	0.728817	3.24192	486.118	FALSE	7
2022-09-14	12:19:57	0.732634	3.2589	485.28	FALSE	7
2022-09-14	12:19:58	0.719707	3.2014	489.319	FALSE	7
2022-09-14	12:19:58	0.576349	2.56372	487.844	FALSE	7
2022-09-14	12:19:58	0.722761	3.21499	492.534	FALSE	7
2022-09-14	12:19:58	0.728206	3.23921	491.083	FALSE	7
2022-09-14	12:19:59	0.72388	3.21996	495.754	FALSE	7
2022-09-14	12:19:59	0.724949	3.22472	494.308	FALSE	7
2022-09-14	12:19:59	0.734924	3.26909	499.023	FALSE	7
2022-09-14	12:19:59	0.687697	3.05901	497.367	FALSE	7
2022-09-14	12:20:00	-0.413676	-1.84011	499.023	FALSE	7
2022-09-14	12:20:00	0.471718	2.0983	499.465	FALSE	7
2022-09-14	12:20:00	0.305204	1.35761	500.381	FALSE	7
2022-09-14	12:20:00	0.638639	2.84079	502.306	FALSE	7
2022-09-14	12:20:01	0.721591	3.20978	503.591	FALSE	7
2022-09-14	12:20:01	0.734517	3.26728	505.573	FALSE	7
2022-09-14	12:20:01	0.728104	3.23875	506.829	FALSE	7
2022-09-14	12:20:02	0.727646	3.23671	508.81	FALSE	7
2022-09-14	12:20:02	0.72444	3.22245	510.052	FALSE	7
2022-09-14	12:20:02	0.729428	3.24464	512.055	FALSE	7
2022-09-14	12:20:02	0.722761	3.21499	513.267	FALSE	7
2022-09-14	12:20:03	0.732786	3.25958	515.314	FALSE	7
2022-09-14	12:20:03	0.729631	3.24554	516.512	FALSE	7
2022-09-14	12:20:03	0.725305	3.2263	518.54	FALSE	7
2022-09-14	12:20:03	0.721845	3.21091	519.723	FALSE	7
2022-09-14	12:20:04	0.681437	3.03117	521.572	FALSE	7
2022-09-14	12:20:04	0.726985	3.23377	522.957	FALSE	7
2022-09-14	12:20:04	0.727697	3.23694	524.809	FALSE	7
2022-09-14	12:20:04	0.729224	3.24373	526.201	FALSE	7
2022-09-14	12:20:05	0.726679	3.23241	528.041	FALSE	7
2022-09-14	12:20:05	0.725102	3.2254	529.426	FALSE	7
2022-09-14	12:20:05	0.72215	3.21227	531.253	FALSE	7
2022-09-14	12:20:06	0.732786	3.25958	532.686	FALSE	7
2022-09-14	12:20:06	0.730852	3.25098	534.504	FALSE	7
2022-09-14	12:20:06	0.726272	3.2306	535.916	FALSE	7
2022-09-14	12:20:06	0.729224	3.24373	537.748	FALSE	7
2022-09-14	12:20:07	0.727239	3.2349	539.151	FALSE	7
2022-09-14	12:20:07	0.724695	3.22359	540.971	FALSE	7
2022-09-14	12:20:07	0.734262	3.26614	542.417	FALSE	7
2022-09-14	12:20:07	0.730293	3.24849	544.22	FALSE	7
2022-09-14	12:20:08	0.723982	3.22042	545.638	FALSE	7
2022-09-14	12:20:08	0.732939	3.26026	547.48	FALSE	7
2022-09-14	12:20:08	0.723372	3.2177	548.856	FALSE	7
2022-09-14	12:20:08	0.734109	3.26546	550.746	FALSE	7
2022-09-14	12:20:09	0.729224	3.24373	552.099	FALSE	7
2022-09-14	12:20:09	0.731005	3.25166	553.997	FALSE	7
2022-09-14	12:20:09	0.724338	3.222	555.321	FALSE	7
2022-09-14	12:20:10	0.729377	3.24441	557.242	FALSE	7
2022-09-14	12:20:10	0.725967	3.22925	558.551	FALSE	7
2022-09-14	12:20:10	0.729733	3.246	560.488	FALSE	7
2022-09-14	12:20:10	0.729071	3.24305	561.794	FALSE	7
2022-09-14	12:20:11	0.726578	3.23196	563.72	FALSE	7
2022-09-14	12:20:11	0.724389	3.22223	565.016	FALSE	7
2022-09-14	12:20:11	0.720572	3.20525	566.925	FALSE	7
2022-09-14	12:20:11	0.730242	3.24826	568.264	FALSE	7
2022-09-14	12:20:12	0.72556	3.22744	570.152	FALSE	7
2022-09-14	12:20:12	0.727239	3.2349	571.499	FALSE	7
2022-09-14	12:20:12	0.731412	3.25347	573.406	FALSE	7
2022-09-14	12:20:12	0.734415	3.26682	574.766	FALSE	7
2022-09-14	12:20:13	0.732939	3.26026	576.666	FALSE	7
2022-09-14	12:20:13	0.727137	3.23445	578	FALSE	7
2022-09-14	12:20:13	0.732481	3.25822	579.924	FALSE	7
2022-09-14	12:20:14	0.732888	3.26003	581.26	FALSE	7
2022-09-14	12:20:14	0.729173	3.24351	583.168	FALSE	7
2022-09-14	12:20:14	0.724847	3.22426	584.485	FALSE	7
2022-09-14	12:20:14	0.728206	3.23921	586.407	FALSE	7
2022-09-14	12:20:15	0.728359	3.23989	587.724	FALSE	7
2022-09-14	12:20:15	0.727799	3.2374	589.644	FALSE	7
2022-09-14	12:20:15	0.72556	3.22744	590.952	FALSE	7
2022-09-14	12:20:15	0.733092	3.26094	592.905	FALSE	7
2022-09-14	12:20:16	0.739351	3.28878	594.241	FALSE	7
2022-09-14	12:20:16	0.731819	3.25528	596.161	FALSE	7
2022-09-14	12:20:16	0.720827	3.20638	597.447	FALSE	7
2022-09-14	12:20:16	0.728715	3.24147	599.402	FALSE	7
2022-09-14	12:20:17	0.72103	3.20729	600.654	FALSE	7
2022-09-14	12:20:17	0.727799	3.2374	602.64	FALSE	7
2022-09-14	12:20:17	0.724593	3.22313	603.878	FALSE	7
2022-09-14	12:20:18	0.729682	3.24577	605.885	FALSE	7
2022-09-14	12:20:18	0.725916	3.22902	607.107	FALSE	7
2022-09-14	12:20:18	0.725611	3.22766	609.113	FALSE	7
2022-09-14	12:20:18	0.726018	3.22947	610.336	FALSE	7
2022-09-14	12:20:19	0.724389	3.22223	612.335	FALSE	7
2022-09-14	12:20:19	0.730089	3.24758	613.584	FALSE	7
2022-09-14	12:20:19	0.730598	3.24985	615.585	FALSE	7
2022-09-14	12:20:19	0.72729	3.23513	616.819	FALSE	7
2022-09-14	12:20:20	0.72612	3.22993	618.815	FALSE	7
2022-09-14	12:20:20	0.723931	3.22019	620.039	FALSE	7
2022-09-14	12:20:20	0.72612	3.22993	622.045	FALSE	7
2022-09-14	12:20:20	0.731107	3.25211	623.291	FALSE	7
2022-09-14	12:20:21	0.731565	3.25415	625.299	FALSE	7
2022-09-14	12:20:21	0.726018	3.22947	626.52	FALSE	7
2022-09-14	12:20:21	0.723473	3.21815	628.517	FALSE	7
2022-09-14	12:20:22	0.733041	3.26071	629.781	FALSE	7
2022-09-14	12:20:22	0.724491	3.22268	631.74	FALSE	7
2022-09-14	12:20:22	0.723779	3.21951	633.001	FALSE	7
2022-09-14	12:20:22	0.722862	3.21543	634.955	FALSE	7
2022-09-14	12:20:23	0.72785	3.23762	636.238	FALSE	7
2022-09-14	12:20:23	0.725509	3.22721	638.183	FALSE	7
2022-09-14	12:20:23	0.724186	3.22132	639.46	FALSE	7
2022-09-14	12:20:23	0.728003	3.2383	641.421	FALSE	7
2022-09-14	12:20:24	0.726985	3.23377	642.693	FALSE	7
2022-09-14	12:20:24	0.727239	3.2349	644.656	FALSE	7
2022-09-14	12:20:24	0.719656	3.20117	645.895	FALSE	7
2022-09-14	12:20:25	0.733804	3.26411	647.92	FALSE	7
2022-09-14	12:20:25	0.724338	3.222	649.117	FALSE	7
2022-09-14	12:20:25	0.727036	3.234	651.154	FALSE	7
2022-09-14	12:20:25	0.72612	3.22993	652.347	FALSE	7
2022-09-14	12:20:26	0.72388	3.21996	654.374	FALSE	7
2022-09-14	12:20:26	0.73243	3.258	655.605	FALSE	7
2022-09-14	12:20:26	0.725204	3.22585	657.6	FALSE	7
2022-09-14	12:20:26	0.729733	3.246	658.851	FALSE	7
2022-09-14	12:20:27	0.728308	3.23966	660.839	FALSE	7
2022-09-14	12:20:27	0.729733	3.246	662.097	FALSE	7
2022-09-14	12:20:27	0.728308	3.23966	664.079	FALSE	7
2022-09-14	12:20:27	0.726679	3.23241	665.329	FALSE	7
2022-09-14	12:20:28	0.727188	3.23468	667.314	FALSE	7
2022-09-14	12:20:28	0.727494	3.23604	668.565	FALSE	7
2022-09-14	12:20:28	0.217112	0.965758	668.279	FALSE	7
2022-09-14	12:20:29	0.0486644	0.216469	668.781	FALSE	7
2022-09-14	12:20:29	0.21187	0.94244	669.222	FALSE	7
2022-09-14	12:20:29	0.00372797	0.0165828	668.798	FALSE	7
2022-09-14	12:20:29	0.0860689	0.382852	669.605	FALSE	7
2022-09-14	12:20:30	0.0319214	0.141993	668.94	FALSE	7
2022-09-14	12:20:30	0.0438806	0.19519	669.8	FALSE	7
2022-09-14	12:20:30	0.0815905	0.362931	669.303	FALSE	7
2022-09-14	12:20:30	0.0338552	0.150595	669.951	FALSE	7
2022-09-14	12:20:31	0.0712089	0.316751	669.62	FALSE	7
2022-09-14	12:20:31	0.705611	3.1387	673.089	FALSE	7
2022-09-14	12:20:31	0.72271	3.21476	672.834	FALSE	7
2022-09-14	12:20:31	0.726679	3.23241	676.322	FALSE	7
2022-09-14	12:20:32	0.727545	3.23627	676.071	FALSE	7
2022-09-14	12:20:32	0.722659	3.21453	679.536	FALSE	7
2022-09-14	12:20:32	0.726272	3.2306	679.301	FALSE	7
2022-09-14	12:20:33	0.73187	3.2555	682.792	FALSE	7
2022-09-14	12:20:33	0.725153	3.22563	682.527	FALSE	7
2022-09-14	12:20:33	0.722303	3.21295	686.005	FALSE	7
2022-09-14	12:20:33	0.72673	3.23264	685.76	FALSE	7
2022-09-14	12:20:34	0.722862	3.21543	689.22	FALSE	7
2022-09-14	12:20:34	0.736043	3.27407	689.034	FALSE	7
2022-09-14	12:20:34	0.724898	3.22449	692.445	FALSE	7
2022-09-14	12:20:34	0.728512	3.24057	692.274	FALSE	7
2022-09-14	12:20:35	0.723066	3.21634	695.661	FALSE	7
2022-09-14	12:20:35	0.721641	3.21	695.484	FALSE	7
2022-09-14	12:20:35	0.727799	3.2374	698.898	FALSE	7
2022-09-14	12:20:35	0.728919	3.24238	698.727	FALSE	7
2022-09-14	12:20:36	0.736501	3.2761	702.174	FALSE	7
2022-09-14	12:20:36	0.727748	3.23717	701.964	FALSE	7
2022-09-14	12:20:36	0.727137	3.23445	705.409	FALSE	7
2022-09-14	12:20:37	0.72958	3.24532	705.209	FALSE	7
2022-09-14	12:20:37	0.720114	3.20321	708.612	FALSE	7
2022-09-14	12:20:37	0.72383	3.21974	708.429	FALSE	7
2022-09-14	12:20:37	0.725814	3.22857	711.841	FALSE	7
2022-09-14	12:20:38	0.727545	3.23627	711.665	FALSE	7
2022-09-14	12:20:38	0.72897	3.2426	715.083	FALSE	7
2022-09-14	12:20:38	0.724338	3.222	714.887	FALSE	7
2022-09-14	12:20:38	0.730394	3.24894	718.332	FALSE	7
2022-09-14	12:20:39	0.727697	3.23694	718.124	FALSE	7
2022-09-14	12:20:39	0.729122	3.24328	721.575	FALSE	7
2022-09-14	12:20:39	0.721845	3.21091	721.335	FALSE	7
2022-09-14	12:20:39	0.72617	3.23015	724.806	FALSE	7
2022-09-14	12:20:40	0.726679	3.23241	724.567	FALSE	7
2022-09-14	12:20:40	0.725356	3.22653	728.032	FALSE	7
2022-09-14	12:20:40	0.725356	3.22653	727.794	FALSE	7
2022-09-14	12:20:41	0.656552	2.92047	730.953	FALSE	7
2022-09-14	12:20:41	0.635331	2.82608	730.62	FALSE	7
2022-09-14	12:20:41	0.726374	3.23106	734.184	FALSE	7
2022-09-14	12:20:41	-0.217544	-0.967679	730.62	FALSE	7
2022-09-14	12:20:42	0.350344	1.5584	735.742	FALSE	7
2022-09-14	12:20:42	0.398944	1.77458	732.395	FALSE	7
2022-09-14	12:20:42	0.458028	2.0374	737.779	FALSE	7
2022-09-14	12:20:42	0.396909	1.76553	734.16	FALSE	7
2022-09-14	12:20:43	0.412634	1.83548	739.615	FALSE	7
2022-09-14	12:20:43	0.43411	1.93101	736.091	FALSE	7
2022-09-14	12:20:43	0.373092	1.65959	741.275	FALSE	7
2022-09-14	12:20:43	0.38612	1.71754	737.809	FALSE	7
2022-09-14	12:20:44	0.388512	1.72818	743.003	FALSE	7
2022-09-14	12:20:44	0.383321	1.70509	739.514	FALSE	7
2022-09-14	12:20:44	0.378079	1.68177	744.684	FALSE	7
2022-09-14	12:20:45	0.383881	1.70758	741.221	FALSE	7
2022-09-14	12:20:45	0.380369	1.69196	746.376	FALSE	7
2022-09-14	12:20:45	0.376654	1.67543	742.897	FALSE	7
2022-09-14	12:20:45	0.37986	1.68969	748.066	FALSE	7
2022-09-14	12:20:46	0.38215	1.69988	744.597	FALSE	7
2022-09-14	12:20:46	0.382405	1.70101	749.767	FALSE	7
2022-09-14	12:20:46	0.382099	1.69965	746.296	FALSE	7
2022-09-14	12:20:46	0.382405	1.70101	751.468	FALSE	7
2022-09-14	12:20:47	0.387901	1.72546	748.022	FALSE	7
2022-09-14	12:20:47	0.385153	1.71324	753.181	FALSE	7
2022-09-14	12:20:47	0.394313	1.75398	749.776	FALSE	7
2022-09-14	12:20:47	0.383982	1.70803	754.889	FALSE	7
2022-09-14	12:20:48	0.379758	1.68924	751.465	FALSE	7
2022-09-14	12:20:48	0.386781	1.72048	756.61	FALSE	7
2022-09-14	12:20:48	0.385051	1.71278	753.178	FALSE	7
2022-09-14	12:20:49	0.388512	1.72818	758.338	FALSE	7
2022-09-14	12:20:49	0.389275	1.73157	754.909	FALSE	7
2022-09-14	12:20:49	0.388003	1.72591	760.064	FALSE	7
2022-09-14	12:20:49	0.391565	1.74176	756.651	FALSE	7
2022-09-14	12:20:50	0.391769	1.74267	761.807	FALSE	7
2022-09-14	12:20:50	0.393855	1.75195	758.403	FALSE	7
2022-09-14	12:20:50	0.394618	1.75534	763.562	FALSE	7
2022-09-14	12:20:50	0.392176	1.74448	760.147	FALSE	7
2022-09-14	12:20:51	0.389733	1.73361	765.296	FALSE	7
2022-09-14	12:20:51	0.388461	1.72795	761.875	FALSE	7
2022-09-14	12:20:51	0.386323	1.71844	767.014	FALSE	7
2022-09-14	12:20:51	0.388868	1.72976	763.605	FALSE	7
2022-09-14	12:20:52	0.391463	1.74131	768.755	FALSE	7
2022-09-14	12:20:52	0.390649	1.73768	765.343	FALSE	7
2022-09-14	12:20:52	0.394109	1.75308	770.508	FALSE	7
2022-09-14	12:20:53	0.390852	1.73859	767.081	FALSE	7
2022-09-14	12:20:53	0.395127	1.7576	772.266	FALSE	7
2022-09-14	12:20:53	0.395585	1.75964	768.841	FALSE	7
2022-09-14	12:20:53	0.39757	1.76847	774.034	FALSE	7
2022-09-14	12:20:54	0.397163	1.76666	770.608	FALSE	7
2022-09-14	12:20:54	0.395942	1.76123	775.796	FALSE	7
2022-09-14	12:20:54	0.395484	1.75919	772.367	FALSE	7
2022-09-14	12:20:54	0.398995	1.77481	777.571	FALSE	7
2022-09-14	12:20:55	0.399199	1.77572	774.143	FALSE	7
2022-09-14	12:20:55	0.397672	1.76892	779.339	FALSE	7
2022-09-14	12:20:55	0.393601	1.75082	775.894	FALSE	7
2022-09-14	12:20:55	0.396807	1.76508	781.105	FALSE	7
2022-09-14	12:20:56	0.399809	1.77843	777.672	FALSE	7
2022-09-14	12:20:56	0.396654	1.7644	782.869	FALSE	7
2022-09-14	12:20:56	0.395789	1.76055	779.432	FALSE	7
2022-09-14	12:20:57	0.394873	1.75647	784.625	FALSE	7
2022-09-14	12:20:57	0.405713	1.80469	781.237	FALSE	7
2022-09-14	12:20:57	0.403321	1.79405	786.419	FALSE	7
2022-09-14	12:20:57	0.39813	1.77096	783.008	FALSE	7
2022-09-14	12:20:58	0.399402	1.77662	788.196	FALSE	7
2022-09-14	12:20:58	0.394211	1.75353	784.762	FALSE	7
2022-09-14	12:20:58	0.403117	1.79315	789.989	FALSE	7
2022-09-14	12:20:58	0.402812	1.79179	786.553	FALSE	7
2022-09-14	12:20:59	0.399657	1.77775	791.767	FALSE	7
2022-09-14	12:20:59	0.396298	1.76281	788.316	FALSE	7
2022-09-14	12:20:59	0.393753	1.75149	793.518	FALSE	7
2022-09-14	12:20:59	0.410547	1.8262	790.142	FALSE	7
2022-09-14	12:21:00	0.400318	1.78069	795.299	FALSE	7
2022-09-14	12:21:00	0.405	1.80152	791.944	FALSE	7
2022-09-14	12:21:00	0.410496	1.82597	797.125	FALSE	7
2022-09-14	12:21:01	0.406527	1.80831	793.752	FALSE	7
2022-09-14	12:21:01	0.400674	1.78228	798.907	FALSE	7
2022-09-14	12:21:01	0.414568	1.84408	795.596	FALSE	7
2022-09-14	12:21:01	0.415127	1.84657	800.754	FALSE	7
2022-09-14	12:21:02	0.411463	1.83027	797.427	FALSE	7
2022-09-14	12:21:02	0.418588	1.86196	802.616	FALSE	7
2022-09-14	12:21:02	0.411718	1.8314	799.258	FALSE	7
2022-09-14	12:21:02	0.408003	1.81488	804.431	FALSE	7
2022-09-14	12:21:03	0.410802	1.82733	801.085	FALSE	7
2022-09-14	12:21:03	0.403168	1.79337	806.224	FALSE	7
2022-09-14	12:21:03	0.40271	1.79133	802.877	FALSE	7
2022-09-14	12:21:03	0.406425	1.80786	808.032	FALSE	7
2022-09-14	12:21:04	0.407545	1.81284	804.69	FALSE	7
2022-09-14	12:21:04	0.411056	1.82846	809.861	FALSE	7
2022-09-14	12:21:04	0.404593	1.79971	806.489	FALSE	7
2022-09-14	12:21:05	0.412786	1.83615	811.697	FALSE	7
2022-09-14	12:21:05	0.418079	1.8597	808.349	FALSE	7
2022-09-14	12:21:05	0.415127	1.84657	813.543	FALSE	7
2022-09-14	12:21:05	0.412837	1.83638	810.185	FALSE	7
2022-09-14	12:21:06	0.413906	1.84114	815.384	FALSE	7
2022-09-14	12:21:06	0.422761	1.88053	812.066	FALSE	7
2022-09-14	12:21:06	0.421387	1.87441	817.259	FALSE	7
2022-09-14	12:21:06	0.416552	1.85291	813.919	FALSE	7
2022-09-14	12:21:07	0.420573	1.87079	819.13	FALSE	7
2022-09-14	12:21:07	0.415026	1.84612	815.765	FALSE	7
2022-09-14	12:21:07	0.41126	1.82937	820.959	FALSE	7
2022-09-14	12:21:07	0.409021	1.81941	817.584	FALSE	7
2022-09-14	12:21:08	0.410089	1.82416	822.783	FALSE	7
2022-09-14	12:21:08	0.408257	1.81601	819.4	FALSE	7
2022-09-14	12:21:08	0.403066	1.79292	824.576	FALSE	7
2022-09-14	12:21:09	0.406934	1.81012	821.21	FALSE	7
2022-09-14	12:21:09	0.407646	1.81329	826.389	FALSE	7
2022-09-14	12:21:09	0.413702	1.84023	823.051	FALSE	7
2022-09-14	12:21:09	0.424644	1.8889	828.278	FALSE	7
2022-09-14	12:21:10	0.412634	1.83548	824.886	FALSE	7
2022-09-14	12:21:10	0.411921	1.83231	830.111	FALSE	7
2022-09-14	12:21:10	0.410242	1.82484	826.711	FALSE	7
2022-09-14	12:21:10	0.412888	1.83661	831.947	FALSE	7
2022-09-14	12:21:11	0.41355	1.83955	828.551	FALSE	7
2022-09-14	12:21:11	0.401947	1.78794	833.735	FALSE	7
2022-09-14	12:21:11	0.642099	2.85618	831.407	FALSE	7
2022-09-14	12:21:11	0.722303	3.21295	836.948	FALSE	7
2022-09-14	12:21:12	0.725407	3.22676	834.633	FALSE	7
2022-09-14	12:21:12	0.726323	3.23083	840.179	FALSE	7
2022-09-14	12:21:12	0.730954	3.25143	837.885	FALSE	7
2022-09-14	12:21:13	0.723931	3.22019	843.399	FALSE	7
2022-09-14	12:21:13	0.730191	3.24804	841.133	FALSE	7
2022-09-14	12:21:13	0.730293	3.24849	846.648	FALSE	7
2022-09-14	12:21:13	0.73472	3.26818	844.401	FALSE	7
2022-09-14	12:21:14	0.734262	3.26614	849.914	FALSE	7
2022-09-14	12:21:14	0.728104	3.23875	847.64	FALSE	7
2022-09-14	12:21:14	0.729682	3.24577	853.159	FALSE	7
2022-09-14	12:21:14	0.72612	3.22993	850.87	FALSE	7
2022-09-14	12:21:15	0.729326	3.24419	856.404	FALSE	7
2022-09-14	12:21:15	0.731259	3.25279	854.123	FALSE	7
2022-09-14	12:21:15	0.734822	3.26864	859.672	FALSE	7
2022-09-14	12:21:16	0.736145	3.27452	857.397	FALSE	7
2022-09-14	12:21:16	0.72617	3.23015	862.902	FALSE	7
2022-09-14	12:21:16	0.726476	3.23151	860.629	FALSE	7
2022-09-14	12:21:16	0.734059	3.26524	866.168	FALSE	7
2022-09-14	12:21:17	0.737214	3.27928	863.908	FALSE	7
2022-09-14	12:21:17	0.731768	3.25505	869.423	FALSE	7
2022-09-14	12:21:17	0.734771	3.26841	867.176	FALSE	7
2022-09-14	12:21:17	0.734517	3.26728	872.69	FALSE	7
2022-09-14	12:21:18	0.730343	3.24871	870.425	FALSE	7
2022-09-14	12:21:18	0.730903	3.2512	875.941	FALSE	7
2022-09-14	12:21:18	0.73645	3.27588	873.701	FALSE	7
2022-09-14	12:21:18	0.727799	3.2374	879.179	FALSE	7
2022-09-14	12:21:19	0.728817	3.24192	876.943	FALSE	7
2022-09-14	12:21:19	0.733142	3.26116	882.44	FALSE	7
2022-09-14	12:21:19	0.729631	3.24554	880.188	FALSE	7
2022-09-14	12:21:20	0.720623	3.20548	885.645	FALSE	7
2022-09-14	12:21:20	0.72612	3.22993	883.418	FALSE	7
2022-09-14	12:21:20	0.736196	3.27475	888.92	FALSE	7
2022-09-14	12:21:20	0.727392	3.23559	886.654	FALSE	7
2022-09-14	12:21:21	0.734262	3.26614	892.186	FALSE	7
2022-09-14	12:21:21	0.731717	3.25482	889.909	FALSE	7
2022-09-14	12:21:21	0.730547	3.24962	895.436	FALSE	7
2022-09-14	12:21:21	0.724033	3.22064	893.129	FALSE	7
2022-09-14	12:21:22	0.726069	3.2297	898.665	FALSE	7
2022-09-14	12:21:22	0.731768	3.25505	896.384	FALSE	7
2022-09-14	12:21:22	0.72785	3.23762	901.903	FALSE	7
2022-09-14	12:21:22	0.73355	3.26298	899.647	FALSE	7
2022-09-14	12:21:23	0.727596	3.23649	905.14	FALSE	7
2022-09-14	12:21:23	0.725967	3.22925	902.877	FALSE	7
2022-09-14	12:21:23	0.464186	2.06479	907.204	FALSE	7
2022-09-14	12:21:24	0.724644	3.22336	906.1	FALSE	7
2022-09-14	12:21:24	0.733855	3.26433	910.469	FALSE	7
2022-09-14	12:21:24	0.72612	3.22993	909.33	FALSE	7
2022-09-14	12:21:24	0.72617	3.23015	913.699	FALSE	7
2022-09-14	12:21:25	0.725102	3.2254	912.555	FALSE	7
2022-09-14	12:21:25	0.728766	3.2417	916.941	FALSE	7
2022-09-14	12:21:25	0.734364	3.2666	915.822	FALSE	7
2022-09-14	12:21:25	0.728562	3.24079	920.181	FALSE	7
2022-09-14	12:21:26	0.729071	3.24305	919.065	FALSE	7
2022-09-14	12:21:26	0.735178	3.27022	923.452	FALSE	7
2022-09-14	12:21:26	0.731616	3.25437	922.319	FALSE	7
2022-09-14	12:21:26	0.730954	3.25143	926.703	FALSE	7
2022-09-14	12:21:27	0.732583	3.25868	925.578	FALSE	7
2022-09-14	12:21:27	0.730801	3.25075	929.954	FALSE	7
2022-09-14	12:21:27	0.607544	2.70248	928.28	FALSE	7
2022-09-14	12:21:28	-0.623549	-2.77367	929.954	FALSE	7
2022-09-14	12:21:28	-1.22884	-5.46613	928.28	FALSE	7
2022-09-14	12:21:28	-1.235	-5.49353	929.954	FALSE	7
2022-09-14	12:21:28	-1.07179	-4.76754	928.28	FALSE	7
2022-09-14	12:21:29	-1.02223	-4.54708	929.954	FALSE	7
2022-09-14	12:21:29	-0.255101	-1.13474	928.28	FALSE	7
2022-09-14	12:21:29	-0.362989	-1.61465	929.954	FALSE	7
2022-09-14	12:21:29	-0.135865	-0.604355	928.28	FALSE	7
2022-09-14	12:21:30	-0.0532694	-0.236953	929.954	FALSE	7
2022-09-14	12:21:30	0.0144659	0.0643472	928.345	FALSE	7
2022-09-14	12:21:30	-0.0189183	-0.0841524	929.954	FALSE	7
2022-09-14	12:21:30	0.102965	0.458009	928.803	FALSE	7
2022-09-14	12:21:31	-0.0933203	-0.415107	929.954	FALSE	7
2022-09-14	12:21:31	-0.891997	-3.96778	928.803	FALSE	7
2022-09-14	12:21:31	-3.02477	-13.4548	929.954	FALSE	7
2022-09-14	12:21:32	-3.71434	-16.5221	928.803	FALSE	7
2022-09-14	12:21:32	-3.53973	-15.7454	929.954	FALSE	7
2022-09-14	12:21:32	-3.79184	-16.8669	928.803	FALSE	7
2022-09-14	12:21:32	-3.68686	-16.3999	929.954	FALSE	7
2022-09-14	12:21:33	-3.78589	-16.8404	928.803	FALSE	7
2022-09-14	12:21:33	-3.75953	-16.7231	929.954	FALSE	7
2022-09-14	12:21:33	-3.71342	-16.518	928.803	FALSE	7
2022-09-14	12:21:33	-3.85266	-17.1374	929.954	FALSE	7
2022-09-14	12:21:34	-3.75826	-16.7175	928.803	FALSE	7
2022-09-14	12:21:34	-4.0893	-18.19	929.954	FALSE	7
2022-09-14	12:21:34	-3.88686	-17.2895	928.803	FALSE	7
2022-09-14	12:21:34	-4.04131	-17.9766	929.954	FALSE	7
2022-09-14	12:21:35	-3.821	-16.9966	928.803	FALSE	7
2022-09-14	12:21:35	-4.01067	-17.8403	929.954	FALSE	7
2022-09-14	12:21:35	-4.05825	-18.0519	928.803	FALSE	7
2022-09-14	12:21:36	-3.94024	-17.527	929.954	FALSE	7
2022-09-14	12:21:36	-4.10752	-18.2711	928.803	FALSE	7
2022-09-14	12:21:36	-3.92945	-17.479	929.954	FALSE	7
2022-09-14	12:21:36	-4.09876	-18.2321	928.803	FALSE	7
2022-09-14	12:21:37	-4.04049	-17.9729	929.954	FALSE	7
2022-09-14	12:21:37	-4.06141	-18.066	928.803	FALSE	7
2022-09-14	12:21:37	-4.18518	-18.6165	929.954	FALSE	7
2022-09-14	12:21:37	-4.24675	-18.8904	928.803	FALSE	7
2022-09-14	12:21:38	-4.37546	-19.4629	929.954	FALSE	7
2022-09-14	12:21:38	-4.3866	-19.5125	928.803	FALSE	7
2022-09-14	12:21:38	-4.51144	-20.0678	929.954	FALSE	7
2022-09-14	12:21:38	-3.21973	-14.322	928.803	FALSE	7
2022-09-14	12:21:39	-4.61561	-20.5312	929.954	FALSE	7
2022-09-14	12:21:39	-4.71184	-20.9592	928.803	FALSE	7
2022-09-14	12:21:39	-4.60019	-20.4626	929.954	FALSE	7
2022-09-14	12:21:40	-4.71902	-20.9911	928.803	FALSE	7
2022-09-14	12:21:40	-4.53428	-20.1694	929.954	FALSE	7
2022-09-14	12:21:40	-4.58426	-20.3917	928.803	FALSE	7
2022-09-14	12:21:40	-4.595	-20.4395	929.954	FALSE	7
2022-09-14	12:21:41	-4.68614	-20.8449	928.803	FALSE	7
2022-09-14	12:21:41	-4.65668	-20.7138	929.954	FALSE	7
2022-09-14	12:21:41	-4.69057	-20.8646	928.803	FALSE	7
2022-09-14	12:21:41	-4.78726	-21.2947	929.954	FALSE	7
2022-09-14	12:21:42	-4.78686	-21.2929	928.803	FALSE	7
2022-09-14	12:21:42	-4.93551	-21.9541	929.954	FALSE	7
2022-09-14	12:21:42	-4.89754	-21.7852	928.803	FALSE	7
2022-09-14	12:21:42	-4.93688	-21.9602	929.954	FALSE	7
2022-09-14	12:21:43	-5.05429	-22.4825	928.803	FALSE	7
2022-09-14	12:21:43	-5.23174	-23.2718	929.954	FALSE	7
2022-09-14	12:21:43	-5.84874	-26.0164	928.803	FALSE	7
2022-09-14	12:21:44	-5.77719	-25.6981	929.954	FALSE	7
2022-09-14	12:21:44	-5.88166	-26.1628	928.803	FALSE	7
2022-09-14	12:21:44	-5.97098	-26.5601	929.954	FALSE	7
2022-09-14	12:21:44	-6.06207	-26.9653	928.803	FALSE	7
2022-09-14	12:21:45	-6.14543	-27.3361	929.954	FALSE	7
2022-09-14	12:21:45	-6.07032	-27.002	928.803	FALSE	7
2022-09-14	12:21:45	-6.12828	-27.2598	929.954	FALSE	7
2022-09-14	12:21:45	-6.13596	-27.294	928.803	FALSE	7
2022-09-14	12:21:46	-4.87556	-21.6875	929.954	FALSE	7
2022-09-14	12:21:46	-2.13047	-9.47676	928.803	FALSE	7
2022-09-14	12:21:46	-1.57195	-6.99235	929.954	FALSE	7
2022-09-14	12:21:46	-1.06167	-4.72252	928.803	FALSE	7
2022-09-14	12:21:47	-0.970877	-4.31866	929.954	FALSE	7
2022-09-14	12:21:47	-0.788893	-3.50915	928.803	FALSE	7
2022-09-14	12:21:47	-1.03149	-4.58827	929.954	FALSE	7
2022-09-14	12:21:48	-1.15846	-5.15306	928.803	FALSE	7
2022-09-14	12:21:48	-2.77907	-12.3619	929.954	FALSE	7
2022-09-14	12:21:48	-3.21937	-14.3204	928.803	FALSE	7
2022-09-14	12:21:48	0.489428	2.17707	932.131	FALSE	7
2022-09-14	12:21:49	0.363372	1.61635	930.419	FALSE	7
2022-09-14	12:21:49	0.635178	2.8254	934.956	FALSE	7
2022-09-14	12:21:49	0.713092	3.17198	933.591	FALSE	7
2022-09-14	12:21:49	0.726578	3.23196	938.188	FALSE	7
2022-09-14	12:21:50	0.723677	3.21906	936.81	FALSE	7
2022-09-14	12:21:50	0.725509	3.22721	941.415	FALSE	7
2022-09-14	12:21:50	0.726781	3.23287	940.043	FALSE	7
2022-09-14	12:21:50	0.728257	3.23943	944.655	FALSE	7
2022-09-14	12:21:51	0.73472	3.26818	943.311	FALSE	7
2022-09-14	12:21:51	0.735483	3.27158	947.926	FALSE	7
2022-09-14	12:21:51	0.736501	3.2761	946.587	FALSE	7
2022-09-14	12:21:52	0.73131	3.25301	951.179	FALSE	7
2022-09-14	12:21:52	0.734568	3.26751	949.855	FALSE	7
2022-09-14	12:21:52	0.73014	3.24781	954.427	FALSE	7
2022-09-14	12:21:52	0.733499	3.26275	953.118	FALSE	7
2022-09-14	12:21:53	-2.10391	-9.35861	954.427	FALSE	7
2022-09-14	12:21:53	-5.14176	-22.8716	953.118	FALSE	7
2022-09-14	12:21:53	-5.052	-22.4723	954.427	FALSE	7
2022-09-14	12:21:53	-4.67357	-20.789	953.118	FALSE	7
2022-09-14	12:21:54	-4.69663	-20.8915	954.427	FALSE	7
2022-09-14	12:21:54	-4.71067	-20.954	953.118	FALSE	7
2022-09-14	12:21:54	-4.70467	-20.9273	954.427	FALSE	7
2022-09-14	12:21:54	-4.76228	-21.1836	953.118	FALSE	7
2022-09-14	12:21:55	-4.73082	-21.0436	954.427	FALSE	7
2022-09-14	12:21:55	-4.73978	-21.0835	953.118	FALSE	7
2022-09-14	12:21:55	-4.67846	-20.8107	954.427	FALSE	7
2022-09-14	12:21:56	0.276196	1.22858	954.346	FALSE	7
2022-09-14	12:21:56	0.0709544	0.315619	954.743	FALSE	7
2022-09-14	12:21:56	-0.247163	-1.09943	954.346	FALSE	7
2022-09-14	12:21:56	-0.446196	-1.98477	954.743	FALSE	7
2022-09-14	12:21:57	-0.60874	-2.7078	954.346	FALSE	7
2022-09-14	12:21:57	-0.749401	-3.33349	954.743	FALSE	7
2022-09-14	12:21:57	-0.752353	-3.34662	954.346	FALSE	7
2022-09-14	12:21:57	-1.24767	-5.54989	954.743	FALSE	7
2022-09-14	12:21:58	-1.43352	-6.37658	954.346	FALSE	7
2022-09-14	12:21:58	-1.54823	-6.88684	954.743	FALSE	7
2022-09-14	12:21:58	-1.452	-6.45879	954.346	FALSE	7
2022-09-14	12:21:58	-1.59927	-7.11387	954.743	FALSE	7
2022-09-14	12:21:59	-1.5407	-6.85334	954.346	FALSE	7
2022-09-14	12:21:59	-1.88686	-8.39313	954.743	FALSE	7
2022-09-14	12:21:59	-1.75266	-7.79618	954.346	FALSE	7
2022-09-14	12:22:00	-1.82411	-8.11401	954.743	FALSE	7
2022-09-14	12:22:00	-2.06777	-9.19785	954.346	FALSE	7
2022-09-14	12:22:00	-2.05352	-9.13447	954.743	FALSE	7
2022-09-14	12:22:00	-2.05693	-9.14964	954.346	FALSE	7
2022-09-14	12:22:01	-1.93744	-8.61812	954.743	FALSE	7
2022-09-14	12:22:01	-2.01617	-8.96833	954.346	FALSE	7
2022-09-14	12:22:01	-2.03795	-9.06521	954.743	FALSE	7
2022-09-14	12:22:01	-2.16874	-9.64699	954.346	FALSE	7
2022-09-14	12:22:02	-2.11805	-9.42151	954.743	FALSE	7
2022-09-14	12:22:02	-2.03973	-9.07313	954.346	FALSE	7
2022-09-14	12:22:02	-2.20518	-9.80908	954.743	FALSE	7
2022-09-14	12:22:02	-2.12991	-9.47427	954.346	FALSE	7
2022-09-14	12:22:03	-3.8524	-17.1362	954.743	FALSE	7
2022-09-14	12:22:03	-3.35836	-14.9387	954.346	FALSE	7
2022-09-14	12:22:03	0.664746	2.95692	957.7	FALSE	7
2022-09-14	12:22:04	0.726934	3.23355	957.58	FALSE	7
2022-09-14	12:22:04	0.730343	3.24871	960.948	FALSE	7
2022-09-14	12:22:04	0.728562	3.24079	960.821	FALSE	7
2022-09-14	12:22:04	0.73584	3.27316	964.222	FALSE	7
2022-09-14	12:22:05	0.70159	3.12081	963.941	FALSE	7
2022-09-14	12:22:05	0.726883	3.23332	967.455	FALSE	7
2022-09-14	12:22:05	0.726476	3.23151	967.173	FALSE	7
2022-09-14	12:22:05	0.729529	3.24509	970.7	FALSE	7
2022-09-14	12:22:06	0.727188	3.23468	970.408	FALSE	7
2022-09-14	12:22:06	0.725509	3.22721	973.927	FALSE	7
2022-09-14	12:22:06	0.724949	3.22472	973.632	FALSE	7
2022-09-14	12:22:07	0.728359	3.23989	977.167	FALSE	7
2022-09-14	12:22:07	0.729936	3.2469	976.879	FALSE	7
2022-09-14	12:22:07	0.735483	3.27158	980.439	FALSE	7
2022-09-14	12:22:07	0.727799	3.2374	980.117	FALSE	7
2022-09-14	12:22:08	0.729173	3.24351	983.682	FALSE	7
2022-09-14	12:22:08	0.735127	3.26999	983.387	FALSE	7
2022-09-14	12:22:08	0.727443	3.23581	986.918	FALSE	7
2022-09-14	12:22:08	0.675229	3.00355	986.39	FALSE	7
2022-09-14	12:22:09	0.728257	3.23943	990.157	FALSE	7
2022-09-14	12:22:09	-1.08309	-4.8178	986.39	FALSE	7
2022-09-14	12:22:09	0.724288	3.22178	993.379	FALSE	7
2022-09-14	12:22:09	-2.29978	-10.2299	986.39	FALSE	7
2022-09-14	12:22:10	0.705102	3.13643	996.516	FALSE	7
2022-09-14	12:22:10	0.725051	3.22517	989.615	FALSE	7
2022-09-14	12:22:10	0.0911071	0.405263	996.921	FALSE	7
2022-09-14	12:22:11	0.704847	3.1353	992.751	FALSE	7
2022-09-14	12:22:11	0.731972	3.25596	1000.18	FALSE	7
2022-09-14	12:22:11	0.729631	3.24554	995.996	FALSE	7
2022-09-14	12:22:11	0.731667	3.2546	1003.43	FALSE	7
2022-09-14	12:22:12	0.728613	3.24102	999.237	FALSE	7
2022-09-14	12:22:12	0.734109	3.26546	1006.7	FALSE	7
2022-09-14	12:22:12	0.727087	3.23423	1002.47	FALSE	7
2022-09-14	12:22:12	0.731768	3.25505	1009.95	FALSE	7
2022-09-14	12:22:13	0.730547	3.24962	1005.72	FALSE	7
2022-09-14	12:22:13	0.729987	3.24713	1013.2	FALSE	7
2022-09-14	12:22:13	0.728613	3.24102	1008.96	FALSE	7
2022-09-14	12:22:13	0.730394	3.24894	1016.45	FALSE	7
2022-09-14	12:22:14	0.733448	3.26252	1012.22	FALSE	7
2022-09-14	12:22:14	0.732023	3.25618	1019.7	FALSE	7
2022-09-14	12:22:14	0.735789	3.27294	1015.5	FALSE	7
2022-09-14	12:22:15	0.728461	3.24034	1022.94	FALSE	7
2022-09-14	12:22:15	0.728003	3.2383	1018.74	FALSE	7
2022-09-14	12:22:15	0.735331	3.2709	1026.22	FALSE	7
2022-09-14	12:22:15	0.726883	3.23332	1021.97	FALSE	7
2022-09-14	12:22:16	0.729529	3.24509	1029.46	FALSE	7
2022-09-14	12:22:16	0.72902	3.24283	1025.21	FALSE	7
2022-09-14	12:22:16	0.732481	3.25822	1032.72	FALSE	7
2022-09-14	12:22:16	0.729326	3.24419	1028.46	FALSE	7
2022-09-14	12:22:17	0.727545	3.23627	1035.96	FALSE	7
2022-09-14	12:22:17	0.723219	3.21702	1031.67	FALSE	7
2022-09-14	12:22:17	0.728919	3.24238	1039.2	FALSE	7
2022-09-14	12:22:17	0.731768	3.25505	1034.93	FALSE	7
2022-09-14	12:22:18	0.730242	3.24826	1042.45	FALSE	7
2022-09-14	12:22:18	0.731972	3.25596	1038.18	FALSE	7
2022-09-14	12:22:18	0.729631	3.24554	1045.69	FALSE	7
2022-09-14	12:22:19	0.728766	3.2417	1041.43	FALSE	7
2022-09-14	12:22:19	0.724491	3.22268	1048.91	FALSE	7
2022-09-14	12:22:19	0.728817	3.24192	1044.67	FALSE	7
2022-09-14	12:22:19	0.729275	3.24396	1052.16	FALSE	7
2022-09-14	12:22:20	0.729326	3.24419	1047.91	FALSE	7
2022-09-14	12:22:20	0.731361	3.25324	1055.41	FALSE	7
2022-09-14	12:22:20	0.726323	3.23083	1051.14	FALSE	7
2022-09-14	12:22:20	0.731616	3.25437	1058.67	FALSE	7
2022-09-14	12:22:21	0.726374	3.23106	1054.37	FALSE	7
2022-09-14	12:22:21	0.729478	3.24486	1061.91	FALSE	7
2022-09-14	12:22:21	0.725865	3.22879	1057.6	FALSE	7
2022-09-14	12:22:21	0.730496	3.24939	1065.16	FALSE	7
2022-09-14	12:22:22	0.731209	3.25256	1060.86	FALSE	7
2022-09-14	12:22:22	0.73014	3.24781	1068.41	FALSE	7
2022-09-14	12:22:22	0.736654	3.27678	1064.13	FALSE	7
2022-09-14	12:22:23	0.729631	3.24554	1071.65	FALSE	7
2022-09-14	12:22:23	0.724084	3.22087	1067.35	FALSE	7
2022-09-14	12:22:23	0.724746	3.22382	1074.88	FALSE	7
2022-09-14	12:22:23	0.726476	3.23151	1070.58	FALSE	7
2022-09-14	12:22:24	0.729835	3.24645	1078.12	FALSE	7
2022-09-14	12:22:24	0.734415	3.26682	1073.85	FALSE	7
2022-09-14	12:22:24	0.730547	3.24962	1081.37	FALSE	7
2022-09-14	12:22:24	0.725254	3.22607	1077.08	FALSE	7

## Sheet: MsPotato_star_202291412179 (2)
Date	Time	Lbs	Total force x time			**GoPro Fitting: 12:06
2022-09-14	12:17:09	-0.0251779	0	FALSE	0
2022-09-14	12:17:09	0.0322267	0.0322267	FALSE	0
2022-09-14	12:17:10	0.0262725	0.0584992	FALSE	0
2022-09-14	12:17:10	0.0857635	0.144263	FALSE	0
2022-09-14	12:17:10	0.137468	0.281731	FALSE	0
2022-09-14	12:17:10	0.271463	0.553194	FALSE	0
2022-09-14	12:17:11	0.243321	0.796515	FALSE	0
2022-09-14	12:17:11	0.226527	1.02304	FALSE	0
2022-09-14	12:17:11	0.153244	1.17629	FALSE	0
2022-09-14	12:17:11	0.153244	1.32953	FALSE	0
2022-09-14	12:17:12	0.211361	1.54089	FALSE	0
2022-09-14	12:17:12	0.185356	1.72625	FALSE	0
2022-09-14	12:17:12	0.248562	1.97481	FALSE	0
2022-09-14	12:17:12	0.158537	2.13335	FALSE	0
2022-09-14	12:17:13	0.216807	2.35015	FALSE	0
2022-09-14	12:17:13	0.159504	2.50966	FALSE	0
2022-09-14	12:17:13	0.183728	2.69338	FALSE	0
2022-09-14	12:17:13	0.220878	2.91426	FALSE	0
2022-09-14	12:17:14	0.2107	3.12496	FALSE	0
2022-09-14	12:17:14	0.176756	3.30172	FALSE	0
2022-09-14	12:17:14	0.296349	3.59807	FALSE	0
2022-09-14	12:17:15	0.203626	3.80169	FALSE	0
2022-09-14	12:17:15	0.21243	4.01412	FALSE	0
2022-09-14	12:17:15	0.178333	4.19246	FALSE	0
2022-09-14	12:17:15	0.161794	4.35425	FALSE	0
2022-09-14	12:17:16	0.190242	4.54449	FALSE	0
2022-09-14	12:17:16	0.168563	4.71306	FALSE	0
2022-09-14	12:17:16	0.162965	4.87602	FALSE	0
2022-09-14	12:17:16	0.208054	5.08407	FALSE	0
2022-09-14	12:17:17	0.190191	5.27427	FALSE	0
2022-09-14	12:17:17	0.174364	5.44863	FALSE	0
2022-09-14	12:17:17	0.2564	5.70503	FALSE	0
2022-09-14	12:17:17	0.430445	6.13547	FALSE	0
2022-09-14	12:17:18	0.325712	6.46119	FALSE	0
2022-09-14	12:17:18	0.192786	6.65397	FALSE	0
2022-09-14	12:17:18	0.238537	6.89251	FALSE	0
2022-09-14	12:17:19	0.228613	7.12112	FALSE	0
2022-09-14	12:17:19	0.196654	7.31778	FALSE	0
2022-09-14	12:17:19	0.204186	7.52196	FALSE	0
2022-09-14	12:17:19	0.195738	7.7177	FALSE	0
2022-09-14	12:17:20	0.187443	7.90514	FALSE	0
2022-09-14	12:17:20	0.20215	8.10729	FALSE	0
2022-09-14	12:17:20	0.182608	8.2899	FALSE	0
2022-09-14	12:17:20	0.199555	8.48946	FALSE	0
2022-09-14	12:17:21	0.215178	8.70463	FALSE	0
2022-09-14	12:17:21	0.203626	8.90826	FALSE	0
2022-09-14	12:17:21	0.153397	9.06166	FALSE	0
2022-09-14	12:17:21	0.138944	9.2006	FALSE	0
2022-09-14	12:17:22	0.00932595	9.20993	FALSE	0
2022-09-14	12:17:22	0.0639315	9.27386	FALSE	0
2022-09-14	12:17:22	0.551107	9.82497	FALSE	0
2022-09-14	12:17:23	0.494059	10.319	FALSE	0
2022-09-14	12:17:23	0.286527	10.6056	FALSE	0
2022-09-14	12:17:23	0.374669	10.9802	FALSE	0
2022-09-14	12:17:23	0.203015	11.1832	FALSE	0
2022-09-14	12:17:24	0.165102	11.3483	FALSE	0
2022-09-14	12:17:24	-0.13332	11.3483	FALSE	0
2022-09-14	12:17:24	-0.188028	11.3483	FALSE	0
2022-09-14	12:17:24	-0.126196	11.3483	FALSE	0
2022-09-14	12:17:25	-0.0346435	11.3483	FALSE	0
2022-09-14	12:17:25	-0.0640583	11.3483	FALSE	0
2022-09-14	12:17:25	-0.0792745	11.3483	FALSE	0
2022-09-14	12:17:25	0.0495803	11.3979	FALSE	0
2022-09-14	12:17:26	0.143219	11.5411	FALSE	0
2022-09-14	12:17:26	0.174262	11.7154	FALSE	0
2022-09-14	12:17:26	0.134975	11.8504	FALSE	0
2022-09-14	12:17:27	0.0690206	11.9194	FALSE	0
2022-09-14	12:17:27	-0.00894378	11.9194	FALSE	0
2022-09-14	12:17:27	0.112888	12.0323	FALSE	0
2022-09-14	12:17:27	-0.0129133	12.0323	FALSE	0
2022-09-14	12:17:28	0.124084	12.1564	FALSE	0
2022-09-14	12:17:28	-0.0157122	12.1564	FALSE	0
2022-09-14	12:17:28	0.124644	12.281	FALSE	0
2022-09-14	12:17:28	0.259199	12.5402	FALSE	0
2022-09-14	12:17:29	0.446832	12.987	FALSE	0
2022-09-14	12:17:29	0.321692	13.3087	FALSE	0
2022-09-14	12:17:29	0.238792	13.5475	FALSE	0
2022-09-14	12:17:29	0.207341	13.7549	FALSE	0
2022-09-14	12:17:30	0.247646	14.0025	FALSE	0
2022-09-14	12:17:30	0.0303946	14.0329	FALSE	0
2022-09-14	12:17:30	0.0644913	14.0974	FALSE	0
2022-09-14	12:17:31	0.127341	14.2247	FALSE	0
2022-09-14	12:17:31	0.297977	14.5227	FALSE	0
2022-09-14	12:17:31	0.487901	15.0106	FALSE	0
2022-09-14	12:17:31	0.400471	15.4111	FALSE	0
2022-09-14	12:17:32	0.406018	15.8171	FALSE	0
2022-09-14	12:17:32	0.219809	16.0369	FALSE	0
2022-09-14	12:17:32	0.241132	16.278	FALSE	0
2022-09-14	12:17:32	0.142201	16.4202	FALSE	0
2022-09-14	12:17:33	0.294415	16.7147	FALSE	0
2022-09-14	12:17:33	0.042812	16.7575	FALSE	0
2022-09-14	12:17:33	0.135229	16.8927	FALSE	0
2022-09-14	12:17:33	-0.000750381	16.8927	FALSE	0
2022-09-14	12:17:34	0.158792	17.0515	FALSE	0
2022-09-14	12:17:34	-0.233066	17.0515	FALSE	0
2022-09-14	12:17:34	-0.289605	17.0515	FALSE	0
2022-09-14	12:17:35	-0.285687	17.0515	FALSE	0
2022-09-14	12:17:35	-0.283448	17.0515	FALSE	0
2022-09-14	12:17:35	-0.310827	17.0515	FALSE	0
2022-09-14	12:17:35	-0.171132	17.0515	FALSE	0
2022-09-14	12:17:36	-0.248944	17.0515	FALSE	0
2022-09-14	12:17:36	-0.244872	17.0515	FALSE	0
2022-09-14	12:17:36	-0.233829	17.0515	FALSE	0
2022-09-14	12:17:36	-0.230928	17.0515	FALSE	0
2022-09-14	12:17:37	-0.18818	17.0515	FALSE	0
2022-09-14	12:17:37	-0.213117	17.0515	FALSE	0
2022-09-14	12:17:37	-0.32187	17.0515	FALSE	0
2022-09-14	12:17:38	-0.474847	17.0515	FALSE	0
2022-09-14	12:17:38	-0.688434	17.0515	FALSE	0
2022-09-14	12:17:38	-0.67505	17.0515	FALSE	0
2022-09-14	12:17:38	-0.598307	17.0515	FALSE	0
2022-09-14	12:17:39	-0.498918	17.0515	FALSE	0
2022-09-14	12:17:39	-0.55734	17.0515	FALSE	0
2022-09-14	12:17:39	-0.41729	17.0515	FALSE	0
2022-09-14	12:17:39	0.167239	17.2187	FALSE	0
2022-09-14	12:17:40	0.0648476	17.2836	FALSE	0
2022-09-14	12:17:40	0.263728	17.5473	FALSE	0
2022-09-14	12:17:40	0.166781	17.7141	FALSE	0
2022-09-14	12:17:40	0.221641	17.9357	FALSE	0
2022-09-14	12:17:41	0.126222	18.062	FALSE	0
2022-09-14	12:17:41	0.0758399	18.1378	FALSE	0
2022-09-14	12:17:41	0.170293	18.3081	FALSE	0
2022-09-14	12:17:42	0.14215	18.4502	FALSE	0
2022-09-14	12:17:42	0.218588	18.6688	FALSE	0
2022-09-14	12:17:42	0.0272903	18.6961	FALSE	0
2022-09-14	12:17:42	0.178384	18.8745	FALSE	0
2022-09-14	12:17:43	0.16958	19.0441	FALSE	0
2022-09-14	12:17:43	0.186171	19.2303	FALSE	0
2022-09-14	12:17:43	0.0739061	19.3042	FALSE	0
2022-09-14	12:17:43	0.174873	19.479	FALSE	0
2022-09-14	12:17:44	0.195942	19.675	FALSE	0
2022-09-14	12:17:44	0.118995	19.794	FALSE	0
2022-09-14	12:17:44	0.212074	20.006	FALSE	0
2022-09-14	12:17:44	0.736247	20.7423	FALSE	0
2022-09-14	12:17:45	1.32449	22.0668	FALSE	0
2022-09-14	12:17:45	1.90597	23.9727	FALSE	0
2022-09-14	12:17:45	0.937824	24.9106	FALSE	0
2022-09-14	12:17:46	1.20429	26.1149	FALSE	0
2022-09-14	12:17:46	1.65212	27.767	FALSE	0
2022-09-14	12:17:46	2.00464	29.7716	FALSE	0
2022-09-14	12:17:46	2.81263	32.5843	FALSE	0
2022-09-14	12:17:47	3.02413	35.6084	1	1
2022-09-14	12:17:47	3.32729	38.9357	1	2
2022-09-14	12:17:47	0.73131	39.667	FALSE	2
2022-09-14	12:17:47	0.756043	40.423	FALSE	2
2022-09-14	12:17:48	0.386171	40.8092	FALSE	2
2022-09-14	12:17:48	0.421031	41.2302	FALSE	2
2022-09-14	12:17:48	0.138537	41.3688	FALSE	2
2022-09-14	12:17:48	0.168715	41.5375	FALSE	2
2022-09-14	12:17:49	0.168664	41.7061	FALSE	2
2022-09-14	12:17:49	0.324593	42.0307	FALSE	2
2022-09-14	12:17:49	0.101845	42.1326	FALSE	2
2022-09-14	12:17:50	0.199758	42.3323	FALSE	2
2022-09-14	12:17:50	0.0253056	42.3576	FALSE	2
2022-09-14	12:17:50	0.155331	42.513	FALSE	2
2022-09-14	12:17:50	-0.0513356	42.513	FALSE	2
2022-09-14	12:17:51	0.0619468	42.5749	FALSE	2
2022-09-14	12:17:51	-0.0503687	42.5749	FALSE	2
2022-09-14	12:17:51	0.052074	42.627	FALSE	2
2022-09-14	12:17:51	-0.0924043	42.627	FALSE	2
2022-09-14	12:17:52	0.0746185	42.7016	FALSE	2
2022-09-14	12:17:52	0.0878501	42.7895	FALSE	2
2022-09-14	12:17:52	0.117418	42.9069	FALSE	2
2022-09-14	12:17:52	0.116858	43.0237	FALSE	2
2022-09-14	12:17:53	0.183473	43.2072	FALSE	2
2022-09-14	12:17:53	0.253601	43.4608	FALSE	2
2022-09-14	12:17:53	0.295534	43.7563	FALSE	2
2022-09-14	12:17:54	0.602455	44.3588	FALSE	2
2022-09-14	12:17:54	0.334109	44.6929	FALSE	2
2022-09-14	12:17:54	0.274975	44.9679	FALSE	2
2022-09-14	12:17:54	0.11584	45.0837	FALSE	2
2022-09-14	12:17:55	0.197316	45.281	FALSE	2
2022-09-14	12:17:55	0.179046	45.4601	FALSE	2
2022-09-14	12:17:55	0.58388	46.044	FALSE	2
2022-09-14	12:17:55	0.224746	46.2687	FALSE	2
2022-09-14	12:17:56	0.148664	46.4174	FALSE	2
2022-09-14	12:17:56	0.107596	46.525	FALSE	2
2022-09-14	12:17:56	0.24673	46.7717	FALSE	2
2022-09-14	12:17:56	0.114008	46.8857	FALSE	2
2022-09-14	12:17:57	0.257774	47.1435	FALSE	2
2022-09-14	12:17:57	0.260369	47.4039	FALSE	2
2022-09-14	12:17:57	0.0754327	47.4793	FALSE	2
2022-09-14	12:17:58	0.130853	47.6101	FALSE	2
2022-09-14	12:17:58	0.21014	47.8203	FALSE	2
2022-09-14	12:17:58	0.33472	48.155	FALSE	2
2022-09-14	12:17:58	0.0942114	48.2492	FALSE	2
2022-09-14	12:17:59	0.265356	48.5146	FALSE	2
2022-09-14	12:17:59	0.0572649	48.5718	FALSE	2
2022-09-14	12:17:59	0.317112	48.8889	FALSE	2
2022-09-14	12:17:59	0.610496	49.4994	FALSE	2
2022-09-14	12:18:00	1.85406	51.3535	FALSE	2
2022-09-14	12:18:00	5.65538	57.0089	1	3
2022-09-14	12:18:00	7.18556	64.1944	1	4
2022-09-14	12:18:00	3.20948	67.4039	1	5
2022-09-14	12:18:01	3.90703	71.311	1	6
2022-09-14	12:18:01	3.2624	74.5734	1	7
2022-09-14	12:18:01	2.54861	77.122	FALSE	7
2022-09-14	12:18:02	1.6023	78.7243	FALSE	7
2022-09-14	12:18:02	0.393906	79.1182	FALSE	7
2022-09-14	12:18:02	0.258741	79.3769	FALSE	7
2022-09-14	12:18:02	0.42612	79.803	FALSE	7
2022-09-14	12:18:03	0.498588	80.3016	FALSE	7
2022-09-14	12:18:03	-0.0674679	80.3016	FALSE	7
2022-09-14	12:18:03	-0.176883	80.3016	FALSE	7
2022-09-14	12:18:03	-0.383396	80.3016	FALSE	7
2022-09-14	12:18:04	-0.374694	80.3016	FALSE	7
2022-09-14	12:18:04	-0.279682	80.3016	FALSE	7
2022-09-14	12:18:04	-0.389961	80.3016	FALSE	7
2022-09-14	12:18:04	-0.325534	80.3016	FALSE	7
2022-09-14	12:18:05	-0.225076	80.3016	FALSE	7
2022-09-14	12:18:05	-0.0914883	80.3016	FALSE	7
2022-09-14	12:18:05	0.190496	80.4921	FALSE	7
2022-09-14	12:18:06	0.0866287	80.5787	FALSE	7
2022-09-14	12:18:06	0.328613	80.9074	FALSE	7
2022-09-14	12:18:06	0.345	81.2524	FALSE	7
2022-09-14	12:18:06	0.59869	81.851	FALSE	7
2022-09-14	12:18:07	0.281285	82.1323	FALSE	7
2022-09-14	12:18:07	0.785305	82.9176	FALSE	7
2022-09-14	12:18:07	0.510751	83.4284	FALSE	7
2022-09-14	12:18:07	0.643321	84.0717	FALSE	7
2022-09-14	12:18:08	0.364542	84.4363	FALSE	7
2022-09-14	12:18:08	0.603728	85.04	FALSE	7
2022-09-14	12:18:08	0.360216	85.4002	FALSE	7
2022-09-14	12:18:09	0.513652	85.9138	FALSE	7
2022-09-14	12:18:09	0.27757	86.1914	FALSE	7
2022-09-14	12:18:09	0.476298	86.6677	FALSE	7
2022-09-14	12:18:09	0.355585	87.0233	FALSE	7
2022-09-14	12:18:10	0.49355	87.5168	FALSE	7
2022-09-14	12:18:10	0.31813	87.835	FALSE	7
2022-09-14	12:18:10	1.0077	88.8427	FALSE	7
2022-09-14	12:18:10	0.31869	89.1614	FALSE	7
2022-09-14	12:18:11	1.3422	90.5036	FALSE	7
2022-09-14	12:18:11	0.204542	90.7081	FALSE	7
2022-09-14	12:18:11	1.61604	92.3242	FALSE	7
2022-09-14	12:18:11	0.645254	92.9694	FALSE	7
2022-09-14	12:18:12	2.52963	95.499	FALSE	7
2022-09-14	12:18:12	0.792328	96.2914	FALSE	7
2022-09-14	12:18:12	1.56597	97.8573	FALSE	7
2022-09-14	12:18:13	1.10531	98.9626	FALSE	7
2022-09-14	12:18:13	0.842506	99.8051	FALSE	7
2022-09-14	12:18:13	0.664186	100.469	FALSE	7
2022-09-14	12:18:13	0.363015	100.832	FALSE	7
2022-09-14	12:18:14	0.496145	101.328	FALSE	7
2022-09-14	12:18:14	0.318334	101.647	FALSE	7
2022-09-14	12:18:14	0.419962	102.067	FALSE	7
2022-09-14	12:18:14	0.349733	102.417	FALSE	7
2022-09-14	12:18:15	0.501743	102.918	FALSE	7
2022-09-14	12:18:15	0.292481	103.211	FALSE	7
2022-09-14	12:18:15	0.449886	103.661	FALSE	7
2022-09-14	12:18:15	0.266323	103.927	FALSE	7
2022-09-14	12:18:16	0.479707	104.407	FALSE	7
2022-09-14	12:18:16	0.338944	104.746	FALSE	7
2022-09-14	12:18:16	0.410445	105.156	FALSE	7
2022-09-14	12:18:17	0.322506	105.479	FALSE	7
2022-09-14	12:18:17	0.506577	105.985	FALSE	7
2022-09-14	12:18:17	0.967341	106.952	FALSE	7
2022-09-14	12:18:17	0.806323	107.759	FALSE	7
2022-09-14	12:18:18	0.829733	108.589	FALSE	7
2022-09-14	12:18:18	0.944186	109.533	FALSE	7
2022-09-14	12:18:18	0.902506	110.435	FALSE	7
2022-09-14	12:18:18	0.731819	111.167	FALSE	7
2022-09-14	12:18:19	0.410751	111.578	FALSE	7
2022-09-14	12:18:19	0.528308	112.106	FALSE	7
2022-09-14	12:18:19	0.249071	112.355	FALSE	7
2022-09-14	12:18:19	0.523015	112.878	FALSE	7
2022-09-14	12:18:20	0.347952	113.226	FALSE	7
2022-09-14	12:18:20	0.247646	113.474	FALSE	7
2022-09-14	12:18:20	-0.167671	113.474	FALSE	7
2022-09-14	12:18:21	-0.232252	113.474	FALSE	7
2022-09-14	12:18:21	-0.169554	113.474	FALSE	7
2022-09-14	12:18:21	-0.116781	113.474	FALSE	7
2022-09-14	12:18:21	-0.28874	113.474	FALSE	7
2022-09-14	12:18:22	-0.117341	113.474	FALSE	7
2022-09-14	12:18:22	-0.253269	113.474	FALSE	7
2022-09-14	12:18:22	-0.164211	113.474	FALSE	7
2022-09-14	12:18:22	-0.208944	113.474	FALSE	7
2022-09-14	12:18:23	-0.0481295	113.474	FALSE	7
2022-09-14	12:18:23	-0.189249	113.474	FALSE	7
2022-09-14	12:18:23	0.00545825	113.479	FALSE	7
2022-09-14	12:18:23	-0.0602415	113.479	FALSE	7
2022-09-14	12:18:24	0.117367	113.597	FALSE	7
2022-09-14	12:18:24	0.020471	113.617	FALSE	7
2022-09-14	12:18:24	0.288766	113.906	FALSE	7
2022-09-14	12:18:25	-0.0235494	113.906	FALSE	7
2022-09-14	12:18:25	0.0943131	114	FALSE	7
2022-09-14	12:18:25	-0.0955595	114	FALSE	7
2022-09-14	12:18:25	-0.142531	114	FALSE	7
2022-09-14	12:18:26	-0.477646	114	FALSE	7
2022-09-14	12:18:26	-0.592099	114	FALSE	7
2022-09-14	12:18:26	-0.162582	114	FALSE	7
2022-09-14	12:18:26	-0.108435	114	FALSE	7
2022-09-14	12:18:27	-0.00441451	114	FALSE	7
2022-09-14	12:18:27	0.325458	114.326	FALSE	7
2022-09-14	12:18:27	0.446883	114.773	FALSE	7
2022-09-14	12:18:27	0.367138	115.14	FALSE	7
2022-09-14	12:18:28	0.253295	115.393	FALSE	7
2022-09-14	12:18:28	0.428003	115.821	FALSE	7
2022-09-14	12:18:28	0.612735	116.434	FALSE	7
2022-09-14	12:18:29	0.373855	116.808	FALSE	7
2022-09-14	12:18:29	0.358893	117.166	FALSE	7
2022-09-14	12:18:29	0.238435	117.405	FALSE	7
2022-09-14	12:18:29	0.378791	117.784	FALSE	7
2022-09-14	12:18:30	0.362455	118.146	FALSE	7
2022-09-14	12:18:30	0.456807	118.603	FALSE	7
2022-09-14	12:18:30	0.429122	119.032	FALSE	7
2022-09-14	12:18:30	0.57528	119.607	FALSE	7
2022-09-14	12:18:31	0.721692	120.329	FALSE	7
2022-09-14	12:18:31	0.726781	121.056	FALSE	7
2022-09-14	12:18:31	0.723372	121.779	FALSE	7
2022-09-14	12:18:31	0.722049	122.501	FALSE	7
2022-09-14	12:18:32	0.726018	123.227	FALSE	7
2022-09-14	12:18:32	0.726425	123.954	FALSE	7
2022-09-14	12:18:32	0.734109	124.688	FALSE	7
2022-09-14	12:18:33	0.726323	125.414	FALSE	7
2022-09-14	12:18:33	0.731463	126.146	FALSE	7
2022-09-14	12:18:33	0.728562	126.874	FALSE	7
2022-09-14	12:18:33	0.730038	127.604	FALSE	7
2022-09-14	12:18:34	0.689682	128.294	FALSE	7
2022-09-14	12:18:34	0.269835	128.564	FALSE	7
2022-09-14	12:18:34	0.252277	128.816	FALSE	7
2022-09-14	12:18:34	0.278384	129.094	FALSE	7
2022-09-14	12:18:35	0.321489	129.416	FALSE	7
2022-09-14	12:18:35	0.348206	129.764	FALSE	7
2022-09-14	12:18:35	0.721743	130.486	FALSE	7
2022-09-14	12:18:35	1.44841	131.934	FALSE	7
2022-09-14	12:18:36	0.0149748	131.949	FALSE	7
2022-09-14	12:18:36	-0.1779	131.949	FALSE	7
2022-09-14	12:18:36	-0.14075	131.949	FALSE	7
2022-09-14	12:18:37	-0.0822771	131.949	FALSE	7
2022-09-14	12:18:37	0.212583	132.162	FALSE	7
2022-09-14	12:18:37	0.18388	132.346	FALSE	7
2022-09-14	12:18:37	0.335127	132.681	FALSE	7
2022-09-14	12:18:38	0.244746	132.925	FALSE	7
2022-09-14	12:18:38	0.293753	133.219	FALSE	7
2022-09-14	12:18:38	0.309479	133.529	FALSE	7
2022-09-14	12:18:38	0.281234	133.81	FALSE	7
2022-09-14	12:18:39	0.267188	134.077	FALSE	7
2022-09-14	12:18:39	0.365458	134.443	FALSE	7
2022-09-14	12:18:39	0.253499	134.696	FALSE	7
2022-09-14	12:18:40	0.24271	134.939	FALSE	7
2022-09-14	12:18:40	0.33014	135.269	FALSE	7
2022-09-14	12:18:40	0.464491	135.733	FALSE	7
2022-09-14	12:18:40	0.16897	135.902	FALSE	7
2022-09-14	12:18:41	0.408053	136.31	FALSE	7
2022-09-14	12:18:41	-0.545127	136.31	FALSE	7
2022-09-14	12:18:41	-0.355916	136.31	FALSE	7
2022-09-14	12:18:41	-0.735814	136.31	FALSE	7
2022-09-14	12:18:42	-0.642938	136.31	FALSE	7
2022-09-14	12:18:42	-0.670419	136.31	FALSE	7
2022-09-14	12:18:42	-0.639783	136.31	FALSE	7
2022-09-14	12:18:42	-0.663905	136.31	FALSE	7
2022-09-14	12:18:43	-0.687162	136.31	FALSE	7
2022-09-14	12:18:43	-0.869299	136.31	FALSE	7
2022-09-14	12:18:43	-0.876628	136.31	FALSE	7
2022-09-14	12:18:44	-1.30996	136.31	FALSE	7
2022-09-14	12:18:44	-2.18502	136.31	FALSE	7
2022-09-14	12:18:44	-2.14838	136.31	FALSE	7
2022-09-14	12:18:44	-2.14696	136.31	FALSE	7
2022-09-14	12:18:45	-2.07882	136.31	FALSE	7
2022-09-14	12:18:45	-2.07958	136.31	FALSE	7
2022-09-14	12:18:45	-1.8064	136.31	FALSE	7
2022-09-14	12:18:45	-1.81994	136.31	FALSE	7
2022-09-14	12:18:46	-1.68462	136.31	FALSE	7
2022-09-14	12:18:46	-1.61434	136.31	FALSE	7
2022-09-14	12:18:46	-1.42935	136.31	FALSE	7
2022-09-14	12:18:46	-1.38217	136.31	FALSE	7
2022-09-14	12:18:47	-1.28004	136.31	FALSE	7
2022-09-14	12:18:47	-1.22762	136.31	FALSE	7
2022-09-14	12:18:47	-1.1119	136.31	FALSE	7
2022-09-14	12:18:48	-1.1438	136.31	FALSE	7
2022-09-14	12:18:48	-1.0864	136.31	FALSE	7
2022-09-14	12:18:48	-1.08945	136.31	FALSE	7
2022-09-14	12:18:48	-1.00385	136.31	FALSE	7
2022-09-14	12:18:49	-1.08289	136.31	FALSE	7
2022-09-14	12:18:49	-0.937391	136.31	FALSE	7
2022-09-14	12:18:49	-1.00686	136.31	FALSE	7
2022-09-14	12:18:49	-0.992862	136.31	FALSE	7
2022-09-14	12:18:50	-1.18828	136.31	FALSE	7
2022-09-14	12:18:50	-1.2208	136.31	FALSE	7
2022-09-14	12:18:50	-1.24762	136.31	FALSE	7
2022-09-14	12:18:50	0.375026	136.685	FALSE	7
2022-09-14	12:18:51	0.267138	136.953	FALSE	7
2022-09-14	12:18:51	0.339249	137.292	FALSE	7
2022-09-14	12:18:51	0.329071	137.621	FALSE	7
2022-09-14	12:18:52	0.350191	137.971	FALSE	7
2022-09-14	12:18:52	0.380165	138.351	FALSE	7
2022-09-14	12:18:52	0.301845	138.653	FALSE	7
2022-09-14	12:18:52	0.425458	139.079	FALSE	7
2022-09-14	12:18:53	0.204593	139.283	FALSE	7
2022-09-14	12:18:53	0.392379	139.676	FALSE	7
2022-09-14	12:18:53	0.23472	139.91	FALSE	7
2022-09-14	12:18:53	0.713295	140.624	FALSE	7
2022-09-14	12:18:54	0.552074	141.176	FALSE	7
2022-09-14	12:18:54	0.510852	141.687	FALSE	7
2022-09-14	12:18:54	0.418486	142.105	FALSE	7
2022-09-14	12:18:54	0.423779	142.529	FALSE	7
2022-09-14	12:18:55	0.15243	142.681	FALSE	7
2022-09-14	12:18:55	-0.208791	142.681	FALSE	7
2022-09-14	12:18:55	-0.262226	142.681	FALSE	7
2022-09-14	12:18:56	0.0297331	142.711	FALSE	7
2022-09-14	12:18:56	-0.0244654	142.711	FALSE	7
2022-09-14	12:18:56	0.120827	142.832	FALSE	7
2022-09-14	12:18:56	0.276451	143.108	FALSE	7
2022-09-14	12:18:57	0.444796	143.553	FALSE	7
2022-09-14	12:18:57	0.154059	143.707	FALSE	7
2022-09-14	12:18:57	0.31701	144.024	FALSE	7
2022-09-14	12:18:57	0.250445	144.275	FALSE	7
2022-09-14	12:18:58	0.382048	144.657	FALSE	7
2022-09-14	12:18:58	0.293244	144.95	FALSE	7
2022-09-14	12:18:58	0.397519	145.347	FALSE	7
2022-09-14	12:18:58	0.287901	145.635	FALSE	7
2022-09-14	12:18:59	0.423728	146.059	FALSE	7
2022-09-14	12:18:59	0.33645	146.395	FALSE	7
2022-09-14	12:18:59	0.425662	146.821	FALSE	7
2022-09-14	12:19:00	0.349936	147.171	FALSE	7
2022-09-14	12:19:00	0.399657	147.571	FALSE	7
2022-09-14	12:19:00	0.411056	147.982	FALSE	7
2022-09-14	12:19:00	0.338537	148.32	FALSE	7
2022-09-14	12:19:01	0.406832	148.727	FALSE	7
2022-09-14	12:19:01	0.290598	149.018	FALSE	7
2022-09-14	12:19:01	0.441031	149.459	FALSE	7
2022-09-14	12:19:01	0.264593	149.723	FALSE	7
2022-09-14	12:19:02	0.454975	150.178	FALSE	7
2022-09-14	12:19:02	0.26383	150.442	FALSE	7
2022-09-14	12:19:02	0.47584	150.918	FALSE	7
2022-09-14	12:19:02	0.255636	151.174	FALSE	7
2022-09-14	12:19:03	0.476094	151.65	FALSE	7
2022-09-14	12:19:03	0.288206	151.938	FALSE	7
2022-09-14	12:19:03	0.525967	152.464	FALSE	7
2022-09-14	12:19:04	0.242659	152.707	FALSE	7
2022-09-14	12:19:04	0.512685	153.219	FALSE	7
2022-09-14	12:19:04	0.351921	153.571	FALSE	7
2022-09-14	12:19:04	0.522964	154.094	FALSE	7
2022-09-14	12:19:05	0.321438	154.416	FALSE	7
2022-09-14	12:19:05	0.447647	154.863	FALSE	7
2022-09-14	12:19:05	0.273193	155.136	FALSE	7
2022-09-14	12:19:05	0.532532	155.669	FALSE	7
2022-09-14	12:19:06	0.258537	155.927	FALSE	7
2022-09-14	12:19:06	0.484237	156.412	FALSE	7
2022-09-14	12:19:06	0.264593	156.676	FALSE	7
2022-09-14	12:19:06	0.52327	157.2	FALSE	7
2022-09-14	12:19:07	0.292735	157.492	FALSE	7
2022-09-14	12:19:07	0.491463	157.984	FALSE	7
2022-09-14	12:19:07	0.333346	158.317	FALSE	7
2022-09-14	12:19:08	0.486272	158.803	FALSE	7
2022-09-14	12:19:08	0.426832	159.23	FALSE	7
2022-09-14	12:19:08	0.438181	159.668	FALSE	7
2022-09-14	12:19:08	0.401285	160.07	FALSE	7
2022-09-14	12:19:09	0.445255	160.515	FALSE	7
2022-09-14	12:19:09	0.422965	160.938	FALSE	7
2022-09-14	12:19:09	0.408715	161.347	FALSE	7
2022-09-14	12:19:09	0.39187	161.738	FALSE	7
2022-09-14	12:19:10	0.394211	162.133	FALSE	7
2022-09-14	12:19:10	0.396705	162.529	FALSE	7
2022-09-14	12:19:10	0.403728	162.933	FALSE	7
2022-09-14	12:19:11	0.32841	163.262	FALSE	7
2022-09-14	12:19:11	0.3764	163.638	FALSE	7
2022-09-14	12:19:11	0.327901	163.966	FALSE	7
2022-09-14	12:19:11	0.356349	164.322	FALSE	7
2022-09-14	12:19:12	0.481997	164.804	FALSE	7
2022-09-14	12:19:12	0.291718	165.096	FALSE	7
2022-09-14	12:19:12	0.500063	165.596	FALSE	7
2022-09-14	12:19:12	0.297367	165.893	FALSE	7
2022-09-14	12:19:13	0.476959	166.37	FALSE	7
2022-09-14	12:19:13	0.294822	166.665	FALSE	7
2022-09-14	12:19:13	0.4907	167.156	FALSE	7
2022-09-14	12:19:13	0.28154	167.437	FALSE	7
2022-09-14	12:19:14	0.476145	167.913	FALSE	7
2022-09-14	12:19:14	0.25355	168.167	FALSE	7
2022-09-14	12:19:14	0.480318	168.647	FALSE	7
2022-09-14	12:19:15	0.263677	168.911	FALSE	7
2022-09-14	12:19:15	0.483066	169.394	FALSE	7
2022-09-14	12:19:15	0.202303	169.596	FALSE	7
2022-09-14	12:19:15	0.455942	170.052	FALSE	7
2022-09-14	12:19:16	0.210751	170.263	FALSE	7
2022-09-14	12:19:16	0.537468	170.801	FALSE	7
2022-09-14	12:19:16	0.245	171.046	FALSE	7
2022-09-14	12:19:16	0.537519	171.583	FALSE	7
2022-09-14	12:19:17	0.145356	171.728	FALSE	7
2022-09-14	12:19:17	0.210445	171.939	FALSE	7
2022-09-14	12:19:17	0.491616	172.43	FALSE	7
2022-09-14	12:19:17	0.781997	173.212	FALSE	7
2022-09-14	12:19:18	0.714211	173.927	FALSE	7
2022-09-14	12:19:18	0.483422	174.41	FALSE	7
2022-09-14	12:19:18	0.534873	174.945	FALSE	7
2022-09-14	12:19:19	0.251361	175.196	FALSE	7
2022-09-14	12:19:19	0.226323	175.423	FALSE	7
2022-09-14	12:19:19	0.127545	175.55	FALSE	7
2022-09-14	12:19:19	-0.0280786	175.55	FALSE	7
2022-09-14	12:19:20	-0.391081	175.55	FALSE	7
2022-09-14	12:19:20	-0.421056	175.55	FALSE	7
2022-09-14	12:19:20	-0.536475	175.55	FALSE	7
2022-09-14	12:19:20	-0.330318	175.55	FALSE	7
2022-09-14	12:19:21	-0.139427	175.55	FALSE	7
2022-09-14	12:19:21	0.174771	175.725	FALSE	7
2022-09-14	12:19:21	0.116552	175.842	FALSE	7
2022-09-14	12:19:21	0.266883	176.108	FALSE	7
2022-09-14	12:19:22	0.0448984	176.153	FALSE	7
2022-09-14	12:19:22	0.279453	176.433	FALSE	7
2022-09-14	12:19:22	0.339657	176.772	FALSE	7
2022-09-14	12:19:23	0.395026	177.167	FALSE	7
2022-09-14	12:19:23	0.26668	177.434	FALSE	7
2022-09-14	12:19:23	0.45813	177.892	FALSE	7
2022-09-14	12:19:23	0.290191	178.182	FALSE	7
2022-09-14	12:19:24	0.460929	178.643	FALSE	7
2022-09-14	12:19:24	0.236043	178.879	FALSE	7
2022-09-14	12:19:24	0.431921	179.311	FALSE	7
2022-09-14	12:19:24	0.304644	179.616	FALSE	7
2022-09-14	12:19:25	0.470191	180.086	FALSE	7
2022-09-14	12:19:25	0.268817	180.355	FALSE	7
2022-09-14	12:19:25	0.441234	180.796	FALSE	7
2022-09-14	12:19:25	0.269173	181.065	FALSE	7
2022-09-14	12:19:26	0.432735	181.498	FALSE	7
2022-09-14	12:19:26	0.223677	181.722	FALSE	7
2022-09-14	12:19:26	0.440674	182.163	FALSE	7
2022-09-14	12:19:27	0.289122	182.452	FALSE	7
2022-09-14	12:19:27	0.470344	182.922	FALSE	7
2022-09-14	12:19:27	0.261285	183.183	FALSE	7
2022-09-14	12:19:27	0.394161	183.577	FALSE	7
2022-09-14	12:19:28	0.262405	183.84	FALSE	7
2022-09-14	12:19:28	0.416399	184.256	FALSE	7
2022-09-14	12:19:28	0.333041	184.589	FALSE	7
2022-09-14	12:19:28	0.334262	184.924	FALSE	7
2022-09-14	12:19:29	0.339351	185.263	FALSE	7
2022-09-14	12:19:29	0.303677	185.567	FALSE	7
2022-09-14	12:19:29	0.386476	185.953	FALSE	7
2022-09-14	12:19:29	0.346781	186.3	FALSE	7
2022-09-14	12:19:30	0.412532	186.712	FALSE	7
2022-09-14	12:19:30	0.310496	187.023	FALSE	7
2022-09-14	12:19:30	0.504491	187.527	FALSE	7
2022-09-14	12:19:31	0.339199	187.867	FALSE	7
2022-09-14	12:19:31	0.411921	188.278	FALSE	7
2022-09-14	12:19:31	0.405764	188.684	FALSE	7
2022-09-14	12:19:31	0.374822	189.059	FALSE	7
2022-09-14	12:19:32	0.382048	189.441	FALSE	7
2022-09-14	12:19:32	0.319606	189.761	FALSE	7
2022-09-14	12:19:32	0.487952	190.249	FALSE	7
2022-09-14	12:19:32	0.430954	190.68	FALSE	7
2022-09-14	12:19:33	0.420318	191.1	FALSE	7
2022-09-14	12:19:33	0.384695	191.485	FALSE	7
2022-09-14	12:19:33	0.348359	191.833	FALSE	7
2022-09-14	12:19:33	0.345102	192.178	FALSE	7
2022-09-14	12:19:34	0.34556	192.524	FALSE	7
2022-09-14	12:19:34	0.366272	192.89	FALSE	7
2022-09-14	12:19:34	0.291361	193.181	FALSE	7
2022-09-14	12:19:35	-0.716475	193.181	FALSE	7
2022-09-14	12:19:35	0.425865	193.607	FALSE	7
2022-09-14	12:19:35	0.404389	194.012	FALSE	7
2022-09-14	12:19:35	0.381082	194.393	FALSE	7
2022-09-14	12:19:36	0.343372	194.736	FALSE	7
2022-09-14	12:19:36	0.359809	195.096	FALSE	7
2022-09-14	12:19:36	0.638333	195.734	FALSE	7
2022-09-14	12:19:36	0.00459311	195.739	FALSE	7
2022-09-14	12:19:37	0.317519	196.056	FALSE	7
2022-09-14	12:19:37	0.306018	196.362	FALSE	7
2022-09-14	12:19:37	0.308206	196.67	FALSE	7
2022-09-14	12:19:37	0.301947	196.972	FALSE	7
2022-09-14	12:19:38	0.300318	197.273	FALSE	7
2022-09-14	12:19:38	0.277214	197.55	FALSE	7
2022-09-14	12:19:38	0.652226	198.202	FALSE	7
2022-09-14	12:19:39	0.730751	198.933	FALSE	7
2022-09-14	12:19:39	-0.504719	198.933	FALSE	7
2022-09-14	12:19:39	0.528206	199.461	FALSE	7
2022-09-14	12:19:39	0.730496	200.192	FALSE	7
2022-09-14	12:19:40	0.728919	200.921	FALSE	7
2022-09-14	12:19:40	0.728613	201.649	FALSE	7
2022-09-14	12:19:40	0.730038	202.379	FALSE	7
2022-09-14	12:19:40	0.724033	203.103	FALSE	7
2022-09-14	12:19:41	0.72897	203.832	FALSE	7
2022-09-14	12:19:41	0.726018	204.558	FALSE	7
2022-09-14	12:19:41	0.725865	205.284	FALSE	7
2022-09-14	12:19:41	0.731565	206.016	FALSE	7
2022-09-14	12:19:42	0.732532	206.748	FALSE	7
2022-09-14	12:19:42	0.730343	207.478	FALSE	7
2022-09-14	12:19:42	0.732786	208.211	FALSE	7
2022-09-14	12:19:43	0.71014	208.921	FALSE	7
2022-09-14	12:19:43	0.726883	209.648	FALSE	7
2022-09-14	12:19:43	-0.185687	209.648	FALSE	7
2022-09-14	12:19:43	0.719249	210.368	FALSE	7
2022-09-14	12:19:44	0.726476	211.094	FALSE	7
2022-09-14	12:19:44	0.726883	211.821	FALSE	7
2022-09-14	12:19:44	0.725458	212.546	FALSE	7
2022-09-14	12:19:44	0.722862	213.269	FALSE	7
2022-09-14	12:19:45	0.720674	213.99	FALSE	7
2022-09-14	12:19:45	0.734059	214.724	FALSE	7
2022-09-14	12:19:45	0.728512	215.452	FALSE	7
2022-09-14	12:19:46	0.722099	216.175	FALSE	7
2022-09-14	12:19:46	0.559911	216.734	FALSE	7
2022-09-14	12:19:46	-0.774338	216.734	FALSE	7
2022-09-14	12:19:46	-0.828485	216.734	FALSE	7
2022-09-14	12:19:47	-0.860495	216.734	FALSE	7
2022-09-14	12:19:47	-0.954439	216.734	FALSE	7
2022-09-14	12:19:47	-0.968638	216.734	FALSE	7
2022-09-14	12:19:47	-1.03434	216.734	FALSE	7
2022-09-14	12:19:48	-1.02976	216.734	FALSE	7
2022-09-14	12:19:48	-1.05179	216.734	FALSE	7
2022-09-14	12:19:48	-1.36543	216.734	FALSE	7
2022-09-14	12:19:48	-1.56681	216.734	FALSE	7
2022-09-14	12:19:49	-1.53917	216.734	FALSE	7
2022-09-14	12:19:49	-1.48894	216.734	FALSE	7
2022-09-14	12:19:49	-1.42156	216.734	FALSE	7
2022-09-14	12:19:50	-1.47658	216.734	FALSE	7
2022-09-14	12:19:50	-1.34599	216.734	FALSE	7
2022-09-14	12:19:50	-1.42228	216.734	FALSE	7
2022-09-14	12:19:50	-1.35571	216.734	FALSE	7
2022-09-14	12:19:51	-1.36609	216.734	FALSE	7
2022-09-14	12:19:51	-1.05225	216.734	FALSE	7
2022-09-14	12:19:51	-0.814083	216.734	FALSE	7
2022-09-14	12:19:51	-0.169758	216.734	FALSE	7
2022-09-14	12:19:52	-0.00100484	216.734	FALSE	7
2022-09-14	12:19:52	0.165102	216.9	FALSE	7
2022-09-14	12:19:52	0.189886	217.089	FALSE	7
2022-09-14	12:19:52	0.121285	217.211	FALSE	7
2022-09-14	12:19:53	0.39187	217.603	FALSE	7
2022-09-14	12:19:53	0.697417	218.3	FALSE	7
2022-09-14	12:19:53	0.725102	219.025	FALSE	7
2022-09-14	12:19:54	0.730903	219.756	FALSE	7
2022-09-14	12:19:54	0.726272	220.482	FALSE	7
2022-09-14	12:19:54	0.730903	221.213	FALSE	7
2022-09-14	12:19:54	0.723779	221.937	FALSE	7
2022-09-14	12:19:55	0.72327	222.66	FALSE	7
2022-09-14	12:19:55	0.340216	223	FALSE	7
2022-09-14	12:19:55	0.728054	223.729	FALSE	7
2022-09-14	12:19:55	0.727952	224.457	FALSE	7
2022-09-14	12:19:56	0.726425	225.183	FALSE	7
2022-09-14	12:19:56	0.736603	225.92	FALSE	7
2022-09-14	12:19:56	0.726883	226.646	FALSE	7
2022-09-14	12:19:56	0.728003	227.374	FALSE	7
2022-09-14	12:19:57	0.727392	228.102	FALSE	7
2022-09-14	12:19:57	0.728817	228.831	FALSE	7
2022-09-14	12:19:57	0.732634	229.563	FALSE	7
2022-09-14	12:19:58	0.719707	230.283	FALSE	7
2022-09-14	12:19:58	0.576349	230.859	FALSE	7
2022-09-14	12:19:58	0.722761	231.582	FALSE	7
2022-09-14	12:19:58	0.728206	232.31	FALSE	7
2022-09-14	12:19:59	0.72388	233.034	FALSE	7
2022-09-14	12:19:59	0.724949	233.759	FALSE	7
2022-09-14	12:19:59	0.734924	234.494	FALSE	7
2022-09-14	12:19:59	0.687697	235.182	FALSE	7
2022-09-14	12:20:00	-0.413676	235.182	FALSE	7
2022-09-14	12:20:00	0.471718	235.653	FALSE	7
2022-09-14	12:20:00	0.305204	235.959	FALSE	7
2022-09-14	12:20:00	0.638639	236.597	FALSE	7
2022-09-14	12:20:01	0.721591	237.319	FALSE	7
2022-09-14	12:20:01	0.734517	238.053	FALSE	7
2022-09-14	12:20:01	0.728104	238.782	FALSE	7
2022-09-14	12:20:02	0.727646	239.509	FALSE	7
2022-09-14	12:20:02	0.72444	240.234	FALSE	7
2022-09-14	12:20:02	0.729428	240.963	FALSE	7
2022-09-14	12:20:02	0.722761	241.686	FALSE	7
2022-09-14	12:20:03	0.732786	242.419	FALSE	7
2022-09-14	12:20:03	0.729631	243.148	FALSE	7
2022-09-14	12:20:03	0.725305	243.874	FALSE	7
2022-09-14	12:20:03	0.721845	244.595	FALSE	7
2022-09-14	12:20:04	0.681437	245.277	FALSE	7
2022-09-14	12:20:04	0.726985	246.004	FALSE	7
2022-09-14	12:20:04	0.727697	246.731	FALSE	7
2022-09-14	12:20:04	0.729224	247.461	FALSE	7
2022-09-14	12:20:05	0.726679	248.187	FALSE	7
2022-09-14	12:20:05	0.725102	248.912	FALSE	7
2022-09-14	12:20:05	0.72215	249.635	FALSE	7
2022-09-14	12:20:06	0.732786	250.367	FALSE	7
2022-09-14	12:20:06	0.730852	251.098	FALSE	7
2022-09-14	12:20:06	0.726272	251.825	FALSE	7
2022-09-14	12:20:06	0.729224	252.554	FALSE	7
2022-09-14	12:20:07	0.727239	253.281	FALSE	7
2022-09-14	12:20:07	0.724695	254.006	FALSE	7
2022-09-14	12:20:07	0.734262	254.74	FALSE	7
2022-09-14	12:20:07	0.730293	255.47	FALSE	7
2022-09-14	12:20:08	0.723982	256.194	FALSE	7
2022-09-14	12:20:08	0.732939	256.927	FALSE	7
2022-09-14	12:20:08	0.723372	257.651	FALSE	7
2022-09-14	12:20:08	0.734109	258.385	FALSE	7
2022-09-14	12:20:09	0.729224	259.114	FALSE	7
2022-09-14	12:20:09	0.731005	259.845	FALSE	7
2022-09-14	12:20:09	0.724338	260.569	FALSE	7
2022-09-14	12:20:10	0.729377	261.299	FALSE	7
2022-09-14	12:20:10	0.725967	262.025	FALSE	7
2022-09-14	12:20:10	0.729733	262.754	FALSE	7
2022-09-14	12:20:10	0.729071	263.483	FALSE	7
2022-09-14	12:20:11	0.726578	264.21	FALSE	7
2022-09-14	12:20:11	0.724389	264.934	FALSE	7
2022-09-14	12:20:11	0.720572	265.655	FALSE	7
2022-09-14	12:20:11	0.730242	266.385	FALSE	7
2022-09-14	12:20:12	0.72556	267.111	FALSE	7
2022-09-14	12:20:12	0.727239	267.838	FALSE	7
2022-09-14	12:20:12	0.731412	268.569	FALSE	7
2022-09-14	12:20:12	0.734415	269.304	FALSE	7
2022-09-14	12:20:13	0.732939	270.037	FALSE	7
2022-09-14	12:20:13	0.727137	270.764	FALSE	7
2022-09-14	12:20:13	0.732481	271.496	FALSE	7
2022-09-14	12:20:14	0.732888	272.229	FALSE	7
2022-09-14	12:20:14	0.729173	272.958	FALSE	7
2022-09-14	12:20:14	0.724847	273.683	FALSE	7
2022-09-14	12:20:14	0.728206	274.411	FALSE	7
2022-09-14	12:20:15	0.728359	275.14	FALSE	7
2022-09-14	12:20:15	0.727799	275.868	FALSE	7
2022-09-14	12:20:15	0.72556	276.593	FALSE	7
2022-09-14	12:20:15	0.733092	277.326	FALSE	7
2022-09-14	12:20:16	0.739351	278.066	FALSE	7
2022-09-14	12:20:16	0.731819	278.797	FALSE	7
2022-09-14	12:20:16	0.720827	279.518	FALSE	7
2022-09-14	12:20:16	0.728715	280.247	FALSE	7
2022-09-14	12:20:17	0.72103	280.968	FALSE	7
2022-09-14	12:20:17	0.727799	281.696	FALSE	7
2022-09-14	12:20:17	0.724593	282.42	FALSE	7
2022-09-14	12:20:18	0.729682	283.15	FALSE	7
2022-09-14	12:20:18	0.725916	283.876	FALSE	7
2022-09-14	12:20:18	0.725611	284.602	FALSE	7
2022-09-14	12:20:18	0.726018	285.328	FALSE	7
2022-09-14	12:20:19	0.724389	286.052	FALSE	7
2022-09-14	12:20:19	0.730089	286.782	FALSE	7
2022-09-14	12:20:19	0.730598	287.513	FALSE	7
2022-09-14	12:20:19	0.72729	288.24	FALSE	7
2022-09-14	12:20:20	0.72612	288.966	FALSE	7
2022-09-14	12:20:20	0.723931	289.69	FALSE	7
2022-09-14	12:20:20	0.72612	290.416	FALSE	7
2022-09-14	12:20:20	0.731107	291.147	FALSE	7
2022-09-14	12:20:21	0.731565	291.879	FALSE	7
2022-09-14	12:20:21	0.726018	292.605	FALSE	7
2022-09-14	12:20:21	0.723473	293.328	FALSE	7
2022-09-14	12:20:22	0.733041	294.061	FALSE	7
2022-09-14	12:20:22	0.724491	294.786	FALSE	7
2022-09-14	12:20:22	0.723779	295.51	FALSE	7
2022-09-14	12:20:22	0.722862	296.232	FALSE	7
2022-09-14	12:20:23	0.72785	296.96	FALSE	7
2022-09-14	12:20:23	0.725509	297.686	FALSE	7
2022-09-14	12:20:23	0.724186	298.41	FALSE	7
2022-09-14	12:20:23	0.728003	299.138	FALSE	7
2022-09-14	12:20:24	0.726985	299.865	FALSE	7
2022-09-14	12:20:24	0.727239	300.592	FALSE	7
2022-09-14	12:20:24	0.719656	301.312	FALSE	7
2022-09-14	12:20:25	0.733804	302.046	FALSE	7
2022-09-14	12:20:25	0.724338	302.77	FALSE	7
2022-09-14	12:20:25	0.727036	303.497	FALSE	7
2022-09-14	12:20:25	0.72612	304.223	FALSE	7
2022-09-14	12:20:26	0.72388	304.947	FALSE	7
2022-09-14	12:20:26	0.73243	305.68	FALSE	7
2022-09-14	12:20:26	0.725204	306.405	FALSE	7
2022-09-14	12:20:26	0.729733	307.134	FALSE	7
2022-09-14	12:20:27	0.728308	307.863	FALSE	7
2022-09-14	12:20:27	0.729733	308.592	FALSE	7
2022-09-14	12:20:27	0.728308	309.321	FALSE	7
2022-09-14	12:20:27	0.726679	310.047	FALSE	7
2022-09-14	12:20:28	0.727188	310.775	FALSE	7
2022-09-14	12:20:28	0.727494	311.502	FALSE	7
2022-09-14	12:20:28	0.217112	311.719	FALSE	7
2022-09-14	12:20:29	0.0486644	311.768	FALSE	7
2022-09-14	12:20:29	0.21187	311.98	FALSE	7
2022-09-14	12:20:29	0.00372797	311.984	FALSE	7
2022-09-14	12:20:29	0.0860689	312.07	FALSE	7
2022-09-14	12:20:30	0.0319214	312.102	FALSE	7
2022-09-14	12:20:30	0.0438806	312.145	FALSE	7
2022-09-14	12:20:30	0.0815905	312.227	FALSE	7
2022-09-14	12:20:30	0.0338552	312.261	FALSE	7
2022-09-14	12:20:31	0.0712089	312.332	FALSE	7
2022-09-14	12:20:31	0.705611	313.038	FALSE	7
2022-09-14	12:20:31	0.72271	313.76	FALSE	7
2022-09-14	12:20:31	0.726679	314.487	FALSE	7
2022-09-14	12:20:32	0.727545	315.215	FALSE	7
2022-09-14	12:20:32	0.722659	315.937	FALSE	7
2022-09-14	12:20:32	0.726272	316.664	FALSE	7
2022-09-14	12:20:33	0.73187	317.395	FALSE	7
2022-09-14	12:20:33	0.725153	318.121	FALSE	7
2022-09-14	12:20:33	0.722303	318.843	FALSE	7
2022-09-14	12:20:33	0.72673	319.57	FALSE	7
2022-09-14	12:20:34	0.722862	320.292	FALSE	7
2022-09-14	12:20:34	0.736043	321.029	FALSE	7
2022-09-14	12:20:34	0.724898	321.753	FALSE	7
2022-09-14	12:20:34	0.728512	322.482	FALSE	7
2022-09-14	12:20:35	0.723066	323.205	FALSE	7
2022-09-14	12:20:35	0.721641	323.927	FALSE	7
2022-09-14	12:20:35	0.727799	324.654	FALSE	7
2022-09-14	12:20:35	0.728919	325.383	FALSE	7
2022-09-14	12:20:36	0.736501	326.12	FALSE	7
2022-09-14	12:20:36	0.727748	326.848	FALSE	7
2022-09-14	12:20:36	0.727137	327.575	FALSE	7
2022-09-14	12:20:37	0.72958	328.304	FALSE	7
2022-09-14	12:20:37	0.720114	329.024	FALSE	7
2022-09-14	12:20:37	0.72383	329.748	FALSE	7
2022-09-14	12:20:37	0.725814	330.474	FALSE	7
2022-09-14	12:20:38	0.727545	331.202	FALSE	7
2022-09-14	12:20:38	0.72897	331.931	FALSE	7
2022-09-14	12:20:38	0.724338	332.655	FALSE	7
2022-09-14	12:20:38	0.730394	333.385	FALSE	7
2022-09-14	12:20:39	0.727697	334.113	FALSE	7
2022-09-14	12:20:39	0.729122	334.842	FALSE	7
2022-09-14	12:20:39	0.721845	335.564	FALSE	7
2022-09-14	12:20:39	0.72617	336.29	FALSE	7
2022-09-14	12:20:40	0.726679	337.017	FALSE	7
2022-09-14	12:20:40	0.725356	337.742	FALSE	7
2022-09-14	12:20:40	0.725356	338.468	FALSE	7
2022-09-14	12:20:41	0.656552	339.124	FALSE	7
2022-09-14	12:20:41	0.635331	339.759	FALSE	7
2022-09-14	12:20:41	0.726374	340.486	FALSE	7
2022-09-14	12:20:41	-0.217544	340.486	FALSE	7
2022-09-14	12:20:42	0.350344	340.836	FALSE	7
2022-09-14	12:20:42	0.398944	341.235	FALSE	7
2022-09-14	12:20:42	0.458028	341.693	FALSE	7
2022-09-14	12:20:42	0.396909	342.09	FALSE	7
2022-09-14	12:20:43	0.412634	342.503	FALSE	7
2022-09-14	12:20:43	0.43411	342.937	FALSE	7
2022-09-14	12:20:43	0.373092	343.31	FALSE	7
2022-09-14	12:20:43	0.38612	343.696	FALSE	7
2022-09-14	12:20:44	0.388512	344.084	FALSE	7
2022-09-14	12:20:44	0.383321	344.468	FALSE	7
2022-09-14	12:20:44	0.378079	344.846	FALSE	7
2022-09-14	12:20:45	0.383881	345.23	FALSE	7
2022-09-14	12:20:45	0.380369	345.61	FALSE	7
2022-09-14	12:20:45	0.376654	345.987	FALSE	7
2022-09-14	12:20:45	0.37986	346.367	FALSE	7
2022-09-14	12:20:46	0.38215	346.749	FALSE	7
2022-09-14	12:20:46	0.382405	347.131	FALSE	7
2022-09-14	12:20:46	0.382099	347.513	FALSE	7
2022-09-14	12:20:46	0.382405	347.896	FALSE	7
2022-09-14	12:20:47	0.387901	348.284	FALSE	7
2022-09-14	12:20:47	0.385153	348.669	FALSE	7
2022-09-14	12:20:47	0.394313	349.063	FALSE	7
2022-09-14	12:20:47	0.383982	349.447	FALSE	7
2022-09-14	12:20:48	0.379758	349.827	FALSE	7
2022-09-14	12:20:48	0.386781	350.214	FALSE	7
2022-09-14	12:20:48	0.385051	350.599	FALSE	7
2022-09-14	12:20:49	0.388512	350.987	FALSE	7
2022-09-14	12:20:49	0.389275	351.376	FALSE	7
2022-09-14	12:20:49	0.388003	351.764	FALSE	7
2022-09-14	12:20:49	0.391565	352.156	FALSE	7
2022-09-14	12:20:50	0.391769	352.548	FALSE	7
2022-09-14	12:20:50	0.393855	352.942	FALSE	7
2022-09-14	12:20:50	0.394618	353.336	FALSE	7
2022-09-14	12:20:50	0.392176	353.728	FALSE	7
2022-09-14	12:20:51	0.389733	354.118	FALSE	7
2022-09-14	12:20:51	0.388461	354.507	FALSE	7
2022-09-14	12:20:51	0.386323	354.893	FALSE	7
2022-09-14	12:20:51	0.388868	355.282	FALSE	7
2022-09-14	12:20:52	0.391463	355.673	FALSE	7
2022-09-14	12:20:52	0.390649	356.064	FALSE	7
2022-09-14	12:20:52	0.394109	356.458	FALSE	7
2022-09-14	12:20:53	0.390852	356.849	FALSE	7
2022-09-14	12:20:53	0.395127	357.244	FALSE	7
2022-09-14	12:20:53	0.395585	357.64	FALSE	7
2022-09-14	12:20:53	0.39757	358.037	FALSE	7
2022-09-14	12:20:54	0.397163	358.434	FALSE	7
2022-09-14	12:20:54	0.395942	358.83	FALSE	7
2022-09-14	12:20:54	0.395484	359.226	FALSE	7
2022-09-14	12:20:54	0.398995	359.625	FALSE	7
2022-09-14	12:20:55	0.399199	360.024	FALSE	7
2022-09-14	12:20:55	0.397672	360.422	FALSE	7
2022-09-14	12:20:55	0.393601	360.815	FALSE	7
2022-09-14	12:20:55	0.396807	361.212	FALSE	7
2022-09-14	12:20:56	0.399809	361.612	FALSE	7
2022-09-14	12:20:56	0.396654	362.008	FALSE	7
2022-09-14	12:20:56	0.395789	362.404	FALSE	7
2022-09-14	12:20:57	0.394873	362.799	FALSE	7
2022-09-14	12:20:57	0.405713	363.205	FALSE	7
2022-09-14	12:20:57	0.403321	363.608	FALSE	7
2022-09-14	12:20:57	0.39813	364.006	FALSE	7
2022-09-14	12:20:58	0.399402	364.406	FALSE	7
2022-09-14	12:20:58	0.394211	364.8	FALSE	7
2022-09-14	12:20:58	0.403117	365.203	FALSE	7
2022-09-14	12:20:58	0.402812	365.606	FALSE	7
2022-09-14	12:20:59	0.399657	366.006	FALSE	7
2022-09-14	12:20:59	0.396298	366.402	FALSE	7
2022-09-14	12:20:59	0.393753	366.796	FALSE	7
2022-09-14	12:20:59	0.410547	367.206	FALSE	7
2022-09-14	12:21:00	0.400318	367.606	FALSE	7
2022-09-14	12:21:00	0.405	368.011	FALSE	7
2022-09-14	12:21:00	0.410496	368.422	FALSE	7
2022-09-14	12:21:01	0.406527	368.828	FALSE	7
2022-09-14	12:21:01	0.400674	369.229	FALSE	7
2022-09-14	12:21:01	0.414568	369.644	FALSE	7
2022-09-14	12:21:01	0.415127	370.059	FALSE	7
2022-09-14	12:21:02	0.411463	370.47	FALSE	7
2022-09-14	12:21:02	0.418588	370.889	FALSE	7
2022-09-14	12:21:02	0.411718	371.301	FALSE	7
2022-09-14	12:21:02	0.408003	371.709	FALSE	7
2022-09-14	12:21:03	0.410802	372.119	FALSE	7
2022-09-14	12:21:03	0.403168	372.523	FALSE	7
2022-09-14	12:21:03	0.40271	372.925	FALSE	7
2022-09-14	12:21:03	0.406425	373.332	FALSE	7
2022-09-14	12:21:04	0.407545	373.739	FALSE	7
2022-09-14	12:21:04	0.411056	374.15	FALSE	7
2022-09-14	12:21:04	0.404593	374.555	FALSE	7
2022-09-14	12:21:05	0.412786	374.968	FALSE	7
2022-09-14	12:21:05	0.418079	375.386	FALSE	7
2022-09-14	12:21:05	0.415127	375.801	FALSE	7
2022-09-14	12:21:05	0.412837	376.214	FALSE	7
2022-09-14	12:21:06	0.413906	376.628	FALSE	7
2022-09-14	12:21:06	0.422761	377.05	FALSE	7
2022-09-14	12:21:06	0.421387	377.472	FALSE	7
2022-09-14	12:21:06	0.416552	377.888	FALSE	7
2022-09-14	12:21:07	0.420573	378.309	FALSE	7
2022-09-14	12:21:07	0.415026	378.724	FALSE	7
2022-09-14	12:21:07	0.41126	379.135	FALSE	7
2022-09-14	12:21:07	0.409021	379.544	FALSE	7
2022-09-14	12:21:08	0.410089	379.954	FALSE	7
2022-09-14	12:21:08	0.408257	380.363	FALSE	7
2022-09-14	12:21:08	0.403066	380.766	FALSE	7
2022-09-14	12:21:09	0.406934	381.173	FALSE	7
2022-09-14	12:21:09	0.407646	381.58	FALSE	7
2022-09-14	12:21:09	0.413702	381.994	FALSE	7
2022-09-14	12:21:09	0.424644	382.419	FALSE	7
2022-09-14	12:21:10	0.412634	382.831	FALSE	7
2022-09-14	12:21:10	0.411921	383.243	FALSE	7
2022-09-14	12:21:10	0.410242	383.653	FALSE	7
2022-09-14	12:21:10	0.412888	384.066	FALSE	7
2022-09-14	12:21:11	0.41355	384.48	FALSE	7
2022-09-14	12:21:11	0.401947	384.882	FALSE	7
2022-09-14	12:21:11	0.642099	385.524	FALSE	7
2022-09-14	12:21:11	0.722303	386.246	FALSE	7
2022-09-14	12:21:12	0.725407	386.972	FALSE	7
2022-09-14	12:21:12	0.726323	387.698	FALSE	7
2022-09-14	12:21:12	0.730954	388.429	FALSE	7
2022-09-14	12:21:13	0.723931	389.153	FALSE	7
2022-09-14	12:21:13	0.730191	389.883	FALSE	7
2022-09-14	12:21:13	0.730293	390.613	FALSE	7
2022-09-14	12:21:13	0.73472	391.348	FALSE	7
2022-09-14	12:21:14	0.734262	392.082	FALSE	7
2022-09-14	12:21:14	0.728104	392.81	FALSE	7
2022-09-14	12:21:14	0.729682	393.54	FALSE	7
2022-09-14	12:21:14	0.72612	394.266	FALSE	7
2022-09-14	12:21:15	0.729326	394.995	FALSE	7
2022-09-14	12:21:15	0.731259	395.727	FALSE	7
2022-09-14	12:21:15	0.734822	396.462	FALSE	7
2022-09-14	12:21:16	0.736145	397.198	FALSE	7
2022-09-14	12:21:16	0.72617	397.924	FALSE	7
2022-09-14	12:21:16	0.726476	398.65	FALSE	7
2022-09-14	12:21:16	0.734059	399.384	FALSE	7
2022-09-14	12:21:17	0.737214	400.122	FALSE	7
2022-09-14	12:21:17	0.731768	400.853	FALSE	7
2022-09-14	12:21:17	0.734771	401.588	FALSE	7
2022-09-14	12:21:17	0.734517	402.323	FALSE	7
2022-09-14	12:21:18	0.730343	403.053	FALSE	7
2022-09-14	12:21:18	0.730903	403.784	FALSE	7
2022-09-14	12:21:18	0.73645	404.52	FALSE	7
2022-09-14	12:21:18	0.727799	405.248	FALSE	7
2022-09-14	12:21:19	0.728817	405.977	FALSE	7
2022-09-14	12:21:19	0.733142	406.71	FALSE	7
2022-09-14	12:21:19	0.729631	407.44	FALSE	7
2022-09-14	12:21:20	0.720623	408.16	FALSE	7
2022-09-14	12:21:20	0.72612	408.886	FALSE	7
2022-09-14	12:21:20	0.736196	409.623	FALSE	7
2022-09-14	12:21:20	0.727392	410.35	FALSE	7
2022-09-14	12:21:21	0.734262	411.084	FALSE	7
2022-09-14	12:21:21	0.731717	411.816	FALSE	7
2022-09-14	12:21:21	0.730547	412.547	FALSE	7
2022-09-14	12:21:21	0.724033	413.271	FALSE	7
2022-09-14	12:21:22	0.726069	413.997	FALSE	7
2022-09-14	12:21:22	0.731768	414.728	FALSE	7
2022-09-14	12:21:22	0.72785	415.456	FALSE	7
2022-09-14	12:21:22	0.73355	416.19	FALSE	7
2022-09-14	12:21:23	0.727596	416.917	FALSE	7
2022-09-14	12:21:23	0.725967	417.643	FALSE	7
2022-09-14	12:21:23	0.464186	418.108	FALSE	7
2022-09-14	12:21:24	0.724644	418.832	FALSE	7
2022-09-14	12:21:24	0.733855	419.566	FALSE	7
2022-09-14	12:21:24	0.72612	420.292	FALSE	7
2022-09-14	12:21:24	0.72617	421.018	FALSE	7
2022-09-14	12:21:25	0.725102	421.743	FALSE	7
2022-09-14	12:21:25	0.728766	422.472	FALSE	7
2022-09-14	12:21:25	0.734364	423.207	FALSE	7
2022-09-14	12:21:25	0.728562	423.935	FALSE	7
2022-09-14	12:21:26	0.729071	424.664	FALSE	7
2022-09-14	12:21:26	0.735178	425.399	FALSE	7
2022-09-14	12:21:26	0.731616	426.131	FALSE	7
2022-09-14	12:21:26	0.730954	426.862	FALSE	7
2022-09-14	12:21:27	0.732583	427.595	FALSE	7
2022-09-14	12:21:27	0.730801	428.325	FALSE	7
2022-09-14	12:21:27	0.607544	428.933	FALSE	7
2022-09-14	12:21:28	-0.623549	428.933	FALSE	7
2022-09-14	12:21:28	-1.22884	428.933	FALSE	7
2022-09-14	12:21:28	-1.235	428.933	FALSE	7
2022-09-14	12:21:28	-1.07179	428.933	FALSE	7
2022-09-14	12:21:29	-1.02223	428.933	FALSE	7
2022-09-14	12:21:29	-0.255101	428.933	FALSE	7
2022-09-14	12:21:29	-0.362989	428.933	FALSE	7
2022-09-14	12:21:29	-0.135865	428.933	FALSE	7
2022-09-14	12:21:30	-0.0532694	428.933	FALSE	7
2022-09-14	12:21:30	0.0144659	428.947	FALSE	7
2022-09-14	12:21:30	-0.0189183	428.947	FALSE	7
2022-09-14	12:21:30	0.102965	429.05	FALSE	7
2022-09-14	12:21:31	-0.0933203	429.05	FALSE	7
2022-09-14	12:21:31	-0.891997	429.05	FALSE	7
2022-09-14	12:21:31	-3.02477	429.05	FALSE	7
2022-09-14	12:21:32	-3.71434	429.05	FALSE	7
2022-09-14	12:21:32	-3.53973	429.05	FALSE	7
2022-09-14	12:21:32	-3.79184	429.05	FALSE	7
2022-09-14	12:21:32	-3.68686	429.05	FALSE	7
2022-09-14	12:21:33	-3.78589	429.05	FALSE	7
2022-09-14	12:21:33	-3.75953	429.05	FALSE	7
2022-09-14	12:21:33	-3.71342	429.05	FALSE	7
2022-09-14	12:21:33	-3.85266	429.05	FALSE	7
2022-09-14	12:21:34	-3.75826	429.05	FALSE	7
2022-09-14	12:21:34	-4.0893	429.05	FALSE	7
2022-09-14	12:21:34	-3.88686	429.05	FALSE	7
2022-09-14	12:21:34	-4.04131	429.05	FALSE	7
2022-09-14	12:21:35	-3.821	429.05	FALSE	7
2022-09-14	12:21:35	-4.01067	429.05	FALSE	7
2022-09-14	12:21:35	-4.05825	429.05	FALSE	7
2022-09-14	12:21:36	-3.94024	429.05	FALSE	7
2022-09-14	12:21:36	-4.10752	429.05	FALSE	7
2022-09-14	12:21:36	-3.92945	429.05	FALSE	7
2022-09-14	12:21:36	-4.09876	429.05	FALSE	7
2022-09-14	12:21:37	-4.04049	429.05	FALSE	7
2022-09-14	12:21:37	-4.06141	429.05	FALSE	7
2022-09-14	12:21:37	-4.18518	429.05	FALSE	7
2022-09-14	12:21:37	-4.24675	429.05	FALSE	7
2022-09-14	12:21:38	-4.37546	429.05	FALSE	7
2022-09-14	12:21:38	-4.3866	429.05	FALSE	7
2022-09-14	12:21:38	-4.51144	429.05	FALSE	7
2022-09-14	12:21:38	-3.21973	429.05	FALSE	7
2022-09-14	12:21:39	-4.61561	429.05	FALSE	7
2022-09-14	12:21:39	-4.71184	429.05	FALSE	7
2022-09-14	12:21:39	-4.60019	429.05	FALSE	7
2022-09-14	12:21:40	-4.71902	429.05	FALSE	7
2022-09-14	12:21:40	-4.53428	429.05	FALSE	7
2022-09-14	12:21:40	-4.58426	429.05	FALSE	7
2022-09-14	12:21:40	-4.595	429.05	FALSE	7
2022-09-14	12:21:41	-4.68614	429.05	FALSE	7
2022-09-14	12:21:41	-4.65668	429.05	FALSE	7
2022-09-14	12:21:41	-4.69057	429.05	FALSE	7
2022-09-14	12:21:41	-4.78726	429.05	FALSE	7
2022-09-14	12:21:42	-4.78686	429.05	FALSE	7
2022-09-14	12:21:42	-4.93551	429.05	FALSE	7
2022-09-14	12:21:42	-4.89754	429.05	FALSE	7
2022-09-14	12:21:42	-4.93688	429.05	FALSE	7
2022-09-14	12:21:43	-5.05429	429.05	FALSE	7
2022-09-14	12:21:43	-5.23174	429.05	FALSE	7
2022-09-14	12:21:43	-5.84874	429.05	FALSE	7
2022-09-14	12:21:44	-5.77719	429.05	FALSE	7
2022-09-14	12:21:44	-5.88166	429.05	FALSE	7
2022-09-14	12:21:44	-5.97098	429.05	FALSE	7
2022-09-14	12:21:44	-6.06207	429.05	FALSE	7
2022-09-14	12:21:45	-6.14543	429.05	FALSE	7
2022-09-14	12:21:45	-6.07032	429.05	FALSE	7
2022-09-14	12:21:45	-6.12828	429.05	FALSE	7
2022-09-14	12:21:45	-6.13596	429.05	FALSE	7
2022-09-14	12:21:46	-4.87556	429.05	FALSE	7
2022-09-14	12:21:46	-2.13047	429.05	FALSE	7
2022-09-14	12:21:46	-1.57195	429.05	FALSE	7
2022-09-14	12:21:46	-1.06167	429.05	FALSE	7
2022-09-14	12:21:47	-0.970877	429.05	FALSE	7
2022-09-14	12:21:47	-0.788893	429.05	FALSE	7
2022-09-14	12:21:47	-1.03149	429.05	FALSE	7
2022-09-14	12:21:48	-1.15846	429.05	FALSE	7
2022-09-14	12:21:48	-2.77907	429.05	FALSE	7
2022-09-14	12:21:48	-3.21937	429.05	FALSE	7
2022-09-14	12:21:48	0.489428	429.54	FALSE	7
2022-09-14	12:21:49	0.363372	429.903	FALSE	7
2022-09-14	12:21:49	0.635178	430.538	FALSE	7
2022-09-14	12:21:49	0.713092	431.251	FALSE	7
2022-09-14	12:21:49	0.726578	431.978	FALSE	7
2022-09-14	12:21:50	0.723677	432.702	FALSE	7
2022-09-14	12:21:50	0.725509	433.427	FALSE	7
2022-09-14	12:21:50	0.726781	434.154	FALSE	7
2022-09-14	12:21:50	0.728257	434.882	FALSE	7
2022-09-14	12:21:51	0.73472	435.617	FALSE	7
2022-09-14	12:21:51	0.735483	436.352	FALSE	7
2022-09-14	12:21:51	0.736501	437.089	FALSE	7
2022-09-14	12:21:52	0.73131	437.82	FALSE	7
2022-09-14	12:21:52	0.734568	438.555	FALSE	7
2022-09-14	12:21:52	0.73014	439.285	FALSE	7
2022-09-14	12:21:52	0.733499	440.018	FALSE	7
2022-09-14	12:21:53	-2.10391	440.018	FALSE	7
2022-09-14	12:21:53	-5.14176	440.018	FALSE	7
2022-09-14	12:21:53	-5.052	440.018	FALSE	7
2022-09-14	12:21:53	-4.67357	440.018	FALSE	7
2022-09-14	12:21:54	-4.69663	440.018	FALSE	7
2022-09-14	12:21:54	-4.71067	440.018	FALSE	7
2022-09-14	12:21:54	-4.70467	440.018	FALSE	7
2022-09-14	12:21:54	-4.76228	440.018	FALSE	7
2022-09-14	12:21:55	-4.73082	440.018	FALSE	7
2022-09-14	12:21:55	-4.73978	440.018	FALSE	7
2022-09-14	12:21:55	-4.67846	440.018	FALSE	7
2022-09-14	12:21:56	0.276196	440.295	FALSE	7
2022-09-14	12:21:56	0.0709544	440.366	FALSE	7
2022-09-14	12:21:56	-0.247163	440.366	FALSE	7
2022-09-14	12:21:56	-0.446196	440.366	FALSE	7
2022-09-14	12:21:57	-0.60874	440.366	FALSE	7
2022-09-14	12:21:57	-0.749401	440.366	FALSE	7
2022-09-14	12:21:57	-0.752353	440.366	FALSE	7
2022-09-14	12:21:57	-1.24767	440.366	FALSE	7
2022-09-14	12:21:58	-1.43352	440.366	FALSE	7
2022-09-14	12:21:58	-1.54823	440.366	FALSE	7
2022-09-14	12:21:58	-1.452	440.366	FALSE	7
2022-09-14	12:21:58	-1.59927	440.366	FALSE	7
2022-09-14	12:21:59	-1.5407	440.366	FALSE	7
2022-09-14	12:21:59	-1.88686	440.366	FALSE	7
2022-09-14	12:21:59	-1.75266	440.366	FALSE	7
2022-09-14	12:22:00	-1.82411	440.366	FALSE	7
2022-09-14	12:22:00	-2.06777	440.366	FALSE	7
2022-09-14	12:22:00	-2.05352	440.366	FALSE	7
2022-09-14	12:22:00	-2.05693	440.366	FALSE	7
2022-09-14	12:22:01	-1.93744	440.366	FALSE	7
2022-09-14	12:22:01	-2.01617	440.366	FALSE	7
2022-09-14	12:22:01	-2.03795	440.366	FALSE	7
2022-09-14	12:22:01	-2.16874	440.366	FALSE	7
2022-09-14	12:22:02	-2.11805	440.366	FALSE	7
2022-09-14	12:22:02	-2.03973	440.366	FALSE	7
2022-09-14	12:22:02	-2.20518	440.366	FALSE	7
2022-09-14	12:22:02	-2.12991	440.366	FALSE	7
2022-09-14	12:22:03	-3.8524	440.366	FALSE	7
2022-09-14	12:22:03	-3.35836	440.366	FALSE	7
2022-09-14	12:22:03	0.664746	441.03	FALSE	7
2022-09-14	12:22:04	0.726934	441.757	FALSE	7
2022-09-14	12:22:04	0.730343	442.488	FALSE	7
2022-09-14	12:22:04	0.728562	443.216	FALSE	7
2022-09-14	12:22:04	0.73584	443.952	FALSE	7
2022-09-14	12:22:05	0.70159	444.654	FALSE	7
2022-09-14	12:22:05	0.726883	445.381	FALSE	7
2022-09-14	12:22:05	0.726476	446.107	FALSE	7
2022-09-14	12:22:05	0.729529	446.837	FALSE	7
2022-09-14	12:22:06	0.727188	447.564	FALSE	7
2022-09-14	12:22:06	0.725509	448.289	FALSE	7
2022-09-14	12:22:06	0.724949	449.014	FALSE	7
2022-09-14	12:22:07	0.728359	449.743	FALSE	7
2022-09-14	12:22:07	0.729936	450.472	FALSE	7
2022-09-14	12:22:07	0.735483	451.208	FALSE	7
2022-09-14	12:22:07	0.727799	451.936	FALSE	7
2022-09-14	12:22:08	0.729173	452.665	FALSE	7
2022-09-14	12:22:08	0.735127	453.4	FALSE	7
2022-09-14	12:22:08	0.727443	454.127	FALSE	7
2022-09-14	12:22:08	0.675229	454.803	FALSE	7
2022-09-14	12:22:09	0.728257	455.531	FALSE	7
2022-09-14	12:22:09	-1.08309	455.531	FALSE	7
2022-09-14	12:22:09	0.724288	456.255	FALSE	7
2022-09-14	12:22:09	-2.29978	456.255	FALSE	7
2022-09-14	12:22:10	0.705102	456.96	FALSE	7
2022-09-14	12:22:10	0.725051	457.685	FALSE	7
2022-09-14	12:22:10	0.0911071	457.777	FALSE	7
2022-09-14	12:22:11	0.704847	458.481	FALSE	7
2022-09-14	12:22:11	0.731972	459.213	FALSE	7
2022-09-14	12:22:11	0.729631	459.943	FALSE	7
2022-09-14	12:22:11	0.731667	460.675	FALSE	7
2022-09-14	12:22:12	0.728613	461.403	FALSE	7
2022-09-14	12:22:12	0.734109	462.137	FALSE	7
2022-09-14	12:22:12	0.727087	462.864	FALSE	7
2022-09-14	12:22:12	0.731768	463.596	FALSE	7
2022-09-14	12:22:13	0.730547	464.327	FALSE	7
2022-09-14	12:22:13	0.729987	465.057	FALSE	7
2022-09-14	12:22:13	0.728613	465.785	FALSE	7
2022-09-14	12:22:13	0.730394	466.516	FALSE	7
2022-09-14	12:22:14	0.733448	467.249	FALSE	7
2022-09-14	12:22:14	0.732023	467.981	FALSE	7
2022-09-14	12:22:14	0.735789	468.717	FALSE	7
2022-09-14	12:22:15	0.728461	469.445	FALSE	7
2022-09-14	12:22:15	0.728003	470.173	FALSE	7
2022-09-14	12:22:15	0.735331	470.909	FALSE	7
2022-09-14	12:22:15	0.726883	471.636	FALSE	7
2022-09-14	12:22:16	0.729529	472.365	FALSE	7
2022-09-14	12:22:16	0.72902	473.094	FALSE	7
2022-09-14	12:22:16	0.732481	473.827	FALSE	7
2022-09-14	12:22:16	0.729326	474.556	FALSE	7
2022-09-14	12:22:17	0.727545	475.284	FALSE	7
2022-09-14	12:22:17	0.723219	476.007	FALSE	7
2022-09-14	12:22:17	0.728919	476.736	FALSE	7
2022-09-14	12:22:17	0.731768	477.467	FALSE	7
2022-09-14	12:22:18	0.730242	478.198	FALSE	7
2022-09-14	12:22:18	0.731972	478.93	FALSE	7
2022-09-14	12:22:18	0.729631	479.659	FALSE	7
2022-09-14	12:22:19	0.728766	480.388	FALSE	7
2022-09-14	12:22:19	0.724491	481.113	FALSE	7
2022-09-14	12:22:19	0.728817	481.841	FALSE	7
2022-09-14	12:22:19	0.729275	482.571	FALSE	7
2022-09-14	12:22:20	0.729326	483.3	FALSE	7
2022-09-14	12:22:20	0.731361	484.031	FALSE	7
2022-09-14	12:22:20	0.726323	484.758	FALSE	7
2022-09-14	12:22:20	0.731616	485.489	FALSE	7
2022-09-14	12:22:21	0.726374	486.216	FALSE	7
2022-09-14	12:22:21	0.729478	486.945	FALSE	7
2022-09-14	12:22:21	0.725865	487.671	FALSE	7
2022-09-14	12:22:21	0.730496	488.402	FALSE	7
2022-09-14	12:22:22	0.731209	489.133	FALSE	7
2022-09-14	12:22:22	0.73014	489.863	FALSE	7
2022-09-14	12:22:22	0.736654	490.6	FALSE	7
2022-09-14	12:22:23	0.729631	491.329	FALSE	7
2022-09-14	12:22:23	0.724084	492.053	FALSE	7
2022-09-14	12:22:23	0.724746	492.778	FALSE	7
2022-09-14	12:22:23	0.726476	493.504	FALSE	7
2022-09-14	12:22:24	0.729835	494.234	FALSE	7
2022-09-14	12:22:24	0.734415	494.969	FALSE	7
2022-09-14	12:22:24	0.730547	495.699	FALSE	7
2022-09-14	12:22:24	0.725254	496.425	FALSE	7
2022-09-14	12:22:25	0.728817	497.153	FALSE	7
2022-09-14	12:22:25	0.72673	497.88	FALSE	7
2022-09-14	12:22:25	0.73701	498.617	FALSE	7
2022-09-14	12:22:25	0.728868	499.346	FALSE	7
2022-09-14	12:22:26	0.735178	500.081	FALSE	7
2022-09-14	12:22:26	0.727697	500.809	FALSE	7
2022-09-14	12:22:26	0.61528	501.424	FALSE	7
2022-09-14	12:22:27	-1.86981	501.424	FALSE	7
2022-09-14	12:22:27	-3.15988	501.424	FALSE	7
2022-09-14	12:22:27	-2.99876	501.424	FALSE	7
2022-09-14	12:22:27	-3.0834	501.424	FALSE	7
2022-09-14	12:22:28	-3.06228	501.424	FALSE	7

## Sheet: MsPotato_star_202291412179
						**GoPro Fitting: 12:06
2022-09-14	12:17:09	-0.0251779
2022-09-14	12:17:09	0.0322267
2022-09-14	12:17:10	0.0262725
2022-09-14	12:17:10	0.0857635
2022-09-14	12:17:10	0.137468
2022-09-14	12:17:10	0.271463
2022-09-14	12:17:11	0.243321
2022-09-14	12:17:11	0.226527
2022-09-14	12:17:11	0.153244
2022-09-14	12:17:11	0.153244
2022-09-14	12:17:12	0.211361
2022-09-14	12:17:12	0.185356
2022-09-14	12:17:12	0.248562
2022-09-14	12:17:12	0.158537
2022-09-14	12:17:13	0.216807
2022-09-14	12:17:13	0.159504
2022-09-14	12:17:13	0.183728
2022-09-14	12:17:13	0.220878
2022-09-14	12:17:14	0.2107
2022-09-14	12:17:14	0.176756
2022-09-14	12:17:14	0.296349
2022-09-14	12:17:15	0.203626
2022-09-14	12:17:15	0.21243
2022-09-14	12:17:15	0.178333
2022-09-14	12:17:15	0.161794
2022-09-14	12:17:16	0.190242
2022-09-14	12:17:16	0.168563
2022-09-14	12:17:16	0.162965
2022-09-14	12:17:16	0.208054
2022-09-14	12:17:17	0.190191
2022-09-14	12:17:17	0.174364
2022-09-14	12:17:17	0.2564
2022-09-14	12:17:17	0.430445
2022-09-14	12:17:18	0.325712
2022-09-14	12:17:18	0.192786
2022-09-14	12:17:18	0.238537
2022-09-14	12:17:19	0.228613
2022-09-14	12:17:19	0.196654
2022-09-14	12:17:19	0.204186
2022-09-14	12:17:19	0.195738
2022-09-14	12:17:20	0.187443
2022-09-14	12:17:20	0.20215
2022-09-14	12:17:20	0.182608
2022-09-14	12:17:20	0.199555
2022-09-14	12:17:21	0.215178
2022-09-14	12:17:21	0.203626
2022-09-14	12:17:21	0.153397
2022-09-14	12:17:21	0.138944
2022-09-14	12:17:22	0.00932595
2022-09-14	12:17:22	0.0639315
2022-09-14	12:17:22	0.551107
2022-09-14	12:17:23	0.494059
2022-09-14	12:17:23	0.286527
2022-09-14	12:17:23	0.374669
2022-09-14	12:17:23	0.203015
2022-09-14	12:17:24	0.165102
2022-09-14	12:17:24	-0.13332
2022-09-14	12:17:24	-0.188028
2022-09-14	12:17:24	-0.126196
2022-09-14	12:17:25	-0.0346435
2022-09-14	12:17:25	-0.0640583
2022-09-14	12:17:25	-0.0792745
2022-09-14	12:17:25	0.0495803
2022-09-14	12:17:26	0.143219
2022-09-14	12:17:26	0.174262
2022-09-14	12:17:26	0.134975
2022-09-14	12:17:27	0.0690206
2022-09-14	12:17:27	-0.00894378
2022-09-14	12:17:27	0.112888
2022-09-14	12:17:27	-0.0129133
2022-09-14	12:17:28	0.124084
2022-09-14	12:17:28	-0.0157122
2022-09-14	12:17:28	0.124644
2022-09-14	12:17:28	0.259199
2022-09-14	12:17:29	0.446832
2022-09-14	12:17:29	0.321692
2022-09-14	12:17:29	0.238792
2022-09-14	12:17:29	0.207341
2022-09-14	12:17:30	0.247646
2022-09-14	12:17:30	0.0303946
2022-09-14	12:17:30	0.0644913
2022-09-14	12:17:31	0.127341
2022-09-14	12:17:31	0.297977
2022-09-14	12:17:31	0.487901
2022-09-14	12:17:31	0.400471
2022-09-14	12:17:32	0.406018
2022-09-14	12:17:32	0.219809
2022-09-14	12:17:32	0.241132
2022-09-14	12:17:32	0.142201
2022-09-14	12:17:33	0.294415
2022-09-14	12:17:33	0.042812
2022-09-14	12:17:33	0.135229
2022-09-14	12:17:33	-0.000750381
2022-09-14	12:17:34	0.158792
2022-09-14	12:17:34	-0.233066
2022-09-14	12:17:34	-0.289605
2022-09-14	12:17:35	-0.285687
2022-09-14	12:17:35	-0.283448
2022-09-14	12:17:35	-0.310827
2022-09-14	12:17:35	-0.171132
2022-09-14	12:17:36	-0.248944
2022-09-14	12:17:36	-0.244872
2022-09-14	12:17:36	-0.233829
2022-09-14	12:17:36	-0.230928
2022-09-14	12:17:37	-0.18818
2022-09-14	12:17:37	-0.213117
2022-09-14	12:17:37	-0.32187
2022-09-14	12:17:38	-0.474847
2022-09-14	12:17:38	-0.688434
2022-09-14	12:17:38	-0.67505
2022-09-14	12:17:38	-0.598307
2022-09-14	12:17:39	-0.498918
2022-09-14	12:17:39	-0.55734
2022-09-14	12:17:39	-0.41729
2022-09-14	12:17:39	0.167239
2022-09-14	12:17:40	0.0648476
2022-09-14	12:17:40	0.263728
2022-09-14	12:17:40	0.166781
2022-09-14	12:17:40	0.221641
2022-09-14	12:17:41	0.126222
2022-09-14	12:17:41	0.0758399
2022-09-14	12:17:41	0.170293
2022-09-14	12:17:42	0.14215
2022-09-14	12:17:42	0.218588
2022-09-14	12:17:42	0.0272903
2022-09-14	12:17:42	0.178384
2022-09-14	12:17:43	0.16958
2022-09-14	12:17:43	0.186171
2022-09-14	12:17:43	0.0739061
2022-09-14	12:17:43	0.174873
2022-09-14	12:17:44	0.195942
2022-09-14	12:17:44	0.118995
2022-09-14	12:17:44	0.212074
2022-09-14	12:17:44	0.736247
2022-09-14	12:17:45	1.32449
2022-09-14	12:17:45	1.90597
2022-09-14	12:17:45	0.937824
2022-09-14	12:17:46	1.20429
2022-09-14	12:17:46	1.65212
2022-09-14	12:17:46	2.00464
2022-09-14	12:17:46	2.81263
2022-09-14	12:17:47	3.02413
2022-09-14	12:17:47	3.32729
2022-09-14	12:17:47	0.73131
2022-09-14	12:17:47	0.756043
2022-09-14	12:17:48	0.386171
2022-09-14	12:17:48	0.421031
2022-09-14	12:17:48	0.138537
2022-09-14	12:17:48	0.168715
2022-09-14	12:17:49	0.168664
2022-09-14	12:17:49	0.324593
2022-09-14	12:17:49	0.101845
2022-09-14	12:17:50	0.199758
2022-09-14	12:17:50	0.0253056
2022-09-14	12:17:50	0.155331
2022-09-14	12:17:50	-0.0513356
2022-09-14	12:17:51	0.0619468
2022-09-14	12:17:51	-0.0503687
2022-09-14	12:17:51	0.052074
2022-09-14	12:17:51	-0.0924043
2022-09-14	12:17:52	0.0746185
2022-09-14	12:17:52	0.0878501
2022-09-14	12:17:52	0.117418
2022-09-14	12:17:52	0.116858
2022-09-14	12:17:53	0.183473
2022-09-14	12:17:53	0.253601
2022-09-14	12:17:53	0.295534
2022-09-14	12:17:54	0.602455
2022-09-14	12:17:54	0.334109
2022-09-14	12:17:54	0.274975
2022-09-14	12:17:54	0.11584
2022-09-14	12:17:55	0.197316
2022-09-14	12:17:55	0.179046
2022-09-14	12:17:55	0.58388
2022-09-14	12:17:55	0.224746
2022-09-14	12:17:56	0.148664
2022-09-14	12:17:56	0.107596
2022-09-14	12:17:56	0.24673
2022-09-14	12:17:56	0.114008
2022-09-14	12:17:57	0.257774
2022-09-14	12:17:57	0.260369
2022-09-14	12:17:57	0.0754327
2022-09-14	12:17:58	0.130853
2022-09-14	12:17:58	0.21014
2022-09-14	12:17:58	0.33472
2022-09-14	12:17:58	0.0942114
2022-09-14	12:17:59	0.265356
2022-09-14	12:17:59	0.0572649
2022-09-14	12:17:59	0.317112
2022-09-14	12:17:59	0.610496
2022-09-14	12:18:00	1.85406
2022-09-14	12:18:00	5.65538
2022-09-14	12:18:00	7.18556
2022-09-14	12:18:00	3.20948
2022-09-14	12:18:01	3.90703
2022-09-14	12:18:01	3.2624
2022-09-14	12:18:01	2.54861
2022-09-14	12:18:02	1.6023
2022-09-14	12:18:02	0.393906
2022-09-14	12:18:02	0.258741
2022-09-14	12:18:02	0.42612
2022-09-14	12:18:03	0.498588
2022-09-14	12:18:03	-0.0674679
2022-09-14	12:18:03	-0.176883
2022-09-14	12:18:03	-0.383396
2022-09-14	12:18:04	-0.374694
2022-09-14	12:18:04	-0.279682
2022-09-14	12:18:04	-0.389961
2022-09-14	12:18:04	-0.325534
2022-09-14	12:18:05	-0.225076
2022-09-14	12:18:05	-0.0914883
2022-09-14	12:18:05	0.190496
2022-09-14	12:18:06	0.0866287
2022-09-14	12:18:06	0.328613
2022-09-14	12:18:06	0.345
2022-09-14	12:18:06	0.59869
2022-09-14	12:18:07	0.281285
2022-09-14	12:18:07	0.785305
2022-09-14	12:18:07	0.510751
2022-09-14	12:18:07	0.643321
2022-09-14	12:18:08	0.364542
2022-09-14	12:18:08	0.603728
2022-09-14	12:18:08	0.360216
2022-09-14	12:18:09	0.513652
2022-09-14	12:18:09	0.27757
2022-09-14	12:18:09	0.476298
2022-09-14	12:18:09	0.355585
2022-09-14	12:18:10	0.49355
2022-09-14	12:18:10	0.31813
2022-09-14	12:18:10	1.0077
2022-09-14	12:18:10	0.31869
2022-09-14	12:18:11	1.3422
2022-09-14	12:18:11	0.204542
2022-09-14	12:18:11	1.61604
2022-09-14	12:18:11	0.645254
2022-09-14	12:18:12	2.52963
2022-09-14	12:18:12	0.792328
2022-09-14	12:18:12	1.56597
2022-09-14	12:18:13	1.10531
2022-09-14	12:18:13	0.842506
2022-09-14	12:18:13	0.664186
2022-09-14	12:18:13	0.363015
2022-09-14	12:18:14	0.496145
2022-09-14	12:18:14	0.318334
2022-09-14	12:18:14	0.419962
2022-09-14	12:18:14	0.349733
2022-09-14	12:18:15	0.501743
2022-09-14	12:18:15	0.292481
2022-09-14	12:18:15	0.449886
2022-09-14	12:18:15	0.266323
2022-09-14	12:18:16	0.479707
2022-09-14	12:18:16	0.338944
2022-09-14	12:18:16	0.410445
2022-09-14	12:18:17	0.322506
2022-09-14	12:18:17	0.506577
2022-09-14	12:18:17	0.967341
2022-09-14	12:18:17	0.806323
2022-09-14	12:18:18	0.829733
2022-09-14	12:18:18	0.944186
2022-09-14	12:18:18	0.902506
2022-09-14	12:18:18	0.731819
2022-09-14	12:18:19	0.410751
2022-09-14	12:18:19	0.528308
2022-09-14	12:18:19	0.249071
2022-09-14	12:18:19	0.523015
2022-09-14	12:18:20	0.347952
2022-09-14	12:18:20	0.247646
2022-09-14	12:18:20	-0.167671
2022-09-14	12:18:21	-0.232252
2022-09-14	12:18:21	-0.169554
2022-09-14	12:18:21	-0.116781
2022-09-14	12:18:21	-0.28874
2022-09-14	12:18:22	-0.117341
2022-09-14	12:18:22	-0.253269
2022-09-14	12:18:22	-0.164211
2022-09-14	12:18:22	-0.208944
2022-09-14	12:18:23	-0.0481295
2022-09-14	12:18:23	-0.189249
2022-09-14	12:18:23	0.00545825
2022-09-14	12:18:23	-0.0602415
2022-09-14	12:18:24	0.117367
2022-09-14	12:18:24	0.020471
2022-09-14	12:18:24	0.288766
2022-09-14	12:18:25	-0.0235494
2022-09-14	12:18:25	0.0943131
2022-09-14	12:18:25	-0.0955595
2022-09-14	12:18:25	-0.142531
2022-09-14	12:18:26	-0.477646
2022-09-14	12:18:26	-0.592099
2022-09-14	12:18:26	-0.162582
2022-09-14	12:18:26	-0.108435
2022-09-14	12:18:27	-0.00441451
2022-09-14	12:18:27	0.325458
2022-09-14	12:18:27	0.446883
2022-09-14	12:18:27	0.367138
2022-09-14	12:18:28	0.253295
2022-09-14	12:18:28	0.428003
2022-09-14	12:18:28	0.612735
2022-09-14	12:18:29	0.373855
2022-09-14	12:18:29	0.358893
2022-09-14	12:18:29	0.238435
2022-09-14	12:18:29	0.378791
2022-09-14	12:18:30	0.362455
2022-09-14	12:18:30	0.456807
2022-09-14	12:18:30	0.429122
2022-09-14	12:18:30	0.57528
2022-09-14	12:18:31	0.721692
2022-09-14	12:18:31	0.726781
2022-09-14	12:18:31	0.723372
2022-09-14	12:18:31	0.722049
2022-09-14	12:18:32	0.726018
2022-09-14	12:18:32	0.726425
2022-09-14	12:18:32	0.734109
2022-09-14	12:18:33	0.726323
2022-09-14	12:18:33	0.731463
2022-09-14	12:18:33	0.728562
2022-09-14	12:18:33	0.730038
2022-09-14	12:18:34	0.689682
2022-09-14	12:18:34	0.269835
2022-09-14	12:18:34	0.252277
2022-09-14	12:18:34	0.278384
2022-09-14	12:18:35	0.321489
2022-09-14	12:18:35	0.348206
2022-09-14	12:18:35	0.721743
2022-09-14	12:18:35	1.44841
2022-09-14	12:18:36	0.0149748
2022-09-14	12:18:36	-0.1779
2022-09-14	12:18:36	-0.14075
2022-09-14	12:18:37	-0.0822771
2022-09-14	12:18:37	0.212583
2022-09-14	12:18:37	0.18388
2022-09-14	12:18:37	0.335127
2022-09-14	12:18:38	0.244746
2022-09-14	12:18:38	0.293753
2022-09-14	12:18:38	0.309479
2022-09-14	12:18:38	0.281234
2022-09-14	12:18:39	0.267188
2022-09-14	12:18:39	0.365458
2022-09-14	12:18:39	0.253499
2022-09-14	12:18:40	0.24271
2022-09-14	12:18:40	0.33014
2022-09-14	12:18:40	0.464491
2022-09-14	12:18:40	0.16897
2022-09-14	12:18:41	0.408053
2022-09-14	12:18:41	-0.545127
2022-09-14	12:18:41	-0.355916
2022-09-14	12:18:41	-0.735814
2022-09-14	12:18:42	-0.642938
2022-09-14	12:18:42	-0.670419
2022-09-14	12:18:42	-0.639783
2022-09-14	12:18:42	-0.663905
2022-09-14	12:18:43	-0.687162
2022-09-14	12:18:43	-0.869299
2022-09-14	12:18:43	-0.876628
2022-09-14	12:18:44	-1.30996
2022-09-14	12:18:44	-2.18502
2022-09-14	12:18:44	-2.14838
2022-09-14	12:18:44	-2.14696
2022-09-14	12:18:45	-2.07882
2022-09-14	12:18:45	-2.07958
2022-09-14	12:18:45	-1.8064
2022-09-14	12:18:45	-1.81994
2022-09-14	12:18:46	-1.68462
2022-09-14	12:18:46	-1.61434
2022-09-14	12:18:46	-1.42935
2022-09-14	12:18:46	-1.38217
2022-09-14	12:18:47	-1.28004
2022-09-14	12:18:47	-1.22762
2022-09-14	12:18:47	-1.1119
2022-09-14	12:18:48	-1.1438
2022-09-14	12:18:48	-1.0864
2022-09-14	12:18:48	-1.08945
2022-09-14	12:18:48	-1.00385
2022-09-14	12:18:49	-1.08289
2022-09-14	12:18:49	-0.937391
2022-09-14	12:18:49	-1.00686
2022-09-14	12:18:49	-0.992862
2022-09-14	12:18:50	-1.18828
2022-09-14	12:18:50	-1.2208
2022-09-14	12:18:50	-1.24762
2022-09-14	12:18:50	0.375026
2022-09-14	12:18:51	0.267138
2022-09-14	12:18:51	0.339249
2022-09-14	12:18:51	0.329071
2022-09-14	12:18:52	0.350191
2022-09-14	12:18:52	0.380165
2022-09-14	12:18:52	0.301845
2022-09-14	12:18:52	0.425458
2022-09-14	12:18:53	0.204593
2022-09-14	12:18:53	0.392379
2022-09-14	12:18:53	0.23472
2022-09-14	12:18:53	0.713295
2022-09-14	12:18:54	0.552074
2022-09-14	12:18:54	0.510852
2022-09-14	12:18:54	0.418486
2022-09-14	12:18:54	0.423779
2022-09-14	12:18:55	0.15243
2022-09-14	12:18:55	-0.208791
2022-09-14	12:18:55	-0.262226
2022-09-14	12:18:56	0.0297331
2022-09-14	12:18:56	-0.0244654
2022-09-14	12:18:56	0.120827
2022-09-14	12:18:56	0.276451
2022-09-14	12:18:57	0.444796
2022-09-14	12:18:57	0.154059
2022-09-14	12:18:57	0.31701
2022-09-14	12:18:57	0.250445
2022-09-14	12:18:58	0.382048
2022-09-14	12:18:58	0.293244
2022-09-14	12:18:58	0.397519
2022-09-14	12:18:58	0.287901
2022-09-14	12:18:59	0.423728
2022-09-14	12:18:59	0.33645
2022-09-14	12:18:59	0.425662
2022-09-14	12:19:00	0.349936
2022-09-14	12:19:00	0.399657
2022-09-14	12:19:00	0.411056
2022-09-14	12:19:00	0.338537
2022-09-14	12:19:01	0.406832
2022-09-14	12:19:01	0.290598
2022-09-14	12:19:01	0.441031
2022-09-14	12:19:01	0.264593
2022-09-14	12:19:02	0.454975
2022-09-14	12:19:02	0.26383
2022-09-14	12:19:02	0.47584
2022-09-14	12:19:02	0.255636
2022-09-14	12:19:03	0.476094
2022-09-14	12:19:03	0.288206
2022-09-14	12:19:03	0.525967
2022-09-14	12:19:04	0.242659
2022-09-14	12:19:04	0.512685
2022-09-14	12:19:04	0.351921
2022-09-14	12:19:04	0.522964
2022-09-14	12:19:05	0.321438
2022-09-14	12:19:05	0.447647
2022-09-14	12:19:05	0.273193
2022-09-14	12:19:05	0.532532
2022-09-14	12:19:06	0.258537
2022-09-14	12:19:06	0.484237
2022-09-14	12:19:06	0.264593
2022-09-14	12:19:06	0.52327
2022-09-14	12:19:07	0.292735
2022-09-14	12:19:07	0.491463
2022-09-14	12:19:07	0.333346
2022-09-14	12:19:08	0.486272
2022-09-14	12:19:08	0.426832
2022-09-14	12:19:08	0.438181
2022-09-14	12:19:08	0.401285
2022-09-14	12:19:09	0.445255
2022-09-14	12:19:09	0.422965
2022-09-14	12:19:09	0.408715
2022-09-14	12:19:09	0.39187
2022-09-14	12:19:10	0.394211
2022-09-14	12:19:10	0.396705
2022-09-14	12:19:10	0.403728
2022-09-14	12:19:11	0.32841
2022-09-14	12:19:11	0.3764
2022-09-14	12:19:11	0.327901
2022-09-14	12:19:11	0.356349
2022-09-14	12:19:12	0.481997
2022-09-14	12:19:12	0.291718
2022-09-14	12:19:12	0.500063
2022-09-14	12:19:12	0.297367
2022-09-14	12:19:13	0.476959
2022-09-14	12:19:13	0.294822
2022-09-14	12:19:13	0.4907
2022-09-14	12:19:13	0.28154
2022-09-14	12:19:14	0.476145
2022-09-14	12:19:14	0.25355
2022-09-14	12:19:14	0.480318
2022-09-14	12:19:15	0.263677
2022-09-14	12:19:15	0.483066
2022-09-14	12:19:15	0.202303
2022-09-14	12:19:15	0.455942
2022-09-14	12:19:16	0.210751
2022-09-14	12:19:16	0.537468
2022-09-14	12:19:16	0.245
2022-09-14	12:19:16	0.537519
2022-09-14	12:19:17	0.145356
2022-09-14	12:19:17	0.210445
2022-09-14	12:19:17	0.491616
2022-09-14	12:19:17	0.781997
2022-09-14	12:19:18	0.714211
2022-09-14	12:19:18	0.483422
2022-09-14	12:19:18	0.534873
2022-09-14	12:19:19	0.251361
2022-09-14	12:19:19	0.226323
2022-09-14	12:19:19	0.127545
2022-09-14	12:19:19	-0.0280786
2022-09-14	12:19:20	-0.391081
2022-09-14	12:19:20	-0.421056
2022-09-14	12:19:20	-0.536475
2022-09-14	12:19:20	-0.330318
2022-09-14	12:19:21	-0.139427
2022-09-14	12:19:21	0.174771
2022-09-14	12:19:21	0.116552
2022-09-14	12:19:21	0.266883
2022-09-14	12:19:22	0.0448984
2022-09-14	12:19:22	0.279453
2022-09-14	12:19:22	0.339657
2022-09-14	12:19:23	0.395026
2022-09-14	12:19:23	0.26668
2022-09-14	12:19:23	0.45813
2022-09-14	12:19:23	0.290191
2022-09-14	12:19:24	0.460929
2022-09-14	12:19:24	0.236043
2022-09-14	12:19:24	0.431921
2022-09-14	12:19:24	0.304644
2022-09-14	12:19:25	0.470191
2022-09-14	12:19:25	0.268817
2022-09-14	12:19:25	0.441234
2022-09-14	12:19:25	0.269173
2022-09-14	12:19:26	0.432735
2022-09-14	12:19:26	0.223677
2022-09-14	12:19:26	0.440674
2022-09-14	12:19:27	0.289122
2022-09-14	12:19:27	0.470344
2022-09-14	12:19:27	0.261285
2022-09-14	12:19:27	0.394161
2022-09-14	12:19:28	0.262405
2022-09-14	12:19:28	0.416399
2022-09-14	12:19:28	0.333041
2022-09-14	12:19:28	0.334262
2022-09-14	12:19:29	0.339351
2022-09-14	12:19:29	0.303677
2022-09-14	12:19:29	0.386476
2022-09-14	12:19:29	0.346781
2022-09-14	12:19:30	0.412532
2022-09-14	12:19:30	0.310496
2022-09-14	12:19:30	0.504491
2022-09-14	12:19:31	0.339199
2022-09-14	12:19:31	0.411921
2022-09-14	12:19:31	0.405764
2022-09-14	12:19:31	0.374822
2022-09-14	12:19:32	0.382048
2022-09-14	12:19:32	0.319606
2022-09-14	12:19:32	0.487952
2022-09-14	12:19:32	0.430954
2022-09-14	12:19:33	0.420318
2022-09-14	12:19:33	0.384695
2022-09-14	12:19:33	0.348359
2022-09-14	12:19:33	0.345102
2022-09-14	12:19:34	0.34556
2022-09-14	12:19:34	0.366272
2022-09-14	12:19:34	0.291361
2022-09-14	12:19:35	-0.716475
2022-09-14	12:19:35	0.425865
2022-09-14	12:19:35	0.404389
2022-09-14	12:19:35	0.381082
2022-09-14	12:19:36	0.343372
2022-09-14	12:19:36	0.359809
2022-09-14	12:19:36	0.638333
2022-09-14	12:19:36	0.00459311
2022-09-14	12:19:37	0.317519
2022-09-14	12:19:37	0.306018
2022-09-14	12:19:37	0.308206
2022-09-14	12:19:37	0.301947
2022-09-14	12:19:38	0.300318
2022-09-14	12:19:38	0.277214
2022-09-14	12:19:38	0.652226
2022-09-14	12:19:39	0.730751
2022-09-14	12:19:39	-0.504719
2022-09-14	12:19:39	0.528206
2022-09-14	12:19:39	0.730496
2022-09-14	12:19:40	0.728919
2022-09-14	12:19:40	0.728613
2022-09-14	12:19:40	0.730038
2022-09-14	12:19:40	0.724033
2022-09-14	12:19:41	0.72897
2022-09-14	12:19:41	0.726018
2022-09-14	12:19:41	0.725865
2022-09-14	12:19:41	0.731565
2022-09-14	12:19:42	0.732532
2022-09-14	12:19:42	0.730343
2022-09-14	12:19:42	0.732786
2022-09-14	12:19:43	0.71014
2022-09-14	12:19:43	0.726883
2022-09-14	12:19:43	-0.185687
2022-09-14	12:19:43	0.719249
2022-09-14	12:19:44	0.726476
2022-09-14	12:19:44	0.726883
2022-09-14	12:19:44	0.725458
2022-09-14	12:19:44	0.722862
2022-09-14	12:19:45	0.720674
2022-09-14	12:19:45	0.734059
2022-09-14	12:19:45	0.728512
2022-09-14	12:19:46	0.722099
2022-09-14	12:19:46	0.559911
2022-09-14	12:19:46	-0.774338
2022-09-14	12:19:46	-0.828485
2022-09-14	12:19:47	-0.860495
2022-09-14	12:19:47	-0.954439
2022-09-14	12:19:47	-0.968638
2022-09-14	12:19:47	-1.03434
2022-09-14	12:19:48	-1.02976
2022-09-14	12:19:48	-1.05179
2022-09-14	12:19:48	-1.36543
2022-09-14	12:19:48	-1.56681
2022-09-14	12:19:49	-1.53917
2022-09-14	12:19:49	-1.48894
2022-09-14	12:19:49	-1.42156
2022-09-14	12:19:50	-1.47658
2022-09-14	12:19:50	-1.34599
2022-09-14	12:19:50	-1.42228
2022-09-14	12:19:50	-1.35571
2022-09-14	12:19:51	-1.36609
2022-09-14	12:19:51	-1.05225
2022-09-14	12:19:51	-0.814083
2022-09-14	12:19:51	-0.169758
2022-09-14	12:19:52	-0.00100484
2022-09-14	12:19:52	0.165102
2022-09-14	12:19:52	0.189886
2022-09-14	12:19:52	0.121285
2022-09-14	12:19:53	0.39187
2022-09-14	12:19:53	0.697417
2022-09-14	12:19:53	0.725102
2022-09-14	12:19:54	0.730903
2022-09-14	12:19:54	0.726272
2022-09-14	12:19:54	0.730903
2022-09-14	12:19:54	0.723779
2022-09-14	12:19:55	0.72327
2022-09-14	12:19:55	0.340216
2022-09-14	12:19:55	0.728054
2022-09-14	12:19:55	0.727952
2022-09-14	12:19:56	0.726425
2022-09-14	12:19:56	0.736603
2022-09-14	12:19:56	0.726883
2022-09-14	12:19:56	0.728003
2022-09-14	12:19:57	0.727392
2022-09-14	12:19:57	0.728817
2022-09-14	12:19:57	0.732634
2022-09-14	12:19:58	0.719707
2022-09-14	12:19:58	0.576349
2022-09-14	12:19:58	0.722761
2022-09-14	12:19:58	0.728206
2022-09-14	12:19:59	0.72388
2022-09-14	12:19:59	0.724949
2022-09-14	12:19:59	0.734924
2022-09-14	12:19:59	0.687697
2022-09-14	12:20:00	-0.413676
2022-09-14	12:20:00	0.471718
2022-09-14	12:20:00	0.305204
2022-09-14	12:20:00	0.638639
2022-09-14	12:20:01	0.721591
2022-09-14	12:20:01	0.734517
2022-09-14	12:20:01	0.728104
2022-09-14	12:20:02	0.727646
2022-09-14	12:20:02	0.72444
2022-09-14	12:20:02	0.729428
2022-09-14	12:20:02	0.722761
2022-09-14	12:20:03	0.732786
2022-09-14	12:20:03	0.729631
2022-09-14	12:20:03	0.725305
2022-09-14	12:20:03	0.721845
2022-09-14	12:20:04	0.681437
2022-09-14	12:20:04	0.726985
2022-09-14	12:20:04	0.727697
2022-09-14	12:20:04	0.729224
2022-09-14	12:20:05	0.726679
2022-09-14	12:20:05	0.725102
2022-09-14	12:20:05	0.72215
2022-09-14	12:20:06	0.732786
2022-09-14	12:20:06	0.730852
2022-09-14	12:20:06	0.726272
2022-09-14	12:20:06	0.729224
2022-09-14	12:20:07	0.727239
2022-09-14	12:20:07	0.724695
2022-09-14	12:20:07	0.734262
2022-09-14	12:20:07	0.730293
2022-09-14	12:20:08	0.723982
2022-09-14	12:20:08	0.732939
2022-09-14	12:20:08	0.723372
2022-09-14	12:20:08	0.734109
2022-09-14	12:20:09	0.729224
2022-09-14	12:20:09	0.731005
2022-09-14	12:20:09	0.724338
2022-09-14	12:20:10	0.729377
2022-09-14	12:20:10	0.725967
2022-09-14	12:20:10	0.729733
2022-09-14	12:20:10	0.729071
2022-09-14	12:20:11	0.726578
2022-09-14	12:20:11	0.724389
2022-09-14	12:20:11	0.720572
2022-09-14	12:20:11	0.730242
2022-09-14	12:20:12	0.72556
2022-09-14	12:20:12	0.727239
2022-09-14	12:20:12	0.731412
2022-09-14	12:20:12	0.734415
2022-09-14	12:20:13	0.732939
2022-09-14	12:20:13	0.727137
2022-09-14	12:20:13	0.732481
2022-09-14	12:20:14	0.732888
2022-09-14	12:20:14	0.729173
2022-09-14	12:20:14	0.724847
2022-09-14	12:20:14	0.728206
2022-09-14	12:20:15	0.728359
2022-09-14	12:20:15	0.727799
2022-09-14	12:20:15	0.72556
2022-09-14	12:20:15	0.733092
2022-09-14	12:20:16	0.739351
2022-09-14	12:20:16	0.731819
2022-09-14	12:20:16	0.720827
2022-09-14	12:20:16	0.728715
2022-09-14	12:20:17	0.72103
2022-09-14	12:20:17	0.727799
2022-09-14	12:20:17	0.724593
2022-09-14	12:20:18	0.729682
2022-09-14	12:20:18	0.725916
2022-09-14	12:20:18	0.725611
2022-09-14	12:20:18	0.726018
2022-09-14	12:20:19	0.724389
2022-09-14	12:20:19	0.730089
2022-09-14	12:20:19	0.730598
2022-09-14	12:20:19	0.72729
2022-09-14	12:20:20	0.72612
2022-09-14	12:20:20	0.723931
2022-09-14	12:20:20	0.72612
2022-09-14	12:20:20	0.731107
2022-09-14	12:20:21	0.731565
2022-09-14	12:20:21	0.726018
2022-09-14	12:20:21	0.723473
2022-09-14	12:20:22	0.733041
2022-09-14	12:20:22	0.724491
2022-09-14	12:20:22	0.723779
2022-09-14	12:20:22	0.722862
2022-09-14	12:20:23	0.72785
2022-09-14	12:20:23	0.725509
2022-09-14	12:20:23	0.724186
2022-09-14	12:20:23	0.728003
2022-09-14	12:20:24	0.726985
2022-09-14	12:20:24	0.727239
2022-09-14	12:20:24	0.719656
2022-09-14	12:20:25	0.733804
2022-09-14	12:20:25	0.724338
2022-09-14	12:20:25	0.727036
2022-09-14	12:20:25	0.72612
2022-09-14	12:20:26	0.72388
2022-09-14	12:20:26	0.73243
2022-09-14	12:20:26	0.725204
2022-09-14	12:20:26	0.729733
2022-09-14	12:20:27	0.728308
2022-09-14	12:20:27	0.729733
2022-09-14	12:20:27	0.728308
2022-09-14	12:20:27	0.726679
2022-09-14	12:20:28	0.727188
2022-09-14	12:20:28	0.727494
2022-09-14	12:20:28	0.217112
2022-09-14	12:20:29	0.0486644
2022-09-14	12:20:29	0.21187
2022-09-14	12:20:29	0.00372797
2022-09-14	12:20:29	0.0860689
2022-09-14	12:20:30	0.0319214
2022-09-14	12:20:30	0.0438806
2022-09-14	12:20:30	0.0815905
2022-09-14	12:20:30	0.0338552
2022-09-14	12:20:31	0.0712089
2022-09-14	12:20:31	0.705611
2022-09-14	12:20:31	0.72271
2022-09-14	12:20:31	0.726679
2022-09-14	12:20:32	0.727545
2022-09-14	12:20:32	0.722659
2022-09-14	12:20:32	0.726272
2022-09-14	12:20:33	0.73187
2022-09-14	12:20:33	0.725153
2022-09-14	12:20:33	0.722303
2022-09-14	12:20:33	0.72673
2022-09-14	12:20:34	0.722862
2022-09-14	12:20:34	0.736043
2022-09-14	12:20:34	0.724898
2022-09-14	12:20:34	0.728512
2022-09-14	12:20:35	0.723066
2022-09-14	12:20:35	0.721641
2022-09-14	12:20:35	0.727799
2022-09-14	12:20:35	0.728919
2022-09-14	12:20:36	0.736501
2022-09-14	12:20:36	0.727748
2022-09-14	12:20:36	0.727137
2022-09-14	12:20:37	0.72958
2022-09-14	12:20:37	0.720114
2022-09-14	12:20:37	0.72383
2022-09-14	12:20:37	0.725814
2022-09-14	12:20:38	0.727545
2022-09-14	12:20:38	0.72897
2022-09-14	12:20:38	0.724338
2022-09-14	12:20:38	0.730394
2022-09-14	12:20:39	0.727697
2022-09-14	12:20:39	0.729122
2022-09-14	12:20:39	0.721845
2022-09-14	12:20:39	0.72617
2022-09-14	12:20:40	0.726679
2022-09-14	12:20:40	0.725356
2022-09-14	12:20:40	0.725356
2022-09-14	12:20:41	0.656552
2022-09-14	12:20:41	0.635331
2022-09-14	12:20:41	0.726374
2022-09-14	12:20:41	-0.217544
2022-09-14	12:20:42	0.350344
2022-09-14	12:20:42	0.398944
2022-09-14	12:20:42	0.458028
2022-09-14	12:20:42	0.396909
2022-09-14	12:20:43	0.412634
2022-09-14	12:20:43	0.43411
2022-09-14	12:20:43	0.373092
2022-09-14	12:20:43	0.38612
2022-09-14	12:20:44	0.388512
2022-09-14	12:20:44	0.383321
2022-09-14	12:20:44	0.378079
2022-09-14	12:20:45	0.383881
2022-09-14	12:20:45	0.380369
2022-09-14	12:20:45	0.376654
2022-09-14	12:20:45	0.37986
2022-09-14	12:20:46	0.38215
2022-09-14	12:20:46	0.382405
2022-09-14	12:20:46	0.382099
2022-09-14	12:20:46	0.382405
2022-09-14	12:20:47	0.387901
2022-09-14	12:20:47	0.385153
2022-09-14	12:20:47	0.394313
2022-09-14	12:20:47	0.383982
2022-09-14	12:20:48	0.379758
2022-09-14	12:20:48	0.386781
2022-09-14	12:20:48	0.385051
2022-09-14	12:20:49	0.388512
2022-09-14	12:20:49	0.389275
2022-09-14	12:20:49	0.388003
2022-09-14	12:20:49	0.391565
2022-09-14	12:20:50	0.391769
2022-09-14	12:20:50	0.393855
2022-09-14	12:20:50	0.394618
2022-09-14	12:20:50	0.392176
2022-09-14	12:20:51	0.389733
2022-09-14	12:20:51	0.388461
2022-09-14	12:20:51	0.386323
2022-09-14	12:20:51	0.388868
2022-09-14	12:20:52	0.391463
2022-09-14	12:20:52	0.390649
2022-09-14	12:20:52	0.394109
2022-09-14	12:20:53	0.390852
2022-09-14	12:20:53	0.395127
2022-09-14	12:20:53	0.395585
2022-09-14	12:20:53	0.39757
2022-09-14	12:20:54	0.397163
2022-09-14	12:20:54	0.395942
2022-09-14	12:20:54	0.395484
2022-09-14	12:20:54	0.398995
2022-09-14	12:20:55	0.399199
2022-09-14	12:20:55	0.397672
2022-09-14	12:20:55	0.393601
2022-09-14	12:20:55	0.396807
2022-09-14	12:20:56	0.399809
2022-09-14	12:20:56	0.396654
2022-09-14	12:20:56	0.395789
2022-09-14	12:20:57	0.394873
2022-09-14	12:20:57	0.405713
2022-09-14	12:20:57	0.403321
2022-09-14	12:20:57	0.39813
2022-09-14	12:20:58	0.399402
2022-09-14	12:20:58	0.394211
2022-09-14	12:20:58	0.403117
2022-09-14	12:20:58	0.402812
2022-09-14	12:20:59	0.399657
2022-09-14	12:20:59	0.396298
2022-09-14	12:20:59	0.393753
2022-09-14	12:20:59	0.410547
2022-09-14	12:21:00	0.400318
2022-09-14	12:21:00	0.405
2022-09-14	12:21:00	0.410496
2022-09-14	12:21:01	0.406527
2022-09-14	12:21:01	0.400674
2022-09-14	12:21:01	0.414568
2022-09-14	12:21:01	0.415127
2022-09-14	12:21:02	0.411463
2022-09-14	12:21:02	0.418588
2022-09-14	12:21:02	0.411718
2022-09-14	12:21:02	0.408003
2022-09-14	12:21:03	0.410802
2022-09-14	12:21:03	0.403168
2022-09-14	12:21:03	0.40271
2022-09-14	12:21:03	0.406425
2022-09-14	12:21:04	0.407545
2022-09-14	12:21:04	0.411056
2022-09-14	12:21:04	0.404593
2022-09-14	12:21:05	0.412786
2022-09-14	12:21:05	0.418079
2022-09-14	12:21:05	0.415127
2022-09-14	12:21:05	0.412837
2022-09-14	12:21:06	0.413906
2022-09-14	12:21:06	0.422761
2022-09-14	12:21:06	0.421387
2022-09-14	12:21:06	0.416552
2022-09-14	12:21:07	0.420573
2022-09-14	12:21:07	0.415026
2022-09-14	12:21:07	0.41126
2022-09-14	12:21:07	0.409021
2022-09-14	12:21:08	0.410089
2022-09-14	12:21:08	0.408257
2022-09-14	12:21:08	0.403066
2022-09-14	12:21:09	0.406934
2022-09-14	12:21:09	0.407646
2022-09-14	12:21:09	0.413702
2022-09-14	12:21:09	0.424644
2022-09-14	12:21:10	0.412634
2022-09-14	12:21:10	0.411921
2022-09-14	12:21:10	0.410242
2022-09-14	12:21:10	0.412888
2022-09-14	12:21:11	0.41355
2022-09-14	12:21:11	0.401947
2022-09-14	12:21:11	0.642099
2022-09-14	12:21:11	0.722303
2022-09-14	12:21:12	0.725407
2022-09-14	12:21:12	0.726323
2022-09-14	12:21:12	0.730954
2022-09-14	12:21:13	0.723931
2022-09-14	12:21:13	0.730191
2022-09-14	12:21:13	0.730293
2022-09-14	12:21:13	0.73472
2022-09-14	12:21:14	0.734262
2022-09-14	12:21:14	0.728104
2022-09-14	12:21:14	0.729682
2022-09-14	12:21:14	0.72612
2022-09-14	12:21:15	0.729326
2022-09-14	12:21:15	0.731259
2022-09-14	12:21:15	0.734822
2022-09-14	12:21:16	0.736145
2022-09-14	12:21:16	0.72617
2022-09-14	12:21:16	0.726476
2022-09-14	12:21:16	0.734059
2022-09-14	12:21:17	0.737214
2022-09-14	12:21:17	0.731768
2022-09-14	12:21:17	0.734771
2022-09-14	12:21:17	0.734517
2022-09-14	12:21:18	0.730343
2022-09-14	12:21:18	0.730903
2022-09-14	12:21:18	0.73645
2022-09-14	12:21:18	0.727799
2022-09-14	12:21:19	0.728817
2022-09-14	12:21:19	0.733142
2022-09-14	12:21:19	0.729631
2022-09-14	12:21:20	0.720623
2022-09-14	12:21:20	0.72612
2022-09-14	12:21:20	0.736196
2022-09-14	12:21:20	0.727392
2022-09-14	12:21:21	0.734262
2022-09-14	12:21:21	0.731717
2022-09-14	12:21:21	0.730547
2022-09-14	12:21:21	0.724033
2022-09-14	12:21:22	0.726069
2022-09-14	12:21:22	0.731768
2022-09-14	12:21:22	0.72785
2022-09-14	12:21:22	0.73355
2022-09-14	12:21:23	0.727596
2022-09-14	12:21:23	0.725967
2022-09-14	12:21:23	0.464186
2022-09-14	12:21:24	0.724644
2022-09-14	12:21:24	0.733855
2022-09-14	12:21:24	0.72612
2022-09-14	12:21:24	0.72617
2022-09-14	12:21:25	0.725102
2022-09-14	12:21:25	0.728766
2022-09-14	12:21:25	0.734364
2022-09-14	12:21:25	0.728562
2022-09-14	12:21:26	0.729071
2022-09-14	12:21:26	0.735178
2022-09-14	12:21:26	0.731616
2022-09-14	12:21:26	0.730954
2022-09-14	12:21:27	0.732583
2022-09-14	12:21:27	0.730801
2022-09-14	12:21:27	0.607544
2022-09-14	12:21:28	-0.623549
2022-09-14	12:21:28	-1.22884
2022-09-14	12:21:28	-1.235
2022-09-14	12:21:28	-1.07179
2022-09-14	12:21:29	-1.02223
2022-09-14	12:21:29	-0.255101
2022-09-14	12:21:29	-0.362989
2022-09-14	12:21:29	-0.135865
2022-09-14	12:21:30	-0.0532694
2022-09-14	12:21:30	0.0144659
2022-09-14	12:21:30	-0.0189183
2022-09-14	12:21:30	0.102965
2022-09-14	12:21:31	-0.0933203
2022-09-14	12:21:31	-0.891997
2022-09-14	12:21:31	-3.02477
2022-09-14	12:21:32	-3.71434
2022-09-14	12:21:32	-3.53973
2022-09-14	12:21:32	-3.79184
2022-09-14	12:21:32	-3.68686
2022-09-14	12:21:33	-3.78589
2022-09-14	12:21:33	-3.75953
2022-09-14	12:21:33	-3.71342
2022-09-14	12:21:33	-3.85266
2022-09-14	12:21:34	-3.75826
2022-09-14	12:21:34	-4.0893
2022-09-14	12:21:34	-3.88686
2022-09-14	12:21:34	-4.04131
2022-09-14	12:21:35	-3.821
2022-09-14	12:21:35	-4.01067
2022-09-14	12:21:35	-4.05825
2022-09-14	12:21:36	-3.94024
2022-09-14	12:21:36	-4.10752
2022-09-14	12:21:36	-3.92945
2022-09-14	12:21:36	-4.09876
2022-09-14	12:21:37	-4.04049
2022-09-14	12:21:37	-4.06141
2022-09-14	12:21:37	-4.18518
2022-09-14	12:21:37	-4.24675
2022-09-14	12:21:38	-4.37546
2022-09-14	12:21:38	-4.3866
2022-09-14	12:21:38	-4.51144
2022-09-14	12:21:38	-3.21973
2022-09-14	12:21:39	-4.61561
2022-09-14	12:21:39	-4.71184
2022-09-14	12:21:39	-4.60019
2022-09-14	12:21:40	-4.71902
2022-09-14	12:21:40	-4.53428
2022-09-14	12:21:40	-4.58426
2022-09-14	12:21:40	-4.595
2022-09-14	12:21:41	-4.68614
2022-09-14	12:21:41	-4.65668
2022-09-14	12:21:41	-4.69057
2022-09-14	12:21:41	-4.78726
2022-09-14	12:21:42	-4.78686
2022-09-14	12:21:42	-4.93551
2022-09-14	12:21:42	-4.89754
2022-09-14	12:21:42	-4.93688
2022-09-14	12:21:43	-5.05429
2022-09-14	12:21:43	-5.23174
2022-09-14	12:21:43	-5.84874
2022-09-14	12:21:44	-5.77719
2022-09-14	12:21:44	-5.88166
2022-09-14	12:21:44	-5.97098
2022-09-14	12:21:44	-6.06207
2022-09-14	12:21:45	-6.14543
2022-09-14	12:21:45	-6.07032
2022-09-14	12:21:45	-6.12828
2022-09-14	12:21:45	-6.13596
2022-09-14	12:21:46	-4.87556
2022-09-14	12:21:46	-2.13047
2022-09-14	12:21:46	-1.57195
2022-09-14	12:21:46	-1.06167
2022-09-14	12:21:47	-0.970877
2022-09-14	12:21:47	-0.788893
2022-09-14	12:21:47	-1.03149
2022-09-14	12:21:48	-1.15846
2022-09-14	12:21:48	-2.77907
2022-09-14	12:21:48	-3.21937
2022-09-14	12:21:48	0.489428
2022-09-14	12:21:49	0.363372
2022-09-14	12:21:49	0.635178
2022-09-14	12:21:49	0.713092
2022-09-14	12:21:49	0.726578
2022-09-14	12:21:50	0.723677
2022-09-14	12:21:50	0.725509
2022-09-14	12:21:50	0.726781
2022-09-14	12:21:50	0.728257
2022-09-14	12:21:51	0.73472
2022-09-14	12:21:51	0.735483
2022-09-14	12:21:51	0.736501
2022-09-14	12:21:52	0.73131
2022-09-14	12:21:52	0.734568
2022-09-14	12:21:52	0.73014
2022-09-14	12:21:52	0.733499
2022-09-14	12:21:53	-2.10391
2022-09-14	12:21:53	-5.14176
2022-09-14	12:21:53	-5.052
2022-09-14	12:21:53	-4.67357
2022-09-14	12:21:54	-4.69663
2022-09-14	12:21:54	-4.71067
2022-09-14	12:21:54	-4.70467
2022-09-14	12:21:54	-4.76228
2022-09-14	12:21:55	-4.73082
2022-09-14	12:21:55	-4.73978
2022-09-14	12:21:55	-4.67846
2022-09-14	12:21:56	0.276196
2022-09-14	12:21:56	0.0709544
2022-09-14	12:21:56	-0.247163
2022-09-14	12:21:56	-0.446196
2022-09-14	12:21:57	-0.60874
2022-09-14	12:21:57	-0.749401
2022-09-14	12:21:57	-0.752353
2022-09-14	12:21:57	-1.24767
2022-09-14	12:21:58	-1.43352
2022-09-14	12:21:58	-1.54823
2022-09-14	12:21:58	-1.452
2022-09-14	12:21:58	-1.59927
2022-09-14	12:21:59	-1.5407
2022-09-14	12:21:59	-1.88686
2022-09-14	12:21:59	-1.75266
2022-09-14	12:22:00	-1.82411
2022-09-14	12:22:00	-2.06777
2022-09-14	12:22:00	-2.05352
2022-09-14	12:22:00	-2.05693
2022-09-14	12:22:01	-1.93744
2022-09-14	12:22:01	-2.01617
2022-09-14	12:22:01	-2.03795
2022-09-14	12:22:01	-2.16874
2022-09-14	12:22:02	-2.11805
2022-09-14	12:22:02	-2.03973
2022-09-14	12:22:02	-2.20518
2022-09-14	12:22:02	-2.12991
2022-09-14	12:22:03	-3.8524
2022-09-14	12:22:03	-3.35836
2022-09-14	12:22:03	0.664746
2022-09-14	12:22:04	0.726934
2022-09-14	12:22:04	0.730343
2022-09-14	12:22:04	0.728562
2022-09-14	12:22:04	0.73584
2022-09-14	12:22:05	0.70159
2022-09-14	12:22:05	0.726883
2022-09-14	12:22:05	0.726476
2022-09-14	12:22:05	0.729529
2022-09-14	12:22:06	0.727188
2022-09-14	12:22:06	0.725509
2022-09-14	12:22:06	0.724949
2022-09-14	12:22:07	0.728359
2022-09-14	12:22:07	0.729936
2022-09-14	12:22:07	0.735483
2022-09-14	12:22:07	0.727799
2022-09-14	12:22:08	0.729173
2022-09-14	12:22:08	0.735127
2022-09-14	12:22:08	0.727443
2022-09-14	12:22:08	0.675229
2022-09-14	12:22:09	0.728257
2022-09-14	12:22:09	-1.08309
2022-09-14	12:22:09	0.724288
2022-09-14	12:22:09	-2.29978
2022-09-14	12:22:10	0.705102
2022-09-14	12:22:10	0.725051
2022-09-14	12:22:10	0.0911071
2022-09-14	12:22:11	0.704847
2022-09-14	12:22:11	0.731972
2022-09-14	12:22:11	0.729631
2022-09-14	12:22:11	0.731667
2022-09-14	12:22:12	0.728613
2022-09-14	12:22:12	0.734109
2022-09-14	12:22:12	0.727087
2022-09-14	12:22:12	0.731768
2022-09-14	12:22:13	0.730547
2022-09-14	12:22:13	0.729987
2022-09-14	12:22:13	0.728613
2022-09-14	12:22:13	0.730394
2022-09-14	12:22:14	0.733448
2022-09-14	12:22:14	0.732023
2022-09-14	12:22:14	0.735789
2022-09-14	12:22:15	0.728461
2022-09-14	12:22:15	0.728003
2022-09-14	12:22:15	0.735331
2022-09-14	12:22:15	0.726883
2022-09-14	12:22:16	0.729529
2022-09-14	12:22:16	0.72902
2022-09-14	12:22:16	0.732481
2022-09-14	12:22:16	0.729326
2022-09-14	12:22:17	0.727545
2022-09-14	12:22:17	0.723219
2022-09-14	12:22:17	0.728919
2022-09-14	12:22:17	0.731768
2022-09-14	12:22:18	0.730242
2022-09-14	12:22:18	0.731972
2022-09-14	12:22:18	0.729631
2022-09-14	12:22:19	0.728766
2022-09-14	12:22:19	0.724491
2022-09-14	12:22:19	0.728817
2022-09-14	12:22:19	0.729275
2022-09-14	12:22:20	0.729326
2022-09-14	12:22:20	0.731361
2022-09-14	12:22:20	0.726323
2022-09-14	12:22:20	0.731616
2022-09-14	12:22:21	0.726374
2022-09-14	12:22:21	0.729478
2022-09-14	12:22:21	0.725865
2022-09-14	12:22:21	0.730496
2022-09-14	12:22:22	0.731209
2022-09-14	12:22:22	0.73014
2022-09-14	12:22:22	0.736654
2022-09-14	12:22:23	0.729631
2022-09-14	12:22:23	0.724084
2022-09-14	12:22:23	0.724746
2022-09-14	12:22:23	0.726476
2022-09-14	12:22:24	0.729835
2022-09-14	12:22:24	0.734415
2022-09-14	12:22:24	0.730547
2022-09-14	12:22:24	0.725254
2022-09-14	12:22:25	0.728817
2022-09-14	12:22:25	0.72673
2022-09-14	12:22:25	0.73701
2022-09-14	12:22:25	0.728868
2022-09-14	12:22:26	0.735178
2022-09-14	12:22:26	0.727697
2022-09-14	12:22:26	0.61528
2022-09-14	12:22:27	-1.86981
2022-09-14	12:22:27	-3.15988
2022-09-14	12:22:27	-2.99876
2022-09-14	12:22:27	-3.0834
2022-09-14	12:22:28	-3.06228
