# Supplementary material for: Comparing efficacy in reducing pulling and welfare impacts of four types of leash walking equipment
Source: PeerJ journal article supplement (doi:10.7717/peerj.18131), 2024-10-24
Supplement: Shelter_2_Tension_files.zip [file Reggie_harness_2022914113519 copy.xlsx]

## Sheet: Averaged Newtons
Date	Time	Averaged Newtons	Impulse	Total steps
2022-09-14	11:35:19	0.82684	0.82684	0
2022-09-14	11:35:20	1.11171	1.93855	0		Impulse Newtons	1980.38
2022-09-14	11:35:21	1.48647	3.42502	0		Total steps	45
2022-09-14	11:35:22	1.44604	4.87106	0		# > 5 sec	3
2022-09-14	11:35:23	1.42999	6.30105	0
2022-09-14	11:35:24	1.37498	7.67604	0
2022-09-14	11:35:25	1.37175	9.04779	0
2022-09-14	11:35:26	1.38447	10.4323	0
2022-09-14	11:35:27	2.80531	13.2376	0
2022-09-14	11:35:28	6.63507	19.8726	0
2022-09-14	11:35:29	6.6929	26.5655	0
2022-09-14	11:35:30	6.9609	33.5264	0
2022-09-14	11:35:31	6.17286	39.6993	0
2022-09-14	11:35:32	0.237069	39.9364	0
2022-09-14	11:35:33	-0.872094	39.9364	0
2022-09-14	11:35:34	-0.142707	39.9364	0
2022-09-14	11:35:35	0.17674	40.1131	0
2022-09-14	11:35:36	2.40639	42.5195	0
2022-09-14	11:35:37	1.54284	44.0623	0
2022-09-14	11:35:38	1.59379	45.6561	0
2022-09-14	11:35:39	1.2876	46.9437	0
2022-09-14	11:35:40	1.30073	48.2444	0
2022-09-14	11:35:41	0.960495	49.2049	0
2022-09-14	11:35:42	8.8152	58.0201	0
2022-09-14	11:35:43	1.49467	59.5148	0
2022-09-14	11:35:44	2.90191	62.4167	0
2022-09-14	11:35:45	9.51943	71.9361	0
2022-09-14	11:35:46	10.1687	82.1048	0
2022-09-14	11:35:47	9.74421	91.849	0
2022-09-14	11:35:48	5.59885	97.4479	0
2022-09-14	11:35:49	6.71004	104.158	0
2022-09-14	11:35:50	4.17978	108.338	0
2022-09-14	11:35:51	8.73873	117.076	0
2022-09-14	11:35:52	7.50812	124.585	0
2022-09-14	11:35:53	4.84061	129.425	0
2022-09-14	11:35:54	2.70987	132.135	0
2022-09-14	11:35:55	1.75347	133.889	0
2022-09-14	11:35:56	1.20475	135.093	0
2022-09-14	11:35:57	0.364064	135.457	0
2022-09-14	11:35:58	-0.127843	135.457	0
2022-09-14	11:35:59	-1.49377	135.457	0
2022-09-14	11:36:00	-0.309732	135.457	0
2022-09-14	11:36:01	0.758459	136.216	0
2022-09-14	11:36:02	1.73776	137.954	0
2022-09-14	11:36:03	0.827388	138.781	0
2022-09-14	11:36:04	-0.00305486	138.781	0
2022-09-14	11:36:05	-0.236331	138.781	0
2022-09-14	11:36:06	0.0152996	138.796	0
2022-09-14	11:36:07	-0.270343	138.796	0
2022-09-14	11:36:08	-0.156196	138.796	0
2022-09-14	11:36:09	5.54254	144.339	0
2022-09-14	11:36:10	3.89297	148.232	0
2022-09-14	11:36:11	5.43059	153.662	0
2022-09-14	11:36:12	2.78426	156.447	0
2022-09-14	11:36:13	-0.320484	156.447	0
2022-09-14	11:36:14	-1.67494	156.447	0
2022-09-14	11:36:15	0.110923	156.558	0
2022-09-14	11:36:16	3.9108	160.468	0
2022-09-14	11:36:17	2.56043	163.029	0
2022-09-14	11:36:18	3.50617	166.535	0
2022-09-14	11:36:19	3.53173	170.067	0
2022-09-14	11:36:20	2.84419	172.911	0
2022-09-14	11:36:21	2.7683	175.679	0
2022-09-14	11:36:22	3.26592	178.945	0
2022-09-14	11:36:23	3.149	182.094	0
2022-09-14	11:36:24	1.6125	183.707	0
2022-09-14	11:36:25	1.54023	185.247	0
2022-09-14	11:36:26	-0.277247	185.247	0
2022-09-14	11:36:27	0.164404	185.411	0
2022-09-14	11:36:28	0.49881	185.91	0
2022-09-14	11:36:29	0.960438	186.87	0
2022-09-14	11:36:30	1.17357	188.044	0
2022-09-14	11:36:31	1.03571	189.08	0
2022-09-14	11:36:32	1.00764	190.087	0
2022-09-14	11:36:33	0.9657	191.053	0
2022-09-14	11:36:34	0.997224	192.05	0
2022-09-14	11:36:35	1.01596	193.066	0
2022-09-14	11:36:36	1.05031	194.117	0
2022-09-14	11:36:37	1.03895	195.155	0
2022-09-14	11:36:38	1.17362	196.329	0
2022-09-14	11:36:39	1.3009	197.63	0
2022-09-14	11:36:40	0.61658	198.247	0
2022-09-14	11:36:41	0.133447	198.38	0
2022-09-14	11:36:42	0.773796	199.154	0
2022-09-14	11:36:43	-1.19496	199.154	0
2022-09-14	11:36:44	20.1211	219.275	1
2022-09-14	11:36:45	12.4605	231.735	1
2022-09-14	11:36:46	10.8269	242.562	1
2022-09-14	11:36:47	9.08072	251.643	1
2022-09-14	11:36:48	0.979339	252.622	1
2022-09-14	11:36:49	-1.07943	252.622	1
2022-09-14	11:36:50	-1.71001	252.622	1
2022-09-14	11:36:51	3.64995	256.272	1
2022-09-14	11:36:52	7.66239	263.935	1
2022-09-14	11:36:53	1.1707	265.105	1
2022-09-14	11:36:54	0.732256	265.838	1
2022-09-14	11:36:55	0.0861352	265.924	1
2022-09-14	11:36:56	-0.564456	265.924	1
2022-09-14	11:36:57	-0.764776	265.924	1
2022-09-14	11:36:58	0.613468	266.537	1
2022-09-14	11:36:59	1.07051	267.608	1
2022-09-14	11:37:00	1.65738	269.265	1
2022-09-14	11:37:01	2.06879	271.334	1
2022-09-14	11:37:02	1.88941	273.223	1
2022-09-14	11:37:03	1.6039	274.827	1
2022-09-14	11:37:04	1.34985	276.177	1
2022-09-14	11:37:05	1.50015	277.677	1
2022-09-14	11:37:06	5.34706	283.024	1
2022-09-14	11:37:07	6.48945	289.514	1
2022-09-14	11:37:08	5.304	294.818	1
2022-09-14	11:37:09	2.90705	297.725	1
2022-09-14	11:37:10	4.25517	301.98	1
2022-09-14	11:37:11	4.96851	306.949	1
2022-09-14	11:37:12	5.30422	312.253	1
2022-09-14	11:37:13	1.94821	314.201	1
2022-09-14	11:37:14	1.61822	315.819	1
2022-09-14	11:37:15	2.02138	317.841	1
2022-09-14	11:37:16	1.44018	319.281	1
2022-09-14	11:37:17	1.35376	320.635	1
2022-09-14	11:37:18	1.45936	322.094	1
2022-09-14	11:37:19	0.346123	322.44	1
2022-09-14	11:37:20	1.36468	323.805	1
2022-09-14	11:37:21	1.96338	325.768	1
2022-09-14	11:37:22	1.81539	327.583	1
2022-09-14	11:37:23	1.96547	329.549	1
2022-09-14	11:37:24	1.81273	331.362	1
2022-09-14	11:37:25	1.78356	333.145	1
2022-09-14	11:37:26	1.86106	335.006	1
2022-09-14	11:37:27	1.81041	336.817	1
2022-09-14	11:37:28	1.68007	338.497	1
2022-09-14	11:37:29	1.2414	339.738	1
2022-09-14	11:37:30	1.48381	341.222	1
2022-09-14	11:37:31	2.17854	343.4	1
2022-09-14	11:37:32	2.1056	345.506	1
2022-09-14	11:37:33	1.59545	347.102	1
2022-09-14	11:37:34	4.80315	351.905	1
2022-09-14	11:37:35	4.77101	356.676	1
2022-09-14	11:37:36	3.87124	360.547	1
2022-09-14	11:37:37	1.23589	361.783	1
2022-09-14	11:37:38	2.07486	363.858	1
2022-09-14	11:37:39	1.0477	364.905	1
2022-09-14	11:37:40	1.94708	366.852	1
2022-09-14	11:37:41	2.02812	368.881	1
2022-09-14	11:37:42	2.31165	371.192	1
2022-09-14	11:37:43	2.76546	373.958	1
2022-09-14	11:37:44	3.39183	377.35	1
2022-09-14	11:37:45	0.929087	378.279	1
2022-09-14	11:37:46	0.862193	379.141	1
2022-09-14	11:37:47	3.10112	382.242	1
2022-09-14	11:37:48	16.9744	399.216	2
2022-09-14	11:37:49	35.8832	435.099	3
2022-09-14	11:37:50	32.3179	467.417	4
2022-09-14	11:37:51	12.8343	480.252	4
2022-09-14	11:37:52	49.1186	529.37	5
2022-09-14	11:37:53	31.1222	560.493	6
2022-09-14	11:37:54	31.9291	592.422	7
2022-09-14	11:37:55	32.23	624.652	8
2022-09-14	11:37:56	32.0181	656.67	9
2022-09-14	11:37:57	30.9697	687.639	10
2022-09-14	11:37:58	29.5921	717.232	11
2022-09-14	11:37:59	27.3787	744.61	12
2022-09-14	11:38:00	25.4568	770.067	13
2022-09-14	11:38:01	24.194	794.261	14
2022-09-14	11:38:02	23.0895	817.351	15
2022-09-14	11:38:03	23.3995	840.75	16
2022-09-14	11:38:04	22.6765	863.427	17
2022-09-14	11:38:05	22.3979	885.824	18
2022-09-14	11:38:06	16.942	902.766	19
2022-09-14	11:38:07	15.1993	917.966	20
2022-09-14	11:38:08	15.3355	933.301	21
2022-09-14	11:38:09	15.4851	948.786	22
2022-09-14	11:38:10	16.7989	965.585	23
2022-09-14	11:38:11	13.5101	979.095	24
2022-09-14	11:38:12	56.5506	1035.65	25
2022-09-14	11:38:13	42.0236	1077.67	26
2022-09-14	11:38:14	40.666	1118.34	27
2022-09-14	11:38:15	11.5012	1129.84	27
2022-09-14	11:38:16	3.25415	1133.09	27
2022-09-14	11:38:17	4.13949	1137.23	27
2022-09-14	11:38:18	5.51842	1142.75	27
2022-09-14	11:38:19	32.4035	1175.15	28
2022-09-14	11:38:20	12.3537	1187.51	28
2022-09-14	11:38:21	10.0168	1197.52	28
2022-09-14	11:38:22	9.07278	1206.6	28
2022-09-14	11:38:23	9.42826	1216.02	28
2022-09-14	11:38:24	9.47302	1225.5	28
2022-09-14	11:38:25	9.5801	1235.08	28
2022-09-14	11:38:26	8.97263	1244.05	28
2022-09-14	11:38:27	9.10818	1253.16	28
2022-09-14	11:38:28	9.25486	1262.41	28
2022-09-14	11:38:29	9.01032	1271.42	28
2022-09-14	11:38:30	9.20727	1280.63	28
2022-09-14	11:38:31	8.49594	1289.13	28
2022-09-14	11:38:32	8.66387	1297.79	28
2022-09-14	11:38:33	8.34131	1306.13	28
2022-09-14	11:38:34	7.97467	1314.11	28
2022-09-14	11:38:35	8.16397	1322.27	28
2022-09-14	11:38:36	7.84151	1330.11	28
2022-09-14	11:38:37	7.57204	1337.68	28
2022-09-14	11:38:38	6.47893	1344.16	28
2022-09-14	11:38:39	5.4654	1349.63	28
2022-09-14	11:38:40	2.1207	1351.75	28
2022-09-14	11:38:41	1.52829	1353.28	28
2022-09-14	11:38:42	1.90758	1355.18	28
2022-09-14	11:38:43	19.5751	1374.76	29
2022-09-14	11:38:44	7.36211	1382.12	29
2022-09-14	11:38:45	0.61028	1382.73	29
2022-09-14	11:38:46	-0.854154	1382.73	29
2022-09-14	11:38:47	-3.62924	1382.73	29
2022-09-14	11:38:48	-4.14859	1382.73	29
2022-09-14	11:38:49	-4.35541	1382.73	29
2022-09-14	11:38:50	-4.88107	1382.73	29
2022-09-14	11:38:51	-5.41125	1382.73	29
2022-09-14	11:38:52	-6.05357	1382.73	29
2022-09-14	11:38:53	-7.08385	1382.73	29
2022-09-14	11:38:54	-8.27286	1382.73	29
2022-09-14	11:38:55	-9.00601	1382.73	29
2022-09-14	11:38:56	-5.81497	1382.73	29
2022-09-14	11:38:57	2.02518	1384.76	29
2022-09-14	11:38:58	2.69172	1387.45	29
2022-09-14	11:38:59	2.11239	1389.56	29
2022-09-14	11:39:00	1.77466	1391.34	29
2022-09-14	11:39:01	2.06451	1393.4	29
2022-09-14	11:39:02	4.42579	1397.83	29
2022-09-14	11:39:03	16.1411	1413.97	30
2022-09-14	11:39:04	4.52364	1418.49	30
2022-09-14	11:39:05	3.92489	1422.42	30
2022-09-14	11:39:06	2.6121	1425.03	30
2022-09-14	11:39:07	1.83678	1426.86	30
2022-09-14	11:39:08	3.91142	1430.78	30
2022-09-14	11:39:09	7.05696	1437.83	30
2022-09-14	11:39:10	4.22862	1442.06	30
2022-09-14	11:39:11	2.77565	1444.84	30
2022-09-14	11:39:12	0.542273	1445.38	30
2022-09-14	11:39:13	0.600169	1445.98	30
2022-09-14	11:39:14	1.0361	1447.02	30
2022-09-14	11:39:15	0.125014	1447.14	30
2022-09-14	11:39:16	-1.93389	1447.14	30
2022-09-14	11:39:17	2.0254	1449.17	30
2022-09-14	11:39:18	1.72399	1450.89	30
2022-09-14	11:39:19	1.86513	1452.76	30
2022-09-14	11:39:20	1.86428	1454.62	30
2022-09-14	11:39:21	2.96439	1457.58	30
2022-09-14	11:39:22	4.08849	1461.67	30
2022-09-14	11:39:23	2.89071	1464.56	30
2022-09-14	11:39:24	0.491228	1465.05	30
2022-09-14	11:39:25	0.860948	1465.92	30
2022-09-14	11:39:26	1.73978	1467.66	30
2022-09-14	11:39:27	1.20554	1468.86	30
2022-09-14	11:39:28	1.47108	1470.33	30
2022-09-14	11:39:29	1.1123	1471.44	30
2022-09-14	11:39:30	0.39451	1471.84	30
2022-09-14	11:39:31	0.527786	1472.37	30
2022-09-14	11:39:32	0.344424	1472.71	30
2022-09-14	11:39:33	0.177231	1472.89	30
2022-09-14	11:39:34	-0.441819	1472.89	30
2022-09-14	11:39:35	-1.13989	1472.89	30
2022-09-14	11:39:36	-0.844874	1472.89	30
2022-09-14	11:39:37	-0.499771	1472.89	30
2022-09-14	11:39:38	-1.61827	1472.89	30
2022-09-14	11:39:39	0.153933	1473.04	30
2022-09-14	11:39:40	36.1088	1509.15	31
2022-09-14	11:39:41	27.9167	1537.07	32
2022-09-14	11:39:42	19.002	1556.07	33
2022-09-14	11:39:43	30.9469	1587.02	34
2022-09-14	11:39:44	22.2572	1609.27	35
2022-09-14	11:39:45	49.3811	1658.65	36
2022-09-14	11:39:46	35.3732	1694.03	37
2022-09-14	11:39:47	10.0194	1704.05	37
2022-09-14	11:39:48	2.85438	1706.9	37
2022-09-14	11:39:49	2.17307	1709.07	37
2022-09-14	11:39:50	1.63785	1710.71	37
2022-09-14	11:39:51	1.53559	1712.25	37
2022-09-14	11:39:52	1.82665	1714.07	37
2022-09-14	11:39:53	11.1825	1725.26	37
2022-09-14	11:39:54	13.4403	1738.7	38
2022-09-14	11:39:55	2.05494	1740.75	38
2022-09-14	11:39:56	1.95823	1742.71	38
2022-09-14	11:39:57	3.13085	1745.84	38
2022-09-14	11:39:58	3.27695	1749.12	38
2022-09-14	11:39:59	3.98765	1753.11	38
2022-09-14	11:40:00	5.26251	1758.37	38
2022-09-14	11:40:01	1.90105	1760.27	38
2022-09-14	11:40:02	12.4179	1772.69	38
2022-09-14	11:40:03	11.716	1784.4	38
2022-09-14	11:40:04	9.35577	1793.76	38
2022-09-14	11:40:05	12.4472	1806.21	38
2022-09-14	11:40:06	17.7805	1823.99	39
2022-09-14	11:40:07	12.5304	1836.52	39
2022-09-14	11:40:08	12.1406	1848.66	39
2022-09-14	11:40:09	18.7558	1867.41	40
2022-09-14	11:40:10	13.4121	1880.83	41
2022-09-14	11:40:11	20.4887	1901.31	42
2022-09-14	11:40:12	22.2215	1923.54	43
2022-09-14	11:40:13	28.3199	1951.86	44
2022-09-14	11:40:14	14.4179	1966.27	45
2022-09-14	11:40:15	8.85192	1975.13	45
2022-09-14	11:40:16	2.44923	1977.58	45
2022-09-14	11:40:17	-0.557494	1977.58	45
2022-09-14	11:40:18	1.21946	1978.79	45
2022-09-14	11:40:19	1.58669	1980.38	45

## Sheet: Reggie_harness_202291411351 (4)
Date	Time	Lbs	Newtons	Averaged Newtons	Total force x time		total steps > 13.345	**GoPro Fitting: 11:24
2022-09-14	11:35:19	0.193193	0.859361	0.82684	0.859361	FALSE	0
2022-09-14	11:35:19	0.178384	0.793488	0.82684	0.793488	FALSE	0
2022-09-14	11:35:19	0.186069	0.827672	0.82684	1.68703	FALSE	0
2022-09-14	11:35:20	0.181438	0.807073	1.11171	1.60056	FALSE	0
2022-09-14	11:35:20	0.224339	0.997905	1.11171	2.68494	FALSE	0
2022-09-14	11:35:20	0.282659	1.25732	1.11171	2.85788	FALSE	0
2022-09-14	11:35:20	0.31126	1.38455	1.11171	4.06948	FALSE	0
2022-09-14	11:35:21	0.331209	1.47328	1.48647	4.33117	FALSE	0
2022-09-14	11:35:21	0.359911	1.60096	1.48647	5.67044	FALSE	0
2022-09-14	11:35:21	0.314975	1.40107	1.48647	5.73224	FALSE	0
2022-09-14	11:35:21	0.330598	1.47057	1.48647	7.14101	FALSE	0
2022-09-14	11:35:22	0.329886	1.4674	1.44604	7.19964	FALSE	0
2022-09-14	11:35:22	0.322252	1.43344	1.44604	8.57445	FALSE	0
2022-09-14	11:35:22	0.323117	1.43729	1.44604	8.63693	FALSE	0
2022-09-14	11:35:23	0.32612	1.45065	1.42999	10.0251	FALSE	0
2022-09-14	11:35:23	0.321438	1.42982	1.42999	10.0667	FALSE	0
2022-09-14	11:35:23	0.321845	1.43163	1.42999	11.4567	FALSE	0
2022-09-14	11:35:23	0.316501	1.40786	1.42999	11.4746	FALSE	0
2022-09-14	11:35:24	0.361896	1.60979	1.37498	13.0665	FALSE	0
2022-09-14	11:35:24	0.301082	1.33927	1.37498	12.8139	FALSE	0
2022-09-14	11:35:24	0.289377	1.28721	1.37498	14.3537	FALSE	0
2022-09-14	11:35:24	0.284084	1.26366	1.37498	14.0775	FALSE	0
2022-09-14	11:35:25	0.293804	1.3069	1.37175	15.6606	FALSE	0
2022-09-14	11:35:25	0.313753	1.39564	1.37175	15.4732	FALSE	0
2022-09-14	11:35:25	0.313244	1.39337	1.37175	17.054	FALSE	0
2022-09-14	11:35:25	0.312736	1.39111	1.37175	16.8643	FALSE	0
2022-09-14	11:35:26	0.3107	1.38206	1.38447	18.436	FALSE	0
2022-09-14	11:35:26	0.311158	1.38409	1.38447	18.2484	FALSE	0
2022-09-14	11:35:26	0.31187	1.38726	1.38447	19.8233	FALSE	0
2022-09-14	11:35:27	0.369326	1.64284	2.80531	19.8912	FALSE	0
2022-09-14	11:35:27	0.73243	3.258	2.80531	23.0813	FALSE	0
2022-09-14	11:35:27	0.74958	3.33428	2.80531	23.2255	FALSE	0
2022-09-14	11:35:27	0.67131	2.98612	2.80531	26.0674	FALSE	0
2022-09-14	11:35:28	1.57095	6.9879	6.63507	30.2134	FALSE	0
2022-09-14	11:35:28	1.52653	6.79031	6.63507	32.8577	FALSE	0
2022-09-14	11:35:28	1.41396	6.28958	6.63507	36.503	FALSE	0
2022-09-14	11:35:28	1.45508	6.47249	6.63507	39.3302	FALSE	0
2022-09-14	11:35:29	1.47243	6.54966	6.6929	43.0526	FALSE	0
2022-09-14	11:35:29	1.4994	6.66963	6.6929	45.9999	FALSE	0
2022-09-14	11:35:29	1.52205	6.77038	6.6929	49.823	FALSE	0
2022-09-14	11:35:29	1.52464	6.7819	6.6929	52.7818	FALSE	0
2022-09-14	11:35:30	1.54637	6.87856	6.9609	56.7016	FALSE	0
2022-09-14	11:35:30	1.56424	6.95805	6.9609	59.7398	FALSE	0
2022-09-14	11:35:30	1.58403	7.04608	6.9609	63.7477	FALSE	0
2022-09-14	11:35:31	1.60576	7.14274	6.17286	66.8825	FALSE	0
2022-09-14	11:35:31	1.66301	7.3974	6.17286	71.1451	FALSE	0
2022-09-14	11:35:31	1.68052	7.47529	6.17286	74.3578	FALSE	0
2022-09-14	11:35:31	0.60159	2.67599	6.17286	73.8211	FALSE	0
2022-09-14	11:35:32	0.111311	0.495134	0.237069	74.853	FALSE	0
2022-09-14	11:35:32	0.249173	1.10837	0.237069	74.9294	FALSE	0
2022-09-14	11:35:32	0.11925	0.530448	0.237069	75.3834	FALSE	0
2022-09-14	11:35:32	-0.266552	-1.18568	0.237069	74.9294	FALSE	0
2022-09-14	11:35:33	-0.364923	-1.62325	-0.872094	75.3834	FALSE	0
2022-09-14	11:35:33	-0.180903	-0.804693	-0.872094	74.9294	FALSE	0
2022-09-14	11:35:33	-0.176679	-0.785904	-0.872094	75.3834	FALSE	0
2022-09-14	11:35:33	-0.0617173	-0.274531	-0.872094	74.9294	FALSE	0
2022-09-14	11:35:34	-0.117493	-0.522632	-0.142707	75.3834	FALSE	0
2022-09-14	11:35:34	0.0714124	0.317657	-0.142707	75.2471	FALSE	0
2022-09-14	11:35:34	-0.0501651	-0.223144	-0.142707	75.3834	FALSE	0
2022-09-14	11:35:35	0.0530918	0.236163	0.17674	75.4833	FALSE	0
2022-09-14	11:35:35	-0.0607504	-0.27023	0.17674	75.3834	FALSE	0
2022-09-14	11:35:35	0.111005	0.493772	0.17674	75.977	FALSE	0
2022-09-14	11:35:35	0.0555855	0.247255	0.17674	75.6307	FALSE	0
2022-09-14	11:35:36	0.0719213	0.31992	2.40639	76.2969	FALSE	0
2022-09-14	11:35:36	0.991412	4.41	2.40639	80.0407	FALSE	0
2022-09-14	11:35:36	0.649835	2.8906	2.40639	79.1875	FALSE	0
2022-09-14	11:35:36	0.450751	2.00503	2.40639	82.0457	FALSE	0
2022-09-14	11:35:37	0.525458	2.33734	1.54284	81.5249	FALSE	0
2022-09-14	11:35:37	0.652532	2.90259	1.54284	84.9483	FALSE	0
2022-09-14	11:35:37	0.204797	0.910978	1.54284	82.4359	FALSE	0
2022-09-14	11:35:37	0.00459311	0.0204311	1.54284	84.9687	FALSE	0
2022-09-14	11:35:38	0.0293768	0.130674	1.59379	82.5665	FALSE	0
2022-09-14	11:35:38	0.357112	1.58851	1.59379	86.5572	FALSE	0
2022-09-14	11:35:38	0.68841	3.06219	1.59379	85.6287	FALSE	0
2022-09-14	11:35:39	0.276552	1.23016	1.2876	87.7874	FALSE	0
2022-09-14	11:35:39	0.407341	1.81193	1.2876	87.4407	FALSE	0
2022-09-14	11:35:39	0.307341	1.36711	1.2876	89.1545	FALSE	0
2022-09-14	11:35:39	0.166629	0.741199	1.2876	88.1819	FALSE	0
2022-09-14	11:35:40	0.315026	1.4013	1.30073	90.5558	FALSE	0
2022-09-14	11:35:40	0.241438	1.07396	1.30073	89.2558	FALSE	0
2022-09-14	11:35:40	0.22958	1.02122	1.30073	91.577	FALSE	0
2022-09-14	11:35:40	0.383626	1.70645	1.30073	90.9623	FALSE	0
2022-09-14	11:35:41	0.0482063	0.214431	0.960495	91.7915	FALSE	0
2022-09-14	11:35:41	0.171616	0.763382	0.960495	91.7256	FALSE	0
2022-09-14	11:35:41	0.298995	1.32999	0.960495	93.1214	FALSE	0
2022-09-14	11:35:41	0.344898	1.53418	0.960495	93.2598	FALSE	0
2022-09-14	11:35:42	0.465916	2.07249	8.8152	95.1939	FALSE	0
2022-09-14	11:35:42	3.48714	15.5115	8.8152	108.771	1	1
2022-09-14	11:35:42	1.99218	8.86162	8.8152	104.056	FALSE	1
2022-09-14	11:35:43	0.565356	2.51482	1.49467	111.286	FALSE	1
2022-09-14	11:35:43	0.116349	0.517544	1.49467	104.573	FALSE	1
2022-09-14	11:35:43	0.568257	2.52772	1.49467	113.814	FALSE	1
2022-09-14	11:35:43	0.0941096	0.418618	1.49467	104.992	FALSE	1
2022-09-14	11:35:44	0.45243	2.0125	2.90191	115.826	FALSE	1
2022-09-14	11:35:44	0.683168	3.03887	2.90191	108.031	FALSE	1
2022-09-14	11:35:44	0.346476	1.54119	2.90191	117.368	FALSE	1
2022-09-14	11:35:44	1.12744	5.01508	2.90191	113.046	FALSE	1
2022-09-14	11:35:45	0.700471	3.11584	9.51943	120.483	FALSE	1
2022-09-14	11:35:45	2.27273	10.1096	9.51943	123.155	FALSE	1
2022-09-14	11:35:45	1.55477	6.91593	9.51943	127.399	FALSE	1
2022-09-14	11:35:45	4.03228	17.9364	9.51943	141.092	1	2
2022-09-14	11:35:46	1.65335	7.35443	10.1687	134.754	FALSE	2
2022-09-14	11:35:46	3.21726	14.311	10.1687	155.403	1	3
2022-09-14	11:35:46	1.98744	8.84053	10.1687	143.594	FALSE	3
2022-09-14	11:35:47	3.29721	14.6666	9.74421	170.069	1	4
2022-09-14	11:35:47	1.71401	7.62426	9.74421	151.219	FALSE	4
2022-09-14	11:35:47	3.44576	15.3274	9.74421	185.397	1	5
2022-09-14	11:35:47	0.305407	1.35851	9.74421	152.577	FALSE	5
2022-09-14	11:35:48	2.04139	9.08051	5.59885	194.477	FALSE	5
2022-09-14	11:35:48	0.271107	1.20594	5.59885	153.783	FALSE	5
2022-09-14	11:35:48	2.12724	9.46239	5.59885	203.94	FALSE	5
2022-09-14	11:35:48	0.594975	2.64657	5.59885	156.43	FALSE	5
2022-09-14	11:35:49	0.859758	3.82438	6.71004	207.764	FALSE	5
2022-09-14	11:35:49	1.97197	8.77172	6.71004	165.201	FALSE	5
2022-09-14	11:35:49	0.525712	2.33847	6.71004	210.102	FALSE	5
2022-09-14	11:35:49	2.6765	11.9056	6.71004	177.107	FALSE	5
2022-09-14	11:35:50	0.349122	1.55296	4.17978	211.655	FALSE	5
2022-09-14	11:35:50	1.842	8.19358	4.17978	185.3	FALSE	5
2022-09-14	11:35:50	0.62785	2.7928	4.17978	214.448	FALSE	5
2022-09-14	11:35:51	0.771667	3.43253	8.73873	188.733	FALSE	5
2022-09-14	11:35:51	2.08546	9.27654	8.73873	223.725	FALSE	5
2022-09-14	11:35:51	1.29421	5.7569	8.73873	194.49	FALSE	5
2022-09-14	11:35:51	3.70688	16.4889	8.73873	240.214	1	6
2022-09-14	11:35:52	1.0593	4.71198	7.50812	199.202	FALSE	6
2022-09-14	11:35:52	3.44245	15.3127	7.50812	255.526	1	7
2022-09-14	11:35:52	0.505102	2.24679	7.50812	201.449	FALSE	7
2022-09-14	11:35:52	1.74475	7.761	7.50812	263.287	FALSE	7
2022-09-14	11:35:53	0.83131	3.69783	4.84061	205.147	FALSE	7
2022-09-14	11:35:53	0.613346	2.72829	4.84061	266.016	FALSE	7
2022-09-14	11:35:53	2.49014	11.0766	4.84061	216.223	FALSE	7
2022-09-14	11:35:53	0.418079	1.8597	4.84061	267.875	FALSE	7
2022-09-14	11:35:54	1.3508	6.00863	2.70987	222.232	FALSE	7
2022-09-14	11:35:54	0.263779	1.17334	2.70987	269.049	FALSE	7
2022-09-14	11:35:54	0.213041	0.947649	2.70987	223.179	FALSE	7
2022-09-14	11:35:55	0.938995	4.17684	1.75347	273.226	FALSE	7
2022-09-14	11:35:55	0.182507	0.811828	1.75347	223.991	FALSE	7
2022-09-14	11:35:55	0.193041	0.858685	1.75347	274.084	FALSE	7
2022-09-14	11:35:55	0.262252	1.16655	1.75347	225.158	FALSE	7
2022-09-14	11:35:56	0.12785	0.568702	1.20475	274.653	FALSE	7
2022-09-14	11:35:56	0.420471	1.87034	1.20475	227.028	FALSE	7
2022-09-14	11:35:56	0.225713	1.00402	1.20475	275.657	FALSE	7
2022-09-14	11:35:56	0.309326	1.37594	1.20475	228.404	FALSE	7
2022-09-14	11:35:57	0.177825	0.791001	0.364064	276.448	FALSE	7
2022-09-14	11:35:57	0.113601	0.50532	0.364064	228.909	FALSE	7
2022-09-14	11:35:57	0.0895295	0.398245	0.364064	276.846	FALSE	7
2022-09-14	11:35:57	-0.0535748	-0.238311	0.364064	228.909	FALSE	7
2022-09-14	11:35:58	0.0512089	0.227787	-0.127843	277.074	FALSE	7
2022-09-14	11:35:58	-0.103397	-0.459931	-0.127843	228.909	FALSE	7
2022-09-14	11:35:58	-0.0340328	-0.151385	-0.127843	277.074	FALSE	7
2022-09-14	11:35:59	-0.331285	-1.47362	-1.49377	228.909	FALSE	7
2022-09-14	11:35:59	-0.386246	-1.7181	-1.49377	277.074	FALSE	7
2022-09-14	11:35:59	-0.364974	-1.62348	-1.49377	228.909	FALSE	7
2022-09-14	11:35:59	-0.26075	-1.15987	-1.49377	277.074	FALSE	7
2022-09-14	11:36:00	-0.114491	-0.509279	-0.309732	228.909	FALSE	7
2022-09-14	11:36:00	0.000318332	0.001416	-0.309732	277.075	FALSE	7
2022-09-14	11:36:00	-0.0381549	-0.169721	-0.309732	228.909	FALSE	7
2022-09-14	11:36:00	-0.126196	-0.561345	-0.309732	277.075	FALSE	7
2022-09-14	11:36:01	0.0905473	0.402772	0.758459	229.312	FALSE	7
2022-09-14	11:36:01	0.181947	0.809337	0.758459	277.885	FALSE	7
2022-09-14	11:36:01	0.321234	1.42891	0.758459	230.741	FALSE	7
2022-09-14	11:36:01	0.0883081	0.392812	0.758459	278.278	FALSE	7
2022-09-14	11:36:02	0.446832	1.9876	1.73776	232.729	FALSE	7
2022-09-14	11:36:02	0.37986	1.68969	1.73776	279.967	FALSE	7
2022-09-14	11:36:02	0.345305	1.53599	1.73776	234.265	FALSE	7
2022-09-14	11:36:03	0.280267	1.24668	0.827388	281.214	FALSE	7
2022-09-14	11:36:03	0.296959	1.32093	0.827388	235.586	FALSE	7
2022-09-14	11:36:03	0.128359	0.570967	0.827388	281.785	FALSE	7
2022-09-14	11:36:03	0.0384353	0.170968	0.827388	235.757	FALSE	7
2022-09-14	11:36:04	-0.0129641	-0.0576669	-0.00305486	281.785	FALSE	7
2022-09-14	11:36:04	0.0509036	0.226429	-0.00305486	235.983	FALSE	7
2022-09-14	11:36:04	-0.0374934	-0.166778	-0.00305486	281.785	FALSE	7
2022-09-14	11:36:04	-0.00319315	-0.0142038	-0.00305486	235.983	FALSE	7
2022-09-14	11:36:05	-0.112761	-0.501583	-0.236331	281.785	FALSE	7
2022-09-14	11:36:05	-0.0377478	-0.16791	-0.236331	235.983	FALSE	7
2022-09-14	11:36:05	-0.116832	-0.519692	-0.236331	281.785	FALSE	7
2022-09-14	11:36:05	0.0548221	0.24386	-0.236331	236.227	FALSE	7
2022-09-14	11:36:06	0.136145	0.6056	0.0152996	282.391	FALSE	7
2022-09-14	11:36:06	-0.0705214	-0.313693	0.0152996	236.227	FALSE	7
2022-09-14	11:36:06	-0.0553051	-0.246008	0.0152996	282.391	FALSE	7
2022-09-14	11:36:07	-0.0504196	-0.224276	-0.270343	236.227	FALSE	7
2022-09-14	11:36:07	0.119809	0.532934	-0.270343	282.923	FALSE	7
2022-09-14	11:36:07	-0.183906	-0.818051	-0.270343	236.227	FALSE	7
2022-09-14	11:36:07	-0.128587	-0.571981	-0.270343	282.923	FALSE	7
2022-09-14	11:36:08	-0.257646	-1.14606	-0.156196	236.227	FALSE	7
2022-09-14	11:36:08	-0.0671117	-0.298526	-0.156196	282.923	FALSE	7
2022-09-14	11:36:08	0.0151783	0.0675161	-0.156196	236.294	FALSE	7
2022-09-14	11:36:08	0.169122	0.752288	-0.156196	283.676	FALSE	7
2022-09-14	11:36:09	2.50536	11.1443	5.54254	247.439	FALSE	7
2022-09-14	11:36:09	0.319148	1.41963	5.54254	285.095	FALSE	7
2022-09-14	11:36:09	1.8021	8.0161	5.54254	255.455	FALSE	7
2022-09-14	11:36:09	0.357468	1.59009	5.54254	286.685	FALSE	7
2022-09-14	11:36:10	0.88098	3.91878	3.89297	259.374	FALSE	7
2022-09-14	11:36:10	1.26989	5.64872	3.89297	292.334	FALSE	7
2022-09-14	11:36:10	0.474669	2.11142	3.89297	261.485	FALSE	7
2022-09-14	11:36:11	1.63187	7.25888	5.43059	299.593	FALSE	7
2022-09-14	11:36:11	0.483117	2.149	5.43059	263.634	FALSE	7
2022-09-14	11:36:11	1.14144	5.07735	5.43059	304.67	FALSE	7
2022-09-14	11:36:11	1.62698	7.23713	5.43059	270.871	FALSE	7
2022-09-14	11:36:12	1.40083	6.23117	2.78426	310.902	FALSE	7
2022-09-14	11:36:12	0.438181	1.94912	2.78426	272.82	FALSE	7
2022-09-14	11:36:12	0.400776	1.78273	2.78426	312.684	FALSE	7
2022-09-14	11:36:12	0.263931	1.17402	2.78426	273.994	FALSE	7
2022-09-14	11:36:13	0.043219	0.192247	-0.320484	312.877	FALSE	7
2022-09-14	11:36:13	-0.101259	-0.45042	-0.320484	273.994	FALSE	7
2022-09-14	11:36:13	-0.0430405	-0.191453	-0.320484	312.877	FALSE	7
2022-09-14	11:36:13	-0.187112	-0.832312	-0.320484	273.994	FALSE	7
2022-09-14	11:36:14	-0.369961	-1.64566	-1.67494	312.877	FALSE	7
2022-09-14	11:36:14	-0.382124	-1.69976	-1.67494	273.994	FALSE	7
2022-09-14	11:36:14	-0.377544	-1.67939	-1.67494	312.877	FALSE	7
2022-09-14	11:36:15	-0.0801396	-0.356477	0.110923	273.994	FALSE	7
2022-09-14	11:36:15	-0.170318	-0.757609	0.110923	312.877	FALSE	7
2022-09-14	11:36:15	0.107545	0.478382	0.110923	274.473	FALSE	7
2022-09-14	11:36:15	0.242659	1.0794	0.110923	313.956	FALSE	7
2022-09-14	11:36:16	0.359962	1.60118	3.9108	276.074	FALSE	7
2022-09-14	11:36:16	1.73732	7.72795	3.9108	321.684	FALSE	7
2022-09-14	11:36:16	0.258893	1.15161	3.9108	277.225	FALSE	7
2022-09-14	11:36:16	1.16057	5.16245	3.9108	326.846	FALSE	7
2022-09-14	11:36:17	0.336247	1.49569	2.56043	278.721	FALSE	7
2022-09-14	11:36:17	0.729529	3.24509	2.56043	330.091	FALSE	7
2022-09-14	11:36:17	0.571819	2.54357	2.56043	281.265	FALSE	7
2022-09-14	11:36:17	0.664847	2.95737	2.56043	333.049	FALSE	7
2022-09-14	11:36:18	0.733142	3.26116	3.50617	284.526	FALSE	7
2022-09-14	11:36:18	0.884135	3.93281	3.50617	336.982	FALSE	7
2022-09-14	11:36:18	0.747392	3.32455	3.50617	287.85	FALSE	7
2022-09-14	11:36:19	0.463015	2.05958	3.53173	339.041	FALSE	7
2022-09-14	11:36:19	0.994008	4.42155	3.53173	292.272	FALSE	7
2022-09-14	11:36:19	0.540572	2.40457	3.53173	341.446	FALSE	7
2022-09-14	11:36:19	1.17828	5.24123	3.53173	297.513	FALSE	7
2022-09-14	11:36:20	0.500165	2.22483	2.84419	343.671	FALSE	7
2022-09-14	11:36:20	0.697163	3.10112	2.84419	300.614	FALSE	7
2022-09-14	11:36:20	0.957417	4.25878	2.84419	347.929	FALSE	7
2022-09-14	11:36:20	0.402863	1.79202	2.84419	302.406	FALSE	7
2022-09-14	11:36:21	0.971565	4.32172	2.7683	352.251	FALSE	7
2022-09-14	11:36:21	0.56673	2.52093	2.7683	304.927	FALSE	7
2022-09-14	11:36:21	0.339199	1.50882	2.7683	353.76	FALSE	7
2022-09-14	11:36:21	0.61187	2.72172	2.7683	307.649	FALSE	7
2022-09-14	11:36:22	0.404237	1.79813	3.26592	355.558	FALSE	7
2022-09-14	11:36:22	1.44999	6.44985	3.26592	314.099	FALSE	7
2022-09-14	11:36:22	0.34841	1.5498	3.26592	357.108	FALSE	7
2022-09-14	11:36:23	0.847952	3.77186	3.149	317.871	FALSE	7
2022-09-14	11:36:23	0.685763	3.05041	3.149	360.158	FALSE	7
2022-09-14	11:36:23	0.213855	0.95127	3.149	318.822	FALSE	7
2022-09-14	11:36:23	1.08414	4.82247	3.149	364.981	FALSE	7
2022-09-14	11:36:24	0.284695	1.26638	1.6125	320.088	FALSE	7
2022-09-14	11:36:24	0.365305	1.62495	1.6125	366.606	FALSE	7
2022-09-14	11:36:24	0.523728	2.32965	1.6125	322.418	FALSE	7
2022-09-14	11:36:24	0.276298	1.22903	1.6125	367.835	FALSE	7
2022-09-14	11:36:25	0.548562	2.44011	1.54023	324.858	FALSE	7
2022-09-14	11:36:25	0.146527	0.651781	1.54023	368.487	FALSE	7
2022-09-14	11:36:25	0.57187	2.54379	1.54023	327.402	FALSE	7
2022-09-14	11:36:25	0.118079	0.525239	1.54023	369.012	FALSE	7
2022-09-14	11:36:26	0.18271	0.812731	-0.277247	328.215	FALSE	7
2022-09-14	11:36:26	-0.191488	-0.851777	-0.277247	369.012	FALSE	7
2022-09-14	11:36:26	-0.178206	-0.792696	-0.277247	328.215	FALSE	7
2022-09-14	11:36:27	-0.0722007	-0.321163	0.164404	369.012	FALSE	7
2022-09-14	11:36:27	0.16897	0.751612	0.164404	328.966	FALSE	7
2022-09-14	11:36:27	-0.0535748	-0.238311	0.164404	369.012	FALSE	7
2022-09-14	11:36:27	0.104644	0.465477	0.164404	329.432	FALSE	7
2022-09-14	11:36:28	-0.000139698	-0.000621405	0.49881	369.012	FALSE	7
2022-09-14	11:36:28	0.116043	0.516182	0.49881	329.948	FALSE	7
2022-09-14	11:36:28	0.15299	0.68053	0.49881	369.692	FALSE	7
2022-09-14	11:36:28	0.179657	0.79915	0.49881	330.747	FALSE	7
2022-09-14	11:36:29	0.120115	0.534296	0.960438	370.227	FALSE	7
2022-09-14	11:36:29	0.219758	0.977528	0.960438	331.725	FALSE	7
2022-09-14	11:36:29	0.267188	1.18851	0.960438	371.415	FALSE	7
2022-09-14	11:36:29	0.256603	1.14142	0.960438	332.866	FALSE	7
2022-09-14	11:36:30	0.260216	1.15749	1.17357	372.573	FALSE	7
2022-09-14	11:36:30	0.250853	1.11584	1.17357	333.982	FALSE	7
2022-09-14	11:36:30	0.28042	1.24736	1.17357	373.82	FALSE	7
2022-09-14	11:36:31	0.284898	1.26728	1.03571	335.249	FALSE	7
2022-09-14	11:36:31	0.227952	1.01398	1.03571	374.834	FALSE	7
2022-09-14	11:36:31	0.211769	0.941991	1.03571	336.191	FALSE	7
2022-09-14	11:36:31	0.20673	0.919576	1.03571	375.753	FALSE	7
2022-09-14	11:36:32	0.226374	1.00696	1.00764	337.198	FALSE	7
2022-09-14	11:36:32	0.22327	0.99315	1.00764	376.747	FALSE	7
2022-09-14	11:36:32	0.224084	0.99677	1.00764	338.195	FALSE	7
2022-09-14	11:36:32	0.232379	1.03367	1.00764	377.78	FALSE	7
2022-09-14	11:36:33	0.215534	0.958738	0.9657	339.154	FALSE	7
2022-09-14	11:36:33	0.215687	0.959419	0.9657	378.74	FALSE	7
2022-09-14	11:36:33	0.213753	0.950816	0.9657	340.104	FALSE	7
2022-09-14	11:36:33	0.223422	0.993826	0.9657	379.734	FALSE	7
2022-09-14	11:36:34	0.224848	1.00017	0.997224	341.105	FALSE	7
2022-09-14	11:36:34	0.226985	1.00967	0.997224	380.743	FALSE	7
2022-09-14	11:36:34	0.220725	0.981829	0.997224	342.086	FALSE	7
2022-09-14	11:36:35	0.223066	0.992242	1.01596	381.735	FALSE	7
2022-09-14	11:36:35	0.224797	0.999942	1.01596	343.086	FALSE	7
2022-09-14	11:36:35	0.229835	1.02235	1.01596	382.758	FALSE	7
2022-09-14	11:36:35	0.235891	1.04929	1.01596	344.136	FALSE	7
2022-09-14	11:36:36	0.23584	1.04906	1.05031	383.807	FALSE	7
2022-09-14	11:36:36	0.235433	1.04725	1.05031	345.183	FALSE	7
2022-09-14	11:36:36	0.231209	1.02846	1.05031	384.835	FALSE	7
2022-09-14	11:36:36	0.241998	1.07646	1.05031	346.259	FALSE	7
2022-09-14	11:36:37	0.231361	1.02914	1.03895	385.864	FALSE	7
2022-09-14	11:36:37	0.245407	1.09162	1.03895	347.351	FALSE	7
2022-09-14	11:36:37	0.223931	0.99609	1.03895	386.861	FALSE	7
2022-09-14	11:36:38	0.275331	1.22473	1.17362	348.576	FALSE	7
2022-09-14	11:36:38	0.246374	1.09592	1.17362	387.956	FALSE	7
2022-09-14	11:36:38	0.264237	1.17538	1.17362	349.751	FALSE	7
2022-09-14	11:36:38	0.269428	1.19847	1.17362	389.155	FALSE	7
2022-09-14	11:36:39	0.296603	1.31935	1.3009	351.07	FALSE	7
2022-09-14	11:36:39	0.313601	1.39496	1.3009	390.55	FALSE	7
2022-09-14	11:36:39	0.222303	0.988848	1.3009	352.059	FALSE	7
2022-09-14	11:36:39	0.337316	1.50045	1.3009	392.05	FALSE	7
2022-09-14	11:36:40	0.208359	0.926823	0.61658	352.986	FALSE	7
2022-09-14	11:36:40	0.0721249	0.320826	0.61658	392.371	FALSE	7
2022-09-14	11:36:40	0.184186	0.819296	0.61658	353.805	FALSE	7
2022-09-14	11:36:40	0.0897839	0.399377	0.61658	392.771	FALSE	7
2022-09-14	11:36:41	-0.0523025	-0.232652	0.133447	353.805	FALSE	7
2022-09-14	11:36:41	0.0385371	0.171421	0.133447	392.942	FALSE	7
2022-09-14	11:36:41	0.0676465	0.300905	0.133447	354.106	FALSE	7
2022-09-14	11:36:41	0.0661198	0.294114	0.133447	393.236	FALSE	7
2022-09-14	11:36:42	0.23355	1.03888	0.773796	355.145	FALSE	7
2022-09-14	11:36:42	0.334059	1.48596	0.773796	394.722	FALSE	7
2022-09-14	11:36:42	-0.0457377	-0.20345	0.773796	355.145	FALSE	7
2022-09-14	11:36:43	-0.106857	-0.475321	-1.19496	394.722	FALSE	7
2022-09-14	11:36:43	-0.282735	-1.25766	-1.19496	355.145	FALSE	7
2022-09-14	11:36:43	-0.45047	-2.00378	-1.19496	394.722	FALSE	7
2022-09-14	11:36:43	-0.234491	-1.04306	-1.19496	355.145	FALSE	7
2022-09-14	11:36:44	0.763524	3.39631	20.1211	398.118	FALSE	7
2022-09-14	11:36:44	5.69696	25.3412	20.1211	380.486	1	8
2022-09-14	11:36:44	5.60001	24.91	20.1211	423.028	1	9
2022-09-14	11:36:44	6.03319	26.8368	20.1211	407.323	1	10
2022-09-14	11:36:45	4.10968	18.2807	12.4605	441.309	1	11
2022-09-14	11:36:45	3.08169	13.708	12.4605	421.031	1	12
2022-09-14	11:36:45	1.21238	5.39291	12.4605	446.702	FALSE	12
2022-09-14	11:36:46	1.86093	8.27779	10.8269	429.309	FALSE	12
2022-09-14	11:36:46	2.68337	11.9362	10.8269	458.638	FALSE	12
2022-09-14	11:36:46	2.96434	13.186	10.8269	442.495	FALSE	12
2022-09-14	11:36:46	2.22734	9.90765	10.8269	468.546	FALSE	12
2022-09-14	11:36:47	2.65253	11.799	9.08072	454.294	FALSE	12
2022-09-14	11:36:47	2.41767	10.7543	9.08072	479.3	FALSE	12
2022-09-14	11:36:47	2.28765	10.1759	9.08072	464.47	FALSE	12
2022-09-14	11:36:47	0.807901	3.59371	9.08072	482.894	FALSE	12
2022-09-14	11:36:48	0.110496	0.491508	0.979339	464.961	FALSE	12
2022-09-14	11:36:48	0.429987	1.91267	0.979339	484.806	FALSE	12
2022-09-14	11:36:48	0.40159	1.78635	0.979339	466.748	FALSE	12
2022-09-14	11:36:48	-0.061412	-0.273173	0.979339	484.806	FALSE	12
2022-09-14	11:36:49	-0.0552033	-0.245555	-1.07943	466.748	FALSE	12
2022-09-14	11:36:49	-0.357035	-1.58816	-1.07943	484.806	FALSE	12
2022-09-14	11:36:49	-0.315763	-1.40458	-1.07943	466.748	FALSE	12
2022-09-14	11:36:50	-0.395458	-1.75908	-1.71001	484.806	FALSE	12
2022-09-14	11:36:50	-0.47673	-2.12059	-1.71001	466.748	FALSE	12
2022-09-14	11:36:50	-0.374847	-1.66739	-1.71001	484.806	FALSE	12
2022-09-14	11:36:50	-0.290674	-1.29298	-1.71001	466.748	FALSE	12
2022-09-14	11:36:51	-0.169503	-0.753983	3.64995	484.806	FALSE	12
2022-09-14	11:36:51	0.401794	1.78726	3.64995	468.535	FALSE	12
2022-09-14	11:36:51	0.729835	3.24645	3.64995	488.053	FALSE	12
2022-09-14	11:36:51	2.32006	10.3201	3.64995	478.855	FALSE	12
2022-09-14	11:36:52	1.82912	8.13629	7.66239	496.189	FALSE	12
2022-09-14	11:36:52	3.80047	16.9053	7.66239	495.76	1	13
2022-09-14	11:36:52	0.638232	2.83898	7.66239	499.028	FALSE	13
2022-09-14	11:36:52	0.622506	2.76903	7.66239	498.529	FALSE	13
2022-09-14	11:36:53	0.159249	0.708371	1.1707	499.737	FALSE	13
2022-09-14	11:36:53	0.353499	1.57243	1.1707	500.102	FALSE	13
2022-09-14	11:36:53	0.276807	1.23129	1.1707	500.968	FALSE	13
2022-09-14	11:36:54	0.192939	0.858231	0.732256	500.96	FALSE	13
2022-09-14	11:36:54	0.181743	0.808429	0.732256	501.776	FALSE	13
2022-09-14	11:36:54	0.128868	0.573231	0.732256	501.533	FALSE	13
2022-09-14	11:36:54	0.154924	0.689133	0.732256	502.465	FALSE	13
2022-09-14	11:36:55	0.0324812	0.144483	0.0861352	501.678	FALSE	13
2022-09-14	11:36:55	0.13472	0.599262	0.0861352	503.065	FALSE	13
2022-09-14	11:36:55	-0.0970353	-0.431632	0.0861352	501.678	FALSE	13
2022-09-14	11:36:55	0.00729033	0.0324288	0.0861352	503.097	FALSE	13
2022-09-14	11:36:56	-0.145585	-0.647591	-0.564456	501.678	FALSE	13
2022-09-14	11:36:56	-0.138104	-0.614314	-0.564456	503.097	FALSE	13
2022-09-14	11:36:56	-0.0879768	-0.391338	-0.564456	501.678	FALSE	13
2022-09-14	11:36:56	-0.135916	-0.604582	-0.564456	503.097	FALSE	13
2022-09-14	11:36:57	-0.138664	-0.616805	-0.764776	501.678	FALSE	13
2022-09-14	11:36:57	-0.0677732	-0.301469	-0.764776	503.097	FALSE	13
2022-09-14	11:36:57	-0.309351	-1.37606	-0.764776	501.678	FALSE	13
2022-09-14	11:36:58	0.0799111	0.355461	0.613468	503.453	FALSE	13
2022-09-14	11:36:58	0.0777228	0.345727	0.613468	502.023	FALSE	13
2022-09-14	11:36:58	0.177214	0.788283	0.613468	504.241	FALSE	13
2022-09-14	11:36:58	0.216807	0.964401	0.613468	502.988	FALSE	13
2022-09-14	11:36:59	0.0544659	0.242275	1.07051	504.483	FALSE	13
2022-09-14	11:36:59	0.176501	0.785112	1.07051	503.773	FALSE	13
2022-09-14	11:36:59	0.352786	1.56926	1.07051	506.052	FALSE	13
2022-09-14	11:36:59	0.378893	1.68539	1.07051	505.458	FALSE	13
2022-09-14	11:37:00	0.288868	1.28494	1.65738	507.337	FALSE	13
2022-09-14	11:37:00	0.462099	2.05551	1.65738	507.514	FALSE	13
2022-09-14	11:37:00	0.352939	1.56994	1.65738	508.907	FALSE	13
2022-09-14	11:37:00	0.386476	1.71912	1.65738	509.233	FALSE	13
2022-09-14	11:37:01	0.467545	2.07973	2.06879	510.987	FALSE	13
2022-09-14	11:37:01	0.45472	2.02269	2.06879	511.256	FALSE	13
2022-09-14	11:37:01	0.47299	2.10395	2.06879	513.091	FALSE	13
2022-09-14	11:37:02	0.462812	2.05868	1.88941	513.314	FALSE	13
2022-09-14	11:37:02	0.45355	2.01748	1.88941	515.108	FALSE	13
2022-09-14	11:37:02	0.45416	2.02019	1.88941	515.335	FALSE	13
2022-09-14	11:37:02	0.328511	1.46128	1.88941	516.57	FALSE	13
2022-09-14	11:37:03	0.391616	1.74199	1.6039	517.077	FALSE	13
2022-09-14	11:37:03	0.289122	1.28607	1.6039	517.856	FALSE	13
2022-09-14	11:37:03	0.264135	1.17493	1.6039	518.251	FALSE	13
2022-09-14	11:37:03	0.497417	2.21261	1.6039	520.068	FALSE	13
2022-09-14	11:37:04	0.167596	0.745501	1.34985	518.997	FALSE	13
2022-09-14	11:37:04	0.348817	1.55161	1.34985	521.62	FALSE	13
2022-09-14	11:37:04	0.320674	1.42642	1.34985	520.423	FALSE	13
2022-09-14	11:37:04	0.376756	1.67589	1.34985	523.296	FALSE	13
2022-09-14	11:37:05	0.26668	1.18625	1.50015	521.61	FALSE	13
2022-09-14	11:37:05	0.332278	1.47804	1.50015	524.774	FALSE	13
2022-09-14	11:37:05	0.412786	1.83615	1.50015	523.446	FALSE	13
2022-09-14	11:37:06	1.2079	5.37298	5.34706	530.147	FALSE	13
2022-09-14	11:37:06	0.641896	2.85528	5.34706	526.301	FALSE	13
2022-09-14	11:37:06	2.06642	9.19185	5.34706	539.339	FALSE	13
2022-09-14	11:37:06	0.892074	3.96812	5.34706	530.269	FALSE	13
2022-09-14	11:37:07	2.91742	12.9773	6.48945	552.316	FALSE	13
2022-09-14	11:37:07	0.81986	3.6469	6.48945	533.916	FALSE	13
2022-09-14	11:37:07	1.64276	7.30733	6.48945	559.623	FALSE	13
2022-09-14	11:37:07	0.455534	2.02631	6.48945	535.942	FALSE	13
2022-09-14	11:37:08	1.37355	6.10983	5.304	565.733	FALSE	13
2022-09-14	11:37:08	0.806476	3.58737	5.304	539.53	FALSE	13
2022-09-14	11:37:08	1.24714	5.54753	5.304	571.281	FALSE	13
2022-09-14	11:37:08	1.3424	5.97126	5.304	545.501	FALSE	13
2022-09-14	11:37:09	0.373702	1.6623	2.90705	572.943	FALSE	13
2022-09-14	11:37:09	1.44307	6.41906	2.90705	551.92	FALSE	13
2022-09-14	11:37:09	0.14383	0.639785	2.90705	573.583	FALSE	13
2022-09-14	11:37:10	1.15569	5.14074	4.25517	557.061	FALSE	13
2022-09-14	11:37:10	0.252074	1.12128	4.25517	574.704	FALSE	13
2022-09-14	11:37:10	1.72317	7.665	4.25517	564.726	FALSE	13
2022-09-14	11:37:10	0.695484	3.09365	4.25517	577.798	FALSE	13
2022-09-14	11:37:11	1.24775	5.55024	4.96851	570.276	FALSE	13
2022-09-14	11:37:11	1.20042	5.33971	4.96851	583.137	FALSE	13
2022-09-14	11:37:11	0.559046	2.48675	4.96851	572.763	FALSE	13
2022-09-14	11:37:11	1.46067	6.49735	4.96851	589.635	FALSE	13
2022-09-14	11:37:12	0.541081	2.40684	5.30422	575.17	FALSE	13
2022-09-14	11:37:12	2.66515	11.8551	5.30422	601.49	FALSE	13
2022-09-14	11:37:12	0.489631	2.17798	5.30422	577.348	FALSE	13
2022-09-14	11:37:12	1.07391	4.77697	5.30422	606.267	FALSE	13
2022-09-14	11:37:13	0.535382	2.38149	1.94821	579.729	FALSE	13
2022-09-14	11:37:13	0.31584	1.40492	1.94821	607.672	FALSE	13
2022-09-14	11:37:13	0.46271	2.05823	1.94821	581.787	FALSE	13
2022-09-14	11:37:14	0.339962	1.51222	1.61822	609.184	FALSE	13
2022-09-14	11:37:14	0.234822	1.04454	1.61822	582.832	FALSE	13
2022-09-14	11:37:14	0.540522	2.40435	1.61822	611.588	FALSE	13
2022-09-14	11:37:14	0.33986	1.51177	1.61822	584.344	FALSE	13
2022-09-14	11:37:15	0.66673	2.96575	2.02138	614.554	FALSE	13
2022-09-14	11:37:15	0.391361	1.74085	2.02138	586.085	FALSE	13
2022-09-14	11:37:15	0.27187	1.20933	2.02138	615.763	FALSE	13
2022-09-14	11:37:15	0.487748	2.1696	2.02138	588.254	FALSE	13
2022-09-14	11:37:16	0.190242	0.846234	1.44018	616.61	FALSE	13
2022-09-14	11:37:16	0.46098	2.05053	1.44018	590.305	FALSE	13
2022-09-14	11:37:16	0.21243	0.944931	1.44018	617.555	FALSE	13
2022-09-14	11:37:16	0.431412	1.91901	1.44018	592.224	FALSE	13
2022-09-14	11:37:17	0.237316	1.05563	1.35376	618.61	FALSE	13
2022-09-14	11:37:17	0.338384	1.5052	1.35376	593.729	FALSE	13
2022-09-14	11:37:17	0.337316	1.50045	1.35376	620.111	FALSE	13
2022-09-14	11:37:18	0.323524	1.4391	1.45936	595.168	FALSE	13
2022-09-14	11:37:18	0.416552	1.85291	1.45936	621.964	FALSE	13
2022-09-14	11:37:18	0.23416	1.04159	1.45936	596.21	FALSE	13
2022-09-14	11:37:18	0.338079	1.50384	1.45936	623.467	FALSE	13
2022-09-14	11:37:19	0.427188	1.90022	0.346123	598.11	FALSE	13
2022-09-14	11:37:19	0.392125	1.74425	0.346123	625.212	FALSE	13
2022-09-14	11:37:19	-0.861055	-3.83014	0.346123	598.11	FALSE	13
2022-09-14	11:37:19	0.35299	1.57017	0.346123	626.782	FALSE	13
2022-09-14	11:37:20	0.423575	1.88415	1.36468	599.994	FALSE	13
2022-09-14	11:37:20	0.396451	1.76349	1.36468	628.545	FALSE	13
2022-09-14	11:37:20	0.31243	1.38975	1.36468	601.384	FALSE	13
2022-09-14	11:37:20	0.0947203	0.421335	1.36468	628.967	FALSE	13
2022-09-14	11:37:21	0.486527	2.16417	1.96338	603.548	FALSE	13
2022-09-14	11:37:21	0.40042	1.78115	1.96338	630.748	FALSE	13
2022-09-14	11:37:21	0.437214	1.94482	1.96338	605.493	FALSE	13
2022-09-14	11:37:22	0.396094	1.76191	1.81539	632.51	FALSE	13
2022-09-14	11:37:22	0.42785	1.90316	1.81539	607.396	FALSE	13
2022-09-14	11:37:22	0.428003	1.90384	1.81539	634.414	FALSE	13
2022-09-14	11:37:22	0.380522	1.69264	1.81539	609.088	FALSE	13
2022-09-14	11:37:23	0.534415	2.37718	1.96547	636.791	FALSE	13
2022-09-14	11:37:23	0.435026	1.93508	1.96547	611.024	FALSE	13
2022-09-14	11:37:23	0.378639	1.68426	1.96547	638.475	FALSE	13
2022-09-14	11:37:23	0.419351	1.86536	1.96547	612.889	FALSE	13
2022-09-14	11:37:24	0.425305	1.89184	1.81273	640.367	FALSE	13
2022-09-14	11:37:24	0.449224	1.99824	1.81273	614.887	FALSE	13
2022-09-14	11:37:24	0.367188	1.63333	1.81273	642	FALSE	13
2022-09-14	11:37:24	0.388359	1.7275	1.81273	616.615	FALSE	13
2022-09-14	11:37:25	0.397163	1.76666	1.78356	643.767	FALSE	13
2022-09-14	11:37:25	0.401082	1.78409	1.78356	618.399	FALSE	13
2022-09-14	11:37:25	0.404644	1.79994	1.78356	645.567	FALSE	13
2022-09-14	11:37:26	0.412379	1.83434	1.86106	620.233	FALSE	13
2022-09-14	11:37:26	0.419708	1.86695	1.86106	647.434	FALSE	13
2022-09-14	11:37:26	0.41986	1.86762	1.86106	622.101	FALSE	13
2022-09-14	11:37:26	0.42159	1.87532	1.86106	649.309	FALSE	13
2022-09-14	11:37:27	0.413295	1.83842	1.81041	623.939	FALSE	13
2022-09-14	11:37:27	0.412532	1.83502	1.81041	651.144	FALSE	13
2022-09-14	11:37:27	0.398486	1.77255	1.81041	625.712	FALSE	13
2022-09-14	11:37:27	0.403677	1.79564	1.81041	652.94	FALSE	13
2022-09-14	11:37:28	0.389377	1.73203	1.68007	627.444	FALSE	13
2022-09-14	11:37:28	0.392125	1.74425	1.68007	654.684	FALSE	13
2022-09-14	11:37:28	0.381998	1.6992	1.68007	629.143	FALSE	13
2022-09-14	11:37:28	0.34729	1.54482	1.68007	656.229	FALSE	13
2022-09-14	11:37:29	0.18271	0.812731	1.2414	629.956	FALSE	13
2022-09-14	11:37:29	0.253092	1.1258	1.2414	657.355	FALSE	13
2022-09-14	11:37:29	0.401438	1.78568	1.2414	631.741	FALSE	13
2022-09-14	11:37:30	0.33757	1.50158	1.48381	658.856	FALSE	13
2022-09-14	11:37:30	0.336349	1.49615	1.48381	633.237	FALSE	13
2022-09-14	11:37:30	0.208359	0.926823	1.48381	659.783	FALSE	13
2022-09-14	11:37:30	0.452023	2.01069	1.48381	635.248	FALSE	13
2022-09-14	11:37:31	0.119555	0.531805	2.17854	660.315	FALSE	13
2022-09-14	11:37:31	0.820522	3.64985	2.17854	638.898	FALSE	13
2022-09-14	11:37:31	0.391616	1.74199	2.17854	662.057	FALSE	13
2022-09-14	11:37:31	0.627341	2.79054	2.17854	641.688	FALSE	13
2022-09-14	11:37:32	0.462049	2.05529	2.1056	664.112	FALSE	13
2022-09-14	11:37:32	0.473804	2.10757	2.1056	643.796	FALSE	13
2022-09-14	11:37:32	0.560878	2.4949	2.1056	666.607	FALSE	13
2022-09-14	11:37:32	0.396705	1.76462	2.1056	645.561	FALSE	13
2022-09-14	11:37:33	0.352074	1.5661	1.59545	668.173	FALSE	13
2022-09-14	11:37:33	0.119809	0.532934	1.59545	646.094	FALSE	13
2022-09-14	11:37:33	0.604135	2.68731	1.59545	670.86	FALSE	13
2022-09-14	11:37:34	1.41441	6.29158	4.80315	652.385	FALSE	13
2022-09-14	11:37:34	0.7593	3.37752	4.80315	674.238	FALSE	13
2022-09-14	11:37:34	1.73559	7.72025	4.80315	660.105	FALSE	13
2022-09-14	11:37:34	0.409886	1.82325	4.80315	676.061	FALSE	13
2022-09-14	11:37:35	1.23126	5.47689	4.77101	665.582	FALSE	13
2022-09-14	11:37:35	0.611565	2.72036	4.77101	678.781	FALSE	13
2022-09-14	11:37:35	1.41584	6.29794	4.77101	671.88	FALSE	13
2022-09-14	11:37:35	1.03162	4.58885	4.77101	683.37	FALSE	13
2022-09-14	11:37:36	0.740522	3.29399	3.87124	675.174	FALSE	13
2022-09-14	11:37:36	1.45462	6.47044	3.87124	689.841	FALSE	13
2022-09-14	11:37:36	0.329071	1.46377	3.87124	676.638	FALSE	13
2022-09-14	11:37:36	0.956959	4.25675	3.87124	694.097	FALSE	13
2022-09-14	11:37:37	0.140318	0.624163	1.23589	677.262	FALSE	13
2022-09-14	11:37:37	0.563982	2.5087	1.23589	696.606	FALSE	13
2022-09-14	11:37:37	0.129224	0.574814	1.23589	677.837	FALSE	13
2022-09-14	11:37:38	0.356603	1.58624	2.07486	698.192	FALSE	13
2022-09-14	11:37:38	0.388155	1.72659	2.07486	679.564	FALSE	13
2022-09-14	11:37:38	0.284593	1.26593	2.07486	699.458	FALSE	13
2022-09-14	11:37:38	0.83645	3.7207	2.07486	683.284	FALSE	13
2022-09-14	11:37:39	0.226679	1.00831	1.0477	700.467	FALSE	13
2022-09-14	11:37:39	-0.0455341	-0.202545	1.0477	683.284	FALSE	13
2022-09-14	11:37:39	0.19584	0.871135	1.0477	701.338	FALSE	13
2022-09-14	11:37:39	0.565153	2.51391	1.0477	685.798	FALSE	13
2022-09-14	11:37:40	0.443524	1.97288	1.94708	703.311	FALSE	13
2022-09-14	11:37:40	0.256501	1.14097	1.94708	686.939	FALSE	13
2022-09-14	11:37:40	0.789325	3.51108	1.94708	706.822	FALSE	13
2022-09-14	11:37:40	0.26154	1.16338	1.94708	688.103	FALSE	13
2022-09-14	11:37:41	0.745509	3.31617	2.02812	710.138	FALSE	13
2022-09-14	11:37:41	0.140674	0.625746	2.02812	688.728	FALSE	13
2022-09-14	11:37:41	0.481641	2.14244	2.02812	712.28	FALSE	13
2022-09-14	11:37:42	0.458181	2.03808	2.31165	690.766	FALSE	13
2022-09-14	11:37:42	0.496858	2.21012	2.31165	714.491	FALSE	13
2022-09-14	11:37:42	0.852278	3.7911	2.31165	694.558	FALSE	13
2022-09-14	11:37:42	0.271412	1.20729	2.31165	715.698	FALSE	13
2022-09-14	11:37:43	1.12642	5.01054	2.76546	699.568	FALSE	13
2022-09-14	11:37:43	0.202099	0.898977	2.76546	716.597	FALSE	13
2022-09-14	11:37:43	0.875687	3.89523	2.76546	703.463	FALSE	13
2022-09-14	11:37:43	0.282608	1.2571	2.76546	717.854	FALSE	13
2022-09-14	11:37:44	0.480013	2.13519	3.39183	705.598	FALSE	13
2022-09-14	11:37:44	1.28459	5.71411	3.39183	723.568	FALSE	13
2022-09-14	11:37:44	0.301031	1.33905	3.39183	706.938	FALSE	13
2022-09-14	11:37:44	0.98444	4.37899	3.39183	727.947	FALSE	13
2022-09-14	11:37:45	0.128054	0.56961	0.929087	707.507	FALSE	13
2022-09-14	11:37:45	0.30612	1.36168	0.929087	729.309	FALSE	13
2022-09-14	11:37:45	0.19243	0.855967	0.929087	708.363	FALSE	13
2022-09-14	11:37:46	0.213601	0.95014	0.862193	730.259	FALSE	13
2022-09-14	11:37:46	0.0625575	0.278268	0.862193	708.641	FALSE	13
2022-09-14	11:37:46	0.455636	2.02676	0.862193	732.286	FALSE	13
2022-09-14	11:37:46	0.0435244	0.193605	0.862193	708.835	FALSE	13
2022-09-14	11:37:47	0.299555	1.33248	3.10112	733.618	FALSE	13
2022-09-14	11:37:47	0.933143	4.15081	3.10112	712.986	FALSE	13
2022-09-14	11:37:47	0.409886	1.82325	3.10112	735.441	FALSE	13
2022-09-14	11:37:47	1.14607	5.09795	3.10112	718.084	FALSE	13
2022-09-14	11:37:48	1.19706	5.32476	16.9744	740.766	FALSE	13
2022-09-14	11:37:48	0.661132	2.94085	16.9744	721.025	FALSE	13
2022-09-14	11:37:48	1.33324	5.93052	16.9744	746.697	FALSE	13
2022-09-14	11:37:48	12.0726	53.7013	16.9744	774.726	1	14
2022-09-14	11:37:49	6.33629	28.1851	35.8832	774.882	1	15
2022-09-14	11:37:49	7.8311	34.8343	35.8832	809.56	1	16
2022-09-14	11:37:49	10.0333	44.6301	35.8832	819.512	1	17
2022-09-14	11:37:50	11.227	49.9399	32.3179	859.5	1	18
2022-09-14	11:37:50	8.73482	38.8542	32.3179	858.366	1	19
2022-09-14	11:37:50	5.54612	24.6703	32.3179	884.17	1	20
2022-09-14	11:37:50	3.55365	15.8073	32.3179	874.173	1	21
2022-09-14	11:37:51	2.65905	11.828	12.8343	895.998	FALSE	21
2022-09-14	11:37:51	2.28612	10.1691	12.8343	884.342	FALSE	21
2022-09-14	11:37:51	2.01177	8.94876	12.8343	904.947	FALSE	21
2022-09-14	11:37:51	4.58418	20.3913	12.8343	904.734	1	22
2022-09-14	11:37:52	14.2307	63.301	49.1186	968.248	1	23
2022-09-14	11:37:52	16.7718	74.6043	49.1186	979.338	1	24
2022-09-14	11:37:52	7.71354	34.3114	49.1186	1002.56	1	25
2022-09-14	11:37:52	5.45339	24.2578	49.1186	1003.6	1	26
2022-09-14	11:37:53	7.30337	32.4869	31.1222	1035.05	1	27
2022-09-14	11:37:53	6.96601	30.9862	31.1222	1034.58	1	28
2022-09-14	11:37:53	6.72037	29.8935	31.1222	1064.94	1	29
2022-09-14	11:37:54	7.00632	31.1655	31.9291	1065.75	1	30
2022-09-14	11:37:54	7.18968	31.9811	31.9291	1096.92	1	31
2022-09-14	11:37:54	7.26042	32.2958	31.9291	1098.04	1	32
2022-09-14	11:37:54	7.25548	32.2738	31.9291	1129.19	1	33
2022-09-14	11:37:55	7.23472	32.1815	32.23	1130.22	1	34
2022-09-14	11:37:55	7.34896	32.6896	32.23	1161.88	1	35
2022-09-14	11:37:55	7.08561	31.5182	32.23	1161.74	1	36
2022-09-14	11:37:55	7.31324	32.5308	32.23	1194.42	1	37
2022-09-14	11:37:56	7.35655	32.7234	32.0181	1194.47	1	38
2022-09-14	11:37:56	7.32825	32.5975	32.0181	1227.01	1	39
2022-09-14	11:37:56	7.25115	32.2546	32.0181	1226.72	1	40
2022-09-14	11:37:56	6.85604	30.497	32.0181	1257.51	1	41
2022-09-14	11:37:57	7.16688	31.8797	30.9697	1258.6	1	42
2022-09-14	11:37:57	6.88663	30.6331	30.9697	1288.14	1	43
2022-09-14	11:37:57	6.83339	30.3963	30.9697	1289	1	44
2022-09-14	11:37:58	6.788	30.1944	29.5921	1318.34	1	45
2022-09-14	11:37:58	6.69334	29.7733	29.5921	1318.77	1	46
2022-09-14	11:37:58	6.5397	29.0899	29.5921	1347.43	1	47
2022-09-14	11:37:58	6.58937	29.3108	29.5921	1348.08	1	48
2022-09-14	11:37:59	6.42622	28.5851	27.3787	1376.01	1	49
2022-09-14	11:37:59	6.01634	26.7619	27.3787	1374.84	1	50
2022-09-14	11:37:59	6.14698	27.343	27.3787	1403.36	1	51
2022-09-14	11:37:59	6.03049	26.8248	27.3787	1401.67	1	52
2022-09-14	11:38:00	5.8453	26.0011	25.4568	1429.36	1	53
2022-09-14	11:38:00	5.7623	25.6319	25.4568	1427.3	1	54
2022-09-14	11:38:00	5.66378	25.1936	25.4568	1454.55	1	55
2022-09-14	11:38:00	5.62042	25.0008	25.4568	1452.3	1	56
2022-09-14	11:38:01	5.5281	24.5901	24.194	1479.14	1	57
2022-09-14	11:38:01	5.46357	24.3031	24.194	1476.6	1	58
2022-09-14	11:38:01	5.32551	23.6889	24.194	1502.83	1	59
2022-09-14	11:38:02	5.18139	23.0479	23.0895	1499.65	1	60
2022-09-14	11:38:02	5.19232	23.0965	23.0895	1525.93	1	61
2022-09-14	11:38:02	5.19304	23.0997	23.0895	1522.75	1	62
2022-09-14	11:38:02	5.19624	23.1139	23.0895	1549.04	1	63
2022-09-14	11:38:03	5.1792	23.0381	23.3995	1545.79	1	64
2022-09-14	11:38:03	5.22423	23.2384	23.3995	1572.28	1	65
2022-09-14	11:38:03	5.2711	23.4469	23.3995	1569.24	1	66
2022-09-14	11:38:03	5.36724	23.8746	23.3995	1596.15	1	67
2022-09-14	11:38:04	5.24352	23.3242	22.6765	1592.56	1	68
2022-09-14	11:38:04	5.22627	23.2475	22.6765	1619.4	1	69
2022-09-14	11:38:04	5.01818	22.3219	22.6765	1614.88	1	70
2022-09-14	11:38:04	4.90362	21.8123	22.6765	1641.21	1	71
2022-09-14	11:38:05	4.92714	21.9169	22.3979	1636.8	1	72
2022-09-14	11:38:05	5.0134	22.3006	22.3979	1663.51	1	73
2022-09-14	11:38:05	5.16525	22.9761	22.3979	1659.78	1	74
2022-09-14	11:38:06	4.92933	21.9266	16.942	1685.44	1	75
2022-09-14	11:38:06	3.60093	16.0177	16.942	1675.79	1	76
2022-09-14	11:38:06	3.52434	15.677	16.942	1701.12	1	77
2022-09-14	11:38:06	3.18032	14.1467	16.942	1689.94	1	78
2022-09-14	11:38:07	2.86317	12.736	15.1993	1713.85	FALSE	78
2022-09-14	11:38:07	3.448	15.3374	15.1993	1705.28	1	79
2022-09-14	11:38:07	3.4907	15.5273	15.1993	1729.38	1	80
2022-09-14	11:38:07	3.86597	17.1966	15.1993	1722.47	1	81
2022-09-14	11:38:08	3.5023	15.5789	15.3355	1744.96	1	82
2022-09-14	11:38:08	3.28953	14.6325	15.3355	1737.11	1	83
2022-09-14	11:38:08	3.55187	15.7994	15.3355	1760.76	1	84
2022-09-14	11:38:08	3.44658	15.3311	15.3355	1752.44	1	85
2022-09-14	11:38:09	3.22856	14.3613	15.4851	1775.12	1	86
2022-09-14	11:38:09	3.33742	14.8455	15.4851	1767.28	1	87
2022-09-14	11:38:09	3.87767	17.2487	15.4851	1792.37	1	88
2022-09-14	11:38:10	4.07838	18.1414	16.7989	1785.42	1	89
2022-09-14	11:38:10	3.98373	17.7204	16.7989	1810.09	1	90
2022-09-14	11:38:10	4.09772	18.2275	16.7989	1803.65	1	91
2022-09-14	11:38:10	2.94642	13.1063	16.7989	1823.19	FALSE	91
2022-09-14	11:38:11	2.0393	9.07121	13.5101	1812.72	FALSE	91
2022-09-14	11:38:11	1.43986	6.40479	13.5101	1829.6	FALSE	91
2022-09-14	11:38:11	1.41838	6.30924	13.5101	1819.03	FALSE	91
2022-09-14	11:38:11	7.25131	32.2553	13.5101	1861.85	1	92
2022-09-14	11:38:12	10.627	47.271	56.5506	1866.3	1	93
2022-09-14	11:38:12	16.2167	72.1351	56.5506	1933.99	1	94
2022-09-14	11:38:12	16.6105	73.8868	56.5506	1940.19	1	95
2022-09-14	11:38:12	7.39838	32.9095	56.5506	1966.9	1	96
2022-09-14	11:38:13	8.3511	37.1474	42.0236	1977.34	1	97
2022-09-14	11:38:13	11.855	52.7334	42.0236	2019.63	1	98
2022-09-14	11:38:13	8.13589	36.1901	42.0236	2013.53	1	99
2022-09-14	11:38:14	10.242	45.5585	40.666	2065.19	1	100
2022-09-14	11:38:14	6.91054	30.7395	40.666	2044.27	1	101
2022-09-14	11:38:14	8.57248	38.1321	40.666	2103.32	1	102
2022-09-14	11:38:14	10.8435	48.2341	40.666	2092.5	1	103
2022-09-14	11:38:15	5.36922	23.8834	11.5012	2127.21	1	104
2022-09-14	11:38:15	3.42032	15.2143	11.5012	2107.72	1	105
2022-09-14	11:38:15	0.819911	3.64713	11.5012	2130.85	FALSE	105
2022-09-14	11:38:15	0.732888	3.26003	11.5012	2110.98	FALSE	105
2022-09-14	11:38:16	0.734568	3.26751	3.25415	2134.12	FALSE	105
2022-09-14	11:38:16	0.733092	3.26094	3.25415	2114.24	FALSE	105
2022-09-14	11:38:16	0.729173	3.24351	3.25415	2137.36	FALSE	105
2022-09-14	11:38:16	0.729428	3.24464	3.25415	2117.48	FALSE	105
2022-09-14	11:38:17	0.701183	3.119	4.13949	2140.48	FALSE	105
2022-09-14	11:38:17	0.559453	2.48856	4.13949	2119.97	FALSE	105
2022-09-14	11:38:17	1.53116	6.81091	4.13949	2147.29	FALSE	105
2022-09-14	11:38:18	0.737315	3.27972	5.51842	2123.25	FALSE	105
2022-09-14	11:38:18	-0.60986	-2.71278	5.51842	2147.29	FALSE	105
2022-09-14	11:38:18	2.05085	9.12259	5.51842	2132.37	FALSE	105
2022-09-14	11:38:18	2.78408	12.3841	5.51842	2159.68	FALSE	105
2022-09-14	11:38:19	3.49859	15.5624	32.4035	2147.93	1	106
2022-09-14	11:38:19	11.1574	49.6303	32.4035	2209.31	1	107
2022-09-14	11:38:19	8.90836	39.6262	32.4035	2187.56	1	108
2022-09-14	11:38:19	5.57416	24.795	32.4035	2234.1	1	109
2022-09-14	11:38:20	3.10205	13.7985	12.3537	2201.36	1	110
2022-09-14	11:38:20	2.65599	11.8144	12.3537	2245.92	FALSE	110
2022-09-14	11:38:20	2.5794	11.4737	12.3537	2212.83	FALSE	110
2022-09-14	11:38:20	2.77151	12.3282	12.3537	2258.25	FALSE	110
2022-09-14	11:38:21	2.55925	11.3841	10.0168	2224.22	FALSE	110
2022-09-14	11:38:21	2.07594	9.2342	10.0168	2267.48	FALSE	110
2022-09-14	11:38:21	2.12042	9.43205	10.0168	2233.65	FALSE	110
2022-09-14	11:38:22	2.03548	9.05422	9.07278	2276.54	FALSE	110
2022-09-14	11:38:22	2.02123	8.99084	9.07278	2242.64	FALSE	110
2022-09-14	11:38:22	2.03329	9.04448	9.07278	2285.58	FALSE	110
2022-09-14	11:38:22	2.06861	9.20159	9.07278	2251.84	FALSE	110
2022-09-14	11:38:23	2.19971	9.78475	9.42826	2295.36	FALSE	110
2022-09-14	11:38:23	2.08225	9.26226	9.42826	2261.1	FALSE	110
2022-09-14	11:38:23	2.06164	9.17059	9.42826	2304.54	FALSE	110
2022-09-14	11:38:23	2.13467	9.49544	9.42826	2270.6	FALSE	110
2022-09-14	11:38:24	2.13635	9.50291	9.47302	2314.04	FALSE	110
2022-09-14	11:38:24	2.04586	9.10039	9.47302	2279.7	FALSE	110
2022-09-14	11:38:24	2.0992	9.33766	9.47302	2323.38	FALSE	110
2022-09-14	11:38:24	2.23711	9.95111	9.47302	2289.65	FALSE	110
2022-09-14	11:38:25	2.22551	9.89951	9.5801	2333.28	FALSE	110
2022-09-14	11:38:25	2.09589	9.32294	9.5801	2298.97	FALSE	110
2022-09-14	11:38:25	2.13971	9.51786	9.5801	2342.79	FALSE	110
2022-09-14	11:38:26	2.09014	9.29736	8.97263	2308.27	FALSE	110
2022-09-14	11:38:26	2.09904	9.33695	8.97263	2352.13	FALSE	110
2022-09-14	11:38:26	2.13401	9.4925	8.97263	2317.76	FALSE	110
2022-09-14	11:38:26	1.74536	7.76371	8.97263	2359.89	FALSE	110
2022-09-14	11:38:27	1.88485	8.38419	9.10818	2326.15	FALSE	110
2022-09-14	11:38:27	2.10368	9.35759	9.10818	2369.25	FALSE	110
2022-09-14	11:38:27	2.12617	9.45763	9.10818	2335.6	FALSE	110
2022-09-14	11:38:27	2.07574	9.23331	9.10818	2378.48	FALSE	110
2022-09-14	11:38:28	2.06683	9.19367	9.25486	2344.8	FALSE	110
2022-09-14	11:38:28	2.09055	9.29918	9.25486	2387.78	FALSE	110
2022-09-14	11:38:28	2.08775	9.28673	9.25486	2354.09	FALSE	110
2022-09-14	11:38:28	2.07721	9.23985	9.25486	2397.02	FALSE	110
2022-09-14	11:38:29	2.09314	9.31071	9.01032	2363.4	FALSE	110
2022-09-14	11:38:29	1.95996	8.71829	9.01032	2405.74	FALSE	110
2022-09-14	11:38:29	2.02373	9.00196	9.01032	2372.4	FALSE	110
2022-09-14	11:38:30	2.25391	10.0258	9.20727	2415.77	FALSE	110
2022-09-14	11:38:30	2.13742	9.50767	9.20727	2381.91	FALSE	110
2022-09-14	11:38:30	1.94337	8.6445	9.20727	2424.41	FALSE	110
2022-09-14	11:38:30	1.94485	8.65108	9.20727	2390.56	FALSE	110
2022-09-14	11:38:31	1.96515	8.74138	8.49594	2433.15	FALSE	110
2022-09-14	11:38:31	1.91604	8.52293	8.49594	2399.08	FALSE	110
2022-09-14	11:38:31	1.82337	8.11071	8.49594	2441.26	FALSE	110
2022-09-14	11:38:31	1.93533	8.60873	8.49594	2407.69	FALSE	110
2022-09-14	11:38:32	1.96556	8.7432	8.66387	2450.01	FALSE	110
2022-09-14	11:38:32	1.96022	8.71945	8.66387	2416.41	FALSE	110
2022-09-14	11:38:32	1.96256	8.72986	8.66387	2458.74	FALSE	110
2022-09-14	11:38:32	1.90256	8.46297	8.66387	2424.87	FALSE	110
2022-09-14	11:38:33	1.90072	8.45478	8.34131	2467.19	FALSE	110
2022-09-14	11:38:33	1.89584	8.43308	8.34131	2433.3	FALSE	110
2022-09-14	11:38:33	1.82907	8.13607	8.34131	2475.33	FALSE	110
2022-09-14	11:38:34	1.74154	7.74672	7.97467	2441.05	FALSE	110
2022-09-14	11:38:34	1.77838	7.91059	7.97467	2483.24	FALSE	110
2022-09-14	11:38:34	1.82612	8.12295	7.97467	2449.17	FALSE	110
2022-09-14	11:38:34	1.8251	8.11841	7.97467	2491.36	FALSE	110
2022-09-14	11:38:35	1.76887	7.86829	8.16397	2457.04	FALSE	110
2022-09-14	11:38:35	1.76927	7.87007	8.16397	2499.23	FALSE	110
2022-09-14	11:38:35	1.87594	8.34456	8.16397	2465.39	FALSE	110
2022-09-14	11:38:35	1.92729	8.57297	8.16397	2507.8	FALSE	110
2022-09-14	11:38:36	1.91523	8.51933	7.84151	2473.91	FALSE	110
2022-09-14	11:38:36	1.76627	7.85672	7.84151	2515.66	FALSE	110
2022-09-14	11:38:36	1.67981	7.47213	7.84151	2481.38	FALSE	110
2022-09-14	11:38:36	1.69009	7.51786	7.84151	2523.17	FALSE	110
2022-09-14	11:38:37	1.7562	7.81193	7.57204	2489.19	FALSE	110
2022-09-14	11:38:37	1.73304	7.70891	7.57204	2530.88	FALSE	110
2022-09-14	11:38:37	1.61757	7.19527	7.57204	2496.38	FALSE	110
2022-09-14	11:38:38	1.44424	6.42427	6.47893	2537.31	FALSE	110
2022-09-14	11:38:38	1.42149	6.32307	6.47893	2502.71	FALSE	110
2022-09-14	11:38:38	1.54668	6.87994	6.47893	2544.19	FALSE	110
2022-09-14	11:38:38	1.4137	6.28842	6.47893	2509	FALSE	110
2022-09-14	11:38:39	1.37879	6.13313	5.4654	2550.32	FALSE	110
2022-09-14	11:38:39	1.64612	7.32227	5.4654	2516.32	FALSE	110
2022-09-14	11:38:39	1.42429	6.33553	5.4654	2556.66	FALSE	110
2022-09-14	11:38:39	0.465509	2.07068	5.4654	2518.39	FALSE	110
2022-09-14	11:38:40	0.594109	2.64272	2.1207	2559.3	FALSE	110
2022-09-14	11:38:40	0.443066	1.97085	2.1207	2520.36	FALSE	110
2022-09-14	11:38:40	0.414517	1.84385	2.1207	2561.14	FALSE	110
2022-09-14	11:38:40	0.455331	2.0254	2.1207	2522.39	FALSE	110
2022-09-14	11:38:41	0.341183	1.51765	1.52829	2562.66	FALSE	110
2022-09-14	11:38:41	0.349733	1.55568	1.52829	2523.94	FALSE	110
2022-09-14	11:38:41	0.339809	1.51154	1.52829	2564.17	FALSE	110
2022-09-14	11:38:42	0.307697	1.3687	1.90758	2525.31	FALSE	110
2022-09-14	11:38:42	0.360878	1.60526	1.90758	2565.78	FALSE	110
2022-09-14	11:38:42	0.404491	1.79926	1.90758	2527.11	FALSE	110
2022-09-14	11:38:42	0.642303	2.85709	1.90758	2568.63	FALSE	110
2022-09-14	11:38:43	2.52067	11.2124	19.5751	2538.32	FALSE	110
2022-09-14	11:38:43	2.89202	12.8643	19.5751	2581.5	FALSE	110
2022-09-14	11:38:43	5.64963	25.1307	19.5751	2563.45	1	111
2022-09-14	11:38:43	6.54042	29.0931	19.5751	2610.59	1	112
2022-09-14	11:38:44	2.99396	13.3177	7.36211	2576.77	FALSE	112
2022-09-14	11:38:44	1.69294	7.53054	7.36211	2618.12	FALSE	112
2022-09-14	11:38:44	1.96469	8.73933	7.36211	2585.51	FALSE	112
2022-09-14	11:38:44	-0.0312847	-0.139161	7.36211	2618.12	FALSE	112
2022-09-14	11:38:45	0.282201	1.25529	0.61028	2586.76	FALSE	112
2022-09-14	11:38:45	0.284797	1.26683	0.61028	2619.39	FALSE	112
2022-09-14	11:38:45	-0.155407	-0.691281	0.61028	2586.76	FALSE	112
2022-09-14	11:38:46	-0.223142	-0.99258	-0.854154	2619.39	FALSE	112
2022-09-14	11:38:46	-0.303244	-1.34889	-0.854154	2586.76	FALSE	112
2022-09-14	11:38:46	-0.0958648	-0.426426	-0.854154	2619.39	FALSE	112
2022-09-14	11:38:46	-0.145839	-0.648721	-0.854154	2586.76	FALSE	112
2022-09-14	11:38:47	-0.557849	-2.48142	-3.62924	2619.39	FALSE	112
2022-09-14	11:38:47	-0.723905	-3.22007	-3.62924	2586.76	FALSE	112
2022-09-14	11:38:47	-0.927773	-4.12692	-3.62924	2619.39	FALSE	112
2022-09-14	11:38:47	-1.05403	-4.68854	-3.62924	2586.76	FALSE	112
2022-09-14	11:38:48	-0.974796	-4.33609	-4.14859	2619.39	FALSE	112
2022-09-14	11:38:48	-0.955814	-4.25165	-4.14859	2586.76	FALSE	112
2022-09-14	11:38:48	-0.889605	-3.95714	-4.14859	2619.39	FALSE	112
2022-09-14	11:38:48	-0.910368	-4.0495	-4.14859	2586.76	FALSE	112
2022-09-14	11:38:49	-0.94136	-4.18736	-4.35541	2619.39	FALSE	112
2022-09-14	11:38:49	-0.958409	-4.26319	-4.35541	2586.76	FALSE	112
2022-09-14	11:38:49	-1.03765	-4.61567	-4.35541	2619.39	FALSE	112
2022-09-14	11:38:50	-1.0581	-4.70664	-4.88107	2586.76	FALSE	112
2022-09-14	11:38:50	-1.081	-4.8085	-4.88107	2619.39	FALSE	112
2022-09-14	11:38:50	-1.06838	-4.75237	-4.88107	2586.76	FALSE	112
2022-09-14	11:38:50	-1.18177	-5.25675	-4.88107	2619.39	FALSE	112
2022-09-14	11:38:51	-1.18767	-5.28299	-5.41125	2586.76	FALSE	112
2022-09-14	11:38:51	-1.21775	-5.4168	-5.41125	2619.39	FALSE	112
2022-09-14	11:38:51	-1.25892	-5.59993	-5.41125	2586.76	FALSE	112
2022-09-14	11:38:51	-1.20167	-5.34527	-5.41125	2619.39	FALSE	112
2022-09-14	11:38:52	-1.30431	-5.80183	-6.05357	2586.76	FALSE	112
2022-09-14	11:38:52	-1.34401	-5.97843	-6.05357	2619.39	FALSE	112
2022-09-14	11:38:52	-1.39983	-6.22672	-6.05357	2586.76	FALSE	112
2022-09-14	11:38:52	-1.39546	-6.20729	-6.05357	2619.39	FALSE	112
2022-09-14	11:38:53	-1.45973	-6.49317	-7.08385	2586.76	FALSE	112
2022-09-14	11:38:53	-1.58258	-7.03963	-7.08385	2619.39	FALSE	112
2022-09-14	11:38:53	-1.73525	-7.71874	-7.08385	2586.76	FALSE	112
2022-09-14	11:38:54	-1.82976	-8.13914	-8.27286	2619.39	FALSE	112
2022-09-14	11:38:54	-1.88116	-8.36778	-8.27286	2586.76	FALSE	112
2022-09-14	11:38:54	-1.7951	-7.98496	-8.27286	2619.39	FALSE	112
2022-09-14	11:38:54	-1.93327	-8.59957	-8.27286	2586.76	FALSE	112
2022-09-14	11:38:55	-1.90849	-8.48935	-9.00601	2619.39	FALSE	112
2022-09-14	11:38:55	-2.06777	-9.19785	-9.00601	2586.76	FALSE	112
2022-09-14	11:38:55	-2.05245	-9.12971	-9.00601	2619.39	FALSE	112
2022-09-14	11:38:55	-2.06986	-9.20715	-9.00601	2586.76	FALSE	112
2022-09-14	11:38:56	-2.05474	-9.13989	-5.81497	2619.39	FALSE	112
2022-09-14	11:38:56	-2.08294	-9.26533	-5.81497	2586.76	FALSE	112
2022-09-14	11:38:56	-1.67332	-7.44326	-5.81497	2619.39	FALSE	112
2022-09-14	11:38:56	0.581947	2.58862	-5.81497	2589.35	FALSE	112
2022-09-14	11:38:57	1.1506	5.1181	2.02518	2624.51	FALSE	112
2022-09-14	11:38:57	0.711361	3.16428	2.02518	2592.52	FALSE	112
2022-09-14	11:38:57	-0.496119	-2.20684	2.02518	2624.51	FALSE	112
2022-09-14	11:38:58	-2.0835	-9.26782	2.69172	2592.52	FALSE	112
2022-09-14	11:38:58	3.1651	14.079	2.69172	2638.59	1	113
2022-09-14	11:38:58	0.449886	2.00118	2.69172	2594.52	FALSE	113
2022-09-14	11:38:58	0.88902	3.95454	2.69172	2642.54	FALSE	113
2022-09-14	11:38:59	0.745967	3.31821	2.11239	2597.84	FALSE	113
2022-09-14	11:38:59	0.295636	1.31505	2.11239	2643.86	FALSE	113
2022-09-14	11:38:59	0.571209	2.54085	2.11239	2600.38	FALSE	113
2022-09-14	11:38:59	0.28673	1.27543	2.11239	2645.13	FALSE	113
2022-09-14	11:39:00	0.431616	1.91991	1.77466	2602.3	FALSE	113
2022-09-14	11:39:00	0.326323	1.45155	1.77466	2646.58	FALSE	113
2022-09-14	11:39:00	0.438944	1.95251	1.77466	2604.25	FALSE	113
2022-09-14	11:39:01	0.38897	1.73022	2.06451	2648.31	FALSE	113
2022-09-14	11:39:01	0.401082	1.78409	2.06451	2606.03	FALSE	113
2022-09-14	11:39:01	0.551208	2.45188	2.06451	2650.77	FALSE	113
2022-09-14	11:39:01	0.515229	2.29184	2.06451	2608.33	FALSE	113
2022-09-14	11:39:02	0.797875	3.54911	4.42579	2654.31	FALSE	113
2022-09-14	11:39:02	0.847086	3.76801	4.42579	2612.09	FALSE	113
2022-09-14	11:39:02	0.841234	3.74198	4.42579	2658.06	FALSE	113
2022-09-14	11:39:02	1.49365	6.64405	4.42579	2618.74	FALSE	113
2022-09-14	11:39:03	3.80296	16.9163	16.1411	2674.97	1	114
2022-09-14	11:39:03	2.26754	10.0865	16.1411	2628.82	FALSE	114
2022-09-14	11:39:03	4.66815	20.7649	16.1411	2695.74	1	115
2022-09-14	11:39:03	3.77609	16.7968	16.1411	2645.62	1	116
2022-09-14	11:39:04	0.788613	3.50791	4.52364	2699.25	FALSE	116
2022-09-14	11:39:04	0.734822	3.26864	4.52364	2648.89	FALSE	116
2022-09-14	11:39:04	1.97864	8.80139	4.52364	2708.05	FALSE	116
2022-09-14	11:39:04	0.565763	2.51663	4.52364	2651.41	FALSE	116
2022-09-14	11:39:05	1.0163	4.52071	3.92489	2712.57	FALSE	116
2022-09-14	11:39:05	0.989224	4.40027	3.92489	2655.81	FALSE	116
2022-09-14	11:39:05	0.641539	2.85369	3.92489	2715.42	FALSE	116
2022-09-14	11:39:06	0.730038	3.24736	2.6121	2659.05	FALSE	116
2022-09-14	11:39:06	0.718995	3.19823	2.6121	2718.62	FALSE	116
2022-09-14	11:39:06	0.466679	2.07588	2.6121	2661.13	FALSE	116
2022-09-14	11:39:06	0.433193	1.92693	2.6121	2720.55	FALSE	116
2022-09-14	11:39:07	0.38556	1.71505	1.83678	2662.85	FALSE	116
2022-09-14	11:39:07	0.375738	1.67136	1.83678	2722.22	FALSE	116
2022-09-14	11:39:07	0.484084	2.1533	1.83678	2665	FALSE	116
2022-09-14	11:39:07	0.406323	1.80741	1.83678	2724.03	FALSE	116
2022-09-14	11:39:08	0.655433	2.9155	3.91142	2667.91	FALSE	116
2022-09-14	11:39:08	0.332685	1.47985	3.91142	2725.5	FALSE	116
2022-09-14	11:39:08	2.02373	9.00196	3.91142	2676.92	FALSE	116
2022-09-14	11:39:08	0.505458	2.24838	3.91142	2727.75	FALSE	116
2022-09-14	11:39:09	2.43406	10.8272	7.05696	2687.74	FALSE	116
2022-09-14	11:39:09	0.541896	2.41046	7.05696	2730.16	FALSE	116
2022-09-14	11:39:09	1.78347	7.93323	7.05696	2695.68	FALSE	116
2022-09-14	11:39:10	1.04541	4.65019	4.22862	2734.81	FALSE	116
2022-09-14	11:39:10	1.02368	4.55353	4.22862	2700.23	FALSE	116
2022-09-14	11:39:10	1.29594	5.7646	4.22862	2740.58	FALSE	116
2022-09-14	11:39:10	0.437519	1.94617	4.22862	2702.18	FALSE	116
2022-09-14	11:39:11	1.48057	6.58587	2.77565	2747.16	FALSE	116
2022-09-14	11:39:11	0.189478	0.842836	2.77565	2703.02	FALSE	116
2022-09-14	11:39:11	0.431565	1.91969	2.77565	2749.08	FALSE	116
2022-09-14	11:39:11	0.394364	1.75421	2.77565	2704.77	FALSE	116
2022-09-14	11:39:12	0.244084	1.08573	0.542273	2750.17	FALSE	116
2022-09-14	11:39:12	0.0847458	0.376966	0.542273	2705.15	FALSE	116
2022-09-14	11:39:12	0.142048	0.631858	0.542273	2750.8	FALSE	116
2022-09-14	11:39:12	0.0167559	0.0745336	0.542273	2705.22	FALSE	116
2022-09-14	11:39:13	0.103626	0.460949	0.600169	2751.26	FALSE	116
2022-09-14	11:39:13	0.107036	0.476118	0.600169	2705.7	FALSE	116
2022-09-14	11:39:13	0.19411	0.86344	0.600169	2752.13	FALSE	116
2022-09-14	11:39:14	0.286832	1.27589	1.0361	2706.98	FALSE	116
2022-09-14	11:39:14	0.0936007	0.416355	1.0361	2752.54	FALSE	116
2022-09-14	11:39:14	0.371361	1.65189	1.0361	2708.63	FALSE	116
2022-09-14	11:39:14	0.179911	0.80028	1.0361	2753.34	FALSE	116
2022-09-14	11:39:15	0.518282	2.30542	0.125014	2710.93	FALSE	116
2022-09-14	11:39:15	0.141438	0.629145	0.125014	2753.97	FALSE	116
2022-09-14	11:39:15	0.440827	1.96089	0.125014	2712.9	FALSE	116
2022-09-14	11:39:15	-0.988129	-4.3954	0.125014	2753.97	FALSE	116
2022-09-14	11:39:16	-1.17317	-5.21849	-1.93389	2712.9	FALSE	116
2022-09-14	11:39:16	-0.961411	-4.27655	-1.93389	2753.97	FALSE	116
2022-09-14	11:39:16	-0.0198344	-0.0882274	-1.93389	2712.9	FALSE	116
2022-09-14	11:39:16	0.415382	1.8477	-1.93389	2755.82	FALSE	116
2022-09-14	11:39:17	0.421438	1.87464	2.0254	2714.77	FALSE	116
2022-09-14	11:39:17	0.525458	2.33734	2.0254	2758.16	FALSE	116
2022-09-14	11:39:17	0.419097	1.86423	2.0254	2716.63	FALSE	116
2022-09-14	11:39:18	0.499046	2.21986	1.72399	2760.38	FALSE	116
2022-09-14	11:39:18	0.33701	1.49909	1.72399	2718.13	FALSE	116
2022-09-14	11:39:18	0.54159	2.4091	1.72399	2762.79	FALSE	116
2022-09-14	11:39:18	0.172634	0.767911	1.72399	2718.9	FALSE	116
2022-09-14	11:39:19	0.577112	2.56711	1.86513	2765.35	FALSE	116
2022-09-14	11:39:19	0.277875	1.23604	1.86513	2720.14	FALSE	116
2022-09-14	11:39:19	0.496298	2.20763	1.86513	2767.56	FALSE	116
2022-09-14	11:39:19	0.325916	1.44974	1.86513	2721.59	FALSE	116
2022-09-14	11:39:20	0.487952	2.17051	1.86428	2769.73	FALSE	116
2022-09-14	11:39:20	0.261692	1.16406	1.86428	2722.75	FALSE	116
2022-09-14	11:39:20	0.447036	1.98851	1.86428	2771.72	FALSE	116
2022-09-14	11:39:20	0.479758	2.13406	1.86428	2724.88	FALSE	116
2022-09-14	11:39:21	0.483626	2.15127	2.96439	2773.87	FALSE	116
2022-09-14	11:39:21	1.04352	4.64179	2.96439	2729.53	FALSE	116
2022-09-14	11:39:21	0.472125	2.10011	2.96439	2775.97	FALSE	116
2022-09-14	11:39:22	1.72963	7.69374	4.08849	2737.22	FALSE	116
2022-09-14	11:39:22	0.524593	2.33349	4.08849	2778.3	FALSE	116
2022-09-14	11:39:22	0.828002	3.68312	4.08849	2740.9	FALSE	116
2022-09-14	11:39:22	0.594313	2.64362	4.08849	2780.95	FALSE	116
2022-09-14	11:39:23	0.661845	2.94402	2.89071	2743.85	FALSE	116
2022-09-14	11:39:23	1.3219	5.88008	2.89071	2786.83	FALSE	116
2022-09-14	11:39:23	0.393855	1.75195	2.89071	2745.6	FALSE	116
2022-09-14	11:39:23	0.221845	0.986811	2.89071	2787.82	FALSE	116
2022-09-14	11:39:24	0.290853	1.29377	0.491228	2746.89	FALSE	116
2022-09-14	11:39:24	0.0257127	0.114375	0.491228	2787.93	FALSE	116
2022-09-14	11:39:24	0.116298	0.517317	0.491228	2747.41	FALSE	116
2022-09-14	11:39:24	0.00886792	0.0394463	0.491228	2787.97	FALSE	116
2022-09-14	11:39:25	0.00301552	0.0134136	0.860948	2747.42	FALSE	116
2022-09-14	11:39:25	0.0448475	0.199491	0.860948	2788.17	FALSE	116
2022-09-14	11:39:25	0.532786	2.36994	0.860948	2749.79	FALSE	116
2022-09-14	11:39:26	0.654619	2.91188	1.73978	2791.08	FALSE	116
2022-09-14	11:39:26	0.369987	1.64578	1.73978	2751.44	FALSE	116
2022-09-14	11:39:26	0.303168	1.34855	1.73978	2792.43	FALSE	116
2022-09-14	11:39:26	0.236705	1.05291	1.73978	2752.49	FALSE	116
2022-09-14	11:39:27	0.386171	1.71777	1.20554	2794.15	FALSE	116
2022-09-14	11:39:27	0.274211	1.21975	1.20554	2753.71	FALSE	116
2022-09-14	11:39:27	0.195992	0.871812	1.20554	2795.02	FALSE	116
2022-09-14	11:39:27	0.227697	1.01284	1.20554	2754.73	FALSE	116
2022-09-14	11:39:28	0.366476	1.63016	1.47108	2796.65	FALSE	116
2022-09-14	11:39:28	0.367799	1.63604	1.47108	2756.36	FALSE	116
2022-09-14	11:39:28	0.307036	1.36576	1.47108	2798.01	FALSE	116
2022-09-14	11:39:28	0.28154	1.25235	1.47108	2757.61	FALSE	116
2022-09-14	11:39:29	0.270853	1.20481	1.1123	2799.22	FALSE	116
2022-09-14	11:39:29	0.271463	1.20752	1.1123	2758.82	FALSE	116
2022-09-14	11:39:29	0.20785	0.924558	1.1123	2800.14	FALSE	116
2022-09-14	11:39:30	0.121591	0.540861	0.39451	2759.36	FALSE	116
2022-09-14	11:39:30	0.0873412	0.388511	0.39451	2800.53	FALSE	116
2022-09-14	11:39:30	0.0595041	0.264686	0.39451	2759.63	FALSE	116
2022-09-14	11:39:30	0.0863233	0.383983	0.39451	2800.92	FALSE	116
2022-09-14	11:39:31	0.0937025	0.416807	0.527786	2760.04	FALSE	116
2022-09-14	11:39:31	0.115077	0.511886	0.527786	2801.43	FALSE	116
2022-09-14	11:39:31	0.128359	0.570967	0.527786	2760.61	FALSE	116
2022-09-14	11:39:31	0.137468	0.611485	0.527786	2802.04	FALSE	116
2022-09-14	11:39:32	0.115585	0.514145	0.344424	2761.13	FALSE	116
2022-09-14	11:39:32	0.283575	1.2614	0.344424	2803.3	FALSE	116
2022-09-14	11:39:32	0.0442369	0.196775	0.344424	2761.33	FALSE	116
2022-09-14	11:39:32	-0.133677	-0.594622	0.344424	2803.3	FALSE	116
2022-09-14	11:39:33	0.0155346	0.069101	0.177231	2761.39	FALSE	116
2022-09-14	11:39:33	0.110089	0.489698	0.177231	2803.79	FALSE	116
2022-09-14	11:39:33	-0.00609391	-0.0271069	0.177231	2761.39	FALSE	116
2022-09-14	11:39:34	-0.10874	-0.483697	-0.441819	2803.79	FALSE	116
2022-09-14	11:39:34	-0.107366	-0.477585	-0.441819	2761.39	FALSE	116
2022-09-14	11:39:34	-0.0997326	-0.443631	-0.441819	2803.79	FALSE	116
2022-09-14	11:39:34	-0.0814628	-0.362363	-0.441819	2761.39	FALSE	116
2022-09-14	11:39:35	-0.141615	-0.629932	-1.13989	2803.79	FALSE	116
2022-09-14	11:39:35	-0.221819	-0.986695	-1.13989	2761.39	FALSE	116
2022-09-14	11:39:35	-0.341514	-1.51912	-1.13989	2803.79	FALSE	116
2022-09-14	11:39:35	-0.320089	-1.42382	-1.13989	2761.39	FALSE	116
2022-09-14	11:39:36	-0.234033	-1.04103	-0.844874	2803.79	FALSE	116
2022-09-14	11:39:36	-0.167162	-0.74357	-0.844874	2761.39	FALSE	116
2022-09-14	11:39:36	-0.260547	-1.15897	-0.844874	2803.79	FALSE	116
2022-09-14	11:39:36	-0.0980023	-0.435934	-0.844874	2761.39	FALSE	116
2022-09-14	11:39:37	-0.0644145	-0.286529	-0.499771	2803.79	FALSE	116
2022-09-14	11:39:37	-0.137646	-0.612277	-0.499771	2761.39	FALSE	116
2022-09-14	11:39:37	-0.135	-0.600507	-0.499771	2803.79	FALSE	116
2022-09-14	11:39:38	-0.14757	-0.656421	-1.61827	2761.39	FALSE	116
2022-09-14	11:39:38	-0.286857	-1.276	-1.61827	2803.79	FALSE	116
2022-09-14	11:39:38	-0.385839	-1.71629	-1.61827	2761.39	FALSE	116
2022-09-14	11:39:38	-0.634948	-2.82438	-1.61827	2803.79	FALSE	116
2022-09-14	11:39:39	-0.910674	-4.05086	0.153933	2761.39	FALSE	116
2022-09-14	11:39:39	0.11986	0.533161	0.153933	2804.32	FALSE	116
2022-09-14	11:39:39	0.121794	0.541764	0.153933	2761.94	FALSE	116
2022-09-14	11:39:39	0.807443	3.59167	0.153933	2807.92	FALSE	116
2022-09-14	11:39:40	6.4278	28.5921	36.1088	2790.53	1	117
2022-09-14	11:39:40	7.55171	33.5915	36.1088	2841.51	1	118
2022-09-14	11:39:40	9.15807	40.7369	36.1088	2831.27	1	119
2022-09-14	11:39:40	9.33294	41.5148	36.1088	2883.02	1	120
2022-09-14	11:39:41	8.46988	37.6757	27.9167	2868.94	1	121
2022-09-14	11:39:41	4.81589	21.422	27.9167	2904.44	1	122
2022-09-14	11:39:41	5.5421	24.6524	27.9167	2893.59	1	123
2022-09-14	11:39:42	6.06159	26.9632	19.002	2931.41	1	124
2022-09-14	11:39:42	4.66393	20.7461	19.002	2914.34	1	125
2022-09-14	11:39:42	2.8051	12.4776	19.002	2943.88	FALSE	125
2022-09-14	11:39:42	3.5567	15.8209	19.002	2930.16	1	126
2022-09-14	11:39:43	4.68332	20.8323	30.9469	2964.72	1	127
2022-09-14	11:39:43	5.42917	24.15	30.9469	2954.31	1	128
2022-09-14	11:39:43	6.2364	27.7408	30.9469	2992.46	1	129
2022-09-14	11:39:43	11.4798	51.0644	30.9469	3005.37	1	130
2022-09-14	11:39:44	7.35874	32.7331	22.2572	3025.19	1	131
2022-09-14	11:39:44	2.72993	12.1433	22.2572	3017.52	FALSE	131
2022-09-14	11:39:44	2.40815	10.7119	22.2572	3035.9	FALSE	131
2022-09-14	11:39:44	7.51772	33.4403	22.2572	3050.96	1	132
2022-09-14	11:39:45	6.93477	30.8472	49.3811	3066.75	1	133
2022-09-14	11:39:45	14.1771	63.0626	49.3811	3114.02	1	134
2022-09-14	11:39:45	12.1922	54.2333	49.3811	3120.98	1	135
2022-09-14	11:39:46	5.7683	25.6586	35.3732	3139.68	1	136
2022-09-14	11:39:46	15.9004	70.7282	35.3732	3191.71	1	137
2022-09-14	11:39:46	7.45451	33.1592	35.3732	3172.84	1	138
2022-09-14	11:39:46	2.68576	11.9468	35.3732	3203.66	FALSE	138
2022-09-14	11:39:47	5.88831	26.1924	10.0194	3199.03	1	139
2022-09-14	11:39:47	1.97309	8.7767	10.0194	3212.44	FALSE	139
2022-09-14	11:39:47	0.807494	3.59189	10.0194	3202.62	FALSE	139
2022-09-14	11:39:47	0.340929	1.51652	10.0194	3213.95	FALSE	139
2022-09-14	11:39:48	0.58098	2.58432	2.85438	3205.21	FALSE	139
2022-09-14	11:39:48	0.538893	2.3971	2.85438	3216.35	FALSE	139
2022-09-14	11:39:48	0.720013	3.20276	2.85438	3208.41	FALSE	139
2022-09-14	11:39:48	0.726883	3.23332	2.85438	3219.58	FALSE	139
2022-09-14	11:39:49	0.546476	2.43083	2.17307	3210.84	FALSE	139
2022-09-14	11:39:49	0.485814	2.161	2.17307	3221.74	FALSE	139
2022-09-14	11:39:49	0.433295	1.92738	2.17307	3212.77	FALSE	139
2022-09-14	11:39:50	0.415534	1.84838	1.63785	3223.59	FALSE	139
2022-09-14	11:39:50	0.474262	2.10961	1.63785	3214.88	FALSE	139
2022-09-14	11:39:50	0.19701	0.87634	1.63785	3224.47	FALSE	139
2022-09-14	11:39:50	0.386018	1.71709	1.63785	3216.59	FALSE	139
2022-09-14	11:39:51	0.270903	1.20503	1.53559	3225.67	FALSE	139
2022-09-14	11:39:51	0.407646	1.81329	1.53559	3218.41	FALSE	139
2022-09-14	11:39:51	0.296196	1.31754	1.53559	3226.99	FALSE	139
2022-09-14	11:39:51	0.40612	1.8065	1.53559	3220.21	FALSE	139
2022-09-14	11:39:52	0.281438	1.25189	1.82665	3228.24	FALSE	139
2022-09-14	11:39:52	0.467595	2.07996	1.82665	3222.29	FALSE	139
2022-09-14	11:39:52	0.295229	1.31324	1.82665	3229.56	FALSE	139
2022-09-14	11:39:52	0.598333	2.6615	1.82665	3224.96	FALSE	139
2022-09-14	11:39:53	0.51813	2.30475	11.1825	3231.86	FALSE	139
2022-09-14	11:39:53	2.09513	9.31956	11.1825	3234.28	FALSE	139
2022-09-14	11:39:53	4.92856	21.9232	11.1825	3253.78	1	140
2022-09-14	11:39:54	6.34316	28.2156	13.4403	3262.49	1	141
2022-09-14	11:39:54	3.33146	14.819	13.4403	3268.6	1	142
2022-09-14	11:39:54	1.72571	7.6763	13.4403	3270.17	FALSE	142
2022-09-14	11:39:54	0.685712	3.05018	13.4403	3271.65	FALSE	142
2022-09-14	11:39:55	0.613193	2.72761	2.05494	3272.9	FALSE	142
2022-09-14	11:39:55	0.421234	1.87373	2.05494	3273.53	FALSE	142
2022-09-14	11:39:55	0.452532	2.01295	2.05494	3274.91	FALSE	142
2022-09-14	11:39:55	0.360929	1.60548	2.05494	3275.13	FALSE	142
2022-09-14	11:39:56	0.483168	2.14923	1.95823	3277.06	FALSE	142
2022-09-14	11:39:56	0.409682	1.82235	1.95823	3276.95	FALSE	142
2022-09-14	11:39:56	0.480623	2.13791	1.95823	3279.2	FALSE	142
2022-09-14	11:39:56	0.387443	1.72342	1.95823	3278.68	FALSE	142
2022-09-14	11:39:57	1.07971	4.80277	3.13085	3284	FALSE	142
2022-09-14	11:39:57	0.40154	1.78613	3.13085	3280.46	FALSE	142
2022-09-14	11:39:57	0.630292	2.80366	3.13085	3286.8	FALSE	142
2022-09-14	11:39:58	0.987392	4.39212	3.27695	3284.86	FALSE	142
2022-09-14	11:39:58	0.637163	2.83423	3.27695	3289.64	FALSE	142
2022-09-14	11:39:58	0.433906	1.9301	3.27695	3286.79	FALSE	142
2022-09-14	11:39:58	0.888308	3.95137	3.27695	3293.59	FALSE	142
2022-09-14	11:39:59	0.273193	1.21522	3.98765	3288	FALSE	142
2022-09-14	11:39:59	0.688461	3.06241	3.98765	3296.65	FALSE	142
2022-09-14	11:39:59	1.09304	4.86206	3.98765	3292.86	FALSE	142
2022-09-14	11:39:59	1.53116	6.81091	3.98765	3303.46	FALSE	142
2022-09-14	11:40:00	1.39421	6.20172	5.26251	3299.06	FALSE	142
2022-09-14	11:40:00	1.98851	8.84529	5.26251	3312.31	FALSE	142
2022-09-14	11:40:00	0.441998	1.9661	5.26251	3301.03	FALSE	142
2022-09-14	11:40:00	0.907544	4.03694	5.26251	3316.34	FALSE	142
2022-09-14	11:40:01	0.345407	1.53644	1.90105	3302.57	FALSE	142
2022-09-14	11:40:01	0.562048	2.5001	1.90105	3318.84	FALSE	142
2022-09-14	11:40:01	0.374669	1.6666	1.90105	3304.23	FALSE	142
2022-09-14	11:40:02	1.53818	6.84213	12.4179	3325.69	FALSE	142
2022-09-14	11:40:02	1.34352	5.97625	12.4179	3310.21	FALSE	142
2022-09-14	11:40:02	4.79355	21.3227	12.4179	3347.01	1	143
2022-09-14	11:40:02	3.49146	15.5307	12.4179	3325.74	1	144
2022-09-14	11:40:03	4.4965	20.0013	11.716	3367.01	1	145
2022-09-14	11:40:03	2.34195	10.4175	11.716	3336.16	FALSE	145
2022-09-14	11:40:03	1.80378	8.02357	11.716	3375.03	FALSE	145
2022-09-14	11:40:03	1.8933	8.42178	11.716	3344.58	FALSE	145
2022-09-14	11:40:04	1.38434	6.15782	9.35577	3381.19	FALSE	145
2022-09-14	11:40:04	1.72541	7.67497	9.35577	3352.26	FALSE	145
2022-09-14	11:40:04	3.20006	14.2345	9.35577	3395.43	1	146
2022-09-14	11:40:05	1.7992	8.0032	12.4472	3360.26	FALSE	146
2022-09-14	11:40:05	3.4423	15.312	12.4472	3410.74	1	147
2022-09-14	11:40:05	1.34475	5.98172	12.4472	3366.24	FALSE	147
2022-09-14	11:40:05	4.60678	20.4919	12.4472	3431.23	1	148
2022-09-14	11:40:06	1.52388	6.77852	17.7805	3373.02	FALSE	148
2022-09-14	11:40:06	4.91563	21.8657	17.7805	3453.09	1	149
2022-09-14	11:40:06	3.74144	16.6427	17.7805	3389.66	1	150
2022-09-14	11:40:06	5.808	25.8351	17.7805	3478.93	1	151
2022-09-14	11:40:07	4.27742	19.0268	12.5304	3408.69	1	152
2022-09-14	11:40:07	2.45625	10.9259	12.5304	3489.86	FALSE	152
2022-09-14	11:40:07	1.8908	8.41066	12.5304	3417.1	FALSE	152
2022-09-14	11:40:07	2.64337	11.7582	12.5304	3501.61	FALSE	152
2022-09-14	11:40:08	2.61151	11.6165	12.1406	3428.72	FALSE	152
2022-09-14	11:40:08	3.63039	16.1487	12.1406	3517.76	1	153
2022-09-14	11:40:08	2.36352	10.5134	12.1406	3439.23	FALSE	153
2022-09-14	11:40:08	2.31187	10.2837	12.1406	3528.05	FALSE	153
2022-09-14	11:40:09	3.37345	15.0058	18.7558	3454.23	1	154
2022-09-14	11:40:09	3.17457	14.1211	18.7558	3542.17	1	155
2022-09-14	11:40:09	6.10143	27.1404	18.7558	3481.37	1	156
2022-09-14	11:40:10	2.27136	10.1035	13.4121	3552.27	FALSE	156
2022-09-14	11:40:10	3.03304	13.4916	13.4121	3494.87	1	157
2022-09-14	11:40:10	3.12062	13.8811	13.4121	3566.15	1	158
2022-09-14	11:40:10	3.63568	16.1722	13.4121	3511.04	1	159
2022-09-14	11:40:11	6.19563	27.5594	20.4887	3593.71	1	160
2022-09-14	11:40:11	2.83187	12.5967	20.4887	3523.64	FALSE	160
2022-09-14	11:40:11	3.0907	13.7481	20.4887	3607.46	1	161
2022-09-14	11:40:11	6.30606	28.0506	20.4887	3551.69	1	162
2022-09-14	11:40:12	3.12403	13.8963	22.2215	3621.36	1	163
2022-09-14	11:40:12	5.71436	25.4186	22.2215	3577.1	1	164
2022-09-14	11:40:12	4.02576	17.9074	22.2215	3639.26	1	165
2022-09-14	11:40:12	7.11828	31.6635	22.2215	3608.77	1	166
2022-09-14	11:40:13	8.84683	39.3525	28.3199	3678.62	1	167
2022-09-14	11:40:13	8.02632	35.7027	28.3199	3644.47	1	168
2022-09-14	11:40:13	2.22663	9.9045	28.3199	3688.52	FALSE	168
2022-09-14	11:40:14	1.90052	8.45389	14.4179	3652.92	FALSE	168
2022-09-14	11:40:14	5.12673	22.8047	14.4179	3711.32	1	169
2022-09-14	11:40:14	5.10057	22.6884	14.4179	3675.61	1	170
2022-09-14	11:40:14	0.837316	3.72455	14.4179	3715.05	FALSE	170
2022-09-14	11:40:15	0.77528	3.4486	8.85192	3679.06	FALSE	170
2022-09-14	11:40:15	0.868359	3.86263	8.85192	3718.91	FALSE	170
2022-09-14	11:40:15	3.75075	16.6841	8.85192	3695.75	1	171
2022-09-14	11:40:15	2.56561	11.4123	8.85192	3730.32	FALSE	171
2022-09-14	11:40:16	0.321183	1.42869	2.44923	3697.17	FALSE	171
2022-09-14	11:40:16	0.41986	1.86762	2.44923	3732.19	FALSE	171
2022-09-14	11:40:16	0.732786	3.25958	2.44923	3700.43	FALSE	171
2022-09-14	11:40:16	0.728613	3.24102	2.44923	3735.43	FALSE	171
2022-09-14	11:40:17	-0.906093	-4.03048	-0.557494	3700.43	FALSE	171
2022-09-14	11:40:17	0.279657	1.24397	-0.557494	3736.68	FALSE	171
2022-09-14	11:40:17	0.250445	1.11403	-0.557494	3701.55	FALSE	171
2022-09-14	11:40:18	0.319911	1.42303	1.21946	3738.1	FALSE	171
2022-09-14	11:40:18	0.241336	1.07351	1.21946	3702.62	FALSE	171
2022-09-14	11:40:18	0.30215	1.34402	1.21946	3739.44	FALSE	171
2022-09-14	11:40:18	0.233194	1.03729	1.21946	3703.66	FALSE	171
2022-09-14	11:40:19	0.392277	1.74493	1.58669	3741.19	FALSE	171
2022-09-14	11:40:19	0.288817	1.28472	1.58669	3704.94	FALSE	171
2022-09-14	11:40:19	0.471463	2.09716	1.58669	3743.29	FALSE	171
2022-09-14	11:40:19	0.274262	1.21997	1.58669	3706.16	FALSE	171

## Sheet: Reggie_harness_202291411351 (3)
Date	Time	Lbs	Newtons	Total force x time		total steps > 13.345	**GoPro Fitting: 11:24
2022-09-14	11:35:19	0.193193	0.859361	0.859361	FALSE	0
2022-09-14	11:35:19	0.178384	0.793488	0.793488	FALSE	0
2022-09-14	11:35:19	0.186069	0.827672	1.68703	FALSE	0
2022-09-14	11:35:20	0.181438	0.807073	1.60056	FALSE	0
2022-09-14	11:35:20	0.224339	0.997905	2.68494	FALSE	0
2022-09-14	11:35:20	0.282659	1.25732	2.85788	FALSE	0
2022-09-14	11:35:20	0.31126	1.38455	4.06948	FALSE	0
2022-09-14	11:35:21	0.331209	1.47328	4.33117	FALSE	0
2022-09-14	11:35:21	0.359911	1.60096	5.67044	FALSE	0
2022-09-14	11:35:21	0.314975	1.40107	5.73224	FALSE	0
2022-09-14	11:35:21	0.330598	1.47057	7.14101	FALSE	0
2022-09-14	11:35:22	0.329886	1.4674	7.19964	FALSE	0
2022-09-14	11:35:22	0.322252	1.43344	8.57445	FALSE	0
2022-09-14	11:35:22	0.323117	1.43729	8.63693	FALSE	0
2022-09-14	11:35:23	0.32612	1.45065	10.0251	FALSE	0
2022-09-14	11:35:23	0.321438	1.42982	10.0667	FALSE	0
2022-09-14	11:35:23	0.321845	1.43163	11.4567	FALSE	0
2022-09-14	11:35:23	0.316501	1.40786	11.4746	FALSE	0
2022-09-14	11:35:24	0.361896	1.60979	13.0665	FALSE	0
2022-09-14	11:35:24	0.301082	1.33927	12.8139	FALSE	0
2022-09-14	11:35:24	0.289377	1.28721	14.3537	FALSE	0
2022-09-14	11:35:24	0.284084	1.26366	14.0775	FALSE	0
2022-09-14	11:35:25	0.293804	1.3069	15.6606	FALSE	0
2022-09-14	11:35:25	0.313753	1.39564	15.4732	FALSE	0
2022-09-14	11:35:25	0.313244	1.39337	17.054	FALSE	0
2022-09-14	11:35:25	0.312736	1.39111	16.8643	FALSE	0
2022-09-14	11:35:26	0.3107	1.38206	18.436	FALSE	0
2022-09-14	11:35:26	0.311158	1.38409	18.2484	FALSE	0
2022-09-14	11:35:26	0.31187	1.38726	19.8233	FALSE	0
2022-09-14	11:35:27	0.369326	1.64284	19.8912	FALSE	0
2022-09-14	11:35:27	0.73243	3.258	23.0813	FALSE	0
2022-09-14	11:35:27	0.74958	3.33428	23.2255	FALSE	0
2022-09-14	11:35:27	0.67131	2.98612	26.0674	FALSE	0
2022-09-14	11:35:28	1.57095	6.9879	30.2134	FALSE	0
2022-09-14	11:35:28	1.52653	6.79031	32.8577	FALSE	0
2022-09-14	11:35:28	1.41396	6.28958	36.503	FALSE	0
2022-09-14	11:35:28	1.45508	6.47249	39.3302	FALSE	0
2022-09-14	11:35:29	1.47243	6.54966	43.0526	FALSE	0
2022-09-14	11:35:29	1.4994	6.66963	45.9999	FALSE	0
2022-09-14	11:35:29	1.52205	6.77038	49.823	FALSE	0
2022-09-14	11:35:29	1.52464	6.7819	52.7818	FALSE	0
2022-09-14	11:35:30	1.54637	6.87856	56.7016	FALSE	0
2022-09-14	11:35:30	1.56424	6.95805	59.7398	FALSE	0
2022-09-14	11:35:30	1.58403	7.04608	63.7477	FALSE	0
2022-09-14	11:35:31	1.60576	7.14274	66.8825	FALSE	0
2022-09-14	11:35:31	1.66301	7.3974	71.1451	FALSE	0
2022-09-14	11:35:31	1.68052	7.47529	74.3578	FALSE	0
2022-09-14	11:35:31	0.60159	2.67599	73.8211	FALSE	0
2022-09-14	11:35:32	0.111311	0.495134	74.853	FALSE	0
2022-09-14	11:35:32	0.249173	1.10837	74.9294	FALSE	0
2022-09-14	11:35:32	0.11925	0.530448	75.3834	FALSE	0
2022-09-14	11:35:32	-0.266552	-1.18568	74.9294	FALSE	0
2022-09-14	11:35:33	-0.364923	-1.62325	75.3834	FALSE	0
2022-09-14	11:35:33	-0.180903	-0.804693	74.9294	FALSE	0
2022-09-14	11:35:33	-0.176679	-0.785904	75.3834	FALSE	0
2022-09-14	11:35:33	-0.0617173	-0.274531	74.9294	FALSE	0
2022-09-14	11:35:34	-0.117493	-0.522632	75.3834	FALSE	0
2022-09-14	11:35:34	0.0714124	0.317657	75.2471	FALSE	0
2022-09-14	11:35:34	-0.0501651	-0.223144	75.3834	FALSE	0
2022-09-14	11:35:35	0.0530918	0.236163	75.4833	FALSE	0
2022-09-14	11:35:35	-0.0607504	-0.27023	75.3834	FALSE	0
2022-09-14	11:35:35	0.111005	0.493772	75.977	FALSE	0
2022-09-14	11:35:35	0.0555855	0.247255	75.6307	FALSE	0
2022-09-14	11:35:36	0.0719213	0.31992	76.2969	FALSE	0
2022-09-14	11:35:36	0.991412	4.41	80.0407	FALSE	0
2022-09-14	11:35:36	0.649835	2.8906	79.1875	FALSE	0
2022-09-14	11:35:36	0.450751	2.00503	82.0457	FALSE	0
2022-09-14	11:35:37	0.525458	2.33734	81.5249	FALSE	0
2022-09-14	11:35:37	0.652532	2.90259	84.9483	FALSE	0
2022-09-14	11:35:37	0.204797	0.910978	82.4359	FALSE	0
2022-09-14	11:35:37	0.00459311	0.0204311	84.9687	FALSE	0
2022-09-14	11:35:38	0.0293768	0.130674	82.5665	FALSE	0
2022-09-14	11:35:38	0.357112	1.58851	86.5572	FALSE	0
2022-09-14	11:35:38	0.68841	3.06219	85.6287	FALSE	0
2022-09-14	11:35:39	0.276552	1.23016	87.7874	FALSE	0
2022-09-14	11:35:39	0.407341	1.81193	87.4407	FALSE	0
2022-09-14	11:35:39	0.307341	1.36711	89.1545	FALSE	0
2022-09-14	11:35:39	0.166629	0.741199	88.1819	FALSE	0
2022-09-14	11:35:40	0.315026	1.4013	90.5558	FALSE	0
2022-09-14	11:35:40	0.241438	1.07396	89.2558	FALSE	0
2022-09-14	11:35:40	0.22958	1.02122	91.577	FALSE	0
2022-09-14	11:35:40	0.383626	1.70645	90.9623	FALSE	0
2022-09-14	11:35:41	0.0482063	0.214431	91.7915	FALSE	0
2022-09-14	11:35:41	0.171616	0.763382	91.7256	FALSE	0
2022-09-14	11:35:41	0.298995	1.32999	93.1214	FALSE	0
2022-09-14	11:35:41	0.344898	1.53418	93.2598	FALSE	0
2022-09-14	11:35:42	0.465916	2.07249	95.1939	FALSE	0
2022-09-14	11:35:42	3.48714	15.5115	108.771	1	1
2022-09-14	11:35:42	1.99218	8.86162	104.056	FALSE	1
2022-09-14	11:35:43	0.565356	2.51482	111.286	FALSE	1
2022-09-14	11:35:43	0.116349	0.517544	104.573	FALSE	1
2022-09-14	11:35:43	0.568257	2.52772	113.814	FALSE	1
2022-09-14	11:35:43	0.0941096	0.418618	104.992	FALSE	1
2022-09-14	11:35:44	0.45243	2.0125	115.826	FALSE	1
2022-09-14	11:35:44	0.683168	3.03887	108.031	FALSE	1
2022-09-14	11:35:44	0.346476	1.54119	117.368	FALSE	1
2022-09-14	11:35:44	1.12744	5.01508	113.046	FALSE	1
2022-09-14	11:35:45	0.700471	3.11584	120.483	FALSE	1
2022-09-14	11:35:45	2.27273	10.1096	123.155	FALSE	1
2022-09-14	11:35:45	1.55477	6.91593	127.399	FALSE	1
2022-09-14	11:35:45	4.03228	17.9364	141.092	1	2
2022-09-14	11:35:46	1.65335	7.35443	134.754	FALSE	2
2022-09-14	11:35:46	3.21726	14.311	155.403	1	3
2022-09-14	11:35:46	1.98744	8.84053	143.594	FALSE	3
2022-09-14	11:35:47	3.29721	14.6666	170.069	1	4
2022-09-14	11:35:47	1.71401	7.62426	151.219	FALSE	4
2022-09-14	11:35:47	3.44576	15.3274	185.397	1	5
2022-09-14	11:35:47	0.305407	1.35851	152.577	FALSE	5
2022-09-14	11:35:48	2.04139	9.08051	194.477	FALSE	5
2022-09-14	11:35:48	0.271107	1.20594	153.783	FALSE	5
2022-09-14	11:35:48	2.12724	9.46239	203.94	FALSE	5
2022-09-14	11:35:48	0.594975	2.64657	156.43	FALSE	5
2022-09-14	11:35:49	0.859758	3.82438	207.764	FALSE	5
2022-09-14	11:35:49	1.97197	8.77172	165.201	FALSE	5
2022-09-14	11:35:49	0.525712	2.33847	210.102	FALSE	5
2022-09-14	11:35:49	2.6765	11.9056	177.107	FALSE	5
2022-09-14	11:35:50	0.349122	1.55296	211.655	FALSE	5
2022-09-14	11:35:50	1.842	8.19358	185.3	FALSE	5
2022-09-14	11:35:50	0.62785	2.7928	214.448	FALSE	5
2022-09-14	11:35:51	0.771667	3.43253	188.733	FALSE	5
2022-09-14	11:35:51	2.08546	9.27654	223.725	FALSE	5
2022-09-14	11:35:51	1.29421	5.7569	194.49	FALSE	5
2022-09-14	11:35:51	3.70688	16.4889	240.214	1	6
2022-09-14	11:35:52	1.0593	4.71198	199.202	FALSE	6
2022-09-14	11:35:52	3.44245	15.3127	255.526	1	7
2022-09-14	11:35:52	0.505102	2.24679	201.449	FALSE	7
2022-09-14	11:35:52	1.74475	7.761	263.287	FALSE	7
2022-09-14	11:35:53	0.83131	3.69783	205.147	FALSE	7
2022-09-14	11:35:53	0.613346	2.72829	266.016	FALSE	7
2022-09-14	11:35:53	2.49014	11.0766	216.223	FALSE	7
2022-09-14	11:35:53	0.418079	1.8597	267.875	FALSE	7
2022-09-14	11:35:54	1.3508	6.00863	222.232	FALSE	7
2022-09-14	11:35:54	0.263779	1.17334	269.049	FALSE	7
2022-09-14	11:35:54	0.213041	0.947649	223.179	FALSE	7
2022-09-14	11:35:55	0.938995	4.17684	273.226	FALSE	7
2022-09-14	11:35:55	0.182507	0.811828	223.991	FALSE	7
2022-09-14	11:35:55	0.193041	0.858685	274.084	FALSE	7
2022-09-14	11:35:55	0.262252	1.16655	225.158	FALSE	7
2022-09-14	11:35:56	0.12785	0.568702	274.653	FALSE	7
2022-09-14	11:35:56	0.420471	1.87034	227.028	FALSE	7
2022-09-14	11:35:56	0.225713	1.00402	275.657	FALSE	7
2022-09-14	11:35:56	0.309326	1.37594	228.404	FALSE	7
2022-09-14	11:35:57	0.177825	0.791001	276.448	FALSE	7
2022-09-14	11:35:57	0.113601	0.50532	228.909	FALSE	7
2022-09-14	11:35:57	0.0895295	0.398245	276.846	FALSE	7
2022-09-14	11:35:57	-0.0535748	-0.238311	228.909	FALSE	7
2022-09-14	11:35:58	0.0512089	0.227787	277.074	FALSE	7
2022-09-14	11:35:58	-0.103397	-0.459931	228.909	FALSE	7
2022-09-14	11:35:58	-0.0340328	-0.151385	277.074	FALSE	7
2022-09-14	11:35:59	-0.331285	-1.47362	228.909	FALSE	7
2022-09-14	11:35:59	-0.386246	-1.7181	277.074	FALSE	7
2022-09-14	11:35:59	-0.364974	-1.62348	228.909	FALSE	7
2022-09-14	11:35:59	-0.26075	-1.15987	277.074	FALSE	7
2022-09-14	11:36:00	-0.114491	-0.509279	228.909	FALSE	7
2022-09-14	11:36:00	0.000318332	0.001416	277.075	FALSE	7
2022-09-14	11:36:00	-0.0381549	-0.169721	228.909	FALSE	7
2022-09-14	11:36:00	-0.126196	-0.561345	277.075	FALSE	7
2022-09-14	11:36:01	0.0905473	0.402772	229.312	FALSE	7
2022-09-14	11:36:01	0.181947	0.809337	277.885	FALSE	7
2022-09-14	11:36:01	0.321234	1.42891	230.741	FALSE	7
2022-09-14	11:36:01	0.0883081	0.392812	278.278	FALSE	7
2022-09-14	11:36:02	0.446832	1.9876	232.729	FALSE	7
2022-09-14	11:36:02	0.37986	1.68969	279.967	FALSE	7
2022-09-14	11:36:02	0.345305	1.53599	234.265	FALSE	7
2022-09-14	11:36:03	0.280267	1.24668	281.214	FALSE	7
2022-09-14	11:36:03	0.296959	1.32093	235.586	FALSE	7
2022-09-14	11:36:03	0.128359	0.570967	281.785	FALSE	7
2022-09-14	11:36:03	0.0384353	0.170968	235.757	FALSE	7
2022-09-14	11:36:04	-0.0129641	-0.0576669	281.785	FALSE	7
2022-09-14	11:36:04	0.0509036	0.226429	235.983	FALSE	7
2022-09-14	11:36:04	-0.0374934	-0.166778	281.785	FALSE	7
2022-09-14	11:36:04	-0.00319315	-0.0142038	235.983	FALSE	7
2022-09-14	11:36:05	-0.112761	-0.501583	281.785	FALSE	7
2022-09-14	11:36:05	-0.0377478	-0.16791	235.983	FALSE	7
2022-09-14	11:36:05	-0.116832	-0.519692	281.785	FALSE	7
2022-09-14	11:36:05	0.0548221	0.24386	236.227	FALSE	7
2022-09-14	11:36:06	0.136145	0.6056	282.391	FALSE	7
2022-09-14	11:36:06	-0.0705214	-0.313693	236.227	FALSE	7
2022-09-14	11:36:06	-0.0553051	-0.246008	282.391	FALSE	7
2022-09-14	11:36:07	-0.0504196	-0.224276	236.227	FALSE	7
2022-09-14	11:36:07	0.119809	0.532934	282.923	FALSE	7
2022-09-14	11:36:07	-0.183906	-0.818051	236.227	FALSE	7
2022-09-14	11:36:07	-0.128587	-0.571981	282.923	FALSE	7
2022-09-14	11:36:08	-0.257646	-1.14606	236.227	FALSE	7
2022-09-14	11:36:08	-0.0671117	-0.298526	282.923	FALSE	7
2022-09-14	11:36:08	0.0151783	0.0675161	236.294	FALSE	7
2022-09-14	11:36:08	0.169122	0.752288	283.676	FALSE	7
2022-09-14	11:36:09	2.50536	11.1443	247.439	FALSE	7
2022-09-14	11:36:09	0.319148	1.41963	285.095	FALSE	7
2022-09-14	11:36:09	1.8021	8.0161	255.455	FALSE	7
2022-09-14	11:36:09	0.357468	1.59009	286.685	FALSE	7
2022-09-14	11:36:10	0.88098	3.91878	259.374	FALSE	7
2022-09-14	11:36:10	1.26989	5.64872	292.334	FALSE	7
2022-09-14	11:36:10	0.474669	2.11142	261.485	FALSE	7
2022-09-14	11:36:11	1.63187	7.25888	299.593	FALSE	7
2022-09-14	11:36:11	0.483117	2.149	263.634	FALSE	7
2022-09-14	11:36:11	1.14144	5.07735	304.67	FALSE	7
2022-09-14	11:36:11	1.62698	7.23713	270.871	FALSE	7
2022-09-14	11:36:12	1.40083	6.23117	310.902	FALSE	7
2022-09-14	11:36:12	0.438181	1.94912	272.82	FALSE	7
2022-09-14	11:36:12	0.400776	1.78273	312.684	FALSE	7
2022-09-14	11:36:12	0.263931	1.17402	273.994	FALSE	7
2022-09-14	11:36:13	0.043219	0.192247	312.877	FALSE	7
2022-09-14	11:36:13	-0.101259	-0.45042	273.994	FALSE	7
2022-09-14	11:36:13	-0.0430405	-0.191453	312.877	FALSE	7
2022-09-14	11:36:13	-0.187112	-0.832312	273.994	FALSE	7
2022-09-14	11:36:14	-0.369961	-1.64566	312.877	FALSE	7
2022-09-14	11:36:14	-0.382124	-1.69976	273.994	FALSE	7
2022-09-14	11:36:14	-0.377544	-1.67939	312.877	FALSE	7
2022-09-14	11:36:15	-0.0801396	-0.356477	273.994	FALSE	7
2022-09-14	11:36:15	-0.170318	-0.757609	312.877	FALSE	7
2022-09-14	11:36:15	0.107545	0.478382	274.473	FALSE	7
2022-09-14	11:36:15	0.242659	1.0794	313.956	FALSE	7
2022-09-14	11:36:16	0.359962	1.60118	276.074	FALSE	7
2022-09-14	11:36:16	1.73732	7.72795	321.684	FALSE	7
2022-09-14	11:36:16	0.258893	1.15161	277.225	FALSE	7
2022-09-14	11:36:16	1.16057	5.16245	326.846	FALSE	7
2022-09-14	11:36:17	0.336247	1.49569	278.721	FALSE	7
2022-09-14	11:36:17	0.729529	3.24509	330.091	FALSE	7
2022-09-14	11:36:17	0.571819	2.54357	281.265	FALSE	7
2022-09-14	11:36:17	0.664847	2.95737	333.049	FALSE	7
2022-09-14	11:36:18	0.733142	3.26116	284.526	FALSE	7
2022-09-14	11:36:18	0.884135	3.93281	336.982	FALSE	7
2022-09-14	11:36:18	0.747392	3.32455	287.85	FALSE	7
2022-09-14	11:36:19	0.463015	2.05958	339.041	FALSE	7
2022-09-14	11:36:19	0.994008	4.42155	292.272	FALSE	7
2022-09-14	11:36:19	0.540572	2.40457	341.446	FALSE	7
2022-09-14	11:36:19	1.17828	5.24123	297.513	FALSE	7
2022-09-14	11:36:20	0.500165	2.22483	343.671	FALSE	7
2022-09-14	11:36:20	0.697163	3.10112	300.614	FALSE	7
2022-09-14	11:36:20	0.957417	4.25878	347.929	FALSE	7
2022-09-14	11:36:20	0.402863	1.79202	302.406	FALSE	7
2022-09-14	11:36:21	0.971565	4.32172	352.251	FALSE	7
2022-09-14	11:36:21	0.56673	2.52093	304.927	FALSE	7
2022-09-14	11:36:21	0.339199	1.50882	353.76	FALSE	7
2022-09-14	11:36:21	0.61187	2.72172	307.649	FALSE	7
2022-09-14	11:36:22	0.404237	1.79813	355.558	FALSE	7
2022-09-14	11:36:22	1.44999	6.44985	314.099	FALSE	7
2022-09-14	11:36:22	0.34841	1.5498	357.108	FALSE	7
2022-09-14	11:36:23	0.847952	3.77186	317.871	FALSE	7
2022-09-14	11:36:23	0.685763	3.05041	360.158	FALSE	7
2022-09-14	11:36:23	0.213855	0.95127	318.822	FALSE	7
2022-09-14	11:36:23	1.08414	4.82247	364.981	FALSE	7
2022-09-14	11:36:24	0.284695	1.26638	320.088	FALSE	7
2022-09-14	11:36:24	0.365305	1.62495	366.606	FALSE	7
2022-09-14	11:36:24	0.523728	2.32965	322.418	FALSE	7
2022-09-14	11:36:24	0.276298	1.22903	367.835	FALSE	7
2022-09-14	11:36:25	0.548562	2.44011	324.858	FALSE	7
2022-09-14	11:36:25	0.146527	0.651781	368.487	FALSE	7
2022-09-14	11:36:25	0.57187	2.54379	327.402	FALSE	7
2022-09-14	11:36:25	0.118079	0.525239	369.012	FALSE	7
2022-09-14	11:36:26	0.18271	0.812731	328.215	FALSE	7
2022-09-14	11:36:26	-0.191488	-0.851777	369.012	FALSE	7
2022-09-14	11:36:26	-0.178206	-0.792696	328.215	FALSE	7
2022-09-14	11:36:27	-0.0722007	-0.321163	369.012	FALSE	7
2022-09-14	11:36:27	0.16897	0.751612	328.966	FALSE	7
2022-09-14	11:36:27	-0.0535748	-0.238311	369.012	FALSE	7
2022-09-14	11:36:27	0.104644	0.465477	329.432	FALSE	7
2022-09-14	11:36:28	-0.000139698	-0.000621405	369.012	FALSE	7
2022-09-14	11:36:28	0.116043	0.516182	329.948	FALSE	7
2022-09-14	11:36:28	0.15299	0.68053	369.692	FALSE	7
2022-09-14	11:36:28	0.179657	0.79915	330.747	FALSE	7
2022-09-14	11:36:29	0.120115	0.534296	370.227	FALSE	7
2022-09-14	11:36:29	0.219758	0.977528	331.725	FALSE	7
2022-09-14	11:36:29	0.267188	1.18851	371.415	FALSE	7
2022-09-14	11:36:29	0.256603	1.14142	332.866	FALSE	7
2022-09-14	11:36:30	0.260216	1.15749	372.573	FALSE	7
2022-09-14	11:36:30	0.250853	1.11584	333.982	FALSE	7
2022-09-14	11:36:30	0.28042	1.24736	373.82	FALSE	7
2022-09-14	11:36:31	0.284898	1.26728	335.249	FALSE	7
2022-09-14	11:36:31	0.227952	1.01398	374.834	FALSE	7
2022-09-14	11:36:31	0.211769	0.941991	336.191	FALSE	7
2022-09-14	11:36:31	0.20673	0.919576	375.753	FALSE	7
2022-09-14	11:36:32	0.226374	1.00696	337.198	FALSE	7
2022-09-14	11:36:32	0.22327	0.99315	376.747	FALSE	7
2022-09-14	11:36:32	0.224084	0.99677	338.195	FALSE	7
2022-09-14	11:36:32	0.232379	1.03367	377.78	FALSE	7
2022-09-14	11:36:33	0.215534	0.958738	339.154	FALSE	7
2022-09-14	11:36:33	0.215687	0.959419	378.74	FALSE	7
2022-09-14	11:36:33	0.213753	0.950816	340.104	FALSE	7
2022-09-14	11:36:33	0.223422	0.993826	379.734	FALSE	7
2022-09-14	11:36:34	0.224848	1.00017	341.105	FALSE	7
2022-09-14	11:36:34	0.226985	1.00967	380.743	FALSE	7
2022-09-14	11:36:34	0.220725	0.981829	342.086	FALSE	7
2022-09-14	11:36:35	0.223066	0.992242	381.735	FALSE	7
2022-09-14	11:36:35	0.224797	0.999942	343.086	FALSE	7
2022-09-14	11:36:35	0.229835	1.02235	382.758	FALSE	7
2022-09-14	11:36:35	0.235891	1.04929	344.136	FALSE	7
2022-09-14	11:36:36	0.23584	1.04906	383.807	FALSE	7
2022-09-14	11:36:36	0.235433	1.04725	345.183	FALSE	7
2022-09-14	11:36:36	0.231209	1.02846	384.835	FALSE	7
2022-09-14	11:36:36	0.241998	1.07646	346.259	FALSE	7
2022-09-14	11:36:37	0.231361	1.02914	385.864	FALSE	7
2022-09-14	11:36:37	0.245407	1.09162	347.351	FALSE	7
2022-09-14	11:36:37	0.223931	0.99609	386.861	FALSE	7
2022-09-14	11:36:38	0.275331	1.22473	348.576	FALSE	7
2022-09-14	11:36:38	0.246374	1.09592	387.956	FALSE	7
2022-09-14	11:36:38	0.264237	1.17538	349.751	FALSE	7
2022-09-14	11:36:38	0.269428	1.19847	389.155	FALSE	7
2022-09-14	11:36:39	0.296603	1.31935	351.07	FALSE	7
2022-09-14	11:36:39	0.313601	1.39496	390.55	FALSE	7
2022-09-14	11:36:39	0.222303	0.988848	352.059	FALSE	7
2022-09-14	11:36:39	0.337316	1.50045	392.05	FALSE	7
2022-09-14	11:36:40	0.208359	0.926823	352.986	FALSE	7
2022-09-14	11:36:40	0.0721249	0.320826	392.371	FALSE	7
2022-09-14	11:36:40	0.184186	0.819296	353.805	FALSE	7
2022-09-14	11:36:40	0.0897839	0.399377	392.771	FALSE	7
2022-09-14	11:36:41	-0.0523025	-0.232652	353.805	FALSE	7
2022-09-14	11:36:41	0.0385371	0.171421	392.942	FALSE	7
2022-09-14	11:36:41	0.0676465	0.300905	354.106	FALSE	7
2022-09-14	11:36:41	0.0661198	0.294114	393.236	FALSE	7
2022-09-14	11:36:42	0.23355	1.03888	355.145	FALSE	7
2022-09-14	11:36:42	0.334059	1.48596	394.722	FALSE	7
2022-09-14	11:36:42	-0.0457377	-0.20345	355.145	FALSE	7
2022-09-14	11:36:43	-0.106857	-0.475321	394.722	FALSE	7
2022-09-14	11:36:43	-0.282735	-1.25766	355.145	FALSE	7
2022-09-14	11:36:43	-0.45047	-2.00378	394.722	FALSE	7
2022-09-14	11:36:43	-0.234491	-1.04306	355.145	FALSE	7
2022-09-14	11:36:44	0.763524	3.39631	398.118	FALSE	7
2022-09-14	11:36:44	5.69696	25.3412	380.486	1	8
2022-09-14	11:36:44	5.60001	24.91	423.028	1	9
2022-09-14	11:36:44	6.03319	26.8368	407.323	1	10
2022-09-14	11:36:45	4.10968	18.2807	441.309	1	11
2022-09-14	11:36:45	3.08169	13.708	421.031	1	12
2022-09-14	11:36:45	1.21238	5.39291	446.702	FALSE	12
2022-09-14	11:36:46	1.86093	8.27779	429.309	FALSE	12
2022-09-14	11:36:46	2.68337	11.9362	458.638	FALSE	12
2022-09-14	11:36:46	2.96434	13.186	442.495	FALSE	12
2022-09-14	11:36:46	2.22734	9.90765	468.546	FALSE	12
2022-09-14	11:36:47	2.65253	11.799	454.294	FALSE	12
2022-09-14	11:36:47	2.41767	10.7543	479.3	FALSE	12
2022-09-14	11:36:47	2.28765	10.1759	464.47	FALSE	12
2022-09-14	11:36:47	0.807901	3.59371	482.894	FALSE	12
2022-09-14	11:36:48	0.110496	0.491508	464.961	FALSE	12
2022-09-14	11:36:48	0.429987	1.91267	484.806	FALSE	12
2022-09-14	11:36:48	0.40159	1.78635	466.748	FALSE	12
2022-09-14	11:36:48	-0.061412	-0.273173	484.806	FALSE	12
2022-09-14	11:36:49	-0.0552033	-0.245555	466.748	FALSE	12
2022-09-14	11:36:49	-0.357035	-1.58816	484.806	FALSE	12
2022-09-14	11:36:49	-0.315763	-1.40458	466.748	FALSE	12
2022-09-14	11:36:50	-0.395458	-1.75908	484.806	FALSE	12
2022-09-14	11:36:50	-0.47673	-2.12059	466.748	FALSE	12
2022-09-14	11:36:50	-0.374847	-1.66739	484.806	FALSE	12
2022-09-14	11:36:50	-0.290674	-1.29298	466.748	FALSE	12
2022-09-14	11:36:51	-0.169503	-0.753983	484.806	FALSE	12
2022-09-14	11:36:51	0.401794	1.78726	468.535	FALSE	12
2022-09-14	11:36:51	0.729835	3.24645	488.053	FALSE	12
2022-09-14	11:36:51	2.32006	10.3201	478.855	FALSE	12
2022-09-14	11:36:52	1.82912	8.13629	496.189	FALSE	12
2022-09-14	11:36:52	3.80047	16.9053	495.76	1	13
2022-09-14	11:36:52	0.638232	2.83898	499.028	FALSE	13
2022-09-14	11:36:52	0.622506	2.76903	498.529	FALSE	13
2022-09-14	11:36:53	0.159249	0.708371	499.737	FALSE	13
2022-09-14	11:36:53	0.353499	1.57243	500.102	FALSE	13
2022-09-14	11:36:53	0.276807	1.23129	500.968	FALSE	13
2022-09-14	11:36:54	0.192939	0.858231	500.96	FALSE	13
2022-09-14	11:36:54	0.181743	0.808429	501.776	FALSE	13
2022-09-14	11:36:54	0.128868	0.573231	501.533	FALSE	13
2022-09-14	11:36:54	0.154924	0.689133	502.465	FALSE	13
2022-09-14	11:36:55	0.0324812	0.144483	501.678	FALSE	13
2022-09-14	11:36:55	0.13472	0.599262	503.065	FALSE	13
2022-09-14	11:36:55	-0.0970353	-0.431632	501.678	FALSE	13
2022-09-14	11:36:55	0.00729033	0.0324288	503.097	FALSE	13
2022-09-14	11:36:56	-0.145585	-0.647591	501.678	FALSE	13
2022-09-14	11:36:56	-0.138104	-0.614314	503.097	FALSE	13
2022-09-14	11:36:56	-0.0879768	-0.391338	501.678	FALSE	13
2022-09-14	11:36:56	-0.135916	-0.604582	503.097	FALSE	13
2022-09-14	11:36:57	-0.138664	-0.616805	501.678	FALSE	13
2022-09-14	11:36:57	-0.0677732	-0.301469	503.097	FALSE	13
2022-09-14	11:36:57	-0.309351	-1.37606	501.678	FALSE	13
2022-09-14	11:36:58	0.0799111	0.355461	503.453	FALSE	13
2022-09-14	11:36:58	0.0777228	0.345727	502.023	FALSE	13
2022-09-14	11:36:58	0.177214	0.788283	504.241	FALSE	13
2022-09-14	11:36:58	0.216807	0.964401	502.988	FALSE	13
2022-09-14	11:36:59	0.0544659	0.242275	504.483	FALSE	13
2022-09-14	11:36:59	0.176501	0.785112	503.773	FALSE	13
2022-09-14	11:36:59	0.352786	1.56926	506.052	FALSE	13
2022-09-14	11:36:59	0.378893	1.68539	505.458	FALSE	13
2022-09-14	11:37:00	0.288868	1.28494	507.337	FALSE	13
2022-09-14	11:37:00	0.462099	2.05551	507.514	FALSE	13
2022-09-14	11:37:00	0.352939	1.56994	508.907	FALSE	13
2022-09-14	11:37:00	0.386476	1.71912	509.233	FALSE	13
2022-09-14	11:37:01	0.467545	2.07973	510.987	FALSE	13
2022-09-14	11:37:01	0.45472	2.02269	511.256	FALSE	13
2022-09-14	11:37:01	0.47299	2.10395	513.091	FALSE	13
2022-09-14	11:37:02	0.462812	2.05868	513.314	FALSE	13
2022-09-14	11:37:02	0.45355	2.01748	515.108	FALSE	13
2022-09-14	11:37:02	0.45416	2.02019	515.335	FALSE	13
2022-09-14	11:37:02	0.328511	1.46128	516.57	FALSE	13
2022-09-14	11:37:03	0.391616	1.74199	517.077	FALSE	13
2022-09-14	11:37:03	0.289122	1.28607	517.856	FALSE	13
2022-09-14	11:37:03	0.264135	1.17493	518.251	FALSE	13
2022-09-14	11:37:03	0.497417	2.21261	520.068	FALSE	13
2022-09-14	11:37:04	0.167596	0.745501	518.997	FALSE	13
2022-09-14	11:37:04	0.348817	1.55161	521.62	FALSE	13
2022-09-14	11:37:04	0.320674	1.42642	520.423	FALSE	13
2022-09-14	11:37:04	0.376756	1.67589	523.296	FALSE	13
2022-09-14	11:37:05	0.26668	1.18625	521.61	FALSE	13
2022-09-14	11:37:05	0.332278	1.47804	524.774	FALSE	13
2022-09-14	11:37:05	0.412786	1.83615	523.446	FALSE	13
2022-09-14	11:37:06	1.2079	5.37298	530.147	FALSE	13
2022-09-14	11:37:06	0.641896	2.85528	526.301	FALSE	13
2022-09-14	11:37:06	2.06642	9.19185	539.339	FALSE	13
2022-09-14	11:37:06	0.892074	3.96812	530.269	FALSE	13
2022-09-14	11:37:07	2.91742	12.9773	552.316	FALSE	13
2022-09-14	11:37:07	0.81986	3.6469	533.916	FALSE	13
2022-09-14	11:37:07	1.64276	7.30733	559.623	FALSE	13
2022-09-14	11:37:07	0.455534	2.02631	535.942	FALSE	13
2022-09-14	11:37:08	1.37355	6.10983	565.733	FALSE	13
2022-09-14	11:37:08	0.806476	3.58737	539.53	FALSE	13
2022-09-14	11:37:08	1.24714	5.54753	571.281	FALSE	13
2022-09-14	11:37:08	1.3424	5.97126	545.501	FALSE	13
2022-09-14	11:37:09	0.373702	1.6623	572.943	FALSE	13
2022-09-14	11:37:09	1.44307	6.41906	551.92	FALSE	13
2022-09-14	11:37:09	0.14383	0.639785	573.583	FALSE	13
2022-09-14	11:37:10	1.15569	5.14074	557.061	FALSE	13
2022-09-14	11:37:10	0.252074	1.12128	574.704	FALSE	13
2022-09-14	11:37:10	1.72317	7.665	564.726	FALSE	13
2022-09-14	11:37:10	0.695484	3.09365	577.798	FALSE	13
2022-09-14	11:37:11	1.24775	5.55024	570.276	FALSE	13
2022-09-14	11:37:11	1.20042	5.33971	583.137	FALSE	13
2022-09-14	11:37:11	0.559046	2.48675	572.763	FALSE	13
2022-09-14	11:37:11	1.46067	6.49735	589.635	FALSE	13
2022-09-14	11:37:12	0.541081	2.40684	575.17	FALSE	13
2022-09-14	11:37:12	2.66515	11.8551	601.49	FALSE	13
2022-09-14	11:37:12	0.489631	2.17798	577.348	FALSE	13
2022-09-14	11:37:12	1.07391	4.77697	606.267	FALSE	13
2022-09-14	11:37:13	0.535382	2.38149	579.729	FALSE	13
2022-09-14	11:37:13	0.31584	1.40492	607.672	FALSE	13
2022-09-14	11:37:13	0.46271	2.05823	581.787	FALSE	13
2022-09-14	11:37:14	0.339962	1.51222	609.184	FALSE	13
2022-09-14	11:37:14	0.234822	1.04454	582.832	FALSE	13
2022-09-14	11:37:14	0.540522	2.40435	611.588	FALSE	13
2022-09-14	11:37:14	0.33986	1.51177	584.344	FALSE	13
2022-09-14	11:37:15	0.66673	2.96575	614.554	FALSE	13
2022-09-14	11:37:15	0.391361	1.74085	586.085	FALSE	13
2022-09-14	11:37:15	0.27187	1.20933	615.763	FALSE	13
2022-09-14	11:37:15	0.487748	2.1696	588.254	FALSE	13
2022-09-14	11:37:16	0.190242	0.846234	616.61	FALSE	13
2022-09-14	11:37:16	0.46098	2.05053	590.305	FALSE	13
2022-09-14	11:37:16	0.21243	0.944931	617.555	FALSE	13
2022-09-14	11:37:16	0.431412	1.91901	592.224	FALSE	13
2022-09-14	11:37:17	0.237316	1.05563	618.61	FALSE	13
2022-09-14	11:37:17	0.338384	1.5052	593.729	FALSE	13
2022-09-14	11:37:17	0.337316	1.50045	620.111	FALSE	13
2022-09-14	11:37:18	0.323524	1.4391	595.168	FALSE	13
2022-09-14	11:37:18	0.416552	1.85291	621.964	FALSE	13
2022-09-14	11:37:18	0.23416	1.04159	596.21	FALSE	13
2022-09-14	11:37:18	0.338079	1.50384	623.467	FALSE	13
2022-09-14	11:37:19	0.427188	1.90022	598.11	FALSE	13
2022-09-14	11:37:19	0.392125	1.74425	625.212	FALSE	13
2022-09-14	11:37:19	-0.861055	-3.83014	598.11	FALSE	13
2022-09-14	11:37:19	0.35299	1.57017	626.782	FALSE	13
2022-09-14	11:37:20	0.423575	1.88415	599.994	FALSE	13
2022-09-14	11:37:20	0.396451	1.76349	628.545	FALSE	13
2022-09-14	11:37:20	0.31243	1.38975	601.384	FALSE	13
2022-09-14	11:37:20	0.0947203	0.421335	628.967	FALSE	13
2022-09-14	11:37:21	0.486527	2.16417	603.548	FALSE	13
2022-09-14	11:37:21	0.40042	1.78115	630.748	FALSE	13
2022-09-14	11:37:21	0.437214	1.94482	605.493	FALSE	13
2022-09-14	11:37:22	0.396094	1.76191	632.51	FALSE	13
2022-09-14	11:37:22	0.42785	1.90316	607.396	FALSE	13
2022-09-14	11:37:22	0.428003	1.90384	634.414	FALSE	13
2022-09-14	11:37:22	0.380522	1.69264	609.088	FALSE	13
2022-09-14	11:37:23	0.534415	2.37718	636.791	FALSE	13
2022-09-14	11:37:23	0.435026	1.93508	611.024	FALSE	13
2022-09-14	11:37:23	0.378639	1.68426	638.475	FALSE	13
2022-09-14	11:37:23	0.419351	1.86536	612.889	FALSE	13
2022-09-14	11:37:24	0.425305	1.89184	640.367	FALSE	13
2022-09-14	11:37:24	0.449224	1.99824	614.887	FALSE	13
2022-09-14	11:37:24	0.367188	1.63333	642	FALSE	13
2022-09-14	11:37:24	0.388359	1.7275	616.615	FALSE	13
2022-09-14	11:37:25	0.397163	1.76666	643.767	FALSE	13
2022-09-14	11:37:25	0.401082	1.78409	618.399	FALSE	13
2022-09-14	11:37:25	0.404644	1.79994	645.567	FALSE	13
2022-09-14	11:37:26	0.412379	1.83434	620.233	FALSE	13
2022-09-14	11:37:26	0.419708	1.86695	647.434	FALSE	13
2022-09-14	11:37:26	0.41986	1.86762	622.101	FALSE	13
2022-09-14	11:37:26	0.42159	1.87532	649.309	FALSE	13
2022-09-14	11:37:27	0.413295	1.83842	623.939	FALSE	13
2022-09-14	11:37:27	0.412532	1.83502	651.144	FALSE	13
2022-09-14	11:37:27	0.398486	1.77255	625.712	FALSE	13
2022-09-14	11:37:27	0.403677	1.79564	652.94	FALSE	13
2022-09-14	11:37:28	0.389377	1.73203	627.444	FALSE	13
2022-09-14	11:37:28	0.392125	1.74425	654.684	FALSE	13
2022-09-14	11:37:28	0.381998	1.6992	629.143	FALSE	13
2022-09-14	11:37:28	0.34729	1.54482	656.229	FALSE	13
2022-09-14	11:37:29	0.18271	0.812731	629.956	FALSE	13
2022-09-14	11:37:29	0.253092	1.1258	657.355	FALSE	13
2022-09-14	11:37:29	0.401438	1.78568	631.741	FALSE	13
2022-09-14	11:37:30	0.33757	1.50158	658.856	FALSE	13
2022-09-14	11:37:30	0.336349	1.49615	633.237	FALSE	13
2022-09-14	11:37:30	0.208359	0.926823	659.783	FALSE	13
2022-09-14	11:37:30	0.452023	2.01069	635.248	FALSE	13
2022-09-14	11:37:31	0.119555	0.531805	660.315	FALSE	13
2022-09-14	11:37:31	0.820522	3.64985	638.898	FALSE	13
2022-09-14	11:37:31	0.391616	1.74199	662.057	FALSE	13
2022-09-14	11:37:31	0.627341	2.79054	641.688	FALSE	13
2022-09-14	11:37:32	0.462049	2.05529	664.112	FALSE	13
2022-09-14	11:37:32	0.473804	2.10757	643.796	FALSE	13
2022-09-14	11:37:32	0.560878	2.4949	666.607	FALSE	13
2022-09-14	11:37:32	0.396705	1.76462	645.561	FALSE	13
2022-09-14	11:37:33	0.352074	1.5661	668.173	FALSE	13
2022-09-14	11:37:33	0.119809	0.532934	646.094	FALSE	13
2022-09-14	11:37:33	0.604135	2.68731	670.86	FALSE	13
2022-09-14	11:37:34	1.41441	6.29158	652.385	FALSE	13
2022-09-14	11:37:34	0.7593	3.37752	674.238	FALSE	13
2022-09-14	11:37:34	1.73559	7.72025	660.105	FALSE	13
2022-09-14	11:37:34	0.409886	1.82325	676.061	FALSE	13
2022-09-14	11:37:35	1.23126	5.47689	665.582	FALSE	13
2022-09-14	11:37:35	0.611565	2.72036	678.781	FALSE	13
2022-09-14	11:37:35	1.41584	6.29794	671.88	FALSE	13
2022-09-14	11:37:35	1.03162	4.58885	683.37	FALSE	13
2022-09-14	11:37:36	0.740522	3.29399	675.174	FALSE	13
2022-09-14	11:37:36	1.45462	6.47044	689.841	FALSE	13
2022-09-14	11:37:36	0.329071	1.46377	676.638	FALSE	13
2022-09-14	11:37:36	0.956959	4.25675	694.097	FALSE	13
2022-09-14	11:37:37	0.140318	0.624163	677.262	FALSE	13
2022-09-14	11:37:37	0.563982	2.5087	696.606	FALSE	13
2022-09-14	11:37:37	0.129224	0.574814	677.837	FALSE	13
2022-09-14	11:37:38	0.356603	1.58624	698.192	FALSE	13
2022-09-14	11:37:38	0.388155	1.72659	679.564	FALSE	13
2022-09-14	11:37:38	0.284593	1.26593	699.458	FALSE	13
2022-09-14	11:37:38	0.83645	3.7207	683.284	FALSE	13
2022-09-14	11:37:39	0.226679	1.00831	700.467	FALSE	13
2022-09-14	11:37:39	-0.0455341	-0.202545	683.284	FALSE	13
2022-09-14	11:37:39	0.19584	0.871135	701.338	FALSE	13
2022-09-14	11:37:39	0.565153	2.51391	685.798	FALSE	13
2022-09-14	11:37:40	0.443524	1.97288	703.311	FALSE	13
2022-09-14	11:37:40	0.256501	1.14097	686.939	FALSE	13
2022-09-14	11:37:40	0.789325	3.51108	706.822	FALSE	13
2022-09-14	11:37:40	0.26154	1.16338	688.103	FALSE	13
2022-09-14	11:37:41	0.745509	3.31617	710.138	FALSE	13
2022-09-14	11:37:41	0.140674	0.625746	688.728	FALSE	13
2022-09-14	11:37:41	0.481641	2.14244	712.28	FALSE	13
2022-09-14	11:37:42	0.458181	2.03808	690.766	FALSE	13
2022-09-14	11:37:42	0.496858	2.21012	714.491	FALSE	13
2022-09-14	11:37:42	0.852278	3.7911	694.558	FALSE	13
2022-09-14	11:37:42	0.271412	1.20729	715.698	FALSE	13
2022-09-14	11:37:43	1.12642	5.01054	699.568	FALSE	13
2022-09-14	11:37:43	0.202099	0.898977	716.597	FALSE	13
2022-09-14	11:37:43	0.875687	3.89523	703.463	FALSE	13
2022-09-14	11:37:43	0.282608	1.2571	717.854	FALSE	13
2022-09-14	11:37:44	0.480013	2.13519	705.598	FALSE	13
2022-09-14	11:37:44	1.28459	5.71411	723.568	FALSE	13
2022-09-14	11:37:44	0.301031	1.33905	706.938	FALSE	13
2022-09-14	11:37:44	0.98444	4.37899	727.947	FALSE	13
2022-09-14	11:37:45	0.128054	0.56961	707.507	FALSE	13
2022-09-14	11:37:45	0.30612	1.36168	729.309	FALSE	13
2022-09-14	11:37:45	0.19243	0.855967	708.363	FALSE	13
2022-09-14	11:37:46	0.213601	0.95014	730.259	FALSE	13
2022-09-14	11:37:46	0.0625575	0.278268	708.641	FALSE	13
2022-09-14	11:37:46	0.455636	2.02676	732.286	FALSE	13
2022-09-14	11:37:46	0.0435244	0.193605	708.835	FALSE	13
2022-09-14	11:37:47	0.299555	1.33248	733.618	FALSE	13
2022-09-14	11:37:47	0.933143	4.15081	712.986	FALSE	13
2022-09-14	11:37:47	0.409886	1.82325	735.441	FALSE	13
2022-09-14	11:37:47	1.14607	5.09795	718.084	FALSE	13
2022-09-14	11:37:48	1.19706	5.32476	740.766	FALSE	13
2022-09-14	11:37:48	0.661132	2.94085	721.025	FALSE	13
2022-09-14	11:37:48	1.33324	5.93052	746.697	FALSE	13
2022-09-14	11:37:48	12.0726	53.7013	774.726	1	14
2022-09-14	11:37:49	6.33629	28.1851	774.882	1	15
2022-09-14	11:37:49	7.8311	34.8343	809.56	1	16
2022-09-14	11:37:49	10.0333	44.6301	819.512	1	17
2022-09-14	11:37:50	11.227	49.9399	859.5	1	18
2022-09-14	11:37:50	8.73482	38.8542	858.366	1	19
2022-09-14	11:37:50	5.54612	24.6703	884.17	1	20
2022-09-14	11:37:50	3.55365	15.8073	874.173	1	21
2022-09-14	11:37:51	2.65905	11.828	895.998	FALSE	21
2022-09-14	11:37:51	2.28612	10.1691	884.342	FALSE	21
2022-09-14	11:37:51	2.01177	8.94876	904.947	FALSE	21
2022-09-14	11:37:51	4.58418	20.3913	904.734	1	22
2022-09-14	11:37:52	14.2307	63.301	968.248	1	23
2022-09-14	11:37:52	16.7718	74.6043	979.338	1	24
2022-09-14	11:37:52	7.71354	34.3114	1002.56	1	25
2022-09-14	11:37:52	5.45339	24.2578	1003.6	1	26
2022-09-14	11:37:53	7.30337	32.4869	1035.05	1	27
2022-09-14	11:37:53	6.96601	30.9862	1034.58	1	28
2022-09-14	11:37:53	6.72037	29.8935	1064.94	1	29
2022-09-14	11:37:54	7.00632	31.1655	1065.75	1	30
2022-09-14	11:37:54	7.18968	31.9811	1096.92	1	31
2022-09-14	11:37:54	7.26042	32.2958	1098.04	1	32
2022-09-14	11:37:54	7.25548	32.2738	1129.19	1	33
2022-09-14	11:37:55	7.23472	32.1815	1130.22	1	34
2022-09-14	11:37:55	7.34896	32.6896	1161.88	1	35
2022-09-14	11:37:55	7.08561	31.5182	1161.74	1	36
2022-09-14	11:37:55	7.31324	32.5308	1194.42	1	37
2022-09-14	11:37:56	7.35655	32.7234	1194.47	1	38
2022-09-14	11:37:56	7.32825	32.5975	1227.01	1	39
2022-09-14	11:37:56	7.25115	32.2546	1226.72	1	40
2022-09-14	11:37:56	6.85604	30.497	1257.51	1	41
2022-09-14	11:37:57	7.16688	31.8797	1258.6	1	42
2022-09-14	11:37:57	6.88663	30.6331	1288.14	1	43
2022-09-14	11:37:57	6.83339	30.3963	1289	1	44
2022-09-14	11:37:58	6.788	30.1944	1318.34	1	45
2022-09-14	11:37:58	6.69334	29.7733	1318.77	1	46
2022-09-14	11:37:58	6.5397	29.0899	1347.43	1	47
2022-09-14	11:37:58	6.58937	29.3108	1348.08	1	48
2022-09-14	11:37:59	6.42622	28.5851	1376.01	1	49
2022-09-14	11:37:59	6.01634	26.7619	1374.84	1	50
2022-09-14	11:37:59	6.14698	27.343	1403.36	1	51
2022-09-14	11:37:59	6.03049	26.8248	1401.67	1	52
2022-09-14	11:38:00	5.8453	26.0011	1429.36	1	53
2022-09-14	11:38:00	5.7623	25.6319	1427.3	1	54
2022-09-14	11:38:00	5.66378	25.1936	1454.55	1	55
2022-09-14	11:38:00	5.62042	25.0008	1452.3	1	56
2022-09-14	11:38:01	5.5281	24.5901	1479.14	1	57
2022-09-14	11:38:01	5.46357	24.3031	1476.6	1	58
2022-09-14	11:38:01	5.32551	23.6889	1502.83	1	59
2022-09-14	11:38:02	5.18139	23.0479	1499.65	1	60
2022-09-14	11:38:02	5.19232	23.0965	1525.93	1	61
2022-09-14	11:38:02	5.19304	23.0997	1522.75	1	62
2022-09-14	11:38:02	5.19624	23.1139	1549.04	1	63
2022-09-14	11:38:03	5.1792	23.0381	1545.79	1	64
2022-09-14	11:38:03	5.22423	23.2384	1572.28	1	65
2022-09-14	11:38:03	5.2711	23.4469	1569.24	1	66
2022-09-14	11:38:03	5.36724	23.8746	1596.15	1	67
2022-09-14	11:38:04	5.24352	23.3242	1592.56	1	68
2022-09-14	11:38:04	5.22627	23.2475	1619.4	1	69
2022-09-14	11:38:04	5.01818	22.3219	1614.88	1	70
2022-09-14	11:38:04	4.90362	21.8123	1641.21	1	71
2022-09-14	11:38:05	4.92714	21.9169	1636.8	1	72
2022-09-14	11:38:05	5.0134	22.3006	1663.51	1	73
2022-09-14	11:38:05	5.16525	22.9761	1659.78	1	74
2022-09-14	11:38:06	4.92933	21.9266	1685.44	1	75
2022-09-14	11:38:06	3.60093	16.0177	1675.79	1	76
2022-09-14	11:38:06	3.52434	15.677	1701.12	1	77
2022-09-14	11:38:06	3.18032	14.1467	1689.94	1	78
2022-09-14	11:38:07	2.86317	12.736	1713.85	FALSE	78
2022-09-14	11:38:07	3.448	15.3374	1705.28	1	79
2022-09-14	11:38:07	3.4907	15.5273	1729.38	1	80
2022-09-14	11:38:07	3.86597	17.1966	1722.47	1	81
2022-09-14	11:38:08	3.5023	15.5789	1744.96	1	82
2022-09-14	11:38:08	3.28953	14.6325	1737.11	1	83
2022-09-14	11:38:08	3.55187	15.7994	1760.76	1	84
2022-09-14	11:38:08	3.44658	15.3311	1752.44	1	85
2022-09-14	11:38:09	3.22856	14.3613	1775.12	1	86
2022-09-14	11:38:09	3.33742	14.8455	1767.28	1	87
2022-09-14	11:38:09	3.87767	17.2487	1792.37	1	88
2022-09-14	11:38:10	4.07838	18.1414	1785.42	1	89
2022-09-14	11:38:10	3.98373	17.7204	1810.09	1	90
2022-09-14	11:38:10	4.09772	18.2275	1803.65	1	91
2022-09-14	11:38:10	2.94642	13.1063	1823.19	FALSE	91
2022-09-14	11:38:11	2.0393	9.07121	1812.72	FALSE	91
2022-09-14	11:38:11	1.43986	6.40479	1829.6	FALSE	91
2022-09-14	11:38:11	1.41838	6.30924	1819.03	FALSE	91
2022-09-14	11:38:11	7.25131	32.2553	1861.85	1	92
2022-09-14	11:38:12	10.627	47.271	1866.3	1	93
2022-09-14	11:38:12	16.2167	72.1351	1933.99	1	94
2022-09-14	11:38:12	16.6105	73.8868	1940.19	1	95
2022-09-14	11:38:12	7.39838	32.9095	1966.9	1	96
2022-09-14	11:38:13	8.3511	37.1474	1977.34	1	97
2022-09-14	11:38:13	11.855	52.7334	2019.63	1	98
2022-09-14	11:38:13	8.13589	36.1901	2013.53	1	99
2022-09-14	11:38:14	10.242	45.5585	2065.19	1	100
2022-09-14	11:38:14	6.91054	30.7395	2044.27	1	101
2022-09-14	11:38:14	8.57248	38.1321	2103.32	1	102
2022-09-14	11:38:14	10.8435	48.2341	2092.5	1	103
2022-09-14	11:38:15	5.36922	23.8834	2127.21	1	104
2022-09-14	11:38:15	3.42032	15.2143	2107.72	1	105
2022-09-14	11:38:15	0.819911	3.64713	2130.85	FALSE	105
2022-09-14	11:38:15	0.732888	3.26003	2110.98	FALSE	105
2022-09-14	11:38:16	0.734568	3.26751	2134.12	FALSE	105
2022-09-14	11:38:16	0.733092	3.26094	2114.24	FALSE	105
2022-09-14	11:38:16	0.729173	3.24351	2137.36	FALSE	105
2022-09-14	11:38:16	0.729428	3.24464	2117.48	FALSE	105
2022-09-14	11:38:17	0.701183	3.119	2140.48	FALSE	105
2022-09-14	11:38:17	0.559453	2.48856	2119.97	FALSE	105
2022-09-14	11:38:17	1.53116	6.81091	2147.29	FALSE	105
2022-09-14	11:38:18	0.737315	3.27972	2123.25	FALSE	105
2022-09-14	11:38:18	-0.60986	-2.71278	2147.29	FALSE	105
2022-09-14	11:38:18	2.05085	9.12259	2132.37	FALSE	105
2022-09-14	11:38:18	2.78408	12.3841	2159.68	FALSE	105
2022-09-14	11:38:19	3.49859	15.5624	2147.93	1	106
2022-09-14	11:38:19	11.1574	49.6303	2209.31	1	107
2022-09-14	11:38:19	8.90836	39.6262	2187.56	1	108
2022-09-14	11:38:19	5.57416	24.795	2234.1	1	109
2022-09-14	11:38:20	3.10205	13.7985	2201.36	1	110
2022-09-14	11:38:20	2.65599	11.8144	2245.92	FALSE	110
2022-09-14	11:38:20	2.5794	11.4737	2212.83	FALSE	110
2022-09-14	11:38:20	2.77151	12.3282	2258.25	FALSE	110
2022-09-14	11:38:21	2.55925	11.3841	2224.22	FALSE	110
2022-09-14	11:38:21	2.07594	9.2342	2267.48	FALSE	110
2022-09-14	11:38:21	2.12042	9.43205	2233.65	FALSE	110
2022-09-14	11:38:22	2.03548	9.05422	2276.54	FALSE	110
2022-09-14	11:38:22	2.02123	8.99084	2242.64	FALSE	110
2022-09-14	11:38:22	2.03329	9.04448	2285.58	FALSE	110
2022-09-14	11:38:22	2.06861	9.20159	2251.84	FALSE	110
2022-09-14	11:38:23	2.19971	9.78475	2295.36	FALSE	110
2022-09-14	11:38:23	2.08225	9.26226	2261.1	FALSE	110
2022-09-14	11:38:23	2.06164	9.17059	2304.54	FALSE	110
2022-09-14	11:38:23	2.13467	9.49544	2270.6	FALSE	110
2022-09-14	11:38:24	2.13635	9.50291	2314.04	FALSE	110
2022-09-14	11:38:24	2.04586	9.10039	2279.7	FALSE	110
2022-09-14	11:38:24	2.0992	9.33766	2323.38	FALSE	110
2022-09-14	11:38:24	2.23711	9.95111	2289.65	FALSE	110
2022-09-14	11:38:25	2.22551	9.89951	2333.28	FALSE	110
2022-09-14	11:38:25	2.09589	9.32294	2298.97	FALSE	110
2022-09-14	11:38:25	2.13971	9.51786	2342.79	FALSE	110
2022-09-14	11:38:26	2.09014	9.29736	2308.27	FALSE	110
2022-09-14	11:38:26	2.09904	9.33695	2352.13	FALSE	110
2022-09-14	11:38:26	2.13401	9.4925	2317.76	FALSE	110
2022-09-14	11:38:26	1.74536	7.76371	2359.89	FALSE	110
2022-09-14	11:38:27	1.88485	8.38419	2326.15	FALSE	110
2022-09-14	11:38:27	2.10368	9.35759	2369.25	FALSE	110
2022-09-14	11:38:27	2.12617	9.45763	2335.6	FALSE	110
2022-09-14	11:38:27	2.07574	9.23331	2378.48	FALSE	110
2022-09-14	11:38:28	2.06683	9.19367	2344.8	FALSE	110
2022-09-14	11:38:28	2.09055	9.29918	2387.78	FALSE	110
2022-09-14	11:38:28	2.08775	9.28673	2354.09	FALSE	110
2022-09-14	11:38:28	2.07721	9.23985	2397.02	FALSE	110
2022-09-14	11:38:29	2.09314	9.31071	2363.4	FALSE	110
2022-09-14	11:38:29	1.95996	8.71829	2405.74	FALSE	110
2022-09-14	11:38:29	2.02373	9.00196	2372.4	FALSE	110
2022-09-14	11:38:30	2.25391	10.0258	2415.77	FALSE	110
2022-09-14	11:38:30	2.13742	9.50767	2381.91	FALSE	110
2022-09-14	11:38:30	1.94337	8.6445	2424.41	FALSE	110
2022-09-14	11:38:30	1.94485	8.65108	2390.56	FALSE	110
2022-09-14	11:38:31	1.96515	8.74138	2433.15	FALSE	110
2022-09-14	11:38:31	1.91604	8.52293	2399.08	FALSE	110
2022-09-14	11:38:31	1.82337	8.11071	2441.26	FALSE	110
2022-09-14	11:38:31	1.93533	8.60873	2407.69	FALSE	110
2022-09-14	11:38:32	1.96556	8.7432	2450.01	FALSE	110
2022-09-14	11:38:32	1.96022	8.71945	2416.41	FALSE	110
2022-09-14	11:38:32	1.96256	8.72986	2458.74	FALSE	110
2022-09-14	11:38:32	1.90256	8.46297	2424.87	FALSE	110
2022-09-14	11:38:33	1.90072	8.45478	2467.19	FALSE	110
2022-09-14	11:38:33	1.89584	8.43308	2433.3	FALSE	110
2022-09-14	11:38:33	1.82907	8.13607	2475.33	FALSE	110
2022-09-14	11:38:34	1.74154	7.74672	2441.05	FALSE	110
2022-09-14	11:38:34	1.77838	7.91059	2483.24	FALSE	110
2022-09-14	11:38:34	1.82612	8.12295	2449.17	FALSE	110
2022-09-14	11:38:34	1.8251	8.11841	2491.36	FALSE	110
2022-09-14	11:38:35	1.76887	7.86829	2457.04	FALSE	110
2022-09-14	11:38:35	1.76927	7.87007	2499.23	FALSE	110
2022-09-14	11:38:35	1.87594	8.34456	2465.39	FALSE	110
2022-09-14	11:38:35	1.92729	8.57297	2507.8	FALSE	110
2022-09-14	11:38:36	1.91523	8.51933	2473.91	FALSE	110
2022-09-14	11:38:36	1.76627	7.85672	2515.66	FALSE	110
2022-09-14	11:38:36	1.67981	7.47213	2481.38	FALSE	110
2022-09-14	11:38:36	1.69009	7.51786	2523.17	FALSE	110
2022-09-14	11:38:37	1.7562	7.81193	2489.19	FALSE	110
2022-09-14	11:38:37	1.73304	7.70891	2530.88	FALSE	110
2022-09-14	11:38:37	1.61757	7.19527	2496.38	FALSE	110
2022-09-14	11:38:38	1.44424	6.42427	2537.31	FALSE	110
2022-09-14	11:38:38	1.42149	6.32307	2502.71	FALSE	110
2022-09-14	11:38:38	1.54668	6.87994	2544.19	FALSE	110
2022-09-14	11:38:38	1.4137	6.28842	2509	FALSE	110
2022-09-14	11:38:39	1.37879	6.13313	2550.32	FALSE	110
2022-09-14	11:38:39	1.64612	7.32227	2516.32	FALSE	110
2022-09-14	11:38:39	1.42429	6.33553	2556.66	FALSE	110
2022-09-14	11:38:39	0.465509	2.07068	2518.39	FALSE	110
2022-09-14	11:38:40	0.594109	2.64272	2559.3	FALSE	110
2022-09-14	11:38:40	0.443066	1.97085	2520.36	FALSE	110
2022-09-14	11:38:40	0.414517	1.84385	2561.14	FALSE	110
2022-09-14	11:38:40	0.455331	2.0254	2522.39	FALSE	110
2022-09-14	11:38:41	0.341183	1.51765	2562.66	FALSE	110
2022-09-14	11:38:41	0.349733	1.55568	2523.94	FALSE	110
2022-09-14	11:38:41	0.339809	1.51154	2564.17	FALSE	110
2022-09-14	11:38:42	0.307697	1.3687	2525.31	FALSE	110
2022-09-14	11:38:42	0.360878	1.60526	2565.78	FALSE	110
2022-09-14	11:38:42	0.404491	1.79926	2527.11	FALSE	110
2022-09-14	11:38:42	0.642303	2.85709	2568.63	FALSE	110
2022-09-14	11:38:43	2.52067	11.2124	2538.32	FALSE	110
2022-09-14	11:38:43	2.89202	12.8643	2581.5	FALSE	110
2022-09-14	11:38:43	5.64963	25.1307	2563.45	1	111
2022-09-14	11:38:43	6.54042	29.0931	2610.59	1	112
2022-09-14	11:38:44	2.99396	13.3177	2576.77	FALSE	112
2022-09-14	11:38:44	1.69294	7.53054	2618.12	FALSE	112
2022-09-14	11:38:44	1.96469	8.73933	2585.51	FALSE	112
2022-09-14	11:38:44	-0.0312847	-0.139161	2618.12	FALSE	112
2022-09-14	11:38:45	0.282201	1.25529	2586.76	FALSE	112
2022-09-14	11:38:45	0.284797	1.26683	2619.39	FALSE	112
2022-09-14	11:38:45	-0.155407	-0.691281	2586.76	FALSE	112
2022-09-14	11:38:46	-0.223142	-0.99258	2619.39	FALSE	112
2022-09-14	11:38:46	-0.303244	-1.34889	2586.76	FALSE	112
2022-09-14	11:38:46	-0.0958648	-0.426426	2619.39	FALSE	112
2022-09-14	11:38:46	-0.145839	-0.648721	2586.76	FALSE	112
2022-09-14	11:38:47	-0.557849	-2.48142	2619.39	FALSE	112
2022-09-14	11:38:47	-0.723905	-3.22007	2586.76	FALSE	112
2022-09-14	11:38:47	-0.927773	-4.12692	2619.39	FALSE	112
2022-09-14	11:38:47	-1.05403	-4.68854	2586.76	FALSE	112
2022-09-14	11:38:48	-0.974796	-4.33609	2619.39	FALSE	112
2022-09-14	11:38:48	-0.955814	-4.25165	2586.76	FALSE	112
2022-09-14	11:38:48	-0.889605	-3.95714	2619.39	FALSE	112
2022-09-14	11:38:48	-0.910368	-4.0495	2586.76	FALSE	112
2022-09-14	11:38:49	-0.94136	-4.18736	2619.39	FALSE	112
2022-09-14	11:38:49	-0.958409	-4.26319	2586.76	FALSE	112
2022-09-14	11:38:49	-1.03765	-4.61567	2619.39	FALSE	112
2022-09-14	11:38:50	-1.0581	-4.70664	2586.76	FALSE	112
2022-09-14	11:38:50	-1.081	-4.8085	2619.39	FALSE	112
2022-09-14	11:38:50	-1.06838	-4.75237	2586.76	FALSE	112
2022-09-14	11:38:50	-1.18177	-5.25675	2619.39	FALSE	112
2022-09-14	11:38:51	-1.18767	-5.28299	2586.76	FALSE	112
2022-09-14	11:38:51	-1.21775	-5.4168	2619.39	FALSE	112
2022-09-14	11:38:51	-1.25892	-5.59993	2586.76	FALSE	112
2022-09-14	11:38:51	-1.20167	-5.34527	2619.39	FALSE	112
2022-09-14	11:38:52	-1.30431	-5.80183	2586.76	FALSE	112
2022-09-14	11:38:52	-1.34401	-5.97843	2619.39	FALSE	112
2022-09-14	11:38:52	-1.39983	-6.22672	2586.76	FALSE	112
2022-09-14	11:38:52	-1.39546	-6.20729	2619.39	FALSE	112
2022-09-14	11:38:53	-1.45973	-6.49317	2586.76	FALSE	112
2022-09-14	11:38:53	-1.58258	-7.03963	2619.39	FALSE	112
2022-09-14	11:38:53	-1.73525	-7.71874	2586.76	FALSE	112
2022-09-14	11:38:54	-1.82976	-8.13914	2619.39	FALSE	112
2022-09-14	11:38:54	-1.88116	-8.36778	2586.76	FALSE	112
2022-09-14	11:38:54	-1.7951	-7.98496	2619.39	FALSE	112
2022-09-14	11:38:54	-1.93327	-8.59957	2586.76	FALSE	112
2022-09-14	11:38:55	-1.90849	-8.48935	2619.39	FALSE	112
2022-09-14	11:38:55	-2.06777	-9.19785	2586.76	FALSE	112
2022-09-14	11:38:55	-2.05245	-9.12971	2619.39	FALSE	112
2022-09-14	11:38:55	-2.06986	-9.20715	2586.76	FALSE	112
2022-09-14	11:38:56	-2.05474	-9.13989	2619.39	FALSE	112
2022-09-14	11:38:56	-2.08294	-9.26533	2586.76	FALSE	112
2022-09-14	11:38:56	-1.67332	-7.44326	2619.39	FALSE	112
2022-09-14	11:38:56	0.581947	2.58862	2589.35	FALSE	112
2022-09-14	11:38:57	1.1506	5.1181	2624.51	FALSE	112
2022-09-14	11:38:57	0.711361	3.16428	2592.52	FALSE	112
2022-09-14	11:38:57	-0.496119	-2.20684	2624.51	FALSE	112
2022-09-14	11:38:58	-2.0835	-9.26782	2592.52	FALSE	112
2022-09-14	11:38:58	3.1651	14.079	2638.59	1	113
2022-09-14	11:38:58	0.449886	2.00118	2594.52	FALSE	113
2022-09-14	11:38:58	0.88902	3.95454	2642.54	FALSE	113
2022-09-14	11:38:59	0.745967	3.31821	2597.84	FALSE	113
2022-09-14	11:38:59	0.295636	1.31505	2643.86	FALSE	113
2022-09-14	11:38:59	0.571209	2.54085	2600.38	FALSE	113
2022-09-14	11:38:59	0.28673	1.27543	2645.13	FALSE	113
2022-09-14	11:39:00	0.431616	1.91991	2602.3	FALSE	113
2022-09-14	11:39:00	0.326323	1.45155	2646.58	FALSE	113
2022-09-14	11:39:00	0.438944	1.95251	2604.25	FALSE	113
2022-09-14	11:39:01	0.38897	1.73022	2648.31	FALSE	113
2022-09-14	11:39:01	0.401082	1.78409	2606.03	FALSE	113
2022-09-14	11:39:01	0.551208	2.45188	2650.77	FALSE	113
2022-09-14	11:39:01	0.515229	2.29184	2608.33	FALSE	113
2022-09-14	11:39:02	0.797875	3.54911	2654.31	FALSE	113
2022-09-14	11:39:02	0.847086	3.76801	2612.09	FALSE	113
2022-09-14	11:39:02	0.841234	3.74198	2658.06	FALSE	113
2022-09-14	11:39:02	1.49365	6.64405	2618.74	FALSE	113
2022-09-14	11:39:03	3.80296	16.9163	2674.97	1	114
2022-09-14	11:39:03	2.26754	10.0865	2628.82	FALSE	114
2022-09-14	11:39:03	4.66815	20.7649	2695.74	1	115
2022-09-14	11:39:03	3.77609	16.7968	2645.62	1	116
2022-09-14	11:39:04	0.788613	3.50791	2699.25	FALSE	116
2022-09-14	11:39:04	0.734822	3.26864	2648.89	FALSE	116
2022-09-14	11:39:04	1.97864	8.80139	2708.05	FALSE	116
2022-09-14	11:39:04	0.565763	2.51663	2651.41	FALSE	116
2022-09-14	11:39:05	1.0163	4.52071	2712.57	FALSE	116
2022-09-14	11:39:05	0.989224	4.40027	2655.81	FALSE	116
2022-09-14	11:39:05	0.641539	2.85369	2715.42	FALSE	116
2022-09-14	11:39:06	0.730038	3.24736	2659.05	FALSE	116
2022-09-14	11:39:06	0.718995	3.19823	2718.62	FALSE	116
2022-09-14	11:39:06	0.466679	2.07588	2661.13	FALSE	116
2022-09-14	11:39:06	0.433193	1.92693	2720.55	FALSE	116
2022-09-14	11:39:07	0.38556	1.71505	2662.85	FALSE	116
2022-09-14	11:39:07	0.375738	1.67136	2722.22	FALSE	116
2022-09-14	11:39:07	0.484084	2.1533	2665	FALSE	116
2022-09-14	11:39:07	0.406323	1.80741	2724.03	FALSE	116
2022-09-14	11:39:08	0.655433	2.9155	2667.91	FALSE	116
2022-09-14	11:39:08	0.332685	1.47985	2725.5	FALSE	116
2022-09-14	11:39:08	2.02373	9.00196	2676.92	FALSE	116
2022-09-14	11:39:08	0.505458	2.24838	2727.75	FALSE	116
2022-09-14	11:39:09	2.43406	10.8272	2687.74	FALSE	116
2022-09-14	11:39:09	0.541896	2.41046	2730.16	FALSE	116
2022-09-14	11:39:09	1.78347	7.93323	2695.68	FALSE	116
2022-09-14	11:39:10	1.04541	4.65019	2734.81	FALSE	116
2022-09-14	11:39:10	1.02368	4.55353	2700.23	FALSE	116
2022-09-14	11:39:10	1.29594	5.7646	2740.58	FALSE	116
2022-09-14	11:39:10	0.437519	1.94617	2702.18	FALSE	116
2022-09-14	11:39:11	1.48057	6.58587	2747.16	FALSE	116
2022-09-14	11:39:11	0.189478	0.842836	2703.02	FALSE	116
2022-09-14	11:39:11	0.431565	1.91969	2749.08	FALSE	116
2022-09-14	11:39:11	0.394364	1.75421	2704.77	FALSE	116
2022-09-14	11:39:12	0.244084	1.08573	2750.17	FALSE	116
2022-09-14	11:39:12	0.0847458	0.376966	2705.15	FALSE	116
2022-09-14	11:39:12	0.142048	0.631858	2750.8	FALSE	116
2022-09-14	11:39:12	0.0167559	0.0745336	2705.22	FALSE	116
2022-09-14	11:39:13	0.103626	0.460949	2751.26	FALSE	116
2022-09-14	11:39:13	0.107036	0.476118	2705.7	FALSE	116
2022-09-14	11:39:13	0.19411	0.86344	2752.13	FALSE	116
2022-09-14	11:39:14	0.286832	1.27589	2706.98	FALSE	116
2022-09-14	11:39:14	0.0936007	0.416355	2752.54	FALSE	116
2022-09-14	11:39:14	0.371361	1.65189	2708.63	FALSE	116
2022-09-14	11:39:14	0.179911	0.80028	2753.34	FALSE	116
2022-09-14	11:39:15	0.518282	2.30542	2710.93	FALSE	116
2022-09-14	11:39:15	0.141438	0.629145	2753.97	FALSE	116
2022-09-14	11:39:15	0.440827	1.96089	2712.9	FALSE	116
2022-09-14	11:39:15	-0.988129	-4.3954	2753.97	FALSE	116
2022-09-14	11:39:16	-1.17317	-5.21849	2712.9	FALSE	116
2022-09-14	11:39:16	-0.961411	-4.27655	2753.97	FALSE	116
2022-09-14	11:39:16	-0.0198344	-0.0882274	2712.9	FALSE	116
2022-09-14	11:39:16	0.415382	1.8477	2755.82	FALSE	116
2022-09-14	11:39:17	0.421438	1.87464	2714.77	FALSE	116
2022-09-14	11:39:17	0.525458	2.33734	2758.16	FALSE	116
2022-09-14	11:39:17	0.419097	1.86423	2716.63	FALSE	116
2022-09-14	11:39:18	0.499046	2.21986	2760.38	FALSE	116
2022-09-14	11:39:18	0.33701	1.49909	2718.13	FALSE	116
2022-09-14	11:39:18	0.54159	2.4091	2762.79	FALSE	116
2022-09-14	11:39:18	0.172634	0.767911	2718.9	FALSE	116
2022-09-14	11:39:19	0.577112	2.56711	2765.35	FALSE	116
2022-09-14	11:39:19	0.277875	1.23604	2720.14	FALSE	116
2022-09-14	11:39:19	0.496298	2.20763	2767.56	FALSE	116
2022-09-14	11:39:19	0.325916	1.44974	2721.59	FALSE	116
2022-09-14	11:39:20	0.487952	2.17051	2769.73	FALSE	116
2022-09-14	11:39:20	0.261692	1.16406	2722.75	FALSE	116
2022-09-14	11:39:20	0.447036	1.98851	2771.72	FALSE	116
2022-09-14	11:39:20	0.479758	2.13406	2724.88	FALSE	116
2022-09-14	11:39:21	0.483626	2.15127	2773.87	FALSE	116
2022-09-14	11:39:21	1.04352	4.64179	2729.53	FALSE	116
2022-09-14	11:39:21	0.472125	2.10011	2775.97	FALSE	116
2022-09-14	11:39:22	1.72963	7.69374	2737.22	FALSE	116
2022-09-14	11:39:22	0.524593	2.33349	2778.3	FALSE	116
2022-09-14	11:39:22	0.828002	3.68312	2740.9	FALSE	116
2022-09-14	11:39:22	0.594313	2.64362	2780.95	FALSE	116
2022-09-14	11:39:23	0.661845	2.94402	2743.85	FALSE	116
2022-09-14	11:39:23	1.3219	5.88008	2786.83	FALSE	116
2022-09-14	11:39:23	0.393855	1.75195	2745.6	FALSE	116
2022-09-14	11:39:23	0.221845	0.986811	2787.82	FALSE	116
2022-09-14	11:39:24	0.290853	1.29377	2746.89	FALSE	116
2022-09-14	11:39:24	0.0257127	0.114375	2787.93	FALSE	116
2022-09-14	11:39:24	0.116298	0.517317	2747.41	FALSE	116
2022-09-14	11:39:24	0.00886792	0.0394463	2787.97	FALSE	116
2022-09-14	11:39:25	0.00301552	0.0134136	2747.42	FALSE	116
2022-09-14	11:39:25	0.0448475	0.199491	2788.17	FALSE	116
2022-09-14	11:39:25	0.532786	2.36994	2749.79	FALSE	116
2022-09-14	11:39:26	0.654619	2.91188	2791.08	FALSE	116
2022-09-14	11:39:26	0.369987	1.64578	2751.44	FALSE	116
2022-09-14	11:39:26	0.303168	1.34855	2792.43	FALSE	116
2022-09-14	11:39:26	0.236705	1.05291	2752.49	FALSE	116
2022-09-14	11:39:27	0.386171	1.71777	2794.15	FALSE	116
2022-09-14	11:39:27	0.274211	1.21975	2753.71	FALSE	116
2022-09-14	11:39:27	0.195992	0.871812	2795.02	FALSE	116
2022-09-14	11:39:27	0.227697	1.01284	2754.73	FALSE	116
2022-09-14	11:39:28	0.366476	1.63016	2796.65	FALSE	116
2022-09-14	11:39:28	0.367799	1.63604	2756.36	FALSE	116
2022-09-14	11:39:28	0.307036	1.36576	2798.01	FALSE	116
2022-09-14	11:39:28	0.28154	1.25235	2757.61	FALSE	116
2022-09-14	11:39:29	0.270853	1.20481	2799.22	FALSE	116
2022-09-14	11:39:29	0.271463	1.20752	2758.82	FALSE	116
2022-09-14	11:39:29	0.20785	0.924558	2800.14	FALSE	116
2022-09-14	11:39:30	0.121591	0.540861	2759.36	FALSE	116
2022-09-14	11:39:30	0.0873412	0.388511	2800.53	FALSE	116
2022-09-14	11:39:30	0.0595041	0.264686	2759.63	FALSE	116
2022-09-14	11:39:30	0.0863233	0.383983	2800.92	FALSE	116
2022-09-14	11:39:31	0.0937025	0.416807	2760.04	FALSE	116
2022-09-14	11:39:31	0.115077	0.511886	2801.43	FALSE	116
2022-09-14	11:39:31	0.128359	0.570967	2760.61	FALSE	116
2022-09-14	11:39:31	0.137468	0.611485	2802.04	FALSE	116
2022-09-14	11:39:32	0.115585	0.514145	2761.13	FALSE	116
2022-09-14	11:39:32	0.283575	1.2614	2803.3	FALSE	116
2022-09-14	11:39:32	0.0442369	0.196775	2761.33	FALSE	116
2022-09-14	11:39:32	-0.133677	-0.594622	2803.3	FALSE	116
2022-09-14	11:39:33	0.0155346	0.069101	2761.39	FALSE	116
2022-09-14	11:39:33	0.110089	0.489698	2803.79	FALSE	116
2022-09-14	11:39:33	-0.00609391	-0.0271069	2761.39	FALSE	116
2022-09-14	11:39:34	-0.10874	-0.483697	2803.79	FALSE	116
2022-09-14	11:39:34	-0.107366	-0.477585	2761.39	FALSE	116
2022-09-14	11:39:34	-0.0997326	-0.443631	2803.79	FALSE	116
2022-09-14	11:39:34	-0.0814628	-0.362363	2761.39	FALSE	116
2022-09-14	11:39:35	-0.141615	-0.629932	2803.79	FALSE	116
2022-09-14	11:39:35	-0.221819	-0.986695	2761.39	FALSE	116
2022-09-14	11:39:35	-0.341514	-1.51912	2803.79	FALSE	116
2022-09-14	11:39:35	-0.320089	-1.42382	2761.39	FALSE	116
2022-09-14	11:39:36	-0.234033	-1.04103	2803.79	FALSE	116
2022-09-14	11:39:36	-0.167162	-0.74357	2761.39	FALSE	116
2022-09-14	11:39:36	-0.260547	-1.15897	2803.79	FALSE	116
2022-09-14	11:39:36	-0.0980023	-0.435934	2761.39	FALSE	116
2022-09-14	11:39:37	-0.0644145	-0.286529	2803.79	FALSE	116
2022-09-14	11:39:37	-0.137646	-0.612277	2761.39	FALSE	116
2022-09-14	11:39:37	-0.135	-0.600507	2803.79	FALSE	116
2022-09-14	11:39:38	-0.14757	-0.656421	2761.39	FALSE	116
2022-09-14	11:39:38	-0.286857	-1.276	2803.79	FALSE	116
2022-09-14	11:39:38	-0.385839	-1.71629	2761.39	FALSE	116
2022-09-14	11:39:38	-0.634948	-2.82438	2803.79	FALSE	116
2022-09-14	11:39:39	-0.910674	-4.05086	2761.39	FALSE	116
2022-09-14	11:39:39	0.11986	0.533161	2804.32	FALSE	116
2022-09-14	11:39:39	0.121794	0.541764	2761.94	FALSE	116
2022-09-14	11:39:39	0.807443	3.59167	2807.92	FALSE	116
2022-09-14	11:39:40	6.4278	28.5921	2790.53	1	117
2022-09-14	11:39:40	7.55171	33.5915	2841.51	1	118
2022-09-14	11:39:40	9.15807	40.7369	2831.27	1	119
2022-09-14	11:39:40	9.33294	41.5148	2883.02	1	120
2022-09-14	11:39:41	8.46988	37.6757	2868.94	1	121
2022-09-14	11:39:41	4.81589	21.422	2904.44	1	122
2022-09-14	11:39:41	5.5421	24.6524	2893.59	1	123
2022-09-14	11:39:42	6.06159	26.9632	2931.41	1	124
2022-09-14	11:39:42	4.66393	20.7461	2914.34	1	125
2022-09-14	11:39:42	2.8051	12.4776	2943.88	FALSE	125
2022-09-14	11:39:42	3.5567	15.8209	2930.16	1	126
2022-09-14	11:39:43	4.68332	20.8323	2964.72	1	127
2022-09-14	11:39:43	5.42917	24.15	2954.31	1	128
2022-09-14	11:39:43	6.2364	27.7408	2992.46	1	129
2022-09-14	11:39:43	11.4798	51.0644	3005.37	1	130
2022-09-14	11:39:44	7.35874	32.7331	3025.19	1	131
2022-09-14	11:39:44	2.72993	12.1433	3017.52	FALSE	131
2022-09-14	11:39:44	2.40815	10.7119	3035.9	FALSE	131
2022-09-14	11:39:44	7.51772	33.4403	3050.96	1	132
2022-09-14	11:39:45	6.93477	30.8472	3066.75	1	133
2022-09-14	11:39:45	14.1771	63.0626	3114.02	1	134
2022-09-14	11:39:45	12.1922	54.2333	3120.98	1	135
2022-09-14	11:39:46	5.7683	25.6586	3139.68	1	136
2022-09-14	11:39:46	15.9004	70.7282	3191.71	1	137
2022-09-14	11:39:46	7.45451	33.1592	3172.84	1	138
2022-09-14	11:39:46	2.68576	11.9468	3203.66	FALSE	138
2022-09-14	11:39:47	5.88831	26.1924	3199.03	1	139
2022-09-14	11:39:47	1.97309	8.7767	3212.44	FALSE	139
2022-09-14	11:39:47	0.807494	3.59189	3202.62	FALSE	139
2022-09-14	11:39:47	0.340929	1.51652	3213.95	FALSE	139
2022-09-14	11:39:48	0.58098	2.58432	3205.21	FALSE	139
2022-09-14	11:39:48	0.538893	2.3971	3216.35	FALSE	139
2022-09-14	11:39:48	0.720013	3.20276	3208.41	FALSE	139
2022-09-14	11:39:48	0.726883	3.23332	3219.58	FALSE	139
2022-09-14	11:39:49	0.546476	2.43083	3210.84	FALSE	139
2022-09-14	11:39:49	0.485814	2.161	3221.74	FALSE	139
2022-09-14	11:39:49	0.433295	1.92738	3212.77	FALSE	139
2022-09-14	11:39:50	0.415534	1.84838	3223.59	FALSE	139
2022-09-14	11:39:50	0.474262	2.10961	3214.88	FALSE	139
2022-09-14	11:39:50	0.19701	0.87634	3224.47	FALSE	139
2022-09-14	11:39:50	0.386018	1.71709	3216.59	FALSE	139
2022-09-14	11:39:51	0.270903	1.20503	3225.67	FALSE	139
2022-09-14	11:39:51	0.407646	1.81329	3218.41	FALSE	139
2022-09-14	11:39:51	0.296196	1.31754	3226.99	FALSE	139
2022-09-14	11:39:51	0.40612	1.8065	3220.21	FALSE	139
2022-09-14	11:39:52	0.281438	1.25189	3228.24	FALSE	139
2022-09-14	11:39:52	0.467595	2.07996	3222.29	FALSE	139
2022-09-14	11:39:52	0.295229	1.31324	3229.56	FALSE	139
2022-09-14	11:39:52	0.598333	2.6615	3224.96	FALSE	139
2022-09-14	11:39:53	0.51813	2.30475	3231.86	FALSE	139
2022-09-14	11:39:53	2.09513	9.31956	3234.28	FALSE	139
2022-09-14	11:39:53	4.92856	21.9232	3253.78	1	140
2022-09-14	11:39:54	6.34316	28.2156	3262.49	1	141
2022-09-14	11:39:54	3.33146	14.819	3268.6	1	142
2022-09-14	11:39:54	1.72571	7.6763	3270.17	FALSE	142
2022-09-14	11:39:54	0.685712	3.05018	3271.65	FALSE	142
2022-09-14	11:39:55	0.613193	2.72761	3272.9	FALSE	142
2022-09-14	11:39:55	0.421234	1.87373	3273.53	FALSE	142
2022-09-14	11:39:55	0.452532	2.01295	3274.91	FALSE	142
2022-09-14	11:39:55	0.360929	1.60548	3275.13	FALSE	142
2022-09-14	11:39:56	0.483168	2.14923	3277.06	FALSE	142
2022-09-14	11:39:56	0.409682	1.82235	3276.95	FALSE	142
2022-09-14	11:39:56	0.480623	2.13791	3279.2	FALSE	142
2022-09-14	11:39:56	0.387443	1.72342	3278.68	FALSE	142
2022-09-14	11:39:57	1.07971	4.80277	3284	FALSE	142
2022-09-14	11:39:57	0.40154	1.78613	3280.46	FALSE	142
2022-09-14	11:39:57	0.630292	2.80366	3286.8	FALSE	142
2022-09-14	11:39:58	0.987392	4.39212	3284.86	FALSE	142
2022-09-14	11:39:58	0.637163	2.83423	3289.64	FALSE	142
2022-09-14	11:39:58	0.433906	1.9301	3286.79	FALSE	142
2022-09-14	11:39:58	0.888308	3.95137	3293.59	FALSE	142
2022-09-14	11:39:59	0.273193	1.21522	3288	FALSE	142
2022-09-14	11:39:59	0.688461	3.06241	3296.65	FALSE	142
2022-09-14	11:39:59	1.09304	4.86206	3292.86	FALSE	142
2022-09-14	11:39:59	1.53116	6.81091	3303.46	FALSE	142
2022-09-14	11:40:00	1.39421	6.20172	3299.06	FALSE	142
2022-09-14	11:40:00	1.98851	8.84529	3312.31	FALSE	142
2022-09-14	11:40:00	0.441998	1.9661	3301.03	FALSE	142
2022-09-14	11:40:00	0.907544	4.03694	3316.34	FALSE	142
2022-09-14	11:40:01	0.345407	1.53644	3302.57	FALSE	142
2022-09-14	11:40:01	0.562048	2.5001	3318.84	FALSE	142
2022-09-14	11:40:01	0.374669	1.6666	3304.23	FALSE	142
2022-09-14	11:40:02	1.53818	6.84213	3325.69	FALSE	142
2022-09-14	11:40:02	1.34352	5.97625	3310.21	FALSE	142
2022-09-14	11:40:02	4.79355	21.3227	3347.01	1	143
2022-09-14	11:40:02	3.49146	15.5307	3325.74	1	144
2022-09-14	11:40:03	4.4965	20.0013	3367.01	1	145
2022-09-14	11:40:03	2.34195	10.4175	3336.16	FALSE	145
2022-09-14	11:40:03	1.80378	8.02357	3375.03	FALSE	145
2022-09-14	11:40:03	1.8933	8.42178	3344.58	FALSE	145
2022-09-14	11:40:04	1.38434	6.15782	3381.19	FALSE	145
2022-09-14	11:40:04	1.72541	7.67497	3352.26	FALSE	145
2022-09-14	11:40:04	3.20006	14.2345	3395.43	1	146
2022-09-14	11:40:05	1.7992	8.0032	3360.26	FALSE	146
2022-09-14	11:40:05	3.4423	15.312	3410.74	1	147
2022-09-14	11:40:05	1.34475	5.98172	3366.24	FALSE	147
2022-09-14	11:40:05	4.60678	20.4919	3431.23	1	148
2022-09-14	11:40:06	1.52388	6.77852	3373.02	FALSE	148
2022-09-14	11:40:06	4.91563	21.8657	3453.09	1	149
2022-09-14	11:40:06	3.74144	16.6427	3389.66	1	150
2022-09-14	11:40:06	5.808	25.8351	3478.93	1	151
2022-09-14	11:40:07	4.27742	19.0268	3408.69	1	152
2022-09-14	11:40:07	2.45625	10.9259	3489.86	FALSE	152
2022-09-14	11:40:07	1.8908	8.41066	3417.1	FALSE	152
2022-09-14	11:40:07	2.64337	11.7582	3501.61	FALSE	152
2022-09-14	11:40:08	2.61151	11.6165	3428.72	FALSE	152
2022-09-14	11:40:08	3.63039	16.1487	3517.76	1	153
2022-09-14	11:40:08	2.36352	10.5134	3439.23	FALSE	153
2022-09-14	11:40:08	2.31187	10.2837	3528.05	FALSE	153
2022-09-14	11:40:09	3.37345	15.0058	3454.23	1	154
2022-09-14	11:40:09	3.17457	14.1211	3542.17	1	155
2022-09-14	11:40:09	6.10143	27.1404	3481.37	1	156
2022-09-14	11:40:10	2.27136	10.1035	3552.27	FALSE	156
2022-09-14	11:40:10	3.03304	13.4916	3494.87	1	157
2022-09-14	11:40:10	3.12062	13.8811	3566.15	1	158
2022-09-14	11:40:10	3.63568	16.1722	3511.04	1	159
2022-09-14	11:40:11	6.19563	27.5594	3593.71	1	160
2022-09-14	11:40:11	2.83187	12.5967	3523.64	FALSE	160
2022-09-14	11:40:11	3.0907	13.7481	3607.46	1	161
2022-09-14	11:40:11	6.30606	28.0506	3551.69	1	162
2022-09-14	11:40:12	3.12403	13.8963	3621.36	1	163
2022-09-14	11:40:12	5.71436	25.4186	3577.1	1	164
2022-09-14	11:40:12	4.02576	17.9074	3639.26	1	165
2022-09-14	11:40:12	7.11828	31.6635	3608.77	1	166
2022-09-14	11:40:13	8.84683	39.3525	3678.62	1	167
2022-09-14	11:40:13	8.02632	35.7027	3644.47	1	168
2022-09-14	11:40:13	2.22663	9.9045	3688.52	FALSE	168
2022-09-14	11:40:14	1.90052	8.45389	3652.92	FALSE	168
2022-09-14	11:40:14	5.12673	22.8047	3711.32	1	169
2022-09-14	11:40:14	5.10057	22.6884	3675.61	1	170
2022-09-14	11:40:14	0.837316	3.72455	3715.05	FALSE	170
2022-09-14	11:40:15	0.77528	3.4486	3679.06	FALSE	170
2022-09-14	11:40:15	0.868359	3.86263	3718.91	FALSE	170
2022-09-14	11:40:15	3.75075	16.6841	3695.75	1	171
2022-09-14	11:40:15	2.56561	11.4123	3730.32	FALSE	171
2022-09-14	11:40:16	0.321183	1.42869	3697.17	FALSE	171
2022-09-14	11:40:16	0.41986	1.86762	3732.19	FALSE	171
2022-09-14	11:40:16	0.732786	3.25958	3700.43	FALSE	171
2022-09-14	11:40:16	0.728613	3.24102	3735.43	FALSE	171
2022-09-14	11:40:17	-0.906093	-4.03048	3700.43	FALSE	171
2022-09-14	11:40:17	0.279657	1.24397	3736.68	FALSE	171
2022-09-14	11:40:17	0.250445	1.11403	3701.55	FALSE	171
2022-09-14	11:40:18	0.319911	1.42303	3738.1	FALSE	171
2022-09-14	11:40:18	0.241336	1.07351	3702.62	FALSE	171
2022-09-14	11:40:18	0.30215	1.34402	3739.44	FALSE	171
2022-09-14	11:40:18	0.233194	1.03729	3703.66	FALSE	171
2022-09-14	11:40:19	0.392277	1.74493	3741.19	FALSE	171
2022-09-14	11:40:19	0.288817	1.28472	3704.94	FALSE	171
2022-09-14	11:40:19	0.471463	2.09716	3743.29	FALSE	171
2022-09-14	11:40:19	0.274262	1.21997	3706.16	FALSE	171

## Sheet: Reggie_harness_202291411351 (2)
Date	Time	Lbs	Total force x time			**GoPro Fitting: 11:24
2022-09-14	11:35:19	0.193193	0.193193	FALSE	0
2022-09-14	11:35:19	0.178384	0.371577	FALSE	0
2022-09-14	11:35:19	0.186069	0.557646	FALSE	0
2022-09-14	11:35:20	0.181438	0.739084	FALSE	0
2022-09-14	11:35:20	0.224339	0.963423	FALSE	0
2022-09-14	11:35:20	0.282659	1.24608	FALSE	0
2022-09-14	11:35:20	0.31126	1.55734	FALSE	0
2022-09-14	11:35:21	0.331209	1.88855	FALSE	0
2022-09-14	11:35:21	0.359911	2.24846	FALSE	0
2022-09-14	11:35:21	0.314975	2.56344	FALSE	0
2022-09-14	11:35:21	0.330598	2.89403	FALSE	0
2022-09-14	11:35:22	0.329886	3.22392	FALSE	0
2022-09-14	11:35:22	0.322252	3.54617	FALSE	0
2022-09-14	11:35:22	0.323117	3.86929	FALSE	0
2022-09-14	11:35:23	0.32612	4.19541	FALSE	0
2022-09-14	11:35:23	0.321438	4.51685	FALSE	0
2022-09-14	11:35:23	0.321845	4.83869	FALSE	0
2022-09-14	11:35:23	0.316501	5.15519	FALSE	0
2022-09-14	11:35:24	0.361896	5.51709	FALSE	0
2022-09-14	11:35:24	0.301082	5.81817	FALSE	0
2022-09-14	11:35:24	0.289377	6.10755	FALSE	0
2022-09-14	11:35:24	0.284084	6.39163	FALSE	0
2022-09-14	11:35:25	0.293804	6.68544	FALSE	0
2022-09-14	11:35:25	0.313753	6.99919	FALSE	0
2022-09-14	11:35:25	0.313244	7.31243	FALSE	0
2022-09-14	11:35:25	0.312736	7.62517	FALSE	0
2022-09-14	11:35:26	0.3107	7.93587	FALSE	0
2022-09-14	11:35:26	0.311158	8.24703	FALSE	0
2022-09-14	11:35:26	0.31187	8.5589	FALSE	0
2022-09-14	11:35:27	0.369326	8.92822	FALSE	0
2022-09-14	11:35:27	0.73243	9.66065	FALSE	0
2022-09-14	11:35:27	0.74958	10.4102	FALSE	0
2022-09-14	11:35:27	0.67131	11.0815	FALSE	0
2022-09-14	11:35:28	1.57095	12.6525	FALSE	0
2022-09-14	11:35:28	1.52653	14.179	FALSE	0
2022-09-14	11:35:28	1.41396	15.593	FALSE	0
2022-09-14	11:35:28	1.45508	17.0481	FALSE	0
2022-09-14	11:35:29	1.47243	18.5205	FALSE	0
2022-09-14	11:35:29	1.4994	20.0199	FALSE	0
2022-09-14	11:35:29	1.52205	21.5419	FALSE	0
2022-09-14	11:35:29	1.52464	23.0666	FALSE	0
2022-09-14	11:35:30	1.54637	24.613	FALSE	0
2022-09-14	11:35:30	1.56424	26.1772	FALSE	0
2022-09-14	11:35:30	1.58403	27.7612	FALSE	0
2022-09-14	11:35:31	1.60576	29.367	FALSE	0
2022-09-14	11:35:31	1.66301	31.03	FALSE	0
2022-09-14	11:35:31	1.68052	32.7105	FALSE	0
2022-09-14	11:35:31	0.60159	33.3121	FALSE	0
2022-09-14	11:35:32	0.111311	33.4234	FALSE	0
2022-09-14	11:35:32	0.249173	33.6726	FALSE	0
2022-09-14	11:35:32	0.11925	33.7918	FALSE	0
2022-09-14	11:35:32	-0.266552	33.7918	FALSE	0
2022-09-14	11:35:33	-0.364923	33.7918	FALSE	0
2022-09-14	11:35:33	-0.180903	33.7918	FALSE	0
2022-09-14	11:35:33	-0.176679	33.7918	FALSE	0
2022-09-14	11:35:33	-0.0617173	33.7918	FALSE	0
2022-09-14	11:35:34	-0.117493	33.7918	FALSE	0
2022-09-14	11:35:34	0.0714124	33.8633	FALSE	0
2022-09-14	11:35:34	-0.0501651	33.8633	FALSE	0
2022-09-14	11:35:35	0.0530918	33.9163	FALSE	0
2022-09-14	11:35:35	-0.0607504	33.9163	FALSE	0
2022-09-14	11:35:35	0.111005	34.0273	FALSE	0
2022-09-14	11:35:35	0.0555855	34.0829	FALSE	0
2022-09-14	11:35:36	0.0719213	34.1549	FALSE	0
2022-09-14	11:35:36	0.991412	35.1463	FALSE	0
2022-09-14	11:35:36	0.649835	35.7961	FALSE	0
2022-09-14	11:35:36	0.450751	36.2469	FALSE	0
2022-09-14	11:35:37	0.525458	36.7723	FALSE	0
2022-09-14	11:35:37	0.652532	37.4248	FALSE	0
2022-09-14	11:35:37	0.204797	37.6296	FALSE	0
2022-09-14	11:35:37	0.00459311	37.6342	FALSE	0
2022-09-14	11:35:38	0.0293768	37.6636	FALSE	0
2022-09-14	11:35:38	0.357112	38.0207	FALSE	0
2022-09-14	11:35:38	0.68841	38.7091	FALSE	0
2022-09-14	11:35:39	0.276552	38.9857	FALSE	0
2022-09-14	11:35:39	0.407341	39.393	FALSE	0
2022-09-14	11:35:39	0.307341	39.7004	FALSE	0
2022-09-14	11:35:39	0.166629	39.867	FALSE	0
2022-09-14	11:35:40	0.315026	40.182	FALSE	0
2022-09-14	11:35:40	0.241438	40.4235	FALSE	0
2022-09-14	11:35:40	0.22958	40.653	FALSE	0
2022-09-14	11:35:40	0.383626	41.0367	FALSE	0
2022-09-14	11:35:41	0.0482063	41.0849	FALSE	0
2022-09-14	11:35:41	0.171616	41.2565	FALSE	0
2022-09-14	11:35:41	0.298995	41.5555	FALSE	0
2022-09-14	11:35:41	0.344898	41.9004	FALSE	0
2022-09-14	11:35:42	0.465916	42.3663	FALSE	0
2022-09-14	11:35:42	3.48714	45.8534	1	1
2022-09-14	11:35:42	1.99218	47.8456	FALSE	1
2022-09-14	11:35:43	0.565356	48.411	FALSE	1
2022-09-14	11:35:43	0.116349	48.5273	FALSE	1
2022-09-14	11:35:43	0.568257	49.0956	FALSE	1
2022-09-14	11:35:43	0.0941096	49.1897	FALSE	1
2022-09-14	11:35:44	0.45243	49.6421	FALSE	1
2022-09-14	11:35:44	0.683168	50.3253	FALSE	1
2022-09-14	11:35:44	0.346476	50.6718	FALSE	1
2022-09-14	11:35:44	1.12744	51.7992	FALSE	1
2022-09-14	11:35:45	0.700471	52.4997	FALSE	1
2022-09-14	11:35:45	2.27273	54.7724	FALSE	1
2022-09-14	11:35:45	1.55477	56.3272	FALSE	1
2022-09-14	11:35:45	4.03228	60.3595	1	2
2022-09-14	11:35:46	1.65335	62.0128	FALSE	2
2022-09-14	11:35:46	3.21726	65.2301	1	3
2022-09-14	11:35:46	1.98744	67.2175	FALSE	3
2022-09-14	11:35:47	3.29721	70.5147	1	4
2022-09-14	11:35:47	1.71401	72.2287	FALSE	4
2022-09-14	11:35:47	3.44576	75.6745	1	5
2022-09-14	11:35:47	0.305407	75.9799	FALSE	5
2022-09-14	11:35:48	2.04139	78.0213	FALSE	5
2022-09-14	11:35:48	0.271107	78.2924	FALSE	5
2022-09-14	11:35:48	2.12724	80.4196	FALSE	5
2022-09-14	11:35:48	0.594975	81.0146	FALSE	5
2022-09-14	11:35:49	0.859758	81.8744	FALSE	5
2022-09-14	11:35:49	1.97197	83.8463	FALSE	5
2022-09-14	11:35:49	0.525712	84.372	FALSE	5
2022-09-14	11:35:49	2.6765	87.0485	FALSE	5
2022-09-14	11:35:50	0.349122	87.3977	FALSE	5
2022-09-14	11:35:50	1.842	89.2397	FALSE	5
2022-09-14	11:35:50	0.62785	89.8675	FALSE	5
2022-09-14	11:35:51	0.771667	90.6392	FALSE	5
2022-09-14	11:35:51	2.08546	92.7246	FALSE	5
2022-09-14	11:35:51	1.29421	94.0188	FALSE	5
2022-09-14	11:35:51	3.70688	97.7257	1	6
2022-09-14	11:35:52	1.0593	98.785	FALSE	6
2022-09-14	11:35:52	3.44245	102.227	1	7
2022-09-14	11:35:52	0.505102	102.733	FALSE	7
2022-09-14	11:35:52	1.74475	104.477	FALSE	7
2022-09-14	11:35:53	0.83131	105.309	FALSE	7
2022-09-14	11:35:53	0.613346	105.922	FALSE	7
2022-09-14	11:35:53	2.49014	108.412	FALSE	7
2022-09-14	11:35:53	0.418079	108.83	FALSE	7
2022-09-14	11:35:54	1.3508	110.181	FALSE	7
2022-09-14	11:35:54	0.263779	110.445	FALSE	7
2022-09-14	11:35:54	0.213041	110.658	FALSE	7
2022-09-14	11:35:55	0.938995	111.597	FALSE	7
2022-09-14	11:35:55	0.182507	111.779	FALSE	7
2022-09-14	11:35:55	0.193041	111.972	FALSE	7
2022-09-14	11:35:55	0.262252	112.235	FALSE	7
2022-09-14	11:35:56	0.12785	112.362	FALSE	7
2022-09-14	11:35:56	0.420471	112.783	FALSE	7
2022-09-14	11:35:56	0.225713	113.009	FALSE	7
2022-09-14	11:35:56	0.309326	113.318	FALSE	7
2022-09-14	11:35:57	0.177825	113.496	FALSE	7
2022-09-14	11:35:57	0.113601	113.609	FALSE	7
2022-09-14	11:35:57	0.0895295	113.699	FALSE	7
2022-09-14	11:35:57	-0.0535748	113.699	FALSE	7
2022-09-14	11:35:58	0.0512089	113.75	FALSE	7
2022-09-14	11:35:58	-0.103397	113.75	FALSE	7
2022-09-14	11:35:58	-0.0340328	113.75	FALSE	7
2022-09-14	11:35:59	-0.331285	113.75	FALSE	7
2022-09-14	11:35:59	-0.386246	113.75	FALSE	7
2022-09-14	11:35:59	-0.364974	113.75	FALSE	7
2022-09-14	11:35:59	-0.26075	113.75	FALSE	7
2022-09-14	11:36:00	-0.114491	113.75	FALSE	7
2022-09-14	11:36:00	0.000318332	113.75	FALSE	7
2022-09-14	11:36:00	-0.0381549	113.75	FALSE	7
2022-09-14	11:36:00	-0.126196	113.75	FALSE	7
2022-09-14	11:36:01	0.0905473	113.841	FALSE	7
2022-09-14	11:36:01	0.181947	114.023	FALSE	7
2022-09-14	11:36:01	0.321234	114.344	FALSE	7
2022-09-14	11:36:01	0.0883081	114.433	FALSE	7
2022-09-14	11:36:02	0.446832	114.879	FALSE	7
2022-09-14	11:36:02	0.37986	115.259	FALSE	7
2022-09-14	11:36:02	0.345305	115.604	FALSE	7
2022-09-14	11:36:03	0.280267	115.885	FALSE	7
2022-09-14	11:36:03	0.296959	116.182	FALSE	7
2022-09-14	11:36:03	0.128359	116.31	FALSE	7
2022-09-14	11:36:03	0.0384353	116.349	FALSE	7
2022-09-14	11:36:04	-0.0129641	116.349	FALSE	7
2022-09-14	11:36:04	0.0509036	116.399	FALSE	7
2022-09-14	11:36:04	-0.0374934	116.399	FALSE	7
2022-09-14	11:36:04	-0.00319315	116.399	FALSE	7
2022-09-14	11:36:05	-0.112761	116.399	FALSE	7
2022-09-14	11:36:05	-0.0377478	116.399	FALSE	7
2022-09-14	11:36:05	-0.116832	116.399	FALSE	7
2022-09-14	11:36:05	0.0548221	116.454	FALSE	7
2022-09-14	11:36:06	0.136145	116.59	FALSE	7
2022-09-14	11:36:06	-0.0705214	116.59	FALSE	7
2022-09-14	11:36:06	-0.0553051	116.59	FALSE	7
2022-09-14	11:36:07	-0.0504196	116.59	FALSE	7
2022-09-14	11:36:07	0.119809	116.71	FALSE	7
2022-09-14	11:36:07	-0.183906	116.71	FALSE	7
2022-09-14	11:36:07	-0.128587	116.71	FALSE	7
2022-09-14	11:36:08	-0.257646	116.71	FALSE	7
2022-09-14	11:36:08	-0.0671117	116.71	FALSE	7
2022-09-14	11:36:08	0.0151783	116.725	FALSE	7
2022-09-14	11:36:08	0.169122	116.894	FALSE	7
2022-09-14	11:36:09	2.50536	119.4	FALSE	7
2022-09-14	11:36:09	0.319148	119.719	FALSE	7
2022-09-14	11:36:09	1.8021	121.521	FALSE	7
2022-09-14	11:36:09	0.357468	121.879	FALSE	7
2022-09-14	11:36:10	0.88098	122.76	FALSE	7
2022-09-14	11:36:10	1.26989	124.029	FALSE	7
2022-09-14	11:36:10	0.474669	124.504	FALSE	7
2022-09-14	11:36:11	1.63187	126.136	FALSE	7
2022-09-14	11:36:11	0.483117	126.619	FALSE	7
2022-09-14	11:36:11	1.14144	127.761	FALSE	7
2022-09-14	11:36:11	1.62698	129.388	FALSE	7
2022-09-14	11:36:12	1.40083	130.788	FALSE	7
2022-09-14	11:36:12	0.438181	131.227	FALSE	7
2022-09-14	11:36:12	0.400776	131.627	FALSE	7
2022-09-14	11:36:12	0.263931	131.891	FALSE	7
2022-09-14	11:36:13	0.043219	131.934	FALSE	7
2022-09-14	11:36:13	-0.101259	131.934	FALSE	7
2022-09-14	11:36:13	-0.0430405	131.934	FALSE	7
2022-09-14	11:36:13	-0.187112	131.934	FALSE	7
2022-09-14	11:36:14	-0.369961	131.934	FALSE	7
2022-09-14	11:36:14	-0.382124	131.934	FALSE	7
2022-09-14	11:36:14	-0.377544	131.934	FALSE	7
2022-09-14	11:36:15	-0.0801396	131.934	FALSE	7
2022-09-14	11:36:15	-0.170318	131.934	FALSE	7
2022-09-14	11:36:15	0.107545	132.042	FALSE	7
2022-09-14	11:36:15	0.242659	132.285	FALSE	7
2022-09-14	11:36:16	0.359962	132.645	FALSE	7
2022-09-14	11:36:16	1.73732	134.382	FALSE	7
2022-09-14	11:36:16	0.258893	134.641	FALSE	7
2022-09-14	11:36:16	1.16057	135.801	FALSE	7
2022-09-14	11:36:17	0.336247	136.138	FALSE	7
2022-09-14	11:36:17	0.729529	136.867	FALSE	7
2022-09-14	11:36:17	0.571819	137.439	FALSE	7
2022-09-14	11:36:17	0.664847	138.104	FALSE	7
2022-09-14	11:36:18	0.733142	138.837	FALSE	7
2022-09-14	11:36:18	0.884135	139.721	FALSE	7
2022-09-14	11:36:18	0.747392	140.469	FALSE	7
2022-09-14	11:36:19	0.463015	140.932	FALSE	7
2022-09-14	11:36:19	0.994008	141.926	FALSE	7
2022-09-14	11:36:19	0.540572	142.466	FALSE	7
2022-09-14	11:36:19	1.17828	143.644	FALSE	7
2022-09-14	11:36:20	0.500165	144.145	FALSE	7
2022-09-14	11:36:20	0.697163	144.842	FALSE	7
2022-09-14	11:36:20	0.957417	145.799	FALSE	7
2022-09-14	11:36:20	0.402863	146.202	FALSE	7
2022-09-14	11:36:21	0.971565	147.174	FALSE	7
2022-09-14	11:36:21	0.56673	147.74	FALSE	7
2022-09-14	11:36:21	0.339199	148.079	FALSE	7
2022-09-14	11:36:21	0.61187	148.691	FALSE	7
2022-09-14	11:36:22	0.404237	149.096	FALSE	7
2022-09-14	11:36:22	1.44999	150.546	FALSE	7
2022-09-14	11:36:22	0.34841	150.894	FALSE	7
2022-09-14	11:36:23	0.847952	151.742	FALSE	7
2022-09-14	11:36:23	0.685763	152.428	FALSE	7
2022-09-14	11:36:23	0.213855	152.642	FALSE	7
2022-09-14	11:36:23	1.08414	153.726	FALSE	7
2022-09-14	11:36:24	0.284695	154.01	FALSE	7
2022-09-14	11:36:24	0.365305	154.376	FALSE	7
2022-09-14	11:36:24	0.523728	154.899	FALSE	7
2022-09-14	11:36:24	0.276298	155.176	FALSE	7
2022-09-14	11:36:25	0.548562	155.724	FALSE	7
2022-09-14	11:36:25	0.146527	155.871	FALSE	7
2022-09-14	11:36:25	0.57187	156.443	FALSE	7
2022-09-14	11:36:25	0.118079	156.561	FALSE	7
2022-09-14	11:36:26	0.18271	156.743	FALSE	7
2022-09-14	11:36:26	-0.191488	156.743	FALSE	7
2022-09-14	11:36:26	-0.178206	156.743	FALSE	7
2022-09-14	11:36:27	-0.0722007	156.743	FALSE	7
2022-09-14	11:36:27	0.16897	156.912	FALSE	7
2022-09-14	11:36:27	-0.0535748	156.912	FALSE	7
2022-09-14	11:36:27	0.104644	157.017	FALSE	7
2022-09-14	11:36:28	-0.000139698	157.017	FALSE	7
2022-09-14	11:36:28	0.116043	157.133	FALSE	7
2022-09-14	11:36:28	0.15299	157.286	FALSE	7
2022-09-14	11:36:28	0.179657	157.466	FALSE	7
2022-09-14	11:36:29	0.120115	157.586	FALSE	7
2022-09-14	11:36:29	0.219758	157.806	FALSE	7
2022-09-14	11:36:29	0.267188	158.073	FALSE	7
2022-09-14	11:36:29	0.256603	158.329	FALSE	7
2022-09-14	11:36:30	0.260216	158.59	FALSE	7
2022-09-14	11:36:30	0.250853	158.841	FALSE	7
2022-09-14	11:36:30	0.28042	159.121	FALSE	7
2022-09-14	11:36:31	0.284898	159.406	FALSE	7
2022-09-14	11:36:31	0.227952	159.634	FALSE	7
2022-09-14	11:36:31	0.211769	159.846	FALSE	7
2022-09-14	11:36:31	0.20673	160.052	FALSE	7
2022-09-14	11:36:32	0.226374	160.279	FALSE	7
2022-09-14	11:36:32	0.22327	160.502	FALSE	7
2022-09-14	11:36:32	0.224084	160.726	FALSE	7
2022-09-14	11:36:32	0.232379	160.958	FALSE	7
2022-09-14	11:36:33	0.215534	161.174	FALSE	7
2022-09-14	11:36:33	0.215687	161.39	FALSE	7
2022-09-14	11:36:33	0.213753	161.603	FALSE	7
2022-09-14	11:36:33	0.223422	161.827	FALSE	7
2022-09-14	11:36:34	0.224848	162.052	FALSE	7
2022-09-14	11:36:34	0.226985	162.279	FALSE	7
2022-09-14	11:36:34	0.220725	162.499	FALSE	7
2022-09-14	11:36:35	0.223066	162.722	FALSE	7
2022-09-14	11:36:35	0.224797	162.947	FALSE	7
2022-09-14	11:36:35	0.229835	163.177	FALSE	7
2022-09-14	11:36:35	0.235891	163.413	FALSE	7
2022-09-14	11:36:36	0.23584	163.649	FALSE	7
2022-09-14	11:36:36	0.235433	163.884	FALSE	7
2022-09-14	11:36:36	0.231209	164.115	FALSE	7
2022-09-14	11:36:36	0.241998	164.357	FALSE	7
2022-09-14	11:36:37	0.231361	164.589	FALSE	7
2022-09-14	11:36:37	0.245407	164.834	FALSE	7
2022-09-14	11:36:37	0.223931	165.058	FALSE	7
2022-09-14	11:36:38	0.275331	165.333	FALSE	7
2022-09-14	11:36:38	0.246374	165.58	FALSE	7
2022-09-14	11:36:38	0.264237	165.844	FALSE	7
2022-09-14	11:36:38	0.269428	166.113	FALSE	7
2022-09-14	11:36:39	0.296603	166.41	FALSE	7
2022-09-14	11:36:39	0.313601	166.724	FALSE	7
2022-09-14	11:36:39	0.222303	166.946	FALSE	7
2022-09-14	11:36:39	0.337316	167.283	FALSE	7
2022-09-14	11:36:40	0.208359	167.492	FALSE	7
2022-09-14	11:36:40	0.0721249	167.564	FALSE	7
2022-09-14	11:36:40	0.184186	167.748	FALSE	7
2022-09-14	11:36:40	0.0897839	167.838	FALSE	7
2022-09-14	11:36:41	-0.0523025	167.838	FALSE	7
2022-09-14	11:36:41	0.0385371	167.876	FALSE	7
2022-09-14	11:36:41	0.0676465	167.944	FALSE	7
2022-09-14	11:36:41	0.0661198	168.01	FALSE	7
2022-09-14	11:36:42	0.23355	168.244	FALSE	7
2022-09-14	11:36:42	0.334059	168.578	FALSE	7
2022-09-14	11:36:42	-0.0457377	168.578	FALSE	7
2022-09-14	11:36:43	-0.106857	168.578	FALSE	7
2022-09-14	11:36:43	-0.282735	168.578	FALSE	7
2022-09-14	11:36:43	-0.45047	168.578	FALSE	7
2022-09-14	11:36:43	-0.234491	168.578	FALSE	7
2022-09-14	11:36:44	0.763524	169.341	FALSE	7
2022-09-14	11:36:44	5.69696	175.038	1	8
2022-09-14	11:36:44	5.60001	180.638	1	9
2022-09-14	11:36:44	6.03319	186.671	1	10
2022-09-14	11:36:45	4.10968	190.781	1	11
2022-09-14	11:36:45	3.08169	193.863	1	12
2022-09-14	11:36:45	1.21238	195.075	FALSE	12
2022-09-14	11:36:46	1.86093	196.936	FALSE	12
2022-09-14	11:36:46	2.68337	199.619	FALSE	12
2022-09-14	11:36:46	2.96434	202.584	FALSE	12
2022-09-14	11:36:46	2.22734	204.811	FALSE	12
2022-09-14	11:36:47	2.65253	207.464	FALSE	12
2022-09-14	11:36:47	2.41767	209.881	FALSE	12
2022-09-14	11:36:47	2.28765	212.169	FALSE	12
2022-09-14	11:36:47	0.807901	212.977	FALSE	12
2022-09-14	11:36:48	0.110496	213.087	FALSE	12
2022-09-14	11:36:48	0.429987	213.517	FALSE	12
2022-09-14	11:36:48	0.40159	213.919	FALSE	12
2022-09-14	11:36:48	-0.061412	213.919	FALSE	12
2022-09-14	11:36:49	-0.0552033	213.919	FALSE	12
2022-09-14	11:36:49	-0.357035	213.919	FALSE	12
2022-09-14	11:36:49	-0.315763	213.919	FALSE	12
2022-09-14	11:36:50	-0.395458	213.919	FALSE	12
2022-09-14	11:36:50	-0.47673	213.919	FALSE	12
2022-09-14	11:36:50	-0.374847	213.919	FALSE	12
2022-09-14	11:36:50	-0.290674	213.919	FALSE	12
2022-09-14	11:36:51	-0.169503	213.919	FALSE	12
2022-09-14	11:36:51	0.401794	214.321	FALSE	12
2022-09-14	11:36:51	0.729835	215.051	FALSE	12
2022-09-14	11:36:51	2.32006	217.371	FALSE	12
2022-09-14	11:36:52	1.82912	219.2	FALSE	12
2022-09-14	11:36:52	3.80047	223	1	13
2022-09-14	11:36:52	0.638232	223.638	FALSE	13
2022-09-14	11:36:52	0.622506	224.261	FALSE	13
2022-09-14	11:36:53	0.159249	224.42	FALSE	13
2022-09-14	11:36:53	0.353499	224.774	FALSE	13
2022-09-14	11:36:53	0.276807	225.05	FALSE	13
2022-09-14	11:36:54	0.192939	225.243	FALSE	13
2022-09-14	11:36:54	0.181743	225.425	FALSE	13
2022-09-14	11:36:54	0.128868	225.554	FALSE	13
2022-09-14	11:36:54	0.154924	225.709	FALSE	13
2022-09-14	11:36:55	0.0324812	225.741	FALSE	13
2022-09-14	11:36:55	0.13472	225.876	FALSE	13
2022-09-14	11:36:55	-0.0970353	225.876	FALSE	13
2022-09-14	11:36:55	0.00729033	225.883	FALSE	13
2022-09-14	11:36:56	-0.145585	225.883	FALSE	13
2022-09-14	11:36:56	-0.138104	225.883	FALSE	13
2022-09-14	11:36:56	-0.0879768	225.883	FALSE	13
2022-09-14	11:36:56	-0.135916	225.883	FALSE	13
2022-09-14	11:36:57	-0.138664	225.883	FALSE	13
2022-09-14	11:36:57	-0.0677732	225.883	FALSE	13
2022-09-14	11:36:57	-0.309351	225.883	FALSE	13
2022-09-14	11:36:58	0.0799111	225.963	FALSE	13
2022-09-14	11:36:58	0.0777228	226.041	FALSE	13
2022-09-14	11:36:58	0.177214	226.218	FALSE	13
2022-09-14	11:36:58	0.216807	226.435	FALSE	13
2022-09-14	11:36:59	0.0544659	226.49	FALSE	13
2022-09-14	11:36:59	0.176501	226.666	FALSE	13
2022-09-14	11:36:59	0.352786	227.019	FALSE	13
2022-09-14	11:36:59	0.378893	227.398	FALSE	13
2022-09-14	11:37:00	0.288868	227.687	FALSE	13
2022-09-14	11:37:00	0.462099	228.149	FALSE	13
2022-09-14	11:37:00	0.352939	228.502	FALSE	13
2022-09-14	11:37:00	0.386476	228.888	FALSE	13
2022-09-14	11:37:01	0.467545	229.356	FALSE	13
2022-09-14	11:37:01	0.45472	229.81	FALSE	13
2022-09-14	11:37:01	0.47299	230.283	FALSE	13
2022-09-14	11:37:02	0.462812	230.746	FALSE	13
2022-09-14	11:37:02	0.45355	231.2	FALSE	13
2022-09-14	11:37:02	0.45416	231.654	FALSE	13
2022-09-14	11:37:02	0.328511	231.982	FALSE	13
2022-09-14	11:37:03	0.391616	232.374	FALSE	13
2022-09-14	11:37:03	0.289122	232.663	FALSE	13
2022-09-14	11:37:03	0.264135	232.927	FALSE	13
2022-09-14	11:37:03	0.497417	233.425	FALSE	13
2022-09-14	11:37:04	0.167596	233.592	FALSE	13
2022-09-14	11:37:04	0.348817	233.941	FALSE	13
2022-09-14	11:37:04	0.320674	234.262	FALSE	13
2022-09-14	11:37:04	0.376756	234.639	FALSE	13
2022-09-14	11:37:05	0.26668	234.905	FALSE	13
2022-09-14	11:37:05	0.332278	235.238	FALSE	13
2022-09-14	11:37:05	0.412786	235.65	FALSE	13
2022-09-14	11:37:06	1.2079	236.858	FALSE	13
2022-09-14	11:37:06	0.641896	237.5	FALSE	13
2022-09-14	11:37:06	2.06642	239.567	FALSE	13
2022-09-14	11:37:06	0.892074	240.459	FALSE	13
2022-09-14	11:37:07	2.91742	243.376	FALSE	13
2022-09-14	11:37:07	0.81986	244.196	FALSE	13
2022-09-14	11:37:07	1.64276	245.839	FALSE	13
2022-09-14	11:37:07	0.455534	246.294	FALSE	13
2022-09-14	11:37:08	1.37355	247.668	FALSE	13
2022-09-14	11:37:08	0.806476	248.474	FALSE	13
2022-09-14	11:37:08	1.24714	249.721	FALSE	13
2022-09-14	11:37:08	1.3424	251.064	FALSE	13
2022-09-14	11:37:09	0.373702	251.437	FALSE	13
2022-09-14	11:37:09	1.44307	252.881	FALSE	13
2022-09-14	11:37:09	0.14383	253.024	FALSE	13
2022-09-14	11:37:10	1.15569	254.18	FALSE	13
2022-09-14	11:37:10	0.252074	254.432	FALSE	13
2022-09-14	11:37:10	1.72317	256.155	FALSE	13
2022-09-14	11:37:10	0.695484	256.851	FALSE	13
2022-09-14	11:37:11	1.24775	258.099	FALSE	13
2022-09-14	11:37:11	1.20042	259.299	FALSE	13
2022-09-14	11:37:11	0.559046	259.858	FALSE	13
2022-09-14	11:37:11	1.46067	261.319	FALSE	13
2022-09-14	11:37:12	0.541081	261.86	FALSE	13
2022-09-14	11:37:12	2.66515	264.525	FALSE	13
2022-09-14	11:37:12	0.489631	265.015	FALSE	13
2022-09-14	11:37:12	1.07391	266.088	FALSE	13
2022-09-14	11:37:13	0.535382	266.624	FALSE	13
2022-09-14	11:37:13	0.31584	266.94	FALSE	13
2022-09-14	11:37:13	0.46271	267.402	FALSE	13
2022-09-14	11:37:14	0.339962	267.742	FALSE	13
2022-09-14	11:37:14	0.234822	267.977	FALSE	13
2022-09-14	11:37:14	0.540522	268.518	FALSE	13
2022-09-14	11:37:14	0.33986	268.858	FALSE	13
2022-09-14	11:37:15	0.66673	269.524	FALSE	13
2022-09-14	11:37:15	0.391361	269.916	FALSE	13
2022-09-14	11:37:15	0.27187	270.187	FALSE	13
2022-09-14	11:37:15	0.487748	270.675	FALSE	13
2022-09-14	11:37:16	0.190242	270.865	FALSE	13
2022-09-14	11:37:16	0.46098	271.326	FALSE	13
2022-09-14	11:37:16	0.21243	271.539	FALSE	13
2022-09-14	11:37:16	0.431412	271.97	FALSE	13
2022-09-14	11:37:17	0.237316	272.208	FALSE	13
2022-09-14	11:37:17	0.338384	272.546	FALSE	13
2022-09-14	11:37:17	0.337316	272.883	FALSE	13
2022-09-14	11:37:18	0.323524	273.207	FALSE	13
2022-09-14	11:37:18	0.416552	273.623	FALSE	13
2022-09-14	11:37:18	0.23416	273.858	FALSE	13
2022-09-14	11:37:18	0.338079	274.196	FALSE	13
2022-09-14	11:37:19	0.427188	274.623	FALSE	13
2022-09-14	11:37:19	0.392125	275.015	FALSE	13
2022-09-14	11:37:19	-0.861055	275.015	FALSE	13
2022-09-14	11:37:19	0.35299	275.368	FALSE	13
2022-09-14	11:37:20	0.423575	275.791	FALSE	13
2022-09-14	11:37:20	0.396451	276.188	FALSE	13
2022-09-14	11:37:20	0.31243	276.5	FALSE	13
2022-09-14	11:37:20	0.0947203	276.595	FALSE	13
2022-09-14	11:37:21	0.486527	277.082	FALSE	13
2022-09-14	11:37:21	0.40042	277.482	FALSE	13
2022-09-14	11:37:21	0.437214	277.919	FALSE	13
2022-09-14	11:37:22	0.396094	278.315	FALSE	13
2022-09-14	11:37:22	0.42785	278.743	FALSE	13
2022-09-14	11:37:22	0.428003	279.171	FALSE	13
2022-09-14	11:37:22	0.380522	279.552	FALSE	13
2022-09-14	11:37:23	0.534415	280.086	FALSE	13
2022-09-14	11:37:23	0.435026	280.521	FALSE	13
2022-09-14	11:37:23	0.378639	280.9	FALSE	13
2022-09-14	11:37:23	0.419351	281.319	FALSE	13
2022-09-14	11:37:24	0.425305	281.744	FALSE	13
2022-09-14	11:37:24	0.449224	282.194	FALSE	13
2022-09-14	11:37:24	0.367188	282.561	FALSE	13
2022-09-14	11:37:24	0.388359	282.949	FALSE	13
2022-09-14	11:37:25	0.397163	283.346	FALSE	13
2022-09-14	11:37:25	0.401082	283.747	FALSE	13
2022-09-14	11:37:25	0.404644	284.152	FALSE	13
2022-09-14	11:37:26	0.412379	284.564	FALSE	13
2022-09-14	11:37:26	0.419708	284.984	FALSE	13
2022-09-14	11:37:26	0.41986	285.404	FALSE	13
2022-09-14	11:37:26	0.42159	285.826	FALSE	13
2022-09-14	11:37:27	0.413295	286.239	FALSE	13
2022-09-14	11:37:27	0.412532	286.651	FALSE	13
2022-09-14	11:37:27	0.398486	287.05	FALSE	13
2022-09-14	11:37:27	0.403677	287.454	FALSE	13
2022-09-14	11:37:28	0.389377	287.843	FALSE	13
2022-09-14	11:37:28	0.392125	288.235	FALSE	13
2022-09-14	11:37:28	0.381998	288.617	FALSE	13
2022-09-14	11:37:28	0.34729	288.964	FALSE	13
2022-09-14	11:37:29	0.18271	289.147	FALSE	13
2022-09-14	11:37:29	0.253092	289.4	FALSE	13
2022-09-14	11:37:29	0.401438	289.802	FALSE	13
2022-09-14	11:37:30	0.33757	290.139	FALSE	13
2022-09-14	11:37:30	0.336349	290.476	FALSE	13
2022-09-14	11:37:30	0.208359	290.684	FALSE	13
2022-09-14	11:37:30	0.452023	291.136	FALSE	13
2022-09-14	11:37:31	0.119555	291.256	FALSE	13
2022-09-14	11:37:31	0.820522	292.076	FALSE	13
2022-09-14	11:37:31	0.391616	292.468	FALSE	13
2022-09-14	11:37:31	0.627341	293.095	FALSE	13
2022-09-14	11:37:32	0.462049	293.557	FALSE	13
2022-09-14	11:37:32	0.473804	294.031	FALSE	13
2022-09-14	11:37:32	0.560878	294.592	FALSE	13
2022-09-14	11:37:32	0.396705	294.988	FALSE	13
2022-09-14	11:37:33	0.352074	295.341	FALSE	13
2022-09-14	11:37:33	0.119809	295.46	FALSE	13
2022-09-14	11:37:33	0.604135	296.064	FALSE	13
2022-09-14	11:37:34	1.41441	297.479	FALSE	13
2022-09-14	11:37:34	0.7593	298.238	FALSE	13
2022-09-14	11:37:34	1.73559	299.974	FALSE	13
2022-09-14	11:37:34	0.409886	300.384	FALSE	13
2022-09-14	11:37:35	1.23126	301.615	FALSE	13
2022-09-14	11:37:35	0.611565	302.226	FALSE	13
2022-09-14	11:37:35	1.41584	303.642	FALSE	13
2022-09-14	11:37:35	1.03162	304.674	FALSE	13
2022-09-14	11:37:36	0.740522	305.414	FALSE	13
2022-09-14	11:37:36	1.45462	306.869	FALSE	13
2022-09-14	11:37:36	0.329071	307.198	FALSE	13
2022-09-14	11:37:36	0.956959	308.155	FALSE	13
2022-09-14	11:37:37	0.140318	308.295	FALSE	13
2022-09-14	11:37:37	0.563982	308.859	FALSE	13
2022-09-14	11:37:37	0.129224	308.989	FALSE	13
2022-09-14	11:37:38	0.356603	309.345	FALSE	13
2022-09-14	11:37:38	0.388155	309.733	FALSE	13
2022-09-14	11:37:38	0.284593	310.018	FALSE	13
2022-09-14	11:37:38	0.83645	310.854	FALSE	13
2022-09-14	11:37:39	0.226679	311.081	FALSE	13
2022-09-14	11:37:39	-0.0455341	311.081	FALSE	13
2022-09-14	11:37:39	0.19584	311.277	FALSE	13
2022-09-14	11:37:39	0.565153	311.842	FALSE	13
2022-09-14	11:37:40	0.443524	312.286	FALSE	13
2022-09-14	11:37:40	0.256501	312.542	FALSE	13
2022-09-14	11:37:40	0.789325	313.331	FALSE	13
2022-09-14	11:37:40	0.26154	313.593	FALSE	13
2022-09-14	11:37:41	0.745509	314.339	FALSE	13
2022-09-14	11:37:41	0.140674	314.479	FALSE	13
2022-09-14	11:37:41	0.481641	314.961	FALSE	13
2022-09-14	11:37:42	0.458181	315.419	FALSE	13
2022-09-14	11:37:42	0.496858	315.916	FALSE	13
2022-09-14	11:37:42	0.852278	316.768	FALSE	13
2022-09-14	11:37:42	0.271412	317.04	FALSE	13
2022-09-14	11:37:43	1.12642	318.166	FALSE	13
2022-09-14	11:37:43	0.202099	318.368	FALSE	13
2022-09-14	11:37:43	0.875687	319.244	FALSE	13
2022-09-14	11:37:43	0.282608	319.526	FALSE	13
2022-09-14	11:37:44	0.480013	320.006	FALSE	13
2022-09-14	11:37:44	1.28459	321.291	FALSE	13
2022-09-14	11:37:44	0.301031	321.592	FALSE	13
2022-09-14	11:37:44	0.98444	322.576	FALSE	13
2022-09-14	11:37:45	0.128054	322.704	FALSE	13
2022-09-14	11:37:45	0.30612	323.011	FALSE	13
2022-09-14	11:37:45	0.19243	323.203	FALSE	13
2022-09-14	11:37:46	0.213601	323.417	FALSE	13
2022-09-14	11:37:46	0.0625575	323.479	FALSE	13
2022-09-14	11:37:46	0.455636	323.935	FALSE	13
2022-09-14	11:37:46	0.0435244	323.978	FALSE	13
2022-09-14	11:37:47	0.299555	324.278	FALSE	13
2022-09-14	11:37:47	0.933143	325.211	FALSE	13
2022-09-14	11:37:47	0.409886	325.621	FALSE	13
2022-09-14	11:37:47	1.14607	326.767	FALSE	13
2022-09-14	11:37:48	1.19706	327.964	FALSE	13
2022-09-14	11:37:48	0.661132	328.625	FALSE	13
2022-09-14	11:37:48	1.33324	329.958	FALSE	13
2022-09-14	11:37:48	12.0726	342.031	1	14
2022-09-14	11:37:49	6.33629	348.367	1	15
2022-09-14	11:37:49	7.8311	356.198	1	16
2022-09-14	11:37:49	10.0333	366.232	1	17
2022-09-14	11:37:50	11.227	377.459	1	18
2022-09-14	11:37:50	8.73482	386.194	1	19
2022-09-14	11:37:50	5.54612	391.74	1	20
2022-09-14	11:37:50	3.55365	395.293	1	21
2022-09-14	11:37:51	2.65905	397.952	FALSE	21
2022-09-14	11:37:51	2.28612	400.238	FALSE	21
2022-09-14	11:37:51	2.01177	402.25	FALSE	21
2022-09-14	11:37:51	4.58418	406.834	1	22
2022-09-14	11:37:52	14.2307	421.065	1	23
2022-09-14	11:37:52	16.7718	437.837	1	24
2022-09-14	11:37:52	7.71354	445.55	1	25
2022-09-14	11:37:52	5.45339	451.004	1	26
2022-09-14	11:37:53	7.30337	458.307	1	27
2022-09-14	11:37:53	6.96601	465.273	1	28
2022-09-14	11:37:53	6.72037	471.994	1	29
2022-09-14	11:37:54	7.00632	479	1	30
2022-09-14	11:37:54	7.18968	486.19	1	31
2022-09-14	11:37:54	7.26042	493.45	1	32
2022-09-14	11:37:54	7.25548	500.706	1	33
2022-09-14	11:37:55	7.23472	507.94	1	34
2022-09-14	11:37:55	7.34896	515.289	1	35
2022-09-14	11:37:55	7.08561	522.375	1	36
2022-09-14	11:37:55	7.31324	529.688	1	37
2022-09-14	11:37:56	7.35655	537.045	1	38
2022-09-14	11:37:56	7.32825	544.373	1	39
2022-09-14	11:37:56	7.25115	551.624	1	40
2022-09-14	11:37:56	6.85604	558.48	1	41
2022-09-14	11:37:57	7.16688	565.647	1	42
2022-09-14	11:37:57	6.88663	572.534	1	43
2022-09-14	11:37:57	6.83339	579.367	1	44
2022-09-14	11:37:58	6.788	586.155	1	45
2022-09-14	11:37:58	6.69334	592.848	1	46
2022-09-14	11:37:58	6.5397	599.388	1	47
2022-09-14	11:37:58	6.58937	605.977	1	48
2022-09-14	11:37:59	6.42622	612.404	1	49
2022-09-14	11:37:59	6.01634	618.42	1	50
2022-09-14	11:37:59	6.14698	624.567	1	51
2022-09-14	11:37:59	6.03049	630.597	1	52
2022-09-14	11:38:00	5.8453	636.443	1	53
2022-09-14	11:38:00	5.7623	642.205	1	54
2022-09-14	11:38:00	5.66378	647.869	1	55
2022-09-14	11:38:00	5.62042	653.489	1	56
2022-09-14	11:38:01	5.5281	659.017	1	57
2022-09-14	11:38:01	5.46357	664.481	1	58
2022-09-14	11:38:01	5.32551	669.806	1	59
2022-09-14	11:38:02	5.18139	674.988	1	60
2022-09-14	11:38:02	5.19232	680.18	1	61
2022-09-14	11:38:02	5.19304	685.373	1	62
2022-09-14	11:38:02	5.19624	690.569	1	63
2022-09-14	11:38:03	5.1792	695.749	1	64
2022-09-14	11:38:03	5.22423	700.973	1	65
2022-09-14	11:38:03	5.2711	706.244	1	66
2022-09-14	11:38:03	5.36724	711.611	1	67
2022-09-14	11:38:04	5.24352	716.855	1	68
2022-09-14	11:38:04	5.22627	722.081	1	69
2022-09-14	11:38:04	5.01818	727.099	1	70
2022-09-14	11:38:04	4.90362	732.003	1	71
2022-09-14	11:38:05	4.92714	736.93	1	72
2022-09-14	11:38:05	5.0134	741.943	1	73
2022-09-14	11:38:05	5.16525	747.109	1	74
2022-09-14	11:38:06	4.92933	752.038	1	75
2022-09-14	11:38:06	3.60093	755.639	1	76
2022-09-14	11:38:06	3.52434	759.163	1	77
2022-09-14	11:38:06	3.18032	762.343	1	78
2022-09-14	11:38:07	2.86317	765.207	FALSE	78
2022-09-14	11:38:07	3.448	768.655	1	79
2022-09-14	11:38:07	3.4907	772.145	1	80
2022-09-14	11:38:07	3.86597	776.011	1	81
2022-09-14	11:38:08	3.5023	779.514	1	82
2022-09-14	11:38:08	3.28953	782.803	1	83
2022-09-14	11:38:08	3.55187	786.355	1	84
2022-09-14	11:38:08	3.44658	789.802	1	85
2022-09-14	11:38:09	3.22856	793.03	1	86
2022-09-14	11:38:09	3.33742	796.368	1	87
2022-09-14	11:38:09	3.87767	800.245	1	88
2022-09-14	11:38:10	4.07838	804.324	1	89
2022-09-14	11:38:10	3.98373	808.307	1	90
2022-09-14	11:38:10	4.09772	812.405	1	91
2022-09-14	11:38:10	2.94642	815.351	FALSE	91
2022-09-14	11:38:11	2.0393	817.391	FALSE	91
2022-09-14	11:38:11	1.43986	818.831	FALSE	91
2022-09-14	11:38:11	1.41838	820.249	FALSE	91
2022-09-14	11:38:11	7.25131	827.5	1	92
2022-09-14	11:38:12	10.627	838.127	1	93
2022-09-14	11:38:12	16.2167	854.344	1	94
2022-09-14	11:38:12	16.6105	870.954	1	95
2022-09-14	11:38:12	7.39838	878.353	1	96
2022-09-14	11:38:13	8.3511	886.704	1	97
2022-09-14	11:38:13	11.855	898.559	1	98
2022-09-14	11:38:13	8.13589	906.695	1	99
2022-09-14	11:38:14	10.242	916.937	1	100
2022-09-14	11:38:14	6.91054	923.847	1	101
2022-09-14	11:38:14	8.57248	932.42	1	102
2022-09-14	11:38:14	10.8435	943.263	1	103
2022-09-14	11:38:15	5.36922	948.633	1	104
2022-09-14	11:38:15	3.42032	952.053	1	105
2022-09-14	11:38:15	0.819911	952.873	FALSE	105
2022-09-14	11:38:15	0.732888	953.606	FALSE	105
2022-09-14	11:38:16	0.734568	954.34	FALSE	105
2022-09-14	11:38:16	0.733092	955.073	FALSE	105
2022-09-14	11:38:16	0.729173	955.803	FALSE	105
2022-09-14	11:38:16	0.729428	956.532	FALSE	105
2022-09-14	11:38:17	0.701183	957.233	FALSE	105
2022-09-14	11:38:17	0.559453	957.793	FALSE	105
2022-09-14	11:38:17	1.53116	959.324	FALSE	105
2022-09-14	11:38:18	0.737315	960.061	FALSE	105
2022-09-14	11:38:18	-0.60986	960.061	FALSE	105
2022-09-14	11:38:18	2.05085	962.112	FALSE	105
2022-09-14	11:38:18	2.78408	964.896	FALSE	105
2022-09-14	11:38:19	3.49859	968.395	1	106
2022-09-14	11:38:19	11.1574	979.552	1	107
2022-09-14	11:38:19	8.90836	988.46	1	108
2022-09-14	11:38:19	5.57416	994.035	1	109
2022-09-14	11:38:20	3.10205	997.137	1	110
2022-09-14	11:38:20	2.65599	999.793	FALSE	110
2022-09-14	11:38:20	2.5794	1002.37	FALSE	110
2022-09-14	11:38:20	2.77151	1005.14	FALSE	110
2022-09-14	11:38:21	2.55925	1007.7	FALSE	110
2022-09-14	11:38:21	2.07594	1009.78	FALSE	110
2022-09-14	11:38:21	2.12042	1011.9	FALSE	110
2022-09-14	11:38:22	2.03548	1013.93	FALSE	110
2022-09-14	11:38:22	2.02123	1015.96	FALSE	110
2022-09-14	11:38:22	2.03329	1017.99	FALSE	110
2022-09-14	11:38:22	2.06861	1020.06	FALSE	110
2022-09-14	11:38:23	2.19971	1022.26	FALSE	110
2022-09-14	11:38:23	2.08225	1024.34	FALSE	110
2022-09-14	11:38:23	2.06164	1026.4	FALSE	110
2022-09-14	11:38:23	2.13467	1028.54	FALSE	110
2022-09-14	11:38:24	2.13635	1030.67	FALSE	110
2022-09-14	11:38:24	2.04586	1032.72	FALSE	110
2022-09-14	11:38:24	2.0992	1034.82	FALSE	110
2022-09-14	11:38:24	2.23711	1037.05	FALSE	110
2022-09-14	11:38:25	2.22551	1039.28	FALSE	110
2022-09-14	11:38:25	2.09589	1041.38	FALSE	110
2022-09-14	11:38:25	2.13971	1043.52	FALSE	110
2022-09-14	11:38:26	2.09014	1045.61	FALSE	110
2022-09-14	11:38:26	2.09904	1047.7	FALSE	110
2022-09-14	11:38:26	2.13401	1049.84	FALSE	110
2022-09-14	11:38:26	1.74536	1051.58	FALSE	110
2022-09-14	11:38:27	1.88485	1053.47	FALSE	110
2022-09-14	11:38:27	2.10368	1055.57	FALSE	110
2022-09-14	11:38:27	2.12617	1057.7	FALSE	110
2022-09-14	11:38:27	2.07574	1059.77	FALSE	110
2022-09-14	11:38:28	2.06683	1061.84	FALSE	110
2022-09-14	11:38:28	2.09055	1063.93	FALSE	110
2022-09-14	11:38:28	2.08775	1066.02	FALSE	110
2022-09-14	11:38:28	2.07721	1068.1	FALSE	110
2022-09-14	11:38:29	2.09314	1070.19	FALSE	110
2022-09-14	11:38:29	1.95996	1072.15	FALSE	110
2022-09-14	11:38:29	2.02373	1074.17	FALSE	110
2022-09-14	11:38:30	2.25391	1076.43	FALSE	110
2022-09-14	11:38:30	2.13742	1078.57	FALSE	110
2022-09-14	11:38:30	1.94337	1080.51	FALSE	110
2022-09-14	11:38:30	1.94485	1082.45	FALSE	110
2022-09-14	11:38:31	1.96515	1084.42	FALSE	110
2022-09-14	11:38:31	1.91604	1086.33	FALSE	110
2022-09-14	11:38:31	1.82337	1088.16	FALSE	110
2022-09-14	11:38:31	1.93533	1090.09	FALSE	110
2022-09-14	11:38:32	1.96556	1092.06	FALSE	110
2022-09-14	11:38:32	1.96022	1094.02	FALSE	110
2022-09-14	11:38:32	1.96256	1095.98	FALSE	110
2022-09-14	11:38:32	1.90256	1097.88	FALSE	110
2022-09-14	11:38:33	1.90072	1099.78	FALSE	110
2022-09-14	11:38:33	1.89584	1101.68	FALSE	110
2022-09-14	11:38:33	1.82907	1103.51	FALSE	110
2022-09-14	11:38:34	1.74154	1105.25	FALSE	110
2022-09-14	11:38:34	1.77838	1107.03	FALSE	110
2022-09-14	11:38:34	1.82612	1108.86	FALSE	110
2022-09-14	11:38:34	1.8251	1110.68	FALSE	110
2022-09-14	11:38:35	1.76887	1112.45	FALSE	110
2022-09-14	11:38:35	1.76927	1114.22	FALSE	110
2022-09-14	11:38:35	1.87594	1116.09	FALSE	110
2022-09-14	11:38:35	1.92729	1118.02	FALSE	110
2022-09-14	11:38:36	1.91523	1119.94	FALSE	110
2022-09-14	11:38:36	1.76627	1121.7	FALSE	110
2022-09-14	11:38:36	1.67981	1123.38	FALSE	110
2022-09-14	11:38:36	1.69009	1125.07	FALSE	110
2022-09-14	11:38:37	1.7562	1126.83	FALSE	110
2022-09-14	11:38:37	1.73304	1128.56	FALSE	110
2022-09-14	11:38:37	1.61757	1130.18	FALSE	110
2022-09-14	11:38:38	1.44424	1131.62	FALSE	110
2022-09-14	11:38:38	1.42149	1133.05	FALSE	110
2022-09-14	11:38:38	1.54668	1134.59	FALSE	110
2022-09-14	11:38:38	1.4137	1136.01	FALSE	110
2022-09-14	11:38:39	1.37879	1137.39	FALSE	110
2022-09-14	11:38:39	1.64612	1139.03	FALSE	110
2022-09-14	11:38:39	1.42429	1140.46	FALSE	110
2022-09-14	11:38:39	0.465509	1140.92	FALSE	110
2022-09-14	11:38:40	0.594109	1141.52	FALSE	110
2022-09-14	11:38:40	0.443066	1141.96	FALSE	110
2022-09-14	11:38:40	0.414517	1142.37	FALSE	110
2022-09-14	11:38:40	0.455331	1142.83	FALSE	110
2022-09-14	11:38:41	0.341183	1143.17	FALSE	110
2022-09-14	11:38:41	0.349733	1143.52	FALSE	110
2022-09-14	11:38:41	0.339809	1143.86	FALSE	110
2022-09-14	11:38:42	0.307697	1144.17	FALSE	110
2022-09-14	11:38:42	0.360878	1144.53	FALSE	110
2022-09-14	11:38:42	0.404491	1144.93	FALSE	110
2022-09-14	11:38:42	0.642303	1145.57	FALSE	110
2022-09-14	11:38:43	2.52067	1148.1	FALSE	110
2022-09-14	11:38:43	2.89202	1150.99	FALSE	110
2022-09-14	11:38:43	5.64963	1156.64	1	111
2022-09-14	11:38:43	6.54042	1163.18	1	112
2022-09-14	11:38:44	2.99396	1166.17	FALSE	112
2022-09-14	11:38:44	1.69294	1167.86	FALSE	112
2022-09-14	11:38:44	1.96469	1169.83	FALSE	112
2022-09-14	11:38:44	-0.0312847	1169.83	FALSE	112
2022-09-14	11:38:45	0.282201	1170.11	FALSE	112
2022-09-14	11:38:45	0.284797	1170.4	FALSE	112
2022-09-14	11:38:45	-0.155407	1170.4	FALSE	112
2022-09-14	11:38:46	-0.223142	1170.4	FALSE	112
2022-09-14	11:38:46	-0.303244	1170.4	FALSE	112
2022-09-14	11:38:46	-0.0958648	1170.4	FALSE	112
2022-09-14	11:38:46	-0.145839	1170.4	FALSE	112
2022-09-14	11:38:47	-0.557849	1170.4	FALSE	112
2022-09-14	11:38:47	-0.723905	1170.4	FALSE	112
2022-09-14	11:38:47	-0.927773	1170.4	FALSE	112
2022-09-14	11:38:47	-1.05403	1170.4	FALSE	112
2022-09-14	11:38:48	-0.974796	1170.4	FALSE	112
2022-09-14	11:38:48	-0.955814	1170.4	FALSE	112
2022-09-14	11:38:48	-0.889605	1170.4	FALSE	112
2022-09-14	11:38:48	-0.910368	1170.4	FALSE	112
2022-09-14	11:38:49	-0.94136	1170.4	FALSE	112
2022-09-14	11:38:49	-0.958409	1170.4	FALSE	112
2022-09-14	11:38:49	-1.03765	1170.4	FALSE	112
2022-09-14	11:38:50	-1.0581	1170.4	FALSE	112
2022-09-14	11:38:50	-1.081	1170.4	FALSE	112
2022-09-14	11:38:50	-1.06838	1170.4	FALSE	112
2022-09-14	11:38:50	-1.18177	1170.4	FALSE	112
2022-09-14	11:38:51	-1.18767	1170.4	FALSE	112
2022-09-14	11:38:51	-1.21775	1170.4	FALSE	112
2022-09-14	11:38:51	-1.25892	1170.4	FALSE	112
2022-09-14	11:38:51	-1.20167	1170.4	FALSE	112
2022-09-14	11:38:52	-1.30431	1170.4	FALSE	112
2022-09-14	11:38:52	-1.34401	1170.4	FALSE	112
2022-09-14	11:38:52	-1.39983	1170.4	FALSE	112
2022-09-14	11:38:52	-1.39546	1170.4	FALSE	112
2022-09-14	11:38:53	-1.45973	1170.4	FALSE	112
2022-09-14	11:38:53	-1.58258	1170.4	FALSE	112
2022-09-14	11:38:53	-1.73525	1170.4	FALSE	112
2022-09-14	11:38:54	-1.82976	1170.4	FALSE	112
2022-09-14	11:38:54	-1.88116	1170.4	FALSE	112
2022-09-14	11:38:54	-1.7951	1170.4	FALSE	112
2022-09-14	11:38:54	-1.93327	1170.4	FALSE	112
2022-09-14	11:38:55	-1.90849	1170.4	FALSE	112
2022-09-14	11:38:55	-2.06777	1170.4	FALSE	112
2022-09-14	11:38:55	-2.05245	1170.4	FALSE	112
2022-09-14	11:38:55	-2.06986	1170.4	FALSE	112
2022-09-14	11:38:56	-2.05474	1170.4	FALSE	112
2022-09-14	11:38:56	-2.08294	1170.4	FALSE	112
2022-09-14	11:38:56	-1.67332	1170.4	FALSE	112
2022-09-14	11:38:56	0.581947	1170.98	FALSE	112
2022-09-14	11:38:57	1.1506	1172.13	FALSE	112
2022-09-14	11:38:57	0.711361	1172.84	FALSE	112
2022-09-14	11:38:57	-0.496119	1172.84	FALSE	112
2022-09-14	11:38:58	-2.0835	1172.84	FALSE	112
2022-09-14	11:38:58	3.1651	1176	1	113
2022-09-14	11:38:58	0.449886	1176.45	FALSE	113
2022-09-14	11:38:58	0.88902	1177.34	FALSE	113
2022-09-14	11:38:59	0.745967	1178.09	FALSE	113
2022-09-14	11:38:59	0.295636	1178.39	FALSE	113
2022-09-14	11:38:59	0.571209	1178.96	FALSE	113
2022-09-14	11:38:59	0.28673	1179.24	FALSE	113
2022-09-14	11:39:00	0.431616	1179.67	FALSE	113
2022-09-14	11:39:00	0.326323	1180	FALSE	113
2022-09-14	11:39:00	0.438944	1180.44	FALSE	113
2022-09-14	11:39:01	0.38897	1180.83	FALSE	113
2022-09-14	11:39:01	0.401082	1181.23	FALSE	113
2022-09-14	11:39:01	0.551208	1181.78	FALSE	113
2022-09-14	11:39:01	0.515229	1182.3	FALSE	113
2022-09-14	11:39:02	0.797875	1183.09	FALSE	113
2022-09-14	11:39:02	0.847086	1183.94	FALSE	113
2022-09-14	11:39:02	0.841234	1184.78	FALSE	113
2022-09-14	11:39:02	1.49365	1186.28	FALSE	113
2022-09-14	11:39:03	3.80296	1190.08	1	114
2022-09-14	11:39:03	2.26754	1192.35	FALSE	114
2022-09-14	11:39:03	4.66815	1197.02	1	115
2022-09-14	11:39:03	3.77609	1200.79	1	116
2022-09-14	11:39:04	0.788613	1201.58	FALSE	116
2022-09-14	11:39:04	0.734822	1202.31	FALSE	116
2022-09-14	11:39:04	1.97864	1204.29	FALSE	116
2022-09-14	11:39:04	0.565763	1204.86	FALSE	116
2022-09-14	11:39:05	1.0163	1205.88	FALSE	116
2022-09-14	11:39:05	0.989224	1206.86	FALSE	116
2022-09-14	11:39:05	0.641539	1207.51	FALSE	116
2022-09-14	11:39:06	0.730038	1208.24	FALSE	116
2022-09-14	11:39:06	0.718995	1208.96	FALSE	116
2022-09-14	11:39:06	0.466679	1209.42	FALSE	116
2022-09-14	11:39:06	0.433193	1209.85	FALSE	116
2022-09-14	11:39:07	0.38556	1210.24	FALSE	116
2022-09-14	11:39:07	0.375738	1210.62	FALSE	116
2022-09-14	11:39:07	0.484084	1211.1	FALSE	116
2022-09-14	11:39:07	0.406323	1211.51	FALSE	116
2022-09-14	11:39:08	0.655433	1212.16	FALSE	116
2022-09-14	11:39:08	0.332685	1212.49	FALSE	116
2022-09-14	11:39:08	2.02373	1214.52	FALSE	116
2022-09-14	11:39:08	0.505458	1215.02	FALSE	116
2022-09-14	11:39:09	2.43406	1217.46	FALSE	116
2022-09-14	11:39:09	0.541896	1218	FALSE	116
2022-09-14	11:39:09	1.78347	1219.78	FALSE	116
2022-09-14	11:39:10	1.04541	1220.83	FALSE	116
2022-09-14	11:39:10	1.02368	1221.85	FALSE	116
2022-09-14	11:39:10	1.29594	1223.15	FALSE	116
2022-09-14	11:39:10	0.437519	1223.59	FALSE	116
2022-09-14	11:39:11	1.48057	1225.07	FALSE	116
2022-09-14	11:39:11	0.189478	1225.26	FALSE	116
2022-09-14	11:39:11	0.431565	1225.69	FALSE	116
2022-09-14	11:39:11	0.394364	1226.08	FALSE	116
2022-09-14	11:39:12	0.244084	1226.33	FALSE	116
2022-09-14	11:39:12	0.0847458	1226.41	FALSE	116
2022-09-14	11:39:12	0.142048	1226.55	FALSE	116
2022-09-14	11:39:12	0.0167559	1226.57	FALSE	116
2022-09-14	11:39:13	0.103626	1226.67	FALSE	116
2022-09-14	11:39:13	0.107036	1226.78	FALSE	116
2022-09-14	11:39:13	0.19411	1226.97	FALSE	116
2022-09-14	11:39:14	0.286832	1227.26	FALSE	116
2022-09-14	11:39:14	0.0936007	1227.35	FALSE	116
2022-09-14	11:39:14	0.371361	1227.73	FALSE	116
2022-09-14	11:39:14	0.179911	1227.91	FALSE	116
2022-09-14	11:39:15	0.518282	1228.42	FALSE	116
2022-09-14	11:39:15	0.141438	1228.57	FALSE	116
2022-09-14	11:39:15	0.440827	1229.01	FALSE	116
2022-09-14	11:39:15	-0.988129	1229.01	FALSE	116
2022-09-14	11:39:16	-1.17317	1229.01	FALSE	116
2022-09-14	11:39:16	-0.961411	1229.01	FALSE	116
2022-09-14	11:39:16	-0.0198344	1229.01	FALSE	116
2022-09-14	11:39:16	0.415382	1229.42	FALSE	116
2022-09-14	11:39:17	0.421438	1229.84	FALSE	116
2022-09-14	11:39:17	0.525458	1230.37	FALSE	116
2022-09-14	11:39:17	0.419097	1230.79	FALSE	116
2022-09-14	11:39:18	0.499046	1231.29	FALSE	116
2022-09-14	11:39:18	0.33701	1231.62	FALSE	116
2022-09-14	11:39:18	0.54159	1232.17	FALSE	116
2022-09-14	11:39:18	0.172634	1232.34	FALSE	116
2022-09-14	11:39:19	0.577112	1232.92	FALSE	116
2022-09-14	11:39:19	0.277875	1233.19	FALSE	116
2022-09-14	11:39:19	0.496298	1233.69	FALSE	116
2022-09-14	11:39:19	0.325916	1234.02	FALSE	116
2022-09-14	11:39:20	0.487952	1234.5	FALSE	116
2022-09-14	11:39:20	0.261692	1234.77	FALSE	116
2022-09-14	11:39:20	0.447036	1235.21	FALSE	116
2022-09-14	11:39:20	0.479758	1235.69	FALSE	116
2022-09-14	11:39:21	0.483626	1236.18	FALSE	116
2022-09-14	11:39:21	1.04352	1237.22	FALSE	116
2022-09-14	11:39:21	0.472125	1237.69	FALSE	116
2022-09-14	11:39:22	1.72963	1239.42	FALSE	116
2022-09-14	11:39:22	0.524593	1239.95	FALSE	116
2022-09-14	11:39:22	0.828002	1240.77	FALSE	116
2022-09-14	11:39:22	0.594313	1241.37	FALSE	116
2022-09-14	11:39:23	0.661845	1242.03	FALSE	116
2022-09-14	11:39:23	1.3219	1243.35	FALSE	116
2022-09-14	11:39:23	0.393855	1243.75	FALSE	116
2022-09-14	11:39:23	0.221845	1243.97	FALSE	116
2022-09-14	11:39:24	0.290853	1244.26	FALSE	116
2022-09-14	11:39:24	0.0257127	1244.28	FALSE	116
2022-09-14	11:39:24	0.116298	1244.4	FALSE	116
2022-09-14	11:39:24	0.00886792	1244.41	FALSE	116
2022-09-14	11:39:25	0.00301552	1244.41	FALSE	116
2022-09-14	11:39:25	0.0448475	1244.46	FALSE	116
2022-09-14	11:39:25	0.532786	1244.99	FALSE	116
2022-09-14	11:39:26	0.654619	1245.64	FALSE	116
2022-09-14	11:39:26	0.369987	1246.01	FALSE	116
2022-09-14	11:39:26	0.303168	1246.32	FALSE	116
2022-09-14	11:39:26	0.236705	1246.55	FALSE	116
2022-09-14	11:39:27	0.386171	1246.94	FALSE	116
2022-09-14	11:39:27	0.274211	1247.21	FALSE	116
2022-09-14	11:39:27	0.195992	1247.41	FALSE	116
2022-09-14	11:39:27	0.227697	1247.64	FALSE	116
2022-09-14	11:39:28	0.366476	1248	FALSE	116
2022-09-14	11:39:28	0.367799	1248.37	FALSE	116
2022-09-14	11:39:28	0.307036	1248.68	FALSE	116
2022-09-14	11:39:28	0.28154	1248.96	FALSE	116
2022-09-14	11:39:29	0.270853	1249.23	FALSE	116
2022-09-14	11:39:29	0.271463	1249.5	FALSE	116
2022-09-14	11:39:29	0.20785	1249.71	FALSE	116
2022-09-14	11:39:30	0.121591	1249.83	FALSE	116
2022-09-14	11:39:30	0.0873412	1249.92	FALSE	116
2022-09-14	11:39:30	0.0595041	1249.98	FALSE	116
2022-09-14	11:39:30	0.0863233	1250.07	FALSE	116
2022-09-14	11:39:31	0.0937025	1250.16	FALSE	116
2022-09-14	11:39:31	0.115077	1250.27	FALSE	116
2022-09-14	11:39:31	0.128359	1250.4	FALSE	116
2022-09-14	11:39:31	0.137468	1250.54	FALSE	116
2022-09-14	11:39:32	0.115585	1250.66	FALSE	116
2022-09-14	11:39:32	0.283575	1250.94	FALSE	116
2022-09-14	11:39:32	0.0442369	1250.98	FALSE	116
2022-09-14	11:39:32	-0.133677	1250.98	FALSE	116
2022-09-14	11:39:33	0.0155346	1251	FALSE	116
2022-09-14	11:39:33	0.110089	1251.11	FALSE	116
2022-09-14	11:39:33	-0.00609391	1251.11	FALSE	116
2022-09-14	11:39:34	-0.10874	1251.11	FALSE	116
2022-09-14	11:39:34	-0.107366	1251.11	FALSE	116
2022-09-14	11:39:34	-0.0997326	1251.11	FALSE	116
2022-09-14	11:39:34	-0.0814628	1251.11	FALSE	116
2022-09-14	11:39:35	-0.141615	1251.11	FALSE	116
2022-09-14	11:39:35	-0.221819	1251.11	FALSE	116
2022-09-14	11:39:35	-0.341514	1251.11	FALSE	116
2022-09-14	11:39:35	-0.320089	1251.11	FALSE	116
2022-09-14	11:39:36	-0.234033	1251.11	FALSE	116
2022-09-14	11:39:36	-0.167162	1251.11	FALSE	116
2022-09-14	11:39:36	-0.260547	1251.11	FALSE	116
2022-09-14	11:39:36	-0.0980023	1251.11	FALSE	116
2022-09-14	11:39:37	-0.0644145	1251.11	FALSE	116
2022-09-14	11:39:37	-0.137646	1251.11	FALSE	116
2022-09-14	11:39:37	-0.135	1251.11	FALSE	116
2022-09-14	11:39:38	-0.14757	1251.11	FALSE	116
2022-09-14	11:39:38	-0.286857	1251.11	FALSE	116
2022-09-14	11:39:38	-0.385839	1251.11	FALSE	116
2022-09-14	11:39:38	-0.634948	1251.11	FALSE	116
2022-09-14	11:39:39	-0.910674	1251.11	FALSE	116
2022-09-14	11:39:39	0.11986	1251.23	FALSE	116
2022-09-14	11:39:39	0.121794	1251.35	FALSE	116
2022-09-14	11:39:39	0.807443	1252.16	FALSE	116
2022-09-14	11:39:40	6.4278	1258.59	1	117
2022-09-14	11:39:40	7.55171	1266.14	1	118
2022-09-14	11:39:40	9.15807	1275.3	1	119
2022-09-14	11:39:40	9.33294	1284.63	1	120
2022-09-14	11:39:41	8.46988	1293.1	1	121
2022-09-14	11:39:41	4.81589	1297.91	1	122
2022-09-14	11:39:41	5.5421	1303.46	1	123
2022-09-14	11:39:42	6.06159	1309.52	1	124
2022-09-14	11:39:42	4.66393	1314.18	1	125
2022-09-14	11:39:42	2.8051	1316.99	FALSE	125
2022-09-14	11:39:42	3.5567	1320.54	1	126
2022-09-14	11:39:43	4.68332	1325.23	1	127
2022-09-14	11:39:43	5.42917	1330.66	1	128
2022-09-14	11:39:43	6.2364	1336.89	1	129
2022-09-14	11:39:43	11.4798	1348.37	1	130
2022-09-14	11:39:44	7.35874	1355.73	1	131
2022-09-14	11:39:44	2.72993	1358.46	FALSE	131
2022-09-14	11:39:44	2.40815	1360.87	FALSE	131
2022-09-14	11:39:44	7.51772	1368.39	1	132
2022-09-14	11:39:45	6.93477	1375.32	1	133
2022-09-14	11:39:45	14.1771	1389.5	1	134
2022-09-14	11:39:45	12.1922	1401.69	1	135
2022-09-14	11:39:46	5.7683	1407.46	1	136
2022-09-14	11:39:46	15.9004	1423.36	1	137
2022-09-14	11:39:46	7.45451	1430.81	1	138
2022-09-14	11:39:46	2.68576	1433.5	FALSE	138
2022-09-14	11:39:47	5.88831	1439.39	1	139
2022-09-14	11:39:47	1.97309	1441.36	FALSE	139
2022-09-14	11:39:47	0.807494	1442.17	FALSE	139
2022-09-14	11:39:47	0.340929	1442.51	FALSE	139
2022-09-14	11:39:48	0.58098	1443.09	FALSE	139
2022-09-14	11:39:48	0.538893	1443.63	FALSE	139
2022-09-14	11:39:48	0.720013	1444.35	FALSE	139
2022-09-14	11:39:48	0.726883	1445.08	FALSE	139
2022-09-14	11:39:49	0.546476	1445.62	FALSE	139
2022-09-14	11:39:49	0.485814	1446.11	FALSE	139
2022-09-14	11:39:49	0.433295	1446.54	FALSE	139
2022-09-14	11:39:50	0.415534	1446.96	FALSE	139
2022-09-14	11:39:50	0.474262	1447.43	FALSE	139
2022-09-14	11:39:50	0.19701	1447.63	FALSE	139
2022-09-14	11:39:50	0.386018	1448.02	FALSE	139
2022-09-14	11:39:51	0.270903	1448.29	FALSE	139
2022-09-14	11:39:51	0.407646	1448.69	FALSE	139
2022-09-14	11:39:51	0.296196	1448.99	FALSE	139
2022-09-14	11:39:51	0.40612	1449.4	FALSE	139
2022-09-14	11:39:52	0.281438	1449.68	FALSE	139
2022-09-14	11:39:52	0.467595	1450.15	FALSE	139
2022-09-14	11:39:52	0.295229	1450.44	FALSE	139
2022-09-14	11:39:52	0.598333	1451.04	FALSE	139
2022-09-14	11:39:53	0.51813	1451.56	FALSE	139
2022-09-14	11:39:53	2.09513	1453.65	FALSE	139
2022-09-14	11:39:53	4.92856	1458.58	1	140
2022-09-14	11:39:54	6.34316	1464.92	1	141
2022-09-14	11:39:54	3.33146	1468.26	1	142
2022-09-14	11:39:54	1.72571	1469.98	FALSE	142
2022-09-14	11:39:54	0.685712	1470.67	FALSE	142
2022-09-14	11:39:55	0.613193	1471.28	FALSE	142
2022-09-14	11:39:55	0.421234	1471.7	FALSE	142
2022-09-14	11:39:55	0.452532	1472.15	FALSE	142
2022-09-14	11:39:55	0.360929	1472.51	FALSE	142
2022-09-14	11:39:56	0.483168	1473	FALSE	142
2022-09-14	11:39:56	0.409682	1473.41	FALSE	142
2022-09-14	11:39:56	0.480623	1473.89	FALSE	142
2022-09-14	11:39:56	0.387443	1474.28	FALSE	142
2022-09-14	11:39:57	1.07971	1475.36	FALSE	142
2022-09-14	11:39:57	0.40154	1475.76	FALSE	142
2022-09-14	11:39:57	0.630292	1476.39	FALSE	142
2022-09-14	11:39:58	0.987392	1477.37	FALSE	142
2022-09-14	11:39:58	0.637163	1478.01	FALSE	142
2022-09-14	11:39:58	0.433906	1478.45	FALSE	142
2022-09-14	11:39:58	0.888308	1479.33	FALSE	142
2022-09-14	11:39:59	0.273193	1479.61	FALSE	142
2022-09-14	11:39:59	0.688461	1480.3	FALSE	142
2022-09-14	11:39:59	1.09304	1481.39	FALSE	142
2022-09-14	11:39:59	1.53116	1482.92	FALSE	142
2022-09-14	11:40:00	1.39421	1484.31	FALSE	142
2022-09-14	11:40:00	1.98851	1486.3	FALSE	142
2022-09-14	11:40:00	0.441998	1486.74	FALSE	142
2022-09-14	11:40:00	0.907544	1487.65	FALSE	142
2022-09-14	11:40:01	0.345407	1488	FALSE	142
2022-09-14	11:40:01	0.562048	1488.56	FALSE	142
2022-09-14	11:40:01	0.374669	1488.93	FALSE	142
2022-09-14	11:40:02	1.53818	1490.47	FALSE	142
2022-09-14	11:40:02	1.34352	1491.82	FALSE	142
2022-09-14	11:40:02	4.79355	1496.61	1	143
2022-09-14	11:40:02	3.49146	1500.1	1	144
2022-09-14	11:40:03	4.4965	1504.6	1	145
2022-09-14	11:40:03	2.34195	1506.94	FALSE	145
2022-09-14	11:40:03	1.80378	1508.74	FALSE	145
2022-09-14	11:40:03	1.8933	1510.64	FALSE	145
2022-09-14	11:40:04	1.38434	1512.02	FALSE	145
2022-09-14	11:40:04	1.72541	1513.75	FALSE	145
2022-09-14	11:40:04	3.20006	1516.95	1	146
2022-09-14	11:40:05	1.7992	1518.75	FALSE	146
2022-09-14	11:40:05	3.4423	1522.19	1	147
2022-09-14	11:40:05	1.34475	1523.53	FALSE	147
2022-09-14	11:40:05	4.60678	1528.14	1	148
2022-09-14	11:40:06	1.52388	1529.66	FALSE	148
2022-09-14	11:40:06	4.91563	1534.58	1	149
2022-09-14	11:40:06	3.74144	1538.32	1	150
2022-09-14	11:40:06	5.808	1544.13	1	151
2022-09-14	11:40:07	4.27742	1548.41	1	152
2022-09-14	11:40:07	2.45625	1550.86	FALSE	152
2022-09-14	11:40:07	1.8908	1552.75	FALSE	152
2022-09-14	11:40:07	2.64337	1555.4	FALSE	152
2022-09-14	11:40:08	2.61151	1558.01	FALSE	152
2022-09-14	11:40:08	3.63039	1561.64	1	153
2022-09-14	11:40:08	2.36352	1564	FALSE	153
2022-09-14	11:40:08	2.31187	1566.31	FALSE	153
2022-09-14	11:40:09	3.37345	1569.69	1	154
2022-09-14	11:40:09	3.17457	1572.86	1	155
2022-09-14	11:40:09	6.10143	1578.96	1	156
2022-09-14	11:40:10	2.27136	1581.23	FALSE	156
2022-09-14	11:40:10	3.03304	1584.27	1	157
2022-09-14	11:40:10	3.12062	1587.39	1	158
2022-09-14	11:40:10	3.63568	1591.02	1	159
2022-09-14	11:40:11	6.19563	1597.22	1	160
2022-09-14	11:40:11	2.83187	1600.05	FALSE	160
2022-09-14	11:40:11	3.0907	1603.14	1	161
2022-09-14	11:40:11	6.30606	1609.45	1	162
2022-09-14	11:40:12	3.12403	1612.57	1	163
2022-09-14	11:40:12	5.71436	1618.29	1	164
2022-09-14	11:40:12	4.02576	1622.31	1	165
2022-09-14	11:40:12	7.11828	1629.43	1	166
2022-09-14	11:40:13	8.84683	1638.28	1	167
2022-09-14	11:40:13	8.02632	1646.3	1	168
2022-09-14	11:40:13	2.22663	1648.53	FALSE	168
2022-09-14	11:40:14	1.90052	1650.43	FALSE	168
2022-09-14	11:40:14	5.12673	1655.56	1	169
2022-09-14	11:40:14	5.10057	1660.66	1	170
2022-09-14	11:40:14	0.837316	1661.5	FALSE	170
2022-09-14	11:40:15	0.77528	1662.27	FALSE	170
2022-09-14	11:40:15	0.868359	1663.14	FALSE	170
2022-09-14	11:40:15	3.75075	1666.89	1	171
2022-09-14	11:40:15	2.56561	1669.46	FALSE	171
2022-09-14	11:40:16	0.321183	1669.78	FALSE	171
2022-09-14	11:40:16	0.41986	1670.2	FALSE	171
2022-09-14	11:40:16	0.732786	1670.93	FALSE	171
2022-09-14	11:40:16	0.728613	1671.66	FALSE	171
2022-09-14	11:40:17	-0.906093	1671.66	FALSE	171
2022-09-14	11:40:17	0.279657	1671.94	FALSE	171
2022-09-14	11:40:17	0.250445	1672.19	FALSE	171
2022-09-14	11:40:18	0.319911	1672.51	FALSE	171
2022-09-14	11:40:18	0.241336	1672.75	FALSE	171
2022-09-14	11:40:18	0.30215	1673.05	FALSE	171
2022-09-14	11:40:18	0.233194	1673.28	FALSE	171
2022-09-14	11:40:19	0.392277	1673.68	FALSE	171
2022-09-14	11:40:19	0.288817	1673.97	FALSE	171
2022-09-14	11:40:19	0.471463	1674.44	FALSE	171
2022-09-14	11:40:19	0.274262	1674.71	FALSE	171
2022-09-14	11:40:20	0.552328	1675.26	FALSE	171
2022-09-14	11:40:20	0.236756	1675.5	FALSE	171
2022-09-14	11:40:20	0.504135	1676	FALSE	171
2022-09-14	11:40:20	0.180471	1676.18	FALSE	171
2022-09-14	11:40:21	0.423066	1676.61	FALSE	171
2022-09-14	11:40:21	0.110496	1676.72	FALSE	171
2022-09-14	11:40:21	0.294822	1677.01	FALSE	171
2022-09-14	11:40:22	0.118944	1677.13	FALSE	171
2022-09-14	11:40:22	0.285458	1677.42	FALSE	171
2022-09-14	11:40:22	0.0700384	1677.49	FALSE	171
2022-09-14	11:40:22	0.334262	1677.82	FALSE	171
2022-09-14	11:40:23	0.180827	1678	FALSE	171
2022-09-14	11:40:23	0.401743	1678.4	FALSE	171
2022-09-14	11:40:23	0.212176	1678.62	FALSE	171
2022-09-14	11:40:23	0.574618	1679.19	FALSE	171
2022-09-14	11:40:24	0.649224	1679.84	FALSE	171
2022-09-14	11:40:24	1.49304	1681.33	FALSE	171
2022-09-14	11:40:24	4.13492	1685.47	1	172
2022-09-14	11:40:24	7.58398	1693.05	1	173
2022-09-14	11:40:25	4.19548	1697.25	1	174
2022-09-14	11:40:25	1.73477	1698.98	FALSE	174
2022-09-14	11:40:25	1.00205	1699.98	FALSE	174
2022-09-14	11:40:26	0.874007	1700.86	FALSE	174
2022-09-14	11:40:26	0.539911	1701.4	FALSE	174
2022-09-14	11:40:26	0.48673	1701.89	FALSE	174
2022-09-14	11:40:26	0.421031	1702.31	FALSE	174
2022-09-14	11:40:27	0.433855	1702.74	FALSE	174
2022-09-14	11:40:27	0.251972	1702.99	FALSE	174
2022-09-14	11:40:27	0.494109	1703.49	FALSE	174
2022-09-14	11:40:27	0.0398094	1703.53	FALSE	174
2022-09-14	11:40:28	0.454822	1703.98	FALSE	174
2022-09-14	11:40:28	0.274618	1704.26	FALSE	174
2022-09-14	11:40:28	0.533651	1704.79	FALSE	174
2022-09-14	11:40:28	0.351514	1705.14	FALSE	174
2022-09-14	11:40:29	0.537824	1705.68	FALSE	174
2022-09-14	11:40:29	0.316043	1705.99	FALSE	174
2022-09-14	11:40:29	0.527901	1706.52	FALSE	174
2022-09-14	11:40:30	0.268817	1706.79	FALSE	174
2022-09-14	11:40:30	0.541947	1707.33	FALSE	174
2022-09-14	11:40:30	0.227646	1707.56	FALSE	174
2022-09-14	11:40:30	0.571667	1708.13	FALSE	174
2022-09-14	11:40:31	0.303066	1708.44	FALSE	174
2022-09-14	11:40:31	0.536298	1708.97	FALSE	174
2022-09-14	11:40:31	0.304288	1709.28	FALSE	174
2022-09-14	11:40:31	0.50729	1709.78	FALSE	174
2022-09-14	11:40:32	0.333295	1710.12	FALSE	174
2022-09-14	11:40:32	0.459606	1710.58	FALSE	174
2022-09-14	11:40:32	0.390445	1710.97	FALSE	174
2022-09-14	11:40:32	0.593601	1711.56	FALSE	174
2022-09-14	11:40:33	1.24403	1712.8	FALSE	174
2022-09-14	11:40:33	1.26006	1714.06	FALSE	174
2022-09-14	11:40:33	0.703626	1714.77	FALSE	174
2022-09-14	11:40:34	0.937926	1715.71	FALSE	174
2022-09-14	11:40:34	1.19828	1716.9	FALSE	174
2022-09-14	11:40:34	1.62363	1718.53	FALSE	174
2022-09-14	11:40:34	0.922812	1719.45	FALSE	174
2022-09-14	11:40:35	0.504644	1719.96	FALSE	174
2022-09-14	11:40:35	0.450649	1720.41	FALSE	174
2022-09-14	11:40:35	0.550293	1720.96	FALSE	174

## Sheet: Reggie_harness_2022914113519
						**GoPro Fitting: 11:24
2022-09-14	11:35:19	0.193193
2022-09-14	11:35:19	0.178384
2022-09-14	11:35:19	0.186069
2022-09-14	11:35:20	0.181438
2022-09-14	11:35:20	0.224339
2022-09-14	11:35:20	0.282659
2022-09-14	11:35:20	0.31126
2022-09-14	11:35:21	0.331209
2022-09-14	11:35:21	0.359911
2022-09-14	11:35:21	0.314975
2022-09-14	11:35:21	0.330598
2022-09-14	11:35:22	0.329886
2022-09-14	11:35:22	0.322252
2022-09-14	11:35:22	0.323117
2022-09-14	11:35:23	0.32612
2022-09-14	11:35:23	0.321438
2022-09-14	11:35:23	0.321845
2022-09-14	11:35:23	0.316501
2022-09-14	11:35:24	0.361896
2022-09-14	11:35:24	0.301082
2022-09-14	11:35:24	0.289377
2022-09-14	11:35:24	0.284084
2022-09-14	11:35:25	0.293804
2022-09-14	11:35:25	0.313753
2022-09-14	11:35:25	0.313244
2022-09-14	11:35:25	0.312736
2022-09-14	11:35:26	0.3107
2022-09-14	11:35:26	0.311158
2022-09-14	11:35:26	0.31187
2022-09-14	11:35:27	0.369326
2022-09-14	11:35:27	0.73243
2022-09-14	11:35:27	0.74958
2022-09-14	11:35:27	0.67131
2022-09-14	11:35:28	1.57095
2022-09-14	11:35:28	1.52653
2022-09-14	11:35:28	1.41396
2022-09-14	11:35:28	1.45508
2022-09-14	11:35:29	1.47243
2022-09-14	11:35:29	1.4994
2022-09-14	11:35:29	1.52205
2022-09-14	11:35:29	1.52464
2022-09-14	11:35:30	1.54637
2022-09-14	11:35:30	1.56424
2022-09-14	11:35:30	1.58403
2022-09-14	11:35:31	1.60576
2022-09-14	11:35:31	1.66301
2022-09-14	11:35:31	1.68052
2022-09-14	11:35:31	0.60159
2022-09-14	11:35:32	0.111311
2022-09-14	11:35:32	0.249173
2022-09-14	11:35:32	0.11925
2022-09-14	11:35:32	-0.266552
2022-09-14	11:35:33	-0.364923
2022-09-14	11:35:33	-0.180903
2022-09-14	11:35:33	-0.176679
2022-09-14	11:35:33	-0.0617173
2022-09-14	11:35:34	-0.117493
2022-09-14	11:35:34	0.0714124
2022-09-14	11:35:34	-0.0501651
2022-09-14	11:35:35	0.0530918
2022-09-14	11:35:35	-0.0607504
2022-09-14	11:35:35	0.111005
2022-09-14	11:35:35	0.0555855
2022-09-14	11:35:36	0.0719213
2022-09-14	11:35:36	0.991412
2022-09-14	11:35:36	0.649835
2022-09-14	11:35:36	0.450751
2022-09-14	11:35:37	0.525458
2022-09-14	11:35:37	0.652532
2022-09-14	11:35:37	0.204797
2022-09-14	11:35:37	0.00459311
2022-09-14	11:35:38	0.0293768
2022-09-14	11:35:38	0.357112
2022-09-14	11:35:38	0.68841
2022-09-14	11:35:39	0.276552
2022-09-14	11:35:39	0.407341
2022-09-14	11:35:39	0.307341
2022-09-14	11:35:39	0.166629
2022-09-14	11:35:40	0.315026
2022-09-14	11:35:40	0.241438
2022-09-14	11:35:40	0.22958
2022-09-14	11:35:40	0.383626
2022-09-14	11:35:41	0.0482063
2022-09-14	11:35:41	0.171616
2022-09-14	11:35:41	0.298995
2022-09-14	11:35:41	0.344898
2022-09-14	11:35:42	0.465916
2022-09-14	11:35:42	3.48714
2022-09-14	11:35:42	1.99218
2022-09-14	11:35:43	0.565356
2022-09-14	11:35:43	0.116349
2022-09-14	11:35:43	0.568257
2022-09-14	11:35:43	0.0941096
2022-09-14	11:35:44	0.45243
2022-09-14	11:35:44	0.683168
2022-09-14	11:35:44	0.346476
2022-09-14	11:35:44	1.12744
2022-09-14	11:35:45	0.700471
2022-09-14	11:35:45	2.27273
2022-09-14	11:35:45	1.55477
2022-09-14	11:35:45	4.03228
2022-09-14	11:35:46	1.65335
2022-09-14	11:35:46	3.21726
2022-09-14	11:35:46	1.98744
2022-09-14	11:35:47	3.29721
2022-09-14	11:35:47	1.71401
2022-09-14	11:35:47	3.44576
2022-09-14	11:35:47	0.305407
2022-09-14	11:35:48	2.04139
2022-09-14	11:35:48	0.271107
2022-09-14	11:35:48	2.12724
2022-09-14	11:35:48	0.594975
2022-09-14	11:35:49	0.859758
2022-09-14	11:35:49	1.97197
2022-09-14	11:35:49	0.525712
2022-09-14	11:35:49	2.6765
2022-09-14	11:35:50	0.349122
2022-09-14	11:35:50	1.842
2022-09-14	11:35:50	0.62785
2022-09-14	11:35:51	0.771667
2022-09-14	11:35:51	2.08546
2022-09-14	11:35:51	1.29421
2022-09-14	11:35:51	3.70688
2022-09-14	11:35:52	1.0593
2022-09-14	11:35:52	3.44245
2022-09-14	11:35:52	0.505102
2022-09-14	11:35:52	1.74475
2022-09-14	11:35:53	0.83131
2022-09-14	11:35:53	0.613346
2022-09-14	11:35:53	2.49014
2022-09-14	11:35:53	0.418079
2022-09-14	11:35:54	1.3508
2022-09-14	11:35:54	0.263779
2022-09-14	11:35:54	0.213041
2022-09-14	11:35:55	0.938995
2022-09-14	11:35:55	0.182507
2022-09-14	11:35:55	0.193041
2022-09-14	11:35:55	0.262252
2022-09-14	11:35:56	0.12785
2022-09-14	11:35:56	0.420471
2022-09-14	11:35:56	0.225713
2022-09-14	11:35:56	0.309326
2022-09-14	11:35:57	0.177825
2022-09-14	11:35:57	0.113601
2022-09-14	11:35:57	0.0895295
2022-09-14	11:35:57	-0.0535748
2022-09-14	11:35:58	0.0512089
2022-09-14	11:35:58	-0.103397
2022-09-14	11:35:58	-0.0340328
2022-09-14	11:35:59	-0.331285
2022-09-14	11:35:59	-0.386246
2022-09-14	11:35:59	-0.364974
2022-09-14	11:35:59	-0.26075
2022-09-14	11:36:00	-0.114491
2022-09-14	11:36:00	0.000318332
2022-09-14	11:36:00	-0.0381549
2022-09-14	11:36:00	-0.126196
2022-09-14	11:36:01	0.0905473
2022-09-14	11:36:01	0.181947
2022-09-14	11:36:01	0.321234
2022-09-14	11:36:01	0.0883081
2022-09-14	11:36:02	0.446832
2022-09-14	11:36:02	0.37986
2022-09-14	11:36:02	0.345305
2022-09-14	11:36:03	0.280267
2022-09-14	11:36:03	0.296959
2022-09-14	11:36:03	0.128359
2022-09-14	11:36:03	0.0384353
2022-09-14	11:36:04	-0.0129641
2022-09-14	11:36:04	0.0509036
2022-09-14	11:36:04	-0.0374934
2022-09-14	11:36:04	-0.00319315
2022-09-14	11:36:05	-0.112761
2022-09-14	11:36:05	-0.0377478
2022-09-14	11:36:05	-0.116832
2022-09-14	11:36:05	0.0548221
2022-09-14	11:36:06	0.136145
2022-09-14	11:36:06	-0.0705214
2022-09-14	11:36:06	-0.0553051
2022-09-14	11:36:07	-0.0504196
2022-09-14	11:36:07	0.119809
2022-09-14	11:36:07	-0.183906
2022-09-14	11:36:07	-0.128587
2022-09-14	11:36:08	-0.257646
2022-09-14	11:36:08	-0.0671117
2022-09-14	11:36:08	0.0151783
2022-09-14	11:36:08	0.169122
2022-09-14	11:36:09	2.50536
2022-09-14	11:36:09	0.319148
2022-09-14	11:36:09	1.8021
2022-09-14	11:36:09	0.357468
2022-09-14	11:36:10	0.88098
2022-09-14	11:36:10	1.26989
2022-09-14	11:36:10	0.474669
2022-09-14	11:36:11	1.63187
2022-09-14	11:36:11	0.483117
2022-09-14	11:36:11	1.14144
2022-09-14	11:36:11	1.62698
2022-09-14	11:36:12	1.40083
2022-09-14	11:36:12	0.438181
2022-09-14	11:36:12	0.400776
2022-09-14	11:36:12	0.263931
2022-09-14	11:36:13	0.043219
2022-09-14	11:36:13	-0.101259
2022-09-14	11:36:13	-0.0430405
2022-09-14	11:36:13	-0.187112
2022-09-14	11:36:14	-0.369961
2022-09-14	11:36:14	-0.382124
2022-09-14	11:36:14	-0.377544
2022-09-14	11:36:15	-0.0801396
2022-09-14	11:36:15	-0.170318
2022-09-14	11:36:15	0.107545
2022-09-14	11:36:15	0.242659
2022-09-14	11:36:16	0.359962
2022-09-14	11:36:16	1.73732
2022-09-14	11:36:16	0.258893
2022-09-14	11:36:16	1.16057
2022-09-14	11:36:17	0.336247
2022-09-14	11:36:17	0.729529
2022-09-14	11:36:17	0.571819
2022-09-14	11:36:17	0.664847
2022-09-14	11:36:18	0.733142
2022-09-14	11:36:18	0.884135
2022-09-14	11:36:18	0.747392
2022-09-14	11:36:19	0.463015
2022-09-14	11:36:19	0.994008
2022-09-14	11:36:19	0.540572
2022-09-14	11:36:19	1.17828
2022-09-14	11:36:20	0.500165
2022-09-14	11:36:20	0.697163
2022-09-14	11:36:20	0.957417
2022-09-14	11:36:20	0.402863
2022-09-14	11:36:21	0.971565
2022-09-14	11:36:21	0.56673
2022-09-14	11:36:21	0.339199
2022-09-14	11:36:21	0.61187
2022-09-14	11:36:22	0.404237
2022-09-14	11:36:22	1.44999
2022-09-14	11:36:22	0.34841
2022-09-14	11:36:23	0.847952
2022-09-14	11:36:23	0.685763
2022-09-14	11:36:23	0.213855
2022-09-14	11:36:23	1.08414
2022-09-14	11:36:24	0.284695
2022-09-14	11:36:24	0.365305
2022-09-14	11:36:24	0.523728
2022-09-14	11:36:24	0.276298
2022-09-14	11:36:25	0.548562
2022-09-14	11:36:25	0.146527
2022-09-14	11:36:25	0.57187
2022-09-14	11:36:25	0.118079
2022-09-14	11:36:26	0.18271
2022-09-14	11:36:26	-0.191488
2022-09-14	11:36:26	-0.178206
2022-09-14	11:36:27	-0.0722007
2022-09-14	11:36:27	0.16897
2022-09-14	11:36:27	-0.0535748
2022-09-14	11:36:27	0.104644
2022-09-14	11:36:28	-0.000139698
2022-09-14	11:36:28	0.116043
2022-09-14	11:36:28	0.15299
2022-09-14	11:36:28	0.179657
2022-09-14	11:36:29	0.120115
2022-09-14	11:36:29	0.219758
2022-09-14	11:36:29	0.267188
2022-09-14	11:36:29	0.256603
2022-09-14	11:36:30	0.260216
2022-09-14	11:36:30	0.250853
2022-09-14	11:36:30	0.28042
2022-09-14	11:36:31	0.284898
2022-09-14	11:36:31	0.227952
2022-09-14	11:36:31	0.211769
2022-09-14	11:36:31	0.20673
2022-09-14	11:36:32	0.226374
2022-09-14	11:36:32	0.22327
2022-09-14	11:36:32	0.224084
2022-09-14	11:36:32	0.232379
2022-09-14	11:36:33	0.215534
2022-09-14	11:36:33	0.215687
2022-09-14	11:36:33	0.213753
2022-09-14	11:36:33	0.223422
2022-09-14	11:36:34	0.224848
2022-09-14	11:36:34	0.226985
2022-09-14	11:36:34	0.220725
2022-09-14	11:36:35	0.223066
2022-09-14	11:36:35	0.224797
2022-09-14	11:36:35	0.229835
2022-09-14	11:36:35	0.235891
2022-09-14	11:36:36	0.23584
2022-09-14	11:36:36	0.235433
2022-09-14	11:36:36	0.231209
2022-09-14	11:36:36	0.241998
2022-09-14	11:36:37	0.231361
2022-09-14	11:36:37	0.245407
2022-09-14	11:36:37	0.223931
2022-09-14	11:36:38	0.275331
2022-09-14	11:36:38	0.246374
2022-09-14	11:36:38	0.264237
2022-09-14	11:36:38	0.269428
2022-09-14	11:36:39	0.296603
2022-09-14	11:36:39	0.313601
2022-09-14	11:36:39	0.222303
2022-09-14	11:36:39	0.337316
2022-09-14	11:36:40	0.208359
2022-09-14	11:36:40	0.0721249
2022-09-14	11:36:40	0.184186
2022-09-14	11:36:40	0.0897839
2022-09-14	11:36:41	-0.0523025
2022-09-14	11:36:41	0.0385371
2022-09-14	11:36:41	0.0676465
2022-09-14	11:36:41	0.0661198
2022-09-14	11:36:42	0.23355
2022-09-14	11:36:42	0.334059
2022-09-14	11:36:42	-0.0457377
2022-09-14	11:36:43	-0.106857
2022-09-14	11:36:43	-0.282735
2022-09-14	11:36:43	-0.45047
2022-09-14	11:36:43	-0.234491
2022-09-14	11:36:44	0.763524
2022-09-14	11:36:44	5.69696
2022-09-14	11:36:44	5.60001
2022-09-14	11:36:44	6.03319
2022-09-14	11:36:45	4.10968
2022-09-14	11:36:45	3.08169
2022-09-14	11:36:45	1.21238
2022-09-14	11:36:46	1.86093
2022-09-14	11:36:46	2.68337
2022-09-14	11:36:46	2.96434
2022-09-14	11:36:46	2.22734
2022-09-14	11:36:47	2.65253
2022-09-14	11:36:47	2.41767
2022-09-14	11:36:47	2.28765
2022-09-14	11:36:47	0.807901
2022-09-14	11:36:48	0.110496
2022-09-14	11:36:48	0.429987
2022-09-14	11:36:48	0.40159
2022-09-14	11:36:48	-0.061412
2022-09-14	11:36:49	-0.0552033
2022-09-14	11:36:49	-0.357035
2022-09-14	11:36:49	-0.315763
2022-09-14	11:36:50	-0.395458
2022-09-14	11:36:50	-0.47673
2022-09-14	11:36:50	-0.374847
2022-09-14	11:36:50	-0.290674
2022-09-14	11:36:51	-0.169503
2022-09-14	11:36:51	0.401794
2022-09-14	11:36:51	0.729835
2022-09-14	11:36:51	2.32006
2022-09-14	11:36:52	1.82912
2022-09-14	11:36:52	3.80047
2022-09-14	11:36:52	0.638232
2022-09-14	11:36:52	0.622506
2022-09-14	11:36:53	0.159249
2022-09-14	11:36:53	0.353499
2022-09-14	11:36:53	0.276807
2022-09-14	11:36:54	0.192939
2022-09-14	11:36:54	0.181743
2022-09-14	11:36:54	0.128868
2022-09-14	11:36:54	0.154924
2022-09-14	11:36:55	0.0324812
2022-09-14	11:36:55	0.13472
2022-09-14	11:36:55	-0.0970353
2022-09-14	11:36:55	0.00729033
2022-09-14	11:36:56	-0.145585
2022-09-14	11:36:56	-0.138104
2022-09-14	11:36:56	-0.0879768
2022-09-14	11:36:56	-0.135916
2022-09-14	11:36:57	-0.138664
2022-09-14	11:36:57	-0.0677732
2022-09-14	11:36:57	-0.309351
2022-09-14	11:36:58	0.0799111
2022-09-14	11:36:58	0.0777228
2022-09-14	11:36:58	0.177214
2022-09-14	11:36:58	0.216807
2022-09-14	11:36:59	0.0544659
2022-09-14	11:36:59	0.176501
2022-09-14	11:36:59	0.352786
2022-09-14	11:36:59	0.378893
2022-09-14	11:37:00	0.288868
2022-09-14	11:37:00	0.462099
2022-09-14	11:37:00	0.352939
2022-09-14	11:37:00	0.386476
2022-09-14	11:37:01	0.467545
2022-09-14	11:37:01	0.45472
2022-09-14	11:37:01	0.47299
2022-09-14	11:37:02	0.462812
2022-09-14	11:37:02	0.45355
2022-09-14	11:37:02	0.45416
2022-09-14	11:37:02	0.328511
2022-09-14	11:37:03	0.391616
2022-09-14	11:37:03	0.289122
2022-09-14	11:37:03	0.264135
2022-09-14	11:37:03	0.497417
2022-09-14	11:37:04	0.167596
2022-09-14	11:37:04	0.348817
2022-09-14	11:37:04	0.320674
2022-09-14	11:37:04	0.376756
2022-09-14	11:37:05	0.26668
2022-09-14	11:37:05	0.332278
2022-09-14	11:37:05	0.412786
2022-09-14	11:37:06	1.2079
2022-09-14	11:37:06	0.641896
2022-09-14	11:37:06	2.06642
2022-09-14	11:37:06	0.892074
2022-09-14	11:37:07	2.91742
2022-09-14	11:37:07	0.81986
2022-09-14	11:37:07	1.64276
2022-09-14	11:37:07	0.455534
2022-09-14	11:37:08	1.37355
2022-09-14	11:37:08	0.806476
2022-09-14	11:37:08	1.24714
2022-09-14	11:37:08	1.3424
2022-09-14	11:37:09	0.373702
2022-09-14	11:37:09	1.44307
2022-09-14	11:37:09	0.14383
2022-09-14	11:37:10	1.15569
2022-09-14	11:37:10	0.252074
2022-09-14	11:37:10	1.72317
2022-09-14	11:37:10	0.695484
2022-09-14	11:37:11	1.24775
2022-09-14	11:37:11	1.20042
2022-09-14	11:37:11	0.559046
2022-09-14	11:37:11	1.46067
2022-09-14	11:37:12	0.541081
2022-09-14	11:37:12	2.66515
2022-09-14	11:37:12	0.489631
2022-09-14	11:37:12	1.07391
2022-09-14	11:37:13	0.535382
2022-09-14	11:37:13	0.31584
2022-09-14	11:37:13	0.46271
2022-09-14	11:37:14	0.339962
2022-09-14	11:37:14	0.234822
2022-09-14	11:37:14	0.540522
2022-09-14	11:37:14	0.33986
2022-09-14	11:37:15	0.66673
2022-09-14	11:37:15	0.391361
2022-09-14	11:37:15	0.27187
2022-09-14	11:37:15	0.487748
2022-09-14	11:37:16	0.190242
2022-09-14	11:37:16	0.46098
2022-09-14	11:37:16	0.21243
2022-09-14	11:37:16	0.431412
2022-09-14	11:37:17	0.237316
2022-09-14	11:37:17	0.338384
2022-09-14	11:37:17	0.337316
2022-09-14	11:37:18	0.323524
2022-09-14	11:37:18	0.416552
2022-09-14	11:37:18	0.23416
2022-09-14	11:37:18	0.338079
2022-09-14	11:37:19	0.427188
2022-09-14	11:37:19	0.392125
2022-09-14	11:37:19	-0.861055
2022-09-14	11:37:19	0.35299
2022-09-14	11:37:20	0.423575
2022-09-14	11:37:20	0.396451
2022-09-14	11:37:20	0.31243
2022-09-14	11:37:20	0.0947203
2022-09-14	11:37:21	0.486527
2022-09-14	11:37:21	0.40042
2022-09-14	11:37:21	0.437214
2022-09-14	11:37:22	0.396094
2022-09-14	11:37:22	0.42785
2022-09-14	11:37:22	0.428003
2022-09-14	11:37:22	0.380522
2022-09-14	11:37:23	0.534415
2022-09-14	11:37:23	0.435026
2022-09-14	11:37:23	0.378639
2022-09-14	11:37:23	0.419351
2022-09-14	11:37:24	0.425305
2022-09-14	11:37:24	0.449224
2022-09-14	11:37:24	0.367188
2022-09-14	11:37:24	0.388359
2022-09-14	11:37:25	0.397163
2022-09-14	11:37:25	0.401082
2022-09-14	11:37:25	0.404644
2022-09-14	11:37:26	0.412379
2022-09-14	11:37:26	0.419708
2022-09-14	11:37:26	0.41986
2022-09-14	11:37:26	0.42159
2022-09-14	11:37:27	0.413295
2022-09-14	11:37:27	0.412532
2022-09-14	11:37:27	0.398486
2022-09-14	11:37:27	0.403677
2022-09-14	11:37:28	0.389377
2022-09-14	11:37:28	0.392125
2022-09-14	11:37:28	0.381998
2022-09-14	11:37:28	0.34729
2022-09-14	11:37:29	0.18271
2022-09-14	11:37:29	0.253092
2022-09-14	11:37:29	0.401438
2022-09-14	11:37:30	0.33757
2022-09-14	11:37:30	0.336349
2022-09-14	11:37:30	0.208359
2022-09-14	11:37:30	0.452023
2022-09-14	11:37:31	0.119555
2022-09-14	11:37:31	0.820522
2022-09-14	11:37:31	0.391616
2022-09-14	11:37:31	0.627341
2022-09-14	11:37:32	0.462049
2022-09-14	11:37:32	0.473804
2022-09-14	11:37:32	0.560878
2022-09-14	11:37:32	0.396705
2022-09-14	11:37:33	0.352074
2022-09-14	11:37:33	0.119809
2022-09-14	11:37:33	0.604135
2022-09-14	11:37:34	1.41441
2022-09-14	11:37:34	0.7593
2022-09-14	11:37:34	1.73559
2022-09-14	11:37:34	0.409886
2022-09-14	11:37:35	1.23126
2022-09-14	11:37:35	0.611565
2022-09-14	11:37:35	1.41584
2022-09-14	11:37:35	1.03162
2022-09-14	11:37:36	0.740522
2022-09-14	11:37:36	1.45462
2022-09-14	11:37:36	0.329071
2022-09-14	11:37:36	0.956959
2022-09-14	11:37:37	0.140318
2022-09-14	11:37:37	0.563982
2022-09-14	11:37:37	0.129224
2022-09-14	11:37:38	0.356603
2022-09-14	11:37:38	0.388155
2022-09-14	11:37:38	0.284593
2022-09-14	11:37:38	0.83645
2022-09-14	11:37:39	0.226679
2022-09-14	11:37:39	-0.0455341
2022-09-14	11:37:39	0.19584
2022-09-14	11:37:39	0.565153
2022-09-14	11:37:40	0.443524
2022-09-14	11:37:40	0.256501
2022-09-14	11:37:40	0.789325
2022-09-14	11:37:40	0.26154
2022-09-14	11:37:41	0.745509
2022-09-14	11:37:41	0.140674
2022-09-14	11:37:41	0.481641
2022-09-14	11:37:42	0.458181
2022-09-14	11:37:42	0.496858
2022-09-14	11:37:42	0.852278
2022-09-14	11:37:42	0.271412
2022-09-14	11:37:43	1.12642
2022-09-14	11:37:43	0.202099
2022-09-14	11:37:43	0.875687
2022-09-14	11:37:43	0.282608
2022-09-14	11:37:44	0.480013
2022-09-14	11:37:44	1.28459
2022-09-14	11:37:44	0.301031
2022-09-14	11:37:44	0.98444
2022-09-14	11:37:45	0.128054
2022-09-14	11:37:45	0.30612
2022-09-14	11:37:45	0.19243
2022-09-14	11:37:46	0.213601
2022-09-14	11:37:46	0.0625575
2022-09-14	11:37:46	0.455636
2022-09-14	11:37:46	0.0435244
2022-09-14	11:37:47	0.299555
2022-09-14	11:37:47	0.933143
2022-09-14	11:37:47	0.409886
2022-09-14	11:37:47	1.14607
2022-09-14	11:37:48	1.19706
2022-09-14	11:37:48	0.661132
2022-09-14	11:37:48	1.33324
2022-09-14	11:37:48	12.0726
2022-09-14	11:37:49	6.33629
2022-09-14	11:37:49	7.8311
2022-09-14	11:37:49	10.0333
2022-09-14	11:37:50	11.227
2022-09-14	11:37:50	8.73482
2022-09-14	11:37:50	5.54612
2022-09-14	11:37:50	3.55365
2022-09-14	11:37:51	2.65905
2022-09-14	11:37:51	2.28612
2022-09-14	11:37:51	2.01177
2022-09-14	11:37:51	4.58418
2022-09-14	11:37:52	14.2307
2022-09-14	11:37:52	16.7718
2022-09-14	11:37:52	7.71354
2022-09-14	11:37:52	5.45339
2022-09-14	11:37:53	7.30337
2022-09-14	11:37:53	6.96601
2022-09-14	11:37:53	6.72037
2022-09-14	11:37:54	7.00632
2022-09-14	11:37:54	7.18968
2022-09-14	11:37:54	7.26042
2022-09-14	11:37:54	7.25548
2022-09-14	11:37:55	7.23472
2022-09-14	11:37:55	7.34896
2022-09-14	11:37:55	7.08561
2022-09-14	11:37:55	7.31324
2022-09-14	11:37:56	7.35655
2022-09-14	11:37:56	7.32825
2022-09-14	11:37:56	7.25115
2022-09-14	11:37:56	6.85604
2022-09-14	11:37:57	7.16688
2022-09-14	11:37:57	6.88663
2022-09-14	11:37:57	6.83339
2022-09-14	11:37:58	6.788
2022-09-14	11:37:58	6.69334
2022-09-14	11:37:58	6.5397
2022-09-14	11:37:58	6.58937
2022-09-14	11:37:59	6.42622
2022-09-14	11:37:59	6.01634
2022-09-14	11:37:59	6.14698
2022-09-14	11:37:59	6.03049
2022-09-14	11:38:00	5.8453
2022-09-14	11:38:00	5.7623
2022-09-14	11:38:00	5.66378
2022-09-14	11:38:00	5.62042
2022-09-14	11:38:01	5.5281
2022-09-14	11:38:01	5.46357
2022-09-14	11:38:01	5.32551
2022-09-14	11:38:02	5.18139
2022-09-14	11:38:02	5.19232
2022-09-14	11:38:02	5.19304
2022-09-14	11:38:02	5.19624
2022-09-14	11:38:03	5.1792
2022-09-14	11:38:03	5.22423
2022-09-14	11:38:03	5.2711
2022-09-14	11:38:03	5.36724
2022-09-14	11:38:04	5.24352
2022-09-14	11:38:04	5.22627
2022-09-14	11:38:04	5.01818
2022-09-14	11:38:04	4.90362
2022-09-14	11:38:05	4.92714
2022-09-14	11:38:05	5.0134
2022-09-14	11:38:05	5.16525
2022-09-14	11:38:06	4.92933
2022-09-14	11:38:06	3.60093
2022-09-14	11:38:06	3.52434
2022-09-14	11:38:06	3.18032
2022-09-14	11:38:07	2.86317
2022-09-14	11:38:07	3.448
2022-09-14	11:38:07	3.4907
2022-09-14	11:38:07	3.86597
2022-09-14	11:38:08	3.5023
2022-09-14	11:38:08	3.28953
2022-09-14	11:38:08	3.55187
2022-09-14	11:38:08	3.44658
2022-09-14	11:38:09	3.22856
2022-09-14	11:38:09	3.33742
2022-09-14	11:38:09	3.87767
2022-09-14	11:38:10	4.07838
2022-09-14	11:38:10	3.98373
2022-09-14	11:38:10	4.09772
2022-09-14	11:38:10	2.94642
2022-09-14	11:38:11	2.0393
2022-09-14	11:38:11	1.43986
2022-09-14	11:38:11	1.41838
2022-09-14	11:38:11	7.25131
2022-09-14	11:38:12	10.627
2022-09-14	11:38:12	16.2167
2022-09-14	11:38:12	16.6105
2022-09-14	11:38:12	7.39838
2022-09-14	11:38:13	8.3511
2022-09-14	11:38:13	11.855
2022-09-14	11:38:13	8.13589
2022-09-14	11:38:14	10.242
2022-09-14	11:38:14	6.91054
2022-09-14	11:38:14	8.57248
2022-09-14	11:38:14	10.8435
2022-09-14	11:38:15	5.36922
2022-09-14	11:38:15	3.42032
2022-09-14	11:38:15	0.819911
2022-09-14	11:38:15	0.732888
2022-09-14	11:38:16	0.734568
2022-09-14	11:38:16	0.733092
2022-09-14	11:38:16	0.729173
2022-09-14	11:38:16	0.729428
2022-09-14	11:38:17	0.701183
2022-09-14	11:38:17	0.559453
2022-09-14	11:38:17	1.53116
2022-09-14	11:38:18	0.737315
2022-09-14	11:38:18	-0.60986
2022-09-14	11:38:18	2.05085
2022-09-14	11:38:18	2.78408
2022-09-14	11:38:19	3.49859
2022-09-14	11:38:19	11.1574
2022-09-14	11:38:19	8.90836
2022-09-14	11:38:19	5.57416
2022-09-14	11:38:20	3.10205
2022-09-14	11:38:20	2.65599
2022-09-14	11:38:20	2.5794
2022-09-14	11:38:20	2.77151
2022-09-14	11:38:21	2.55925
2022-09-14	11:38:21	2.07594
2022-09-14	11:38:21	2.12042
2022-09-14	11:38:22	2.03548
2022-09-14	11:38:22	2.02123
2022-09-14	11:38:22	2.03329
2022-09-14	11:38:22	2.06861
2022-09-14	11:38:23	2.19971
2022-09-14	11:38:23	2.08225
2022-09-14	11:38:23	2.06164
2022-09-14	11:38:23	2.13467
2022-09-14	11:38:24	2.13635
2022-09-14	11:38:24	2.04586
2022-09-14	11:38:24	2.0992
2022-09-14	11:38:24	2.23711
2022-09-14	11:38:25	2.22551
2022-09-14	11:38:25	2.09589
2022-09-14	11:38:25	2.13971
2022-09-14	11:38:26	2.09014
2022-09-14	11:38:26	2.09904
2022-09-14	11:38:26	2.13401
2022-09-14	11:38:26	1.74536
2022-09-14	11:38:27	1.88485
2022-09-14	11:38:27	2.10368
2022-09-14	11:38:27	2.12617
2022-09-14	11:38:27	2.07574
2022-09-14	11:38:28	2.06683
2022-09-14	11:38:28	2.09055
2022-09-14	11:38:28	2.08775
2022-09-14	11:38:28	2.07721
2022-09-14	11:38:29	2.09314
2022-09-14	11:38:29	1.95996
2022-09-14	11:38:29	2.02373
2022-09-14	11:38:30	2.25391
2022-09-14	11:38:30	2.13742
2022-09-14	11:38:30	1.94337
2022-09-14	11:38:30	1.94485
2022-09-14	11:38:31	1.96515
2022-09-14	11:38:31	1.91604
2022-09-14	11:38:31	1.82337
2022-09-14	11:38:31	1.93533
2022-09-14	11:38:32	1.96556
2022-09-14	11:38:32	1.96022
2022-09-14	11:38:32	1.96256
2022-09-14	11:38:32	1.90256
2022-09-14	11:38:33	1.90072
2022-09-14	11:38:33	1.89584
2022-09-14	11:38:33	1.82907
2022-09-14	11:38:34	1.74154
2022-09-14	11:38:34	1.77838
2022-09-14	11:38:34	1.82612
2022-09-14	11:38:34	1.8251
2022-09-14	11:38:35	1.76887
2022-09-14	11:38:35	1.76927
2022-09-14	11:38:35	1.87594
2022-09-14	11:38:35	1.92729
2022-09-14	11:38:36	1.91523
2022-09-14	11:38:36	1.76627
2022-09-14	11:38:36	1.67981
2022-09-14	11:38:36	1.69009
2022-09-14	11:38:37	1.7562
2022-09-14	11:38:37	1.73304
2022-09-14	11:38:37	1.61757
2022-09-14	11:38:38	1.44424
2022-09-14	11:38:38	1.42149
2022-09-14	11:38:38	1.54668
2022-09-14	11:38:38	1.4137
2022-09-14	11:38:39	1.37879
2022-09-14	11:38:39	1.64612
2022-09-14	11:38:39	1.42429
2022-09-14	11:38:39	0.465509
2022-09-14	11:38:40	0.594109
2022-09-14	11:38:40	0.443066
2022-09-14	11:38:40	0.414517
2022-09-14	11:38:40	0.455331
2022-09-14	11:38:41	0.341183
2022-09-14	11:38:41	0.349733
2022-09-14	11:38:41	0.339809
2022-09-14	11:38:42	0.307697
2022-09-14	11:38:42	0.360878
2022-09-14	11:38:42	0.404491
2022-09-14	11:38:42	0.642303
2022-09-14	11:38:43	2.52067
2022-09-14	11:38:43	2.89202
2022-09-14	11:38:43	5.64963
2022-09-14	11:38:43	6.54042
2022-09-14	11:38:44	2.99396
2022-09-14	11:38:44	1.69294
2022-09-14	11:38:44	1.96469
2022-09-14	11:38:44	-0.0312847
2022-09-14	11:38:45	0.282201
2022-09-14	11:38:45	0.284797
2022-09-14	11:38:45	-0.155407
2022-09-14	11:38:46	-0.223142
2022-09-14	11:38:46	-0.303244
2022-09-14	11:38:46	-0.0958648
2022-09-14	11:38:46	-0.145839
2022-09-14	11:38:47	-0.557849
2022-09-14	11:38:47	-0.723905
2022-09-14	11:38:47	-0.927773
2022-09-14	11:38:47	-1.05403
2022-09-14	11:38:48	-0.974796
2022-09-14	11:38:48	-0.955814
2022-09-14	11:38:48	-0.889605
2022-09-14	11:38:48	-0.910368
2022-09-14	11:38:49	-0.94136
2022-09-14	11:38:49	-0.958409
2022-09-14	11:38:49	-1.03765
2022-09-14	11:38:50	-1.0581
2022-09-14	11:38:50	-1.081
2022-09-14	11:38:50	-1.06838
2022-09-14	11:38:50	-1.18177
2022-09-14	11:38:51	-1.18767
2022-09-14	11:38:51	-1.21775
2022-09-14	11:38:51	-1.25892
2022-09-14	11:38:51	-1.20167
2022-09-14	11:38:52	-1.30431
2022-09-14	11:38:52	-1.34401
2022-09-14	11:38:52	-1.39983
2022-09-14	11:38:52	-1.39546
2022-09-14	11:38:53	-1.45973
2022-09-14	11:38:53	-1.58258
2022-09-14	11:38:53	-1.73525
2022-09-14	11:38:54	-1.82976
2022-09-14	11:38:54	-1.88116
2022-09-14	11:38:54	-1.7951
2022-09-14	11:38:54	-1.93327
2022-09-14	11:38:55	-1.90849
2022-09-14	11:38:55	-2.06777
2022-09-14	11:38:55	-2.05245
2022-09-14	11:38:55	-2.06986
2022-09-14	11:38:56	-2.05474
2022-09-14	11:38:56	-2.08294
2022-09-14	11:38:56	-1.67332
2022-09-14	11:38:56	0.581947
2022-09-14	11:38:57	1.1506
2022-09-14	11:38:57	0.711361
2022-09-14	11:38:57	-0.496119
2022-09-14	11:38:58	-2.0835
2022-09-14	11:38:58	3.1651
2022-09-14	11:38:58	0.449886
2022-09-14	11:38:58	0.88902
2022-09-14	11:38:59	0.745967
2022-09-14	11:38:59	0.295636
2022-09-14	11:38:59	0.571209
2022-09-14	11:38:59	0.28673
2022-09-14	11:39:00	0.431616
2022-09-14	11:39:00	0.326323
2022-09-14	11:39:00	0.438944
2022-09-14	11:39:01	0.38897
2022-09-14	11:39:01	0.401082
2022-09-14	11:39:01	0.551208
2022-09-14	11:39:01	0.515229
2022-09-14	11:39:02	0.797875
2022-09-14	11:39:02	0.847086
2022-09-14	11:39:02	0.841234
2022-09-14	11:39:02	1.49365
2022-09-14	11:39:03	3.80296
2022-09-14	11:39:03	2.26754
2022-09-14	11:39:03	4.66815
2022-09-14	11:39:03	3.77609
2022-09-14	11:39:04	0.788613
2022-09-14	11:39:04	0.734822
2022-09-14	11:39:04	1.97864
2022-09-14	11:39:04	0.565763
2022-09-14	11:39:05	1.0163
2022-09-14	11:39:05	0.989224
2022-09-14	11:39:05	0.641539
2022-09-14	11:39:06	0.730038
2022-09-14	11:39:06	0.718995
2022-09-14	11:39:06	0.466679
2022-09-14	11:39:06	0.433193
2022-09-14	11:39:07	0.38556
2022-09-14	11:39:07	0.375738
2022-09-14	11:39:07	0.484084
2022-09-14	11:39:07	0.406323
2022-09-14	11:39:08	0.655433
2022-09-14	11:39:08	0.332685
2022-09-14	11:39:08	2.02373
2022-09-14	11:39:08	0.505458
2022-09-14	11:39:09	2.43406
2022-09-14	11:39:09	0.541896
2022-09-14	11:39:09	1.78347
2022-09-14	11:39:10	1.04541
2022-09-14	11:39:10	1.02368
2022-09-14	11:39:10	1.29594
2022-09-14	11:39:10	0.437519
2022-09-14	11:39:11	1.48057
2022-09-14	11:39:11	0.189478
2022-09-14	11:39:11	0.431565
2022-09-14	11:39:11	0.394364
2022-09-14	11:39:12	0.244084
2022-09-14	11:39:12	0.0847458
2022-09-14	11:39:12	0.142048
2022-09-14	11:39:12	0.0167559
2022-09-14	11:39:13	0.103626
2022-09-14	11:39:13	0.107036
2022-09-14	11:39:13	0.19411
2022-09-14	11:39:14	0.286832
2022-09-14	11:39:14	0.0936007
2022-09-14	11:39:14	0.371361
2022-09-14	11:39:14	0.179911
2022-09-14	11:39:15	0.518282
2022-09-14	11:39:15	0.141438
2022-09-14	11:39:15	0.440827
2022-09-14	11:39:15	-0.988129
2022-09-14	11:39:16	-1.17317
2022-09-14	11:39:16	-0.961411
2022-09-14	11:39:16	-0.0198344
2022-09-14	11:39:16	0.415382
2022-09-14	11:39:17	0.421438
2022-09-14	11:39:17	0.525458
2022-09-14	11:39:17	0.419097
2022-09-14	11:39:18	0.499046
2022-09-14	11:39:18	0.33701
2022-09-14	11:39:18	0.54159
2022-09-14	11:39:18	0.172634
2022-09-14	11:39:19	0.577112
2022-09-14	11:39:19	0.277875
2022-09-14	11:39:19	0.496298
2022-09-14	11:39:19	0.325916
2022-09-14	11:39:20	0.487952
2022-09-14	11:39:20	0.261692
2022-09-14	11:39:20	0.447036
2022-09-14	11:39:20	0.479758
2022-09-14	11:39:21	0.483626
2022-09-14	11:39:21	1.04352
2022-09-14	11:39:21	0.472125
2022-09-14	11:39:22	1.72963
2022-09-14	11:39:22	0.524593
2022-09-14	11:39:22	0.828002
2022-09-14	11:39:22	0.594313
2022-09-14	11:39:23	0.661845
2022-09-14	11:39:23	1.3219
2022-09-14	11:39:23	0.393855
2022-09-14	11:39:23	0.221845
2022-09-14	11:39:24	0.290853
2022-09-14	11:39:24	0.0257127
2022-09-14	11:39:24	0.116298
2022-09-14	11:39:24	0.00886792
2022-09-14	11:39:25	0.00301552
2022-09-14	11:39:25	0.0448475
2022-09-14	11:39:25	0.532786
2022-09-14	11:39:26	0.654619
2022-09-14	11:39:26	0.369987
2022-09-14	11:39:26	0.303168
2022-09-14	11:39:26	0.236705
2022-09-14	11:39:27	0.386171
2022-09-14	11:39:27	0.274211
2022-09-14	11:39:27	0.195992
2022-09-14	11:39:27	0.227697
2022-09-14	11:39:28	0.366476
2022-09-14	11:39:28	0.367799
2022-09-14	11:39:28	0.307036
2022-09-14	11:39:28	0.28154
2022-09-14	11:39:29	0.270853
2022-09-14	11:39:29	0.271463
2022-09-14	11:39:29	0.20785
2022-09-14	11:39:30	0.121591
2022-09-14	11:39:30	0.0873412
2022-09-14	11:39:30	0.0595041
2022-09-14	11:39:30	0.0863233
2022-09-14	11:39:31	0.0937025
2022-09-14	11:39:31	0.115077
2022-09-14	11:39:31	0.128359
2022-09-14	11:39:31	0.137468
2022-09-14	11:39:32	0.115585
2022-09-14	11:39:32	0.283575
2022-09-14	11:39:32	0.0442369
2022-09-14	11:39:32	-0.133677
2022-09-14	11:39:33	0.0155346
2022-09-14	11:39:33	0.110089
2022-09-14	11:39:33	-0.00609391
2022-09-14	11:39:34	-0.10874
2022-09-14	11:39:34	-0.107366
2022-09-14	11:39:34	-0.0997326
2022-09-14	11:39:34	-0.0814628
2022-09-14	11:39:35	-0.141615
2022-09-14	11:39:35	-0.221819
2022-09-14	11:39:35	-0.341514
2022-09-14	11:39:35	-0.320089
2022-09-14	11:39:36	-0.234033
2022-09-14	11:39:36	-0.167162
2022-09-14	11:39:36	-0.260547
2022-09-14	11:39:36	-0.0980023
2022-09-14	11:39:37	-0.0644145
2022-09-14	11:39:37	-0.137646
2022-09-14	11:39:37	-0.135
2022-09-14	11:39:38	-0.14757
2022-09-14	11:39:38	-0.286857
2022-09-14	11:39:38	-0.385839
2022-09-14	11:39:38	-0.634948
2022-09-14	11:39:39	-0.910674
2022-09-14	11:39:39	0.11986
2022-09-14	11:39:39	0.121794
2022-09-14	11:39:39	0.807443
2022-09-14	11:39:40	6.4278
2022-09-14	11:39:40	7.55171
2022-09-14	11:39:40	9.15807
2022-09-14	11:39:40	9.33294
2022-09-14	11:39:41	8.46988
2022-09-14	11:39:41	4.81589
2022-09-14	11:39:41	5.5421
2022-09-14	11:39:42	6.06159
2022-09-14	11:39:42	4.66393
2022-09-14	11:39:42	2.8051
2022-09-14	11:39:42	3.5567
2022-09-14	11:39:43	4.68332
2022-09-14	11:39:43	5.42917
2022-09-14	11:39:43	6.2364
2022-09-14	11:39:43	11.4798
2022-09-14	11:39:44	7.35874
2022-09-14	11:39:44	2.72993
2022-09-14	11:39:44	2.40815
2022-09-14	11:39:44	7.51772
2022-09-14	11:39:45	6.93477
2022-09-14	11:39:45	14.1771
2022-09-14	11:39:45	12.1922
2022-09-14	11:39:46	5.7683
2022-09-14	11:39:46	15.9004
2022-09-14	11:39:46	7.45451
2022-09-14	11:39:46	2.68576
2022-09-14	11:39:47	5.88831
2022-09-14	11:39:47	1.97309
2022-09-14	11:39:47	0.807494
2022-09-14	11:39:47	0.340929
2022-09-14	11:39:48	0.58098
2022-09-14	11:39:48	0.538893
2022-09-14	11:39:48	0.720013
2022-09-14	11:39:48	0.726883
2022-09-14	11:39:49	0.546476
2022-09-14	11:39:49	0.485814
2022-09-14	11:39:49	0.433295
2022-09-14	11:39:50	0.415534
2022-09-14	11:39:50	0.474262
2022-09-14	11:39:50	0.19701
2022-09-14	11:39:50	0.386018
2022-09-14	11:39:51	0.270903
2022-09-14	11:39:51	0.407646
2022-09-14	11:39:51	0.296196
2022-09-14	11:39:51	0.40612
2022-09-14	11:39:52	0.281438
2022-09-14	11:39:52	0.467595
2022-09-14	11:39:52	0.295229
2022-09-14	11:39:52	0.598333
2022-09-14	11:39:53	0.51813
2022-09-14	11:39:53	2.09513
2022-09-14	11:39:53	4.92856
2022-09-14	11:39:54	6.34316
2022-09-14	11:39:54	3.33146
2022-09-14	11:39:54	1.72571
2022-09-14	11:39:54	0.685712
2022-09-14	11:39:55	0.613193
2022-09-14	11:39:55	0.421234
2022-09-14	11:39:55	0.452532
2022-09-14	11:39:55	0.360929
2022-09-14	11:39:56	0.483168
2022-09-14	11:39:56	0.409682
2022-09-14	11:39:56	0.480623
2022-09-14	11:39:56	0.387443
2022-09-14	11:39:57	1.07971
2022-09-14	11:39:57	0.40154
2022-09-14	11:39:57	0.630292
2022-09-14	11:39:58	0.987392
2022-09-14	11:39:58	0.637163
2022-09-14	11:39:58	0.433906
2022-09-14	11:39:58	0.888308
2022-09-14	11:39:59	0.273193
2022-09-14	11:39:59	0.688461
2022-09-14	11:39:59	1.09304
2022-09-14	11:39:59	1.53116
2022-09-14	11:40:00	1.39421
2022-09-14	11:40:00	1.98851
2022-09-14	11:40:00	0.441998
2022-09-14	11:40:00	0.907544
2022-09-14	11:40:01	0.345407
2022-09-14	11:40:01	0.562048
2022-09-14	11:40:01	0.374669
2022-09-14	11:40:02	1.53818
2022-09-14	11:40:02	1.34352
2022-09-14	11:40:02	4.79355
2022-09-14	11:40:02	3.49146
2022-09-14	11:40:03	4.4965
2022-09-14	11:40:03	2.34195
2022-09-14	11:40:03	1.80378
2022-09-14	11:40:03	1.8933
2022-09-14	11:40:04	1.38434
2022-09-14	11:40:04	1.72541
2022-09-14	11:40:04	3.20006
2022-09-14	11:40:05	1.7992
2022-09-14	11:40:05	3.4423
2022-09-14	11:40:05	1.34475
2022-09-14	11:40:05	4.60678
2022-09-14	11:40:06	1.52388
2022-09-14	11:40:06	4.91563
2022-09-14	11:40:06	3.74144
2022-09-14	11:40:06	5.808
2022-09-14	11:40:07	4.27742
2022-09-14	11:40:07	2.45625
2022-09-14	11:40:07	1.8908
2022-09-14	11:40:07	2.64337
2022-09-14	11:40:08	2.61151
2022-09-14	11:40:08	3.63039
2022-09-14	11:40:08	2.36352
2022-09-14	11:40:08	2.31187
2022-09-14	11:40:09	3.37345
2022-09-14	11:40:09	3.17457
2022-09-14	11:40:09	6.10143
2022-09-14	11:40:10	2.27136
2022-09-14	11:40:10	3.03304
2022-09-14	11:40:10	3.12062
2022-09-14	11:40:10	3.63568
2022-09-14	11:40:11	6.19563
2022-09-14	11:40:11	2.83187
2022-09-14	11:40:11	3.0907
2022-09-14	11:40:11	6.30606
2022-09-14	11:40:12	3.12403
2022-09-14	11:40:12	5.71436
2022-09-14	11:40:12	4.02576
2022-09-14	11:40:12	7.11828
2022-09-14	11:40:13	8.84683
2022-09-14	11:40:13	8.02632
2022-09-14	11:40:13	2.22663
2022-09-14	11:40:14	1.90052
2022-09-14	11:40:14	5.12673
2022-09-14	11:40:14	5.10057
2022-09-14	11:40:14	0.837316
2022-09-14	11:40:15	0.77528
2022-09-14	11:40:15	0.868359
2022-09-14	11:40:15	3.75075
2022-09-14	11:40:15	2.56561
2022-09-14	11:40:16	0.321183
2022-09-14	11:40:16	0.41986
2022-09-14	11:40:16	0.732786
2022-09-14	11:40:16	0.728613
2022-09-14	11:40:17	-0.906093
2022-09-14	11:40:17	0.279657
2022-09-14	11:40:17	0.250445
2022-09-14	11:40:18	0.319911
2022-09-14	11:40:18	0.241336
2022-09-14	11:40:18	0.30215
2022-09-14	11:40:18	0.233194
2022-09-14	11:40:19	0.392277
2022-09-14	11:40:19	0.288817
2022-09-14	11:40:19	0.471463
2022-09-14	11:40:19	0.274262
2022-09-14	11:40:20	0.552328
2022-09-14	11:40:20	0.236756
2022-09-14	11:40:20	0.504135
2022-09-14	11:40:20	0.180471
2022-09-14	11:40:21	0.423066
2022-09-14	11:40:21	0.110496
2022-09-14	11:40:21	0.294822
2022-09-14	11:40:22	0.118944
2022-09-14	11:40:22	0.285458
2022-09-14	11:40:22	0.0700384
2022-09-14	11:40:22	0.334262
2022-09-14	11:40:23	0.180827
2022-09-14	11:40:23	0.401743
2022-09-14	11:40:23	0.212176
2022-09-14	11:40:23	0.574618
2022-09-14	11:40:24	0.649224
2022-09-14	11:40:24	1.49304
2022-09-14	11:40:24	4.13492
2022-09-14	11:40:24	7.58398
2022-09-14	11:40:25	4.19548
2022-09-14	11:40:25	1.73477
2022-09-14	11:40:25	1.00205
2022-09-14	11:40:26	0.874007
2022-09-14	11:40:26	0.539911
2022-09-14	11:40:26	0.48673
2022-09-14	11:40:26	0.421031
2022-09-14	11:40:27	0.433855
2022-09-14	11:40:27	0.251972
2022-09-14	11:40:27	0.494109
2022-09-14	11:40:27	0.0398094
2022-09-14	11:40:28	0.454822
2022-09-14	11:40:28	0.274618
2022-09-14	11:40:28	0.533651
2022-09-14	11:40:28	0.351514
2022-09-14	11:40:29	0.537824
2022-09-14	11:40:29	0.316043
2022-09-14	11:40:29	0.527901
2022-09-14	11:40:30	0.268817
2022-09-14	11:40:30	0.541947
2022-09-14	11:40:30	0.227646
2022-09-14	11:40:30	0.571667
2022-09-14	11:40:31	0.303066
2022-09-14	11:40:31	0.536298
2022-09-14	11:40:31	0.304288
2022-09-14	11:40:31	0.50729
2022-09-14	11:40:32	0.333295
2022-09-14	11:40:32	0.459606
2022-09-14	11:40:32	0.390445
2022-09-14	11:40:32	0.593601
2022-09-14	11:40:33	1.24403
2022-09-14	11:40:33	1.26006
2022-09-14	11:40:33	0.703626
2022-09-14	11:40:34	0.937926
2022-09-14	11:40:34	1.19828
2022-09-14	11:40:34	1.62363
2022-09-14	11:40:34	0.922812
2022-09-14	11:40:35	0.504644
2022-09-14	11:40:35	0.450649
2022-09-14	11:40:35	0.550293
