# Supplementary material for: Comparing efficacy in reducing pulling and welfare impacts of four types of leash walking equipment
Source: PeerJ journal article supplement (doi:10.7717/peerj.18131), 2024-10-24
Supplement: Shelter_2_Tension_files.zip [file Reggie_martin_2022914103212 copy.xlsx]

## Sheet: Averaged Newtons
Date	Time	Averaged Newtons	Impulse	Total steps
2022-09-14	10:32:21	1.53621	1.53621	0
2022-09-14	10:32:22	1.88369	3.41991	0		Impulse newtons	5480.76
2022-09-14	10:32:23	2.01369	5.43359	0		Total steps	141
2022-09-14	10:32:24	1.80543	7.23902	0		# > 5 sec	5	89 secs of pulling
2022-09-14	10:32:25	1.73036	8.96939	0
2022-09-14	10:32:26	1.79258	10.762	0
2022-09-14	10:32:27	1.88432	12.6463	0
2022-09-14	10:32:28	1.7863	14.4326	0
2022-09-14	10:32:29	-1.46215	14.4326	0
2022-09-14	10:32:30	-1.48975	14.4326	0
2022-09-14	10:32:31	0.16961	14.6022	0
2022-09-14	10:32:32	1.67108	16.2733	0
2022-09-14	10:32:33	4.37461	20.6479	0
2022-09-14	10:32:34	6.45057	27.0984	0
2022-09-14	10:32:35	4.3139	31.4123	0
2022-09-14	10:32:36	4.16796	35.5803	0
2022-09-14	10:32:37	5.19076	40.7711	0
2022-09-14	10:32:38	9.68881	50.4599	0
2022-09-14	10:32:39	8.56731	59.0272	0
2022-09-14	10:32:40	4.47979	63.507	0
2022-09-14	10:32:41	2.60808	66.1151	0
2022-09-14	10:32:42	3.3542	69.4693	0
2022-09-14	10:32:43	3.31521	72.7845	0
2022-09-14	10:32:44	1.86344	74.6479	0
2022-09-14	10:32:45	1.0723	75.7202	0
2022-09-14	10:32:46	9.29724	85.0174	0
2022-09-14	10:32:47	9.29323	94.3107	0
2022-09-14	10:32:48	3.88601	98.1967	0
2022-09-14	10:32:49	19.8196	118.016	1
2022-09-14	10:32:50	30.3155	148.332	2
2022-09-14	10:32:51	20.6672	168.999	3
2022-09-14	10:32:52	45.7902	214.789	4
2022-09-14	10:32:53	53.7609	268.55	5
2022-09-14	10:32:54	59.1742	327.724	6
2022-09-14	10:32:55	34.157	361.881	7
2022-09-14	10:32:56	26.7038	388.585	8
2022-09-14	10:32:57	45.8371	434.422	9
2022-09-14	10:32:58	10.9534	445.376	9
2022-09-14	10:32:59	0.654271	446.03	9
2022-09-14	10:33:00	0.684605	446.714	9
2022-09-14	10:33:01	2.30188	449.016	9
2022-09-14	10:33:02	3.95295	452.969	9
2022-09-14	10:33:03	9.98916	462.958	9
2022-09-14	10:33:04	77.2255	540.184	10
2022-09-14	10:33:05	28.7252	568.909	11
2022-09-14	10:33:06	10.091	579	11
2022-09-14	10:33:07	1.50339	580.504	11
2022-09-14	10:33:08	8.85118	589.355	11
2022-09-14	10:33:09	7.51168	596.866	11
2022-09-14	10:33:10	25.6466	622.513	12
2022-09-14	10:33:11	19.14	641.653	13
2022-09-14	10:33:12	32.0198	673.673	14
2022-09-14	10:33:13	38.399	712.072	15
2022-09-14	10:33:14	4.42828	716.5	15
2022-09-14	10:33:15	0.0186768	716.519	15
2022-09-14	10:33:16	0.406734	716.926	15
2022-09-14	10:33:17	12.9437	729.869	15
2022-09-14	10:33:18	6.738	736.607	15
2022-09-14	10:33:19	16.7989	753.406	16
2022-09-14	10:33:20	1.32835	754.734	16
2022-09-14	10:33:21	-0.560814	754.734	16
2022-09-14	10:33:22	4.1259	758.86	16
2022-09-14	10:33:23	28.5956	787.456	17
2022-09-14	10:33:24	5.55498	793.011	17
2022-09-14	10:33:25	0.0398238	793.051	17
2022-09-14	10:33:26	24.6203	817.671	18
2022-09-14	10:33:27	48.4548	866.126	19
2022-09-14	10:33:28	47.1909	913.317	20
2022-09-14	10:33:29	23.5545	936.871	21
2022-09-14	10:33:30	4.54393	941.415	21
2022-09-14	10:33:31	-0.022919	941.415	21
2022-09-14	10:33:32	2.77464	944.19	21
2022-09-14	10:33:33	11.2766	955.466	21
2022-09-14	10:33:34	11.5965	967.063	21
2022-09-14	10:33:35	1.51986	968.583	21
2022-09-14	10:33:36	0.425749	969.009	21
2022-09-14	10:33:37	8.05486	977.063	21
2022-09-14	10:33:38	5.41916	982.483	21
2022-09-14	10:33:39	1.8202	984.303	21
2022-09-14	10:33:40	2.23519	986.538	21
2022-09-14	10:33:41	4.82465	991.363	21
2022-09-14	10:33:42	3.927	995.29	21
2022-09-14	10:33:43	3.68861	998.978	21
2022-09-14	10:33:44	0.578266	999.557	21
2022-09-14	10:33:45	-0.972999	999.557	21
2022-09-14	10:33:46	25.0048	1024.56	22
2022-09-14	10:33:47	35.7982	1060.36	23
2022-09-14	10:33:48	36.4189	1096.78	24
2022-09-14	10:33:49	8.6504	1105.43	24
2022-09-14	10:33:50	1.66298	1107.09	24
2022-09-14	10:33:51	1.99467	1109.09	24
2022-09-14	10:33:52	1.90644	1110.99	24
2022-09-14	10:33:53	2.53722	1113.53	24
2022-09-14	10:33:54	14.6135	1128.14	25
2022-09-14	10:33:55	9.63873	1137.78	25
2022-09-14	10:33:56	9.88513	1147.67	25
2022-09-14	10:33:57	2.37339	1150.04	25
2022-09-14	10:33:58	1.77224	1151.81	25
2022-09-14	10:33:59	1.76768	1153.58	25
2022-09-14	10:34:00	1.70928	1155.29	25
2022-09-14	10:34:01	1.68777	1156.98	25
2022-09-14	10:34:02	1.20481	1158.18	25
2022-09-14	10:34:03	1.24318	1159.43	25
2022-09-14	10:34:04	6.68249	1166.11	25
2022-09-14	10:34:05	42.2517	1208.36	26
2022-09-14	10:34:06	25.0248	1233.38	27
2022-09-14	10:34:07	7.87908	1241.26	27
2022-09-14	10:34:08	1.11624	1242.38	27
2022-09-14	10:34:09	4.74453	1247.12	27
2022-09-14	10:34:10	17.0009	1264.13	28
2022-09-14	10:34:11	16.0706	1280.2	29
2022-09-14	10:34:12	16.3704	1296.57	30
2022-09-14	10:34:13	30.0737	1326.64	31
2022-09-14	10:34:14	26.1109	1352.75	32
2022-09-14	10:34:15	22.7926	1375.54	33
2022-09-14	10:34:16	23.9423	1399.49	34
2022-09-14	10:34:17	16.6283	1416.11	35
2022-09-14	10:34:18	11.2794	1427.39	35
2022-09-14	10:34:19	10.0531	1437.45	35
2022-09-14	10:34:20	17.0962	1454.54	36
2022-09-14	10:34:21	17.0174	1471.56	37
2022-09-14	10:34:22	21.2244	1492.78	38
2022-09-14	10:34:23	34.8848	1527.67	39
2022-09-14	10:34:24	23.6341	1551.3	40
2022-09-14	10:34:25	37.3638	1588.67	41
2022-09-14	10:34:26	26.0357	1614.7	42
2022-09-14	10:34:27	12.4327	1627.14	42
2022-09-14	10:34:28	30.7507	1657.89	43
2022-09-14	10:34:29	45.1171	1703	44
2022-09-14	10:34:30	59.8015	1762.81	45
2022-09-14	10:34:31	54.0127	1816.82	46
2022-09-14	10:34:32	31.5287	1848.35	47
2022-09-14	10:34:33	51.0821	1899.43	48
2022-09-14	10:34:34	13.0222	1912.45	49
2022-09-14	10:34:35	12.0937	1924.54	49
2022-09-14	10:34:36	19.1068	1943.65	50
2022-09-14	10:34:37	82.3379	2025.99	51
2022-09-14	10:34:38	111.072	2137.06	52
2022-09-14	10:34:39	151.015	2288.08	53
2022-09-14	10:34:40	139.066	2427.14	54
2022-09-14	10:34:41	110.896	2538.04	55
2022-09-14	10:34:42	77.1576	2615.2	56
2022-09-14	10:34:43	68.589	2683.79	57
2022-09-14	10:34:44	35.7344	2719.52	58
2022-09-14	10:34:45	11.8398	2731.36	58
2022-09-14	10:34:46	64.9285	2796.29	59
2022-09-14	10:34:47	76.9626	2873.25	60
2022-09-14	10:34:48	44.3924	2917.64	61
2022-09-14	10:34:49	43.0535	2960.7	62
2022-09-14	10:34:50	59.0543	3019.75	63
2022-09-14	10:34:51	26.9472	3046.7	64
2022-09-14	10:34:52	19.6039	3066.3	65
2022-09-14	10:34:53	44.5184	3110.82	66
2022-09-14	10:34:54	43.125	3153.95	67
2022-09-14	10:34:55	32.4038	3186.35	68
2022-09-14	10:34:56	25.3367	3211.69	69
2022-09-14	10:34:57	23.6001	3235.29	70
2022-09-14	10:34:58	22.5595	3257.85	71
2022-09-14	10:34:59	21.0599	3278.91	72
2022-09-14	10:35:00	19.7048	3298.61	73
2022-09-14	10:35:01	19.1745	3317.79	74
2022-09-14	10:35:02	20.7675	3338.55	75
2022-09-14	10:35:03	21.1625	3359.72	76
2022-09-14	10:35:04	19.5683	3379.28	77
2022-09-14	10:35:05	18.0807	3397.36	78
2022-09-14	10:35:06	18.6982	3416.06	79
2022-09-14	10:35:07	17.177	3433.24	80
2022-09-14	10:35:08	13.1477	3446.39	81
2022-09-14	10:35:09	10.9709	3457.36	81
2022-09-14	10:35:10	11.5885	3468.95	81
2022-09-14	10:35:11	20.9865	3489.93	82
2022-09-14	10:35:12	19.09	3509.02	83
2022-09-14	10:35:13	13.1083	3522.13	84
2022-09-14	10:35:14	12.3489	3534.48	84
2022-09-14	10:35:15	14.0444	3548.52	85
2022-09-14	10:35:16	13.5164	3562.04	86
2022-09-14	10:35:17	13.2308	3575.27	87
2022-09-14	10:35:18	12.5698	3587.84	87
2022-09-14	10:35:19	12.5818	3600.42	87
2022-09-14	10:35:20	14.3723	3614.8	88
2022-09-14	10:35:21	16.3449	3631.14	89
2022-09-14	10:35:22	17.2797	3648.42	90
2022-09-14	10:35:23	16.6205	3665.04	91
2022-09-14	10:35:24	16.1443	3681.19	92
2022-09-14	10:35:25	15.6319	3696.82	93
2022-09-14	10:35:26	15.583	3712.4	94
2022-09-14	10:35:27	15.3937	3727.79	95
2022-09-14	10:35:28	15.7482	3743.54	96
2022-09-14	10:35:29	15.3772	3758.92	97
2022-09-14	10:35:30	15.6898	3774.61	98
2022-09-14	10:35:31	15.4031	3790.01	99
2022-09-14	10:35:32	15.0203	3805.03	100
2022-09-14	10:35:33	14.6439	3819.68	101
2022-09-14	10:35:34	15.8547	3835.53	102
2022-09-14	10:35:35	15.2761	3850.81	103
2022-09-14	10:35:36	15.6558	3866.46	104
2022-09-14	10:35:37	16.0983	3882.56	105
2022-09-14	10:35:38	15.7255	3898.29	106
2022-09-14	10:35:39	15.1757	3913.46	107
2022-09-14	10:35:40	6.5862	3920.05	107
2022-09-14	10:35:41	2.48454	3922.53	107
2022-09-14	10:35:42	1.85619	3924.39	107
2022-09-14	10:35:43	1.94906	3926.34	107
2022-09-14	10:35:44	4.00034	3930.34	107
2022-09-14	10:35:45	12.1564	3942.49	107
2022-09-14	10:35:46	9.82531	3952.32	107
2022-09-14	10:35:47	18.4257	3970.75	108
2022-09-14	10:35:48	21.0676	3991.81	109
2022-09-14	10:35:49	65.3342	4057.15	110
2022-09-14	10:35:50	106.579	4163.73	111
2022-09-14	10:35:51	73.045	4236.77	112
2022-09-14	10:35:52	46.4222	4283.19	113
2022-09-14	10:35:53	48.8662	4332.06	114
2022-09-14	10:35:54	29.9044	4361.96	115
2022-09-14	10:35:55	3.90519	4365.87	115
2022-09-14	10:35:56	0.664911	4366.53	115
2022-09-14	10:35:57	0.070007	4366.6	115
2022-09-14	10:35:58	-0.637065	4366.6	115
2022-09-14	10:35:59	-0.514938	4366.6	115
2022-09-14	10:36:00	0.549536	4367.15	115
2022-09-14	10:36:01	0.588001	4367.74	115
2022-09-14	10:36:02	1.87521	4369.62	115
2022-09-14	10:36:03	0.469155	4370.09	115
2022-09-14	10:36:04	-1.3384	4370.09	115
2022-09-14	10:36:05	-0.339726	4370.09	115
2022-09-14	10:36:06	1.00407	4371.09	115
2022-09-14	10:36:07	0.647141	4371.74	115
2022-09-14	10:36:08	1.23033	4372.97	115
2022-09-14	10:36:09	2.13813	4375.11	115
2022-09-14	10:36:10	2.50689	4377.61	115
2022-09-14	10:36:11	2.35353	4379.97	115
2022-09-14	10:36:12	3.15992	4383.13	115
2022-09-14	10:36:13	2.74368	4385.87	115
2022-09-14	10:36:14	2.71889	4388.59	115
2022-09-14	10:36:15	2.37848	4390.97	115
2022-09-14	10:36:16	2.09077	4393.06	115
2022-09-14	10:36:17	2.21125	4395.27	115
2022-09-14	10:36:18	17.6213	4412.89	116
2022-09-14	10:36:19	22.8559	4435.75	117
2022-09-14	10:36:20	17.9189	4453.67	118
2022-09-14	10:36:21	50.0052	4503.67	119
2022-09-14	10:36:22	53.121	4556.79	120
2022-09-14	10:36:23	17.7544	4574.55	121
2022-09-14	10:36:24	81.3294	4655.88	122
2022-09-14	10:36:25	61.4093	4717.28	123
2022-09-14	10:36:26	42.965	4760.25	124
2022-09-14	10:36:27	6.00892	4766.26	124
2022-09-14	10:36:28	2.02319	4768.28	124
2022-09-14	10:36:29	-8.14222	4768.28	124
2022-09-14	10:36:30	0.262364	4768.54	124
2022-09-14	10:36:31	0.332258	4768.88	124
2022-09-14	10:36:32	1.32388	4770.2	124
2022-09-14	10:36:33	0.790019	4770.99	124
2022-09-14	10:36:34	0.883641	4771.87	124
2022-09-14	10:36:35	2.27356	4774.15	124
2022-09-14	10:36:36	2.8228	4776.97	124
2022-09-14	10:36:37	2.09135	4779.06	124
2022-09-14	10:36:38	1.69513	4780.76	124
2022-09-14	10:36:39	1.91969	4782.68	124
2022-09-14	10:36:40	2.14074	4784.82	124
2022-09-14	10:36:41	2.26038	4787.08	124
2022-09-14	10:36:42	2.32542	4789.4	124
2022-09-14	10:36:43	2.07917	4791.48	124
2022-09-14	10:36:44	2.0271	4793.51	124
2022-09-14	10:36:45	1.90265	4795.41	124
2022-09-14	10:36:46	2.06177	4797.47	124
2022-09-14	10:36:47	2.1069	4799.58	124
2022-09-14	10:36:48	2.18551	4801.77	124
2022-09-14	10:36:49	2.49999	4804.27	124
2022-09-14	10:36:50	2.32783	4806.59	124
2022-09-14	10:36:51	2.56286	4809.16	124
2022-09-14	10:36:52	2.48663	4811.64	124
2022-09-14	10:36:53	3.37311	4815.02	124
2022-09-14	10:36:54	5.69429	4820.71	124
2022-09-14	10:36:55	3.9748	4824.69	124
2022-09-14	10:36:56	5.62396	4830.31	124
2022-09-14	10:36:57	3.35211	4833.66	124
2022-09-14	10:36:58	2.26498	4835.93	124
2022-09-14	10:36:59	18.6892	4854.62	125
2022-09-14	10:37:00	16.0516	4870.67	126
2022-09-14	10:37:01	19.2723	4889.94	127
2022-09-14	10:37:02	9.08398	4899.02	127
2022-09-14	10:37:03	7.67439	4906.7	127
2022-09-14	10:37:04	18.0526	4924.75	128
2022-09-14	10:37:05	8.55219	4933.3	128
2022-09-14	10:37:06	15.9457	4949.25	129
2022-09-14	10:37:07	18.5636	4967.81	130
2022-09-14	10:37:08	10.4444	4978.26	130
2022-09-14	10:37:09	19.2079	4997.46	131
2022-09-14	10:37:10	34.363	5031.83	132
2022-09-14	10:37:11	89.1462	5120.97	133
2022-09-14	10:37:12	94.5716	5215.55	134
2022-09-14	10:37:13	81.1192	5296.66	135
2022-09-14	10:37:14	87.5398	5384.2	136
2022-09-14	10:37:15	13.0829	5397.29	137
2022-09-14	10:37:16	16.8602	5414.15	138
2022-09-14	10:37:17	17.9708	5432.12	139
2022-09-14	10:37:18	21.5968	5453.72	140
2022-09-14	10:37:19	20.758	5474.47	141
2022-09-14	10:37:20	4.38725	5478.86	141
2022-09-14	10:37:21	1.90226	5480.76	141

## Sheet: Reggie_martin_2022914103212 (4)
Date	Time	Lbs	newtons	Averaged Newtons	Total force x time		total steps > 13.345	**GoPro Fitting: 1021
2022-09-14	10:32:21	0.417926	1.85902	1.53621	1.85902	FALSE	0
2022-09-14	10:32:21	0.311463	1.38545	1.53621	1.38545	FALSE	0
2022-09-14	10:32:21	0.306679	1.36417	1.53621	3.22319	FALSE	0
2022-09-14	10:32:22	0.282863	1.25823	1.88369	2.64368	FALSE	0
2022-09-14	10:32:22	0.433906	1.9301	1.88369	5.15329	FALSE	0
2022-09-14	10:32:22	0.486221	2.16281	1.88369	4.80649	FALSE	0
2022-09-14	10:32:22	0.490903	2.18363	1.88369	7.33692	FALSE	0
2022-09-14	10:32:23	0.388766	1.72931	2.01369	6.5358	FALSE	0
2022-09-14	10:32:23	0.624949	2.7799	2.01369	10.1168	FALSE	0
2022-09-14	10:32:23	0.430293	1.91403	2.01369	8.44983	FALSE	0
2022-09-14	10:32:23	0.366781	1.63152	2.01369	11.7483	FALSE	0
2022-09-14	10:32:24	0.348104	1.54844	1.80543	9.99826	FALSE	0
2022-09-14	10:32:24	0.457723	2.03604	1.80543	13.7844	FALSE	0
2022-09-14	10:32:24	0.418741	1.86264	1.80543	11.8609	FALSE	0
2022-09-14	10:32:24	0.398944	1.77458	1.80543	15.559	FALSE	0
2022-09-14	10:32:25	0.392125	1.74425	1.73036	13.6052	FALSE	0
2022-09-14	10:32:25	0.37701	1.67702	1.73036	17.236	FALSE	0
2022-09-14	10:32:25	0.397875	1.76983	1.73036	15.375	FALSE	0
2022-09-14	10:32:26	0.384542	1.71052	1.79258	18.9465	FALSE	0
2022-09-14	10:32:26	0.417774	1.85834	1.79258	17.2333	FALSE	0
2022-09-14	10:32:26	0.404542	1.79948	1.79258	20.746	FALSE	0
2022-09-14	10:32:26	0.405102	1.80197	1.79258	19.0353	FALSE	0
2022-09-14	10:32:27	0.419148	1.86445	1.88432	22.6104	FALSE	0
2022-09-14	10:32:27	0.41986	1.86762	1.88432	20.9029	FALSE	0
2022-09-14	10:32:27	0.422761	1.88053	1.88432	24.491	FALSE	0
2022-09-14	10:32:27	0.432685	1.92467	1.88432	22.8276	FALSE	0
2022-09-14	10:32:28	0.404237	1.79813	1.7863	26.2891	FALSE	0
2022-09-14	10:32:28	0.402252	1.7893	1.7863	24.6169	FALSE	0
2022-09-14	10:32:28	0.532837	2.37017	1.7863	28.6593	FALSE	0
2022-09-14	10:32:28	0.266985	1.1876	1.7863	25.8045	FALSE	0
2022-09-14	10:32:29	-0.078562	-0.349459	-1.46215	28.6593	FALSE	0
2022-09-14	10:32:29	-0.452862	-2.01442	-1.46215	25.8045	FALSE	0
2022-09-14	10:32:29	-0.454694	-2.02257	-1.46215	28.6593	FALSE	0
2022-09-14	10:32:30	-0.598664	-2.66298	-1.48975	25.8045	FALSE	0
2022-09-14	10:32:30	-0.591997	-2.63332	-1.48975	28.6593	FALSE	0
2022-09-14	10:32:30	-0.158257	-0.703959	-1.48975	25.8045	FALSE	0
2022-09-14	10:32:30	0.00927507	0.0412574	-1.48975	28.7005	FALSE	0
2022-09-14	10:32:31	0.0161453	0.0718175	0.16961	25.8763	FALSE	0
2022-09-14	10:32:31	0.114211	0.508033	0.16961	29.2085	FALSE	0
2022-09-14	10:32:31	0.0447967	0.199265	0.16961	26.0756	FALSE	0
2022-09-14	10:32:31	-0.0226333	-0.100677	0.16961	29.2085	FALSE	0
2022-09-14	10:32:32	0.0198094	0.0881162	1.67108	26.1637	FALSE	0
2022-09-14	10:32:32	0.713906	3.1756	1.67108	32.3841	FALSE	0
2022-09-14	10:32:32	0.519555	2.31108	1.67108	28.4748	FALSE	0
2022-09-14	10:32:32	0.249428	1.10951	1.67108	33.4936	FALSE	0
2022-09-14	10:32:33	0.0910562	0.405036	4.37461	28.8798	FALSE	0
2022-09-14	10:32:33	1.18744	5.28197	4.37461	38.7756	FALSE	0
2022-09-14	10:32:33	1.67187	7.43681	4.37461	36.3166	FALSE	0
2022-09-14	10:32:34	2.59823	11.5574	6.45057	50.3331	FALSE	0
2022-09-14	10:32:34	1.38251	6.14968	6.45057	42.4663	FALSE	0
2022-09-14	10:32:34	0.881641	3.92172	6.45057	54.2548	FALSE	0
2022-09-14	10:32:34	0.938232	4.17344	6.45057	46.6397	FALSE	0
2022-09-14	10:32:35	0.727392	3.23559	4.3139	57.4904	FALSE	0
2022-09-14	10:32:35	0.51701	2.29976	4.3139	48.9395	FALSE	0
2022-09-14	10:32:35	1.23431	5.49046	4.3139	62.9808	FALSE	0
2022-09-14	10:32:35	1.40052	6.22979	4.3139	55.1693	FALSE	0
2022-09-14	10:32:36	1.24648	5.54459	4.16796	68.5254	FALSE	0
2022-09-14	10:32:36	0.898486	3.99665	4.16796	59.166	FALSE	0
2022-09-14	10:32:36	0.756603	3.36552	4.16796	71.8909	FALSE	0
2022-09-14	10:32:36	0.846425	3.76507	4.16796	62.931	FALSE	0
2022-09-14	10:32:37	0.916145	4.0752	5.19076	75.9661	FALSE	0
2022-09-14	10:32:37	1.11477	4.95872	5.19076	67.8897	FALSE	0
2022-09-14	10:32:37	1.46989	6.53836	5.19076	82.5045	FALSE	0
2022-09-14	10:32:38	1.79854	8.00027	9.68881	75.89	FALSE	0
2022-09-14	10:32:38	2.13823	9.51127	9.68881	92.0158	FALSE	0
2022-09-14	10:32:38	2.18805	9.73288	9.68881	85.6229	FALSE	0
2022-09-14	10:32:38	2.58775	11.5108	9.68881	103.527	FALSE	0
2022-09-14	10:32:39	2.49955	11.1185	8.56731	96.7414	FALSE	0
2022-09-14	10:32:39	2.76999	12.3215	8.56731	115.848	FALSE	0
2022-09-14	10:32:39	1.44846	6.44304	8.56731	103.184	FALSE	0
2022-09-14	10:32:39	0.986069	4.38623	8.56731	120.234	FALSE	0
2022-09-14	10:32:40	0.806883	3.58918	4.47979	106.774	FALSE	0
2022-09-14	10:32:40	0.766781	3.4108	4.47979	123.645	FALSE	0
2022-09-14	10:32:40	1.17279	5.2168	4.47979	111.99	FALSE	0
2022-09-14	10:32:40	1.28195	5.70237	4.47979	129.347	FALSE	0
2022-09-14	10:32:41	0.933397	4.15194	2.60808	116.142	FALSE	0
2022-09-14	10:32:41	0.427239	1.90044	2.60808	131.248	FALSE	0
2022-09-14	10:32:41	0.398333	1.77186	2.60808	117.914	FALSE	0
2022-09-14	10:32:42	0.44556	1.98194	3.3542	133.23	FALSE	0
2022-09-14	10:32:42	0.669834	2.97956	3.3542	120.894	FALSE	0
2022-09-14	10:32:42	1.20235	5.34829	3.3542	138.578	FALSE	0
2022-09-14	10:32:42	0.698486	3.10701	3.3542	124.001	FALSE	0
2022-09-14	10:32:43	0.52897	2.35296	3.31521	140.931	FALSE	0
2022-09-14	10:32:43	0.705204	3.13689	3.31521	127.138	FALSE	0
2022-09-14	10:32:43	1.01574	4.51821	3.31521	145.449	FALSE	0
2022-09-14	10:32:43	0.731259	3.25279	3.31521	130.39	FALSE	0
2022-09-14	10:32:44	0.729784	3.24623	1.86344	148.696	FALSE	0
2022-09-14	10:32:44	0.323881	1.44069	1.86344	131.831	FALSE	0
2022-09-14	10:32:44	0.366069	1.62835	1.86344	150.324	FALSE	0
2022-09-14	10:32:44	0.255942	1.13848	1.86344	132.97	FALSE	0
2022-09-14	10:32:45	0.295789	1.31573	1.0723	151.64	FALSE	0
2022-09-14	10:32:45	0.262048	1.16564	1.0723	134.135	FALSE	0
2022-09-14	10:32:45	0.165356	0.735537	1.0723	152.375	FALSE	0
2022-09-14	10:32:46	0.274669	1.22178	9.29724	135.357	FALSE	0
2022-09-14	10:32:46	1.05431	4.68978	9.29724	157.065	FALSE	0
2022-09-14	10:32:46	3.07446	13.6758	9.29724	149.033	1	1
2022-09-14	10:32:46	3.95701	17.6016	9.29724	174.667	1	2
2022-09-14	10:32:47	4.8191	21.4363	9.29323	170.469	1	3
2022-09-14	10:32:47	1.54352	6.86589	9.29323	181.532	FALSE	3
2022-09-14	10:32:47	1.46546	6.51866	9.29323	176.988	FALSE	3
2022-09-14	10:32:47	0.528766	2.35206	9.29323	183.884	FALSE	3
2022-09-14	10:32:48	0.582812	2.59246	3.88601	179.58	FALSE	3
2022-09-14	10:32:48	0.857774	3.81555	3.88601	187.7	FALSE	3
2022-09-14	10:32:48	0.600776	2.67237	3.88601	182.253	FALSE	3
2022-09-14	10:32:48	1.45309	6.46363	3.88601	194.164	FALSE	3
2022-09-14	10:32:49	2.17599	9.67924	19.8196	191.932	FALSE	3
2022-09-14	10:32:49	5.62321	25.0132	19.8196	219.177	1	4
2022-09-14	10:32:49	5.56774	24.7664	19.8196	216.698	1	5
2022-09-14	10:32:50	5.23624	23.2918	30.3155	242.469	1	6
2022-09-14	10:32:50	5.11558	22.7551	30.3155	239.453	1	7
2022-09-14	10:32:50	6.36886	28.33	30.3155	270.799	1	8
2022-09-14	10:32:50	10.5402	46.8849	30.3155	286.338	1	9
2022-09-14	10:32:51	5.74021	25.5336	20.6672	296.332	1	10
2022-09-14	10:32:51	7.17283	31.9062	20.6672	318.245	1	11
2022-09-14	10:32:51	2.71182	12.0627	20.6672	308.395	FALSE	11
2022-09-14	10:32:51	2.95991	13.1663	20.6672	331.411	FALSE	11
2022-09-14	10:32:52	4.23614	18.8432	45.7902	327.238	1	12
2022-09-14	10:32:52	6.89059	30.6507	45.7902	362.062	1	13
2022-09-14	10:32:52	16.7636	74.5678	45.7902	401.806	1	14
2022-09-14	10:32:52	13.2861	59.0992	45.7902	421.161	1	15
2022-09-14	10:32:53	11.8298	52.6213	53.7609	454.427	1	16
2022-09-14	10:32:53	16.1573	71.8709	53.7609	493.032	1	17
2022-09-14	10:32:53	8.27085	36.7904	53.7609	491.218	1	18
2022-09-14	10:32:54	19.6351	87.3409	59.1742	580.373	1	19
2022-09-14	10:32:54	13.3031	59.1748	59.1742	550.393	1	20
2022-09-14	10:32:54	9.0966	40.4635	59.1742	620.836	1	21
2022-09-14	10:32:54	11.177	49.7175	59.1742	600.11	1	22
2022-09-14	10:32:55	5.01355	22.3013	34.157	643.137	1	23
2022-09-14	10:32:55	10.3005	45.8187	34.157	645.929	1	24
2022-09-14	10:32:55	12.205	54.2903	34.157	697.428	1	25
2022-09-14	10:32:55	3.1963	14.2178	34.157	660.147	1	26
2022-09-14	10:32:56	8.74978	38.9208	26.7038	736.348	1	27
2022-09-14	10:32:56	8.68607	38.6374	26.7038	698.784	1	28
2022-09-14	10:32:56	4.37553	19.4632	26.7038	755.812	1	29
2022-09-14	10:32:56	2.20174	9.79378	26.7038	708.578	FALSE	29
2022-09-14	10:32:57	3.02398	13.4513	45.8371	769.263	1	30
2022-09-14	10:32:57	8.38423	37.2947	45.8371	745.872	1	31
2022-09-14	10:32:57	19.5057	86.7653	45.8371	856.028	1	32
2022-09-14	10:32:58	8.34454	37.1182	10.9534	782.991	1	33
2022-09-14	10:32:58	0.372277	1.65596	10.9534	857.684	FALSE	33
2022-09-14	10:32:58	0.710445	3.1602	10.9534	786.151	FALSE	33
2022-09-14	10:32:58	0.422506	1.87939	10.9534	859.563	FALSE	33
2022-09-14	10:32:59	0.136654	0.607864	0.654271	786.759	FALSE	33
2022-09-14	10:32:59	0.199148	0.88585	0.654271	860.449	FALSE	33
2022-09-14	10:32:59	-0.0157631	-0.0701174	0.654271	786.759	FALSE	33
2022-09-14	10:32:59	0.268308	1.19349	0.654271	861.643	FALSE	33
2022-09-14	10:33:00	0.115382	0.513242	0.684605	787.272	FALSE	33
2022-09-14	10:33:00	0.228206	1.01511	0.684605	862.658	FALSE	33
2022-09-14	10:33:00	0.109021	0.484947	0.684605	787.757	FALSE	33
2022-09-14	10:33:00	0.163015	0.725123	0.684605	863.383	FALSE	33
2022-09-14	10:33:01	0.400929	1.78341	2.30188	789.54	FALSE	33
2022-09-14	10:33:01	0.66841	2.97322	2.30188	866.356	FALSE	33
2022-09-14	10:33:01	0.483117	2.149	2.30188	791.689	FALSE	33
2022-09-14	10:33:02	0.680878	3.02868	3.95295	869.385	FALSE	33
2022-09-14	10:33:02	1.13426	5.04542	3.95295	796.735	FALSE	33
2022-09-14	10:33:02	0.493651	2.19586	3.95295	871.581	FALSE	33
2022-09-14	10:33:02	1.24586	5.54183	3.95295	802.277	FALSE	33
2022-09-14	10:33:03	1.90948	8.49375	9.98916	880.075	FALSE	33
2022-09-14	10:33:03	1.9792	8.80388	9.98916	811.08	FALSE	33
2022-09-14	10:33:03	1.17467	5.22517	9.98916	885.3	FALSE	33
2022-09-14	10:33:03	3.9193	17.4338	9.98916	828.514	1	34
2022-09-14	10:33:04	18.6797	83.091	77.2255	968.391	1	35
2022-09-14	10:33:04	20.3859	90.6806	77.2255	919.195	1	36
2022-09-14	10:33:04	19.1638	85.2444	77.2255	1053.64	1	37
2022-09-14	10:33:04	11.2149	49.8861	77.2255	969.081	1	38
2022-09-14	10:33:05	7.61986	33.8947	28.7252	1087.53	1	39
2022-09-14	10:33:05	8.03477	35.7403	28.7252	1004.82	1	40
2022-09-14	10:33:05	3.71848	16.5405	28.7252	1104.07	1	41
2022-09-14	10:33:06	5.1596	22.9509	10.091	1027.77	1	42
2022-09-14	10:33:06	2.47085	10.9908	10.091	1115.06	FALSE	42
2022-09-14	10:33:06	0.968613	4.30858	10.091	1032.08	FALSE	42
2022-09-14	10:33:06	0.475178	2.11369	10.091	1117.17	FALSE	42
2022-09-14	10:33:07	0.262456	1.16746	1.50339	1033.25	FALSE	42
2022-09-14	10:33:07	0.315127	1.40175	1.50339	1118.58	FALSE	42
2022-09-14	10:33:07	0.306221	1.36213	1.50339	1034.61	FALSE	42
2022-09-14	10:33:07	0.468104	2.08222	1.50339	1120.66	FALSE	42
2022-09-14	10:33:08	0.33701	1.49909	8.85118	1036.11	FALSE	42
2022-09-14	10:33:08	1.52973	6.80454	8.85118	1127.46	FALSE	42
2022-09-14	10:33:08	2.12592	9.45652	8.85118	1045.57	FALSE	42
2022-09-14	10:33:08	3.96668	17.6446	8.85118	1145.11	1	43
2022-09-14	10:33:09	2.50714	11.1523	7.51168	1056.72	FALSE	43
2022-09-14	10:33:09	1.32933	5.91313	7.51168	1151.02	FALSE	43
2022-09-14	10:33:09	1.22963	5.46964	7.51168	1062.19	FALSE	43
2022-09-14	10:33:10	3.5967	15.9988	25.6466	1167.02	1	44
2022-09-14	10:33:10	6.71782	29.8822	25.6466	1092.07	1	45
2022-09-14	10:33:10	5.39543	24	25.6466	1191.02	1	46
2022-09-14	10:33:10	7.35253	32.7055	25.6466	1124.78	1	47
2022-09-14	10:33:11	5.51385	24.5267	19.14	1215.55	1	48
2022-09-14	10:33:11	4.52052	20.1082	19.14	1144.88	1	49
2022-09-14	10:33:11	3.43762	15.2912	19.14	1230.84	1	50
2022-09-14	10:33:11	3.73945	16.6338	19.14	1161.52	1	51
2022-09-14	10:33:12	6.18714	27.5216	32.0198	1258.36	1	52
2022-09-14	10:33:12	6.18566	27.5151	32.0198	1189.03	1	53
2022-09-14	10:33:12	6.75314	30.0393	32.0198	1288.4	1	54
2022-09-14	10:33:12	9.66759	43.0034	32.0198	1232.04	1	55
2022-09-14	10:33:13	3.30897	14.719	38.399	1303.12	1	56
2022-09-14	10:33:13	15.7382	70.0067	38.399	1302.04	1	57
2022-09-14	10:33:13	6.85029	30.4715	38.399	1333.59	1	58
2022-09-14	10:33:14	2.74159	12.1951	4.42828	1314.24	FALSE	58
2022-09-14	10:33:14	0.517315	2.30112	4.42828	1335.89	FALSE	58
2022-09-14	10:33:14	0.268664	1.19507	4.42828	1315.43	FALSE	58
2022-09-14	10:33:14	0.454517	2.02178	4.42828	1337.91	FALSE	58
2022-09-14	10:33:15	0.0546694	0.24318	0.0186768	1315.68	FALSE	58
2022-09-14	10:33:15	0.23411	1.04137	0.0186768	1338.95	FALSE	58
2022-09-14	10:33:15	-0.0513865	-0.228577	0.0186768	1315.68	FALSE	58
2022-09-14	10:33:15	-0.220598	-0.981264	0.0186768	1338.95	FALSE	58
2022-09-14	10:33:16	-0.43902	-1.95285	0.406734	1315.68	FALSE	58
2022-09-14	10:33:16	-0.128384	-0.571078	0.406734	1338.95	FALSE	58
2022-09-14	10:33:16	0.0833717	0.370854	0.406734	1316.05	FALSE	58
2022-09-14	10:33:16	0.849784	3.78001	0.406734	1342.73	FALSE	58
2022-09-14	10:33:17	2.06027	9.16449	12.9437	1325.21	FALSE	58
2022-09-14	10:33:17	3.44093	15.3059	12.9437	1358.04	1	59
2022-09-14	10:33:17	3.22841	14.3606	12.9437	1339.57	1	60
2022-09-14	10:33:18	0.707239	3.14594	6.738	1361.19	FALSE	60
2022-09-14	10:33:18	1.11268	4.94942	6.738	1344.52	FALSE	60
2022-09-14	10:33:18	1.42062	6.3192	6.738	1367.5	FALSE	60
2022-09-14	10:33:18	2.81854	12.5374	6.738	1357.06	FALSE	60
2022-09-14	10:33:19	4.52474	20.1269	16.7989	1387.63	1	61
2022-09-14	10:33:19	8.24789	36.6883	16.7989	1393.75	1	62
2022-09-14	10:33:19	2.01136	8.94693	16.7989	1396.58	FALSE	62
2022-09-14	10:33:19	0.322252	1.43344	16.7989	1395.18	FALSE	62
2022-09-14	10:33:20	0.28098	1.24986	1.32835	1397.83	FALSE	62
2022-09-14	10:33:20	0.241031	1.07215	1.32835	1396.25	FALSE	62
2022-09-14	10:33:20	0.397926	1.77005	1.32835	1399.6	FALSE	62
2022-09-14	10:33:20	0.274567	1.22133	1.32835	1397.47	FALSE	62
2022-09-14	10:33:21	0.250853	1.11584	-0.560814	1400.71	FALSE	62
2022-09-14	10:33:21	-0.281106	-1.25042	-0.560814	1397.47	FALSE	62
2022-09-14	10:33:21	-0.347977	-1.54787	-0.560814	1400.71	FALSE	62
2022-09-14	10:33:22	-0.324312	-1.4426	4.1259	1397.47	FALSE	62
2022-09-14	10:33:22	-0.114643	-0.509955	4.1259	1400.71	FALSE	62
2022-09-14	10:33:22	1.73039	7.69712	4.1259	1405.17	FALSE	62
2022-09-14	10:33:22	2.41874	10.759	4.1259	1411.47	FALSE	62
2022-09-14	10:33:23	3.71105	16.5075	28.5956	1421.68	1	63
2022-09-14	10:33:23	7.94087	35.3226	28.5956	1446.8	1	64
2022-09-14	10:33:23	8.09579	36.0117	28.5956	1457.69	1	65
2022-09-14	10:33:23	5.96657	26.5405	28.5956	1473.34	1	66
2022-09-14	10:33:24	4.53044	20.1523	5.55498	1477.84	1	67
2022-09-14	10:33:24	0.398232	1.77142	5.55498	1475.11	FALSE	67
2022-09-14	10:33:24	0.049275	0.219185	5.55498	1478.06	FALSE	67
2022-09-14	10:33:24	0.0173157	0.0770237	5.55498	1475.18	FALSE	67
2022-09-14	10:33:25	-0.0220226	-0.0979609	0.0398238	1478.06	FALSE	67
2022-09-14	10:33:25	0.0238807	0.106226	0.0398238	1475.29	FALSE	67
2022-09-14	10:33:25	0.0250003	0.111206	0.0398238	1478.17	FALSE	67
2022-09-14	10:33:26	0.74785	3.32659	24.6203	1478.62	FALSE	67
2022-09-14	10:33:26	3.68627	16.3973	24.6203	1494.57	1	68
2022-09-14	10:33:26	8.73177	38.8407	24.6203	1517.46	1	69
2022-09-14	10:33:26	8.97365	39.9166	24.6203	1534.49	1	70
2022-09-14	10:33:27	13.1022	58.2812	48.4548	1575.74	1	71
2022-09-14	10:33:27	7.39858	32.9104	48.4548	1567.4	1	72
2022-09-14	10:33:27	12.557	55.856	48.4548	1631.6	1	73
2022-09-14	10:33:27	10.5147	46.7715	48.4548	1614.17	1	74
2022-09-14	10:33:28	7.72948	34.3823	47.1909	1665.98	1	75
2022-09-14	10:33:28	9.81548	43.6612	47.1909	1657.83	1	76
2022-09-14	10:33:28	13.5512	60.2784	47.1909	1726.26	1	77
2022-09-14	10:33:28	11.3398	50.4417	47.1909	1708.27	1	78
2022-09-14	10:33:29	7.19141	31.9888	23.5545	1758.25	1	79
2022-09-14	10:33:29	5.72785	25.4786	23.5545	1733.75	1	80
2022-09-14	10:33:29	4.72225	21.0055	23.5545	1779.25	1	81
2022-09-14	10:33:29	3.53966	15.7451	23.5545	1749.5	1	82
2022-09-14	10:33:30	2.26357	10.0688	4.54393	1789.32	FALSE	82
2022-09-14	10:33:30	0.794618	3.53462	4.54393	1753.03	FALSE	82
2022-09-14	10:33:30	0.00637431	0.0283542	4.54393	1789.35	FALSE	82
2022-09-14	10:33:31	0.011158	0.049633	-0.022919	1753.08	FALSE	82
2022-09-14	10:33:31	-0.0278242	-0.123768	-0.022919	1789.35	FALSE	82
2022-09-14	10:33:31	6.3875e-05	0.000284129	-0.022919	1753.08	FALSE	82
2022-09-14	10:33:31	-0.0040074	-0.0178257	-0.022919	1789.35	FALSE	82
2022-09-14	10:33:32	0.0328374	0.146067	2.77464	1753.23	FALSE	82
2022-09-14	10:33:32	0.0958908	0.426541	2.77464	1789.77	FALSE	82
2022-09-14	10:33:32	0.859606	3.8237	2.77464	1757.05	FALSE	82
2022-09-14	10:33:32	1.50673	6.70224	2.77464	1796.48	FALSE	82
2022-09-14	10:33:33	2.76474	12.2981	11.2766	1769.35	FALSE	82
2022-09-14	10:33:33	2.56902	11.4275	11.2766	1807.9	FALSE	82
2022-09-14	10:33:33	2.29991	10.2305	11.2766	1779.58	FALSE	82
2022-09-14	10:33:33	2.50673	11.1504	11.2766	1819.05	FALSE	82
2022-09-14	10:33:34	3.34999	14.9014	11.5965	1794.48	1	83
2022-09-14	10:33:34	1.95869	8.71264	11.5965	1827.77	FALSE	83
2022-09-14	10:33:34	2.51238	11.1756	11.5965	1805.66	FALSE	83
2022-09-14	10:33:35	0.94444	4.20106	1.51986	1831.97	FALSE	83
2022-09-14	10:33:35	0.512379	2.27916	1.51986	1807.93	FALSE	83
2022-09-14	10:33:35	-0.109046	-0.485058	1.51986	1831.97	FALSE	83
2022-09-14	10:33:35	0.0189442	0.0842676	1.51986	1808.02	FALSE	83
2022-09-14	10:33:36	0.0839824	0.373571	0.425749	1832.34	FALSE	83
2022-09-14	10:33:36	0.0925829	0.411827	0.425749	1808.43	FALSE	83
2022-09-14	10:33:36	-0.00349849	-0.015562	0.425749	1832.34	FALSE	83
2022-09-14	10:33:36	0.209784	0.933161	0.425749	1809.36	FALSE	83
2022-09-14	10:33:37	0.213244	0.948552	8.05486	1833.29	FALSE	83
2022-09-14	10:33:37	1.13436	5.04586	8.05486	1814.41	FALSE	83
2022-09-14	10:33:37	2.63243	11.7096	8.05486	1845	FALSE	83
2022-09-14	10:33:37	3.26322	14.5155	8.05486	1828.92	1	84
2022-09-14	10:33:38	1.67182	7.43659	5.41916	1852.44	FALSE	84
2022-09-14	10:33:38	1.37538	6.11797	5.41916	1835.04	FALSE	84
2022-09-14	10:33:38	0.607646	2.70293	5.41916	1855.14	FALSE	84
2022-09-14	10:33:39	0.44902	1.99733	1.8202	1837.04	FALSE	84
2022-09-14	10:33:39	0.419097	1.86423	1.8202	1857	FALSE	84
2022-09-14	10:33:39	0.37986	1.68969	1.8202	1838.73	FALSE	84
2022-09-14	10:33:39	0.388817	1.72954	1.8202	1858.73	FALSE	84
2022-09-14	10:33:40	0.44271	1.96926	2.23519	1840.7	FALSE	84
2022-09-14	10:33:40	0.44159	1.96428	2.23519	1860.7	FALSE	84
2022-09-14	10:33:40	0.525967	2.33961	2.23519	1843.04	FALSE	84
2022-09-14	10:33:40	0.599707	2.66762	2.23519	1863.37	FALSE	84
2022-09-14	10:33:41	0.756552	3.36529	4.82465	1846.4	FALSE	84
2022-09-14	10:33:41	0.959249	4.26693	4.82465	1867.63	FALSE	84
2022-09-14	10:33:41	1.17238	5.21498	4.82465	1851.62	FALSE	84
2022-09-14	10:33:41	1.45034	6.4514	4.82465	1874.08	FALSE	84
2022-09-14	10:33:42	0.848919	3.77616	3.927	1855.4	FALSE	84
2022-09-14	10:33:42	0.875178	3.89297	3.927	1877.98	FALSE	84
2022-09-14	10:33:42	0.924389	4.11187	3.927	1859.51	FALSE	84
2022-09-14	10:33:43	0.911361	4.05392	3.68861	1882.03	FALSE	84
2022-09-14	10:33:43	0.821641	3.65482	3.68861	1863.16	FALSE	84
2022-09-14	10:33:43	0.841743	3.74424	3.68861	1885.77	FALSE	84
2022-09-14	10:33:43	0.742201	3.30146	3.68861	1866.46	FALSE	84
2022-09-14	10:33:44	0.398893	1.77436	0.578266	1887.55	FALSE	84
2022-09-14	10:33:44	0.385254	1.71369	0.578266	1868.18	FALSE	84
2022-09-14	10:33:44	0.035789	0.159197	0.578266	1887.71	FALSE	84
2022-09-14	10:33:44	-0.299936	-1.33418	0.578266	1868.18	FALSE	84
2022-09-14	10:33:45	-0.593371	-2.63943	-0.972999	1887.71	FALSE	84
2022-09-14	10:33:45	-0.767365	-3.41339	-0.972999	1868.18	FALSE	84
2022-09-14	10:33:45	-0.426857	-1.89875	-0.972999	1887.71	FALSE	84
2022-09-14	10:33:45	0.912633	4.05957	-0.972999	1872.24	FALSE	84
2022-09-14	10:33:46	2.96464	13.1873	25.0048	1900.9	FALSE	84
2022-09-14	10:33:46	6.00744	26.7223	25.0048	1898.96	1	85
2022-09-14	10:33:46	7.89192	35.1048	25.0048	1936	1	86
2022-09-14	10:33:47	6.62749	29.4804	35.7982	1928.44	1	87
2022-09-14	10:33:47	7.8053	34.7195	35.7982	1970.72	1	88
2022-09-14	10:33:47	5.17411	23.0155	35.7982	1951.45	1	89
2022-09-14	10:33:47	12.5843	55.9775	35.7982	2026.7	1	90
2022-09-14	10:33:48	12.3491	54.9313	36.4189	2006.39	1	91
2022-09-14	10:33:48	7.40718	32.9486	36.4189	2059.65	1	92
2022-09-14	10:33:48	11.5594	51.4185	36.4189	2057.8	1	93
2022-09-14	10:33:48	1.43365	6.37716	36.4189	2066.02	FALSE	93
2022-09-14	10:33:49	4.73182	21.0481	8.6504	2078.85	1	94
2022-09-14	10:33:49	1.85625	8.25697	8.6504	2074.28	FALSE	94
2022-09-14	10:33:49	0.541794	2.41001	8.6504	2081.26	FALSE	94
2022-09-14	10:33:49	0.648919	2.88652	8.6504	2077.17	FALSE	94
2022-09-14	10:33:50	0.166629	0.741199	1.66298	2082	FALSE	94
2022-09-14	10:33:50	0.664796	2.95715	1.66298	2080.12	FALSE	94
2022-09-14	10:33:50	0.29014	1.2906	1.66298	2083.29	FALSE	94
2022-09-14	10:33:51	0.423982	1.88596	1.99467	2082.01	FALSE	94
2022-09-14	10:33:51	0.5364	2.38601	1.99467	2085.68	FALSE	94
2022-09-14	10:33:51	0.404033	1.79722	1.99467	2083.81	FALSE	94
2022-09-14	10:33:51	0.429275	1.9095	1.99467	2087.59	FALSE	94
2022-09-14	10:33:52	0.509987	2.26852	1.90644	2086.08	FALSE	94
2022-09-14	10:33:52	0.452735	2.01386	1.90644	2089.6	FALSE	94
2022-09-14	10:33:52	0.352786	1.56926	1.90644	2087.64	FALSE	94
2022-09-14	10:33:52	0.398842	1.77413	1.90644	2091.38	FALSE	94
2022-09-14	10:33:53	0.445051	1.97968	2.53722	2089.62	FALSE	94
2022-09-14	10:33:53	0.320369	1.42507	2.53722	2092.8	FALSE	94
2022-09-14	10:33:53	0.374313	1.66502	2.53722	2091.29	FALSE	94
2022-09-14	10:33:53	1.14184	5.07913	2.53722	2097.88	FALSE	94
2022-09-14	10:33:54	2.48887	11.071	14.6135	2102.36	FALSE	94
2022-09-14	10:33:54	3.19584	14.2157	14.6135	2112.1	1	95
2022-09-14	10:33:54	4.17105	18.5537	14.6135	2120.91	1	96
2022-09-14	10:33:55	4.0622	18.0695	9.63873	2130.17	1	97
2022-09-14	10:33:55	1.79645	7.99097	9.63873	2128.9	FALSE	97
2022-09-14	10:33:55	1.53126	6.81135	9.63873	2136.98	FALSE	97
2022-09-14	10:33:55	1.27762	5.68311	9.63873	2134.59	FALSE	97
2022-09-14	10:33:56	3.69757	16.4475	9.88513	2153.43	1	98
2022-09-14	10:33:56	2.83574	12.6139	9.88513	2147.2	FALSE	98
2022-09-14	10:33:56	1.49309	6.64156	9.88513	2160.07	FALSE	98
2022-09-14	10:33:56	0.86271	3.83751	9.88513	2151.04	FALSE	98
2022-09-14	10:33:57	0.777468	3.45833	2.37339	2163.53	FALSE	98
2022-09-14	10:33:57	0.464135	2.06457	2.37339	2153.1	FALSE	98
2022-09-14	10:33:57	0.396145	1.76213	2.37339	2165.29	FALSE	98
2022-09-14	10:33:57	0.496501	2.20854	2.37339	2155.31	FALSE	98
2022-09-14	10:33:58	0.375178	1.66887	1.77224	2166.96	FALSE	98
2022-09-14	10:33:58	0.368512	1.63922	1.77224	2156.95	FALSE	98
2022-09-14	10:33:58	0.451565	2.00865	1.77224	2168.97	FALSE	98
2022-09-14	10:33:59	0.43416	1.93123	1.76768	2158.88	FALSE	98
2022-09-14	10:33:59	0.392888	1.74764	1.76768	2170.71	FALSE	98
2022-09-14	10:33:59	0.376756	1.67589	1.76768	2160.56	FALSE	98
2022-09-14	10:33:59	0.385764	1.71596	1.76768	2172.43	FALSE	98
2022-09-14	10:34:00	0.391361	1.74085	1.70928	2162.3	FALSE	98
2022-09-14	10:34:00	0.379962	1.69015	1.70928	2174.12	FALSE	98
2022-09-14	10:34:00	0.381896	1.69875	1.70928	2164	FALSE	98
2022-09-14	10:34:00	0.38383	1.70735	1.70928	2175.83	FALSE	98
2022-09-14	10:34:01	0.450852	2.00548	1.68777	2166	FALSE	98
2022-09-14	10:34:01	0.422405	1.87894	1.68777	2177.71	FALSE	98
2022-09-14	10:34:01	0.336298	1.49592	1.68777	2167.5	FALSE	98
2022-09-14	10:34:01	0.308155	1.37074	1.68777	2179.08	FALSE	98
2022-09-14	10:34:02	0.292074	1.2992	1.20481	2168.8	FALSE	98
2022-09-14	10:34:02	0.310954	1.38319	1.20481	2180.46	FALSE	98
2022-09-14	10:34:02	0.209529	0.932027	1.20481	2169.73	FALSE	98
2022-09-14	10:34:03	0.362405	1.61205	1.24318	2182.07	FALSE	98
2022-09-14	10:34:03	0.190191	0.846008	1.24318	2170.58	FALSE	98
2022-09-14	10:34:03	0.358537	1.59484	1.24318	2183.67	FALSE	98
2022-09-14	10:34:03	0.206781	0.919803	1.24318	2171.5	FALSE	98
2022-09-14	10:34:04	0.698893	3.10882	6.68249	2186.78	FALSE	98
2022-09-14	10:34:04	0.570598	2.53813	6.68249	2174.04	FALSE	98
2022-09-14	10:34:04	1.56765	6.97322	6.68249	2193.75	FALSE	98
2022-09-14	10:34:04	3.17202	14.1098	6.68249	2188.14	1	99
2022-09-14	10:34:05	8.26739	36.775	42.2517	2230.52	1	100
2022-09-14	10:34:05	13.1168	58.3461	42.2517	2246.49	1	101
2022-09-14	10:34:05	8.8337	39.2941	42.2517	2269.82	1	102
2022-09-14	10:34:05	7.77655	34.5916	42.2517	2281.08	1	103
2022-09-14	10:34:06	2.92658	13.018	25.0248	2282.84	FALSE	103
2022-09-14	10:34:06	8.38484	37.2974	25.0248	2318.38	1	104
2022-09-14	10:34:06	5.56606	24.7589	25.0248	2307.59	1	105
2022-09-14	10:34:07	4.01334	17.8521	7.87908	2336.23	1	106
2022-09-14	10:34:07	2.35584	10.4792	7.87908	2318.07	FALSE	106
2022-09-14	10:34:07	0.31472	1.39994	7.87908	2337.63	FALSE	106
2022-09-14	10:34:07	0.401285	1.785	7.87908	2319.86	FALSE	106
2022-09-14	10:34:08	0.207087	0.921164	1.11624	2338.55	FALSE	106
2022-09-14	10:34:08	0.248461	1.1052	1.11624	2320.96	FALSE	106
2022-09-14	10:34:08	0.345967	1.53893	1.11624	2340.09	FALSE	106
2022-09-14	10:34:08	0.202252	0.899657	1.11624	2321.86	FALSE	106
2022-09-14	10:34:09	0.473295	2.10531	4.74453	2342.2	FALSE	106
2022-09-14	10:34:09	0.222914	0.991566	4.74453	2322.86	FALSE	106
2022-09-14	10:34:09	1.28709	5.72523	4.74453	2347.92	FALSE	106
2022-09-14	10:34:09	2.28317	10.156	4.74453	2333.01	FALSE	106
2022-09-14	10:34:10	3.88047	17.2611	17.0009	2365.18	1	107
2022-09-14	10:34:10	3.20581	14.2601	17.0009	2347.27	1	108
2022-09-14	10:34:10	4.37966	19.4816	17.0009	2384.67	1	109
2022-09-14	10:34:11	3.64744	16.2245	16.0706	2363.5	1	110
2022-09-14	10:34:11	3.3477	14.8912	16.0706	2399.56	1	111
2022-09-14	10:34:11	5.79645	25.7838	16.0706	2389.28	1	112
2022-09-14	10:34:11	1.65971	7.38272	16.0706	2406.94	FALSE	112
2022-09-14	10:34:12	3.98851	17.7417	16.3704	2407.02	1	113
2022-09-14	10:34:12	2.99034	13.3016	16.3704	2420.24	FALSE	113
2022-09-14	10:34:12	2.99278	13.3125	16.3704	2420.33	FALSE	113
2022-09-14	10:34:12	4.74927	21.1257	16.3704	2441.37	1	114
2022-09-14	10:34:13	4.41238	19.6271	30.0737	2439.96	1	115
2022-09-14	10:34:13	12.0101	53.4233	30.0737	2494.79	1	116
2022-09-14	10:34:13	2.69594	11.9921	30.0737	2451.95	FALSE	116
2022-09-14	10:34:13	7.92505	35.2522	30.0737	2530.04	1	117
2022-09-14	10:34:14	6.18678	27.52	26.1109	2479.47	1	118
2022-09-14	10:34:14	7.43762	33.084	26.1109	2563.13	1	119
2022-09-14	10:34:14	3.98561	17.7288	26.1109	2497.2	1	120
2022-09-14	10:34:15	3.1482	14.0038	22.7926	2577.13	1	121
2022-09-14	10:34:15	7.6509	34.0327	22.7926	2531.23	1	122
2022-09-14	10:34:15	2.38571	10.6121	22.7926	2587.74	FALSE	122
2022-09-14	10:34:15	7.31121	32.5217	22.7926	2563.76	1	123
2022-09-14	10:34:16	6.91365	30.7533	23.9423	2618.5	1	124
2022-09-14	10:34:16	8.18479	36.4076	23.9423	2600.16	1	125
2022-09-14	10:34:16	3.80251	16.9143	23.9423	2635.41	1	126
2022-09-14	10:34:16	2.62897	11.6942	23.9423	2611.86	FALSE	126
2022-09-14	10:34:17	6.02774	26.8126	16.6283	2662.22	1	127
2022-09-14	10:34:17	1.59151	7.07935	16.6283	2618.94	FALSE	127
2022-09-14	10:34:17	4.96535	22.0869	16.6283	2684.31	1	128
2022-09-14	10:34:17	2.36821	10.5343	16.6283	2629.47	FALSE	128
2022-09-14	10:34:18	3.35808	14.9374	11.2794	2699.25	1	129
2022-09-14	10:34:18	2.49049	11.0782	11.2794	2640.55	FALSE	129
2022-09-14	10:34:18	1.75859	7.82256	11.2794	2707.07	FALSE	129
2022-09-14	10:34:19	3.87737	17.2473	10.0531	2657.8	1	130
2022-09-14	10:34:19	0.707036	3.14504	10.0531	2710.21	FALSE	130
2022-09-14	10:34:19	2.91095	12.9485	10.0531	2670.75	FALSE	130
2022-09-14	10:34:19	1.5448	6.87158	10.0531	2717.09	FALSE	130
2022-09-14	10:34:20	2.94261	13.0893	17.0962	2683.84	FALSE	130
2022-09-14	10:34:20	3.00561	13.3696	17.0962	2730.46	1	131
2022-09-14	10:34:20	3.37187	14.9988	17.0962	2698.83	1	132
2022-09-14	10:34:20	6.05354	26.9274	17.0962	2757.38	1	133
2022-09-14	10:34:21	2.13172	9.48232	17.0174	2708.32	FALSE	133
2022-09-14	10:34:21	6.32154	28.1195	17.0174	2785.5	1	134
2022-09-14	10:34:21	1.95716	8.70584	17.0174	2717.02	FALSE	134
2022-09-14	10:34:21	4.89227	21.7618	17.0174	2807.26	1	135
2022-09-14	10:34:22	2.81538	12.5234	21.2244	2729.55	FALSE	135
2022-09-14	10:34:22	3.31406	14.7416	21.2244	2822.01	1	136
2022-09-14	10:34:22	8.18494	36.4083	21.2244	2765.95	1	137
2022-09-14	10:34:23	4.22169	18.7789	34.8848	2840.78	1	138
2022-09-14	10:34:23	13.1215	58.3671	34.8848	2824.32	1	139
2022-09-14	10:34:23	5.36352	23.858	34.8848	2864.64	1	140
2022-09-14	10:34:23	8.66311	38.5352	34.8848	2862.86	1	141
2022-09-14	10:34:24	2.67024	11.8778	23.6341	2876.52	FALSE	141
2022-09-14	10:34:24	3.9537	17.5868	23.6341	2880.44	1	142
2022-09-14	10:34:24	9.00276	40.0461	23.6341	2916.57	1	143
2022-09-14	10:34:24	5.62607	25.0259	23.6341	2905.47	1	144
2022-09-14	10:34:25	10.4912	46.667	37.3638	2963.23	1	145
2022-09-14	10:34:25	7.54922	33.5804	37.3638	2939.05	1	146
2022-09-14	10:34:25	9.53365	42.4076	37.3638	3005.64	1	147
2022-09-14	10:34:25	6.02494	26.8001	37.3638	2965.85	1	148
2022-09-14	10:34:26	4.43401	19.7234	26.0357	3025.36	1	149
2022-09-14	10:34:26	9.94825	44.2518	26.0357	3010.1	1	150
2022-09-14	10:34:26	3.17701	14.132	26.0357	3039.5	1	151
2022-09-14	10:34:27	4.50754	20.0504	12.4327	3030.15	1	152
2022-09-14	10:34:27	2.64459	11.7637	12.4327	3051.26	FALSE	152
2022-09-14	10:34:27	1.43579	6.38668	12.4327	3036.54	FALSE	152
2022-09-14	10:34:27	2.59207	11.53	12.4327	3062.79	FALSE	152
2022-09-14	10:34:28	2.48245	11.0424	30.7507	3047.58	FALSE	152
2022-09-14	10:34:28	9.02622	40.1504	30.7507	3102.94	1	153
2022-09-14	10:34:28	6.80352	30.2634	30.7507	3077.84	1	154
2022-09-14	10:34:28	9.34011	41.5467	30.7507	3144.49	1	155
2022-09-14	10:34:29	11.4082	50.746	45.1171	3128.59	1	156
2022-09-14	10:34:29	7.43192	33.0587	45.1171	3177.55	1	157
2022-09-14	10:34:29	9.77848	43.4966	45.1171	3172.09	1	158
2022-09-14	10:34:29	11.9525	53.1671	45.1171	3230.71	1	159
2022-09-14	10:34:30	23.1526	102.987	59.8015	3275.07	1	160
2022-09-14	10:34:30	9.67879	43.0532	59.8015	3273.77	1	161
2022-09-14	10:34:30	7.50052	33.3638	59.8015	3308.44	1	162
2022-09-14	10:34:31	17.1573	76.3191	54.0127	3350.09	1	163
2022-09-14	10:34:31	8.49283	37.7778	54.0127	3346.22	1	164
2022-09-14	10:34:31	16.3321	72.6484	54.0127	3422.73	1	165
2022-09-14	10:34:31	6.5882	29.3056	54.0127	3375.52	1	166
2022-09-14	10:34:32	5.56179	24.74	31.5287	3447.47	1	167
2022-09-14	10:34:32	3.76149	16.7319	31.5287	3392.25	1	168
2022-09-14	10:34:32	5.1222	22.7846	31.5287	3470.26	1	169
2022-09-14	10:34:32	13.9064	61.8584	31.5287	3454.11	1	170
2022-09-14	10:34:33	17.5374	78.0099	51.0821	3548.27	1	171
2022-09-14	10:34:33	14.6581	65.2022	51.0821	3519.31	1	172
2022-09-14	10:34:33	5.85406	26.04	51.0821	3574.31	1	173
2022-09-14	10:34:33	7.88551	35.0763	51.0821	3554.39	1	174
2022-09-14	10:34:34	2.73065	12.1465	13.0222	3586.45	FALSE	174
2022-09-14	10:34:34	3.6649	16.3022	13.0222	3570.69	1	175
2022-09-14	10:34:34	2.38704	10.618	13.0222	3597.07	FALSE	175
2022-09-14	10:34:35	1.85589	8.25537	12.0937	3578.95	FALSE	175
2022-09-14	10:34:35	3.16256	14.0677	12.0937	3611.14	1	176
2022-09-14	10:34:35	3.00251	13.3558	12.0937	3592.3	1	177
2022-09-14	10:34:35	2.85416	12.6959	12.0937	3623.84	FALSE	177
2022-09-14	10:34:36	2.4477	10.8879	19.1068	3603.19	FALSE	177
2022-09-14	10:34:36	2.52077	11.2129	19.1068	3635.05	FALSE	177
2022-09-14	10:34:36	4.09299	18.2064	19.1068	3621.4	1	178
2022-09-14	10:34:36	8.12011	36.1199	19.1068	3671.17	1	179
2022-09-14	10:34:37	14.3088	63.6484	82.3379	3685.05	1	180
2022-09-14	10:34:37	18.5571	82.5457	82.3379	3753.71	1	181
2022-09-14	10:34:37	17.9356	79.7811	82.3379	3764.83	1	182
2022-09-14	10:34:37	23.24	103.376	82.3379	3857.09	1	183
2022-09-14	10:34:38	30.8629	137.284	111.072	3902.11	1	184
2022-09-14	10:34:38	12.8513	57.1652	111.072	3914.26	1	185
2022-09-14	10:34:38	21.9367	97.5788	111.072	3999.69	1	186
2022-09-14	10:34:38	34.2297	152.261	111.072	4066.52	1	187
2022-09-14	10:34:39	32.2359	143.392	151.015	4143.08	1	188
2022-09-14	10:34:39	34.4953	153.442	151.015	4219.96	1	189
2022-09-14	10:34:39	35.118	156.212	151.015	4299.29	1	190
2022-09-14	10:34:40	30.9707	137.764	139.066	4357.72	1	191
2022-09-14	10:34:40	31.5752	140.453	139.066	4439.75	1	192
2022-09-14	10:34:40	32.3585	143.937	139.066	4501.66	1	193
2022-09-14	10:34:40	30.1496	134.111	139.066	4573.86	1	194
2022-09-14	10:34:41	28.5905	127.176	110.896	4628.84	1	195
2022-09-14	10:34:41	25.5633	113.711	110.896	4687.57	1	196
2022-09-14	10:34:41	23.6701	105.289	110.896	4734.13	1	197
2022-09-14	10:34:41	21.8983	97.408	110.896	4784.98	1	198
2022-09-14	10:34:42	20.1497	89.6299	77.1576	4823.76	1	199
2022-09-14	10:34:42	17.6069	78.319	77.1576	4863.3	1	200
2022-09-14	10:34:42	16.4945	73.3708	77.1576	4897.13	1	201
2022-09-14	10:34:42	15.1321	67.3106	77.1576	4930.61	1	202
2022-09-14	10:34:43	15.0441	66.9192	68.589	4964.05	1	203
2022-09-14	10:34:43	16.3158	72.5759	68.589	5003.18	1	204
2022-09-14	10:34:43	14.8986	66.272	68.589	5030.32	1	205
2022-09-14	10:34:44	11.7822	52.4096	35.7344	5055.59	1	206
2022-09-14	10:34:44	9.29736	41.3565	35.7344	5071.67	1	207
2022-09-14	10:34:44	4.87004	21.6629	35.7344	5077.26	1	208
2022-09-14	10:34:44	6.18423	27.5087	35.7344	5099.18	1	209
2022-09-14	10:34:45	2.89202	12.8643	11.8398	5090.12	FALSE	209
2022-09-14	10:34:45	1.37762	6.12793	11.8398	5105.31	FALSE	209
2022-09-14	10:34:45	1.75365	7.80059	11.8398	5097.92	FALSE	209
2022-09-14	10:34:45	4.62352	20.5663	11.8398	5125.88	1	210
2022-09-14	10:34:46	10.4981	46.6976	64.9285	5144.62	1	211
2022-09-14	10:34:46	14.2761	63.5029	64.9285	5189.38	1	212
2022-09-14	10:34:46	9.43975	41.9899	64.9285	5186.61	1	213
2022-09-14	10:34:46	24.1724	107.524	64.9285	5296.9	1	214
2022-09-14	10:34:47	16.3626	72.7841	76.9626	5259.39	1	215
2022-09-14	10:34:47	21.9973	97.8484	76.9626	5394.75	1	216
2022-09-14	10:34:47	13.546	60.2553	76.9626	5319.65	1	217
2022-09-14	10:34:48	20.2369	90.0178	44.3924	5484.77	1	218
2022-09-14	10:34:48	14.5111	64.5483	44.3924	5384.2	1	219
2022-09-14	10:34:48	3.56088	15.8395	44.3924	5500.61	1	220
2022-09-14	10:34:48	1.61055	7.16405	44.3924	5391.36	FALSE	220
2022-09-14	10:34:49	3.95136	17.5764	43.0535	5518.19	1	221
2022-09-14	10:34:49	11.0879	49.3212	43.0535	5440.68	1	222
2022-09-14	10:34:49	13.3081	59.1971	43.0535	5577.38	1	223
2022-09-14	10:34:49	10.3681	46.1194	43.0535	5486.8	1	224
2022-09-14	10:34:50	15.3995	68.5001	59.0543	5645.88	1	225
2022-09-14	10:34:50	10.9261	48.6015	59.0543	5535.4	1	226
2022-09-14	10:34:50	11.057	49.1837	59.0543	5695.07	1	227
2022-09-14	10:34:50	15.7214	69.9319	59.0543	5605.33	1	228
2022-09-14	10:34:51	12.6133	56.1065	26.9472	5751.17	1	229
2022-09-14	10:34:51	3.60067	16.0165	26.9472	5621.35	1	230
2022-09-14	10:34:51	1.96006	8.71874	26.9472	5759.89	FALSE	230
2022-09-14	10:34:52	2.2964	10.2148	19.6039	5631.56	FALSE	230
2022-09-14	10:34:52	4.66882	20.7678	19.6039	5780.66	1	231
2022-09-14	10:34:52	3.88973	17.3023	19.6039	5648.87	1	232
2022-09-14	10:34:52	6.7737	30.1308	19.6039	5810.79	1	233
2022-09-14	10:34:53	12.435	55.3134	44.5184	5704.18	1	234
2022-09-14	10:34:53	10.1316	45.0674	44.5184	5855.86	1	235
2022-09-14	10:34:53	10.2646	45.659	44.5184	5749.84	1	236
2022-09-14	10:34:53	7.20154	32.0339	44.5184	5887.89	1	237
2022-09-14	10:34:54	13.167	58.5694	43.125	5808.41	1	238
2022-09-14	10:34:54	8.49136	37.7713	43.125	5925.66	1	239
2022-09-14	10:34:54	8.17863	36.3802	43.125	5844.79	1	240
2022-09-14	10:34:54	8.94276	39.7792	43.125	5965.44	1	241
2022-09-14	10:34:55	8.57059	38.1237	32.4038	5882.91	1	242
2022-09-14	10:34:55	6.96245	30.9704	32.4038	5996.41	1	243
2022-09-14	10:34:55	6.32103	28.1172	32.4038	5911.03	1	244
2022-09-14	10:34:56	6.24469	27.7776	25.3367	6024.19	1	245
2022-09-14	10:34:56	5.48729	24.4086	25.3367	5935.44	1	246
2022-09-14	10:34:56	5.50143	24.4715	25.3367	6048.66	1	247
2022-09-14	10:34:56	5.55034	24.689	25.3367	5960.13	1	248
2022-09-14	10:34:57	5.30607	23.6025	23.6001	6072.26	1	249
2022-09-14	10:34:57	5.33879	23.748	23.6001	5983.88	1	250
2022-09-14	10:34:57	5.23558	23.2889	23.6001	6095.55	1	251
2022-09-14	10:34:57	5.34169	23.7609	23.6001	6007.64	1	252
2022-09-14	10:34:58	5.18143	23.048	22.5595	6118.6	1	253
2022-09-14	10:34:58	5.04439	22.4385	22.5595	6030.07	1	254
2022-09-14	10:34:58	4.98983	22.1958	22.5595	6140.8	1	255
2022-09-14	10:34:58	5.0708	22.5559	22.5595	6052.63	1	256
2022-09-14	10:34:59	4.90469	21.817	21.0599	6162.61	1	257
2022-09-14	10:34:59	4.71915	20.9917	21.0599	6073.62	1	258
2022-09-14	10:34:59	4.5796	20.371	21.0599	6182.98	1	259
2022-09-14	10:35:00	4.53854	20.1883	19.7048	6093.81	1	260
2022-09-14	10:35:00	4.53141	20.1566	19.7048	6203.14	1	261
2022-09-14	10:35:00	4.31441	19.1914	19.7048	6113	1	262
2022-09-14	10:35:00	4.33502	19.283	19.7048	6222.42	1	263
2022-09-14	10:35:01	4.29324	19.0972	19.1745	6132.1	1	264
2022-09-14	10:35:01	4.36841	19.4316	19.1745	6241.86	1	265
2022-09-14	10:35:01	4.31324	19.1862	19.1745	6151.29	1	266
2022-09-14	10:35:01	4.26759	18.9831	19.1745	6260.84	1	267
2022-09-14	10:35:02	4.40566	19.5973	20.7675	6170.88	1	268
2022-09-14	10:35:02	4.59497	20.4393	20.7675	6281.28	1	269
2022-09-14	10:35:02	4.70637	20.9349	20.7675	6191.82	1	270
2022-09-14	10:35:02	4.968	22.0987	20.7675	6303.38	1	271
2022-09-14	10:35:03	4.91345	21.856	21.1625	6213.67	1	272
2022-09-14	10:35:03	4.89894	21.7915	21.1625	6325.17	1	273
2022-09-14	10:35:03	4.46027	19.8402	21.1625	6233.51	1	274
2022-09-14	10:35:04	4.18246	18.6044	19.5683	6343.77	1	275
2022-09-14	10:35:04	4.30179	19.1352	19.5683	6252.65	1	276
2022-09-14	10:35:04	4.60134	20.4677	19.5683	6364.24	1	277
2022-09-14	10:35:04	4.51105	20.0661	19.5683	6272.72	1	278
2022-09-14	10:35:05	4.271	18.9983	18.0807	6383.24	1	279
2022-09-14	10:35:05	3.15136	14.0179	18.0807	6286.73	1	280
2022-09-14	10:35:05	4.00195	17.8015	18.0807	6401.04	1	281
2022-09-14	10:35:05	4.83457	21.5051	18.0807	6308.24	1	282
2022-09-14	10:35:06	5.10601	22.7126	18.6982	6423.75	1	283
2022-09-14	10:35:06	4.06398	18.0774	18.6982	6326.32	1	284
2022-09-14	10:35:06	3.83146	17.0431	18.6982	6440.8	1	285
2022-09-14	10:35:06	3.81273	16.9598	18.6982	6343.28	1	286
2022-09-14	10:35:07	3.88225	17.269	17.177	6458.06	1	287
2022-09-14	10:35:07	3.84591	17.1074	17.177	6360.38	1	288
2022-09-14	10:35:07	3.8565	17.1545	17.177	6475.22	1	289
2022-09-14	10:35:08	3.50495	15.5907	13.1477	6375.97	1	290
2022-09-14	10:35:08	2.99518	13.3232	13.1477	6488.54	FALSE	290
2022-09-14	10:35:08	2.73248	12.1546	13.1477	6388.13	FALSE	290
2022-09-14	10:35:08	2.59029	11.5221	13.1477	6500.06	FALSE	290
2022-09-14	10:35:09	2.5082	11.157	10.9709	6399.29	FALSE	290
2022-09-14	10:35:09	2.30688	10.2615	10.9709	6510.33	FALSE	290
2022-09-14	10:35:09	2.33416	10.3828	10.9709	6409.67	FALSE	290
2022-09-14	10:35:09	2.7162	12.0822	10.9709	6522.41	FALSE	290
2022-09-14	10:35:10	2.72093	12.1032	11.5885	6421.77	FALSE	290
2022-09-14	10:35:10	2.58378	11.4932	11.5885	6533.9	FALSE	290
2022-09-14	10:35:10	2.68108	11.926	11.5885	6433.7	FALSE	290
2022-09-14	10:35:10	2.43502	10.8315	11.5885	6544.73	FALSE	290
2022-09-14	10:35:11	3.95701	17.6016	20.9865	6451.3	1	291
2022-09-14	10:35:11	5.36617	23.8698	20.9865	6568.6	1	292
2022-09-14	10:35:11	4.83075	21.4881	20.9865	6472.79	1	293
2022-09-14	10:35:12	4.73609	21.0671	19.09	6589.67	1	294
2022-09-14	10:35:12	4.01085	17.8411	19.09	6490.63	1	295
2022-09-14	10:35:12	4.48271	19.94	19.09	6609.61	1	296
2022-09-14	10:35:12	3.9368	17.5117	19.09	6508.14	1	297
2022-09-14	10:35:13	3.24368	14.4285	13.1083	6624.04	1	298
2022-09-14	10:35:13	2.97904	13.2514	13.1083	6521.39	FALSE	298
2022-09-14	10:35:13	2.75472	12.2535	13.1083	6636.29	FALSE	298
2022-09-14	10:35:13	2.81009	12.4998	13.1083	6533.89	FALSE	298
2022-09-14	10:35:14	2.80917	12.4957	12.3489	6648.79	FALSE	298
2022-09-14	10:35:14	2.77614	12.3488	12.3489	6546.24	FALSE	298
2022-09-14	10:35:14	2.62994	11.6985	12.3489	6660.49	FALSE	298
2022-09-14	10:35:14	2.88938	12.8525	12.3489	6559.09	FALSE	298
2022-09-14	10:35:15	3.12688	13.909	14.0444	6674.39	1	299
2022-09-14	10:35:15	3.24347	14.4276	14.0444	6573.52	1	300
2022-09-14	10:35:15	3.10164	13.7967	14.0444	6688.19	1	301
2022-09-14	10:35:16	2.98271	13.2677	13.5164	6586.79	FALSE	301
2022-09-14	10:35:16	3.03172	13.4857	13.5164	6701.68	1	302
2022-09-14	10:35:16	3.02765	13.4676	13.5164	6600.25	1	303
2022-09-14	10:35:16	3.11243	13.8447	13.5164	6715.52	1	304
2022-09-14	10:35:17	2.98052	13.2579	13.2308	6613.51	FALSE	304
2022-09-14	10:35:17	2.95258	13.1337	13.2308	6728.66	FALSE	304
2022-09-14	10:35:17	2.97212	13.2206	13.2308	6626.73	FALSE	304
2022-09-14	10:35:17	2.99248	13.3111	13.2308	6741.97	FALSE	304
2022-09-14	10:35:18	2.91324	12.9587	12.5698	6639.69	FALSE	304
2022-09-14	10:35:18	2.81385	12.5166	12.5698	6754.48	FALSE	304
2022-09-14	10:35:18	2.77294	12.3346	12.5698	6652.03	FALSE	304
2022-09-14	10:35:18	2.80322	12.4693	12.5698	6766.95	FALSE	304
2022-09-14	10:35:19	2.84907	12.6732	12.5818	6664.7	FALSE	304
2022-09-14	10:35:19	2.79039	12.4122	12.5818	6779.36	FALSE	304
2022-09-14	10:35:19	2.84607	12.6599	12.5818	6677.36	FALSE	304
2022-09-14	10:35:20	3.08846	13.7381	14.3723	6793.1	1	305
2022-09-14	10:35:20	3.23599	14.3943	14.3723	6691.75	1	306
2022-09-14	10:35:20	3.23492	14.3896	14.3723	6807.49	1	307
2022-09-14	10:35:20	3.3648	14.9673	14.3723	6706.72	1	308
2022-09-14	10:35:21	3.64917	16.2322	16.3449	6823.72	1	309
2022-09-14	10:35:21	3.60347	16.029	16.3449	6722.75	1	310
2022-09-14	10:35:21	3.71065	16.5057	16.3449	6840.23	1	311
2022-09-14	10:35:21	3.73467	16.6126	16.3449	6739.36	1	312
2022-09-14	10:35:22	3.96088	17.6188	17.2797	6857.85	1	313
2022-09-14	10:35:22	3.96469	17.6357	17.2797	6757	1	314
2022-09-14	10:35:22	3.83243	17.0474	17.2797	6874.9	1	315
2022-09-14	10:35:22	3.78062	16.817	17.2797	6773.82	1	316
2022-09-14	10:35:23	3.73014	16.5924	16.6205	6891.49	1	317
2022-09-14	10:35:23	3.81538	16.9716	16.6205	6790.79	1	318
2022-09-14	10:35:23	3.75324	16.6952	16.6205	6908.18	1	319
2022-09-14	10:35:23	3.64709	16.223	16.6205	6807.01	1	320
2022-09-14	10:35:24	3.67752	16.3583	16.1443	6924.54	1	321
2022-09-14	10:35:24	3.65136	16.242	16.1443	6823.25	1	322
2022-09-14	10:35:24	3.55935	15.8327	16.1443	6940.38	1	323
2022-09-14	10:35:25	3.50154	15.5756	15.6319	6838.83	1	324
2022-09-14	10:35:25	3.54164	15.7539	15.6319	6956.13	1	325
2022-09-14	10:35:25	3.52474	15.6787	15.6319	6854.51	1	326
2022-09-14	10:35:25	3.48887	15.5192	15.6319	6971.65	1	327
2022-09-14	10:35:26	3.60663	16.043	15.583	6870.55	1	328
2022-09-14	10:35:26	3.44006	15.3021	15.583	6986.95	1	329
2022-09-14	10:35:26	3.5023	15.5789	15.583	6886.13	1	330
2022-09-14	10:35:26	3.46388	15.408	15.583	7002.36	1	331
2022-09-14	10:35:27	3.44592	15.3281	15.3937	6901.46	1	332
2022-09-14	10:35:27	3.48388	15.497	15.3937	7017.86	1	333
2022-09-14	10:35:27	3.47411	15.4535	15.3937	6916.91	1	334
2022-09-14	10:35:27	3.43869	15.296	15.3937	7033.15	1	335
2022-09-14	10:35:28	3.48312	15.4936	15.7482	6932.4	1	336
2022-09-14	10:35:28	3.60256	16.0249	15.7482	7049.18	1	337
2022-09-14	10:35:28	3.53538	15.7261	15.7482	6948.13	1	338
2022-09-14	10:35:29	3.50418	15.5873	15.3772	7064.76	1	339
2022-09-14	10:35:29	3.38103	15.0395	15.3772	6963.17	1	340
2022-09-14	10:35:29	3.45691	15.377	15.3772	7080.14	1	341
2022-09-14	10:35:29	3.48566	15.5049	15.3772	6978.67	1	342
2022-09-14	10:35:30	3.5506	15.7938	15.6898	7095.93	1	343
2022-09-14	10:35:30	3.5505	15.7933	15.6898	6994.47	1	344
2022-09-14	10:35:30	3.49126	15.5298	15.6898	7111.46	1	345
2022-09-14	10:35:30	3.5165	15.6421	15.6898	7010.11	1	346
2022-09-14	10:35:31	3.47976	15.4787	15.4031	7126.94	1	347
2022-09-14	10:35:31	3.34551	14.8815	15.4031	7024.99	1	348
2022-09-14	10:35:31	3.44317	15.3159	15.4031	7142.26	1	349
2022-09-14	10:35:31	3.58261	15.9362	15.4031	7040.93	1	350
2022-09-14	10:35:32	3.35304	14.915	15.0203	7157.17	1	351
2022-09-14	10:35:32	3.36866	14.9845	15.0203	7055.91	1	352
2022-09-14	10:35:32	3.40841	15.1613	15.0203	7172.34	1	353
2022-09-14	10:35:33	3.2882	14.6266	14.6439	7070.54	1	354
2022-09-14	10:35:33	3.1967	14.2196	14.6439	7186.55	1	355
2022-09-14	10:35:33	3.26424	14.52	14.6439	7085.06	1	356
2022-09-14	10:35:33	3.4192	15.2093	14.6439	7201.76	1	357
2022-09-14	10:35:34	3.54464	15.7673	15.8547	7100.83	1	358
2022-09-14	10:35:34	3.57345	15.8954	15.8547	7217.66	1	359
2022-09-14	10:35:34	3.55889	15.8307	15.8547	7116.66	1	360
2022-09-14	10:35:34	3.58016	15.9253	15.8547	7233.58	1	361
2022-09-14	10:35:35	3.50546	15.593	15.2761	7132.25	1	362
2022-09-14	10:35:35	3.43518	15.2804	15.2761	7248.87	1	363
2022-09-14	10:35:35	3.4022	15.1337	15.2761	7147.38	1	364
2022-09-14	10:35:35	3.39401	15.0972	15.2761	7263.96	1	365
2022-09-14	10:35:36	3.43548	15.2817	15.6558	7162.66	1	366
2022-09-14	10:35:36	3.57686	15.9106	15.6558	7279.87	1	367
2022-09-14	10:35:36	3.54642	15.7752	15.6558	7178.44	1	368
2022-09-14	10:35:37	3.65823	16.2725	16.0983	7296.15	1	369
2022-09-14	10:35:37	3.66444	16.3002	16.0983	7194.74	1	370
2022-09-14	10:35:37	3.57609	15.9072	16.0983	7312.05	1	371
2022-09-14	10:35:37	3.57752	15.9135	16.0983	7210.65	1	372
2022-09-14	10:35:38	3.51553	15.6378	15.7255	7327.69	1	373
2022-09-14	10:35:38	3.5708	15.8836	15.7255	7226.54	1	374
2022-09-14	10:35:38	3.53675	15.7322	15.7255	7343.42	1	375
2022-09-14	10:35:38	3.51792	15.6484	15.7255	7242.19	1	376
2022-09-14	10:35:39	3.5024	15.5794	15.1757	7359	1	377
2022-09-14	10:35:39	3.62215	16.112	15.1757	7258.3	1	378
2022-09-14	10:35:39	3.69996	16.4582	15.1757	7375.46	1	379
2022-09-14	10:35:39	2.8221	12.5533	15.1757	7270.85	FALSE	379
2022-09-14	10:35:40	1.84816	8.22099	6.5862	7383.68	FALSE	379
2022-09-14	10:35:40	1.40836	6.26467	6.5862	7277.12	FALSE	379
2022-09-14	10:35:40	1.18541	5.27294	6.5862	7388.95	FALSE	379
2022-09-14	10:35:41	0.451107	2.00661	2.48454	7279.12	FALSE	379
2022-09-14	10:35:41	0.404847	1.80084	2.48454	7390.75	FALSE	379
2022-09-14	10:35:41	0.643626	2.86298	2.48454	7281.99	FALSE	379
2022-09-14	10:35:41	0.734618	3.26773	2.48454	7394.02	FALSE	379
2022-09-14	10:35:42	0.377367	1.6786	1.85619	7283.66	FALSE	379
2022-09-14	10:35:42	0.331718	1.47555	1.85619	7395.5	FALSE	379
2022-09-14	10:35:42	0.37126	1.65144	1.85619	7285.32	FALSE	379
2022-09-14	10:35:42	0.588817	2.61918	1.85619	7398.12	FALSE	379
2022-09-14	10:35:43	0.495026	2.20197	1.94906	7287.52	FALSE	379
2022-09-14	10:35:43	0.361947	1.61001	1.94906	7399.73	FALSE	379
2022-09-14	10:35:43	0.296603	1.31935	1.94906	7288.84	FALSE	379
2022-09-14	10:35:43	0.599097	2.6649	1.94906	7402.39	FALSE	379
2022-09-14	10:35:44	0.569529	2.53338	4.00034	7291.37	FALSE	379
2022-09-14	10:35:44	0.937621	4.17073	4.00034	7406.56	FALSE	379
2022-09-14	10:35:44	1.1908	5.29692	4.00034	7296.67	FALSE	379
2022-09-14	10:35:45	2.21009	9.83092	12.1564	7416.39	FALSE	379
2022-09-14	10:35:45	3.03304	13.4916	12.1564	7310.16	1	380
2022-09-14	10:35:45	2.62469	11.6751	12.1564	7428.07	FALSE	380
2022-09-14	10:35:45	3.06368	13.6279	12.1564	7323.79	1	381
2022-09-14	10:35:46	1.36459	6.06997	9.82531	7434.14	FALSE	381
2022-09-14	10:35:46	2.55721	11.375	9.82531	7335.16	FALSE	381
2022-09-14	10:35:46	1.34072	5.96379	9.82531	7440.1	FALSE	381
2022-09-14	10:35:46	3.57279	15.8925	9.82531	7351.05	1	382
2022-09-14	10:35:47	4.72088	20.9994	18.4257	7461.1	1	383
2022-09-14	10:35:47	5.51879	24.5487	18.4257	7375.6	1	384
2022-09-14	10:35:47	3.56373	15.8522	18.4257	7476.95	1	385
2022-09-14	10:35:47	2.76576	12.3027	18.4257	7387.91	FALSE	385
2022-09-14	10:35:48	4.23172	18.8235	21.0676	7495.78	1	386
2022-09-14	10:35:48	2.52398	11.2272	21.0676	7399.13	FALSE	386
2022-09-14	10:35:48	7.45293	33.1521	21.0676	7528.93	1	387
2022-09-14	10:35:49	12.5477	55.8147	65.3342	7454.95	1	388
2022-09-14	10:35:49	8.59354	38.2258	65.3342	7567.16	1	389
2022-09-14	10:35:49	21.7507	96.7515	65.3342	7551.7	1	390
2022-09-14	10:35:49	15.8592	70.5449	65.3342	7637.7	1	391
2022-09-14	10:35:50	25.5886	113.823	106.579	7665.52	1	392
2022-09-14	10:35:50	22.4297	99.7718	106.579	7737.47	1	393
2022-09-14	10:35:50	24.989	111.156	106.579	7776.68	1	394
2022-09-14	10:35:50	22.8324	101.563	106.579	7839.04	1	395
2022-09-14	10:35:51	21.3884	95.1399	73.045	7871.82	1	396
2022-09-14	10:35:51	17.2067	76.5388	73.045	7915.57	1	397
2022-09-14	10:35:51	15.5911	69.3523	73.045	7941.17	1	398
2022-09-14	10:35:51	11.4988	51.149	73.045	7966.72	1	399
2022-09-14	10:35:52	11.097	49.3617	46.4222	7990.53	1	400
2022-09-14	10:35:52	8.38311	37.2897	46.4222	8004.01	1	401
2022-09-14	10:35:52	11.8284	52.6151	46.4222	8043.15	1	402
2022-09-14	10:35:53	11.892	52.898	48.8662	8056.91	1	403
2022-09-14	10:35:53	8.63146	38.3945	48.8662	8081.54	1	404
2022-09-14	10:35:53	10.6822	47.5166	48.8662	8104.43	1	405
2022-09-14	10:35:53	12.7368	56.6558	48.8662	8138.2	1	406
2022-09-14	10:35:54	6.33064	28.16	29.9044	8132.59	1	407
2022-09-14	10:35:54	13.6411	60.6783	29.9044	8198.88	1	408
2022-09-14	10:35:54	3.79253	16.8699	29.9044	8149.46	1	409
2022-09-14	10:35:54	3.12693	13.9092	29.9044	8212.78	1	410
2022-09-14	10:35:55	2.50296	11.1337	3.90519	8160.59	FALSE	410
2022-09-14	10:35:55	0.177316	0.788737	3.90519	8213.57	FALSE	410
2022-09-14	10:35:55	0.707188	3.14571	3.90519	8163.74	FALSE	410
2022-09-14	10:35:55	0.124237	0.552631	3.90519	8214.13	FALSE	410
2022-09-14	10:35:56	0.213244	0.948552	0.664911	8164.69	FALSE	410
2022-09-14	10:35:56	0.100624	0.447596	0.664911	8214.57	FALSE	410
2022-09-14	10:35:56	0.134568	0.598585	0.664911	8165.28	FALSE	410
2022-09-14	10:35:57	0.0779265	0.346633	0.070007	8214.92	FALSE	410
2022-09-14	10:35:57	0.0846949	0.37674	0.070007	8165.66	FALSE	410
2022-09-14	10:35:57	0.0141097	0.0627628	0.070007	8214.98	FALSE	410
2022-09-14	10:35:57	-0.113778	-0.506107	0.070007	8165.66	FALSE	410
2022-09-14	10:35:58	-0.0825824	-0.367343	-0.637065	8214.98	FALSE	410
2022-09-14	10:35:58	-0.131234	-0.583755	-0.637065	8165.66	FALSE	410
2022-09-14	10:35:58	-0.175916	-0.78251	-0.637065	8214.98	FALSE	410
2022-09-14	10:35:58	-0.183142	-0.814652	-0.637065	8165.66	FALSE	410
2022-09-14	10:35:59	-0.0883839	-0.393149	-0.514938	8214.98	FALSE	410
2022-09-14	10:35:59	-0.180903	-0.804693	-0.514938	8165.66	FALSE	410
2022-09-14	10:35:59	-0.0717936	-0.319352	-0.514938	8214.98	FALSE	410
2022-09-14	10:35:59	-0.121972	-0.542556	-0.514938	8165.66	FALSE	410
2022-09-14	10:36:00	0.206883	0.920257	0.549536	8215.9	FALSE	410
2022-09-14	10:36:00	0.0693259	0.308375	0.549536	8165.97	FALSE	410
2022-09-14	10:36:00	0.0944149	0.419976	0.549536	8216.32	FALSE	410
2022-09-14	10:36:01	-0.0234985	-0.104526	0.588001	8165.97	FALSE	410
2022-09-14	10:36:01	0.116807	0.519581	0.588001	8216.84	FALSE	410
2022-09-14	10:36:01	0.193143	0.859139	0.588001	8166.83	FALSE	410
2022-09-14	10:36:01	0.242303	1.07781	0.588001	8217.92	FALSE	410
2022-09-14	10:36:02	0.221845	0.986811	1.87521	8167.82	FALSE	410
2022-09-14	10:36:02	0.436603	1.9421	1.87521	8219.86	FALSE	410
2022-09-14	10:36:02	0.347392	1.54527	1.87521	8169.36	FALSE	410
2022-09-14	10:36:02	0.68042	3.02664	1.87521	8222.89	FALSE	410
2022-09-14	10:36:03	0.124542	0.553988	0.469155	8169.91	FALSE	410
2022-09-14	10:36:03	0.195585	0.870001	0.469155	8223.76	FALSE	410
2022-09-14	10:36:03	0.160369	0.713353	0.469155	8170.63	FALSE	410
2022-09-14	10:36:03	-0.058613	-0.260722	0.469155	8223.76	FALSE	410
2022-09-14	10:36:04	-0.16645	-0.740403	-1.3384	8170.63	FALSE	410
2022-09-14	10:36:04	-0.293269	-1.30452	-1.3384	8223.76	FALSE	410
2022-09-14	10:36:04	-0.442938	-1.97028	-1.3384	8170.63	FALSE	410
2022-09-14	10:36:05	-0.182684	-0.812615	-0.339726	8223.76	FALSE	410
2022-09-14	10:36:05	-0.0948979	-0.422125	-0.339726	8170.63	FALSE	410
2022-09-14	10:36:05	-0.0504705	-0.224503	-0.339726	8223.76	FALSE	410
2022-09-14	10:36:05	0.0225575	0.10034	-0.339726	8170.73	FALSE	410
2022-09-14	10:36:06	0.310853	1.38274	1.00407	8225.14	FALSE	410
2022-09-14	10:36:06	0.272888	1.21386	1.00407	8171.94	FALSE	410
2022-09-14	10:36:06	0.200115	0.890152	1.00407	8226.03	FALSE	410
2022-09-14	10:36:06	0.119046	0.52954	1.00407	8172.47	FALSE	410
2022-09-14	10:36:07	0.193601	0.861176	0.647141	8226.89	FALSE	410
2022-09-14	10:36:07	0.161743	0.719465	0.647141	8173.19	FALSE	410
2022-09-14	10:36:07	0.0706491	0.314261	0.647141	8227.21	FALSE	410
2022-09-14	10:36:07	0.155942	0.693661	0.647141	8173.88	FALSE	410
2022-09-14	10:36:08	0.125916	0.5601	1.23033	8227.77	FALSE	410
2022-09-14	10:36:08	0.215992	0.960776	1.23033	8174.85	FALSE	410
2022-09-14	10:36:08	0.361794	1.60933	1.23033	8229.38	FALSE	410
2022-09-14	10:36:08	0.402659	1.79111	1.23033	8176.64	FALSE	410
2022-09-14	10:36:09	0.423473	1.88369	2.13813	8231.26	FALSE	410
2022-09-14	10:36:09	0.395534	1.75941	2.13813	8178.4	FALSE	410
2022-09-14	10:36:09	0.623015	2.7713	2.13813	8234.03	FALSE	410
2022-09-14	10:36:10	0.638333	2.83943	2.50689	8181.24	FALSE	410
2022-09-14	10:36:10	0.423219	1.88256	2.50689	8235.91	FALSE	410
2022-09-14	10:36:10	0.457926	2.03695	2.50689	8183.27	FALSE	410
2022-09-14	10:36:10	0.734822	3.26864	2.50689	8239.18	FALSE	410
2022-09-14	10:36:11	0.538842	2.39688	2.35353	8185.67	FALSE	410
2022-09-14	10:36:11	0.513041	2.28211	2.35353	8241.47	FALSE	410
2022-09-14	10:36:11	0.535585	2.38239	2.35353	8188.05	FALSE	410
2022-09-14	10:36:11	0.528919	2.35274	2.35353	8243.82	FALSE	410
2022-09-14	10:36:12	0.663117	2.94968	3.15992	8191	FALSE	410
2022-09-14	10:36:12	0.584186	2.59858	3.15992	8246.42	FALSE	410
2022-09-14	10:36:12	0.776756	3.45517	3.15992	8194.46	FALSE	410
2022-09-14	10:36:12	0.817468	3.63626	3.15992	8250.05	FALSE	410
2022-09-14	10:36:13	0.506425	2.25268	2.74368	8196.71	FALSE	410
2022-09-14	10:36:13	0.574059	2.55353	2.74368	8252.61	FALSE	410
2022-09-14	10:36:13	0.769936	3.42483	2.74368	8200.13	FALSE	410
2022-09-14	10:36:14	0.797723	3.54843	2.71889	8256.15	FALSE	410
2022-09-14	10:36:14	0.800063	3.55884	2.71889	8203.69	FALSE	410
2022-09-14	10:36:14	0.413397	1.83887	2.71889	8257.99	FALSE	410
2022-09-14	10:36:14	0.433753	1.92942	2.71889	8205.62	FALSE	410
2022-09-14	10:36:15	0.427646	1.90225	2.37848	8259.9	FALSE	410
2022-09-14	10:36:15	0.491463	2.18613	2.37848	8207.81	FALSE	410
2022-09-14	10:36:15	0.428104	1.90429	2.37848	8261.8	FALSE	410
2022-09-14	10:36:15	0.791616	3.52127	2.37848	8211.33	FALSE	410
2022-09-14	10:36:16	0.541132	2.40706	2.09077	8264.21	FALSE	410
2022-09-14	10:36:16	0.518333	2.30565	2.09077	8213.64	FALSE	410
2022-09-14	10:36:16	0.360929	1.60548	2.09077	8265.81	FALSE	410
2022-09-14	10:36:16	0.459707	2.04487	2.09077	8215.68	FALSE	410
2022-09-14	10:36:17	0.278384	1.23831	2.21125	8267.05	FALSE	410
2022-09-14	10:36:17	0.498079	2.21556	2.21125	8217.9	FALSE	410
2022-09-14	10:36:17	0.714873	3.1799	2.21125	8270.23	FALSE	410
2022-09-14	10:36:18	2.14872	9.55794	17.6213	8227.45	FALSE	410
2022-09-14	10:36:18	1.62159	7.21316	17.6213	8277.44	FALSE	410
2022-09-14	10:36:18	5.44871	24.237	17.6213	8251.69	1	411
2022-09-14	10:36:18	6.62673	29.477	17.6213	8306.92	1	412
2022-09-14	10:36:19	9.32749	41.4905	22.8559	8293.18	1	413
2022-09-14	10:36:19	3.34307	14.8706	22.8559	8321.79	1	414
2022-09-14	10:36:19	6.06515	26.979	22.8559	8320.16	1	415
2022-09-14	10:36:19	1.81726	8.08354	22.8559	8329.88	FALSE	415
2022-09-14	10:36:20	3.52128	15.6634	17.9189	8335.82	1	416
2022-09-14	10:36:20	3.33197	14.8213	17.9189	8344.7	1	417
2022-09-14	10:36:20	3.82047	16.9942	17.9189	8352.82	1	418
2022-09-14	10:36:20	5.4397	24.1969	17.9189	8368.89	1	419
2022-09-14	10:36:21	9.52739	42.3797	50.0052	8395.2	1	420
2022-09-14	10:36:21	13.3215	59.2567	50.0052	8428.15	1	421
2022-09-14	10:36:21	10.8761	48.3791	50.0052	8443.58	1	422
2022-09-14	10:36:22	16.0948	71.5929	53.121	8499.74	1	423
2022-09-14	10:36:22	8.17619	36.3693	53.121	8479.95	1	424
2022-09-14	10:36:22	19.0101	84.5607	53.121	8584.3	1	425
2022-09-14	10:36:22	4.48749	19.9613	53.121	8499.91	1	426
2022-09-14	10:36:23	4.22652	18.8004	17.7544	8603.1	1	427
2022-09-14	10:36:23	2.4278	10.7993	17.7544	8510.71	FALSE	427
2022-09-14	10:36:23	2.20388	9.8033	17.7544	8612.91	FALSE	427
2022-09-14	10:36:23	7.10729	31.6146	17.7544	8542.32	1	428
2022-09-14	10:36:24	10.0768	44.8236	81.3294	8657.73	1	429
2022-09-14	10:36:24	17.8729	79.5022	81.3294	8621.82	1	430
2022-09-14	10:36:24	16.6148	73.906	81.3294	8731.64	1	431
2022-09-14	10:36:24	28.5702	127.086	81.3294	8748.91	1	432
2022-09-14	10:36:25	19.252	85.6367	61.4093	8817.27	1	433
2022-09-14	10:36:25	8.31146	36.971	61.4093	8785.88	1	434
2022-09-14	10:36:25	13.8528	61.62	61.4093	8878.89	1	435
2022-09-14	10:36:26	14.1937	63.1364	42.965	8849.02	1	436
2022-09-14	10:36:26	10.0126	44.538	42.965	8923.43	1	437
2022-09-14	10:36:26	7.78759	34.6408	42.965	8883.66	1	438
2022-09-14	10:36:26	6.64199	29.5449	42.965	8952.98	1	439
2022-09-14	10:36:27	3.51146	15.6197	6.00892	8899.28	1	440
2022-09-14	10:36:27	1.37905	6.13429	6.00892	8959.11	FALSE	440
2022-09-14	10:36:27	0.37584	1.67181	6.00892	8900.95	FALSE	440
2022-09-14	10:36:27	0.137112	0.609902	6.00892	8959.72	FALSE	440
2022-09-14	10:36:28	0.189326	0.84216	2.02319	8901.79	FALSE	440
2022-09-14	10:36:28	0.211158	0.939273	2.02319	8960.66	FALSE	440
2022-09-14	10:36:28	0.688053	3.0606	2.02319	8904.85	FALSE	440
2022-09-14	10:36:28	0.730801	3.25075	2.02319	8963.91	FALSE	440
2022-09-14	10:36:29	0.743117	3.30553	-8.14222	8908.16	FALSE	440
2022-09-14	10:36:29	-6.64436	-29.5554	-8.14222	8963.91	FALSE	440
2022-09-14	10:36:29	0.409886	1.82325	-8.14222	8909.98	FALSE	440
2022-09-14	10:36:30	0.291361	1.29603	0.262364	8965.21	FALSE	440
2022-09-14	10:36:30	0.0638297	0.283927	0.262364	8910.26	FALSE	440
2022-09-14	10:36:30	0.0209289	0.0930959	0.262364	8965.3	FALSE	440
2022-09-14	10:36:30	-0.140191	-0.623598	0.262364	8910.26	FALSE	440
2022-09-14	10:36:31	-0.252404	-1.12274	0.332258	8965.3	FALSE	440
2022-09-14	10:36:31	-0.197951	-0.880526	0.332258	8910.26	FALSE	440
2022-09-14	10:36:31	0.0672394	0.299094	0.332258	8965.6	FALSE	440
2022-09-14	10:36:31	0.681895	3.03321	0.332258	8913.3	FALSE	440
2022-09-14	10:36:32	0.497417	2.21261	1.32388	8967.81	FALSE	440
2022-09-14	10:36:32	0.129173	0.574587	1.32388	8913.87	FALSE	440
2022-09-14	10:36:32	0.275585	1.22586	1.32388	8969.04	FALSE	440
2022-09-14	10:36:32	0.288308	1.28245	1.32388	8915.15	FALSE	440
2022-09-14	10:36:33	0.453855	2.01884	0.790019	8971.06	FALSE	440
2022-09-14	10:36:33	0.168512	0.749575	0.790019	8915.9	FALSE	440
2022-09-14	10:36:33	-0.0895544	-0.398356	0.790019	8971.06	FALSE	440
2022-09-14	10:36:34	-0.0989692	-0.440235	0.883641	8915.9	FALSE	440
2022-09-14	10:36:34	-0.0818699	-0.364174	0.883641	8971.06	FALSE	440
2022-09-14	10:36:34	0.411056	1.82846	0.883641	8917.73	FALSE	440
2022-09-14	10:36:34	0.564389	2.51052	0.883641	8973.57	FALSE	440
2022-09-14	10:36:35	0.465255	2.06955	2.27356	8919.8	FALSE	440
2022-09-14	10:36:35	0.530802	2.36111	2.27356	8975.93	FALSE	440
2022-09-14	10:36:35	0.51986	2.31244	2.27356	8922.11	FALSE	440
2022-09-14	10:36:35	0.528562	2.35115	2.27356	8978.28	FALSE	440
2022-09-14	10:36:36	0.667901	2.97096	2.8228	8925.09	FALSE	440
2022-09-14	10:36:36	0.706832	3.14413	2.8228	8981.42	FALSE	440
2022-09-14	10:36:36	0.605865	2.69501	2.8228	8927.78	FALSE	440
2022-09-14	10:36:36	0.557774	2.48109	2.8228	8983.9	FALSE	440
2022-09-14	10:36:37	0.525865	2.33915	2.09135	8930.12	FALSE	440
2022-09-14	10:36:37	0.450598	2.00435	2.09135	8985.91	FALSE	440
2022-09-14	10:36:37	0.434008	1.93055	2.09135	8932.05	FALSE	440
2022-09-14	10:36:38	0.424848	1.88981	1.69513	8987.8	FALSE	440
2022-09-14	10:36:38	0.37986	1.68969	1.69513	8933.74	FALSE	440
2022-09-14	10:36:38	0.365153	1.62427	1.69513	8989.42	FALSE	440
2022-09-14	10:36:38	0.354466	1.57674	1.69513	8935.32	FALSE	440
2022-09-14	10:36:39	0.35869	1.59552	1.91969	8991.02	FALSE	440
2022-09-14	10:36:39	0.398995	1.77481	1.91969	8937.09	FALSE	440
2022-09-14	10:36:39	0.465407	2.07022	1.91969	8993.09	FALSE	440
2022-09-14	10:36:39	0.503168	2.23819	1.91969	8939.33	FALSE	440
2022-09-14	10:36:40	0.443219	1.97153	2.14074	8995.06	FALSE	440
2022-09-14	10:36:40	0.477468	2.12387	2.14074	8941.45	FALSE	440
2022-09-14	10:36:40	0.499707	2.2228	2.14074	8997.28	FALSE	440
2022-09-14	10:36:40	0.504644	2.24476	2.14074	8943.7	FALSE	440
2022-09-14	10:36:41	0.569021	2.53112	2.26038	8999.81	FALSE	440
2022-09-14	10:36:41	0.476298	2.11867	2.26038	8945.82	FALSE	440
2022-09-14	10:36:41	0.459504	2.04397	2.26038	9001.86	FALSE	440
2022-09-14	10:36:41	0.527799	2.34776	2.26038	8948.16	FALSE	440
2022-09-14	10:36:42	0.552023	2.45551	2.32542	9004.31	FALSE	440
2022-09-14	10:36:42	0.531463	2.36405	2.32542	8950.53	FALSE	440
2022-09-14	10:36:42	0.484847	2.1567	2.32542	9006.47	FALSE	440
2022-09-14	10:36:43	0.464898	2.06796	2.07917	8952.6	FALSE	440
2022-09-14	10:36:43	0.471311	2.09649	2.07917	9008.57	FALSE	440
2022-09-14	10:36:43	0.44383	1.97424	2.07917	8954.57	FALSE	440
2022-09-14	10:36:43	0.489631	2.17798	2.07917	9010.74	FALSE	440
2022-09-14	10:36:44	0.490954	2.18386	2.0271	8956.75	FALSE	440
2022-09-14	10:36:44	0.444338	1.9765	2.0271	9012.72	FALSE	440
2022-09-14	10:36:44	0.453652	2.01793	2.0271	8958.77	FALSE	440
2022-09-14	10:36:44	0.433906	1.9301	2.0271	9014.65	FALSE	440
2022-09-14	10:36:45	0.447392	1.99009	1.90265	8960.76	FALSE	440
2022-09-14	10:36:45	0.417112	1.8554	1.90265	9016.51	FALSE	440
2022-09-14	10:36:45	0.421438	1.87464	1.90265	8962.64	FALSE	440
2022-09-14	10:36:45	0.425	1.89048	1.90265	9018.4	FALSE	440
2022-09-14	10:36:46	0.451718	2.00933	2.06177	8964.65	FALSE	440
2022-09-14	10:36:46	0.469122	2.08675	2.06177	9020.48	FALSE	440
2022-09-14	10:36:46	0.469682	2.08924	2.06177	8966.74	FALSE	440
2022-09-14	10:36:47	0.470751	2.09399	2.1069	9022.58	FALSE	440
2022-09-14	10:36:47	0.469326	2.08766	2.1069	8968.82	FALSE	440
2022-09-14	10:36:47	0.478537	2.12863	2.1069	9024.71	FALSE	440
2022-09-14	10:36:47	0.475992	2.11731	2.1069	8970.94	FALSE	440
2022-09-14	10:36:48	0.45813	2.03785	2.18551	9026.74	FALSE	440
2022-09-14	10:36:48	0.491718	2.18726	2.18551	8973.13	FALSE	440
2022-09-14	10:36:48	0.495026	2.20197	2.18551	9028.95	FALSE	440
2022-09-14	10:36:48	0.52042	2.31493	2.18551	8975.44	FALSE	440
2022-09-14	10:36:49	0.531005	2.36202	2.49999	9031.31	FALSE	440
2022-09-14	10:36:49	0.576959	2.56643	2.49999	8978.01	FALSE	440
2022-09-14	10:36:49	0.565407	2.51504	2.49999	9033.82	FALSE	440
2022-09-14	10:36:49	0.57472	2.55647	2.49999	8980.57	FALSE	440
2022-09-14	10:36:50	0.521947	2.32172	2.32783	9036.15	FALSE	440
2022-09-14	10:36:50	0.530649	2.36043	2.32783	8982.93	FALSE	440
2022-09-14	10:36:50	0.517366	2.30135	2.32783	9038.45	FALSE	440
2022-09-14	10:36:51	0.522404	2.32376	2.56286	8985.25	FALSE	440
2022-09-14	10:36:51	0.527544	2.34662	2.56286	9040.79	FALSE	440
2022-09-14	10:36:51	0.623677	2.77424	2.56286	8988.02	FALSE	440
2022-09-14	10:36:51	0.631005	2.80684	2.56286	9043.6	FALSE	440
2022-09-14	10:36:52	0.61757	2.74707	2.48663	8990.77	FALSE	440
2022-09-14	10:36:52	0.58841	2.61737	2.48663	9046.22	FALSE	440
2022-09-14	10:36:52	0.565102	2.51369	2.48663	8993.29	FALSE	440
2022-09-14	10:36:52	0.465	2.06841	2.48663	9048.29	FALSE	440
2022-09-14	10:36:53	0.469122	2.08675	3.37311	8995.37	FALSE	440
2022-09-14	10:36:53	0.615229	2.73666	3.37311	9051.02	FALSE	440
2022-09-14	10:36:53	0.96098	4.27463	3.37311	8999.65	FALSE	440
2022-09-14	10:36:53	0.987901	4.39438	3.37311	9055.42	FALSE	440
2022-09-14	10:36:54	1.35228	6.01521	5.69429	9005.66	FALSE	440
2022-09-14	10:36:54	1.28103	5.69828	5.69429	9061.12	FALSE	440
2022-09-14	10:36:54	1.20709	5.36938	5.69429	9011.03	FALSE	440
2022-09-14	10:36:55	1.09004	4.84872	3.9748	9065.96	FALSE	440
2022-09-14	10:36:55	0.924135	4.11074	3.9748	9015.14	FALSE	440
2022-09-14	10:36:55	0.770649	3.428	3.9748	9069.39	FALSE	440
2022-09-14	10:36:55	0.789479	3.51176	3.9748	9018.65	FALSE	440
2022-09-14	10:36:56	0.867951	3.86082	5.62396	9073.25	FALSE	440
2022-09-14	10:36:56	1.3509	6.00907	5.62396	9024.66	FALSE	440
2022-09-14	10:36:56	1.33314	5.93007	5.62396	9079.18	FALSE	440
2022-09-14	10:36:56	1.5053	6.69588	5.62396	9031.36	FALSE	440
2022-09-14	10:36:57	1.46113	6.4994	3.35211	9085.68	FALSE	440
2022-09-14	10:36:57	0.686018	3.05155	3.35211	9034.41	FALSE	440
2022-09-14	10:36:57	0.456196	2.02925	3.35211	9087.71	FALSE	440
2022-09-14	10:36:57	0.411005	1.82823	3.35211	9036.24	FALSE	440
2022-09-14	10:36:58	0.391514	1.74153	2.26498	9089.45	FALSE	440
2022-09-14	10:36:58	0.454262	2.02065	2.26498	9038.26	FALSE	440
2022-09-14	10:36:58	0.681794	3.03276	2.26498	9092.49	FALSE	440
2022-09-14	10:36:59	1.02001	4.53721	18.6892	9042.8	FALSE	440
2022-09-14	10:36:59	3.81304	16.9612	18.6892	9109.45	1	441
2022-09-14	10:36:59	4.81996	21.4401	18.6892	9064.24	1	442
2022-09-14	10:36:59	7.15309	31.8184	18.6892	9141.27	1	443
2022-09-14	10:37:00	5.97472	26.5767	16.0516	9090.81	1	444
2022-09-14	10:37:00	2.9195	12.9865	16.0516	9154.25	FALSE	444
2022-09-14	10:37:00	1.18485	5.27045	16.0516	9096.08	FALSE	444
2022-09-14	10:37:00	4.35513	19.3725	16.0516	9173.62	1	445
2022-09-14	10:37:01	3.59197	15.9778	19.2723	9112.06	1	446
2022-09-14	10:37:01	7.02892	31.266	19.2723	9204.89	1	447
2022-09-14	10:37:01	1.53721	6.83782	19.2723	9118.9	FALSE	447
2022-09-14	10:37:01	5.17233	23.0076	19.2723	9227.9	1	448
2022-09-14	10:37:02	2.17508	9.67519	9.08398	9128.57	FALSE	448
2022-09-14	10:37:02	2.43681	10.8394	9.08398	9238.74	FALSE	448
2022-09-14	10:37:02	1.51462	6.73733	9.08398	9135.31	FALSE	448
2022-09-14	10:37:03	0.856603	3.81034	7.67439	9242.55	FALSE	448
2022-09-14	10:37:03	1.71223	7.61634	7.67439	9142.93	FALSE	448
2022-09-14	10:37:03	1.49243	6.63863	7.67439	9249.19	FALSE	448
2022-09-14	10:37:03	2.83986	12.6323	7.67439	9155.56	FALSE	448
2022-09-14	10:37:04	2.54332	11.3132	18.0526	9260.5	FALSE	448
2022-09-14	10:37:04	6.86769	30.5489	18.0526	9186.11	1	449
2022-09-14	10:37:04	1.20693	5.36867	18.0526	9265.87	FALSE	449
2022-09-14	10:37:04	5.61568	24.9797	18.0526	9211.09	1	450
2022-09-14	10:37:05	2.00225	8.90641	8.55219	9274.77	FALSE	450
2022-09-14	10:37:05	2.46123	10.948	8.55219	9222.04	FALSE	450
2022-09-14	10:37:05	1.80805	8.04257	8.55219	9282.82	FALSE	450
2022-09-14	10:37:05	1.41894	6.31173	8.55219	9228.35	FALSE	450
2022-09-14	10:37:06	4.72958	21.0381	15.9457	9303.86	1	451
2022-09-14	10:37:06	3.02108	13.4384	15.9457	9241.79	1	452
2022-09-14	10:37:06	3.90765	17.382	15.9457	9321.24	1	453
2022-09-14	10:37:06	2.68072	11.9244	15.9457	9253.71	FALSE	453
2022-09-14	10:37:07	5.53039	24.6003	18.5636	9345.84	1	454
2022-09-14	10:37:07	1.67691	7.45923	18.5636	9261.17	FALSE	454
2022-09-14	10:37:07	5.31258	23.6314	18.5636	9369.47	1	455
2022-09-14	10:37:08	1.31177	5.83502	10.4444	9267.01	FALSE	455
2022-09-14	10:37:08	5.15003	22.9084	10.4444	9392.38	1	456
2022-09-14	10:37:08	1.08622	4.83172	10.4444	9271.84	FALSE	456
2022-09-14	10:37:08	1.84403	8.20261	10.4444	9400.58	FALSE	456
2022-09-14	10:37:09	1.26856	5.64281	19.2079	9277.48	FALSE	456
2022-09-14	10:37:09	3.5821	15.9339	19.2079	9416.51	1	457
2022-09-14	10:37:09	4.28586	19.0644	19.2079	9296.54	1	458
2022-09-14	10:37:09	8.13599	36.1905	19.2079	9452.7	1	459
2022-09-14	10:37:10	4.13446	18.3909	34.363	9314.94	1	460
2022-09-14	10:37:10	7.06408	31.4224	34.363	9484.13	1	461
2022-09-14	10:37:10	5.60734	24.9426	34.363	9339.88	1	462
2022-09-14	10:37:10	14.0947	62.696	34.363	9546.82	1	463
2022-09-14	10:37:11	18.904	84.0888	89.1462	9423.97	1	464
2022-09-14	10:37:11	20.9172	93.0439	89.1462	9639.87	1	465
2022-09-14	10:37:11	20.3017	90.306	89.1462	9514.27	1	466
2022-09-14	10:37:12	35.4068	157.497	94.5716	9797.36	1	467
2022-09-14	10:37:12	22.4288	99.7678	94.5716	9614.04	1	468
2022-09-14	10:37:12	12.952	57.6131	94.5716	9854.98	1	469
2022-09-14	10:37:12	14.255	63.4091	94.5716	9677.45	1	470
2022-09-14	10:37:13	16.617	73.9157	81.1192	9928.89	1	471
2022-09-14	10:37:13	17.1358	76.2235	81.1192	9753.67	1	472
2022-09-14	10:37:13	16.9812	75.5358	81.1192	10004.4	1	473
2022-09-14	10:37:13	22.2116	98.8016	81.1192	9852.47	1	474
2022-09-14	10:37:14	20.4721	91.064	87.5398	10095.5	1	475
2022-09-14	10:37:14	32.7795	145.81	87.5398	9998.28	1	476
2022-09-14	10:37:14	15.1773	67.5117	87.5398	10163	1	477
2022-09-14	10:37:14	10.2904	45.7738	87.5398	10044.1	1	478
2022-09-14	10:37:15	5.54993	24.6872	13.0829	10187.7	1	479
2022-09-14	10:37:15	2.11513	9.40852	13.0829	10053.5	FALSE	479
2022-09-14	10:37:15	1.15843	5.15293	13.0829	10192.8	FALSE	479
2022-09-14	10:37:16	0.64617	2.87429	16.8602	10056.3	FALSE	479
2022-09-14	10:37:16	2.4877	11.0658	16.8602	10203.9	FALSE	479
2022-09-14	10:37:16	5.7052	25.3779	16.8602	10081.7	1	480
2022-09-14	10:37:16	6.3223	28.1229	16.8602	10232	1	481
2022-09-14	10:37:17	4.33177	19.2686	17.9708	10101	1	482
2022-09-14	10:37:17	4.0649	18.0815	17.9708	10250.1	1	483
2022-09-14	10:37:17	3.69925	16.455	17.9708	10117.4	1	484
2022-09-14	10:37:17	4.06413	18.0781	17.9708	10268.2	1	485
2022-09-14	10:37:18	4.53568	20.1756	21.5968	10137.6	1	486
2022-09-14	10:37:18	4.83619	21.5123	21.5968	10289.7	1	487
2022-09-14	10:37:18	5.00103	22.2456	21.5968	10159.9	1	488
2022-09-14	10:37:18	5.0478	22.4536	21.5968	10312.2	1	489
2022-09-14	10:37:19	4.8936	21.7677	20.758	10181.6	1	490
2022-09-14	10:37:19	4.82368	21.4567	20.758	10333.6	1	491
2022-09-14	10:37:19	4.28251	19.0495	20.758	10200.7	1	492
2022-09-14	10:37:20	2.1395	9.51692	4.38725	10343.1	FALSE	492
2022-09-14	10:37:20	0.640267	2.84804	4.38725	10203.5	FALSE	492
2022-09-14	10:37:20	0.731667	3.2546	4.38725	10346.4	FALSE	492
2022-09-14	10:37:20	0.433753	1.92942	4.38725	10205.5	FALSE	492
2022-09-14	10:37:21	0.369173	1.64216	1.90226	10348	FALSE	492
2022-09-14	10:37:21	0.394873	1.75647	1.90226	10207.2	FALSE	492
2022-09-14	10:37:21	0.518893	2.30814	1.90226	10350.3	FALSE	492

## Sheet: Reggie_martin_2022914103212 (3)
Date	Time	Lbs	newtons	Total force x time		total steps > 13.345	**GoPro Fitting: 1021
2022-09-14	10:32:21	0.417926	1.85902	1.85902	FALSE	0
2022-09-14	10:32:21	0.311463	1.38545	1.38545	FALSE	0
2022-09-14	10:32:21	0.306679	1.36417	3.22319	FALSE	0
2022-09-14	10:32:22	0.282863	1.25823	2.64368	FALSE	0
2022-09-14	10:32:22	0.433906	1.9301	5.15329	FALSE	0
2022-09-14	10:32:22	0.486221	2.16281	4.80649	FALSE	0
2022-09-14	10:32:22	0.490903	2.18363	7.33692	FALSE	0
2022-09-14	10:32:23	0.388766	1.72931	6.5358	FALSE	0
2022-09-14	10:32:23	0.624949	2.7799	10.1168	FALSE	0
2022-09-14	10:32:23	0.430293	1.91403	8.44983	FALSE	0
2022-09-14	10:32:23	0.366781	1.63152	11.7483	FALSE	0
2022-09-14	10:32:24	0.348104	1.54844	9.99826	FALSE	0
2022-09-14	10:32:24	0.457723	2.03604	13.7844	FALSE	0
2022-09-14	10:32:24	0.418741	1.86264	11.8609	FALSE	0
2022-09-14	10:32:24	0.398944	1.77458	15.559	FALSE	0
2022-09-14	10:32:25	0.392125	1.74425	13.6052	FALSE	0
2022-09-14	10:32:25	0.37701	1.67702	17.236	FALSE	0
2022-09-14	10:32:25	0.397875	1.76983	15.375	FALSE	0
2022-09-14	10:32:26	0.384542	1.71052	18.9465	FALSE	0
2022-09-14	10:32:26	0.417774	1.85834	17.2333	FALSE	0
2022-09-14	10:32:26	0.404542	1.79948	20.746	FALSE	0
2022-09-14	10:32:26	0.405102	1.80197	19.0353	FALSE	0
2022-09-14	10:32:27	0.419148	1.86445	22.6104	FALSE	0
2022-09-14	10:32:27	0.41986	1.86762	20.9029	FALSE	0
2022-09-14	10:32:27	0.422761	1.88053	24.491	FALSE	0
2022-09-14	10:32:27	0.432685	1.92467	22.8276	FALSE	0
2022-09-14	10:32:28	0.404237	1.79813	26.2891	FALSE	0
2022-09-14	10:32:28	0.402252	1.7893	24.6169	FALSE	0
2022-09-14	10:32:28	0.532837	2.37017	28.6593	FALSE	0
2022-09-14	10:32:28	0.266985	1.1876	25.8045	FALSE	0
2022-09-14	10:32:29	-0.078562	-0.349459	28.6593	FALSE	0
2022-09-14	10:32:29	-0.452862	-2.01442	25.8045	FALSE	0
2022-09-14	10:32:29	-0.454694	-2.02257	28.6593	FALSE	0
2022-09-14	10:32:30	-0.598664	-2.66298	25.8045	FALSE	0
2022-09-14	10:32:30	-0.591997	-2.63332	28.6593	FALSE	0
2022-09-14	10:32:30	-0.158257	-0.703959	25.8045	FALSE	0
2022-09-14	10:32:30	0.00927507	0.0412574	28.7005	FALSE	0
2022-09-14	10:32:31	0.0161453	0.0718175	25.8763	FALSE	0
2022-09-14	10:32:31	0.114211	0.508033	29.2085	FALSE	0
2022-09-14	10:32:31	0.0447967	0.199265	26.0756	FALSE	0
2022-09-14	10:32:31	-0.0226333	-0.100677	29.2085	FALSE	0
2022-09-14	10:32:32	0.0198094	0.0881162	26.1637	FALSE	0
2022-09-14	10:32:32	0.713906	3.1756	32.3841	FALSE	0
2022-09-14	10:32:32	0.519555	2.31108	28.4748	FALSE	0
2022-09-14	10:32:32	0.249428	1.10951	33.4936	FALSE	0
2022-09-14	10:32:33	0.0910562	0.405036	28.8798	FALSE	0
2022-09-14	10:32:33	1.18744	5.28197	38.7756	FALSE	0
2022-09-14	10:32:33	1.67187	7.43681	36.3166	FALSE	0
2022-09-14	10:32:34	2.59823	11.5574	50.3331	FALSE	0
2022-09-14	10:32:34	1.38251	6.14968	42.4663	FALSE	0
2022-09-14	10:32:34	0.881641	3.92172	54.2548	FALSE	0
2022-09-14	10:32:34	0.938232	4.17344	46.6397	FALSE	0
2022-09-14	10:32:35	0.727392	3.23559	57.4904	FALSE	0
2022-09-14	10:32:35	0.51701	2.29976	48.9395	FALSE	0
2022-09-14	10:32:35	1.23431	5.49046	62.9808	FALSE	0
2022-09-14	10:32:35	1.40052	6.22979	55.1693	FALSE	0
2022-09-14	10:32:36	1.24648	5.54459	68.5254	FALSE	0
2022-09-14	10:32:36	0.898486	3.99665	59.166	FALSE	0
2022-09-14	10:32:36	0.756603	3.36552	71.8909	FALSE	0
2022-09-14	10:32:36	0.846425	3.76507	62.931	FALSE	0
2022-09-14	10:32:37	0.916145	4.0752	75.9661	FALSE	0
2022-09-14	10:32:37	1.11477	4.95872	67.8897	FALSE	0
2022-09-14	10:32:37	1.46989	6.53836	82.5045	FALSE	0
2022-09-14	10:32:38	1.79854	8.00027	75.89	FALSE	0
2022-09-14	10:32:38	2.13823	9.51127	92.0158	FALSE	0
2022-09-14	10:32:38	2.18805	9.73288	85.6229	FALSE	0
2022-09-14	10:32:38	2.58775	11.5108	103.527	FALSE	0
2022-09-14	10:32:39	2.49955	11.1185	96.7414	FALSE	0
2022-09-14	10:32:39	2.76999	12.3215	115.848	FALSE	0
2022-09-14	10:32:39	1.44846	6.44304	103.184	FALSE	0
2022-09-14	10:32:39	0.986069	4.38623	120.234	FALSE	0
2022-09-14	10:32:40	0.806883	3.58918	106.774	FALSE	0
2022-09-14	10:32:40	0.766781	3.4108	123.645	FALSE	0
2022-09-14	10:32:40	1.17279	5.2168	111.99	FALSE	0
2022-09-14	10:32:40	1.28195	5.70237	129.347	FALSE	0
2022-09-14	10:32:41	0.933397	4.15194	116.142	FALSE	0
2022-09-14	10:32:41	0.427239	1.90044	131.248	FALSE	0
2022-09-14	10:32:41	0.398333	1.77186	117.914	FALSE	0
2022-09-14	10:32:42	0.44556	1.98194	133.23	FALSE	0
2022-09-14	10:32:42	0.669834	2.97956	120.894	FALSE	0
2022-09-14	10:32:42	1.20235	5.34829	138.578	FALSE	0
2022-09-14	10:32:42	0.698486	3.10701	124.001	FALSE	0
2022-09-14	10:32:43	0.52897	2.35296	140.931	FALSE	0
2022-09-14	10:32:43	0.705204	3.13689	127.138	FALSE	0
2022-09-14	10:32:43	1.01574	4.51821	145.449	FALSE	0
2022-09-14	10:32:43	0.731259	3.25279	130.39	FALSE	0
2022-09-14	10:32:44	0.729784	3.24623	148.696	FALSE	0
2022-09-14	10:32:44	0.323881	1.44069	131.831	FALSE	0
2022-09-14	10:32:44	0.366069	1.62835	150.324	FALSE	0
2022-09-14	10:32:44	0.255942	1.13848	132.97	FALSE	0
2022-09-14	10:32:45	0.295789	1.31573	151.64	FALSE	0
2022-09-14	10:32:45	0.262048	1.16564	134.135	FALSE	0
2022-09-14	10:32:45	0.165356	0.735537	152.375	FALSE	0
2022-09-14	10:32:46	0.274669	1.22178	135.357	FALSE	0
2022-09-14	10:32:46	1.05431	4.68978	157.065	FALSE	0
2022-09-14	10:32:46	3.07446	13.6758	149.033	1	1
2022-09-14	10:32:46	3.95701	17.6016	174.667	1	2
2022-09-14	10:32:47	4.8191	21.4363	170.469	1	3
2022-09-14	10:32:47	1.54352	6.86589	181.532	FALSE	3
2022-09-14	10:32:47	1.46546	6.51866	176.988	FALSE	3
2022-09-14	10:32:47	0.528766	2.35206	183.884	FALSE	3
2022-09-14	10:32:48	0.582812	2.59246	179.58	FALSE	3
2022-09-14	10:32:48	0.857774	3.81555	187.7	FALSE	3
2022-09-14	10:32:48	0.600776	2.67237	182.253	FALSE	3
2022-09-14	10:32:48	1.45309	6.46363	194.164	FALSE	3
2022-09-14	10:32:49	2.17599	9.67924	191.932	FALSE	3
2022-09-14	10:32:49	5.62321	25.0132	219.177	1	4
2022-09-14	10:32:49	5.56774	24.7664	216.698	1	5
2022-09-14	10:32:50	5.23624	23.2918	242.469	1	6
2022-09-14	10:32:50	5.11558	22.7551	239.453	1	7
2022-09-14	10:32:50	6.36886	28.33	270.799	1	8
2022-09-14	10:32:50	10.5402	46.8849	286.338	1	9
2022-09-14	10:32:51	5.74021	25.5336	296.332	1	10
2022-09-14	10:32:51	7.17283	31.9062	318.245	1	11
2022-09-14	10:32:51	2.71182	12.0627	308.395	FALSE	11
2022-09-14	10:32:51	2.95991	13.1663	331.411	FALSE	11
2022-09-14	10:32:52	4.23614	18.8432	327.238	1	12
2022-09-14	10:32:52	6.89059	30.6507	362.062	1	13
2022-09-14	10:32:52	16.7636	74.5678	401.806	1	14
2022-09-14	10:32:52	13.2861	59.0992	421.161	1	15
2022-09-14	10:32:53	11.8298	52.6213	454.427	1	16
2022-09-14	10:32:53	16.1573	71.8709	493.032	1	17
2022-09-14	10:32:53	8.27085	36.7904	491.218	1	18
2022-09-14	10:32:54	19.6351	87.3409	580.373	1	19
2022-09-14	10:32:54	13.3031	59.1748	550.393	1	20
2022-09-14	10:32:54	9.0966	40.4635	620.836	1	21
2022-09-14	10:32:54	11.177	49.7175	600.11	1	22
2022-09-14	10:32:55	5.01355	22.3013	643.137	1	23
2022-09-14	10:32:55	10.3005	45.8187	645.929	1	24
2022-09-14	10:32:55	12.205	54.2903	697.428	1	25
2022-09-14	10:32:55	3.1963	14.2178	660.147	1	26
2022-09-14	10:32:56	8.74978	38.9208	736.348	1	27
2022-09-14	10:32:56	8.68607	38.6374	698.784	1	28
2022-09-14	10:32:56	4.37553	19.4632	755.812	1	29
2022-09-14	10:32:56	2.20174	9.79378	708.578	FALSE	29
2022-09-14	10:32:57	3.02398	13.4513	769.263	1	30
2022-09-14	10:32:57	8.38423	37.2947	745.872	1	31
2022-09-14	10:32:57	19.5057	86.7653	856.028	1	32
2022-09-14	10:32:58	8.34454	37.1182	782.991	1	33
2022-09-14	10:32:58	0.372277	1.65596	857.684	FALSE	33
2022-09-14	10:32:58	0.710445	3.1602	786.151	FALSE	33
2022-09-14	10:32:58	0.422506	1.87939	859.563	FALSE	33
2022-09-14	10:32:59	0.136654	0.607864	786.759	FALSE	33
2022-09-14	10:32:59	0.199148	0.88585	860.449	FALSE	33
2022-09-14	10:32:59	-0.0157631	-0.0701174	786.759	FALSE	33
2022-09-14	10:32:59	0.268308	1.19349	861.643	FALSE	33
2022-09-14	10:33:00	0.115382	0.513242	787.272	FALSE	33
2022-09-14	10:33:00	0.228206	1.01511	862.658	FALSE	33
2022-09-14	10:33:00	0.109021	0.484947	787.757	FALSE	33
2022-09-14	10:33:00	0.163015	0.725123	863.383	FALSE	33
2022-09-14	10:33:01	0.400929	1.78341	789.54	FALSE	33
2022-09-14	10:33:01	0.66841	2.97322	866.356	FALSE	33
2022-09-14	10:33:01	0.483117	2.149	791.689	FALSE	33
2022-09-14	10:33:02	0.680878	3.02868	869.385	FALSE	33
2022-09-14	10:33:02	1.13426	5.04542	796.735	FALSE	33
2022-09-14	10:33:02	0.493651	2.19586	871.581	FALSE	33
2022-09-14	10:33:02	1.24586	5.54183	802.277	FALSE	33
2022-09-14	10:33:03	1.90948	8.49375	880.075	FALSE	33
2022-09-14	10:33:03	1.9792	8.80388	811.08	FALSE	33
2022-09-14	10:33:03	1.17467	5.22517	885.3	FALSE	33
2022-09-14	10:33:03	3.9193	17.4338	828.514	1	34
2022-09-14	10:33:04	18.6797	83.091	968.391	1	35
2022-09-14	10:33:04	20.3859	90.6806	919.195	1	36
2022-09-14	10:33:04	19.1638	85.2444	1053.64	1	37
2022-09-14	10:33:04	11.2149	49.8861	969.081	1	38
2022-09-14	10:33:05	7.61986	33.8947	1087.53	1	39
2022-09-14	10:33:05	8.03477	35.7403	1004.82	1	40
2022-09-14	10:33:05	3.71848	16.5405	1104.07	1	41
2022-09-14	10:33:06	5.1596	22.9509	1027.77	1	42
2022-09-14	10:33:06	2.47085	10.9908	1115.06	FALSE	42
2022-09-14	10:33:06	0.968613	4.30858	1032.08	FALSE	42
2022-09-14	10:33:06	0.475178	2.11369	1117.17	FALSE	42
2022-09-14	10:33:07	0.262456	1.16746	1033.25	FALSE	42
2022-09-14	10:33:07	0.315127	1.40175	1118.58	FALSE	42
2022-09-14	10:33:07	0.306221	1.36213	1034.61	FALSE	42
2022-09-14	10:33:07	0.468104	2.08222	1120.66	FALSE	42
2022-09-14	10:33:08	0.33701	1.49909	1036.11	FALSE	42
2022-09-14	10:33:08	1.52973	6.80454	1127.46	FALSE	42
2022-09-14	10:33:08	2.12592	9.45652	1045.57	FALSE	42
2022-09-14	10:33:08	3.96668	17.6446	1145.11	1	43
2022-09-14	10:33:09	2.50714	11.1523	1056.72	FALSE	43
2022-09-14	10:33:09	1.32933	5.91313	1151.02	FALSE	43
2022-09-14	10:33:09	1.22963	5.46964	1062.19	FALSE	43
2022-09-14	10:33:10	3.5967	15.9988	1167.02	1	44
2022-09-14	10:33:10	6.71782	29.8822	1092.07	1	45
2022-09-14	10:33:10	5.39543	24	1191.02	1	46
2022-09-14	10:33:10	7.35253	32.7055	1124.78	1	47
2022-09-14	10:33:11	5.51385	24.5267	1215.55	1	48
2022-09-14	10:33:11	4.52052	20.1082	1144.88	1	49
2022-09-14	10:33:11	3.43762	15.2912	1230.84	1	50
2022-09-14	10:33:11	3.73945	16.6338	1161.52	1	51
2022-09-14	10:33:12	6.18714	27.5216	1258.36	1	52
2022-09-14	10:33:12	6.18566	27.5151	1189.03	1	53
2022-09-14	10:33:12	6.75314	30.0393	1288.4	1	54
2022-09-14	10:33:12	9.66759	43.0034	1232.04	1	55
2022-09-14	10:33:13	3.30897	14.719	1303.12	1	56
2022-09-14	10:33:13	15.7382	70.0067	1302.04	1	57
2022-09-14	10:33:13	6.85029	30.4715	1333.59	1	58
2022-09-14	10:33:14	2.74159	12.1951	1314.24	FALSE	58
2022-09-14	10:33:14	0.517315	2.30112	1335.89	FALSE	58
2022-09-14	10:33:14	0.268664	1.19507	1315.43	FALSE	58
2022-09-14	10:33:14	0.454517	2.02178	1337.91	FALSE	58
2022-09-14	10:33:15	0.0546694	0.24318	1315.68	FALSE	58
2022-09-14	10:33:15	0.23411	1.04137	1338.95	FALSE	58
2022-09-14	10:33:15	-0.0513865	-0.228577	1315.68	FALSE	58
2022-09-14	10:33:15	-0.220598	-0.981264	1338.95	FALSE	58
2022-09-14	10:33:16	-0.43902	-1.95285	1315.68	FALSE	58
2022-09-14	10:33:16	-0.128384	-0.571078	1338.95	FALSE	58
2022-09-14	10:33:16	0.0833717	0.370854	1316.05	FALSE	58
2022-09-14	10:33:16	0.849784	3.78001	1342.73	FALSE	58
2022-09-14	10:33:17	2.06027	9.16449	1325.21	FALSE	58
2022-09-14	10:33:17	3.44093	15.3059	1358.04	1	59
2022-09-14	10:33:17	3.22841	14.3606	1339.57	1	60
2022-09-14	10:33:18	0.707239	3.14594	1361.19	FALSE	60
2022-09-14	10:33:18	1.11268	4.94942	1344.52	FALSE	60
2022-09-14	10:33:18	1.42062	6.3192	1367.5	FALSE	60
2022-09-14	10:33:18	2.81854	12.5374	1357.06	FALSE	60
2022-09-14	10:33:19	4.52474	20.1269	1387.63	1	61
2022-09-14	10:33:19	8.24789	36.6883	1393.75	1	62
2022-09-14	10:33:19	2.01136	8.94693	1396.58	FALSE	62
2022-09-14	10:33:19	0.322252	1.43344	1395.18	FALSE	62
2022-09-14	10:33:20	0.28098	1.24986	1397.83	FALSE	62
2022-09-14	10:33:20	0.241031	1.07215	1396.25	FALSE	62
2022-09-14	10:33:20	0.397926	1.77005	1399.6	FALSE	62
2022-09-14	10:33:20	0.274567	1.22133	1397.47	FALSE	62
2022-09-14	10:33:21	0.250853	1.11584	1400.71	FALSE	62
2022-09-14	10:33:21	-0.281106	-1.25042	1397.47	FALSE	62
2022-09-14	10:33:21	-0.347977	-1.54787	1400.71	FALSE	62
2022-09-14	10:33:22	-0.324312	-1.4426	1397.47	FALSE	62
2022-09-14	10:33:22	-0.114643	-0.509955	1400.71	FALSE	62
2022-09-14	10:33:22	1.73039	7.69712	1405.17	FALSE	62
2022-09-14	10:33:22	2.41874	10.759	1411.47	FALSE	62
2022-09-14	10:33:23	3.71105	16.5075	1421.68	1	63
2022-09-14	10:33:23	7.94087	35.3226	1446.8	1	64
2022-09-14	10:33:23	8.09579	36.0117	1457.69	1	65
2022-09-14	10:33:23	5.96657	26.5405	1473.34	1	66
2022-09-14	10:33:24	4.53044	20.1523	1477.84	1	67
2022-09-14	10:33:24	0.398232	1.77142	1475.11	FALSE	67
2022-09-14	10:33:24	0.049275	0.219185	1478.06	FALSE	67
2022-09-14	10:33:24	0.0173157	0.0770237	1475.18	FALSE	67
2022-09-14	10:33:25	-0.0220226	-0.0979609	1478.06	FALSE	67
2022-09-14	10:33:25	0.0238807	0.106226	1475.29	FALSE	67
2022-09-14	10:33:25	0.0250003	0.111206	1478.17	FALSE	67
2022-09-14	10:33:26	0.74785	3.32659	1478.62	FALSE	67
2022-09-14	10:33:26	3.68627	16.3973	1494.57	1	68
2022-09-14	10:33:26	8.73177	38.8407	1517.46	1	69
2022-09-14	10:33:26	8.97365	39.9166	1534.49	1	70
2022-09-14	10:33:27	13.1022	58.2812	1575.74	1	71
2022-09-14	10:33:27	7.39858	32.9104	1567.4	1	72
2022-09-14	10:33:27	12.557	55.856	1631.6	1	73
2022-09-14	10:33:27	10.5147	46.7715	1614.17	1	74
2022-09-14	10:33:28	7.72948	34.3823	1665.98	1	75
2022-09-14	10:33:28	9.81548	43.6612	1657.83	1	76
2022-09-14	10:33:28	13.5512	60.2784	1726.26	1	77
2022-09-14	10:33:28	11.3398	50.4417	1708.27	1	78
2022-09-14	10:33:29	7.19141	31.9888	1758.25	1	79
2022-09-14	10:33:29	5.72785	25.4786	1733.75	1	80
2022-09-14	10:33:29	4.72225	21.0055	1779.25	1	81
2022-09-14	10:33:29	3.53966	15.7451	1749.5	1	82
2022-09-14	10:33:30	2.26357	10.0688	1789.32	FALSE	82
2022-09-14	10:33:30	0.794618	3.53462	1753.03	FALSE	82
2022-09-14	10:33:30	0.00637431	0.0283542	1789.35	FALSE	82
2022-09-14	10:33:31	0.011158	0.049633	1753.08	FALSE	82
2022-09-14	10:33:31	-0.0278242	-0.123768	1789.35	FALSE	82
2022-09-14	10:33:31	6.3875e-05	0.000284129	1753.08	FALSE	82
2022-09-14	10:33:31	-0.0040074	-0.0178257	1789.35	FALSE	82
2022-09-14	10:33:32	0.0328374	0.146067	1753.23	FALSE	82
2022-09-14	10:33:32	0.0958908	0.426541	1789.77	FALSE	82
2022-09-14	10:33:32	0.859606	3.8237	1757.05	FALSE	82
2022-09-14	10:33:32	1.50673	6.70224	1796.48	FALSE	82
2022-09-14	10:33:33	2.76474	12.2981	1769.35	FALSE	82
2022-09-14	10:33:33	2.56902	11.4275	1807.9	FALSE	82
2022-09-14	10:33:33	2.29991	10.2305	1779.58	FALSE	82
2022-09-14	10:33:33	2.50673	11.1504	1819.05	FALSE	82
2022-09-14	10:33:34	3.34999	14.9014	1794.48	1	83
2022-09-14	10:33:34	1.95869	8.71264	1827.77	FALSE	83
2022-09-14	10:33:34	2.51238	11.1756	1805.66	FALSE	83
2022-09-14	10:33:35	0.94444	4.20106	1831.97	FALSE	83
2022-09-14	10:33:35	0.512379	2.27916	1807.93	FALSE	83
2022-09-14	10:33:35	-0.109046	-0.485058	1831.97	FALSE	83
2022-09-14	10:33:35	0.0189442	0.0842676	1808.02	FALSE	83
2022-09-14	10:33:36	0.0839824	0.373571	1832.34	FALSE	83
2022-09-14	10:33:36	0.0925829	0.411827	1808.43	FALSE	83
2022-09-14	10:33:36	-0.00349849	-0.015562	1832.34	FALSE	83
2022-09-14	10:33:36	0.209784	0.933161	1809.36	FALSE	83
2022-09-14	10:33:37	0.213244	0.948552	1833.29	FALSE	83
2022-09-14	10:33:37	1.13436	5.04586	1814.41	FALSE	83
2022-09-14	10:33:37	2.63243	11.7096	1845	FALSE	83
2022-09-14	10:33:37	3.26322	14.5155	1828.92	1	84
2022-09-14	10:33:38	1.67182	7.43659	1852.44	FALSE	84
2022-09-14	10:33:38	1.37538	6.11797	1835.04	FALSE	84
2022-09-14	10:33:38	0.607646	2.70293	1855.14	FALSE	84
2022-09-14	10:33:39	0.44902	1.99733	1837.04	FALSE	84
2022-09-14	10:33:39	0.419097	1.86423	1857	FALSE	84
2022-09-14	10:33:39	0.37986	1.68969	1838.73	FALSE	84
2022-09-14	10:33:39	0.388817	1.72954	1858.73	FALSE	84
2022-09-14	10:33:40	0.44271	1.96926	1840.7	FALSE	84
2022-09-14	10:33:40	0.44159	1.96428	1860.7	FALSE	84
2022-09-14	10:33:40	0.525967	2.33961	1843.04	FALSE	84
2022-09-14	10:33:40	0.599707	2.66762	1863.37	FALSE	84
2022-09-14	10:33:41	0.756552	3.36529	1846.4	FALSE	84
2022-09-14	10:33:41	0.959249	4.26693	1867.63	FALSE	84
2022-09-14	10:33:41	1.17238	5.21498	1851.62	FALSE	84
2022-09-14	10:33:41	1.45034	6.4514	1874.08	FALSE	84
2022-09-14	10:33:42	0.848919	3.77616	1855.4	FALSE	84
2022-09-14	10:33:42	0.875178	3.89297	1877.98	FALSE	84
2022-09-14	10:33:42	0.924389	4.11187	1859.51	FALSE	84
2022-09-14	10:33:43	0.911361	4.05392	1882.03	FALSE	84
2022-09-14	10:33:43	0.821641	3.65482	1863.16	FALSE	84
2022-09-14	10:33:43	0.841743	3.74424	1885.77	FALSE	84
2022-09-14	10:33:43	0.742201	3.30146	1866.46	FALSE	84
2022-09-14	10:33:44	0.398893	1.77436	1887.55	FALSE	84
2022-09-14	10:33:44	0.385254	1.71369	1868.18	FALSE	84
2022-09-14	10:33:44	0.035789	0.159197	1887.71	FALSE	84
2022-09-14	10:33:44	-0.299936	-1.33418	1868.18	FALSE	84
2022-09-14	10:33:45	-0.593371	-2.63943	1887.71	FALSE	84
2022-09-14	10:33:45	-0.767365	-3.41339	1868.18	FALSE	84
2022-09-14	10:33:45	-0.426857	-1.89875	1887.71	FALSE	84
2022-09-14	10:33:45	0.912633	4.05957	1872.24	FALSE	84
2022-09-14	10:33:46	2.96464	13.1873	1900.9	FALSE	84
2022-09-14	10:33:46	6.00744	26.7223	1898.96	1	85
2022-09-14	10:33:46	7.89192	35.1048	1936	1	86
2022-09-14	10:33:47	6.62749	29.4804	1928.44	1	87
2022-09-14	10:33:47	7.8053	34.7195	1970.72	1	88
2022-09-14	10:33:47	5.17411	23.0155	1951.45	1	89
2022-09-14	10:33:47	12.5843	55.9775	2026.7	1	90
2022-09-14	10:33:48	12.3491	54.9313	2006.39	1	91
2022-09-14	10:33:48	7.40718	32.9486	2059.65	1	92
2022-09-14	10:33:48	11.5594	51.4185	2057.8	1	93
2022-09-14	10:33:48	1.43365	6.37716	2066.02	FALSE	93
2022-09-14	10:33:49	4.73182	21.0481	2078.85	1	94
2022-09-14	10:33:49	1.85625	8.25697	2074.28	FALSE	94
2022-09-14	10:33:49	0.541794	2.41001	2081.26	FALSE	94
2022-09-14	10:33:49	0.648919	2.88652	2077.17	FALSE	94
2022-09-14	10:33:50	0.166629	0.741199	2082	FALSE	94
2022-09-14	10:33:50	0.664796	2.95715	2080.12	FALSE	94
2022-09-14	10:33:50	0.29014	1.2906	2083.29	FALSE	94
2022-09-14	10:33:51	0.423982	1.88596	2082.01	FALSE	94
2022-09-14	10:33:51	0.5364	2.38601	2085.68	FALSE	94
2022-09-14	10:33:51	0.404033	1.79722	2083.81	FALSE	94
2022-09-14	10:33:51	0.429275	1.9095	2087.59	FALSE	94
2022-09-14	10:33:52	0.509987	2.26852	2086.08	FALSE	94
2022-09-14	10:33:52	0.452735	2.01386	2089.6	FALSE	94
2022-09-14	10:33:52	0.352786	1.56926	2087.64	FALSE	94
2022-09-14	10:33:52	0.398842	1.77413	2091.38	FALSE	94
2022-09-14	10:33:53	0.445051	1.97968	2089.62	FALSE	94
2022-09-14	10:33:53	0.320369	1.42507	2092.8	FALSE	94
2022-09-14	10:33:53	0.374313	1.66502	2091.29	FALSE	94
2022-09-14	10:33:53	1.14184	5.07913	2097.88	FALSE	94
2022-09-14	10:33:54	2.48887	11.071	2102.36	FALSE	94
2022-09-14	10:33:54	3.19584	14.2157	2112.1	1	95
2022-09-14	10:33:54	4.17105	18.5537	2120.91	1	96
2022-09-14	10:33:55	4.0622	18.0695	2130.17	1	97
2022-09-14	10:33:55	1.79645	7.99097	2128.9	FALSE	97
2022-09-14	10:33:55	1.53126	6.81135	2136.98	FALSE	97
2022-09-14	10:33:55	1.27762	5.68311	2134.59	FALSE	97
2022-09-14	10:33:56	3.69757	16.4475	2153.43	1	98
2022-09-14	10:33:56	2.83574	12.6139	2147.2	FALSE	98
2022-09-14	10:33:56	1.49309	6.64156	2160.07	FALSE	98
2022-09-14	10:33:56	0.86271	3.83751	2151.04	FALSE	98
2022-09-14	10:33:57	0.777468	3.45833	2163.53	FALSE	98
2022-09-14	10:33:57	0.464135	2.06457	2153.1	FALSE	98
2022-09-14	10:33:57	0.396145	1.76213	2165.29	FALSE	98
2022-09-14	10:33:57	0.496501	2.20854	2155.31	FALSE	98
2022-09-14	10:33:58	0.375178	1.66887	2166.96	FALSE	98
2022-09-14	10:33:58	0.368512	1.63922	2156.95	FALSE	98
2022-09-14	10:33:58	0.451565	2.00865	2168.97	FALSE	98
2022-09-14	10:33:59	0.43416	1.93123	2158.88	FALSE	98
2022-09-14	10:33:59	0.392888	1.74764	2170.71	FALSE	98
2022-09-14	10:33:59	0.376756	1.67589	2160.56	FALSE	98
2022-09-14	10:33:59	0.385764	1.71596	2172.43	FALSE	98
2022-09-14	10:34:00	0.391361	1.74085	2162.3	FALSE	98
2022-09-14	10:34:00	0.379962	1.69015	2174.12	FALSE	98
2022-09-14	10:34:00	0.381896	1.69875	2164	FALSE	98
2022-09-14	10:34:00	0.38383	1.70735	2175.83	FALSE	98
2022-09-14	10:34:01	0.450852	2.00548	2166	FALSE	98
2022-09-14	10:34:01	0.422405	1.87894	2177.71	FALSE	98
2022-09-14	10:34:01	0.336298	1.49592	2167.5	FALSE	98
2022-09-14	10:34:01	0.308155	1.37074	2179.08	FALSE	98
2022-09-14	10:34:02	0.292074	1.2992	2168.8	FALSE	98
2022-09-14	10:34:02	0.310954	1.38319	2180.46	FALSE	98
2022-09-14	10:34:02	0.209529	0.932027	2169.73	FALSE	98
2022-09-14	10:34:03	0.362405	1.61205	2182.07	FALSE	98
2022-09-14	10:34:03	0.190191	0.846008	2170.58	FALSE	98
2022-09-14	10:34:03	0.358537	1.59484	2183.67	FALSE	98
2022-09-14	10:34:03	0.206781	0.919803	2171.5	FALSE	98
2022-09-14	10:34:04	0.698893	3.10882	2186.78	FALSE	98
2022-09-14	10:34:04	0.570598	2.53813	2174.04	FALSE	98
2022-09-14	10:34:04	1.56765	6.97322	2193.75	FALSE	98
2022-09-14	10:34:04	3.17202	14.1098	2188.14	1	99
2022-09-14	10:34:05	8.26739	36.775	2230.52	1	100
2022-09-14	10:34:05	13.1168	58.3461	2246.49	1	101
2022-09-14	10:34:05	8.8337	39.2941	2269.82	1	102
2022-09-14	10:34:05	7.77655	34.5916	2281.08	1	103
2022-09-14	10:34:06	2.92658	13.018	2282.84	FALSE	103
2022-09-14	10:34:06	8.38484	37.2974	2318.38	1	104
2022-09-14	10:34:06	5.56606	24.7589	2307.59	1	105
2022-09-14	10:34:07	4.01334	17.8521	2336.23	1	106
2022-09-14	10:34:07	2.35584	10.4792	2318.07	FALSE	106
2022-09-14	10:34:07	0.31472	1.39994	2337.63	FALSE	106
2022-09-14	10:34:07	0.401285	1.785	2319.86	FALSE	106
2022-09-14	10:34:08	0.207087	0.921164	2338.55	FALSE	106
2022-09-14	10:34:08	0.248461	1.1052	2320.96	FALSE	106
2022-09-14	10:34:08	0.345967	1.53893	2340.09	FALSE	106
2022-09-14	10:34:08	0.202252	0.899657	2321.86	FALSE	106
2022-09-14	10:34:09	0.473295	2.10531	2342.2	FALSE	106
2022-09-14	10:34:09	0.222914	0.991566	2322.86	FALSE	106
2022-09-14	10:34:09	1.28709	5.72523	2347.92	FALSE	106
2022-09-14	10:34:09	2.28317	10.156	2333.01	FALSE	106
2022-09-14	10:34:10	3.88047	17.2611	2365.18	1	107
2022-09-14	10:34:10	3.20581	14.2601	2347.27	1	108
2022-09-14	10:34:10	4.37966	19.4816	2384.67	1	109
2022-09-14	10:34:11	3.64744	16.2245	2363.5	1	110
2022-09-14	10:34:11	3.3477	14.8912	2399.56	1	111
2022-09-14	10:34:11	5.79645	25.7838	2389.28	1	112
2022-09-14	10:34:11	1.65971	7.38272	2406.94	FALSE	112
2022-09-14	10:34:12	3.98851	17.7417	2407.02	1	113
2022-09-14	10:34:12	2.99034	13.3016	2420.24	FALSE	113
2022-09-14	10:34:12	2.99278	13.3125	2420.33	FALSE	113
2022-09-14	10:34:12	4.74927	21.1257	2441.37	1	114
2022-09-14	10:34:13	4.41238	19.6271	2439.96	1	115
2022-09-14	10:34:13	12.0101	53.4233	2494.79	1	116
2022-09-14	10:34:13	2.69594	11.9921	2451.95	FALSE	116
2022-09-14	10:34:13	7.92505	35.2522	2530.04	1	117
2022-09-14	10:34:14	6.18678	27.52	2479.47	1	118
2022-09-14	10:34:14	7.43762	33.084	2563.13	1	119
2022-09-14	10:34:14	3.98561	17.7288	2497.2	1	120
2022-09-14	10:34:15	3.1482	14.0038	2577.13	1	121
2022-09-14	10:34:15	7.6509	34.0327	2531.23	1	122
2022-09-14	10:34:15	2.38571	10.6121	2587.74	FALSE	122
2022-09-14	10:34:15	7.31121	32.5217	2563.76	1	123
2022-09-14	10:34:16	6.91365	30.7533	2618.5	1	124
2022-09-14	10:34:16	8.18479	36.4076	2600.16	1	125
2022-09-14	10:34:16	3.80251	16.9143	2635.41	1	126
2022-09-14	10:34:16	2.62897	11.6942	2611.86	FALSE	126
2022-09-14	10:34:17	6.02774	26.8126	2662.22	1	127
2022-09-14	10:34:17	1.59151	7.07935	2618.94	FALSE	127
2022-09-14	10:34:17	4.96535	22.0869	2684.31	1	128
2022-09-14	10:34:17	2.36821	10.5343	2629.47	FALSE	128
2022-09-14	10:34:18	3.35808	14.9374	2699.25	1	129
2022-09-14	10:34:18	2.49049	11.0782	2640.55	FALSE	129
2022-09-14	10:34:18	1.75859	7.82256	2707.07	FALSE	129
2022-09-14	10:34:19	3.87737	17.2473	2657.8	1	130
2022-09-14	10:34:19	0.707036	3.14504	2710.21	FALSE	130
2022-09-14	10:34:19	2.91095	12.9485	2670.75	FALSE	130
2022-09-14	10:34:19	1.5448	6.87158	2717.09	FALSE	130
2022-09-14	10:34:20	2.94261	13.0893	2683.84	FALSE	130
2022-09-14	10:34:20	3.00561	13.3696	2730.46	1	131
2022-09-14	10:34:20	3.37187	14.9988	2698.83	1	132
2022-09-14	10:34:20	6.05354	26.9274	2757.38	1	133
2022-09-14	10:34:21	2.13172	9.48232	2708.32	FALSE	133
2022-09-14	10:34:21	6.32154	28.1195	2785.5	1	134
2022-09-14	10:34:21	1.95716	8.70584	2717.02	FALSE	134
2022-09-14	10:34:21	4.89227	21.7618	2807.26	1	135
2022-09-14	10:34:22	2.81538	12.5234	2729.55	FALSE	135
2022-09-14	10:34:22	3.31406	14.7416	2822.01	1	136
2022-09-14	10:34:22	8.18494	36.4083	2765.95	1	137
2022-09-14	10:34:23	4.22169	18.7789	2840.78	1	138
2022-09-14	10:34:23	13.1215	58.3671	2824.32	1	139
2022-09-14	10:34:23	5.36352	23.858	2864.64	1	140
2022-09-14	10:34:23	8.66311	38.5352	2862.86	1	141
2022-09-14	10:34:24	2.67024	11.8778	2876.52	FALSE	141
2022-09-14	10:34:24	3.9537	17.5868	2880.44	1	142
2022-09-14	10:34:24	9.00276	40.0461	2916.57	1	143
2022-09-14	10:34:24	5.62607	25.0259	2905.47	1	144
2022-09-14	10:34:25	10.4912	46.667	2963.23	1	145
2022-09-14	10:34:25	7.54922	33.5804	2939.05	1	146
2022-09-14	10:34:25	9.53365	42.4076	3005.64	1	147
2022-09-14	10:34:25	6.02494	26.8001	2965.85	1	148
2022-09-14	10:34:26	4.43401	19.7234	3025.36	1	149
2022-09-14	10:34:26	9.94825	44.2518	3010.1	1	150
2022-09-14	10:34:26	3.17701	14.132	3039.5	1	151
2022-09-14	10:34:27	4.50754	20.0504	3030.15	1	152
2022-09-14	10:34:27	2.64459	11.7637	3051.26	FALSE	152
2022-09-14	10:34:27	1.43579	6.38668	3036.54	FALSE	152
2022-09-14	10:34:27	2.59207	11.53	3062.79	FALSE	152
2022-09-14	10:34:28	2.48245	11.0424	3047.58	FALSE	152
2022-09-14	10:34:28	9.02622	40.1504	3102.94	1	153
2022-09-14	10:34:28	6.80352	30.2634	3077.84	1	154
2022-09-14	10:34:28	9.34011	41.5467	3144.49	1	155
2022-09-14	10:34:29	11.4082	50.746	3128.59	1	156
2022-09-14	10:34:29	7.43192	33.0587	3177.55	1	157
2022-09-14	10:34:29	9.77848	43.4966	3172.09	1	158
2022-09-14	10:34:29	11.9525	53.1671	3230.71	1	159
2022-09-14	10:34:30	23.1526	102.987	3275.07	1	160
2022-09-14	10:34:30	9.67879	43.0532	3273.77	1	161
2022-09-14	10:34:30	7.50052	33.3638	3308.44	1	162
2022-09-14	10:34:31	17.1573	76.3191	3350.09	1	163
2022-09-14	10:34:31	8.49283	37.7778	3346.22	1	164
2022-09-14	10:34:31	16.3321	72.6484	3422.73	1	165
2022-09-14	10:34:31	6.5882	29.3056	3375.52	1	166
2022-09-14	10:34:32	5.56179	24.74	3447.47	1	167
2022-09-14	10:34:32	3.76149	16.7319	3392.25	1	168
2022-09-14	10:34:32	5.1222	22.7846	3470.26	1	169
2022-09-14	10:34:32	13.9064	61.8584	3454.11	1	170
2022-09-14	10:34:33	17.5374	78.0099	3548.27	1	171
2022-09-14	10:34:33	14.6581	65.2022	3519.31	1	172
2022-09-14	10:34:33	5.85406	26.04	3574.31	1	173
2022-09-14	10:34:33	7.88551	35.0763	3554.39	1	174
2022-09-14	10:34:34	2.73065	12.1465	3586.45	FALSE	174
2022-09-14	10:34:34	3.6649	16.3022	3570.69	1	175
2022-09-14	10:34:34	2.38704	10.618	3597.07	FALSE	175
2022-09-14	10:34:35	1.85589	8.25537	3578.95	FALSE	175
2022-09-14	10:34:35	3.16256	14.0677	3611.14	1	176
2022-09-14	10:34:35	3.00251	13.3558	3592.3	1	177
2022-09-14	10:34:35	2.85416	12.6959	3623.84	FALSE	177
2022-09-14	10:34:36	2.4477	10.8879	3603.19	FALSE	177
2022-09-14	10:34:36	2.52077	11.2129	3635.05	FALSE	177
2022-09-14	10:34:36	4.09299	18.2064	3621.4	1	178
2022-09-14	10:34:36	8.12011	36.1199	3671.17	1	179
2022-09-14	10:34:37	14.3088	63.6484	3685.05	1	180
2022-09-14	10:34:37	18.5571	82.5457	3753.71	1	181
2022-09-14	10:34:37	17.9356	79.7811	3764.83	1	182
2022-09-14	10:34:37	23.24	103.376	3857.09	1	183
2022-09-14	10:34:38	30.8629	137.284	3902.11	1	184
2022-09-14	10:34:38	12.8513	57.1652	3914.26	1	185
2022-09-14	10:34:38	21.9367	97.5788	3999.69	1	186
2022-09-14	10:34:38	34.2297	152.261	4066.52	1	187
2022-09-14	10:34:39	32.2359	143.392	4143.08	1	188
2022-09-14	10:34:39	34.4953	153.442	4219.96	1	189
2022-09-14	10:34:39	35.118	156.212	4299.29	1	190
2022-09-14	10:34:40	30.9707	137.764	4357.72	1	191
2022-09-14	10:34:40	31.5752	140.453	4439.75	1	192
2022-09-14	10:34:40	32.3585	143.937	4501.66	1	193
2022-09-14	10:34:40	30.1496	134.111	4573.86	1	194
2022-09-14	10:34:41	28.5905	127.176	4628.84	1	195
2022-09-14	10:34:41	25.5633	113.711	4687.57	1	196
2022-09-14	10:34:41	23.6701	105.289	4734.13	1	197
2022-09-14	10:34:41	21.8983	97.408	4784.98	1	198
2022-09-14	10:34:42	20.1497	89.6299	4823.76	1	199
2022-09-14	10:34:42	17.6069	78.319	4863.3	1	200
2022-09-14	10:34:42	16.4945	73.3708	4897.13	1	201
2022-09-14	10:34:42	15.1321	67.3106	4930.61	1	202
2022-09-14	10:34:43	15.0441	66.9192	4964.05	1	203
2022-09-14	10:34:43	16.3158	72.5759	5003.18	1	204
2022-09-14	10:34:43	14.8986	66.272	5030.32	1	205
2022-09-14	10:34:44	11.7822	52.4096	5055.59	1	206
2022-09-14	10:34:44	9.29736	41.3565	5071.67	1	207
2022-09-14	10:34:44	4.87004	21.6629	5077.26	1	208
2022-09-14	10:34:44	6.18423	27.5087	5099.18	1	209
2022-09-14	10:34:45	2.89202	12.8643	5090.12	FALSE	209
2022-09-14	10:34:45	1.37762	6.12793	5105.31	FALSE	209
2022-09-14	10:34:45	1.75365	7.80059	5097.92	FALSE	209
2022-09-14	10:34:45	4.62352	20.5663	5125.88	1	210
2022-09-14	10:34:46	10.4981	46.6976	5144.62	1	211
2022-09-14	10:34:46	14.2761	63.5029	5189.38	1	212
2022-09-14	10:34:46	9.43975	41.9899	5186.61	1	213
2022-09-14	10:34:46	24.1724	107.524	5296.9	1	214
2022-09-14	10:34:47	16.3626	72.7841	5259.39	1	215
2022-09-14	10:34:47	21.9973	97.8484	5394.75	1	216
2022-09-14	10:34:47	13.546	60.2553	5319.65	1	217
2022-09-14	10:34:48	20.2369	90.0178	5484.77	1	218
2022-09-14	10:34:48	14.5111	64.5483	5384.2	1	219
2022-09-14	10:34:48	3.56088	15.8395	5500.61	1	220
2022-09-14	10:34:48	1.61055	7.16405	5391.36	FALSE	220
2022-09-14	10:34:49	3.95136	17.5764	5518.19	1	221
2022-09-14	10:34:49	11.0879	49.3212	5440.68	1	222
2022-09-14	10:34:49	13.3081	59.1971	5577.38	1	223
2022-09-14	10:34:49	10.3681	46.1194	5486.8	1	224
2022-09-14	10:34:50	15.3995	68.5001	5645.88	1	225
2022-09-14	10:34:50	10.9261	48.6015	5535.4	1	226
2022-09-14	10:34:50	11.057	49.1837	5695.07	1	227
2022-09-14	10:34:50	15.7214	69.9319	5605.33	1	228
2022-09-14	10:34:51	12.6133	56.1065	5751.17	1	229
2022-09-14	10:34:51	3.60067	16.0165	5621.35	1	230
2022-09-14	10:34:51	1.96006	8.71874	5759.89	FALSE	230
2022-09-14	10:34:52	2.2964	10.2148	5631.56	FALSE	230
2022-09-14	10:34:52	4.66882	20.7678	5780.66	1	231
2022-09-14	10:34:52	3.88973	17.3023	5648.87	1	232
2022-09-14	10:34:52	6.7737	30.1308	5810.79	1	233
2022-09-14	10:34:53	12.435	55.3134	5704.18	1	234
2022-09-14	10:34:53	10.1316	45.0674	5855.86	1	235
2022-09-14	10:34:53	10.2646	45.659	5749.84	1	236
2022-09-14	10:34:53	7.20154	32.0339	5887.89	1	237
2022-09-14	10:34:54	13.167	58.5694	5808.41	1	238
2022-09-14	10:34:54	8.49136	37.7713	5925.66	1	239
2022-09-14	10:34:54	8.17863	36.3802	5844.79	1	240
2022-09-14	10:34:54	8.94276	39.7792	5965.44	1	241
2022-09-14	10:34:55	8.57059	38.1237	5882.91	1	242
2022-09-14	10:34:55	6.96245	30.9704	5996.41	1	243
2022-09-14	10:34:55	6.32103	28.1172	5911.03	1	244
2022-09-14	10:34:56	6.24469	27.7776	6024.19	1	245
2022-09-14	10:34:56	5.48729	24.4086	5935.44	1	246
2022-09-14	10:34:56	5.50143	24.4715	6048.66	1	247
2022-09-14	10:34:56	5.55034	24.689	5960.13	1	248
2022-09-14	10:34:57	5.30607	23.6025	6072.26	1	249
2022-09-14	10:34:57	5.33879	23.748	5983.88	1	250
2022-09-14	10:34:57	5.23558	23.2889	6095.55	1	251
2022-09-14	10:34:57	5.34169	23.7609	6007.64	1	252
2022-09-14	10:34:58	5.18143	23.048	6118.6	1	253
2022-09-14	10:34:58	5.04439	22.4385	6030.07	1	254
2022-09-14	10:34:58	4.98983	22.1958	6140.8	1	255
2022-09-14	10:34:58	5.0708	22.5559	6052.63	1	256
2022-09-14	10:34:59	4.90469	21.817	6162.61	1	257
2022-09-14	10:34:59	4.71915	20.9917	6073.62	1	258
2022-09-14	10:34:59	4.5796	20.371	6182.98	1	259
2022-09-14	10:35:00	4.53854	20.1883	6093.81	1	260
2022-09-14	10:35:00	4.53141	20.1566	6203.14	1	261
2022-09-14	10:35:00	4.31441	19.1914	6113	1	262
2022-09-14	10:35:00	4.33502	19.283	6222.42	1	263
2022-09-14	10:35:01	4.29324	19.0972	6132.1	1	264
2022-09-14	10:35:01	4.36841	19.4316	6241.86	1	265
2022-09-14	10:35:01	4.31324	19.1862	6151.29	1	266
2022-09-14	10:35:01	4.26759	18.9831	6260.84	1	267
2022-09-14	10:35:02	4.40566	19.5973	6170.88	1	268
2022-09-14	10:35:02	4.59497	20.4393	6281.28	1	269
2022-09-14	10:35:02	4.70637	20.9349	6191.82	1	270
2022-09-14	10:35:02	4.968	22.0987	6303.38	1	271
2022-09-14	10:35:03	4.91345	21.856	6213.67	1	272
2022-09-14	10:35:03	4.89894	21.7915	6325.17	1	273
2022-09-14	10:35:03	4.46027	19.8402	6233.51	1	274
2022-09-14	10:35:04	4.18246	18.6044	6343.77	1	275
2022-09-14	10:35:04	4.30179	19.1352	6252.65	1	276
2022-09-14	10:35:04	4.60134	20.4677	6364.24	1	277
2022-09-14	10:35:04	4.51105	20.0661	6272.72	1	278
2022-09-14	10:35:05	4.271	18.9983	6383.24	1	279
2022-09-14	10:35:05	3.15136	14.0179	6286.73	1	280
2022-09-14	10:35:05	4.00195	17.8015	6401.04	1	281
2022-09-14	10:35:05	4.83457	21.5051	6308.24	1	282
2022-09-14	10:35:06	5.10601	22.7126	6423.75	1	283
2022-09-14	10:35:06	4.06398	18.0774	6326.32	1	284
2022-09-14	10:35:06	3.83146	17.0431	6440.8	1	285
2022-09-14	10:35:06	3.81273	16.9598	6343.28	1	286
2022-09-14	10:35:07	3.88225	17.269	6458.06	1	287
2022-09-14	10:35:07	3.84591	17.1074	6360.38	1	288
2022-09-14	10:35:07	3.8565	17.1545	6475.22	1	289
2022-09-14	10:35:08	3.50495	15.5907	6375.97	1	290
2022-09-14	10:35:08	2.99518	13.3232	6488.54	FALSE	290
2022-09-14	10:35:08	2.73248	12.1546	6388.13	FALSE	290
2022-09-14	10:35:08	2.59029	11.5221	6500.06	FALSE	290
2022-09-14	10:35:09	2.5082	11.157	6399.29	FALSE	290
2022-09-14	10:35:09	2.30688	10.2615	6510.33	FALSE	290
2022-09-14	10:35:09	2.33416	10.3828	6409.67	FALSE	290
2022-09-14	10:35:09	2.7162	12.0822	6522.41	FALSE	290
2022-09-14	10:35:10	2.72093	12.1032	6421.77	FALSE	290
2022-09-14	10:35:10	2.58378	11.4932	6533.9	FALSE	290
2022-09-14	10:35:10	2.68108	11.926	6433.7	FALSE	290
2022-09-14	10:35:10	2.43502	10.8315	6544.73	FALSE	290
2022-09-14	10:35:11	3.95701	17.6016	6451.3	1	291
2022-09-14	10:35:11	5.36617	23.8698	6568.6	1	292
2022-09-14	10:35:11	4.83075	21.4881	6472.79	1	293
2022-09-14	10:35:12	4.73609	21.0671	6589.67	1	294
2022-09-14	10:35:12	4.01085	17.8411	6490.63	1	295
2022-09-14	10:35:12	4.48271	19.94	6609.61	1	296
2022-09-14	10:35:12	3.9368	17.5117	6508.14	1	297
2022-09-14	10:35:13	3.24368	14.4285	6624.04	1	298
2022-09-14	10:35:13	2.97904	13.2514	6521.39	FALSE	298
2022-09-14	10:35:13	2.75472	12.2535	6636.29	FALSE	298
2022-09-14	10:35:13	2.81009	12.4998	6533.89	FALSE	298
2022-09-14	10:35:14	2.80917	12.4957	6648.79	FALSE	298
2022-09-14	10:35:14	2.77614	12.3488	6546.24	FALSE	298
2022-09-14	10:35:14	2.62994	11.6985	6660.49	FALSE	298
2022-09-14	10:35:14	2.88938	12.8525	6559.09	FALSE	298
2022-09-14	10:35:15	3.12688	13.909	6674.39	1	299
2022-09-14	10:35:15	3.24347	14.4276	6573.52	1	300
2022-09-14	10:35:15	3.10164	13.7967	6688.19	1	301
2022-09-14	10:35:16	2.98271	13.2677	6586.79	FALSE	301
2022-09-14	10:35:16	3.03172	13.4857	6701.68	1	302
2022-09-14	10:35:16	3.02765	13.4676	6600.25	1	303
2022-09-14	10:35:16	3.11243	13.8447	6715.52	1	304
2022-09-14	10:35:17	2.98052	13.2579	6613.51	FALSE	304
2022-09-14	10:35:17	2.95258	13.1337	6728.66	FALSE	304
2022-09-14	10:35:17	2.97212	13.2206	6626.73	FALSE	304
2022-09-14	10:35:17	2.99248	13.3111	6741.97	FALSE	304
2022-09-14	10:35:18	2.91324	12.9587	6639.69	FALSE	304
2022-09-14	10:35:18	2.81385	12.5166	6754.48	FALSE	304
2022-09-14	10:35:18	2.77294	12.3346	6652.03	FALSE	304
2022-09-14	10:35:18	2.80322	12.4693	6766.95	FALSE	304
2022-09-14	10:35:19	2.84907	12.6732	6664.7	FALSE	304
2022-09-14	10:35:19	2.79039	12.4122	6779.36	FALSE	304
2022-09-14	10:35:19	2.84607	12.6599	6677.36	FALSE	304
2022-09-14	10:35:20	3.08846	13.7381	6793.1	1	305
2022-09-14	10:35:20	3.23599	14.3943	6691.75	1	306
2022-09-14	10:35:20	3.23492	14.3896	6807.49	1	307
2022-09-14	10:35:20	3.3648	14.9673	6706.72	1	308
2022-09-14	10:35:21	3.64917	16.2322	6823.72	1	309
2022-09-14	10:35:21	3.60347	16.029	6722.75	1	310
2022-09-14	10:35:21	3.71065	16.5057	6840.23	1	311
2022-09-14	10:35:21	3.73467	16.6126	6739.36	1	312
2022-09-14	10:35:22	3.96088	17.6188	6857.85	1	313
2022-09-14	10:35:22	3.96469	17.6357	6757	1	314
2022-09-14	10:35:22	3.83243	17.0474	6874.9	1	315
2022-09-14	10:35:22	3.78062	16.817	6773.82	1	316
2022-09-14	10:35:23	3.73014	16.5924	6891.49	1	317
2022-09-14	10:35:23	3.81538	16.9716	6790.79	1	318
2022-09-14	10:35:23	3.75324	16.6952	6908.18	1	319
2022-09-14	10:35:23	3.64709	16.223	6807.01	1	320
2022-09-14	10:35:24	3.67752	16.3583	6924.54	1	321
2022-09-14	10:35:24	3.65136	16.242	6823.25	1	322
2022-09-14	10:35:24	3.55935	15.8327	6940.38	1	323
2022-09-14	10:35:25	3.50154	15.5756	6838.83	1	324
2022-09-14	10:35:25	3.54164	15.7539	6956.13	1	325
2022-09-14	10:35:25	3.52474	15.6787	6854.51	1	326
2022-09-14	10:35:25	3.48887	15.5192	6971.65	1	327
2022-09-14	10:35:26	3.60663	16.043	6870.55	1	328
2022-09-14	10:35:26	3.44006	15.3021	6986.95	1	329
2022-09-14	10:35:26	3.5023	15.5789	6886.13	1	330
2022-09-14	10:35:26	3.46388	15.408	7002.36	1	331
2022-09-14	10:35:27	3.44592	15.3281	6901.46	1	332
2022-09-14	10:35:27	3.48388	15.497	7017.86	1	333
2022-09-14	10:35:27	3.47411	15.4535	6916.91	1	334
2022-09-14	10:35:27	3.43869	15.296	7033.15	1	335
2022-09-14	10:35:28	3.48312	15.4936	6932.4	1	336
2022-09-14	10:35:28	3.60256	16.0249	7049.18	1	337
2022-09-14	10:35:28	3.53538	15.7261	6948.13	1	338
2022-09-14	10:35:29	3.50418	15.5873	7064.76	1	339
2022-09-14	10:35:29	3.38103	15.0395	6963.17	1	340
2022-09-14	10:35:29	3.45691	15.377	7080.14	1	341
2022-09-14	10:35:29	3.48566	15.5049	6978.67	1	342
2022-09-14	10:35:30	3.5506	15.7938	7095.93	1	343
2022-09-14	10:35:30	3.5505	15.7933	6994.47	1	344
2022-09-14	10:35:30	3.49126	15.5298	7111.46	1	345
2022-09-14	10:35:30	3.5165	15.6421	7010.11	1	346
2022-09-14	10:35:31	3.47976	15.4787	7126.94	1	347
2022-09-14	10:35:31	3.34551	14.8815	7024.99	1	348
2022-09-14	10:35:31	3.44317	15.3159	7142.26	1	349
2022-09-14	10:35:31	3.58261	15.9362	7040.93	1	350
2022-09-14	10:35:32	3.35304	14.915	7157.17	1	351
2022-09-14	10:35:32	3.36866	14.9845	7055.91	1	352
2022-09-14	10:35:32	3.40841	15.1613	7172.34	1	353
2022-09-14	10:35:33	3.2882	14.6266	7070.54	1	354
2022-09-14	10:35:33	3.1967	14.2196	7186.55	1	355
2022-09-14	10:35:33	3.26424	14.52	7085.06	1	356
2022-09-14	10:35:33	3.4192	15.2093	7201.76	1	357
2022-09-14	10:35:34	3.54464	15.7673	7100.83	1	358
2022-09-14	10:35:34	3.57345	15.8954	7217.66	1	359
2022-09-14	10:35:34	3.55889	15.8307	7116.66	1	360
2022-09-14	10:35:34	3.58016	15.9253	7233.58	1	361
2022-09-14	10:35:35	3.50546	15.593	7132.25	1	362
2022-09-14	10:35:35	3.43518	15.2804	7248.87	1	363
2022-09-14	10:35:35	3.4022	15.1337	7147.38	1	364
2022-09-14	10:35:35	3.39401	15.0972	7263.96	1	365
2022-09-14	10:35:36	3.43548	15.2817	7162.66	1	366
2022-09-14	10:35:36	3.57686	15.9106	7279.87	1	367
2022-09-14	10:35:36	3.54642	15.7752	7178.44	1	368
2022-09-14	10:35:37	3.65823	16.2725	7296.15	1	369
2022-09-14	10:35:37	3.66444	16.3002	7194.74	1	370
2022-09-14	10:35:37	3.57609	15.9072	7312.05	1	371
2022-09-14	10:35:37	3.57752	15.9135	7210.65	1	372
2022-09-14	10:35:38	3.51553	15.6378	7327.69	1	373
2022-09-14	10:35:38	3.5708	15.8836	7226.54	1	374
2022-09-14	10:35:38	3.53675	15.7322	7343.42	1	375
2022-09-14	10:35:38	3.51792	15.6484	7242.19	1	376
2022-09-14	10:35:39	3.5024	15.5794	7359	1	377
2022-09-14	10:35:39	3.62215	16.112	7258.3	1	378
2022-09-14	10:35:39	3.69996	16.4582	7375.46	1	379
2022-09-14	10:35:39	2.8221	12.5533	7270.85	FALSE	379
2022-09-14	10:35:40	1.84816	8.22099	7383.68	FALSE	379
2022-09-14	10:35:40	1.40836	6.26467	7277.12	FALSE	379
2022-09-14	10:35:40	1.18541	5.27294	7388.95	FALSE	379
2022-09-14	10:35:41	0.451107	2.00661	7279.12	FALSE	379
2022-09-14	10:35:41	0.404847	1.80084	7390.75	FALSE	379
2022-09-14	10:35:41	0.643626	2.86298	7281.99	FALSE	379
2022-09-14	10:35:41	0.734618	3.26773	7394.02	FALSE	379
2022-09-14	10:35:42	0.377367	1.6786	7283.66	FALSE	379
2022-09-14	10:35:42	0.331718	1.47555	7395.5	FALSE	379
2022-09-14	10:35:42	0.37126	1.65144	7285.32	FALSE	379
2022-09-14	10:35:42	0.588817	2.61918	7398.12	FALSE	379
2022-09-14	10:35:43	0.495026	2.20197	7287.52	FALSE	379
2022-09-14	10:35:43	0.361947	1.61001	7399.73	FALSE	379
2022-09-14	10:35:43	0.296603	1.31935	7288.84	FALSE	379
2022-09-14	10:35:43	0.599097	2.6649	7402.39	FALSE	379
2022-09-14	10:35:44	0.569529	2.53338	7291.37	FALSE	379
2022-09-14	10:35:44	0.937621	4.17073	7406.56	FALSE	379
2022-09-14	10:35:44	1.1908	5.29692	7296.67	FALSE	379
2022-09-14	10:35:45	2.21009	9.83092	7416.39	FALSE	379
2022-09-14	10:35:45	3.03304	13.4916	7310.16	1	380
2022-09-14	10:35:45	2.62469	11.6751	7428.07	FALSE	380
2022-09-14	10:35:45	3.06368	13.6279	7323.79	1	381
2022-09-14	10:35:46	1.36459	6.06997	7434.14	FALSE	381
2022-09-14	10:35:46	2.55721	11.375	7335.16	FALSE	381
2022-09-14	10:35:46	1.34072	5.96379	7440.1	FALSE	381
2022-09-14	10:35:46	3.57279	15.8925	7351.05	1	382
2022-09-14	10:35:47	4.72088	20.9994	7461.1	1	383
2022-09-14	10:35:47	5.51879	24.5487	7375.6	1	384
2022-09-14	10:35:47	3.56373	15.8522	7476.95	1	385
2022-09-14	10:35:47	2.76576	12.3027	7387.91	FALSE	385
2022-09-14	10:35:48	4.23172	18.8235	7495.78	1	386
2022-09-14	10:35:48	2.52398	11.2272	7399.13	FALSE	386
2022-09-14	10:35:48	7.45293	33.1521	7528.93	1	387
2022-09-14	10:35:49	12.5477	55.8147	7454.95	1	388
2022-09-14	10:35:49	8.59354	38.2258	7567.16	1	389
2022-09-14	10:35:49	21.7507	96.7515	7551.7	1	390
2022-09-14	10:35:49	15.8592	70.5449	7637.7	1	391
2022-09-14	10:35:50	25.5886	113.823	7665.52	1	392
2022-09-14	10:35:50	22.4297	99.7718	7737.47	1	393
2022-09-14	10:35:50	24.989	111.156	7776.68	1	394
2022-09-14	10:35:50	22.8324	101.563	7839.04	1	395
2022-09-14	10:35:51	21.3884	95.1399	7871.82	1	396
2022-09-14	10:35:51	17.2067	76.5388	7915.57	1	397
2022-09-14	10:35:51	15.5911	69.3523	7941.17	1	398
2022-09-14	10:35:51	11.4988	51.149	7966.72	1	399
2022-09-14	10:35:52	11.097	49.3617	7990.53	1	400
2022-09-14	10:35:52	8.38311	37.2897	8004.01	1	401
2022-09-14	10:35:52	11.8284	52.6151	8043.15	1	402
2022-09-14	10:35:53	11.892	52.898	8056.91	1	403
2022-09-14	10:35:53	8.63146	38.3945	8081.54	1	404
2022-09-14	10:35:53	10.6822	47.5166	8104.43	1	405
2022-09-14	10:35:53	12.7368	56.6558	8138.2	1	406
2022-09-14	10:35:54	6.33064	28.16	8132.59	1	407
2022-09-14	10:35:54	13.6411	60.6783	8198.88	1	408
2022-09-14	10:35:54	3.79253	16.8699	8149.46	1	409
2022-09-14	10:35:54	3.12693	13.9092	8212.78	1	410
2022-09-14	10:35:55	2.50296	11.1337	8160.59	FALSE	410
2022-09-14	10:35:55	0.177316	0.788737	8213.57	FALSE	410
2022-09-14	10:35:55	0.707188	3.14571	8163.74	FALSE	410
2022-09-14	10:35:55	0.124237	0.552631	8214.13	FALSE	410
2022-09-14	10:35:56	0.213244	0.948552	8164.69	FALSE	410
2022-09-14	10:35:56	0.100624	0.447596	8214.57	FALSE	410
2022-09-14	10:35:56	0.134568	0.598585	8165.28	FALSE	410
2022-09-14	10:35:57	0.0779265	0.346633	8214.92	FALSE	410
2022-09-14	10:35:57	0.0846949	0.37674	8165.66	FALSE	410
2022-09-14	10:35:57	0.0141097	0.0627628	8214.98	FALSE	410
2022-09-14	10:35:57	-0.113778	-0.506107	8165.66	FALSE	410
2022-09-14	10:35:58	-0.0825824	-0.367343	8214.98	FALSE	410
2022-09-14	10:35:58	-0.131234	-0.583755	8165.66	FALSE	410
2022-09-14	10:35:58	-0.175916	-0.78251	8214.98	FALSE	410
2022-09-14	10:35:58	-0.183142	-0.814652	8165.66	FALSE	410
2022-09-14	10:35:59	-0.0883839	-0.393149	8214.98	FALSE	410
2022-09-14	10:35:59	-0.180903	-0.804693	8165.66	FALSE	410
2022-09-14	10:35:59	-0.0717936	-0.319352	8214.98	FALSE	410
2022-09-14	10:35:59	-0.121972	-0.542556	8165.66	FALSE	410
2022-09-14	10:36:00	0.206883	0.920257	8215.9	FALSE	410
2022-09-14	10:36:00	0.0693259	0.308375	8165.97	FALSE	410
2022-09-14	10:36:00	0.0944149	0.419976	8216.32	FALSE	410
2022-09-14	10:36:01	-0.0234985	-0.104526	8165.97	FALSE	410
2022-09-14	10:36:01	0.116807	0.519581	8216.84	FALSE	410
2022-09-14	10:36:01	0.193143	0.859139	8166.83	FALSE	410
2022-09-14	10:36:01	0.242303	1.07781	8217.92	FALSE	410
2022-09-14	10:36:02	0.221845	0.986811	8167.82	FALSE	410
2022-09-14	10:36:02	0.436603	1.9421	8219.86	FALSE	410
2022-09-14	10:36:02	0.347392	1.54527	8169.36	FALSE	410
2022-09-14	10:36:02	0.68042	3.02664	8222.89	FALSE	410
2022-09-14	10:36:03	0.124542	0.553988	8169.91	FALSE	410
2022-09-14	10:36:03	0.195585	0.870001	8223.76	FALSE	410
2022-09-14	10:36:03	0.160369	0.713353	8170.63	FALSE	410
2022-09-14	10:36:03	-0.058613	-0.260722	8223.76	FALSE	410
2022-09-14	10:36:04	-0.16645	-0.740403	8170.63	FALSE	410
2022-09-14	10:36:04	-0.293269	-1.30452	8223.76	FALSE	410
2022-09-14	10:36:04	-0.442938	-1.97028	8170.63	FALSE	410
2022-09-14	10:36:05	-0.182684	-0.812615	8223.76	FALSE	410
2022-09-14	10:36:05	-0.0948979	-0.422125	8170.63	FALSE	410
2022-09-14	10:36:05	-0.0504705	-0.224503	8223.76	FALSE	410
2022-09-14	10:36:05	0.0225575	0.10034	8170.73	FALSE	410
2022-09-14	10:36:06	0.310853	1.38274	8225.14	FALSE	410
2022-09-14	10:36:06	0.272888	1.21386	8171.94	FALSE	410
2022-09-14	10:36:06	0.200115	0.890152	8226.03	FALSE	410
2022-09-14	10:36:06	0.119046	0.52954	8172.47	FALSE	410
2022-09-14	10:36:07	0.193601	0.861176	8226.89	FALSE	410
2022-09-14	10:36:07	0.161743	0.719465	8173.19	FALSE	410
2022-09-14	10:36:07	0.0706491	0.314261	8227.21	FALSE	410
2022-09-14	10:36:07	0.155942	0.693661	8173.88	FALSE	410
2022-09-14	10:36:08	0.125916	0.5601	8227.77	FALSE	410
2022-09-14	10:36:08	0.215992	0.960776	8174.85	FALSE	410
2022-09-14	10:36:08	0.361794	1.60933	8229.38	FALSE	410
2022-09-14	10:36:08	0.402659	1.79111	8176.64	FALSE	410
2022-09-14	10:36:09	0.423473	1.88369	8231.26	FALSE	410
2022-09-14	10:36:09	0.395534	1.75941	8178.4	FALSE	410
2022-09-14	10:36:09	0.623015	2.7713	8234.03	FALSE	410
2022-09-14	10:36:10	0.638333	2.83943	8181.24	FALSE	410
2022-09-14	10:36:10	0.423219	1.88256	8235.91	FALSE	410
2022-09-14	10:36:10	0.457926	2.03695	8183.27	FALSE	410
2022-09-14	10:36:10	0.734822	3.26864	8239.18	FALSE	410
2022-09-14	10:36:11	0.538842	2.39688	8185.67	FALSE	410
2022-09-14	10:36:11	0.513041	2.28211	8241.47	FALSE	410
2022-09-14	10:36:11	0.535585	2.38239	8188.05	FALSE	410
2022-09-14	10:36:11	0.528919	2.35274	8243.82	FALSE	410
2022-09-14	10:36:12	0.663117	2.94968	8191	FALSE	410
2022-09-14	10:36:12	0.584186	2.59858	8246.42	FALSE	410
2022-09-14	10:36:12	0.776756	3.45517	8194.46	FALSE	410
2022-09-14	10:36:12	0.817468	3.63626	8250.05	FALSE	410
2022-09-14	10:36:13	0.506425	2.25268	8196.71	FALSE	410
2022-09-14	10:36:13	0.574059	2.55353	8252.61	FALSE	410
2022-09-14	10:36:13	0.769936	3.42483	8200.13	FALSE	410
2022-09-14	10:36:14	0.797723	3.54843	8256.15	FALSE	410
2022-09-14	10:36:14	0.800063	3.55884	8203.69	FALSE	410
2022-09-14	10:36:14	0.413397	1.83887	8257.99	FALSE	410
2022-09-14	10:36:14	0.433753	1.92942	8205.62	FALSE	410
2022-09-14	10:36:15	0.427646	1.90225	8259.9	FALSE	410
2022-09-14	10:36:15	0.491463	2.18613	8207.81	FALSE	410
2022-09-14	10:36:15	0.428104	1.90429	8261.8	FALSE	410
2022-09-14	10:36:15	0.791616	3.52127	8211.33	FALSE	410
2022-09-14	10:36:16	0.541132	2.40706	8264.21	FALSE	410
2022-09-14	10:36:16	0.518333	2.30565	8213.64	FALSE	410
2022-09-14	10:36:16	0.360929	1.60548	8265.81	FALSE	410
2022-09-14	10:36:16	0.459707	2.04487	8215.68	FALSE	410
2022-09-14	10:36:17	0.278384	1.23831	8267.05	FALSE	410
2022-09-14	10:36:17	0.498079	2.21556	8217.9	FALSE	410
2022-09-14	10:36:17	0.714873	3.1799	8270.23	FALSE	410
2022-09-14	10:36:18	2.14872	9.55794	8227.45	FALSE	410
2022-09-14	10:36:18	1.62159	7.21316	8277.44	FALSE	410
2022-09-14	10:36:18	5.44871	24.237	8251.69	1	411
2022-09-14	10:36:18	6.62673	29.477	8306.92	1	412
2022-09-14	10:36:19	9.32749	41.4905	8293.18	1	413
2022-09-14	10:36:19	3.34307	14.8706	8321.79	1	414
2022-09-14	10:36:19	6.06515	26.979	8320.16	1	415
2022-09-14	10:36:19	1.81726	8.08354	8329.88	FALSE	415
2022-09-14	10:36:20	3.52128	15.6634	8335.82	1	416
2022-09-14	10:36:20	3.33197	14.8213	8344.7	1	417
2022-09-14	10:36:20	3.82047	16.9942	8352.82	1	418
2022-09-14	10:36:20	5.4397	24.1969	8368.89	1	419
2022-09-14	10:36:21	9.52739	42.3797	8395.2	1	420
2022-09-14	10:36:21	13.3215	59.2567	8428.15	1	421
2022-09-14	10:36:21	10.8761	48.3791	8443.58	1	422
2022-09-14	10:36:22	16.0948	71.5929	8499.74	1	423
2022-09-14	10:36:22	8.17619	36.3693	8479.95	1	424
2022-09-14	10:36:22	19.0101	84.5607	8584.3	1	425
2022-09-14	10:36:22	4.48749	19.9613	8499.91	1	426
2022-09-14	10:36:23	4.22652	18.8004	8603.1	1	427
2022-09-14	10:36:23	2.4278	10.7993	8510.71	FALSE	427
2022-09-14	10:36:23	2.20388	9.8033	8612.91	FALSE	427
2022-09-14	10:36:23	7.10729	31.6146	8542.32	1	428
2022-09-14	10:36:24	10.0768	44.8236	8657.73	1	429
2022-09-14	10:36:24	17.8729	79.5022	8621.82	1	430
2022-09-14	10:36:24	16.6148	73.906	8731.64	1	431
2022-09-14	10:36:24	28.5702	127.086	8748.91	1	432
2022-09-14	10:36:25	19.252	85.6367	8817.27	1	433
2022-09-14	10:36:25	8.31146	36.971	8785.88	1	434
2022-09-14	10:36:25	13.8528	61.62	8878.89	1	435
2022-09-14	10:36:26	14.1937	63.1364	8849.02	1	436
2022-09-14	10:36:26	10.0126	44.538	8923.43	1	437
2022-09-14	10:36:26	7.78759	34.6408	8883.66	1	438
2022-09-14	10:36:26	6.64199	29.5449	8952.98	1	439
2022-09-14	10:36:27	3.51146	15.6197	8899.28	1	440
2022-09-14	10:36:27	1.37905	6.13429	8959.11	FALSE	440
2022-09-14	10:36:27	0.37584	1.67181	8900.95	FALSE	440
2022-09-14	10:36:27	0.137112	0.609902	8959.72	FALSE	440
2022-09-14	10:36:28	0.189326	0.84216	8901.79	FALSE	440
2022-09-14	10:36:28	0.211158	0.939273	8960.66	FALSE	440
2022-09-14	10:36:28	0.688053	3.0606	8904.85	FALSE	440
2022-09-14	10:36:28	0.730801	3.25075	8963.91	FALSE	440
2022-09-14	10:36:29	0.743117	3.30553	8908.16	FALSE	440
2022-09-14	10:36:29	-6.64436	-29.5554	8963.91	FALSE	440
2022-09-14	10:36:29	0.409886	1.82325	8909.98	FALSE	440
2022-09-14	10:36:30	0.291361	1.29603	8965.21	FALSE	440
2022-09-14	10:36:30	0.0638297	0.283927	8910.26	FALSE	440
2022-09-14	10:36:30	0.0209289	0.0930959	8965.3	FALSE	440
2022-09-14	10:36:30	-0.140191	-0.623598	8910.26	FALSE	440
2022-09-14	10:36:31	-0.252404	-1.12274	8965.3	FALSE	440
2022-09-14	10:36:31	-0.197951	-0.880526	8910.26	FALSE	440
2022-09-14	10:36:31	0.0672394	0.299094	8965.6	FALSE	440
2022-09-14	10:36:31	0.681895	3.03321	8913.3	FALSE	440
2022-09-14	10:36:32	0.497417	2.21261	8967.81	FALSE	440
2022-09-14	10:36:32	0.129173	0.574587	8913.87	FALSE	440
2022-09-14	10:36:32	0.275585	1.22586	8969.04	FALSE	440
2022-09-14	10:36:32	0.288308	1.28245	8915.15	FALSE	440
2022-09-14	10:36:33	0.453855	2.01884	8971.06	FALSE	440
2022-09-14	10:36:33	0.168512	0.749575	8915.9	FALSE	440
2022-09-14	10:36:33	-0.0895544	-0.398356	8971.06	FALSE	440
2022-09-14	10:36:34	-0.0989692	-0.440235	8915.9	FALSE	440
2022-09-14	10:36:34	-0.0818699	-0.364174	8971.06	FALSE	440
2022-09-14	10:36:34	0.411056	1.82846	8917.73	FALSE	440
2022-09-14	10:36:34	0.564389	2.51052	8973.57	FALSE	440
2022-09-14	10:36:35	0.465255	2.06955	8919.8	FALSE	440
2022-09-14	10:36:35	0.530802	2.36111	8975.93	FALSE	440
2022-09-14	10:36:35	0.51986	2.31244	8922.11	FALSE	440
2022-09-14	10:36:35	0.528562	2.35115	8978.28	FALSE	440
2022-09-14	10:36:36	0.667901	2.97096	8925.09	FALSE	440
2022-09-14	10:36:36	0.706832	3.14413	8981.42	FALSE	440
2022-09-14	10:36:36	0.605865	2.69501	8927.78	FALSE	440
2022-09-14	10:36:36	0.557774	2.48109	8983.9	FALSE	440
2022-09-14	10:36:37	0.525865	2.33915	8930.12	FALSE	440
2022-09-14	10:36:37	0.450598	2.00435	8985.91	FALSE	440
2022-09-14	10:36:37	0.434008	1.93055	8932.05	FALSE	440
2022-09-14	10:36:38	0.424848	1.88981	8987.8	FALSE	440
2022-09-14	10:36:38	0.37986	1.68969	8933.74	FALSE	440
2022-09-14	10:36:38	0.365153	1.62427	8989.42	FALSE	440
2022-09-14	10:36:38	0.354466	1.57674	8935.32	FALSE	440
2022-09-14	10:36:39	0.35869	1.59552	8991.02	FALSE	440
2022-09-14	10:36:39	0.398995	1.77481	8937.09	FALSE	440
2022-09-14	10:36:39	0.465407	2.07022	8993.09	FALSE	440
2022-09-14	10:36:39	0.503168	2.23819	8939.33	FALSE	440
2022-09-14	10:36:40	0.443219	1.97153	8995.06	FALSE	440
2022-09-14	10:36:40	0.477468	2.12387	8941.45	FALSE	440
2022-09-14	10:36:40	0.499707	2.2228	8997.28	FALSE	440
2022-09-14	10:36:40	0.504644	2.24476	8943.7	FALSE	440
2022-09-14	10:36:41	0.569021	2.53112	8999.81	FALSE	440
2022-09-14	10:36:41	0.476298	2.11867	8945.82	FALSE	440
2022-09-14	10:36:41	0.459504	2.04397	9001.86	FALSE	440
2022-09-14	10:36:41	0.527799	2.34776	8948.16	FALSE	440
2022-09-14	10:36:42	0.552023	2.45551	9004.31	FALSE	440
2022-09-14	10:36:42	0.531463	2.36405	8950.53	FALSE	440
2022-09-14	10:36:42	0.484847	2.1567	9006.47	FALSE	440
2022-09-14	10:36:43	0.464898	2.06796	8952.6	FALSE	440
2022-09-14	10:36:43	0.471311	2.09649	9008.57	FALSE	440
2022-09-14	10:36:43	0.44383	1.97424	8954.57	FALSE	440
2022-09-14	10:36:43	0.489631	2.17798	9010.74	FALSE	440
2022-09-14	10:36:44	0.490954	2.18386	8956.75	FALSE	440
2022-09-14	10:36:44	0.444338	1.9765	9012.72	FALSE	440
2022-09-14	10:36:44	0.453652	2.01793	8958.77	FALSE	440
2022-09-14	10:36:44	0.433906	1.9301	9014.65	FALSE	440
2022-09-14	10:36:45	0.447392	1.99009	8960.76	FALSE	440
2022-09-14	10:36:45	0.417112	1.8554	9016.51	FALSE	440
2022-09-14	10:36:45	0.421438	1.87464	8962.64	FALSE	440
2022-09-14	10:36:45	0.425	1.89048	9018.4	FALSE	440
2022-09-14	10:36:46	0.451718	2.00933	8964.65	FALSE	440
2022-09-14	10:36:46	0.469122	2.08675	9020.48	FALSE	440
2022-09-14	10:36:46	0.469682	2.08924	8966.74	FALSE	440
2022-09-14	10:36:47	0.470751	2.09399	9022.58	FALSE	440
2022-09-14	10:36:47	0.469326	2.08766	8968.82	FALSE	440
2022-09-14	10:36:47	0.478537	2.12863	9024.71	FALSE	440
2022-09-14	10:36:47	0.475992	2.11731	8970.94	FALSE	440
2022-09-14	10:36:48	0.45813	2.03785	9026.74	FALSE	440
2022-09-14	10:36:48	0.491718	2.18726	8973.13	FALSE	440
2022-09-14	10:36:48	0.495026	2.20197	9028.95	FALSE	440
2022-09-14	10:36:48	0.52042	2.31493	8975.44	FALSE	440
2022-09-14	10:36:49	0.531005	2.36202	9031.31	FALSE	440
2022-09-14	10:36:49	0.576959	2.56643	8978.01	FALSE	440
2022-09-14	10:36:49	0.565407	2.51504	9033.82	FALSE	440
2022-09-14	10:36:49	0.57472	2.55647	8980.57	FALSE	440
2022-09-14	10:36:50	0.521947	2.32172	9036.15	FALSE	440
2022-09-14	10:36:50	0.530649	2.36043	8982.93	FALSE	440
2022-09-14	10:36:50	0.517366	2.30135	9038.45	FALSE	440
2022-09-14	10:36:51	0.522404	2.32376	8985.25	FALSE	440
2022-09-14	10:36:51	0.527544	2.34662	9040.79	FALSE	440
2022-09-14	10:36:51	0.623677	2.77424	8988.02	FALSE	440
2022-09-14	10:36:51	0.631005	2.80684	9043.6	FALSE	440
2022-09-14	10:36:52	0.61757	2.74707	8990.77	FALSE	440
2022-09-14	10:36:52	0.58841	2.61737	9046.22	FALSE	440
2022-09-14	10:36:52	0.565102	2.51369	8993.29	FALSE	440
2022-09-14	10:36:52	0.465	2.06841	9048.29	FALSE	440
2022-09-14	10:36:53	0.469122	2.08675	8995.37	FALSE	440
2022-09-14	10:36:53	0.615229	2.73666	9051.02	FALSE	440
2022-09-14	10:36:53	0.96098	4.27463	8999.65	FALSE	440
2022-09-14	10:36:53	0.987901	4.39438	9055.42	FALSE	440
2022-09-14	10:36:54	1.35228	6.01521	9005.66	FALSE	440
2022-09-14	10:36:54	1.28103	5.69828	9061.12	FALSE	440
2022-09-14	10:36:54	1.20709	5.36938	9011.03	FALSE	440
2022-09-14	10:36:55	1.09004	4.84872	9065.96	FALSE	440
2022-09-14	10:36:55	0.924135	4.11074	9015.14	FALSE	440
2022-09-14	10:36:55	0.770649	3.428	9069.39	FALSE	440
2022-09-14	10:36:55	0.789479	3.51176	9018.65	FALSE	440
2022-09-14	10:36:56	0.867951	3.86082	9073.25	FALSE	440
2022-09-14	10:36:56	1.3509	6.00907	9024.66	FALSE	440
2022-09-14	10:36:56	1.33314	5.93007	9079.18	FALSE	440
2022-09-14	10:36:56	1.5053	6.69588	9031.36	FALSE	440
2022-09-14	10:36:57	1.46113	6.4994	9085.68	FALSE	440
2022-09-14	10:36:57	0.686018	3.05155	9034.41	FALSE	440
2022-09-14	10:36:57	0.456196	2.02925	9087.71	FALSE	440
2022-09-14	10:36:57	0.411005	1.82823	9036.24	FALSE	440
2022-09-14	10:36:58	0.391514	1.74153	9089.45	FALSE	440
2022-09-14	10:36:58	0.454262	2.02065	9038.26	FALSE	440
2022-09-14	10:36:58	0.681794	3.03276	9092.49	FALSE	440
2022-09-14	10:36:59	1.02001	4.53721	9042.8	FALSE	440
2022-09-14	10:36:59	3.81304	16.9612	9109.45	1	441
2022-09-14	10:36:59	4.81996	21.4401	9064.24	1	442
2022-09-14	10:36:59	7.15309	31.8184	9141.27	1	443
2022-09-14	10:37:00	5.97472	26.5767	9090.81	1	444
2022-09-14	10:37:00	2.9195	12.9865	9154.25	FALSE	444
2022-09-14	10:37:00	1.18485	5.27045	9096.08	FALSE	444
2022-09-14	10:37:00	4.35513	19.3725	9173.62	1	445
2022-09-14	10:37:01	3.59197	15.9778	9112.06	1	446
2022-09-14	10:37:01	7.02892	31.266	9204.89	1	447
2022-09-14	10:37:01	1.53721	6.83782	9118.9	FALSE	447
2022-09-14	10:37:01	5.17233	23.0076	9227.9	1	448
2022-09-14	10:37:02	2.17508	9.67519	9128.57	FALSE	448
2022-09-14	10:37:02	2.43681	10.8394	9238.74	FALSE	448
2022-09-14	10:37:02	1.51462	6.73733	9135.31	FALSE	448
2022-09-14	10:37:03	0.856603	3.81034	9242.55	FALSE	448
2022-09-14	10:37:03	1.71223	7.61634	9142.93	FALSE	448
2022-09-14	10:37:03	1.49243	6.63863	9249.19	FALSE	448
2022-09-14	10:37:03	2.83986	12.6323	9155.56	FALSE	448
2022-09-14	10:37:04	2.54332	11.3132	9260.5	FALSE	448
2022-09-14	10:37:04	6.86769	30.5489	9186.11	1	449
2022-09-14	10:37:04	1.20693	5.36867	9265.87	FALSE	449
2022-09-14	10:37:04	5.61568	24.9797	9211.09	1	450
2022-09-14	10:37:05	2.00225	8.90641	9274.77	FALSE	450
2022-09-14	10:37:05	2.46123	10.948	9222.04	FALSE	450
2022-09-14	10:37:05	1.80805	8.04257	9282.82	FALSE	450
2022-09-14	10:37:05	1.41894	6.31173	9228.35	FALSE	450
2022-09-14	10:37:06	4.72958	21.0381	9303.86	1	451
2022-09-14	10:37:06	3.02108	13.4384	9241.79	1	452
2022-09-14	10:37:06	3.90765	17.382	9321.24	1	453
2022-09-14	10:37:06	2.68072	11.9244	9253.71	FALSE	453
2022-09-14	10:37:07	5.53039	24.6003	9345.84	1	454
2022-09-14	10:37:07	1.67691	7.45923	9261.17	FALSE	454
2022-09-14	10:37:07	5.31258	23.6314	9369.47	1	455
2022-09-14	10:37:08	1.31177	5.83502	9267.01	FALSE	455
2022-09-14	10:37:08	5.15003	22.9084	9392.38	1	456
2022-09-14	10:37:08	1.08622	4.83172	9271.84	FALSE	456
2022-09-14	10:37:08	1.84403	8.20261	9400.58	FALSE	456
2022-09-14	10:37:09	1.26856	5.64281	9277.48	FALSE	456
2022-09-14	10:37:09	3.5821	15.9339	9416.51	1	457
2022-09-14	10:37:09	4.28586	19.0644	9296.54	1	458
2022-09-14	10:37:09	8.13599	36.1905	9452.7	1	459
2022-09-14	10:37:10	4.13446	18.3909	9314.94	1	460
2022-09-14	10:37:10	7.06408	31.4224	9484.13	1	461
2022-09-14	10:37:10	5.60734	24.9426	9339.88	1	462
2022-09-14	10:37:10	14.0947	62.696	9546.82	1	463
2022-09-14	10:37:11	18.904	84.0888	9423.97	1	464
2022-09-14	10:37:11	20.9172	93.0439	9639.87	1	465
2022-09-14	10:37:11	20.3017	90.306	9514.27	1	466
2022-09-14	10:37:12	35.4068	157.497	9797.36	1	467
2022-09-14	10:37:12	22.4288	99.7678	9614.04	1	468
2022-09-14	10:37:12	12.952	57.6131	9854.98	1	469
2022-09-14	10:37:12	14.255	63.4091	9677.45	1	470
2022-09-14	10:37:13	16.617	73.9157	9928.89	1	471
2022-09-14	10:37:13	17.1358	76.2235	9753.67	1	472
2022-09-14	10:37:13	16.9812	75.5358	10004.4	1	473
2022-09-14	10:37:13	22.2116	98.8016	9852.47	1	474
2022-09-14	10:37:14	20.4721	91.064	10095.5	1	475
2022-09-14	10:37:14	32.7795	145.81	9998.28	1	476
2022-09-14	10:37:14	15.1773	67.5117	10163	1	477
2022-09-14	10:37:14	10.2904	45.7738	10044.1	1	478
2022-09-14	10:37:15	5.54993	24.6872	10187.7	1	479
2022-09-14	10:37:15	2.11513	9.40852	10053.5	FALSE	479
2022-09-14	10:37:15	1.15843	5.15293	10192.8	FALSE	479
2022-09-14	10:37:16	0.64617	2.87429	10056.3	FALSE	479
2022-09-14	10:37:16	2.4877	11.0658	10203.9	FALSE	479
2022-09-14	10:37:16	5.7052	25.3779	10081.7	1	480
2022-09-14	10:37:16	6.3223	28.1229	10232	1	481
2022-09-14	10:37:17	4.33177	19.2686	10101	1	482
2022-09-14	10:37:17	4.0649	18.0815	10250.1	1	483
2022-09-14	10:37:17	3.69925	16.455	10117.4	1	484
2022-09-14	10:37:17	4.06413	18.0781	10268.2	1	485
2022-09-14	10:37:18	4.53568	20.1756	10137.6	1	486
2022-09-14	10:37:18	4.83619	21.5123	10289.7	1	487
2022-09-14	10:37:18	5.00103	22.2456	10159.9	1	488
2022-09-14	10:37:18	5.0478	22.4536	10312.2	1	489
2022-09-14	10:37:19	4.8936	21.7677	10181.6	1	490
2022-09-14	10:37:19	4.82368	21.4567	10333.6	1	491
2022-09-14	10:37:19	4.28251	19.0495	10200.7	1	492
2022-09-14	10:37:20	2.1395	9.51692	10343.1	FALSE	492
2022-09-14	10:37:20	0.640267	2.84804	10203.5	FALSE	492
2022-09-14	10:37:20	0.731667	3.2546	10346.4	FALSE	492
2022-09-14	10:37:20	0.433753	1.92942	10205.5	FALSE	492
2022-09-14	10:37:21	0.369173	1.64216	10348	FALSE	492
2022-09-14	10:37:21	0.394873	1.75647	10207.2	FALSE	492
2022-09-14	10:37:21	0.518893	2.30814	10350.3	FALSE	492

## Sheet: Reggie_martin_2022914103212 (2)
Date	Time	Lbs	Total force x time			**GoPro Fitting: 1021
2022-09-14	10:32:12	0.274415	0.274415	FALSE	0
2022-09-14	10:32:12	0.257265	0.53168	FALSE	0
2022-09-14	10:32:12	0.26154	0.79322	FALSE	0
2022-09-14	10:32:13	0.301845	1.09506	FALSE	0
2022-09-14	10:32:13	0.421387	1.51645	FALSE	0
2022-09-14	10:32:13	0.431005	1.94746	FALSE	0
2022-09-14	10:32:13	0.260725	2.20818	FALSE	0
2022-09-14	10:32:14	0.364135	2.57232	FALSE	0
2022-09-14	10:32:14	0.44383	3.01615	FALSE	0
2022-09-14	10:32:14	0.427799	3.44395	FALSE	0
2022-09-14	10:32:14	0.390089	3.83404	FALSE	0
2022-09-14	10:32:15	0.441438	4.27547	FALSE	0
2022-09-14	10:32:15	0.386476	4.66195	FALSE	0
2022-09-14	10:32:15	0.363575	5.02552	FALSE	0
2022-09-14	10:32:15	0.355687	5.38121	FALSE	0
2022-09-14	10:32:16	0.35584	5.73705	FALSE	0
2022-09-14	10:32:16	0.379351	6.1164	FALSE	0
2022-09-14	10:32:16	0.358435	6.47484	FALSE	0
2022-09-14	10:32:16	0.359606	6.83444	FALSE	0
2022-09-14	10:32:17	0.391361	7.2258	FALSE	0
2022-09-14	10:32:17	0.377112	7.60292	FALSE	0
2022-09-14	10:32:17	0.414109	8.01703	FALSE	0
2022-09-14	10:32:18	0.387748	8.40477	FALSE	0
2022-09-14	10:32:18	0.381336	8.78611	FALSE	0
2022-09-14	10:32:18	0.368053	9.15416	FALSE	0
2022-09-14	10:32:18	0.380776	9.53494	FALSE	0
2022-09-14	10:32:19	0.382099	9.91704	FALSE	0
2022-09-14	10:32:19	0.359606	10.2766	FALSE	0
2022-09-14	10:32:19	0.389733	10.6664	FALSE	0
2022-09-14	10:32:19	0.43411	11.1005	FALSE	0
2022-09-14	10:32:20	0.354211	11.4547	FALSE	0
2022-09-14	10:32:20	0.368461	11.8232	FALSE	0
2022-09-14	10:32:20	0.382099	12.2053	FALSE	0
2022-09-14	10:32:20	0.381387	12.5866	FALSE	0
2022-09-14	10:32:21	0.417926	13.0046	FALSE	0
2022-09-14	10:32:21	0.311463	13.316	FALSE	0
2022-09-14	10:32:21	0.306679	13.6227	FALSE	0
2022-09-14	10:32:22	0.282863	13.9056	FALSE	0
2022-09-14	10:32:22	0.433906	14.3395	FALSE	0
2022-09-14	10:32:22	0.486221	14.8257	FALSE	0
2022-09-14	10:32:22	0.490903	15.3166	FALSE	0
2022-09-14	10:32:23	0.388766	15.7054	FALSE	0
2022-09-14	10:32:23	0.624949	16.3303	FALSE	0
2022-09-14	10:32:23	0.430293	16.7606	FALSE	0
2022-09-14	10:32:23	0.366781	17.1274	FALSE	0
2022-09-14	10:32:24	0.348104	17.4755	FALSE	0
2022-09-14	10:32:24	0.457723	17.9332	FALSE	0
2022-09-14	10:32:24	0.418741	18.352	FALSE	0
2022-09-14	10:32:24	0.398944	18.7509	FALSE	0
2022-09-14	10:32:25	0.392125	19.143	FALSE	0
2022-09-14	10:32:25	0.37701	19.52	FALSE	0
2022-09-14	10:32:25	0.397875	19.9179	FALSE	0
2022-09-14	10:32:26	0.384542	20.3025	FALSE	0
2022-09-14	10:32:26	0.417774	20.7202	FALSE	0
2022-09-14	10:32:26	0.404542	21.1248	FALSE	0
2022-09-14	10:32:26	0.405102	21.5299	FALSE	0
2022-09-14	10:32:27	0.419148	21.949	FALSE	0
2022-09-14	10:32:27	0.41986	22.3689	FALSE	0
2022-09-14	10:32:27	0.422761	22.7916	FALSE	0
2022-09-14	10:32:27	0.432685	23.2243	FALSE	0
2022-09-14	10:32:28	0.404237	23.6286	FALSE	0
2022-09-14	10:32:28	0.402252	24.0308	FALSE	0
2022-09-14	10:32:28	0.532837	24.5637	FALSE	0
2022-09-14	10:32:28	0.266985	24.8306	FALSE	0
2022-09-14	10:32:29	-0.078562	24.8306	FALSE	0
2022-09-14	10:32:29	-0.452862	24.8306	FALSE	0
2022-09-14	10:32:29	-0.454694	24.8306	FALSE	0
2022-09-14	10:32:30	-0.598664	24.8306	FALSE	0
2022-09-14	10:32:30	-0.591997	24.8306	FALSE	0
2022-09-14	10:32:30	-0.158257	24.8306	FALSE	0
2022-09-14	10:32:30	0.00927507	24.8399	FALSE	0
2022-09-14	10:32:31	0.0161453	24.8561	FALSE	0
2022-09-14	10:32:31	0.114211	24.9703	FALSE	0
2022-09-14	10:32:31	0.0447967	25.0151	FALSE	0
2022-09-14	10:32:31	-0.0226333	25.0151	FALSE	0
2022-09-14	10:32:32	0.0198094	25.0349	FALSE	0
2022-09-14	10:32:32	0.713906	25.7488	FALSE	0
2022-09-14	10:32:32	0.519555	26.2683	FALSE	0
2022-09-14	10:32:32	0.249428	26.5178	FALSE	0
2022-09-14	10:32:33	0.0910562	26.6088	FALSE	0
2022-09-14	10:32:33	1.18744	27.7963	FALSE	0
2022-09-14	10:32:33	1.67187	29.4681	FALSE	0
2022-09-14	10:32:34	2.59823	32.0664	FALSE	0
2022-09-14	10:32:34	1.38251	33.4489	FALSE	0
2022-09-14	10:32:34	0.881641	34.3305	FALSE	0
2022-09-14	10:32:34	0.938232	35.2687	FALSE	0
2022-09-14	10:32:35	0.727392	35.9961	FALSE	0
2022-09-14	10:32:35	0.51701	36.5131	FALSE	0
2022-09-14	10:32:35	1.23431	37.7475	FALSE	0
2022-09-14	10:32:35	1.40052	39.148	FALSE	0
2022-09-14	10:32:36	1.24648	40.3945	FALSE	0
2022-09-14	10:32:36	0.898486	41.2929	FALSE	0
2022-09-14	10:32:36	0.756603	42.0495	FALSE	0
2022-09-14	10:32:36	0.846425	42.896	FALSE	0
2022-09-14	10:32:37	0.916145	43.8121	FALSE	0
2022-09-14	10:32:37	1.11477	44.9269	FALSE	0
2022-09-14	10:32:37	1.46989	46.3968	FALSE	0
2022-09-14	10:32:38	1.79854	48.1953	FALSE	0
2022-09-14	10:32:38	2.13823	50.3335	FALSE	0
2022-09-14	10:32:38	2.18805	52.5216	FALSE	0
2022-09-14	10:32:38	2.58775	55.1093	FALSE	0
2022-09-14	10:32:39	2.49955	57.6089	FALSE	0
2022-09-14	10:32:39	2.76999	60.3789	FALSE	0
2022-09-14	10:32:39	1.44846	61.8273	FALSE	0
2022-09-14	10:32:39	0.986069	62.8134	FALSE	0
2022-09-14	10:32:40	0.806883	63.6203	FALSE	0
2022-09-14	10:32:40	0.766781	64.3871	FALSE	0
2022-09-14	10:32:40	1.17279	65.5599	FALSE	0
2022-09-14	10:32:40	1.28195	66.8418	FALSE	0
2022-09-14	10:32:41	0.933397	67.7752	FALSE	0
2022-09-14	10:32:41	0.427239	68.2025	FALSE	0
2022-09-14	10:32:41	0.398333	68.6008	FALSE	0
2022-09-14	10:32:42	0.44556	69.0463	FALSE	0
2022-09-14	10:32:42	0.669834	69.7162	FALSE	0
2022-09-14	10:32:42	1.20235	70.9185	FALSE	0
2022-09-14	10:32:42	0.698486	71.617	FALSE	0
2022-09-14	10:32:43	0.52897	72.146	FALSE	0
2022-09-14	10:32:43	0.705204	72.8512	FALSE	0
2022-09-14	10:32:43	1.01574	73.8669	FALSE	0
2022-09-14	10:32:43	0.731259	74.5982	FALSE	0
2022-09-14	10:32:44	0.729784	75.328	FALSE	0
2022-09-14	10:32:44	0.323881	75.6519	FALSE	0
2022-09-14	10:32:44	0.366069	76.0179	FALSE	0
2022-09-14	10:32:44	0.255942	76.2739	FALSE	0
2022-09-14	10:32:45	0.295789	76.5697	FALSE	0
2022-09-14	10:32:45	0.262048	76.8317	FALSE	0
2022-09-14	10:32:45	0.165356	76.9971	FALSE	0
2022-09-14	10:32:46	0.274669	77.2717	FALSE	0
2022-09-14	10:32:46	1.05431	78.326	FALSE	0
2022-09-14	10:32:46	3.07446	81.4005	1	1
2022-09-14	10:32:46	3.95701	85.3575	1	2
2022-09-14	10:32:47	4.8191	90.1766	1	3
2022-09-14	10:32:47	1.54352	91.7201	FALSE	3
2022-09-14	10:32:47	1.46546	93.1856	FALSE	3
2022-09-14	10:32:47	0.528766	93.7144	FALSE	3
2022-09-14	10:32:48	0.582812	94.2972	FALSE	3
2022-09-14	10:32:48	0.857774	95.1549	FALSE	3
2022-09-14	10:32:48	0.600776	95.7557	FALSE	3
2022-09-14	10:32:48	1.45309	97.2088	FALSE	3
2022-09-14	10:32:49	2.17599	99.3848	FALSE	3
2022-09-14	10:32:49	5.62321	105.008	1	4
2022-09-14	10:32:49	5.56774	110.576	1	5
2022-09-14	10:32:50	5.23624	115.812	1	6
2022-09-14	10:32:50	5.11558	120.928	1	7
2022-09-14	10:32:50	6.36886	127.296	1	8
2022-09-14	10:32:50	10.5402	137.837	1	9
2022-09-14	10:32:51	5.74021	143.577	1	10
2022-09-14	10:32:51	7.17283	150.75	1	11
2022-09-14	10:32:51	2.71182	153.461	FALSE	11
2022-09-14	10:32:51	2.95991	156.421	FALSE	11
2022-09-14	10:32:52	4.23614	160.658	1	12
2022-09-14	10:32:52	6.89059	167.548	1	13
2022-09-14	10:32:52	16.7636	184.312	1	14
2022-09-14	10:32:52	13.2861	197.598	1	15
2022-09-14	10:32:53	11.8298	209.428	1	16
2022-09-14	10:32:53	16.1573	225.585	1	17
2022-09-14	10:32:53	8.27085	233.856	1	18
2022-09-14	10:32:54	19.6351	253.491	1	19
2022-09-14	10:32:54	13.3031	266.794	1	20
2022-09-14	10:32:54	9.0966	275.891	1	21
2022-09-14	10:32:54	11.177	287.068	1	22
2022-09-14	10:32:55	5.01355	292.081	1	23
2022-09-14	10:32:55	10.3005	302.382	1	24
2022-09-14	10:32:55	12.205	314.587	1	25
2022-09-14	10:32:55	3.1963	317.783	1	26
2022-09-14	10:32:56	8.74978	326.533	1	27
2022-09-14	10:32:56	8.68607	335.219	1	28
2022-09-14	10:32:56	4.37553	339.594	1	29
2022-09-14	10:32:56	2.20174	341.796	FALSE	29
2022-09-14	10:32:57	3.02398	344.82	1	30
2022-09-14	10:32:57	8.38423	353.204	1	31
2022-09-14	10:32:57	19.5057	372.71	1	32
2022-09-14	10:32:58	8.34454	381.054	1	33
2022-09-14	10:32:58	0.372277	381.427	FALSE	33
2022-09-14	10:32:58	0.710445	382.137	FALSE	33
2022-09-14	10:32:58	0.422506	382.56	FALSE	33
2022-09-14	10:32:59	0.136654	382.696	FALSE	33
2022-09-14	10:32:59	0.199148	382.896	FALSE	33
2022-09-14	10:32:59	-0.0157631	382.896	FALSE	33
2022-09-14	10:32:59	0.268308	383.164	FALSE	33
2022-09-14	10:33:00	0.115382	383.279	FALSE	33
2022-09-14	10:33:00	0.228206	383.507	FALSE	33
2022-09-14	10:33:00	0.109021	383.616	FALSE	33
2022-09-14	10:33:00	0.163015	383.779	FALSE	33
2022-09-14	10:33:01	0.400929	384.18	FALSE	33
2022-09-14	10:33:01	0.66841	384.849	FALSE	33
2022-09-14	10:33:01	0.483117	385.332	FALSE	33
2022-09-14	10:33:02	0.680878	386.013	FALSE	33
2022-09-14	10:33:02	1.13426	387.147	FALSE	33
2022-09-14	10:33:02	0.493651	387.641	FALSE	33
2022-09-14	10:33:02	1.24586	388.887	FALSE	33
2022-09-14	10:33:03	1.90948	390.796	FALSE	33
2022-09-14	10:33:03	1.9792	392.775	FALSE	33
2022-09-14	10:33:03	1.17467	393.95	FALSE	33
2022-09-14	10:33:03	3.9193	397.869	1	34
2022-09-14	10:33:04	18.6797	416.549	1	35
2022-09-14	10:33:04	20.3859	436.935	1	36
2022-09-14	10:33:04	19.1638	456.099	1	37
2022-09-14	10:33:04	11.2149	467.314	1	38
2022-09-14	10:33:05	7.61986	474.933	1	39
2022-09-14	10:33:05	8.03477	482.968	1	40
2022-09-14	10:33:05	3.71848	486.687	1	41
2022-09-14	10:33:06	5.1596	491.846	1	42
2022-09-14	10:33:06	2.47085	494.317	FALSE	42
2022-09-14	10:33:06	0.968613	495.286	FALSE	42
2022-09-14	10:33:06	0.475178	495.761	FALSE	42
2022-09-14	10:33:07	0.262456	496.023	FALSE	42
2022-09-14	10:33:07	0.315127	496.338	FALSE	42
2022-09-14	10:33:07	0.306221	496.645	FALSE	42
2022-09-14	10:33:07	0.468104	497.113	FALSE	42
2022-09-14	10:33:08	0.33701	497.45	FALSE	42
2022-09-14	10:33:08	1.52973	498.98	FALSE	42
2022-09-14	10:33:08	2.12592	501.105	FALSE	42
2022-09-14	10:33:08	3.96668	505.072	1	43
2022-09-14	10:33:09	2.50714	507.579	FALSE	43
2022-09-14	10:33:09	1.32933	508.909	FALSE	43
2022-09-14	10:33:09	1.22963	510.138	FALSE	43
2022-09-14	10:33:10	3.5967	513.735	1	44
2022-09-14	10:33:10	6.71782	520.453	1	45
2022-09-14	10:33:10	5.39543	525.848	1	46
2022-09-14	10:33:10	7.35253	533.201	1	47
2022-09-14	10:33:11	5.51385	538.715	1	48
2022-09-14	10:33:11	4.52052	543.235	1	49
2022-09-14	10:33:11	3.43762	546.673	1	50
2022-09-14	10:33:11	3.73945	550.412	1	51
2022-09-14	10:33:12	6.18714	556.599	1	52
2022-09-14	10:33:12	6.18566	562.785	1	53
2022-09-14	10:33:12	6.75314	569.538	1	54
2022-09-14	10:33:12	9.66759	579.206	1	55
2022-09-14	10:33:13	3.30897	582.515	1	56
2022-09-14	10:33:13	15.7382	598.253	1	57
2022-09-14	10:33:13	6.85029	605.103	1	58
2022-09-14	10:33:14	2.74159	607.845	FALSE	58
2022-09-14	10:33:14	0.517315	608.362	FALSE	58
2022-09-14	10:33:14	0.268664	608.631	FALSE	58
2022-09-14	10:33:14	0.454517	609.085	FALSE	58
2022-09-14	10:33:15	0.0546694	609.14	FALSE	58
2022-09-14	10:33:15	0.23411	609.374	FALSE	58
2022-09-14	10:33:15	-0.0513865	609.374	FALSE	58
2022-09-14	10:33:15	-0.220598	609.374	FALSE	58
2022-09-14	10:33:16	-0.43902	609.374	FALSE	58
2022-09-14	10:33:16	-0.128384	609.374	FALSE	58
2022-09-14	10:33:16	0.0833717	609.457	FALSE	58
2022-09-14	10:33:16	0.849784	610.307	FALSE	58
2022-09-14	10:33:17	2.06027	612.367	FALSE	58
2022-09-14	10:33:17	3.44093	615.808	1	59
2022-09-14	10:33:17	3.22841	619.037	1	60
2022-09-14	10:33:18	0.707239	619.744	FALSE	60
2022-09-14	10:33:18	1.11268	620.857	FALSE	60
2022-09-14	10:33:18	1.42062	622.277	FALSE	60
2022-09-14	10:33:18	2.81854	625.096	FALSE	60
2022-09-14	10:33:19	4.52474	629.621	1	61
2022-09-14	10:33:19	8.24789	637.868	1	62
2022-09-14	10:33:19	2.01136	639.88	FALSE	62
2022-09-14	10:33:19	0.322252	640.202	FALSE	62
2022-09-14	10:33:20	0.28098	640.483	FALSE	62
2022-09-14	10:33:20	0.241031	640.724	FALSE	62
2022-09-14	10:33:20	0.397926	641.122	FALSE	62
2022-09-14	10:33:20	0.274567	641.397	FALSE	62
2022-09-14	10:33:21	0.250853	641.647	FALSE	62
2022-09-14	10:33:21	-0.281106	641.647	FALSE	62
2022-09-14	10:33:21	-0.347977	641.647	FALSE	62
2022-09-14	10:33:22	-0.324312	641.647	FALSE	62
2022-09-14	10:33:22	-0.114643	641.647	FALSE	62
2022-09-14	10:33:22	1.73039	643.378	FALSE	62
2022-09-14	10:33:22	2.41874	645.797	FALSE	62
2022-09-14	10:33:23	3.71105	649.508	1	63
2022-09-14	10:33:23	7.94087	657.448	1	64
2022-09-14	10:33:23	8.09579	665.544	1	65
2022-09-14	10:33:23	5.96657	671.511	1	66
2022-09-14	10:33:24	4.53044	676.041	1	67
2022-09-14	10:33:24	0.398232	676.44	FALSE	67
2022-09-14	10:33:24	0.049275	676.489	FALSE	67
2022-09-14	10:33:24	0.0173157	676.506	FALSE	67
2022-09-14	10:33:25	-0.0220226	676.506	FALSE	67
2022-09-14	10:33:25	0.0238807	676.53	FALSE	67
2022-09-14	10:33:25	0.0250003	676.555	FALSE	67
2022-09-14	10:33:26	0.74785	677.303	FALSE	67
2022-09-14	10:33:26	3.68627	680.989	1	68
2022-09-14	10:33:26	8.73177	689.721	1	69
2022-09-14	10:33:26	8.97365	698.695	1	70
2022-09-14	10:33:27	13.1022	711.797	1	71
2022-09-14	10:33:27	7.39858	719.195	1	72
2022-09-14	10:33:27	12.557	731.752	1	73
2022-09-14	10:33:27	10.5147	742.267	1	74
2022-09-14	10:33:28	7.72948	749.996	1	75
2022-09-14	10:33:28	9.81548	759.812	1	76
2022-09-14	10:33:28	13.5512	773.363	1	77
2022-09-14	10:33:28	11.3398	784.703	1	78
2022-09-14	10:33:29	7.19141	791.894	1	79
2022-09-14	10:33:29	5.72785	797.622	1	80
2022-09-14	10:33:29	4.72225	802.344	1	81
2022-09-14	10:33:29	3.53966	805.884	1	82
2022-09-14	10:33:30	2.26357	808.148	FALSE	82
2022-09-14	10:33:30	0.794618	808.942	FALSE	82
2022-09-14	10:33:30	0.00637431	808.949	FALSE	82
2022-09-14	10:33:31	0.011158	808.96	FALSE	82
2022-09-14	10:33:31	-0.0278242	808.96	FALSE	82
2022-09-14	10:33:31	6.3875e-05	808.96	FALSE	82
2022-09-14	10:33:31	-0.0040074	808.96	FALSE	82
2022-09-14	10:33:32	0.0328374	808.993	FALSE	82
2022-09-14	10:33:32	0.0958908	809.089	FALSE	82
2022-09-14	10:33:32	0.859606	809.948	FALSE	82
2022-09-14	10:33:32	1.50673	811.455	FALSE	82
2022-09-14	10:33:33	2.76474	814.22	FALSE	82
2022-09-14	10:33:33	2.56902	816.789	FALSE	82
2022-09-14	10:33:33	2.29991	819.089	FALSE	82
2022-09-14	10:33:33	2.50673	821.595	FALSE	82
2022-09-14	10:33:34	3.34999	824.945	1	83
2022-09-14	10:33:34	1.95869	826.904	FALSE	83
2022-09-14	10:33:34	2.51238	829.416	FALSE	83
2022-09-14	10:33:35	0.94444	830.361	FALSE	83
2022-09-14	10:33:35	0.512379	830.873	FALSE	83
2022-09-14	10:33:35	-0.109046	830.873	FALSE	83
2022-09-14	10:33:35	0.0189442	830.892	FALSE	83
2022-09-14	10:33:36	0.0839824	830.976	FALSE	83
2022-09-14	10:33:36	0.0925829	831.069	FALSE	83
2022-09-14	10:33:36	-0.00349849	831.069	FALSE	83
2022-09-14	10:33:36	0.209784	831.279	FALSE	83
2022-09-14	10:33:37	0.213244	831.492	FALSE	83
2022-09-14	10:33:37	1.13436	832.626	FALSE	83
2022-09-14	10:33:37	2.63243	835.259	FALSE	83
2022-09-14	10:33:37	3.26322	838.522	1	84
2022-09-14	10:33:38	1.67182	840.194	FALSE	84
2022-09-14	10:33:38	1.37538	841.569	FALSE	84
2022-09-14	10:33:38	0.607646	842.177	FALSE	84
2022-09-14	10:33:39	0.44902	842.626	FALSE	84
2022-09-14	10:33:39	0.419097	843.045	FALSE	84
2022-09-14	10:33:39	0.37986	843.425	FALSE	84
2022-09-14	10:33:39	0.388817	843.813	FALSE	84
2022-09-14	10:33:40	0.44271	844.256	FALSE	84
2022-09-14	10:33:40	0.44159	844.698	FALSE	84
2022-09-14	10:33:40	0.525967	845.224	FALSE	84
2022-09-14	10:33:40	0.599707	845.823	FALSE	84
2022-09-14	10:33:41	0.756552	846.58	FALSE	84
2022-09-14	10:33:41	0.959249	847.539	FALSE	84
2022-09-14	10:33:41	1.17238	848.712	FALSE	84
2022-09-14	10:33:41	1.45034	850.162	FALSE	84
2022-09-14	10:33:42	0.848919	851.011	FALSE	84
2022-09-14	10:33:42	0.875178	851.886	FALSE	84
2022-09-14	10:33:42	0.924389	852.81	FALSE	84
2022-09-14	10:33:43	0.911361	853.722	FALSE	84
2022-09-14	10:33:43	0.821641	854.543	FALSE	84
2022-09-14	10:33:43	0.841743	855.385	FALSE	84
2022-09-14	10:33:43	0.742201	856.127	FALSE	84
2022-09-14	10:33:44	0.398893	856.526	FALSE	84
2022-09-14	10:33:44	0.385254	856.912	FALSE	84
2022-09-14	10:33:44	0.035789	856.947	FALSE	84
2022-09-14	10:33:44	-0.299936	856.947	FALSE	84
2022-09-14	10:33:45	-0.593371	856.947	FALSE	84
2022-09-14	10:33:45	-0.767365	856.947	FALSE	84
2022-09-14	10:33:45	-0.426857	856.947	FALSE	84
2022-09-14	10:33:45	0.912633	857.86	FALSE	84
2022-09-14	10:33:46	2.96464	860.825	FALSE	84
2022-09-14	10:33:46	6.00744	866.832	1	85
2022-09-14	10:33:46	7.89192	874.724	1	86
2022-09-14	10:33:47	6.62749	881.351	1	87
2022-09-14	10:33:47	7.8053	889.157	1	88
2022-09-14	10:33:47	5.17411	894.331	1	89
2022-09-14	10:33:47	12.5843	906.915	1	90
2022-09-14	10:33:48	12.3491	919.264	1	91
2022-09-14	10:33:48	7.40718	926.671	1	92
2022-09-14	10:33:48	11.5594	938.231	1	93
2022-09-14	10:33:48	1.43365	939.664	FALSE	93
2022-09-14	10:33:49	4.73182	944.396	1	94
2022-09-14	10:33:49	1.85625	946.253	FALSE	94
2022-09-14	10:33:49	0.541794	946.794	FALSE	94
2022-09-14	10:33:49	0.648919	947.443	FALSE	94
2022-09-14	10:33:50	0.166629	947.61	FALSE	94
2022-09-14	10:33:50	0.664796	948.275	FALSE	94
2022-09-14	10:33:50	0.29014	948.565	FALSE	94
2022-09-14	10:33:51	0.423982	948.989	FALSE	94
2022-09-14	10:33:51	0.5364	949.525	FALSE	94
2022-09-14	10:33:51	0.404033	949.929	FALSE	94
2022-09-14	10:33:51	0.429275	950.359	FALSE	94
2022-09-14	10:33:52	0.509987	950.869	FALSE	94
2022-09-14	10:33:52	0.452735	951.321	FALSE	94
2022-09-14	10:33:52	0.352786	951.674	FALSE	94
2022-09-14	10:33:52	0.398842	952.073	FALSE	94
2022-09-14	10:33:53	0.445051	952.518	FALSE	94
2022-09-14	10:33:53	0.320369	952.838	FALSE	94
2022-09-14	10:33:53	0.374313	953.213	FALSE	94
2022-09-14	10:33:53	1.14184	954.354	FALSE	94
2022-09-14	10:33:54	2.48887	956.843	FALSE	94
2022-09-14	10:33:54	3.19584	960.039	1	95
2022-09-14	10:33:54	4.17105	964.21	1	96
2022-09-14	10:33:55	4.0622	968.272	1	97
2022-09-14	10:33:55	1.79645	970.069	FALSE	97
2022-09-14	10:33:55	1.53126	971.6	FALSE	97
2022-09-14	10:33:55	1.27762	972.878	FALSE	97
2022-09-14	10:33:56	3.69757	976.575	1	98
2022-09-14	10:33:56	2.83574	979.411	FALSE	98
2022-09-14	10:33:56	1.49309	980.904	FALSE	98
2022-09-14	10:33:56	0.86271	981.767	FALSE	98
2022-09-14	10:33:57	0.777468	982.544	FALSE	98
2022-09-14	10:33:57	0.464135	983.008	FALSE	98
2022-09-14	10:33:57	0.396145	983.405	FALSE	98
2022-09-14	10:33:57	0.496501	983.901	FALSE	98
2022-09-14	10:33:58	0.375178	984.276	FALSE	98
2022-09-14	10:33:58	0.368512	984.645	FALSE	98
2022-09-14	10:33:58	0.451565	985.096	FALSE	98
2022-09-14	10:33:59	0.43416	985.531	FALSE	98
2022-09-14	10:33:59	0.392888	985.923	FALSE	98
2022-09-14	10:33:59	0.376756	986.3	FALSE	98
2022-09-14	10:33:59	0.385764	986.686	FALSE	98
2022-09-14	10:34:00	0.391361	987.077	FALSE	98
2022-09-14	10:34:00	0.379962	987.457	FALSE	98
2022-09-14	10:34:00	0.381896	987.839	FALSE	98
2022-09-14	10:34:00	0.38383	988.223	FALSE	98
2022-09-14	10:34:01	0.450852	988.674	FALSE	98
2022-09-14	10:34:01	0.422405	989.096	FALSE	98
2022-09-14	10:34:01	0.336298	989.433	FALSE	98
2022-09-14	10:34:01	0.308155	989.741	FALSE	98
2022-09-14	10:34:02	0.292074	990.033	FALSE	98
2022-09-14	10:34:02	0.310954	990.344	FALSE	98
2022-09-14	10:34:02	0.209529	990.553	FALSE	98
2022-09-14	10:34:03	0.362405	990.916	FALSE	98
2022-09-14	10:34:03	0.190191	991.106	FALSE	98
2022-09-14	10:34:03	0.358537	991.464	FALSE	98
2022-09-14	10:34:03	0.206781	991.671	FALSE	98
2022-09-14	10:34:04	0.698893	992.37	FALSE	98
2022-09-14	10:34:04	0.570598	992.941	FALSE	98
2022-09-14	10:34:04	1.56765	994.508	FALSE	98
2022-09-14	10:34:04	3.17202	997.68	1	99
2022-09-14	10:34:05	8.26739	1005.95	1	100
2022-09-14	10:34:05	13.1168	1019.06	1	101
2022-09-14	10:34:05	8.8337	1027.9	1	102
2022-09-14	10:34:05	7.77655	1035.67	1	103
2022-09-14	10:34:06	2.92658	1038.6	FALSE	103
2022-09-14	10:34:06	8.38484	1046.99	1	104
2022-09-14	10:34:06	5.56606	1052.55	1	105
2022-09-14	10:34:07	4.01334	1056.57	1	106
2022-09-14	10:34:07	2.35584	1058.92	FALSE	106
2022-09-14	10:34:07	0.31472	1059.24	FALSE	106
2022-09-14	10:34:07	0.401285	1059.64	FALSE	106
2022-09-14	10:34:08	0.207087	1059.84	FALSE	106
2022-09-14	10:34:08	0.248461	1060.09	FALSE	106
2022-09-14	10:34:08	0.345967	1060.44	FALSE	106
2022-09-14	10:34:08	0.202252	1060.64	FALSE	106
2022-09-14	10:34:09	0.473295	1061.11	FALSE	106
2022-09-14	10:34:09	0.222914	1061.34	FALSE	106
2022-09-14	10:34:09	1.28709	1062.62	FALSE	106
2022-09-14	10:34:09	2.28317	1064.91	FALSE	106
2022-09-14	10:34:10	3.88047	1068.79	1	107
2022-09-14	10:34:10	3.20581	1071.99	1	108
2022-09-14	10:34:10	4.37966	1076.37	1	109
2022-09-14	10:34:11	3.64744	1080.02	1	110
2022-09-14	10:34:11	3.3477	1083.37	1	111
2022-09-14	10:34:11	5.79645	1089.17	1	112
2022-09-14	10:34:11	1.65971	1090.82	FALSE	112
2022-09-14	10:34:12	3.98851	1094.81	1	113
2022-09-14	10:34:12	2.99034	1097.8	FALSE	113
2022-09-14	10:34:12	2.99278	1100.8	FALSE	113
2022-09-14	10:34:12	4.74927	1105.55	1	114
2022-09-14	10:34:13	4.41238	1109.96	1	115
2022-09-14	10:34:13	12.0101	1121.97	1	116
2022-09-14	10:34:13	2.69594	1124.66	FALSE	116
2022-09-14	10:34:13	7.92505	1132.59	1	117
2022-09-14	10:34:14	6.18678	1138.78	1	118
2022-09-14	10:34:14	7.43762	1146.21	1	119
2022-09-14	10:34:14	3.98561	1150.2	1	120
2022-09-14	10:34:15	3.1482	1153.35	1	121
2022-09-14	10:34:15	7.6509	1161	1	122
2022-09-14	10:34:15	2.38571	1163.38	FALSE	122
2022-09-14	10:34:15	7.31121	1170.7	1	123
2022-09-14	10:34:16	6.91365	1177.61	1	124
2022-09-14	10:34:16	8.18479	1185.79	1	125
2022-09-14	10:34:16	3.80251	1189.6	1	126
2022-09-14	10:34:16	2.62897	1192.23	FALSE	126
2022-09-14	10:34:17	6.02774	1198.25	1	127
2022-09-14	10:34:17	1.59151	1199.84	FALSE	127
2022-09-14	10:34:17	4.96535	1204.81	1	128
2022-09-14	10:34:17	2.36821	1207.18	FALSE	128
2022-09-14	10:34:18	3.35808	1210.54	1	129
2022-09-14	10:34:18	2.49049	1213.03	FALSE	129
2022-09-14	10:34:18	1.75859	1214.79	FALSE	129
2022-09-14	10:34:19	3.87737	1218.66	1	130
2022-09-14	10:34:19	0.707036	1219.37	FALSE	130
2022-09-14	10:34:19	2.91095	1222.28	FALSE	130
2022-09-14	10:34:19	1.5448	1223.83	FALSE	130
2022-09-14	10:34:20	2.94261	1226.77	FALSE	130
2022-09-14	10:34:20	3.00561	1229.77	1	131
2022-09-14	10:34:20	3.37187	1233.15	1	132
2022-09-14	10:34:20	6.05354	1239.2	1	133
2022-09-14	10:34:21	2.13172	1241.33	FALSE	133
2022-09-14	10:34:21	6.32154	1247.65	1	134
2022-09-14	10:34:21	1.95716	1249.61	FALSE	134
2022-09-14	10:34:21	4.89227	1254.5	1	135
2022-09-14	10:34:22	2.81538	1257.32	FALSE	135
2022-09-14	10:34:22	3.31406	1260.63	1	136
2022-09-14	10:34:22	8.18494	1268.82	1	137
2022-09-14	10:34:23	4.22169	1273.04	1	138
2022-09-14	10:34:23	13.1215	1286.16	1	139
2022-09-14	10:34:23	5.36352	1291.52	1	140
2022-09-14	10:34:23	8.66311	1300.19	1	141
2022-09-14	10:34:24	2.67024	1302.86	FALSE	141
2022-09-14	10:34:24	3.9537	1306.81	1	142
2022-09-14	10:34:24	9.00276	1315.81	1	143
2022-09-14	10:34:24	5.62607	1321.44	1	144
2022-09-14	10:34:25	10.4912	1331.93	1	145
2022-09-14	10:34:25	7.54922	1339.48	1	146
2022-09-14	10:34:25	9.53365	1349.01	1	147
2022-09-14	10:34:25	6.02494	1355.04	1	148
2022-09-14	10:34:26	4.43401	1359.47	1	149
2022-09-14	10:34:26	9.94825	1369.42	1	150
2022-09-14	10:34:26	3.17701	1372.6	1	151
2022-09-14	10:34:27	4.50754	1377.1	1	152
2022-09-14	10:34:27	2.64459	1379.75	FALSE	152
2022-09-14	10:34:27	1.43579	1381.18	FALSE	152
2022-09-14	10:34:27	2.59207	1383.78	FALSE	152
2022-09-14	10:34:28	2.48245	1386.26	FALSE	152
2022-09-14	10:34:28	9.02622	1395.29	1	153
2022-09-14	10:34:28	6.80352	1402.09	1	154
2022-09-14	10:34:28	9.34011	1411.43	1	155
2022-09-14	10:34:29	11.4082	1422.84	1	156
2022-09-14	10:34:29	7.43192	1430.27	1	157
2022-09-14	10:34:29	9.77848	1440.05	1	158
2022-09-14	10:34:29	11.9525	1452	1	159
2022-09-14	10:34:30	23.1526	1475.15	1	160
2022-09-14	10:34:30	9.67879	1484.83	1	161
2022-09-14	10:34:30	7.50052	1492.33	1	162
2022-09-14	10:34:31	17.1573	1509.49	1	163
2022-09-14	10:34:31	8.49283	1517.98	1	164
2022-09-14	10:34:31	16.3321	1534.31	1	165
2022-09-14	10:34:31	6.5882	1540.9	1	166
2022-09-14	10:34:32	5.56179	1546.46	1	167
2022-09-14	10:34:32	3.76149	1550.23	1	168
2022-09-14	10:34:32	5.1222	1555.35	1	169
2022-09-14	10:34:32	13.9064	1569.25	1	170
2022-09-14	10:34:33	17.5374	1586.79	1	171
2022-09-14	10:34:33	14.6581	1601.45	1	172
2022-09-14	10:34:33	5.85406	1607.3	1	173
2022-09-14	10:34:33	7.88551	1615.19	1	174
2022-09-14	10:34:34	2.73065	1617.92	FALSE	174
2022-09-14	10:34:34	3.6649	1621.59	1	175
2022-09-14	10:34:34	2.38704	1623.97	FALSE	175
2022-09-14	10:34:35	1.85589	1625.83	FALSE	175
2022-09-14	10:34:35	3.16256	1628.99	1	176
2022-09-14	10:34:35	3.00251	1631.99	1	177
2022-09-14	10:34:35	2.85416	1634.85	FALSE	177
2022-09-14	10:34:36	2.4477	1637.29	FALSE	177
2022-09-14	10:34:36	2.52077	1639.82	FALSE	177
2022-09-14	10:34:36	4.09299	1643.91	1	178
2022-09-14	10:34:36	8.12011	1652.03	1	179
2022-09-14	10:34:37	14.3088	1666.34	1	180
2022-09-14	10:34:37	18.5571	1684.89	1	181
2022-09-14	10:34:37	17.9356	1702.83	1	182
2022-09-14	10:34:37	23.24	1726.07	1	183
2022-09-14	10:34:38	30.8629	1756.93	1	184
2022-09-14	10:34:38	12.8513	1769.78	1	185
2022-09-14	10:34:38	21.9367	1791.72	1	186
2022-09-14	10:34:38	34.2297	1825.95	1	187
2022-09-14	10:34:39	32.2359	1858.19	1	188
2022-09-14	10:34:39	34.4953	1892.68	1	189
2022-09-14	10:34:39	35.118	1927.8	1	190
2022-09-14	10:34:40	30.9707	1958.77	1	191
2022-09-14	10:34:40	31.5752	1990.35	1	192
2022-09-14	10:34:40	32.3585	2022.7	1	193
2022-09-14	10:34:40	30.1496	2052.85	1	194
2022-09-14	10:34:41	28.5905	2081.44	1	195
2022-09-14	10:34:41	25.5633	2107.01	1	196
2022-09-14	10:34:41	23.6701	2130.68	1	197
2022-09-14	10:34:41	21.8983	2152.58	1	198
2022-09-14	10:34:42	20.1497	2172.73	1	199
2022-09-14	10:34:42	17.6069	2190.33	1	200
2022-09-14	10:34:42	16.4945	2206.83	1	201
2022-09-14	10:34:42	15.1321	2221.96	1	202
2022-09-14	10:34:43	15.0441	2237	1	203
2022-09-14	10:34:43	16.3158	2253.32	1	204
2022-09-14	10:34:43	14.8986	2268.22	1	205
2022-09-14	10:34:44	11.7822	2280	1	206
2022-09-14	10:34:44	9.29736	2289.3	1	207
2022-09-14	10:34:44	4.87004	2294.17	1	208
2022-09-14	10:34:44	6.18423	2300.35	1	209
2022-09-14	10:34:45	2.89202	2303.24	FALSE	209
2022-09-14	10:34:45	1.37762	2304.62	FALSE	209
2022-09-14	10:34:45	1.75365	2306.38	FALSE	209
2022-09-14	10:34:45	4.62352	2311	1	210
2022-09-14	10:34:46	10.4981	2321.5	1	211
2022-09-14	10:34:46	14.2761	2335.77	1	212
2022-09-14	10:34:46	9.43975	2345.21	1	213
2022-09-14	10:34:46	24.1724	2369.39	1	214
2022-09-14	10:34:47	16.3626	2385.75	1	215
2022-09-14	10:34:47	21.9973	2407.74	1	216
2022-09-14	10:34:47	13.546	2421.29	1	217
2022-09-14	10:34:48	20.2369	2441.53	1	218
2022-09-14	10:34:48	14.5111	2456.04	1	219
2022-09-14	10:34:48	3.56088	2459.6	1	220
2022-09-14	10:34:48	1.61055	2461.21	FALSE	220
2022-09-14	10:34:49	3.95136	2465.16	1	221
2022-09-14	10:34:49	11.0879	2476.25	1	222
2022-09-14	10:34:49	13.3081	2489.56	1	223
2022-09-14	10:34:49	10.3681	2499.93	1	224
2022-09-14	10:34:50	15.3995	2515.33	1	225
2022-09-14	10:34:50	10.9261	2526.25	1	226
2022-09-14	10:34:50	11.057	2537.31	1	227
2022-09-14	10:34:50	15.7214	2553.03	1	228
2022-09-14	10:34:51	12.6133	2565.64	1	229
2022-09-14	10:34:51	3.60067	2569.24	1	230
2022-09-14	10:34:51	1.96006	2571.2	FALSE	230
2022-09-14	10:34:52	2.2964	2573.5	FALSE	230
2022-09-14	10:34:52	4.66882	2578.17	1	231
2022-09-14	10:34:52	3.88973	2582.06	1	232
2022-09-14	10:34:52	6.7737	2588.83	1	233
2022-09-14	10:34:53	12.435	2601.27	1	234
2022-09-14	10:34:53	10.1316	2611.4	1	235
2022-09-14	10:34:53	10.2646	2621.66	1	236
2022-09-14	10:34:53	7.20154	2628.87	1	237
2022-09-14	10:34:54	13.167	2642.03	1	238
2022-09-14	10:34:54	8.49136	2650.52	1	239
2022-09-14	10:34:54	8.17863	2658.7	1	240
2022-09-14	10:34:54	8.94276	2667.65	1	241
2022-09-14	10:34:55	8.57059	2676.22	1	242
2022-09-14	10:34:55	6.96245	2683.18	1	243
2022-09-14	10:34:55	6.32103	2689.5	1	244
2022-09-14	10:34:56	6.24469	2695.74	1	245
2022-09-14	10:34:56	5.48729	2701.23	1	246
2022-09-14	10:34:56	5.50143	2706.73	1	247
2022-09-14	10:34:56	5.55034	2712.28	1	248
2022-09-14	10:34:57	5.30607	2717.59	1	249
2022-09-14	10:34:57	5.33879	2722.93	1	250
2022-09-14	10:34:57	5.23558	2728.16	1	251
2022-09-14	10:34:57	5.34169	2733.5	1	252
2022-09-14	10:34:58	5.18143	2738.69	1	253
2022-09-14	10:34:58	5.04439	2743.73	1	254
2022-09-14	10:34:58	4.98983	2748.72	1	255
2022-09-14	10:34:58	5.0708	2753.79	1	256
2022-09-14	10:34:59	4.90469	2758.7	1	257
2022-09-14	10:34:59	4.71915	2763.42	1	258
2022-09-14	10:34:59	4.5796	2767.99	1	259
2022-09-14	10:35:00	4.53854	2772.53	1	260
2022-09-14	10:35:00	4.53141	2777.06	1	261
2022-09-14	10:35:00	4.31441	2781.38	1	262
2022-09-14	10:35:00	4.33502	2785.71	1	263
2022-09-14	10:35:01	4.29324	2790.01	1	264
2022-09-14	10:35:01	4.36841	2794.38	1	265
2022-09-14	10:35:01	4.31324	2798.69	1	266
2022-09-14	10:35:01	4.26759	2802.96	1	267
2022-09-14	10:35:02	4.40566	2807.36	1	268
2022-09-14	10:35:02	4.59497	2811.96	1	269
2022-09-14	10:35:02	4.70637	2816.66	1	270
2022-09-14	10:35:02	4.968	2821.63	1	271
2022-09-14	10:35:03	4.91345	2826.55	1	272
2022-09-14	10:35:03	4.89894	2831.44	1	273
2022-09-14	10:35:03	4.46027	2835.9	1	274
2022-09-14	10:35:04	4.18246	2840.09	1	275
2022-09-14	10:35:04	4.30179	2844.39	1	276
2022-09-14	10:35:04	4.60134	2848.99	1	277
2022-09-14	10:35:04	4.51105	2853.5	1	278
2022-09-14	10:35:05	4.271	2857.77	1	279
2022-09-14	10:35:05	3.15136	2860.92	1	280
2022-09-14	10:35:05	4.00195	2864.93	1	281
2022-09-14	10:35:05	4.83457	2869.76	1	282
2022-09-14	10:35:06	5.10601	2874.87	1	283
2022-09-14	10:35:06	4.06398	2878.93	1	284
2022-09-14	10:35:06	3.83146	2882.76	1	285
2022-09-14	10:35:06	3.81273	2886.57	1	286
2022-09-14	10:35:07	3.88225	2890.46	1	287
2022-09-14	10:35:07	3.84591	2894.3	1	288
2022-09-14	10:35:07	3.8565	2898.16	1	289
2022-09-14	10:35:08	3.50495	2901.66	1	290
2022-09-14	10:35:08	2.99518	2904.66	FALSE	290
2022-09-14	10:35:08	2.73248	2907.39	FALSE	290
2022-09-14	10:35:08	2.59029	2909.98	FALSE	290
2022-09-14	10:35:09	2.5082	2912.49	FALSE	290
2022-09-14	10:35:09	2.30688	2914.8	FALSE	290
2022-09-14	10:35:09	2.33416	2917.13	FALSE	290
2022-09-14	10:35:09	2.7162	2919.85	FALSE	290
2022-09-14	10:35:10	2.72093	2922.57	FALSE	290
2022-09-14	10:35:10	2.58378	2925.15	FALSE	290
2022-09-14	10:35:10	2.68108	2927.83	FALSE	290
2022-09-14	10:35:10	2.43502	2930.27	FALSE	290
2022-09-14	10:35:11	3.95701	2934.22	1	291
2022-09-14	10:35:11	5.36617	2939.59	1	292
2022-09-14	10:35:11	4.83075	2944.42	1	293
2022-09-14	10:35:12	4.73609	2949.16	1	294
2022-09-14	10:35:12	4.01085	2953.17	1	295
2022-09-14	10:35:12	4.48271	2957.65	1	296
2022-09-14	10:35:12	3.9368	2961.59	1	297
2022-09-14	10:35:13	3.24368	2964.83	1	298
2022-09-14	10:35:13	2.97904	2967.81	FALSE	298
2022-09-14	10:35:13	2.75472	2970.57	FALSE	298
2022-09-14	10:35:13	2.81009	2973.38	FALSE	298
2022-09-14	10:35:14	2.80917	2976.18	FALSE	298
2022-09-14	10:35:14	2.77614	2978.96	FALSE	298
2022-09-14	10:35:14	2.62994	2981.59	FALSE	298
2022-09-14	10:35:14	2.88938	2984.48	FALSE	298
2022-09-14	10:35:15	3.12688	2987.61	1	299
2022-09-14	10:35:15	3.24347	2990.85	1	300
2022-09-14	10:35:15	3.10164	2993.95	1	301
2022-09-14	10:35:16	2.98271	2996.94	FALSE	301
2022-09-14	10:35:16	3.03172	2999.97	1	302
2022-09-14	10:35:16	3.02765	3002.99	1	303
2022-09-14	10:35:16	3.11243	3006.11	1	304
2022-09-14	10:35:17	2.98052	3009.09	FALSE	304
2022-09-14	10:35:17	2.95258	3012.04	FALSE	304
2022-09-14	10:35:17	2.97212	3015.01	FALSE	304
2022-09-14	10:35:17	2.99248	3018	FALSE	304
2022-09-14	10:35:18	2.91324	3020.92	FALSE	304
2022-09-14	10:35:18	2.81385	3023.73	FALSE	304
2022-09-14	10:35:18	2.77294	3026.5	FALSE	304
2022-09-14	10:35:18	2.80322	3029.31	FALSE	304
2022-09-14	10:35:19	2.84907	3032.16	FALSE	304
2022-09-14	10:35:19	2.79039	3034.95	FALSE	304
2022-09-14	10:35:19	2.84607	3037.79	FALSE	304
2022-09-14	10:35:20	3.08846	3040.88	1	305
2022-09-14	10:35:20	3.23599	3044.12	1	306
2022-09-14	10:35:20	3.23492	3047.35	1	307
2022-09-14	10:35:20	3.3648	3050.72	1	308
2022-09-14	10:35:21	3.64917	3054.37	1	309
2022-09-14	10:35:21	3.60347	3057.97	1	310
2022-09-14	10:35:21	3.71065	3061.68	1	311
2022-09-14	10:35:21	3.73467	3065.42	1	312
2022-09-14	10:35:22	3.96088	3069.38	1	313
2022-09-14	10:35:22	3.96469	3073.34	1	314
2022-09-14	10:35:22	3.83243	3077.17	1	315
2022-09-14	10:35:22	3.78062	3080.95	1	316
2022-09-14	10:35:23	3.73014	3084.68	1	317
2022-09-14	10:35:23	3.81538	3088.5	1	318
2022-09-14	10:35:23	3.75324	3092.25	1	319
2022-09-14	10:35:23	3.64709	3095.9	1	320
2022-09-14	10:35:24	3.67752	3099.58	1	321
2022-09-14	10:35:24	3.65136	3103.23	1	322
2022-09-14	10:35:24	3.55935	3106.79	1	323
2022-09-14	10:35:25	3.50154	3110.29	1	324
2022-09-14	10:35:25	3.54164	3113.83	1	325
2022-09-14	10:35:25	3.52474	3117.36	1	326
2022-09-14	10:35:25	3.48887	3120.85	1	327
2022-09-14	10:35:26	3.60663	3124.45	1	328
2022-09-14	10:35:26	3.44006	3127.89	1	329
2022-09-14	10:35:26	3.5023	3131.39	1	330
2022-09-14	10:35:26	3.46388	3134.86	1	331
2022-09-14	10:35:27	3.44592	3138.3	1	332
2022-09-14	10:35:27	3.48388	3141.79	1	333
2022-09-14	10:35:27	3.47411	3145.26	1	334
2022-09-14	10:35:27	3.43869	3148.7	1	335
2022-09-14	10:35:28	3.48312	3152.18	1	336
2022-09-14	10:35:28	3.60256	3155.79	1	337
2022-09-14	10:35:28	3.53538	3159.32	1	338
2022-09-14	10:35:29	3.50418	3162.83	1	339
2022-09-14	10:35:29	3.38103	3166.21	1	340
2022-09-14	10:35:29	3.45691	3169.66	1	341
2022-09-14	10:35:29	3.48566	3173.15	1	342
2022-09-14	10:35:30	3.5506	3176.7	1	343
2022-09-14	10:35:30	3.5505	3180.25	1	344
2022-09-14	10:35:30	3.49126	3183.74	1	345
2022-09-14	10:35:30	3.5165	3187.26	1	346
2022-09-14	10:35:31	3.47976	3190.74	1	347
2022-09-14	10:35:31	3.34551	3194.08	1	348
2022-09-14	10:35:31	3.44317	3197.53	1	349
2022-09-14	10:35:31	3.58261	3201.11	1	350
2022-09-14	10:35:32	3.35304	3204.46	1	351
2022-09-14	10:35:32	3.36866	3207.83	1	352
2022-09-14	10:35:32	3.40841	3211.24	1	353
2022-09-14	10:35:33	3.2882	3214.53	1	354
2022-09-14	10:35:33	3.1967	3217.72	1	355
2022-09-14	10:35:33	3.26424	3220.99	1	356
2022-09-14	10:35:33	3.4192	3224.41	1	357
2022-09-14	10:35:34	3.54464	3227.95	1	358
2022-09-14	10:35:34	3.57345	3231.53	1	359
2022-09-14	10:35:34	3.55889	3235.08	1	360
2022-09-14	10:35:34	3.58016	3238.66	1	361
2022-09-14	10:35:35	3.50546	3242.17	1	362
2022-09-14	10:35:35	3.43518	3245.61	1	363
2022-09-14	10:35:35	3.4022	3249.01	1	364
2022-09-14	10:35:35	3.39401	3252.4	1	365
2022-09-14	10:35:36	3.43548	3255.84	1	366
2022-09-14	10:35:36	3.57686	3259.41	1	367
2022-09-14	10:35:36	3.54642	3262.96	1	368
2022-09-14	10:35:37	3.65823	3266.62	1	369
2022-09-14	10:35:37	3.66444	3270.28	1	370
2022-09-14	10:35:37	3.57609	3273.86	1	371
2022-09-14	10:35:37	3.57752	3277.44	1	372
2022-09-14	10:35:38	3.51553	3280.95	1	373
2022-09-14	10:35:38	3.5708	3284.52	1	374
2022-09-14	10:35:38	3.53675	3288.06	1	375
2022-09-14	10:35:38	3.51792	3291.58	1	376
2022-09-14	10:35:39	3.5024	3295.08	1	377
2022-09-14	10:35:39	3.62215	3298.7	1	378
2022-09-14	10:35:39	3.69996	3302.4	1	379
2022-09-14	10:35:39	2.8221	3305.22	FALSE	379
2022-09-14	10:35:40	1.84816	3307.07	FALSE	379
2022-09-14	10:35:40	1.40836	3308.48	FALSE	379
2022-09-14	10:35:40	1.18541	3309.67	FALSE	379
2022-09-14	10:35:41	0.451107	3310.12	FALSE	379
2022-09-14	10:35:41	0.404847	3310.52	FALSE	379
2022-09-14	10:35:41	0.643626	3311.17	FALSE	379
2022-09-14	10:35:41	0.734618	3311.9	FALSE	379
2022-09-14	10:35:42	0.377367	3312.28	FALSE	379
2022-09-14	10:35:42	0.331718	3312.61	FALSE	379
2022-09-14	10:35:42	0.37126	3312.98	FALSE	379
2022-09-14	10:35:42	0.588817	3313.57	FALSE	379
2022-09-14	10:35:43	0.495026	3314.06	FALSE	379
2022-09-14	10:35:43	0.361947	3314.43	FALSE	379
2022-09-14	10:35:43	0.296603	3314.72	FALSE	379
2022-09-14	10:35:43	0.599097	3315.32	FALSE	379
2022-09-14	10:35:44	0.569529	3315.89	FALSE	379
2022-09-14	10:35:44	0.937621	3316.83	FALSE	379
2022-09-14	10:35:44	1.1908	3318.02	FALSE	379
2022-09-14	10:35:45	2.21009	3320.23	FALSE	379
2022-09-14	10:35:45	3.03304	3323.26	1	380
2022-09-14	10:35:45	2.62469	3325.89	FALSE	380
2022-09-14	10:35:45	3.06368	3328.95	1	381
2022-09-14	10:35:46	1.36459	3330.32	FALSE	381
2022-09-14	10:35:46	2.55721	3332.87	FALSE	381
2022-09-14	10:35:46	1.34072	3334.21	FALSE	381
2022-09-14	10:35:46	3.57279	3337.79	1	382
2022-09-14	10:35:47	4.72088	3342.51	1	383
2022-09-14	10:35:47	5.51879	3348.03	1	384
2022-09-14	10:35:47	3.56373	3351.59	1	385
2022-09-14	10:35:47	2.76576	3354.36	FALSE	385
2022-09-14	10:35:48	4.23172	3358.59	1	386
2022-09-14	10:35:48	2.52398	3361.11	FALSE	386
2022-09-14	10:35:48	7.45293	3368.56	1	387
2022-09-14	10:35:49	12.5477	3381.11	1	388
2022-09-14	10:35:49	8.59354	3389.71	1	389
2022-09-14	10:35:49	21.7507	3411.46	1	390
2022-09-14	10:35:49	15.8592	3427.32	1	391
2022-09-14	10:35:50	25.5886	3452.9	1	392
2022-09-14	10:35:50	22.4297	3475.33	1	393
2022-09-14	10:35:50	24.989	3500.32	1	394
2022-09-14	10:35:50	22.8324	3523.16	1	395
2022-09-14	10:35:51	21.3884	3544.54	1	396
2022-09-14	10:35:51	17.2067	3561.75	1	397
2022-09-14	10:35:51	15.5911	3577.34	1	398
2022-09-14	10:35:51	11.4988	3588.84	1	399
2022-09-14	10:35:52	11.097	3599.94	1	400
2022-09-14	10:35:52	8.38311	3608.32	1	401
2022-09-14	10:35:52	11.8284	3620.15	1	402
2022-09-14	10:35:53	11.892	3632.04	1	403
2022-09-14	10:35:53	8.63146	3640.67	1	404
2022-09-14	10:35:53	10.6822	3651.35	1	405
2022-09-14	10:35:53	12.7368	3664.09	1	406
2022-09-14	10:35:54	6.33064	3670.42	1	407
2022-09-14	10:35:54	13.6411	3684.06	1	408
2022-09-14	10:35:54	3.79253	3687.86	1	409
2022-09-14	10:35:54	3.12693	3690.98	1	410
2022-09-14	10:35:55	2.50296	3693.49	FALSE	410
2022-09-14	10:35:55	0.177316	3693.66	FALSE	410
2022-09-14	10:35:55	0.707188	3694.37	FALSE	410
2022-09-14	10:35:55	0.124237	3694.49	FALSE	410
2022-09-14	10:35:56	0.213244	3694.71	FALSE	410
2022-09-14	10:35:56	0.100624	3694.81	FALSE	410
2022-09-14	10:35:56	0.134568	3694.94	FALSE	410
2022-09-14	10:35:57	0.0779265	3695.02	FALSE	410
2022-09-14	10:35:57	0.0846949	3695.11	FALSE	410
2022-09-14	10:35:57	0.0141097	3695.12	FALSE	410
2022-09-14	10:35:57	-0.113778	3695.12	FALSE	410
2022-09-14	10:35:58	-0.0825824	3695.12	FALSE	410
2022-09-14	10:35:58	-0.131234	3695.12	FALSE	410
2022-09-14	10:35:58	-0.175916	3695.12	FALSE	410
2022-09-14	10:35:58	-0.183142	3695.12	FALSE	410
2022-09-14	10:35:59	-0.0883839	3695.12	FALSE	410
2022-09-14	10:35:59	-0.180903	3695.12	FALSE	410
2022-09-14	10:35:59	-0.0717936	3695.12	FALSE	410
2022-09-14	10:35:59	-0.121972	3695.12	FALSE	410
2022-09-14	10:36:00	0.206883	3695.33	FALSE	410
2022-09-14	10:36:00	0.0693259	3695.4	FALSE	410
2022-09-14	10:36:00	0.0944149	3695.49	FALSE	410
2022-09-14	10:36:01	-0.0234985	3695.49	FALSE	410
2022-09-14	10:36:01	0.116807	3695.61	FALSE	410
2022-09-14	10:36:01	0.193143	3695.8	FALSE	410
2022-09-14	10:36:01	0.242303	3696.04	FALSE	410
2022-09-14	10:36:02	0.221845	3696.26	FALSE	410
2022-09-14	10:36:02	0.436603	3696.7	FALSE	410
2022-09-14	10:36:02	0.347392	3697.05	FALSE	410
2022-09-14	10:36:02	0.68042	3697.73	FALSE	410
2022-09-14	10:36:03	0.124542	3697.85	FALSE	410
2022-09-14	10:36:03	0.195585	3698.05	FALSE	410
2022-09-14	10:36:03	0.160369	3698.21	FALSE	410
2022-09-14	10:36:03	-0.058613	3698.21	FALSE	410
2022-09-14	10:36:04	-0.16645	3698.21	FALSE	410
2022-09-14	10:36:04	-0.293269	3698.21	FALSE	410
2022-09-14	10:36:04	-0.442938	3698.21	FALSE	410
2022-09-14	10:36:05	-0.182684	3698.21	FALSE	410
2022-09-14	10:36:05	-0.0948979	3698.21	FALSE	410
2022-09-14	10:36:05	-0.0504705	3698.21	FALSE	410
2022-09-14	10:36:05	0.0225575	3698.23	FALSE	410
2022-09-14	10:36:06	0.310853	3698.54	FALSE	410
2022-09-14	10:36:06	0.272888	3698.82	FALSE	410
2022-09-14	10:36:06	0.200115	3699.02	FALSE	410
2022-09-14	10:36:06	0.119046	3699.13	FALSE	410
2022-09-14	10:36:07	0.193601	3699.33	FALSE	410
2022-09-14	10:36:07	0.161743	3699.49	FALSE	410
2022-09-14	10:36:07	0.0706491	3699.56	FALSE	410
2022-09-14	10:36:07	0.155942	3699.72	FALSE	410
2022-09-14	10:36:08	0.125916	3699.84	FALSE	410
2022-09-14	10:36:08	0.215992	3700.06	FALSE	410
2022-09-14	10:36:08	0.361794	3700.42	FALSE	410
2022-09-14	10:36:08	0.402659	3700.82	FALSE	410
2022-09-14	10:36:09	0.423473	3701.25	FALSE	410
2022-09-14	10:36:09	0.395534	3701.64	FALSE	410
2022-09-14	10:36:09	0.623015	3702.27	FALSE	410
2022-09-14	10:36:10	0.638333	3702.9	FALSE	410
2022-09-14	10:36:10	0.423219	3703.33	FALSE	410
2022-09-14	10:36:10	0.457926	3703.78	FALSE	410
2022-09-14	10:36:10	0.734822	3704.52	FALSE	410
2022-09-14	10:36:11	0.538842	3705.06	FALSE	410
2022-09-14	10:36:11	0.513041	3705.57	FALSE	410
2022-09-14	10:36:11	0.535585	3706.11	FALSE	410
2022-09-14	10:36:11	0.528919	3706.64	FALSE	410
2022-09-14	10:36:12	0.663117	3707.3	FALSE	410
2022-09-14	10:36:12	0.584186	3707.88	FALSE	410
2022-09-14	10:36:12	0.776756	3708.66	FALSE	410
2022-09-14	10:36:12	0.817468	3709.48	FALSE	410
2022-09-14	10:36:13	0.506425	3709.98	FALSE	410
2022-09-14	10:36:13	0.574059	3710.56	FALSE	410
2022-09-14	10:36:13	0.769936	3711.33	FALSE	410
2022-09-14	10:36:14	0.797723	3712.13	FALSE	410
2022-09-14	10:36:14	0.800063	3712.93	FALSE	410
2022-09-14	10:36:14	0.413397	3713.34	FALSE	410
2022-09-14	10:36:14	0.433753	3713.77	FALSE	410
2022-09-14	10:36:15	0.427646	3714.2	FALSE	410
2022-09-14	10:36:15	0.491463	3714.69	FALSE	410
2022-09-14	10:36:15	0.428104	3715.12	FALSE	410
2022-09-14	10:36:15	0.791616	3715.91	FALSE	410
2022-09-14	10:36:16	0.541132	3716.45	FALSE	410
2022-09-14	10:36:16	0.518333	3716.97	FALSE	410
2022-09-14	10:36:16	0.360929	3717.33	FALSE	410
2022-09-14	10:36:16	0.459707	3717.79	FALSE	410
2022-09-14	10:36:17	0.278384	3718.07	FALSE	410
2022-09-14	10:36:17	0.498079	3718.57	FALSE	410
2022-09-14	10:36:17	0.714873	3719.28	FALSE	410
2022-09-14	10:36:18	2.14872	3721.43	FALSE	410
2022-09-14	10:36:18	1.62159	3723.05	FALSE	410
2022-09-14	10:36:18	5.44871	3728.5	1	411
2022-09-14	10:36:18	6.62673	3735.13	1	412
2022-09-14	10:36:19	9.32749	3744.46	1	413
2022-09-14	10:36:19	3.34307	3747.8	1	414
2022-09-14	10:36:19	6.06515	3753.86	1	415
2022-09-14	10:36:19	1.81726	3755.68	FALSE	415
2022-09-14	10:36:20	3.52128	3759.2	1	416
2022-09-14	10:36:20	3.33197	3762.53	1	417
2022-09-14	10:36:20	3.82047	3766.36	1	418
2022-09-14	10:36:20	5.4397	3771.8	1	419
2022-09-14	10:36:21	9.52739	3781.32	1	420
2022-09-14	10:36:21	13.3215	3794.64	1	421
2022-09-14	10:36:21	10.8761	3805.52	1	422
2022-09-14	10:36:22	16.0948	3821.61	1	423
2022-09-14	10:36:22	8.17619	3829.79	1	424
2022-09-14	10:36:22	19.0101	3848.8	1	425
2022-09-14	10:36:22	4.48749	3853.29	1	426
2022-09-14	10:36:23	4.22652	3857.52	1	427
2022-09-14	10:36:23	2.4278	3859.94	FALSE	427
2022-09-14	10:36:23	2.20388	3862.15	FALSE	427
2022-09-14	10:36:23	7.10729	3869.25	1	428
2022-09-14	10:36:24	10.0768	3879.33	1	429
2022-09-14	10:36:24	17.8729	3897.2	1	430
2022-09-14	10:36:24	16.6148	3913.82	1	431
2022-09-14	10:36:24	28.5702	3942.39	1	432
2022-09-14	10:36:25	19.252	3961.64	1	433
2022-09-14	10:36:25	8.31146	3969.95	1	434
2022-09-14	10:36:25	13.8528	3983.81	1	435
2022-09-14	10:36:26	14.1937	3998	1	436
2022-09-14	10:36:26	10.0126	4008.01	1	437
2022-09-14	10:36:26	7.78759	4015.8	1	438
2022-09-14	10:36:26	6.64199	4022.44	1	439
2022-09-14	10:36:27	3.51146	4025.95	1	440
2022-09-14	10:36:27	1.37905	4027.33	FALSE	440
2022-09-14	10:36:27	0.37584	4027.71	FALSE	440
2022-09-14	10:36:27	0.137112	4027.84	FALSE	440
2022-09-14	10:36:28	0.189326	4028.03	FALSE	440
2022-09-14	10:36:28	0.211158	4028.24	FALSE	440
2022-09-14	10:36:28	0.688053	4028.93	FALSE	440
2022-09-14	10:36:28	0.730801	4029.66	FALSE	440
2022-09-14	10:36:29	0.743117	4030.41	FALSE	440
2022-09-14	10:36:29	-6.64436	4030.41	FALSE	440
2022-09-14	10:36:29	0.409886	4030.82	FALSE	440
2022-09-14	10:36:30	0.291361	4031.11	FALSE	440
2022-09-14	10:36:30	0.0638297	4031.17	FALSE	440
2022-09-14	10:36:30	0.0209289	4031.19	FALSE	440
2022-09-14	10:36:30	-0.140191	4031.19	FALSE	440
2022-09-14	10:36:31	-0.252404	4031.19	FALSE	440
2022-09-14	10:36:31	-0.197951	4031.19	FALSE	440
2022-09-14	10:36:31	0.0672394	4031.26	FALSE	440
2022-09-14	10:36:31	0.681895	4031.94	FALSE	440
2022-09-14	10:36:32	0.497417	4032.44	FALSE	440
2022-09-14	10:36:32	0.129173	4032.57	FALSE	440
2022-09-14	10:36:32	0.275585	4032.84	FALSE	440
2022-09-14	10:36:32	0.288308	4033.13	FALSE	440
2022-09-14	10:36:33	0.453855	4033.59	FALSE	440
2022-09-14	10:36:33	0.168512	4033.75	FALSE	440
2022-09-14	10:36:33	-0.0895544	4033.75	FALSE	440
2022-09-14	10:36:34	-0.0989692	4033.75	FALSE	440
2022-09-14	10:36:34	-0.0818699	4033.75	FALSE	440
2022-09-14	10:36:34	0.411056	4034.17	FALSE	440
2022-09-14	10:36:34	0.564389	4034.73	FALSE	440
2022-09-14	10:36:35	0.465255	4035.2	FALSE	440
2022-09-14	10:36:35	0.530802	4035.73	FALSE	440
2022-09-14	10:36:35	0.51986	4036.25	FALSE	440
2022-09-14	10:36:35	0.528562	4036.77	FALSE	440
2022-09-14	10:36:36	0.667901	4037.44	FALSE	440
2022-09-14	10:36:36	0.706832	4038.15	FALSE	440
2022-09-14	10:36:36	0.605865	4038.76	FALSE	440
2022-09-14	10:36:36	0.557774	4039.31	FALSE	440
2022-09-14	10:36:37	0.525865	4039.84	FALSE	440
2022-09-14	10:36:37	0.450598	4040.29	FALSE	440
2022-09-14	10:36:37	0.434008	4040.72	FALSE	440
2022-09-14	10:36:38	0.424848	4041.15	FALSE	440
2022-09-14	10:36:38	0.37986	4041.53	FALSE	440
2022-09-14	10:36:38	0.365153	4041.89	FALSE	440
2022-09-14	10:36:38	0.354466	4042.25	FALSE	440
2022-09-14	10:36:39	0.35869	4042.61	FALSE	440
2022-09-14	10:36:39	0.398995	4043.01	FALSE	440
2022-09-14	10:36:39	0.465407	4043.47	FALSE	440
2022-09-14	10:36:39	0.503168	4043.97	FALSE	440
2022-09-14	10:36:40	0.443219	4044.42	FALSE	440
2022-09-14	10:36:40	0.477468	4044.89	FALSE	440
2022-09-14	10:36:40	0.499707	4045.39	FALSE	440
2022-09-14	10:36:40	0.504644	4045.9	FALSE	440
2022-09-14	10:36:41	0.569021	4046.47	FALSE	440
2022-09-14	10:36:41	0.476298	4046.94	FALSE	440
2022-09-14	10:36:41	0.459504	4047.4	FALSE	440
2022-09-14	10:36:41	0.527799	4047.93	FALSE	440
2022-09-14	10:36:42	0.552023	4048.48	FALSE	440
2022-09-14	10:36:42	0.531463	4049.02	FALSE	440
2022-09-14	10:36:42	0.484847	4049.5	FALSE	440
2022-09-14	10:36:43	0.464898	4049.97	FALSE	440
2022-09-14	10:36:43	0.471311	4050.44	FALSE	440
2022-09-14	10:36:43	0.44383	4050.88	FALSE	440
2022-09-14	10:36:43	0.489631	4051.37	FALSE	440
2022-09-14	10:36:44	0.490954	4051.86	FALSE	440
2022-09-14	10:36:44	0.444338	4052.31	FALSE	440
2022-09-14	10:36:44	0.453652	4052.76	FALSE	440
2022-09-14	10:36:44	0.433906	4053.19	FALSE	440
2022-09-14	10:36:45	0.447392	4053.64	FALSE	440
2022-09-14	10:36:45	0.417112	4054.06	FALSE	440
2022-09-14	10:36:45	0.421438	4054.48	FALSE	440
2022-09-14	10:36:45	0.425	4054.9	FALSE	440
2022-09-14	10:36:46	0.451718	4055.36	FALSE	440
2022-09-14	10:36:46	0.469122	4055.82	FALSE	440
2022-09-14	10:36:46	0.469682	4056.29	FALSE	440
2022-09-14	10:36:47	0.470751	4056.76	FALSE	440
2022-09-14	10:36:47	0.469326	4057.23	FALSE	440
2022-09-14	10:36:47	0.478537	4057.71	FALSE	440
2022-09-14	10:36:47	0.475992	4058.19	FALSE	440
2022-09-14	10:36:48	0.45813	4058.65	FALSE	440
2022-09-14	10:36:48	0.491718	4059.14	FALSE	440
2022-09-14	10:36:48	0.495026	4059.63	FALSE	440
2022-09-14	10:36:48	0.52042	4060.15	FALSE	440
2022-09-14	10:36:49	0.531005	4060.69	FALSE	440
2022-09-14	10:36:49	0.576959	4061.26	FALSE	440
2022-09-14	10:36:49	0.565407	4061.83	FALSE	440
2022-09-14	10:36:49	0.57472	4062.4	FALSE	440
2022-09-14	10:36:50	0.521947	4062.92	FALSE	440
2022-09-14	10:36:50	0.530649	4063.45	FALSE	440
2022-09-14	10:36:50	0.517366	4063.97	FALSE	440
2022-09-14	10:36:51	0.522404	4064.49	FALSE	440
2022-09-14	10:36:51	0.527544	4065.02	FALSE	440
2022-09-14	10:36:51	0.623677	4065.65	FALSE	440
2022-09-14	10:36:51	0.631005	4066.28	FALSE	440
2022-09-14	10:36:52	0.61757	4066.89	FALSE	440
2022-09-14	10:36:52	0.58841	4067.48	FALSE	440
2022-09-14	10:36:52	0.565102	4068.05	FALSE	440
2022-09-14	10:36:52	0.465	4068.51	FALSE	440
2022-09-14	10:36:53	0.469122	4068.98	FALSE	440
2022-09-14	10:36:53	0.615229	4069.6	FALSE	440
2022-09-14	10:36:53	0.96098	4070.56	FALSE	440
2022-09-14	10:36:53	0.987901	4071.55	FALSE	440
2022-09-14	10:36:54	1.35228	4072.9	FALSE	440
2022-09-14	10:36:54	1.28103	4074.18	FALSE	440
2022-09-14	10:36:54	1.20709	4075.39	FALSE	440
2022-09-14	10:36:55	1.09004	4076.48	FALSE	440
2022-09-14	10:36:55	0.924135	4077.4	FALSE	440
2022-09-14	10:36:55	0.770649	4078.17	FALSE	440
2022-09-14	10:36:55	0.789479	4078.96	FALSE	440
2022-09-14	10:36:56	0.867951	4079.83	FALSE	440
2022-09-14	10:36:56	1.3509	4081.18	FALSE	440
2022-09-14	10:36:56	1.33314	4082.51	FALSE	440
2022-09-14	10:36:56	1.5053	4084.02	FALSE	440
2022-09-14	10:36:57	1.46113	4085.48	FALSE	440
2022-09-14	10:36:57	0.686018	4086.17	FALSE	440
2022-09-14	10:36:57	0.456196	4086.62	FALSE	440
2022-09-14	10:36:57	0.411005	4087.03	FALSE	440
2022-09-14	10:36:58	0.391514	4087.42	FALSE	440
2022-09-14	10:36:58	0.454262	4087.88	FALSE	440
2022-09-14	10:36:58	0.681794	4088.56	FALSE	440
2022-09-14	10:36:59	1.02001	4089.58	FALSE	440
2022-09-14	10:36:59	3.81304	4093.39	1	441
2022-09-14	10:36:59	4.81996	4098.21	1	442
2022-09-14	10:36:59	7.15309	4105.37	1	443
2022-09-14	10:37:00	5.97472	4111.34	1	444
2022-09-14	10:37:00	2.9195	4114.26	FALSE	444
2022-09-14	10:37:00	1.18485	4115.45	FALSE	444
2022-09-14	10:37:00	4.35513	4119.8	1	445
2022-09-14	10:37:01	3.59197	4123.39	1	446
2022-09-14	10:37:01	7.02892	4130.42	1	447
2022-09-14	10:37:01	1.53721	4131.96	FALSE	447
2022-09-14	10:37:01	5.17233	4137.13	1	448
2022-09-14	10:37:02	2.17508	4139.31	FALSE	448
2022-09-14	10:37:02	2.43681	4141.74	FALSE	448
2022-09-14	10:37:02	1.51462	4143.26	FALSE	448
2022-09-14	10:37:03	0.856603	4144.11	FALSE	448
2022-09-14	10:37:03	1.71223	4145.83	FALSE	448
2022-09-14	10:37:03	1.49243	4147.32	FALSE	448
2022-09-14	10:37:03	2.83986	4150.16	FALSE	448
2022-09-14	10:37:04	2.54332	4152.7	FALSE	448
2022-09-14	10:37:04	6.86769	4159.57	1	449
2022-09-14	10:37:04	1.20693	4160.78	FALSE	449
2022-09-14	10:37:04	5.61568	4166.39	1	450
2022-09-14	10:37:05	2.00225	4168.39	FALSE	450
2022-09-14	10:37:05	2.46123	4170.86	FALSE	450
2022-09-14	10:37:05	1.80805	4172.66	FALSE	450
2022-09-14	10:37:05	1.41894	4174.08	FALSE	450
2022-09-14	10:37:06	4.72958	4178.81	1	451
2022-09-14	10:37:06	3.02108	4181.83	1	452
2022-09-14	10:37:06	3.90765	4185.74	1	453
2022-09-14	10:37:06	2.68072	4188.42	FALSE	453
2022-09-14	10:37:07	5.53039	4193.95	1	454
2022-09-14	10:37:07	1.67691	4195.63	FALSE	454
2022-09-14	10:37:07	5.31258	4200.94	1	455
2022-09-14	10:37:08	1.31177	4202.25	FALSE	455
2022-09-14	10:37:08	5.15003	4207.4	1	456
2022-09-14	10:37:08	1.08622	4208.49	FALSE	456
2022-09-14	10:37:08	1.84403	4210.33	FALSE	456
2022-09-14	10:37:09	1.26856	4211.6	FALSE	456
2022-09-14	10:37:09	3.5821	4215.18	1	457
2022-09-14	10:37:09	4.28586	4219.47	1	458
2022-09-14	10:37:09	8.13599	4227.61	1	459
2022-09-14	10:37:10	4.13446	4231.74	1	460
2022-09-14	10:37:10	7.06408	4238.8	1	461
2022-09-14	10:37:10	5.60734	4244.41	1	462
2022-09-14	10:37:10	14.0947	4258.51	1	463
2022-09-14	10:37:11	18.904	4277.41	1	464
2022-09-14	10:37:11	20.9172	4298.33	1	465
2022-09-14	10:37:11	20.3017	4318.63	1	466
2022-09-14	10:37:12	35.4068	4354.04	1	467
2022-09-14	10:37:12	22.4288	4376.47	1	468
2022-09-14	10:37:12	12.952	4389.42	1	469
2022-09-14	10:37:12	14.255	4403.67	1	470
2022-09-14	10:37:13	16.617	4420.29	1	471
2022-09-14	10:37:13	17.1358	4437.42	1	472
2022-09-14	10:37:13	16.9812	4454.41	1	473
2022-09-14	10:37:13	22.2116	4476.62	1	474
2022-09-14	10:37:14	20.4721	4497.09	1	475
2022-09-14	10:37:14	32.7795	4529.87	1	476
2022-09-14	10:37:14	15.1773	4545.05	1	477
2022-09-14	10:37:14	10.2904	4555.34	1	478
2022-09-14	10:37:15	5.54993	4560.89	1	479
2022-09-14	10:37:15	2.11513	4563	FALSE	479
2022-09-14	10:37:15	1.15843	4564.16	FALSE	479
2022-09-14	10:37:16	0.64617	4564.81	FALSE	479
2022-09-14	10:37:16	2.4877	4567.29	FALSE	479
2022-09-14	10:37:16	5.7052	4573	1	480
2022-09-14	10:37:16	6.3223	4579.32	1	481
2022-09-14	10:37:17	4.33177	4583.65	1	482
2022-09-14	10:37:17	4.0649	4587.72	1	483
2022-09-14	10:37:17	3.69925	4591.42	1	484
2022-09-14	10:37:17	4.06413	4595.48	1	485
2022-09-14	10:37:18	4.53568	4600.02	1	486
2022-09-14	10:37:18	4.83619	4604.85	1	487
2022-09-14	10:37:18	5.00103	4609.85	1	488
2022-09-14	10:37:18	5.0478	4614.9	1	489
2022-09-14	10:37:19	4.8936	4619.8	1	490
2022-09-14	10:37:19	4.82368	4624.62	1	491
2022-09-14	10:37:19	4.28251	4628.9	1	492
2022-09-14	10:37:20	2.1395	4631.04	FALSE	492
2022-09-14	10:37:20	0.640267	4631.68	FALSE	492
2022-09-14	10:37:20	0.731667	4632.41	FALSE	492
2022-09-14	10:37:20	0.433753	4632.85	FALSE	492
2022-09-14	10:37:21	0.369173	4633.22	FALSE	492
2022-09-14	10:37:21	0.394873	4633.61	FALSE	492
2022-09-14	10:37:21	0.518893	4634.13	FALSE	492
2022-09-14	10:37:21	0.600013	4634.73	FALSE	492
2022-09-14	10:37:22	0.27925	4635.01	FALSE	492
2022-09-14	10:37:22	0.518435	4635.53	FALSE	492
2022-09-14	10:37:22	0.352023	4635.88	FALSE	492
2022-09-14	10:37:22	0.543117	4636.42	FALSE	492
2022-09-14	10:37:23	0.253143	4636.68	FALSE	492
2022-09-14	10:37:23	0.566679	4637.24	FALSE	492
2022-09-14	10:37:23	0.347545	4637.59	FALSE	492
2022-09-14	10:37:24	0.447799	4638.04	FALSE	492
2022-09-14	10:37:24	0.275025	4638.31	FALSE	492
2022-09-14	10:37:24	0.536756	4638.85	FALSE	492
2022-09-14	10:37:24	0.151412	4639	FALSE	492
2022-09-14	10:37:25	1.20612	4640.21	FALSE	492
2022-09-14	10:37:25	2.51849	4642.73	FALSE	492
2022-09-14	10:37:25	4.01248	4646.74	1	493
2022-09-14	10:37:25	5.35146	4652.09	1	494
2022-09-14	10:37:26	6.65716	4658.75	1	495
2022-09-14	10:37:26	5.53029	4664.28	1	496
2022-09-14	10:37:26	3.74495	4668.02	1	497
2022-09-14	10:37:26	0.683982	4668.71	FALSE	497
2022-09-14	10:37:27	0.45411	4669.16	FALSE	497
2022-09-14	10:37:27	0.247799	4669.41	FALSE	497
2022-09-14	10:37:27	0.264033	4669.67	FALSE	497
2022-09-14	10:37:28	0.095331	4669.77	FALSE	497
2022-09-14	10:37:28	0.17416	4669.94	FALSE	497
2022-09-14	10:37:28	0.133092	4670.08	FALSE	497
2022-09-14	10:37:28	0.214059	4670.29	FALSE	497
2022-09-14	10:37:29	0.267799	4670.56	FALSE	497
2022-09-14	10:37:29	0.199046	4670.76	FALSE	497
2022-09-14	10:37:29	0.417672	4671.17	FALSE	497
2022-09-14	10:37:29	0.2793	4671.45	FALSE	497
2022-09-14	10:37:30	0.804237	4672.26	FALSE	497
2022-09-14	10:37:30	1.55457	4673.81	FALSE	497
2022-09-14	10:37:30	2.91945	4676.73	FALSE	497
2022-09-14	10:37:30	1.79039	4678.52	FALSE	497
2022-09-14	10:37:31	3.28739	4681.81	1	498
2022-09-14	10:37:31	3.81553	4685.62	1	499
2022-09-14	10:37:31	4.53655	4690.16	1	500
2022-09-14	10:37:32	4.43594	4694.6	1	501
2022-09-14	10:37:32	11.0541	4705.65	1	502
2022-09-14	10:37:32	12.2332	4717.88	1	503
2022-09-14	10:37:32	6.48194	4724.37	1	504
2022-09-14	10:37:33	15.5373	4739.9	1	505
2022-09-14	10:37:33	11.6029	4751.51	1	506
2022-09-14	10:37:33	21.6711	4773.18	1	507
2022-09-14	10:37:33	14.7666	4787.94	1	508
2022-09-14	10:37:34	16.388	4804.33	1	509
2022-09-14	10:37:34	16.7815	4821.11	1	510
2022-09-14	10:37:34	9.78683	4830.9	1	511
2022-09-14	10:37:34	5.325	4836.23	1	512
2022-09-14	10:37:35	8.5196	4844.75	1	513
2022-09-14	10:37:35	10.7998	4855.54	1	514
2022-09-14	10:37:35	3.71136	4859.26	1	515
2022-09-14	10:37:35	1.56887	4860.83	FALSE	515
2022-09-14	10:37:36	2.49935	4863.32	FALSE	515
2022-09-14	10:37:36	4.0623	4867.39	1	516
2022-09-14	10:37:36	4.61014	4872	1	517
2022-09-14	10:37:37	13.7534	4885.75	1	518
2022-09-14	10:37:37	16.5725	4902.32	1	519
2022-09-14	10:37:37	16.7233	4919.05	1	520
2022-09-14	10:37:37	30.4979	4949.54	1	521
2022-09-14	10:37:38	29.3955	4978.94	1	522
2022-09-14	10:37:38	30.1626	5009.1	1	523
2022-09-14	10:37:38	36.5401	5045.64	1	524
2022-09-14	10:37:38	33.306	5078.95	1	525
2022-09-14	10:37:39	36.3955	5115.34	1	526
2022-09-14	10:37:39	32.573	5147.92	1	527
2022-09-14	10:37:39	19.727	5167.64	1	528
2022-09-14	10:37:39	22.7982	5190.44	1	529
2022-09-14	10:37:40	20.0583	5210.5	1	530
2022-09-14	10:37:40	20.512	5231.01	1	531
2022-09-14	10:37:40	20.1134	5251.13	1	532
2022-09-14	10:37:41	9.16047	5260.29	1	533
2022-09-14	10:37:41	0.844135	5261.13	FALSE	533
2022-09-14	10:37:41	0.435636	5261.57	FALSE	533
2022-09-14	10:37:41	0.894109	5262.46	FALSE	533
2022-09-14	10:37:42	0.0667305	5262.53	FALSE	533
2022-09-14	10:37:42	-0.042328	5262.53	FALSE	533
2022-09-14	10:37:42	-0.0680786	5262.53	FALSE	533
2022-09-14	10:37:42	-0.0261448	5262.53	FALSE	533

## Sheet: Reggie_martin_2022914103212
						**GoPro Fitting: 1021
2022-09-14	10:32:12	0.274415
2022-09-14	10:32:12	0.257265
2022-09-14	10:32:12	0.26154
2022-09-14	10:32:13	0.301845
2022-09-14	10:32:13	0.421387
2022-09-14	10:32:13	0.431005
2022-09-14	10:32:13	0.260725
2022-09-14	10:32:14	0.364135
2022-09-14	10:32:14	0.44383
2022-09-14	10:32:14	0.427799
2022-09-14	10:32:14	0.390089
2022-09-14	10:32:15	0.441438
2022-09-14	10:32:15	0.386476
2022-09-14	10:32:15	0.363575
2022-09-14	10:32:15	0.355687
2022-09-14	10:32:16	0.35584
2022-09-14	10:32:16	0.379351
2022-09-14	10:32:16	0.358435
2022-09-14	10:32:16	0.359606
2022-09-14	10:32:17	0.391361
2022-09-14	10:32:17	0.377112
2022-09-14	10:32:17	0.414109
2022-09-14	10:32:18	0.387748
2022-09-14	10:32:18	0.381336
2022-09-14	10:32:18	0.368053
2022-09-14	10:32:18	0.380776
2022-09-14	10:32:19	0.382099
2022-09-14	10:32:19	0.359606
2022-09-14	10:32:19	0.389733
2022-09-14	10:32:19	0.43411
2022-09-14	10:32:20	0.354211
2022-09-14	10:32:20	0.368461
2022-09-14	10:32:20	0.382099
2022-09-14	10:32:20	0.381387
2022-09-14	10:32:21	0.417926
2022-09-14	10:32:21	0.311463
2022-09-14	10:32:21	0.306679
2022-09-14	10:32:22	0.282863
2022-09-14	10:32:22	0.433906
2022-09-14	10:32:22	0.486221
2022-09-14	10:32:22	0.490903
2022-09-14	10:32:23	0.388766
2022-09-14	10:32:23	0.624949
2022-09-14	10:32:23	0.430293
2022-09-14	10:32:23	0.366781
2022-09-14	10:32:24	0.348104
2022-09-14	10:32:24	0.457723
2022-09-14	10:32:24	0.418741
2022-09-14	10:32:24	0.398944
2022-09-14	10:32:25	0.392125
2022-09-14	10:32:25	0.37701
2022-09-14	10:32:25	0.397875
2022-09-14	10:32:26	0.384542
2022-09-14	10:32:26	0.417774
2022-09-14	10:32:26	0.404542
2022-09-14	10:32:26	0.405102
2022-09-14	10:32:27	0.419148
2022-09-14	10:32:27	0.41986
2022-09-14	10:32:27	0.422761
2022-09-14	10:32:27	0.432685
2022-09-14	10:32:28	0.404237
2022-09-14	10:32:28	0.402252
2022-09-14	10:32:28	0.532837
2022-09-14	10:32:28	0.266985
2022-09-14	10:32:29	-0.078562
2022-09-14	10:32:29	-0.452862
2022-09-14	10:32:29	-0.454694
2022-09-14	10:32:30	-0.598664
2022-09-14	10:32:30	-0.591997
2022-09-14	10:32:30	-0.158257
2022-09-14	10:32:30	0.00927507
2022-09-14	10:32:31	0.0161453
2022-09-14	10:32:31	0.114211
2022-09-14	10:32:31	0.0447967
2022-09-14	10:32:31	-0.0226333
2022-09-14	10:32:32	0.0198094
2022-09-14	10:32:32	0.713906
2022-09-14	10:32:32	0.519555
2022-09-14	10:32:32	0.249428
2022-09-14	10:32:33	0.0910562
2022-09-14	10:32:33	1.18744
2022-09-14	10:32:33	1.67187
2022-09-14	10:32:34	2.59823
2022-09-14	10:32:34	1.38251
2022-09-14	10:32:34	0.881641
2022-09-14	10:32:34	0.938232
2022-09-14	10:32:35	0.727392
2022-09-14	10:32:35	0.51701
2022-09-14	10:32:35	1.23431
2022-09-14	10:32:35	1.40052
2022-09-14	10:32:36	1.24648
2022-09-14	10:32:36	0.898486
2022-09-14	10:32:36	0.756603
2022-09-14	10:32:36	0.846425
2022-09-14	10:32:37	0.916145
2022-09-14	10:32:37	1.11477
2022-09-14	10:32:37	1.46989
2022-09-14	10:32:38	1.79854
2022-09-14	10:32:38	2.13823
2022-09-14	10:32:38	2.18805
2022-09-14	10:32:38	2.58775
2022-09-14	10:32:39	2.49955
2022-09-14	10:32:39	2.76999
2022-09-14	10:32:39	1.44846
2022-09-14	10:32:39	0.986069
2022-09-14	10:32:40	0.806883
2022-09-14	10:32:40	0.766781
2022-09-14	10:32:40	1.17279
2022-09-14	10:32:40	1.28195
2022-09-14	10:32:41	0.933397
2022-09-14	10:32:41	0.427239
2022-09-14	10:32:41	0.398333
2022-09-14	10:32:42	0.44556
2022-09-14	10:32:42	0.669834
2022-09-14	10:32:42	1.20235
2022-09-14	10:32:42	0.698486
2022-09-14	10:32:43	0.52897
2022-09-14	10:32:43	0.705204
2022-09-14	10:32:43	1.01574
2022-09-14	10:32:43	0.731259
2022-09-14	10:32:44	0.729784
2022-09-14	10:32:44	0.323881
2022-09-14	10:32:44	0.366069
2022-09-14	10:32:44	0.255942
2022-09-14	10:32:45	0.295789
2022-09-14	10:32:45	0.262048
2022-09-14	10:32:45	0.165356
2022-09-14	10:32:46	0.274669
2022-09-14	10:32:46	1.05431
2022-09-14	10:32:46	3.07446
2022-09-14	10:32:46	3.95701
2022-09-14	10:32:47	4.8191
2022-09-14	10:32:47	1.54352
2022-09-14	10:32:47	1.46546
2022-09-14	10:32:47	0.528766
2022-09-14	10:32:48	0.582812
2022-09-14	10:32:48	0.857774
2022-09-14	10:32:48	0.600776
2022-09-14	10:32:48	1.45309
2022-09-14	10:32:49	2.17599
2022-09-14	10:32:49	5.62321
2022-09-14	10:32:49	5.56774
2022-09-14	10:32:50	5.23624
2022-09-14	10:32:50	5.11558
2022-09-14	10:32:50	6.36886
2022-09-14	10:32:50	10.5402
2022-09-14	10:32:51	5.74021
2022-09-14	10:32:51	7.17283
2022-09-14	10:32:51	2.71182
2022-09-14	10:32:51	2.95991
2022-09-14	10:32:52	4.23614
2022-09-14	10:32:52	6.89059
2022-09-14	10:32:52	16.7636
2022-09-14	10:32:52	13.2861
2022-09-14	10:32:53	11.8298
2022-09-14	10:32:53	16.1573
2022-09-14	10:32:53	8.27085
2022-09-14	10:32:54	19.6351
2022-09-14	10:32:54	13.3031
2022-09-14	10:32:54	9.0966
2022-09-14	10:32:54	11.177
2022-09-14	10:32:55	5.01355
2022-09-14	10:32:55	10.3005
2022-09-14	10:32:55	12.205
2022-09-14	10:32:55	3.1963
2022-09-14	10:32:56	8.74978
2022-09-14	10:32:56	8.68607
2022-09-14	10:32:56	4.37553
2022-09-14	10:32:56	2.20174
2022-09-14	10:32:57	3.02398
2022-09-14	10:32:57	8.38423
2022-09-14	10:32:57	19.5057
2022-09-14	10:32:58	8.34454
2022-09-14	10:32:58	0.372277
2022-09-14	10:32:58	0.710445
2022-09-14	10:32:58	0.422506
2022-09-14	10:32:59	0.136654
2022-09-14	10:32:59	0.199148
2022-09-14	10:32:59	-0.0157631
2022-09-14	10:32:59	0.268308
2022-09-14	10:33:00	0.115382
2022-09-14	10:33:00	0.228206
2022-09-14	10:33:00	0.109021
2022-09-14	10:33:00	0.163015
2022-09-14	10:33:01	0.400929
2022-09-14	10:33:01	0.66841
2022-09-14	10:33:01	0.483117
2022-09-14	10:33:02	0.680878
2022-09-14	10:33:02	1.13426
2022-09-14	10:33:02	0.493651
2022-09-14	10:33:02	1.24586
2022-09-14	10:33:03	1.90948
2022-09-14	10:33:03	1.9792
2022-09-14	10:33:03	1.17467
2022-09-14	10:33:03	3.9193
2022-09-14	10:33:04	18.6797
2022-09-14	10:33:04	20.3859
2022-09-14	10:33:04	19.1638
2022-09-14	10:33:04	11.2149
2022-09-14	10:33:05	7.61986
2022-09-14	10:33:05	8.03477
2022-09-14	10:33:05	3.71848
2022-09-14	10:33:06	5.1596
2022-09-14	10:33:06	2.47085
2022-09-14	10:33:06	0.968613
2022-09-14	10:33:06	0.475178
2022-09-14	10:33:07	0.262456
2022-09-14	10:33:07	0.315127
2022-09-14	10:33:07	0.306221
2022-09-14	10:33:07	0.468104
2022-09-14	10:33:08	0.33701
2022-09-14	10:33:08	1.52973
2022-09-14	10:33:08	2.12592
2022-09-14	10:33:08	3.96668
2022-09-14	10:33:09	2.50714
2022-09-14	10:33:09	1.32933
2022-09-14	10:33:09	1.22963
2022-09-14	10:33:10	3.5967
2022-09-14	10:33:10	6.71782
2022-09-14	10:33:10	5.39543
2022-09-14	10:33:10	7.35253
2022-09-14	10:33:11	5.51385
2022-09-14	10:33:11	4.52052
2022-09-14	10:33:11	3.43762
2022-09-14	10:33:11	3.73945
2022-09-14	10:33:12	6.18714
2022-09-14	10:33:12	6.18566
2022-09-14	10:33:12	6.75314
2022-09-14	10:33:12	9.66759
2022-09-14	10:33:13	3.30897
2022-09-14	10:33:13	15.7382
2022-09-14	10:33:13	6.85029
2022-09-14	10:33:14	2.74159
2022-09-14	10:33:14	0.517315
2022-09-14	10:33:14	0.268664
2022-09-14	10:33:14	0.454517
2022-09-14	10:33:15	0.0546694
2022-09-14	10:33:15	0.23411
2022-09-14	10:33:15	-0.0513865
2022-09-14	10:33:15	-0.220598
2022-09-14	10:33:16	-0.43902
2022-09-14	10:33:16	-0.128384
2022-09-14	10:33:16	0.0833717
2022-09-14	10:33:16	0.849784
2022-09-14	10:33:17	2.06027
2022-09-14	10:33:17	3.44093
2022-09-14	10:33:17	3.22841
2022-09-14	10:33:18	0.707239
2022-09-14	10:33:18	1.11268
2022-09-14	10:33:18	1.42062
2022-09-14	10:33:18	2.81854
2022-09-14	10:33:19	4.52474
2022-09-14	10:33:19	8.24789
2022-09-14	10:33:19	2.01136
2022-09-14	10:33:19	0.322252
2022-09-14	10:33:20	0.28098
2022-09-14	10:33:20	0.241031
2022-09-14	10:33:20	0.397926
2022-09-14	10:33:20	0.274567
2022-09-14	10:33:21	0.250853
2022-09-14	10:33:21	-0.281106
2022-09-14	10:33:21	-0.347977
2022-09-14	10:33:22	-0.324312
2022-09-14	10:33:22	-0.114643
2022-09-14	10:33:22	1.73039
2022-09-14	10:33:22	2.41874
2022-09-14	10:33:23	3.71105
2022-09-14	10:33:23	7.94087
2022-09-14	10:33:23	8.09579
2022-09-14	10:33:23	5.96657
2022-09-14	10:33:24	4.53044
2022-09-14	10:33:24	0.398232
2022-09-14	10:33:24	0.049275
2022-09-14	10:33:24	0.0173157
2022-09-14	10:33:25	-0.0220226
2022-09-14	10:33:25	0.0238807
2022-09-14	10:33:25	0.0250003
2022-09-14	10:33:26	0.74785
2022-09-14	10:33:26	3.68627
2022-09-14	10:33:26	8.73177
2022-09-14	10:33:26	8.97365
2022-09-14	10:33:27	13.1022
2022-09-14	10:33:27	7.39858
2022-09-14	10:33:27	12.557
2022-09-14	10:33:27	10.5147
2022-09-14	10:33:28	7.72948
2022-09-14	10:33:28	9.81548
2022-09-14	10:33:28	13.5512
2022-09-14	10:33:28	11.3398
2022-09-14	10:33:29	7.19141
2022-09-14	10:33:29	5.72785
2022-09-14	10:33:29	4.72225
2022-09-14	10:33:29	3.53966
2022-09-14	10:33:30	2.26357
2022-09-14	10:33:30	0.794618
2022-09-14	10:33:30	0.00637431
2022-09-14	10:33:31	0.011158
2022-09-14	10:33:31	-0.0278242
2022-09-14	10:33:31	6.3875e-05
2022-09-14	10:33:31	-0.0040074
2022-09-14	10:33:32	0.0328374
2022-09-14	10:33:32	0.0958908
2022-09-14	10:33:32	0.859606
2022-09-14	10:33:32	1.50673
2022-09-14	10:33:33	2.76474
2022-09-14	10:33:33	2.56902
2022-09-14	10:33:33	2.29991
2022-09-14	10:33:33	2.50673
2022-09-14	10:33:34	3.34999
2022-09-14	10:33:34	1.95869
2022-09-14	10:33:34	2.51238
2022-09-14	10:33:35	0.94444
2022-09-14	10:33:35	0.512379
2022-09-14	10:33:35	-0.109046
2022-09-14	10:33:35	0.0189442
2022-09-14	10:33:36	0.0839824
2022-09-14	10:33:36	0.0925829
2022-09-14	10:33:36	-0.00349849
2022-09-14	10:33:36	0.209784
2022-09-14	10:33:37	0.213244
2022-09-14	10:33:37	1.13436
2022-09-14	10:33:37	2.63243
2022-09-14	10:33:37	3.26322
2022-09-14	10:33:38	1.67182
2022-09-14	10:33:38	1.37538
2022-09-14	10:33:38	0.607646
2022-09-14	10:33:39	0.44902
2022-09-14	10:33:39	0.419097
2022-09-14	10:33:39	0.37986
2022-09-14	10:33:39	0.388817
2022-09-14	10:33:40	0.44271
2022-09-14	10:33:40	0.44159
2022-09-14	10:33:40	0.525967
2022-09-14	10:33:40	0.599707
2022-09-14	10:33:41	0.756552
2022-09-14	10:33:41	0.959249
2022-09-14	10:33:41	1.17238
2022-09-14	10:33:41	1.45034
2022-09-14	10:33:42	0.848919
2022-09-14	10:33:42	0.875178
2022-09-14	10:33:42	0.924389
2022-09-14	10:33:43	0.911361
2022-09-14	10:33:43	0.821641
2022-09-14	10:33:43	0.841743
2022-09-14	10:33:43	0.742201
2022-09-14	10:33:44	0.398893
2022-09-14	10:33:44	0.385254
2022-09-14	10:33:44	0.035789
2022-09-14	10:33:44	-0.299936
2022-09-14	10:33:45	-0.593371
2022-09-14	10:33:45	-0.767365
2022-09-14	10:33:45	-0.426857
2022-09-14	10:33:45	0.912633
2022-09-14	10:33:46	2.96464
2022-09-14	10:33:46	6.00744
2022-09-14	10:33:46	7.89192
2022-09-14	10:33:47	6.62749
2022-09-14	10:33:47	7.8053
2022-09-14	10:33:47	5.17411
2022-09-14	10:33:47	12.5843
2022-09-14	10:33:48	12.3491
2022-09-14	10:33:48	7.40718
2022-09-14	10:33:48	11.5594
2022-09-14	10:33:48	1.43365
2022-09-14	10:33:49	4.73182
2022-09-14	10:33:49	1.85625
2022-09-14	10:33:49	0.541794
2022-09-14	10:33:49	0.648919
2022-09-14	10:33:50	0.166629
2022-09-14	10:33:50	0.664796
2022-09-14	10:33:50	0.29014
2022-09-14	10:33:51	0.423982
2022-09-14	10:33:51	0.5364
2022-09-14	10:33:51	0.404033
2022-09-14	10:33:51	0.429275
2022-09-14	10:33:52	0.509987
2022-09-14	10:33:52	0.452735
2022-09-14	10:33:52	0.352786
2022-09-14	10:33:52	0.398842
2022-09-14	10:33:53	0.445051
2022-09-14	10:33:53	0.320369
2022-09-14	10:33:53	0.374313
2022-09-14	10:33:53	1.14184
2022-09-14	10:33:54	2.48887
2022-09-14	10:33:54	3.19584
2022-09-14	10:33:54	4.17105
2022-09-14	10:33:55	4.0622
2022-09-14	10:33:55	1.79645
2022-09-14	10:33:55	1.53126
2022-09-14	10:33:55	1.27762
2022-09-14	10:33:56	3.69757
2022-09-14	10:33:56	2.83574
2022-09-14	10:33:56	1.49309
2022-09-14	10:33:56	0.86271
2022-09-14	10:33:57	0.777468
2022-09-14	10:33:57	0.464135
2022-09-14	10:33:57	0.396145
2022-09-14	10:33:57	0.496501
2022-09-14	10:33:58	0.375178
2022-09-14	10:33:58	0.368512
2022-09-14	10:33:58	0.451565
2022-09-14	10:33:59	0.43416
2022-09-14	10:33:59	0.392888
2022-09-14	10:33:59	0.376756
2022-09-14	10:33:59	0.385764
2022-09-14	10:34:00	0.391361
2022-09-14	10:34:00	0.379962
2022-09-14	10:34:00	0.381896
2022-09-14	10:34:00	0.38383
2022-09-14	10:34:01	0.450852
2022-09-14	10:34:01	0.422405
2022-09-14	10:34:01	0.336298
2022-09-14	10:34:01	0.308155
2022-09-14	10:34:02	0.292074
2022-09-14	10:34:02	0.310954
2022-09-14	10:34:02	0.209529
2022-09-14	10:34:03	0.362405
2022-09-14	10:34:03	0.190191
2022-09-14	10:34:03	0.358537
2022-09-14	10:34:03	0.206781
2022-09-14	10:34:04	0.698893
2022-09-14	10:34:04	0.570598
2022-09-14	10:34:04	1.56765
2022-09-14	10:34:04	3.17202
2022-09-14	10:34:05	8.26739
2022-09-14	10:34:05	13.1168
2022-09-14	10:34:05	8.8337
2022-09-14	10:34:05	7.77655
2022-09-14	10:34:06	2.92658
2022-09-14	10:34:06	8.38484
2022-09-14	10:34:06	5.56606
2022-09-14	10:34:07	4.01334
2022-09-14	10:34:07	2.35584
2022-09-14	10:34:07	0.31472
2022-09-14	10:34:07	0.401285
2022-09-14	10:34:08	0.207087
2022-09-14	10:34:08	0.248461
2022-09-14	10:34:08	0.345967
2022-09-14	10:34:08	0.202252
2022-09-14	10:34:09	0.473295
2022-09-14	10:34:09	0.222914
2022-09-14	10:34:09	1.28709
2022-09-14	10:34:09	2.28317
2022-09-14	10:34:10	3.88047
2022-09-14	10:34:10	3.20581
2022-09-14	10:34:10	4.37966
2022-09-14	10:34:11	3.64744
2022-09-14	10:34:11	3.3477
2022-09-14	10:34:11	5.79645
2022-09-14	10:34:11	1.65971
2022-09-14	10:34:12	3.98851
2022-09-14	10:34:12	2.99034
2022-09-14	10:34:12	2.99278
2022-09-14	10:34:12	4.74927
2022-09-14	10:34:13	4.41238
2022-09-14	10:34:13	12.0101
2022-09-14	10:34:13	2.69594
2022-09-14	10:34:13	7.92505
2022-09-14	10:34:14	6.18678
2022-09-14	10:34:14	7.43762
2022-09-14	10:34:14	3.98561
2022-09-14	10:34:15	3.1482
2022-09-14	10:34:15	7.6509
2022-09-14	10:34:15	2.38571
2022-09-14	10:34:15	7.31121
2022-09-14	10:34:16	6.91365
2022-09-14	10:34:16	8.18479
2022-09-14	10:34:16	3.80251
2022-09-14	10:34:16	2.62897
2022-09-14	10:34:17	6.02774
2022-09-14	10:34:17	1.59151
2022-09-14	10:34:17	4.96535
2022-09-14	10:34:17	2.36821
2022-09-14	10:34:18	3.35808
2022-09-14	10:34:18	2.49049
2022-09-14	10:34:18	1.75859
2022-09-14	10:34:19	3.87737
2022-09-14	10:34:19	0.707036
2022-09-14	10:34:19	2.91095
2022-09-14	10:34:19	1.5448
2022-09-14	10:34:20	2.94261
2022-09-14	10:34:20	3.00561
2022-09-14	10:34:20	3.37187
2022-09-14	10:34:20	6.05354
2022-09-14	10:34:21	2.13172
2022-09-14	10:34:21	6.32154
2022-09-14	10:34:21	1.95716
2022-09-14	10:34:21	4.89227
2022-09-14	10:34:22	2.81538
2022-09-14	10:34:22	3.31406
2022-09-14	10:34:22	8.18494
2022-09-14	10:34:23	4.22169
2022-09-14	10:34:23	13.1215
2022-09-14	10:34:23	5.36352
2022-09-14	10:34:23	8.66311
2022-09-14	10:34:24	2.67024
2022-09-14	10:34:24	3.9537
2022-09-14	10:34:24	9.00276
2022-09-14	10:34:24	5.62607
2022-09-14	10:34:25	10.4912
2022-09-14	10:34:25	7.54922
2022-09-14	10:34:25	9.53365
2022-09-14	10:34:25	6.02494
2022-09-14	10:34:26	4.43401
2022-09-14	10:34:26	9.94825
2022-09-14	10:34:26	3.17701
2022-09-14	10:34:27	4.50754
2022-09-14	10:34:27	2.64459
2022-09-14	10:34:27	1.43579
2022-09-14	10:34:27	2.59207
2022-09-14	10:34:28	2.48245
2022-09-14	10:34:28	9.02622
2022-09-14	10:34:28	6.80352
2022-09-14	10:34:28	9.34011
2022-09-14	10:34:29	11.4082
2022-09-14	10:34:29	7.43192
2022-09-14	10:34:29	9.77848
2022-09-14	10:34:29	11.9525
2022-09-14	10:34:30	23.1526
2022-09-14	10:34:30	9.67879
2022-09-14	10:34:30	7.50052
2022-09-14	10:34:31	17.1573
2022-09-14	10:34:31	8.49283
2022-09-14	10:34:31	16.3321
2022-09-14	10:34:31	6.5882
2022-09-14	10:34:32	5.56179
2022-09-14	10:34:32	3.76149
2022-09-14	10:34:32	5.1222
2022-09-14	10:34:32	13.9064
2022-09-14	10:34:33	17.5374
2022-09-14	10:34:33	14.6581
2022-09-14	10:34:33	5.85406
2022-09-14	10:34:33	7.88551
2022-09-14	10:34:34	2.73065
2022-09-14	10:34:34	3.6649
2022-09-14	10:34:34	2.38704
2022-09-14	10:34:35	1.85589
2022-09-14	10:34:35	3.16256
2022-09-14	10:34:35	3.00251
2022-09-14	10:34:35	2.85416
2022-09-14	10:34:36	2.4477
2022-09-14	10:34:36	2.52077
2022-09-14	10:34:36	4.09299
2022-09-14	10:34:36	8.12011
2022-09-14	10:34:37	14.3088
2022-09-14	10:34:37	18.5571
2022-09-14	10:34:37	17.9356
2022-09-14	10:34:37	23.24
2022-09-14	10:34:38	30.8629
2022-09-14	10:34:38	12.8513
2022-09-14	10:34:38	21.9367
2022-09-14	10:34:38	34.2297
2022-09-14	10:34:39	32.2359
2022-09-14	10:34:39	34.4953
2022-09-14	10:34:39	35.118
2022-09-14	10:34:40	30.9707
2022-09-14	10:34:40	31.5752
2022-09-14	10:34:40	32.3585
2022-09-14	10:34:40	30.1496
2022-09-14	10:34:41	28.5905
2022-09-14	10:34:41	25.5633
2022-09-14	10:34:41	23.6701
2022-09-14	10:34:41	21.8983
2022-09-14	10:34:42	20.1497
2022-09-14	10:34:42	17.6069
2022-09-14	10:34:42	16.4945
2022-09-14	10:34:42	15.1321
2022-09-14	10:34:43	15.0441
2022-09-14	10:34:43	16.3158
2022-09-14	10:34:43	14.8986
2022-09-14	10:34:44	11.7822
2022-09-14	10:34:44	9.29736
2022-09-14	10:34:44	4.87004
2022-09-14	10:34:44	6.18423
2022-09-14	10:34:45	2.89202
2022-09-14	10:34:45	1.37762
2022-09-14	10:34:45	1.75365
2022-09-14	10:34:45	4.62352
2022-09-14	10:34:46	10.4981
2022-09-14	10:34:46	14.2761
2022-09-14	10:34:46	9.43975
2022-09-14	10:34:46	24.1724
2022-09-14	10:34:47	16.3626
2022-09-14	10:34:47	21.9973
2022-09-14	10:34:47	13.546
2022-09-14	10:34:48	20.2369
2022-09-14	10:34:48	14.5111
2022-09-14	10:34:48	3.56088
2022-09-14	10:34:48	1.61055
2022-09-14	10:34:49	3.95136
2022-09-14	10:34:49	11.0879
2022-09-14	10:34:49	13.3081
2022-09-14	10:34:49	10.3681
2022-09-14	10:34:50	15.3995
2022-09-14	10:34:50	10.9261
2022-09-14	10:34:50	11.057
2022-09-14	10:34:50	15.7214
2022-09-14	10:34:51	12.6133
2022-09-14	10:34:51	3.60067
2022-09-14	10:34:51	1.96006
2022-09-14	10:34:52	2.2964
2022-09-14	10:34:52	4.66882
2022-09-14	10:34:52	3.88973
2022-09-14	10:34:52	6.7737
2022-09-14	10:34:53	12.435
2022-09-14	10:34:53	10.1316
2022-09-14	10:34:53	10.2646
2022-09-14	10:34:53	7.20154
2022-09-14	10:34:54	13.167
2022-09-14	10:34:54	8.49136
2022-09-14	10:34:54	8.17863
2022-09-14	10:34:54	8.94276
2022-09-14	10:34:55	8.57059
2022-09-14	10:34:55	6.96245
2022-09-14	10:34:55	6.32103
2022-09-14	10:34:56	6.24469
2022-09-14	10:34:56	5.48729
2022-09-14	10:34:56	5.50143
2022-09-14	10:34:56	5.55034
2022-09-14	10:34:57	5.30607
2022-09-14	10:34:57	5.33879
2022-09-14	10:34:57	5.23558
2022-09-14	10:34:57	5.34169
2022-09-14	10:34:58	5.18143
2022-09-14	10:34:58	5.04439
2022-09-14	10:34:58	4.98983
2022-09-14	10:34:58	5.0708
2022-09-14	10:34:59	4.90469
2022-09-14	10:34:59	4.71915
2022-09-14	10:34:59	4.5796
2022-09-14	10:35:00	4.53854
2022-09-14	10:35:00	4.53141
2022-09-14	10:35:00	4.31441
2022-09-14	10:35:00	4.33502
2022-09-14	10:35:01	4.29324
2022-09-14	10:35:01	4.36841
2022-09-14	10:35:01	4.31324
2022-09-14	10:35:01	4.26759
2022-09-14	10:35:02	4.40566
2022-09-14	10:35:02	4.59497
2022-09-14	10:35:02	4.70637
2022-09-14	10:35:02	4.968
2022-09-14	10:35:03	4.91345
2022-09-14	10:35:03	4.89894
2022-09-14	10:35:03	4.46027
2022-09-14	10:35:04	4.18246
2022-09-14	10:35:04	4.30179
2022-09-14	10:35:04	4.60134
2022-09-14	10:35:04	4.51105
2022-09-14	10:35:05	4.271
2022-09-14	10:35:05	3.15136
2022-09-14	10:35:05	4.00195
2022-09-14	10:35:05	4.83457
2022-09-14	10:35:06	5.10601
2022-09-14	10:35:06	4.06398
2022-09-14	10:35:06	3.83146
2022-09-14	10:35:06	3.81273
2022-09-14	10:35:07	3.88225
2022-09-14	10:35:07	3.84591
2022-09-14	10:35:07	3.8565
2022-09-14	10:35:08	3.50495
2022-09-14	10:35:08	2.99518
2022-09-14	10:35:08	2.73248
2022-09-14	10:35:08	2.59029
2022-09-14	10:35:09	2.5082
2022-09-14	10:35:09	2.30688
2022-09-14	10:35:09	2.33416
2022-09-14	10:35:09	2.7162
2022-09-14	10:35:10	2.72093
2022-09-14	10:35:10	2.58378
2022-09-14	10:35:10	2.68108
2022-09-14	10:35:10	2.43502
2022-09-14	10:35:11	3.95701
2022-09-14	10:35:11	5.36617
2022-09-14	10:35:11	4.83075
2022-09-14	10:35:12	4.73609
2022-09-14	10:35:12	4.01085
2022-09-14	10:35:12	4.48271
2022-09-14	10:35:12	3.9368
2022-09-14	10:35:13	3.24368
2022-09-14	10:35:13	2.97904
2022-09-14	10:35:13	2.75472
2022-09-14	10:35:13	2.81009
2022-09-14	10:35:14	2.80917
2022-09-14	10:35:14	2.77614
2022-09-14	10:35:14	2.62994
2022-09-14	10:35:14	2.88938
2022-09-14	10:35:15	3.12688
2022-09-14	10:35:15	3.24347
2022-09-14	10:35:15	3.10164
2022-09-14	10:35:16	2.98271
2022-09-14	10:35:16	3.03172
2022-09-14	10:35:16	3.02765
2022-09-14	10:35:16	3.11243
2022-09-14	10:35:17	2.98052
2022-09-14	10:35:17	2.95258
2022-09-14	10:35:17	2.97212
2022-09-14	10:35:17	2.99248
2022-09-14	10:35:18	2.91324
2022-09-14	10:35:18	2.81385
2022-09-14	10:35:18	2.77294
2022-09-14	10:35:18	2.80322
2022-09-14	10:35:19	2.84907
2022-09-14	10:35:19	2.79039
2022-09-14	10:35:19	2.84607
2022-09-14	10:35:20	3.08846
2022-09-14	10:35:20	3.23599
2022-09-14	10:35:20	3.23492
2022-09-14	10:35:20	3.3648
2022-09-14	10:35:21	3.64917
2022-09-14	10:35:21	3.60347
2022-09-14	10:35:21	3.71065
2022-09-14	10:35:21	3.73467
2022-09-14	10:35:22	3.96088
2022-09-14	10:35:22	3.96469
2022-09-14	10:35:22	3.83243
2022-09-14	10:35:22	3.78062
2022-09-14	10:35:23	3.73014
2022-09-14	10:35:23	3.81538
2022-09-14	10:35:23	3.75324
2022-09-14	10:35:23	3.64709
2022-09-14	10:35:24	3.67752
2022-09-14	10:35:24	3.65136
2022-09-14	10:35:24	3.55935
2022-09-14	10:35:25	3.50154
2022-09-14	10:35:25	3.54164
2022-09-14	10:35:25	3.52474
2022-09-14	10:35:25	3.48887
2022-09-14	10:35:26	3.60663
2022-09-14	10:35:26	3.44006
2022-09-14	10:35:26	3.5023
2022-09-14	10:35:26	3.46388
2022-09-14	10:35:27	3.44592
2022-09-14	10:35:27	3.48388
2022-09-14	10:35:27	3.47411
2022-09-14	10:35:27	3.43869
2022-09-14	10:35:28	3.48312
2022-09-14	10:35:28	3.60256
2022-09-14	10:35:28	3.53538
2022-09-14	10:35:29	3.50418
2022-09-14	10:35:29	3.38103
2022-09-14	10:35:29	3.45691
2022-09-14	10:35:29	3.48566
2022-09-14	10:35:30	3.5506
2022-09-14	10:35:30	3.5505
2022-09-14	10:35:30	3.49126
2022-09-14	10:35:30	3.5165
2022-09-14	10:35:31	3.47976
2022-09-14	10:35:31	3.34551
2022-09-14	10:35:31	3.44317
2022-09-14	10:35:31	3.58261
2022-09-14	10:35:32	3.35304
2022-09-14	10:35:32	3.36866
2022-09-14	10:35:32	3.40841
2022-09-14	10:35:33	3.2882
2022-09-14	10:35:33	3.1967
2022-09-14	10:35:33	3.26424
2022-09-14	10:35:33	3.4192
2022-09-14	10:35:34	3.54464
2022-09-14	10:35:34	3.57345
2022-09-14	10:35:34	3.55889
2022-09-14	10:35:34	3.58016
2022-09-14	10:35:35	3.50546
2022-09-14	10:35:35	3.43518
2022-09-14	10:35:35	3.4022
2022-09-14	10:35:35	3.39401
2022-09-14	10:35:36	3.43548
2022-09-14	10:35:36	3.57686
2022-09-14	10:35:36	3.54642
2022-09-14	10:35:37	3.65823
2022-09-14	10:35:37	3.66444
2022-09-14	10:35:37	3.57609
2022-09-14	10:35:37	3.57752
2022-09-14	10:35:38	3.51553
2022-09-14	10:35:38	3.5708
2022-09-14	10:35:38	3.53675
2022-09-14	10:35:38	3.51792
2022-09-14	10:35:39	3.5024
2022-09-14	10:35:39	3.62215
2022-09-14	10:35:39	3.69996
2022-09-14	10:35:39	2.8221
2022-09-14	10:35:40	1.84816
2022-09-14	10:35:40	1.40836
2022-09-14	10:35:40	1.18541
2022-09-14	10:35:41	0.451107
2022-09-14	10:35:41	0.404847
2022-09-14	10:35:41	0.643626
2022-09-14	10:35:41	0.734618
2022-09-14	10:35:42	0.377367
2022-09-14	10:35:42	0.331718
2022-09-14	10:35:42	0.37126
2022-09-14	10:35:42	0.588817
2022-09-14	10:35:43	0.495026
2022-09-14	10:35:43	0.361947
2022-09-14	10:35:43	0.296603
2022-09-14	10:35:43	0.599097
2022-09-14	10:35:44	0.569529
2022-09-14	10:35:44	0.937621
2022-09-14	10:35:44	1.1908
2022-09-14	10:35:45	2.21009
2022-09-14	10:35:45	3.03304
2022-09-14	10:35:45	2.62469
2022-09-14	10:35:45	3.06368
2022-09-14	10:35:46	1.36459
2022-09-14	10:35:46	2.55721
2022-09-14	10:35:46	1.34072
2022-09-14	10:35:46	3.57279
2022-09-14	10:35:47	4.72088
2022-09-14	10:35:47	5.51879
2022-09-14	10:35:47	3.56373
2022-09-14	10:35:47	2.76576
2022-09-14	10:35:48	4.23172
2022-09-14	10:35:48	2.52398
2022-09-14	10:35:48	7.45293
2022-09-14	10:35:49	12.5477
2022-09-14	10:35:49	8.59354
2022-09-14	10:35:49	21.7507
2022-09-14	10:35:49	15.8592
2022-09-14	10:35:50	25.5886
2022-09-14	10:35:50	22.4297
2022-09-14	10:35:50	24.989
2022-09-14	10:35:50	22.8324
2022-09-14	10:35:51	21.3884
2022-09-14	10:35:51	17.2067
2022-09-14	10:35:51	15.5911
2022-09-14	10:35:51	11.4988
2022-09-14	10:35:52	11.097
2022-09-14	10:35:52	8.38311
2022-09-14	10:35:52	11.8284
2022-09-14	10:35:53	11.892
2022-09-14	10:35:53	8.63146
2022-09-14	10:35:53	10.6822
2022-09-14	10:35:53	12.7368
2022-09-14	10:35:54	6.33064
2022-09-14	10:35:54	13.6411
2022-09-14	10:35:54	3.79253
2022-09-14	10:35:54	3.12693
2022-09-14	10:35:55	2.50296
2022-09-14	10:35:55	0.177316
2022-09-14	10:35:55	0.707188
2022-09-14	10:35:55	0.124237
2022-09-14	10:35:56	0.213244
2022-09-14	10:35:56	0.100624
2022-09-14	10:35:56	0.134568
2022-09-14	10:35:57	0.0779265
2022-09-14	10:35:57	0.0846949
2022-09-14	10:35:57	0.0141097
2022-09-14	10:35:57	-0.113778
2022-09-14	10:35:58	-0.0825824
2022-09-14	10:35:58	-0.131234
2022-09-14	10:35:58	-0.175916
2022-09-14	10:35:58	-0.183142
2022-09-14	10:35:59	-0.0883839
2022-09-14	10:35:59	-0.180903
2022-09-14	10:35:59	-0.0717936
2022-09-14	10:35:59	-0.121972
2022-09-14	10:36:00	0.206883
2022-09-14	10:36:00	0.0693259
2022-09-14	10:36:00	0.0944149
2022-09-14	10:36:01	-0.0234985
2022-09-14	10:36:01	0.116807
2022-09-14	10:36:01	0.193143
2022-09-14	10:36:01	0.242303
2022-09-14	10:36:02	0.221845
2022-09-14	10:36:02	0.436603
2022-09-14	10:36:02	0.347392
2022-09-14	10:36:02	0.68042
2022-09-14	10:36:03	0.124542
2022-09-14	10:36:03	0.195585
2022-09-14	10:36:03	0.160369
2022-09-14	10:36:03	-0.058613
2022-09-14	10:36:04	-0.16645
2022-09-14	10:36:04	-0.293269
2022-09-14	10:36:04	-0.442938
2022-09-14	10:36:05	-0.182684
2022-09-14	10:36:05	-0.0948979
2022-09-14	10:36:05	-0.0504705
2022-09-14	10:36:05	0.0225575
2022-09-14	10:36:06	0.310853
2022-09-14	10:36:06	0.272888
2022-09-14	10:36:06	0.200115
2022-09-14	10:36:06	0.119046
2022-09-14	10:36:07	0.193601
2022-09-14	10:36:07	0.161743
2022-09-14	10:36:07	0.0706491
2022-09-14	10:36:07	0.155942
2022-09-14	10:36:08	0.125916
2022-09-14	10:36:08	0.215992
2022-09-14	10:36:08	0.361794
2022-09-14	10:36:08	0.402659
2022-09-14	10:36:09	0.423473
2022-09-14	10:36:09	0.395534
2022-09-14	10:36:09	0.623015
2022-09-14	10:36:10	0.638333
2022-09-14	10:36:10	0.423219
2022-09-14	10:36:10	0.457926
2022-09-14	10:36:10	0.734822
2022-09-14	10:36:11	0.538842
2022-09-14	10:36:11	0.513041
2022-09-14	10:36:11	0.535585
2022-09-14	10:36:11	0.528919
2022-09-14	10:36:12	0.663117
2022-09-14	10:36:12	0.584186
2022-09-14	10:36:12	0.776756
2022-09-14	10:36:12	0.817468
2022-09-14	10:36:13	0.506425
2022-09-14	10:36:13	0.574059
2022-09-14	10:36:13	0.769936
2022-09-14	10:36:14	0.797723
2022-09-14	10:36:14	0.800063
2022-09-14	10:36:14	0.413397
2022-09-14	10:36:14	0.433753
2022-09-14	10:36:15	0.427646
2022-09-14	10:36:15	0.491463
2022-09-14	10:36:15	0.428104
2022-09-14	10:36:15	0.791616
2022-09-14	10:36:16	0.541132
2022-09-14	10:36:16	0.518333
2022-09-14	10:36:16	0.360929
2022-09-14	10:36:16	0.459707
2022-09-14	10:36:17	0.278384
2022-09-14	10:36:17	0.498079
2022-09-14	10:36:17	0.714873
2022-09-14	10:36:18	2.14872
2022-09-14	10:36:18	1.62159
2022-09-14	10:36:18	5.44871
2022-09-14	10:36:18	6.62673
2022-09-14	10:36:19	9.32749
2022-09-14	10:36:19	3.34307
2022-09-14	10:36:19	6.06515
2022-09-14	10:36:19	1.81726
2022-09-14	10:36:20	3.52128
2022-09-14	10:36:20	3.33197
2022-09-14	10:36:20	3.82047
2022-09-14	10:36:20	5.4397
2022-09-14	10:36:21	9.52739
2022-09-14	10:36:21	13.3215
2022-09-14	10:36:21	10.8761
2022-09-14	10:36:22	16.0948
2022-09-14	10:36:22	8.17619
2022-09-14	10:36:22	19.0101
2022-09-14	10:36:22	4.48749
2022-09-14	10:36:23	4.22652
2022-09-14	10:36:23	2.4278
2022-09-14	10:36:23	2.20388
2022-09-14	10:36:23	7.10729
2022-09-14	10:36:24	10.0768
2022-09-14	10:36:24	17.8729
2022-09-14	10:36:24	16.6148
2022-09-14	10:36:24	28.5702
2022-09-14	10:36:25	19.252
2022-09-14	10:36:25	8.31146
2022-09-14	10:36:25	13.8528
2022-09-14	10:36:26	14.1937
2022-09-14	10:36:26	10.0126
2022-09-14	10:36:26	7.78759
2022-09-14	10:36:26	6.64199
2022-09-14	10:36:27	3.51146
2022-09-14	10:36:27	1.37905
2022-09-14	10:36:27	0.37584
2022-09-14	10:36:27	0.137112
2022-09-14	10:36:28	0.189326
2022-09-14	10:36:28	0.211158
2022-09-14	10:36:28	0.688053
2022-09-14	10:36:28	0.730801
2022-09-14	10:36:29	0.743117
2022-09-14	10:36:29	-6.64436
2022-09-14	10:36:29	0.409886
2022-09-14	10:36:30	0.291361
2022-09-14	10:36:30	0.0638297
2022-09-14	10:36:30	0.0209289
2022-09-14	10:36:30	-0.140191
2022-09-14	10:36:31	-0.252404
2022-09-14	10:36:31	-0.197951
2022-09-14	10:36:31	0.0672394
2022-09-14	10:36:31	0.681895
2022-09-14	10:36:32	0.497417
2022-09-14	10:36:32	0.129173
2022-09-14	10:36:32	0.275585
2022-09-14	10:36:32	0.288308
2022-09-14	10:36:33	0.453855
2022-09-14	10:36:33	0.168512
2022-09-14	10:36:33	-0.0895544
2022-09-14	10:36:34	-0.0989692
2022-09-14	10:36:34	-0.0818699
2022-09-14	10:36:34	0.411056
2022-09-14	10:36:34	0.564389
2022-09-14	10:36:35	0.465255
2022-09-14	10:36:35	0.530802
2022-09-14	10:36:35	0.51986
2022-09-14	10:36:35	0.528562
2022-09-14	10:36:36	0.667901
2022-09-14	10:36:36	0.706832
2022-09-14	10:36:36	0.605865
2022-09-14	10:36:36	0.557774
2022-09-14	10:36:37	0.525865
2022-09-14	10:36:37	0.450598
2022-09-14	10:36:37	0.434008
2022-09-14	10:36:38	0.424848
2022-09-14	10:36:38	0.37986
2022-09-14	10:36:38	0.365153
2022-09-14	10:36:38	0.354466
2022-09-14	10:36:39	0.35869
2022-09-14	10:36:39	0.398995
2022-09-14	10:36:39	0.465407
2022-09-14	10:36:39	0.503168
2022-09-14	10:36:40	0.443219
2022-09-14	10:36:40	0.477468
2022-09-14	10:36:40	0.499707
2022-09-14	10:36:40	0.504644
2022-09-14	10:36:41	0.569021
2022-09-14	10:36:41	0.476298
2022-09-14	10:36:41	0.459504
2022-09-14	10:36:41	0.527799
2022-09-14	10:36:42	0.552023
2022-09-14	10:36:42	0.531463
2022-09-14	10:36:42	0.484847
2022-09-14	10:36:43	0.464898
2022-09-14	10:36:43	0.471311
2022-09-14	10:36:43	0.44383
2022-09-14	10:36:43	0.489631
2022-09-14	10:36:44	0.490954
2022-09-14	10:36:44	0.444338
2022-09-14	10:36:44	0.453652
2022-09-14	10:36:44	0.433906
2022-09-14	10:36:45	0.447392
2022-09-14	10:36:45	0.417112
2022-09-14	10:36:45	0.421438
2022-09-14	10:36:45	0.425
2022-09-14	10:36:46	0.451718
2022-09-14	10:36:46	0.469122
2022-09-14	10:36:46	0.469682
2022-09-14	10:36:47	0.470751
2022-09-14	10:36:47	0.469326
2022-09-14	10:36:47	0.478537
2022-09-14	10:36:47	0.475992
2022-09-14	10:36:48	0.45813
2022-09-14	10:36:48	0.491718
2022-09-14	10:36:48	0.495026
2022-09-14	10:36:48	0.52042
2022-09-14	10:36:49	0.531005
2022-09-14	10:36:49	0.576959
2022-09-14	10:36:49	0.565407
2022-09-14	10:36:49	0.57472
2022-09-14	10:36:50	0.521947
2022-09-14	10:36:50	0.530649
2022-09-14	10:36:50	0.517366
2022-09-14	10:36:51	0.522404
2022-09-14	10:36:51	0.527544
2022-09-14	10:36:51	0.623677
2022-09-14	10:36:51	0.631005
2022-09-14	10:36:52	0.61757
2022-09-14	10:36:52	0.58841
2022-09-14	10:36:52	0.565102
2022-09-14	10:36:52	0.465
2022-09-14	10:36:53	0.469122
2022-09-14	10:36:53	0.615229
2022-09-14	10:36:53	0.96098
2022-09-14	10:36:53	0.987901
2022-09-14	10:36:54	1.35228
2022-09-14	10:36:54	1.28103
2022-09-14	10:36:54	1.20709
2022-09-14	10:36:55	1.09004
2022-09-14	10:36:55	0.924135
2022-09-14	10:36:55	0.770649
2022-09-14	10:36:55	0.789479
2022-09-14	10:36:56	0.867951
2022-09-14	10:36:56	1.3509
2022-09-14	10:36:56	1.33314
2022-09-14	10:36:56	1.5053
2022-09-14	10:36:57	1.46113
2022-09-14	10:36:57	0.686018
2022-09-14	10:36:57	0.456196
2022-09-14	10:36:57	0.411005
2022-09-14	10:36:58	0.391514
2022-09-14	10:36:58	0.454262
2022-09-14	10:36:58	0.681794
2022-09-14	10:36:59	1.02001
2022-09-14	10:36:59	3.81304
2022-09-14	10:36:59	4.81996
2022-09-14	10:36:59	7.15309
2022-09-14	10:37:00	5.97472
2022-09-14	10:37:00	2.9195
2022-09-14	10:37:00	1.18485
2022-09-14	10:37:00	4.35513
2022-09-14	10:37:01	3.59197
2022-09-14	10:37:01	7.02892
2022-09-14	10:37:01	1.53721
2022-09-14	10:37:01	5.17233
2022-09-14	10:37:02	2.17508
2022-09-14	10:37:02	2.43681
2022-09-14	10:37:02	1.51462
2022-09-14	10:37:03	0.856603
2022-09-14	10:37:03	1.71223
2022-09-14	10:37:03	1.49243
2022-09-14	10:37:03	2.83986
2022-09-14	10:37:04	2.54332
2022-09-14	10:37:04	6.86769
2022-09-14	10:37:04	1.20693
2022-09-14	10:37:04	5.61568
2022-09-14	10:37:05	2.00225
2022-09-14	10:37:05	2.46123
2022-09-14	10:37:05	1.80805
2022-09-14	10:37:05	1.41894
2022-09-14	10:37:06	4.72958
2022-09-14	10:37:06	3.02108
2022-09-14	10:37:06	3.90765
2022-09-14	10:37:06	2.68072
2022-09-14	10:37:07	5.53039
2022-09-14	10:37:07	1.67691
2022-09-14	10:37:07	5.31258
2022-09-14	10:37:08	1.31177
2022-09-14	10:37:08	5.15003
2022-09-14	10:37:08	1.08622
2022-09-14	10:37:08	1.84403
2022-09-14	10:37:09	1.26856
2022-09-14	10:37:09	3.5821
2022-09-14	10:37:09	4.28586
2022-09-14	10:37:09	8.13599
2022-09-14	10:37:10	4.13446
2022-09-14	10:37:10	7.06408
2022-09-14	10:37:10	5.60734
2022-09-14	10:37:10	14.0947
2022-09-14	10:37:11	18.904
2022-09-14	10:37:11	20.9172
2022-09-14	10:37:11	20.3017
2022-09-14	10:37:12	35.4068
2022-09-14	10:37:12	22.4288
2022-09-14	10:37:12	12.952
2022-09-14	10:37:12	14.255
2022-09-14	10:37:13	16.617
2022-09-14	10:37:13	17.1358
2022-09-14	10:37:13	16.9812
2022-09-14	10:37:13	22.2116
2022-09-14	10:37:14	20.4721
2022-09-14	10:37:14	32.7795
2022-09-14	10:37:14	15.1773
2022-09-14	10:37:14	10.2904
2022-09-14	10:37:15	5.54993
2022-09-14	10:37:15	2.11513
2022-09-14	10:37:15	1.15843
2022-09-14	10:37:16	0.64617
2022-09-14	10:37:16	2.4877
2022-09-14	10:37:16	5.7052
2022-09-14	10:37:16	6.3223
2022-09-14	10:37:17	4.33177
2022-09-14	10:37:17	4.0649
2022-09-14	10:37:17	3.69925
2022-09-14	10:37:17	4.06413
2022-09-14	10:37:18	4.53568
2022-09-14	10:37:18	4.83619
2022-09-14	10:37:18	5.00103
2022-09-14	10:37:18	5.0478
2022-09-14	10:37:19	4.8936
2022-09-14	10:37:19	4.82368
2022-09-14	10:37:19	4.28251
2022-09-14	10:37:20	2.1395
2022-09-14	10:37:20	0.640267
2022-09-14	10:37:20	0.731667
2022-09-14	10:37:20	0.433753
2022-09-14	10:37:21	0.369173
2022-09-14	10:37:21	0.394873
2022-09-14	10:37:21	0.518893
2022-09-14	10:37:21	0.600013
2022-09-14	10:37:22	0.27925
2022-09-14	10:37:22	0.518435
2022-09-14	10:37:22	0.352023
2022-09-14	10:37:22	0.543117
2022-09-14	10:37:23	0.253143
2022-09-14	10:37:23	0.566679
2022-09-14	10:37:23	0.347545
2022-09-14	10:37:24	0.447799
2022-09-14	10:37:24	0.275025
2022-09-14	10:37:24	0.536756
2022-09-14	10:37:24	0.151412
2022-09-14	10:37:25	1.20612
2022-09-14	10:37:25	2.51849
2022-09-14	10:37:25	4.01248
2022-09-14	10:37:25	5.35146
2022-09-14	10:37:26	6.65716
2022-09-14	10:37:26	5.53029
2022-09-14	10:37:26	3.74495
2022-09-14	10:37:26	0.683982
2022-09-14	10:37:27	0.45411
2022-09-14	10:37:27	0.247799
2022-09-14	10:37:27	0.264033
2022-09-14	10:37:28	0.095331
2022-09-14	10:37:28	0.17416
2022-09-14	10:37:28	0.133092
2022-09-14	10:37:28	0.214059
2022-09-14	10:37:29	0.267799
2022-09-14	10:37:29	0.199046
2022-09-14	10:37:29	0.417672
2022-09-14	10:37:29	0.2793
2022-09-14	10:37:30	0.804237
2022-09-14	10:37:30	1.55457
2022-09-14	10:37:30	2.91945
2022-09-14	10:37:30	1.79039
2022-09-14	10:37:31	3.28739
2022-09-14	10:37:31	3.81553
2022-09-14	10:37:31	4.53655
2022-09-14	10:37:32	4.43594
2022-09-14	10:37:32	11.0541
2022-09-14	10:37:32	12.2332
2022-09-14	10:37:32	6.48194
2022-09-14	10:37:33	15.5373
2022-09-14	10:37:33	11.6029
2022-09-14	10:37:33	21.6711
2022-09-14	10:37:33	14.7666
2022-09-14	10:37:34	16.388
2022-09-14	10:37:34	16.7815
2022-09-14	10:37:34	9.78683
2022-09-14	10:37:34	5.325
2022-09-14	10:37:35	8.5196
2022-09-14	10:37:35	10.7998
2022-09-14	10:37:35	3.71136
2022-09-14	10:37:35	1.56887
2022-09-14	10:37:36	2.49935
2022-09-14	10:37:36	4.0623
2022-09-14	10:37:36	4.61014
2022-09-14	10:37:37	13.7534
2022-09-14	10:37:37	16.5725
2022-09-14	10:37:37	16.7233
2022-09-14	10:37:37	30.4979
2022-09-14	10:37:38	29.3955
2022-09-14	10:37:38	30.1626
2022-09-14	10:37:38	36.5401
2022-09-14	10:37:38	33.306
2022-09-14	10:37:39	36.3955
2022-09-14	10:37:39	32.573
2022-09-14	10:37:39	19.727
2022-09-14	10:37:39	22.7982
2022-09-14	10:37:40	20.0583
2022-09-14	10:37:40	20.512
2022-09-14	10:37:40	20.1134
2022-09-14	10:37:41	9.16047
2022-09-14	10:37:41	0.844135
2022-09-14	10:37:41	0.435636
2022-09-14	10:37:41	0.894109
2022-09-14	10:37:42	0.0667305
2022-09-14	10:37:42	-0.042328
2022-09-14	10:37:42	-0.0680786
2022-09-14	10:37:42	-0.0261448
