# Supplementary material for: Comparing efficacy in reducing pulling and welfare impacts of four types of leash walking equipment
Source: PeerJ journal article supplement (doi:10.7717/peerj.18131), 2024-10-24
Supplement: Shelter_2_Tension_files.zip [file Reggie_prong_2022914133917 copy.xlsx]

## Sheet: Averaged Newtons
Date	Time	Averaged Newtons	Impulse	Total steps
2022-09-14	13:39:31	2.32942	2.32942	0		Impulse newtons	539.647
2022-09-14	13:39:32	2.31342	4.64284	0		Total steps	2
2022-09-14	13:39:33	2.3237	6.96654	0
2022-09-14	13:39:34	2.37752	9.34407	0
2022-09-14	13:39:35	2.42314	11.7672	0
2022-09-14	13:39:36	2.08328	13.8505	0
2022-09-14	13:39:37	2.41091	16.2614	0
2022-09-14	13:39:38	2.38454	18.6459	0
2022-09-14	13:39:39	2.67945	21.3254	0
2022-09-14	13:39:40	2.4961	23.8215	0
2022-09-14	13:39:41	2.1563	25.9778	0
2022-09-14	13:39:42	1.12671	27.1045	0
2022-09-14	13:39:43	1.26744	28.3719	0
2022-09-14	13:39:44	0.865984	29.2379	0
2022-09-14	13:39:45	2.56451	31.8024	0
2022-09-14	13:39:46	3.17927	34.9817	0
2022-09-14	13:39:47	3.71858	38.7003	0
2022-09-14	13:39:48	4.83858	43.5389	0
2022-09-14	13:39:49	1.94589	45.4847	0
2022-09-14	13:39:50	0.872832	46.3576	0
2022-09-14	13:39:51	-1.06178	46.3576	0
2022-09-14	13:39:52	-1.96807	46.3576	0
2022-09-14	13:39:53	-1.5709	46.3576	0
2022-09-14	13:39:54	-1.34108	46.3576	0
2022-09-14	13:39:55	-1.31116	46.3576	0
2022-09-14	13:39:56	-2.03485	46.3576	0
2022-09-14	13:39:57	4.45765	50.8152	0
2022-09-14	13:39:58	7.49674	58.312	0
2022-09-14	13:39:59	2.45143	60.7634	0
2022-09-14	13:40:00	3.17101	63.9344	0
2022-09-14	13:40:01	3.13938	67.0738	0
2022-09-14	13:40:02	2.92138	69.9952	0
2022-09-14	13:40:03	2.78533	72.7805	0
2022-09-14	13:40:04	1.88771	74.6682	0
2022-09-14	13:40:05	1.13203	75.8002	0
2022-09-14	13:40:06	-1.29671	75.8002	0
2022-09-14	13:40:07	-3.61811	75.8002	0
2022-09-14	13:40:08	-1.11363	75.8002	0
2022-09-14	13:40:09	2.05879	77.859	0
2022-09-14	13:40:10	2.20067	80.0597	0
2022-09-14	13:40:11	2.14734	82.207	0
2022-09-14	13:40:12	2.16802	84.3751	0
2022-09-14	13:40:13	1.87119	86.2463	0
2022-09-14	13:40:14	1.80725	88.0535	0
2022-09-14	13:40:15	1.84476	89.8983	0
2022-09-14	13:40:16	2.48409	92.3824	0
2022-09-14	13:40:17	3.49262	95.875	0
2022-09-14	13:40:18	2.0752	97.9502	0
2022-09-14	13:40:19	-0.901183	97.9502	0
2022-09-14	13:40:20	-2.4666	97.9502	0
2022-09-14	13:40:21	-2.49059	97.9502	0
2022-09-14	13:40:22	-1.1066	97.9502	0
2022-09-14	13:40:23	1.07125	99.0214	0
2022-09-14	13:40:24	1.91969	100.941	0
2022-09-14	13:40:25	1.56791	102.509	0
2022-09-14	13:40:26	1.79581	104.305	0
2022-09-14	13:40:27	1.62591	105.931	0
2022-09-14	13:40:28	1.53039	107.461	0
2022-09-14	13:40:29	2.73474	110.196	0
2022-09-14	13:40:30	2.44555	112.641	0
2022-09-14	13:40:31	2.10803	114.749	0
2022-09-14	13:40:32	-0.0881144	114.749	0
2022-09-14	13:40:33	8.68496	123.434	0
2022-09-14	13:40:34	13.9503	137.385	1
2022-09-14	13:40:35	3.46665	140.851	1
2022-09-14	13:40:36	-0.420256	140.851	1
2022-09-14	13:40:37	-1.18398	140.851	1
2022-09-14	13:40:38	1.8729	142.724	1
2022-09-14	13:40:39	7.05884	149.783	1
2022-09-14	13:40:40	2.14249	151.926	1
2022-09-14	13:40:41	1.5996	153.525	1
2022-09-14	13:40:42	-1.88811	153.525	1
2022-09-14	13:40:43	-1.68777	153.525	1
2022-09-14	13:40:44	1.17091	154.696	1
2022-09-14	13:40:45	1.53818	156.234	1
2022-09-14	13:40:46	1.40333	157.638	1
2022-09-14	13:40:47	1.03701	158.675	1
2022-09-14	13:40:48	1.58969	160.264	1
2022-09-14	13:40:49	1.62744	161.892	1
2022-09-14	13:40:50	1.6022	163.494	1
2022-09-14	13:40:51	1.69088	165.185	1
2022-09-14	13:40:52	1.11545	166.3	1
2022-09-14	13:40:53	0.875963	167.176	1
2022-09-14	13:40:54	1.76208	168.938	1
2022-09-14	13:40:55	2.37628	171.315	1
2022-09-14	13:40:56	1.38285	172.697	1
2022-09-14	13:40:57	1.49615	174.194	1
2022-09-14	13:40:58	1.57102	175.765	1
2022-09-14	13:40:59	1.54719	177.312	1
2022-09-14	13:41:00	1.82025	179.132	1
2022-09-14	13:41:01	2.38352	181.516	1
2022-09-14	13:41:02	3.22862	184.744	1
2022-09-14	13:41:03	3.24639	187.991	1
2022-09-14	13:41:04	3.22238	191.213	1
2022-09-14	13:41:05	3.22149	194.435	1
2022-09-14	13:41:06	3.22811	197.663	1
2022-09-14	13:41:07	3.22347	200.886	1
2022-09-14	13:41:08	3.23808	204.124	1
2022-09-14	13:41:09	3.22511	207.349	1
2022-09-14	13:41:10	3.22992	210.579	1
2022-09-14	13:41:11	3.24668	213.826	1
2022-09-14	13:41:12	3.22389	217.05	1
2022-09-14	13:41:13	3.23338	220.283	1
2022-09-14	13:41:14	3.213	223.496	1
2022-09-14	13:41:15	1.54968	225.046	1
2022-09-14	13:41:16	1.61446	226.66	1
2022-09-14	13:41:17	1.09009	227.75	1
2022-09-14	13:41:18	1.21307	228.963	1
2022-09-14	13:41:19	1.50888	230.472	1
2022-09-14	13:41:20	2.04117	232.514	1
2022-09-14	13:41:21	1.98562	234.499	1
2022-09-14	13:41:22	1.37391	235.873	1
2022-09-14	13:41:23	2.176	238.049	1
2022-09-14	13:41:24	1.32878	239.378	1
2022-09-14	13:41:25	0.0883992	239.466	1
2022-09-14	13:41:26	0.791621	240.258	1
2022-09-14	13:41:27	1.3232	241.581	1
2022-09-14	13:41:28	1.31776	242.899	1
2022-09-14	13:41:29	1.54889	244.448	1
2022-09-14	13:41:30	1.49524	245.943	1
2022-09-14	13:41:31	1.57656	247.52	1
2022-09-14	13:41:32	1.58481	249.104	1
2022-09-14	13:41:33	1.80373	250.908	1
2022-09-14	13:41:34	2.11963	253.028	1
2022-09-14	13:41:35	2.12131	255.149	1
2022-09-14	13:41:36	3.12925	258.278	1
2022-09-14	13:41:37	2.3301	260.608	1
2022-09-14	13:41:38	2.43253	263.041	1
2022-09-14	13:41:39	2.23412	265.275	1
2022-09-14	13:41:40	1.89162	267.167	1
2022-09-14	13:41:41	1.66491	268.831	1
2022-09-14	13:41:42	1.70095	270.532	1
2022-09-14	13:41:43	1.63627	272.169	1
2022-09-14	13:41:44	1.0232	273.192	1
2022-09-14	13:41:45	1.99015	275.182	1
2022-09-14	13:41:46	2.10401	277.286	1
2022-09-14	13:41:47	2.11927	279.405	1
2022-09-14	13:41:48	1.9597	281.365	1
2022-09-14	13:41:49	2.08245	283.447	1
2022-09-14	13:41:50	1.90056	285.348	1
2022-09-14	13:41:51	1.97387	287.322	1
2022-09-14	13:41:52	1.98839	289.31	1
2022-09-14	13:41:53	2.24742	291.558	1
2022-09-14	13:41:54	1.98273	293.54	1
2022-09-14	13:41:55	2.17556	295.716	1
2022-09-14	13:41:56	2.30808	298.024	1
2022-09-14	13:41:57	2.38613	300.41	1
2022-09-14	13:41:58	2.2241	302.634	1
2022-09-14	13:41:59	1.84913	304.483	1
2022-09-14	13:42:00	1.46366	305.947	1
2022-09-14	13:42:01	1.56168	307.509	1
2022-09-14	13:42:02	2.17135	309.68	1
2022-09-14	13:42:03	2.25645	311.937	1
2022-09-14	13:42:04	2.22155	314.158	1
2022-09-14	13:42:05	2.08958	316.248	1
2022-09-14	13:42:06	1.9859	318.234	1
2022-09-14	13:42:07	1.90935	320.143	1
2022-09-14	13:42:08	2.082	322.225	1
2022-09-14	13:42:09	2.04238	324.267	1
2022-09-14	13:42:10	1.93916	326.207	1
2022-09-14	13:42:11	1.15812	327.365	1
2022-09-14	13:42:12	1.64453	329.009	1
2022-09-14	13:42:13	2.42953	331.439	1
2022-09-14	13:42:14	2.3673	333.806	1
2022-09-14	13:42:15	2.08884	335.895	1
2022-09-14	13:42:16	1.89524	337.79	1
2022-09-14	13:42:17	2.61555	340.406	1
2022-09-14	13:42:18	3.77179	344.177	1
2022-09-14	13:42:19	1.71505	345.892	1
2022-09-14	13:42:20	1.44136	347.334	1
2022-09-14	13:42:21	1.36355	348.697	1
2022-09-14	13:42:22	1.33225	350.03	1
2022-09-14	13:42:23	1.7228	351.752	1
2022-09-14	13:42:24	1.78024	353.533	1
2022-09-14	13:42:25	1.71471	355.247	1
2022-09-14	13:42:26	1.79262	357.04	1
2022-09-14	13:42:27	1.77854	358.819	1
2022-09-14	13:42:28	1.77068	360.589	1
2022-09-14	13:42:29	1.75777	362.347	1
2022-09-14	13:42:30	1.65159	363.999	1
2022-09-14	13:42:31	1.69796	365.697	1
2022-09-14	13:42:32	1.76044	367.457	1
2022-09-14	13:42:33	1.86655	369.324	1
2022-09-14	13:42:34	-0.339576	369.324	1
2022-09-14	13:42:35	-0.907465	369.324	1
2022-09-14	13:42:36	2.16077	371.484	1
2022-09-14	13:42:37	2.63525	374.12	1
2022-09-14	13:42:38	2.68113	376.801	1
2022-09-14	13:42:39	2.25828	379.059	1
2022-09-14	13:42:40	2.22953	381.289	1
2022-09-14	13:42:41	2.26626	383.555	1
2022-09-14	13:42:42	1.9181	385.473	1
2022-09-14	13:42:43	-3.41742	385.473	1
2022-09-14	13:42:44	-3.04186	385.473	1
2022-09-14	13:42:45	-5.14341	385.473	1
2022-09-14	13:42:46	-4.02997	385.473	1
2022-09-14	13:42:47	-5.1109	385.473	1
2022-09-14	13:42:48	-5.84418	385.473	1
2022-09-14	13:42:49	-6.13091	385.473	1
2022-09-14	13:42:50	-6.08265	385.473	1
2022-09-14	13:42:51	-6.52554	385.473	1
2022-09-14	13:42:52	-7.75055	385.473	1
2022-09-14	13:42:53	-7.69733	385.473	1
2022-09-14	13:42:54	-7.94162	385.473	1
2022-09-14	13:42:55	-6.4908	385.473	1
2022-09-14	13:42:56	-6.51803	385.473	1
2022-09-14	13:42:57	-7.06508	385.473	1
2022-09-14	13:42:58	-7.47548	385.473	1
2022-09-14	13:42:59	-7.23963	385.473	1
2022-09-14	13:43:00	-6.82442	385.473	1
2022-09-14	13:43:01	-4.98713	385.473	1
2022-09-14	13:43:02	-4.37853	385.473	1
2022-09-14	13:43:03	-3.70858	385.473	1
2022-09-14	13:43:04	-3.76071	385.473	1
2022-09-14	13:43:05	-3.84177	385.473	1
2022-09-14	13:43:06	-4.02811	385.473	1
2022-09-14	13:43:07	-3.91617	385.473	1
2022-09-14	13:43:08	-3.61328	385.473	1
2022-09-14	13:43:09	-3.48229	385.473	1
2022-09-14	13:43:10	-4.20524	385.473	1
2022-09-14	13:43:11	-4.07146	385.473	1
2022-09-14	13:43:12	-3.70564	385.473	1
2022-09-14	13:43:13	-4.13001	385.473	1
2022-09-14	13:43:14	-3.46784	385.473	1
2022-09-14	13:43:15	-2.85019	385.473	1
2022-09-14	13:43:16	-4.7992	385.473	1
2022-09-14	13:43:17	-4.32899	385.473	1
2022-09-14	13:43:18	-3.7353	385.473	1
2022-09-14	13:43:19	-3.65312	385.473	1
2022-09-14	13:43:20	-3.50632	385.473	1
2022-09-14	13:43:21	-4.24742	385.473	1
2022-09-14	13:43:22	-4.20292	385.473	1
2022-09-14	13:43:23	-5.77495	385.473	1
2022-09-14	13:43:24	-5.59932	385.473	1
2022-09-14	13:43:25	-5.79481	385.473	1
2022-09-14	13:43:26	-5.75509	385.473	1
2022-09-14	13:43:27	-5.62549	385.473	1
2022-09-14	13:43:28	-5.5932	385.473	1
2022-09-14	13:43:29	-5.53065	385.473	1
2022-09-14	13:43:30	-5.65356	385.473	1
2022-09-14	13:43:31	-6.23948	385.473	1
2022-09-14	13:43:32	-7.21682	385.473	1
2022-09-14	13:43:33	-9.21897	385.473	1
2022-09-14	13:43:34	-8.69424	385.473	1
2022-09-14	13:43:35	-9.07959	385.473	1
2022-09-14	13:43:36	-8.65632	385.473	1
2022-09-14	13:43:37	-8.77495	385.473	1
2022-09-14	13:43:38	-8.6964	385.473	1
2022-09-14	13:43:39	-8.47669	385.473	1
2022-09-14	13:43:40	-8.28204	385.473	1
2022-09-14	13:43:41	-8.30982	385.473	1
2022-09-14	13:43:42	-8.39035	385.473	1
2022-09-14	13:43:43	-8.43914	385.473	1
2022-09-14	13:43:44	3.13628	388.609	1
2022-09-14	13:43:45	1.5756	390.185	1
2022-09-14	13:43:46	-8.22504	390.185	1
2022-09-14	13:43:47	2.88505	393.07	1
2022-09-14	13:43:48	3.25724	396.327	1
2022-09-14	13:43:49	3.23892	399.566	1
2022-09-14	13:43:50	3.25528	402.821	1
2022-09-14	13:43:51	3.2606	406.082	1
2022-09-14	13:43:52	3.2586	409.34	1
2022-09-14	13:43:53	3.27333	412.614	1
2022-09-14	13:43:54	3.24362	415.857	1
2022-09-14	13:43:55	3.25092	419.108	1
2022-09-14	13:43:56	3.23377	422.342	1
2022-09-14	13:43:57	3.2469	425.589	1
2022-09-14	13:43:58	3.26275	428.852	1
2022-09-14	13:43:59	3.24826	432.1	1
2022-09-14	13:44:00	3.2417	435.342	1
2022-09-14	13:44:01	3.27028	438.612	1
2022-09-14	13:44:02	3.24039	441.852	1
2022-09-14	13:44:03	3.24826	445.101	1
2022-09-14	13:44:04	3.25409	448.355	1
2022-09-14	13:44:05	3.24436	451.599	1
2022-09-14	13:44:06	3.25545	454.855	1
2022-09-14	13:44:07	3.24343	458.098	1
2022-09-14	13:44:08	3.26767	461.366	1
2022-09-14	13:44:09	3.25466	464.62	1
2022-09-14	13:44:10	3.25194	467.872	1
2022-09-14	13:44:11	3.24358	471.116	1
2022-09-14	13:44:12	3.24843	474.364	1
2022-09-14	13:44:13	3.26315	477.627	1
2022-09-14	13:44:14	3.24147	480.869	1
2022-09-14	13:44:15	3.24162	484.11	1
2022-09-14	13:44:16	3.24475	487.355	1
2022-09-14	13:44:17	3.25256	490.608	1
2022-09-14	13:44:18	3.23508	493.843	1
2022-09-14	13:44:19	3.24004	497.083	1
2022-09-14	13:44:20	3.26965	500.353	1
2022-09-14	13:44:21	3.24928	503.602	1
2022-09-14	13:44:22	1.5537	505.156	1
2022-09-14	13:44:23	-0.787788	505.156	1
2022-09-14	13:44:24	2.35772	507.513	1
2022-09-14	13:44:25	3.24979	510.763	1
2022-09-14	13:44:26	2.57113	513.334	1
2022-09-14	13:44:27	3.24947	516.584	1
2022-09-14	13:44:28	1.21392	517.798	1
2022-09-14	13:44:29	-6.09697	517.798	1
2022-09-14	13:44:30	8.15118	525.949	1
2022-09-14	13:44:31	13.6981	539.647	2

## Sheet: Reggie_prong_2022914133917 (4)
Date	Time	Lbs	Newtons	Averaged Newtons	Total force x time		total steps > 13.345	**GoPro Fitting: 13:18
2022-09-14	13:39:31	0.480674	2.13813	2.32942	2.13813	FALSE	0
2022-09-14	13:39:31	0.551412	2.45279	2.32942	2.45279	FALSE	0
2022-09-14	13:39:31	0.50902	2.26422	2.32942	4.40236	FALSE	0
2022-09-14	13:39:31	0.553601	2.46253	2.32942	4.91532	FALSE	0
2022-09-14	13:39:32	0.490547	2.18205	2.31342	6.58441	FALSE	0
2022-09-14	13:39:32	0.547494	2.43536	2.31342	7.35068	FALSE	0
2022-09-14	13:39:32	0.522201	2.32285	2.31342	8.90726	FALSE	0
2022-09-14	13:39:33	0.524338	2.33236	2.3237	9.68304	FALSE	0
2022-09-14	13:39:33	0.512023	2.27758	2.3237	11.1848	FALSE	0
2022-09-14	13:39:33	0.525763	2.3387	2.3237	12.0217	FALSE	0
2022-09-14	13:39:33	0.527443	2.34617	2.3237	13.531	FALSE	0
2022-09-14	13:39:34	0.530191	2.3584	2.37752	14.3801	FALSE	0
2022-09-14	13:39:34	0.524084	2.33123	2.37752	15.8622	FALSE	0
2022-09-14	13:39:34	0.511005	2.27305	2.37752	16.6532	FALSE	0
2022-09-14	13:39:34	0.572684	2.54741	2.37752	18.4097	FALSE	0
2022-09-14	13:39:35	0.541947	2.41069	2.42314	19.0639	FALSE	0
2022-09-14	13:39:35	0.560674	2.49399	2.42314	20.9036	FALSE	0
2022-09-14	13:39:35	0.566985	2.52206	2.42314	21.5859	FALSE	0
2022-09-14	13:39:35	0.509377	2.26581	2.42314	23.1695	FALSE	0
2022-09-14	13:39:36	0.451361	2.00774	2.08328	23.5937	FALSE	0
2022-09-14	13:39:36	0.588613	2.61827	2.08328	25.7877	FALSE	0
2022-09-14	13:39:36	0.365051	1.62382	2.08328	25.2175	FALSE	0
2022-09-14	13:39:37	0.382201	1.70011	2.41091	27.4878	FALSE	0
2022-09-14	13:39:37	0.542964	2.41521	2.41091	27.6327	FALSE	0
2022-09-14	13:39:37	0.669936	2.98001	2.41091	30.4678	FALSE	0
2022-09-14	13:39:37	0.572888	2.54832	2.41091	30.181	FALSE	0
2022-09-14	13:39:38	0.618333	2.75047	2.38454	33.2183	FALSE	0
2022-09-14	13:39:38	0.477367	2.12342	2.38454	32.3045	FALSE	0
2022-09-14	13:39:38	0.613346	2.72829	2.38454	35.9466	FALSE	0
2022-09-14	13:39:38	0.435229	1.93599	2.38454	34.2404	FALSE	0
2022-09-14	13:39:39	0.682608	3.03638	2.67945	38.983	FALSE	0
2022-09-14	13:39:39	0.479809	2.13429	2.67945	36.3747	FALSE	0
2022-09-14	13:39:39	0.671718	2.98794	2.67945	41.9709	FALSE	0
2022-09-14	13:39:39	0.575331	2.55919	2.67945	38.9339	FALSE	0
2022-09-14	13:39:40	0.52215	2.32263	2.4961	44.2935	FALSE	0
2022-09-14	13:39:40	0.497621	2.21352	2.4961	41.1474	FALSE	0
2022-09-14	13:39:40	0.663677	2.95217	2.4961	47.2457	FALSE	0
2022-09-14	13:39:41	0.562099	2.50033	2.1563	43.6478	FALSE	0
2022-09-14	13:39:41	0.467087	2.0777	2.1563	49.3234	FALSE	0
2022-09-14	13:39:41	0.637468	2.83559	2.1563	46.4834	FALSE	0
2022-09-14	13:39:41	0.272379	1.2116	2.1563	50.535	FALSE	0
2022-09-14	13:39:42	0.300573	1.33701	1.12671	47.8204	FALSE	0
2022-09-14	13:39:42	0.25355	1.12784	1.12671	51.6628	FALSE	0
2022-09-14	13:39:42	0.331616	1.47509	1.12671	49.2955	FALSE	0
2022-09-14	13:39:42	0.127443	0.566892	1.12671	52.2297	FALSE	0
2022-09-14	13:39:43	0.301947	1.34312	1.26744	50.6386	FALSE	0
2022-09-14	13:39:43	0.167341	0.744366	1.26744	52.9741	FALSE	0
2022-09-14	13:39:43	0.385509	1.71482	1.26744	52.3534	FALSE	0
2022-09-14	13:39:44	0.119453	0.531351	0.865984	53.5054	FALSE	0
2022-09-14	13:39:44	0.253753	1.12874	0.865984	53.4821	FALSE	0
2022-09-14	13:39:44	0.180674	0.803674	0.865984	54.3091	FALSE	0
2022-09-14	13:39:44	0.224848	1.00017	0.865984	54.4823	FALSE	0
2022-09-14	13:39:45	0.228766	1.0176	2.56451	55.3267	FALSE	0
2022-09-14	13:39:45	0.447137	1.98895	2.56451	56.4713	FALSE	0
2022-09-14	13:39:45	0.661438	2.94221	2.56451	58.2689	FALSE	0
2022-09-14	13:39:45	0.968766	4.30926	2.56451	60.7805	FALSE	0
2022-09-14	13:39:46	0.904847	4.02494	3.17927	62.2939	FALSE	0
2022-09-14	13:39:46	0.958231	4.2624	3.17927	65.0429	FALSE	0
2022-09-14	13:39:46	0.551056	2.45121	3.17927	64.7451	FALSE	0
2022-09-14	13:39:46	0.444796	1.97854	3.17927	67.0215	FALSE	0
2022-09-14	13:39:47	0.542608	2.41363	3.71858	67.1587	FALSE	0
2022-09-14	13:39:47	0.511463	2.27509	3.71858	69.2966	FALSE	0
2022-09-14	13:39:47	1.45385	6.46702	3.71858	73.6257	FALSE	0
2022-09-14	13:39:48	1.18989	5.29287	4.83858	74.5894	FALSE	0
2022-09-14	13:39:48	1.89182	8.41519	4.83858	82.0409	FALSE	0
2022-09-14	13:39:48	0.687748	3.05924	4.83858	77.6487	FALSE	0
2022-09-14	13:39:48	0.58159	2.58703	4.83858	84.6279	FALSE	0
2022-09-14	13:39:49	0.554567	2.46682	1.94589	80.1155	FALSE	0
2022-09-14	13:39:49	0.336145	1.49524	1.94589	86.1232	FALSE	0
2022-09-14	13:39:49	0.517519	2.30203	1.94589	82.4175	FALSE	0
2022-09-14	13:39:49	0.34159	1.51946	1.94589	87.6426	FALSE	0
2022-09-14	13:39:50	0.283422	1.26072	0.872832	83.6782	FALSE	0
2022-09-14	13:39:50	0.291718	1.29762	0.872832	88.9403	FALSE	0
2022-09-14	13:39:50	-0.00726439	-0.0323135	0.872832	83.6782	FALSE	0
2022-09-14	13:39:50	0.21701	0.965304	0.872832	89.9056	FALSE	0
2022-09-14	13:39:51	0.0638297	0.283927	-1.06178	83.9622	FALSE	0
2022-09-14	13:39:51	-0.265738	-1.18206	-1.06178	89.9056	FALSE	0
2022-09-14	13:39:51	-0.514185	-2.2872	-1.06178	83.9622	FALSE	0
2022-09-14	13:39:52	-0.573473	-2.55092	-1.96807	89.9056	FALSE	0
2022-09-14	13:39:52	-0.47103	-2.09524	-1.96807	83.9622	FALSE	0
2022-09-14	13:39:52	-0.342328	-1.52274	-1.96807	89.9056	FALSE	0
2022-09-14	13:39:52	-0.382938	-1.70338	-1.96807	83.9622	FALSE	0
2022-09-14	13:39:53	-0.312964	-1.39213	-1.5709	89.9056	FALSE	0
2022-09-14	13:39:53	-0.377188	-1.67781	-1.5709	83.9622	FALSE	0
2022-09-14	13:39:53	-0.358206	-1.59337	-1.5709	89.9056	FALSE	0
2022-09-14	13:39:53	-0.364262	-1.62031	-1.5709	83.9622	FALSE	0
2022-09-14	13:39:54	-0.295356	-1.3138	-1.34108	89.9056	FALSE	0
2022-09-14	13:39:54	-0.326857	-1.45393	-1.34108	83.9622	FALSE	0
2022-09-14	13:39:54	-0.336374	-1.49626	-1.34108	89.9056	FALSE	0
2022-09-14	13:39:54	-0.247366	-1.10033	-1.34108	83.9622	FALSE	0
2022-09-14	13:39:55	-0.264822	-1.17798	-1.31116	89.9056	FALSE	0
2022-09-14	13:39:55	-0.266857	-1.18703	-1.31116	83.9622	FALSE	0
2022-09-14	13:39:55	-0.352608	-1.56847	-1.31116	89.9056	FALSE	0
2022-09-14	13:39:56	-0.362786	-1.61374	-2.03485	83.9622	FALSE	0
2022-09-14	13:39:56	-0.626857	-2.78839	-2.03485	89.9056	FALSE	0
2022-09-14	13:39:56	-0.451946	-2.01035	-2.03485	83.9622	FALSE	0
2022-09-14	13:39:56	-0.388231	-1.72693	-2.03485	89.9056	FALSE	0
2022-09-14	13:39:57	0.124339	0.553085	4.45765	84.5153	FALSE	0
2022-09-14	13:39:57	1.44678	6.43557	4.45765	96.3411	FALSE	0
2022-09-14	13:39:57	1.37447	6.11392	4.45765	90.6292	FALSE	0
2022-09-14	13:39:57	1.06291	4.72804	4.45765	101.069	FALSE	0
2022-09-14	13:39:58	2.49085	11.0798	7.49674	101.709	FALSE	0
2022-09-14	13:39:58	2.60861	11.6036	7.49674	112.673	FALSE	0
2022-09-14	13:39:58	1.26169	5.61225	7.49674	107.321	FALSE	0
2022-09-14	13:39:58	0.380216	1.69128	7.49674	114.364	FALSE	0
2022-09-14	13:39:59	0.464695	2.06706	2.45143	109.388	FALSE	0
2022-09-14	13:39:59	0.589835	2.6237	2.45143	116.988	FALSE	0
2022-09-14	13:39:59	0.598791	2.66354	2.45143	112.052	FALSE	0
2022-09-14	13:40:00	0.698689	3.10791	3.17101	120.096	FALSE	0
2022-09-14	13:40:00	0.687799	3.05947	3.17101	115.111	FALSE	0
2022-09-14	13:40:00	0.79757	3.54775	3.17101	123.643	FALSE	0
2022-09-14	13:40:00	0.667443	2.96892	3.17101	118.08	FALSE	0
2022-09-14	13:40:01	0.711056	3.16292	3.13938	126.806	FALSE	0
2022-09-14	13:40:01	0.69584	3.09524	3.13938	121.175	FALSE	0
2022-09-14	13:40:01	0.732634	3.2589	3.13938	130.065	FALSE	0
2022-09-14	13:40:01	0.683524	3.04045	3.13938	124.216	FALSE	0
2022-09-14	13:40:02	0.656807	2.92161	2.92138	132.987	FALSE	0
2022-09-14	13:40:02	0.680165	3.02551	2.92138	127.241	FALSE	0
2022-09-14	13:40:02	0.625153	2.78081	2.92138	135.768	FALSE	0
2022-09-14	13:40:02	0.664898	2.9576	2.92138	130.199	FALSE	0
2022-09-14	13:40:03	0.645356	2.87067	2.78533	138.638	FALSE	0
2022-09-14	13:40:03	0.658893	2.93089	2.78533	133.13	FALSE	0
2022-09-14	13:40:03	0.574262	2.55443	2.78533	141.193	FALSE	0
2022-09-14	13:40:04	0.426629	1.89773	1.88771	135.028	FALSE	0
2022-09-14	13:40:04	0.434008	1.93055	1.88771	143.123	FALSE	0
2022-09-14	13:40:04	0.457417	2.03468	1.88771	137.062	FALSE	0
2022-09-14	13:40:04	0.379453	1.68788	1.88771	144.811	FALSE	0
2022-09-14	13:40:05	0.339199	1.50882	1.13203	138.571	FALSE	0
2022-09-14	13:40:05	0.206374	0.917993	1.13203	145.729	FALSE	0
2022-09-14	13:40:05	0.28327	1.26004	1.13203	139.831	FALSE	0
2022-09-14	13:40:05	0.189122	0.841252	1.13203	146.57	FALSE	0
2022-09-14	13:40:06	0.0479009	0.213073	-1.29671	140.044	FALSE	0
2022-09-14	13:40:06	-0.211844	-0.942324	-1.29671	146.57	FALSE	0
2022-09-14	13:40:06	-0.311386	-1.38511	-1.29671	140.044	FALSE	0
2022-09-14	13:40:06	-0.690724	-3.07248	-1.29671	146.57	FALSE	0
2022-09-14	13:40:07	-0.799427	-3.55601	-3.61811	140.044	FALSE	0
2022-09-14	13:40:07	-0.966246	-4.29806	-3.61811	146.57	FALSE	0
2022-09-14	13:40:07	-0.67449	-3.00027	-3.61811	140.044	FALSE	0
2022-09-14	13:40:08	-0.566806	-2.52127	-1.11363	146.57	FALSE	0
2022-09-14	13:40:08	-0.668231	-2.97243	-1.11363	140.044	FALSE	0
2022-09-14	13:40:08	-0.105839	-0.470793	-1.11363	146.57	FALSE	0
2022-09-14	13:40:08	0.339453	1.50995	-1.11363	141.554	FALSE	0
2022-09-14	13:40:09	0.396349	1.76304	2.05879	148.333	FALSE	0
2022-09-14	13:40:09	0.546221	2.4297	2.05879	143.984	FALSE	0
2022-09-14	13:40:09	0.520318	2.31448	2.05879	150.648	FALSE	0
2022-09-14	13:40:09	0.388461	1.72795	2.05879	145.712	FALSE	0
2022-09-14	13:40:10	0.489478	2.1773	2.20067	152.825	FALSE	0
2022-09-14	13:40:10	0.481539	2.14198	2.20067	147.854	FALSE	0
2022-09-14	13:40:10	0.5764	2.56394	2.20067	155.389	FALSE	0
2022-09-14	13:40:10	0.431514	1.91946	2.20067	149.773	FALSE	0
2022-09-14	13:40:11	0.495891	2.20582	2.14734	157.595	FALSE	0
2022-09-14	13:40:11	0.477774	2.12523	2.14734	151.899	FALSE	0
2022-09-14	13:40:11	0.474568	2.11097	2.14734	159.706	FALSE	0
2022-09-14	13:40:12	0.496807	2.2099	2.16802	154.108	FALSE	0
2022-09-14	13:40:12	0.489784	2.17866	2.16802	161.885	FALSE	0
2022-09-14	13:40:12	0.487239	2.16734	2.16802	156.276	FALSE	0
2022-09-14	13:40:12	0.475738	2.11618	2.16802	164.001	FALSE	0
2022-09-14	13:40:13	0.452379	2.01227	1.87119	158.288	FALSE	0
2022-09-14	13:40:13	0.438944	1.95251	1.87119	165.953	FALSE	0
2022-09-14	13:40:13	0.395127	1.7576	1.87119	160.046	FALSE	0
2022-09-14	13:40:13	0.396196	1.76236	1.87119	167.716	FALSE	0
2022-09-14	13:40:14	0.4593	2.04306	1.80725	162.089	FALSE	0
2022-09-14	13:40:14	0.379707	1.68901	1.80725	169.405	FALSE	0
2022-09-14	13:40:14	0.37986	1.68969	1.80725	163.778	FALSE	0
2022-09-14	13:40:15	0.489631	2.17798	1.84476	171.583	FALSE	0
2022-09-14	13:40:15	0.42042	1.87011	1.84476	165.649	FALSE	0
2022-09-14	13:40:15	0.494109	2.1979	1.84476	173.781	FALSE	0
2022-09-14	13:40:15	0.25472	1.13305	1.84476	166.782	FALSE	0
2022-09-14	13:40:16	0.481794	2.14312	2.48409	175.924	FALSE	0
2022-09-14	13:40:16	0.37126	1.65144	2.48409	168.433	FALSE	0
2022-09-14	13:40:16	0.658028	2.92704	2.48409	178.851	FALSE	0
2022-09-14	13:40:16	0.72271	3.21476	2.48409	171.648	FALSE	0
2022-09-14	13:40:17	1.06011	4.71558	3.49262	183.566	FALSE	0
2022-09-14	13:40:17	0.966323	4.2984	3.49262	175.946	FALSE	0
2022-09-14	13:40:17	0.658944	2.93111	3.49262	186.497	FALSE	0
2022-09-14	13:40:17	0.455331	2.0254	3.49262	177.972	FALSE	0
2022-09-14	13:40:18	0.410038	1.82393	2.0752	188.321	FALSE	0
2022-09-14	13:40:18	0.483015	2.14855	2.0752	180.12	FALSE	0
2022-09-14	13:40:18	0.506527	2.25313	2.0752	190.575	FALSE	0
2022-09-14	13:40:19	0.225204	1.00175	-0.901183	181.122	FALSE	0
2022-09-14	13:40:19	-0.062786	-0.279285	-0.901183	190.575	FALSE	0
2022-09-14	13:40:19	-0.429096	-1.9087	-0.901183	181.122	FALSE	0
2022-09-14	13:40:19	-0.543702	-2.4185	-0.901183	190.575	FALSE	0
2022-09-14	13:40:20	-0.505229	-2.24736	-2.4666	181.122	FALSE	0
2022-09-14	13:40:20	-0.542328	-2.41238	-2.4666	190.575	FALSE	0
2022-09-14	13:40:20	-0.567722	-2.52534	-2.4666	181.122	FALSE	0
2022-09-14	13:40:20	-0.602786	-2.68131	-2.4666	190.575	FALSE	0
2022-09-14	13:40:21	-0.590216	-2.6254	-2.49059	181.122	FALSE	0
2022-09-14	13:40:21	-0.54416	-2.42053	-2.49059	190.575	FALSE	0
2022-09-14	13:40:21	-0.650317	-2.89274	-2.49059	181.122	FALSE	0
2022-09-14	13:40:21	-0.454949	-2.0237	-2.49059	190.575	FALSE	0
2022-09-14	13:40:22	-0.382226	-1.70022	-1.1066	181.122	FALSE	0
2022-09-14	13:40:22	-0.221666	-0.986015	-1.1066	190.575	FALSE	0
2022-09-14	13:40:22	-0.14243	-0.633557	-1.1066	181.122	FALSE	0
2022-09-14	13:40:23	-0.0113865	-0.0506494	1.07125	190.575	FALSE	0
2022-09-14	13:40:23	0.231056	1.02778	1.07125	182.15	FALSE	0
2022-09-14	13:40:23	0.305407	1.35851	1.07125	191.933	FALSE	0
2022-09-14	13:40:23	0.438232	1.94934	1.07125	184.099	FALSE	0
2022-09-14	13:40:24	0.402405	1.78998	1.91969	193.723	FALSE	0
2022-09-14	13:40:24	0.398791	1.7739	1.91969	185.873	FALSE	0
2022-09-14	13:40:24	0.530089	2.35794	1.91969	196.081	FALSE	0
2022-09-14	13:40:24	0.394975	1.75693	1.91969	187.63	FALSE	0
2022-09-14	13:40:25	0.381183	1.69558	1.56791	197.777	FALSE	0
2022-09-14	13:40:25	0.353397	1.57198	1.56791	189.202	FALSE	0
2022-09-14	13:40:25	0.322863	1.43616	1.56791	199.213	FALSE	0
2022-09-14	13:40:26	0.380064	1.6906	1.79581	190.892	FALSE	0
2022-09-14	13:40:26	0.356908	1.5876	1.79581	200.8	FALSE	0
2022-09-14	13:40:26	0.437723	1.94708	1.79581	192.839	FALSE	0
2022-09-14	13:40:26	0.440166	1.95795	1.79581	202.758	FALSE	0
2022-09-14	13:40:27	0.465153	2.06909	1.62591	194.909	FALSE	0
2022-09-14	13:40:27	0.515229	2.29184	1.62591	205.05	FALSE	0
2022-09-14	13:40:27	0.261031	1.16112	1.62591	196.07	FALSE	0
2022-09-14	13:40:27	0.220674	0.981602	1.62591	206.032	FALSE	0
2022-09-14	13:40:28	0.204033	0.90758	1.53039	196.977	FALSE	0
2022-09-14	13:40:28	0.394466	1.75466	1.53039	207.786	FALSE	0
2022-09-14	13:40:28	0.278232	1.23763	1.53039	198.215	FALSE	0
2022-09-14	13:40:28	0.499453	2.22167	1.53039	210.008	FALSE	0
2022-09-14	13:40:29	0.461438	2.05257	2.73474	200.267	FALSE	0
2022-09-14	13:40:29	0.468104	2.08222	2.73474	212.09	FALSE	0
2022-09-14	13:40:29	0.473906	2.10803	2.73474	202.375	FALSE	0
2022-09-14	13:40:29	1.05574	4.69614	2.73474	216.786	FALSE	0
2022-09-14	13:40:30	0.659148	2.93202	2.44555	205.308	FALSE	0
2022-09-14	13:40:30	0.575178	2.55851	2.44555	219.345	FALSE	0
2022-09-14	13:40:30	0.415026	1.84612	2.44555	207.154	FALSE	0
2022-09-14	13:40:31	0.498537	2.21759	2.10803	221.562	FALSE	0
2022-09-14	13:40:31	0.512125	2.27803	2.10803	209.432	FALSE	0
2022-09-14	13:40:31	0.494364	2.19903	2.10803	223.761	FALSE	0
2022-09-14	13:40:31	0.390598	1.73746	2.10803	211.169	FALSE	0
2022-09-14	13:40:32	0.348359	1.54957	-0.0881144	225.311	FALSE	0
2022-09-14	13:40:32	0.027443	0.122072	-0.0881144	211.291	FALSE	0
2022-09-14	13:40:32	-0.199173	-0.885961	-0.0881144	225.311	FALSE	0
2022-09-14	13:40:32	-0.255865	-1.13814	-0.0881144	211.291	FALSE	0
2022-09-14	13:40:33	0.498232	2.21624	8.68496	227.527	FALSE	0
2022-09-14	13:40:33	1.59497	7.09475	8.68496	218.386	FALSE	0
2022-09-14	13:40:33	2.79324	12.4249	8.68496	239.952	FALSE	0
2022-09-14	13:40:33	2.92342	13.004	8.68496	231.39	FALSE	0
2022-09-14	13:40:34	4.00347	17.8082	13.9503	257.76	1	1
2022-09-14	13:40:34	2.95777	13.1568	13.9503	244.547	FALSE	1
2022-09-14	13:40:34	2.44729	10.886	13.9503	268.646	FALSE	1
2022-09-14	13:40:35	1.39818	6.21938	3.46665	250.766	FALSE	1
2022-09-14	13:40:35	0.850038	3.78114	3.46665	272.428	FALSE	1
2022-09-14	13:40:35	0.513346	2.28347	3.46665	253.049	FALSE	1
2022-09-14	13:40:35	0.355789	1.58262	3.46665	274.01	FALSE	1
2022-09-14	13:40:36	0.596858	2.65494	-0.420256	255.704	FALSE	1
2022-09-14	13:40:36	-0.16304	-0.725235	-0.420256	274.01	FALSE	1
2022-09-14	13:40:36	-0.407162	-1.81114	-0.420256	255.704	FALSE	1
2022-09-14	13:40:36	-0.404567	-1.79959	-0.420256	274.01	FALSE	1
2022-09-14	13:40:37	-0.282124	-1.25494	-1.18398	255.704	FALSE	1
2022-09-14	13:40:37	-0.299987	-1.3344	-1.18398	274.01	FALSE	1
2022-09-14	13:40:37	-0.257595	-1.14583	-1.18398	255.704	FALSE	1
2022-09-14	13:40:37	-0.224974	-1.00073	-1.18398	274.01	FALSE	1
2022-09-14	13:40:38	0.0710562	0.316072	1.8729	256.021	FALSE	1
2022-09-14	13:40:38	0.39701	1.76598	1.8729	275.776	FALSE	1
2022-09-14	13:40:38	0.795076	3.53666	1.8729	259.557	FALSE	1
2022-09-14	13:40:39	0.724695	3.22359	7.05884	279	FALSE	1
2022-09-14	13:40:39	1.95564	8.69908	7.05884	268.256	FALSE	1
2022-09-14	13:40:39	2.67569	11.902	7.05884	290.902	FALSE	1
2022-09-14	13:40:39	0.991565	4.41068	7.05884	272.667	FALSE	1
2022-09-14	13:40:40	0.69925	3.1104	2.14249	294.012	FALSE	1
2022-09-14	13:40:40	0.188308	0.837632	2.14249	273.505	FALSE	1
2022-09-14	13:40:40	0.706883	3.14436	2.14249	297.157	FALSE	1
2022-09-14	13:40:40	0.332176	1.47759	2.14249	274.982	FALSE	1
2022-09-14	13:40:41	0.525611	2.33802	1.5996	299.495	FALSE	1
2022-09-14	13:40:41	0.262456	1.16746	1.5996	276.15	FALSE	1
2022-09-14	13:40:41	0.290751	1.29332	1.5996	300.788	FALSE	1
2022-09-14	13:40:42	0.109682	0.487887	-1.88811	276.637	FALSE	1
2022-09-14	13:40:42	-0.353524	-1.57255	-1.88811	300.788	FALSE	1
2022-09-14	13:40:42	-0.783345	-3.48448	-1.88811	276.637	FALSE	1
2022-09-14	13:40:42	-0.670673	-2.98329	-1.88811	300.788	FALSE	1
2022-09-14	13:40:43	-0.805483	-3.58295	-1.68777	276.637	FALSE	1
2022-09-14	13:40:43	-0.471692	-2.09818	-1.68777	300.788	FALSE	1
2022-09-14	13:40:43	-0.191488	-0.851777	-1.68777	276.637	FALSE	1
2022-09-14	13:40:43	-0.0490455	-0.218164	-1.68777	300.788	FALSE	1
2022-09-14	13:40:44	0.273702	1.21748	1.17091	277.855	FALSE	1
2022-09-14	13:40:44	0.208257	0.926369	1.17091	301.714	FALSE	1
2022-09-14	13:40:44	0.234822	1.04454	1.17091	278.9	FALSE	1
2022-09-14	13:40:44	0.336145	1.49524	1.17091	303.21	FALSE	1
2022-09-14	13:40:45	0.338181	1.5043	1.53818	280.404	FALSE	1
2022-09-14	13:40:45	0.385153	1.71324	1.53818	304.923	FALSE	1
2022-09-14	13:40:45	0.314059	1.397	1.53818	281.801	FALSE	1
2022-09-14	13:40:46	0.37299	1.65913	1.40333	306.582	FALSE	1
2022-09-14	13:40:46	0.190751	0.848499	1.40333	282.649	FALSE	1
2022-09-14	13:40:46	0.498435	2.21714	1.40333	308.799	FALSE	1
2022-09-14	13:40:46	0.199758	0.888564	1.40333	283.538	FALSE	1
2022-09-14	13:40:47	0.443931	1.97469	1.03701	310.774	FALSE	1
2022-09-14	13:40:47	0.138792	0.617375	1.03701	284.155	FALSE	1
2022-09-14	13:40:47	0.267748	1.191	1.03701	311.965	FALSE	1
2022-09-14	13:40:47	0.0820485	0.364968	1.03701	284.52	FALSE	1
2022-09-14	13:40:48	0.371361	1.65189	1.58969	313.617	FALSE	1
2022-09-14	13:40:48	0.315382	1.40288	1.58969	285.923	FALSE	1
2022-09-14	13:40:48	0.337774	1.50249	1.58969	315.119	FALSE	1
2022-09-14	13:40:48	0.405	1.80152	1.58969	287.725	FALSE	1
2022-09-14	13:40:49	0.354262	1.57583	1.62744	316.695	FALSE	1
2022-09-14	13:40:49	0.43243	1.92354	1.62744	289.648	FALSE	1
2022-09-14	13:40:49	0.310903	1.38296	1.62744	318.078	FALSE	1
2022-09-14	13:40:50	0.454059	2.01975	1.6022	291.668	FALSE	1
2022-09-14	13:40:50	0.282608	1.2571	1.6022	319.335	FALSE	1
2022-09-14	13:40:50	0.415687	1.84906	1.6022	293.517	FALSE	1
2022-09-14	13:40:50	0.28841	1.28291	1.6022	320.618	FALSE	1
2022-09-14	13:40:51	0.530751	2.36089	1.69088	295.878	FALSE	1
2022-09-14	13:40:51	0.203982	0.907353	1.69088	321.525	FALSE	1
2022-09-14	13:40:51	0.52444	2.33281	1.69088	298.211	FALSE	1
2022-09-14	13:40:51	0.261336	1.16247	1.69088	322.688	FALSE	1
2022-09-14	13:40:52	0.509428	2.26604	1.11545	300.477	FALSE	1
2022-09-14	13:40:52	0.190598	0.847818	1.11545	323.536	FALSE	1
2022-09-14	13:40:52	0.188817	0.839896	1.11545	301.317	FALSE	1
2022-09-14	13:40:52	0.114211	0.508033	1.11545	324.044	FALSE	1
2022-09-14	13:40:53	0.215585	0.958965	0.875963	302.276	FALSE	1
2022-09-14	13:40:53	0.054415	0.242049	0.875963	324.286	FALSE	1
2022-09-14	13:40:53	0.320776	1.42688	0.875963	303.702	FALSE	1
2022-09-14	13:40:54	0.297417	1.32297	1.76208	325.609	FALSE	1
2022-09-14	13:40:54	0.316298	1.40696	1.76208	305.109	FALSE	1
2022-09-14	13:40:54	0.534822	2.379	1.76208	327.988	FALSE	1
2022-09-14	13:40:54	0.435992	1.93938	1.76208	307.049	FALSE	1
2022-09-14	13:40:55	1.11167	4.94493	2.37628	332.932	FALSE	1
2022-09-14	13:40:55	0.42841	1.90565	2.37628	308.954	FALSE	1
2022-09-14	13:40:55	0.396909	1.76553	2.37628	334.698	FALSE	1
2022-09-14	13:40:55	0.19986	0.889017	2.37628	309.843	FALSE	1
2022-09-14	13:40:56	0.421132	1.87328	1.38285	336.571	FALSE	1
2022-09-14	13:40:56	0.192277	0.855287	1.38285	310.699	FALSE	1
2022-09-14	13:40:56	0.373143	1.65981	1.38285	338.231	FALSE	1
2022-09-14	13:40:56	0.256959	1.14301	1.38285	311.842	FALSE	1
2022-09-14	13:40:57	0.378588	1.68404	1.49615	339.915	FALSE	1
2022-09-14	13:40:57	0.266323	1.18466	1.49615	313.026	FALSE	1
2022-09-14	13:40:57	0.364135	1.61975	1.49615	341.535	FALSE	1
2022-09-14	13:40:58	0.30042	1.33633	1.57102	314.363	FALSE	1
2022-09-14	13:40:58	0.406374	1.80763	1.57102	343.343	FALSE	1
2022-09-14	13:40:58	0.292888	1.30282	1.57102	315.666	FALSE	1
2022-09-14	13:40:58	0.413041	1.83729	1.57102	345.18	FALSE	1
2022-09-14	13:40:59	0.306679	1.36417	1.54719	317.03	FALSE	1
2022-09-14	13:40:59	0.449122	1.99778	1.54719	347.178	FALSE	1
2022-09-14	13:40:59	0.218842	0.973453	1.54719	318.003	FALSE	1
2022-09-14	13:40:59	0.416654	1.85336	1.54719	349.031	FALSE	1
2022-09-14	13:41:00	0.268817	1.19575	1.82025	319.199	FALSE	1
2022-09-14	13:41:00	0.375738	1.67136	1.82025	350.702	FALSE	1
2022-09-14	13:41:00	0.329682	1.46649	1.82025	320.665	FALSE	1
2022-09-14	13:41:00	0.662608	2.94741	1.82025	353.65	FALSE	1
2022-09-14	13:41:01	0.350242	1.55795	2.38352	322.223	FALSE	1
2022-09-14	13:41:01	0.559249	2.48765	2.38352	356.137	FALSE	1
2022-09-14	13:41:01	0.698028	3.10497	2.38352	325.328	FALSE	1
2022-09-14	13:41:02	0.733601	3.2632	3.22862	359.401	FALSE	1
2022-09-14	13:41:02	0.720979	3.20706	3.22862	328.535	FALSE	1
2022-09-14	13:41:02	0.726425	3.23128	3.22862	362.632	FALSE	1
2022-09-14	13:41:02	0.722303	3.21295	3.22862	331.748	FALSE	1
2022-09-14	13:41:03	0.731259	3.25279	3.24639	365.885	FALSE	1
2022-09-14	13:41:03	0.721285	3.20842	3.24639	334.957	FALSE	1
2022-09-14	13:41:03	0.733957	3.26479	3.24639	369.149	FALSE	1
2022-09-14	13:41:03	0.732786	3.25958	3.24639	338.216	FALSE	1
2022-09-14	13:41:04	0.720776	3.20616	3.22238	372.356	FALSE	1
2022-09-14	13:41:04	0.724695	3.22359	3.22238	341.44	FALSE	1
2022-09-14	13:41:04	0.727799	3.2374	3.22238	375.593	FALSE	1
2022-09-14	13:41:05	0.722965	3.21589	3.22149	344.656	FALSE	1
2022-09-14	13:41:05	0.723117	3.21657	3.22149	378.81	FALSE	1
2022-09-14	13:41:05	0.727392	3.23559	3.22149	347.891	FALSE	1
2022-09-14	13:41:05	0.723422	3.21793	3.22149	382.027	FALSE	1
2022-09-14	13:41:06	0.722099	3.21204	3.22811	351.103	FALSE	1
2022-09-14	13:41:06	0.725204	3.22585	3.22811	385.253	FALSE	1
2022-09-14	13:41:06	0.728868	3.24215	3.22811	354.346	FALSE	1
2022-09-14	13:41:06	0.726679	3.23241	3.22811	388.486	FALSE	1
2022-09-14	13:41:07	0.718639	3.19665	3.22347	357.542	FALSE	1
2022-09-14	13:41:07	0.723779	3.21951	3.22347	391.705	FALSE	1
2022-09-14	13:41:07	0.726374	3.23106	3.22347	360.773	FALSE	1
2022-09-14	13:41:07	0.729886	3.24668	3.22347	394.952	FALSE	1
2022-09-14	13:41:08	0.726476	3.23151	3.23808	364.005	FALSE	1
2022-09-14	13:41:08	0.727952	3.23808	3.23808	398.19	FALSE	1
2022-09-14	13:41:08	0.729428	3.24464	3.23808	367.249	FALSE	1
2022-09-14	13:41:09	0.724338	3.222	3.22511	401.412	FALSE	1
2022-09-14	13:41:09	0.726272	3.2306	3.22511	370.48	FALSE	1
2022-09-14	13:41:09	0.725051	3.22517	3.22511	404.637	FALSE	1
2022-09-14	13:41:09	0.724491	3.22268	3.22511	373.703	FALSE	1
2022-09-14	13:41:10	0.728868	3.24215	3.22992	407.879	FALSE	1
2022-09-14	13:41:10	0.725305	3.2263	3.22992	376.929	FALSE	1
2022-09-14	13:41:10	0.728359	3.23989	3.22992	411.119	FALSE	1
2022-09-14	13:41:10	0.721946	3.21136	3.22992	380.14	FALSE	1
2022-09-14	13:41:11	0.730242	3.24826	3.24668	414.367	FALSE	1
2022-09-14	13:41:11	0.731412	3.25347	3.24668	383.394	FALSE	1
2022-09-14	13:41:11	0.730598	3.24985	3.24668	417.617	FALSE	1
2022-09-14	13:41:11	0.72729	3.23513	3.24668	386.629	FALSE	1
2022-09-14	13:41:12	0.723372	3.2177	3.22389	420.835	FALSE	1
2022-09-14	13:41:12	0.724288	3.22178	3.22389	389.851	FALSE	1
2022-09-14	13:41:12	0.726629	3.23219	3.22389	424.067	FALSE	1
2022-09-14	13:41:13	0.727239	3.2349	3.23338	393.086	FALSE	1
2022-09-14	13:41:13	0.725916	3.22902	3.23338	427.296	FALSE	1
2022-09-14	13:41:13	0.721946	3.21136	3.23338	396.297	FALSE	1
2022-09-14	13:41:13	0.732481	3.25822	3.23338	430.554	FALSE	1
2022-09-14	13:41:14	0.728054	3.23853	3.213	399.536	FALSE	1
2022-09-14	13:41:14	0.729275	3.24396	3.213	433.798	FALSE	1
2022-09-14	13:41:14	0.725662	3.22789	3.213	402.763	FALSE	1
2022-09-14	13:41:14	0.706272	3.14164	3.213	436.94	FALSE	1
2022-09-14	13:41:15	0.367188	1.63333	1.54968	404.397	FALSE	1
2022-09-14	13:41:15	0.258995	1.15206	1.54968	438.092	FALSE	1
2022-09-14	13:41:15	0.431005	1.9172	1.54968	406.314	FALSE	1
2022-09-14	13:41:15	0.336349	1.49615	1.54968	439.588	FALSE	1
2022-09-14	13:41:16	0.433092	1.92648	1.61446	408.24	FALSE	1
2022-09-14	13:41:16	0.2793	1.24238	1.61446	440.831	FALSE	1
2022-09-14	13:41:16	0.37645	1.67452	1.61446	409.915	FALSE	1
2022-09-14	13:41:17	0.282608	1.2571	1.09009	442.088	FALSE	1
2022-09-14	13:41:17	0.251667	1.11947	1.09009	411.034	FALSE	1
2022-09-14	13:41:17	0.276298	1.22903	1.09009	443.317	FALSE	1
2022-09-14	13:41:17	0.169682	0.754779	1.09009	411.789	FALSE	1
2022-09-14	13:41:18	0.112328	0.499657	1.21307	443.816	FALSE	1
2022-09-14	13:41:18	0.255178	1.13508	1.21307	412.924	FALSE	1
2022-09-14	13:41:18	0.259606	1.15478	1.21307	444.971	FALSE	1
2022-09-14	13:41:18	0.463728	2.06275	1.21307	414.987	FALSE	1
2022-09-14	13:41:19	0.234568	1.04341	1.50888	446.015	FALSE	1
2022-09-14	13:41:19	0.300318	1.33587	1.50888	416.323	FALSE	1
2022-09-14	13:41:19	0.463677	2.06253	1.50888	448.077	FALSE	1
2022-09-14	13:41:19	0.358283	1.59371	1.50888	417.917	FALSE	1
2022-09-14	13:41:20	0.531667	2.36496	2.04117	450.442	FALSE	1
2022-09-14	13:41:20	0.430751	1.91607	2.04117	419.833	FALSE	1
2022-09-14	13:41:20	0.414211	1.84249	2.04117	452.285	FALSE	1
2022-09-14	13:41:21	0.47986	2.13451	1.98562	421.967	FALSE	1
2022-09-14	13:41:21	0.433957	1.93033	1.98562	454.215	FALSE	1
2022-09-14	13:41:21	0.478791	2.12976	1.98562	424.097	FALSE	1
2022-09-14	13:41:21	0.392939	1.74787	1.98562	455.963	FALSE	1
2022-09-14	13:41:22	0.282863	1.25823	1.37391	425.355	FALSE	1
2022-09-14	13:41:22	0.300929	1.33859	1.37391	457.301	FALSE	1
2022-09-14	13:41:22	0.322863	1.43616	1.37391	426.791	FALSE	1
2022-09-14	13:41:22	0.328817	1.46264	1.37391	458.764	FALSE	1
2022-09-14	13:41:23	0.567188	2.52297	2.176	429.314	FALSE	1
2022-09-14	13:41:23	0.443677	1.97356	2.176	460.738	FALSE	1
2022-09-14	13:41:23	0.378384	1.68313	2.176	430.997	FALSE	1
2022-09-14	13:41:23	0.567494	2.52433	2.176	463.262	FALSE	1
2022-09-14	13:41:24	0.446883	1.98782	1.32878	432.985	FALSE	1
2022-09-14	13:41:24	0.288766	1.28449	1.32878	464.546	FALSE	1
2022-09-14	13:41:24	0.160522	0.714034	1.32878	433.699	FALSE	1
2022-09-14	13:41:25	0.0396058	0.176175	0.0883992	464.723	FALSE	1
2022-09-14	13:41:25	-0.0591219	-0.262986	0.0883992	433.699	FALSE	1
2022-09-14	13:41:25	0.0698349	0.31064	0.0883992	465.033	FALSE	1
2022-09-14	13:41:25	0.0291733	0.129769	0.0883992	433.829	FALSE	1
2022-09-14	13:41:26	0.351005	1.56134	0.791621	466.595	FALSE	1
2022-09-14	13:41:26	-0.0215646	-0.0959237	0.791621	433.829	FALSE	1
2022-09-14	13:41:26	-0.0182567	-0.0812095	0.791621	466.595	FALSE	1
2022-09-14	13:41:26	0.400674	1.78228	0.791621	435.611	FALSE	1
2022-09-14	13:41:27	0.259504	1.15433	1.3232	467.749	FALSE	1
2022-09-14	13:41:27	0.381031	1.6949	1.3232	437.306	FALSE	1
2022-09-14	13:41:27	0.251667	1.11947	1.3232	468.868	FALSE	1
2022-09-14	13:41:27	0.297672	1.3241	1.3232	438.63	FALSE	1
2022-09-14	13:41:28	0.343473	1.52784	1.31776	470.396	FALSE	1
2022-09-14	13:41:28	0.314618	1.39948	1.31776	440.03	FALSE	1
2022-09-14	13:41:28	0.230649	1.02597	1.31776	471.422	FALSE	1
2022-09-14	13:41:29	0.439453	1.95477	1.54889	441.985	FALSE	1
2022-09-14	13:41:29	0.337112	1.49954	1.54889	472.922	FALSE	1
2022-09-14	13:41:29	0.291514	1.29671	1.54889	443.281	FALSE	1
2022-09-14	13:41:29	0.324746	1.44454	1.54889	474.366	FALSE	1
2022-09-14	13:41:30	0.353499	1.57243	1.49524	444.854	FALSE	1
2022-09-14	13:41:30	0.490038	2.17979	1.49524	476.546	FALSE	1
2022-09-14	13:41:30	0.318486	1.41669	1.49524	446.27	FALSE	1
2022-09-14	13:41:30	0.182557	0.81205	1.49524	477.358	FALSE	1
2022-09-14	13:41:31	0.428919	1.90792	1.57656	448.178	FALSE	1
2022-09-14	13:41:31	0.328766	1.46242	1.57656	478.821	FALSE	1
2022-09-14	13:41:31	0.356552	1.58601	1.57656	449.764	FALSE	1
2022-09-14	13:41:31	0.303473	1.34991	1.57656	480.17	FALSE	1
2022-09-14	13:41:32	0.29757	1.32365	1.58481	451.088	FALSE	1
2022-09-14	13:41:32	0.330242	1.46898	1.58481	481.639	FALSE	1
2022-09-14	13:41:32	0.441031	1.96179	1.58481	453.05	FALSE	1
2022-09-14	13:41:33	0.311616	1.38613	1.80373	483.026	FALSE	1
2022-09-14	13:41:33	0.551616	2.4537	1.80373	455.504	FALSE	1
2022-09-14	13:41:33	0.407545	1.81284	1.80373	484.838	FALSE	1
2022-09-14	13:41:33	0.351209	1.56225	1.80373	457.066	FALSE	1
2022-09-14	13:41:34	0.524236	2.33191	2.11963	487.17	FALSE	1
2022-09-14	13:41:34	0.404593	1.79971	2.11963	458.865	FALSE	1
2022-09-14	13:41:34	0.437468	1.94595	2.11963	489.116	FALSE	1
2022-09-14	13:41:34	0.539758	2.40095	2.11963	461.266	FALSE	1
2022-09-14	13:41:35	0.36729	1.63378	2.12131	490.75	FALSE	1
2022-09-14	13:41:35	0.493295	2.19427	2.12131	463.461	FALSE	1
2022-09-14	13:41:35	0.570089	2.53587	2.12131	493.286	FALSE	1
2022-09-14	13:41:36	0.882201	3.92421	3.12925	467.385	FALSE	1
2022-09-14	13:41:36	0.875229	3.89319	3.12925	497.179	FALSE	1
2022-09-14	13:41:36	0.52444	2.33281	3.12925	469.718	FALSE	1
2022-09-14	13:41:36	0.532074	2.36677	3.12925	499.546	FALSE	1
2022-09-14	13:41:37	0.457672	2.03582	2.3301	471.754	FALSE	1
2022-09-14	13:41:37	0.539605	2.40027	2.3301	501.946	FALSE	1
2022-09-14	13:41:37	0.53757	2.39122	2.3301	474.145	FALSE	1
2022-09-14	13:41:37	0.560471	2.49309	2.3301	504.439	FALSE	1
2022-09-14	13:41:38	0.559097	2.48698	2.43253	476.632	FALSE	1
2022-09-14	13:41:38	0.523778	2.32987	2.43253	506.769	FALSE	1
2022-09-14	13:41:38	0.621998	2.76677	2.43253	479.399	FALSE	1
2022-09-14	13:41:38	0.482557	2.14651	2.43253	508.916	FALSE	1
2022-09-14	13:41:39	0.527341	2.34572	2.23412	481.744	FALSE	1
2022-09-14	13:41:39	0.542914	2.41499	2.23412	511.331	FALSE	1
2022-09-14	13:41:39	0.436501	1.94164	2.23412	483.686	FALSE	1
2022-09-14	13:41:40	0.393906	1.75217	1.89162	513.083	FALSE	1
2022-09-14	13:41:40	0.404186	1.7979	1.89162	485.484	FALSE	1
2022-09-14	13:41:40	0.510038	2.26875	1.89162	515.352	FALSE	1
2022-09-14	13:41:40	0.392888	1.74764	1.89162	487.231	FALSE	1
2022-09-14	13:41:41	0.448613	1.99552	1.66491	517.347	FALSE	1
2022-09-14	13:41:41	0.372328	1.65619	1.66491	488.888	FALSE	1
2022-09-14	13:41:41	0.331311	1.47374	1.66491	518.821	FALSE	1
2022-09-14	13:41:41	0.344898	1.53418	1.66491	490.422	FALSE	1
2022-09-14	13:41:42	0.409835	1.82303	1.70095	520.644	FALSE	1
2022-09-14	13:41:42	0.345356	1.53621	1.70095	491.958	FALSE	1
2022-09-14	13:41:42	0.435127	1.93553	1.70095	522.579	FALSE	1
2022-09-14	13:41:42	0.339249	1.50905	1.70095	493.467	FALSE	1
2022-09-14	13:41:43	0.309682	1.37753	1.63627	523.957	FALSE	1
2022-09-14	13:41:43	0.489886	2.17911	1.63627	495.646	FALSE	1
2022-09-14	13:41:43	0.303982	1.35217	1.63627	525.309	FALSE	1
2022-09-14	13:41:44	0.260369	1.15817	1.0232	496.804	FALSE	1
2022-09-14	13:41:44	0.279606	1.24374	1.0232	526.553	FALSE	1
2022-09-14	13:41:44	0.143728	0.639331	1.0232	497.444	FALSE	1
2022-09-14	13:41:44	0.2364	1.05155	1.0232	527.604	FALSE	1
2022-09-14	13:41:45	0.298893	1.32954	1.99015	498.773	FALSE	1
2022-09-14	13:41:45	0.52785	2.34798	1.99015	529.952	FALSE	1
2022-09-14	13:41:45	0.5364	2.38601	1.99015	501.159	FALSE	1
2022-09-14	13:41:45	0.426476	1.89705	1.99015	531.849	FALSE	1
2022-09-14	13:41:46	0.434771	1.93395	2.10401	503.093	FALSE	1
2022-09-14	13:41:46	0.402303	1.78952	2.10401	533.639	FALSE	1
2022-09-14	13:41:46	0.433193	1.92693	2.10401	505.02	FALSE	1
2022-09-14	13:41:46	0.621743	2.76564	2.10401	536.405	FALSE	1
2022-09-14	13:41:47	0.419758	1.86717	2.11927	506.887	FALSE	1
2022-09-14	13:41:47	0.415382	1.8477	2.11927	538.252	FALSE	1
2022-09-14	13:41:47	0.59416	2.64294	2.11927	509.53	FALSE	1
2022-09-14	13:41:48	0.419453	1.86581	1.9597	540.118	FALSE	1
2022-09-14	13:41:48	0.518181	2.30497	1.9597	511.835	FALSE	1
2022-09-14	13:41:48	0.41243	1.83457	1.9597	541.953	FALSE	1
2022-09-14	13:41:48	0.412176	1.83344	1.9597	513.669	FALSE	1
2022-09-14	13:41:49	0.517723	2.30294	2.08245	544.256	FALSE	1
2022-09-14	13:41:49	0.40271	1.79133	2.08245	515.46	FALSE	1
2022-09-14	13:41:49	0.412277	1.83389	2.08245	546.089	FALSE	1
2022-09-14	13:41:49	0.539911	2.40163	2.08245	517.862	FALSE	1
2022-09-14	13:41:50	0.43187	1.92104	1.90056	548.01	FALSE	1
2022-09-14	13:41:50	0.341641	1.51969	1.90056	519.381	FALSE	1
2022-09-14	13:41:50	0.527188	2.34504	1.90056	550.356	FALSE	1
2022-09-14	13:41:50	0.408359	1.81646	1.90056	521.198	FALSE	1
2022-09-14	13:41:51	0.549478	2.44419	1.97387	552.8	FALSE	1
2022-09-14	13:41:51	0.436705	1.94255	1.97387	523.14	FALSE	1
2022-09-14	13:41:51	0.345051	1.53486	1.97387	554.335	FALSE	1
2022-09-14	13:41:52	0.557366	2.47928	1.98839	525.62	FALSE	1
2022-09-14	13:41:52	0.374771	1.66706	1.98839	556.002	FALSE	1
2022-09-14	13:41:52	0.501997	2.23298	1.98839	527.853	FALSE	1
2022-09-14	13:41:52	0.353906	1.57424	1.98839	557.576	FALSE	1
2022-09-14	13:41:53	0.413397	1.83887	2.24742	529.691	FALSE	1
2022-09-14	13:41:53	0.641743	2.8546	2.24742	560.43	FALSE	1
2022-09-14	13:41:53	0.427341	1.9009	2.24742	531.592	FALSE	1
2022-09-14	13:41:53	0.538486	2.39529	2.24742	562.826	FALSE	1
2022-09-14	13:41:54	0.333448	1.48324	1.98273	533.076	FALSE	1
2022-09-14	13:41:54	0.436858	1.94323	1.98273	564.769	FALSE	1
2022-09-14	13:41:54	0.589071	2.62031	1.98273	535.696	FALSE	1
2022-09-14	13:41:54	0.423575	1.88415	1.98273	566.653	FALSE	1
2022-09-14	13:41:55	0.564389	2.51052	2.17556	538.206	FALSE	1
2022-09-14	13:41:55	0.430853	1.91652	2.17556	568.57	FALSE	1
2022-09-14	13:41:55	0.472023	2.09965	2.17556	540.306	FALSE	1
2022-09-14	13:41:56	0.580216	2.58092	2.30808	571.151	FALSE	1
2022-09-14	13:41:56	0.477214	2.12274	2.30808	542.429	FALSE	1
2022-09-14	13:41:56	0.607137	2.70067	2.30808	573.851	FALSE	1
2022-09-14	13:41:56	0.410954	1.82801	2.30808	544.257	FALSE	1
2022-09-14	13:41:57	0.452685	2.01363	2.38613	575.865	FALSE	1
2022-09-14	13:41:57	0.635178	2.8254	2.38613	547.082	FALSE	1
2022-09-14	13:41:57	0.46383	2.06321	2.38613	577.928	FALSE	1
2022-09-14	13:41:57	0.594008	2.64227	2.38613	549.724	FALSE	1
2022-09-14	13:41:58	0.448512	1.99507	2.2241	579.923	FALSE	1
2022-09-14	13:41:58	0.444491	1.97718	2.2241	551.702	FALSE	1
2022-09-14	13:41:58	0.656043	2.91821	2.2241	582.841	FALSE	1
2022-09-14	13:41:58	0.450954	2.00593	2.2241	553.708	FALSE	1
2022-09-14	13:41:59	0.530496	2.35975	1.84913	585.201	FALSE	1
2022-09-14	13:41:59	0.371361	1.65189	1.84913	555.359	FALSE	1
2022-09-14	13:41:59	0.345255	1.53576	1.84913	586.737	FALSE	1
2022-09-14	13:42:00	0.540063	2.40231	1.46366	557.762	FALSE	1
2022-09-14	13:42:00	0.248461	1.1052	1.46366	587.842	FALSE	1
2022-09-14	13:42:00	0.168104	0.74776	1.46366	558.51	FALSE	1
2022-09-14	13:42:00	0.359555	1.59937	1.46366	589.441	FALSE	1
2022-09-14	13:42:01	0.245916	1.09388	1.56168	559.603	FALSE	1
2022-09-14	13:42:01	0.232583	1.03458	1.56168	590.476	FALSE	1
2022-09-14	13:42:01	0.441031	1.96179	1.56168	561.565	FALSE	1
2022-09-14	13:42:01	0.484797	2.15647	1.56168	592.632	FALSE	1
2022-09-14	13:42:02	0.518842	2.30791	2.17135	563.873	FALSE	1
2022-09-14	13:42:02	0.420216	1.8692	2.17135	594.502	FALSE	1
2022-09-14	13:42:02	0.523982	2.33078	2.17135	566.204	FALSE	1
2022-09-14	13:42:02	0.489529	2.17752	2.17135	596.679	FALSE	1
2022-09-14	13:42:03	0.498842	2.21895	2.25645	568.423	FALSE	1
2022-09-14	13:42:03	0.478639	2.12908	2.25645	598.808	FALSE	1
2022-09-14	13:42:03	0.544338	2.42132	2.25645	570.844	FALSE	1
2022-09-14	13:42:04	0.491769	2.18749	2.22155	600.996	FALSE	1
2022-09-14	13:42:04	0.556908	2.47724	2.22155	573.321	FALSE	1
2022-09-14	13:42:04	0.47411	2.10894	2.22155	603.105	FALSE	1
2022-09-14	13:42:04	0.474924	2.11256	2.22155	575.434	FALSE	1
2022-09-14	13:42:05	0.456959	2.03265	2.08958	605.137	FALSE	1
2022-09-14	13:42:05	0.472634	2.10237	2.08958	577.536	FALSE	1
2022-09-14	13:42:05	0.472837	2.10327	2.08958	607.241	FALSE	1
2022-09-14	13:42:05	0.476603	2.12003	2.08958	579.656	FALSE	1
2022-09-14	13:42:06	0.468919	2.08585	1.9859	609.326	FALSE	1
2022-09-14	13:42:06	0.470802	2.09422	1.9859	581.751	FALSE	1
2022-09-14	13:42:06	0.451005	2.00616	1.9859	611.333	FALSE	1
2022-09-14	13:42:06	0.395076	1.75738	1.9859	583.508	FALSE	1
2022-09-14	13:42:07	0.399453	1.77685	1.90935	613.109	FALSE	1
2022-09-14	13:42:07	0.412328	1.83412	1.90935	585.342	FALSE	1
2022-09-14	13:42:07	0.475942	2.11709	1.90935	615.227	FALSE	1
2022-09-14	13:42:08	0.476705	2.12048	2.082	587.463	FALSE	1
2022-09-14	13:42:08	0.467952	2.08154	2.082	617.308	FALSE	1
2022-09-14	13:42:08	0.455992	2.02834	2.082	589.491	FALSE	1
2022-09-14	13:42:08	0.471565	2.09762	2.082	619.406	FALSE	1
2022-09-14	13:42:09	0.448308	1.99416	2.04238	591.485	FALSE	1
2022-09-14	13:42:09	0.479962	2.13497	2.04238	621.541	FALSE	1
2022-09-14	13:42:09	0.450903	2.00571	2.04238	593.491	FALSE	1
2022-09-14	13:42:09	0.457417	2.03468	2.04238	623.575	FALSE	1
2022-09-14	13:42:10	0.462863	2.05891	1.93916	595.55	FALSE	1
2022-09-14	13:42:10	0.465458	2.07045	1.93916	625.646	FALSE	1
2022-09-14	13:42:10	0.379504	1.68811	1.93916	597.238	FALSE	1
2022-09-14	13:42:11	0.422252	1.87826	1.15812	627.524	FALSE	1
2022-09-14	13:42:11	0.370852	1.64962	1.15812	598.887	FALSE	1
2022-09-14	13:42:11	0.0420994	0.187267	1.15812	627.711	FALSE	1
2022-09-14	13:42:11	0.206221	0.917312	1.15812	599.805	FALSE	1
2022-09-14	13:42:12	0.168563	0.749802	1.64453	628.461	FALSE	1
2022-09-14	13:42:12	0.251361	1.1181	1.64453	600.923	FALSE	1
2022-09-14	13:42:12	0.68958	3.06739	1.64453	631.529	FALSE	1
2022-09-14	13:42:12	0.369326	1.64284	1.64453	602.566	FALSE	1
2022-09-14	13:42:13	0.356807	1.58715	2.42953	633.116	FALSE	1
2022-09-14	13:42:13	0.702557	3.12511	2.42953	605.691	FALSE	1
2022-09-14	13:42:13	0.51416	2.28709	2.42953	635.403	FALSE	1
2022-09-14	13:42:13	0.611209	2.71878	2.42953	608.41	FALSE	1
2022-09-14	13:42:14	0.603728	2.6855	2.3673	638.088	FALSE	1
2022-09-14	13:42:14	0.403626	1.79541	2.3673	610.205	FALSE	1
2022-09-14	13:42:14	0.589224	2.62099	2.3673	640.709	FALSE	1
2022-09-14	13:42:15	0.417214	1.85585	2.08884	612.061	FALSE	1
2022-09-14	13:42:15	0.63131	2.80819	2.08884	643.517	FALSE	1
2022-09-14	13:42:15	0.415789	1.84951	2.08884	613.91	FALSE	1
2022-09-14	13:42:15	0.414059	1.84182	2.08884	645.359	FALSE	1
2022-09-14	13:42:16	0.444288	1.97628	1.89524	615.887	FALSE	1
2022-09-14	13:42:16	0.365356	1.62518	1.89524	646.984	FALSE	1
2022-09-14	13:42:16	0.516857	2.29908	1.89524	618.186	FALSE	1
2022-09-14	13:42:16	0.377774	1.68041	1.89524	648.665	FALSE	1
2022-09-14	13:42:17	0.402506	1.79043	2.61555	619.976	FALSE	1
2022-09-14	13:42:17	0.476552	2.1198	2.61555	650.785	FALSE	1
2022-09-14	13:42:17	0.4307	1.91584	2.61555	621.892	FALSE	1
2022-09-14	13:42:17	1.04225	4.63614	2.61555	655.421	FALSE	1
2022-09-14	13:42:18	1.27905	5.68947	3.77179	627.581	FALSE	1
2022-09-14	13:42:18	0.696349	3.0975	3.77179	658.518	FALSE	1
2022-09-14	13:42:18	0.568409	2.5284	3.77179	630.11	FALSE	1
2022-09-14	13:42:19	0.345	1.53463	1.71505	660.053	FALSE	1
2022-09-14	13:42:19	0.386222	1.71799	1.71505	631.828	FALSE	1
2022-09-14	13:42:19	0.415178	1.84679	1.71505	661.9	FALSE	1
2022-09-14	13:42:19	0.39584	1.76078	1.71505	633.589	FALSE	1
2022-09-14	13:42:20	0.528715	2.35183	1.44136	664.252	FALSE	1
2022-09-14	13:42:20	0.359199	1.59779	1.44136	635.186	FALSE	1
2022-09-14	13:42:20	0.141794	0.630728	1.44136	664.882	FALSE	1
2022-09-14	13:42:20	0.266425	1.18511	1.44136	636.371	FALSE	1
2022-09-14	13:42:21	0.342761	1.52467	1.36355	666.407	FALSE	1
2022-09-14	13:42:21	0.311514	1.38568	1.36355	637.757	FALSE	1
2022-09-14	13:42:21	0.35813	1.59303	1.36355	668	FALSE	1
2022-09-14	13:42:21	0.213753	0.950816	1.36355	638.708	FALSE	1
2022-09-14	13:42:22	0.290496	1.29218	1.33225	669.292	FALSE	1
2022-09-14	13:42:22	0.218588	0.972323	1.33225	639.68	FALSE	1
2022-09-14	13:42:22	0.389428	1.73225	1.33225	671.024	FALSE	1
2022-09-14	13:42:23	0.384746	1.71143	1.7228	641.392	FALSE	1
2022-09-14	13:42:23	0.328664	1.46196	1.7228	672.486	FALSE	1
2022-09-14	13:42:23	0.47411	2.10894	1.7228	643.501	FALSE	1
2022-09-14	13:42:23	0.361692	1.60888	1.7228	674.095	FALSE	1
2022-09-14	13:42:24	0.500114	2.22461	1.78024	645.725	FALSE	1
2022-09-14	13:42:24	0.383982	1.70803	1.78024	675.803	FALSE	1
2022-09-14	13:42:24	0.346069	1.53938	1.78024	647.265	FALSE	1
2022-09-14	13:42:24	0.3707	1.64895	1.78024	677.452	FALSE	1
2022-09-14	13:42:25	0.373652	1.66208	1.71471	648.927	FALSE	1
2022-09-14	13:42:25	0.383117	1.70418	1.71471	679.156	FALSE	1
2022-09-14	13:42:25	0.404491	1.79926	1.71471	650.726	FALSE	1
2022-09-14	13:42:25	0.380674	1.69331	1.71471	680.85	FALSE	1
2022-09-14	13:42:26	0.405662	1.80447	1.79262	652.53	FALSE	1
2022-09-14	13:42:26	0.401743	1.78703	1.79262	682.637	FALSE	1
2022-09-14	13:42:26	0.40159	1.78635	1.79262	654.317	FALSE	1
2022-09-14	13:42:27	0.40383	1.79632	1.77854	684.433	FALSE	1
2022-09-14	13:42:27	0.400216	1.78024	1.77854	656.097	FALSE	1
2022-09-14	13:42:27	0.3964	1.76327	1.77854	686.196	FALSE	1
2022-09-14	13:42:27	0.398893	1.77436	1.77854	657.871	FALSE	1
2022-09-14	13:42:28	0.397723	1.76915	1.77068	687.966	FALSE	1
2022-09-14	13:42:28	0.40098	1.78364	1.77068	659.655	FALSE	1
2022-09-14	13:42:28	0.394211	1.75353	1.77068	689.719	FALSE	1
2022-09-14	13:42:28	0.399351	1.77639	1.77068	661.431	FALSE	1
2022-09-14	13:42:29	0.403575	1.79518	1.75777	691.514	FALSE	1
2022-09-14	13:42:29	0.395229	1.75806	1.75777	663.19	FALSE	1
2022-09-14	13:42:29	0.402608	1.79088	1.75777	693.305	FALSE	1
2022-09-14	13:42:29	0.379249	1.68698	1.75777	664.876	FALSE	1
2022-09-14	13:42:30	0.371514	1.65257	1.65159	694.958	FALSE	1
2022-09-14	13:42:30	0.37355	1.66163	1.65159	666.538	FALSE	1
2022-09-14	13:42:30	0.368817	1.64057	1.65159	696.598	FALSE	1
2022-09-14	13:42:31	0.365407	1.6254	1.69796	668.164	FALSE	1
2022-09-14	13:42:31	0.393601	1.75082	1.69796	698.349	FALSE	1
2022-09-14	13:42:31	0.390344	1.73633	1.69796	669.9	FALSE	1
2022-09-14	13:42:31	0.377519	1.67928	1.69796	700.028	FALSE	1
2022-09-14	13:42:32	0.381031	1.6949	1.76044	671.595	FALSE	1
2022-09-14	13:42:32	0.373753	1.66253	1.76044	701.691	FALSE	1
2022-09-14	13:42:32	0.425458	1.89252	1.76044	673.487	FALSE	1
2022-09-14	13:42:32	0.402812	1.79179	1.76044	703.483	FALSE	1
2022-09-14	13:42:33	0.522608	2.32466	1.86655	675.812	FALSE	1
2022-09-14	13:42:33	0.489326	2.17662	1.86655	705.659	FALSE	1
2022-09-14	13:42:33	0.44215	1.96677	1.86655	677.779	FALSE	1
2022-09-14	13:42:33	0.22439	0.998132	1.86655	706.657	FALSE	1
2022-09-14	13:42:34	0.125	0.556025	-0.339576	678.335	FALSE	1
2022-09-14	13:42:34	-0.152201	-0.67702	-0.339576	706.657	FALSE	1
2022-09-14	13:42:34	-0.201819	-0.897731	-0.339576	678.335	FALSE	1
2022-09-14	13:42:35	-0.376679	-1.67554	-0.907465	706.657	FALSE	1
2022-09-14	13:42:35	-0.36416	-1.61986	-0.907465	678.335	FALSE	1
2022-09-14	13:42:35	-0.310063	-1.37922	-0.907465	706.657	FALSE	1
2022-09-14	13:42:35	0.234873	1.04476	-0.907465	679.379	FALSE	1
2022-09-14	13:42:36	0.404084	1.79745	2.16077	708.455	FALSE	1
2022-09-14	13:42:36	0.493906	2.19699	2.16077	681.576	FALSE	1
2022-09-14	13:42:36	0.533092	2.3713	2.16077	710.826	FALSE	1
2022-09-14	13:42:36	0.511972	2.27735	2.16077	683.854	FALSE	1
2022-09-14	13:42:37	0.643881	2.86411	2.63525	713.69	FALSE	1
2022-09-14	13:42:37	0.503779	2.24091	2.63525	686.095	FALSE	1
2022-09-14	13:42:37	0.665763	2.96145	2.63525	716.652	FALSE	1
2022-09-14	13:42:37	0.556298	2.47452	2.63525	688.569	FALSE	1
2022-09-14	13:42:38	0.568308	2.52795	2.68113	719.18	FALSE	1
2022-09-14	13:42:38	0.48383	2.15217	2.68113	690.721	FALSE	1
2022-09-14	13:42:38	0.756094	3.36326	2.68113	722.543	FALSE	1
2022-09-14	13:42:39	0.556247	2.4743	2.25828	693.196	FALSE	1
2022-09-14	13:42:39	0.524745	2.33417	2.25828	724.877	FALSE	1
2022-09-14	13:42:39	0.366323	1.62948	2.25828	694.825	FALSE	1
2022-09-14	13:42:39	0.583422	2.59518	2.25828	727.472	FALSE	1
2022-09-14	13:42:40	0.447647	1.99122	2.22953	696.816	FALSE	1
2022-09-14	13:42:40	0.488512	2.173	2.22953	729.645	FALSE	1
2022-09-14	13:42:40	0.574568	2.55579	2.22953	699.372	FALSE	1
2022-09-14	13:42:40	0.49416	2.19812	2.22953	731.843	FALSE	1
2022-09-14	13:42:41	0.448562	1.99529	2.26626	701.368	FALSE	1
2022-09-14	13:42:41	0.4736	2.10667	2.26626	733.95	FALSE	1
2022-09-14	13:42:41	0.716908	3.18895	2.26626	704.556	FALSE	1
2022-09-14	13:42:41	0.398842	1.77413	2.26626	735.724	FALSE	1
2022-09-14	13:42:42	0.633499	2.81793	1.9181	707.374	FALSE	1
2022-09-14	13:42:42	0.324033	1.44136	1.9181	737.166	FALSE	1
2022-09-14	13:42:42	0.336094	1.49501	1.9181	708.869	FALSE	1
2022-09-14	13:42:43	-0.672404	-2.99099	-3.41742	737.166	FALSE	1
2022-09-14	13:42:43	-0.752302	-3.34639	-3.41742	708.869	FALSE	1
2022-09-14	13:42:43	-0.643091	-2.8606	-3.41742	737.166	FALSE	1
2022-09-14	13:42:43	-1.00528	-4.47169	-3.41742	708.869	FALSE	1
2022-09-14	13:42:44	-0.8379	-3.72715	-3.04186	737.166	FALSE	1
2022-09-14	13:42:44	-0.631335	-2.8083	-3.04186	708.869	FALSE	1
2022-09-14	13:42:44	-0.610521	-2.71572	-3.04186	737.166	FALSE	1
2022-09-14	13:42:44	-0.65561	-2.91628	-3.04186	708.869	FALSE	1
2022-09-14	13:42:45	-1.14818	-5.10733	-5.14341	737.166	FALSE	1
2022-09-14	13:42:45	-1.21022	-5.3833	-5.14341	708.869	FALSE	1
2022-09-14	13:42:45	-1.11047	-4.93959	-5.14341	737.166	FALSE	1
2022-09-14	13:42:46	-1.00548	-4.47258	-4.02997	708.869	FALSE	1
2022-09-14	13:42:46	-0.721004	-3.20717	-4.02997	737.166	FALSE	1
2022-09-14	13:42:46	-0.935966	-4.16336	-4.02997	708.869	FALSE	1
2022-09-14	13:42:46	-0.961462	-4.27678	-4.02997	737.166	FALSE	1
2022-09-14	13:42:47	-0.930012	-4.13688	-5.1109	708.869	FALSE	1
2022-09-14	13:42:47	-1.14401	-5.08879	-5.1109	737.166	FALSE	1
2022-09-14	13:42:47	-1.27072	-5.65242	-5.1109	708.869	FALSE	1
2022-09-14	13:42:47	-1.25118	-5.5655	-5.1109	737.166	FALSE	1
2022-09-14	13:42:48	-1.292	-5.74707	-5.84418	708.869	FALSE	1
2022-09-14	13:42:48	-1.30905	-5.82292	-5.84418	737.166	FALSE	1
2022-09-14	13:42:48	-1.34314	-5.97456	-5.84418	708.869	FALSE	1
2022-09-14	13:42:48	-1.31113	-5.83217	-5.84418	737.166	FALSE	1
2022-09-14	13:42:49	-1.34253	-5.97184	-6.13091	708.869	FALSE	1
2022-09-14	13:42:49	-1.38446	-6.15835	-6.13091	737.166	FALSE	1
2022-09-14	13:42:49	-1.40788	-6.26253	-6.13091	708.869	FALSE	1
2022-09-14	13:42:50	-1.41815	-6.30821	-6.08265	737.166	FALSE	1
2022-09-14	13:42:50	-1.44655	-6.43454	-6.08265	708.869	FALSE	1
2022-09-14	13:42:50	-1.28925	-5.73484	-6.08265	737.166	FALSE	1
2022-09-14	13:42:50	-1.31581	-5.85299	-6.08265	708.869	FALSE	1
2022-09-14	13:42:51	-1.34477	-5.98181	-6.52554	737.166	FALSE	1
2022-09-14	13:42:51	-1.36884	-6.08887	-6.52554	708.869	FALSE	1
2022-09-14	13:42:51	-1.53301	-6.81914	-6.52554	737.166	FALSE	1
2022-09-14	13:42:51	-1.62141	-7.21236	-6.52554	708.869	FALSE	1
2022-09-14	13:42:52	-1.80106	-8.01148	-7.75055	737.166	FALSE	1
2022-09-14	13:42:52	-1.84385	-8.20181	-7.75055	708.869	FALSE	1
2022-09-14	13:42:52	-1.73225	-7.70539	-7.75055	737.166	FALSE	1
2022-09-14	13:42:52	-1.59245	-7.08354	-7.75055	708.869	FALSE	1
2022-09-14	13:42:53	-1.68752	-7.50643	-7.69733	737.166	FALSE	1
2022-09-14	13:42:53	-1.73678	-7.72554	-7.69733	708.869	FALSE	1
2022-09-14	13:42:53	-1.76701	-7.86001	-7.69733	737.166	FALSE	1
2022-09-14	13:42:54	-1.75642	-7.81291	-7.94162	708.869	FALSE	1
2022-09-14	13:42:54	-1.74752	-7.77332	-7.94162	737.166	FALSE	1
2022-09-14	13:42:54	-1.78034	-7.91931	-7.94162	708.869	FALSE	1
2022-09-14	13:42:54	-1.85714	-8.26093	-7.94162	737.166	FALSE	1
2022-09-14	13:42:55	-1.56136	-6.94524	-6.4908	708.869	FALSE	1
2022-09-14	13:42:55	-1.51785	-6.7517	-6.4908	737.166	FALSE	1
2022-09-14	13:42:55	-1.35968	-6.04813	-6.4908	708.869	FALSE	1
2022-09-14	13:42:55	-1.3979	-6.21814	-6.4908	737.166	FALSE	1
2022-09-14	13:42:56	-1.53123	-6.81122	-6.51803	708.869	FALSE	1
2022-09-14	13:42:56	-1.44299	-6.41871	-6.51803	737.166	FALSE	1
2022-09-14	13:42:56	-1.46635	-6.52262	-6.51803	708.869	FALSE	1
2022-09-14	13:42:56	-1.4207	-6.31956	-6.51803	737.166	FALSE	1
2022-09-14	13:42:57	-1.61882	-7.20084	-7.06508	708.869	FALSE	1
2022-09-14	13:42:57	-1.55327	-6.90926	-7.06508	737.166	FALSE	1
2022-09-14	13:42:57	-1.59281	-7.08514	-7.06508	708.869	FALSE	1
2022-09-14	13:42:58	-1.65668	-7.36924	-7.47548	737.166	FALSE	1
2022-09-14	13:42:58	-1.55134	-6.90067	-7.47548	708.869	FALSE	1
2022-09-14	13:42:58	-1.80167	-8.01419	-7.47548	737.166	FALSE	1
2022-09-14	13:42:58	-1.71256	-7.61781	-7.47548	708.869	FALSE	1
2022-09-14	13:42:59	-1.7951	-7.98496	-7.23963	737.166	FALSE	1
2022-09-14	13:42:59	-1.66828	-7.42084	-7.23963	708.869	FALSE	1
2022-09-14	13:42:59	-1.37642	-6.12259	-7.23963	737.166	FALSE	1
2022-09-14	13:42:59	-1.67037	-7.43014	-7.23963	708.869	FALSE	1
2022-09-14	13:43:00	-1.56905	-6.97945	-6.82442	737.166	FALSE	1
2022-09-14	13:43:00	-1.5609	-6.9432	-6.82442	708.869	FALSE	1
2022-09-14	13:43:00	-1.45179	-6.45785	-6.82442	737.166	FALSE	1
2022-09-14	13:43:00	-1.55505	-6.91717	-6.82442	708.869	FALSE	1
2022-09-14	13:43:01	-1.15983	-5.15916	-4.98713	737.166	FALSE	1
2022-09-14	13:43:01	-1.20986	-5.3817	-4.98713	708.869	FALSE	1
2022-09-14	13:43:01	-0.993778	-4.42052	-4.98713	737.166	FALSE	1
2022-09-14	13:43:02	-1.04838	-4.6634	-4.37853	708.869	FALSE	1
2022-09-14	13:43:02	-1.18355	-5.26467	-4.37853	737.166	FALSE	1
2022-09-14	13:43:02	-0.814388	-3.62256	-4.37853	708.869	FALSE	1
2022-09-14	13:43:02	-0.89103	-3.96348	-4.37853	737.166	FALSE	1
2022-09-14	13:43:03	-0.766144	-3.40796	-3.70858	708.869	FALSE	1
2022-09-14	13:43:03	-0.860343	-3.82698	-3.70858	737.166	FALSE	1
2022-09-14	13:43:03	-0.852556	-3.79234	-3.70858	708.869	FALSE	1
2022-09-14	13:43:03	-0.855864	-3.80705	-3.70858	737.166	FALSE	1
2022-09-14	13:43:04	-0.863549	-3.84124	-3.76071	708.869	FALSE	1
2022-09-14	13:43:04	-0.824312	-3.6667	-3.76071	737.166	FALSE	1
2022-09-14	13:43:04	-0.845737	-3.76201	-3.76071	708.869	FALSE	1
2022-09-14	13:43:04	-0.84818	-3.77287	-3.76071	737.166	FALSE	1
2022-09-14	13:43:05	-0.846093	-3.76359	-3.84177	708.869	FALSE	1
2022-09-14	13:43:05	-0.850012	-3.78102	-3.84177	737.166	FALSE	1
2022-09-14	13:43:05	-0.894897	-3.98068	-3.84177	708.869	FALSE	1
2022-09-14	13:43:06	-0.90589	-4.02958	-4.02811	737.166	FALSE	1
2022-09-14	13:43:06	-0.950368	-4.22743	-4.02811	708.869	FALSE	1
2022-09-14	13:43:06	-0.88019	-3.91526	-4.02811	737.166	FALSE	1
2022-09-14	13:43:06	-0.885788	-3.94016	-4.02811	708.869	FALSE	1
2022-09-14	13:43:07	-0.875457	-3.89421	-3.91617	737.166	FALSE	1
2022-09-14	13:43:07	-0.915305	-4.07146	-3.91617	708.869	FALSE	1
2022-09-14	13:43:07	-0.903295	-4.01804	-3.91617	737.166	FALSE	1
2022-09-14	13:43:07	-0.827518	-3.68097	-3.91617	708.869	FALSE	1
2022-09-14	13:43:08	-0.796882	-3.54469	-3.61328	737.166	FALSE	1
2022-09-14	13:43:08	-0.700648	-3.11662	-3.61328	708.869	FALSE	1
2022-09-14	13:43:08	-0.799834	-3.55782	-3.61328	737.166	FALSE	1
2022-09-14	13:43:08	-0.951844	-4.23399	-3.61328	708.869	FALSE	1
2022-09-14	13:43:09	-0.743956	-3.30927	-3.48229	737.166	FALSE	1
2022-09-14	13:43:09	-0.808842	-3.59789	-3.48229	708.869	FALSE	1
2022-09-14	13:43:09	-0.795763	-3.53971	-3.48229	737.166	FALSE	1
2022-09-14	13:43:10	-0.834949	-3.71402	-4.20524	708.869	FALSE	1
2022-09-14	13:43:10	-0.899478	-4.00106	-4.20524	737.166	FALSE	1
2022-09-14	13:43:10	-1.09403	-4.86646	-4.20524	708.869	FALSE	1
2022-09-14	13:43:10	-0.953065	-4.23942	-4.20524	737.166	FALSE	1
2022-09-14	13:43:11	-0.954439	-4.24554	-4.07146	708.869	FALSE	1
2022-09-14	13:43:11	-0.826551	-3.67666	-4.07146	737.166	FALSE	1
2022-09-14	13:43:11	-0.940801	-4.18487	-4.07146	708.869	FALSE	1
2022-09-14	13:43:11	-0.939427	-4.17876	-4.07146	737.166	FALSE	1
2022-09-14	13:43:12	-0.802328	-3.56892	-3.70564	708.869	FALSE	1
2022-09-14	13:43:12	-0.800394	-3.56031	-3.70564	737.166	FALSE	1
2022-09-14	13:43:12	-0.931437	-4.14322	-3.70564	708.869	FALSE	1
2022-09-14	13:43:12	-0.798104	-3.55013	-3.70564	737.166	FALSE	1
2022-09-14	13:43:13	-0.916424	-4.07644	-4.13001	708.869	FALSE	1
2022-09-14	13:43:13	-0.920648	-4.09523	-4.13001	737.166	FALSE	1
2022-09-14	13:43:13	-0.948333	-4.21837	-4.13001	708.869	FALSE	1
2022-09-14	13:43:14	-0.871488	-3.87655	-3.46784	737.166	FALSE	1
2022-09-14	13:43:14	-0.784465	-3.48946	-3.46784	708.869	FALSE	1
2022-09-14	13:43:14	-0.914439	-4.06761	-3.46784	737.166	FALSE	1
2022-09-14	13:43:14	-0.548028	-2.43774	-3.46784	708.869	FALSE	1
2022-09-14	13:43:15	-0.276475	-1.22982	-2.85019	737.166	FALSE	1
2022-09-14	13:43:15	-0.61047	-2.71549	-2.85019	708.869	FALSE	1
2022-09-14	13:43:15	-0.60986	-2.71278	-2.85019	737.166	FALSE	1
2022-09-14	13:43:15	-1.0662	-4.74267	-2.85019	708.869	FALSE	1
2022-09-14	13:43:16	-1.1377	-5.06072	-4.7992	737.166	FALSE	1
2022-09-14	13:43:16	-1.11724	-4.96971	-4.7992	708.869	FALSE	1
2022-09-14	13:43:16	-1.0291	-4.57764	-4.7992	737.166	FALSE	1
2022-09-14	13:43:16	-1.03159	-4.58872	-4.7992	708.869	FALSE	1
2022-09-14	13:43:17	-1.03281	-4.59415	-4.32899	737.166	FALSE	1
2022-09-14	13:43:17	-0.938002	-4.17242	-4.32899	708.869	FALSE	1
2022-09-14	13:43:17	-0.948791	-4.22041	-4.32899	737.166	FALSE	1
2022-09-14	13:43:18	-0.879885	-3.9139	-3.7353	708.869	FALSE	1
2022-09-14	13:43:18	-0.85505	-3.80343	-3.7353	737.166	FALSE	1
2022-09-14	13:43:18	-0.77047	-3.4272	-3.7353	708.869	FALSE	1
2022-09-14	13:43:18	-0.853523	-3.79664	-3.7353	737.166	FALSE	1
2022-09-14	13:43:19	-0.874083	-3.8881	-3.65312	708.869	FALSE	1
2022-09-14	13:43:19	-0.828587	-3.68572	-3.65312	737.166	FALSE	1
2022-09-14	13:43:19	-0.793778	-3.53088	-3.65312	708.869	FALSE	1
2022-09-14	13:43:19	-0.788587	-3.50779	-3.65312	737.166	FALSE	1
2022-09-14	13:43:20	-0.79449	-3.53405	-3.50632	708.869	FALSE	1
2022-09-14	13:43:20	-0.754592	-3.35658	-3.50632	737.166	FALSE	1
2022-09-14	13:43:20	-0.767315	-3.41317	-3.50632	708.869	FALSE	1
2022-09-14	13:43:20	-0.836628	-3.72149	-3.50632	737.166	FALSE	1
2022-09-14	13:43:21	-0.960801	-4.27384	-4.24742	708.869	FALSE	1
2022-09-14	13:43:21	-0.945483	-4.2057	-4.24742	737.166	FALSE	1
2022-09-14	13:43:21	-0.958307	-4.26274	-4.24742	708.869	FALSE	1
2022-09-14	13:43:22	-0.958612	-4.2641	-4.20292	737.166	FALSE	1
2022-09-14	13:43:22	-0.944923	-4.20321	-4.20292	708.869	FALSE	1
2022-09-14	13:43:22	-0.90192	-4.01192	-4.20292	737.166	FALSE	1
2022-09-14	13:43:22	-0.973981	-4.33246	-4.20292	708.869	FALSE	1
2022-09-14	13:43:23	-1.26075	-5.60807	-5.77495	737.166	FALSE	1
2022-09-14	13:43:23	-1.29337	-5.75317	-5.77495	708.869	FALSE	1
2022-09-14	13:43:23	-1.30767	-5.81678	-5.77495	737.166	FALSE	1
2022-09-14	13:43:23	-1.33128	-5.9218	-5.77495	708.869	FALSE	1
2022-09-14	13:43:24	-1.20645	-5.36653	-5.59932	737.166	FALSE	1
2022-09-14	13:43:24	-1.27739	-5.68209	-5.59932	708.869	FALSE	1
2022-09-14	13:43:24	-1.29251	-5.74934	-5.59932	737.166	FALSE	1
2022-09-14	13:43:25	-1.28935	-5.73529	-5.79481	708.869	FALSE	1
2022-09-14	13:43:25	-1.29988	-5.78213	-5.79481	737.166	FALSE	1
2022-09-14	13:43:25	-1.31347	-5.84258	-5.79481	708.869	FALSE	1
2022-09-14	13:43:25	-1.30823	-5.81927	-5.79481	737.166	FALSE	1
2022-09-14	13:43:26	-1.30009	-5.78306	-5.75509	708.869	FALSE	1
2022-09-14	13:43:26	-1.28131	-5.69952	-5.75509	737.166	FALSE	1
2022-09-14	13:43:26	-1.29917	-5.77897	-5.75509	708.869	FALSE	1
2022-09-14	13:43:26	-1.29464	-5.75882	-5.75509	737.166	FALSE	1
2022-09-14	13:43:27	-1.29195	-5.74685	-5.62549	708.869	FALSE	1
2022-09-14	13:43:27	-1.27057	-5.65175	-5.62549	737.166	FALSE	1
2022-09-14	13:43:27	-1.24502	-5.5381	-5.62549	708.869	FALSE	1
2022-09-14	13:43:27	-1.25113	-5.56528	-5.62549	737.166	FALSE	1
2022-09-14	13:43:28	-1.25714	-5.59201	-5.5932	708.869	FALSE	1
2022-09-14	13:43:28	-1.25011	-5.56074	-5.5932	737.166	FALSE	1
2022-09-14	13:43:28	-1.26497	-5.62684	-5.5932	708.869	FALSE	1
2022-09-14	13:43:29	-1.26655	-5.63387	-5.53065	737.166	FALSE	1
2022-09-14	13:43:29	-1.2523	-5.57048	-5.53065	708.869	FALSE	1
2022-09-14	13:43:29	-1.23449	-5.49126	-5.53065	737.166	FALSE	1
2022-09-14	13:43:29	-1.22004	-5.42698	-5.53065	708.869	FALSE	1
2022-09-14	13:43:30	-1.15413	-5.1338	-5.65356	737.166	FALSE	1
2022-09-14	13:43:30	-1.2235	-5.44237	-5.65356	708.869	FALSE	1
2022-09-14	13:43:30	-1.31917	-5.86793	-5.65356	737.166	FALSE	1
2022-09-14	13:43:30	-1.38711	-6.17014	-5.65356	708.869	FALSE	1
2022-09-14	13:43:31	-1.3748	-6.11539	-6.23948	737.166	FALSE	1
2022-09-14	13:43:31	-1.41291	-6.28491	-6.23948	708.869	FALSE	1
2022-09-14	13:43:31	-1.39307	-6.19665	-6.23948	737.166	FALSE	1
2022-09-14	13:43:31	-1.43001	-6.36097	-6.23948	708.869	FALSE	1
2022-09-14	13:43:32	-1.65032	-7.34095	-7.21682	737.166	FALSE	1
2022-09-14	13:43:32	-1.52172	-6.76891	-7.21682	708.869	FALSE	1
2022-09-14	13:43:32	-1.6952	-7.54059	-7.21682	737.166	FALSE	1
2022-09-14	13:43:33	-2.29561	-10.2113	-9.21897	708.869	FALSE	1
2022-09-14	13:43:33	-1.98538	-8.83137	-9.21897	737.166	FALSE	1
2022-09-14	13:43:33	-2.0181	-8.97691	-9.21897	708.869	FALSE	1
2022-09-14	13:43:33	-1.99098	-8.85628	-9.21897	737.166	FALSE	1
2022-09-14	13:43:34	-1.95342	-8.6892	-8.69424	708.869	FALSE	1
2022-09-14	13:43:34	-1.94925	-8.67065	-8.69424	737.166	FALSE	1
2022-09-14	13:43:34	-1.92314	-8.55451	-8.69424	708.869	FALSE	1
2022-09-14	13:43:34	-1.9924	-8.86259	-8.69424	737.166	FALSE	1
2022-09-14	13:43:35	-2.16207	-9.61732	-9.07959	708.869	FALSE	1
2022-09-14	13:43:35	-1.9749	-8.78475	-9.07959	737.166	FALSE	1
2022-09-14	13:43:35	-1.99866	-8.89044	-9.07959	708.869	FALSE	1
2022-09-14	13:43:35	-2.0291	-9.02584	-9.07959	737.166	FALSE	1
2022-09-14	13:43:36	-1.95668	-8.7037	-8.65632	708.869	FALSE	1
2022-09-14	13:43:36	-1.94314	-8.64348	-8.65632	737.166	FALSE	1
2022-09-14	13:43:36	-1.93826	-8.62177	-8.65632	708.869	FALSE	1
2022-09-14	13:43:37	-1.92884	-8.57987	-8.77495	737.166	FALSE	1
2022-09-14	13:43:37	-1.97235	-8.77341	-8.77495	708.869	FALSE	1
2022-09-14	13:43:37	-1.98793	-8.84271	-8.77495	737.166	FALSE	1
2022-09-14	13:43:37	-2.00167	-8.90383	-8.77495	708.869	FALSE	1
2022-09-14	13:43:38	-1.99444	-8.87167	-8.6964	737.166	FALSE	1
2022-09-14	13:43:38	-1.96579	-8.74423	-8.6964	708.869	FALSE	1
2022-09-14	13:43:38	-1.9352	-8.60816	-8.6964	737.166	FALSE	1
2022-09-14	13:43:38	-1.92472	-8.56154	-8.6964	708.869	FALSE	1
2022-09-14	13:43:39	-1.97861	-8.80125	-8.47669	737.166	FALSE	1
2022-09-14	13:43:39	-1.89622	-8.43477	-8.47669	708.869	FALSE	1
2022-09-14	13:43:39	-1.87932	-8.35959	-8.47669	737.166	FALSE	1
2022-09-14	13:43:39	-1.86843	-8.31115	-8.47669	708.869	FALSE	1
2022-09-14	13:43:40	-1.87943	-8.36008	-8.28204	737.166	FALSE	1
2022-09-14	13:43:40	-1.85383	-8.24621	-8.28204	708.869	FALSE	1
2022-09-14	13:43:40	-1.8524	-8.23985	-8.28204	737.166	FALSE	1
2022-09-14	13:43:41	-1.84828	-8.22152	-8.30982	708.869	FALSE	1
2022-09-14	13:43:41	-1.99424	-8.87078	-8.30982	737.166	FALSE	1
2022-09-14	13:43:41	-1.81495	-8.07326	-8.30982	708.869	FALSE	1
2022-09-14	13:43:41	-1.81505	-8.07371	-8.30982	737.166	FALSE	1
2022-09-14	13:43:42	-1.87856	-8.35621	-8.39035	708.869	FALSE	1
2022-09-14	13:43:42	-1.76523	-7.8521	-8.39035	737.166	FALSE	1
2022-09-14	13:43:42	-1.9177	-8.53031	-8.39035	708.869	FALSE	1
2022-09-14	13:43:42	-1.98345	-8.82278	-8.39035	737.166	FALSE	1
2022-09-14	13:43:43	-1.9036	-8.46759	-8.43914	708.869	FALSE	1
2022-09-14	13:43:43	-1.8378	-8.1749	-8.43914	737.166	FALSE	1
2022-09-14	13:43:43	-1.89093	-8.41123	-8.43914	708.869	FALSE	1
2022-09-14	13:43:43	-1.95648	-8.70281	-8.43914	737.166	FALSE	1
2022-09-14	13:43:44	0.658995	2.93134	3.13628	711.801	FALSE	1
2022-09-14	13:43:44	0.730649	3.25007	3.13628	740.416	FALSE	1
2022-09-14	13:43:44	0.72556	3.22744	3.13628	715.028	FALSE	1
2022-09-14	13:43:45	0.726832	3.23309	1.5756	743.649	FALSE	1
2022-09-14	13:43:45	0.320115	1.42394	1.5756	716.452	FALSE	1
2022-09-14	13:43:45	0.733397	3.2623	1.5756	746.911	FALSE	1
2022-09-14	13:43:45	-0.363498	-1.61691	1.5756	716.452	FALSE	1
2022-09-14	13:43:46	-4.67098	-20.7775	-8.22504	746.911	FALSE	1
2022-09-14	13:43:46	0.429224	1.90927	-8.22504	718.361	FALSE	1
2022-09-14	13:43:46	-3.632	-16.1559	-8.22504	746.911	FALSE	1
2022-09-14	13:43:46	0.477468	2.12387	-8.22504	720.485	FALSE	1
2022-09-14	13:43:47	0.412888	1.83661	2.88505	748.748	FALSE	1
2022-09-14	13:43:47	0.724338	3.222	2.88505	723.707	FALSE	1
2022-09-14	13:43:47	0.726679	3.23241	2.88505	751.98	FALSE	1
2022-09-14	13:43:47	0.730445	3.24917	2.88505	726.956	FALSE	1
2022-09-14	13:43:48	0.727341	3.23536	3.25724	755.215	FALSE	1
2022-09-14	13:43:48	0.735941	3.27361	3.25724	730.23	FALSE	1
2022-09-14	13:43:48	0.733499	3.26275	3.25724	758.478	FALSE	1
2022-09-14	13:43:49	0.733702	3.26365	3.23892	733.494	FALSE	1
2022-09-14	13:43:49	0.723982	3.22042	3.23892	761.699	FALSE	1
2022-09-14	13:43:49	0.728206	3.23921	3.23892	736.733	FALSE	1
2022-09-14	13:43:49	0.726679	3.23241	3.23892	764.931	FALSE	1
2022-09-14	13:43:50	0.730394	3.24894	3.25528	739.982	FALSE	1
2022-09-14	13:43:50	0.734364	3.2666	3.25528	768.198	FALSE	1
2022-09-14	13:43:50	0.731056	3.25188	3.25528	743.234	FALSE	1
2022-09-14	13:43:50	0.731463	3.25369	3.25528	771.451	FALSE	1
2022-09-14	13:43:51	0.732735	3.25935	3.2606	746.493	FALSE	1
2022-09-14	13:43:51	0.732125	3.25664	3.2606	774.708	FALSE	1
2022-09-14	13:43:51	0.73757	3.28086	3.2606	749.774	FALSE	1
2022-09-14	13:43:51	0.729631	3.24554	3.2606	777.953	FALSE	1
2022-09-14	13:43:52	0.741387	3.29784	3.2586	753.072	FALSE	1
2022-09-14	13:43:52	0.728868	3.24215	3.2586	781.196	FALSE	1
2022-09-14	13:43:52	0.727443	3.23581	3.2586	756.308	FALSE	1
2022-09-14	13:43:53	0.73528	3.27067	3.27333	784.466	FALSE	1
2022-09-14	13:43:53	0.734109	3.26546	3.27333	759.573	FALSE	1
2022-09-14	13:43:53	0.737926	3.28244	3.27333	787.749	FALSE	1
2022-09-14	13:43:53	0.736196	3.27475	3.27333	762.848	FALSE	1
2022-09-14	13:43:54	0.729224	3.24373	3.24362	790.992	FALSE	1
2022-09-14	13:43:54	0.728715	3.24147	3.24362	766.089	FALSE	1
2022-09-14	13:43:54	0.731565	3.25415	3.24362	794.247	FALSE	1
2022-09-14	13:43:54	0.72729	3.23513	3.24362	769.324	FALSE	1
2022-09-14	13:43:55	0.733244	3.26162	3.25092	797.508	FALSE	1
2022-09-14	13:43:55	0.731565	3.25415	3.25092	772.579	FALSE	1
2022-09-14	13:43:55	0.729936	3.2469	3.25092	800.755	FALSE	1
2022-09-14	13:43:55	0.728613	3.24102	3.25092	775.82	FALSE	1
2022-09-14	13:43:56	0.725611	3.22766	3.23377	803.983	FALSE	1
2022-09-14	13:43:56	0.729784	3.24623	3.23377	779.066	FALSE	1
2022-09-14	13:43:56	0.72556	3.22744	3.23377	807.21	FALSE	1
2022-09-14	13:43:57	0.727239	3.2349	3.2469	782.301	FALSE	1
2022-09-14	13:43:57	0.723779	3.21951	3.2469	810.43	FALSE	1
2022-09-14	13:43:57	0.734568	3.26751	3.2469	785.568	FALSE	1
2022-09-14	13:43:57	0.73416	3.26569	3.2469	813.695	FALSE	1
2022-09-14	13:43:58	0.732837	3.25981	3.26275	788.828	FALSE	1
2022-09-14	13:43:58	0.732939	3.26026	3.26275	816.956	FALSE	1
2022-09-14	13:43:58	0.734924	3.26909	3.26275	792.097	FALSE	1
2022-09-14	13:43:58	0.733295	3.26184	3.26275	820.218	FALSE	1
2022-09-14	13:43:59	0.731107	3.25211	3.24826	795.349	FALSE	1
2022-09-14	13:43:59	0.726374	3.23106	3.24826	823.449	FALSE	1
2022-09-14	13:43:59	0.731412	3.25347	3.24826	798.603	FALSE	1
2022-09-14	13:43:59	0.732074	3.25641	3.24826	826.705	FALSE	1
2022-09-14	13:44:00	0.72958	3.24532	3.2417	801.848	FALSE	1
2022-09-14	13:44:00	0.726425	3.23128	3.2417	829.936	FALSE	1
2022-09-14	13:44:00	0.730293	3.24849	3.2417	805.096	FALSE	1
2022-09-14	13:44:01	0.733651	3.26343	3.27028	833.2	FALSE	1
2022-09-14	13:44:01	0.739962	3.2915	3.27028	808.388	FALSE	1
2022-09-14	13:44:01	0.732175	3.25686	3.27028	836.457	FALSE	1
2022-09-14	13:44:01	0.734975	3.26932	3.27028	811.657	FALSE	1
2022-09-14	13:44:02	0.726374	3.23106	3.24039	839.688	FALSE	1
2022-09-14	13:44:02	0.730445	3.24917	3.24039	814.906	FALSE	1
2022-09-14	13:44:02	0.728562	3.24079	3.24039	842.928	FALSE	1
2022-09-14	13:44:02	0.728512	3.24057	3.24039	818.147	FALSE	1
2022-09-14	13:44:03	0.731412	3.25347	3.24826	846.182	FALSE	1
2022-09-14	13:44:03	0.731361	3.25324	3.24826	821.4	FALSE	1
2022-09-14	13:44:03	0.727952	3.23808	3.24826	849.42	FALSE	1
2022-09-14	13:44:04	0.729682	3.24577	3.25409	824.646	FALSE	1
2022-09-14	13:44:04	0.730801	3.25075	3.25409	852.671	FALSE	1
2022-09-14	13:44:04	0.728308	3.23966	3.25409	827.886	FALSE	1
2022-09-14	13:44:04	0.737417	3.28018	3.25409	855.951	FALSE	1
2022-09-14	13:44:05	0.731005	3.25166	3.24436	831.137	FALSE	1
2022-09-14	13:44:05	0.73131	3.25301	3.24436	859.204	FALSE	1
2022-09-14	13:44:05	0.72902	3.24283	3.24436	834.38	FALSE	1
2022-09-14	13:44:05	0.72612	3.22993	3.24436	862.434	FALSE	1
2022-09-14	13:44:06	0.737265	3.2795	3.25545	837.66	FALSE	1
2022-09-14	13:44:06	0.732888	3.26003	3.25545	865.694	FALSE	1
2022-09-14	13:44:06	0.72897	3.2426	3.25545	840.902	FALSE	1
2022-09-14	13:44:06	0.728308	3.23966	3.25545	868.934	FALSE	1
2022-09-14	13:44:07	0.730445	3.24917	3.24343	844.151	FALSE	1
2022-09-14	13:44:07	0.728766	3.2417	3.24343	872.175	FALSE	1
2022-09-14	13:44:07	0.728257	3.23943	3.24343	847.391	FALSE	1
2022-09-14	13:44:08	0.739198	3.2881	3.26767	875.463	FALSE	1
2022-09-14	13:44:08	0.73416	3.26569	3.26767	850.657	FALSE	1
2022-09-14	13:44:08	0.730903	3.2512	3.26767	878.715	FALSE	1
2022-09-14	13:44:08	0.73416	3.26569	3.26767	853.922	FALSE	1
2022-09-14	13:44:09	0.736094	3.27429	3.25466	881.989	FALSE	1
2022-09-14	13:44:09	0.728359	3.23989	3.25466	857.162	FALSE	1
2022-09-14	13:44:09	0.728003	3.2383	3.25466	885.227	FALSE	1
2022-09-14	13:44:09	0.734262	3.26614	3.25466	860.428	FALSE	1
2022-09-14	13:44:10	0.723066	3.21634	3.25194	888.443	FALSE	1
2022-09-14	13:44:10	0.731921	3.25573	3.25194	863.684	FALSE	1
2022-09-14	13:44:10	0.732125	3.25664	3.25194	891.7	FALSE	1
2022-09-14	13:44:10	0.737163	3.27905	3.25194	866.963	FALSE	1
2022-09-14	13:44:11	0.730547	3.24962	3.24358	894.95	FALSE	1
2022-09-14	13:44:11	0.729071	3.24305	3.24358	870.206	FALSE	1
2022-09-14	13:44:11	0.727952	3.23808	3.24358	898.188	FALSE	1
2022-09-14	13:44:12	0.728664	3.24124	3.24843	873.447	FALSE	1
2022-09-14	13:44:12	0.73528	3.27067	3.24843	901.458	FALSE	1
2022-09-14	13:44:12	0.725662	3.22789	3.24843	876.675	FALSE	1
2022-09-14	13:44:12	0.731514	3.25392	3.24843	904.712	FALSE	1
2022-09-14	13:44:13	0.723219	3.21702	3.26315	879.892	FALSE	1
2022-09-14	13:44:13	0.734822	3.26864	3.26315	907.981	FALSE	1
2022-09-14	13:44:13	0.742659	3.3035	3.26315	883.196	FALSE	1
2022-09-14	13:44:13	0.733651	3.26343	3.26315	911.244	FALSE	1
2022-09-14	13:44:14	0.723728	3.21929	3.24147	886.415	FALSE	1
2022-09-14	13:44:14	0.733295	3.26184	3.24147	914.506	FALSE	1
2022-09-14	13:44:14	0.725916	3.22902	3.24147	889.644	FALSE	1
2022-09-14	13:44:14	0.731921	3.25573	3.24147	917.762	FALSE	1
2022-09-14	13:44:15	0.732939	3.26026	3.24162	892.904	FALSE	1
2022-09-14	13:44:15	0.733142	3.26116	3.24162	921.023	FALSE	1
2022-09-14	13:44:15	0.720165	3.20344	3.24162	896.108	FALSE	1
2022-09-14	13:44:16	0.73243	3.258	3.24475	924.281	FALSE	1
2022-09-14	13:44:16	0.727697	3.23694	3.24475	899.345	FALSE	1
2022-09-14	13:44:16	0.727188	3.23468	3.24475	927.516	FALSE	1
2022-09-14	13:44:16	0.730496	3.24939	3.24475	902.594	FALSE	1
2022-09-14	13:44:17	0.732939	3.26026	3.25256	930.776	FALSE	1
2022-09-14	13:44:17	0.731158	3.25234	3.25256	905.846	FALSE	1
2022-09-14	13:44:17	0.729224	3.24373	3.25256	934.02	FALSE	1
2022-09-14	13:44:17	0.731514	3.25392	3.25256	909.1	FALSE	1
2022-09-14	13:44:18	0.726018	3.22947	3.23508	937.249	FALSE	1
2022-09-14	13:44:18	0.725458	3.22698	3.23508	912.327	FALSE	1
2022-09-14	13:44:18	0.725153	3.22563	3.23508	940.475	FALSE	1
2022-09-14	13:44:18	0.732481	3.25822	3.23508	915.586	FALSE	1
2022-09-14	13:44:19	0.721234	3.20819	3.24004	943.683	FALSE	1
2022-09-14	13:44:19	0.728613	3.24102	3.24004	918.827	FALSE	1
2022-09-14	13:44:19	0.735331	3.2709	3.24004	946.954	FALSE	1
2022-09-14	13:44:20	0.731616	3.25437	3.26965	922.081	FALSE	1
2022-09-14	13:44:20	0.737366	3.27995	3.26965	950.234	FALSE	1
2022-09-14	13:44:20	0.734415	3.26682	3.26965	925.348	FALSE	1
2022-09-14	13:44:20	0.736807	3.27746	3.26965	953.511	FALSE	1
2022-09-14	13:44:21	0.73528	3.27067	3.24928	928.618	FALSE	1
2022-09-14	13:44:21	0.726934	3.23355	3.24928	956.745	FALSE	1
2022-09-14	13:44:21	0.729682	3.24577	3.24928	931.864	FALSE	1
2022-09-14	13:44:21	0.729987	3.24713	3.24928	959.992	FALSE	1
2022-09-14	13:44:22	0.725916	3.22902	1.5537	935.093	FALSE	1
2022-09-14	13:44:22	0.729936	3.2469	1.5537	963.239	FALSE	1
2022-09-14	13:44:22	0.727036	3.234	1.5537	938.327	FALSE	1
2022-09-14	13:44:22	-0.785737	-3.49512	1.5537	963.239	FALSE	1
2022-09-14	13:44:23	-1.98314	-8.8214	-0.787788	938.327	FALSE	1
2022-09-14	13:44:23	0.724033	3.22064	-0.787788	966.46	FALSE	1
2022-09-14	13:44:23	0.727799	3.2374	-0.787788	941.565	FALSE	1
2022-09-14	13:44:24	0.719555	3.20072	2.35772	969.66	FALSE	1
2022-09-14	13:44:24	-0.063702	-0.283359	2.35772	941.565	FALSE	1
2022-09-14	13:44:24	0.733499	3.26275	2.35772	972.923	FALSE	1
2022-09-14	13:44:24	0.730801	3.25075	2.35772	944.815	FALSE	1
2022-09-14	13:44:25	0.733448	3.26252	3.24979	976.186	FALSE	1
2022-09-14	13:44:25	0.730496	3.24939	3.24979	948.065	FALSE	1
2022-09-14	13:44:25	0.733448	3.26252	3.24979	979.448	FALSE	1
2022-09-14	13:44:25	0.724949	3.22472	3.24979	951.29	FALSE	1
2022-09-14	13:44:26	0.667646	2.96982	2.57113	982.418	FALSE	1
2022-09-14	13:44:26	0.732939	3.26026	2.57113	954.55	FALSE	1
2022-09-14	13:44:26	0.437061	1.94413	2.57113	984.362	FALSE	1
2022-09-14	13:44:26	0.474415	2.11029	2.57113	956.66	FALSE	1
2022-09-14	13:44:27	0.732735	3.25935	3.24947	987.622	FALSE	1
2022-09-14	13:44:27	0.730649	3.25007	3.24947	959.91	FALSE	1
2022-09-14	13:44:27	0.728155	3.23898	3.24947	990.86	FALSE	1
2022-09-14	13:44:28	0.730649	3.25007	1.21392	963.16	FALSE	1
2022-09-14	13:44:28	0.730038	3.24736	1.21392	994.108	FALSE	1
2022-09-14	13:44:28	0.724695	3.22359	1.21392	966.384	FALSE	1
2022-09-14	13:44:28	-1.09378	-4.86535	1.21392	994.108	FALSE	1
2022-09-14	13:44:29	-1.55429	-6.91379	-6.09697	966.384	FALSE	1
2022-09-14	13:44:29	-1.95133	-8.67991	-6.09697	994.108	FALSE	1
2022-09-14	13:44:29	-0.984312	-4.37842	-6.09697	966.384	FALSE	1
2022-09-14	13:44:29	-0.992709	-4.41577	-6.09697	994.108	FALSE	1
2022-09-14	13:44:30	-1.01693	-4.52351	8.15118	966.384	FALSE	1
2022-09-14	13:44:30	-0.830928	-3.69613	8.15118	994.108	FALSE	1
2022-09-14	13:44:30	1.46953	6.53676	8.15118	972.921	FALSE	1
2022-09-14	13:44:30	7.7082	34.2876	8.15118	1028.4	1	2
2022-09-14	13:44:31	3.33441	14.8321	13.6981	987.753	1	3
2022-09-14	13:44:31	2.82454	12.5641	13.6981	1040.96	FALSE	3

## Sheet: Reggie_prong_2022914133917 (3)
Date	Time	Lbs	Newtons	Total force x time		total steps > 13.345	**GoPro Fitting: 13:18
2022-09-14	13:39:31	0.480674	2.13813	2.13813	FALSE	0
2022-09-14	13:39:31	0.551412	2.45279	2.45279	FALSE	0
2022-09-14	13:39:31	0.50902	2.26422	4.40236	FALSE	0
2022-09-14	13:39:31	0.553601	2.46253	4.91532	FALSE	0
2022-09-14	13:39:32	0.490547	2.18205	6.58441	FALSE	0
2022-09-14	13:39:32	0.547494	2.43536	7.35068	FALSE	0
2022-09-14	13:39:32	0.522201	2.32285	8.90726	FALSE	0
2022-09-14	13:39:33	0.524338	2.33236	9.68304	FALSE	0
2022-09-14	13:39:33	0.512023	2.27758	11.1848	FALSE	0
2022-09-14	13:39:33	0.525763	2.3387	12.0217	FALSE	0
2022-09-14	13:39:33	0.527443	2.34617	13.531	FALSE	0
2022-09-14	13:39:34	0.530191	2.3584	14.3801	FALSE	0
2022-09-14	13:39:34	0.524084	2.33123	15.8622	FALSE	0
2022-09-14	13:39:34	0.511005	2.27305	16.6532	FALSE	0
2022-09-14	13:39:34	0.572684	2.54741	18.4097	FALSE	0
2022-09-14	13:39:35	0.541947	2.41069	19.0639	FALSE	0
2022-09-14	13:39:35	0.560674	2.49399	20.9036	FALSE	0
2022-09-14	13:39:35	0.566985	2.52206	21.5859	FALSE	0
2022-09-14	13:39:35	0.509377	2.26581	23.1695	FALSE	0
2022-09-14	13:39:36	0.451361	2.00774	23.5937	FALSE	0
2022-09-14	13:39:36	0.588613	2.61827	25.7877	FALSE	0
2022-09-14	13:39:36	0.365051	1.62382	25.2175	FALSE	0
2022-09-14	13:39:37	0.382201	1.70011	27.4878	FALSE	0
2022-09-14	13:39:37	0.542964	2.41521	27.6327	FALSE	0
2022-09-14	13:39:37	0.669936	2.98001	30.4678	FALSE	0
2022-09-14	13:39:37	0.572888	2.54832	30.181	FALSE	0
2022-09-14	13:39:38	0.618333	2.75047	33.2183	FALSE	0
2022-09-14	13:39:38	0.477367	2.12342	32.3045	FALSE	0
2022-09-14	13:39:38	0.613346	2.72829	35.9466	FALSE	0
2022-09-14	13:39:38	0.435229	1.93599	34.2404	FALSE	0
2022-09-14	13:39:39	0.682608	3.03638	38.983	FALSE	0
2022-09-14	13:39:39	0.479809	2.13429	36.3747	FALSE	0
2022-09-14	13:39:39	0.671718	2.98794	41.9709	FALSE	0
2022-09-14	13:39:39	0.575331	2.55919	38.9339	FALSE	0
2022-09-14	13:39:40	0.52215	2.32263	44.2935	FALSE	0
2022-09-14	13:39:40	0.497621	2.21352	41.1474	FALSE	0
2022-09-14	13:39:40	0.663677	2.95217	47.2457	FALSE	0
2022-09-14	13:39:41	0.562099	2.50033	43.6478	FALSE	0
2022-09-14	13:39:41	0.467087	2.0777	49.3234	FALSE	0
2022-09-14	13:39:41	0.637468	2.83559	46.4834	FALSE	0
2022-09-14	13:39:41	0.272379	1.2116	50.535	FALSE	0
2022-09-14	13:39:42	0.300573	1.33701	47.8204	FALSE	0
2022-09-14	13:39:42	0.25355	1.12784	51.6628	FALSE	0
2022-09-14	13:39:42	0.331616	1.47509	49.2955	FALSE	0
2022-09-14	13:39:42	0.127443	0.566892	52.2297	FALSE	0
2022-09-14	13:39:43	0.301947	1.34312	50.6386	FALSE	0
2022-09-14	13:39:43	0.167341	0.744366	52.9741	FALSE	0
2022-09-14	13:39:43	0.385509	1.71482	52.3534	FALSE	0
2022-09-14	13:39:44	0.119453	0.531351	53.5054	FALSE	0
2022-09-14	13:39:44	0.253753	1.12874	53.4821	FALSE	0
2022-09-14	13:39:44	0.180674	0.803674	54.3091	FALSE	0
2022-09-14	13:39:44	0.224848	1.00017	54.4823	FALSE	0
2022-09-14	13:39:45	0.228766	1.0176	55.3267	FALSE	0
2022-09-14	13:39:45	0.447137	1.98895	56.4713	FALSE	0
2022-09-14	13:39:45	0.661438	2.94221	58.2689	FALSE	0
2022-09-14	13:39:45	0.968766	4.30926	60.7805	FALSE	0
2022-09-14	13:39:46	0.904847	4.02494	62.2939	FALSE	0
2022-09-14	13:39:46	0.958231	4.2624	65.0429	FALSE	0
2022-09-14	13:39:46	0.551056	2.45121	64.7451	FALSE	0
2022-09-14	13:39:46	0.444796	1.97854	67.0215	FALSE	0
2022-09-14	13:39:47	0.542608	2.41363	67.1587	FALSE	0
2022-09-14	13:39:47	0.511463	2.27509	69.2966	FALSE	0
2022-09-14	13:39:47	1.45385	6.46702	73.6257	FALSE	0
2022-09-14	13:39:48	1.18989	5.29287	74.5894	FALSE	0
2022-09-14	13:39:48	1.89182	8.41519	82.0409	FALSE	0
2022-09-14	13:39:48	0.687748	3.05924	77.6487	FALSE	0
2022-09-14	13:39:48	0.58159	2.58703	84.6279	FALSE	0
2022-09-14	13:39:49	0.554567	2.46682	80.1155	FALSE	0
2022-09-14	13:39:49	0.336145	1.49524	86.1232	FALSE	0
2022-09-14	13:39:49	0.517519	2.30203	82.4175	FALSE	0
2022-09-14	13:39:49	0.34159	1.51946	87.6426	FALSE	0
2022-09-14	13:39:50	0.283422	1.26072	83.6782	FALSE	0
2022-09-14	13:39:50	0.291718	1.29762	88.9403	FALSE	0
2022-09-14	13:39:50	-0.00726439	-0.0323135	83.6782	FALSE	0
2022-09-14	13:39:50	0.21701	0.965304	89.9056	FALSE	0
2022-09-14	13:39:51	0.0638297	0.283927	83.9622	FALSE	0
2022-09-14	13:39:51	-0.265738	-1.18206	89.9056	FALSE	0
2022-09-14	13:39:51	-0.514185	-2.2872	83.9622	FALSE	0
2022-09-14	13:39:52	-0.573473	-2.55092	89.9056	FALSE	0
2022-09-14	13:39:52	-0.47103	-2.09524	83.9622	FALSE	0
2022-09-14	13:39:52	-0.342328	-1.52274	89.9056	FALSE	0
2022-09-14	13:39:52	-0.382938	-1.70338	83.9622	FALSE	0
2022-09-14	13:39:53	-0.312964	-1.39213	89.9056	FALSE	0
2022-09-14	13:39:53	-0.377188	-1.67781	83.9622	FALSE	0
2022-09-14	13:39:53	-0.358206	-1.59337	89.9056	FALSE	0
2022-09-14	13:39:53	-0.364262	-1.62031	83.9622	FALSE	0
2022-09-14	13:39:54	-0.295356	-1.3138	89.9056	FALSE	0
2022-09-14	13:39:54	-0.326857	-1.45393	83.9622	FALSE	0
2022-09-14	13:39:54	-0.336374	-1.49626	89.9056	FALSE	0
2022-09-14	13:39:54	-0.247366	-1.10033	83.9622	FALSE	0
2022-09-14	13:39:55	-0.264822	-1.17798	89.9056	FALSE	0
2022-09-14	13:39:55	-0.266857	-1.18703	83.9622	FALSE	0
2022-09-14	13:39:55	-0.352608	-1.56847	89.9056	FALSE	0
2022-09-14	13:39:56	-0.362786	-1.61374	83.9622	FALSE	0
2022-09-14	13:39:56	-0.626857	-2.78839	89.9056	FALSE	0
2022-09-14	13:39:56	-0.451946	-2.01035	83.9622	FALSE	0
2022-09-14	13:39:56	-0.388231	-1.72693	89.9056	FALSE	0
2022-09-14	13:39:57	0.124339	0.553085	84.5153	FALSE	0
2022-09-14	13:39:57	1.44678	6.43557	96.3411	FALSE	0
2022-09-14	13:39:57	1.37447	6.11392	90.6292	FALSE	0
2022-09-14	13:39:57	1.06291	4.72804	101.069	FALSE	0
2022-09-14	13:39:58	2.49085	11.0798	101.709	FALSE	0
2022-09-14	13:39:58	2.60861	11.6036	112.673	FALSE	0
2022-09-14	13:39:58	1.26169	5.61225	107.321	FALSE	0
2022-09-14	13:39:58	0.380216	1.69128	114.364	FALSE	0
2022-09-14	13:39:59	0.464695	2.06706	109.388	FALSE	0
2022-09-14	13:39:59	0.589835	2.6237	116.988	FALSE	0
2022-09-14	13:39:59	0.598791	2.66354	112.052	FALSE	0
2022-09-14	13:40:00	0.698689	3.10791	120.096	FALSE	0
2022-09-14	13:40:00	0.687799	3.05947	115.111	FALSE	0
2022-09-14	13:40:00	0.79757	3.54775	123.643	FALSE	0
2022-09-14	13:40:00	0.667443	2.96892	118.08	FALSE	0
2022-09-14	13:40:01	0.711056	3.16292	126.806	FALSE	0
2022-09-14	13:40:01	0.69584	3.09524	121.175	FALSE	0
2022-09-14	13:40:01	0.732634	3.2589	130.065	FALSE	0
2022-09-14	13:40:01	0.683524	3.04045	124.216	FALSE	0
2022-09-14	13:40:02	0.656807	2.92161	132.987	FALSE	0
2022-09-14	13:40:02	0.680165	3.02551	127.241	FALSE	0
2022-09-14	13:40:02	0.625153	2.78081	135.768	FALSE	0
2022-09-14	13:40:02	0.664898	2.9576	130.199	FALSE	0
2022-09-14	13:40:03	0.645356	2.87067	138.638	FALSE	0
2022-09-14	13:40:03	0.658893	2.93089	133.13	FALSE	0
2022-09-14	13:40:03	0.574262	2.55443	141.193	FALSE	0
2022-09-14	13:40:04	0.426629	1.89773	135.028	FALSE	0
2022-09-14	13:40:04	0.434008	1.93055	143.123	FALSE	0
2022-09-14	13:40:04	0.457417	2.03468	137.062	FALSE	0
2022-09-14	13:40:04	0.379453	1.68788	144.811	FALSE	0
2022-09-14	13:40:05	0.339199	1.50882	138.571	FALSE	0
2022-09-14	13:40:05	0.206374	0.917993	145.729	FALSE	0
2022-09-14	13:40:05	0.28327	1.26004	139.831	FALSE	0
2022-09-14	13:40:05	0.189122	0.841252	146.57	FALSE	0
2022-09-14	13:40:06	0.0479009	0.213073	140.044	FALSE	0
2022-09-14	13:40:06	-0.211844	-0.942324	146.57	FALSE	0
2022-09-14	13:40:06	-0.311386	-1.38511	140.044	FALSE	0
2022-09-14	13:40:06	-0.690724	-3.07248	146.57	FALSE	0
2022-09-14	13:40:07	-0.799427	-3.55601	140.044	FALSE	0
2022-09-14	13:40:07	-0.966246	-4.29806	146.57	FALSE	0
2022-09-14	13:40:07	-0.67449	-3.00027	140.044	FALSE	0
2022-09-14	13:40:08	-0.566806	-2.52127	146.57	FALSE	0
2022-09-14	13:40:08	-0.668231	-2.97243	140.044	FALSE	0
2022-09-14	13:40:08	-0.105839	-0.470793	146.57	FALSE	0
2022-09-14	13:40:08	0.339453	1.50995	141.554	FALSE	0
2022-09-14	13:40:09	0.396349	1.76304	148.333	FALSE	0
2022-09-14	13:40:09	0.546221	2.4297	143.984	FALSE	0
2022-09-14	13:40:09	0.520318	2.31448	150.648	FALSE	0
2022-09-14	13:40:09	0.388461	1.72795	145.712	FALSE	0
2022-09-14	13:40:10	0.489478	2.1773	152.825	FALSE	0
2022-09-14	13:40:10	0.481539	2.14198	147.854	FALSE	0
2022-09-14	13:40:10	0.5764	2.56394	155.389	FALSE	0
2022-09-14	13:40:10	0.431514	1.91946	149.773	FALSE	0
2022-09-14	13:40:11	0.495891	2.20582	157.595	FALSE	0
2022-09-14	13:40:11	0.477774	2.12523	151.899	FALSE	0
2022-09-14	13:40:11	0.474568	2.11097	159.706	FALSE	0
2022-09-14	13:40:12	0.496807	2.2099	154.108	FALSE	0
2022-09-14	13:40:12	0.489784	2.17866	161.885	FALSE	0
2022-09-14	13:40:12	0.487239	2.16734	156.276	FALSE	0
2022-09-14	13:40:12	0.475738	2.11618	164.001	FALSE	0
2022-09-14	13:40:13	0.452379	2.01227	158.288	FALSE	0
2022-09-14	13:40:13	0.438944	1.95251	165.953	FALSE	0
2022-09-14	13:40:13	0.395127	1.7576	160.046	FALSE	0
2022-09-14	13:40:13	0.396196	1.76236	167.716	FALSE	0
2022-09-14	13:40:14	0.4593	2.04306	162.089	FALSE	0
2022-09-14	13:40:14	0.379707	1.68901	169.405	FALSE	0
2022-09-14	13:40:14	0.37986	1.68969	163.778	FALSE	0
2022-09-14	13:40:15	0.489631	2.17798	171.583	FALSE	0
2022-09-14	13:40:15	0.42042	1.87011	165.649	FALSE	0
2022-09-14	13:40:15	0.494109	2.1979	173.781	FALSE	0
2022-09-14	13:40:15	0.25472	1.13305	166.782	FALSE	0
2022-09-14	13:40:16	0.481794	2.14312	175.924	FALSE	0
2022-09-14	13:40:16	0.37126	1.65144	168.433	FALSE	0
2022-09-14	13:40:16	0.658028	2.92704	178.851	FALSE	0
2022-09-14	13:40:16	0.72271	3.21476	171.648	FALSE	0
2022-09-14	13:40:17	1.06011	4.71558	183.566	FALSE	0
2022-09-14	13:40:17	0.966323	4.2984	175.946	FALSE	0
2022-09-14	13:40:17	0.658944	2.93111	186.497	FALSE	0
2022-09-14	13:40:17	0.455331	2.0254	177.972	FALSE	0
2022-09-14	13:40:18	0.410038	1.82393	188.321	FALSE	0
2022-09-14	13:40:18	0.483015	2.14855	180.12	FALSE	0
2022-09-14	13:40:18	0.506527	2.25313	190.575	FALSE	0
2022-09-14	13:40:19	0.225204	1.00175	181.122	FALSE	0
2022-09-14	13:40:19	-0.062786	-0.279285	190.575	FALSE	0
2022-09-14	13:40:19	-0.429096	-1.9087	181.122	FALSE	0
2022-09-14	13:40:19	-0.543702	-2.4185	190.575	FALSE	0
2022-09-14	13:40:20	-0.505229	-2.24736	181.122	FALSE	0
2022-09-14	13:40:20	-0.542328	-2.41238	190.575	FALSE	0
2022-09-14	13:40:20	-0.567722	-2.52534	181.122	FALSE	0
2022-09-14	13:40:20	-0.602786	-2.68131	190.575	FALSE	0
2022-09-14	13:40:21	-0.590216	-2.6254	181.122	FALSE	0
2022-09-14	13:40:21	-0.54416	-2.42053	190.575	FALSE	0
2022-09-14	13:40:21	-0.650317	-2.89274	181.122	FALSE	0
2022-09-14	13:40:21	-0.454949	-2.0237	190.575	FALSE	0
2022-09-14	13:40:22	-0.382226	-1.70022	181.122	FALSE	0
2022-09-14	13:40:22	-0.221666	-0.986015	190.575	FALSE	0
2022-09-14	13:40:22	-0.14243	-0.633557	181.122	FALSE	0
2022-09-14	13:40:23	-0.0113865	-0.0506494	190.575	FALSE	0
2022-09-14	13:40:23	0.231056	1.02778	182.15	FALSE	0
2022-09-14	13:40:23	0.305407	1.35851	191.933	FALSE	0
2022-09-14	13:40:23	0.438232	1.94934	184.099	FALSE	0
2022-09-14	13:40:24	0.402405	1.78998	193.723	FALSE	0
2022-09-14	13:40:24	0.398791	1.7739	185.873	FALSE	0
2022-09-14	13:40:24	0.530089	2.35794	196.081	FALSE	0
2022-09-14	13:40:24	0.394975	1.75693	187.63	FALSE	0
2022-09-14	13:40:25	0.381183	1.69558	197.777	FALSE	0
2022-09-14	13:40:25	0.353397	1.57198	189.202	FALSE	0
2022-09-14	13:40:25	0.322863	1.43616	199.213	FALSE	0
2022-09-14	13:40:26	0.380064	1.6906	190.892	FALSE	0
2022-09-14	13:40:26	0.356908	1.5876	200.8	FALSE	0
2022-09-14	13:40:26	0.437723	1.94708	192.839	FALSE	0
2022-09-14	13:40:26	0.440166	1.95795	202.758	FALSE	0
2022-09-14	13:40:27	0.465153	2.06909	194.909	FALSE	0
2022-09-14	13:40:27	0.515229	2.29184	205.05	FALSE	0
2022-09-14	13:40:27	0.261031	1.16112	196.07	FALSE	0
2022-09-14	13:40:27	0.220674	0.981602	206.032	FALSE	0
2022-09-14	13:40:28	0.204033	0.90758	196.977	FALSE	0
2022-09-14	13:40:28	0.394466	1.75466	207.786	FALSE	0
2022-09-14	13:40:28	0.278232	1.23763	198.215	FALSE	0
2022-09-14	13:40:28	0.499453	2.22167	210.008	FALSE	0
2022-09-14	13:40:29	0.461438	2.05257	200.267	FALSE	0
2022-09-14	13:40:29	0.468104	2.08222	212.09	FALSE	0
2022-09-14	13:40:29	0.473906	2.10803	202.375	FALSE	0
2022-09-14	13:40:29	1.05574	4.69614	216.786	FALSE	0
2022-09-14	13:40:30	0.659148	2.93202	205.308	FALSE	0
2022-09-14	13:40:30	0.575178	2.55851	219.345	FALSE	0
2022-09-14	13:40:30	0.415026	1.84612	207.154	FALSE	0
2022-09-14	13:40:31	0.498537	2.21759	221.562	FALSE	0
2022-09-14	13:40:31	0.512125	2.27803	209.432	FALSE	0
2022-09-14	13:40:31	0.494364	2.19903	223.761	FALSE	0
2022-09-14	13:40:31	0.390598	1.73746	211.169	FALSE	0
2022-09-14	13:40:32	0.348359	1.54957	225.311	FALSE	0
2022-09-14	13:40:32	0.027443	0.122072	211.291	FALSE	0
2022-09-14	13:40:32	-0.199173	-0.885961	225.311	FALSE	0
2022-09-14	13:40:32	-0.255865	-1.13814	211.291	FALSE	0
2022-09-14	13:40:33	0.498232	2.21624	227.527	FALSE	0
2022-09-14	13:40:33	1.59497	7.09475	218.386	FALSE	0
2022-09-14	13:40:33	2.79324	12.4249	239.952	FALSE	0
2022-09-14	13:40:33	2.92342	13.004	231.39	FALSE	0
2022-09-14	13:40:34	4.00347	17.8082	257.76	1	1
2022-09-14	13:40:34	2.95777	13.1568	244.547	FALSE	1
2022-09-14	13:40:34	2.44729	10.886	268.646	FALSE	1
2022-09-14	13:40:35	1.39818	6.21938	250.766	FALSE	1
2022-09-14	13:40:35	0.850038	3.78114	272.428	FALSE	1
2022-09-14	13:40:35	0.513346	2.28347	253.049	FALSE	1
2022-09-14	13:40:35	0.355789	1.58262	274.01	FALSE	1
2022-09-14	13:40:36	0.596858	2.65494	255.704	FALSE	1
2022-09-14	13:40:36	-0.16304	-0.725235	274.01	FALSE	1
2022-09-14	13:40:36	-0.407162	-1.81114	255.704	FALSE	1
2022-09-14	13:40:36	-0.404567	-1.79959	274.01	FALSE	1
2022-09-14	13:40:37	-0.282124	-1.25494	255.704	FALSE	1
2022-09-14	13:40:37	-0.299987	-1.3344	274.01	FALSE	1
2022-09-14	13:40:37	-0.257595	-1.14583	255.704	FALSE	1
2022-09-14	13:40:37	-0.224974	-1.00073	274.01	FALSE	1
2022-09-14	13:40:38	0.0710562	0.316072	256.021	FALSE	1
2022-09-14	13:40:38	0.39701	1.76598	275.776	FALSE	1
2022-09-14	13:40:38	0.795076	3.53666	259.557	FALSE	1
2022-09-14	13:40:39	0.724695	3.22359	279	FALSE	1
2022-09-14	13:40:39	1.95564	8.69908	268.256	FALSE	1
2022-09-14	13:40:39	2.67569	11.902	290.902	FALSE	1
2022-09-14	13:40:39	0.991565	4.41068	272.667	FALSE	1
2022-09-14	13:40:40	0.69925	3.1104	294.012	FALSE	1
2022-09-14	13:40:40	0.188308	0.837632	273.505	FALSE	1
2022-09-14	13:40:40	0.706883	3.14436	297.157	FALSE	1
2022-09-14	13:40:40	0.332176	1.47759	274.982	FALSE	1
2022-09-14	13:40:41	0.525611	2.33802	299.495	FALSE	1
2022-09-14	13:40:41	0.262456	1.16746	276.15	FALSE	1
2022-09-14	13:40:41	0.290751	1.29332	300.788	FALSE	1
2022-09-14	13:40:42	0.109682	0.487887	276.637	FALSE	1
2022-09-14	13:40:42	-0.353524	-1.57255	300.788	FALSE	1
2022-09-14	13:40:42	-0.783345	-3.48448	276.637	FALSE	1
2022-09-14	13:40:42	-0.670673	-2.98329	300.788	FALSE	1
2022-09-14	13:40:43	-0.805483	-3.58295	276.637	FALSE	1
2022-09-14	13:40:43	-0.471692	-2.09818	300.788	FALSE	1
2022-09-14	13:40:43	-0.191488	-0.851777	276.637	FALSE	1
2022-09-14	13:40:43	-0.0490455	-0.218164	300.788	FALSE	1
2022-09-14	13:40:44	0.273702	1.21748	277.855	FALSE	1
2022-09-14	13:40:44	0.208257	0.926369	301.714	FALSE	1
2022-09-14	13:40:44	0.234822	1.04454	278.9	FALSE	1
2022-09-14	13:40:44	0.336145	1.49524	303.21	FALSE	1
2022-09-14	13:40:45	0.338181	1.5043	280.404	FALSE	1
2022-09-14	13:40:45	0.385153	1.71324	304.923	FALSE	1
2022-09-14	13:40:45	0.314059	1.397	281.801	FALSE	1
2022-09-14	13:40:46	0.37299	1.65913	306.582	FALSE	1
2022-09-14	13:40:46	0.190751	0.848499	282.649	FALSE	1
2022-09-14	13:40:46	0.498435	2.21714	308.799	FALSE	1
2022-09-14	13:40:46	0.199758	0.888564	283.538	FALSE	1
2022-09-14	13:40:47	0.443931	1.97469	310.774	FALSE	1
2022-09-14	13:40:47	0.138792	0.617375	284.155	FALSE	1
2022-09-14	13:40:47	0.267748	1.191	311.965	FALSE	1
2022-09-14	13:40:47	0.0820485	0.364968	284.52	FALSE	1
2022-09-14	13:40:48	0.371361	1.65189	313.617	FALSE	1
2022-09-14	13:40:48	0.315382	1.40288	285.923	FALSE	1
2022-09-14	13:40:48	0.337774	1.50249	315.119	FALSE	1
2022-09-14	13:40:48	0.405	1.80152	287.725	FALSE	1
2022-09-14	13:40:49	0.354262	1.57583	316.695	FALSE	1
2022-09-14	13:40:49	0.43243	1.92354	289.648	FALSE	1
2022-09-14	13:40:49	0.310903	1.38296	318.078	FALSE	1
2022-09-14	13:40:50	0.454059	2.01975	291.668	FALSE	1
2022-09-14	13:40:50	0.282608	1.2571	319.335	FALSE	1
2022-09-14	13:40:50	0.415687	1.84906	293.517	FALSE	1
2022-09-14	13:40:50	0.28841	1.28291	320.618	FALSE	1
2022-09-14	13:40:51	0.530751	2.36089	295.878	FALSE	1
2022-09-14	13:40:51	0.203982	0.907353	321.525	FALSE	1
2022-09-14	13:40:51	0.52444	2.33281	298.211	FALSE	1
2022-09-14	13:40:51	0.261336	1.16247	322.688	FALSE	1
2022-09-14	13:40:52	0.509428	2.26604	300.477	FALSE	1
2022-09-14	13:40:52	0.190598	0.847818	323.536	FALSE	1
2022-09-14	13:40:52	0.188817	0.839896	301.317	FALSE	1
2022-09-14	13:40:52	0.114211	0.508033	324.044	FALSE	1
2022-09-14	13:40:53	0.215585	0.958965	302.276	FALSE	1
2022-09-14	13:40:53	0.054415	0.242049	324.286	FALSE	1
2022-09-14	13:40:53	0.320776	1.42688	303.702	FALSE	1
2022-09-14	13:40:54	0.297417	1.32297	325.609	FALSE	1
2022-09-14	13:40:54	0.316298	1.40696	305.109	FALSE	1
2022-09-14	13:40:54	0.534822	2.379	327.988	FALSE	1
2022-09-14	13:40:54	0.435992	1.93938	307.049	FALSE	1
2022-09-14	13:40:55	1.11167	4.94493	332.932	FALSE	1
2022-09-14	13:40:55	0.42841	1.90565	308.954	FALSE	1
2022-09-14	13:40:55	0.396909	1.76553	334.698	FALSE	1
2022-09-14	13:40:55	0.19986	0.889017	309.843	FALSE	1
2022-09-14	13:40:56	0.421132	1.87328	336.571	FALSE	1
2022-09-14	13:40:56	0.192277	0.855287	310.699	FALSE	1
2022-09-14	13:40:56	0.373143	1.65981	338.231	FALSE	1
2022-09-14	13:40:56	0.256959	1.14301	311.842	FALSE	1
2022-09-14	13:40:57	0.378588	1.68404	339.915	FALSE	1
2022-09-14	13:40:57	0.266323	1.18466	313.026	FALSE	1
2022-09-14	13:40:57	0.364135	1.61975	341.535	FALSE	1
2022-09-14	13:40:58	0.30042	1.33633	314.363	FALSE	1
2022-09-14	13:40:58	0.406374	1.80763	343.343	FALSE	1
2022-09-14	13:40:58	0.292888	1.30282	315.666	FALSE	1
2022-09-14	13:40:58	0.413041	1.83729	345.18	FALSE	1
2022-09-14	13:40:59	0.306679	1.36417	317.03	FALSE	1
2022-09-14	13:40:59	0.449122	1.99778	347.178	FALSE	1
2022-09-14	13:40:59	0.218842	0.973453	318.003	FALSE	1
2022-09-14	13:40:59	0.416654	1.85336	349.031	FALSE	1
2022-09-14	13:41:00	0.268817	1.19575	319.199	FALSE	1
2022-09-14	13:41:00	0.375738	1.67136	350.702	FALSE	1
2022-09-14	13:41:00	0.329682	1.46649	320.665	FALSE	1
2022-09-14	13:41:00	0.662608	2.94741	353.65	FALSE	1
2022-09-14	13:41:01	0.350242	1.55795	322.223	FALSE	1
2022-09-14	13:41:01	0.559249	2.48765	356.137	FALSE	1
2022-09-14	13:41:01	0.698028	3.10497	325.328	FALSE	1
2022-09-14	13:41:02	0.733601	3.2632	359.401	FALSE	1
2022-09-14	13:41:02	0.720979	3.20706	328.535	FALSE	1
2022-09-14	13:41:02	0.726425	3.23128	362.632	FALSE	1
2022-09-14	13:41:02	0.722303	3.21295	331.748	FALSE	1
2022-09-14	13:41:03	0.731259	3.25279	365.885	FALSE	1
2022-09-14	13:41:03	0.721285	3.20842	334.957	FALSE	1
2022-09-14	13:41:03	0.733957	3.26479	369.149	FALSE	1
2022-09-14	13:41:03	0.732786	3.25958	338.216	FALSE	1
2022-09-14	13:41:04	0.720776	3.20616	372.356	FALSE	1
2022-09-14	13:41:04	0.724695	3.22359	341.44	FALSE	1
2022-09-14	13:41:04	0.727799	3.2374	375.593	FALSE	1
2022-09-14	13:41:05	0.722965	3.21589	344.656	FALSE	1
2022-09-14	13:41:05	0.723117	3.21657	378.81	FALSE	1
2022-09-14	13:41:05	0.727392	3.23559	347.891	FALSE	1
2022-09-14	13:41:05	0.723422	3.21793	382.027	FALSE	1
2022-09-14	13:41:06	0.722099	3.21204	351.103	FALSE	1
2022-09-14	13:41:06	0.725204	3.22585	385.253	FALSE	1
2022-09-14	13:41:06	0.728868	3.24215	354.346	FALSE	1
2022-09-14	13:41:06	0.726679	3.23241	388.486	FALSE	1
2022-09-14	13:41:07	0.718639	3.19665	357.542	FALSE	1
2022-09-14	13:41:07	0.723779	3.21951	391.705	FALSE	1
2022-09-14	13:41:07	0.726374	3.23106	360.773	FALSE	1
2022-09-14	13:41:07	0.729886	3.24668	394.952	FALSE	1
2022-09-14	13:41:08	0.726476	3.23151	364.005	FALSE	1
2022-09-14	13:41:08	0.727952	3.23808	398.19	FALSE	1
2022-09-14	13:41:08	0.729428	3.24464	367.249	FALSE	1
2022-09-14	13:41:09	0.724338	3.222	401.412	FALSE	1
2022-09-14	13:41:09	0.726272	3.2306	370.48	FALSE	1
2022-09-14	13:41:09	0.725051	3.22517	404.637	FALSE	1
2022-09-14	13:41:09	0.724491	3.22268	373.703	FALSE	1
2022-09-14	13:41:10	0.728868	3.24215	407.879	FALSE	1
2022-09-14	13:41:10	0.725305	3.2263	376.929	FALSE	1
2022-09-14	13:41:10	0.728359	3.23989	411.119	FALSE	1
2022-09-14	13:41:10	0.721946	3.21136	380.14	FALSE	1
2022-09-14	13:41:11	0.730242	3.24826	414.367	FALSE	1
2022-09-14	13:41:11	0.731412	3.25347	383.394	FALSE	1
2022-09-14	13:41:11	0.730598	3.24985	417.617	FALSE	1
2022-09-14	13:41:11	0.72729	3.23513	386.629	FALSE	1
2022-09-14	13:41:12	0.723372	3.2177	420.835	FALSE	1
2022-09-14	13:41:12	0.724288	3.22178	389.851	FALSE	1
2022-09-14	13:41:12	0.726629	3.23219	424.067	FALSE	1
2022-09-14	13:41:13	0.727239	3.2349	393.086	FALSE	1
2022-09-14	13:41:13	0.725916	3.22902	427.296	FALSE	1
2022-09-14	13:41:13	0.721946	3.21136	396.297	FALSE	1
2022-09-14	13:41:13	0.732481	3.25822	430.554	FALSE	1
2022-09-14	13:41:14	0.728054	3.23853	399.536	FALSE	1
2022-09-14	13:41:14	0.729275	3.24396	433.798	FALSE	1
2022-09-14	13:41:14	0.725662	3.22789	402.763	FALSE	1
2022-09-14	13:41:14	0.706272	3.14164	436.94	FALSE	1
2022-09-14	13:41:15	0.367188	1.63333	404.397	FALSE	1
2022-09-14	13:41:15	0.258995	1.15206	438.092	FALSE	1
2022-09-14	13:41:15	0.431005	1.9172	406.314	FALSE	1
2022-09-14	13:41:15	0.336349	1.49615	439.588	FALSE	1
2022-09-14	13:41:16	0.433092	1.92648	408.24	FALSE	1
2022-09-14	13:41:16	0.2793	1.24238	440.831	FALSE	1
2022-09-14	13:41:16	0.37645	1.67452	409.915	FALSE	1
2022-09-14	13:41:17	0.282608	1.2571	442.088	FALSE	1
2022-09-14	13:41:17	0.251667	1.11947	411.034	FALSE	1
2022-09-14	13:41:17	0.276298	1.22903	443.317	FALSE	1
2022-09-14	13:41:17	0.169682	0.754779	411.789	FALSE	1
2022-09-14	13:41:18	0.112328	0.499657	443.816	FALSE	1
2022-09-14	13:41:18	0.255178	1.13508	412.924	FALSE	1
2022-09-14	13:41:18	0.259606	1.15478	444.971	FALSE	1
2022-09-14	13:41:18	0.463728	2.06275	414.987	FALSE	1
2022-09-14	13:41:19	0.234568	1.04341	446.015	FALSE	1
2022-09-14	13:41:19	0.300318	1.33587	416.323	FALSE	1
2022-09-14	13:41:19	0.463677	2.06253	448.077	FALSE	1
2022-09-14	13:41:19	0.358283	1.59371	417.917	FALSE	1
2022-09-14	13:41:20	0.531667	2.36496	450.442	FALSE	1
2022-09-14	13:41:20	0.430751	1.91607	419.833	FALSE	1
2022-09-14	13:41:20	0.414211	1.84249	452.285	FALSE	1
2022-09-14	13:41:21	0.47986	2.13451	421.967	FALSE	1
2022-09-14	13:41:21	0.433957	1.93033	454.215	FALSE	1
2022-09-14	13:41:21	0.478791	2.12976	424.097	FALSE	1
2022-09-14	13:41:21	0.392939	1.74787	455.963	FALSE	1
2022-09-14	13:41:22	0.282863	1.25823	425.355	FALSE	1
2022-09-14	13:41:22	0.300929	1.33859	457.301	FALSE	1
2022-09-14	13:41:22	0.322863	1.43616	426.791	FALSE	1
2022-09-14	13:41:22	0.328817	1.46264	458.764	FALSE	1
2022-09-14	13:41:23	0.567188	2.52297	429.314	FALSE	1
2022-09-14	13:41:23	0.443677	1.97356	460.738	FALSE	1
2022-09-14	13:41:23	0.378384	1.68313	430.997	FALSE	1
2022-09-14	13:41:23	0.567494	2.52433	463.262	FALSE	1
2022-09-14	13:41:24	0.446883	1.98782	432.985	FALSE	1
2022-09-14	13:41:24	0.288766	1.28449	464.546	FALSE	1
2022-09-14	13:41:24	0.160522	0.714034	433.699	FALSE	1
2022-09-14	13:41:25	0.0396058	0.176175	464.723	FALSE	1
2022-09-14	13:41:25	-0.0591219	-0.262986	433.699	FALSE	1
2022-09-14	13:41:25	0.0698349	0.31064	465.033	FALSE	1
2022-09-14	13:41:25	0.0291733	0.129769	433.829	FALSE	1
2022-09-14	13:41:26	0.351005	1.56134	466.595	FALSE	1
2022-09-14	13:41:26	-0.0215646	-0.0959237	433.829	FALSE	1
2022-09-14	13:41:26	-0.0182567	-0.0812095	466.595	FALSE	1
2022-09-14	13:41:26	0.400674	1.78228	435.611	FALSE	1
2022-09-14	13:41:27	0.259504	1.15433	467.749	FALSE	1
2022-09-14	13:41:27	0.381031	1.6949	437.306	FALSE	1
2022-09-14	13:41:27	0.251667	1.11947	468.868	FALSE	1
2022-09-14	13:41:27	0.297672	1.3241	438.63	FALSE	1
2022-09-14	13:41:28	0.343473	1.52784	470.396	FALSE	1
2022-09-14	13:41:28	0.314618	1.39948	440.03	FALSE	1
2022-09-14	13:41:28	0.230649	1.02597	471.422	FALSE	1
2022-09-14	13:41:29	0.439453	1.95477	441.985	FALSE	1
2022-09-14	13:41:29	0.337112	1.49954	472.922	FALSE	1
2022-09-14	13:41:29	0.291514	1.29671	443.281	FALSE	1
2022-09-14	13:41:29	0.324746	1.44454	474.366	FALSE	1
2022-09-14	13:41:30	0.353499	1.57243	444.854	FALSE	1
2022-09-14	13:41:30	0.490038	2.17979	476.546	FALSE	1
2022-09-14	13:41:30	0.318486	1.41669	446.27	FALSE	1
2022-09-14	13:41:30	0.182557	0.81205	477.358	FALSE	1
2022-09-14	13:41:31	0.428919	1.90792	448.178	FALSE	1
2022-09-14	13:41:31	0.328766	1.46242	478.821	FALSE	1
2022-09-14	13:41:31	0.356552	1.58601	449.764	FALSE	1
2022-09-14	13:41:31	0.303473	1.34991	480.17	FALSE	1
2022-09-14	13:41:32	0.29757	1.32365	451.088	FALSE	1
2022-09-14	13:41:32	0.330242	1.46898	481.639	FALSE	1
2022-09-14	13:41:32	0.441031	1.96179	453.05	FALSE	1
2022-09-14	13:41:33	0.311616	1.38613	483.026	FALSE	1
2022-09-14	13:41:33	0.551616	2.4537	455.504	FALSE	1
2022-09-14	13:41:33	0.407545	1.81284	484.838	FALSE	1
2022-09-14	13:41:33	0.351209	1.56225	457.066	FALSE	1
2022-09-14	13:41:34	0.524236	2.33191	487.17	FALSE	1
2022-09-14	13:41:34	0.404593	1.79971	458.865	FALSE	1
2022-09-14	13:41:34	0.437468	1.94595	489.116	FALSE	1
2022-09-14	13:41:34	0.539758	2.40095	461.266	FALSE	1
2022-09-14	13:41:35	0.36729	1.63378	490.75	FALSE	1
2022-09-14	13:41:35	0.493295	2.19427	463.461	FALSE	1
2022-09-14	13:41:35	0.570089	2.53587	493.286	FALSE	1
2022-09-14	13:41:36	0.882201	3.92421	467.385	FALSE	1
2022-09-14	13:41:36	0.875229	3.89319	497.179	FALSE	1
2022-09-14	13:41:36	0.52444	2.33281	469.718	FALSE	1
2022-09-14	13:41:36	0.532074	2.36677	499.546	FALSE	1
2022-09-14	13:41:37	0.457672	2.03582	471.754	FALSE	1
2022-09-14	13:41:37	0.539605	2.40027	501.946	FALSE	1
2022-09-14	13:41:37	0.53757	2.39122	474.145	FALSE	1
2022-09-14	13:41:37	0.560471	2.49309	504.439	FALSE	1
2022-09-14	13:41:38	0.559097	2.48698	476.632	FALSE	1
2022-09-14	13:41:38	0.523778	2.32987	506.769	FALSE	1
2022-09-14	13:41:38	0.621998	2.76677	479.399	FALSE	1
2022-09-14	13:41:38	0.482557	2.14651	508.916	FALSE	1
2022-09-14	13:41:39	0.527341	2.34572	481.744	FALSE	1
2022-09-14	13:41:39	0.542914	2.41499	511.331	FALSE	1
2022-09-14	13:41:39	0.436501	1.94164	483.686	FALSE	1
2022-09-14	13:41:40	0.393906	1.75217	513.083	FALSE	1
2022-09-14	13:41:40	0.404186	1.7979	485.484	FALSE	1
2022-09-14	13:41:40	0.510038	2.26875	515.352	FALSE	1
2022-09-14	13:41:40	0.392888	1.74764	487.231	FALSE	1
2022-09-14	13:41:41	0.448613	1.99552	517.347	FALSE	1
2022-09-14	13:41:41	0.372328	1.65619	488.888	FALSE	1
2022-09-14	13:41:41	0.331311	1.47374	518.821	FALSE	1
2022-09-14	13:41:41	0.344898	1.53418	490.422	FALSE	1
2022-09-14	13:41:42	0.409835	1.82303	520.644	FALSE	1
2022-09-14	13:41:42	0.345356	1.53621	491.958	FALSE	1
2022-09-14	13:41:42	0.435127	1.93553	522.579	FALSE	1
2022-09-14	13:41:42	0.339249	1.50905	493.467	FALSE	1
2022-09-14	13:41:43	0.309682	1.37753	523.957	FALSE	1
2022-09-14	13:41:43	0.489886	2.17911	495.646	FALSE	1
2022-09-14	13:41:43	0.303982	1.35217	525.309	FALSE	1
2022-09-14	13:41:44	0.260369	1.15817	496.804	FALSE	1
2022-09-14	13:41:44	0.279606	1.24374	526.553	FALSE	1
2022-09-14	13:41:44	0.143728	0.639331	497.444	FALSE	1
2022-09-14	13:41:44	0.2364	1.05155	527.604	FALSE	1
2022-09-14	13:41:45	0.298893	1.32954	498.773	FALSE	1
2022-09-14	13:41:45	0.52785	2.34798	529.952	FALSE	1
2022-09-14	13:41:45	0.5364	2.38601	501.159	FALSE	1
2022-09-14	13:41:45	0.426476	1.89705	531.849	FALSE	1
2022-09-14	13:41:46	0.434771	1.93395	503.093	FALSE	1
2022-09-14	13:41:46	0.402303	1.78952	533.639	FALSE	1
2022-09-14	13:41:46	0.433193	1.92693	505.02	FALSE	1
2022-09-14	13:41:46	0.621743	2.76564	536.405	FALSE	1
2022-09-14	13:41:47	0.419758	1.86717	506.887	FALSE	1
2022-09-14	13:41:47	0.415382	1.8477	538.252	FALSE	1
2022-09-14	13:41:47	0.59416	2.64294	509.53	FALSE	1
2022-09-14	13:41:48	0.419453	1.86581	540.118	FALSE	1
2022-09-14	13:41:48	0.518181	2.30497	511.835	FALSE	1
2022-09-14	13:41:48	0.41243	1.83457	541.953	FALSE	1
2022-09-14	13:41:48	0.412176	1.83344	513.669	FALSE	1
2022-09-14	13:41:49	0.517723	2.30294	544.256	FALSE	1
2022-09-14	13:41:49	0.40271	1.79133	515.46	FALSE	1
2022-09-14	13:41:49	0.412277	1.83389	546.089	FALSE	1
2022-09-14	13:41:49	0.539911	2.40163	517.862	FALSE	1
2022-09-14	13:41:50	0.43187	1.92104	548.01	FALSE	1
2022-09-14	13:41:50	0.341641	1.51969	519.381	FALSE	1
2022-09-14	13:41:50	0.527188	2.34504	550.356	FALSE	1
2022-09-14	13:41:50	0.408359	1.81646	521.198	FALSE	1
2022-09-14	13:41:51	0.549478	2.44419	552.8	FALSE	1
2022-09-14	13:41:51	0.436705	1.94255	523.14	FALSE	1
2022-09-14	13:41:51	0.345051	1.53486	554.335	FALSE	1
2022-09-14	13:41:52	0.557366	2.47928	525.62	FALSE	1
2022-09-14	13:41:52	0.374771	1.66706	556.002	FALSE	1
2022-09-14	13:41:52	0.501997	2.23298	527.853	FALSE	1
2022-09-14	13:41:52	0.353906	1.57424	557.576	FALSE	1
2022-09-14	13:41:53	0.413397	1.83887	529.691	FALSE	1
2022-09-14	13:41:53	0.641743	2.8546	560.43	FALSE	1
2022-09-14	13:41:53	0.427341	1.9009	531.592	FALSE	1
2022-09-14	13:41:53	0.538486	2.39529	562.826	FALSE	1
2022-09-14	13:41:54	0.333448	1.48324	533.076	FALSE	1
2022-09-14	13:41:54	0.436858	1.94323	564.769	FALSE	1
2022-09-14	13:41:54	0.589071	2.62031	535.696	FALSE	1
2022-09-14	13:41:54	0.423575	1.88415	566.653	FALSE	1
2022-09-14	13:41:55	0.564389	2.51052	538.206	FALSE	1
2022-09-14	13:41:55	0.430853	1.91652	568.57	FALSE	1
2022-09-14	13:41:55	0.472023	2.09965	540.306	FALSE	1
2022-09-14	13:41:56	0.580216	2.58092	571.151	FALSE	1
2022-09-14	13:41:56	0.477214	2.12274	542.429	FALSE	1
2022-09-14	13:41:56	0.607137	2.70067	573.851	FALSE	1
2022-09-14	13:41:56	0.410954	1.82801	544.257	FALSE	1
2022-09-14	13:41:57	0.452685	2.01363	575.865	FALSE	1
2022-09-14	13:41:57	0.635178	2.8254	547.082	FALSE	1
2022-09-14	13:41:57	0.46383	2.06321	577.928	FALSE	1
2022-09-14	13:41:57	0.594008	2.64227	549.724	FALSE	1
2022-09-14	13:41:58	0.448512	1.99507	579.923	FALSE	1
2022-09-14	13:41:58	0.444491	1.97718	551.702	FALSE	1
2022-09-14	13:41:58	0.656043	2.91821	582.841	FALSE	1
2022-09-14	13:41:58	0.450954	2.00593	553.708	FALSE	1
2022-09-14	13:41:59	0.530496	2.35975	585.201	FALSE	1
2022-09-14	13:41:59	0.371361	1.65189	555.359	FALSE	1
2022-09-14	13:41:59	0.345255	1.53576	586.737	FALSE	1
2022-09-14	13:42:00	0.540063	2.40231	557.762	FALSE	1
2022-09-14	13:42:00	0.248461	1.1052	587.842	FALSE	1
2022-09-14	13:42:00	0.168104	0.74776	558.51	FALSE	1
2022-09-14	13:42:00	0.359555	1.59937	589.441	FALSE	1
2022-09-14	13:42:01	0.245916	1.09388	559.603	FALSE	1
2022-09-14	13:42:01	0.232583	1.03458	590.476	FALSE	1
2022-09-14	13:42:01	0.441031	1.96179	561.565	FALSE	1
2022-09-14	13:42:01	0.484797	2.15647	592.632	FALSE	1
2022-09-14	13:42:02	0.518842	2.30791	563.873	FALSE	1
2022-09-14	13:42:02	0.420216	1.8692	594.502	FALSE	1
2022-09-14	13:42:02	0.523982	2.33078	566.204	FALSE	1
2022-09-14	13:42:02	0.489529	2.17752	596.679	FALSE	1
2022-09-14	13:42:03	0.498842	2.21895	568.423	FALSE	1
2022-09-14	13:42:03	0.478639	2.12908	598.808	FALSE	1
2022-09-14	13:42:03	0.544338	2.42132	570.844	FALSE	1
2022-09-14	13:42:04	0.491769	2.18749	600.996	FALSE	1
2022-09-14	13:42:04	0.556908	2.47724	573.321	FALSE	1
2022-09-14	13:42:04	0.47411	2.10894	603.105	FALSE	1
2022-09-14	13:42:04	0.474924	2.11256	575.434	FALSE	1
2022-09-14	13:42:05	0.456959	2.03265	605.137	FALSE	1
2022-09-14	13:42:05	0.472634	2.10237	577.536	FALSE	1
2022-09-14	13:42:05	0.472837	2.10327	607.241	FALSE	1
2022-09-14	13:42:05	0.476603	2.12003	579.656	FALSE	1
2022-09-14	13:42:06	0.468919	2.08585	609.326	FALSE	1
2022-09-14	13:42:06	0.470802	2.09422	581.751	FALSE	1
2022-09-14	13:42:06	0.451005	2.00616	611.333	FALSE	1
2022-09-14	13:42:06	0.395076	1.75738	583.508	FALSE	1
2022-09-14	13:42:07	0.399453	1.77685	613.109	FALSE	1
2022-09-14	13:42:07	0.412328	1.83412	585.342	FALSE	1
2022-09-14	13:42:07	0.475942	2.11709	615.227	FALSE	1
2022-09-14	13:42:08	0.476705	2.12048	587.463	FALSE	1
2022-09-14	13:42:08	0.467952	2.08154	617.308	FALSE	1
2022-09-14	13:42:08	0.455992	2.02834	589.491	FALSE	1
2022-09-14	13:42:08	0.471565	2.09762	619.406	FALSE	1
2022-09-14	13:42:09	0.448308	1.99416	591.485	FALSE	1
2022-09-14	13:42:09	0.479962	2.13497	621.541	FALSE	1
2022-09-14	13:42:09	0.450903	2.00571	593.491	FALSE	1
2022-09-14	13:42:09	0.457417	2.03468	623.575	FALSE	1
2022-09-14	13:42:10	0.462863	2.05891	595.55	FALSE	1
2022-09-14	13:42:10	0.465458	2.07045	625.646	FALSE	1
2022-09-14	13:42:10	0.379504	1.68811	597.238	FALSE	1
2022-09-14	13:42:11	0.422252	1.87826	627.524	FALSE	1
2022-09-14	13:42:11	0.370852	1.64962	598.887	FALSE	1
2022-09-14	13:42:11	0.0420994	0.187267	627.711	FALSE	1
2022-09-14	13:42:11	0.206221	0.917312	599.805	FALSE	1
2022-09-14	13:42:12	0.168563	0.749802	628.461	FALSE	1
2022-09-14	13:42:12	0.251361	1.1181	600.923	FALSE	1
2022-09-14	13:42:12	0.68958	3.06739	631.529	FALSE	1
2022-09-14	13:42:12	0.369326	1.64284	602.566	FALSE	1
2022-09-14	13:42:13	0.356807	1.58715	633.116	FALSE	1
2022-09-14	13:42:13	0.702557	3.12511	605.691	FALSE	1
2022-09-14	13:42:13	0.51416	2.28709	635.403	FALSE	1
2022-09-14	13:42:13	0.611209	2.71878	608.41	FALSE	1
2022-09-14	13:42:14	0.603728	2.6855	638.088	FALSE	1
2022-09-14	13:42:14	0.403626	1.79541	610.205	FALSE	1
2022-09-14	13:42:14	0.589224	2.62099	640.709	FALSE	1
2022-09-14	13:42:15	0.417214	1.85585	612.061	FALSE	1
2022-09-14	13:42:15	0.63131	2.80819	643.517	FALSE	1
2022-09-14	13:42:15	0.415789	1.84951	613.91	FALSE	1
2022-09-14	13:42:15	0.414059	1.84182	645.359	FALSE	1
2022-09-14	13:42:16	0.444288	1.97628	615.887	FALSE	1
2022-09-14	13:42:16	0.365356	1.62518	646.984	FALSE	1
2022-09-14	13:42:16	0.516857	2.29908	618.186	FALSE	1
2022-09-14	13:42:16	0.377774	1.68041	648.665	FALSE	1
2022-09-14	13:42:17	0.402506	1.79043	619.976	FALSE	1
2022-09-14	13:42:17	0.476552	2.1198	650.785	FALSE	1
2022-09-14	13:42:17	0.4307	1.91584	621.892	FALSE	1
2022-09-14	13:42:17	1.04225	4.63614	655.421	FALSE	1
2022-09-14	13:42:18	1.27905	5.68947	627.581	FALSE	1
2022-09-14	13:42:18	0.696349	3.0975	658.518	FALSE	1
2022-09-14	13:42:18	0.568409	2.5284	630.11	FALSE	1
2022-09-14	13:42:19	0.345	1.53463	660.053	FALSE	1
2022-09-14	13:42:19	0.386222	1.71799	631.828	FALSE	1
2022-09-14	13:42:19	0.415178	1.84679	661.9	FALSE	1
2022-09-14	13:42:19	0.39584	1.76078	633.589	FALSE	1
2022-09-14	13:42:20	0.528715	2.35183	664.252	FALSE	1
2022-09-14	13:42:20	0.359199	1.59779	635.186	FALSE	1
2022-09-14	13:42:20	0.141794	0.630728	664.882	FALSE	1
2022-09-14	13:42:20	0.266425	1.18511	636.371	FALSE	1
2022-09-14	13:42:21	0.342761	1.52467	666.407	FALSE	1
2022-09-14	13:42:21	0.311514	1.38568	637.757	FALSE	1
2022-09-14	13:42:21	0.35813	1.59303	668	FALSE	1
2022-09-14	13:42:21	0.213753	0.950816	638.708	FALSE	1
2022-09-14	13:42:22	0.290496	1.29218	669.292	FALSE	1
2022-09-14	13:42:22	0.218588	0.972323	639.68	FALSE	1
2022-09-14	13:42:22	0.389428	1.73225	671.024	FALSE	1
2022-09-14	13:42:23	0.384746	1.71143	641.392	FALSE	1
2022-09-14	13:42:23	0.328664	1.46196	672.486	FALSE	1
2022-09-14	13:42:23	0.47411	2.10894	643.501	FALSE	1
2022-09-14	13:42:23	0.361692	1.60888	674.095	FALSE	1
2022-09-14	13:42:24	0.500114	2.22461	645.725	FALSE	1
2022-09-14	13:42:24	0.383982	1.70803	675.803	FALSE	1
2022-09-14	13:42:24	0.346069	1.53938	647.265	FALSE	1
2022-09-14	13:42:24	0.3707	1.64895	677.452	FALSE	1
2022-09-14	13:42:25	0.373652	1.66208	648.927	FALSE	1
2022-09-14	13:42:25	0.383117	1.70418	679.156	FALSE	1
2022-09-14	13:42:25	0.404491	1.79926	650.726	FALSE	1
2022-09-14	13:42:25	0.380674	1.69331	680.85	FALSE	1
2022-09-14	13:42:26	0.405662	1.80447	652.53	FALSE	1
2022-09-14	13:42:26	0.401743	1.78703	682.637	FALSE	1
2022-09-14	13:42:26	0.40159	1.78635	654.317	FALSE	1
2022-09-14	13:42:27	0.40383	1.79632	684.433	FALSE	1
2022-09-14	13:42:27	0.400216	1.78024	656.097	FALSE	1
2022-09-14	13:42:27	0.3964	1.76327	686.196	FALSE	1
2022-09-14	13:42:27	0.398893	1.77436	657.871	FALSE	1
2022-09-14	13:42:28	0.397723	1.76915	687.966	FALSE	1
2022-09-14	13:42:28	0.40098	1.78364	659.655	FALSE	1
2022-09-14	13:42:28	0.394211	1.75353	689.719	FALSE	1
2022-09-14	13:42:28	0.399351	1.77639	661.431	FALSE	1
2022-09-14	13:42:29	0.403575	1.79518	691.514	FALSE	1
2022-09-14	13:42:29	0.395229	1.75806	663.19	FALSE	1
2022-09-14	13:42:29	0.402608	1.79088	693.305	FALSE	1
2022-09-14	13:42:29	0.379249	1.68698	664.876	FALSE	1
2022-09-14	13:42:30	0.371514	1.65257	694.958	FALSE	1
2022-09-14	13:42:30	0.37355	1.66163	666.538	FALSE	1
2022-09-14	13:42:30	0.368817	1.64057	696.598	FALSE	1
2022-09-14	13:42:31	0.365407	1.6254	668.164	FALSE	1
2022-09-14	13:42:31	0.393601	1.75082	698.349	FALSE	1
2022-09-14	13:42:31	0.390344	1.73633	669.9	FALSE	1
2022-09-14	13:42:31	0.377519	1.67928	700.028	FALSE	1
2022-09-14	13:42:32	0.381031	1.6949	671.595	FALSE	1
2022-09-14	13:42:32	0.373753	1.66253	701.691	FALSE	1
2022-09-14	13:42:32	0.425458	1.89252	673.487	FALSE	1
2022-09-14	13:42:32	0.402812	1.79179	703.483	FALSE	1
2022-09-14	13:42:33	0.522608	2.32466	675.812	FALSE	1
2022-09-14	13:42:33	0.489326	2.17662	705.659	FALSE	1
2022-09-14	13:42:33	0.44215	1.96677	677.779	FALSE	1
2022-09-14	13:42:33	0.22439	0.998132	706.657	FALSE	1
2022-09-14	13:42:34	0.125	0.556025	678.335	FALSE	1
2022-09-14	13:42:34	-0.152201	-0.67702	706.657	FALSE	1
2022-09-14	13:42:34	-0.201819	-0.897731	678.335	FALSE	1
2022-09-14	13:42:35	-0.376679	-1.67554	706.657	FALSE	1
2022-09-14	13:42:35	-0.36416	-1.61986	678.335	FALSE	1
2022-09-14	13:42:35	-0.310063	-1.37922	706.657	FALSE	1
2022-09-14	13:42:35	0.234873	1.04476	679.379	FALSE	1
2022-09-14	13:42:36	0.404084	1.79745	708.455	FALSE	1
2022-09-14	13:42:36	0.493906	2.19699	681.576	FALSE	1
2022-09-14	13:42:36	0.533092	2.3713	710.826	FALSE	1
2022-09-14	13:42:36	0.511972	2.27735	683.854	FALSE	1
2022-09-14	13:42:37	0.643881	2.86411	713.69	FALSE	1
2022-09-14	13:42:37	0.503779	2.24091	686.095	FALSE	1
2022-09-14	13:42:37	0.665763	2.96145	716.652	FALSE	1
2022-09-14	13:42:37	0.556298	2.47452	688.569	FALSE	1
2022-09-14	13:42:38	0.568308	2.52795	719.18	FALSE	1
2022-09-14	13:42:38	0.48383	2.15217	690.721	FALSE	1
2022-09-14	13:42:38	0.756094	3.36326	722.543	FALSE	1
2022-09-14	13:42:39	0.556247	2.4743	693.196	FALSE	1
2022-09-14	13:42:39	0.524745	2.33417	724.877	FALSE	1
2022-09-14	13:42:39	0.366323	1.62948	694.825	FALSE	1
2022-09-14	13:42:39	0.583422	2.59518	727.472	FALSE	1
2022-09-14	13:42:40	0.447647	1.99122	696.816	FALSE	1
2022-09-14	13:42:40	0.488512	2.173	729.645	FALSE	1
2022-09-14	13:42:40	0.574568	2.55579	699.372	FALSE	1
2022-09-14	13:42:40	0.49416	2.19812	731.843	FALSE	1
2022-09-14	13:42:41	0.448562	1.99529	701.368	FALSE	1
2022-09-14	13:42:41	0.4736	2.10667	733.95	FALSE	1
2022-09-14	13:42:41	0.716908	3.18895	704.556	FALSE	1
2022-09-14	13:42:41	0.398842	1.77413	735.724	FALSE	1
2022-09-14	13:42:42	0.633499	2.81793	707.374	FALSE	1
2022-09-14	13:42:42	0.324033	1.44136	737.166	FALSE	1
2022-09-14	13:42:42	0.336094	1.49501	708.869	FALSE	1
2022-09-14	13:42:43	-0.672404	-2.99099	737.166	FALSE	1
2022-09-14	13:42:43	-0.752302	-3.34639	708.869	FALSE	1
2022-09-14	13:42:43	-0.643091	-2.8606	737.166	FALSE	1
2022-09-14	13:42:43	-1.00528	-4.47169	708.869	FALSE	1
2022-09-14	13:42:44	-0.8379	-3.72715	737.166	FALSE	1
2022-09-14	13:42:44	-0.631335	-2.8083	708.869	FALSE	1
2022-09-14	13:42:44	-0.610521	-2.71572	737.166	FALSE	1
2022-09-14	13:42:44	-0.65561	-2.91628	708.869	FALSE	1
2022-09-14	13:42:45	-1.14818	-5.10733	737.166	FALSE	1
2022-09-14	13:42:45	-1.21022	-5.3833	708.869	FALSE	1
2022-09-14	13:42:45	-1.11047	-4.93959	737.166	FALSE	1
2022-09-14	13:42:46	-1.00548	-4.47258	708.869	FALSE	1
2022-09-14	13:42:46	-0.721004	-3.20717	737.166	FALSE	1
2022-09-14	13:42:46	-0.935966	-4.16336	708.869	FALSE	1
2022-09-14	13:42:46	-0.961462	-4.27678	737.166	FALSE	1
2022-09-14	13:42:47	-0.930012	-4.13688	708.869	FALSE	1
2022-09-14	13:42:47	-1.14401	-5.08879	737.166	FALSE	1
2022-09-14	13:42:47	-1.27072	-5.65242	708.869	FALSE	1
2022-09-14	13:42:47	-1.25118	-5.5655	737.166	FALSE	1
2022-09-14	13:42:48	-1.292	-5.74707	708.869	FALSE	1
2022-09-14	13:42:48	-1.30905	-5.82292	737.166	FALSE	1
2022-09-14	13:42:48	-1.34314	-5.97456	708.869	FALSE	1
2022-09-14	13:42:48	-1.31113	-5.83217	737.166	FALSE	1
2022-09-14	13:42:49	-1.34253	-5.97184	708.869	FALSE	1
2022-09-14	13:42:49	-1.38446	-6.15835	737.166	FALSE	1
2022-09-14	13:42:49	-1.40788	-6.26253	708.869	FALSE	1
2022-09-14	13:42:50	-1.41815	-6.30821	737.166	FALSE	1
2022-09-14	13:42:50	-1.44655	-6.43454	708.869	FALSE	1
2022-09-14	13:42:50	-1.28925	-5.73484	737.166	FALSE	1
2022-09-14	13:42:50	-1.31581	-5.85299	708.869	FALSE	1
2022-09-14	13:42:51	-1.34477	-5.98181	737.166	FALSE	1
2022-09-14	13:42:51	-1.36884	-6.08887	708.869	FALSE	1
2022-09-14	13:42:51	-1.53301	-6.81914	737.166	FALSE	1
2022-09-14	13:42:51	-1.62141	-7.21236	708.869	FALSE	1
2022-09-14	13:42:52	-1.80106	-8.01148	737.166	FALSE	1
2022-09-14	13:42:52	-1.84385	-8.20181	708.869	FALSE	1
2022-09-14	13:42:52	-1.73225	-7.70539	737.166	FALSE	1
2022-09-14	13:42:52	-1.59245	-7.08354	708.869	FALSE	1
2022-09-14	13:42:53	-1.68752	-7.50643	737.166	FALSE	1
2022-09-14	13:42:53	-1.73678	-7.72554	708.869	FALSE	1
2022-09-14	13:42:53	-1.76701	-7.86001	737.166	FALSE	1
2022-09-14	13:42:54	-1.75642	-7.81291	708.869	FALSE	1
2022-09-14	13:42:54	-1.74752	-7.77332	737.166	FALSE	1
2022-09-14	13:42:54	-1.78034	-7.91931	708.869	FALSE	1
2022-09-14	13:42:54	-1.85714	-8.26093	737.166	FALSE	1
2022-09-14	13:42:55	-1.56136	-6.94524	708.869	FALSE	1
2022-09-14	13:42:55	-1.51785	-6.7517	737.166	FALSE	1
2022-09-14	13:42:55	-1.35968	-6.04813	708.869	FALSE	1
2022-09-14	13:42:55	-1.3979	-6.21814	737.166	FALSE	1
2022-09-14	13:42:56	-1.53123	-6.81122	708.869	FALSE	1
2022-09-14	13:42:56	-1.44299	-6.41871	737.166	FALSE	1
2022-09-14	13:42:56	-1.46635	-6.52262	708.869	FALSE	1
2022-09-14	13:42:56	-1.4207	-6.31956	737.166	FALSE	1
2022-09-14	13:42:57	-1.61882	-7.20084	708.869	FALSE	1
2022-09-14	13:42:57	-1.55327	-6.90926	737.166	FALSE	1
2022-09-14	13:42:57	-1.59281	-7.08514	708.869	FALSE	1
2022-09-14	13:42:58	-1.65668	-7.36924	737.166	FALSE	1
2022-09-14	13:42:58	-1.55134	-6.90067	708.869	FALSE	1
2022-09-14	13:42:58	-1.80167	-8.01419	737.166	FALSE	1
2022-09-14	13:42:58	-1.71256	-7.61781	708.869	FALSE	1
2022-09-14	13:42:59	-1.7951	-7.98496	737.166	FALSE	1
2022-09-14	13:42:59	-1.66828	-7.42084	708.869	FALSE	1
2022-09-14	13:42:59	-1.37642	-6.12259	737.166	FALSE	1
2022-09-14	13:42:59	-1.67037	-7.43014	708.869	FALSE	1
2022-09-14	13:43:00	-1.56905	-6.97945	737.166	FALSE	1
2022-09-14	13:43:00	-1.5609	-6.9432	708.869	FALSE	1
2022-09-14	13:43:00	-1.45179	-6.45785	737.166	FALSE	1
2022-09-14	13:43:00	-1.55505	-6.91717	708.869	FALSE	1
2022-09-14	13:43:01	-1.15983	-5.15916	737.166	FALSE	1
2022-09-14	13:43:01	-1.20986	-5.3817	708.869	FALSE	1
2022-09-14	13:43:01	-0.993778	-4.42052	737.166	FALSE	1
2022-09-14	13:43:02	-1.04838	-4.6634	708.869	FALSE	1
2022-09-14	13:43:02	-1.18355	-5.26467	737.166	FALSE	1
2022-09-14	13:43:02	-0.814388	-3.62256	708.869	FALSE	1
2022-09-14	13:43:02	-0.89103	-3.96348	737.166	FALSE	1
2022-09-14	13:43:03	-0.766144	-3.40796	708.869	FALSE	1
2022-09-14	13:43:03	-0.860343	-3.82698	737.166	FALSE	1
2022-09-14	13:43:03	-0.852556	-3.79234	708.869	FALSE	1
2022-09-14	13:43:03	-0.855864	-3.80705	737.166	FALSE	1
2022-09-14	13:43:04	-0.863549	-3.84124	708.869	FALSE	1
2022-09-14	13:43:04	-0.824312	-3.6667	737.166	FALSE	1
2022-09-14	13:43:04	-0.845737	-3.76201	708.869	FALSE	1
2022-09-14	13:43:04	-0.84818	-3.77287	737.166	FALSE	1
2022-09-14	13:43:05	-0.846093	-3.76359	708.869	FALSE	1
2022-09-14	13:43:05	-0.850012	-3.78102	737.166	FALSE	1
2022-09-14	13:43:05	-0.894897	-3.98068	708.869	FALSE	1
2022-09-14	13:43:06	-0.90589	-4.02958	737.166	FALSE	1
2022-09-14	13:43:06	-0.950368	-4.22743	708.869	FALSE	1
2022-09-14	13:43:06	-0.88019	-3.91526	737.166	FALSE	1
2022-09-14	13:43:06	-0.885788	-3.94016	708.869	FALSE	1
2022-09-14	13:43:07	-0.875457	-3.89421	737.166	FALSE	1
2022-09-14	13:43:07	-0.915305	-4.07146	708.869	FALSE	1
2022-09-14	13:43:07	-0.903295	-4.01804	737.166	FALSE	1
2022-09-14	13:43:07	-0.827518	-3.68097	708.869	FALSE	1
2022-09-14	13:43:08	-0.796882	-3.54469	737.166	FALSE	1
2022-09-14	13:43:08	-0.700648	-3.11662	708.869	FALSE	1
2022-09-14	13:43:08	-0.799834	-3.55782	737.166	FALSE	1
2022-09-14	13:43:08	-0.951844	-4.23399	708.869	FALSE	1
2022-09-14	13:43:09	-0.743956	-3.30927	737.166	FALSE	1
2022-09-14	13:43:09	-0.808842	-3.59789	708.869	FALSE	1
2022-09-14	13:43:09	-0.795763	-3.53971	737.166	FALSE	1
2022-09-14	13:43:10	-0.834949	-3.71402	708.869	FALSE	1
2022-09-14	13:43:10	-0.899478	-4.00106	737.166	FALSE	1
2022-09-14	13:43:10	-1.09403	-4.86646	708.869	FALSE	1
2022-09-14	13:43:10	-0.953065	-4.23942	737.166	FALSE	1
2022-09-14	13:43:11	-0.954439	-4.24554	708.869	FALSE	1
2022-09-14	13:43:11	-0.826551	-3.67666	737.166	FALSE	1
2022-09-14	13:43:11	-0.940801	-4.18487	708.869	FALSE	1
2022-09-14	13:43:11	-0.939427	-4.17876	737.166	FALSE	1
2022-09-14	13:43:12	-0.802328	-3.56892	708.869	FALSE	1
2022-09-14	13:43:12	-0.800394	-3.56031	737.166	FALSE	1
2022-09-14	13:43:12	-0.931437	-4.14322	708.869	FALSE	1
2022-09-14	13:43:12	-0.798104	-3.55013	737.166	FALSE	1
2022-09-14	13:43:13	-0.916424	-4.07644	708.869	FALSE	1
2022-09-14	13:43:13	-0.920648	-4.09523	737.166	FALSE	1
2022-09-14	13:43:13	-0.948333	-4.21837	708.869	FALSE	1
2022-09-14	13:43:14	-0.871488	-3.87655	737.166	FALSE	1
2022-09-14	13:43:14	-0.784465	-3.48946	708.869	FALSE	1
2022-09-14	13:43:14	-0.914439	-4.06761	737.166	FALSE	1
2022-09-14	13:43:14	-0.548028	-2.43774	708.869	FALSE	1
2022-09-14	13:43:15	-0.276475	-1.22982	737.166	FALSE	1
2022-09-14	13:43:15	-0.61047	-2.71549	708.869	FALSE	1
2022-09-14	13:43:15	-0.60986	-2.71278	737.166	FALSE	1
2022-09-14	13:43:15	-1.0662	-4.74267	708.869	FALSE	1
2022-09-14	13:43:16	-1.1377	-5.06072	737.166	FALSE	1
2022-09-14	13:43:16	-1.11724	-4.96971	708.869	FALSE	1
2022-09-14	13:43:16	-1.0291	-4.57764	737.166	FALSE	1
2022-09-14	13:43:16	-1.03159	-4.58872	708.869	FALSE	1
2022-09-14	13:43:17	-1.03281	-4.59415	737.166	FALSE	1
2022-09-14	13:43:17	-0.938002	-4.17242	708.869	FALSE	1
2022-09-14	13:43:17	-0.948791	-4.22041	737.166	FALSE	1
2022-09-14	13:43:18	-0.879885	-3.9139	708.869	FALSE	1
2022-09-14	13:43:18	-0.85505	-3.80343	737.166	FALSE	1
2022-09-14	13:43:18	-0.77047	-3.4272	708.869	FALSE	1
2022-09-14	13:43:18	-0.853523	-3.79664	737.166	FALSE	1
2022-09-14	13:43:19	-0.874083	-3.8881	708.869	FALSE	1
2022-09-14	13:43:19	-0.828587	-3.68572	737.166	FALSE	1
2022-09-14	13:43:19	-0.793778	-3.53088	708.869	FALSE	1
2022-09-14	13:43:19	-0.788587	-3.50779	737.166	FALSE	1
2022-09-14	13:43:20	-0.79449	-3.53405	708.869	FALSE	1
2022-09-14	13:43:20	-0.754592	-3.35658	737.166	FALSE	1
2022-09-14	13:43:20	-0.767315	-3.41317	708.869	FALSE	1
2022-09-14	13:43:20	-0.836628	-3.72149	737.166	FALSE	1
2022-09-14	13:43:21	-0.960801	-4.27384	708.869	FALSE	1
2022-09-14	13:43:21	-0.945483	-4.2057	737.166	FALSE	1
2022-09-14	13:43:21	-0.958307	-4.26274	708.869	FALSE	1
2022-09-14	13:43:22	-0.958612	-4.2641	737.166	FALSE	1
2022-09-14	13:43:22	-0.944923	-4.20321	708.869	FALSE	1
2022-09-14	13:43:22	-0.90192	-4.01192	737.166	FALSE	1
2022-09-14	13:43:22	-0.973981	-4.33246	708.869	FALSE	1
2022-09-14	13:43:23	-1.26075	-5.60807	737.166	FALSE	1
2022-09-14	13:43:23	-1.29337	-5.75317	708.869	FALSE	1
2022-09-14	13:43:23	-1.30767	-5.81678	737.166	FALSE	1
2022-09-14	13:43:23	-1.33128	-5.9218	708.869	FALSE	1
2022-09-14	13:43:24	-1.20645	-5.36653	737.166	FALSE	1
2022-09-14	13:43:24	-1.27739	-5.68209	708.869	FALSE	1
2022-09-14	13:43:24	-1.29251	-5.74934	737.166	FALSE	1
2022-09-14	13:43:25	-1.28935	-5.73529	708.869	FALSE	1
2022-09-14	13:43:25	-1.29988	-5.78213	737.166	FALSE	1
2022-09-14	13:43:25	-1.31347	-5.84258	708.869	FALSE	1
2022-09-14	13:43:25	-1.30823	-5.81927	737.166	FALSE	1
2022-09-14	13:43:26	-1.30009	-5.78306	708.869	FALSE	1
2022-09-14	13:43:26	-1.28131	-5.69952	737.166	FALSE	1
2022-09-14	13:43:26	-1.29917	-5.77897	708.869	FALSE	1
2022-09-14	13:43:26	-1.29464	-5.75882	737.166	FALSE	1
2022-09-14	13:43:27	-1.29195	-5.74685	708.869	FALSE	1
2022-09-14	13:43:27	-1.27057	-5.65175	737.166	FALSE	1
2022-09-14	13:43:27	-1.24502	-5.5381	708.869	FALSE	1
2022-09-14	13:43:27	-1.25113	-5.56528	737.166	FALSE	1
2022-09-14	13:43:28	-1.25714	-5.59201	708.869	FALSE	1
2022-09-14	13:43:28	-1.25011	-5.56074	737.166	FALSE	1
2022-09-14	13:43:28	-1.26497	-5.62684	708.869	FALSE	1
2022-09-14	13:43:29	-1.26655	-5.63387	737.166	FALSE	1
2022-09-14	13:43:29	-1.2523	-5.57048	708.869	FALSE	1
2022-09-14	13:43:29	-1.23449	-5.49126	737.166	FALSE	1
2022-09-14	13:43:29	-1.22004	-5.42698	708.869	FALSE	1
2022-09-14	13:43:30	-1.15413	-5.1338	737.166	FALSE	1
2022-09-14	13:43:30	-1.2235	-5.44237	708.869	FALSE	1
2022-09-14	13:43:30	-1.31917	-5.86793	737.166	FALSE	1
2022-09-14	13:43:30	-1.38711	-6.17014	708.869	FALSE	1
2022-09-14	13:43:31	-1.3748	-6.11539	737.166	FALSE	1
2022-09-14	13:43:31	-1.41291	-6.28491	708.869	FALSE	1
2022-09-14	13:43:31	-1.39307	-6.19665	737.166	FALSE	1
2022-09-14	13:43:31	-1.43001	-6.36097	708.869	FALSE	1
2022-09-14	13:43:32	-1.65032	-7.34095	737.166	FALSE	1
2022-09-14	13:43:32	-1.52172	-6.76891	708.869	FALSE	1
2022-09-14	13:43:32	-1.6952	-7.54059	737.166	FALSE	1
2022-09-14	13:43:33	-2.29561	-10.2113	708.869	FALSE	1
2022-09-14	13:43:33	-1.98538	-8.83137	737.166	FALSE	1
2022-09-14	13:43:33	-2.0181	-8.97691	708.869	FALSE	1
2022-09-14	13:43:33	-1.99098	-8.85628	737.166	FALSE	1
2022-09-14	13:43:34	-1.95342	-8.6892	708.869	FALSE	1
2022-09-14	13:43:34	-1.94925	-8.67065	737.166	FALSE	1
2022-09-14	13:43:34	-1.92314	-8.55451	708.869	FALSE	1
2022-09-14	13:43:34	-1.9924	-8.86259	737.166	FALSE	1
2022-09-14	13:43:35	-2.16207	-9.61732	708.869	FALSE	1
2022-09-14	13:43:35	-1.9749	-8.78475	737.166	FALSE	1
2022-09-14	13:43:35	-1.99866	-8.89044	708.869	FALSE	1
2022-09-14	13:43:35	-2.0291	-9.02584	737.166	FALSE	1
2022-09-14	13:43:36	-1.95668	-8.7037	708.869	FALSE	1
2022-09-14	13:43:36	-1.94314	-8.64348	737.166	FALSE	1
2022-09-14	13:43:36	-1.93826	-8.62177	708.869	FALSE	1
2022-09-14	13:43:37	-1.92884	-8.57987	737.166	FALSE	1
2022-09-14	13:43:37	-1.97235	-8.77341	708.869	FALSE	1
2022-09-14	13:43:37	-1.98793	-8.84271	737.166	FALSE	1
2022-09-14	13:43:37	-2.00167	-8.90383	708.869	FALSE	1
2022-09-14	13:43:38	-1.99444	-8.87167	737.166	FALSE	1
2022-09-14	13:43:38	-1.96579	-8.74423	708.869	FALSE	1
2022-09-14	13:43:38	-1.9352	-8.60816	737.166	FALSE	1
2022-09-14	13:43:38	-1.92472	-8.56154	708.869	FALSE	1
2022-09-14	13:43:39	-1.97861	-8.80125	737.166	FALSE	1
2022-09-14	13:43:39	-1.89622	-8.43477	708.869	FALSE	1
2022-09-14	13:43:39	-1.87932	-8.35959	737.166	FALSE	1
2022-09-14	13:43:39	-1.86843	-8.31115	708.869	FALSE	1
2022-09-14	13:43:40	-1.87943	-8.36008	737.166	FALSE	1
2022-09-14	13:43:40	-1.85383	-8.24621	708.869	FALSE	1
2022-09-14	13:43:40	-1.8524	-8.23985	737.166	FALSE	1
2022-09-14	13:43:41	-1.84828	-8.22152	708.869	FALSE	1
2022-09-14	13:43:41	-1.99424	-8.87078	737.166	FALSE	1
2022-09-14	13:43:41	-1.81495	-8.07326	708.869	FALSE	1
2022-09-14	13:43:41	-1.81505	-8.07371	737.166	FALSE	1
2022-09-14	13:43:42	-1.87856	-8.35621	708.869	FALSE	1
2022-09-14	13:43:42	-1.76523	-7.8521	737.166	FALSE	1
2022-09-14	13:43:42	-1.9177	-8.53031	708.869	FALSE	1
2022-09-14	13:43:42	-1.98345	-8.82278	737.166	FALSE	1
2022-09-14	13:43:43	-1.9036	-8.46759	708.869	FALSE	1
2022-09-14	13:43:43	-1.8378	-8.1749	737.166	FALSE	1
2022-09-14	13:43:43	-1.89093	-8.41123	708.869	FALSE	1
2022-09-14	13:43:43	-1.95648	-8.70281	737.166	FALSE	1
2022-09-14	13:43:44	0.658995	2.93134	711.801	FALSE	1
2022-09-14	13:43:44	0.730649	3.25007	740.416	FALSE	1
2022-09-14	13:43:44	0.72556	3.22744	715.028	FALSE	1
2022-09-14	13:43:45	0.726832	3.23309	743.649	FALSE	1
2022-09-14	13:43:45	0.320115	1.42394	716.452	FALSE	1
2022-09-14	13:43:45	0.733397	3.2623	746.911	FALSE	1
2022-09-14	13:43:45	-0.363498	-1.61691	716.452	FALSE	1
2022-09-14	13:43:46	-4.67098	-20.7775	746.911	FALSE	1
2022-09-14	13:43:46	0.429224	1.90927	718.361	FALSE	1
2022-09-14	13:43:46	-3.632	-16.1559	746.911	FALSE	1
2022-09-14	13:43:46	0.477468	2.12387	720.485	FALSE	1
2022-09-14	13:43:47	0.412888	1.83661	748.748	FALSE	1
2022-09-14	13:43:47	0.724338	3.222	723.707	FALSE	1
2022-09-14	13:43:47	0.726679	3.23241	751.98	FALSE	1
2022-09-14	13:43:47	0.730445	3.24917	726.956	FALSE	1
2022-09-14	13:43:48	0.727341	3.23536	755.215	FALSE	1
2022-09-14	13:43:48	0.735941	3.27361	730.23	FALSE	1
2022-09-14	13:43:48	0.733499	3.26275	758.478	FALSE	1
2022-09-14	13:43:49	0.733702	3.26365	733.494	FALSE	1
2022-09-14	13:43:49	0.723982	3.22042	761.699	FALSE	1
2022-09-14	13:43:49	0.728206	3.23921	736.733	FALSE	1
2022-09-14	13:43:49	0.726679	3.23241	764.931	FALSE	1
2022-09-14	13:43:50	0.730394	3.24894	739.982	FALSE	1
2022-09-14	13:43:50	0.734364	3.2666	768.198	FALSE	1
2022-09-14	13:43:50	0.731056	3.25188	743.234	FALSE	1
2022-09-14	13:43:50	0.731463	3.25369	771.451	FALSE	1
2022-09-14	13:43:51	0.732735	3.25935	746.493	FALSE	1
2022-09-14	13:43:51	0.732125	3.25664	774.708	FALSE	1
2022-09-14	13:43:51	0.73757	3.28086	749.774	FALSE	1
2022-09-14	13:43:51	0.729631	3.24554	777.953	FALSE	1
2022-09-14	13:43:52	0.741387	3.29784	753.072	FALSE	1
2022-09-14	13:43:52	0.728868	3.24215	781.196	FALSE	1
2022-09-14	13:43:52	0.727443	3.23581	756.308	FALSE	1
2022-09-14	13:43:53	0.73528	3.27067	784.466	FALSE	1
2022-09-14	13:43:53	0.734109	3.26546	759.573	FALSE	1
2022-09-14	13:43:53	0.737926	3.28244	787.749	FALSE	1
2022-09-14	13:43:53	0.736196	3.27475	762.848	FALSE	1
2022-09-14	13:43:54	0.729224	3.24373	790.992	FALSE	1
2022-09-14	13:43:54	0.728715	3.24147	766.089	FALSE	1
2022-09-14	13:43:54	0.731565	3.25415	794.247	FALSE	1
2022-09-14	13:43:54	0.72729	3.23513	769.324	FALSE	1
2022-09-14	13:43:55	0.733244	3.26162	797.508	FALSE	1
2022-09-14	13:43:55	0.731565	3.25415	772.579	FALSE	1
2022-09-14	13:43:55	0.729936	3.2469	800.755	FALSE	1
2022-09-14	13:43:55	0.728613	3.24102	775.82	FALSE	1
2022-09-14	13:43:56	0.725611	3.22766	803.983	FALSE	1
2022-09-14	13:43:56	0.729784	3.24623	779.066	FALSE	1
2022-09-14	13:43:56	0.72556	3.22744	807.21	FALSE	1
2022-09-14	13:43:57	0.727239	3.2349	782.301	FALSE	1
2022-09-14	13:43:57	0.723779	3.21951	810.43	FALSE	1
2022-09-14	13:43:57	0.734568	3.26751	785.568	FALSE	1
2022-09-14	13:43:57	0.73416	3.26569	813.695	FALSE	1
2022-09-14	13:43:58	0.732837	3.25981	788.828	FALSE	1
2022-09-14	13:43:58	0.732939	3.26026	816.956	FALSE	1
2022-09-14	13:43:58	0.734924	3.26909	792.097	FALSE	1
2022-09-14	13:43:58	0.733295	3.26184	820.218	FALSE	1
2022-09-14	13:43:59	0.731107	3.25211	795.349	FALSE	1
2022-09-14	13:43:59	0.726374	3.23106	823.449	FALSE	1
2022-09-14	13:43:59	0.731412	3.25347	798.603	FALSE	1
2022-09-14	13:43:59	0.732074	3.25641	826.705	FALSE	1
2022-09-14	13:44:00	0.72958	3.24532	801.848	FALSE	1
2022-09-14	13:44:00	0.726425	3.23128	829.936	FALSE	1
2022-09-14	13:44:00	0.730293	3.24849	805.096	FALSE	1
2022-09-14	13:44:01	0.733651	3.26343	833.2	FALSE	1
2022-09-14	13:44:01	0.739962	3.2915	808.388	FALSE	1
2022-09-14	13:44:01	0.732175	3.25686	836.457	FALSE	1
2022-09-14	13:44:01	0.734975	3.26932	811.657	FALSE	1
2022-09-14	13:44:02	0.726374	3.23106	839.688	FALSE	1
2022-09-14	13:44:02	0.730445	3.24917	814.906	FALSE	1
2022-09-14	13:44:02	0.728562	3.24079	842.928	FALSE	1
2022-09-14	13:44:02	0.728512	3.24057	818.147	FALSE	1
2022-09-14	13:44:03	0.731412	3.25347	846.182	FALSE	1
2022-09-14	13:44:03	0.731361	3.25324	821.4	FALSE	1
2022-09-14	13:44:03	0.727952	3.23808	849.42	FALSE	1
2022-09-14	13:44:04	0.729682	3.24577	824.646	FALSE	1
2022-09-14	13:44:04	0.730801	3.25075	852.671	FALSE	1
2022-09-14	13:44:04	0.728308	3.23966	827.886	FALSE	1
2022-09-14	13:44:04	0.737417	3.28018	855.951	FALSE	1
2022-09-14	13:44:05	0.731005	3.25166	831.137	FALSE	1
2022-09-14	13:44:05	0.73131	3.25301	859.204	FALSE	1
2022-09-14	13:44:05	0.72902	3.24283	834.38	FALSE	1
2022-09-14	13:44:05	0.72612	3.22993	862.434	FALSE	1
2022-09-14	13:44:06	0.737265	3.2795	837.66	FALSE	1
2022-09-14	13:44:06	0.732888	3.26003	865.694	FALSE	1
2022-09-14	13:44:06	0.72897	3.2426	840.902	FALSE	1
2022-09-14	13:44:06	0.728308	3.23966	868.934	FALSE	1
2022-09-14	13:44:07	0.730445	3.24917	844.151	FALSE	1
2022-09-14	13:44:07	0.728766	3.2417	872.175	FALSE	1
2022-09-14	13:44:07	0.728257	3.23943	847.391	FALSE	1
2022-09-14	13:44:08	0.739198	3.2881	875.463	FALSE	1
2022-09-14	13:44:08	0.73416	3.26569	850.657	FALSE	1
2022-09-14	13:44:08	0.730903	3.2512	878.715	FALSE	1
2022-09-14	13:44:08	0.73416	3.26569	853.922	FALSE	1
2022-09-14	13:44:09	0.736094	3.27429	881.989	FALSE	1
2022-09-14	13:44:09	0.728359	3.23989	857.162	FALSE	1
2022-09-14	13:44:09	0.728003	3.2383	885.227	FALSE	1
2022-09-14	13:44:09	0.734262	3.26614	860.428	FALSE	1
2022-09-14	13:44:10	0.723066	3.21634	888.443	FALSE	1
2022-09-14	13:44:10	0.731921	3.25573	863.684	FALSE	1
2022-09-14	13:44:10	0.732125	3.25664	891.7	FALSE	1
2022-09-14	13:44:10	0.737163	3.27905	866.963	FALSE	1
2022-09-14	13:44:11	0.730547	3.24962	894.95	FALSE	1
2022-09-14	13:44:11	0.729071	3.24305	870.206	FALSE	1
2022-09-14	13:44:11	0.727952	3.23808	898.188	FALSE	1
2022-09-14	13:44:12	0.728664	3.24124	873.447	FALSE	1
2022-09-14	13:44:12	0.73528	3.27067	901.458	FALSE	1
2022-09-14	13:44:12	0.725662	3.22789	876.675	FALSE	1
2022-09-14	13:44:12	0.731514	3.25392	904.712	FALSE	1
2022-09-14	13:44:13	0.723219	3.21702	879.892	FALSE	1
2022-09-14	13:44:13	0.734822	3.26864	907.981	FALSE	1
2022-09-14	13:44:13	0.742659	3.3035	883.196	FALSE	1
2022-09-14	13:44:13	0.733651	3.26343	911.244	FALSE	1
2022-09-14	13:44:14	0.723728	3.21929	886.415	FALSE	1
2022-09-14	13:44:14	0.733295	3.26184	914.506	FALSE	1
2022-09-14	13:44:14	0.725916	3.22902	889.644	FALSE	1
2022-09-14	13:44:14	0.731921	3.25573	917.762	FALSE	1
2022-09-14	13:44:15	0.732939	3.26026	892.904	FALSE	1
2022-09-14	13:44:15	0.733142	3.26116	921.023	FALSE	1
2022-09-14	13:44:15	0.720165	3.20344	896.108	FALSE	1
2022-09-14	13:44:16	0.73243	3.258	924.281	FALSE	1
2022-09-14	13:44:16	0.727697	3.23694	899.345	FALSE	1
2022-09-14	13:44:16	0.727188	3.23468	927.516	FALSE	1
2022-09-14	13:44:16	0.730496	3.24939	902.594	FALSE	1
2022-09-14	13:44:17	0.732939	3.26026	930.776	FALSE	1
2022-09-14	13:44:17	0.731158	3.25234	905.846	FALSE	1
2022-09-14	13:44:17	0.729224	3.24373	934.02	FALSE	1
2022-09-14	13:44:17	0.731514	3.25392	909.1	FALSE	1
2022-09-14	13:44:18	0.726018	3.22947	937.249	FALSE	1
2022-09-14	13:44:18	0.725458	3.22698	912.327	FALSE	1
2022-09-14	13:44:18	0.725153	3.22563	940.475	FALSE	1
2022-09-14	13:44:18	0.732481	3.25822	915.586	FALSE	1
2022-09-14	13:44:19	0.721234	3.20819	943.683	FALSE	1
2022-09-14	13:44:19	0.728613	3.24102	918.827	FALSE	1
2022-09-14	13:44:19	0.735331	3.2709	946.954	FALSE	1
2022-09-14	13:44:20	0.731616	3.25437	922.081	FALSE	1
2022-09-14	13:44:20	0.737366	3.27995	950.234	FALSE	1
2022-09-14	13:44:20	0.734415	3.26682	925.348	FALSE	1
2022-09-14	13:44:20	0.736807	3.27746	953.511	FALSE	1
2022-09-14	13:44:21	0.73528	3.27067	928.618	FALSE	1
2022-09-14	13:44:21	0.726934	3.23355	956.745	FALSE	1
2022-09-14	13:44:21	0.729682	3.24577	931.864	FALSE	1
2022-09-14	13:44:21	0.729987	3.24713	959.992	FALSE	1
2022-09-14	13:44:22	0.725916	3.22902	935.093	FALSE	1
2022-09-14	13:44:22	0.729936	3.2469	963.239	FALSE	1
2022-09-14	13:44:22	0.727036	3.234	938.327	FALSE	1
2022-09-14	13:44:22	-0.785737	-3.49512	963.239	FALSE	1
2022-09-14	13:44:23	-1.98314	-8.8214	938.327	FALSE	1
2022-09-14	13:44:23	0.724033	3.22064	966.46	FALSE	1
2022-09-14	13:44:23	0.727799	3.2374	941.565	FALSE	1
2022-09-14	13:44:24	0.719555	3.20072	969.66	FALSE	1
2022-09-14	13:44:24	-0.063702	-0.283359	941.565	FALSE	1
2022-09-14	13:44:24	0.733499	3.26275	972.923	FALSE	1
2022-09-14	13:44:24	0.730801	3.25075	944.815	FALSE	1
2022-09-14	13:44:25	0.733448	3.26252	976.186	FALSE	1
2022-09-14	13:44:25	0.730496	3.24939	948.065	FALSE	1
2022-09-14	13:44:25	0.733448	3.26252	979.448	FALSE	1
2022-09-14	13:44:25	0.724949	3.22472	951.29	FALSE	1
2022-09-14	13:44:26	0.667646	2.96982	982.418	FALSE	1
2022-09-14	13:44:26	0.732939	3.26026	954.55	FALSE	1
2022-09-14	13:44:26	0.437061	1.94413	984.362	FALSE	1
2022-09-14	13:44:26	0.474415	2.11029	956.66	FALSE	1
2022-09-14	13:44:27	0.732735	3.25935	987.622	FALSE	1
2022-09-14	13:44:27	0.730649	3.25007	959.91	FALSE	1
2022-09-14	13:44:27	0.728155	3.23898	990.86	FALSE	1
2022-09-14	13:44:28	0.730649	3.25007	963.16	FALSE	1
2022-09-14	13:44:28	0.730038	3.24736	994.108	FALSE	1
2022-09-14	13:44:28	0.724695	3.22359	966.384	FALSE	1
2022-09-14	13:44:28	-1.09378	-4.86535	994.108	FALSE	1
2022-09-14	13:44:29	-1.55429	-6.91379	966.384	FALSE	1
2022-09-14	13:44:29	-1.95133	-8.67991	994.108	FALSE	1
2022-09-14	13:44:29	-0.984312	-4.37842	966.384	FALSE	1
2022-09-14	13:44:29	-0.992709	-4.41577	994.108	FALSE	1
2022-09-14	13:44:30	-1.01693	-4.52351	966.384	FALSE	1
2022-09-14	13:44:30	-0.830928	-3.69613	994.108	FALSE	1
2022-09-14	13:44:30	1.46953	6.53676	972.921	FALSE	1
2022-09-14	13:44:30	7.7082	34.2876	1028.4	1	2
2022-09-14	13:44:31	3.33441	14.8321	987.753	1	3
2022-09-14	13:44:31	2.82454	12.5641	1040.96	FALSE	3

## Sheet: Reggie_prong_2022914133917 (2)
Date	Time	Lbs	Total force x time			**GoPro Fitting: 13:18
2022-09-14	13:39:17	0.455891	0.455891	FALSE	0
2022-09-14	13:39:17	0.446832	0.902723	FALSE	0
2022-09-14	13:39:18	0.443168	1.34589	FALSE	0
2022-09-14	13:39:18	0.432685	1.77858	FALSE	0
2022-09-14	13:39:18	0.45528	2.23386	FALSE	0
2022-09-14	13:39:18	0.484746	2.7186	FALSE	0
2022-09-14	13:39:19	0.539097	3.2577	FALSE	0
2022-09-14	13:39:19	0.488206	3.7459	FALSE	0
2022-09-14	13:39:19	0.503422	4.24933	FALSE	0
2022-09-14	13:39:19	0.524695	4.77402	FALSE	0
2022-09-14	13:39:20	0.517112	5.29113	FALSE	0
2022-09-14	13:39:20	0.506883	5.79802	FALSE	0
2022-09-14	13:39:20	0.523168	6.32118	FALSE	0
2022-09-14	13:39:21	0.516603	6.83779	FALSE	0
2022-09-14	13:39:21	0.526069	7.36386	FALSE	0
2022-09-14	13:39:21	0.519707	7.88356	FALSE	0
2022-09-14	13:39:21	0.517773	8.40134	FALSE	0
2022-09-14	13:39:22	0.514415	8.91575	FALSE	0
2022-09-14	13:39:22	0.536196	9.45195	FALSE	0
2022-09-14	13:39:22	0.46958	9.92153	FALSE	0
2022-09-14	13:39:22	0.51416	10.4357	FALSE	0
2022-09-14	13:39:23	0.474924	10.9106	FALSE	0
2022-09-14	13:39:23	0.542557	11.4532	FALSE	0
2022-09-14	13:39:23	0.497468	11.9506	FALSE	0
2022-09-14	13:39:24	0.508257	12.4589	FALSE	0
2022-09-14	13:39:24	0.503015	12.9619	FALSE	0
2022-09-14	13:39:24	0.472379	13.4343	FALSE	0
2022-09-14	13:39:24	0.588715	14.023	FALSE	0
2022-09-14	13:39:25	0.490445	14.5134	FALSE	0
2022-09-14	13:39:25	0.598435	15.1119	FALSE	0
2022-09-14	13:39:25	0.545661	15.6575	FALSE	0
2022-09-14	13:39:25	0.658537	16.3161	FALSE	0
2022-09-14	13:39:26	0.530293	16.8464	FALSE	0
2022-09-14	13:39:26	0.708308	17.5547	FALSE	0
2022-09-14	13:39:26	0.544491	18.0992	FALSE	0
2022-09-14	13:39:26	0.60556	18.7047	FALSE	0
2022-09-14	13:39:27	0.400827	19.1056	FALSE	0
2022-09-14	13:39:27	0.623422	19.729	FALSE	0
2022-09-14	13:39:27	0.478537	20.2075	FALSE	0
2022-09-14	13:39:27	0.551056	20.7586	FALSE	0
2022-09-14	13:39:28	0.409122	21.1677	FALSE	0
2022-09-14	13:39:28	0.654466	21.8222	FALSE	0
2022-09-14	13:39:28	0.410445	22.2326	FALSE	0
2022-09-14	13:39:29	0.577214	22.8098	FALSE	0
2022-09-14	13:39:29	0.499656	23.3095	FALSE	0
2022-09-14	13:39:29	0.519809	23.8293	FALSE	0
2022-09-14	13:39:29	0.52897	24.3583	FALSE	0
2022-09-14	13:39:30	0.413855	24.7721	FALSE	0
2022-09-14	13:39:30	0.617265	25.3894	FALSE	0
2022-09-14	13:39:30	0.366985	25.7564	FALSE	0
2022-09-14	13:39:30	0.585305	26.3417	FALSE	0
2022-09-14	13:39:31	0.480674	26.8223	FALSE	0
2022-09-14	13:39:31	0.551412	27.3738	FALSE	0
2022-09-14	13:39:31	0.50902	27.8828	FALSE	0
2022-09-14	13:39:31	0.553601	28.4364	FALSE	0
2022-09-14	13:39:32	0.490547	28.9269	FALSE	0
2022-09-14	13:39:32	0.547494	29.4744	FALSE	0
2022-09-14	13:39:32	0.522201	29.9966	FALSE	0
2022-09-14	13:39:33	0.524338	30.521	FALSE	0
2022-09-14	13:39:33	0.512023	31.033	FALSE	0
2022-09-14	13:39:33	0.525763	31.5587	FALSE	0
2022-09-14	13:39:33	0.527443	32.0862	FALSE	0
2022-09-14	13:39:34	0.530191	32.6164	FALSE	0
2022-09-14	13:39:34	0.524084	33.1405	FALSE	0
2022-09-14	13:39:34	0.511005	33.6515	FALSE	0
2022-09-14	13:39:34	0.572684	34.2241	FALSE	0
2022-09-14	13:39:35	0.541947	34.7661	FALSE	0
2022-09-14	13:39:35	0.560674	35.3268	FALSE	0
2022-09-14	13:39:35	0.566985	35.8938	FALSE	0
2022-09-14	13:39:35	0.509377	36.4031	FALSE	0
2022-09-14	13:39:36	0.451361	36.8545	FALSE	0
2022-09-14	13:39:36	0.588613	37.4431	FALSE	0
2022-09-14	13:39:36	0.365051	37.8082	FALSE	0
2022-09-14	13:39:37	0.382201	38.1904	FALSE	0
2022-09-14	13:39:37	0.542964	38.7333	FALSE	0
2022-09-14	13:39:37	0.669936	39.4033	FALSE	0
2022-09-14	13:39:37	0.572888	39.9761	FALSE	0
2022-09-14	13:39:38	0.618333	40.5945	FALSE	0
2022-09-14	13:39:38	0.477367	41.0718	FALSE	0
2022-09-14	13:39:38	0.613346	41.6852	FALSE	0
2022-09-14	13:39:38	0.435229	42.1204	FALSE	0
2022-09-14	13:39:39	0.682608	42.803	FALSE	0
2022-09-14	13:39:39	0.479809	43.2828	FALSE	0
2022-09-14	13:39:39	0.671718	43.9546	FALSE	0
2022-09-14	13:39:39	0.575331	44.5299	FALSE	0
2022-09-14	13:39:40	0.52215	45.052	FALSE	0
2022-09-14	13:39:40	0.497621	45.5497	FALSE	0
2022-09-14	13:39:40	0.663677	46.2133	FALSE	0
2022-09-14	13:39:41	0.562099	46.7754	FALSE	0
2022-09-14	13:39:41	0.467087	47.2425	FALSE	0
2022-09-14	13:39:41	0.637468	47.88	FALSE	0
2022-09-14	13:39:41	0.272379	48.1524	FALSE	0
2022-09-14	13:39:42	0.300573	48.4529	FALSE	0
2022-09-14	13:39:42	0.25355	48.7065	FALSE	0
2022-09-14	13:39:42	0.331616	49.0381	FALSE	0
2022-09-14	13:39:42	0.127443	49.1655	FALSE	0
2022-09-14	13:39:43	0.301947	49.4675	FALSE	0
2022-09-14	13:39:43	0.167341	49.6348	FALSE	0
2022-09-14	13:39:43	0.385509	50.0203	FALSE	0
2022-09-14	13:39:44	0.119453	50.1398	FALSE	0
2022-09-14	13:39:44	0.253753	50.3936	FALSE	0
2022-09-14	13:39:44	0.180674	50.5742	FALSE	0
2022-09-14	13:39:44	0.224848	50.7991	FALSE	0
2022-09-14	13:39:45	0.228766	51.0278	FALSE	0
2022-09-14	13:39:45	0.447137	51.475	FALSE	0
2022-09-14	13:39:45	0.661438	52.1364	FALSE	0
2022-09-14	13:39:45	0.968766	53.1052	FALSE	0
2022-09-14	13:39:46	0.904847	54.01	FALSE	0
2022-09-14	13:39:46	0.958231	54.9683	FALSE	0
2022-09-14	13:39:46	0.551056	55.5193	FALSE	0
2022-09-14	13:39:46	0.444796	55.9641	FALSE	0
2022-09-14	13:39:47	0.542608	56.5067	FALSE	0
2022-09-14	13:39:47	0.511463	57.0182	FALSE	0
2022-09-14	13:39:47	1.45385	58.472	FALSE	0
2022-09-14	13:39:48	1.18989	59.6619	FALSE	0
2022-09-14	13:39:48	1.89182	61.5537	FALSE	0
2022-09-14	13:39:48	0.687748	62.2415	FALSE	0
2022-09-14	13:39:48	0.58159	62.8231	FALSE	0
2022-09-14	13:39:49	0.554567	63.3776	FALSE	0
2022-09-14	13:39:49	0.336145	63.7138	FALSE	0
2022-09-14	13:39:49	0.517519	64.2313	FALSE	0
2022-09-14	13:39:49	0.34159	64.5729	FALSE	0
2022-09-14	13:39:50	0.283422	64.8563	FALSE	0
2022-09-14	13:39:50	0.291718	65.148	FALSE	0
2022-09-14	13:39:50	-0.00726439	65.148	FALSE	0
2022-09-14	13:39:50	0.21701	65.3651	FALSE	0
2022-09-14	13:39:51	0.0638297	65.4289	FALSE	0
2022-09-14	13:39:51	-0.265738	65.4289	FALSE	0
2022-09-14	13:39:51	-0.514185	65.4289	FALSE	0
2022-09-14	13:39:52	-0.573473	65.4289	FALSE	0
2022-09-14	13:39:52	-0.47103	65.4289	FALSE	0
2022-09-14	13:39:52	-0.342328	65.4289	FALSE	0
2022-09-14	13:39:52	-0.382938	65.4289	FALSE	0
2022-09-14	13:39:53	-0.312964	65.4289	FALSE	0
2022-09-14	13:39:53	-0.377188	65.4289	FALSE	0
2022-09-14	13:39:53	-0.358206	65.4289	FALSE	0
2022-09-14	13:39:53	-0.364262	65.4289	FALSE	0
2022-09-14	13:39:54	-0.295356	65.4289	FALSE	0
2022-09-14	13:39:54	-0.326857	65.4289	FALSE	0
2022-09-14	13:39:54	-0.336374	65.4289	FALSE	0
2022-09-14	13:39:54	-0.247366	65.4289	FALSE	0
2022-09-14	13:39:55	-0.264822	65.4289	FALSE	0
2022-09-14	13:39:55	-0.266857	65.4289	FALSE	0
2022-09-14	13:39:55	-0.352608	65.4289	FALSE	0
2022-09-14	13:39:56	-0.362786	65.4289	FALSE	0
2022-09-14	13:39:56	-0.626857	65.4289	FALSE	0
2022-09-14	13:39:56	-0.451946	65.4289	FALSE	0
2022-09-14	13:39:56	-0.388231	65.4289	FALSE	0
2022-09-14	13:39:57	0.124339	65.5532	FALSE	0
2022-09-14	13:39:57	1.44678	67	FALSE	0
2022-09-14	13:39:57	1.37447	68.3745	FALSE	0
2022-09-14	13:39:57	1.06291	69.4374	FALSE	0
2022-09-14	13:39:58	2.49085	71.9282	FALSE	0
2022-09-14	13:39:58	2.60861	74.5368	FALSE	0
2022-09-14	13:39:58	1.26169	75.7985	FALSE	0
2022-09-14	13:39:58	0.380216	76.1787	FALSE	0
2022-09-14	13:39:59	0.464695	76.6434	FALSE	0
2022-09-14	13:39:59	0.589835	77.2333	FALSE	0
2022-09-14	13:39:59	0.598791	77.8321	FALSE	0
2022-09-14	13:40:00	0.698689	78.5308	FALSE	0
2022-09-14	13:40:00	0.687799	79.2186	FALSE	0
2022-09-14	13:40:00	0.79757	80.0161	FALSE	0
2022-09-14	13:40:00	0.667443	80.6836	FALSE	0
2022-09-14	13:40:01	0.711056	81.3946	FALSE	0
2022-09-14	13:40:01	0.69584	82.0905	FALSE	0
2022-09-14	13:40:01	0.732634	82.8231	FALSE	0
2022-09-14	13:40:01	0.683524	83.5066	FALSE	0
2022-09-14	13:40:02	0.656807	84.1634	FALSE	0
2022-09-14	13:40:02	0.680165	84.8436	FALSE	0
2022-09-14	13:40:02	0.625153	85.4687	FALSE	0
2022-09-14	13:40:02	0.664898	86.1336	FALSE	0
2022-09-14	13:40:03	0.645356	86.779	FALSE	0
2022-09-14	13:40:03	0.658893	87.4379	FALSE	0
2022-09-14	13:40:03	0.574262	88.0122	FALSE	0
2022-09-14	13:40:04	0.426629	88.4388	FALSE	0
2022-09-14	13:40:04	0.434008	88.8728	FALSE	0
2022-09-14	13:40:04	0.457417	89.3302	FALSE	0
2022-09-14	13:40:04	0.379453	89.7097	FALSE	0
2022-09-14	13:40:05	0.339199	90.0489	FALSE	0
2022-09-14	13:40:05	0.206374	90.2552	FALSE	0
2022-09-14	13:40:05	0.28327	90.5385	FALSE	0
2022-09-14	13:40:05	0.189122	90.7276	FALSE	0
2022-09-14	13:40:06	0.0479009	90.7755	FALSE	0
2022-09-14	13:40:06	-0.211844	90.7755	FALSE	0
2022-09-14	13:40:06	-0.311386	90.7755	FALSE	0
2022-09-14	13:40:06	-0.690724	90.7755	FALSE	0
2022-09-14	13:40:07	-0.799427	90.7755	FALSE	0
2022-09-14	13:40:07	-0.966246	90.7755	FALSE	0
2022-09-14	13:40:07	-0.67449	90.7755	FALSE	0
2022-09-14	13:40:08	-0.566806	90.7755	FALSE	0
2022-09-14	13:40:08	-0.668231	90.7755	FALSE	0
2022-09-14	13:40:08	-0.105839	90.7755	FALSE	0
2022-09-14	13:40:08	0.339453	91.115	FALSE	0
2022-09-14	13:40:09	0.396349	91.5113	FALSE	0
2022-09-14	13:40:09	0.546221	92.0576	FALSE	0
2022-09-14	13:40:09	0.520318	92.5779	FALSE	0
2022-09-14	13:40:09	0.388461	92.9663	FALSE	0
2022-09-14	13:40:10	0.489478	93.4558	FALSE	0
2022-09-14	13:40:10	0.481539	93.9373	FALSE	0
2022-09-14	13:40:10	0.5764	94.5137	FALSE	0
2022-09-14	13:40:10	0.431514	94.9453	FALSE	0
2022-09-14	13:40:11	0.495891	95.4412	FALSE	0
2022-09-14	13:40:11	0.477774	95.9189	FALSE	0
2022-09-14	13:40:11	0.474568	96.3935	FALSE	0
2022-09-14	13:40:12	0.496807	96.8903	FALSE	0
2022-09-14	13:40:12	0.489784	97.3801	FALSE	0
2022-09-14	13:40:12	0.487239	97.8673	FALSE	0
2022-09-14	13:40:12	0.475738	98.3431	FALSE	0
2022-09-14	13:40:13	0.452379	98.7954	FALSE	0
2022-09-14	13:40:13	0.438944	99.2344	FALSE	0
2022-09-14	13:40:13	0.395127	99.6295	FALSE	0
2022-09-14	13:40:13	0.396196	100.026	FALSE	0
2022-09-14	13:40:14	0.4593	100.485	FALSE	0
2022-09-14	13:40:14	0.379707	100.865	FALSE	0
2022-09-14	13:40:14	0.37986	101.245	FALSE	0
2022-09-14	13:40:15	0.489631	101.734	FALSE	0
2022-09-14	13:40:15	0.42042	102.155	FALSE	0
2022-09-14	13:40:15	0.494109	102.649	FALSE	0
2022-09-14	13:40:15	0.25472	102.903	FALSE	0
2022-09-14	13:40:16	0.481794	103.385	FALSE	0
2022-09-14	13:40:16	0.37126	103.757	FALSE	0
2022-09-14	13:40:16	0.658028	104.415	FALSE	0
2022-09-14	13:40:16	0.72271	105.137	FALSE	0
2022-09-14	13:40:17	1.06011	106.197	FALSE	0
2022-09-14	13:40:17	0.966323	107.164	FALSE	0
2022-09-14	13:40:17	0.658944	107.823	FALSE	0
2022-09-14	13:40:17	0.455331	108.278	FALSE	0
2022-09-14	13:40:18	0.410038	108.688	FALSE	0
2022-09-14	13:40:18	0.483015	109.171	FALSE	0
2022-09-14	13:40:18	0.506527	109.678	FALSE	0
2022-09-14	13:40:19	0.225204	109.903	FALSE	0
2022-09-14	13:40:19	-0.062786	109.903	FALSE	0
2022-09-14	13:40:19	-0.429096	109.903	FALSE	0
2022-09-14	13:40:19	-0.543702	109.903	FALSE	0
2022-09-14	13:40:20	-0.505229	109.903	FALSE	0
2022-09-14	13:40:20	-0.542328	109.903	FALSE	0
2022-09-14	13:40:20	-0.567722	109.903	FALSE	0
2022-09-14	13:40:20	-0.602786	109.903	FALSE	0
2022-09-14	13:40:21	-0.590216	109.903	FALSE	0
2022-09-14	13:40:21	-0.54416	109.903	FALSE	0
2022-09-14	13:40:21	-0.650317	109.903	FALSE	0
2022-09-14	13:40:21	-0.454949	109.903	FALSE	0
2022-09-14	13:40:22	-0.382226	109.903	FALSE	0
2022-09-14	13:40:22	-0.221666	109.903	FALSE	0
2022-09-14	13:40:22	-0.14243	109.903	FALSE	0
2022-09-14	13:40:23	-0.0113865	109.903	FALSE	0
2022-09-14	13:40:23	0.231056	110.134	FALSE	0
2022-09-14	13:40:23	0.305407	110.439	FALSE	0
2022-09-14	13:40:23	0.438232	110.877	FALSE	0
2022-09-14	13:40:24	0.402405	111.28	FALSE	0
2022-09-14	13:40:24	0.398791	111.679	FALSE	0
2022-09-14	13:40:24	0.530089	112.209	FALSE	0
2022-09-14	13:40:24	0.394975	112.604	FALSE	0
2022-09-14	13:40:25	0.381183	112.985	FALSE	0
2022-09-14	13:40:25	0.353397	113.338	FALSE	0
2022-09-14	13:40:25	0.322863	113.661	FALSE	0
2022-09-14	13:40:26	0.380064	114.041	FALSE	0
2022-09-14	13:40:26	0.356908	114.398	FALSE	0
2022-09-14	13:40:26	0.437723	114.836	FALSE	0
2022-09-14	13:40:26	0.440166	115.276	FALSE	0
2022-09-14	13:40:27	0.465153	115.741	FALSE	0
2022-09-14	13:40:27	0.515229	116.256	FALSE	0
2022-09-14	13:40:27	0.261031	116.517	FALSE	0
2022-09-14	13:40:27	0.220674	116.738	FALSE	0
2022-09-14	13:40:28	0.204033	116.942	FALSE	0
2022-09-14	13:40:28	0.394466	117.337	FALSE	0
2022-09-14	13:40:28	0.278232	117.615	FALSE	0
2022-09-14	13:40:28	0.499453	118.114	FALSE	0
2022-09-14	13:40:29	0.461438	118.576	FALSE	0
2022-09-14	13:40:29	0.468104	119.044	FALSE	0
2022-09-14	13:40:29	0.473906	119.518	FALSE	0
2022-09-14	13:40:29	1.05574	120.573	FALSE	0
2022-09-14	13:40:30	0.659148	121.233	FALSE	0
2022-09-14	13:40:30	0.575178	121.808	FALSE	0
2022-09-14	13:40:30	0.415026	122.223	FALSE	0
2022-09-14	13:40:31	0.498537	122.721	FALSE	0
2022-09-14	13:40:31	0.512125	123.233	FALSE	0
2022-09-14	13:40:31	0.494364	123.728	FALSE	0
2022-09-14	13:40:31	0.390598	124.118	FALSE	0
2022-09-14	13:40:32	0.348359	124.467	FALSE	0
2022-09-14	13:40:32	0.027443	124.494	FALSE	0
2022-09-14	13:40:32	-0.199173	124.494	FALSE	0
2022-09-14	13:40:32	-0.255865	124.494	FALSE	0
2022-09-14	13:40:33	0.498232	124.992	FALSE	0
2022-09-14	13:40:33	1.59497	126.587	FALSE	0
2022-09-14	13:40:33	2.79324	129.381	FALSE	0
2022-09-14	13:40:33	2.92342	132.304	FALSE	0
2022-09-14	13:40:34	4.00347	136.308	1	1
2022-09-14	13:40:34	2.95777	139.265	FALSE	1
2022-09-14	13:40:34	2.44729	141.713	FALSE	1
2022-09-14	13:40:35	1.39818	143.111	FALSE	1
2022-09-14	13:40:35	0.850038	143.961	FALSE	1
2022-09-14	13:40:35	0.513346	144.474	FALSE	1
2022-09-14	13:40:35	0.355789	144.83	FALSE	1
2022-09-14	13:40:36	0.596858	145.427	FALSE	1
2022-09-14	13:40:36	-0.16304	145.427	FALSE	1
2022-09-14	13:40:36	-0.407162	145.427	FALSE	1
2022-09-14	13:40:36	-0.404567	145.427	FALSE	1
2022-09-14	13:40:37	-0.282124	145.427	FALSE	1
2022-09-14	13:40:37	-0.299987	145.427	FALSE	1
2022-09-14	13:40:37	-0.257595	145.427	FALSE	1
2022-09-14	13:40:37	-0.224974	145.427	FALSE	1
2022-09-14	13:40:38	0.0710562	145.498	FALSE	1
2022-09-14	13:40:38	0.39701	145.895	FALSE	1
2022-09-14	13:40:38	0.795076	146.69	FALSE	1
2022-09-14	13:40:39	0.724695	147.415	FALSE	1
2022-09-14	13:40:39	1.95564	149.37	FALSE	1
2022-09-14	13:40:39	2.67569	152.046	FALSE	1
2022-09-14	13:40:39	0.991565	153.038	FALSE	1
2022-09-14	13:40:40	0.69925	153.737	FALSE	1
2022-09-14	13:40:40	0.188308	153.925	FALSE	1
2022-09-14	13:40:40	0.706883	154.632	FALSE	1
2022-09-14	13:40:40	0.332176	154.964	FALSE	1
2022-09-14	13:40:41	0.525611	155.49	FALSE	1
2022-09-14	13:40:41	0.262456	155.752	FALSE	1
2022-09-14	13:40:41	0.290751	156.043	FALSE	1
2022-09-14	13:40:42	0.109682	156.153	FALSE	1
2022-09-14	13:40:42	-0.353524	156.153	FALSE	1
2022-09-14	13:40:42	-0.783345	156.153	FALSE	1
2022-09-14	13:40:42	-0.670673	156.153	FALSE	1
2022-09-14	13:40:43	-0.805483	156.153	FALSE	1
2022-09-14	13:40:43	-0.471692	156.153	FALSE	1
2022-09-14	13:40:43	-0.191488	156.153	FALSE	1
2022-09-14	13:40:43	-0.0490455	156.153	FALSE	1
2022-09-14	13:40:44	0.273702	156.426	FALSE	1
2022-09-14	13:40:44	0.208257	156.635	FALSE	1
2022-09-14	13:40:44	0.234822	156.869	FALSE	1
2022-09-14	13:40:44	0.336145	157.206	FALSE	1
2022-09-14	13:40:45	0.338181	157.544	FALSE	1
2022-09-14	13:40:45	0.385153	157.929	FALSE	1
2022-09-14	13:40:45	0.314059	158.243	FALSE	1
2022-09-14	13:40:46	0.37299	158.616	FALSE	1
2022-09-14	13:40:46	0.190751	158.807	FALSE	1
2022-09-14	13:40:46	0.498435	159.305	FALSE	1
2022-09-14	13:40:46	0.199758	159.505	FALSE	1
2022-09-14	13:40:47	0.443931	159.949	FALSE	1
2022-09-14	13:40:47	0.138792	160.088	FALSE	1
2022-09-14	13:40:47	0.267748	160.355	FALSE	1
2022-09-14	13:40:47	0.0820485	160.437	FALSE	1
2022-09-14	13:40:48	0.371361	160.809	FALSE	1
2022-09-14	13:40:48	0.315382	161.124	FALSE	1
2022-09-14	13:40:48	0.337774	161.462	FALSE	1
2022-09-14	13:40:48	0.405	161.867	FALSE	1
2022-09-14	13:40:49	0.354262	162.221	FALSE	1
2022-09-14	13:40:49	0.43243	162.654	FALSE	1
2022-09-14	13:40:49	0.310903	162.965	FALSE	1
2022-09-14	13:40:50	0.454059	163.419	FALSE	1
2022-09-14	13:40:50	0.282608	163.701	FALSE	1
2022-09-14	13:40:50	0.415687	164.117	FALSE	1
2022-09-14	13:40:50	0.28841	164.405	FALSE	1
2022-09-14	13:40:51	0.530751	164.936	FALSE	1
2022-09-14	13:40:51	0.203982	165.14	FALSE	1
2022-09-14	13:40:51	0.52444	165.665	FALSE	1
2022-09-14	13:40:51	0.261336	165.926	FALSE	1
2022-09-14	13:40:52	0.509428	166.435	FALSE	1
2022-09-14	13:40:52	0.190598	166.626	FALSE	1
2022-09-14	13:40:52	0.188817	166.815	FALSE	1
2022-09-14	13:40:52	0.114211	166.929	FALSE	1
2022-09-14	13:40:53	0.215585	167.144	FALSE	1
2022-09-14	13:40:53	0.054415	167.199	FALSE	1
2022-09-14	13:40:53	0.320776	167.52	FALSE	1
2022-09-14	13:40:54	0.297417	167.817	FALSE	1
2022-09-14	13:40:54	0.316298	168.133	FALSE	1
2022-09-14	13:40:54	0.534822	168.668	FALSE	1
2022-09-14	13:40:54	0.435992	169.104	FALSE	1
2022-09-14	13:40:55	1.11167	170.216	FALSE	1
2022-09-14	13:40:55	0.42841	170.644	FALSE	1
2022-09-14	13:40:55	0.396909	171.041	FALSE	1
2022-09-14	13:40:55	0.19986	171.241	FALSE	1
2022-09-14	13:40:56	0.421132	171.662	FALSE	1
2022-09-14	13:40:56	0.192277	171.854	FALSE	1
2022-09-14	13:40:56	0.373143	172.228	FALSE	1
2022-09-14	13:40:56	0.256959	172.485	FALSE	1
2022-09-14	13:40:57	0.378588	172.863	FALSE	1
2022-09-14	13:40:57	0.266323	173.129	FALSE	1
2022-09-14	13:40:57	0.364135	173.494	FALSE	1
2022-09-14	13:40:58	0.30042	173.794	FALSE	1
2022-09-14	13:40:58	0.406374	174.2	FALSE	1
2022-09-14	13:40:58	0.292888	174.493	FALSE	1
2022-09-14	13:40:58	0.413041	174.906	FALSE	1
2022-09-14	13:40:59	0.306679	175.213	FALSE	1
2022-09-14	13:40:59	0.449122	175.662	FALSE	1
2022-09-14	13:40:59	0.218842	175.881	FALSE	1
2022-09-14	13:40:59	0.416654	176.298	FALSE	1
2022-09-14	13:41:00	0.268817	176.566	FALSE	1
2022-09-14	13:41:00	0.375738	176.942	FALSE	1
2022-09-14	13:41:00	0.329682	177.272	FALSE	1
2022-09-14	13:41:00	0.662608	177.934	FALSE	1
2022-09-14	13:41:01	0.350242	178.285	FALSE	1
2022-09-14	13:41:01	0.559249	178.844	FALSE	1
2022-09-14	13:41:01	0.698028	179.542	FALSE	1
2022-09-14	13:41:02	0.733601	180.276	FALSE	1
2022-09-14	13:41:02	0.720979	180.997	FALSE	1
2022-09-14	13:41:02	0.726425	181.723	FALSE	1
2022-09-14	13:41:02	0.722303	182.445	FALSE	1
2022-09-14	13:41:03	0.731259	183.177	FALSE	1
2022-09-14	13:41:03	0.721285	183.898	FALSE	1
2022-09-14	13:41:03	0.733957	184.632	FALSE	1
2022-09-14	13:41:03	0.732786	185.365	FALSE	1
2022-09-14	13:41:04	0.720776	186.085	FALSE	1
2022-09-14	13:41:04	0.724695	186.81	FALSE	1
2022-09-14	13:41:04	0.727799	187.538	FALSE	1
2022-09-14	13:41:05	0.722965	188.261	FALSE	1
2022-09-14	13:41:05	0.723117	188.984	FALSE	1
2022-09-14	13:41:05	0.727392	189.711	FALSE	1
2022-09-14	13:41:05	0.723422	190.435	FALSE	1
2022-09-14	13:41:06	0.722099	191.157	FALSE	1
2022-09-14	13:41:06	0.725204	191.882	FALSE	1
2022-09-14	13:41:06	0.728868	192.611	FALSE	1
2022-09-14	13:41:06	0.726679	193.338	FALSE	1
2022-09-14	13:41:07	0.718639	194.056	FALSE	1
2022-09-14	13:41:07	0.723779	194.78	FALSE	1
2022-09-14	13:41:07	0.726374	195.506	FALSE	1
2022-09-14	13:41:07	0.729886	196.236	FALSE	1
2022-09-14	13:41:08	0.726476	196.963	FALSE	1
2022-09-14	13:41:08	0.727952	197.691	FALSE	1
2022-09-14	13:41:08	0.729428	198.42	FALSE	1
2022-09-14	13:41:09	0.724338	199.144	FALSE	1
2022-09-14	13:41:09	0.726272	199.871	FALSE	1
2022-09-14	13:41:09	0.725051	200.596	FALSE	1
2022-09-14	13:41:09	0.724491	201.32	FALSE	1
2022-09-14	13:41:10	0.728868	202.049	FALSE	1
2022-09-14	13:41:10	0.725305	202.774	FALSE	1
2022-09-14	13:41:10	0.728359	203.503	FALSE	1
2022-09-14	13:41:10	0.721946	204.225	FALSE	1
2022-09-14	13:41:11	0.730242	204.955	FALSE	1
2022-09-14	13:41:11	0.731412	205.686	FALSE	1
2022-09-14	13:41:11	0.730598	206.417	FALSE	1
2022-09-14	13:41:11	0.72729	207.144	FALSE	1
2022-09-14	13:41:12	0.723372	207.868	FALSE	1
2022-09-14	13:41:12	0.724288	208.592	FALSE	1
2022-09-14	13:41:12	0.726629	209.319	FALSE	1
2022-09-14	13:41:13	0.727239	210.046	FALSE	1
2022-09-14	13:41:13	0.725916	210.772	FALSE	1
2022-09-14	13:41:13	0.721946	211.494	FALSE	1
2022-09-14	13:41:13	0.732481	212.226	FALSE	1
2022-09-14	13:41:14	0.728054	212.954	FALSE	1
2022-09-14	13:41:14	0.729275	213.684	FALSE	1
2022-09-14	13:41:14	0.725662	214.409	FALSE	1
2022-09-14	13:41:14	0.706272	215.115	FALSE	1
2022-09-14	13:41:15	0.367188	215.483	FALSE	1
2022-09-14	13:41:15	0.258995	215.742	FALSE	1
2022-09-14	13:41:15	0.431005	216.173	FALSE	1
2022-09-14	13:41:15	0.336349	216.509	FALSE	1
2022-09-14	13:41:16	0.433092	216.942	FALSE	1
2022-09-14	13:41:16	0.2793	217.221	FALSE	1
2022-09-14	13:41:16	0.37645	217.598	FALSE	1
2022-09-14	13:41:17	0.282608	217.88	FALSE	1
2022-09-14	13:41:17	0.251667	218.132	FALSE	1
2022-09-14	13:41:17	0.276298	218.408	FALSE	1
2022-09-14	13:41:17	0.169682	218.578	FALSE	1
2022-09-14	13:41:18	0.112328	218.69	FALSE	1
2022-09-14	13:41:18	0.255178	218.946	FALSE	1
2022-09-14	13:41:18	0.259606	219.205	FALSE	1
2022-09-14	13:41:18	0.463728	219.669	FALSE	1
2022-09-14	13:41:19	0.234568	219.903	FALSE	1
2022-09-14	13:41:19	0.300318	220.204	FALSE	1
2022-09-14	13:41:19	0.463677	220.667	FALSE	1
2022-09-14	13:41:19	0.358283	221.026	FALSE	1
2022-09-14	13:41:20	0.531667	221.557	FALSE	1
2022-09-14	13:41:20	0.430751	221.988	FALSE	1
2022-09-14	13:41:20	0.414211	222.402	FALSE	1
2022-09-14	13:41:21	0.47986	222.882	FALSE	1
2022-09-14	13:41:21	0.433957	223.316	FALSE	1
2022-09-14	13:41:21	0.478791	223.795	FALSE	1
2022-09-14	13:41:21	0.392939	224.188	FALSE	1
2022-09-14	13:41:22	0.282863	224.471	FALSE	1
2022-09-14	13:41:22	0.300929	224.772	FALSE	1
2022-09-14	13:41:22	0.322863	225.095	FALSE	1
2022-09-14	13:41:22	0.328817	225.423	FALSE	1
2022-09-14	13:41:23	0.567188	225.991	FALSE	1
2022-09-14	13:41:23	0.443677	226.434	FALSE	1
2022-09-14	13:41:23	0.378384	226.813	FALSE	1
2022-09-14	13:41:23	0.567494	227.38	FALSE	1
2022-09-14	13:41:24	0.446883	227.827	FALSE	1
2022-09-14	13:41:24	0.288766	228.116	FALSE	1
2022-09-14	13:41:24	0.160522	228.276	FALSE	1
2022-09-14	13:41:25	0.0396058	228.316	FALSE	1
2022-09-14	13:41:25	-0.0591219	228.316	FALSE	1
2022-09-14	13:41:25	0.0698349	228.386	FALSE	1
2022-09-14	13:41:25	0.0291733	228.415	FALSE	1
2022-09-14	13:41:26	0.351005	228.766	FALSE	1
2022-09-14	13:41:26	-0.0215646	228.766	FALSE	1
2022-09-14	13:41:26	-0.0182567	228.766	FALSE	1
2022-09-14	13:41:26	0.400674	229.167	FALSE	1
2022-09-14	13:41:27	0.259504	229.426	FALSE	1
2022-09-14	13:41:27	0.381031	229.807	FALSE	1
2022-09-14	13:41:27	0.251667	230.059	FALSE	1
2022-09-14	13:41:27	0.297672	230.356	FALSE	1
2022-09-14	13:41:28	0.343473	230.7	FALSE	1
2022-09-14	13:41:28	0.314618	231.015	FALSE	1
2022-09-14	13:41:28	0.230649	231.245	FALSE	1
2022-09-14	13:41:29	0.439453	231.685	FALSE	1
2022-09-14	13:41:29	0.337112	232.022	FALSE	1
2022-09-14	13:41:29	0.291514	232.313	FALSE	1
2022-09-14	13:41:29	0.324746	232.638	FALSE	1
2022-09-14	13:41:30	0.353499	232.992	FALSE	1
2022-09-14	13:41:30	0.490038	233.482	FALSE	1
2022-09-14	13:41:30	0.318486	233.8	FALSE	1
2022-09-14	13:41:30	0.182557	233.983	FALSE	1
2022-09-14	13:41:31	0.428919	234.412	FALSE	1
2022-09-14	13:41:31	0.328766	234.74	FALSE	1
2022-09-14	13:41:31	0.356552	235.097	FALSE	1
2022-09-14	13:41:31	0.303473	235.4	FALSE	1
2022-09-14	13:41:32	0.29757	235.698	FALSE	1
2022-09-14	13:41:32	0.330242	236.028	FALSE	1
2022-09-14	13:41:32	0.441031	236.469	FALSE	1
2022-09-14	13:41:33	0.311616	236.781	FALSE	1
2022-09-14	13:41:33	0.551616	237.332	FALSE	1
2022-09-14	13:41:33	0.407545	237.74	FALSE	1
2022-09-14	13:41:33	0.351209	238.091	FALSE	1
2022-09-14	13:41:34	0.524236	238.615	FALSE	1
2022-09-14	13:41:34	0.404593	239.02	FALSE	1
2022-09-14	13:41:34	0.437468	239.457	FALSE	1
2022-09-14	13:41:34	0.539758	239.997	FALSE	1
2022-09-14	13:41:35	0.36729	240.365	FALSE	1
2022-09-14	13:41:35	0.493295	240.858	FALSE	1
2022-09-14	13:41:35	0.570089	241.428	FALSE	1
2022-09-14	13:41:36	0.882201	242.31	FALSE	1
2022-09-14	13:41:36	0.875229	243.185	FALSE	1
2022-09-14	13:41:36	0.52444	243.71	FALSE	1
2022-09-14	13:41:36	0.532074	244.242	FALSE	1
2022-09-14	13:41:37	0.457672	244.7	FALSE	1
2022-09-14	13:41:37	0.539605	245.239	FALSE	1
2022-09-14	13:41:37	0.53757	245.777	FALSE	1
2022-09-14	13:41:37	0.560471	246.337	FALSE	1
2022-09-14	13:41:38	0.559097	246.896	FALSE	1
2022-09-14	13:41:38	0.523778	247.42	FALSE	1
2022-09-14	13:41:38	0.621998	248.042	FALSE	1
2022-09-14	13:41:38	0.482557	248.525	FALSE	1
2022-09-14	13:41:39	0.527341	249.052	FALSE	1
2022-09-14	13:41:39	0.542914	249.595	FALSE	1
2022-09-14	13:41:39	0.436501	250.031	FALSE	1
2022-09-14	13:41:40	0.393906	250.425	FALSE	1
2022-09-14	13:41:40	0.404186	250.829	FALSE	1
2022-09-14	13:41:40	0.510038	251.339	FALSE	1
2022-09-14	13:41:40	0.392888	251.732	FALSE	1
2022-09-14	13:41:41	0.448613	252.181	FALSE	1
2022-09-14	13:41:41	0.372328	252.553	FALSE	1
2022-09-14	13:41:41	0.331311	252.885	FALSE	1
2022-09-14	13:41:41	0.344898	253.23	FALSE	1
2022-09-14	13:41:42	0.409835	253.639	FALSE	1
2022-09-14	13:41:42	0.345356	253.985	FALSE	1
2022-09-14	13:41:42	0.435127	254.42	FALSE	1
2022-09-14	13:41:42	0.339249	254.759	FALSE	1
2022-09-14	13:41:43	0.309682	255.069	FALSE	1
2022-09-14	13:41:43	0.489886	255.559	FALSE	1
2022-09-14	13:41:43	0.303982	255.863	FALSE	1
2022-09-14	13:41:44	0.260369	256.123	FALSE	1
2022-09-14	13:41:44	0.279606	256.403	FALSE	1
2022-09-14	13:41:44	0.143728	256.546	FALSE	1
2022-09-14	13:41:44	0.2364	256.783	FALSE	1
2022-09-14	13:41:45	0.298893	257.082	FALSE	1
2022-09-14	13:41:45	0.52785	257.609	FALSE	1
2022-09-14	13:41:45	0.5364	258.146	FALSE	1
2022-09-14	13:41:45	0.426476	258.572	FALSE	1
2022-09-14	13:41:46	0.434771	259.007	FALSE	1
2022-09-14	13:41:46	0.402303	259.409	FALSE	1
2022-09-14	13:41:46	0.433193	259.843	FALSE	1
2022-09-14	13:41:46	0.621743	260.464	FALSE	1
2022-09-14	13:41:47	0.419758	260.884	FALSE	1
2022-09-14	13:41:47	0.415382	261.3	FALSE	1
2022-09-14	13:41:47	0.59416	261.894	FALSE	1
2022-09-14	13:41:48	0.419453	262.313	FALSE	1
2022-09-14	13:41:48	0.518181	262.831	FALSE	1
2022-09-14	13:41:48	0.41243	263.244	FALSE	1
2022-09-14	13:41:48	0.412176	263.656	FALSE	1
2022-09-14	13:41:49	0.517723	264.174	FALSE	1
2022-09-14	13:41:49	0.40271	264.576	FALSE	1
2022-09-14	13:41:49	0.412277	264.989	FALSE	1
2022-09-14	13:41:49	0.539911	265.529	FALSE	1
2022-09-14	13:41:50	0.43187	265.96	FALSE	1
2022-09-14	13:41:50	0.341641	266.302	FALSE	1
2022-09-14	13:41:50	0.527188	266.829	FALSE	1
2022-09-14	13:41:50	0.408359	267.238	FALSE	1
2022-09-14	13:41:51	0.549478	267.787	FALSE	1
2022-09-14	13:41:51	0.436705	268.224	FALSE	1
2022-09-14	13:41:51	0.345051	268.569	FALSE	1
2022-09-14	13:41:52	0.557366	269.126	FALSE	1
2022-09-14	13:41:52	0.374771	269.501	FALSE	1
2022-09-14	13:41:52	0.501997	270.003	FALSE	1
2022-09-14	13:41:52	0.353906	270.357	FALSE	1
2022-09-14	13:41:53	0.413397	270.77	FALSE	1
2022-09-14	13:41:53	0.641743	271.412	FALSE	1
2022-09-14	13:41:53	0.427341	271.839	FALSE	1
2022-09-14	13:41:53	0.538486	272.378	FALSE	1
2022-09-14	13:41:54	0.333448	272.711	FALSE	1
2022-09-14	13:41:54	0.436858	273.148	FALSE	1
2022-09-14	13:41:54	0.589071	273.737	FALSE	1
2022-09-14	13:41:54	0.423575	274.161	FALSE	1
2022-09-14	13:41:55	0.564389	274.725	FALSE	1
2022-09-14	13:41:55	0.430853	275.156	FALSE	1
2022-09-14	13:41:55	0.472023	275.628	FALSE	1
2022-09-14	13:41:56	0.580216	276.208	FALSE	1
2022-09-14	13:41:56	0.477214	276.685	FALSE	1
2022-09-14	13:41:56	0.607137	277.293	FALSE	1
2022-09-14	13:41:56	0.410954	277.704	FALSE	1
2022-09-14	13:41:57	0.452685	278.156	FALSE	1
2022-09-14	13:41:57	0.635178	278.791	FALSE	1
2022-09-14	13:41:57	0.46383	279.255	FALSE	1
2022-09-14	13:41:57	0.594008	279.849	FALSE	1
2022-09-14	13:41:58	0.448512	280.298	FALSE	1
2022-09-14	13:41:58	0.444491	280.742	FALSE	1
2022-09-14	13:41:58	0.656043	281.398	FALSE	1
2022-09-14	13:41:58	0.450954	281.849	FALSE	1
2022-09-14	13:41:59	0.530496	282.38	FALSE	1
2022-09-14	13:41:59	0.371361	282.751	FALSE	1
2022-09-14	13:41:59	0.345255	283.096	FALSE	1
2022-09-14	13:42:00	0.540063	283.636	FALSE	1
2022-09-14	13:42:00	0.248461	283.885	FALSE	1
2022-09-14	13:42:00	0.168104	284.053	FALSE	1
2022-09-14	13:42:00	0.359555	284.413	FALSE	1
2022-09-14	13:42:01	0.245916	284.658	FALSE	1
2022-09-14	13:42:01	0.232583	284.891	FALSE	1
2022-09-14	13:42:01	0.441031	285.332	FALSE	1
2022-09-14	13:42:01	0.484797	285.817	FALSE	1
2022-09-14	13:42:02	0.518842	286.336	FALSE	1
2022-09-14	13:42:02	0.420216	286.756	FALSE	1
2022-09-14	13:42:02	0.523982	287.28	FALSE	1
2022-09-14	13:42:02	0.489529	287.769	FALSE	1
2022-09-14	13:42:03	0.498842	288.268	FALSE	1
2022-09-14	13:42:03	0.478639	288.747	FALSE	1
2022-09-14	13:42:03	0.544338	289.291	FALSE	1
2022-09-14	13:42:04	0.491769	289.783	FALSE	1
2022-09-14	13:42:04	0.556908	290.34	FALSE	1
2022-09-14	13:42:04	0.47411	290.814	FALSE	1
2022-09-14	13:42:04	0.474924	291.289	FALSE	1
2022-09-14	13:42:05	0.456959	291.746	FALSE	1
2022-09-14	13:42:05	0.472634	292.219	FALSE	1
2022-09-14	13:42:05	0.472837	292.691	FALSE	1
2022-09-14	13:42:05	0.476603	293.168	FALSE	1
2022-09-14	13:42:06	0.468919	293.637	FALSE	1
2022-09-14	13:42:06	0.470802	294.108	FALSE	1
2022-09-14	13:42:06	0.451005	294.559	FALSE	1
2022-09-14	13:42:06	0.395076	294.954	FALSE	1
2022-09-14	13:42:07	0.399453	295.353	FALSE	1
2022-09-14	13:42:07	0.412328	295.766	FALSE	1
2022-09-14	13:42:07	0.475942	296.242	FALSE	1
2022-09-14	13:42:08	0.476705	296.718	FALSE	1
2022-09-14	13:42:08	0.467952	297.186	FALSE	1
2022-09-14	13:42:08	0.455992	297.642	FALSE	1
2022-09-14	13:42:08	0.471565	298.114	FALSE	1
2022-09-14	13:42:09	0.448308	298.562	FALSE	1
2022-09-14	13:42:09	0.479962	299.042	FALSE	1
2022-09-14	13:42:09	0.450903	299.493	FALSE	1
2022-09-14	13:42:09	0.457417	299.95	FALSE	1
2022-09-14	13:42:10	0.462863	300.413	FALSE	1
2022-09-14	13:42:10	0.465458	300.879	FALSE	1
2022-09-14	13:42:10	0.379504	301.258	FALSE	1
2022-09-14	13:42:11	0.422252	301.68	FALSE	1
2022-09-14	13:42:11	0.370852	302.051	FALSE	1
2022-09-14	13:42:11	0.0420994	302.093	FALSE	1
2022-09-14	13:42:11	0.206221	302.3	FALSE	1
2022-09-14	13:42:12	0.168563	302.468	FALSE	1
2022-09-14	13:42:12	0.251361	302.72	FALSE	1
2022-09-14	13:42:12	0.68958	303.409	FALSE	1
2022-09-14	13:42:12	0.369326	303.778	FALSE	1
2022-09-14	13:42:13	0.356807	304.135	FALSE	1
2022-09-14	13:42:13	0.702557	304.838	FALSE	1
2022-09-14	13:42:13	0.51416	305.352	FALSE	1
2022-09-14	13:42:13	0.611209	305.963	FALSE	1
2022-09-14	13:42:14	0.603728	306.567	FALSE	1
2022-09-14	13:42:14	0.403626	306.971	FALSE	1
2022-09-14	13:42:14	0.589224	307.56	FALSE	1
2022-09-14	13:42:15	0.417214	307.977	FALSE	1
2022-09-14	13:42:15	0.63131	308.608	FALSE	1
2022-09-14	13:42:15	0.415789	309.024	FALSE	1
2022-09-14	13:42:15	0.414059	309.438	FALSE	1
2022-09-14	13:42:16	0.444288	309.882	FALSE	1
2022-09-14	13:42:16	0.365356	310.248	FALSE	1
2022-09-14	13:42:16	0.516857	310.765	FALSE	1
2022-09-14	13:42:16	0.377774	311.142	FALSE	1
2022-09-14	13:42:17	0.402506	311.545	FALSE	1
2022-09-14	13:42:17	0.476552	312.021	FALSE	1
2022-09-14	13:42:17	0.4307	312.452	FALSE	1
2022-09-14	13:42:17	1.04225	313.494	FALSE	1
2022-09-14	13:42:18	1.27905	314.773	FALSE	1
2022-09-14	13:42:18	0.696349	315.47	FALSE	1
2022-09-14	13:42:18	0.568409	316.038	FALSE	1
2022-09-14	13:42:19	0.345	316.383	FALSE	1
2022-09-14	13:42:19	0.386222	316.769	FALSE	1
2022-09-14	13:42:19	0.415178	317.185	FALSE	1
2022-09-14	13:42:19	0.39584	317.58	FALSE	1
2022-09-14	13:42:20	0.528715	318.109	FALSE	1
2022-09-14	13:42:20	0.359199	318.468	FALSE	1
2022-09-14	13:42:20	0.141794	318.61	FALSE	1
2022-09-14	13:42:20	0.266425	318.877	FALSE	1
2022-09-14	13:42:21	0.342761	319.219	FALSE	1
2022-09-14	13:42:21	0.311514	319.531	FALSE	1
2022-09-14	13:42:21	0.35813	319.889	FALSE	1
2022-09-14	13:42:21	0.213753	320.103	FALSE	1
2022-09-14	13:42:22	0.290496	320.393	FALSE	1
2022-09-14	13:42:22	0.218588	320.612	FALSE	1
2022-09-14	13:42:22	0.389428	321.001	FALSE	1
2022-09-14	13:42:23	0.384746	321.386	FALSE	1
2022-09-14	13:42:23	0.328664	321.715	FALSE	1
2022-09-14	13:42:23	0.47411	322.189	FALSE	1
2022-09-14	13:42:23	0.361692	322.55	FALSE	1
2022-09-14	13:42:24	0.500114	323.051	FALSE	1
2022-09-14	13:42:24	0.383982	323.435	FALSE	1
2022-09-14	13:42:24	0.346069	323.781	FALSE	1
2022-09-14	13:42:24	0.3707	324.151	FALSE	1
2022-09-14	13:42:25	0.373652	324.525	FALSE	1
2022-09-14	13:42:25	0.383117	324.908	FALSE	1
2022-09-14	13:42:25	0.404491	325.313	FALSE	1
2022-09-14	13:42:25	0.380674	325.693	FALSE	1
2022-09-14	13:42:26	0.405662	326.099	FALSE	1
2022-09-14	13:42:26	0.401743	326.501	FALSE	1
2022-09-14	13:42:26	0.40159	326.902	FALSE	1
2022-09-14	13:42:27	0.40383	327.306	FALSE	1
2022-09-14	13:42:27	0.400216	327.706	FALSE	1
2022-09-14	13:42:27	0.3964	328.103	FALSE	1
2022-09-14	13:42:27	0.398893	328.502	FALSE	1
2022-09-14	13:42:28	0.397723	328.899	FALSE	1
2022-09-14	13:42:28	0.40098	329.3	FALSE	1
2022-09-14	13:42:28	0.394211	329.695	FALSE	1
2022-09-14	13:42:28	0.399351	330.094	FALSE	1
2022-09-14	13:42:29	0.403575	330.497	FALSE	1
2022-09-14	13:42:29	0.395229	330.893	FALSE	1
2022-09-14	13:42:29	0.402608	331.295	FALSE	1
2022-09-14	13:42:29	0.379249	331.675	FALSE	1
2022-09-14	13:42:30	0.371514	332.046	FALSE	1
2022-09-14	13:42:30	0.37355	332.42	FALSE	1
2022-09-14	13:42:30	0.368817	332.788	FALSE	1
2022-09-14	13:42:31	0.365407	333.154	FALSE	1
2022-09-14	13:42:31	0.393601	333.547	FALSE	1
2022-09-14	13:42:31	0.390344	333.938	FALSE	1
2022-09-14	13:42:31	0.377519	334.315	FALSE	1
2022-09-14	13:42:32	0.381031	334.696	FALSE	1
2022-09-14	13:42:32	0.373753	335.07	FALSE	1
2022-09-14	13:42:32	0.425458	335.496	FALSE	1
2022-09-14	13:42:32	0.402812	335.898	FALSE	1
2022-09-14	13:42:33	0.522608	336.421	FALSE	1
2022-09-14	13:42:33	0.489326	336.91	FALSE	1
2022-09-14	13:42:33	0.44215	337.352	FALSE	1
2022-09-14	13:42:33	0.22439	337.577	FALSE	1
2022-09-14	13:42:34	0.125	337.702	FALSE	1
2022-09-14	13:42:34	-0.152201	337.702	FALSE	1
2022-09-14	13:42:34	-0.201819	337.702	FALSE	1
2022-09-14	13:42:35	-0.376679	337.702	FALSE	1
2022-09-14	13:42:35	-0.36416	337.702	FALSE	1
2022-09-14	13:42:35	-0.310063	337.702	FALSE	1
2022-09-14	13:42:35	0.234873	337.937	FALSE	1
2022-09-14	13:42:36	0.404084	338.341	FALSE	1
2022-09-14	13:42:36	0.493906	338.835	FALSE	1
2022-09-14	13:42:36	0.533092	339.368	FALSE	1
2022-09-14	13:42:36	0.511972	339.88	FALSE	1
2022-09-14	13:42:37	0.643881	340.524	FALSE	1
2022-09-14	13:42:37	0.503779	341.027	FALSE	1
2022-09-14	13:42:37	0.665763	341.693	FALSE	1
2022-09-14	13:42:37	0.556298	342.249	FALSE	1
2022-09-14	13:42:38	0.568308	342.818	FALSE	1
2022-09-14	13:42:38	0.48383	343.302	FALSE	1
2022-09-14	13:42:38	0.756094	344.058	FALSE	1
2022-09-14	13:42:39	0.556247	344.614	FALSE	1
2022-09-14	13:42:39	0.524745	345.139	FALSE	1
2022-09-14	13:42:39	0.366323	345.505	FALSE	1
2022-09-14	13:42:39	0.583422	346.088	FALSE	1
2022-09-14	13:42:40	0.447647	346.536	FALSE	1
2022-09-14	13:42:40	0.488512	347.025	FALSE	1
2022-09-14	13:42:40	0.574568	347.599	FALSE	1
2022-09-14	13:42:40	0.49416	348.093	FALSE	1
2022-09-14	13:42:41	0.448562	348.542	FALSE	1
2022-09-14	13:42:41	0.4736	349.015	FALSE	1
2022-09-14	13:42:41	0.716908	349.732	FALSE	1
2022-09-14	13:42:41	0.398842	350.131	FALSE	1
2022-09-14	13:42:42	0.633499	350.765	FALSE	1
2022-09-14	13:42:42	0.324033	351.089	FALSE	1
2022-09-14	13:42:42	0.336094	351.425	FALSE	1
2022-09-14	13:42:43	-0.672404	351.425	FALSE	1
2022-09-14	13:42:43	-0.752302	351.425	FALSE	1
2022-09-14	13:42:43	-0.643091	351.425	FALSE	1
2022-09-14	13:42:43	-1.00528	351.425	FALSE	1
2022-09-14	13:42:44	-0.8379	351.425	FALSE	1
2022-09-14	13:42:44	-0.631335	351.425	FALSE	1
2022-09-14	13:42:44	-0.610521	351.425	FALSE	1
2022-09-14	13:42:44	-0.65561	351.425	FALSE	1
2022-09-14	13:42:45	-1.14818	351.425	FALSE	1
2022-09-14	13:42:45	-1.21022	351.425	FALSE	1
2022-09-14	13:42:45	-1.11047	351.425	FALSE	1
2022-09-14	13:42:46	-1.00548	351.425	FALSE	1
2022-09-14	13:42:46	-0.721004	351.425	FALSE	1
2022-09-14	13:42:46	-0.935966	351.425	FALSE	1
2022-09-14	13:42:46	-0.961462	351.425	FALSE	1
2022-09-14	13:42:47	-0.930012	351.425	FALSE	1
2022-09-14	13:42:47	-1.14401	351.425	FALSE	1
2022-09-14	13:42:47	-1.27072	351.425	FALSE	1
2022-09-14	13:42:47	-1.25118	351.425	FALSE	1
2022-09-14	13:42:48	-1.292	351.425	FALSE	1
2022-09-14	13:42:48	-1.30905	351.425	FALSE	1
2022-09-14	13:42:48	-1.34314	351.425	FALSE	1
2022-09-14	13:42:48	-1.31113	351.425	FALSE	1
2022-09-14	13:42:49	-1.34253	351.425	FALSE	1
2022-09-14	13:42:49	-1.38446	351.425	FALSE	1
2022-09-14	13:42:49	-1.40788	351.425	FALSE	1
2022-09-14	13:42:50	-1.41815	351.425	FALSE	1
2022-09-14	13:42:50	-1.44655	351.425	FALSE	1
2022-09-14	13:42:50	-1.28925	351.425	FALSE	1
2022-09-14	13:42:50	-1.31581	351.425	FALSE	1
2022-09-14	13:42:51	-1.34477	351.425	FALSE	1
2022-09-14	13:42:51	-1.36884	351.425	FALSE	1
2022-09-14	13:42:51	-1.53301	351.425	FALSE	1
2022-09-14	13:42:51	-1.62141	351.425	FALSE	1
2022-09-14	13:42:52	-1.80106	351.425	FALSE	1
2022-09-14	13:42:52	-1.84385	351.425	FALSE	1
2022-09-14	13:42:52	-1.73225	351.425	FALSE	1
2022-09-14	13:42:52	-1.59245	351.425	FALSE	1
2022-09-14	13:42:53	-1.68752	351.425	FALSE	1
2022-09-14	13:42:53	-1.73678	351.425	FALSE	1
2022-09-14	13:42:53	-1.76701	351.425	FALSE	1
2022-09-14	13:42:54	-1.75642	351.425	FALSE	1
2022-09-14	13:42:54	-1.74752	351.425	FALSE	1
2022-09-14	13:42:54	-1.78034	351.425	FALSE	1
2022-09-14	13:42:54	-1.85714	351.425	FALSE	1
2022-09-14	13:42:55	-1.56136	351.425	FALSE	1
2022-09-14	13:42:55	-1.51785	351.425	FALSE	1
2022-09-14	13:42:55	-1.35968	351.425	FALSE	1
2022-09-14	13:42:55	-1.3979	351.425	FALSE	1
2022-09-14	13:42:56	-1.53123	351.425	FALSE	1
2022-09-14	13:42:56	-1.44299	351.425	FALSE	1
2022-09-14	13:42:56	-1.46635	351.425	FALSE	1
2022-09-14	13:42:56	-1.4207	351.425	FALSE	1
2022-09-14	13:42:57	-1.61882	351.425	FALSE	1
2022-09-14	13:42:57	-1.55327	351.425	FALSE	1
2022-09-14	13:42:57	-1.59281	351.425	FALSE	1
2022-09-14	13:42:58	-1.65668	351.425	FALSE	1
2022-09-14	13:42:58	-1.55134	351.425	FALSE	1
2022-09-14	13:42:58	-1.80167	351.425	FALSE	1
2022-09-14	13:42:58	-1.71256	351.425	FALSE	1
2022-09-14	13:42:59	-1.7951	351.425	FALSE	1
2022-09-14	13:42:59	-1.66828	351.425	FALSE	1
2022-09-14	13:42:59	-1.37642	351.425	FALSE	1
2022-09-14	13:42:59	-1.67037	351.425	FALSE	1
2022-09-14	13:43:00	-1.56905	351.425	FALSE	1
2022-09-14	13:43:00	-1.5609	351.425	FALSE	1
2022-09-14	13:43:00	-1.45179	351.425	FALSE	1
2022-09-14	13:43:00	-1.55505	351.425	FALSE	1
2022-09-14	13:43:01	-1.15983	351.425	FALSE	1
2022-09-14	13:43:01	-1.20986	351.425	FALSE	1
2022-09-14	13:43:01	-0.993778	351.425	FALSE	1
2022-09-14	13:43:02	-1.04838	351.425	FALSE	1
2022-09-14	13:43:02	-1.18355	351.425	FALSE	1
2022-09-14	13:43:02	-0.814388	351.425	FALSE	1
2022-09-14	13:43:02	-0.89103	351.425	FALSE	1
2022-09-14	13:43:03	-0.766144	351.425	FALSE	1
2022-09-14	13:43:03	-0.860343	351.425	FALSE	1
2022-09-14	13:43:03	-0.852556	351.425	FALSE	1
2022-09-14	13:43:03	-0.855864	351.425	FALSE	1
2022-09-14	13:43:04	-0.863549	351.425	FALSE	1
2022-09-14	13:43:04	-0.824312	351.425	FALSE	1
2022-09-14	13:43:04	-0.845737	351.425	FALSE	1
2022-09-14	13:43:04	-0.84818	351.425	FALSE	1
2022-09-14	13:43:05	-0.846093	351.425	FALSE	1
2022-09-14	13:43:05	-0.850012	351.425	FALSE	1
2022-09-14	13:43:05	-0.894897	351.425	FALSE	1
2022-09-14	13:43:06	-0.90589	351.425	FALSE	1
2022-09-14	13:43:06	-0.950368	351.425	FALSE	1
2022-09-14	13:43:06	-0.88019	351.425	FALSE	1
2022-09-14	13:43:06	-0.885788	351.425	FALSE	1
2022-09-14	13:43:07	-0.875457	351.425	FALSE	1
2022-09-14	13:43:07	-0.915305	351.425	FALSE	1
2022-09-14	13:43:07	-0.903295	351.425	FALSE	1
2022-09-14	13:43:07	-0.827518	351.425	FALSE	1
2022-09-14	13:43:08	-0.796882	351.425	FALSE	1
2022-09-14	13:43:08	-0.700648	351.425	FALSE	1
2022-09-14	13:43:08	-0.799834	351.425	FALSE	1
2022-09-14	13:43:08	-0.951844	351.425	FALSE	1
2022-09-14	13:43:09	-0.743956	351.425	FALSE	1
2022-09-14	13:43:09	-0.808842	351.425	FALSE	1
2022-09-14	13:43:09	-0.795763	351.425	FALSE	1
2022-09-14	13:43:10	-0.834949	351.425	FALSE	1
2022-09-14	13:43:10	-0.899478	351.425	FALSE	1
2022-09-14	13:43:10	-1.09403	351.425	FALSE	1
2022-09-14	13:43:10	-0.953065	351.425	FALSE	1
2022-09-14	13:43:11	-0.954439	351.425	FALSE	1
2022-09-14	13:43:11	-0.826551	351.425	FALSE	1
2022-09-14	13:43:11	-0.940801	351.425	FALSE	1
2022-09-14	13:43:11	-0.939427	351.425	FALSE	1
2022-09-14	13:43:12	-0.802328	351.425	FALSE	1
2022-09-14	13:43:12	-0.800394	351.425	FALSE	1
2022-09-14	13:43:12	-0.931437	351.425	FALSE	1
2022-09-14	13:43:12	-0.798104	351.425	FALSE	1
2022-09-14	13:43:13	-0.916424	351.425	FALSE	1
2022-09-14	13:43:13	-0.920648	351.425	FALSE	1
2022-09-14	13:43:13	-0.948333	351.425	FALSE	1
2022-09-14	13:43:14	-0.871488	351.425	FALSE	1
2022-09-14	13:43:14	-0.784465	351.425	FALSE	1
2022-09-14	13:43:14	-0.914439	351.425	FALSE	1
2022-09-14	13:43:14	-0.548028	351.425	FALSE	1
2022-09-14	13:43:15	-0.276475	351.425	FALSE	1
2022-09-14	13:43:15	-0.61047	351.425	FALSE	1
2022-09-14	13:43:15	-0.60986	351.425	FALSE	1
2022-09-14	13:43:15	-1.0662	351.425	FALSE	1
2022-09-14	13:43:16	-1.1377	351.425	FALSE	1
2022-09-14	13:43:16	-1.11724	351.425	FALSE	1
2022-09-14	13:43:16	-1.0291	351.425	FALSE	1
2022-09-14	13:43:16	-1.03159	351.425	FALSE	1
2022-09-14	13:43:17	-1.03281	351.425	FALSE	1
2022-09-14	13:43:17	-0.938002	351.425	FALSE	1
2022-09-14	13:43:17	-0.948791	351.425	FALSE	1
2022-09-14	13:43:18	-0.879885	351.425	FALSE	1
2022-09-14	13:43:18	-0.85505	351.425	FALSE	1
2022-09-14	13:43:18	-0.77047	351.425	FALSE	1
2022-09-14	13:43:18	-0.853523	351.425	FALSE	1
2022-09-14	13:43:19	-0.874083	351.425	FALSE	1
2022-09-14	13:43:19	-0.828587	351.425	FALSE	1
2022-09-14	13:43:19	-0.793778	351.425	FALSE	1
2022-09-14	13:43:19	-0.788587	351.425	FALSE	1
2022-09-14	13:43:20	-0.79449	351.425	FALSE	1
2022-09-14	13:43:20	-0.754592	351.425	FALSE	1
2022-09-14	13:43:20	-0.767315	351.425	FALSE	1
2022-09-14	13:43:20	-0.836628	351.425	FALSE	1
2022-09-14	13:43:21	-0.960801	351.425	FALSE	1
2022-09-14	13:43:21	-0.945483	351.425	FALSE	1
2022-09-14	13:43:21	-0.958307	351.425	FALSE	1
2022-09-14	13:43:22	-0.958612	351.425	FALSE	1
2022-09-14	13:43:22	-0.944923	351.425	FALSE	1
2022-09-14	13:43:22	-0.90192	351.425	FALSE	1
2022-09-14	13:43:22	-0.973981	351.425	FALSE	1
2022-09-14	13:43:23	-1.26075	351.425	FALSE	1
2022-09-14	13:43:23	-1.29337	351.425	FALSE	1
2022-09-14	13:43:23	-1.30767	351.425	FALSE	1
2022-09-14	13:43:23	-1.33128	351.425	FALSE	1
2022-09-14	13:43:24	-1.20645	351.425	FALSE	1
2022-09-14	13:43:24	-1.27739	351.425	FALSE	1
2022-09-14	13:43:24	-1.29251	351.425	FALSE	1
2022-09-14	13:43:25	-1.28935	351.425	FALSE	1
2022-09-14	13:43:25	-1.29988	351.425	FALSE	1
2022-09-14	13:43:25	-1.31347	351.425	FALSE	1
2022-09-14	13:43:25	-1.30823	351.425	FALSE	1
2022-09-14	13:43:26	-1.30009	351.425	FALSE	1
2022-09-14	13:43:26	-1.28131	351.425	FALSE	1
2022-09-14	13:43:26	-1.29917	351.425	FALSE	1
2022-09-14	13:43:26	-1.29464	351.425	FALSE	1
2022-09-14	13:43:27	-1.29195	351.425	FALSE	1
2022-09-14	13:43:27	-1.27057	351.425	FALSE	1
2022-09-14	13:43:27	-1.24502	351.425	FALSE	1
2022-09-14	13:43:27	-1.25113	351.425	FALSE	1
2022-09-14	13:43:28	-1.25714	351.425	FALSE	1
2022-09-14	13:43:28	-1.25011	351.425	FALSE	1
2022-09-14	13:43:28	-1.26497	351.425	FALSE	1
2022-09-14	13:43:29	-1.26655	351.425	FALSE	1
2022-09-14	13:43:29	-1.2523	351.425	FALSE	1
2022-09-14	13:43:29	-1.23449	351.425	FALSE	1
2022-09-14	13:43:29	-1.22004	351.425	FALSE	1
2022-09-14	13:43:30	-1.15413	351.425	FALSE	1
2022-09-14	13:43:30	-1.2235	351.425	FALSE	1
2022-09-14	13:43:30	-1.31917	351.425	FALSE	1
2022-09-14	13:43:30	-1.38711	351.425	FALSE	1
2022-09-14	13:43:31	-1.3748	351.425	FALSE	1
2022-09-14	13:43:31	-1.41291	351.425	FALSE	1
2022-09-14	13:43:31	-1.39307	351.425	FALSE	1
2022-09-14	13:43:31	-1.43001	351.425	FALSE	1
2022-09-14	13:43:32	-1.65032	351.425	FALSE	1
2022-09-14	13:43:32	-1.52172	351.425	FALSE	1
2022-09-14	13:43:32	-1.6952	351.425	FALSE	1
2022-09-14	13:43:33	-2.29561	351.425	FALSE	1
2022-09-14	13:43:33	-1.98538	351.425	FALSE	1
2022-09-14	13:43:33	-2.0181	351.425	FALSE	1
2022-09-14	13:43:33	-1.99098	351.425	FALSE	1
2022-09-14	13:43:34	-1.95342	351.425	FALSE	1
2022-09-14	13:43:34	-1.94925	351.425	FALSE	1
2022-09-14	13:43:34	-1.92314	351.425	FALSE	1
2022-09-14	13:43:34	-1.9924	351.425	FALSE	1
2022-09-14	13:43:35	-2.16207	351.425	FALSE	1
2022-09-14	13:43:35	-1.9749	351.425	FALSE	1
2022-09-14	13:43:35	-1.99866	351.425	FALSE	1
2022-09-14	13:43:35	-2.0291	351.425	FALSE	1
2022-09-14	13:43:36	-1.95668	351.425	FALSE	1
2022-09-14	13:43:36	-1.94314	351.425	FALSE	1
2022-09-14	13:43:36	-1.93826	351.425	FALSE	1
2022-09-14	13:43:37	-1.92884	351.425	FALSE	1
2022-09-14	13:43:37	-1.97235	351.425	FALSE	1
2022-09-14	13:43:37	-1.98793	351.425	FALSE	1
2022-09-14	13:43:37	-2.00167	351.425	FALSE	1
2022-09-14	13:43:38	-1.99444	351.425	FALSE	1
2022-09-14	13:43:38	-1.96579	351.425	FALSE	1
2022-09-14	13:43:38	-1.9352	351.425	FALSE	1
2022-09-14	13:43:38	-1.92472	351.425	FALSE	1
2022-09-14	13:43:39	-1.97861	351.425	FALSE	1
2022-09-14	13:43:39	-1.89622	351.425	FALSE	1
2022-09-14	13:43:39	-1.87932	351.425	FALSE	1
2022-09-14	13:43:39	-1.86843	351.425	FALSE	1
2022-09-14	13:43:40	-1.87943	351.425	FALSE	1
2022-09-14	13:43:40	-1.85383	351.425	FALSE	1
2022-09-14	13:43:40	-1.8524	351.425	FALSE	1
2022-09-14	13:43:41	-1.84828	351.425	FALSE	1
2022-09-14	13:43:41	-1.99424	351.425	FALSE	1
2022-09-14	13:43:41	-1.81495	351.425	FALSE	1
2022-09-14	13:43:41	-1.81505	351.425	FALSE	1
2022-09-14	13:43:42	-1.87856	351.425	FALSE	1
2022-09-14	13:43:42	-1.76523	351.425	FALSE	1
2022-09-14	13:43:42	-1.9177	351.425	FALSE	1
2022-09-14	13:43:42	-1.98345	351.425	FALSE	1
2022-09-14	13:43:43	-1.9036	351.425	FALSE	1
2022-09-14	13:43:43	-1.8378	351.425	FALSE	1
2022-09-14	13:43:43	-1.89093	351.425	FALSE	1
2022-09-14	13:43:43	-1.95648	351.425	FALSE	1
2022-09-14	13:43:44	0.658995	352.084	FALSE	1
2022-09-14	13:43:44	0.730649	352.814	FALSE	1
2022-09-14	13:43:44	0.72556	353.54	FALSE	1
2022-09-14	13:43:45	0.726832	354.267	FALSE	1
2022-09-14	13:43:45	0.320115	354.587	FALSE	1
2022-09-14	13:43:45	0.733397	355.32	FALSE	1
2022-09-14	13:43:45	-0.363498	355.32	FALSE	1
2022-09-14	13:43:46	-4.67098	355.32	FALSE	1
2022-09-14	13:43:46	0.429224	355.75	FALSE	1
2022-09-14	13:43:46	-3.632	355.75	FALSE	1
2022-09-14	13:43:46	0.477468	356.227	FALSE	1
2022-09-14	13:43:47	0.412888	356.64	FALSE	1
2022-09-14	13:43:47	0.724338	357.364	FALSE	1
2022-09-14	13:43:47	0.726679	358.091	FALSE	1
2022-09-14	13:43:47	0.730445	358.821	FALSE	1
2022-09-14	13:43:48	0.727341	359.549	FALSE	1
2022-09-14	13:43:48	0.735941	360.285	FALSE	1
2022-09-14	13:43:48	0.733499	361.018	FALSE	1
2022-09-14	13:43:49	0.733702	361.752	FALSE	1
2022-09-14	13:43:49	0.723982	362.476	FALSE	1
2022-09-14	13:43:49	0.728206	363.204	FALSE	1
2022-09-14	13:43:49	0.726679	363.931	FALSE	1
2022-09-14	13:43:50	0.730394	364.661	FALSE	1
2022-09-14	13:43:50	0.734364	365.396	FALSE	1
2022-09-14	13:43:50	0.731056	366.127	FALSE	1
2022-09-14	13:43:50	0.731463	366.858	FALSE	1
2022-09-14	13:43:51	0.732735	367.591	FALSE	1
2022-09-14	13:43:51	0.732125	368.323	FALSE	1
2022-09-14	13:43:51	0.73757	369.06	FALSE	1
2022-09-14	13:43:51	0.729631	369.79	FALSE	1
2022-09-14	13:43:52	0.741387	370.532	FALSE	1
2022-09-14	13:43:52	0.728868	371.26	FALSE	1
2022-09-14	13:43:52	0.727443	371.988	FALSE	1
2022-09-14	13:43:53	0.73528	372.723	FALSE	1
2022-09-14	13:43:53	0.734109	373.457	FALSE	1
2022-09-14	13:43:53	0.737926	374.195	FALSE	1
2022-09-14	13:43:53	0.736196	374.931	FALSE	1
2022-09-14	13:43:54	0.729224	375.661	FALSE	1
2022-09-14	13:43:54	0.728715	376.389	FALSE	1
2022-09-14	13:43:54	0.731565	377.121	FALSE	1
2022-09-14	13:43:54	0.72729	377.848	FALSE	1
2022-09-14	13:43:55	0.733244	378.581	FALSE	1
2022-09-14	13:43:55	0.731565	379.313	FALSE	1
2022-09-14	13:43:55	0.729936	380.043	FALSE	1
2022-09-14	13:43:55	0.728613	380.771	FALSE	1
2022-09-14	13:43:56	0.725611	381.497	FALSE	1
2022-09-14	13:43:56	0.729784	382.227	FALSE	1
2022-09-14	13:43:56	0.72556	382.952	FALSE	1
2022-09-14	13:43:57	0.727239	383.68	FALSE	1
2022-09-14	13:43:57	0.723779	384.403	FALSE	1
2022-09-14	13:43:57	0.734568	385.138	FALSE	1
2022-09-14	13:43:57	0.73416	385.872	FALSE	1
2022-09-14	13:43:58	0.732837	386.605	FALSE	1
2022-09-14	13:43:58	0.732939	387.338	FALSE	1
2022-09-14	13:43:58	0.734924	388.073	FALSE	1
2022-09-14	13:43:58	0.733295	388.806	FALSE	1
2022-09-14	13:43:59	0.731107	389.537	FALSE	1
2022-09-14	13:43:59	0.726374	390.264	FALSE	1
2022-09-14	13:43:59	0.731412	390.995	FALSE	1
2022-09-14	13:43:59	0.732074	391.727	FALSE	1
2022-09-14	13:44:00	0.72958	392.457	FALSE	1
2022-09-14	13:44:00	0.726425	393.183	FALSE	1
2022-09-14	13:44:00	0.730293	393.913	FALSE	1
2022-09-14	13:44:01	0.733651	394.647	FALSE	1
2022-09-14	13:44:01	0.739962	395.387	FALSE	1
2022-09-14	13:44:01	0.732175	396.119	FALSE	1
2022-09-14	13:44:01	0.734975	396.854	FALSE	1
2022-09-14	13:44:02	0.726374	397.581	FALSE	1
2022-09-14	13:44:02	0.730445	398.311	FALSE	1
2022-09-14	13:44:02	0.728562	399.04	FALSE	1
2022-09-14	13:44:02	0.728512	399.768	FALSE	1
2022-09-14	13:44:03	0.731412	400.5	FALSE	1
2022-09-14	13:44:03	0.731361	401.231	FALSE	1
2022-09-14	13:44:03	0.727952	401.959	FALSE	1
2022-09-14	13:44:04	0.729682	402.689	FALSE	1
2022-09-14	13:44:04	0.730801	403.419	FALSE	1
2022-09-14	13:44:04	0.728308	404.148	FALSE	1
2022-09-14	13:44:04	0.737417	404.885	FALSE	1
2022-09-14	13:44:05	0.731005	405.616	FALSE	1
2022-09-14	13:44:05	0.73131	406.347	FALSE	1
2022-09-14	13:44:05	0.72902	407.076	FALSE	1
2022-09-14	13:44:05	0.72612	407.802	FALSE	1
2022-09-14	13:44:06	0.737265	408.54	FALSE	1
2022-09-14	13:44:06	0.732888	409.273	FALSE	1
2022-09-14	13:44:06	0.72897	410.002	FALSE	1
2022-09-14	13:44:06	0.728308	410.73	FALSE	1
2022-09-14	13:44:07	0.730445	411.46	FALSE	1
2022-09-14	13:44:07	0.728766	412.189	FALSE	1
2022-09-14	13:44:07	0.728257	412.917	FALSE	1
2022-09-14	13:44:08	0.739198	413.657	FALSE	1
2022-09-14	13:44:08	0.73416	414.391	FALSE	1
2022-09-14	13:44:08	0.730903	415.122	FALSE	1
2022-09-14	13:44:08	0.73416	415.856	FALSE	1
2022-09-14	13:44:09	0.736094	416.592	FALSE	1
2022-09-14	13:44:09	0.728359	417.32	FALSE	1
2022-09-14	13:44:09	0.728003	418.048	FALSE	1
2022-09-14	13:44:09	0.734262	418.783	FALSE	1
2022-09-14	13:44:10	0.723066	419.506	FALSE	1
2022-09-14	13:44:10	0.731921	420.238	FALSE	1
2022-09-14	13:44:10	0.732125	420.97	FALSE	1
2022-09-14	13:44:10	0.737163	421.707	FALSE	1
2022-09-14	13:44:11	0.730547	422.437	FALSE	1
2022-09-14	13:44:11	0.729071	423.166	FALSE	1
2022-09-14	13:44:11	0.727952	423.894	FALSE	1
2022-09-14	13:44:12	0.728664	424.623	FALSE	1
2022-09-14	13:44:12	0.73528	425.358	FALSE	1
2022-09-14	13:44:12	0.725662	426.084	FALSE	1
2022-09-14	13:44:12	0.731514	426.815	FALSE	1
2022-09-14	13:44:13	0.723219	427.539	FALSE	1
2022-09-14	13:44:13	0.734822	428.274	FALSE	1
2022-09-14	13:44:13	0.742659	429.016	FALSE	1
2022-09-14	13:44:13	0.733651	429.75	FALSE	1
2022-09-14	13:44:14	0.723728	430.474	FALSE	1
2022-09-14	13:44:14	0.733295	431.207	FALSE	1
2022-09-14	13:44:14	0.725916	431.933	FALSE	1
2022-09-14	13:44:14	0.731921	432.665	FALSE	1
2022-09-14	13:44:15	0.732939	433.398	FALSE	1
2022-09-14	13:44:15	0.733142	434.131	FALSE	1
2022-09-14	13:44:15	0.720165	434.851	FALSE	1
2022-09-14	13:44:16	0.73243	435.583	FALSE	1
2022-09-14	13:44:16	0.727697	436.311	FALSE	1
2022-09-14	13:44:16	0.727188	437.038	FALSE	1
2022-09-14	13:44:16	0.730496	437.769	FALSE	1
2022-09-14	13:44:17	0.732939	438.502	FALSE	1
2022-09-14	13:44:17	0.731158	439.233	FALSE	1
2022-09-14	13:44:17	0.729224	439.962	FALSE	1
2022-09-14	13:44:17	0.731514	440.694	FALSE	1
2022-09-14	13:44:18	0.726018	441.42	FALSE	1
2022-09-14	13:44:18	0.725458	442.145	FALSE	1
2022-09-14	13:44:18	0.725153	442.87	FALSE	1
2022-09-14	13:44:18	0.732481	443.603	FALSE	1
2022-09-14	13:44:19	0.721234	444.324	FALSE	1
2022-09-14	13:44:19	0.728613	445.053	FALSE	1
2022-09-14	13:44:19	0.735331	445.788	FALSE	1
2022-09-14	13:44:20	0.731616	446.519	FALSE	1
2022-09-14	13:44:20	0.737366	447.257	FALSE	1
2022-09-14	13:44:20	0.734415	447.991	FALSE	1
2022-09-14	13:44:20	0.736807	448.728	FALSE	1
2022-09-14	13:44:21	0.73528	449.463	FALSE	1
2022-09-14	13:44:21	0.726934	450.19	FALSE	1
2022-09-14	13:44:21	0.729682	450.92	FALSE	1
2022-09-14	13:44:21	0.729987	451.65	FALSE	1
2022-09-14	13:44:22	0.725916	452.376	FALSE	1
2022-09-14	13:44:22	0.729936	453.106	FALSE	1
2022-09-14	13:44:22	0.727036	453.833	FALSE	1
2022-09-14	13:44:22	-0.785737	453.833	FALSE	1
2022-09-14	13:44:23	-1.98314	453.833	FALSE	1
2022-09-14	13:44:23	0.724033	454.557	FALSE	1
2022-09-14	13:44:23	0.727799	455.285	FALSE	1
2022-09-14	13:44:24	0.719555	456.004	FALSE	1
2022-09-14	13:44:24	-0.063702	456.004	FALSE	1
2022-09-14	13:44:24	0.733499	456.738	FALSE	1
2022-09-14	13:44:24	0.730801	457.469	FALSE	1
2022-09-14	13:44:25	0.733448	458.202	FALSE	1
2022-09-14	13:44:25	0.730496	458.932	FALSE	1
2022-09-14	13:44:25	0.733448	459.666	FALSE	1
2022-09-14	13:44:25	0.724949	460.391	FALSE	1
2022-09-14	13:44:26	0.667646	461.059	FALSE	1
2022-09-14	13:44:26	0.732939	461.791	FALSE	1
2022-09-14	13:44:26	0.437061	462.229	FALSE	1
2022-09-14	13:44:26	0.474415	462.703	FALSE	1
2022-09-14	13:44:27	0.732735	463.436	FALSE	1
2022-09-14	13:44:27	0.730649	464.166	FALSE	1
2022-09-14	13:44:27	0.728155	464.894	FALSE	1
2022-09-14	13:44:28	0.730649	465.625	FALSE	1
2022-09-14	13:44:28	0.730038	466.355	FALSE	1
2022-09-14	13:44:28	0.724695	467.08	FALSE	1
2022-09-14	13:44:28	-1.09378	467.08	FALSE	1
2022-09-14	13:44:29	-1.55429	467.08	FALSE	1
2022-09-14	13:44:29	-1.95133	467.08	FALSE	1
2022-09-14	13:44:29	-0.984312	467.08	FALSE	1
2022-09-14	13:44:29	-0.992709	467.08	FALSE	1
2022-09-14	13:44:30	-1.01693	467.08	FALSE	1
2022-09-14	13:44:30	-0.830928	467.08	FALSE	1
2022-09-14	13:44:30	1.46953	468.549	FALSE	1
2022-09-14	13:44:30	7.7082	476.258	1	2
2022-09-14	13:44:31	3.33441	479.592	1	3
2022-09-14	13:44:31	2.82454	482.417	FALSE	3

## Sheet: Reggie_prong_2022914133917
						**GoPro Fitting: 13:18
2022-09-14	13:39:17	0.455891
2022-09-14	13:39:17	0.446832
2022-09-14	13:39:18	0.443168
2022-09-14	13:39:18	0.432685
2022-09-14	13:39:18	0.45528
2022-09-14	13:39:18	0.484746
2022-09-14	13:39:19	0.539097
2022-09-14	13:39:19	0.488206
2022-09-14	13:39:19	0.503422
2022-09-14	13:39:19	0.524695
2022-09-14	13:39:20	0.517112
2022-09-14	13:39:20	0.506883
2022-09-14	13:39:20	0.523168
2022-09-14	13:39:21	0.516603
2022-09-14	13:39:21	0.526069
2022-09-14	13:39:21	0.519707
2022-09-14	13:39:21	0.517773
2022-09-14	13:39:22	0.514415
2022-09-14	13:39:22	0.536196
2022-09-14	13:39:22	0.46958
2022-09-14	13:39:22	0.51416
2022-09-14	13:39:23	0.474924
2022-09-14	13:39:23	0.542557
2022-09-14	13:39:23	0.497468
2022-09-14	13:39:24	0.508257
2022-09-14	13:39:24	0.503015
2022-09-14	13:39:24	0.472379
2022-09-14	13:39:24	0.588715
2022-09-14	13:39:25	0.490445
2022-09-14	13:39:25	0.598435
2022-09-14	13:39:25	0.545661
2022-09-14	13:39:25	0.658537
2022-09-14	13:39:26	0.530293
2022-09-14	13:39:26	0.708308
2022-09-14	13:39:26	0.544491
2022-09-14	13:39:26	0.60556
2022-09-14	13:39:27	0.400827
2022-09-14	13:39:27	0.623422
2022-09-14	13:39:27	0.478537
2022-09-14	13:39:27	0.551056
2022-09-14	13:39:28	0.409122
2022-09-14	13:39:28	0.654466
2022-09-14	13:39:28	0.410445
2022-09-14	13:39:29	0.577214
2022-09-14	13:39:29	0.499656
2022-09-14	13:39:29	0.519809
2022-09-14	13:39:29	0.52897
2022-09-14	13:39:30	0.413855
2022-09-14	13:39:30	0.617265
2022-09-14	13:39:30	0.366985
2022-09-14	13:39:30	0.585305
2022-09-14	13:39:31	0.480674
2022-09-14	13:39:31	0.551412
2022-09-14	13:39:31	0.50902
2022-09-14	13:39:31	0.553601
2022-09-14	13:39:32	0.490547
2022-09-14	13:39:32	0.547494
2022-09-14	13:39:32	0.522201
2022-09-14	13:39:33	0.524338
2022-09-14	13:39:33	0.512023
2022-09-14	13:39:33	0.525763
2022-09-14	13:39:33	0.527443
2022-09-14	13:39:34	0.530191
2022-09-14	13:39:34	0.524084
2022-09-14	13:39:34	0.511005
2022-09-14	13:39:34	0.572684
2022-09-14	13:39:35	0.541947
2022-09-14	13:39:35	0.560674
2022-09-14	13:39:35	0.566985
2022-09-14	13:39:35	0.509377
2022-09-14	13:39:36	0.451361
2022-09-14	13:39:36	0.588613
2022-09-14	13:39:36	0.365051
2022-09-14	13:39:37	0.382201
2022-09-14	13:39:37	0.542964
2022-09-14	13:39:37	0.669936
2022-09-14	13:39:37	0.572888
2022-09-14	13:39:38	0.618333
2022-09-14	13:39:38	0.477367
2022-09-14	13:39:38	0.613346
2022-09-14	13:39:38	0.435229
2022-09-14	13:39:39	0.682608
2022-09-14	13:39:39	0.479809
2022-09-14	13:39:39	0.671718
2022-09-14	13:39:39	0.575331
2022-09-14	13:39:40	0.52215
2022-09-14	13:39:40	0.497621
2022-09-14	13:39:40	0.663677
2022-09-14	13:39:41	0.562099
2022-09-14	13:39:41	0.467087
2022-09-14	13:39:41	0.637468
2022-09-14	13:39:41	0.272379
2022-09-14	13:39:42	0.300573
2022-09-14	13:39:42	0.25355
2022-09-14	13:39:42	0.331616
2022-09-14	13:39:42	0.127443
2022-09-14	13:39:43	0.301947
2022-09-14	13:39:43	0.167341
2022-09-14	13:39:43	0.385509
2022-09-14	13:39:44	0.119453
2022-09-14	13:39:44	0.253753
2022-09-14	13:39:44	0.180674
2022-09-14	13:39:44	0.224848
2022-09-14	13:39:45	0.228766
2022-09-14	13:39:45	0.447137
2022-09-14	13:39:45	0.661438
2022-09-14	13:39:45	0.968766
2022-09-14	13:39:46	0.904847
2022-09-14	13:39:46	0.958231
2022-09-14	13:39:46	0.551056
2022-09-14	13:39:46	0.444796
2022-09-14	13:39:47	0.542608
2022-09-14	13:39:47	0.511463
2022-09-14	13:39:47	1.45385
2022-09-14	13:39:48	1.18989
2022-09-14	13:39:48	1.89182
2022-09-14	13:39:48	0.687748
2022-09-14	13:39:48	0.58159
2022-09-14	13:39:49	0.554567
2022-09-14	13:39:49	0.336145
2022-09-14	13:39:49	0.517519
2022-09-14	13:39:49	0.34159
2022-09-14	13:39:50	0.283422
2022-09-14	13:39:50	0.291718
2022-09-14	13:39:50	-0.00726439
2022-09-14	13:39:50	0.21701
2022-09-14	13:39:51	0.0638297
2022-09-14	13:39:51	-0.265738
2022-09-14	13:39:51	-0.514185
2022-09-14	13:39:52	-0.573473
2022-09-14	13:39:52	-0.47103
2022-09-14	13:39:52	-0.342328
2022-09-14	13:39:52	-0.382938
2022-09-14	13:39:53	-0.312964
2022-09-14	13:39:53	-0.377188
2022-09-14	13:39:53	-0.358206
2022-09-14	13:39:53	-0.364262
2022-09-14	13:39:54	-0.295356
2022-09-14	13:39:54	-0.326857
2022-09-14	13:39:54	-0.336374
2022-09-14	13:39:54	-0.247366
2022-09-14	13:39:55	-0.264822
2022-09-14	13:39:55	-0.266857
2022-09-14	13:39:55	-0.352608
2022-09-14	13:39:56	-0.362786
2022-09-14	13:39:56	-0.626857
2022-09-14	13:39:56	-0.451946
2022-09-14	13:39:56	-0.388231
2022-09-14	13:39:57	0.124339
2022-09-14	13:39:57	1.44678
2022-09-14	13:39:57	1.37447
2022-09-14	13:39:57	1.06291
2022-09-14	13:39:58	2.49085
2022-09-14	13:39:58	2.60861
2022-09-14	13:39:58	1.26169
2022-09-14	13:39:58	0.380216
2022-09-14	13:39:59	0.464695
2022-09-14	13:39:59	0.589835
2022-09-14	13:39:59	0.598791
2022-09-14	13:40:00	0.698689
2022-09-14	13:40:00	0.687799
2022-09-14	13:40:00	0.79757
2022-09-14	13:40:00	0.667443
2022-09-14	13:40:01	0.711056
2022-09-14	13:40:01	0.69584
2022-09-14	13:40:01	0.732634
2022-09-14	13:40:01	0.683524
2022-09-14	13:40:02	0.656807
2022-09-14	13:40:02	0.680165
2022-09-14	13:40:02	0.625153
2022-09-14	13:40:02	0.664898
2022-09-14	13:40:03	0.645356
2022-09-14	13:40:03	0.658893
2022-09-14	13:40:03	0.574262
2022-09-14	13:40:04	0.426629
2022-09-14	13:40:04	0.434008
2022-09-14	13:40:04	0.457417
2022-09-14	13:40:04	0.379453
2022-09-14	13:40:05	0.339199
2022-09-14	13:40:05	0.206374
2022-09-14	13:40:05	0.28327
2022-09-14	13:40:05	0.189122
2022-09-14	13:40:06	0.0479009
2022-09-14	13:40:06	-0.211844
2022-09-14	13:40:06	-0.311386
2022-09-14	13:40:06	-0.690724
2022-09-14	13:40:07	-0.799427
2022-09-14	13:40:07	-0.966246
2022-09-14	13:40:07	-0.67449
2022-09-14	13:40:08	-0.566806
2022-09-14	13:40:08	-0.668231
2022-09-14	13:40:08	-0.105839
2022-09-14	13:40:08	0.339453
2022-09-14	13:40:09	0.396349
2022-09-14	13:40:09	0.546221
2022-09-14	13:40:09	0.520318
2022-09-14	13:40:09	0.388461
2022-09-14	13:40:10	0.489478
2022-09-14	13:40:10	0.481539
2022-09-14	13:40:10	0.5764
2022-09-14	13:40:10	0.431514
2022-09-14	13:40:11	0.495891
2022-09-14	13:40:11	0.477774
2022-09-14	13:40:11	0.474568
2022-09-14	13:40:12	0.496807
2022-09-14	13:40:12	0.489784
2022-09-14	13:40:12	0.487239
2022-09-14	13:40:12	0.475738
2022-09-14	13:40:13	0.452379
2022-09-14	13:40:13	0.438944
2022-09-14	13:40:13	0.395127
2022-09-14	13:40:13	0.396196
2022-09-14	13:40:14	0.4593
2022-09-14	13:40:14	0.379707
2022-09-14	13:40:14	0.37986
2022-09-14	13:40:15	0.489631
2022-09-14	13:40:15	0.42042
2022-09-14	13:40:15	0.494109
2022-09-14	13:40:15	0.25472
2022-09-14	13:40:16	0.481794
2022-09-14	13:40:16	0.37126
2022-09-14	13:40:16	0.658028
2022-09-14	13:40:16	0.72271
2022-09-14	13:40:17	1.06011
2022-09-14	13:40:17	0.966323
2022-09-14	13:40:17	0.658944
2022-09-14	13:40:17	0.455331
2022-09-14	13:40:18	0.410038
2022-09-14	13:40:18	0.483015
2022-09-14	13:40:18	0.506527
2022-09-14	13:40:19	0.225204
2022-09-14	13:40:19	-0.062786
2022-09-14	13:40:19	-0.429096
2022-09-14	13:40:19	-0.543702
2022-09-14	13:40:20	-0.505229
2022-09-14	13:40:20	-0.542328
2022-09-14	13:40:20	-0.567722
2022-09-14	13:40:20	-0.602786
2022-09-14	13:40:21	-0.590216
2022-09-14	13:40:21	-0.54416
2022-09-14	13:40:21	-0.650317
2022-09-14	13:40:21	-0.454949
2022-09-14	13:40:22	-0.382226
2022-09-14	13:40:22	-0.221666
2022-09-14	13:40:22	-0.14243
2022-09-14	13:40:23	-0.0113865
2022-09-14	13:40:23	0.231056
2022-09-14	13:40:23	0.305407
2022-09-14	13:40:23	0.438232
2022-09-14	13:40:24	0.402405
2022-09-14	13:40:24	0.398791
2022-09-14	13:40:24	0.530089
2022-09-14	13:40:24	0.394975
2022-09-14	13:40:25	0.381183
2022-09-14	13:40:25	0.353397
2022-09-14	13:40:25	0.322863
2022-09-14	13:40:26	0.380064
2022-09-14	13:40:26	0.356908
2022-09-14	13:40:26	0.437723
2022-09-14	13:40:26	0.440166
2022-09-14	13:40:27	0.465153
2022-09-14	13:40:27	0.515229
2022-09-14	13:40:27	0.261031
2022-09-14	13:40:27	0.220674
2022-09-14	13:40:28	0.204033
2022-09-14	13:40:28	0.394466
2022-09-14	13:40:28	0.278232
2022-09-14	13:40:28	0.499453
2022-09-14	13:40:29	0.461438
2022-09-14	13:40:29	0.468104
2022-09-14	13:40:29	0.473906
2022-09-14	13:40:29	1.05574
2022-09-14	13:40:30	0.659148
2022-09-14	13:40:30	0.575178
2022-09-14	13:40:30	0.415026
2022-09-14	13:40:31	0.498537
2022-09-14	13:40:31	0.512125
2022-09-14	13:40:31	0.494364
2022-09-14	13:40:31	0.390598
2022-09-14	13:40:32	0.348359
2022-09-14	13:40:32	0.027443
2022-09-14	13:40:32	-0.199173
2022-09-14	13:40:32	-0.255865
2022-09-14	13:40:33	0.498232
2022-09-14	13:40:33	1.59497
2022-09-14	13:40:33	2.79324
2022-09-14	13:40:33	2.92342
2022-09-14	13:40:34	4.00347
2022-09-14	13:40:34	2.95777
2022-09-14	13:40:34	2.44729
2022-09-14	13:40:35	1.39818
2022-09-14	13:40:35	0.850038
2022-09-14	13:40:35	0.513346
2022-09-14	13:40:35	0.355789
2022-09-14	13:40:36	0.596858
2022-09-14	13:40:36	-0.16304
2022-09-14	13:40:36	-0.407162
2022-09-14	13:40:36	-0.404567
2022-09-14	13:40:37	-0.282124
2022-09-14	13:40:37	-0.299987
2022-09-14	13:40:37	-0.257595
2022-09-14	13:40:37	-0.224974
2022-09-14	13:40:38	0.0710562
2022-09-14	13:40:38	0.39701
2022-09-14	13:40:38	0.795076
2022-09-14	13:40:39	0.724695
2022-09-14	13:40:39	1.95564
2022-09-14	13:40:39	2.67569
2022-09-14	13:40:39	0.991565
2022-09-14	13:40:40	0.69925
2022-09-14	13:40:40	0.188308
2022-09-14	13:40:40	0.706883
2022-09-14	13:40:40	0.332176
2022-09-14	13:40:41	0.525611
2022-09-14	13:40:41	0.262456
2022-09-14	13:40:41	0.290751
2022-09-14	13:40:42	0.109682
2022-09-14	13:40:42	-0.353524
2022-09-14	13:40:42	-0.783345
2022-09-14	13:40:42	-0.670673
2022-09-14	13:40:43	-0.805483
2022-09-14	13:40:43	-0.471692
2022-09-14	13:40:43	-0.191488
2022-09-14	13:40:43	-0.0490455
2022-09-14	13:40:44	0.273702
2022-09-14	13:40:44	0.208257
2022-09-14	13:40:44	0.234822
2022-09-14	13:40:44	0.336145
2022-09-14	13:40:45	0.338181
2022-09-14	13:40:45	0.385153
2022-09-14	13:40:45	0.314059
2022-09-14	13:40:46	0.37299
2022-09-14	13:40:46	0.190751
2022-09-14	13:40:46	0.498435
2022-09-14	13:40:46	0.199758
2022-09-14	13:40:47	0.443931
2022-09-14	13:40:47	0.138792
2022-09-14	13:40:47	0.267748
2022-09-14	13:40:47	0.0820485
2022-09-14	13:40:48	0.371361
2022-09-14	13:40:48	0.315382
2022-09-14	13:40:48	0.337774
2022-09-14	13:40:48	0.405
2022-09-14	13:40:49	0.354262
2022-09-14	13:40:49	0.43243
2022-09-14	13:40:49	0.310903
2022-09-14	13:40:50	0.454059
2022-09-14	13:40:50	0.282608
2022-09-14	13:40:50	0.415687
2022-09-14	13:40:50	0.28841
2022-09-14	13:40:51	0.530751
2022-09-14	13:40:51	0.203982
2022-09-14	13:40:51	0.52444
2022-09-14	13:40:51	0.261336
2022-09-14	13:40:52	0.509428
2022-09-14	13:40:52	0.190598
2022-09-14	13:40:52	0.188817
2022-09-14	13:40:52	0.114211
2022-09-14	13:40:53	0.215585
2022-09-14	13:40:53	0.054415
2022-09-14	13:40:53	0.320776
2022-09-14	13:40:54	0.297417
2022-09-14	13:40:54	0.316298
2022-09-14	13:40:54	0.534822
2022-09-14	13:40:54	0.435992
2022-09-14	13:40:55	1.11167
2022-09-14	13:40:55	0.42841
2022-09-14	13:40:55	0.396909
2022-09-14	13:40:55	0.19986
2022-09-14	13:40:56	0.421132
2022-09-14	13:40:56	0.192277
2022-09-14	13:40:56	0.373143
2022-09-14	13:40:56	0.256959
2022-09-14	13:40:57	0.378588
2022-09-14	13:40:57	0.266323
2022-09-14	13:40:57	0.364135
2022-09-14	13:40:58	0.30042
2022-09-14	13:40:58	0.406374
2022-09-14	13:40:58	0.292888
2022-09-14	13:40:58	0.413041
2022-09-14	13:40:59	0.306679
2022-09-14	13:40:59	0.449122
2022-09-14	13:40:59	0.218842
2022-09-14	13:40:59	0.416654
2022-09-14	13:41:00	0.268817
2022-09-14	13:41:00	0.375738
2022-09-14	13:41:00	0.329682
2022-09-14	13:41:00	0.662608
2022-09-14	13:41:01	0.350242
2022-09-14	13:41:01	0.559249
2022-09-14	13:41:01	0.698028
2022-09-14	13:41:02	0.733601
2022-09-14	13:41:02	0.720979
2022-09-14	13:41:02	0.726425
2022-09-14	13:41:02	0.722303
2022-09-14	13:41:03	0.731259
2022-09-14	13:41:03	0.721285
2022-09-14	13:41:03	0.733957
2022-09-14	13:41:03	0.732786
2022-09-14	13:41:04	0.720776
2022-09-14	13:41:04	0.724695
2022-09-14	13:41:04	0.727799
2022-09-14	13:41:05	0.722965
2022-09-14	13:41:05	0.723117
2022-09-14	13:41:05	0.727392
2022-09-14	13:41:05	0.723422
2022-09-14	13:41:06	0.722099
2022-09-14	13:41:06	0.725204
2022-09-14	13:41:06	0.728868
2022-09-14	13:41:06	0.726679
2022-09-14	13:41:07	0.718639
2022-09-14	13:41:07	0.723779
2022-09-14	13:41:07	0.726374
2022-09-14	13:41:07	0.729886
2022-09-14	13:41:08	0.726476
2022-09-14	13:41:08	0.727952
2022-09-14	13:41:08	0.729428
2022-09-14	13:41:09	0.724338
2022-09-14	13:41:09	0.726272
2022-09-14	13:41:09	0.725051
2022-09-14	13:41:09	0.724491
2022-09-14	13:41:10	0.728868
2022-09-14	13:41:10	0.725305
2022-09-14	13:41:10	0.728359
2022-09-14	13:41:10	0.721946
2022-09-14	13:41:11	0.730242
2022-09-14	13:41:11	0.731412
2022-09-14	13:41:11	0.730598
2022-09-14	13:41:11	0.72729
2022-09-14	13:41:12	0.723372
2022-09-14	13:41:12	0.724288
2022-09-14	13:41:12	0.726629
2022-09-14	13:41:13	0.727239
2022-09-14	13:41:13	0.725916
2022-09-14	13:41:13	0.721946
2022-09-14	13:41:13	0.732481
2022-09-14	13:41:14	0.728054
2022-09-14	13:41:14	0.729275
2022-09-14	13:41:14	0.725662
2022-09-14	13:41:14	0.706272
2022-09-14	13:41:15	0.367188
2022-09-14	13:41:15	0.258995
2022-09-14	13:41:15	0.431005
2022-09-14	13:41:15	0.336349
2022-09-14	13:41:16	0.433092
2022-09-14	13:41:16	0.2793
2022-09-14	13:41:16	0.37645
2022-09-14	13:41:17	0.282608
2022-09-14	13:41:17	0.251667
2022-09-14	13:41:17	0.276298
2022-09-14	13:41:17	0.169682
2022-09-14	13:41:18	0.112328
2022-09-14	13:41:18	0.255178
2022-09-14	13:41:18	0.259606
2022-09-14	13:41:18	0.463728
2022-09-14	13:41:19	0.234568
2022-09-14	13:41:19	0.300318
2022-09-14	13:41:19	0.463677
2022-09-14	13:41:19	0.358283
2022-09-14	13:41:20	0.531667
2022-09-14	13:41:20	0.430751
2022-09-14	13:41:20	0.414211
2022-09-14	13:41:21	0.47986
2022-09-14	13:41:21	0.433957
2022-09-14	13:41:21	0.478791
2022-09-14	13:41:21	0.392939
2022-09-14	13:41:22	0.282863
2022-09-14	13:41:22	0.300929
2022-09-14	13:41:22	0.322863
2022-09-14	13:41:22	0.328817
2022-09-14	13:41:23	0.567188
2022-09-14	13:41:23	0.443677
2022-09-14	13:41:23	0.378384
2022-09-14	13:41:23	0.567494
2022-09-14	13:41:24	0.446883
2022-09-14	13:41:24	0.288766
2022-09-14	13:41:24	0.160522
2022-09-14	13:41:25	0.0396058
2022-09-14	13:41:25	-0.0591219
2022-09-14	13:41:25	0.0698349
2022-09-14	13:41:25	0.0291733
2022-09-14	13:41:26	0.351005
2022-09-14	13:41:26	-0.0215646
2022-09-14	13:41:26	-0.0182567
2022-09-14	13:41:26	0.400674
2022-09-14	13:41:27	0.259504
2022-09-14	13:41:27	0.381031
2022-09-14	13:41:27	0.251667
2022-09-14	13:41:27	0.297672
2022-09-14	13:41:28	0.343473
2022-09-14	13:41:28	0.314618
2022-09-14	13:41:28	0.230649
2022-09-14	13:41:29	0.439453
2022-09-14	13:41:29	0.337112
2022-09-14	13:41:29	0.291514
2022-09-14	13:41:29	0.324746
2022-09-14	13:41:30	0.353499
2022-09-14	13:41:30	0.490038
2022-09-14	13:41:30	0.318486
2022-09-14	13:41:30	0.182557
2022-09-14	13:41:31	0.428919
2022-09-14	13:41:31	0.328766
2022-09-14	13:41:31	0.356552
2022-09-14	13:41:31	0.303473
2022-09-14	13:41:32	0.29757
2022-09-14	13:41:32	0.330242
2022-09-14	13:41:32	0.441031
2022-09-14	13:41:33	0.311616
2022-09-14	13:41:33	0.551616
2022-09-14	13:41:33	0.407545
2022-09-14	13:41:33	0.351209
2022-09-14	13:41:34	0.524236
2022-09-14	13:41:34	0.404593
2022-09-14	13:41:34	0.437468
2022-09-14	13:41:34	0.539758
2022-09-14	13:41:35	0.36729
2022-09-14	13:41:35	0.493295
2022-09-14	13:41:35	0.570089
2022-09-14	13:41:36	0.882201
2022-09-14	13:41:36	0.875229
2022-09-14	13:41:36	0.52444
2022-09-14	13:41:36	0.532074
2022-09-14	13:41:37	0.457672
2022-09-14	13:41:37	0.539605
2022-09-14	13:41:37	0.53757
2022-09-14	13:41:37	0.560471
2022-09-14	13:41:38	0.559097
2022-09-14	13:41:38	0.523778
2022-09-14	13:41:38	0.621998
2022-09-14	13:41:38	0.482557
2022-09-14	13:41:39	0.527341
2022-09-14	13:41:39	0.542914
2022-09-14	13:41:39	0.436501
2022-09-14	13:41:40	0.393906
2022-09-14	13:41:40	0.404186
2022-09-14	13:41:40	0.510038
2022-09-14	13:41:40	0.392888
2022-09-14	13:41:41	0.448613
2022-09-14	13:41:41	0.372328
2022-09-14	13:41:41	0.331311
2022-09-14	13:41:41	0.344898
2022-09-14	13:41:42	0.409835
2022-09-14	13:41:42	0.345356
2022-09-14	13:41:42	0.435127
2022-09-14	13:41:42	0.339249
2022-09-14	13:41:43	0.309682
2022-09-14	13:41:43	0.489886
2022-09-14	13:41:43	0.303982
2022-09-14	13:41:44	0.260369
2022-09-14	13:41:44	0.279606
2022-09-14	13:41:44	0.143728
2022-09-14	13:41:44	0.2364
2022-09-14	13:41:45	0.298893
2022-09-14	13:41:45	0.52785
2022-09-14	13:41:45	0.5364
2022-09-14	13:41:45	0.426476
2022-09-14	13:41:46	0.434771
2022-09-14	13:41:46	0.402303
2022-09-14	13:41:46	0.433193
2022-09-14	13:41:46	0.621743
2022-09-14	13:41:47	0.419758
2022-09-14	13:41:47	0.415382
2022-09-14	13:41:47	0.59416
2022-09-14	13:41:48	0.419453
2022-09-14	13:41:48	0.518181
2022-09-14	13:41:48	0.41243
2022-09-14	13:41:48	0.412176
2022-09-14	13:41:49	0.517723
2022-09-14	13:41:49	0.40271
2022-09-14	13:41:49	0.412277
2022-09-14	13:41:49	0.539911
2022-09-14	13:41:50	0.43187
2022-09-14	13:41:50	0.341641
2022-09-14	13:41:50	0.527188
2022-09-14	13:41:50	0.408359
2022-09-14	13:41:51	0.549478
2022-09-14	13:41:51	0.436705
2022-09-14	13:41:51	0.345051
2022-09-14	13:41:52	0.557366
2022-09-14	13:41:52	0.374771
2022-09-14	13:41:52	0.501997
2022-09-14	13:41:52	0.353906
2022-09-14	13:41:53	0.413397
2022-09-14	13:41:53	0.641743
2022-09-14	13:41:53	0.427341
2022-09-14	13:41:53	0.538486
2022-09-14	13:41:54	0.333448
2022-09-14	13:41:54	0.436858
2022-09-14	13:41:54	0.589071
2022-09-14	13:41:54	0.423575
2022-09-14	13:41:55	0.564389
2022-09-14	13:41:55	0.430853
2022-09-14	13:41:55	0.472023
2022-09-14	13:41:56	0.580216
2022-09-14	13:41:56	0.477214
2022-09-14	13:41:56	0.607137
2022-09-14	13:41:56	0.410954
2022-09-14	13:41:57	0.452685
2022-09-14	13:41:57	0.635178
2022-09-14	13:41:57	0.46383
2022-09-14	13:41:57	0.594008
2022-09-14	13:41:58	0.448512
2022-09-14	13:41:58	0.444491
2022-09-14	13:41:58	0.656043
2022-09-14	13:41:58	0.450954
2022-09-14	13:41:59	0.530496
2022-09-14	13:41:59	0.371361
2022-09-14	13:41:59	0.345255
2022-09-14	13:42:00	0.540063
2022-09-14	13:42:00	0.248461
2022-09-14	13:42:00	0.168104
2022-09-14	13:42:00	0.359555
2022-09-14	13:42:01	0.245916
2022-09-14	13:42:01	0.232583
2022-09-14	13:42:01	0.441031
2022-09-14	13:42:01	0.484797
2022-09-14	13:42:02	0.518842
2022-09-14	13:42:02	0.420216
2022-09-14	13:42:02	0.523982
2022-09-14	13:42:02	0.489529
2022-09-14	13:42:03	0.498842
2022-09-14	13:42:03	0.478639
2022-09-14	13:42:03	0.544338
2022-09-14	13:42:04	0.491769
2022-09-14	13:42:04	0.556908
2022-09-14	13:42:04	0.47411
2022-09-14	13:42:04	0.474924
2022-09-14	13:42:05	0.456959
2022-09-14	13:42:05	0.472634
2022-09-14	13:42:05	0.472837
2022-09-14	13:42:05	0.476603
2022-09-14	13:42:06	0.468919
2022-09-14	13:42:06	0.470802
2022-09-14	13:42:06	0.451005
2022-09-14	13:42:06	0.395076
2022-09-14	13:42:07	0.399453
2022-09-14	13:42:07	0.412328
2022-09-14	13:42:07	0.475942
2022-09-14	13:42:08	0.476705
2022-09-14	13:42:08	0.467952
2022-09-14	13:42:08	0.455992
2022-09-14	13:42:08	0.471565
2022-09-14	13:42:09	0.448308
2022-09-14	13:42:09	0.479962
2022-09-14	13:42:09	0.450903
2022-09-14	13:42:09	0.457417
2022-09-14	13:42:10	0.462863
2022-09-14	13:42:10	0.465458
2022-09-14	13:42:10	0.379504
2022-09-14	13:42:11	0.422252
2022-09-14	13:42:11	0.370852
2022-09-14	13:42:11	0.0420994
2022-09-14	13:42:11	0.206221
2022-09-14	13:42:12	0.168563
2022-09-14	13:42:12	0.251361
2022-09-14	13:42:12	0.68958
2022-09-14	13:42:12	0.369326
2022-09-14	13:42:13	0.356807
2022-09-14	13:42:13	0.702557
2022-09-14	13:42:13	0.51416
2022-09-14	13:42:13	0.611209
2022-09-14	13:42:14	0.603728
2022-09-14	13:42:14	0.403626
2022-09-14	13:42:14	0.589224
2022-09-14	13:42:15	0.417214
2022-09-14	13:42:15	0.63131
2022-09-14	13:42:15	0.415789
2022-09-14	13:42:15	0.414059
2022-09-14	13:42:16	0.444288
2022-09-14	13:42:16	0.365356
2022-09-14	13:42:16	0.516857
2022-09-14	13:42:16	0.377774
2022-09-14	13:42:17	0.402506
2022-09-14	13:42:17	0.476552
2022-09-14	13:42:17	0.4307
2022-09-14	13:42:17	1.04225
2022-09-14	13:42:18	1.27905
2022-09-14	13:42:18	0.696349
2022-09-14	13:42:18	0.568409
2022-09-14	13:42:19	0.345
2022-09-14	13:42:19	0.386222
2022-09-14	13:42:19	0.415178
2022-09-14	13:42:19	0.39584
2022-09-14	13:42:20	0.528715
2022-09-14	13:42:20	0.359199
2022-09-14	13:42:20	0.141794
2022-09-14	13:42:20	0.266425
2022-09-14	13:42:21	0.342761
2022-09-14	13:42:21	0.311514
2022-09-14	13:42:21	0.35813
2022-09-14	13:42:21	0.213753
2022-09-14	13:42:22	0.290496
2022-09-14	13:42:22	0.218588
2022-09-14	13:42:22	0.389428
2022-09-14	13:42:23	0.384746
2022-09-14	13:42:23	0.328664
2022-09-14	13:42:23	0.47411
2022-09-14	13:42:23	0.361692
2022-09-14	13:42:24	0.500114
2022-09-14	13:42:24	0.383982
2022-09-14	13:42:24	0.346069
2022-09-14	13:42:24	0.3707
2022-09-14	13:42:25	0.373652
2022-09-14	13:42:25	0.383117
2022-09-14	13:42:25	0.404491
2022-09-14	13:42:25	0.380674
2022-09-14	13:42:26	0.405662
2022-09-14	13:42:26	0.401743
2022-09-14	13:42:26	0.40159
2022-09-14	13:42:27	0.40383
2022-09-14	13:42:27	0.400216
2022-09-14	13:42:27	0.3964
2022-09-14	13:42:27	0.398893
2022-09-14	13:42:28	0.397723
2022-09-14	13:42:28	0.40098
2022-09-14	13:42:28	0.394211
2022-09-14	13:42:28	0.399351
2022-09-14	13:42:29	0.403575
2022-09-14	13:42:29	0.395229
2022-09-14	13:42:29	0.402608
2022-09-14	13:42:29	0.379249
2022-09-14	13:42:30	0.371514
2022-09-14	13:42:30	0.37355
2022-09-14	13:42:30	0.368817
2022-09-14	13:42:31	0.365407
2022-09-14	13:42:31	0.393601
2022-09-14	13:42:31	0.390344
2022-09-14	13:42:31	0.377519
2022-09-14	13:42:32	0.381031
2022-09-14	13:42:32	0.373753
2022-09-14	13:42:32	0.425458
2022-09-14	13:42:32	0.402812
2022-09-14	13:42:33	0.522608
2022-09-14	13:42:33	0.489326
2022-09-14	13:42:33	0.44215
2022-09-14	13:42:33	0.22439
2022-09-14	13:42:34	0.125
2022-09-14	13:42:34	-0.152201
2022-09-14	13:42:34	-0.201819
2022-09-14	13:42:35	-0.376679
2022-09-14	13:42:35	-0.36416
2022-09-14	13:42:35	-0.310063
2022-09-14	13:42:35	0.234873
2022-09-14	13:42:36	0.404084
2022-09-14	13:42:36	0.493906
2022-09-14	13:42:36	0.533092
2022-09-14	13:42:36	0.511972
2022-09-14	13:42:37	0.643881
2022-09-14	13:42:37	0.503779
2022-09-14	13:42:37	0.665763
2022-09-14	13:42:37	0.556298
2022-09-14	13:42:38	0.568308
2022-09-14	13:42:38	0.48383
2022-09-14	13:42:38	0.756094
2022-09-14	13:42:39	0.556247
2022-09-14	13:42:39	0.524745
2022-09-14	13:42:39	0.366323
2022-09-14	13:42:39	0.583422
2022-09-14	13:42:40	0.447647
2022-09-14	13:42:40	0.488512
2022-09-14	13:42:40	0.574568
2022-09-14	13:42:40	0.49416
2022-09-14	13:42:41	0.448562
2022-09-14	13:42:41	0.4736
2022-09-14	13:42:41	0.716908
2022-09-14	13:42:41	0.398842
2022-09-14	13:42:42	0.633499
2022-09-14	13:42:42	0.324033
2022-09-14	13:42:42	0.336094
2022-09-14	13:42:43	-0.672404
2022-09-14	13:42:43	-0.752302
2022-09-14	13:42:43	-0.643091
2022-09-14	13:42:43	-1.00528
2022-09-14	13:42:44	-0.8379
2022-09-14	13:42:44	-0.631335
2022-09-14	13:42:44	-0.610521
2022-09-14	13:42:44	-0.65561
2022-09-14	13:42:45	-1.14818
2022-09-14	13:42:45	-1.21022
2022-09-14	13:42:45	-1.11047
2022-09-14	13:42:46	-1.00548
2022-09-14	13:42:46	-0.721004
2022-09-14	13:42:46	-0.935966
2022-09-14	13:42:46	-0.961462
2022-09-14	13:42:47	-0.930012
2022-09-14	13:42:47	-1.14401
2022-09-14	13:42:47	-1.27072
2022-09-14	13:42:47	-1.25118
2022-09-14	13:42:48	-1.292
2022-09-14	13:42:48	-1.30905
2022-09-14	13:42:48	-1.34314
2022-09-14	13:42:48	-1.31113
2022-09-14	13:42:49	-1.34253
2022-09-14	13:42:49	-1.38446
2022-09-14	13:42:49	-1.40788
2022-09-14	13:42:50	-1.41815
2022-09-14	13:42:50	-1.44655
2022-09-14	13:42:50	-1.28925
2022-09-14	13:42:50	-1.31581
2022-09-14	13:42:51	-1.34477
2022-09-14	13:42:51	-1.36884
2022-09-14	13:42:51	-1.53301
2022-09-14	13:42:51	-1.62141
2022-09-14	13:42:52	-1.80106
2022-09-14	13:42:52	-1.84385
2022-09-14	13:42:52	-1.73225
2022-09-14	13:42:52	-1.59245
2022-09-14	13:42:53	-1.68752
2022-09-14	13:42:53	-1.73678
2022-09-14	13:42:53	-1.76701
2022-09-14	13:42:54	-1.75642
2022-09-14	13:42:54	-1.74752
2022-09-14	13:42:54	-1.78034
2022-09-14	13:42:54	-1.85714
2022-09-14	13:42:55	-1.56136
2022-09-14	13:42:55	-1.51785
2022-09-14	13:42:55	-1.35968
2022-09-14	13:42:55	-1.3979
2022-09-14	13:42:56	-1.53123
2022-09-14	13:42:56	-1.44299
2022-09-14	13:42:56	-1.46635
2022-09-14	13:42:56	-1.4207
2022-09-14	13:42:57	-1.61882
2022-09-14	13:42:57	-1.55327
2022-09-14	13:42:57	-1.59281
2022-09-14	13:42:58	-1.65668
2022-09-14	13:42:58	-1.55134
2022-09-14	13:42:58	-1.80167
2022-09-14	13:42:58	-1.71256
2022-09-14	13:42:59	-1.7951
2022-09-14	13:42:59	-1.66828
2022-09-14	13:42:59	-1.37642
2022-09-14	13:42:59	-1.67037
2022-09-14	13:43:00	-1.56905
2022-09-14	13:43:00	-1.5609
2022-09-14	13:43:00	-1.45179
2022-09-14	13:43:00	-1.55505
2022-09-14	13:43:01	-1.15983
2022-09-14	13:43:01	-1.20986
2022-09-14	13:43:01	-0.993778
2022-09-14	13:43:02	-1.04838
2022-09-14	13:43:02	-1.18355
2022-09-14	13:43:02	-0.814388
2022-09-14	13:43:02	-0.89103
2022-09-14	13:43:03	-0.766144
2022-09-14	13:43:03	-0.860343
2022-09-14	13:43:03	-0.852556
2022-09-14	13:43:03	-0.855864
2022-09-14	13:43:04	-0.863549
2022-09-14	13:43:04	-0.824312
2022-09-14	13:43:04	-0.845737
2022-09-14	13:43:04	-0.84818
2022-09-14	13:43:05	-0.846093
2022-09-14	13:43:05	-0.850012
2022-09-14	13:43:05	-0.894897
2022-09-14	13:43:06	-0.90589
2022-09-14	13:43:06	-0.950368
2022-09-14	13:43:06	-0.88019
2022-09-14	13:43:06	-0.885788
2022-09-14	13:43:07	-0.875457
2022-09-14	13:43:07	-0.915305
2022-09-14	13:43:07	-0.903295
2022-09-14	13:43:07	-0.827518
2022-09-14	13:43:08	-0.796882
2022-09-14	13:43:08	-0.700648
2022-09-14	13:43:08	-0.799834
2022-09-14	13:43:08	-0.951844
2022-09-14	13:43:09	-0.743956
2022-09-14	13:43:09	-0.808842
2022-09-14	13:43:09	-0.795763
2022-09-14	13:43:10	-0.834949
2022-09-14	13:43:10	-0.899478
2022-09-14	13:43:10	-1.09403
2022-09-14	13:43:10	-0.953065
2022-09-14	13:43:11	-0.954439
2022-09-14	13:43:11	-0.826551
2022-09-14	13:43:11	-0.940801
2022-09-14	13:43:11	-0.939427
2022-09-14	13:43:12	-0.802328
2022-09-14	13:43:12	-0.800394
2022-09-14	13:43:12	-0.931437
2022-09-14	13:43:12	-0.798104
2022-09-14	13:43:13	-0.916424
2022-09-14	13:43:13	-0.920648
2022-09-14	13:43:13	-0.948333
2022-09-14	13:43:14	-0.871488
2022-09-14	13:43:14	-0.784465
2022-09-14	13:43:14	-0.914439
2022-09-14	13:43:14	-0.548028
2022-09-14	13:43:15	-0.276475
2022-09-14	13:43:15	-0.61047
2022-09-14	13:43:15	-0.60986
2022-09-14	13:43:15	-1.0662
2022-09-14	13:43:16	-1.1377
2022-09-14	13:43:16	-1.11724
2022-09-14	13:43:16	-1.0291
2022-09-14	13:43:16	-1.03159
2022-09-14	13:43:17	-1.03281
2022-09-14	13:43:17	-0.938002
2022-09-14	13:43:17	-0.948791
2022-09-14	13:43:18	-0.879885
2022-09-14	13:43:18	-0.85505
2022-09-14	13:43:18	-0.77047
2022-09-14	13:43:18	-0.853523
2022-09-14	13:43:19	-0.874083
2022-09-14	13:43:19	-0.828587
2022-09-14	13:43:19	-0.793778
2022-09-14	13:43:19	-0.788587
2022-09-14	13:43:20	-0.79449
2022-09-14	13:43:20	-0.754592
2022-09-14	13:43:20	-0.767315
2022-09-14	13:43:20	-0.836628
2022-09-14	13:43:21	-0.960801
2022-09-14	13:43:21	-0.945483
2022-09-14	13:43:21	-0.958307
2022-09-14	13:43:22	-0.958612
2022-09-14	13:43:22	-0.944923
2022-09-14	13:43:22	-0.90192
2022-09-14	13:43:22	-0.973981
2022-09-14	13:43:23	-1.26075
2022-09-14	13:43:23	-1.29337
2022-09-14	13:43:23	-1.30767
2022-09-14	13:43:23	-1.33128
2022-09-14	13:43:24	-1.20645
2022-09-14	13:43:24	-1.27739
2022-09-14	13:43:24	-1.29251
2022-09-14	13:43:25	-1.28935
2022-09-14	13:43:25	-1.29988
2022-09-14	13:43:25	-1.31347
2022-09-14	13:43:25	-1.30823
2022-09-14	13:43:26	-1.30009
2022-09-14	13:43:26	-1.28131
2022-09-14	13:43:26	-1.29917
2022-09-14	13:43:26	-1.29464
2022-09-14	13:43:27	-1.29195
2022-09-14	13:43:27	-1.27057
2022-09-14	13:43:27	-1.24502
2022-09-14	13:43:27	-1.25113
2022-09-14	13:43:28	-1.25714
2022-09-14	13:43:28	-1.25011
2022-09-14	13:43:28	-1.26497
2022-09-14	13:43:29	-1.26655
2022-09-14	13:43:29	-1.2523
2022-09-14	13:43:29	-1.23449
2022-09-14	13:43:29	-1.22004
2022-09-14	13:43:30	-1.15413
2022-09-14	13:43:30	-1.2235
2022-09-14	13:43:30	-1.31917
2022-09-14	13:43:30	-1.38711
2022-09-14	13:43:31	-1.3748
2022-09-14	13:43:31	-1.41291
2022-09-14	13:43:31	-1.39307
2022-09-14	13:43:31	-1.43001
2022-09-14	13:43:32	-1.65032
2022-09-14	13:43:32	-1.52172
2022-09-14	13:43:32	-1.6952
2022-09-14	13:43:33	-2.29561
2022-09-14	13:43:33	-1.98538
2022-09-14	13:43:33	-2.0181
2022-09-14	13:43:33	-1.99098
2022-09-14	13:43:34	-1.95342
2022-09-14	13:43:34	-1.94925
2022-09-14	13:43:34	-1.92314
2022-09-14	13:43:34	-1.9924
2022-09-14	13:43:35	-2.16207
2022-09-14	13:43:35	-1.9749
2022-09-14	13:43:35	-1.99866
2022-09-14	13:43:35	-2.0291
2022-09-14	13:43:36	-1.95668
2022-09-14	13:43:36	-1.94314
2022-09-14	13:43:36	-1.93826
2022-09-14	13:43:37	-1.92884
2022-09-14	13:43:37	-1.97235
2022-09-14	13:43:37	-1.98793
2022-09-14	13:43:37	-2.00167
2022-09-14	13:43:38	-1.99444
2022-09-14	13:43:38	-1.96579
2022-09-14	13:43:38	-1.9352
2022-09-14	13:43:38	-1.92472
2022-09-14	13:43:39	-1.97861
2022-09-14	13:43:39	-1.89622
2022-09-14	13:43:39	-1.87932
2022-09-14	13:43:39	-1.86843
2022-09-14	13:43:40	-1.87943
2022-09-14	13:43:40	-1.85383
2022-09-14	13:43:40	-1.8524
2022-09-14	13:43:41	-1.84828
2022-09-14	13:43:41	-1.99424
2022-09-14	13:43:41	-1.81495
2022-09-14	13:43:41	-1.81505
2022-09-14	13:43:42	-1.87856
2022-09-14	13:43:42	-1.76523
2022-09-14	13:43:42	-1.9177
2022-09-14	13:43:42	-1.98345
2022-09-14	13:43:43	-1.9036
2022-09-14	13:43:43	-1.8378
2022-09-14	13:43:43	-1.89093
2022-09-14	13:43:43	-1.95648
2022-09-14	13:43:44	0.658995
2022-09-14	13:43:44	0.730649
2022-09-14	13:43:44	0.72556
2022-09-14	13:43:45	0.726832
2022-09-14	13:43:45	0.320115
2022-09-14	13:43:45	0.733397
2022-09-14	13:43:45	-0.363498
2022-09-14	13:43:46	-4.67098
2022-09-14	13:43:46	0.429224
2022-09-14	13:43:46	-3.632
2022-09-14	13:43:46	0.477468
2022-09-14	13:43:47	0.412888
2022-09-14	13:43:47	0.724338
2022-09-14	13:43:47	0.726679
2022-09-14	13:43:47	0.730445
2022-09-14	13:43:48	0.727341
2022-09-14	13:43:48	0.735941
2022-09-14	13:43:48	0.733499
2022-09-14	13:43:49	0.733702
2022-09-14	13:43:49	0.723982
2022-09-14	13:43:49	0.728206
2022-09-14	13:43:49	0.726679
2022-09-14	13:43:50	0.730394
2022-09-14	13:43:50	0.734364
2022-09-14	13:43:50	0.731056
2022-09-14	13:43:50	0.731463
2022-09-14	13:43:51	0.732735
2022-09-14	13:43:51	0.732125
2022-09-14	13:43:51	0.73757
2022-09-14	13:43:51	0.729631
2022-09-14	13:43:52	0.741387
2022-09-14	13:43:52	0.728868
2022-09-14	13:43:52	0.727443
2022-09-14	13:43:53	0.73528
2022-09-14	13:43:53	0.734109
2022-09-14	13:43:53	0.737926
2022-09-14	13:43:53	0.736196
2022-09-14	13:43:54	0.729224
2022-09-14	13:43:54	0.728715
2022-09-14	13:43:54	0.731565
2022-09-14	13:43:54	0.72729
2022-09-14	13:43:55	0.733244
2022-09-14	13:43:55	0.731565
2022-09-14	13:43:55	0.729936
2022-09-14	13:43:55	0.728613
2022-09-14	13:43:56	0.725611
2022-09-14	13:43:56	0.729784
2022-09-14	13:43:56	0.72556
2022-09-14	13:43:57	0.727239
2022-09-14	13:43:57	0.723779
2022-09-14	13:43:57	0.734568
2022-09-14	13:43:57	0.73416
2022-09-14	13:43:58	0.732837
2022-09-14	13:43:58	0.732939
2022-09-14	13:43:58	0.734924
2022-09-14	13:43:58	0.733295
2022-09-14	13:43:59	0.731107
2022-09-14	13:43:59	0.726374
2022-09-14	13:43:59	0.731412
2022-09-14	13:43:59	0.732074
2022-09-14	13:44:00	0.72958
2022-09-14	13:44:00	0.726425
2022-09-14	13:44:00	0.730293
2022-09-14	13:44:01	0.733651
2022-09-14	13:44:01	0.739962
2022-09-14	13:44:01	0.732175
2022-09-14	13:44:01	0.734975
2022-09-14	13:44:02	0.726374
2022-09-14	13:44:02	0.730445
2022-09-14	13:44:02	0.728562
2022-09-14	13:44:02	0.728512
2022-09-14	13:44:03	0.731412
2022-09-14	13:44:03	0.731361
2022-09-14	13:44:03	0.727952
2022-09-14	13:44:04	0.729682
2022-09-14	13:44:04	0.730801
2022-09-14	13:44:04	0.728308
2022-09-14	13:44:04	0.737417
2022-09-14	13:44:05	0.731005
2022-09-14	13:44:05	0.73131
2022-09-14	13:44:05	0.72902
2022-09-14	13:44:05	0.72612
2022-09-14	13:44:06	0.737265
2022-09-14	13:44:06	0.732888
2022-09-14	13:44:06	0.72897
2022-09-14	13:44:06	0.728308
2022-09-14	13:44:07	0.730445
2022-09-14	13:44:07	0.728766
2022-09-14	13:44:07	0.728257
2022-09-14	13:44:08	0.739198
2022-09-14	13:44:08	0.73416
2022-09-14	13:44:08	0.730903
2022-09-14	13:44:08	0.73416
2022-09-14	13:44:09	0.736094
2022-09-14	13:44:09	0.728359
2022-09-14	13:44:09	0.728003
2022-09-14	13:44:09	0.734262
2022-09-14	13:44:10	0.723066
2022-09-14	13:44:10	0.731921
2022-09-14	13:44:10	0.732125
2022-09-14	13:44:10	0.737163
2022-09-14	13:44:11	0.730547
2022-09-14	13:44:11	0.729071
2022-09-14	13:44:11	0.727952
2022-09-14	13:44:12	0.728664
2022-09-14	13:44:12	0.73528
2022-09-14	13:44:12	0.725662
2022-09-14	13:44:12	0.731514
2022-09-14	13:44:13	0.723219
2022-09-14	13:44:13	0.734822
2022-09-14	13:44:13	0.742659
2022-09-14	13:44:13	0.733651
2022-09-14	13:44:14	0.723728
2022-09-14	13:44:14	0.733295
2022-09-14	13:44:14	0.725916
2022-09-14	13:44:14	0.731921
2022-09-14	13:44:15	0.732939
2022-09-14	13:44:15	0.733142
2022-09-14	13:44:15	0.720165
2022-09-14	13:44:16	0.73243
2022-09-14	13:44:16	0.727697
2022-09-14	13:44:16	0.727188
2022-09-14	13:44:16	0.730496
2022-09-14	13:44:17	0.732939
2022-09-14	13:44:17	0.731158
2022-09-14	13:44:17	0.729224
2022-09-14	13:44:17	0.731514
2022-09-14	13:44:18	0.726018
2022-09-14	13:44:18	0.725458
2022-09-14	13:44:18	0.725153
2022-09-14	13:44:18	0.732481
2022-09-14	13:44:19	0.721234
2022-09-14	13:44:19	0.728613
2022-09-14	13:44:19	0.735331
2022-09-14	13:44:20	0.731616
2022-09-14	13:44:20	0.737366
2022-09-14	13:44:20	0.734415
2022-09-14	13:44:20	0.736807
2022-09-14	13:44:21	0.73528
2022-09-14	13:44:21	0.726934
2022-09-14	13:44:21	0.729682
2022-09-14	13:44:21	0.729987
2022-09-14	13:44:22	0.725916
2022-09-14	13:44:22	0.729936
2022-09-14	13:44:22	0.727036
2022-09-14	13:44:22	-0.785737
2022-09-14	13:44:23	-1.98314
2022-09-14	13:44:23	0.724033
2022-09-14	13:44:23	0.727799
2022-09-14	13:44:24	0.719555
2022-09-14	13:44:24	-0.063702
2022-09-14	13:44:24	0.733499
2022-09-14	13:44:24	0.730801
2022-09-14	13:44:25	0.733448
2022-09-14	13:44:25	0.730496
2022-09-14	13:44:25	0.733448
2022-09-14	13:44:25	0.724949
2022-09-14	13:44:26	0.667646
2022-09-14	13:44:26	0.732939
2022-09-14	13:44:26	0.437061
2022-09-14	13:44:26	0.474415
2022-09-14	13:44:27	0.732735
2022-09-14	13:44:27	0.730649
2022-09-14	13:44:27	0.728155
2022-09-14	13:44:28	0.730649
2022-09-14	13:44:28	0.730038
2022-09-14	13:44:28	0.724695
2022-09-14	13:44:28	-1.09378
2022-09-14	13:44:29	-1.55429
2022-09-14	13:44:29	-1.95133
2022-09-14	13:44:29	-0.984312
2022-09-14	13:44:29	-0.992709
2022-09-14	13:44:30	-1.01693
2022-09-14	13:44:30	-0.830928
2022-09-14	13:44:30	1.46953
2022-09-14	13:44:30	7.7082
2022-09-14	13:44:31	3.33441
2022-09-14	13:44:31	2.82454
