# Supplementary material for: Comparing efficacy in reducing pulling and welfare impacts of four types of leash walking equipment
Source: PeerJ journal article supplement (doi:10.7717/peerj.18131), 2024-10-24
Supplement: Shelter_2_Tension_files.zip [file Reggie_star_2022914122830 copy.xlsx]

## Sheet: Averaged Newtons
Date	Time	Averaged newtons	impulse	total steps
2022-09-14	12:28:45	1.74063	1.74063	0		Impulse newtons	1686.33
2022-09-14	12:28:46	4.89946	6.64009	0		Total steps	40
2022-09-14	12:28:47	4.72941	11.3695	0		# > 5 sec	3
2022-09-14	12:28:48	1.80247	13.172	0
2022-09-14	12:28:49	1.37753	14.5495	0
2022-09-14	12:28:50	1.7297	16.2792	0
2022-09-14	12:28:51	1.77249	18.0517	0
2022-09-14	12:28:52	1.74793	19.7996	0
2022-09-14	12:28:53	1.80597	21.6056	0
2022-09-14	12:28:54	6.54463	28.1502	0
2022-09-14	12:28:55	4.1336	32.2838	0
2022-09-14	12:28:56	7.14099	39.4248	0
2022-09-14	12:28:57	16.5725	55.9973	1
2022-09-14	12:28:58	19.8687	75.866	2
2022-09-14	12:28:59	14.2068	90.0728	3
2022-09-14	12:29:00	4.59743	94.6702	3
2022-09-14	12:29:01	28.621	123.291	4
2022-09-14	12:29:02	19.2931	142.584	5
2022-09-14	12:29:03	14.8057	157.39	6
2022-09-14	12:29:04	15.4255	172.816	7
2022-09-14	12:29:05	35.908	208.724	8
2022-09-14	12:29:06	25.9053	234.629	9
2022-09-14	12:29:07	13.938	248.567	10
2022-09-14	12:29:08	17.0682	265.635	11
2022-09-14	12:29:09	11.4607	277.096	11
2022-09-14	12:29:10	35.6237	312.719	12
2022-09-14	12:29:11	5.40224	318.122	12
2022-09-14	12:29:12	1.62156	319.743	12
2022-09-14	12:29:13	0.927728	320.671	12
2022-09-14	12:29:14	2.49823	323.169	12
2022-09-14	12:29:15	7.2491	330.418	12
2022-09-14	12:29:16	6.19788	336.616	12
2022-09-14	12:29:17	6.24525	342.861	12
2022-09-14	12:29:18	9.02475	351.886	12
2022-09-14	12:29:19	2.99212	354.878	12
2022-09-14	12:29:20	3.16624	358.045	12
2022-09-14	12:29:21	1.77628	359.821	12
2022-09-14	12:29:22	0.923823	360.745	12
2022-09-14	12:29:23	5.59233	366.337	12
2022-09-14	12:29:24	4.60009	370.937	12
2022-09-14	12:29:25	18.2076	389.145	13
2022-09-14	12:29:26	7.42034	396.565	13
2022-09-14	12:29:27	17.1458	413.711	14
2022-09-14	12:29:28	21.4241	435.135	15
2022-09-14	12:29:29	1.0644	436.199	15
2022-09-14	12:29:30	1.79196	437.991	15
2022-09-14	12:29:31	1.393	439.384	15
2022-09-14	12:29:32	1.42908	440.813	15
2022-09-14	12:29:33	1.21324	442.027	15
2022-09-14	12:29:34	0.946574	442.973	15
2022-09-14	12:29:35	1.45917	444.432	15
2022-09-14	12:29:36	1.61669	446.049	15
2022-09-14	12:29:37	1.53825	447.587	15
2022-09-14	12:29:38	1.57328	449.161	15
2022-09-14	12:29:39	1.54912	450.71	15
2022-09-14	12:29:40	1.47221	452.182	15
2022-09-14	12:29:41	1.52031	453.702	15
2022-09-14	12:29:42	1.52467	455.227	15
2022-09-14	12:29:43	1.50739	456.734	15
2022-09-14	12:29:44	1.52937	458.264	15
2022-09-14	12:29:45	0.594962	458.859	15
2022-09-14	12:29:46	2.13519	460.994	15
2022-09-14	12:29:47	19.8797	480.873	16
2022-09-14	12:29:48	3.74769	484.621	16
2022-09-14	12:29:49	-2.34187	484.621	16
2022-09-14	12:29:50	-2.24221	484.621	16
2022-09-14	12:29:51	0.5684	485.19	16
2022-09-14	12:29:52	1.57283	486.762	16
2022-09-14	12:29:53	1.2322	487.995	16
2022-09-14	12:29:54	1.56904	489.564	16
2022-09-14	12:29:55	1.94278	491.506	16
2022-09-14	12:29:56	1.67651	493.183	16
2022-09-14	12:29:57	1.37804	494.561	16
2022-09-14	12:29:58	1.44815	496.009	16
2022-09-14	12:29:59	1.35891	497.368	16
2022-09-14	12:30:00	1.31612	498.684	16
2022-09-14	12:30:01	1.31946	500.004	16
2022-09-14	12:30:02	1.19168	501.195	16
2022-09-14	12:30:03	1.17119	502.366	16
2022-09-14	12:30:04	1.17945	503.546	16
2022-09-14	12:30:05	1.19654	504.742	16
2022-09-14	12:30:06	1.18828	505.931	16
2022-09-14	12:30:07	1.21754	507.148	16
2022-09-14	12:30:08	1.20141	508.35	16
2022-09-14	12:30:09	1.18913	509.539	16
2022-09-14	12:30:10	1.17628	510.715	16
2022-09-14	12:30:11	1.16983	511.885	16
2022-09-14	12:30:12	1.17374	513.059	16
2022-09-14	12:30:13	1.16276	514.221	16
2022-09-14	12:30:14	1.31837	515.54	16
2022-09-14	12:30:15	1.17651	516.716	16
2022-09-14	12:30:16	1.26944	517.986	16
2022-09-14	12:30:17	1.26193	519.248	16
2022-09-14	12:30:18	1.32071	520.568	16
2022-09-14	12:30:19	1.67956	522.248	16
2022-09-14	12:30:20	1.42614	523.674	16
2022-09-14	12:30:21	1.32592	525	16
2022-09-14	12:30:22	1.28992	526.29	16
2022-09-14	12:30:23	1.27911	527.569	16
2022-09-14	12:30:24	1.25223	528.821	16
2022-09-14	12:30:25	4.72767	533.549	16
2022-09-14	12:30:26	15.6966	549.245	17
2022-09-14	12:30:27	14.9323	564.178	18
2022-09-14	12:30:28	16.4562	580.634	19
2022-09-14	12:30:29	2.35492	582.989	19
2022-09-14	12:30:30	1.82116	584.81	19
2022-09-14	12:30:31	15.9294	600.74	20
2022-09-14	12:30:32	6.30269	607.042	20
2022-09-14	12:30:33	2.26604	609.308	20
2022-09-14	12:30:34	1.25698	610.565	20
2022-09-14	12:30:35	1.02127	611.587	20
2022-09-14	12:30:36	4.7208	616.307	20
2022-09-14	12:30:37	12.1377	628.445	20
2022-09-14	12:30:38	1.88313	630.328	20
2022-09-14	12:30:39	1.3048	631.633	20
2022-09-14	12:30:40	1.13491	632.768	20
2022-09-14	12:30:41	1.21092	633.979	20
2022-09-14	12:30:42	-0.669606	633.979	20
2022-09-14	12:30:43	12.9672	646.946	20
2022-09-14	12:30:44	9.30331	656.249	20
2022-09-14	12:30:45	1.08523	657.335	20
2022-09-14	12:30:46	0.506111	657.841	20
2022-09-14	12:30:47	0.329089	658.17	20
2022-09-14	12:30:48	0.597603	658.767	20
2022-09-14	12:30:49	0.731349	659.499	20
2022-09-14	12:30:50	1.08036	660.579	20
2022-09-14	12:30:51	1.45319	662.032	20
2022-09-14	12:30:52	10.3618	672.394	20
2022-09-14	12:30:53	19.9817	692.376	21
2022-09-14	12:30:54	6.81066	699.186	21
2022-09-14	12:30:55	5.38378	704.57	21
2022-09-14	12:30:56	4.26867	708.839	21
2022-09-14	12:30:57	5.54497	714.384	21
2022-09-14	12:30:58	24.5272	738.911	22
2022-09-14	12:30:59	20.2488	759.16	23
2022-09-14	12:31:00	16.3676	775.527	24
2022-09-14	12:31:01	11.9498	787.477	24
2022-09-14	12:31:02	5.32471	792.802	24
2022-09-14	12:31:03	0.985282	793.787	24
2022-09-14	12:31:04	2.11007	795.897	24
2022-09-14	12:31:05	1.72048	797.618	24
2022-09-14	12:31:06	2.09275	799.71	24
2022-09-14	12:31:07	3.25805	802.969	24
2022-09-14	12:31:08	1.82416	804.793	24
2022-09-14	12:31:09	1.65959	806.452	24
2022-09-14	12:31:10	1.57215	808.024	24
2022-09-14	12:31:11	1.60656	809.631	24
2022-09-14	12:31:12	1.55659	811.188	24
2022-09-14	12:31:13	1.49462	812.682	24
2022-09-14	12:31:14	1.47402	814.156	24
2022-09-14	12:31:15	1.47408	815.63	24
2022-09-14	12:31:16	1.36681	816.997	24
2022-09-14	12:31:17	1.41692	818.414	24
2022-09-14	12:31:18	1.63406	820.048	24
2022-09-14	12:31:19	2.73945	822.788	24
2022-09-14	12:31:20	2.86632	825.654	24
2022-09-14	12:31:21	2.01414	827.668	24
2022-09-14	12:31:22	1.75574	829.424	24
2022-09-14	12:31:23	1.74795	831.172	24
2022-09-14	12:31:24	1.75557	832.927	24
2022-09-14	12:31:25	1.77255	834.7	24
2022-09-14	12:31:26	1.80373	836.504	24
2022-09-14	12:31:27	1.78756	838.291	24
2022-09-14	12:31:28	1.81833	840.109	24
2022-09-14	12:31:29	1.31935	841.429	24
2022-09-14	12:31:30	1.70209	843.131	24
2022-09-14	12:31:31	1.06506	844.196	24
2022-09-14	12:31:32	1.13627	845.332	24
2022-09-14	12:31:33	2.62749	847.96	24
2022-09-14	12:31:34	3.05415	851.014	24
2022-09-14	12:31:35	1.8265	852.84	24
2022-09-14	12:31:36	1.82999	854.67	24
2022-09-14	12:31:37	1.94323	856.614	24
2022-09-14	12:31:38	0.978039	857.592	24
2022-09-14	12:31:39	2.31886	859.91	24
2022-09-14	12:31:40	1.77181	861.682	24
2022-09-14	12:31:41	1.51273	863.195	24
2022-09-14	12:31:42	2.1237	865.319	24
2022-09-14	12:31:43	2.05672	867.375	24
2022-09-14	12:31:44	1.42693	868.802	24
2022-09-14	12:31:45	12.7085	881.511	24
2022-09-14	12:31:46	14.9482	896.459	25
2022-09-14	12:31:47	18.356	914.815	26
2022-09-14	12:31:48	21.6073	936.422	27
2022-09-14	12:31:49	17.7639	954.186	28
2022-09-14	12:31:50	27.3508	981.537	29
2022-09-14	12:31:51	42.9961	1024.53	30
2022-09-14	12:31:52	22.6778	1047.21	31
2022-09-14	12:31:53	26.9032	1074.11	32
2022-09-14	12:31:54	1.9664	1076.08	32
2022-09-14	12:31:55	1.55019	1077.63	32
2022-09-14	12:31:56	8.77258	1086.4	32
2022-09-14	12:31:57	4.49331	1090.9	32
2022-09-14	12:31:58	3.16639	1094.06	32
2022-09-14	12:31:59	3.24073	1097.3	32
2022-09-14	12:32:00	3.12902	1100.43	32
2022-09-14	12:32:01	2.91815	1103.35	32
2022-09-14	12:32:02	1.51546	1104.87	32
2022-09-14	12:32:03	-1.61991	1104.87	32
2022-09-14	12:32:04	-3.2679	1104.87	32
2022-09-14	12:32:05	-4.21158	1104.87	32
2022-09-14	12:32:06	-2.44166	1104.87	32
2022-09-14	12:32:07	-1.82625	1104.87	32
2022-09-14	12:32:08	-1.87328	1104.87	32
2022-09-14	12:32:09	-1.76355	1104.87	32
2022-09-14	12:32:10	-1.59828	1104.87	32
2022-09-14	12:32:11	-1.60299	1104.87	32
2022-09-14	12:32:12	-2.19252	1104.87	32
2022-09-14	12:32:13	-2.29648	1104.87	32
2022-09-14	12:32:14	-2.37564	1104.87	32
2022-09-14	12:32:15	-2.18199	1104.87	32
2022-09-14	12:32:16	-2.14096	1104.87	32
2022-09-14	12:32:17	-2.18307	1104.87	32
2022-09-14	12:32:18	-1.99201	1104.87	32
2022-09-14	12:32:19	0.622297	1105.49	32
2022-09-14	12:32:20	3.24656	1108.74	32
2022-09-14	12:32:21	2.99778	1111.73	32
2022-09-14	12:32:22	1.0757	1112.81	32
2022-09-14	12:32:23	-0.806787	1112.81	32
2022-09-14	12:32:24	-1.43519	1112.81	32
2022-09-14	12:32:25	3.33055	1116.14	32
2022-09-14	12:32:26	8.00213	1124.14	32
2022-09-14	12:32:27	3.48646	1127.63	32
2022-09-14	12:32:28	1.50045	1129.13	32
2022-09-14	12:32:29	4.11373	1133.24	32
2022-09-14	12:32:30	8.09277	1141.33	32
2022-09-14	12:32:31	0.185852	1141.52	32
2022-09-14	12:32:32	-1.9829	1141.52	32
2022-09-14	12:32:33	-2.38816	1141.52	32
2022-09-14	12:32:34	0.970361	1142.49	32
2022-09-14	12:32:35	1.60435	1144.1	32
2022-09-14	12:32:36	2.6954	1146.79	32
2022-09-14	12:32:37	2.40246	1149.19	32
2022-09-14	12:32:38	1.5915	1150.78	32
2022-09-14	12:32:39	0.960665	1151.75	32
2022-09-14	12:32:40	1.61601	1153.36	32
2022-09-14	12:32:41	1.92859	1155.29	32
2022-09-14	12:32:42	4.88962	1160.18	32
2022-09-14	12:32:43	51.6944	1211.87	33
2022-09-14	12:32:44	18.5513	1230.43	34
2022-09-14	12:32:45	15.4317	1245.86	35
2022-09-14	12:32:46	14.9927	1260.85	36
2022-09-14	12:32:47	14.703	1275.55	37
2022-09-14	12:32:48	13.6755	1289.23	38
2022-09-14	12:32:49	13.1223	1302.35	39
2022-09-14	12:32:50	12.883	1315.23	39
2022-09-14	12:32:51	8.75192	1323.99	39
2022-09-14	12:32:52	6.49393	1330.48	39
2022-09-14	12:32:53	7.12192	1337.6	39
2022-09-14	12:32:54	6.19195	1343.79	39
2022-09-14	12:32:55	7.14908	1350.94	39
2022-09-14	12:32:56	7.39114	1358.33	39
2022-09-14	12:32:57	7.02082	1365.35	39
2022-09-14	12:32:58	7.20965	1372.56	39
2022-09-14	12:32:59	7.08374	1379.65	39
2022-09-14	12:33:00	7.68116	1387.33	39
2022-09-14	12:33:01	8.41721	1395.75	39
2022-09-14	12:33:02	7.69906	1403.45	39
2022-09-14	12:33:03	7.54269	1410.99	39
2022-09-14	12:33:04	6.9606	1417.95	39
2022-09-14	12:33:05	6.3528	1424.3	39
2022-09-14	12:33:06	6.23189	1430.53	39
2022-09-14	12:33:07	6.35662	1436.89	39
2022-09-14	12:33:08	6.18731	1443.08	39
2022-09-14	12:33:09	6.05028	1449.13	39
2022-09-14	12:33:10	5.53206	1454.66	39
2022-09-14	12:33:11	5.88724	1460.55	39
2022-09-14	12:33:12	6.1006	1466.65	39
2022-09-14	12:33:13	6.28452	1472.93	39
2022-09-14	12:33:14	6.01288	1478.94	39
2022-09-14	12:33:15	5.95724	1484.9	39
2022-09-14	12:33:16	6.79336	1491.7	39
2022-09-14	12:33:17	7.25654	1498.95	39
2022-09-14	12:33:18	6.73178	1505.68	39
2022-09-14	12:33:19	7.08757	1512.77	39
2022-09-14	12:33:20	7.23267	1520	39
2022-09-14	12:33:21	6.07436	1526.08	39
2022-09-14	12:33:22	1.91544	1527.99	39
2022-09-14	12:33:23	3.97158	1531.97	39
2022-09-14	12:33:24	4.44468	1536.41	39
2022-09-14	12:33:25	4.3365	1540.75	39
2022-09-14	12:33:26	4.03535	1544.78	39
2022-09-14	12:33:27	5.92629	1550.71	39
2022-09-14	12:33:28	5.89896	1556.61	39
2022-09-14	12:33:29	5.65135	1562.26	39
2022-09-14	12:33:30	6.02986	1568.29	39
2022-09-14	12:33:31	6.42182	1574.71	39
2022-09-14	12:33:32	5.73164	1580.44	39
2022-09-14	12:33:33	5.57242	1586.01	39
2022-09-14	12:33:34	6.61514	1592.63	39
2022-09-14	12:33:35	7.24597	1599.88	39
2022-09-14	12:33:36	7.92164	1607.8	39
2022-09-14	12:33:37	7.73811	1615.53	39
2022-09-14	12:33:38	6.58339	1622.12	39
2022-09-14	12:33:39	6.28955	1628.41	39
2022-09-14	12:33:40	6.51676	1634.92	39
2022-09-14	12:33:41	8.49007	1643.41	39
2022-09-14	12:33:42	7.59974	1651.01	39
2022-09-14	12:33:43	7.44333	1658.46	39
2022-09-14	12:33:44	8.05089	1666.51	39
2022-09-14	12:33:45	19.8261	1686.33	40

## Sheet: Reggie_star_2022914122830 (4)
Date	Time	Lbs	newtons	Averaged newtons	Total force x time		total steps > 13.345	**GoPro Fitting: 1217
2022-09-14	12:28:45	0.455483	2.02608	1.74063	2.02608	FALSE	0
2022-09-14	12:28:45	0.389224	1.73135	1.74063	1.73135	FALSE	0
2022-09-14	12:28:45	0.329224	1.46445	1.74063	3.49053	FALSE	0
2022-09-14	12:28:46	0.498995	2.21963	4.89946	3.95098	FALSE	0
2022-09-14	12:28:46	1.03874	4.62052	4.89946	8.11106	FALSE	0
2022-09-14	12:28:46	1.65304	7.35305	4.89946	11.304	FALSE	0
2022-09-14	12:28:46	1.21502	5.40465	4.89946	13.5157	FALSE	0
2022-09-14	12:28:47	0.647595	2.88063	4.72941	14.1847	FALSE	0
2022-09-14	12:28:47	1.31782	5.86193	4.72941	19.3776	FALSE	0
2022-09-14	12:28:47	1.22424	5.44566	4.72941	19.6303	FALSE	0
2022-09-14	12:28:48	0.708969	3.15364	1.80247	22.5313	FALSE	0
2022-09-14	12:28:48	0.384389	1.70984	1.80247	21.3402	FALSE	0
2022-09-14	12:28:48	0.165153	0.734634	1.80247	23.2659	FALSE	0
2022-09-14	12:28:48	0.297621	1.32388	1.80247	22.664	FALSE	0
2022-09-14	12:28:48	0.469936	2.09037	1.80247	25.3563	FALSE	0
2022-09-14	12:28:49	0.324593	1.44385	1.37753	24.1079	FALSE	0
2022-09-14	12:28:49	0.324389	1.44295	1.37753	26.7992	FALSE	0
2022-09-14	12:28:49	0.280064	1.24578	1.37753	25.3537	FALSE	0
2022-09-14	12:28:50	0.415229	1.84702	1.7297	28.6462	FALSE	0
2022-09-14	12:28:50	0.432634	1.92444	1.7297	27.2781	FALSE	0
2022-09-14	12:28:50	0.240725	1.07079	1.7297	29.717	FALSE	0
2022-09-14	12:28:50	0.466832	2.07656	1.7297	29.3547	FALSE	0
2022-09-14	12:28:51	0.389071	1.73067	1.77249	31.4477	FALSE	0
2022-09-14	12:28:51	0.392125	1.74425	1.77249	31.0989	FALSE	0
2022-09-14	12:28:51	0.347443	1.5455	1.77249	32.9932	FALSE	0
2022-09-14	12:28:51	0.465255	2.06955	1.77249	33.1685	FALSE	0
2022-09-14	12:28:52	0.38159	1.69739	1.74793	34.6906	FALSE	0
2022-09-14	12:28:52	0.418181	1.86015	1.74793	35.0286	FALSE	0
2022-09-14	12:28:52	0.389377	1.73203	1.74793	36.4226	FALSE	0
2022-09-14	12:28:52	0.382659	1.70214	1.74793	36.7308	FALSE	0
2022-09-14	12:28:53	0.409326	1.82076	1.80597	38.2434	FALSE	0
2022-09-14	12:28:53	0.443015	1.97062	1.80597	38.7014	FALSE	0
2022-09-14	12:28:53	0.365662	1.62654	1.80597	39.8699	FALSE	0
2022-09-14	12:28:54	0.710191	3.15907	6.54463	41.8605	FALSE	0
2022-09-14	12:28:54	1.41472	6.29296	6.54463	46.1629	FALSE	0
2022-09-14	12:28:54	2.92882	13.028	6.54463	54.8884	FALSE	0
2022-09-14	12:28:54	0.831463	3.69851	6.54463	49.8614	FALSE	0
2022-09-14	12:28:55	0.603372	2.68392	4.1336	57.5724	FALSE	0
2022-09-14	12:28:55	0.55813	2.48267	4.1336	52.3441	FALSE	0
2022-09-14	12:28:55	1.27411	5.6675	4.1336	63.2399	FALSE	0
2022-09-14	12:28:55	1.28149	5.70032	4.1336	58.0444	FALSE	0
2022-09-14	12:28:56	0.714364	3.17763	7.14099	66.4175	FALSE	0
2022-09-14	12:28:56	0.837824	3.72681	7.14099	61.7712	FALSE	0
2022-09-14	12:28:56	2.24576	9.98959	7.14099	76.4071	FALSE	0
2022-09-14	12:28:56	2.62352	11.6699	7.14099	73.4411	FALSE	0
2022-09-14	12:28:57	3.28805	14.6259	16.5725	91.033	1	1
2022-09-14	12:28:57	3.48719	15.5117	16.5725	88.9529	1	2
2022-09-14	12:28:57	4.40174	19.5798	16.5725	110.613	1	3
2022-09-14	12:28:58	4.55421	20.258	19.8687	109.211	1	4
2022-09-14	12:28:58	5.0706	22.555	19.8687	133.168	1	5
2022-09-14	12:28:58	4.77838	21.2552	19.8687	130.466	1	6
2022-09-14	12:28:58	3.46352	15.4064	19.8687	148.574	1	7
2022-09-14	12:28:59	4.78067	21.2654	14.2068	151.731	1	8
2022-09-14	12:28:59	2.06785	9.19821	14.2068	157.772	FALSE	8
2022-09-14	12:28:59	3.24617	14.4396	14.2068	166.171	1	9
2022-09-14	12:28:59	2.68067	11.9242	14.2068	169.697	FALSE	9
2022-09-14	12:29:00	1.97721	8.79503	4.59743	174.966	FALSE	9
2022-09-14	12:29:00	0.784338	3.48889	4.59743	173.186	FALSE	9
2022-09-14	12:29:00	0.339097	1.50837	4.59743	176.474	FALSE	9
2022-09-14	12:29:01	3.56011	15.8361	28.621	189.022	1	10
2022-09-14	12:29:01	5.84052	25.9798	28.621	202.454	1	11
2022-09-14	12:29:01	10.3968	46.247	28.621	235.269	1	12
2022-09-14	12:29:01	5.9397	26.421	28.621	228.875	1	13
2022-09-14	12:29:02	8.90983	39.6327	19.2931	274.901	1	14
2022-09-14	12:29:02	2.76205	12.2862	19.2931	241.161	FALSE	14
2022-09-14	12:29:02	2.47925	11.0282	19.2931	285.93	FALSE	14
2022-09-14	12:29:02	3.19798	14.2253	19.2931	255.387	1	15
2022-09-14	12:29:03	2.36617	10.5252	14.8057	296.455	FALSE	15
2022-09-14	12:29:03	4.42072	19.6642	14.8057	275.051	1	16
2022-09-14	12:29:03	3.6334	16.1621	14.8057	312.617	1	17
2022-09-14	12:29:03	2.8936	12.8713	14.8057	287.922	FALSE	17
2022-09-14	12:29:04	3.831	17.0411	15.4255	329.658	1	18
2022-09-14	12:29:04	1.79192	7.97082	15.4255	295.893	FALSE	18
2022-09-14	12:29:04	4.78052	21.2647	15.4255	350.923	1	19
2022-09-14	12:29:05	5.71467	25.42	35.908	321.313	1	20
2022-09-14	12:29:05	8.71471	38.7648	35.908	389.687	1	21
2022-09-14	12:29:05	10.6839	47.5241	35.908	368.837	1	22
2022-09-14	12:29:05	7.17665	31.9232	35.908	421.611	1	23
2022-09-14	12:29:06	12.0287	53.5061	25.9053	422.343	1	24
2022-09-14	12:29:06	3.87111	17.2195	25.9053	438.83	1	25
2022-09-14	12:29:06	4.08307	18.1623	25.9053	440.506	1	26
2022-09-14	12:29:06	3.31223	14.7335	25.9053	453.564	1	27
2022-09-14	12:29:07	1.73004	7.69556	13.938	448.201	FALSE	27
2022-09-14	12:29:07	3.37141	14.9967	13.938	468.56	1	28
2022-09-14	12:29:07	2.93116	13.0384	13.938	461.239	FALSE	28
2022-09-14	12:29:07	4.50103	20.0215	13.938	488.582	1	29
2022-09-14	12:29:08	3.29487	14.6562	17.0682	475.896	1	30
2022-09-14	12:29:08	3.4649	15.4126	17.0682	503.994	1	31
2022-09-14	12:29:08	4.75151	21.1357	17.0682	497.031	1	32
2022-09-14	12:29:09	2.23569	9.9448	11.4607	513.939	FALSE	32
2022-09-14	12:29:09	3.51492	15.6351	11.4607	512.666	1	33
2022-09-14	12:29:09	1.93218	8.59472	11.4607	522.534	FALSE	33
2022-09-14	12:29:09	2.62312	11.6682	11.4607	524.335	FALSE	33
2022-09-14	12:29:10	2.49793	11.1113	35.6237	533.645	FALSE	33
2022-09-14	12:29:10	4.9537	22.035	35.6237	546.37	1	34
2022-09-14	12:29:10	11.1169	49.4502	35.6237	583.095	1	35
2022-09-14	12:29:10	13.4657	59.8981	35.6237	606.268	1	36
2022-09-14	12:29:11	3.65309	16.2497	5.40224	599.345	1	37
2022-09-14	12:29:11	0.674262	2.99925	5.40224	609.267	FALSE	37
2022-09-14	12:29:11	0.308003	1.37006	5.40224	600.715	FALSE	37
2022-09-14	12:29:11	0.222557	0.989978	5.40224	610.257	FALSE	37
2022-09-14	12:29:12	0.466221	2.07384	1.62156	602.789	FALSE	37
2022-09-14	12:29:12	0.343779	1.5292	1.62156	611.786	FALSE	37
2022-09-14	12:29:12	0.283626	1.26163	1.62156	604.05	FALSE	37
2022-09-14	12:29:13	0.0287152	0.127731	0.927728	611.914	FALSE	37
2022-09-14	12:29:13	0.240318	1.06898	0.927728	605.119	FALSE	37
2022-09-14	12:29:13	0.267494	1.18987	0.927728	613.104	FALSE	37
2022-09-14	12:29:13	0.297723	1.32433	0.927728	606.444	FALSE	37
2022-09-14	12:29:14	0.123066	0.547422	2.49823	613.651	FALSE	37
2022-09-14	12:29:14	0.314364	1.39835	2.49823	607.842	FALSE	37
2022-09-14	12:29:14	0.288003	1.28109	2.49823	614.932	FALSE	37
2022-09-14	12:29:14	1.52108	6.76607	2.49823	614.608	FALSE	37
2022-09-14	12:29:15	1.42317	6.33054	7.2491	621.263	FALSE	37
2022-09-14	12:29:15	2.24831	10.0009	7.2491	624.609	FALSE	37
2022-09-14	12:29:15	1.78088	7.92171	7.2491	629.185	FALSE	37
2022-09-14	12:29:15	1.06632	4.7432	7.2491	629.352	FALSE	37
2022-09-14	12:29:16	1.35976	6.04848	6.19788	635.233	FALSE	37
2022-09-14	12:29:16	0.772226	3.43502	6.19788	632.787	FALSE	37
2022-09-14	12:29:16	2.04805	9.11014	6.19788	644.343	FALSE	37
2022-09-14	12:29:17	0.534313	2.37673	6.24525	635.164	FALSE	37
2022-09-14	12:29:17	1.01732	4.52524	6.24525	648.868	FALSE	37
2022-09-14	12:29:17	1.64174	7.30279	6.24525	642.467	FALSE	37
2022-09-14	12:29:17	2.42261	10.7763	6.24525	659.645	FALSE	37
2022-09-14	12:29:18	2.12775	9.46466	9.02475	651.932	FALSE	37
2022-09-14	12:29:18	2.78052	12.3683	9.02475	672.013	FALSE	37
2022-09-14	12:29:18	1.50912	6.71287	9.02475	658.644	FALSE	37
2022-09-14	12:29:18	1.69803	7.55318	9.02475	679.566	FALSE	37
2022-09-14	12:29:19	0.655941	2.91776	2.99212	661.562	FALSE	37
2022-09-14	12:29:19	0.883066	3.92805	2.99212	683.494	FALSE	37
2022-09-14	12:29:19	0.541896	2.41046	2.99212	663.973	FALSE	37
2022-09-14	12:29:19	0.609733	2.71221	2.99212	686.206	FALSE	37
2022-09-14	12:29:20	0.737722	3.28154	3.16624	667.254	FALSE	37
2022-09-14	12:29:20	0.828461	3.68516	3.16624	689.892	FALSE	37
2022-09-14	12:29:20	0.569224	2.53202	3.16624	669.786	FALSE	37
2022-09-14	12:29:21	0.394364	1.75421	1.77628	691.646	FALSE	37
2022-09-14	12:29:21	0.385509	1.71482	1.77628	671.501	FALSE	37
2022-09-14	12:29:21	0.38612	1.71754	1.77628	693.363	FALSE	37
2022-09-14	12:29:21	0.431311	1.91856	1.77628	673.42	FALSE	37
2022-09-14	12:29:22	0.483881	2.1524	0.923823	695.516	FALSE	37
2022-09-14	12:29:22	0.273499	1.21658	0.923823	674.636	FALSE	37
2022-09-14	12:29:22	-0.0446181	-0.19847	0.923823	695.516	FALSE	37
2022-09-14	12:29:22	0.117977	0.524785	0.923823	675.161	FALSE	37
2022-09-14	12:29:23	0.45243	2.0125	5.59233	697.528	FALSE	37
2022-09-14	12:29:23	1.38841	6.17593	5.59233	681.337	FALSE	37
2022-09-14	12:29:23	1.33538	5.94004	5.59233	703.468	FALSE	37
2022-09-14	12:29:23	1.85263	8.24087	5.59233	689.578	FALSE	37
2022-09-14	12:29:24	1.3763	6.12206	4.60009	709.59	FALSE	37
2022-09-14	12:29:24	1.04933	4.66763	4.60009	694.245	FALSE	37
2022-09-14	12:29:24	0.676806	3.01057	4.60009	712.601	FALSE	37
2022-09-14	12:29:25	2.05497	9.14092	18.2076	703.386	FALSE	37
2022-09-14	12:29:25	3.11131	13.8397	18.2076	726.441	1	38
2022-09-14	12:29:25	5.75797	25.6126	18.2076	728.999	1	39
2022-09-14	12:29:25	5.44876	24.2372	18.2076	750.678	1	40
2022-09-14	12:29:26	3.93976	17.5248	7.42034	746.524	1	41
2022-09-14	12:29:26	0.675992	3.00695	7.42034	753.685	FALSE	41
2022-09-14	12:29:26	0.27416	1.21952	7.42034	747.743	FALSE	41
2022-09-14	12:29:26	1.78276	7.93007	7.42034	761.615	FALSE	41
2022-09-14	12:29:27	3.74251	16.6474	17.1458	764.391	1	42
2022-09-14	12:29:27	3.55808	15.8271	17.1458	777.442	1	43
2022-09-14	12:29:27	4.26306	18.9629	17.1458	783.354	1	44
2022-09-14	12:29:28	5.78688	25.7412	21.4241	803.183	1	45
2022-09-14	12:29:28	6.9597	30.9581	21.4241	814.312	1	46
2022-09-14	12:29:28	3.92597	17.4635	21.4241	820.647	1	47
2022-09-14	12:29:28	2.59284	11.5335	21.4241	825.845	FALSE	47
2022-09-14	12:29:29	0.343168	1.52648	1.0644	822.173	FALSE	47
2022-09-14	12:29:29	0.381896	1.69875	1.0644	827.544	FALSE	47
2022-09-14	12:29:29	0.0174175	0.0774765	1.0644	822.251	FALSE	47
2022-09-14	12:29:29	0.214669	0.954891	1.0644	828.499	FALSE	47
2022-09-14	12:29:30	0.736654	3.27678	1.79196	825.527	FALSE	47
2022-09-14	12:29:30	0.280776	1.24895	1.79196	829.748	FALSE	47
2022-09-14	12:29:30	0.392125	1.74425	1.79196	827.272	FALSE	47
2022-09-14	12:29:30	0.201845	0.897847	1.79196	830.646	FALSE	47
2022-09-14	12:29:31	0.428613	1.90656	1.393	829.178	FALSE	47
2022-09-14	12:29:31	0.16841	0.749121	1.393	831.395	FALSE	47
2022-09-14	12:29:31	0.342456	1.52331	1.393	830.701	FALSE	47
2022-09-14	12:29:32	0.233855	1.04023	1.42908	832.435	FALSE	47
2022-09-14	12:29:32	0.412125	1.83321	1.42908	832.535	FALSE	47
2022-09-14	12:29:32	0.235585	1.04793	1.42908	833.483	FALSE	47
2022-09-14	12:29:32	0.403524	1.79496	1.42908	834.33	FALSE	47
2022-09-14	12:29:33	0.31645	1.40763	1.21324	834.891	FALSE	47
2022-09-14	12:29:33	0.301183	1.33972	1.21324	835.669	FALSE	47
2022-09-14	12:29:33	0.248003	1.10317	1.21324	835.994	FALSE	47
2022-09-14	12:29:33	0.225356	1.00243	1.21324	836.672	FALSE	47
2022-09-14	12:29:34	0.28383	1.26253	0.946574	837.256	FALSE	47
2022-09-14	12:29:34	0.113295	0.503959	0.946574	837.176	FALSE	47
2022-09-14	12:29:34	0.312736	1.39111	0.946574	838.647	FALSE	47
2022-09-14	12:29:34	0.141336	0.628691	0.946574	837.804	FALSE	47
2022-09-14	12:29:35	0.334211	1.48664	1.45917	840.134	FALSE	47
2022-09-14	12:29:35	0.286069	1.27249	1.45917	839.077	FALSE	47
2022-09-14	12:29:35	0.36383	1.61839	1.45917	841.752	FALSE	47
2022-09-14	12:29:36	0.380216	1.69128	1.61669	840.768	FALSE	47
2022-09-14	12:29:36	0.374517	1.66593	1.61669	843.418	FALSE	47
2022-09-14	12:29:36	0.356196	1.58443	1.61669	842.353	FALSE	47
2022-09-14	12:29:36	0.342863	1.52512	1.61669	844.943	FALSE	47
2022-09-14	12:29:37	0.353193	1.57107	1.53825	843.924	FALSE	47
2022-09-14	12:29:37	0.340878	1.51629	1.53825	846.46	FALSE	47
2022-09-14	12:29:37	0.35187	1.56519	1.53825	845.489	FALSE	47
2022-09-14	12:29:37	0.337316	1.50045	1.53825	847.96	FALSE	47
2022-09-14	12:29:38	0.348715	1.55115	1.57328	847.04	FALSE	47
2022-09-14	12:29:38	0.355534	1.58149	1.57328	849.542	FALSE	47
2022-09-14	12:29:38	0.357112	1.58851	1.57328	848.629	FALSE	47
2022-09-14	12:29:38	0.353397	1.57198	1.57328	851.114	FALSE	47
2022-09-14	12:29:39	0.35584	1.58285	1.54912	850.211	FALSE	47
2022-09-14	12:29:39	0.363779	1.61816	1.54912	852.732	FALSE	47
2022-09-14	12:29:39	0.325153	1.44635	1.54912	851.658	FALSE	47
2022-09-14	12:29:40	0.329479	1.46559	1.47221	854.197	FALSE	47
2022-09-14	12:29:40	0.331463	1.47441	1.47221	853.132	FALSE	47
2022-09-14	12:29:40	0.332227	1.47781	1.47221	855.675	FALSE	47
2022-09-14	12:29:40	0.3307	1.47102	1.47221	854.603	FALSE	47
2022-09-14	12:29:41	0.338537	1.50588	1.52031	857.181	FALSE	47
2022-09-14	12:29:41	0.334924	1.48981	1.52031	856.093	FALSE	47
2022-09-14	12:29:41	0.341743	1.52014	1.52031	858.701	FALSE	47
2022-09-14	12:29:41	0.351921	1.56541	1.52031	857.658	FALSE	47
2022-09-14	12:29:42	0.343524	1.52806	1.52467	860.229	FALSE	47
2022-09-14	12:29:42	0.342659	1.52422	1.52467	859.183	FALSE	47
2022-09-14	12:29:42	0.343881	1.52965	1.52467	861.759	FALSE	47
2022-09-14	12:29:42	0.34098	1.51675	1.52467	860.699	FALSE	47
2022-09-14	12:29:43	0.340675	1.51539	1.50739	863.274	FALSE	47
2022-09-14	12:29:43	0.342812	1.5249	1.50739	862.224	FALSE	47
2022-09-14	12:29:43	0.333143	1.48189	1.50739	864.756	FALSE	47
2022-09-14	12:29:44	0.485458	2.15941	1.52937	864.384	FALSE	47
2022-09-14	12:29:44	0.631412	2.80865	1.52937	867.565	FALSE	47
2022-09-14	12:29:44	0.207697	0.923878	1.52937	865.308	FALSE	47
2022-09-14	12:29:44	0.0506999	0.225523	1.52937	867.79	FALSE	47
2022-09-14	12:29:45	0.120013	0.533842	0.594962	865.841	FALSE	47
2022-09-14	12:29:45	0.0193005	0.0858525	0.594962	867.876	FALSE	47
2022-09-14	12:29:45	0.308512	1.37232	0.594962	867.214	FALSE	47
2022-09-14	12:29:45	0.0871885	0.387832	0.594962	868.264	FALSE	47
2022-09-14	12:29:46	0.182354	0.811147	2.13519	868.025	FALSE	47
2022-09-14	12:29:46	0.0255091	0.11347	2.13519	868.378	FALSE	47
2022-09-14	12:29:46	0.260674	1.15953	2.13519	869.184	FALSE	47
2022-09-14	12:29:46	1.45151	6.45661	2.13519	874.834	FALSE	47
2022-09-14	12:29:47	4.99955	22.239	19.8797	891.423	1	48
2022-09-14	12:29:47	4.76556	21.1982	19.8797	896.032	1	49
2022-09-14	12:29:47	3.64235	16.2019	19.8797	907.625	1	50
2022-09-14	12:29:48	2.29202	10.1954	3.74769	906.228	FALSE	50
2022-09-14	12:29:48	0.425509	1.89275	3.74769	909.518	FALSE	50
2022-09-14	12:29:48	0.489275	2.17639	3.74769	908.404	FALSE	50
2022-09-14	12:29:48	0.16327	0.726258	3.74769	910.244	FALSE	50
2022-09-14	12:29:49	-0.140089	-0.623144	-2.34187	908.404	FALSE	50
2022-09-14	12:29:49	-0.645177	-2.86988	-2.34187	910.244	FALSE	50
2022-09-14	12:29:49	-0.735305	-3.27078	-2.34187	908.404	FALSE	50
2022-09-14	12:29:49	-0.58533	-2.60366	-2.34187	910.244	FALSE	50
2022-09-14	12:29:50	-0.530877	-2.36145	-2.24221	908.404	FALSE	50
2022-09-14	12:29:50	-0.616781	-2.74357	-2.24221	910.244	FALSE	50
2022-09-14	12:29:50	-0.558053	-2.48233	-2.24221	908.404	FALSE	50
2022-09-14	12:29:50	-0.310572	-1.38149	-2.24221	910.244	FALSE	50
2022-09-14	12:29:51	0.0339061	0.150821	0.5684	908.555	FALSE	50
2022-09-14	12:29:51	0.211819	0.942213	0.5684	911.187	FALSE	50
2022-09-14	12:29:51	0.137621	0.612166	0.5684	909.167	FALSE	50
2022-09-14	12:29:52	0.253143	1.12603	1.57283	912.313	FALSE	50
2022-09-14	12:29:52	0.40159	1.78635	1.57283	910.953	FALSE	50
2022-09-14	12:29:52	0.408308	1.81624	1.57283	914.129	FALSE	50
2022-09-14	12:29:52	0.35131	1.5627	1.57283	912.516	FALSE	50
2022-09-14	12:29:53	0.292074	1.2992	1.2322	915.428	FALSE	50
2022-09-14	12:29:53	0.314975	1.40107	1.2322	913.917	FALSE	50
2022-09-14	12:29:53	0.252837	1.12467	1.2322	916.553	FALSE	50
2022-09-14	12:29:53	0.248155	1.10384	1.2322	915.021	FALSE	50
2022-09-14	12:29:54	0.271972	1.20979	1.56904	917.762	FALSE	50
2022-09-14	12:29:54	0.384695	1.7112	1.56904	916.732	FALSE	50
2022-09-14	12:29:54	0.40154	1.78613	1.56904	919.549	FALSE	50
2022-09-14	12:29:55	0.396196	1.76236	1.94278	918.495	FALSE	50
2022-09-14	12:29:55	0.467137	2.07792	1.94278	921.626	FALSE	50
2022-09-14	12:29:55	0.451412	2.00797	1.94278	920.503	FALSE	50
2022-09-14	12:29:55	0.432277	1.92285	1.94278	923.549	FALSE	50
2022-09-14	12:29:56	0.425254	1.89161	1.67651	922.394	FALSE	50
2022-09-14	12:29:56	0.382455	1.70124	1.67651	925.251	FALSE	50
2022-09-14	12:29:56	0.370344	1.64736	1.67651	924.042	FALSE	50
2022-09-14	12:29:56	0.329529	1.46581	1.67651	926.716	FALSE	50
2022-09-14	12:29:57	0.295738	1.3155	1.37804	925.357	FALSE	50
2022-09-14	12:29:57	0.309326	1.37594	1.37804	928.092	FALSE	50
2022-09-14	12:29:57	0.318028	1.41465	1.37804	926.772	FALSE	50
2022-09-14	12:29:57	0.316094	1.40605	1.37804	929.498	FALSE	50
2022-09-14	12:29:58	0.325916	1.44974	1.44815	928.221	FALSE	50
2022-09-14	12:29:58	0.329987	1.46785	1.44815	930.966	FALSE	50
2022-09-14	12:29:58	0.320776	1.42688	1.44815	929.648	FALSE	50
2022-09-14	12:29:59	0.306679	1.36417	1.35891	932.33	FALSE	50
2022-09-14	12:29:59	0.308054	1.37029	1.35891	931.019	FALSE	50
2022-09-14	12:29:59	0.305662	1.35965	1.35891	933.69	FALSE	50
2022-09-14	12:29:59	0.30159	1.34153	1.35891	932.36	FALSE	50
2022-09-14	12:30:00	0.293702	1.30645	1.31612	934.996	FALSE	50
2022-09-14	12:30:00	0.292634	1.30169	1.31612	933.662	FALSE	50
2022-09-14	12:30:00	0.301285	1.34018	1.31612	936.337	FALSE	50
2022-09-14	12:30:00	0.295891	1.31618	1.31612	934.978	FALSE	50
2022-09-14	12:30:01	0.308054	1.37029	1.31946	937.707	FALSE	50
2022-09-14	12:30:01	0.300827	1.33814	1.31946	936.316	FALSE	50
2022-09-14	12:30:01	0.29528	1.31346	1.31946	939.02	FALSE	50
2022-09-14	12:30:01	0.282354	1.25597	1.31946	937.572	FALSE	50
2022-09-14	12:30:02	0.281845	1.2537	1.19168	940.274	FALSE	50
2022-09-14	12:30:02	0.267952	1.1919	1.19168	938.764	FALSE	50
2022-09-14	12:30:02	0.253906	1.12942	1.19168	941.404	FALSE	50
2022-09-14	12:30:03	0.264033	1.17447	1.17119	939.938	FALSE	50
2022-09-14	12:30:03	0.268512	1.1944	1.17119	942.598	FALSE	50
2022-09-14	12:30:03	0.260471	1.15863	1.17119	941.097	FALSE	50
2022-09-14	12:30:03	0.260165	1.15727	1.17119	943.755	FALSE	50
2022-09-14	12:30:04	0.260013	1.15659	1.17945	942.254	FALSE	50
2022-09-14	12:30:04	0.265509	1.18104	1.17945	944.936	FALSE	50
2022-09-14	12:30:04	0.270751	1.20435	1.17945	943.458	FALSE	50
2022-09-14	12:30:04	0.264338	1.17583	1.17945	946.112	FALSE	50
2022-09-14	12:30:05	0.26612	1.18375	1.19654	944.642	FALSE	50
2022-09-14	12:30:05	0.268512	1.1944	1.19654	947.306	FALSE	50
2022-09-14	12:30:05	0.2707	1.20413	1.19654	945.846	FALSE	50
2022-09-14	12:30:05	0.270649	1.2039	1.19654	948.51	FALSE	50
2022-09-14	12:30:06	0.264186	1.17515	1.18828	947.021	FALSE	50
2022-09-14	12:30:06	0.262608	1.16813	1.18828	949.678	FALSE	50
2022-09-14	12:30:06	0.274618	1.22156	1.18828	948.243	FALSE	50
2022-09-14	12:30:07	0.274466	1.22088	1.21754	950.899	FALSE	50
2022-09-14	12:30:07	0.270242	1.20209	1.21754	949.445	FALSE	50
2022-09-14	12:30:07	0.273753	1.21771	1.21754	952.117	FALSE	50
2022-09-14	12:30:07	0.2764	1.22948	1.21754	950.674	FALSE	50
2022-09-14	12:30:08	0.270344	1.20254	1.20141	953.32	FALSE	50
2022-09-14	12:30:08	0.267188	1.18851	1.20141	951.863	FALSE	50
2022-09-14	12:30:08	0.274873	1.22269	1.20141	954.542	FALSE	50
2022-09-14	12:30:08	0.267952	1.1919	1.20141	953.055	FALSE	50
2022-09-14	12:30:09	0.261692	1.16406	1.18913	955.706	FALSE	50
2022-09-14	12:30:09	0.270089	1.20141	1.18913	954.256	FALSE	50
2022-09-14	12:30:09	0.26271	1.16859	1.18913	956.875	FALSE	50
2022-09-14	12:30:09	0.274822	1.22246	1.18913	955.479	FALSE	50
2022-09-14	12:30:10	0.267392	1.18941	1.17628	958.064	FALSE	50
2022-09-14	12:30:10	0.26388	1.17379	1.17628	956.652	FALSE	50
2022-09-14	12:30:10	0.262048	1.16564	1.17628	959.23	FALSE	50
2022-09-14	12:30:11	0.263728	1.17311	1.16983	957.825	FALSE	50
2022-09-14	12:30:11	0.264033	1.17447	1.16983	960.404	FALSE	50
2022-09-14	12:30:11	0.26383	1.17357	1.16983	958.999	FALSE	50
2022-09-14	12:30:11	0.260369	1.15817	1.16983	961.563	FALSE	50
2022-09-14	12:30:12	0.264898	1.17832	1.17374	960.177	FALSE	50
2022-09-14	12:30:12	0.269478	1.19869	1.17374	962.761	FALSE	50
2022-09-14	12:30:12	0.260064	1.15682	1.17374	961.334	FALSE	50
2022-09-14	12:30:12	0.261031	1.16112	1.17374	963.922	FALSE	50
2022-09-14	12:30:13	0.260929	1.16066	1.16276	962.495	FALSE	50
2022-09-14	12:30:13	0.264593	1.17696	1.16276	965.099	FALSE	50
2022-09-14	12:30:13	0.258181	1.14844	1.16276	963.643	FALSE	50
2022-09-14	12:30:13	0.261896	1.16497	1.16276	966.264	FALSE	50
2022-09-14	12:30:14	0.297417	1.32297	1.31837	964.966	FALSE	50
2022-09-14	12:30:14	0.300674	1.33746	1.31837	967.602	FALSE	50
2022-09-14	12:30:14	0.291056	1.29468	1.31837	966.261	FALSE	50
2022-09-14	12:30:15	0.268919	1.19621	1.17651	968.798	FALSE	50
2022-09-14	12:30:15	0.262608	1.16813	1.17651	967.429	FALSE	50
2022-09-14	12:30:15	0.259758	1.15546	1.17651	969.954	FALSE	50
2022-09-14	12:30:15	0.26668	1.18625	1.17651	968.615	FALSE	50
2022-09-14	12:30:16	0.286578	1.27476	1.26944	971.228	FALSE	50
2022-09-14	12:30:16	0.285662	1.27068	1.26944	969.886	FALSE	50
2022-09-14	12:30:16	0.283677	1.26185	1.26944	972.49	FALSE	50
2022-09-14	12:30:16	0.285611	1.27045	1.26944	971.156	FALSE	50
2022-09-14	12:30:17	0.289987	1.28992	1.26193	973.78	FALSE	50
2022-09-14	12:30:17	0.283473	1.26094	1.26193	972.417	FALSE	50
2022-09-14	12:30:17	0.277621	1.23491	1.26193	975.015	FALSE	50
2022-09-14	12:30:18	0.284033	1.26344	1.32071	973.681	FALSE	50
2022-09-14	12:30:18	0.292634	1.30169	1.32071	976.317	FALSE	50
2022-09-14	12:30:18	0.296196	1.31754	1.32071	974.998	FALSE	50
2022-09-14	12:30:18	0.314771	1.40016	1.32071	977.717	FALSE	50
2022-09-14	12:30:19	0.358639	1.5953	1.67956	976.594	FALSE	50
2022-09-14	12:30:19	0.381998	1.6992	1.67956	979.416	FALSE	50
2022-09-14	12:30:19	0.415585	1.84861	1.67956	978.442	FALSE	50
2022-09-14	12:30:19	0.35411	1.57515	1.67956	980.991	FALSE	50
2022-09-14	12:30:20	0.33416	1.48641	1.42614	979.929	FALSE	50
2022-09-14	12:30:20	0.335127	1.49071	1.42614	982.482	FALSE	50
2022-09-14	12:30:20	0.316501	1.40786	1.42614	981.336	FALSE	50
2022-09-14	12:30:20	0.296654	1.31958	1.42614	983.801	FALSE	50
2022-09-14	12:30:21	0.294059	1.30803	1.32592	982.645	FALSE	50
2022-09-14	12:30:21	0.300929	1.33859	1.32592	985.14	FALSE	50
2022-09-14	12:30:21	0.299249	1.33112	1.32592	983.976	FALSE	50
2022-09-14	12:30:22	0.29243	1.30079	1.28992	986.441	FALSE	50
2022-09-14	12:30:22	0.287748	1.27996	1.28992	985.256	FALSE	50
2022-09-14	12:30:22	0.293702	1.30645	1.28992	987.747	FALSE	50
2022-09-14	12:30:22	0.286069	1.27249	1.28992	986.528	FALSE	50
2022-09-14	12:30:23	0.29416	1.30848	1.27911	989.056	FALSE	50
2022-09-14	12:30:23	0.291972	1.29875	1.27911	987.827	FALSE	50
2022-09-14	12:30:23	0.284898	1.26728	1.27911	990.323	FALSE	50
2022-09-14	12:30:23	0.279199	1.24193	1.27911	989.069	FALSE	50
2022-09-14	12:30:24	0.280369	1.24714	1.25223	991.57	FALSE	50
2022-09-14	12:30:24	0.279453	1.24306	1.25223	990.312	FALSE	50
2022-09-14	12:30:24	0.28271	1.25755	1.25223	992.828	FALSE	50
2022-09-14	12:30:24	0.283524	1.26117	1.25223	991.573	FALSE	50
2022-09-14	12:30:25	0.282201	1.25529	4.72767	994.083	FALSE	50
2022-09-14	12:30:25	0.377621	1.67973	4.72767	993.253	FALSE	50
2022-09-14	12:30:25	2.52866	11.248	4.72767	1005.33	FALSE	50
2022-09-14	12:30:26	5.40739	24.0532	15.6966	1017.31	1	51
2022-09-14	12:30:26	3.81299	16.9609	15.6966	1022.29	1	52
2022-09-14	12:30:26	2.94133	13.0836	15.6966	1030.39	FALSE	52
2022-09-14	12:30:26	1.95329	8.68862	15.6966	1030.98	FALSE	52
2022-09-14	12:30:27	2.02184	8.99355	14.9323	1039.38	FALSE	52
2022-09-14	12:30:27	3.28673	14.62	14.9323	1045.6	1	53
2022-09-14	12:30:27	3.93584	17.5074	14.9323	1056.89	1	54
2022-09-14	12:30:27	4.18332	18.6082	14.9323	1064.21	1	55
2022-09-14	12:30:28	6.27049	27.8924	16.4562	1084.78	1	56
2022-09-14	12:30:28	5.0969	22.672	16.4562	1086.88	1	57
2022-09-14	12:30:28	1.98439	8.82696	16.4562	1093.61	FALSE	57
2022-09-14	12:30:28	1.44632	6.43352	16.4562	1093.31	FALSE	57
2022-09-14	12:30:29	0.778588	3.46332	2.35492	1097.07	FALSE	57
2022-09-14	12:30:29	0.489275	2.17639	2.35492	1095.49	FALSE	57
2022-09-14	12:30:29	0.320369	1.42507	2.35492	1098.5	FALSE	57
2022-09-14	12:30:30	0.575178	2.55851	1.82116	1098.05	FALSE	57
2022-09-14	12:30:30	0.184389	0.820199	1.82116	1099.32	FALSE	57
2022-09-14	12:30:30	0.292888	1.30282	1.82116	1099.35	FALSE	57
2022-09-14	12:30:30	0.585203	2.6031	1.82116	1101.92	FALSE	57
2022-09-14	12:30:31	2.84586	12.659	15.9294	1112.01	FALSE	57
2022-09-14	12:30:31	4.11222	18.292	15.9294	1120.21	1	58
2022-09-14	12:30:31	3.7852	16.8373	15.9294	1128.85	1	59
2022-09-14	12:30:32	1.83777	8.17477	6.30269	1128.39	FALSE	59
2022-09-14	12:30:32	1.47131	6.54468	6.30269	1135.39	FALSE	59
2022-09-14	12:30:32	0.736807	3.27746	6.30269	1131.67	FALSE	59
2022-09-14	12:30:32	1.56327	6.95374	6.30269	1142.35	FALSE	59
2022-09-14	12:30:32	1.47538	6.56279	6.30269	1138.23	FALSE	59
2022-09-14	12:30:33	0.844135	3.75488	2.26604	1146.1	FALSE	59
2022-09-14	12:30:33	0.43126	1.91833	2.26604	1140.15	FALSE	59
2022-09-14	12:30:33	0.252888	1.1249	2.26604	1147.23	FALSE	59
2022-09-14	12:30:34	0.404288	1.79835	1.25698	1141.95	FALSE	59
2022-09-14	12:30:34	0.175992	0.782848	1.25698	1148.01	FALSE	59
2022-09-14	12:30:34	0.371616	1.65302	1.25698	1143.6	FALSE	59
2022-09-14	12:30:34	0.178435	0.793715	1.25698	1148.8	FALSE	59
2022-09-14	12:30:35	0.22215	0.988168	1.02127	1144.59	FALSE	59
2022-09-14	12:30:35	0.133702	0.594733	1.02127	1149.4	FALSE	59
2022-09-14	12:30:35	0.212837	0.946742	1.02127	1145.53	FALSE	59
2022-09-14	12:30:35	0.349682	1.55546	1.02127	1150.95	FALSE	59
2022-09-14	12:30:36	0.192685	0.857101	4.7208	1146.39	FALSE	59
2022-09-14	12:30:36	0.541539	2.40887	4.7208	1153.36	FALSE	59
2022-09-14	12:30:36	0.806832	3.58895	4.7208	1149.98	FALSE	59
2022-09-14	12:30:36	2.70408	12.0283	4.7208	1165.39	FALSE	59
2022-09-14	12:30:37	3.04912	13.5631	12.1377	1163.54	1	60
2022-09-14	12:30:37	3.23736	14.4004	12.1377	1179.79	1	61
2022-09-14	12:30:37	1.89955	8.44958	12.1377	1171.99	FALSE	61
2022-09-14	12:30:38	0.486018	2.16191	1.88313	1181.95	FALSE	61
2022-09-14	12:30:38	0.351361	1.56292	1.88313	1173.55	FALSE	61
2022-09-14	12:30:38	0.386985	1.72139	1.88313	1183.67	FALSE	61
2022-09-14	12:30:38	0.46902	2.08629	1.88313	1175.64	FALSE	61
2022-09-14	12:30:39	0.282099	1.25483	1.3048	1184.93	FALSE	61
2022-09-14	12:30:39	0.326883	1.45404	1.3048	1177.1	FALSE	61
2022-09-14	12:30:39	0.406679	1.80899	1.3048	1186.74	FALSE	61
2022-09-14	12:30:39	0.157672	0.701357	1.3048	1177.8	FALSE	61
2022-09-14	12:30:40	0.345662	1.53757	1.13491	1188.28	FALSE	61
2022-09-14	12:30:40	0.10383	0.461857	1.13491	1178.26	FALSE	61
2022-09-14	12:30:40	0.350293	1.55817	1.13491	1189.83	FALSE	61
2022-09-14	12:30:40	0.220776	0.982056	1.13491	1179.24	FALSE	61
2022-09-14	12:30:41	0.31299	1.39224	1.21092	1191.23	FALSE	61
2022-09-14	12:30:41	0.351209	1.56225	1.21092	1180.8	FALSE	61
2022-09-14	12:30:41	0.152481	0.678266	1.21092	1191.9	FALSE	61
2022-09-14	12:30:42	0.0494277	0.219864	-0.669606	1181.02	FALSE	61
2022-09-14	12:30:42	-0.0882312	-0.39247	-0.669606	1191.9	FALSE	61
2022-09-14	12:30:42	-0.222939	-0.991677	-0.669606	1181.02	FALSE	61
2022-09-14	12:30:42	-0.340394	-1.51414	-0.669606	1191.9	FALSE	61
2022-09-14	12:30:43	-0.142684	-0.634687	12.9672	1181.02	FALSE	61
2022-09-14	12:30:43	1.76592	7.85517	12.9672	1199.76	FALSE	61
2022-09-14	12:30:43	4.40128	19.5778	12.9672	1200.6	1	62
2022-09-14	12:30:43	5.63614	25.0707	12.9672	1224.83	1	63
2022-09-14	12:30:44	4.14413	18.4339	9.30331	1219.03	1	64
2022-09-14	12:30:44	1.50693	6.70313	9.30331	1231.53	FALSE	64
2022-09-14	12:30:44	0.623371	2.77288	9.30331	1221.81	FALSE	64
2022-09-14	12:30:45	0.433397	1.92784	1.08523	1233.46	FALSE	64
2022-09-14	12:30:45	0.242507	1.07872	1.08523	1222.89	FALSE	64
2022-09-14	12:30:45	0.296654	1.31958	1.08523	1234.78	FALSE	64
2022-09-14	12:30:45	0.00332086	0.0147718	1.08523	1222.9	FALSE	64
2022-09-14	12:30:46	0.152074	0.676456	0.506111	1235.46	FALSE	64
2022-09-14	12:30:46	0.111005	0.493772	0.506111	1223.39	FALSE	64
2022-09-14	12:30:46	0.199657	0.888114	0.506111	1236.35	FALSE	64
2022-09-14	12:30:46	-0.00762061	-0.033898	0.506111	1223.39	FALSE	64
2022-09-14	12:30:47	0.155331	0.690943	0.329089	1237.04	FALSE	64
2022-09-14	12:30:47	0.0125829	0.0559713	0.329089	1223.45	FALSE	64
2022-09-14	12:30:47	0.125255	0.557159	0.329089	1237.59	FALSE	64
2022-09-14	12:30:47	0.00276106	0.0122817	0.329089	1223.46	FALSE	64
2022-09-14	12:30:48	0.147087	0.654272	0.597603	1238.25	FALSE	64
2022-09-14	12:30:48	0.0960434	0.42722	0.597603	1223.89	FALSE	64
2022-09-14	12:30:48	0.159911	0.711316	0.597603	1238.96	FALSE	64
2022-09-14	12:30:49	0.0926338	0.412054	0.731349	1224.3	FALSE	64
2022-09-14	12:30:49	0.148206	0.65925	0.731349	1239.62	FALSE	64
2022-09-14	12:30:49	0.217061	0.965531	0.731349	1225.27	FALSE	64
2022-09-14	12:30:49	0.199758	0.888564	0.731349	1240.51	FALSE	64
2022-09-14	12:30:50	0.178181	0.792585	1.08036	1226.06	FALSE	64
2022-09-14	12:30:50	0.271412	1.20729	1.08036	1241.71	FALSE	64
2022-09-14	12:30:50	0.380471	1.69241	1.08036	1227.75	FALSE	64
2022-09-14	12:30:50	0.141438	0.629145	1.08036	1242.34	FALSE	64
2022-09-14	12:30:51	0.400115	1.77979	1.45319	1229.53	FALSE	64
2022-09-14	12:30:51	0.202608	0.901241	1.45319	1243.24	FALSE	64
2022-09-14	12:30:51	0.370903	1.64985	1.45319	1231.18	FALSE	64
2022-09-14	12:30:51	0.333143	1.48189	1.45319	1244.73	FALSE	64
2022-09-14	12:30:52	0.409987	1.8237	10.3618	1233.01	FALSE	64
2022-09-14	12:30:52	1.73625	7.72319	10.3618	1252.45	FALSE	64
2022-09-14	12:30:52	4.84205	21.5384	10.3618	1254.54	1	65
2022-09-14	12:30:53	7.55202	33.5929	19.9817	1286.04	1	66
2022-09-14	12:30:53	4.06785	18.0946	19.9817	1272.64	1	67
2022-09-14	12:30:53	4.51808	20.0973	19.9817	1306.14	1	68
2022-09-14	12:30:53	1.83039	8.14194	19.9817	1280.78	FALSE	68
2022-09-14	12:30:54	1.68296	7.48614	6.81066	1313.63	FALSE	68
2022-09-14	12:30:54	1.13202	5.03545	6.81066	1285.82	FALSE	68
2022-09-14	12:30:54	1.52892	6.80094	6.81066	1320.43	FALSE	68
2022-09-14	12:30:54	1.78052	7.92011	6.81066	1293.74	FALSE	68
2022-09-14	12:30:55	1.13777	5.06103	5.38378	1325.49	FALSE	68
2022-09-14	12:30:55	1.52235	6.77172	5.38378	1300.51	FALSE	68
2022-09-14	12:30:55	0.842303	3.74673	5.38378	1329.23	FALSE	68
2022-09-14	12:30:55	1.33889	5.95565	5.38378	1306.46	FALSE	68
2022-09-14	12:30:56	0.979249	4.3559	4.26867	1333.59	FALSE	68
2022-09-14	12:30:56	0.873193	3.88414	4.26867	1310.35	FALSE	68
2022-09-14	12:30:56	1.02648	4.56599	4.26867	1338.16	FALSE	68
2022-09-14	12:30:57	0.489631	2.17798	5.54497	1312.53	FALSE	68
2022-09-14	12:30:57	0.870547	3.87237	5.54497	1342.03	FALSE	68
2022-09-14	12:30:57	1.11299	4.9508	5.54497	1317.48	FALSE	68
2022-09-14	12:30:57	2.51309	11.1787	5.54497	1353.21	FALSE	68
2022-09-14	12:30:58	5.10846	22.7235	24.5272	1340.2	1	69
2022-09-14	12:30:58	7.09319	31.5519	24.5272	1384.76	1	70
2022-09-14	12:30:58	6.7938	30.2202	24.5272	1370.42	1	71
2022-09-14	12:30:58	3.06042	13.6134	24.5272	1398.37	1	72
2022-09-14	12:30:59	4.30118	19.1325	20.2488	1389.55	1	73
2022-09-14	12:30:59	3.00205	13.3537	20.2488	1411.73	1	74
2022-09-14	12:30:59	6.26764	27.8797	20.2488	1417.43	1	75
2022-09-14	12:30:59	4.63762	20.6291	20.2488	1432.36	1	76
2022-09-14	12:31:00	4.40637	19.6004	16.3676	1437.03	1	77
2022-09-14	12:31:00	4.94622	22.0018	16.3676	1454.36	1	78
2022-09-14	12:31:00	1.68622	7.50064	16.3676	1444.53	FALSE	78
2022-09-14	12:31:01	3.66948	16.3226	11.9498	1470.68	1	79
2022-09-14	12:31:01	1.33187	5.92442	11.9498	1450.46	FALSE	79
2022-09-14	12:31:01	2.72541	12.1232	11.9498	1482.8	FALSE	79
2022-09-14	12:31:01	3.01899	13.4291	11.9498	1463.89	1	80
2022-09-14	12:31:02	1.78953	7.96019	5.32471	1490.76	FALSE	80
2022-09-14	12:31:02	2.0623	9.17352	5.32471	1473.06	FALSE	80
2022-09-14	12:31:02	0.417519	1.85721	5.32471	1492.62	FALSE	80
2022-09-14	12:31:02	0.518842	2.30791	5.32471	1475.37	FALSE	80
2022-09-14	12:31:03	0.321794	1.4314	0.985282	1494.05	FALSE	80
2022-09-14	12:31:03	0.217061	0.965531	0.985282	1476.33	FALSE	80
2022-09-14	12:31:03	0.129275	0.575041	0.985282	1494.63	FALSE	80
2022-09-14	12:31:03	0.217875	0.969152	0.985282	1477.3	FALSE	80
2022-09-14	12:31:04	0.411565	1.83072	2.11007	1496.46	FALSE	80
2022-09-14	12:31:04	0.582914	2.59292	2.11007	1479.9	FALSE	80
2022-09-14	12:31:04	0.428613	1.90656	2.11007	1498.36	FALSE	80
2022-09-14	12:31:05	0.34841	1.5498	1.72048	1481.45	FALSE	80
2022-09-14	12:31:05	0.374008	1.66366	1.72048	1500.03	FALSE	80
2022-09-14	12:31:05	0.395026	1.75715	1.72048	1483.2	FALSE	80
2022-09-14	12:31:05	0.429682	1.91131	1.72048	1501.94	FALSE	80
2022-09-14	12:31:06	0.485051	2.1576	2.09275	1485.36	FALSE	80
2022-09-14	12:31:06	-0.323193	-1.43763	2.09275	1501.94	FALSE	80
2022-09-14	12:31:06	0.986221	4.38691	2.09275	1489.75	FALSE	80
2022-09-14	12:31:06	0.733804	3.26411	2.09275	1505.2	FALSE	80
2022-09-14	12:31:07	0.728155	3.23898	3.25805	1492.99	FALSE	80
2022-09-14	12:31:07	0.736247	3.27497	3.25805	1508.48	FALSE	80
2022-09-14	12:31:07	0.736857	3.27769	3.25805	1496.26	FALSE	80
2022-09-14	12:31:07	0.728512	3.24057	3.25805	1511.72	FALSE	80
2022-09-14	12:31:08	0.608868	2.70837	1.82416	1498.97	FALSE	80
2022-09-14	12:31:08	0.28612	1.27272	1.82416	1512.99	FALSE	80
2022-09-14	12:31:08	0.33528	1.49139	1.82416	1500.46	FALSE	80
2022-09-14	12:31:09	0.349173	1.55319	1.65959	1514.54	FALSE	80
2022-09-14	12:31:09	0.429173	1.90905	1.65959	1502.37	FALSE	80
2022-09-14	12:31:09	0.375789	1.67158	1.65959	1516.22	FALSE	80
2022-09-14	12:31:09	0.338232	1.50452	1.65959	1503.88	FALSE	80
2022-09-14	12:31:10	0.337926	1.50316	1.57215	1517.72	FALSE	80
2022-09-14	12:31:10	0.3164	1.40741	1.57215	1505.28	FALSE	80
2022-09-14	12:31:10	0.343575	1.52829	1.57215	1519.25	FALSE	80
2022-09-14	12:31:10	0.41584	1.84974	1.57215	1507.13	FALSE	80
2022-09-14	12:31:11	0.374517	1.66593	1.60656	1520.91	FALSE	80
2022-09-14	12:31:11	0.375382	1.66977	1.60656	1508.8	FALSE	80
2022-09-14	12:31:11	0.345407	1.53644	1.60656	1522.45	FALSE	80
2022-09-14	12:31:11	0.349377	1.5541	1.60656	1510.36	FALSE	80
2022-09-14	12:31:12	0.345102	1.53508	1.55659	1523.99	FALSE	80
2022-09-14	12:31:12	0.350954	1.56111	1.55659	1511.92	FALSE	80
2022-09-14	12:31:12	0.353753	1.57356	1.55659	1525.56	FALSE	80
2022-09-14	12:31:13	0.343524	1.52806	1.49462	1513.45	FALSE	80
2022-09-14	12:31:13	0.333041	1.48143	1.49462	1527.04	FALSE	80
2022-09-14	12:31:13	0.330598	1.47057	1.49462	1514.92	FALSE	80
2022-09-14	12:31:13	0.336858	1.49841	1.49462	1528.54	FALSE	80
2022-09-14	12:31:14	0.337468	1.50113	1.47402	1516.42	FALSE	80
2022-09-14	12:31:14	0.337723	1.50226	1.47402	1530.04	FALSE	80
2022-09-14	12:31:14	0.329784	1.46695	1.47402	1517.89	FALSE	80
2022-09-14	12:31:14	0.320522	1.42575	1.47402	1531.47	FALSE	80
2022-09-14	12:31:15	0.32841	1.46083	1.47408	1519.35	FALSE	80
2022-09-14	12:31:15	0.343321	1.52716	1.47408	1532.99	FALSE	80
2022-09-14	12:31:15	0.331718	1.47555	1.47408	1520.82	FALSE	80
2022-09-14	12:31:15	0.322099	1.43276	1.47408	1534.43	FALSE	80
2022-09-14	12:31:16	0.309631	1.3773	1.36681	1522.2	FALSE	80
2022-09-14	12:31:16	0.305102	1.35715	1.36681	1535.78	FALSE	80
2022-09-14	12:31:16	0.307087	1.36598	1.36681	1523.57	FALSE	80
2022-09-14	12:31:17	0.292532	1.30124	1.41692	1537.09	FALSE	80
2022-09-14	12:31:17	0.300624	1.33724	1.41692	1524.9	FALSE	80
2022-09-14	12:31:17	0.334771	1.48913	1.41692	1538.57	FALSE	80
2022-09-14	12:31:17	0.346221	1.54006	1.41692	1526.44	FALSE	80
2022-09-14	12:31:18	0.338283	1.50475	1.63406	1540.08	FALSE	80
2022-09-14	12:31:18	0.361132	1.60639	1.63406	1528.05	FALSE	80
2022-09-14	12:31:18	0.370852	1.64962	1.63406	1541.73	FALSE	80
2022-09-14	12:31:18	0.399148	1.77549	1.63406	1529.83	FALSE	80
2022-09-14	12:31:19	0.46902	2.08629	2.73945	1543.81	FALSE	80
2022-09-14	12:31:19	0.60042	2.67079	2.73945	1532.5	FALSE	80
2022-09-14	12:31:19	0.77813	3.46128	2.73945	1547.28	FALSE	80
2022-09-14	12:31:20	0.692837	3.08188	2.86632	1535.58	FALSE	80
2022-09-14	12:31:20	0.711005	3.16269	2.86632	1550.44	FALSE	80
2022-09-14	12:31:20	0.594924	2.64634	2.86632	1538.22	FALSE	80
2022-09-14	12:31:20	0.57874	2.57435	2.86632	1553.01	FALSE	80
2022-09-14	12:31:21	0.490802	2.18319	2.01414	1540.41	FALSE	80
2022-09-14	12:31:21	0.458944	2.04147	2.01414	1555.05	FALSE	80
2022-09-14	12:31:21	0.432277	1.92285	2.01414	1542.33	FALSE	80
2022-09-14	12:31:21	0.429173	1.90905	2.01414	1556.96	FALSE	80
2022-09-14	12:31:22	0.401845	1.78749	1.75574	1544.12	FALSE	80
2022-09-14	12:31:22	0.397926	1.77005	1.75574	1558.73	FALSE	80
2022-09-14	12:31:22	0.395534	1.75941	1.75574	1545.88	FALSE	80
2022-09-14	12:31:22	0.383524	1.70599	1.75574	1560.44	FALSE	80
2022-09-14	12:31:23	0.387494	1.72365	1.74795	1547.6	FALSE	80
2022-09-14	12:31:23	0.39528	1.75828	1.74795	1562.2	FALSE	80
2022-09-14	12:31:23	0.396094	1.76191	1.74795	1549.36	FALSE	80
2022-09-14	12:31:24	0.40042	1.78115	1.75557	1563.98	FALSE	80
2022-09-14	12:31:24	0.392379	1.74538	1.75557	1551.11	FALSE	80
2022-09-14	12:31:24	0.390344	1.73633	1.75557	1565.72	FALSE	80
2022-09-14	12:31:24	0.395534	1.75941	1.75557	1552.87	FALSE	80
2022-09-14	12:31:25	0.398384	1.77209	1.77255	1567.49	FALSE	80
2022-09-14	12:31:25	0.396145	1.76213	1.77255	1554.63	FALSE	80
2022-09-14	12:31:25	0.397621	1.7687	1.77255	1569.26	FALSE	80
2022-09-14	12:31:25	0.401794	1.78726	1.77255	1556.42	FALSE	80
2022-09-14	12:31:26	0.399249	1.77594	1.80373	1571.03	FALSE	80
2022-09-14	12:31:26	0.40556	1.80401	1.80373	1558.22	FALSE	80
2022-09-14	12:31:26	0.409733	1.82257	1.80373	1572.85	FALSE	80
2022-09-14	12:31:26	0.407443	1.81239	1.80373	1560.03	FALSE	80
2022-09-14	12:31:27	0.404949	1.80129	1.78756	1574.66	FALSE	80
2022-09-14	12:31:27	0.403473	1.79473	1.78756	1561.83	FALSE	80
2022-09-14	12:31:27	0.397163	1.76666	1.78756	1576.42	FALSE	80
2022-09-14	12:31:28	0.400115	1.77979	1.81833	1563.61	FALSE	80
2022-09-14	12:31:28	0.402506	1.79043	1.81833	1578.21	FALSE	80
2022-09-14	12:31:28	0.371056	1.65053	1.81833	1565.26	FALSE	80
2022-09-14	12:31:28	0.461438	2.05257	1.81833	1580.27	FALSE	80
2022-09-14	12:31:29	0.372379	1.65642	1.31935	1566.91	FALSE	80
2022-09-14	12:31:29	0.238486	1.06083	1.31935	1581.33	FALSE	80
2022-09-14	12:31:29	0.28612	1.27272	1.31935	1568.19	FALSE	80
2022-09-14	12:31:29	0.289428	1.28743	1.31935	1582.61	FALSE	80
2022-09-14	12:31:30	0.436908	1.94345	1.70209	1570.13	FALSE	80
2022-09-14	12:31:30	0.297468	1.3232	1.70209	1583.94	FALSE	80
2022-09-14	12:31:30	0.337214	1.5	1.70209	1571.63	FALSE	80
2022-09-14	12:31:30	0.458995	2.0417	1.70209	1585.98	FALSE	80
2022-09-14	12:31:31	0.285255	1.26887	1.06506	1572.9	FALSE	80
2022-09-14	12:31:31	0.222099	0.987941	1.06506	1586.97	FALSE	80
2022-09-14	12:31:31	0.210954	0.938366	1.06506	1573.84	FALSE	80
2022-09-14	12:31:32	0.17472	0.77719	1.13627	1587.74	FALSE	80
2022-09-14	12:31:32	0.212583	0.945612	1.13627	1574.78	FALSE	80
2022-09-14	12:31:32	0.262863	1.16927	1.13627	1588.91	FALSE	80
2022-09-14	12:31:32	0.371616	1.65302	1.13627	1576.44	FALSE	80
2022-09-14	12:31:33	0.503626	2.24023	2.62749	1591.15	FALSE	80
2022-09-14	12:31:33	0.683677	3.04113	2.62749	1579.48	FALSE	80
2022-09-14	12:31:33	0.482812	2.14764	2.62749	1593.3	FALSE	80
2022-09-14	12:31:33	0.692633	3.08097	2.62749	1582.56	FALSE	80
2022-09-14	12:31:34	0.860471	3.82755	3.05415	1597.13	FALSE	80
2022-09-14	12:31:34	0.833601	3.70802	3.05415	1586.27	FALSE	80
2022-09-14	12:31:34	0.537926	2.3928	3.05415	1599.52	FALSE	80
2022-09-14	12:31:34	0.514415	2.28822	3.05415	1588.56	FALSE	80
2022-09-14	12:31:35	0.444033	1.97515	1.8265	1601.5	FALSE	80
2022-09-14	12:31:35	0.360064	1.60164	1.8265	1590.16	FALSE	80
2022-09-14	12:31:35	0.427748	1.90271	1.8265	1603.4	FALSE	80
2022-09-14	12:31:36	0.383015	1.70373	1.82999	1591.86	FALSE	80
2022-09-14	12:31:36	0.385611	1.71527	1.82999	1605.11	FALSE	80
2022-09-14	12:31:36	0.423779	1.88505	1.82999	1593.75	FALSE	80
2022-09-14	12:31:36	0.453193	2.01589	1.82999	1607.13	FALSE	80
2022-09-14	12:31:37	0.464186	2.06479	1.94323	1595.81	FALSE	80
2022-09-14	12:31:37	0.434008	1.93055	1.94323	1609.06	FALSE	80
2022-09-14	12:31:37	0.449071	1.99756	1.94323	1597.81	FALSE	80
2022-09-14	12:31:37	0.400166	1.78002	1.94323	1610.84	FALSE	80
2022-09-14	12:31:38	0.29126	1.29558	0.978039	1599.1	FALSE	80
2022-09-14	12:31:38	0.201285	0.895356	0.978039	1611.74	FALSE	80
2022-09-14	12:31:38	0.171769	0.764063	0.978039	1599.87	FALSE	80
2022-09-14	12:31:38	0.215178	0.957155	0.978039	1612.69	FALSE	80
2022-09-14	12:31:39	0.348613	1.5507	2.31886	1601.42	FALSE	80
2022-09-14	12:31:39	0.472227	2.10056	2.31886	1614.79	FALSE	80
2022-09-14	12:31:39	0.743066	3.30531	2.31886	1604.72	FALSE	80
2022-09-14	12:31:40	0.532837	2.37017	1.77181	1617.16	FALSE	80
2022-09-14	12:31:40	0.352888	1.56972	1.77181	1606.29	FALSE	80
2022-09-14	12:31:40	0.344847	1.53395	1.77181	1618.7	FALSE	80
2022-09-14	12:31:40	0.36271	1.61341	1.77181	1607.91	FALSE	80
2022-09-14	12:31:41	0.34327	1.52693	1.51273	1620.23	FALSE	80
2022-09-14	12:31:41	0.299657	1.33293	1.51273	1609.24	FALSE	80
2022-09-14	12:31:41	0.352736	1.56904	1.51273	1621.79	FALSE	80
2022-09-14	12:31:41	0.364644	1.62201	1.51273	1610.86	FALSE	80
2022-09-14	12:31:42	0.383524	1.70599	2.1237	1623.5	FALSE	80
2022-09-14	12:31:42	0.436196	1.94029	2.1237	1612.8	FALSE	80
2022-09-14	12:31:42	0.535534	2.38216	2.1237	1625.88	FALSE	80
2022-09-14	12:31:42	0.554466	2.46638	2.1237	1615.27	FALSE	80
2022-09-14	12:31:43	0.567646	2.525	2.05672	1628.41	FALSE	80
2022-09-14	12:31:43	0.363117	1.61522	2.05672	1616.88	FALSE	80
2022-09-14	12:31:43	0.456349	2.02993	2.05672	1630.44	FALSE	80
2022-09-14	12:31:44	0.360369	1.60299	1.42693	1618.49	FALSE	80
2022-09-14	12:31:44	0.296196	1.31754	1.42693	1631.75	FALSE	80
2022-09-14	12:31:44	0.291819	1.29807	1.42693	1619.78	FALSE	80
2022-09-14	12:31:44	0.334771	1.48913	1.42693	1633.24	FALSE	80
2022-09-14	12:31:45	0.594262	2.6434	12.7085	1622.43	FALSE	80
2022-09-14	12:31:45	1.8823	8.37285	12.7085	1641.62	FALSE	80
2022-09-14	12:31:45	4.40683	19.6025	12.7085	1642.03	1	81
2022-09-14	12:31:45	4.54464	20.2155	12.7085	1661.83	1	82
2022-09-14	12:31:46	2.90286	12.9125	14.9482	1654.94	FALSE	82
2022-09-14	12:31:46	2.70235	12.0206	14.9482	1673.85	FALSE	82
2022-09-14	12:31:46	4.38317	19.4972	14.9482	1674.44	1	83
2022-09-14	12:31:46	3.4536	15.3623	14.9482	1689.22	1	84
2022-09-14	12:31:47	3.49523	15.5475	18.356	1689.99	1	85
2022-09-14	12:31:47	3.19528	14.2132	18.356	1703.43	1	86
2022-09-14	12:31:47	5.68932	25.3072	18.356	1715.29	1	87
2022-09-14	12:31:48	10.1007	44.9299	21.6073	1748.36	1	88
2022-09-14	12:31:48	4.69263	20.8738	21.6073	1736.17	1	89
2022-09-14	12:31:48	2.97874	13.25	21.6073	1761.61	FALSE	89
2022-09-14	12:31:48	1.65808	7.37547	21.6073	1743.54	FALSE	89
2022-09-14	12:31:49	2.13772	9.50901	17.7639	1771.12	FALSE	89
2022-09-14	12:31:49	2.81467	12.5202	17.7639	1756.06	FALSE	89
2022-09-14	12:31:49	4.27289	19.0067	17.7639	1790.12	1	90
2022-09-14	12:31:49	6.74871	30.0196	17.7639	1786.08	1	91
2022-09-14	12:31:50	6.17482	27.4668	27.3508	1817.59	1	92
2022-09-14	12:31:50	5.45762	24.2766	27.3508	1810.36	1	93
2022-09-14	12:31:50	5.02917	22.3708	27.3508	1839.96	1	94
2022-09-14	12:31:50	7.93334	35.2891	27.3508	1845.65	1	95
2022-09-14	12:31:51	9.96321	44.3184	42.9961	1884.28	1	96
2022-09-14	12:31:51	10.9257	48.5997	42.9961	1894.25	1	97
2022-09-14	12:31:51	8.10897	36.0703	42.9961	1920.35	1	98
2022-09-14	12:31:52	7.46204	33.1926	22.6778	1927.44	1	99
2022-09-14	12:31:52	5.97701	26.5869	22.6778	1946.94	1	100
2022-09-14	12:31:52	2.84393	12.6504	22.6778	1940.09	FALSE	100
2022-09-14	12:31:52	4.10978	18.2811	22.6778	1965.22	1	101
2022-09-14	12:31:53	11.6085	51.6369	26.9032	1991.73	1	102
2022-09-14	12:31:53	7.32036	32.5624	26.9032	1997.78	1	103
2022-09-14	12:31:53	4.23701	18.8471	26.9032	2010.58	1	104
2022-09-14	12:31:53	1.02653	4.56621	26.9032	2002.35	FALSE	104
2022-09-14	12:31:54	0.465407	2.07022	1.9664	2012.65	FALSE	104
2022-09-14	12:31:54	0.442252	1.96723	1.9664	2004.31	FALSE	104
2022-09-14	12:31:54	0.418537	1.86174	1.9664	2014.51	FALSE	104
2022-09-14	12:31:55	0.278486	1.23876	1.55019	2005.55	FALSE	104
2022-09-14	12:31:55	0.359351	1.59847	1.55019	2016.11	FALSE	104
2022-09-14	12:31:55	0.175942	0.782625	1.55019	2006.34	FALSE	104
2022-09-14	12:31:55	0.580216	2.58092	1.55019	2018.69	FALSE	104
2022-09-14	12:31:56	0.893092	3.97265	8.77258	2010.31	FALSE	104
2022-09-14	12:31:56	1.92775	8.57502	8.77258	2027.26	FALSE	104
2022-09-14	12:31:56	3.20378	14.2511	8.77258	2024.56	1	105
2022-09-14	12:31:56	1.86403	8.29158	8.77258	2035.55	FALSE	105
2022-09-14	12:31:57	1.4164	6.30043	4.49331	2030.86	FALSE	105
2022-09-14	12:31:57	1.16027	5.16111	4.49331	2040.72	FALSE	105
2022-09-14	12:31:57	0.726679	3.23241	4.49331	2034.09	FALSE	105
2022-09-14	12:31:57	0.737214	3.27928	4.49331	2043.99	FALSE	105
2022-09-14	12:31:58	0.681285	3.03049	3.16639	2037.12	FALSE	105
2022-09-14	12:31:58	0.729326	3.24419	3.16639	2047.24	FALSE	105
2022-09-14	12:31:58	0.724898	3.22449	3.16639	2040.35	FALSE	105
2022-09-14	12:31:59	0.72215	3.21227	3.24073	2050.45	FALSE	105
2022-09-14	12:31:59	0.724898	3.22449	3.24073	2043.57	FALSE	105
2022-09-14	12:31:59	0.73813	3.28335	3.24073	2053.73	FALSE	105
2022-09-14	12:31:59	0.72902	3.24283	3.24073	2046.81	FALSE	105
2022-09-14	12:32:00	0.637672	2.83649	3.12902	2056.57	FALSE	105
2022-09-14	12:32:00	0.724542	3.22291	3.12902	2050.04	FALSE	105
2022-09-14	12:32:00	0.721387	3.20887	3.12902	2059.78	FALSE	105
2022-09-14	12:32:00	0.73014	3.24781	3.12902	2053.29	FALSE	105
2022-09-14	12:32:01	0.72327	3.21725	2.91815	2063	FALSE	105
2022-09-14	12:32:01	0.701539	3.12059	2.91815	2056.41	FALSE	105
2022-09-14	12:32:01	0.659199	2.93225	2.91815	2065.93	FALSE	105
2022-09-14	12:32:01	0.540114	2.40254	2.91815	2058.81	FALSE	105
2022-09-14	12:32:02	0.485865	2.16122	1.51546	2068.09	FALSE	105
2022-09-14	12:32:02	0.304593	1.35489	1.51546	2060.16	FALSE	105
2022-09-14	12:32:02	0.231616	1.03027	1.51546	2069.12	FALSE	105
2022-09-14	12:32:03	-0.1436	-0.638762	-1.61991	2060.16	FALSE	105
2022-09-14	12:32:03	-0.195152	-0.868075	-1.61991	2069.12	FALSE	105
2022-09-14	12:32:03	-0.446755	-1.98726	-1.61991	2060.16	FALSE	105
2022-09-14	12:32:03	-0.671182	-2.98555	-1.61991	2069.12	FALSE	105
2022-09-14	12:32:04	-0.732048	-3.2563	-3.2679	2060.16	FALSE	105
2022-09-14	12:32:04	-0.725941	-3.22913	-3.2679	2069.12	FALSE	105
2022-09-14	12:32:04	-0.618053	-2.74922	-3.2679	2060.16	FALSE	105
2022-09-14	12:32:04	-0.862582	-3.83694	-3.2679	2069.12	FALSE	105
2022-09-14	12:32:05	-0.805279	-3.58204	-4.21158	2060.16	FALSE	105
2022-09-14	12:32:05	-0.90365	-4.01962	-4.21158	2069.12	FALSE	105
2022-09-14	12:32:05	-1.00645	-4.47689	-4.21158	2060.16	FALSE	105
2022-09-14	12:32:05	-1.07184	-4.76776	-4.21158	2069.12	FALSE	105
2022-09-14	12:32:06	-0.592811	-2.63694	-2.44166	2060.16	FALSE	105
2022-09-14	12:32:06	-0.531081	-2.36235	-2.44166	2069.12	FALSE	105
2022-09-14	12:32:06	-0.522837	-2.32568	-2.44166	2060.16	FALSE	105
2022-09-14	12:32:07	-0.5179	-2.30372	-1.82625	2069.12	FALSE	105
2022-09-14	12:32:07	-0.396425	-1.76338	-1.82625	2060.16	FALSE	105
2022-09-14	12:32:07	-0.418867	-1.8632	-1.82625	2069.12	FALSE	105
2022-09-14	12:32:07	-0.309045	-1.37469	-1.82625	2060.16	FALSE	105
2022-09-14	12:32:08	-0.349554	-1.55489	-1.87328	2069.12	FALSE	105
2022-09-14	12:32:08	-0.463549	-2.06196	-1.87328	2060.16	FALSE	105
2022-09-14	12:32:08	-0.443905	-1.97458	-1.87328	2069.12	FALSE	105
2022-09-14	12:32:08	-0.427519	-1.90169	-1.87328	2060.16	FALSE	105
2022-09-14	12:32:09	-0.436272	-1.94063	-1.76355	2069.12	FALSE	105
2022-09-14	12:32:09	-0.378409	-1.68324	-1.76355	2060.16	FALSE	105
2022-09-14	12:32:09	-0.38416	-1.70882	-1.76355	2069.12	FALSE	105
2022-09-14	12:32:09	-0.38701	-1.7215	-1.76355	2060.16	FALSE	105
2022-09-14	12:32:10	-0.402226	-1.78918	-1.59828	2069.12	FALSE	105
2022-09-14	12:32:10	-0.373218	-1.66015	-1.59828	2060.16	FALSE	105
2022-09-14	12:32:10	-0.302481	-1.3455	-1.59828	2069.12	FALSE	105
2022-09-14	12:32:11	-0.324211	-1.44216	-1.60299	2060.16	FALSE	105
2022-09-14	12:32:11	-0.327671	-1.45755	-1.60299	2069.12	FALSE	105
2022-09-14	12:32:11	-0.373066	-1.65947	-1.60299	2060.16	FALSE	105
2022-09-14	12:32:11	-0.416526	-1.85279	-1.60299	2069.12	FALSE	105
2022-09-14	12:32:12	-0.446552	-1.98635	-2.19252	2060.16	FALSE	105
2022-09-14	12:32:12	-0.497544	-2.21318	-2.19252	2069.12	FALSE	105
2022-09-14	12:32:12	-0.519427	-2.31052	-2.19252	2060.16	FALSE	105
2022-09-14	12:32:12	-0.508078	-2.26003	-2.19252	2069.12	FALSE	105
2022-09-14	12:32:13	-0.501971	-2.23287	-2.29648	2060.16	FALSE	105
2022-09-14	12:32:13	-0.513727	-2.28516	-2.29648	2069.12	FALSE	105
2022-09-14	12:32:13	-0.521157	-2.31821	-2.29648	2060.16	FALSE	105
2022-09-14	12:32:13	-0.528231	-2.34968	-2.29648	2069.12	FALSE	105
2022-09-14	12:32:14	-0.546806	-2.4323	-2.37564	2060.16	FALSE	105
2022-09-14	12:32:14	-0.531234	-2.36304	-2.37564	2069.12	FALSE	105
2022-09-14	12:32:14	-0.52416	-2.33157	-2.37564	2060.16	FALSE	105
2022-09-14	12:32:15	-0.528587	-2.35126	-2.18199	2069.12	FALSE	105
2022-09-14	12:32:15	-0.517086	-2.3001	-2.18199	2060.16	FALSE	105
2022-09-14	12:32:15	-0.518562	-2.30667	-2.18199	2069.12	FALSE	105
2022-09-14	12:32:15	-0.3979	-1.76994	-2.18199	2060.16	FALSE	105
2022-09-14	12:32:16	-0.457086	-2.03321	-2.14096	2069.12	FALSE	105
2022-09-14	12:32:16	-0.46874	-2.08505	-2.14096	2060.16	FALSE	105
2022-09-14	12:32:16	-0.500699	-2.22721	-2.14096	2069.12	FALSE	105
2022-09-14	12:32:16	-0.498715	-2.21838	-2.14096	2060.16	FALSE	105
2022-09-14	12:32:17	-0.513473	-2.28403	-2.18307	2069.12	FALSE	105
2022-09-14	12:32:17	-0.453524	-2.01737	-2.18307	2060.16	FALSE	105
2022-09-14	12:32:17	-0.490114	-2.18013	-2.18307	2069.12	FALSE	105
2022-09-14	12:32:17	-0.505992	-2.25075	-2.18307	2060.16	FALSE	105
2022-09-14	12:32:18	-0.499478	-2.22178	-1.99201	2069.12	FALSE	105
2022-09-14	12:32:18	-0.467926	-2.08143	-1.99201	2060.16	FALSE	105
2022-09-14	12:32:18	-0.376068	-1.67283	-1.99201	2069.12	FALSE	105
2022-09-14	12:32:19	-0.259783	-1.15557	0.622297	2060.16	FALSE	105
2022-09-14	12:32:19	-0.0651269	-0.289697	0.622297	2069.12	FALSE	105
2022-09-14	12:32:19	0.147545	0.65631	0.622297	2060.82	FALSE	105
2022-09-14	12:32:19	0.736959	3.27814	0.622297	2072.4	FALSE	105
2022-09-14	12:32:20	0.733804	3.26411	3.24656	2064.08	FALSE	105
2022-09-14	12:32:20	0.724542	3.22291	3.24656	2075.62	FALSE	105
2022-09-14	12:32:20	0.731107	3.25211	3.24656	2067.34	FALSE	105
2022-09-14	12:32:20	0.729987	3.24713	3.24656	2078.87	FALSE	105
2022-09-14	12:32:21	0.727596	3.23649	2.99778	2070.57	FALSE	105
2022-09-14	12:32:21	0.7107	3.16134	2.99778	2082.03	FALSE	105
2022-09-14	12:32:21	0.663117	2.94968	2.99778	2073.52	FALSE	105
2022-09-14	12:32:21	0.594313	2.64362	2.99778	2084.67	FALSE	105
2022-09-14	12:32:22	0.551412	2.45279	1.0757	2075.97	FALSE	105
2022-09-14	12:32:22	0.22098	0.982963	1.0757	2085.66	FALSE	105
2022-09-14	12:32:22	-0.0469081	-0.208657	1.0757	2075.97	FALSE	105
2022-09-14	12:32:23	-0.262786	-1.16892	-0.806787	2085.66	FALSE	105
2022-09-14	12:32:23	0.0814379	0.362252	-0.806787	2076.34	FALSE	105
2022-09-14	12:32:23	-0.247773	-1.10214	-0.806787	2085.66	FALSE	105
2022-09-14	12:32:23	-0.296374	-1.31833	-0.806787	2076.34	FALSE	105
2022-09-14	12:32:24	-0.42589	-1.89444	-1.43519	2085.66	FALSE	105
2022-09-14	12:32:24	-0.448842	-1.99654	-1.43519	2076.34	FALSE	105
2022-09-14	12:32:24	-0.355203	-1.58001	-1.43519	2085.66	FALSE	105
2022-09-14	12:32:24	-0.0606486	-0.269777	-1.43519	2076.34	FALSE	105
2022-09-14	12:32:25	0.07813	0.347538	3.33055	2086	FALSE	105
2022-09-14	12:32:25	0.37986	1.68969	3.33055	2078.03	FALSE	105
2022-09-14	12:32:25	1.41818	6.30835	3.33055	2092.31	FALSE	105
2022-09-14	12:32:25	1.11879	4.9766	3.33055	2083	FALSE	105
2022-09-14	12:32:26	2.25279	10.0209	8.00213	2102.33	FALSE	105
2022-09-14	12:32:26	1.30281	5.79516	8.00213	2088.8	FALSE	105
2022-09-14	12:32:26	1.84128	8.19038	8.00213	2110.52	FALSE	105
2022-09-14	12:32:27	1.13742	5.05947	3.48646	2093.86	FALSE	105
2022-09-14	12:32:27	0.638486	2.84011	3.48646	2113.36	FALSE	105
2022-09-14	12:32:27	1.06154	4.72194	3.48646	2098.58	FALSE	105
2022-09-14	12:32:27	0.297723	1.32433	3.48646	2114.69	FALSE	105
2022-09-14	12:32:28	0.335484	1.4923	1.50045	2100.07	FALSE	105
2022-09-14	12:32:28	0.538435	2.39507	1.50045	2117.08	FALSE	105
2022-09-14	12:32:28	0.224033	0.996544	1.50045	2101.07	FALSE	105
2022-09-14	12:32:28	0.251311	1.11788	1.50045	2118.2	FALSE	105
2022-09-14	12:32:29	0.325662	1.44861	4.11373	2102.52	FALSE	105
2022-09-14	12:32:29	1.40317	6.24158	4.11373	2124.44	FALSE	105
2022-09-14	12:32:29	0.667392	2.96869	4.11373	2105.49	FALSE	105
2022-09-14	12:32:29	1.30301	5.79605	4.11373	2130.24	FALSE	105
2022-09-14	12:32:30	2.34709	10.4403	8.09277	2115.93	FALSE	105
2022-09-14	12:32:30	2.1507	9.56674	8.09277	2139.81	FALSE	105
2022-09-14	12:32:30	0.960216	4.27123	8.09277	2120.2	FALSE	105
2022-09-14	12:32:31	0.420267	1.86943	0.185852	2141.68	FALSE	105
2022-09-14	12:32:31	0.0554837	0.246803	0.185852	2120.44	FALSE	105
2022-09-14	12:32:31	0.0468832	0.208546	0.185852	2141.88	FALSE	105
2022-09-14	12:32:31	-0.355508	-1.58137	0.185852	2120.44	FALSE	105
2022-09-14	12:32:32	-0.358358	-1.59405	-1.9829	2141.88	FALSE	105
2022-09-14	12:32:32	-0.439834	-1.95647	-1.9829	2120.44	FALSE	105
2022-09-14	12:32:32	-0.512048	-2.27769	-1.9829	2141.88	FALSE	105
2022-09-14	12:32:32	-0.472862	-2.10338	-1.9829	2120.44	FALSE	105
2022-09-14	12:32:33	-0.626552	-2.78703	-2.38816	2141.88	FALSE	105
2022-09-14	12:32:33	-0.374898	-1.66762	-2.38816	2120.44	FALSE	105
2022-09-14	12:32:33	-0.8579	-3.81611	-2.38816	2141.88	FALSE	105
2022-09-14	12:32:33	-0.28818	-1.28188	-2.38816	2120.44	FALSE	105
2022-09-14	12:32:34	0.0540078	0.240237	0.970361	2142.12	FALSE	105
2022-09-14	12:32:34	0.210395	0.935879	0.970361	2121.38	FALSE	105
2022-09-14	12:32:34	0.390038	1.73497	0.970361	2143.86	FALSE	105
2022-09-14	12:32:35	0.200522	0.891962	1.60435	2122.27	FALSE	105
2022-09-14	12:32:35	0.342659	1.52422	1.60435	2145.38	FALSE	105
2022-09-14	12:32:35	0.397774	1.76938	1.60435	2124.04	FALSE	105
2022-09-14	12:32:35	0.501743	2.23185	1.60435	2147.61	FALSE	105
2022-09-14	12:32:36	0.604898	2.69071	2.6954	2126.73	FALSE	105
2022-09-14	12:32:36	0.471616	2.09784	2.6954	2149.71	FALSE	105
2022-09-14	12:32:36	0.713651	3.17446	2.6954	2129.91	FALSE	105
2022-09-14	12:32:36	0.633651	2.81861	2.6954	2152.53	FALSE	105
2022-09-14	12:32:37	0.571259	2.54107	2.40246	2132.45	FALSE	105
2022-09-14	12:32:37	0.545356	2.42585	2.40246	2154.96	FALSE	105
2022-09-14	12:32:37	0.503677	2.24046	2.40246	2134.69	FALSE	105
2022-09-14	12:32:38	0.429224	1.90927	1.5915	2156.87	FALSE	105
2022-09-14	12:32:38	0.413957	1.84136	1.5915	2136.53	FALSE	105
2022-09-14	12:32:38	0.392786	1.74719	1.5915	2158.61	FALSE	105
2022-09-14	12:32:38	0.195178	0.868191	1.5915	2137.4	FALSE	105
2022-09-14	12:32:39	0.261336	1.16247	0.960665	2159.78	FALSE	105
2022-09-14	12:32:39	0.0246949	0.109848	0.960665	2137.51	FALSE	105
2022-09-14	12:32:39	0.224746	0.999715	0.960665	2160.78	FALSE	105
2022-09-14	12:32:39	0.353092	1.57062	0.960665	2139.08	FALSE	105
2022-09-14	12:32:40	0.625	2.78012	1.61601	2163.56	FALSE	105
2022-09-14	12:32:40	0.401692	1.78681	1.61601	2140.87	FALSE	105
2022-09-14	12:32:40	0.104186	0.46344	1.61601	2164.02	FALSE	105
2022-09-14	12:32:40	0.322303	1.43367	1.61601	2142.3	FALSE	105
2022-09-14	12:32:41	0.705051	3.13621	1.92859	2167.16	FALSE	105
2022-09-14	12:32:41	0.316196	1.4065	1.92859	2143.71	FALSE	105
2022-09-14	12:32:41	0.279453	1.24306	1.92859	2168.4	FALSE	105
2022-09-14	12:32:42	0.37411	1.66412	4.88962	2145.37	FALSE	105
2022-09-14	12:32:42	0.345916	1.5387	4.88962	2169.94	FALSE	105
2022-09-14	12:32:42	1.93798	8.62052	4.88962	2153.99	FALSE	105
2022-09-14	12:32:42	1.73894	7.73515	4.88962	2177.67	FALSE	105
2022-09-14	12:32:43	6.67289	29.6823	51.6944	2183.67	1	106
2022-09-14	12:32:43	14.8497	66.0544	51.6944	2243.73	1	107
2022-09-14	12:32:43	16.1921	72.0257	51.6944	2255.7	1	108
2022-09-14	12:32:43	8.77095	39.0149	51.6944	2282.74	1	109
2022-09-14	12:32:44	5.23248	23.2751	18.5513	2278.97	1	110
2022-09-14	12:32:44	3.8279	17.0273	18.5513	2299.77	1	111
2022-09-14	12:32:44	3.79248	16.8697	18.5513	2295.84	1	112
2022-09-14	12:32:44	3.82917	17.0329	18.5513	2316.8	1	113
2022-09-14	12:32:45	3.4649	15.4126	15.4317	2311.26	1	114
2022-09-14	12:32:45	3.44306	15.3154	15.4317	2332.12	1	115
2022-09-14	12:32:45	3.49966	15.5672	15.4317	2326.82	1	116
2022-09-14	12:32:46	3.58535	15.9484	14.9927	2348.07	1	117
2022-09-14	12:32:46	3.2937	14.651	14.9927	2341.47	1	118
2022-09-14	12:32:46	3.25314	14.4706	14.9927	2362.54	1	119
2022-09-14	12:32:46	3.34983	14.9007	14.9927	2356.37	1	120
2022-09-14	12:32:47	3.46082	15.3944	14.703	2377.93	1	121
2022-09-14	12:32:47	3.33905	14.8528	14.703	2371.23	1	122
2022-09-14	12:32:47	3.27095	14.5498	14.703	2392.48	1	123
2022-09-14	12:32:47	3.15075	14.0152	14.703	2385.24	1	124
2022-09-14	12:32:48	3.11976	13.8773	13.6755	2406.36	1	125
2022-09-14	12:32:48	3.10006	13.7897	13.6755	2399.03	1	126
2022-09-14	12:32:48	3.00337	13.3596	13.6755	2419.72	1	127
2022-09-14	12:32:49	2.91533	12.968	13.1223	2412	FALSE	127
2022-09-14	12:32:49	2.91792	12.9795	13.1223	2432.7	FALSE	127
2022-09-14	12:32:49	2.92754	13.0223	13.1223	2425.02	FALSE	127
2022-09-14	12:32:49	3.0393	13.5194	13.1223	2446.22	1	128
2022-09-14	12:32:50	2.96571	13.1921	12.883	2438.21	FALSE	128
2022-09-14	12:32:50	2.88688	12.8414	12.883	2459.06	FALSE	128
2022-09-14	12:32:50	2.9679	13.2018	12.883	2451.42	FALSE	128
2022-09-14	12:32:50	2.76444	12.2968	12.883	2471.35	FALSE	128
2022-09-14	12:32:51	2.32276	10.3321	8.75192	2461.75	FALSE	128
2022-09-14	12:32:51	2.00419	8.91504	8.75192	2480.27	FALSE	128
2022-09-14	12:32:51	1.8392	8.18113	8.75192	2469.93	FALSE	128
2022-09-14	12:32:51	1.70393	7.57942	8.75192	2487.85	FALSE	128
2022-09-14	12:32:52	1.56536	6.96303	6.49393	2476.89	FALSE	128
2022-09-14	12:32:52	1.39223	6.19292	6.49393	2494.04	FALSE	128
2022-09-14	12:32:52	1.39146	6.18949	6.49393	2483.08	FALSE	128
2022-09-14	12:32:52	1.49055	6.63026	6.49393	2500.67	FALSE	128
2022-09-14	12:32:53	1.52261	6.77287	7.12192	2489.85	FALSE	128
2022-09-14	12:32:53	1.62413	7.22446	7.12192	2507.9	FALSE	128
2022-09-14	12:32:53	1.6565	7.36844	7.12192	2497.22	FALSE	128
2022-09-14	12:32:54	1.52093	6.7654	6.19195	2514.66	FALSE	128
2022-09-14	12:32:54	1.39162	6.1902	6.19195	2503.41	FALSE	128
2022-09-14	12:32:54	1.30368	5.79903	6.19195	2520.46	FALSE	128
2022-09-14	12:32:54	1.35182	6.01317	6.19195	2509.43	FALSE	128
2022-09-14	12:32:55	1.51945	6.75882	7.14908	2527.22	FALSE	128
2022-09-14	12:32:55	1.60561	7.14207	7.14908	2516.57	FALSE	128
2022-09-14	12:32:55	1.61212	7.17103	7.14908	2534.39	FALSE	128
2022-09-14	12:32:55	1.69156	7.5244	7.14908	2524.09	FALSE	128
2022-09-14	12:32:56	1.62917	7.24687	7.39114	2541.64	FALSE	128
2022-09-14	12:32:56	1.66286	7.39673	7.39114	2531.49	FALSE	128
2022-09-14	12:32:56	1.70617	7.58939	7.39114	2549.23	FALSE	128
2022-09-14	12:32:56	1.64821	7.33157	7.39114	2538.82	FALSE	128
2022-09-14	12:32:57	1.62159	7.21316	7.02082	2556.44	FALSE	128
2022-09-14	12:32:57	1.54887	6.88968	7.02082	2545.71	FALSE	128
2022-09-14	12:32:57	1.56459	6.95961	7.02082	2563.4	FALSE	128
2022-09-14	12:32:58	1.57818	7.02006	7.20965	2552.73	FALSE	128
2022-09-14	12:32:58	1.65945	7.38157	7.20965	2570.78	FALSE	128
2022-09-14	12:32:58	1.66826	7.42075	7.20965	2560.15	FALSE	128
2022-09-14	12:32:58	1.57732	7.01623	7.20965	2577.8	FALSE	128
2022-09-14	12:32:59	1.55788	6.92976	7.08374	2567.08	FALSE	128
2022-09-14	12:32:59	1.61899	7.20159	7.08374	2585	FALSE	128
2022-09-14	12:32:59	1.60062	7.11988	7.08374	2574.2	FALSE	128
2022-09-14	12:33:00	1.62882	7.24532	7.68116	2592.24	FALSE	128
2022-09-14	12:33:00	1.69497	7.53957	7.68116	2581.74	FALSE	128
2022-09-14	12:33:00	1.72027	7.65211	7.68116	2599.9	FALSE	128
2022-09-14	12:33:00	1.76505	7.8513	7.68116	2589.59	FALSE	128
2022-09-14	12:33:00	1.8249	8.11752	7.68116	2608.01	FALSE	128
2022-09-14	12:33:01	1.85889	8.26871	8.41721	2597.86	FALSE	128
2022-09-14	12:33:01	1.90464	8.47222	8.41721	2616.49	FALSE	128
2022-09-14	12:33:01	1.91329	8.5107	8.41721	2606.37	FALSE	128
2022-09-14	12:33:02	1.86912	8.31422	7.69906	2624.8	FALSE	128
2022-09-14	12:33:02	1.74851	7.77772	7.69906	2614.15	FALSE	128
2022-09-14	12:33:02	1.65991	7.38361	7.69906	2632.18	FALSE	128
2022-09-14	12:33:02	1.64576	7.32067	7.69906	2621.47	FALSE	128
2022-09-14	12:33:03	1.67039	7.43023	7.54269	2639.61	FALSE	128
2022-09-14	12:33:03	1.74602	7.76665	7.54269	2629.24	FALSE	128
2022-09-14	12:33:03	1.68281	7.48548	7.54269	2647.1	FALSE	128
2022-09-14	12:33:03	1.68347	7.48841	7.54269	2636.73	FALSE	128
2022-09-14	12:33:04	1.66312	7.39789	6.9606	2654.5	FALSE	128
2022-09-14	12:33:04	1.61803	7.19732	6.9606	2643.92	FALSE	128
2022-09-14	12:33:04	1.50877	6.71131	6.9606	2661.21	FALSE	128
2022-09-14	12:33:04	1.46933	6.53587	6.9606	2650.46	FALSE	128
2022-09-14	12:33:05	1.43538	6.38486	6.3528	2667.59	FALSE	128
2022-09-14	12:33:05	1.42317	6.33054	6.3528	2656.79	FALSE	128
2022-09-14	12:33:05	1.42597	6.343	6.3528	2673.94	FALSE	128
2022-09-14	12:33:06	1.41014	6.27258	6.23189	2663.06	FALSE	128
2022-09-14	12:33:06	1.37579	6.11979	6.23189	2680.06	FALSE	128
2022-09-14	12:33:06	1.38266	6.15035	6.23189	2669.21	FALSE	128
2022-09-14	12:33:06	1.43538	6.38486	6.23189	2686.44	FALSE	128
2022-09-14	12:33:07	1.42123	6.32192	6.35662	2675.53	FALSE	128
2022-09-14	12:33:07	1.42017	6.3172	6.35662	2692.76	FALSE	128
2022-09-14	12:33:07	1.44291	6.41835	6.35662	2681.95	FALSE	128
2022-09-14	12:33:07	1.43182	6.36902	6.35662	2699.13	FALSE	128
2022-09-14	12:33:08	1.43961	6.40367	6.18731	2688.36	FALSE	128
2022-09-14	12:33:08	1.43101	6.36542	6.18731	2705.49	FALSE	128
2022-09-14	12:33:08	1.32765	5.90565	6.18731	2694.26	FALSE	128
2022-09-14	12:33:08	1.36561	6.07451	6.18731	2711.57	FALSE	128
2022-09-14	12:33:09	1.41228	6.2821	6.05028	2700.54	FALSE	128
2022-09-14	12:33:09	1.36586	6.07562	6.05028	2717.64	FALSE	128
2022-09-14	12:33:09	1.30235	5.79311	6.05028	2706.34	FALSE	128
2022-09-14	12:33:10	1.25538	5.58418	5.53206	2723.23	FALSE	128
2022-09-14	12:33:10	1.24541	5.53983	5.53206	2711.88	FALSE	128
2022-09-14	12:33:10	1.24291	5.52871	5.53206	2728.76	FALSE	128
2022-09-14	12:33:10	1.23095	5.47551	5.53206	2717.35	FALSE	128
2022-09-14	12:33:11	1.2908	5.74174	5.88724	2734.5	FALSE	128
2022-09-14	12:33:11	1.30245	5.79356	5.88724	2723.15	FALSE	128
2022-09-14	12:33:11	1.33559	5.94097	5.88724	2740.44	FALSE	128
2022-09-14	12:33:11	1.3652	6.07268	5.88724	2729.22	FALSE	128
2022-09-14	12:33:12	1.3962	6.21058	6.1006	2746.65	FALSE	128
2022-09-14	12:33:12	1.3366	5.94546	6.1006	2735.16	FALSE	128
2022-09-14	12:33:12	1.3421	5.96993	6.1006	2752.62	FALSE	128
2022-09-14	12:33:12	1.411	6.27641	6.1006	2741.44	FALSE	128
2022-09-14	12:33:13	1.45335	6.46479	6.28452	2759.08	FALSE	128
2022-09-14	12:33:13	1.40831	6.26444	6.28452	2747.7	FALSE	128
2022-09-14	12:33:13	1.37681	6.12433	6.28452	2765.21	FALSE	128
2022-09-14	12:33:14	1.38938	6.18024	6.01288	2753.88	FALSE	128
2022-09-14	12:33:14	1.31604	5.85401	6.01288	2771.06	FALSE	128
2022-09-14	12:33:14	1.37584	6.12001	6.01288	2760	FALSE	128
2022-09-14	12:33:14	1.32576	5.89725	6.01288	2776.96	FALSE	128
2022-09-14	12:33:15	1.35726	6.03736	5.95724	2766.04	FALSE	128
2022-09-14	12:33:15	1.30261	5.79427	5.95724	2782.75	FALSE	128
2022-09-14	12:33:15	1.29533	5.76189	5.95724	2771.8	FALSE	128
2022-09-14	12:33:15	1.40179	6.23544	5.95724	2788.99	FALSE	128
2022-09-14	12:33:16	1.47029	6.54014	6.79336	2778.34	FALSE	128
2022-09-14	12:33:16	1.53645	6.83444	6.79336	2795.82	FALSE	128
2022-09-14	12:33:16	1.57447	7.00356	6.79336	2785.35	FALSE	128
2022-09-14	12:33:16	1.52765	6.79529	6.79336	2802.62	FALSE	128
2022-09-14	12:33:17	1.60815	7.15337	7.25654	2792.5	FALSE	128
2022-09-14	12:33:17	1.66429	7.40309	7.25654	2810.02	FALSE	128
2022-09-14	12:33:17	1.62159	7.21316	7.25654	2799.71	FALSE	128
2022-09-14	12:33:18	1.55691	6.92545	6.73178	2816.95	FALSE	128
2022-09-14	12:33:18	1.51477	6.738	6.73178	2806.45	FALSE	128
2022-09-14	12:33:18	1.4905	6.63004	6.73178	2823.58	FALSE	128
2022-09-14	12:33:18	1.49131	6.63365	6.73178	2813.09	FALSE	128
2022-09-14	12:33:19	1.5364	6.83421	7.08757	2830.41	FALSE	128
2022-09-14	12:33:19	1.59039	7.07437	7.08757	2820.16	FALSE	128
2022-09-14	12:33:19	1.61889	7.20115	7.08757	2837.61	FALSE	128
2022-09-14	12:33:19	1.62775	7.24056	7.08757	2827.4	FALSE	128
2022-09-14	12:33:20	1.68525	7.49633	7.23267	2845.11	FALSE	128
2022-09-14	12:33:20	1.6423	7.30528	7.23267	2834.71	FALSE	128
2022-09-14	12:33:20	1.56917	6.97998	7.23267	2852.09	FALSE	128
2022-09-14	12:33:20	1.60719	7.1491	7.23267	2841.86	FALSE	128
2022-09-14	12:33:21	1.61202	7.17059	6.07436	2859.26	FALSE	128
2022-09-14	12:33:21	1.45197	6.45865	6.07436	2848.31	FALSE	128
2022-09-14	12:33:21	1.03274	4.59383	6.07436	2863.85	FALSE	128
2022-09-14	12:33:22	0.351565	1.56383	1.91544	2849.88	FALSE	128
2022-09-14	12:33:22	0.387595	1.7241	1.91544	2865.58	FALSE	128
2022-09-14	12:33:22	0.477214	2.12274	1.91544	2852	FALSE	128
2022-09-14	12:33:22	0.506069	2.2511	1.91544	2867.83	FALSE	128
2022-09-14	12:33:23	0.640064	2.84713	3.97158	2854.85	FALSE	128
2022-09-14	12:33:23	0.967952	4.30564	3.97158	2872.14	FALSE	128
2022-09-14	12:33:23	1.2591	5.60073	3.97158	2860.45	FALSE	128
2022-09-14	12:33:23	0.704288	3.13281	3.97158	2875.27	FALSE	128
2022-09-14	12:33:24	0.956145	4.25312	4.44468	2864.7	FALSE	128
2022-09-14	12:33:24	0.745051	3.31414	4.44468	2878.58	FALSE	128
2022-09-14	12:33:24	1.23263	5.48298	4.44468	2870.18	FALSE	128
2022-09-14	12:33:24	1.06301	4.72848	4.44468	2883.31	FALSE	128
2022-09-14	12:33:25	1.12067	4.98496	4.3365	2875.17	FALSE	128
2022-09-14	12:33:25	0.912481	4.0589	4.3365	2887.37	FALSE	128
2022-09-14	12:33:25	0.891514	3.96563	4.3365	2879.14	FALSE	128
2022-09-14	12:33:26	0.865865	3.85154	4.03535	2891.22	FALSE	128
2022-09-14	12:33:26	0.940471	4.1834	4.03535	2883.32	FALSE	128
2022-09-14	12:33:26	0.937417	4.16982	4.03535	2895.39	FALSE	128
2022-09-14	12:33:26	0.885	3.93666	4.03535	2887.26	FALSE	128
2022-09-14	12:33:27	1.28698	5.72474	5.92629	2901.12	FALSE	128
2022-09-14	12:33:27	1.17828	5.24123	5.92629	2892.5	FALSE	128
2022-09-14	12:33:27	1.64251	7.30621	5.92629	2908.42	FALSE	128
2022-09-14	12:33:27	1.22139	5.43299	5.92629	2897.93	FALSE	128
2022-09-14	12:33:28	1.67838	7.46577	5.89896	2915.89	FALSE	128
2022-09-14	12:33:28	1.17055	5.20684	5.89896	2903.14	FALSE	128
2022-09-14	12:33:28	1.22668	5.45652	5.89896	2921.34	FALSE	128
2022-09-14	12:33:28	1.22897	5.4667	5.89896	2908.6	FALSE	128
2022-09-14	12:33:29	1.24663	5.54526	5.65135	2926.89	FALSE	128
2022-09-14	12:33:29	1.26597	5.63129	5.65135	2914.23	FALSE	128
2022-09-14	12:33:29	1.29884	5.7775	5.65135	2932.67	FALSE	128
2022-09-14	12:33:30	1.30816	5.81896	6.02986	2920.05	FALSE	128
2022-09-14	12:33:30	1.3052	5.80579	6.02986	2938.47	FALSE	128
2022-09-14	12:33:30	1.3765	6.12295	6.02986	2926.18	FALSE	128
2022-09-14	12:33:30	1.43243	6.37174	6.02986	2944.84	FALSE	128
2022-09-14	12:33:31	1.4934	6.64294	6.42182	2932.82	FALSE	128
2022-09-14	12:33:31	1.46627	6.52226	6.42182	2951.37	FALSE	128
2022-09-14	12:33:31	1.42551	6.34095	6.42182	2939.16	FALSE	128
2022-09-14	12:33:31	1.38958	6.18113	6.42182	2957.55	FALSE	128
2022-09-14	12:33:32	1.35808	6.04101	5.73164	2945.2	FALSE	128
2022-09-14	12:33:32	1.27238	5.6598	5.73164	2963.21	FALSE	128
2022-09-14	12:33:32	1.23513	5.49411	5.73164	2950.7	FALSE	128
2022-09-14	12:33:33	1.22871	5.46555	5.57242	2968.67	FALSE	128
2022-09-14	12:33:33	1.25635	5.5885	5.57242	2956.28	FALSE	128
2022-09-14	12:33:33	1.26566	5.62991	5.57242	2974.3	FALSE	128
2022-09-14	12:33:33	1.26022	5.60571	5.57242	2961.89	FALSE	128
2022-09-14	12:33:34	1.32475	5.89275	6.61514	2980.2	FALSE	128
2022-09-14	12:33:34	1.44439	6.42494	6.61514	2968.31	FALSE	128
2022-09-14	12:33:34	1.54642	6.87879	6.61514	2987.07	FALSE	128
2022-09-14	12:33:34	1.63304	7.26409	6.61514	2975.58	FALSE	128
2022-09-14	12:33:35	1.61034	7.16311	7.24597	2994.24	FALSE	128
2022-09-14	12:33:35	1.61436	7.181	7.24597	2982.76	FALSE	128
2022-09-14	12:33:35	1.63966	7.29354	7.24597	3001.53	FALSE	128
2022-09-14	12:33:35	1.65151	7.34625	7.24597	2990.11	FALSE	128
2022-09-14	12:33:36	1.77854	7.9113	7.92164	3009.44	FALSE	128
2022-09-14	12:33:36	1.75844	7.82189	7.92164	2997.93	FALSE	128
2022-09-14	12:33:36	1.80561	8.03171	7.92164	3017.47	FALSE	128
2022-09-14	12:33:37	1.72342	7.66612	7.73811	3005.59	FALSE	128
2022-09-14	12:33:37	1.81248	8.06227	7.73811	3025.54	FALSE	128
2022-09-14	12:33:37	1.8106	8.05391	7.73811	3013.65	FALSE	128
2022-09-14	12:33:37	1.61192	7.17014	7.73811	3032.71	FALSE	128
2022-09-14	12:33:38	1.47635	6.5671	6.58339	3020.21	FALSE	128
2022-09-14	12:33:38	1.42912	6.35701	6.58339	3039.06	FALSE	128
2022-09-14	12:33:38	1.49747	6.66105	6.58339	3026.88	FALSE	128
2022-09-14	12:33:38	1.51711	6.74841	6.58339	3045.81	FALSE	128
2022-09-14	12:33:39	1.51691	6.74752	6.28955	3033.62	FALSE	128
2022-09-14	12:33:39	1.50352	6.68796	6.28955	3052.5	FALSE	128
2022-09-14	12:33:39	1.4367	6.39073	6.28955	3040.01	FALSE	128
2022-09-14	12:33:39	1.19869	5.33201	6.28955	3057.83	FALSE	128
2022-09-14	12:33:40	1.25589	5.58645	6.51676	3045.6	FALSE	128
2022-09-14	12:33:40	1.31879	5.86624	6.51676	3063.7	FALSE	128
2022-09-14	12:33:40	1.82042	8.09759	6.51676	3053.7	FALSE	128
2022-09-14	12:33:41	2.11065	9.38859	8.49007	3073.09	FALSE	128
2022-09-14	12:33:41	2.13691	9.5054	8.49007	3063.2	FALSE	128
2022-09-14	12:33:41	1.69253	7.52871	8.49007	3080.62	FALSE	128
2022-09-14	12:33:41	1.69452	7.53756	8.49007	3070.74	FALSE	128
2022-09-14	12:33:42	1.66729	7.41644	7.59974	3088.03	FALSE	128
2022-09-14	12:33:42	1.6595	7.38179	7.59974	3078.12	FALSE	128
2022-09-14	12:33:42	1.78403	7.93572	7.59974	3095.97	FALSE	128
2022-09-14	12:33:42	1.72317	7.665	7.59974	3085.79	FALSE	128
2022-09-14	12:33:43	1.68831	7.50994	7.44333	3103.48	FALSE	128
2022-09-14	12:33:43	1.60556	7.14185	7.44333	3092.93	FALSE	128
2022-09-14	12:33:43	1.68653	7.50202	7.44333	3110.98	FALSE	128
2022-09-14	12:33:43	1.71294	7.6195	7.44333	3100.55	FALSE	128
2022-09-14	12:33:44	1.79955	8.00476	8.05089	3118.98	FALSE	128
2022-09-14	12:33:44	1.89747	8.44033	8.05089	3108.99	FALSE	128
2022-09-14	12:33:44	1.73274	7.70757	8.05089	3126.69	FALSE	128
2022-09-14	12:33:45	2.38327	10.6013	19.8261	3119.59	FALSE	128
2022-09-14	12:33:45	6.52205	29.0114	19.8261	3155.7	1	129
2022-09-14	12:33:45	6.16673	27.4308	19.8261	3147.02	1	130
2022-09-14	12:33:45	2.75635	12.2608	19.8261	3167.96	FALSE	130

## Sheet: Reggie_star_2022914122830 (3)
Date	Time	Lbs	newtons	Total force x time		total steps > 13.345	**GoPro Fitting: 1217
2022-09-14	12:28:45	0.455483	2.02608	2.02608	FALSE	0
2022-09-14	12:28:45	0.389224	1.73135	1.73135	FALSE	0
2022-09-14	12:28:45	0.329224	1.46445	3.49053	FALSE	0
2022-09-14	12:28:46	0.498995	2.21963	3.95098	FALSE	0
2022-09-14	12:28:46	1.03874	4.62052	8.11106	FALSE	0
2022-09-14	12:28:46	1.65304	7.35305	11.304	FALSE	0
2022-09-14	12:28:46	1.21502	5.40465	13.5157	FALSE	0
2022-09-14	12:28:47	0.647595	2.88063	14.1847	FALSE	0
2022-09-14	12:28:47	1.31782	5.86193	19.3776	FALSE	0
2022-09-14	12:28:47	1.22424	5.44566	19.6303	FALSE	0
2022-09-14	12:28:48	0.708969	3.15364	22.5313	FALSE	0
2022-09-14	12:28:48	0.384389	1.70984	21.3402	FALSE	0
2022-09-14	12:28:48	0.165153	0.734634	23.2659	FALSE	0
2022-09-14	12:28:48	0.297621	1.32388	22.664	FALSE	0
2022-09-14	12:28:48	0.469936	2.09037	25.3563	FALSE	0
2022-09-14	12:28:49	0.324593	1.44385	24.1079	FALSE	0
2022-09-14	12:28:49	0.324389	1.44295	26.7992	FALSE	0
2022-09-14	12:28:49	0.280064	1.24578	25.3537	FALSE	0
2022-09-14	12:28:50	0.415229	1.84702	28.6462	FALSE	0
2022-09-14	12:28:50	0.432634	1.92444	27.2781	FALSE	0
2022-09-14	12:28:50	0.240725	1.07079	29.717	FALSE	0
2022-09-14	12:28:50	0.466832	2.07656	29.3547	FALSE	0
2022-09-14	12:28:51	0.389071	1.73067	31.4477	FALSE	0
2022-09-14	12:28:51	0.392125	1.74425	31.0989	FALSE	0
2022-09-14	12:28:51	0.347443	1.5455	32.9932	FALSE	0
2022-09-14	12:28:51	0.465255	2.06955	33.1685	FALSE	0
2022-09-14	12:28:52	0.38159	1.69739	34.6906	FALSE	0
2022-09-14	12:28:52	0.418181	1.86015	35.0286	FALSE	0
2022-09-14	12:28:52	0.389377	1.73203	36.4226	FALSE	0
2022-09-14	12:28:52	0.382659	1.70214	36.7308	FALSE	0
2022-09-14	12:28:53	0.409326	1.82076	38.2434	FALSE	0
2022-09-14	12:28:53	0.443015	1.97062	38.7014	FALSE	0
2022-09-14	12:28:53	0.365662	1.62654	39.8699	FALSE	0
2022-09-14	12:28:54	0.710191	3.15907	41.8605	FALSE	0
2022-09-14	12:28:54	1.41472	6.29296	46.1629	FALSE	0
2022-09-14	12:28:54	2.92882	13.028	54.8884	FALSE	0
2022-09-14	12:28:54	0.831463	3.69851	49.8614	FALSE	0
2022-09-14	12:28:55	0.603372	2.68392	57.5724	FALSE	0
2022-09-14	12:28:55	0.55813	2.48267	52.3441	FALSE	0
2022-09-14	12:28:55	1.27411	5.6675	63.2399	FALSE	0
2022-09-14	12:28:55	1.28149	5.70032	58.0444	FALSE	0
2022-09-14	12:28:56	0.714364	3.17763	66.4175	FALSE	0
2022-09-14	12:28:56	0.837824	3.72681	61.7712	FALSE	0
2022-09-14	12:28:56	2.24576	9.98959	76.4071	FALSE	0
2022-09-14	12:28:56	2.62352	11.6699	73.4411	FALSE	0
2022-09-14	12:28:57	3.28805	14.6259	91.033	1	1
2022-09-14	12:28:57	3.48719	15.5117	88.9529	1	2
2022-09-14	12:28:57	4.40174	19.5798	110.613	1	3
2022-09-14	12:28:58	4.55421	20.258	109.211	1	4
2022-09-14	12:28:58	5.0706	22.555	133.168	1	5
2022-09-14	12:28:58	4.77838	21.2552	130.466	1	6
2022-09-14	12:28:58	3.46352	15.4064	148.574	1	7
2022-09-14	12:28:59	4.78067	21.2654	151.731	1	8
2022-09-14	12:28:59	2.06785	9.19821	157.772	FALSE	8
2022-09-14	12:28:59	3.24617	14.4396	166.171	1	9
2022-09-14	12:28:59	2.68067	11.9242	169.697	FALSE	9
2022-09-14	12:29:00	1.97721	8.79503	174.966	FALSE	9
2022-09-14	12:29:00	0.784338	3.48889	173.186	FALSE	9
2022-09-14	12:29:00	0.339097	1.50837	176.474	FALSE	9
2022-09-14	12:29:01	3.56011	15.8361	189.022	1	10
2022-09-14	12:29:01	5.84052	25.9798	202.454	1	11
2022-09-14	12:29:01	10.3968	46.247	235.269	1	12
2022-09-14	12:29:01	5.9397	26.421	228.875	1	13
2022-09-14	12:29:02	8.90983	39.6327	274.901	1	14
2022-09-14	12:29:02	2.76205	12.2862	241.161	FALSE	14
2022-09-14	12:29:02	2.47925	11.0282	285.93	FALSE	14
2022-09-14	12:29:02	3.19798	14.2253	255.387	1	15
2022-09-14	12:29:03	2.36617	10.5252	296.455	FALSE	15
2022-09-14	12:29:03	4.42072	19.6642	275.051	1	16
2022-09-14	12:29:03	3.6334	16.1621	312.617	1	17
2022-09-14	12:29:03	2.8936	12.8713	287.922	FALSE	17
2022-09-14	12:29:04	3.831	17.0411	329.658	1	18
2022-09-14	12:29:04	1.79192	7.97082	295.893	FALSE	18
2022-09-14	12:29:04	4.78052	21.2647	350.923	1	19
2022-09-14	12:29:05	5.71467	25.42	321.313	1	20
2022-09-14	12:29:05	8.71471	38.7648	389.687	1	21
2022-09-14	12:29:05	10.6839	47.5241	368.837	1	22
2022-09-14	12:29:05	7.17665	31.9232	421.611	1	23
2022-09-14	12:29:06	12.0287	53.5061	422.343	1	24
2022-09-14	12:29:06	3.87111	17.2195	438.83	1	25
2022-09-14	12:29:06	4.08307	18.1623	440.506	1	26
2022-09-14	12:29:06	3.31223	14.7335	453.564	1	27
2022-09-14	12:29:07	1.73004	7.69556	448.201	FALSE	27
2022-09-14	12:29:07	3.37141	14.9967	468.56	1	28
2022-09-14	12:29:07	2.93116	13.0384	461.239	FALSE	28
2022-09-14	12:29:07	4.50103	20.0215	488.582	1	29
2022-09-14	12:29:08	3.29487	14.6562	475.896	1	30
2022-09-14	12:29:08	3.4649	15.4126	503.994	1	31
2022-09-14	12:29:08	4.75151	21.1357	497.031	1	32
2022-09-14	12:29:09	2.23569	9.9448	513.939	FALSE	32
2022-09-14	12:29:09	3.51492	15.6351	512.666	1	33
2022-09-14	12:29:09	1.93218	8.59472	522.534	FALSE	33
2022-09-14	12:29:09	2.62312	11.6682	524.335	FALSE	33
2022-09-14	12:29:10	2.49793	11.1113	533.645	FALSE	33
2022-09-14	12:29:10	4.9537	22.035	546.37	1	34
2022-09-14	12:29:10	11.1169	49.4502	583.095	1	35
2022-09-14	12:29:10	13.4657	59.8981	606.268	1	36
2022-09-14	12:29:11	3.65309	16.2497	599.345	1	37
2022-09-14	12:29:11	0.674262	2.99925	609.267	FALSE	37
2022-09-14	12:29:11	0.308003	1.37006	600.715	FALSE	37
2022-09-14	12:29:11	0.222557	0.989978	610.257	FALSE	37
2022-09-14	12:29:12	0.466221	2.07384	602.789	FALSE	37
2022-09-14	12:29:12	0.343779	1.5292	611.786	FALSE	37
2022-09-14	12:29:12	0.283626	1.26163	604.05	FALSE	37
2022-09-14	12:29:13	0.0287152	0.127731	611.914	FALSE	37
2022-09-14	12:29:13	0.240318	1.06898	605.119	FALSE	37
2022-09-14	12:29:13	0.267494	1.18987	613.104	FALSE	37
2022-09-14	12:29:13	0.297723	1.32433	606.444	FALSE	37
2022-09-14	12:29:14	0.123066	0.547422	613.651	FALSE	37
2022-09-14	12:29:14	0.314364	1.39835	607.842	FALSE	37
2022-09-14	12:29:14	0.288003	1.28109	614.932	FALSE	37
2022-09-14	12:29:14	1.52108	6.76607	614.608	FALSE	37
2022-09-14	12:29:15	1.42317	6.33054	621.263	FALSE	37
2022-09-14	12:29:15	2.24831	10.0009	624.609	FALSE	37
2022-09-14	12:29:15	1.78088	7.92171	629.185	FALSE	37
2022-09-14	12:29:15	1.06632	4.7432	629.352	FALSE	37
2022-09-14	12:29:16	1.35976	6.04848	635.233	FALSE	37
2022-09-14	12:29:16	0.772226	3.43502	632.787	FALSE	37
2022-09-14	12:29:16	2.04805	9.11014	644.343	FALSE	37
2022-09-14	12:29:17	0.534313	2.37673	635.164	FALSE	37
2022-09-14	12:29:17	1.01732	4.52524	648.868	FALSE	37
2022-09-14	12:29:17	1.64174	7.30279	642.467	FALSE	37
2022-09-14	12:29:17	2.42261	10.7763	659.645	FALSE	37
2022-09-14	12:29:18	2.12775	9.46466	651.932	FALSE	37
2022-09-14	12:29:18	2.78052	12.3683	672.013	FALSE	37
2022-09-14	12:29:18	1.50912	6.71287	658.644	FALSE	37
2022-09-14	12:29:18	1.69803	7.55318	679.566	FALSE	37
2022-09-14	12:29:19	0.655941	2.91776	661.562	FALSE	37
2022-09-14	12:29:19	0.883066	3.92805	683.494	FALSE	37
2022-09-14	12:29:19	0.541896	2.41046	663.973	FALSE	37
2022-09-14	12:29:19	0.609733	2.71221	686.206	FALSE	37
2022-09-14	12:29:20	0.737722	3.28154	667.254	FALSE	37
2022-09-14	12:29:20	0.828461	3.68516	689.892	FALSE	37
2022-09-14	12:29:20	0.569224	2.53202	669.786	FALSE	37
2022-09-14	12:29:21	0.394364	1.75421	691.646	FALSE	37
2022-09-14	12:29:21	0.385509	1.71482	671.501	FALSE	37
2022-09-14	12:29:21	0.38612	1.71754	693.363	FALSE	37
2022-09-14	12:29:21	0.431311	1.91856	673.42	FALSE	37
2022-09-14	12:29:22	0.483881	2.1524	695.516	FALSE	37
2022-09-14	12:29:22	0.273499	1.21658	674.636	FALSE	37
2022-09-14	12:29:22	-0.0446181	-0.19847	695.516	FALSE	37
2022-09-14	12:29:22	0.117977	0.524785	675.161	FALSE	37
2022-09-14	12:29:23	0.45243	2.0125	697.528	FALSE	37
2022-09-14	12:29:23	1.38841	6.17593	681.337	FALSE	37
2022-09-14	12:29:23	1.33538	5.94004	703.468	FALSE	37
2022-09-14	12:29:23	1.85263	8.24087	689.578	FALSE	37
2022-09-14	12:29:24	1.3763	6.12206	709.59	FALSE	37
2022-09-14	12:29:24	1.04933	4.66763	694.245	FALSE	37
2022-09-14	12:29:24	0.676806	3.01057	712.601	FALSE	37
2022-09-14	12:29:25	2.05497	9.14092	703.386	FALSE	37
2022-09-14	12:29:25	3.11131	13.8397	726.441	1	38
2022-09-14	12:29:25	5.75797	25.6126	728.999	1	39
2022-09-14	12:29:25	5.44876	24.2372	750.678	1	40
2022-09-14	12:29:26	3.93976	17.5248	746.524	1	41
2022-09-14	12:29:26	0.675992	3.00695	753.685	FALSE	41
2022-09-14	12:29:26	0.27416	1.21952	747.743	FALSE	41
2022-09-14	12:29:26	1.78276	7.93007	761.615	FALSE	41
2022-09-14	12:29:27	3.74251	16.6474	764.391	1	42
2022-09-14	12:29:27	3.55808	15.8271	777.442	1	43
2022-09-14	12:29:27	4.26306	18.9629	783.354	1	44
2022-09-14	12:29:28	5.78688	25.7412	803.183	1	45
2022-09-14	12:29:28	6.9597	30.9581	814.312	1	46
2022-09-14	12:29:28	3.92597	17.4635	820.647	1	47
2022-09-14	12:29:28	2.59284	11.5335	825.845	FALSE	47
2022-09-14	12:29:29	0.343168	1.52648	822.173	FALSE	47
2022-09-14	12:29:29	0.381896	1.69875	827.544	FALSE	47
2022-09-14	12:29:29	0.0174175	0.0774765	822.251	FALSE	47
2022-09-14	12:29:29	0.214669	0.954891	828.499	FALSE	47
2022-09-14	12:29:30	0.736654	3.27678	825.527	FALSE	47
2022-09-14	12:29:30	0.280776	1.24895	829.748	FALSE	47
2022-09-14	12:29:30	0.392125	1.74425	827.272	FALSE	47
2022-09-14	12:29:30	0.201845	0.897847	830.646	FALSE	47
2022-09-14	12:29:31	0.428613	1.90656	829.178	FALSE	47
2022-09-14	12:29:31	0.16841	0.749121	831.395	FALSE	47
2022-09-14	12:29:31	0.342456	1.52331	830.701	FALSE	47
2022-09-14	12:29:32	0.233855	1.04023	832.435	FALSE	47
2022-09-14	12:29:32	0.412125	1.83321	832.535	FALSE	47
2022-09-14	12:29:32	0.235585	1.04793	833.483	FALSE	47
2022-09-14	12:29:32	0.403524	1.79496	834.33	FALSE	47
2022-09-14	12:29:33	0.31645	1.40763	834.891	FALSE	47
2022-09-14	12:29:33	0.301183	1.33972	835.669	FALSE	47
2022-09-14	12:29:33	0.248003	1.10317	835.994	FALSE	47
2022-09-14	12:29:33	0.225356	1.00243	836.672	FALSE	47
2022-09-14	12:29:34	0.28383	1.26253	837.256	FALSE	47
2022-09-14	12:29:34	0.113295	0.503959	837.176	FALSE	47
2022-09-14	12:29:34	0.312736	1.39111	838.647	FALSE	47
2022-09-14	12:29:34	0.141336	0.628691	837.804	FALSE	47
2022-09-14	12:29:35	0.334211	1.48664	840.134	FALSE	47
2022-09-14	12:29:35	0.286069	1.27249	839.077	FALSE	47
2022-09-14	12:29:35	0.36383	1.61839	841.752	FALSE	47
2022-09-14	12:29:36	0.380216	1.69128	840.768	FALSE	47
2022-09-14	12:29:36	0.374517	1.66593	843.418	FALSE	47
2022-09-14	12:29:36	0.356196	1.58443	842.353	FALSE	47
2022-09-14	12:29:36	0.342863	1.52512	844.943	FALSE	47
2022-09-14	12:29:37	0.353193	1.57107	843.924	FALSE	47
2022-09-14	12:29:37	0.340878	1.51629	846.46	FALSE	47
2022-09-14	12:29:37	0.35187	1.56519	845.489	FALSE	47
2022-09-14	12:29:37	0.337316	1.50045	847.96	FALSE	47
2022-09-14	12:29:38	0.348715	1.55115	847.04	FALSE	47
2022-09-14	12:29:38	0.355534	1.58149	849.542	FALSE	47
2022-09-14	12:29:38	0.357112	1.58851	848.629	FALSE	47
2022-09-14	12:29:38	0.353397	1.57198	851.114	FALSE	47
2022-09-14	12:29:39	0.35584	1.58285	850.211	FALSE	47
2022-09-14	12:29:39	0.363779	1.61816	852.732	FALSE	47
2022-09-14	12:29:39	0.325153	1.44635	851.658	FALSE	47
2022-09-14	12:29:40	0.329479	1.46559	854.197	FALSE	47
2022-09-14	12:29:40	0.331463	1.47441	853.132	FALSE	47
2022-09-14	12:29:40	0.332227	1.47781	855.675	FALSE	47
2022-09-14	12:29:40	0.3307	1.47102	854.603	FALSE	47
2022-09-14	12:29:41	0.338537	1.50588	857.181	FALSE	47
2022-09-14	12:29:41	0.334924	1.48981	856.093	FALSE	47
2022-09-14	12:29:41	0.341743	1.52014	858.701	FALSE	47
2022-09-14	12:29:41	0.351921	1.56541	857.658	FALSE	47
2022-09-14	12:29:42	0.343524	1.52806	860.229	FALSE	47
2022-09-14	12:29:42	0.342659	1.52422	859.183	FALSE	47
2022-09-14	12:29:42	0.343881	1.52965	861.759	FALSE	47
2022-09-14	12:29:42	0.34098	1.51675	860.699	FALSE	47
2022-09-14	12:29:43	0.340675	1.51539	863.274	FALSE	47
2022-09-14	12:29:43	0.342812	1.5249	862.224	FALSE	47
2022-09-14	12:29:43	0.333143	1.48189	864.756	FALSE	47
2022-09-14	12:29:44	0.485458	2.15941	864.384	FALSE	47
2022-09-14	12:29:44	0.631412	2.80865	867.565	FALSE	47
2022-09-14	12:29:44	0.207697	0.923878	865.308	FALSE	47
2022-09-14	12:29:44	0.0506999	0.225523	867.79	FALSE	47
2022-09-14	12:29:45	0.120013	0.533842	865.841	FALSE	47
2022-09-14	12:29:45	0.0193005	0.0858525	867.876	FALSE	47
2022-09-14	12:29:45	0.308512	1.37232	867.214	FALSE	47
2022-09-14	12:29:45	0.0871885	0.387832	868.264	FALSE	47
2022-09-14	12:29:46	0.182354	0.811147	868.025	FALSE	47
2022-09-14	12:29:46	0.0255091	0.11347	868.378	FALSE	47
2022-09-14	12:29:46	0.260674	1.15953	869.184	FALSE	47
2022-09-14	12:29:46	1.45151	6.45661	874.834	FALSE	47
2022-09-14	12:29:47	4.99955	22.239	891.423	1	48
2022-09-14	12:29:47	4.76556	21.1982	896.032	1	49
2022-09-14	12:29:47	3.64235	16.2019	907.625	1	50
2022-09-14	12:29:48	2.29202	10.1954	906.228	FALSE	50
2022-09-14	12:29:48	0.425509	1.89275	909.518	FALSE	50
2022-09-14	12:29:48	0.489275	2.17639	908.404	FALSE	50
2022-09-14	12:29:48	0.16327	0.726258	910.244	FALSE	50
2022-09-14	12:29:49	-0.140089	-0.623144	908.404	FALSE	50
2022-09-14	12:29:49	-0.645177	-2.86988	910.244	FALSE	50
2022-09-14	12:29:49	-0.735305	-3.27078	908.404	FALSE	50
2022-09-14	12:29:49	-0.58533	-2.60366	910.244	FALSE	50
2022-09-14	12:29:50	-0.530877	-2.36145	908.404	FALSE	50
2022-09-14	12:29:50	-0.616781	-2.74357	910.244	FALSE	50
2022-09-14	12:29:50	-0.558053	-2.48233	908.404	FALSE	50
2022-09-14	12:29:50	-0.310572	-1.38149	910.244	FALSE	50
2022-09-14	12:29:51	0.0339061	0.150821	908.555	FALSE	50
2022-09-14	12:29:51	0.211819	0.942213	911.187	FALSE	50
2022-09-14	12:29:51	0.137621	0.612166	909.167	FALSE	50
2022-09-14	12:29:52	0.253143	1.12603	912.313	FALSE	50
2022-09-14	12:29:52	0.40159	1.78635	910.953	FALSE	50
2022-09-14	12:29:52	0.408308	1.81624	914.129	FALSE	50
2022-09-14	12:29:52	0.35131	1.5627	912.516	FALSE	50
2022-09-14	12:29:53	0.292074	1.2992	915.428	FALSE	50
2022-09-14	12:29:53	0.314975	1.40107	913.917	FALSE	50
2022-09-14	12:29:53	0.252837	1.12467	916.553	FALSE	50
2022-09-14	12:29:53	0.248155	1.10384	915.021	FALSE	50
2022-09-14	12:29:54	0.271972	1.20979	917.762	FALSE	50
2022-09-14	12:29:54	0.384695	1.7112	916.732	FALSE	50
2022-09-14	12:29:54	0.40154	1.78613	919.549	FALSE	50
2022-09-14	12:29:55	0.396196	1.76236	918.495	FALSE	50
2022-09-14	12:29:55	0.467137	2.07792	921.626	FALSE	50
2022-09-14	12:29:55	0.451412	2.00797	920.503	FALSE	50
2022-09-14	12:29:55	0.432277	1.92285	923.549	FALSE	50
2022-09-14	12:29:56	0.425254	1.89161	922.394	FALSE	50
2022-09-14	12:29:56	0.382455	1.70124	925.251	FALSE	50
2022-09-14	12:29:56	0.370344	1.64736	924.042	FALSE	50
2022-09-14	12:29:56	0.329529	1.46581	926.716	FALSE	50
2022-09-14	12:29:57	0.295738	1.3155	925.357	FALSE	50
2022-09-14	12:29:57	0.309326	1.37594	928.092	FALSE	50
2022-09-14	12:29:57	0.318028	1.41465	926.772	FALSE	50
2022-09-14	12:29:57	0.316094	1.40605	929.498	FALSE	50
2022-09-14	12:29:58	0.325916	1.44974	928.221	FALSE	50
2022-09-14	12:29:58	0.329987	1.46785	930.966	FALSE	50
2022-09-14	12:29:58	0.320776	1.42688	929.648	FALSE	50
2022-09-14	12:29:59	0.306679	1.36417	932.33	FALSE	50
2022-09-14	12:29:59	0.308054	1.37029	931.019	FALSE	50
2022-09-14	12:29:59	0.305662	1.35965	933.69	FALSE	50
2022-09-14	12:29:59	0.30159	1.34153	932.36	FALSE	50
2022-09-14	12:30:00	0.293702	1.30645	934.996	FALSE	50
2022-09-14	12:30:00	0.292634	1.30169	933.662	FALSE	50
2022-09-14	12:30:00	0.301285	1.34018	936.337	FALSE	50
2022-09-14	12:30:00	0.295891	1.31618	934.978	FALSE	50
2022-09-14	12:30:01	0.308054	1.37029	937.707	FALSE	50
2022-09-14	12:30:01	0.300827	1.33814	936.316	FALSE	50
2022-09-14	12:30:01	0.29528	1.31346	939.02	FALSE	50
2022-09-14	12:30:01	0.282354	1.25597	937.572	FALSE	50
2022-09-14	12:30:02	0.281845	1.2537	940.274	FALSE	50
2022-09-14	12:30:02	0.267952	1.1919	938.764	FALSE	50
2022-09-14	12:30:02	0.253906	1.12942	941.404	FALSE	50
2022-09-14	12:30:03	0.264033	1.17447	939.938	FALSE	50
2022-09-14	12:30:03	0.268512	1.1944	942.598	FALSE	50
2022-09-14	12:30:03	0.260471	1.15863	941.097	FALSE	50
2022-09-14	12:30:03	0.260165	1.15727	943.755	FALSE	50
2022-09-14	12:30:04	0.260013	1.15659	942.254	FALSE	50
2022-09-14	12:30:04	0.265509	1.18104	944.936	FALSE	50
2022-09-14	12:30:04	0.270751	1.20435	943.458	FALSE	50
2022-09-14	12:30:04	0.264338	1.17583	946.112	FALSE	50
2022-09-14	12:30:05	0.26612	1.18375	944.642	FALSE	50
2022-09-14	12:30:05	0.268512	1.1944	947.306	FALSE	50
2022-09-14	12:30:05	0.2707	1.20413	945.846	FALSE	50
2022-09-14	12:30:05	0.270649	1.2039	948.51	FALSE	50
2022-09-14	12:30:06	0.264186	1.17515	947.021	FALSE	50
2022-09-14	12:30:06	0.262608	1.16813	949.678	FALSE	50
2022-09-14	12:30:06	0.274618	1.22156	948.243	FALSE	50
2022-09-14	12:30:07	0.274466	1.22088	950.899	FALSE	50
2022-09-14	12:30:07	0.270242	1.20209	949.445	FALSE	50
2022-09-14	12:30:07	0.273753	1.21771	952.117	FALSE	50
2022-09-14	12:30:07	0.2764	1.22948	950.674	FALSE	50
2022-09-14	12:30:08	0.270344	1.20254	953.32	FALSE	50
2022-09-14	12:30:08	0.267188	1.18851	951.863	FALSE	50
2022-09-14	12:30:08	0.274873	1.22269	954.542	FALSE	50
2022-09-14	12:30:08	0.267952	1.1919	953.055	FALSE	50
2022-09-14	12:30:09	0.261692	1.16406	955.706	FALSE	50
2022-09-14	12:30:09	0.270089	1.20141	954.256	FALSE	50
2022-09-14	12:30:09	0.26271	1.16859	956.875	FALSE	50
2022-09-14	12:30:09	0.274822	1.22246	955.479	FALSE	50
2022-09-14	12:30:10	0.267392	1.18941	958.064	FALSE	50
2022-09-14	12:30:10	0.26388	1.17379	956.652	FALSE	50
2022-09-14	12:30:10	0.262048	1.16564	959.23	FALSE	50
2022-09-14	12:30:11	0.263728	1.17311	957.825	FALSE	50
2022-09-14	12:30:11	0.264033	1.17447	960.404	FALSE	50
2022-09-14	12:30:11	0.26383	1.17357	958.999	FALSE	50
2022-09-14	12:30:11	0.260369	1.15817	961.563	FALSE	50
2022-09-14	12:30:12	0.264898	1.17832	960.177	FALSE	50
2022-09-14	12:30:12	0.269478	1.19869	962.761	FALSE	50
2022-09-14	12:30:12	0.260064	1.15682	961.334	FALSE	50
2022-09-14	12:30:12	0.261031	1.16112	963.922	FALSE	50
2022-09-14	12:30:13	0.260929	1.16066	962.495	FALSE	50
2022-09-14	12:30:13	0.264593	1.17696	965.099	FALSE	50
2022-09-14	12:30:13	0.258181	1.14844	963.643	FALSE	50
2022-09-14	12:30:13	0.261896	1.16497	966.264	FALSE	50
2022-09-14	12:30:14	0.297417	1.32297	964.966	FALSE	50
2022-09-14	12:30:14	0.300674	1.33746	967.602	FALSE	50
2022-09-14	12:30:14	0.291056	1.29468	966.261	FALSE	50
2022-09-14	12:30:15	0.268919	1.19621	968.798	FALSE	50
2022-09-14	12:30:15	0.262608	1.16813	967.429	FALSE	50
2022-09-14	12:30:15	0.259758	1.15546	969.954	FALSE	50
2022-09-14	12:30:15	0.26668	1.18625	968.615	FALSE	50
2022-09-14	12:30:16	0.286578	1.27476	971.228	FALSE	50
2022-09-14	12:30:16	0.285662	1.27068	969.886	FALSE	50
2022-09-14	12:30:16	0.283677	1.26185	972.49	FALSE	50
2022-09-14	12:30:16	0.285611	1.27045	971.156	FALSE	50
2022-09-14	12:30:17	0.289987	1.28992	973.78	FALSE	50
2022-09-14	12:30:17	0.283473	1.26094	972.417	FALSE	50
2022-09-14	12:30:17	0.277621	1.23491	975.015	FALSE	50
2022-09-14	12:30:18	0.284033	1.26344	973.681	FALSE	50
2022-09-14	12:30:18	0.292634	1.30169	976.317	FALSE	50
2022-09-14	12:30:18	0.296196	1.31754	974.998	FALSE	50
2022-09-14	12:30:18	0.314771	1.40016	977.717	FALSE	50
2022-09-14	12:30:19	0.358639	1.5953	976.594	FALSE	50
2022-09-14	12:30:19	0.381998	1.6992	979.416	FALSE	50
2022-09-14	12:30:19	0.415585	1.84861	978.442	FALSE	50
2022-09-14	12:30:19	0.35411	1.57515	980.991	FALSE	50
2022-09-14	12:30:20	0.33416	1.48641	979.929	FALSE	50
2022-09-14	12:30:20	0.335127	1.49071	982.482	FALSE	50
2022-09-14	12:30:20	0.316501	1.40786	981.336	FALSE	50
2022-09-14	12:30:20	0.296654	1.31958	983.801	FALSE	50
2022-09-14	12:30:21	0.294059	1.30803	982.645	FALSE	50
2022-09-14	12:30:21	0.300929	1.33859	985.14	FALSE	50
2022-09-14	12:30:21	0.299249	1.33112	983.976	FALSE	50
2022-09-14	12:30:22	0.29243	1.30079	986.441	FALSE	50
2022-09-14	12:30:22	0.287748	1.27996	985.256	FALSE	50
2022-09-14	12:30:22	0.293702	1.30645	987.747	FALSE	50
2022-09-14	12:30:22	0.286069	1.27249	986.528	FALSE	50
2022-09-14	12:30:23	0.29416	1.30848	989.056	FALSE	50
2022-09-14	12:30:23	0.291972	1.29875	987.827	FALSE	50
2022-09-14	12:30:23	0.284898	1.26728	990.323	FALSE	50
2022-09-14	12:30:23	0.279199	1.24193	989.069	FALSE	50
2022-09-14	12:30:24	0.280369	1.24714	991.57	FALSE	50
2022-09-14	12:30:24	0.279453	1.24306	990.312	FALSE	50
2022-09-14	12:30:24	0.28271	1.25755	992.828	FALSE	50
2022-09-14	12:30:24	0.283524	1.26117	991.573	FALSE	50
2022-09-14	12:30:25	0.282201	1.25529	994.083	FALSE	50
2022-09-14	12:30:25	0.377621	1.67973	993.253	FALSE	50
2022-09-14	12:30:25	2.52866	11.248	1005.33	FALSE	50
2022-09-14	12:30:26	5.40739	24.0532	1017.31	1	51
2022-09-14	12:30:26	3.81299	16.9609	1022.29	1	52
2022-09-14	12:30:26	2.94133	13.0836	1030.39	FALSE	52
2022-09-14	12:30:26	1.95329	8.68862	1030.98	FALSE	52
2022-09-14	12:30:27	2.02184	8.99355	1039.38	FALSE	52
2022-09-14	12:30:27	3.28673	14.62	1045.6	1	53
2022-09-14	12:30:27	3.93584	17.5074	1056.89	1	54
2022-09-14	12:30:27	4.18332	18.6082	1064.21	1	55
2022-09-14	12:30:28	6.27049	27.8924	1084.78	1	56
2022-09-14	12:30:28	5.0969	22.672	1086.88	1	57
2022-09-14	12:30:28	1.98439	8.82696	1093.61	FALSE	57
2022-09-14	12:30:28	1.44632	6.43352	1093.31	FALSE	57
2022-09-14	12:30:29	0.778588	3.46332	1097.07	FALSE	57
2022-09-14	12:30:29	0.489275	2.17639	1095.49	FALSE	57
2022-09-14	12:30:29	0.320369	1.42507	1098.5	FALSE	57
2022-09-14	12:30:30	0.575178	2.55851	1098.05	FALSE	57
2022-09-14	12:30:30	0.184389	0.820199	1099.32	FALSE	57
2022-09-14	12:30:30	0.292888	1.30282	1099.35	FALSE	57
2022-09-14	12:30:30	0.585203	2.6031	1101.92	FALSE	57
2022-09-14	12:30:31	2.84586	12.659	1112.01	FALSE	57
2022-09-14	12:30:31	4.11222	18.292	1120.21	1	58
2022-09-14	12:30:31	3.7852	16.8373	1128.85	1	59
2022-09-14	12:30:32	1.83777	8.17477	1128.39	FALSE	59
2022-09-14	12:30:32	1.47131	6.54468	1135.39	FALSE	59
2022-09-14	12:30:32	0.736807	3.27746	1131.67	FALSE	59
2022-09-14	12:30:32	1.56327	6.95374	1142.35	FALSE	59
2022-09-14	12:30:32	1.47538	6.56279	1138.23	FALSE	59
2022-09-14	12:30:33	0.844135	3.75488	1146.1	FALSE	59
2022-09-14	12:30:33	0.43126	1.91833	1140.15	FALSE	59
2022-09-14	12:30:33	0.252888	1.1249	1147.23	FALSE	59
2022-09-14	12:30:34	0.404288	1.79835	1141.95	FALSE	59
2022-09-14	12:30:34	0.175992	0.782848	1148.01	FALSE	59
2022-09-14	12:30:34	0.371616	1.65302	1143.6	FALSE	59
2022-09-14	12:30:34	0.178435	0.793715	1148.8	FALSE	59
2022-09-14	12:30:35	0.22215	0.988168	1144.59	FALSE	59
2022-09-14	12:30:35	0.133702	0.594733	1149.4	FALSE	59
2022-09-14	12:30:35	0.212837	0.946742	1145.53	FALSE	59
2022-09-14	12:30:35	0.349682	1.55546	1150.95	FALSE	59
2022-09-14	12:30:36	0.192685	0.857101	1146.39	FALSE	59
2022-09-14	12:30:36	0.541539	2.40887	1153.36	FALSE	59
2022-09-14	12:30:36	0.806832	3.58895	1149.98	FALSE	59
2022-09-14	12:30:36	2.70408	12.0283	1165.39	FALSE	59
2022-09-14	12:30:37	3.04912	13.5631	1163.54	1	60
2022-09-14	12:30:37	3.23736	14.4004	1179.79	1	61
2022-09-14	12:30:37	1.89955	8.44958	1171.99	FALSE	61
2022-09-14	12:30:38	0.486018	2.16191	1181.95	FALSE	61
2022-09-14	12:30:38	0.351361	1.56292	1173.55	FALSE	61
2022-09-14	12:30:38	0.386985	1.72139	1183.67	FALSE	61
2022-09-14	12:30:38	0.46902	2.08629	1175.64	FALSE	61
2022-09-14	12:30:39	0.282099	1.25483	1184.93	FALSE	61
2022-09-14	12:30:39	0.326883	1.45404	1177.1	FALSE	61
2022-09-14	12:30:39	0.406679	1.80899	1186.74	FALSE	61
2022-09-14	12:30:39	0.157672	0.701357	1177.8	FALSE	61
2022-09-14	12:30:40	0.345662	1.53757	1188.28	FALSE	61
2022-09-14	12:30:40	0.10383	0.461857	1178.26	FALSE	61
2022-09-14	12:30:40	0.350293	1.55817	1189.83	FALSE	61
2022-09-14	12:30:40	0.220776	0.982056	1179.24	FALSE	61
2022-09-14	12:30:41	0.31299	1.39224	1191.23	FALSE	61
2022-09-14	12:30:41	0.351209	1.56225	1180.8	FALSE	61
2022-09-14	12:30:41	0.152481	0.678266	1191.9	FALSE	61
2022-09-14	12:30:42	0.0494277	0.219864	1181.02	FALSE	61
2022-09-14	12:30:42	-0.0882312	-0.39247	1191.9	FALSE	61
2022-09-14	12:30:42	-0.222939	-0.991677	1181.02	FALSE	61
2022-09-14	12:30:42	-0.340394	-1.51414	1191.9	FALSE	61
2022-09-14	12:30:43	-0.142684	-0.634687	1181.02	FALSE	61
2022-09-14	12:30:43	1.76592	7.85517	1199.76	FALSE	61
2022-09-14	12:30:43	4.40128	19.5778	1200.6	1	62
2022-09-14	12:30:43	5.63614	25.0707	1224.83	1	63
2022-09-14	12:30:44	4.14413	18.4339	1219.03	1	64
2022-09-14	12:30:44	1.50693	6.70313	1231.53	FALSE	64
2022-09-14	12:30:44	0.623371	2.77288	1221.81	FALSE	64
2022-09-14	12:30:45	0.433397	1.92784	1233.46	FALSE	64
2022-09-14	12:30:45	0.242507	1.07872	1222.89	FALSE	64
2022-09-14	12:30:45	0.296654	1.31958	1234.78	FALSE	64
2022-09-14	12:30:45	0.00332086	0.0147718	1222.9	FALSE	64
2022-09-14	12:30:46	0.152074	0.676456	1235.46	FALSE	64
2022-09-14	12:30:46	0.111005	0.493772	1223.39	FALSE	64
2022-09-14	12:30:46	0.199657	0.888114	1236.35	FALSE	64
2022-09-14	12:30:46	-0.00762061	-0.033898	1223.39	FALSE	64
2022-09-14	12:30:47	0.155331	0.690943	1237.04	FALSE	64
2022-09-14	12:30:47	0.0125829	0.0559713	1223.45	FALSE	64
2022-09-14	12:30:47	0.125255	0.557159	1237.59	FALSE	64
2022-09-14	12:30:47	0.00276106	0.0122817	1223.46	FALSE	64
2022-09-14	12:30:48	0.147087	0.654272	1238.25	FALSE	64
2022-09-14	12:30:48	0.0960434	0.42722	1223.89	FALSE	64
2022-09-14	12:30:48	0.159911	0.711316	1238.96	FALSE	64
2022-09-14	12:30:49	0.0926338	0.412054	1224.3	FALSE	64
2022-09-14	12:30:49	0.148206	0.65925	1239.62	FALSE	64
2022-09-14	12:30:49	0.217061	0.965531	1225.27	FALSE	64
2022-09-14	12:30:49	0.199758	0.888564	1240.51	FALSE	64
2022-09-14	12:30:50	0.178181	0.792585	1226.06	FALSE	64
2022-09-14	12:30:50	0.271412	1.20729	1241.71	FALSE	64
2022-09-14	12:30:50	0.380471	1.69241	1227.75	FALSE	64
2022-09-14	12:30:50	0.141438	0.629145	1242.34	FALSE	64
2022-09-14	12:30:51	0.400115	1.77979	1229.53	FALSE	64
2022-09-14	12:30:51	0.202608	0.901241	1243.24	FALSE	64
2022-09-14	12:30:51	0.370903	1.64985	1231.18	FALSE	64
2022-09-14	12:30:51	0.333143	1.48189	1244.73	FALSE	64
2022-09-14	12:30:52	0.409987	1.8237	1233.01	FALSE	64
2022-09-14	12:30:52	1.73625	7.72319	1252.45	FALSE	64
2022-09-14	12:30:52	4.84205	21.5384	1254.54	1	65
2022-09-14	12:30:53	7.55202	33.5929	1286.04	1	66
2022-09-14	12:30:53	4.06785	18.0946	1272.64	1	67
2022-09-14	12:30:53	4.51808	20.0973	1306.14	1	68
2022-09-14	12:30:53	1.83039	8.14194	1280.78	FALSE	68
2022-09-14	12:30:54	1.68296	7.48614	1313.63	FALSE	68
2022-09-14	12:30:54	1.13202	5.03545	1285.82	FALSE	68
2022-09-14	12:30:54	1.52892	6.80094	1320.43	FALSE	68
2022-09-14	12:30:54	1.78052	7.92011	1293.74	FALSE	68
2022-09-14	12:30:55	1.13777	5.06103	1325.49	FALSE	68
2022-09-14	12:30:55	1.52235	6.77172	1300.51	FALSE	68
2022-09-14	12:30:55	0.842303	3.74673	1329.23	FALSE	68
2022-09-14	12:30:55	1.33889	5.95565	1306.46	FALSE	68
2022-09-14	12:30:56	0.979249	4.3559	1333.59	FALSE	68
2022-09-14	12:30:56	0.873193	3.88414	1310.35	FALSE	68
2022-09-14	12:30:56	1.02648	4.56599	1338.16	FALSE	68
2022-09-14	12:30:57	0.489631	2.17798	1312.53	FALSE	68
2022-09-14	12:30:57	0.870547	3.87237	1342.03	FALSE	68
2022-09-14	12:30:57	1.11299	4.9508	1317.48	FALSE	68
2022-09-14	12:30:57	2.51309	11.1787	1353.21	FALSE	68
2022-09-14	12:30:58	5.10846	22.7235	1340.2	1	69
2022-09-14	12:30:58	7.09319	31.5519	1384.76	1	70
2022-09-14	12:30:58	6.7938	30.2202	1370.42	1	71
2022-09-14	12:30:58	3.06042	13.6134	1398.37	1	72
2022-09-14	12:30:59	4.30118	19.1325	1389.55	1	73
2022-09-14	12:30:59	3.00205	13.3537	1411.73	1	74
2022-09-14	12:30:59	6.26764	27.8797	1417.43	1	75
2022-09-14	12:30:59	4.63762	20.6291	1432.36	1	76
2022-09-14	12:31:00	4.40637	19.6004	1437.03	1	77
2022-09-14	12:31:00	4.94622	22.0018	1454.36	1	78
2022-09-14	12:31:00	1.68622	7.50064	1444.53	FALSE	78
2022-09-14	12:31:01	3.66948	16.3226	1470.68	1	79
2022-09-14	12:31:01	1.33187	5.92442	1450.46	FALSE	79
2022-09-14	12:31:01	2.72541	12.1232	1482.8	FALSE	79
2022-09-14	12:31:01	3.01899	13.4291	1463.89	1	80
2022-09-14	12:31:02	1.78953	7.96019	1490.76	FALSE	80
2022-09-14	12:31:02	2.0623	9.17352	1473.06	FALSE	80
2022-09-14	12:31:02	0.417519	1.85721	1492.62	FALSE	80
2022-09-14	12:31:02	0.518842	2.30791	1475.37	FALSE	80
2022-09-14	12:31:03	0.321794	1.4314	1494.05	FALSE	80
2022-09-14	12:31:03	0.217061	0.965531	1476.33	FALSE	80
2022-09-14	12:31:03	0.129275	0.575041	1494.63	FALSE	80
2022-09-14	12:31:03	0.217875	0.969152	1477.3	FALSE	80
2022-09-14	12:31:04	0.411565	1.83072	1496.46	FALSE	80
2022-09-14	12:31:04	0.582914	2.59292	1479.9	FALSE	80
2022-09-14	12:31:04	0.428613	1.90656	1498.36	FALSE	80
2022-09-14	12:31:05	0.34841	1.5498	1481.45	FALSE	80
2022-09-14	12:31:05	0.374008	1.66366	1500.03	FALSE	80
2022-09-14	12:31:05	0.395026	1.75715	1483.2	FALSE	80
2022-09-14	12:31:05	0.429682	1.91131	1501.94	FALSE	80
2022-09-14	12:31:06	0.485051	2.1576	1485.36	FALSE	80
2022-09-14	12:31:06	-0.323193	-1.43763	1501.94	FALSE	80
2022-09-14	12:31:06	0.986221	4.38691	1489.75	FALSE	80
2022-09-14	12:31:06	0.733804	3.26411	1505.2	FALSE	80
2022-09-14	12:31:07	0.728155	3.23898	1492.99	FALSE	80
2022-09-14	12:31:07	0.736247	3.27497	1508.48	FALSE	80
2022-09-14	12:31:07	0.736857	3.27769	1496.26	FALSE	80
2022-09-14	12:31:07	0.728512	3.24057	1511.72	FALSE	80
2022-09-14	12:31:08	0.608868	2.70837	1498.97	FALSE	80
2022-09-14	12:31:08	0.28612	1.27272	1512.99	FALSE	80
2022-09-14	12:31:08	0.33528	1.49139	1500.46	FALSE	80
2022-09-14	12:31:09	0.349173	1.55319	1514.54	FALSE	80
2022-09-14	12:31:09	0.429173	1.90905	1502.37	FALSE	80
2022-09-14	12:31:09	0.375789	1.67158	1516.22	FALSE	80
2022-09-14	12:31:09	0.338232	1.50452	1503.88	FALSE	80
2022-09-14	12:31:10	0.337926	1.50316	1517.72	FALSE	80
2022-09-14	12:31:10	0.3164	1.40741	1505.28	FALSE	80
2022-09-14	12:31:10	0.343575	1.52829	1519.25	FALSE	80
2022-09-14	12:31:10	0.41584	1.84974	1507.13	FALSE	80
2022-09-14	12:31:11	0.374517	1.66593	1520.91	FALSE	80
2022-09-14	12:31:11	0.375382	1.66977	1508.8	FALSE	80
2022-09-14	12:31:11	0.345407	1.53644	1522.45	FALSE	80
2022-09-14	12:31:11	0.349377	1.5541	1510.36	FALSE	80
2022-09-14	12:31:12	0.345102	1.53508	1523.99	FALSE	80
2022-09-14	12:31:12	0.350954	1.56111	1511.92	FALSE	80
2022-09-14	12:31:12	0.353753	1.57356	1525.56	FALSE	80
2022-09-14	12:31:13	0.343524	1.52806	1513.45	FALSE	80
2022-09-14	12:31:13	0.333041	1.48143	1527.04	FALSE	80
2022-09-14	12:31:13	0.330598	1.47057	1514.92	FALSE	80
2022-09-14	12:31:13	0.336858	1.49841	1528.54	FALSE	80
2022-09-14	12:31:14	0.337468	1.50113	1516.42	FALSE	80
2022-09-14	12:31:14	0.337723	1.50226	1530.04	FALSE	80
2022-09-14	12:31:14	0.329784	1.46695	1517.89	FALSE	80
2022-09-14	12:31:14	0.320522	1.42575	1531.47	FALSE	80
2022-09-14	12:31:15	0.32841	1.46083	1519.35	FALSE	80
2022-09-14	12:31:15	0.343321	1.52716	1532.99	FALSE	80
2022-09-14	12:31:15	0.331718	1.47555	1520.82	FALSE	80
2022-09-14	12:31:15	0.322099	1.43276	1534.43	FALSE	80
2022-09-14	12:31:16	0.309631	1.3773	1522.2	FALSE	80
2022-09-14	12:31:16	0.305102	1.35715	1535.78	FALSE	80
2022-09-14	12:31:16	0.307087	1.36598	1523.57	FALSE	80
2022-09-14	12:31:17	0.292532	1.30124	1537.09	FALSE	80
2022-09-14	12:31:17	0.300624	1.33724	1524.9	FALSE	80
2022-09-14	12:31:17	0.334771	1.48913	1538.57	FALSE	80
2022-09-14	12:31:17	0.346221	1.54006	1526.44	FALSE	80
2022-09-14	12:31:18	0.338283	1.50475	1540.08	FALSE	80
2022-09-14	12:31:18	0.361132	1.60639	1528.05	FALSE	80
2022-09-14	12:31:18	0.370852	1.64962	1541.73	FALSE	80
2022-09-14	12:31:18	0.399148	1.77549	1529.83	FALSE	80
2022-09-14	12:31:19	0.46902	2.08629	1543.81	FALSE	80
2022-09-14	12:31:19	0.60042	2.67079	1532.5	FALSE	80
2022-09-14	12:31:19	0.77813	3.46128	1547.28	FALSE	80
2022-09-14	12:31:20	0.692837	3.08188	1535.58	FALSE	80
2022-09-14	12:31:20	0.711005	3.16269	1550.44	FALSE	80
2022-09-14	12:31:20	0.594924	2.64634	1538.22	FALSE	80
2022-09-14	12:31:20	0.57874	2.57435	1553.01	FALSE	80
2022-09-14	12:31:21	0.490802	2.18319	1540.41	FALSE	80
2022-09-14	12:31:21	0.458944	2.04147	1555.05	FALSE	80
2022-09-14	12:31:21	0.432277	1.92285	1542.33	FALSE	80
2022-09-14	12:31:21	0.429173	1.90905	1556.96	FALSE	80
2022-09-14	12:31:22	0.401845	1.78749	1544.12	FALSE	80
2022-09-14	12:31:22	0.397926	1.77005	1558.73	FALSE	80
2022-09-14	12:31:22	0.395534	1.75941	1545.88	FALSE	80
2022-09-14	12:31:22	0.383524	1.70599	1560.44	FALSE	80
2022-09-14	12:31:23	0.387494	1.72365	1547.6	FALSE	80
2022-09-14	12:31:23	0.39528	1.75828	1562.2	FALSE	80
2022-09-14	12:31:23	0.396094	1.76191	1549.36	FALSE	80
2022-09-14	12:31:24	0.40042	1.78115	1563.98	FALSE	80
2022-09-14	12:31:24	0.392379	1.74538	1551.11	FALSE	80
2022-09-14	12:31:24	0.390344	1.73633	1565.72	FALSE	80
2022-09-14	12:31:24	0.395534	1.75941	1552.87	FALSE	80
2022-09-14	12:31:25	0.398384	1.77209	1567.49	FALSE	80
2022-09-14	12:31:25	0.396145	1.76213	1554.63	FALSE	80
2022-09-14	12:31:25	0.397621	1.7687	1569.26	FALSE	80
2022-09-14	12:31:25	0.401794	1.78726	1556.42	FALSE	80
2022-09-14	12:31:26	0.399249	1.77594	1571.03	FALSE	80
2022-09-14	12:31:26	0.40556	1.80401	1558.22	FALSE	80
2022-09-14	12:31:26	0.409733	1.82257	1572.85	FALSE	80
2022-09-14	12:31:26	0.407443	1.81239	1560.03	FALSE	80
2022-09-14	12:31:27	0.404949	1.80129	1574.66	FALSE	80
2022-09-14	12:31:27	0.403473	1.79473	1561.83	FALSE	80
2022-09-14	12:31:27	0.397163	1.76666	1576.42	FALSE	80
2022-09-14	12:31:28	0.400115	1.77979	1563.61	FALSE	80
2022-09-14	12:31:28	0.402506	1.79043	1578.21	FALSE	80
2022-09-14	12:31:28	0.371056	1.65053	1565.26	FALSE	80
2022-09-14	12:31:28	0.461438	2.05257	1580.27	FALSE	80
2022-09-14	12:31:29	0.372379	1.65642	1566.91	FALSE	80
2022-09-14	12:31:29	0.238486	1.06083	1581.33	FALSE	80
2022-09-14	12:31:29	0.28612	1.27272	1568.19	FALSE	80
2022-09-14	12:31:29	0.289428	1.28743	1582.61	FALSE	80
2022-09-14	12:31:30	0.436908	1.94345	1570.13	FALSE	80
2022-09-14	12:31:30	0.297468	1.3232	1583.94	FALSE	80
2022-09-14	12:31:30	0.337214	1.5	1571.63	FALSE	80
2022-09-14	12:31:30	0.458995	2.0417	1585.98	FALSE	80
2022-09-14	12:31:31	0.285255	1.26887	1572.9	FALSE	80
2022-09-14	12:31:31	0.222099	0.987941	1586.97	FALSE	80
2022-09-14	12:31:31	0.210954	0.938366	1573.84	FALSE	80
2022-09-14	12:31:32	0.17472	0.77719	1587.74	FALSE	80
2022-09-14	12:31:32	0.212583	0.945612	1574.78	FALSE	80
2022-09-14	12:31:32	0.262863	1.16927	1588.91	FALSE	80
2022-09-14	12:31:32	0.371616	1.65302	1576.44	FALSE	80
2022-09-14	12:31:33	0.503626	2.24023	1591.15	FALSE	80
2022-09-14	12:31:33	0.683677	3.04113	1579.48	FALSE	80
2022-09-14	12:31:33	0.482812	2.14764	1593.3	FALSE	80
2022-09-14	12:31:33	0.692633	3.08097	1582.56	FALSE	80
2022-09-14	12:31:34	0.860471	3.82755	1597.13	FALSE	80
2022-09-14	12:31:34	0.833601	3.70802	1586.27	FALSE	80
2022-09-14	12:31:34	0.537926	2.3928	1599.52	FALSE	80
2022-09-14	12:31:34	0.514415	2.28822	1588.56	FALSE	80
2022-09-14	12:31:35	0.444033	1.97515	1601.5	FALSE	80
2022-09-14	12:31:35	0.360064	1.60164	1590.16	FALSE	80
2022-09-14	12:31:35	0.427748	1.90271	1603.4	FALSE	80
2022-09-14	12:31:36	0.383015	1.70373	1591.86	FALSE	80
2022-09-14	12:31:36	0.385611	1.71527	1605.11	FALSE	80
2022-09-14	12:31:36	0.423779	1.88505	1593.75	FALSE	80
2022-09-14	12:31:36	0.453193	2.01589	1607.13	FALSE	80
2022-09-14	12:31:37	0.464186	2.06479	1595.81	FALSE	80
2022-09-14	12:31:37	0.434008	1.93055	1609.06	FALSE	80
2022-09-14	12:31:37	0.449071	1.99756	1597.81	FALSE	80
2022-09-14	12:31:37	0.400166	1.78002	1610.84	FALSE	80
2022-09-14	12:31:38	0.29126	1.29558	1599.1	FALSE	80
2022-09-14	12:31:38	0.201285	0.895356	1611.74	FALSE	80
2022-09-14	12:31:38	0.171769	0.764063	1599.87	FALSE	80
2022-09-14	12:31:38	0.215178	0.957155	1612.69	FALSE	80
2022-09-14	12:31:39	0.348613	1.5507	1601.42	FALSE	80
2022-09-14	12:31:39	0.472227	2.10056	1614.79	FALSE	80
2022-09-14	12:31:39	0.743066	3.30531	1604.72	FALSE	80
2022-09-14	12:31:40	0.532837	2.37017	1617.16	FALSE	80
2022-09-14	12:31:40	0.352888	1.56972	1606.29	FALSE	80
2022-09-14	12:31:40	0.344847	1.53395	1618.7	FALSE	80
2022-09-14	12:31:40	0.36271	1.61341	1607.91	FALSE	80
2022-09-14	12:31:41	0.34327	1.52693	1620.23	FALSE	80
2022-09-14	12:31:41	0.299657	1.33293	1609.24	FALSE	80
2022-09-14	12:31:41	0.352736	1.56904	1621.79	FALSE	80
2022-09-14	12:31:41	0.364644	1.62201	1610.86	FALSE	80
2022-09-14	12:31:42	0.383524	1.70599	1623.5	FALSE	80
2022-09-14	12:31:42	0.436196	1.94029	1612.8	FALSE	80
2022-09-14	12:31:42	0.535534	2.38216	1625.88	FALSE	80
2022-09-14	12:31:42	0.554466	2.46638	1615.27	FALSE	80
2022-09-14	12:31:43	0.567646	2.525	1628.41	FALSE	80
2022-09-14	12:31:43	0.363117	1.61522	1616.88	FALSE	80
2022-09-14	12:31:43	0.456349	2.02993	1630.44	FALSE	80
2022-09-14	12:31:44	0.360369	1.60299	1618.49	FALSE	80
2022-09-14	12:31:44	0.296196	1.31754	1631.75	FALSE	80
2022-09-14	12:31:44	0.291819	1.29807	1619.78	FALSE	80
2022-09-14	12:31:44	0.334771	1.48913	1633.24	FALSE	80
2022-09-14	12:31:45	0.594262	2.6434	1622.43	FALSE	80
2022-09-14	12:31:45	1.8823	8.37285	1641.62	FALSE	80
2022-09-14	12:31:45	4.40683	19.6025	1642.03	1	81
2022-09-14	12:31:45	4.54464	20.2155	1661.83	1	82
2022-09-14	12:31:46	2.90286	12.9125	1654.94	FALSE	82
2022-09-14	12:31:46	2.70235	12.0206	1673.85	FALSE	82
2022-09-14	12:31:46	4.38317	19.4972	1674.44	1	83
2022-09-14	12:31:46	3.4536	15.3623	1689.22	1	84
2022-09-14	12:31:47	3.49523	15.5475	1689.99	1	85
2022-09-14	12:31:47	3.19528	14.2132	1703.43	1	86
2022-09-14	12:31:47	5.68932	25.3072	1715.29	1	87
2022-09-14	12:31:48	10.1007	44.9299	1748.36	1	88
2022-09-14	12:31:48	4.69263	20.8738	1736.17	1	89
2022-09-14	12:31:48	2.97874	13.25	1761.61	FALSE	89
2022-09-14	12:31:48	1.65808	7.37547	1743.54	FALSE	89
2022-09-14	12:31:49	2.13772	9.50901	1771.12	FALSE	89
2022-09-14	12:31:49	2.81467	12.5202	1756.06	FALSE	89
2022-09-14	12:31:49	4.27289	19.0067	1790.12	1	90
2022-09-14	12:31:49	6.74871	30.0196	1786.08	1	91
2022-09-14	12:31:50	6.17482	27.4668	1817.59	1	92
2022-09-14	12:31:50	5.45762	24.2766	1810.36	1	93
2022-09-14	12:31:50	5.02917	22.3708	1839.96	1	94
2022-09-14	12:31:50	7.93334	35.2891	1845.65	1	95
2022-09-14	12:31:51	9.96321	44.3184	1884.28	1	96
2022-09-14	12:31:51	10.9257	48.5997	1894.25	1	97
2022-09-14	12:31:51	8.10897	36.0703	1920.35	1	98
2022-09-14	12:31:52	7.46204	33.1926	1927.44	1	99
2022-09-14	12:31:52	5.97701	26.5869	1946.94	1	100
2022-09-14	12:31:52	2.84393	12.6504	1940.09	FALSE	100
2022-09-14	12:31:52	4.10978	18.2811	1965.22	1	101
2022-09-14	12:31:53	11.6085	51.6369	1991.73	1	102
2022-09-14	12:31:53	7.32036	32.5624	1997.78	1	103
2022-09-14	12:31:53	4.23701	18.8471	2010.58	1	104
2022-09-14	12:31:53	1.02653	4.56621	2002.35	FALSE	104
2022-09-14	12:31:54	0.465407	2.07022	2012.65	FALSE	104
2022-09-14	12:31:54	0.442252	1.96723	2004.31	FALSE	104
2022-09-14	12:31:54	0.418537	1.86174	2014.51	FALSE	104
2022-09-14	12:31:55	0.278486	1.23876	2005.55	FALSE	104
2022-09-14	12:31:55	0.359351	1.59847	2016.11	FALSE	104
2022-09-14	12:31:55	0.175942	0.782625	2006.34	FALSE	104
2022-09-14	12:31:55	0.580216	2.58092	2018.69	FALSE	104
2022-09-14	12:31:56	0.893092	3.97265	2010.31	FALSE	104
2022-09-14	12:31:56	1.92775	8.57502	2027.26	FALSE	104
2022-09-14	12:31:56	3.20378	14.2511	2024.56	1	105
2022-09-14	12:31:56	1.86403	8.29158	2035.55	FALSE	105
2022-09-14	12:31:57	1.4164	6.30043	2030.86	FALSE	105
2022-09-14	12:31:57	1.16027	5.16111	2040.72	FALSE	105
2022-09-14	12:31:57	0.726679	3.23241	2034.09	FALSE	105
2022-09-14	12:31:57	0.737214	3.27928	2043.99	FALSE	105
2022-09-14	12:31:58	0.681285	3.03049	2037.12	FALSE	105
2022-09-14	12:31:58	0.729326	3.24419	2047.24	FALSE	105
2022-09-14	12:31:58	0.724898	3.22449	2040.35	FALSE	105
2022-09-14	12:31:59	0.72215	3.21227	2050.45	FALSE	105
2022-09-14	12:31:59	0.724898	3.22449	2043.57	FALSE	105
2022-09-14	12:31:59	0.73813	3.28335	2053.73	FALSE	105
2022-09-14	12:31:59	0.72902	3.24283	2046.81	FALSE	105
2022-09-14	12:32:00	0.637672	2.83649	2056.57	FALSE	105
2022-09-14	12:32:00	0.724542	3.22291	2050.04	FALSE	105
2022-09-14	12:32:00	0.721387	3.20887	2059.78	FALSE	105
2022-09-14	12:32:00	0.73014	3.24781	2053.29	FALSE	105
2022-09-14	12:32:01	0.72327	3.21725	2063	FALSE	105
2022-09-14	12:32:01	0.701539	3.12059	2056.41	FALSE	105
2022-09-14	12:32:01	0.659199	2.93225	2065.93	FALSE	105
2022-09-14	12:32:01	0.540114	2.40254	2058.81	FALSE	105
2022-09-14	12:32:02	0.485865	2.16122	2068.09	FALSE	105
2022-09-14	12:32:02	0.304593	1.35489	2060.16	FALSE	105
2022-09-14	12:32:02	0.231616	1.03027	2069.12	FALSE	105
2022-09-14	12:32:03	-0.1436	-0.638762	2060.16	FALSE	105
2022-09-14	12:32:03	-0.195152	-0.868075	2069.12	FALSE	105
2022-09-14	12:32:03	-0.446755	-1.98726	2060.16	FALSE	105
2022-09-14	12:32:03	-0.671182	-2.98555	2069.12	FALSE	105
2022-09-14	12:32:04	-0.732048	-3.2563	2060.16	FALSE	105
2022-09-14	12:32:04	-0.725941	-3.22913	2069.12	FALSE	105
2022-09-14	12:32:04	-0.618053	-2.74922	2060.16	FALSE	105
2022-09-14	12:32:04	-0.862582	-3.83694	2069.12	FALSE	105
2022-09-14	12:32:05	-0.805279	-3.58204	2060.16	FALSE	105
2022-09-14	12:32:05	-0.90365	-4.01962	2069.12	FALSE	105
2022-09-14	12:32:05	-1.00645	-4.47689	2060.16	FALSE	105
2022-09-14	12:32:05	-1.07184	-4.76776	2069.12	FALSE	105
2022-09-14	12:32:06	-0.592811	-2.63694	2060.16	FALSE	105
2022-09-14	12:32:06	-0.531081	-2.36235	2069.12	FALSE	105
2022-09-14	12:32:06	-0.522837	-2.32568	2060.16	FALSE	105
2022-09-14	12:32:07	-0.5179	-2.30372	2069.12	FALSE	105
2022-09-14	12:32:07	-0.396425	-1.76338	2060.16	FALSE	105
2022-09-14	12:32:07	-0.418867	-1.8632	2069.12	FALSE	105
2022-09-14	12:32:07	-0.309045	-1.37469	2060.16	FALSE	105
2022-09-14	12:32:08	-0.349554	-1.55489	2069.12	FALSE	105
2022-09-14	12:32:08	-0.463549	-2.06196	2060.16	FALSE	105
2022-09-14	12:32:08	-0.443905	-1.97458	2069.12	FALSE	105
2022-09-14	12:32:08	-0.427519	-1.90169	2060.16	FALSE	105
2022-09-14	12:32:09	-0.436272	-1.94063	2069.12	FALSE	105
2022-09-14	12:32:09	-0.378409	-1.68324	2060.16	FALSE	105
2022-09-14	12:32:09	-0.38416	-1.70882	2069.12	FALSE	105
2022-09-14	12:32:09	-0.38701	-1.7215	2060.16	FALSE	105
2022-09-14	12:32:10	-0.402226	-1.78918	2069.12	FALSE	105
2022-09-14	12:32:10	-0.373218	-1.66015	2060.16	FALSE	105
2022-09-14	12:32:10	-0.302481	-1.3455	2069.12	FALSE	105
2022-09-14	12:32:11	-0.324211	-1.44216	2060.16	FALSE	105
2022-09-14	12:32:11	-0.327671	-1.45755	2069.12	FALSE	105
2022-09-14	12:32:11	-0.373066	-1.65947	2060.16	FALSE	105
2022-09-14	12:32:11	-0.416526	-1.85279	2069.12	FALSE	105
2022-09-14	12:32:12	-0.446552	-1.98635	2060.16	FALSE	105
2022-09-14	12:32:12	-0.497544	-2.21318	2069.12	FALSE	105
2022-09-14	12:32:12	-0.519427	-2.31052	2060.16	FALSE	105
2022-09-14	12:32:12	-0.508078	-2.26003	2069.12	FALSE	105
2022-09-14	12:32:13	-0.501971	-2.23287	2060.16	FALSE	105
2022-09-14	12:32:13	-0.513727	-2.28516	2069.12	FALSE	105
2022-09-14	12:32:13	-0.521157	-2.31821	2060.16	FALSE	105
2022-09-14	12:32:13	-0.528231	-2.34968	2069.12	FALSE	105
2022-09-14	12:32:14	-0.546806	-2.4323	2060.16	FALSE	105
2022-09-14	12:32:14	-0.531234	-2.36304	2069.12	FALSE	105
2022-09-14	12:32:14	-0.52416	-2.33157	2060.16	FALSE	105
2022-09-14	12:32:15	-0.528587	-2.35126	2069.12	FALSE	105
2022-09-14	12:32:15	-0.517086	-2.3001	2060.16	FALSE	105
2022-09-14	12:32:15	-0.518562	-2.30667	2069.12	FALSE	105
2022-09-14	12:32:15	-0.3979	-1.76994	2060.16	FALSE	105
2022-09-14	12:32:16	-0.457086	-2.03321	2069.12	FALSE	105
2022-09-14	12:32:16	-0.46874	-2.08505	2060.16	FALSE	105
2022-09-14	12:32:16	-0.500699	-2.22721	2069.12	FALSE	105
2022-09-14	12:32:16	-0.498715	-2.21838	2060.16	FALSE	105
2022-09-14	12:32:17	-0.513473	-2.28403	2069.12	FALSE	105
2022-09-14	12:32:17	-0.453524	-2.01737	2060.16	FALSE	105
2022-09-14	12:32:17	-0.490114	-2.18013	2069.12	FALSE	105
2022-09-14	12:32:17	-0.505992	-2.25075	2060.16	FALSE	105
2022-09-14	12:32:18	-0.499478	-2.22178	2069.12	FALSE	105
2022-09-14	12:32:18	-0.467926	-2.08143	2060.16	FALSE	105
2022-09-14	12:32:18	-0.376068	-1.67283	2069.12	FALSE	105
2022-09-14	12:32:19	-0.259783	-1.15557	2060.16	FALSE	105
2022-09-14	12:32:19	-0.0651269	-0.289697	2069.12	FALSE	105
2022-09-14	12:32:19	0.147545	0.65631	2060.82	FALSE	105
2022-09-14	12:32:19	0.736959	3.27814	2072.4	FALSE	105
2022-09-14	12:32:20	0.733804	3.26411	2064.08	FALSE	105
2022-09-14	12:32:20	0.724542	3.22291	2075.62	FALSE	105
2022-09-14	12:32:20	0.731107	3.25211	2067.34	FALSE	105
2022-09-14	12:32:20	0.729987	3.24713	2078.87	FALSE	105
2022-09-14	12:32:21	0.727596	3.23649	2070.57	FALSE	105
2022-09-14	12:32:21	0.7107	3.16134	2082.03	FALSE	105
2022-09-14	12:32:21	0.663117	2.94968	2073.52	FALSE	105
2022-09-14	12:32:21	0.594313	2.64362	2084.67	FALSE	105
2022-09-14	12:32:22	0.551412	2.45279	2075.97	FALSE	105
2022-09-14	12:32:22	0.22098	0.982963	2085.66	FALSE	105
2022-09-14	12:32:22	-0.0469081	-0.208657	2075.97	FALSE	105
2022-09-14	12:32:23	-0.262786	-1.16892	2085.66	FALSE	105
2022-09-14	12:32:23	0.0814379	0.362252	2076.34	FALSE	105
2022-09-14	12:32:23	-0.247773	-1.10214	2085.66	FALSE	105
2022-09-14	12:32:23	-0.296374	-1.31833	2076.34	FALSE	105
2022-09-14	12:32:24	-0.42589	-1.89444	2085.66	FALSE	105
2022-09-14	12:32:24	-0.448842	-1.99654	2076.34	FALSE	105
2022-09-14	12:32:24	-0.355203	-1.58001	2085.66	FALSE	105
2022-09-14	12:32:24	-0.0606486	-0.269777	2076.34	FALSE	105
2022-09-14	12:32:25	0.07813	0.347538	2086	FALSE	105
2022-09-14	12:32:25	0.37986	1.68969	2078.03	FALSE	105
2022-09-14	12:32:25	1.41818	6.30835	2092.31	FALSE	105
2022-09-14	12:32:25	1.11879	4.9766	2083	FALSE	105
2022-09-14	12:32:26	2.25279	10.0209	2102.33	FALSE	105
2022-09-14	12:32:26	1.30281	5.79516	2088.8	FALSE	105
2022-09-14	12:32:26	1.84128	8.19038	2110.52	FALSE	105
2022-09-14	12:32:27	1.13742	5.05947	2093.86	FALSE	105
2022-09-14	12:32:27	0.638486	2.84011	2113.36	FALSE	105
2022-09-14	12:32:27	1.06154	4.72194	2098.58	FALSE	105
2022-09-14	12:32:27	0.297723	1.32433	2114.69	FALSE	105
2022-09-14	12:32:28	0.335484	1.4923	2100.07	FALSE	105
2022-09-14	12:32:28	0.538435	2.39507	2117.08	FALSE	105
2022-09-14	12:32:28	0.224033	0.996544	2101.07	FALSE	105
2022-09-14	12:32:28	0.251311	1.11788	2118.2	FALSE	105
2022-09-14	12:32:29	0.325662	1.44861	2102.52	FALSE	105
2022-09-14	12:32:29	1.40317	6.24158	2124.44	FALSE	105
2022-09-14	12:32:29	0.667392	2.96869	2105.49	FALSE	105
2022-09-14	12:32:29	1.30301	5.79605	2130.24	FALSE	105
2022-09-14	12:32:30	2.34709	10.4403	2115.93	FALSE	105
2022-09-14	12:32:30	2.1507	9.56674	2139.81	FALSE	105
2022-09-14	12:32:30	0.960216	4.27123	2120.2	FALSE	105
2022-09-14	12:32:31	0.420267	1.86943	2141.68	FALSE	105
2022-09-14	12:32:31	0.0554837	0.246803	2120.44	FALSE	105
2022-09-14	12:32:31	0.0468832	0.208546	2141.88	FALSE	105
2022-09-14	12:32:31	-0.355508	-1.58137	2120.44	FALSE	105
2022-09-14	12:32:32	-0.358358	-1.59405	2141.88	FALSE	105
2022-09-14	12:32:32	-0.439834	-1.95647	2120.44	FALSE	105
2022-09-14	12:32:32	-0.512048	-2.27769	2141.88	FALSE	105
2022-09-14	12:32:32	-0.472862	-2.10338	2120.44	FALSE	105
2022-09-14	12:32:33	-0.626552	-2.78703	2141.88	FALSE	105
2022-09-14	12:32:33	-0.374898	-1.66762	2120.44	FALSE	105
2022-09-14	12:32:33	-0.8579	-3.81611	2141.88	FALSE	105
2022-09-14	12:32:33	-0.28818	-1.28188	2120.44	FALSE	105
2022-09-14	12:32:34	0.0540078	0.240237	2142.12	FALSE	105
2022-09-14	12:32:34	0.210395	0.935879	2121.38	FALSE	105
2022-09-14	12:32:34	0.390038	1.73497	2143.86	FALSE	105
2022-09-14	12:32:35	0.200522	0.891962	2122.27	FALSE	105
2022-09-14	12:32:35	0.342659	1.52422	2145.38	FALSE	105
2022-09-14	12:32:35	0.397774	1.76938	2124.04	FALSE	105
2022-09-14	12:32:35	0.501743	2.23185	2147.61	FALSE	105
2022-09-14	12:32:36	0.604898	2.69071	2126.73	FALSE	105
2022-09-14	12:32:36	0.471616	2.09784	2149.71	FALSE	105
2022-09-14	12:32:36	0.713651	3.17446	2129.91	FALSE	105
2022-09-14	12:32:36	0.633651	2.81861	2152.53	FALSE	105
2022-09-14	12:32:37	0.571259	2.54107	2132.45	FALSE	105
2022-09-14	12:32:37	0.545356	2.42585	2154.96	FALSE	105
2022-09-14	12:32:37	0.503677	2.24046	2134.69	FALSE	105
2022-09-14	12:32:38	0.429224	1.90927	2156.87	FALSE	105
2022-09-14	12:32:38	0.413957	1.84136	2136.53	FALSE	105
2022-09-14	12:32:38	0.392786	1.74719	2158.61	FALSE	105
2022-09-14	12:32:38	0.195178	0.868191	2137.4	FALSE	105
2022-09-14	12:32:39	0.261336	1.16247	2159.78	FALSE	105
2022-09-14	12:32:39	0.0246949	0.109848	2137.51	FALSE	105
2022-09-14	12:32:39	0.224746	0.999715	2160.78	FALSE	105
2022-09-14	12:32:39	0.353092	1.57062	2139.08	FALSE	105
2022-09-14	12:32:40	0.625	2.78012	2163.56	FALSE	105
2022-09-14	12:32:40	0.401692	1.78681	2140.87	FALSE	105
2022-09-14	12:32:40	0.104186	0.46344	2164.02	FALSE	105
2022-09-14	12:32:40	0.322303	1.43367	2142.3	FALSE	105
2022-09-14	12:32:41	0.705051	3.13621	2167.16	FALSE	105
2022-09-14	12:32:41	0.316196	1.4065	2143.71	FALSE	105
2022-09-14	12:32:41	0.279453	1.24306	2168.4	FALSE	105
2022-09-14	12:32:42	0.37411	1.66412	2145.37	FALSE	105
2022-09-14	12:32:42	0.345916	1.5387	2169.94	FALSE	105
2022-09-14	12:32:42	1.93798	8.62052	2153.99	FALSE	105
2022-09-14	12:32:42	1.73894	7.73515	2177.67	FALSE	105
2022-09-14	12:32:43	6.67289	29.6823	2183.67	1	106
2022-09-14	12:32:43	14.8497	66.0544	2243.73	1	107
2022-09-14	12:32:43	16.1921	72.0257	2255.7	1	108
2022-09-14	12:32:43	8.77095	39.0149	2282.74	1	109
2022-09-14	12:32:44	5.23248	23.2751	2278.97	1	110
2022-09-14	12:32:44	3.8279	17.0273	2299.77	1	111
2022-09-14	12:32:44	3.79248	16.8697	2295.84	1	112
2022-09-14	12:32:44	3.82917	17.0329	2316.8	1	113
2022-09-14	12:32:45	3.4649	15.4126	2311.26	1	114
2022-09-14	12:32:45	3.44306	15.3154	2332.12	1	115
2022-09-14	12:32:45	3.49966	15.5672	2326.82	1	116
2022-09-14	12:32:46	3.58535	15.9484	2348.07	1	117
2022-09-14	12:32:46	3.2937	14.651	2341.47	1	118
2022-09-14	12:32:46	3.25314	14.4706	2362.54	1	119
2022-09-14	12:32:46	3.34983	14.9007	2356.37	1	120
2022-09-14	12:32:47	3.46082	15.3944	2377.93	1	121
2022-09-14	12:32:47	3.33905	14.8528	2371.23	1	122
2022-09-14	12:32:47	3.27095	14.5498	2392.48	1	123
2022-09-14	12:32:47	3.15075	14.0152	2385.24	1	124
2022-09-14	12:32:48	3.11976	13.8773	2406.36	1	125
2022-09-14	12:32:48	3.10006	13.7897	2399.03	1	126
2022-09-14	12:32:48	3.00337	13.3596	2419.72	1	127
2022-09-14	12:32:49	2.91533	12.968	2412	FALSE	127
2022-09-14	12:32:49	2.91792	12.9795	2432.7	FALSE	127
2022-09-14	12:32:49	2.92754	13.0223	2425.02	FALSE	127
2022-09-14	12:32:49	3.0393	13.5194	2446.22	1	128
2022-09-14	12:32:50	2.96571	13.1921	2438.21	FALSE	128
2022-09-14	12:32:50	2.88688	12.8414	2459.06	FALSE	128
2022-09-14	12:32:50	2.9679	13.2018	2451.42	FALSE	128
2022-09-14	12:32:50	2.76444	12.2968	2471.35	FALSE	128
2022-09-14	12:32:51	2.32276	10.3321	2461.75	FALSE	128
2022-09-14	12:32:51	2.00419	8.91504	2480.27	FALSE	128
2022-09-14	12:32:51	1.8392	8.18113	2469.93	FALSE	128
2022-09-14	12:32:51	1.70393	7.57942	2487.85	FALSE	128
2022-09-14	12:32:52	1.56536	6.96303	2476.89	FALSE	128
2022-09-14	12:32:52	1.39223	6.19292	2494.04	FALSE	128
2022-09-14	12:32:52	1.39146	6.18949	2483.08	FALSE	128
2022-09-14	12:32:52	1.49055	6.63026	2500.67	FALSE	128
2022-09-14	12:32:53	1.52261	6.77287	2489.85	FALSE	128
2022-09-14	12:32:53	1.62413	7.22446	2507.9	FALSE	128
2022-09-14	12:32:53	1.6565	7.36844	2497.22	FALSE	128
2022-09-14	12:32:54	1.52093	6.7654	2514.66	FALSE	128
2022-09-14	12:32:54	1.39162	6.1902	2503.41	FALSE	128
2022-09-14	12:32:54	1.30368	5.79903	2520.46	FALSE	128
2022-09-14	12:32:54	1.35182	6.01317	2509.43	FALSE	128
2022-09-14	12:32:55	1.51945	6.75882	2527.22	FALSE	128
2022-09-14	12:32:55	1.60561	7.14207	2516.57	FALSE	128
2022-09-14	12:32:55	1.61212	7.17103	2534.39	FALSE	128
2022-09-14	12:32:55	1.69156	7.5244	2524.09	FALSE	128
2022-09-14	12:32:56	1.62917	7.24687	2541.64	FALSE	128
2022-09-14	12:32:56	1.66286	7.39673	2531.49	FALSE	128
2022-09-14	12:32:56	1.70617	7.58939	2549.23	FALSE	128
2022-09-14	12:32:56	1.64821	7.33157	2538.82	FALSE	128
2022-09-14	12:32:57	1.62159	7.21316	2556.44	FALSE	128
2022-09-14	12:32:57	1.54887	6.88968	2545.71	FALSE	128
2022-09-14	12:32:57	1.56459	6.95961	2563.4	FALSE	128
2022-09-14	12:32:58	1.57818	7.02006	2552.73	FALSE	128
2022-09-14	12:32:58	1.65945	7.38157	2570.78	FALSE	128
2022-09-14	12:32:58	1.66826	7.42075	2560.15	FALSE	128
2022-09-14	12:32:58	1.57732	7.01623	2577.8	FALSE	128
2022-09-14	12:32:59	1.55788	6.92976	2567.08	FALSE	128
2022-09-14	12:32:59	1.61899	7.20159	2585	FALSE	128
2022-09-14	12:32:59	1.60062	7.11988	2574.2	FALSE	128
2022-09-14	12:33:00	1.62882	7.24532	2592.24	FALSE	128
2022-09-14	12:33:00	1.69497	7.53957	2581.74	FALSE	128
2022-09-14	12:33:00	1.72027	7.65211	2599.9	FALSE	128
2022-09-14	12:33:00	1.76505	7.8513	2589.59	FALSE	128
2022-09-14	12:33:00	1.8249	8.11752	2608.01	FALSE	128
2022-09-14	12:33:01	1.85889	8.26871	2597.86	FALSE	128
2022-09-14	12:33:01	1.90464	8.47222	2616.49	FALSE	128
2022-09-14	12:33:01	1.91329	8.5107	2606.37	FALSE	128
2022-09-14	12:33:02	1.86912	8.31422	2624.8	FALSE	128
2022-09-14	12:33:02	1.74851	7.77772	2614.15	FALSE	128
2022-09-14	12:33:02	1.65991	7.38361	2632.18	FALSE	128
2022-09-14	12:33:02	1.64576	7.32067	2621.47	FALSE	128
2022-09-14	12:33:03	1.67039	7.43023	2639.61	FALSE	128
2022-09-14	12:33:03	1.74602	7.76665	2629.24	FALSE	128
2022-09-14	12:33:03	1.68281	7.48548	2647.1	FALSE	128
2022-09-14	12:33:03	1.68347	7.48841	2636.73	FALSE	128
2022-09-14	12:33:04	1.66312	7.39789	2654.5	FALSE	128
2022-09-14	12:33:04	1.61803	7.19732	2643.92	FALSE	128
2022-09-14	12:33:04	1.50877	6.71131	2661.21	FALSE	128
2022-09-14	12:33:04	1.46933	6.53587	2650.46	FALSE	128
2022-09-14	12:33:05	1.43538	6.38486	2667.59	FALSE	128
2022-09-14	12:33:05	1.42317	6.33054	2656.79	FALSE	128
2022-09-14	12:33:05	1.42597	6.343	2673.94	FALSE	128
2022-09-14	12:33:06	1.41014	6.27258	2663.06	FALSE	128
2022-09-14	12:33:06	1.37579	6.11979	2680.06	FALSE	128
2022-09-14	12:33:06	1.38266	6.15035	2669.21	FALSE	128
2022-09-14	12:33:06	1.43538	6.38486	2686.44	FALSE	128
2022-09-14	12:33:07	1.42123	6.32192	2675.53	FALSE	128
2022-09-14	12:33:07	1.42017	6.3172	2692.76	FALSE	128
2022-09-14	12:33:07	1.44291	6.41835	2681.95	FALSE	128
2022-09-14	12:33:07	1.43182	6.36902	2699.13	FALSE	128
2022-09-14	12:33:08	1.43961	6.40367	2688.36	FALSE	128
2022-09-14	12:33:08	1.43101	6.36542	2705.49	FALSE	128
2022-09-14	12:33:08	1.32765	5.90565	2694.26	FALSE	128
2022-09-14	12:33:08	1.36561	6.07451	2711.57	FALSE	128
2022-09-14	12:33:09	1.41228	6.2821	2700.54	FALSE	128
2022-09-14	12:33:09	1.36586	6.07562	2717.64	FALSE	128
2022-09-14	12:33:09	1.30235	5.79311	2706.34	FALSE	128
2022-09-14	12:33:10	1.25538	5.58418	2723.23	FALSE	128
2022-09-14	12:33:10	1.24541	5.53983	2711.88	FALSE	128
2022-09-14	12:33:10	1.24291	5.52871	2728.76	FALSE	128
2022-09-14	12:33:10	1.23095	5.47551	2717.35	FALSE	128
2022-09-14	12:33:11	1.2908	5.74174	2734.5	FALSE	128
2022-09-14	12:33:11	1.30245	5.79356	2723.15	FALSE	128
2022-09-14	12:33:11	1.33559	5.94097	2740.44	FALSE	128
2022-09-14	12:33:11	1.3652	6.07268	2729.22	FALSE	128
2022-09-14	12:33:12	1.3962	6.21058	2746.65	FALSE	128
2022-09-14	12:33:12	1.3366	5.94546	2735.16	FALSE	128
2022-09-14	12:33:12	1.3421	5.96993	2752.62	FALSE	128
2022-09-14	12:33:12	1.411	6.27641	2741.44	FALSE	128
2022-09-14	12:33:13	1.45335	6.46479	2759.08	FALSE	128
2022-09-14	12:33:13	1.40831	6.26444	2747.7	FALSE	128
2022-09-14	12:33:13	1.37681	6.12433	2765.21	FALSE	128
2022-09-14	12:33:14	1.38938	6.18024	2753.88	FALSE	128
2022-09-14	12:33:14	1.31604	5.85401	2771.06	FALSE	128
2022-09-14	12:33:14	1.37584	6.12001	2760	FALSE	128
2022-09-14	12:33:14	1.32576	5.89725	2776.96	FALSE	128
2022-09-14	12:33:15	1.35726	6.03736	2766.04	FALSE	128
2022-09-14	12:33:15	1.30261	5.79427	2782.75	FALSE	128
2022-09-14	12:33:15	1.29533	5.76189	2771.8	FALSE	128
2022-09-14	12:33:15	1.40179	6.23544	2788.99	FALSE	128
2022-09-14	12:33:16	1.47029	6.54014	2778.34	FALSE	128
2022-09-14	12:33:16	1.53645	6.83444	2795.82	FALSE	128
2022-09-14	12:33:16	1.57447	7.00356	2785.35	FALSE	128
2022-09-14	12:33:16	1.52765	6.79529	2802.62	FALSE	128
2022-09-14	12:33:17	1.60815	7.15337	2792.5	FALSE	128
2022-09-14	12:33:17	1.66429	7.40309	2810.02	FALSE	128
2022-09-14	12:33:17	1.62159	7.21316	2799.71	FALSE	128
2022-09-14	12:33:18	1.55691	6.92545	2816.95	FALSE	128
2022-09-14	12:33:18	1.51477	6.738	2806.45	FALSE	128
2022-09-14	12:33:18	1.4905	6.63004	2823.58	FALSE	128
2022-09-14	12:33:18	1.49131	6.63365	2813.09	FALSE	128
2022-09-14	12:33:19	1.5364	6.83421	2830.41	FALSE	128
2022-09-14	12:33:19	1.59039	7.07437	2820.16	FALSE	128
2022-09-14	12:33:19	1.61889	7.20115	2837.61	FALSE	128
2022-09-14	12:33:19	1.62775	7.24056	2827.4	FALSE	128
2022-09-14	12:33:20	1.68525	7.49633	2845.11	FALSE	128
2022-09-14	12:33:20	1.6423	7.30528	2834.71	FALSE	128
2022-09-14	12:33:20	1.56917	6.97998	2852.09	FALSE	128
2022-09-14	12:33:20	1.60719	7.1491	2841.86	FALSE	128
2022-09-14	12:33:21	1.61202	7.17059	2859.26	FALSE	128
2022-09-14	12:33:21	1.45197	6.45865	2848.31	FALSE	128
2022-09-14	12:33:21	1.03274	4.59383	2863.85	FALSE	128
2022-09-14	12:33:22	0.351565	1.56383	2849.88	FALSE	128
2022-09-14	12:33:22	0.387595	1.7241	2865.58	FALSE	128
2022-09-14	12:33:22	0.477214	2.12274	2852	FALSE	128
2022-09-14	12:33:22	0.506069	2.2511	2867.83	FALSE	128
2022-09-14	12:33:23	0.640064	2.84713	2854.85	FALSE	128
2022-09-14	12:33:23	0.967952	4.30564	2872.14	FALSE	128
2022-09-14	12:33:23	1.2591	5.60073	2860.45	FALSE	128
2022-09-14	12:33:23	0.704288	3.13281	2875.27	FALSE	128
2022-09-14	12:33:24	0.956145	4.25312	2864.7	FALSE	128
2022-09-14	12:33:24	0.745051	3.31414	2878.58	FALSE	128
2022-09-14	12:33:24	1.23263	5.48298	2870.18	FALSE	128
2022-09-14	12:33:24	1.06301	4.72848	2883.31	FALSE	128
2022-09-14	12:33:25	1.12067	4.98496	2875.17	FALSE	128
2022-09-14	12:33:25	0.912481	4.0589	2887.37	FALSE	128
2022-09-14	12:33:25	0.891514	3.96563	2879.14	FALSE	128
2022-09-14	12:33:26	0.865865	3.85154	2891.22	FALSE	128
2022-09-14	12:33:26	0.940471	4.1834	2883.32	FALSE	128
2022-09-14	12:33:26	0.937417	4.16982	2895.39	FALSE	128
2022-09-14	12:33:26	0.885	3.93666	2887.26	FALSE	128
2022-09-14	12:33:27	1.28698	5.72474	2901.12	FALSE	128
2022-09-14	12:33:27	1.17828	5.24123	2892.5	FALSE	128
2022-09-14	12:33:27	1.64251	7.30621	2908.42	FALSE	128
2022-09-14	12:33:27	1.22139	5.43299	2897.93	FALSE	128
2022-09-14	12:33:28	1.67838	7.46577	2915.89	FALSE	128
2022-09-14	12:33:28	1.17055	5.20684	2903.14	FALSE	128
2022-09-14	12:33:28	1.22668	5.45652	2921.34	FALSE	128
2022-09-14	12:33:28	1.22897	5.4667	2908.6	FALSE	128
2022-09-14	12:33:29	1.24663	5.54526	2926.89	FALSE	128
2022-09-14	12:33:29	1.26597	5.63129	2914.23	FALSE	128
2022-09-14	12:33:29	1.29884	5.7775	2932.67	FALSE	128
2022-09-14	12:33:30	1.30816	5.81896	2920.05	FALSE	128
2022-09-14	12:33:30	1.3052	5.80579	2938.47	FALSE	128
2022-09-14	12:33:30	1.3765	6.12295	2926.18	FALSE	128
2022-09-14	12:33:30	1.43243	6.37174	2944.84	FALSE	128
2022-09-14	12:33:31	1.4934	6.64294	2932.82	FALSE	128
2022-09-14	12:33:31	1.46627	6.52226	2951.37	FALSE	128
2022-09-14	12:33:31	1.42551	6.34095	2939.16	FALSE	128
2022-09-14	12:33:31	1.38958	6.18113	2957.55	FALSE	128
2022-09-14	12:33:32	1.35808	6.04101	2945.2	FALSE	128
2022-09-14	12:33:32	1.27238	5.6598	2963.21	FALSE	128
2022-09-14	12:33:32	1.23513	5.49411	2950.7	FALSE	128
2022-09-14	12:33:33	1.22871	5.46555	2968.67	FALSE	128
2022-09-14	12:33:33	1.25635	5.5885	2956.28	FALSE	128
2022-09-14	12:33:33	1.26566	5.62991	2974.3	FALSE	128
2022-09-14	12:33:33	1.26022	5.60571	2961.89	FALSE	128
2022-09-14	12:33:34	1.32475	5.89275	2980.2	FALSE	128
2022-09-14	12:33:34	1.44439	6.42494	2968.31	FALSE	128
2022-09-14	12:33:34	1.54642	6.87879	2987.07	FALSE	128
2022-09-14	12:33:34	1.63304	7.26409	2975.58	FALSE	128
2022-09-14	12:33:35	1.61034	7.16311	2994.24	FALSE	128
2022-09-14	12:33:35	1.61436	7.181	2982.76	FALSE	128
2022-09-14	12:33:35	1.63966	7.29354	3001.53	FALSE	128
2022-09-14	12:33:35	1.65151	7.34625	2990.11	FALSE	128
2022-09-14	12:33:36	1.77854	7.9113	3009.44	FALSE	128
2022-09-14	12:33:36	1.75844	7.82189	2997.93	FALSE	128
2022-09-14	12:33:36	1.80561	8.03171	3017.47	FALSE	128
2022-09-14	12:33:37	1.72342	7.66612	3005.59	FALSE	128
2022-09-14	12:33:37	1.81248	8.06227	3025.54	FALSE	128
2022-09-14	12:33:37	1.8106	8.05391	3013.65	FALSE	128
2022-09-14	12:33:37	1.61192	7.17014	3032.71	FALSE	128
2022-09-14	12:33:38	1.47635	6.5671	3020.21	FALSE	128
2022-09-14	12:33:38	1.42912	6.35701	3039.06	FALSE	128
2022-09-14	12:33:38	1.49747	6.66105	3026.88	FALSE	128
2022-09-14	12:33:38	1.51711	6.74841	3045.81	FALSE	128
2022-09-14	12:33:39	1.51691	6.74752	3033.62	FALSE	128
2022-09-14	12:33:39	1.50352	6.68796	3052.5	FALSE	128
2022-09-14	12:33:39	1.4367	6.39073	3040.01	FALSE	128
2022-09-14	12:33:39	1.19869	5.33201	3057.83	FALSE	128
2022-09-14	12:33:40	1.25589	5.58645	3045.6	FALSE	128
2022-09-14	12:33:40	1.31879	5.86624	3063.7	FALSE	128
2022-09-14	12:33:40	1.82042	8.09759	3053.7	FALSE	128
2022-09-14	12:33:41	2.11065	9.38859	3073.09	FALSE	128
2022-09-14	12:33:41	2.13691	9.5054	3063.2	FALSE	128
2022-09-14	12:33:41	1.69253	7.52871	3080.62	FALSE	128
2022-09-14	12:33:41	1.69452	7.53756	3070.74	FALSE	128
2022-09-14	12:33:42	1.66729	7.41644	3088.03	FALSE	128
2022-09-14	12:33:42	1.6595	7.38179	3078.12	FALSE	128
2022-09-14	12:33:42	1.78403	7.93572	3095.97	FALSE	128
2022-09-14	12:33:42	1.72317	7.665	3085.79	FALSE	128
2022-09-14	12:33:43	1.68831	7.50994	3103.48	FALSE	128
2022-09-14	12:33:43	1.60556	7.14185	3092.93	FALSE	128
2022-09-14	12:33:43	1.68653	7.50202	3110.98	FALSE	128
2022-09-14	12:33:43	1.71294	7.6195	3100.55	FALSE	128
2022-09-14	12:33:44	1.79955	8.00476	3118.98	FALSE	128
2022-09-14	12:33:44	1.89747	8.44033	3108.99	FALSE	128
2022-09-14	12:33:44	1.73274	7.70757	3126.69	FALSE	128
2022-09-14	12:33:45	2.38327	10.6013	3119.59	FALSE	128
2022-09-14	12:33:45	6.52205	29.0114	3155.7	1	129
2022-09-14	12:33:45	6.16673	27.4308	3147.02	1	130
2022-09-14	12:33:45	2.75635	12.2608	3167.96	FALSE	130

## Sheet: Reggie_star_2022914122830 (2)
Date	Time	Lbs	Total force x time			**GoPro Fitting: 1217
2022-09-14	12:28:30	0.609377	0.609377	FALSE	0
2022-09-14	12:28:30	0.577061	1.18644	FALSE	0
2022-09-14	12:28:31	0.58154	1.76798	FALSE	0
2022-09-14	12:28:31	0.534618	2.3026	FALSE	0
2022-09-14	12:28:31	0.37411	2.67671	FALSE	0
2022-09-14	12:28:31	0.446018	3.12272	FALSE	0
2022-09-14	12:28:32	0.439046	3.56177	FALSE	0
2022-09-14	12:28:32	0.44673	4.0085	FALSE	0
2022-09-14	12:28:32	0.428512	4.43701	FALSE	0
2022-09-14	12:28:32	0.370344	4.80736	FALSE	0
2022-09-14	12:28:33	0.477112	5.28447	FALSE	0
2022-09-14	12:28:33	0.331565	5.61603	FALSE	0
2022-09-14	12:28:33	0.336145	5.95218	FALSE	0
2022-09-14	12:28:34	0.497621	6.4498	FALSE	0
2022-09-14	12:28:34	0.400115	6.84991	FALSE	0
2022-09-14	12:28:34	0.45416	7.30407	FALSE	0
2022-09-14	12:28:34	0.42785	7.73192	FALSE	0
2022-09-14	12:28:35	0.413601	8.14553	FALSE	0
2022-09-14	12:28:35	0.417367	8.56289	FALSE	0
2022-09-14	12:28:35	0.427545	8.99044	FALSE	0
2022-09-14	12:28:35	0.445255	9.43569	FALSE	0
2022-09-14	12:28:36	0.457672	9.89336	FALSE	0
2022-09-14	12:28:36	0.428664	10.322	FALSE	0
2022-09-14	12:28:36	0.448766	10.7708	FALSE	0
2022-09-14	12:28:36	0.423423	11.1942	FALSE	0
2022-09-14	12:28:37	0.418181	11.6124	FALSE	0
2022-09-14	12:28:37	0.416196	12.0286	FALSE	0
2022-09-14	12:28:37	0.404898	12.4335	FALSE	0
2022-09-14	12:28:38	0.405764	12.8393	FALSE	0
2022-09-14	12:28:38	0.400369	13.2396	FALSE	0
2022-09-14	12:28:38	0.454262	13.6939	FALSE	0
2022-09-14	12:28:38	0.461794	14.1557	FALSE	0
2022-09-14	12:28:39	0.444949	14.6006	FALSE	0
2022-09-14	12:28:39	0.432328	15.033	FALSE	0
2022-09-14	12:28:39	0.475331	15.5083	FALSE	0
2022-09-14	12:28:39	0.456603	15.9649	FALSE	0
2022-09-14	12:28:40	0.465865	16.4308	FALSE	0
2022-09-14	12:28:40	0.449529	16.8803	FALSE	0
2022-09-14	12:28:40	0.357825	17.2381	FALSE	0
2022-09-14	12:28:40	0.403677	17.6418	FALSE	0
2022-09-14	12:28:41	0.457926	18.0997	FALSE	0
2022-09-14	12:28:41	0.405764	18.5055	FALSE	0
2022-09-14	12:28:41	0.437265	18.9427	FALSE	0
2022-09-14	12:28:42	0.427596	19.3703	FALSE	0
2022-09-14	12:28:42	0.425713	19.7961	FALSE	0
2022-09-14	12:28:42	0.442761	20.2388	FALSE	0
2022-09-14	12:28:42	0.425916	20.6647	FALSE	0
2022-09-14	12:28:43	0.426272	21.091	FALSE	0
2022-09-14	12:28:43	0.437519	21.5285	FALSE	0
2022-09-14	12:28:43	0.426985	21.9555	FALSE	0
2022-09-14	12:28:43	0.448715	22.4042	FALSE	0
2022-09-14	12:28:44	0.450445	22.8547	FALSE	0
2022-09-14	12:28:44	0.406323	23.261	FALSE	0
2022-09-14	12:28:44	0.433906	23.6949	FALSE	0
2022-09-14	12:28:44	0.397163	24.0921	FALSE	0
2022-09-14	12:28:45	0.455483	24.5475	FALSE	0
2022-09-14	12:28:45	0.389224	24.9368	FALSE	0
2022-09-14	12:28:45	0.329224	25.266	FALSE	0
2022-09-14	12:28:46	0.498995	25.765	FALSE	0
2022-09-14	12:28:46	1.03874	26.8037	FALSE	0
2022-09-14	12:28:46	1.65304	28.4568	FALSE	0
2022-09-14	12:28:46	1.21502	29.6718	FALSE	0
2022-09-14	12:28:47	0.647595	30.3194	FALSE	0
2022-09-14	12:28:47	1.31782	31.6372	FALSE	0
2022-09-14	12:28:47	1.22424	32.8614	FALSE	0
2022-09-14	12:28:48	0.708969	33.5704	FALSE	0
2022-09-14	12:28:48	0.384389	33.9548	FALSE	0
2022-09-14	12:28:48	0.165153	34.1199	FALSE	0
2022-09-14	12:28:48	0.297621	34.4176	FALSE	0
2022-09-14	12:28:48	0.469936	34.8875	FALSE	0
2022-09-14	12:28:49	0.324593	35.2121	FALSE	0
2022-09-14	12:28:49	0.324389	35.5365	FALSE	0
2022-09-14	12:28:49	0.280064	35.8166	FALSE	0
2022-09-14	12:28:50	0.415229	36.2318	FALSE	0
2022-09-14	12:28:50	0.432634	36.6644	FALSE	0
2022-09-14	12:28:50	0.240725	36.9051	FALSE	0
2022-09-14	12:28:50	0.466832	37.372	FALSE	0
2022-09-14	12:28:51	0.389071	37.761	FALSE	0
2022-09-14	12:28:51	0.392125	38.1532	FALSE	0
2022-09-14	12:28:51	0.347443	38.5006	FALSE	0
2022-09-14	12:28:51	0.465255	38.9659	FALSE	0
2022-09-14	12:28:52	0.38159	39.3475	FALSE	0
2022-09-14	12:28:52	0.418181	39.7656	FALSE	0
2022-09-14	12:28:52	0.389377	40.155	FALSE	0
2022-09-14	12:28:52	0.382659	40.5377	FALSE	0
2022-09-14	12:28:53	0.409326	40.947	FALSE	0
2022-09-14	12:28:53	0.443015	41.39	FALSE	0
2022-09-14	12:28:53	0.365662	41.7557	FALSE	0
2022-09-14	12:28:54	0.710191	42.4659	FALSE	0
2022-09-14	12:28:54	1.41472	43.8806	FALSE	0
2022-09-14	12:28:54	2.92882	46.8094	FALSE	0
2022-09-14	12:28:54	0.831463	47.6409	FALSE	0
2022-09-14	12:28:55	0.603372	48.2442	FALSE	0
2022-09-14	12:28:55	0.55813	48.8024	FALSE	0
2022-09-14	12:28:55	1.27411	50.0765	FALSE	0
2022-09-14	12:28:55	1.28149	51.358	FALSE	0
2022-09-14	12:28:56	0.714364	52.0723	FALSE	0
2022-09-14	12:28:56	0.837824	52.9102	FALSE	0
2022-09-14	12:28:56	2.24576	55.1559	FALSE	0
2022-09-14	12:28:56	2.62352	57.7794	FALSE	0
2022-09-14	12:28:57	3.28805	61.0675	1	1
2022-09-14	12:28:57	3.48719	64.5547	1	2
2022-09-14	12:28:57	4.40174	68.9564	1	3
2022-09-14	12:28:58	4.55421	73.5106	1	4
2022-09-14	12:28:58	5.0706	78.5812	1	5
2022-09-14	12:28:58	4.77838	83.3596	1	6
2022-09-14	12:28:58	3.46352	86.8231	1	7
2022-09-14	12:28:59	4.78067	91.6038	1	8
2022-09-14	12:28:59	2.06785	93.6716	FALSE	8
2022-09-14	12:28:59	3.24617	96.9178	1	9
2022-09-14	12:28:59	2.68067	99.5985	FALSE	9
2022-09-14	12:29:00	1.97721	101.576	FALSE	9
2022-09-14	12:29:00	0.784338	102.36	FALSE	9
2022-09-14	12:29:00	0.339097	102.699	FALSE	9
2022-09-14	12:29:01	3.56011	106.259	1	10
2022-09-14	12:29:01	5.84052	112.1	1	11
2022-09-14	12:29:01	10.3968	122.497	1	12
2022-09-14	12:29:01	5.9397	128.436	1	13
2022-09-14	12:29:02	8.90983	137.346	1	14
2022-09-14	12:29:02	2.76205	140.108	FALSE	14
2022-09-14	12:29:02	2.47925	142.587	FALSE	14
2022-09-14	12:29:02	3.19798	145.785	1	15
2022-09-14	12:29:03	2.36617	148.152	FALSE	15
2022-09-14	12:29:03	4.42072	152.572	1	16
2022-09-14	12:29:03	3.6334	156.206	1	17
2022-09-14	12:29:03	2.8936	159.099	FALSE	17
2022-09-14	12:29:04	3.831	162.93	1	18
2022-09-14	12:29:04	1.79192	164.722	FALSE	18
2022-09-14	12:29:04	4.78052	169.503	1	19
2022-09-14	12:29:05	5.71467	175.217	1	20
2022-09-14	12:29:05	8.71471	183.932	1	21
2022-09-14	12:29:05	10.6839	194.616	1	22
2022-09-14	12:29:05	7.17665	201.793	1	23
2022-09-14	12:29:06	12.0287	213.821	1	24
2022-09-14	12:29:06	3.87111	217.692	1	25
2022-09-14	12:29:06	4.08307	221.776	1	26
2022-09-14	12:29:06	3.31223	225.088	1	27
2022-09-14	12:29:07	1.73004	226.818	FALSE	27
2022-09-14	12:29:07	3.37141	230.189	1	28
2022-09-14	12:29:07	2.93116	233.12	FALSE	28
2022-09-14	12:29:07	4.50103	237.621	1	29
2022-09-14	12:29:08	3.29487	240.916	1	30
2022-09-14	12:29:08	3.4649	244.381	1	31
2022-09-14	12:29:08	4.75151	249.133	1	32
2022-09-14	12:29:09	2.23569	251.368	FALSE	32
2022-09-14	12:29:09	3.51492	254.883	1	33
2022-09-14	12:29:09	1.93218	256.815	FALSE	33
2022-09-14	12:29:09	2.62312	259.439	FALSE	33
2022-09-14	12:29:10	2.49793	261.937	FALSE	33
2022-09-14	12:29:10	4.9537	266.89	1	34
2022-09-14	12:29:10	11.1169	278.007	1	35
2022-09-14	12:29:10	13.4657	291.473	1	36
2022-09-14	12:29:11	3.65309	295.126	1	37
2022-09-14	12:29:11	0.674262	295.8	FALSE	37
2022-09-14	12:29:11	0.308003	296.108	FALSE	37
2022-09-14	12:29:11	0.222557	296.331	FALSE	37
2022-09-14	12:29:12	0.466221	296.797	FALSE	37
2022-09-14	12:29:12	0.343779	297.141	FALSE	37
2022-09-14	12:29:12	0.283626	297.424	FALSE	37
2022-09-14	12:29:13	0.0287152	297.453	FALSE	37
2022-09-14	12:29:13	0.240318	297.693	FALSE	37
2022-09-14	12:29:13	0.267494	297.961	FALSE	37
2022-09-14	12:29:13	0.297723	298.259	FALSE	37
2022-09-14	12:29:14	0.123066	298.382	FALSE	37
2022-09-14	12:29:14	0.314364	298.696	FALSE	37
2022-09-14	12:29:14	0.288003	298.984	FALSE	37
2022-09-14	12:29:14	1.52108	300.505	FALSE	37
2022-09-14	12:29:15	1.42317	301.928	FALSE	37
2022-09-14	12:29:15	2.24831	304.177	FALSE	37
2022-09-14	12:29:15	1.78088	305.957	FALSE	37
2022-09-14	12:29:15	1.06632	307.024	FALSE	37
2022-09-14	12:29:16	1.35976	308.384	FALSE	37
2022-09-14	12:29:16	0.772226	309.156	FALSE	37
2022-09-14	12:29:16	2.04805	311.204	FALSE	37
2022-09-14	12:29:17	0.534313	311.738	FALSE	37
2022-09-14	12:29:17	1.01732	312.755	FALSE	37
2022-09-14	12:29:17	1.64174	314.397	FALSE	37
2022-09-14	12:29:17	2.42261	316.82	FALSE	37
2022-09-14	12:29:18	2.12775	318.948	FALSE	37
2022-09-14	12:29:18	2.78052	321.728	FALSE	37
2022-09-14	12:29:18	1.50912	323.237	FALSE	37
2022-09-14	12:29:18	1.69803	324.935	FALSE	37
2022-09-14	12:29:19	0.655941	325.591	FALSE	37
2022-09-14	12:29:19	0.883066	326.474	FALSE	37
2022-09-14	12:29:19	0.541896	327.016	FALSE	37
2022-09-14	12:29:19	0.609733	327.626	FALSE	37
2022-09-14	12:29:20	0.737722	328.364	FALSE	37
2022-09-14	12:29:20	0.828461	329.192	FALSE	37
2022-09-14	12:29:20	0.569224	329.761	FALSE	37
2022-09-14	12:29:21	0.394364	330.156	FALSE	37
2022-09-14	12:29:21	0.385509	330.541	FALSE	37
2022-09-14	12:29:21	0.38612	330.927	FALSE	37
2022-09-14	12:29:21	0.431311	331.359	FALSE	37
2022-09-14	12:29:22	0.483881	331.842	FALSE	37
2022-09-14	12:29:22	0.273499	332.116	FALSE	37
2022-09-14	12:29:22	-0.0446181	332.116	FALSE	37
2022-09-14	12:29:22	0.117977	332.234	FALSE	37
2022-09-14	12:29:23	0.45243	332.686	FALSE	37
2022-09-14	12:29:23	1.38841	334.075	FALSE	37
2022-09-14	12:29:23	1.33538	335.41	FALSE	37
2022-09-14	12:29:23	1.85263	337.263	FALSE	37
2022-09-14	12:29:24	1.3763	338.639	FALSE	37
2022-09-14	12:29:24	1.04933	339.688	FALSE	37
2022-09-14	12:29:24	0.676806	340.365	FALSE	37
2022-09-14	12:29:25	2.05497	342.42	FALSE	37
2022-09-14	12:29:25	3.11131	345.531	1	38
2022-09-14	12:29:25	5.75797	351.289	1	39
2022-09-14	12:29:25	5.44876	356.738	1	40
2022-09-14	12:29:26	3.93976	360.678	1	41
2022-09-14	12:29:26	0.675992	361.354	FALSE	41
2022-09-14	12:29:26	0.27416	361.628	FALSE	41
2022-09-14	12:29:26	1.78276	363.411	FALSE	41
2022-09-14	12:29:27	3.74251	367.153	1	42
2022-09-14	12:29:27	3.55808	370.711	1	43
2022-09-14	12:29:27	4.26306	374.975	1	44
2022-09-14	12:29:28	5.78688	380.761	1	45
2022-09-14	12:29:28	6.9597	387.721	1	46
2022-09-14	12:29:28	3.92597	391.647	1	47
2022-09-14	12:29:28	2.59284	394.24	FALSE	47
2022-09-14	12:29:29	0.343168	394.583	FALSE	47
2022-09-14	12:29:29	0.381896	394.965	FALSE	47
2022-09-14	12:29:29	0.0174175	394.982	FALSE	47
2022-09-14	12:29:29	0.214669	395.197	FALSE	47
2022-09-14	12:29:30	0.736654	395.934	FALSE	47
2022-09-14	12:29:30	0.280776	396.215	FALSE	47
2022-09-14	12:29:30	0.392125	396.607	FALSE	47
2022-09-14	12:29:30	0.201845	396.808	FALSE	47
2022-09-14	12:29:31	0.428613	397.237	FALSE	47
2022-09-14	12:29:31	0.16841	397.406	FALSE	47
2022-09-14	12:29:31	0.342456	397.748	FALSE	47
2022-09-14	12:29:32	0.233855	397.982	FALSE	47
2022-09-14	12:29:32	0.412125	398.394	FALSE	47
2022-09-14	12:29:32	0.235585	398.63	FALSE	47
2022-09-14	12:29:32	0.403524	399.033	FALSE	47
2022-09-14	12:29:33	0.31645	399.35	FALSE	47
2022-09-14	12:29:33	0.301183	399.651	FALSE	47
2022-09-14	12:29:33	0.248003	399.899	FALSE	47
2022-09-14	12:29:33	0.225356	400.124	FALSE	47
2022-09-14	12:29:34	0.28383	400.408	FALSE	47
2022-09-14	12:29:34	0.113295	400.521	FALSE	47
2022-09-14	12:29:34	0.312736	400.834	FALSE	47
2022-09-14	12:29:34	0.141336	400.975	FALSE	47
2022-09-14	12:29:35	0.334211	401.309	FALSE	47
2022-09-14	12:29:35	0.286069	401.596	FALSE	47
2022-09-14	12:29:35	0.36383	401.959	FALSE	47
2022-09-14	12:29:36	0.380216	402.34	FALSE	47
2022-09-14	12:29:36	0.374517	402.714	FALSE	47
2022-09-14	12:29:36	0.356196	403.07	FALSE	47
2022-09-14	12:29:36	0.342863	403.413	FALSE	47
2022-09-14	12:29:37	0.353193	403.766	FALSE	47
2022-09-14	12:29:37	0.340878	404.107	FALSE	47
2022-09-14	12:29:37	0.35187	404.459	FALSE	47
2022-09-14	12:29:37	0.337316	404.796	FALSE	47
2022-09-14	12:29:38	0.348715	405.145	FALSE	47
2022-09-14	12:29:38	0.355534	405.501	FALSE	47
2022-09-14	12:29:38	0.357112	405.858	FALSE	47
2022-09-14	12:29:38	0.353397	406.211	FALSE	47
2022-09-14	12:29:39	0.35584	406.567	FALSE	47
2022-09-14	12:29:39	0.363779	406.931	FALSE	47
2022-09-14	12:29:39	0.325153	407.256	FALSE	47
2022-09-14	12:29:40	0.329479	407.585	FALSE	47
2022-09-14	12:29:40	0.331463	407.917	FALSE	47
2022-09-14	12:29:40	0.332227	408.249	FALSE	47
2022-09-14	12:29:40	0.3307	408.58	FALSE	47
2022-09-14	12:29:41	0.338537	408.918	FALSE	47
2022-09-14	12:29:41	0.334924	409.253	FALSE	47
2022-09-14	12:29:41	0.341743	409.595	FALSE	47
2022-09-14	12:29:41	0.351921	409.947	FALSE	47
2022-09-14	12:29:42	0.343524	410.29	FALSE	47
2022-09-14	12:29:42	0.342659	410.633	FALSE	47
2022-09-14	12:29:42	0.343881	410.977	FALSE	47
2022-09-14	12:29:42	0.34098	411.318	FALSE	47
2022-09-14	12:29:43	0.340675	411.659	FALSE	47
2022-09-14	12:29:43	0.342812	412.001	FALSE	47
2022-09-14	12:29:43	0.333143	412.335	FALSE	47
2022-09-14	12:29:44	0.485458	412.82	FALSE	47
2022-09-14	12:29:44	0.631412	413.451	FALSE	47
2022-09-14	12:29:44	0.207697	413.659	FALSE	47
2022-09-14	12:29:44	0.0506999	413.71	FALSE	47
2022-09-14	12:29:45	0.120013	413.83	FALSE	47
2022-09-14	12:29:45	0.0193005	413.849	FALSE	47
2022-09-14	12:29:45	0.308512	414.158	FALSE	47
2022-09-14	12:29:45	0.0871885	414.245	FALSE	47
2022-09-14	12:29:46	0.182354	414.427	FALSE	47
2022-09-14	12:29:46	0.0255091	414.453	FALSE	47
2022-09-14	12:29:46	0.260674	414.713	FALSE	47
2022-09-14	12:29:46	1.45151	416.165	FALSE	47
2022-09-14	12:29:47	4.99955	421.164	1	48
2022-09-14	12:29:47	4.76556	425.93	1	49
2022-09-14	12:29:47	3.64235	429.572	1	50
2022-09-14	12:29:48	2.29202	431.864	FALSE	50
2022-09-14	12:29:48	0.425509	432.29	FALSE	50
2022-09-14	12:29:48	0.489275	432.779	FALSE	50
2022-09-14	12:29:48	0.16327	432.942	FALSE	50
2022-09-14	12:29:49	-0.140089	432.942	FALSE	50
2022-09-14	12:29:49	-0.645177	432.942	FALSE	50
2022-09-14	12:29:49	-0.735305	432.942	FALSE	50
2022-09-14	12:29:49	-0.58533	432.942	FALSE	50
2022-09-14	12:29:50	-0.530877	432.942	FALSE	50
2022-09-14	12:29:50	-0.616781	432.942	FALSE	50
2022-09-14	12:29:50	-0.558053	432.942	FALSE	50
2022-09-14	12:29:50	-0.310572	432.942	FALSE	50
2022-09-14	12:29:51	0.0339061	432.976	FALSE	50
2022-09-14	12:29:51	0.211819	433.188	FALSE	50
2022-09-14	12:29:51	0.137621	433.326	FALSE	50
2022-09-14	12:29:52	0.253143	433.579	FALSE	50
2022-09-14	12:29:52	0.40159	433.981	FALSE	50
2022-09-14	12:29:52	0.408308	434.389	FALSE	50
2022-09-14	12:29:52	0.35131	434.74	FALSE	50
2022-09-14	12:29:53	0.292074	435.032	FALSE	50
2022-09-14	12:29:53	0.314975	435.347	FALSE	50
2022-09-14	12:29:53	0.252837	435.6	FALSE	50
2022-09-14	12:29:53	0.248155	435.848	FALSE	50
2022-09-14	12:29:54	0.271972	436.12	FALSE	50
2022-09-14	12:29:54	0.384695	436.505	FALSE	50
2022-09-14	12:29:54	0.40154	436.906	FALSE	50
2022-09-14	12:29:55	0.396196	437.303	FALSE	50
2022-09-14	12:29:55	0.467137	437.77	FALSE	50
2022-09-14	12:29:55	0.451412	438.221	FALSE	50
2022-09-14	12:29:55	0.432277	438.653	FALSE	50
2022-09-14	12:29:56	0.425254	439.079	FALSE	50
2022-09-14	12:29:56	0.382455	439.461	FALSE	50
2022-09-14	12:29:56	0.370344	439.831	FALSE	50
2022-09-14	12:29:56	0.329529	440.161	FALSE	50
2022-09-14	12:29:57	0.295738	440.457	FALSE	50
2022-09-14	12:29:57	0.309326	440.766	FALSE	50
2022-09-14	12:29:57	0.318028	441.084	FALSE	50
2022-09-14	12:29:57	0.316094	441.4	FALSE	50
2022-09-14	12:29:58	0.325916	441.726	FALSE	50
2022-09-14	12:29:58	0.329987	442.056	FALSE	50
2022-09-14	12:29:58	0.320776	442.377	FALSE	50
2022-09-14	12:29:59	0.306679	442.684	FALSE	50
2022-09-14	12:29:59	0.308054	442.992	FALSE	50
2022-09-14	12:29:59	0.305662	443.297	FALSE	50
2022-09-14	12:29:59	0.30159	443.599	FALSE	50
2022-09-14	12:30:00	0.293702	443.893	FALSE	50
2022-09-14	12:30:00	0.292634	444.185	FALSE	50
2022-09-14	12:30:00	0.301285	444.486	FALSE	50
2022-09-14	12:30:00	0.295891	444.782	FALSE	50
2022-09-14	12:30:01	0.308054	445.09	FALSE	50
2022-09-14	12:30:01	0.300827	445.391	FALSE	50
2022-09-14	12:30:01	0.29528	445.687	FALSE	50
2022-09-14	12:30:01	0.282354	445.969	FALSE	50
2022-09-14	12:30:02	0.281845	446.251	FALSE	50
2022-09-14	12:30:02	0.267952	446.519	FALSE	50
2022-09-14	12:30:02	0.253906	446.773	FALSE	50
2022-09-14	12:30:03	0.264033	447.037	FALSE	50
2022-09-14	12:30:03	0.268512	447.305	FALSE	50
2022-09-14	12:30:03	0.260471	447.566	FALSE	50
2022-09-14	12:30:03	0.260165	447.826	FALSE	50
2022-09-14	12:30:04	0.260013	448.086	FALSE	50
2022-09-14	12:30:04	0.265509	448.351	FALSE	50
2022-09-14	12:30:04	0.270751	448.622	FALSE	50
2022-09-14	12:30:04	0.264338	448.886	FALSE	50
2022-09-14	12:30:05	0.26612	449.153	FALSE	50
2022-09-14	12:30:05	0.268512	449.421	FALSE	50
2022-09-14	12:30:05	0.2707	449.692	FALSE	50
2022-09-14	12:30:05	0.270649	449.962	FALSE	50
2022-09-14	12:30:06	0.264186	450.227	FALSE	50
2022-09-14	12:30:06	0.262608	450.489	FALSE	50
2022-09-14	12:30:06	0.274618	450.764	FALSE	50
2022-09-14	12:30:07	0.274466	451.038	FALSE	50
2022-09-14	12:30:07	0.270242	451.308	FALSE	50
2022-09-14	12:30:07	0.273753	451.582	FALSE	50
2022-09-14	12:30:07	0.2764	451.859	FALSE	50
2022-09-14	12:30:08	0.270344	452.129	FALSE	50
2022-09-14	12:30:08	0.267188	452.396	FALSE	50
2022-09-14	12:30:08	0.274873	452.671	FALSE	50
2022-09-14	12:30:08	0.267952	452.939	FALSE	50
2022-09-14	12:30:09	0.261692	453.201	FALSE	50
2022-09-14	12:30:09	0.270089	453.471	FALSE	50
2022-09-14	12:30:09	0.26271	453.733	FALSE	50
2022-09-14	12:30:09	0.274822	454.008	FALSE	50
2022-09-14	12:30:10	0.267392	454.276	FALSE	50
2022-09-14	12:30:10	0.26388	454.54	FALSE	50
2022-09-14	12:30:10	0.262048	454.802	FALSE	50
2022-09-14	12:30:11	0.263728	455.065	FALSE	50
2022-09-14	12:30:11	0.264033	455.329	FALSE	50
2022-09-14	12:30:11	0.26383	455.593	FALSE	50
2022-09-14	12:30:11	0.260369	455.854	FALSE	50
2022-09-14	12:30:12	0.264898	456.118	FALSE	50
2022-09-14	12:30:12	0.269478	456.388	FALSE	50
2022-09-14	12:30:12	0.260064	456.648	FALSE	50
2022-09-14	12:30:12	0.261031	456.909	FALSE	50
2022-09-14	12:30:13	0.260929	457.17	FALSE	50
2022-09-14	12:30:13	0.264593	457.435	FALSE	50
2022-09-14	12:30:13	0.258181	457.693	FALSE	50
2022-09-14	12:30:13	0.261896	457.955	FALSE	50
2022-09-14	12:30:14	0.297417	458.252	FALSE	50
2022-09-14	12:30:14	0.300674	458.553	FALSE	50
2022-09-14	12:30:14	0.291056	458.844	FALSE	50
2022-09-14	12:30:15	0.268919	459.113	FALSE	50
2022-09-14	12:30:15	0.262608	459.375	FALSE	50
2022-09-14	12:30:15	0.259758	459.635	FALSE	50
2022-09-14	12:30:15	0.26668	459.902	FALSE	50
2022-09-14	12:30:16	0.286578	460.188	FALSE	50
2022-09-14	12:30:16	0.285662	460.474	FALSE	50
2022-09-14	12:30:16	0.283677	460.758	FALSE	50
2022-09-14	12:30:16	0.285611	461.043	FALSE	50
2022-09-14	12:30:17	0.289987	461.333	FALSE	50
2022-09-14	12:30:17	0.283473	461.617	FALSE	50
2022-09-14	12:30:17	0.277621	461.894	FALSE	50
2022-09-14	12:30:18	0.284033	462.178	FALSE	50
2022-09-14	12:30:18	0.292634	462.471	FALSE	50
2022-09-14	12:30:18	0.296196	462.767	FALSE	50
2022-09-14	12:30:18	0.314771	463.082	FALSE	50
2022-09-14	12:30:19	0.358639	463.441	FALSE	50
2022-09-14	12:30:19	0.381998	463.823	FALSE	50
2022-09-14	12:30:19	0.415585	464.238	FALSE	50
2022-09-14	12:30:19	0.35411	464.592	FALSE	50
2022-09-14	12:30:20	0.33416	464.927	FALSE	50
2022-09-14	12:30:20	0.335127	465.262	FALSE	50
2022-09-14	12:30:20	0.316501	465.578	FALSE	50
2022-09-14	12:30:20	0.296654	465.875	FALSE	50
2022-09-14	12:30:21	0.294059	466.169	FALSE	50
2022-09-14	12:30:21	0.300929	466.47	FALSE	50
2022-09-14	12:30:21	0.299249	466.769	FALSE	50
2022-09-14	12:30:22	0.29243	467.061	FALSE	50
2022-09-14	12:30:22	0.287748	467.349	FALSE	50
2022-09-14	12:30:22	0.293702	467.643	FALSE	50
2022-09-14	12:30:22	0.286069	467.929	FALSE	50
2022-09-14	12:30:23	0.29416	468.223	FALSE	50
2022-09-14	12:30:23	0.291972	468.515	FALSE	50
2022-09-14	12:30:23	0.284898	468.8	FALSE	50
2022-09-14	12:30:23	0.279199	469.079	FALSE	50
2022-09-14	12:30:24	0.280369	469.36	FALSE	50
2022-09-14	12:30:24	0.279453	469.639	FALSE	50
2022-09-14	12:30:24	0.28271	469.922	FALSE	50
2022-09-14	12:30:24	0.283524	470.205	FALSE	50
2022-09-14	12:30:25	0.282201	470.487	FALSE	50
2022-09-14	12:30:25	0.377621	470.865	FALSE	50
2022-09-14	12:30:25	2.52866	473.394	FALSE	50
2022-09-14	12:30:26	5.40739	478.801	1	51
2022-09-14	12:30:26	3.81299	482.614	1	52
2022-09-14	12:30:26	2.94133	485.555	FALSE	52
2022-09-14	12:30:26	1.95329	487.509	FALSE	52
2022-09-14	12:30:27	2.02184	489.531	FALSE	52
2022-09-14	12:30:27	3.28673	492.817	1	53
2022-09-14	12:30:27	3.93584	496.753	1	54
2022-09-14	12:30:27	4.18332	500.936	1	55
2022-09-14	12:30:28	6.27049	507.207	1	56
2022-09-14	12:30:28	5.0969	512.304	1	57
2022-09-14	12:30:28	1.98439	514.288	FALSE	57
2022-09-14	12:30:28	1.44632	515.735	FALSE	57
2022-09-14	12:30:29	0.778588	516.513	FALSE	57
2022-09-14	12:30:29	0.489275	517.002	FALSE	57
2022-09-14	12:30:29	0.320369	517.323	FALSE	57
2022-09-14	12:30:30	0.575178	517.898	FALSE	57
2022-09-14	12:30:30	0.184389	518.082	FALSE	57
2022-09-14	12:30:30	0.292888	518.375	FALSE	57
2022-09-14	12:30:30	0.585203	518.96	FALSE	57
2022-09-14	12:30:31	2.84586	521.806	FALSE	57
2022-09-14	12:30:31	4.11222	525.919	1	58
2022-09-14	12:30:31	3.7852	529.704	1	59
2022-09-14	12:30:32	1.83777	531.542	FALSE	59
2022-09-14	12:30:32	1.47131	533.013	FALSE	59
2022-09-14	12:30:32	0.736807	533.75	FALSE	59
2022-09-14	12:30:32	1.56327	535.313	FALSE	59
2022-09-14	12:30:32	1.47538	536.788	FALSE	59
2022-09-14	12:30:33	0.844135	537.632	FALSE	59
2022-09-14	12:30:33	0.43126	538.064	FALSE	59
2022-09-14	12:30:33	0.252888	538.317	FALSE	59
2022-09-14	12:30:34	0.404288	538.721	FALSE	59
2022-09-14	12:30:34	0.175992	538.897	FALSE	59
2022-09-14	12:30:34	0.371616	539.268	FALSE	59
2022-09-14	12:30:34	0.178435	539.447	FALSE	59
2022-09-14	12:30:35	0.22215	539.669	FALSE	59
2022-09-14	12:30:35	0.133702	539.803	FALSE	59
2022-09-14	12:30:35	0.212837	540.016	FALSE	59
2022-09-14	12:30:35	0.349682	540.365	FALSE	59
2022-09-14	12:30:36	0.192685	540.558	FALSE	59
2022-09-14	12:30:36	0.541539	541.099	FALSE	59
2022-09-14	12:30:36	0.806832	541.906	FALSE	59
2022-09-14	12:30:36	2.70408	544.61	FALSE	59
2022-09-14	12:30:37	3.04912	547.66	1	60
2022-09-14	12:30:37	3.23736	550.897	1	61
2022-09-14	12:30:37	1.89955	552.796	FALSE	61
2022-09-14	12:30:38	0.486018	553.282	FALSE	61
2022-09-14	12:30:38	0.351361	553.634	FALSE	61
2022-09-14	12:30:38	0.386985	554.021	FALSE	61
2022-09-14	12:30:38	0.46902	554.49	FALSE	61
2022-09-14	12:30:39	0.282099	554.772	FALSE	61
2022-09-14	12:30:39	0.326883	555.099	FALSE	61
2022-09-14	12:30:39	0.406679	555.505	FALSE	61
2022-09-14	12:30:39	0.157672	555.663	FALSE	61
2022-09-14	12:30:40	0.345662	556.009	FALSE	61
2022-09-14	12:30:40	0.10383	556.113	FALSE	61
2022-09-14	12:30:40	0.350293	556.463	FALSE	61
2022-09-14	12:30:40	0.220776	556.684	FALSE	61
2022-09-14	12:30:41	0.31299	556.997	FALSE	61
2022-09-14	12:30:41	0.351209	557.348	FALSE	61
2022-09-14	12:30:41	0.152481	557.5	FALSE	61
2022-09-14	12:30:42	0.0494277	557.55	FALSE	61
2022-09-14	12:30:42	-0.0882312	557.55	FALSE	61
2022-09-14	12:30:42	-0.222939	557.55	FALSE	61
2022-09-14	12:30:42	-0.340394	557.55	FALSE	61
2022-09-14	12:30:43	-0.142684	557.55	FALSE	61
2022-09-14	12:30:43	1.76592	559.316	FALSE	61
2022-09-14	12:30:43	4.40128	563.717	1	62
2022-09-14	12:30:43	5.63614	569.353	1	63
2022-09-14	12:30:44	4.14413	573.497	1	64
2022-09-14	12:30:44	1.50693	575.004	FALSE	64
2022-09-14	12:30:44	0.623371	575.628	FALSE	64
2022-09-14	12:30:45	0.433397	576.061	FALSE	64
2022-09-14	12:30:45	0.242507	576.303	FALSE	64
2022-09-14	12:30:45	0.296654	576.6	FALSE	64
2022-09-14	12:30:45	0.00332086	576.603	FALSE	64
2022-09-14	12:30:46	0.152074	576.756	FALSE	64
2022-09-14	12:30:46	0.111005	576.867	FALSE	64
2022-09-14	12:30:46	0.199657	577.066	FALSE	64
2022-09-14	12:30:46	-0.00762061	577.066	FALSE	64
2022-09-14	12:30:47	0.155331	577.222	FALSE	64
2022-09-14	12:30:47	0.0125829	577.234	FALSE	64
2022-09-14	12:30:47	0.125255	577.359	FALSE	64
2022-09-14	12:30:47	0.00276106	577.362	FALSE	64
2022-09-14	12:30:48	0.147087	577.509	FALSE	64
2022-09-14	12:30:48	0.0960434	577.605	FALSE	64
2022-09-14	12:30:48	0.159911	577.765	FALSE	64
2022-09-14	12:30:49	0.0926338	577.858	FALSE	64
2022-09-14	12:30:49	0.148206	578.006	FALSE	64
2022-09-14	12:30:49	0.217061	578.223	FALSE	64
2022-09-14	12:30:49	0.199758	578.423	FALSE	64
2022-09-14	12:30:50	0.178181	578.601	FALSE	64
2022-09-14	12:30:50	0.271412	578.872	FALSE	64
2022-09-14	12:30:50	0.380471	579.253	FALSE	64
2022-09-14	12:30:50	0.141438	579.394	FALSE	64
2022-09-14	12:30:51	0.400115	579.794	FALSE	64
2022-09-14	12:30:51	0.202608	579.997	FALSE	64
2022-09-14	12:30:51	0.370903	580.368	FALSE	64
2022-09-14	12:30:51	0.333143	580.701	FALSE	64
2022-09-14	12:30:52	0.409987	581.111	FALSE	64
2022-09-14	12:30:52	1.73625	582.847	FALSE	64
2022-09-14	12:30:52	4.84205	587.689	1	65
2022-09-14	12:30:53	7.55202	595.241	1	66
2022-09-14	12:30:53	4.06785	599.309	1	67
2022-09-14	12:30:53	4.51808	603.827	1	68
2022-09-14	12:30:53	1.83039	605.658	FALSE	68
2022-09-14	12:30:54	1.68296	607.341	FALSE	68
2022-09-14	12:30:54	1.13202	608.473	FALSE	68
2022-09-14	12:30:54	1.52892	610.002	FALSE	68
2022-09-14	12:30:54	1.78052	611.782	FALSE	68
2022-09-14	12:30:55	1.13777	612.92	FALSE	68
2022-09-14	12:30:55	1.52235	614.442	FALSE	68
2022-09-14	12:30:55	0.842303	615.285	FALSE	68
2022-09-14	12:30:55	1.33889	616.623	FALSE	68
2022-09-14	12:30:56	0.979249	617.603	FALSE	68
2022-09-14	12:30:56	0.873193	618.476	FALSE	68
2022-09-14	12:30:56	1.02648	619.502	FALSE	68
2022-09-14	12:30:57	0.489631	619.992	FALSE	68
2022-09-14	12:30:57	0.870547	620.863	FALSE	68
2022-09-14	12:30:57	1.11299	621.976	FALSE	68
2022-09-14	12:30:57	2.51309	624.489	FALSE	68
2022-09-14	12:30:58	5.10846	629.597	1	69
2022-09-14	12:30:58	7.09319	636.69	1	70
2022-09-14	12:30:58	6.7938	643.484	1	71
2022-09-14	12:30:58	3.06042	646.545	1	72
2022-09-14	12:30:59	4.30118	650.846	1	73
2022-09-14	12:30:59	3.00205	653.848	1	74
2022-09-14	12:30:59	6.26764	660.115	1	75
2022-09-14	12:30:59	4.63762	664.753	1	76
2022-09-14	12:31:00	4.40637	669.159	1	77
2022-09-14	12:31:00	4.94622	674.106	1	78
2022-09-14	12:31:00	1.68622	675.792	FALSE	78
2022-09-14	12:31:01	3.66948	679.461	1	79
2022-09-14	12:31:01	1.33187	680.793	FALSE	79
2022-09-14	12:31:01	2.72541	683.519	FALSE	79
2022-09-14	12:31:01	3.01899	686.538	1	80
2022-09-14	12:31:02	1.78953	688.327	FALSE	80
2022-09-14	12:31:02	2.0623	690.389	FALSE	80
2022-09-14	12:31:02	0.417519	690.807	FALSE	80
2022-09-14	12:31:02	0.518842	691.326	FALSE	80
2022-09-14	12:31:03	0.321794	691.648	FALSE	80
2022-09-14	12:31:03	0.217061	691.865	FALSE	80
2022-09-14	12:31:03	0.129275	691.994	FALSE	80
2022-09-14	12:31:03	0.217875	692.212	FALSE	80
2022-09-14	12:31:04	0.411565	692.623	FALSE	80
2022-09-14	12:31:04	0.582914	693.206	FALSE	80
2022-09-14	12:31:04	0.428613	693.635	FALSE	80
2022-09-14	12:31:05	0.34841	693.983	FALSE	80
2022-09-14	12:31:05	0.374008	694.357	FALSE	80
2022-09-14	12:31:05	0.395026	694.752	FALSE	80
2022-09-14	12:31:05	0.429682	695.182	FALSE	80
2022-09-14	12:31:06	0.485051	695.667	FALSE	80
2022-09-14	12:31:06	-0.323193	695.667	FALSE	80
2022-09-14	12:31:06	0.986221	696.653	FALSE	80
2022-09-14	12:31:06	0.733804	697.387	FALSE	80
2022-09-14	12:31:07	0.728155	698.115	FALSE	80
2022-09-14	12:31:07	0.736247	698.851	FALSE	80
2022-09-14	12:31:07	0.736857	699.588	FALSE	80
2022-09-14	12:31:07	0.728512	700.317	FALSE	80
2022-09-14	12:31:08	0.608868	700.926	FALSE	80
2022-09-14	12:31:08	0.28612	701.212	FALSE	80
2022-09-14	12:31:08	0.33528	701.547	FALSE	80
2022-09-14	12:31:09	0.349173	701.896	FALSE	80
2022-09-14	12:31:09	0.429173	702.325	FALSE	80
2022-09-14	12:31:09	0.375789	702.701	FALSE	80
2022-09-14	12:31:09	0.338232	703.039	FALSE	80
2022-09-14	12:31:10	0.337926	703.377	FALSE	80
2022-09-14	12:31:10	0.3164	703.694	FALSE	80
2022-09-14	12:31:10	0.343575	704.037	FALSE	80
2022-09-14	12:31:10	0.41584	704.453	FALSE	80
2022-09-14	12:31:11	0.374517	704.828	FALSE	80
2022-09-14	12:31:11	0.375382	705.203	FALSE	80
2022-09-14	12:31:11	0.345407	705.549	FALSE	80
2022-09-14	12:31:11	0.349377	705.898	FALSE	80
2022-09-14	12:31:12	0.345102	706.243	FALSE	80
2022-09-14	12:31:12	0.350954	706.594	FALSE	80
2022-09-14	12:31:12	0.353753	706.948	FALSE	80
2022-09-14	12:31:13	0.343524	707.291	FALSE	80
2022-09-14	12:31:13	0.333041	707.624	FALSE	80
2022-09-14	12:31:13	0.330598	707.955	FALSE	80
2022-09-14	12:31:13	0.336858	708.292	FALSE	80
2022-09-14	12:31:14	0.337468	708.629	FALSE	80
2022-09-14	12:31:14	0.337723	708.967	FALSE	80
2022-09-14	12:31:14	0.329784	709.297	FALSE	80
2022-09-14	12:31:14	0.320522	709.617	FALSE	80
2022-09-14	12:31:15	0.32841	709.946	FALSE	80
2022-09-14	12:31:15	0.343321	710.289	FALSE	80
2022-09-14	12:31:15	0.331718	710.621	FALSE	80
2022-09-14	12:31:15	0.322099	710.943	FALSE	80
2022-09-14	12:31:16	0.309631	711.252	FALSE	80
2022-09-14	12:31:16	0.305102	711.557	FALSE	80
2022-09-14	12:31:16	0.307087	711.865	FALSE	80
2022-09-14	12:31:17	0.292532	712.157	FALSE	80
2022-09-14	12:31:17	0.300624	712.458	FALSE	80
2022-09-14	12:31:17	0.334771	712.793	FALSE	80
2022-09-14	12:31:17	0.346221	713.139	FALSE	80
2022-09-14	12:31:18	0.338283	713.477	FALSE	80
2022-09-14	12:31:18	0.361132	713.838	FALSE	80
2022-09-14	12:31:18	0.370852	714.209	FALSE	80
2022-09-14	12:31:18	0.399148	714.608	FALSE	80
2022-09-14	12:31:19	0.46902	715.077	FALSE	80
2022-09-14	12:31:19	0.60042	715.678	FALSE	80
2022-09-14	12:31:19	0.77813	716.456	FALSE	80
2022-09-14	12:31:20	0.692837	717.149	FALSE	80
2022-09-14	12:31:20	0.711005	717.86	FALSE	80
2022-09-14	12:31:20	0.594924	718.454	FALSE	80
2022-09-14	12:31:20	0.57874	719.033	FALSE	80
2022-09-14	12:31:21	0.490802	719.524	FALSE	80
2022-09-14	12:31:21	0.458944	719.983	FALSE	80
2022-09-14	12:31:21	0.432277	720.415	FALSE	80
2022-09-14	12:31:21	0.429173	720.844	FALSE	80
2022-09-14	12:31:22	0.401845	721.246	FALSE	80
2022-09-14	12:31:22	0.397926	721.644	FALSE	80
2022-09-14	12:31:22	0.395534	722.04	FALSE	80
2022-09-14	12:31:22	0.383524	722.423	FALSE	80
2022-09-14	12:31:23	0.387494	722.811	FALSE	80
2022-09-14	12:31:23	0.39528	723.206	FALSE	80
2022-09-14	12:31:23	0.396094	723.602	FALSE	80
2022-09-14	12:31:24	0.40042	724.003	FALSE	80
2022-09-14	12:31:24	0.392379	724.395	FALSE	80
2022-09-14	12:31:24	0.390344	724.785	FALSE	80
2022-09-14	12:31:24	0.395534	725.181	FALSE	80
2022-09-14	12:31:25	0.398384	725.579	FALSE	80
2022-09-14	12:31:25	0.396145	725.975	FALSE	80
2022-09-14	12:31:25	0.397621	726.373	FALSE	80
2022-09-14	12:31:25	0.401794	726.775	FALSE	80
2022-09-14	12:31:26	0.399249	727.174	FALSE	80
2022-09-14	12:31:26	0.40556	727.58	FALSE	80
2022-09-14	12:31:26	0.409733	727.989	FALSE	80
2022-09-14	12:31:26	0.407443	728.397	FALSE	80
2022-09-14	12:31:27	0.404949	728.802	FALSE	80
2022-09-14	12:31:27	0.403473	729.205	FALSE	80
2022-09-14	12:31:27	0.397163	729.602	FALSE	80
2022-09-14	12:31:28	0.400115	730.002	FALSE	80
2022-09-14	12:31:28	0.402506	730.405	FALSE	80
2022-09-14	12:31:28	0.371056	730.776	FALSE	80
2022-09-14	12:31:28	0.461438	731.237	FALSE	80
2022-09-14	12:31:29	0.372379	731.61	FALSE	80
2022-09-14	12:31:29	0.238486	731.848	FALSE	80
2022-09-14	12:31:29	0.28612	732.134	FALSE	80
2022-09-14	12:31:29	0.289428	732.424	FALSE	80
2022-09-14	12:31:30	0.436908	732.861	FALSE	80
2022-09-14	12:31:30	0.297468	733.158	FALSE	80
2022-09-14	12:31:30	0.337214	733.495	FALSE	80
2022-09-14	12:31:30	0.458995	733.954	FALSE	80
2022-09-14	12:31:31	0.285255	734.24	FALSE	80
2022-09-14	12:31:31	0.222099	734.462	FALSE	80
2022-09-14	12:31:31	0.210954	734.673	FALSE	80
2022-09-14	12:31:32	0.17472	734.847	FALSE	80
2022-09-14	12:31:32	0.212583	735.06	FALSE	80
2022-09-14	12:31:32	0.262863	735.323	FALSE	80
2022-09-14	12:31:32	0.371616	735.695	FALSE	80
2022-09-14	12:31:33	0.503626	736.198	FALSE	80
2022-09-14	12:31:33	0.683677	736.882	FALSE	80
2022-09-14	12:31:33	0.482812	737.365	FALSE	80
2022-09-14	12:31:33	0.692633	738.057	FALSE	80
2022-09-14	12:31:34	0.860471	738.918	FALSE	80
2022-09-14	12:31:34	0.833601	739.751	FALSE	80
2022-09-14	12:31:34	0.537926	740.289	FALSE	80
2022-09-14	12:31:34	0.514415	740.804	FALSE	80
2022-09-14	12:31:35	0.444033	741.248	FALSE	80
2022-09-14	12:31:35	0.360064	741.608	FALSE	80
2022-09-14	12:31:35	0.427748	742.036	FALSE	80
2022-09-14	12:31:36	0.383015	742.419	FALSE	80
2022-09-14	12:31:36	0.385611	742.804	FALSE	80
2022-09-14	12:31:36	0.423779	743.228	FALSE	80
2022-09-14	12:31:36	0.453193	743.681	FALSE	80
2022-09-14	12:31:37	0.464186	744.145	FALSE	80
2022-09-14	12:31:37	0.434008	744.579	FALSE	80
2022-09-14	12:31:37	0.449071	745.028	FALSE	80
2022-09-14	12:31:37	0.400166	745.429	FALSE	80
2022-09-14	12:31:38	0.29126	745.72	FALSE	80
2022-09-14	12:31:38	0.201285	745.921	FALSE	80
2022-09-14	12:31:38	0.171769	746.093	FALSE	80
2022-09-14	12:31:38	0.215178	746.308	FALSE	80
2022-09-14	12:31:39	0.348613	746.657	FALSE	80
2022-09-14	12:31:39	0.472227	747.129	FALSE	80
2022-09-14	12:31:39	0.743066	747.872	FALSE	80
2022-09-14	12:31:40	0.532837	748.405	FALSE	80
2022-09-14	12:31:40	0.352888	748.758	FALSE	80
2022-09-14	12:31:40	0.344847	749.103	FALSE	80
2022-09-14	12:31:40	0.36271	749.465	FALSE	80
2022-09-14	12:31:41	0.34327	749.808	FALSE	80
2022-09-14	12:31:41	0.299657	750.108	FALSE	80
2022-09-14	12:31:41	0.352736	750.461	FALSE	80
2022-09-14	12:31:41	0.364644	750.826	FALSE	80
2022-09-14	12:31:42	0.383524	751.209	FALSE	80
2022-09-14	12:31:42	0.436196	751.645	FALSE	80
2022-09-14	12:31:42	0.535534	752.181	FALSE	80
2022-09-14	12:31:42	0.554466	752.735	FALSE	80
2022-09-14	12:31:43	0.567646	753.303	FALSE	80
2022-09-14	12:31:43	0.363117	753.666	FALSE	80
2022-09-14	12:31:43	0.456349	754.122	FALSE	80
2022-09-14	12:31:44	0.360369	754.483	FALSE	80
2022-09-14	12:31:44	0.296196	754.779	FALSE	80
2022-09-14	12:31:44	0.291819	755.071	FALSE	80
2022-09-14	12:31:44	0.334771	755.406	FALSE	80
2022-09-14	12:31:45	0.594262	756	FALSE	80
2022-09-14	12:31:45	1.8823	757.882	FALSE	80
2022-09-14	12:31:45	4.40683	762.289	1	81
2022-09-14	12:31:45	4.54464	766.834	1	82
2022-09-14	12:31:46	2.90286	769.736	FALSE	82
2022-09-14	12:31:46	2.70235	772.439	FALSE	82
2022-09-14	12:31:46	4.38317	776.822	1	83
2022-09-14	12:31:46	3.4536	780.276	1	84
2022-09-14	12:31:47	3.49523	783.771	1	85
2022-09-14	12:31:47	3.19528	786.966	1	86
2022-09-14	12:31:47	5.68932	792.655	1	87
2022-09-14	12:31:48	10.1007	802.756	1	88
2022-09-14	12:31:48	4.69263	807.449	1	89
2022-09-14	12:31:48	2.97874	810.427	FALSE	89
2022-09-14	12:31:48	1.65808	812.086	FALSE	89
2022-09-14	12:31:49	2.13772	814.223	FALSE	89
2022-09-14	12:31:49	2.81467	817.038	FALSE	89
2022-09-14	12:31:49	4.27289	821.311	1	90
2022-09-14	12:31:49	6.74871	828.059	1	91
2022-09-14	12:31:50	6.17482	834.234	1	92
2022-09-14	12:31:50	5.45762	839.692	1	93
2022-09-14	12:31:50	5.02917	844.721	1	94
2022-09-14	12:31:50	7.93334	852.654	1	95
2022-09-14	12:31:51	9.96321	862.618	1	96
2022-09-14	12:31:51	10.9257	873.543	1	97
2022-09-14	12:31:51	8.10897	881.652	1	98
2022-09-14	12:31:52	7.46204	889.114	1	99
2022-09-14	12:31:52	5.97701	895.091	1	100
2022-09-14	12:31:52	2.84393	897.935	FALSE	100
2022-09-14	12:31:52	4.10978	902.045	1	101
2022-09-14	12:31:53	11.6085	913.654	1	102
2022-09-14	12:31:53	7.32036	920.974	1	103
2022-09-14	12:31:53	4.23701	925.211	1	104
2022-09-14	12:31:53	1.02653	926.237	FALSE	104
2022-09-14	12:31:54	0.465407	926.703	FALSE	104
2022-09-14	12:31:54	0.442252	927.145	FALSE	104
2022-09-14	12:31:54	0.418537	927.564	FALSE	104
2022-09-14	12:31:55	0.278486	927.842	FALSE	104
2022-09-14	12:31:55	0.359351	928.202	FALSE	104
2022-09-14	12:31:55	0.175942	928.377	FALSE	104
2022-09-14	12:31:55	0.580216	928.958	FALSE	104
2022-09-14	12:31:56	0.893092	929.851	FALSE	104
2022-09-14	12:31:56	1.92775	931.779	FALSE	104
2022-09-14	12:31:56	3.20378	934.982	1	105
2022-09-14	12:31:56	1.86403	936.846	FALSE	105
2022-09-14	12:31:57	1.4164	938.263	FALSE	105
2022-09-14	12:31:57	1.16027	939.423	FALSE	105
2022-09-14	12:31:57	0.726679	940.15	FALSE	105
2022-09-14	12:31:57	0.737214	940.887	FALSE	105
2022-09-14	12:31:58	0.681285	941.568	FALSE	105
2022-09-14	12:31:58	0.729326	942.298	FALSE	105
2022-09-14	12:31:58	0.724898	943.022	FALSE	105
2022-09-14	12:31:59	0.72215	943.745	FALSE	105
2022-09-14	12:31:59	0.724898	944.469	FALSE	105
2022-09-14	12:31:59	0.73813	945.208	FALSE	105
2022-09-14	12:31:59	0.72902	945.937	FALSE	105
2022-09-14	12:32:00	0.637672	946.574	FALSE	105
2022-09-14	12:32:00	0.724542	947.299	FALSE	105
2022-09-14	12:32:00	0.721387	948.02	FALSE	105
2022-09-14	12:32:00	0.73014	948.75	FALSE	105
2022-09-14	12:32:01	0.72327	949.474	FALSE	105
2022-09-14	12:32:01	0.701539	950.175	FALSE	105
2022-09-14	12:32:01	0.659199	950.834	FALSE	105
2022-09-14	12:32:01	0.540114	951.374	FALSE	105
2022-09-14	12:32:02	0.485865	951.86	FALSE	105
2022-09-14	12:32:02	0.304593	952.165	FALSE	105
2022-09-14	12:32:02	0.231616	952.397	FALSE	105
2022-09-14	12:32:03	-0.1436	952.397	FALSE	105
2022-09-14	12:32:03	-0.195152	952.397	FALSE	105
2022-09-14	12:32:03	-0.446755	952.397	FALSE	105
2022-09-14	12:32:03	-0.671182	952.397	FALSE	105
2022-09-14	12:32:04	-0.732048	952.397	FALSE	105
2022-09-14	12:32:04	-0.725941	952.397	FALSE	105
2022-09-14	12:32:04	-0.618053	952.397	FALSE	105
2022-09-14	12:32:04	-0.862582	952.397	FALSE	105
2022-09-14	12:32:05	-0.805279	952.397	FALSE	105
2022-09-14	12:32:05	-0.90365	952.397	FALSE	105
2022-09-14	12:32:05	-1.00645	952.397	FALSE	105
2022-09-14	12:32:05	-1.07184	952.397	FALSE	105
2022-09-14	12:32:06	-0.592811	952.397	FALSE	105
2022-09-14	12:32:06	-0.531081	952.397	FALSE	105
2022-09-14	12:32:06	-0.522837	952.397	FALSE	105
2022-09-14	12:32:07	-0.5179	952.397	FALSE	105
2022-09-14	12:32:07	-0.396425	952.397	FALSE	105
2022-09-14	12:32:07	-0.418867	952.397	FALSE	105
2022-09-14	12:32:07	-0.309045	952.397	FALSE	105
2022-09-14	12:32:08	-0.349554	952.397	FALSE	105
2022-09-14	12:32:08	-0.463549	952.397	FALSE	105
2022-09-14	12:32:08	-0.443905	952.397	FALSE	105
2022-09-14	12:32:08	-0.427519	952.397	FALSE	105
2022-09-14	12:32:09	-0.436272	952.397	FALSE	105
2022-09-14	12:32:09	-0.378409	952.397	FALSE	105
2022-09-14	12:32:09	-0.38416	952.397	FALSE	105
2022-09-14	12:32:09	-0.38701	952.397	FALSE	105
2022-09-14	12:32:10	-0.402226	952.397	FALSE	105
2022-09-14	12:32:10	-0.373218	952.397	FALSE	105
2022-09-14	12:32:10	-0.302481	952.397	FALSE	105
2022-09-14	12:32:11	-0.324211	952.397	FALSE	105
2022-09-14	12:32:11	-0.327671	952.397	FALSE	105
2022-09-14	12:32:11	-0.373066	952.397	FALSE	105
2022-09-14	12:32:11	-0.416526	952.397	FALSE	105
2022-09-14	12:32:12	-0.446552	952.397	FALSE	105
2022-09-14	12:32:12	-0.497544	952.397	FALSE	105
2022-09-14	12:32:12	-0.519427	952.397	FALSE	105
2022-09-14	12:32:12	-0.508078	952.397	FALSE	105
2022-09-14	12:32:13	-0.501971	952.397	FALSE	105
2022-09-14	12:32:13	-0.513727	952.397	FALSE	105
2022-09-14	12:32:13	-0.521157	952.397	FALSE	105
2022-09-14	12:32:13	-0.528231	952.397	FALSE	105
2022-09-14	12:32:14	-0.546806	952.397	FALSE	105
2022-09-14	12:32:14	-0.531234	952.397	FALSE	105
2022-09-14	12:32:14	-0.52416	952.397	FALSE	105
2022-09-14	12:32:15	-0.528587	952.397	FALSE	105
2022-09-14	12:32:15	-0.517086	952.397	FALSE	105
2022-09-14	12:32:15	-0.518562	952.397	FALSE	105
2022-09-14	12:32:15	-0.3979	952.397	FALSE	105
2022-09-14	12:32:16	-0.457086	952.397	FALSE	105
2022-09-14	12:32:16	-0.46874	952.397	FALSE	105
2022-09-14	12:32:16	-0.500699	952.397	FALSE	105
2022-09-14	12:32:16	-0.498715	952.397	FALSE	105
2022-09-14	12:32:17	-0.513473	952.397	FALSE	105
2022-09-14	12:32:17	-0.453524	952.397	FALSE	105
2022-09-14	12:32:17	-0.490114	952.397	FALSE	105
2022-09-14	12:32:17	-0.505992	952.397	FALSE	105
2022-09-14	12:32:18	-0.499478	952.397	FALSE	105
2022-09-14	12:32:18	-0.467926	952.397	FALSE	105
2022-09-14	12:32:18	-0.376068	952.397	FALSE	105
2022-09-14	12:32:19	-0.259783	952.397	FALSE	105
2022-09-14	12:32:19	-0.0651269	952.397	FALSE	105
2022-09-14	12:32:19	0.147545	952.544	FALSE	105
2022-09-14	12:32:19	0.736959	953.281	FALSE	105
2022-09-14	12:32:20	0.733804	954.015	FALSE	105
2022-09-14	12:32:20	0.724542	954.739	FALSE	105
2022-09-14	12:32:20	0.731107	955.47	FALSE	105
2022-09-14	12:32:20	0.729987	956.2	FALSE	105
2022-09-14	12:32:21	0.727596	956.928	FALSE	105
2022-09-14	12:32:21	0.7107	957.639	FALSE	105
2022-09-14	12:32:21	0.663117	958.302	FALSE	105
2022-09-14	12:32:21	0.594313	958.896	FALSE	105
2022-09-14	12:32:22	0.551412	959.448	FALSE	105
2022-09-14	12:32:22	0.22098	959.669	FALSE	105
2022-09-14	12:32:22	-0.0469081	959.669	FALSE	105
2022-09-14	12:32:23	-0.262786	959.669	FALSE	105
2022-09-14	12:32:23	0.0814379	959.75	FALSE	105
2022-09-14	12:32:23	-0.247773	959.75	FALSE	105
2022-09-14	12:32:23	-0.296374	959.75	FALSE	105
2022-09-14	12:32:24	-0.42589	959.75	FALSE	105
2022-09-14	12:32:24	-0.448842	959.75	FALSE	105
2022-09-14	12:32:24	-0.355203	959.75	FALSE	105
2022-09-14	12:32:24	-0.0606486	959.75	FALSE	105
2022-09-14	12:32:25	0.07813	959.828	FALSE	105
2022-09-14	12:32:25	0.37986	960.208	FALSE	105
2022-09-14	12:32:25	1.41818	961.626	FALSE	105
2022-09-14	12:32:25	1.11879	962.745	FALSE	105
2022-09-14	12:32:26	2.25279	964.998	FALSE	105
2022-09-14	12:32:26	1.30281	966.301	FALSE	105
2022-09-14	12:32:26	1.84128	968.142	FALSE	105
2022-09-14	12:32:27	1.13742	969.279	FALSE	105
2022-09-14	12:32:27	0.638486	969.918	FALSE	105
2022-09-14	12:32:27	1.06154	970.979	FALSE	105
2022-09-14	12:32:27	0.297723	971.277	FALSE	105
2022-09-14	12:32:28	0.335484	971.613	FALSE	105
2022-09-14	12:32:28	0.538435	972.151	FALSE	105
2022-09-14	12:32:28	0.224033	972.375	FALSE	105
2022-09-14	12:32:28	0.251311	972.626	FALSE	105
2022-09-14	12:32:29	0.325662	972.952	FALSE	105
2022-09-14	12:32:29	1.40317	974.355	FALSE	105
2022-09-14	12:32:29	0.667392	975.023	FALSE	105
2022-09-14	12:32:29	1.30301	976.326	FALSE	105
2022-09-14	12:32:30	2.34709	978.673	FALSE	105
2022-09-14	12:32:30	2.1507	980.823	FALSE	105
2022-09-14	12:32:30	0.960216	981.784	FALSE	105
2022-09-14	12:32:31	0.420267	982.204	FALSE	105
2022-09-14	12:32:31	0.0554837	982.259	FALSE	105
2022-09-14	12:32:31	0.0468832	982.306	FALSE	105
2022-09-14	12:32:31	-0.355508	982.306	FALSE	105
2022-09-14	12:32:32	-0.358358	982.306	FALSE	105
2022-09-14	12:32:32	-0.439834	982.306	FALSE	105
2022-09-14	12:32:32	-0.512048	982.306	FALSE	105
2022-09-14	12:32:32	-0.472862	982.306	FALSE	105
2022-09-14	12:32:33	-0.626552	982.306	FALSE	105
2022-09-14	12:32:33	-0.374898	982.306	FALSE	105
2022-09-14	12:32:33	-0.8579	982.306	FALSE	105
2022-09-14	12:32:33	-0.28818	982.306	FALSE	105
2022-09-14	12:32:34	0.0540078	982.36	FALSE	105
2022-09-14	12:32:34	0.210395	982.571	FALSE	105
2022-09-14	12:32:34	0.390038	982.961	FALSE	105
2022-09-14	12:32:35	0.200522	983.161	FALSE	105
2022-09-14	12:32:35	0.342659	983.504	FALSE	105
2022-09-14	12:32:35	0.397774	983.902	FALSE	105
2022-09-14	12:32:35	0.501743	984.403	FALSE	105
2022-09-14	12:32:36	0.604898	985.008	FALSE	105
2022-09-14	12:32:36	0.471616	985.48	FALSE	105
2022-09-14	12:32:36	0.713651	986.193	FALSE	105
2022-09-14	12:32:36	0.633651	986.827	FALSE	105
2022-09-14	12:32:37	0.571259	987.398	FALSE	105
2022-09-14	12:32:37	0.545356	987.944	FALSE	105
2022-09-14	12:32:37	0.503677	988.447	FALSE	105
2022-09-14	12:32:38	0.429224	988.877	FALSE	105
2022-09-14	12:32:38	0.413957	989.291	FALSE	105
2022-09-14	12:32:38	0.392786	989.683	FALSE	105
2022-09-14	12:32:38	0.195178	989.879	FALSE	105
2022-09-14	12:32:39	0.261336	990.14	FALSE	105
2022-09-14	12:32:39	0.0246949	990.165	FALSE	105
2022-09-14	12:32:39	0.224746	990.389	FALSE	105
2022-09-14	12:32:39	0.353092	990.742	FALSE	105
2022-09-14	12:32:40	0.625	991.367	FALSE	105
2022-09-14	12:32:40	0.401692	991.769	FALSE	105
2022-09-14	12:32:40	0.104186	991.873	FALSE	105
2022-09-14	12:32:40	0.322303	992.196	FALSE	105
2022-09-14	12:32:41	0.705051	992.901	FALSE	105
2022-09-14	12:32:41	0.316196	993.217	FALSE	105
2022-09-14	12:32:41	0.279453	993.496	FALSE	105
2022-09-14	12:32:42	0.37411	993.87	FALSE	105
2022-09-14	12:32:42	0.345916	994.216	FALSE	105
2022-09-14	12:32:42	1.93798	996.154	FALSE	105
2022-09-14	12:32:42	1.73894	997.893	FALSE	105
2022-09-14	12:32:43	6.67289	1004.57	1	106
2022-09-14	12:32:43	14.8497	1019.42	1	107
2022-09-14	12:32:43	16.1921	1035.61	1	108
2022-09-14	12:32:43	8.77095	1044.38	1	109
2022-09-14	12:32:44	5.23248	1049.61	1	110
2022-09-14	12:32:44	3.8279	1053.44	1	111
2022-09-14	12:32:44	3.79248	1057.23	1	112
2022-09-14	12:32:44	3.82917	1061.06	1	113
2022-09-14	12:32:45	3.4649	1064.53	1	114
2022-09-14	12:32:45	3.44306	1067.97	1	115
2022-09-14	12:32:45	3.49966	1071.47	1	116
2022-09-14	12:32:46	3.58535	1075.05	1	117
2022-09-14	12:32:46	3.2937	1078.35	1	118
2022-09-14	12:32:46	3.25314	1081.6	1	119
2022-09-14	12:32:46	3.34983	1084.95	1	120
2022-09-14	12:32:47	3.46082	1088.41	1	121
2022-09-14	12:32:47	3.33905	1091.75	1	122
2022-09-14	12:32:47	3.27095	1095.02	1	123
2022-09-14	12:32:47	3.15075	1098.17	1	124
2022-09-14	12:32:48	3.11976	1101.29	1	125
2022-09-14	12:32:48	3.10006	1104.39	1	126
2022-09-14	12:32:48	3.00337	1107.4	1	127
2022-09-14	12:32:49	2.91533	1110.31	FALSE	127
2022-09-14	12:32:49	2.91792	1113.23	FALSE	127
2022-09-14	12:32:49	2.92754	1116.16	FALSE	127
2022-09-14	12:32:49	3.0393	1119.2	1	128
2022-09-14	12:32:50	2.96571	1122.16	FALSE	128
2022-09-14	12:32:50	2.88688	1125.05	FALSE	128
2022-09-14	12:32:50	2.9679	1128.02	FALSE	128
2022-09-14	12:32:50	2.76444	1130.78	FALSE	128
2022-09-14	12:32:51	2.32276	1133.1	FALSE	128
2022-09-14	12:32:51	2.00419	1135.11	FALSE	128
2022-09-14	12:32:51	1.8392	1136.95	FALSE	128
2022-09-14	12:32:51	1.70393	1138.65	FALSE	128
2022-09-14	12:32:52	1.56536	1140.22	FALSE	128
2022-09-14	12:32:52	1.39223	1141.61	FALSE	128
2022-09-14	12:32:52	1.39146	1143	FALSE	128
2022-09-14	12:32:52	1.49055	1144.49	FALSE	128
2022-09-14	12:32:53	1.52261	1146.01	FALSE	128
2022-09-14	12:32:53	1.62413	1147.64	FALSE	128
2022-09-14	12:32:53	1.6565	1149.29	FALSE	128
2022-09-14	12:32:54	1.52093	1150.81	FALSE	128
2022-09-14	12:32:54	1.39162	1152.21	FALSE	128
2022-09-14	12:32:54	1.30368	1153.51	FALSE	128
2022-09-14	12:32:54	1.35182	1154.86	FALSE	128
2022-09-14	12:32:55	1.51945	1156.38	FALSE	128
2022-09-14	12:32:55	1.60561	1157.99	FALSE	128
2022-09-14	12:32:55	1.61212	1159.6	FALSE	128
2022-09-14	12:32:55	1.69156	1161.29	FALSE	128
2022-09-14	12:32:56	1.62917	1162.92	FALSE	128
2022-09-14	12:32:56	1.66286	1164.58	FALSE	128
2022-09-14	12:32:56	1.70617	1166.29	FALSE	128
2022-09-14	12:32:56	1.64821	1167.94	FALSE	128
2022-09-14	12:32:57	1.62159	1169.56	FALSE	128
2022-09-14	12:32:57	1.54887	1171.11	FALSE	128
2022-09-14	12:32:57	1.56459	1172.67	FALSE	128
2022-09-14	12:32:58	1.57818	1174.25	FALSE	128
2022-09-14	12:32:58	1.65945	1175.91	FALSE	128
2022-09-14	12:32:58	1.66826	1177.58	FALSE	128
2022-09-14	12:32:58	1.57732	1179.15	FALSE	128
2022-09-14	12:32:59	1.55788	1180.71	FALSE	128
2022-09-14	12:32:59	1.61899	1182.33	FALSE	128
2022-09-14	12:32:59	1.60062	1183.93	FALSE	128
2022-09-14	12:33:00	1.62882	1185.56	FALSE	128
2022-09-14	12:33:00	1.69497	1187.26	FALSE	128
2022-09-14	12:33:00	1.72027	1188.98	FALSE	128
2022-09-14	12:33:00	1.76505	1190.74	FALSE	128
2022-09-14	12:33:00	1.8249	1192.57	FALSE	128
2022-09-14	12:33:01	1.85889	1194.43	FALSE	128
2022-09-14	12:33:01	1.90464	1196.33	FALSE	128
2022-09-14	12:33:01	1.91329	1198.24	FALSE	128
2022-09-14	12:33:02	1.86912	1200.11	FALSE	128
2022-09-14	12:33:02	1.74851	1201.86	FALSE	128
2022-09-14	12:33:02	1.65991	1203.52	FALSE	128
2022-09-14	12:33:02	1.64576	1205.17	FALSE	128
2022-09-14	12:33:03	1.67039	1206.84	FALSE	128
2022-09-14	12:33:03	1.74602	1208.58	FALSE	128
2022-09-14	12:33:03	1.68281	1210.27	FALSE	128
2022-09-14	12:33:03	1.68347	1211.95	FALSE	128
2022-09-14	12:33:04	1.66312	1213.61	FALSE	128
2022-09-14	12:33:04	1.61803	1215.23	FALSE	128
2022-09-14	12:33:04	1.50877	1216.74	FALSE	128
2022-09-14	12:33:04	1.46933	1218.21	FALSE	128
2022-09-14	12:33:05	1.43538	1219.64	FALSE	128
2022-09-14	12:33:05	1.42317	1221.07	FALSE	128
2022-09-14	12:33:05	1.42597	1222.49	FALSE	128
2022-09-14	12:33:06	1.41014	1223.9	FALSE	128
2022-09-14	12:33:06	1.37579	1225.28	FALSE	128
2022-09-14	12:33:06	1.38266	1226.66	FALSE	128
2022-09-14	12:33:06	1.43538	1228.1	FALSE	128
2022-09-14	12:33:07	1.42123	1229.52	FALSE	128
2022-09-14	12:33:07	1.42017	1230.94	FALSE	128
2022-09-14	12:33:07	1.44291	1232.38	FALSE	128
2022-09-14	12:33:07	1.43182	1233.81	FALSE	128
2022-09-14	12:33:08	1.43961	1235.25	FALSE	128
2022-09-14	12:33:08	1.43101	1236.68	FALSE	128
2022-09-14	12:33:08	1.32765	1238.01	FALSE	128
2022-09-14	12:33:08	1.36561	1239.38	FALSE	128
2022-09-14	12:33:09	1.41228	1240.79	FALSE	128
2022-09-14	12:33:09	1.36586	1242.15	FALSE	128
2022-09-14	12:33:09	1.30235	1243.46	FALSE	128
2022-09-14	12:33:10	1.25538	1244.71	FALSE	128
2022-09-14	12:33:10	1.24541	1245.96	FALSE	128
2022-09-14	12:33:10	1.24291	1247.2	FALSE	128
2022-09-14	12:33:10	1.23095	1248.43	FALSE	128
2022-09-14	12:33:11	1.2908	1249.72	FALSE	128
2022-09-14	12:33:11	1.30245	1251.03	FALSE	128
2022-09-14	12:33:11	1.33559	1252.36	FALSE	128
2022-09-14	12:33:11	1.3652	1253.73	FALSE	128
2022-09-14	12:33:12	1.3962	1255.12	FALSE	128
2022-09-14	12:33:12	1.3366	1256.46	FALSE	128
2022-09-14	12:33:12	1.3421	1257.8	FALSE	128
2022-09-14	12:33:12	1.411	1259.21	FALSE	128
2022-09-14	12:33:13	1.45335	1260.67	FALSE	128
2022-09-14	12:33:13	1.40831	1262.07	FALSE	128
2022-09-14	12:33:13	1.37681	1263.45	FALSE	128
2022-09-14	12:33:14	1.38938	1264.84	FALSE	128
2022-09-14	12:33:14	1.31604	1266.16	FALSE	128
2022-09-14	12:33:14	1.37584	1267.53	FALSE	128
2022-09-14	12:33:14	1.32576	1268.86	FALSE	128
2022-09-14	12:33:15	1.35726	1270.21	FALSE	128
2022-09-14	12:33:15	1.30261	1271.52	FALSE	128
2022-09-14	12:33:15	1.29533	1272.81	FALSE	128
2022-09-14	12:33:15	1.40179	1274.21	FALSE	128
2022-09-14	12:33:16	1.47029	1275.68	FALSE	128
2022-09-14	12:33:16	1.53645	1277.22	FALSE	128
2022-09-14	12:33:16	1.57447	1278.8	FALSE	128
2022-09-14	12:33:16	1.52765	1280.32	FALSE	128
2022-09-14	12:33:17	1.60815	1281.93	FALSE	128
2022-09-14	12:33:17	1.66429	1283.6	FALSE	128
2022-09-14	12:33:17	1.62159	1285.22	FALSE	128
2022-09-14	12:33:18	1.55691	1286.77	FALSE	128
2022-09-14	12:33:18	1.51477	1288.29	FALSE	128
2022-09-14	12:33:18	1.4905	1289.78	FALSE	128
2022-09-14	12:33:18	1.49131	1291.27	FALSE	128
2022-09-14	12:33:19	1.5364	1292.81	FALSE	128
2022-09-14	12:33:19	1.59039	1294.4	FALSE	128
2022-09-14	12:33:19	1.61889	1296.02	FALSE	128
2022-09-14	12:33:19	1.62775	1297.64	FALSE	128
2022-09-14	12:33:20	1.68525	1299.33	FALSE	128
2022-09-14	12:33:20	1.6423	1300.97	FALSE	128
2022-09-14	12:33:20	1.56917	1302.54	FALSE	128
2022-09-14	12:33:20	1.60719	1304.15	FALSE	128
2022-09-14	12:33:21	1.61202	1305.76	FALSE	128
2022-09-14	12:33:21	1.45197	1307.21	FALSE	128
2022-09-14	12:33:21	1.03274	1308.24	FALSE	128
2022-09-14	12:33:22	0.351565	1308.6	FALSE	128
2022-09-14	12:33:22	0.387595	1308.98	FALSE	128
2022-09-14	12:33:22	0.477214	1309.46	FALSE	128
2022-09-14	12:33:22	0.506069	1309.97	FALSE	128
2022-09-14	12:33:23	0.640064	1310.61	FALSE	128
2022-09-14	12:33:23	0.967952	1311.58	FALSE	128
2022-09-14	12:33:23	1.2591	1312.83	FALSE	128
2022-09-14	12:33:23	0.704288	1313.54	FALSE	128
2022-09-14	12:33:24	0.956145	1314.49	FALSE	128
2022-09-14	12:33:24	0.745051	1315.24	FALSE	128
2022-09-14	12:33:24	1.23263	1316.47	FALSE	128
2022-09-14	12:33:24	1.06301	1317.54	FALSE	128
2022-09-14	12:33:25	1.12067	1318.66	FALSE	128
2022-09-14	12:33:25	0.912481	1319.57	FALSE	128
2022-09-14	12:33:25	0.891514	1320.46	FALSE	128
2022-09-14	12:33:26	0.865865	1321.33	FALSE	128
2022-09-14	12:33:26	0.940471	1322.27	FALSE	128
2022-09-14	12:33:26	0.937417	1323.2	FALSE	128
2022-09-14	12:33:26	0.885	1324.09	FALSE	128
2022-09-14	12:33:27	1.28698	1325.38	FALSE	128
2022-09-14	12:33:27	1.17828	1326.55	FALSE	128
2022-09-14	12:33:27	1.64251	1328.2	FALSE	128
2022-09-14	12:33:27	1.22139	1329.42	FALSE	128
2022-09-14	12:33:28	1.67838	1331.1	FALSE	128
2022-09-14	12:33:28	1.17055	1332.27	FALSE	128
2022-09-14	12:33:28	1.22668	1333.49	FALSE	128
2022-09-14	12:33:28	1.22897	1334.72	FALSE	128
2022-09-14	12:33:29	1.24663	1335.97	FALSE	128
2022-09-14	12:33:29	1.26597	1337.24	FALSE	128
2022-09-14	12:33:29	1.29884	1338.53	FALSE	128
2022-09-14	12:33:30	1.30816	1339.84	FALSE	128
2022-09-14	12:33:30	1.3052	1341.15	FALSE	128
2022-09-14	12:33:30	1.3765	1342.52	FALSE	128
2022-09-14	12:33:30	1.43243	1343.96	FALSE	128
2022-09-14	12:33:31	1.4934	1345.45	FALSE	128
2022-09-14	12:33:31	1.46627	1346.92	FALSE	128
2022-09-14	12:33:31	1.42551	1348.34	FALSE	128
2022-09-14	12:33:31	1.38958	1349.73	FALSE	128
2022-09-14	12:33:32	1.35808	1351.09	FALSE	128
2022-09-14	12:33:32	1.27238	1352.36	FALSE	128
2022-09-14	12:33:32	1.23513	1353.6	FALSE	128
2022-09-14	12:33:33	1.22871	1354.83	FALSE	128
2022-09-14	12:33:33	1.25635	1356.08	FALSE	128
2022-09-14	12:33:33	1.26566	1357.35	FALSE	128
2022-09-14	12:33:33	1.26022	1358.61	FALSE	128
2022-09-14	12:33:34	1.32475	1359.93	FALSE	128
2022-09-14	12:33:34	1.44439	1361.38	FALSE	128
2022-09-14	12:33:34	1.54642	1362.92	FALSE	128
2022-09-14	12:33:34	1.63304	1364.56	FALSE	128
2022-09-14	12:33:35	1.61034	1366.17	FALSE	128
2022-09-14	12:33:35	1.61436	1367.78	FALSE	128
2022-09-14	12:33:35	1.63966	1369.42	FALSE	128
2022-09-14	12:33:35	1.65151	1371.07	FALSE	128
2022-09-14	12:33:36	1.77854	1372.85	FALSE	128
2022-09-14	12:33:36	1.75844	1374.61	FALSE	128
2022-09-14	12:33:36	1.80561	1376.41	FALSE	128
2022-09-14	12:33:37	1.72342	1378.14	FALSE	128
2022-09-14	12:33:37	1.81248	1379.95	FALSE	128
2022-09-14	12:33:37	1.8106	1381.76	FALSE	128
2022-09-14	12:33:37	1.61192	1383.37	FALSE	128
2022-09-14	12:33:38	1.47635	1384.85	FALSE	128
2022-09-14	12:33:38	1.42912	1386.28	FALSE	128
2022-09-14	12:33:38	1.49747	1387.78	FALSE	128
2022-09-14	12:33:38	1.51711	1389.29	FALSE	128
2022-09-14	12:33:39	1.51691	1390.81	FALSE	128
2022-09-14	12:33:39	1.50352	1392.31	FALSE	128
2022-09-14	12:33:39	1.4367	1393.75	FALSE	128
2022-09-14	12:33:39	1.19869	1394.95	FALSE	128
2022-09-14	12:33:40	1.25589	1396.2	FALSE	128
2022-09-14	12:33:40	1.31879	1397.52	FALSE	128
2022-09-14	12:33:40	1.82042	1399.34	FALSE	128
2022-09-14	12:33:41	2.11065	1401.45	FALSE	128
2022-09-14	12:33:41	2.13691	1403.59	FALSE	128
2022-09-14	12:33:41	1.69253	1405.28	FALSE	128
2022-09-14	12:33:41	1.69452	1406.98	FALSE	128
2022-09-14	12:33:42	1.66729	1408.65	FALSE	128
2022-09-14	12:33:42	1.6595	1410.31	FALSE	128
2022-09-14	12:33:42	1.78403	1412.09	FALSE	128
2022-09-14	12:33:42	1.72317	1413.81	FALSE	128
2022-09-14	12:33:43	1.68831	1415.5	FALSE	128
2022-09-14	12:33:43	1.60556	1417.11	FALSE	128
2022-09-14	12:33:43	1.68653	1418.79	FALSE	128
2022-09-14	12:33:43	1.71294	1420.51	FALSE	128
2022-09-14	12:33:44	1.79955	1422.31	FALSE	128
2022-09-14	12:33:44	1.89747	1424.2	FALSE	128
2022-09-14	12:33:44	1.73274	1425.94	FALSE	128
2022-09-14	12:33:45	2.38327	1428.32	FALSE	128
2022-09-14	12:33:45	6.52205	1434.84	1	129
2022-09-14	12:33:45	6.16673	1441.01	1	130
2022-09-14	12:33:45	2.75635	1443.76	FALSE	130
2022-09-14	12:33:46	1.91391	1445.68	FALSE	130
2022-09-14	12:33:46	1.94704	1447.63	FALSE	130
2022-09-14	12:33:46	1.6737	1449.3	FALSE	130
2022-09-14	12:33:46	1.59538	1450.89	FALSE	130
2022-09-14	12:33:47	1.60276	1452.5	FALSE	130
2022-09-14	12:33:47	1.42271	1453.92	FALSE	130
2022-09-14	12:33:47	1.18663	1455.11	FALSE	130
2022-09-14	12:33:47	1.78159	1456.89	FALSE	130
2022-09-14	12:33:48	2.49762	1459.39	FALSE	130
2022-09-14	12:33:48	2.79075	1462.18	FALSE	130
2022-09-14	12:33:48	2.2993	1464.48	FALSE	130
2022-09-14	12:33:49	1.92022	1466.4	FALSE	130
2022-09-14	12:33:49	1.75599	1468.15	FALSE	130
2022-09-14	12:33:49	1.81106	1469.96	FALSE	130
2022-09-14	12:33:49	1.87121	1471.83	FALSE	130
2022-09-14	12:33:50	1.85823	1473.69	FALSE	130
2022-09-14	12:33:50	1.86006	1475.55	FALSE	130
2022-09-14	12:33:50	2.01528	1477.57	FALSE	130
2022-09-14	12:33:50	2.05706	1479.62	FALSE	130
2022-09-14	12:33:51	2.13411	1481.76	FALSE	130
2022-09-14	12:33:51	1.89869	1483.66	FALSE	130
2022-09-14	12:33:51	1.66927	1485.33	FALSE	130
2022-09-14	12:33:51	1.62052	1486.95	FALSE	130
2022-09-14	12:33:52	1.66948	1488.62	FALSE	130
2022-09-14	12:33:52	1.69431	1490.31	FALSE	130
2022-09-14	12:33:52	1.67615	1491.99	FALSE	130
2022-09-14	12:33:53	1.79935	1493.79	FALSE	130
2022-09-14	12:33:53	1.98235	1495.77	FALSE	130
2022-09-14	12:33:53	1.94612	1497.72	FALSE	130
2022-09-14	12:33:53	1.75253	1499.47	FALSE	130
2022-09-14	12:33:54	1.7993	1501.27	FALSE	130
2022-09-14	12:33:54	1.83782	1503.1	FALSE	130
2022-09-14	12:33:54	1.85212	1504.96	FALSE	130
2022-09-14	12:33:54	1.84836	1506.81	FALSE	130
2022-09-14	12:33:55	2.07803	1508.88	FALSE	130
2022-09-14	12:33:55	2.45487	1511.34	FALSE	130
2022-09-14	12:33:55	4.10734	1515.45	1	131
2022-09-14	12:33:55	4.69848	1520.14	1	132
2022-09-14	12:33:56	1.88861	1522.03	FALSE	132
2022-09-14	12:33:56	0.87584	1522.91	FALSE	132
2022-09-14	12:33:56	0.505967	1523.41	FALSE	132
2022-09-14	12:33:57	0.382303	1523.8	FALSE	132
2022-09-14	12:33:57	0.496705	1524.29	FALSE	132
2022-09-14	12:33:57	0.775687	1525.07	FALSE	132
2022-09-14	12:33:57	0.524084	1525.59	FALSE	132
2022-09-14	12:33:58	0.684746	1526.28	FALSE	132
2022-09-14	12:33:58	0.368868	1526.65	FALSE	132
2022-09-14	12:33:58	0.364033	1527.01	FALSE	132
2022-09-14	12:33:58	0.35416	1527.36	FALSE	132
2022-09-14	12:33:59	0.36841	1527.73	FALSE	132
2022-09-14	12:33:59	0.493499	1528.23	FALSE	132
2022-09-14	12:33:59	0.412277	1528.64	FALSE	132
2022-09-14	12:33:59	0.410445	1529.05	FALSE	132
2022-09-14	12:34:00	0.387595	1529.44	FALSE	132
2022-09-14	12:34:00	0.439453	1529.88	FALSE	132
2022-09-14	12:34:00	0.476552	1530.35	FALSE	132
2022-09-14	12:34:01	0.59187	1530.95	FALSE	132
2022-09-14	12:34:01	0.899656	1531.84	FALSE	132
2022-09-14	12:34:01	1.9136	1533.76	FALSE	132
2022-09-14	12:34:01	8.95003	1542.71	1	133
2022-09-14	12:34:02	5.61202	1548.32	1	134
2022-09-14	12:34:02	1.9706	1550.29	FALSE	134
2022-09-14	12:34:02	1.96271	1552.25	FALSE	134
2022-09-14	12:34:02	4.90856	1557.16	1	135
2022-09-14	12:34:03	9.15792	1566.32	1	136
2022-09-14	12:34:03	4.80306	1571.12	1	137
2022-09-14	12:34:03	3.86388	1574.99	1	138
2022-09-14	12:34:03	4.54164	1579.53	1	139
2022-09-14	12:34:04	4.28836	1583.82	1	140
2022-09-14	12:34:04	4.01411	1587.83	1	141
2022-09-14	12:34:04	3.67772	1591.51	1	142

## Sheet: Reggie_star_2022914122830
						**GoPro Fitting: 1217
2022-09-14	12:28:30	0.609377
2022-09-14	12:28:30	0.577061
2022-09-14	12:28:31	0.58154
2022-09-14	12:28:31	0.534618
2022-09-14	12:28:31	0.37411
2022-09-14	12:28:31	0.446018
2022-09-14	12:28:32	0.439046
2022-09-14	12:28:32	0.44673
2022-09-14	12:28:32	0.428512
2022-09-14	12:28:32	0.370344
2022-09-14	12:28:33	0.477112
2022-09-14	12:28:33	0.331565
2022-09-14	12:28:33	0.336145
2022-09-14	12:28:34	0.497621
2022-09-14	12:28:34	0.400115
2022-09-14	12:28:34	0.45416
2022-09-14	12:28:34	0.42785
2022-09-14	12:28:35	0.413601
2022-09-14	12:28:35	0.417367
2022-09-14	12:28:35	0.427545
2022-09-14	12:28:35	0.445255
2022-09-14	12:28:36	0.457672
2022-09-14	12:28:36	0.428664
2022-09-14	12:28:36	0.448766
2022-09-14	12:28:36	0.423423
2022-09-14	12:28:37	0.418181
2022-09-14	12:28:37	0.416196
2022-09-14	12:28:37	0.404898
2022-09-14	12:28:38	0.405764
2022-09-14	12:28:38	0.400369
2022-09-14	12:28:38	0.454262
2022-09-14	12:28:38	0.461794
2022-09-14	12:28:39	0.444949
2022-09-14	12:28:39	0.432328
2022-09-14	12:28:39	0.475331
2022-09-14	12:28:39	0.456603
2022-09-14	12:28:40	0.465865
2022-09-14	12:28:40	0.449529
2022-09-14	12:28:40	0.357825
2022-09-14	12:28:40	0.403677
2022-09-14	12:28:41	0.457926
2022-09-14	12:28:41	0.405764
2022-09-14	12:28:41	0.437265
2022-09-14	12:28:42	0.427596
2022-09-14	12:28:42	0.425713
2022-09-14	12:28:42	0.442761
2022-09-14	12:28:42	0.425916
2022-09-14	12:28:43	0.426272
2022-09-14	12:28:43	0.437519
2022-09-14	12:28:43	0.426985
2022-09-14	12:28:43	0.448715
2022-09-14	12:28:44	0.450445
2022-09-14	12:28:44	0.406323
2022-09-14	12:28:44	0.433906
2022-09-14	12:28:44	0.397163
2022-09-14	12:28:45	0.455483
2022-09-14	12:28:45	0.389224
2022-09-14	12:28:45	0.329224
2022-09-14	12:28:46	0.498995
2022-09-14	12:28:46	1.03874
2022-09-14	12:28:46	1.65304
2022-09-14	12:28:46	1.21502
2022-09-14	12:28:47	0.647595
2022-09-14	12:28:47	1.31782
2022-09-14	12:28:47	1.22424
2022-09-14	12:28:48	0.708969
2022-09-14	12:28:48	0.384389
2022-09-14	12:28:48	0.165153
2022-09-14	12:28:48	0.297621
2022-09-14	12:28:48	0.469936
2022-09-14	12:28:49	0.324593
2022-09-14	12:28:49	0.324389
2022-09-14	12:28:49	0.280064
2022-09-14	12:28:50	0.415229
2022-09-14	12:28:50	0.432634
2022-09-14	12:28:50	0.240725
2022-09-14	12:28:50	0.466832
2022-09-14	12:28:51	0.389071
2022-09-14	12:28:51	0.392125
2022-09-14	12:28:51	0.347443
2022-09-14	12:28:51	0.465255
2022-09-14	12:28:52	0.38159
2022-09-14	12:28:52	0.418181
2022-09-14	12:28:52	0.389377
2022-09-14	12:28:52	0.382659
2022-09-14	12:28:53	0.409326
2022-09-14	12:28:53	0.443015
2022-09-14	12:28:53	0.365662
2022-09-14	12:28:54	0.710191
2022-09-14	12:28:54	1.41472
2022-09-14	12:28:54	2.92882
2022-09-14	12:28:54	0.831463
2022-09-14	12:28:55	0.603372
2022-09-14	12:28:55	0.55813
2022-09-14	12:28:55	1.27411
2022-09-14	12:28:55	1.28149
2022-09-14	12:28:56	0.714364
2022-09-14	12:28:56	0.837824
2022-09-14	12:28:56	2.24576
2022-09-14	12:28:56	2.62352
2022-09-14	12:28:57	3.28805
2022-09-14	12:28:57	3.48719
2022-09-14	12:28:57	4.40174
2022-09-14	12:28:58	4.55421
2022-09-14	12:28:58	5.0706
2022-09-14	12:28:58	4.77838
2022-09-14	12:28:58	3.46352
2022-09-14	12:28:59	4.78067
2022-09-14	12:28:59	2.06785
2022-09-14	12:28:59	3.24617
2022-09-14	12:28:59	2.68067
2022-09-14	12:29:00	1.97721
2022-09-14	12:29:00	0.784338
2022-09-14	12:29:00	0.339097
2022-09-14	12:29:01	3.56011
2022-09-14	12:29:01	5.84052
2022-09-14	12:29:01	10.3968
2022-09-14	12:29:01	5.9397
2022-09-14	12:29:02	8.90983
2022-09-14	12:29:02	2.76205
2022-09-14	12:29:02	2.47925
2022-09-14	12:29:02	3.19798
2022-09-14	12:29:03	2.36617
2022-09-14	12:29:03	4.42072
2022-09-14	12:29:03	3.6334
2022-09-14	12:29:03	2.8936
2022-09-14	12:29:04	3.831
2022-09-14	12:29:04	1.79192
2022-09-14	12:29:04	4.78052
2022-09-14	12:29:05	5.71467
2022-09-14	12:29:05	8.71471
2022-09-14	12:29:05	10.6839
2022-09-14	12:29:05	7.17665
2022-09-14	12:29:06	12.0287
2022-09-14	12:29:06	3.87111
2022-09-14	12:29:06	4.08307
2022-09-14	12:29:06	3.31223
2022-09-14	12:29:07	1.73004
2022-09-14	12:29:07	3.37141
2022-09-14	12:29:07	2.93116
2022-09-14	12:29:07	4.50103
2022-09-14	12:29:08	3.29487
2022-09-14	12:29:08	3.4649
2022-09-14	12:29:08	4.75151
2022-09-14	12:29:09	2.23569
2022-09-14	12:29:09	3.51492
2022-09-14	12:29:09	1.93218
2022-09-14	12:29:09	2.62312
2022-09-14	12:29:10	2.49793
2022-09-14	12:29:10	4.9537
2022-09-14	12:29:10	11.1169
2022-09-14	12:29:10	13.4657
2022-09-14	12:29:11	3.65309
2022-09-14	12:29:11	0.674262
2022-09-14	12:29:11	0.308003
2022-09-14	12:29:11	0.222557
2022-09-14	12:29:12	0.466221
2022-09-14	12:29:12	0.343779
2022-09-14	12:29:12	0.283626
2022-09-14	12:29:13	0.0287152
2022-09-14	12:29:13	0.240318
2022-09-14	12:29:13	0.267494
2022-09-14	12:29:13	0.297723
2022-09-14	12:29:14	0.123066
2022-09-14	12:29:14	0.314364
2022-09-14	12:29:14	0.288003
2022-09-14	12:29:14	1.52108
2022-09-14	12:29:15	1.42317
2022-09-14	12:29:15	2.24831
2022-09-14	12:29:15	1.78088
2022-09-14	12:29:15	1.06632
2022-09-14	12:29:16	1.35976
2022-09-14	12:29:16	0.772226
2022-09-14	12:29:16	2.04805
2022-09-14	12:29:17	0.534313
2022-09-14	12:29:17	1.01732
2022-09-14	12:29:17	1.64174
2022-09-14	12:29:17	2.42261
2022-09-14	12:29:18	2.12775
2022-09-14	12:29:18	2.78052
2022-09-14	12:29:18	1.50912
2022-09-14	12:29:18	1.69803
2022-09-14	12:29:19	0.655941
2022-09-14	12:29:19	0.883066
2022-09-14	12:29:19	0.541896
2022-09-14	12:29:19	0.609733
2022-09-14	12:29:20	0.737722
2022-09-14	12:29:20	0.828461
2022-09-14	12:29:20	0.569224
2022-09-14	12:29:21	0.394364
2022-09-14	12:29:21	0.385509
2022-09-14	12:29:21	0.38612
2022-09-14	12:29:21	0.431311
2022-09-14	12:29:22	0.483881
2022-09-14	12:29:22	0.273499
2022-09-14	12:29:22	-0.0446181
2022-09-14	12:29:22	0.117977
2022-09-14	12:29:23	0.45243
2022-09-14	12:29:23	1.38841
2022-09-14	12:29:23	1.33538
2022-09-14	12:29:23	1.85263
2022-09-14	12:29:24	1.3763
2022-09-14	12:29:24	1.04933
2022-09-14	12:29:24	0.676806
2022-09-14	12:29:25	2.05497
2022-09-14	12:29:25	3.11131
2022-09-14	12:29:25	5.75797
2022-09-14	12:29:25	5.44876
2022-09-14	12:29:26	3.93976
2022-09-14	12:29:26	0.675992
2022-09-14	12:29:26	0.27416
2022-09-14	12:29:26	1.78276
2022-09-14	12:29:27	3.74251
2022-09-14	12:29:27	3.55808
2022-09-14	12:29:27	4.26306
2022-09-14	12:29:28	5.78688
2022-09-14	12:29:28	6.9597
2022-09-14	12:29:28	3.92597
2022-09-14	12:29:28	2.59284
2022-09-14	12:29:29	0.343168
2022-09-14	12:29:29	0.381896
2022-09-14	12:29:29	0.0174175
2022-09-14	12:29:29	0.214669
2022-09-14	12:29:30	0.736654
2022-09-14	12:29:30	0.280776
2022-09-14	12:29:30	0.392125
2022-09-14	12:29:30	0.201845
2022-09-14	12:29:31	0.428613
2022-09-14	12:29:31	0.16841
2022-09-14	12:29:31	0.342456
2022-09-14	12:29:32	0.233855
2022-09-14	12:29:32	0.412125
2022-09-14	12:29:32	0.235585
2022-09-14	12:29:32	0.403524
2022-09-14	12:29:33	0.31645
2022-09-14	12:29:33	0.301183
2022-09-14	12:29:33	0.248003
2022-09-14	12:29:33	0.225356
2022-09-14	12:29:34	0.28383
2022-09-14	12:29:34	0.113295
2022-09-14	12:29:34	0.312736
2022-09-14	12:29:34	0.141336
2022-09-14	12:29:35	0.334211
2022-09-14	12:29:35	0.286069
2022-09-14	12:29:35	0.36383
2022-09-14	12:29:36	0.380216
2022-09-14	12:29:36	0.374517
2022-09-14	12:29:36	0.356196
2022-09-14	12:29:36	0.342863
2022-09-14	12:29:37	0.353193
2022-09-14	12:29:37	0.340878
2022-09-14	12:29:37	0.35187
2022-09-14	12:29:37	0.337316
2022-09-14	12:29:38	0.348715
2022-09-14	12:29:38	0.355534
2022-09-14	12:29:38	0.357112
2022-09-14	12:29:38	0.353397
2022-09-14	12:29:39	0.35584
2022-09-14	12:29:39	0.363779
2022-09-14	12:29:39	0.325153
2022-09-14	12:29:40	0.329479
2022-09-14	12:29:40	0.331463
2022-09-14	12:29:40	0.332227
2022-09-14	12:29:40	0.3307
2022-09-14	12:29:41	0.338537
2022-09-14	12:29:41	0.334924
2022-09-14	12:29:41	0.341743
2022-09-14	12:29:41	0.351921
2022-09-14	12:29:42	0.343524
2022-09-14	12:29:42	0.342659
2022-09-14	12:29:42	0.343881
2022-09-14	12:29:42	0.34098
2022-09-14	12:29:43	0.340675
2022-09-14	12:29:43	0.342812
2022-09-14	12:29:43	0.333143
2022-09-14	12:29:44	0.485458
2022-09-14	12:29:44	0.631412
2022-09-14	12:29:44	0.207697
2022-09-14	12:29:44	0.0506999
2022-09-14	12:29:45	0.120013
2022-09-14	12:29:45	0.0193005
2022-09-14	12:29:45	0.308512
2022-09-14	12:29:45	0.0871885
2022-09-14	12:29:46	0.182354
2022-09-14	12:29:46	0.0255091
2022-09-14	12:29:46	0.260674
2022-09-14	12:29:46	1.45151
2022-09-14	12:29:47	4.99955
2022-09-14	12:29:47	4.76556
2022-09-14	12:29:47	3.64235
2022-09-14	12:29:48	2.29202
2022-09-14	12:29:48	0.425509
2022-09-14	12:29:48	0.489275
2022-09-14	12:29:48	0.16327
2022-09-14	12:29:49	-0.140089
2022-09-14	12:29:49	-0.645177
2022-09-14	12:29:49	-0.735305
2022-09-14	12:29:49	-0.58533
2022-09-14	12:29:50	-0.530877
2022-09-14	12:29:50	-0.616781
2022-09-14	12:29:50	-0.558053
2022-09-14	12:29:50	-0.310572
2022-09-14	12:29:51	0.0339061
2022-09-14	12:29:51	0.211819
2022-09-14	12:29:51	0.137621
2022-09-14	12:29:52	0.253143
2022-09-14	12:29:52	0.40159
2022-09-14	12:29:52	0.408308
2022-09-14	12:29:52	0.35131
2022-09-14	12:29:53	0.292074
2022-09-14	12:29:53	0.314975
2022-09-14	12:29:53	0.252837
2022-09-14	12:29:53	0.248155
2022-09-14	12:29:54	0.271972
2022-09-14	12:29:54	0.384695
2022-09-14	12:29:54	0.40154
2022-09-14	12:29:55	0.396196
2022-09-14	12:29:55	0.467137
2022-09-14	12:29:55	0.451412
2022-09-14	12:29:55	0.432277
2022-09-14	12:29:56	0.425254
2022-09-14	12:29:56	0.382455
2022-09-14	12:29:56	0.370344
2022-09-14	12:29:56	0.329529
2022-09-14	12:29:57	0.295738
2022-09-14	12:29:57	0.309326
2022-09-14	12:29:57	0.318028
2022-09-14	12:29:57	0.316094
2022-09-14	12:29:58	0.325916
2022-09-14	12:29:58	0.329987
2022-09-14	12:29:58	0.320776
2022-09-14	12:29:59	0.306679
2022-09-14	12:29:59	0.308054
2022-09-14	12:29:59	0.305662
2022-09-14	12:29:59	0.30159
2022-09-14	12:30:00	0.293702
2022-09-14	12:30:00	0.292634
2022-09-14	12:30:00	0.301285
2022-09-14	12:30:00	0.295891
2022-09-14	12:30:01	0.308054
2022-09-14	12:30:01	0.300827
2022-09-14	12:30:01	0.29528
2022-09-14	12:30:01	0.282354
2022-09-14	12:30:02	0.281845
2022-09-14	12:30:02	0.267952
2022-09-14	12:30:02	0.253906
2022-09-14	12:30:03	0.264033
2022-09-14	12:30:03	0.268512
2022-09-14	12:30:03	0.260471
2022-09-14	12:30:03	0.260165
2022-09-14	12:30:04	0.260013
2022-09-14	12:30:04	0.265509
2022-09-14	12:30:04	0.270751
2022-09-14	12:30:04	0.264338
2022-09-14	12:30:05	0.26612
2022-09-14	12:30:05	0.268512
2022-09-14	12:30:05	0.2707
2022-09-14	12:30:05	0.270649
2022-09-14	12:30:06	0.264186
2022-09-14	12:30:06	0.262608
2022-09-14	12:30:06	0.274618
2022-09-14	12:30:07	0.274466
2022-09-14	12:30:07	0.270242
2022-09-14	12:30:07	0.273753
2022-09-14	12:30:07	0.2764
2022-09-14	12:30:08	0.270344
2022-09-14	12:30:08	0.267188
2022-09-14	12:30:08	0.274873
2022-09-14	12:30:08	0.267952
2022-09-14	12:30:09	0.261692
2022-09-14	12:30:09	0.270089
2022-09-14	12:30:09	0.26271
2022-09-14	12:30:09	0.274822
2022-09-14	12:30:10	0.267392
2022-09-14	12:30:10	0.26388
2022-09-14	12:30:10	0.262048
2022-09-14	12:30:11	0.263728
2022-09-14	12:30:11	0.264033
2022-09-14	12:30:11	0.26383
2022-09-14	12:30:11	0.260369
2022-09-14	12:30:12	0.264898
2022-09-14	12:30:12	0.269478
2022-09-14	12:30:12	0.260064
2022-09-14	12:30:12	0.261031
2022-09-14	12:30:13	0.260929
2022-09-14	12:30:13	0.264593
2022-09-14	12:30:13	0.258181
2022-09-14	12:30:13	0.261896
2022-09-14	12:30:14	0.297417
2022-09-14	12:30:14	0.300674
2022-09-14	12:30:14	0.291056
2022-09-14	12:30:15	0.268919
2022-09-14	12:30:15	0.262608
2022-09-14	12:30:15	0.259758
2022-09-14	12:30:15	0.26668
2022-09-14	12:30:16	0.286578
2022-09-14	12:30:16	0.285662
2022-09-14	12:30:16	0.283677
2022-09-14	12:30:16	0.285611
2022-09-14	12:30:17	0.289987
2022-09-14	12:30:17	0.283473
2022-09-14	12:30:17	0.277621
2022-09-14	12:30:18	0.284033
2022-09-14	12:30:18	0.292634
2022-09-14	12:30:18	0.296196
2022-09-14	12:30:18	0.314771
2022-09-14	12:30:19	0.358639
2022-09-14	12:30:19	0.381998
2022-09-14	12:30:19	0.415585
2022-09-14	12:30:19	0.35411
2022-09-14	12:30:20	0.33416
2022-09-14	12:30:20	0.335127
2022-09-14	12:30:20	0.316501
2022-09-14	12:30:20	0.296654
2022-09-14	12:30:21	0.294059
2022-09-14	12:30:21	0.300929
2022-09-14	12:30:21	0.299249
2022-09-14	12:30:22	0.29243
2022-09-14	12:30:22	0.287748
2022-09-14	12:30:22	0.293702
2022-09-14	12:30:22	0.286069
2022-09-14	12:30:23	0.29416
2022-09-14	12:30:23	0.291972
2022-09-14	12:30:23	0.284898
2022-09-14	12:30:23	0.279199
2022-09-14	12:30:24	0.280369
2022-09-14	12:30:24	0.279453
2022-09-14	12:30:24	0.28271
2022-09-14	12:30:24	0.283524
2022-09-14	12:30:25	0.282201
2022-09-14	12:30:25	0.377621
2022-09-14	12:30:25	2.52866
2022-09-14	12:30:26	5.40739
2022-09-14	12:30:26	3.81299
2022-09-14	12:30:26	2.94133
2022-09-14	12:30:26	1.95329
2022-09-14	12:30:27	2.02184
2022-09-14	12:30:27	3.28673
2022-09-14	12:30:27	3.93584
2022-09-14	12:30:27	4.18332
2022-09-14	12:30:28	6.27049
2022-09-14	12:30:28	5.0969
2022-09-14	12:30:28	1.98439
2022-09-14	12:30:28	1.44632
2022-09-14	12:30:29	0.778588
2022-09-14	12:30:29	0.489275
2022-09-14	12:30:29	0.320369
2022-09-14	12:30:30	0.575178
2022-09-14	12:30:30	0.184389
2022-09-14	12:30:30	0.292888
2022-09-14	12:30:30	0.585203
2022-09-14	12:30:31	2.84586
2022-09-14	12:30:31	4.11222
2022-09-14	12:30:31	3.7852
2022-09-14	12:30:32	1.83777
2022-09-14	12:30:32	1.47131
2022-09-14	12:30:32	0.736807
2022-09-14	12:30:32	1.56327
2022-09-14	12:30:32	1.47538
2022-09-14	12:30:33	0.844135
2022-09-14	12:30:33	0.43126
2022-09-14	12:30:33	0.252888
2022-09-14	12:30:34	0.404288
2022-09-14	12:30:34	0.175992
2022-09-14	12:30:34	0.371616
2022-09-14	12:30:34	0.178435
2022-09-14	12:30:35	0.22215
2022-09-14	12:30:35	0.133702
2022-09-14	12:30:35	0.212837
2022-09-14	12:30:35	0.349682
2022-09-14	12:30:36	0.192685
2022-09-14	12:30:36	0.541539
2022-09-14	12:30:36	0.806832
2022-09-14	12:30:36	2.70408
2022-09-14	12:30:37	3.04912
2022-09-14	12:30:37	3.23736
2022-09-14	12:30:37	1.89955
2022-09-14	12:30:38	0.486018
2022-09-14	12:30:38	0.351361
2022-09-14	12:30:38	0.386985
2022-09-14	12:30:38	0.46902
2022-09-14	12:30:39	0.282099
2022-09-14	12:30:39	0.326883
2022-09-14	12:30:39	0.406679
2022-09-14	12:30:39	0.157672
2022-09-14	12:30:40	0.345662
2022-09-14	12:30:40	0.10383
2022-09-14	12:30:40	0.350293
2022-09-14	12:30:40	0.220776
2022-09-14	12:30:41	0.31299
2022-09-14	12:30:41	0.351209
2022-09-14	12:30:41	0.152481
2022-09-14	12:30:42	0.0494277
2022-09-14	12:30:42	-0.0882312
2022-09-14	12:30:42	-0.222939
2022-09-14	12:30:42	-0.340394
2022-09-14	12:30:43	-0.142684
2022-09-14	12:30:43	1.76592
2022-09-14	12:30:43	4.40128
2022-09-14	12:30:43	5.63614
2022-09-14	12:30:44	4.14413
2022-09-14	12:30:44	1.50693
2022-09-14	12:30:44	0.623371
2022-09-14	12:30:45	0.433397
2022-09-14	12:30:45	0.242507
2022-09-14	12:30:45	0.296654
2022-09-14	12:30:45	0.00332086
2022-09-14	12:30:46	0.152074
2022-09-14	12:30:46	0.111005
2022-09-14	12:30:46	0.199657
2022-09-14	12:30:46	-0.00762061
2022-09-14	12:30:47	0.155331
2022-09-14	12:30:47	0.0125829
2022-09-14	12:30:47	0.125255
2022-09-14	12:30:47	0.00276106
2022-09-14	12:30:48	0.147087
2022-09-14	12:30:48	0.0960434
2022-09-14	12:30:48	0.159911
2022-09-14	12:30:49	0.0926338
2022-09-14	12:30:49	0.148206
2022-09-14	12:30:49	0.217061
2022-09-14	12:30:49	0.199758
2022-09-14	12:30:50	0.178181
2022-09-14	12:30:50	0.271412
2022-09-14	12:30:50	0.380471
2022-09-14	12:30:50	0.141438
2022-09-14	12:30:51	0.400115
2022-09-14	12:30:51	0.202608
2022-09-14	12:30:51	0.370903
2022-09-14	12:30:51	0.333143
2022-09-14	12:30:52	0.409987
2022-09-14	12:30:52	1.73625
2022-09-14	12:30:52	4.84205
2022-09-14	12:30:53	7.55202
2022-09-14	12:30:53	4.06785
2022-09-14	12:30:53	4.51808
2022-09-14	12:30:53	1.83039
2022-09-14	12:30:54	1.68296
2022-09-14	12:30:54	1.13202
2022-09-14	12:30:54	1.52892
2022-09-14	12:30:54	1.78052
2022-09-14	12:30:55	1.13777
2022-09-14	12:30:55	1.52235
2022-09-14	12:30:55	0.842303
2022-09-14	12:30:55	1.33889
2022-09-14	12:30:56	0.979249
2022-09-14	12:30:56	0.873193
2022-09-14	12:30:56	1.02648
2022-09-14	12:30:57	0.489631
2022-09-14	12:30:57	0.870547
2022-09-14	12:30:57	1.11299
2022-09-14	12:30:57	2.51309
2022-09-14	12:30:58	5.10846
2022-09-14	12:30:58	7.09319
2022-09-14	12:30:58	6.7938
2022-09-14	12:30:58	3.06042
2022-09-14	12:30:59	4.30118
2022-09-14	12:30:59	3.00205
2022-09-14	12:30:59	6.26764
2022-09-14	12:30:59	4.63762
2022-09-14	12:31:00	4.40637
2022-09-14	12:31:00	4.94622
2022-09-14	12:31:00	1.68622
2022-09-14	12:31:01	3.66948
2022-09-14	12:31:01	1.33187
2022-09-14	12:31:01	2.72541
2022-09-14	12:31:01	3.01899
2022-09-14	12:31:02	1.78953
2022-09-14	12:31:02	2.0623
2022-09-14	12:31:02	0.417519
2022-09-14	12:31:02	0.518842
2022-09-14	12:31:03	0.321794
2022-09-14	12:31:03	0.217061
2022-09-14	12:31:03	0.129275
2022-09-14	12:31:03	0.217875
2022-09-14	12:31:04	0.411565
2022-09-14	12:31:04	0.582914
2022-09-14	12:31:04	0.428613
2022-09-14	12:31:05	0.34841
2022-09-14	12:31:05	0.374008
2022-09-14	12:31:05	0.395026
2022-09-14	12:31:05	0.429682
2022-09-14	12:31:06	0.485051
2022-09-14	12:31:06	-0.323193
2022-09-14	12:31:06	0.986221
2022-09-14	12:31:06	0.733804
2022-09-14	12:31:07	0.728155
2022-09-14	12:31:07	0.736247
2022-09-14	12:31:07	0.736857
2022-09-14	12:31:07	0.728512
2022-09-14	12:31:08	0.608868
2022-09-14	12:31:08	0.28612
2022-09-14	12:31:08	0.33528
2022-09-14	12:31:09	0.349173
2022-09-14	12:31:09	0.429173
2022-09-14	12:31:09	0.375789
2022-09-14	12:31:09	0.338232
2022-09-14	12:31:10	0.337926
2022-09-14	12:31:10	0.3164
2022-09-14	12:31:10	0.343575
2022-09-14	12:31:10	0.41584
2022-09-14	12:31:11	0.374517
2022-09-14	12:31:11	0.375382
2022-09-14	12:31:11	0.345407
2022-09-14	12:31:11	0.349377
2022-09-14	12:31:12	0.345102
2022-09-14	12:31:12	0.350954
2022-09-14	12:31:12	0.353753
2022-09-14	12:31:13	0.343524
2022-09-14	12:31:13	0.333041
2022-09-14	12:31:13	0.330598
2022-09-14	12:31:13	0.336858
2022-09-14	12:31:14	0.337468
2022-09-14	12:31:14	0.337723
2022-09-14	12:31:14	0.329784
2022-09-14	12:31:14	0.320522
2022-09-14	12:31:15	0.32841
2022-09-14	12:31:15	0.343321
2022-09-14	12:31:15	0.331718
2022-09-14	12:31:15	0.322099
2022-09-14	12:31:16	0.309631
2022-09-14	12:31:16	0.305102
2022-09-14	12:31:16	0.307087
2022-09-14	12:31:17	0.292532
2022-09-14	12:31:17	0.300624
2022-09-14	12:31:17	0.334771
2022-09-14	12:31:17	0.346221
2022-09-14	12:31:18	0.338283
2022-09-14	12:31:18	0.361132
2022-09-14	12:31:18	0.370852
2022-09-14	12:31:18	0.399148
2022-09-14	12:31:19	0.46902
2022-09-14	12:31:19	0.60042
2022-09-14	12:31:19	0.77813
2022-09-14	12:31:20	0.692837
2022-09-14	12:31:20	0.711005
2022-09-14	12:31:20	0.594924
2022-09-14	12:31:20	0.57874
2022-09-14	12:31:21	0.490802
2022-09-14	12:31:21	0.458944
2022-09-14	12:31:21	0.432277
2022-09-14	12:31:21	0.429173
2022-09-14	12:31:22	0.401845
2022-09-14	12:31:22	0.397926
2022-09-14	12:31:22	0.395534
2022-09-14	12:31:22	0.383524
2022-09-14	12:31:23	0.387494
2022-09-14	12:31:23	0.39528
2022-09-14	12:31:23	0.396094
2022-09-14	12:31:24	0.40042
2022-09-14	12:31:24	0.392379
2022-09-14	12:31:24	0.390344
2022-09-14	12:31:24	0.395534
2022-09-14	12:31:25	0.398384
2022-09-14	12:31:25	0.396145
2022-09-14	12:31:25	0.397621
2022-09-14	12:31:25	0.401794
2022-09-14	12:31:26	0.399249
2022-09-14	12:31:26	0.40556
2022-09-14	12:31:26	0.409733
2022-09-14	12:31:26	0.407443
2022-09-14	12:31:27	0.404949
2022-09-14	12:31:27	0.403473
2022-09-14	12:31:27	0.397163
2022-09-14	12:31:28	0.400115
2022-09-14	12:31:28	0.402506
2022-09-14	12:31:28	0.371056
2022-09-14	12:31:28	0.461438
2022-09-14	12:31:29	0.372379
2022-09-14	12:31:29	0.238486
2022-09-14	12:31:29	0.28612
2022-09-14	12:31:29	0.289428
2022-09-14	12:31:30	0.436908
2022-09-14	12:31:30	0.297468
2022-09-14	12:31:30	0.337214
2022-09-14	12:31:30	0.458995
2022-09-14	12:31:31	0.285255
2022-09-14	12:31:31	0.222099
2022-09-14	12:31:31	0.210954
2022-09-14	12:31:32	0.17472
2022-09-14	12:31:32	0.212583
2022-09-14	12:31:32	0.262863
2022-09-14	12:31:32	0.371616
2022-09-14	12:31:33	0.503626
2022-09-14	12:31:33	0.683677
2022-09-14	12:31:33	0.482812
2022-09-14	12:31:33	0.692633
2022-09-14	12:31:34	0.860471
2022-09-14	12:31:34	0.833601
2022-09-14	12:31:34	0.537926
2022-09-14	12:31:34	0.514415
2022-09-14	12:31:35	0.444033
2022-09-14	12:31:35	0.360064
2022-09-14	12:31:35	0.427748
2022-09-14	12:31:36	0.383015
2022-09-14	12:31:36	0.385611
2022-09-14	12:31:36	0.423779
2022-09-14	12:31:36	0.453193
2022-09-14	12:31:37	0.464186
2022-09-14	12:31:37	0.434008
2022-09-14	12:31:37	0.449071
2022-09-14	12:31:37	0.400166
2022-09-14	12:31:38	0.29126
2022-09-14	12:31:38	0.201285
2022-09-14	12:31:38	0.171769
2022-09-14	12:31:38	0.215178
2022-09-14	12:31:39	0.348613
2022-09-14	12:31:39	0.472227
2022-09-14	12:31:39	0.743066
2022-09-14	12:31:40	0.532837
2022-09-14	12:31:40	0.352888
2022-09-14	12:31:40	0.344847
2022-09-14	12:31:40	0.36271
2022-09-14	12:31:41	0.34327
2022-09-14	12:31:41	0.299657
2022-09-14	12:31:41	0.352736
2022-09-14	12:31:41	0.364644
2022-09-14	12:31:42	0.383524
2022-09-14	12:31:42	0.436196
2022-09-14	12:31:42	0.535534
2022-09-14	12:31:42	0.554466
2022-09-14	12:31:43	0.567646
2022-09-14	12:31:43	0.363117
2022-09-14	12:31:43	0.456349
2022-09-14	12:31:44	0.360369
2022-09-14	12:31:44	0.296196
2022-09-14	12:31:44	0.291819
2022-09-14	12:31:44	0.334771
2022-09-14	12:31:45	0.594262
2022-09-14	12:31:45	1.8823
2022-09-14	12:31:45	4.40683
2022-09-14	12:31:45	4.54464
2022-09-14	12:31:46	2.90286
2022-09-14	12:31:46	2.70235
2022-09-14	12:31:46	4.38317
2022-09-14	12:31:46	3.4536
2022-09-14	12:31:47	3.49523
2022-09-14	12:31:47	3.19528
2022-09-14	12:31:47	5.68932
2022-09-14	12:31:48	10.1007
2022-09-14	12:31:48	4.69263
2022-09-14	12:31:48	2.97874
2022-09-14	12:31:48	1.65808
2022-09-14	12:31:49	2.13772
2022-09-14	12:31:49	2.81467
2022-09-14	12:31:49	4.27289
2022-09-14	12:31:49	6.74871
2022-09-14	12:31:50	6.17482
2022-09-14	12:31:50	5.45762
2022-09-14	12:31:50	5.02917
2022-09-14	12:31:50	7.93334
2022-09-14	12:31:51	9.96321
2022-09-14	12:31:51	10.9257
2022-09-14	12:31:51	8.10897
2022-09-14	12:31:52	7.46204
2022-09-14	12:31:52	5.97701
2022-09-14	12:31:52	2.84393
2022-09-14	12:31:52	4.10978
2022-09-14	12:31:53	11.6085
2022-09-14	12:31:53	7.32036
2022-09-14	12:31:53	4.23701
2022-09-14	12:31:53	1.02653
2022-09-14	12:31:54	0.465407
2022-09-14	12:31:54	0.442252
2022-09-14	12:31:54	0.418537
2022-09-14	12:31:55	0.278486
2022-09-14	12:31:55	0.359351
2022-09-14	12:31:55	0.175942
2022-09-14	12:31:55	0.580216
2022-09-14	12:31:56	0.893092
2022-09-14	12:31:56	1.92775
2022-09-14	12:31:56	3.20378
2022-09-14	12:31:56	1.86403
2022-09-14	12:31:57	1.4164
2022-09-14	12:31:57	1.16027
2022-09-14	12:31:57	0.726679
2022-09-14	12:31:57	0.737214
2022-09-14	12:31:58	0.681285
2022-09-14	12:31:58	0.729326
2022-09-14	12:31:58	0.724898
2022-09-14	12:31:59	0.72215
2022-09-14	12:31:59	0.724898
2022-09-14	12:31:59	0.73813
2022-09-14	12:31:59	0.72902
2022-09-14	12:32:00	0.637672
2022-09-14	12:32:00	0.724542
2022-09-14	12:32:00	0.721387
2022-09-14	12:32:00	0.73014
2022-09-14	12:32:01	0.72327
2022-09-14	12:32:01	0.701539
2022-09-14	12:32:01	0.659199
2022-09-14	12:32:01	0.540114
2022-09-14	12:32:02	0.485865
2022-09-14	12:32:02	0.304593
2022-09-14	12:32:02	0.231616
2022-09-14	12:32:03	-0.1436
2022-09-14	12:32:03	-0.195152
2022-09-14	12:32:03	-0.446755
2022-09-14	12:32:03	-0.671182
2022-09-14	12:32:04	-0.732048
2022-09-14	12:32:04	-0.725941
2022-09-14	12:32:04	-0.618053
2022-09-14	12:32:04	-0.862582
2022-09-14	12:32:05	-0.805279
2022-09-14	12:32:05	-0.90365
2022-09-14	12:32:05	-1.00645
2022-09-14	12:32:05	-1.07184
2022-09-14	12:32:06	-0.592811
2022-09-14	12:32:06	-0.531081
2022-09-14	12:32:06	-0.522837
2022-09-14	12:32:07	-0.5179
2022-09-14	12:32:07	-0.396425
2022-09-14	12:32:07	-0.418867
2022-09-14	12:32:07	-0.309045
2022-09-14	12:32:08	-0.349554
2022-09-14	12:32:08	-0.463549
2022-09-14	12:32:08	-0.443905
2022-09-14	12:32:08	-0.427519
2022-09-14	12:32:09	-0.436272
2022-09-14	12:32:09	-0.378409
2022-09-14	12:32:09	-0.38416
2022-09-14	12:32:09	-0.38701
2022-09-14	12:32:10	-0.402226
2022-09-14	12:32:10	-0.373218
2022-09-14	12:32:10	-0.302481
2022-09-14	12:32:11	-0.324211
2022-09-14	12:32:11	-0.327671
2022-09-14	12:32:11	-0.373066
2022-09-14	12:32:11	-0.416526
2022-09-14	12:32:12	-0.446552
2022-09-14	12:32:12	-0.497544
2022-09-14	12:32:12	-0.519427
2022-09-14	12:32:12	-0.508078
2022-09-14	12:32:13	-0.501971
2022-09-14	12:32:13	-0.513727
2022-09-14	12:32:13	-0.521157
2022-09-14	12:32:13	-0.528231
2022-09-14	12:32:14	-0.546806
2022-09-14	12:32:14	-0.531234
2022-09-14	12:32:14	-0.52416
2022-09-14	12:32:15	-0.528587
2022-09-14	12:32:15	-0.517086
2022-09-14	12:32:15	-0.518562
2022-09-14	12:32:15	-0.3979
2022-09-14	12:32:16	-0.457086
2022-09-14	12:32:16	-0.46874
2022-09-14	12:32:16	-0.500699
2022-09-14	12:32:16	-0.498715
2022-09-14	12:32:17	-0.513473
2022-09-14	12:32:17	-0.453524
2022-09-14	12:32:17	-0.490114
2022-09-14	12:32:17	-0.505992
2022-09-14	12:32:18	-0.499478
2022-09-14	12:32:18	-0.467926
2022-09-14	12:32:18	-0.376068
2022-09-14	12:32:19	-0.259783
2022-09-14	12:32:19	-0.0651269
2022-09-14	12:32:19	0.147545
2022-09-14	12:32:19	0.736959
2022-09-14	12:32:20	0.733804
2022-09-14	12:32:20	0.724542
2022-09-14	12:32:20	0.731107
2022-09-14	12:32:20	0.729987
2022-09-14	12:32:21	0.727596
2022-09-14	12:32:21	0.7107
2022-09-14	12:32:21	0.663117
2022-09-14	12:32:21	0.594313
2022-09-14	12:32:22	0.551412
2022-09-14	12:32:22	0.22098
2022-09-14	12:32:22	-0.0469081
2022-09-14	12:32:23	-0.262786
2022-09-14	12:32:23	0.0814379
2022-09-14	12:32:23	-0.247773
2022-09-14	12:32:23	-0.296374
2022-09-14	12:32:24	-0.42589
2022-09-14	12:32:24	-0.448842
2022-09-14	12:32:24	-0.355203
2022-09-14	12:32:24	-0.0606486
2022-09-14	12:32:25	0.07813
2022-09-14	12:32:25	0.37986
2022-09-14	12:32:25	1.41818
2022-09-14	12:32:25	1.11879
2022-09-14	12:32:26	2.25279
2022-09-14	12:32:26	1.30281
2022-09-14	12:32:26	1.84128
2022-09-14	12:32:27	1.13742
2022-09-14	12:32:27	0.638486
2022-09-14	12:32:27	1.06154
2022-09-14	12:32:27	0.297723
2022-09-14	12:32:28	0.335484
2022-09-14	12:32:28	0.538435
2022-09-14	12:32:28	0.224033
2022-09-14	12:32:28	0.251311
2022-09-14	12:32:29	0.325662
2022-09-14	12:32:29	1.40317
2022-09-14	12:32:29	0.667392
2022-09-14	12:32:29	1.30301
2022-09-14	12:32:30	2.34709
2022-09-14	12:32:30	2.1507
2022-09-14	12:32:30	0.960216
2022-09-14	12:32:31	0.420267
2022-09-14	12:32:31	0.0554837
2022-09-14	12:32:31	0.0468832
2022-09-14	12:32:31	-0.355508
2022-09-14	12:32:32	-0.358358
2022-09-14	12:32:32	-0.439834
2022-09-14	12:32:32	-0.512048
2022-09-14	12:32:32	-0.472862
2022-09-14	12:32:33	-0.626552
2022-09-14	12:32:33	-0.374898
2022-09-14	12:32:33	-0.8579
2022-09-14	12:32:33	-0.28818
2022-09-14	12:32:34	0.0540078
2022-09-14	12:32:34	0.210395
2022-09-14	12:32:34	0.390038
2022-09-14	12:32:35	0.200522
2022-09-14	12:32:35	0.342659
2022-09-14	12:32:35	0.397774
2022-09-14	12:32:35	0.501743
2022-09-14	12:32:36	0.604898
2022-09-14	12:32:36	0.471616
2022-09-14	12:32:36	0.713651
2022-09-14	12:32:36	0.633651
2022-09-14	12:32:37	0.571259
2022-09-14	12:32:37	0.545356
2022-09-14	12:32:37	0.503677
2022-09-14	12:32:38	0.429224
2022-09-14	12:32:38	0.413957
2022-09-14	12:32:38	0.392786
2022-09-14	12:32:38	0.195178
2022-09-14	12:32:39	0.261336
2022-09-14	12:32:39	0.0246949
2022-09-14	12:32:39	0.224746
2022-09-14	12:32:39	0.353092
2022-09-14	12:32:40	0.625
2022-09-14	12:32:40	0.401692
2022-09-14	12:32:40	0.104186
2022-09-14	12:32:40	0.322303
2022-09-14	12:32:41	0.705051
2022-09-14	12:32:41	0.316196
2022-09-14	12:32:41	0.279453
2022-09-14	12:32:42	0.37411
2022-09-14	12:32:42	0.345916
2022-09-14	12:32:42	1.93798
2022-09-14	12:32:42	1.73894
2022-09-14	12:32:43	6.67289
2022-09-14	12:32:43	14.8497
2022-09-14	12:32:43	16.1921
2022-09-14	12:32:43	8.77095
2022-09-14	12:32:44	5.23248
2022-09-14	12:32:44	3.8279
2022-09-14	12:32:44	3.79248
2022-09-14	12:32:44	3.82917
2022-09-14	12:32:45	3.4649
2022-09-14	12:32:45	3.44306
2022-09-14	12:32:45	3.49966
2022-09-14	12:32:46	3.58535
2022-09-14	12:32:46	3.2937
2022-09-14	12:32:46	3.25314
2022-09-14	12:32:46	3.34983
2022-09-14	12:32:47	3.46082
2022-09-14	12:32:47	3.33905
2022-09-14	12:32:47	3.27095
2022-09-14	12:32:47	3.15075
2022-09-14	12:32:48	3.11976
2022-09-14	12:32:48	3.10006
2022-09-14	12:32:48	3.00337
2022-09-14	12:32:49	2.91533
2022-09-14	12:32:49	2.91792
2022-09-14	12:32:49	2.92754
2022-09-14	12:32:49	3.0393
2022-09-14	12:32:50	2.96571
2022-09-14	12:32:50	2.88688
2022-09-14	12:32:50	2.9679
2022-09-14	12:32:50	2.76444
2022-09-14	12:32:51	2.32276
2022-09-14	12:32:51	2.00419
2022-09-14	12:32:51	1.8392
2022-09-14	12:32:51	1.70393
2022-09-14	12:32:52	1.56536
2022-09-14	12:32:52	1.39223
2022-09-14	12:32:52	1.39146
2022-09-14	12:32:52	1.49055
2022-09-14	12:32:53	1.52261
2022-09-14	12:32:53	1.62413
2022-09-14	12:32:53	1.6565
2022-09-14	12:32:54	1.52093
2022-09-14	12:32:54	1.39162
2022-09-14	12:32:54	1.30368
2022-09-14	12:32:54	1.35182
2022-09-14	12:32:55	1.51945
2022-09-14	12:32:55	1.60561
2022-09-14	12:32:55	1.61212
2022-09-14	12:32:55	1.69156
2022-09-14	12:32:56	1.62917
2022-09-14	12:32:56	1.66286
2022-09-14	12:32:56	1.70617
2022-09-14	12:32:56	1.64821
2022-09-14	12:32:57	1.62159
2022-09-14	12:32:57	1.54887
2022-09-14	12:32:57	1.56459
2022-09-14	12:32:58	1.57818
2022-09-14	12:32:58	1.65945
2022-09-14	12:32:58	1.66826
2022-09-14	12:32:58	1.57732
2022-09-14	12:32:59	1.55788
2022-09-14	12:32:59	1.61899
2022-09-14	12:32:59	1.60062
2022-09-14	12:33:00	1.62882
2022-09-14	12:33:00	1.69497
2022-09-14	12:33:00	1.72027
2022-09-14	12:33:00	1.76505
2022-09-14	12:33:00	1.8249
2022-09-14	12:33:01	1.85889
2022-09-14	12:33:01	1.90464
2022-09-14	12:33:01	1.91329
2022-09-14	12:33:02	1.86912
2022-09-14	12:33:02	1.74851
2022-09-14	12:33:02	1.65991
2022-09-14	12:33:02	1.64576
2022-09-14	12:33:03	1.67039
2022-09-14	12:33:03	1.74602
2022-09-14	12:33:03	1.68281
2022-09-14	12:33:03	1.68347
2022-09-14	12:33:04	1.66312
2022-09-14	12:33:04	1.61803
2022-09-14	12:33:04	1.50877
2022-09-14	12:33:04	1.46933
2022-09-14	12:33:05	1.43538
2022-09-14	12:33:05	1.42317
2022-09-14	12:33:05	1.42597
2022-09-14	12:33:06	1.41014
2022-09-14	12:33:06	1.37579
2022-09-14	12:33:06	1.38266
2022-09-14	12:33:06	1.43538
2022-09-14	12:33:07	1.42123
2022-09-14	12:33:07	1.42017
2022-09-14	12:33:07	1.44291
2022-09-14	12:33:07	1.43182
2022-09-14	12:33:08	1.43961
2022-09-14	12:33:08	1.43101
2022-09-14	12:33:08	1.32765
2022-09-14	12:33:08	1.36561
2022-09-14	12:33:09	1.41228
2022-09-14	12:33:09	1.36586
2022-09-14	12:33:09	1.30235
2022-09-14	12:33:10	1.25538
2022-09-14	12:33:10	1.24541
2022-09-14	12:33:10	1.24291
2022-09-14	12:33:10	1.23095
2022-09-14	12:33:11	1.2908
2022-09-14	12:33:11	1.30245
2022-09-14	12:33:11	1.33559
2022-09-14	12:33:11	1.3652
2022-09-14	12:33:12	1.3962
2022-09-14	12:33:12	1.3366
2022-09-14	12:33:12	1.3421
2022-09-14	12:33:12	1.411
2022-09-14	12:33:13	1.45335
2022-09-14	12:33:13	1.40831
2022-09-14	12:33:13	1.37681
2022-09-14	12:33:14	1.38938
2022-09-14	12:33:14	1.31604
2022-09-14	12:33:14	1.37584
2022-09-14	12:33:14	1.32576
2022-09-14	12:33:15	1.35726
2022-09-14	12:33:15	1.30261
2022-09-14	12:33:15	1.29533
2022-09-14	12:33:15	1.40179
2022-09-14	12:33:16	1.47029
2022-09-14	12:33:16	1.53645
2022-09-14	12:33:16	1.57447
2022-09-14	12:33:16	1.52765
2022-09-14	12:33:17	1.60815
2022-09-14	12:33:17	1.66429
2022-09-14	12:33:17	1.62159
2022-09-14	12:33:18	1.55691
2022-09-14	12:33:18	1.51477
2022-09-14	12:33:18	1.4905
2022-09-14	12:33:18	1.49131
2022-09-14	12:33:19	1.5364
2022-09-14	12:33:19	1.59039
2022-09-14	12:33:19	1.61889
2022-09-14	12:33:19	1.62775
2022-09-14	12:33:20	1.68525
2022-09-14	12:33:20	1.6423
2022-09-14	12:33:20	1.56917
2022-09-14	12:33:20	1.60719
2022-09-14	12:33:21	1.61202
2022-09-14	12:33:21	1.45197
2022-09-14	12:33:21	1.03274
2022-09-14	12:33:22	0.351565
2022-09-14	12:33:22	0.387595
2022-09-14	12:33:22	0.477214
2022-09-14	12:33:22	0.506069
2022-09-14	12:33:23	0.640064
2022-09-14	12:33:23	0.967952
2022-09-14	12:33:23	1.2591
2022-09-14	12:33:23	0.704288
2022-09-14	12:33:24	0.956145
2022-09-14	12:33:24	0.745051
2022-09-14	12:33:24	1.23263
2022-09-14	12:33:24	1.06301
2022-09-14	12:33:25	1.12067
2022-09-14	12:33:25	0.912481
2022-09-14	12:33:25	0.891514
2022-09-14	12:33:26	0.865865
2022-09-14	12:33:26	0.940471
2022-09-14	12:33:26	0.937417
2022-09-14	12:33:26	0.885
2022-09-14	12:33:27	1.28698
2022-09-14	12:33:27	1.17828
2022-09-14	12:33:27	1.64251
2022-09-14	12:33:27	1.22139
2022-09-14	12:33:28	1.67838
2022-09-14	12:33:28	1.17055
2022-09-14	12:33:28	1.22668
2022-09-14	12:33:28	1.22897
2022-09-14	12:33:29	1.24663
2022-09-14	12:33:29	1.26597
2022-09-14	12:33:29	1.29884
2022-09-14	12:33:30	1.30816
2022-09-14	12:33:30	1.3052
2022-09-14	12:33:30	1.3765
2022-09-14	12:33:30	1.43243
2022-09-14	12:33:31	1.4934
2022-09-14	12:33:31	1.46627
2022-09-14	12:33:31	1.42551
2022-09-14	12:33:31	1.38958
2022-09-14	12:33:32	1.35808
2022-09-14	12:33:32	1.27238
2022-09-14	12:33:32	1.23513
2022-09-14	12:33:33	1.22871
2022-09-14	12:33:33	1.25635
2022-09-14	12:33:33	1.26566
2022-09-14	12:33:33	1.26022
2022-09-14	12:33:34	1.32475
2022-09-14	12:33:34	1.44439
2022-09-14	12:33:34	1.54642
2022-09-14	12:33:34	1.63304
2022-09-14	12:33:35	1.61034
2022-09-14	12:33:35	1.61436
2022-09-14	12:33:35	1.63966
2022-09-14	12:33:35	1.65151
2022-09-14	12:33:36	1.77854
2022-09-14	12:33:36	1.75844
2022-09-14	12:33:36	1.80561
2022-09-14	12:33:37	1.72342
2022-09-14	12:33:37	1.81248
2022-09-14	12:33:37	1.8106
2022-09-14	12:33:37	1.61192
2022-09-14	12:33:38	1.47635
2022-09-14	12:33:38	1.42912
2022-09-14	12:33:38	1.49747
2022-09-14	12:33:38	1.51711
2022-09-14	12:33:39	1.51691
2022-09-14	12:33:39	1.50352
2022-09-14	12:33:39	1.4367
2022-09-14	12:33:39	1.19869
2022-09-14	12:33:40	1.25589
2022-09-14	12:33:40	1.31879
2022-09-14	12:33:40	1.82042
2022-09-14	12:33:41	2.11065
2022-09-14	12:33:41	2.13691
2022-09-14	12:33:41	1.69253
2022-09-14	12:33:41	1.69452
2022-09-14	12:33:42	1.66729
2022-09-14	12:33:42	1.6595
2022-09-14	12:33:42	1.78403
2022-09-14	12:33:42	1.72317
2022-09-14	12:33:43	1.68831
2022-09-14	12:33:43	1.60556
2022-09-14	12:33:43	1.68653
2022-09-14	12:33:43	1.71294
2022-09-14	12:33:44	1.79955
2022-09-14	12:33:44	1.89747
2022-09-14	12:33:44	1.73274
2022-09-14	12:33:45	2.38327
2022-09-14	12:33:45	6.52205
2022-09-14	12:33:45	6.16673
2022-09-14	12:33:45	2.75635
2022-09-14	12:33:46	1.91391
2022-09-14	12:33:46	1.94704
2022-09-14	12:33:46	1.6737
2022-09-14	12:33:46	1.59538
2022-09-14	12:33:47	1.60276
2022-09-14	12:33:47	1.42271
2022-09-14	12:33:47	1.18663
2022-09-14	12:33:47	1.78159
2022-09-14	12:33:48	2.49762
2022-09-14	12:33:48	2.79075
2022-09-14	12:33:48	2.2993
2022-09-14	12:33:49	1.92022
2022-09-14	12:33:49	1.75599
2022-09-14	12:33:49	1.81106
2022-09-14	12:33:49	1.87121
2022-09-14	12:33:50	1.85823
2022-09-14	12:33:50	1.86006
2022-09-14	12:33:50	2.01528
2022-09-14	12:33:50	2.05706
2022-09-14	12:33:51	2.13411
2022-09-14	12:33:51	1.89869
2022-09-14	12:33:51	1.66927
2022-09-14	12:33:51	1.62052
2022-09-14	12:33:52	1.66948
2022-09-14	12:33:52	1.69431
2022-09-14	12:33:52	1.67615
2022-09-14	12:33:53	1.79935
2022-09-14	12:33:53	1.98235
2022-09-14	12:33:53	1.94612
2022-09-14	12:33:53	1.75253
2022-09-14	12:33:54	1.7993
2022-09-14	12:33:54	1.83782
2022-09-14	12:33:54	1.85212
2022-09-14	12:33:54	1.84836
2022-09-14	12:33:55	2.07803
2022-09-14	12:33:55	2.45487
2022-09-14	12:33:55	4.10734
2022-09-14	12:33:55	4.69848
2022-09-14	12:33:56	1.88861
2022-09-14	12:33:56	0.87584
2022-09-14	12:33:56	0.505967
2022-09-14	12:33:57	0.382303
2022-09-14	12:33:57	0.496705
2022-09-14	12:33:57	0.775687
2022-09-14	12:33:57	0.524084
2022-09-14	12:33:58	0.684746
2022-09-14	12:33:58	0.368868
2022-09-14	12:33:58	0.364033
2022-09-14	12:33:58	0.35416
2022-09-14	12:33:59	0.36841
2022-09-14	12:33:59	0.493499
2022-09-14	12:33:59	0.412277
2022-09-14	12:33:59	0.410445
2022-09-14	12:34:00	0.387595
2022-09-14	12:34:00	0.439453
2022-09-14	12:34:00	0.476552
2022-09-14	12:34:01	0.59187
2022-09-14	12:34:01	0.899656
2022-09-14	12:34:01	1.9136
2022-09-14	12:34:01	8.95003
2022-09-14	12:34:02	5.61202
2022-09-14	12:34:02	1.9706
2022-09-14	12:34:02	1.96271
2022-09-14	12:34:02	4.90856
2022-09-14	12:34:03	9.15792
2022-09-14	12:34:03	4.80306
2022-09-14	12:34:03	3.86388
2022-09-14	12:34:03	4.54164
2022-09-14	12:34:04	4.28836
2022-09-14	12:34:04	4.01411
2022-09-14	12:34:04	3.67772
