# Supplementary material for: Comparing efficacy in reducing pulling and welfare impacts of four types of leash walking equipment
Source: PeerJ journal article supplement (doi:10.7717/peerj.18131), 2024-10-24
Supplement: Shelter_2_Tension_files.zip [file Richa_harness_2022914105648 copy.xlsx]

## Sheet: Averaged Newtons
Date	Time	Averaged Newtons	impulse	total steps
2022-09-14	10:57:03	1.75059	1.75059	0		Impulse newtons	783.896
2022-09-14	10:57:04	1.84448	3.59506	0		total steps	0
2022-09-14	10:57:05	1.82354	5.4186	0
2022-09-14	10:57:06	2.80329	8.22189	0
2022-09-14	10:57:07	2.13864	10.3605	0
2022-09-14	10:57:08	2.17056	12.5311	0
2022-09-14	10:57:09	0.789924	13.321	0
2022-09-14	10:57:10	0.755384	14.0764	0
2022-09-14	10:57:11	0.7219	14.7983	0
2022-09-14	10:57:12	0.863551	15.6619	0
2022-09-14	10:57:13	1.03067	16.6925	0
2022-09-14	10:57:14	0.945007	17.6375	0
2022-09-14	10:57:15	0.957665	18.5952	0
2022-09-14	10:57:16	0.930443	19.5256	0
2022-09-14	10:57:17	1.48148	21.0071	0
2022-09-14	10:57:18	1.45887	22.466	0
2022-09-14	10:57:19	1.41901	23.885	0
2022-09-14	10:57:20	1.31516	25.2002	0
2022-09-14	10:57:21	1.66706	26.8672	0
2022-09-14	10:57:22	2.01582	28.883	0
2022-09-14	10:57:23	1.3769	30.2599	0
2022-09-14	10:57:24	1.32778	31.5877	0
2022-09-14	10:57:25	1.29745	32.8852	0
2022-09-14	10:57:26	1.54859	34.4338	0
2022-09-14	10:57:27	1.382	35.8158	0
2022-09-14	10:57:28	1.42648	37.2422	0
2022-09-14	10:57:29	1.33169	38.5739	0
2022-09-14	10:57:30	0.488794	39.0627	0
2022-09-14	10:57:31	-0.52354	39.0627	0
2022-09-14	10:57:32	8.49871	47.5614	0
2022-09-14	10:57:33	7.37773	54.9392	0
2022-09-14	10:57:34	6.11254	61.0517	0
2022-09-14	10:57:35	0.317601	61.3693	0
2022-09-14	10:57:36	-0.383019	61.3693	0
2022-09-14	10:57:37	0.745895	62.1152	0
2022-09-14	10:57:38	1.73919	63.8544	0
2022-09-14	10:57:39	1.72846	65.5829	0
2022-09-14	10:57:40	1.10396	66.6868	0
2022-09-14	10:57:41	1.1764	67.8632	0
2022-09-14	10:57:42	1.11954	68.9828	0
2022-09-14	10:57:43	1.26089	70.2436	0
2022-09-14	10:57:44	1.68851	71.9321	0
2022-09-14	10:57:45	2.26558	74.1977	0
2022-09-14	10:57:46	3.25573	77.4535	0
2022-09-14	10:57:47	2.72274	80.1762	0
2022-09-14	10:57:48	3.06965	83.2459	0
2022-09-14	10:57:49	7.86912	91.115	0
2022-09-14	10:57:50	2.05098	93.166	0
2022-09-14	10:57:51	1.30633	94.4723	0
2022-09-14	10:57:52	1.78103	96.2533	0
2022-09-14	10:57:53	1.91606	98.1694	0
2022-09-14	10:57:54	1.83706	100.006	0
2022-09-14	10:57:55	2.02274	102.029	0
2022-09-14	10:57:56	1.98833	104.018	0
2022-09-14	10:57:57	2.57684	106.594	0
2022-09-14	10:57:58	3.24577	109.84	0
2022-09-14	10:57:59	3.24962	113.09	0
2022-09-14	10:58:00	3.30372	116.393	0
2022-09-14	10:58:01	3.2482	119.642	0
2022-09-14	10:58:02	3.23807	122.88	0
2022-09-14	10:58:03	2.59444	125.474	0
2022-09-14	10:58:04	1.5554	127.03	0
2022-09-14	10:58:05	1.3382	128.368	0
2022-09-14	10:58:06	3.33383	131.702	0
2022-09-14	10:58:07	3.24068	134.942	0
2022-09-14	10:58:08	4.94842	139.891	0
2022-09-14	10:58:09	2.66724	142.558	0
2022-09-14	10:58:10	3.57141	146.129	0
2022-09-14	10:58:11	3.24283	149.372	0
2022-09-14	10:58:12	3.22981	152.602	0
2022-09-14	10:58:13	3.24109	155.843	0
2022-09-14	10:58:14	3.25879	159.102	0
2022-09-14	10:58:15	3.85256	162.954	0
2022-09-14	10:58:16	3.3181	166.273	0
2022-09-14	10:58:17	3.42568	169.698	0
2022-09-14	10:58:18	3.42272	173.121	0
2022-09-14	10:58:19	3.4666	176.588	0
2022-09-14	10:58:20	3.40836	179.996	0
2022-09-14	10:58:21	3.17794	183.174	0
2022-09-14	10:58:22	2.76886	185.943	0
2022-09-14	10:58:23	2.2155	188.158	0
2022-09-14	10:58:24	2.38692	190.545	0
2022-09-14	10:58:25	2.11459	192.66	0
2022-09-14	10:58:26	3.2499	195.91	0
2022-09-14	10:58:27	3.23717	199.147	0
2022-09-14	10:58:28	3.25562	202.402	0
2022-09-14	10:58:29	3.24803	205.65	0
2022-09-14	10:58:30	-3.68845	205.65	0
2022-09-14	10:58:31	0.526088	206.177	0
2022-09-14	10:58:32	0.678266	206.855	0
2022-09-14	10:58:33	0.242427	207.097	0
2022-09-14	10:58:34	0.248501	207.346	0
2022-09-14	10:58:35	0.280305	207.626	0
2022-09-14	10:58:36	-0.139727	207.626	0
2022-09-14	10:58:37	-0.180587	207.626	0
2022-09-14	10:58:38	0.488737	208.115	0
2022-09-14	10:58:39	0.840519	208.955	0
2022-09-14	10:58:40	1.30707	210.262	0
2022-09-14	10:58:41	-0.158402	210.262	0
2022-09-14	10:58:42	0.699432	210.962	0
2022-09-14	10:58:43	0.976114	211.938	0
2022-09-14	10:58:44	1.61873	213.557	0
2022-09-14	10:58:45	-2.01963	213.557	0
2022-09-14	10:58:46	1.54125	215.098	0
2022-09-14	10:58:47	2.92738	218.025	0
2022-09-14	10:58:48	3.16309	221.188	0
2022-09-14	10:58:49	3.18367	224.372	0
2022-09-14	10:58:50	3.19269	227.565	0
2022-09-14	10:58:51	3.20785	230.773	0
2022-09-14	10:58:52	3.21895	233.992	0
2022-09-14	10:58:53	3.23513	237.227	0
2022-09-14	10:58:54	3.22477	240.451	0
2022-09-14	10:58:55	3.22562	243.677	0
2022-09-14	10:58:56	3.23157	246.909	0
2022-09-14	10:58:57	3.22276	250.131	0
2022-09-14	10:58:58	3.23785	253.369	0
2022-09-14	10:58:59	3.24526	256.614	0
2022-09-14	10:59:00	3.0855	259.7	0
2022-09-14	10:59:01	3.22834	262.928	0
2022-09-14	10:59:02	3.23671	266.165	0
2022-09-14	10:59:03	3.23502	269.4	0
2022-09-14	10:59:04	3.23219	272.632	0
2022-09-14	10:59:05	3.24668	275.879	0
2022-09-14	10:59:06	3.21114	279.09	0
2022-09-14	10:59:07	3.1756	282.266	0
2022-09-14	10:59:08	3.12721	285.393	0
2022-09-14	10:59:09	3.17356	288.566	0
2022-09-14	10:59:10	3.13598	291.702	0
2022-09-14	10:59:11	3.14317	294.846	0
2022-09-14	10:59:12	2.71674	297.562	0
2022-09-14	10:59:13	3.26177	300.824	0
2022-09-14	10:59:14	3.25398	304.078	0
2022-09-14	10:59:15	3.26858	307.347	0
2022-09-14	10:59:16	3.24583	310.592	0
2022-09-14	10:59:17	3.25407	313.847	0
2022-09-14	10:59:18	3.2486	317.095	0
2022-09-14	10:59:19	3.25749	320.353	0
2022-09-14	10:59:20	3.23892	323.592	0
2022-09-14	10:59:21	3.22502	326.817	0
2022-09-14	10:59:22	3.25822	330.075	0
2022-09-14	10:59:23	3.25534	333.33	0
2022-09-14	10:59:24	3.25347	336.584	0
2022-09-14	10:59:25	3.23551	339.819	0
2022-09-14	10:59:26	3.11555	342.935	0
2022-09-14	10:59:27	3.25754	346.192	0
2022-09-14	10:59:28	3.24272	349.435	0
2022-09-14	10:59:29	3.26826	352.703	0
2022-09-14	10:59:30	3.27237	355.976	0
2022-09-14	10:59:31	3.2585	359.234	0
2022-09-14	10:59:32	3.24724	362.481	0
2022-09-14	10:59:33	3.25241	365.734	0
2022-09-14	10:59:34	3.24334	368.977	0
2022-09-14	10:59:35	3.22676	372.204	0
2022-09-14	10:59:36	3.25715	375.461	0
2022-09-14	10:59:37	3.23936	378.7	0
2022-09-14	10:59:38	3.25454	381.955	0
2022-09-14	10:59:39	3.26756	385.222	0
2022-09-14	10:59:40	3.24894	388.471	0
2022-09-14	10:59:41	3.26871	391.74	0
2022-09-14	10:59:42	3.26801	395.008	0
2022-09-14	10:59:43	-1.02801	395.008	0
2022-09-14	10:59:44	1.23689	396.245	0
2022-09-14	10:59:45	3.26811	399.513	0
2022-09-14	10:59:46	3.26071	402.774	0
2022-09-14	10:59:47	3.26994	406.044	0
2022-09-14	10:59:48	3.26043	409.304	0
2022-09-14	10:59:49	3.2552	412.559	0
2022-09-14	10:59:50	3.2542	415.814	0
2022-09-14	10:59:51	3.24339	419.057	0
2022-09-14	10:59:52	3.26201	422.319	0
2022-09-14	10:59:53	3.24924	425.568	0
2022-09-14	10:59:54	3.2593	428.827	0
2022-09-14	10:59:55	3.26654	432.094	0
2022-09-14	10:59:56	3.26716	435.361	0
2022-09-14	10:59:57	3.26184	438.623	0
2022-09-14	10:59:58	3.25573	441.879	0
2022-09-14	10:59:59	3.27011	445.149	0
2022-09-14	11:00:00	3.25177	448.401	0
2022-09-14	11:00:01	3.25528	451.656	0
2022-09-14	11:00:02	3.26856	454.924	0
2022-09-14	11:00:03	3.2383	458.163	0
2022-09-14	11:00:04	2.83247	460.995	0
2022-09-14	11:00:05	3.25177	464.247	0
2022-09-14	11:00:06	3.25573	467.503	0
2022-09-14	11:00:07	3.24515	470.748	0
2022-09-14	11:00:08	3.25137	473.999	0
2022-09-14	11:00:09	3.25828	477.258	0
2022-09-14	11:00:10	3.26479	480.522	0
2022-09-14	11:00:11	3.24883	483.771	0
2022-09-14	11:00:12	3.24158	487.013	0
2022-09-14	11:00:13	3.26801	490.281	0
2022-09-14	11:00:14	3.25384	493.535	0
2022-09-14	11:00:15	3.22676	496.761	0
2022-09-14	11:00:16	3.25466	500.016	0
2022-09-14	11:00:17	3.23275	503.249	0
2022-09-14	11:00:18	3.24841	506.497	0
2022-09-14	11:00:19	3.25652	509.754	0
2022-09-14	11:00:20	3.25534	513.009	0
2022-09-14	11:00:21	3.25415	516.263	0
2022-09-14	11:00:22	3.2638	519.527	0
2022-09-14	11:00:23	3.25149	522.778	0
2022-09-14	11:00:24	3.26445	526.043	0
2022-09-14	11:00:25	3.25488	529.298	0
2022-09-14	11:00:26	3.23362	532.531	0
2022-09-14	11:00:27	3.24611	535.778	0
2022-09-14	11:00:28	3.27344	539.051	0
2022-09-14	11:00:29	3.25913	542.31	0
2022-09-14	11:00:30	3.27173	545.582	0
2022-09-14	11:00:31	3.25817	548.84	0
2022-09-14	11:00:32	3.26648	552.106	0
2022-09-14	11:00:33	3.26207	555.369	0
2022-09-14	11:00:34	3.24328	558.612	0
2022-09-14	11:00:35	3.25534	561.867	0
2022-09-14	11:00:36	3.25347	565.121	0
2022-09-14	11:00:37	3.2426	568.363	0
2022-09-14	11:00:38	3.25475	571.618	0
2022-09-14	11:00:39	3.24809	574.866	0
2022-09-14	11:00:40	3.25449	578.121	0
2022-09-14	11:00:41	3.2546	581.375	0
2022-09-14	11:00:42	3.25483	584.63	0
2022-09-14	11:00:43	3.25884	587.889	0
2022-09-14	11:00:44	3.24583	591.135	0
2022-09-14	11:00:45	3.25245	594.387	0
2022-09-14	11:00:46	3.258	597.645	0
2022-09-14	11:00:47	3.25126	600.896	0
2022-09-14	11:00:48	3.24334	604.14	0
2022-09-14	11:00:49	3.25205	607.392	0
2022-09-14	11:00:50	3.25883	610.651	0
2022-09-14	11:00:51	3.27441	613.925	0
2022-09-14	11:00:52	3.2542	617.179	0
2022-09-14	11:00:53	3.25601	620.435	0
2022-09-14	11:00:54	3.24366	623.679	0
2022-09-14	11:00:55	3.26026	626.939	0
2022-09-14	11:00:56	3.25862	630.198	0
2022-09-14	11:00:57	3.25109	633.449	0
2022-09-14	11:00:58	3.25943	636.708	0
2022-09-14	11:00:59	3.23428	639.943	0
2022-09-14	11:01:00	3.26201	643.205	0
2022-09-14	11:01:01	3.26309	646.468	0
2022-09-14	11:01:02	3.25271	649.72	0
2022-09-14	11:01:03	3.26309	652.983	0
2022-09-14	11:01:04	3.25856	656.242	0
2022-09-14	11:01:05	3.25607	659.498	0
2022-09-14	11:01:06	3.26464	662.763	0
2022-09-14	11:01:07	3.26071	666.023	0
2022-09-14	11:01:08	2.92862	668.952	0
2022-09-14	11:01:09	2.52568	671.478	0
2022-09-14	11:01:10	-0.778511	671.478	0
2022-09-14	11:01:11	-2.06937	671.478	0
2022-09-14	11:01:12	-2.50904	671.478	0
2022-09-14	11:01:13	-3.43869	671.478	0
2022-09-14	11:01:14	-0.976811	671.478	0
2022-09-14	11:01:15	0.52456	672.002	0
2022-09-14	11:01:16	0.585284	672.588	0
2022-09-14	11:01:17	0.331126	672.919	0
2022-09-14	11:01:18	0.685962	673.605	0
2022-09-14	11:01:19	0.729256	674.334	0
2022-09-14	11:01:20	0.573287	674.907	0
2022-09-14	11:01:21	0.29236	675.2	0
2022-09-14	11:01:22	0.318411	675.518	0
2022-09-14	11:01:23	0.150142	675.668	0
2022-09-14	11:01:24	4.17152	679.84	0
2022-09-14	11:01:25	3.21045	683.05	0
2022-09-14	11:01:26	-0.593111	683.05	0
2022-09-14	11:01:27	-1.49756	683.05	0
2022-09-14	11:01:28	-0.431802	683.05	0
2022-09-14	11:01:29	3.93416	686.984	0
2022-09-14	11:01:30	2.64204	689.626	0
2022-09-14	11:01:31	3.94971	693.576	0
2022-09-14	11:01:32	2.17317	695.749	0
2022-09-14	11:01:33	3.04192	698.791	0
2022-09-14	11:01:34	-1.53938	698.791	0
2022-09-14	11:01:35	3.25543	702.047	0
2022-09-14	11:01:36	3.25964	705.306	0
2022-09-14	11:01:37	3.27367	708.58	0
2022-09-14	11:01:38	2.7297	711.31	0
2022-09-14	11:01:39	1.09788	712.407	0
2022-09-14	11:01:40	2.57181	714.979	0
2022-09-14	11:01:41	1.62156	716.601	0
2022-09-14	11:01:42	1.63271	718.234	0
2022-09-14	11:01:43	0.351764	718.585	0
2022-09-14	11:01:44	3.26196	721.847	0
2022-09-14	11:01:45	3.2559	725.103	0
2022-09-14	11:01:46	3.2662	728.369	0
2022-09-14	11:01:47	3.25694	731.626	0
2022-09-14	11:01:48	3.26354	734.89	0
2022-09-14	11:01:49	3.2546	738.144	0
2022-09-14	11:01:50	3.26428	741.409	0
2022-09-14	11:01:51	3.26856	744.677	0
2022-09-14	11:01:52	3.26575	747.943	0
2022-09-14	11:01:53	3.27226	751.215	0
2022-09-14	11:01:54	3.27967	754.495	0
2022-09-14	11:01:55	3.26388	757.759	0
2022-09-14	11:01:56	3.26982	761.029	0
2022-09-14	11:01:57	3.27379	764.302	0
2022-09-14	11:01:58	3.26677	767.569	0
2022-09-14	11:01:59	1.99726	769.566	0
2022-09-14	11:02:00	2.42653	771.993	0
2022-09-14	11:02:01	3.23292	775.226	0
2022-09-14	11:02:02	2.19343	777.419	0
2022-09-14	11:02:03	6.47639	783.896	0

## Sheet: Richa_harness_2022914105648 (4)
Date	Time	Lbs	Newtons	Averaged Newtons	Total force x time		total steps > 13.345	**GoPro Fitting: 1046
2022-09-14	10:57:03	0.39126	1.7404	1.75059	1.7404	FALSE	0
2022-09-14	10:57:03	0.409987	1.8237	1.75059	1.8237	FALSE	0
2022-09-14	10:57:03	0.410191	1.82461	1.75059	3.56501	FALSE	0
2022-09-14	10:57:03	0.362761	1.61363	1.75059	3.43734	FALSE	0
2022-09-14	10:57:04	0.445255	1.98058	1.84448	5.5456	FALSE	0
2022-09-14	10:57:04	0.399555	1.7773	1.84448	5.21464	FALSE	0
2022-09-14	10:57:04	0.393448	1.75014	1.84448	7.29573	FALSE	0
2022-09-14	10:57:04	0.420369	1.86989	1.84448	7.08452	FALSE	0
2022-09-14	10:57:05	0.396247	1.76259	1.82354	9.05832	FALSE	0
2022-09-14	10:57:05	0.432379	1.92331	1.82354	9.00783	FALSE	0
2022-09-14	10:57:05	0.44215	1.96677	1.82354	11.0251	FALSE	0
2022-09-14	10:57:05	0.36902	1.64147	1.82354	10.6493	FALSE	0
2022-09-14	10:57:06	0.475942	2.11709	2.80329	13.1422	FALSE	0
2022-09-14	10:57:06	0.445713	1.98262	2.80329	12.6319	FALSE	0
2022-09-14	10:57:06	0.968969	4.31017	2.80329	17.4523	FALSE	0
2022-09-14	10:57:07	0.611972	2.72217	2.13864	15.3541	FALSE	0
2022-09-14	10:57:07	0.445407	1.98126	2.13864	19.4336	FALSE	0
2022-09-14	10:57:07	0.448613	1.99552	2.13864	17.3496	FALSE	0
2022-09-14	10:57:07	0.417163	1.85562	2.13864	21.2892	FALSE	0
2022-09-14	10:57:08	0.432328	1.92308	2.17056	19.2727	FALSE	0
2022-09-14	10:57:08	0.385611	1.71527	2.17056	23.0045	FALSE	0
2022-09-14	10:57:08	0.423575	1.88415	2.17056	21.1568	FALSE	0
2022-09-14	10:57:08	0.710344	3.15975	2.17056	26.1643	FALSE	0
2022-09-14	10:57:09	0.0305473	0.13588	0.789924	21.2927	FALSE	0
2022-09-14	10:57:09	0.310802	1.38251	0.789924	27.5468	FALSE	0
2022-09-14	10:57:09	0.218333	0.971189	0.789924	22.2639	FALSE	0
2022-09-14	10:57:09	0.150649	0.670117	0.789924	28.2169	FALSE	0
2022-09-14	10:57:10	0.0686644	0.305433	0.755384	22.5694	FALSE	0
2022-09-14	10:57:10	0.270496	1.20322	0.755384	29.4201	FALSE	0
2022-09-14	10:57:10	0.170293	0.757497	0.755384	23.3268	FALSE	0
2022-09-14	10:57:11	0.0968577	0.430842	0.7219	29.8509	FALSE	0
2022-09-14	10:57:11	0.27411	1.2193	0.7219	24.5461	FALSE	0
2022-09-14	10:57:11	0.0596567	0.265365	0.7219	30.1163	FALSE	0
2022-09-14	10:57:11	0.218537	0.972096	0.7219	25.5182	FALSE	0
2022-09-14	10:57:12	0.188003	0.836275	0.863551	30.9526	FALSE	0
2022-09-14	10:57:12	0.218995	0.974134	0.863551	26.4924	FALSE	0
2022-09-14	10:57:12	0.207341	0.922294	0.863551	31.8749	FALSE	0
2022-09-14	10:57:12	0.162201	0.721502	0.863551	27.2139	FALSE	0
2022-09-14	10:57:13	0.219657	0.977078	1.03067	32.852	FALSE	0
2022-09-14	10:57:13	0.211718	0.941764	1.03067	28.1556	FALSE	0
2022-09-14	10:57:13	0.231209	1.02846	1.03067	33.8804	FALSE	0
2022-09-14	10:57:13	0.264237	1.17538	1.03067	29.331	FALSE	0
2022-09-14	10:57:14	0.25355	1.12784	0.945007	35.0083	FALSE	0
2022-09-14	10:57:14	0.135229	0.601526	0.945007	29.9325	FALSE	0
2022-09-14	10:57:14	0.248562	1.10565	0.945007	36.1139	FALSE	0
2022-09-14	10:57:15	0.0608781	0.270798	0.957665	30.2033	FALSE	0
2022-09-14	10:57:15	0.371361	1.65189	0.957665	37.7658	FALSE	0
2022-09-14	10:57:15	0.13813	0.61443	0.957665	30.8178	FALSE	0
2022-09-14	10:57:15	0.290802	1.29355	0.957665	39.0593	FALSE	0
2022-09-14	10:57:16	0.119097	0.529767	0.930443	31.3475	FALSE	0
2022-09-14	10:57:16	0.363524	1.61703	0.930443	40.6764	FALSE	0
2022-09-14	10:57:16	0.144898	0.644535	0.930443	31.9921	FALSE	0
2022-09-14	10:57:17	0.35701	1.58805	1.48148	42.2644	FALSE	0
2022-09-14	10:57:17	0.27014	1.20164	1.48148	33.1937	FALSE	0
2022-09-14	10:57:17	0.357723	1.59122	1.48148	43.8557	FALSE	0
2022-09-14	10:57:17	0.225255	1.00198	1.48148	34.1957	FALSE	0
2022-09-14	10:57:17	0.455127	2.0245	1.48148	45.8801	FALSE	0
2022-09-14	10:57:18	0.249682	1.11064	1.45887	35.3063	FALSE	0
2022-09-14	10:57:18	0.441132	1.96224	1.45887	47.8424	FALSE	0
2022-09-14	10:57:18	0.293092	1.30373	1.45887	36.6101	FALSE	0
2022-09-14	10:57:19	0.367188	1.63333	1.41901	49.4757	FALSE	0
2022-09-14	10:57:19	0.325458	1.4477	1.41901	38.0578	FALSE	0
2022-09-14	10:57:19	0.375229	1.66909	1.41901	51.1448	FALSE	0
2022-09-14	10:57:19	0.208155	0.925915	1.41901	38.9837	FALSE	0
2022-09-14	10:57:20	0.309427	1.37639	1.31516	52.5212	FALSE	0
2022-09-14	10:57:20	0.273041	1.21454	1.31516	40.1982	FALSE	0
2022-09-14	10:57:20	0.298741	1.32886	1.31516	53.8501	FALSE	0
2022-09-14	10:57:20	0.301438	1.34086	1.31516	41.5391	FALSE	0
2022-09-14	10:57:21	0.308308	1.37142	1.66706	55.2215	FALSE	0
2022-09-14	10:57:21	0.333702	1.48437	1.66706	43.0234	FALSE	0
2022-09-14	10:57:21	0.338079	1.50384	1.66706	56.7253	FALSE	0
2022-09-14	10:57:21	0.518995	2.30859	1.66706	45.332	FALSE	0
2022-09-14	10:57:22	0.683321	3.03955	2.01582	59.7649	FALSE	0
2022-09-14	10:57:22	0.368155	1.63763	2.01582	46.9697	FALSE	0
2022-09-14	10:57:22	0.308054	1.37029	2.01582	61.1352	FALSE	0
2022-09-14	10:57:23	0.350852	1.56066	1.3769	48.5303	FALSE	0
2022-09-14	10:57:23	0.244135	1.08596	1.3769	62.2211	FALSE	0
2022-09-14	10:57:23	0.418537	1.86174	1.3769	50.3921	FALSE	0
2022-09-14	10:57:23	0.224644	0.999261	1.3769	63.2204	FALSE	0
2022-09-14	10:57:24	0.421234	1.87373	1.32778	52.2658	FALSE	0
2022-09-14	10:57:24	0.187697	0.834914	1.32778	64.0553	FALSE	0
2022-09-14	10:57:24	0.460013	2.04623	1.32778	54.312	FALSE	0
2022-09-14	10:57:24	0.125051	0.556252	1.32778	64.6115	FALSE	0
2022-09-14	10:57:25	0.430038	1.9129	1.29745	56.2249	FALSE	0
2022-09-14	10:57:25	0.18785	0.835594	1.29745	65.4471	FALSE	0
2022-09-14	10:57:25	0.387188	1.72229	1.29745	57.9472	FALSE	0
2022-09-14	10:57:25	0.161641	0.719011	1.29745	66.1661	FALSE	0
2022-09-14	10:57:26	0.371056	1.65053	1.54859	59.5977	FALSE	0
2022-09-14	10:57:26	0.234364	1.0425	1.54859	67.2086	FALSE	0
2022-09-14	10:57:26	0.438995	1.95274	1.54859	61.5505	FALSE	0
2022-09-14	10:57:27	0.145204	0.645896	1.382	67.8545	FALSE	0
2022-09-14	10:57:27	0.449326	1.99869	1.382	63.5492	FALSE	0
2022-09-14	10:57:27	0.219708	0.977305	1.382	68.8318	FALSE	0
2022-09-14	10:57:27	0.428512	1.90611	1.382	65.4553	FALSE	0
2022-09-14	10:57:28	0.194211	0.863889	1.42648	69.6957	FALSE	0
2022-09-14	10:57:28	0.485611	2.16009	1.42648	67.6154	FALSE	0
2022-09-14	10:57:28	0.176196	0.783755	1.42648	70.4795	FALSE	0
2022-09-14	10:57:28	0.42673	1.89818	1.42648	69.5136	FALSE	0
2022-09-14	10:57:29	0.175992	0.782848	1.33169	71.2623	FALSE	0
2022-09-14	10:57:29	0.446069	1.9842	1.33169	71.4978	FALSE	0
2022-09-14	10:57:29	0.213448	0.949459	1.33169	72.2118	FALSE	0
2022-09-14	10:57:29	0.361998	1.61024	1.33169	73.108	FALSE	0
2022-09-14	10:57:30	0.13584	0.604243	0.488794	72.816	FALSE	0
2022-09-14	10:57:30	0.278639	1.23944	0.488794	74.3474	FALSE	0
2022-09-14	10:57:30	-0.0848216	-0.377303	0.488794	72.816	FALSE	0
2022-09-14	10:57:31	-0.133168	-0.592358	-0.52354	74.3474	FALSE	0
2022-09-14	10:57:31	-0.424923	-1.89014	-0.52354	72.816	FALSE	0
2022-09-14	10:57:31	-0.373422	-1.66106	-0.52354	74.3474	FALSE	0
2022-09-14	10:57:31	0.460725	2.0494	-0.52354	74.8654	FALSE	0
2022-09-14	10:57:32	0.722303	3.21295	8.49871	77.5604	FALSE	0
2022-09-14	10:57:32	1.82983	8.13945	8.49871	83.0049	FALSE	0
2022-09-14	10:57:32	3.1538	14.0287	8.49871	91.5891	1	1
2022-09-14	10:57:32	1.93645	8.61372	8.49871	91.6186	FALSE	1
2022-09-14	10:57:33	1.63665	7.28015	7.37773	98.8693	FALSE	1
2022-09-14	10:57:33	1.90342	8.46679	7.37773	100.085	FALSE	1
2022-09-14	10:57:33	1.60363	7.13327	7.37773	106.003	FALSE	1
2022-09-14	10:57:33	1.49065	6.63071	7.37773	106.716	FALSE	1
2022-09-14	10:57:34	1.81233	8.06161	6.11254	114.064	FALSE	1
2022-09-14	10:57:34	1.60383	7.13416	6.11254	113.85	FALSE	1
2022-09-14	10:57:34	0.706323	3.14187	6.11254	117.206	FALSE	1
2022-09-14	10:57:35	0.134161	0.596775	0.317601	114.447	FALSE	1
2022-09-14	10:57:35	0.0321249	0.142898	0.317601	117.349	FALSE	1
2022-09-14	10:57:35	0.33584	1.49388	0.317601	115.941	FALSE	1
2022-09-14	10:57:35	-0.216526	-0.963151	0.317601	117.349	FALSE	1
2022-09-14	10:57:36	-0.20533	-0.913349	-0.383019	115.941	FALSE	1
2022-09-14	10:57:36	0.124186	0.552404	-0.383019	117.901	FALSE	1
2022-09-14	10:57:36	-0.070674	-0.314372	-0.383019	115.941	FALSE	1
2022-09-14	10:57:36	-0.192608	-0.856759	-0.383019	117.901	FALSE	1
2022-09-14	10:57:37	-0.201615	-0.896824	0.745895	115.941	FALSE	1
2022-09-14	10:57:37	0.160013	0.71177	0.745895	118.613	FALSE	1
2022-09-14	10:57:37	0.335076	1.49049	0.745895	117.431	FALSE	1
2022-09-14	10:57:37	0.377265	1.67815	0.745895	120.291	FALSE	1
2022-09-14	10:57:38	0.379504	1.68811	1.73919	119.12	FALSE	1
2022-09-14	10:57:38	0.450344	2.00322	1.73919	122.294	FALSE	1
2022-09-14	10:57:38	0.343117	1.52625	1.73919	120.646	FALSE	1
2022-09-14	10:57:39	0.380674	1.69331	1.72846	123.988	FALSE	1
2022-09-14	10:57:39	0.428766	1.90724	1.72846	122.553	FALSE	1
2022-09-14	10:57:39	0.339758	1.51131	1.72846	125.499	FALSE	1
2022-09-14	10:57:39	0.405102	1.80197	1.72846	124.355	FALSE	1
2022-09-14	10:57:40	0.192074	0.854384	1.10396	126.353	FALSE	1
2022-09-14	10:57:40	0.297367	1.32275	1.10396	125.678	FALSE	1
2022-09-14	10:57:40	0.218741	0.973004	1.10396	127.326	FALSE	1
2022-09-14	10:57:40	0.284542	1.2657	1.10396	126.943	FALSE	1
2022-09-14	10:57:41	0.244797	1.08891	1.1764	128.415	FALSE	1
2022-09-14	10:57:41	0.282863	1.25823	1.1764	128.202	FALSE	1
2022-09-14	10:57:41	0.159351	0.708825	1.1764	129.124	FALSE	1
2022-09-14	10:57:41	0.370852	1.64962	1.1764	129.851	FALSE	1
2022-09-14	10:57:42	0.204084	0.907806	1.11954	130.032	FALSE	1
2022-09-14	10:57:42	0.377723	1.68019	1.11954	131.531	FALSE	1
2022-09-14	10:57:42	0.173244	0.770624	1.11954	130.803	FALSE	1
2022-09-14	10:57:43	0.319504	1.42122	1.26089	132.953	FALSE	1
2022-09-14	10:57:43	0.213702	0.950589	1.26089	131.753	FALSE	1
2022-09-14	10:57:43	0.38897	1.73022	1.26089	134.683	FALSE	1
2022-09-14	10:57:43	0.211667	0.941537	1.26089	132.695	FALSE	1
2022-09-14	10:57:44	0.383524	1.70599	1.68851	136.389	FALSE	1
2022-09-14	10:57:44	0.322252	1.43344	1.68851	134.128	FALSE	1
2022-09-14	10:57:44	0.524542	2.33327	1.68851	138.722	FALSE	1
2022-09-14	10:57:44	0.288054	1.28132	1.68851	135.41	FALSE	1
2022-09-14	10:57:45	0.278741	1.2399	2.26558	139.962	FALSE	1
2022-09-14	10:57:45	0.454262	2.02065	2.26558	137.43	FALSE	1
2022-09-14	10:57:45	0.543168	2.41612	2.26558	142.378	FALSE	1
2022-09-14	10:57:45	0.761132	3.38567	2.26558	140.816	FALSE	1
2022-09-14	10:57:46	0.794669	3.53485	3.25573	145.913	FALSE	1
2022-09-14	10:57:46	0.501387	2.23027	3.25573	143.046	FALSE	1
2022-09-14	10:57:46	0.899707	4.00208	3.25573	149.915	FALSE	1
2022-09-14	10:57:47	0.636959	2.83332	2.72274	145.879	FALSE	1
2022-09-14	10:57:47	0.606527	2.69795	2.72274	152.613	FALSE	1
2022-09-14	10:57:47	0.686679	3.05449	2.72274	148.934	FALSE	1
2022-09-14	10:57:47	0.518231	2.3052	2.72274	154.918	FALSE	1
2022-09-14	10:57:48	0.414313	1.84295	3.06965	150.777	FALSE	1
2022-09-14	10:57:48	0.54556	2.42676	3.06965	157.345	FALSE	1
2022-09-14	10:57:48	0.61411	2.73168	3.06965	153.509	FALSE	1
2022-09-14	10:57:48	1.18637	5.27721	3.06965	162.622	FALSE	1
2022-09-14	10:57:49	2.44648	10.8824	7.86912	164.391	FALSE	1
2022-09-14	10:57:49	2.60306	11.5789	7.86912	174.201	FALSE	1
2022-09-14	10:57:49	1.3135	5.84271	7.86912	170.234	FALSE	1
2022-09-14	10:57:49	0.713193	3.17243	7.86912	177.374	FALSE	1
2022-09-14	10:57:50	0.544033	2.41997	2.05098	172.654	FALSE	1
2022-09-14	10:57:50	0.368613	1.63966	2.05098	179.013	FALSE	1
2022-09-14	10:57:50	0.470598	2.09331	2.05098	174.747	FALSE	1
2022-09-14	10:57:51	0.372074	1.65506	1.30633	180.668	FALSE	1
2022-09-14	10:57:51	0.248054	1.10339	1.30633	175.85	FALSE	1
2022-09-14	10:57:51	0.318282	1.41578	1.30633	182.084	FALSE	1
2022-09-14	10:57:51	0.236298	1.0511	1.30633	176.901	FALSE	1
2022-09-14	10:57:52	0.363677	1.61771	1.78103	183.702	FALSE	1
2022-09-14	10:57:52	0.388104	1.72636	1.78103	178.628	FALSE	1
2022-09-14	10:57:52	0.407036	1.81058	1.78103	185.512	FALSE	1
2022-09-14	10:57:52	0.442761	1.96949	1.78103	180.597	FALSE	1
2022-09-14	10:57:53	0.395127	1.7576	1.91606	187.27	FALSE	1
2022-09-14	10:57:53	0.390394	1.73655	1.91606	182.334	FALSE	1
2022-09-14	10:57:53	0.485662	2.16032	1.91606	189.43	FALSE	1
2022-09-14	10:57:53	0.451819	2.00978	1.91606	184.344	FALSE	1
2022-09-14	10:57:54	0.435891	1.93893	1.83706	191.369	FALSE	1
2022-09-14	10:57:54	0.430903	1.91674	1.83706	186.26	FALSE	1
2022-09-14	10:57:54	0.372176	1.65551	1.83706	193.025	FALSE	1
2022-09-14	10:57:55	0.44444	1.97696	2.02274	188.237	FALSE	1
2022-09-14	10:57:55	0.417163	1.85562	2.02274	194.88	FALSE	1
2022-09-14	10:57:55	0.475789	2.1164	2.02274	190.354	FALSE	1
2022-09-14	10:57:55	0.481539	2.14198	2.02274	197.022	FALSE	1
2022-09-14	10:57:56	0.449529	1.99959	1.98833	192.353	FALSE	1
2022-09-14	10:57:56	0.454364	2.0211	1.98833	199.043	FALSE	1
2022-09-14	10:57:56	0.450089	2.00209	1.98833	194.355	FALSE	1
2022-09-14	10:57:56	0.434008	1.93055	1.98833	200.974	FALSE	1
2022-09-14	10:57:57	0.432786	1.92512	2.57684	196.281	FALSE	1
2022-09-14	10:57:57	0.430344	1.91426	2.57684	202.888	FALSE	1
2022-09-14	10:57:57	0.726934	3.23355	2.57684	199.514	FALSE	1
2022-09-14	10:57:57	0.727137	3.23445	2.57684	206.123	FALSE	1
2022-09-14	10:57:58	0.731514	3.25392	3.24577	202.768	FALSE	1
2022-09-14	10:57:58	0.726425	3.23128	3.24577	209.354	FALSE	1
2022-09-14	10:57:58	0.731107	3.25211	3.24577	206.02	FALSE	1
2022-09-14	10:57:59	0.726374	3.23106	3.24962	212.585	FALSE	1
2022-09-14	10:57:59	0.736196	3.27475	3.24962	209.295	FALSE	1
2022-09-14	10:57:59	0.729886	3.24668	3.24962	215.832	FALSE	1
2022-09-14	10:57:59	0.729733	3.246	3.24962	212.541	FALSE	1
2022-09-14	10:58:00	0.734924	3.26909	3.30372	219.101	FALSE	1
2022-09-14	10:58:00	0.730445	3.24917	3.30372	215.79	FALSE	1
2022-09-14	10:58:00	0.807799	3.59325	3.30372	222.694	FALSE	1
2022-09-14	10:58:00	0.697672	3.10338	3.30372	218.893	FALSE	1
2022-09-14	10:58:01	0.729326	3.24419	3.2482	225.938	FALSE	1
2022-09-14	10:58:01	0.72902	3.24283	3.2482	222.136	FALSE	1
2022-09-14	10:58:01	0.731921	3.25573	3.2482	229.194	FALSE	1
2022-09-14	10:58:01	0.730649	3.25007	3.2482	225.386	FALSE	1
2022-09-14	10:58:02	0.724389	3.22223	3.23807	232.416	FALSE	1
2022-09-14	10:58:02	0.730496	3.24939	3.23807	228.636	FALSE	1
2022-09-14	10:58:02	0.72897	3.2426	3.23807	235.659	FALSE	1
2022-09-14	10:58:03	0.724796	3.22404	2.59444	231.86	FALSE	1
2022-09-14	10:58:03	0.732837	3.25981	2.59444	238.919	FALSE	1
2022-09-14	10:58:03	0.521539	2.31991	2.59444	234.18	FALSE	1
2022-09-14	10:58:03	0.353855	1.57402	2.59444	240.493	FALSE	1
2022-09-14	10:58:04	0.530954	2.36179	1.5554	236.541	FALSE	1
2022-09-14	10:58:04	0.327239	1.45562	1.5554	241.948	FALSE	1
2022-09-14	10:58:04	0.308868	1.37391	1.5554	237.915	FALSE	1
2022-09-14	10:58:04	0.231616	1.03027	1.5554	242.979	FALSE	1
2022-09-14	10:58:05	-0.163651	-0.727952	1.3382	237.915	FALSE	1
2022-09-14	10:58:05	0.0946694	0.421108	1.3382	243.4	FALSE	1
2022-09-14	10:58:05	0.545	2.42427	1.3382	240.34	FALSE	1
2022-09-14	10:58:05	0.727341	3.23536	1.3382	246.635	FALSE	1
2022-09-14	10:58:06	0.851514	3.7877	3.33383	244.127	FALSE	1
2022-09-14	10:58:06	0.673651	2.99653	3.33383	249.632	FALSE	1
2022-09-14	10:58:06	0.72327	3.21725	3.33383	247.345	FALSE	1
2022-09-14	10:58:07	0.729071	3.24305	3.24068	252.875	FALSE	1
2022-09-14	10:58:07	0.730903	3.2512	3.24068	250.596	FALSE	1
2022-09-14	10:58:07	0.727901	3.23785	3.24068	256.112	FALSE	1
2022-09-14	10:58:07	0.726272	3.2306	3.24068	253.826	FALSE	1
2022-09-14	10:58:08	0.733193	3.26139	4.94842	259.374	FALSE	1
2022-09-14	10:58:08	0.728003	3.2383	4.94842	257.065	FALSE	1
2022-09-14	10:58:08	1.79777	7.99684	4.94842	267.371	FALSE	1
2022-09-14	10:58:08	1.19085	5.29714	4.94842	262.362	FALSE	1
2022-09-14	10:58:09	0.667545	2.96937	2.66724	270.34	FALSE	1
2022-09-14	10:58:09	0.397112	1.76643	2.66724	264.128	FALSE	1
2022-09-14	10:58:09	0.734211	3.26592	2.66724	273.606	FALSE	1
2022-09-14	10:58:10	1.07533	4.78328	3.57141	268.912	FALSE	1
2022-09-14	10:58:10	0.743168	3.30576	3.57141	276.912	FALSE	1
2022-09-14	10:58:10	0.662048	2.94492	3.57141	271.856	FALSE	1
2022-09-14	10:58:10	0.731005	3.25166	3.57141	280.163	FALSE	1
2022-09-14	10:58:11	0.731514	3.25392	3.24283	275.11	FALSE	1
2022-09-14	10:58:11	0.731717	3.25482	3.24283	283.418	FALSE	1
2022-09-14	10:58:11	0.727646	3.23671	3.24283	278.347	FALSE	1
2022-09-14	10:58:11	0.725204	3.22585	3.24283	286.644	FALSE	1
2022-09-14	10:58:12	0.725916	3.22902	3.22981	281.576	FALSE	1
2022-09-14	10:58:12	0.722761	3.21499	3.22981	289.859	FALSE	1
2022-09-14	10:58:12	0.725458	3.22698	3.22981	284.803	FALSE	1
2022-09-14	10:58:12	0.730242	3.24826	3.22981	293.107	FALSE	1
2022-09-14	10:58:13	0.722252	3.21272	3.24109	288.016	FALSE	1
2022-09-14	10:58:13	0.735127	3.26999	3.24109	296.377	FALSE	1
2022-09-14	10:58:13	0.728512	3.24057	3.24109	291.256	FALSE	1
2022-09-14	10:58:14	0.72785	3.23762	3.25879	299.615	FALSE	1
2022-09-14	10:58:14	0.735331	3.2709	3.25879	294.527	FALSE	1
2022-09-14	10:58:14	0.739656	3.29014	3.25879	302.905	FALSE	1
2022-09-14	10:58:14	0.727596	3.23649	3.25879	297.764	FALSE	1
2022-09-14	10:58:15	0.731921	3.25573	3.85256	306.161	FALSE	1
2022-09-14	10:58:15	0.731158	3.25234	3.85256	301.016	FALSE	1
2022-09-14	10:58:15	1.27411	5.6675	3.85256	311.828	FALSE	1
2022-09-14	10:58:15	0.727188	3.23468	3.85256	304.251	FALSE	1
2022-09-14	10:58:16	0.736857	3.27769	3.3181	315.106	FALSE	1
2022-09-14	10:58:16	0.735076	3.26977	3.3181	307.521	FALSE	1
2022-09-14	10:58:16	0.757214	3.36824	3.3181	318.474	FALSE	1
2022-09-14	10:58:16	0.754618	3.35669	3.3181	310.877	FALSE	1
2022-09-14	10:58:17	0.775483	3.4495	3.42568	321.924	FALSE	1
2022-09-14	10:58:17	0.774059	3.44317	3.42568	314.32	FALSE	1
2022-09-14	10:58:17	0.766374	3.40898	3.42568	325.333	FALSE	1
2022-09-14	10:58:17	0.764593	3.40106	3.42568	317.721	FALSE	1
2022-09-14	10:58:18	0.775229	3.44837	3.42272	328.781	FALSE	1
2022-09-14	10:58:18	0.769784	3.42415	3.42272	321.146	FALSE	1
2022-09-14	10:58:18	0.763372	3.39563	3.42272	332.177	FALSE	1
2022-09-14	10:58:19	0.771056	3.42981	3.4666	324.575	FALSE	1
2022-09-14	10:58:19	0.778842	3.46444	3.4666	335.641	FALSE	1
2022-09-14	10:58:19	0.781438	3.47599	3.4666	328.051	FALSE	1
2022-09-14	10:58:19	0.785967	3.49614	3.4666	339.137	FALSE	1
2022-09-14	10:58:20	0.793499	3.52964	3.40836	331.581	FALSE	1
2022-09-14	10:58:20	0.767087	3.41216	3.40836	342.549	FALSE	1
2022-09-14	10:58:20	0.760471	3.38273	3.40836	334.964	FALSE	1
2022-09-14	10:58:20	0.743881	3.30893	3.40836	345.858	FALSE	1
2022-09-14	10:58:21	0.728359	3.23989	3.17794	338.204	FALSE	1
2022-09-14	10:58:21	0.724644	3.22336	3.17794	349.082	FALSE	1
2022-09-14	10:58:21	0.690293	3.07056	3.17794	341.274	FALSE	1
2022-09-14	10:58:22	0.664542	2.95602	2.76886	352.038	FALSE	1
2022-09-14	10:58:22	0.63757	2.83604	2.76886	344.11	FALSE	1
2022-09-14	10:58:22	0.620471	2.75998	2.76886	354.798	FALSE	1
2022-09-14	10:58:22	0.56729	2.52342	2.76886	346.634	FALSE	1
2022-09-14	10:58:23	0.576705	2.5653	2.2155	357.363	FALSE	1
2022-09-14	10:58:23	0.599606	2.66717	2.2155	349.301	FALSE	1
2022-09-14	10:58:23	0.546679	2.43174	2.2155	359.795	FALSE	1
2022-09-14	10:58:23	0.269275	1.19779	2.2155	350.499	FALSE	1
2022-09-14	10:58:24	0.671463	2.9868	2.38692	362.782	FALSE	1
2022-09-14	10:58:24	0.56556	2.51572	2.38692	353.014	FALSE	1
2022-09-14	10:58:24	0.480573	2.13768	2.38692	364.919	FALSE	1
2022-09-14	10:58:24	0.428817	1.90746	2.38692	354.922	FALSE	1
2022-09-14	10:58:25	0.366171	1.6288	2.11459	366.548	FALSE	1
2022-09-14	10:58:25	0.330547	1.47034	2.11459	356.392	FALSE	1
2022-09-14	10:58:25	0.729428	3.24464	2.11459	369.793	FALSE	1
2022-09-14	10:58:26	0.732226	3.25709	3.2499	359.649	FALSE	1
2022-09-14	10:58:26	0.728766	3.2417	3.2499	373.034	FALSE	1
2022-09-14	10:58:26	0.728461	3.24034	3.2499	362.89	FALSE	1
2022-09-14	10:58:26	0.73299	3.26049	3.2499	376.295	FALSE	1
2022-09-14	10:58:27	0.731972	3.25596	3.23717	366.146	FALSE	1
2022-09-14	10:58:27	0.721183	3.20797	3.23717	379.503	FALSE	1
2022-09-14	10:58:27	0.727087	3.23423	3.23717	369.38	FALSE	1
2022-09-14	10:58:27	0.730751	3.25053	3.23717	382.753	FALSE	1
2022-09-14	10:58:28	0.732125	3.25664	3.25562	372.636	FALSE	1
2022-09-14	10:58:28	0.72902	3.24283	3.25562	385.996	FALSE	1
2022-09-14	10:58:28	0.732735	3.25935	3.25562	375.896	FALSE	1
2022-09-14	10:58:28	0.733702	3.26365	3.25562	389.26	FALSE	1
2022-09-14	10:58:29	0.731005	3.25166	3.24803	379.147	FALSE	1
2022-09-14	10:58:29	0.730343	3.24871	3.24803	392.509	FALSE	1
2022-09-14	10:58:29	0.729224	3.24373	3.24803	382.391	FALSE	1
2022-09-14	10:58:30	0.730242	3.24826	-3.68845	395.757	FALSE	1
2022-09-14	10:58:30	-1.37546	-6.11832	-3.68845	382.391	FALSE	1
2022-09-14	10:58:30	-0.45902	-2.04181	-3.68845	395.757	FALSE	1
2022-09-14	10:58:30	-2.21256	-9.84191	-3.68845	382.391	FALSE	1
2022-09-14	10:58:31	0.0494277	0.219864	0.526088	395.977	FALSE	1
2022-09-14	10:58:31	0.126272	0.561683	0.526088	382.953	FALSE	1
2022-09-14	10:58:31	0.153957	0.684832	0.526088	396.662	FALSE	1
2022-09-14	10:58:31	0.143423	0.637974	0.526088	383.591	FALSE	1
2022-09-14	10:58:32	0.149529	0.665135	0.678266	397.327	FALSE	1
2022-09-14	10:58:32	0.157112	0.698866	0.678266	384.29	FALSE	1
2022-09-14	10:58:32	0.13472	0.599262	0.678266	397.926	FALSE	1
2022-09-14	10:58:32	0.168563	0.749802	0.678266	385.04	FALSE	1
2022-09-14	10:58:33	0.117418	0.522299	0.242427	398.448	FALSE	1
2022-09-14	10:58:33	0.0709036	0.315393	0.242427	385.355	FALSE	1
2022-09-14	10:58:33	-0.0248216	-0.110411	0.242427	398.448	FALSE	1
2022-09-14	10:58:34	0.0128883	0.0573297	0.248501	385.412	FALSE	1
2022-09-14	10:58:34	0.0732445	0.325806	0.248501	398.774	FALSE	1
2022-09-14	10:58:34	0.0186389	0.0829096	0.248501	385.495	FALSE	1
2022-09-14	10:58:34	0.11869	0.527957	0.248501	399.302	FALSE	1
2022-09-14	10:58:35	0.10673	0.474756	0.280305	385.97	FALSE	1
2022-09-14	10:58:35	0.055789	0.248161	0.280305	399.55	FALSE	1
2022-09-14	10:58:35	0.0477992	0.21262	0.280305	386.183	FALSE	1
2022-09-14	10:58:35	0.0417432	0.185682	0.280305	399.736	FALSE	1
2022-09-14	10:58:36	0.0138552	0.0616307	-0.139727	386.244	FALSE	1
2022-09-14	10:58:36	0.00978398	0.0435211	-0.139727	399.779	FALSE	1
2022-09-14	10:58:36	-0.0957122	-0.425747	-0.139727	386.244	FALSE	1
2022-09-14	10:58:36	-0.0535748	-0.238311	-0.139727	399.779	FALSE	1
2022-09-14	10:58:37	0.0557381	0.247934	-0.180587	386.492	FALSE	1
2022-09-14	10:58:37	-0.0949488	-0.422351	-0.180587	399.779	FALSE	1
2022-09-14	10:58:37	-0.0825824	-0.367343	-0.180587	386.492	FALSE	1
2022-09-14	10:58:38	0.0252547	0.112338	0.488737	399.892	FALSE	1
2022-09-14	10:58:38	0.0946185	0.420882	0.488737	386.913	FALSE	1
2022-09-14	10:58:38	0.145967	0.64929	0.488737	400.541	FALSE	1
2022-09-14	10:58:38	0.173652	0.772439	0.488737	387.685	FALSE	1
2022-09-14	10:58:39	0.209784	0.933161	0.840519	401.474	FALSE	1
2022-09-14	10:58:39	0.107952	0.480192	0.840519	388.166	FALSE	1
2022-09-14	10:58:39	0.3364	1.49637	0.840519	402.971	FALSE	1
2022-09-14	10:58:39	0.101692	0.452346	0.840519	388.618	FALSE	1
2022-09-14	10:58:40	0.431107	1.91765	1.30707	404.888	FALSE	1
2022-09-14	10:58:40	0.148155	0.659023	1.30707	389.277	FALSE	1
2022-09-14	10:58:40	0.367036	1.63265	1.30707	406.521	FALSE	1
2022-09-14	10:58:40	0.229071	1.01895	1.30707	390.296	FALSE	1
2022-09-14	10:58:41	0.291005	1.29445	-0.158402	407.815	FALSE	1
2022-09-14	10:58:41	-0.366857	-1.63185	-0.158402	390.296	FALSE	1
2022-09-14	10:58:41	-0.0309794	-0.137803	-0.158402	407.815	FALSE	1
2022-09-14	10:58:42	-0.0593763	-0.264118	0.699432	390.296	FALSE	1
2022-09-14	10:58:42	0.250802	1.11562	0.699432	408.931	FALSE	1
2022-09-14	10:58:42	0.191107	0.850082	0.699432	391.146	FALSE	1
2022-09-14	10:58:42	0.246425	1.09615	0.699432	410.027	FALSE	1
2022-09-14	10:58:43	0.234669	1.04385	0.976114	392.19	FALSE	1
2022-09-14	10:58:43	0.201336	0.895583	0.976114	410.923	FALSE	1
2022-09-14	10:58:43	0.186272	0.828575	0.976114	393.018	FALSE	1
2022-09-14	10:58:43	0.255484	1.13644	0.976114	412.059	FALSE	1
2022-09-14	10:58:44	0.283575	1.2614	1.61873	394.28	FALSE	1
2022-09-14	10:58:44	0.14098	0.627107	1.61873	412.686	FALSE	1
2022-09-14	10:58:44	0.729478	3.24486	1.61873	397.525	FALSE	1
2022-09-14	10:58:44	0.30159	1.34153	1.61873	414.028	FALSE	1
2022-09-14	10:58:45	-0.11042	-0.49117	-2.01963	397.525	FALSE	1
2022-09-14	10:58:45	-0.531692	-2.36507	-2.01963	414.028	FALSE	1
2022-09-14	10:58:45	-0.719986	-3.20264	-2.01963	397.525	FALSE	1
2022-09-14	10:58:46	-0.189707	-0.843855	1.54125	414.028	FALSE	1
2022-09-14	10:58:46	0.469682	2.08924	1.54125	399.614	FALSE	1
2022-09-14	10:58:46	0.529478	2.35522	1.54125	416.383	FALSE	1
2022-09-14	10:58:46	0.576501	2.56439	1.54125	402.178	FALSE	1
2022-09-14	10:58:47	0.599453	2.66649	2.92738	419.049	FALSE	1
2022-09-14	10:58:47	0.670394	2.98205	2.92738	405.16	FALSE	1
2022-09-14	10:58:47	0.668919	2.97549	2.92738	422.025	FALSE	1
2022-09-14	10:58:47	0.693651	3.0855	2.92738	408.246	FALSE	1
2022-09-14	10:58:48	0.686476	3.05358	3.16309	425.078	FALSE	1
2022-09-14	10:58:48	0.716196	3.18578	3.16309	411.432	FALSE	1
2022-09-14	10:58:48	0.715789	3.18397	3.16309	428.262	FALSE	1
2022-09-14	10:58:48	0.725916	3.22902	3.16309	414.661	FALSE	1
2022-09-14	10:58:49	0.718384	3.19552	3.18367	431.458	FALSE	1
2022-09-14	10:58:49	0.719758	3.20163	3.18367	417.862	FALSE	1
2022-09-14	10:58:49	0.70902	3.15386	3.18367	434.612	FALSE	1
2022-09-14	10:58:50	0.729478	3.24486	3.19269	421.107	FALSE	1
2022-09-14	10:58:50	0.706069	3.14074	3.19269	437.753	FALSE	1
2022-09-14	10:58:50	0.729428	3.24464	3.19269	424.352	FALSE	1
2022-09-14	10:58:50	0.706018	3.14051	3.19269	440.893	FALSE	1
2022-09-14	10:58:51	0.730496	3.24939	3.20785	427.601	FALSE	1
2022-09-14	10:58:51	0.711921	3.16677	3.20785	444.06	FALSE	1
2022-09-14	10:58:51	0.729886	3.24668	3.20785	430.848	FALSE	1
2022-09-14	10:58:51	0.712328	3.16858	3.20785	447.228	FALSE	1
2022-09-14	10:58:52	0.726679	3.23241	3.21895	434.08	FALSE	1
2022-09-14	10:58:52	0.714415	3.17786	3.21895	450.406	FALSE	1
2022-09-14	10:58:52	0.731667	3.2546	3.21895	437.335	FALSE	1
2022-09-14	10:58:52	0.721845	3.21091	3.21895	453.617	FALSE	1
2022-09-14	10:58:53	0.73355	3.26298	3.23513	440.598	FALSE	1
2022-09-14	10:58:53	0.722812	3.21521	3.23513	456.832	FALSE	1
2022-09-14	10:58:53	0.725509	3.22721	3.23513	443.825	FALSE	1
2022-09-14	10:58:54	0.719656	3.20117	3.22477	460.034	FALSE	1
2022-09-14	10:58:54	0.733295	3.26184	3.22477	447.087	FALSE	1
2022-09-14	10:58:54	0.720013	3.20276	3.22477	463.236	FALSE	1
2022-09-14	10:58:54	0.726883	3.23332	3.22477	450.32	FALSE	1
2022-09-14	10:58:55	0.718639	3.19665	3.22562	466.433	FALSE	1
2022-09-14	10:58:55	0.730954	3.25143	3.22562	453.572	FALSE	1
2022-09-14	10:58:55	0.717977	3.19371	3.22562	469.627	FALSE	1
2022-09-14	10:58:55	0.733041	3.26071	3.22562	456.832	FALSE	1
2022-09-14	10:58:56	0.724389	3.22223	3.23157	472.849	FALSE	1
2022-09-14	10:58:56	0.728155	3.23898	3.23157	460.071	FALSE	1
2022-09-14	10:58:56	0.723321	3.21748	3.23157	476.066	FALSE	1
2022-09-14	10:58:56	0.730089	3.24758	3.23157	463.319	FALSE	1
2022-09-14	10:58:57	0.718944	3.19801	3.22276	479.264	FALSE	1
2022-09-14	10:58:57	0.726069	3.2297	3.22276	466.549	FALSE	1
2022-09-14	10:58:57	0.728512	3.24057	3.22276	482.505	FALSE	1
2022-09-14	10:58:58	0.731463	3.25369	3.23785	469.802	FALSE	1
2022-09-14	10:58:58	0.72673	3.23264	3.23785	485.738	FALSE	1
2022-09-14	10:58:58	0.725204	3.22585	3.23785	473.028	FALSE	1
2022-09-14	10:58:58	0.728206	3.23921	3.23785	488.977	FALSE	1
2022-09-14	10:58:59	0.729275	3.24396	3.24526	476.272	FALSE	1
2022-09-14	10:58:59	0.730547	3.24962	3.24526	492.226	FALSE	1
2022-09-14	10:58:59	0.731768	3.25505	3.24526	479.527	FALSE	1
2022-09-14	10:58:59	0.726679	3.23241	3.24526	495.459	FALSE	1
2022-09-14	10:59:00	0.591769	2.63231	3.0855	482.16	FALSE	1
2022-09-14	10:59:00	0.725458	3.22698	3.0855	498.686	FALSE	1
2022-09-14	10:59:00	0.72902	3.24283	3.0855	485.402	FALSE	1
2022-09-14	10:59:00	0.728359	3.23989	3.0855	501.926	FALSE	1
2022-09-14	10:59:01	0.7136	3.17424	3.22834	488.577	FALSE	1
2022-09-14	10:59:01	0.73299	3.26049	3.22834	505.186	FALSE	1
2022-09-14	10:59:01	0.7307	3.2503	3.22834	491.827	FALSE	1
2022-09-14	10:59:02	0.731717	3.25482	3.23671	508.441	FALSE	1
2022-09-14	10:59:02	0.720674	3.2057	3.23671	495.033	FALSE	1
2022-09-14	10:59:02	0.730496	3.24939	3.23671	511.69	FALSE	1
2022-09-14	10:59:02	0.727697	3.23694	3.23671	498.27	FALSE	1
2022-09-14	10:59:03	0.722456	3.21363	3.23502	514.904	FALSE	1
2022-09-14	10:59:03	0.732684	3.25912	3.23502	501.529	FALSE	1
2022-09-14	10:59:03	0.730089	3.24758	3.23502	518.152	FALSE	1
2022-09-14	10:59:03	0.72383	3.21974	3.23502	504.748	FALSE	1
2022-09-14	10:59:04	0.725763	3.22834	3.23219	521.38	FALSE	1
2022-09-14	10:59:04	0.722761	3.21499	3.23219	507.963	FALSE	1
2022-09-14	10:59:04	0.731972	3.25596	3.23219	524.636	FALSE	1
2022-09-14	10:59:04	0.726018	3.22947	3.23219	511.193	FALSE	1
2022-09-14	10:59:05	0.721692	3.21023	3.24668	527.846	FALSE	1
2022-09-14	10:59:05	0.732532	3.25845	3.24668	514.451	FALSE	1
2022-09-14	10:59:05	0.735433	3.27135	3.24668	531.118	FALSE	1
2022-09-14	10:59:06	0.725662	3.22789	3.21114	517.679	FALSE	1
2022-09-14	10:59:06	0.728562	3.24079	3.21114	534.358	FALSE	1
2022-09-14	10:59:06	0.721234	3.20819	3.21114	520.887	FALSE	1
2022-09-14	10:59:06	0.712125	3.16767	3.21114	537.526	FALSE	1
2022-09-14	10:59:07	0.72444	3.22245	3.1756	524.11	FALSE	1
2022-09-14	10:59:07	0.724186	3.22132	3.1756	540.747	FALSE	1
2022-09-14	10:59:07	0.691514	3.07599	3.1756	527.186	FALSE	1
2022-09-14	10:59:07	0.715483	3.18261	3.1756	543.93	FALSE	1
2022-09-14	10:59:08	0.70673	3.14368	3.12721	530.33	FALSE	1
2022-09-14	10:59:08	0.711412	3.1645	3.12721	547.094	FALSE	1
2022-09-14	10:59:08	0.680216	3.02574	3.12721	533.355	FALSE	1
2022-09-14	10:59:08	0.713753	3.17492	3.12721	550.269	FALSE	1
2022-09-14	10:59:09	0.715534	3.18284	3.17356	536.538	FALSE	1
2022-09-14	10:59:09	0.709122	3.15432	3.17356	553.424	FALSE	1
2022-09-14	10:59:09	0.715687	3.18352	3.17356	539.722	FALSE	1
2022-09-14	10:59:10	0.712277	3.16835	3.13598	556.592	FALSE	1
2022-09-14	10:59:10	0.705407	3.13779	3.13598	542.859	FALSE	1
2022-09-14	10:59:10	0.702761	3.12602	3.13598	559.718	FALSE	1
2022-09-14	10:59:10	0.699555	3.11176	3.13598	545.971	FALSE	1
2022-09-14	10:59:11	0.696756	3.09931	3.14317	562.817	FALSE	1
2022-09-14	10:59:11	0.711718	3.16586	3.14317	549.137	FALSE	1
2022-09-14	10:59:11	0.704542	3.13394	3.14317	565.951	FALSE	1
2022-09-14	10:59:11	0.713448	3.17356	3.14317	552.311	FALSE	1
2022-09-14	10:59:12	0.667443	2.96892	2.71674	568.92	FALSE	1
2022-09-14	10:59:12	0.473346	2.10554	2.71674	554.416	FALSE	1
2022-09-14	10:59:12	0.595483	2.64883	2.71674	571.569	FALSE	1
2022-09-14	10:59:12	0.70673	3.14368	2.71674	557.56	FALSE	1
2022-09-14	10:59:13	0.73355	3.26298	3.26177	574.832	FALSE	1
2022-09-14	10:59:13	0.730954	3.25143	3.26177	560.811	FALSE	1
2022-09-14	10:59:13	0.735331	3.2709	3.26177	578.103	FALSE	1
2022-09-14	10:59:14	0.731005	3.25166	3.25398	564.063	FALSE	1
2022-09-14	10:59:14	0.735992	3.27384	3.25398	581.377	FALSE	1
2022-09-14	10:59:14	0.73131	3.25301	3.25398	567.316	FALSE	1
2022-09-14	10:59:14	0.727799	3.2374	3.25398	584.614	FALSE	1
2022-09-14	10:59:15	0.732175	3.25686	3.26858	570.573	FALSE	1
2022-09-14	10:59:15	0.739351	3.28878	3.26858	587.903	FALSE	1
2022-09-14	10:59:15	0.739046	3.28742	3.26858	573.86	FALSE	1
2022-09-14	10:59:15	0.728664	3.24124	3.26858	591.144	FALSE	1
2022-09-14	10:59:16	0.726221	3.23038	3.24583	577.091	FALSE	1
2022-09-14	10:59:16	0.7307	3.2503	3.24583	594.394	FALSE	1
2022-09-14	10:59:16	0.731819	3.25528	3.24583	580.346	FALSE	1
2022-09-14	10:59:16	0.730038	3.24736	3.24583	597.642	FALSE	1
2022-09-14	10:59:17	0.728664	3.24124	3.25407	583.587	FALSE	1
2022-09-14	10:59:17	0.73986	3.29105	3.25407	600.933	FALSE	1
2022-09-14	10:59:17	0.72612	3.22993	3.25407	586.817	FALSE	1
2022-09-14	10:59:18	0.734313	3.26637	3.2486	604.199	FALSE	1
2022-09-14	10:59:18	0.720318	3.20412	3.2486	590.021	FALSE	1
2022-09-14	10:59:18	0.734008	3.26501	3.2486	607.464	FALSE	1
2022-09-14	10:59:18	0.732634	3.2589	3.2486	593.28	FALSE	1
2022-09-14	10:59:19	0.728257	3.23943	3.25749	610.704	FALSE	1
2022-09-14	10:59:19	0.734008	3.26501	3.25749	596.545	FALSE	1
2022-09-14	10:59:19	0.734618	3.26773	3.25749	613.971	FALSE	1
2022-09-14	10:59:19	0.732379	3.25777	3.25749	599.803	FALSE	1
2022-09-14	10:59:20	0.719606	3.20095	3.23892	617.172	FALSE	1
2022-09-14	10:59:20	0.730394	3.24894	3.23892	603.052	FALSE	1
2022-09-14	10:59:20	0.731667	3.2546	3.23892	620.427	FALSE	1
2022-09-14	10:59:20	0.730903	3.2512	3.23892	606.303	FALSE	1
2022-09-14	10:59:21	0.728461	3.24034	3.22502	623.667	FALSE	1
2022-09-14	10:59:21	0.722761	3.21499	3.22502	609.518	FALSE	1
2022-09-14	10:59:21	0.72383	3.21974	3.22502	626.887	FALSE	1
2022-09-14	10:59:22	0.734008	3.26501	3.25822	612.783	FALSE	1
2022-09-14	10:59:22	0.731209	3.25256	3.25822	630.14	FALSE	1
2022-09-14	10:59:22	0.729631	3.24554	3.25822	616.028	FALSE	1
2022-09-14	10:59:22	0.735076	3.26977	3.25822	633.409	FALSE	1
2022-09-14	10:59:23	0.734008	3.26501	3.25534	619.294	FALSE	1
2022-09-14	10:59:23	0.730598	3.24985	3.25534	636.659	FALSE	1
2022-09-14	10:59:23	0.730343	3.24871	3.25534	622.542	FALSE	1
2022-09-14	10:59:23	0.732379	3.25777	3.25534	639.917	FALSE	1
2022-09-14	10:59:24	0.731921	3.25573	3.25347	625.798	FALSE	1
2022-09-14	10:59:24	0.731717	3.25482	3.25347	643.172	FALSE	1
2022-09-14	10:59:24	0.730801	3.25075	3.25347	629.049	FALSE	1
2022-09-14	10:59:24	0.731209	3.25256	3.25347	646.424	FALSE	1
2022-09-14	10:59:25	0.732786	3.25958	3.23551	632.308	FALSE	1
2022-09-14	10:59:25	0.723575	3.21861	3.23551	649.643	FALSE	1
2022-09-14	10:59:25	0.725763	3.22834	3.23551	635.537	FALSE	1
2022-09-14	10:59:26	0.724135	3.2211	3.11555	652.864	FALSE	1
2022-09-14	10:59:26	0.608308	2.70588	3.11555	638.242	FALSE	1
2022-09-14	10:59:26	0.734364	3.2666	3.11555	656.131	FALSE	1
2022-09-14	10:59:26	0.734822	3.26864	3.11555	641.511	FALSE	1
2022-09-14	10:59:27	0.731768	3.25505	3.25754	659.386	FALSE	1
2022-09-14	10:59:27	0.725916	3.22902	3.25754	644.74	FALSE	1
2022-09-14	10:59:27	0.740623	3.29444	3.25754	662.68	FALSE	1
2022-09-14	10:59:27	0.731005	3.25166	3.25754	647.992	FALSE	1
2022-09-14	10:59:28	0.72612	3.22993	3.24272	665.91	FALSE	1
2022-09-14	10:59:28	0.732023	3.25618	3.24272	651.248	FALSE	1
2022-09-14	10:59:28	0.727799	3.2374	3.24272	669.147	FALSE	1
2022-09-14	10:59:28	0.730038	3.24736	3.24272	654.495	FALSE	1
2022-09-14	10:59:29	0.736145	3.27452	3.26826	672.422	FALSE	1
2022-09-14	10:59:29	0.735076	3.26977	3.26826	657.765	FALSE	1
2022-09-14	10:59:29	0.73299	3.26049	3.26826	675.682	FALSE	1
2022-09-14	10:59:30	0.735687	3.27248	3.27237	661.038	FALSE	1
2022-09-14	10:59:30	0.736603	3.27656	3.27237	678.959	FALSE	1
2022-09-14	10:59:30	0.741285	3.29738	3.27237	664.335	FALSE	1
2022-09-14	10:59:30	0.729071	3.24305	3.27237	682.202	FALSE	1
2022-09-14	10:59:31	0.735178	3.27022	3.2585	667.605	FALSE	1
2022-09-14	10:59:31	0.72958	3.24532	3.2585	685.447	FALSE	1
2022-09-14	10:59:31	0.732175	3.25686	3.2585	670.862	FALSE	1
2022-09-14	10:59:31	0.733244	3.26162	3.2585	688.709	FALSE	1
2022-09-14	10:59:32	0.733601	3.2632	3.24724	674.125	FALSE	1
2022-09-14	10:59:32	0.731768	3.25505	3.24724	691.964	FALSE	1
2022-09-14	10:59:32	0.72673	3.23264	3.24724	677.358	FALSE	1
2022-09-14	10:59:32	0.727952	3.23808	3.24724	695.202	FALSE	1
2022-09-14	10:59:33	0.733244	3.26162	3.25241	680.62	FALSE	1
2022-09-14	10:59:33	0.725662	3.22789	3.25241	698.43	FALSE	1
2022-09-14	10:59:33	0.734618	3.26773	3.25241	683.887	FALSE	1
2022-09-14	10:59:34	0.722201	3.21249	3.24334	701.643	FALSE	1
2022-09-14	10:59:34	0.727952	3.23808	3.24334	687.125	FALSE	1
2022-09-14	10:59:34	0.730191	3.24804	3.24334	704.891	FALSE	1
2022-09-14	10:59:34	0.736196	3.27475	3.24334	690.4	FALSE	1
2022-09-14	10:59:35	0.725102	3.2254	3.22676	708.116	FALSE	1
2022-09-14	10:59:35	0.730293	3.24849	3.22676	693.649	FALSE	1
2022-09-14	10:59:35	0.717621	3.19212	3.22676	711.308	FALSE	1
2022-09-14	10:59:35	0.728613	3.24102	3.22676	696.89	FALSE	1
2022-09-14	10:59:36	0.728817	3.24192	3.25715	714.55	FALSE	1
2022-09-14	10:59:36	0.734873	3.26886	3.25715	700.158	FALSE	1
2022-09-14	10:59:36	0.735127	3.26999	3.25715	717.82	FALSE	1
2022-09-14	10:59:36	0.73014	3.24781	3.25715	703.406	FALSE	1
2022-09-14	10:59:37	0.729784	3.24623	3.23936	721.066	FALSE	1
2022-09-14	10:59:37	0.722252	3.21272	3.23936	706.619	FALSE	1
2022-09-14	10:59:37	0.732684	3.25912	3.23936	724.325	FALSE	1
2022-09-14	10:59:38	0.730547	3.24962	3.25454	709.869	FALSE	1
2022-09-14	10:59:38	0.735382	3.27113	3.25454	727.596	FALSE	1
2022-09-14	10:59:38	0.731565	3.25415	3.25454	713.123	FALSE	1
2022-09-14	10:59:38	0.729122	3.24328	3.25454	730.84	FALSE	1
2022-09-14	10:59:39	0.736654	3.27678	3.26756	716.4	FALSE	1
2022-09-14	10:59:39	0.738181	3.28358	3.26756	734.123	FALSE	1
2022-09-14	10:59:39	0.730394	3.24894	3.26756	719.648	FALSE	1
2022-09-14	10:59:39	0.733092	3.26094	3.26756	737.384	FALSE	1
2022-09-14	10:59:40	0.732074	3.25641	3.24894	722.905	FALSE	1
2022-09-14	10:59:40	0.734517	3.26728	3.24894	740.652	FALSE	1
2022-09-14	10:59:40	0.721591	3.20978	3.24894	726.115	FALSE	1
2022-09-14	10:59:40	0.733397	3.2623	3.24894	743.914	FALSE	1
2022-09-14	10:59:41	0.729784	3.24623	3.26871	729.361	FALSE	1
2022-09-14	10:59:41	0.736552	3.27633	3.26871	747.19	FALSE	1
2022-09-14	10:59:41	0.738181	3.28358	3.26871	732.644	FALSE	1
2022-09-14	10:59:42	0.735789	3.27294	3.26801	750.463	FALSE	1
2022-09-14	10:59:42	0.733244	3.26162	3.26801	735.906	FALSE	1
2022-09-14	10:59:42	0.734466	3.26705	3.26801	753.73	FALSE	1
2022-09-14	10:59:42	0.735229	3.27045	3.26801	739.177	FALSE	1
2022-09-14	10:59:43	0.733702	3.26365	-1.02801	756.994	FALSE	1
2022-09-14	10:59:43	0.123779	0.550594	-1.02801	739.727	FALSE	1
2022-09-14	10:59:43	-0.872048	-3.87904	-1.02801	756.994	FALSE	1
2022-09-14	10:59:43	-0.909859	-4.04723	-1.02801	739.727	FALSE	1
2022-09-14	10:59:44	-0.923905	-4.10971	1.23689	756.994	FALSE	1
2022-09-14	10:59:44	0.573753	2.55217	1.23689	742.279	FALSE	1
2022-09-14	10:59:44	0.736196	3.27475	1.23689	760.269	FALSE	1
2022-09-14	10:59:44	0.726221	3.23038	1.23689	745.51	FALSE	1
2022-09-14	10:59:45	0.734771	3.26841	3.26811	763.537	FALSE	1
2022-09-14	10:59:45	0.733448	3.26252	3.26811	748.772	FALSE	1
2022-09-14	10:59:45	0.735891	3.27339	3.26811	766.81	FALSE	1
2022-09-14	10:59:46	0.734771	3.26841	3.26071	752.041	FALSE	1
2022-09-14	10:59:46	0.731921	3.25573	3.26071	770.066	FALSE	1
2022-09-14	10:59:46	0.731259	3.25279	3.26071	755.293	FALSE	1
2022-09-14	10:59:46	0.734211	3.26592	3.26071	773.332	FALSE	1
2022-09-14	10:59:47	0.72902	3.24283	3.26994	758.536	FALSE	1
2022-09-14	10:59:47	0.742506	3.30282	3.26994	776.635	FALSE	1
2022-09-14	10:59:47	0.742659	3.3035	3.26994	761.84	FALSE	1
2022-09-14	10:59:47	0.726272	3.2306	3.26994	779.865	FALSE	1
2022-09-14	10:59:48	0.735076	3.26977	3.26043	765.109	FALSE	1
2022-09-14	10:59:48	0.728868	3.24215	3.26043	783.108	FALSE	1
2022-09-14	10:59:48	0.731717	3.25482	3.26043	768.364	FALSE	1
2022-09-14	10:59:48	0.736247	3.27497	3.26043	786.383	FALSE	1
2022-09-14	10:59:49	0.734466	3.26705	3.2552	771.631	FALSE	1
2022-09-14	10:59:49	0.725763	3.22834	3.2552	789.611	FALSE	1
2022-09-14	10:59:49	0.735178	3.27022	3.2552	774.902	FALSE	1
2022-09-14	10:59:50	0.734109	3.26546	3.2542	792.876	FALSE	1
2022-09-14	10:59:50	0.731158	3.25234	3.2542	778.154	FALSE	1
2022-09-14	10:59:50	0.726272	3.2306	3.2542	796.107	FALSE	1
2022-09-14	10:59:50	0.734771	3.26841	3.2542	781.422	FALSE	1
2022-09-14	10:59:51	0.729224	3.24373	3.24339	799.351	FALSE	1
2022-09-14	10:59:51	0.732023	3.25618	3.24339	784.678	FALSE	1
2022-09-14	10:59:51	0.731819	3.25528	3.24339	802.606	FALSE	1
2022-09-14	10:59:51	0.723524	3.21838	3.24339	787.897	FALSE	1
2022-09-14	10:59:52	0.733092	3.26094	3.26201	805.867	FALSE	1
2022-09-14	10:59:52	0.73757	3.28086	3.26201	791.178	FALSE	1
2022-09-14	10:59:52	0.730343	3.24871	3.26201	809.116	FALSE	1
2022-09-14	10:59:52	0.732328	3.25754	3.26201	794.435	FALSE	1
2022-09-14	10:59:53	0.738231	3.2838	3.24924	812.399	FALSE	1
2022-09-14	10:59:53	0.724542	3.22291	3.24924	797.658	FALSE	1
2022-09-14	10:59:53	0.728613	3.24102	3.24924	815.64	FALSE	1
2022-09-14	10:59:54	0.734313	3.26637	3.2593	800.925	FALSE	1
2022-09-14	10:59:54	0.732837	3.25981	3.2593	818.9	FALSE	1
2022-09-14	10:59:54	0.732786	3.25958	3.2593	804.184	FALSE	1
2022-09-14	10:59:54	0.730954	3.25143	3.2593	822.152	FALSE	1
2022-09-14	10:59:55	0.730242	3.24826	3.26654	807.432	FALSE	1
2022-09-14	10:59:55	0.73472	3.26818	3.26654	825.42	FALSE	1
2022-09-14	10:59:55	0.736043	3.27407	3.26654	810.706	FALSE	1
2022-09-14	10:59:55	0.736399	3.27565	3.26654	828.696	FALSE	1
2022-09-14	10:59:56	0.733499	3.26275	3.26716	813.969	FALSE	1
2022-09-14	10:59:56	0.735891	3.27339	3.26716	831.969	FALSE	1
2022-09-14	10:59:56	0.733448	3.26252	3.26716	817.232	FALSE	1
2022-09-14	10:59:56	0.735127	3.26999	3.26716	835.239	FALSE	1
2022-09-14	10:59:57	0.736094	3.27429	3.26184	820.506	FALSE	1
2022-09-14	10:59:57	0.733193	3.26139	3.26184	838.5	FALSE	1
2022-09-14	10:59:57	0.733244	3.26162	3.26184	823.768	FALSE	1
2022-09-14	10:59:57	0.730649	3.25007	3.26184	841.75	FALSE	1
2022-09-14	10:59:58	0.729224	3.24373	3.25573	827.011	FALSE	1
2022-09-14	10:59:58	0.734466	3.26705	3.25573	845.017	FALSE	1
2022-09-14	10:59:58	0.732074	3.25641	3.25573	830.268	FALSE	1
2022-09-14	10:59:59	0.7307	3.2503	3.27011	848.268	FALSE	1
2022-09-14	10:59:59	0.738231	3.2838	3.27011	833.552	FALSE	1
2022-09-14	10:59:59	0.728155	3.23898	3.27011	851.507	FALSE	1
2022-09-14	10:59:59	0.743524	3.30734	3.27011	836.859	FALSE	1
2022-09-14	11:00:00	0.724949	3.22472	3.25177	854.731	FALSE	1
2022-09-14	11:00:00	0.73131	3.25301	3.25177	840.112	FALSE	1
2022-09-14	11:00:00	0.735891	3.27339	3.25177	858.005	FALSE	1
2022-09-14	11:00:00	0.731972	3.25596	3.25177	843.368	FALSE	1
2022-09-14	11:00:01	0.732175	3.25686	3.25528	861.262	FALSE	1
2022-09-14	11:00:01	0.729936	3.2469	3.25528	846.615	FALSE	1
2022-09-14	11:00:01	0.732684	3.25912	3.25528	864.521	FALSE	1
2022-09-14	11:00:01	0.732481	3.25822	3.25528	849.873	FALSE	1
2022-09-14	11:00:02	0.738282	3.28403	3.26856	867.805	FALSE	1
2022-09-14	11:00:02	0.732074	3.25641	3.26856	853.129	FALSE	1
2022-09-14	11:00:02	0.734059	3.26524	3.26856	871.07	FALSE	1
2022-09-14	11:00:03	0.734008	3.26501	3.2383	856.394	FALSE	1
2022-09-14	11:00:03	0.714822	3.17967	3.2383	874.25	FALSE	1
2022-09-14	11:00:03	0.736857	3.27769	3.2383	859.672	FALSE	1
2022-09-14	11:00:03	0.726323	3.23083	3.2383	877.481	FALSE	1
2022-09-14	11:00:04	0.734924	3.26909	2.83247	862.941	FALSE	1
2022-09-14	11:00:04	0.198181	0.881549	2.83247	878.362	FALSE	1
2022-09-14	11:00:04	0.979351	4.35635	2.83247	867.298	FALSE	1
2022-09-14	11:00:04	0.634618	2.82291	2.83247	881.185	FALSE	1
2022-09-14	11:00:05	0.730801	3.25075	3.25177	870.548	FALSE	1
2022-09-14	11:00:05	0.731514	3.25392	3.25177	884.439	FALSE	1
2022-09-14	11:00:05	0.731361	3.25324	3.25177	873.802	FALSE	1
2022-09-14	11:00:05	0.730445	3.24917	3.25177	887.688	FALSE	1
2022-09-14	11:00:06	0.728054	3.23853	3.25573	877.04	FALSE	1
2022-09-14	11:00:06	0.733142	3.26116	3.25573	890.949	FALSE	1
2022-09-14	11:00:06	0.734568	3.26751	3.25573	880.308	FALSE	1
2022-09-14	11:00:07	0.727341	3.23536	3.24515	894.185	FALSE	1
2022-09-14	11:00:07	0.73243	3.258	3.24515	883.566	FALSE	1
2022-09-14	11:00:07	0.728613	3.24102	3.24515	897.426	FALSE	1
2022-09-14	11:00:07	0.729784	3.24623	3.24515	886.812	FALSE	1
2022-09-14	11:00:08	0.735076	3.26977	3.25137	900.695	FALSE	1
2022-09-14	11:00:08	0.72841	3.24011	3.25137	890.052	FALSE	1
2022-09-14	11:00:08	0.725204	3.22585	3.25137	903.921	FALSE	1
2022-09-14	11:00:08	0.735076	3.26977	3.25137	893.322	FALSE	1
2022-09-14	11:00:09	0.735433	3.27135	3.25828	907.193	FALSE	1
2022-09-14	11:00:09	0.727748	3.23717	3.25828	896.559	FALSE	1
2022-09-14	11:00:09	0.736705	3.27701	3.25828	910.47	FALSE	1
2022-09-14	11:00:09	0.730089	3.24758	3.25828	899.806	FALSE	1
2022-09-14	11:00:10	0.727494	3.23604	3.26479	913.706	FALSE	1
2022-09-14	11:00:10	0.736959	3.27814	3.26479	903.085	FALSE	1
2022-09-14	11:00:10	0.737417	3.28018	3.26479	916.986	FALSE	1
2022-09-14	11:00:11	0.728868	3.24215	3.24883	906.327	FALSE	1
2022-09-14	11:00:11	0.734415	3.26682	3.24883	920.253	FALSE	1
2022-09-14	11:00:11	0.728562	3.24079	3.24883	909.568	FALSE	1
2022-09-14	11:00:11	0.729631	3.24554	3.24883	923.498	FALSE	1
2022-09-14	11:00:12	0.727341	3.23536	3.24158	912.803	FALSE	1
2022-09-14	11:00:12	0.734008	3.26501	3.24158	926.763	FALSE	1
2022-09-14	11:00:12	0.725967	3.22925	3.24158	916.032	FALSE	1
2022-09-14	11:00:12	0.727646	3.23671	3.24158	930	FALSE	1
2022-09-14	11:00:13	0.72902	3.24283	3.26801	919.275	FALSE	1
2022-09-14	11:00:13	0.737672	3.28131	3.26801	933.281	FALSE	1
2022-09-14	11:00:13	0.735891	3.27339	3.26801	922.548	FALSE	1
2022-09-14	11:00:13	0.736145	3.27452	3.26801	936.556	FALSE	1
2022-09-14	11:00:14	0.734568	3.26751	3.25384	925.816	FALSE	1
2022-09-14	11:00:14	0.724338	3.222	3.25384	939.778	FALSE	1
2022-09-14	11:00:14	0.735585	3.27203	3.25384	929.088	FALSE	1
2022-09-14	11:00:15	0.725305	3.2263	3.22676	943.004	FALSE	1
2022-09-14	11:00:15	0.726272	3.2306	3.22676	932.318	FALSE	1
2022-09-14	11:00:15	0.723982	3.22042	3.22676	946.224	FALSE	1
2022-09-14	11:00:15	0.726069	3.2297	3.22676	935.548	FALSE	1
2022-09-14	11:00:16	0.734924	3.26909	3.25466	949.494	FALSE	1
2022-09-14	11:00:16	0.730293	3.24849	3.25466	938.797	FALSE	1
2022-09-14	11:00:16	0.734975	3.26932	3.25466	952.763	FALSE	1
2022-09-14	11:00:16	0.726527	3.23174	3.25466	942.028	FALSE	1
2022-09-14	11:00:17	0.719504	3.2005	3.23275	955.963	FALSE	1
2022-09-14	11:00:17	0.730649	3.25007	3.23275	945.278	FALSE	1
2022-09-14	11:00:17	0.730954	3.25143	3.23275	959.215	FALSE	1
2022-09-14	11:00:17	0.725916	3.22902	3.23275	948.507	FALSE	1
2022-09-14	11:00:18	0.732684	3.25912	3.24841	962.474	FALSE	1
2022-09-14	11:00:18	0.728461	3.24034	3.24841	951.748	FALSE	1
2022-09-14	11:00:18	0.729682	3.24577	3.24841	965.72	FALSE	1
2022-09-14	11:00:19	0.730903	3.2512	3.25652	954.999	FALSE	1
2022-09-14	11:00:19	0.728919	3.24238	3.25652	968.962	FALSE	1
2022-09-14	11:00:19	0.734008	3.26501	3.25652	958.264	FALSE	1
2022-09-14	11:00:19	0.734568	3.26751	3.25652	972.23	FALSE	1
2022-09-14	11:00:20	0.732074	3.25641	3.25534	961.52	FALSE	1
2022-09-14	11:00:20	0.73187	3.2555	3.25534	975.485	FALSE	1
2022-09-14	11:00:20	0.730038	3.24736	3.25534	964.768	FALSE	1
2022-09-14	11:00:20	0.733346	3.26207	3.25534	978.747	FALSE	1
2022-09-14	11:00:21	0.734669	3.26795	3.25415	968.036	FALSE	1
2022-09-14	11:00:21	0.736399	3.27565	3.25415	982.023	FALSE	1
2022-09-14	11:00:21	0.727392	3.23559	3.25415	971.271	FALSE	1
2022-09-14	11:00:21	0.727799	3.2374	3.25415	985.26	FALSE	1
2022-09-14	11:00:22	0.730496	3.24939	3.2638	974.521	FALSE	1
2022-09-14	11:00:22	0.735941	3.27361	3.2638	988.534	FALSE	1
2022-09-14	11:00:22	0.734771	3.26841	3.2638	977.789	FALSE	1
2022-09-14	11:00:23	0.732939	3.26026	3.25149	991.794	FALSE	1
2022-09-14	11:00:23	0.732786	3.25958	3.25149	981.049	FALSE	1
2022-09-14	11:00:23	0.731514	3.25392	3.25149	995.048	FALSE	1
2022-09-14	11:00:23	0.726629	3.23219	3.25149	984.281	FALSE	1
2022-09-14	11:00:24	0.735382	3.27113	3.26445	998.319	FALSE	1
2022-09-14	11:00:24	0.73416	3.26569	3.26445	987.547	FALSE	1
2022-09-14	11:00:24	0.732583	3.25868	3.26445	1001.58	FALSE	1
2022-09-14	11:00:24	0.733397	3.2623	3.26445	990.809	FALSE	1
2022-09-14	11:00:25	0.737519	3.28063	3.25488	1004.86	FALSE	1
2022-09-14	11:00:25	0.732175	3.25686	3.25488	994.066	FALSE	1
2022-09-14	11:00:25	0.72444	3.22245	3.25488	1008.08	FALSE	1
2022-09-14	11:00:25	0.732786	3.25958	3.25488	997.325	FALSE	1
2022-09-14	11:00:26	0.725814	3.22857	3.23362	1011.31	FALSE	1
2022-09-14	11:00:26	0.725407	3.22676	3.23362	1000.55	FALSE	1
2022-09-14	11:00:26	0.729631	3.24554	3.23362	1014.56	FALSE	1
2022-09-14	11:00:27	0.729529	3.24509	3.24611	1003.8	FALSE	1
2022-09-14	11:00:27	0.725865	3.22879	3.24611	1017.78	FALSE	1
2022-09-14	11:00:27	0.731209	3.25256	3.24611	1007.05	FALSE	1
2022-09-14	11:00:27	0.73243	3.258	3.24611	1021.04	FALSE	1
2022-09-14	11:00:28	0.735992	3.27384	3.27344	1010.32	FALSE	1
2022-09-14	11:00:28	0.735178	3.27022	3.27344	1024.31	FALSE	1
2022-09-14	11:00:28	0.733702	3.26365	3.27344	1013.59	FALSE	1
2022-09-14	11:00:28	0.73874	3.28606	3.27344	1027.6	FALSE	1
2022-09-14	11:00:29	0.731107	3.25211	3.25913	1016.84	FALSE	1
2022-09-14	11:00:29	0.730547	3.24962	3.25913	1030.85	FALSE	1
2022-09-14	11:00:29	0.736908	3.27791	3.25913	1020.12	FALSE	1
2022-09-14	11:00:29	0.732175	3.25686	3.25913	1034.1	FALSE	1
2022-09-14	11:00:30	0.732379	3.25777	3.27173	1023.38	FALSE	1
2022-09-14	11:00:30	0.738486	3.28493	3.27173	1037.39	FALSE	1
2022-09-14	11:00:30	0.735687	3.27248	3.27173	1026.65	FALSE	1
2022-09-14	11:00:31	0.730293	3.24849	3.25817	1040.64	FALSE	1
2022-09-14	11:00:31	0.730751	3.25053	3.25817	1029.9	FALSE	1
2022-09-14	11:00:31	0.734415	3.26682	3.25817	1043.9	FALSE	1
2022-09-14	11:00:31	0.734415	3.26682	3.25817	1033.16	FALSE	1
2022-09-14	11:00:32	0.732175	3.25686	3.26648	1047.16	FALSE	1
2022-09-14	11:00:32	0.736807	3.27746	3.26648	1036.44	FALSE	1
2022-09-14	11:00:32	0.735585	3.27203	3.26648	1050.43	FALSE	1
2022-09-14	11:00:32	0.732786	3.25958	3.26648	1039.7	FALSE	1
2022-09-14	11:00:33	0.73584	3.27316	3.26207	1053.71	FALSE	1
2022-09-14	11:00:33	0.731819	3.25528	3.26207	1042.96	FALSE	1
2022-09-14	11:00:33	0.734568	3.26751	3.26207	1056.97	FALSE	1
2022-09-14	11:00:33	0.731158	3.25234	3.26207	1046.21	FALSE	1
2022-09-14	11:00:34	0.735992	3.27384	3.24328	1060.25	FALSE	1
2022-09-14	11:00:34	0.728613	3.24102	3.24328	1049.45	FALSE	1
2022-09-14	11:00:34	0.722761	3.21499	3.24328	1063.46	FALSE	1
2022-09-14	11:00:35	0.728308	3.23966	3.25534	1052.69	FALSE	1
2022-09-14	11:00:35	0.729529	3.24509	3.25534	1066.71	FALSE	1
2022-09-14	11:00:35	0.733397	3.2623	3.25534	1055.95	FALSE	1
2022-09-14	11:00:35	0.736094	3.27429	3.25534	1069.98	FALSE	1
2022-09-14	11:00:36	0.735331	3.2709	3.25347	1059.22	FALSE	1
2022-09-14	11:00:36	0.726527	3.23174	3.25347	1073.21	FALSE	1
2022-09-14	11:00:36	0.733244	3.26162	3.25347	1062.49	FALSE	1
2022-09-14	11:00:36	0.730547	3.24962	3.25347	1076.46	FALSE	1
2022-09-14	11:00:37	0.730903	3.2512	3.2426	1065.74	FALSE	1
2022-09-14	11:00:37	0.726221	3.23038	3.2426	1079.69	FALSE	1
2022-09-14	11:00:37	0.733499	3.26275	3.2426	1069	FALSE	1
2022-09-14	11:00:37	0.725254	3.22607	3.2426	1082.92	FALSE	1
2022-09-14	11:00:38	0.729224	3.24373	3.25475	1072.24	FALSE	1
2022-09-14	11:00:38	0.732634	3.2589	3.25475	1086.18	FALSE	1
2022-09-14	11:00:38	0.733244	3.26162	3.25475	1075.5	FALSE	1
2022-09-14	11:00:39	0.735585	3.27203	3.24809	1089.45	FALSE	1
2022-09-14	11:00:39	0.727697	3.23694	3.24809	1078.74	FALSE	1
2022-09-14	11:00:39	0.728054	3.23853	3.24809	1092.69	FALSE	1
2022-09-14	11:00:39	0.729478	3.24486	3.24809	1081.99	FALSE	1
2022-09-14	11:00:40	0.7307	3.2503	3.25449	1095.94	FALSE	1
2022-09-14	11:00:40	0.733244	3.26162	3.25449	1085.25	FALSE	1
2022-09-14	11:00:40	0.733906	3.26456	3.25449	1099.2	FALSE	1
2022-09-14	11:00:40	0.728715	3.24147	3.25449	1088.49	FALSE	1
2022-09-14	11:00:41	0.736196	3.27475	3.2546	1102.48	FALSE	1
2022-09-14	11:00:41	0.730852	3.25098	3.2546	1091.74	FALSE	1
2022-09-14	11:00:41	0.727443	3.23581	3.2546	1105.72	FALSE	1
2022-09-14	11:00:41	0.732175	3.25686	3.2546	1095	FALSE	1
2022-09-14	11:00:42	0.736807	3.27746	3.25483	1108.99	FALSE	1
2022-09-14	11:00:42	0.726425	3.23128	3.25483	1098.23	FALSE	1
2022-09-14	11:00:42	0.731921	3.25573	3.25483	1112.25	FALSE	1
2022-09-14	11:00:43	0.735229	3.27045	3.25884	1101.5	FALSE	1
2022-09-14	11:00:43	0.735076	3.26977	3.25884	1115.52	FALSE	1
2022-09-14	11:00:43	0.72556	3.22744	3.25884	1104.73	FALSE	1
2022-09-14	11:00:43	0.734618	3.26773	3.25884	1118.79	FALSE	1
2022-09-14	11:00:44	0.72556	3.22744	3.24583	1107.95	FALSE	1
2022-09-14	11:00:44	0.730394	3.24894	3.24583	1122.03	FALSE	1
2022-09-14	11:00:44	0.73131	3.25301	3.24583	1111.21	FALSE	1
2022-09-14	11:00:44	0.731514	3.25392	3.24583	1125.29	FALSE	1
2022-09-14	11:00:45	0.730903	3.2512	3.25245	1114.46	FALSE	1
2022-09-14	11:00:45	0.729122	3.24328	3.25245	1128.53	FALSE	1
2022-09-14	11:00:45	0.736247	3.27497	3.25245	1117.73	FALSE	1
2022-09-14	11:00:45	0.728461	3.24034	3.25245	1131.77	FALSE	1
2022-09-14	11:00:46	0.728766	3.2417	3.258	1120.97	FALSE	1
2022-09-14	11:00:46	0.73355	3.26298	3.258	1135.04	FALSE	1
2022-09-14	11:00:46	0.734975	3.26932	3.258	1124.24	FALSE	1
2022-09-14	11:00:47	0.728613	3.24102	3.25126	1138.28	FALSE	1
2022-09-14	11:00:47	0.735076	3.26977	3.25126	1127.51	FALSE	1
2022-09-14	11:00:47	0.730496	3.24939	3.25126	1141.53	FALSE	1
2022-09-14	11:00:47	0.729478	3.24486	3.25126	1130.76	FALSE	1
2022-09-14	11:00:48	0.731819	3.25528	3.24334	1144.78	FALSE	1
2022-09-14	11:00:48	0.728206	3.23921	3.24334	1134	FALSE	1
2022-09-14	11:00:48	0.726832	3.23309	3.24334	1148.01	FALSE	1
2022-09-14	11:00:48	0.729682	3.24577	3.24334	1137.24	FALSE	1
2022-09-14	11:00:49	0.729682	3.24577	3.25205	1151.26	FALSE	1
2022-09-14	11:00:49	0.73645	3.27588	3.25205	1140.52	FALSE	1
2022-09-14	11:00:49	0.728868	3.24215	3.25205	1154.5	FALSE	1
2022-09-14	11:00:49	0.729377	3.24441	3.25205	1143.76	FALSE	1
2022-09-14	11:00:50	0.731616	3.25437	3.25883	1157.76	FALSE	1
2022-09-14	11:00:50	0.73243	3.258	3.25883	1147.02	FALSE	1
2022-09-14	11:00:50	0.733804	3.26411	3.25883	1161.02	FALSE	1
2022-09-14	11:00:51	0.738231	3.2838	3.27441	1150.31	FALSE	1
2022-09-14	11:00:51	0.730751	3.25053	3.27441	1164.27	FALSE	1
2022-09-14	11:00:51	0.735433	3.27135	3.27441	1153.58	FALSE	1
2022-09-14	11:00:51	0.740064	3.29195	3.27441	1167.56	FALSE	1
2022-09-14	11:00:52	0.730394	3.24894	3.2542	1156.83	FALSE	1
2022-09-14	11:00:52	0.734313	3.26637	3.2542	1170.83	FALSE	1
2022-09-14	11:00:52	0.730801	3.25075	3.2542	1160.08	FALSE	1
2022-09-14	11:00:52	0.730801	3.25075	3.2542	1174.08	FALSE	1
2022-09-14	11:00:53	0.728919	3.24238	3.25601	1163.32	FALSE	1
2022-09-14	11:00:53	0.732786	3.25958	3.25601	1177.34	FALSE	1
2022-09-14	11:00:53	0.732023	3.25618	3.25601	1166.58	FALSE	1
2022-09-14	11:00:53	0.734211	3.26592	3.25601	1180.61	FALSE	1
2022-09-14	11:00:54	0.723117	3.21657	3.24366	1169.79	FALSE	1
2022-09-14	11:00:54	0.7307	3.2503	3.24366	1183.86	FALSE	1
2022-09-14	11:00:54	0.733804	3.26411	3.24366	1173.06	FALSE	1
2022-09-14	11:00:55	0.735891	3.27339	3.26026	1187.13	FALSE	1
2022-09-14	11:00:55	0.73355	3.26298	3.26026	1176.32	FALSE	1
2022-09-14	11:00:55	0.731565	3.25415	3.26026	1190.38	FALSE	1
2022-09-14	11:00:55	0.730751	3.25053	3.26026	1179.57	FALSE	1
2022-09-14	11:00:56	0.731667	3.2546	3.25862	1193.64	FALSE	1
2022-09-14	11:00:56	0.732532	3.25845	3.25862	1182.83	FALSE	1
2022-09-14	11:00:56	0.734924	3.26909	3.25862	1196.91	FALSE	1
2022-09-14	11:00:56	0.731158	3.25234	3.25862	1186.08	FALSE	1
2022-09-14	11:00:57	0.734211	3.26592	3.25109	1200.17	FALSE	1
2022-09-14	11:00:57	0.729224	3.24373	3.25109	1189.32	FALSE	1
2022-09-14	11:00:57	0.729886	3.24668	3.25109	1203.42	FALSE	1
2022-09-14	11:00:57	0.730191	3.24804	3.25109	1192.57	FALSE	1
2022-09-14	11:00:58	0.737214	3.27928	3.25943	1206.7	FALSE	1
2022-09-14	11:00:58	0.728155	3.23898	3.25943	1195.81	FALSE	1
2022-09-14	11:00:58	0.732888	3.26003	3.25943	1209.96	FALSE	1
2022-09-14	11:00:59	0.723473	3.21815	3.23428	1199.03	FALSE	1
2022-09-14	11:00:59	0.727646	3.23671	3.23428	1213.2	FALSE	1
2022-09-14	11:00:59	0.725305	3.2263	3.23428	1202.26	FALSE	1
2022-09-14	11:00:59	0.731972	3.25596	3.23428	1216.45	FALSE	1
2022-09-14	11:01:00	0.731005	3.25166	3.26201	1205.51	FALSE	1
2022-09-14	11:01:00	0.731667	3.2546	3.26201	1219.71	FALSE	1
2022-09-14	11:01:00	0.733753	3.26388	3.26201	1208.77	FALSE	1
2022-09-14	11:01:00	0.736908	3.27791	3.26201	1222.98	FALSE	1
2022-09-14	11:01:01	0.732277	3.25731	3.26309	1212.03	FALSE	1
2022-09-14	11:01:01	0.734669	3.26795	3.26309	1226.25	FALSE	1
2022-09-14	11:01:01	0.731667	3.2546	3.26309	1215.28	FALSE	1
2022-09-14	11:01:01	0.735687	3.27248	3.26309	1229.52	FALSE	1
2022-09-14	11:01:02	0.734313	3.26637	3.25271	1218.55	FALSE	1
2022-09-14	11:01:02	0.730547	3.24962	3.25271	1232.77	FALSE	1
2022-09-14	11:01:02	0.728868	3.24215	3.25271	1221.79	FALSE	1
2022-09-14	11:01:03	0.733906	3.26456	3.26309	1236.04	FALSE	1
2022-09-14	11:01:03	0.729224	3.24373	3.26309	1225.04	FALSE	1
2022-09-14	11:01:03	0.735891	3.27339	3.26309	1239.31	FALSE	1
2022-09-14	11:01:03	0.73528	3.27067	3.26309	1228.31	FALSE	1
2022-09-14	11:01:04	0.732634	3.2589	3.25856	1242.57	FALSE	1
2022-09-14	11:01:04	0.724135	3.2211	3.25856	1231.53	FALSE	1
2022-09-14	11:01:04	0.731463	3.25369	3.25856	1245.82	FALSE	1
2022-09-14	11:01:04	0.741997	3.30055	3.25856	1234.83	FALSE	1
2022-09-14	11:01:05	0.737214	3.27928	3.25607	1249.1	FALSE	1
2022-09-14	11:01:05	0.734466	3.26705	3.25607	1238.09	FALSE	1
2022-09-14	11:01:05	0.727188	3.23468	3.25607	1252.34	FALSE	1
2022-09-14	11:01:05	0.729122	3.24328	3.25607	1241.34	FALSE	1
2022-09-14	11:01:06	0.728359	3.23989	3.26464	1255.58	FALSE	1
2022-09-14	11:01:06	0.734822	3.26864	3.26464	1244.61	FALSE	1
2022-09-14	11:01:06	0.738588	3.28539	3.26464	1258.86	FALSE	1
2022-09-14	11:01:07	0.729733	3.246	3.26071	1247.85	FALSE	1
2022-09-14	11:01:07	0.732532	3.25845	3.26071	1262.12	FALSE	1
2022-09-14	11:01:07	0.737315	3.27972	3.26071	1251.13	FALSE	1
2022-09-14	11:01:07	0.732583	3.25868	3.26071	1265.38	FALSE	1
2022-09-14	11:01:08	0.737265	3.2795	2.92862	1254.41	FALSE	1
2022-09-14	11:01:08	0.733448	3.26252	2.92862	1268.64	FALSE	1
2022-09-14	11:01:08	0.726323	3.23083	2.92862	1257.64	FALSE	1
2022-09-14	11:01:08	0.436501	1.94164	2.92862	1270.59	FALSE	1
2022-09-14	11:01:09	0.732583	3.25868	2.52568	1260.9	FALSE	1
2022-09-14	11:01:09	0.736908	3.27791	2.52568	1273.86	FALSE	1
2022-09-14	11:01:09	0.732786	3.25958	2.52568	1264.16	FALSE	1
2022-09-14	11:01:09	0.0689188	0.306565	2.52568	1274.17	FALSE	1
2022-09-14	11:01:10	0.306272	1.36236	-0.778511	1265.52	FALSE	1
2022-09-14	11:01:10	-0.289402	-1.28732	-0.778511	1274.17	FALSE	1
2022-09-14	11:01:10	-0.541921	-2.41057	-0.778511	1265.52	FALSE	1
2022-09-14	11:01:11	-0.318867	-1.41838	-2.06937	1274.17	FALSE	1
2022-09-14	11:01:11	-0.455916	-2.02801	-2.06937	1265.52	FALSE	1
2022-09-14	11:01:11	-0.490674	-2.18262	-2.06937	1274.17	FALSE	1
2022-09-14	11:01:11	-0.595407	-2.64849	-2.06937	1265.52	FALSE	1
2022-09-14	11:01:12	-0.387875	-1.72535	-2.50904	1274.17	FALSE	1
2022-09-14	11:01:12	-0.665381	-2.95975	-2.50904	1265.52	FALSE	1
2022-09-14	11:01:12	-0.553066	-2.46015	-2.50904	1274.17	FALSE	1
2022-09-14	11:01:12	-0.64991	-2.89093	-2.50904	1265.52	FALSE	1
2022-09-14	11:01:13	-0.675457	-3.00457	-3.43869	1274.17	FALSE	1
2022-09-14	11:01:13	-0.716271	-3.18612	-3.43869	1265.52	FALSE	1
2022-09-14	11:01:13	-0.831182	-3.69726	-3.43869	1274.17	FALSE	1
2022-09-14	11:01:13	-0.869299	-3.86682	-3.43869	1265.52	FALSE	1
2022-09-14	11:01:14	-0.370114	-1.64634	-0.976811	1274.17	FALSE	1
2022-09-14	11:01:14	-0.299631	-1.33282	-0.976811	1265.52	FALSE	1
2022-09-14	11:01:14	0.0109545	0.0487278	-0.976811	1274.22	FALSE	1
2022-09-14	11:01:15	0.172481	0.76723	0.52456	1266.29	FALSE	1
2022-09-14	11:01:15	0.0827101	0.367911	0.52456	1274.59	FALSE	1
2022-09-14	11:01:15	0.152685	0.679173	0.52456	1266.97	FALSE	1
2022-09-14	11:01:15	0.0638297	0.283927	0.52456	1274.87	FALSE	1
2022-09-14	11:01:16	0.153397	0.682341	0.585284	1267.65	FALSE	1
2022-09-14	11:01:16	0.0594022	0.264233	0.585284	1275.13	FALSE	1
2022-09-14	11:01:16	0.264847	1.17809	0.585284	1268.83	FALSE	1
2022-09-14	11:01:16	0.0486644	0.216469	0.585284	1275.35	FALSE	1
2022-09-14	11:01:17	0.203372	0.904639	0.331126	1269.73	FALSE	1
2022-09-14	11:01:17	0.0989442	0.440124	0.331126	1275.79	FALSE	1
2022-09-14	11:01:17	0.438232	1.94934	0.331126	1271.68	FALSE	1
2022-09-14	11:01:17	-0.442786	-1.9696	0.331126	1275.79	FALSE	1
2022-09-14	11:01:18	0.179402	0.798016	0.685962	1272.48	FALSE	1
2022-09-14	11:01:18	0.0714124	0.317657	0.685962	1276.11	FALSE	1
2022-09-14	11:01:18	0.211819	0.942213	0.685962	1273.42	FALSE	1
2022-09-14	11:01:19	0.0968069	0.430616	0.729256	1276.54	FALSE	1
2022-09-14	11:01:19	0.229275	1.01986	0.729256	1274.44	FALSE	1
2022-09-14	11:01:19	0.0991987	0.441256	0.729256	1276.98	FALSE	1
2022-09-14	11:01:19	0.230496	1.02529	0.729256	1275.47	FALSE	1
2022-09-14	11:01:20	0.144695	0.643632	0.573287	1277.62	FALSE	1
2022-09-14	11:01:20	0.175331	0.779907	0.573287	1276.25	FALSE	1
2022-09-14	11:01:20	0.0954328	0.424504	0.573287	1278.05	FALSE	1
2022-09-14	11:01:20	0.100064	0.445105	0.573287	1276.69	FALSE	1
2022-09-14	11:01:21	0.0375702	0.16712	0.29236	1278.22	FALSE	1
2022-09-14	11:01:21	0.0511071	0.227335	0.29236	1276.92	FALSE	1
2022-09-14	11:01:21	0.123117	0.547649	0.29236	1278.76	FALSE	1
2022-09-14	11:01:21	0.0511071	0.227335	0.29236	1277.15	FALSE	1
2022-09-14	11:01:22	0.0908017	0.403904	0.318411	1279.17	FALSE	1
2022-09-14	11:01:22	0.0206236	0.0917379	0.318411	1277.24	FALSE	1
2022-09-14	11:01:22	0.103321	0.459592	0.318411	1279.63	FALSE	1
2022-09-14	11:01:23	0.0242877	0.108037	0.150142	1277.35	FALSE	1
2022-09-14	11:01:23	0.0880536	0.39168	0.150142	1280.02	FALSE	1
2022-09-14	11:01:23	-0.0283331	-0.126031	0.150142	1277.35	FALSE	1
2022-09-14	11:01:23	0.0510053	0.226882	0.150142	1280.25	FALSE	1
2022-09-14	11:01:24	0.109173	0.485623	4.17152	1277.83	FALSE	1
2022-09-14	11:01:24	0.765458	3.40491	4.17152	1283.65	FALSE	1
2022-09-14	11:01:24	0.744898	3.31346	4.17152	1281.15	FALSE	1
2022-09-14	11:01:24	2.13167	9.48209	4.17152	1293.13	FALSE	1
2022-09-14	11:01:25	2.22352	9.89066	3.21045	1291.04	FALSE	1
2022-09-14	11:01:25	0.849987	3.78091	3.21045	1296.91	FALSE	1
2022-09-14	11:01:25	-0.039529	-0.175833	3.21045	1291.04	FALSE	1
2022-09-14	11:01:25	-0.14701	-0.65393	3.21045	1296.91	FALSE	1
2022-09-14	11:01:26	-0.206806	-0.919914	-0.593111	1291.04	FALSE	1
2022-09-14	11:01:26	-0.161972	-0.720484	-0.593111	1296.91	FALSE	1
2022-09-14	11:01:26	-0.0312338	-0.138934	-0.593111	1291.04	FALSE	1
2022-09-14	11:01:27	-0.328536	-1.46139	-1.49756	1296.91	FALSE	1
2022-09-14	11:01:27	-0.362684	-1.61329	-1.49756	1291.04	FALSE	1
2022-09-14	11:01:27	-0.398664	-1.77334	-1.49756	1296.91	FALSE	1
2022-09-14	11:01:27	-0.256781	-1.14221	-1.49756	1291.04	FALSE	1
2022-09-14	11:01:28	-0.318511	-1.4168	-0.431802	1296.91	FALSE	1
2022-09-14	11:01:28	-0.287824	-1.2803	-0.431802	1291.04	FALSE	1
2022-09-14	11:01:28	-0.0229896	-0.102262	-0.431802	1296.91	FALSE	1
2022-09-14	11:01:28	0.241031	1.07215	-0.431802	1292.11	FALSE	1
2022-09-14	11:01:29	0.946119	4.20853	3.93416	1301.12	FALSE	1
2022-09-14	11:01:29	1.42169	6.32396	3.93416	1298.43	FALSE	1
2022-09-14	11:01:29	0.742659	3.3035	3.93416	1304.43	FALSE	1
2022-09-14	11:01:29	0.42729	1.90067	3.93416	1300.34	FALSE	1
2022-09-14	11:01:30	0.305305	1.35806	2.64204	1305.78	FALSE	1
2022-09-14	11:01:30	0.406527	1.80831	2.64204	1302.14	FALSE	1
2022-09-14	11:01:30	0.559555	2.48901	2.64204	1308.27	FALSE	1
2022-09-14	11:01:30	1.10444	4.91277	2.64204	1307.06	FALSE	1
2022-09-14	11:01:31	0.945814	4.20717	3.94971	1312.48	FALSE	1
2022-09-14	11:01:31	0.810242	3.60412	3.94971	1310.66	FALSE	1
2022-09-14	11:01:31	0.907748	4.03784	3.94971	1316.52	FALSE	1
2022-09-14	11:01:32	0.862252	3.83547	2.17317	1314.5	FALSE	1
2022-09-14	11:01:32	0.885967	3.94096	2.17317	1320.46	FALSE	1
2022-09-14	11:01:32	0.319097	1.41941	2.17317	1315.92	FALSE	1
2022-09-14	11:01:32	-0.113117	-0.503167	2.17317	1320.46	FALSE	1
2022-09-14	11:01:33	0.630801	2.80593	3.04192	1318.72	FALSE	1
2022-09-14	11:01:33	0.640674	2.84985	3.04192	1323.31	FALSE	1
2022-09-14	11:01:33	0.726425	3.23128	3.04192	1321.95	FALSE	1
2022-09-14	11:01:33	0.737519	3.28063	3.04192	1326.59	FALSE	1
2022-09-14	11:01:34	-3.54431	-15.7658	-1.53938	1321.95	FALSE	1
2022-09-14	11:01:34	0.727596	3.23649	-1.53938	1329.83	FALSE	1
2022-09-14	11:01:34	0.730394	3.24894	-1.53938	1325.2	FALSE	1
2022-09-14	11:01:34	0.702048	3.12285	-1.53938	1332.95	FALSE	1
2022-09-14	11:01:35	0.731259	3.25279	3.25543	1328.45	FALSE	1
2022-09-14	11:01:35	0.730089	3.24758	3.25543	1336.2	FALSE	1
2022-09-14	11:01:35	0.734211	3.26592	3.25543	1331.72	FALSE	1
2022-09-14	11:01:36	0.736349	3.27543	3.25964	1339.47	FALSE	1
2022-09-14	11:01:36	0.732175	3.25686	3.25964	1334.98	FALSE	1
2022-09-14	11:01:36	0.736094	3.27429	3.25964	1342.75	FALSE	1
2022-09-14	11:01:36	0.726578	3.23196	3.25964	1338.21	FALSE	1
2022-09-14	11:01:37	0.734008	3.26501	3.27367	1346.01	FALSE	1
2022-09-14	11:01:37	0.733295	3.26184	3.27367	1341.47	FALSE	1
2022-09-14	11:01:37	0.739962	3.2915	3.27367	1349.3	FALSE	1
2022-09-14	11:01:37	0.736552	3.27633	3.27367	1344.75	FALSE	1
2022-09-14	11:01:38	0.732939	3.26026	2.7297	1352.56	FALSE	1
2022-09-14	11:01:38	0.73187	3.2555	2.7297	1348	FALSE	1
2022-09-14	11:01:38	0.724237	3.22155	2.7297	1355.78	FALSE	1
2022-09-14	11:01:38	0.265611	1.18149	2.7297	1349.18	FALSE	1
2022-09-14	11:01:39	0.0876465	0.389869	1.09788	1356.17	FALSE	1
2022-09-14	11:01:39	-0.0800888	-0.356251	1.09788	1349.18	FALSE	1
2022-09-14	11:01:39	0.732888	3.26003	1.09788	1359.43	FALSE	1
2022-09-14	11:01:40	0.731514	3.25392	2.57181	1352.44	FALSE	1
2022-09-14	11:01:40	0.740216	3.29263	2.57181	1362.73	FALSE	1
2022-09-14	11:01:40	0.493041	2.19314	2.57181	1354.63	FALSE	1
2022-09-14	11:01:40	0.347901	1.54753	2.57181	1364.27	FALSE	1
2022-09-14	11:01:41	0.319046	1.41918	1.62156	1356.05	FALSE	1
2022-09-14	11:01:41	0.392685	1.74674	1.62156	1366.02	FALSE	1
2022-09-14	11:01:41	0.342354	1.52286	1.62156	1357.57	FALSE	1
2022-09-14	11:01:41	0.404084	1.79745	1.62156	1367.82	FALSE	1
2022-09-14	11:01:42	0.363168	1.61544	1.63271	1359.19	FALSE	1
2022-09-14	11:01:42	0.370751	1.64917	1.63271	1369.47	FALSE	1
2022-09-14	11:01:42	0.426679	1.89795	1.63271	1361.09	FALSE	1
2022-09-14	11:01:42	0.307596	1.36825	1.63271	1370.84	FALSE	1
2022-09-14	11:01:43	-0.529605	-2.35579	0.351764	1361.09	FALSE	1
2022-09-14	11:01:43	0.140115	0.62326	0.351764	1371.46	FALSE	1
2022-09-14	11:01:43	0.62673	2.78782	0.351764	1363.87	FALSE	1
2022-09-14	11:01:44	0.735585	3.27203	3.26196	1374.73	FALSE	1
2022-09-14	11:01:44	0.731616	3.25437	3.26196	1367.13	FALSE	1
2022-09-14	11:01:44	0.72841	3.24011	3.26196	1377.97	FALSE	1
2022-09-14	11:01:44	0.737672	3.28131	3.26196	1370.41	FALSE	1
2022-09-14	11:01:45	0.734262	3.26614	3.2559	1381.24	FALSE	1
2022-09-14	11:01:45	0.73416	3.26569	3.2559	1373.68	FALSE	1
2022-09-14	11:01:45	0.721997	3.21159	3.2559	1384.45	FALSE	1
2022-09-14	11:01:45	0.737417	3.28018	3.2559	1376.96	FALSE	1
2022-09-14	11:01:46	0.740064	3.29195	3.2662	1387.74	FALSE	1
2022-09-14	11:01:46	0.729987	3.24713	3.2662	1380.2	FALSE	1
2022-09-14	11:01:46	0.732634	3.2589	3.2662	1391	FALSE	1
2022-09-14	11:01:46	0.734415	3.26682	3.2662	1383.47	FALSE	1
2022-09-14	11:01:47	0.726883	3.23332	3.25694	1394.23	FALSE	1
2022-09-14	11:01:47	0.739453	3.28923	3.25694	1386.76	FALSE	1
2022-09-14	11:01:47	0.730242	3.24826	3.25694	1397.48	FALSE	1
2022-09-14	11:01:48	0.731259	3.25279	3.26354	1390.01	FALSE	1
2022-09-14	11:01:48	0.735789	3.27294	3.26354	1400.75	FALSE	1
2022-09-14	11:01:48	0.735585	3.27203	3.26354	1393.28	FALSE	1
2022-09-14	11:01:48	0.732074	3.25641	3.26354	1404.01	FALSE	1
2022-09-14	11:01:49	0.726679	3.23241	3.2546	1396.52	FALSE	1
2022-09-14	11:01:49	0.735433	3.27135	3.2546	1407.28	FALSE	1
2022-09-14	11:01:49	0.730801	3.25075	3.2546	1399.77	FALSE	1
2022-09-14	11:01:49	0.733753	3.26388	3.2546	1410.55	FALSE	1
2022-09-14	11:01:50	0.7307	3.2503	3.26428	1403.02	FALSE	1
2022-09-14	11:01:50	0.738893	3.28674	3.26428	1413.83	FALSE	1
2022-09-14	11:01:50	0.735738	3.27271	3.26428	1406.29	FALSE	1
2022-09-14	11:01:50	0.730038	3.24736	3.26428	1417.08	FALSE	1
2022-09-14	11:01:51	0.736399	3.27565	3.26856	1409.57	FALSE	1
2022-09-14	11:01:51	0.736807	3.27746	3.26856	1420.36	FALSE	1
2022-09-14	11:01:51	0.731209	3.25256	3.26856	1412.82	FALSE	1
2022-09-14	11:01:52	0.737519	3.28063	3.26575	1423.64	FALSE	1
2022-09-14	11:01:52	0.735127	3.26999	3.26575	1416.09	FALSE	1
2022-09-14	11:01:52	0.730852	3.25098	3.26575	1426.89	FALSE	1
2022-09-14	11:01:52	0.733193	3.26139	3.26575	1419.35	FALSE	1
2022-09-14	11:01:53	0.734924	3.26909	3.27226	1430.16	FALSE	1
2022-09-14	11:01:53	0.737977	3.28267	3.27226	1422.63	FALSE	1
2022-09-14	11:01:53	0.735229	3.27045	3.27226	1433.43	FALSE	1
2022-09-14	11:01:53	0.734415	3.26682	3.27226	1425.9	FALSE	1
2022-09-14	11:01:54	0.731717	3.25482	3.27967	1436.68	FALSE	1
2022-09-14	11:01:54	0.734568	3.26751	3.27967	1429.17	FALSE	1
2022-09-14	11:01:54	0.736247	3.27497	3.27967	1439.96	FALSE	1
2022-09-14	11:01:54	0.746679	3.32138	3.27967	1432.49	FALSE	1
2022-09-14	11:01:55	0.735483	3.27158	3.26388	1443.23	FALSE	1
2022-09-14	11:01:55	0.733295	3.26184	3.26388	1435.75	FALSE	1
2022-09-14	11:01:55	0.732481	3.25822	3.26388	1446.49	FALSE	1
2022-09-14	11:01:56	0.731819	3.25528	3.26982	1439.01	FALSE	1
2022-09-14	11:01:56	0.73472	3.26818	3.26982	1449.76	FALSE	1
2022-09-14	11:01:56	0.734618	3.26773	3.26982	1442.27	FALSE	1
2022-09-14	11:01:56	0.739198	3.2881	3.26982	1453.04	FALSE	1
2022-09-14	11:01:57	0.734568	3.26751	3.27379	1445.54	FALSE	1
2022-09-14	11:01:57	0.738537	3.28516	3.27379	1456.33	FALSE	1
2022-09-14	11:01:57	0.738791	3.28629	3.27379	1448.83	FALSE	1
2022-09-14	11:01:57	0.732023	3.25618	3.27379	1459.59	FALSE	1
2022-09-14	11:01:58	0.736196	3.27475	3.26677	1452.1	FALSE	1
2022-09-14	11:01:58	0.733397	3.2623	3.26677	1462.85	FALSE	1
2022-09-14	11:01:58	0.734924	3.26909	3.26677	1455.37	FALSE	1
2022-09-14	11:01:58	0.733092	3.26094	3.26677	1466.11	FALSE	1
2022-09-14	11:01:59	0.728512	3.24057	1.99726	1458.61	FALSE	1
2022-09-14	11:01:59	0.721183	3.20797	1.99726	1469.32	FALSE	1
2022-09-14	11:01:59	-0.102684	-0.456759	1.99726	1458.61	FALSE	1
2022-09-14	11:02:00	0.593295	2.63909	2.42653	1471.96	FALSE	1
2022-09-14	11:02:00	0.260725	1.15976	2.42653	1459.77	FALSE	1
2022-09-14	11:02:00	0.592583	2.63593	2.42653	1474.59	FALSE	1
2022-09-14	11:02:00	0.735433	3.27135	2.42653	1463.04	FALSE	1
2022-09-14	11:02:01	0.720267	3.20389	3.23292	1477.8	FALSE	1
2022-09-14	11:02:01	0.734618	3.26773	3.23292	1466.31	FALSE	1
2022-09-14	11:02:01	0.719097	3.19869	3.23292	1480.99	FALSE	1
2022-09-14	11:02:01	0.733193	3.26139	3.23292	1469.57	FALSE	1
2022-09-14	11:02:02	0.243575	1.08347	2.19343	1482.08	FALSE	1
2022-09-14	11:02:02	0.147748	0.657213	2.19343	1470.23	FALSE	1
2022-09-14	11:02:02	0.843219	3.75081	2.19343	1485.83	FALSE	1
2022-09-14	11:02:02	0.737875	3.28222	2.19343	1473.51	FALSE	1
2022-09-14	11:02:03	1.28159	5.70077	6.47639	1491.53	FALSE	1
2022-09-14	11:02:03	2.57828	11.4687	6.47639	1484.98	FALSE	1
2022-09-14	11:02:03	0.508003	2.2597	6.47639	1493.79	FALSE	1

## Sheet: Richa_harness_2022914105648 (3)
Date	Time	Lbs	Newtons	Total force x time		total steps > 13.345	**GoPro Fitting: 1046
2022-09-14	10:57:03	0.39126	1.7404	1.7404	FALSE	0
2022-09-14	10:57:03	0.409987	1.8237	1.8237	FALSE	0
2022-09-14	10:57:03	0.410191	1.82461	3.56501	FALSE	0
2022-09-14	10:57:03	0.362761	1.61363	3.43734	FALSE	0
2022-09-14	10:57:04	0.445255	1.98058	5.5456	FALSE	0
2022-09-14	10:57:04	0.399555	1.7773	5.21464	FALSE	0
2022-09-14	10:57:04	0.393448	1.75014	7.29573	FALSE	0
2022-09-14	10:57:04	0.420369	1.86989	7.08452	FALSE	0
2022-09-14	10:57:05	0.396247	1.76259	9.05832	FALSE	0
2022-09-14	10:57:05	0.432379	1.92331	9.00783	FALSE	0
2022-09-14	10:57:05	0.44215	1.96677	11.0251	FALSE	0
2022-09-14	10:57:05	0.36902	1.64147	10.6493	FALSE	0
2022-09-14	10:57:06	0.475942	2.11709	13.1422	FALSE	0
2022-09-14	10:57:06	0.445713	1.98262	12.6319	FALSE	0
2022-09-14	10:57:06	0.968969	4.31017	17.4523	FALSE	0
2022-09-14	10:57:07	0.611972	2.72217	15.3541	FALSE	0
2022-09-14	10:57:07	0.445407	1.98126	19.4336	FALSE	0
2022-09-14	10:57:07	0.448613	1.99552	17.3496	FALSE	0
2022-09-14	10:57:07	0.417163	1.85562	21.2892	FALSE	0
2022-09-14	10:57:08	0.432328	1.92308	19.2727	FALSE	0
2022-09-14	10:57:08	0.385611	1.71527	23.0045	FALSE	0
2022-09-14	10:57:08	0.423575	1.88415	21.1568	FALSE	0
2022-09-14	10:57:08	0.710344	3.15975	26.1643	FALSE	0
2022-09-14	10:57:09	0.0305473	0.13588	21.2927	FALSE	0
2022-09-14	10:57:09	0.310802	1.38251	27.5468	FALSE	0
2022-09-14	10:57:09	0.218333	0.971189	22.2639	FALSE	0
2022-09-14	10:57:09	0.150649	0.670117	28.2169	FALSE	0
2022-09-14	10:57:10	0.0686644	0.305433	22.5694	FALSE	0
2022-09-14	10:57:10	0.270496	1.20322	29.4201	FALSE	0
2022-09-14	10:57:10	0.170293	0.757497	23.3268	FALSE	0
2022-09-14	10:57:11	0.0968577	0.430842	29.8509	FALSE	0
2022-09-14	10:57:11	0.27411	1.2193	24.5461	FALSE	0
2022-09-14	10:57:11	0.0596567	0.265365	30.1163	FALSE	0
2022-09-14	10:57:11	0.218537	0.972096	25.5182	FALSE	0
2022-09-14	10:57:12	0.188003	0.836275	30.9526	FALSE	0
2022-09-14	10:57:12	0.218995	0.974134	26.4924	FALSE	0
2022-09-14	10:57:12	0.207341	0.922294	31.8749	FALSE	0
2022-09-14	10:57:12	0.162201	0.721502	27.2139	FALSE	0
2022-09-14	10:57:13	0.219657	0.977078	32.852	FALSE	0
2022-09-14	10:57:13	0.211718	0.941764	28.1556	FALSE	0
2022-09-14	10:57:13	0.231209	1.02846	33.8804	FALSE	0
2022-09-14	10:57:13	0.264237	1.17538	29.331	FALSE	0
2022-09-14	10:57:14	0.25355	1.12784	35.0083	FALSE	0
2022-09-14	10:57:14	0.135229	0.601526	29.9325	FALSE	0
2022-09-14	10:57:14	0.248562	1.10565	36.1139	FALSE	0
2022-09-14	10:57:15	0.0608781	0.270798	30.2033	FALSE	0
2022-09-14	10:57:15	0.371361	1.65189	37.7658	FALSE	0
2022-09-14	10:57:15	0.13813	0.61443	30.8178	FALSE	0
2022-09-14	10:57:15	0.290802	1.29355	39.0593	FALSE	0
2022-09-14	10:57:16	0.119097	0.529767	31.3475	FALSE	0
2022-09-14	10:57:16	0.363524	1.61703	40.6764	FALSE	0
2022-09-14	10:57:16	0.144898	0.644535	31.9921	FALSE	0
2022-09-14	10:57:17	0.35701	1.58805	42.2644	FALSE	0
2022-09-14	10:57:17	0.27014	1.20164	33.1937	FALSE	0
2022-09-14	10:57:17	0.357723	1.59122	43.8557	FALSE	0
2022-09-14	10:57:17	0.225255	1.00198	34.1957	FALSE	0
2022-09-14	10:57:17	0.455127	2.0245	45.8801	FALSE	0
2022-09-14	10:57:18	0.249682	1.11064	35.3063	FALSE	0
2022-09-14	10:57:18	0.441132	1.96224	47.8424	FALSE	0
2022-09-14	10:57:18	0.293092	1.30373	36.6101	FALSE	0
2022-09-14	10:57:19	0.367188	1.63333	49.4757	FALSE	0
2022-09-14	10:57:19	0.325458	1.4477	38.0578	FALSE	0
2022-09-14	10:57:19	0.375229	1.66909	51.1448	FALSE	0
2022-09-14	10:57:19	0.208155	0.925915	38.9837	FALSE	0
2022-09-14	10:57:20	0.309427	1.37639	52.5212	FALSE	0
2022-09-14	10:57:20	0.273041	1.21454	40.1982	FALSE	0
2022-09-14	10:57:20	0.298741	1.32886	53.8501	FALSE	0
2022-09-14	10:57:20	0.301438	1.34086	41.5391	FALSE	0
2022-09-14	10:57:21	0.308308	1.37142	55.2215	FALSE	0
2022-09-14	10:57:21	0.333702	1.48437	43.0234	FALSE	0
2022-09-14	10:57:21	0.338079	1.50384	56.7253	FALSE	0
2022-09-14	10:57:21	0.518995	2.30859	45.332	FALSE	0
2022-09-14	10:57:22	0.683321	3.03955	59.7649	FALSE	0
2022-09-14	10:57:22	0.368155	1.63763	46.9697	FALSE	0
2022-09-14	10:57:22	0.308054	1.37029	61.1352	FALSE	0
2022-09-14	10:57:23	0.350852	1.56066	48.5303	FALSE	0
2022-09-14	10:57:23	0.244135	1.08596	62.2211	FALSE	0
2022-09-14	10:57:23	0.418537	1.86174	50.3921	FALSE	0
2022-09-14	10:57:23	0.224644	0.999261	63.2204	FALSE	0
2022-09-14	10:57:24	0.421234	1.87373	52.2658	FALSE	0
2022-09-14	10:57:24	0.187697	0.834914	64.0553	FALSE	0
2022-09-14	10:57:24	0.460013	2.04623	54.312	FALSE	0
2022-09-14	10:57:24	0.125051	0.556252	64.6115	FALSE	0
2022-09-14	10:57:25	0.430038	1.9129	56.2249	FALSE	0
2022-09-14	10:57:25	0.18785	0.835594	65.4471	FALSE	0
2022-09-14	10:57:25	0.387188	1.72229	57.9472	FALSE	0
2022-09-14	10:57:25	0.161641	0.719011	66.1661	FALSE	0
2022-09-14	10:57:26	0.371056	1.65053	59.5977	FALSE	0
2022-09-14	10:57:26	0.234364	1.0425	67.2086	FALSE	0
2022-09-14	10:57:26	0.438995	1.95274	61.5505	FALSE	0
2022-09-14	10:57:27	0.145204	0.645896	67.8545	FALSE	0
2022-09-14	10:57:27	0.449326	1.99869	63.5492	FALSE	0
2022-09-14	10:57:27	0.219708	0.977305	68.8318	FALSE	0
2022-09-14	10:57:27	0.428512	1.90611	65.4553	FALSE	0
2022-09-14	10:57:28	0.194211	0.863889	69.6957	FALSE	0
2022-09-14	10:57:28	0.485611	2.16009	67.6154	FALSE	0
2022-09-14	10:57:28	0.176196	0.783755	70.4795	FALSE	0
2022-09-14	10:57:28	0.42673	1.89818	69.5136	FALSE	0
2022-09-14	10:57:29	0.175992	0.782848	71.2623	FALSE	0
2022-09-14	10:57:29	0.446069	1.9842	71.4978	FALSE	0
2022-09-14	10:57:29	0.213448	0.949459	72.2118	FALSE	0
2022-09-14	10:57:29	0.361998	1.61024	73.108	FALSE	0
2022-09-14	10:57:30	0.13584	0.604243	72.816	FALSE	0
2022-09-14	10:57:30	0.278639	1.23944	74.3474	FALSE	0
2022-09-14	10:57:30	-0.0848216	-0.377303	72.816	FALSE	0
2022-09-14	10:57:31	-0.133168	-0.592358	74.3474	FALSE	0
2022-09-14	10:57:31	-0.424923	-1.89014	72.816	FALSE	0
2022-09-14	10:57:31	-0.373422	-1.66106	74.3474	FALSE	0
2022-09-14	10:57:31	0.460725	2.0494	74.8654	FALSE	0
2022-09-14	10:57:32	0.722303	3.21295	77.5604	FALSE	0
2022-09-14	10:57:32	1.82983	8.13945	83.0049	FALSE	0
2022-09-14	10:57:32	3.1538	14.0287	91.5891	1	1
2022-09-14	10:57:32	1.93645	8.61372	91.6186	FALSE	1
2022-09-14	10:57:33	1.63665	7.28015	98.8693	FALSE	1
2022-09-14	10:57:33	1.90342	8.46679	100.085	FALSE	1
2022-09-14	10:57:33	1.60363	7.13327	106.003	FALSE	1
2022-09-14	10:57:33	1.49065	6.63071	106.716	FALSE	1
2022-09-14	10:57:34	1.81233	8.06161	114.064	FALSE	1
2022-09-14	10:57:34	1.60383	7.13416	113.85	FALSE	1
2022-09-14	10:57:34	0.706323	3.14187	117.206	FALSE	1
2022-09-14	10:57:35	0.134161	0.596775	114.447	FALSE	1
2022-09-14	10:57:35	0.0321249	0.142898	117.349	FALSE	1
2022-09-14	10:57:35	0.33584	1.49388	115.941	FALSE	1
2022-09-14	10:57:35	-0.216526	-0.963151	117.349	FALSE	1
2022-09-14	10:57:36	-0.20533	-0.913349	115.941	FALSE	1
2022-09-14	10:57:36	0.124186	0.552404	117.901	FALSE	1
2022-09-14	10:57:36	-0.070674	-0.314372	115.941	FALSE	1
2022-09-14	10:57:36	-0.192608	-0.856759	117.901	FALSE	1
2022-09-14	10:57:37	-0.201615	-0.896824	115.941	FALSE	1
2022-09-14	10:57:37	0.160013	0.71177	118.613	FALSE	1
2022-09-14	10:57:37	0.335076	1.49049	117.431	FALSE	1
2022-09-14	10:57:37	0.377265	1.67815	120.291	FALSE	1
2022-09-14	10:57:38	0.379504	1.68811	119.12	FALSE	1
2022-09-14	10:57:38	0.450344	2.00322	122.294	FALSE	1
2022-09-14	10:57:38	0.343117	1.52625	120.646	FALSE	1
2022-09-14	10:57:39	0.380674	1.69331	123.988	FALSE	1
2022-09-14	10:57:39	0.428766	1.90724	122.553	FALSE	1
2022-09-14	10:57:39	0.339758	1.51131	125.499	FALSE	1
2022-09-14	10:57:39	0.405102	1.80197	124.355	FALSE	1
2022-09-14	10:57:40	0.192074	0.854384	126.353	FALSE	1
2022-09-14	10:57:40	0.297367	1.32275	125.678	FALSE	1
2022-09-14	10:57:40	0.218741	0.973004	127.326	FALSE	1
2022-09-14	10:57:40	0.284542	1.2657	126.943	FALSE	1
2022-09-14	10:57:41	0.244797	1.08891	128.415	FALSE	1
2022-09-14	10:57:41	0.282863	1.25823	128.202	FALSE	1
2022-09-14	10:57:41	0.159351	0.708825	129.124	FALSE	1
2022-09-14	10:57:41	0.370852	1.64962	129.851	FALSE	1
2022-09-14	10:57:42	0.204084	0.907806	130.032	FALSE	1
2022-09-14	10:57:42	0.377723	1.68019	131.531	FALSE	1
2022-09-14	10:57:42	0.173244	0.770624	130.803	FALSE	1
2022-09-14	10:57:43	0.319504	1.42122	132.953	FALSE	1
2022-09-14	10:57:43	0.213702	0.950589	131.753	FALSE	1
2022-09-14	10:57:43	0.38897	1.73022	134.683	FALSE	1
2022-09-14	10:57:43	0.211667	0.941537	132.695	FALSE	1
2022-09-14	10:57:44	0.383524	1.70599	136.389	FALSE	1
2022-09-14	10:57:44	0.322252	1.43344	134.128	FALSE	1
2022-09-14	10:57:44	0.524542	2.33327	138.722	FALSE	1
2022-09-14	10:57:44	0.288054	1.28132	135.41	FALSE	1
2022-09-14	10:57:45	0.278741	1.2399	139.962	FALSE	1
2022-09-14	10:57:45	0.454262	2.02065	137.43	FALSE	1
2022-09-14	10:57:45	0.543168	2.41612	142.378	FALSE	1
2022-09-14	10:57:45	0.761132	3.38567	140.816	FALSE	1
2022-09-14	10:57:46	0.794669	3.53485	145.913	FALSE	1
2022-09-14	10:57:46	0.501387	2.23027	143.046	FALSE	1
2022-09-14	10:57:46	0.899707	4.00208	149.915	FALSE	1
2022-09-14	10:57:47	0.636959	2.83332	145.879	FALSE	1
2022-09-14	10:57:47	0.606527	2.69795	152.613	FALSE	1
2022-09-14	10:57:47	0.686679	3.05449	148.934	FALSE	1
2022-09-14	10:57:47	0.518231	2.3052	154.918	FALSE	1
2022-09-14	10:57:48	0.414313	1.84295	150.777	FALSE	1
2022-09-14	10:57:48	0.54556	2.42676	157.345	FALSE	1
2022-09-14	10:57:48	0.61411	2.73168	153.509	FALSE	1
2022-09-14	10:57:48	1.18637	5.27721	162.622	FALSE	1
2022-09-14	10:57:49	2.44648	10.8824	164.391	FALSE	1
2022-09-14	10:57:49	2.60306	11.5789	174.201	FALSE	1
2022-09-14	10:57:49	1.3135	5.84271	170.234	FALSE	1
2022-09-14	10:57:49	0.713193	3.17243	177.374	FALSE	1
2022-09-14	10:57:50	0.544033	2.41997	172.654	FALSE	1
2022-09-14	10:57:50	0.368613	1.63966	179.013	FALSE	1
2022-09-14	10:57:50	0.470598	2.09331	174.747	FALSE	1
2022-09-14	10:57:51	0.372074	1.65506	180.668	FALSE	1
2022-09-14	10:57:51	0.248054	1.10339	175.85	FALSE	1
2022-09-14	10:57:51	0.318282	1.41578	182.084	FALSE	1
2022-09-14	10:57:51	0.236298	1.0511	176.901	FALSE	1
2022-09-14	10:57:52	0.363677	1.61771	183.702	FALSE	1
2022-09-14	10:57:52	0.388104	1.72636	178.628	FALSE	1
2022-09-14	10:57:52	0.407036	1.81058	185.512	FALSE	1
2022-09-14	10:57:52	0.442761	1.96949	180.597	FALSE	1
2022-09-14	10:57:53	0.395127	1.7576	187.27	FALSE	1
2022-09-14	10:57:53	0.390394	1.73655	182.334	FALSE	1
2022-09-14	10:57:53	0.485662	2.16032	189.43	FALSE	1
2022-09-14	10:57:53	0.451819	2.00978	184.344	FALSE	1
2022-09-14	10:57:54	0.435891	1.93893	191.369	FALSE	1
2022-09-14	10:57:54	0.430903	1.91674	186.26	FALSE	1
2022-09-14	10:57:54	0.372176	1.65551	193.025	FALSE	1
2022-09-14	10:57:55	0.44444	1.97696	188.237	FALSE	1
2022-09-14	10:57:55	0.417163	1.85562	194.88	FALSE	1
2022-09-14	10:57:55	0.475789	2.1164	190.354	FALSE	1
2022-09-14	10:57:55	0.481539	2.14198	197.022	FALSE	1
2022-09-14	10:57:56	0.449529	1.99959	192.353	FALSE	1
2022-09-14	10:57:56	0.454364	2.0211	199.043	FALSE	1
2022-09-14	10:57:56	0.450089	2.00209	194.355	FALSE	1
2022-09-14	10:57:56	0.434008	1.93055	200.974	FALSE	1
2022-09-14	10:57:57	0.432786	1.92512	196.281	FALSE	1
2022-09-14	10:57:57	0.430344	1.91426	202.888	FALSE	1
2022-09-14	10:57:57	0.726934	3.23355	199.514	FALSE	1
2022-09-14	10:57:57	0.727137	3.23445	206.123	FALSE	1
2022-09-14	10:57:58	0.731514	3.25392	202.768	FALSE	1
2022-09-14	10:57:58	0.726425	3.23128	209.354	FALSE	1
2022-09-14	10:57:58	0.731107	3.25211	206.02	FALSE	1
2022-09-14	10:57:59	0.726374	3.23106	212.585	FALSE	1
2022-09-14	10:57:59	0.736196	3.27475	209.295	FALSE	1
2022-09-14	10:57:59	0.729886	3.24668	215.832	FALSE	1
2022-09-14	10:57:59	0.729733	3.246	212.541	FALSE	1
2022-09-14	10:58:00	0.734924	3.26909	219.101	FALSE	1
2022-09-14	10:58:00	0.730445	3.24917	215.79	FALSE	1
2022-09-14	10:58:00	0.807799	3.59325	222.694	FALSE	1
2022-09-14	10:58:00	0.697672	3.10338	218.893	FALSE	1
2022-09-14	10:58:01	0.729326	3.24419	225.938	FALSE	1
2022-09-14	10:58:01	0.72902	3.24283	222.136	FALSE	1
2022-09-14	10:58:01	0.731921	3.25573	229.194	FALSE	1
2022-09-14	10:58:01	0.730649	3.25007	225.386	FALSE	1
2022-09-14	10:58:02	0.724389	3.22223	232.416	FALSE	1
2022-09-14	10:58:02	0.730496	3.24939	228.636	FALSE	1
2022-09-14	10:58:02	0.72897	3.2426	235.659	FALSE	1
2022-09-14	10:58:03	0.724796	3.22404	231.86	FALSE	1
2022-09-14	10:58:03	0.732837	3.25981	238.919	FALSE	1
2022-09-14	10:58:03	0.521539	2.31991	234.18	FALSE	1
2022-09-14	10:58:03	0.353855	1.57402	240.493	FALSE	1
2022-09-14	10:58:04	0.530954	2.36179	236.541	FALSE	1
2022-09-14	10:58:04	0.327239	1.45562	241.948	FALSE	1
2022-09-14	10:58:04	0.308868	1.37391	237.915	FALSE	1
2022-09-14	10:58:04	0.231616	1.03027	242.979	FALSE	1
2022-09-14	10:58:05	-0.163651	-0.727952	237.915	FALSE	1
2022-09-14	10:58:05	0.0946694	0.421108	243.4	FALSE	1
2022-09-14	10:58:05	0.545	2.42427	240.34	FALSE	1
2022-09-14	10:58:05	0.727341	3.23536	246.635	FALSE	1
2022-09-14	10:58:06	0.851514	3.7877	244.127	FALSE	1
2022-09-14	10:58:06	0.673651	2.99653	249.632	FALSE	1
2022-09-14	10:58:06	0.72327	3.21725	247.345	FALSE	1
2022-09-14	10:58:07	0.729071	3.24305	252.875	FALSE	1
2022-09-14	10:58:07	0.730903	3.2512	250.596	FALSE	1
2022-09-14	10:58:07	0.727901	3.23785	256.112	FALSE	1
2022-09-14	10:58:07	0.726272	3.2306	253.826	FALSE	1
2022-09-14	10:58:08	0.733193	3.26139	259.374	FALSE	1
2022-09-14	10:58:08	0.728003	3.2383	257.065	FALSE	1
2022-09-14	10:58:08	1.79777	7.99684	267.371	FALSE	1
2022-09-14	10:58:08	1.19085	5.29714	262.362	FALSE	1
2022-09-14	10:58:09	0.667545	2.96937	270.34	FALSE	1
2022-09-14	10:58:09	0.397112	1.76643	264.128	FALSE	1
2022-09-14	10:58:09	0.734211	3.26592	273.606	FALSE	1
2022-09-14	10:58:10	1.07533	4.78328	268.912	FALSE	1
2022-09-14	10:58:10	0.743168	3.30576	276.912	FALSE	1
2022-09-14	10:58:10	0.662048	2.94492	271.856	FALSE	1
2022-09-14	10:58:10	0.731005	3.25166	280.163	FALSE	1
2022-09-14	10:58:11	0.731514	3.25392	275.11	FALSE	1
2022-09-14	10:58:11	0.731717	3.25482	283.418	FALSE	1
2022-09-14	10:58:11	0.727646	3.23671	278.347	FALSE	1
2022-09-14	10:58:11	0.725204	3.22585	286.644	FALSE	1
2022-09-14	10:58:12	0.725916	3.22902	281.576	FALSE	1
2022-09-14	10:58:12	0.722761	3.21499	289.859	FALSE	1
2022-09-14	10:58:12	0.725458	3.22698	284.803	FALSE	1
2022-09-14	10:58:12	0.730242	3.24826	293.107	FALSE	1
2022-09-14	10:58:13	0.722252	3.21272	288.016	FALSE	1
2022-09-14	10:58:13	0.735127	3.26999	296.377	FALSE	1
2022-09-14	10:58:13	0.728512	3.24057	291.256	FALSE	1
2022-09-14	10:58:14	0.72785	3.23762	299.615	FALSE	1
2022-09-14	10:58:14	0.735331	3.2709	294.527	FALSE	1
2022-09-14	10:58:14	0.739656	3.29014	302.905	FALSE	1
2022-09-14	10:58:14	0.727596	3.23649	297.764	FALSE	1
2022-09-14	10:58:15	0.731921	3.25573	306.161	FALSE	1
2022-09-14	10:58:15	0.731158	3.25234	301.016	FALSE	1
2022-09-14	10:58:15	1.27411	5.6675	311.828	FALSE	1
2022-09-14	10:58:15	0.727188	3.23468	304.251	FALSE	1
2022-09-14	10:58:16	0.736857	3.27769	315.106	FALSE	1
2022-09-14	10:58:16	0.735076	3.26977	307.521	FALSE	1
2022-09-14	10:58:16	0.757214	3.36824	318.474	FALSE	1
2022-09-14	10:58:16	0.754618	3.35669	310.877	FALSE	1
2022-09-14	10:58:17	0.775483	3.4495	321.924	FALSE	1
2022-09-14	10:58:17	0.774059	3.44317	314.32	FALSE	1
2022-09-14	10:58:17	0.766374	3.40898	325.333	FALSE	1
2022-09-14	10:58:17	0.764593	3.40106	317.721	FALSE	1
2022-09-14	10:58:18	0.775229	3.44837	328.781	FALSE	1
2022-09-14	10:58:18	0.769784	3.42415	321.146	FALSE	1
2022-09-14	10:58:18	0.763372	3.39563	332.177	FALSE	1
2022-09-14	10:58:19	0.771056	3.42981	324.575	FALSE	1
2022-09-14	10:58:19	0.778842	3.46444	335.641	FALSE	1
2022-09-14	10:58:19	0.781438	3.47599	328.051	FALSE	1
2022-09-14	10:58:19	0.785967	3.49614	339.137	FALSE	1
2022-09-14	10:58:20	0.793499	3.52964	331.581	FALSE	1
2022-09-14	10:58:20	0.767087	3.41216	342.549	FALSE	1
2022-09-14	10:58:20	0.760471	3.38273	334.964	FALSE	1
2022-09-14	10:58:20	0.743881	3.30893	345.858	FALSE	1
2022-09-14	10:58:21	0.728359	3.23989	338.204	FALSE	1
2022-09-14	10:58:21	0.724644	3.22336	349.082	FALSE	1
2022-09-14	10:58:21	0.690293	3.07056	341.274	FALSE	1
2022-09-14	10:58:22	0.664542	2.95602	352.038	FALSE	1
2022-09-14	10:58:22	0.63757	2.83604	344.11	FALSE	1
2022-09-14	10:58:22	0.620471	2.75998	354.798	FALSE	1
2022-09-14	10:58:22	0.56729	2.52342	346.634	FALSE	1
2022-09-14	10:58:23	0.576705	2.5653	357.363	FALSE	1
2022-09-14	10:58:23	0.599606	2.66717	349.301	FALSE	1
2022-09-14	10:58:23	0.546679	2.43174	359.795	FALSE	1
2022-09-14	10:58:23	0.269275	1.19779	350.499	FALSE	1
2022-09-14	10:58:24	0.671463	2.9868	362.782	FALSE	1
2022-09-14	10:58:24	0.56556	2.51572	353.014	FALSE	1
2022-09-14	10:58:24	0.480573	2.13768	364.919	FALSE	1
2022-09-14	10:58:24	0.428817	1.90746	354.922	FALSE	1
2022-09-14	10:58:25	0.366171	1.6288	366.548	FALSE	1
2022-09-14	10:58:25	0.330547	1.47034	356.392	FALSE	1
2022-09-14	10:58:25	0.729428	3.24464	369.793	FALSE	1
2022-09-14	10:58:26	0.732226	3.25709	359.649	FALSE	1
2022-09-14	10:58:26	0.728766	3.2417	373.034	FALSE	1
2022-09-14	10:58:26	0.728461	3.24034	362.89	FALSE	1
2022-09-14	10:58:26	0.73299	3.26049	376.295	FALSE	1
2022-09-14	10:58:27	0.731972	3.25596	366.146	FALSE	1
2022-09-14	10:58:27	0.721183	3.20797	379.503	FALSE	1
2022-09-14	10:58:27	0.727087	3.23423	369.38	FALSE	1
2022-09-14	10:58:27	0.730751	3.25053	382.753	FALSE	1
2022-09-14	10:58:28	0.732125	3.25664	372.636	FALSE	1
2022-09-14	10:58:28	0.72902	3.24283	385.996	FALSE	1
2022-09-14	10:58:28	0.732735	3.25935	375.896	FALSE	1
2022-09-14	10:58:28	0.733702	3.26365	389.26	FALSE	1
2022-09-14	10:58:29	0.731005	3.25166	379.147	FALSE	1
2022-09-14	10:58:29	0.730343	3.24871	392.509	FALSE	1
2022-09-14	10:58:29	0.729224	3.24373	382.391	FALSE	1
2022-09-14	10:58:30	0.730242	3.24826	395.757	FALSE	1
2022-09-14	10:58:30	-1.37546	-6.11832	382.391	FALSE	1
2022-09-14	10:58:30	-0.45902	-2.04181	395.757	FALSE	1
2022-09-14	10:58:30	-2.21256	-9.84191	382.391	FALSE	1
2022-09-14	10:58:31	0.0494277	0.219864	395.977	FALSE	1
2022-09-14	10:58:31	0.126272	0.561683	382.953	FALSE	1
2022-09-14	10:58:31	0.153957	0.684832	396.662	FALSE	1
2022-09-14	10:58:31	0.143423	0.637974	383.591	FALSE	1
2022-09-14	10:58:32	0.149529	0.665135	397.327	FALSE	1
2022-09-14	10:58:32	0.157112	0.698866	384.29	FALSE	1
2022-09-14	10:58:32	0.13472	0.599262	397.926	FALSE	1
2022-09-14	10:58:32	0.168563	0.749802	385.04	FALSE	1
2022-09-14	10:58:33	0.117418	0.522299	398.448	FALSE	1
2022-09-14	10:58:33	0.0709036	0.315393	385.355	FALSE	1
2022-09-14	10:58:33	-0.0248216	-0.110411	398.448	FALSE	1
2022-09-14	10:58:34	0.0128883	0.0573297	385.412	FALSE	1
2022-09-14	10:58:34	0.0732445	0.325806	398.774	FALSE	1
2022-09-14	10:58:34	0.0186389	0.0829096	385.495	FALSE	1
2022-09-14	10:58:34	0.11869	0.527957	399.302	FALSE	1
2022-09-14	10:58:35	0.10673	0.474756	385.97	FALSE	1
2022-09-14	10:58:35	0.055789	0.248161	399.55	FALSE	1
2022-09-14	10:58:35	0.0477992	0.21262	386.183	FALSE	1
2022-09-14	10:58:35	0.0417432	0.185682	399.736	FALSE	1
2022-09-14	10:58:36	0.0138552	0.0616307	386.244	FALSE	1
2022-09-14	10:58:36	0.00978398	0.0435211	399.779	FALSE	1
2022-09-14	10:58:36	-0.0957122	-0.425747	386.244	FALSE	1
2022-09-14	10:58:36	-0.0535748	-0.238311	399.779	FALSE	1
2022-09-14	10:58:37	0.0557381	0.247934	386.492	FALSE	1
2022-09-14	10:58:37	-0.0949488	-0.422351	399.779	FALSE	1
2022-09-14	10:58:37	-0.0825824	-0.367343	386.492	FALSE	1
2022-09-14	10:58:38	0.0252547	0.112338	399.892	FALSE	1
2022-09-14	10:58:38	0.0946185	0.420882	386.913	FALSE	1
2022-09-14	10:58:38	0.145967	0.64929	400.541	FALSE	1
2022-09-14	10:58:38	0.173652	0.772439	387.685	FALSE	1
2022-09-14	10:58:39	0.209784	0.933161	401.474	FALSE	1
2022-09-14	10:58:39	0.107952	0.480192	388.166	FALSE	1
2022-09-14	10:58:39	0.3364	1.49637	402.971	FALSE	1
2022-09-14	10:58:39	0.101692	0.452346	388.618	FALSE	1
2022-09-14	10:58:40	0.431107	1.91765	404.888	FALSE	1
2022-09-14	10:58:40	0.148155	0.659023	389.277	FALSE	1
2022-09-14	10:58:40	0.367036	1.63265	406.521	FALSE	1
2022-09-14	10:58:40	0.229071	1.01895	390.296	FALSE	1
2022-09-14	10:58:41	0.291005	1.29445	407.815	FALSE	1
2022-09-14	10:58:41	-0.366857	-1.63185	390.296	FALSE	1
2022-09-14	10:58:41	-0.0309794	-0.137803	407.815	FALSE	1
2022-09-14	10:58:42	-0.0593763	-0.264118	390.296	FALSE	1
2022-09-14	10:58:42	0.250802	1.11562	408.931	FALSE	1
2022-09-14	10:58:42	0.191107	0.850082	391.146	FALSE	1
2022-09-14	10:58:42	0.246425	1.09615	410.027	FALSE	1
2022-09-14	10:58:43	0.234669	1.04385	392.19	FALSE	1
2022-09-14	10:58:43	0.201336	0.895583	410.923	FALSE	1
2022-09-14	10:58:43	0.186272	0.828575	393.018	FALSE	1
2022-09-14	10:58:43	0.255484	1.13644	412.059	FALSE	1
2022-09-14	10:58:44	0.283575	1.2614	394.28	FALSE	1
2022-09-14	10:58:44	0.14098	0.627107	412.686	FALSE	1
2022-09-14	10:58:44	0.729478	3.24486	397.525	FALSE	1
2022-09-14	10:58:44	0.30159	1.34153	414.028	FALSE	1
2022-09-14	10:58:45	-0.11042	-0.49117	397.525	FALSE	1
2022-09-14	10:58:45	-0.531692	-2.36507	414.028	FALSE	1
2022-09-14	10:58:45	-0.719986	-3.20264	397.525	FALSE	1
2022-09-14	10:58:46	-0.189707	-0.843855	414.028	FALSE	1
2022-09-14	10:58:46	0.469682	2.08924	399.614	FALSE	1
2022-09-14	10:58:46	0.529478	2.35522	416.383	FALSE	1
2022-09-14	10:58:46	0.576501	2.56439	402.178	FALSE	1
2022-09-14	10:58:47	0.599453	2.66649	419.049	FALSE	1
2022-09-14	10:58:47	0.670394	2.98205	405.16	FALSE	1
2022-09-14	10:58:47	0.668919	2.97549	422.025	FALSE	1
2022-09-14	10:58:47	0.693651	3.0855	408.246	FALSE	1
2022-09-14	10:58:48	0.686476	3.05358	425.078	FALSE	1
2022-09-14	10:58:48	0.716196	3.18578	411.432	FALSE	1
2022-09-14	10:58:48	0.715789	3.18397	428.262	FALSE	1
2022-09-14	10:58:48	0.725916	3.22902	414.661	FALSE	1
2022-09-14	10:58:49	0.718384	3.19552	431.458	FALSE	1
2022-09-14	10:58:49	0.719758	3.20163	417.862	FALSE	1
2022-09-14	10:58:49	0.70902	3.15386	434.612	FALSE	1
2022-09-14	10:58:50	0.729478	3.24486	421.107	FALSE	1
2022-09-14	10:58:50	0.706069	3.14074	437.753	FALSE	1
2022-09-14	10:58:50	0.729428	3.24464	424.352	FALSE	1
2022-09-14	10:58:50	0.706018	3.14051	440.893	FALSE	1
2022-09-14	10:58:51	0.730496	3.24939	427.601	FALSE	1
2022-09-14	10:58:51	0.711921	3.16677	444.06	FALSE	1
2022-09-14	10:58:51	0.729886	3.24668	430.848	FALSE	1
2022-09-14	10:58:51	0.712328	3.16858	447.228	FALSE	1
2022-09-14	10:58:52	0.726679	3.23241	434.08	FALSE	1
2022-09-14	10:58:52	0.714415	3.17786	450.406	FALSE	1
2022-09-14	10:58:52	0.731667	3.2546	437.335	FALSE	1
2022-09-14	10:58:52	0.721845	3.21091	453.617	FALSE	1
2022-09-14	10:58:53	0.73355	3.26298	440.598	FALSE	1
2022-09-14	10:58:53	0.722812	3.21521	456.832	FALSE	1
2022-09-14	10:58:53	0.725509	3.22721	443.825	FALSE	1
2022-09-14	10:58:54	0.719656	3.20117	460.034	FALSE	1
2022-09-14	10:58:54	0.733295	3.26184	447.087	FALSE	1
2022-09-14	10:58:54	0.720013	3.20276	463.236	FALSE	1
2022-09-14	10:58:54	0.726883	3.23332	450.32	FALSE	1
2022-09-14	10:58:55	0.718639	3.19665	466.433	FALSE	1
2022-09-14	10:58:55	0.730954	3.25143	453.572	FALSE	1
2022-09-14	10:58:55	0.717977	3.19371	469.627	FALSE	1
2022-09-14	10:58:55	0.733041	3.26071	456.832	FALSE	1
2022-09-14	10:58:56	0.724389	3.22223	472.849	FALSE	1
2022-09-14	10:58:56	0.728155	3.23898	460.071	FALSE	1
2022-09-14	10:58:56	0.723321	3.21748	476.066	FALSE	1
2022-09-14	10:58:56	0.730089	3.24758	463.319	FALSE	1
2022-09-14	10:58:57	0.718944	3.19801	479.264	FALSE	1
2022-09-14	10:58:57	0.726069	3.2297	466.549	FALSE	1
2022-09-14	10:58:57	0.728512	3.24057	482.505	FALSE	1
2022-09-14	10:58:58	0.731463	3.25369	469.802	FALSE	1
2022-09-14	10:58:58	0.72673	3.23264	485.738	FALSE	1
2022-09-14	10:58:58	0.725204	3.22585	473.028	FALSE	1
2022-09-14	10:58:58	0.728206	3.23921	488.977	FALSE	1
2022-09-14	10:58:59	0.729275	3.24396	476.272	FALSE	1
2022-09-14	10:58:59	0.730547	3.24962	492.226	FALSE	1
2022-09-14	10:58:59	0.731768	3.25505	479.527	FALSE	1
2022-09-14	10:58:59	0.726679	3.23241	495.459	FALSE	1
2022-09-14	10:59:00	0.591769	2.63231	482.16	FALSE	1
2022-09-14	10:59:00	0.725458	3.22698	498.686	FALSE	1
2022-09-14	10:59:00	0.72902	3.24283	485.402	FALSE	1
2022-09-14	10:59:00	0.728359	3.23989	501.926	FALSE	1
2022-09-14	10:59:01	0.7136	3.17424	488.577	FALSE	1
2022-09-14	10:59:01	0.73299	3.26049	505.186	FALSE	1
2022-09-14	10:59:01	0.7307	3.2503	491.827	FALSE	1
2022-09-14	10:59:02	0.731717	3.25482	508.441	FALSE	1
2022-09-14	10:59:02	0.720674	3.2057	495.033	FALSE	1
2022-09-14	10:59:02	0.730496	3.24939	511.69	FALSE	1
2022-09-14	10:59:02	0.727697	3.23694	498.27	FALSE	1
2022-09-14	10:59:03	0.722456	3.21363	514.904	FALSE	1
2022-09-14	10:59:03	0.732684	3.25912	501.529	FALSE	1
2022-09-14	10:59:03	0.730089	3.24758	518.152	FALSE	1
2022-09-14	10:59:03	0.72383	3.21974	504.748	FALSE	1
2022-09-14	10:59:04	0.725763	3.22834	521.38	FALSE	1
2022-09-14	10:59:04	0.722761	3.21499	507.963	FALSE	1
2022-09-14	10:59:04	0.731972	3.25596	524.636	FALSE	1
2022-09-14	10:59:04	0.726018	3.22947	511.193	FALSE	1
2022-09-14	10:59:05	0.721692	3.21023	527.846	FALSE	1
2022-09-14	10:59:05	0.732532	3.25845	514.451	FALSE	1
2022-09-14	10:59:05	0.735433	3.27135	531.118	FALSE	1
2022-09-14	10:59:06	0.725662	3.22789	517.679	FALSE	1
2022-09-14	10:59:06	0.728562	3.24079	534.358	FALSE	1
2022-09-14	10:59:06	0.721234	3.20819	520.887	FALSE	1
2022-09-14	10:59:06	0.712125	3.16767	537.526	FALSE	1
2022-09-14	10:59:07	0.72444	3.22245	524.11	FALSE	1
2022-09-14	10:59:07	0.724186	3.22132	540.747	FALSE	1
2022-09-14	10:59:07	0.691514	3.07599	527.186	FALSE	1
2022-09-14	10:59:07	0.715483	3.18261	543.93	FALSE	1
2022-09-14	10:59:08	0.70673	3.14368	530.33	FALSE	1
2022-09-14	10:59:08	0.711412	3.1645	547.094	FALSE	1
2022-09-14	10:59:08	0.680216	3.02574	533.355	FALSE	1
2022-09-14	10:59:08	0.713753	3.17492	550.269	FALSE	1
2022-09-14	10:59:09	0.715534	3.18284	536.538	FALSE	1
2022-09-14	10:59:09	0.709122	3.15432	553.424	FALSE	1
2022-09-14	10:59:09	0.715687	3.18352	539.722	FALSE	1
2022-09-14	10:59:10	0.712277	3.16835	556.592	FALSE	1
2022-09-14	10:59:10	0.705407	3.13779	542.859	FALSE	1
2022-09-14	10:59:10	0.702761	3.12602	559.718	FALSE	1
2022-09-14	10:59:10	0.699555	3.11176	545.971	FALSE	1
2022-09-14	10:59:11	0.696756	3.09931	562.817	FALSE	1
2022-09-14	10:59:11	0.711718	3.16586	549.137	FALSE	1
2022-09-14	10:59:11	0.704542	3.13394	565.951	FALSE	1
2022-09-14	10:59:11	0.713448	3.17356	552.311	FALSE	1
2022-09-14	10:59:12	0.667443	2.96892	568.92	FALSE	1
2022-09-14	10:59:12	0.473346	2.10554	554.416	FALSE	1
2022-09-14	10:59:12	0.595483	2.64883	571.569	FALSE	1
2022-09-14	10:59:12	0.70673	3.14368	557.56	FALSE	1
2022-09-14	10:59:13	0.73355	3.26298	574.832	FALSE	1
2022-09-14	10:59:13	0.730954	3.25143	560.811	FALSE	1
2022-09-14	10:59:13	0.735331	3.2709	578.103	FALSE	1
2022-09-14	10:59:14	0.731005	3.25166	564.063	FALSE	1
2022-09-14	10:59:14	0.735992	3.27384	581.377	FALSE	1
2022-09-14	10:59:14	0.73131	3.25301	567.316	FALSE	1
2022-09-14	10:59:14	0.727799	3.2374	584.614	FALSE	1
2022-09-14	10:59:15	0.732175	3.25686	570.573	FALSE	1
2022-09-14	10:59:15	0.739351	3.28878	587.903	FALSE	1
2022-09-14	10:59:15	0.739046	3.28742	573.86	FALSE	1
2022-09-14	10:59:15	0.728664	3.24124	591.144	FALSE	1
2022-09-14	10:59:16	0.726221	3.23038	577.091	FALSE	1
2022-09-14	10:59:16	0.7307	3.2503	594.394	FALSE	1
2022-09-14	10:59:16	0.731819	3.25528	580.346	FALSE	1
2022-09-14	10:59:16	0.730038	3.24736	597.642	FALSE	1
2022-09-14	10:59:17	0.728664	3.24124	583.587	FALSE	1
2022-09-14	10:59:17	0.73986	3.29105	600.933	FALSE	1
2022-09-14	10:59:17	0.72612	3.22993	586.817	FALSE	1
2022-09-14	10:59:18	0.734313	3.26637	604.199	FALSE	1
2022-09-14	10:59:18	0.720318	3.20412	590.021	FALSE	1
2022-09-14	10:59:18	0.734008	3.26501	607.464	FALSE	1
2022-09-14	10:59:18	0.732634	3.2589	593.28	FALSE	1
2022-09-14	10:59:19	0.728257	3.23943	610.704	FALSE	1
2022-09-14	10:59:19	0.734008	3.26501	596.545	FALSE	1
2022-09-14	10:59:19	0.734618	3.26773	613.971	FALSE	1
2022-09-14	10:59:19	0.732379	3.25777	599.803	FALSE	1
2022-09-14	10:59:20	0.719606	3.20095	617.172	FALSE	1
2022-09-14	10:59:20	0.730394	3.24894	603.052	FALSE	1
2022-09-14	10:59:20	0.731667	3.2546	620.427	FALSE	1
2022-09-14	10:59:20	0.730903	3.2512	606.303	FALSE	1
2022-09-14	10:59:21	0.728461	3.24034	623.667	FALSE	1
2022-09-14	10:59:21	0.722761	3.21499	609.518	FALSE	1
2022-09-14	10:59:21	0.72383	3.21974	626.887	FALSE	1
2022-09-14	10:59:22	0.734008	3.26501	612.783	FALSE	1
2022-09-14	10:59:22	0.731209	3.25256	630.14	FALSE	1
2022-09-14	10:59:22	0.729631	3.24554	616.028	FALSE	1
2022-09-14	10:59:22	0.735076	3.26977	633.409	FALSE	1
2022-09-14	10:59:23	0.734008	3.26501	619.294	FALSE	1
2022-09-14	10:59:23	0.730598	3.24985	636.659	FALSE	1
2022-09-14	10:59:23	0.730343	3.24871	622.542	FALSE	1
2022-09-14	10:59:23	0.732379	3.25777	639.917	FALSE	1
2022-09-14	10:59:24	0.731921	3.25573	625.798	FALSE	1
2022-09-14	10:59:24	0.731717	3.25482	643.172	FALSE	1
2022-09-14	10:59:24	0.730801	3.25075	629.049	FALSE	1
2022-09-14	10:59:24	0.731209	3.25256	646.424	FALSE	1
2022-09-14	10:59:25	0.732786	3.25958	632.308	FALSE	1
2022-09-14	10:59:25	0.723575	3.21861	649.643	FALSE	1
2022-09-14	10:59:25	0.725763	3.22834	635.537	FALSE	1
2022-09-14	10:59:26	0.724135	3.2211	652.864	FALSE	1
2022-09-14	10:59:26	0.608308	2.70588	638.242	FALSE	1
2022-09-14	10:59:26	0.734364	3.2666	656.131	FALSE	1
2022-09-14	10:59:26	0.734822	3.26864	641.511	FALSE	1
2022-09-14	10:59:27	0.731768	3.25505	659.386	FALSE	1
2022-09-14	10:59:27	0.725916	3.22902	644.74	FALSE	1
2022-09-14	10:59:27	0.740623	3.29444	662.68	FALSE	1
2022-09-14	10:59:27	0.731005	3.25166	647.992	FALSE	1
2022-09-14	10:59:28	0.72612	3.22993	665.91	FALSE	1
2022-09-14	10:59:28	0.732023	3.25618	651.248	FALSE	1
2022-09-14	10:59:28	0.727799	3.2374	669.147	FALSE	1
2022-09-14	10:59:28	0.730038	3.24736	654.495	FALSE	1
2022-09-14	10:59:29	0.736145	3.27452	672.422	FALSE	1
2022-09-14	10:59:29	0.735076	3.26977	657.765	FALSE	1
2022-09-14	10:59:29	0.73299	3.26049	675.682	FALSE	1
2022-09-14	10:59:30	0.735687	3.27248	661.038	FALSE	1
2022-09-14	10:59:30	0.736603	3.27656	678.959	FALSE	1
2022-09-14	10:59:30	0.741285	3.29738	664.335	FALSE	1
2022-09-14	10:59:30	0.729071	3.24305	682.202	FALSE	1
2022-09-14	10:59:31	0.735178	3.27022	667.605	FALSE	1
2022-09-14	10:59:31	0.72958	3.24532	685.447	FALSE	1
2022-09-14	10:59:31	0.732175	3.25686	670.862	FALSE	1
2022-09-14	10:59:31	0.733244	3.26162	688.709	FALSE	1
2022-09-14	10:59:32	0.733601	3.2632	674.125	FALSE	1
2022-09-14	10:59:32	0.731768	3.25505	691.964	FALSE	1
2022-09-14	10:59:32	0.72673	3.23264	677.358	FALSE	1
2022-09-14	10:59:32	0.727952	3.23808	695.202	FALSE	1
2022-09-14	10:59:33	0.733244	3.26162	680.62	FALSE	1
2022-09-14	10:59:33	0.725662	3.22789	698.43	FALSE	1
2022-09-14	10:59:33	0.734618	3.26773	683.887	FALSE	1
2022-09-14	10:59:34	0.722201	3.21249	701.643	FALSE	1
2022-09-14	10:59:34	0.727952	3.23808	687.125	FALSE	1
2022-09-14	10:59:34	0.730191	3.24804	704.891	FALSE	1
2022-09-14	10:59:34	0.736196	3.27475	690.4	FALSE	1
2022-09-14	10:59:35	0.725102	3.2254	708.116	FALSE	1
2022-09-14	10:59:35	0.730293	3.24849	693.649	FALSE	1
2022-09-14	10:59:35	0.717621	3.19212	711.308	FALSE	1
2022-09-14	10:59:35	0.728613	3.24102	696.89	FALSE	1
2022-09-14	10:59:36	0.728817	3.24192	714.55	FALSE	1
2022-09-14	10:59:36	0.734873	3.26886	700.158	FALSE	1
2022-09-14	10:59:36	0.735127	3.26999	717.82	FALSE	1
2022-09-14	10:59:36	0.73014	3.24781	703.406	FALSE	1
2022-09-14	10:59:37	0.729784	3.24623	721.066	FALSE	1
2022-09-14	10:59:37	0.722252	3.21272	706.619	FALSE	1
2022-09-14	10:59:37	0.732684	3.25912	724.325	FALSE	1
2022-09-14	10:59:38	0.730547	3.24962	709.869	FALSE	1
2022-09-14	10:59:38	0.735382	3.27113	727.596	FALSE	1
2022-09-14	10:59:38	0.731565	3.25415	713.123	FALSE	1
2022-09-14	10:59:38	0.729122	3.24328	730.84	FALSE	1
2022-09-14	10:59:39	0.736654	3.27678	716.4	FALSE	1
2022-09-14	10:59:39	0.738181	3.28358	734.123	FALSE	1
2022-09-14	10:59:39	0.730394	3.24894	719.648	FALSE	1
2022-09-14	10:59:39	0.733092	3.26094	737.384	FALSE	1
2022-09-14	10:59:40	0.732074	3.25641	722.905	FALSE	1
2022-09-14	10:59:40	0.734517	3.26728	740.652	FALSE	1
2022-09-14	10:59:40	0.721591	3.20978	726.115	FALSE	1
2022-09-14	10:59:40	0.733397	3.2623	743.914	FALSE	1
2022-09-14	10:59:41	0.729784	3.24623	729.361	FALSE	1
2022-09-14	10:59:41	0.736552	3.27633	747.19	FALSE	1
2022-09-14	10:59:41	0.738181	3.28358	732.644	FALSE	1
2022-09-14	10:59:42	0.735789	3.27294	750.463	FALSE	1
2022-09-14	10:59:42	0.733244	3.26162	735.906	FALSE	1
2022-09-14	10:59:42	0.734466	3.26705	753.73	FALSE	1
2022-09-14	10:59:42	0.735229	3.27045	739.177	FALSE	1
2022-09-14	10:59:43	0.733702	3.26365	756.994	FALSE	1
2022-09-14	10:59:43	0.123779	0.550594	739.727	FALSE	1
2022-09-14	10:59:43	-0.872048	-3.87904	756.994	FALSE	1
2022-09-14	10:59:43	-0.909859	-4.04723	739.727	FALSE	1
2022-09-14	10:59:44	-0.923905	-4.10971	756.994	FALSE	1
2022-09-14	10:59:44	0.573753	2.55217	742.279	FALSE	1
2022-09-14	10:59:44	0.736196	3.27475	760.269	FALSE	1
2022-09-14	10:59:44	0.726221	3.23038	745.51	FALSE	1
2022-09-14	10:59:45	0.734771	3.26841	763.537	FALSE	1
2022-09-14	10:59:45	0.733448	3.26252	748.772	FALSE	1
2022-09-14	10:59:45	0.735891	3.27339	766.81	FALSE	1
2022-09-14	10:59:46	0.734771	3.26841	752.041	FALSE	1
2022-09-14	10:59:46	0.731921	3.25573	770.066	FALSE	1
2022-09-14	10:59:46	0.731259	3.25279	755.293	FALSE	1
2022-09-14	10:59:46	0.734211	3.26592	773.332	FALSE	1
2022-09-14	10:59:47	0.72902	3.24283	758.536	FALSE	1
2022-09-14	10:59:47	0.742506	3.30282	776.635	FALSE	1
2022-09-14	10:59:47	0.742659	3.3035	761.84	FALSE	1
2022-09-14	10:59:47	0.726272	3.2306	779.865	FALSE	1
2022-09-14	10:59:48	0.735076	3.26977	765.109	FALSE	1
2022-09-14	10:59:48	0.728868	3.24215	783.108	FALSE	1
2022-09-14	10:59:48	0.731717	3.25482	768.364	FALSE	1
2022-09-14	10:59:48	0.736247	3.27497	786.383	FALSE	1
2022-09-14	10:59:49	0.734466	3.26705	771.631	FALSE	1
2022-09-14	10:59:49	0.725763	3.22834	789.611	FALSE	1
2022-09-14	10:59:49	0.735178	3.27022	774.902	FALSE	1
2022-09-14	10:59:50	0.734109	3.26546	792.876	FALSE	1
2022-09-14	10:59:50	0.731158	3.25234	778.154	FALSE	1
2022-09-14	10:59:50	0.726272	3.2306	796.107	FALSE	1
2022-09-14	10:59:50	0.734771	3.26841	781.422	FALSE	1
2022-09-14	10:59:51	0.729224	3.24373	799.351	FALSE	1
2022-09-14	10:59:51	0.732023	3.25618	784.678	FALSE	1
2022-09-14	10:59:51	0.731819	3.25528	802.606	FALSE	1
2022-09-14	10:59:51	0.723524	3.21838	787.897	FALSE	1
2022-09-14	10:59:52	0.733092	3.26094	805.867	FALSE	1
2022-09-14	10:59:52	0.73757	3.28086	791.178	FALSE	1
2022-09-14	10:59:52	0.730343	3.24871	809.116	FALSE	1
2022-09-14	10:59:52	0.732328	3.25754	794.435	FALSE	1
2022-09-14	10:59:53	0.738231	3.2838	812.399	FALSE	1
2022-09-14	10:59:53	0.724542	3.22291	797.658	FALSE	1
2022-09-14	10:59:53	0.728613	3.24102	815.64	FALSE	1
2022-09-14	10:59:54	0.734313	3.26637	800.925	FALSE	1
2022-09-14	10:59:54	0.732837	3.25981	818.9	FALSE	1
2022-09-14	10:59:54	0.732786	3.25958	804.184	FALSE	1
2022-09-14	10:59:54	0.730954	3.25143	822.152	FALSE	1
2022-09-14	10:59:55	0.730242	3.24826	807.432	FALSE	1
2022-09-14	10:59:55	0.73472	3.26818	825.42	FALSE	1
2022-09-14	10:59:55	0.736043	3.27407	810.706	FALSE	1
2022-09-14	10:59:55	0.736399	3.27565	828.696	FALSE	1
2022-09-14	10:59:56	0.733499	3.26275	813.969	FALSE	1
2022-09-14	10:59:56	0.735891	3.27339	831.969	FALSE	1
2022-09-14	10:59:56	0.733448	3.26252	817.232	FALSE	1
2022-09-14	10:59:56	0.735127	3.26999	835.239	FALSE	1
2022-09-14	10:59:57	0.736094	3.27429	820.506	FALSE	1
2022-09-14	10:59:57	0.733193	3.26139	838.5	FALSE	1
2022-09-14	10:59:57	0.733244	3.26162	823.768	FALSE	1
2022-09-14	10:59:57	0.730649	3.25007	841.75	FALSE	1
2022-09-14	10:59:58	0.729224	3.24373	827.011	FALSE	1
2022-09-14	10:59:58	0.734466	3.26705	845.017	FALSE	1
2022-09-14	10:59:58	0.732074	3.25641	830.268	FALSE	1
2022-09-14	10:59:59	0.7307	3.2503	848.268	FALSE	1
2022-09-14	10:59:59	0.738231	3.2838	833.552	FALSE	1
2022-09-14	10:59:59	0.728155	3.23898	851.507	FALSE	1
2022-09-14	10:59:59	0.743524	3.30734	836.859	FALSE	1
2022-09-14	11:00:00	0.724949	3.22472	854.731	FALSE	1
2022-09-14	11:00:00	0.73131	3.25301	840.112	FALSE	1
2022-09-14	11:00:00	0.735891	3.27339	858.005	FALSE	1
2022-09-14	11:00:00	0.731972	3.25596	843.368	FALSE	1
2022-09-14	11:00:01	0.732175	3.25686	861.262	FALSE	1
2022-09-14	11:00:01	0.729936	3.2469	846.615	FALSE	1
2022-09-14	11:00:01	0.732684	3.25912	864.521	FALSE	1
2022-09-14	11:00:01	0.732481	3.25822	849.873	FALSE	1
2022-09-14	11:00:02	0.738282	3.28403	867.805	FALSE	1
2022-09-14	11:00:02	0.732074	3.25641	853.129	FALSE	1
2022-09-14	11:00:02	0.734059	3.26524	871.07	FALSE	1
2022-09-14	11:00:03	0.734008	3.26501	856.394	FALSE	1
2022-09-14	11:00:03	0.714822	3.17967	874.25	FALSE	1
2022-09-14	11:00:03	0.736857	3.27769	859.672	FALSE	1
2022-09-14	11:00:03	0.726323	3.23083	877.481	FALSE	1
2022-09-14	11:00:04	0.734924	3.26909	862.941	FALSE	1
2022-09-14	11:00:04	0.198181	0.881549	878.362	FALSE	1
2022-09-14	11:00:04	0.979351	4.35635	867.298	FALSE	1
2022-09-14	11:00:04	0.634618	2.82291	881.185	FALSE	1
2022-09-14	11:00:05	0.730801	3.25075	870.548	FALSE	1
2022-09-14	11:00:05	0.731514	3.25392	884.439	FALSE	1
2022-09-14	11:00:05	0.731361	3.25324	873.802	FALSE	1
2022-09-14	11:00:05	0.730445	3.24917	887.688	FALSE	1
2022-09-14	11:00:06	0.728054	3.23853	877.04	FALSE	1
2022-09-14	11:00:06	0.733142	3.26116	890.949	FALSE	1
2022-09-14	11:00:06	0.734568	3.26751	880.308	FALSE	1
2022-09-14	11:00:07	0.727341	3.23536	894.185	FALSE	1
2022-09-14	11:00:07	0.73243	3.258	883.566	FALSE	1
2022-09-14	11:00:07	0.728613	3.24102	897.426	FALSE	1
2022-09-14	11:00:07	0.729784	3.24623	886.812	FALSE	1
2022-09-14	11:00:08	0.735076	3.26977	900.695	FALSE	1
2022-09-14	11:00:08	0.72841	3.24011	890.052	FALSE	1
2022-09-14	11:00:08	0.725204	3.22585	903.921	FALSE	1
2022-09-14	11:00:08	0.735076	3.26977	893.322	FALSE	1
2022-09-14	11:00:09	0.735433	3.27135	907.193	FALSE	1
2022-09-14	11:00:09	0.727748	3.23717	896.559	FALSE	1
2022-09-14	11:00:09	0.736705	3.27701	910.47	FALSE	1
2022-09-14	11:00:09	0.730089	3.24758	899.806	FALSE	1
2022-09-14	11:00:10	0.727494	3.23604	913.706	FALSE	1
2022-09-14	11:00:10	0.736959	3.27814	903.085	FALSE	1
2022-09-14	11:00:10	0.737417	3.28018	916.986	FALSE	1
2022-09-14	11:00:11	0.728868	3.24215	906.327	FALSE	1
2022-09-14	11:00:11	0.734415	3.26682	920.253	FALSE	1
2022-09-14	11:00:11	0.728562	3.24079	909.568	FALSE	1
2022-09-14	11:00:11	0.729631	3.24554	923.498	FALSE	1
2022-09-14	11:00:12	0.727341	3.23536	912.803	FALSE	1
2022-09-14	11:00:12	0.734008	3.26501	926.763	FALSE	1
2022-09-14	11:00:12	0.725967	3.22925	916.032	FALSE	1
2022-09-14	11:00:12	0.727646	3.23671	930	FALSE	1
2022-09-14	11:00:13	0.72902	3.24283	919.275	FALSE	1
2022-09-14	11:00:13	0.737672	3.28131	933.281	FALSE	1
2022-09-14	11:00:13	0.735891	3.27339	922.548	FALSE	1
2022-09-14	11:00:13	0.736145	3.27452	936.556	FALSE	1
2022-09-14	11:00:14	0.734568	3.26751	925.816	FALSE	1
2022-09-14	11:00:14	0.724338	3.222	939.778	FALSE	1
2022-09-14	11:00:14	0.735585	3.27203	929.088	FALSE	1
2022-09-14	11:00:15	0.725305	3.2263	943.004	FALSE	1
2022-09-14	11:00:15	0.726272	3.2306	932.318	FALSE	1
2022-09-14	11:00:15	0.723982	3.22042	946.224	FALSE	1
2022-09-14	11:00:15	0.726069	3.2297	935.548	FALSE	1
2022-09-14	11:00:16	0.734924	3.26909	949.494	FALSE	1
2022-09-14	11:00:16	0.730293	3.24849	938.797	FALSE	1
2022-09-14	11:00:16	0.734975	3.26932	952.763	FALSE	1
2022-09-14	11:00:16	0.726527	3.23174	942.028	FALSE	1
2022-09-14	11:00:17	0.719504	3.2005	955.963	FALSE	1
2022-09-14	11:00:17	0.730649	3.25007	945.278	FALSE	1
2022-09-14	11:00:17	0.730954	3.25143	959.215	FALSE	1
2022-09-14	11:00:17	0.725916	3.22902	948.507	FALSE	1
2022-09-14	11:00:18	0.732684	3.25912	962.474	FALSE	1
2022-09-14	11:00:18	0.728461	3.24034	951.748	FALSE	1
2022-09-14	11:00:18	0.729682	3.24577	965.72	FALSE	1
2022-09-14	11:00:19	0.730903	3.2512	954.999	FALSE	1
2022-09-14	11:00:19	0.728919	3.24238	968.962	FALSE	1
2022-09-14	11:00:19	0.734008	3.26501	958.264	FALSE	1
2022-09-14	11:00:19	0.734568	3.26751	972.23	FALSE	1
2022-09-14	11:00:20	0.732074	3.25641	961.52	FALSE	1
2022-09-14	11:00:20	0.73187	3.2555	975.485	FALSE	1
2022-09-14	11:00:20	0.730038	3.24736	964.768	FALSE	1
2022-09-14	11:00:20	0.733346	3.26207	978.747	FALSE	1
2022-09-14	11:00:21	0.734669	3.26795	968.036	FALSE	1
2022-09-14	11:00:21	0.736399	3.27565	982.023	FALSE	1
2022-09-14	11:00:21	0.727392	3.23559	971.271	FALSE	1
2022-09-14	11:00:21	0.727799	3.2374	985.26	FALSE	1
2022-09-14	11:00:22	0.730496	3.24939	974.521	FALSE	1
2022-09-14	11:00:22	0.735941	3.27361	988.534	FALSE	1
2022-09-14	11:00:22	0.734771	3.26841	977.789	FALSE	1
2022-09-14	11:00:23	0.732939	3.26026	991.794	FALSE	1
2022-09-14	11:00:23	0.732786	3.25958	981.049	FALSE	1
2022-09-14	11:00:23	0.731514	3.25392	995.048	FALSE	1
2022-09-14	11:00:23	0.726629	3.23219	984.281	FALSE	1
2022-09-14	11:00:24	0.735382	3.27113	998.319	FALSE	1
2022-09-14	11:00:24	0.73416	3.26569	987.547	FALSE	1
2022-09-14	11:00:24	0.732583	3.25868	1001.58	FALSE	1
2022-09-14	11:00:24	0.733397	3.2623	990.809	FALSE	1
2022-09-14	11:00:25	0.737519	3.28063	1004.86	FALSE	1
2022-09-14	11:00:25	0.732175	3.25686	994.066	FALSE	1
2022-09-14	11:00:25	0.72444	3.22245	1008.08	FALSE	1
2022-09-14	11:00:25	0.732786	3.25958	997.325	FALSE	1
2022-09-14	11:00:26	0.725814	3.22857	1011.31	FALSE	1
2022-09-14	11:00:26	0.725407	3.22676	1000.55	FALSE	1
2022-09-14	11:00:26	0.729631	3.24554	1014.56	FALSE	1
2022-09-14	11:00:27	0.729529	3.24509	1003.8	FALSE	1
2022-09-14	11:00:27	0.725865	3.22879	1017.78	FALSE	1
2022-09-14	11:00:27	0.731209	3.25256	1007.05	FALSE	1
2022-09-14	11:00:27	0.73243	3.258	1021.04	FALSE	1
2022-09-14	11:00:28	0.735992	3.27384	1010.32	FALSE	1
2022-09-14	11:00:28	0.735178	3.27022	1024.31	FALSE	1
2022-09-14	11:00:28	0.733702	3.26365	1013.59	FALSE	1
2022-09-14	11:00:28	0.73874	3.28606	1027.6	FALSE	1
2022-09-14	11:00:29	0.731107	3.25211	1016.84	FALSE	1
2022-09-14	11:00:29	0.730547	3.24962	1030.85	FALSE	1
2022-09-14	11:00:29	0.736908	3.27791	1020.12	FALSE	1
2022-09-14	11:00:29	0.732175	3.25686	1034.1	FALSE	1
2022-09-14	11:00:30	0.732379	3.25777	1023.38	FALSE	1
2022-09-14	11:00:30	0.738486	3.28493	1037.39	FALSE	1
2022-09-14	11:00:30	0.735687	3.27248	1026.65	FALSE	1
2022-09-14	11:00:31	0.730293	3.24849	1040.64	FALSE	1
2022-09-14	11:00:31	0.730751	3.25053	1029.9	FALSE	1
2022-09-14	11:00:31	0.734415	3.26682	1043.9	FALSE	1
2022-09-14	11:00:31	0.734415	3.26682	1033.16	FALSE	1
2022-09-14	11:00:32	0.732175	3.25686	1047.16	FALSE	1
2022-09-14	11:00:32	0.736807	3.27746	1036.44	FALSE	1
2022-09-14	11:00:32	0.735585	3.27203	1050.43	FALSE	1
2022-09-14	11:00:32	0.732786	3.25958	1039.7	FALSE	1
2022-09-14	11:00:33	0.73584	3.27316	1053.71	FALSE	1
2022-09-14	11:00:33	0.731819	3.25528	1042.96	FALSE	1
2022-09-14	11:00:33	0.734568	3.26751	1056.97	FALSE	1
2022-09-14	11:00:33	0.731158	3.25234	1046.21	FALSE	1
2022-09-14	11:00:34	0.735992	3.27384	1060.25	FALSE	1
2022-09-14	11:00:34	0.728613	3.24102	1049.45	FALSE	1
2022-09-14	11:00:34	0.722761	3.21499	1063.46	FALSE	1
2022-09-14	11:00:35	0.728308	3.23966	1052.69	FALSE	1
2022-09-14	11:00:35	0.729529	3.24509	1066.71	FALSE	1
2022-09-14	11:00:35	0.733397	3.2623	1055.95	FALSE	1
2022-09-14	11:00:35	0.736094	3.27429	1069.98	FALSE	1
2022-09-14	11:00:36	0.735331	3.2709	1059.22	FALSE	1
2022-09-14	11:00:36	0.726527	3.23174	1073.21	FALSE	1
2022-09-14	11:00:36	0.733244	3.26162	1062.49	FALSE	1
2022-09-14	11:00:36	0.730547	3.24962	1076.46	FALSE	1
2022-09-14	11:00:37	0.730903	3.2512	1065.74	FALSE	1
2022-09-14	11:00:37	0.726221	3.23038	1079.69	FALSE	1
2022-09-14	11:00:37	0.733499	3.26275	1069	FALSE	1
2022-09-14	11:00:37	0.725254	3.22607	1082.92	FALSE	1
2022-09-14	11:00:38	0.729224	3.24373	1072.24	FALSE	1
2022-09-14	11:00:38	0.732634	3.2589	1086.18	FALSE	1
2022-09-14	11:00:38	0.733244	3.26162	1075.5	FALSE	1
2022-09-14	11:00:39	0.735585	3.27203	1089.45	FALSE	1
2022-09-14	11:00:39	0.727697	3.23694	1078.74	FALSE	1
2022-09-14	11:00:39	0.728054	3.23853	1092.69	FALSE	1
2022-09-14	11:00:39	0.729478	3.24486	1081.99	FALSE	1
2022-09-14	11:00:40	0.7307	3.2503	1095.94	FALSE	1
2022-09-14	11:00:40	0.733244	3.26162	1085.25	FALSE	1
2022-09-14	11:00:40	0.733906	3.26456	1099.2	FALSE	1
2022-09-14	11:00:40	0.728715	3.24147	1088.49	FALSE	1
2022-09-14	11:00:41	0.736196	3.27475	1102.48	FALSE	1
2022-09-14	11:00:41	0.730852	3.25098	1091.74	FALSE	1
2022-09-14	11:00:41	0.727443	3.23581	1105.72	FALSE	1
2022-09-14	11:00:41	0.732175	3.25686	1095	FALSE	1
2022-09-14	11:00:42	0.736807	3.27746	1108.99	FALSE	1
2022-09-14	11:00:42	0.726425	3.23128	1098.23	FALSE	1
2022-09-14	11:00:42	0.731921	3.25573	1112.25	FALSE	1
2022-09-14	11:00:43	0.735229	3.27045	1101.5	FALSE	1
2022-09-14	11:00:43	0.735076	3.26977	1115.52	FALSE	1
2022-09-14	11:00:43	0.72556	3.22744	1104.73	FALSE	1
2022-09-14	11:00:43	0.734618	3.26773	1118.79	FALSE	1
2022-09-14	11:00:44	0.72556	3.22744	1107.95	FALSE	1
2022-09-14	11:00:44	0.730394	3.24894	1122.03	FALSE	1
2022-09-14	11:00:44	0.73131	3.25301	1111.21	FALSE	1
2022-09-14	11:00:44	0.731514	3.25392	1125.29	FALSE	1
2022-09-14	11:00:45	0.730903	3.2512	1114.46	FALSE	1
2022-09-14	11:00:45	0.729122	3.24328	1128.53	FALSE	1
2022-09-14	11:00:45	0.736247	3.27497	1117.73	FALSE	1
2022-09-14	11:00:45	0.728461	3.24034	1131.77	FALSE	1
2022-09-14	11:00:46	0.728766	3.2417	1120.97	FALSE	1
2022-09-14	11:00:46	0.73355	3.26298	1135.04	FALSE	1
2022-09-14	11:00:46	0.734975	3.26932	1124.24	FALSE	1
2022-09-14	11:00:47	0.728613	3.24102	1138.28	FALSE	1
2022-09-14	11:00:47	0.735076	3.26977	1127.51	FALSE	1
2022-09-14	11:00:47	0.730496	3.24939	1141.53	FALSE	1
2022-09-14	11:00:47	0.729478	3.24486	1130.76	FALSE	1
2022-09-14	11:00:48	0.731819	3.25528	1144.78	FALSE	1
2022-09-14	11:00:48	0.728206	3.23921	1134	FALSE	1
2022-09-14	11:00:48	0.726832	3.23309	1148.01	FALSE	1
2022-09-14	11:00:48	0.729682	3.24577	1137.24	FALSE	1
2022-09-14	11:00:49	0.729682	3.24577	1151.26	FALSE	1
2022-09-14	11:00:49	0.73645	3.27588	1140.52	FALSE	1
2022-09-14	11:00:49	0.728868	3.24215	1154.5	FALSE	1
2022-09-14	11:00:49	0.729377	3.24441	1143.76	FALSE	1
2022-09-14	11:00:50	0.731616	3.25437	1157.76	FALSE	1
2022-09-14	11:00:50	0.73243	3.258	1147.02	FALSE	1
2022-09-14	11:00:50	0.733804	3.26411	1161.02	FALSE	1
2022-09-14	11:00:51	0.738231	3.2838	1150.31	FALSE	1
2022-09-14	11:00:51	0.730751	3.25053	1164.27	FALSE	1
2022-09-14	11:00:51	0.735433	3.27135	1153.58	FALSE	1
2022-09-14	11:00:51	0.740064	3.29195	1167.56	FALSE	1
2022-09-14	11:00:52	0.730394	3.24894	1156.83	FALSE	1
2022-09-14	11:00:52	0.734313	3.26637	1170.83	FALSE	1
2022-09-14	11:00:52	0.730801	3.25075	1160.08	FALSE	1
2022-09-14	11:00:52	0.730801	3.25075	1174.08	FALSE	1
2022-09-14	11:00:53	0.728919	3.24238	1163.32	FALSE	1
2022-09-14	11:00:53	0.732786	3.25958	1177.34	FALSE	1
2022-09-14	11:00:53	0.732023	3.25618	1166.58	FALSE	1
2022-09-14	11:00:53	0.734211	3.26592	1180.61	FALSE	1
2022-09-14	11:00:54	0.723117	3.21657	1169.79	FALSE	1
2022-09-14	11:00:54	0.7307	3.2503	1183.86	FALSE	1
2022-09-14	11:00:54	0.733804	3.26411	1173.06	FALSE	1
2022-09-14	11:00:55	0.735891	3.27339	1187.13	FALSE	1
2022-09-14	11:00:55	0.73355	3.26298	1176.32	FALSE	1
2022-09-14	11:00:55	0.731565	3.25415	1190.38	FALSE	1
2022-09-14	11:00:55	0.730751	3.25053	1179.57	FALSE	1
2022-09-14	11:00:56	0.731667	3.2546	1193.64	FALSE	1
2022-09-14	11:00:56	0.732532	3.25845	1182.83	FALSE	1
2022-09-14	11:00:56	0.734924	3.26909	1196.91	FALSE	1
2022-09-14	11:00:56	0.731158	3.25234	1186.08	FALSE	1
2022-09-14	11:00:57	0.734211	3.26592	1200.17	FALSE	1
2022-09-14	11:00:57	0.729224	3.24373	1189.32	FALSE	1
2022-09-14	11:00:57	0.729886	3.24668	1203.42	FALSE	1
2022-09-14	11:00:57	0.730191	3.24804	1192.57	FALSE	1
2022-09-14	11:00:58	0.737214	3.27928	1206.7	FALSE	1
2022-09-14	11:00:58	0.728155	3.23898	1195.81	FALSE	1
2022-09-14	11:00:58	0.732888	3.26003	1209.96	FALSE	1
2022-09-14	11:00:59	0.723473	3.21815	1199.03	FALSE	1
2022-09-14	11:00:59	0.727646	3.23671	1213.2	FALSE	1
2022-09-14	11:00:59	0.725305	3.2263	1202.26	FALSE	1
2022-09-14	11:00:59	0.731972	3.25596	1216.45	FALSE	1
2022-09-14	11:01:00	0.731005	3.25166	1205.51	FALSE	1
2022-09-14	11:01:00	0.731667	3.2546	1219.71	FALSE	1
2022-09-14	11:01:00	0.733753	3.26388	1208.77	FALSE	1
2022-09-14	11:01:00	0.736908	3.27791	1222.98	FALSE	1
2022-09-14	11:01:01	0.732277	3.25731	1212.03	FALSE	1
2022-09-14	11:01:01	0.734669	3.26795	1226.25	FALSE	1
2022-09-14	11:01:01	0.731667	3.2546	1215.28	FALSE	1
2022-09-14	11:01:01	0.735687	3.27248	1229.52	FALSE	1
2022-09-14	11:01:02	0.734313	3.26637	1218.55	FALSE	1
2022-09-14	11:01:02	0.730547	3.24962	1232.77	FALSE	1
2022-09-14	11:01:02	0.728868	3.24215	1221.79	FALSE	1
2022-09-14	11:01:03	0.733906	3.26456	1236.04	FALSE	1
2022-09-14	11:01:03	0.729224	3.24373	1225.04	FALSE	1
2022-09-14	11:01:03	0.735891	3.27339	1239.31	FALSE	1
2022-09-14	11:01:03	0.73528	3.27067	1228.31	FALSE	1
2022-09-14	11:01:04	0.732634	3.2589	1242.57	FALSE	1
2022-09-14	11:01:04	0.724135	3.2211	1231.53	FALSE	1
2022-09-14	11:01:04	0.731463	3.25369	1245.82	FALSE	1
2022-09-14	11:01:04	0.741997	3.30055	1234.83	FALSE	1
2022-09-14	11:01:05	0.737214	3.27928	1249.1	FALSE	1
2022-09-14	11:01:05	0.734466	3.26705	1238.09	FALSE	1
2022-09-14	11:01:05	0.727188	3.23468	1252.34	FALSE	1
2022-09-14	11:01:05	0.729122	3.24328	1241.34	FALSE	1
2022-09-14	11:01:06	0.728359	3.23989	1255.58	FALSE	1
2022-09-14	11:01:06	0.734822	3.26864	1244.61	FALSE	1
2022-09-14	11:01:06	0.738588	3.28539	1258.86	FALSE	1
2022-09-14	11:01:07	0.729733	3.246	1247.85	FALSE	1
2022-09-14	11:01:07	0.732532	3.25845	1262.12	FALSE	1
2022-09-14	11:01:07	0.737315	3.27972	1251.13	FALSE	1
2022-09-14	11:01:07	0.732583	3.25868	1265.38	FALSE	1
2022-09-14	11:01:08	0.737265	3.2795	1254.41	FALSE	1
2022-09-14	11:01:08	0.733448	3.26252	1268.64	FALSE	1
2022-09-14	11:01:08	0.726323	3.23083	1257.64	FALSE	1
2022-09-14	11:01:08	0.436501	1.94164	1270.59	FALSE	1
2022-09-14	11:01:09	0.732583	3.25868	1260.9	FALSE	1
2022-09-14	11:01:09	0.736908	3.27791	1273.86	FALSE	1
2022-09-14	11:01:09	0.732786	3.25958	1264.16	FALSE	1
2022-09-14	11:01:09	0.0689188	0.306565	1274.17	FALSE	1
2022-09-14	11:01:10	0.306272	1.36236	1265.52	FALSE	1
2022-09-14	11:01:10	-0.289402	-1.28732	1274.17	FALSE	1
2022-09-14	11:01:10	-0.541921	-2.41057	1265.52	FALSE	1
2022-09-14	11:01:11	-0.318867	-1.41838	1274.17	FALSE	1
2022-09-14	11:01:11	-0.455916	-2.02801	1265.52	FALSE	1
2022-09-14	11:01:11	-0.490674	-2.18262	1274.17	FALSE	1
2022-09-14	11:01:11	-0.595407	-2.64849	1265.52	FALSE	1
2022-09-14	11:01:12	-0.387875	-1.72535	1274.17	FALSE	1
2022-09-14	11:01:12	-0.665381	-2.95975	1265.52	FALSE	1
2022-09-14	11:01:12	-0.553066	-2.46015	1274.17	FALSE	1
2022-09-14	11:01:12	-0.64991	-2.89093	1265.52	FALSE	1
2022-09-14	11:01:13	-0.675457	-3.00457	1274.17	FALSE	1
2022-09-14	11:01:13	-0.716271	-3.18612	1265.52	FALSE	1
2022-09-14	11:01:13	-0.831182	-3.69726	1274.17	FALSE	1
2022-09-14	11:01:13	-0.869299	-3.86682	1265.52	FALSE	1
2022-09-14	11:01:14	-0.370114	-1.64634	1274.17	FALSE	1
2022-09-14	11:01:14	-0.299631	-1.33282	1265.52	FALSE	1
2022-09-14	11:01:14	0.0109545	0.0487278	1274.22	FALSE	1
2022-09-14	11:01:15	0.172481	0.76723	1266.29	FALSE	1
2022-09-14	11:01:15	0.0827101	0.367911	1274.59	FALSE	1
2022-09-14	11:01:15	0.152685	0.679173	1266.97	FALSE	1
2022-09-14	11:01:15	0.0638297	0.283927	1274.87	FALSE	1
2022-09-14	11:01:16	0.153397	0.682341	1267.65	FALSE	1
2022-09-14	11:01:16	0.0594022	0.264233	1275.13	FALSE	1
2022-09-14	11:01:16	0.264847	1.17809	1268.83	FALSE	1
2022-09-14	11:01:16	0.0486644	0.216469	1275.35	FALSE	1
2022-09-14	11:01:17	0.203372	0.904639	1269.73	FALSE	1
2022-09-14	11:01:17	0.0989442	0.440124	1275.79	FALSE	1
2022-09-14	11:01:17	0.438232	1.94934	1271.68	FALSE	1
2022-09-14	11:01:17	-0.442786	-1.9696	1275.79	FALSE	1
2022-09-14	11:01:18	0.179402	0.798016	1272.48	FALSE	1
2022-09-14	11:01:18	0.0714124	0.317657	1276.11	FALSE	1
2022-09-14	11:01:18	0.211819	0.942213	1273.42	FALSE	1
2022-09-14	11:01:19	0.0968069	0.430616	1276.54	FALSE	1
2022-09-14	11:01:19	0.229275	1.01986	1274.44	FALSE	1
2022-09-14	11:01:19	0.0991987	0.441256	1276.98	FALSE	1
2022-09-14	11:01:19	0.230496	1.02529	1275.47	FALSE	1
2022-09-14	11:01:20	0.144695	0.643632	1277.62	FALSE	1
2022-09-14	11:01:20	0.175331	0.779907	1276.25	FALSE	1
2022-09-14	11:01:20	0.0954328	0.424504	1278.05	FALSE	1
2022-09-14	11:01:20	0.100064	0.445105	1276.69	FALSE	1
2022-09-14	11:01:21	0.0375702	0.16712	1278.22	FALSE	1
2022-09-14	11:01:21	0.0511071	0.227335	1276.92	FALSE	1
2022-09-14	11:01:21	0.123117	0.547649	1278.76	FALSE	1
2022-09-14	11:01:21	0.0511071	0.227335	1277.15	FALSE	1
2022-09-14	11:01:22	0.0908017	0.403904	1279.17	FALSE	1
2022-09-14	11:01:22	0.0206236	0.0917379	1277.24	FALSE	1
2022-09-14	11:01:22	0.103321	0.459592	1279.63	FALSE	1
2022-09-14	11:01:23	0.0242877	0.108037	1277.35	FALSE	1
2022-09-14	11:01:23	0.0880536	0.39168	1280.02	FALSE	1
2022-09-14	11:01:23	-0.0283331	-0.126031	1277.35	FALSE	1
2022-09-14	11:01:23	0.0510053	0.226882	1280.25	FALSE	1
2022-09-14	11:01:24	0.109173	0.485623	1277.83	FALSE	1
2022-09-14	11:01:24	0.765458	3.40491	1283.65	FALSE	1
2022-09-14	11:01:24	0.744898	3.31346	1281.15	FALSE	1
2022-09-14	11:01:24	2.13167	9.48209	1293.13	FALSE	1
2022-09-14	11:01:25	2.22352	9.89066	1291.04	FALSE	1
2022-09-14	11:01:25	0.849987	3.78091	1296.91	FALSE	1
2022-09-14	11:01:25	-0.039529	-0.175833	1291.04	FALSE	1
2022-09-14	11:01:25	-0.14701	-0.65393	1296.91	FALSE	1
2022-09-14	11:01:26	-0.206806	-0.919914	1291.04	FALSE	1
2022-09-14	11:01:26	-0.161972	-0.720484	1296.91	FALSE	1
2022-09-14	11:01:26	-0.0312338	-0.138934	1291.04	FALSE	1
2022-09-14	11:01:27	-0.328536	-1.46139	1296.91	FALSE	1
2022-09-14	11:01:27	-0.362684	-1.61329	1291.04	FALSE	1
2022-09-14	11:01:27	-0.398664	-1.77334	1296.91	FALSE	1
2022-09-14	11:01:27	-0.256781	-1.14221	1291.04	FALSE	1
2022-09-14	11:01:28	-0.318511	-1.4168	1296.91	FALSE	1
2022-09-14	11:01:28	-0.287824	-1.2803	1291.04	FALSE	1
2022-09-14	11:01:28	-0.0229896	-0.102262	1296.91	FALSE	1
2022-09-14	11:01:28	0.241031	1.07215	1292.11	FALSE	1
2022-09-14	11:01:29	0.946119	4.20853	1301.12	FALSE	1
2022-09-14	11:01:29	1.42169	6.32396	1298.43	FALSE	1
2022-09-14	11:01:29	0.742659	3.3035	1304.43	FALSE	1
2022-09-14	11:01:29	0.42729	1.90067	1300.34	FALSE	1
2022-09-14	11:01:30	0.305305	1.35806	1305.78	FALSE	1
2022-09-14	11:01:30	0.406527	1.80831	1302.14	FALSE	1
2022-09-14	11:01:30	0.559555	2.48901	1308.27	FALSE	1
2022-09-14	11:01:30	1.10444	4.91277	1307.06	FALSE	1
2022-09-14	11:01:31	0.945814	4.20717	1312.48	FALSE	1
2022-09-14	11:01:31	0.810242	3.60412	1310.66	FALSE	1
2022-09-14	11:01:31	0.907748	4.03784	1316.52	FALSE	1
2022-09-14	11:01:32	0.862252	3.83547	1314.5	FALSE	1
2022-09-14	11:01:32	0.885967	3.94096	1320.46	FALSE	1
2022-09-14	11:01:32	0.319097	1.41941	1315.92	FALSE	1
2022-09-14	11:01:32	-0.113117	-0.503167	1320.46	FALSE	1
2022-09-14	11:01:33	0.630801	2.80593	1318.72	FALSE	1
2022-09-14	11:01:33	0.640674	2.84985	1323.31	FALSE	1
2022-09-14	11:01:33	0.726425	3.23128	1321.95	FALSE	1
2022-09-14	11:01:33	0.737519	3.28063	1326.59	FALSE	1
2022-09-14	11:01:34	-3.54431	-15.7658	1321.95	FALSE	1
2022-09-14	11:01:34	0.727596	3.23649	1329.83	FALSE	1
2022-09-14	11:01:34	0.730394	3.24894	1325.2	FALSE	1
2022-09-14	11:01:34	0.702048	3.12285	1332.95	FALSE	1
2022-09-14	11:01:35	0.731259	3.25279	1328.45	FALSE	1
2022-09-14	11:01:35	0.730089	3.24758	1336.2	FALSE	1
2022-09-14	11:01:35	0.734211	3.26592	1331.72	FALSE	1
2022-09-14	11:01:36	0.736349	3.27543	1339.47	FALSE	1
2022-09-14	11:01:36	0.732175	3.25686	1334.98	FALSE	1
2022-09-14	11:01:36	0.736094	3.27429	1342.75	FALSE	1
2022-09-14	11:01:36	0.726578	3.23196	1338.21	FALSE	1
2022-09-14	11:01:37	0.734008	3.26501	1346.01	FALSE	1
2022-09-14	11:01:37	0.733295	3.26184	1341.47	FALSE	1
2022-09-14	11:01:37	0.739962	3.2915	1349.3	FALSE	1
2022-09-14	11:01:37	0.736552	3.27633	1344.75	FALSE	1
2022-09-14	11:01:38	0.732939	3.26026	1352.56	FALSE	1
2022-09-14	11:01:38	0.73187	3.2555	1348	FALSE	1
2022-09-14	11:01:38	0.724237	3.22155	1355.78	FALSE	1
2022-09-14	11:01:38	0.265611	1.18149	1349.18	FALSE	1
2022-09-14	11:01:39	0.0876465	0.389869	1356.17	FALSE	1
2022-09-14	11:01:39	-0.0800888	-0.356251	1349.18	FALSE	1
2022-09-14	11:01:39	0.732888	3.26003	1359.43	FALSE	1
2022-09-14	11:01:40	0.731514	3.25392	1352.44	FALSE	1
2022-09-14	11:01:40	0.740216	3.29263	1362.73	FALSE	1
2022-09-14	11:01:40	0.493041	2.19314	1354.63	FALSE	1
2022-09-14	11:01:40	0.347901	1.54753	1364.27	FALSE	1
2022-09-14	11:01:41	0.319046	1.41918	1356.05	FALSE	1
2022-09-14	11:01:41	0.392685	1.74674	1366.02	FALSE	1
2022-09-14	11:01:41	0.342354	1.52286	1357.57	FALSE	1
2022-09-14	11:01:41	0.404084	1.79745	1367.82	FALSE	1
2022-09-14	11:01:42	0.363168	1.61544	1359.19	FALSE	1
2022-09-14	11:01:42	0.370751	1.64917	1369.47	FALSE	1
2022-09-14	11:01:42	0.426679	1.89795	1361.09	FALSE	1
2022-09-14	11:01:42	0.307596	1.36825	1370.84	FALSE	1
2022-09-14	11:01:43	-0.529605	-2.35579	1361.09	FALSE	1
2022-09-14	11:01:43	0.140115	0.62326	1371.46	FALSE	1
2022-09-14	11:01:43	0.62673	2.78782	1363.87	FALSE	1
2022-09-14	11:01:44	0.735585	3.27203	1374.73	FALSE	1
2022-09-14	11:01:44	0.731616	3.25437	1367.13	FALSE	1
2022-09-14	11:01:44	0.72841	3.24011	1377.97	FALSE	1
2022-09-14	11:01:44	0.737672	3.28131	1370.41	FALSE	1
2022-09-14	11:01:45	0.734262	3.26614	1381.24	FALSE	1
2022-09-14	11:01:45	0.73416	3.26569	1373.68	FALSE	1
2022-09-14	11:01:45	0.721997	3.21159	1384.45	FALSE	1
2022-09-14	11:01:45	0.737417	3.28018	1376.96	FALSE	1
2022-09-14	11:01:46	0.740064	3.29195	1387.74	FALSE	1
2022-09-14	11:01:46	0.729987	3.24713	1380.2	FALSE	1
2022-09-14	11:01:46	0.732634	3.2589	1391	FALSE	1
2022-09-14	11:01:46	0.734415	3.26682	1383.47	FALSE	1
2022-09-14	11:01:47	0.726883	3.23332	1394.23	FALSE	1
2022-09-14	11:01:47	0.739453	3.28923	1386.76	FALSE	1
2022-09-14	11:01:47	0.730242	3.24826	1397.48	FALSE	1
2022-09-14	11:01:48	0.731259	3.25279	1390.01	FALSE	1
2022-09-14	11:01:48	0.735789	3.27294	1400.75	FALSE	1
2022-09-14	11:01:48	0.735585	3.27203	1393.28	FALSE	1
2022-09-14	11:01:48	0.732074	3.25641	1404.01	FALSE	1
2022-09-14	11:01:49	0.726679	3.23241	1396.52	FALSE	1
2022-09-14	11:01:49	0.735433	3.27135	1407.28	FALSE	1
2022-09-14	11:01:49	0.730801	3.25075	1399.77	FALSE	1
2022-09-14	11:01:49	0.733753	3.26388	1410.55	FALSE	1
2022-09-14	11:01:50	0.7307	3.2503	1403.02	FALSE	1
2022-09-14	11:01:50	0.738893	3.28674	1413.83	FALSE	1
2022-09-14	11:01:50	0.735738	3.27271	1406.29	FALSE	1
2022-09-14	11:01:50	0.730038	3.24736	1417.08	FALSE	1
2022-09-14	11:01:51	0.736399	3.27565	1409.57	FALSE	1
2022-09-14	11:01:51	0.736807	3.27746	1420.36	FALSE	1
2022-09-14	11:01:51	0.731209	3.25256	1412.82	FALSE	1
2022-09-14	11:01:52	0.737519	3.28063	1423.64	FALSE	1
2022-09-14	11:01:52	0.735127	3.26999	1416.09	FALSE	1
2022-09-14	11:01:52	0.730852	3.25098	1426.89	FALSE	1
2022-09-14	11:01:52	0.733193	3.26139	1419.35	FALSE	1
2022-09-14	11:01:53	0.734924	3.26909	1430.16	FALSE	1
2022-09-14	11:01:53	0.737977	3.28267	1422.63	FALSE	1
2022-09-14	11:01:53	0.735229	3.27045	1433.43	FALSE	1
2022-09-14	11:01:53	0.734415	3.26682	1425.9	FALSE	1
2022-09-14	11:01:54	0.731717	3.25482	1436.68	FALSE	1
2022-09-14	11:01:54	0.734568	3.26751	1429.17	FALSE	1
2022-09-14	11:01:54	0.736247	3.27497	1439.96	FALSE	1
2022-09-14	11:01:54	0.746679	3.32138	1432.49	FALSE	1
2022-09-14	11:01:55	0.735483	3.27158	1443.23	FALSE	1
2022-09-14	11:01:55	0.733295	3.26184	1435.75	FALSE	1
2022-09-14	11:01:55	0.732481	3.25822	1446.49	FALSE	1
2022-09-14	11:01:56	0.731819	3.25528	1439.01	FALSE	1
2022-09-14	11:01:56	0.73472	3.26818	1449.76	FALSE	1
2022-09-14	11:01:56	0.734618	3.26773	1442.27	FALSE	1
2022-09-14	11:01:56	0.739198	3.2881	1453.04	FALSE	1
2022-09-14	11:01:57	0.734568	3.26751	1445.54	FALSE	1
2022-09-14	11:01:57	0.738537	3.28516	1456.33	FALSE	1
2022-09-14	11:01:57	0.738791	3.28629	1448.83	FALSE	1
2022-09-14	11:01:57	0.732023	3.25618	1459.59	FALSE	1
2022-09-14	11:01:58	0.736196	3.27475	1452.1	FALSE	1
2022-09-14	11:01:58	0.733397	3.2623	1462.85	FALSE	1
2022-09-14	11:01:58	0.734924	3.26909	1455.37	FALSE	1
2022-09-14	11:01:58	0.733092	3.26094	1466.11	FALSE	1
2022-09-14	11:01:59	0.728512	3.24057	1458.61	FALSE	1
2022-09-14	11:01:59	0.721183	3.20797	1469.32	FALSE	1
2022-09-14	11:01:59	-0.102684	-0.456759	1458.61	FALSE	1
2022-09-14	11:02:00	0.593295	2.63909	1471.96	FALSE	1
2022-09-14	11:02:00	0.260725	1.15976	1459.77	FALSE	1
2022-09-14	11:02:00	0.592583	2.63593	1474.59	FALSE	1
2022-09-14	11:02:00	0.735433	3.27135	1463.04	FALSE	1
2022-09-14	11:02:01	0.720267	3.20389	1477.8	FALSE	1
2022-09-14	11:02:01	0.734618	3.26773	1466.31	FALSE	1
2022-09-14	11:02:01	0.719097	3.19869	1480.99	FALSE	1
2022-09-14	11:02:01	0.733193	3.26139	1469.57	FALSE	1
2022-09-14	11:02:02	0.243575	1.08347	1482.08	FALSE	1
2022-09-14	11:02:02	0.147748	0.657213	1470.23	FALSE	1
2022-09-14	11:02:02	0.843219	3.75081	1485.83	FALSE	1
2022-09-14	11:02:02	0.737875	3.28222	1473.51	FALSE	1
2022-09-14	11:02:03	1.28159	5.70077	1491.53	FALSE	1
2022-09-14	11:02:03	2.57828	11.4687	1484.98	FALSE	1
2022-09-14	11:02:03	0.508003	2.2597	1493.79	FALSE	1

## Sheet: Richa_harness_2022914105648 (2)
Date	Time	Lbs	Total force x time			**GoPro Fitting: 1046
2022-09-14	10:56:48	0.406171	0.406171	FALSE	0
2022-09-14	10:56:48	0.361641	0.767812	FALSE	0
2022-09-14	10:56:48	0.368562	1.13637	FALSE	0
2022-09-14	10:56:49	0.341896	1.47827	FALSE	0
2022-09-14	10:56:49	0.374262	1.85253	FALSE	0
2022-09-14	10:56:49	0.327748	2.18028	FALSE	0
2022-09-14	10:56:49	0.372888	2.55317	FALSE	0
2022-09-14	10:56:50	0.306985	2.86015	FALSE	0
2022-09-14	10:56:50	0.325102	3.18526	FALSE	0
2022-09-14	10:56:50	0.367646	3.5529	FALSE	0
2022-09-14	10:56:51	0.364033	3.91693	FALSE	0
2022-09-14	10:56:51	0.365713	4.28265	FALSE	0
2022-09-14	10:56:51	0.323931	4.60658	FALSE	0
2022-09-14	10:56:51	0.352786	4.95936	FALSE	0
2022-09-14	10:56:52	0.355178	5.31454	FALSE	0
2022-09-14	10:56:52	0.378435	5.69298	FALSE	0
2022-09-14	10:56:52	0.613855	6.30683	FALSE	0
2022-09-14	10:56:52	0.386069	6.6929	FALSE	0
2022-09-14	10:56:53	0.369326	7.06223	FALSE	0
2022-09-14	10:56:53	0.367239	7.42947	FALSE	0
2022-09-14	10:56:53	0.349886	7.77935	FALSE	0
2022-09-14	10:56:53	0.342048	8.1214	FALSE	0
2022-09-14	10:56:54	0.34444	8.46584	FALSE	0
2022-09-14	10:56:54	0.323321	8.78916	FALSE	0
2022-09-14	10:56:54	0.382812	9.17197	FALSE	0
2022-09-14	10:56:55	0.385814	9.55779	FALSE	0
2022-09-14	10:56:55	0.358537	9.91632	FALSE	0
2022-09-14	10:56:55	0.378842	10.2952	FALSE	0
2022-09-14	10:56:55	0.387494	10.6827	FALSE	0
2022-09-14	10:56:56	0.390038	11.0727	FALSE	0
2022-09-14	10:56:56	0.333193	11.4059	FALSE	0
2022-09-14	10:56:56	0.363575	11.7695	FALSE	0
2022-09-14	10:56:56	0.364237	12.1337	FALSE	0
2022-09-14	10:56:57	0.362557	12.4963	FALSE	0
2022-09-14	10:56:57	0.334466	12.8307	FALSE	0
2022-09-14	10:56:57	0.344644	13.1754	FALSE	0
2022-09-14	10:56:57	0.32729	13.5027	FALSE	0
2022-09-14	10:56:58	0.364339	13.867	FALSE	0
2022-09-14	10:56:58	0.337163	14.2042	FALSE	0
2022-09-14	10:56:58	0.383372	14.5875	FALSE	0
2022-09-14	10:56:59	0.390038	14.9776	FALSE	0
2022-09-14	10:56:59	0.376705	15.3543	FALSE	0
2022-09-14	10:56:59	0.399707	15.754	FALSE	0
2022-09-14	10:56:59	0.380165	16.1341	FALSE	0
2022-09-14	10:57:00	0.692074	16.8262	FALSE	0
2022-09-14	10:57:00	0.7707	17.5969	FALSE	0
2022-09-14	10:57:00	2.2624	19.8593	FALSE	0
2022-09-14	10:57:00	4.83874	24.6981	1	1
2022-09-14	10:57:01	3.76154	28.4596	1	2
2022-09-14	10:57:01	2.60261	31.0622	FALSE	2
2022-09-14	10:57:01	1.77314	32.8354	FALSE	2
2022-09-14	10:57:02	1.02927	33.8646	FALSE	2
2022-09-14	10:57:02	0.653295	34.5179	FALSE	2
2022-09-14	10:57:02	0.492634	35.0106	FALSE	2
2022-09-14	10:57:02	0.411412	35.422	FALSE	2
2022-09-14	10:57:03	0.39126	35.8132	FALSE	2
2022-09-14	10:57:03	0.409987	36.2232	FALSE	2
2022-09-14	10:57:03	0.410191	36.6334	FALSE	2
2022-09-14	10:57:03	0.362761	36.9962	FALSE	2
2022-09-14	10:57:04	0.445255	37.4414	FALSE	2
2022-09-14	10:57:04	0.399555	37.841	FALSE	2
2022-09-14	10:57:04	0.393448	38.2344	FALSE	2
2022-09-14	10:57:04	0.420369	38.6548	FALSE	2
2022-09-14	10:57:05	0.396247	39.051	FALSE	2
2022-09-14	10:57:05	0.432379	39.4834	FALSE	2
2022-09-14	10:57:05	0.44215	39.9256	FALSE	2
2022-09-14	10:57:05	0.36902	40.2946	FALSE	2
2022-09-14	10:57:06	0.475942	40.7705	FALSE	2
2022-09-14	10:57:06	0.445713	41.2162	FALSE	2
2022-09-14	10:57:06	0.968969	42.1852	FALSE	2
2022-09-14	10:57:07	0.611972	42.7972	FALSE	2
2022-09-14	10:57:07	0.445407	43.2426	FALSE	2
2022-09-14	10:57:07	0.448613	43.6912	FALSE	2
2022-09-14	10:57:07	0.417163	44.1084	FALSE	2
2022-09-14	10:57:08	0.432328	44.5407	FALSE	2
2022-09-14	10:57:08	0.385611	44.9263	FALSE	2
2022-09-14	10:57:08	0.423575	45.3499	FALSE	2
2022-09-14	10:57:08	0.710344	46.0602	FALSE	2
2022-09-14	10:57:09	0.0305473	46.0908	FALSE	2
2022-09-14	10:57:09	0.310802	46.4016	FALSE	2
2022-09-14	10:57:09	0.218333	46.6199	FALSE	2
2022-09-14	10:57:09	0.150649	46.7706	FALSE	2
2022-09-14	10:57:10	0.0686644	46.8392	FALSE	2
2022-09-14	10:57:10	0.270496	47.1097	FALSE	2
2022-09-14	10:57:10	0.170293	47.28	FALSE	2
2022-09-14	10:57:11	0.0968577	47.3769	FALSE	2
2022-09-14	10:57:11	0.27411	47.651	FALSE	2
2022-09-14	10:57:11	0.0596567	47.7106	FALSE	2
2022-09-14	10:57:11	0.218537	47.9292	FALSE	2
2022-09-14	10:57:12	0.188003	48.1172	FALSE	2
2022-09-14	10:57:12	0.218995	48.3362	FALSE	2
2022-09-14	10:57:12	0.207341	48.5435	FALSE	2
2022-09-14	10:57:12	0.162201	48.7057	FALSE	2
2022-09-14	10:57:13	0.219657	48.9254	FALSE	2
2022-09-14	10:57:13	0.211718	49.1371	FALSE	2
2022-09-14	10:57:13	0.231209	49.3683	FALSE	2
2022-09-14	10:57:13	0.264237	49.6325	FALSE	2
2022-09-14	10:57:14	0.25355	49.8861	FALSE	2
2022-09-14	10:57:14	0.135229	50.0213	FALSE	2
2022-09-14	10:57:14	0.248562	50.2699	FALSE	2
2022-09-14	10:57:15	0.0608781	50.3307	FALSE	2
2022-09-14	10:57:15	0.371361	50.7021	FALSE	2
2022-09-14	10:57:15	0.13813	50.8402	FALSE	2
2022-09-14	10:57:15	0.290802	51.131	FALSE	2
2022-09-14	10:57:16	0.119097	51.2501	FALSE	2
2022-09-14	10:57:16	0.363524	51.6137	FALSE	2
2022-09-14	10:57:16	0.144898	51.7586	FALSE	2
2022-09-14	10:57:17	0.35701	52.1156	FALSE	2
2022-09-14	10:57:17	0.27014	52.3857	FALSE	2
2022-09-14	10:57:17	0.357723	52.7434	FALSE	2
2022-09-14	10:57:17	0.225255	52.9687	FALSE	2
2022-09-14	10:57:17	0.455127	53.4238	FALSE	2
2022-09-14	10:57:18	0.249682	53.6735	FALSE	2
2022-09-14	10:57:18	0.441132	54.1146	FALSE	2
2022-09-14	10:57:18	0.293092	54.4077	FALSE	2
2022-09-14	10:57:19	0.367188	54.7749	FALSE	2
2022-09-14	10:57:19	0.325458	55.1004	FALSE	2
2022-09-14	10:57:19	0.375229	55.4756	FALSE	2
2022-09-14	10:57:19	0.208155	55.6838	FALSE	2
2022-09-14	10:57:20	0.309427	55.9932	FALSE	2
2022-09-14	10:57:20	0.273041	56.2662	FALSE	2
2022-09-14	10:57:20	0.298741	56.565	FALSE	2
2022-09-14	10:57:20	0.301438	56.8664	FALSE	2
2022-09-14	10:57:21	0.308308	57.1747	FALSE	2
2022-09-14	10:57:21	0.333702	57.5084	FALSE	2
2022-09-14	10:57:21	0.338079	57.8465	FALSE	2
2022-09-14	10:57:21	0.518995	58.3655	FALSE	2
2022-09-14	10:57:22	0.683321	59.0488	FALSE	2
2022-09-14	10:57:22	0.368155	59.417	FALSE	2
2022-09-14	10:57:22	0.308054	59.725	FALSE	2
2022-09-14	10:57:23	0.350852	60.0759	FALSE	2
2022-09-14	10:57:23	0.244135	60.32	FALSE	2
2022-09-14	10:57:23	0.418537	60.7385	FALSE	2
2022-09-14	10:57:23	0.224644	60.9632	FALSE	2
2022-09-14	10:57:24	0.421234	61.3844	FALSE	2
2022-09-14	10:57:24	0.187697	61.5721	FALSE	2
2022-09-14	10:57:24	0.460013	62.0321	FALSE	2
2022-09-14	10:57:24	0.125051	62.1572	FALSE	2
2022-09-14	10:57:25	0.430038	62.5872	FALSE	2
2022-09-14	10:57:25	0.18785	62.7751	FALSE	2
2022-09-14	10:57:25	0.387188	63.1623	FALSE	2
2022-09-14	10:57:25	0.161641	63.3239	FALSE	2
2022-09-14	10:57:26	0.371056	63.6949	FALSE	2
2022-09-14	10:57:26	0.234364	63.9293	FALSE	2
2022-09-14	10:57:26	0.438995	64.3683	FALSE	2
2022-09-14	10:57:27	0.145204	64.5135	FALSE	2
2022-09-14	10:57:27	0.449326	64.9628	FALSE	2
2022-09-14	10:57:27	0.219708	65.1825	FALSE	2
2022-09-14	10:57:27	0.428512	65.6111	FALSE	2
2022-09-14	10:57:28	0.194211	65.8053	FALSE	2
2022-09-14	10:57:28	0.485611	66.2909	FALSE	2
2022-09-14	10:57:28	0.176196	66.4671	FALSE	2
2022-09-14	10:57:28	0.42673	66.8938	FALSE	2
2022-09-14	10:57:29	0.175992	67.0698	FALSE	2
2022-09-14	10:57:29	0.446069	67.5159	FALSE	2
2022-09-14	10:57:29	0.213448	67.7293	FALSE	2
2022-09-14	10:57:29	0.361998	68.0913	FALSE	2
2022-09-14	10:57:30	0.13584	68.2272	FALSE	2
2022-09-14	10:57:30	0.278639	68.5058	FALSE	2
2022-09-14	10:57:30	-0.0848216	68.5058	FALSE	2
2022-09-14	10:57:31	-0.133168	68.5058	FALSE	2
2022-09-14	10:57:31	-0.424923	68.5058	FALSE	2
2022-09-14	10:57:31	-0.373422	68.5058	FALSE	2
2022-09-14	10:57:31	0.460725	68.9665	FALSE	2
2022-09-14	10:57:32	0.722303	69.6888	FALSE	2
2022-09-14	10:57:32	1.82983	71.5187	FALSE	2
2022-09-14	10:57:32	3.1538	74.6725	1	3
2022-09-14	10:57:32	1.93645	76.6089	FALSE	3
2022-09-14	10:57:33	1.63665	78.2456	FALSE	3
2022-09-14	10:57:33	1.90342	80.149	FALSE	3
2022-09-14	10:57:33	1.60363	81.7526	FALSE	3
2022-09-14	10:57:33	1.49065	83.2433	FALSE	3
2022-09-14	10:57:34	1.81233	85.0556	FALSE	3
2022-09-14	10:57:34	1.60383	86.6594	FALSE	3
2022-09-14	10:57:34	0.706323	87.3657	FALSE	3
2022-09-14	10:57:35	0.134161	87.4999	FALSE	3
2022-09-14	10:57:35	0.0321249	87.532	FALSE	3
2022-09-14	10:57:35	0.33584	87.8679	FALSE	3
2022-09-14	10:57:35	-0.216526	87.8679	FALSE	3
2022-09-14	10:57:36	-0.20533	87.8679	FALSE	3
2022-09-14	10:57:36	0.124186	87.992	FALSE	3
2022-09-14	10:57:36	-0.070674	87.992	FALSE	3
2022-09-14	10:57:36	-0.192608	87.992	FALSE	3
2022-09-14	10:57:37	-0.201615	87.992	FALSE	3
2022-09-14	10:57:37	0.160013	88.1521	FALSE	3
2022-09-14	10:57:37	0.335076	88.4871	FALSE	3
2022-09-14	10:57:37	0.377265	88.8644	FALSE	3
2022-09-14	10:57:38	0.379504	89.2439	FALSE	3
2022-09-14	10:57:38	0.450344	89.6942	FALSE	3
2022-09-14	10:57:38	0.343117	90.0374	FALSE	3
2022-09-14	10:57:39	0.380674	90.418	FALSE	3
2022-09-14	10:57:39	0.428766	90.8468	FALSE	3
2022-09-14	10:57:39	0.339758	91.1866	FALSE	3
2022-09-14	10:57:39	0.405102	91.5917	FALSE	3
2022-09-14	10:57:40	0.192074	91.7837	FALSE	3
2022-09-14	10:57:40	0.297367	92.0811	FALSE	3
2022-09-14	10:57:40	0.218741	92.2998	FALSE	3
2022-09-14	10:57:40	0.284542	92.5844	FALSE	3
2022-09-14	10:57:41	0.244797	92.8292	FALSE	3
2022-09-14	10:57:41	0.282863	93.112	FALSE	3
2022-09-14	10:57:41	0.159351	93.2714	FALSE	3
2022-09-14	10:57:41	0.370852	93.6423	FALSE	3
2022-09-14	10:57:42	0.204084	93.8463	FALSE	3
2022-09-14	10:57:42	0.377723	94.2241	FALSE	3
2022-09-14	10:57:42	0.173244	94.3973	FALSE	3
2022-09-14	10:57:43	0.319504	94.7168	FALSE	3
2022-09-14	10:57:43	0.213702	94.9305	FALSE	3
2022-09-14	10:57:43	0.38897	95.3195	FALSE	3
2022-09-14	10:57:43	0.211667	95.5311	FALSE	3
2022-09-14	10:57:44	0.383524	95.9147	FALSE	3
2022-09-14	10:57:44	0.322252	96.2369	FALSE	3
2022-09-14	10:57:44	0.524542	96.7615	FALSE	3
2022-09-14	10:57:44	0.288054	97.0495	FALSE	3
2022-09-14	10:57:45	0.278741	97.3283	FALSE	3
2022-09-14	10:57:45	0.454262	97.7825	FALSE	3
2022-09-14	10:57:45	0.543168	98.3257	FALSE	3
2022-09-14	10:57:45	0.761132	99.0868	FALSE	3
2022-09-14	10:57:46	0.794669	99.8815	FALSE	3
2022-09-14	10:57:46	0.501387	100.383	FALSE	3
2022-09-14	10:57:46	0.899707	101.283	FALSE	3
2022-09-14	10:57:47	0.636959	101.92	FALSE	3
2022-09-14	10:57:47	0.606527	102.526	FALSE	3
2022-09-14	10:57:47	0.686679	103.213	FALSE	3
2022-09-14	10:57:47	0.518231	103.731	FALSE	3
2022-09-14	10:57:48	0.414313	104.145	FALSE	3
2022-09-14	10:57:48	0.54556	104.691	FALSE	3
2022-09-14	10:57:48	0.61411	105.305	FALSE	3
2022-09-14	10:57:48	1.18637	106.491	FALSE	3
2022-09-14	10:57:49	2.44648	108.938	FALSE	3
2022-09-14	10:57:49	2.60306	111.541	FALSE	3
2022-09-14	10:57:49	1.3135	112.854	FALSE	3
2022-09-14	10:57:49	0.713193	113.568	FALSE	3
2022-09-14	10:57:50	0.544033	114.112	FALSE	3
2022-09-14	10:57:50	0.368613	114.48	FALSE	3
2022-09-14	10:57:50	0.470598	114.951	FALSE	3
2022-09-14	10:57:51	0.372074	115.323	FALSE	3
2022-09-14	10:57:51	0.248054	115.571	FALSE	3
2022-09-14	10:57:51	0.318282	115.889	FALSE	3
2022-09-14	10:57:51	0.236298	116.126	FALSE	3
2022-09-14	10:57:52	0.363677	116.489	FALSE	3
2022-09-14	10:57:52	0.388104	116.877	FALSE	3
2022-09-14	10:57:52	0.407036	117.284	FALSE	3
2022-09-14	10:57:52	0.442761	117.727	FALSE	3
2022-09-14	10:57:53	0.395127	118.122	FALSE	3
2022-09-14	10:57:53	0.390394	118.513	FALSE	3
2022-09-14	10:57:53	0.485662	118.998	FALSE	3
2022-09-14	10:57:53	0.451819	119.45	FALSE	3
2022-09-14	10:57:54	0.435891	119.886	FALSE	3
2022-09-14	10:57:54	0.430903	120.317	FALSE	3
2022-09-14	10:57:54	0.372176	120.689	FALSE	3
2022-09-14	10:57:55	0.44444	121.134	FALSE	3
2022-09-14	10:57:55	0.417163	121.551	FALSE	3
2022-09-14	10:57:55	0.475789	122.026	FALSE	3
2022-09-14	10:57:55	0.481539	122.508	FALSE	3
2022-09-14	10:57:56	0.449529	122.958	FALSE	3
2022-09-14	10:57:56	0.454364	123.412	FALSE	3
2022-09-14	10:57:56	0.450089	123.862	FALSE	3
2022-09-14	10:57:56	0.434008	124.296	FALSE	3
2022-09-14	10:57:57	0.432786	124.729	FALSE	3
2022-09-14	10:57:57	0.430344	125.159	FALSE	3
2022-09-14	10:57:57	0.726934	125.886	FALSE	3
2022-09-14	10:57:57	0.727137	126.613	FALSE	3
2022-09-14	10:57:58	0.731514	127.345	FALSE	3
2022-09-14	10:57:58	0.726425	128.071	FALSE	3
2022-09-14	10:57:58	0.731107	128.802	FALSE	3
2022-09-14	10:57:59	0.726374	129.529	FALSE	3
2022-09-14	10:57:59	0.736196	130.265	FALSE	3
2022-09-14	10:57:59	0.729886	130.995	FALSE	3
2022-09-14	10:57:59	0.729733	131.724	FALSE	3
2022-09-14	10:58:00	0.734924	132.459	FALSE	3
2022-09-14	10:58:00	0.730445	133.19	FALSE	3
2022-09-14	10:58:00	0.807799	133.998	FALSE	3
2022-09-14	10:58:00	0.697672	134.695	FALSE	3
2022-09-14	10:58:01	0.729326	135.425	FALSE	3
2022-09-14	10:58:01	0.72902	136.154	FALSE	3
2022-09-14	10:58:01	0.731921	136.886	FALSE	3
2022-09-14	10:58:01	0.730649	137.616	FALSE	3
2022-09-14	10:58:02	0.724389	138.341	FALSE	3
2022-09-14	10:58:02	0.730496	139.071	FALSE	3
2022-09-14	10:58:02	0.72897	139.8	FALSE	3
2022-09-14	10:58:03	0.724796	140.525	FALSE	3
2022-09-14	10:58:03	0.732837	141.258	FALSE	3
2022-09-14	10:58:03	0.521539	141.779	FALSE	3
2022-09-14	10:58:03	0.353855	142.133	FALSE	3
2022-09-14	10:58:04	0.530954	142.664	FALSE	3
2022-09-14	10:58:04	0.327239	142.991	FALSE	3
2022-09-14	10:58:04	0.308868	143.3	FALSE	3
2022-09-14	10:58:04	0.231616	143.532	FALSE	3
2022-09-14	10:58:05	-0.163651	143.532	FALSE	3
2022-09-14	10:58:05	0.0946694	143.626	FALSE	3
2022-09-14	10:58:05	0.545	144.171	FALSE	3
2022-09-14	10:58:05	0.727341	144.899	FALSE	3
2022-09-14	10:58:06	0.851514	145.75	FALSE	3
2022-09-14	10:58:06	0.673651	146.424	FALSE	3
2022-09-14	10:58:06	0.72327	147.147	FALSE	3
2022-09-14	10:58:07	0.729071	147.876	FALSE	3
2022-09-14	10:58:07	0.730903	148.607	FALSE	3
2022-09-14	10:58:07	0.727901	149.335	FALSE	3
2022-09-14	10:58:07	0.726272	150.061	FALSE	3
2022-09-14	10:58:08	0.733193	150.795	FALSE	3
2022-09-14	10:58:08	0.728003	151.523	FALSE	3
2022-09-14	10:58:08	1.79777	153.32	FALSE	3
2022-09-14	10:58:08	1.19085	154.511	FALSE	3
2022-09-14	10:58:09	0.667545	155.179	FALSE	3
2022-09-14	10:58:09	0.397112	155.576	FALSE	3
2022-09-14	10:58:09	0.734211	156.31	FALSE	3
2022-09-14	10:58:10	1.07533	157.385	FALSE	3
2022-09-14	10:58:10	0.743168	158.129	FALSE	3
2022-09-14	10:58:10	0.662048	158.791	FALSE	3
2022-09-14	10:58:10	0.731005	159.522	FALSE	3
2022-09-14	10:58:11	0.731514	160.253	FALSE	3
2022-09-14	10:58:11	0.731717	160.985	FALSE	3
2022-09-14	10:58:11	0.727646	161.712	FALSE	3
2022-09-14	10:58:11	0.725204	162.438	FALSE	3
2022-09-14	10:58:12	0.725916	163.164	FALSE	3
2022-09-14	10:58:12	0.722761	163.886	FALSE	3
2022-09-14	10:58:12	0.725458	164.612	FALSE	3
2022-09-14	10:58:12	0.730242	165.342	FALSE	3
2022-09-14	10:58:13	0.722252	166.064	FALSE	3
2022-09-14	10:58:13	0.735127	166.799	FALSE	3
2022-09-14	10:58:13	0.728512	167.528	FALSE	3
2022-09-14	10:58:14	0.72785	168.256	FALSE	3
2022-09-14	10:58:14	0.735331	168.991	FALSE	3
2022-09-14	10:58:14	0.739656	169.731	FALSE	3
2022-09-14	10:58:14	0.727596	170.458	FALSE	3
2022-09-14	10:58:15	0.731921	171.19	FALSE	3
2022-09-14	10:58:15	0.731158	171.921	FALSE	3
2022-09-14	10:58:15	1.27411	173.196	FALSE	3
2022-09-14	10:58:15	0.727188	173.923	FALSE	3
2022-09-14	10:58:16	0.736857	174.66	FALSE	3
2022-09-14	10:58:16	0.735076	175.395	FALSE	3
2022-09-14	10:58:16	0.757214	176.152	FALSE	3
2022-09-14	10:58:16	0.754618	176.906	FALSE	3
2022-09-14	10:58:17	0.775483	177.682	FALSE	3
2022-09-14	10:58:17	0.774059	178.456	FALSE	3
2022-09-14	10:58:17	0.766374	179.222	FALSE	3
2022-09-14	10:58:17	0.764593	179.987	FALSE	3
2022-09-14	10:58:18	0.775229	180.762	FALSE	3
2022-09-14	10:58:18	0.769784	181.532	FALSE	3
2022-09-14	10:58:18	0.763372	182.295	FALSE	3
2022-09-14	10:58:19	0.771056	183.066	FALSE	3
2022-09-14	10:58:19	0.778842	183.845	FALSE	3
2022-09-14	10:58:19	0.781438	184.627	FALSE	3
2022-09-14	10:58:19	0.785967	185.413	FALSE	3
2022-09-14	10:58:20	0.793499	186.206	FALSE	3
2022-09-14	10:58:20	0.767087	186.973	FALSE	3
2022-09-14	10:58:20	0.760471	187.734	FALSE	3
2022-09-14	10:58:20	0.743881	188.478	FALSE	3
2022-09-14	10:58:21	0.728359	189.206	FALSE	3
2022-09-14	10:58:21	0.724644	189.931	FALSE	3
2022-09-14	10:58:21	0.690293	190.621	FALSE	3
2022-09-14	10:58:22	0.664542	191.285	FALSE	3
2022-09-14	10:58:22	0.63757	191.923	FALSE	3
2022-09-14	10:58:22	0.620471	192.544	FALSE	3
2022-09-14	10:58:22	0.56729	193.111	FALSE	3
2022-09-14	10:58:23	0.576705	193.687	FALSE	3
2022-09-14	10:58:23	0.599606	194.287	FALSE	3
2022-09-14	10:58:23	0.546679	194.834	FALSE	3
2022-09-14	10:58:23	0.269275	195.103	FALSE	3
2022-09-14	10:58:24	0.671463	195.775	FALSE	3
2022-09-14	10:58:24	0.56556	196.34	FALSE	3
2022-09-14	10:58:24	0.480573	196.821	FALSE	3
2022-09-14	10:58:24	0.428817	197.249	FALSE	3
2022-09-14	10:58:25	0.366171	197.616	FALSE	3
2022-09-14	10:58:25	0.330547	197.946	FALSE	3
2022-09-14	10:58:25	0.729428	198.676	FALSE	3
2022-09-14	10:58:26	0.732226	199.408	FALSE	3
2022-09-14	10:58:26	0.728766	200.137	FALSE	3
2022-09-14	10:58:26	0.728461	200.865	FALSE	3
2022-09-14	10:58:26	0.73299	201.598	FALSE	3
2022-09-14	10:58:27	0.731972	202.33	FALSE	3
2022-09-14	10:58:27	0.721183	203.051	FALSE	3
2022-09-14	10:58:27	0.727087	203.778	FALSE	3
2022-09-14	10:58:27	0.730751	204.509	FALSE	3
2022-09-14	10:58:28	0.732125	205.241	FALSE	3
2022-09-14	10:58:28	0.72902	205.97	FALSE	3
2022-09-14	10:58:28	0.732735	206.703	FALSE	3
2022-09-14	10:58:28	0.733702	207.437	FALSE	3
2022-09-14	10:58:29	0.731005	208.168	FALSE	3
2022-09-14	10:58:29	0.730343	208.898	FALSE	3
2022-09-14	10:58:29	0.729224	209.627	FALSE	3
2022-09-14	10:58:30	0.730242	210.357	FALSE	3
2022-09-14	10:58:30	-1.37546	210.357	FALSE	3
2022-09-14	10:58:30	-0.45902	210.357	FALSE	3
2022-09-14	10:58:30	-2.21256	210.357	FALSE	3
2022-09-14	10:58:31	0.0494277	210.407	FALSE	3
2022-09-14	10:58:31	0.126272	210.533	FALSE	3
2022-09-14	10:58:31	0.153957	210.687	FALSE	3
2022-09-14	10:58:31	0.143423	210.831	FALSE	3
2022-09-14	10:58:32	0.149529	210.98	FALSE	3
2022-09-14	10:58:32	0.157112	211.137	FALSE	3
2022-09-14	10:58:32	0.13472	211.272	FALSE	3
2022-09-14	10:58:32	0.168563	211.44	FALSE	3
2022-09-14	10:58:33	0.117418	211.558	FALSE	3
2022-09-14	10:58:33	0.0709036	211.629	FALSE	3
2022-09-14	10:58:33	-0.0248216	211.629	FALSE	3
2022-09-14	10:58:34	0.0128883	211.642	FALSE	3
2022-09-14	10:58:34	0.0732445	211.715	FALSE	3
2022-09-14	10:58:34	0.0186389	211.734	FALSE	3
2022-09-14	10:58:34	0.11869	211.852	FALSE	3
2022-09-14	10:58:35	0.10673	211.959	FALSE	3
2022-09-14	10:58:35	0.055789	212.015	FALSE	3
2022-09-14	10:58:35	0.0477992	212.063	FALSE	3
2022-09-14	10:58:35	0.0417432	212.104	FALSE	3
2022-09-14	10:58:36	0.0138552	212.118	FALSE	3
2022-09-14	10:58:36	0.00978398	212.128	FALSE	3
2022-09-14	10:58:36	-0.0957122	212.128	FALSE	3
2022-09-14	10:58:36	-0.0535748	212.128	FALSE	3
2022-09-14	10:58:37	0.0557381	212.184	FALSE	3
2022-09-14	10:58:37	-0.0949488	212.184	FALSE	3
2022-09-14	10:58:37	-0.0825824	212.184	FALSE	3
2022-09-14	10:58:38	0.0252547	212.209	FALSE	3
2022-09-14	10:58:38	0.0946185	212.304	FALSE	3
2022-09-14	10:58:38	0.145967	212.45	FALSE	3
2022-09-14	10:58:38	0.173652	212.623	FALSE	3
2022-09-14	10:58:39	0.209784	212.833	FALSE	3
2022-09-14	10:58:39	0.107952	212.941	FALSE	3
2022-09-14	10:58:39	0.3364	213.277	FALSE	3
2022-09-14	10:58:39	0.101692	213.379	FALSE	3
2022-09-14	10:58:40	0.431107	213.81	FALSE	3
2022-09-14	10:58:40	0.148155	213.958	FALSE	3
2022-09-14	10:58:40	0.367036	214.325	FALSE	3
2022-09-14	10:58:40	0.229071	214.554	FALSE	3
2022-09-14	10:58:41	0.291005	214.845	FALSE	3
2022-09-14	10:58:41	-0.366857	214.845	FALSE	3
2022-09-14	10:58:41	-0.0309794	214.845	FALSE	3
2022-09-14	10:58:42	-0.0593763	214.845	FALSE	3
2022-09-14	10:58:42	0.250802	215.096	FALSE	3
2022-09-14	10:58:42	0.191107	215.287	FALSE	3
2022-09-14	10:58:42	0.246425	215.534	FALSE	3
2022-09-14	10:58:43	0.234669	215.768	FALSE	3
2022-09-14	10:58:43	0.201336	215.97	FALSE	3
2022-09-14	10:58:43	0.186272	216.156	FALSE	3
2022-09-14	10:58:43	0.255484	216.411	FALSE	3
2022-09-14	10:58:44	0.283575	216.695	FALSE	3
2022-09-14	10:58:44	0.14098	216.836	FALSE	3
2022-09-14	10:58:44	0.729478	217.565	FALSE	3
2022-09-14	10:58:44	0.30159	217.867	FALSE	3
2022-09-14	10:58:45	-0.11042	217.867	FALSE	3
2022-09-14	10:58:45	-0.531692	217.867	FALSE	3
2022-09-14	10:58:45	-0.719986	217.867	FALSE	3
2022-09-14	10:58:46	-0.189707	217.867	FALSE	3
2022-09-14	10:58:46	0.469682	218.337	FALSE	3
2022-09-14	10:58:46	0.529478	218.866	FALSE	3
2022-09-14	10:58:46	0.576501	219.443	FALSE	3
2022-09-14	10:58:47	0.599453	220.042	FALSE	3
2022-09-14	10:58:47	0.670394	220.713	FALSE	3
2022-09-14	10:58:47	0.668919	221.382	FALSE	3
2022-09-14	10:58:47	0.693651	222.075	FALSE	3
2022-09-14	10:58:48	0.686476	222.762	FALSE	3
2022-09-14	10:58:48	0.716196	223.478	FALSE	3
2022-09-14	10:58:48	0.715789	224.194	FALSE	3
2022-09-14	10:58:48	0.725916	224.92	FALSE	3
2022-09-14	10:58:49	0.718384	225.638	FALSE	3
2022-09-14	10:58:49	0.719758	226.358	FALSE	3
2022-09-14	10:58:49	0.70902	227.067	FALSE	3
2022-09-14	10:58:50	0.729478	227.796	FALSE	3
2022-09-14	10:58:50	0.706069	228.502	FALSE	3
2022-09-14	10:58:50	0.729428	229.232	FALSE	3
2022-09-14	10:58:50	0.706018	229.938	FALSE	3
2022-09-14	10:58:51	0.730496	230.668	FALSE	3
2022-09-14	10:58:51	0.711921	231.38	FALSE	3
2022-09-14	10:58:51	0.729886	232.11	FALSE	3
2022-09-14	10:58:51	0.712328	232.822	FALSE	3
2022-09-14	10:58:52	0.726679	233.549	FALSE	3
2022-09-14	10:58:52	0.714415	234.263	FALSE	3
2022-09-14	10:58:52	0.731667	234.995	FALSE	3
2022-09-14	10:58:52	0.721845	235.717	FALSE	3
2022-09-14	10:58:53	0.73355	236.45	FALSE	3
2022-09-14	10:58:53	0.722812	237.173	FALSE	3
2022-09-14	10:58:53	0.725509	237.899	FALSE	3
2022-09-14	10:58:54	0.719656	238.618	FALSE	3
2022-09-14	10:58:54	0.733295	239.352	FALSE	3
2022-09-14	10:58:54	0.720013	240.072	FALSE	3
2022-09-14	10:58:54	0.726883	240.799	FALSE	3
2022-09-14	10:58:55	0.718639	241.517	FALSE	3
2022-09-14	10:58:55	0.730954	242.248	FALSE	3
2022-09-14	10:58:55	0.717977	242.966	FALSE	3
2022-09-14	10:58:55	0.733041	243.699	FALSE	3
2022-09-14	10:58:56	0.724389	244.424	FALSE	3
2022-09-14	10:58:56	0.728155	245.152	FALSE	3
2022-09-14	10:58:56	0.723321	245.875	FALSE	3
2022-09-14	10:58:56	0.730089	246.605	FALSE	3
2022-09-14	10:58:57	0.718944	247.324	FALSE	3
2022-09-14	10:58:57	0.726069	248.05	FALSE	3
2022-09-14	10:58:57	0.728512	248.779	FALSE	3
2022-09-14	10:58:58	0.731463	249.51	FALSE	3
2022-09-14	10:58:58	0.72673	250.237	FALSE	3
2022-09-14	10:58:58	0.725204	250.962	FALSE	3
2022-09-14	10:58:58	0.728206	251.69	FALSE	3
2022-09-14	10:58:59	0.729275	252.42	FALSE	3
2022-09-14	10:58:59	0.730547	253.15	FALSE	3
2022-09-14	10:58:59	0.731768	253.882	FALSE	3
2022-09-14	10:58:59	0.726679	254.609	FALSE	3
2022-09-14	10:59:00	0.591769	255.2	FALSE	3
2022-09-14	10:59:00	0.725458	255.926	FALSE	3
2022-09-14	10:59:00	0.72902	256.655	FALSE	3
2022-09-14	10:59:00	0.728359	257.383	FALSE	3
2022-09-14	10:59:01	0.7136	258.097	FALSE	3
2022-09-14	10:59:01	0.73299	258.83	FALSE	3
2022-09-14	10:59:01	0.7307	259.561	FALSE	3
2022-09-14	10:59:02	0.731717	260.292	FALSE	3
2022-09-14	10:59:02	0.720674	261.013	FALSE	3
2022-09-14	10:59:02	0.730496	261.743	FALSE	3
2022-09-14	10:59:02	0.727697	262.471	FALSE	3
2022-09-14	10:59:03	0.722456	263.194	FALSE	3
2022-09-14	10:59:03	0.732684	263.926	FALSE	3
2022-09-14	10:59:03	0.730089	264.656	FALSE	3
2022-09-14	10:59:03	0.72383	265.38	FALSE	3
2022-09-14	10:59:04	0.725763	266.106	FALSE	3
2022-09-14	10:59:04	0.722761	266.829	FALSE	3
2022-09-14	10:59:04	0.731972	267.561	FALSE	3
2022-09-14	10:59:04	0.726018	268.287	FALSE	3
2022-09-14	10:59:05	0.721692	269.008	FALSE	3
2022-09-14	10:59:05	0.732532	269.741	FALSE	3
2022-09-14	10:59:05	0.735433	270.476	FALSE	3
2022-09-14	10:59:06	0.725662	271.202	FALSE	3
2022-09-14	10:59:06	0.728562	271.931	FALSE	3
2022-09-14	10:59:06	0.721234	272.652	FALSE	3
2022-09-14	10:59:06	0.712125	273.364	FALSE	3
2022-09-14	10:59:07	0.72444	274.088	FALSE	3
2022-09-14	10:59:07	0.724186	274.813	FALSE	3
2022-09-14	10:59:07	0.691514	275.504	FALSE	3
2022-09-14	10:59:07	0.715483	276.22	FALSE	3
2022-09-14	10:59:08	0.70673	276.926	FALSE	3
2022-09-14	10:59:08	0.711412	277.638	FALSE	3
2022-09-14	10:59:08	0.680216	278.318	FALSE	3
2022-09-14	10:59:08	0.713753	279.032	FALSE	3
2022-09-14	10:59:09	0.715534	279.747	FALSE	3
2022-09-14	10:59:09	0.709122	280.456	FALSE	3
2022-09-14	10:59:09	0.715687	281.172	FALSE	3
2022-09-14	10:59:10	0.712277	281.884	FALSE	3
2022-09-14	10:59:10	0.705407	282.59	FALSE	3
2022-09-14	10:59:10	0.702761	283.292	FALSE	3
2022-09-14	10:59:10	0.699555	283.992	FALSE	3
2022-09-14	10:59:11	0.696756	284.689	FALSE	3
2022-09-14	10:59:11	0.711718	285.4	FALSE	3
2022-09-14	10:59:11	0.704542	286.105	FALSE	3
2022-09-14	10:59:11	0.713448	286.818	FALSE	3
2022-09-14	10:59:12	0.667443	287.486	FALSE	3
2022-09-14	10:59:12	0.473346	287.959	FALSE	3
2022-09-14	10:59:12	0.595483	288.555	FALSE	3
2022-09-14	10:59:12	0.70673	289.261	FALSE	3
2022-09-14	10:59:13	0.73355	289.995	FALSE	3
2022-09-14	10:59:13	0.730954	290.726	FALSE	3
2022-09-14	10:59:13	0.735331	291.461	FALSE	3
2022-09-14	10:59:14	0.731005	292.192	FALSE	3
2022-09-14	10:59:14	0.735992	292.928	FALSE	3
2022-09-14	10:59:14	0.73131	293.66	FALSE	3
2022-09-14	10:59:14	0.727799	294.387	FALSE	3
2022-09-14	10:59:15	0.732175	295.12	FALSE	3
2022-09-14	10:59:15	0.739351	295.859	FALSE	3
2022-09-14	10:59:15	0.739046	296.598	FALSE	3
2022-09-14	10:59:15	0.728664	297.327	FALSE	3
2022-09-14	10:59:16	0.726221	298.053	FALSE	3
2022-09-14	10:59:16	0.7307	298.784	FALSE	3
2022-09-14	10:59:16	0.731819	299.515	FALSE	3
2022-09-14	10:59:16	0.730038	300.245	FALSE	3
2022-09-14	10:59:17	0.728664	300.974	FALSE	3
2022-09-14	10:59:17	0.73986	301.714	FALSE	3
2022-09-14	10:59:17	0.72612	302.44	FALSE	3
2022-09-14	10:59:18	0.734313	303.174	FALSE	3
2022-09-14	10:59:18	0.720318	303.895	FALSE	3
2022-09-14	10:59:18	0.734008	304.629	FALSE	3
2022-09-14	10:59:18	0.732634	305.361	FALSE	3
2022-09-14	10:59:19	0.728257	306.09	FALSE	3
2022-09-14	10:59:19	0.734008	306.824	FALSE	3
2022-09-14	10:59:19	0.734618	307.558	FALSE	3
2022-09-14	10:59:19	0.732379	308.291	FALSE	3
2022-09-14	10:59:20	0.719606	309.01	FALSE	3
2022-09-14	10:59:20	0.730394	309.741	FALSE	3
2022-09-14	10:59:20	0.731667	310.472	FALSE	3
2022-09-14	10:59:20	0.730903	311.203	FALSE	3
2022-09-14	10:59:21	0.728461	311.932	FALSE	3
2022-09-14	10:59:21	0.722761	312.654	FALSE	3
2022-09-14	10:59:21	0.72383	313.378	FALSE	3
2022-09-14	10:59:22	0.734008	314.112	FALSE	3
2022-09-14	10:59:22	0.731209	314.843	FALSE	3
2022-09-14	10:59:22	0.729631	315.573	FALSE	3
2022-09-14	10:59:22	0.735076	316.308	FALSE	3
2022-09-14	10:59:23	0.734008	317.042	FALSE	3
2022-09-14	10:59:23	0.730598	317.773	FALSE	3
2022-09-14	10:59:23	0.730343	318.503	FALSE	3
2022-09-14	10:59:23	0.732379	319.235	FALSE	3
2022-09-14	10:59:24	0.731921	319.967	FALSE	3
2022-09-14	10:59:24	0.731717	320.699	FALSE	3
2022-09-14	10:59:24	0.730801	321.43	FALSE	3
2022-09-14	10:59:24	0.731209	322.161	FALSE	3
2022-09-14	10:59:25	0.732786	322.894	FALSE	3
2022-09-14	10:59:25	0.723575	323.617	FALSE	3
2022-09-14	10:59:25	0.725763	324.343	FALSE	3
2022-09-14	10:59:26	0.724135	325.067	FALSE	3
2022-09-14	10:59:26	0.608308	325.676	FALSE	3
2022-09-14	10:59:26	0.734364	326.41	FALSE	3
2022-09-14	10:59:26	0.734822	327.145	FALSE	3
2022-09-14	10:59:27	0.731768	327.877	FALSE	3
2022-09-14	10:59:27	0.725916	328.603	FALSE	3
2022-09-14	10:59:27	0.740623	329.343	FALSE	3
2022-09-14	10:59:27	0.731005	330.074	FALSE	3
2022-09-14	10:59:28	0.72612	330.8	FALSE	3
2022-09-14	10:59:28	0.732023	331.532	FALSE	3
2022-09-14	10:59:28	0.727799	332.26	FALSE	3
2022-09-14	10:59:28	0.730038	332.99	FALSE	3
2022-09-14	10:59:29	0.736145	333.726	FALSE	3
2022-09-14	10:59:29	0.735076	334.461	FALSE	3
2022-09-14	10:59:29	0.73299	335.194	FALSE	3
2022-09-14	10:59:30	0.735687	335.93	FALSE	3
2022-09-14	10:59:30	0.736603	336.667	FALSE	3
2022-09-14	10:59:30	0.741285	337.408	FALSE	3
2022-09-14	10:59:30	0.729071	338.137	FALSE	3
2022-09-14	10:59:31	0.735178	338.872	FALSE	3
2022-09-14	10:59:31	0.72958	339.602	FALSE	3
2022-09-14	10:59:31	0.732175	340.334	FALSE	3
2022-09-14	10:59:31	0.733244	341.067	FALSE	3
2022-09-14	10:59:32	0.733601	341.801	FALSE	3
2022-09-14	10:59:32	0.731768	342.533	FALSE	3
2022-09-14	10:59:32	0.72673	343.259	FALSE	3
2022-09-14	10:59:32	0.727952	343.987	FALSE	3
2022-09-14	10:59:33	0.733244	344.72	FALSE	3
2022-09-14	10:59:33	0.725662	345.446	FALSE	3
2022-09-14	10:59:33	0.734618	346.181	FALSE	3
2022-09-14	10:59:34	0.722201	346.903	FALSE	3
2022-09-14	10:59:34	0.727952	347.631	FALSE	3
2022-09-14	10:59:34	0.730191	348.361	FALSE	3
2022-09-14	10:59:34	0.736196	349.097	FALSE	3
2022-09-14	10:59:35	0.725102	349.822	FALSE	3
2022-09-14	10:59:35	0.730293	350.553	FALSE	3
2022-09-14	10:59:35	0.717621	351.27	FALSE	3
2022-09-14	10:59:35	0.728613	351.999	FALSE	3
2022-09-14	10:59:36	0.728817	352.728	FALSE	3
2022-09-14	10:59:36	0.734873	353.463	FALSE	3
2022-09-14	10:59:36	0.735127	354.198	FALSE	3
2022-09-14	10:59:36	0.73014	354.928	FALSE	3
2022-09-14	10:59:37	0.729784	355.658	FALSE	3
2022-09-14	10:59:37	0.722252	356.38	FALSE	3
2022-09-14	10:59:37	0.732684	357.113	FALSE	3
2022-09-14	10:59:38	0.730547	357.843	FALSE	3
2022-09-14	10:59:38	0.735382	358.579	FALSE	3
2022-09-14	10:59:38	0.731565	359.31	FALSE	3
2022-09-14	10:59:38	0.729122	360.039	FALSE	3
2022-09-14	10:59:39	0.736654	360.776	FALSE	3
2022-09-14	10:59:39	0.738181	361.514	FALSE	3
2022-09-14	10:59:39	0.730394	362.244	FALSE	3
2022-09-14	10:59:39	0.733092	362.978	FALSE	3
2022-09-14	10:59:40	0.732074	363.71	FALSE	3
2022-09-14	10:59:40	0.734517	364.444	FALSE	3
2022-09-14	10:59:40	0.721591	365.166	FALSE	3
2022-09-14	10:59:40	0.733397	365.899	FALSE	3
2022-09-14	10:59:41	0.729784	366.629	FALSE	3
2022-09-14	10:59:41	0.736552	367.365	FALSE	3
2022-09-14	10:59:41	0.738181	368.104	FALSE	3
2022-09-14	10:59:42	0.735789	368.839	FALSE	3
2022-09-14	10:59:42	0.733244	369.573	FALSE	3
2022-09-14	10:59:42	0.734466	370.307	FALSE	3
2022-09-14	10:59:42	0.735229	371.042	FALSE	3
2022-09-14	10:59:43	0.733702	371.776	FALSE	3
2022-09-14	10:59:43	0.123779	371.9	FALSE	3
2022-09-14	10:59:43	-0.872048	371.9	FALSE	3
2022-09-14	10:59:43	-0.909859	371.9	FALSE	3
2022-09-14	10:59:44	-0.923905	371.9	FALSE	3
2022-09-14	10:59:44	0.573753	372.474	FALSE	3
2022-09-14	10:59:44	0.736196	373.21	FALSE	3
2022-09-14	10:59:44	0.726221	373.936	FALSE	3
2022-09-14	10:59:45	0.734771	374.671	FALSE	3
2022-09-14	10:59:45	0.733448	375.404	FALSE	3
2022-09-14	10:59:45	0.735891	376.14	FALSE	3
2022-09-14	10:59:46	0.734771	376.875	FALSE	3
2022-09-14	10:59:46	0.731921	377.607	FALSE	3
2022-09-14	10:59:46	0.731259	378.338	FALSE	3
2022-09-14	10:59:46	0.734211	379.072	FALSE	3
2022-09-14	10:59:47	0.72902	379.801	FALSE	3
2022-09-14	10:59:47	0.742506	380.544	FALSE	3
2022-09-14	10:59:47	0.742659	381.286	FALSE	3
2022-09-14	10:59:47	0.726272	382.013	FALSE	3
2022-09-14	10:59:48	0.735076	382.748	FALSE	3
2022-09-14	10:59:48	0.728868	383.477	FALSE	3
2022-09-14	10:59:48	0.731717	384.208	FALSE	3
2022-09-14	10:59:48	0.736247	384.945	FALSE	3
2022-09-14	10:59:49	0.734466	385.679	FALSE	3
2022-09-14	10:59:49	0.725763	386.405	FALSE	3
2022-09-14	10:59:49	0.735178	387.14	FALSE	3
2022-09-14	10:59:50	0.734109	387.874	FALSE	3
2022-09-14	10:59:50	0.731158	388.605	FALSE	3
2022-09-14	10:59:50	0.726272	389.332	FALSE	3
2022-09-14	10:59:50	0.734771	390.066	FALSE	3
2022-09-14	10:59:51	0.729224	390.796	FALSE	3
2022-09-14	10:59:51	0.732023	391.528	FALSE	3
2022-09-14	10:59:51	0.731819	392.259	FALSE	3
2022-09-14	10:59:51	0.723524	392.983	FALSE	3
2022-09-14	10:59:52	0.733092	393.716	FALSE	3
2022-09-14	10:59:52	0.73757	394.454	FALSE	3
2022-09-14	10:59:52	0.730343	395.184	FALSE	3
2022-09-14	10:59:52	0.732328	395.916	FALSE	3
2022-09-14	10:59:53	0.738231	396.655	FALSE	3
2022-09-14	10:59:53	0.724542	397.379	FALSE	3
2022-09-14	10:59:53	0.728613	398.108	FALSE	3
2022-09-14	10:59:54	0.734313	398.842	FALSE	3
2022-09-14	10:59:54	0.732837	399.575	FALSE	3
2022-09-14	10:59:54	0.732786	400.308	FALSE	3
2022-09-14	10:59:54	0.730954	401.039	FALSE	3
2022-09-14	10:59:55	0.730242	401.769	FALSE	3
2022-09-14	10:59:55	0.73472	402.504	FALSE	3
2022-09-14	10:59:55	0.736043	403.24	FALSE	3
2022-09-14	10:59:55	0.736399	403.976	FALSE	3
2022-09-14	10:59:56	0.733499	404.709	FALSE	3
2022-09-14	10:59:56	0.735891	405.445	FALSE	3
2022-09-14	10:59:56	0.733448	406.179	FALSE	3
2022-09-14	10:59:56	0.735127	406.914	FALSE	3
2022-09-14	10:59:57	0.736094	407.65	FALSE	3
2022-09-14	10:59:57	0.733193	408.383	FALSE	3
2022-09-14	10:59:57	0.733244	409.116	FALSE	3
2022-09-14	10:59:57	0.730649	409.847	FALSE	3
2022-09-14	10:59:58	0.729224	410.576	FALSE	3
2022-09-14	10:59:58	0.734466	411.311	FALSE	3
2022-09-14	10:59:58	0.732074	412.043	FALSE	3
2022-09-14	10:59:59	0.7307	412.774	FALSE	3
2022-09-14	10:59:59	0.738231	413.512	FALSE	3
2022-09-14	10:59:59	0.728155	414.24	FALSE	3
2022-09-14	10:59:59	0.743524	414.983	FALSE	3
2022-09-14	11:00:00	0.724949	415.708	FALSE	3
2022-09-14	11:00:00	0.73131	416.44	FALSE	3
2022-09-14	11:00:00	0.735891	417.176	FALSE	3
2022-09-14	11:00:00	0.731972	417.908	FALSE	3
2022-09-14	11:00:01	0.732175	418.64	FALSE	3
2022-09-14	11:00:01	0.729936	419.37	FALSE	3
2022-09-14	11:00:01	0.732684	420.102	FALSE	3
2022-09-14	11:00:01	0.732481	420.835	FALSE	3
2022-09-14	11:00:02	0.738282	421.573	FALSE	3
2022-09-14	11:00:02	0.732074	422.305	FALSE	3
2022-09-14	11:00:02	0.734059	423.039	FALSE	3
2022-09-14	11:00:03	0.734008	423.773	FALSE	3
2022-09-14	11:00:03	0.714822	424.488	FALSE	3
2022-09-14	11:00:03	0.736857	425.225	FALSE	3
2022-09-14	11:00:03	0.726323	425.951	FALSE	3
2022-09-14	11:00:04	0.734924	426.686	FALSE	3
2022-09-14	11:00:04	0.198181	426.884	FALSE	3
2022-09-14	11:00:04	0.979351	427.864	FALSE	3
2022-09-14	11:00:04	0.634618	428.498	FALSE	3
2022-09-14	11:00:05	0.730801	429.229	FALSE	3
2022-09-14	11:00:05	0.731514	429.961	FALSE	3
2022-09-14	11:00:05	0.731361	430.692	FALSE	3
2022-09-14	11:00:05	0.730445	431.423	FALSE	3
2022-09-14	11:00:06	0.728054	432.151	FALSE	3
2022-09-14	11:00:06	0.733142	432.884	FALSE	3
2022-09-14	11:00:06	0.734568	433.618	FALSE	3
2022-09-14	11:00:07	0.727341	434.346	FALSE	3
2022-09-14	11:00:07	0.73243	435.078	FALSE	3
2022-09-14	11:00:07	0.728613	435.807	FALSE	3
2022-09-14	11:00:07	0.729784	436.536	FALSE	3
2022-09-14	11:00:08	0.735076	437.272	FALSE	3
2022-09-14	11:00:08	0.72841	438	FALSE	3
2022-09-14	11:00:08	0.725204	438.725	FALSE	3
2022-09-14	11:00:08	0.735076	439.46	FALSE	3
2022-09-14	11:00:09	0.735433	440.196	FALSE	3
2022-09-14	11:00:09	0.727748	440.923	FALSE	3
2022-09-14	11:00:09	0.736705	441.66	FALSE	3
2022-09-14	11:00:09	0.730089	442.39	FALSE	3
2022-09-14	11:00:10	0.727494	443.118	FALSE	3
2022-09-14	11:00:10	0.736959	443.855	FALSE	3
2022-09-14	11:00:10	0.737417	444.592	FALSE	3
2022-09-14	11:00:11	0.728868	445.321	FALSE	3
2022-09-14	11:00:11	0.734415	446.055	FALSE	3
2022-09-14	11:00:11	0.728562	446.784	FALSE	3
2022-09-14	11:00:11	0.729631	447.514	FALSE	3
2022-09-14	11:00:12	0.727341	448.241	FALSE	3
2022-09-14	11:00:12	0.734008	448.975	FALSE	3
2022-09-14	11:00:12	0.725967	449.701	FALSE	3
2022-09-14	11:00:12	0.727646	450.428	FALSE	3
2022-09-14	11:00:13	0.72902	451.158	FALSE	3
2022-09-14	11:00:13	0.737672	451.895	FALSE	3
2022-09-14	11:00:13	0.735891	452.631	FALSE	3
2022-09-14	11:00:13	0.736145	453.367	FALSE	3
2022-09-14	11:00:14	0.734568	454.102	FALSE	3
2022-09-14	11:00:14	0.724338	454.826	FALSE	3
2022-09-14	11:00:14	0.735585	455.562	FALSE	3
2022-09-14	11:00:15	0.725305	456.287	FALSE	3
2022-09-14	11:00:15	0.726272	457.013	FALSE	3
2022-09-14	11:00:15	0.723982	457.737	FALSE	3
2022-09-14	11:00:15	0.726069	458.463	FALSE	3
2022-09-14	11:00:16	0.734924	459.198	FALSE	3
2022-09-14	11:00:16	0.730293	459.929	FALSE	3
2022-09-14	11:00:16	0.734975	460.664	FALSE	3
2022-09-14	11:00:16	0.726527	461.39	FALSE	3
2022-09-14	11:00:17	0.719504	462.11	FALSE	3
2022-09-14	11:00:17	0.730649	462.84	FALSE	3
2022-09-14	11:00:17	0.730954	463.571	FALSE	3
2022-09-14	11:00:17	0.725916	464.297	FALSE	3
2022-09-14	11:00:18	0.732684	465.03	FALSE	3
2022-09-14	11:00:18	0.728461	465.758	FALSE	3
2022-09-14	11:00:18	0.729682	466.488	FALSE	3
2022-09-14	11:00:19	0.730903	467.219	FALSE	3
2022-09-14	11:00:19	0.728919	467.948	FALSE	3
2022-09-14	11:00:19	0.734008	468.682	FALSE	3
2022-09-14	11:00:19	0.734568	469.416	FALSE	3
2022-09-14	11:00:20	0.732074	470.148	FALSE	3
2022-09-14	11:00:20	0.73187	470.88	FALSE	3
2022-09-14	11:00:20	0.730038	471.61	FALSE	3
2022-09-14	11:00:20	0.733346	472.344	FALSE	3
2022-09-14	11:00:21	0.734669	473.078	FALSE	3
2022-09-14	11:00:21	0.736399	473.815	FALSE	3
2022-09-14	11:00:21	0.727392	474.542	FALSE	3
2022-09-14	11:00:21	0.727799	475.27	FALSE	3
2022-09-14	11:00:22	0.730496	476	FALSE	3
2022-09-14	11:00:22	0.735941	476.736	FALSE	3
2022-09-14	11:00:22	0.734771	477.471	FALSE	3
2022-09-14	11:00:23	0.732939	478.204	FALSE	3
2022-09-14	11:00:23	0.732786	478.937	FALSE	3
2022-09-14	11:00:23	0.731514	479.668	FALSE	3
2022-09-14	11:00:23	0.726629	480.395	FALSE	3
2022-09-14	11:00:24	0.735382	481.13	FALSE	3
2022-09-14	11:00:24	0.73416	481.865	FALSE	3
2022-09-14	11:00:24	0.732583	482.597	FALSE	3
2022-09-14	11:00:24	0.733397	483.33	FALSE	3
2022-09-14	11:00:25	0.737519	484.068	FALSE	3
2022-09-14	11:00:25	0.732175	484.8	FALSE	3
2022-09-14	11:00:25	0.72444	485.525	FALSE	3
2022-09-14	11:00:25	0.732786	486.257	FALSE	3
2022-09-14	11:00:26	0.725814	486.983	FALSE	3
2022-09-14	11:00:26	0.725407	487.709	FALSE	3
2022-09-14	11:00:26	0.729631	488.438	FALSE	3
2022-09-14	11:00:27	0.729529	489.168	FALSE	3
2022-09-14	11:00:27	0.725865	489.894	FALSE	3
2022-09-14	11:00:27	0.731209	490.625	FALSE	3
2022-09-14	11:00:27	0.73243	491.357	FALSE	3
2022-09-14	11:00:28	0.735992	492.093	FALSE	3
2022-09-14	11:00:28	0.735178	492.828	FALSE	3
2022-09-14	11:00:28	0.733702	493.562	FALSE	3
2022-09-14	11:00:28	0.73874	494.301	FALSE	3
2022-09-14	11:00:29	0.731107	495.032	FALSE	3
2022-09-14	11:00:29	0.730547	495.763	FALSE	3
2022-09-14	11:00:29	0.736908	496.499	FALSE	3
2022-09-14	11:00:29	0.732175	497.232	FALSE	3
2022-09-14	11:00:30	0.732379	497.964	FALSE	3
2022-09-14	11:00:30	0.738486	498.703	FALSE	3
2022-09-14	11:00:30	0.735687	499.438	FALSE	3
2022-09-14	11:00:31	0.730293	500.168	FALSE	3
2022-09-14	11:00:31	0.730751	500.899	FALSE	3
2022-09-14	11:00:31	0.734415	501.634	FALSE	3
2022-09-14	11:00:31	0.734415	502.368	FALSE	3
2022-09-14	11:00:32	0.732175	503.1	FALSE	3
2022-09-14	11:00:32	0.736807	503.837	FALSE	3
2022-09-14	11:00:32	0.735585	504.573	FALSE	3
2022-09-14	11:00:32	0.732786	505.305	FALSE	3
2022-09-14	11:00:33	0.73584	506.041	FALSE	3
2022-09-14	11:00:33	0.731819	506.773	FALSE	3
2022-09-14	11:00:33	0.734568	507.508	FALSE	3
2022-09-14	11:00:33	0.731158	508.239	FALSE	3
2022-09-14	11:00:34	0.735992	508.975	FALSE	3
2022-09-14	11:00:34	0.728613	509.703	FALSE	3
2022-09-14	11:00:34	0.722761	510.426	FALSE	3
2022-09-14	11:00:35	0.728308	511.154	FALSE	3
2022-09-14	11:00:35	0.729529	511.884	FALSE	3
2022-09-14	11:00:35	0.733397	512.617	FALSE	3
2022-09-14	11:00:35	0.736094	513.354	FALSE	3
2022-09-14	11:00:36	0.735331	514.089	FALSE	3
2022-09-14	11:00:36	0.726527	514.815	FALSE	3
2022-09-14	11:00:36	0.733244	515.549	FALSE	3
2022-09-14	11:00:36	0.730547	516.279	FALSE	3
2022-09-14	11:00:37	0.730903	517.01	FALSE	3
2022-09-14	11:00:37	0.726221	517.736	FALSE	3
2022-09-14	11:00:37	0.733499	518.47	FALSE	3
2022-09-14	11:00:37	0.725254	519.195	FALSE	3
2022-09-14	11:00:38	0.729224	519.924	FALSE	3
2022-09-14	11:00:38	0.732634	520.657	FALSE	3
2022-09-14	11:00:38	0.733244	521.39	FALSE	3
2022-09-14	11:00:39	0.735585	522.126	FALSE	3
2022-09-14	11:00:39	0.727697	522.853	FALSE	3
2022-09-14	11:00:39	0.728054	523.581	FALSE	3
2022-09-14	11:00:39	0.729478	524.311	FALSE	3
2022-09-14	11:00:40	0.7307	525.042	FALSE	3
2022-09-14	11:00:40	0.733244	525.775	FALSE	3
2022-09-14	11:00:40	0.733906	526.509	FALSE	3
2022-09-14	11:00:40	0.728715	527.238	FALSE	3
2022-09-14	11:00:41	0.736196	527.974	FALSE	3
2022-09-14	11:00:41	0.730852	528.705	FALSE	3
2022-09-14	11:00:41	0.727443	529.432	FALSE	3
2022-09-14	11:00:41	0.732175	530.164	FALSE	3
2022-09-14	11:00:42	0.736807	530.901	FALSE	3
2022-09-14	11:00:42	0.726425	531.627	FALSE	3
2022-09-14	11:00:42	0.731921	532.359	FALSE	3
2022-09-14	11:00:43	0.735229	533.095	FALSE	3
2022-09-14	11:00:43	0.735076	533.83	FALSE	3
2022-09-14	11:00:43	0.72556	534.555	FALSE	3
2022-09-14	11:00:43	0.734618	535.29	FALSE	3
2022-09-14	11:00:44	0.72556	536.015	FALSE	3
2022-09-14	11:00:44	0.730394	536.746	FALSE	3
2022-09-14	11:00:44	0.73131	537.477	FALSE	3
2022-09-14	11:00:44	0.731514	538.209	FALSE	3
2022-09-14	11:00:45	0.730903	538.939	FALSE	3
2022-09-14	11:00:45	0.729122	539.669	FALSE	3
2022-09-14	11:00:45	0.736247	540.405	FALSE	3
2022-09-14	11:00:45	0.728461	541.133	FALSE	3
2022-09-14	11:00:46	0.728766	541.862	FALSE	3
2022-09-14	11:00:46	0.73355	542.596	FALSE	3
2022-09-14	11:00:46	0.734975	543.331	FALSE	3
2022-09-14	11:00:47	0.728613	544.059	FALSE	3
2022-09-14	11:00:47	0.735076	544.794	FALSE	3
2022-09-14	11:00:47	0.730496	545.525	FALSE	3
2022-09-14	11:00:47	0.729478	546.254	FALSE	3
2022-09-14	11:00:48	0.731819	546.986	FALSE	3
2022-09-14	11:00:48	0.728206	547.714	FALSE	3
2022-09-14	11:00:48	0.726832	548.441	FALSE	3
2022-09-14	11:00:48	0.729682	549.171	FALSE	3
2022-09-14	11:00:49	0.729682	549.901	FALSE	3
2022-09-14	11:00:49	0.73645	550.637	FALSE	3
2022-09-14	11:00:49	0.728868	551.366	FALSE	3
2022-09-14	11:00:49	0.729377	552.095	FALSE	3
2022-09-14	11:00:50	0.731616	552.827	FALSE	3
2022-09-14	11:00:50	0.73243	553.559	FALSE	3
2022-09-14	11:00:50	0.733804	554.293	FALSE	3
2022-09-14	11:00:51	0.738231	555.031	FALSE	3
2022-09-14	11:00:51	0.730751	555.762	FALSE	3
2022-09-14	11:00:51	0.735433	556.497	FALSE	3
2022-09-14	11:00:51	0.740064	557.238	FALSE	3
2022-09-14	11:00:52	0.730394	557.968	FALSE	3
2022-09-14	11:00:52	0.734313	558.702	FALSE	3
2022-09-14	11:00:52	0.730801	559.433	FALSE	3
2022-09-14	11:00:52	0.730801	560.164	FALSE	3
2022-09-14	11:00:53	0.728919	560.893	FALSE	3
2022-09-14	11:00:53	0.732786	561.626	FALSE	3
2022-09-14	11:00:53	0.732023	562.358	FALSE	3
2022-09-14	11:00:53	0.734211	563.092	FALSE	3
2022-09-14	11:00:54	0.723117	563.815	FALSE	3
2022-09-14	11:00:54	0.7307	564.546	FALSE	3
2022-09-14	11:00:54	0.733804	565.279	FALSE	3
2022-09-14	11:00:55	0.735891	566.015	FALSE	3
2022-09-14	11:00:55	0.73355	566.749	FALSE	3
2022-09-14	11:00:55	0.731565	567.48	FALSE	3
2022-09-14	11:00:55	0.730751	568.211	FALSE	3
2022-09-14	11:00:56	0.731667	568.943	FALSE	3
2022-09-14	11:00:56	0.732532	569.675	FALSE	3
2022-09-14	11:00:56	0.734924	570.41	FALSE	3
2022-09-14	11:00:56	0.731158	571.141	FALSE	3
2022-09-14	11:00:57	0.734211	571.876	FALSE	3
2022-09-14	11:00:57	0.729224	572.605	FALSE	3
2022-09-14	11:00:57	0.729886	573.335	FALSE	3
2022-09-14	11:00:57	0.730191	574.065	FALSE	3
2022-09-14	11:00:58	0.737214	574.802	FALSE	3
2022-09-14	11:00:58	0.728155	575.53	FALSE	3
2022-09-14	11:00:58	0.732888	576.263	FALSE	3
2022-09-14	11:00:59	0.723473	576.987	FALSE	3
2022-09-14	11:00:59	0.727646	577.714	FALSE	3
2022-09-14	11:00:59	0.725305	578.44	FALSE	3
2022-09-14	11:00:59	0.731972	579.172	FALSE	3
2022-09-14	11:01:00	0.731005	579.903	FALSE	3
2022-09-14	11:01:00	0.731667	580.634	FALSE	3
2022-09-14	11:01:00	0.733753	581.368	FALSE	3
2022-09-14	11:01:00	0.736908	582.105	FALSE	3
2022-09-14	11:01:01	0.732277	582.837	FALSE	3
2022-09-14	11:01:01	0.734669	583.572	FALSE	3
2022-09-14	11:01:01	0.731667	584.304	FALSE	3
2022-09-14	11:01:01	0.735687	585.039	FALSE	3
2022-09-14	11:01:02	0.734313	585.774	FALSE	3
2022-09-14	11:01:02	0.730547	586.504	FALSE	3
2022-09-14	11:01:02	0.728868	587.233	FALSE	3
2022-09-14	11:01:03	0.733906	587.967	FALSE	3
2022-09-14	11:01:03	0.729224	588.696	FALSE	3
2022-09-14	11:01:03	0.735891	589.432	FALSE	3
2022-09-14	11:01:03	0.73528	590.167	FALSE	3
2022-09-14	11:01:04	0.732634	590.9	FALSE	3
2022-09-14	11:01:04	0.724135	591.624	FALSE	3
2022-09-14	11:01:04	0.731463	592.355	FALSE	3
2022-09-14	11:01:04	0.741997	593.097	FALSE	3
2022-09-14	11:01:05	0.737214	593.835	FALSE	3
2022-09-14	11:01:05	0.734466	594.569	FALSE	3
2022-09-14	11:01:05	0.727188	595.296	FALSE	3
2022-09-14	11:01:05	0.729122	596.025	FALSE	3
2022-09-14	11:01:06	0.728359	596.754	FALSE	3
2022-09-14	11:01:06	0.734822	597.489	FALSE	3
2022-09-14	11:01:06	0.738588	598.227	FALSE	3
2022-09-14	11:01:07	0.729733	598.957	FALSE	3
2022-09-14	11:01:07	0.732532	599.69	FALSE	3
2022-09-14	11:01:07	0.737315	600.427	FALSE	3
2022-09-14	11:01:07	0.732583	601.159	FALSE	3
2022-09-14	11:01:08	0.737265	601.897	FALSE	3
2022-09-14	11:01:08	0.733448	602.63	FALSE	3
2022-09-14	11:01:08	0.726323	603.356	FALSE	3
2022-09-14	11:01:08	0.436501	603.793	FALSE	3
2022-09-14	11:01:09	0.732583	604.526	FALSE	3
2022-09-14	11:01:09	0.736908	605.262	FALSE	3
2022-09-14	11:01:09	0.732786	605.995	FALSE	3
2022-09-14	11:01:09	0.0689188	606.064	FALSE	3
2022-09-14	11:01:10	0.306272	606.37	FALSE	3
2022-09-14	11:01:10	-0.289402	606.37	FALSE	3
2022-09-14	11:01:10	-0.541921	606.37	FALSE	3
2022-09-14	11:01:11	-0.318867	606.37	FALSE	3
2022-09-14	11:01:11	-0.455916	606.37	FALSE	3
2022-09-14	11:01:11	-0.490674	606.37	FALSE	3
2022-09-14	11:01:11	-0.595407	606.37	FALSE	3
2022-09-14	11:01:12	-0.387875	606.37	FALSE	3
2022-09-14	11:01:12	-0.665381	606.37	FALSE	3
2022-09-14	11:01:12	-0.553066	606.37	FALSE	3
2022-09-14	11:01:12	-0.64991	606.37	FALSE	3
2022-09-14	11:01:13	-0.675457	606.37	FALSE	3
2022-09-14	11:01:13	-0.716271	606.37	FALSE	3
2022-09-14	11:01:13	-0.831182	606.37	FALSE	3
2022-09-14	11:01:13	-0.869299	606.37	FALSE	3
2022-09-14	11:01:14	-0.370114	606.37	FALSE	3
2022-09-14	11:01:14	-0.299631	606.37	FALSE	3
2022-09-14	11:01:14	0.0109545	606.381	FALSE	3
2022-09-14	11:01:15	0.172481	606.554	FALSE	3
2022-09-14	11:01:15	0.0827101	606.637	FALSE	3
2022-09-14	11:01:15	0.152685	606.789	FALSE	3
2022-09-14	11:01:15	0.0638297	606.853	FALSE	3
2022-09-14	11:01:16	0.153397	607.006	FALSE	3
2022-09-14	11:01:16	0.0594022	607.066	FALSE	3
2022-09-14	11:01:16	0.264847	607.331	FALSE	3
2022-09-14	11:01:16	0.0486644	607.379	FALSE	3
2022-09-14	11:01:17	0.203372	607.583	FALSE	3
2022-09-14	11:01:17	0.0989442	607.682	FALSE	3
2022-09-14	11:01:17	0.438232	608.12	FALSE	3
2022-09-14	11:01:17	-0.442786	608.12	FALSE	3
2022-09-14	11:01:18	0.179402	608.299	FALSE	3
2022-09-14	11:01:18	0.0714124	608.371	FALSE	3
2022-09-14	11:01:18	0.211819	608.583	FALSE	3
2022-09-14	11:01:19	0.0968069	608.679	FALSE	3
2022-09-14	11:01:19	0.229275	608.909	FALSE	3
2022-09-14	11:01:19	0.0991987	609.008	FALSE	3
2022-09-14	11:01:19	0.230496	609.238	FALSE	3
2022-09-14	11:01:20	0.144695	609.383	FALSE	3
2022-09-14	11:01:20	0.175331	609.558	FALSE	3
2022-09-14	11:01:20	0.0954328	609.654	FALSE	3
2022-09-14	11:01:20	0.100064	609.754	FALSE	3
2022-09-14	11:01:21	0.0375702	609.791	FALSE	3
2022-09-14	11:01:21	0.0511071	609.843	FALSE	3
2022-09-14	11:01:21	0.123117	609.966	FALSE	3
2022-09-14	11:01:21	0.0511071	610.017	FALSE	3
2022-09-14	11:01:22	0.0908017	610.108	FALSE	3
2022-09-14	11:01:22	0.0206236	610.128	FALSE	3
2022-09-14	11:01:22	0.103321	610.232	FALSE	3
2022-09-14	11:01:23	0.0242877	610.256	FALSE	3
2022-09-14	11:01:23	0.0880536	610.344	FALSE	3
2022-09-14	11:01:23	-0.0283331	610.344	FALSE	3
2022-09-14	11:01:23	0.0510053	610.395	FALSE	3
2022-09-14	11:01:24	0.109173	610.504	FALSE	3
2022-09-14	11:01:24	0.765458	611.269	FALSE	3
2022-09-14	11:01:24	0.744898	612.014	FALSE	3
2022-09-14	11:01:24	2.13167	614.146	FALSE	3
2022-09-14	11:01:25	2.22352	616.37	FALSE	3
2022-09-14	11:01:25	0.849987	617.22	FALSE	3
2022-09-14	11:01:25	-0.039529	617.22	FALSE	3
2022-09-14	11:01:25	-0.14701	617.22	FALSE	3
2022-09-14	11:01:26	-0.206806	617.22	FALSE	3
2022-09-14	11:01:26	-0.161972	617.22	FALSE	3
2022-09-14	11:01:26	-0.0312338	617.22	FALSE	3
2022-09-14	11:01:27	-0.328536	617.22	FALSE	3
2022-09-14	11:01:27	-0.362684	617.22	FALSE	3
2022-09-14	11:01:27	-0.398664	617.22	FALSE	3
2022-09-14	11:01:27	-0.256781	617.22	FALSE	3
2022-09-14	11:01:28	-0.318511	617.22	FALSE	3
2022-09-14	11:01:28	-0.287824	617.22	FALSE	3
2022-09-14	11:01:28	-0.0229896	617.22	FALSE	3
2022-09-14	11:01:28	0.241031	617.461	FALSE	3
2022-09-14	11:01:29	0.946119	618.407	FALSE	3
2022-09-14	11:01:29	1.42169	619.828	FALSE	3
2022-09-14	11:01:29	0.742659	620.571	FALSE	3
2022-09-14	11:01:29	0.42729	620.998	FALSE	3
2022-09-14	11:01:30	0.305305	621.304	FALSE	3
2022-09-14	11:01:30	0.406527	621.71	FALSE	3
2022-09-14	11:01:30	0.559555	622.27	FALSE	3
2022-09-14	11:01:30	1.10444	623.374	FALSE	3
2022-09-14	11:01:31	0.945814	624.32	FALSE	3
2022-09-14	11:01:31	0.810242	625.13	FALSE	3
2022-09-14	11:01:31	0.907748	626.038	FALSE	3
2022-09-14	11:01:32	0.862252	626.9	FALSE	3
2022-09-14	11:01:32	0.885967	627.786	FALSE	3
2022-09-14	11:01:32	0.319097	628.105	FALSE	3
2022-09-14	11:01:32	-0.113117	628.105	FALSE	3
2022-09-14	11:01:33	0.630801	628.736	FALSE	3
2022-09-14	11:01:33	0.640674	629.377	FALSE	3
2022-09-14	11:01:33	0.726425	630.103	FALSE	3
2022-09-14	11:01:33	0.737519	630.841	FALSE	3
2022-09-14	11:01:34	-3.54431	630.841	FALSE	3
2022-09-14	11:01:34	0.727596	631.568	FALSE	3
2022-09-14	11:01:34	0.730394	632.299	FALSE	3
2022-09-14	11:01:34	0.702048	633.001	FALSE	3
2022-09-14	11:01:35	0.731259	633.732	FALSE	3
2022-09-14	11:01:35	0.730089	634.462	FALSE	3
2022-09-14	11:01:35	0.734211	635.196	FALSE	3
2022-09-14	11:01:36	0.736349	635.933	FALSE	3
2022-09-14	11:01:36	0.732175	636.665	FALSE	3
2022-09-14	11:01:36	0.736094	637.401	FALSE	3
2022-09-14	11:01:36	0.726578	638.128	FALSE	3
2022-09-14	11:01:37	0.734008	638.862	FALSE	3
2022-09-14	11:01:37	0.733295	639.595	FALSE	3
2022-09-14	11:01:37	0.739962	640.335	FALSE	3
2022-09-14	11:01:37	0.736552	641.071	FALSE	3
2022-09-14	11:01:38	0.732939	641.804	FALSE	3
2022-09-14	11:01:38	0.73187	642.536	FALSE	3
2022-09-14	11:01:38	0.724237	643.26	FALSE	3
2022-09-14	11:01:38	0.265611	643.526	FALSE	3
2022-09-14	11:01:39	0.0876465	643.614	FALSE	3
2022-09-14	11:01:39	-0.0800888	643.614	FALSE	3
2022-09-14	11:01:39	0.732888	644.347	FALSE	3
2022-09-14	11:01:40	0.731514	645.078	FALSE	3
2022-09-14	11:01:40	0.740216	645.818	FALSE	3
2022-09-14	11:01:40	0.493041	646.311	FALSE	3
2022-09-14	11:01:40	0.347901	646.659	FALSE	3
2022-09-14	11:01:41	0.319046	646.978	FALSE	3
2022-09-14	11:01:41	0.392685	647.371	FALSE	3
2022-09-14	11:01:41	0.342354	647.713	FALSE	3
2022-09-14	11:01:41	0.404084	648.117	FALSE	3
2022-09-14	11:01:42	0.363168	648.481	FALSE	3
2022-09-14	11:01:42	0.370751	648.851	FALSE	3
2022-09-14	11:01:42	0.426679	649.278	FALSE	3
2022-09-14	11:01:42	0.307596	649.586	FALSE	3
2022-09-14	11:01:43	-0.529605	649.586	FALSE	3
2022-09-14	11:01:43	0.140115	649.726	FALSE	3
2022-09-14	11:01:43	0.62673	650.352	FALSE	3
2022-09-14	11:01:44	0.735585	651.088	FALSE	3
2022-09-14	11:01:44	0.731616	651.82	FALSE	3
2022-09-14	11:01:44	0.72841	652.548	FALSE	3
2022-09-14	11:01:44	0.737672	653.286	FALSE	3
2022-09-14	11:01:45	0.734262	654.02	FALSE	3
2022-09-14	11:01:45	0.73416	654.754	FALSE	3
2022-09-14	11:01:45	0.721997	655.476	FALSE	3
2022-09-14	11:01:45	0.737417	656.214	FALSE	3
2022-09-14	11:01:46	0.740064	656.954	FALSE	3
2022-09-14	11:01:46	0.729987	657.684	FALSE	3
2022-09-14	11:01:46	0.732634	658.416	FALSE	3
2022-09-14	11:01:46	0.734415	659.151	FALSE	3
2022-09-14	11:01:47	0.726883	659.878	FALSE	3
2022-09-14	11:01:47	0.739453	660.617	FALSE	3
2022-09-14	11:01:47	0.730242	661.347	FALSE	3
2022-09-14	11:01:48	0.731259	662.078	FALSE	3
2022-09-14	11:01:48	0.735789	662.814	FALSE	3
2022-09-14	11:01:48	0.735585	663.55	FALSE	3
2022-09-14	11:01:48	0.732074	664.282	FALSE	3
2022-09-14	11:01:49	0.726679	665.009	FALSE	3
2022-09-14	11:01:49	0.735433	665.744	FALSE	3
2022-09-14	11:01:49	0.730801	666.475	FALSE	3
2022-09-14	11:01:49	0.733753	667.209	FALSE	3
2022-09-14	11:01:50	0.7307	667.939	FALSE	3
2022-09-14	11:01:50	0.738893	668.678	FALSE	3
2022-09-14	11:01:50	0.735738	669.414	FALSE	3
2022-09-14	11:01:50	0.730038	670.144	FALSE	3
2022-09-14	11:01:51	0.736399	670.88	FALSE	3
2022-09-14	11:01:51	0.736807	671.617	FALSE	3
2022-09-14	11:01:51	0.731209	672.348	FALSE	3
2022-09-14	11:01:52	0.737519	673.086	FALSE	3
2022-09-14	11:01:52	0.735127	673.821	FALSE	3
2022-09-14	11:01:52	0.730852	674.552	FALSE	3
2022-09-14	11:01:52	0.733193	675.285	FALSE	3
2022-09-14	11:01:53	0.734924	676.02	FALSE	3
2022-09-14	11:01:53	0.737977	676.758	FALSE	3
2022-09-14	11:01:53	0.735229	677.493	FALSE	3
2022-09-14	11:01:53	0.734415	678.228	FALSE	3
2022-09-14	11:01:54	0.731717	678.959	FALSE	3
2022-09-14	11:01:54	0.734568	679.694	FALSE	3
2022-09-14	11:01:54	0.736247	680.43	FALSE	3
2022-09-14	11:01:54	0.746679	681.177	FALSE	3
2022-09-14	11:01:55	0.735483	681.912	FALSE	3
2022-09-14	11:01:55	0.733295	682.646	FALSE	3
2022-09-14	11:01:55	0.732481	683.378	FALSE	3
2022-09-14	11:01:56	0.731819	684.11	FALSE	3
2022-09-14	11:01:56	0.73472	684.845	FALSE	3
2022-09-14	11:01:56	0.734618	685.579	FALSE	3
2022-09-14	11:01:56	0.739198	686.318	FALSE	3
2022-09-14	11:01:57	0.734568	687.053	FALSE	3
2022-09-14	11:01:57	0.738537	687.792	FALSE	3
2022-09-14	11:01:57	0.738791	688.53	FALSE	3
2022-09-14	11:01:57	0.732023	689.262	FALSE	3
2022-09-14	11:01:58	0.736196	689.999	FALSE	3
2022-09-14	11:01:58	0.733397	690.732	FALSE	3
2022-09-14	11:01:58	0.734924	691.467	FALSE	3
2022-09-14	11:01:58	0.733092	692.2	FALSE	3
2022-09-14	11:01:59	0.728512	692.928	FALSE	3
2022-09-14	11:01:59	0.721183	693.65	FALSE	3
2022-09-14	11:01:59	-0.102684	693.65	FALSE	3
2022-09-14	11:02:00	0.593295	694.243	FALSE	3
2022-09-14	11:02:00	0.260725	694.504	FALSE	3
2022-09-14	11:02:00	0.592583	695.096	FALSE	3
2022-09-14	11:02:00	0.735433	695.832	FALSE	3
2022-09-14	11:02:01	0.720267	696.552	FALSE	3
2022-09-14	11:02:01	0.734618	697.287	FALSE	3
2022-09-14	11:02:01	0.719097	698.006	FALSE	3
2022-09-14	11:02:01	0.733193	698.739	FALSE	3
2022-09-14	11:02:02	0.243575	698.982	FALSE	3
2022-09-14	11:02:02	0.147748	699.13	FALSE	3
2022-09-14	11:02:02	0.843219	699.973	FALSE	3
2022-09-14	11:02:02	0.737875	700.711	FALSE	3
2022-09-14	11:02:03	1.28159	701.993	FALSE	3
2022-09-14	11:02:03	2.57828	704.571	FALSE	3
2022-09-14	11:02:03	0.508003	705.079	FALSE	3
2022-09-14	11:02:04	7.80083	712.88	1	4
2022-09-14	11:02:04	4.91212	717.792	1	5
2022-09-14	11:02:04	2.1222	719.914	FALSE	5
2022-09-14	11:02:04	2.31151	722.226	FALSE	5
2022-09-14	11:02:05	5.04413	727.27	1	6
2022-09-14	11:02:05	6.71156	733.981	1	7
2022-09-14	11:02:05	1.71899	735.7	FALSE	7
2022-09-14	11:02:05	0.700166	736.401	FALSE	7
2022-09-14	11:02:06	0.697417	737.098	FALSE	7
2022-09-14	11:02:06	0.732379	737.83	FALSE	7
2022-09-14	11:02:06	0.733906	738.564	FALSE	7
2022-09-14	11:02:06	0.727545	739.292	FALSE	7

## Sheet: Richa_harness_2022914105648
						**GoPro Fitting: 1046
2022-09-14	10:56:48	0.406171
2022-09-14	10:56:48	0.361641
2022-09-14	10:56:48	0.368562
2022-09-14	10:56:49	0.341896
2022-09-14	10:56:49	0.374262
2022-09-14	10:56:49	0.327748
2022-09-14	10:56:49	0.372888
2022-09-14	10:56:50	0.306985
2022-09-14	10:56:50	0.325102
2022-09-14	10:56:50	0.367646
2022-09-14	10:56:51	0.364033
2022-09-14	10:56:51	0.365713
2022-09-14	10:56:51	0.323931
2022-09-14	10:56:51	0.352786
2022-09-14	10:56:52	0.355178
2022-09-14	10:56:52	0.378435
2022-09-14	10:56:52	0.613855
2022-09-14	10:56:52	0.386069
2022-09-14	10:56:53	0.369326
2022-09-14	10:56:53	0.367239
2022-09-14	10:56:53	0.349886
2022-09-14	10:56:53	0.342048
2022-09-14	10:56:54	0.34444
2022-09-14	10:56:54	0.323321
2022-09-14	10:56:54	0.382812
2022-09-14	10:56:55	0.385814
2022-09-14	10:56:55	0.358537
2022-09-14	10:56:55	0.378842
2022-09-14	10:56:55	0.387494
2022-09-14	10:56:56	0.390038
2022-09-14	10:56:56	0.333193
2022-09-14	10:56:56	0.363575
2022-09-14	10:56:56	0.364237
2022-09-14	10:56:57	0.362557
2022-09-14	10:56:57	0.334466
2022-09-14	10:56:57	0.344644
2022-09-14	10:56:57	0.32729
2022-09-14	10:56:58	0.364339
2022-09-14	10:56:58	0.337163
2022-09-14	10:56:58	0.383372
2022-09-14	10:56:59	0.390038
2022-09-14	10:56:59	0.376705
2022-09-14	10:56:59	0.399707
2022-09-14	10:56:59	0.380165
2022-09-14	10:57:00	0.692074
2022-09-14	10:57:00	0.7707
2022-09-14	10:57:00	2.2624
2022-09-14	10:57:00	4.83874
2022-09-14	10:57:01	3.76154
2022-09-14	10:57:01	2.60261
2022-09-14	10:57:01	1.77314
2022-09-14	10:57:02	1.02927
2022-09-14	10:57:02	0.653295
2022-09-14	10:57:02	0.492634
2022-09-14	10:57:02	0.411412
2022-09-14	10:57:03	0.39126
2022-09-14	10:57:03	0.409987
2022-09-14	10:57:03	0.410191
2022-09-14	10:57:03	0.362761
2022-09-14	10:57:04	0.445255
2022-09-14	10:57:04	0.399555
2022-09-14	10:57:04	0.393448
2022-09-14	10:57:04	0.420369
2022-09-14	10:57:05	0.396247
2022-09-14	10:57:05	0.432379
2022-09-14	10:57:05	0.44215
2022-09-14	10:57:05	0.36902
2022-09-14	10:57:06	0.475942
2022-09-14	10:57:06	0.445713
2022-09-14	10:57:06	0.968969
2022-09-14	10:57:07	0.611972
2022-09-14	10:57:07	0.445407
2022-09-14	10:57:07	0.448613
2022-09-14	10:57:07	0.417163
2022-09-14	10:57:08	0.432328
2022-09-14	10:57:08	0.385611
2022-09-14	10:57:08	0.423575
2022-09-14	10:57:08	0.710344
2022-09-14	10:57:09	0.0305473
2022-09-14	10:57:09	0.310802
2022-09-14	10:57:09	0.218333
2022-09-14	10:57:09	0.150649
2022-09-14	10:57:10	0.0686644
2022-09-14	10:57:10	0.270496
2022-09-14	10:57:10	0.170293
2022-09-14	10:57:11	0.0968577
2022-09-14	10:57:11	0.27411
2022-09-14	10:57:11	0.0596567
2022-09-14	10:57:11	0.218537
2022-09-14	10:57:12	0.188003
2022-09-14	10:57:12	0.218995
2022-09-14	10:57:12	0.207341
2022-09-14	10:57:12	0.162201
2022-09-14	10:57:13	0.219657
2022-09-14	10:57:13	0.211718
2022-09-14	10:57:13	0.231209
2022-09-14	10:57:13	0.264237
2022-09-14	10:57:14	0.25355
2022-09-14	10:57:14	0.135229
2022-09-14	10:57:14	0.248562
2022-09-14	10:57:15	0.0608781
2022-09-14	10:57:15	0.371361
2022-09-14	10:57:15	0.13813
2022-09-14	10:57:15	0.290802
2022-09-14	10:57:16	0.119097
2022-09-14	10:57:16	0.363524
2022-09-14	10:57:16	0.144898
2022-09-14	10:57:17	0.35701
2022-09-14	10:57:17	0.27014
2022-09-14	10:57:17	0.357723
2022-09-14	10:57:17	0.225255
2022-09-14	10:57:17	0.455127
2022-09-14	10:57:18	0.249682
2022-09-14	10:57:18	0.441132
2022-09-14	10:57:18	0.293092
2022-09-14	10:57:19	0.367188
2022-09-14	10:57:19	0.325458
2022-09-14	10:57:19	0.375229
2022-09-14	10:57:19	0.208155
2022-09-14	10:57:20	0.309427
2022-09-14	10:57:20	0.273041
2022-09-14	10:57:20	0.298741
2022-09-14	10:57:20	0.301438
2022-09-14	10:57:21	0.308308
2022-09-14	10:57:21	0.333702
2022-09-14	10:57:21	0.338079
2022-09-14	10:57:21	0.518995
2022-09-14	10:57:22	0.683321
2022-09-14	10:57:22	0.368155
2022-09-14	10:57:22	0.308054
2022-09-14	10:57:23	0.350852
2022-09-14	10:57:23	0.244135
2022-09-14	10:57:23	0.418537
2022-09-14	10:57:23	0.224644
2022-09-14	10:57:24	0.421234
2022-09-14	10:57:24	0.187697
2022-09-14	10:57:24	0.460013
2022-09-14	10:57:24	0.125051
2022-09-14	10:57:25	0.430038
2022-09-14	10:57:25	0.18785
2022-09-14	10:57:25	0.387188
2022-09-14	10:57:25	0.161641
2022-09-14	10:57:26	0.371056
2022-09-14	10:57:26	0.234364
2022-09-14	10:57:26	0.438995
2022-09-14	10:57:27	0.145204
2022-09-14	10:57:27	0.449326
2022-09-14	10:57:27	0.219708
2022-09-14	10:57:27	0.428512
2022-09-14	10:57:28	0.194211
2022-09-14	10:57:28	0.485611
2022-09-14	10:57:28	0.176196
2022-09-14	10:57:28	0.42673
2022-09-14	10:57:29	0.175992
2022-09-14	10:57:29	0.446069
2022-09-14	10:57:29	0.213448
2022-09-14	10:57:29	0.361998
2022-09-14	10:57:30	0.13584
2022-09-14	10:57:30	0.278639
2022-09-14	10:57:30	-0.0848216
2022-09-14	10:57:31	-0.133168
2022-09-14	10:57:31	-0.424923
2022-09-14	10:57:31	-0.373422
2022-09-14	10:57:31	0.460725
2022-09-14	10:57:32	0.722303
2022-09-14	10:57:32	1.82983
2022-09-14	10:57:32	3.1538
2022-09-14	10:57:32	1.93645
2022-09-14	10:57:33	1.63665
2022-09-14	10:57:33	1.90342
2022-09-14	10:57:33	1.60363
2022-09-14	10:57:33	1.49065
2022-09-14	10:57:34	1.81233
2022-09-14	10:57:34	1.60383
2022-09-14	10:57:34	0.706323
2022-09-14	10:57:35	0.134161
2022-09-14	10:57:35	0.0321249
2022-09-14	10:57:35	0.33584
2022-09-14	10:57:35	-0.216526
2022-09-14	10:57:36	-0.20533
2022-09-14	10:57:36	0.124186
2022-09-14	10:57:36	-0.070674
2022-09-14	10:57:36	-0.192608
2022-09-14	10:57:37	-0.201615
2022-09-14	10:57:37	0.160013
2022-09-14	10:57:37	0.335076
2022-09-14	10:57:37	0.377265
2022-09-14	10:57:38	0.379504
2022-09-14	10:57:38	0.450344
2022-09-14	10:57:38	0.343117
2022-09-14	10:57:39	0.380674
2022-09-14	10:57:39	0.428766
2022-09-14	10:57:39	0.339758
2022-09-14	10:57:39	0.405102
2022-09-14	10:57:40	0.192074
2022-09-14	10:57:40	0.297367
2022-09-14	10:57:40	0.218741
2022-09-14	10:57:40	0.284542
2022-09-14	10:57:41	0.244797
2022-09-14	10:57:41	0.282863
2022-09-14	10:57:41	0.159351
2022-09-14	10:57:41	0.370852
2022-09-14	10:57:42	0.204084
2022-09-14	10:57:42	0.377723
2022-09-14	10:57:42	0.173244
2022-09-14	10:57:43	0.319504
2022-09-14	10:57:43	0.213702
2022-09-14	10:57:43	0.38897
2022-09-14	10:57:43	0.211667
2022-09-14	10:57:44	0.383524
2022-09-14	10:57:44	0.322252
2022-09-14	10:57:44	0.524542
2022-09-14	10:57:44	0.288054
2022-09-14	10:57:45	0.278741
2022-09-14	10:57:45	0.454262
2022-09-14	10:57:45	0.543168
2022-09-14	10:57:45	0.761132
2022-09-14	10:57:46	0.794669
2022-09-14	10:57:46	0.501387
2022-09-14	10:57:46	0.899707
2022-09-14	10:57:47	0.636959
2022-09-14	10:57:47	0.606527
2022-09-14	10:57:47	0.686679
2022-09-14	10:57:47	0.518231
2022-09-14	10:57:48	0.414313
2022-09-14	10:57:48	0.54556
2022-09-14	10:57:48	0.61411
2022-09-14	10:57:48	1.18637
2022-09-14	10:57:49	2.44648
2022-09-14	10:57:49	2.60306
2022-09-14	10:57:49	1.3135
2022-09-14	10:57:49	0.713193
2022-09-14	10:57:50	0.544033
2022-09-14	10:57:50	0.368613
2022-09-14	10:57:50	0.470598
2022-09-14	10:57:51	0.372074
2022-09-14	10:57:51	0.248054
2022-09-14	10:57:51	0.318282
2022-09-14	10:57:51	0.236298
2022-09-14	10:57:52	0.363677
2022-09-14	10:57:52	0.388104
2022-09-14	10:57:52	0.407036
2022-09-14	10:57:52	0.442761
2022-09-14	10:57:53	0.395127
2022-09-14	10:57:53	0.390394
2022-09-14	10:57:53	0.485662
2022-09-14	10:57:53	0.451819
2022-09-14	10:57:54	0.435891
2022-09-14	10:57:54	0.430903
2022-09-14	10:57:54	0.372176
2022-09-14	10:57:55	0.44444
2022-09-14	10:57:55	0.417163
2022-09-14	10:57:55	0.475789
2022-09-14	10:57:55	0.481539
2022-09-14	10:57:56	0.449529
2022-09-14	10:57:56	0.454364
2022-09-14	10:57:56	0.450089
2022-09-14	10:57:56	0.434008
2022-09-14	10:57:57	0.432786
2022-09-14	10:57:57	0.430344
2022-09-14	10:57:57	0.726934
2022-09-14	10:57:57	0.727137
2022-09-14	10:57:58	0.731514
2022-09-14	10:57:58	0.726425
2022-09-14	10:57:58	0.731107
2022-09-14	10:57:59	0.726374
2022-09-14	10:57:59	0.736196
2022-09-14	10:57:59	0.729886
2022-09-14	10:57:59	0.729733
2022-09-14	10:58:00	0.734924
2022-09-14	10:58:00	0.730445
2022-09-14	10:58:00	0.807799
2022-09-14	10:58:00	0.697672
2022-09-14	10:58:01	0.729326
2022-09-14	10:58:01	0.72902
2022-09-14	10:58:01	0.731921
2022-09-14	10:58:01	0.730649
2022-09-14	10:58:02	0.724389
2022-09-14	10:58:02	0.730496
2022-09-14	10:58:02	0.72897
2022-09-14	10:58:03	0.724796
2022-09-14	10:58:03	0.732837
2022-09-14	10:58:03	0.521539
2022-09-14	10:58:03	0.353855
2022-09-14	10:58:04	0.530954
2022-09-14	10:58:04	0.327239
2022-09-14	10:58:04	0.308868
2022-09-14	10:58:04	0.231616
2022-09-14	10:58:05	-0.163651
2022-09-14	10:58:05	0.0946694
2022-09-14	10:58:05	0.545
2022-09-14	10:58:05	0.727341
2022-09-14	10:58:06	0.851514
2022-09-14	10:58:06	0.673651
2022-09-14	10:58:06	0.72327
2022-09-14	10:58:07	0.729071
2022-09-14	10:58:07	0.730903
2022-09-14	10:58:07	0.727901
2022-09-14	10:58:07	0.726272
2022-09-14	10:58:08	0.733193
2022-09-14	10:58:08	0.728003
2022-09-14	10:58:08	1.79777
2022-09-14	10:58:08	1.19085
2022-09-14	10:58:09	0.667545
2022-09-14	10:58:09	0.397112
2022-09-14	10:58:09	0.734211
2022-09-14	10:58:10	1.07533
2022-09-14	10:58:10	0.743168
2022-09-14	10:58:10	0.662048
2022-09-14	10:58:10	0.731005
2022-09-14	10:58:11	0.731514
2022-09-14	10:58:11	0.731717
2022-09-14	10:58:11	0.727646
2022-09-14	10:58:11	0.725204
2022-09-14	10:58:12	0.725916
2022-09-14	10:58:12	0.722761
2022-09-14	10:58:12	0.725458
2022-09-14	10:58:12	0.730242
2022-09-14	10:58:13	0.722252
2022-09-14	10:58:13	0.735127
2022-09-14	10:58:13	0.728512
2022-09-14	10:58:14	0.72785
2022-09-14	10:58:14	0.735331
2022-09-14	10:58:14	0.739656
2022-09-14	10:58:14	0.727596
2022-09-14	10:58:15	0.731921
2022-09-14	10:58:15	0.731158
2022-09-14	10:58:15	1.27411
2022-09-14	10:58:15	0.727188
2022-09-14	10:58:16	0.736857
2022-09-14	10:58:16	0.735076
2022-09-14	10:58:16	0.757214
2022-09-14	10:58:16	0.754618
2022-09-14	10:58:17	0.775483
2022-09-14	10:58:17	0.774059
2022-09-14	10:58:17	0.766374
2022-09-14	10:58:17	0.764593
2022-09-14	10:58:18	0.775229
2022-09-14	10:58:18	0.769784
2022-09-14	10:58:18	0.763372
2022-09-14	10:58:19	0.771056
2022-09-14	10:58:19	0.778842
2022-09-14	10:58:19	0.781438
2022-09-14	10:58:19	0.785967
2022-09-14	10:58:20	0.793499
2022-09-14	10:58:20	0.767087
2022-09-14	10:58:20	0.760471
2022-09-14	10:58:20	0.743881
2022-09-14	10:58:21	0.728359
2022-09-14	10:58:21	0.724644
2022-09-14	10:58:21	0.690293
2022-09-14	10:58:22	0.664542
2022-09-14	10:58:22	0.63757
2022-09-14	10:58:22	0.620471
2022-09-14	10:58:22	0.56729
2022-09-14	10:58:23	0.576705
2022-09-14	10:58:23	0.599606
2022-09-14	10:58:23	0.546679
2022-09-14	10:58:23	0.269275
2022-09-14	10:58:24	0.671463
2022-09-14	10:58:24	0.56556
2022-09-14	10:58:24	0.480573
2022-09-14	10:58:24	0.428817
2022-09-14	10:58:25	0.366171
2022-09-14	10:58:25	0.330547
2022-09-14	10:58:25	0.729428
2022-09-14	10:58:26	0.732226
2022-09-14	10:58:26	0.728766
2022-09-14	10:58:26	0.728461
2022-09-14	10:58:26	0.73299
2022-09-14	10:58:27	0.731972
2022-09-14	10:58:27	0.721183
2022-09-14	10:58:27	0.727087
2022-09-14	10:58:27	0.730751
2022-09-14	10:58:28	0.732125
2022-09-14	10:58:28	0.72902
2022-09-14	10:58:28	0.732735
2022-09-14	10:58:28	0.733702
2022-09-14	10:58:29	0.731005
2022-09-14	10:58:29	0.730343
2022-09-14	10:58:29	0.729224
2022-09-14	10:58:30	0.730242
2022-09-14	10:58:30	-1.37546
2022-09-14	10:58:30	-0.45902
2022-09-14	10:58:30	-2.21256
2022-09-14	10:58:31	0.0494277
2022-09-14	10:58:31	0.126272
2022-09-14	10:58:31	0.153957
2022-09-14	10:58:31	0.143423
2022-09-14	10:58:32	0.149529
2022-09-14	10:58:32	0.157112
2022-09-14	10:58:32	0.13472
2022-09-14	10:58:32	0.168563
2022-09-14	10:58:33	0.117418
2022-09-14	10:58:33	0.0709036
2022-09-14	10:58:33	-0.0248216
2022-09-14	10:58:34	0.0128883
2022-09-14	10:58:34	0.0732445
2022-09-14	10:58:34	0.0186389
2022-09-14	10:58:34	0.11869
2022-09-14	10:58:35	0.10673
2022-09-14	10:58:35	0.055789
2022-09-14	10:58:35	0.0477992
2022-09-14	10:58:35	0.0417432
2022-09-14	10:58:36	0.0138552
2022-09-14	10:58:36	0.00978398
2022-09-14	10:58:36	-0.0957122
2022-09-14	10:58:36	-0.0535748
2022-09-14	10:58:37	0.0557381
2022-09-14	10:58:37	-0.0949488
2022-09-14	10:58:37	-0.0825824
2022-09-14	10:58:38	0.0252547
2022-09-14	10:58:38	0.0946185
2022-09-14	10:58:38	0.145967
2022-09-14	10:58:38	0.173652
2022-09-14	10:58:39	0.209784
2022-09-14	10:58:39	0.107952
2022-09-14	10:58:39	0.3364
2022-09-14	10:58:39	0.101692
2022-09-14	10:58:40	0.431107
2022-09-14	10:58:40	0.148155
2022-09-14	10:58:40	0.367036
2022-09-14	10:58:40	0.229071
2022-09-14	10:58:41	0.291005
2022-09-14	10:58:41	-0.366857
2022-09-14	10:58:41	-0.0309794
2022-09-14	10:58:42	-0.0593763
2022-09-14	10:58:42	0.250802
2022-09-14	10:58:42	0.191107
2022-09-14	10:58:42	0.246425
2022-09-14	10:58:43	0.234669
2022-09-14	10:58:43	0.201336
2022-09-14	10:58:43	0.186272
2022-09-14	10:58:43	0.255484
2022-09-14	10:58:44	0.283575
2022-09-14	10:58:44	0.14098
2022-09-14	10:58:44	0.729478
2022-09-14	10:58:44	0.30159
2022-09-14	10:58:45	-0.11042
2022-09-14	10:58:45	-0.531692
2022-09-14	10:58:45	-0.719986
2022-09-14	10:58:46	-0.189707
2022-09-14	10:58:46	0.469682
2022-09-14	10:58:46	0.529478
2022-09-14	10:58:46	0.576501
2022-09-14	10:58:47	0.599453
2022-09-14	10:58:47	0.670394
2022-09-14	10:58:47	0.668919
2022-09-14	10:58:47	0.693651
2022-09-14	10:58:48	0.686476
2022-09-14	10:58:48	0.716196
2022-09-14	10:58:48	0.715789
2022-09-14	10:58:48	0.725916
2022-09-14	10:58:49	0.718384
2022-09-14	10:58:49	0.719758
2022-09-14	10:58:49	0.70902
2022-09-14	10:58:50	0.729478
2022-09-14	10:58:50	0.706069
2022-09-14	10:58:50	0.729428
2022-09-14	10:58:50	0.706018
2022-09-14	10:58:51	0.730496
2022-09-14	10:58:51	0.711921
2022-09-14	10:58:51	0.729886
2022-09-14	10:58:51	0.712328
2022-09-14	10:58:52	0.726679
2022-09-14	10:58:52	0.714415
2022-09-14	10:58:52	0.731667
2022-09-14	10:58:52	0.721845
2022-09-14	10:58:53	0.73355
2022-09-14	10:58:53	0.722812
2022-09-14	10:58:53	0.725509
2022-09-14	10:58:54	0.719656
2022-09-14	10:58:54	0.733295
2022-09-14	10:58:54	0.720013
2022-09-14	10:58:54	0.726883
2022-09-14	10:58:55	0.718639
2022-09-14	10:58:55	0.730954
2022-09-14	10:58:55	0.717977
2022-09-14	10:58:55	0.733041
2022-09-14	10:58:56	0.724389
2022-09-14	10:58:56	0.728155
2022-09-14	10:58:56	0.723321
2022-09-14	10:58:56	0.730089
2022-09-14	10:58:57	0.718944
2022-09-14	10:58:57	0.726069
2022-09-14	10:58:57	0.728512
2022-09-14	10:58:58	0.731463
2022-09-14	10:58:58	0.72673
2022-09-14	10:58:58	0.725204
2022-09-14	10:58:58	0.728206
2022-09-14	10:58:59	0.729275
2022-09-14	10:58:59	0.730547
2022-09-14	10:58:59	0.731768
2022-09-14	10:58:59	0.726679
2022-09-14	10:59:00	0.591769
2022-09-14	10:59:00	0.725458
2022-09-14	10:59:00	0.72902
2022-09-14	10:59:00	0.728359
2022-09-14	10:59:01	0.7136
2022-09-14	10:59:01	0.73299
2022-09-14	10:59:01	0.7307
2022-09-14	10:59:02	0.731717
2022-09-14	10:59:02	0.720674
2022-09-14	10:59:02	0.730496
2022-09-14	10:59:02	0.727697
2022-09-14	10:59:03	0.722456
2022-09-14	10:59:03	0.732684
2022-09-14	10:59:03	0.730089
2022-09-14	10:59:03	0.72383
2022-09-14	10:59:04	0.725763
2022-09-14	10:59:04	0.722761
2022-09-14	10:59:04	0.731972
2022-09-14	10:59:04	0.726018
2022-09-14	10:59:05	0.721692
2022-09-14	10:59:05	0.732532
2022-09-14	10:59:05	0.735433
2022-09-14	10:59:06	0.725662
2022-09-14	10:59:06	0.728562
2022-09-14	10:59:06	0.721234
2022-09-14	10:59:06	0.712125
2022-09-14	10:59:07	0.72444
2022-09-14	10:59:07	0.724186
2022-09-14	10:59:07	0.691514
2022-09-14	10:59:07	0.715483
2022-09-14	10:59:08	0.70673
2022-09-14	10:59:08	0.711412
2022-09-14	10:59:08	0.680216
2022-09-14	10:59:08	0.713753
2022-09-14	10:59:09	0.715534
2022-09-14	10:59:09	0.709122
2022-09-14	10:59:09	0.715687
2022-09-14	10:59:10	0.712277
2022-09-14	10:59:10	0.705407
2022-09-14	10:59:10	0.702761
2022-09-14	10:59:10	0.699555
2022-09-14	10:59:11	0.696756
2022-09-14	10:59:11	0.711718
2022-09-14	10:59:11	0.704542
2022-09-14	10:59:11	0.713448
2022-09-14	10:59:12	0.667443
2022-09-14	10:59:12	0.473346
2022-09-14	10:59:12	0.595483
2022-09-14	10:59:12	0.70673
2022-09-14	10:59:13	0.73355
2022-09-14	10:59:13	0.730954
2022-09-14	10:59:13	0.735331
2022-09-14	10:59:14	0.731005
2022-09-14	10:59:14	0.735992
2022-09-14	10:59:14	0.73131
2022-09-14	10:59:14	0.727799
2022-09-14	10:59:15	0.732175
2022-09-14	10:59:15	0.739351
2022-09-14	10:59:15	0.739046
2022-09-14	10:59:15	0.728664
2022-09-14	10:59:16	0.726221
2022-09-14	10:59:16	0.7307
2022-09-14	10:59:16	0.731819
2022-09-14	10:59:16	0.730038
2022-09-14	10:59:17	0.728664
2022-09-14	10:59:17	0.73986
2022-09-14	10:59:17	0.72612
2022-09-14	10:59:18	0.734313
2022-09-14	10:59:18	0.720318
2022-09-14	10:59:18	0.734008
2022-09-14	10:59:18	0.732634
2022-09-14	10:59:19	0.728257
2022-09-14	10:59:19	0.734008
2022-09-14	10:59:19	0.734618
2022-09-14	10:59:19	0.732379
2022-09-14	10:59:20	0.719606
2022-09-14	10:59:20	0.730394
2022-09-14	10:59:20	0.731667
2022-09-14	10:59:20	0.730903
2022-09-14	10:59:21	0.728461
2022-09-14	10:59:21	0.722761
2022-09-14	10:59:21	0.72383
2022-09-14	10:59:22	0.734008
2022-09-14	10:59:22	0.731209
2022-09-14	10:59:22	0.729631
2022-09-14	10:59:22	0.735076
2022-09-14	10:59:23	0.734008
2022-09-14	10:59:23	0.730598
2022-09-14	10:59:23	0.730343
2022-09-14	10:59:23	0.732379
2022-09-14	10:59:24	0.731921
2022-09-14	10:59:24	0.731717
2022-09-14	10:59:24	0.730801
2022-09-14	10:59:24	0.731209
2022-09-14	10:59:25	0.732786
2022-09-14	10:59:25	0.723575
2022-09-14	10:59:25	0.725763
2022-09-14	10:59:26	0.724135
2022-09-14	10:59:26	0.608308
2022-09-14	10:59:26	0.734364
2022-09-14	10:59:26	0.734822
2022-09-14	10:59:27	0.731768
2022-09-14	10:59:27	0.725916
2022-09-14	10:59:27	0.740623
2022-09-14	10:59:27	0.731005
2022-09-14	10:59:28	0.72612
2022-09-14	10:59:28	0.732023
2022-09-14	10:59:28	0.727799
2022-09-14	10:59:28	0.730038
2022-09-14	10:59:29	0.736145
2022-09-14	10:59:29	0.735076
2022-09-14	10:59:29	0.73299
2022-09-14	10:59:30	0.735687
2022-09-14	10:59:30	0.736603
2022-09-14	10:59:30	0.741285
2022-09-14	10:59:30	0.729071
2022-09-14	10:59:31	0.735178
2022-09-14	10:59:31	0.72958
2022-09-14	10:59:31	0.732175
2022-09-14	10:59:31	0.733244
2022-09-14	10:59:32	0.733601
2022-09-14	10:59:32	0.731768
2022-09-14	10:59:32	0.72673
2022-09-14	10:59:32	0.727952
2022-09-14	10:59:33	0.733244
2022-09-14	10:59:33	0.725662
2022-09-14	10:59:33	0.734618
2022-09-14	10:59:34	0.722201
2022-09-14	10:59:34	0.727952
2022-09-14	10:59:34	0.730191
2022-09-14	10:59:34	0.736196
2022-09-14	10:59:35	0.725102
2022-09-14	10:59:35	0.730293
2022-09-14	10:59:35	0.717621
2022-09-14	10:59:35	0.728613
2022-09-14	10:59:36	0.728817
2022-09-14	10:59:36	0.734873
2022-09-14	10:59:36	0.735127
2022-09-14	10:59:36	0.73014
2022-09-14	10:59:37	0.729784
2022-09-14	10:59:37	0.722252
2022-09-14	10:59:37	0.732684
2022-09-14	10:59:38	0.730547
2022-09-14	10:59:38	0.735382
2022-09-14	10:59:38	0.731565
2022-09-14	10:59:38	0.729122
2022-09-14	10:59:39	0.736654
2022-09-14	10:59:39	0.738181
2022-09-14	10:59:39	0.730394
2022-09-14	10:59:39	0.733092
2022-09-14	10:59:40	0.732074
2022-09-14	10:59:40	0.734517
2022-09-14	10:59:40	0.721591
2022-09-14	10:59:40	0.733397
2022-09-14	10:59:41	0.729784
2022-09-14	10:59:41	0.736552
2022-09-14	10:59:41	0.738181
2022-09-14	10:59:42	0.735789
2022-09-14	10:59:42	0.733244
2022-09-14	10:59:42	0.734466
2022-09-14	10:59:42	0.735229
2022-09-14	10:59:43	0.733702
2022-09-14	10:59:43	0.123779
2022-09-14	10:59:43	-0.872048
2022-09-14	10:59:43	-0.909859
2022-09-14	10:59:44	-0.923905
2022-09-14	10:59:44	0.573753
2022-09-14	10:59:44	0.736196
2022-09-14	10:59:44	0.726221
2022-09-14	10:59:45	0.734771
2022-09-14	10:59:45	0.733448
2022-09-14	10:59:45	0.735891
2022-09-14	10:59:46	0.734771
2022-09-14	10:59:46	0.731921
2022-09-14	10:59:46	0.731259
2022-09-14	10:59:46	0.734211
2022-09-14	10:59:47	0.72902
2022-09-14	10:59:47	0.742506
2022-09-14	10:59:47	0.742659
2022-09-14	10:59:47	0.726272
2022-09-14	10:59:48	0.735076
2022-09-14	10:59:48	0.728868
2022-09-14	10:59:48	0.731717
2022-09-14	10:59:48	0.736247
2022-09-14	10:59:49	0.734466
2022-09-14	10:59:49	0.725763
2022-09-14	10:59:49	0.735178
2022-09-14	10:59:50	0.734109
2022-09-14	10:59:50	0.731158
2022-09-14	10:59:50	0.726272
2022-09-14	10:59:50	0.734771
2022-09-14	10:59:51	0.729224
2022-09-14	10:59:51	0.732023
2022-09-14	10:59:51	0.731819
2022-09-14	10:59:51	0.723524
2022-09-14	10:59:52	0.733092
2022-09-14	10:59:52	0.73757
2022-09-14	10:59:52	0.730343
2022-09-14	10:59:52	0.732328
2022-09-14	10:59:53	0.738231
2022-09-14	10:59:53	0.724542
2022-09-14	10:59:53	0.728613
2022-09-14	10:59:54	0.734313
2022-09-14	10:59:54	0.732837
2022-09-14	10:59:54	0.732786
2022-09-14	10:59:54	0.730954
2022-09-14	10:59:55	0.730242
2022-09-14	10:59:55	0.73472
2022-09-14	10:59:55	0.736043
2022-09-14	10:59:55	0.736399
2022-09-14	10:59:56	0.733499
2022-09-14	10:59:56	0.735891
2022-09-14	10:59:56	0.733448
2022-09-14	10:59:56	0.735127
2022-09-14	10:59:57	0.736094
2022-09-14	10:59:57	0.733193
2022-09-14	10:59:57	0.733244
2022-09-14	10:59:57	0.730649
2022-09-14	10:59:58	0.729224
2022-09-14	10:59:58	0.734466
2022-09-14	10:59:58	0.732074
2022-09-14	10:59:59	0.7307
2022-09-14	10:59:59	0.738231
2022-09-14	10:59:59	0.728155
2022-09-14	10:59:59	0.743524
2022-09-14	11:00:00	0.724949
2022-09-14	11:00:00	0.73131
2022-09-14	11:00:00	0.735891
2022-09-14	11:00:00	0.731972
2022-09-14	11:00:01	0.732175
2022-09-14	11:00:01	0.729936
2022-09-14	11:00:01	0.732684
2022-09-14	11:00:01	0.732481
2022-09-14	11:00:02	0.738282
2022-09-14	11:00:02	0.732074
2022-09-14	11:00:02	0.734059
2022-09-14	11:00:03	0.734008
2022-09-14	11:00:03	0.714822
2022-09-14	11:00:03	0.736857
2022-09-14	11:00:03	0.726323
2022-09-14	11:00:04	0.734924
2022-09-14	11:00:04	0.198181
2022-09-14	11:00:04	0.979351
2022-09-14	11:00:04	0.634618
2022-09-14	11:00:05	0.730801
2022-09-14	11:00:05	0.731514
2022-09-14	11:00:05	0.731361
2022-09-14	11:00:05	0.730445
2022-09-14	11:00:06	0.728054
2022-09-14	11:00:06	0.733142
2022-09-14	11:00:06	0.734568
2022-09-14	11:00:07	0.727341
2022-09-14	11:00:07	0.73243
2022-09-14	11:00:07	0.728613
2022-09-14	11:00:07	0.729784
2022-09-14	11:00:08	0.735076
2022-09-14	11:00:08	0.72841
2022-09-14	11:00:08	0.725204
2022-09-14	11:00:08	0.735076
2022-09-14	11:00:09	0.735433
2022-09-14	11:00:09	0.727748
2022-09-14	11:00:09	0.736705
2022-09-14	11:00:09	0.730089
2022-09-14	11:00:10	0.727494
2022-09-14	11:00:10	0.736959
2022-09-14	11:00:10	0.737417
2022-09-14	11:00:11	0.728868
2022-09-14	11:00:11	0.734415
2022-09-14	11:00:11	0.728562
2022-09-14	11:00:11	0.729631
2022-09-14	11:00:12	0.727341
2022-09-14	11:00:12	0.734008
2022-09-14	11:00:12	0.725967
2022-09-14	11:00:12	0.727646
2022-09-14	11:00:13	0.72902
2022-09-14	11:00:13	0.737672
2022-09-14	11:00:13	0.735891
2022-09-14	11:00:13	0.736145
2022-09-14	11:00:14	0.734568
2022-09-14	11:00:14	0.724338
2022-09-14	11:00:14	0.735585
2022-09-14	11:00:15	0.725305
2022-09-14	11:00:15	0.726272
2022-09-14	11:00:15	0.723982
2022-09-14	11:00:15	0.726069
2022-09-14	11:00:16	0.734924
2022-09-14	11:00:16	0.730293
2022-09-14	11:00:16	0.734975
2022-09-14	11:00:16	0.726527
2022-09-14	11:00:17	0.719504
2022-09-14	11:00:17	0.730649
2022-09-14	11:00:17	0.730954
2022-09-14	11:00:17	0.725916
2022-09-14	11:00:18	0.732684
2022-09-14	11:00:18	0.728461
2022-09-14	11:00:18	0.729682
2022-09-14	11:00:19	0.730903
2022-09-14	11:00:19	0.728919
2022-09-14	11:00:19	0.734008
2022-09-14	11:00:19	0.734568
2022-09-14	11:00:20	0.732074
2022-09-14	11:00:20	0.73187
2022-09-14	11:00:20	0.730038
2022-09-14	11:00:20	0.733346
2022-09-14	11:00:21	0.734669
2022-09-14	11:00:21	0.736399
2022-09-14	11:00:21	0.727392
2022-09-14	11:00:21	0.727799
2022-09-14	11:00:22	0.730496
2022-09-14	11:00:22	0.735941
2022-09-14	11:00:22	0.734771
2022-09-14	11:00:23	0.732939
2022-09-14	11:00:23	0.732786
2022-09-14	11:00:23	0.731514
2022-09-14	11:00:23	0.726629
2022-09-14	11:00:24	0.735382
2022-09-14	11:00:24	0.73416
2022-09-14	11:00:24	0.732583
2022-09-14	11:00:24	0.733397
2022-09-14	11:00:25	0.737519
2022-09-14	11:00:25	0.732175
2022-09-14	11:00:25	0.72444
2022-09-14	11:00:25	0.732786
2022-09-14	11:00:26	0.725814
2022-09-14	11:00:26	0.725407
2022-09-14	11:00:26	0.729631
2022-09-14	11:00:27	0.729529
2022-09-14	11:00:27	0.725865
2022-09-14	11:00:27	0.731209
2022-09-14	11:00:27	0.73243
2022-09-14	11:00:28	0.735992
2022-09-14	11:00:28	0.735178
2022-09-14	11:00:28	0.733702
2022-09-14	11:00:28	0.73874
2022-09-14	11:00:29	0.731107
2022-09-14	11:00:29	0.730547
2022-09-14	11:00:29	0.736908
2022-09-14	11:00:29	0.732175
2022-09-14	11:00:30	0.732379
2022-09-14	11:00:30	0.738486
2022-09-14	11:00:30	0.735687
2022-09-14	11:00:31	0.730293
2022-09-14	11:00:31	0.730751
2022-09-14	11:00:31	0.734415
2022-09-14	11:00:31	0.734415
2022-09-14	11:00:32	0.732175
2022-09-14	11:00:32	0.736807
2022-09-14	11:00:32	0.735585
2022-09-14	11:00:32	0.732786
2022-09-14	11:00:33	0.73584
2022-09-14	11:00:33	0.731819
2022-09-14	11:00:33	0.734568
2022-09-14	11:00:33	0.731158
2022-09-14	11:00:34	0.735992
2022-09-14	11:00:34	0.728613
2022-09-14	11:00:34	0.722761
2022-09-14	11:00:35	0.728308
2022-09-14	11:00:35	0.729529
2022-09-14	11:00:35	0.733397
2022-09-14	11:00:35	0.736094
2022-09-14	11:00:36	0.735331
2022-09-14	11:00:36	0.726527
2022-09-14	11:00:36	0.733244
2022-09-14	11:00:36	0.730547
2022-09-14	11:00:37	0.730903
2022-09-14	11:00:37	0.726221
2022-09-14	11:00:37	0.733499
2022-09-14	11:00:37	0.725254
2022-09-14	11:00:38	0.729224
2022-09-14	11:00:38	0.732634
2022-09-14	11:00:38	0.733244
2022-09-14	11:00:39	0.735585
2022-09-14	11:00:39	0.727697
2022-09-14	11:00:39	0.728054
2022-09-14	11:00:39	0.729478
2022-09-14	11:00:40	0.7307
2022-09-14	11:00:40	0.733244
2022-09-14	11:00:40	0.733906
2022-09-14	11:00:40	0.728715
2022-09-14	11:00:41	0.736196
2022-09-14	11:00:41	0.730852
2022-09-14	11:00:41	0.727443
2022-09-14	11:00:41	0.732175
2022-09-14	11:00:42	0.736807
2022-09-14	11:00:42	0.726425
2022-09-14	11:00:42	0.731921
2022-09-14	11:00:43	0.735229
2022-09-14	11:00:43	0.735076
2022-09-14	11:00:43	0.72556
2022-09-14	11:00:43	0.734618
2022-09-14	11:00:44	0.72556
2022-09-14	11:00:44	0.730394
2022-09-14	11:00:44	0.73131
2022-09-14	11:00:44	0.731514
2022-09-14	11:00:45	0.730903
2022-09-14	11:00:45	0.729122
2022-09-14	11:00:45	0.736247
2022-09-14	11:00:45	0.728461
2022-09-14	11:00:46	0.728766
2022-09-14	11:00:46	0.73355
2022-09-14	11:00:46	0.734975
2022-09-14	11:00:47	0.728613
2022-09-14	11:00:47	0.735076
2022-09-14	11:00:47	0.730496
2022-09-14	11:00:47	0.729478
2022-09-14	11:00:48	0.731819
2022-09-14	11:00:48	0.728206
2022-09-14	11:00:48	0.726832
2022-09-14	11:00:48	0.729682
2022-09-14	11:00:49	0.729682
2022-09-14	11:00:49	0.73645
2022-09-14	11:00:49	0.728868
2022-09-14	11:00:49	0.729377
2022-09-14	11:00:50	0.731616
2022-09-14	11:00:50	0.73243
2022-09-14	11:00:50	0.733804
2022-09-14	11:00:51	0.738231
2022-09-14	11:00:51	0.730751
2022-09-14	11:00:51	0.735433
2022-09-14	11:00:51	0.740064
2022-09-14	11:00:52	0.730394
2022-09-14	11:00:52	0.734313
2022-09-14	11:00:52	0.730801
2022-09-14	11:00:52	0.730801
2022-09-14	11:00:53	0.728919
2022-09-14	11:00:53	0.732786
2022-09-14	11:00:53	0.732023
2022-09-14	11:00:53	0.734211
2022-09-14	11:00:54	0.723117
2022-09-14	11:00:54	0.7307
2022-09-14	11:00:54	0.733804
2022-09-14	11:00:55	0.735891
2022-09-14	11:00:55	0.73355
2022-09-14	11:00:55	0.731565
2022-09-14	11:00:55	0.730751
2022-09-14	11:00:56	0.731667
2022-09-14	11:00:56	0.732532
2022-09-14	11:00:56	0.734924
2022-09-14	11:00:56	0.731158
2022-09-14	11:00:57	0.734211
2022-09-14	11:00:57	0.729224
2022-09-14	11:00:57	0.729886
2022-09-14	11:00:57	0.730191
2022-09-14	11:00:58	0.737214
2022-09-14	11:00:58	0.728155
2022-09-14	11:00:58	0.732888
2022-09-14	11:00:59	0.723473
2022-09-14	11:00:59	0.727646
2022-09-14	11:00:59	0.725305
2022-09-14	11:00:59	0.731972
2022-09-14	11:01:00	0.731005
2022-09-14	11:01:00	0.731667
2022-09-14	11:01:00	0.733753
2022-09-14	11:01:00	0.736908
2022-09-14	11:01:01	0.732277
2022-09-14	11:01:01	0.734669
2022-09-14	11:01:01	0.731667
2022-09-14	11:01:01	0.735687
2022-09-14	11:01:02	0.734313
2022-09-14	11:01:02	0.730547
2022-09-14	11:01:02	0.728868
2022-09-14	11:01:03	0.733906
2022-09-14	11:01:03	0.729224
2022-09-14	11:01:03	0.735891
2022-09-14	11:01:03	0.73528
2022-09-14	11:01:04	0.732634
2022-09-14	11:01:04	0.724135
2022-09-14	11:01:04	0.731463
2022-09-14	11:01:04	0.741997
2022-09-14	11:01:05	0.737214
2022-09-14	11:01:05	0.734466
2022-09-14	11:01:05	0.727188
2022-09-14	11:01:05	0.729122
2022-09-14	11:01:06	0.728359
2022-09-14	11:01:06	0.734822
2022-09-14	11:01:06	0.738588
2022-09-14	11:01:07	0.729733
2022-09-14	11:01:07	0.732532
2022-09-14	11:01:07	0.737315
2022-09-14	11:01:07	0.732583
2022-09-14	11:01:08	0.737265
2022-09-14	11:01:08	0.733448
2022-09-14	11:01:08	0.726323
2022-09-14	11:01:08	0.436501
2022-09-14	11:01:09	0.732583
2022-09-14	11:01:09	0.736908
2022-09-14	11:01:09	0.732786
2022-09-14	11:01:09	0.0689188
2022-09-14	11:01:10	0.306272
2022-09-14	11:01:10	-0.289402
2022-09-14	11:01:10	-0.541921
2022-09-14	11:01:11	-0.318867
2022-09-14	11:01:11	-0.455916
2022-09-14	11:01:11	-0.490674
2022-09-14	11:01:11	-0.595407
2022-09-14	11:01:12	-0.387875
2022-09-14	11:01:12	-0.665381
2022-09-14	11:01:12	-0.553066
2022-09-14	11:01:12	-0.64991
2022-09-14	11:01:13	-0.675457
2022-09-14	11:01:13	-0.716271
2022-09-14	11:01:13	-0.831182
2022-09-14	11:01:13	-0.869299
2022-09-14	11:01:14	-0.370114
2022-09-14	11:01:14	-0.299631
2022-09-14	11:01:14	0.0109545
2022-09-14	11:01:15	0.172481
2022-09-14	11:01:15	0.0827101
2022-09-14	11:01:15	0.152685
2022-09-14	11:01:15	0.0638297
2022-09-14	11:01:16	0.153397
2022-09-14	11:01:16	0.0594022
2022-09-14	11:01:16	0.264847
2022-09-14	11:01:16	0.0486644
2022-09-14	11:01:17	0.203372
2022-09-14	11:01:17	0.0989442
2022-09-14	11:01:17	0.438232
2022-09-14	11:01:17	-0.442786
2022-09-14	11:01:18	0.179402
2022-09-14	11:01:18	0.0714124
2022-09-14	11:01:18	0.211819
2022-09-14	11:01:19	0.0968069
2022-09-14	11:01:19	0.229275
2022-09-14	11:01:19	0.0991987
2022-09-14	11:01:19	0.230496
2022-09-14	11:01:20	0.144695
2022-09-14	11:01:20	0.175331
2022-09-14	11:01:20	0.0954328
2022-09-14	11:01:20	0.100064
2022-09-14	11:01:21	0.0375702
2022-09-14	11:01:21	0.0511071
2022-09-14	11:01:21	0.123117
2022-09-14	11:01:21	0.0511071
2022-09-14	11:01:22	0.0908017
2022-09-14	11:01:22	0.0206236
2022-09-14	11:01:22	0.103321
2022-09-14	11:01:23	0.0242877
2022-09-14	11:01:23	0.0880536
2022-09-14	11:01:23	-0.0283331
2022-09-14	11:01:23	0.0510053
2022-09-14	11:01:24	0.109173
2022-09-14	11:01:24	0.765458
2022-09-14	11:01:24	0.744898
2022-09-14	11:01:24	2.13167
2022-09-14	11:01:25	2.22352
2022-09-14	11:01:25	0.849987
2022-09-14	11:01:25	-0.039529
2022-09-14	11:01:25	-0.14701
2022-09-14	11:01:26	-0.206806
2022-09-14	11:01:26	-0.161972
2022-09-14	11:01:26	-0.0312338
2022-09-14	11:01:27	-0.328536
2022-09-14	11:01:27	-0.362684
2022-09-14	11:01:27	-0.398664
2022-09-14	11:01:27	-0.256781
2022-09-14	11:01:28	-0.318511
2022-09-14	11:01:28	-0.287824
2022-09-14	11:01:28	-0.0229896
2022-09-14	11:01:28	0.241031
2022-09-14	11:01:29	0.946119
2022-09-14	11:01:29	1.42169
2022-09-14	11:01:29	0.742659
2022-09-14	11:01:29	0.42729
2022-09-14	11:01:30	0.305305
2022-09-14	11:01:30	0.406527
2022-09-14	11:01:30	0.559555
2022-09-14	11:01:30	1.10444
2022-09-14	11:01:31	0.945814
2022-09-14	11:01:31	0.810242
2022-09-14	11:01:31	0.907748
2022-09-14	11:01:32	0.862252
2022-09-14	11:01:32	0.885967
2022-09-14	11:01:32	0.319097
2022-09-14	11:01:32	-0.113117
2022-09-14	11:01:33	0.630801
2022-09-14	11:01:33	0.640674
2022-09-14	11:01:33	0.726425
2022-09-14	11:01:33	0.737519
2022-09-14	11:01:34	-3.54431
2022-09-14	11:01:34	0.727596
2022-09-14	11:01:34	0.730394
2022-09-14	11:01:34	0.702048
2022-09-14	11:01:35	0.731259
2022-09-14	11:01:35	0.730089
2022-09-14	11:01:35	0.734211
2022-09-14	11:01:36	0.736349
2022-09-14	11:01:36	0.732175
2022-09-14	11:01:36	0.736094
2022-09-14	11:01:36	0.726578
2022-09-14	11:01:37	0.734008
2022-09-14	11:01:37	0.733295
2022-09-14	11:01:37	0.739962
2022-09-14	11:01:37	0.736552
2022-09-14	11:01:38	0.732939
2022-09-14	11:01:38	0.73187
2022-09-14	11:01:38	0.724237
2022-09-14	11:01:38	0.265611
2022-09-14	11:01:39	0.0876465
2022-09-14	11:01:39	-0.0800888
2022-09-14	11:01:39	0.732888
2022-09-14	11:01:40	0.731514
2022-09-14	11:01:40	0.740216
2022-09-14	11:01:40	0.493041
2022-09-14	11:01:40	0.347901
2022-09-14	11:01:41	0.319046
2022-09-14	11:01:41	0.392685
2022-09-14	11:01:41	0.342354
2022-09-14	11:01:41	0.404084
2022-09-14	11:01:42	0.363168
2022-09-14	11:01:42	0.370751
2022-09-14	11:01:42	0.426679
2022-09-14	11:01:42	0.307596
2022-09-14	11:01:43	-0.529605
2022-09-14	11:01:43	0.140115
2022-09-14	11:01:43	0.62673
2022-09-14	11:01:44	0.735585
2022-09-14	11:01:44	0.731616
2022-09-14	11:01:44	0.72841
2022-09-14	11:01:44	0.737672
2022-09-14	11:01:45	0.734262
2022-09-14	11:01:45	0.73416
2022-09-14	11:01:45	0.721997
2022-09-14	11:01:45	0.737417
2022-09-14	11:01:46	0.740064
2022-09-14	11:01:46	0.729987
2022-09-14	11:01:46	0.732634
2022-09-14	11:01:46	0.734415
2022-09-14	11:01:47	0.726883
2022-09-14	11:01:47	0.739453
2022-09-14	11:01:47	0.730242
2022-09-14	11:01:48	0.731259
2022-09-14	11:01:48	0.735789
2022-09-14	11:01:48	0.735585
2022-09-14	11:01:48	0.732074
2022-09-14	11:01:49	0.726679
2022-09-14	11:01:49	0.735433
2022-09-14	11:01:49	0.730801
2022-09-14	11:01:49	0.733753
2022-09-14	11:01:50	0.7307
2022-09-14	11:01:50	0.738893
2022-09-14	11:01:50	0.735738
2022-09-14	11:01:50	0.730038
2022-09-14	11:01:51	0.736399
2022-09-14	11:01:51	0.736807
2022-09-14	11:01:51	0.731209
2022-09-14	11:01:52	0.737519
2022-09-14	11:01:52	0.735127
2022-09-14	11:01:52	0.730852
2022-09-14	11:01:52	0.733193
2022-09-14	11:01:53	0.734924
2022-09-14	11:01:53	0.737977
2022-09-14	11:01:53	0.735229
2022-09-14	11:01:53	0.734415
2022-09-14	11:01:54	0.731717
2022-09-14	11:01:54	0.734568
2022-09-14	11:01:54	0.736247
2022-09-14	11:01:54	0.746679
2022-09-14	11:01:55	0.735483
2022-09-14	11:01:55	0.733295
2022-09-14	11:01:55	0.732481
2022-09-14	11:01:56	0.731819
2022-09-14	11:01:56	0.73472
2022-09-14	11:01:56	0.734618
2022-09-14	11:01:56	0.739198
2022-09-14	11:01:57	0.734568
2022-09-14	11:01:57	0.738537
2022-09-14	11:01:57	0.738791
2022-09-14	11:01:57	0.732023
2022-09-14	11:01:58	0.736196
2022-09-14	11:01:58	0.733397
2022-09-14	11:01:58	0.734924
2022-09-14	11:01:58	0.733092
2022-09-14	11:01:59	0.728512
2022-09-14	11:01:59	0.721183
2022-09-14	11:01:59	-0.102684
2022-09-14	11:02:00	0.593295
2022-09-14	11:02:00	0.260725
2022-09-14	11:02:00	0.592583
2022-09-14	11:02:00	0.735433
2022-09-14	11:02:01	0.720267
2022-09-14	11:02:01	0.734618
2022-09-14	11:02:01	0.719097
2022-09-14	11:02:01	0.733193
2022-09-14	11:02:02	0.243575
2022-09-14	11:02:02	0.147748
2022-09-14	11:02:02	0.843219
2022-09-14	11:02:02	0.737875
2022-09-14	11:02:03	1.28159
2022-09-14	11:02:03	2.57828
2022-09-14	11:02:03	0.508003
2022-09-14	11:02:04	7.80083
2022-09-14	11:02:04	4.91212
2022-09-14	11:02:04	2.1222
2022-09-14	11:02:04	2.31151
2022-09-14	11:02:05	5.04413
2022-09-14	11:02:05	6.71156
2022-09-14	11:02:05	1.71899
2022-09-14	11:02:05	0.700166
2022-09-14	11:02:06	0.697417
2022-09-14	11:02:06	0.732379
2022-09-14	11:02:06	0.733906
2022-09-14	11:02:06	0.727545
