# Supplementary material for: Comparing efficacy in reducing pulling and welfare impacts of four types of leash walking equipment
Source: PeerJ journal article supplement (doi:10.7717/peerj.18131), 2024-10-24
Supplement: Shelter_2_Tension_files.zip [file Richa_martin_202291493413 copy.xlsx]

## Sheet: Averaged Newtons
Date	Time	Averaged newtons	Impulse	Total steps
2022-09-14	09:34:23	0.268478	0.268478	0
2022-09-14	09:34:24	0.224109	0.492586	0		Impulse newtons	856.986
2022-09-14	09:34:25	-0.0725321	0.492586	0		total steps	10
2022-09-14	09:34:26	-0.247423	0.492586	0
2022-09-14	09:34:27	0.469325	0.961912	0
2022-09-14	09:34:28	0.149972	1.11188	0
2022-09-14	09:34:29	-0.00605422	1.11188	0
2022-09-14	09:34:30	-0.109431	1.11188	0
2022-09-14	09:34:31	1.15399	2.26587	0
2022-09-14	09:34:32	1.92303	4.18889	0
2022-09-14	09:34:33	1.49609	5.68498	0
2022-09-14	09:34:34	1.33361	7.01859	0
2022-09-14	09:34:35	0.165139	7.18373	0
2022-09-14	09:34:36	-0.0800791	7.18373	0
2022-09-14	09:34:37	1.38583	8.56956	0
2022-09-14	09:34:38	1.36683	9.93639	0
2022-09-14	09:34:39	1.16564	11.102	0
2022-09-14	09:34:40	-0.480416	11.102	0
2022-09-14	09:34:41	-3.40532	11.102	0
2022-09-14	09:34:42	0.418959	11.521	0
2022-09-14	09:34:43	1.84176	13.3628	0
2022-09-14	09:34:44	2.38482	15.7476	0
2022-09-14	09:34:45	2.10094	17.8485	0
2022-09-14	09:34:46	2.18896	20.0375	0
2022-09-14	09:34:47	1.99201	22.0295	0
2022-09-14	09:34:48	2.02648	24.056	0
2022-09-14	09:34:49	2.09784	26.1538	0
2022-09-14	09:34:50	2.26536	28.4192	0
2022-09-14	09:34:51	2.20203	30.6212	0
2022-09-14	09:34:52	2.23553	32.8567	0
2022-09-14	09:34:53	1.97085	34.8276	0
2022-09-14	09:34:54	1.93491	36.7625	0
2022-09-14	09:34:55	1.91765	38.6801	0
2022-09-14	09:34:56	1.82727	40.5074	0
2022-09-14	09:34:57	1.8431	42.3505	0
2022-09-14	09:34:58	2.07701	44.4275	0
2022-09-14	09:34:59	1.92365	46.3512	0
2022-09-14	09:35:00	1.9159	48.2671	0
2022-09-14	09:35:01	2.03363	50.3007	0
2022-09-14	09:35:02	2.09105	52.3917	0
2022-09-14	09:35:03	1.79292	54.1847	0
2022-09-14	09:35:04	1.9876	56.1723	0
2022-09-14	09:35:05	2.17056	58.3428	0
2022-09-14	09:35:06	2.76535	61.1082	0
2022-09-14	09:35:07	2.85975	63.9679	0
2022-09-14	09:35:08	3.12896	67.0969	0
2022-09-14	09:35:09	16.763	83.8599	1
2022-09-14	09:35:10	4.60066	88.4605	1
2022-09-14	09:35:11	2.26196	90.7225	1
2022-09-14	09:35:12	2.14214	92.8646	1
2022-09-14	09:35:13	3.15788	96.0225	1
2022-09-14	09:35:14	2.4893	98.5118	1
2022-09-14	09:35:15	-2.06784	98.5118	1
2022-09-14	09:35:16	-1.66498	98.5118	1
2022-09-14	09:35:17	0.802771	99.3146	1
2022-09-14	09:35:18	2.12829	101.443	1
2022-09-14	09:35:19	2.10599	103.549	1
2022-09-14	09:35:20	0.79862	104.347	1
2022-09-14	09:35:21	-0.767625	104.347	1
2022-09-14	09:35:22	-0.176965	104.347	1
2022-09-14	09:35:23	4.25669	108.604	1
2022-09-14	09:35:24	4.97834	113.582	1
2022-09-14	09:35:25	3.02936	116.612	1
2022-09-14	09:35:26	1.04889	117.661	1
2022-09-14	09:35:27	-2.32325	117.661	1
2022-09-14	09:35:28	-0.500978	117.661	1
2022-09-14	09:35:29	1.75715	119.418	1
2022-09-14	09:35:30	1.85285	121.271	1
2022-09-14	09:35:31	-0.69677	121.271	1
2022-09-14	09:35:32	-0.913728	121.271	1
2022-09-14	09:35:33	-0.946911	121.271	1
2022-09-14	09:35:34	-0.0647407	121.271	1
2022-09-14	09:35:35	1.90097	123.172	1
2022-09-14	09:35:36	1.28126	124.453	1
2022-09-14	09:35:37	1.49394	125.947	1
2022-09-14	09:35:38	-1.36394	125.947	1
2022-09-14	09:35:39	0.956704	126.904	1
2022-09-14	09:35:40	1.76825	128.672	1
2022-09-14	09:35:41	2.78064	131.452	1
2022-09-14	09:35:42	1.7876	133.24	1
2022-09-14	09:35:43	1.84876	135.089	1
2022-09-14	09:35:44	-1.02178	135.089	1
2022-09-14	09:35:45	0.346463	135.435	1
2022-09-14	09:35:46	1.83638	137.272	1
2022-09-14	09:35:47	1.29603	138.568	1
2022-09-14	09:35:48	1.97175	140.539	1
2022-09-14	09:35:49	1.56587	142.105	1
2022-09-14	09:35:50	5.01198	147.117	1
2022-09-14	09:35:51	1.3647	148.482	1
2022-09-14	09:35:52	0.742046	149.224	1
2022-09-14	09:35:53	1.37781	150.602	1
2022-09-14	09:35:54	0.828973	151.431	1
2022-09-14	09:35:55	0.594509	152.025	1
2022-09-14	09:35:56	-0.00509208	152.025	1
2022-09-14	09:35:57	0.604865	152.63	1
2022-09-14	09:35:58	1.04997	153.68	1
2022-09-14	09:35:59	1.40786	155.088	1
2022-09-14	09:36:00	1.78551	156.874	1
2022-09-14	09:36:01	2.40588	159.279	1
2022-09-14	09:36:02	2.65664	161.936	1
2022-09-14	09:36:03	2.8125	164.749	1
2022-09-14	09:36:04	2.59218	167.341	1
2022-09-14	09:36:05	2.50101	169.842	1
2022-09-14	09:36:06	2.22201	172.064	1
2022-09-14	09:36:07	2.46555	174.529	1
2022-09-14	09:36:08	3.28403	177.813	1
2022-09-14	09:36:09	2.43746	180.251	1
2022-09-14	09:36:10	3.02385	183.275	1
2022-09-14	09:36:11	2.44034	185.715	1
2022-09-14	09:36:12	2.4421	188.157	1
2022-09-14	09:36:13	2.50342	190.661	1
2022-09-14	09:36:14	2.70344	193.364	1
2022-09-14	09:36:15	2.75607	196.12	1
2022-09-14	09:36:16	2.65268	198.773	1
2022-09-14	09:36:17	2.72025	201.493	1
2022-09-14	09:36:18	2.75779	204.251	1
2022-09-14	09:36:19	2.52002	206.771	1
2022-09-14	09:36:20	2.48748	209.258	1
2022-09-14	09:36:21	2.4211	211.679	1
2022-09-14	09:36:22	2.49308	214.172	1
2022-09-14	09:36:23	2.58171	216.754	1
2022-09-14	09:36:24	3.59438	220.349	1
2022-09-14	09:36:25	2.94758	223.296	1
2022-09-14	09:36:26	2.17828	225.474	1
2022-09-14	09:36:27	2.04244	227.517	1
2022-09-14	09:36:28	0.818956	228.336	1
2022-09-14	09:36:29	-1.17147	228.336	1
2022-09-14	09:36:30	0.57919	228.915	1
2022-09-14	09:36:31	2.12382	231.039	1
2022-09-14	09:36:32	2.73021	233.769	1
2022-09-14	09:36:33	2.34798	236.117	1
2022-09-14	09:36:34	2.58144	238.698	1
2022-09-14	09:36:35	2.79846	241.497	1
2022-09-14	09:36:36	3.29359	244.79	1
2022-09-14	09:36:37	4.00078	248.791	1
2022-09-14	09:36:38	4.71054	253.502	1
2022-09-14	09:36:39	4.44882	257.951	1
2022-09-14	09:36:40	3.48861	261.439	1
2022-09-14	09:36:41	3.79065	265.23	1
2022-09-14	09:36:42	3.52602	268.756	1
2022-09-14	09:36:43	2.80027	271.556	1
2022-09-14	09:36:44	3.22489	274.781	1
2022-09-14	09:36:45	3.24373	278.025	1
2022-09-14	09:36:46	3.11485	281.14	1
2022-09-14	09:36:47	3.42268	284.562	1
2022-09-14	09:36:48	3.27005	287.832	1
2022-09-14	09:36:49	2.48675	290.319	1
2022-09-14	09:36:50	3.75752	294.077	1
2022-09-14	09:36:51	3.58533	297.662	1
2022-09-14	09:36:52	2.79563	300.458	1
2022-09-14	09:36:53	2.58975	303.047	1
2022-09-14	09:36:54	2.53106	305.578	1
2022-09-14	09:36:55	2.57775	308.156	1
2022-09-14	09:36:56	2.0932	310.249	1
2022-09-14	09:36:57	2.01061	312.26	1
2022-09-14	09:36:58	3.26965	315.53	1
2022-09-14	09:36:59	4.30021	319.83	1
2022-09-14	09:37:00	3.98929	323.819	1
2022-09-14	09:37:01	6.26806	330.087	1
2022-09-14	09:37:02	7.15736	337.245	1
2022-09-14	09:37:03	2.64379	339.888	1
2022-09-14	09:37:04	4.1658	344.054	1
2022-09-14	09:37:05	3.39691	347.451	1
2022-09-14	09:37:06	2.98171	350.433	1
2022-09-14	09:37:07	3.26331	353.696	1
2022-09-14	09:37:08	4.13518	357.831	1
2022-09-14	09:37:09	3.31912	361.15	1
2022-09-14	09:37:10	2.04063	363.191	1
2022-09-14	09:37:11	2.42291	365.614	1
2022-09-14	09:37:12	2.24861	367.863	1
2022-09-14	09:37:13	2.13881	370.001	1
2022-09-14	09:37:14	1.96553	371.967	1
2022-09-14	09:37:15	1.90984	373.877	1
2022-09-14	09:37:16	1.77141	375.648	1
2022-09-14	09:37:17	1.70629	377.354	1
2022-09-14	09:37:18	0.208376	377.563	1
2022-09-14	09:37:19	0.554838	378.118	1
2022-09-14	09:37:20	1.44866	379.566	1
2022-09-14	09:37:21	3.23038	382.797	1
2022-09-14	09:37:22	1.84736	384.644	1
2022-09-14	09:37:23	1.6932	386.337	1
2022-09-14	09:37:24	0.71092	387.048	1
2022-09-14	09:37:25	0.985227	388.033	1
2022-09-14	09:37:26	0.653083	388.686	1
2022-09-14	09:37:27	1.45093	390.137	1
2022-09-14	09:37:28	16.3067	406.444	2
2022-09-14	09:37:29	11.6007	418.045	2
2022-09-14	09:37:30	1.40532	419.45	2
2022-09-14	09:37:31	-0.100395	419.45	2
2022-09-14	09:37:32	-0.773905	419.45	2
2022-09-14	09:37:33	-0.680717	419.45	2
2022-09-14	09:37:34	3.74668	423.197	2
2022-09-14	09:37:35	0.763778	423.961	2
2022-09-14	09:37:36	-0.261967	423.961	2
2022-09-14	09:37:37	0.254348	424.215	2
2022-09-14	09:37:38	0.0148849	424.23	2
2022-09-14	09:37:39	-0.190433	424.23	2
2022-09-14	09:37:40	-0.156478	424.23	2
2022-09-14	09:37:41	0.94629	425.176	2
2022-09-14	09:37:42	3.16948	428.346	2
2022-09-14	09:37:43	3.20627	431.552	2
2022-09-14	09:37:44	2.2378	433.79	2
2022-09-14	09:37:45	1.93063	435.72	2
2022-09-14	09:37:46	1.67968	437.4	2
2022-09-14	09:37:47	1.70277	439.103	2
2022-09-14	09:37:48	1.70509	440.808	2
2022-09-14	09:37:49	1.44604	442.254	2
2022-09-14	09:37:50	1.27968	443.534	2
2022-09-14	09:37:51	1.0524	444.586	2
2022-09-14	09:37:52	0.922408	445.508	2
2022-09-14	09:37:53	5.17732	450.686	2
2022-09-14	09:37:54	2.5056	453.191	2
2022-09-14	09:37:55	1.82806	455.019	2
2022-09-14	09:37:56	1.31884	456.338	2
2022-09-14	09:37:57	1.56315	457.901	2
2022-09-14	09:37:58	1.66128	459.563	2
2022-09-14	09:37:59	0.891338	460.454	2
2022-09-14	09:38:00	1.0361	461.49	2
2022-09-14	09:38:01	1.24193	462.732	2
2022-09-14	09:38:02	1.35789	464.09	2
2022-09-14	09:38:03	2.40146	466.491	2
2022-09-14	09:38:04	3.25228	469.744	2
2022-09-14	09:38:05	3.21559	472.959	2
2022-09-14	09:38:06	1.20288	474.162	2
2022-09-14	09:38:07	-0.714316	474.162	2
2022-09-14	09:38:08	-7.9008	474.162	2
2022-09-14	09:38:09	-7.90257	474.162	2
2022-09-14	09:38:10	-8.73998	474.162	2
2022-09-14	09:38:11	-8.97065	474.162	2
2022-09-14	09:38:12	-9.60155	474.162	2
2022-09-14	09:38:13	-10.508	474.162	2
2022-09-14	09:38:14	-9.8741	474.162	2
2022-09-14	09:38:15	-12.3549	474.162	2
2022-09-14	09:38:16	-4.46678	474.162	2
2022-09-14	09:38:17	1.29507	475.457	2
2022-09-14	09:38:18	1.92433	477.381	2
2022-09-14	09:38:19	3.23485	480.616	2
2022-09-14	09:38:20	3.24866	483.865	2
2022-09-14	09:38:21	3.25015	487.115	2
2022-09-14	09:38:22	3.25737	490.372	2
2022-09-14	09:38:23	3.24351	493.616	2
2022-09-14	09:38:24	3.24679	496.863	2
2022-09-14	09:38:25	3.25286	500.116	2
2022-09-14	09:38:26	3.26552	503.381	2
2022-09-14	09:38:27	3.24322	506.624	2
2022-09-14	09:38:28	3.25539	509.88	2
2022-09-14	09:38:29	3.2506	513.13	2
2022-09-14	09:38:30	2.21935	515.35	2
2022-09-14	09:38:31	3.25347	518.603	2
2022-09-14	09:38:32	3.25986	521.863	2
2022-09-14	09:38:33	3.25747	525.121	2
2022-09-14	09:38:34	3.27056	528.391	2
2022-09-14	09:38:35	3.26105	531.652	2
2022-09-14	09:38:36	3.28522	534.937	2
2022-09-14	09:38:37	3.25762	538.195	2
2022-09-14	09:38:38	3.25918	541.454	2
2022-09-14	09:38:39	3.26331	544.717	2
2022-09-14	09:38:40	3.25624	547.974	2
2022-09-14	09:38:41	3.2389	551.213	2
2022-09-14	09:38:42	3.25986	554.472	2
2022-09-14	09:38:43	3.26428	557.737	2
2022-09-14	09:38:44	3.26167	560.998	2
2022-09-14	09:38:45	3.26275	564.261	2
2022-09-14	09:38:46	3.25539	567.517	2
2022-09-14	09:38:47	3.27225	570.789	2
2022-09-14	09:38:48	3.25754	574.046	2
2022-09-14	09:38:49	3.27241	577.319	2
2022-09-14	09:38:50	3.26473	580.584	2
2022-09-14	09:38:51	3.25698	583.84	2
2022-09-14	09:38:52	3.26297	587.103	2
2022-09-14	09:38:53	2.77115	589.875	2
2022-09-14	09:38:54	3.26269	593.137	2
2022-09-14	09:38:55	3.27237	596.41	2
2022-09-14	09:38:56	3.25166	599.661	2
2022-09-14	09:38:57	3.25113	602.912	2
2022-09-14	09:38:58	3.26705	606.18	2
2022-09-14	09:38:59	1.49496	607.674	2
2022-09-14	09:39:00	1.26366	608.938	2
2022-09-14	09:39:01	-4.40936	608.938	2
2022-09-14	09:39:02	4.80445	613.743	2
2022-09-14	09:39:03	5.37293	619.116	2
2022-09-14	09:39:04	3.37401	622.49	2
2022-09-14	09:39:05	2.09362	624.583	2
2022-09-14	09:39:06	2.22121	626.804	2
2022-09-14	09:39:07	2.68228	629.487	2
2022-09-14	09:39:08	3.71702	633.204	2
2022-09-14	09:39:09	14.8017	648.005	3
2022-09-14	09:39:10	6.66817	654.673	3
2022-09-14	09:39:11	17.6374	672.311	4
2022-09-14	09:39:12	22.2401	694.551	5
2022-09-14	09:39:13	26.6363	721.187	6
2022-09-14	09:39:14	6.43364	727.621	6
2022-09-14	09:39:15	2.02314	729.644	6
2022-09-14	09:39:16	12.3518	741.996	6
2022-09-14	09:39:17	35.7714	777.767	7
2022-09-14	09:39:18	27.4956	805.263	8
2022-09-14	09:39:19	6.10009	811.363	8
2022-09-14	09:39:20	19.7418	831.105	9
2022-09-14	09:39:21	5.86473	836.97	9
2022-09-14	09:39:22	6.15386	843.123	9
2022-09-14	09:39:23	13.8629	856.986	10

## Sheet: Richa_martin_202291493413 (4)
Date	Time	Lbs	Newtons	Averaged newtons	Total force x time		total steps > 13.345	**GoPro Fitting: 923
2022-09-14	09:34:23	0.0624557	0.277815	0.268478	0.277815	FALSE	0
2022-09-14	09:34:23	0.0669341	0.297736	0.268478	0.297736	FALSE	0
2022-09-14	09:34:23	0.0510562	0.227108	0.268478	0.504924	FALSE	0
2022-09-14	09:34:23	0.0609798	0.27125	0.268478	0.568987	FALSE	0
2022-09-14	09:34:24	0.0646949	0.287776	0.224109	0.792699	FALSE	0
2022-09-14	09:34:24	0.0757381	0.336898	0.224109	0.905885	FALSE	0
2022-09-14	09:34:24	0.038588	0.171647	0.224109	0.964347	FALSE	0
2022-09-14	09:34:24	0.0225066	0.100114	0.224109	1.006	FALSE	0
2022-09-14	09:34:25	0.0205728	0.0915119	-0.0725321	1.05586	FALSE	0
2022-09-14	09:34:25	0.0213361	0.0949072	-0.0725321	1.10091	FALSE	0
2022-09-14	09:34:25	-0.0908267	-0.404015	-0.0725321	1.05586	FALSE	0
2022-09-14	09:34:26	-0.0923534	-0.410806	-0.247423	1.10091	FALSE	0
2022-09-14	09:34:26	-0.057697	-0.256648	-0.247423	1.05586	FALSE	0
2022-09-14	09:34:26	-0.0391219	-0.174022	-0.247423	1.10091	FALSE	0
2022-09-14	09:34:26	-0.0333204	-0.148216	-0.247423	1.05586	FALSE	0
2022-09-14	09:34:27	-0.00762061	-0.033898	0.469325	1.10091	FALSE	0
2022-09-14	09:34:27	0.142659	0.634576	0.469325	1.69043	FALSE	0
2022-09-14	09:34:27	0.0847967	0.377193	0.469325	1.4781	FALSE	0
2022-09-14	09:34:27	0.202201	0.89943	0.469325	2.58986	FALSE	0
2022-09-14	09:34:28	0.201641	0.896939	0.149972	2.37504	FALSE	0
2022-09-14	09:34:28	0.00281194	0.0125081	0.149972	2.60237	FALSE	0
2022-09-14	09:34:28	-0.0615137	-0.273625	0.149972	2.37504	FALSE	0
2022-09-14	09:34:28	-0.00807864	-0.0359354	0.149972	2.60237	FALSE	0
2022-09-14	09:34:29	-0.0490964	-0.218391	-0.00605422	2.37504	FALSE	0
2022-09-14	09:34:29	0.0453056	0.201528	-0.00605422	2.8039	FALSE	0
2022-09-14	09:34:29	-0.0120481	-0.0535924	-0.00605422	2.37504	FALSE	0
2022-09-14	09:34:29	0.0103947	0.0462377	-0.00605422	2.85014	FALSE	0
2022-09-14	09:34:30	0.00423688	0.0188465	-0.109431	2.39388	FALSE	0
2022-09-14	09:34:30	-0.0709793	-0.31573	-0.109431	2.85014	FALSE	0
2022-09-14	09:34:30	-0.00706081	-0.0314079	-0.109431	2.39388	FALSE	0
2022-09-14	09:34:31	0.0413361	0.183871	1.15399	3.03401	FALSE	0
2022-09-14	09:34:31	0.0340587	0.1515	1.15399	2.54538	FALSE	0
2022-09-14	09:34:31	0.026476	0.117771	1.15399	3.15178	FALSE	0
2022-09-14	09:34:31	0.935839	4.1628	1.15399	6.70818	FALSE	0
2022-09-14	09:34:32	0.558791	2.48561	1.92303	5.63739	FALSE	0
2022-09-14	09:34:32	0.192532	0.856421	1.92303	7.5646	FALSE	0
2022-09-14	09:34:32	0.377519	1.67928	1.92303	7.31667	FALSE	0
2022-09-14	09:34:32	0.60042	2.67079	1.92303	10.2354	FALSE	0
2022-09-14	09:34:33	0.29355	1.30577	1.49609	8.62244	FALSE	0
2022-09-14	09:34:33	0.328003	1.45902	1.49609	11.6944	FALSE	0
2022-09-14	09:34:33	0.294567	1.31029	1.49609	9.93274	FALSE	0
2022-09-14	09:34:33	0.429224	1.90927	1.49609	13.6037	FALSE	0
2022-09-14	09:34:34	0.381234	1.69581	1.33361	11.6285	FALSE	0
2022-09-14	09:34:34	0.483931	2.15262	1.33361	15.7563	FALSE	0
2022-09-14	09:34:34	0.0342623	0.152406	1.33361	11.7809	FALSE	0
2022-09-14	09:34:35	-0.124771	-0.555006	0.165139	15.7563	FALSE	0
2022-09-14	09:34:35	0.0386389	0.171874	0.165139	11.9528	FALSE	0
2022-09-14	09:34:35	0.16154	0.718562	0.165139	16.4749	FALSE	0
2022-09-14	09:34:35	0.0730918	0.325127	0.165139	12.2779	FALSE	0
2022-09-14	09:34:36	-0.153219	-0.681549	-0.0800791	16.4749	FALSE	0
2022-09-14	09:34:36	-0.216374	-0.962475	-0.0800791	12.2779	FALSE	0
2022-09-14	09:34:36	0.0996567	0.443293	-0.0800791	16.9182	FALSE	0
2022-09-14	09:34:36	0.197926	0.880414	-0.0800791	13.1584	FALSE	0
2022-09-14	09:34:37	0.267494	1.18987	1.38583	18.108	FALSE	0
2022-09-14	09:34:37	0.319707	1.42212	1.38583	14.5805	FALSE	0
2022-09-14	09:34:37	0.347443	1.5455	1.38583	19.6535	FALSE	0
2022-09-14	09:34:38	0.295942	1.31641	1.36683	15.8969	FALSE	0
2022-09-14	09:34:38	0.421947	1.8769	1.36683	21.5304	FALSE	0
2022-09-14	09:34:38	0.101896	0.453254	1.36683	16.3501	FALSE	0
2022-09-14	09:34:38	0.409326	1.82076	1.36683	23.3512	FALSE	0
2022-09-14	09:34:39	0.236247	1.05087	1.16564	17.401	FALSE	0
2022-09-14	09:34:39	0.360827	1.60503	1.16564	24.9562	FALSE	0
2022-09-14	09:34:39	0.2193	0.97549	1.16564	18.3765	FALSE	0
2022-09-14	09:34:39	0.231819	1.03118	1.16564	25.9874	FALSE	0
2022-09-14	09:34:40	0.248715	1.10633	-0.480416	19.4828	FALSE	0
2022-09-14	09:34:40	0.181896	0.80911	-0.480416	26.7965	FALSE	0
2022-09-14	09:34:40	-0.276221	-1.22869	-0.480416	19.4828	FALSE	0
2022-09-14	09:34:40	-0.586399	-2.60842	-0.480416	26.7965	FALSE	0
2022-09-14	09:34:41	-0.639529	-2.84475	-3.40532	19.4828	FALSE	0
2022-09-14	09:34:41	-0.666704	-2.96563	-3.40532	26.7965	FALSE	0
2022-09-14	09:34:41	-0.990419	-4.40558	-3.40532	19.4828	FALSE	0
2022-09-14	09:34:42	-0.616017	-2.74017	0.418959	26.7965	FALSE	0
2022-09-14	09:34:42	0.0196567	0.0874369	0.418959	19.5703	FALSE	0
2022-09-14	09:34:42	0.428512	1.90611	0.418959	28.7026	FALSE	0
2022-09-14	09:34:42	0.544593	2.42246	0.418959	21.9927	FALSE	0
2022-09-14	09:34:43	0.472379	2.10124	1.84176	30.8039	FALSE	0
2022-09-14	09:34:43	0.471412	2.09693	1.84176	24.0897	FALSE	0
2022-09-14	09:34:43	0.377316	1.67838	1.84176	32.4822	FALSE	0
2022-09-14	09:34:43	0.335076	1.49049	1.84176	25.5802	FALSE	0
2022-09-14	09:34:44	0.444186	1.97583	2.38482	34.4581	FALSE	0
2022-09-14	09:34:44	0.572939	2.54855	2.38482	28.1287	FALSE	0
2022-09-14	09:34:44	0.588969	2.61985	2.38482	37.0779	FALSE	0
2022-09-14	09:34:44	0.538435	2.39507	2.38482	30.5238	FALSE	0
2022-09-14	09:34:45	0.483372	2.15014	2.10094	39.2281	FALSE	0
2022-09-14	09:34:45	0.469886	2.09015	2.10094	32.6139	FALSE	0
2022-09-14	09:34:45	0.463677	2.06253	2.10094	41.2906	FALSE	0
2022-09-14	09:34:46	0.487494	2.16847	2.18896	34.7824	FALSE	0
2022-09-14	09:34:46	0.500369	2.22574	2.18896	43.5163	FALSE	0
2022-09-14	09:34:46	0.498333	2.21668	2.18896	36.9991	FALSE	0
2022-09-14	09:34:46	0.482201	2.14493	2.18896	45.6612	FALSE	0
2022-09-14	09:34:47	0.452634	2.01341	1.99201	39.0125	FALSE	0
2022-09-14	09:34:47	0.451819	2.00978	1.99201	47.671	FALSE	0
2022-09-14	09:34:47	0.452837	2.01431	1.99201	41.0268	FALSE	0
2022-09-14	09:34:47	0.434008	1.93055	1.99201	49.6016	FALSE	0
2022-09-14	09:34:48	0.468155	2.08245	2.02648	43.1092	FALSE	0
2022-09-14	09:34:48	0.462252	2.05619	2.02648	51.6578	FALSE	0
2022-09-14	09:34:48	0.419453	1.86581	2.02648	44.9751	FALSE	0
2022-09-14	09:34:48	0.47243	2.10146	2.02648	53.7592	FALSE	0
2022-09-14	09:34:49	0.453957	2.01929	2.09784	46.9943	FALSE	0
2022-09-14	09:34:49	0.494669	2.20039	2.09784	55.9596	FALSE	0
2022-09-14	09:34:49	0.466221	2.07384	2.09784	49.0682	FALSE	0
2022-09-14	09:34:50	0.521947	2.32172	2.26536	58.2813	FALSE	0
2022-09-14	09:34:50	0.512685	2.28053	2.26536	51.3487	FALSE	0
2022-09-14	09:34:50	0.501539	2.23095	2.26536	60.5123	FALSE	0
2022-09-14	09:34:50	0.500929	2.22823	2.26536	53.5769	FALSE	0
2022-09-14	09:34:51	0.498435	2.21714	2.20203	62.7294	FALSE	0
2022-09-14	09:34:51	0.507748	2.25856	2.20203	55.8355	FALSE	0
2022-09-14	09:34:51	0.505661	2.24928	2.20203	64.9787	FALSE	0
2022-09-14	09:34:51	0.468308	2.08313	2.20203	57.9186	FALSE	0
2022-09-14	09:34:52	0.47701	2.12184	2.23553	67.1005	FALSE	0
2022-09-14	09:34:52	0.508919	2.26377	2.23553	60.1824	FALSE	0
2022-09-14	09:34:52	0.526629	2.34255	2.23553	69.4431	FALSE	0
2022-09-14	09:34:52	0.497723	2.21397	2.23553	62.3964	FALSE	0
2022-09-14	09:34:53	0.46271	2.05823	1.97085	71.5013	FALSE	0
2022-09-14	09:34:53	0.44902	1.99733	1.97085	64.3937	FALSE	0
2022-09-14	09:34:53	0.417468	1.85698	1.97085	73.3583	FALSE	0
2022-09-14	09:34:54	0.392023	1.7438	1.93491	66.1375	FALSE	0
2022-09-14	09:34:54	0.398741	1.77368	1.93491	75.132	FALSE	0
2022-09-14	09:34:54	0.406425	1.80786	1.93491	67.9454	FALSE	0
2022-09-14	09:34:54	0.542761	2.41431	1.93491	77.5463	FALSE	0
2022-09-14	09:34:55	0.464797	2.06751	1.91765	70.0129	FALSE	0
2022-09-14	09:34:55	0.432837	1.92535	1.91765	79.4716	FALSE	0
2022-09-14	09:34:55	0.41472	1.84476	1.91765	71.8576	FALSE	0
2022-09-14	09:34:55	0.412074	1.83299	1.91765	81.3046	FALSE	0
2022-09-14	09:34:56	0.405254	1.80265	1.82727	73.6603	FALSE	0
2022-09-14	09:34:56	0.397774	1.76938	1.82727	83.074	FALSE	0
2022-09-14	09:34:56	0.411667	1.83118	1.82727	75.4915	FALSE	0
2022-09-14	09:34:56	0.428461	1.90588	1.82727	84.9799	FALSE	0
2022-09-14	09:34:57	0.427901	1.90339	1.8431	77.3949	FALSE	0
2022-09-14	09:34:57	0.435585	1.93757	1.8431	86.9175	FALSE	0
2022-09-14	09:34:57	0.379555	1.68834	1.8431	79.0832	FALSE	0
2022-09-14	09:34:58	0.412328	1.83412	2.07701	88.7516	FALSE	0
2022-09-14	09:34:58	0.515738	2.29411	2.07701	81.3773	FALSE	0
2022-09-14	09:34:58	0.390242	1.73587	2.07701	90.4874	FALSE	0
2022-09-14	09:34:58	0.549427	2.44396	2.07701	83.8213	FALSE	0
2022-09-14	09:34:59	0.360064	1.60164	1.92365	92.0891	FALSE	0
2022-09-14	09:34:59	0.467799	2.08086	1.92365	85.9021	FALSE	0
2022-09-14	09:34:59	0.412227	1.83367	1.92365	93.9228	FALSE	0
2022-09-14	09:34:59	0.489733	2.17843	1.92365	88.0806	FALSE	0
2022-09-14	09:35:00	0.355992	1.58352	1.9159	95.5063	FALSE	0
2022-09-14	09:35:00	0.443982	1.97492	1.9159	90.0555	FALSE	0
2022-09-14	09:35:00	0.417723	1.85812	1.9159	97.3644	FALSE	0
2022-09-14	09:35:00	0.505153	2.24702	1.9159	92.3025	FALSE	0
2022-09-14	09:35:01	0.404695	1.80016	2.03363	99.1646	FALSE	0
2022-09-14	09:35:01	0.505305	2.2477	2.03363	94.5502	FALSE	0
2022-09-14	09:35:01	0.46154	2.05302	2.03363	101.218	FALSE	0
2022-09-14	09:35:02	0.489224	2.17617	2.09105	96.7264	FALSE	0
2022-09-14	09:35:02	0.591514	2.63117	2.09105	103.849	FALSE	0
2022-09-14	09:35:02	0.435636	1.9378	2.09105	98.6642	FALSE	0
2022-09-14	09:35:02	0.363982	1.61906	2.09105	105.468	FALSE	0
2022-09-14	09:35:03	0.337316	1.50045	1.79292	100.165	FALSE	0
2022-09-14	09:35:03	0.519249	2.30972	1.79292	107.778	FALSE	0
2022-09-14	09:35:03	0.302964	1.34764	1.79292	101.512	FALSE	0
2022-09-14	09:35:03	0.452735	2.01386	1.79292	109.791	FALSE	0
2022-09-14	09:35:04	0.420064	1.86853	1.9876	103.381	FALSE	0
2022-09-14	09:35:04	0.525458	2.33734	1.9876	112.129	FALSE	0
2022-09-14	09:35:04	0.394975	1.75693	1.9876	105.138	FALSE	0
2022-09-14	09:35:05	0.49986	2.22348	2.17056	114.352	FALSE	0
2022-09-14	09:35:05	0.489428	2.17707	2.17056	107.315	FALSE	0
2022-09-14	09:35:05	0.495942	2.20605	2.17056	116.558	FALSE	0
2022-09-14	09:35:05	0.466629	2.07566	2.17056	109.39	FALSE	0
2022-09-14	09:35:06	0.598333	2.6615	2.76535	119.22	FALSE	0
2022-09-14	09:35:06	0.547341	2.43468	2.76535	111.825	FALSE	0
2022-09-14	09:35:06	0.769377	3.42234	2.76535	122.642	FALSE	0
2022-09-14	09:35:06	0.571667	2.54289	2.76535	114.368	FALSE	0
2022-09-14	09:35:07	0.667341	2.96847	2.85975	125.611	FALSE	0
2022-09-14	09:35:07	0.609835	2.71267	2.85975	117.081	FALSE	0
2022-09-14	09:35:07	0.7193	3.19959	2.85975	128.81	FALSE	0
2022-09-14	09:35:07	0.575127	2.55828	2.85975	119.639	FALSE	0
2022-09-14	09:35:08	0.743982	3.30938	3.12896	132.12	FALSE	0
2022-09-14	09:35:08	0.629987	2.80231	3.12896	122.441	FALSE	0
2022-09-14	09:35:08	0.736298	3.2752	3.12896	135.395	FALSE	0
2022-09-14	09:35:09	1.20729	5.37027	16.763	127.812	FALSE	0
2022-09-14	09:35:09	3.29894	14.6743	16.763	150.069	1	1
2022-09-14	09:35:09	5.1082	22.7223	16.763	150.534	1	2
2022-09-14	09:35:09	5.4595	24.2849	16.763	174.354	1	3
2022-09-14	09:35:10	2.3823	10.5969	4.60066	161.131	FALSE	3
2022-09-14	09:35:10	0.658995	2.93134	4.60066	177.285	FALSE	3
2022-09-14	09:35:10	0.452888	2.01454	4.60066	163.145	FALSE	3
2022-09-14	09:35:10	0.642914	2.85981	4.60066	180.145	FALSE	3
2022-09-14	09:35:11	0.556501	2.47543	2.26196	165.621	FALSE	3
2022-09-14	09:35:11	0.477977	2.12614	2.26196	182.271	FALSE	3
2022-09-14	09:35:11	0.572328	2.54583	2.26196	168.167	FALSE	3
2022-09-14	09:35:11	0.427239	1.90044	2.26196	184.172	FALSE	3
2022-09-14	09:35:12	0.469479	2.08834	2.14214	170.255	FALSE	3
2022-09-14	09:35:12	0.44729	1.98964	2.14214	186.161	FALSE	3
2022-09-14	09:35:12	0.527952	2.34844	2.14214	172.603	FALSE	3
2022-09-14	09:35:13	0.678282	3.01713	3.15788	189.179	FALSE	3
2022-09-14	09:35:13	0.688868	3.06422	3.15788	175.668	FALSE	3
2022-09-14	09:35:13	0.673397	2.9954	3.15788	192.174	FALSE	3
2022-09-14	09:35:13	0.799147	3.55477	3.15788	179.222	FALSE	3
2022-09-14	09:35:14	0.676603	3.00967	2.4893	195.184	FALSE	3
2022-09-14	09:35:14	0.666476	2.96462	2.4893	182.187	FALSE	3
2022-09-14	09:35:14	0.708359	3.15092	2.4893	198.335	FALSE	3
2022-09-14	09:35:14	0.187036	0.831974	2.4893	183.019	FALSE	3
2022-09-14	09:35:15	-0.251997	-1.12093	-2.06784	198.335	FALSE	3
2022-09-14	09:35:15	-0.36645	-1.63004	-2.06784	183.019	FALSE	3
2022-09-14	09:35:15	-0.565432	-2.51515	-2.06784	198.335	FALSE	3
2022-09-14	09:35:15	-0.67561	-3.00525	-2.06784	183.019	FALSE	3
2022-09-14	09:35:16	-0.551844	-2.45471	-1.66498	198.335	FALSE	3
2022-09-14	09:35:16	-0.40818	-1.81567	-1.66498	183.019	FALSE	3
2022-09-14	09:35:16	-0.162888	-0.724558	-1.66498	198.335	FALSE	3
2022-09-14	09:35:17	-0.0611575	-0.272041	0.802771	183.019	FALSE	3
2022-09-14	09:35:17	0.177367	0.788964	0.802771	199.124	FALSE	3
2022-09-14	09:35:17	0.344542	1.53259	0.802771	184.552	FALSE	3
2022-09-14	09:35:17	0.261132	1.16157	0.802771	200.285	FALSE	3
2022-09-14	09:35:18	0.403168	1.79337	2.12829	186.345	FALSE	3
2022-09-14	09:35:18	0.497061	2.21103	2.12829	202.496	FALSE	3
2022-09-14	09:35:18	0.44902	1.99733	2.12829	188.342	FALSE	3
2022-09-14	09:35:18	0.564593	2.51142	2.12829	205.008	FALSE	3
2022-09-14	09:35:19	0.732175	3.25686	2.10599	191.599	FALSE	3
2022-09-14	09:35:19	0.766577	3.40989	2.10599	208.417	FALSE	3
2022-09-14	09:35:19	0.272939	1.21409	2.10599	192.813	FALSE	3
2022-09-14	09:35:19	0.122099	0.543121	2.10599	208.961	FALSE	3
2022-09-14	09:35:20	0.41187	1.83208	0.79862	194.645	FALSE	3
2022-09-14	09:35:20	0.119809	0.532934	0.79862	209.493	FALSE	3
2022-09-14	09:35:20	0.00693411	0.0308443	0.79862	194.676	FALSE	3
2022-09-14	09:35:21	-0.162786	-0.724105	-0.767625	209.493	FALSE	3
2022-09-14	09:35:21	-0.187061	-0.832085	-0.767625	194.676	FALSE	3
2022-09-14	09:35:21	-0.0892999	-0.397224	-0.767625	209.493	FALSE	3
2022-09-14	09:35:21	-0.251132	-1.11709	-0.767625	194.676	FALSE	3
2022-09-14	09:35:22	-0.259274	-1.1533	-0.176965	209.493	FALSE	3
2022-09-14	09:35:22	-0.125076	-0.556363	-0.176965	194.676	FALSE	3
2022-09-14	09:35:22	0.0775193	0.344821	-0.176965	209.838	FALSE	3
2022-09-14	09:35:22	0.147697	0.656986	-0.176965	195.333	FALSE	3
2022-09-14	09:35:23	0.234771	1.04431	4.25669	210.883	FALSE	3
2022-09-14	09:35:23	0.499962	2.22393	4.25669	197.557	FALSE	3
2022-09-14	09:35:23	1.77533	7.89702	4.25669	218.78	FALSE	3
2022-09-14	09:35:23	1.31772	5.86148	4.25669	203.418	FALSE	3
2022-09-14	09:35:24	0.914211	4.06659	4.97834	222.846	FALSE	3
2022-09-14	09:35:24	0.941234	4.1868	4.97834	207.605	FALSE	3
2022-09-14	09:35:24	1.5021	6.68164	4.97834	229.528	FALSE	3
2022-09-14	09:35:25	1.07945	4.80161	3.02936	212.407	FALSE	3
2022-09-14	09:35:25	0.812277	3.61317	3.02936	233.141	FALSE	3
2022-09-14	09:35:25	0.388359	1.7275	3.02936	214.134	FALSE	3
2022-09-14	09:35:25	0.444033	1.97515	3.02936	235.116	FALSE	3
2022-09-14	09:35:26	0.386883	1.72093	1.04889	215.855	FALSE	3
2022-09-14	09:35:26	0.346272	1.54029	1.04889	236.656	FALSE	3
2022-09-14	09:35:26	0.192481	0.856194	1.04889	216.712	FALSE	3
2022-09-14	09:35:26	0.0175702	0.0781558	1.04889	236.735	FALSE	3
2022-09-14	09:35:27	0.103626	0.460949	-2.32325	217.172	FALSE	3
2022-09-14	09:35:27	-0.894999	-3.98113	-2.32325	236.735	FALSE	3
2022-09-14	09:35:27	-1.06029	-4.71638	-2.32325	217.172	FALSE	3
2022-09-14	09:35:27	-0.237493	-1.05642	-2.32325	236.735	FALSE	3
2022-09-14	09:35:28	-0.210572	-0.936666	-0.500978	217.172	FALSE	3
2022-09-14	09:35:28	-0.137239	-0.610467	-0.500978	236.735	FALSE	3
2022-09-14	09:35:28	0.00993663	0.0442001	-0.500978	217.217	FALSE	3
2022-09-14	09:35:29	0.27355	1.21681	1.75715	237.951	FALSE	3
2022-09-14	09:35:29	0.655483	2.91572	1.75715	220.132	FALSE	3
2022-09-14	09:35:29	0.221539	0.98545	1.75715	238.937	FALSE	3
2022-09-14	09:35:29	0.429529	1.91063	1.75715	222.043	FALSE	3
2022-09-14	09:35:30	0.410598	1.82642	1.85285	240.763	FALSE	3
2022-09-14	09:35:30	0.501692	2.23163	1.85285	224.275	FALSE	3
2022-09-14	09:35:30	0.605662	2.69411	1.85285	243.457	FALSE	3
2022-09-14	09:35:30	0.148206	0.65925	1.85285	224.934	FALSE	3
2022-09-14	09:35:31	-0.0436002	-0.193942	-0.69677	243.457	FALSE	3
2022-09-14	09:35:31	-0.176933	-0.787033	-0.69677	224.934	FALSE	3
2022-09-14	09:35:31	-0.213371	-0.949117	-0.69677	243.457	FALSE	3
2022-09-14	09:35:31	-0.192659	-0.856986	-0.69677	224.934	FALSE	3
2022-09-14	09:35:32	-0.220089	-0.979	-0.913728	243.457	FALSE	3
2022-09-14	09:35:32	-0.192557	-0.856532	-0.913728	224.934	FALSE	3
2022-09-14	09:35:32	-0.2036	-0.905654	-0.913728	243.457	FALSE	3
2022-09-14	09:35:33	-0.207926	-0.924896	-0.946911	224.934	FALSE	3
2022-09-14	09:35:33	-0.199478	-0.887318	-0.946911	243.457	FALSE	3
2022-09-14	09:35:33	-0.207315	-0.922179	-0.946911	224.934	FALSE	3
2022-09-14	09:35:33	-0.236781	-1.05325	-0.946911	243.457	FALSE	3
2022-09-14	09:35:34	-0.301157	-1.33961	-0.0647407	224.934	FALSE	3
2022-09-14	09:35:34	-0.0272644	-0.121278	-0.0647407	243.457	FALSE	3
2022-09-14	09:35:34	-0.163091	-0.725461	-0.0647407	224.934	FALSE	3
2022-09-14	09:35:34	0.433295	1.92738	-0.0647407	245.385	FALSE	3
2022-09-14	09:35:35	0.423473	1.88369	1.90097	226.818	FALSE	3
2022-09-14	09:35:35	0.462914	2.05913	1.90097	247.444	FALSE	3
2022-09-14	09:35:35	0.395687	1.76009	1.90097	228.578	FALSE	3
2022-09-14	09:35:36	0.273601	1.21703	1.28126	248.661	FALSE	3
2022-09-14	09:35:36	0.49299	2.19292	1.28126	230.771	FALSE	3
2022-09-14	09:35:36	0.141845	0.630955	1.28126	249.292	FALSE	3
2022-09-14	09:35:36	0.243728	1.08415	1.28126	231.855	FALSE	3
2022-09-14	09:35:37	0.314008	1.39677	1.49394	250.689	FALSE	3
2022-09-14	09:35:37	0.433092	1.92648	1.49394	233.781	FALSE	3
2022-09-14	09:35:37	0.416909	1.85449	1.49394	252.543	FALSE	3
2022-09-14	09:35:37	0.179402	0.798016	1.49394	234.579	FALSE	3
2022-09-14	09:35:38	-0.290267	-1.29117	-1.36394	252.543	FALSE	3
2022-09-14	09:35:38	-0.615661	-2.73858	-1.36394	234.579	FALSE	3
2022-09-14	09:35:38	-0.374643	-1.66649	-1.36394	252.543	FALSE	3
2022-09-14	09:35:38	0.0540587	0.240464	-1.36394	234.82	FALSE	3
2022-09-14	09:35:39	0.0708017	0.31494	0.956704	252.858	FALSE	3
2022-09-14	09:35:39	0.073957	0.328976	0.956704	235.149	FALSE	3
2022-09-14	09:35:39	0.500471	2.2262	0.956704	255.084	FALSE	3
2022-09-14	09:35:40	0.0957381	0.425862	1.76825	235.575	FALSE	3
2022-09-14	09:35:40	0.13472	0.599262	1.76825	255.684	FALSE	3
2022-09-14	09:35:40	0.76897	3.42053	1.76825	238.995	FALSE	3
2022-09-14	09:35:40	0.590649	2.62732	1.76825	258.311	FALSE	3
2022-09-14	09:35:41	0.916756	4.07791	2.78064	243.073	FALSE	3
2022-09-14	09:35:41	0.805051	3.58103	2.78064	261.892	FALSE	3
2022-09-14	09:35:41	0.461031	2.05076	2.78064	245.124	FALSE	3
2022-09-14	09:35:41	0.317621	1.41284	2.78064	263.305	FALSE	3
2022-09-14	09:35:42	0.489784	2.17866	1.7876	247.302	FALSE	3
2022-09-14	09:35:42	0.305153	1.35738	1.7876	264.662	FALSE	3
2022-09-14	09:35:42	0.406883	1.8099	1.7876	249.112	FALSE	3
2022-09-14	09:35:42	0.405662	1.80447	1.7876	266.467	FALSE	3
2022-09-14	09:35:43	0.509326	2.26558	1.84876	251.378	FALSE	3
2022-09-14	09:35:43	0.490038	2.17979	1.84876	268.646	FALSE	3
2022-09-14	09:35:43	0.247494	1.1009	1.84876	252.479	FALSE	3
2022-09-14	09:35:44	0.393804	1.75172	-1.02178	270.398	FALSE	3
2022-09-14	09:35:44	-0.150928	-0.671358	-1.02178	252.479	FALSE	3
2022-09-14	09:35:44	-0.54019	-2.40287	-1.02178	270.398	FALSE	3
2022-09-14	09:35:44	-0.621513	-2.76461	-1.02178	252.479	FALSE	3
2022-09-14	09:35:45	-0.389045	-1.73055	0.346463	270.398	FALSE	3
2022-09-14	09:35:45	-0.0383076	-0.1704	0.346463	252.479	FALSE	3
2022-09-14	09:35:45	0.154262	0.686188	0.346463	271.084	FALSE	3
2022-09-14	09:35:45	0.584644	2.60061	0.346463	255.079	FALSE	3
2022-09-14	09:35:46	0.716247	3.18601	1.83638	274.27	FALSE	3
2022-09-14	09:35:46	0.323372	1.43842	1.83638	256.518	FALSE	3
2022-09-14	09:35:46	0.254262	1.13101	1.83638	275.401	FALSE	3
2022-09-14	09:35:46	0.357468	1.59009	1.83638	258.108	FALSE	3
2022-09-14	09:35:47	0.420573	1.87079	1.29603	277.272	FALSE	3
2022-09-14	09:35:47	0.271667	1.20843	1.29603	259.316	FALSE	3
2022-09-14	09:35:47	0.181845	0.808883	1.29603	278.081	FALSE	3
2022-09-14	09:35:48	0.554873	2.46819	1.97175	261.785	FALSE	3
2022-09-14	09:35:48	0.592837	2.63706	1.97175	280.718	FALSE	3
2022-09-14	09:35:48	0.208512	0.927503	1.97175	262.712	FALSE	3
2022-09-14	09:35:48	0.416858	1.85427	1.97175	282.572	FALSE	3
2022-09-14	09:35:49	0.228054	1.01443	1.56587	263.726	FALSE	3
2022-09-14	09:35:49	0.261641	1.16383	1.56587	283.736	FALSE	3
2022-09-14	09:35:49	0.324491	1.4434	1.56587	265.17	FALSE	3
2022-09-14	09:35:49	0.593906	2.64181	1.56587	286.378	FALSE	3
2022-09-14	09:35:50	1.54118	6.85548	5.01198	272.025	FALSE	3
2022-09-14	09:35:50	1.99233	8.86228	5.01198	295.24	FALSE	3
2022-09-14	09:35:50	0.372735	1.658	5.01198	273.683	FALSE	3
2022-09-14	09:35:50	0.600725	2.67214	5.01198	297.912	FALSE	3
2022-09-14	09:35:51	0.325916	1.44974	1.3647	275.133	FALSE	3
2022-09-14	09:35:51	0.35299	1.57017	1.3647	299.483	FALSE	3
2022-09-14	09:35:51	0.241489	1.07419	1.3647	276.207	FALSE	3
2022-09-14	09:35:52	0.177774	0.790774	0.742046	300.273	FALSE	3
2022-09-14	09:35:52	0.184135	0.819069	0.742046	277.026	FALSE	3
2022-09-14	09:35:52	0.115738	0.514826	0.742046	300.788	FALSE	3
2022-09-14	09:35:52	0.189631	0.843517	0.742046	277.87	FALSE	3
2022-09-14	09:35:53	0.0944149	0.419976	1.37781	301.208	FALSE	3
2022-09-14	09:35:53	0.453092	2.01544	1.37781	279.885	FALSE	3
2022-09-14	09:35:53	0.389987	1.73474	1.37781	302.943	FALSE	3
2022-09-14	09:35:53	0.301489	1.34108	1.37781	281.226	FALSE	3
2022-09-14	09:35:54	0.14098	0.627107	0.828973	303.57	FALSE	3
2022-09-14	09:35:54	0.257417	1.14504	0.828973	282.371	FALSE	3
2022-09-14	09:35:54	0.185916	0.826992	0.828973	304.397	FALSE	3
2022-09-14	09:35:54	0.161133	0.716752	0.828973	283.088	FALSE	3
2022-09-14	09:35:55	0.0962979	0.428352	0.594509	304.825	FALSE	3
2022-09-14	09:35:55	0.227443	1.01171	0.594509	284.1	FALSE	3
2022-09-14	09:35:55	0.077214	0.343463	0.594509	305.169	FALSE	3
2022-09-14	09:35:56	0.0534989	0.237974	-0.00509208	284.338	FALSE	3
2022-09-14	09:35:56	-0.161768	-0.719576	-0.00509208	305.169	FALSE	3
2022-09-14	09:35:56	0.0307509	0.136786	-0.00509208	284.475	FALSE	3
2022-09-14	09:35:56	0.0729392	0.324448	-0.00509208	305.493	FALSE	3
2022-09-14	09:35:57	0.213193	0.948325	0.604865	285.423	FALSE	3
2022-09-14	09:35:57	0.0396058	0.176175	0.604865	305.669	FALSE	3
2022-09-14	09:35:57	0.0758399	0.337351	0.604865	285.76	FALSE	3
2022-09-14	09:35:57	0.21528	0.957608	0.604865	306.627	FALSE	3
2022-09-14	09:35:58	0.186832	0.831066	1.04997	286.591	FALSE	3
2022-09-14	09:35:58	0.281031	1.25008	1.04997	307.877	FALSE	3
2022-09-14	09:35:58	0.127545	0.567346	1.04997	287.159	FALSE	3
2022-09-14	09:35:58	0.348766	1.55138	1.04997	309.428	FALSE	3
2022-09-14	09:35:59	0.265305	1.18013	1.40786	288.339	FALSE	3
2022-09-14	09:35:59	0.368257	1.63808	1.40786	311.067	FALSE	3
2022-09-14	09:35:59	0.315942	1.40537	1.40786	289.744	FALSE	3
2022-09-14	09:36:00	0.416705	1.85359	1.78551	312.92	FALSE	3
2022-09-14	09:36:00	0.351514	1.5636	1.78551	291.308	FALSE	3
2022-09-14	09:36:00	0.314924	1.40084	1.78551	314.321	FALSE	3
2022-09-14	09:36:00	0.522455	2.32398	1.78551	293.632	FALSE	3
2022-09-14	09:36:01	0.581692	2.58748	2.40588	316.908	FALSE	3
2022-09-14	09:36:01	0.583219	2.59427	2.40588	296.226	FALSE	3
2022-09-14	09:36:01	0.489428	2.17707	2.40588	319.086	FALSE	3
2022-09-14	09:36:01	0.509122	2.26468	2.40588	298.491	FALSE	3
2022-09-14	09:36:02	0.540725	2.40525	2.65664	321.491	FALSE	3
2022-09-14	09:36:02	0.547239	2.43423	2.65664	300.925	FALSE	3
2022-09-14	09:36:02	0.615433	2.73757	2.65664	324.228	FALSE	3
2022-09-14	09:36:02	0.68556	3.04951	2.65664	303.975	FALSE	3
2022-09-14	09:36:03	0.659911	2.93542	2.8125	327.164	FALSE	3
2022-09-14	09:36:03	0.625356	2.78171	2.8125	306.756	FALSE	3
2022-09-14	09:36:03	0.611565	2.72036	2.8125	329.884	FALSE	3
2022-09-14	09:36:04	0.585967	2.6065	2.59218	309.363	FALSE	3
2022-09-14	09:36:04	0.568359	2.52817	2.59218	332.412	FALSE	3
2022-09-14	09:36:04	0.601997	2.6778	2.59218	312.041	FALSE	3
2022-09-14	09:36:04	0.574669	2.55624	2.59218	334.969	FALSE	3
2022-09-14	09:36:05	0.606476	2.69773	2.50101	314.738	FALSE	3
2022-09-14	09:36:05	0.566527	2.52003	2.50101	337.489	FALSE	3
2022-09-14	09:36:05	0.560623	2.49376	2.50101	317.232	FALSE	3
2022-09-14	09:36:05	0.515382	2.29252	2.50101	339.781	FALSE	3
2022-09-14	09:36:06	0.496858	2.21012	2.22201	319.442	FALSE	3
2022-09-14	09:36:06	0.494008	2.19745	2.22201	341.979	FALSE	3
2022-09-14	09:36:06	0.496552	2.20876	2.22201	321.651	FALSE	3
2022-09-14	09:36:06	0.5107	2.2717	2.22201	344.25	FALSE	3
2022-09-14	09:36:07	0.511158	2.27373	2.46555	323.925	FALSE	3
2022-09-14	09:36:07	0.53757	2.39122	2.46555	346.641	FALSE	3
2022-09-14	09:36:07	0.61411	2.73168	2.46555	326.656	FALSE	3
2022-09-14	09:36:08	0.678537	3.01827	3.28403	349.66	FALSE	3
2022-09-14	09:36:08	0.756298	3.36416	3.28403	330.02	FALSE	3
2022-09-14	09:36:08	0.763982	3.39834	3.28403	353.058	FALSE	3
2022-09-14	09:36:08	0.754313	3.35534	3.28403	333.376	FALSE	3
2022-09-14	09:36:09	0.673957	2.9979	2.43746	356.056	FALSE	3
2022-09-14	09:36:09	0.514669	2.28935	2.43746	335.665	FALSE	3
2022-09-14	09:36:09	0.456756	2.03174	2.43746	358.088	FALSE	3
2022-09-14	09:36:09	0.546476	2.43083	2.43746	338.096	FALSE	3
2022-09-14	09:36:10	0.78556	3.49433	3.02385	361.582	FALSE	3
2022-09-14	09:36:10	0.709784	3.15726	3.02385	341.253	FALSE	3
2022-09-14	09:36:10	0.544033	2.41997	3.02385	364.002	FALSE	3
2022-09-14	09:36:11	0.619402	2.75522	2.44034	344.008	FALSE	3
2022-09-14	09:36:11	0.519962	2.31289	2.44034	366.315	FALSE	3
2022-09-14	09:36:11	0.503931	2.24159	2.44034	346.25	FALSE	3
2022-09-14	09:36:11	0.551158	2.45166	2.44034	368.767	FALSE	3
2022-09-14	09:36:12	0.543422	2.41725	2.4421	348.667	FALSE	3
2022-09-14	09:36:12	0.545	2.42427	2.4421	371.191	FALSE	3
2022-09-14	09:36:12	0.56785	2.52591	2.4421	351.193	FALSE	3
2022-09-14	09:36:12	0.539758	2.40095	2.4421	373.592	FALSE	3
2022-09-14	09:36:13	0.580623	2.58273	2.50342	353.776	FALSE	3
2022-09-14	09:36:13	0.553448	2.46185	2.50342	376.054	FALSE	3
2022-09-14	09:36:13	0.554313	2.4657	2.50342	356.242	FALSE	3
2022-09-14	09:36:14	0.596399	2.6529	2.70344	378.707	FALSE	3
2022-09-14	09:36:14	0.608562	2.70701	2.70344	358.949	FALSE	3
2022-09-14	09:36:14	0.615433	2.73757	2.70344	381.444	FALSE	3
2022-09-14	09:36:14	0.610649	2.71629	2.70344	361.665	FALSE	3
2022-09-14	09:36:15	0.633142	2.81634	2.75607	384.26	FALSE	3
2022-09-14	09:36:15	0.575127	2.55828	2.75607	364.223	FALSE	3
2022-09-14	09:36:15	0.647137	2.87859	2.75607	387.139	FALSE	3
2022-09-14	09:36:15	0.622964	2.77107	2.75607	366.994	FALSE	3
2022-09-14	09:36:16	0.613855	2.73055	2.65268	389.87	FALSE	3
2022-09-14	09:36:16	0.631819	2.81046	2.65268	369.805	FALSE	3
2022-09-14	09:36:16	0.582659	2.59178	2.65268	392.461	FALSE	3
2022-09-14	09:36:16	0.557061	2.47792	2.65268	372.283	FALSE	3
2022-09-14	09:36:17	0.601081	2.67373	2.72025	395.135	FALSE	3
2022-09-14	09:36:17	0.619198	2.75432	2.72025	375.037	FALSE	3
2022-09-14	09:36:17	0.626374	2.78624	2.72025	397.921	FALSE	3
2022-09-14	09:36:17	0.599504	2.66671	2.72025	377.704	FALSE	3
2022-09-14	09:36:18	0.615942	2.73983	2.75779	400.661	FALSE	3
2022-09-14	09:36:18	0.592227	2.63434	2.75779	380.338	FALSE	3
2022-09-14	09:36:18	0.651768	2.89919	2.75779	403.56	FALSE	3
2022-09-14	09:36:19	0.56444	2.51074	2.52002	382.849	FALSE	3
2022-09-14	09:36:19	0.573295	2.55013	2.52002	406.111	FALSE	3
2022-09-14	09:36:19	0.566527	2.52003	2.52002	385.369	FALSE	3
2022-09-14	09:36:19	0.561845	2.4992	2.52002	408.61	FALSE	3
2022-09-14	09:36:20	0.561081	2.4958	2.48748	387.865	FALSE	3
2022-09-14	09:36:20	0.586934	2.6108	2.48748	411.221	FALSE	3
2022-09-14	09:36:20	0.55243	2.45732	2.48748	390.322	FALSE	3
2022-09-14	09:36:20	0.5364	2.38601	2.48748	413.607	FALSE	3
2022-09-14	09:36:21	0.52388	2.33032	2.4211	392.652	FALSE	3
2022-09-14	09:36:21	0.529478	2.35522	2.4211	415.962	FALSE	3
2022-09-14	09:36:21	0.564949	2.51301	2.4211	395.165	FALSE	3
2022-09-14	09:36:21	0.558842	2.48584	2.4211	418.448	FALSE	3
2022-09-14	09:36:22	0.569987	2.53542	2.49308	397.701	FALSE	3
2022-09-14	09:36:22	0.548002	2.43762	2.49308	420.885	FALSE	3
2022-09-14	09:36:22	0.563422	2.50621	2.49308	400.207	FALSE	3
2022-09-14	09:36:23	0.620216	2.75884	2.58171	423.644	FALSE	3
2022-09-14	09:36:23	0.620013	2.75794	2.58171	402.965	FALSE	3
2022-09-14	09:36:23	0.559911	2.4906	2.58171	426.135	FALSE	3
2022-09-14	09:36:23	0.521438	2.31946	2.58171	405.284	FALSE	3
2022-09-14	09:36:24	0.551718	2.45415	3.59438	428.589	FALSE	3
2022-09-14	09:36:24	0.603117	2.68279	3.59438	407.967	FALSE	3
2022-09-14	09:36:24	1.14174	5.07869	3.59438	433.667	FALSE	3
2022-09-14	09:36:24	0.935636	4.1619	3.59438	412.129	FALSE	3
2022-09-14	09:36:25	0.662812	2.94832	2.94758	436.616	FALSE	3
2022-09-14	09:36:25	0.88388	3.93168	2.94758	416.061	FALSE	3
2022-09-14	09:36:25	0.63869	2.84102	2.94758	439.457	FALSE	3
2022-09-14	09:36:25	0.465204	2.06932	2.94758	418.13	FALSE	3
2022-09-14	09:36:26	0.603931	2.68641	2.17828	442.143	FALSE	3
2022-09-14	09:36:26	0.430853	1.91652	2.17828	420.047	FALSE	3
2022-09-14	09:36:26	0.434313	1.93191	2.17828	444.075	FALSE	3
2022-09-14	09:36:27	0.48902	2.17526	2.04244	422.222	FALSE	3
2022-09-14	09:36:27	0.473804	2.10757	2.04244	446.183	FALSE	3
2022-09-14	09:36:27	0.512837	2.2812	2.04244	424.503	FALSE	3
2022-09-14	09:36:27	0.36098	1.60571	2.04244	447.788	FALSE	3
2022-09-14	09:36:28	0.281336	1.25144	0.818956	425.754	FALSE	3
2022-09-14	09:36:28	0.238893	1.06264	0.818956	448.851	FALSE	3
2022-09-14	09:36:28	0.169377	0.753423	0.818956	426.508	FALSE	3
2022-09-14	09:36:28	0.0468323	0.208319	0.818956	449.059	FALSE	3
2022-09-14	09:36:29	-0.231081	-1.02789	-1.17147	426.508	FALSE	3
2022-09-14	09:36:29	-0.287926	-1.28075	-1.17147	449.059	FALSE	3
2022-09-14	09:36:29	-0.347773	-1.54696	-1.17147	426.508	FALSE	3
2022-09-14	09:36:29	-0.186654	-0.830274	-1.17147	449.059	FALSE	3
2022-09-14	09:36:30	-0.0481295	-0.21409	0.57919	426.508	FALSE	3
2022-09-14	09:36:30	0.147239	0.654949	0.57919	449.714	FALSE	3
2022-09-14	09:36:30	0.291514	1.29671	0.57919	427.805	FALSE	3
2022-09-14	09:36:31	0.449987	2.00163	2.12382	451.716	FALSE	3
2022-09-14	09:36:31	0.385254	1.71369	2.12382	429.518	FALSE	3
2022-09-14	09:36:31	0.542303	2.41227	2.12382	454.128	FALSE	3
2022-09-14	09:36:31	0.532277	2.36767	2.12382	431.886	FALSE	3
2022-09-14	09:36:32	0.500216	2.22506	2.73021	456.353	FALSE	3
2022-09-14	09:36:32	0.5307	2.36066	2.73021	434.247	FALSE	3
2022-09-14	09:36:32	0.629173	2.79869	2.73021	459.152	FALSE	3
2022-09-14	09:36:32	0.795025	3.53643	2.73021	437.783	FALSE	3
2022-09-14	09:36:33	0.423168	1.88234	2.34798	461.034	FALSE	3
2022-09-14	09:36:33	0.442354	1.96768	2.34798	439.751	FALSE	3
2022-09-14	09:36:33	0.658384	2.92862	2.34798	463.963	FALSE	3
2022-09-14	09:36:33	0.587494	2.61329	2.34798	442.364	FALSE	3
2022-09-14	09:36:34	0.677468	3.01351	2.58144	466.976	FALSE	3
2022-09-14	09:36:34	0.512226	2.27848	2.58144	444.642	FALSE	3
2022-09-14	09:36:34	0.55131	2.45234	2.58144	469.429	FALSE	3
2022-09-14	09:36:35	0.55243	2.45732	2.79846	447.1	FALSE	3
2022-09-14	09:36:35	0.550343	2.44804	2.79846	471.877	FALSE	3
2022-09-14	09:36:35	0.68215	3.03434	2.79846	450.134	FALSE	3
2022-09-14	09:36:35	0.731565	3.25415	2.79846	475.131	FALSE	3
2022-09-14	09:36:36	0.738384	3.28448	3.29359	453.419	FALSE	3
2022-09-14	09:36:36	0.746832	3.32206	3.29359	478.453	FALSE	3
2022-09-14	09:36:36	0.756959	3.36711	3.29359	456.786	FALSE	3
2022-09-14	09:36:36	0.719555	3.20072	3.29359	481.654	FALSE	3
2022-09-14	09:36:37	0.801794	3.56654	4.00078	460.352	FALSE	3
2022-09-14	09:36:37	0.848715	3.77525	4.00078	485.429	FALSE	3
2022-09-14	09:36:37	0.963422	4.28549	4.00078	464.638	FALSE	3
2022-09-14	09:36:37	0.983728	4.37582	4.00078	489.805	FALSE	3
2022-09-14	09:36:38	1.0024	4.45888	4.71054	469.097	FALSE	3
2022-09-14	09:36:38	1.09762	4.88243	4.71054	494.687	FALSE	3
2022-09-14	09:36:38	1.07691	4.79031	4.71054	473.887	FALSE	3
2022-09-14	09:36:39	1.01355	4.50847	4.44882	499.196	FALSE	3
2022-09-14	09:36:39	0.997366	4.43648	4.44882	478.323	FALSE	3
2022-09-14	09:36:39	1.03635	4.60989	4.44882	503.806	FALSE	3
2022-09-14	09:36:39	0.953295	4.24045	4.44882	482.564	FALSE	3
2022-09-14	09:36:40	0.769478	3.42279	3.48861	507.228	FALSE	3
2022-09-14	09:36:40	0.733193	3.26139	3.48861	485.825	FALSE	3
2022-09-14	09:36:40	0.786781	3.49976	3.48861	510.728	FALSE	3
2022-09-14	09:36:40	0.847646	3.7705	3.48861	489.596	FALSE	3
2022-09-14	09:36:41	0.870191	3.87078	3.79065	514.599	FALSE	3
2022-09-14	09:36:41	0.912888	4.06071	3.79065	493.656	FALSE	3
2022-09-14	09:36:41	0.856857	3.81147	3.79065	518.41	FALSE	3
2022-09-14	09:36:41	0.768766	3.41962	3.79065	497.076	FALSE	3
2022-09-14	09:36:42	0.79126	3.51968	3.52602	521.93	FALSE	3
2022-09-14	09:36:42	0.785254	3.49297	3.52602	500.569	FALSE	3
2022-09-14	09:36:42	0.801539	3.56541	3.52602	525.496	FALSE	3
2022-09-14	09:36:43	0.628155	2.79416	2.80027	503.363	FALSE	3
2022-09-14	09:36:43	0.628562	2.79597	2.80027	528.292	FALSE	3
2022-09-14	09:36:43	0.646374	2.8752	2.80027	506.238	FALSE	3
2022-09-14	09:36:43	0.615026	2.73576	2.80027	531.027	FALSE	3
2022-09-14	09:36:44	0.665967	2.96235	3.22489	509.201	FALSE	3
2022-09-14	09:36:44	0.697875	3.10429	3.22489	534.132	FALSE	3
2022-09-14	09:36:44	0.719555	3.20072	3.22489	512.401	FALSE	3
2022-09-14	09:36:44	0.816552	3.63219	3.22489	537.764	FALSE	3
2022-09-14	09:36:45	0.765763	3.40627	3.24373	515.808	FALSE	3
2022-09-14	09:36:45	0.704135	3.13213	3.24373	540.896	FALSE	3
2022-09-14	09:36:45	0.777417	3.45811	3.24373	519.266	FALSE	3
2022-09-14	09:36:45	0.66958	2.97843	3.24373	543.874	FALSE	3
2022-09-14	09:36:46	0.704033	3.13168	3.11485	522.398	FALSE	3
2022-09-14	09:36:46	0.688868	3.06422	3.11485	546.939	FALSE	3
2022-09-14	09:36:46	0.70785	3.14866	3.11485	525.546	FALSE	3
2022-09-14	09:36:47	0.724389	3.22223	3.42268	550.161	FALSE	3
2022-09-14	09:36:47	0.785662	3.49478	3.42268	529.041	FALSE	3
2022-09-14	09:36:47	0.769173	3.42144	3.42268	553.582	FALSE	3
2022-09-14	09:36:47	0.798588	3.55228	3.42268	532.593	FALSE	3
2022-09-14	09:36:48	0.765407	3.40468	3.27005	556.987	FALSE	3
2022-09-14	09:36:48	0.80729	3.59099	3.27005	536.184	FALSE	3
2022-09-14	09:36:48	0.762557	3.39201	3.27005	560.379	FALSE	3
2022-09-14	09:36:48	0.605305	2.69252	3.27005	538.877	FALSE	3
2022-09-14	09:36:49	0.571209	2.54085	2.48675	562.92	FALSE	3
2022-09-14	09:36:49	0.559402	2.48833	2.48675	541.365	FALSE	3
2022-09-14	09:36:49	0.543015	2.41544	2.48675	565.335	FALSE	3
2022-09-14	09:36:49	0.562557	2.50237	2.48675	543.867	FALSE	3
2022-09-14	09:36:50	0.594771	2.64566	3.75752	567.981	FALSE	3
2022-09-14	09:36:50	0.873652	3.88618	3.75752	547.754	FALSE	3
2022-09-14	09:36:50	1.06576	4.74071	3.75752	572.722	FALSE	3
2022-09-14	09:36:51	0.970903	4.31877	3.58533	552.072	FALSE	3
2022-09-14	09:36:51	0.741947	3.30033	3.58533	576.022	FALSE	3
2022-09-14	09:36:51	0.764695	3.40152	3.58533	555.474	FALSE	3
2022-09-14	09:36:51	0.746527	3.3207	3.58533	579.343	FALSE	3
2022-09-14	09:36:52	0.598537	2.66241	2.79563	558.136	FALSE	3
2022-09-14	09:36:52	0.664644	2.95647	2.79563	582.299	FALSE	3
2022-09-14	09:36:52	0.619809	2.75703	2.79563	560.893	FALSE	3
2022-09-14	09:36:52	0.630954	2.80661	2.79563	585.106	FALSE	3
2022-09-14	09:36:53	0.605102	2.69161	2.58975	563.585	FALSE	3
2022-09-14	09:36:53	0.577621	2.56937	2.58975	587.675	FALSE	3
2022-09-14	09:36:53	0.56388	2.50825	2.58975	566.093	FALSE	3
2022-09-14	09:36:54	0.555891	2.47271	2.53106	590.148	FALSE	3
2022-09-14	09:36:54	0.575229	2.55873	2.53106	568.652	FALSE	3
2022-09-14	09:36:54	0.559555	2.48901	2.53106	592.637	FALSE	3
2022-09-14	09:36:54	0.585356	2.60378	2.53106	571.256	FALSE	3
2022-09-14	09:36:55	0.581845	2.58816	2.57775	595.225	FALSE	3
2022-09-14	09:36:55	0.565662	2.51618	2.57775	573.772	FALSE	3
2022-09-14	09:36:55	0.56958	2.53361	2.57775	597.759	FALSE	3
2022-09-14	09:36:55	0.600929	2.67305	2.57775	576.445	FALSE	3
2022-09-14	09:36:56	0.579758	2.57888	2.0932	600.337	FALSE	3
2022-09-14	09:36:56	0.534822	2.379	2.0932	578.824	FALSE	3
2022-09-14	09:36:56	0.437621	1.94663	2.0932	602.284	FALSE	3
2022-09-14	09:36:56	0.330089	1.4683	2.0932	580.292	FALSE	3
2022-09-14	09:36:57	0.316908	1.40967	2.01061	603.694	FALSE	3
2022-09-14	09:36:57	0.383117	1.70418	2.01061	581.996	FALSE	3
2022-09-14	09:36:57	0.655992	2.91798	2.01061	606.612	FALSE	3
2022-09-14	09:36:58	0.611209	2.71878	3.26965	584.715	FALSE	3
2022-09-14	09:36:58	0.588715	2.61872	3.26965	609.23	FALSE	3
2022-09-14	09:36:58	0.971463	4.32126	3.26965	589.036	FALSE	3
2022-09-14	09:36:58	0.768817	3.41985	3.26965	612.65	FALSE	3
2022-09-14	09:36:59	0.926629	4.12183	4.30021	593.158	FALSE	3
2022-09-14	09:36:59	1.00846	4.48583	4.30021	617.136	FALSE	3
2022-09-14	09:36:59	1.07172	4.76722	4.30021	597.926	FALSE	3
2022-09-14	09:36:59	0.860115	3.82596	4.30021	620.962	FALSE	3
2022-09-14	09:37:00	0.88958	3.95703	3.98929	601.883	FALSE	3
2022-09-14	09:37:00	0.824491	3.6675	3.98929	624.63	FALSE	3
2022-09-14	09:37:00	0.896298	3.98691	3.98929	605.869	FALSE	3
2022-09-14	09:37:00	0.976959	4.34571	3.98929	628.975	FALSE	3
2022-09-14	09:37:01	1.18729	5.2813	6.26806	611.151	FALSE	3
2022-09-14	09:37:01	1.41808	6.3079	6.26806	635.283	FALSE	3
2022-09-14	09:37:01	1.622	7.21498	6.26806	618.366	FALSE	3
2022-09-14	09:37:02	1.65279	7.35194	7.15736	642.635	FALSE	3
2022-09-14	09:37:02	2.12169	9.4377	7.15736	627.803	FALSE	3
2022-09-14	09:37:02	1.78816	7.95409	7.15736	650.589	FALSE	3
2022-09-14	09:37:02	0.873549	3.88572	7.15736	631.689	FALSE	3
2022-09-14	09:37:03	0.585356	2.60378	2.64379	653.193	FALSE	3
2022-09-14	09:37:03	0.547544	2.43559	2.64379	634.125	FALSE	3
2022-09-14	09:37:03	0.540827	2.40571	2.64379	655.599	FALSE	3
2022-09-14	09:37:03	0.703677	3.1301	2.64379	637.255	FALSE	3
2022-09-14	09:37:04	0.772939	3.43819	4.1658	659.037	FALSE	3
2022-09-14	09:37:04	1.1081	4.92905	4.1658	642.184	FALSE	3
2022-09-14	09:37:04	0.995789	4.42947	4.1658	663.466	FALSE	3
2022-09-14	09:37:04	0.869224	3.86648	4.1658	646.05	FALSE	3
2022-09-14	09:37:05	0.87416	3.88844	3.39691	667.355	FALSE	3
2022-09-14	09:37:05	0.712634	3.16994	3.39691	649.22	FALSE	3
2022-09-14	09:37:05	0.704186	3.13236	3.39691	670.487	FALSE	3
2022-09-14	09:37:06	0.67589	3.00649	2.98171	652.227	FALSE	3
2022-09-14	09:37:06	0.658893	2.93089	2.98171	673.418	FALSE	3
2022-09-14	09:37:06	0.682761	3.03706	2.98171	655.264	FALSE	3
2022-09-14	09:37:06	0.663728	2.95239	2.98171	676.37	FALSE	3
2022-09-14	09:37:07	0.728104	3.23875	3.26331	658.503	FALSE	3
2022-09-14	09:37:07	0.719911	3.20231	3.26331	679.573	FALSE	3
2022-09-14	09:37:07	0.735483	3.27158	3.26331	661.774	FALSE	3
2022-09-14	09:37:07	0.751005	3.34062	3.26331	682.913	FALSE	3
2022-09-14	09:37:08	0.740114	3.29218	4.13518	665.066	FALSE	3
2022-09-14	09:37:08	1.10953	4.93541	4.13518	687.849	FALSE	3
2022-09-14	09:37:08	0.883473	3.92986	4.13518	668.996	FALSE	3
2022-09-14	09:37:08	0.985407	4.38329	4.13518	692.232	FALSE	3
2022-09-14	09:37:09	0.910598	4.05052	3.31912	673.047	FALSE	3
2022-09-14	09:37:09	0.753906	3.35352	3.31912	695.586	FALSE	3
2022-09-14	09:37:09	0.574008	2.5533	3.31912	675.6	FALSE	3
2022-09-14	09:37:10	0.499249	2.22076	2.04063	697.806	FALSE	3
2022-09-14	09:37:10	0.451819	2.00978	2.04063	677.61	FALSE	3
2022-09-14	09:37:10	0.378232	1.68245	2.04063	699.489	FALSE	3
2022-09-14	09:37:10	0.505713	2.24951	2.04063	679.859	FALSE	3
2022-09-14	09:37:11	0.420166	1.86898	2.42291	701.358	FALSE	3
2022-09-14	09:37:11	0.585102	2.60265	2.42291	682.462	FALSE	3
2022-09-14	09:37:11	0.576858	2.56598	2.42291	703.924	FALSE	3
2022-09-14	09:37:11	0.596654	2.65404	2.42291	685.116	FALSE	3
2022-09-14	09:37:12	0.50785	2.25902	2.24861	706.183	FALSE	3
2022-09-14	09:37:12	0.515789	2.29433	2.24861	687.41	FALSE	3
2022-09-14	09:37:12	0.509733	2.26739	2.24861	708.45	FALSE	3
2022-09-14	09:37:12	0.488664	2.17368	2.24861	689.584	FALSE	3
2022-09-14	09:37:13	0.506883	2.25472	2.13881	710.705	FALSE	3
2022-09-14	09:37:13	0.485305	2.15873	2.13881	691.743	FALSE	3
2022-09-14	09:37:13	0.450293	2.00299	2.13881	712.708	FALSE	3
2022-09-14	09:37:14	0.394415	1.75444	1.96553	693.497	FALSE	3
2022-09-14	09:37:14	0.466272	2.07407	1.96553	714.782	FALSE	3
2022-09-14	09:37:14	0.472634	2.10237	1.96553	695.6	FALSE	3
2022-09-14	09:37:14	0.43416	1.93123	1.96553	716.713	FALSE	3
2022-09-14	09:37:15	0.439809	1.95636	1.90984	697.556	FALSE	3
2022-09-14	09:37:15	0.373906	1.66321	1.90984	718.376	FALSE	3
2022-09-14	09:37:15	0.423473	1.88369	1.90984	699.44	FALSE	3
2022-09-14	09:37:15	0.480216	2.1361	1.90984	720.512	FALSE	3
2022-09-14	09:37:16	0.380165	1.69105	1.77141	701.131	FALSE	3
2022-09-14	09:37:16	0.415585	1.84861	1.77141	722.361	FALSE	3
2022-09-14	09:37:16	0.39813	1.77096	1.77141	702.902	FALSE	3
2022-09-14	09:37:16	0.399046	1.77504	1.77141	724.136	FALSE	3
2022-09-14	09:37:17	0.400471	1.78138	1.70629	704.683	FALSE	3
2022-09-14	09:37:17	0.461183	2.05143	1.70629	726.188	FALSE	3
2022-09-14	09:37:17	0.289122	1.28607	1.70629	705.969	FALSE	3
2022-09-14	09:37:18	0.231361	1.02914	0.208376	727.217	FALSE	3
2022-09-14	09:37:18	0.10383	0.461857	0.208376	706.431	FALSE	3
2022-09-14	09:37:18	-0.0972898	-0.432764	0.208376	727.217	FALSE	3
2022-09-14	09:37:18	-0.0505214	-0.224729	0.208376	706.431	FALSE	3
2022-09-14	09:37:19	0.0450511	0.200396	0.554838	727.417	FALSE	3
2022-09-14	09:37:19	0.202863	0.902375	0.554838	707.333	FALSE	3
2022-09-14	09:37:19	0.00952952	0.0423892	0.554838	727.459	FALSE	3
2022-09-14	09:37:19	0.241489	1.07419	0.554838	708.408	FALSE	3
2022-09-14	09:37:20	0.258944	1.15183	1.44866	728.611	FALSE	3
2022-09-14	09:37:20	0.286425	1.27408	1.44866	709.682	FALSE	3
2022-09-14	09:37:20	0.193702	0.861625	1.44866	729.473	FALSE	3
2022-09-14	09:37:20	0.563626	2.50712	1.44866	712.189	FALSE	3
2022-09-14	09:37:21	0.725611	3.22766	3.23038	732.701	FALSE	3
2022-09-14	09:37:21	0.723931	3.22019	3.23038	715.409	FALSE	3
2022-09-14	09:37:21	0.729122	3.24328	3.23038	735.944	FALSE	3
2022-09-14	09:37:22	0.27187	1.20933	1.84736	716.618	FALSE	3
2022-09-14	09:37:22	0.262964	1.16972	1.84736	737.114	FALSE	3
2022-09-14	09:37:22	0.44159	1.96428	1.84736	718.583	FALSE	3
2022-09-14	09:37:22	0.684796	3.04611	1.84736	740.16	FALSE	3
2022-09-14	09:37:23	0.736654	3.27678	1.6932	721.859	FALSE	3
2022-09-14	09:37:23	0.425916	1.89456	1.6932	742.054	FALSE	3
2022-09-14	09:37:23	0.18841	0.838085	1.6932	722.697	FALSE	3
2022-09-14	09:37:23	0.171616	0.763382	1.6932	742.818	FALSE	3
2022-09-14	09:37:24	0.0962979	0.428352	0.71092	723.126	FALSE	3
2022-09-14	09:37:24	0.0961961	0.427899	0.71092	743.246	FALSE	3
2022-09-14	09:37:24	0.247799	1.10226	0.71092	724.228	FALSE	3
2022-09-14	09:37:24	0.198995	0.88517	0.71092	744.131	FALSE	3
2022-09-14	09:37:25	0.292176	1.29966	0.985227	725.528	FALSE	3
2022-09-14	09:37:25	0.183321	0.815448	0.985227	744.946	FALSE	3
2022-09-14	09:37:25	0.18897	0.840576	0.985227	726.368	FALSE	3
2022-09-14	09:37:26	0.254924	1.13395	0.653083	746.08	FALSE	3
2022-09-14	09:37:26	0.115331	0.513015	0.653083	726.881	FALSE	3
2022-09-14	09:37:26	0.0873412	0.388511	0.653083	746.469	FALSE	3
2022-09-14	09:37:26	0.129682	0.576851	0.653083	727.458	FALSE	3
2022-09-14	09:37:27	0.0305982	0.136107	1.45093	746.605	FALSE	3
2022-09-14	09:37:27	0.271412	1.20729	1.45093	728.665	FALSE	3
2022-09-14	09:37:27	0.365509	1.62586	1.45093	748.231	FALSE	3
2022-09-14	09:37:27	0.637214	2.83446	1.45093	731.5	FALSE	3
2022-09-14	09:37:28	2.94983	13.1214	16.3067	761.352	FALSE	3
2022-09-14	09:37:28	2.57569	11.4572	16.3067	742.957	FALSE	3
2022-09-14	09:37:28	3.14693	13.9982	16.3067	775.35	1	4
2022-09-14	09:37:28	5.99121	26.6501	16.3067	769.607	1	5
2022-09-14	09:37:29	3.32586	14.7941	11.6007	790.144	1	6
2022-09-14	09:37:29	3.58648	15.9534	11.6007	785.561	1	7
2022-09-14	09:37:29	0.911514	4.0546	11.6007	794.199	FALSE	7
2022-09-14	09:37:30	0.921336	4.09829	1.40532	789.659	FALSE	7
2022-09-14	09:37:30	0.312074	1.38817	1.40532	795.587	FALSE	7
2022-09-14	09:37:30	-0.0397834	-0.176965	1.40532	789.659	FALSE	7
2022-09-14	09:37:30	0.0700893	0.311771	1.40532	795.899	FALSE	7
2022-09-14	09:37:31	0.00255749	0.0113762	-0.100395	789.67	FALSE	7
2022-09-14	09:37:31	0.0182827	0.0813251	-0.100395	795.98	FALSE	7
2022-09-14	09:37:31	-0.122328	-0.544139	-0.100395	789.67	FALSE	7
2022-09-14	09:37:31	0.0112089	0.0498594	-0.100395	796.03	FALSE	7
2022-09-14	09:37:32	-0.161157	-0.716859	-0.773905	789.67	FALSE	7
2022-09-14	09:37:32	-0.123498	-0.549344	-0.773905	796.03	FALSE	7
2022-09-14	09:37:32	-0.13332	-0.593034	-0.773905	789.67	FALSE	7
2022-09-14	09:37:32	-0.277951	-1.23638	-0.773905	796.03	FALSE	7
2022-09-14	09:37:33	-0.0856358	-0.380925	-0.680717	789.67	FALSE	7
2022-09-14	09:37:33	-0.198206	-0.88166	-0.680717	796.03	FALSE	7
2022-09-14	09:37:33	-0.175254	-0.779565	-0.680717	789.67	FALSE	7
2022-09-14	09:37:34	-0.0319972	-0.14233	3.74668	796.03	FALSE	7
2022-09-14	09:37:34	0.209631	0.932481	3.74668	790.603	FALSE	7
2022-09-14	09:37:34	1.24256	5.52716	3.74668	801.557	FALSE	7
2022-09-14	09:37:34	1.94897	8.66941	3.74668	799.272	FALSE	7
2022-09-14	09:37:35	0.391056	1.7395	0.763778	803.297	FALSE	7
2022-09-14	09:37:35	0.155687	0.692527	0.763778	799.965	FALSE	7
2022-09-14	09:37:35	0.112023	0.498301	0.763778	803.795	FALSE	7
2022-09-14	09:37:35	0.0280537	0.124788	0.763778	800.089	FALSE	7
2022-09-14	09:37:36	-0.0174934	-0.0778141	-0.261967	803.795	FALSE	7
2022-09-14	09:37:36	-0.0621244	-0.276342	-0.261967	800.089	FALSE	7
2022-09-14	09:37:36	-0.0538292	-0.239443	-0.261967	803.795	FALSE	7
2022-09-14	09:37:36	-0.102124	-0.454268	-0.261967	800.089	FALSE	7
2022-09-14	09:37:37	-0.00645013	-0.0286915	0.254348	803.795	FALSE	7
2022-09-14	09:37:37	0.0690714	0.307243	0.254348	800.397	FALSE	7
2022-09-14	09:37:37	0.108919	0.484493	0.254348	804.279	FALSE	7
2022-09-14	09:37:38	0.142252	0.632765	0.0148849	801.029	FALSE	7
2022-09-14	09:37:38	-0.0293	-0.130332	0.0148849	804.279	FALSE	7
2022-09-14	09:37:38	-0.0757631	-0.337009	0.0148849	801.029	FALSE	7
2022-09-14	09:37:38	-0.0238038	-0.105884	0.0148849	804.279	FALSE	7
2022-09-14	09:37:39	-0.0777987	-0.346064	-0.190433	801.029	FALSE	7
2022-09-14	09:37:39	0.00143789	0.00639602	-0.190433	804.286	FALSE	7
2022-09-14	09:37:39	-0.108638	-0.483244	-0.190433	801.029	FALSE	7
2022-09-14	09:37:39	0.0137534	0.0611779	-0.190433	804.347	FALSE	7
2022-09-14	09:37:40	-0.0855341	-0.380473	-0.156478	801.029	FALSE	7
2022-09-14	09:37:40	0.0473412	0.210583	-0.156478	804.558	FALSE	7
2022-09-14	09:37:40	-0.131081	-0.583075	-0.156478	801.029	FALSE	7
2022-09-14	09:37:40	0.0285626	0.127052	-0.156478	804.685	FALSE	7
2022-09-14	09:37:41	0.0570613	0.25382	0.94629	801.283	FALSE	7
2022-09-14	09:37:41	0.353193	1.57107	0.94629	806.256	FALSE	7
2022-09-14	09:37:41	0.227952	1.01398	0.94629	802.297	FALSE	7
2022-09-14	09:37:42	0.613244	2.72783	3.16948	808.984	FALSE	7
2022-09-14	09:37:42	0.769173	3.42144	3.16948	805.719	FALSE	7
2022-09-14	09:37:42	0.676806	3.01057	3.16948	811.994	FALSE	7
2022-09-14	09:37:42	0.790903	3.51809	3.16948	809.237	FALSE	7
2022-09-14	09:37:43	0.806374	3.58691	3.20627	815.581	FALSE	7
2022-09-14	09:37:43	0.432328	1.92308	3.20627	811.16	FALSE	7
2022-09-14	09:37:43	0.847595	3.77027	3.20627	819.351	FALSE	7
2022-09-14	09:37:43	0.796908	3.54481	3.20627	814.705	FALSE	7
2022-09-14	09:37:44	0.342201	1.52218	2.2378	820.874	FALSE	7
2022-09-14	09:37:44	0.55411	2.46479	2.2378	817.169	FALSE	7
2022-09-14	09:37:44	0.634517	2.82246	2.2378	823.696	FALSE	7
2022-09-14	09:37:44	0.481489	2.14176	2.2378	819.311	FALSE	7
2022-09-14	09:37:45	0.303321	1.34923	1.93063	825.045	FALSE	7
2022-09-14	09:37:45	0.480267	2.13632	1.93063	821.448	FALSE	7
2022-09-14	09:37:45	0.518486	2.30633	1.93063	827.352	FALSE	7
2022-09-14	09:37:46	0.402659	1.79111	1.67968	823.239	FALSE	7
2022-09-14	09:37:46	0.34841	1.5498	1.67968	828.901	FALSE	7
2022-09-14	09:37:46	0.38215	1.69988	1.67968	824.938	FALSE	7
2022-09-14	09:37:46	0.377214	1.67792	1.67968	830.579	FALSE	7
2022-09-14	09:37:47	0.35182	1.56497	1.70277	826.503	FALSE	7
2022-09-14	09:37:47	0.396705	1.76462	1.70277	832.344	FALSE	7
2022-09-14	09:37:47	0.382455	1.70124	1.70277	828.205	FALSE	7
2022-09-14	09:37:47	0.400216	1.78024	1.70277	834.124	FALSE	7
2022-09-14	09:37:48	0.71813	3.19439	1.70509	831.399	FALSE	7
2022-09-14	09:37:48	0.288461	1.28313	1.70509	835.407	FALSE	7
2022-09-14	09:37:48	0.260776	1.15998	1.70509	832.559	FALSE	7
2022-09-14	09:37:48	0.265916	1.18285	1.70509	836.59	FALSE	7
2022-09-14	09:37:49	0.21869	0.972777	1.44604	833.532	FALSE	7
2022-09-14	09:37:49	0.357316	1.58941	1.44604	838.18	FALSE	7
2022-09-14	09:37:49	0.399249	1.77594	1.44604	835.308	FALSE	7
2022-09-14	09:37:50	0.330496	1.47011	1.27968	839.65	FALSE	7
2022-09-14	09:37:50	0.301234	1.33995	1.27968	836.648	FALSE	7
2022-09-14	09:37:50	0.268054	1.19236	1.27968	840.842	FALSE	7
2022-09-14	09:37:50	0.250954	1.11629	1.27968	837.764	FALSE	7
2022-09-14	09:37:51	0.282456	1.25642	1.0524	842.098	FALSE	7
2022-09-14	09:37:51	0.27986	1.24487	1.0524	839.009	FALSE	7
2022-09-14	09:37:51	0.228766	1.0176	1.0524	843.116	FALSE	7
2022-09-14	09:37:51	0.15528	0.690716	1.0524	839.7	FALSE	7
2022-09-14	09:37:52	-0.178664	-0.794733	0.922408	843.116	FALSE	7
2022-09-14	09:37:52	0.0673411	0.299547	0.922408	839.999	FALSE	7
2022-09-14	09:37:52	0.198435	0.882679	0.922408	843.999	FALSE	7
2022-09-14	09:37:52	0.742354	3.30214	0.922408	843.301	FALSE	7
2022-09-14	09:37:53	1.67212	7.43792	5.17732	851.437	FALSE	7
2022-09-14	09:37:53	0.902506	4.01453	5.17732	847.316	FALSE	7
2022-09-14	09:37:53	0.917112	4.0795	5.17732	855.516	FALSE	7
2022-09-14	09:37:54	1.04602	4.65291	2.5056	851.969	FALSE	7
2022-09-14	09:37:54	0.338741	1.50679	2.5056	857.023	FALSE	7
2022-09-14	09:37:54	0.441285	1.96292	2.5056	853.932	FALSE	7
2022-09-14	09:37:54	0.427087	1.89977	2.5056	858.923	FALSE	7
2022-09-14	09:37:55	0.274567	1.22133	1.82806	855.153	FALSE	7
2022-09-14	09:37:55	0.726985	3.23377	1.82806	862.156	FALSE	7
2022-09-14	09:37:55	0.224848	1.00017	1.82806	856.153	FALSE	7
2022-09-14	09:37:55	0.417468	1.85698	1.82806	864.013	FALSE	7
2022-09-14	09:37:56	0.2964	1.31845	1.31884	857.472	FALSE	7
2022-09-14	09:37:56	0.275382	1.22495	1.31884	865.238	FALSE	7
2022-09-14	09:37:56	0.420115	1.86876	1.31884	859.34	FALSE	7
2022-09-14	09:37:56	0.194059	0.863213	1.31884	866.102	FALSE	7
2022-09-14	09:37:57	0.36444	1.6211	1.56315	860.961	FALSE	7
2022-09-14	09:37:57	0.376858	1.67634	1.56315	867.778	FALSE	7
2022-09-14	09:37:57	0.312939	1.39202	1.56315	862.353	FALSE	7
2022-09-14	09:37:58	0.44785	1.99213	1.66128	869.77	FALSE	7
2022-09-14	09:37:58	0.399657	1.77775	1.66128	864.131	FALSE	7
2022-09-14	09:37:58	0.276145	1.22835	1.66128	870.998	FALSE	7
2022-09-14	09:37:58	0.370242	1.64691	1.66128	865.778	FALSE	7
2022-09-14	09:37:59	0.211209	0.9395	0.891338	871.938	FALSE	7
2022-09-14	09:37:59	0.240827	1.07125	0.891338	866.849	FALSE	7
2022-09-14	09:37:59	0.265458	1.18081	0.891338	873.119	FALSE	7
2022-09-14	09:37:59	0.0840333	0.373797	0.891338	867.223	FALSE	7
2022-09-14	09:38:00	0.299148	1.33067	1.0361	874.449	FALSE	7
2022-09-14	09:38:00	0.169682	0.754779	1.0361	867.978	FALSE	7
2022-09-14	09:38:00	0.316654	1.40854	1.0361	875.858	FALSE	7
2022-09-14	09:38:00	0.146222	0.650425	1.0361	868.628	FALSE	7
2022-09-14	09:38:01	0.252328	1.12241	1.24193	876.98	FALSE	7
2022-09-14	09:38:01	0.259911	1.15614	1.24193	869.785	FALSE	7
2022-09-14	09:38:01	0.325356	1.44725	1.24193	878.428	FALSE	7
2022-09-14	09:38:02	0.248359	1.10475	1.35789	870.889	FALSE	7
2022-09-14	09:38:02	0.267646	1.19054	1.35789	879.618	FALSE	7
2022-09-14	09:38:02	0.499911	2.2237	1.35789	873.113	FALSE	7
2022-09-14	09:38:02	0.205153	0.912562	1.35789	880.531	FALSE	7
2022-09-14	09:38:03	0.441896	1.96564	2.40146	875.079	FALSE	7
2022-09-14	09:38:03	0.252684	1.12399	2.40146	881.655	FALSE	7
2022-09-14	09:38:03	0.728868	3.24215	2.40146	878.321	FALSE	7
2022-09-14	09:38:03	0.736043	3.27407	2.40146	884.929	FALSE	7
2022-09-14	09:38:04	0.725153	3.22563	3.25228	881.546	FALSE	7
2022-09-14	09:38:04	0.73757	3.28086	3.25228	888.21	FALSE	7
2022-09-14	09:38:04	0.733092	3.26094	3.25228	884.807	FALSE	7
2022-09-14	09:38:04	0.728766	3.2417	3.25228	891.451	FALSE	7
2022-09-14	09:38:05	0.724796	3.22404	3.21559	888.031	FALSE	7
2022-09-14	09:38:05	0.726425	3.23128	3.21559	894.683	FALSE	7
2022-09-14	09:38:05	0.717468	3.19144	3.21559	891.223	FALSE	7
2022-09-14	09:38:06	0.408155	1.81556	1.20288	896.498	FALSE	7
2022-09-14	09:38:06	-0.242633	-1.07928	1.20288	891.223	FALSE	7
2022-09-14	09:38:06	0.340776	1.51584	1.20288	898.014	FALSE	7
2022-09-14	09:38:06	0.575382	2.55941	1.20288	893.782	FALSE	7
2022-09-14	09:38:07	0.542761	2.41431	-0.714316	900.428	FALSE	7
2022-09-14	09:38:07	0.361387	1.60752	-0.714316	895.39	FALSE	7
2022-09-14	09:38:07	0.19472	0.866154	-0.714316	901.294	FALSE	7
2022-09-14	09:38:07	-1.74121	-7.74525	-0.714316	895.39	FALSE	7
2022-09-14	09:38:08	-1.74721	-7.77194	-7.9008	901.294	FALSE	7
2022-09-14	09:38:08	-2.00675	-8.92643	-7.9008	895.39	FALSE	7
2022-09-14	09:38:08	-1.4866	-6.61269	-7.9008	901.294	FALSE	7
2022-09-14	09:38:08	-1.86416	-8.29216	-7.9008	895.39	FALSE	7
2022-09-14	09:38:09	-1.91067	-8.49904	-7.90257	901.294	FALSE	7
2022-09-14	09:38:09	-1.79307	-7.97593	-7.90257	895.39	FALSE	7
2022-09-14	09:38:09	-1.62599	-7.23273	-7.90257	901.294	FALSE	7
2022-09-14	09:38:10	-1.85195	-8.23784	-8.73998	895.39	FALSE	7
2022-09-14	09:38:10	-2.06502	-9.18562	-8.73998	901.294	FALSE	7
2022-09-14	09:38:10	-1.89027	-8.4083	-8.73998	895.39	FALSE	7
2022-09-14	09:38:10	-2.0521	-9.12815	-8.73998	901.294	FALSE	7
2022-09-14	09:38:11	-1.87871	-8.35688	-8.97065	895.39	FALSE	7
2022-09-14	09:38:11	-2.27765	-10.1314	-8.97065	901.294	FALSE	7
2022-09-14	09:38:11	-1.81312	-8.06512	-8.97065	895.39	FALSE	7
2022-09-14	09:38:11	-2.09729	-9.32917	-8.97065	901.294	FALSE	7
2022-09-14	09:38:12	-1.81485	-8.07282	-9.60155	895.39	FALSE	7
2022-09-14	09:38:12	-2.37225	-10.5522	-9.60155	901.294	FALSE	7
2022-09-14	09:38:12	-2.08742	-9.28526	-9.60155	895.39	FALSE	7
2022-09-14	09:38:12	-2.35958	-10.4959	-9.60155	901.294	FALSE	7
2022-09-14	09:38:13	-2.29648	-10.2152	-10.508	895.39	FALSE	7
2022-09-14	09:38:13	-2.40828	-10.7125	-10.508	901.294	FALSE	7
2022-09-14	09:38:13	-2.38212	-10.5961	-10.508	895.39	FALSE	7
2022-09-14	09:38:14	-2.20991	-9.83012	-9.8741	901.294	FALSE	7
2022-09-14	09:38:14	-2.26029	-10.0542	-9.8741	895.39	FALSE	7
2022-09-14	09:38:14	-2.09933	-9.33824	-9.8741	901.294	FALSE	7
2022-09-14	09:38:14	-2.30966	-10.2738	-9.8741	895.39	FALSE	7
2022-09-14	09:38:15	-1.70004	-7.56212	-12.3549	901.294	FALSE	7
2022-09-14	09:38:15	-3.08416	-13.719	-12.3549	895.39	FALSE	7
2022-09-14	09:38:15	-3.29439	-14.6541	-12.3549	901.294	FALSE	7
2022-09-14	09:38:15	-3.03139	-13.4842	-12.3549	895.39	FALSE	7
2022-09-14	09:38:16	-3.48665	-15.5093	-4.46678	901.294	FALSE	7
2022-09-14	09:38:16	0.285763	1.27113	-4.46678	896.661	FALSE	7
2022-09-14	09:38:16	0.188359	0.837859	-4.46678	902.132	FALSE	7
2022-09-14	09:38:17	0.316807	1.40922	1.29507	898.07	FALSE	7
2022-09-14	09:38:17	0.257061	1.14346	1.29507	903.276	FALSE	7
2022-09-14	09:38:17	0.364695	1.62224	1.29507	899.692	FALSE	7
2022-09-14	09:38:17	0.226018	1.00537	1.29507	904.281	FALSE	7
2022-09-14	09:38:18	0.299402	1.3318	1.92433	901.024	FALSE	7
2022-09-14	09:38:18	0.207901	0.924785	1.92433	905.206	FALSE	7
2022-09-14	09:38:18	0.503524	2.23978	1.92433	903.264	FALSE	7
2022-09-14	09:38:18	0.719606	3.20095	1.92433	908.407	FALSE	7
2022-09-14	09:38:19	0.726374	3.23106	3.23485	906.495	FALSE	7
2022-09-14	09:38:19	0.729835	3.24645	3.23485	911.653	FALSE	7
2022-09-14	09:38:19	0.72612	3.22993	3.23485	909.725	FALSE	7
2022-09-14	09:38:19	0.726578	3.23196	3.23485	914.885	FALSE	7
2022-09-14	09:38:20	0.727646	3.23671	3.24866	912.962	FALSE	7
2022-09-14	09:38:20	0.730598	3.24985	3.24866	918.135	FALSE	7
2022-09-14	09:38:20	0.731259	3.25279	3.24866	916.214	FALSE	7
2022-09-14	09:38:20	0.731819	3.25528	3.24866	921.39	FALSE	7
2022-09-14	09:38:21	0.729428	3.24464	3.25015	919.459	FALSE	7
2022-09-14	09:38:21	0.728715	3.24147	3.25015	924.632	FALSE	7
2022-09-14	09:38:21	0.733855	3.26433	3.25015	922.723	FALSE	7
2022-09-14	09:38:22	0.733397	3.2623	3.25737	927.894	FALSE	7
2022-09-14	09:38:22	0.733244	3.26162	3.25737	925.985	FALSE	7
2022-09-14	09:38:22	0.732277	3.25731	3.25737	931.151	FALSE	7
2022-09-14	09:38:22	0.730242	3.24826	3.25737	929.233	FALSE	7
2022-09-14	09:38:23	0.733397	3.2623	3.24351	934.414	FALSE	7
2022-09-14	09:38:23	0.73014	3.24781	3.24351	932.481	FALSE	7
2022-09-14	09:38:23	0.730242	3.24826	3.24351	937.662	FALSE	7
2022-09-14	09:38:23	0.722914	3.21567	3.24351	935.697	FALSE	7
2022-09-14	09:38:24	0.729071	3.24305	3.24679	940.905	FALSE	7
2022-09-14	09:38:24	0.732328	3.25754	3.24679	938.954	FALSE	7
2022-09-14	09:38:24	0.730801	3.25075	3.24679	944.156	FALSE	7
2022-09-14	09:38:24	0.727443	3.23581	3.24679	942.19	FALSE	7
2022-09-14	09:38:25	0.728003	3.2383	3.25286	947.394	FALSE	7
2022-09-14	09:38:25	0.730343	3.24871	3.25286	945.439	FALSE	7
2022-09-14	09:38:25	0.735483	3.27158	3.25286	950.666	FALSE	7
2022-09-14	09:38:26	0.732888	3.26003	3.26552	948.699	FALSE	7
2022-09-14	09:38:26	0.731056	3.25188	3.26552	953.918	FALSE	7
2022-09-14	09:38:26	0.734008	3.26501	3.26552	951.964	FALSE	7
2022-09-14	09:38:26	0.738537	3.28516	3.26552	957.203	FALSE	7
2022-09-14	09:38:27	0.733702	3.26365	3.24322	955.227	FALSE	7
2022-09-14	09:38:27	0.724796	3.22404	3.24322	960.427	FALSE	7
2022-09-14	09:38:27	0.730191	3.24804	3.24322	958.476	FALSE	7
2022-09-14	09:38:27	0.727748	3.23717	3.24322	963.664	FALSE	7
2022-09-14	09:38:28	0.731259	3.25279	3.25539	961.728	FALSE	7
2022-09-14	09:38:28	0.732125	3.25664	3.25539	966.921	FALSE	7
2022-09-14	09:38:28	0.728257	3.23943	3.25539	964.968	FALSE	7
2022-09-14	09:38:28	0.735738	3.27271	3.25539	970.193	FALSE	7
2022-09-14	09:38:29	0.72958	3.24532	3.2506	968.213	FALSE	7
2022-09-14	09:38:29	0.734313	3.26637	3.2506	973.46	FALSE	7
2022-09-14	09:38:29	0.72841	3.24011	3.2506	971.453	FALSE	7
2022-09-14	09:38:30	0.735891	3.27339	2.21935	976.733	FALSE	7
2022-09-14	09:38:30	-0.201259	-0.89524	2.21935	971.453	FALSE	7
2022-09-14	09:38:30	0.729122	3.24328	2.21935	979.976	FALSE	7
2022-09-14	09:38:30	0.731972	3.25596	2.21935	974.709	FALSE	7
2022-09-14	09:38:31	0.729733	3.246	3.25347	983.222	FALSE	7
2022-09-14	09:38:31	0.727036	3.234	3.25347	977.943	FALSE	7
2022-09-14	09:38:31	0.736043	3.27407	3.25347	986.496	FALSE	7
2022-09-14	09:38:31	0.732837	3.25981	3.25347	981.203	FALSE	7
2022-09-14	09:38:32	0.736857	3.27769	3.25986	989.774	FALSE	7
2022-09-14	09:38:32	0.730649	3.25007	3.25986	984.453	FALSE	7
2022-09-14	09:38:32	0.731717	3.25482	3.25986	993.029	FALSE	7
2022-09-14	09:38:32	0.732175	3.25686	3.25986	987.71	FALSE	7
2022-09-14	09:38:33	0.728206	3.23921	3.25747	996.268	FALSE	7
2022-09-14	09:38:33	0.735738	3.27271	3.25747	990.983	FALSE	7
2022-09-14	09:38:33	0.73299	3.26049	3.25747	999.529	FALSE	7
2022-09-14	09:38:34	0.736603	3.27656	3.27056	994.259	FALSE	7
2022-09-14	09:38:34	0.732023	3.25618	3.27056	1002.78	FALSE	7
2022-09-14	09:38:34	0.733906	3.26456	3.27056	997.524	FALSE	7
2022-09-14	09:38:34	0.738486	3.28493	3.27056	1006.07	FALSE	7
2022-09-14	09:38:35	0.735127	3.26999	3.26105	1000.79	FALSE	7
2022-09-14	09:38:35	0.733702	3.26365	3.26105	1009.33	FALSE	7
2022-09-14	09:38:35	0.729275	3.24396	3.26105	1004.04	FALSE	7
2022-09-14	09:38:35	0.734364	3.2666	3.26105	1012.6	FALSE	7
2022-09-14	09:38:36	0.735687	3.27248	3.28522	1007.31	FALSE	7
2022-09-14	09:38:36	0.737875	3.28222	3.28522	1015.88	FALSE	7
2022-09-14	09:38:36	0.743829	3.3087	3.28522	1010.62	FALSE	7
2022-09-14	09:38:36	0.736807	3.27746	3.28522	1019.16	FALSE	7
2022-09-14	09:38:37	0.730649	3.25007	3.25762	1013.87	FALSE	7
2022-09-14	09:38:37	0.735229	3.27045	3.25762	1022.43	FALSE	7
2022-09-14	09:38:37	0.731158	3.25234	3.25762	1017.12	FALSE	7
2022-09-14	09:38:38	0.727137	3.23445	3.25918	1025.66	FALSE	7
2022-09-14	09:38:38	0.737366	3.27995	3.25918	1020.4	FALSE	7
2022-09-14	09:38:38	0.731616	3.25437	3.25918	1028.92	FALSE	7
2022-09-14	09:38:38	0.734669	3.26795	3.25918	1023.67	FALSE	7
2022-09-14	09:38:39	0.732074	3.25641	3.26331	1032.18	FALSE	7
2022-09-14	09:38:39	0.736857	3.27769	3.26331	1026.95	FALSE	7
2022-09-14	09:38:39	0.731259	3.25279	3.26331	1035.43	FALSE	7
2022-09-14	09:38:39	0.734313	3.26637	3.26331	1030.21	FALSE	7
2022-09-14	09:38:40	0.739453	3.28923	3.25624	1038.72	FALSE	7
2022-09-14	09:38:40	0.724949	3.22472	3.25624	1033.44	FALSE	7
2022-09-14	09:38:40	0.726985	3.23377	3.25624	1041.95	FALSE	7
2022-09-14	09:38:40	0.736756	3.27724	3.25624	1036.72	FALSE	7
2022-09-14	09:38:41	0.729428	3.24464	3.2389	1045.2	FALSE	7
2022-09-14	09:38:41	0.72729	3.23513	3.2389	1039.95	FALSE	7
2022-09-14	09:38:41	0.727697	3.23694	3.2389	1048.43	FALSE	7
2022-09-14	09:38:42	0.73014	3.24781	3.25986	1043.2	FALSE	7
2022-09-14	09:38:42	0.734975	3.26932	3.25986	1051.7	FALSE	7
2022-09-14	09:38:42	0.733092	3.26094	3.25986	1046.46	FALSE	7
2022-09-14	09:38:42	0.733193	3.26139	3.25986	1054.96	FALSE	7
2022-09-14	09:38:43	0.729224	3.24373	3.26428	1049.7	FALSE	7
2022-09-14	09:38:43	0.738079	3.28312	3.26428	1058.25	FALSE	7
2022-09-14	09:38:43	0.735382	3.27113	3.26428	1052.97	FALSE	7
2022-09-14	09:38:43	0.732684	3.25912	3.26428	1061.51	FALSE	7
2022-09-14	09:38:44	0.730547	3.24962	3.26167	1056.22	FALSE	7
2022-09-14	09:38:44	0.736196	3.27475	3.26167	1064.78	FALSE	7
2022-09-14	09:38:44	0.729122	3.24328	3.26167	1059.47	FALSE	7
2022-09-14	09:38:44	0.737163	3.27905	3.26167	1068.06	FALSE	7
2022-09-14	09:38:45	0.737417	3.28018	3.26275	1062.75	FALSE	7
2022-09-14	09:38:45	0.728766	3.2417	3.26275	1071.3	FALSE	7
2022-09-14	09:38:45	0.734313	3.26637	3.26275	1066.01	FALSE	7
2022-09-14	09:38:46	0.728257	3.23943	3.25539	1074.54	FALSE	7
2022-09-14	09:38:46	0.732786	3.25958	3.25539	1069.27	FALSE	7
2022-09-14	09:38:46	0.734364	3.2666	3.25539	1077.81	FALSE	7
2022-09-14	09:38:46	0.731972	3.25596	3.25539	1072.53	FALSE	7
2022-09-14	09:38:47	0.72902	3.24283	3.27225	1081.05	FALSE	7
2022-09-14	09:38:47	0.733702	3.26365	3.27225	1075.79	FALSE	7
2022-09-14	09:38:47	0.739198	3.2881	3.27225	1084.34	FALSE	7
2022-09-14	09:38:47	0.740623	3.29444	3.27225	1079.09	FALSE	7
2022-09-14	09:38:48	0.734568	3.26751	3.25754	1087.61	FALSE	7
2022-09-14	09:38:48	0.730903	3.2512	3.25754	1082.34	FALSE	7
2022-09-14	09:38:48	0.733804	3.26411	3.25754	1090.87	FALSE	7
2022-09-14	09:38:48	0.730038	3.24736	3.25754	1085.59	FALSE	7
2022-09-14	09:38:49	0.734466	3.26705	3.27241	1094.14	FALSE	7
2022-09-14	09:38:49	0.735534	3.2718	3.27241	1088.86	FALSE	7
2022-09-14	09:38:49	0.73701	3.27837	3.27241	1097.42	FALSE	7
2022-09-14	09:38:50	0.732125	3.25664	3.26473	1092.11	FALSE	7
2022-09-14	09:38:50	0.733244	3.26162	3.26473	1100.68	FALSE	7
2022-09-14	09:38:50	0.739453	3.28923	3.26473	1095.4	FALSE	7
2022-09-14	09:38:50	0.730954	3.25143	3.26473	1103.93	FALSE	7
2022-09-14	09:38:51	0.735433	3.27135	3.25698	1098.67	FALSE	7
2022-09-14	09:38:51	0.734211	3.26592	3.25698	1107.19	FALSE	7
2022-09-14	09:38:51	0.730751	3.25053	3.25698	1101.93	FALSE	7
2022-09-14	09:38:51	0.72841	3.24011	3.25698	1110.43	FALSE	7
2022-09-14	09:38:52	0.72958	3.24532	3.26297	1105.17	FALSE	7
2022-09-14	09:38:52	0.738689	3.28584	3.26297	1113.72	FALSE	7
2022-09-14	09:38:52	0.731361	3.25324	3.26297	1108.42	FALSE	7
2022-09-14	09:38:52	0.734568	3.26751	3.26297	1116.99	FALSE	7
2022-09-14	09:38:53	0.624338	2.77718	2.77115	1111.2	FALSE	7
2022-09-14	09:38:53	0.514517	2.28867	2.77115	1119.28	FALSE	7
2022-09-14	09:38:53	0.730089	3.24758	2.77115	1114.45	FALSE	7
2022-09-14	09:38:54	0.732023	3.25618	3.26269	1122.53	FALSE	7
2022-09-14	09:38:54	0.735687	3.27248	3.26269	1117.72	FALSE	7
2022-09-14	09:38:54	0.732125	3.25664	3.26269	1125.79	FALSE	7
2022-09-14	09:38:54	0.734109	3.26546	3.26269	1120.99	FALSE	7
2022-09-14	09:38:55	0.729784	3.24623	3.27237	1129.04	FALSE	7
2022-09-14	09:38:55	0.730242	3.24826	3.27237	1124.23	FALSE	7
2022-09-14	09:38:55	0.740267	3.29286	3.27237	1132.33	FALSE	7
2022-09-14	09:38:55	0.742354	3.30214	3.27237	1127.54	FALSE	7
2022-09-14	09:38:56	0.729835	3.24645	3.25166	1135.57	FALSE	7
2022-09-14	09:38:56	0.730598	3.24985	3.25166	1130.79	FALSE	7
2022-09-14	09:38:56	0.727087	3.23423	3.25166	1138.81	FALSE	7
2022-09-14	09:38:56	0.736501	3.2761	3.25166	1134.06	FALSE	7
2022-09-14	09:38:57	0.72729	3.23513	3.25113	1142.04	FALSE	7
2022-09-14	09:38:57	0.734669	3.26795	3.25113	1137.33	FALSE	7
2022-09-14	09:38:57	0.7307	3.2503	3.25113	1145.29	FALSE	7
2022-09-14	09:38:58	0.736196	3.27475	3.26705	1140.61	FALSE	7
2022-09-14	09:38:58	0.733041	3.26071	3.26705	1148.55	FALSE	7
2022-09-14	09:38:58	0.734771	3.26841	3.26705	1143.87	FALSE	7
2022-09-14	09:38:58	0.733855	3.26433	3.26705	1151.82	FALSE	7
2022-09-14	09:38:59	0.72673	3.23264	1.49496	1147.11	FALSE	7
2022-09-14	09:38:59	0.409631	1.82212	1.49496	1153.64	FALSE	7
2022-09-14	09:38:59	-0.18304	-0.814199	1.49496	1147.11	FALSE	7
2022-09-14	09:38:59	0.391005	1.73927	1.49496	1155.38	FALSE	7
2022-09-14	09:39:00	0.384389	1.70984	1.26366	1148.82	FALSE	7
2022-09-14	09:39:00	0.730496	3.24939	1.26366	1158.63	FALSE	7
2022-09-14	09:39:00	0.662812	2.94832	1.26366	1151.76	FALSE	7
2022-09-14	09:39:00	-0.641361	-2.8529	1.26366	1158.63	FALSE	7
2022-09-14	09:39:01	-1.99286	-8.86464	-4.40936	1151.76	FALSE	7
2022-09-14	09:39:01	-1.33943	-5.95805	-4.40936	1158.63	FALSE	7
2022-09-14	09:39:01	0.358486	1.59462	-4.40936	1153.36	FALSE	7
2022-09-14	09:39:02	0.564287	2.51006	4.80445	1161.14	FALSE	7
2022-09-14	09:39:02	0.838689	3.73066	4.80445	1157.09	FALSE	7
2022-09-14	09:39:02	0.917417	4.08085	4.80445	1165.22	FALSE	7
2022-09-14	09:39:02	1.99996	8.89622	4.80445	1165.99	FALSE	7
2022-09-14	09:39:03	1.03991	4.62573	5.37293	1169.85	FALSE	7
2022-09-14	09:39:03	0.983422	4.37446	5.37293	1170.36	FALSE	7
2022-09-14	09:39:03	1.76536	7.85267	5.37293	1177.7	FALSE	7
2022-09-14	09:39:03	1.04286	4.63885	5.37293	1175	FALSE	7
2022-09-14	09:39:04	1.01126	4.49829	3.37401	1182.2	FALSE	7
2022-09-14	09:39:04	0.87131	3.87576	3.37401	1178.88	FALSE	7
2022-09-14	09:39:04	0.479453	2.1327	3.37401	1184.33	FALSE	7
2022-09-14	09:39:04	0.672023	2.98929	3.37401	1181.86	FALSE	7
2022-09-14	09:39:05	0.537977	2.39303	2.09362	1186.72	FALSE	7
2022-09-14	09:39:05	0.524898	2.33485	2.09362	1184.2	FALSE	7
2022-09-14	09:39:05	0.349122	1.55296	2.09362	1188.28	FALSE	7
2022-09-14	09:39:06	0.473244	2.10508	2.22121	1186.3	FALSE	7
2022-09-14	09:39:06	0.318741	1.41782	2.22121	1189.69	FALSE	7
2022-09-14	09:39:06	0.564135	2.50939	2.22121	1188.81	FALSE	7
2022-09-14	09:39:06	0.641285	2.85256	2.22121	1192.55	FALSE	7
2022-09-14	09:39:07	0.50388	2.24136	2.68228	1191.06	FALSE	7
2022-09-14	09:39:07	0.696654	3.09886	2.68228	1195.65	FALSE	7
2022-09-14	09:39:07	0.638995	2.84238	2.68228	1193.9	FALSE	7
2022-09-14	09:39:07	0.572481	2.54651	2.68228	1198.19	FALSE	7
2022-09-14	09:39:08	0.589936	2.62415	3.71702	1196.52	FALSE	7
2022-09-14	09:39:08	0.537163	2.38941	3.71702	1200.58	FALSE	7
2022-09-14	09:39:08	0.629173	2.79869	3.71702	1199.32	FALSE	7
2022-09-14	09:39:08	1.58622	7.05582	3.71702	1207.64	FALSE	7
2022-09-14	09:39:09	1.97431	8.78213	14.8017	1208.1	FALSE	7
2022-09-14	09:39:09	3.42607	15.2398	14.8017	1222.88	1	8
2022-09-14	09:39:09	4.5823	20.383	14.8017	1228.49	1	9
2022-09-14	09:39:10	2.24566	9.98914	6.66817	1232.87	FALSE	9
2022-09-14	09:39:10	1.28785	5.72861	6.66817	1234.21	FALSE	9
2022-09-14	09:39:10	0.912532	4.05912	6.66817	1236.93	FALSE	9
2022-09-14	09:39:10	1.55024	6.89578	6.66817	1241.11	FALSE	9
2022-09-14	09:39:11	1.7793	7.91468	17.6374	1244.84	FALSE	9
2022-09-14	09:39:11	3.53584	15.7281	17.6374	1256.84	1	10
2022-09-14	09:39:11	5.75935	25.6187	17.6374	1270.46	1	11
2022-09-14	09:39:11	4.78576	21.288	17.6374	1278.13	1	12
2022-09-14	09:39:12	4.70245	20.9174	22.2401	1291.38	1	13
2022-09-14	09:39:12	4.3854	19.5071	22.2401	1297.63	1	14
2022-09-14	09:39:12	3.54174	15.7544	22.2401	1307.13	1	15
2022-09-14	09:39:12	7.36958	32.7814	22.2401	1330.41	1	16
2022-09-14	09:39:13	8.96627	39.8838	26.6363	1347.01	1	17
2022-09-14	09:39:13	5.97874	26.5946	26.6363	1357.01	1	18
2022-09-14	09:39:13	3.0193	13.4305	26.6363	1360.44	1	19
2022-09-14	09:39:14	1.46795	6.52974	6.43364	1363.54	FALSE	19
2022-09-14	09:39:14	1.68546	7.49726	6.43364	1367.94	FALSE	19
2022-09-14	09:39:14	1.4936	6.64383	6.43364	1370.18	FALSE	19
2022-09-14	09:39:14	1.13838	5.06374	6.43364	1373.01	FALSE	19
2022-09-14	09:39:15	0.544033	2.41997	2.02314	1372.6	FALSE	19
2022-09-14	09:39:15	0.417977	1.85925	2.02314	1374.87	FALSE	19
2022-09-14	09:39:15	0.380573	1.69286	2.02314	1374.3	FALSE	19
2022-09-14	09:39:15	0.476705	2.12048	2.02314	1376.99	FALSE	19
2022-09-14	09:39:16	0.649377	2.88856	12.3518	1377.18	FALSE	19
2022-09-14	09:39:16	1.97009	8.76335	12.3518	1385.75	FALSE	19
2022-09-14	09:39:16	3.92266	17.4488	12.3518	1394.63	1	20
2022-09-14	09:39:16	4.56515	20.3067	12.3518	1406.06	1	21
2022-09-14	09:39:17	6.04255	26.8785	35.7714	1421.51	1	22
2022-09-14	09:39:17	7.70647	34.2799	35.7714	1440.34	1	23
2022-09-14	09:39:17	10.3763	46.1559	35.7714	1467.67	1	24
2022-09-14	09:39:18	10.9971	48.9173	27.4956	1489.25	1	25
2022-09-14	09:39:18	4.14785	18.4505	27.4956	1486.12	1	26
2022-09-14	09:39:18	4.7192	20.9919	27.4956	1510.24	1	27
2022-09-14	09:39:18	4.86103	21.6228	27.4956	1507.74	1	28
2022-09-14	09:39:19	2.4678	10.9773	6.10009	1521.22	FALSE	28
2022-09-14	09:39:19	0.580267	2.58114	6.10009	1510.32	FALSE	28
2022-09-14	09:39:19	0.713448	3.17356	6.10009	1524.4	FALSE	28
2022-09-14	09:39:19	1.72393	7.66839	6.10009	1517.99	FALSE	28
2022-09-14	09:39:20	3.49172	15.5319	19.7418	1539.93	1	29
2022-09-14	09:39:20	5.26479	23.4188	19.7418	1541.41	1	30
2022-09-14	09:39:20	5.61441	24.974	19.7418	1564.9	1	31
2022-09-14	09:39:20	3.38174	15.0427	19.7418	1556.45	1	32
2022-09-14	09:39:21	1.68469	7.49384	5.86473	1572.4	FALSE	32
2022-09-14	09:39:21	0.963219	4.28459	5.86473	1560.74	FALSE	32
2022-09-14	09:39:21	1.30744	5.81575	5.86473	1578.21	FALSE	32
2022-09-14	09:39:22	1.78078	7.92127	6.15386	1568.66	FALSE	32
2022-09-14	09:39:22	0.999249	4.44486	6.15386	1582.66	FALSE	32
2022-09-14	09:39:22	1.09742	4.88154	6.15386	1573.54	FALSE	32
2022-09-14	09:39:22	1.65635	7.36778	6.15386	1590.02	FALSE	32
2022-09-14	09:39:23	4.4851	19.9506	13.8629	1593.49	1	33
2022-09-14	09:39:23	4.76307	21.1871	13.8629	1611.21	1	34
2022-09-14	09:39:23	2.31976	10.3188	13.8629	1603.81	FALSE	34
2022-09-14	09:39:23	0.89813	3.99506	13.8629	1615.21	FALSE	34

## Sheet: Richa_martin_202291493413 (3)
Date	Time	Lbs	Newtons	Total force x time		total steps > 13.345	**GoPro Fitting: 923
2022-09-14	09:34:23	0.0624557	0.277815	0.277815	FALSE	0
2022-09-14	09:34:23	0.0669341	0.297736	0.297736	FALSE	0
2022-09-14	09:34:23	0.0510562	0.227108	0.504924	FALSE	0
2022-09-14	09:34:23	0.0609798	0.27125	0.568987	FALSE	0
2022-09-14	09:34:24	0.0646949	0.287776	0.792699	FALSE	0
2022-09-14	09:34:24	0.0757381	0.336898	0.905885	FALSE	0
2022-09-14	09:34:24	0.038588	0.171647	0.964347	FALSE	0
2022-09-14	09:34:24	0.0225066	0.100114	1.006	FALSE	0
2022-09-14	09:34:25	0.0205728	0.0915119	1.05586	FALSE	0
2022-09-14	09:34:25	0.0213361	0.0949072	1.10091	FALSE	0
2022-09-14	09:34:25	-0.0908267	-0.404015	1.05586	FALSE	0
2022-09-14	09:34:26	-0.0923534	-0.410806	1.10091	FALSE	0
2022-09-14	09:34:26	-0.057697	-0.256648	1.05586	FALSE	0
2022-09-14	09:34:26	-0.0391219	-0.174022	1.10091	FALSE	0
2022-09-14	09:34:26	-0.0333204	-0.148216	1.05586	FALSE	0
2022-09-14	09:34:27	-0.00762061	-0.033898	1.10091	FALSE	0
2022-09-14	09:34:27	0.142659	0.634576	1.69043	FALSE	0
2022-09-14	09:34:27	0.0847967	0.377193	1.4781	FALSE	0
2022-09-14	09:34:27	0.202201	0.89943	2.58986	FALSE	0
2022-09-14	09:34:28	0.201641	0.896939	2.37504	FALSE	0
2022-09-14	09:34:28	0.00281194	0.0125081	2.60237	FALSE	0
2022-09-14	09:34:28	-0.0615137	-0.273625	2.37504	FALSE	0
2022-09-14	09:34:28	-0.00807864	-0.0359354	2.60237	FALSE	0
2022-09-14	09:34:29	-0.0490964	-0.218391	2.37504	FALSE	0
2022-09-14	09:34:29	0.0453056	0.201528	2.8039	FALSE	0
2022-09-14	09:34:29	-0.0120481	-0.0535924	2.37504	FALSE	0
2022-09-14	09:34:29	0.0103947	0.0462377	2.85014	FALSE	0
2022-09-14	09:34:30	0.00423688	0.0188465	2.39388	FALSE	0
2022-09-14	09:34:30	-0.0709793	-0.31573	2.85014	FALSE	0
2022-09-14	09:34:30	-0.00706081	-0.0314079	2.39388	FALSE	0
2022-09-14	09:34:31	0.0413361	0.183871	3.03401	FALSE	0
2022-09-14	09:34:31	0.0340587	0.1515	2.54538	FALSE	0
2022-09-14	09:34:31	0.026476	0.117771	3.15178	FALSE	0
2022-09-14	09:34:31	0.935839	4.1628	6.70818	FALSE	0
2022-09-14	09:34:32	0.558791	2.48561	5.63739	FALSE	0
2022-09-14	09:34:32	0.192532	0.856421	7.5646	FALSE	0
2022-09-14	09:34:32	0.377519	1.67928	7.31667	FALSE	0
2022-09-14	09:34:32	0.60042	2.67079	10.2354	FALSE	0
2022-09-14	09:34:33	0.29355	1.30577	8.62244	FALSE	0
2022-09-14	09:34:33	0.328003	1.45902	11.6944	FALSE	0
2022-09-14	09:34:33	0.294567	1.31029	9.93274	FALSE	0
2022-09-14	09:34:33	0.429224	1.90927	13.6037	FALSE	0
2022-09-14	09:34:34	0.381234	1.69581	11.6285	FALSE	0
2022-09-14	09:34:34	0.483931	2.15262	15.7563	FALSE	0
2022-09-14	09:34:34	0.0342623	0.152406	11.7809	FALSE	0
2022-09-14	09:34:35	-0.124771	-0.555006	15.7563	FALSE	0
2022-09-14	09:34:35	0.0386389	0.171874	11.9528	FALSE	0
2022-09-14	09:34:35	0.16154	0.718562	16.4749	FALSE	0
2022-09-14	09:34:35	0.0730918	0.325127	12.2779	FALSE	0
2022-09-14	09:34:36	-0.153219	-0.681549	16.4749	FALSE	0
2022-09-14	09:34:36	-0.216374	-0.962475	12.2779	FALSE	0
2022-09-14	09:34:36	0.0996567	0.443293	16.9182	FALSE	0
2022-09-14	09:34:36	0.197926	0.880414	13.1584	FALSE	0
2022-09-14	09:34:37	0.267494	1.18987	18.108	FALSE	0
2022-09-14	09:34:37	0.319707	1.42212	14.5805	FALSE	0
2022-09-14	09:34:37	0.347443	1.5455	19.6535	FALSE	0
2022-09-14	09:34:38	0.295942	1.31641	15.8969	FALSE	0
2022-09-14	09:34:38	0.421947	1.8769	21.5304	FALSE	0
2022-09-14	09:34:38	0.101896	0.453254	16.3501	FALSE	0
2022-09-14	09:34:38	0.409326	1.82076	23.3512	FALSE	0
2022-09-14	09:34:39	0.236247	1.05087	17.401	FALSE	0
2022-09-14	09:34:39	0.360827	1.60503	24.9562	FALSE	0
2022-09-14	09:34:39	0.2193	0.97549	18.3765	FALSE	0
2022-09-14	09:34:39	0.231819	1.03118	25.9874	FALSE	0
2022-09-14	09:34:40	0.248715	1.10633	19.4828	FALSE	0
2022-09-14	09:34:40	0.181896	0.80911	26.7965	FALSE	0
2022-09-14	09:34:40	-0.276221	-1.22869	19.4828	FALSE	0
2022-09-14	09:34:40	-0.586399	-2.60842	26.7965	FALSE	0
2022-09-14	09:34:41	-0.639529	-2.84475	19.4828	FALSE	0
2022-09-14	09:34:41	-0.666704	-2.96563	26.7965	FALSE	0
2022-09-14	09:34:41	-0.990419	-4.40558	19.4828	FALSE	0
2022-09-14	09:34:42	-0.616017	-2.74017	26.7965	FALSE	0
2022-09-14	09:34:42	0.0196567	0.0874369	19.5703	FALSE	0
2022-09-14	09:34:42	0.428512	1.90611	28.7026	FALSE	0
2022-09-14	09:34:42	0.544593	2.42246	21.9927	FALSE	0
2022-09-14	09:34:43	0.472379	2.10124	30.8039	FALSE	0
2022-09-14	09:34:43	0.471412	2.09693	24.0897	FALSE	0
2022-09-14	09:34:43	0.377316	1.67838	32.4822	FALSE	0
2022-09-14	09:34:43	0.335076	1.49049	25.5802	FALSE	0
2022-09-14	09:34:44	0.444186	1.97583	34.4581	FALSE	0
2022-09-14	09:34:44	0.572939	2.54855	28.1287	FALSE	0
2022-09-14	09:34:44	0.588969	2.61985	37.0779	FALSE	0
2022-09-14	09:34:44	0.538435	2.39507	30.5238	FALSE	0
2022-09-14	09:34:45	0.483372	2.15014	39.2281	FALSE	0
2022-09-14	09:34:45	0.469886	2.09015	32.6139	FALSE	0
2022-09-14	09:34:45	0.463677	2.06253	41.2906	FALSE	0
2022-09-14	09:34:46	0.487494	2.16847	34.7824	FALSE	0
2022-09-14	09:34:46	0.500369	2.22574	43.5163	FALSE	0
2022-09-14	09:34:46	0.498333	2.21668	36.9991	FALSE	0
2022-09-14	09:34:46	0.482201	2.14493	45.6612	FALSE	0
2022-09-14	09:34:47	0.452634	2.01341	39.0125	FALSE	0
2022-09-14	09:34:47	0.451819	2.00978	47.671	FALSE	0
2022-09-14	09:34:47	0.452837	2.01431	41.0268	FALSE	0
2022-09-14	09:34:47	0.434008	1.93055	49.6016	FALSE	0
2022-09-14	09:34:48	0.468155	2.08245	43.1092	FALSE	0
2022-09-14	09:34:48	0.462252	2.05619	51.6578	FALSE	0
2022-09-14	09:34:48	0.419453	1.86581	44.9751	FALSE	0
2022-09-14	09:34:48	0.47243	2.10146	53.7592	FALSE	0
2022-09-14	09:34:49	0.453957	2.01929	46.9943	FALSE	0
2022-09-14	09:34:49	0.494669	2.20039	55.9596	FALSE	0
2022-09-14	09:34:49	0.466221	2.07384	49.0682	FALSE	0
2022-09-14	09:34:50	0.521947	2.32172	58.2813	FALSE	0
2022-09-14	09:34:50	0.512685	2.28053	51.3487	FALSE	0
2022-09-14	09:34:50	0.501539	2.23095	60.5123	FALSE	0
2022-09-14	09:34:50	0.500929	2.22823	53.5769	FALSE	0
2022-09-14	09:34:51	0.498435	2.21714	62.7294	FALSE	0
2022-09-14	09:34:51	0.507748	2.25856	55.8355	FALSE	0
2022-09-14	09:34:51	0.505661	2.24928	64.9787	FALSE	0
2022-09-14	09:34:51	0.468308	2.08313	57.9186	FALSE	0
2022-09-14	09:34:52	0.47701	2.12184	67.1005	FALSE	0
2022-09-14	09:34:52	0.508919	2.26377	60.1824	FALSE	0
2022-09-14	09:34:52	0.526629	2.34255	69.4431	FALSE	0
2022-09-14	09:34:52	0.497723	2.21397	62.3964	FALSE	0
2022-09-14	09:34:53	0.46271	2.05823	71.5013	FALSE	0
2022-09-14	09:34:53	0.44902	1.99733	64.3937	FALSE	0
2022-09-14	09:34:53	0.417468	1.85698	73.3583	FALSE	0
2022-09-14	09:34:54	0.392023	1.7438	66.1375	FALSE	0
2022-09-14	09:34:54	0.398741	1.77368	75.132	FALSE	0
2022-09-14	09:34:54	0.406425	1.80786	67.9454	FALSE	0
2022-09-14	09:34:54	0.542761	2.41431	77.5463	FALSE	0
2022-09-14	09:34:55	0.464797	2.06751	70.0129	FALSE	0
2022-09-14	09:34:55	0.432837	1.92535	79.4716	FALSE	0
2022-09-14	09:34:55	0.41472	1.84476	71.8576	FALSE	0
2022-09-14	09:34:55	0.412074	1.83299	81.3046	FALSE	0
2022-09-14	09:34:56	0.405254	1.80265	73.6603	FALSE	0
2022-09-14	09:34:56	0.397774	1.76938	83.074	FALSE	0
2022-09-14	09:34:56	0.411667	1.83118	75.4915	FALSE	0
2022-09-14	09:34:56	0.428461	1.90588	84.9799	FALSE	0
2022-09-14	09:34:57	0.427901	1.90339	77.3949	FALSE	0
2022-09-14	09:34:57	0.435585	1.93757	86.9175	FALSE	0
2022-09-14	09:34:57	0.379555	1.68834	79.0832	FALSE	0
2022-09-14	09:34:58	0.412328	1.83412	88.7516	FALSE	0
2022-09-14	09:34:58	0.515738	2.29411	81.3773	FALSE	0
2022-09-14	09:34:58	0.390242	1.73587	90.4874	FALSE	0
2022-09-14	09:34:58	0.549427	2.44396	83.8213	FALSE	0
2022-09-14	09:34:59	0.360064	1.60164	92.0891	FALSE	0
2022-09-14	09:34:59	0.467799	2.08086	85.9021	FALSE	0
2022-09-14	09:34:59	0.412227	1.83367	93.9228	FALSE	0
2022-09-14	09:34:59	0.489733	2.17843	88.0806	FALSE	0
2022-09-14	09:35:00	0.355992	1.58352	95.5063	FALSE	0
2022-09-14	09:35:00	0.443982	1.97492	90.0555	FALSE	0
2022-09-14	09:35:00	0.417723	1.85812	97.3644	FALSE	0
2022-09-14	09:35:00	0.505153	2.24702	92.3025	FALSE	0
2022-09-14	09:35:01	0.404695	1.80016	99.1646	FALSE	0
2022-09-14	09:35:01	0.505305	2.2477	94.5502	FALSE	0
2022-09-14	09:35:01	0.46154	2.05302	101.218	FALSE	0
2022-09-14	09:35:02	0.489224	2.17617	96.7264	FALSE	0
2022-09-14	09:35:02	0.591514	2.63117	103.849	FALSE	0
2022-09-14	09:35:02	0.435636	1.9378	98.6642	FALSE	0
2022-09-14	09:35:02	0.363982	1.61906	105.468	FALSE	0
2022-09-14	09:35:03	0.337316	1.50045	100.165	FALSE	0
2022-09-14	09:35:03	0.519249	2.30972	107.778	FALSE	0
2022-09-14	09:35:03	0.302964	1.34764	101.512	FALSE	0
2022-09-14	09:35:03	0.452735	2.01386	109.791	FALSE	0
2022-09-14	09:35:04	0.420064	1.86853	103.381	FALSE	0
2022-09-14	09:35:04	0.525458	2.33734	112.129	FALSE	0
2022-09-14	09:35:04	0.394975	1.75693	105.138	FALSE	0
2022-09-14	09:35:05	0.49986	2.22348	114.352	FALSE	0
2022-09-14	09:35:05	0.489428	2.17707	107.315	FALSE	0
2022-09-14	09:35:05	0.495942	2.20605	116.558	FALSE	0
2022-09-14	09:35:05	0.466629	2.07566	109.39	FALSE	0
2022-09-14	09:35:06	0.598333	2.6615	119.22	FALSE	0
2022-09-14	09:35:06	0.547341	2.43468	111.825	FALSE	0
2022-09-14	09:35:06	0.769377	3.42234	122.642	FALSE	0
2022-09-14	09:35:06	0.571667	2.54289	114.368	FALSE	0
2022-09-14	09:35:07	0.667341	2.96847	125.611	FALSE	0
2022-09-14	09:35:07	0.609835	2.71267	117.081	FALSE	0
2022-09-14	09:35:07	0.7193	3.19959	128.81	FALSE	0
2022-09-14	09:35:07	0.575127	2.55828	119.639	FALSE	0
2022-09-14	09:35:08	0.743982	3.30938	132.12	FALSE	0
2022-09-14	09:35:08	0.629987	2.80231	122.441	FALSE	0
2022-09-14	09:35:08	0.736298	3.2752	135.395	FALSE	0
2022-09-14	09:35:09	1.20729	5.37027	127.812	FALSE	0
2022-09-14	09:35:09	3.29894	14.6743	150.069	1	1
2022-09-14	09:35:09	5.1082	22.7223	150.534	1	2
2022-09-14	09:35:09	5.4595	24.2849	174.354	1	3
2022-09-14	09:35:10	2.3823	10.5969	161.131	FALSE	3
2022-09-14	09:35:10	0.658995	2.93134	177.285	FALSE	3
2022-09-14	09:35:10	0.452888	2.01454	163.145	FALSE	3
2022-09-14	09:35:10	0.642914	2.85981	180.145	FALSE	3
2022-09-14	09:35:11	0.556501	2.47543	165.621	FALSE	3
2022-09-14	09:35:11	0.477977	2.12614	182.271	FALSE	3
2022-09-14	09:35:11	0.572328	2.54583	168.167	FALSE	3
2022-09-14	09:35:11	0.427239	1.90044	184.172	FALSE	3
2022-09-14	09:35:12	0.469479	2.08834	170.255	FALSE	3
2022-09-14	09:35:12	0.44729	1.98964	186.161	FALSE	3
2022-09-14	09:35:12	0.527952	2.34844	172.603	FALSE	3
2022-09-14	09:35:13	0.678282	3.01713	189.179	FALSE	3
2022-09-14	09:35:13	0.688868	3.06422	175.668	FALSE	3
2022-09-14	09:35:13	0.673397	2.9954	192.174	FALSE	3
2022-09-14	09:35:13	0.799147	3.55477	179.222	FALSE	3
2022-09-14	09:35:14	0.676603	3.00967	195.184	FALSE	3
2022-09-14	09:35:14	0.666476	2.96462	182.187	FALSE	3
2022-09-14	09:35:14	0.708359	3.15092	198.335	FALSE	3
2022-09-14	09:35:14	0.187036	0.831974	183.019	FALSE	3
2022-09-14	09:35:15	-0.251997	-1.12093	198.335	FALSE	3
2022-09-14	09:35:15	-0.36645	-1.63004	183.019	FALSE	3
2022-09-14	09:35:15	-0.565432	-2.51515	198.335	FALSE	3
2022-09-14	09:35:15	-0.67561	-3.00525	183.019	FALSE	3
2022-09-14	09:35:16	-0.551844	-2.45471	198.335	FALSE	3
2022-09-14	09:35:16	-0.40818	-1.81567	183.019	FALSE	3
2022-09-14	09:35:16	-0.162888	-0.724558	198.335	FALSE	3
2022-09-14	09:35:17	-0.0611575	-0.272041	183.019	FALSE	3
2022-09-14	09:35:17	0.177367	0.788964	199.124	FALSE	3
2022-09-14	09:35:17	0.344542	1.53259	184.552	FALSE	3
2022-09-14	09:35:17	0.261132	1.16157	200.285	FALSE	3
2022-09-14	09:35:18	0.403168	1.79337	186.345	FALSE	3
2022-09-14	09:35:18	0.497061	2.21103	202.496	FALSE	3
2022-09-14	09:35:18	0.44902	1.99733	188.342	FALSE	3
2022-09-14	09:35:18	0.564593	2.51142	205.008	FALSE	3
2022-09-14	09:35:19	0.732175	3.25686	191.599	FALSE	3
2022-09-14	09:35:19	0.766577	3.40989	208.417	FALSE	3
2022-09-14	09:35:19	0.272939	1.21409	192.813	FALSE	3
2022-09-14	09:35:19	0.122099	0.543121	208.961	FALSE	3
2022-09-14	09:35:20	0.41187	1.83208	194.645	FALSE	3
2022-09-14	09:35:20	0.119809	0.532934	209.493	FALSE	3
2022-09-14	09:35:20	0.00693411	0.0308443	194.676	FALSE	3
2022-09-14	09:35:21	-0.162786	-0.724105	209.493	FALSE	3
2022-09-14	09:35:21	-0.187061	-0.832085	194.676	FALSE	3
2022-09-14	09:35:21	-0.0892999	-0.397224	209.493	FALSE	3
2022-09-14	09:35:21	-0.251132	-1.11709	194.676	FALSE	3
2022-09-14	09:35:22	-0.259274	-1.1533	209.493	FALSE	3
2022-09-14	09:35:22	-0.125076	-0.556363	194.676	FALSE	3
2022-09-14	09:35:22	0.0775193	0.344821	209.838	FALSE	3
2022-09-14	09:35:22	0.147697	0.656986	195.333	FALSE	3
2022-09-14	09:35:23	0.234771	1.04431	210.883	FALSE	3
2022-09-14	09:35:23	0.499962	2.22393	197.557	FALSE	3
2022-09-14	09:35:23	1.77533	7.89702	218.78	FALSE	3
2022-09-14	09:35:23	1.31772	5.86148	203.418	FALSE	3
2022-09-14	09:35:24	0.914211	4.06659	222.846	FALSE	3
2022-09-14	09:35:24	0.941234	4.1868	207.605	FALSE	3
2022-09-14	09:35:24	1.5021	6.68164	229.528	FALSE	3
2022-09-14	09:35:25	1.07945	4.80161	212.407	FALSE	3
2022-09-14	09:35:25	0.812277	3.61317	233.141	FALSE	3
2022-09-14	09:35:25	0.388359	1.7275	214.134	FALSE	3
2022-09-14	09:35:25	0.444033	1.97515	235.116	FALSE	3
2022-09-14	09:35:26	0.386883	1.72093	215.855	FALSE	3
2022-09-14	09:35:26	0.346272	1.54029	236.656	FALSE	3
2022-09-14	09:35:26	0.192481	0.856194	216.712	FALSE	3
2022-09-14	09:35:26	0.0175702	0.0781558	236.735	FALSE	3
2022-09-14	09:35:27	0.103626	0.460949	217.172	FALSE	3
2022-09-14	09:35:27	-0.894999	-3.98113	236.735	FALSE	3
2022-09-14	09:35:27	-1.06029	-4.71638	217.172	FALSE	3
2022-09-14	09:35:27	-0.237493	-1.05642	236.735	FALSE	3
2022-09-14	09:35:28	-0.210572	-0.936666	217.172	FALSE	3
2022-09-14	09:35:28	-0.137239	-0.610467	236.735	FALSE	3
2022-09-14	09:35:28	0.00993663	0.0442001	217.217	FALSE	3
2022-09-14	09:35:29	0.27355	1.21681	237.951	FALSE	3
2022-09-14	09:35:29	0.655483	2.91572	220.132	FALSE	3
2022-09-14	09:35:29	0.221539	0.98545	238.937	FALSE	3
2022-09-14	09:35:29	0.429529	1.91063	222.043	FALSE	3
2022-09-14	09:35:30	0.410598	1.82642	240.763	FALSE	3
2022-09-14	09:35:30	0.501692	2.23163	224.275	FALSE	3
2022-09-14	09:35:30	0.605662	2.69411	243.457	FALSE	3
2022-09-14	09:35:30	0.148206	0.65925	224.934	FALSE	3
2022-09-14	09:35:31	-0.0436002	-0.193942	243.457	FALSE	3
2022-09-14	09:35:31	-0.176933	-0.787033	224.934	FALSE	3
2022-09-14	09:35:31	-0.213371	-0.949117	243.457	FALSE	3
2022-09-14	09:35:31	-0.192659	-0.856986	224.934	FALSE	3
2022-09-14	09:35:32	-0.220089	-0.979	243.457	FALSE	3
2022-09-14	09:35:32	-0.192557	-0.856532	224.934	FALSE	3
2022-09-14	09:35:32	-0.2036	-0.905654	243.457	FALSE	3
2022-09-14	09:35:33	-0.207926	-0.924896	224.934	FALSE	3
2022-09-14	09:35:33	-0.199478	-0.887318	243.457	FALSE	3
2022-09-14	09:35:33	-0.207315	-0.922179	224.934	FALSE	3
2022-09-14	09:35:33	-0.236781	-1.05325	243.457	FALSE	3
2022-09-14	09:35:34	-0.301157	-1.33961	224.934	FALSE	3
2022-09-14	09:35:34	-0.0272644	-0.121278	243.457	FALSE	3
2022-09-14	09:35:34	-0.163091	-0.725461	224.934	FALSE	3
2022-09-14	09:35:34	0.433295	1.92738	245.385	FALSE	3
2022-09-14	09:35:35	0.423473	1.88369	226.818	FALSE	3
2022-09-14	09:35:35	0.462914	2.05913	247.444	FALSE	3
2022-09-14	09:35:35	0.395687	1.76009	228.578	FALSE	3
2022-09-14	09:35:36	0.273601	1.21703	248.661	FALSE	3
2022-09-14	09:35:36	0.49299	2.19292	230.771	FALSE	3
2022-09-14	09:35:36	0.141845	0.630955	249.292	FALSE	3
2022-09-14	09:35:36	0.243728	1.08415	231.855	FALSE	3
2022-09-14	09:35:37	0.314008	1.39677	250.689	FALSE	3
2022-09-14	09:35:37	0.433092	1.92648	233.781	FALSE	3
2022-09-14	09:35:37	0.416909	1.85449	252.543	FALSE	3
2022-09-14	09:35:37	0.179402	0.798016	234.579	FALSE	3
2022-09-14	09:35:38	-0.290267	-1.29117	252.543	FALSE	3
2022-09-14	09:35:38	-0.615661	-2.73858	234.579	FALSE	3
2022-09-14	09:35:38	-0.374643	-1.66649	252.543	FALSE	3
2022-09-14	09:35:38	0.0540587	0.240464	234.82	FALSE	3
2022-09-14	09:35:39	0.0708017	0.31494	252.858	FALSE	3
2022-09-14	09:35:39	0.073957	0.328976	235.149	FALSE	3
2022-09-14	09:35:39	0.500471	2.2262	255.084	FALSE	3
2022-09-14	09:35:40	0.0957381	0.425862	235.575	FALSE	3
2022-09-14	09:35:40	0.13472	0.599262	255.684	FALSE	3
2022-09-14	09:35:40	0.76897	3.42053	238.995	FALSE	3
2022-09-14	09:35:40	0.590649	2.62732	258.311	FALSE	3
2022-09-14	09:35:41	0.916756	4.07791	243.073	FALSE	3
2022-09-14	09:35:41	0.805051	3.58103	261.892	FALSE	3
2022-09-14	09:35:41	0.461031	2.05076	245.124	FALSE	3
2022-09-14	09:35:41	0.317621	1.41284	263.305	FALSE	3
2022-09-14	09:35:42	0.489784	2.17866	247.302	FALSE	3
2022-09-14	09:35:42	0.305153	1.35738	264.662	FALSE	3
2022-09-14	09:35:42	0.406883	1.8099	249.112	FALSE	3
2022-09-14	09:35:42	0.405662	1.80447	266.467	FALSE	3
2022-09-14	09:35:43	0.509326	2.26558	251.378	FALSE	3
2022-09-14	09:35:43	0.490038	2.17979	268.646	FALSE	3
2022-09-14	09:35:43	0.247494	1.1009	252.479	FALSE	3
2022-09-14	09:35:44	0.393804	1.75172	270.398	FALSE	3
2022-09-14	09:35:44	-0.150928	-0.671358	252.479	FALSE	3
2022-09-14	09:35:44	-0.54019	-2.40287	270.398	FALSE	3
2022-09-14	09:35:44	-0.621513	-2.76461	252.479	FALSE	3
2022-09-14	09:35:45	-0.389045	-1.73055	270.398	FALSE	3
2022-09-14	09:35:45	-0.0383076	-0.1704	252.479	FALSE	3
2022-09-14	09:35:45	0.154262	0.686188	271.084	FALSE	3
2022-09-14	09:35:45	0.584644	2.60061	255.079	FALSE	3
2022-09-14	09:35:46	0.716247	3.18601	274.27	FALSE	3
2022-09-14	09:35:46	0.323372	1.43842	256.518	FALSE	3
2022-09-14	09:35:46	0.254262	1.13101	275.401	FALSE	3
2022-09-14	09:35:46	0.357468	1.59009	258.108	FALSE	3
2022-09-14	09:35:47	0.420573	1.87079	277.272	FALSE	3
2022-09-14	09:35:47	0.271667	1.20843	259.316	FALSE	3
2022-09-14	09:35:47	0.181845	0.808883	278.081	FALSE	3
2022-09-14	09:35:48	0.554873	2.46819	261.785	FALSE	3
2022-09-14	09:35:48	0.592837	2.63706	280.718	FALSE	3
2022-09-14	09:35:48	0.208512	0.927503	262.712	FALSE	3
2022-09-14	09:35:48	0.416858	1.85427	282.572	FALSE	3
2022-09-14	09:35:49	0.228054	1.01443	263.726	FALSE	3
2022-09-14	09:35:49	0.261641	1.16383	283.736	FALSE	3
2022-09-14	09:35:49	0.324491	1.4434	265.17	FALSE	3
2022-09-14	09:35:49	0.593906	2.64181	286.378	FALSE	3
2022-09-14	09:35:50	1.54118	6.85548	272.025	FALSE	3
2022-09-14	09:35:50	1.99233	8.86228	295.24	FALSE	3
2022-09-14	09:35:50	0.372735	1.658	273.683	FALSE	3
2022-09-14	09:35:50	0.600725	2.67214	297.912	FALSE	3
2022-09-14	09:35:51	0.325916	1.44974	275.133	FALSE	3
2022-09-14	09:35:51	0.35299	1.57017	299.483	FALSE	3
2022-09-14	09:35:51	0.241489	1.07419	276.207	FALSE	3
2022-09-14	09:35:52	0.177774	0.790774	300.273	FALSE	3
2022-09-14	09:35:52	0.184135	0.819069	277.026	FALSE	3
2022-09-14	09:35:52	0.115738	0.514826	300.788	FALSE	3
2022-09-14	09:35:52	0.189631	0.843517	277.87	FALSE	3
2022-09-14	09:35:53	0.0944149	0.419976	301.208	FALSE	3
2022-09-14	09:35:53	0.453092	2.01544	279.885	FALSE	3
2022-09-14	09:35:53	0.389987	1.73474	302.943	FALSE	3
2022-09-14	09:35:53	0.301489	1.34108	281.226	FALSE	3
2022-09-14	09:35:54	0.14098	0.627107	303.57	FALSE	3
2022-09-14	09:35:54	0.257417	1.14504	282.371	FALSE	3
2022-09-14	09:35:54	0.185916	0.826992	304.397	FALSE	3
2022-09-14	09:35:54	0.161133	0.716752	283.088	FALSE	3
2022-09-14	09:35:55	0.0962979	0.428352	304.825	FALSE	3
2022-09-14	09:35:55	0.227443	1.01171	284.1	FALSE	3
2022-09-14	09:35:55	0.077214	0.343463	305.169	FALSE	3
2022-09-14	09:35:56	0.0534989	0.237974	284.338	FALSE	3
2022-09-14	09:35:56	-0.161768	-0.719576	305.169	FALSE	3
2022-09-14	09:35:56	0.0307509	0.136786	284.475	FALSE	3
2022-09-14	09:35:56	0.0729392	0.324448	305.493	FALSE	3
2022-09-14	09:35:57	0.213193	0.948325	285.423	FALSE	3
2022-09-14	09:35:57	0.0396058	0.176175	305.669	FALSE	3
2022-09-14	09:35:57	0.0758399	0.337351	285.76	FALSE	3
2022-09-14	09:35:57	0.21528	0.957608	306.627	FALSE	3
2022-09-14	09:35:58	0.186832	0.831066	286.591	FALSE	3
2022-09-14	09:35:58	0.281031	1.25008	307.877	FALSE	3
2022-09-14	09:35:58	0.127545	0.567346	287.159	FALSE	3
2022-09-14	09:35:58	0.348766	1.55138	309.428	FALSE	3
2022-09-14	09:35:59	0.265305	1.18013	288.339	FALSE	3
2022-09-14	09:35:59	0.368257	1.63808	311.067	FALSE	3
2022-09-14	09:35:59	0.315942	1.40537	289.744	FALSE	3
2022-09-14	09:36:00	0.416705	1.85359	312.92	FALSE	3
2022-09-14	09:36:00	0.351514	1.5636	291.308	FALSE	3
2022-09-14	09:36:00	0.314924	1.40084	314.321	FALSE	3
2022-09-14	09:36:00	0.522455	2.32398	293.632	FALSE	3
2022-09-14	09:36:01	0.581692	2.58748	316.908	FALSE	3
2022-09-14	09:36:01	0.583219	2.59427	296.226	FALSE	3
2022-09-14	09:36:01	0.489428	2.17707	319.086	FALSE	3
2022-09-14	09:36:01	0.509122	2.26468	298.491	FALSE	3
2022-09-14	09:36:02	0.540725	2.40525	321.491	FALSE	3
2022-09-14	09:36:02	0.547239	2.43423	300.925	FALSE	3
2022-09-14	09:36:02	0.615433	2.73757	324.228	FALSE	3
2022-09-14	09:36:02	0.68556	3.04951	303.975	FALSE	3
2022-09-14	09:36:03	0.659911	2.93542	327.164	FALSE	3
2022-09-14	09:36:03	0.625356	2.78171	306.756	FALSE	3
2022-09-14	09:36:03	0.611565	2.72036	329.884	FALSE	3
2022-09-14	09:36:04	0.585967	2.6065	309.363	FALSE	3
2022-09-14	09:36:04	0.568359	2.52817	332.412	FALSE	3
2022-09-14	09:36:04	0.601997	2.6778	312.041	FALSE	3
2022-09-14	09:36:04	0.574669	2.55624	334.969	FALSE	3
2022-09-14	09:36:05	0.606476	2.69773	314.738	FALSE	3
2022-09-14	09:36:05	0.566527	2.52003	337.489	FALSE	3
2022-09-14	09:36:05	0.560623	2.49376	317.232	FALSE	3
2022-09-14	09:36:05	0.515382	2.29252	339.781	FALSE	3
2022-09-14	09:36:06	0.496858	2.21012	319.442	FALSE	3
2022-09-14	09:36:06	0.494008	2.19745	341.979	FALSE	3
2022-09-14	09:36:06	0.496552	2.20876	321.651	FALSE	3
2022-09-14	09:36:06	0.5107	2.2717	344.25	FALSE	3
2022-09-14	09:36:07	0.511158	2.27373	323.925	FALSE	3
2022-09-14	09:36:07	0.53757	2.39122	346.641	FALSE	3
2022-09-14	09:36:07	0.61411	2.73168	326.656	FALSE	3
2022-09-14	09:36:08	0.678537	3.01827	349.66	FALSE	3
2022-09-14	09:36:08	0.756298	3.36416	330.02	FALSE	3
2022-09-14	09:36:08	0.763982	3.39834	353.058	FALSE	3
2022-09-14	09:36:08	0.754313	3.35534	333.376	FALSE	3
2022-09-14	09:36:09	0.673957	2.9979	356.056	FALSE	3
2022-09-14	09:36:09	0.514669	2.28935	335.665	FALSE	3
2022-09-14	09:36:09	0.456756	2.03174	358.088	FALSE	3
2022-09-14	09:36:09	0.546476	2.43083	338.096	FALSE	3
2022-09-14	09:36:10	0.78556	3.49433	361.582	FALSE	3
2022-09-14	09:36:10	0.709784	3.15726	341.253	FALSE	3
2022-09-14	09:36:10	0.544033	2.41997	364.002	FALSE	3
2022-09-14	09:36:11	0.619402	2.75522	344.008	FALSE	3
2022-09-14	09:36:11	0.519962	2.31289	366.315	FALSE	3
2022-09-14	09:36:11	0.503931	2.24159	346.25	FALSE	3
2022-09-14	09:36:11	0.551158	2.45166	368.767	FALSE	3
2022-09-14	09:36:12	0.543422	2.41725	348.667	FALSE	3
2022-09-14	09:36:12	0.545	2.42427	371.191	FALSE	3
2022-09-14	09:36:12	0.56785	2.52591	351.193	FALSE	3
2022-09-14	09:36:12	0.539758	2.40095	373.592	FALSE	3
2022-09-14	09:36:13	0.580623	2.58273	353.776	FALSE	3
2022-09-14	09:36:13	0.553448	2.46185	376.054	FALSE	3
2022-09-14	09:36:13	0.554313	2.4657	356.242	FALSE	3
2022-09-14	09:36:14	0.596399	2.6529	378.707	FALSE	3
2022-09-14	09:36:14	0.608562	2.70701	358.949	FALSE	3
2022-09-14	09:36:14	0.615433	2.73757	381.444	FALSE	3
2022-09-14	09:36:14	0.610649	2.71629	361.665	FALSE	3
2022-09-14	09:36:15	0.633142	2.81634	384.26	FALSE	3
2022-09-14	09:36:15	0.575127	2.55828	364.223	FALSE	3
2022-09-14	09:36:15	0.647137	2.87859	387.139	FALSE	3
2022-09-14	09:36:15	0.622964	2.77107	366.994	FALSE	3
2022-09-14	09:36:16	0.613855	2.73055	389.87	FALSE	3
2022-09-14	09:36:16	0.631819	2.81046	369.805	FALSE	3
2022-09-14	09:36:16	0.582659	2.59178	392.461	FALSE	3
2022-09-14	09:36:16	0.557061	2.47792	372.283	FALSE	3
2022-09-14	09:36:17	0.601081	2.67373	395.135	FALSE	3
2022-09-14	09:36:17	0.619198	2.75432	375.037	FALSE	3
2022-09-14	09:36:17	0.626374	2.78624	397.921	FALSE	3
2022-09-14	09:36:17	0.599504	2.66671	377.704	FALSE	3
2022-09-14	09:36:18	0.615942	2.73983	400.661	FALSE	3
2022-09-14	09:36:18	0.592227	2.63434	380.338	FALSE	3
2022-09-14	09:36:18	0.651768	2.89919	403.56	FALSE	3
2022-09-14	09:36:19	0.56444	2.51074	382.849	FALSE	3
2022-09-14	09:36:19	0.573295	2.55013	406.111	FALSE	3
2022-09-14	09:36:19	0.566527	2.52003	385.369	FALSE	3
2022-09-14	09:36:19	0.561845	2.4992	408.61	FALSE	3
2022-09-14	09:36:20	0.561081	2.4958	387.865	FALSE	3
2022-09-14	09:36:20	0.586934	2.6108	411.221	FALSE	3
2022-09-14	09:36:20	0.55243	2.45732	390.322	FALSE	3
2022-09-14	09:36:20	0.5364	2.38601	413.607	FALSE	3
2022-09-14	09:36:21	0.52388	2.33032	392.652	FALSE	3
2022-09-14	09:36:21	0.529478	2.35522	415.962	FALSE	3
2022-09-14	09:36:21	0.564949	2.51301	395.165	FALSE	3
2022-09-14	09:36:21	0.558842	2.48584	418.448	FALSE	3
2022-09-14	09:36:22	0.569987	2.53542	397.701	FALSE	3
2022-09-14	09:36:22	0.548002	2.43762	420.885	FALSE	3
2022-09-14	09:36:22	0.563422	2.50621	400.207	FALSE	3
2022-09-14	09:36:23	0.620216	2.75884	423.644	FALSE	3
2022-09-14	09:36:23	0.620013	2.75794	402.965	FALSE	3
2022-09-14	09:36:23	0.559911	2.4906	426.135	FALSE	3
2022-09-14	09:36:23	0.521438	2.31946	405.284	FALSE	3
2022-09-14	09:36:24	0.551718	2.45415	428.589	FALSE	3
2022-09-14	09:36:24	0.603117	2.68279	407.967	FALSE	3
2022-09-14	09:36:24	1.14174	5.07869	433.667	FALSE	3
2022-09-14	09:36:24	0.935636	4.1619	412.129	FALSE	3
2022-09-14	09:36:25	0.662812	2.94832	436.616	FALSE	3
2022-09-14	09:36:25	0.88388	3.93168	416.061	FALSE	3
2022-09-14	09:36:25	0.63869	2.84102	439.457	FALSE	3
2022-09-14	09:36:25	0.465204	2.06932	418.13	FALSE	3
2022-09-14	09:36:26	0.603931	2.68641	442.143	FALSE	3
2022-09-14	09:36:26	0.430853	1.91652	420.047	FALSE	3
2022-09-14	09:36:26	0.434313	1.93191	444.075	FALSE	3
2022-09-14	09:36:27	0.48902	2.17526	422.222	FALSE	3
2022-09-14	09:36:27	0.473804	2.10757	446.183	FALSE	3
2022-09-14	09:36:27	0.512837	2.2812	424.503	FALSE	3
2022-09-14	09:36:27	0.36098	1.60571	447.788	FALSE	3
2022-09-14	09:36:28	0.281336	1.25144	425.754	FALSE	3
2022-09-14	09:36:28	0.238893	1.06264	448.851	FALSE	3
2022-09-14	09:36:28	0.169377	0.753423	426.508	FALSE	3
2022-09-14	09:36:28	0.0468323	0.208319	449.059	FALSE	3
2022-09-14	09:36:29	-0.231081	-1.02789	426.508	FALSE	3
2022-09-14	09:36:29	-0.287926	-1.28075	449.059	FALSE	3
2022-09-14	09:36:29	-0.347773	-1.54696	426.508	FALSE	3
2022-09-14	09:36:29	-0.186654	-0.830274	449.059	FALSE	3
2022-09-14	09:36:30	-0.0481295	-0.21409	426.508	FALSE	3
2022-09-14	09:36:30	0.147239	0.654949	449.714	FALSE	3
2022-09-14	09:36:30	0.291514	1.29671	427.805	FALSE	3
2022-09-14	09:36:31	0.449987	2.00163	451.716	FALSE	3
2022-09-14	09:36:31	0.385254	1.71369	429.518	FALSE	3
2022-09-14	09:36:31	0.542303	2.41227	454.128	FALSE	3
2022-09-14	09:36:31	0.532277	2.36767	431.886	FALSE	3
2022-09-14	09:36:32	0.500216	2.22506	456.353	FALSE	3
2022-09-14	09:36:32	0.5307	2.36066	434.247	FALSE	3
2022-09-14	09:36:32	0.629173	2.79869	459.152	FALSE	3
2022-09-14	09:36:32	0.795025	3.53643	437.783	FALSE	3
2022-09-14	09:36:33	0.423168	1.88234	461.034	FALSE	3
2022-09-14	09:36:33	0.442354	1.96768	439.751	FALSE	3
2022-09-14	09:36:33	0.658384	2.92862	463.963	FALSE	3
2022-09-14	09:36:33	0.587494	2.61329	442.364	FALSE	3
2022-09-14	09:36:34	0.677468	3.01351	466.976	FALSE	3
2022-09-14	09:36:34	0.512226	2.27848	444.642	FALSE	3
2022-09-14	09:36:34	0.55131	2.45234	469.429	FALSE	3
2022-09-14	09:36:35	0.55243	2.45732	447.1	FALSE	3
2022-09-14	09:36:35	0.550343	2.44804	471.877	FALSE	3
2022-09-14	09:36:35	0.68215	3.03434	450.134	FALSE	3
2022-09-14	09:36:35	0.731565	3.25415	475.131	FALSE	3
2022-09-14	09:36:36	0.738384	3.28448	453.419	FALSE	3
2022-09-14	09:36:36	0.746832	3.32206	478.453	FALSE	3
2022-09-14	09:36:36	0.756959	3.36711	456.786	FALSE	3
2022-09-14	09:36:36	0.719555	3.20072	481.654	FALSE	3
2022-09-14	09:36:37	0.801794	3.56654	460.352	FALSE	3
2022-09-14	09:36:37	0.848715	3.77525	485.429	FALSE	3
2022-09-14	09:36:37	0.963422	4.28549	464.638	FALSE	3
2022-09-14	09:36:37	0.983728	4.37582	489.805	FALSE	3
2022-09-14	09:36:38	1.0024	4.45888	469.097	FALSE	3
2022-09-14	09:36:38	1.09762	4.88243	494.687	FALSE	3
2022-09-14	09:36:38	1.07691	4.79031	473.887	FALSE	3
2022-09-14	09:36:39	1.01355	4.50847	499.196	FALSE	3
2022-09-14	09:36:39	0.997366	4.43648	478.323	FALSE	3
2022-09-14	09:36:39	1.03635	4.60989	503.806	FALSE	3
2022-09-14	09:36:39	0.953295	4.24045	482.564	FALSE	3
2022-09-14	09:36:40	0.769478	3.42279	507.228	FALSE	3
2022-09-14	09:36:40	0.733193	3.26139	485.825	FALSE	3
2022-09-14	09:36:40	0.786781	3.49976	510.728	FALSE	3
2022-09-14	09:36:40	0.847646	3.7705	489.596	FALSE	3
2022-09-14	09:36:41	0.870191	3.87078	514.599	FALSE	3
2022-09-14	09:36:41	0.912888	4.06071	493.656	FALSE	3
2022-09-14	09:36:41	0.856857	3.81147	518.41	FALSE	3
2022-09-14	09:36:41	0.768766	3.41962	497.076	FALSE	3
2022-09-14	09:36:42	0.79126	3.51968	521.93	FALSE	3
2022-09-14	09:36:42	0.785254	3.49297	500.569	FALSE	3
2022-09-14	09:36:42	0.801539	3.56541	525.496	FALSE	3
2022-09-14	09:36:43	0.628155	2.79416	503.363	FALSE	3
2022-09-14	09:36:43	0.628562	2.79597	528.292	FALSE	3
2022-09-14	09:36:43	0.646374	2.8752	506.238	FALSE	3
2022-09-14	09:36:43	0.615026	2.73576	531.027	FALSE	3
2022-09-14	09:36:44	0.665967	2.96235	509.201	FALSE	3
2022-09-14	09:36:44	0.697875	3.10429	534.132	FALSE	3
2022-09-14	09:36:44	0.719555	3.20072	512.401	FALSE	3
2022-09-14	09:36:44	0.816552	3.63219	537.764	FALSE	3
2022-09-14	09:36:45	0.765763	3.40627	515.808	FALSE	3
2022-09-14	09:36:45	0.704135	3.13213	540.896	FALSE	3
2022-09-14	09:36:45	0.777417	3.45811	519.266	FALSE	3
2022-09-14	09:36:45	0.66958	2.97843	543.874	FALSE	3
2022-09-14	09:36:46	0.704033	3.13168	522.398	FALSE	3
2022-09-14	09:36:46	0.688868	3.06422	546.939	FALSE	3
2022-09-14	09:36:46	0.70785	3.14866	525.546	FALSE	3
2022-09-14	09:36:47	0.724389	3.22223	550.161	FALSE	3
2022-09-14	09:36:47	0.785662	3.49478	529.041	FALSE	3
2022-09-14	09:36:47	0.769173	3.42144	553.582	FALSE	3
2022-09-14	09:36:47	0.798588	3.55228	532.593	FALSE	3
2022-09-14	09:36:48	0.765407	3.40468	556.987	FALSE	3
2022-09-14	09:36:48	0.80729	3.59099	536.184	FALSE	3
2022-09-14	09:36:48	0.762557	3.39201	560.379	FALSE	3
2022-09-14	09:36:48	0.605305	2.69252	538.877	FALSE	3
2022-09-14	09:36:49	0.571209	2.54085	562.92	FALSE	3
2022-09-14	09:36:49	0.559402	2.48833	541.365	FALSE	3
2022-09-14	09:36:49	0.543015	2.41544	565.335	FALSE	3
2022-09-14	09:36:49	0.562557	2.50237	543.867	FALSE	3
2022-09-14	09:36:50	0.594771	2.64566	567.981	FALSE	3
2022-09-14	09:36:50	0.873652	3.88618	547.754	FALSE	3
2022-09-14	09:36:50	1.06576	4.74071	572.722	FALSE	3
2022-09-14	09:36:51	0.970903	4.31877	552.072	FALSE	3
2022-09-14	09:36:51	0.741947	3.30033	576.022	FALSE	3
2022-09-14	09:36:51	0.764695	3.40152	555.474	FALSE	3
2022-09-14	09:36:51	0.746527	3.3207	579.343	FALSE	3
2022-09-14	09:36:52	0.598537	2.66241	558.136	FALSE	3
2022-09-14	09:36:52	0.664644	2.95647	582.299	FALSE	3
2022-09-14	09:36:52	0.619809	2.75703	560.893	FALSE	3
2022-09-14	09:36:52	0.630954	2.80661	585.106	FALSE	3
2022-09-14	09:36:53	0.605102	2.69161	563.585	FALSE	3
2022-09-14	09:36:53	0.577621	2.56937	587.675	FALSE	3
2022-09-14	09:36:53	0.56388	2.50825	566.093	FALSE	3
2022-09-14	09:36:54	0.555891	2.47271	590.148	FALSE	3
2022-09-14	09:36:54	0.575229	2.55873	568.652	FALSE	3
2022-09-14	09:36:54	0.559555	2.48901	592.637	FALSE	3
2022-09-14	09:36:54	0.585356	2.60378	571.256	FALSE	3
2022-09-14	09:36:55	0.581845	2.58816	595.225	FALSE	3
2022-09-14	09:36:55	0.565662	2.51618	573.772	FALSE	3
2022-09-14	09:36:55	0.56958	2.53361	597.759	FALSE	3
2022-09-14	09:36:55	0.600929	2.67305	576.445	FALSE	3
2022-09-14	09:36:56	0.579758	2.57888	600.337	FALSE	3
2022-09-14	09:36:56	0.534822	2.379	578.824	FALSE	3
2022-09-14	09:36:56	0.437621	1.94663	602.284	FALSE	3
2022-09-14	09:36:56	0.330089	1.4683	580.292	FALSE	3
2022-09-14	09:36:57	0.316908	1.40967	603.694	FALSE	3
2022-09-14	09:36:57	0.383117	1.70418	581.996	FALSE	3
2022-09-14	09:36:57	0.655992	2.91798	606.612	FALSE	3
2022-09-14	09:36:58	0.611209	2.71878	584.715	FALSE	3
2022-09-14	09:36:58	0.588715	2.61872	609.23	FALSE	3
2022-09-14	09:36:58	0.971463	4.32126	589.036	FALSE	3
2022-09-14	09:36:58	0.768817	3.41985	612.65	FALSE	3
2022-09-14	09:36:59	0.926629	4.12183	593.158	FALSE	3
2022-09-14	09:36:59	1.00846	4.48583	617.136	FALSE	3
2022-09-14	09:36:59	1.07172	4.76722	597.926	FALSE	3
2022-09-14	09:36:59	0.860115	3.82596	620.962	FALSE	3
2022-09-14	09:37:00	0.88958	3.95703	601.883	FALSE	3
2022-09-14	09:37:00	0.824491	3.6675	624.63	FALSE	3
2022-09-14	09:37:00	0.896298	3.98691	605.869	FALSE	3
2022-09-14	09:37:00	0.976959	4.34571	628.975	FALSE	3
2022-09-14	09:37:01	1.18729	5.2813	611.151	FALSE	3
2022-09-14	09:37:01	1.41808	6.3079	635.283	FALSE	3
2022-09-14	09:37:01	1.622	7.21498	618.366	FALSE	3
2022-09-14	09:37:02	1.65279	7.35194	642.635	FALSE	3
2022-09-14	09:37:02	2.12169	9.4377	627.803	FALSE	3
2022-09-14	09:37:02	1.78816	7.95409	650.589	FALSE	3
2022-09-14	09:37:02	0.873549	3.88572	631.689	FALSE	3
2022-09-14	09:37:03	0.585356	2.60378	653.193	FALSE	3
2022-09-14	09:37:03	0.547544	2.43559	634.125	FALSE	3
2022-09-14	09:37:03	0.540827	2.40571	655.599	FALSE	3
2022-09-14	09:37:03	0.703677	3.1301	637.255	FALSE	3
2022-09-14	09:37:04	0.772939	3.43819	659.037	FALSE	3
2022-09-14	09:37:04	1.1081	4.92905	642.184	FALSE	3
2022-09-14	09:37:04	0.995789	4.42947	663.466	FALSE	3
2022-09-14	09:37:04	0.869224	3.86648	646.05	FALSE	3
2022-09-14	09:37:05	0.87416	3.88844	667.355	FALSE	3
2022-09-14	09:37:05	0.712634	3.16994	649.22	FALSE	3
2022-09-14	09:37:05	0.704186	3.13236	670.487	FALSE	3
2022-09-14	09:37:06	0.67589	3.00649	652.227	FALSE	3
2022-09-14	09:37:06	0.658893	2.93089	673.418	FALSE	3
2022-09-14	09:37:06	0.682761	3.03706	655.264	FALSE	3
2022-09-14	09:37:06	0.663728	2.95239	676.37	FALSE	3
2022-09-14	09:37:07	0.728104	3.23875	658.503	FALSE	3
2022-09-14	09:37:07	0.719911	3.20231	679.573	FALSE	3
2022-09-14	09:37:07	0.735483	3.27158	661.774	FALSE	3
2022-09-14	09:37:07	0.751005	3.34062	682.913	FALSE	3
2022-09-14	09:37:08	0.740114	3.29218	665.066	FALSE	3
2022-09-14	09:37:08	1.10953	4.93541	687.849	FALSE	3
2022-09-14	09:37:08	0.883473	3.92986	668.996	FALSE	3
2022-09-14	09:37:08	0.985407	4.38329	692.232	FALSE	3
2022-09-14	09:37:09	0.910598	4.05052	673.047	FALSE	3
2022-09-14	09:37:09	0.753906	3.35352	695.586	FALSE	3
2022-09-14	09:37:09	0.574008	2.5533	675.6	FALSE	3
2022-09-14	09:37:10	0.499249	2.22076	697.806	FALSE	3
2022-09-14	09:37:10	0.451819	2.00978	677.61	FALSE	3
2022-09-14	09:37:10	0.378232	1.68245	699.489	FALSE	3
2022-09-14	09:37:10	0.505713	2.24951	679.859	FALSE	3
2022-09-14	09:37:11	0.420166	1.86898	701.358	FALSE	3
2022-09-14	09:37:11	0.585102	2.60265	682.462	FALSE	3
2022-09-14	09:37:11	0.576858	2.56598	703.924	FALSE	3
2022-09-14	09:37:11	0.596654	2.65404	685.116	FALSE	3
2022-09-14	09:37:12	0.50785	2.25902	706.183	FALSE	3
2022-09-14	09:37:12	0.515789	2.29433	687.41	FALSE	3
2022-09-14	09:37:12	0.509733	2.26739	708.45	FALSE	3
2022-09-14	09:37:12	0.488664	2.17368	689.584	FALSE	3
2022-09-14	09:37:13	0.506883	2.25472	710.705	FALSE	3
2022-09-14	09:37:13	0.485305	2.15873	691.743	FALSE	3
2022-09-14	09:37:13	0.450293	2.00299	712.708	FALSE	3
2022-09-14	09:37:14	0.394415	1.75444	693.497	FALSE	3
2022-09-14	09:37:14	0.466272	2.07407	714.782	FALSE	3
2022-09-14	09:37:14	0.472634	2.10237	695.6	FALSE	3
2022-09-14	09:37:14	0.43416	1.93123	716.713	FALSE	3
2022-09-14	09:37:15	0.439809	1.95636	697.556	FALSE	3
2022-09-14	09:37:15	0.373906	1.66321	718.376	FALSE	3
2022-09-14	09:37:15	0.423473	1.88369	699.44	FALSE	3
2022-09-14	09:37:15	0.480216	2.1361	720.512	FALSE	3
2022-09-14	09:37:16	0.380165	1.69105	701.131	FALSE	3
2022-09-14	09:37:16	0.415585	1.84861	722.361	FALSE	3
2022-09-14	09:37:16	0.39813	1.77096	702.902	FALSE	3
2022-09-14	09:37:16	0.399046	1.77504	724.136	FALSE	3
2022-09-14	09:37:17	0.400471	1.78138	704.683	FALSE	3
2022-09-14	09:37:17	0.461183	2.05143	726.188	FALSE	3
2022-09-14	09:37:17	0.289122	1.28607	705.969	FALSE	3
2022-09-14	09:37:18	0.231361	1.02914	727.217	FALSE	3
2022-09-14	09:37:18	0.10383	0.461857	706.431	FALSE	3
2022-09-14	09:37:18	-0.0972898	-0.432764	727.217	FALSE	3
2022-09-14	09:37:18	-0.0505214	-0.224729	706.431	FALSE	3
2022-09-14	09:37:19	0.0450511	0.200396	727.417	FALSE	3
2022-09-14	09:37:19	0.202863	0.902375	707.333	FALSE	3
2022-09-14	09:37:19	0.00952952	0.0423892	727.459	FALSE	3
2022-09-14	09:37:19	0.241489	1.07419	708.408	FALSE	3
2022-09-14	09:37:20	0.258944	1.15183	728.611	FALSE	3
2022-09-14	09:37:20	0.286425	1.27408	709.682	FALSE	3
2022-09-14	09:37:20	0.193702	0.861625	729.473	FALSE	3
2022-09-14	09:37:20	0.563626	2.50712	712.189	FALSE	3
2022-09-14	09:37:21	0.725611	3.22766	732.701	FALSE	3
2022-09-14	09:37:21	0.723931	3.22019	715.409	FALSE	3
2022-09-14	09:37:21	0.729122	3.24328	735.944	FALSE	3
2022-09-14	09:37:22	0.27187	1.20933	716.618	FALSE	3
2022-09-14	09:37:22	0.262964	1.16972	737.114	FALSE	3
2022-09-14	09:37:22	0.44159	1.96428	718.583	FALSE	3
2022-09-14	09:37:22	0.684796	3.04611	740.16	FALSE	3
2022-09-14	09:37:23	0.736654	3.27678	721.859	FALSE	3
2022-09-14	09:37:23	0.425916	1.89456	742.054	FALSE	3
2022-09-14	09:37:23	0.18841	0.838085	722.697	FALSE	3
2022-09-14	09:37:23	0.171616	0.763382	742.818	FALSE	3
2022-09-14	09:37:24	0.0962979	0.428352	723.126	FALSE	3
2022-09-14	09:37:24	0.0961961	0.427899	743.246	FALSE	3
2022-09-14	09:37:24	0.247799	1.10226	724.228	FALSE	3
2022-09-14	09:37:24	0.198995	0.88517	744.131	FALSE	3
2022-09-14	09:37:25	0.292176	1.29966	725.528	FALSE	3
2022-09-14	09:37:25	0.183321	0.815448	744.946	FALSE	3
2022-09-14	09:37:25	0.18897	0.840576	726.368	FALSE	3
2022-09-14	09:37:26	0.254924	1.13395	746.08	FALSE	3
2022-09-14	09:37:26	0.115331	0.513015	726.881	FALSE	3
2022-09-14	09:37:26	0.0873412	0.388511	746.469	FALSE	3
2022-09-14	09:37:26	0.129682	0.576851	727.458	FALSE	3
2022-09-14	09:37:27	0.0305982	0.136107	746.605	FALSE	3
2022-09-14	09:37:27	0.271412	1.20729	728.665	FALSE	3
2022-09-14	09:37:27	0.365509	1.62586	748.231	FALSE	3
2022-09-14	09:37:27	0.637214	2.83446	731.5	FALSE	3
2022-09-14	09:37:28	2.94983	13.1214	761.352	FALSE	3
2022-09-14	09:37:28	2.57569	11.4572	742.957	FALSE	3
2022-09-14	09:37:28	3.14693	13.9982	775.35	1	4
2022-09-14	09:37:28	5.99121	26.6501	769.607	1	5
2022-09-14	09:37:29	3.32586	14.7941	790.144	1	6
2022-09-14	09:37:29	3.58648	15.9534	785.561	1	7
2022-09-14	09:37:29	0.911514	4.0546	794.199	FALSE	7
2022-09-14	09:37:30	0.921336	4.09829	789.659	FALSE	7
2022-09-14	09:37:30	0.312074	1.38817	795.587	FALSE	7
2022-09-14	09:37:30	-0.0397834	-0.176965	789.659	FALSE	7
2022-09-14	09:37:30	0.0700893	0.311771	795.899	FALSE	7
2022-09-14	09:37:31	0.00255749	0.0113762	789.67	FALSE	7
2022-09-14	09:37:31	0.0182827	0.0813251	795.98	FALSE	7
2022-09-14	09:37:31	-0.122328	-0.544139	789.67	FALSE	7
2022-09-14	09:37:31	0.0112089	0.0498594	796.03	FALSE	7
2022-09-14	09:37:32	-0.161157	-0.716859	789.67	FALSE	7
2022-09-14	09:37:32	-0.123498	-0.549344	796.03	FALSE	7
2022-09-14	09:37:32	-0.13332	-0.593034	789.67	FALSE	7
2022-09-14	09:37:32	-0.277951	-1.23638	796.03	FALSE	7
2022-09-14	09:37:33	-0.0856358	-0.380925	789.67	FALSE	7
2022-09-14	09:37:33	-0.198206	-0.88166	796.03	FALSE	7
2022-09-14	09:37:33	-0.175254	-0.779565	789.67	FALSE	7
2022-09-14	09:37:34	-0.0319972	-0.14233	796.03	FALSE	7
2022-09-14	09:37:34	0.209631	0.932481	790.603	FALSE	7
2022-09-14	09:37:34	1.24256	5.52716	801.557	FALSE	7
2022-09-14	09:37:34	1.94897	8.66941	799.272	FALSE	7
2022-09-14	09:37:35	0.391056	1.7395	803.297	FALSE	7
2022-09-14	09:37:35	0.155687	0.692527	799.965	FALSE	7
2022-09-14	09:37:35	0.112023	0.498301	803.795	FALSE	7
2022-09-14	09:37:35	0.0280537	0.124788	800.089	FALSE	7
2022-09-14	09:37:36	-0.0174934	-0.0778141	803.795	FALSE	7
2022-09-14	09:37:36	-0.0621244	-0.276342	800.089	FALSE	7
2022-09-14	09:37:36	-0.0538292	-0.239443	803.795	FALSE	7
2022-09-14	09:37:36	-0.102124	-0.454268	800.089	FALSE	7
2022-09-14	09:37:37	-0.00645013	-0.0286915	803.795	FALSE	7
2022-09-14	09:37:37	0.0690714	0.307243	800.397	FALSE	7
2022-09-14	09:37:37	0.108919	0.484493	804.279	FALSE	7
2022-09-14	09:37:38	0.142252	0.632765	801.029	FALSE	7
2022-09-14	09:37:38	-0.0293	-0.130332	804.279	FALSE	7
2022-09-14	09:37:38	-0.0757631	-0.337009	801.029	FALSE	7
2022-09-14	09:37:38	-0.0238038	-0.105884	804.279	FALSE	7
2022-09-14	09:37:39	-0.0777987	-0.346064	801.029	FALSE	7
2022-09-14	09:37:39	0.00143789	0.00639602	804.286	FALSE	7
2022-09-14	09:37:39	-0.108638	-0.483244	801.029	FALSE	7
2022-09-14	09:37:39	0.0137534	0.0611779	804.347	FALSE	7
2022-09-14	09:37:40	-0.0855341	-0.380473	801.029	FALSE	7
2022-09-14	09:37:40	0.0473412	0.210583	804.558	FALSE	7
2022-09-14	09:37:40	-0.131081	-0.583075	801.029	FALSE	7
2022-09-14	09:37:40	0.0285626	0.127052	804.685	FALSE	7
2022-09-14	09:37:41	0.0570613	0.25382	801.283	FALSE	7
2022-09-14	09:37:41	0.353193	1.57107	806.256	FALSE	7
2022-09-14	09:37:41	0.227952	1.01398	802.297	FALSE	7
2022-09-14	09:37:42	0.613244	2.72783	808.984	FALSE	7
2022-09-14	09:37:42	0.769173	3.42144	805.719	FALSE	7
2022-09-14	09:37:42	0.676806	3.01057	811.994	FALSE	7
2022-09-14	09:37:42	0.790903	3.51809	809.237	FALSE	7
2022-09-14	09:37:43	0.806374	3.58691	815.581	FALSE	7
2022-09-14	09:37:43	0.432328	1.92308	811.16	FALSE	7
2022-09-14	09:37:43	0.847595	3.77027	819.351	FALSE	7
2022-09-14	09:37:43	0.796908	3.54481	814.705	FALSE	7
2022-09-14	09:37:44	0.342201	1.52218	820.874	FALSE	7
2022-09-14	09:37:44	0.55411	2.46479	817.169	FALSE	7
2022-09-14	09:37:44	0.634517	2.82246	823.696	FALSE	7
2022-09-14	09:37:44	0.481489	2.14176	819.311	FALSE	7
2022-09-14	09:37:45	0.303321	1.34923	825.045	FALSE	7
2022-09-14	09:37:45	0.480267	2.13632	821.448	FALSE	7
2022-09-14	09:37:45	0.518486	2.30633	827.352	FALSE	7
2022-09-14	09:37:46	0.402659	1.79111	823.239	FALSE	7
2022-09-14	09:37:46	0.34841	1.5498	828.901	FALSE	7
2022-09-14	09:37:46	0.38215	1.69988	824.938	FALSE	7
2022-09-14	09:37:46	0.377214	1.67792	830.579	FALSE	7
2022-09-14	09:37:47	0.35182	1.56497	826.503	FALSE	7
2022-09-14	09:37:47	0.396705	1.76462	832.344	FALSE	7
2022-09-14	09:37:47	0.382455	1.70124	828.205	FALSE	7
2022-09-14	09:37:47	0.400216	1.78024	834.124	FALSE	7
2022-09-14	09:37:48	0.71813	3.19439	831.399	FALSE	7
2022-09-14	09:37:48	0.288461	1.28313	835.407	FALSE	7
2022-09-14	09:37:48	0.260776	1.15998	832.559	FALSE	7
2022-09-14	09:37:48	0.265916	1.18285	836.59	FALSE	7
2022-09-14	09:37:49	0.21869	0.972777	833.532	FALSE	7
2022-09-14	09:37:49	0.357316	1.58941	838.18	FALSE	7
2022-09-14	09:37:49	0.399249	1.77594	835.308	FALSE	7
2022-09-14	09:37:50	0.330496	1.47011	839.65	FALSE	7
2022-09-14	09:37:50	0.301234	1.33995	836.648	FALSE	7
2022-09-14	09:37:50	0.268054	1.19236	840.842	FALSE	7
2022-09-14	09:37:50	0.250954	1.11629	837.764	FALSE	7
2022-09-14	09:37:51	0.282456	1.25642	842.098	FALSE	7
2022-09-14	09:37:51	0.27986	1.24487	839.009	FALSE	7
2022-09-14	09:37:51	0.228766	1.0176	843.116	FALSE	7
2022-09-14	09:37:51	0.15528	0.690716	839.7	FALSE	7
2022-09-14	09:37:52	-0.178664	-0.794733	843.116	FALSE	7
2022-09-14	09:37:52	0.0673411	0.299547	839.999	FALSE	7
2022-09-14	09:37:52	0.198435	0.882679	843.999	FALSE	7
2022-09-14	09:37:52	0.742354	3.30214	843.301	FALSE	7
2022-09-14	09:37:53	1.67212	7.43792	851.437	FALSE	7
2022-09-14	09:37:53	0.902506	4.01453	847.316	FALSE	7
2022-09-14	09:37:53	0.917112	4.0795	855.516	FALSE	7
2022-09-14	09:37:54	1.04602	4.65291	851.969	FALSE	7
2022-09-14	09:37:54	0.338741	1.50679	857.023	FALSE	7
2022-09-14	09:37:54	0.441285	1.96292	853.932	FALSE	7
2022-09-14	09:37:54	0.427087	1.89977	858.923	FALSE	7
2022-09-14	09:37:55	0.274567	1.22133	855.153	FALSE	7
2022-09-14	09:37:55	0.726985	3.23377	862.156	FALSE	7
2022-09-14	09:37:55	0.224848	1.00017	856.153	FALSE	7
2022-09-14	09:37:55	0.417468	1.85698	864.013	FALSE	7
2022-09-14	09:37:56	0.2964	1.31845	857.472	FALSE	7
2022-09-14	09:37:56	0.275382	1.22495	865.238	FALSE	7
2022-09-14	09:37:56	0.420115	1.86876	859.34	FALSE	7
2022-09-14	09:37:56	0.194059	0.863213	866.102	FALSE	7
2022-09-14	09:37:57	0.36444	1.6211	860.961	FALSE	7
2022-09-14	09:37:57	0.376858	1.67634	867.778	FALSE	7
2022-09-14	09:37:57	0.312939	1.39202	862.353	FALSE	7
2022-09-14	09:37:58	0.44785	1.99213	869.77	FALSE	7
2022-09-14	09:37:58	0.399657	1.77775	864.131	FALSE	7
2022-09-14	09:37:58	0.276145	1.22835	870.998	FALSE	7
2022-09-14	09:37:58	0.370242	1.64691	865.778	FALSE	7
2022-09-14	09:37:59	0.211209	0.9395	871.938	FALSE	7
2022-09-14	09:37:59	0.240827	1.07125	866.849	FALSE	7
2022-09-14	09:37:59	0.265458	1.18081	873.119	FALSE	7
2022-09-14	09:37:59	0.0840333	0.373797	867.223	FALSE	7
2022-09-14	09:38:00	0.299148	1.33067	874.449	FALSE	7
2022-09-14	09:38:00	0.169682	0.754779	867.978	FALSE	7
2022-09-14	09:38:00	0.316654	1.40854	875.858	FALSE	7
2022-09-14	09:38:00	0.146222	0.650425	868.628	FALSE	7
2022-09-14	09:38:01	0.252328	1.12241	876.98	FALSE	7
2022-09-14	09:38:01	0.259911	1.15614	869.785	FALSE	7
2022-09-14	09:38:01	0.325356	1.44725	878.428	FALSE	7
2022-09-14	09:38:02	0.248359	1.10475	870.889	FALSE	7
2022-09-14	09:38:02	0.267646	1.19054	879.618	FALSE	7
2022-09-14	09:38:02	0.499911	2.2237	873.113	FALSE	7
2022-09-14	09:38:02	0.205153	0.912562	880.531	FALSE	7
2022-09-14	09:38:03	0.441896	1.96564	875.079	FALSE	7
2022-09-14	09:38:03	0.252684	1.12399	881.655	FALSE	7
2022-09-14	09:38:03	0.728868	3.24215	878.321	FALSE	7
2022-09-14	09:38:03	0.736043	3.27407	884.929	FALSE	7
2022-09-14	09:38:04	0.725153	3.22563	881.546	FALSE	7
2022-09-14	09:38:04	0.73757	3.28086	888.21	FALSE	7
2022-09-14	09:38:04	0.733092	3.26094	884.807	FALSE	7
2022-09-14	09:38:04	0.728766	3.2417	891.451	FALSE	7
2022-09-14	09:38:05	0.724796	3.22404	888.031	FALSE	7
2022-09-14	09:38:05	0.726425	3.23128	894.683	FALSE	7
2022-09-14	09:38:05	0.717468	3.19144	891.223	FALSE	7
2022-09-14	09:38:06	0.408155	1.81556	896.498	FALSE	7
2022-09-14	09:38:06	-0.242633	-1.07928	891.223	FALSE	7
2022-09-14	09:38:06	0.340776	1.51584	898.014	FALSE	7
2022-09-14	09:38:06	0.575382	2.55941	893.782	FALSE	7
2022-09-14	09:38:07	0.542761	2.41431	900.428	FALSE	7
2022-09-14	09:38:07	0.361387	1.60752	895.39	FALSE	7
2022-09-14	09:38:07	0.19472	0.866154	901.294	FALSE	7
2022-09-14	09:38:07	-1.74121	-7.74525	895.39	FALSE	7
2022-09-14	09:38:08	-1.74721	-7.77194	901.294	FALSE	7
2022-09-14	09:38:08	-2.00675	-8.92643	895.39	FALSE	7
2022-09-14	09:38:08	-1.4866	-6.61269	901.294	FALSE	7
2022-09-14	09:38:08	-1.86416	-8.29216	895.39	FALSE	7
2022-09-14	09:38:09	-1.91067	-8.49904	901.294	FALSE	7
2022-09-14	09:38:09	-1.79307	-7.97593	895.39	FALSE	7
2022-09-14	09:38:09	-1.62599	-7.23273	901.294	FALSE	7
2022-09-14	09:38:10	-1.85195	-8.23784	895.39	FALSE	7
2022-09-14	09:38:10	-2.06502	-9.18562	901.294	FALSE	7
2022-09-14	09:38:10	-1.89027	-8.4083	895.39	FALSE	7
2022-09-14	09:38:10	-2.0521	-9.12815	901.294	FALSE	7
2022-09-14	09:38:11	-1.87871	-8.35688	895.39	FALSE	7
2022-09-14	09:38:11	-2.27765	-10.1314	901.294	FALSE	7
2022-09-14	09:38:11	-1.81312	-8.06512	895.39	FALSE	7
2022-09-14	09:38:11	-2.09729	-9.32917	901.294	FALSE	7
2022-09-14	09:38:12	-1.81485	-8.07282	895.39	FALSE	7
2022-09-14	09:38:12	-2.37225	-10.5522	901.294	FALSE	7
2022-09-14	09:38:12	-2.08742	-9.28526	895.39	FALSE	7
2022-09-14	09:38:12	-2.35958	-10.4959	901.294	FALSE	7
2022-09-14	09:38:13	-2.29648	-10.2152	895.39	FALSE	7
2022-09-14	09:38:13	-2.40828	-10.7125	901.294	FALSE	7
2022-09-14	09:38:13	-2.38212	-10.5961	895.39	FALSE	7
2022-09-14	09:38:14	-2.20991	-9.83012	901.294	FALSE	7
2022-09-14	09:38:14	-2.26029	-10.0542	895.39	FALSE	7
2022-09-14	09:38:14	-2.09933	-9.33824	901.294	FALSE	7
2022-09-14	09:38:14	-2.30966	-10.2738	895.39	FALSE	7
2022-09-14	09:38:15	-1.70004	-7.56212	901.294	FALSE	7
2022-09-14	09:38:15	-3.08416	-13.719	895.39	FALSE	7
2022-09-14	09:38:15	-3.29439	-14.6541	901.294	FALSE	7
2022-09-14	09:38:15	-3.03139	-13.4842	895.39	FALSE	7
2022-09-14	09:38:16	-3.48665	-15.5093	901.294	FALSE	7
2022-09-14	09:38:16	0.285763	1.27113	896.661	FALSE	7
2022-09-14	09:38:16	0.188359	0.837859	902.132	FALSE	7
2022-09-14	09:38:17	0.316807	1.40922	898.07	FALSE	7
2022-09-14	09:38:17	0.257061	1.14346	903.276	FALSE	7
2022-09-14	09:38:17	0.364695	1.62224	899.692	FALSE	7
2022-09-14	09:38:17	0.226018	1.00537	904.281	FALSE	7
2022-09-14	09:38:18	0.299402	1.3318	901.024	FALSE	7
2022-09-14	09:38:18	0.207901	0.924785	905.206	FALSE	7
2022-09-14	09:38:18	0.503524	2.23978	903.264	FALSE	7
2022-09-14	09:38:18	0.719606	3.20095	908.407	FALSE	7
2022-09-14	09:38:19	0.726374	3.23106	906.495	FALSE	7
2022-09-14	09:38:19	0.729835	3.24645	911.653	FALSE	7
2022-09-14	09:38:19	0.72612	3.22993	909.725	FALSE	7
2022-09-14	09:38:19	0.726578	3.23196	914.885	FALSE	7
2022-09-14	09:38:20	0.727646	3.23671	912.962	FALSE	7
2022-09-14	09:38:20	0.730598	3.24985	918.135	FALSE	7
2022-09-14	09:38:20	0.731259	3.25279	916.214	FALSE	7
2022-09-14	09:38:20	0.731819	3.25528	921.39	FALSE	7
2022-09-14	09:38:21	0.729428	3.24464	919.459	FALSE	7
2022-09-14	09:38:21	0.728715	3.24147	924.632	FALSE	7
2022-09-14	09:38:21	0.733855	3.26433	922.723	FALSE	7
2022-09-14	09:38:22	0.733397	3.2623	927.894	FALSE	7
2022-09-14	09:38:22	0.733244	3.26162	925.985	FALSE	7
2022-09-14	09:38:22	0.732277	3.25731	931.151	FALSE	7
2022-09-14	09:38:22	0.730242	3.24826	929.233	FALSE	7
2022-09-14	09:38:23	0.733397	3.2623	934.414	FALSE	7
2022-09-14	09:38:23	0.73014	3.24781	932.481	FALSE	7
2022-09-14	09:38:23	0.730242	3.24826	937.662	FALSE	7
2022-09-14	09:38:23	0.722914	3.21567	935.697	FALSE	7
2022-09-14	09:38:24	0.729071	3.24305	940.905	FALSE	7
2022-09-14	09:38:24	0.732328	3.25754	938.954	FALSE	7
2022-09-14	09:38:24	0.730801	3.25075	944.156	FALSE	7
2022-09-14	09:38:24	0.727443	3.23581	942.19	FALSE	7
2022-09-14	09:38:25	0.728003	3.2383	947.394	FALSE	7
2022-09-14	09:38:25	0.730343	3.24871	945.439	FALSE	7
2022-09-14	09:38:25	0.735483	3.27158	950.666	FALSE	7
2022-09-14	09:38:26	0.732888	3.26003	948.699	FALSE	7
2022-09-14	09:38:26	0.731056	3.25188	953.918	FALSE	7
2022-09-14	09:38:26	0.734008	3.26501	951.964	FALSE	7
2022-09-14	09:38:26	0.738537	3.28516	957.203	FALSE	7
2022-09-14	09:38:27	0.733702	3.26365	955.227	FALSE	7
2022-09-14	09:38:27	0.724796	3.22404	960.427	FALSE	7
2022-09-14	09:38:27	0.730191	3.24804	958.476	FALSE	7
2022-09-14	09:38:27	0.727748	3.23717	963.664	FALSE	7
2022-09-14	09:38:28	0.731259	3.25279	961.728	FALSE	7
2022-09-14	09:38:28	0.732125	3.25664	966.921	FALSE	7
2022-09-14	09:38:28	0.728257	3.23943	964.968	FALSE	7
2022-09-14	09:38:28	0.735738	3.27271	970.193	FALSE	7
2022-09-14	09:38:29	0.72958	3.24532	968.213	FALSE	7
2022-09-14	09:38:29	0.734313	3.26637	973.46	FALSE	7
2022-09-14	09:38:29	0.72841	3.24011	971.453	FALSE	7
2022-09-14	09:38:30	0.735891	3.27339	976.733	FALSE	7
2022-09-14	09:38:30	-0.201259	-0.89524	971.453	FALSE	7
2022-09-14	09:38:30	0.729122	3.24328	979.976	FALSE	7
2022-09-14	09:38:30	0.731972	3.25596	974.709	FALSE	7
2022-09-14	09:38:31	0.729733	3.246	983.222	FALSE	7
2022-09-14	09:38:31	0.727036	3.234	977.943	FALSE	7
2022-09-14	09:38:31	0.736043	3.27407	986.496	FALSE	7
2022-09-14	09:38:31	0.732837	3.25981	981.203	FALSE	7
2022-09-14	09:38:32	0.736857	3.27769	989.774	FALSE	7
2022-09-14	09:38:32	0.730649	3.25007	984.453	FALSE	7
2022-09-14	09:38:32	0.731717	3.25482	993.029	FALSE	7
2022-09-14	09:38:32	0.732175	3.25686	987.71	FALSE	7
2022-09-14	09:38:33	0.728206	3.23921	996.268	FALSE	7
2022-09-14	09:38:33	0.735738	3.27271	990.983	FALSE	7
2022-09-14	09:38:33	0.73299	3.26049	999.529	FALSE	7
2022-09-14	09:38:34	0.736603	3.27656	994.259	FALSE	7
2022-09-14	09:38:34	0.732023	3.25618	1002.78	FALSE	7
2022-09-14	09:38:34	0.733906	3.26456	997.524	FALSE	7
2022-09-14	09:38:34	0.738486	3.28493	1006.07	FALSE	7
2022-09-14	09:38:35	0.735127	3.26999	1000.79	FALSE	7
2022-09-14	09:38:35	0.733702	3.26365	1009.33	FALSE	7
2022-09-14	09:38:35	0.729275	3.24396	1004.04	FALSE	7
2022-09-14	09:38:35	0.734364	3.2666	1012.6	FALSE	7
2022-09-14	09:38:36	0.735687	3.27248	1007.31	FALSE	7
2022-09-14	09:38:36	0.737875	3.28222	1015.88	FALSE	7
2022-09-14	09:38:36	0.743829	3.3087	1010.62	FALSE	7
2022-09-14	09:38:36	0.736807	3.27746	1019.16	FALSE	7
2022-09-14	09:38:37	0.730649	3.25007	1013.87	FALSE	7
2022-09-14	09:38:37	0.735229	3.27045	1022.43	FALSE	7
2022-09-14	09:38:37	0.731158	3.25234	1017.12	FALSE	7
2022-09-14	09:38:38	0.727137	3.23445	1025.66	FALSE	7
2022-09-14	09:38:38	0.737366	3.27995	1020.4	FALSE	7
2022-09-14	09:38:38	0.731616	3.25437	1028.92	FALSE	7
2022-09-14	09:38:38	0.734669	3.26795	1023.67	FALSE	7
2022-09-14	09:38:39	0.732074	3.25641	1032.18	FALSE	7
2022-09-14	09:38:39	0.736857	3.27769	1026.95	FALSE	7
2022-09-14	09:38:39	0.731259	3.25279	1035.43	FALSE	7
2022-09-14	09:38:39	0.734313	3.26637	1030.21	FALSE	7
2022-09-14	09:38:40	0.739453	3.28923	1038.72	FALSE	7
2022-09-14	09:38:40	0.724949	3.22472	1033.44	FALSE	7
2022-09-14	09:38:40	0.726985	3.23377	1041.95	FALSE	7
2022-09-14	09:38:40	0.736756	3.27724	1036.72	FALSE	7
2022-09-14	09:38:41	0.729428	3.24464	1045.2	FALSE	7
2022-09-14	09:38:41	0.72729	3.23513	1039.95	FALSE	7
2022-09-14	09:38:41	0.727697	3.23694	1048.43	FALSE	7
2022-09-14	09:38:42	0.73014	3.24781	1043.2	FALSE	7
2022-09-14	09:38:42	0.734975	3.26932	1051.7	FALSE	7
2022-09-14	09:38:42	0.733092	3.26094	1046.46	FALSE	7
2022-09-14	09:38:42	0.733193	3.26139	1054.96	FALSE	7
2022-09-14	09:38:43	0.729224	3.24373	1049.7	FALSE	7
2022-09-14	09:38:43	0.738079	3.28312	1058.25	FALSE	7
2022-09-14	09:38:43	0.735382	3.27113	1052.97	FALSE	7
2022-09-14	09:38:43	0.732684	3.25912	1061.51	FALSE	7
2022-09-14	09:38:44	0.730547	3.24962	1056.22	FALSE	7
2022-09-14	09:38:44	0.736196	3.27475	1064.78	FALSE	7
2022-09-14	09:38:44	0.729122	3.24328	1059.47	FALSE	7
2022-09-14	09:38:44	0.737163	3.27905	1068.06	FALSE	7
2022-09-14	09:38:45	0.737417	3.28018	1062.75	FALSE	7
2022-09-14	09:38:45	0.728766	3.2417	1071.3	FALSE	7
2022-09-14	09:38:45	0.734313	3.26637	1066.01	FALSE	7
2022-09-14	09:38:46	0.728257	3.23943	1074.54	FALSE	7
2022-09-14	09:38:46	0.732786	3.25958	1069.27	FALSE	7
2022-09-14	09:38:46	0.734364	3.2666	1077.81	FALSE	7
2022-09-14	09:38:46	0.731972	3.25596	1072.53	FALSE	7
2022-09-14	09:38:47	0.72902	3.24283	1081.05	FALSE	7
2022-09-14	09:38:47	0.733702	3.26365	1075.79	FALSE	7
2022-09-14	09:38:47	0.739198	3.2881	1084.34	FALSE	7
2022-09-14	09:38:47	0.740623	3.29444	1079.09	FALSE	7
2022-09-14	09:38:48	0.734568	3.26751	1087.61	FALSE	7
2022-09-14	09:38:48	0.730903	3.2512	1082.34	FALSE	7
2022-09-14	09:38:48	0.733804	3.26411	1090.87	FALSE	7
2022-09-14	09:38:48	0.730038	3.24736	1085.59	FALSE	7
2022-09-14	09:38:49	0.734466	3.26705	1094.14	FALSE	7
2022-09-14	09:38:49	0.735534	3.2718	1088.86	FALSE	7
2022-09-14	09:38:49	0.73701	3.27837	1097.42	FALSE	7
2022-09-14	09:38:50	0.732125	3.25664	1092.11	FALSE	7
2022-09-14	09:38:50	0.733244	3.26162	1100.68	FALSE	7
2022-09-14	09:38:50	0.739453	3.28923	1095.4	FALSE	7
2022-09-14	09:38:50	0.730954	3.25143	1103.93	FALSE	7
2022-09-14	09:38:51	0.735433	3.27135	1098.67	FALSE	7
2022-09-14	09:38:51	0.734211	3.26592	1107.19	FALSE	7
2022-09-14	09:38:51	0.730751	3.25053	1101.93	FALSE	7
2022-09-14	09:38:51	0.72841	3.24011	1110.43	FALSE	7
2022-09-14	09:38:52	0.72958	3.24532	1105.17	FALSE	7
2022-09-14	09:38:52	0.738689	3.28584	1113.72	FALSE	7
2022-09-14	09:38:52	0.731361	3.25324	1108.42	FALSE	7
2022-09-14	09:38:52	0.734568	3.26751	1116.99	FALSE	7
2022-09-14	09:38:53	0.624338	2.77718	1111.2	FALSE	7
2022-09-14	09:38:53	0.514517	2.28867	1119.28	FALSE	7
2022-09-14	09:38:53	0.730089	3.24758	1114.45	FALSE	7
2022-09-14	09:38:54	0.732023	3.25618	1122.53	FALSE	7
2022-09-14	09:38:54	0.735687	3.27248	1117.72	FALSE	7
2022-09-14	09:38:54	0.732125	3.25664	1125.79	FALSE	7
2022-09-14	09:38:54	0.734109	3.26546	1120.99	FALSE	7
2022-09-14	09:38:55	0.729784	3.24623	1129.04	FALSE	7
2022-09-14	09:38:55	0.730242	3.24826	1124.23	FALSE	7
2022-09-14	09:38:55	0.740267	3.29286	1132.33	FALSE	7
2022-09-14	09:38:55	0.742354	3.30214	1127.54	FALSE	7
2022-09-14	09:38:56	0.729835	3.24645	1135.57	FALSE	7
2022-09-14	09:38:56	0.730598	3.24985	1130.79	FALSE	7
2022-09-14	09:38:56	0.727087	3.23423	1138.81	FALSE	7
2022-09-14	09:38:56	0.736501	3.2761	1134.06	FALSE	7
2022-09-14	09:38:57	0.72729	3.23513	1142.04	FALSE	7
2022-09-14	09:38:57	0.734669	3.26795	1137.33	FALSE	7
2022-09-14	09:38:57	0.7307	3.2503	1145.29	FALSE	7
2022-09-14	09:38:58	0.736196	3.27475	1140.61	FALSE	7
2022-09-14	09:38:58	0.733041	3.26071	1148.55	FALSE	7
2022-09-14	09:38:58	0.734771	3.26841	1143.87	FALSE	7
2022-09-14	09:38:58	0.733855	3.26433	1151.82	FALSE	7
2022-09-14	09:38:59	0.72673	3.23264	1147.11	FALSE	7
2022-09-14	09:38:59	0.409631	1.82212	1153.64	FALSE	7
2022-09-14	09:38:59	-0.18304	-0.814199	1147.11	FALSE	7
2022-09-14	09:38:59	0.391005	1.73927	1155.38	FALSE	7
2022-09-14	09:39:00	0.384389	1.70984	1148.82	FALSE	7
2022-09-14	09:39:00	0.730496	3.24939	1158.63	FALSE	7
2022-09-14	09:39:00	0.662812	2.94832	1151.76	FALSE	7
2022-09-14	09:39:00	-0.641361	-2.8529	1158.63	FALSE	7
2022-09-14	09:39:01	-1.99286	-8.86464	1151.76	FALSE	7
2022-09-14	09:39:01	-1.33943	-5.95805	1158.63	FALSE	7
2022-09-14	09:39:01	0.358486	1.59462	1153.36	FALSE	7
2022-09-14	09:39:02	0.564287	2.51006	1161.14	FALSE	7
2022-09-14	09:39:02	0.838689	3.73066	1157.09	FALSE	7
2022-09-14	09:39:02	0.917417	4.08085	1165.22	FALSE	7
2022-09-14	09:39:02	1.99996	8.89622	1165.99	FALSE	7
2022-09-14	09:39:03	1.03991	4.62573	1169.85	FALSE	7
2022-09-14	09:39:03	0.983422	4.37446	1170.36	FALSE	7
2022-09-14	09:39:03	1.76536	7.85267	1177.7	FALSE	7
2022-09-14	09:39:03	1.04286	4.63885	1175	FALSE	7
2022-09-14	09:39:04	1.01126	4.49829	1182.2	FALSE	7
2022-09-14	09:39:04	0.87131	3.87576	1178.88	FALSE	7
2022-09-14	09:39:04	0.479453	2.1327	1184.33	FALSE	7
2022-09-14	09:39:04	0.672023	2.98929	1181.86	FALSE	7
2022-09-14	09:39:05	0.537977	2.39303	1186.72	FALSE	7
2022-09-14	09:39:05	0.524898	2.33485	1184.2	FALSE	7
2022-09-14	09:39:05	0.349122	1.55296	1188.28	FALSE	7
2022-09-14	09:39:06	0.473244	2.10508	1186.3	FALSE	7
2022-09-14	09:39:06	0.318741	1.41782	1189.69	FALSE	7
2022-09-14	09:39:06	0.564135	2.50939	1188.81	FALSE	7
2022-09-14	09:39:06	0.641285	2.85256	1192.55	FALSE	7
2022-09-14	09:39:07	0.50388	2.24136	1191.06	FALSE	7
2022-09-14	09:39:07	0.696654	3.09886	1195.65	FALSE	7
2022-09-14	09:39:07	0.638995	2.84238	1193.9	FALSE	7
2022-09-14	09:39:07	0.572481	2.54651	1198.19	FALSE	7
2022-09-14	09:39:08	0.589936	2.62415	1196.52	FALSE	7
2022-09-14	09:39:08	0.537163	2.38941	1200.58	FALSE	7
2022-09-14	09:39:08	0.629173	2.79869	1199.32	FALSE	7
2022-09-14	09:39:08	1.58622	7.05582	1207.64	FALSE	7
2022-09-14	09:39:09	1.97431	8.78213	1208.1	FALSE	7
2022-09-14	09:39:09	3.42607	15.2398	1222.88	1	8
2022-09-14	09:39:09	4.5823	20.383	1228.49	1	9
2022-09-14	09:39:10	2.24566	9.98914	1232.87	FALSE	9
2022-09-14	09:39:10	1.28785	5.72861	1234.21	FALSE	9
2022-09-14	09:39:10	0.912532	4.05912	1236.93	FALSE	9
2022-09-14	09:39:10	1.55024	6.89578	1241.11	FALSE	9
2022-09-14	09:39:11	1.7793	7.91468	1244.84	FALSE	9
2022-09-14	09:39:11	3.53584	15.7281	1256.84	1	10
2022-09-14	09:39:11	5.75935	25.6187	1270.46	1	11
2022-09-14	09:39:11	4.78576	21.288	1278.13	1	12
2022-09-14	09:39:12	4.70245	20.9174	1291.38	1	13
2022-09-14	09:39:12	4.3854	19.5071	1297.63	1	14
2022-09-14	09:39:12	3.54174	15.7544	1307.13	1	15
2022-09-14	09:39:12	7.36958	32.7814	1330.41	1	16
2022-09-14	09:39:13	8.96627	39.8838	1347.01	1	17
2022-09-14	09:39:13	5.97874	26.5946	1357.01	1	18
2022-09-14	09:39:13	3.0193	13.4305	1360.44	1	19
2022-09-14	09:39:14	1.46795	6.52974	1363.54	FALSE	19
2022-09-14	09:39:14	1.68546	7.49726	1367.94	FALSE	19
2022-09-14	09:39:14	1.4936	6.64383	1370.18	FALSE	19
2022-09-14	09:39:14	1.13838	5.06374	1373.01	FALSE	19
2022-09-14	09:39:15	0.544033	2.41997	1372.6	FALSE	19
2022-09-14	09:39:15	0.417977	1.85925	1374.87	FALSE	19
2022-09-14	09:39:15	0.380573	1.69286	1374.3	FALSE	19
2022-09-14	09:39:15	0.476705	2.12048	1376.99	FALSE	19
2022-09-14	09:39:16	0.649377	2.88856	1377.18	FALSE	19
2022-09-14	09:39:16	1.97009	8.76335	1385.75	FALSE	19
2022-09-14	09:39:16	3.92266	17.4488	1394.63	1	20
2022-09-14	09:39:16	4.56515	20.3067	1406.06	1	21
2022-09-14	09:39:17	6.04255	26.8785	1421.51	1	22
2022-09-14	09:39:17	7.70647	34.2799	1440.34	1	23
2022-09-14	09:39:17	10.3763	46.1559	1467.67	1	24
2022-09-14	09:39:18	10.9971	48.9173	1489.25	1	25
2022-09-14	09:39:18	4.14785	18.4505	1486.12	1	26
2022-09-14	09:39:18	4.7192	20.9919	1510.24	1	27
2022-09-14	09:39:18	4.86103	21.6228	1507.74	1	28
2022-09-14	09:39:19	2.4678	10.9773	1521.22	FALSE	28
2022-09-14	09:39:19	0.580267	2.58114	1510.32	FALSE	28
2022-09-14	09:39:19	0.713448	3.17356	1524.4	FALSE	28
2022-09-14	09:39:19	1.72393	7.66839	1517.99	FALSE	28
2022-09-14	09:39:20	3.49172	15.5319	1539.93	1	29
2022-09-14	09:39:20	5.26479	23.4188	1541.41	1	30
2022-09-14	09:39:20	5.61441	24.974	1564.9	1	31
2022-09-14	09:39:20	3.38174	15.0427	1556.45	1	32
2022-09-14	09:39:21	1.68469	7.49384	1572.4	FALSE	32
2022-09-14	09:39:21	0.963219	4.28459	1560.74	FALSE	32
2022-09-14	09:39:21	1.30744	5.81575	1578.21	FALSE	32
2022-09-14	09:39:22	1.78078	7.92127	1568.66	FALSE	32
2022-09-14	09:39:22	0.999249	4.44486	1582.66	FALSE	32
2022-09-14	09:39:22	1.09742	4.88154	1573.54	FALSE	32
2022-09-14	09:39:22	1.65635	7.36778	1590.02	FALSE	32
2022-09-14	09:39:23	4.4851	19.9506	1593.49	1	33
2022-09-14	09:39:23	4.76307	21.1871	1611.21	1	34
2022-09-14	09:39:23	2.31976	10.3188	1603.81	FALSE	34
2022-09-14	09:39:23	0.89813	3.99506	1615.21	FALSE	34

## Sheet: Richa_martin_202291493413 (2)
Date	Time	Lbs	Total force x time			**GoPro Fitting: 923
2022-09-14	09:34:14	0.421743	0.421743	FALSE	0
2022-09-14	09:34:14	0.412786	0.834529	FALSE	0
2022-09-14	09:34:14	0.411616	1.24614	FALSE	0
2022-09-14	09:34:14	0.410751	1.6569	FALSE	0
2022-09-14	09:34:15	0.432888	2.08978	FALSE	0
2022-09-14	09:34:15	0.461947	2.55173	FALSE	0
2022-09-14	09:34:15	0.428359	2.98009	FALSE	0
2022-09-14	09:34:15	0.170038	3.15013	FALSE	0
2022-09-14	09:34:16	0.132277	3.2824	FALSE	0
2022-09-14	09:34:16	-0.238613	3.2824	FALSE	0
2022-09-14	09:34:16	-0.679885	3.2824	FALSE	0
2022-09-14	09:34:16	-0.509605	3.2824	FALSE	0
2022-09-14	09:34:17	0.156858	3.43926	FALSE	0
2022-09-14	09:34:17	0.192532	3.63179	FALSE	0
2022-09-14	09:34:17	0.143015	3.77481	FALSE	0
2022-09-14	09:34:17	0.0903946	3.8652	FALSE	0
2022-09-14	09:34:18	0.172227	4.03743	FALSE	0
2022-09-14	09:34:18	0.128868	4.1663	FALSE	0
2022-09-14	09:34:18	0.103575	4.26987	FALSE	0
2022-09-14	09:34:19	0.0958908	4.36577	FALSE	0
2022-09-14	09:34:19	0.0702419	4.43601	FALSE	0
2022-09-14	09:34:19	0.017214	4.45322	FALSE	0
2022-09-14	09:34:19	0.0531936	4.50641	FALSE	0
2022-09-14	09:34:20	0.0145676	4.52098	FALSE	0
2022-09-14	09:34:20	0.00932595	4.53031	FALSE	0
2022-09-14	09:34:20	0.00520383	4.53551	FALSE	0
2022-09-14	09:34:20	-0.00594122	4.53551	FALSE	0
2022-09-14	09:34:21	-0.0100634	4.53551	FALSE	0
2022-09-14	09:34:21	-0.0676715	4.53551	FALSE	0
2022-09-14	09:34:21	0.0168068	4.55232	FALSE	0
2022-09-14	09:34:21	0.0786389	4.63096	FALSE	0
2022-09-14	09:34:22	0.246425	4.87738	FALSE	0
2022-09-14	09:34:22	0.117214	4.9946	FALSE	0
2022-09-14	09:34:22	0.0830664	5.07766	FALSE	0
2022-09-14	09:34:23	0.0624557	5.14012	FALSE	0
2022-09-14	09:34:23	0.0669341	5.20705	FALSE	0
2022-09-14	09:34:23	0.0510562	5.25811	FALSE	0
2022-09-14	09:34:23	0.0609798	5.31909	FALSE	0
2022-09-14	09:34:24	0.0646949	5.38378	FALSE	0
2022-09-14	09:34:24	0.0757381	5.45952	FALSE	0
2022-09-14	09:34:24	0.038588	5.49811	FALSE	0
2022-09-14	09:34:24	0.0225066	5.52062	FALSE	0
2022-09-14	09:34:25	0.0205728	5.54119	FALSE	0
2022-09-14	09:34:25	0.0213361	5.56253	FALSE	0
2022-09-14	09:34:25	-0.0908267	5.56253	FALSE	0
2022-09-14	09:34:26	-0.0923534	5.56253	FALSE	0
2022-09-14	09:34:26	-0.057697	5.56253	FALSE	0
2022-09-14	09:34:26	-0.0391219	5.56253	FALSE	0
2022-09-14	09:34:26	-0.0333204	5.56253	FALSE	0
2022-09-14	09:34:27	-0.00762061	5.56253	FALSE	0
2022-09-14	09:34:27	0.142659	5.70518	FALSE	0
2022-09-14	09:34:27	0.0847967	5.78998	FALSE	0
2022-09-14	09:34:27	0.202201	5.99218	FALSE	0
2022-09-14	09:34:28	0.201641	6.19382	FALSE	0
2022-09-14	09:34:28	0.00281194	6.19664	FALSE	0
2022-09-14	09:34:28	-0.0615137	6.19664	FALSE	0
2022-09-14	09:34:28	-0.00807864	6.19664	FALSE	0
2022-09-14	09:34:29	-0.0490964	6.19664	FALSE	0
2022-09-14	09:34:29	0.0453056	6.24194	FALSE	0
2022-09-14	09:34:29	-0.0120481	6.24194	FALSE	0
2022-09-14	09:34:29	0.0103947	6.25234	FALSE	0
2022-09-14	09:34:30	0.00423688	6.25657	FALSE	0
2022-09-14	09:34:30	-0.0709793	6.25657	FALSE	0
2022-09-14	09:34:30	-0.00706081	6.25657	FALSE	0
2022-09-14	09:34:31	0.0413361	6.29791	FALSE	0
2022-09-14	09:34:31	0.0340587	6.33197	FALSE	0
2022-09-14	09:34:31	0.026476	6.35844	FALSE	0
2022-09-14	09:34:31	0.935839	7.29428	FALSE	0
2022-09-14	09:34:32	0.558791	7.85307	FALSE	0
2022-09-14	09:34:32	0.192532	8.04561	FALSE	0
2022-09-14	09:34:32	0.377519	8.42312	FALSE	0
2022-09-14	09:34:32	0.60042	9.02354	FALSE	0
2022-09-14	09:34:33	0.29355	9.31709	FALSE	0
2022-09-14	09:34:33	0.328003	9.6451	FALSE	0
2022-09-14	09:34:33	0.294567	9.93966	FALSE	0
2022-09-14	09:34:33	0.429224	10.3689	FALSE	0
2022-09-14	09:34:34	0.381234	10.7501	FALSE	0
2022-09-14	09:34:34	0.483931	11.2341	FALSE	0
2022-09-14	09:34:34	0.0342623	11.2683	FALSE	0
2022-09-14	09:34:35	-0.124771	11.2683	FALSE	0
2022-09-14	09:34:35	0.0386389	11.307	FALSE	0
2022-09-14	09:34:35	0.16154	11.4685	FALSE	0
2022-09-14	09:34:35	0.0730918	11.5416	FALSE	0
2022-09-14	09:34:36	-0.153219	11.5416	FALSE	0
2022-09-14	09:34:36	-0.216374	11.5416	FALSE	0
2022-09-14	09:34:36	0.0996567	11.6412	FALSE	0
2022-09-14	09:34:36	0.197926	11.8392	FALSE	0
2022-09-14	09:34:37	0.267494	12.1067	FALSE	0
2022-09-14	09:34:37	0.319707	12.4264	FALSE	0
2022-09-14	09:34:37	0.347443	12.7738	FALSE	0
2022-09-14	09:34:38	0.295942	13.0698	FALSE	0
2022-09-14	09:34:38	0.421947	13.4917	FALSE	0
2022-09-14	09:34:38	0.101896	13.5936	FALSE	0
2022-09-14	09:34:38	0.409326	14.0029	FALSE	0
2022-09-14	09:34:39	0.236247	14.2392	FALSE	0
2022-09-14	09:34:39	0.360827	14.6	FALSE	0
2022-09-14	09:34:39	0.2193	14.8193	FALSE	0
2022-09-14	09:34:39	0.231819	15.0511	FALSE	0
2022-09-14	09:34:40	0.248715	15.2998	FALSE	0
2022-09-14	09:34:40	0.181896	15.4817	FALSE	0
2022-09-14	09:34:40	-0.276221	15.4817	FALSE	0
2022-09-14	09:34:40	-0.586399	15.4817	FALSE	0
2022-09-14	09:34:41	-0.639529	15.4817	FALSE	0
2022-09-14	09:34:41	-0.666704	15.4817	FALSE	0
2022-09-14	09:34:41	-0.990419	15.4817	FALSE	0
2022-09-14	09:34:42	-0.616017	15.4817	FALSE	0
2022-09-14	09:34:42	0.0196567	15.5014	FALSE	0
2022-09-14	09:34:42	0.428512	15.9299	FALSE	0
2022-09-14	09:34:42	0.544593	16.4745	FALSE	0
2022-09-14	09:34:43	0.472379	16.9469	FALSE	0
2022-09-14	09:34:43	0.471412	17.4183	FALSE	0
2022-09-14	09:34:43	0.377316	17.7956	FALSE	0
2022-09-14	09:34:43	0.335076	18.1307	FALSE	0
2022-09-14	09:34:44	0.444186	18.5749	FALSE	0
2022-09-14	09:34:44	0.572939	19.1478	FALSE	0
2022-09-14	09:34:44	0.588969	19.7368	FALSE	0
2022-09-14	09:34:44	0.538435	20.2752	FALSE	0
2022-09-14	09:34:45	0.483372	20.7586	FALSE	0
2022-09-14	09:34:45	0.469886	21.2285	FALSE	0
2022-09-14	09:34:45	0.463677	21.6921	FALSE	0
2022-09-14	09:34:46	0.487494	22.1796	FALSE	0
2022-09-14	09:34:46	0.500369	22.68	FALSE	0
2022-09-14	09:34:46	0.498333	23.1783	FALSE	0
2022-09-14	09:34:46	0.482201	23.6605	FALSE	0
2022-09-14	09:34:47	0.452634	24.1132	FALSE	0
2022-09-14	09:34:47	0.451819	24.565	FALSE	0
2022-09-14	09:34:47	0.452837	25.0178	FALSE	0
2022-09-14	09:34:47	0.434008	25.4518	FALSE	0
2022-09-14	09:34:48	0.468155	25.92	FALSE	0
2022-09-14	09:34:48	0.462252	26.3822	FALSE	0
2022-09-14	09:34:48	0.419453	26.8017	FALSE	0
2022-09-14	09:34:48	0.47243	27.2741	FALSE	0
2022-09-14	09:34:49	0.453957	27.7281	FALSE	0
2022-09-14	09:34:49	0.494669	28.2227	FALSE	0
2022-09-14	09:34:49	0.466221	28.689	FALSE	0
2022-09-14	09:34:50	0.521947	29.2109	FALSE	0
2022-09-14	09:34:50	0.512685	29.7236	FALSE	0
2022-09-14	09:34:50	0.501539	30.2251	FALSE	0
2022-09-14	09:34:50	0.500929	30.7261	FALSE	0
2022-09-14	09:34:51	0.498435	31.2245	FALSE	0
2022-09-14	09:34:51	0.507748	31.7323	FALSE	0
2022-09-14	09:34:51	0.505661	32.2379	FALSE	0
2022-09-14	09:34:51	0.468308	32.7062	FALSE	0
2022-09-14	09:34:52	0.47701	33.1832	FALSE	0
2022-09-14	09:34:52	0.508919	33.6921	FALSE	0
2022-09-14	09:34:52	0.526629	34.2188	FALSE	0
2022-09-14	09:34:52	0.497723	34.7165	FALSE	0
2022-09-14	09:34:53	0.46271	35.1792	FALSE	0
2022-09-14	09:34:53	0.44902	35.6282	FALSE	0
2022-09-14	09:34:53	0.417468	36.0457	FALSE	0
2022-09-14	09:34:54	0.392023	36.4377	FALSE	0
2022-09-14	09:34:54	0.398741	36.8365	FALSE	0
2022-09-14	09:34:54	0.406425	37.2429	FALSE	0
2022-09-14	09:34:54	0.542761	37.7856	FALSE	0
2022-09-14	09:34:55	0.464797	38.2504	FALSE	0
2022-09-14	09:34:55	0.432837	38.6833	FALSE	0
2022-09-14	09:34:55	0.41472	39.098	FALSE	0
2022-09-14	09:34:55	0.412074	39.5101	FALSE	0
2022-09-14	09:34:56	0.405254	39.9153	FALSE	0
2022-09-14	09:34:56	0.397774	40.3131	FALSE	0
2022-09-14	09:34:56	0.411667	40.7248	FALSE	0
2022-09-14	09:34:56	0.428461	41.1532	FALSE	0
2022-09-14	09:34:57	0.427901	41.5811	FALSE	0
2022-09-14	09:34:57	0.435585	42.0167	FALSE	0
2022-09-14	09:34:57	0.379555	42.3963	FALSE	0
2022-09-14	09:34:58	0.412328	42.8086	FALSE	0
2022-09-14	09:34:58	0.515738	43.3243	FALSE	0
2022-09-14	09:34:58	0.390242	43.7146	FALSE	0
2022-09-14	09:34:58	0.549427	44.264	FALSE	0
2022-09-14	09:34:59	0.360064	44.6241	FALSE	0
2022-09-14	09:34:59	0.467799	45.0919	FALSE	0
2022-09-14	09:34:59	0.412227	45.5041	FALSE	0
2022-09-14	09:34:59	0.489733	45.9938	FALSE	0
2022-09-14	09:35:00	0.355992	46.3498	FALSE	0
2022-09-14	09:35:00	0.443982	46.7938	FALSE	0
2022-09-14	09:35:00	0.417723	47.2115	FALSE	0
2022-09-14	09:35:00	0.505153	47.7167	FALSE	0
2022-09-14	09:35:01	0.404695	48.1214	FALSE	0
2022-09-14	09:35:01	0.505305	48.6267	FALSE	0
2022-09-14	09:35:01	0.46154	49.0882	FALSE	0
2022-09-14	09:35:02	0.489224	49.5774	FALSE	0
2022-09-14	09:35:02	0.591514	50.169	FALSE	0
2022-09-14	09:35:02	0.435636	50.6046	FALSE	0
2022-09-14	09:35:02	0.363982	50.9686	FALSE	0
2022-09-14	09:35:03	0.337316	51.3059	FALSE	0
2022-09-14	09:35:03	0.519249	51.8251	FALSE	0
2022-09-14	09:35:03	0.302964	52.1281	FALSE	0
2022-09-14	09:35:03	0.452735	52.5808	FALSE	0
2022-09-14	09:35:04	0.420064	53.0009	FALSE	0
2022-09-14	09:35:04	0.525458	53.5264	FALSE	0
2022-09-14	09:35:04	0.394975	53.9213	FALSE	0
2022-09-14	09:35:05	0.49986	54.4212	FALSE	0
2022-09-14	09:35:05	0.489428	54.9106	FALSE	0
2022-09-14	09:35:05	0.495942	55.4066	FALSE	0
2022-09-14	09:35:05	0.466629	55.8732	FALSE	0
2022-09-14	09:35:06	0.598333	56.4715	FALSE	0
2022-09-14	09:35:06	0.547341	57.0189	FALSE	0
2022-09-14	09:35:06	0.769377	57.7882	FALSE	0
2022-09-14	09:35:06	0.571667	58.3599	FALSE	0
2022-09-14	09:35:07	0.667341	59.0273	FALSE	0
2022-09-14	09:35:07	0.609835	59.6371	FALSE	0
2022-09-14	09:35:07	0.7193	60.3564	FALSE	0
2022-09-14	09:35:07	0.575127	60.9315	FALSE	0
2022-09-14	09:35:08	0.743982	61.6755	FALSE	0
2022-09-14	09:35:08	0.629987	62.3055	FALSE	0
2022-09-14	09:35:08	0.736298	63.0418	FALSE	0
2022-09-14	09:35:09	1.20729	64.2491	FALSE	0
2022-09-14	09:35:09	3.29894	67.548	1	1
2022-09-14	09:35:09	5.1082	72.6562	1	2
2022-09-14	09:35:09	5.4595	78.1157	1	3
2022-09-14	09:35:10	2.3823	80.498	FALSE	3
2022-09-14	09:35:10	0.658995	81.157	FALSE	3
2022-09-14	09:35:10	0.452888	81.6099	FALSE	3
2022-09-14	09:35:10	0.642914	82.2528	FALSE	3
2022-09-14	09:35:11	0.556501	82.8093	FALSE	3
2022-09-14	09:35:11	0.477977	83.2873	FALSE	3
2022-09-14	09:35:11	0.572328	83.8596	FALSE	3
2022-09-14	09:35:11	0.427239	84.2869	FALSE	3
2022-09-14	09:35:12	0.469479	84.7563	FALSE	3
2022-09-14	09:35:12	0.44729	85.2036	FALSE	3
2022-09-14	09:35:12	0.527952	85.7316	FALSE	3
2022-09-14	09:35:13	0.678282	86.4099	FALSE	3
2022-09-14	09:35:13	0.688868	87.0987	FALSE	3
2022-09-14	09:35:13	0.673397	87.7721	FALSE	3
2022-09-14	09:35:13	0.799147	88.5713	FALSE	3
2022-09-14	09:35:14	0.676603	89.2479	FALSE	3
2022-09-14	09:35:14	0.666476	89.9144	FALSE	3
2022-09-14	09:35:14	0.708359	90.6227	FALSE	3
2022-09-14	09:35:14	0.187036	90.8097	FALSE	3
2022-09-14	09:35:15	-0.251997	90.8097	FALSE	3
2022-09-14	09:35:15	-0.36645	90.8097	FALSE	3
2022-09-14	09:35:15	-0.565432	90.8097	FALSE	3
2022-09-14	09:35:15	-0.67561	90.8097	FALSE	3
2022-09-14	09:35:16	-0.551844	90.8097	FALSE	3
2022-09-14	09:35:16	-0.40818	90.8097	FALSE	3
2022-09-14	09:35:16	-0.162888	90.8097	FALSE	3
2022-09-14	09:35:17	-0.0611575	90.8097	FALSE	3
2022-09-14	09:35:17	0.177367	90.9871	FALSE	3
2022-09-14	09:35:17	0.344542	91.3317	FALSE	3
2022-09-14	09:35:17	0.261132	91.5928	FALSE	3
2022-09-14	09:35:18	0.403168	91.996	FALSE	3
2022-09-14	09:35:18	0.497061	92.493	FALSE	3
2022-09-14	09:35:18	0.44902	92.942	FALSE	3
2022-09-14	09:35:18	0.564593	93.5066	FALSE	3
2022-09-14	09:35:19	0.732175	94.2388	FALSE	3
2022-09-14	09:35:19	0.766577	95.0054	FALSE	3
2022-09-14	09:35:19	0.272939	95.2783	FALSE	3
2022-09-14	09:35:19	0.122099	95.4004	FALSE	3
2022-09-14	09:35:20	0.41187	95.8123	FALSE	3
2022-09-14	09:35:20	0.119809	95.9321	FALSE	3
2022-09-14	09:35:20	0.00693411	95.939	FALSE	3
2022-09-14	09:35:21	-0.162786	95.939	FALSE	3
2022-09-14	09:35:21	-0.187061	95.939	FALSE	3
2022-09-14	09:35:21	-0.0892999	95.939	FALSE	3
2022-09-14	09:35:21	-0.251132	95.939	FALSE	3
2022-09-14	09:35:22	-0.259274	95.939	FALSE	3
2022-09-14	09:35:22	-0.125076	95.939	FALSE	3
2022-09-14	09:35:22	0.0775193	96.0166	FALSE	3
2022-09-14	09:35:22	0.147697	96.1643	FALSE	3
2022-09-14	09:35:23	0.234771	96.399	FALSE	3
2022-09-14	09:35:23	0.499962	96.899	FALSE	3
2022-09-14	09:35:23	1.77533	98.6743	FALSE	3
2022-09-14	09:35:23	1.31772	99.992	FALSE	3
2022-09-14	09:35:24	0.914211	100.906	FALSE	3
2022-09-14	09:35:24	0.941234	101.847	FALSE	3
2022-09-14	09:35:24	1.5021	103.35	FALSE	3
2022-09-14	09:35:25	1.07945	104.429	FALSE	3
2022-09-14	09:35:25	0.812277	105.241	FALSE	3
2022-09-14	09:35:25	0.388359	105.63	FALSE	3
2022-09-14	09:35:25	0.444033	106.074	FALSE	3
2022-09-14	09:35:26	0.386883	106.461	FALSE	3
2022-09-14	09:35:26	0.346272	106.807	FALSE	3
2022-09-14	09:35:26	0.192481	106.999	FALSE	3
2022-09-14	09:35:26	0.0175702	107.017	FALSE	3
2022-09-14	09:35:27	0.103626	107.121	FALSE	3
2022-09-14	09:35:27	-0.894999	107.121	FALSE	3
2022-09-14	09:35:27	-1.06029	107.121	FALSE	3
2022-09-14	09:35:27	-0.237493	107.121	FALSE	3
2022-09-14	09:35:28	-0.210572	107.121	FALSE	3
2022-09-14	09:35:28	-0.137239	107.121	FALSE	3
2022-09-14	09:35:28	0.00993663	107.13	FALSE	3
2022-09-14	09:35:29	0.27355	107.404	FALSE	3
2022-09-14	09:35:29	0.655483	108.059	FALSE	3
2022-09-14	09:35:29	0.221539	108.281	FALSE	3
2022-09-14	09:35:29	0.429529	108.711	FALSE	3
2022-09-14	09:35:30	0.410598	109.121	FALSE	3
2022-09-14	09:35:30	0.501692	109.623	FALSE	3
2022-09-14	09:35:30	0.605662	110.229	FALSE	3
2022-09-14	09:35:30	0.148206	110.377	FALSE	3
2022-09-14	09:35:31	-0.0436002	110.377	FALSE	3
2022-09-14	09:35:31	-0.176933	110.377	FALSE	3
2022-09-14	09:35:31	-0.213371	110.377	FALSE	3
2022-09-14	09:35:31	-0.192659	110.377	FALSE	3
2022-09-14	09:35:32	-0.220089	110.377	FALSE	3
2022-09-14	09:35:32	-0.192557	110.377	FALSE	3
2022-09-14	09:35:32	-0.2036	110.377	FALSE	3
2022-09-14	09:35:33	-0.207926	110.377	FALSE	3
2022-09-14	09:35:33	-0.199478	110.377	FALSE	3
2022-09-14	09:35:33	-0.207315	110.377	FALSE	3
2022-09-14	09:35:33	-0.236781	110.377	FALSE	3
2022-09-14	09:35:34	-0.301157	110.377	FALSE	3
2022-09-14	09:35:34	-0.0272644	110.377	FALSE	3
2022-09-14	09:35:34	-0.163091	110.377	FALSE	3
2022-09-14	09:35:34	0.433295	110.81	FALSE	3
2022-09-14	09:35:35	0.423473	111.233	FALSE	3
2022-09-14	09:35:35	0.462914	111.696	FALSE	3
2022-09-14	09:35:35	0.395687	112.092	FALSE	3
2022-09-14	09:35:36	0.273601	112.366	FALSE	3
2022-09-14	09:35:36	0.49299	112.859	FALSE	3
2022-09-14	09:35:36	0.141845	113.001	FALSE	3
2022-09-14	09:35:36	0.243728	113.244	FALSE	3
2022-09-14	09:35:37	0.314008	113.558	FALSE	3
2022-09-14	09:35:37	0.433092	113.991	FALSE	3
2022-09-14	09:35:37	0.416909	114.408	FALSE	3
2022-09-14	09:35:37	0.179402	114.588	FALSE	3
2022-09-14	09:35:38	-0.290267	114.588	FALSE	3
2022-09-14	09:35:38	-0.615661	114.588	FALSE	3
2022-09-14	09:35:38	-0.374643	114.588	FALSE	3
2022-09-14	09:35:38	0.0540587	114.642	FALSE	3
2022-09-14	09:35:39	0.0708017	114.713	FALSE	3
2022-09-14	09:35:39	0.073957	114.786	FALSE	3
2022-09-14	09:35:39	0.500471	115.287	FALSE	3
2022-09-14	09:35:40	0.0957381	115.383	FALSE	3
2022-09-14	09:35:40	0.13472	115.517	FALSE	3
2022-09-14	09:35:40	0.76897	116.286	FALSE	3
2022-09-14	09:35:40	0.590649	116.877	FALSE	3
2022-09-14	09:35:41	0.916756	117.794	FALSE	3
2022-09-14	09:35:41	0.805051	118.599	FALSE	3
2022-09-14	09:35:41	0.461031	119.06	FALSE	3
2022-09-14	09:35:41	0.317621	119.377	FALSE	3
2022-09-14	09:35:42	0.489784	119.867	FALSE	3
2022-09-14	09:35:42	0.305153	120.172	FALSE	3
2022-09-14	09:35:42	0.406883	120.579	FALSE	3
2022-09-14	09:35:42	0.405662	120.985	FALSE	3
2022-09-14	09:35:43	0.509326	121.494	FALSE	3
2022-09-14	09:35:43	0.490038	121.984	FALSE	3
2022-09-14	09:35:43	0.247494	122.232	FALSE	3
2022-09-14	09:35:44	0.393804	122.626	FALSE	3
2022-09-14	09:35:44	-0.150928	122.626	FALSE	3
2022-09-14	09:35:44	-0.54019	122.626	FALSE	3
2022-09-14	09:35:44	-0.621513	122.626	FALSE	3
2022-09-14	09:35:45	-0.389045	122.626	FALSE	3
2022-09-14	09:35:45	-0.0383076	122.626	FALSE	3
2022-09-14	09:35:45	0.154262	122.78	FALSE	3
2022-09-14	09:35:45	0.584644	123.365	FALSE	3
2022-09-14	09:35:46	0.716247	124.081	FALSE	3
2022-09-14	09:35:46	0.323372	124.404	FALSE	3
2022-09-14	09:35:46	0.254262	124.658	FALSE	3
2022-09-14	09:35:46	0.357468	125.016	FALSE	3
2022-09-14	09:35:47	0.420573	125.436	FALSE	3
2022-09-14	09:35:47	0.271667	125.708	FALSE	3
2022-09-14	09:35:47	0.181845	125.89	FALSE	3
2022-09-14	09:35:48	0.554873	126.445	FALSE	3
2022-09-14	09:35:48	0.592837	127.038	FALSE	3
2022-09-14	09:35:48	0.208512	127.246	FALSE	3
2022-09-14	09:35:48	0.416858	127.663	FALSE	3
2022-09-14	09:35:49	0.228054	127.891	FALSE	3
2022-09-14	09:35:49	0.261641	128.153	FALSE	3
2022-09-14	09:35:49	0.324491	128.477	FALSE	3
2022-09-14	09:35:49	0.593906	129.071	FALSE	3
2022-09-14	09:35:50	1.54118	130.612	FALSE	3
2022-09-14	09:35:50	1.99233	132.605	FALSE	3
2022-09-14	09:35:50	0.372735	132.977	FALSE	3
2022-09-14	09:35:50	0.600725	133.578	FALSE	3
2022-09-14	09:35:51	0.325916	133.904	FALSE	3
2022-09-14	09:35:51	0.35299	134.257	FALSE	3
2022-09-14	09:35:51	0.241489	134.499	FALSE	3
2022-09-14	09:35:52	0.177774	134.676	FALSE	3
2022-09-14	09:35:52	0.184135	134.86	FALSE	3
2022-09-14	09:35:52	0.115738	134.976	FALSE	3
2022-09-14	09:35:52	0.189631	135.166	FALSE	3
2022-09-14	09:35:53	0.0944149	135.26	FALSE	3
2022-09-14	09:35:53	0.453092	135.713	FALSE	3
2022-09-14	09:35:53	0.389987	136.103	FALSE	3
2022-09-14	09:35:53	0.301489	136.405	FALSE	3
2022-09-14	09:35:54	0.14098	136.546	FALSE	3
2022-09-14	09:35:54	0.257417	136.803	FALSE	3
2022-09-14	09:35:54	0.185916	136.989	FALSE	3
2022-09-14	09:35:54	0.161133	137.15	FALSE	3
2022-09-14	09:35:55	0.0962979	137.247	FALSE	3
2022-09-14	09:35:55	0.227443	137.474	FALSE	3
2022-09-14	09:35:55	0.077214	137.551	FALSE	3
2022-09-14	09:35:56	0.0534989	137.605	FALSE	3
2022-09-14	09:35:56	-0.161768	137.605	FALSE	3
2022-09-14	09:35:56	0.0307509	137.635	FALSE	3
2022-09-14	09:35:56	0.0729392	137.708	FALSE	3
2022-09-14	09:35:57	0.213193	137.922	FALSE	3
2022-09-14	09:35:57	0.0396058	137.961	FALSE	3
2022-09-14	09:35:57	0.0758399	138.037	FALSE	3
2022-09-14	09:35:57	0.21528	138.252	FALSE	3
2022-09-14	09:35:58	0.186832	138.439	FALSE	3
2022-09-14	09:35:58	0.281031	138.72	FALSE	3
2022-09-14	09:35:58	0.127545	138.848	FALSE	3
2022-09-14	09:35:58	0.348766	139.196	FALSE	3
2022-09-14	09:35:59	0.265305	139.462	FALSE	3
2022-09-14	09:35:59	0.368257	139.83	FALSE	3
2022-09-14	09:35:59	0.315942	140.146	FALSE	3
2022-09-14	09:36:00	0.416705	140.563	FALSE	3
2022-09-14	09:36:00	0.351514	140.914	FALSE	3
2022-09-14	09:36:00	0.314924	141.229	FALSE	3
2022-09-14	09:36:00	0.522455	141.752	FALSE	3
2022-09-14	09:36:01	0.581692	142.333	FALSE	3
2022-09-14	09:36:01	0.583219	142.916	FALSE	3
2022-09-14	09:36:01	0.489428	143.406	FALSE	3
2022-09-14	09:36:01	0.509122	143.915	FALSE	3
2022-09-14	09:36:02	0.540725	144.456	FALSE	3
2022-09-14	09:36:02	0.547239	145.003	FALSE	3
2022-09-14	09:36:02	0.615433	145.618	FALSE	3
2022-09-14	09:36:02	0.68556	146.304	FALSE	3
2022-09-14	09:36:03	0.659911	146.964	FALSE	3
2022-09-14	09:36:03	0.625356	147.589	FALSE	3
2022-09-14	09:36:03	0.611565	148.201	FALSE	3
2022-09-14	09:36:04	0.585967	148.787	FALSE	3
2022-09-14	09:36:04	0.568359	149.355	FALSE	3
2022-09-14	09:36:04	0.601997	149.957	FALSE	3
2022-09-14	09:36:04	0.574669	150.532	FALSE	3
2022-09-14	09:36:05	0.606476	151.138	FALSE	3
2022-09-14	09:36:05	0.566527	151.705	FALSE	3
2022-09-14	09:36:05	0.560623	152.265	FALSE	3
2022-09-14	09:36:05	0.515382	152.781	FALSE	3
2022-09-14	09:36:06	0.496858	153.278	FALSE	3
2022-09-14	09:36:06	0.494008	153.772	FALSE	3
2022-09-14	09:36:06	0.496552	154.268	FALSE	3
2022-09-14	09:36:06	0.5107	154.779	FALSE	3
2022-09-14	09:36:07	0.511158	155.29	FALSE	3
2022-09-14	09:36:07	0.53757	155.828	FALSE	3
2022-09-14	09:36:07	0.61411	156.442	FALSE	3
2022-09-14	09:36:08	0.678537	157.12	FALSE	3
2022-09-14	09:36:08	0.756298	157.877	FALSE	3
2022-09-14	09:36:08	0.763982	158.641	FALSE	3
2022-09-14	09:36:08	0.754313	159.395	FALSE	3
2022-09-14	09:36:09	0.673957	160.069	FALSE	3
2022-09-14	09:36:09	0.514669	160.584	FALSE	3
2022-09-14	09:36:09	0.456756	161.04	FALSE	3
2022-09-14	09:36:09	0.546476	161.587	FALSE	3
2022-09-14	09:36:10	0.78556	162.372	FALSE	3
2022-09-14	09:36:10	0.709784	163.082	FALSE	3
2022-09-14	09:36:10	0.544033	163.626	FALSE	3
2022-09-14	09:36:11	0.619402	164.246	FALSE	3
2022-09-14	09:36:11	0.519962	164.765	FALSE	3
2022-09-14	09:36:11	0.503931	165.269	FALSE	3
2022-09-14	09:36:11	0.551158	165.821	FALSE	3
2022-09-14	09:36:12	0.543422	166.364	FALSE	3
2022-09-14	09:36:12	0.545	166.909	FALSE	3
2022-09-14	09:36:12	0.56785	167.477	FALSE	3
2022-09-14	09:36:12	0.539758	168.017	FALSE	3
2022-09-14	09:36:13	0.580623	168.597	FALSE	3
2022-09-14	09:36:13	0.553448	169.151	FALSE	3
2022-09-14	09:36:13	0.554313	169.705	FALSE	3
2022-09-14	09:36:14	0.596399	170.301	FALSE	3
2022-09-14	09:36:14	0.608562	170.91	FALSE	3
2022-09-14	09:36:14	0.615433	171.525	FALSE	3
2022-09-14	09:36:14	0.610649	172.136	FALSE	3
2022-09-14	09:36:15	0.633142	172.769	FALSE	3
2022-09-14	09:36:15	0.575127	173.344	FALSE	3
2022-09-14	09:36:15	0.647137	173.991	FALSE	3
2022-09-14	09:36:15	0.622964	174.614	FALSE	3
2022-09-14	09:36:16	0.613855	175.228	FALSE	3
2022-09-14	09:36:16	0.631819	175.86	FALSE	3
2022-09-14	09:36:16	0.582659	176.443	FALSE	3
2022-09-14	09:36:16	0.557061	177	FALSE	3
2022-09-14	09:36:17	0.601081	177.601	FALSE	3
2022-09-14	09:36:17	0.619198	178.22	FALSE	3
2022-09-14	09:36:17	0.626374	178.846	FALSE	3
2022-09-14	09:36:17	0.599504	179.446	FALSE	3
2022-09-14	09:36:18	0.615942	180.062	FALSE	3
2022-09-14	09:36:18	0.592227	180.654	FALSE	3
2022-09-14	09:36:18	0.651768	181.306	FALSE	3
2022-09-14	09:36:19	0.56444	181.87	FALSE	3
2022-09-14	09:36:19	0.573295	182.444	FALSE	3
2022-09-14	09:36:19	0.566527	183.01	FALSE	3
2022-09-14	09:36:19	0.561845	183.572	FALSE	3
2022-09-14	09:36:20	0.561081	184.133	FALSE	3
2022-09-14	09:36:20	0.586934	184.72	FALSE	3
2022-09-14	09:36:20	0.55243	185.272	FALSE	3
2022-09-14	09:36:20	0.5364	185.809	FALSE	3
2022-09-14	09:36:21	0.52388	186.333	FALSE	3
2022-09-14	09:36:21	0.529478	186.862	FALSE	3
2022-09-14	09:36:21	0.564949	187.427	FALSE	3
2022-09-14	09:36:21	0.558842	187.986	FALSE	3
2022-09-14	09:36:22	0.569987	188.556	FALSE	3
2022-09-14	09:36:22	0.548002	189.104	FALSE	3
2022-09-14	09:36:22	0.563422	189.667	FALSE	3
2022-09-14	09:36:23	0.620216	190.288	FALSE	3
2022-09-14	09:36:23	0.620013	190.908	FALSE	3
2022-09-14	09:36:23	0.559911	191.468	FALSE	3
2022-09-14	09:36:23	0.521438	191.989	FALSE	3
2022-09-14	09:36:24	0.551718	192.541	FALSE	3
2022-09-14	09:36:24	0.603117	193.144	FALSE	3
2022-09-14	09:36:24	1.14174	194.286	FALSE	3
2022-09-14	09:36:24	0.935636	195.221	FALSE	3
2022-09-14	09:36:25	0.662812	195.884	FALSE	3
2022-09-14	09:36:25	0.88388	196.768	FALSE	3
2022-09-14	09:36:25	0.63869	197.407	FALSE	3
2022-09-14	09:36:25	0.465204	197.872	FALSE	3
2022-09-14	09:36:26	0.603931	198.476	FALSE	3
2022-09-14	09:36:26	0.430853	198.907	FALSE	3
2022-09-14	09:36:26	0.434313	199.341	FALSE	3
2022-09-14	09:36:27	0.48902	199.83	FALSE	3
2022-09-14	09:36:27	0.473804	200.304	FALSE	3
2022-09-14	09:36:27	0.512837	200.817	FALSE	3
2022-09-14	09:36:27	0.36098	201.178	FALSE	3
2022-09-14	09:36:28	0.281336	201.459	FALSE	3
2022-09-14	09:36:28	0.238893	201.698	FALSE	3
2022-09-14	09:36:28	0.169377	201.867	FALSE	3
2022-09-14	09:36:28	0.0468323	201.914	FALSE	3
2022-09-14	09:36:29	-0.231081	201.914	FALSE	3
2022-09-14	09:36:29	-0.287926	201.914	FALSE	3
2022-09-14	09:36:29	-0.347773	201.914	FALSE	3
2022-09-14	09:36:29	-0.186654	201.914	FALSE	3
2022-09-14	09:36:30	-0.0481295	201.914	FALSE	3
2022-09-14	09:36:30	0.147239	202.061	FALSE	3
2022-09-14	09:36:30	0.291514	202.353	FALSE	3
2022-09-14	09:36:31	0.449987	202.803	FALSE	3
2022-09-14	09:36:31	0.385254	203.188	FALSE	3
2022-09-14	09:36:31	0.542303	203.73	FALSE	3
2022-09-14	09:36:31	0.532277	204.263	FALSE	3
2022-09-14	09:36:32	0.500216	204.763	FALSE	3
2022-09-14	09:36:32	0.5307	205.293	FALSE	3
2022-09-14	09:36:32	0.629173	205.923	FALSE	3
2022-09-14	09:36:32	0.795025	206.718	FALSE	3
2022-09-14	09:36:33	0.423168	207.141	FALSE	3
2022-09-14	09:36:33	0.442354	207.583	FALSE	3
2022-09-14	09:36:33	0.658384	208.242	FALSE	3
2022-09-14	09:36:33	0.587494	208.829	FALSE	3
2022-09-14	09:36:34	0.677468	209.507	FALSE	3
2022-09-14	09:36:34	0.512226	210.019	FALSE	3
2022-09-14	09:36:34	0.55131	210.57	FALSE	3
2022-09-14	09:36:35	0.55243	211.122	FALSE	3
2022-09-14	09:36:35	0.550343	211.673	FALSE	3
2022-09-14	09:36:35	0.68215	212.355	FALSE	3
2022-09-14	09:36:35	0.731565	213.087	FALSE	3
2022-09-14	09:36:36	0.738384	213.825	FALSE	3
2022-09-14	09:36:36	0.746832	214.572	FALSE	3
2022-09-14	09:36:36	0.756959	215.329	FALSE	3
2022-09-14	09:36:36	0.719555	216.048	FALSE	3
2022-09-14	09:36:37	0.801794	216.85	FALSE	3
2022-09-14	09:36:37	0.848715	217.699	FALSE	3
2022-09-14	09:36:37	0.963422	218.662	FALSE	3
2022-09-14	09:36:37	0.983728	219.646	FALSE	3
2022-09-14	09:36:38	1.0024	220.648	FALSE	3
2022-09-14	09:36:38	1.09762	221.746	FALSE	3
2022-09-14	09:36:38	1.07691	222.823	FALSE	3
2022-09-14	09:36:39	1.01355	223.836	FALSE	3
2022-09-14	09:36:39	0.997366	224.834	FALSE	3
2022-09-14	09:36:39	1.03635	225.87	FALSE	3
2022-09-14	09:36:39	0.953295	226.823	FALSE	3
2022-09-14	09:36:40	0.769478	227.593	FALSE	3
2022-09-14	09:36:40	0.733193	228.326	FALSE	3
2022-09-14	09:36:40	0.786781	229.113	FALSE	3
2022-09-14	09:36:40	0.847646	229.961	FALSE	3
2022-09-14	09:36:41	0.870191	230.831	FALSE	3
2022-09-14	09:36:41	0.912888	231.744	FALSE	3
2022-09-14	09:36:41	0.856857	232.6	FALSE	3
2022-09-14	09:36:41	0.768766	233.369	FALSE	3
2022-09-14	09:36:42	0.79126	234.16	FALSE	3
2022-09-14	09:36:42	0.785254	234.946	FALSE	3
2022-09-14	09:36:42	0.801539	235.747	FALSE	3
2022-09-14	09:36:43	0.628155	236.375	FALSE	3
2022-09-14	09:36:43	0.628562	237.004	FALSE	3
2022-09-14	09:36:43	0.646374	237.65	FALSE	3
2022-09-14	09:36:43	0.615026	238.265	FALSE	3
2022-09-14	09:36:44	0.665967	238.931	FALSE	3
2022-09-14	09:36:44	0.697875	239.629	FALSE	3
2022-09-14	09:36:44	0.719555	240.349	FALSE	3
2022-09-14	09:36:44	0.816552	241.165	FALSE	3
2022-09-14	09:36:45	0.765763	241.931	FALSE	3
2022-09-14	09:36:45	0.704135	242.635	FALSE	3
2022-09-14	09:36:45	0.777417	243.413	FALSE	3
2022-09-14	09:36:45	0.66958	244.082	FALSE	3
2022-09-14	09:36:46	0.704033	244.786	FALSE	3
2022-09-14	09:36:46	0.688868	245.475	FALSE	3
2022-09-14	09:36:46	0.70785	246.183	FALSE	3
2022-09-14	09:36:47	0.724389	246.907	FALSE	3
2022-09-14	09:36:47	0.785662	247.693	FALSE	3
2022-09-14	09:36:47	0.769173	248.462	FALSE	3
2022-09-14	09:36:47	0.798588	249.261	FALSE	3
2022-09-14	09:36:48	0.765407	250.026	FALSE	3
2022-09-14	09:36:48	0.80729	250.833	FALSE	3
2022-09-14	09:36:48	0.762557	251.596	FALSE	3
2022-09-14	09:36:48	0.605305	252.201	FALSE	3
2022-09-14	09:36:49	0.571209	252.773	FALSE	3
2022-09-14	09:36:49	0.559402	253.332	FALSE	3
2022-09-14	09:36:49	0.543015	253.875	FALSE	3
2022-09-14	09:36:49	0.562557	254.438	FALSE	3
2022-09-14	09:36:50	0.594771	255.032	FALSE	3
2022-09-14	09:36:50	0.873652	255.906	FALSE	3
2022-09-14	09:36:50	1.06576	256.972	FALSE	3
2022-09-14	09:36:51	0.970903	257.943	FALSE	3
2022-09-14	09:36:51	0.741947	258.685	FALSE	3
2022-09-14	09:36:51	0.764695	259.449	FALSE	3
2022-09-14	09:36:51	0.746527	260.196	FALSE	3
2022-09-14	09:36:52	0.598537	260.794	FALSE	3
2022-09-14	09:36:52	0.664644	261.459	FALSE	3
2022-09-14	09:36:52	0.619809	262.079	FALSE	3
2022-09-14	09:36:52	0.630954	262.71	FALSE	3
2022-09-14	09:36:53	0.605102	263.315	FALSE	3
2022-09-14	09:36:53	0.577621	263.892	FALSE	3
2022-09-14	09:36:53	0.56388	264.456	FALSE	3
2022-09-14	09:36:54	0.555891	265.012	FALSE	3
2022-09-14	09:36:54	0.575229	265.587	FALSE	3
2022-09-14	09:36:54	0.559555	266.147	FALSE	3
2022-09-14	09:36:54	0.585356	266.732	FALSE	3
2022-09-14	09:36:55	0.581845	267.314	FALSE	3
2022-09-14	09:36:55	0.565662	267.88	FALSE	3
2022-09-14	09:36:55	0.56958	268.449	FALSE	3
2022-09-14	09:36:55	0.600929	269.05	FALSE	3
2022-09-14	09:36:56	0.579758	269.63	FALSE	3
2022-09-14	09:36:56	0.534822	270.165	FALSE	3
2022-09-14	09:36:56	0.437621	270.603	FALSE	3
2022-09-14	09:36:56	0.330089	270.933	FALSE	3
2022-09-14	09:36:57	0.316908	271.25	FALSE	3
2022-09-14	09:36:57	0.383117	271.633	FALSE	3
2022-09-14	09:36:57	0.655992	272.289	FALSE	3
2022-09-14	09:36:58	0.611209	272.9	FALSE	3
2022-09-14	09:36:58	0.588715	273.489	FALSE	3
2022-09-14	09:36:58	0.971463	274.46	FALSE	3
2022-09-14	09:36:58	0.768817	275.229	FALSE	3
2022-09-14	09:36:59	0.926629	276.156	FALSE	3
2022-09-14	09:36:59	1.00846	277.164	FALSE	3
2022-09-14	09:36:59	1.07172	278.236	FALSE	3
2022-09-14	09:36:59	0.860115	279.096	FALSE	3
2022-09-14	09:37:00	0.88958	279.985	FALSE	3
2022-09-14	09:37:00	0.824491	280.81	FALSE	3
2022-09-14	09:37:00	0.896298	281.706	FALSE	3
2022-09-14	09:37:00	0.976959	282.683	FALSE	3
2022-09-14	09:37:01	1.18729	283.87	FALSE	3
2022-09-14	09:37:01	1.41808	285.289	FALSE	3
2022-09-14	09:37:01	1.622	286.911	FALSE	3
2022-09-14	09:37:02	1.65279	288.563	FALSE	3
2022-09-14	09:37:02	2.12169	290.685	FALSE	3
2022-09-14	09:37:02	1.78816	292.473	FALSE	3
2022-09-14	09:37:02	0.873549	293.347	FALSE	3
2022-09-14	09:37:03	0.585356	293.932	FALSE	3
2022-09-14	09:37:03	0.547544	294.48	FALSE	3
2022-09-14	09:37:03	0.540827	295.02	FALSE	3
2022-09-14	09:37:03	0.703677	295.724	FALSE	3
2022-09-14	09:37:04	0.772939	296.497	FALSE	3
2022-09-14	09:37:04	1.1081	297.605	FALSE	3
2022-09-14	09:37:04	0.995789	298.601	FALSE	3
2022-09-14	09:37:04	0.869224	299.47	FALSE	3
2022-09-14	09:37:05	0.87416	300.344	FALSE	3
2022-09-14	09:37:05	0.712634	301.057	FALSE	3
2022-09-14	09:37:05	0.704186	301.761	FALSE	3
2022-09-14	09:37:06	0.67589	302.437	FALSE	3
2022-09-14	09:37:06	0.658893	303.096	FALSE	3
2022-09-14	09:37:06	0.682761	303.779	FALSE	3
2022-09-14	09:37:06	0.663728	304.442	FALSE	3
2022-09-14	09:37:07	0.728104	305.171	FALSE	3
2022-09-14	09:37:07	0.719911	305.89	FALSE	3
2022-09-14	09:37:07	0.735483	306.626	FALSE	3
2022-09-14	09:37:07	0.751005	307.377	FALSE	3
2022-09-14	09:37:08	0.740114	308.117	FALSE	3
2022-09-14	09:37:08	1.10953	309.227	FALSE	3
2022-09-14	09:37:08	0.883473	310.11	FALSE	3
2022-09-14	09:37:08	0.985407	311.095	FALSE	3
2022-09-14	09:37:09	0.910598	312.006	FALSE	3
2022-09-14	09:37:09	0.753906	312.76	FALSE	3
2022-09-14	09:37:09	0.574008	313.334	FALSE	3
2022-09-14	09:37:10	0.499249	313.833	FALSE	3
2022-09-14	09:37:10	0.451819	314.285	FALSE	3
2022-09-14	09:37:10	0.378232	314.663	FALSE	3
2022-09-14	09:37:10	0.505713	315.169	FALSE	3
2022-09-14	09:37:11	0.420166	315.589	FALSE	3
2022-09-14	09:37:11	0.585102	316.174	FALSE	3
2022-09-14	09:37:11	0.576858	316.751	FALSE	3
2022-09-14	09:37:11	0.596654	317.348	FALSE	3
2022-09-14	09:37:12	0.50785	317.856	FALSE	3
2022-09-14	09:37:12	0.515789	318.371	FALSE	3
2022-09-14	09:37:12	0.509733	318.881	FALSE	3
2022-09-14	09:37:12	0.488664	319.37	FALSE	3
2022-09-14	09:37:13	0.506883	319.877	FALSE	3
2022-09-14	09:37:13	0.485305	320.362	FALSE	3
2022-09-14	09:37:13	0.450293	320.812	FALSE	3
2022-09-14	09:37:14	0.394415	321.207	FALSE	3
2022-09-14	09:37:14	0.466272	321.673	FALSE	3
2022-09-14	09:37:14	0.472634	322.146	FALSE	3
2022-09-14	09:37:14	0.43416	322.58	FALSE	3
2022-09-14	09:37:15	0.439809	323.02	FALSE	3
2022-09-14	09:37:15	0.373906	323.393	FALSE	3
2022-09-14	09:37:15	0.423473	323.817	FALSE	3
2022-09-14	09:37:15	0.480216	324.297	FALSE	3
2022-09-14	09:37:16	0.380165	324.677	FALSE	3
2022-09-14	09:37:16	0.415585	325.093	FALSE	3
2022-09-14	09:37:16	0.39813	325.491	FALSE	3
2022-09-14	09:37:16	0.399046	325.89	FALSE	3
2022-09-14	09:37:17	0.400471	326.291	FALSE	3
2022-09-14	09:37:17	0.461183	326.752	FALSE	3
2022-09-14	09:37:17	0.289122	327.041	FALSE	3
2022-09-14	09:37:18	0.231361	327.272	FALSE	3
2022-09-14	09:37:18	0.10383	327.376	FALSE	3
2022-09-14	09:37:18	-0.0972898	327.376	FALSE	3
2022-09-14	09:37:18	-0.0505214	327.376	FALSE	3
2022-09-14	09:37:19	0.0450511	327.421	FALSE	3
2022-09-14	09:37:19	0.202863	327.624	FALSE	3
2022-09-14	09:37:19	0.00952952	327.633	FALSE	3
2022-09-14	09:37:19	0.241489	327.875	FALSE	3
2022-09-14	09:37:20	0.258944	328.134	FALSE	3
2022-09-14	09:37:20	0.286425	328.42	FALSE	3
2022-09-14	09:37:20	0.193702	328.614	FALSE	3
2022-09-14	09:37:20	0.563626	329.178	FALSE	3
2022-09-14	09:37:21	0.725611	329.903	FALSE	3
2022-09-14	09:37:21	0.723931	330.627	FALSE	3
2022-09-14	09:37:21	0.729122	331.356	FALSE	3
2022-09-14	09:37:22	0.27187	331.628	FALSE	3
2022-09-14	09:37:22	0.262964	331.891	FALSE	3
2022-09-14	09:37:22	0.44159	332.333	FALSE	3
2022-09-14	09:37:22	0.684796	333.018	FALSE	3
2022-09-14	09:37:23	0.736654	333.754	FALSE	3
2022-09-14	09:37:23	0.425916	334.18	FALSE	3
2022-09-14	09:37:23	0.18841	334.369	FALSE	3
2022-09-14	09:37:23	0.171616	334.54	FALSE	3
2022-09-14	09:37:24	0.0962979	334.636	FALSE	3
2022-09-14	09:37:24	0.0961961	334.733	FALSE	3
2022-09-14	09:37:24	0.247799	334.98	FALSE	3
2022-09-14	09:37:24	0.198995	335.179	FALSE	3
2022-09-14	09:37:25	0.292176	335.472	FALSE	3
2022-09-14	09:37:25	0.183321	335.655	FALSE	3
2022-09-14	09:37:25	0.18897	335.844	FALSE	3
2022-09-14	09:37:26	0.254924	336.099	FALSE	3
2022-09-14	09:37:26	0.115331	336.214	FALSE	3
2022-09-14	09:37:26	0.0873412	336.302	FALSE	3
2022-09-14	09:37:26	0.129682	336.431	FALSE	3
2022-09-14	09:37:27	0.0305982	336.462	FALSE	3
2022-09-14	09:37:27	0.271412	336.733	FALSE	3
2022-09-14	09:37:27	0.365509	337.099	FALSE	3
2022-09-14	09:37:27	0.637214	337.736	FALSE	3
2022-09-14	09:37:28	2.94983	340.686	FALSE	3
2022-09-14	09:37:28	2.57569	343.261	FALSE	3
2022-09-14	09:37:28	3.14693	346.408	1	4
2022-09-14	09:37:28	5.99121	352.4	1	5
2022-09-14	09:37:29	3.32586	355.725	1	6
2022-09-14	09:37:29	3.58648	359.312	1	7
2022-09-14	09:37:29	0.911514	360.223	FALSE	7
2022-09-14	09:37:30	0.921336	361.145	FALSE	7
2022-09-14	09:37:30	0.312074	361.457	FALSE	7
2022-09-14	09:37:30	-0.0397834	361.457	FALSE	7
2022-09-14	09:37:30	0.0700893	361.527	FALSE	7
2022-09-14	09:37:31	0.00255749	361.529	FALSE	7
2022-09-14	09:37:31	0.0182827	361.548	FALSE	7
2022-09-14	09:37:31	-0.122328	361.548	FALSE	7
2022-09-14	09:37:31	0.0112089	361.559	FALSE	7
2022-09-14	09:37:32	-0.161157	361.559	FALSE	7
2022-09-14	09:37:32	-0.123498	361.559	FALSE	7
2022-09-14	09:37:32	-0.13332	361.559	FALSE	7
2022-09-14	09:37:32	-0.277951	361.559	FALSE	7
2022-09-14	09:37:33	-0.0856358	361.559	FALSE	7
2022-09-14	09:37:33	-0.198206	361.559	FALSE	7
2022-09-14	09:37:33	-0.175254	361.559	FALSE	7
2022-09-14	09:37:34	-0.0319972	361.559	FALSE	7
2022-09-14	09:37:34	0.209631	361.769	FALSE	7
2022-09-14	09:37:34	1.24256	363.011	FALSE	7
2022-09-14	09:37:34	1.94897	364.96	FALSE	7
2022-09-14	09:37:35	0.391056	365.351	FALSE	7
2022-09-14	09:37:35	0.155687	365.507	FALSE	7
2022-09-14	09:37:35	0.112023	365.619	FALSE	7
2022-09-14	09:37:35	0.0280537	365.647	FALSE	7
2022-09-14	09:37:36	-0.0174934	365.647	FALSE	7
2022-09-14	09:37:36	-0.0621244	365.647	FALSE	7
2022-09-14	09:37:36	-0.0538292	365.647	FALSE	7
2022-09-14	09:37:36	-0.102124	365.647	FALSE	7
2022-09-14	09:37:37	-0.00645013	365.647	FALSE	7
2022-09-14	09:37:37	0.0690714	365.716	FALSE	7
2022-09-14	09:37:37	0.108919	365.825	FALSE	7
2022-09-14	09:37:38	0.142252	365.967	FALSE	7
2022-09-14	09:37:38	-0.0293	365.967	FALSE	7
2022-09-14	09:37:38	-0.0757631	365.967	FALSE	7
2022-09-14	09:37:38	-0.0238038	365.967	FALSE	7
2022-09-14	09:37:39	-0.0777987	365.967	FALSE	7
2022-09-14	09:37:39	0.00143789	365.969	FALSE	7
2022-09-14	09:37:39	-0.108638	365.969	FALSE	7
2022-09-14	09:37:39	0.0137534	365.982	FALSE	7
2022-09-14	09:37:40	-0.0855341	365.982	FALSE	7
2022-09-14	09:37:40	0.0473412	366.03	FALSE	7
2022-09-14	09:37:40	-0.131081	366.03	FALSE	7
2022-09-14	09:37:40	0.0285626	366.058	FALSE	7
2022-09-14	09:37:41	0.0570613	366.115	FALSE	7
2022-09-14	09:37:41	0.353193	366.469	FALSE	7
2022-09-14	09:37:41	0.227952	366.697	FALSE	7
2022-09-14	09:37:42	0.613244	367.31	FALSE	7
2022-09-14	09:37:42	0.769173	368.079	FALSE	7
2022-09-14	09:37:42	0.676806	368.756	FALSE	7
2022-09-14	09:37:42	0.790903	369.547	FALSE	7
2022-09-14	09:37:43	0.806374	370.353	FALSE	7
2022-09-14	09:37:43	0.432328	370.785	FALSE	7
2022-09-14	09:37:43	0.847595	371.633	FALSE	7
2022-09-14	09:37:43	0.796908	372.43	FALSE	7
2022-09-14	09:37:44	0.342201	372.772	FALSE	7
2022-09-14	09:37:44	0.55411	373.326	FALSE	7
2022-09-14	09:37:44	0.634517	373.961	FALSE	7
2022-09-14	09:37:44	0.481489	374.442	FALSE	7
2022-09-14	09:37:45	0.303321	374.745	FALSE	7
2022-09-14	09:37:45	0.480267	375.226	FALSE	7
2022-09-14	09:37:45	0.518486	375.744	FALSE	7
2022-09-14	09:37:46	0.402659	376.147	FALSE	7
2022-09-14	09:37:46	0.34841	376.495	FALSE	7
2022-09-14	09:37:46	0.38215	376.877	FALSE	7
2022-09-14	09:37:46	0.377214	377.255	FALSE	7
2022-09-14	09:37:47	0.35182	377.606	FALSE	7
2022-09-14	09:37:47	0.396705	378.003	FALSE	7
2022-09-14	09:37:47	0.382455	378.386	FALSE	7
2022-09-14	09:37:47	0.400216	378.786	FALSE	7
2022-09-14	09:37:48	0.71813	379.504	FALSE	7
2022-09-14	09:37:48	0.288461	379.792	FALSE	7
2022-09-14	09:37:48	0.260776	380.053	FALSE	7
2022-09-14	09:37:48	0.265916	380.319	FALSE	7
2022-09-14	09:37:49	0.21869	380.538	FALSE	7
2022-09-14	09:37:49	0.357316	380.895	FALSE	7
2022-09-14	09:37:49	0.399249	381.294	FALSE	7
2022-09-14	09:37:50	0.330496	381.625	FALSE	7
2022-09-14	09:37:50	0.301234	381.926	FALSE	7
2022-09-14	09:37:50	0.268054	382.194	FALSE	7
2022-09-14	09:37:50	0.250954	382.445	FALSE	7
2022-09-14	09:37:51	0.282456	382.728	FALSE	7
2022-09-14	09:37:51	0.27986	383.007	FALSE	7
2022-09-14	09:37:51	0.228766	383.236	FALSE	7
2022-09-14	09:37:51	0.15528	383.391	FALSE	7
2022-09-14	09:37:52	-0.178664	383.391	FALSE	7
2022-09-14	09:37:52	0.0673411	383.459	FALSE	7
2022-09-14	09:37:52	0.198435	383.657	FALSE	7
2022-09-14	09:37:52	0.742354	384.4	FALSE	7
2022-09-14	09:37:53	1.67212	386.072	FALSE	7
2022-09-14	09:37:53	0.902506	386.974	FALSE	7
2022-09-14	09:37:53	0.917112	387.891	FALSE	7
2022-09-14	09:37:54	1.04602	388.937	FALSE	7
2022-09-14	09:37:54	0.338741	389.276	FALSE	7
2022-09-14	09:37:54	0.441285	389.717	FALSE	7
2022-09-14	09:37:54	0.427087	390.145	FALSE	7
2022-09-14	09:37:55	0.274567	390.419	FALSE	7
2022-09-14	09:37:55	0.726985	391.146	FALSE	7
2022-09-14	09:37:55	0.224848	391.371	FALSE	7
2022-09-14	09:37:55	0.417468	391.788	FALSE	7
2022-09-14	09:37:56	0.2964	392.085	FALSE	7
2022-09-14	09:37:56	0.275382	392.36	FALSE	7
2022-09-14	09:37:56	0.420115	392.78	FALSE	7
2022-09-14	09:37:56	0.194059	392.974	FALSE	7
2022-09-14	09:37:57	0.36444	393.339	FALSE	7
2022-09-14	09:37:57	0.376858	393.716	FALSE	7
2022-09-14	09:37:57	0.312939	394.029	FALSE	7
2022-09-14	09:37:58	0.44785	394.476	FALSE	7
2022-09-14	09:37:58	0.399657	394.876	FALSE	7
2022-09-14	09:37:58	0.276145	395.152	FALSE	7
2022-09-14	09:37:58	0.370242	395.522	FALSE	7
2022-09-14	09:37:59	0.211209	395.734	FALSE	7
2022-09-14	09:37:59	0.240827	395.974	FALSE	7
2022-09-14	09:37:59	0.265458	396.24	FALSE	7
2022-09-14	09:37:59	0.0840333	396.324	FALSE	7
2022-09-14	09:38:00	0.299148	396.623	FALSE	7
2022-09-14	09:38:00	0.169682	396.793	FALSE	7
2022-09-14	09:38:00	0.316654	397.109	FALSE	7
2022-09-14	09:38:00	0.146222	397.256	FALSE	7
2022-09-14	09:38:01	0.252328	397.508	FALSE	7
2022-09-14	09:38:01	0.259911	397.768	FALSE	7
2022-09-14	09:38:01	0.325356	398.093	FALSE	7
2022-09-14	09:38:02	0.248359	398.342	FALSE	7
2022-09-14	09:38:02	0.267646	398.609	FALSE	7
2022-09-14	09:38:02	0.499911	399.109	FALSE	7
2022-09-14	09:38:02	0.205153	399.314	FALSE	7
2022-09-14	09:38:03	0.441896	399.756	FALSE	7
2022-09-14	09:38:03	0.252684	400.009	FALSE	7
2022-09-14	09:38:03	0.728868	400.738	FALSE	7
2022-09-14	09:38:03	0.736043	401.474	FALSE	7
2022-09-14	09:38:04	0.725153	402.199	FALSE	7
2022-09-14	09:38:04	0.73757	402.937	FALSE	7
2022-09-14	09:38:04	0.733092	403.67	FALSE	7
2022-09-14	09:38:04	0.728766	404.398	FALSE	7
2022-09-14	09:38:05	0.724796	405.123	FALSE	7
2022-09-14	09:38:05	0.726425	405.85	FALSE	7
2022-09-14	09:38:05	0.717468	406.567	FALSE	7
2022-09-14	09:38:06	0.408155	406.975	FALSE	7
2022-09-14	09:38:06	-0.242633	406.975	FALSE	7
2022-09-14	09:38:06	0.340776	407.316	FALSE	7
2022-09-14	09:38:06	0.575382	407.891	FALSE	7
2022-09-14	09:38:07	0.542761	408.434	FALSE	7
2022-09-14	09:38:07	0.361387	408.796	FALSE	7
2022-09-14	09:38:07	0.19472	408.99	FALSE	7
2022-09-14	09:38:07	-1.74121	408.99	FALSE	7
2022-09-14	09:38:08	-1.74721	408.99	FALSE	7
2022-09-14	09:38:08	-2.00675	408.99	FALSE	7
2022-09-14	09:38:08	-1.4866	408.99	FALSE	7
2022-09-14	09:38:08	-1.86416	408.99	FALSE	7
2022-09-14	09:38:09	-1.91067	408.99	FALSE	7
2022-09-14	09:38:09	-1.79307	408.99	FALSE	7
2022-09-14	09:38:09	-1.62599	408.99	FALSE	7
2022-09-14	09:38:10	-1.85195	408.99	FALSE	7
2022-09-14	09:38:10	-2.06502	408.99	FALSE	7
2022-09-14	09:38:10	-1.89027	408.99	FALSE	7
2022-09-14	09:38:10	-2.0521	408.99	FALSE	7
2022-09-14	09:38:11	-1.87871	408.99	FALSE	7
2022-09-14	09:38:11	-2.27765	408.99	FALSE	7
2022-09-14	09:38:11	-1.81312	408.99	FALSE	7
2022-09-14	09:38:11	-2.09729	408.99	FALSE	7
2022-09-14	09:38:12	-1.81485	408.99	FALSE	7
2022-09-14	09:38:12	-2.37225	408.99	FALSE	7
2022-09-14	09:38:12	-2.08742	408.99	FALSE	7
2022-09-14	09:38:12	-2.35958	408.99	FALSE	7
2022-09-14	09:38:13	-2.29648	408.99	FALSE	7
2022-09-14	09:38:13	-2.40828	408.99	FALSE	7
2022-09-14	09:38:13	-2.38212	408.99	FALSE	7
2022-09-14	09:38:14	-2.20991	408.99	FALSE	7
2022-09-14	09:38:14	-2.26029	408.99	FALSE	7
2022-09-14	09:38:14	-2.09933	408.99	FALSE	7
2022-09-14	09:38:14	-2.30966	408.99	FALSE	7
2022-09-14	09:38:15	-1.70004	408.99	FALSE	7
2022-09-14	09:38:15	-3.08416	408.99	FALSE	7
2022-09-14	09:38:15	-3.29439	408.99	FALSE	7
2022-09-14	09:38:15	-3.03139	408.99	FALSE	7
2022-09-14	09:38:16	-3.48665	408.99	FALSE	7
2022-09-14	09:38:16	0.285763	409.276	FALSE	7
2022-09-14	09:38:16	0.188359	409.464	FALSE	7
2022-09-14	09:38:17	0.316807	409.781	FALSE	7
2022-09-14	09:38:17	0.257061	410.038	FALSE	7
2022-09-14	09:38:17	0.364695	410.403	FALSE	7
2022-09-14	09:38:17	0.226018	410.629	FALSE	7
2022-09-14	09:38:18	0.299402	410.928	FALSE	7
2022-09-14	09:38:18	0.207901	411.136	FALSE	7
2022-09-14	09:38:18	0.503524	411.64	FALSE	7
2022-09-14	09:38:18	0.719606	412.359	FALSE	7
2022-09-14	09:38:19	0.726374	413.086	FALSE	7
2022-09-14	09:38:19	0.729835	413.816	FALSE	7
2022-09-14	09:38:19	0.72612	414.542	FALSE	7
2022-09-14	09:38:19	0.726578	415.268	FALSE	7
2022-09-14	09:38:20	0.727646	415.996	FALSE	7
2022-09-14	09:38:20	0.730598	416.727	FALSE	7
2022-09-14	09:38:20	0.731259	417.458	FALSE	7
2022-09-14	09:38:20	0.731819	418.19	FALSE	7
2022-09-14	09:38:21	0.729428	418.919	FALSE	7
2022-09-14	09:38:21	0.728715	419.648	FALSE	7
2022-09-14	09:38:21	0.733855	420.382	FALSE	7
2022-09-14	09:38:22	0.733397	421.115	FALSE	7
2022-09-14	09:38:22	0.733244	421.848	FALSE	7
2022-09-14	09:38:22	0.732277	422.581	FALSE	7
2022-09-14	09:38:22	0.730242	423.311	FALSE	7
2022-09-14	09:38:23	0.733397	424.044	FALSE	7
2022-09-14	09:38:23	0.73014	424.774	FALSE	7
2022-09-14	09:38:23	0.730242	425.505	FALSE	7
2022-09-14	09:38:23	0.722914	426.228	FALSE	7
2022-09-14	09:38:24	0.729071	426.957	FALSE	7
2022-09-14	09:38:24	0.732328	427.689	FALSE	7
2022-09-14	09:38:24	0.730801	428.42	FALSE	7
2022-09-14	09:38:24	0.727443	429.147	FALSE	7
2022-09-14	09:38:25	0.728003	429.875	FALSE	7
2022-09-14	09:38:25	0.730343	430.605	FALSE	7
2022-09-14	09:38:25	0.735483	431.341	FALSE	7
2022-09-14	09:38:26	0.732888	432.074	FALSE	7
2022-09-14	09:38:26	0.731056	432.805	FALSE	7
2022-09-14	09:38:26	0.734008	433.539	FALSE	7
2022-09-14	09:38:26	0.738537	434.277	FALSE	7
2022-09-14	09:38:27	0.733702	435.011	FALSE	7
2022-09-14	09:38:27	0.724796	435.736	FALSE	7
2022-09-14	09:38:27	0.730191	436.466	FALSE	7
2022-09-14	09:38:27	0.727748	437.194	FALSE	7
2022-09-14	09:38:28	0.731259	437.925	FALSE	7
2022-09-14	09:38:28	0.732125	438.657	FALSE	7
2022-09-14	09:38:28	0.728257	439.386	FALSE	7
2022-09-14	09:38:28	0.735738	440.121	FALSE	7
2022-09-14	09:38:29	0.72958	440.851	FALSE	7
2022-09-14	09:38:29	0.734313	441.585	FALSE	7
2022-09-14	09:38:29	0.72841	442.314	FALSE	7
2022-09-14	09:38:30	0.735891	443.049	FALSE	7
2022-09-14	09:38:30	-0.201259	443.049	FALSE	7
2022-09-14	09:38:30	0.729122	443.779	FALSE	7
2022-09-14	09:38:30	0.731972	444.511	FALSE	7
2022-09-14	09:38:31	0.729733	445.24	FALSE	7
2022-09-14	09:38:31	0.727036	445.967	FALSE	7
2022-09-14	09:38:31	0.736043	446.703	FALSE	7
2022-09-14	09:38:31	0.732837	447.436	FALSE	7
2022-09-14	09:38:32	0.736857	448.173	FALSE	7
2022-09-14	09:38:32	0.730649	448.904	FALSE	7
2022-09-14	09:38:32	0.731717	449.635	FALSE	7
2022-09-14	09:38:32	0.732175	450.368	FALSE	7
2022-09-14	09:38:33	0.728206	451.096	FALSE	7
2022-09-14	09:38:33	0.735738	451.832	FALSE	7
2022-09-14	09:38:33	0.73299	452.565	FALSE	7
2022-09-14	09:38:34	0.736603	453.301	FALSE	7
2022-09-14	09:38:34	0.732023	454.033	FALSE	7
2022-09-14	09:38:34	0.733906	454.767	FALSE	7
2022-09-14	09:38:34	0.738486	455.506	FALSE	7
2022-09-14	09:38:35	0.735127	456.241	FALSE	7
2022-09-14	09:38:35	0.733702	456.974	FALSE	7
2022-09-14	09:38:35	0.729275	457.704	FALSE	7
2022-09-14	09:38:35	0.734364	458.438	FALSE	7
2022-09-14	09:38:36	0.735687	459.174	FALSE	7
2022-09-14	09:38:36	0.737875	459.912	FALSE	7
2022-09-14	09:38:36	0.743829	460.655	FALSE	7
2022-09-14	09:38:36	0.736807	461.392	FALSE	7
2022-09-14	09:38:37	0.730649	462.123	FALSE	7
2022-09-14	09:38:37	0.735229	462.858	FALSE	7
2022-09-14	09:38:37	0.731158	463.589	FALSE	7
2022-09-14	09:38:38	0.727137	464.316	FALSE	7
2022-09-14	09:38:38	0.737366	465.054	FALSE	7
2022-09-14	09:38:38	0.731616	465.785	FALSE	7
2022-09-14	09:38:38	0.734669	466.52	FALSE	7
2022-09-14	09:38:39	0.732074	467.252	FALSE	7
2022-09-14	09:38:39	0.736857	467.989	FALSE	7
2022-09-14	09:38:39	0.731259	468.72	FALSE	7
2022-09-14	09:38:39	0.734313	469.455	FALSE	7
2022-09-14	09:38:40	0.739453	470.194	FALSE	7
2022-09-14	09:38:40	0.724949	470.919	FALSE	7
2022-09-14	09:38:40	0.726985	471.646	FALSE	7
2022-09-14	09:38:40	0.736756	472.383	FALSE	7
2022-09-14	09:38:41	0.729428	473.112	FALSE	7
2022-09-14	09:38:41	0.72729	473.839	FALSE	7
2022-09-14	09:38:41	0.727697	474.567	FALSE	7
2022-09-14	09:38:42	0.73014	475.297	FALSE	7
2022-09-14	09:38:42	0.734975	476.032	FALSE	7
2022-09-14	09:38:42	0.733092	476.765	FALSE	7
2022-09-14	09:38:42	0.733193	477.499	FALSE	7
2022-09-14	09:38:43	0.729224	478.228	FALSE	7
2022-09-14	09:38:43	0.738079	478.966	FALSE	7
2022-09-14	09:38:43	0.735382	479.701	FALSE	7
2022-09-14	09:38:43	0.732684	480.434	FALSE	7
2022-09-14	09:38:44	0.730547	481.164	FALSE	7
2022-09-14	09:38:44	0.736196	481.901	FALSE	7
2022-09-14	09:38:44	0.729122	482.63	FALSE	7
2022-09-14	09:38:44	0.737163	483.367	FALSE	7
2022-09-14	09:38:45	0.737417	484.104	FALSE	7
2022-09-14	09:38:45	0.728766	484.833	FALSE	7
2022-09-14	09:38:45	0.734313	485.567	FALSE	7
2022-09-14	09:38:46	0.728257	486.296	FALSE	7
2022-09-14	09:38:46	0.732786	487.028	FALSE	7
2022-09-14	09:38:46	0.734364	487.763	FALSE	7
2022-09-14	09:38:46	0.731972	488.495	FALSE	7
2022-09-14	09:38:47	0.72902	489.224	FALSE	7
2022-09-14	09:38:47	0.733702	489.958	FALSE	7
2022-09-14	09:38:47	0.739198	490.697	FALSE	7
2022-09-14	09:38:47	0.740623	491.437	FALSE	7
2022-09-14	09:38:48	0.734568	492.172	FALSE	7
2022-09-14	09:38:48	0.730903	492.903	FALSE	7
2022-09-14	09:38:48	0.733804	493.637	FALSE	7
2022-09-14	09:38:48	0.730038	494.367	FALSE	7
2022-09-14	09:38:49	0.734466	495.101	FALSE	7
2022-09-14	09:38:49	0.735534	495.837	FALSE	7
2022-09-14	09:38:49	0.73701	496.574	FALSE	7
2022-09-14	09:38:50	0.732125	497.306	FALSE	7
2022-09-14	09:38:50	0.733244	498.039	FALSE	7
2022-09-14	09:38:50	0.739453	498.778	FALSE	7
2022-09-14	09:38:50	0.730954	499.509	FALSE	7
2022-09-14	09:38:51	0.735433	500.245	FALSE	7
2022-09-14	09:38:51	0.734211	500.979	FALSE	7
2022-09-14	09:38:51	0.730751	501.71	FALSE	7
2022-09-14	09:38:51	0.72841	502.438	FALSE	7
2022-09-14	09:38:52	0.72958	503.168	FALSE	7
2022-09-14	09:38:52	0.738689	503.907	FALSE	7
2022-09-14	09:38:52	0.731361	504.638	FALSE	7
2022-09-14	09:38:52	0.734568	505.372	FALSE	7
2022-09-14	09:38:53	0.624338	505.997	FALSE	7
2022-09-14	09:38:53	0.514517	506.511	FALSE	7
2022-09-14	09:38:53	0.730089	507.241	FALSE	7
2022-09-14	09:38:54	0.732023	507.973	FALSE	7
2022-09-14	09:38:54	0.735687	508.709	FALSE	7
2022-09-14	09:38:54	0.732125	509.441	FALSE	7
2022-09-14	09:38:54	0.734109	510.175	FALSE	7
2022-09-14	09:38:55	0.729784	510.905	FALSE	7
2022-09-14	09:38:55	0.730242	511.635	FALSE	7
2022-09-14	09:38:55	0.740267	512.376	FALSE	7
2022-09-14	09:38:55	0.742354	513.118	FALSE	7
2022-09-14	09:38:56	0.729835	513.848	FALSE	7
2022-09-14	09:38:56	0.730598	514.578	FALSE	7
2022-09-14	09:38:56	0.727087	515.305	FALSE	7
2022-09-14	09:38:56	0.736501	516.042	FALSE	7
2022-09-14	09:38:57	0.72729	516.769	FALSE	7
2022-09-14	09:38:57	0.734669	517.504	FALSE	7
2022-09-14	09:38:57	0.7307	518.235	FALSE	7
2022-09-14	09:38:58	0.736196	518.971	FALSE	7
2022-09-14	09:38:58	0.733041	519.704	FALSE	7
2022-09-14	09:38:58	0.734771	520.439	FALSE	7
2022-09-14	09:38:58	0.733855	521.173	FALSE	7
2022-09-14	09:38:59	0.72673	521.899	FALSE	7
2022-09-14	09:38:59	0.409631	522.309	FALSE	7
2022-09-14	09:38:59	-0.18304	522.309	FALSE	7
2022-09-14	09:38:59	0.391005	522.7	FALSE	7
2022-09-14	09:39:00	0.384389	523.084	FALSE	7
2022-09-14	09:39:00	0.730496	523.815	FALSE	7
2022-09-14	09:39:00	0.662812	524.478	FALSE	7
2022-09-14	09:39:00	-0.641361	524.478	FALSE	7
2022-09-14	09:39:01	-1.99286	524.478	FALSE	7
2022-09-14	09:39:01	-1.33943	524.478	FALSE	7
2022-09-14	09:39:01	0.358486	524.836	FALSE	7
2022-09-14	09:39:02	0.564287	525.4	FALSE	7
2022-09-14	09:39:02	0.838689	526.239	FALSE	7
2022-09-14	09:39:02	0.917417	527.156	FALSE	7
2022-09-14	09:39:02	1.99996	529.156	FALSE	7
2022-09-14	09:39:03	1.03991	530.196	FALSE	7
2022-09-14	09:39:03	0.983422	531.18	FALSE	7
2022-09-14	09:39:03	1.76536	532.945	FALSE	7
2022-09-14	09:39:03	1.04286	533.988	FALSE	7
2022-09-14	09:39:04	1.01126	534.999	FALSE	7
2022-09-14	09:39:04	0.87131	535.871	FALSE	7
2022-09-14	09:39:04	0.479453	536.35	FALSE	7
2022-09-14	09:39:04	0.672023	537.022	FALSE	7
2022-09-14	09:39:05	0.537977	537.56	FALSE	7
2022-09-14	09:39:05	0.524898	538.085	FALSE	7
2022-09-14	09:39:05	0.349122	538.434	FALSE	7
2022-09-14	09:39:06	0.473244	538.907	FALSE	7
2022-09-14	09:39:06	0.318741	539.226	FALSE	7
2022-09-14	09:39:06	0.564135	539.79	FALSE	7
2022-09-14	09:39:06	0.641285	540.431	FALSE	7
2022-09-14	09:39:07	0.50388	540.935	FALSE	7
2022-09-14	09:39:07	0.696654	541.632	FALSE	7
2022-09-14	09:39:07	0.638995	542.271	FALSE	7
2022-09-14	09:39:07	0.572481	542.843	FALSE	7
2022-09-14	09:39:08	0.589936	543.433	FALSE	7
2022-09-14	09:39:08	0.537163	543.971	FALSE	7
2022-09-14	09:39:08	0.629173	544.6	FALSE	7
2022-09-14	09:39:08	1.58622	546.186	FALSE	7
2022-09-14	09:39:09	1.97431	548.16	FALSE	7
2022-09-14	09:39:09	3.42607	551.586	1	8
2022-09-14	09:39:09	4.5823	556.169	1	9
2022-09-14	09:39:10	2.24566	558.414	FALSE	9
2022-09-14	09:39:10	1.28785	559.702	FALSE	9
2022-09-14	09:39:10	0.912532	560.615	FALSE	9
2022-09-14	09:39:10	1.55024	562.165	FALSE	9
2022-09-14	09:39:11	1.7793	563.944	FALSE	9
2022-09-14	09:39:11	3.53584	567.48	1	10
2022-09-14	09:39:11	5.75935	573.239	1	11
2022-09-14	09:39:11	4.78576	578.025	1	12
2022-09-14	09:39:12	4.70245	582.728	1	13
2022-09-14	09:39:12	4.3854	587.113	1	14
2022-09-14	09:39:12	3.54174	590.655	1	15
2022-09-14	09:39:12	7.36958	598.024	1	16
2022-09-14	09:39:13	8.96627	606.991	1	17
2022-09-14	09:39:13	5.97874	612.969	1	18
2022-09-14	09:39:13	3.0193	615.989	1	19
2022-09-14	09:39:14	1.46795	617.457	FALSE	19
2022-09-14	09:39:14	1.68546	619.142	FALSE	19
2022-09-14	09:39:14	1.4936	620.636	FALSE	19
2022-09-14	09:39:14	1.13838	621.774	FALSE	19
2022-09-14	09:39:15	0.544033	622.318	FALSE	19
2022-09-14	09:39:15	0.417977	622.736	FALSE	19
2022-09-14	09:39:15	0.380573	623.117	FALSE	19
2022-09-14	09:39:15	0.476705	623.593	FALSE	19
2022-09-14	09:39:16	0.649377	624.243	FALSE	19
2022-09-14	09:39:16	1.97009	626.213	FALSE	19
2022-09-14	09:39:16	3.92266	630.135	1	20
2022-09-14	09:39:16	4.56515	634.701	1	21
2022-09-14	09:39:17	6.04255	640.743	1	22
2022-09-14	09:39:17	7.70647	648.45	1	23
2022-09-14	09:39:17	10.3763	658.826	1	24
2022-09-14	09:39:18	10.9971	669.823	1	25
2022-09-14	09:39:18	4.14785	673.971	1	26
2022-09-14	09:39:18	4.7192	678.69	1	27
2022-09-14	09:39:18	4.86103	683.551	1	28
2022-09-14	09:39:19	2.4678	686.019	FALSE	28
2022-09-14	09:39:19	0.580267	686.599	FALSE	28
2022-09-14	09:39:19	0.713448	687.313	FALSE	28
2022-09-14	09:39:19	1.72393	689.037	FALSE	28
2022-09-14	09:39:20	3.49172	692.528	1	29
2022-09-14	09:39:20	5.26479	697.793	1	30
2022-09-14	09:39:20	5.61441	703.407	1	31
2022-09-14	09:39:20	3.38174	706.789	1	32
2022-09-14	09:39:21	1.68469	708.474	FALSE	32
2022-09-14	09:39:21	0.963219	709.437	FALSE	32
2022-09-14	09:39:21	1.30744	710.745	FALSE	32
2022-09-14	09:39:22	1.78078	712.525	FALSE	32
2022-09-14	09:39:22	0.999249	713.525	FALSE	32
2022-09-14	09:39:22	1.09742	714.622	FALSE	32
2022-09-14	09:39:22	1.65635	716.278	FALSE	32
2022-09-14	09:39:23	4.4851	720.763	1	33
2022-09-14	09:39:23	4.76307	725.526	1	34
2022-09-14	09:39:23	2.31976	727.846	FALSE	34
2022-09-14	09:39:23	0.89813	728.744	FALSE	34
2022-09-14	09:39:24	0.704491	729.449	FALSE	34
2022-09-14	09:39:24	0.672939	730.122	FALSE	34
2022-09-14	09:39:24	0.799809	730.922	FALSE	34
2022-09-14	09:39:24	1.00078	731.922	FALSE	34
2022-09-14	09:39:25	1.24296	733.165	FALSE	34
2022-09-14	09:39:25	1.148	734.313	FALSE	34
2022-09-14	09:39:25	2.65686	736.97	FALSE	34
2022-09-14	09:39:26	2.44785	739.418	FALSE	34
2022-09-14	09:39:26	2.00307	741.421	FALSE	34
2022-09-14	09:39:26	6.26566	747.687	1	35
2022-09-14	09:39:26	7.67049	755.357	1	36
2022-09-14	09:39:27	9.32194	764.679	1	37
2022-09-14	09:39:27	8.35227	773.032	1	38
2022-09-14	09:39:27	6.76703	779.799	1	39
2022-09-14	09:39:27	6.60719	786.406	1	40
2022-09-14	09:39:28	6.82296	793.229	1	41
2022-09-14	09:39:28	5.64143	798.87	1	42
2022-09-14	09:39:28	5.40907	804.279	1	43
2022-09-14	09:39:28	6.085	810.364	1	44
2022-09-14	09:39:29	6.70556	817.07	1	45
2022-09-14	09:39:29	6.52836	823.598	1	46
2022-09-14	09:39:29	6.75136	830.349	1	47
2022-09-14	09:39:30	7.70337	838.053	1	48
2022-09-14	09:39:30	12.7615	850.814	1	49
2022-09-14	09:39:30	15.7258	866.54	1	50
2022-09-14	09:39:30	7.08108	873.621	1	51
2022-09-14	09:39:31	0.606069	874.227	FALSE	51
2022-09-14	09:39:31	0.473295	874.701	FALSE	51
2022-09-14	09:39:31	0.347748	875.048	FALSE	51
2022-09-14	09:39:31	0.390293	875.439	FALSE	51
2022-09-14	09:39:32	0.337774	875.776	FALSE	51
2022-09-14	09:39:32	0.259555	876.036	FALSE	51
2022-09-14	09:39:32	0.427137	876.463	FALSE	51
2022-09-14	09:39:32	0.318741	876.782	FALSE	51
2022-09-14	09:39:33	0.350852	877.133	FALSE	51
2022-09-14	09:39:33	0.30444	877.437	FALSE	51
2022-09-14	09:39:33	0.0463234	877.483	FALSE	51
2022-09-14	09:39:34	0.250954	877.734	FALSE	51
2022-09-14	09:39:34	0.132786	877.867	FALSE	51
2022-09-14	09:39:34	-0.169809	877.867	FALSE	51
2022-09-14	09:39:34	-0.430063	877.867	FALSE	51
2022-09-14	09:39:35	0.113092	877.98	FALSE	51
2022-09-14	09:39:35	0.89813	878.878	FALSE	51
2022-09-14	09:39:35	3.91523	882.794	1	52
2022-09-14	09:39:35	8.4452	891.239	1	53
2022-09-14	09:39:36	15.0393	906.278	1	54
2022-09-14	09:39:36	12.1142	918.392	1	55
2022-09-14	09:39:36	7.44352	925.836	1	56
2022-09-14	09:39:36	5.6021	931.438	1	57
2022-09-14	09:39:37	6.23263	937.671	1	58
2022-09-14	09:39:37	5.88352	943.554	1	59
2022-09-14	09:39:37	4.08541	947.64	1	60
2022-09-14	09:39:37	6.06001	953.7	1	61
2022-09-14	09:39:38	6.38947	960.089	1	62
2022-09-14	09:39:38	1.0133	961.102	FALSE	62
2022-09-14	09:39:38	0.743473	961.846	FALSE	62
2022-09-14	09:39:39	0.790293	962.636	FALSE	62
2022-09-14	09:39:39	1.61172	964.248	FALSE	62
2022-09-14	09:39:39	3.07793	967.326	1	63
2022-09-14	09:39:39	3.47049	970.796	1	64
2022-09-14	09:39:40	3.39772	974.194	1	65
2022-09-14	09:39:40	1.85767	976.052	FALSE	65
2022-09-14	09:39:40	0.925611	976.977	FALSE	65
2022-09-14	09:39:40	0.556247	977.533	FALSE	65
2022-09-14	09:39:41	0.476043	978.009	FALSE	65
2022-09-14	09:39:41	0.451412	978.461	FALSE	65
2022-09-14	09:39:41	0.61869	979.08	FALSE	65

## Sheet: Richa_martin_202291493413
						**GoPro Fitting: 923
2022-09-14	09:34:14	0.421743
2022-09-14	09:34:14	0.412786
2022-09-14	09:34:14	0.411616
2022-09-14	09:34:14	0.410751
2022-09-14	09:34:15	0.432888
2022-09-14	09:34:15	0.461947
2022-09-14	09:34:15	0.428359
2022-09-14	09:34:15	0.170038
2022-09-14	09:34:16	0.132277
2022-09-14	09:34:16	-0.238613
2022-09-14	09:34:16	-0.679885
2022-09-14	09:34:16	-0.509605
2022-09-14	09:34:17	0.156858
2022-09-14	09:34:17	0.192532
2022-09-14	09:34:17	0.143015
2022-09-14	09:34:17	0.0903946
2022-09-14	09:34:18	0.172227
2022-09-14	09:34:18	0.128868
2022-09-14	09:34:18	0.103575
2022-09-14	09:34:19	0.0958908
2022-09-14	09:34:19	0.0702419
2022-09-14	09:34:19	0.017214
2022-09-14	09:34:19	0.0531936
2022-09-14	09:34:20	0.0145676
2022-09-14	09:34:20	0.00932595
2022-09-14	09:34:20	0.00520383
2022-09-14	09:34:20	-0.00594122
2022-09-14	09:34:21	-0.0100634
2022-09-14	09:34:21	-0.0676715
2022-09-14	09:34:21	0.0168068
2022-09-14	09:34:21	0.0786389
2022-09-14	09:34:22	0.246425
2022-09-14	09:34:22	0.117214
2022-09-14	09:34:22	0.0830664
2022-09-14	09:34:23	0.0624557
2022-09-14	09:34:23	0.0669341
2022-09-14	09:34:23	0.0510562
2022-09-14	09:34:23	0.0609798
2022-09-14	09:34:24	0.0646949
2022-09-14	09:34:24	0.0757381
2022-09-14	09:34:24	0.038588
2022-09-14	09:34:24	0.0225066
2022-09-14	09:34:25	0.0205728
2022-09-14	09:34:25	0.0213361
2022-09-14	09:34:25	-0.0908267
2022-09-14	09:34:26	-0.0923534
2022-09-14	09:34:26	-0.057697
2022-09-14	09:34:26	-0.0391219
2022-09-14	09:34:26	-0.0333204
2022-09-14	09:34:27	-0.00762061
2022-09-14	09:34:27	0.142659
2022-09-14	09:34:27	0.0847967
2022-09-14	09:34:27	0.202201
2022-09-14	09:34:28	0.201641
2022-09-14	09:34:28	0.00281194
2022-09-14	09:34:28	-0.0615137
2022-09-14	09:34:28	-0.00807864
2022-09-14	09:34:29	-0.0490964
2022-09-14	09:34:29	0.0453056
2022-09-14	09:34:29	-0.0120481
2022-09-14	09:34:29	0.0103947
2022-09-14	09:34:30	0.00423688
2022-09-14	09:34:30	-0.0709793
2022-09-14	09:34:30	-0.00706081
2022-09-14	09:34:31	0.0413361
2022-09-14	09:34:31	0.0340587
2022-09-14	09:34:31	0.026476
2022-09-14	09:34:31	0.935839
2022-09-14	09:34:32	0.558791
2022-09-14	09:34:32	0.192532
2022-09-14	09:34:32	0.377519
2022-09-14	09:34:32	0.60042
2022-09-14	09:34:33	0.29355
2022-09-14	09:34:33	0.328003
2022-09-14	09:34:33	0.294567
2022-09-14	09:34:33	0.429224
2022-09-14	09:34:34	0.381234
2022-09-14	09:34:34	0.483931
2022-09-14	09:34:34	0.0342623
2022-09-14	09:34:35	-0.124771
2022-09-14	09:34:35	0.0386389
2022-09-14	09:34:35	0.16154
2022-09-14	09:34:35	0.0730918
2022-09-14	09:34:36	-0.153219
2022-09-14	09:34:36	-0.216374
2022-09-14	09:34:36	0.0996567
2022-09-14	09:34:36	0.197926
2022-09-14	09:34:37	0.267494
2022-09-14	09:34:37	0.319707
2022-09-14	09:34:37	0.347443
2022-09-14	09:34:38	0.295942
2022-09-14	09:34:38	0.421947
2022-09-14	09:34:38	0.101896
2022-09-14	09:34:38	0.409326
2022-09-14	09:34:39	0.236247
2022-09-14	09:34:39	0.360827
2022-09-14	09:34:39	0.2193
2022-09-14	09:34:39	0.231819
2022-09-14	09:34:40	0.248715
2022-09-14	09:34:40	0.181896
2022-09-14	09:34:40	-0.276221
2022-09-14	09:34:40	-0.586399
2022-09-14	09:34:41	-0.639529
2022-09-14	09:34:41	-0.666704
2022-09-14	09:34:41	-0.990419
2022-09-14	09:34:42	-0.616017
2022-09-14	09:34:42	0.0196567
2022-09-14	09:34:42	0.428512
2022-09-14	09:34:42	0.544593
2022-09-14	09:34:43	0.472379
2022-09-14	09:34:43	0.471412
2022-09-14	09:34:43	0.377316
2022-09-14	09:34:43	0.335076
2022-09-14	09:34:44	0.444186
2022-09-14	09:34:44	0.572939
2022-09-14	09:34:44	0.588969
2022-09-14	09:34:44	0.538435
2022-09-14	09:34:45	0.483372
2022-09-14	09:34:45	0.469886
2022-09-14	09:34:45	0.463677
2022-09-14	09:34:46	0.487494
2022-09-14	09:34:46	0.500369
2022-09-14	09:34:46	0.498333
2022-09-14	09:34:46	0.482201
2022-09-14	09:34:47	0.452634
2022-09-14	09:34:47	0.451819
2022-09-14	09:34:47	0.452837
2022-09-14	09:34:47	0.434008
2022-09-14	09:34:48	0.468155
2022-09-14	09:34:48	0.462252
2022-09-14	09:34:48	0.419453
2022-09-14	09:34:48	0.47243
2022-09-14	09:34:49	0.453957
2022-09-14	09:34:49	0.494669
2022-09-14	09:34:49	0.466221
2022-09-14	09:34:50	0.521947
2022-09-14	09:34:50	0.512685
2022-09-14	09:34:50	0.501539
2022-09-14	09:34:50	0.500929
2022-09-14	09:34:51	0.498435
2022-09-14	09:34:51	0.507748
2022-09-14	09:34:51	0.505661
2022-09-14	09:34:51	0.468308
2022-09-14	09:34:52	0.47701
2022-09-14	09:34:52	0.508919
2022-09-14	09:34:52	0.526629
2022-09-14	09:34:52	0.497723
2022-09-14	09:34:53	0.46271
2022-09-14	09:34:53	0.44902
2022-09-14	09:34:53	0.417468
2022-09-14	09:34:54	0.392023
2022-09-14	09:34:54	0.398741
2022-09-14	09:34:54	0.406425
2022-09-14	09:34:54	0.542761
2022-09-14	09:34:55	0.464797
2022-09-14	09:34:55	0.432837
2022-09-14	09:34:55	0.41472
2022-09-14	09:34:55	0.412074
2022-09-14	09:34:56	0.405254
2022-09-14	09:34:56	0.397774
2022-09-14	09:34:56	0.411667
2022-09-14	09:34:56	0.428461
2022-09-14	09:34:57	0.427901
2022-09-14	09:34:57	0.435585
2022-09-14	09:34:57	0.379555
2022-09-14	09:34:58	0.412328
2022-09-14	09:34:58	0.515738
2022-09-14	09:34:58	0.390242
2022-09-14	09:34:58	0.549427
2022-09-14	09:34:59	0.360064
2022-09-14	09:34:59	0.467799
2022-09-14	09:34:59	0.412227
2022-09-14	09:34:59	0.489733
2022-09-14	09:35:00	0.355992
2022-09-14	09:35:00	0.443982
2022-09-14	09:35:00	0.417723
2022-09-14	09:35:00	0.505153
2022-09-14	09:35:01	0.404695
2022-09-14	09:35:01	0.505305
2022-09-14	09:35:01	0.46154
2022-09-14	09:35:02	0.489224
2022-09-14	09:35:02	0.591514
2022-09-14	09:35:02	0.435636
2022-09-14	09:35:02	0.363982
2022-09-14	09:35:03	0.337316
2022-09-14	09:35:03	0.519249
2022-09-14	09:35:03	0.302964
2022-09-14	09:35:03	0.452735
2022-09-14	09:35:04	0.420064
2022-09-14	09:35:04	0.525458
2022-09-14	09:35:04	0.394975
2022-09-14	09:35:05	0.49986
2022-09-14	09:35:05	0.489428
2022-09-14	09:35:05	0.495942
2022-09-14	09:35:05	0.466629
2022-09-14	09:35:06	0.598333
2022-09-14	09:35:06	0.547341
2022-09-14	09:35:06	0.769377
2022-09-14	09:35:06	0.571667
2022-09-14	09:35:07	0.667341
2022-09-14	09:35:07	0.609835
2022-09-14	09:35:07	0.7193
2022-09-14	09:35:07	0.575127
2022-09-14	09:35:08	0.743982
2022-09-14	09:35:08	0.629987
2022-09-14	09:35:08	0.736298
2022-09-14	09:35:09	1.20729
2022-09-14	09:35:09	3.29894
2022-09-14	09:35:09	5.1082
2022-09-14	09:35:09	5.4595
2022-09-14	09:35:10	2.3823
2022-09-14	09:35:10	0.658995
2022-09-14	09:35:10	0.452888
2022-09-14	09:35:10	0.642914
2022-09-14	09:35:11	0.556501
2022-09-14	09:35:11	0.477977
2022-09-14	09:35:11	0.572328
2022-09-14	09:35:11	0.427239
2022-09-14	09:35:12	0.469479
2022-09-14	09:35:12	0.44729
2022-09-14	09:35:12	0.527952
2022-09-14	09:35:13	0.678282
2022-09-14	09:35:13	0.688868
2022-09-14	09:35:13	0.673397
2022-09-14	09:35:13	0.799147
2022-09-14	09:35:14	0.676603
2022-09-14	09:35:14	0.666476
2022-09-14	09:35:14	0.708359
2022-09-14	09:35:14	0.187036
2022-09-14	09:35:15	-0.251997
2022-09-14	09:35:15	-0.36645
2022-09-14	09:35:15	-0.565432
2022-09-14	09:35:15	-0.67561
2022-09-14	09:35:16	-0.551844
2022-09-14	09:35:16	-0.40818
2022-09-14	09:35:16	-0.162888
2022-09-14	09:35:17	-0.0611575
2022-09-14	09:35:17	0.177367
2022-09-14	09:35:17	0.344542
2022-09-14	09:35:17	0.261132
2022-09-14	09:35:18	0.403168
2022-09-14	09:35:18	0.497061
2022-09-14	09:35:18	0.44902
2022-09-14	09:35:18	0.564593
2022-09-14	09:35:19	0.732175
2022-09-14	09:35:19	0.766577
2022-09-14	09:35:19	0.272939
2022-09-14	09:35:19	0.122099
2022-09-14	09:35:20	0.41187
2022-09-14	09:35:20	0.119809
2022-09-14	09:35:20	0.00693411
2022-09-14	09:35:21	-0.162786
2022-09-14	09:35:21	-0.187061
2022-09-14	09:35:21	-0.0892999
2022-09-14	09:35:21	-0.251132
2022-09-14	09:35:22	-0.259274
2022-09-14	09:35:22	-0.125076
2022-09-14	09:35:22	0.0775193
2022-09-14	09:35:22	0.147697
2022-09-14	09:35:23	0.234771
2022-09-14	09:35:23	0.499962
2022-09-14	09:35:23	1.77533
2022-09-14	09:35:23	1.31772
2022-09-14	09:35:24	0.914211
2022-09-14	09:35:24	0.941234
2022-09-14	09:35:24	1.5021
2022-09-14	09:35:25	1.07945
2022-09-14	09:35:25	0.812277
2022-09-14	09:35:25	0.388359
2022-09-14	09:35:25	0.444033
2022-09-14	09:35:26	0.386883
2022-09-14	09:35:26	0.346272
2022-09-14	09:35:26	0.192481
2022-09-14	09:35:26	0.0175702
2022-09-14	09:35:27	0.103626
2022-09-14	09:35:27	-0.894999
2022-09-14	09:35:27	-1.06029
2022-09-14	09:35:27	-0.237493
2022-09-14	09:35:28	-0.210572
2022-09-14	09:35:28	-0.137239
2022-09-14	09:35:28	0.00993663
2022-09-14	09:35:29	0.27355
2022-09-14	09:35:29	0.655483
2022-09-14	09:35:29	0.221539
2022-09-14	09:35:29	0.429529
2022-09-14	09:35:30	0.410598
2022-09-14	09:35:30	0.501692
2022-09-14	09:35:30	0.605662
2022-09-14	09:35:30	0.148206
2022-09-14	09:35:31	-0.0436002
2022-09-14	09:35:31	-0.176933
2022-09-14	09:35:31	-0.213371
2022-09-14	09:35:31	-0.192659
2022-09-14	09:35:32	-0.220089
2022-09-14	09:35:32	-0.192557
2022-09-14	09:35:32	-0.2036
2022-09-14	09:35:33	-0.207926
2022-09-14	09:35:33	-0.199478
2022-09-14	09:35:33	-0.207315
2022-09-14	09:35:33	-0.236781
2022-09-14	09:35:34	-0.301157
2022-09-14	09:35:34	-0.0272644
2022-09-14	09:35:34	-0.163091
2022-09-14	09:35:34	0.433295
2022-09-14	09:35:35	0.423473
2022-09-14	09:35:35	0.462914
2022-09-14	09:35:35	0.395687
2022-09-14	09:35:36	0.273601
2022-09-14	09:35:36	0.49299
2022-09-14	09:35:36	0.141845
2022-09-14	09:35:36	0.243728
2022-09-14	09:35:37	0.314008
2022-09-14	09:35:37	0.433092
2022-09-14	09:35:37	0.416909
2022-09-14	09:35:37	0.179402
2022-09-14	09:35:38	-0.290267
2022-09-14	09:35:38	-0.615661
2022-09-14	09:35:38	-0.374643
2022-09-14	09:35:38	0.0540587
2022-09-14	09:35:39	0.0708017
2022-09-14	09:35:39	0.073957
2022-09-14	09:35:39	0.500471
2022-09-14	09:35:40	0.0957381
2022-09-14	09:35:40	0.13472
2022-09-14	09:35:40	0.76897
2022-09-14	09:35:40	0.590649
2022-09-14	09:35:41	0.916756
2022-09-14	09:35:41	0.805051
2022-09-14	09:35:41	0.461031
2022-09-14	09:35:41	0.317621
2022-09-14	09:35:42	0.489784
2022-09-14	09:35:42	0.305153
2022-09-14	09:35:42	0.406883
2022-09-14	09:35:42	0.405662
2022-09-14	09:35:43	0.509326
2022-09-14	09:35:43	0.490038
2022-09-14	09:35:43	0.247494
2022-09-14	09:35:44	0.393804
2022-09-14	09:35:44	-0.150928
2022-09-14	09:35:44	-0.54019
2022-09-14	09:35:44	-0.621513
2022-09-14	09:35:45	-0.389045
2022-09-14	09:35:45	-0.0383076
2022-09-14	09:35:45	0.154262
2022-09-14	09:35:45	0.584644
2022-09-14	09:35:46	0.716247
2022-09-14	09:35:46	0.323372
2022-09-14	09:35:46	0.254262
2022-09-14	09:35:46	0.357468
2022-09-14	09:35:47	0.420573
2022-09-14	09:35:47	0.271667
2022-09-14	09:35:47	0.181845
2022-09-14	09:35:48	0.554873
2022-09-14	09:35:48	0.592837
2022-09-14	09:35:48	0.208512
2022-09-14	09:35:48	0.416858
2022-09-14	09:35:49	0.228054
2022-09-14	09:35:49	0.261641
2022-09-14	09:35:49	0.324491
2022-09-14	09:35:49	0.593906
2022-09-14	09:35:50	1.54118
2022-09-14	09:35:50	1.99233
2022-09-14	09:35:50	0.372735
2022-09-14	09:35:50	0.600725
2022-09-14	09:35:51	0.325916
2022-09-14	09:35:51	0.35299
2022-09-14	09:35:51	0.241489
2022-09-14	09:35:52	0.177774
2022-09-14	09:35:52	0.184135
2022-09-14	09:35:52	0.115738
2022-09-14	09:35:52	0.189631
2022-09-14	09:35:53	0.0944149
2022-09-14	09:35:53	0.453092
2022-09-14	09:35:53	0.389987
2022-09-14	09:35:53	0.301489
2022-09-14	09:35:54	0.14098
2022-09-14	09:35:54	0.257417
2022-09-14	09:35:54	0.185916
2022-09-14	09:35:54	0.161133
2022-09-14	09:35:55	0.0962979
2022-09-14	09:35:55	0.227443
2022-09-14	09:35:55	0.077214
2022-09-14	09:35:56	0.0534989
2022-09-14	09:35:56	-0.161768
2022-09-14	09:35:56	0.0307509
2022-09-14	09:35:56	0.0729392
2022-09-14	09:35:57	0.213193
2022-09-14	09:35:57	0.0396058
2022-09-14	09:35:57	0.0758399
2022-09-14	09:35:57	0.21528
2022-09-14	09:35:58	0.186832
2022-09-14	09:35:58	0.281031
2022-09-14	09:35:58	0.127545
2022-09-14	09:35:58	0.348766
2022-09-14	09:35:59	0.265305
2022-09-14	09:35:59	0.368257
2022-09-14	09:35:59	0.315942
2022-09-14	09:36:00	0.416705
2022-09-14	09:36:00	0.351514
2022-09-14	09:36:00	0.314924
2022-09-14	09:36:00	0.522455
2022-09-14	09:36:01	0.581692
2022-09-14	09:36:01	0.583219
2022-09-14	09:36:01	0.489428
2022-09-14	09:36:01	0.509122
2022-09-14	09:36:02	0.540725
2022-09-14	09:36:02	0.547239
2022-09-14	09:36:02	0.615433
2022-09-14	09:36:02	0.68556
2022-09-14	09:36:03	0.659911
2022-09-14	09:36:03	0.625356
2022-09-14	09:36:03	0.611565
2022-09-14	09:36:04	0.585967
2022-09-14	09:36:04	0.568359
2022-09-14	09:36:04	0.601997
2022-09-14	09:36:04	0.574669
2022-09-14	09:36:05	0.606476
2022-09-14	09:36:05	0.566527
2022-09-14	09:36:05	0.560623
2022-09-14	09:36:05	0.515382
2022-09-14	09:36:06	0.496858
2022-09-14	09:36:06	0.494008
2022-09-14	09:36:06	0.496552
2022-09-14	09:36:06	0.5107
2022-09-14	09:36:07	0.511158
2022-09-14	09:36:07	0.53757
2022-09-14	09:36:07	0.61411
2022-09-14	09:36:08	0.678537
2022-09-14	09:36:08	0.756298
2022-09-14	09:36:08	0.763982
2022-09-14	09:36:08	0.754313
2022-09-14	09:36:09	0.673957
2022-09-14	09:36:09	0.514669
2022-09-14	09:36:09	0.456756
2022-09-14	09:36:09	0.546476
2022-09-14	09:36:10	0.78556
2022-09-14	09:36:10	0.709784
2022-09-14	09:36:10	0.544033
2022-09-14	09:36:11	0.619402
2022-09-14	09:36:11	0.519962
2022-09-14	09:36:11	0.503931
2022-09-14	09:36:11	0.551158
2022-09-14	09:36:12	0.543422
2022-09-14	09:36:12	0.545
2022-09-14	09:36:12	0.56785
2022-09-14	09:36:12	0.539758
2022-09-14	09:36:13	0.580623
2022-09-14	09:36:13	0.553448
2022-09-14	09:36:13	0.554313
2022-09-14	09:36:14	0.596399
2022-09-14	09:36:14	0.608562
2022-09-14	09:36:14	0.615433
2022-09-14	09:36:14	0.610649
2022-09-14	09:36:15	0.633142
2022-09-14	09:36:15	0.575127
2022-09-14	09:36:15	0.647137
2022-09-14	09:36:15	0.622964
2022-09-14	09:36:16	0.613855
2022-09-14	09:36:16	0.631819
2022-09-14	09:36:16	0.582659
2022-09-14	09:36:16	0.557061
2022-09-14	09:36:17	0.601081
2022-09-14	09:36:17	0.619198
2022-09-14	09:36:17	0.626374
2022-09-14	09:36:17	0.599504
2022-09-14	09:36:18	0.615942
2022-09-14	09:36:18	0.592227
2022-09-14	09:36:18	0.651768
2022-09-14	09:36:19	0.56444
2022-09-14	09:36:19	0.573295
2022-09-14	09:36:19	0.566527
2022-09-14	09:36:19	0.561845
2022-09-14	09:36:20	0.561081
2022-09-14	09:36:20	0.586934
2022-09-14	09:36:20	0.55243
2022-09-14	09:36:20	0.5364
2022-09-14	09:36:21	0.52388
2022-09-14	09:36:21	0.529478
2022-09-14	09:36:21	0.564949
2022-09-14	09:36:21	0.558842
2022-09-14	09:36:22	0.569987
2022-09-14	09:36:22	0.548002
2022-09-14	09:36:22	0.563422
2022-09-14	09:36:23	0.620216
2022-09-14	09:36:23	0.620013
2022-09-14	09:36:23	0.559911
2022-09-14	09:36:23	0.521438
2022-09-14	09:36:24	0.551718
2022-09-14	09:36:24	0.603117
2022-09-14	09:36:24	1.14174
2022-09-14	09:36:24	0.935636
2022-09-14	09:36:25	0.662812
2022-09-14	09:36:25	0.88388
2022-09-14	09:36:25	0.63869
2022-09-14	09:36:25	0.465204
2022-09-14	09:36:26	0.603931
2022-09-14	09:36:26	0.430853
2022-09-14	09:36:26	0.434313
2022-09-14	09:36:27	0.48902
2022-09-14	09:36:27	0.473804
2022-09-14	09:36:27	0.512837
2022-09-14	09:36:27	0.36098
2022-09-14	09:36:28	0.281336
2022-09-14	09:36:28	0.238893
2022-09-14	09:36:28	0.169377
2022-09-14	09:36:28	0.0468323
2022-09-14	09:36:29	-0.231081
2022-09-14	09:36:29	-0.287926
2022-09-14	09:36:29	-0.347773
2022-09-14	09:36:29	-0.186654
2022-09-14	09:36:30	-0.0481295
2022-09-14	09:36:30	0.147239
2022-09-14	09:36:30	0.291514
2022-09-14	09:36:31	0.449987
2022-09-14	09:36:31	0.385254
2022-09-14	09:36:31	0.542303
2022-09-14	09:36:31	0.532277
2022-09-14	09:36:32	0.500216
2022-09-14	09:36:32	0.5307
2022-09-14	09:36:32	0.629173
2022-09-14	09:36:32	0.795025
2022-09-14	09:36:33	0.423168
2022-09-14	09:36:33	0.442354
2022-09-14	09:36:33	0.658384
2022-09-14	09:36:33	0.587494
2022-09-14	09:36:34	0.677468
2022-09-14	09:36:34	0.512226
2022-09-14	09:36:34	0.55131
2022-09-14	09:36:35	0.55243
2022-09-14	09:36:35	0.550343
2022-09-14	09:36:35	0.68215
2022-09-14	09:36:35	0.731565
2022-09-14	09:36:36	0.738384
2022-09-14	09:36:36	0.746832
2022-09-14	09:36:36	0.756959
2022-09-14	09:36:36	0.719555
2022-09-14	09:36:37	0.801794
2022-09-14	09:36:37	0.848715
2022-09-14	09:36:37	0.963422
2022-09-14	09:36:37	0.983728
2022-09-14	09:36:38	1.0024
2022-09-14	09:36:38	1.09762
2022-09-14	09:36:38	1.07691
2022-09-14	09:36:39	1.01355
2022-09-14	09:36:39	0.997366
2022-09-14	09:36:39	1.03635
2022-09-14	09:36:39	0.953295
2022-09-14	09:36:40	0.769478
2022-09-14	09:36:40	0.733193
2022-09-14	09:36:40	0.786781
2022-09-14	09:36:40	0.847646
2022-09-14	09:36:41	0.870191
2022-09-14	09:36:41	0.912888
2022-09-14	09:36:41	0.856857
2022-09-14	09:36:41	0.768766
2022-09-14	09:36:42	0.79126
2022-09-14	09:36:42	0.785254
2022-09-14	09:36:42	0.801539
2022-09-14	09:36:43	0.628155
2022-09-14	09:36:43	0.628562
2022-09-14	09:36:43	0.646374
2022-09-14	09:36:43	0.615026
2022-09-14	09:36:44	0.665967
2022-09-14	09:36:44	0.697875
2022-09-14	09:36:44	0.719555
2022-09-14	09:36:44	0.816552
2022-09-14	09:36:45	0.765763
2022-09-14	09:36:45	0.704135
2022-09-14	09:36:45	0.777417
2022-09-14	09:36:45	0.66958
2022-09-14	09:36:46	0.704033
2022-09-14	09:36:46	0.688868
2022-09-14	09:36:46	0.70785
2022-09-14	09:36:47	0.724389
2022-09-14	09:36:47	0.785662
2022-09-14	09:36:47	0.769173
2022-09-14	09:36:47	0.798588
2022-09-14	09:36:48	0.765407
2022-09-14	09:36:48	0.80729
2022-09-14	09:36:48	0.762557
2022-09-14	09:36:48	0.605305
2022-09-14	09:36:49	0.571209
2022-09-14	09:36:49	0.559402
2022-09-14	09:36:49	0.543015
2022-09-14	09:36:49	0.562557
2022-09-14	09:36:50	0.594771
2022-09-14	09:36:50	0.873652
2022-09-14	09:36:50	1.06576
2022-09-14	09:36:51	0.970903
2022-09-14	09:36:51	0.741947
2022-09-14	09:36:51	0.764695
2022-09-14	09:36:51	0.746527
2022-09-14	09:36:52	0.598537
2022-09-14	09:36:52	0.664644
2022-09-14	09:36:52	0.619809
2022-09-14	09:36:52	0.630954
2022-09-14	09:36:53	0.605102
2022-09-14	09:36:53	0.577621
2022-09-14	09:36:53	0.56388
2022-09-14	09:36:54	0.555891
2022-09-14	09:36:54	0.575229
2022-09-14	09:36:54	0.559555
2022-09-14	09:36:54	0.585356
2022-09-14	09:36:55	0.581845
2022-09-14	09:36:55	0.565662
2022-09-14	09:36:55	0.56958
2022-09-14	09:36:55	0.600929
2022-09-14	09:36:56	0.579758
2022-09-14	09:36:56	0.534822
2022-09-14	09:36:56	0.437621
2022-09-14	09:36:56	0.330089
2022-09-14	09:36:57	0.316908
2022-09-14	09:36:57	0.383117
2022-09-14	09:36:57	0.655992
2022-09-14	09:36:58	0.611209
2022-09-14	09:36:58	0.588715
2022-09-14	09:36:58	0.971463
2022-09-14	09:36:58	0.768817
2022-09-14	09:36:59	0.926629
2022-09-14	09:36:59	1.00846
2022-09-14	09:36:59	1.07172
2022-09-14	09:36:59	0.860115
2022-09-14	09:37:00	0.88958
2022-09-14	09:37:00	0.824491
2022-09-14	09:37:00	0.896298
2022-09-14	09:37:00	0.976959
2022-09-14	09:37:01	1.18729
2022-09-14	09:37:01	1.41808
2022-09-14	09:37:01	1.622
2022-09-14	09:37:02	1.65279
2022-09-14	09:37:02	2.12169
2022-09-14	09:37:02	1.78816
2022-09-14	09:37:02	0.873549
2022-09-14	09:37:03	0.585356
2022-09-14	09:37:03	0.547544
2022-09-14	09:37:03	0.540827
2022-09-14	09:37:03	0.703677
2022-09-14	09:37:04	0.772939
2022-09-14	09:37:04	1.1081
2022-09-14	09:37:04	0.995789
2022-09-14	09:37:04	0.869224
2022-09-14	09:37:05	0.87416
2022-09-14	09:37:05	0.712634
2022-09-14	09:37:05	0.704186
2022-09-14	09:37:06	0.67589
2022-09-14	09:37:06	0.658893
2022-09-14	09:37:06	0.682761
2022-09-14	09:37:06	0.663728
2022-09-14	09:37:07	0.728104
2022-09-14	09:37:07	0.719911
2022-09-14	09:37:07	0.735483
2022-09-14	09:37:07	0.751005
2022-09-14	09:37:08	0.740114
2022-09-14	09:37:08	1.10953
2022-09-14	09:37:08	0.883473
2022-09-14	09:37:08	0.985407
2022-09-14	09:37:09	0.910598
2022-09-14	09:37:09	0.753906
2022-09-14	09:37:09	0.574008
2022-09-14	09:37:10	0.499249
2022-09-14	09:37:10	0.451819
2022-09-14	09:37:10	0.378232
2022-09-14	09:37:10	0.505713
2022-09-14	09:37:11	0.420166
2022-09-14	09:37:11	0.585102
2022-09-14	09:37:11	0.576858
2022-09-14	09:37:11	0.596654
2022-09-14	09:37:12	0.50785
2022-09-14	09:37:12	0.515789
2022-09-14	09:37:12	0.509733
2022-09-14	09:37:12	0.488664
2022-09-14	09:37:13	0.506883
2022-09-14	09:37:13	0.485305
2022-09-14	09:37:13	0.450293
2022-09-14	09:37:14	0.394415
2022-09-14	09:37:14	0.466272
2022-09-14	09:37:14	0.472634
2022-09-14	09:37:14	0.43416
2022-09-14	09:37:15	0.439809
2022-09-14	09:37:15	0.373906
2022-09-14	09:37:15	0.423473
2022-09-14	09:37:15	0.480216
2022-09-14	09:37:16	0.380165
2022-09-14	09:37:16	0.415585
2022-09-14	09:37:16	0.39813
2022-09-14	09:37:16	0.399046
2022-09-14	09:37:17	0.400471
2022-09-14	09:37:17	0.461183
2022-09-14	09:37:17	0.289122
2022-09-14	09:37:18	0.231361
2022-09-14	09:37:18	0.10383
2022-09-14	09:37:18	-0.0972898
2022-09-14	09:37:18	-0.0505214
2022-09-14	09:37:19	0.0450511
2022-09-14	09:37:19	0.202863
2022-09-14	09:37:19	0.00952952
2022-09-14	09:37:19	0.241489
2022-09-14	09:37:20	0.258944
2022-09-14	09:37:20	0.286425
2022-09-14	09:37:20	0.193702
2022-09-14	09:37:20	0.563626
2022-09-14	09:37:21	0.725611
2022-09-14	09:37:21	0.723931
2022-09-14	09:37:21	0.729122
2022-09-14	09:37:22	0.27187
2022-09-14	09:37:22	0.262964
2022-09-14	09:37:22	0.44159
2022-09-14	09:37:22	0.684796
2022-09-14	09:37:23	0.736654
2022-09-14	09:37:23	0.425916
2022-09-14	09:37:23	0.18841
2022-09-14	09:37:23	0.171616
2022-09-14	09:37:24	0.0962979
2022-09-14	09:37:24	0.0961961
2022-09-14	09:37:24	0.247799
2022-09-14	09:37:24	0.198995
2022-09-14	09:37:25	0.292176
2022-09-14	09:37:25	0.183321
2022-09-14	09:37:25	0.18897
2022-09-14	09:37:26	0.254924
2022-09-14	09:37:26	0.115331
2022-09-14	09:37:26	0.0873412
2022-09-14	09:37:26	0.129682
2022-09-14	09:37:27	0.0305982
2022-09-14	09:37:27	0.271412
2022-09-14	09:37:27	0.365509
2022-09-14	09:37:27	0.637214
2022-09-14	09:37:28	2.94983
2022-09-14	09:37:28	2.57569
2022-09-14	09:37:28	3.14693
2022-09-14	09:37:28	5.99121
2022-09-14	09:37:29	3.32586
2022-09-14	09:37:29	3.58648
2022-09-14	09:37:29	0.911514
2022-09-14	09:37:30	0.921336
2022-09-14	09:37:30	0.312074
2022-09-14	09:37:30	-0.0397834
2022-09-14	09:37:30	0.0700893
2022-09-14	09:37:31	0.00255749
2022-09-14	09:37:31	0.0182827
2022-09-14	09:37:31	-0.122328
2022-09-14	09:37:31	0.0112089
2022-09-14	09:37:32	-0.161157
2022-09-14	09:37:32	-0.123498
2022-09-14	09:37:32	-0.13332
2022-09-14	09:37:32	-0.277951
2022-09-14	09:37:33	-0.0856358
2022-09-14	09:37:33	-0.198206
2022-09-14	09:37:33	-0.175254
2022-09-14	09:37:34	-0.0319972
2022-09-14	09:37:34	0.209631
2022-09-14	09:37:34	1.24256
2022-09-14	09:37:34	1.94897
2022-09-14	09:37:35	0.391056
2022-09-14	09:37:35	0.155687
2022-09-14	09:37:35	0.112023
2022-09-14	09:37:35	0.0280537
2022-09-14	09:37:36	-0.0174934
2022-09-14	09:37:36	-0.0621244
2022-09-14	09:37:36	-0.0538292
2022-09-14	09:37:36	-0.102124
2022-09-14	09:37:37	-0.00645013
2022-09-14	09:37:37	0.0690714
2022-09-14	09:37:37	0.108919
2022-09-14	09:37:38	0.142252
2022-09-14	09:37:38	-0.0293
2022-09-14	09:37:38	-0.0757631
2022-09-14	09:37:38	-0.0238038
2022-09-14	09:37:39	-0.0777987
2022-09-14	09:37:39	0.00143789
2022-09-14	09:37:39	-0.108638
2022-09-14	09:37:39	0.0137534
2022-09-14	09:37:40	-0.0855341
2022-09-14	09:37:40	0.0473412
2022-09-14	09:37:40	-0.131081
2022-09-14	09:37:40	0.0285626
2022-09-14	09:37:41	0.0570613
2022-09-14	09:37:41	0.353193
2022-09-14	09:37:41	0.227952
2022-09-14	09:37:42	0.613244
2022-09-14	09:37:42	0.769173
2022-09-14	09:37:42	0.676806
2022-09-14	09:37:42	0.790903
2022-09-14	09:37:43	0.806374
2022-09-14	09:37:43	0.432328
2022-09-14	09:37:43	0.847595
2022-09-14	09:37:43	0.796908
2022-09-14	09:37:44	0.342201
2022-09-14	09:37:44	0.55411
2022-09-14	09:37:44	0.634517
2022-09-14	09:37:44	0.481489
2022-09-14	09:37:45	0.303321
2022-09-14	09:37:45	0.480267
2022-09-14	09:37:45	0.518486
2022-09-14	09:37:46	0.402659
2022-09-14	09:37:46	0.34841
2022-09-14	09:37:46	0.38215
2022-09-14	09:37:46	0.377214
2022-09-14	09:37:47	0.35182
2022-09-14	09:37:47	0.396705
2022-09-14	09:37:47	0.382455
2022-09-14	09:37:47	0.400216
2022-09-14	09:37:48	0.71813
2022-09-14	09:37:48	0.288461
2022-09-14	09:37:48	0.260776
2022-09-14	09:37:48	0.265916
2022-09-14	09:37:49	0.21869
2022-09-14	09:37:49	0.357316
2022-09-14	09:37:49	0.399249
2022-09-14	09:37:50	0.330496
2022-09-14	09:37:50	0.301234
2022-09-14	09:37:50	0.268054
2022-09-14	09:37:50	0.250954
2022-09-14	09:37:51	0.282456
2022-09-14	09:37:51	0.27986
2022-09-14	09:37:51	0.228766
2022-09-14	09:37:51	0.15528
2022-09-14	09:37:52	-0.178664
2022-09-14	09:37:52	0.0673411
2022-09-14	09:37:52	0.198435
2022-09-14	09:37:52	0.742354
2022-09-14	09:37:53	1.67212
2022-09-14	09:37:53	0.902506
2022-09-14	09:37:53	0.917112
2022-09-14	09:37:54	1.04602
2022-09-14	09:37:54	0.338741
2022-09-14	09:37:54	0.441285
2022-09-14	09:37:54	0.427087
2022-09-14	09:37:55	0.274567
2022-09-14	09:37:55	0.726985
2022-09-14	09:37:55	0.224848
2022-09-14	09:37:55	0.417468
2022-09-14	09:37:56	0.2964
2022-09-14	09:37:56	0.275382
2022-09-14	09:37:56	0.420115
2022-09-14	09:37:56	0.194059
2022-09-14	09:37:57	0.36444
2022-09-14	09:37:57	0.376858
2022-09-14	09:37:57	0.312939
2022-09-14	09:37:58	0.44785
2022-09-14	09:37:58	0.399657
2022-09-14	09:37:58	0.276145
2022-09-14	09:37:58	0.370242
2022-09-14	09:37:59	0.211209
2022-09-14	09:37:59	0.240827
2022-09-14	09:37:59	0.265458
2022-09-14	09:37:59	0.0840333
2022-09-14	09:38:00	0.299148
2022-09-14	09:38:00	0.169682
2022-09-14	09:38:00	0.316654
2022-09-14	09:38:00	0.146222
2022-09-14	09:38:01	0.252328
2022-09-14	09:38:01	0.259911
2022-09-14	09:38:01	0.325356
2022-09-14	09:38:02	0.248359
2022-09-14	09:38:02	0.267646
2022-09-14	09:38:02	0.499911
2022-09-14	09:38:02	0.205153
2022-09-14	09:38:03	0.441896
2022-09-14	09:38:03	0.252684
2022-09-14	09:38:03	0.728868
2022-09-14	09:38:03	0.736043
2022-09-14	09:38:04	0.725153
2022-09-14	09:38:04	0.73757
2022-09-14	09:38:04	0.733092
2022-09-14	09:38:04	0.728766
2022-09-14	09:38:05	0.724796
2022-09-14	09:38:05	0.726425
2022-09-14	09:38:05	0.717468
2022-09-14	09:38:06	0.408155
2022-09-14	09:38:06	-0.242633
2022-09-14	09:38:06	0.340776
2022-09-14	09:38:06	0.575382
2022-09-14	09:38:07	0.542761
2022-09-14	09:38:07	0.361387
2022-09-14	09:38:07	0.19472
2022-09-14	09:38:07	-1.74121
2022-09-14	09:38:08	-1.74721
2022-09-14	09:38:08	-2.00675
2022-09-14	09:38:08	-1.4866
2022-09-14	09:38:08	-1.86416
2022-09-14	09:38:09	-1.91067
2022-09-14	09:38:09	-1.79307
2022-09-14	09:38:09	-1.62599
2022-09-14	09:38:10	-1.85195
2022-09-14	09:38:10	-2.06502
2022-09-14	09:38:10	-1.89027
2022-09-14	09:38:10	-2.0521
2022-09-14	09:38:11	-1.87871
2022-09-14	09:38:11	-2.27765
2022-09-14	09:38:11	-1.81312
2022-09-14	09:38:11	-2.09729
2022-09-14	09:38:12	-1.81485
2022-09-14	09:38:12	-2.37225
2022-09-14	09:38:12	-2.08742
2022-09-14	09:38:12	-2.35958
2022-09-14	09:38:13	-2.29648
2022-09-14	09:38:13	-2.40828
2022-09-14	09:38:13	-2.38212
2022-09-14	09:38:14	-2.20991
2022-09-14	09:38:14	-2.26029
2022-09-14	09:38:14	-2.09933
2022-09-14	09:38:14	-2.30966
2022-09-14	09:38:15	-1.70004
2022-09-14	09:38:15	-3.08416
2022-09-14	09:38:15	-3.29439
2022-09-14	09:38:15	-3.03139
2022-09-14	09:38:16	-3.48665
2022-09-14	09:38:16	0.285763
2022-09-14	09:38:16	0.188359
2022-09-14	09:38:17	0.316807
2022-09-14	09:38:17	0.257061
2022-09-14	09:38:17	0.364695
2022-09-14	09:38:17	0.226018
2022-09-14	09:38:18	0.299402
2022-09-14	09:38:18	0.207901
2022-09-14	09:38:18	0.503524
2022-09-14	09:38:18	0.719606
2022-09-14	09:38:19	0.726374
2022-09-14	09:38:19	0.729835
2022-09-14	09:38:19	0.72612
2022-09-14	09:38:19	0.726578
2022-09-14	09:38:20	0.727646
2022-09-14	09:38:20	0.730598
2022-09-14	09:38:20	0.731259
2022-09-14	09:38:20	0.731819
2022-09-14	09:38:21	0.729428
2022-09-14	09:38:21	0.728715
2022-09-14	09:38:21	0.733855
2022-09-14	09:38:22	0.733397
2022-09-14	09:38:22	0.733244
2022-09-14	09:38:22	0.732277
2022-09-14	09:38:22	0.730242
2022-09-14	09:38:23	0.733397
2022-09-14	09:38:23	0.73014
2022-09-14	09:38:23	0.730242
2022-09-14	09:38:23	0.722914
2022-09-14	09:38:24	0.729071
2022-09-14	09:38:24	0.732328
2022-09-14	09:38:24	0.730801
2022-09-14	09:38:24	0.727443
2022-09-14	09:38:25	0.728003
2022-09-14	09:38:25	0.730343
2022-09-14	09:38:25	0.735483
2022-09-14	09:38:26	0.732888
2022-09-14	09:38:26	0.731056
2022-09-14	09:38:26	0.734008
2022-09-14	09:38:26	0.738537
2022-09-14	09:38:27	0.733702
2022-09-14	09:38:27	0.724796
2022-09-14	09:38:27	0.730191
2022-09-14	09:38:27	0.727748
2022-09-14	09:38:28	0.731259
2022-09-14	09:38:28	0.732125
2022-09-14	09:38:28	0.728257
2022-09-14	09:38:28	0.735738
2022-09-14	09:38:29	0.72958
2022-09-14	09:38:29	0.734313
2022-09-14	09:38:29	0.72841
2022-09-14	09:38:30	0.735891
2022-09-14	09:38:30	-0.201259
2022-09-14	09:38:30	0.729122
2022-09-14	09:38:30	0.731972
2022-09-14	09:38:31	0.729733
2022-09-14	09:38:31	0.727036
2022-09-14	09:38:31	0.736043
2022-09-14	09:38:31	0.732837
2022-09-14	09:38:32	0.736857
2022-09-14	09:38:32	0.730649
2022-09-14	09:38:32	0.731717
2022-09-14	09:38:32	0.732175
2022-09-14	09:38:33	0.728206
2022-09-14	09:38:33	0.735738
2022-09-14	09:38:33	0.73299
2022-09-14	09:38:34	0.736603
2022-09-14	09:38:34	0.732023
2022-09-14	09:38:34	0.733906
2022-09-14	09:38:34	0.738486
2022-09-14	09:38:35	0.735127
2022-09-14	09:38:35	0.733702
2022-09-14	09:38:35	0.729275
2022-09-14	09:38:35	0.734364
2022-09-14	09:38:36	0.735687
2022-09-14	09:38:36	0.737875
2022-09-14	09:38:36	0.743829
2022-09-14	09:38:36	0.736807
2022-09-14	09:38:37	0.730649
2022-09-14	09:38:37	0.735229
2022-09-14	09:38:37	0.731158
2022-09-14	09:38:38	0.727137
2022-09-14	09:38:38	0.737366
2022-09-14	09:38:38	0.731616
2022-09-14	09:38:38	0.734669
2022-09-14	09:38:39	0.732074
2022-09-14	09:38:39	0.736857
2022-09-14	09:38:39	0.731259
2022-09-14	09:38:39	0.734313
2022-09-14	09:38:40	0.739453
2022-09-14	09:38:40	0.724949
2022-09-14	09:38:40	0.726985
2022-09-14	09:38:40	0.736756
2022-09-14	09:38:41	0.729428
2022-09-14	09:38:41	0.72729
2022-09-14	09:38:41	0.727697
2022-09-14	09:38:42	0.73014
2022-09-14	09:38:42	0.734975
2022-09-14	09:38:42	0.733092
2022-09-14	09:38:42	0.733193
2022-09-14	09:38:43	0.729224
2022-09-14	09:38:43	0.738079
2022-09-14	09:38:43	0.735382
2022-09-14	09:38:43	0.732684
2022-09-14	09:38:44	0.730547
2022-09-14	09:38:44	0.736196
2022-09-14	09:38:44	0.729122
2022-09-14	09:38:44	0.737163
2022-09-14	09:38:45	0.737417
2022-09-14	09:38:45	0.728766
2022-09-14	09:38:45	0.734313
2022-09-14	09:38:46	0.728257
2022-09-14	09:38:46	0.732786
2022-09-14	09:38:46	0.734364
2022-09-14	09:38:46	0.731972
2022-09-14	09:38:47	0.72902
2022-09-14	09:38:47	0.733702
2022-09-14	09:38:47	0.739198
2022-09-14	09:38:47	0.740623
2022-09-14	09:38:48	0.734568
2022-09-14	09:38:48	0.730903
2022-09-14	09:38:48	0.733804
2022-09-14	09:38:48	0.730038
2022-09-14	09:38:49	0.734466
2022-09-14	09:38:49	0.735534
2022-09-14	09:38:49	0.73701
2022-09-14	09:38:50	0.732125
2022-09-14	09:38:50	0.733244
2022-09-14	09:38:50	0.739453
2022-09-14	09:38:50	0.730954
2022-09-14	09:38:51	0.735433
2022-09-14	09:38:51	0.734211
2022-09-14	09:38:51	0.730751
2022-09-14	09:38:51	0.72841
2022-09-14	09:38:52	0.72958
2022-09-14	09:38:52	0.738689
2022-09-14	09:38:52	0.731361
2022-09-14	09:38:52	0.734568
2022-09-14	09:38:53	0.624338
2022-09-14	09:38:53	0.514517
2022-09-14	09:38:53	0.730089
2022-09-14	09:38:54	0.732023
2022-09-14	09:38:54	0.735687
2022-09-14	09:38:54	0.732125
2022-09-14	09:38:54	0.734109
2022-09-14	09:38:55	0.729784
2022-09-14	09:38:55	0.730242
2022-09-14	09:38:55	0.740267
2022-09-14	09:38:55	0.742354
2022-09-14	09:38:56	0.729835
2022-09-14	09:38:56	0.730598
2022-09-14	09:38:56	0.727087
2022-09-14	09:38:56	0.736501
2022-09-14	09:38:57	0.72729
2022-09-14	09:38:57	0.734669
2022-09-14	09:38:57	0.7307
2022-09-14	09:38:58	0.736196
2022-09-14	09:38:58	0.733041
2022-09-14	09:38:58	0.734771
2022-09-14	09:38:58	0.733855
2022-09-14	09:38:59	0.72673
2022-09-14	09:38:59	0.409631
2022-09-14	09:38:59	-0.18304
2022-09-14	09:38:59	0.391005
2022-09-14	09:39:00	0.384389
2022-09-14	09:39:00	0.730496
2022-09-14	09:39:00	0.662812
2022-09-14	09:39:00	-0.641361
2022-09-14	09:39:01	-1.99286
2022-09-14	09:39:01	-1.33943
2022-09-14	09:39:01	0.358486
2022-09-14	09:39:02	0.564287
2022-09-14	09:39:02	0.838689
2022-09-14	09:39:02	0.917417
2022-09-14	09:39:02	1.99996
2022-09-14	09:39:03	1.03991
2022-09-14	09:39:03	0.983422
2022-09-14	09:39:03	1.76536
2022-09-14	09:39:03	1.04286
2022-09-14	09:39:04	1.01126
2022-09-14	09:39:04	0.87131
2022-09-14	09:39:04	0.479453
2022-09-14	09:39:04	0.672023
2022-09-14	09:39:05	0.537977
2022-09-14	09:39:05	0.524898
2022-09-14	09:39:05	0.349122
2022-09-14	09:39:06	0.473244
2022-09-14	09:39:06	0.318741
2022-09-14	09:39:06	0.564135
2022-09-14	09:39:06	0.641285
2022-09-14	09:39:07	0.50388
2022-09-14	09:39:07	0.696654
2022-09-14	09:39:07	0.638995
2022-09-14	09:39:07	0.572481
2022-09-14	09:39:08	0.589936
2022-09-14	09:39:08	0.537163
2022-09-14	09:39:08	0.629173
2022-09-14	09:39:08	1.58622
2022-09-14	09:39:09	1.97431
2022-09-14	09:39:09	3.42607
2022-09-14	09:39:09	4.5823
2022-09-14	09:39:10	2.24566
2022-09-14	09:39:10	1.28785
2022-09-14	09:39:10	0.912532
2022-09-14	09:39:10	1.55024
2022-09-14	09:39:11	1.7793
2022-09-14	09:39:11	3.53584
2022-09-14	09:39:11	5.75935
2022-09-14	09:39:11	4.78576
2022-09-14	09:39:12	4.70245
2022-09-14	09:39:12	4.3854
2022-09-14	09:39:12	3.54174
2022-09-14	09:39:12	7.36958
2022-09-14	09:39:13	8.96627
2022-09-14	09:39:13	5.97874
2022-09-14	09:39:13	3.0193
2022-09-14	09:39:14	1.46795
2022-09-14	09:39:14	1.68546
2022-09-14	09:39:14	1.4936
2022-09-14	09:39:14	1.13838
2022-09-14	09:39:15	0.544033
2022-09-14	09:39:15	0.417977
2022-09-14	09:39:15	0.380573
2022-09-14	09:39:15	0.476705
2022-09-14	09:39:16	0.649377
2022-09-14	09:39:16	1.97009
2022-09-14	09:39:16	3.92266
2022-09-14	09:39:16	4.56515
2022-09-14	09:39:17	6.04255
2022-09-14	09:39:17	7.70647
2022-09-14	09:39:17	10.3763
2022-09-14	09:39:18	10.9971
2022-09-14	09:39:18	4.14785
2022-09-14	09:39:18	4.7192
2022-09-14	09:39:18	4.86103
2022-09-14	09:39:19	2.4678
2022-09-14	09:39:19	0.580267
2022-09-14	09:39:19	0.713448
2022-09-14	09:39:19	1.72393
2022-09-14	09:39:20	3.49172
2022-09-14	09:39:20	5.26479
2022-09-14	09:39:20	5.61441
2022-09-14	09:39:20	3.38174
2022-09-14	09:39:21	1.68469
2022-09-14	09:39:21	0.963219
2022-09-14	09:39:21	1.30744
2022-09-14	09:39:22	1.78078
2022-09-14	09:39:22	0.999249
2022-09-14	09:39:22	1.09742
2022-09-14	09:39:22	1.65635
2022-09-14	09:39:23	4.4851
2022-09-14	09:39:23	4.76307
2022-09-14	09:39:23	2.31976
2022-09-14	09:39:23	0.89813
2022-09-14	09:39:24	0.704491
2022-09-14	09:39:24	0.672939
2022-09-14	09:39:24	0.799809
2022-09-14	09:39:24	1.00078
2022-09-14	09:39:25	1.24296
2022-09-14	09:39:25	1.148
2022-09-14	09:39:25	2.65686
2022-09-14	09:39:26	2.44785
2022-09-14	09:39:26	2.00307
2022-09-14	09:39:26	6.26566
2022-09-14	09:39:26	7.67049
2022-09-14	09:39:27	9.32194
2022-09-14	09:39:27	8.35227
2022-09-14	09:39:27	6.76703
2022-09-14	09:39:27	6.60719
2022-09-14	09:39:28	6.82296
2022-09-14	09:39:28	5.64143
2022-09-14	09:39:28	5.40907
2022-09-14	09:39:28	6.085
2022-09-14	09:39:29	6.70556
2022-09-14	09:39:29	6.52836
2022-09-14	09:39:29	6.75136
2022-09-14	09:39:30	7.70337
2022-09-14	09:39:30	12.7615
2022-09-14	09:39:30	15.7258
2022-09-14	09:39:30	7.08108
2022-09-14	09:39:31	0.606069
2022-09-14	09:39:31	0.473295
2022-09-14	09:39:31	0.347748
2022-09-14	09:39:31	0.390293
2022-09-14	09:39:32	0.337774
2022-09-14	09:39:32	0.259555
2022-09-14	09:39:32	0.427137
2022-09-14	09:39:32	0.318741
2022-09-14	09:39:33	0.350852
2022-09-14	09:39:33	0.30444
2022-09-14	09:39:33	0.0463234
2022-09-14	09:39:34	0.250954
2022-09-14	09:39:34	0.132786
2022-09-14	09:39:34	-0.169809
2022-09-14	09:39:34	-0.430063
2022-09-14	09:39:35	0.113092
2022-09-14	09:39:35	0.89813
2022-09-14	09:39:35	3.91523
2022-09-14	09:39:35	8.4452
2022-09-14	09:39:36	15.0393
2022-09-14	09:39:36	12.1142
2022-09-14	09:39:36	7.44352
2022-09-14	09:39:36	5.6021
2022-09-14	09:39:37	6.23263
2022-09-14	09:39:37	5.88352
2022-09-14	09:39:37	4.08541
2022-09-14	09:39:37	6.06001
2022-09-14	09:39:38	6.38947
2022-09-14	09:39:38	1.0133
2022-09-14	09:39:38	0.743473
2022-09-14	09:39:39	0.790293
2022-09-14	09:39:39	1.61172
2022-09-14	09:39:39	3.07793
2022-09-14	09:39:39	3.47049
2022-09-14	09:39:40	3.39772
2022-09-14	09:39:40	1.85767
2022-09-14	09:39:40	0.925611
2022-09-14	09:39:40	0.556247
2022-09-14	09:39:41	0.476043
2022-09-14	09:39:41	0.451412
2022-09-14	09:39:41	0.61869
