# Supplementary material for: Comparing efficacy in reducing pulling and welfare impacts of four types of leash walking equipment
Source: PeerJ journal article supplement (doi:10.7717/peerj.18131), 2024-10-24
Supplement: Shelter_2_Tension_files.zip [file Richa_prong_202291413631 copy.xlsx]

## Sheet: Averaged Newtons
Date	Time	Averaged newtons	Impulse	Total steps
2022-09-14	13:06:44	1.8111	1.8111	0
2022-09-14	13:06:45	1.96094	3.77205	0		Impulse newtons	689.903
2022-09-14	13:06:46	2.10792	5.87996	0		Total steps	1
2022-09-14	13:06:47	3.48663	9.36659	0
2022-09-14	13:06:48	2.53232	11.8989	0
2022-09-14	13:06:49	1.479	13.3779	0
2022-09-14	13:06:50	-0.792637	13.3779	0
2022-09-14	13:06:51	-0.874527	13.3779	0
2022-09-14	13:06:52	-0.762813	13.3779	0
2022-09-14	13:06:53	-0.0282951	13.3779	0
2022-09-14	13:06:54	-0.133558	13.3779	0
2022-09-14	13:06:55	1.04552	14.4234	0
2022-09-14	13:06:56	0.864231	15.2877	0
2022-09-14	13:06:57	1.59779	16.8854	0
2022-09-14	13:06:58	2.24889	19.1343	0
2022-09-14	13:06:59	1.89486	21.0292	0
2022-09-14	13:07:00	1.8069	22.8361	0
2022-09-14	13:07:01	1.45325	24.2893	0
2022-09-14	13:07:02	2.32687	26.6162	0
2022-09-14	13:07:03	2.40405	29.0203	0
2022-09-14	13:07:04	2.20197	31.2222	0
2022-09-14	13:07:05	2.71184	33.9341	0
2022-09-14	13:07:06	2.35106	36.2851	0
2022-09-14	13:07:07	3.51357	39.7987	0
2022-09-14	13:07:08	2.84719	42.6459	0
2022-09-14	13:07:09	2.05743	44.7033	0
2022-09-14	13:07:10	1.95512	46.6584	0
2022-09-14	13:07:11	1.99748	48.6559	0
2022-09-14	13:07:12	1.92659	50.5825	0
2022-09-14	13:07:13	2.00418	52.5867	0
2022-09-14	13:07:14	1.86362	54.4503	0
2022-09-14	13:07:15	2.08194	56.5323	0
2022-09-14	13:07:16	1.84713	58.3794	0
2022-09-14	13:07:17	1.8734	60.2528	0
2022-09-14	13:07:18	2.38231	62.6351	0
2022-09-14	13:07:19	3.16224	65.7973	0
2022-09-14	13:07:20	3.38177	69.1791	0
2022-09-14	13:07:21	2.32693	71.506	0
2022-09-14	13:07:22	2.75492	74.261	0
2022-09-14	13:07:23	5.50252	79.7635	0
2022-09-14	13:07:24	8.52916	88.2926	0
2022-09-14	13:07:25	5.61006	93.9027	0
2022-09-14	13:07:26	4.93698	98.8397	0
2022-09-14	13:07:27	4.20287	103.043	0
2022-09-14	13:07:28	4.21487	107.257	0
2022-09-14	13:07:29	2.99354	110.251	0
2022-09-14	13:07:30	2.08441	112.335	0
2022-09-14	13:07:31	1.82795	114.163	0
2022-09-14	13:07:32	1.88375	116.047	0
2022-09-14	13:07:33	0.859439	116.907	0
2022-09-14	13:07:34	-2.89144	116.907	0
2022-09-14	13:07:35	-0.993599	116.907	0
2022-09-14	13:07:36	1.72586	118.632	0
2022-09-14	13:07:37	3.4237	122.056	0
2022-09-14	13:07:38	2.74549	124.802	0
2022-09-14	13:07:39	2.19801	127	0
2022-09-14	13:07:40	3.20836	130.208	0
2022-09-14	13:07:41	3.2177	133.426	0
2022-09-14	13:07:42	2.57837	136.004	0
2022-09-14	13:07:43	0.461854	136.466	0
2022-09-14	13:07:44	1.67124	138.137	0
2022-09-14	13:07:45	1.96745	140.105	0
2022-09-14	13:07:46	1.80894	141.913	0
2022-09-14	13:07:47	2.51997	144.433	0
2022-09-14	13:07:48	2.55918	146.993	0
2022-09-14	13:07:49	4.64859	151.641	0
2022-09-14	13:07:50	1.06864	152.71	0
2022-09-14	13:07:51	1.56644	154.276	0
2022-09-14	13:07:52	1.54074	155.817	0
2022-09-14	13:07:53	1.54617	157.363	0
2022-09-14	13:07:54	1.56315	158.926	0
2022-09-14	13:07:55	1.53972	160.466	0
2022-09-14	13:07:56	1.68388	162.15	0
2022-09-14	13:07:57	1.7833	163.933	0
2022-09-14	13:07:58	2.52665	166.46	0
2022-09-14	13:07:59	2.67169	169.132	0
2022-09-14	13:08:00	1.75466	170.886	0
2022-09-14	13:08:01	1.19417	172.08	0
2022-09-14	13:08:02	1.06717	173.148	0
2022-09-14	13:08:03	1.45127	174.599	0
2022-09-14	13:08:04	1.73308	176.332	0
2022-09-14	13:08:05	2.10661	178.439	0
2022-09-14	13:08:06	1.83814	180.277	0
2022-09-14	13:08:07	1.54942	181.826	0
2022-09-14	13:08:08	2.95409	184.78	0
2022-09-14	13:08:09	3.06909	187.849	0
2022-09-14	13:08:10	3.12031	190.97	0
2022-09-14	13:08:11	3.25709	194.227	0
2022-09-14	13:08:12	2.03955	196.266	0
2022-09-14	13:08:13	3.19727	199.464	0
2022-09-14	13:08:14	3.20316	202.667	0
2022-09-14	13:08:15	3.21514	205.882	0
2022-09-14	13:08:16	3.21391	209.096	0
2022-09-14	13:08:17	3.21227	212.308	0
2022-09-14	13:08:18	3.20882	215.517	0
2022-09-14	13:08:19	3.21921	218.736	0
2022-09-14	13:08:20	3.21125	221.947	0
2022-09-14	13:08:21	3.20701	225.154	0
2022-09-14	13:08:22	3.20676	228.361	0
2022-09-14	13:08:23	3.20774	231.569	0
2022-09-14	13:08:24	3.2168	234.786	0
2022-09-14	13:08:25	3.21148	237.997	0
2022-09-14	13:08:26	3.20397	241.201	0
2022-09-14	13:08:27	3.21334	244.414	0
2022-09-14	13:08:28	3.19054	247.605	0
2022-09-14	13:08:29	3.20412	250.809	0
2022-09-14	13:08:30	2.747	253.556	0
2022-09-14	13:08:31	1.96462	255.521	0
2022-09-14	13:08:32	1.88522	257.406	0
2022-09-14	13:08:33	1.89524	259.301	0
2022-09-14	13:08:34	1.86611	261.167	0
2022-09-14	13:08:35	1.94742	263.115	0
2022-09-14	13:08:36	1.91686	265.031	0
2022-09-14	13:08:37	1.85868	266.89	0
2022-09-14	13:08:38	2.30595	269.196	0
2022-09-14	13:08:39	2.07549	271.272	0
2022-09-14	13:08:40	1.84306	273.115	0
2022-09-14	13:08:41	1.70712	274.822	0
2022-09-14	13:08:42	2.05227	276.874	0
2022-09-14	13:08:43	1.99552	278.87	0
2022-09-14	13:08:44	3.00689	281.876	0
2022-09-14	13:08:45	2.72066	284.597	0
2022-09-14	13:08:46	1.83474	286.432	0
2022-09-14	13:08:47	3.1992	289.631	0
2022-09-14	13:08:48	3.21487	292.846	0
2022-09-14	13:08:49	3.22404	296.07	0
2022-09-14	13:08:50	3.21963	299.29	0
2022-09-14	13:08:51	2.99195	302.282	0
2022-09-14	13:08:52	3.1181	305.4	0
2022-09-14	13:08:53	2.45837	307.858	0
2022-09-14	13:08:54	2.25732	310.115	0
2022-09-14	13:08:55	2.1644	312.28	0
2022-09-14	13:08:56	2.36026	314.64	0
2022-09-14	13:08:57	2.61563	317.256	0
2022-09-14	13:08:58	1.95975	319.215	0
2022-09-14	13:08:59	2.89625	322.112	0
2022-09-14	13:09:00	2.55013	324.662	0
2022-09-14	13:09:01	2.2932	326.955	0
2022-09-14	13:09:02	2.97407	329.929	0
2022-09-14	13:09:03	2.82829	332.757	0
2022-09-14	13:09:04	2.8672	335.625	0
2022-09-14	13:09:05	2.74447	338.369	0
2022-09-14	13:09:06	3.22472	341.594	0
2022-09-14	13:09:07	4.25833	345.852	0
2022-09-14	13:09:08	4.85089	350.703	0
2022-09-14	13:09:09	3.21951	353.922	0
2022-09-14	13:09:10	4.15606	358.079	0
2022-09-14	13:09:11	2.76422	360.843	0
2022-09-14	13:09:12	3.00529	363.848	0
2022-09-14	13:09:13	3.15166	367	0
2022-09-14	13:09:14	3.02285	370.023	0
2022-09-14	13:09:15	2.98284	373.005	0
2022-09-14	13:09:16	2.61533	375.621	0
2022-09-14	13:09:17	2.7052	378.326	0
2022-09-14	13:09:18	2.3812	380.707	0
2022-09-14	13:09:19	1.83927	382.546	0
2022-09-14	13:09:20	1.67189	384.218	0
2022-09-14	13:09:21	1.68658	385.905	0
2022-09-14	13:09:22	1.69779	387.603	0
2022-09-14	13:09:23	1.80197	389.405	0
2022-09-14	13:09:24	1.76002	391.165	0
2022-09-14	13:09:25	1.85647	393.021	0
2022-09-14	13:09:26	2.43559	395.457	0
2022-09-14	13:09:27	1.85321	397.31	0
2022-09-14	13:09:28	0.760891	398.071	0
2022-09-14	13:09:29	2.48443	400.555	0
2022-09-14	13:09:30	2.77995	403.335	0
2022-09-14	13:09:31	3.09418	406.429	0
2022-09-14	13:09:32	3.20667	409.636	0
2022-09-14	13:09:33	2.60684	412.243	0
2022-09-14	13:09:34	2.55058	414.793	0
2022-09-14	13:09:35	2.52583	417.319	0
2022-09-14	13:09:36	1.9331	419.252	0
2022-09-14	13:09:37	0.966664	420.219	0
2022-09-14	13:09:38	-0.0094502	420.219	0
2022-09-14	13:09:39	2.22227	422.441	0
2022-09-14	13:09:40	1.18409	423.625	0
2022-09-14	13:09:41	-0.382963	423.625	0
2022-09-14	13:09:42	-1.0408	423.625	0
2022-09-14	13:09:43	-1.25095	423.625	0
2022-09-14	13:09:44	-1.09915	423.625	0
2022-09-14	13:09:45	-1.0769	423.625	0
2022-09-14	13:09:46	1.00096	424.626	0
2022-09-14	13:09:47	3.87434	428.501	0
2022-09-14	13:09:48	1.61069	430.111	0
2022-09-14	13:09:49	1.86683	431.978	0
2022-09-14	13:09:50	0.442218	432.42	0
2022-09-14	13:09:51	-0.25959	432.42	0
2022-09-14	13:09:52	1.15455	433.575	0
2022-09-14	13:09:53	2.81629	436.391	0
2022-09-14	13:09:54	1.07796	437.469	0
2022-09-14	13:09:55	1.20005	438.669	0
2022-09-14	13:09:56	1.37498	440.044	0
2022-09-14	13:09:57	0.964003	441.008	0
2022-09-14	13:09:58	0.845858	441.854	0
2022-09-14	13:09:59	0.893036	442.747	0
2022-09-14	13:10:00	1.03882	443.786	0
2022-09-14	13:10:01	0.861287	444.647	0
2022-09-14	13:10:02	1.15885	445.806	0
2022-09-14	13:10:03	1.21318	447.019	0
2022-09-14	13:10:04	1.2653	448.285	0
2022-09-14	13:10:05	1.87526	450.16	0
2022-09-14	13:10:06	0.0689487	450.229	0
2022-09-14	13:10:07	-10.77	450.229	0
2022-09-14	13:10:08	-3.37061	450.229	0
2022-09-14	13:10:09	-8.08134	450.229	0
2022-09-14	13:10:10	-14.0535	450.229	0
2022-09-14	13:10:11	-1.55936	450.229	0
2022-09-14	13:10:12	-0.346686	450.229	0
2022-09-14	13:10:13	3.16648	453.395	0
2022-09-14	13:10:14	4.15759	457.553	0
2022-09-14	13:10:15	0.268925	457.822	0
2022-09-14	13:10:16	3.234	461.056	0
2022-09-14	13:10:17	3.24064	464.296	0
2022-09-14	13:10:18	3.22325	467.52	0
2022-09-14	13:10:19	3.17809	470.698	0
2022-09-14	13:10:20	2.93332	473.631	0
2022-09-14	13:10:21	2.48411	476.115	0
2022-09-14	13:10:22	1.78771	477.903	0
2022-09-14	13:10:23	0.878831	478.782	0
2022-09-14	13:10:24	3.48657	482.268	0
2022-09-14	13:10:25	6.38238	488.651	0
2022-09-14	13:10:26	2.60463	491.255	0
2022-09-14	13:10:27	-0.873624	491.255	0
2022-09-14	13:10:28	-2.17447	491.255	0
2022-09-14	13:10:29	0.778247	492.034	0
2022-09-14	13:10:30	0.50979	492.543	0
2022-09-14	13:10:31	-0.154837	492.543	0
2022-09-14	13:10:32	-0.319748	492.543	0
2022-09-14	13:10:33	0.32075	492.864	0
2022-09-14	13:10:34	0.739217	493.603	0
2022-09-14	13:10:35	11.9278	505.531	0
2022-09-14	13:10:36	2.44883	507.98	0
2022-09-14	13:10:37	1.83306	509.813	0
2022-09-14	13:10:38	1.27017	511.083	0
2022-09-14	13:10:39	2.37339	513.457	0
2022-09-14	13:10:40	1.4468	514.903	0
2022-09-14	13:10:41	1.27279	516.176	0
2022-09-14	13:10:42	1.32614	517.502	0
2022-09-14	13:10:43	1.51828	519.021	0
2022-09-14	13:10:44	1.35772	520.378	0
2022-09-14	13:10:45	2.20741	522.586	0
2022-09-14	13:10:46	1.9374	524.523	0
2022-09-14	13:10:47	1.65268	526.176	0
2022-09-14	13:10:48	1.46621	527.642	0
2022-09-14	13:10:49	1.45419	529.096	0
2022-09-14	13:10:50	1.35619	530.452	0
2022-09-14	13:10:51	1.43452	531.887	0
2022-09-14	13:10:52	0.318034	532.205	0
2022-09-14	13:10:53	0.33322	532.538	0
2022-09-14	13:10:54	6.62357	539.162	0
2022-09-14	13:10:55	7.96104	547.123	0
2022-09-14	13:10:56	9.23187	556.355	0
2022-09-14	13:10:57	12.6078	568.962	0
2022-09-14	13:10:58	5.6589	574.621	0
2022-09-14	13:10:59	12.2311	586.852	0
2022-09-14	13:11:00	31.7537	618.606	1
2022-09-14	13:11:01	5.59969	624.206	1
2022-09-14	13:11:02	1.54233	625.748	1
2022-09-14	13:11:03	1.71369	627.462	1
2022-09-14	13:11:04	-2.91003	627.462	1
2022-09-14	13:11:05	-8.14235	627.462	1
2022-09-14	13:11:06	-9.79554	627.462	1
2022-09-14	13:11:07	-11.1894	627.462	1
2022-09-14	13:11:08	-12.5454	627.462	1
2022-09-14	13:11:09	-14.9508	627.462	1
2022-09-14	13:11:10	-12.8653	627.462	1
2022-09-14	13:11:11	-2.35732	627.462	1
2022-09-14	13:11:12	-2.46241	627.462	1
2022-09-14	13:11:13	-2.2254	627.462	1
2022-09-14	13:11:14	-1.852	627.462	1
2022-09-14	13:11:15	-1.58154	627.462	1
2022-09-14	13:11:16	-1.37077	627.462	1
2022-09-14	13:11:17	-1.02042	627.462	1
2022-09-14	13:11:18	-0.560212	627.462	1
2022-09-14	13:11:19	-1.14719	627.462	1
2022-09-14	13:11:20	-1.63638	627.462	1
2022-09-14	13:11:21	-1.78539	627.462	1
2022-09-14	13:11:22	-1.21312	627.462	1
2022-09-14	13:11:23	-0.810012	627.462	1
2022-09-14	13:11:24	-0.753758	627.462	1
2022-09-14	13:11:25	-0.458683	627.462	1
2022-09-14	13:11:26	-0.195697	627.462	1
2022-09-14	13:11:27	-0.180587	627.462	1
2022-09-14	13:11:28	-1.86638	627.462	1
2022-09-14	13:11:29	0.292416	627.754	1
2022-09-14	13:11:30	2.04606	629.8	1
2022-09-14	13:11:31	1.93138	631.732	1
2022-09-14	13:11:32	2.06609	633.798	1
2022-09-14	13:11:33	2.03831	635.836	1
2022-09-14	13:11:34	2.2026	638.039	1
2022-09-14	13:11:35	1.98134	640.02	1
2022-09-14	13:11:36	2.88709	642.907	1
2022-09-14	13:11:37	4.34413	647.251	1
2022-09-14	13:11:38	3.82698	651.078	1
2022-09-14	13:11:39	5.23588	656.314	1
2022-09-14	13:11:40	12.1428	668.457	1
2022-09-14	13:11:41	6.16448	674.621	1
2022-09-14	13:11:42	6.00535	680.627	1
2022-09-14	13:11:43	4.72572	685.352	1
2022-09-14	13:11:44	4.5502	689.903	1

## Sheet: Richa_prong_202291413631 (4)
Date	Time	Lbs	Newtons	Averaged newtons		Total Force x time		total steps > 13.345			**GoPro Fitting: 1256
2022-09-14	13:06:44	0.440166	1.72636	1.8111	1.72636	FALSE	0
2022-09-14	13:06:44	0.388104	1.68041	1.8111	1.68041	FALSE	0
2022-09-14	13:06:44	0.377774	2.02653	1.8111	3.7529	FALSE	0
2022-09-14	13:06:45	0.455585	1.87102	1.96094	3.55143	FALSE	0
2022-09-14	13:06:45	0.420624	2.07158	1.96094	5.82448	FALSE	0
2022-09-14	13:06:45	0.465713	2.13746	1.96094	5.68889	FALSE	0
2022-09-14	13:06:45	0.480522	1.76372	1.96094	7.5882	FALSE	0
2022-09-14	13:06:46	0.396501	1.91539	2.10792	7.60428	FALSE	0
2022-09-14	13:06:46	0.430598	1.85812	2.10792	9.44631	FALSE	0
2022-09-14	13:06:46	0.417723	2.02246	2.10792	9.62674	FALSE	0
2022-09-14	13:06:46	0.454669	2.6357	2.10792	12.082	FALSE	0
2022-09-14	13:06:47	0.592532	2.6357	3.48663	12.2624	FALSE	0
2022-09-14	13:06:47	0.803473	3.57401	3.48663	15.656	FALSE	0
2022-09-14	13:06:47	0.825865	3.67361	3.48663	15.9361	FALSE	0
2022-09-14	13:06:47	0.913448	4.0632	3.48663	19.7192	FALSE	0
2022-09-14	13:06:48	0.614262	2.73236	2.53232	18.6684	FALSE	0
2022-09-14	13:06:48	0.595789	2.65019	2.53232	22.3694	FALSE	0
2022-09-14	13:06:48	0.497824	2.21442	2.53232	20.8828	FALSE	0
2022-09-14	13:06:49	0.502252	2.23412	1.479	24.6035	FALSE	0
2022-09-14	13:06:49	0.445458	1.98149	1.479	22.8643	FALSE	0
2022-09-14	13:06:49	0.36612	1.62857	1.479	26.2321	FALSE	0
2022-09-14	13:06:49	0.0161453	0.0718175	1.479	22.9361	FALSE	0
2022-09-14	13:06:50	-0.0808012	-0.35942	-0.792637	26.2321	FALSE	0
2022-09-14	13:06:50	-0.158969	-0.707126	-0.792637	22.9361	FALSE	0
2022-09-14	13:06:50	-0.264414	-1.17617	-0.792637	26.2321	FALSE	0
2022-09-14	13:06:50	-0.208587	-0.927837	-0.792637	22.9361	FALSE	0
2022-09-14	13:06:51	-0.224974	-1.00073	-0.874527	26.2321	FALSE	0
2022-09-14	13:06:51	-0.14874	-0.661625	-0.874527	22.9361	FALSE	0
2022-09-14	13:06:51	-0.20131	-0.895467	-0.874527	26.2321	FALSE	0
2022-09-14	13:06:51	-0.211386	-0.940287	-0.874527	22.9361	FALSE	0
2022-09-14	13:06:52	-0.171437	-0.762586	-0.762813	26.2321	FALSE	0
2022-09-14	13:06:52	-0.140852	-0.626538	-0.762813	22.9361	FALSE	0
2022-09-14	13:06:52	-0.202175	-0.899315	-0.762813	26.2321	FALSE	0
2022-09-14	13:06:53	0.0205728	0.0915119	-0.0282951	23.0276	FALSE	0
2022-09-14	13:06:53	0.143881	0.640011	-0.0282951	26.8721	FALSE	0
2022-09-14	13:06:53	-0.152659	-0.679058	-0.0282951	23.0276	FALSE	0
2022-09-14	13:06:53	-0.0372389	-0.165646	-0.0282951	26.8721	FALSE	0
2022-09-14	13:06:54	0.027443	0.122072	-0.133558	23.1497	FALSE	0
2022-09-14	13:06:54	0.0637788	0.283701	-0.133558	27.1558	FALSE	0
2022-09-14	13:06:54	-0.174084	-0.77436	-0.133558	23.1497	FALSE	0
2022-09-14	13:06:54	-0.0372389	-0.165646	-0.133558	27.1558	FALSE	0
2022-09-14	13:06:55	0.090191	0.401188	1.04552	23.5509	FALSE	0
2022-09-14	13:06:55	0.368155	1.63763	1.04552	28.7934	FALSE	0
2022-09-14	13:06:55	0.246781	1.09773	1.04552	24.6486	FALSE	0
2022-09-14	13:06:56	0.262557	1.16791	0.864231	29.9613	FALSE	0
2022-09-14	13:06:56	0.177774	0.790774	0.864231	25.4394	FALSE	0
2022-09-14	13:06:56	0.150802	0.670797	0.864231	30.6321	FALSE	0
2022-09-14	13:06:56	0.186018	0.827445	0.864231	26.2669	FALSE	0
2022-09-14	13:06:57	0.205255	0.913015	1.59779	31.5452	FALSE	0
2022-09-14	13:06:57	0.5393	2.39891	1.59779	28.6658	FALSE	0
2022-09-14	13:06:57	0.280878	1.2494	1.59779	32.7946	FALSE	0
2022-09-14	13:06:57	0.411361	1.82982	1.59779	30.4956	FALSE	0
2022-09-14	13:06:58	0.569784	2.53451	2.24889	35.3291	FALSE	0
2022-09-14	13:06:58	0.524949	2.33508	2.24889	32.8307	FALSE	0
2022-09-14	13:06:58	0.389021	1.73044	2.24889	37.0595	FALSE	0
2022-09-14	13:06:58	0.538537	2.39552	2.24889	35.2262	FALSE	0
2022-09-14	13:06:59	0.417367	1.85653	1.89486	38.9161	FALSE	0
2022-09-14	13:06:59	0.536196	2.38511	1.89486	37.6113	FALSE	0
2022-09-14	13:06:59	0.324389	1.44295	1.89486	40.359	FALSE	0
2022-09-14	13:07:00	0.431056	1.91742	1.8069	39.5287	FALSE	0
2022-09-14	13:07:00	0.32042	1.42529	1.8069	41.7843	FALSE	0
2022-09-14	13:07:00	0.556857	2.47701	1.8069	42.0057	FALSE	0
2022-09-14	13:07:00	0.316501	1.40786	1.8069	43.1922	FALSE	0
2022-09-14	13:07:01	0.26271	1.16859	1.45325	43.1743	FALSE	0
2022-09-14	13:07:01	0.167188	0.743686	1.45325	43.9358	FALSE	0
2022-09-14	13:07:01	0.535585	2.38239	1.45325	45.5567	FALSE	0
2022-09-14	13:07:01	0.341336	1.51833	1.45325	45.4542	FALSE	0
2022-09-14	13:07:02	0.707137	3.14549	2.32687	48.7022	FALSE	0
2022-09-14	13:07:02	0.312736	1.39111	2.32687	46.8453	FALSE	0
2022-09-14	13:07:02	0.622405	2.76858	2.32687	51.4708	FALSE	0
2022-09-14	13:07:02	0.45014	2.00231	2.32687	48.8476	FALSE	0
2022-09-14	13:07:03	0.603931	2.68641	2.40405	54.1572	FALSE	0
2022-09-14	13:07:03	0.462252	2.05619	2.40405	50.9038	FALSE	0
2022-09-14	13:07:03	0.555178	2.46954	2.40405	56.6267	FALSE	0
2022-09-14	13:07:04	0.418537	1.86174	2.20197	52.7655	FALSE	0
2022-09-14	13:07:04	0.518282	2.30542	2.20197	58.9321	FALSE	0
2022-09-14	13:07:04	0.584593	2.60039	2.20197	55.3659	FALSE	0
2022-09-14	13:07:04	0.45869	2.04034	2.20197	60.9725	FALSE	0
2022-09-14	13:07:05	0.710954	3.16247	2.71184	58.5284	FALSE	0
2022-09-14	13:07:05	0.384084	1.70848	2.71184	62.681	FALSE	0
2022-09-14	13:07:05	0.733906	3.26456	2.71184	61.7929	FALSE	0
2022-09-14	13:07:06	0.39528	1.75828	2.35106	64.4393	FALSE	0
2022-09-14	13:07:06	0.699096	3.10972	2.35106	64.9026	FALSE	0
2022-09-14	13:07:06	0.415942	1.85019	2.35106	66.2894	FALSE	0
2022-09-14	13:07:06	0.639758	2.84577	2.35106	67.7484	FALSE	0
2022-09-14	13:07:06	0.492634	2.19133	2.35106	68.4808	FALSE	0
2022-09-14	13:07:07	0.672532	2.99156	3.51357	70.74	FALSE	0
2022-09-14	13:07:07	0.606374	2.69727	3.51357	71.1781	FALSE	0
2022-09-14	13:07:07	1.09075	4.85187	3.51357	75.5919	FALSE	0
2022-09-14	13:07:08	0.655076	2.91391	2.84719	74.092	FALSE	0
2022-09-14	13:07:08	0.638791	2.84147	2.84719	78.4333	FALSE	0
2022-09-14	13:07:08	0.783575	3.4855	2.84719	77.5775	FALSE	0
2022-09-14	13:07:08	0.482863	2.14787	2.84719	80.5812	FALSE	0
2022-09-14	13:07:09	0.510293	2.26989	2.05743	79.8473	FALSE	0
2022-09-14	13:07:09	0.398333	1.77186	2.05743	82.3531	FALSE	0
2022-09-14	13:07:09	0.541336	2.40797	2.05743	82.2553	FALSE	0
2022-09-14	13:07:09	0.400166	1.78002	2.05743	84.1331	FALSE	0
2022-09-14	13:07:10	0.437112	1.94436	1.95512	84.1997	FALSE	0
2022-09-14	13:07:10	0.383219	1.70463	1.95512	85.8377	FALSE	0
2022-09-14	13:07:10	0.517723	2.30294	1.95512	86.5026	FALSE	0
2022-09-14	13:07:10	0.420064	1.86853	1.95512	87.7062	FALSE	0
2022-09-14	13:07:11	0.40673	1.80922	1.99748	88.3118	FALSE	0
2022-09-14	13:07:11	0.448512	1.99507	1.99748	89.7013	FALSE	0
2022-09-14	13:07:11	0.491921	2.18816	1.99748	90.5	FALSE	0
2022-09-14	13:07:12	0.412888	1.83661	1.92659	91.5379	FALSE	0
2022-09-14	13:07:12	0.424542	1.88845	1.92659	92.3884	FALSE	0
2022-09-14	13:07:12	0.350293	1.55817	1.92659	93.0961	FALSE	0
2022-09-14	13:07:12	0.544745	2.42313	1.92659	94.8116	FALSE	0
2022-09-14	13:07:13	0.357672	1.591	2.00418	94.6871	FALSE	0
2022-09-14	13:07:13	0.493651	2.19586	2.00418	97.0074	FALSE	0
2022-09-14	13:07:13	0.345051	1.53486	2.00418	96.2219	FALSE	0
2022-09-14	13:07:13	0.605865	2.69501	2.00418	99.7024	FALSE	0
2022-09-14	13:07:14	0.313753	1.39564	1.86362	97.6176	FALSE	0
2022-09-14	13:07:14	0.602252	2.67894	1.86362	102.381	FALSE	0
2022-09-14	13:07:14	0.340878	1.51629	1.86362	99.1339	FALSE	0
2022-09-14	13:07:15	0.574211	2.55421	2.08194	104.936	FALSE	0
2022-09-14	13:07:15	0.322354	1.4339	2.08194	100.568	FALSE	0
2022-09-14	13:07:15	0.59182	2.63253	2.08194	107.568	FALSE	0
2022-09-14	13:07:15	0.383779	1.70713	2.08194	102.275	FALSE	0
2022-09-14	13:07:16	0.547697	2.43627	1.84713	110.004	FALSE	0
2022-09-14	13:07:16	0.307341	1.36711	1.84713	103.642	FALSE	0
2022-09-14	13:07:16	0.498333	2.21668	1.84713	112.221	FALSE	0
2022-09-14	13:07:16	0.307646	1.36847	1.84713	105.01	FALSE	0
2022-09-14	13:07:17	0.517926	2.30384	1.8734	114.525	FALSE	0
2022-09-14	13:07:17	0.271667	1.20843	1.8734	106.219	FALSE	0
2022-09-14	13:07:17	0.552736	2.45868	1.8734	116.984	FALSE	0
2022-09-14	13:07:17	0.342303	1.52263	1.8734	107.742	FALSE	0
2022-09-14	13:07:18	0.58444	2.59971	2.38231	119.583	FALSE	0
2022-09-14	13:07:18	0.334618	1.48845	2.38231	109.23	FALSE	0
2022-09-14	13:07:18	0.687646	3.05879	2.38231	122.642	FALSE	0
2022-09-14	13:07:19	0.375382	1.66977	3.16224	110.9	FALSE	0
2022-09-14	13:07:19	0.740267	3.29286	3.16224	125.935	FALSE	0
2022-09-14	13:07:19	0.750853	3.33994	3.16224	114.24	FALSE	0
2022-09-14	13:07:19	0.977112	4.34639	3.16224	130.281	FALSE	0
2022-09-14	13:07:20	0.6193	2.75477	3.38177	116.994	FALSE	0
2022-09-14	13:07:20	1.06205	4.72421	3.38177	135.006	FALSE	0
2022-09-14	13:07:20	0.672888	2.99314	3.38177	119.988	FALSE	0
2022-09-14	13:07:20	0.686781	3.05494	3.38177	138.06	FALSE	0
2022-09-14	13:07:21	0.509326	2.26558	2.32693	122.253	FALSE	0
2022-09-14	13:07:21	0.621285	2.7636	2.32693	140.824	FALSE	0
2022-09-14	13:07:21	0.486374	2.16349	2.32693	124.417	FALSE	0
2022-09-14	13:07:21	0.475484	2.11505	2.32693	142.939	FALSE	0
2022-09-14	13:07:22	0.613244	2.72783	2.75492	127.145	FALSE	0
2022-09-14	13:07:22	0.613142	2.72738	2.75492	145.667	FALSE	0
2022-09-14	13:07:22	0.631616	2.80955	2.75492	129.954	FALSE	0
2022-09-14	13:07:23	0.578435	2.57299	5.50252	148.239	FALSE	0
2022-09-14	13:07:23	0.683626	3.04091	5.50252	132.995	FALSE	0
2022-09-14	13:07:23	1.17548	5.22877	5.50252	153.468	FALSE	0
2022-09-14	13:07:23	2.51055	11.1674	5.50252	144.162	FALSE	0
2022-09-14	13:07:24	2.33558	10.3891	8.52916	163.857	FALSE	0
2022-09-14	13:07:24	2.02673	9.0153	8.52916	153.178	FALSE	0
2022-09-14	13:07:24	1.69421	7.53618	8.52916	171.394	FALSE	0
2022-09-14	13:07:24	1.61324	7.17601	8.52916	160.354	FALSE	0
2022-09-14	13:07:25	1.4021	6.23682	5.61006	177.63	FALSE	0
2022-09-14	13:07:25	1.24037	5.51741	5.61006	165.871	FALSE	0
2022-09-14	13:07:25	1.2193	5.42369	5.61006	183.054	FALSE	0
2022-09-14	13:07:25	1.18302	5.26231	5.61006	171.133	FALSE	0
2022-09-14	13:07:26	1.17258	5.21587	4.93698	188.27	FALSE	0
2022-09-14	13:07:26	1.07594	4.786	4.93698	175.919	FALSE	0
2022-09-14	13:07:26	1.08113	4.80908	4.93698	193.079	FALSE	0
2022-09-14	13:07:27	0.963168	4.28436	4.20287	180.204	FALSE	0
2022-09-14	13:07:27	0.956959	4.25675	4.20287	197.336	FALSE	0
2022-09-14	13:07:27	0.93416	4.15533	4.20287	184.359	FALSE	0
2022-09-14	13:07:27	0.925102	4.11504	4.20287	201.451	FALSE	0
2022-09-14	13:07:28	0.947443	4.21442	4.21487	188.574	FALSE	0
2022-09-14	13:07:28	0.934771	4.15805	4.21487	205.609	FALSE	0
2022-09-14	13:07:28	0.960318	4.27169	4.21487	192.845	FALSE	0
2022-09-14	13:07:28	0.947646	4.21532	4.21487	209.824	FALSE	0
2022-09-14	13:07:29	0.919605	4.09059	2.99354	196.936	FALSE	0
2022-09-14	13:07:29	0.750903	3.34017	2.99354	213.164	FALSE	0
2022-09-14	13:07:29	0.5393	2.39891	2.99354	199.335	FALSE	0
2022-09-14	13:07:29	0.482099	2.14447	2.99354	215.309	FALSE	0
2022-09-14	13:07:30	0.46958	2.08879	2.08441	201.424	FALSE	0
2022-09-14	13:07:30	0.452837	2.01431	2.08441	217.323	FALSE	0
2022-09-14	13:07:30	0.483372	2.15014	2.08441	203.574	FALSE	0
2022-09-14	13:07:31	0.347239	1.54459	1.82795	218.868	FALSE	0
2022-09-14	13:07:31	0.414771	1.84498	1.82795	205.419	FALSE	0
2022-09-14	13:07:31	0.414975	1.84589	1.82795	220.714	FALSE	0
2022-09-14	13:07:31	0.466781	2.07634	1.82795	207.495	FALSE	0
2022-09-14	13:07:32	0.427748	1.90271	1.88375	222.616	FALSE	0
2022-09-14	13:07:32	0.398232	1.77142	1.88375	209.266	FALSE	0
2022-09-14	13:07:32	0.45584	2.02767	1.88375	224.644	FALSE	0
2022-09-14	13:07:32	0.412125	1.83321	1.88375	211.1	FALSE	0
2022-09-14	13:07:33	0.441845	1.96541	0.859439	226.609	FALSE	0
2022-09-14	13:07:33	0.135229	0.601526	0.859439	211.701	FALSE	0
2022-09-14	13:07:33	0.00255749	0.0113762	0.859439	226.621	FALSE	0
2022-09-14	13:07:34	-0.322735	-1.43559	-2.89144	211.701	FALSE	0
2022-09-14	13:07:34	-0.698103	-3.1053	-2.89144	226.621	FALSE	0
2022-09-14	13:07:34	-0.72991	-3.24679	-2.89144	211.701	FALSE	0
2022-09-14	13:07:34	-0.84935	-3.77808	-2.89144	226.621	FALSE	0
2022-09-14	13:07:35	-0.521157	-2.31821	-0.993599	211.701	FALSE	0
2022-09-14	13:07:35	-0.444313	-1.97639	-0.993599	226.621	FALSE	0
2022-09-14	13:07:35	-0.339172	-1.5087	-0.993599	211.701	FALSE	0
2022-09-14	13:07:35	0.411158	1.82891	-0.993599	228.45	FALSE	0
2022-09-14	13:07:36	0.369326	1.64284	1.72586	213.344	FALSE	0
2022-09-14	13:07:36	0.403473	1.79473	1.72586	230.244	FALSE	0
2022-09-14	13:07:36	0.305713	1.35987	1.72586	214.704	FALSE	0
2022-09-14	13:07:36	0.473448	2.10599	1.72586	232.35	FALSE	0
2022-09-14	13:07:37	0.540013	2.40209	3.4237	217.106	FALSE	0
2022-09-14	13:07:37	0.666272	2.96371	3.4237	235.314	FALSE	0
2022-09-14	13:07:37	1.10276	4.9053	3.4237	222.011	FALSE	0
2022-09-14	13:07:38	0.828511	3.68538	2.74549	239	FALSE	0
2022-09-14	13:07:38	0.623015	2.7713	2.74549	224.783	FALSE	0
2022-09-14	13:07:38	0.57416	2.55398	2.74549	241.553	FALSE	0
2022-09-14	13:07:38	0.443168	1.9713	2.74549	226.754	FALSE	0
2022-09-14	13:07:39	0.550496	2.44872	2.19801	244.002	FALSE	0
2022-09-14	13:07:39	0.428868	1.90769	2.19801	228.662	FALSE	0
2022-09-14	13:07:39	0.446883	1.98782	2.19801	245.99	FALSE	0
2022-09-14	13:07:39	0.550293	2.44781	2.19801	231.109	FALSE	0
2022-09-14	13:07:40	0.71874	3.1971	3.20836	249.187	FALSE	0
2022-09-14	13:07:40	0.719198	3.19914	3.20836	234.308	FALSE	0
2022-09-14	13:07:40	0.72673	3.23264	3.20836	252.42	FALSE	0
2022-09-14	13:07:40	0.72042	3.20457	3.20836	237.513	FALSE	0
2022-09-14	13:07:41	0.72042	3.20457	3.2177	255.624	FALSE	0
2022-09-14	13:07:41	0.721895	3.21113	3.2177	240.724	FALSE	0
2022-09-14	13:07:41	0.727799	3.2374	3.2177	258.862	FALSE	0
2022-09-14	13:07:42	0.731209	3.25256	2.57837	243.977	FALSE	0
2022-09-14	13:07:42	0.71986	3.20208	2.57837	262.064	FALSE	0
2022-09-14	13:07:42	0.725916	3.22902	2.57837	247.206	FALSE	0
2022-09-14	13:07:42	0.141591	0.629825	2.57837	262.694	FALSE	0
2022-09-14	13:07:43	0.143982	0.640461	0.461854	247.846	FALSE	0
2022-09-14	13:07:43	0.0711071	0.316299	0.461854	263.01	FALSE	0
2022-09-14	13:07:43	0.0423539	0.188399	0.461854	248.035	FALSE	0
2022-09-14	13:07:43	0.157875	0.70226	0.461854	263.712	FALSE	0
2022-09-14	13:07:44	0.35528	1.58036	1.67124	249.615	FALSE	0
2022-09-14	13:07:44	0.469936	2.09037	1.67124	265.803	FALSE	0
2022-09-14	13:07:44	0.336654	1.4975	1.67124	251.112	FALSE	0
2022-09-14	13:07:44	0.34098	1.51675	1.67124	267.319	FALSE	0
2022-09-14	13:07:45	0.394211	1.75353	1.96745	252.866	FALSE	0
2022-09-14	13:07:45	0.46271	2.05823	1.96745	269.378	FALSE	0
2022-09-14	13:07:45	0.469987	2.0906	1.96745	254.957	FALSE	0
2022-09-14	13:07:46	0.500674	2.2271	1.80894	271.605	FALSE	0
2022-09-14	13:07:46	0.376298	1.67385	1.80894	256.63	FALSE	0
2022-09-14	13:07:46	0.36668	1.63107	1.80894	273.236	FALSE	0
2022-09-14	13:07:46	0.383015	1.70373	1.80894	258.334	FALSE	0
2022-09-14	13:07:47	0.871514	3.87667	2.51997	277.112	FALSE	0
2022-09-14	13:07:47	0.730598	3.24985	2.51997	261.584	FALSE	0
2022-09-14	13:07:47	0.432277	1.92285	2.51997	279.035	FALSE	0
2022-09-14	13:07:47	0.231667	1.0305	2.51997	262.615	FALSE	0
2022-09-14	13:07:48	0.180216	0.801637	2.55918	279.837	FALSE	0
2022-09-14	13:07:48	0.212583	0.945612	2.55918	263.56	FALSE	0
2022-09-14	13:07:48	1.33319	5.9303	2.55918	285.767	FALSE	0
2022-09-14	13:07:49	2.14006	9.51941	4.64859	273.08	FALSE	0
2022-09-14	13:07:49	1.23477	5.4925	4.64859	291.26	FALSE	0
2022-09-14	13:07:49	0.53813	2.39371	4.64859	275.473	FALSE	0
2022-09-14	13:07:49	0.267239	1.18873	4.64859	292.448	FALSE	0
2022-09-14	13:07:50	0.172328	0.766549	1.06864	276.24	FALSE	0
2022-09-14	13:07:50	0.243575	1.08347	1.06864	293.532	FALSE	0
2022-09-14	13:07:50	0.221387	0.984774	1.06864	277.225	FALSE	0
2022-09-14	13:07:50	0.323677	1.43978	1.06864	294.972	FALSE	0
2022-09-14	13:07:51	0.388359	1.7275	1.56644	278.952	FALSE	0
2022-09-14	13:07:51	0.30841	1.37187	1.56644	296.344	FALSE	0
2022-09-14	13:07:51	0.348868	1.55183	1.56644	280.504	FALSE	0
2022-09-14	13:07:51	0.362965	1.61454	1.56644	297.958	FALSE	0
2022-09-14	13:07:52	0.340675	1.51539	1.54074	282.019	FALSE	0
2022-09-14	13:07:52	0.342506	1.52354	1.54074	299.482	FALSE	0
2022-09-14	13:07:52	0.355942	1.5833	1.54074	283.603	FALSE	0
2022-09-14	13:07:53	0.34902	1.55251	1.54617	301.034	FALSE	0
2022-09-14	13:07:53	0.342303	1.52263	1.54617	285.125	FALSE	0
2022-09-14	13:07:53	0.348817	1.55161	1.54617	302.586	FALSE	0
2022-09-14	13:07:53	0.350242	1.55795	1.54617	286.683	FALSE	0
2022-09-14	13:07:54	0.352481	1.56791	1.56315	304.154	FALSE	0
2022-09-14	13:07:54	0.358741	1.59575	1.56315	288.279	FALSE	0
2022-09-14	13:07:54	0.350242	1.55795	1.56315	305.712	FALSE	0
2022-09-14	13:07:54	0.344186	1.53101	1.56315	289.81	FALSE	0
2022-09-14	13:07:55	0.347748	1.54685	1.53972	307.258	FALSE	0
2022-09-14	13:07:55	0.341947	1.52105	1.53972	291.331	FALSE	0
2022-09-14	13:07:55	0.348308	1.54934	1.53972	308.808	FALSE	0
2022-09-14	13:07:55	0.346578	1.54165	1.53972	292.873	FALSE	0
2022-09-14	13:07:56	0.348053	1.54821	1.68388	310.356	FALSE	0
2022-09-14	13:07:56	0.387799	1.72501	1.68388	294.598	FALSE	0
2022-09-14	13:07:56	0.399809	1.77843	1.68388	312.134	FALSE	0
2022-09-14	13:07:57	0.405764	1.80492	1.7833	296.403	FALSE	0
2022-09-14	13:07:57	0.434415	1.93236	1.7833	314.067	FALSE	0
2022-09-14	13:07:57	0.406985	1.81035	1.7833	298.213	FALSE	0
2022-09-14	13:07:57	0.35645	1.58556	1.7833	315.652	FALSE	0
2022-09-14	13:07:58	0.419453	1.86581	2.52665	300.079	FALSE	0
2022-09-14	13:07:58	0.568511	2.52885	2.52665	318.181	FALSE	0
2022-09-14	13:07:58	0.821794	3.6555	2.52665	303.734	FALSE	0
2022-09-14	13:07:58	0.462303	2.05642	2.52665	320.238	FALSE	0
2022-09-14	13:07:59	0.648461	2.88448	2.67169	306.619	FALSE	0
2022-09-14	13:07:59	0.592685	2.63638	2.67169	322.874	FALSE	0
2022-09-14	13:07:59	0.683372	3.03978	2.67169	309.658	FALSE	0
2022-09-14	13:07:59	0.477977	2.12614	2.67169	325	FALSE	0
2022-09-14	13:08:00	0.396298	1.76281	1.75466	311.421	FALSE	0
2022-09-14	13:08:00	0.423372	1.88324	1.75466	326.883	FALSE	0
2022-09-14	13:08:00	0.363728	1.61793	1.75466	313.039	FALSE	0
2022-09-14	13:08:01	0.38154	1.69717	1.19417	328.581	FALSE	0
2022-09-14	13:08:01	0.236654	1.05268	1.19417	314.092	FALSE	0
2022-09-14	13:08:01	0.215992	0.960776	1.19417	329.541	FALSE	0
2022-09-14	13:08:01	0.239657	1.06604	1.19417	315.158	FALSE	0
2022-09-14	13:08:02	0.235076	1.04567	1.06717	330.587	FALSE	0
2022-09-14	13:08:02	0.242812	1.08008	1.06717	316.238	FALSE	0
2022-09-14	13:08:02	0.235942	1.04952	1.06717	331.636	FALSE	0
2022-09-14	13:08:02	0.245814	1.09343	1.06717	317.331	FALSE	0
2022-09-14	13:08:03	0.30612	1.36168	1.45127	332.998	FALSE	0
2022-09-14	13:08:03	0.282506	1.25664	1.45127	318.588	FALSE	0
2022-09-14	13:08:03	0.346527	1.54142	1.45127	334.54	FALSE	0
2022-09-14	13:08:03	0.369886	1.64533	1.45127	320.233	FALSE	0
2022-09-14	13:08:04	0.353702	1.57334	1.73308	336.113	FALSE	0
2022-09-14	13:08:04	0.400522	1.7816	1.73308	322.015	FALSE	0
2022-09-14	13:08:04	0.414618	1.8443	1.73308	337.957	FALSE	0
2022-09-14	13:08:05	0.42215	1.87781	2.10661	323.893	FALSE	0
2022-09-14	13:08:05	0.378181	1.68222	2.10661	339.639	FALSE	0
2022-09-14	13:08:05	0.402506	1.79043	2.10661	325.683	FALSE	0
2022-09-14	13:08:05	0.691514	3.07599	2.10661	342.715	FALSE	0
2022-09-14	13:08:06	0.540725	2.40525	1.83814	328.089	FALSE	0
2022-09-14	13:08:06	0.388206	1.72682	1.83814	344.442	FALSE	0
2022-09-14	13:08:06	0.374313	1.66502	1.83814	329.754	FALSE	0
2022-09-14	13:08:06	0.349682	1.55546	1.83814	345.998	FALSE	0
2022-09-14	13:08:07	0.30958	1.37707	1.54942	331.131	FALSE	0
2022-09-14	13:08:07	0.252888	1.1249	1.54942	347.123	FALSE	0
2022-09-14	13:08:07	0.482507	2.14629	1.54942	333.277	FALSE	0
2022-09-14	13:08:08	0.680623	3.02755	2.95409	350.15	FALSE	0
2022-09-14	13:08:08	0.732379	3.25777	2.95409	336.535	FALSE	0
2022-09-14	13:08:08	0.662812	2.94832	2.95409	353.098	FALSE	0
2022-09-14	13:08:08	0.580623	2.58273	2.95409	339.117	FALSE	0
2022-09-14	13:08:09	0.619453	2.75545	3.06909	355.854	FALSE	0
2022-09-14	13:08:09	0.684033	3.04272	3.06909	342.16	FALSE	0
2022-09-14	13:08:09	0.682761	3.03706	3.06909	358.891	FALSE	0
2022-09-14	13:08:09	0.773601	3.44113	3.06909	345.601	FALSE	0
2022-09-14	13:08:10	0.927494	4.12568	3.12031	363.017	FALSE	0
2022-09-14	13:08:10	0.721234	3.20819	3.12031	348.809	FALSE	0
2022-09-14	13:08:10	0.497265	2.21193	3.12031	365.229	FALSE	0
2022-09-14	13:08:10	0.659911	2.93542	3.12031	351.745	FALSE	0
2022-09-14	13:08:11	0.853244	3.7954	3.25709	369.024	FALSE	0
2022-09-14	13:08:11	0.787697	3.50383	3.25709	355.249	FALSE	0
2022-09-14	13:08:11	0.555738	2.47203	3.25709	371.496	FALSE	0
2022-09-14	13:08:12	0.410445	1.82574	2.03955	357.074	FALSE	0
2022-09-14	13:08:12	0.37986	1.68969	2.03955	373.186	FALSE	0
2022-09-14	13:08:12	0.340064	1.51267	2.03955	358.587	FALSE	0
2022-09-14	13:08:12	0.703677	3.1301	2.03955	376.316	FALSE	0
2022-09-14	13:08:13	0.716145	3.18556	3.19727	361.773	FALSE	0
2022-09-14	13:08:13	0.720369	3.20435	3.19727	379.52	FALSE	0
2022-09-14	13:08:13	0.718588	3.19642	3.19727	364.969	FALSE	0
2022-09-14	13:08:13	0.720013	3.20276	3.19727	382.723	FALSE	0
2022-09-14	13:08:14	0.723066	3.21634	3.20316	368.185	FALSE	0
2022-09-14	13:08:14	0.713855	3.17537	3.20316	385.898	FALSE	0
2022-09-14	13:08:14	0.717621	3.19212	3.20316	371.378	FALSE	0
2022-09-14	13:08:14	0.725865	3.22879	3.20316	389.127	FALSE	0
2022-09-14	13:08:15	0.719758	3.20163	3.21514	374.579	FALSE	0
2022-09-14	13:08:15	0.718893	3.19778	3.21514	392.325	FALSE	0
2022-09-14	13:08:15	0.729733	3.246	3.21514	377.825	FALSE	0
2022-09-14	13:08:16	0.727596	3.23649	3.21391	395.561	FALSE	0
2022-09-14	13:08:16	0.723931	3.22019	3.21391	381.045	FALSE	0
2022-09-14	13:08:16	0.720369	3.20435	3.21391	398.766	FALSE	0
2022-09-14	13:08:16	0.718181	3.19461	3.21391	384.24	FALSE	0
2022-09-14	13:08:17	0.726323	3.23083	3.21227	401.997	FALSE	0
2022-09-14	13:08:17	0.718893	3.19778	3.21227	387.438	FALSE	0
2022-09-14	13:08:17	0.724898	3.22449	3.21227	405.221	FALSE	0
2022-09-14	13:08:17	0.718486	3.19597	3.21227	390.634	FALSE	0
2022-09-14	13:08:18	0.715738	3.18375	3.20882	408.405	FALSE	0
2022-09-14	13:08:18	0.723321	3.21748	3.20882	393.851	FALSE	0
2022-09-14	13:08:18	0.723117	3.21657	3.20882	411.621	FALSE	0
2022-09-14	13:08:18	0.723321	3.21748	3.20882	397.069	FALSE	0
2022-09-14	13:08:19	0.721895	3.21113	3.21921	414.832	FALSE	0
2022-09-14	13:08:19	0.72383	3.21974	3.21921	400.288	FALSE	0
2022-09-14	13:08:19	0.725407	3.22676	3.21921	418.059	FALSE	0
2022-09-14	13:08:20	0.71589	3.18442	3.21125	403.473	FALSE	0
2022-09-14	13:08:20	0.71584	3.1842	3.21125	421.243	FALSE	0
2022-09-14	13:08:20	0.724796	3.22404	3.21125	406.697	FALSE	0
2022-09-14	13:08:20	0.731158	3.25234	3.21125	424.496	FALSE	0
2022-09-14	13:08:21	0.72042	3.20457	3.20701	409.901	FALSE	0
2022-09-14	13:08:21	0.723321	3.21748	3.20701	427.713	FALSE	0
2022-09-14	13:08:21	0.720064	3.20299	3.20701	413.104	FALSE	0
2022-09-14	13:08:21	0.720064	3.20299	3.20701	430.916	FALSE	0
2022-09-14	13:08:22	0.722557	3.21408	3.20676	416.319	FALSE	0
2022-09-14	13:08:22	0.722761	3.21499	3.20676	434.131	FALSE	0
2022-09-14	13:08:22	0.717417	3.19121	3.20676	419.51	FALSE	0
2022-09-14	13:08:23	0.723524	3.21838	3.20774	437.35	FALSE	0
2022-09-14	13:08:23	0.720216	3.20366	3.20774	422.713	FALSE	0
2022-09-14	13:08:23	0.721895	3.21113	3.20774	440.561	FALSE	0
2022-09-14	13:08:23	0.718893	3.19778	3.20774	425.911	FALSE	0
2022-09-14	13:08:24	0.732888	3.26003	3.2168	443.821	FALSE	0
2022-09-14	13:08:24	0.725204	3.22585	3.2168	429.137	FALSE	0
2022-09-14	13:08:24	0.71813	3.19439	3.2168	447.015	FALSE	0
2022-09-14	13:08:24	0.71645	3.18691	3.2168	432.324	FALSE	0
2022-09-14	13:08:25	0.722659	3.21453	3.21148	450.23	FALSE	0
2022-09-14	13:08:25	0.721081	3.20751	3.21148	435.531	FALSE	0
2022-09-14	13:08:25	0.721183	3.20797	3.21148	453.438	FALSE	0
2022-09-14	13:08:25	0.722965	3.21589	3.21148	438.747	FALSE	0
2022-09-14	13:08:26	0.720827	3.20638	3.20397	456.644	FALSE	0
2022-09-14	13:08:26	0.719249	3.19936	3.20397	441.947	FALSE	0
2022-09-14	13:08:26	0.720776	3.20616	3.20397	459.85	FALSE	0
2022-09-14	13:08:27	0.720216	3.20366	3.21334	445.15	FALSE	0
2022-09-14	13:08:27	0.718232	3.19484	3.21334	463.045	FALSE	0
2022-09-14	13:08:27	0.727036	3.234	3.21334	448.384	FALSE	0
2022-09-14	13:08:27	0.724084	3.22087	3.21334	466.266	FALSE	0
2022-09-14	13:08:28	0.722862	3.21543	3.19054	451.6	FALSE	0
2022-09-14	13:08:28	0.716196	3.18578	3.19054	469.452	FALSE	0
2022-09-14	13:08:28	0.715636	3.18329	3.19054	454.783	FALSE	0
2022-09-14	13:08:28	0.714364	3.17763	3.19054	472.629	FALSE	0
2022-09-14	13:08:29	0.717417	3.19121	3.20412	457.974	FALSE	0
2022-09-14	13:08:29	0.725356	3.22653	3.20412	475.856	FALSE	0
2022-09-14	13:08:29	0.718537	3.1962	3.20412	461.171	FALSE	0
2022-09-14	13:08:29	0.719962	3.20253	3.20412	479.058	FALSE	0
2022-09-14	13:08:30	0.714058	3.17627	2.747	464.347	FALSE	0
2022-09-14	13:08:30	0.69355	3.08505	2.747	482.143	FALSE	0
2022-09-14	13:08:30	0.445051	1.97968	2.747	466.326	FALSE	0
2022-09-14	13:08:31	0.44902	1.99733	1.96462	484.141	FALSE	0
2022-09-14	13:08:31	0.447036	1.98851	1.96462	468.315	FALSE	0
2022-09-14	13:08:31	0.438588	1.95093	1.96462	486.092	FALSE	0
2022-09-14	13:08:31	0.432023	1.92172	1.96462	470.237	FALSE	0
2022-09-14	13:08:32	0.421947	1.8769	1.88522	487.969	FALSE	0
2022-09-14	13:08:32	0.422201	1.87803	1.88522	472.115	FALSE	0
2022-09-14	13:08:32	0.426679	1.89795	1.88522	489.867	FALSE	0
2022-09-14	13:08:32	0.42444	1.88799	1.88522	474.003	FALSE	0
2022-09-14	13:08:33	0.423931	1.88573	1.89524	491.752	FALSE	0
2022-09-14	13:08:33	0.421489	1.87487	1.89524	475.878	FALSE	0
2022-09-14	13:08:33	0.426069	1.89524	1.89524	493.648	FALSE	0
2022-09-14	13:08:33	0.432786	1.92512	1.89524	477.803	FALSE	0
2022-09-14	13:08:34	0.418028	1.85947	1.86611	495.507	FALSE	0
2022-09-14	13:08:34	0.414924	1.84566	1.86611	479.648	FALSE	0
2022-09-14	13:08:34	0.425611	1.8932	1.86611	497.4	FALSE	0
2022-09-14	13:08:35	0.434415	1.93236	1.94742	481.581	FALSE	0
2022-09-14	13:08:35	0.435331	1.93644	1.94742	499.337	FALSE	0
2022-09-14	13:08:35	0.437977	1.94821	1.94742	483.529	FALSE	0
2022-09-14	13:08:35	0.443473	1.97266	1.94742	501.309	FALSE	0
2022-09-14	13:08:36	0.435484	1.93712	1.91686	485.466	FALSE	0
2022-09-14	13:08:36	0.431667	1.92014	1.91686	503.229	FALSE	0
2022-09-14	13:08:36	0.426527	1.89728	1.91686	487.363	FALSE	0
2022-09-14	13:08:36	0.430038	1.9129	1.91686	505.142	FALSE	0
2022-09-14	13:08:37	0.403982	1.79699	1.85868	489.16	FALSE	0
2022-09-14	13:08:37	0.387443	1.72342	1.85868	506.866	FALSE	0
2022-09-14	13:08:37	0.412583	1.83525	1.85868	490.996	FALSE	0
2022-09-14	13:08:37	0.467392	2.07905	1.85868	508.945	FALSE	0
2022-09-14	13:08:38	0.496654	2.20922	2.30595	493.205	FALSE	0
2022-09-14	13:08:38	0.514873	2.29026	2.30595	511.235	FALSE	0
2022-09-14	13:08:38	0.543677	2.41838	2.30595	495.623	FALSE	0
2022-09-14	13:08:39	0.489936	2.17933	2.07549	513.414	FALSE	0
2022-09-14	13:08:39	0.476298	2.11867	2.07549	497.742	FALSE	0
2022-09-14	13:08:39	0.45299	2.01499	2.07549	515.429	FALSE	0
2022-09-14	13:08:39	0.447137	1.98895	2.07549	499.731	FALSE	0
2022-09-14	13:08:40	0.448919	1.99688	1.84306	517.426	FALSE	0
2022-09-14	13:08:40	0.418283	1.86061	1.84306	501.591	FALSE	0
2022-09-14	13:08:40	0.396196	1.76236	1.84306	519.189	FALSE	0
2022-09-14	13:08:40	0.393957	1.7524	1.84306	503.344	FALSE	0
2022-09-14	13:08:41	0.386934	1.72116	1.70712	520.91	FALSE	0
2022-09-14	13:08:41	0.389326	1.7318	1.70712	505.076	FALSE	0
2022-09-14	13:08:41	0.38327	1.70486	1.70712	522.615	FALSE	0
2022-09-14	13:08:41	0.375585	1.67068	1.70712	506.746	FALSE	0
2022-09-14	13:08:42	0.398079	1.77074	2.05227	524.385	FALSE	0
2022-09-14	13:08:42	0.477265	2.12297	2.05227	508.869	FALSE	0
2022-09-14	13:08:42	0.508766	2.26309	2.05227	526.648	FALSE	0
2022-09-14	13:08:43	0.493651	2.19586	1.99552	511.065	FALSE	0
2022-09-14	13:08:43	0.436349	1.94097	1.99552	528.589	FALSE	0
2022-09-14	13:08:43	0.433244	1.92716	1.99552	512.992	FALSE	0
2022-09-14	13:08:43	0.431209	1.9181	1.99552	530.508	FALSE	0
2022-09-14	13:08:44	0.448155	1.99348	3.00689	514.986	FALSE	0
2022-09-14	13:08:44	0.580623	2.58273	3.00689	533.09	FALSE	0
2022-09-14	13:08:44	0.856349	3.80921	3.00689	518.795	FALSE	0
2022-09-14	13:08:44	0.818791	3.64215	3.00689	536.732	FALSE	0
2022-09-14	13:08:45	0.741132	3.2967	2.72066	522.092	FALSE	0
2022-09-14	13:08:45	0.606272	2.69682	2.72066	539.429	FALSE	0
2022-09-14	13:08:45	0.487494	2.16847	2.72066	524.26	FALSE	0
2022-09-14	13:08:46	0.3564	1.58534	1.83474	541.015	FALSE	0
2022-09-14	13:08:46	0.324389	1.44295	1.83474	525.703	FALSE	0
2022-09-14	13:08:46	0.298486	1.32773	1.83474	542.342	FALSE	0
2022-09-14	13:08:46	0.670598	2.98295	1.83474	528.686	FALSE	0
2022-09-14	13:08:47	0.716705	3.18805	3.1992	545.53	FALSE	0
2022-09-14	13:08:47	0.718333	3.19529	3.1992	531.881	FALSE	0
2022-09-14	13:08:47	0.723575	3.21861	3.1992	548.749	FALSE	0
2022-09-14	13:08:47	0.718232	3.19484	3.1992	535.076	FALSE	0
2022-09-14	13:08:48	0.725204	3.22585	3.21487	551.975	FALSE	0
2022-09-14	13:08:48	0.723219	3.21702	3.21487	538.293	FALSE	0
2022-09-14	13:08:48	0.723931	3.22019	3.21487	555.195	FALSE	0
2022-09-14	13:08:48	0.718588	3.19642	3.21487	541.49	FALSE	0
2022-09-14	13:08:49	0.727239	3.2349	3.22404	558.43	FALSE	0
2022-09-14	13:08:49	0.729784	3.24623	3.22404	544.736	FALSE	0
2022-09-14	13:08:49	0.717366	3.19099	3.22404	561.621	FALSE	0
2022-09-14	13:08:50	0.728512	3.24057	3.21963	547.976	FALSE	0
2022-09-14	13:08:50	0.720572	3.20525	3.21963	564.826	FALSE	0
2022-09-14	13:08:50	0.725204	3.22585	3.21963	551.202	FALSE	0
2022-09-14	13:08:50	0.720929	3.20684	3.21963	568.033	FALSE	0
2022-09-14	13:08:51	0.718384	3.19552	2.99195	554.398	FALSE	0
2022-09-14	13:08:51	0.72271	3.21476	2.99195	571.248	FALSE	0
2022-09-14	13:08:51	0.72729	3.23513	2.99195	557.633	FALSE	0
2022-09-14	13:08:51	0.522099	2.3224	2.99195	573.57	FALSE	0
2022-09-14	13:08:52	0.64444	2.8666	3.1181	560.5	FALSE	0
2022-09-14	13:08:52	0.717417	3.19121	3.1181	576.761	FALSE	0
2022-09-14	13:08:52	0.719198	3.19914	3.1181	563.699	FALSE	0
2022-09-14	13:08:52	0.722862	3.21543	3.1181	579.977	FALSE	0
2022-09-14	13:08:53	0.717061	3.18963	2.45837	566.888	FALSE	0
2022-09-14	13:08:53	0.461183	2.05143	2.45837	582.028	FALSE	0
2022-09-14	13:08:53	0.479758	2.13406	2.45837	569.022	FALSE	0
2022-09-14	13:08:54	0.420013	1.8683	2.25732	583.897	FALSE	0
2022-09-14	13:08:54	0.441794	1.96519	2.25732	570.988	FALSE	0
2022-09-14	13:08:54	0.562608	2.50259	2.25732	586.399	FALSE	0
2022-09-14	13:08:54	0.605458	2.6932	2.25732	573.681	FALSE	0
2022-09-14	13:08:55	0.506018	2.25087	2.1644	588.65	FALSE	0
2022-09-14	13:08:55	0.396909	1.76553	2.1644	575.446	FALSE	0
2022-09-14	13:08:55	0.522354	2.32354	2.1644	590.974	FALSE	0
2022-09-14	13:08:55	0.521031	2.31765	2.1644	577.764	FALSE	0
2022-09-14	13:08:56	0.474924	2.11256	2.36026	593.086	FALSE	0
2022-09-14	13:08:56	0.556348	2.47475	2.36026	580.239	FALSE	0
2022-09-14	13:08:56	0.576501	2.56439	2.36026	595.65	FALSE	0
2022-09-14	13:08:56	0.514669	2.28935	2.36026	582.528	FALSE	0
2022-09-14	13:08:57	0.58841	2.61737	2.61563	598.268	FALSE	0
2022-09-14	13:08:57	0.607137	2.70067	2.61563	585.229	FALSE	0
2022-09-14	13:08:57	0.568511	2.52885	2.61563	600.797	FALSE	0
2022-09-14	13:08:58	0.608613	2.70723	1.95975	587.936	FALSE	0
2022-09-14	13:08:58	0.447545	1.99077	1.95975	602.787	FALSE	0
2022-09-14	13:08:58	0.37131	1.65166	1.95975	589.588	FALSE	0
2022-09-14	13:08:58	0.334822	1.48936	1.95975	604.277	FALSE	0
2022-09-14	13:08:59	0.43472	1.93372	2.89625	591.521	FALSE	0
2022-09-14	13:08:59	0.729784	3.24623	2.89625	607.523	FALSE	0
2022-09-14	13:08:59	0.720776	3.20616	2.89625	594.727	FALSE	0
2022-09-14	13:08:59	0.719148	3.19891	2.89625	610.722	FALSE	0
2022-09-14	13:09:00	0.725865	3.22879	2.55013	597.956	FALSE	0
2022-09-14	13:09:00	0.606018	2.69569	2.55013	613.418	FALSE	0
2022-09-14	13:09:00	0.500471	2.2262	2.55013	600.182	FALSE	0
2022-09-14	13:09:00	0.460827	2.04985	2.55013	615.467	FALSE	0
2022-09-14	13:09:01	0.45411	2.01997	2.2932	602.202	FALSE	0
2022-09-14	13:09:01	0.516094	2.29569	2.2932	617.763	FALSE	0
2022-09-14	13:09:01	0.5764	2.56394	2.2932	604.766	FALSE	0
2022-09-14	13:09:02	0.624338	2.77718	2.97407	620.54	FALSE	0
2022-09-14	13:09:02	0.697824	3.10406	2.97407	607.87	FALSE	0
2022-09-14	13:09:02	0.644746	2.86796	2.97407	623.408	FALSE	0
2022-09-14	13:09:02	0.707494	3.14707	2.97407	611.017	FALSE	0
2022-09-14	13:09:03	0.585102	2.60265	2.82829	626.011	FALSE	0
2022-09-14	13:09:03	0.618639	2.75183	2.82829	613.769	FALSE	0
2022-09-14	13:09:03	0.622608	2.76948	2.82829	628.78	FALSE	0
2022-09-14	13:09:03	0.716959	3.18918	2.82829	616.959	FALSE	0
2022-09-14	13:09:04	0.688562	3.06286	2.8672	631.843	FALSE	0
2022-09-14	13:09:04	0.618842	2.75273	2.8672	619.711	FALSE	0
2022-09-14	13:09:04	0.626323	2.78601	2.8672	634.629	FALSE	0
2022-09-14	13:09:05	0.577621	2.56937	2.74447	622.281	FALSE	0
2022-09-14	13:09:05	0.62617	2.78533	2.74447	637.415	FALSE	0
2022-09-14	13:09:05	0.630649	2.80525	2.74447	625.086	FALSE	0
2022-09-14	13:09:05	0.633499	2.81793	2.74447	640.233	FALSE	0
2022-09-14	13:09:06	0.693906	3.08663	3.22472	628.172	FALSE	0
2022-09-14	13:09:06	0.717621	3.19212	3.22472	643.425	FALSE	0
2022-09-14	13:09:06	0.757977	3.37163	3.22472	631.544	FALSE	0
2022-09-14	13:09:06	0.730293	3.24849	3.22472	646.673	FALSE	0
2022-09-14	13:09:07	0.778893	3.46467	4.25833	635.009	FALSE	0
2022-09-14	13:09:07	0.981692	4.36676	4.25833	651.04	FALSE	0
2022-09-14	13:09:07	1.02668	4.56688	4.25833	639.576	FALSE	0
2022-09-14	13:09:07	1.042	4.63502	4.25833	655.675	FALSE	0
2022-09-14	13:09:08	1.15029	5.11672	4.85089	644.692	FALSE	0
2022-09-14	13:09:08	1.19782	5.32814	4.85089	661.003	FALSE	0
2022-09-14	13:09:08	0.923473	4.10779	4.85089	648.8	FALSE	0
2022-09-14	13:09:09	0.792837	3.5267	3.21951	664.53	FALSE	0
2022-09-14	13:09:09	0.560623	2.49376	3.21951	651.294	FALSE	0
2022-09-14	13:09:09	0.685763	3.05041	3.21951	667.58	FALSE	0
2022-09-14	13:09:09	0.85589	3.80717	3.21951	655.101	FALSE	0
2022-09-14	13:09:10	1.08169	4.81157	4.15606	672.392	FALSE	0
2022-09-14	13:09:10	1.21029	5.38361	4.15606	660.485	FALSE	0
2022-09-14	13:09:10	0.741438	3.29806	4.15606	675.69	FALSE	0
2022-09-14	13:09:10	0.70388	3.131	4.15606	663.616	FALSE	0
2022-09-14	13:09:11	0.719656	3.20117	2.76422	678.891	FALSE	0
2022-09-14	13:09:11	0.600013	2.66898	2.76422	666.285	FALSE	0
2022-09-14	13:09:11	0.594924	2.64634	2.76422	681.537	FALSE	0
2022-09-14	13:09:11	0.571107	2.5404	2.76422	668.825	FALSE	0
2022-09-14	13:09:12	0.638588	2.84057	3.00529	684.378	FALSE	0
2022-09-14	13:09:12	0.697468	3.10248	3.00529	671.928	FALSE	0
2022-09-14	13:09:12	0.690802	3.07283	3.00529	687.451	FALSE	0
2022-09-14	13:09:13	0.724288	3.22178	3.15166	675.149	FALSE	0
2022-09-14	13:09:13	0.635076	2.82495	3.15166	690.276	FALSE	0
2022-09-14	13:09:13	0.65528	2.91482	3.15166	678.064	FALSE	0
2022-09-14	13:09:13	0.819453	3.64509	3.15166	693.921	FALSE	0
2022-09-14	13:09:14	0.727087	3.23423	3.02285	681.298	FALSE	0
2022-09-14	13:09:14	0.644847	2.86841	3.02285	696.789	FALSE	0
2022-09-14	13:09:14	0.69757	3.10293	3.02285	684.401	FALSE	0
2022-09-14	13:09:14	0.648766	2.88584	3.02285	699.675	FALSE	0
2022-09-14	13:09:15	0.639657	2.84532	2.98284	687.247	FALSE	0
2022-09-14	13:09:15	0.659657	2.93429	2.98284	702.609	FALSE	0
2022-09-14	13:09:15	0.650191	2.89218	2.98284	690.139	FALSE	0
2022-09-14	13:09:15	0.732786	3.25958	2.98284	705.869	FALSE	0
2022-09-14	13:09:16	0.607544	2.70248	2.61533	692.841	FALSE	0
2022-09-14	13:09:16	0.589326	2.62144	2.61533	708.49	FALSE	0
2022-09-14	13:09:16	0.566985	2.52206	2.61533	695.363	FALSE	0
2022-09-14	13:09:17	0.617723	2.74776	2.7052	711.238	FALSE	0
2022-09-14	13:09:17	0.649733	2.89014	2.7052	698.254	FALSE	0
2022-09-14	13:09:17	0.590852	2.62823	2.7052	713.866	FALSE	0
2022-09-14	13:09:17	0.574313	2.55466	2.7052	700.808	FALSE	0
2022-09-14	13:09:18	0.578689	2.57412	2.3812	716.44	FALSE	0
2022-09-14	13:09:18	0.566069	2.51799	2.3812	703.326	FALSE	0
2022-09-14	13:09:18	0.520013	2.31312	2.3812	718.754	FALSE	0
2022-09-14	13:09:18	0.476501	2.11957	2.3812	705.446	FALSE	0
2022-09-14	13:09:19	0.462456	2.0571	1.83927	720.811	FALSE	0
2022-09-14	13:09:19	0.423728	1.88483	1.83927	707.331	FALSE	0
2022-09-14	13:09:19	0.38673	1.72025	1.83927	722.531	FALSE	0
2022-09-14	13:09:19	0.381031	1.6949	1.83927	709.025	FALSE	0
2022-09-14	13:09:20	0.375127	1.66864	1.67189	724.2	FALSE	0
2022-09-14	13:09:20	0.377061	1.67724	1.67189	710.703	FALSE	0
2022-09-14	13:09:20	0.375382	1.66977	1.67189	725.869	FALSE	0
2022-09-14	13:09:21	0.382964	1.7035	1.68658	712.406	FALSE	0
2022-09-14	13:09:21	0.375942	1.67227	1.68658	727.542	FALSE	0
2022-09-14	13:09:21	0.379148	1.68653	1.68658	714.093	FALSE	0
2022-09-14	13:09:21	0.378588	1.68404	1.68658	729.226	FALSE	0
2022-09-14	13:09:22	0.370547	1.64827	1.69779	715.741	FALSE	0
2022-09-14	13:09:22	0.386629	1.7198	1.69779	730.945	FALSE	0
2022-09-14	13:09:22	0.379148	1.68653	1.69779	717.428	FALSE	0
2022-09-14	13:09:22	0.390394	1.73655	1.69779	732.682	FALSE	0
2022-09-14	13:09:23	0.404338	1.79858	1.80197	719.226	FALSE	0
2022-09-14	13:09:23	0.396349	1.76304	1.80197	734.445	FALSE	0
2022-09-14	13:09:23	0.405254	1.80265	1.80197	721.029	FALSE	0
2022-09-14	13:09:23	0.414466	1.84363	1.80197	736.289	FALSE	0
2022-09-14	13:09:24	0.407545	1.81284	1.76002	722.842	FALSE	0
2022-09-14	13:09:24	0.40673	1.80922	1.76002	738.098	FALSE	0
2022-09-14	13:09:24	0.372735	1.658	1.76002	724.5	FALSE	0
2022-09-14	13:09:25	0.406578	1.80854	1.85647	739.906	FALSE	0
2022-09-14	13:09:25	0.413448	1.8391	1.85647	726.339	FALSE	0
2022-09-14	13:09:25	0.414008	1.84159	1.85647	741.748	FALSE	0
2022-09-14	13:09:25	0.435382	1.93667	1.85647	728.275	FALSE	0
2022-09-14	13:09:26	0.474415	2.11029	2.43559	743.858	FALSE	0
2022-09-14	13:09:26	0.542099	2.41136	2.43559	730.687	FALSE	0
2022-09-14	13:09:26	0.614822	2.73485	2.43559	746.593	FALSE	0
2022-09-14	13:09:26	0.558842	2.48584	2.43559	733.173	FALSE	0
2022-09-14	13:09:27	0.609071	2.70927	1.85321	749.302	FALSE	0
2022-09-14	13:09:27	0.388664	1.72886	1.85321	734.901	FALSE	0
2022-09-14	13:09:27	0.252125	1.1215	1.85321	750.424	FALSE	0
2022-09-14	13:09:28	0.172735	0.76836	0.760891	735.67	FALSE	0
2022-09-14	13:09:28	0.125102	0.556479	0.760891	750.98	FALSE	0
2022-09-14	13:09:28	0.121031	0.53837	0.760891	736.208	FALSE	0
2022-09-14	13:09:28	0.265356	1.18036	0.760891	752.161	FALSE	0
2022-09-14	13:09:29	0.506832	2.25449	2.48443	738.463	FALSE	0
2022-09-14	13:09:29	0.631667	2.80978	2.48443	754.971	FALSE	0
2022-09-14	13:09:29	0.531463	2.36405	2.48443	740.827	FALSE	0
2022-09-14	13:09:29	0.564135	2.50939	2.48443	757.48	FALSE	0
2022-09-14	13:09:30	0.629834	2.80163	2.77995	743.628	FALSE	0
2022-09-14	13:09:30	0.618893	2.75296	2.77995	760.233	FALSE	0
2022-09-14	13:09:30	0.637417	2.83536	2.77995	746.464	FALSE	0
2022-09-14	13:09:30	0.613702	2.72987	2.77995	762.963	FALSE	0
2022-09-14	13:09:31	0.585254	2.60333	3.09418	749.067	FALSE	0
2022-09-14	13:09:31	0.623422	2.77311	3.09418	765.736	FALSE	0
2022-09-14	13:09:31	0.87813	3.9061	3.09418	752.973	FALSE	0
2022-09-14	13:09:32	0.823728	3.66411	3.20667	769.4	FALSE	0
2022-09-14	13:09:32	0.734313	3.26637	3.20667	756.239	FALSE	0
2022-09-14	13:09:32	0.675178	3.00333	3.20667	772.403	FALSE	0
2022-09-14	13:09:32	0.650344	2.89286	3.20667	759.132	FALSE	0
2022-09-14	13:09:33	0.686679	3.05449	2.60684	775.458	FALSE	0
2022-09-14	13:09:33	0.581438	2.58635	2.60684	761.719	FALSE	0
2022-09-14	13:09:33	0.515382	2.29252	2.60684	777.75	FALSE	0
2022-09-14	13:09:33	0.560674	2.49399	2.60684	764.213	FALSE	0
2022-09-14	13:09:34	0.617163	2.74526	2.55058	780.496	FALSE	0
2022-09-14	13:09:34	0.567137	2.52274	2.55058	766.735	FALSE	0
2022-09-14	13:09:34	0.560929	2.49512	2.55058	782.991	FALSE	0
2022-09-14	13:09:34	0.548359	2.43921	2.55058	769.175	FALSE	0
2022-09-14	13:09:35	0.553855	2.46366	2.52583	785.454	FALSE	0
2022-09-14	13:09:35	0.581132	2.58499	2.52583	771.76	FALSE	0
2022-09-14	13:09:35	0.568511	2.52885	2.52583	787.983	FALSE	0
2022-09-14	13:09:36	0.5793	2.57684	1.9331	774.336	FALSE	0
2022-09-14	13:09:36	0.421082	1.87306	1.9331	789.856	FALSE	0
2022-09-14	13:09:36	0.370038	1.646	1.9331	775.982	FALSE	0
2022-09-14	13:09:36	0.367901	1.6365	1.9331	791.493	FALSE	0
2022-09-14	13:09:37	0.448461	1.99484	0.966664	777.977	FALSE	0
2022-09-14	13:09:37	0.300369	1.3361	0.966664	792.829	FALSE	0
2022-09-14	13:09:37	0.0700384	0.311545	0.966664	778.289	FALSE	0
2022-09-14	13:09:37	0.0503946	0.224165	0.966664	793.053	FALSE	0
2022-09-14	13:09:38	-0.0439565	-0.195527	-0.0094502	778.289	FALSE	0
2022-09-14	13:09:38	-0.102735	-0.456986	-0.0094502	793.053	FALSE	0
2022-09-14	13:09:38	-0.0704705	-0.313467	-0.0094502	778.289	FALSE	0
2022-09-14	13:09:38	0.208664	0.928179	-0.0094502	793.981	FALSE	0
2022-09-14	13:09:39	0.642405	2.85755	2.22227	781.146	FALSE	0
2022-09-14	13:09:39	0.251921	1.12059	2.22227	795.102	FALSE	0
2022-09-14	13:09:39	0.60444	2.68867	2.22227	783.835	FALSE	0
2022-09-14	13:09:40	0.230802	1.02665	1.18409	796.128	FALSE	0
2022-09-14	13:09:40	0.536501	2.38646	1.18409	786.222	FALSE	0
2022-09-14	13:09:40	0.118486	0.527049	1.18409	796.656	FALSE	0
2022-09-14	13:09:40	0.178995	0.796206	1.18409	787.018	FALSE	0
2022-09-14	13:09:41	0.13528	0.601752	-0.382963	797.257	FALSE	0
2022-09-14	13:09:41	-0.0352033	-0.156591	-0.382963	787.018	FALSE	0
2022-09-14	13:09:41	-0.237239	-1.05529	-0.382963	797.257	FALSE	0
2022-09-14	13:09:41	-0.207213	-0.921725	-0.382963	787.018	FALSE	0
2022-09-14	13:09:42	-0.207773	-0.924216	-1.0408	797.257	FALSE	0
2022-09-14	13:09:42	-0.140089	-0.623144	-1.0408	787.018	FALSE	0
2022-09-14	13:09:42	-0.317188	-1.41092	-1.0408	797.257	FALSE	0
2022-09-14	13:09:42	-0.270877	-1.20492	-1.0408	787.018	FALSE	0
2022-09-14	13:09:43	-0.31846	-1.41657	-1.25095	797.257	FALSE	0
2022-09-14	13:09:43	-0.192862	-0.857889	-1.25095	787.018	FALSE	0
2022-09-14	13:09:43	-0.332353	-1.47837	-1.25095	797.257	FALSE	0
2022-09-14	13:09:44	-0.221819	-0.986695	-1.09915	787.018	FALSE	0
2022-09-14	13:09:44	-0.257239	-1.14425	-1.09915	797.257	FALSE	0
2022-09-14	13:09:44	-0.204262	-0.908598	-1.09915	787.018	FALSE	0
2022-09-14	13:09:44	-0.305076	-1.35704	-1.09915	797.257	FALSE	0
2022-09-14	13:09:45	-0.206704	-0.919461	-1.0769	787.018	FALSE	0
2022-09-14	13:09:45	-0.275254	-1.22438	-1.0769	797.257	FALSE	0
2022-09-14	13:09:45	-0.193473	-0.860607	-1.0769	787.018	FALSE	0
2022-09-14	13:09:45	-0.292964	-1.30316	-1.0769	797.257	FALSE	0
2022-09-14	13:09:46	-0.0449234	-0.199828	1.00096	787.018	FALSE	0
2022-09-14	13:09:46	0.153499	0.682794	1.00096	797.94	FALSE	0
2022-09-14	13:09:46	0.335433	1.49207	1.00096	788.51	FALSE	0
2022-09-14	13:09:46	0.456094	2.0288	1.00096	799.969	FALSE	0
2022-09-14	13:09:47	0.917214	4.07995	3.87434	792.59	FALSE	0
2022-09-14	13:09:47	0.690445	3.07124	3.87434	803.04	FALSE	0
2022-09-14	13:09:47	1.00531	4.47182	3.87434	797.062	FALSE	0
2022-09-14	13:09:48	0.409733	1.82257	1.61069	804.863	FALSE	0
2022-09-14	13:09:48	0.257265	1.14437	1.61069	798.206	FALSE	0
2022-09-14	13:09:48	0.535127	2.38035	1.61069	807.243	FALSE	0
2022-09-14	13:09:48	0.246272	1.09547	1.61069	799.301	FALSE	0
2022-09-14	13:09:49	0.53874	2.39642	1.86683	809.639	FALSE	0
2022-09-14	13:09:49	0.316908	1.40967	1.86683	800.711	FALSE	0
2022-09-14	13:09:49	0.509682	2.26717	1.86683	811.907	FALSE	0
2022-09-14	13:09:49	0.313397	1.39405	1.86683	802.105	FALSE	0
2022-09-14	13:09:50	0.122965	0.546973	0.442218	812.454	FALSE	0
2022-09-14	13:09:50	0.0858144	0.38172	0.442218	802.487	FALSE	0
2022-09-14	13:09:50	0.0624048	0.277589	0.442218	812.731	FALSE	0
2022-09-14	13:09:50	0.126476	0.562591	0.442218	803.049	FALSE	0
2022-09-14	13:09:51	-0.0946435	-0.420993	-0.25959	812.731	FALSE	0
2022-09-14	13:09:51	-0.0467554	-0.207977	-0.25959	803.049	FALSE	0
2022-09-14	13:09:51	-0.0336766	-0.1498	-0.25959	812.731	FALSE	0
2022-09-14	13:09:52	0.114262	0.50826	1.15455	803.558	FALSE	0
2022-09-14	13:09:52	0.117214	0.521391	1.15455	813.253	FALSE	0
2022-09-14	13:09:52	0.22271	0.990659	1.15455	804.548	FALSE	0
2022-09-14	13:09:52	0.584033	2.5979	1.15455	815.85	FALSE	0
2022-09-14	13:09:53	0.934516	4.15691	2.81629	808.705	FALSE	0
2022-09-14	13:09:53	0.567952	2.52636	2.81629	818.377	FALSE	0
2022-09-14	13:09:53	0.618079	2.74934	2.81629	811.455	FALSE	0
2022-09-14	13:09:53	0.411972	1.83253	2.81629	820.209	FALSE	0
2022-09-14	13:09:54	0.22159	0.985677	1.07796	812.44	FALSE	0
2022-09-14	13:09:54	0.316094	1.40605	1.07796	821.615	FALSE	0
2022-09-14	13:09:54	0.189326	0.84216	1.07796	813.282	FALSE	0
2022-09-14	13:09:55	0.205662	0.914826	1.20005	822.53	FALSE	0
2022-09-14	13:09:55	0.208664	0.928179	1.20005	814.211	FALSE	0
2022-09-14	13:09:55	0.441845	1.96541	1.20005	824.496	FALSE	0
2022-09-14	13:09:55	0.222965	0.991793	1.20005	815.202	FALSE	0
2022-09-14	13:09:56	0.396094	1.76191	1.37498	826.258	FALSE	0
2022-09-14	13:09:56	0.250496	1.11426	1.37498	816.317	FALSE	0
2022-09-14	13:09:56	0.324746	1.44454	1.37498	827.702	FALSE	0
2022-09-14	13:09:56	0.265102	1.17923	1.37498	817.496	FALSE	0
2022-09-14	13:09:57	0.285102	1.26819	0.964003	828.97	FALSE	0
2022-09-14	13:09:57	0.1793	0.797562	0.964003	818.293	FALSE	0
2022-09-14	13:09:57	0.217977	0.969605	0.964003	829.94	FALSE	0
2022-09-14	13:09:57	0.184491	0.820653	0.964003	819.114	FALSE	0
2022-09-14	13:09:58	0.169224	0.752742	0.845858	830.693	FALSE	0
2022-09-14	13:09:58	0.200624	0.892416	0.845858	820.007	FALSE	0
2022-09-14	13:09:58	0.200624	0.892416	0.845858	831.585	FALSE	0
2022-09-14	13:09:59	0.217163	0.965984	0.893036	820.973	FALSE	0
2022-09-14	13:09:59	0.177926	0.79145	0.893036	832.377	FALSE	0
2022-09-14	13:09:59	0.237214	1.05518	0.893036	822.028	FALSE	0
2022-09-14	13:09:59	0.170751	0.759535	0.893036	833.136	FALSE	0
2022-09-14	13:10:00	0.248562	1.10565	1.03882	823.133	FALSE	0
2022-09-14	13:10:00	0.225662	1.00379	1.03882	834.14	FALSE	0
2022-09-14	13:10:00	0.281489	1.25212	1.03882	824.385	FALSE	0
2022-09-14	13:10:00	0.178435	0.793715	1.03882	834.934	FALSE	0
2022-09-14	13:10:01	0.244695	1.08845	0.861287	825.474	FALSE	0
2022-09-14	13:10:01	0.172328	0.766549	0.861287	835.7	FALSE	0
2022-09-14	13:10:01	0.242303	1.07781	0.861287	826.552	FALSE	0
2022-09-14	13:10:01	0.115178	0.512335	0.861287	836.212	FALSE	0
2022-09-14	13:10:02	0.321183	1.42869	1.15885	827.98	FALSE	0
2022-09-14	13:10:02	0.160624	0.714488	1.15885	836.927	FALSE	0
2022-09-14	13:10:02	0.299758	1.33338	1.15885	829.314	FALSE	0
2022-09-14	13:10:03	0.145713	0.648161	1.21318	837.575	FALSE	0
2022-09-14	13:10:03	0.425713	1.89366	1.21318	831.207	FALSE	0
2022-09-14	13:10:03	0.15813	0.703394	1.21318	838.278	FALSE	0
2022-09-14	13:10:03	0.361387	1.60752	1.21318	832.815	FALSE	0
2022-09-14	13:10:04	0.177316	0.788737	1.2653	839.067	FALSE	0
2022-09-14	13:10:04	0.331921	1.47645	1.2653	834.291	FALSE	0
2022-09-14	13:10:04	0.217672	0.968249	1.2653	840.035	FALSE	0
2022-09-14	13:10:04	0.410903	1.82778	1.2653	836.119	FALSE	0
2022-09-14	13:10:05	0.202914	0.902602	1.87526	840.938	FALSE	0
2022-09-14	13:10:05	0.433906	1.9301	1.87526	838.049	FALSE	0
2022-09-14	13:10:05	0.38154	1.69717	1.87526	842.635	FALSE	0
2022-09-14	13:10:05	0.667952	2.97118	1.87526	841.021	FALSE	0
2022-09-14	13:10:06	0.00413511	0.0183938	0.0689487	842.654	FALSE	0
2022-09-14	13:10:06	-0.368028	-1.63706	0.0689487	841.021	FALSE	0
2022-09-14	13:10:06	0.410394	1.82551	0.0689487	844.479	FALSE	0
2022-09-14	13:10:07	0.691158	3.07441	-10.77	844.095	FALSE	0
2022-09-14	13:10:07	-0.843905	-3.75386	-10.77	844.479	FALSE	0
2022-09-14	13:10:07	-5.15703	-22.9395	-10.77	844.095	FALSE	0
2022-09-14	13:10:07	-4.375	-19.4609	-10.77	844.479	FALSE	0
2022-09-14	13:10:08	-5.02777	-22.3645	-3.37061	844.095	FALSE	0
2022-09-14	13:10:08	0.65472	2.91233	-3.37061	847.391	FALSE	0
2022-09-14	13:10:08	0.703931	3.13123	-3.37061	847.226	FALSE	0
2022-09-14	13:10:08	0.63813	2.83853	-3.37061	850.23	FALSE	0
2022-09-14	13:10:09	0.759148	3.37684	-8.08134	850.603	FALSE	0
2022-09-14	13:10:09	-0.847315	-3.76903	-8.08134	850.23	FALSE	0
2022-09-14	13:10:09	-3.64243	-16.2023	-8.08134	850.603	FALSE	0
2022-09-14	13:10:09	-3.53647	-15.7309	-8.08134	850.23	FALSE	0
2022-09-14	13:10:10	-3.71317	-16.5169	-14.0535	850.603	FALSE	0
2022-09-14	13:10:10	-4.95149	-22.0252	-14.0535	850.23	FALSE	0
2022-09-14	13:10:10	-0.813473	-3.61849	-14.0535	850.603	FALSE	0
2022-09-14	13:10:11	-2.35973	-10.4966	-1.55936	850.23	FALSE	0
2022-09-14	13:10:11	0.982862	4.37197	-1.55936	854.975	FALSE	0
2022-09-14	13:10:11	0.96612	4.29749	-1.55936	854.527	FALSE	0
2022-09-14	13:10:11	-0.991488	-4.41034	-1.55936	854.975	FALSE	0
2022-09-14	13:10:12	-1.78538	-7.94173	-0.346686	854.527	FALSE	0
2022-09-14	13:10:12	0.906374	4.03173	-0.346686	859.007	FALSE	0
2022-09-14	13:10:12	-0.043244	-0.192358	-0.346686	854.527	FALSE	0
2022-09-14	13:10:12	0.610496	2.71561	-0.346686	861.722	FALSE	0
2022-09-14	13:10:13	0.76958	3.42325	3.16648	857.951	FALSE	0
2022-09-14	13:10:13	0.458486	2.03944	3.16648	863.762	FALSE	0
2022-09-14	13:10:13	0.894059	3.97695	3.16648	861.928	FALSE	0
2022-09-14	13:10:13	0.725305	3.2263	3.16648	866.988	FALSE	0
2022-09-14	13:10:14	0.731463	3.25369	4.15759	865.181	FALSE	0
2022-09-14	13:10:14	1.0538	4.68751	4.15759	871.676	FALSE	0
2022-09-14	13:10:14	1.01874	4.53156	4.15759	869.713	FALSE	0
2022-09-14	13:10:15	-1.60564	-7.14221	0.268925	871.676	FALSE	0
2022-09-14	13:10:15	0.481489	2.14176	0.268925	871.855	FALSE	0
2022-09-14	13:10:15	0.73645	3.27588	0.268925	874.951	FALSE	0
2022-09-14	13:10:15	0.629529	2.80027	0.268925	874.655	FALSE	0
2022-09-14	13:10:16	0.729377	3.24441	3.234	878.196	FALSE	0
2022-09-14	13:10:16	0.725356	3.22653	3.234	877.881	FALSE	0
2022-09-14	13:10:16	0.724949	3.22472	3.234	881.421	FALSE	0
2022-09-14	13:10:16	0.728461	3.24034	3.234	881.122	FALSE	0
2022-09-14	13:10:17	0.733448	3.26252	3.24064	884.683	FALSE	0
2022-09-14	13:10:17	0.730343	3.24871	3.24064	884.371	FALSE	0
2022-09-14	13:10:17	0.721794	3.21068	3.24064	887.894	FALSE	0
2022-09-14	13:10:18	0.726985	3.23377	3.22325	887.604	FALSE	0
2022-09-14	13:10:18	0.723626	3.21883	3.22325	891.113	FALSE	0
2022-09-14	13:10:18	0.723524	3.21838	3.22325	890.823	FALSE	0
2022-09-14	13:10:18	0.724338	3.222	3.22325	894.335	FALSE	0
2022-09-14	13:10:19	0.724338	3.222	3.17809	894.045	FALSE	0
2022-09-14	13:10:19	0.72729	3.23513	3.17809	897.57	FALSE	0
2022-09-14	13:10:19	0.722659	3.21453	3.17809	897.259	FALSE	0
2022-09-14	13:10:19	0.683575	3.04068	3.17809	900.61	FALSE	0
2022-09-14	13:10:20	0.709173	3.15454	2.93332	900.414	FALSE	0
2022-09-14	13:10:20	0.622303	2.76813	2.93332	903.379	FALSE	0
2022-09-14	13:10:20	0.722761	3.21499	2.93332	903.629	FALSE	0
2022-09-14	13:10:20	0.583524	2.59563	2.93332	905.974	FALSE	0
2022-09-14	13:10:21	0.465458	2.07045	2.48411	905.699	FALSE	0
2022-09-14	13:10:21	0.653702	2.9078	2.48411	908.882	FALSE	0
2022-09-14	13:10:21	0.556196	2.47407	2.48411	908.173	FALSE	0
2022-09-14	13:10:22	0.656908	2.92206	1.78771	911.804	FALSE	0
2022-09-14	13:10:22	0.519097	2.30905	1.78771	910.482	FALSE	0
2022-09-14	13:10:22	0.242456	1.07849	1.78771	912.883	FALSE	0
2022-09-14	13:10:22	0.189122	0.841252	1.78771	911.324	FALSE	0
2022-09-14	13:10:23	0.624389	2.77741	0.878831	915.66	FALSE	0
2022-09-14	13:10:23	0.0954328	0.424504	0.878831	911.748	FALSE	0
2022-09-14	13:10:23	0.108664	0.483359	0.878831	916.143	FALSE	0
2022-09-14	13:10:23	-0.0382059	-0.169947	0.878831	911.748	FALSE	0
2022-09-14	13:10:24	0.0675448	0.300453	3.48657	916.444	FALSE	0
2022-09-14	13:10:24	0.725662	3.22789	3.48657	914.976	FALSE	0
2022-09-14	13:10:24	0.972176	4.32443	3.48657	920.768	FALSE	0
2022-09-14	13:10:24	1.36988	6.0935	3.48657	921.069	FALSE	0
2022-09-14	13:10:25	1.51579	6.74254	6.38238	927.511	FALSE	0
2022-09-14	13:10:25	1.43844	6.39847	6.38238	927.468	FALSE	0
2022-09-14	13:10:25	1.35024	6.00614	6.38238	933.517	FALSE	0
2022-09-14	13:10:26	1.43838	6.3982	2.60463	933.866	FALSE	0
2022-09-14	13:10:26	0.77131	3.43094	2.60463	936.948	FALSE	0
2022-09-14	13:10:26	0.192583	0.856648	2.60463	934.723	FALSE	0
2022-09-14	13:10:26	-0.0600888	-0.267287	2.60463	936.948	FALSE	0
2022-09-14	13:10:27	-0.0453305	-0.201639	-0.873624	934.723	FALSE	0
2022-09-14	13:10:27	-0.19271	-0.857213	-0.873624	936.948	FALSE	0
2022-09-14	13:10:27	-0.20701	-0.920822	-0.873624	934.723	FALSE	0
2022-09-14	13:10:27	-0.340547	-1.51482	-0.873624	936.948	FALSE	0
2022-09-14	13:10:28	-0.610674	-2.7164	-2.17447	934.723	FALSE	0
2022-09-14	13:10:28	-0.587213	-2.61204	-2.17447	936.948	FALSE	0
2022-09-14	13:10:28	-0.437086	-1.94425	-2.17447	934.723	FALSE	0
2022-09-14	13:10:28	-0.320394	-1.42518	-2.17447	936.948	FALSE	0
2022-09-14	13:10:29	-0.0312338	-0.138934	0.778247	934.723	FALSE	0
2022-09-14	13:10:29	0.335076	1.49049	0.778247	938.438	FALSE	0
2022-09-14	13:10:29	0.221031	0.98319	0.778247	935.706	FALSE	0
2022-09-14	13:10:30	0.204288	0.908714	0.50979	939.347	FALSE	0
2022-09-14	13:10:30	0.0127865	0.0568769	0.50979	935.763	FALSE	0
2022-09-14	13:10:30	0.195229	0.868418	0.50979	940.215	FALSE	0
2022-09-14	13:10:30	0.0461198	0.20515	0.50979	935.968	FALSE	0
2022-09-14	13:10:31	0.0241351	0.107358	-0.154837	940.323	FALSE	0
2022-09-14	13:10:31	-0.0828369	-0.368475	-0.154837	935.968	FALSE	0
2022-09-14	13:10:31	-0.0511321	-0.227446	-0.154837	940.323	FALSE	0
2022-09-14	13:10:31	-0.0294018	-0.130785	-0.154837	935.968	FALSE	0
2022-09-14	13:10:32	-0.0254832	-0.113354	-0.319748	940.323	FALSE	0
2022-09-14	13:10:32	-0.0676206	-0.30079	-0.319748	935.968	FALSE	0
2022-09-14	13:10:32	-0.18589	-0.826876	-0.319748	940.323	FALSE	0
2022-09-14	13:10:32	-0.00853663	-0.0379726	-0.319748	935.968	FALSE	0
2022-09-14	13:10:33	0.0187407	0.0833624	0.32075	940.406	FALSE	0
2022-09-14	13:10:33	0.00942772	0.0419364	0.32075	936.01	FALSE	0
2022-09-14	13:10:33	0.188155	0.836951	0.32075	941.243	FALSE	0
2022-09-14	13:10:34	0.137163	0.610128	0.739217	936.62	FALSE	0
2022-09-14	13:10:34	0.108817	0.48404	0.739217	941.727	FALSE	0
2022-09-14	13:10:34	-0.0480786	-0.213863	0.739217	936.62	FALSE	0
2022-09-14	13:10:34	0.466832	2.07656	0.739217	943.804	FALSE	0
2022-09-14	13:10:35	1.18388	5.26614	11.9278	941.886	FALSE	0
2022-09-14	13:10:35	1.53136	6.8118	11.9278	950.615	FALSE	0
2022-09-14	13:10:35	3.82617	17.0196	11.9278	958.906	1	1
2022-09-14	13:10:35	4.18454	18.6137	11.9278	969.229	1	2
2022-09-14	13:10:36	1.09757	4.88221	2.44883	963.788	FALSE	2
2022-09-14	13:10:36	0.347188	1.54436	2.44883	970.774	FALSE	2
2022-09-14	13:10:36	0.35355	1.57266	2.44883	965.361	FALSE	2
2022-09-14	13:10:36	0.403779	1.79609	2.44883	972.57	FALSE	2
2022-09-14	13:10:37	0.672226	2.9902	1.83306	968.351	FALSE	2
2022-09-14	13:10:37	0.2107	0.937236	1.83306	973.507	FALSE	2
2022-09-14	13:10:37	0.353346	1.57175	1.83306	969.923	FALSE	2
2022-09-14	13:10:38	0.262201	1.16632	1.27017	974.673	FALSE	2
2022-09-14	13:10:38	0.232125	1.03254	1.27017	970.955	FALSE	2
2022-09-14	13:10:38	0.341794	1.52037	1.27017	976.194	FALSE	2
2022-09-14	13:10:38	0.306069	1.36146	1.27017	972.317	FALSE	2
2022-09-14	13:10:39	0.762099	3.38997	2.37339	979.583	FALSE	2
2022-09-14	13:10:39	0.496909	2.21035	2.37339	974.527	FALSE	2
2022-09-14	13:10:39	0.444746	1.97832	2.37339	981.562	FALSE	2
2022-09-14	13:10:39	0.430496	1.91493	2.37339	976.442	FALSE	2
2022-09-14	13:10:40	0.288257	1.28222	1.4468	982.844	FALSE	2
2022-09-14	13:10:40	0.343728	1.52897	1.4468	977.971	FALSE	2
2022-09-14	13:10:40	0.269275	1.19779	1.4468	984.042	FALSE	2
2022-09-14	13:10:40	0.399758	1.7782	1.4468	979.749	FALSE	2
2022-09-14	13:10:41	0.214262	0.95308	1.27279	984.995	FALSE	2
2022-09-14	13:10:41	0.406374	1.80763	1.27279	981.557	FALSE	2
2022-09-14	13:10:41	0.237774	1.05767	1.27279	986.053	FALSE	2
2022-09-14	13:10:42	0.398995	1.77481	1.32614	983.331	FALSE	2
2022-09-14	13:10:42	0.245051	1.09004	1.32614	987.143	FALSE	2
2022-09-14	13:10:42	0.366171	1.6288	1.32614	984.96	FALSE	2
2022-09-14	13:10:42	0.182303	0.81092	1.32614	987.954	FALSE	2
2022-09-14	13:10:43	0.442354	1.96768	1.51828	986.928	FALSE	2
2022-09-14	13:10:43	0.277163	1.23288	1.51828	989.186	FALSE	2
2022-09-14	13:10:43	0.419657	1.86672	1.51828	988.795	FALSE	2
2022-09-14	13:10:43	0.22612	1.00583	1.51828	990.192	FALSE	2
2022-09-14	13:10:44	0.423473	1.88369	1.35772	990.678	FALSE	2
2022-09-14	13:10:44	0.19472	0.866154	1.35772	991.058	FALSE	2
2022-09-14	13:10:44	0.400929	1.78341	1.35772	992.462	FALSE	2
2022-09-14	13:10:44	0.201794	0.89762	1.35772	991.956	FALSE	2
2022-09-14	13:10:45	0.482303	2.14538	2.20741	994.607	FALSE	2
2022-09-14	13:10:45	0.315891	1.40515	2.20741	993.361	FALSE	2
2022-09-14	13:10:45	0.690547	3.07169	2.20741	997.679	FALSE	2
2022-09-14	13:10:46	0.377672	1.67996	1.9374	995.041	FALSE	2
2022-09-14	13:10:46	0.555636	2.47158	1.9374	1000.15	FALSE	2
2022-09-14	13:10:46	0.366578	1.63061	1.9374	996.672	FALSE	2
2022-09-14	13:10:46	0.442303	1.96745	1.9374	1002.12	FALSE	2
2022-09-14	13:10:47	0.26958	1.19915	1.65268	997.871	FALSE	2
2022-09-14	13:10:47	0.435636	1.9378	1.65268	1004.06	FALSE	2
2022-09-14	13:10:47	0.269682	1.1996	1.65268	999.07	FALSE	2
2022-09-14	13:10:47	0.511259	2.27418	1.65268	1006.33	FALSE	2
2022-09-14	13:10:48	0.263779	1.17334	1.46621	1000.24	FALSE	2
2022-09-14	13:10:48	0.382608	1.70192	1.46621	1008.03	FALSE	2
2022-09-14	13:10:48	0.248155	1.10384	1.46621	1001.35	FALSE	2
2022-09-14	13:10:48	0.423931	1.88573	1.46621	1009.92	FALSE	2
2022-09-14	13:10:49	0.286069	1.27249	1.45419	1002.62	FALSE	2
2022-09-14	13:10:49	0.392634	1.74651	1.45419	1011.66	FALSE	2
2022-09-14	13:10:49	0.302048	1.34357	1.45419	1003.96	FALSE	2
2022-09-14	13:10:50	0.338028	1.50362	1.35619	1013.17	FALSE	2
2022-09-14	13:10:50	0.229987	1.02303	1.35619	1004.99	FALSE	2
2022-09-14	13:10:50	0.343881	1.52965	1.35619	1014.7	FALSE	2
2022-09-14	13:10:50	0.307646	1.36847	1.35619	1006.36	FALSE	2
2022-09-14	13:10:51	0.401438	1.78568	1.43452	1016.48	FALSE	2
2022-09-14	13:10:51	0.334822	1.48936	1.43452	1007.84	FALSE	2
2022-09-14	13:10:51	0.313702	1.39541	1.43452	1017.88	FALSE	2
2022-09-14	13:10:51	0.240013	1.06763	1.43452	1008.91	FALSE	2
2022-09-14	13:10:52	0.154466	0.687096	0.318034	1018.57	FALSE	2
2022-09-14	13:10:52	0.0171122	0.0761185	0.318034	1008.99	FALSE	2
2022-09-14	13:10:52	0.0429137	0.190889	0.318034	1018.76	FALSE	2
2022-09-14	13:10:53	0.00968217	0.0430682	0.33322	1009.03	FALSE	2
2022-09-14	13:10:53	0.0323793	0.14403	0.33322	1018.9	FALSE	2
2022-09-14	13:10:53	0.217621	0.968022	0.33322	1010	FALSE	2
2022-09-14	13:10:53	0.0399621	0.177759	0.33322	1019.08	FALSE	2
2022-09-14	13:10:54	0.679962	3.02461	6.62357	1013.02	FALSE	2
2022-09-14	13:10:54	1.06215	4.72466	6.62357	1023.8	FALSE	2
2022-09-14	13:10:54	1.9534	8.68911	6.62357	1021.71	FALSE	2
2022-09-14	13:10:54	2.26067	10.0559	6.62357	1033.86	FALSE	2
2022-09-14	13:10:55	1.64368	7.31142	7.96104	1029.02	FALSE	2
2022-09-14	13:10:55	2.25116	10.0136	7.96104	1043.87	FALSE	2
2022-09-14	13:10:55	1.55355	6.9105	7.96104	1035.94	FALSE	2
2022-09-14	13:10:55	1.7105	7.60865	7.96104	1051.48	FALSE	2
2022-09-14	13:10:56	1.2021	5.34718	9.23187	1041.28	FALSE	2
2022-09-14	13:10:56	1.48902	6.62346	9.23187	1058.1	FALSE	2
2022-09-14	13:10:56	3.53513	15.725	9.23187	1057.01	1	3
2022-09-14	13:10:57	3.40851	15.1617	12.6078	1073.27	1	4
2022-09-14	13:10:57	4.03589	17.9524	12.6078	1074.96	1	5
2022-09-14	13:10:57	2.57172	11.4395	12.6078	1084.71	FALSE	5
2022-09-14	13:10:57	1.32128	5.87732	12.6078	1080.84	FALSE	5
2022-09-14	13:10:58	1.24602	5.54255	5.6589	1090.25	FALSE	5
2022-09-14	13:10:58	1.32556	5.89636	5.6589	1086.73	FALSE	5
2022-09-14	13:10:58	1.24933	5.55727	5.6589	1095.81	FALSE	5
2022-09-14	13:10:58	1.2678	5.63943	5.6589	1092.37	FALSE	5
2022-09-14	13:10:59	1.32149	5.87825	12.2311	1101.68	FALSE	5
2022-09-14	13:10:59	1.35726	6.03736	12.2311	1098.41	FALSE	5
2022-09-14	13:10:59	2.8165	12.5284	12.2311	1114.21	FALSE	5
2022-09-14	13:10:59	5.50347	24.4805	12.2311	1122.89	1	6
2022-09-14	13:11:00	7.83645	34.8581	31.7537	1149.07	1	7
2022-09-14	13:11:00	9.13293	40.6251	31.7537	1163.52	1	8
2022-09-14	13:11:00	4.44627	19.7779	31.7537	1168.85	1	9
2022-09-14	13:11:01	1.9963	8.87994	5.59969	1172.4	FALSE	9
2022-09-14	13:11:01	1.59833	7.10969	5.59969	1175.96	FALSE	9
2022-09-14	13:11:01	1.00225	4.45821	5.59969	1176.85	FALSE	9
2022-09-14	13:11:01	0.438588	1.95093	5.59969	1177.91	FALSE	9
2022-09-14	13:11:02	0.3993	1.77617	1.54233	1178.63	FALSE	9
2022-09-14	13:11:02	0.344847	1.53395	1.54233	1179.44	FALSE	9
2022-09-14	13:11:02	0.320013	1.42348	1.54233	1180.05	FALSE	9
2022-09-14	13:11:02	0.322761	1.43571	1.54233	1180.88	FALSE	9
2022-09-14	13:11:03	0.377316	1.67838	1.71369	1181.73	FALSE	9
2022-09-14	13:11:03	0.351667	1.56429	1.71369	1182.44	FALSE	9
2022-09-14	13:11:03	0.347697	1.54663	1.71369	1183.28	FALSE	9
2022-09-14	13:11:03	0.464339	2.06547	1.71369	1184.51	FALSE	9
2022-09-14	13:11:04	0.543626	2.41816	-2.91003	1185.7	FALSE	9
2022-09-14	13:11:04	-1.04279	-4.63854	-2.91003	1184.51	FALSE	9
2022-09-14	13:11:04	-1.46345	-6.50972	-2.91003	1185.7	FALSE	9
2022-09-14	13:11:05	-1.54838	-6.8875	-8.14235	1184.51	FALSE	9
2022-09-14	13:11:05	-1.81459	-8.07166	-8.14235	1185.7	FALSE	9
2022-09-14	13:11:05	-1.94742	-8.66251	-8.14235	1184.51	FALSE	9
2022-09-14	13:11:05	-2.01154	-8.94773	-8.14235	1185.7	FALSE	9
2022-09-14	13:11:06	-2.05749	-9.15213	-9.79554	1184.51	FALSE	9
2022-09-14	13:11:06	-2.17922	-9.69361	-9.79554	1185.7	FALSE	9
2022-09-14	13:11:06	-2.25225	-10.0185	-9.79554	1184.51	FALSE	9
2022-09-14	13:11:06	-2.31958	-10.318	-9.79554	1185.7	FALSE	9
2022-09-14	13:11:07	-2.41826	-10.7569	-11.1894	1184.51	FALSE	9
2022-09-14	13:11:07	-2.375	-10.5645	-11.1894	1185.7	FALSE	9
2022-09-14	13:11:07	-2.51581	-11.1908	-11.1894	1184.51	FALSE	9
2022-09-14	13:11:07	-2.75286	-12.2453	-11.1894	1185.7	FALSE	9
2022-09-14	13:11:08	-2.71525	-12.078	-12.5454	1184.51	FALSE	9
2022-09-14	13:11:08	-2.82854	-12.5819	-12.5454	1185.7	FALSE	9
2022-09-14	13:11:08	-2.91719	-12.9762	-12.5454	1184.51	FALSE	9
2022-09-14	13:11:09	-3.14747	-14.0006	-14.9508	1185.7	FALSE	9
2022-09-14	13:11:09	-3.29866	-14.6731	-14.9508	1184.51	FALSE	9
2022-09-14	13:11:09	-3.29566	-14.6598	-14.9508	1185.7	FALSE	9
2022-09-14	13:11:09	-3.70253	-16.4696	-14.9508	1184.51	FALSE	9
2022-09-14	13:11:10	-3.84879	-17.1202	-12.8653	1185.7	FALSE	9
2022-09-14	13:11:10	-4.27729	-19.0262	-12.8653	1184.51	FALSE	9
2022-09-14	13:11:10	-3.00085	-13.3484	-12.8653	1185.7	FALSE	9
2022-09-14	13:11:10	-0.442073	-1.96643	-12.8653	1184.51	FALSE	9
2022-09-14	13:11:11	-0.531335	-2.36348	-2.35732	1185.7	FALSE	9
2022-09-14	13:11:11	-0.531285	-2.36326	-2.35732	1184.51	FALSE	9
2022-09-14	13:11:11	-0.502073	-2.23332	-2.35732	1185.7	FALSE	9
2022-09-14	13:11:11	-0.555101	-2.4692	-2.35732	1184.51	FALSE	9
2022-09-14	13:11:12	-0.571641	-2.54277	-2.46241	1185.7	FALSE	9
2022-09-14	13:11:12	-0.578002	-2.57107	-2.46241	1184.51	FALSE	9
2022-09-14	13:11:12	-0.511081	-2.27339	-2.46241	1185.7	FALSE	9
2022-09-14	13:11:13	-0.534694	-2.37843	-2.2254	1184.51	FALSE	9
2022-09-14	13:11:13	-0.483193	-2.14934	-2.2254	1185.7	FALSE	9
2022-09-14	13:11:13	-0.552099	-2.45585	-2.2254	1184.51	FALSE	9
2022-09-14	13:11:13	-0.431183	-1.91799	-2.2254	1185.7	FALSE	9
2022-09-14	13:11:14	-0.397137	-1.76654	-1.852	1184.51	FALSE	9
2022-09-14	13:11:14	-0.400089	-1.77968	-1.852	1185.7	FALSE	9
2022-09-14	13:11:14	-0.501259	-2.2297	-1.852	1184.51	FALSE	9
2022-09-14	13:11:14	-0.366908	-1.63208	-1.852	1185.7	FALSE	9
2022-09-14	13:11:15	-0.434796	-1.93406	-1.58154	1184.51	FALSE	9
2022-09-14	13:11:15	-0.321055	-1.42812	-1.58154	1185.7	FALSE	9
2022-09-14	13:11:15	-0.397137	-1.76654	-1.58154	1184.51	FALSE	9
2022-09-14	13:11:15	-0.269198	-1.19745	-1.58154	1185.7	FALSE	9
2022-09-14	13:11:16	-0.380801	-1.69388	-1.37077	1184.51	FALSE	9
2022-09-14	13:11:16	-0.214236	-0.952965	-1.37077	1185.7	FALSE	9
2022-09-14	13:11:16	-0.329452	-1.46547	-1.37077	1184.51	FALSE	9
2022-09-14	13:11:17	-0.299224	-1.33101	-1.02042	1185.7	FALSE	9
2022-09-14	13:11:17	-0.272811	-1.21352	-1.02042	1184.51	FALSE	9
2022-09-14	13:11:17	-0.143702	-0.639215	-1.02042	1185.7	FALSE	9
2022-09-14	13:11:17	-0.20187	-0.897958	-1.02042	1184.51	FALSE	9
2022-09-14	13:11:18	-0.213575	-0.950024	-0.560212	1185.7	FALSE	9
2022-09-14	13:11:18	-0.0812593	-0.361458	-0.560212	1184.51	FALSE	9
2022-09-14	13:11:18	-0.123193	-0.547987	-0.560212	1185.7	FALSE	9
2022-09-14	13:11:18	-0.0857376	-0.381378	-0.560212	1184.51	FALSE	9
2022-09-14	13:11:19	-0.272201	-1.2108	-1.14719	1185.7	FALSE	9
2022-09-14	13:11:19	-0.218613	-0.972434	-1.14719	1184.51	FALSE	9
2022-09-14	13:11:19	-0.299936	-1.33418	-1.14719	1185.7	FALSE	9
2022-09-14	13:11:19	-0.240852	-1.07136	-1.14719	1184.51	FALSE	9
2022-09-14	13:11:20	-0.350674	-1.55987	-1.63638	1185.7	FALSE	9
2022-09-14	13:11:20	-0.374949	-1.66785	-1.63638	1184.51	FALSE	9
2022-09-14	13:11:20	-0.378002	-1.68143	-1.63638	1185.7	FALSE	9
2022-09-14	13:11:21	-0.438867	-1.95217	-1.78539	1184.51	FALSE	9
2022-09-14	13:11:21	-0.419274	-1.86501	-1.78539	1185.7	FALSE	9
2022-09-14	13:11:21	-0.482582	-2.14662	-1.78539	1184.51	FALSE	9
2022-09-14	13:11:21	-0.264771	-1.17775	-1.78539	1185.7	FALSE	9
2022-09-14	13:11:22	-0.313931	-1.39643	-1.21312	1184.51	FALSE	9
2022-09-14	13:11:22	-0.243244	-1.082	-1.21312	1185.7	FALSE	9
2022-09-14	13:11:22	-0.328842	-1.46275	-1.21312	1184.51	FALSE	9
2022-09-14	13:11:22	-0.204872	-0.911312	-1.21312	1185.7	FALSE	9
2022-09-14	13:11:23	-0.322328	-1.43378	-0.810012	1184.51	FALSE	9
2022-09-14	13:11:23	-0.0420226	-0.186925	-0.810012	1185.7	FALSE	9
2022-09-14	13:11:23	-0.165432	-0.735875	-0.810012	1184.51	FALSE	9
2022-09-14	13:11:23	-0.198613	-0.88347	-0.810012	1185.7	FALSE	9
2022-09-14	13:11:24	-0.209605	-0.932365	-0.753758	1184.51	FALSE	9
2022-09-14	13:11:24	-0.131946	-0.586922	-0.753758	1185.7	FALSE	9
2022-09-14	13:11:24	-0.166806	-0.741986	-0.753758	1184.51	FALSE	9
2022-09-14	13:11:25	-0.171844	-0.764396	-0.458683	1185.7	FALSE	9
2022-09-14	13:11:25	-0.0453305	-0.201639	-0.458683	1184.51	FALSE	9
2022-09-14	13:11:25	-0.140292	-0.624047	-0.458683	1185.7	FALSE	9
2022-09-14	13:11:25	-0.0549997	-0.24465	-0.458683	1184.51	FALSE	9
2022-09-14	13:11:26	-0.0987656	-0.439329	-0.195697	1185.7	FALSE	9
2022-09-14	13:11:26	-0.0328114	-0.145952	-0.195697	1184.51	FALSE	9
2022-09-14	13:11:26	-0.1036	-0.460834	-0.195697	1185.7	FALSE	9
2022-09-14	13:11:26	0.0591987	0.263328	-0.195697	1184.77	FALSE	9
2022-09-14	13:11:27	-0.0542364	-0.241254	-0.180587	1185.7	FALSE	9
2022-09-14	13:11:27	-0.0224298	-0.0997722	-0.180587	1184.77	FALSE	9
2022-09-14	13:11:27	-0.045127	-0.200734	-0.180587	1185.7	FALSE	9
2022-09-14	13:11:28	-0.310318	-1.38036	-1.86638	1184.77	FALSE	9
2022-09-14	13:11:28	-0.407519	-1.81273	-1.86638	1185.7	FALSE	9
2022-09-14	13:11:28	-0.544109	-2.42031	-1.86638	1184.77	FALSE	9
2022-09-14	13:11:28	-0.416374	-1.85211	-1.86638	1185.7	FALSE	9
2022-09-14	13:11:29	-0.243804	-1.08449	0.292416	1184.77	FALSE	9
2022-09-14	13:11:29	0.135687	0.603563	0.292416	1186.3	FALSE	9
2022-09-14	13:11:29	0.204898	0.911427	0.292416	1185.68	FALSE	9
2022-09-14	13:11:29	0.166171	0.739162	0.292416	1187.04	FALSE	9
2022-09-14	13:11:30	0.51416	2.28709	2.04606	1187.97	FALSE	9
2022-09-14	13:11:30	0.485	2.15738	2.04606	1189.2	FALSE	9
2022-09-14	13:11:30	0.44154	1.96406	2.04606	1189.93	FALSE	9
2022-09-14	13:11:30	0.399199	1.77572	2.04606	1190.97	FALSE	9
2022-09-14	13:11:31	0.454975	2.02382	1.93138	1191.96	FALSE	9
2022-09-14	13:11:31	0.358588	1.59507	1.93138	1192.57	FALSE	9
2022-09-14	13:11:31	0.48902	2.17526	1.93138	1194.13	FALSE	9
2022-09-14	13:11:32	0.409021	1.81941	2.06609	1194.39	FALSE	9
2022-09-14	13:11:32	0.55014	2.44713	2.06609	1196.58	FALSE	9
2022-09-14	13:11:32	0.439504	1.955	2.06609	1196.34	FALSE	9
2022-09-14	13:11:32	0.459249	2.04283	2.06609	1198.62	FALSE	9
2022-09-14	13:11:33	0.439097	1.95319	2.03831	1198.3	FALSE	9
2022-09-14	13:11:33	0.415789	1.84951	2.03831	1200.47	FALSE	9
2022-09-14	13:11:33	0.567697	2.52523	2.03831	1200.82	FALSE	9
2022-09-14	13:11:33	0.410344	1.82529	2.03831	1202.3	FALSE	9
2022-09-14	13:11:34	0.582405	2.59065	2.2026	1203.41	FALSE	9
2022-09-14	13:11:34	0.438333	1.94979	2.2026	1204.25	FALSE	9
2022-09-14	13:11:34	0.481845	2.14334	2.2026	1205.55	FALSE	9
2022-09-14	13:11:34	0.478079	2.12659	2.2026	1206.37	FALSE	9
2022-09-14	13:11:35	0.417316	1.85631	1.98134	1207.41	FALSE	9
2022-09-14	13:11:35	0.526476	2.34187	1.98134	1208.72	FALSE	9
2022-09-14	13:11:35	0.392481	1.74583	1.98134	1209.16	FALSE	9
2022-09-14	13:11:36	0.601234	2.67441	2.88709	1211.39	FALSE	9
2022-09-14	13:11:36	0.665153	2.95873	2.88709	1212.12	FALSE	9
2022-09-14	13:11:36	0.672735	2.99246	2.88709	1214.38	FALSE	9
2022-09-14	13:11:36	0.657061	2.92274	2.88709	1215.04	FALSE	9
2022-09-14	13:11:37	0.960267	4.27146	4.34413	1218.65	FALSE	9
2022-09-14	13:11:37	1.14592	5.09728	4.34413	1220.14	FALSE	9
2022-09-14	13:11:37	0.846578	3.76575	4.34413	1222.42	FALSE	9
2022-09-14	13:11:37	0.953651	4.24203	4.34413	1224.38	FALSE	9
2022-09-14	13:11:38	0.900064	4.00366	3.82698	1226.42	FALSE	9
2022-09-14	13:11:38	0.922812	4.10485	3.82698	1228.48	FALSE	9
2022-09-14	13:11:38	0.653702	2.9078	3.82698	1229.33	FALSE	9
2022-09-14	13:11:38	0.964797	4.29161	3.82698	1232.77	FALSE	9
2022-09-14	13:11:39	0.703982	3.13145	5.23588	1232.46	FALSE	9
2022-09-14	13:11:39	1.06444	4.73484	5.23588	1237.51	FALSE	9
2022-09-14	13:11:39	1.76281	7.84133	5.23588	1240.3	FALSE	9
2022-09-14	13:11:40	2.10663	9.37071	12.1428	1246.88	FALSE	9
2022-09-14	13:11:40	3.15971	14.055	12.1428	1254.36	1	10
2022-09-14	13:11:40	3.51334	15.628	12.1428	1262.51	1	11
2022-09-14	13:11:40	2.1396	9.51737	12.1428	1263.88	FALSE	11
2022-09-14	13:11:41	1.26144	5.61114	6.16448	1268.12	FALSE	11
2022-09-14	13:11:41	1.35268	6.01699	6.16448	1269.89	FALSE	11
2022-09-14	13:11:41	1.49039	6.62955	6.16448	1274.75	FALSE	11
2022-09-14	13:11:41	1.43884	6.40025	6.16448	1276.29	FALSE	11
2022-09-14	13:11:42	1.46469	6.51523	6.00535	1281.26	FALSE	11
2022-09-14	13:11:42	1.72312	7.66478	6.00535	1283.96	FALSE	11
2022-09-14	13:11:42	0.974466	4.33462	6.00535	1285.6	FALSE	11
2022-09-14	13:11:42	1.23798	5.50678	6.00535	1289.47	FALSE	11
2022-09-14	13:11:43	1.57676	7.01374	4.72572	1292.61	FALSE	11
2022-09-14	13:11:43	0.970496	4.31696	4.72572	1293.78	FALSE	11
2022-09-14	13:11:43	0.639911	2.84645	4.72572	1295.46	FALSE	11
2022-09-14	13:11:44	0.835585	3.71685	4.5502	1297.5	FALSE	11
2022-09-14	13:11:44	1.22536	5.45065	4.5502	1300.91	FALSE	11
2022-09-14	13:11:44	1.00785	4.48312	4.5502	1301.98	FALSE	11

## Sheet: Richa_prong_202291413631 (3)
Date	Time	Lbs	Newtons		Total Force x time		total steps > 13.345			**GoPro Fitting: 1256
2022-09-14	13:06:44	0.440166	1.72636	1.72636	FALSE	0
2022-09-14	13:06:44	0.388104	1.68041	1.68041	FALSE	0
2022-09-14	13:06:44	0.377774	2.02653	3.7529	FALSE	0
2022-09-14	13:06:45	0.455585	1.87102	3.55143	FALSE	0
2022-09-14	13:06:45	0.420624	2.07158	5.82448	FALSE	0
2022-09-14	13:06:45	0.465713	2.13746	5.68889	FALSE	0
2022-09-14	13:06:45	0.480522	1.76372	7.5882	FALSE	0
2022-09-14	13:06:46	0.396501	1.91539	7.60428	FALSE	0
2022-09-14	13:06:46	0.430598	1.85812	9.44631	FALSE	0
2022-09-14	13:06:46	0.417723	2.02246	9.62674	FALSE	0
2022-09-14	13:06:46	0.454669	2.6357	12.082	FALSE	0
2022-09-14	13:06:47	0.592532	2.6357	12.2624	FALSE	0
2022-09-14	13:06:47	0.803473	3.57401	15.656	FALSE	0
2022-09-14	13:06:47	0.825865	3.67361	15.9361	FALSE	0
2022-09-14	13:06:47	0.913448	4.0632	19.7192	FALSE	0
2022-09-14	13:06:48	0.614262	2.73236	18.6684	FALSE	0
2022-09-14	13:06:48	0.595789	2.65019	22.3694	FALSE	0
2022-09-14	13:06:48	0.497824	2.21442	20.8828	FALSE	0
2022-09-14	13:06:49	0.502252	2.23412	24.6035	FALSE	0
2022-09-14	13:06:49	0.445458	1.98149	22.8643	FALSE	0
2022-09-14	13:06:49	0.36612	1.62857	26.2321	FALSE	0
2022-09-14	13:06:49	0.0161453	0.0718175	22.9361	FALSE	0
2022-09-14	13:06:50	-0.0808012	-0.35942	26.2321	FALSE	0
2022-09-14	13:06:50	-0.158969	-0.707126	22.9361	FALSE	0
2022-09-14	13:06:50	-0.264414	-1.17617	26.2321	FALSE	0
2022-09-14	13:06:50	-0.208587	-0.927837	22.9361	FALSE	0
2022-09-14	13:06:51	-0.224974	-1.00073	26.2321	FALSE	0
2022-09-14	13:06:51	-0.14874	-0.661625	22.9361	FALSE	0
2022-09-14	13:06:51	-0.20131	-0.895467	26.2321	FALSE	0
2022-09-14	13:06:51	-0.211386	-0.940287	22.9361	FALSE	0
2022-09-14	13:06:52	-0.171437	-0.762586	26.2321	FALSE	0
2022-09-14	13:06:52	-0.140852	-0.626538	22.9361	FALSE	0
2022-09-14	13:06:52	-0.202175	-0.899315	26.2321	FALSE	0
2022-09-14	13:06:53	0.0205728	0.0915119	23.0276	FALSE	0
2022-09-14	13:06:53	0.143881	0.640011	26.8721	FALSE	0
2022-09-14	13:06:53	-0.152659	-0.679058	23.0276	FALSE	0
2022-09-14	13:06:53	-0.0372389	-0.165646	26.8721	FALSE	0
2022-09-14	13:06:54	0.027443	0.122072	23.1497	FALSE	0
2022-09-14	13:06:54	0.0637788	0.283701	27.1558	FALSE	0
2022-09-14	13:06:54	-0.174084	-0.77436	23.1497	FALSE	0
2022-09-14	13:06:54	-0.0372389	-0.165646	27.1558	FALSE	0
2022-09-14	13:06:55	0.090191	0.401188	23.5509	FALSE	0
2022-09-14	13:06:55	0.368155	1.63763	28.7934	FALSE	0
2022-09-14	13:06:55	0.246781	1.09773	24.6486	FALSE	0
2022-09-14	13:06:56	0.262557	1.16791	29.9613	FALSE	0
2022-09-14	13:06:56	0.177774	0.790774	25.4394	FALSE	0
2022-09-14	13:06:56	0.150802	0.670797	30.6321	FALSE	0
2022-09-14	13:06:56	0.186018	0.827445	26.2669	FALSE	0
2022-09-14	13:06:57	0.205255	0.913015	31.5452	FALSE	0
2022-09-14	13:06:57	0.5393	2.39891	28.6658	FALSE	0
2022-09-14	13:06:57	0.280878	1.2494	32.7946	FALSE	0
2022-09-14	13:06:57	0.411361	1.82982	30.4956	FALSE	0
2022-09-14	13:06:58	0.569784	2.53451	35.3291	FALSE	0
2022-09-14	13:06:58	0.524949	2.33508	32.8307	FALSE	0
2022-09-14	13:06:58	0.389021	1.73044	37.0595	FALSE	0
2022-09-14	13:06:58	0.538537	2.39552	35.2262	FALSE	0
2022-09-14	13:06:59	0.417367	1.85653	38.9161	FALSE	0
2022-09-14	13:06:59	0.536196	2.38511	37.6113	FALSE	0
2022-09-14	13:06:59	0.324389	1.44295	40.359	FALSE	0
2022-09-14	13:07:00	0.431056	1.91742	39.5287	FALSE	0
2022-09-14	13:07:00	0.32042	1.42529	41.7843	FALSE	0
2022-09-14	13:07:00	0.556857	2.47701	42.0057	FALSE	0
2022-09-14	13:07:00	0.316501	1.40786	43.1922	FALSE	0
2022-09-14	13:07:01	0.26271	1.16859	43.1743	FALSE	0
2022-09-14	13:07:01	0.167188	0.743686	43.9358	FALSE	0
2022-09-14	13:07:01	0.535585	2.38239	45.5567	FALSE	0
2022-09-14	13:07:01	0.341336	1.51833	45.4542	FALSE	0
2022-09-14	13:07:02	0.707137	3.14549	48.7022	FALSE	0
2022-09-14	13:07:02	0.312736	1.39111	46.8453	FALSE	0
2022-09-14	13:07:02	0.622405	2.76858	51.4708	FALSE	0
2022-09-14	13:07:02	0.45014	2.00231	48.8476	FALSE	0
2022-09-14	13:07:03	0.603931	2.68641	54.1572	FALSE	0
2022-09-14	13:07:03	0.462252	2.05619	50.9038	FALSE	0
2022-09-14	13:07:03	0.555178	2.46954	56.6267	FALSE	0
2022-09-14	13:07:04	0.418537	1.86174	52.7655	FALSE	0
2022-09-14	13:07:04	0.518282	2.30542	58.9321	FALSE	0
2022-09-14	13:07:04	0.584593	2.60039	55.3659	FALSE	0
2022-09-14	13:07:04	0.45869	2.04034	60.9725	FALSE	0
2022-09-14	13:07:05	0.710954	3.16247	58.5284	FALSE	0
2022-09-14	13:07:05	0.384084	1.70848	62.681	FALSE	0
2022-09-14	13:07:05	0.733906	3.26456	61.7929	FALSE	0
2022-09-14	13:07:06	0.39528	1.75828	64.4393	FALSE	0
2022-09-14	13:07:06	0.699096	3.10972	64.9026	FALSE	0
2022-09-14	13:07:06	0.415942	1.85019	66.2894	FALSE	0
2022-09-14	13:07:06	0.639758	2.84577	67.7484	FALSE	0
2022-09-14	13:07:06	0.492634	2.19133	68.4808	FALSE	0
2022-09-14	13:07:07	0.672532	2.99156	70.74	FALSE	0
2022-09-14	13:07:07	0.606374	2.69727	71.1781	FALSE	0
2022-09-14	13:07:07	1.09075	4.85187	75.5919	FALSE	0
2022-09-14	13:07:08	0.655076	2.91391	74.092	FALSE	0
2022-09-14	13:07:08	0.638791	2.84147	78.4333	FALSE	0
2022-09-14	13:07:08	0.783575	3.4855	77.5775	FALSE	0
2022-09-14	13:07:08	0.482863	2.14787	80.5812	FALSE	0
2022-09-14	13:07:09	0.510293	2.26989	79.8473	FALSE	0
2022-09-14	13:07:09	0.398333	1.77186	82.3531	FALSE	0
2022-09-14	13:07:09	0.541336	2.40797	82.2553	FALSE	0
2022-09-14	13:07:09	0.400166	1.78002	84.1331	FALSE	0
2022-09-14	13:07:10	0.437112	1.94436	84.1997	FALSE	0
2022-09-14	13:07:10	0.383219	1.70463	85.8377	FALSE	0
2022-09-14	13:07:10	0.517723	2.30294	86.5026	FALSE	0
2022-09-14	13:07:10	0.420064	1.86853	87.7062	FALSE	0
2022-09-14	13:07:11	0.40673	1.80922	88.3118	FALSE	0
2022-09-14	13:07:11	0.448512	1.99507	89.7013	FALSE	0
2022-09-14	13:07:11	0.491921	2.18816	90.5	FALSE	0
2022-09-14	13:07:12	0.412888	1.83661	91.5379	FALSE	0
2022-09-14	13:07:12	0.424542	1.88845	92.3884	FALSE	0
2022-09-14	13:07:12	0.350293	1.55817	93.0961	FALSE	0
2022-09-14	13:07:12	0.544745	2.42313	94.8116	FALSE	0
2022-09-14	13:07:13	0.357672	1.591	94.6871	FALSE	0
2022-09-14	13:07:13	0.493651	2.19586	97.0074	FALSE	0
2022-09-14	13:07:13	0.345051	1.53486	96.2219	FALSE	0
2022-09-14	13:07:13	0.605865	2.69501	99.7024	FALSE	0
2022-09-14	13:07:14	0.313753	1.39564	97.6176	FALSE	0
2022-09-14	13:07:14	0.602252	2.67894	102.381	FALSE	0
2022-09-14	13:07:14	0.340878	1.51629	99.1339	FALSE	0
2022-09-14	13:07:15	0.574211	2.55421	104.936	FALSE	0
2022-09-14	13:07:15	0.322354	1.4339	100.568	FALSE	0
2022-09-14	13:07:15	0.59182	2.63253	107.568	FALSE	0
2022-09-14	13:07:15	0.383779	1.70713	102.275	FALSE	0
2022-09-14	13:07:16	0.547697	2.43627	110.004	FALSE	0
2022-09-14	13:07:16	0.307341	1.36711	103.642	FALSE	0
2022-09-14	13:07:16	0.498333	2.21668	112.221	FALSE	0
2022-09-14	13:07:16	0.307646	1.36847	105.01	FALSE	0
2022-09-14	13:07:17	0.517926	2.30384	114.525	FALSE	0
2022-09-14	13:07:17	0.271667	1.20843	106.219	FALSE	0
2022-09-14	13:07:17	0.552736	2.45868	116.984	FALSE	0
2022-09-14	13:07:17	0.342303	1.52263	107.742	FALSE	0
2022-09-14	13:07:18	0.58444	2.59971	119.583	FALSE	0
2022-09-14	13:07:18	0.334618	1.48845	109.23	FALSE	0
2022-09-14	13:07:18	0.687646	3.05879	122.642	FALSE	0
2022-09-14	13:07:19	0.375382	1.66977	110.9	FALSE	0
2022-09-14	13:07:19	0.740267	3.29286	125.935	FALSE	0
2022-09-14	13:07:19	0.750853	3.33994	114.24	FALSE	0
2022-09-14	13:07:19	0.977112	4.34639	130.281	FALSE	0
2022-09-14	13:07:20	0.6193	2.75477	116.994	FALSE	0
2022-09-14	13:07:20	1.06205	4.72421	135.006	FALSE	0
2022-09-14	13:07:20	0.672888	2.99314	119.988	FALSE	0
2022-09-14	13:07:20	0.686781	3.05494	138.06	FALSE	0
2022-09-14	13:07:21	0.509326	2.26558	122.253	FALSE	0
2022-09-14	13:07:21	0.621285	2.7636	140.824	FALSE	0
2022-09-14	13:07:21	0.486374	2.16349	124.417	FALSE	0
2022-09-14	13:07:21	0.475484	2.11505	142.939	FALSE	0
2022-09-14	13:07:22	0.613244	2.72783	127.145	FALSE	0
2022-09-14	13:07:22	0.613142	2.72738	145.667	FALSE	0
2022-09-14	13:07:22	0.631616	2.80955	129.954	FALSE	0
2022-09-14	13:07:23	0.578435	2.57299	148.239	FALSE	0
2022-09-14	13:07:23	0.683626	3.04091	132.995	FALSE	0
2022-09-14	13:07:23	1.17548	5.22877	153.468	FALSE	0
2022-09-14	13:07:23	2.51055	11.1674	144.162	FALSE	0
2022-09-14	13:07:24	2.33558	10.3891	163.857	FALSE	0
2022-09-14	13:07:24	2.02673	9.0153	153.178	FALSE	0
2022-09-14	13:07:24	1.69421	7.53618	171.394	FALSE	0
2022-09-14	13:07:24	1.61324	7.17601	160.354	FALSE	0
2022-09-14	13:07:25	1.4021	6.23682	177.63	FALSE	0
2022-09-14	13:07:25	1.24037	5.51741	165.871	FALSE	0
2022-09-14	13:07:25	1.2193	5.42369	183.054	FALSE	0
2022-09-14	13:07:25	1.18302	5.26231	171.133	FALSE	0
2022-09-14	13:07:26	1.17258	5.21587	188.27	FALSE	0
2022-09-14	13:07:26	1.07594	4.786	175.919	FALSE	0
2022-09-14	13:07:26	1.08113	4.80908	193.079	FALSE	0
2022-09-14	13:07:27	0.963168	4.28436	180.204	FALSE	0
2022-09-14	13:07:27	0.956959	4.25675	197.336	FALSE	0
2022-09-14	13:07:27	0.93416	4.15533	184.359	FALSE	0
2022-09-14	13:07:27	0.925102	4.11504	201.451	FALSE	0
2022-09-14	13:07:28	0.947443	4.21442	188.574	FALSE	0
2022-09-14	13:07:28	0.934771	4.15805	205.609	FALSE	0
2022-09-14	13:07:28	0.960318	4.27169	192.845	FALSE	0
2022-09-14	13:07:28	0.947646	4.21532	209.824	FALSE	0
2022-09-14	13:07:29	0.919605	4.09059	196.936	FALSE	0
2022-09-14	13:07:29	0.750903	3.34017	213.164	FALSE	0
2022-09-14	13:07:29	0.5393	2.39891	199.335	FALSE	0
2022-09-14	13:07:29	0.482099	2.14447	215.309	FALSE	0
2022-09-14	13:07:30	0.46958	2.08879	201.424	FALSE	0
2022-09-14	13:07:30	0.452837	2.01431	217.323	FALSE	0
2022-09-14	13:07:30	0.483372	2.15014	203.574	FALSE	0
2022-09-14	13:07:31	0.347239	1.54459	218.868	FALSE	0
2022-09-14	13:07:31	0.414771	1.84498	205.419	FALSE	0
2022-09-14	13:07:31	0.414975	1.84589	220.714	FALSE	0
2022-09-14	13:07:31	0.466781	2.07634	207.495	FALSE	0
2022-09-14	13:07:32	0.427748	1.90271	222.616	FALSE	0
2022-09-14	13:07:32	0.398232	1.77142	209.266	FALSE	0
2022-09-14	13:07:32	0.45584	2.02767	224.644	FALSE	0
2022-09-14	13:07:32	0.412125	1.83321	211.1	FALSE	0
2022-09-14	13:07:33	0.441845	1.96541	226.609	FALSE	0
2022-09-14	13:07:33	0.135229	0.601526	211.701	FALSE	0
2022-09-14	13:07:33	0.00255749	0.0113762	226.621	FALSE	0
2022-09-14	13:07:34	-0.322735	-1.43559	211.701	FALSE	0
2022-09-14	13:07:34	-0.698103	-3.1053	226.621	FALSE	0
2022-09-14	13:07:34	-0.72991	-3.24679	211.701	FALSE	0
2022-09-14	13:07:34	-0.84935	-3.77808	226.621	FALSE	0
2022-09-14	13:07:35	-0.521157	-2.31821	211.701	FALSE	0
2022-09-14	13:07:35	-0.444313	-1.97639	226.621	FALSE	0
2022-09-14	13:07:35	-0.339172	-1.5087	211.701	FALSE	0
2022-09-14	13:07:35	0.411158	1.82891	228.45	FALSE	0
2022-09-14	13:07:36	0.369326	1.64284	213.344	FALSE	0
2022-09-14	13:07:36	0.403473	1.79473	230.244	FALSE	0
2022-09-14	13:07:36	0.305713	1.35987	214.704	FALSE	0
2022-09-14	13:07:36	0.473448	2.10599	232.35	FALSE	0
2022-09-14	13:07:37	0.540013	2.40209	217.106	FALSE	0
2022-09-14	13:07:37	0.666272	2.96371	235.314	FALSE	0
2022-09-14	13:07:37	1.10276	4.9053	222.011	FALSE	0
2022-09-14	13:07:38	0.828511	3.68538	239	FALSE	0
2022-09-14	13:07:38	0.623015	2.7713	224.783	FALSE	0
2022-09-14	13:07:38	0.57416	2.55398	241.553	FALSE	0
2022-09-14	13:07:38	0.443168	1.9713	226.754	FALSE	0
2022-09-14	13:07:39	0.550496	2.44872	244.002	FALSE	0
2022-09-14	13:07:39	0.428868	1.90769	228.662	FALSE	0
2022-09-14	13:07:39	0.446883	1.98782	245.99	FALSE	0
2022-09-14	13:07:39	0.550293	2.44781	231.109	FALSE	0
2022-09-14	13:07:40	0.71874	3.1971	249.187	FALSE	0
2022-09-14	13:07:40	0.719198	3.19914	234.308	FALSE	0
2022-09-14	13:07:40	0.72673	3.23264	252.42	FALSE	0
2022-09-14	13:07:40	0.72042	3.20457	237.513	FALSE	0
2022-09-14	13:07:41	0.72042	3.20457	255.624	FALSE	0
2022-09-14	13:07:41	0.721895	3.21113	240.724	FALSE	0
2022-09-14	13:07:41	0.727799	3.2374	258.862	FALSE	0
2022-09-14	13:07:42	0.731209	3.25256	243.977	FALSE	0
2022-09-14	13:07:42	0.71986	3.20208	262.064	FALSE	0
2022-09-14	13:07:42	0.725916	3.22902	247.206	FALSE	0
2022-09-14	13:07:42	0.141591	0.629825	262.694	FALSE	0
2022-09-14	13:07:43	0.143982	0.640461	247.846	FALSE	0
2022-09-14	13:07:43	0.0711071	0.316299	263.01	FALSE	0
2022-09-14	13:07:43	0.0423539	0.188399	248.035	FALSE	0
2022-09-14	13:07:43	0.157875	0.70226	263.712	FALSE	0
2022-09-14	13:07:44	0.35528	1.58036	249.615	FALSE	0
2022-09-14	13:07:44	0.469936	2.09037	265.803	FALSE	0
2022-09-14	13:07:44	0.336654	1.4975	251.112	FALSE	0
2022-09-14	13:07:44	0.34098	1.51675	267.319	FALSE	0
2022-09-14	13:07:45	0.394211	1.75353	252.866	FALSE	0
2022-09-14	13:07:45	0.46271	2.05823	269.378	FALSE	0
2022-09-14	13:07:45	0.469987	2.0906	254.957	FALSE	0
2022-09-14	13:07:46	0.500674	2.2271	271.605	FALSE	0
2022-09-14	13:07:46	0.376298	1.67385	256.63	FALSE	0
2022-09-14	13:07:46	0.36668	1.63107	273.236	FALSE	0
2022-09-14	13:07:46	0.383015	1.70373	258.334	FALSE	0
2022-09-14	13:07:47	0.871514	3.87667	277.112	FALSE	0
2022-09-14	13:07:47	0.730598	3.24985	261.584	FALSE	0
2022-09-14	13:07:47	0.432277	1.92285	279.035	FALSE	0
2022-09-14	13:07:47	0.231667	1.0305	262.615	FALSE	0
2022-09-14	13:07:48	0.180216	0.801637	279.837	FALSE	0
2022-09-14	13:07:48	0.212583	0.945612	263.56	FALSE	0
2022-09-14	13:07:48	1.33319	5.9303	285.767	FALSE	0
2022-09-14	13:07:49	2.14006	9.51941	273.08	FALSE	0
2022-09-14	13:07:49	1.23477	5.4925	291.26	FALSE	0
2022-09-14	13:07:49	0.53813	2.39371	275.473	FALSE	0
2022-09-14	13:07:49	0.267239	1.18873	292.448	FALSE	0
2022-09-14	13:07:50	0.172328	0.766549	276.24	FALSE	0
2022-09-14	13:07:50	0.243575	1.08347	293.532	FALSE	0
2022-09-14	13:07:50	0.221387	0.984774	277.225	FALSE	0
2022-09-14	13:07:50	0.323677	1.43978	294.972	FALSE	0
2022-09-14	13:07:51	0.388359	1.7275	278.952	FALSE	0
2022-09-14	13:07:51	0.30841	1.37187	296.344	FALSE	0
2022-09-14	13:07:51	0.348868	1.55183	280.504	FALSE	0
2022-09-14	13:07:51	0.362965	1.61454	297.958	FALSE	0
2022-09-14	13:07:52	0.340675	1.51539	282.019	FALSE	0
2022-09-14	13:07:52	0.342506	1.52354	299.482	FALSE	0
2022-09-14	13:07:52	0.355942	1.5833	283.603	FALSE	0
2022-09-14	13:07:53	0.34902	1.55251	301.034	FALSE	0
2022-09-14	13:07:53	0.342303	1.52263	285.125	FALSE	0
2022-09-14	13:07:53	0.348817	1.55161	302.586	FALSE	0
2022-09-14	13:07:53	0.350242	1.55795	286.683	FALSE	0
2022-09-14	13:07:54	0.352481	1.56791	304.154	FALSE	0
2022-09-14	13:07:54	0.358741	1.59575	288.279	FALSE	0
2022-09-14	13:07:54	0.350242	1.55795	305.712	FALSE	0
2022-09-14	13:07:54	0.344186	1.53101	289.81	FALSE	0
2022-09-14	13:07:55	0.347748	1.54685	307.258	FALSE	0
2022-09-14	13:07:55	0.341947	1.52105	291.331	FALSE	0
2022-09-14	13:07:55	0.348308	1.54934	308.808	FALSE	0
2022-09-14	13:07:55	0.346578	1.54165	292.873	FALSE	0
2022-09-14	13:07:56	0.348053	1.54821	310.356	FALSE	0
2022-09-14	13:07:56	0.387799	1.72501	294.598	FALSE	0
2022-09-14	13:07:56	0.399809	1.77843	312.134	FALSE	0
2022-09-14	13:07:57	0.405764	1.80492	296.403	FALSE	0
2022-09-14	13:07:57	0.434415	1.93236	314.067	FALSE	0
2022-09-14	13:07:57	0.406985	1.81035	298.213	FALSE	0
2022-09-14	13:07:57	0.35645	1.58556	315.652	FALSE	0
2022-09-14	13:07:58	0.419453	1.86581	300.079	FALSE	0
2022-09-14	13:07:58	0.568511	2.52885	318.181	FALSE	0
2022-09-14	13:07:58	0.821794	3.6555	303.734	FALSE	0
2022-09-14	13:07:58	0.462303	2.05642	320.238	FALSE	0
2022-09-14	13:07:59	0.648461	2.88448	306.619	FALSE	0
2022-09-14	13:07:59	0.592685	2.63638	322.874	FALSE	0
2022-09-14	13:07:59	0.683372	3.03978	309.658	FALSE	0
2022-09-14	13:07:59	0.477977	2.12614	325	FALSE	0
2022-09-14	13:08:00	0.396298	1.76281	311.421	FALSE	0
2022-09-14	13:08:00	0.423372	1.88324	326.883	FALSE	0
2022-09-14	13:08:00	0.363728	1.61793	313.039	FALSE	0
2022-09-14	13:08:01	0.38154	1.69717	328.581	FALSE	0
2022-09-14	13:08:01	0.236654	1.05268	314.092	FALSE	0
2022-09-14	13:08:01	0.215992	0.960776	329.541	FALSE	0
2022-09-14	13:08:01	0.239657	1.06604	315.158	FALSE	0
2022-09-14	13:08:02	0.235076	1.04567	330.587	FALSE	0
2022-09-14	13:08:02	0.242812	1.08008	316.238	FALSE	0
2022-09-14	13:08:02	0.235942	1.04952	331.636	FALSE	0
2022-09-14	13:08:02	0.245814	1.09343	317.331	FALSE	0
2022-09-14	13:08:03	0.30612	1.36168	332.998	FALSE	0
2022-09-14	13:08:03	0.282506	1.25664	318.588	FALSE	0
2022-09-14	13:08:03	0.346527	1.54142	334.54	FALSE	0
2022-09-14	13:08:03	0.369886	1.64533	320.233	FALSE	0
2022-09-14	13:08:04	0.353702	1.57334	336.113	FALSE	0
2022-09-14	13:08:04	0.400522	1.7816	322.015	FALSE	0
2022-09-14	13:08:04	0.414618	1.8443	337.957	FALSE	0
2022-09-14	13:08:05	0.42215	1.87781	323.893	FALSE	0
2022-09-14	13:08:05	0.378181	1.68222	339.639	FALSE	0
2022-09-14	13:08:05	0.402506	1.79043	325.683	FALSE	0
2022-09-14	13:08:05	0.691514	3.07599	342.715	FALSE	0
2022-09-14	13:08:06	0.540725	2.40525	328.089	FALSE	0
2022-09-14	13:08:06	0.388206	1.72682	344.442	FALSE	0
2022-09-14	13:08:06	0.374313	1.66502	329.754	FALSE	0
2022-09-14	13:08:06	0.349682	1.55546	345.998	FALSE	0
2022-09-14	13:08:07	0.30958	1.37707	331.131	FALSE	0
2022-09-14	13:08:07	0.252888	1.1249	347.123	FALSE	0
2022-09-14	13:08:07	0.482507	2.14629	333.277	FALSE	0
2022-09-14	13:08:08	0.680623	3.02755	350.15	FALSE	0
2022-09-14	13:08:08	0.732379	3.25777	336.535	FALSE	0
2022-09-14	13:08:08	0.662812	2.94832	353.098	FALSE	0
2022-09-14	13:08:08	0.580623	2.58273	339.117	FALSE	0
2022-09-14	13:08:09	0.619453	2.75545	355.854	FALSE	0
2022-09-14	13:08:09	0.684033	3.04272	342.16	FALSE	0
2022-09-14	13:08:09	0.682761	3.03706	358.891	FALSE	0
2022-09-14	13:08:09	0.773601	3.44113	345.601	FALSE	0
2022-09-14	13:08:10	0.927494	4.12568	363.017	FALSE	0
2022-09-14	13:08:10	0.721234	3.20819	348.809	FALSE	0
2022-09-14	13:08:10	0.497265	2.21193	365.229	FALSE	0
2022-09-14	13:08:10	0.659911	2.93542	351.745	FALSE	0
2022-09-14	13:08:11	0.853244	3.7954	369.024	FALSE	0
2022-09-14	13:08:11	0.787697	3.50383	355.249	FALSE	0
2022-09-14	13:08:11	0.555738	2.47203	371.496	FALSE	0
2022-09-14	13:08:12	0.410445	1.82574	357.074	FALSE	0
2022-09-14	13:08:12	0.37986	1.68969	373.186	FALSE	0
2022-09-14	13:08:12	0.340064	1.51267	358.587	FALSE	0
2022-09-14	13:08:12	0.703677	3.1301	376.316	FALSE	0
2022-09-14	13:08:13	0.716145	3.18556	361.773	FALSE	0
2022-09-14	13:08:13	0.720369	3.20435	379.52	FALSE	0
2022-09-14	13:08:13	0.718588	3.19642	364.969	FALSE	0
2022-09-14	13:08:13	0.720013	3.20276	382.723	FALSE	0
2022-09-14	13:08:14	0.723066	3.21634	368.185	FALSE	0
2022-09-14	13:08:14	0.713855	3.17537	385.898	FALSE	0
2022-09-14	13:08:14	0.717621	3.19212	371.378	FALSE	0
2022-09-14	13:08:14	0.725865	3.22879	389.127	FALSE	0
2022-09-14	13:08:15	0.719758	3.20163	374.579	FALSE	0
2022-09-14	13:08:15	0.718893	3.19778	392.325	FALSE	0
2022-09-14	13:08:15	0.729733	3.246	377.825	FALSE	0
2022-09-14	13:08:16	0.727596	3.23649	395.561	FALSE	0
2022-09-14	13:08:16	0.723931	3.22019	381.045	FALSE	0
2022-09-14	13:08:16	0.720369	3.20435	398.766	FALSE	0
2022-09-14	13:08:16	0.718181	3.19461	384.24	FALSE	0
2022-09-14	13:08:17	0.726323	3.23083	401.997	FALSE	0
2022-09-14	13:08:17	0.718893	3.19778	387.438	FALSE	0
2022-09-14	13:08:17	0.724898	3.22449	405.221	FALSE	0
2022-09-14	13:08:17	0.718486	3.19597	390.634	FALSE	0
2022-09-14	13:08:18	0.715738	3.18375	408.405	FALSE	0
2022-09-14	13:08:18	0.723321	3.21748	393.851	FALSE	0
2022-09-14	13:08:18	0.723117	3.21657	411.621	FALSE	0
2022-09-14	13:08:18	0.723321	3.21748	397.069	FALSE	0
2022-09-14	13:08:19	0.721895	3.21113	414.832	FALSE	0
2022-09-14	13:08:19	0.72383	3.21974	400.288	FALSE	0
2022-09-14	13:08:19	0.725407	3.22676	418.059	FALSE	0
2022-09-14	13:08:20	0.71589	3.18442	403.473	FALSE	0
2022-09-14	13:08:20	0.71584	3.1842	421.243	FALSE	0
2022-09-14	13:08:20	0.724796	3.22404	406.697	FALSE	0
2022-09-14	13:08:20	0.731158	3.25234	424.496	FALSE	0
2022-09-14	13:08:21	0.72042	3.20457	409.901	FALSE	0
2022-09-14	13:08:21	0.723321	3.21748	427.713	FALSE	0
2022-09-14	13:08:21	0.720064	3.20299	413.104	FALSE	0
2022-09-14	13:08:21	0.720064	3.20299	430.916	FALSE	0
2022-09-14	13:08:22	0.722557	3.21408	416.319	FALSE	0
2022-09-14	13:08:22	0.722761	3.21499	434.131	FALSE	0
2022-09-14	13:08:22	0.717417	3.19121	419.51	FALSE	0
2022-09-14	13:08:23	0.723524	3.21838	437.35	FALSE	0
2022-09-14	13:08:23	0.720216	3.20366	422.713	FALSE	0
2022-09-14	13:08:23	0.721895	3.21113	440.561	FALSE	0
2022-09-14	13:08:23	0.718893	3.19778	425.911	FALSE	0
2022-09-14	13:08:24	0.732888	3.26003	443.821	FALSE	0
2022-09-14	13:08:24	0.725204	3.22585	429.137	FALSE	0
2022-09-14	13:08:24	0.71813	3.19439	447.015	FALSE	0
2022-09-14	13:08:24	0.71645	3.18691	432.324	FALSE	0
2022-09-14	13:08:25	0.722659	3.21453	450.23	FALSE	0
2022-09-14	13:08:25	0.721081	3.20751	435.531	FALSE	0
2022-09-14	13:08:25	0.721183	3.20797	453.438	FALSE	0
2022-09-14	13:08:25	0.722965	3.21589	438.747	FALSE	0
2022-09-14	13:08:26	0.720827	3.20638	456.644	FALSE	0
2022-09-14	13:08:26	0.719249	3.19936	441.947	FALSE	0
2022-09-14	13:08:26	0.720776	3.20616	459.85	FALSE	0
2022-09-14	13:08:27	0.720216	3.20366	445.15	FALSE	0
2022-09-14	13:08:27	0.718232	3.19484	463.045	FALSE	0
2022-09-14	13:08:27	0.727036	3.234	448.384	FALSE	0
2022-09-14	13:08:27	0.724084	3.22087	466.266	FALSE	0
2022-09-14	13:08:28	0.722862	3.21543	451.6	FALSE	0
2022-09-14	13:08:28	0.716196	3.18578	469.452	FALSE	0
2022-09-14	13:08:28	0.715636	3.18329	454.783	FALSE	0
2022-09-14	13:08:28	0.714364	3.17763	472.629	FALSE	0
2022-09-14	13:08:29	0.717417	3.19121	457.974	FALSE	0
2022-09-14	13:08:29	0.725356	3.22653	475.856	FALSE	0
2022-09-14	13:08:29	0.718537	3.1962	461.171	FALSE	0
2022-09-14	13:08:29	0.719962	3.20253	479.058	FALSE	0
2022-09-14	13:08:30	0.714058	3.17627	464.347	FALSE	0
2022-09-14	13:08:30	0.69355	3.08505	482.143	FALSE	0
2022-09-14	13:08:30	0.445051	1.97968	466.326	FALSE	0
2022-09-14	13:08:31	0.44902	1.99733	484.141	FALSE	0
2022-09-14	13:08:31	0.447036	1.98851	468.315	FALSE	0
2022-09-14	13:08:31	0.438588	1.95093	486.092	FALSE	0
2022-09-14	13:08:31	0.432023	1.92172	470.237	FALSE	0
2022-09-14	13:08:32	0.421947	1.8769	487.969	FALSE	0
2022-09-14	13:08:32	0.422201	1.87803	472.115	FALSE	0
2022-09-14	13:08:32	0.426679	1.89795	489.867	FALSE	0
2022-09-14	13:08:32	0.42444	1.88799	474.003	FALSE	0
2022-09-14	13:08:33	0.423931	1.88573	491.752	FALSE	0
2022-09-14	13:08:33	0.421489	1.87487	475.878	FALSE	0
2022-09-14	13:08:33	0.426069	1.89524	493.648	FALSE	0
2022-09-14	13:08:33	0.432786	1.92512	477.803	FALSE	0
2022-09-14	13:08:34	0.418028	1.85947	495.507	FALSE	0
2022-09-14	13:08:34	0.414924	1.84566	479.648	FALSE	0
2022-09-14	13:08:34	0.425611	1.8932	497.4	FALSE	0
2022-09-14	13:08:35	0.434415	1.93236	481.581	FALSE	0
2022-09-14	13:08:35	0.435331	1.93644	499.337	FALSE	0
2022-09-14	13:08:35	0.437977	1.94821	483.529	FALSE	0
2022-09-14	13:08:35	0.443473	1.97266	501.309	FALSE	0
2022-09-14	13:08:36	0.435484	1.93712	485.466	FALSE	0
2022-09-14	13:08:36	0.431667	1.92014	503.229	FALSE	0
2022-09-14	13:08:36	0.426527	1.89728	487.363	FALSE	0
2022-09-14	13:08:36	0.430038	1.9129	505.142	FALSE	0
2022-09-14	13:08:37	0.403982	1.79699	489.16	FALSE	0
2022-09-14	13:08:37	0.387443	1.72342	506.866	FALSE	0
2022-09-14	13:08:37	0.412583	1.83525	490.996	FALSE	0
2022-09-14	13:08:37	0.467392	2.07905	508.945	FALSE	0
2022-09-14	13:08:38	0.496654	2.20922	493.205	FALSE	0
2022-09-14	13:08:38	0.514873	2.29026	511.235	FALSE	0
2022-09-14	13:08:38	0.543677	2.41838	495.623	FALSE	0
2022-09-14	13:08:39	0.489936	2.17933	513.414	FALSE	0
2022-09-14	13:08:39	0.476298	2.11867	497.742	FALSE	0
2022-09-14	13:08:39	0.45299	2.01499	515.429	FALSE	0
2022-09-14	13:08:39	0.447137	1.98895	499.731	FALSE	0
2022-09-14	13:08:40	0.448919	1.99688	517.426	FALSE	0
2022-09-14	13:08:40	0.418283	1.86061	501.591	FALSE	0
2022-09-14	13:08:40	0.396196	1.76236	519.189	FALSE	0
2022-09-14	13:08:40	0.393957	1.7524	503.344	FALSE	0
2022-09-14	13:08:41	0.386934	1.72116	520.91	FALSE	0
2022-09-14	13:08:41	0.389326	1.7318	505.076	FALSE	0
2022-09-14	13:08:41	0.38327	1.70486	522.615	FALSE	0
2022-09-14	13:08:41	0.375585	1.67068	506.746	FALSE	0
2022-09-14	13:08:42	0.398079	1.77074	524.385	FALSE	0
2022-09-14	13:08:42	0.477265	2.12297	508.869	FALSE	0
2022-09-14	13:08:42	0.508766	2.26309	526.648	FALSE	0
2022-09-14	13:08:43	0.493651	2.19586	511.065	FALSE	0
2022-09-14	13:08:43	0.436349	1.94097	528.589	FALSE	0
2022-09-14	13:08:43	0.433244	1.92716	512.992	FALSE	0
2022-09-14	13:08:43	0.431209	1.9181	530.508	FALSE	0
2022-09-14	13:08:44	0.448155	1.99348	514.986	FALSE	0
2022-09-14	13:08:44	0.580623	2.58273	533.09	FALSE	0
2022-09-14	13:08:44	0.856349	3.80921	518.795	FALSE	0
2022-09-14	13:08:44	0.818791	3.64215	536.732	FALSE	0
2022-09-14	13:08:45	0.741132	3.2967	522.092	FALSE	0
2022-09-14	13:08:45	0.606272	2.69682	539.429	FALSE	0
2022-09-14	13:08:45	0.487494	2.16847	524.26	FALSE	0
2022-09-14	13:08:46	0.3564	1.58534	541.015	FALSE	0
2022-09-14	13:08:46	0.324389	1.44295	525.703	FALSE	0
2022-09-14	13:08:46	0.298486	1.32773	542.342	FALSE	0
2022-09-14	13:08:46	0.670598	2.98295	528.686	FALSE	0
2022-09-14	13:08:47	0.716705	3.18805	545.53	FALSE	0
2022-09-14	13:08:47	0.718333	3.19529	531.881	FALSE	0
2022-09-14	13:08:47	0.723575	3.21861	548.749	FALSE	0
2022-09-14	13:08:47	0.718232	3.19484	535.076	FALSE	0
2022-09-14	13:08:48	0.725204	3.22585	551.975	FALSE	0
2022-09-14	13:08:48	0.723219	3.21702	538.293	FALSE	0
2022-09-14	13:08:48	0.723931	3.22019	555.195	FALSE	0
2022-09-14	13:08:48	0.718588	3.19642	541.49	FALSE	0
2022-09-14	13:08:49	0.727239	3.2349	558.43	FALSE	0
2022-09-14	13:08:49	0.729784	3.24623	544.736	FALSE	0
2022-09-14	13:08:49	0.717366	3.19099	561.621	FALSE	0
2022-09-14	13:08:50	0.728512	3.24057	547.976	FALSE	0
2022-09-14	13:08:50	0.720572	3.20525	564.826	FALSE	0
2022-09-14	13:08:50	0.725204	3.22585	551.202	FALSE	0
2022-09-14	13:08:50	0.720929	3.20684	568.033	FALSE	0
2022-09-14	13:08:51	0.718384	3.19552	554.398	FALSE	0
2022-09-14	13:08:51	0.72271	3.21476	571.248	FALSE	0
2022-09-14	13:08:51	0.72729	3.23513	557.633	FALSE	0
2022-09-14	13:08:51	0.522099	2.3224	573.57	FALSE	0
2022-09-14	13:08:52	0.64444	2.8666	560.5	FALSE	0
2022-09-14	13:08:52	0.717417	3.19121	576.761	FALSE	0
2022-09-14	13:08:52	0.719198	3.19914	563.699	FALSE	0
2022-09-14	13:08:52	0.722862	3.21543	579.977	FALSE	0
2022-09-14	13:08:53	0.717061	3.18963	566.888	FALSE	0
2022-09-14	13:08:53	0.461183	2.05143	582.028	FALSE	0
2022-09-14	13:08:53	0.479758	2.13406	569.022	FALSE	0
2022-09-14	13:08:54	0.420013	1.8683	583.897	FALSE	0
2022-09-14	13:08:54	0.441794	1.96519	570.988	FALSE	0
2022-09-14	13:08:54	0.562608	2.50259	586.399	FALSE	0
2022-09-14	13:08:54	0.605458	2.6932	573.681	FALSE	0
2022-09-14	13:08:55	0.506018	2.25087	588.65	FALSE	0
2022-09-14	13:08:55	0.396909	1.76553	575.446	FALSE	0
2022-09-14	13:08:55	0.522354	2.32354	590.974	FALSE	0
2022-09-14	13:08:55	0.521031	2.31765	577.764	FALSE	0
2022-09-14	13:08:56	0.474924	2.11256	593.086	FALSE	0
2022-09-14	13:08:56	0.556348	2.47475	580.239	FALSE	0
2022-09-14	13:08:56	0.576501	2.56439	595.65	FALSE	0
2022-09-14	13:08:56	0.514669	2.28935	582.528	FALSE	0
2022-09-14	13:08:57	0.58841	2.61737	598.268	FALSE	0
2022-09-14	13:08:57	0.607137	2.70067	585.229	FALSE	0
2022-09-14	13:08:57	0.568511	2.52885	600.797	FALSE	0
2022-09-14	13:08:58	0.608613	2.70723	587.936	FALSE	0
2022-09-14	13:08:58	0.447545	1.99077	602.787	FALSE	0
2022-09-14	13:08:58	0.37131	1.65166	589.588	FALSE	0
2022-09-14	13:08:58	0.334822	1.48936	604.277	FALSE	0
2022-09-14	13:08:59	0.43472	1.93372	591.521	FALSE	0
2022-09-14	13:08:59	0.729784	3.24623	607.523	FALSE	0
2022-09-14	13:08:59	0.720776	3.20616	594.727	FALSE	0
2022-09-14	13:08:59	0.719148	3.19891	610.722	FALSE	0
2022-09-14	13:09:00	0.725865	3.22879	597.956	FALSE	0
2022-09-14	13:09:00	0.606018	2.69569	613.418	FALSE	0
2022-09-14	13:09:00	0.500471	2.2262	600.182	FALSE	0
2022-09-14	13:09:00	0.460827	2.04985	615.467	FALSE	0
2022-09-14	13:09:01	0.45411	2.01997	602.202	FALSE	0
2022-09-14	13:09:01	0.516094	2.29569	617.763	FALSE	0
2022-09-14	13:09:01	0.5764	2.56394	604.766	FALSE	0
2022-09-14	13:09:02	0.624338	2.77718	620.54	FALSE	0
2022-09-14	13:09:02	0.697824	3.10406	607.87	FALSE	0
2022-09-14	13:09:02	0.644746	2.86796	623.408	FALSE	0
2022-09-14	13:09:02	0.707494	3.14707	611.017	FALSE	0
2022-09-14	13:09:03	0.585102	2.60265	626.011	FALSE	0
2022-09-14	13:09:03	0.618639	2.75183	613.769	FALSE	0
2022-09-14	13:09:03	0.622608	2.76948	628.78	FALSE	0
2022-09-14	13:09:03	0.716959	3.18918	616.959	FALSE	0
2022-09-14	13:09:04	0.688562	3.06286	631.843	FALSE	0
2022-09-14	13:09:04	0.618842	2.75273	619.711	FALSE	0
2022-09-14	13:09:04	0.626323	2.78601	634.629	FALSE	0
2022-09-14	13:09:05	0.577621	2.56937	622.281	FALSE	0
2022-09-14	13:09:05	0.62617	2.78533	637.415	FALSE	0
2022-09-14	13:09:05	0.630649	2.80525	625.086	FALSE	0
2022-09-14	13:09:05	0.633499	2.81793	640.233	FALSE	0
2022-09-14	13:09:06	0.693906	3.08663	628.172	FALSE	0
2022-09-14	13:09:06	0.717621	3.19212	643.425	FALSE	0
2022-09-14	13:09:06	0.757977	3.37163	631.544	FALSE	0
2022-09-14	13:09:06	0.730293	3.24849	646.673	FALSE	0
2022-09-14	13:09:07	0.778893	3.46467	635.009	FALSE	0
2022-09-14	13:09:07	0.981692	4.36676	651.04	FALSE	0
2022-09-14	13:09:07	1.02668	4.56688	639.576	FALSE	0
2022-09-14	13:09:07	1.042	4.63502	655.675	FALSE	0
2022-09-14	13:09:08	1.15029	5.11672	644.692	FALSE	0
2022-09-14	13:09:08	1.19782	5.32814	661.003	FALSE	0
2022-09-14	13:09:08	0.923473	4.10779	648.8	FALSE	0
2022-09-14	13:09:09	0.792837	3.5267	664.53	FALSE	0
2022-09-14	13:09:09	0.560623	2.49376	651.294	FALSE	0
2022-09-14	13:09:09	0.685763	3.05041	667.58	FALSE	0
2022-09-14	13:09:09	0.85589	3.80717	655.101	FALSE	0
2022-09-14	13:09:10	1.08169	4.81157	672.392	FALSE	0
2022-09-14	13:09:10	1.21029	5.38361	660.485	FALSE	0
2022-09-14	13:09:10	0.741438	3.29806	675.69	FALSE	0
2022-09-14	13:09:10	0.70388	3.131	663.616	FALSE	0
2022-09-14	13:09:11	0.719656	3.20117	678.891	FALSE	0
2022-09-14	13:09:11	0.600013	2.66898	666.285	FALSE	0
2022-09-14	13:09:11	0.594924	2.64634	681.537	FALSE	0
2022-09-14	13:09:11	0.571107	2.5404	668.825	FALSE	0
2022-09-14	13:09:12	0.638588	2.84057	684.378	FALSE	0
2022-09-14	13:09:12	0.697468	3.10248	671.928	FALSE	0
2022-09-14	13:09:12	0.690802	3.07283	687.451	FALSE	0
2022-09-14	13:09:13	0.724288	3.22178	675.149	FALSE	0
2022-09-14	13:09:13	0.635076	2.82495	690.276	FALSE	0
2022-09-14	13:09:13	0.65528	2.91482	678.064	FALSE	0
2022-09-14	13:09:13	0.819453	3.64509	693.921	FALSE	0
2022-09-14	13:09:14	0.727087	3.23423	681.298	FALSE	0
2022-09-14	13:09:14	0.644847	2.86841	696.789	FALSE	0
2022-09-14	13:09:14	0.69757	3.10293	684.401	FALSE	0
2022-09-14	13:09:14	0.648766	2.88584	699.675	FALSE	0
2022-09-14	13:09:15	0.639657	2.84532	687.247	FALSE	0
2022-09-14	13:09:15	0.659657	2.93429	702.609	FALSE	0
2022-09-14	13:09:15	0.650191	2.89218	690.139	FALSE	0
2022-09-14	13:09:15	0.732786	3.25958	705.869	FALSE	0
2022-09-14	13:09:16	0.607544	2.70248	692.841	FALSE	0
2022-09-14	13:09:16	0.589326	2.62144	708.49	FALSE	0
2022-09-14	13:09:16	0.566985	2.52206	695.363	FALSE	0
2022-09-14	13:09:17	0.617723	2.74776	711.238	FALSE	0
2022-09-14	13:09:17	0.649733	2.89014	698.254	FALSE	0
2022-09-14	13:09:17	0.590852	2.62823	713.866	FALSE	0
2022-09-14	13:09:17	0.574313	2.55466	700.808	FALSE	0
2022-09-14	13:09:18	0.578689	2.57412	716.44	FALSE	0
2022-09-14	13:09:18	0.566069	2.51799	703.326	FALSE	0
2022-09-14	13:09:18	0.520013	2.31312	718.754	FALSE	0
2022-09-14	13:09:18	0.476501	2.11957	705.446	FALSE	0
2022-09-14	13:09:19	0.462456	2.0571	720.811	FALSE	0
2022-09-14	13:09:19	0.423728	1.88483	707.331	FALSE	0
2022-09-14	13:09:19	0.38673	1.72025	722.531	FALSE	0
2022-09-14	13:09:19	0.381031	1.6949	709.025	FALSE	0
2022-09-14	13:09:20	0.375127	1.66864	724.2	FALSE	0
2022-09-14	13:09:20	0.377061	1.67724	710.703	FALSE	0
2022-09-14	13:09:20	0.375382	1.66977	725.869	FALSE	0
2022-09-14	13:09:21	0.382964	1.7035	712.406	FALSE	0
2022-09-14	13:09:21	0.375942	1.67227	727.542	FALSE	0
2022-09-14	13:09:21	0.379148	1.68653	714.093	FALSE	0
2022-09-14	13:09:21	0.378588	1.68404	729.226	FALSE	0
2022-09-14	13:09:22	0.370547	1.64827	715.741	FALSE	0
2022-09-14	13:09:22	0.386629	1.7198	730.945	FALSE	0
2022-09-14	13:09:22	0.379148	1.68653	717.428	FALSE	0
2022-09-14	13:09:22	0.390394	1.73655	732.682	FALSE	0
2022-09-14	13:09:23	0.404338	1.79858	719.226	FALSE	0
2022-09-14	13:09:23	0.396349	1.76304	734.445	FALSE	0
2022-09-14	13:09:23	0.405254	1.80265	721.029	FALSE	0
2022-09-14	13:09:23	0.414466	1.84363	736.289	FALSE	0
2022-09-14	13:09:24	0.407545	1.81284	722.842	FALSE	0
2022-09-14	13:09:24	0.40673	1.80922	738.098	FALSE	0
2022-09-14	13:09:24	0.372735	1.658	724.5	FALSE	0
2022-09-14	13:09:25	0.406578	1.80854	739.906	FALSE	0
2022-09-14	13:09:25	0.413448	1.8391	726.339	FALSE	0
2022-09-14	13:09:25	0.414008	1.84159	741.748	FALSE	0
2022-09-14	13:09:25	0.435382	1.93667	728.275	FALSE	0
2022-09-14	13:09:26	0.474415	2.11029	743.858	FALSE	0
2022-09-14	13:09:26	0.542099	2.41136	730.687	FALSE	0
2022-09-14	13:09:26	0.614822	2.73485	746.593	FALSE	0
2022-09-14	13:09:26	0.558842	2.48584	733.173	FALSE	0
2022-09-14	13:09:27	0.609071	2.70927	749.302	FALSE	0
2022-09-14	13:09:27	0.388664	1.72886	734.901	FALSE	0
2022-09-14	13:09:27	0.252125	1.1215	750.424	FALSE	0
2022-09-14	13:09:28	0.172735	0.76836	735.67	FALSE	0
2022-09-14	13:09:28	0.125102	0.556479	750.98	FALSE	0
2022-09-14	13:09:28	0.121031	0.53837	736.208	FALSE	0
2022-09-14	13:09:28	0.265356	1.18036	752.161	FALSE	0
2022-09-14	13:09:29	0.506832	2.25449	738.463	FALSE	0
2022-09-14	13:09:29	0.631667	2.80978	754.971	FALSE	0
2022-09-14	13:09:29	0.531463	2.36405	740.827	FALSE	0
2022-09-14	13:09:29	0.564135	2.50939	757.48	FALSE	0
2022-09-14	13:09:30	0.629834	2.80163	743.628	FALSE	0
2022-09-14	13:09:30	0.618893	2.75296	760.233	FALSE	0
2022-09-14	13:09:30	0.637417	2.83536	746.464	FALSE	0
2022-09-14	13:09:30	0.613702	2.72987	762.963	FALSE	0
2022-09-14	13:09:31	0.585254	2.60333	749.067	FALSE	0
2022-09-14	13:09:31	0.623422	2.77311	765.736	FALSE	0
2022-09-14	13:09:31	0.87813	3.9061	752.973	FALSE	0
2022-09-14	13:09:32	0.823728	3.66411	769.4	FALSE	0
2022-09-14	13:09:32	0.734313	3.26637	756.239	FALSE	0
2022-09-14	13:09:32	0.675178	3.00333	772.403	FALSE	0
2022-09-14	13:09:32	0.650344	2.89286	759.132	FALSE	0
2022-09-14	13:09:33	0.686679	3.05449	775.458	FALSE	0
2022-09-14	13:09:33	0.581438	2.58635	761.719	FALSE	0
2022-09-14	13:09:33	0.515382	2.29252	777.75	FALSE	0
2022-09-14	13:09:33	0.560674	2.49399	764.213	FALSE	0
2022-09-14	13:09:34	0.617163	2.74526	780.496	FALSE	0
2022-09-14	13:09:34	0.567137	2.52274	766.735	FALSE	0
2022-09-14	13:09:34	0.560929	2.49512	782.991	FALSE	0
2022-09-14	13:09:34	0.548359	2.43921	769.175	FALSE	0
2022-09-14	13:09:35	0.553855	2.46366	785.454	FALSE	0
2022-09-14	13:09:35	0.581132	2.58499	771.76	FALSE	0
2022-09-14	13:09:35	0.568511	2.52885	787.983	FALSE	0
2022-09-14	13:09:36	0.5793	2.57684	774.336	FALSE	0
2022-09-14	13:09:36	0.421082	1.87306	789.856	FALSE	0
2022-09-14	13:09:36	0.370038	1.646	775.982	FALSE	0
2022-09-14	13:09:36	0.367901	1.6365	791.493	FALSE	0
2022-09-14	13:09:37	0.448461	1.99484	777.977	FALSE	0
2022-09-14	13:09:37	0.300369	1.3361	792.829	FALSE	0
2022-09-14	13:09:37	0.0700384	0.311545	778.289	FALSE	0
2022-09-14	13:09:37	0.0503946	0.224165	793.053	FALSE	0
2022-09-14	13:09:38	-0.0439565	-0.195527	778.289	FALSE	0
2022-09-14	13:09:38	-0.102735	-0.456986	793.053	FALSE	0
2022-09-14	13:09:38	-0.0704705	-0.313467	778.289	FALSE	0
2022-09-14	13:09:38	0.208664	0.928179	793.981	FALSE	0
2022-09-14	13:09:39	0.642405	2.85755	781.146	FALSE	0
2022-09-14	13:09:39	0.251921	1.12059	795.102	FALSE	0
2022-09-14	13:09:39	0.60444	2.68867	783.835	FALSE	0
2022-09-14	13:09:40	0.230802	1.02665	796.128	FALSE	0
2022-09-14	13:09:40	0.536501	2.38646	786.222	FALSE	0
2022-09-14	13:09:40	0.118486	0.527049	796.656	FALSE	0
2022-09-14	13:09:40	0.178995	0.796206	787.018	FALSE	0
2022-09-14	13:09:41	0.13528	0.601752	797.257	FALSE	0
2022-09-14	13:09:41	-0.0352033	-0.156591	787.018	FALSE	0
2022-09-14	13:09:41	-0.237239	-1.05529	797.257	FALSE	0
2022-09-14	13:09:41	-0.207213	-0.921725	787.018	FALSE	0
2022-09-14	13:09:42	-0.207773	-0.924216	797.257	FALSE	0
2022-09-14	13:09:42	-0.140089	-0.623144	787.018	FALSE	0
2022-09-14	13:09:42	-0.317188	-1.41092	797.257	FALSE	0
2022-09-14	13:09:42	-0.270877	-1.20492	787.018	FALSE	0
2022-09-14	13:09:43	-0.31846	-1.41657	797.257	FALSE	0
2022-09-14	13:09:43	-0.192862	-0.857889	787.018	FALSE	0
2022-09-14	13:09:43	-0.332353	-1.47837	797.257	FALSE	0
2022-09-14	13:09:44	-0.221819	-0.986695	787.018	FALSE	0
2022-09-14	13:09:44	-0.257239	-1.14425	797.257	FALSE	0
2022-09-14	13:09:44	-0.204262	-0.908598	787.018	FALSE	0
2022-09-14	13:09:44	-0.305076	-1.35704	797.257	FALSE	0
2022-09-14	13:09:45	-0.206704	-0.919461	787.018	FALSE	0
2022-09-14	13:09:45	-0.275254	-1.22438	797.257	FALSE	0
2022-09-14	13:09:45	-0.193473	-0.860607	787.018	FALSE	0
2022-09-14	13:09:45	-0.292964	-1.30316	797.257	FALSE	0
2022-09-14	13:09:46	-0.0449234	-0.199828	787.018	FALSE	0
2022-09-14	13:09:46	0.153499	0.682794	797.94	FALSE	0
2022-09-14	13:09:46	0.335433	1.49207	788.51	FALSE	0
2022-09-14	13:09:46	0.456094	2.0288	799.969	FALSE	0
2022-09-14	13:09:47	0.917214	4.07995	792.59	FALSE	0
2022-09-14	13:09:47	0.690445	3.07124	803.04	FALSE	0
2022-09-14	13:09:47	1.00531	4.47182	797.062	FALSE	0
2022-09-14	13:09:48	0.409733	1.82257	804.863	FALSE	0
2022-09-14	13:09:48	0.257265	1.14437	798.206	FALSE	0
2022-09-14	13:09:48	0.535127	2.38035	807.243	FALSE	0
2022-09-14	13:09:48	0.246272	1.09547	799.301	FALSE	0
2022-09-14	13:09:49	0.53874	2.39642	809.639	FALSE	0
2022-09-14	13:09:49	0.316908	1.40967	800.711	FALSE	0
2022-09-14	13:09:49	0.509682	2.26717	811.907	FALSE	0
2022-09-14	13:09:49	0.313397	1.39405	802.105	FALSE	0
2022-09-14	13:09:50	0.122965	0.546973	812.454	FALSE	0
2022-09-14	13:09:50	0.0858144	0.38172	802.487	FALSE	0
2022-09-14	13:09:50	0.0624048	0.277589	812.731	FALSE	0
2022-09-14	13:09:50	0.126476	0.562591	803.049	FALSE	0
2022-09-14	13:09:51	-0.0946435	-0.420993	812.731	FALSE	0
2022-09-14	13:09:51	-0.0467554	-0.207977	803.049	FALSE	0
2022-09-14	13:09:51	-0.0336766	-0.1498	812.731	FALSE	0
2022-09-14	13:09:52	0.114262	0.50826	803.558	FALSE	0
2022-09-14	13:09:52	0.117214	0.521391	813.253	FALSE	0
2022-09-14	13:09:52	0.22271	0.990659	804.548	FALSE	0
2022-09-14	13:09:52	0.584033	2.5979	815.85	FALSE	0
2022-09-14	13:09:53	0.934516	4.15691	808.705	FALSE	0
2022-09-14	13:09:53	0.567952	2.52636	818.377	FALSE	0
2022-09-14	13:09:53	0.618079	2.74934	811.455	FALSE	0
2022-09-14	13:09:53	0.411972	1.83253	820.209	FALSE	0
2022-09-14	13:09:54	0.22159	0.985677	812.44	FALSE	0
2022-09-14	13:09:54	0.316094	1.40605	821.615	FALSE	0
2022-09-14	13:09:54	0.189326	0.84216	813.282	FALSE	0
2022-09-14	13:09:55	0.205662	0.914826	822.53	FALSE	0
2022-09-14	13:09:55	0.208664	0.928179	814.211	FALSE	0
2022-09-14	13:09:55	0.441845	1.96541	824.496	FALSE	0
2022-09-14	13:09:55	0.222965	0.991793	815.202	FALSE	0
2022-09-14	13:09:56	0.396094	1.76191	826.258	FALSE	0
2022-09-14	13:09:56	0.250496	1.11426	816.317	FALSE	0
2022-09-14	13:09:56	0.324746	1.44454	827.702	FALSE	0
2022-09-14	13:09:56	0.265102	1.17923	817.496	FALSE	0
2022-09-14	13:09:57	0.285102	1.26819	828.97	FALSE	0
2022-09-14	13:09:57	0.1793	0.797562	818.293	FALSE	0
2022-09-14	13:09:57	0.217977	0.969605	829.94	FALSE	0
2022-09-14	13:09:57	0.184491	0.820653	819.114	FALSE	0
2022-09-14	13:09:58	0.169224	0.752742	830.693	FALSE	0
2022-09-14	13:09:58	0.200624	0.892416	820.007	FALSE	0
2022-09-14	13:09:58	0.200624	0.892416	831.585	FALSE	0
2022-09-14	13:09:59	0.217163	0.965984	820.973	FALSE	0
2022-09-14	13:09:59	0.177926	0.79145	832.377	FALSE	0
2022-09-14	13:09:59	0.237214	1.05518	822.028	FALSE	0
2022-09-14	13:09:59	0.170751	0.759535	833.136	FALSE	0
2022-09-14	13:10:00	0.248562	1.10565	823.133	FALSE	0
2022-09-14	13:10:00	0.225662	1.00379	834.14	FALSE	0
2022-09-14	13:10:00	0.281489	1.25212	824.385	FALSE	0
2022-09-14	13:10:00	0.178435	0.793715	834.934	FALSE	0
2022-09-14	13:10:01	0.244695	1.08845	825.474	FALSE	0
2022-09-14	13:10:01	0.172328	0.766549	835.7	FALSE	0
2022-09-14	13:10:01	0.242303	1.07781	826.552	FALSE	0
2022-09-14	13:10:01	0.115178	0.512335	836.212	FALSE	0
2022-09-14	13:10:02	0.321183	1.42869	827.98	FALSE	0
2022-09-14	13:10:02	0.160624	0.714488	836.927	FALSE	0
2022-09-14	13:10:02	0.299758	1.33338	829.314	FALSE	0
2022-09-14	13:10:03	0.145713	0.648161	837.575	FALSE	0
2022-09-14	13:10:03	0.425713	1.89366	831.207	FALSE	0
2022-09-14	13:10:03	0.15813	0.703394	838.278	FALSE	0
2022-09-14	13:10:03	0.361387	1.60752	832.815	FALSE	0
2022-09-14	13:10:04	0.177316	0.788737	839.067	FALSE	0
2022-09-14	13:10:04	0.331921	1.47645	834.291	FALSE	0
2022-09-14	13:10:04	0.217672	0.968249	840.035	FALSE	0
2022-09-14	13:10:04	0.410903	1.82778	836.119	FALSE	0
2022-09-14	13:10:05	0.202914	0.902602	840.938	FALSE	0
2022-09-14	13:10:05	0.433906	1.9301	838.049	FALSE	0
2022-09-14	13:10:05	0.38154	1.69717	842.635	FALSE	0
2022-09-14	13:10:05	0.667952	2.97118	841.021	FALSE	0
2022-09-14	13:10:06	0.00413511	0.0183938	842.654	FALSE	0
2022-09-14	13:10:06	-0.368028	-1.63706	841.021	FALSE	0
2022-09-14	13:10:06	0.410394	1.82551	844.479	FALSE	0
2022-09-14	13:10:07	0.691158	3.07441	844.095	FALSE	0
2022-09-14	13:10:07	-0.843905	-3.75386	844.479	FALSE	0
2022-09-14	13:10:07	-5.15703	-22.9395	844.095	FALSE	0
2022-09-14	13:10:07	-4.375	-19.4609	844.479	FALSE	0
2022-09-14	13:10:08	-5.02777	-22.3645	844.095	FALSE	0
2022-09-14	13:10:08	0.65472	2.91233	847.391	FALSE	0
2022-09-14	13:10:08	0.703931	3.13123	847.226	FALSE	0
2022-09-14	13:10:08	0.63813	2.83853	850.23	FALSE	0
2022-09-14	13:10:09	0.759148	3.37684	850.603	FALSE	0
2022-09-14	13:10:09	-0.847315	-3.76903	850.23	FALSE	0
2022-09-14	13:10:09	-3.64243	-16.2023	850.603	FALSE	0
2022-09-14	13:10:09	-3.53647	-15.7309	850.23	FALSE	0
2022-09-14	13:10:10	-3.71317	-16.5169	850.603	FALSE	0
2022-09-14	13:10:10	-4.95149	-22.0252	850.23	FALSE	0
2022-09-14	13:10:10	-0.813473	-3.61849	850.603	FALSE	0
2022-09-14	13:10:11	-2.35973	-10.4966	850.23	FALSE	0
2022-09-14	13:10:11	0.982862	4.37197	854.975	FALSE	0
2022-09-14	13:10:11	0.96612	4.29749	854.527	FALSE	0
2022-09-14	13:10:11	-0.991488	-4.41034	854.975	FALSE	0
2022-09-14	13:10:12	-1.78538	-7.94173	854.527	FALSE	0
2022-09-14	13:10:12	0.906374	4.03173	859.007	FALSE	0
2022-09-14	13:10:12	-0.043244	-0.192358	854.527	FALSE	0
2022-09-14	13:10:12	0.610496	2.71561	861.722	FALSE	0
2022-09-14	13:10:13	0.76958	3.42325	857.951	FALSE	0
2022-09-14	13:10:13	0.458486	2.03944	863.762	FALSE	0
2022-09-14	13:10:13	0.894059	3.97695	861.928	FALSE	0
2022-09-14	13:10:13	0.725305	3.2263	866.988	FALSE	0
2022-09-14	13:10:14	0.731463	3.25369	865.181	FALSE	0
2022-09-14	13:10:14	1.0538	4.68751	871.676	FALSE	0
2022-09-14	13:10:14	1.01874	4.53156	869.713	FALSE	0
2022-09-14	13:10:15	-1.60564	-7.14221	871.676	FALSE	0
2022-09-14	13:10:15	0.481489	2.14176	871.855	FALSE	0
2022-09-14	13:10:15	0.73645	3.27588	874.951	FALSE	0
2022-09-14	13:10:15	0.629529	2.80027	874.655	FALSE	0
2022-09-14	13:10:16	0.729377	3.24441	878.196	FALSE	0
2022-09-14	13:10:16	0.725356	3.22653	877.881	FALSE	0
2022-09-14	13:10:16	0.724949	3.22472	881.421	FALSE	0
2022-09-14	13:10:16	0.728461	3.24034	881.122	FALSE	0
2022-09-14	13:10:17	0.733448	3.26252	884.683	FALSE	0
2022-09-14	13:10:17	0.730343	3.24871	884.371	FALSE	0
2022-09-14	13:10:17	0.721794	3.21068	887.894	FALSE	0
2022-09-14	13:10:18	0.726985	3.23377	887.604	FALSE	0
2022-09-14	13:10:18	0.723626	3.21883	891.113	FALSE	0
2022-09-14	13:10:18	0.723524	3.21838	890.823	FALSE	0
2022-09-14	13:10:18	0.724338	3.222	894.335	FALSE	0
2022-09-14	13:10:19	0.724338	3.222	894.045	FALSE	0
2022-09-14	13:10:19	0.72729	3.23513	897.57	FALSE	0
2022-09-14	13:10:19	0.722659	3.21453	897.259	FALSE	0
2022-09-14	13:10:19	0.683575	3.04068	900.61	FALSE	0
2022-09-14	13:10:20	0.709173	3.15454	900.414	FALSE	0
2022-09-14	13:10:20	0.622303	2.76813	903.379	FALSE	0
2022-09-14	13:10:20	0.722761	3.21499	903.629	FALSE	0
2022-09-14	13:10:20	0.583524	2.59563	905.974	FALSE	0
2022-09-14	13:10:21	0.465458	2.07045	905.699	FALSE	0
2022-09-14	13:10:21	0.653702	2.9078	908.882	FALSE	0
2022-09-14	13:10:21	0.556196	2.47407	908.173	FALSE	0
2022-09-14	13:10:22	0.656908	2.92206	911.804	FALSE	0
2022-09-14	13:10:22	0.519097	2.30905	910.482	FALSE	0
2022-09-14	13:10:22	0.242456	1.07849	912.883	FALSE	0
2022-09-14	13:10:22	0.189122	0.841252	911.324	FALSE	0
2022-09-14	13:10:23	0.624389	2.77741	915.66	FALSE	0
2022-09-14	13:10:23	0.0954328	0.424504	911.748	FALSE	0
2022-09-14	13:10:23	0.108664	0.483359	916.143	FALSE	0
2022-09-14	13:10:23	-0.0382059	-0.169947	911.748	FALSE	0
2022-09-14	13:10:24	0.0675448	0.300453	916.444	FALSE	0
2022-09-14	13:10:24	0.725662	3.22789	914.976	FALSE	0
2022-09-14	13:10:24	0.972176	4.32443	920.768	FALSE	0
2022-09-14	13:10:24	1.36988	6.0935	921.069	FALSE	0
2022-09-14	13:10:25	1.51579	6.74254	927.511	FALSE	0
2022-09-14	13:10:25	1.43844	6.39847	927.468	FALSE	0
2022-09-14	13:10:25	1.35024	6.00614	933.517	FALSE	0
2022-09-14	13:10:26	1.43838	6.3982	933.866	FALSE	0
2022-09-14	13:10:26	0.77131	3.43094	936.948	FALSE	0
2022-09-14	13:10:26	0.192583	0.856648	934.723	FALSE	0
2022-09-14	13:10:26	-0.0600888	-0.267287	936.948	FALSE	0
2022-09-14	13:10:27	-0.0453305	-0.201639	934.723	FALSE	0
2022-09-14	13:10:27	-0.19271	-0.857213	936.948	FALSE	0
2022-09-14	13:10:27	-0.20701	-0.920822	934.723	FALSE	0
2022-09-14	13:10:27	-0.340547	-1.51482	936.948	FALSE	0
2022-09-14	13:10:28	-0.610674	-2.7164	934.723	FALSE	0
2022-09-14	13:10:28	-0.587213	-2.61204	936.948	FALSE	0
2022-09-14	13:10:28	-0.437086	-1.94425	934.723	FALSE	0
2022-09-14	13:10:28	-0.320394	-1.42518	936.948	FALSE	0
2022-09-14	13:10:29	-0.0312338	-0.138934	934.723	FALSE	0
2022-09-14	13:10:29	0.335076	1.49049	938.438	FALSE	0
2022-09-14	13:10:29	0.221031	0.98319	935.706	FALSE	0
2022-09-14	13:10:30	0.204288	0.908714	939.347	FALSE	0
2022-09-14	13:10:30	0.0127865	0.0568769	935.763	FALSE	0
2022-09-14	13:10:30	0.195229	0.868418	940.215	FALSE	0
2022-09-14	13:10:30	0.0461198	0.20515	935.968	FALSE	0
2022-09-14	13:10:31	0.0241351	0.107358	940.323	FALSE	0
2022-09-14	13:10:31	-0.0828369	-0.368475	935.968	FALSE	0
2022-09-14	13:10:31	-0.0511321	-0.227446	940.323	FALSE	0
2022-09-14	13:10:31	-0.0294018	-0.130785	935.968	FALSE	0
2022-09-14	13:10:32	-0.0254832	-0.113354	940.323	FALSE	0
2022-09-14	13:10:32	-0.0676206	-0.30079	935.968	FALSE	0
2022-09-14	13:10:32	-0.18589	-0.826876	940.323	FALSE	0
2022-09-14	13:10:32	-0.00853663	-0.0379726	935.968	FALSE	0
2022-09-14	13:10:33	0.0187407	0.0833624	940.406	FALSE	0
2022-09-14	13:10:33	0.00942772	0.0419364	936.01	FALSE	0
2022-09-14	13:10:33	0.188155	0.836951	941.243	FALSE	0
2022-09-14	13:10:34	0.137163	0.610128	936.62	FALSE	0
2022-09-14	13:10:34	0.108817	0.48404	941.727	FALSE	0
2022-09-14	13:10:34	-0.0480786	-0.213863	936.62	FALSE	0
2022-09-14	13:10:34	0.466832	2.07656	943.804	FALSE	0
2022-09-14	13:10:35	1.18388	5.26614	941.886	FALSE	0
2022-09-14	13:10:35	1.53136	6.8118	950.615	FALSE	0
2022-09-14	13:10:35	3.82617	17.0196	958.906	1	1
2022-09-14	13:10:35	4.18454	18.6137	969.229	1	2
2022-09-14	13:10:36	1.09757	4.88221	963.788	FALSE	2
2022-09-14	13:10:36	0.347188	1.54436	970.774	FALSE	2
2022-09-14	13:10:36	0.35355	1.57266	965.361	FALSE	2
2022-09-14	13:10:36	0.403779	1.79609	972.57	FALSE	2
2022-09-14	13:10:37	0.672226	2.9902	968.351	FALSE	2
2022-09-14	13:10:37	0.2107	0.937236	973.507	FALSE	2
2022-09-14	13:10:37	0.353346	1.57175	969.923	FALSE	2
2022-09-14	13:10:38	0.262201	1.16632	974.673	FALSE	2
2022-09-14	13:10:38	0.232125	1.03254	970.955	FALSE	2
2022-09-14	13:10:38	0.341794	1.52037	976.194	FALSE	2
2022-09-14	13:10:38	0.306069	1.36146	972.317	FALSE	2
2022-09-14	13:10:39	0.762099	3.38997	979.583	FALSE	2
2022-09-14	13:10:39	0.496909	2.21035	974.527	FALSE	2
2022-09-14	13:10:39	0.444746	1.97832	981.562	FALSE	2
2022-09-14	13:10:39	0.430496	1.91493	976.442	FALSE	2
2022-09-14	13:10:40	0.288257	1.28222	982.844	FALSE	2
2022-09-14	13:10:40	0.343728	1.52897	977.971	FALSE	2
2022-09-14	13:10:40	0.269275	1.19779	984.042	FALSE	2
2022-09-14	13:10:40	0.399758	1.7782	979.749	FALSE	2
2022-09-14	13:10:41	0.214262	0.95308	984.995	FALSE	2
2022-09-14	13:10:41	0.406374	1.80763	981.557	FALSE	2
2022-09-14	13:10:41	0.237774	1.05767	986.053	FALSE	2
2022-09-14	13:10:42	0.398995	1.77481	983.331	FALSE	2
2022-09-14	13:10:42	0.245051	1.09004	987.143	FALSE	2
2022-09-14	13:10:42	0.366171	1.6288	984.96	FALSE	2
2022-09-14	13:10:42	0.182303	0.81092	987.954	FALSE	2
2022-09-14	13:10:43	0.442354	1.96768	986.928	FALSE	2
2022-09-14	13:10:43	0.277163	1.23288	989.186	FALSE	2
2022-09-14	13:10:43	0.419657	1.86672	988.795	FALSE	2
2022-09-14	13:10:43	0.22612	1.00583	990.192	FALSE	2
2022-09-14	13:10:44	0.423473	1.88369	990.678	FALSE	2
2022-09-14	13:10:44	0.19472	0.866154	991.058	FALSE	2
2022-09-14	13:10:44	0.400929	1.78341	992.462	FALSE	2
2022-09-14	13:10:44	0.201794	0.89762	991.956	FALSE	2
2022-09-14	13:10:45	0.482303	2.14538	994.607	FALSE	2
2022-09-14	13:10:45	0.315891	1.40515	993.361	FALSE	2
2022-09-14	13:10:45	0.690547	3.07169	997.679	FALSE	2
2022-09-14	13:10:46	0.377672	1.67996	995.041	FALSE	2
2022-09-14	13:10:46	0.555636	2.47158	1000.15	FALSE	2
2022-09-14	13:10:46	0.366578	1.63061	996.672	FALSE	2
2022-09-14	13:10:46	0.442303	1.96745	1002.12	FALSE	2
2022-09-14	13:10:47	0.26958	1.19915	997.871	FALSE	2
2022-09-14	13:10:47	0.435636	1.9378	1004.06	FALSE	2
2022-09-14	13:10:47	0.269682	1.1996	999.07	FALSE	2
2022-09-14	13:10:47	0.511259	2.27418	1006.33	FALSE	2
2022-09-14	13:10:48	0.263779	1.17334	1000.24	FALSE	2
2022-09-14	13:10:48	0.382608	1.70192	1008.03	FALSE	2
2022-09-14	13:10:48	0.248155	1.10384	1001.35	FALSE	2
2022-09-14	13:10:48	0.423931	1.88573	1009.92	FALSE	2
2022-09-14	13:10:49	0.286069	1.27249	1002.62	FALSE	2
2022-09-14	13:10:49	0.392634	1.74651	1011.66	FALSE	2
2022-09-14	13:10:49	0.302048	1.34357	1003.96	FALSE	2
2022-09-14	13:10:50	0.338028	1.50362	1013.17	FALSE	2
2022-09-14	13:10:50	0.229987	1.02303	1004.99	FALSE	2
2022-09-14	13:10:50	0.343881	1.52965	1014.7	FALSE	2
2022-09-14	13:10:50	0.307646	1.36847	1006.36	FALSE	2
2022-09-14	13:10:51	0.401438	1.78568	1016.48	FALSE	2
2022-09-14	13:10:51	0.334822	1.48936	1007.84	FALSE	2
2022-09-14	13:10:51	0.313702	1.39541	1017.88	FALSE	2
2022-09-14	13:10:51	0.240013	1.06763	1008.91	FALSE	2
2022-09-14	13:10:52	0.154466	0.687096	1018.57	FALSE	2
2022-09-14	13:10:52	0.0171122	0.0761185	1008.99	FALSE	2
2022-09-14	13:10:52	0.0429137	0.190889	1018.76	FALSE	2
2022-09-14	13:10:53	0.00968217	0.0430682	1009.03	FALSE	2
2022-09-14	13:10:53	0.0323793	0.14403	1018.9	FALSE	2
2022-09-14	13:10:53	0.217621	0.968022	1010	FALSE	2
2022-09-14	13:10:53	0.0399621	0.177759	1019.08	FALSE	2
2022-09-14	13:10:54	0.679962	3.02461	1013.02	FALSE	2
2022-09-14	13:10:54	1.06215	4.72466	1023.8	FALSE	2
2022-09-14	13:10:54	1.9534	8.68911	1021.71	FALSE	2
2022-09-14	13:10:54	2.26067	10.0559	1033.86	FALSE	2
2022-09-14	13:10:55	1.64368	7.31142	1029.02	FALSE	2
2022-09-14	13:10:55	2.25116	10.0136	1043.87	FALSE	2
2022-09-14	13:10:55	1.55355	6.9105	1035.94	FALSE	2
2022-09-14	13:10:55	1.7105	7.60865	1051.48	FALSE	2
2022-09-14	13:10:56	1.2021	5.34718	1041.28	FALSE	2
2022-09-14	13:10:56	1.48902	6.62346	1058.1	FALSE	2
2022-09-14	13:10:56	3.53513	15.725	1057.01	1	3
2022-09-14	13:10:57	3.40851	15.1617	1073.27	1	4
2022-09-14	13:10:57	4.03589	17.9524	1074.96	1	5
2022-09-14	13:10:57	2.57172	11.4395	1084.71	FALSE	5
2022-09-14	13:10:57	1.32128	5.87732	1080.84	FALSE	5
2022-09-14	13:10:58	1.24602	5.54255	1090.25	FALSE	5
2022-09-14	13:10:58	1.32556	5.89636	1086.73	FALSE	5
2022-09-14	13:10:58	1.24933	5.55727	1095.81	FALSE	5
2022-09-14	13:10:58	1.2678	5.63943	1092.37	FALSE	5
2022-09-14	13:10:59	1.32149	5.87825	1101.68	FALSE	5
2022-09-14	13:10:59	1.35726	6.03736	1098.41	FALSE	5
2022-09-14	13:10:59	2.8165	12.5284	1114.21	FALSE	5
2022-09-14	13:10:59	5.50347	24.4805	1122.89	1	6
2022-09-14	13:11:00	7.83645	34.8581	1149.07	1	7
2022-09-14	13:11:00	9.13293	40.6251	1163.52	1	8
2022-09-14	13:11:00	4.44627	19.7779	1168.85	1	9
2022-09-14	13:11:01	1.9963	8.87994	1172.4	FALSE	9
2022-09-14	13:11:01	1.59833	7.10969	1175.96	FALSE	9
2022-09-14	13:11:01	1.00225	4.45821	1176.85	FALSE	9
2022-09-14	13:11:01	0.438588	1.95093	1177.91	FALSE	9
2022-09-14	13:11:02	0.3993	1.77617	1178.63	FALSE	9
2022-09-14	13:11:02	0.344847	1.53395	1179.44	FALSE	9
2022-09-14	13:11:02	0.320013	1.42348	1180.05	FALSE	9
2022-09-14	13:11:02	0.322761	1.43571	1180.88	FALSE	9
2022-09-14	13:11:03	0.377316	1.67838	1181.73	FALSE	9
2022-09-14	13:11:03	0.351667	1.56429	1182.44	FALSE	9
2022-09-14	13:11:03	0.347697	1.54663	1183.28	FALSE	9
2022-09-14	13:11:03	0.464339	2.06547	1184.51	FALSE	9
2022-09-14	13:11:04	0.543626	2.41816	1185.7	FALSE	9
2022-09-14	13:11:04	-1.04279	-4.63854	1184.51	FALSE	9
2022-09-14	13:11:04	-1.46345	-6.50972	1185.7	FALSE	9
2022-09-14	13:11:05	-1.54838	-6.8875	1184.51	FALSE	9
2022-09-14	13:11:05	-1.81459	-8.07166	1185.7	FALSE	9
2022-09-14	13:11:05	-1.94742	-8.66251	1184.51	FALSE	9
2022-09-14	13:11:05	-2.01154	-8.94773	1185.7	FALSE	9
2022-09-14	13:11:06	-2.05749	-9.15213	1184.51	FALSE	9
2022-09-14	13:11:06	-2.17922	-9.69361	1185.7	FALSE	9
2022-09-14	13:11:06	-2.25225	-10.0185	1184.51	FALSE	9
2022-09-14	13:11:06	-2.31958	-10.318	1185.7	FALSE	9
2022-09-14	13:11:07	-2.41826	-10.7569	1184.51	FALSE	9
2022-09-14	13:11:07	-2.375	-10.5645	1185.7	FALSE	9
2022-09-14	13:11:07	-2.51581	-11.1908	1184.51	FALSE	9
2022-09-14	13:11:07	-2.75286	-12.2453	1185.7	FALSE	9
2022-09-14	13:11:08	-2.71525	-12.078	1184.51	FALSE	9
2022-09-14	13:11:08	-2.82854	-12.5819	1185.7	FALSE	9
2022-09-14	13:11:08	-2.91719	-12.9762	1184.51	FALSE	9
2022-09-14	13:11:09	-3.14747	-14.0006	1185.7	FALSE	9
2022-09-14	13:11:09	-3.29866	-14.6731	1184.51	FALSE	9
2022-09-14	13:11:09	-3.29566	-14.6598	1185.7	FALSE	9
2022-09-14	13:11:09	-3.70253	-16.4696	1184.51	FALSE	9
2022-09-14	13:11:10	-3.84879	-17.1202	1185.7	FALSE	9
2022-09-14	13:11:10	-4.27729	-19.0262	1184.51	FALSE	9
2022-09-14	13:11:10	-3.00085	-13.3484	1185.7	FALSE	9
2022-09-14	13:11:10	-0.442073	-1.96643	1184.51	FALSE	9
2022-09-14	13:11:11	-0.531335	-2.36348	1185.7	FALSE	9
2022-09-14	13:11:11	-0.531285	-2.36326	1184.51	FALSE	9
2022-09-14	13:11:11	-0.502073	-2.23332	1185.7	FALSE	9
2022-09-14	13:11:11	-0.555101	-2.4692	1184.51	FALSE	9
2022-09-14	13:11:12	-0.571641	-2.54277	1185.7	FALSE	9
2022-09-14	13:11:12	-0.578002	-2.57107	1184.51	FALSE	9
2022-09-14	13:11:12	-0.511081	-2.27339	1185.7	FALSE	9
2022-09-14	13:11:13	-0.534694	-2.37843	1184.51	FALSE	9
2022-09-14	13:11:13	-0.483193	-2.14934	1185.7	FALSE	9
2022-09-14	13:11:13	-0.552099	-2.45585	1184.51	FALSE	9
2022-09-14	13:11:13	-0.431183	-1.91799	1185.7	FALSE	9
2022-09-14	13:11:14	-0.397137	-1.76654	1184.51	FALSE	9
2022-09-14	13:11:14	-0.400089	-1.77968	1185.7	FALSE	9
2022-09-14	13:11:14	-0.501259	-2.2297	1184.51	FALSE	9
2022-09-14	13:11:14	-0.366908	-1.63208	1185.7	FALSE	9
2022-09-14	13:11:15	-0.434796	-1.93406	1184.51	FALSE	9
2022-09-14	13:11:15	-0.321055	-1.42812	1185.7	FALSE	9
2022-09-14	13:11:15	-0.397137	-1.76654	1184.51	FALSE	9
2022-09-14	13:11:15	-0.269198	-1.19745	1185.7	FALSE	9
2022-09-14	13:11:16	-0.380801	-1.69388	1184.51	FALSE	9
2022-09-14	13:11:16	-0.214236	-0.952965	1185.7	FALSE	9
2022-09-14	13:11:16	-0.329452	-1.46547	1184.51	FALSE	9
2022-09-14	13:11:17	-0.299224	-1.33101	1185.7	FALSE	9
2022-09-14	13:11:17	-0.272811	-1.21352	1184.51	FALSE	9
2022-09-14	13:11:17	-0.143702	-0.639215	1185.7	FALSE	9
2022-09-14	13:11:17	-0.20187	-0.897958	1184.51	FALSE	9
2022-09-14	13:11:18	-0.213575	-0.950024	1185.7	FALSE	9
2022-09-14	13:11:18	-0.0812593	-0.361458	1184.51	FALSE	9
2022-09-14	13:11:18	-0.123193	-0.547987	1185.7	FALSE	9
2022-09-14	13:11:18	-0.0857376	-0.381378	1184.51	FALSE	9
2022-09-14	13:11:19	-0.272201	-1.2108	1185.7	FALSE	9
2022-09-14	13:11:19	-0.218613	-0.972434	1184.51	FALSE	9
2022-09-14	13:11:19	-0.299936	-1.33418	1185.7	FALSE	9
2022-09-14	13:11:19	-0.240852	-1.07136	1184.51	FALSE	9
2022-09-14	13:11:20	-0.350674	-1.55987	1185.7	FALSE	9
2022-09-14	13:11:20	-0.374949	-1.66785	1184.51	FALSE	9
2022-09-14	13:11:20	-0.378002	-1.68143	1185.7	FALSE	9
2022-09-14	13:11:21	-0.438867	-1.95217	1184.51	FALSE	9
2022-09-14	13:11:21	-0.419274	-1.86501	1185.7	FALSE	9
2022-09-14	13:11:21	-0.482582	-2.14662	1184.51	FALSE	9
2022-09-14	13:11:21	-0.264771	-1.17775	1185.7	FALSE	9
2022-09-14	13:11:22	-0.313931	-1.39643	1184.51	FALSE	9
2022-09-14	13:11:22	-0.243244	-1.082	1185.7	FALSE	9
2022-09-14	13:11:22	-0.328842	-1.46275	1184.51	FALSE	9
2022-09-14	13:11:22	-0.204872	-0.911312	1185.7	FALSE	9
2022-09-14	13:11:23	-0.322328	-1.43378	1184.51	FALSE	9
2022-09-14	13:11:23	-0.0420226	-0.186925	1185.7	FALSE	9
2022-09-14	13:11:23	-0.165432	-0.735875	1184.51	FALSE	9
2022-09-14	13:11:23	-0.198613	-0.88347	1185.7	FALSE	9
2022-09-14	13:11:24	-0.209605	-0.932365	1184.51	FALSE	9
2022-09-14	13:11:24	-0.131946	-0.586922	1185.7	FALSE	9
2022-09-14	13:11:24	-0.166806	-0.741986	1184.51	FALSE	9
2022-09-14	13:11:25	-0.171844	-0.764396	1185.7	FALSE	9
2022-09-14	13:11:25	-0.0453305	-0.201639	1184.51	FALSE	9
2022-09-14	13:11:25	-0.140292	-0.624047	1185.7	FALSE	9
2022-09-14	13:11:25	-0.0549997	-0.24465	1184.51	FALSE	9
2022-09-14	13:11:26	-0.0987656	-0.439329	1185.7	FALSE	9
2022-09-14	13:11:26	-0.0328114	-0.145952	1184.51	FALSE	9
2022-09-14	13:11:26	-0.1036	-0.460834	1185.7	FALSE	9
2022-09-14	13:11:26	0.0591987	0.263328	1184.77	FALSE	9
2022-09-14	13:11:27	-0.0542364	-0.241254	1185.7	FALSE	9
2022-09-14	13:11:27	-0.0224298	-0.0997722	1184.77	FALSE	9
2022-09-14	13:11:27	-0.045127	-0.200734	1185.7	FALSE	9
2022-09-14	13:11:28	-0.310318	-1.38036	1184.77	FALSE	9
2022-09-14	13:11:28	-0.407519	-1.81273	1185.7	FALSE	9
2022-09-14	13:11:28	-0.544109	-2.42031	1184.77	FALSE	9
2022-09-14	13:11:28	-0.416374	-1.85211	1185.7	FALSE	9
2022-09-14	13:11:29	-0.243804	-1.08449	1184.77	FALSE	9
2022-09-14	13:11:29	0.135687	0.603563	1186.3	FALSE	9
2022-09-14	13:11:29	0.204898	0.911427	1185.68	FALSE	9
2022-09-14	13:11:29	0.166171	0.739162	1187.04	FALSE	9
2022-09-14	13:11:30	0.51416	2.28709	1187.97	FALSE	9
2022-09-14	13:11:30	0.485	2.15738	1189.2	FALSE	9
2022-09-14	13:11:30	0.44154	1.96406	1189.93	FALSE	9
2022-09-14	13:11:30	0.399199	1.77572	1190.97	FALSE	9
2022-09-14	13:11:31	0.454975	2.02382	1191.96	FALSE	9
2022-09-14	13:11:31	0.358588	1.59507	1192.57	FALSE	9
2022-09-14	13:11:31	0.48902	2.17526	1194.13	FALSE	9
2022-09-14	13:11:32	0.409021	1.81941	1194.39	FALSE	9
2022-09-14	13:11:32	0.55014	2.44713	1196.58	FALSE	9
2022-09-14	13:11:32	0.439504	1.955	1196.34	FALSE	9
2022-09-14	13:11:32	0.459249	2.04283	1198.62	FALSE	9
2022-09-14	13:11:33	0.439097	1.95319	1198.3	FALSE	9
2022-09-14	13:11:33	0.415789	1.84951	1200.47	FALSE	9
2022-09-14	13:11:33	0.567697	2.52523	1200.82	FALSE	9
2022-09-14	13:11:33	0.410344	1.82529	1202.3	FALSE	9
2022-09-14	13:11:34	0.582405	2.59065	1203.41	FALSE	9
2022-09-14	13:11:34	0.438333	1.94979	1204.25	FALSE	9
2022-09-14	13:11:34	0.481845	2.14334	1205.55	FALSE	9
2022-09-14	13:11:34	0.478079	2.12659	1206.37	FALSE	9
2022-09-14	13:11:35	0.417316	1.85631	1207.41	FALSE	9
2022-09-14	13:11:35	0.526476	2.34187	1208.72	FALSE	9
2022-09-14	13:11:35	0.392481	1.74583	1209.16	FALSE	9
2022-09-14	13:11:36	0.601234	2.67441	1211.39	FALSE	9
2022-09-14	13:11:36	0.665153	2.95873	1212.12	FALSE	9
2022-09-14	13:11:36	0.672735	2.99246	1214.38	FALSE	9
2022-09-14	13:11:36	0.657061	2.92274	1215.04	FALSE	9
2022-09-14	13:11:37	0.960267	4.27146	1218.65	FALSE	9
2022-09-14	13:11:37	1.14592	5.09728	1220.14	FALSE	9
2022-09-14	13:11:37	0.846578	3.76575	1222.42	FALSE	9
2022-09-14	13:11:37	0.953651	4.24203	1224.38	FALSE	9
2022-09-14	13:11:38	0.900064	4.00366	1226.42	FALSE	9
2022-09-14	13:11:38	0.922812	4.10485	1228.48	FALSE	9
2022-09-14	13:11:38	0.653702	2.9078	1229.33	FALSE	9
2022-09-14	13:11:38	0.964797	4.29161	1232.77	FALSE	9
2022-09-14	13:11:39	0.703982	3.13145	1232.46	FALSE	9
2022-09-14	13:11:39	1.06444	4.73484	1237.51	FALSE	9
2022-09-14	13:11:39	1.76281	7.84133	1240.3	FALSE	9
2022-09-14	13:11:40	2.10663	9.37071	1246.88	FALSE	9
2022-09-14	13:11:40	3.15971	14.055	1254.36	1	10
2022-09-14	13:11:40	3.51334	15.628	1262.51	1	11
2022-09-14	13:11:40	2.1396	9.51737	1263.88	FALSE	11
2022-09-14	13:11:41	1.26144	5.61114	1268.12	FALSE	11
2022-09-14	13:11:41	1.35268	6.01699	1269.89	FALSE	11
2022-09-14	13:11:41	1.49039	6.62955	1274.75	FALSE	11
2022-09-14	13:11:41	1.43884	6.40025	1276.29	FALSE	11
2022-09-14	13:11:42	1.46469	6.51523	1281.26	FALSE	11
2022-09-14	13:11:42	1.72312	7.66478	1283.96	FALSE	11
2022-09-14	13:11:42	0.974466	4.33462	1285.6	FALSE	11
2022-09-14	13:11:42	1.23798	5.50678	1289.47	FALSE	11
2022-09-14	13:11:43	1.57676	7.01374	1292.61	FALSE	11
2022-09-14	13:11:43	0.970496	4.31696	1293.78	FALSE	11
2022-09-14	13:11:43	0.639911	2.84645	1295.46	FALSE	11
2022-09-14	13:11:44	0.835585	3.71685	1297.5	FALSE	11
2022-09-14	13:11:44	1.22536	5.45065	1300.91	FALSE	11
2022-09-14	13:11:44	1.00785	4.48312	1301.98	FALSE	11

## Sheet: Richa_prong_202291413631 (2)
Date	Time	Lbs	Total Force x time			**GoPro Fitting: 1256
2022-09-14	13:06:32	-0.0918445	0	FALSE	0
2022-09-14	13:06:32	-0.0545926	0	FALSE	0
2022-09-14	13:06:32	-0.042328	0	FALSE	0
2022-09-14	13:06:32	0.0350257	0.0350257	FALSE	0
2022-09-14	13:06:32	0.148919	0.183945	FALSE	0
2022-09-14	13:06:33	0.179606	0.363551	FALSE	0
2022-09-14	13:06:33	0.260827	0.624378	FALSE	0
2022-09-14	13:06:33	0.24271	0.867088	FALSE	0
2022-09-14	13:06:34	0.352888	1.21998	FALSE	0
2022-09-14	13:06:34	0.441845	1.66182	FALSE	0
2022-09-14	13:06:34	0.276807	1.93863	FALSE	0
2022-09-14	13:06:34	0.418486	2.35711	FALSE	0
2022-09-14	13:06:35	0.367087	2.7242	FALSE	0
2022-09-14	13:06:35	0.166069	2.89027	FALSE	0
2022-09-14	13:06:35	0.406883	3.29715	FALSE	0
2022-09-14	13:06:35	0.416705	3.71386	FALSE	0
2022-09-14	13:06:36	0.391565	4.10542	FALSE	0
2022-09-14	13:06:36	0.479249	4.58467	FALSE	0
2022-09-14	13:06:36	0.409478	4.99415	FALSE	0
2022-09-14	13:06:36	0.444949	5.4391	FALSE	0
2022-09-14	13:06:37	0.362608	5.80171	FALSE	0
2022-09-14	13:06:37	0.481387	6.28309	FALSE	0
2022-09-14	13:06:37	0.419758	6.70285	FALSE	0
2022-09-14	13:06:38	0.421132	7.12398	FALSE	0
2022-09-14	13:06:38	0.417825	7.54181	FALSE	0
2022-09-14	13:06:38	0.408104	7.94991	FALSE	0
2022-09-14	13:06:38	0.420471	8.37038	FALSE	0
2022-09-14	13:06:39	0.418588	8.78897	FALSE	0
2022-09-14	13:06:39	0.413601	9.20257	FALSE	0
2022-09-14	13:06:39	0.414211	9.61678	FALSE	0
2022-09-14	13:06:39	0.423931	10.0407	FALSE	0
2022-09-14	13:06:40	0.393092	10.4338	FALSE	0
2022-09-14	13:06:40	0.41986	10.8537	FALSE	0
2022-09-14	13:06:40	0.448053	11.3017	FALSE	0
2022-09-14	13:06:41	0.402863	11.7046	FALSE	0
2022-09-14	13:06:41	0.470954	12.1755	FALSE	0
2022-09-14	13:06:41	0.470089	12.6456	FALSE	0
2022-09-14	13:06:41	0.267901	12.9135	FALSE	0
2022-09-14	13:06:42	0.464339	13.3779	FALSE	0
2022-09-14	13:06:42	0.430496	13.8084	FALSE	0
2022-09-14	13:06:42	0.426425	14.2348	FALSE	0
2022-09-14	13:06:42	0.490038	14.7248	FALSE	0
2022-09-14	13:06:43	0.464237	15.1891	FALSE	0
2022-09-14	13:06:43	0.427036	15.6161	FALSE	0
2022-09-14	13:06:43	0.443168	16.0593	FALSE	0
2022-09-14	13:06:43	0.461641	16.5209	FALSE	0
2022-09-14	13:06:44	0.440166	16.9611	FALSE	0
2022-09-14	13:06:44	0.388104	17.3492	FALSE	0
2022-09-14	13:06:44	0.377774	17.727	FALSE	0
2022-09-14	13:06:45	0.455585	18.1825	FALSE	0
2022-09-14	13:06:45	0.420624	18.6032	FALSE	0
2022-09-14	13:06:45	0.465713	19.0689	FALSE	0
2022-09-14	13:06:45	0.480522	19.5494	FALSE	0
2022-09-14	13:06:46	0.396501	19.9459	FALSE	0
2022-09-14	13:06:46	0.430598	20.3765	FALSE	0
2022-09-14	13:06:46	0.417723	20.7942	FALSE	0
2022-09-14	13:06:46	0.454669	21.2489	FALSE	0
2022-09-14	13:06:47	0.592532	21.8414	FALSE	0
2022-09-14	13:06:47	0.803473	22.6449	FALSE	0
2022-09-14	13:06:47	0.825865	23.4708	FALSE	0
2022-09-14	13:06:47	0.913448	24.3842	FALSE	0
2022-09-14	13:06:48	0.614262	24.9985	FALSE	0
2022-09-14	13:06:48	0.595789	25.5943	FALSE	0
2022-09-14	13:06:48	0.497824	26.0921	FALSE	0
2022-09-14	13:06:49	0.502252	26.5943	FALSE	0
2022-09-14	13:06:49	0.445458	27.0398	FALSE	0
2022-09-14	13:06:49	0.36612	27.4059	FALSE	0
2022-09-14	13:06:49	0.0161453	27.4221	FALSE	0
2022-09-14	13:06:50	-0.0808012	27.4221	FALSE	0
2022-09-14	13:06:50	-0.158969	27.4221	FALSE	0
2022-09-14	13:06:50	-0.264414	27.4221	FALSE	0
2022-09-14	13:06:50	-0.208587	27.4221	FALSE	0
2022-09-14	13:06:51	-0.224974	27.4221	FALSE	0
2022-09-14	13:06:51	-0.14874	27.4221	FALSE	0
2022-09-14	13:06:51	-0.20131	27.4221	FALSE	0
2022-09-14	13:06:51	-0.211386	27.4221	FALSE	0
2022-09-14	13:06:52	-0.171437	27.4221	FALSE	0
2022-09-14	13:06:52	-0.140852	27.4221	FALSE	0
2022-09-14	13:06:52	-0.202175	27.4221	FALSE	0
2022-09-14	13:06:53	0.0205728	27.4426	FALSE	0
2022-09-14	13:06:53	0.143881	27.5865	FALSE	0
2022-09-14	13:06:53	-0.152659	27.5865	FALSE	0
2022-09-14	13:06:53	-0.0372389	27.5865	FALSE	0
2022-09-14	13:06:54	0.027443	27.614	FALSE	0
2022-09-14	13:06:54	0.0637788	27.6777	FALSE	0
2022-09-14	13:06:54	-0.174084	27.6777	FALSE	0
2022-09-14	13:06:54	-0.0372389	27.6777	FALSE	0
2022-09-14	13:06:55	0.090191	27.7679	FALSE	0
2022-09-14	13:06:55	0.368155	28.1361	FALSE	0
2022-09-14	13:06:55	0.246781	28.3829	FALSE	0
2022-09-14	13:06:56	0.262557	28.6454	FALSE	0
2022-09-14	13:06:56	0.177774	28.8232	FALSE	0
2022-09-14	13:06:56	0.150802	28.974	FALSE	0
2022-09-14	13:06:56	0.186018	29.16	FALSE	0
2022-09-14	13:06:57	0.205255	29.3653	FALSE	0
2022-09-14	13:06:57	0.5393	29.9046	FALSE	0
2022-09-14	13:06:57	0.280878	30.1854	FALSE	0
2022-09-14	13:06:57	0.411361	30.5968	FALSE	0
2022-09-14	13:06:58	0.569784	31.1666	FALSE	0
2022-09-14	13:06:58	0.524949	31.6915	FALSE	0
2022-09-14	13:06:58	0.389021	32.0806	FALSE	0
2022-09-14	13:06:58	0.538537	32.6191	FALSE	0
2022-09-14	13:06:59	0.417367	33.0365	FALSE	0
2022-09-14	13:06:59	0.536196	33.5727	FALSE	0
2022-09-14	13:06:59	0.324389	33.897	FALSE	0
2022-09-14	13:07:00	0.431056	34.3281	FALSE	0
2022-09-14	13:07:00	0.32042	34.6485	FALSE	0
2022-09-14	13:07:00	0.556857	35.2054	FALSE	0
2022-09-14	13:07:00	0.316501	35.5219	FALSE	0
2022-09-14	13:07:01	0.26271	35.7846	FALSE	0
2022-09-14	13:07:01	0.167188	35.9518	FALSE	0
2022-09-14	13:07:01	0.535585	36.4874	FALSE	0
2022-09-14	13:07:01	0.341336	36.8287	FALSE	0
2022-09-14	13:07:02	0.707137	37.5358	FALSE	0
2022-09-14	13:07:02	0.312736	37.8486	FALSE	0
2022-09-14	13:07:02	0.622405	38.471	FALSE	0
2022-09-14	13:07:02	0.45014	38.9211	FALSE	0
2022-09-14	13:07:03	0.603931	39.525	FALSE	0
2022-09-14	13:07:03	0.462252	39.9873	FALSE	0
2022-09-14	13:07:03	0.555178	40.5425	FALSE	0
2022-09-14	13:07:04	0.418537	40.961	FALSE	0
2022-09-14	13:07:04	0.518282	41.4793	FALSE	0
2022-09-14	13:07:04	0.584593	42.0639	FALSE	0
2022-09-14	13:07:04	0.45869	42.5226	FALSE	0
2022-09-14	13:07:05	0.710954	43.2335	FALSE	0
2022-09-14	13:07:05	0.384084	43.6176	FALSE	0
2022-09-14	13:07:05	0.733906	44.3515	FALSE	0
2022-09-14	13:07:06	0.39528	44.7468	FALSE	0
2022-09-14	13:07:06	0.699096	45.4459	FALSE	0
2022-09-14	13:07:06	0.415942	45.8618	FALSE	0
2022-09-14	13:07:06	0.639758	46.5016	FALSE	0
2022-09-14	13:07:06	0.492634	46.9942	FALSE	0
2022-09-14	13:07:07	0.672532	47.6668	FALSE	0
2022-09-14	13:07:07	0.606374	48.2731	FALSE	0
2022-09-14	13:07:07	1.09075	49.3639	FALSE	0
2022-09-14	13:07:08	0.655076	50.019	FALSE	0
2022-09-14	13:07:08	0.638791	50.6578	FALSE	0
2022-09-14	13:07:08	0.783575	51.4413	FALSE	0
2022-09-14	13:07:08	0.482863	51.9242	FALSE	0
2022-09-14	13:07:09	0.510293	52.4345	FALSE	0
2022-09-14	13:07:09	0.398333	52.8328	FALSE	0
2022-09-14	13:07:09	0.541336	53.3742	FALSE	0
2022-09-14	13:07:09	0.400166	53.7743	FALSE	0
2022-09-14	13:07:10	0.437112	54.2114	FALSE	0
2022-09-14	13:07:10	0.383219	54.5947	FALSE	0
2022-09-14	13:07:10	0.517723	55.1124	FALSE	0
2022-09-14	13:07:10	0.420064	55.5324	FALSE	0
2022-09-14	13:07:11	0.40673	55.9392	FALSE	0
2022-09-14	13:07:11	0.448512	56.3877	FALSE	0
2022-09-14	13:07:11	0.491921	56.8796	FALSE	0
2022-09-14	13:07:12	0.412888	57.2925	FALSE	0
2022-09-14	13:07:12	0.424542	57.717	FALSE	0
2022-09-14	13:07:12	0.350293	58.0673	FALSE	0
2022-09-14	13:07:12	0.544745	58.6121	FALSE	0
2022-09-14	13:07:13	0.357672	58.9697	FALSE	0
2022-09-14	13:07:13	0.493651	59.4634	FALSE	0
2022-09-14	13:07:13	0.345051	59.8084	FALSE	0
2022-09-14	13:07:13	0.605865	60.4143	FALSE	0
2022-09-14	13:07:14	0.313753	60.7281	FALSE	0
2022-09-14	13:07:14	0.602252	61.3303	FALSE	0
2022-09-14	13:07:14	0.340878	61.6712	FALSE	0
2022-09-14	13:07:15	0.574211	62.2454	FALSE	0
2022-09-14	13:07:15	0.322354	62.5678	FALSE	0
2022-09-14	13:07:15	0.59182	63.1596	FALSE	0
2022-09-14	13:07:15	0.383779	63.5434	FALSE	0
2022-09-14	13:07:16	0.547697	64.0911	FALSE	0
2022-09-14	13:07:16	0.307341	64.3984	FALSE	0
2022-09-14	13:07:16	0.498333	64.8967	FALSE	0
2022-09-14	13:07:16	0.307646	65.2044	FALSE	0
2022-09-14	13:07:17	0.517926	65.7223	FALSE	0
2022-09-14	13:07:17	0.271667	65.994	FALSE	0
2022-09-14	13:07:17	0.552736	66.5467	FALSE	0
2022-09-14	13:07:17	0.342303	66.889	FALSE	0
2022-09-14	13:07:18	0.58444	67.4734	FALSE	0
2022-09-14	13:07:18	0.334618	67.8081	FALSE	0
2022-09-14	13:07:18	0.687646	68.4957	FALSE	0
2022-09-14	13:07:19	0.375382	68.8711	FALSE	0
2022-09-14	13:07:19	0.740267	69.6114	FALSE	0
2022-09-14	13:07:19	0.750853	70.3622	FALSE	0
2022-09-14	13:07:19	0.977112	71.3393	FALSE	0
2022-09-14	13:07:20	0.6193	71.9586	FALSE	0
2022-09-14	13:07:20	1.06205	73.0207	FALSE	0
2022-09-14	13:07:20	0.672888	73.6936	FALSE	0
2022-09-14	13:07:20	0.686781	74.3803	FALSE	0
2022-09-14	13:07:21	0.509326	74.8897	FALSE	0
2022-09-14	13:07:21	0.621285	75.511	FALSE	0
2022-09-14	13:07:21	0.486374	75.9973	FALSE	0
2022-09-14	13:07:21	0.475484	76.4728	FALSE	0
2022-09-14	13:07:22	0.613244	77.0861	FALSE	0
2022-09-14	13:07:22	0.613142	77.6992	FALSE	0
2022-09-14	13:07:22	0.631616	78.3308	FALSE	0
2022-09-14	13:07:23	0.578435	78.9092	FALSE	0
2022-09-14	13:07:23	0.683626	79.5929	FALSE	0
2022-09-14	13:07:23	1.17548	80.7684	FALSE	0
2022-09-14	13:07:23	2.51055	83.2789	FALSE	0
2022-09-14	13:07:24	2.33558	85.6145	FALSE	0
2022-09-14	13:07:24	2.02673	87.6412	FALSE	0
2022-09-14	13:07:24	1.69421	89.3354	FALSE	0
2022-09-14	13:07:24	1.61324	90.9487	FALSE	0
2022-09-14	13:07:25	1.4021	92.3508	FALSE	0
2022-09-14	13:07:25	1.24037	93.5911	FALSE	0
2022-09-14	13:07:25	1.2193	94.8104	FALSE	0
2022-09-14	13:07:25	1.18302	95.9935	FALSE	0
2022-09-14	13:07:26	1.17258	97.166	FALSE	0
2022-09-14	13:07:26	1.07594	98.242	FALSE	0
2022-09-14	13:07:26	1.08113	99.3231	FALSE	0
2022-09-14	13:07:27	0.963168	100.286	FALSE	0
2022-09-14	13:07:27	0.956959	101.243	FALSE	0
2022-09-14	13:07:27	0.93416	102.177	FALSE	0
2022-09-14	13:07:27	0.925102	103.102	FALSE	0
2022-09-14	13:07:28	0.947443	104.05	FALSE	0
2022-09-14	13:07:28	0.934771	104.985	FALSE	0
2022-09-14	13:07:28	0.960318	105.945	FALSE	0
2022-09-14	13:07:28	0.947646	106.893	FALSE	0
2022-09-14	13:07:29	0.919605	107.812	FALSE	0
2022-09-14	13:07:29	0.750903	108.563	FALSE	0
2022-09-14	13:07:29	0.5393	109.102	FALSE	0
2022-09-14	13:07:29	0.482099	109.585	FALSE	0
2022-09-14	13:07:30	0.46958	110.054	FALSE	0
2022-09-14	13:07:30	0.452837	110.507	FALSE	0
2022-09-14	13:07:30	0.483372	110.99	FALSE	0
2022-09-14	13:07:31	0.347239	111.338	FALSE	0
2022-09-14	13:07:31	0.414771	111.752	FALSE	0
2022-09-14	13:07:31	0.414975	112.167	FALSE	0
2022-09-14	13:07:31	0.466781	112.634	FALSE	0
2022-09-14	13:07:32	0.427748	113.062	FALSE	0
2022-09-14	13:07:32	0.398232	113.46	FALSE	0
2022-09-14	13:07:32	0.45584	113.916	FALSE	0
2022-09-14	13:07:32	0.412125	114.328	FALSE	0
2022-09-14	13:07:33	0.441845	114.77	FALSE	0
2022-09-14	13:07:33	0.135229	114.905	FALSE	0
2022-09-14	13:07:33	0.00255749	114.908	FALSE	0
2022-09-14	13:07:34	-0.322735	114.908	FALSE	0
2022-09-14	13:07:34	-0.698103	114.908	FALSE	0
2022-09-14	13:07:34	-0.72991	114.908	FALSE	0
2022-09-14	13:07:34	-0.84935	114.908	FALSE	0
2022-09-14	13:07:35	-0.521157	114.908	FALSE	0
2022-09-14	13:07:35	-0.444313	114.908	FALSE	0
2022-09-14	13:07:35	-0.339172	114.908	FALSE	0
2022-09-14	13:07:35	0.411158	115.319	FALSE	0
2022-09-14	13:07:36	0.369326	115.688	FALSE	0
2022-09-14	13:07:36	0.403473	116.092	FALSE	0
2022-09-14	13:07:36	0.305713	116.397	FALSE	0
2022-09-14	13:07:36	0.473448	116.871	FALSE	0
2022-09-14	13:07:37	0.540013	117.411	FALSE	0
2022-09-14	13:07:37	0.666272	118.077	FALSE	0
2022-09-14	13:07:37	1.10276	119.18	FALSE	0
2022-09-14	13:07:38	0.828511	120.008	FALSE	0
2022-09-14	13:07:38	0.623015	120.631	FALSE	0
2022-09-14	13:07:38	0.57416	121.206	FALSE	0
2022-09-14	13:07:38	0.443168	121.649	FALSE	0
2022-09-14	13:07:39	0.550496	122.199	FALSE	0
2022-09-14	13:07:39	0.428868	122.628	FALSE	0
2022-09-14	13:07:39	0.446883	123.075	FALSE	0
2022-09-14	13:07:39	0.550293	123.625	FALSE	0
2022-09-14	13:07:40	0.71874	124.344	FALSE	0
2022-09-14	13:07:40	0.719198	125.063	FALSE	0
2022-09-14	13:07:40	0.72673	125.79	FALSE	0
2022-09-14	13:07:40	0.72042	126.51	FALSE	0
2022-09-14	13:07:41	0.72042	127.231	FALSE	0
2022-09-14	13:07:41	0.721895	127.953	FALSE	0
2022-09-14	13:07:41	0.727799	128.68	FALSE	0
2022-09-14	13:07:42	0.731209	129.412	FALSE	0
2022-09-14	13:07:42	0.71986	130.132	FALSE	0
2022-09-14	13:07:42	0.725916	130.857	FALSE	0
2022-09-14	13:07:42	0.141591	130.999	FALSE	0
2022-09-14	13:07:43	0.143982	131.143	FALSE	0
2022-09-14	13:07:43	0.0711071	131.214	FALSE	0
2022-09-14	13:07:43	0.0423539	131.256	FALSE	0
2022-09-14	13:07:43	0.157875	131.414	FALSE	0
2022-09-14	13:07:44	0.35528	131.77	FALSE	0
2022-09-14	13:07:44	0.469936	132.24	FALSE	0
2022-09-14	13:07:44	0.336654	132.576	FALSE	0
2022-09-14	13:07:44	0.34098	132.917	FALSE	0
2022-09-14	13:07:45	0.394211	133.311	FALSE	0
2022-09-14	13:07:45	0.46271	133.774	FALSE	0
2022-09-14	13:07:45	0.469987	134.244	FALSE	0
2022-09-14	13:07:46	0.500674	134.745	FALSE	0
2022-09-14	13:07:46	0.376298	135.121	FALSE	0
2022-09-14	13:07:46	0.36668	135.488	FALSE	0
2022-09-14	13:07:46	0.383015	135.871	FALSE	0
2022-09-14	13:07:47	0.871514	136.742	FALSE	0
2022-09-14	13:07:47	0.730598	137.473	FALSE	0
2022-09-14	13:07:47	0.432277	137.905	FALSE	0
2022-09-14	13:07:47	0.231667	138.137	FALSE	0
2022-09-14	13:07:48	0.180216	138.317	FALSE	0
2022-09-14	13:07:48	0.212583	138.53	FALSE	0
2022-09-14	13:07:48	1.33319	139.863	FALSE	0
2022-09-14	13:07:49	2.14006	142.003	FALSE	0
2022-09-14	13:07:49	1.23477	143.238	FALSE	0
2022-09-14	13:07:49	0.53813	143.776	FALSE	0
2022-09-14	13:07:49	0.267239	144.043	FALSE	0
2022-09-14	13:07:50	0.172328	144.215	FALSE	0
2022-09-14	13:07:50	0.243575	144.459	FALSE	0
2022-09-14	13:07:50	0.221387	144.68	FALSE	0
2022-09-14	13:07:50	0.323677	145.004	FALSE	0
2022-09-14	13:07:51	0.388359	145.392	FALSE	0
2022-09-14	13:07:51	0.30841	145.701	FALSE	0
2022-09-14	13:07:51	0.348868	146.05	FALSE	0
2022-09-14	13:07:51	0.362965	146.413	FALSE	0
2022-09-14	13:07:52	0.340675	146.753	FALSE	0
2022-09-14	13:07:52	0.342506	147.096	FALSE	0
2022-09-14	13:07:52	0.355942	147.452	FALSE	0
2022-09-14	13:07:53	0.34902	147.801	FALSE	0
2022-09-14	13:07:53	0.342303	148.143	FALSE	0
2022-09-14	13:07:53	0.348817	148.492	FALSE	0
2022-09-14	13:07:53	0.350242	148.842	FALSE	0
2022-09-14	13:07:54	0.352481	149.195	FALSE	0
2022-09-14	13:07:54	0.358741	149.553	FALSE	0
2022-09-14	13:07:54	0.350242	149.904	FALSE	0
2022-09-14	13:07:54	0.344186	150.248	FALSE	0
2022-09-14	13:07:55	0.347748	150.596	FALSE	0
2022-09-14	13:07:55	0.341947	150.937	FALSE	0
2022-09-14	13:07:55	0.348308	151.286	FALSE	0
2022-09-14	13:07:55	0.346578	151.632	FALSE	0
2022-09-14	13:07:56	0.348053	151.98	FALSE	0
2022-09-14	13:07:56	0.387799	152.368	FALSE	0
2022-09-14	13:07:56	0.399809	152.768	FALSE	0
2022-09-14	13:07:57	0.405764	153.174	FALSE	0
2022-09-14	13:07:57	0.434415	153.608	FALSE	0
2022-09-14	13:07:57	0.406985	154.015	FALSE	0
2022-09-14	13:07:57	0.35645	154.372	FALSE	0
2022-09-14	13:07:58	0.419453	154.791	FALSE	0
2022-09-14	13:07:58	0.568511	155.36	FALSE	0
2022-09-14	13:07:58	0.821794	156.181	FALSE	0
2022-09-14	13:07:58	0.462303	156.644	FALSE	0
2022-09-14	13:07:59	0.648461	157.292	FALSE	0
2022-09-14	13:07:59	0.592685	157.885	FALSE	0
2022-09-14	13:07:59	0.683372	158.568	FALSE	0
2022-09-14	13:07:59	0.477977	159.046	FALSE	0
2022-09-14	13:08:00	0.396298	159.442	FALSE	0
2022-09-14	13:08:00	0.423372	159.866	FALSE	0
2022-09-14	13:08:00	0.363728	160.23	FALSE	0
2022-09-14	13:08:01	0.38154	160.611	FALSE	0
2022-09-14	13:08:01	0.236654	160.848	FALSE	0
2022-09-14	13:08:01	0.215992	161.064	FALSE	0
2022-09-14	13:08:01	0.239657	161.303	FALSE	0
2022-09-14	13:08:02	0.235076	161.538	FALSE	0
2022-09-14	13:08:02	0.242812	161.781	FALSE	0
2022-09-14	13:08:02	0.235942	162.017	FALSE	0
2022-09-14	13:08:02	0.245814	162.263	FALSE	0
2022-09-14	13:08:03	0.30612	162.569	FALSE	0
2022-09-14	13:08:03	0.282506	162.852	FALSE	0
2022-09-14	13:08:03	0.346527	163.198	FALSE	0
2022-09-14	13:08:03	0.369886	163.568	FALSE	0
2022-09-14	13:08:04	0.353702	163.922	FALSE	0
2022-09-14	13:08:04	0.400522	164.322	FALSE	0
2022-09-14	13:08:04	0.414618	164.737	FALSE	0
2022-09-14	13:08:05	0.42215	165.159	FALSE	0
2022-09-14	13:08:05	0.378181	165.537	FALSE	0
2022-09-14	13:08:05	0.402506	165.94	FALSE	0
2022-09-14	13:08:05	0.691514	166.631	FALSE	0
2022-09-14	13:08:06	0.540725	167.172	FALSE	0
2022-09-14	13:08:06	0.388206	167.56	FALSE	0
2022-09-14	13:08:06	0.374313	167.935	FALSE	0
2022-09-14	13:08:06	0.349682	168.284	FALSE	0
2022-09-14	13:08:07	0.30958	168.594	FALSE	0
2022-09-14	13:08:07	0.252888	168.847	FALSE	0
2022-09-14	13:08:07	0.482507	169.329	FALSE	0
2022-09-14	13:08:08	0.680623	170.01	FALSE	0
2022-09-14	13:08:08	0.732379	170.742	FALSE	0
2022-09-14	13:08:08	0.662812	171.405	FALSE	0
2022-09-14	13:08:08	0.580623	171.986	FALSE	0
2022-09-14	13:08:09	0.619453	172.605	FALSE	0
2022-09-14	13:08:09	0.684033	173.289	FALSE	0
2022-09-14	13:08:09	0.682761	173.972	FALSE	0
2022-09-14	13:08:09	0.773601	174.745	FALSE	0
2022-09-14	13:08:10	0.927494	175.673	FALSE	0
2022-09-14	13:08:10	0.721234	176.394	FALSE	0
2022-09-14	13:08:10	0.497265	176.891	FALSE	0
2022-09-14	13:08:10	0.659911	177.551	FALSE	0
2022-09-14	13:08:11	0.853244	178.405	FALSE	0
2022-09-14	13:08:11	0.787697	179.192	FALSE	0
2022-09-14	13:08:11	0.555738	179.748	FALSE	0
2022-09-14	13:08:12	0.410445	180.158	FALSE	0
2022-09-14	13:08:12	0.37986	180.538	FALSE	0
2022-09-14	13:08:12	0.340064	180.878	FALSE	0
2022-09-14	13:08:12	0.703677	181.582	FALSE	0
2022-09-14	13:08:13	0.716145	182.298	FALSE	0
2022-09-14	13:08:13	0.720369	183.019	FALSE	0
2022-09-14	13:08:13	0.718588	183.737	FALSE	0
2022-09-14	13:08:13	0.720013	184.457	FALSE	0
2022-09-14	13:08:14	0.723066	185.18	FALSE	0
2022-09-14	13:08:14	0.713855	185.894	FALSE	0
2022-09-14	13:08:14	0.717621	186.612	FALSE	0
2022-09-14	13:08:14	0.725865	187.338	FALSE	0
2022-09-14	13:08:15	0.719758	188.057	FALSE	0
2022-09-14	13:08:15	0.718893	188.776	FALSE	0
2022-09-14	13:08:15	0.729733	189.506	FALSE	0
2022-09-14	13:08:16	0.727596	190.234	FALSE	0
2022-09-14	13:08:16	0.723931	190.958	FALSE	0
2022-09-14	13:08:16	0.720369	191.678	FALSE	0
2022-09-14	13:08:16	0.718181	192.396	FALSE	0
2022-09-14	13:08:17	0.726323	193.122	FALSE	0
2022-09-14	13:08:17	0.718893	193.841	FALSE	0
2022-09-14	13:08:17	0.724898	194.566	FALSE	0
2022-09-14	13:08:17	0.718486	195.285	FALSE	0
2022-09-14	13:08:18	0.715738	196	FALSE	0
2022-09-14	13:08:18	0.723321	196.724	FALSE	0
2022-09-14	13:08:18	0.723117	197.447	FALSE	0
2022-09-14	13:08:18	0.723321	198.17	FALSE	0
2022-09-14	13:08:19	0.721895	198.892	FALSE	0
2022-09-14	13:08:19	0.72383	199.616	FALSE	0
2022-09-14	13:08:19	0.725407	200.341	FALSE	0
2022-09-14	13:08:20	0.71589	201.057	FALSE	0
2022-09-14	13:08:20	0.71584	201.773	FALSE	0
2022-09-14	13:08:20	0.724796	202.498	FALSE	0
2022-09-14	13:08:20	0.731158	203.229	FALSE	0
2022-09-14	13:08:21	0.72042	203.949	FALSE	0
2022-09-14	13:08:21	0.723321	204.673	FALSE	0
2022-09-14	13:08:21	0.720064	205.393	FALSE	0
2022-09-14	13:08:21	0.720064	206.113	FALSE	0
2022-09-14	13:08:22	0.722557	206.835	FALSE	0
2022-09-14	13:08:22	0.722761	207.558	FALSE	0
2022-09-14	13:08:22	0.717417	208.276	FALSE	0
2022-09-14	13:08:23	0.723524	208.999	FALSE	0
2022-09-14	13:08:23	0.720216	209.719	FALSE	0
2022-09-14	13:08:23	0.721895	210.441	FALSE	0
2022-09-14	13:08:23	0.718893	211.16	FALSE	0
2022-09-14	13:08:24	0.732888	211.893	FALSE	0
2022-09-14	13:08:24	0.725204	212.618	FALSE	0
2022-09-14	13:08:24	0.71813	213.336	FALSE	0
2022-09-14	13:08:24	0.71645	214.053	FALSE	0
2022-09-14	13:08:25	0.722659	214.775	FALSE	0
2022-09-14	13:08:25	0.721081	215.497	FALSE	0
2022-09-14	13:08:25	0.721183	216.218	FALSE	0
2022-09-14	13:08:25	0.722965	216.941	FALSE	0
2022-09-14	13:08:26	0.720827	217.662	FALSE	0
2022-09-14	13:08:26	0.719249	218.381	FALSE	0
2022-09-14	13:08:26	0.720776	219.102	FALSE	0
2022-09-14	13:08:27	0.720216	219.822	FALSE	0
2022-09-14	13:08:27	0.718232	220.54	FALSE	0
2022-09-14	13:08:27	0.727036	221.267	FALSE	0
2022-09-14	13:08:27	0.724084	221.991	FALSE	0
2022-09-14	13:08:28	0.722862	222.714	FALSE	0
2022-09-14	13:08:28	0.716196	223.43	FALSE	0
2022-09-14	13:08:28	0.715636	224.146	FALSE	0
2022-09-14	13:08:28	0.714364	224.86	FALSE	0
2022-09-14	13:08:29	0.717417	225.578	FALSE	0
2022-09-14	13:08:29	0.725356	226.303	FALSE	0
2022-09-14	13:08:29	0.718537	227.021	FALSE	0
2022-09-14	13:08:29	0.719962	227.741	FALSE	0
2022-09-14	13:08:30	0.714058	228.455	FALSE	0
2022-09-14	13:08:30	0.69355	229.149	FALSE	0
2022-09-14	13:08:30	0.445051	229.594	FALSE	0
2022-09-14	13:08:31	0.44902	230.043	FALSE	0
2022-09-14	13:08:31	0.447036	230.49	FALSE	0
2022-09-14	13:08:31	0.438588	230.929	FALSE	0
2022-09-14	13:08:31	0.432023	231.361	FALSE	0
2022-09-14	13:08:32	0.421947	231.783	FALSE	0
2022-09-14	13:08:32	0.422201	232.205	FALSE	0
2022-09-14	13:08:32	0.426679	232.632	FALSE	0
2022-09-14	13:08:32	0.42444	233.056	FALSE	0
2022-09-14	13:08:33	0.423931	233.48	FALSE	0
2022-09-14	13:08:33	0.421489	233.901	FALSE	0
2022-09-14	13:08:33	0.426069	234.328	FALSE	0
2022-09-14	13:08:33	0.432786	234.76	FALSE	0
2022-09-14	13:08:34	0.418028	235.178	FALSE	0
2022-09-14	13:08:34	0.414924	235.593	FALSE	0
2022-09-14	13:08:34	0.425611	236.019	FALSE	0
2022-09-14	13:08:35	0.434415	236.453	FALSE	0
2022-09-14	13:08:35	0.435331	236.889	FALSE	0
2022-09-14	13:08:35	0.437977	237.327	FALSE	0
2022-09-14	13:08:35	0.443473	237.77	FALSE	0
2022-09-14	13:08:36	0.435484	238.206	FALSE	0
2022-09-14	13:08:36	0.431667	238.637	FALSE	0
2022-09-14	13:08:36	0.426527	239.064	FALSE	0
2022-09-14	13:08:36	0.430038	239.494	FALSE	0
2022-09-14	13:08:37	0.403982	239.898	FALSE	0
2022-09-14	13:08:37	0.387443	240.285	FALSE	0
2022-09-14	13:08:37	0.412583	240.698	FALSE	0
2022-09-14	13:08:37	0.467392	241.165	FALSE	0
2022-09-14	13:08:38	0.496654	241.662	FALSE	0
2022-09-14	13:08:38	0.514873	242.177	FALSE	0
2022-09-14	13:08:38	0.543677	242.72	FALSE	0
2022-09-14	13:08:39	0.489936	243.21	FALSE	0
2022-09-14	13:08:39	0.476298	243.687	FALSE	0
2022-09-14	13:08:39	0.45299	244.14	FALSE	0
2022-09-14	13:08:39	0.447137	244.587	FALSE	0
2022-09-14	13:08:40	0.448919	245.036	FALSE	0
2022-09-14	13:08:40	0.418283	245.454	FALSE	0
2022-09-14	13:08:40	0.396196	245.85	FALSE	0
2022-09-14	13:08:40	0.393957	246.244	FALSE	0
2022-09-14	13:08:41	0.386934	246.631	FALSE	0
2022-09-14	13:08:41	0.389326	247.02	FALSE	0
2022-09-14	13:08:41	0.38327	247.404	FALSE	0
2022-09-14	13:08:41	0.375585	247.779	FALSE	0
2022-09-14	13:08:42	0.398079	248.177	FALSE	0
2022-09-14	13:08:42	0.477265	248.655	FALSE	0
2022-09-14	13:08:42	0.508766	249.163	FALSE	0
2022-09-14	13:08:43	0.493651	249.657	FALSE	0
2022-09-14	13:08:43	0.436349	250.093	FALSE	0
2022-09-14	13:08:43	0.433244	250.527	FALSE	0
2022-09-14	13:08:43	0.431209	250.958	FALSE	0
2022-09-14	13:08:44	0.448155	251.406	FALSE	0
2022-09-14	13:08:44	0.580623	251.987	FALSE	0
2022-09-14	13:08:44	0.856349	252.843	FALSE	0
2022-09-14	13:08:44	0.818791	253.662	FALSE	0
2022-09-14	13:08:45	0.741132	254.403	FALSE	0
2022-09-14	13:08:45	0.606272	255.009	FALSE	0
2022-09-14	13:08:45	0.487494	255.497	FALSE	0
2022-09-14	13:08:46	0.3564	255.853	FALSE	0
2022-09-14	13:08:46	0.324389	256.177	FALSE	0
2022-09-14	13:08:46	0.298486	256.476	FALSE	0
2022-09-14	13:08:46	0.670598	257.146	FALSE	0
2022-09-14	13:08:47	0.716705	257.863	FALSE	0
2022-09-14	13:08:47	0.718333	258.582	FALSE	0
2022-09-14	13:08:47	0.723575	259.305	FALSE	0
2022-09-14	13:08:47	0.718232	260.023	FALSE	0
2022-09-14	13:08:48	0.725204	260.749	FALSE	0
2022-09-14	13:08:48	0.723219	261.472	FALSE	0
2022-09-14	13:08:48	0.723931	262.196	FALSE	0
2022-09-14	13:08:48	0.718588	262.914	FALSE	0
2022-09-14	13:08:49	0.727239	263.641	FALSE	0
2022-09-14	13:08:49	0.729784	264.371	FALSE	0
2022-09-14	13:08:49	0.717366	265.089	FALSE	0
2022-09-14	13:08:50	0.728512	265.817	FALSE	0
2022-09-14	13:08:50	0.720572	266.538	FALSE	0
2022-09-14	13:08:50	0.725204	267.263	FALSE	0
2022-09-14	13:08:50	0.720929	267.984	FALSE	0
2022-09-14	13:08:51	0.718384	268.702	FALSE	0
2022-09-14	13:08:51	0.72271	269.425	FALSE	0
2022-09-14	13:08:51	0.72729	270.152	FALSE	0
2022-09-14	13:08:51	0.522099	270.674	FALSE	0
2022-09-14	13:08:52	0.64444	271.319	FALSE	0
2022-09-14	13:08:52	0.717417	272.036	FALSE	0
2022-09-14	13:08:52	0.719198	272.755	FALSE	0
2022-09-14	13:08:52	0.722862	273.478	FALSE	0
2022-09-14	13:08:53	0.717061	274.195	FALSE	0
2022-09-14	13:08:53	0.461183	274.657	FALSE	0
2022-09-14	13:08:53	0.479758	275.136	FALSE	0
2022-09-14	13:08:54	0.420013	275.556	FALSE	0
2022-09-14	13:08:54	0.441794	275.998	FALSE	0
2022-09-14	13:08:54	0.562608	276.561	FALSE	0
2022-09-14	13:08:54	0.605458	277.166	FALSE	0
2022-09-14	13:08:55	0.506018	277.672	FALSE	0
2022-09-14	13:08:55	0.396909	278.069	FALSE	0
2022-09-14	13:08:55	0.522354	278.591	FALSE	0
2022-09-14	13:08:55	0.521031	279.112	FALSE	0
2022-09-14	13:08:56	0.474924	279.587	FALSE	0
2022-09-14	13:08:56	0.556348	280.144	FALSE	0
2022-09-14	13:08:56	0.576501	280.72	FALSE	0
2022-09-14	13:08:56	0.514669	281.235	FALSE	0
2022-09-14	13:08:57	0.58841	281.823	FALSE	0
2022-09-14	13:08:57	0.607137	282.43	FALSE	0
2022-09-14	13:08:57	0.568511	282.999	FALSE	0
2022-09-14	13:08:58	0.608613	283.608	FALSE	0
2022-09-14	13:08:58	0.447545	284.055	FALSE	0
2022-09-14	13:08:58	0.37131	284.426	FALSE	0
2022-09-14	13:08:58	0.334822	284.761	FALSE	0
2022-09-14	13:08:59	0.43472	285.196	FALSE	0
2022-09-14	13:08:59	0.729784	285.926	FALSE	0
2022-09-14	13:08:59	0.720776	286.647	FALSE	0
2022-09-14	13:08:59	0.719148	287.366	FALSE	0
2022-09-14	13:09:00	0.725865	288.092	FALSE	0
2022-09-14	13:09:00	0.606018	288.698	FALSE	0
2022-09-14	13:09:00	0.500471	289.198	FALSE	0
2022-09-14	13:09:00	0.460827	289.659	FALSE	0
2022-09-14	13:09:01	0.45411	290.113	FALSE	0
2022-09-14	13:09:01	0.516094	290.629	FALSE	0
2022-09-14	13:09:01	0.5764	291.205	FALSE	0
2022-09-14	13:09:02	0.624338	291.83	FALSE	0
2022-09-14	13:09:02	0.697824	292.528	FALSE	0
2022-09-14	13:09:02	0.644746	293.172	FALSE	0
2022-09-14	13:09:02	0.707494	293.88	FALSE	0
2022-09-14	13:09:03	0.585102	294.465	FALSE	0
2022-09-14	13:09:03	0.618639	295.084	FALSE	0
2022-09-14	13:09:03	0.622608	295.706	FALSE	0
2022-09-14	13:09:03	0.716959	296.423	FALSE	0
2022-09-14	13:09:04	0.688562	297.112	FALSE	0
2022-09-14	13:09:04	0.618842	297.731	FALSE	0
2022-09-14	13:09:04	0.626323	298.357	FALSE	0
2022-09-14	13:09:05	0.577621	298.935	FALSE	0
2022-09-14	13:09:05	0.62617	299.561	FALSE	0
2022-09-14	13:09:05	0.630649	300.191	FALSE	0
2022-09-14	13:09:05	0.633499	300.825	FALSE	0
2022-09-14	13:09:06	0.693906	301.519	FALSE	0
2022-09-14	13:09:06	0.717621	302.236	FALSE	0
2022-09-14	13:09:06	0.757977	302.994	FALSE	0
2022-09-14	13:09:06	0.730293	303.725	FALSE	0
2022-09-14	13:09:07	0.778893	304.504	FALSE	0
2022-09-14	13:09:07	0.981692	305.485	FALSE	0
2022-09-14	13:09:07	1.02668	306.512	FALSE	0
2022-09-14	13:09:07	1.042	307.554	FALSE	0
2022-09-14	13:09:08	1.15029	308.704	FALSE	0
2022-09-14	13:09:08	1.19782	309.902	FALSE	0
2022-09-14	13:09:08	0.923473	310.825	FALSE	0
2022-09-14	13:09:09	0.792837	311.618	FALSE	0
2022-09-14	13:09:09	0.560623	312.179	FALSE	0
2022-09-14	13:09:09	0.685763	312.865	FALSE	0
2022-09-14	13:09:09	0.85589	313.721	FALSE	0
2022-09-14	13:09:10	1.08169	314.802	FALSE	0
2022-09-14	13:09:10	1.21029	316.013	FALSE	0
2022-09-14	13:09:10	0.741438	316.754	FALSE	0
2022-09-14	13:09:10	0.70388	317.458	FALSE	0
2022-09-14	13:09:11	0.719656	318.178	FALSE	0
2022-09-14	13:09:11	0.600013	318.778	FALSE	0
2022-09-14	13:09:11	0.594924	319.372	FALSE	0
2022-09-14	13:09:11	0.571107	319.944	FALSE	0
2022-09-14	13:09:12	0.638588	320.582	FALSE	0
2022-09-14	13:09:12	0.697468	321.28	FALSE	0
2022-09-14	13:09:12	0.690802	321.97	FALSE	0
2022-09-14	13:09:13	0.724288	322.695	FALSE	0
2022-09-14	13:09:13	0.635076	323.33	FALSE	0
2022-09-14	13:09:13	0.65528	323.985	FALSE	0
2022-09-14	13:09:13	0.819453	324.805	FALSE	0
2022-09-14	13:09:14	0.727087	325.532	FALSE	0
2022-09-14	13:09:14	0.644847	326.176	FALSE	0
2022-09-14	13:09:14	0.69757	326.874	FALSE	0
2022-09-14	13:09:14	0.648766	327.523	FALSE	0
2022-09-14	13:09:15	0.639657	328.162	FALSE	0
2022-09-14	13:09:15	0.659657	328.822	FALSE	0
2022-09-14	13:09:15	0.650191	329.472	FALSE	0
2022-09-14	13:09:15	0.732786	330.205	FALSE	0
2022-09-14	13:09:16	0.607544	330.813	FALSE	0
2022-09-14	13:09:16	0.589326	331.402	FALSE	0
2022-09-14	13:09:16	0.566985	331.969	FALSE	0
2022-09-14	13:09:17	0.617723	332.587	FALSE	0
2022-09-14	13:09:17	0.649733	333.236	FALSE	0
2022-09-14	13:09:17	0.590852	333.827	FALSE	0
2022-09-14	13:09:17	0.574313	334.402	FALSE	0
2022-09-14	13:09:18	0.578689	334.98	FALSE	0
2022-09-14	13:09:18	0.566069	335.546	FALSE	0
2022-09-14	13:09:18	0.520013	336.066	FALSE	0
2022-09-14	13:09:18	0.476501	336.543	FALSE	0
2022-09-14	13:09:19	0.462456	337.005	FALSE	0
2022-09-14	13:09:19	0.423728	337.429	FALSE	0
2022-09-14	13:09:19	0.38673	337.816	FALSE	0
2022-09-14	13:09:19	0.381031	338.197	FALSE	0
2022-09-14	13:09:20	0.375127	338.572	FALSE	0
2022-09-14	13:09:20	0.377061	338.949	FALSE	0
2022-09-14	13:09:20	0.375382	339.324	FALSE	0
2022-09-14	13:09:21	0.382964	339.707	FALSE	0
2022-09-14	13:09:21	0.375942	340.083	FALSE	0
2022-09-14	13:09:21	0.379148	340.462	FALSE	0
2022-09-14	13:09:21	0.378588	340.841	FALSE	0
2022-09-14	13:09:22	0.370547	341.212	FALSE	0
2022-09-14	13:09:22	0.386629	341.598	FALSE	0
2022-09-14	13:09:22	0.379148	341.977	FALSE	0
2022-09-14	13:09:22	0.390394	342.368	FALSE	0
2022-09-14	13:09:23	0.404338	342.772	FALSE	0
2022-09-14	13:09:23	0.396349	343.168	FALSE	0
2022-09-14	13:09:23	0.405254	343.574	FALSE	0
2022-09-14	13:09:23	0.414466	343.988	FALSE	0
2022-09-14	13:09:24	0.407545	344.396	FALSE	0
2022-09-14	13:09:24	0.40673	344.802	FALSE	0
2022-09-14	13:09:24	0.372735	345.175	FALSE	0
2022-09-14	13:09:25	0.406578	345.582	FALSE	0
2022-09-14	13:09:25	0.413448	345.995	FALSE	0
2022-09-14	13:09:25	0.414008	346.409	FALSE	0
2022-09-14	13:09:25	0.435382	346.845	FALSE	0
2022-09-14	13:09:26	0.474415	347.319	FALSE	0
2022-09-14	13:09:26	0.542099	347.861	FALSE	0
2022-09-14	13:09:26	0.614822	348.476	FALSE	0
2022-09-14	13:09:26	0.558842	349.035	FALSE	0
2022-09-14	13:09:27	0.609071	349.644	FALSE	0
2022-09-14	13:09:27	0.388664	350.032	FALSE	0
2022-09-14	13:09:27	0.252125	350.285	FALSE	0
2022-09-14	13:09:28	0.172735	350.457	FALSE	0
2022-09-14	13:09:28	0.125102	350.582	FALSE	0
2022-09-14	13:09:28	0.121031	350.703	FALSE	0
2022-09-14	13:09:28	0.265356	350.969	FALSE	0
2022-09-14	13:09:29	0.506832	351.476	FALSE	0
2022-09-14	13:09:29	0.631667	352.107	FALSE	0
2022-09-14	13:09:29	0.531463	352.639	FALSE	0
2022-09-14	13:09:29	0.564135	353.203	FALSE	0
2022-09-14	13:09:30	0.629834	353.833	FALSE	0
2022-09-14	13:09:30	0.618893	354.452	FALSE	0
2022-09-14	13:09:30	0.637417	355.089	FALSE	0
2022-09-14	13:09:30	0.613702	355.703	FALSE	0
2022-09-14	13:09:31	0.585254	356.288	FALSE	0
2022-09-14	13:09:31	0.623422	356.911	FALSE	0
2022-09-14	13:09:31	0.87813	357.79	FALSE	0
2022-09-14	13:09:32	0.823728	358.613	FALSE	0
2022-09-14	13:09:32	0.734313	359.348	FALSE	0
2022-09-14	13:09:32	0.675178	360.023	FALSE	0
2022-09-14	13:09:32	0.650344	360.673	FALSE	0
2022-09-14	13:09:33	0.686679	361.36	FALSE	0
2022-09-14	13:09:33	0.581438	361.941	FALSE	0
2022-09-14	13:09:33	0.515382	362.457	FALSE	0
2022-09-14	13:09:33	0.560674	363.017	FALSE	0
2022-09-14	13:09:34	0.617163	363.634	FALSE	0
2022-09-14	13:09:34	0.567137	364.202	FALSE	0
2022-09-14	13:09:34	0.560929	364.763	FALSE	0
2022-09-14	13:09:34	0.548359	365.311	FALSE	0
2022-09-14	13:09:35	0.553855	365.865	FALSE	0
2022-09-14	13:09:35	0.581132	366.446	FALSE	0
2022-09-14	13:09:35	0.568511	367.014	FALSE	0
2022-09-14	13:09:36	0.5793	367.594	FALSE	0
2022-09-14	13:09:36	0.421082	368.015	FALSE	0
2022-09-14	13:09:36	0.370038	368.385	FALSE	0
2022-09-14	13:09:36	0.367901	368.753	FALSE	0
2022-09-14	13:09:37	0.448461	369.201	FALSE	0
2022-09-14	13:09:37	0.300369	369.502	FALSE	0
2022-09-14	13:09:37	0.0700384	369.572	FALSE	0
2022-09-14	13:09:37	0.0503946	369.622	FALSE	0
2022-09-14	13:09:38	-0.0439565	369.622	FALSE	0
2022-09-14	13:09:38	-0.102735	369.622	FALSE	0
2022-09-14	13:09:38	-0.0704705	369.622	FALSE	0
2022-09-14	13:09:38	0.208664	369.831	FALSE	0
2022-09-14	13:09:39	0.642405	370.473	FALSE	0
2022-09-14	13:09:39	0.251921	370.725	FALSE	0
2022-09-14	13:09:39	0.60444	371.329	FALSE	0
2022-09-14	13:09:40	0.230802	371.56	FALSE	0
2022-09-14	13:09:40	0.536501	372.097	FALSE	0
2022-09-14	13:09:40	0.118486	372.215	FALSE	0
2022-09-14	13:09:40	0.178995	372.394	FALSE	0
2022-09-14	13:09:41	0.13528	372.529	FALSE	0
2022-09-14	13:09:41	-0.0352033	372.529	FALSE	0
2022-09-14	13:09:41	-0.237239	372.529	FALSE	0
2022-09-14	13:09:41	-0.207213	372.529	FALSE	0
2022-09-14	13:09:42	-0.207773	372.529	FALSE	0
2022-09-14	13:09:42	-0.140089	372.529	FALSE	0
2022-09-14	13:09:42	-0.317188	372.529	FALSE	0
2022-09-14	13:09:42	-0.270877	372.529	FALSE	0
2022-09-14	13:09:43	-0.31846	372.529	FALSE	0
2022-09-14	13:09:43	-0.192862	372.529	FALSE	0
2022-09-14	13:09:43	-0.332353	372.529	FALSE	0
2022-09-14	13:09:44	-0.221819	372.529	FALSE	0
2022-09-14	13:09:44	-0.257239	372.529	FALSE	0
2022-09-14	13:09:44	-0.204262	372.529	FALSE	0
2022-09-14	13:09:44	-0.305076	372.529	FALSE	0
2022-09-14	13:09:45	-0.206704	372.529	FALSE	0
2022-09-14	13:09:45	-0.275254	372.529	FALSE	0
2022-09-14	13:09:45	-0.193473	372.529	FALSE	0
2022-09-14	13:09:45	-0.292964	372.529	FALSE	0
2022-09-14	13:09:46	-0.0449234	372.529	FALSE	0
2022-09-14	13:09:46	0.153499	372.683	FALSE	0
2022-09-14	13:09:46	0.335433	373.018	FALSE	0
2022-09-14	13:09:46	0.456094	373.474	FALSE	0
2022-09-14	13:09:47	0.917214	374.392	FALSE	0
2022-09-14	13:09:47	0.690445	375.082	FALSE	0
2022-09-14	13:09:47	1.00531	376.087	FALSE	0
2022-09-14	13:09:48	0.409733	376.497	FALSE	0
2022-09-14	13:09:48	0.257265	376.754	FALSE	0
2022-09-14	13:09:48	0.535127	377.29	FALSE	0
2022-09-14	13:09:48	0.246272	377.536	FALSE	0
2022-09-14	13:09:49	0.53874	378.075	FALSE	0
2022-09-14	13:09:49	0.316908	378.392	FALSE	0
2022-09-14	13:09:49	0.509682	378.901	FALSE	0
2022-09-14	13:09:49	0.313397	379.215	FALSE	0
2022-09-14	13:09:50	0.122965	379.338	FALSE	0
2022-09-14	13:09:50	0.0858144	379.423	FALSE	0
2022-09-14	13:09:50	0.0624048	379.486	FALSE	0
2022-09-14	13:09:50	0.126476	379.612	FALSE	0
2022-09-14	13:09:51	-0.0946435	379.612	FALSE	0
2022-09-14	13:09:51	-0.0467554	379.612	FALSE	0
2022-09-14	13:09:51	-0.0336766	379.612	FALSE	0
2022-09-14	13:09:52	0.114262	379.727	FALSE	0
2022-09-14	13:09:52	0.117214	379.844	FALSE	0
2022-09-14	13:09:52	0.22271	380.066	FALSE	0
2022-09-14	13:09:52	0.584033	380.65	FALSE	0
2022-09-14	13:09:53	0.934516	381.585	FALSE	0
2022-09-14	13:09:53	0.567952	382.153	FALSE	0
2022-09-14	13:09:53	0.618079	382.771	FALSE	0
2022-09-14	13:09:53	0.411972	383.183	FALSE	0
2022-09-14	13:09:54	0.22159	383.405	FALSE	0
2022-09-14	13:09:54	0.316094	383.721	FALSE	0
2022-09-14	13:09:54	0.189326	383.91	FALSE	0
2022-09-14	13:09:55	0.205662	384.116	FALSE	0
2022-09-14	13:09:55	0.208664	384.324	FALSE	0
2022-09-14	13:09:55	0.441845	384.766	FALSE	0
2022-09-14	13:09:55	0.222965	384.989	FALSE	0
2022-09-14	13:09:56	0.396094	385.385	FALSE	0
2022-09-14	13:09:56	0.250496	385.636	FALSE	0
2022-09-14	13:09:56	0.324746	385.96	FALSE	0
2022-09-14	13:09:56	0.265102	386.226	FALSE	0
2022-09-14	13:09:57	0.285102	386.511	FALSE	0
2022-09-14	13:09:57	0.1793	386.69	FALSE	0
2022-09-14	13:09:57	0.217977	386.908	FALSE	0
2022-09-14	13:09:57	0.184491	387.092	FALSE	0
2022-09-14	13:09:58	0.169224	387.262	FALSE	0
2022-09-14	13:09:58	0.200624	387.462	FALSE	0
2022-09-14	13:09:58	0.200624	387.663	FALSE	0
2022-09-14	13:09:59	0.217163	387.88	FALSE	0
2022-09-14	13:09:59	0.177926	388.058	FALSE	0
2022-09-14	13:09:59	0.237214	388.295	FALSE	0
2022-09-14	13:09:59	0.170751	388.466	FALSE	0
2022-09-14	13:10:00	0.248562	388.715	FALSE	0
2022-09-14	13:10:00	0.225662	388.94	FALSE	0
2022-09-14	13:10:00	0.281489	389.222	FALSE	0
2022-09-14	13:10:00	0.178435	389.4	FALSE	0
2022-09-14	13:10:01	0.244695	389.645	FALSE	0
2022-09-14	13:10:01	0.172328	389.817	FALSE	0
2022-09-14	13:10:01	0.242303	390.059	FALSE	0
2022-09-14	13:10:01	0.115178	390.175	FALSE	0
2022-09-14	13:10:02	0.321183	390.496	FALSE	0
2022-09-14	13:10:02	0.160624	390.656	FALSE	0
2022-09-14	13:10:02	0.299758	390.956	FALSE	0
2022-09-14	13:10:03	0.145713	391.102	FALSE	0
2022-09-14	13:10:03	0.425713	391.528	FALSE	0
2022-09-14	13:10:03	0.15813	391.686	FALSE	0
2022-09-14	13:10:03	0.361387	392.047	FALSE	0
2022-09-14	13:10:04	0.177316	392.224	FALSE	0
2022-09-14	13:10:04	0.331921	392.556	FALSE	0
2022-09-14	13:10:04	0.217672	392.774	FALSE	0
2022-09-14	13:10:04	0.410903	393.185	FALSE	0
2022-09-14	13:10:05	0.202914	393.388	FALSE	0
2022-09-14	13:10:05	0.433906	393.822	FALSE	0
2022-09-14	13:10:05	0.38154	394.203	FALSE	0
2022-09-14	13:10:05	0.667952	394.871	FALSE	0
2022-09-14	13:10:06	0.00413511	394.875	FALSE	0
2022-09-14	13:10:06	-0.368028	394.875	FALSE	0
2022-09-14	13:10:06	0.410394	395.286	FALSE	0
2022-09-14	13:10:07	0.691158	395.977	FALSE	0
2022-09-14	13:10:07	-0.843905	395.977	FALSE	0
2022-09-14	13:10:07	-5.15703	395.977	FALSE	0
2022-09-14	13:10:07	-4.375	395.977	FALSE	0
2022-09-14	13:10:08	-5.02777	395.977	FALSE	0
2022-09-14	13:10:08	0.65472	396.632	FALSE	0
2022-09-14	13:10:08	0.703931	397.336	FALSE	0
2022-09-14	13:10:08	0.63813	397.974	FALSE	0
2022-09-14	13:10:09	0.759148	398.733	FALSE	0
2022-09-14	13:10:09	-0.847315	398.733	FALSE	0
2022-09-14	13:10:09	-3.64243	398.733	FALSE	0
2022-09-14	13:10:09	-3.53647	398.733	FALSE	0
2022-09-14	13:10:10	-3.71317	398.733	FALSE	0
2022-09-14	13:10:10	-4.95149	398.733	FALSE	0
2022-09-14	13:10:10	-0.813473	398.733	FALSE	0
2022-09-14	13:10:11	-2.35973	398.733	FALSE	0
2022-09-14	13:10:11	0.982862	399.716	FALSE	0
2022-09-14	13:10:11	0.96612	400.682	FALSE	0
2022-09-14	13:10:11	-0.991488	400.682	FALSE	0
2022-09-14	13:10:12	-1.78538	400.682	FALSE	0
2022-09-14	13:10:12	0.906374	401.588	FALSE	0
2022-09-14	13:10:12	-0.043244	401.588	FALSE	0
2022-09-14	13:10:12	0.610496	402.199	FALSE	0
2022-09-14	13:10:13	0.76958	402.968	FALSE	0
2022-09-14	13:10:13	0.458486	403.427	FALSE	0
2022-09-14	13:10:13	0.894059	404.321	FALSE	0
2022-09-14	13:10:13	0.725305	405.046	FALSE	0
2022-09-14	13:10:14	0.731463	405.778	FALSE	0
2022-09-14	13:10:14	1.0538	406.831	FALSE	0
2022-09-14	13:10:14	1.01874	407.85	FALSE	0
2022-09-14	13:10:15	-1.60564	407.85	FALSE	0
2022-09-14	13:10:15	0.481489	408.332	FALSE	0
2022-09-14	13:10:15	0.73645	409.068	FALSE	0
2022-09-14	13:10:15	0.629529	409.698	FALSE	0
2022-09-14	13:10:16	0.729377	410.427	FALSE	0
2022-09-14	13:10:16	0.725356	411.152	FALSE	0
2022-09-14	13:10:16	0.724949	411.877	FALSE	0
2022-09-14	13:10:16	0.728461	412.606	FALSE	0
2022-09-14	13:10:17	0.733448	413.339	FALSE	0
2022-09-14	13:10:17	0.730343	414.07	FALSE	0
2022-09-14	13:10:17	0.721794	414.791	FALSE	0
2022-09-14	13:10:18	0.726985	415.518	FALSE	0
2022-09-14	13:10:18	0.723626	416.242	FALSE	0
2022-09-14	13:10:18	0.723524	416.965	FALSE	0
2022-09-14	13:10:18	0.724338	417.69	FALSE	0
2022-09-14	13:10:19	0.724338	418.414	FALSE	0
2022-09-14	13:10:19	0.72729	419.141	FALSE	0
2022-09-14	13:10:19	0.722659	419.864	FALSE	0
2022-09-14	13:10:19	0.683575	420.548	FALSE	0
2022-09-14	13:10:20	0.709173	421.257	FALSE	0
2022-09-14	13:10:20	0.622303	421.879	FALSE	0
2022-09-14	13:10:20	0.722761	422.602	FALSE	0
2022-09-14	13:10:20	0.583524	423.185	FALSE	0
2022-09-14	13:10:21	0.465458	423.651	FALSE	0
2022-09-14	13:10:21	0.653702	424.305	FALSE	0
2022-09-14	13:10:21	0.556196	424.861	FALSE	0
2022-09-14	13:10:22	0.656908	425.518	FALSE	0
2022-09-14	13:10:22	0.519097	426.037	FALSE	0
2022-09-14	13:10:22	0.242456	426.279	FALSE	0
2022-09-14	13:10:22	0.189122	426.468	FALSE	0
2022-09-14	13:10:23	0.624389	427.093	FALSE	0
2022-09-14	13:10:23	0.0954328	427.188	FALSE	0
2022-09-14	13:10:23	0.108664	427.297	FALSE	0
2022-09-14	13:10:23	-0.0382059	427.297	FALSE	0
2022-09-14	13:10:24	0.0675448	427.364	FALSE	0
2022-09-14	13:10:24	0.725662	428.09	FALSE	0
2022-09-14	13:10:24	0.972176	429.062	FALSE	0
2022-09-14	13:10:24	1.36988	430.432	FALSE	0
2022-09-14	13:10:25	1.51579	431.948	FALSE	0
2022-09-14	13:10:25	1.43844	433.386	FALSE	0
2022-09-14	13:10:25	1.35024	434.737	FALSE	0
2022-09-14	13:10:26	1.43838	436.175	FALSE	0
2022-09-14	13:10:26	0.77131	436.946	FALSE	0
2022-09-14	13:10:26	0.192583	437.139	FALSE	0
2022-09-14	13:10:26	-0.0600888	437.139	FALSE	0
2022-09-14	13:10:27	-0.0453305	437.139	FALSE	0
2022-09-14	13:10:27	-0.19271	437.139	FALSE	0
2022-09-14	13:10:27	-0.20701	437.139	FALSE	0
2022-09-14	13:10:27	-0.340547	437.139	FALSE	0
2022-09-14	13:10:28	-0.610674	437.139	FALSE	0
2022-09-14	13:10:28	-0.587213	437.139	FALSE	0
2022-09-14	13:10:28	-0.437086	437.139	FALSE	0
2022-09-14	13:10:28	-0.320394	437.139	FALSE	0
2022-09-14	13:10:29	-0.0312338	437.139	FALSE	0
2022-09-14	13:10:29	0.335076	437.474	FALSE	0
2022-09-14	13:10:29	0.221031	437.695	FALSE	0
2022-09-14	13:10:30	0.204288	437.899	FALSE	0
2022-09-14	13:10:30	0.0127865	437.912	FALSE	0
2022-09-14	13:10:30	0.195229	438.107	FALSE	0
2022-09-14	13:10:30	0.0461198	438.153	FALSE	0
2022-09-14	13:10:31	0.0241351	438.178	FALSE	0
2022-09-14	13:10:31	-0.0828369	438.178	FALSE	0
2022-09-14	13:10:31	-0.0511321	438.178	FALSE	0
2022-09-14	13:10:31	-0.0294018	438.178	FALSE	0
2022-09-14	13:10:32	-0.0254832	438.178	FALSE	0
2022-09-14	13:10:32	-0.0676206	438.178	FALSE	0
2022-09-14	13:10:32	-0.18589	438.178	FALSE	0
2022-09-14	13:10:32	-0.00853663	438.178	FALSE	0
2022-09-14	13:10:33	0.0187407	438.196	FALSE	0
2022-09-14	13:10:33	0.00942772	438.206	FALSE	0
2022-09-14	13:10:33	0.188155	438.394	FALSE	0
2022-09-14	13:10:34	0.137163	438.531	FALSE	0
2022-09-14	13:10:34	0.108817	438.64	FALSE	0
2022-09-14	13:10:34	-0.0480786	438.64	FALSE	0
2022-09-14	13:10:34	0.466832	439.107	FALSE	0
2022-09-14	13:10:35	1.18388	440.291	FALSE	0
2022-09-14	13:10:35	1.53136	441.822	FALSE	0
2022-09-14	13:10:35	3.82617	445.648	1	1
2022-09-14	13:10:35	4.18454	449.833	1	2
2022-09-14	13:10:36	1.09757	450.93	FALSE	2
2022-09-14	13:10:36	0.347188	451.277	FALSE	2
2022-09-14	13:10:36	0.35355	451.631	FALSE	2
2022-09-14	13:10:36	0.403779	452.035	FALSE	2
2022-09-14	13:10:37	0.672226	452.707	FALSE	2
2022-09-14	13:10:37	0.2107	452.918	FALSE	2
2022-09-14	13:10:37	0.353346	453.271	FALSE	2
2022-09-14	13:10:38	0.262201	453.533	FALSE	2
2022-09-14	13:10:38	0.232125	453.765	FALSE	2
2022-09-14	13:10:38	0.341794	454.107	FALSE	2
2022-09-14	13:10:38	0.306069	454.413	FALSE	2
2022-09-14	13:10:39	0.762099	455.175	FALSE	2
2022-09-14	13:10:39	0.496909	455.672	FALSE	2
2022-09-14	13:10:39	0.444746	456.117	FALSE	2
2022-09-14	13:10:39	0.430496	456.547	FALSE	2
2022-09-14	13:10:40	0.288257	456.836	FALSE	2
2022-09-14	13:10:40	0.343728	457.179	FALSE	2
2022-09-14	13:10:40	0.269275	457.449	FALSE	2
2022-09-14	13:10:40	0.399758	457.848	FALSE	2
2022-09-14	13:10:41	0.214262	458.063	FALSE	2
2022-09-14	13:10:41	0.406374	458.469	FALSE	2
2022-09-14	13:10:41	0.237774	458.707	FALSE	2
2022-09-14	13:10:42	0.398995	459.106	FALSE	2
2022-09-14	13:10:42	0.245051	459.351	FALSE	2
2022-09-14	13:10:42	0.366171	459.717	FALSE	2
2022-09-14	13:10:42	0.182303	459.899	FALSE	2
2022-09-14	13:10:43	0.442354	460.342	FALSE	2
2022-09-14	13:10:43	0.277163	460.619	FALSE	2
2022-09-14	13:10:43	0.419657	461.039	FALSE	2
2022-09-14	13:10:43	0.22612	461.265	FALSE	2
2022-09-14	13:10:44	0.423473	461.688	FALSE	2
2022-09-14	13:10:44	0.19472	461.883	FALSE	2
2022-09-14	13:10:44	0.400929	462.284	FALSE	2
2022-09-14	13:10:44	0.201794	462.486	FALSE	2
2022-09-14	13:10:45	0.482303	462.968	FALSE	2
2022-09-14	13:10:45	0.315891	463.284	FALSE	2
2022-09-14	13:10:45	0.690547	463.974	FALSE	2
2022-09-14	13:10:46	0.377672	464.352	FALSE	2
2022-09-14	13:10:46	0.555636	464.908	FALSE	2
2022-09-14	13:10:46	0.366578	465.274	FALSE	2
2022-09-14	13:10:46	0.442303	465.717	FALSE	2
2022-09-14	13:10:47	0.26958	465.986	FALSE	2
2022-09-14	13:10:47	0.435636	466.422	FALSE	2
2022-09-14	13:10:47	0.269682	466.691	FALSE	2
2022-09-14	13:10:47	0.511259	467.203	FALSE	2
2022-09-14	13:10:48	0.263779	467.466	FALSE	2
2022-09-14	13:10:48	0.382608	467.849	FALSE	2
2022-09-14	13:10:48	0.248155	468.097	FALSE	2
2022-09-14	13:10:48	0.423931	468.521	FALSE	2
2022-09-14	13:10:49	0.286069	468.807	FALSE	2
2022-09-14	13:10:49	0.392634	469.2	FALSE	2
2022-09-14	13:10:49	0.302048	469.502	FALSE	2
2022-09-14	13:10:50	0.338028	469.84	FALSE	2
2022-09-14	13:10:50	0.229987	470.07	FALSE	2
2022-09-14	13:10:50	0.343881	470.414	FALSE	2
2022-09-14	13:10:50	0.307646	470.721	FALSE	2
2022-09-14	13:10:51	0.401438	471.123	FALSE	2
2022-09-14	13:10:51	0.334822	471.458	FALSE	2
2022-09-14	13:10:51	0.313702	471.771	FALSE	2
2022-09-14	13:10:51	0.240013	472.011	FALSE	2
2022-09-14	13:10:52	0.154466	472.166	FALSE	2
2022-09-14	13:10:52	0.0171122	472.183	FALSE	2
2022-09-14	13:10:52	0.0429137	472.226	FALSE	2
2022-09-14	13:10:53	0.00968217	472.236	FALSE	2
2022-09-14	13:10:53	0.0323793	472.268	FALSE	2
2022-09-14	13:10:53	0.217621	472.486	FALSE	2
2022-09-14	13:10:53	0.0399621	472.526	FALSE	2
2022-09-14	13:10:54	0.679962	473.206	FALSE	2
2022-09-14	13:10:54	1.06215	474.268	FALSE	2
2022-09-14	13:10:54	1.9534	476.221	FALSE	2
2022-09-14	13:10:54	2.26067	478.482	FALSE	2
2022-09-14	13:10:55	1.64368	480.125	FALSE	2
2022-09-14	13:10:55	2.25116	482.377	FALSE	2
2022-09-14	13:10:55	1.55355	483.93	FALSE	2
2022-09-14	13:10:55	1.7105	485.641	FALSE	2
2022-09-14	13:10:56	1.2021	486.843	FALSE	2
2022-09-14	13:10:56	1.48902	488.332	FALSE	2
2022-09-14	13:10:56	3.53513	491.867	1	3
2022-09-14	13:10:57	3.40851	495.275	1	4
2022-09-14	13:10:57	4.03589	499.311	1	5
2022-09-14	13:10:57	2.57172	501.883	FALSE	5
2022-09-14	13:10:57	1.32128	503.204	FALSE	5
2022-09-14	13:10:58	1.24602	504.45	FALSE	5
2022-09-14	13:10:58	1.32556	505.776	FALSE	5
2022-09-14	13:10:58	1.24933	507.025	FALSE	5
2022-09-14	13:10:58	1.2678	508.293	FALSE	5
2022-09-14	13:10:59	1.32149	509.614	FALSE	5
2022-09-14	13:10:59	1.35726	510.972	FALSE	5
2022-09-14	13:10:59	2.8165	513.788	FALSE	5
2022-09-14	13:10:59	5.50347	519.292	1	6
2022-09-14	13:11:00	7.83645	527.128	1	7
2022-09-14	13:11:00	9.13293	536.261	1	8
2022-09-14	13:11:00	4.44627	540.707	1	9
2022-09-14	13:11:01	1.9963	542.704	FALSE	9
2022-09-14	13:11:01	1.59833	544.302	FALSE	9
2022-09-14	13:11:01	1.00225	545.304	FALSE	9
2022-09-14	13:11:01	0.438588	545.743	FALSE	9
2022-09-14	13:11:02	0.3993	546.142	FALSE	9
2022-09-14	13:11:02	0.344847	546.487	FALSE	9
2022-09-14	13:11:02	0.320013	546.807	FALSE	9
2022-09-14	13:11:02	0.322761	547.13	FALSE	9
2022-09-14	13:11:03	0.377316	547.507	FALSE	9
2022-09-14	13:11:03	0.351667	547.859	FALSE	9
2022-09-14	13:11:03	0.347697	548.206	FALSE	9
2022-09-14	13:11:03	0.464339	548.671	FALSE	9
2022-09-14	13:11:04	0.543626	549.214	FALSE	9
2022-09-14	13:11:04	-1.04279	549.214	FALSE	9
2022-09-14	13:11:04	-1.46345	549.214	FALSE	9
2022-09-14	13:11:05	-1.54838	549.214	FALSE	9
2022-09-14	13:11:05	-1.81459	549.214	FALSE	9
2022-09-14	13:11:05	-1.94742	549.214	FALSE	9
2022-09-14	13:11:05	-2.01154	549.214	FALSE	9
2022-09-14	13:11:06	-2.05749	549.214	FALSE	9
2022-09-14	13:11:06	-2.17922	549.214	FALSE	9
2022-09-14	13:11:06	-2.25225	549.214	FALSE	9
2022-09-14	13:11:06	-2.31958	549.214	FALSE	9
2022-09-14	13:11:07	-2.41826	549.214	FALSE	9
2022-09-14	13:11:07	-2.375	549.214	FALSE	9
2022-09-14	13:11:07	-2.51581	549.214	FALSE	9
2022-09-14	13:11:07	-2.75286	549.214	FALSE	9
2022-09-14	13:11:08	-2.71525	549.214	FALSE	9
2022-09-14	13:11:08	-2.82854	549.214	FALSE	9
2022-09-14	13:11:08	-2.91719	549.214	FALSE	9
2022-09-14	13:11:09	-3.14747	549.214	FALSE	9
2022-09-14	13:11:09	-3.29866	549.214	FALSE	9
2022-09-14	13:11:09	-3.29566	549.214	FALSE	9
2022-09-14	13:11:09	-3.70253	549.214	FALSE	9
2022-09-14	13:11:10	-3.84879	549.214	FALSE	9
2022-09-14	13:11:10	-4.27729	549.214	FALSE	9
2022-09-14	13:11:10	-3.00085	549.214	FALSE	9
2022-09-14	13:11:10	-0.442073	549.214	FALSE	9
2022-09-14	13:11:11	-0.531335	549.214	FALSE	9
2022-09-14	13:11:11	-0.531285	549.214	FALSE	9
2022-09-14	13:11:11	-0.502073	549.214	FALSE	9
2022-09-14	13:11:11	-0.555101	549.214	FALSE	9
2022-09-14	13:11:12	-0.571641	549.214	FALSE	9
2022-09-14	13:11:12	-0.578002	549.214	FALSE	9
2022-09-14	13:11:12	-0.511081	549.214	FALSE	9
2022-09-14	13:11:13	-0.534694	549.214	FALSE	9
2022-09-14	13:11:13	-0.483193	549.214	FALSE	9
2022-09-14	13:11:13	-0.552099	549.214	FALSE	9
2022-09-14	13:11:13	-0.431183	549.214	FALSE	9
2022-09-14	13:11:14	-0.397137	549.214	FALSE	9
2022-09-14	13:11:14	-0.400089	549.214	FALSE	9
2022-09-14	13:11:14	-0.501259	549.214	FALSE	9
2022-09-14	13:11:14	-0.366908	549.214	FALSE	9
2022-09-14	13:11:15	-0.434796	549.214	FALSE	9
2022-09-14	13:11:15	-0.321055	549.214	FALSE	9
2022-09-14	13:11:15	-0.397137	549.214	FALSE	9
2022-09-14	13:11:15	-0.269198	549.214	FALSE	9
2022-09-14	13:11:16	-0.380801	549.214	FALSE	9
2022-09-14	13:11:16	-0.214236	549.214	FALSE	9
2022-09-14	13:11:16	-0.329452	549.214	FALSE	9
2022-09-14	13:11:17	-0.299224	549.214	FALSE	9
2022-09-14	13:11:17	-0.272811	549.214	FALSE	9
2022-09-14	13:11:17	-0.143702	549.214	FALSE	9
2022-09-14	13:11:17	-0.20187	549.214	FALSE	9
2022-09-14	13:11:18	-0.213575	549.214	FALSE	9
2022-09-14	13:11:18	-0.0812593	549.214	FALSE	9
2022-09-14	13:11:18	-0.123193	549.214	FALSE	9
2022-09-14	13:11:18	-0.0857376	549.214	FALSE	9
2022-09-14	13:11:19	-0.272201	549.214	FALSE	9
2022-09-14	13:11:19	-0.218613	549.214	FALSE	9
2022-09-14	13:11:19	-0.299936	549.214	FALSE	9
2022-09-14	13:11:19	-0.240852	549.214	FALSE	9
2022-09-14	13:11:20	-0.350674	549.214	FALSE	9
2022-09-14	13:11:20	-0.374949	549.214	FALSE	9
2022-09-14	13:11:20	-0.378002	549.214	FALSE	9
2022-09-14	13:11:21	-0.438867	549.214	FALSE	9
2022-09-14	13:11:21	-0.419274	549.214	FALSE	9
2022-09-14	13:11:21	-0.482582	549.214	FALSE	9
2022-09-14	13:11:21	-0.264771	549.214	FALSE	9
2022-09-14	13:11:22	-0.313931	549.214	FALSE	9
2022-09-14	13:11:22	-0.243244	549.214	FALSE	9
2022-09-14	13:11:22	-0.328842	549.214	FALSE	9
2022-09-14	13:11:22	-0.204872	549.214	FALSE	9
2022-09-14	13:11:23	-0.322328	549.214	FALSE	9
2022-09-14	13:11:23	-0.0420226	549.214	FALSE	9
2022-09-14	13:11:23	-0.165432	549.214	FALSE	9
2022-09-14	13:11:23	-0.198613	549.214	FALSE	9
2022-09-14	13:11:24	-0.209605	549.214	FALSE	9
2022-09-14	13:11:24	-0.131946	549.214	FALSE	9
2022-09-14	13:11:24	-0.166806	549.214	FALSE	9
2022-09-14	13:11:25	-0.171844	549.214	FALSE	9
2022-09-14	13:11:25	-0.0453305	549.214	FALSE	9
2022-09-14	13:11:25	-0.140292	549.214	FALSE	9
2022-09-14	13:11:25	-0.0549997	549.214	FALSE	9
2022-09-14	13:11:26	-0.0987656	549.214	FALSE	9
2022-09-14	13:11:26	-0.0328114	549.214	FALSE	9
2022-09-14	13:11:26	-0.1036	549.214	FALSE	9
2022-09-14	13:11:26	0.0591987	549.274	FALSE	9
2022-09-14	13:11:27	-0.0542364	549.274	FALSE	9
2022-09-14	13:11:27	-0.0224298	549.274	FALSE	9
2022-09-14	13:11:27	-0.045127	549.274	FALSE	9
2022-09-14	13:11:28	-0.310318	549.274	FALSE	9
2022-09-14	13:11:28	-0.407519	549.274	FALSE	9
2022-09-14	13:11:28	-0.544109	549.274	FALSE	9
2022-09-14	13:11:28	-0.416374	549.274	FALSE	9
2022-09-14	13:11:29	-0.243804	549.274	FALSE	9
2022-09-14	13:11:29	0.135687	549.409	FALSE	9
2022-09-14	13:11:29	0.204898	549.614	FALSE	9
2022-09-14	13:11:29	0.166171	549.78	FALSE	9
2022-09-14	13:11:30	0.51416	550.294	FALSE	9
2022-09-14	13:11:30	0.485	550.779	FALSE	9
2022-09-14	13:11:30	0.44154	551.221	FALSE	9
2022-09-14	13:11:30	0.399199	551.62	FALSE	9
2022-09-14	13:11:31	0.454975	552.075	FALSE	9
2022-09-14	13:11:31	0.358588	552.434	FALSE	9
2022-09-14	13:11:31	0.48902	552.923	FALSE	9
2022-09-14	13:11:32	0.409021	553.332	FALSE	9
2022-09-14	13:11:32	0.55014	553.882	FALSE	9
2022-09-14	13:11:32	0.439504	554.321	FALSE	9
2022-09-14	13:11:32	0.459249	554.781	FALSE	9
2022-09-14	13:11:33	0.439097	555.22	FALSE	9
2022-09-14	13:11:33	0.415789	555.636	FALSE	9
2022-09-14	13:11:33	0.567697	556.203	FALSE	9
2022-09-14	13:11:33	0.410344	556.614	FALSE	9
2022-09-14	13:11:34	0.582405	557.196	FALSE	9
2022-09-14	13:11:34	0.438333	557.634	FALSE	9
2022-09-14	13:11:34	0.481845	558.116	FALSE	9
2022-09-14	13:11:34	0.478079	558.594	FALSE	9
2022-09-14	13:11:35	0.417316	559.012	FALSE	9
2022-09-14	13:11:35	0.526476	559.538	FALSE	9
2022-09-14	13:11:35	0.392481	559.931	FALSE	9
2022-09-14	13:11:36	0.601234	560.532	FALSE	9
2022-09-14	13:11:36	0.665153	561.197	FALSE	9
2022-09-14	13:11:36	0.672735	561.87	FALSE	9
2022-09-14	13:11:36	0.657061	562.527	FALSE	9
2022-09-14	13:11:37	0.960267	563.487	FALSE	9
2022-09-14	13:11:37	1.14592	564.633	FALSE	9
2022-09-14	13:11:37	0.846578	565.48	FALSE	9
2022-09-14	13:11:37	0.953651	566.433	FALSE	9
2022-09-14	13:11:38	0.900064	567.333	FALSE	9
2022-09-14	13:11:38	0.922812	568.256	FALSE	9
2022-09-14	13:11:38	0.653702	568.91	FALSE	9
2022-09-14	13:11:38	0.964797	569.875	FALSE	9
2022-09-14	13:11:39	0.703982	570.579	FALSE	9
2022-09-14	13:11:39	1.06444	571.643	FALSE	9
2022-09-14	13:11:39	1.76281	573.406	FALSE	9
2022-09-14	13:11:40	2.10663	575.512	FALSE	9
2022-09-14	13:11:40	3.15971	578.672	1	10
2022-09-14	13:11:40	3.51334	582.185	1	11
2022-09-14	13:11:40	2.1396	584.325	FALSE	11
2022-09-14	13:11:41	1.26144	585.587	FALSE	11
2022-09-14	13:11:41	1.35268	586.939	FALSE	11
2022-09-14	13:11:41	1.49039	588.43	FALSE	11
2022-09-14	13:11:41	1.43884	589.868	FALSE	11
2022-09-14	13:11:42	1.46469	591.333	FALSE	11
2022-09-14	13:11:42	1.72312	593.056	FALSE	11
2022-09-14	13:11:42	0.974466	594.031	FALSE	11
2022-09-14	13:11:42	1.23798	595.269	FALSE	11
2022-09-14	13:11:43	1.57676	596.845	FALSE	11
2022-09-14	13:11:43	0.970496	597.816	FALSE	11
2022-09-14	13:11:43	0.639911	598.456	FALSE	11
2022-09-14	13:11:44	0.835585	599.291	FALSE	11
2022-09-14	13:11:44	1.22536	600.517	FALSE	11
2022-09-14	13:11:44	1.00785	601.525	FALSE	11

## Sheet: Richa_prong_202291413631
						**GoPro Fitting: 1256
2022-09-14	13:06:32	-0.0918445
2022-09-14	13:06:32	-0.0545926
2022-09-14	13:06:32	-0.042328
2022-09-14	13:06:32	0.0350257
2022-09-14	13:06:32	0.148919
2022-09-14	13:06:33	0.179606
2022-09-14	13:06:33	0.260827
2022-09-14	13:06:33	0.24271
2022-09-14	13:06:34	0.352888
2022-09-14	13:06:34	0.441845
2022-09-14	13:06:34	0.276807
2022-09-14	13:06:34	0.418486
2022-09-14	13:06:35	0.367087
2022-09-14	13:06:35	0.166069
2022-09-14	13:06:35	0.406883
2022-09-14	13:06:35	0.416705
2022-09-14	13:06:36	0.391565
2022-09-14	13:06:36	0.479249
2022-09-14	13:06:36	0.409478
2022-09-14	13:06:36	0.444949
2022-09-14	13:06:37	0.362608
2022-09-14	13:06:37	0.481387
2022-09-14	13:06:37	0.419758
2022-09-14	13:06:38	0.421132
2022-09-14	13:06:38	0.417825
2022-09-14	13:06:38	0.408104
2022-09-14	13:06:38	0.420471
2022-09-14	13:06:39	0.418588
2022-09-14	13:06:39	0.413601
2022-09-14	13:06:39	0.414211
2022-09-14	13:06:39	0.423931
2022-09-14	13:06:40	0.393092
2022-09-14	13:06:40	0.41986
2022-09-14	13:06:40	0.448053
2022-09-14	13:06:41	0.402863
2022-09-14	13:06:41	0.470954
2022-09-14	13:06:41	0.470089
2022-09-14	13:06:41	0.267901
2022-09-14	13:06:42	0.464339
2022-09-14	13:06:42	0.430496
2022-09-14	13:06:42	0.426425
2022-09-14	13:06:42	0.490038
2022-09-14	13:06:43	0.464237
2022-09-14	13:06:43	0.427036
2022-09-14	13:06:43	0.443168
2022-09-14	13:06:43	0.461641
2022-09-14	13:06:44	0.440166
2022-09-14	13:06:44	0.388104
2022-09-14	13:06:44	0.377774
2022-09-14	13:06:45	0.455585
2022-09-14	13:06:45	0.420624
2022-09-14	13:06:45	0.465713
2022-09-14	13:06:45	0.480522
2022-09-14	13:06:46	0.396501
2022-09-14	13:06:46	0.430598
2022-09-14	13:06:46	0.417723
2022-09-14	13:06:46	0.454669
2022-09-14	13:06:47	0.592532
2022-09-14	13:06:47	0.803473
2022-09-14	13:06:47	0.825865
2022-09-14	13:06:47	0.913448
2022-09-14	13:06:48	0.614262
2022-09-14	13:06:48	0.595789
2022-09-14	13:06:48	0.497824
2022-09-14	13:06:49	0.502252
2022-09-14	13:06:49	0.445458
2022-09-14	13:06:49	0.36612
2022-09-14	13:06:49	0.0161453
2022-09-14	13:06:50	-0.0808012
2022-09-14	13:06:50	-0.158969
2022-09-14	13:06:50	-0.264414
2022-09-14	13:06:50	-0.208587
2022-09-14	13:06:51	-0.224974
2022-09-14	13:06:51	-0.14874
2022-09-14	13:06:51	-0.20131
2022-09-14	13:06:51	-0.211386
2022-09-14	13:06:52	-0.171437
2022-09-14	13:06:52	-0.140852
2022-09-14	13:06:52	-0.202175
2022-09-14	13:06:53	0.0205728
2022-09-14	13:06:53	0.143881
2022-09-14	13:06:53	-0.152659
2022-09-14	13:06:53	-0.0372389
2022-09-14	13:06:54	0.027443
2022-09-14	13:06:54	0.0637788
2022-09-14	13:06:54	-0.174084
2022-09-14	13:06:54	-0.0372389
2022-09-14	13:06:55	0.090191
2022-09-14	13:06:55	0.368155
2022-09-14	13:06:55	0.246781
2022-09-14	13:06:56	0.262557
2022-09-14	13:06:56	0.177774
2022-09-14	13:06:56	0.150802
2022-09-14	13:06:56	0.186018
2022-09-14	13:06:57	0.205255
2022-09-14	13:06:57	0.5393
2022-09-14	13:06:57	0.280878
2022-09-14	13:06:57	0.411361
2022-09-14	13:06:58	0.569784
2022-09-14	13:06:58	0.524949
2022-09-14	13:06:58	0.389021
2022-09-14	13:06:58	0.538537
2022-09-14	13:06:59	0.417367
2022-09-14	13:06:59	0.536196
2022-09-14	13:06:59	0.324389
2022-09-14	13:07:00	0.431056
2022-09-14	13:07:00	0.32042
2022-09-14	13:07:00	0.556857
2022-09-14	13:07:00	0.316501
2022-09-14	13:07:01	0.26271
2022-09-14	13:07:01	0.167188
2022-09-14	13:07:01	0.535585
2022-09-14	13:07:01	0.341336
2022-09-14	13:07:02	0.707137
2022-09-14	13:07:02	0.312736
2022-09-14	13:07:02	0.622405
2022-09-14	13:07:02	0.45014
2022-09-14	13:07:03	0.603931
2022-09-14	13:07:03	0.462252
2022-09-14	13:07:03	0.555178
2022-09-14	13:07:04	0.418537
2022-09-14	13:07:04	0.518282
2022-09-14	13:07:04	0.584593
2022-09-14	13:07:04	0.45869
2022-09-14	13:07:05	0.710954
2022-09-14	13:07:05	0.384084
2022-09-14	13:07:05	0.733906
2022-09-14	13:07:06	0.39528
2022-09-14	13:07:06	0.699096
2022-09-14	13:07:06	0.415942
2022-09-14	13:07:06	0.639758
2022-09-14	13:07:06	0.492634
2022-09-14	13:07:07	0.672532
2022-09-14	13:07:07	0.606374
2022-09-14	13:07:07	1.09075
2022-09-14	13:07:08	0.655076
2022-09-14	13:07:08	0.638791
2022-09-14	13:07:08	0.783575
2022-09-14	13:07:08	0.482863
2022-09-14	13:07:09	0.510293
2022-09-14	13:07:09	0.398333
2022-09-14	13:07:09	0.541336
2022-09-14	13:07:09	0.400166
2022-09-14	13:07:10	0.437112
2022-09-14	13:07:10	0.383219
2022-09-14	13:07:10	0.517723
2022-09-14	13:07:10	0.420064
2022-09-14	13:07:11	0.40673
2022-09-14	13:07:11	0.448512
2022-09-14	13:07:11	0.491921
2022-09-14	13:07:12	0.412888
2022-09-14	13:07:12	0.424542
2022-09-14	13:07:12	0.350293
2022-09-14	13:07:12	0.544745
2022-09-14	13:07:13	0.357672
2022-09-14	13:07:13	0.493651
2022-09-14	13:07:13	0.345051
2022-09-14	13:07:13	0.605865
2022-09-14	13:07:14	0.313753
2022-09-14	13:07:14	0.602252
2022-09-14	13:07:14	0.340878
2022-09-14	13:07:15	0.574211
2022-09-14	13:07:15	0.322354
2022-09-14	13:07:15	0.59182
2022-09-14	13:07:15	0.383779
2022-09-14	13:07:16	0.547697
2022-09-14	13:07:16	0.307341
2022-09-14	13:07:16	0.498333
2022-09-14	13:07:16	0.307646
2022-09-14	13:07:17	0.517926
2022-09-14	13:07:17	0.271667
2022-09-14	13:07:17	0.552736
2022-09-14	13:07:17	0.342303
2022-09-14	13:07:18	0.58444
2022-09-14	13:07:18	0.334618
2022-09-14	13:07:18	0.687646
2022-09-14	13:07:19	0.375382
2022-09-14	13:07:19	0.740267
2022-09-14	13:07:19	0.750853
2022-09-14	13:07:19	0.977112
2022-09-14	13:07:20	0.6193
2022-09-14	13:07:20	1.06205
2022-09-14	13:07:20	0.672888
2022-09-14	13:07:20	0.686781
2022-09-14	13:07:21	0.509326
2022-09-14	13:07:21	0.621285
2022-09-14	13:07:21	0.486374
2022-09-14	13:07:21	0.475484
2022-09-14	13:07:22	0.613244
2022-09-14	13:07:22	0.613142
2022-09-14	13:07:22	0.631616
2022-09-14	13:07:23	0.578435
2022-09-14	13:07:23	0.683626
2022-09-14	13:07:23	1.17548
2022-09-14	13:07:23	2.51055
2022-09-14	13:07:24	2.33558
2022-09-14	13:07:24	2.02673
2022-09-14	13:07:24	1.69421
2022-09-14	13:07:24	1.61324
2022-09-14	13:07:25	1.4021
2022-09-14	13:07:25	1.24037
2022-09-14	13:07:25	1.2193
2022-09-14	13:07:25	1.18302
2022-09-14	13:07:26	1.17258
2022-09-14	13:07:26	1.07594
2022-09-14	13:07:26	1.08113
2022-09-14	13:07:27	0.963168
2022-09-14	13:07:27	0.956959
2022-09-14	13:07:27	0.93416
2022-09-14	13:07:27	0.925102
2022-09-14	13:07:28	0.947443
2022-09-14	13:07:28	0.934771
2022-09-14	13:07:28	0.960318
2022-09-14	13:07:28	0.947646
2022-09-14	13:07:29	0.919605
2022-09-14	13:07:29	0.750903
2022-09-14	13:07:29	0.5393
2022-09-14	13:07:29	0.482099
2022-09-14	13:07:30	0.46958
2022-09-14	13:07:30	0.452837
2022-09-14	13:07:30	0.483372
2022-09-14	13:07:31	0.347239
2022-09-14	13:07:31	0.414771
2022-09-14	13:07:31	0.414975
2022-09-14	13:07:31	0.466781
2022-09-14	13:07:32	0.427748
2022-09-14	13:07:32	0.398232
2022-09-14	13:07:32	0.45584
2022-09-14	13:07:32	0.412125
2022-09-14	13:07:33	0.441845
2022-09-14	13:07:33	0.135229
2022-09-14	13:07:33	0.00255749
2022-09-14	13:07:34	-0.322735
2022-09-14	13:07:34	-0.698103
2022-09-14	13:07:34	-0.72991
2022-09-14	13:07:34	-0.84935
2022-09-14	13:07:35	-0.521157
2022-09-14	13:07:35	-0.444313
2022-09-14	13:07:35	-0.339172
2022-09-14	13:07:35	0.411158
2022-09-14	13:07:36	0.369326
2022-09-14	13:07:36	0.403473
2022-09-14	13:07:36	0.305713
2022-09-14	13:07:36	0.473448
2022-09-14	13:07:37	0.540013
2022-09-14	13:07:37	0.666272
2022-09-14	13:07:37	1.10276
2022-09-14	13:07:38	0.828511
2022-09-14	13:07:38	0.623015
2022-09-14	13:07:38	0.57416
2022-09-14	13:07:38	0.443168
2022-09-14	13:07:39	0.550496
2022-09-14	13:07:39	0.428868
2022-09-14	13:07:39	0.446883
2022-09-14	13:07:39	0.550293
2022-09-14	13:07:40	0.71874
2022-09-14	13:07:40	0.719198
2022-09-14	13:07:40	0.72673
2022-09-14	13:07:40	0.72042
2022-09-14	13:07:41	0.72042
2022-09-14	13:07:41	0.721895
2022-09-14	13:07:41	0.727799
2022-09-14	13:07:42	0.731209
2022-09-14	13:07:42	0.71986
2022-09-14	13:07:42	0.725916
2022-09-14	13:07:42	0.141591
2022-09-14	13:07:43	0.143982
2022-09-14	13:07:43	0.0711071
2022-09-14	13:07:43	0.0423539
2022-09-14	13:07:43	0.157875
2022-09-14	13:07:44	0.35528
2022-09-14	13:07:44	0.469936
2022-09-14	13:07:44	0.336654
2022-09-14	13:07:44	0.34098
2022-09-14	13:07:45	0.394211
2022-09-14	13:07:45	0.46271
2022-09-14	13:07:45	0.469987
2022-09-14	13:07:46	0.500674
2022-09-14	13:07:46	0.376298
2022-09-14	13:07:46	0.36668
2022-09-14	13:07:46	0.383015
2022-09-14	13:07:47	0.871514
2022-09-14	13:07:47	0.730598
2022-09-14	13:07:47	0.432277
2022-09-14	13:07:47	0.231667
2022-09-14	13:07:48	0.180216
2022-09-14	13:07:48	0.212583
2022-09-14	13:07:48	1.33319
2022-09-14	13:07:49	2.14006
2022-09-14	13:07:49	1.23477
2022-09-14	13:07:49	0.53813
2022-09-14	13:07:49	0.267239
2022-09-14	13:07:50	0.172328
2022-09-14	13:07:50	0.243575
2022-09-14	13:07:50	0.221387
2022-09-14	13:07:50	0.323677
2022-09-14	13:07:51	0.388359
2022-09-14	13:07:51	0.30841
2022-09-14	13:07:51	0.348868
2022-09-14	13:07:51	0.362965
2022-09-14	13:07:52	0.340675
2022-09-14	13:07:52	0.342506
2022-09-14	13:07:52	0.355942
2022-09-14	13:07:53	0.34902
2022-09-14	13:07:53	0.342303
2022-09-14	13:07:53	0.348817
2022-09-14	13:07:53	0.350242
2022-09-14	13:07:54	0.352481
2022-09-14	13:07:54	0.358741
2022-09-14	13:07:54	0.350242
2022-09-14	13:07:54	0.344186
2022-09-14	13:07:55	0.347748
2022-09-14	13:07:55	0.341947
2022-09-14	13:07:55	0.348308
2022-09-14	13:07:55	0.346578
2022-09-14	13:07:56	0.348053
2022-09-14	13:07:56	0.387799
2022-09-14	13:07:56	0.399809
2022-09-14	13:07:57	0.405764
2022-09-14	13:07:57	0.434415
2022-09-14	13:07:57	0.406985
2022-09-14	13:07:57	0.35645
2022-09-14	13:07:58	0.419453
2022-09-14	13:07:58	0.568511
2022-09-14	13:07:58	0.821794
2022-09-14	13:07:58	0.462303
2022-09-14	13:07:59	0.648461
2022-09-14	13:07:59	0.592685
2022-09-14	13:07:59	0.683372
2022-09-14	13:07:59	0.477977
2022-09-14	13:08:00	0.396298
2022-09-14	13:08:00	0.423372
2022-09-14	13:08:00	0.363728
2022-09-14	13:08:01	0.38154
2022-09-14	13:08:01	0.236654
2022-09-14	13:08:01	0.215992
2022-09-14	13:08:01	0.239657
2022-09-14	13:08:02	0.235076
2022-09-14	13:08:02	0.242812
2022-09-14	13:08:02	0.235942
2022-09-14	13:08:02	0.245814
2022-09-14	13:08:03	0.30612
2022-09-14	13:08:03	0.282506
2022-09-14	13:08:03	0.346527
2022-09-14	13:08:03	0.369886
2022-09-14	13:08:04	0.353702
2022-09-14	13:08:04	0.400522
2022-09-14	13:08:04	0.414618
2022-09-14	13:08:05	0.42215
2022-09-14	13:08:05	0.378181
2022-09-14	13:08:05	0.402506
2022-09-14	13:08:05	0.691514
2022-09-14	13:08:06	0.540725
2022-09-14	13:08:06	0.388206
2022-09-14	13:08:06	0.374313
2022-09-14	13:08:06	0.349682
2022-09-14	13:08:07	0.30958
2022-09-14	13:08:07	0.252888
2022-09-14	13:08:07	0.482507
2022-09-14	13:08:08	0.680623
2022-09-14	13:08:08	0.732379
2022-09-14	13:08:08	0.662812
2022-09-14	13:08:08	0.580623
2022-09-14	13:08:09	0.619453
2022-09-14	13:08:09	0.684033
2022-09-14	13:08:09	0.682761
2022-09-14	13:08:09	0.773601
2022-09-14	13:08:10	0.927494
2022-09-14	13:08:10	0.721234
2022-09-14	13:08:10	0.497265
2022-09-14	13:08:10	0.659911
2022-09-14	13:08:11	0.853244
2022-09-14	13:08:11	0.787697
2022-09-14	13:08:11	0.555738
2022-09-14	13:08:12	0.410445
2022-09-14	13:08:12	0.37986
2022-09-14	13:08:12	0.340064
2022-09-14	13:08:12	0.703677
2022-09-14	13:08:13	0.716145
2022-09-14	13:08:13	0.720369
2022-09-14	13:08:13	0.718588
2022-09-14	13:08:13	0.720013
2022-09-14	13:08:14	0.723066
2022-09-14	13:08:14	0.713855
2022-09-14	13:08:14	0.717621
2022-09-14	13:08:14	0.725865
2022-09-14	13:08:15	0.719758
2022-09-14	13:08:15	0.718893
2022-09-14	13:08:15	0.729733
2022-09-14	13:08:16	0.727596
2022-09-14	13:08:16	0.723931
2022-09-14	13:08:16	0.720369
2022-09-14	13:08:16	0.718181
2022-09-14	13:08:17	0.726323
2022-09-14	13:08:17	0.718893
2022-09-14	13:08:17	0.724898
2022-09-14	13:08:17	0.718486
2022-09-14	13:08:18	0.715738
2022-09-14	13:08:18	0.723321
2022-09-14	13:08:18	0.723117
2022-09-14	13:08:18	0.723321
2022-09-14	13:08:19	0.721895
2022-09-14	13:08:19	0.72383
2022-09-14	13:08:19	0.725407
2022-09-14	13:08:20	0.71589
2022-09-14	13:08:20	0.71584
2022-09-14	13:08:20	0.724796
2022-09-14	13:08:20	0.731158
2022-09-14	13:08:21	0.72042
2022-09-14	13:08:21	0.723321
2022-09-14	13:08:21	0.720064
2022-09-14	13:08:21	0.720064
2022-09-14	13:08:22	0.722557
2022-09-14	13:08:22	0.722761
2022-09-14	13:08:22	0.717417
2022-09-14	13:08:23	0.723524
2022-09-14	13:08:23	0.720216
2022-09-14	13:08:23	0.721895
2022-09-14	13:08:23	0.718893
2022-09-14	13:08:24	0.732888
2022-09-14	13:08:24	0.725204
2022-09-14	13:08:24	0.71813
2022-09-14	13:08:24	0.71645
2022-09-14	13:08:25	0.722659
2022-09-14	13:08:25	0.721081
2022-09-14	13:08:25	0.721183
2022-09-14	13:08:25	0.722965
2022-09-14	13:08:26	0.720827
2022-09-14	13:08:26	0.719249
2022-09-14	13:08:26	0.720776
2022-09-14	13:08:27	0.720216
2022-09-14	13:08:27	0.718232
2022-09-14	13:08:27	0.727036
2022-09-14	13:08:27	0.724084
2022-09-14	13:08:28	0.722862
2022-09-14	13:08:28	0.716196
2022-09-14	13:08:28	0.715636
2022-09-14	13:08:28	0.714364
2022-09-14	13:08:29	0.717417
2022-09-14	13:08:29	0.725356
2022-09-14	13:08:29	0.718537
2022-09-14	13:08:29	0.719962
2022-09-14	13:08:30	0.714058
2022-09-14	13:08:30	0.69355
2022-09-14	13:08:30	0.445051
2022-09-14	13:08:31	0.44902
2022-09-14	13:08:31	0.447036
2022-09-14	13:08:31	0.438588
2022-09-14	13:08:31	0.432023
2022-09-14	13:08:32	0.421947
2022-09-14	13:08:32	0.422201
2022-09-14	13:08:32	0.426679
2022-09-14	13:08:32	0.42444
2022-09-14	13:08:33	0.423931
2022-09-14	13:08:33	0.421489
2022-09-14	13:08:33	0.426069
2022-09-14	13:08:33	0.432786
2022-09-14	13:08:34	0.418028
2022-09-14	13:08:34	0.414924
2022-09-14	13:08:34	0.425611
2022-09-14	13:08:35	0.434415
2022-09-14	13:08:35	0.435331
2022-09-14	13:08:35	0.437977
2022-09-14	13:08:35	0.443473
2022-09-14	13:08:36	0.435484
2022-09-14	13:08:36	0.431667
2022-09-14	13:08:36	0.426527
2022-09-14	13:08:36	0.430038
2022-09-14	13:08:37	0.403982
2022-09-14	13:08:37	0.387443
2022-09-14	13:08:37	0.412583
2022-09-14	13:08:37	0.467392
2022-09-14	13:08:38	0.496654
2022-09-14	13:08:38	0.514873
2022-09-14	13:08:38	0.543677
2022-09-14	13:08:39	0.489936
2022-09-14	13:08:39	0.476298
2022-09-14	13:08:39	0.45299
2022-09-14	13:08:39	0.447137
2022-09-14	13:08:40	0.448919
2022-09-14	13:08:40	0.418283
2022-09-14	13:08:40	0.396196
2022-09-14	13:08:40	0.393957
2022-09-14	13:08:41	0.386934
2022-09-14	13:08:41	0.389326
2022-09-14	13:08:41	0.38327
2022-09-14	13:08:41	0.375585
2022-09-14	13:08:42	0.398079
2022-09-14	13:08:42	0.477265
2022-09-14	13:08:42	0.508766
2022-09-14	13:08:43	0.493651
2022-09-14	13:08:43	0.436349
2022-09-14	13:08:43	0.433244
2022-09-14	13:08:43	0.431209
2022-09-14	13:08:44	0.448155
2022-09-14	13:08:44	0.580623
2022-09-14	13:08:44	0.856349
2022-09-14	13:08:44	0.818791
2022-09-14	13:08:45	0.741132
2022-09-14	13:08:45	0.606272
2022-09-14	13:08:45	0.487494
2022-09-14	13:08:46	0.3564
2022-09-14	13:08:46	0.324389
2022-09-14	13:08:46	0.298486
2022-09-14	13:08:46	0.670598
2022-09-14	13:08:47	0.716705
2022-09-14	13:08:47	0.718333
2022-09-14	13:08:47	0.723575
2022-09-14	13:08:47	0.718232
2022-09-14	13:08:48	0.725204
2022-09-14	13:08:48	0.723219
2022-09-14	13:08:48	0.723931
2022-09-14	13:08:48	0.718588
2022-09-14	13:08:49	0.727239
2022-09-14	13:08:49	0.729784
2022-09-14	13:08:49	0.717366
2022-09-14	13:08:50	0.728512
2022-09-14	13:08:50	0.720572
2022-09-14	13:08:50	0.725204
2022-09-14	13:08:50	0.720929
2022-09-14	13:08:51	0.718384
2022-09-14	13:08:51	0.72271
2022-09-14	13:08:51	0.72729
2022-09-14	13:08:51	0.522099
2022-09-14	13:08:52	0.64444
2022-09-14	13:08:52	0.717417
2022-09-14	13:08:52	0.719198
2022-09-14	13:08:52	0.722862
2022-09-14	13:08:53	0.717061
2022-09-14	13:08:53	0.461183
2022-09-14	13:08:53	0.479758
2022-09-14	13:08:54	0.420013
2022-09-14	13:08:54	0.441794
2022-09-14	13:08:54	0.562608
2022-09-14	13:08:54	0.605458
2022-09-14	13:08:55	0.506018
2022-09-14	13:08:55	0.396909
2022-09-14	13:08:55	0.522354
2022-09-14	13:08:55	0.521031
2022-09-14	13:08:56	0.474924
2022-09-14	13:08:56	0.556348
2022-09-14	13:08:56	0.576501
2022-09-14	13:08:56	0.514669
2022-09-14	13:08:57	0.58841
2022-09-14	13:08:57	0.607137
2022-09-14	13:08:57	0.568511
2022-09-14	13:08:58	0.608613
2022-09-14	13:08:58	0.447545
2022-09-14	13:08:58	0.37131
2022-09-14	13:08:58	0.334822
2022-09-14	13:08:59	0.43472
2022-09-14	13:08:59	0.729784
2022-09-14	13:08:59	0.720776
2022-09-14	13:08:59	0.719148
2022-09-14	13:09:00	0.725865
2022-09-14	13:09:00	0.606018
2022-09-14	13:09:00	0.500471
2022-09-14	13:09:00	0.460827
2022-09-14	13:09:01	0.45411
2022-09-14	13:09:01	0.516094
2022-09-14	13:09:01	0.5764
2022-09-14	13:09:02	0.624338
2022-09-14	13:09:02	0.697824
2022-09-14	13:09:02	0.644746
2022-09-14	13:09:02	0.707494
2022-09-14	13:09:03	0.585102
2022-09-14	13:09:03	0.618639
2022-09-14	13:09:03	0.622608
2022-09-14	13:09:03	0.716959
2022-09-14	13:09:04	0.688562
2022-09-14	13:09:04	0.618842
2022-09-14	13:09:04	0.626323
2022-09-14	13:09:05	0.577621
2022-09-14	13:09:05	0.62617
2022-09-14	13:09:05	0.630649
2022-09-14	13:09:05	0.633499
2022-09-14	13:09:06	0.693906
2022-09-14	13:09:06	0.717621
2022-09-14	13:09:06	0.757977
2022-09-14	13:09:06	0.730293
2022-09-14	13:09:07	0.778893
2022-09-14	13:09:07	0.981692
2022-09-14	13:09:07	1.02668
2022-09-14	13:09:07	1.042
2022-09-14	13:09:08	1.15029
2022-09-14	13:09:08	1.19782
2022-09-14	13:09:08	0.923473
2022-09-14	13:09:09	0.792837
2022-09-14	13:09:09	0.560623
2022-09-14	13:09:09	0.685763
2022-09-14	13:09:09	0.85589
2022-09-14	13:09:10	1.08169
2022-09-14	13:09:10	1.21029
2022-09-14	13:09:10	0.741438
2022-09-14	13:09:10	0.70388
2022-09-14	13:09:11	0.719656
2022-09-14	13:09:11	0.600013
2022-09-14	13:09:11	0.594924
2022-09-14	13:09:11	0.571107
2022-09-14	13:09:12	0.638588
2022-09-14	13:09:12	0.697468
2022-09-14	13:09:12	0.690802
2022-09-14	13:09:13	0.724288
2022-09-14	13:09:13	0.635076
2022-09-14	13:09:13	0.65528
2022-09-14	13:09:13	0.819453
2022-09-14	13:09:14	0.727087
2022-09-14	13:09:14	0.644847
2022-09-14	13:09:14	0.69757
2022-09-14	13:09:14	0.648766
2022-09-14	13:09:15	0.639657
2022-09-14	13:09:15	0.659657
2022-09-14	13:09:15	0.650191
2022-09-14	13:09:15	0.732786
2022-09-14	13:09:16	0.607544
2022-09-14	13:09:16	0.589326
2022-09-14	13:09:16	0.566985
2022-09-14	13:09:17	0.617723
2022-09-14	13:09:17	0.649733
2022-09-14	13:09:17	0.590852
2022-09-14	13:09:17	0.574313
2022-09-14	13:09:18	0.578689
2022-09-14	13:09:18	0.566069
2022-09-14	13:09:18	0.520013
2022-09-14	13:09:18	0.476501
2022-09-14	13:09:19	0.462456
2022-09-14	13:09:19	0.423728
2022-09-14	13:09:19	0.38673
2022-09-14	13:09:19	0.381031
2022-09-14	13:09:20	0.375127
2022-09-14	13:09:20	0.377061
2022-09-14	13:09:20	0.375382
2022-09-14	13:09:21	0.382964
2022-09-14	13:09:21	0.375942
2022-09-14	13:09:21	0.379148
2022-09-14	13:09:21	0.378588
2022-09-14	13:09:22	0.370547
2022-09-14	13:09:22	0.386629
2022-09-14	13:09:22	0.379148
2022-09-14	13:09:22	0.390394
2022-09-14	13:09:23	0.404338
2022-09-14	13:09:23	0.396349
2022-09-14	13:09:23	0.405254
2022-09-14	13:09:23	0.414466
2022-09-14	13:09:24	0.407545
2022-09-14	13:09:24	0.40673
2022-09-14	13:09:24	0.372735
2022-09-14	13:09:25	0.406578
2022-09-14	13:09:25	0.413448
2022-09-14	13:09:25	0.414008
2022-09-14	13:09:25	0.435382
2022-09-14	13:09:26	0.474415
2022-09-14	13:09:26	0.542099
2022-09-14	13:09:26	0.614822
2022-09-14	13:09:26	0.558842
2022-09-14	13:09:27	0.609071
2022-09-14	13:09:27	0.388664
2022-09-14	13:09:27	0.252125
2022-09-14	13:09:28	0.172735
2022-09-14	13:09:28	0.125102
2022-09-14	13:09:28	0.121031
2022-09-14	13:09:28	0.265356
2022-09-14	13:09:29	0.506832
2022-09-14	13:09:29	0.631667
2022-09-14	13:09:29	0.531463
2022-09-14	13:09:29	0.564135
2022-09-14	13:09:30	0.629834
2022-09-14	13:09:30	0.618893
2022-09-14	13:09:30	0.637417
2022-09-14	13:09:30	0.613702
2022-09-14	13:09:31	0.585254
2022-09-14	13:09:31	0.623422
2022-09-14	13:09:31	0.87813
2022-09-14	13:09:32	0.823728
2022-09-14	13:09:32	0.734313
2022-09-14	13:09:32	0.675178
2022-09-14	13:09:32	0.650344
2022-09-14	13:09:33	0.686679
2022-09-14	13:09:33	0.581438
2022-09-14	13:09:33	0.515382
2022-09-14	13:09:33	0.560674
2022-09-14	13:09:34	0.617163
2022-09-14	13:09:34	0.567137
2022-09-14	13:09:34	0.560929
2022-09-14	13:09:34	0.548359
2022-09-14	13:09:35	0.553855
2022-09-14	13:09:35	0.581132
2022-09-14	13:09:35	0.568511
2022-09-14	13:09:36	0.5793
2022-09-14	13:09:36	0.421082
2022-09-14	13:09:36	0.370038
2022-09-14	13:09:36	0.367901
2022-09-14	13:09:37	0.448461
2022-09-14	13:09:37	0.300369
2022-09-14	13:09:37	0.0700384
2022-09-14	13:09:37	0.0503946
2022-09-14	13:09:38	-0.0439565
2022-09-14	13:09:38	-0.102735
2022-09-14	13:09:38	-0.0704705
2022-09-14	13:09:38	0.208664
2022-09-14	13:09:39	0.642405
2022-09-14	13:09:39	0.251921
2022-09-14	13:09:39	0.60444
2022-09-14	13:09:40	0.230802
2022-09-14	13:09:40	0.536501
2022-09-14	13:09:40	0.118486
2022-09-14	13:09:40	0.178995
2022-09-14	13:09:41	0.13528
2022-09-14	13:09:41	-0.0352033
2022-09-14	13:09:41	-0.237239
2022-09-14	13:09:41	-0.207213
2022-09-14	13:09:42	-0.207773
2022-09-14	13:09:42	-0.140089
2022-09-14	13:09:42	-0.317188
2022-09-14	13:09:42	-0.270877
2022-09-14	13:09:43	-0.31846
2022-09-14	13:09:43	-0.192862
2022-09-14	13:09:43	-0.332353
2022-09-14	13:09:44	-0.221819
2022-09-14	13:09:44	-0.257239
2022-09-14	13:09:44	-0.204262
2022-09-14	13:09:44	-0.305076
2022-09-14	13:09:45	-0.206704
2022-09-14	13:09:45	-0.275254
2022-09-14	13:09:45	-0.193473
2022-09-14	13:09:45	-0.292964
2022-09-14	13:09:46	-0.0449234
2022-09-14	13:09:46	0.153499
2022-09-14	13:09:46	0.335433
2022-09-14	13:09:46	0.456094
2022-09-14	13:09:47	0.917214
2022-09-14	13:09:47	0.690445
2022-09-14	13:09:47	1.00531
2022-09-14	13:09:48	0.409733
2022-09-14	13:09:48	0.257265
2022-09-14	13:09:48	0.535127
2022-09-14	13:09:48	0.246272
2022-09-14	13:09:49	0.53874
2022-09-14	13:09:49	0.316908
2022-09-14	13:09:49	0.509682
2022-09-14	13:09:49	0.313397
2022-09-14	13:09:50	0.122965
2022-09-14	13:09:50	0.0858144
2022-09-14	13:09:50	0.0624048
2022-09-14	13:09:50	0.126476
2022-09-14	13:09:51	-0.0946435
2022-09-14	13:09:51	-0.0467554
2022-09-14	13:09:51	-0.0336766
2022-09-14	13:09:52	0.114262
2022-09-14	13:09:52	0.117214
2022-09-14	13:09:52	0.22271
2022-09-14	13:09:52	0.584033
2022-09-14	13:09:53	0.934516
2022-09-14	13:09:53	0.567952
2022-09-14	13:09:53	0.618079
2022-09-14	13:09:53	0.411972
2022-09-14	13:09:54	0.22159
2022-09-14	13:09:54	0.316094
2022-09-14	13:09:54	0.189326
2022-09-14	13:09:55	0.205662
2022-09-14	13:09:55	0.208664
2022-09-14	13:09:55	0.441845
2022-09-14	13:09:55	0.222965
2022-09-14	13:09:56	0.396094
2022-09-14	13:09:56	0.250496
2022-09-14	13:09:56	0.324746
2022-09-14	13:09:56	0.265102
2022-09-14	13:09:57	0.285102
2022-09-14	13:09:57	0.1793
2022-09-14	13:09:57	0.217977
2022-09-14	13:09:57	0.184491
2022-09-14	13:09:58	0.169224
2022-09-14	13:09:58	0.200624
2022-09-14	13:09:58	0.200624
2022-09-14	13:09:59	0.217163
2022-09-14	13:09:59	0.177926
2022-09-14	13:09:59	0.237214
2022-09-14	13:09:59	0.170751
2022-09-14	13:10:00	0.248562
2022-09-14	13:10:00	0.225662
2022-09-14	13:10:00	0.281489
2022-09-14	13:10:00	0.178435
2022-09-14	13:10:01	0.244695
2022-09-14	13:10:01	0.172328
2022-09-14	13:10:01	0.242303
2022-09-14	13:10:01	0.115178
2022-09-14	13:10:02	0.321183
2022-09-14	13:10:02	0.160624
2022-09-14	13:10:02	0.299758
2022-09-14	13:10:03	0.145713
2022-09-14	13:10:03	0.425713
2022-09-14	13:10:03	0.15813
2022-09-14	13:10:03	0.361387
2022-09-14	13:10:04	0.177316
2022-09-14	13:10:04	0.331921
2022-09-14	13:10:04	0.217672
2022-09-14	13:10:04	0.410903
2022-09-14	13:10:05	0.202914
2022-09-14	13:10:05	0.433906
2022-09-14	13:10:05	0.38154
2022-09-14	13:10:05	0.667952
2022-09-14	13:10:06	0.00413511
2022-09-14	13:10:06	-0.368028
2022-09-14	13:10:06	0.410394
2022-09-14	13:10:07	0.691158
2022-09-14	13:10:07	-0.843905
2022-09-14	13:10:07	-5.15703
2022-09-14	13:10:07	-4.375
2022-09-14	13:10:08	-5.02777
2022-09-14	13:10:08	0.65472
2022-09-14	13:10:08	0.703931
2022-09-14	13:10:08	0.63813
2022-09-14	13:10:09	0.759148
2022-09-14	13:10:09	-0.847315
2022-09-14	13:10:09	-3.64243
2022-09-14	13:10:09	-3.53647
2022-09-14	13:10:10	-3.71317
2022-09-14	13:10:10	-4.95149
2022-09-14	13:10:10	-0.813473
2022-09-14	13:10:11	-2.35973
2022-09-14	13:10:11	0.982862
2022-09-14	13:10:11	0.96612
2022-09-14	13:10:11	-0.991488
2022-09-14	13:10:12	-1.78538
2022-09-14	13:10:12	0.906374
2022-09-14	13:10:12	-0.043244
2022-09-14	13:10:12	0.610496
2022-09-14	13:10:13	0.76958
2022-09-14	13:10:13	0.458486
2022-09-14	13:10:13	0.894059
2022-09-14	13:10:13	0.725305
2022-09-14	13:10:14	0.731463
2022-09-14	13:10:14	1.0538
2022-09-14	13:10:14	1.01874
2022-09-14	13:10:15	-1.60564
2022-09-14	13:10:15	0.481489
2022-09-14	13:10:15	0.73645
2022-09-14	13:10:15	0.629529
2022-09-14	13:10:16	0.729377
2022-09-14	13:10:16	0.725356
2022-09-14	13:10:16	0.724949
2022-09-14	13:10:16	0.728461
2022-09-14	13:10:17	0.733448
2022-09-14	13:10:17	0.730343
2022-09-14	13:10:17	0.721794
2022-09-14	13:10:18	0.726985
2022-09-14	13:10:18	0.723626
2022-09-14	13:10:18	0.723524
2022-09-14	13:10:18	0.724338
2022-09-14	13:10:19	0.724338
2022-09-14	13:10:19	0.72729
2022-09-14	13:10:19	0.722659
2022-09-14	13:10:19	0.683575
2022-09-14	13:10:20	0.709173
2022-09-14	13:10:20	0.622303
2022-09-14	13:10:20	0.722761
2022-09-14	13:10:20	0.583524
2022-09-14	13:10:21	0.465458
2022-09-14	13:10:21	0.653702
2022-09-14	13:10:21	0.556196
2022-09-14	13:10:22	0.656908
2022-09-14	13:10:22	0.519097
2022-09-14	13:10:22	0.242456
2022-09-14	13:10:22	0.189122
2022-09-14	13:10:23	0.624389
2022-09-14	13:10:23	0.0954328
2022-09-14	13:10:23	0.108664
2022-09-14	13:10:23	-0.0382059
2022-09-14	13:10:24	0.0675448
2022-09-14	13:10:24	0.725662
2022-09-14	13:10:24	0.972176
2022-09-14	13:10:24	1.36988
2022-09-14	13:10:25	1.51579
2022-09-14	13:10:25	1.43844
2022-09-14	13:10:25	1.35024
2022-09-14	13:10:26	1.43838
2022-09-14	13:10:26	0.77131
2022-09-14	13:10:26	0.192583
2022-09-14	13:10:26	-0.0600888
2022-09-14	13:10:27	-0.0453305
2022-09-14	13:10:27	-0.19271
2022-09-14	13:10:27	-0.20701
2022-09-14	13:10:27	-0.340547
2022-09-14	13:10:28	-0.610674
2022-09-14	13:10:28	-0.587213
2022-09-14	13:10:28	-0.437086
2022-09-14	13:10:28	-0.320394
2022-09-14	13:10:29	-0.0312338
2022-09-14	13:10:29	0.335076
2022-09-14	13:10:29	0.221031
2022-09-14	13:10:30	0.204288
2022-09-14	13:10:30	0.0127865
2022-09-14	13:10:30	0.195229
2022-09-14	13:10:30	0.0461198
2022-09-14	13:10:31	0.0241351
2022-09-14	13:10:31	-0.0828369
2022-09-14	13:10:31	-0.0511321
2022-09-14	13:10:31	-0.0294018
2022-09-14	13:10:32	-0.0254832
2022-09-14	13:10:32	-0.0676206
2022-09-14	13:10:32	-0.18589
2022-09-14	13:10:32	-0.00853663
2022-09-14	13:10:33	0.0187407
2022-09-14	13:10:33	0.00942772
2022-09-14	13:10:33	0.188155
2022-09-14	13:10:34	0.137163
2022-09-14	13:10:34	0.108817
2022-09-14	13:10:34	-0.0480786
2022-09-14	13:10:34	0.466832
2022-09-14	13:10:35	1.18388
2022-09-14	13:10:35	1.53136
2022-09-14	13:10:35	3.82617
2022-09-14	13:10:35	4.18454
2022-09-14	13:10:36	1.09757
2022-09-14	13:10:36	0.347188
2022-09-14	13:10:36	0.35355
2022-09-14	13:10:36	0.403779
2022-09-14	13:10:37	0.672226
2022-09-14	13:10:37	0.2107
2022-09-14	13:10:37	0.353346
2022-09-14	13:10:38	0.262201
2022-09-14	13:10:38	0.232125
2022-09-14	13:10:38	0.341794
2022-09-14	13:10:38	0.306069
2022-09-14	13:10:39	0.762099
2022-09-14	13:10:39	0.496909
2022-09-14	13:10:39	0.444746
2022-09-14	13:10:39	0.430496
2022-09-14	13:10:40	0.288257
2022-09-14	13:10:40	0.343728
2022-09-14	13:10:40	0.269275
2022-09-14	13:10:40	0.399758
2022-09-14	13:10:41	0.214262
2022-09-14	13:10:41	0.406374
2022-09-14	13:10:41	0.237774
2022-09-14	13:10:42	0.398995
2022-09-14	13:10:42	0.245051
2022-09-14	13:10:42	0.366171
2022-09-14	13:10:42	0.182303
2022-09-14	13:10:43	0.442354
2022-09-14	13:10:43	0.277163
2022-09-14	13:10:43	0.419657
2022-09-14	13:10:43	0.22612
2022-09-14	13:10:44	0.423473
2022-09-14	13:10:44	0.19472
2022-09-14	13:10:44	0.400929
2022-09-14	13:10:44	0.201794
2022-09-14	13:10:45	0.482303
2022-09-14	13:10:45	0.315891
2022-09-14	13:10:45	0.690547
2022-09-14	13:10:46	0.377672
2022-09-14	13:10:46	0.555636
2022-09-14	13:10:46	0.366578
2022-09-14	13:10:46	0.442303
2022-09-14	13:10:47	0.26958
2022-09-14	13:10:47	0.435636
2022-09-14	13:10:47	0.269682
2022-09-14	13:10:47	0.511259
2022-09-14	13:10:48	0.263779
2022-09-14	13:10:48	0.382608
2022-09-14	13:10:48	0.248155
2022-09-14	13:10:48	0.423931
2022-09-14	13:10:49	0.286069
2022-09-14	13:10:49	0.392634
2022-09-14	13:10:49	0.302048
2022-09-14	13:10:50	0.338028
2022-09-14	13:10:50	0.229987
2022-09-14	13:10:50	0.343881
2022-09-14	13:10:50	0.307646
2022-09-14	13:10:51	0.401438
2022-09-14	13:10:51	0.334822
2022-09-14	13:10:51	0.313702
2022-09-14	13:10:51	0.240013
2022-09-14	13:10:52	0.154466
2022-09-14	13:10:52	0.0171122
2022-09-14	13:10:52	0.0429137
2022-09-14	13:10:53	0.00968217
2022-09-14	13:10:53	0.0323793
2022-09-14	13:10:53	0.217621
2022-09-14	13:10:53	0.0399621
2022-09-14	13:10:54	0.679962
2022-09-14	13:10:54	1.06215
2022-09-14	13:10:54	1.9534
2022-09-14	13:10:54	2.26067
2022-09-14	13:10:55	1.64368
2022-09-14	13:10:55	2.25116
2022-09-14	13:10:55	1.55355
2022-09-14	13:10:55	1.7105
2022-09-14	13:10:56	1.2021
2022-09-14	13:10:56	1.48902
2022-09-14	13:10:56	3.53513
2022-09-14	13:10:57	3.40851
2022-09-14	13:10:57	4.03589
2022-09-14	13:10:57	2.57172
2022-09-14	13:10:57	1.32128
2022-09-14	13:10:58	1.24602
2022-09-14	13:10:58	1.32556
2022-09-14	13:10:58	1.24933
2022-09-14	13:10:58	1.2678
2022-09-14	13:10:59	1.32149
2022-09-14	13:10:59	1.35726
2022-09-14	13:10:59	2.8165
2022-09-14	13:10:59	5.50347
2022-09-14	13:11:00	7.83645
2022-09-14	13:11:00	9.13293
2022-09-14	13:11:00	4.44627
2022-09-14	13:11:01	1.9963
2022-09-14	13:11:01	1.59833
2022-09-14	13:11:01	1.00225
2022-09-14	13:11:01	0.438588
2022-09-14	13:11:02	0.3993
2022-09-14	13:11:02	0.344847
2022-09-14	13:11:02	0.320013
2022-09-14	13:11:02	0.322761
2022-09-14	13:11:03	0.377316
2022-09-14	13:11:03	0.351667
2022-09-14	13:11:03	0.347697
2022-09-14	13:11:03	0.464339
2022-09-14	13:11:04	0.543626
2022-09-14	13:11:04	-1.04279
2022-09-14	13:11:04	-1.46345
2022-09-14	13:11:05	-1.54838
2022-09-14	13:11:05	-1.81459
2022-09-14	13:11:05	-1.94742
2022-09-14	13:11:05	-2.01154
2022-09-14	13:11:06	-2.05749
2022-09-14	13:11:06	-2.17922
2022-09-14	13:11:06	-2.25225
2022-09-14	13:11:06	-2.31958
2022-09-14	13:11:07	-2.41826
2022-09-14	13:11:07	-2.375
2022-09-14	13:11:07	-2.51581
2022-09-14	13:11:07	-2.75286
2022-09-14	13:11:08	-2.71525
2022-09-14	13:11:08	-2.82854
2022-09-14	13:11:08	-2.91719
2022-09-14	13:11:09	-3.14747
2022-09-14	13:11:09	-3.29866
2022-09-14	13:11:09	-3.29566
2022-09-14	13:11:09	-3.70253
2022-09-14	13:11:10	-3.84879
2022-09-14	13:11:10	-4.27729
2022-09-14	13:11:10	-3.00085
2022-09-14	13:11:10	-0.442073
2022-09-14	13:11:11	-0.531335
2022-09-14	13:11:11	-0.531285
2022-09-14	13:11:11	-0.502073
2022-09-14	13:11:11	-0.555101
2022-09-14	13:11:12	-0.571641
2022-09-14	13:11:12	-0.578002
2022-09-14	13:11:12	-0.511081
2022-09-14	13:11:13	-0.534694
2022-09-14	13:11:13	-0.483193
2022-09-14	13:11:13	-0.552099
2022-09-14	13:11:13	-0.431183
2022-09-14	13:11:14	-0.397137
2022-09-14	13:11:14	-0.400089
2022-09-14	13:11:14	-0.501259
2022-09-14	13:11:14	-0.366908
2022-09-14	13:11:15	-0.434796
2022-09-14	13:11:15	-0.321055
2022-09-14	13:11:15	-0.397137
2022-09-14	13:11:15	-0.269198
2022-09-14	13:11:16	-0.380801
2022-09-14	13:11:16	-0.214236
2022-09-14	13:11:16	-0.329452
2022-09-14	13:11:17	-0.299224
2022-09-14	13:11:17	-0.272811
2022-09-14	13:11:17	-0.143702
2022-09-14	13:11:17	-0.20187
2022-09-14	13:11:18	-0.213575
2022-09-14	13:11:18	-0.0812593
2022-09-14	13:11:18	-0.123193
2022-09-14	13:11:18	-0.0857376
2022-09-14	13:11:19	-0.272201
2022-09-14	13:11:19	-0.218613
2022-09-14	13:11:19	-0.299936
2022-09-14	13:11:19	-0.240852
2022-09-14	13:11:20	-0.350674
2022-09-14	13:11:20	-0.374949
2022-09-14	13:11:20	-0.378002
2022-09-14	13:11:21	-0.438867
2022-09-14	13:11:21	-0.419274
2022-09-14	13:11:21	-0.482582
2022-09-14	13:11:21	-0.264771
2022-09-14	13:11:22	-0.313931
2022-09-14	13:11:22	-0.243244
2022-09-14	13:11:22	-0.328842
2022-09-14	13:11:22	-0.204872
2022-09-14	13:11:23	-0.322328
2022-09-14	13:11:23	-0.0420226
2022-09-14	13:11:23	-0.165432
2022-09-14	13:11:23	-0.198613
2022-09-14	13:11:24	-0.209605
2022-09-14	13:11:24	-0.131946
2022-09-14	13:11:24	-0.166806
2022-09-14	13:11:25	-0.171844
2022-09-14	13:11:25	-0.0453305
2022-09-14	13:11:25	-0.140292
2022-09-14	13:11:25	-0.0549997
2022-09-14	13:11:26	-0.0987656
2022-09-14	13:11:26	-0.0328114
2022-09-14	13:11:26	-0.1036
2022-09-14	13:11:26	0.0591987
2022-09-14	13:11:27	-0.0542364
2022-09-14	13:11:27	-0.0224298
2022-09-14	13:11:27	-0.045127
2022-09-14	13:11:28	-0.310318
2022-09-14	13:11:28	-0.407519
2022-09-14	13:11:28	-0.544109
2022-09-14	13:11:28	-0.416374
2022-09-14	13:11:29	-0.243804
2022-09-14	13:11:29	0.135687
2022-09-14	13:11:29	0.204898
2022-09-14	13:11:29	0.166171
2022-09-14	13:11:30	0.51416
2022-09-14	13:11:30	0.485
2022-09-14	13:11:30	0.44154
2022-09-14	13:11:30	0.399199
2022-09-14	13:11:31	0.454975
2022-09-14	13:11:31	0.358588
2022-09-14	13:11:31	0.48902
2022-09-14	13:11:32	0.409021
2022-09-14	13:11:32	0.55014
2022-09-14	13:11:32	0.439504
2022-09-14	13:11:32	0.459249
2022-09-14	13:11:33	0.439097
2022-09-14	13:11:33	0.415789
2022-09-14	13:11:33	0.567697
2022-09-14	13:11:33	0.410344
2022-09-14	13:11:34	0.582405
2022-09-14	13:11:34	0.438333
2022-09-14	13:11:34	0.481845
2022-09-14	13:11:34	0.478079
2022-09-14	13:11:35	0.417316
2022-09-14	13:11:35	0.526476
2022-09-14	13:11:35	0.392481
2022-09-14	13:11:36	0.601234
2022-09-14	13:11:36	0.665153
2022-09-14	13:11:36	0.672735
2022-09-14	13:11:36	0.657061
2022-09-14	13:11:37	0.960267
2022-09-14	13:11:37	1.14592
2022-09-14	13:11:37	0.846578
2022-09-14	13:11:37	0.953651
2022-09-14	13:11:38	0.900064
2022-09-14	13:11:38	0.922812
2022-09-14	13:11:38	0.653702
2022-09-14	13:11:38	0.964797
2022-09-14	13:11:39	0.703982
2022-09-14	13:11:39	1.06444
2022-09-14	13:11:39	1.76281
2022-09-14	13:11:40	2.10663
2022-09-14	13:11:40	3.15971
2022-09-14	13:11:40	3.51334
2022-09-14	13:11:40	2.1396
2022-09-14	13:11:41	1.26144
2022-09-14	13:11:41	1.35268
2022-09-14	13:11:41	1.49039
2022-09-14	13:11:41	1.43884
2022-09-14	13:11:42	1.46469
2022-09-14	13:11:42	1.72312
2022-09-14	13:11:42	0.974466
2022-09-14	13:11:42	1.23798
2022-09-14	13:11:43	1.57676
2022-09-14	13:11:43	0.970496
2022-09-14	13:11:43	0.639911
2022-09-14	13:11:44	0.835585
2022-09-14	13:11:44	1.22536
2022-09-14	13:11:44	1.00785
