# Supplementary material for: Comparing efficacy in reducing pulling and welfare impacts of four types of leash walking equipment
Source: PeerJ journal article supplement (doi:10.7717/peerj.18131), 2024-10-24
Supplement: Shelter_2_Tension_files.zip [file Richa_star_202291412512 copy.xlsx]

## Sheet: Averaged newtons
Date	Time	Averaged Newtons	impulse	total steps
2022-09-14	12:05:28	1.95885	1.95885	0
2022-09-14	12:05:29	1.96983	3.92868	0		Impulse newtons	488.378
2022-09-14	12:05:30	2.02229	5.95097	0		Total steps	3
2022-09-14	12:05:31	2.12817	8.07914	0
2022-09-14	12:05:32	2.09473	10.1739	0
2022-09-14	12:05:33	1.82031	11.9942	0
2022-09-14	12:05:34	1.80197	13.7962	0
2022-09-14	12:05:35	1.82008	15.6162	0
2022-09-14	12:05:36	1.85727	17.4735	0
2022-09-14	12:05:37	1.89105	19.3646	0
2022-09-14	12:05:38	-0.787545	19.3646	0
2022-09-14	12:05:39	-2.08339	19.3646	0
2022-09-14	12:05:40	0.836783	20.2013	0
2022-09-14	12:05:41	1.65268	21.854	0
2022-09-14	12:05:42	1.46547	23.3195	0
2022-09-14	12:05:43	0.534596	23.8541	0
2022-09-14	12:05:44	0.702148	24.5562	0
2022-09-14	12:05:45	0.875436	25.4317	0
2022-09-14	12:05:46	1.02767	26.4593	0
2022-09-14	12:05:47	1.16587	27.6252	0
2022-09-14	12:05:48	1.18771	28.8129	0
2022-09-14	12:05:49	1.2009	30.0138	0
2022-09-14	12:05:50	1.47396	31.4878	0
2022-09-14	12:05:51	1.44657	32.9344	0
2022-09-14	12:05:52	1.50401	34.4384	0
2022-09-14	12:05:53	1.5717	36.0101	0
2022-09-14	12:05:54	2.03778	38.0479	0
2022-09-14	12:05:55	1.45466	39.5025	0
2022-09-14	12:05:56	1.49892	41.0014	0
2022-09-14	12:05:57	1.42552	42.427	0
2022-09-14	12:05:58	2.40533	44.8323	0
2022-09-14	12:05:59	12.2078	57.0401	0
2022-09-14	12:06:00	2.06598	59.1061	0
2022-09-14	12:06:01	1.61799	60.7241	0
2022-09-14	12:06:02	1.7441	62.4682	0
2022-09-14	12:06:03	2.40712	64.8753	0
2022-09-14	12:06:04	5.09132	69.9666	0
2022-09-14	12:06:05	2.06558	72.0322	0
2022-09-14	12:06:06	3.14979	75.182	0
2022-09-14	12:06:07	2.89523	78.0772	0
2022-09-14	12:06:08	2.12812	80.2053	0
2022-09-14	12:06:09	2.89235	83.0977	0
2022-09-14	12:06:10	2.23872	85.3364	0
2022-09-14	12:06:11	1.9644	87.3008	0
2022-09-14	12:06:12	1.58602	88.8868	0
2022-09-14	12:06:13	1.77949	90.6663	0
2022-09-14	12:06:14	5.42352	96.0898	0
2022-09-14	12:06:15	3.69071	99.7805	0
2022-09-14	12:06:16	1.57311	101.354	0
2022-09-14	12:06:17	1.69452	103.048	0
2022-09-14	12:06:18	2.12319	105.171	0
2022-09-14	12:06:19	1.58681	106.758	0
2022-09-14	12:06:20	4.66659	111.425	0
2022-09-14	12:06:21	7.63731	119.062	0
2022-09-14	12:06:22	6.77128	125.833	0
2022-09-14	12:06:23	5.37768	131.211	0
2022-09-14	12:06:24	3.40157	134.613	0
2022-09-14	12:06:25	2.29078	136.903	0
2022-09-14	12:06:26	1.84561	138.749	0
2022-09-14	12:06:27	2.78776	141.537	0
2022-09-14	12:06:28	1.83717	143.374	0
2022-09-14	12:06:29	1.75904	145.133	0
2022-09-14	12:06:30	2.64928	147.782	0
2022-09-14	12:06:31	4.92839	152.711	0
2022-09-14	12:06:32	5.18	157.891	0
2022-09-14	12:06:33	4.18906	162.08	0
2022-09-14	12:06:34	4.52981	166.61	0
2022-09-14	12:06:35	3.62732	170.237	0
2022-09-14	12:06:36	4.97011	175.207	0
2022-09-14	12:06:37	5.87388	181.081	0
2022-09-14	12:06:38	4.64593	185.727	0
2022-09-14	12:06:39	1.86621	187.593	0
2022-09-14	12:06:40	1.92957	189.523	0
2022-09-14	12:06:41	2.13604	191.659	0
2022-09-14	12:06:42	-0.885789	191.659	0
2022-09-14	12:06:43	0.793829	192.452	0
2022-09-14	12:06:44	1.14369	193.596	0
2022-09-14	12:06:45	1.20401	194.8	0
2022-09-14	12:06:46	1.29818	196.098	0
2022-09-14	12:06:47	1.37311	197.471	0
2022-09-14	12:06:48	1.39896	198.87	0
2022-09-14	12:06:49	1.19479	200.065	0
2022-09-14	12:06:50	2.80616	202.871	0
2022-09-14	12:06:51	3.08126	205.953	0
2022-09-14	12:06:52	1.32048	207.273	0
2022-09-14	12:06:53	1.06389	208.337	0
2022-09-14	12:06:54	2.16677	210.504	0
2022-09-14	12:06:55	-0.207356	210.504	0
2022-09-14	12:06:56	1.78598	212.29	0
2022-09-14	12:06:57	-0.599998	212.29	0
2022-09-14	12:06:58	-15.0349	212.29	0
2022-09-14	12:06:59	-24.8127	212.29	0
2022-09-14	12:07:00	-30.1237	212.29	0
2022-09-14	12:07:01	-34.8877	212.29	0
2022-09-14	12:07:02	-35.8867	212.29	0
2022-09-14	12:07:03	-37.5368	212.29	0
2022-09-14	12:07:04	-36.8966	212.29	0
2022-09-14	12:07:05	-28.7786	212.29	0
2022-09-14	12:07:06	-24.3681	212.29	0
2022-09-14	12:07:07	-4.52217	212.29	0
2022-09-14	12:07:08	1.52835	213.818	0
2022-09-14	12:07:09	1.49468	215.313	0
2022-09-14	12:07:10	1.30888	216.622	0
2022-09-14	12:07:11	1.1495	217.771	0
2022-09-14	12:07:12	1.30339	219.074	0
2022-09-14	12:07:13	1.47011	220.545	0
2022-09-14	12:07:14	1.4992	222.044	0
2022-09-14	12:07:15	1.42061	223.464	0
2022-09-14	12:07:16	-19.9583	223.464	0
2022-09-14	12:07:17	-19.8655	223.464	0
2022-09-14	12:07:18	-21.5456	223.464	0
2022-09-14	12:07:19	-5.98143	223.464	0
2022-09-14	12:07:20	-1.56631	223.464	0
2022-09-14	12:07:21	-14.8055	223.464	0
2022-09-14	12:07:22	-22.4576	223.464	0
2022-09-14	12:07:23	-23.1851	223.464	0
2022-09-14	12:07:24	-20.7772	223.464	0
2022-09-14	12:07:25	-18.4259	223.464	0
2022-09-14	12:07:26	-17.0767	223.464	0
2022-09-14	12:07:27	-16.7287	223.464	0
2022-09-14	12:07:28	-18.4524	223.464	0
2022-09-14	12:07:29	-20.3881	223.464	0
2022-09-14	12:07:30	-21.8564	223.464	0
2022-09-14	12:07:31	-24.7099	223.464	0
2022-09-14	12:07:32	-23.7399	223.464	0
2022-09-14	12:07:33	-23.0994	223.464	0
2022-09-14	12:07:34	-22.5644	223.464	0
2022-09-14	12:07:35	-9.02231	223.464	0
2022-09-14	12:07:36	3.22528	226.69	0
2022-09-14	12:07:37	2.5554	229.245	0
2022-09-14	12:07:38	1.80499	231.05	0
2022-09-14	12:07:39	-0.802148	231.05	0
2022-09-14	12:07:40	-19.7492	231.05	0
2022-09-14	12:07:41	-19.5527	231.05	0
2022-09-14	12:07:42	-6.47236	231.05	0
2022-09-14	12:07:43	1.80865	232.859	0
2022-09-14	12:07:44	1.85902	234.718	0
2022-09-14	12:07:45	1.82512	236.543	0
2022-09-14	12:07:46	1.91418	238.457	0
2022-09-14	12:07:47	-5.42408	238.457	0
2022-09-14	12:07:48	-10.4356	238.457	0
2022-09-14	12:07:49	-14.2233	238.457	0
2022-09-14	12:07:50	-16.5638	238.457	0
2022-09-14	12:07:51	-15.4172	238.457	0
2022-09-14	12:07:52	-15.9955	238.457	0
2022-09-14	12:07:53	-15.3426	238.457	0
2022-09-14	12:07:54	-14.6235	238.457	0
2022-09-14	12:07:55	-16.2307	238.457	0
2022-09-14	12:07:56	-1.1885	238.457	0
2022-09-14	12:07:57	1.25517	239.712	0
2022-09-14	12:07:58	1.39443	241.107	0
2022-09-14	12:07:59	2.55415	243.661	0
2022-09-14	12:08:00	3.01397	246.675	0
2022-09-14	12:08:01	1.52776	248.203	0
2022-09-14	12:08:02	1.50752	249.71	0
2022-09-14	12:08:03	2.02987	251.74	0
2022-09-14	12:08:04	2.17803	253.918	0
2022-09-14	12:08:05	1.94602	255.864	0
2022-09-14	12:08:06	1.93978	257.804	0
2022-09-14	12:08:07	2.22897	260.033	0
2022-09-14	12:08:08	3.22246	263.255	0
2022-09-14	12:08:09	3.23377	266.489	0
2022-09-14	12:08:10	3.23394	269.723	0
2022-09-14	12:08:11	3.23128	272.954	0
2022-09-14	12:08:12	3.23779	276.192	0
2022-09-14	12:08:13	3.242	279.434	0
2022-09-14	12:08:14	3.22291	282.657	0
2022-09-14	12:08:15	3.21589	285.873	0
2022-09-14	12:08:16	3.21793	289.091	0
2022-09-14	12:08:17	3.2294	292.32	0
2022-09-14	12:08:18	3.22444	295.545	0
2022-09-14	12:08:19	3.23649	298.781	0
2022-09-14	12:08:20	3.06711	301.848	0
2022-09-14	12:08:21	3.04166	304.89	0
2022-09-14	12:08:22	2.19733	307.087	0
2022-09-14	12:08:23	2.42133	309.508	0
2022-09-14	12:08:24	-7.67982	309.508	0
2022-09-14	12:08:25	-11.4789	309.508	0
2022-09-14	12:08:26	-12.8516	309.508	0
2022-09-14	12:08:27	-11.4868	309.508	0
2022-09-14	12:08:28	-9.78529	309.508	0
2022-09-14	12:08:29	-8.81552	309.508	0
2022-09-14	12:08:30	-8.89888	309.508	0
2022-09-14	12:08:31	-8.70946	309.508	0
2022-09-14	12:08:32	-8.87052	309.508	0
2022-09-14	12:08:33	-8.99972	309.508	0
2022-09-14	12:08:34	-9.28275	309.508	0
2022-09-14	12:08:35	-9.17942	309.508	0
2022-09-14	12:08:36	-8.43522	309.508	0
2022-09-14	12:08:37	-8.8343	309.508	0
2022-09-14	12:08:38	-9.0767	309.508	0
2022-09-14	12:08:39	-10.4249	309.508	0
2022-09-14	12:08:40	-10.584	309.508	0
2022-09-14	12:08:41	-8.92259	309.508	0
2022-09-14	12:08:42	-9.59047	309.508	0
2022-09-14	12:08:43	-9.84311	309.508	0
2022-09-14	12:08:44	-10.3425	309.508	0
2022-09-14	12:08:45	-10.5396	309.508	0
2022-09-14	12:08:46	-10.6327	309.508	0
2022-09-14	12:08:47	-10.6263	309.508	0
2022-09-14	12:08:48	-10.8348	309.508	0
2022-09-14	12:08:49	-10.9685	309.508	0
2022-09-14	12:08:50	-11.2082	309.508	0
2022-09-14	12:08:51	-11.6711	309.508	0
2022-09-14	12:08:52	-11.967	309.508	0
2022-09-14	12:08:53	-14.0305	309.508	0
2022-09-14	12:08:54	-15.9574	309.508	0
2022-09-14	12:08:55	-21.8539	309.508	0
2022-09-14	12:08:56	-22.9188	309.508	0
2022-09-14	12:08:57	-29.2101	309.508	0
2022-09-14	12:08:58	-37.0665	309.508	0
2022-09-14	12:08:59	-43.8054	309.508	0
2022-09-14	12:09:00	-44.9037	309.508	0
2022-09-14	12:09:01	-46.6896	309.508	0
2022-09-14	12:09:02	-48.4237	309.508	0
2022-09-14	12:09:03	-46.8907	309.508	0
2022-09-14	12:09:04	-44.4153	309.508	0
2022-09-14	12:09:05	-43.863	309.508	0
2022-09-14	12:09:06	-40.4726	309.508	0
2022-09-14	12:09:07	-38.5501	309.508	0
2022-09-14	12:09:08	-38.0122	309.508	0
2022-09-14	12:09:09	-37.4431	309.508	0
2022-09-14	12:09:10	-33.9493	309.508	0
2022-09-14	12:09:11	-24.8793	309.508	0
2022-09-14	12:09:12	-19.0963	309.508	0
2022-09-14	12:09:13	-16.0674	309.508	0
2022-09-14	12:09:14	-20.2248	309.508	0
2022-09-14	12:09:15	-15.6958	309.508	0
2022-09-14	12:09:16	-11.7104	309.508	0
2022-09-14	12:09:17	-18.7857	309.508	0
2022-09-14	12:09:18	-20.6359	309.508	0
2022-09-14	12:09:19	-23.9269	309.508	0
2022-09-14	12:09:20	-23.4366	309.508	0
2022-09-14	12:09:21	-22.7173	309.508	0
2022-09-14	12:09:22	3.53394	313.042	0
2022-09-14	12:09:23	6.60866	319.651	0
2022-09-14	12:09:24	7.35697	327.008	0
2022-09-14	12:09:25	5.29641	332.304	0
2022-09-14	12:09:26	4.09167	336.396	0
2022-09-14	12:09:27	2.26451	338.661	0
2022-09-14	12:09:28	2.07498	340.736	0
2022-09-14	12:09:29	2.84419	343.58	0
2022-09-14	12:09:30	2.42421	346.004	0
2022-09-14	12:09:31	1.04074	347.045	0
2022-09-14	12:09:32	0.571494	347.616	0
2022-09-14	12:09:33	3.51147	351.128	0
2022-09-14	12:09:34	15.9308	367.059	1
2022-09-14	12:09:35	4.35787	371.416	1
2022-09-14	12:09:36	1.62925	373.046	1
2022-09-14	12:09:37	3.1134	376.159	1
2022-09-14	12:09:38	-2.58204	376.159	1
2022-09-14	12:09:39	-0.0244429	376.159	1
2022-09-14	12:09:40	-10.3428	376.159	1
2022-09-14	12:09:41	-11.958	376.159	1
2022-09-14	12:09:42	-12.0091	376.159	1
2022-09-14	12:09:43	-11.8566	376.159	1
2022-09-14	12:09:44	-3.39792	376.159	1
2022-09-14	12:09:45	-0.715565	376.159	1
2022-09-14	12:09:46	-8.75712	376.159	1
2022-09-14	12:09:47	-11.5436	376.159	1
2022-09-14	12:09:48	-11.7664	376.159	1
2022-09-14	12:09:49	-11.4396	376.159	1
2022-09-14	12:09:50	-9.34807	376.159	1
2022-09-14	12:09:51	-8.7414	376.159	1
2022-09-14	12:09:52	-9.94219	376.159	1
2022-09-14	12:09:53	-10.3283	376.159	1
2022-09-14	12:09:54	-10.9816	376.159	1
2022-09-14	12:09:55	-8.3273	376.159	1
2022-09-14	12:09:56	-9.14459	376.159	1
2022-09-14	12:09:57	-10.6249	376.159	1
2022-09-14	12:09:58	-12.1973	376.159	1
2022-09-14	12:09:59	-7.84241	376.159	1
2022-09-14	12:10:00	-12.6905	376.159	1
2022-09-14	12:10:01	-9.92996	376.159	1
2022-09-14	12:10:02	0.311307	376.47	1
2022-09-14	12:10:03	-8.61542	376.47	1
2022-09-14	12:10:04	2.02308	378.493	1
2022-09-14	12:10:05	0.924898	379.418	1
2022-09-14	12:10:06	1.01669	380.435	1
2022-09-14	12:10:07	1.09917	381.534	1
2022-09-14	12:10:08	1.66932	383.203	1
2022-09-14	12:10:09	2.08499	385.288	1
2022-09-14	12:10:10	2.06106	387.35	1
2022-09-14	12:10:11	2.06396	389.414	1
2022-09-14	12:10:12	2.15251	391.566	1
2022-09-14	12:10:13	2.12421	393.69	1
2022-09-14	12:10:14	2.16541	395.856	1
2022-09-14	12:10:15	2.2523	398.108	1
2022-09-14	12:10:16	2.17622	400.284	1
2022-09-14	12:10:17	2.64481	402.929	1
2022-09-14	12:10:18	23.6468	426.576	2
2022-09-14	12:10:19	26.9584	453.534	3
2022-09-14	12:10:20	4.45629	457.99	3
2022-09-14	12:10:21	2.05036	460.041	3
2022-09-14	12:10:22	2.05087	462.092	3
2022-09-14	12:10:23	2.04917	464.141	3
2022-09-14	12:10:24	1.71788	465.859	3
2022-09-14	12:10:25	8.10371	473.962	3
2022-09-14	12:10:26	11.1329	485.095	3
2022-09-14	12:10:27	0.271024	485.366	3
2022-09-14	12:10:28	3.01119	488.378	3

## Sheet: Richa_star_202291412512 (4)
Date	Time	Lbs	Newtons	Averaged Newtons	Total force x time		total steps > 13.345	**GoPro Fitting: 1154
2022-09-14	12:05:28	0.447901	1.99235	1.95885	1.99235	FALSE	0
2022-09-14	12:05:28	0.437621	1.94663	1.95885	1.94663	FALSE	0
2022-09-14	12:05:28	0.396196	1.76236	1.95885	3.75471	FALSE	0
2022-09-14	12:05:28	0.479758	2.13406	1.95885	4.08069	FALSE	0
2022-09-14	12:05:29	0.412074	1.83299	1.96983	5.5877	FALSE	0
2022-09-14	12:05:29	0.439046	1.95296	1.96983	6.03365	FALSE	0
2022-09-14	12:05:29	0.466323	2.0743	1.96983	7.662	FALSE	0
2022-09-14	12:05:29	0.453906	2.01906	1.96983	8.05271	FALSE	0
2022-09-14	12:05:30	0.447036	1.98851	2.02229	9.6505	FALSE	0
2022-09-14	12:05:30	0.464339	2.06547	2.02229	10.1182	FALSE	0
2022-09-14	12:05:30	0.447087	1.98873	2.02229	11.6392	FALSE	0
2022-09-14	12:05:30	0.460064	2.04646	2.02229	12.1646	FALSE	0
2022-09-14	12:05:31	0.457468	2.03491	2.12817	13.6741	FALSE	0
2022-09-14	12:05:31	0.489478	2.1773	2.12817	14.3419	FALSE	0
2022-09-14	12:05:31	0.488359	2.17232	2.12817	15.8465	FALSE	0
2022-09-14	12:05:32	0.481997	2.14402	2.09473	16.486	FALSE	0
2022-09-14	12:05:32	0.433651	1.92897	2.09473	17.7754	FALSE	0
2022-09-14	12:05:32	0.510242	2.26966	2.09473	18.7556	FALSE	0
2022-09-14	12:05:32	0.457774	2.03627	2.09473	19.8117	FALSE	0
2022-09-14	12:05:33	0.490751	2.18296	1.82031	20.9386	FALSE	0
2022-09-14	12:05:33	0.532125	2.367	1.82031	22.1787	FALSE	0
2022-09-14	12:05:33	0.455178	2.02472	1.82031	22.9633	FALSE	0
2022-09-14	12:05:33	0.158842	0.706561	1.82031	22.8853	FALSE	0
2022-09-14	12:05:34	0.167239	0.743913	1.80197	23.7072	FALSE	0
2022-09-14	12:05:34	0.48612	2.16236	1.80197	25.0476	FALSE	0
2022-09-14	12:05:34	0.518842	2.30791	1.80197	26.0151	FALSE	0
2022-09-14	12:05:34	0.448206	1.99371	1.80197	27.0413	FALSE	0
2022-09-14	12:05:35	0.416959	1.85472	1.82008	27.8698	FALSE	0
2022-09-14	12:05:35	0.360216	1.60231	1.82008	28.6436	FALSE	0
2022-09-14	12:05:35	0.450344	2.00322	1.82008	29.8731	FALSE	0
2022-09-14	12:05:36	0.420827	1.87192	1.85727	30.5156	FALSE	0
2022-09-14	12:05:36	0.378232	1.68245	1.85727	31.5555	FALSE	0
2022-09-14	12:05:36	0.422965	1.88143	1.85727	32.397	FALSE	0
2022-09-14	12:05:36	0.448104	1.99326	1.85727	33.5488	FALSE	0
2022-09-14	12:05:37	0.479657	2.13361	1.89105	34.5306	FALSE	0
2022-09-14	12:05:37	0.374262	1.66479	1.89105	35.2136	FALSE	0
2022-09-14	12:05:37	0.402914	1.79224	1.89105	36.3228	FALSE	0
2022-09-14	12:05:37	0.443677	1.97356	1.89105	37.1871	FALSE	0
2022-09-14	12:05:38	0.124135	0.552177	-0.787545	36.875	FALSE	0
2022-09-14	12:05:38	-0.0302669	-0.134633	-0.787545	37.1871	FALSE	0
2022-09-14	12:05:38	-0.262989	-1.16983	-0.787545	36.875	FALSE	0
2022-09-14	12:05:38	-0.539071	-2.3979	-0.787545	37.1871	FALSE	0
2022-09-14	12:05:39	-0.640546	-2.84928	-2.08339	36.875	FALSE	0
2022-09-14	12:05:39	-0.496068	-2.20661	-2.08339	37.1871	FALSE	0
2022-09-14	12:05:39	-0.268486	-1.19428	-2.08339	36.875	FALSE	0
2022-09-14	12:05:40	-0.130114	-0.578773	0.836783	37.1871	FALSE	0
2022-09-14	12:05:40	0.257468	1.14527	0.836783	38.0203	FALSE	0
2022-09-14	12:05:40	0.279504	1.24329	0.836783	38.4304	FALSE	0
2022-09-14	12:05:40	0.345611	1.53735	0.836783	39.5576	FALSE	0
2022-09-14	12:05:41	0.268562	1.19462	1.65268	39.625	FALSE	0
2022-09-14	12:05:41	0.534822	2.379	1.65268	41.9366	FALSE	0
2022-09-14	12:05:41	0.32159	1.4305	1.65268	41.0555	FALSE	0
2022-09-14	12:05:41	0.361183	1.60661	1.65268	43.5433	FALSE	0
2022-09-14	12:05:42	0.29299	1.30328	1.46547	42.3588	FALSE	0
2022-09-14	12:05:42	0.460776	2.04962	1.46547	45.5929	FALSE	0
2022-09-14	12:05:42	0.258537	1.15002	1.46547	43.5088	FALSE	0
2022-09-14	12:05:42	0.305509	1.35897	1.46547	46.9518	FALSE	0
2022-09-14	12:05:43	0.0709544	0.315619	0.534596	43.8245	FALSE	0
2022-09-14	12:05:43	0.181794	0.808656	0.534596	47.7605	FALSE	0
2022-09-14	12:05:43	0.107799	0.479512	0.534596	44.304	FALSE	0
2022-09-14	12:05:44	0.257316	1.14459	0.702148	48.9051	FALSE	0
2022-09-14	12:05:44	0.0778247	0.34618	0.702148	44.6501	FALSE	0
2022-09-14	12:05:44	0.161641	0.719011	0.702148	49.6241	FALSE	0
2022-09-14	12:05:44	0.134618	0.598808	0.702148	45.249	FALSE	0
2022-09-14	12:05:45	0.225407	1.00266	0.875436	50.6268	FALSE	0
2022-09-14	12:05:45	0.152074	0.676456	0.875436	45.9254	FALSE	0
2022-09-14	12:05:45	0.222354	0.989075	0.875436	51.6158	FALSE	0
2022-09-14	12:05:45	0.187392	0.833557	0.875436	46.759	FALSE	0
2022-09-14	12:05:46	0.229122	1.01918	1.02767	52.635	FALSE	0
2022-09-14	12:05:46	0.157519	0.700676	1.02767	47.4596	FALSE	0
2022-09-14	12:05:46	0.256959	1.14301	1.02767	53.778	FALSE	0
2022-09-14	12:05:46	0.280522	1.24782	1.02767	48.7075	FALSE	0
2022-09-14	12:05:47	0.2764	1.22948	1.16587	55.0075	FALSE	0
2022-09-14	12:05:47	0.258588	1.15025	1.16587	49.8577	FALSE	0
2022-09-14	12:05:47	0.251311	1.11788	1.16587	56.1254	FALSE	0
2022-09-14	12:05:48	0.266883	1.18715	1.18771	51.0449	FALSE	0
2022-09-14	12:05:48	0.282048	1.25461	1.18771	57.38	FALSE	0
2022-09-14	12:05:48	0.243626	1.0837	1.18771	52.1286	FALSE	0
2022-09-14	12:05:48	0.275483	1.2254	1.18771	58.6054	FALSE	0
2022-09-14	12:05:49	0.277774	1.23559	1.2009	53.3641	FALSE	0
2022-09-14	12:05:49	0.250547	1.11448	1.2009	59.7199	FALSE	0
2022-09-14	12:05:49	0.294313	1.30916	1.2009	54.6733	FALSE	0
2022-09-14	12:05:49	0.257265	1.14437	1.2009	60.8642	FALSE	0
2022-09-14	12:05:50	0.388257	1.72704	1.47396	56.4004	FALSE	0
2022-09-14	12:05:50	0.236603	1.05246	1.47396	61.9167	FALSE	0
2022-09-14	12:05:50	0.369224	1.64238	1.47396	58.0427	FALSE	0
2022-09-14	12:05:51	0.192634	0.856875	1.44657	62.7736	FALSE	0
2022-09-14	12:05:51	0.478791	2.12976	1.44657	60.1725	FALSE	0
2022-09-14	12:05:51	0.197825	0.879965	1.44657	63.6535	FALSE	0
2022-09-14	12:05:51	0.431565	1.91969	1.44657	62.0922	FALSE	0
2022-09-14	12:05:52	0.26729	1.18896	1.50401	64.8425	FALSE	0
2022-09-14	12:05:52	0.455127	2.0245	1.50401	64.1167	FALSE	0
2022-09-14	12:05:52	0.236959	1.05404	1.50401	65.8965	FALSE	0
2022-09-14	12:05:52	0.393092	1.74855	1.50401	65.8652	FALSE	0
2022-09-14	12:05:53	0.279148	1.24171	1.5717	67.1382	FALSE	0
2022-09-14	12:05:53	0.46388	2.06343	1.5717	67.9287	FALSE	0
2022-09-14	12:05:53	0.23813	1.05925	1.5717	68.1975	FALSE	0
2022-09-14	12:05:53	0.432176	1.92241	1.5717	69.8511	FALSE	0
2022-09-14	12:05:54	0.328511	1.46128	2.03778	69.6588	FALSE	0
2022-09-14	12:05:54	0.651768	2.89919	2.03778	72.7503	FALSE	0
2022-09-14	12:05:54	0.394059	1.75285	2.03778	71.4116	FALSE	0
2022-09-14	12:05:55	0.412176	1.83344	1.45466	74.5837	FALSE	0
2022-09-14	12:05:55	0.262812	1.16904	1.45466	72.5807	FALSE	0
2022-09-14	12:05:55	0.433092	1.92648	1.45466	76.5102	FALSE	0
2022-09-14	12:05:55	0.200013	0.889698	1.45466	73.4704	FALSE	0
2022-09-14	12:05:56	0.434059	1.93078	1.49892	78.441	FALSE	0
2022-09-14	12:05:56	0.308766	1.37345	1.49892	74.8438	FALSE	0
2022-09-14	12:05:56	0.374771	1.66706	1.49892	80.108	FALSE	0
2022-09-14	12:05:56	0.230293	1.02439	1.49892	75.8682	FALSE	0
2022-09-14	12:05:57	0.358181	1.59326	1.42552	81.7013	FALSE	0
2022-09-14	12:05:57	0.28444	1.26525	1.42552	77.1335	FALSE	0
2022-09-14	12:05:57	0.352379	1.56745	1.42552	83.2687	FALSE	0
2022-09-14	12:05:57	0.286883	1.27611	1.42552	78.4096	FALSE	0
2022-09-14	12:05:58	0.300725	1.33768	2.40533	84.6064	FALSE	0
2022-09-14	12:05:58	0.420522	1.87057	2.40533	80.2801	FALSE	0
2022-09-14	12:05:58	0.90098	4.00774	2.40533	88.6142	FALSE	0
2022-09-14	12:05:59	2.36632	10.5259	12.2078	90.806	FALSE	0
2022-09-14	12:05:59	4.72764	21.0295	12.2078	109.644	1	1
2022-09-14	12:05:59	2.02205	8.99448	12.2078	99.8005	FALSE	1
2022-09-14	12:05:59	1.86174	8.28139	12.2078	117.925	FALSE	1
2022-09-14	12:06:00	0.805407	3.58261	2.06598	103.383	FALSE	1
2022-09-14	12:06:00	0.377112	1.67747	2.06598	119.603	FALSE	1
2022-09-14	12:06:00	0.346425	1.54097	2.06598	104.924	FALSE	1
2022-09-14	12:06:00	0.328868	1.46287	2.06598	121.065	FALSE	1
2022-09-14	12:06:01	0.354008	1.5747	1.61799	106.499	FALSE	1
2022-09-14	12:06:01	0.406221	1.80695	1.61799	122.872	FALSE	1
2022-09-14	12:06:01	0.354466	1.57674	1.61799	108.075	FALSE	1
2022-09-14	12:06:01	0.340267	1.51358	1.61799	124.386	FALSE	1
2022-09-14	12:06:02	0.603931	2.68641	1.7441	110.762	FALSE	1
2022-09-14	12:06:02	0.244186	1.08619	1.7441	125.472	FALSE	1
2022-09-14	12:06:02	0.328155	1.4597	1.7441	112.222	FALSE	1
2022-09-14	12:06:03	0.409936	1.82348	2.40712	127.296	FALSE	1
2022-09-14	12:06:03	0.49869	2.21827	2.40712	114.44	FALSE	1
2022-09-14	12:06:03	0.515687	2.29388	2.40712	129.589	FALSE	1
2022-09-14	12:06:03	0.740267	3.29286	2.40712	117.733	FALSE	1
2022-09-14	12:06:04	0.788918	3.50927	5.09132	133.099	FALSE	1
2022-09-14	12:06:04	1.90877	8.49059	5.09132	126.223	FALSE	1
2022-09-14	12:06:04	1.40927	6.26871	5.09132	139.367	FALSE	1
2022-09-14	12:06:04	0.471361	2.09671	5.09132	128.32	FALSE	1
2022-09-14	12:06:05	0.43243	1.92354	2.06558	141.291	FALSE	1
2022-09-14	12:06:05	0.527036	2.34436	2.06558	130.664	FALSE	1
2022-09-14	12:06:05	0.35869	1.59552	2.06558	142.886	FALSE	1
2022-09-14	12:06:05	0.5393	2.39891	2.06558	133.063	FALSE	1
2022-09-14	12:06:06	0.812481	3.61408	3.14979	146.501	FALSE	1
2022-09-14	12:06:06	0.697315	3.1018	3.14979	136.165	FALSE	1
2022-09-14	12:06:06	0.614516	2.73349	3.14979	149.234	FALSE	1
2022-09-14	12:06:07	0.538384	2.39484	2.89523	138.56	FALSE	1
2022-09-14	12:06:07	0.772176	3.43479	2.89523	152.669	FALSE	1
2022-09-14	12:06:07	0.647035	2.87814	2.89523	141.438	FALSE	1
2022-09-14	12:06:07	0.645916	2.87316	2.89523	155.542	FALSE	1
2022-09-14	12:06:08	0.507443	2.25721	2.12812	143.695	FALSE	1
2022-09-14	12:06:08	0.470802	2.09422	2.12812	157.636	FALSE	1
2022-09-14	12:06:08	0.484288	2.15421	2.12812	145.849	FALSE	1
2022-09-14	12:06:08	0.451158	2.00684	2.12812	159.643	FALSE	1
2022-09-14	12:06:09	0.708562	3.15183	2.89235	149.001	FALSE	1
2022-09-14	12:06:09	0.712634	3.16994	2.89235	162.813	FALSE	1
2022-09-14	12:06:09	0.577824	2.57028	2.89235	151.572	FALSE	1
2022-09-14	12:06:09	0.601896	2.67735	2.89235	165.49	FALSE	1
2022-09-14	12:06:10	0.535433	2.38171	2.23872	153.953	FALSE	1
2022-09-14	12:06:10	0.526578	2.34232	2.23872	167.833	FALSE	1
2022-09-14	12:06:10	0.44785	1.99213	2.23872	155.945	FALSE	1
2022-09-14	12:06:11	0.400624	1.78206	1.9644	169.615	FALSE	1
2022-09-14	12:06:11	0.480827	2.13881	1.9644	158.084	FALSE	1
2022-09-14	12:06:11	0.399707	1.77798	1.9644	171.393	FALSE	1
2022-09-14	12:06:11	0.485305	2.15873	1.9644	160.243	FALSE	1
2022-09-14	12:06:12	0.376196	1.6734	1.58602	173.066	FALSE	1
2022-09-14	12:06:12	0.333957	1.48551	1.58602	161.728	FALSE	1
2022-09-14	12:06:12	0.376756	1.67589	1.58602	174.742	FALSE	1
2022-09-14	12:06:12	0.3393	1.50927	1.58602	163.238	FALSE	1
2022-09-14	12:06:13	0.474669	2.11142	1.77949	176.853	FALSE	1
2022-09-14	12:06:13	0.277468	1.23423	1.77949	164.472	FALSE	1
2022-09-14	12:06:13	0.448003	1.99281	1.77949	178.846	FALSE	1
2022-09-14	12:06:14	0.293601	1.306	5.42352	165.778	FALSE	1
2022-09-14	12:06:14	0.347799	1.54708	5.42352	180.393	FALSE	1
2022-09-14	12:06:14	2.00704	8.92772	5.42352	174.706	FALSE	1
2022-09-14	12:06:14	2.22861	9.9133	5.42352	190.307	FALSE	1
2022-09-14	12:06:15	2.2791	10.1379	3.69071	184.844	FALSE	1
2022-09-14	12:06:15	0.317061	1.41035	3.69071	191.717	FALSE	1
2022-09-14	12:06:15	0.443422	1.97243	3.69071	186.816	FALSE	1
2022-09-14	12:06:15	0.27925	1.24216	3.69071	192.959	FALSE	1
2022-09-14	12:06:16	0.306629	1.36395	1.57311	188.18	FALSE	1
2022-09-14	12:06:16	0.375484	1.67023	1.57311	194.629	FALSE	1
2022-09-14	12:06:16	0.345509	1.53689	1.57311	189.717	FALSE	1
2022-09-14	12:06:16	0.386985	1.72139	1.57311	196.351	FALSE	1
2022-09-14	12:06:17	0.269886	1.20051	1.69452	190.917	FALSE	1
2022-09-14	12:06:17	0.497774	2.2142	1.69452	198.565	FALSE	1
2022-09-14	12:06:17	0.375178	1.66887	1.69452	192.586	FALSE	1
2022-09-14	12:06:18	0.567697	2.52523	2.12319	201.09	FALSE	1
2022-09-14	12:06:18	0.471819	2.09875	2.12319	194.685	FALSE	1
2022-09-14	12:06:18	0.535687	2.38284	2.12319	203.473	FALSE	1
2022-09-14	12:06:18	0.334059	1.48596	2.12319	196.171	FALSE	1
2022-09-14	12:06:19	0.390445	1.73678	1.58681	205.21	FALSE	1
2022-09-14	12:06:19	0.342761	1.52467	1.58681	197.696	FALSE	1
2022-09-14	12:06:19	0.294771	1.3112	1.58681	206.521	FALSE	1
2022-09-14	12:06:19	0.398944	1.77458	1.58681	199.47	FALSE	1
2022-09-14	12:06:20	0.36897	1.64125	4.66659	208.162	FALSE	1
2022-09-14	12:06:20	0.553295	2.46117	4.66659	201.931	FALSE	1
2022-09-14	12:06:20	1.60668	7.14683	4.66659	215.309	FALSE	1
2022-09-14	12:06:20	1.66744	7.41711	4.66659	209.348	FALSE	1
2022-09-14	12:06:21	1.86551	8.29816	7.63731	223.607	FALSE	1
2022-09-14	12:06:21	1.81711	8.08287	7.63731	217.431	FALSE	1
2022-09-14	12:06:21	1.46821	6.53089	7.63731	230.138	FALSE	1
2022-09-14	12:06:22	1.51558	6.7416	6.77128	224.173	FALSE	1
2022-09-14	12:06:22	1.49401	6.64566	6.77128	236.784	FALSE	1
2022-09-14	12:06:22	1.53182	6.81384	6.77128	230.987	FALSE	1
2022-09-14	12:06:22	1.5476	6.88403	6.77128	243.668	FALSE	1
2022-09-14	12:06:23	1.49492	6.6497	5.37768	237.636	FALSE	1
2022-09-14	12:06:23	1.51233	6.72715	5.37768	250.395	FALSE	1
2022-09-14	12:06:23	0.919402	4.08968	5.37768	241.726	FALSE	1
2022-09-14	12:06:23	0.909173	4.04418	5.37768	254.439	FALSE	1
2022-09-14	12:06:24	0.609631	2.71176	3.40157	244.438	FALSE	1
2022-09-14	12:06:24	0.968053	4.30609	3.40157	258.745	FALSE	1
2022-09-14	12:06:24	0.536705	2.38737	3.40157	246.825	FALSE	1
2022-09-14	12:06:24	0.94444	4.20106	3.40157	262.946	FALSE	1
2022-09-14	12:06:25	0.465356	2.07	2.29078	248.895	FALSE	1
2022-09-14	12:06:25	0.694669	3.09003	2.29078	266.036	FALSE	1
2022-09-14	12:06:25	0.384949	1.71233	2.29078	250.608	FALSE	1
2022-09-14	12:06:26	0.528308	2.35002	1.84561	268.386	FALSE	1
2022-09-14	12:06:26	0.35584	1.58285	1.84561	252.19	FALSE	1
2022-09-14	12:06:26	0.415331	1.84748	1.84561	270.234	FALSE	1
2022-09-14	12:06:26	0.360165	1.60209	1.84561	253.793	FALSE	1
2022-09-14	12:06:27	0.371361	1.65189	2.78776	271.886	FALSE	1
2022-09-14	12:06:27	0.687188	3.05675	2.78776	256.849	FALSE	1
2022-09-14	12:06:27	0.922659	4.10417	2.78776	275.99	FALSE	1
2022-09-14	12:06:27	0.525662	2.33825	2.78776	259.188	FALSE	1
2022-09-14	12:06:28	0.377468	1.67905	1.83717	277.669	FALSE	1
2022-09-14	12:06:28	0.486018	2.16191	1.83717	261.349	FALSE	1
2022-09-14	12:06:28	0.275483	1.2254	1.83717	278.894	FALSE	1
2022-09-14	12:06:28	0.513092	2.28234	1.83717	263.632	FALSE	1
2022-09-14	12:06:29	0.365407	1.6254	1.75904	280.52	FALSE	1
2022-09-14	12:06:29	0.474924	2.11256	1.75904	265.744	FALSE	1
2022-09-14	12:06:29	0.346018	1.53916	1.75904	282.059	FALSE	1
2022-09-14	12:06:30	0.412481	1.8348	2.64928	267.579	FALSE	1
2022-09-14	12:06:30	0.467799	2.08086	2.64928	284.14	FALSE	1
2022-09-14	12:06:30	0.499097	2.22008	2.64928	269.799	FALSE	1
2022-09-14	12:06:30	1.00296	4.46137	2.64928	288.601	FALSE	1
2022-09-14	12:06:31	0.746425	3.32025	4.92839	273.12	FALSE	1
2022-09-14	12:06:31	1.37065	6.09693	4.92839	294.698	FALSE	1
2022-09-14	12:06:31	0.828715	3.68629	4.92839	276.806	FALSE	1
2022-09-14	12:06:31	1.48602	6.61011	4.92839	301.308	FALSE	1
2022-09-14	12:06:32	1.22968	5.46986	5.18	282.276	FALSE	1
2022-09-14	12:06:32	1.04795	4.66149	5.18	305.97	FALSE	1
2022-09-14	12:06:32	1.08688	4.83466	5.18	287.11	FALSE	1
2022-09-14	12:06:32	1.29355	5.75397	5.18	311.724	FALSE	1
2022-09-14	12:06:33	0.908461	4.04102	4.18906	291.151	FALSE	1
2022-09-14	12:06:33	1.14098	5.07531	4.18906	316.799	FALSE	1
2022-09-14	12:06:33	0.775789	3.45086	4.18906	294.602	FALSE	1
2022-09-14	12:06:34	1.43126	6.36653	4.52981	323.165	FALSE	1
2022-09-14	12:06:34	0.671768	2.98816	4.52981	297.59	FALSE	1
2022-09-14	12:06:34	1.23976	5.5147	4.52981	328.68	FALSE	1
2022-09-14	12:06:34	0.730598	3.24985	4.52981	300.84	FALSE	1
2022-09-14	12:06:35	0.939809	4.18046	3.62732	332.861	FALSE	1
2022-09-14	12:06:35	0.743168	3.30576	3.62732	304.146	FALSE	1
2022-09-14	12:06:35	0.882201	3.92421	3.62732	336.785	FALSE	1
2022-09-14	12:06:35	0.696654	3.09886	3.62732	307.245	FALSE	1
2022-09-14	12:06:36	1.19782	5.32814	4.97011	342.113	FALSE	1
2022-09-14	12:06:36	1.00067	4.45118	4.97011	311.696	FALSE	1
2022-09-14	12:06:36	1.1535	5.131	4.97011	347.244	FALSE	1
2022-09-14	12:06:37	1.34637	5.98892	5.87388	317.685	FALSE	1
2022-09-14	12:06:37	1.18149	5.2555	5.87388	352.499	FALSE	1
2022-09-14	12:06:37	1.43487	6.38259	5.87388	324.068	FALSE	1
2022-09-14	12:06:37	1.3193	5.86851	5.87388	358.368	FALSE	1
2022-09-14	12:06:38	1.33304	5.92963	4.64593	329.997	FALSE	1
2022-09-14	12:06:38	0.928562	4.13043	4.64593	362.498	FALSE	1
2022-09-14	12:06:38	1.23014	5.47191	4.64593	335.469	FALSE	1
2022-09-14	12:06:38	0.686069	3.05177	4.64593	365.55	FALSE	1
2022-09-14	12:06:39	0.491361	2.18567	1.86621	337.655	FALSE	1
2022-09-14	12:06:39	0.292481	1.30101	1.86621	366.851	FALSE	1
2022-09-14	12:06:39	0.369428	1.64329	1.86621	339.298	FALSE	1
2022-09-14	12:06:39	0.524898	2.33485	1.86621	369.186	FALSE	1
2022-09-14	12:06:40	0.428868	1.90769	1.92957	341.206	FALSE	1
2022-09-14	12:06:40	0.440216	1.95817	1.92957	371.144	FALSE	1
2022-09-14	12:06:40	0.432277	1.92285	1.92957	343.129	FALSE	1
2022-09-14	12:06:41	0.435229	1.93599	2.13604	373.08	FALSE	1
2022-09-14	12:06:41	0.436705	1.94255	2.13604	345.071	FALSE	1
2022-09-14	12:06:41	0.462608	2.05777	2.13604	375.138	FALSE	1
2022-09-14	12:06:41	0.586272	2.60786	2.13604	347.679	FALSE	1
2022-09-14	12:06:42	0.151158	0.672381	-0.885789	375.81	FALSE	1
2022-09-14	12:06:42	-0.382938	-1.70338	-0.885789	347.679	FALSE	1
2022-09-14	12:06:42	-0.448638	-1.99563	-0.885789	375.81	FALSE	1
2022-09-14	12:06:42	-0.116119	-0.516521	-0.885789	347.679	FALSE	1
2022-09-14	12:06:43	0.0598094	0.266044	0.793829	376.076	FALSE	1
2022-09-14	12:06:43	0.0936007	0.416355	0.793829	348.095	FALSE	1
2022-09-14	12:06:43	0.251056	1.11675	0.793829	377.193	FALSE	1
2022-09-14	12:06:43	0.309377	1.37617	0.793829	349.471	FALSE	1
2022-09-14	12:06:44	0.260165	1.15727	1.14369	378.35	FALSE	1
2022-09-14	12:06:44	0.245102	1.09026	1.14369	350.562	FALSE	1
2022-09-14	12:06:44	0.266069	1.18353	1.14369	379.534	FALSE	1
2022-09-14	12:06:45	0.279809	1.24465	1.20401	351.806	FALSE	1
2022-09-14	12:06:45	0.287697	1.27973	1.20401	380.814	FALSE	1
2022-09-14	12:06:45	0.258944	1.15183	1.20401	352.958	FALSE	1
2022-09-14	12:06:45	0.256247	1.13984	1.20401	381.954	FALSE	1
2022-09-14	12:06:46	0.300318	1.33587	1.29818	354.294	FALSE	1
2022-09-14	12:06:46	0.298486	1.32773	1.29818	383.281	FALSE	1
2022-09-14	12:06:46	0.278333	1.23808	1.29818	355.532	FALSE	1
2022-09-14	12:06:46	0.290242	1.29105	1.29818	384.572	FALSE	1
2022-09-14	12:06:47	0.298334	1.32705	1.37311	356.859	FALSE	1
2022-09-14	12:06:47	0.320573	1.42597	1.37311	385.998	FALSE	1
2022-09-14	12:06:47	0.310445	1.38092	1.37311	358.24	FALSE	1
2022-09-14	12:06:47	0.305407	1.35851	1.37311	387.357	FALSE	1
2022-09-14	12:06:48	0.316552	1.40809	1.39896	359.648	FALSE	1
2022-09-14	12:06:48	0.311819	1.38703	1.39896	388.744	FALSE	1
2022-09-14	12:06:48	0.315127	1.40175	1.39896	361.05	FALSE	1
2022-09-14	12:06:49	0.275127	1.22382	1.19479	389.968	FALSE	1
2022-09-14	12:06:49	0.268054	1.19236	1.19479	362.242	FALSE	1
2022-09-14	12:06:49	0.254059	1.13011	1.19479	391.098	FALSE	1
2022-09-14	12:06:49	0.277163	1.23288	1.19479	363.475	FALSE	1
2022-09-14	12:06:50	0.345763	1.53802	2.80616	392.636	FALSE	1
2022-09-14	12:06:50	0.721539	3.20955	2.80616	366.685	FALSE	1
2022-09-14	12:06:50	0.726629	3.23219	2.80616	395.868	FALSE	1
2022-09-14	12:06:50	0.729478	3.24486	2.80616	369.93	FALSE	1
2022-09-14	12:06:51	0.723117	3.21657	3.08126	399.085	FALSE	1
2022-09-14	12:06:51	0.725662	3.22789	3.08126	373.158	FALSE	1
2022-09-14	12:06:51	0.724847	3.22426	3.08126	402.309	FALSE	1
2022-09-14	12:06:51	0.597163	2.6563	3.08126	375.814	FALSE	1
2022-09-14	12:06:52	0.251718	1.11969	1.32048	403.428	FALSE	1
2022-09-14	12:06:52	0.372583	1.65732	1.32048	377.471	FALSE	1
2022-09-14	12:06:52	0.266272	1.18443	1.32048	404.613	FALSE	1
2022-09-14	12:06:53	0.375076	1.66841	1.06389	379.14	FALSE	1
2022-09-14	12:06:53	0.442812	1.96972	1.06389	406.583	FALSE	1
2022-09-14	12:06:53	0.35584	1.58285	1.06389	380.722	FALSE	1
2022-09-14	12:06:53	-0.217035	-0.965415	1.06389	406.583	FALSE	1
2022-09-14	12:06:54	0.372532	1.6571	2.16677	382.38	FALSE	1
2022-09-14	12:06:54	0.57472	2.55647	2.16677	409.139	FALSE	1
2022-09-14	12:06:54	0.387799	1.72501	2.16677	384.105	FALSE	1
2022-09-14	12:06:54	0.613397	2.72851	2.16677	411.868	FALSE	1
2022-09-14	12:06:55	-0.115509	-0.513807	-0.207356	384.105	FALSE	1
2022-09-14	12:06:55	-0.488435	-2.17266	-0.207356	411.868	FALSE	1
2022-09-14	12:06:55	0.130954	0.58251	-0.207356	384.687	FALSE	1
2022-09-14	12:06:55	0.286527	1.27453	-0.207356	413.142	FALSE	1
2022-09-14	12:06:56	0.474008	2.10848	1.78598	386.796	FALSE	1
2022-09-14	12:06:56	0.390089	1.73519	1.78598	414.877	FALSE	1
2022-09-14	12:06:56	0.34042	1.51426	1.78598	388.31	FALSE	1
2022-09-14	12:06:57	0.318282	1.41578	-0.599998	416.293	FALSE	1
2022-09-14	12:06:57	0.330802	1.47147	-0.599998	389.781	FALSE	1
2022-09-14	12:06:57	0.302914	1.34742	-0.599998	417.641	FALSE	1
2022-09-14	12:06:57	-1.49154	-6.63467	-0.599998	389.781	FALSE	1
2022-09-14	12:06:58	-2.46187	-10.9509	-15.0349	417.641	FALSE	1
2022-09-14	12:06:58	-2.93067	-13.0362	-15.0349	389.781	FALSE	1
2022-09-14	12:06:58	-3.86477	-17.1913	-15.0349	417.641	FALSE	1
2022-09-14	12:06:58	-4.26268	-18.9613	-15.0349	389.781	FALSE	1
2022-09-14	12:06:59	-5.10996	-22.7301	-24.8127	417.641	FALSE	1
2022-09-14	12:06:59	-5.63296	-25.0565	-24.8127	389.781	FALSE	1
2022-09-14	12:06:59	-5.99149	-26.6513	-24.8127	417.641	FALSE	1
2022-09-14	12:07:00	-6.36965	-28.3335	-30.1237	389.781	FALSE	1
2022-09-14	12:07:00	-6.43464	-28.6226	-30.1237	417.641	FALSE	1
2022-09-14	12:07:00	-7.10126	-31.5878	-30.1237	389.781	FALSE	1
2022-09-14	12:07:00	-7.18288	-31.9509	-30.1237	417.641	FALSE	1
2022-09-14	12:07:01	-7.74706	-34.4605	-34.8877	389.781	FALSE	1
2022-09-14	12:07:01	-7.63622	-33.9674	-34.8877	417.641	FALSE	1
2022-09-14	12:07:01	-8.21428	-36.5388	-34.8877	389.781	FALSE	1
2022-09-14	12:07:01	-7.77485	-34.5841	-34.8877	417.641	FALSE	1
2022-09-14	12:07:02	-8.01133	-35.636	-35.8867	389.781	FALSE	1
2022-09-14	12:07:02	-7.64803	-34.02	-35.8867	417.641	FALSE	1
2022-09-14	12:07:02	-8.19897	-36.4707	-35.8867	389.781	FALSE	1
2022-09-14	12:07:02	-8.41245	-37.4203	-35.8867	417.641	FALSE	1
2022-09-14	12:07:03	-8.57276	-38.1334	-37.5368	389.781	FALSE	1
2022-09-14	12:07:03	-8.24039	-36.6549	-37.5368	417.641	FALSE	1
2022-09-14	12:07:03	-8.50283	-37.8223	-37.5368	389.781	FALSE	1
2022-09-14	12:07:04	-8.50797	-37.8452	-36.8966	417.641	FALSE	1
2022-09-14	12:07:04	-8.50395	-37.8273	-36.8966	389.781	FALSE	1
2022-09-14	12:07:04	-8.01429	-35.6492	-36.8966	417.641	FALSE	1
2022-09-14	12:07:04	-8.15266	-36.2647	-36.8966	389.781	FALSE	1
2022-09-14	12:07:05	-5.33754	-23.7424	-28.7786	417.641	FALSE	1
2022-09-14	12:07:05	-6.64411	-29.5543	-28.7786	389.781	FALSE	1
2022-09-14	12:07:05	-5.12864	-22.8132	-28.7786	417.641	FALSE	1
2022-09-14	12:07:05	-8.76859	-39.0044	-28.7786	389.781	FALSE	1
2022-09-14	12:07:06	-7.85357	-34.9343	-24.3681	417.641	FALSE	1
2022-09-14	12:07:06	-8.67744	-38.599	-24.3681	389.781	FALSE	1
2022-09-14	12:07:06	-5.62461	-25.0194	-24.3681	417.641	FALSE	1
2022-09-14	12:07:06	0.242812	1.08008	-24.3681	390.861	FALSE	1
2022-09-14	12:07:07	0.461692	2.0537	-4.52217	419.694	FALSE	1
2022-09-14	12:07:07	0.293143	1.30396	-4.52217	392.165	FALSE	1
2022-09-14	12:07:07	-3.80472	-16.9242	-4.52217	419.694	FALSE	1
2022-09-14	12:07:08	0.244288	1.08664	1.52835	393.252	FALSE	1
2022-09-14	12:07:08	0.432074	1.92195	1.52835	421.616	FALSE	1
2022-09-14	12:07:08	0.275076	1.22359	1.52835	394.476	FALSE	1
2022-09-14	12:07:08	0.422914	1.88121	1.52835	423.497	FALSE	1
2022-09-14	12:07:09	0.256349	1.14029	1.49468	395.616	FALSE	1
2022-09-14	12:07:09	0.408308	1.81624	1.49468	425.314	FALSE	1
2022-09-14	12:07:09	0.212837	0.946742	1.49468	396.563	FALSE	1
2022-09-14	12:07:09	0.466578	2.07543	1.49468	427.389	FALSE	1
2022-09-14	12:07:10	0.138588	0.616467	1.30888	397.179	FALSE	1
2022-09-14	12:07:10	0.398842	1.77413	1.30888	429.163	FALSE	1
2022-09-14	12:07:10	0.179249	0.797335	1.30888	397.976	FALSE	1
2022-09-14	12:07:10	0.460318	2.04759	1.30888	431.211	FALSE	1
2022-09-14	12:07:11	0.165204	0.73486	1.1495	398.711	FALSE	1
2022-09-14	12:07:11	0.409478	1.82144	1.1495	433.032	FALSE	1
2022-09-14	12:07:11	0.200573	0.892189	1.1495	399.603	FALSE	1
2022-09-14	12:07:12	0.401896	1.78771	1.30339	434.82	FALSE	1
2022-09-14	12:07:12	0.191616	0.852346	1.30339	400.456	FALSE	1
2022-09-14	12:07:12	0.360674	1.60435	1.30339	436.424	FALSE	1
2022-09-14	12:07:12	0.217875	0.969152	1.30339	401.425	FALSE	1
2022-09-14	12:07:13	0.453652	2.01793	1.47011	438.442	FALSE	1
2022-09-14	12:07:13	0.232583	1.03458	1.47011	402.459	FALSE	1
2022-09-14	12:07:13	0.373346	1.66072	1.47011	440.103	FALSE	1
2022-09-14	12:07:13	0.262405	1.16723	1.47011	403.627	FALSE	1
2022-09-14	12:07:14	0.443473	1.97266	1.4992	442.076	FALSE	1
2022-09-14	12:07:14	0.245611	1.09253	1.4992	404.719	FALSE	1
2022-09-14	12:07:14	0.378181	1.68222	1.4992	443.758	FALSE	1
2022-09-14	12:07:14	0.280878	1.2494	1.4992	405.969	FALSE	1
2022-09-14	12:07:15	0.418384	1.86106	1.42061	445.619	FALSE	1
2022-09-14	12:07:15	0.226069	1.0056	1.42061	406.974	FALSE	1
2022-09-14	12:07:15	0.313651	1.39518	1.42061	447.014	FALSE	1
2022-09-14	12:07:16	-4.04584	-17.9967	-19.9583	406.974	FALSE	1
2022-09-14	12:07:16	-4.54599	-20.2215	-19.9583	447.014	FALSE	1
2022-09-14	12:07:16	-4.78991	-21.3065	-19.9583	406.974	FALSE	1
2022-09-14	12:07:16	-4.56553	-20.3084	-19.9583	447.014	FALSE	1
2022-09-14	12:07:17	-4.57342	-20.3435	-19.8655	406.974	FALSE	1
2022-09-14	12:07:17	-4.41026	-19.6177	-19.8655	447.014	FALSE	1
2022-09-14	12:07:17	-4.41423	-19.6354	-19.8655	406.974	FALSE	1
2022-09-14	12:07:18	-4.29617	-19.1102	-21.5456	447.014	FALSE	1
2022-09-14	12:07:18	-4.48248	-19.939	-21.5456	406.974	FALSE	1
2022-09-14	12:07:18	-4.73764	-21.074	-21.5456	447.014	FALSE	1
2022-09-14	12:07:18	-5.22767	-23.2537	-21.5456	406.974	FALSE	1
2022-09-14	12:07:18	-5.47433	-24.3509	-21.5456	447.014	FALSE	1
2022-09-14	12:07:19	-5.1065	-22.7147	-5.98143	406.974	FALSE	1
2022-09-14	12:07:19	0.586221	2.60763	-5.98143	449.622	FALSE	1
2022-09-14	12:07:19	0.486221	2.16281	-5.98143	409.137	FALSE	1
2022-09-14	12:07:20	0.457468	2.03491	-1.56631	451.657	FALSE	1
2022-09-14	12:07:20	0.425764	1.89388	-1.56631	411.031	FALSE	1
2022-09-14	12:07:20	0.415585	1.84861	-1.56631	453.505	FALSE	1
2022-09-14	12:07:20	-2.70731	-12.0427	-1.56631	411.031	FALSE	1
2022-09-14	12:07:21	-4.31113	-19.1768	-14.8055	453.505	FALSE	1
2022-09-14	12:07:21	-4.39586	-19.5537	-14.8055	411.031	FALSE	1
2022-09-14	12:07:21	-2.35408	-10.4714	-14.8055	453.505	FALSE	1
2022-09-14	12:07:21	-2.25266	-10.0203	-14.8055	411.031	FALSE	1
2022-09-14	12:07:22	-3.8209	-16.9961	-22.4576	453.505	FALSE	1
2022-09-14	12:07:22	-5.5181	-24.5456	-22.4576	411.031	FALSE	1
2022-09-14	12:07:22	-5.42029	-24.1105	-22.4576	453.505	FALSE	1
2022-09-14	12:07:22	-5.43546	-24.178	-22.4576	411.031	FALSE	1
2022-09-14	12:07:23	-5.41128	-24.0705	-23.1851	453.505	FALSE	1
2022-09-14	12:07:23	-5.20502	-23.153	-23.1851	411.031	FALSE	1
2022-09-14	12:07:23	-5.02044	-22.3319	-23.1851	453.505	FALSE	1
2022-09-14	12:07:24	-4.8893	-21.7486	-20.7772	411.031	FALSE	1
2022-09-14	12:07:24	-4.75403	-21.1469	-20.7772	453.505	FALSE	1
2022-09-14	12:07:24	-4.6066	-20.4911	-20.7772	411.031	FALSE	1
2022-09-14	12:07:24	-4.43378	-19.7223	-20.7772	453.505	FALSE	1
2022-09-14	12:07:25	-4.3008	-19.1308	-18.4259	411.031	FALSE	1
2022-09-14	12:07:25	-4.22548	-18.7958	-18.4259	453.505	FALSE	1
2022-09-14	12:07:25	-4.07357	-18.1201	-18.4259	411.031	FALSE	1
2022-09-14	12:07:25	-3.96945	-17.6569	-18.4259	453.505	FALSE	1
2022-09-14	12:07:26	-3.9292	-17.4779	-17.0767	411.031	FALSE	1
2022-09-14	12:07:26	-3.83154	-17.0435	-17.0767	453.505	FALSE	1
2022-09-14	12:07:26	-3.75632	-16.7089	-17.0767	411.031	FALSE	1
2022-09-14	12:07:27	-3.77352	-16.7854	-16.7287	453.505	FALSE	1
2022-09-14	12:07:27	-3.85592	-17.1519	-16.7287	411.031	FALSE	1
2022-09-14	12:07:27	-3.69708	-16.4454	-16.7287	453.505	FALSE	1
2022-09-14	12:07:27	-3.71658	-16.5321	-16.7287	411.031	FALSE	1
2022-09-14	12:07:28	-3.73938	-16.6335	-18.4524	453.505	FALSE	1
2022-09-14	12:07:28	-3.94935	-17.5675	-18.4524	411.031	FALSE	1
2022-09-14	12:07:28	-4.17174	-18.5567	-18.4524	453.505	FALSE	1
2022-09-14	12:07:28	-4.73266	-21.0518	-18.4524	411.031	FALSE	1
2022-09-14	12:07:29	-4.56172	-20.2914	-20.3881	453.505	FALSE	1
2022-09-14	12:07:29	-4.55464	-20.2599	-20.3881	411.031	FALSE	1
2022-09-14	12:07:29	-4.58823	-20.4094	-20.3881	453.505	FALSE	1
2022-09-14	12:07:29	-4.6292	-20.5916	-20.3881	411.031	FALSE	1
2022-09-14	12:07:30	-4.75256	-21.1403	-21.8564	453.505	FALSE	1
2022-09-14	12:07:30	-4.91174	-21.8484	-21.8564	411.031	FALSE	1
2022-09-14	12:07:30	-5.07632	-22.5805	-21.8564	453.505	FALSE	1
2022-09-14	12:07:31	-5.20533	-23.1543	-24.7099	411.031	FALSE	1
2022-09-14	12:07:31	-5.57637	-24.8048	-24.7099	453.505	FALSE	1
2022-09-14	12:07:31	-5.75256	-25.5885	-24.7099	411.031	FALSE	1
2022-09-14	12:07:31	-5.68584	-25.2918	-24.7099	453.505	FALSE	1
2022-09-14	12:07:32	-5.5407	-24.6461	-23.7399	411.031	FALSE	1
2022-09-14	12:07:32	-5.45683	-24.2731	-23.7399	453.505	FALSE	1
2022-09-14	12:07:32	-5.27322	-23.4563	-23.7399	411.031	FALSE	1
2022-09-14	12:07:32	-5.07709	-22.5839	-23.7399	453.505	FALSE	1
2022-09-14	12:07:33	-5.07998	-22.5968	-23.0994	411.031	FALSE	1
2022-09-14	12:07:33	-5.25154	-23.3599	-23.0994	453.505	FALSE	1
2022-09-14	12:07:33	-5.23566	-23.2893	-23.0994	411.031	FALSE	1
2022-09-14	12:07:33	-5.20477	-23.1519	-23.0994	453.505	FALSE	1
2022-09-14	12:07:34	-5.18589	-23.0679	-22.5644	411.031	FALSE	1
2022-09-14	12:07:34	-5.09423	-22.6602	-22.5644	453.505	FALSE	1
2022-09-14	12:07:34	-4.938	-21.9652	-22.5644	411.031	FALSE	1
2022-09-14	12:07:35	-4.78787	-21.2974	-9.02231	453.505	FALSE	1
2022-09-14	12:07:35	-4.71734	-20.9837	-9.02231	411.031	FALSE	1
2022-09-14	12:07:35	0.574873	2.55715	-9.02231	456.062	FALSE	1
2022-09-14	12:07:35	0.817112	3.63468	-9.02231	414.666	FALSE	1
2022-09-14	12:07:36	0.791056	3.51878	3.22528	459.581	FALSE	1
2022-09-14	12:07:36	0.681132	3.02981	3.22528	417.695	FALSE	1
2022-09-14	12:07:36	0.741641	3.29897	3.22528	462.88	FALSE	1
2022-09-14	12:07:36	0.686476	3.05358	3.22528	420.749	FALSE	1
2022-09-14	12:07:37	0.656094	2.91844	2.5554	465.799	FALSE	1
2022-09-14	12:07:37	0.617621	2.7473	2.5554	423.496	FALSE	1
2022-09-14	12:07:37	0.532074	2.36677	2.5554	468.165	FALSE	1
2022-09-14	12:07:37	0.492125	2.18907	2.5554	425.685	FALSE	1
2022-09-14	12:07:38	0.431769	1.92059	1.80499	470.086	FALSE	1
2022-09-14	12:07:38	0.398842	1.77413	1.80499	427.459	FALSE	1
2022-09-14	12:07:38	0.38673	1.72025	1.80499	471.806	FALSE	1
2022-09-14	12:07:39	0.389021	1.73044	-0.802148	429.19	FALSE	1
2022-09-14	12:07:39	0.417367	1.85653	-0.802148	473.663	FALSE	1
2022-09-14	12:07:39	0.439708	1.95591	-0.802148	431.146	FALSE	1
2022-09-14	12:07:39	-1.96742	-8.75148	-0.802148	473.663	FALSE	1
2022-09-14	12:07:40	-4.37607	-19.4656	-19.7492	431.146	FALSE	1
2022-09-14	12:07:40	-4.36787	-19.4292	-19.7492	473.663	FALSE	1
2022-09-14	12:07:40	-4.53108	-20.1552	-19.7492	431.146	FALSE	1
2022-09-14	12:07:40	-4.48426	-19.9469	-19.7492	473.663	FALSE	1
2022-09-14	12:07:41	-4.34925	-19.3463	-19.5527	431.146	FALSE	1
2022-09-14	12:07:41	-4.21978	-18.7704	-19.5527	473.663	FALSE	1
2022-09-14	12:07:41	-4.30899	-19.1672	-19.5527	431.146	FALSE	1
2022-09-14	12:07:41	-4.70457	-20.9269	-19.5527	473.663	FALSE	1
2022-09-14	12:07:42	-5.10686	-22.7163	-6.47236	431.146	FALSE	1
2022-09-14	12:07:42	0.356705	1.5867	-6.47236	475.249	FALSE	1
2022-09-14	12:07:42	0.385	1.71256	-6.47236	432.858	FALSE	1
2022-09-14	12:07:43	0.399504	1.77707	1.80865	477.026	FALSE	1
2022-09-14	12:07:43	0.413804	1.84068	1.80865	434.699	FALSE	1
2022-09-14	12:07:43	0.404797	1.80062	1.80865	478.827	FALSE	1
2022-09-14	12:07:43	0.408308	1.81624	1.80865	436.515	FALSE	1
2022-09-14	12:07:44	0.402659	1.79111	1.85902	480.618	FALSE	1
2022-09-14	12:07:44	0.41701	1.85494	1.85902	438.37	FALSE	1
2022-09-14	12:07:44	0.408003	1.81488	1.85902	482.433	FALSE	1
2022-09-14	12:07:44	0.444033	1.97515	1.85902	440.345	FALSE	1
2022-09-14	12:07:45	0.440115	1.95772	1.82512	484.391	FALSE	1
2022-09-14	12:07:45	0.433193	1.92693	1.82512	442.272	FALSE	1
2022-09-14	12:07:45	0.393346	1.74968	1.82512	486.14	FALSE	1
2022-09-14	12:07:45	0.374568	1.66615	1.82512	443.938	FALSE	1
2022-09-14	12:07:46	0.383524	1.70599	1.91418	487.846	FALSE	1
2022-09-14	12:07:46	0.703575	3.12964	1.91418	447.068	FALSE	1
2022-09-14	12:07:46	0.203881	0.906903	1.91418	488.753	FALSE	1
2022-09-14	12:07:47	-0.536119	-2.38476	-5.42408	447.068	FALSE	1
2022-09-14	12:07:47	-1.04385	-4.64325	-5.42408	488.753	FALSE	1
2022-09-14	12:07:47	-1.40716	-6.25933	-5.42408	447.068	FALSE	1
2022-09-14	12:07:47	-1.89042	-8.40897	-5.42408	488.753	FALSE	1
2022-09-14	12:07:48	-2.12207	-9.43939	-10.4356	447.068	FALSE	1
2022-09-14	12:07:48	-2.25134	-10.0144	-10.4356	488.753	FALSE	1
2022-09-14	12:07:48	-2.42019	-10.7655	-10.4356	447.068	FALSE	1
2022-09-14	12:07:48	-2.59047	-11.5229	-10.4356	488.753	FALSE	1
2022-09-14	12:07:49	-2.83902	-12.6285	-14.2233	447.068	FALSE	1
2022-09-14	12:07:49	-3.13775	-13.9573	-14.2233	488.753	FALSE	1
2022-09-14	12:07:49	-3.27632	-14.5737	-14.2233	447.068	FALSE	1
2022-09-14	12:07:49	-3.53709	-15.7337	-14.2233	488.753	FALSE	1
2022-09-14	12:07:50	-3.70523	-16.4816	-16.5638	447.068	FALSE	1
2022-09-14	12:07:50	-3.82304	-17.0056	-16.5638	488.753	FALSE	1
2022-09-14	12:07:50	-3.64284	-16.2041	-16.5638	447.068	FALSE	1
2022-09-14	12:07:51	-3.42004	-15.213	-15.4172	488.753	FALSE	1
2022-09-14	12:07:51	-3.46258	-15.4022	-15.4172	447.068	FALSE	1
2022-09-14	12:07:51	-3.49423	-15.543	-15.4172	488.753	FALSE	1
2022-09-14	12:07:51	-3.48696	-15.5107	-15.4172	447.068	FALSE	1
2022-09-14	12:07:52	-3.47373	-15.4518	-15.9955	488.753	FALSE	1
2022-09-14	12:07:52	-3.61525	-16.0814	-15.9955	447.068	FALSE	1
2022-09-14	12:07:52	-3.65668	-16.2656	-15.9955	488.753	FALSE	1
2022-09-14	12:07:52	-3.63815	-16.1832	-15.9955	447.068	FALSE	1
2022-09-14	12:07:53	-3.5725	-15.8912	-15.3426	488.753	FALSE	1
2022-09-14	12:07:53	-3.46808	-15.4267	-15.3426	447.068	FALSE	1
2022-09-14	12:07:53	-3.41128	-15.1741	-15.3426	488.753	FALSE	1
2022-09-14	12:07:53	-3.34482	-14.8784	-15.3426	447.068	FALSE	1
2022-09-14	12:07:54	-3.21958	-14.3213	-14.6235	488.753	FALSE	1
2022-09-14	12:07:54	-3.20263	-14.2459	-14.6235	447.068	FALSE	1
2022-09-14	12:07:54	-3.44034	-15.3033	-14.6235	488.753	FALSE	1
2022-09-14	12:07:55	-3.52818	-15.6941	-16.2307	447.068	FALSE	1
2022-09-14	12:07:55	-3.62263	-16.1142	-16.2307	488.753	FALSE	1
2022-09-14	12:07:55	-3.70212	-16.4678	-16.2307	447.068	FALSE	1
2022-09-14	12:07:55	-3.74238	-16.6469	-16.2307	488.753	FALSE	1
2022-09-14	12:07:56	-1.91291	-8.50901	-1.1885	447.068	FALSE	1
2022-09-14	12:07:56	0.379911	1.68992	-1.1885	490.443	FALSE	1
2022-09-14	12:07:56	0.288104	1.28154	-1.1885	448.35	FALSE	1
2022-09-14	12:07:56	0.176145	0.783528	-1.1885	491.227	FALSE	1
2022-09-14	12:07:57	0.191616	0.852346	1.25517	449.202	FALSE	1
2022-09-14	12:07:57	0.322506	1.43457	1.25517	492.661	FALSE	1
2022-09-14	12:07:57	0.311463	1.38545	1.25517	450.587	FALSE	1
2022-09-14	12:07:57	0.303117	1.34833	1.25517	494.01	FALSE	1
2022-09-14	12:07:58	0.308104	1.37051	1.39443	451.958	FALSE	1
2022-09-14	12:07:58	0.310954	1.38319	1.39443	495.393	FALSE	1
2022-09-14	12:07:58	0.321387	1.42959	1.39443	453.388	FALSE	1
2022-09-14	12:07:59	0.367646	1.63536	2.55415	497.028	FALSE	1
2022-09-14	12:07:59	0.514924	2.29048	2.55415	455.678	FALSE	1
2022-09-14	12:07:59	0.698995	3.10927	2.55415	500.138	FALSE	1
2022-09-14	12:07:59	0.715229	3.18148	2.55415	458.86	FALSE	1
2022-09-14	12:08:00	0.780827	3.47327	3.01397	503.611	FALSE	1
2022-09-14	12:08:00	0.749682	3.33474	3.01397	462.194	FALSE	1
2022-09-14	12:08:00	0.75757	3.36982	3.01397	506.981	FALSE	1
2022-09-14	12:08:00	0.422201	1.87803	3.01397	464.072	FALSE	1
2022-09-14	12:08:01	0.385254	1.71369	1.52776	508.694	FALSE	1
2022-09-14	12:08:01	0.287341	1.27815	1.52776	465.35	FALSE	1
2022-09-14	12:08:01	0.357774	1.59145	1.52776	510.286	FALSE	1
2022-09-14	12:08:02	0.411718	1.8314	1.50752	467.182	FALSE	1
2022-09-14	12:08:02	0.289631	1.28834	1.50752	511.574	FALSE	1
2022-09-14	12:08:02	0.273448	1.21635	1.50752	468.398	FALSE	1
2022-09-14	12:08:02	0.380827	1.69399	1.50752	513.268	FALSE	1
2022-09-14	12:08:03	0.482812	2.14764	2.02987	470.546	FALSE	1
2022-09-14	12:08:03	0.479809	2.13429	2.02987	515.402	FALSE	1
2022-09-14	12:08:03	0.43813	1.94889	2.02987	472.495	FALSE	1
2022-09-14	12:08:03	0.424593	1.88867	2.02987	517.291	FALSE	1
2022-09-14	12:08:04	0.505305	2.2477	2.17803	474.742	FALSE	1
2022-09-14	12:08:04	0.526374	2.34142	2.17803	519.632	FALSE	1
2022-09-14	12:08:04	0.495432	2.20378	2.17803	476.946	FALSE	1
2022-09-14	12:08:04	0.431463	1.91923	2.17803	521.552	FALSE	1
2022-09-14	12:08:05	0.428206	1.90475	1.94602	478.851	FALSE	1
2022-09-14	12:08:05	0.434873	1.9344	1.94602	523.486	FALSE	1
2022-09-14	12:08:05	0.449377	1.99892	1.94602	480.85	FALSE	1
2022-09-14	12:08:06	0.41757	1.85743	1.93978	525.344	FALSE	1
2022-09-14	12:08:06	0.453753	2.01838	1.93978	482.868	FALSE	1
2022-09-14	12:08:06	0.436908	1.94345	1.93978	527.287	FALSE	1
2022-09-14	12:08:06	0.436094	1.93983	1.93978	484.808	FALSE	1
2022-09-14	12:08:07	0.417061	1.85517	2.22897	529.142	FALSE	1
2022-09-14	12:08:07	0.468206	2.08267	2.22897	486.891	FALSE	1
2022-09-14	12:08:07	0.396145	1.76213	2.22897	530.904	FALSE	1
2022-09-14	12:08:07	0.722965	3.21589	2.22897	490.107	FALSE	1
2022-09-14	12:08:08	0.714466	3.17809	3.22246	534.082	FALSE	1
2022-09-14	12:08:08	0.725407	3.22676	3.22246	493.333	FALSE	1
2022-09-14	12:08:08	0.728104	3.23875	3.22246	537.321	FALSE	1
2022-09-14	12:08:08	0.729784	3.24623	3.22246	496.58	FALSE	1
2022-09-14	12:08:09	0.722404	3.2134	3.23377	540.535	FALSE	1
2022-09-14	12:08:09	0.732328	3.25754	3.23377	499.837	FALSE	1
2022-09-14	12:08:09	0.726221	3.23038	3.23377	543.765	FALSE	1
2022-09-14	12:08:10	0.721997	3.21159	3.23394	503.049	FALSE	1
2022-09-14	12:08:10	0.726985	3.23377	3.23394	546.999	FALSE	1
2022-09-14	12:08:10	0.727087	3.23423	3.23394	506.283	FALSE	1
2022-09-14	12:08:10	0.732023	3.25618	3.23394	550.255	FALSE	1
2022-09-14	12:08:11	0.731361	3.25324	3.23128	509.536	FALSE	1
2022-09-14	12:08:11	0.720725	3.20593	3.23128	553.461	FALSE	1
2022-09-14	12:08:11	0.727952	3.23808	3.23128	512.774	FALSE	1
2022-09-14	12:08:11	0.725662	3.22789	3.23128	556.689	FALSE	1
2022-09-14	12:08:12	0.725	3.22494	3.23779	515.999	FALSE	1
2022-09-14	12:08:12	0.72556	3.22744	3.23779	559.916	FALSE	1
2022-09-14	12:08:12	0.73416	3.26569	3.23779	519.265	FALSE	1
2022-09-14	12:08:12	0.726832	3.23309	3.23779	563.149	FALSE	1
2022-09-14	12:08:13	0.734211	3.26592	3.242	522.531	FALSE	1
2022-09-14	12:08:13	0.726578	3.23196	3.242	566.381	FALSE	1
2022-09-14	12:08:13	0.725712	3.22811	3.242	525.759	FALSE	1
2022-09-14	12:08:14	0.729733	3.246	3.22291	569.627	FALSE	1
2022-09-14	12:08:14	0.725712	3.22811	3.22291	528.987	FALSE	1
2022-09-14	12:08:14	0.722862	3.21543	3.22291	572.843	FALSE	1
2022-09-14	12:08:14	0.71986	3.20208	3.22291	532.189	FALSE	1
2022-09-14	12:08:15	0.717316	3.19077	3.21589	576.033	FALSE	1
2022-09-14	12:08:15	0.723931	3.22019	3.21589	535.409	FALSE	1
2022-09-14	12:08:15	0.723321	3.21748	3.21589	579.251	FALSE	1
2022-09-14	12:08:15	0.72729	3.23513	3.21589	538.645	FALSE	1
2022-09-14	12:08:16	0.721387	3.20887	3.21793	582.46	FALSE	1
2022-09-14	12:08:16	0.721895	3.21113	3.21793	541.856	FALSE	1
2022-09-14	12:08:16	0.724695	3.22359	3.21793	585.683	FALSE	1
2022-09-14	12:08:16	0.725712	3.22811	3.21793	545.084	FALSE	1
2022-09-14	12:08:17	0.722659	3.21453	3.2294	588.898	FALSE	1
2022-09-14	12:08:17	0.727697	3.23694	3.2294	548.321	FALSE	1
2022-09-14	12:08:17	0.727646	3.23671	3.2294	592.135	FALSE	1
2022-09-14	12:08:18	0.733397	3.2623	3.22444	551.583	FALSE	1
2022-09-14	12:08:18	0.727188	3.23468	3.22444	595.369	FALSE	1
2022-09-14	12:08:18	0.726272	3.2306	3.22444	554.814	FALSE	1
2022-09-14	12:08:18	0.712685	3.17017	3.22444	598.539	FALSE	1
2022-09-14	12:08:19	0.734415	3.26682	3.23649	558.08	FALSE	1
2022-09-14	12:08:19	0.729275	3.24396	3.23649	601.783	FALSE	1
2022-09-14	12:08:19	0.720216	3.20366	3.23649	561.284	FALSE	1
2022-09-14	12:08:19	0.726476	3.23151	3.23649	605.015	FALSE	1
2022-09-14	12:08:20	0.723931	3.22019	3.06711	564.504	FALSE	1
2022-09-14	12:08:20	0.703982	3.13145	3.06711	608.146	FALSE	1
2022-09-14	12:08:20	0.705305	3.13734	3.06711	567.642	FALSE	1
2022-09-14	12:08:20	0.624847	2.77944	3.06711	610.926	FALSE	1
2022-09-14	12:08:21	0.687443	3.05788	3.04166	570.699	FALSE	1
2022-09-14	12:08:21	0.692481	3.08029	3.04166	614.006	FALSE	1
2022-09-14	12:08:21	0.671463	2.9868	3.04166	573.686	FALSE	1
2022-09-14	12:08:22	0.708003	3.14934	2.19733	617.155	FALSE	1
2022-09-14	12:08:22	0.455585	2.02653	2.19733	575.713	FALSE	1
2022-09-14	12:08:22	0.494771	2.20084	2.19733	619.356	FALSE	1
2022-09-14	12:08:22	0.31757	1.41261	2.19733	577.125	FALSE	1
2022-09-14	12:08:23	0.597926	2.65969	2.42133	622.016	FALSE	1
2022-09-14	12:08:23	0.50271	2.23615	2.42133	579.362	FALSE	1
2022-09-14	12:08:23	0.429529	1.91063	2.42133	623.927	FALSE	1
2022-09-14	12:08:23	0.647188	2.87882	2.42133	582.24	FALSE	1
2022-09-14	12:08:24	0.68271	3.03683	-7.67982	626.963	FALSE	1
2022-09-14	12:08:24	-1.78731	-7.95031	-7.67982	582.24	FALSE	1
2022-09-14	12:08:24	-2.7779	-12.3567	-7.67982	626.963	FALSE	1
2022-09-14	12:08:24	-3.0235	-13.4491	-7.67982	582.24	FALSE	1
2022-09-14	12:08:25	-2.52024	-11.2105	-11.4789	626.963	FALSE	1
2022-09-14	12:08:25	-2.43943	-10.8511	-11.4789	582.24	FALSE	1
2022-09-14	12:08:25	-2.78207	-12.3752	-11.4789	626.963	FALSE	1
2022-09-14	12:08:26	-2.82792	-12.5792	-12.8516	582.24	FALSE	1
2022-09-14	12:08:26	-2.83663	-12.6179	-12.8516	626.963	FALSE	1
2022-09-14	12:08:26	-2.87688	-12.7969	-12.8516	582.24	FALSE	1
2022-09-14	12:08:26	-3.0152	-13.4122	-12.8516	626.963	FALSE	1
2022-09-14	12:08:27	-2.87205	-12.7755	-11.4868	582.24	FALSE	1
2022-09-14	12:08:27	-2.73775	-12.1781	-11.4868	626.963	FALSE	1
2022-09-14	12:08:27	-2.45856	-10.9362	-11.4868	582.24	FALSE	1
2022-09-14	12:08:27	-2.261	-10.0574	-11.4868	626.963	FALSE	1
2022-09-14	12:08:28	-2.26029	-10.0542	-9.78529	582.24	FALSE	1
2022-09-14	12:08:28	-2.16172	-9.61576	-9.78529	626.963	FALSE	1
2022-09-14	12:08:28	-2.19403	-9.75948	-9.78529	582.24	FALSE	1
2022-09-14	12:08:28	-2.18329	-9.71171	-9.78529	626.963	FALSE	1
2022-09-14	12:08:29	-2.01469	-8.96174	-8.81552	582.24	FALSE	1
2022-09-14	12:08:29	-1.90747	-8.48481	-8.81552	626.963	FALSE	1
2022-09-14	12:08:29	-2.02329	-9	-8.81552	582.24	FALSE	1
2022-09-14	12:08:30	-2.00848	-8.93412	-8.89888	626.963	FALSE	1
2022-09-14	12:08:30	-2.01775	-8.97536	-8.89888	582.24	FALSE	1
2022-09-14	12:08:30	-2.00502	-8.91873	-8.89888	626.963	FALSE	1
2022-09-14	12:08:30	-1.97098	-8.76731	-8.89888	582.24	FALSE	1
2022-09-14	12:08:31	-1.99342	-8.86713	-8.70946	626.963	FALSE	1
2022-09-14	12:08:31	-1.95495	-8.69601	-8.70946	582.24	FALSE	1
2022-09-14	12:08:31	-1.94721	-8.66158	-8.70946	626.963	FALSE	1
2022-09-14	12:08:31	-1.93632	-8.61314	-8.70946	582.24	FALSE	1
2022-09-14	12:08:32	-1.9924	-8.86259	-8.87052	626.963	FALSE	1
2022-09-14	12:08:32	-2.01103	-8.94546	-8.87052	582.24	FALSE	1
2022-09-14	12:08:32	-2.00441	-8.91602	-8.87052	626.963	FALSE	1
2022-09-14	12:08:32	-1.96889	-8.75802	-8.87052	582.24	FALSE	1
2022-09-14	12:08:33	-2.01093	-8.94502	-8.99972	626.963	FALSE	1
2022-09-14	12:08:33	-2.03566	-9.05502	-8.99972	582.24	FALSE	1
2022-09-14	12:08:33	-2.02309	-8.99911	-8.99972	626.963	FALSE	1
2022-09-14	12:08:34	-2.11195	-9.39438	-9.28275	582.24	FALSE	1
2022-09-14	12:08:34	-2.08665	-9.28184	-9.28275	626.963	FALSE	1
2022-09-14	12:08:34	-2.0667	-9.19309	-9.28275	582.24	FALSE	1
2022-09-14	12:08:34	-2.08212	-9.26169	-9.28275	626.963	FALSE	1
2022-09-14	12:08:35	-2.10212	-9.35065	-9.17942	582.24	FALSE	1
2022-09-14	12:08:35	-2.08492	-9.27414	-9.17942	626.963	FALSE	1
2022-09-14	12:08:35	-2.0491	-9.11481	-9.17942	582.24	FALSE	1
2022-09-14	12:08:35	-2.01836	-8.97807	-9.17942	626.963	FALSE	1
2022-09-14	12:08:36	-1.97266	-8.77479	-8.43522	582.24	FALSE	1
2022-09-14	12:08:36	-1.87128	-8.32383	-8.43522	626.963	FALSE	1
2022-09-14	12:08:36	-1.81668	-8.08096	-8.43522	582.24	FALSE	1
2022-09-14	12:08:36	-1.92467	-8.56132	-8.43522	626.963	FALSE	1
2022-09-14	12:08:37	-2.14385	-9.53627	-8.8343	582.24	FALSE	1
2022-09-14	12:08:37	-1.85907	-8.26952	-8.8343	626.963	FALSE	1
2022-09-14	12:08:37	-1.9552	-8.69712	-8.8343	582.24	FALSE	1
2022-09-14	12:08:38	-2.07072	-9.21098	-9.0767	626.963	FALSE	1
2022-09-14	12:08:38	-1.98472	-8.82843	-9.0767	582.24	FALSE	1
2022-09-14	12:08:38	-2.07245	-9.21867	-9.0767	626.963	FALSE	1
2022-09-14	12:08:38	-2.03424	-9.04871	-9.0767	582.24	FALSE	1
2022-09-14	12:08:39	-2.26686	-10.0834	-10.4249	626.963	FALSE	1
2022-09-14	12:08:39	-2.33169	-10.3718	-10.4249	582.24	FALSE	1
2022-09-14	12:08:39	-2.31195	-10.284	-10.4249	626.963	FALSE	1
2022-09-14	12:08:39	-2.46401	-10.9604	-10.4249	582.24	FALSE	1
2022-09-14	12:08:40	-2.40838	-10.713	-10.584	626.963	FALSE	1
2022-09-14	12:08:40	-1.94899	-8.6695	-10.584	582.24	FALSE	1
2022-09-14	12:08:40	-2.59418	-11.5394	-10.584	626.963	FALSE	1
2022-09-14	12:08:40	-2.56604	-11.4143	-10.584	582.24	FALSE	1
2022-09-14	12:08:41	-2.47459	-11.0075	-8.92259	626.963	FALSE	1
2022-09-14	12:08:41	-1.70843	-7.59944	-8.92259	582.24	FALSE	1
2022-09-14	12:08:41	-1.83464	-8.16085	-8.92259	626.963	FALSE	1
2022-09-14	12:08:42	-2.15072	-9.56683	-9.59047	582.24	FALSE	1
2022-09-14	12:08:42	-2.08635	-9.2805	-9.59047	626.963	FALSE	1
2022-09-14	12:08:42	-2.23103	-9.92407	-9.59047	582.24	FALSE	1
2022-09-14	12:08:43	-2.20075	-9.78938	-9.84311	626.963	FALSE	1
2022-09-14	12:08:43	-2.1491	-9.55963	-9.84311	582.24	FALSE	1
2022-09-14	12:08:43	-2.20034	-9.78755	-9.84311	626.963	FALSE	1
2022-09-14	12:08:43	-2.23072	-9.92269	-9.84311	582.24	FALSE	1
2022-09-14	12:08:43	-2.28324	-10.1563	-9.84311	626.963	FALSE	1
2022-09-14	12:08:44	-2.30319	-10.245	-10.3425	582.24	FALSE	1
2022-09-14	12:08:44	-2.32782	-10.3546	-10.3425	626.963	FALSE	1
2022-09-14	12:08:44	-2.34426	-10.4277	-10.3425	582.24	FALSE	1
2022-09-14	12:08:45	-2.3465	-10.4377	-10.5396	626.963	FALSE	1
2022-09-14	12:08:45	-2.37083	-10.5459	-10.5396	582.24	FALSE	1
2022-09-14	12:08:45	-2.38167	-10.5941	-10.5396	626.963	FALSE	1
2022-09-14	12:08:45	-2.37861	-10.5805	-10.5396	582.24	FALSE	1
2022-09-14	12:08:46	-2.36553	-10.5224	-10.6327	626.963	FALSE	1
2022-09-14	12:08:46	-2.40915	-10.7164	-10.6327	582.24	FALSE	1
2022-09-14	12:08:46	-2.38793	-10.622	-10.6327	626.963	FALSE	1
2022-09-14	12:08:46	-2.39877	-10.6702	-10.6327	582.24	FALSE	1
2022-09-14	12:08:47	-2.38752	-10.6202	-10.6263	626.963	FALSE	1
2022-09-14	12:08:47	-2.37978	-10.5857	-10.6263	582.24	FALSE	1
2022-09-14	12:08:47	-2.38762	-10.6206	-10.6263	626.963	FALSE	1
2022-09-14	12:08:47	-2.40065	-10.6786	-10.6263	582.24	FALSE	1
2022-09-14	12:08:48	-2.42523	-10.7879	-10.8348	626.963	FALSE	1
2022-09-14	12:08:48	-2.44355	-10.8694	-10.8348	582.24	FALSE	1
2022-09-14	12:08:48	-2.43851	-10.847	-10.8348	626.963	FALSE	1
2022-09-14	12:08:49	-2.44889	-10.8932	-10.9685	582.24	FALSE	1
2022-09-14	12:08:49	-2.46798	-10.9781	-10.9685	626.963	FALSE	1
2022-09-14	12:08:49	-2.4634	-10.9577	-10.9685	582.24	FALSE	1
2022-09-14	12:08:49	-2.48309	-11.0453	-10.9685	626.963	FALSE	1
2022-09-14	12:08:50	-2.48507	-11.0541	-11.2082	582.24	FALSE	1
2022-09-14	12:08:50	-2.50467	-11.1413	-11.2082	626.963	FALSE	1
2022-09-14	12:08:50	-2.54131	-11.3043	-11.2082	582.24	FALSE	1
2022-09-14	12:08:50	-2.54777	-11.333	-11.2082	626.963	FALSE	1
2022-09-14	12:08:51	-2.57943	-11.4738	-11.6711	582.24	FALSE	1
2022-09-14	12:08:51	-2.60579	-11.5911	-11.6711	626.963	FALSE	1
2022-09-14	12:08:51	-2.64055	-11.7457	-11.6711	582.24	FALSE	1
2022-09-14	12:08:51	-2.66935	-11.8738	-11.6711	626.963	FALSE	1
2022-09-14	12:08:52	-2.68569	-11.9465	-11.967	582.24	FALSE	1
2022-09-14	12:08:52	-2.70579	-12.0359	-11.967	626.963	FALSE	1
2022-09-14	12:08:52	-2.67943	-11.9186	-11.967	582.24	FALSE	1
2022-09-14	12:08:53	-2.79708	-12.442	-14.0305	626.963	FALSE	1
2022-09-14	12:08:53	-3.08721	-13.7325	-14.0305	582.24	FALSE	1
2022-09-14	12:08:53	-3.32604	-14.7949	-14.0305	626.963	FALSE	1
2022-09-14	12:08:53	-3.4065	-15.1528	-14.0305	582.24	FALSE	1
2022-09-14	12:08:54	-3.53083	-15.7058	-15.9574	626.963	FALSE	1
2022-09-14	12:08:54	-3.55887	-15.8306	-15.9574	582.24	FALSE	1
2022-09-14	12:08:54	-3.46457	-15.4111	-15.9574	626.963	FALSE	1
2022-09-14	12:08:54	-3.7953	-16.8823	-15.9574	582.24	FALSE	1
2022-09-14	12:08:55	-4.38869	-19.5218	-21.8539	626.963	FALSE	1
2022-09-14	12:08:55	-4.8751	-21.6854	-21.8539	582.24	FALSE	1
2022-09-14	12:08:55	-5.09495	-22.6634	-21.8539	626.963	FALSE	1
2022-09-14	12:08:55	-5.29312	-23.5449	-21.8539	582.24	FALSE	1
2022-09-14	12:08:56	-5.13113	-22.8243	-22.9188	626.963	FALSE	1
2022-09-14	12:08:56	-5.02991	-22.374	-22.9188	582.24	FALSE	1
2022-09-14	12:08:56	-5.29612	-23.5582	-22.9188	626.963	FALSE	1
2022-09-14	12:08:57	-5.81932	-25.8855	-29.2101	582.24	FALSE	1
2022-09-14	12:08:57	-6.37047	-28.3371	-29.2101	626.963	FALSE	1
2022-09-14	12:08:57	-6.76772	-30.1042	-29.2101	582.24	FALSE	1
2022-09-14	12:08:57	-7.30935	-32.5135	-29.2101	626.963	FALSE	1
2022-09-14	12:08:58	-7.59897	-33.8017	-37.0665	582.24	FALSE	1
2022-09-14	12:08:58	-8.09128	-35.9916	-37.0665	626.963	FALSE	1
2022-09-14	12:08:58	-8.46034	-37.6333	-37.0665	582.24	FALSE	1
2022-09-14	12:08:58	-9.1811	-40.8394	-37.0665	626.963	FALSE	1
2022-09-14	12:08:59	-9.5438	-42.4527	-43.8054	582.24	FALSE	1
2022-09-14	12:08:59	-9.92385	-44.1433	-43.8054	626.963	FALSE	1
2022-09-14	12:08:59	-9.86711	-43.8909	-43.8054	582.24	FALSE	1
2022-09-14	12:08:59	-10.0568	-44.7347	-43.8054	626.963	FALSE	1
2022-09-14	12:09:00	-10.1111	-44.9762	-44.9037	582.24	FALSE	1
2022-09-14	12:09:00	-10.0665	-44.7778	-44.9037	626.963	FALSE	1
2022-09-14	12:09:00	-10.1068	-44.9571	-44.9037	582.24	FALSE	1
2022-09-14	12:09:01	-10.1641	-45.2119	-46.6896	626.963	FALSE	1
2022-09-14	12:09:01	-10.4251	-46.3729	-46.6896	582.24	FALSE	1
2022-09-14	12:09:01	-10.5636	-46.989	-46.6896	626.963	FALSE	1
2022-09-14	12:09:01	-10.8324	-48.1847	-46.6896	582.24	FALSE	1
2022-09-14	12:09:02	-10.7301	-47.7296	-48.4237	626.963	FALSE	1
2022-09-14	12:09:02	-11.0069	-48.9609	-48.4237	582.24	FALSE	1
2022-09-14	12:09:02	-10.9398	-48.6624	-48.4237	626.963	FALSE	1
2022-09-14	12:09:02	-10.8677	-48.3417	-48.4237	582.24	FALSE	1
2022-09-14	12:09:03	-10.8654	-48.3315	-46.8907	626.963	FALSE	1
2022-09-14	12:09:03	-10.5988	-47.1456	-46.8907	582.24	FALSE	1
2022-09-14	12:09:03	-10.5011	-46.711	-46.8907	626.963	FALSE	1
2022-09-14	12:09:03	-10.2007	-45.3748	-46.8907	582.24	FALSE	1
2022-09-14	12:09:04	-10.1457	-45.1301	-44.4153	626.963	FALSE	1
2022-09-14	12:09:04	-9.89306	-44.0063	-44.4153	582.24	FALSE	1
2022-09-14	12:09:04	-9.91627	-44.1096	-44.4153	626.963	FALSE	1
2022-09-14	12:09:05	-9.88848	-43.9859	-43.863	582.24	FALSE	1
2022-09-14	12:09:05	-10.0299	-44.615	-43.863	626.963	FALSE	1
2022-09-14	12:09:05	-9.81948	-43.679	-43.863	582.24	FALSE	1
2022-09-14	12:09:05	-9.70553	-43.1721	-43.863	626.963	FALSE	1
2022-09-14	12:09:06	-9.48756	-42.2026	-40.4726	582.24	FALSE	1
2022-09-14	12:09:06	-9.1554	-40.7251	-40.4726	626.963	FALSE	1
2022-09-14	12:09:06	-9.01535	-40.1021	-40.4726	582.24	FALSE	1
2022-09-14	12:09:06	-8.73632	-38.8609	-40.4726	626.963	FALSE	1
2022-09-14	12:09:07	-8.8954	-39.5685	-38.5501	582.24	FALSE	1
2022-09-14	12:09:07	-8.67011	-38.5664	-38.5501	626.963	FALSE	1
2022-09-14	12:09:07	-8.72691	-38.819	-38.5501	582.24	FALSE	1
2022-09-14	12:09:07	-8.37337	-37.2464	-38.5501	626.963	FALSE	1
2022-09-14	12:09:08	-8.5211	-37.9036	-38.0122	582.24	FALSE	1
2022-09-14	12:09:08	-8.48294	-37.7338	-38.0122	626.963	FALSE	1
2022-09-14	12:09:08	-8.63255	-38.3993	-38.0122	582.24	FALSE	1
2022-09-14	12:09:09	-8.59754	-38.2436	-37.4431	626.963	FALSE	1
2022-09-14	12:09:09	-8.59897	-38.2499	-37.4431	582.24	FALSE	1
2022-09-14	12:09:09	-8.39795	-37.3558	-37.4431	626.963	FALSE	1
2022-09-14	12:09:09	-8.07586	-35.923	-37.4431	582.24	FALSE	1
2022-09-14	12:09:10	-7.86767	-34.997	-33.9493	626.963	FALSE	1
2022-09-14	12:09:10	-7.68808	-34.1981	-33.9493	582.24	FALSE	1
2022-09-14	12:09:10	-7.5924	-33.7725	-33.9493	626.963	FALSE	1
2022-09-14	12:09:10	-7.38044	-32.8297	-33.9493	582.24	FALSE	1
2022-09-14	12:09:11	-7.20222	-32.0369	-24.8793	626.963	FALSE	1
2022-09-14	12:09:11	-6.51729	-28.9902	-24.8793	582.24	FALSE	1
2022-09-14	12:09:11	-5.21199	-23.184	-24.8793	626.963	FALSE	1
2022-09-14	12:09:11	-3.44095	-15.306	-24.8793	582.24	FALSE	1
2022-09-14	12:09:12	-4.93749	-21.9629	-19.0963	626.963	FALSE	1
2022-09-14	12:09:12	-3.87856	-17.2526	-19.0963	582.24	FALSE	1
2022-09-14	12:09:12	-4.06304	-18.0732	-19.0963	626.963	FALSE	1
2022-09-14	12:09:13	-1.8695	-8.31591	-16.0674	582.24	FALSE	1
2022-09-14	12:09:13	-2.89673	-12.8852	-16.0674	626.963	FALSE	1
2022-09-14	12:09:13	-4.9296	-21.9278	-16.0674	582.24	FALSE	1
2022-09-14	12:09:13	-4.75261	-21.1406	-16.0674	626.963	FALSE	1
2022-09-14	12:09:14	-5.14986	-22.9076	-20.2248	582.24	FALSE	1
2022-09-14	12:09:14	-4.83484	-21.5063	-20.2248	626.963	FALSE	1
2022-09-14	12:09:14	-4.80441	-21.371	-20.2248	582.24	FALSE	1
2022-09-14	12:09:14	-3.39785	-15.1143	-20.2248	626.963	FALSE	1
2022-09-14	12:09:15	-4.13103	-18.3756	-15.6958	582.24	FALSE	1
2022-09-14	12:09:15	-4.93322	-21.9439	-15.6958	626.963	FALSE	1
2022-09-14	12:09:15	-3.31093	-14.7277	-15.6958	582.24	FALSE	1
2022-09-14	12:09:15	-1.73907	-7.73573	-15.6958	626.963	FALSE	1
2022-09-14	12:09:16	-2.22044	-9.87696	-11.7104	582.24	FALSE	1
2022-09-14	12:09:16	-2.25449	-10.0284	-11.7104	626.963	FALSE	1
2022-09-14	12:09:16	-3.42289	-15.2257	-11.7104	582.24	FALSE	1
2022-09-14	12:09:17	-4.03591	-17.9525	-18.7857	626.963	FALSE	1
2022-09-14	12:09:17	-4.56742	-20.3168	-18.7857	582.24	FALSE	1
2022-09-14	12:09:17	-4.20288	-18.6953	-18.7857	626.963	FALSE	1
2022-09-14	12:09:17	-4.08665	-18.1782	-18.7857	582.24	FALSE	1
2022-09-14	12:09:18	-4.24884	-18.8997	-20.6359	626.963	FALSE	1
2022-09-14	12:09:18	-4.28589	-19.0645	-20.6359	582.24	FALSE	1
2022-09-14	12:09:18	-4.68395	-20.8351	-20.6359	626.963	FALSE	1
2022-09-14	12:09:18	-5.33795	-23.7443	-20.6359	582.24	FALSE	1
2022-09-14	12:09:19	-5.33067	-23.7119	-23.9269	626.963	FALSE	1
2022-09-14	12:09:19	-5.45072	-24.2459	-23.9269	582.24	FALSE	1
2022-09-14	12:09:19	-5.38757	-23.965	-23.9269	626.963	FALSE	1
2022-09-14	12:09:19	-5.34706	-23.7848	-23.9269	582.24	FALSE	1
2022-09-14	12:09:20	-5.29586	-23.557	-23.4366	626.963	FALSE	1
2022-09-14	12:09:20	-5.27042	-23.4439	-23.4366	582.24	FALSE	1
2022-09-14	12:09:20	-5.24004	-23.3087	-23.4366	626.963	FALSE	1
2022-09-14	12:09:21	-5.21571	-23.2005	-22.7173	582.24	FALSE	1
2022-09-14	12:09:21	-5.01016	-22.2862	-22.7173	626.963	FALSE	1
2022-09-14	12:09:21	-5.03785	-22.4094	-22.7173	582.24	FALSE	1
2022-09-14	12:09:21	-5.16462	-22.9733	-22.7173	626.963	FALSE	1
2022-09-14	12:09:22	-0.939987	-4.18125	3.53394	582.24	FALSE	1
2022-09-14	12:09:22	0.718232	3.19484	3.53394	630.158	FALSE	1
2022-09-14	12:09:22	1.53803	6.84147	3.53394	589.082	FALSE	1
2022-09-14	12:09:22	1.86159	8.28072	3.53394	638.439	FALSE	1
2022-09-14	12:09:23	1.35614	6.03238	6.60866	595.114	FALSE	1
2022-09-14	12:09:23	1.6163	7.18963	6.60866	645.629	FALSE	1
2022-09-14	12:09:23	1.48464	6.60398	6.60866	601.718	FALSE	1
2022-09-14	12:09:24	1.50378	6.68911	7.35697	652.318	FALSE	1
2022-09-14	12:09:24	1.85406	8.24723	7.35697	609.965	FALSE	1
2022-09-14	12:09:24	1.70846	7.59957	7.35697	659.917	FALSE	1
2022-09-14	12:09:24	1.54938	6.89195	7.35697	616.857	FALSE	1
2022-09-14	12:09:25	1.66607	7.41101	5.29641	667.328	FALSE	1
2022-09-14	12:09:25	1.27375	5.66589	5.29641	622.523	FALSE	1
2022-09-14	12:09:25	0.962913	4.28323	5.29641	671.612	FALSE	1
2022-09-14	12:09:25	0.860013	3.82551	5.29641	626.349	FALSE	1
2022-09-14	12:09:26	0.982862	4.37197	4.09167	675.983	FALSE	1
2022-09-14	12:09:26	0.850954	3.78521	4.09167	630.134	FALSE	1
2022-09-14	12:09:26	1.06022	4.71607	4.09167	680.7	FALSE	1
2022-09-14	12:09:26	0.785356	3.49342	4.09167	633.627	FALSE	1
2022-09-14	12:09:27	0.597468	2.65766	2.26451	683.357	FALSE	1
2022-09-14	12:09:27	0.520216	2.31402	2.26451	635.941	FALSE	1
2022-09-14	12:09:27	0.472125	2.10011	2.26451	685.457	FALSE	1
2022-09-14	12:09:27	0.446527	1.98624	2.26451	637.928	FALSE	1
2022-09-14	12:09:28	0.439911	1.95681	2.07498	687.414	FALSE	1
2022-09-14	12:09:28	0.453193	2.01589	2.07498	639.944	FALSE	1
2022-09-14	12:09:28	0.506323	2.25223	2.07498	689.666	FALSE	1
2022-09-14	12:09:29	0.583575	2.59586	2.84419	642.539	FALSE	1
2022-09-14	12:09:29	0.668461	2.97345	2.84419	692.64	FALSE	1
2022-09-14	12:09:29	0.654109	2.90961	2.84419	645.449	FALSE	1
2022-09-14	12:09:29	0.651463	2.89784	2.84419	695.538	FALSE	1
2022-09-14	12:09:30	0.680929	3.02891	2.42421	648.478	FALSE	1
2022-09-14	12:09:30	0.597214	2.65653	2.42421	698.194	FALSE	1
2022-09-14	12:09:30	0.460929	2.0503	2.42421	650.528	FALSE	1
2022-09-14	12:09:30	0.440878	1.96111	2.42421	700.155	FALSE	1
2022-09-14	12:09:31	0.401641	1.78658	1.04074	652.315	FALSE	1
2022-09-14	12:09:31	0.212837	0.946742	1.04074	701.102	FALSE	1
2022-09-14	12:09:31	0.15416	0.685735	1.04074	653.001	FALSE	1
2022-09-14	12:09:31	0.167239	0.743913	1.04074	701.846	FALSE	1
2022-09-14	12:09:32	0.179453	0.798243	0.571494	653.799	FALSE	1
2022-09-14	12:09:32	0.126832	0.564174	0.571494	702.41	FALSE	1
2022-09-14	12:09:32	0.0791478	0.352065	0.571494	654.151	FALSE	1
2022-09-14	12:09:33	0.114059	0.507357	3.51147	702.917	FALSE	1
2022-09-14	12:09:33	0.416858	1.85427	3.51147	656.005	FALSE	1
2022-09-14	12:09:33	0.819351	3.64464	3.51147	706.562	FALSE	1
2022-09-14	12:09:33	1.80739	8.03963	3.51147	664.045	FALSE	1
2022-09-14	12:09:34	3.83782	17.0714	15.9308	723.633	1	2
2022-09-14	12:09:34	3.29955	14.6771	15.9308	678.722	1	3
2022-09-14	12:09:34	3.80281	16.9157	15.9308	740.549	1	4
2022-09-14	12:09:34	3.38546	15.0592	15.9308	693.781	1	5
2022-09-14	12:09:35	1.93609	8.61212	4.35787	749.161	FALSE	5
2022-09-14	12:09:35	1.2622	5.61452	4.35787	699.396	FALSE	5
2022-09-14	12:09:35	0.453601	2.01771	4.35787	751.179	FALSE	5
2022-09-14	12:09:35	0.266883	1.18715	4.35787	700.583	FALSE	5
2022-09-14	12:09:36	0.383626	1.70645	1.62925	752.885	FALSE	5
2022-09-14	12:09:36	0.286527	1.27453	1.62925	701.857	FALSE	5
2022-09-14	12:09:36	0.428664	1.90678	1.62925	754.792	FALSE	5
2022-09-14	12:09:37	0.36673	1.63129	3.1134	703.489	FALSE	5
2022-09-14	12:09:37	0.510445	2.27056	3.1134	757.063	FALSE	5
2022-09-14	12:09:37	0.623575	2.77379	3.1134	706.262	FALSE	5
2022-09-14	12:09:37	1.29894	5.77794	3.1134	762.841	FALSE	5
2022-09-14	12:09:38	-1.67179	-7.43646	-2.58204	706.262	FALSE	5
2022-09-14	12:09:38	-1.20823	-5.37445	-2.58204	762.841	FALSE	5
2022-09-14	12:09:38	-0.0164756	-0.0732868	-2.58204	706.262	FALSE	5
2022-09-14	12:09:38	0.574618	2.55602	-2.58204	765.397	FALSE	5
2022-09-14	12:09:39	1.97065	8.76585	-0.0244429	715.028	FALSE	5
2022-09-14	12:09:39	1.9395	8.62728	-0.0244429	774.024	FALSE	5
2022-09-14	12:09:39	-1.66787	-7.41902	-0.0244429	715.028	FALSE	5
2022-09-14	12:09:39	-2.26426	-10.0719	-0.0244429	774.024	FALSE	5
2022-09-14	12:09:40	-2.17118	-9.65784	-10.3428	715.028	FALSE	5
2022-09-14	12:09:40	-2.1836	-9.71309	-10.3428	774.024	FALSE	5
2022-09-14	12:09:40	-2.6207	-11.6574	-10.3428	715.028	FALSE	5
2022-09-14	12:09:41	-2.08106	-9.25697	-11.958	774.024	FALSE	5
2022-09-14	12:09:41	-2.86065	-12.7247	-11.958	715.028	FALSE	5
2022-09-14	12:09:41	-2.85637	-12.7057	-11.958	774.024	FALSE	5
2022-09-14	12:09:41	-2.95505	-13.1447	-11.958	715.028	FALSE	5
2022-09-14	12:09:42	-2.91312	-12.9581	-12.0091	774.024	FALSE	5
2022-09-14	12:09:42	-2.03245	-9.04074	-12.0091	715.028	FALSE	5
2022-09-14	12:09:42	-2.98965	-13.2986	-12.0091	774.024	FALSE	5
2022-09-14	12:09:42	-2.86385	-12.739	-12.0091	715.028	FALSE	5
2022-09-14	12:09:43	-2.94375	-13.0944	-11.8566	774.024	FALSE	5
2022-09-14	12:09:43	-2.75352	-12.2482	-11.8566	715.028	FALSE	5
2022-09-14	12:09:43	-2.69184	-11.9738	-11.8566	774.024	FALSE	5
2022-09-14	12:09:43	-2.27286	-10.1101	-11.8566	715.028	FALSE	5
2022-09-14	12:09:44	-2.38675	-10.6167	-3.39792	774.024	FALSE	5
2022-09-14	12:09:44	-1.28508	-5.71629	-3.39792	715.028	FALSE	5
2022-09-14	12:09:44	1.38017	6.13927	-3.39792	780.163	FALSE	5
2022-09-14	12:09:45	1.4165	6.30088	-0.715565	721.329	FALSE	5
2022-09-14	12:09:45	-0.625585	-2.78273	-0.715565	780.163	FALSE	5
2022-09-14	12:09:45	-0.32533	-1.44713	-0.715565	721.329	FALSE	5
2022-09-14	12:09:45	-1.10905	-4.93328	-0.715565	780.163	FALSE	5
2022-09-14	12:09:46	-1.85693	-8.26	-8.75712	721.329	FALSE	5
2022-09-14	12:09:46	-2.15235	-9.57408	-8.75712	780.163	FALSE	5
2022-09-14	12:09:46	-1.58055	-7.0306	-8.75712	721.329	FALSE	5
2022-09-14	12:09:46	-2.28492	-10.1638	-8.75712	780.163	FALSE	5
2022-09-14	12:09:47	-2.42253	-10.7759	-11.5436	721.329	FALSE	5
2022-09-14	12:09:47	-2.54055	-11.3009	-11.5436	780.163	FALSE	5
2022-09-14	12:09:47	-2.68487	-11.9428	-11.5436	721.329	FALSE	5
2022-09-14	12:09:47	-2.73256	-12.155	-11.5436	780.163	FALSE	5
2022-09-14	12:09:48	-2.58156	-11.4833	-11.7664	721.329	FALSE	5
2022-09-14	12:09:48	-2.74909	-12.2285	-11.7664	780.163	FALSE	5
2022-09-14	12:09:48	-2.60497	-11.5874	-11.7664	721.329	FALSE	5
2022-09-14	12:09:49	-2.62294	-11.6674	-11.4396	780.163	FALSE	5
2022-09-14	12:09:49	-2.53999	-11.2984	-11.4396	721.329	FALSE	5
2022-09-14	12:09:49	-2.57724	-11.4641	-11.4396	780.163	FALSE	5
2022-09-14	12:09:49	-2.54681	-11.3287	-11.4396	721.329	FALSE	5
2022-09-14	12:09:50	-2.34808	-10.4447	-9.34807	780.163	FALSE	5
2022-09-14	12:09:50	-2.42314	-10.7786	-9.34807	721.329	FALSE	5
2022-09-14	12:09:50	-1.83724	-8.17241	-9.34807	780.163	FALSE	5
2022-09-14	12:09:50	-1.7977	-7.99653	-9.34807	721.329	FALSE	5
2022-09-14	12:09:51	-1.67546	-7.45278	-8.7414	780.163	FALSE	5
2022-09-14	12:09:51	-1.9549	-8.69579	-8.7414	721.329	FALSE	5
2022-09-14	12:09:51	-2.11536	-9.40954	-8.7414	780.163	FALSE	5
2022-09-14	12:09:51	-2.1149	-9.4075	-8.7414	721.329	FALSE	5
2022-09-14	12:09:52	-2.24569	-9.98928	-9.94219	780.163	FALSE	5
2022-09-14	12:09:52	-2.18981	-9.74071	-9.94219	721.329	FALSE	5
2022-09-14	12:09:52	-2.26981	-10.0966	-9.94219	780.163	FALSE	5
2022-09-14	12:09:53	-2.16187	-9.61643	-10.3283	721.329	FALSE	5
2022-09-14	12:09:53	-2.41515	-10.7431	-10.3283	780.163	FALSE	5
2022-09-14	12:09:53	-2.30034	-10.2324	-10.3283	721.329	FALSE	5
2022-09-14	12:09:53	-2.41022	-10.7211	-10.3283	780.163	FALSE	5
2022-09-14	12:09:54	-2.48782	-11.0663	-10.9816	721.329	FALSE	5
2022-09-14	12:09:54	-2.5491	-11.3389	-10.9816	780.163	FALSE	5
2022-09-14	12:09:54	-2.47541	-11.0111	-10.9816	721.329	FALSE	5
2022-09-14	12:09:54	-2.36279	-10.5102	-10.9816	780.163	FALSE	5
2022-09-14	12:09:55	-2.24446	-9.98381	-8.3273	721.329	FALSE	5
2022-09-14	12:09:55	-1.82676	-8.12579	-8.3273	780.163	FALSE	5
2022-09-14	12:09:55	-1.58538	-7.05209	-8.3273	721.329	FALSE	5
2022-09-14	12:09:55	-1.83164	-8.1475	-8.3273	780.163	FALSE	5
2022-09-14	12:09:56	-1.93042	-8.58689	-9.14459	721.329	FALSE	5
2022-09-14	12:09:56	-2.05434	-9.13812	-9.14459	780.163	FALSE	5
2022-09-14	12:09:56	-2.18263	-9.70877	-9.14459	721.329	FALSE	5
2022-09-14	12:09:57	-2.26192	-10.0615	-10.6249	780.163	FALSE	5
2022-09-14	12:09:57	-2.18991	-9.74116	-10.6249	721.329	FALSE	5
2022-09-14	12:09:57	-2.40182	-10.6838	-10.6249	780.163	FALSE	5
2022-09-14	12:09:57	-2.70065	-12.013	-10.6249	721.329	FALSE	5
2022-09-14	12:09:58	-2.59922	-11.5619	-12.1973	780.163	FALSE	5
2022-09-14	12:09:58	-2.71245	-12.0655	-12.1973	721.329	FALSE	5
2022-09-14	12:09:58	-2.77383	-12.3386	-12.1973	780.163	FALSE	5
2022-09-14	12:09:58	-2.88278	-12.8232	-12.1973	721.329	FALSE	5
2022-09-14	12:09:59	-2.74574	-12.2136	-7.84241	780.163	FALSE	5
2022-09-14	12:09:59	-2.74441	-12.2077	-7.84241	721.329	FALSE	5
2022-09-14	12:09:59	0.369733	1.64465	-7.84241	781.808	FALSE	5
2022-09-14	12:09:59	-1.93179	-8.59299	-7.84241	721.329	FALSE	5
2022-09-14	12:10:00	-2.67418	-11.8953	-12.6905	781.808	FALSE	5
2022-09-14	12:10:00	-2.89281	-12.8678	-12.6905	721.329	FALSE	5
2022-09-14	12:10:00	-2.99189	-13.3085	-12.6905	781.808	FALSE	5
2022-09-14	12:10:01	-3.11892	-13.8736	-9.92996	721.329	FALSE	5
2022-09-14	12:10:01	-3.10126	-13.795	-9.92996	781.808	FALSE	5
2022-09-14	12:10:01	-2.52701	-11.2406	-9.92996	721.329	FALSE	5
2022-09-14	12:10:01	-0.182226	-0.810578	-9.92996	781.808	FALSE	5
2022-09-14	12:10:02	-1.05078	-4.67408	0.311307	721.329	FALSE	5
2022-09-14	12:10:02	1.28184	5.70188	0.311307	787.51	FALSE	5
2022-09-14	12:10:02	1.34892	6.00027	0.311307	727.329	FALSE	5
2022-09-14	12:10:02	-1.30004	-5.78284	0.311307	787.51	FALSE	5
2022-09-14	12:10:03	-2.78818	-12.4024	-8.61542	727.329	FALSE	5
2022-09-14	12:10:03	-2.87836	-12.8035	-8.61542	787.51	FALSE	5
2022-09-14	12:10:03	-0.143956	-0.640345	-8.61542	727.329	FALSE	5
2022-09-14	12:10:04	0.738384	3.28448	2.02308	790.794	FALSE	5
2022-09-14	12:10:04	0.591208	2.62981	2.02308	729.959	FALSE	5
2022-09-14	12:10:04	0.225153	1.00153	2.02308	791.796	FALSE	5
2022-09-14	12:10:04	0.264491	1.17651	2.02308	731.136	FALSE	5
2022-09-14	12:10:05	0.208308	0.926596	0.924898	792.722	FALSE	5
2022-09-14	12:10:05	0.193957	0.86276	0.924898	731.998	FALSE	5
2022-09-14	12:10:05	0.226374	1.00696	0.924898	793.729	FALSE	5
2022-09-14	12:10:05	0.203066	0.903278	0.924898	732.902	FALSE	5
2022-09-14	12:10:06	0.201031	0.894226	1.01669	794.624	FALSE	5
2022-09-14	12:10:06	0.164695	0.732596	1.01669	733.634	FALSE	5
2022-09-14	12:10:06	0.318842	1.41827	1.01669	796.042	FALSE	5
2022-09-14	12:10:06	0.229682	1.02167	1.01669	734.656	FALSE	5
2022-09-14	12:10:07	0.234313	1.04227	1.09917	797.084	FALSE	5
2022-09-14	12:10:07	0.224542	0.998808	1.09917	735.655	FALSE	5
2022-09-14	12:10:07	0.282456	1.25642	1.09917	798.341	FALSE	5
2022-09-14	12:10:08	0.419911	1.86785	1.66932	737.523	FALSE	5
2022-09-14	12:10:08	0.322456	1.43435	1.66932	799.775	FALSE	5
2022-09-14	12:10:08	0.347087	1.54391	1.66932	739.067	FALSE	5
2022-09-14	12:10:08	0.411667	1.83118	1.66932	801.606	FALSE	5
2022-09-14	12:10:09	0.444898	1.979	2.08499	741.046	FALSE	5
2022-09-14	12:10:09	0.470598	2.09331	2.08499	803.699	FALSE	5
2022-09-14	12:10:09	0.406476	1.80809	2.08499	742.854	FALSE	5
2022-09-14	12:10:09	0.552939	2.45958	2.08499	806.159	FALSE	5
2022-09-14	12:10:10	0.464797	2.06751	2.06106	744.921	FALSE	5
2022-09-14	12:10:10	0.452328	2.01205	2.06106	808.171	FALSE	5
2022-09-14	12:10:10	0.424288	1.88732	2.06106	746.808	FALSE	5
2022-09-14	12:10:10	0.511972	2.27735	2.06106	810.448	FALSE	5
2022-09-14	12:10:11	0.497468	2.21284	2.06396	749.021	FALSE	5
2022-09-14	12:10:11	0.448461	1.99484	2.06396	812.443	FALSE	5
2022-09-14	12:10:11	0.446069	1.9842	2.06396	751.005	FALSE	5
2022-09-14	12:10:12	0.510801	2.27215	2.15251	814.715	FALSE	5
2022-09-14	12:10:12	0.511616	2.27577	2.15251	753.281	FALSE	5
2022-09-14	12:10:12	0.433601	1.92874	2.15251	816.644	FALSE	5
2022-09-14	12:10:12	0.479606	2.13338	2.15251	755.415	FALSE	5
2022-09-14	12:10:13	0.464033	2.06411	2.12421	818.708	FALSE	5
2022-09-14	12:10:13	0.545102	2.42472	2.12421	757.839	FALSE	5
2022-09-14	12:10:13	0.424338	1.88754	2.12421	820.596	FALSE	5
2022-09-14	12:10:13	0.476705	2.12048	2.12421	759.96	FALSE	5
2022-09-14	12:10:14	0.457214	2.03378	2.16541	822.63	FALSE	5
2022-09-14	12:10:14	0.563779	2.5078	2.16541	762.468	FALSE	5
2022-09-14	12:10:14	0.448308	1.99416	2.16541	824.624	FALSE	5
2022-09-14	12:10:14	0.477926	2.12591	2.16541	764.594	FALSE	5
2022-09-14	12:10:15	0.499198	2.22053	2.2523	826.844	FALSE	5
2022-09-14	12:10:15	0.510649	2.27147	2.2523	766.865	FALSE	5
2022-09-14	12:10:15	0.509173	2.2649	2.2523	829.109	FALSE	5
2022-09-14	12:10:16	0.44154	1.96406	2.17622	768.829	FALSE	5
2022-09-14	12:10:16	0.507035	2.25539	2.17622	831.365	FALSE	5
2022-09-14	12:10:16	0.4936	2.19563	2.17622	771.025	FALSE	5
2022-09-14	12:10:16	0.514771	2.2898	2.17622	833.654	FALSE	5
2022-09-14	12:10:17	0.423982	1.88596	2.64481	772.911	FALSE	5
2022-09-14	12:10:17	0.551361	2.45256	2.64481	836.107	FALSE	5
2022-09-14	12:10:17	0.570242	2.53655	2.64481	775.447	FALSE	5
2022-09-14	12:10:17	0.832735	3.70417	2.64481	839.811	FALSE	5
2022-09-14	12:10:18	1.33859	5.95432	23.6468	781.402	FALSE	5
2022-09-14	12:10:18	5.04917	22.4597	23.6468	862.271	1	6
2022-09-14	12:10:18	9.20474	40.9445	23.6468	822.346	1	7
2022-09-14	12:10:18	5.67166	25.2287	23.6468	887.499	1	8
2022-09-14	12:10:19	5.53441	24.6182	26.9584	846.964	1	9
2022-09-14	12:10:19	7.16627	31.877	26.9584	919.376	1	10
2022-09-14	12:10:19	5.48088	24.3801	26.9584	871.344	1	11
2022-09-14	12:10:20	2.04642	9.10289	4.45629	928.479	FALSE	11
2022-09-14	12:10:20	0.980623	4.36201	4.45629	875.706	FALSE	11
2022-09-14	12:10:20	0.464898	2.06796	4.45629	930.547	FALSE	11
2022-09-14	12:10:20	0.515331	2.2923	4.45629	877.999	FALSE	11
2022-09-14	12:10:21	0.477723	2.12501	2.05036	932.672	FALSE	11
2022-09-14	12:10:21	0.446832	1.9876	2.05036	879.986	FALSE	11
2022-09-14	12:10:21	0.425051	1.89071	2.05036	934.563	FALSE	11
2022-09-14	12:10:21	0.49416	2.19812	2.05036	882.184	FALSE	11
2022-09-14	12:10:22	0.398741	1.77368	2.05087	936.337	FALSE	11
2022-09-14	12:10:22	0.5336	2.37356	2.05087	884.558	FALSE	11
2022-09-14	12:10:22	0.43355	1.92852	2.05087	938.265	FALSE	11
2022-09-14	12:10:22	0.478333	2.12772	2.05087	886.686	FALSE	11
2022-09-14	12:10:23	0.514517	2.28867	2.04917	940.554	FALSE	11
2022-09-14	12:10:23	0.444796	1.97854	2.04917	888.664	FALSE	11
2022-09-14	12:10:23	0.42271	1.8803	2.04917	942.434	FALSE	11
2022-09-14	12:10:24	0.476145	2.11799	1.71788	890.782	FALSE	11
2022-09-14	12:10:24	0.402964	1.79246	1.71788	944.227	FALSE	11
2022-09-14	12:10:24	0.353855	1.57402	1.71788	892.356	FALSE	11
2022-09-14	12:10:24	0.311819	1.38703	1.71788	945.614	FALSE	11
2022-09-14	12:10:25	0.38042	1.69218	8.10371	894.048	FALSE	11
2022-09-14	12:10:25	0.779962	3.46943	8.10371	949.083	FALSE	11
2022-09-14	12:10:25	2.52933	11.251	8.10371	905.299	FALSE	11
2022-09-14	12:10:25	3.59747	16.0023	8.10371	965.085	1	12
2022-09-14	12:10:26	5.44362	24.2143	11.1329	929.514	1	13
2022-09-14	12:10:26	3.94083	17.5296	11.1329	982.615	1	14
2022-09-14	12:10:26	0.717875	3.19325	11.1329	932.707	FALSE	14
2022-09-14	12:10:26	-0.091132	-0.405373	11.1329	982.615	FALSE	14
2022-09-14	12:10:27	-0.103448	-0.460157	0.271024	932.707	FALSE	14
2022-09-14	12:10:27	0.284135	1.26389	0.271024	983.879	FALSE	14
2022-09-14	12:10:27	0.00209949	0.00933895	0.271024	932.716	FALSE	14
2022-09-14	12:10:28	0.241132	1.0726	3.01119	984.951	FALSE	14
2022-09-14	12:10:28	0.773346	3.44	3.01119	936.156	FALSE	14
2022-09-14	12:10:28	0.832583	3.7035	3.01119	988.655	FALSE	14
2022-09-14	12:10:28	0.860725	3.82868	3.01119	939.985	FALSE	14

## Sheet: Richa_star_202291412512 (3)
Date	Time	Lbs	Newtons	Total force x time		total steps > 13.345	**GoPro Fitting: 1154
2022-09-14	12:05:28	0.447901	1.99235	1.99235	FALSE	0
2022-09-14	12:05:28	0.437621	1.94663	1.94663	FALSE	0
2022-09-14	12:05:28	0.396196	1.76236	3.75471	FALSE	0
2022-09-14	12:05:28	0.479758	2.13406	4.08069	FALSE	0
2022-09-14	12:05:29	0.412074	1.83299	5.5877	FALSE	0
2022-09-14	12:05:29	0.439046	1.95296	6.03365	FALSE	0
2022-09-14	12:05:29	0.466323	2.0743	7.662	FALSE	0
2022-09-14	12:05:29	0.453906	2.01906	8.05271	FALSE	0
2022-09-14	12:05:30	0.447036	1.98851	9.6505	FALSE	0
2022-09-14	12:05:30	0.464339	2.06547	10.1182	FALSE	0
2022-09-14	12:05:30	0.447087	1.98873	11.6392	FALSE	0
2022-09-14	12:05:30	0.460064	2.04646	12.1646	FALSE	0
2022-09-14	12:05:31	0.457468	2.03491	13.6741	FALSE	0
2022-09-14	12:05:31	0.489478	2.1773	14.3419	FALSE	0
2022-09-14	12:05:31	0.488359	2.17232	15.8465	FALSE	0
2022-09-14	12:05:32	0.481997	2.14402	16.486	FALSE	0
2022-09-14	12:05:32	0.433651	1.92897	17.7754	FALSE	0
2022-09-14	12:05:32	0.510242	2.26966	18.7556	FALSE	0
2022-09-14	12:05:32	0.457774	2.03627	19.8117	FALSE	0
2022-09-14	12:05:33	0.490751	2.18296	20.9386	FALSE	0
2022-09-14	12:05:33	0.532125	2.367	22.1787	FALSE	0
2022-09-14	12:05:33	0.455178	2.02472	22.9633	FALSE	0
2022-09-14	12:05:33	0.158842	0.706561	22.8853	FALSE	0
2022-09-14	12:05:34	0.167239	0.743913	23.7072	FALSE	0
2022-09-14	12:05:34	0.48612	2.16236	25.0476	FALSE	0
2022-09-14	12:05:34	0.518842	2.30791	26.0151	FALSE	0
2022-09-14	12:05:34	0.448206	1.99371	27.0413	FALSE	0
2022-09-14	12:05:35	0.416959	1.85472	27.8698	FALSE	0
2022-09-14	12:05:35	0.360216	1.60231	28.6436	FALSE	0
2022-09-14	12:05:35	0.450344	2.00322	29.8731	FALSE	0
2022-09-14	12:05:36	0.420827	1.87192	30.5156	FALSE	0
2022-09-14	12:05:36	0.378232	1.68245	31.5555	FALSE	0
2022-09-14	12:05:36	0.422965	1.88143	32.397	FALSE	0
2022-09-14	12:05:36	0.448104	1.99326	33.5488	FALSE	0
2022-09-14	12:05:37	0.479657	2.13361	34.5306	FALSE	0
2022-09-14	12:05:37	0.374262	1.66479	35.2136	FALSE	0
2022-09-14	12:05:37	0.402914	1.79224	36.3228	FALSE	0
2022-09-14	12:05:37	0.443677	1.97356	37.1871	FALSE	0
2022-09-14	12:05:38	0.124135	0.552177	36.875	FALSE	0
2022-09-14	12:05:38	-0.0302669	-0.134633	37.1871	FALSE	0
2022-09-14	12:05:38	-0.262989	-1.16983	36.875	FALSE	0
2022-09-14	12:05:38	-0.539071	-2.3979	37.1871	FALSE	0
2022-09-14	12:05:39	-0.640546	-2.84928	36.875	FALSE	0
2022-09-14	12:05:39	-0.496068	-2.20661	37.1871	FALSE	0
2022-09-14	12:05:39	-0.268486	-1.19428	36.875	FALSE	0
2022-09-14	12:05:40	-0.130114	-0.578773	37.1871	FALSE	0
2022-09-14	12:05:40	0.257468	1.14527	38.0203	FALSE	0
2022-09-14	12:05:40	0.279504	1.24329	38.4304	FALSE	0
2022-09-14	12:05:40	0.345611	1.53735	39.5576	FALSE	0
2022-09-14	12:05:41	0.268562	1.19462	39.625	FALSE	0
2022-09-14	12:05:41	0.534822	2.379	41.9366	FALSE	0
2022-09-14	12:05:41	0.32159	1.4305	41.0555	FALSE	0
2022-09-14	12:05:41	0.361183	1.60661	43.5433	FALSE	0
2022-09-14	12:05:42	0.29299	1.30328	42.3588	FALSE	0
2022-09-14	12:05:42	0.460776	2.04962	45.5929	FALSE	0
2022-09-14	12:05:42	0.258537	1.15002	43.5088	FALSE	0
2022-09-14	12:05:42	0.305509	1.35897	46.9518	FALSE	0
2022-09-14	12:05:43	0.0709544	0.315619	43.8245	FALSE	0
2022-09-14	12:05:43	0.181794	0.808656	47.7605	FALSE	0
2022-09-14	12:05:43	0.107799	0.479512	44.304	FALSE	0
2022-09-14	12:05:44	0.257316	1.14459	48.9051	FALSE	0
2022-09-14	12:05:44	0.0778247	0.34618	44.6501	FALSE	0
2022-09-14	12:05:44	0.161641	0.719011	49.6241	FALSE	0
2022-09-14	12:05:44	0.134618	0.598808	45.249	FALSE	0
2022-09-14	12:05:45	0.225407	1.00266	50.6268	FALSE	0
2022-09-14	12:05:45	0.152074	0.676456	45.9254	FALSE	0
2022-09-14	12:05:45	0.222354	0.989075	51.6158	FALSE	0
2022-09-14	12:05:45	0.187392	0.833557	46.759	FALSE	0
2022-09-14	12:05:46	0.229122	1.01918	52.635	FALSE	0
2022-09-14	12:05:46	0.157519	0.700676	47.4596	FALSE	0
2022-09-14	12:05:46	0.256959	1.14301	53.778	FALSE	0
2022-09-14	12:05:46	0.280522	1.24782	48.7075	FALSE	0
2022-09-14	12:05:47	0.2764	1.22948	55.0075	FALSE	0
2022-09-14	12:05:47	0.258588	1.15025	49.8577	FALSE	0
2022-09-14	12:05:47	0.251311	1.11788	56.1254	FALSE	0
2022-09-14	12:05:48	0.266883	1.18715	51.0449	FALSE	0
2022-09-14	12:05:48	0.282048	1.25461	57.38	FALSE	0
2022-09-14	12:05:48	0.243626	1.0837	52.1286	FALSE	0
2022-09-14	12:05:48	0.275483	1.2254	58.6054	FALSE	0
2022-09-14	12:05:49	0.277774	1.23559	53.3641	FALSE	0
2022-09-14	12:05:49	0.250547	1.11448	59.7199	FALSE	0
2022-09-14	12:05:49	0.294313	1.30916	54.6733	FALSE	0
2022-09-14	12:05:49	0.257265	1.14437	60.8642	FALSE	0
2022-09-14	12:05:50	0.388257	1.72704	56.4004	FALSE	0
2022-09-14	12:05:50	0.236603	1.05246	61.9167	FALSE	0
2022-09-14	12:05:50	0.369224	1.64238	58.0427	FALSE	0
2022-09-14	12:05:51	0.192634	0.856875	62.7736	FALSE	0
2022-09-14	12:05:51	0.478791	2.12976	60.1725	FALSE	0
2022-09-14	12:05:51	0.197825	0.879965	63.6535	FALSE	0
2022-09-14	12:05:51	0.431565	1.91969	62.0922	FALSE	0
2022-09-14	12:05:52	0.26729	1.18896	64.8425	FALSE	0
2022-09-14	12:05:52	0.455127	2.0245	64.1167	FALSE	0
2022-09-14	12:05:52	0.236959	1.05404	65.8965	FALSE	0
2022-09-14	12:05:52	0.393092	1.74855	65.8652	FALSE	0
2022-09-14	12:05:53	0.279148	1.24171	67.1382	FALSE	0
2022-09-14	12:05:53	0.46388	2.06343	67.9287	FALSE	0
2022-09-14	12:05:53	0.23813	1.05925	68.1975	FALSE	0
2022-09-14	12:05:53	0.432176	1.92241	69.8511	FALSE	0
2022-09-14	12:05:54	0.328511	1.46128	69.6588	FALSE	0
2022-09-14	12:05:54	0.651768	2.89919	72.7503	FALSE	0
2022-09-14	12:05:54	0.394059	1.75285	71.4116	FALSE	0
2022-09-14	12:05:55	0.412176	1.83344	74.5837	FALSE	0
2022-09-14	12:05:55	0.262812	1.16904	72.5807	FALSE	0
2022-09-14	12:05:55	0.433092	1.92648	76.5102	FALSE	0
2022-09-14	12:05:55	0.200013	0.889698	73.4704	FALSE	0
2022-09-14	12:05:56	0.434059	1.93078	78.441	FALSE	0
2022-09-14	12:05:56	0.308766	1.37345	74.8438	FALSE	0
2022-09-14	12:05:56	0.374771	1.66706	80.108	FALSE	0
2022-09-14	12:05:56	0.230293	1.02439	75.8682	FALSE	0
2022-09-14	12:05:57	0.358181	1.59326	81.7013	FALSE	0
2022-09-14	12:05:57	0.28444	1.26525	77.1335	FALSE	0
2022-09-14	12:05:57	0.352379	1.56745	83.2687	FALSE	0
2022-09-14	12:05:57	0.286883	1.27611	78.4096	FALSE	0
2022-09-14	12:05:58	0.300725	1.33768	84.6064	FALSE	0
2022-09-14	12:05:58	0.420522	1.87057	80.2801	FALSE	0
2022-09-14	12:05:58	0.90098	4.00774	88.6142	FALSE	0
2022-09-14	12:05:59	2.36632	10.5259	90.806	FALSE	0
2022-09-14	12:05:59	4.72764	21.0295	109.644	1	1
2022-09-14	12:05:59	2.02205	8.99448	99.8005	FALSE	1
2022-09-14	12:05:59	1.86174	8.28139	117.925	FALSE	1
2022-09-14	12:06:00	0.805407	3.58261	103.383	FALSE	1
2022-09-14	12:06:00	0.377112	1.67747	119.603	FALSE	1
2022-09-14	12:06:00	0.346425	1.54097	104.924	FALSE	1
2022-09-14	12:06:00	0.328868	1.46287	121.065	FALSE	1
2022-09-14	12:06:01	0.354008	1.5747	106.499	FALSE	1
2022-09-14	12:06:01	0.406221	1.80695	122.872	FALSE	1
2022-09-14	12:06:01	0.354466	1.57674	108.075	FALSE	1
2022-09-14	12:06:01	0.340267	1.51358	124.386	FALSE	1
2022-09-14	12:06:02	0.603931	2.68641	110.762	FALSE	1
2022-09-14	12:06:02	0.244186	1.08619	125.472	FALSE	1
2022-09-14	12:06:02	0.328155	1.4597	112.222	FALSE	1
2022-09-14	12:06:03	0.409936	1.82348	127.296	FALSE	1
2022-09-14	12:06:03	0.49869	2.21827	114.44	FALSE	1
2022-09-14	12:06:03	0.515687	2.29388	129.589	FALSE	1
2022-09-14	12:06:03	0.740267	3.29286	117.733	FALSE	1
2022-09-14	12:06:04	0.788918	3.50927	133.099	FALSE	1
2022-09-14	12:06:04	1.90877	8.49059	126.223	FALSE	1
2022-09-14	12:06:04	1.40927	6.26871	139.367	FALSE	1
2022-09-14	12:06:04	0.471361	2.09671	128.32	FALSE	1
2022-09-14	12:06:05	0.43243	1.92354	141.291	FALSE	1
2022-09-14	12:06:05	0.527036	2.34436	130.664	FALSE	1
2022-09-14	12:06:05	0.35869	1.59552	142.886	FALSE	1
2022-09-14	12:06:05	0.5393	2.39891	133.063	FALSE	1
2022-09-14	12:06:06	0.812481	3.61408	146.501	FALSE	1
2022-09-14	12:06:06	0.697315	3.1018	136.165	FALSE	1
2022-09-14	12:06:06	0.614516	2.73349	149.234	FALSE	1
2022-09-14	12:06:07	0.538384	2.39484	138.56	FALSE	1
2022-09-14	12:06:07	0.772176	3.43479	152.669	FALSE	1
2022-09-14	12:06:07	0.647035	2.87814	141.438	FALSE	1
2022-09-14	12:06:07	0.645916	2.87316	155.542	FALSE	1
2022-09-14	12:06:08	0.507443	2.25721	143.695	FALSE	1
2022-09-14	12:06:08	0.470802	2.09422	157.636	FALSE	1
2022-09-14	12:06:08	0.484288	2.15421	145.849	FALSE	1
2022-09-14	12:06:08	0.451158	2.00684	159.643	FALSE	1
2022-09-14	12:06:09	0.708562	3.15183	149.001	FALSE	1
2022-09-14	12:06:09	0.712634	3.16994	162.813	FALSE	1
2022-09-14	12:06:09	0.577824	2.57028	151.572	FALSE	1
2022-09-14	12:06:09	0.601896	2.67735	165.49	FALSE	1
2022-09-14	12:06:10	0.535433	2.38171	153.953	FALSE	1
2022-09-14	12:06:10	0.526578	2.34232	167.833	FALSE	1
2022-09-14	12:06:10	0.44785	1.99213	155.945	FALSE	1
2022-09-14	12:06:11	0.400624	1.78206	169.615	FALSE	1
2022-09-14	12:06:11	0.480827	2.13881	158.084	FALSE	1
2022-09-14	12:06:11	0.399707	1.77798	171.393	FALSE	1
2022-09-14	12:06:11	0.485305	2.15873	160.243	FALSE	1
2022-09-14	12:06:12	0.376196	1.6734	173.066	FALSE	1
2022-09-14	12:06:12	0.333957	1.48551	161.728	FALSE	1
2022-09-14	12:06:12	0.376756	1.67589	174.742	FALSE	1
2022-09-14	12:06:12	0.3393	1.50927	163.238	FALSE	1
2022-09-14	12:06:13	0.474669	2.11142	176.853	FALSE	1
2022-09-14	12:06:13	0.277468	1.23423	164.472	FALSE	1
2022-09-14	12:06:13	0.448003	1.99281	178.846	FALSE	1
2022-09-14	12:06:14	0.293601	1.306	165.778	FALSE	1
2022-09-14	12:06:14	0.347799	1.54708	180.393	FALSE	1
2022-09-14	12:06:14	2.00704	8.92772	174.706	FALSE	1
2022-09-14	12:06:14	2.22861	9.9133	190.307	FALSE	1
2022-09-14	12:06:15	2.2791	10.1379	184.844	FALSE	1
2022-09-14	12:06:15	0.317061	1.41035	191.717	FALSE	1
2022-09-14	12:06:15	0.443422	1.97243	186.816	FALSE	1
2022-09-14	12:06:15	0.27925	1.24216	192.959	FALSE	1
2022-09-14	12:06:16	0.306629	1.36395	188.18	FALSE	1
2022-09-14	12:06:16	0.375484	1.67023	194.629	FALSE	1
2022-09-14	12:06:16	0.345509	1.53689	189.717	FALSE	1
2022-09-14	12:06:16	0.386985	1.72139	196.351	FALSE	1
2022-09-14	12:06:17	0.269886	1.20051	190.917	FALSE	1
2022-09-14	12:06:17	0.497774	2.2142	198.565	FALSE	1
2022-09-14	12:06:17	0.375178	1.66887	192.586	FALSE	1
2022-09-14	12:06:18	0.567697	2.52523	201.09	FALSE	1
2022-09-14	12:06:18	0.471819	2.09875	194.685	FALSE	1
2022-09-14	12:06:18	0.535687	2.38284	203.473	FALSE	1
2022-09-14	12:06:18	0.334059	1.48596	196.171	FALSE	1
2022-09-14	12:06:19	0.390445	1.73678	205.21	FALSE	1
2022-09-14	12:06:19	0.342761	1.52467	197.696	FALSE	1
2022-09-14	12:06:19	0.294771	1.3112	206.521	FALSE	1
2022-09-14	12:06:19	0.398944	1.77458	199.47	FALSE	1
2022-09-14	12:06:20	0.36897	1.64125	208.162	FALSE	1
2022-09-14	12:06:20	0.553295	2.46117	201.931	FALSE	1
2022-09-14	12:06:20	1.60668	7.14683	215.309	FALSE	1
2022-09-14	12:06:20	1.66744	7.41711	209.348	FALSE	1
2022-09-14	12:06:21	1.86551	8.29816	223.607	FALSE	1
2022-09-14	12:06:21	1.81711	8.08287	217.431	FALSE	1
2022-09-14	12:06:21	1.46821	6.53089	230.138	FALSE	1
2022-09-14	12:06:22	1.51558	6.7416	224.173	FALSE	1
2022-09-14	12:06:22	1.49401	6.64566	236.784	FALSE	1
2022-09-14	12:06:22	1.53182	6.81384	230.987	FALSE	1
2022-09-14	12:06:22	1.5476	6.88403	243.668	FALSE	1
2022-09-14	12:06:23	1.49492	6.6497	237.636	FALSE	1
2022-09-14	12:06:23	1.51233	6.72715	250.395	FALSE	1
2022-09-14	12:06:23	0.919402	4.08968	241.726	FALSE	1
2022-09-14	12:06:23	0.909173	4.04418	254.439	FALSE	1
2022-09-14	12:06:24	0.609631	2.71176	244.438	FALSE	1
2022-09-14	12:06:24	0.968053	4.30609	258.745	FALSE	1
2022-09-14	12:06:24	0.536705	2.38737	246.825	FALSE	1
2022-09-14	12:06:24	0.94444	4.20106	262.946	FALSE	1
2022-09-14	12:06:25	0.465356	2.07	248.895	FALSE	1
2022-09-14	12:06:25	0.694669	3.09003	266.036	FALSE	1
2022-09-14	12:06:25	0.384949	1.71233	250.608	FALSE	1
2022-09-14	12:06:26	0.528308	2.35002	268.386	FALSE	1
2022-09-14	12:06:26	0.35584	1.58285	252.19	FALSE	1
2022-09-14	12:06:26	0.415331	1.84748	270.234	FALSE	1
2022-09-14	12:06:26	0.360165	1.60209	253.793	FALSE	1
2022-09-14	12:06:27	0.371361	1.65189	271.886	FALSE	1
2022-09-14	12:06:27	0.687188	3.05675	256.849	FALSE	1
2022-09-14	12:06:27	0.922659	4.10417	275.99	FALSE	1
2022-09-14	12:06:27	0.525662	2.33825	259.188	FALSE	1
2022-09-14	12:06:28	0.377468	1.67905	277.669	FALSE	1
2022-09-14	12:06:28	0.486018	2.16191	261.349	FALSE	1
2022-09-14	12:06:28	0.275483	1.2254	278.894	FALSE	1
2022-09-14	12:06:28	0.513092	2.28234	263.632	FALSE	1
2022-09-14	12:06:29	0.365407	1.6254	280.52	FALSE	1
2022-09-14	12:06:29	0.474924	2.11256	265.744	FALSE	1
2022-09-14	12:06:29	0.346018	1.53916	282.059	FALSE	1
2022-09-14	12:06:30	0.412481	1.8348	267.579	FALSE	1
2022-09-14	12:06:30	0.467799	2.08086	284.14	FALSE	1
2022-09-14	12:06:30	0.499097	2.22008	269.799	FALSE	1
2022-09-14	12:06:30	1.00296	4.46137	288.601	FALSE	1
2022-09-14	12:06:31	0.746425	3.32025	273.12	FALSE	1
2022-09-14	12:06:31	1.37065	6.09693	294.698	FALSE	1
2022-09-14	12:06:31	0.828715	3.68629	276.806	FALSE	1
2022-09-14	12:06:31	1.48602	6.61011	301.308	FALSE	1
2022-09-14	12:06:32	1.22968	5.46986	282.276	FALSE	1
2022-09-14	12:06:32	1.04795	4.66149	305.97	FALSE	1
2022-09-14	12:06:32	1.08688	4.83466	287.11	FALSE	1
2022-09-14	12:06:32	1.29355	5.75397	311.724	FALSE	1
2022-09-14	12:06:33	0.908461	4.04102	291.151	FALSE	1
2022-09-14	12:06:33	1.14098	5.07531	316.799	FALSE	1
2022-09-14	12:06:33	0.775789	3.45086	294.602	FALSE	1
2022-09-14	12:06:34	1.43126	6.36653	323.165	FALSE	1
2022-09-14	12:06:34	0.671768	2.98816	297.59	FALSE	1
2022-09-14	12:06:34	1.23976	5.5147	328.68	FALSE	1
2022-09-14	12:06:34	0.730598	3.24985	300.84	FALSE	1
2022-09-14	12:06:35	0.939809	4.18046	332.861	FALSE	1
2022-09-14	12:06:35	0.743168	3.30576	304.146	FALSE	1
2022-09-14	12:06:35	0.882201	3.92421	336.785	FALSE	1
2022-09-14	12:06:35	0.696654	3.09886	307.245	FALSE	1
2022-09-14	12:06:36	1.19782	5.32814	342.113	FALSE	1
2022-09-14	12:06:36	1.00067	4.45118	311.696	FALSE	1
2022-09-14	12:06:36	1.1535	5.131	347.244	FALSE	1
2022-09-14	12:06:37	1.34637	5.98892	317.685	FALSE	1
2022-09-14	12:06:37	1.18149	5.2555	352.499	FALSE	1
2022-09-14	12:06:37	1.43487	6.38259	324.068	FALSE	1
2022-09-14	12:06:37	1.3193	5.86851	358.368	FALSE	1
2022-09-14	12:06:38	1.33304	5.92963	329.997	FALSE	1
2022-09-14	12:06:38	0.928562	4.13043	362.498	FALSE	1
2022-09-14	12:06:38	1.23014	5.47191	335.469	FALSE	1
2022-09-14	12:06:38	0.686069	3.05177	365.55	FALSE	1
2022-09-14	12:06:39	0.491361	2.18567	337.655	FALSE	1
2022-09-14	12:06:39	0.292481	1.30101	366.851	FALSE	1
2022-09-14	12:06:39	0.369428	1.64329	339.298	FALSE	1
2022-09-14	12:06:39	0.524898	2.33485	369.186	FALSE	1
2022-09-14	12:06:40	0.428868	1.90769	341.206	FALSE	1
2022-09-14	12:06:40	0.440216	1.95817	371.144	FALSE	1
2022-09-14	12:06:40	0.432277	1.92285	343.129	FALSE	1
2022-09-14	12:06:41	0.435229	1.93599	373.08	FALSE	1
2022-09-14	12:06:41	0.436705	1.94255	345.071	FALSE	1
2022-09-14	12:06:41	0.462608	2.05777	375.138	FALSE	1
2022-09-14	12:06:41	0.586272	2.60786	347.679	FALSE	1
2022-09-14	12:06:42	0.151158	0.672381	375.81	FALSE	1
2022-09-14	12:06:42	-0.382938	-1.70338	347.679	FALSE	1
2022-09-14	12:06:42	-0.448638	-1.99563	375.81	FALSE	1
2022-09-14	12:06:42	-0.116119	-0.516521	347.679	FALSE	1
2022-09-14	12:06:43	0.0598094	0.266044	376.076	FALSE	1
2022-09-14	12:06:43	0.0936007	0.416355	348.095	FALSE	1
2022-09-14	12:06:43	0.251056	1.11675	377.193	FALSE	1
2022-09-14	12:06:43	0.309377	1.37617	349.471	FALSE	1
2022-09-14	12:06:44	0.260165	1.15727	378.35	FALSE	1
2022-09-14	12:06:44	0.245102	1.09026	350.562	FALSE	1
2022-09-14	12:06:44	0.266069	1.18353	379.534	FALSE	1
2022-09-14	12:06:45	0.279809	1.24465	351.806	FALSE	1
2022-09-14	12:06:45	0.287697	1.27973	380.814	FALSE	1
2022-09-14	12:06:45	0.258944	1.15183	352.958	FALSE	1
2022-09-14	12:06:45	0.256247	1.13984	381.954	FALSE	1
2022-09-14	12:06:46	0.300318	1.33587	354.294	FALSE	1
2022-09-14	12:06:46	0.298486	1.32773	383.281	FALSE	1
2022-09-14	12:06:46	0.278333	1.23808	355.532	FALSE	1
2022-09-14	12:06:46	0.290242	1.29105	384.572	FALSE	1
2022-09-14	12:06:47	0.298334	1.32705	356.859	FALSE	1
2022-09-14	12:06:47	0.320573	1.42597	385.998	FALSE	1
2022-09-14	12:06:47	0.310445	1.38092	358.24	FALSE	1
2022-09-14	12:06:47	0.305407	1.35851	387.357	FALSE	1
2022-09-14	12:06:48	0.316552	1.40809	359.648	FALSE	1
2022-09-14	12:06:48	0.311819	1.38703	388.744	FALSE	1
2022-09-14	12:06:48	0.315127	1.40175	361.05	FALSE	1
2022-09-14	12:06:49	0.275127	1.22382	389.968	FALSE	1
2022-09-14	12:06:49	0.268054	1.19236	362.242	FALSE	1
2022-09-14	12:06:49	0.254059	1.13011	391.098	FALSE	1
2022-09-14	12:06:49	0.277163	1.23288	363.475	FALSE	1
2022-09-14	12:06:50	0.345763	1.53802	392.636	FALSE	1
2022-09-14	12:06:50	0.721539	3.20955	366.685	FALSE	1
2022-09-14	12:06:50	0.726629	3.23219	395.868	FALSE	1
2022-09-14	12:06:50	0.729478	3.24486	369.93	FALSE	1
2022-09-14	12:06:51	0.723117	3.21657	399.085	FALSE	1
2022-09-14	12:06:51	0.725662	3.22789	373.158	FALSE	1
2022-09-14	12:06:51	0.724847	3.22426	402.309	FALSE	1
2022-09-14	12:06:51	0.597163	2.6563	375.814	FALSE	1
2022-09-14	12:06:52	0.251718	1.11969	403.428	FALSE	1
2022-09-14	12:06:52	0.372583	1.65732	377.471	FALSE	1
2022-09-14	12:06:52	0.266272	1.18443	404.613	FALSE	1
2022-09-14	12:06:53	0.375076	1.66841	379.14	FALSE	1
2022-09-14	12:06:53	0.442812	1.96972	406.583	FALSE	1
2022-09-14	12:06:53	0.35584	1.58285	380.722	FALSE	1
2022-09-14	12:06:53	-0.217035	-0.965415	406.583	FALSE	1
2022-09-14	12:06:54	0.372532	1.6571	382.38	FALSE	1
2022-09-14	12:06:54	0.57472	2.55647	409.139	FALSE	1
2022-09-14	12:06:54	0.387799	1.72501	384.105	FALSE	1
2022-09-14	12:06:54	0.613397	2.72851	411.868	FALSE	1
2022-09-14	12:06:55	-0.115509	-0.513807	384.105	FALSE	1
2022-09-14	12:06:55	-0.488435	-2.17266	411.868	FALSE	1
2022-09-14	12:06:55	0.130954	0.58251	384.687	FALSE	1
2022-09-14	12:06:55	0.286527	1.27453	413.142	FALSE	1
2022-09-14	12:06:56	0.474008	2.10848	386.796	FALSE	1
2022-09-14	12:06:56	0.390089	1.73519	414.877	FALSE	1
2022-09-14	12:06:56	0.34042	1.51426	388.31	FALSE	1
2022-09-14	12:06:57	0.318282	1.41578	416.293	FALSE	1
2022-09-14	12:06:57	0.330802	1.47147	389.781	FALSE	1
2022-09-14	12:06:57	0.302914	1.34742	417.641	FALSE	1
2022-09-14	12:06:57	-1.49154	-6.63467	389.781	FALSE	1
2022-09-14	12:06:58	-2.46187	-10.9509	417.641	FALSE	1
2022-09-14	12:06:58	-2.93067	-13.0362	389.781	FALSE	1
2022-09-14	12:06:58	-3.86477	-17.1913	417.641	FALSE	1
2022-09-14	12:06:58	-4.26268	-18.9613	389.781	FALSE	1
2022-09-14	12:06:59	-5.10996	-22.7301	417.641	FALSE	1
2022-09-14	12:06:59	-5.63296	-25.0565	389.781	FALSE	1
2022-09-14	12:06:59	-5.99149	-26.6513	417.641	FALSE	1
2022-09-14	12:07:00	-6.36965	-28.3335	389.781	FALSE	1
2022-09-14	12:07:00	-6.43464	-28.6226	417.641	FALSE	1
2022-09-14	12:07:00	-7.10126	-31.5878	389.781	FALSE	1
2022-09-14	12:07:00	-7.18288	-31.9509	417.641	FALSE	1
2022-09-14	12:07:01	-7.74706	-34.4605	389.781	FALSE	1
2022-09-14	12:07:01	-7.63622	-33.9674	417.641	FALSE	1
2022-09-14	12:07:01	-8.21428	-36.5388	389.781	FALSE	1
2022-09-14	12:07:01	-7.77485	-34.5841	417.641	FALSE	1
2022-09-14	12:07:02	-8.01133	-35.636	389.781	FALSE	1
2022-09-14	12:07:02	-7.64803	-34.02	417.641	FALSE	1
2022-09-14	12:07:02	-8.19897	-36.4707	389.781	FALSE	1
2022-09-14	12:07:02	-8.41245	-37.4203	417.641	FALSE	1
2022-09-14	12:07:03	-8.57276	-38.1334	389.781	FALSE	1
2022-09-14	12:07:03	-8.24039	-36.6549	417.641	FALSE	1
2022-09-14	12:07:03	-8.50283	-37.8223	389.781	FALSE	1
2022-09-14	12:07:04	-8.50797	-37.8452	417.641	FALSE	1
2022-09-14	12:07:04	-8.50395	-37.8273	389.781	FALSE	1
2022-09-14	12:07:04	-8.01429	-35.6492	417.641	FALSE	1
2022-09-14	12:07:04	-8.15266	-36.2647	389.781	FALSE	1
2022-09-14	12:07:05	-5.33754	-23.7424	417.641	FALSE	1
2022-09-14	12:07:05	-6.64411	-29.5543	389.781	FALSE	1
2022-09-14	12:07:05	-5.12864	-22.8132	417.641	FALSE	1
2022-09-14	12:07:05	-8.76859	-39.0044	389.781	FALSE	1
2022-09-14	12:07:06	-7.85357	-34.9343	417.641	FALSE	1
2022-09-14	12:07:06	-8.67744	-38.599	389.781	FALSE	1
2022-09-14	12:07:06	-5.62461	-25.0194	417.641	FALSE	1
2022-09-14	12:07:06	0.242812	1.08008	390.861	FALSE	1
2022-09-14	12:07:07	0.461692	2.0537	419.694	FALSE	1
2022-09-14	12:07:07	0.293143	1.30396	392.165	FALSE	1
2022-09-14	12:07:07	-3.80472	-16.9242	419.694	FALSE	1
2022-09-14	12:07:08	0.244288	1.08664	393.252	FALSE	1
2022-09-14	12:07:08	0.432074	1.92195	421.616	FALSE	1
2022-09-14	12:07:08	0.275076	1.22359	394.476	FALSE	1
2022-09-14	12:07:08	0.422914	1.88121	423.497	FALSE	1
2022-09-14	12:07:09	0.256349	1.14029	395.616	FALSE	1
2022-09-14	12:07:09	0.408308	1.81624	425.314	FALSE	1
2022-09-14	12:07:09	0.212837	0.946742	396.563	FALSE	1
2022-09-14	12:07:09	0.466578	2.07543	427.389	FALSE	1
2022-09-14	12:07:10	0.138588	0.616467	397.179	FALSE	1
2022-09-14	12:07:10	0.398842	1.77413	429.163	FALSE	1
2022-09-14	12:07:10	0.179249	0.797335	397.976	FALSE	1
2022-09-14	12:07:10	0.460318	2.04759	431.211	FALSE	1
2022-09-14	12:07:11	0.165204	0.73486	398.711	FALSE	1
2022-09-14	12:07:11	0.409478	1.82144	433.032	FALSE	1
2022-09-14	12:07:11	0.200573	0.892189	399.603	FALSE	1
2022-09-14	12:07:12	0.401896	1.78771	434.82	FALSE	1
2022-09-14	12:07:12	0.191616	0.852346	400.456	FALSE	1
2022-09-14	12:07:12	0.360674	1.60435	436.424	FALSE	1
2022-09-14	12:07:12	0.217875	0.969152	401.425	FALSE	1
2022-09-14	12:07:13	0.453652	2.01793	438.442	FALSE	1
2022-09-14	12:07:13	0.232583	1.03458	402.459	FALSE	1
2022-09-14	12:07:13	0.373346	1.66072	440.103	FALSE	1
2022-09-14	12:07:13	0.262405	1.16723	403.627	FALSE	1
2022-09-14	12:07:14	0.443473	1.97266	442.076	FALSE	1
2022-09-14	12:07:14	0.245611	1.09253	404.719	FALSE	1
2022-09-14	12:07:14	0.378181	1.68222	443.758	FALSE	1
2022-09-14	12:07:14	0.280878	1.2494	405.969	FALSE	1
2022-09-14	12:07:15	0.418384	1.86106	445.619	FALSE	1
2022-09-14	12:07:15	0.226069	1.0056	406.974	FALSE	1
2022-09-14	12:07:15	0.313651	1.39518	447.014	FALSE	1
2022-09-14	12:07:16	-4.04584	-17.9967	406.974	FALSE	1
2022-09-14	12:07:16	-4.54599	-20.2215	447.014	FALSE	1
2022-09-14	12:07:16	-4.78991	-21.3065	406.974	FALSE	1
2022-09-14	12:07:16	-4.56553	-20.3084	447.014	FALSE	1
2022-09-14	12:07:17	-4.57342	-20.3435	406.974	FALSE	1
2022-09-14	12:07:17	-4.41026	-19.6177	447.014	FALSE	1
2022-09-14	12:07:17	-4.41423	-19.6354	406.974	FALSE	1
2022-09-14	12:07:18	-4.29617	-19.1102	447.014	FALSE	1
2022-09-14	12:07:18	-4.48248	-19.939	406.974	FALSE	1
2022-09-14	12:07:18	-4.73764	-21.074	447.014	FALSE	1
2022-09-14	12:07:18	-5.22767	-23.2537	406.974	FALSE	1
2022-09-14	12:07:18	-5.47433	-24.3509	447.014	FALSE	1
2022-09-14	12:07:19	-5.1065	-22.7147	406.974	FALSE	1
2022-09-14	12:07:19	0.586221	2.60763	449.622	FALSE	1
2022-09-14	12:07:19	0.486221	2.16281	409.137	FALSE	1
2022-09-14	12:07:20	0.457468	2.03491	451.657	FALSE	1
2022-09-14	12:07:20	0.425764	1.89388	411.031	FALSE	1
2022-09-14	12:07:20	0.415585	1.84861	453.505	FALSE	1
2022-09-14	12:07:20	-2.70731	-12.0427	411.031	FALSE	1
2022-09-14	12:07:21	-4.31113	-19.1768	453.505	FALSE	1
2022-09-14	12:07:21	-4.39586	-19.5537	411.031	FALSE	1
2022-09-14	12:07:21	-2.35408	-10.4714	453.505	FALSE	1
2022-09-14	12:07:21	-2.25266	-10.0203	411.031	FALSE	1
2022-09-14	12:07:22	-3.8209	-16.9961	453.505	FALSE	1
2022-09-14	12:07:22	-5.5181	-24.5456	411.031	FALSE	1
2022-09-14	12:07:22	-5.42029	-24.1105	453.505	FALSE	1
2022-09-14	12:07:22	-5.43546	-24.178	411.031	FALSE	1
2022-09-14	12:07:23	-5.41128	-24.0705	453.505	FALSE	1
2022-09-14	12:07:23	-5.20502	-23.153	411.031	FALSE	1
2022-09-14	12:07:23	-5.02044	-22.3319	453.505	FALSE	1
2022-09-14	12:07:24	-4.8893	-21.7486	411.031	FALSE	1
2022-09-14	12:07:24	-4.75403	-21.1469	453.505	FALSE	1
2022-09-14	12:07:24	-4.6066	-20.4911	411.031	FALSE	1
2022-09-14	12:07:24	-4.43378	-19.7223	453.505	FALSE	1
2022-09-14	12:07:25	-4.3008	-19.1308	411.031	FALSE	1
2022-09-14	12:07:25	-4.22548	-18.7958	453.505	FALSE	1
2022-09-14	12:07:25	-4.07357	-18.1201	411.031	FALSE	1
2022-09-14	12:07:25	-3.96945	-17.6569	453.505	FALSE	1
2022-09-14	12:07:26	-3.9292	-17.4779	411.031	FALSE	1
2022-09-14	12:07:26	-3.83154	-17.0435	453.505	FALSE	1
2022-09-14	12:07:26	-3.75632	-16.7089	411.031	FALSE	1
2022-09-14	12:07:27	-3.77352	-16.7854	453.505	FALSE	1
2022-09-14	12:07:27	-3.85592	-17.1519	411.031	FALSE	1
2022-09-14	12:07:27	-3.69708	-16.4454	453.505	FALSE	1
2022-09-14	12:07:27	-3.71658	-16.5321	411.031	FALSE	1
2022-09-14	12:07:28	-3.73938	-16.6335	453.505	FALSE	1
2022-09-14	12:07:28	-3.94935	-17.5675	411.031	FALSE	1
2022-09-14	12:07:28	-4.17174	-18.5567	453.505	FALSE	1
2022-09-14	12:07:28	-4.73266	-21.0518	411.031	FALSE	1
2022-09-14	12:07:29	-4.56172	-20.2914	453.505	FALSE	1
2022-09-14	12:07:29	-4.55464	-20.2599	411.031	FALSE	1
2022-09-14	12:07:29	-4.58823	-20.4094	453.505	FALSE	1
2022-09-14	12:07:29	-4.6292	-20.5916	411.031	FALSE	1
2022-09-14	12:07:30	-4.75256	-21.1403	453.505	FALSE	1
2022-09-14	12:07:30	-4.91174	-21.8484	411.031	FALSE	1
2022-09-14	12:07:30	-5.07632	-22.5805	453.505	FALSE	1
2022-09-14	12:07:31	-5.20533	-23.1543	411.031	FALSE	1
2022-09-14	12:07:31	-5.57637	-24.8048	453.505	FALSE	1
2022-09-14	12:07:31	-5.75256	-25.5885	411.031	FALSE	1
2022-09-14	12:07:31	-5.68584	-25.2918	453.505	FALSE	1
2022-09-14	12:07:32	-5.5407	-24.6461	411.031	FALSE	1
2022-09-14	12:07:32	-5.45683	-24.2731	453.505	FALSE	1
2022-09-14	12:07:32	-5.27322	-23.4563	411.031	FALSE	1
2022-09-14	12:07:32	-5.07709	-22.5839	453.505	FALSE	1
2022-09-14	12:07:33	-5.07998	-22.5968	411.031	FALSE	1
2022-09-14	12:07:33	-5.25154	-23.3599	453.505	FALSE	1
2022-09-14	12:07:33	-5.23566	-23.2893	411.031	FALSE	1
2022-09-14	12:07:33	-5.20477	-23.1519	453.505	FALSE	1
2022-09-14	12:07:34	-5.18589	-23.0679	411.031	FALSE	1
2022-09-14	12:07:34	-5.09423	-22.6602	453.505	FALSE	1
2022-09-14	12:07:34	-4.938	-21.9652	411.031	FALSE	1
2022-09-14	12:07:35	-4.78787	-21.2974	453.505	FALSE	1
2022-09-14	12:07:35	-4.71734	-20.9837	411.031	FALSE	1
2022-09-14	12:07:35	0.574873	2.55715	456.062	FALSE	1
2022-09-14	12:07:35	0.817112	3.63468	414.666	FALSE	1
2022-09-14	12:07:36	0.791056	3.51878	459.581	FALSE	1
2022-09-14	12:07:36	0.681132	3.02981	417.695	FALSE	1
2022-09-14	12:07:36	0.741641	3.29897	462.88	FALSE	1
2022-09-14	12:07:36	0.686476	3.05358	420.749	FALSE	1
2022-09-14	12:07:37	0.656094	2.91844	465.799	FALSE	1
2022-09-14	12:07:37	0.617621	2.7473	423.496	FALSE	1
2022-09-14	12:07:37	0.532074	2.36677	468.165	FALSE	1
2022-09-14	12:07:37	0.492125	2.18907	425.685	FALSE	1
2022-09-14	12:07:38	0.431769	1.92059	470.086	FALSE	1
2022-09-14	12:07:38	0.398842	1.77413	427.459	FALSE	1
2022-09-14	12:07:38	0.38673	1.72025	471.806	FALSE	1
2022-09-14	12:07:39	0.389021	1.73044	429.19	FALSE	1
2022-09-14	12:07:39	0.417367	1.85653	473.663	FALSE	1
2022-09-14	12:07:39	0.439708	1.95591	431.146	FALSE	1
2022-09-14	12:07:39	-1.96742	-8.75148	473.663	FALSE	1
2022-09-14	12:07:40	-4.37607	-19.4656	431.146	FALSE	1
2022-09-14	12:07:40	-4.36787	-19.4292	473.663	FALSE	1
2022-09-14	12:07:40	-4.53108	-20.1552	431.146	FALSE	1
2022-09-14	12:07:40	-4.48426	-19.9469	473.663	FALSE	1
2022-09-14	12:07:41	-4.34925	-19.3463	431.146	FALSE	1
2022-09-14	12:07:41	-4.21978	-18.7704	473.663	FALSE	1
2022-09-14	12:07:41	-4.30899	-19.1672	431.146	FALSE	1
2022-09-14	12:07:41	-4.70457	-20.9269	473.663	FALSE	1
2022-09-14	12:07:42	-5.10686	-22.7163	431.146	FALSE	1
2022-09-14	12:07:42	0.356705	1.5867	475.249	FALSE	1
2022-09-14	12:07:42	0.385	1.71256	432.858	FALSE	1
2022-09-14	12:07:43	0.399504	1.77707	477.026	FALSE	1
2022-09-14	12:07:43	0.413804	1.84068	434.699	FALSE	1
2022-09-14	12:07:43	0.404797	1.80062	478.827	FALSE	1
2022-09-14	12:07:43	0.408308	1.81624	436.515	FALSE	1
2022-09-14	12:07:44	0.402659	1.79111	480.618	FALSE	1
2022-09-14	12:07:44	0.41701	1.85494	438.37	FALSE	1
2022-09-14	12:07:44	0.408003	1.81488	482.433	FALSE	1
2022-09-14	12:07:44	0.444033	1.97515	440.345	FALSE	1
2022-09-14	12:07:45	0.440115	1.95772	484.391	FALSE	1
2022-09-14	12:07:45	0.433193	1.92693	442.272	FALSE	1
2022-09-14	12:07:45	0.393346	1.74968	486.14	FALSE	1
2022-09-14	12:07:45	0.374568	1.66615	443.938	FALSE	1
2022-09-14	12:07:46	0.383524	1.70599	487.846	FALSE	1
2022-09-14	12:07:46	0.703575	3.12964	447.068	FALSE	1
2022-09-14	12:07:46	0.203881	0.906903	488.753	FALSE	1
2022-09-14	12:07:47	-0.536119	-2.38476	447.068	FALSE	1
2022-09-14	12:07:47	-1.04385	-4.64325	488.753	FALSE	1
2022-09-14	12:07:47	-1.40716	-6.25933	447.068	FALSE	1
2022-09-14	12:07:47	-1.89042	-8.40897	488.753	FALSE	1
2022-09-14	12:07:48	-2.12207	-9.43939	447.068	FALSE	1
2022-09-14	12:07:48	-2.25134	-10.0144	488.753	FALSE	1
2022-09-14	12:07:48	-2.42019	-10.7655	447.068	FALSE	1
2022-09-14	12:07:48	-2.59047	-11.5229	488.753	FALSE	1
2022-09-14	12:07:49	-2.83902	-12.6285	447.068	FALSE	1
2022-09-14	12:07:49	-3.13775	-13.9573	488.753	FALSE	1
2022-09-14	12:07:49	-3.27632	-14.5737	447.068	FALSE	1
2022-09-14	12:07:49	-3.53709	-15.7337	488.753	FALSE	1
2022-09-14	12:07:50	-3.70523	-16.4816	447.068	FALSE	1
2022-09-14	12:07:50	-3.82304	-17.0056	488.753	FALSE	1
2022-09-14	12:07:50	-3.64284	-16.2041	447.068	FALSE	1
2022-09-14	12:07:51	-3.42004	-15.213	488.753	FALSE	1
2022-09-14	12:07:51	-3.46258	-15.4022	447.068	FALSE	1
2022-09-14	12:07:51	-3.49423	-15.543	488.753	FALSE	1
2022-09-14	12:07:51	-3.48696	-15.5107	447.068	FALSE	1
2022-09-14	12:07:52	-3.47373	-15.4518	488.753	FALSE	1
2022-09-14	12:07:52	-3.61525	-16.0814	447.068	FALSE	1
2022-09-14	12:07:52	-3.65668	-16.2656	488.753	FALSE	1
2022-09-14	12:07:52	-3.63815	-16.1832	447.068	FALSE	1
2022-09-14	12:07:53	-3.5725	-15.8912	488.753	FALSE	1
2022-09-14	12:07:53	-3.46808	-15.4267	447.068	FALSE	1
2022-09-14	12:07:53	-3.41128	-15.1741	488.753	FALSE	1
2022-09-14	12:07:53	-3.34482	-14.8784	447.068	FALSE	1
2022-09-14	12:07:54	-3.21958	-14.3213	488.753	FALSE	1
2022-09-14	12:07:54	-3.20263	-14.2459	447.068	FALSE	1
2022-09-14	12:07:54	-3.44034	-15.3033	488.753	FALSE	1
2022-09-14	12:07:55	-3.52818	-15.6941	447.068	FALSE	1
2022-09-14	12:07:55	-3.62263	-16.1142	488.753	FALSE	1
2022-09-14	12:07:55	-3.70212	-16.4678	447.068	FALSE	1
2022-09-14	12:07:55	-3.74238	-16.6469	488.753	FALSE	1
2022-09-14	12:07:56	-1.91291	-8.50901	447.068	FALSE	1
2022-09-14	12:07:56	0.379911	1.68992	490.443	FALSE	1
2022-09-14	12:07:56	0.288104	1.28154	448.35	FALSE	1
2022-09-14	12:07:56	0.176145	0.783528	491.227	FALSE	1
2022-09-14	12:07:57	0.191616	0.852346	449.202	FALSE	1
2022-09-14	12:07:57	0.322506	1.43457	492.661	FALSE	1
2022-09-14	12:07:57	0.311463	1.38545	450.587	FALSE	1
2022-09-14	12:07:57	0.303117	1.34833	494.01	FALSE	1
2022-09-14	12:07:58	0.308104	1.37051	451.958	FALSE	1
2022-09-14	12:07:58	0.310954	1.38319	495.393	FALSE	1
2022-09-14	12:07:58	0.321387	1.42959	453.388	FALSE	1
2022-09-14	12:07:59	0.367646	1.63536	497.028	FALSE	1
2022-09-14	12:07:59	0.514924	2.29048	455.678	FALSE	1
2022-09-14	12:07:59	0.698995	3.10927	500.138	FALSE	1
2022-09-14	12:07:59	0.715229	3.18148	458.86	FALSE	1
2022-09-14	12:08:00	0.780827	3.47327	503.611	FALSE	1
2022-09-14	12:08:00	0.749682	3.33474	462.194	FALSE	1
2022-09-14	12:08:00	0.75757	3.36982	506.981	FALSE	1
2022-09-14	12:08:00	0.422201	1.87803	464.072	FALSE	1
2022-09-14	12:08:01	0.385254	1.71369	508.694	FALSE	1
2022-09-14	12:08:01	0.287341	1.27815	465.35	FALSE	1
2022-09-14	12:08:01	0.357774	1.59145	510.286	FALSE	1
2022-09-14	12:08:02	0.411718	1.8314	467.182	FALSE	1
2022-09-14	12:08:02	0.289631	1.28834	511.574	FALSE	1
2022-09-14	12:08:02	0.273448	1.21635	468.398	FALSE	1
2022-09-14	12:08:02	0.380827	1.69399	513.268	FALSE	1
2022-09-14	12:08:03	0.482812	2.14764	470.546	FALSE	1
2022-09-14	12:08:03	0.479809	2.13429	515.402	FALSE	1
2022-09-14	12:08:03	0.43813	1.94889	472.495	FALSE	1
2022-09-14	12:08:03	0.424593	1.88867	517.291	FALSE	1
2022-09-14	12:08:04	0.505305	2.2477	474.742	FALSE	1
2022-09-14	12:08:04	0.526374	2.34142	519.632	FALSE	1
2022-09-14	12:08:04	0.495432	2.20378	476.946	FALSE	1
2022-09-14	12:08:04	0.431463	1.91923	521.552	FALSE	1
2022-09-14	12:08:05	0.428206	1.90475	478.851	FALSE	1
2022-09-14	12:08:05	0.434873	1.9344	523.486	FALSE	1
2022-09-14	12:08:05	0.449377	1.99892	480.85	FALSE	1
2022-09-14	12:08:06	0.41757	1.85743	525.344	FALSE	1
2022-09-14	12:08:06	0.453753	2.01838	482.868	FALSE	1
2022-09-14	12:08:06	0.436908	1.94345	527.287	FALSE	1
2022-09-14	12:08:06	0.436094	1.93983	484.808	FALSE	1
2022-09-14	12:08:07	0.417061	1.85517	529.142	FALSE	1
2022-09-14	12:08:07	0.468206	2.08267	486.891	FALSE	1
2022-09-14	12:08:07	0.396145	1.76213	530.904	FALSE	1
2022-09-14	12:08:07	0.722965	3.21589	490.107	FALSE	1
2022-09-14	12:08:08	0.714466	3.17809	534.082	FALSE	1
2022-09-14	12:08:08	0.725407	3.22676	493.333	FALSE	1
2022-09-14	12:08:08	0.728104	3.23875	537.321	FALSE	1
2022-09-14	12:08:08	0.729784	3.24623	496.58	FALSE	1
2022-09-14	12:08:09	0.722404	3.2134	540.535	FALSE	1
2022-09-14	12:08:09	0.732328	3.25754	499.837	FALSE	1
2022-09-14	12:08:09	0.726221	3.23038	543.765	FALSE	1
2022-09-14	12:08:10	0.721997	3.21159	503.049	FALSE	1
2022-09-14	12:08:10	0.726985	3.23377	546.999	FALSE	1
2022-09-14	12:08:10	0.727087	3.23423	506.283	FALSE	1
2022-09-14	12:08:10	0.732023	3.25618	550.255	FALSE	1
2022-09-14	12:08:11	0.731361	3.25324	509.536	FALSE	1
2022-09-14	12:08:11	0.720725	3.20593	553.461	FALSE	1
2022-09-14	12:08:11	0.727952	3.23808	512.774	FALSE	1
2022-09-14	12:08:11	0.725662	3.22789	556.689	FALSE	1
2022-09-14	12:08:12	0.725	3.22494	515.999	FALSE	1
2022-09-14	12:08:12	0.72556	3.22744	559.916	FALSE	1
2022-09-14	12:08:12	0.73416	3.26569	519.265	FALSE	1
2022-09-14	12:08:12	0.726832	3.23309	563.149	FALSE	1
2022-09-14	12:08:13	0.734211	3.26592	522.531	FALSE	1
2022-09-14	12:08:13	0.726578	3.23196	566.381	FALSE	1
2022-09-14	12:08:13	0.725712	3.22811	525.759	FALSE	1
2022-09-14	12:08:14	0.729733	3.246	569.627	FALSE	1
2022-09-14	12:08:14	0.725712	3.22811	528.987	FALSE	1
2022-09-14	12:08:14	0.722862	3.21543	572.843	FALSE	1
2022-09-14	12:08:14	0.71986	3.20208	532.189	FALSE	1
2022-09-14	12:08:15	0.717316	3.19077	576.033	FALSE	1
2022-09-14	12:08:15	0.723931	3.22019	535.409	FALSE	1
2022-09-14	12:08:15	0.723321	3.21748	579.251	FALSE	1
2022-09-14	12:08:15	0.72729	3.23513	538.645	FALSE	1
2022-09-14	12:08:16	0.721387	3.20887	582.46	FALSE	1
2022-09-14	12:08:16	0.721895	3.21113	541.856	FALSE	1
2022-09-14	12:08:16	0.724695	3.22359	585.683	FALSE	1
2022-09-14	12:08:16	0.725712	3.22811	545.084	FALSE	1
2022-09-14	12:08:17	0.722659	3.21453	588.898	FALSE	1
2022-09-14	12:08:17	0.727697	3.23694	548.321	FALSE	1
2022-09-14	12:08:17	0.727646	3.23671	592.135	FALSE	1
2022-09-14	12:08:18	0.733397	3.2623	551.583	FALSE	1
2022-09-14	12:08:18	0.727188	3.23468	595.369	FALSE	1
2022-09-14	12:08:18	0.726272	3.2306	554.814	FALSE	1
2022-09-14	12:08:18	0.712685	3.17017	598.539	FALSE	1
2022-09-14	12:08:19	0.734415	3.26682	558.08	FALSE	1
2022-09-14	12:08:19	0.729275	3.24396	601.783	FALSE	1
2022-09-14	12:08:19	0.720216	3.20366	561.284	FALSE	1
2022-09-14	12:08:19	0.726476	3.23151	605.015	FALSE	1
2022-09-14	12:08:20	0.723931	3.22019	564.504	FALSE	1
2022-09-14	12:08:20	0.703982	3.13145	608.146	FALSE	1
2022-09-14	12:08:20	0.705305	3.13734	567.642	FALSE	1
2022-09-14	12:08:20	0.624847	2.77944	610.926	FALSE	1
2022-09-14	12:08:21	0.687443	3.05788	570.699	FALSE	1
2022-09-14	12:08:21	0.692481	3.08029	614.006	FALSE	1
2022-09-14	12:08:21	0.671463	2.9868	573.686	FALSE	1
2022-09-14	12:08:22	0.708003	3.14934	617.155	FALSE	1
2022-09-14	12:08:22	0.455585	2.02653	575.713	FALSE	1
2022-09-14	12:08:22	0.494771	2.20084	619.356	FALSE	1
2022-09-14	12:08:22	0.31757	1.41261	577.125	FALSE	1
2022-09-14	12:08:23	0.597926	2.65969	622.016	FALSE	1
2022-09-14	12:08:23	0.50271	2.23615	579.362	FALSE	1
2022-09-14	12:08:23	0.429529	1.91063	623.927	FALSE	1
2022-09-14	12:08:23	0.647188	2.87882	582.24	FALSE	1
2022-09-14	12:08:24	0.68271	3.03683	626.963	FALSE	1
2022-09-14	12:08:24	-1.78731	-7.95031	582.24	FALSE	1
2022-09-14	12:08:24	-2.7779	-12.3567	626.963	FALSE	1
2022-09-14	12:08:24	-3.0235	-13.4491	582.24	FALSE	1
2022-09-14	12:08:25	-2.52024	-11.2105	626.963	FALSE	1
2022-09-14	12:08:25	-2.43943	-10.8511	582.24	FALSE	1
2022-09-14	12:08:25	-2.78207	-12.3752	626.963	FALSE	1
2022-09-14	12:08:26	-2.82792	-12.5792	582.24	FALSE	1
2022-09-14	12:08:26	-2.83663	-12.6179	626.963	FALSE	1
2022-09-14	12:08:26	-2.87688	-12.7969	582.24	FALSE	1
2022-09-14	12:08:26	-3.0152	-13.4122	626.963	FALSE	1
2022-09-14	12:08:27	-2.87205	-12.7755	582.24	FALSE	1
2022-09-14	12:08:27	-2.73775	-12.1781	626.963	FALSE	1
2022-09-14	12:08:27	-2.45856	-10.9362	582.24	FALSE	1
2022-09-14	12:08:27	-2.261	-10.0574	626.963	FALSE	1
2022-09-14	12:08:28	-2.26029	-10.0542	582.24	FALSE	1
2022-09-14	12:08:28	-2.16172	-9.61576	626.963	FALSE	1
2022-09-14	12:08:28	-2.19403	-9.75948	582.24	FALSE	1
2022-09-14	12:08:28	-2.18329	-9.71171	626.963	FALSE	1
2022-09-14	12:08:29	-2.01469	-8.96174	582.24	FALSE	1
2022-09-14	12:08:29	-1.90747	-8.48481	626.963	FALSE	1
2022-09-14	12:08:29	-2.02329	-9	582.24	FALSE	1
2022-09-14	12:08:30	-2.00848	-8.93412	626.963	FALSE	1
2022-09-14	12:08:30	-2.01775	-8.97536	582.24	FALSE	1
2022-09-14	12:08:30	-2.00502	-8.91873	626.963	FALSE	1
2022-09-14	12:08:30	-1.97098	-8.76731	582.24	FALSE	1
2022-09-14	12:08:31	-1.99342	-8.86713	626.963	FALSE	1
2022-09-14	12:08:31	-1.95495	-8.69601	582.24	FALSE	1
2022-09-14	12:08:31	-1.94721	-8.66158	626.963	FALSE	1
2022-09-14	12:08:31	-1.93632	-8.61314	582.24	FALSE	1
2022-09-14	12:08:32	-1.9924	-8.86259	626.963	FALSE	1
2022-09-14	12:08:32	-2.01103	-8.94546	582.24	FALSE	1
2022-09-14	12:08:32	-2.00441	-8.91602	626.963	FALSE	1
2022-09-14	12:08:32	-1.96889	-8.75802	582.24	FALSE	1
2022-09-14	12:08:33	-2.01093	-8.94502	626.963	FALSE	1
2022-09-14	12:08:33	-2.03566	-9.05502	582.24	FALSE	1
2022-09-14	12:08:33	-2.02309	-8.99911	626.963	FALSE	1
2022-09-14	12:08:34	-2.11195	-9.39438	582.24	FALSE	1
2022-09-14	12:08:34	-2.08665	-9.28184	626.963	FALSE	1
2022-09-14	12:08:34	-2.0667	-9.19309	582.24	FALSE	1
2022-09-14	12:08:34	-2.08212	-9.26169	626.963	FALSE	1
2022-09-14	12:08:35	-2.10212	-9.35065	582.24	FALSE	1
2022-09-14	12:08:35	-2.08492	-9.27414	626.963	FALSE	1
2022-09-14	12:08:35	-2.0491	-9.11481	582.24	FALSE	1
2022-09-14	12:08:35	-2.01836	-8.97807	626.963	FALSE	1
2022-09-14	12:08:36	-1.97266	-8.77479	582.24	FALSE	1
2022-09-14	12:08:36	-1.87128	-8.32383	626.963	FALSE	1
2022-09-14	12:08:36	-1.81668	-8.08096	582.24	FALSE	1
2022-09-14	12:08:36	-1.92467	-8.56132	626.963	FALSE	1
2022-09-14	12:08:37	-2.14385	-9.53627	582.24	FALSE	1
2022-09-14	12:08:37	-1.85907	-8.26952	626.963	FALSE	1
2022-09-14	12:08:37	-1.9552	-8.69712	582.24	FALSE	1
2022-09-14	12:08:38	-2.07072	-9.21098	626.963	FALSE	1
2022-09-14	12:08:38	-1.98472	-8.82843	582.24	FALSE	1
2022-09-14	12:08:38	-2.07245	-9.21867	626.963	FALSE	1
2022-09-14	12:08:38	-2.03424	-9.04871	582.24	FALSE	1
2022-09-14	12:08:39	-2.26686	-10.0834	626.963	FALSE	1
2022-09-14	12:08:39	-2.33169	-10.3718	582.24	FALSE	1
2022-09-14	12:08:39	-2.31195	-10.284	626.963	FALSE	1
2022-09-14	12:08:39	-2.46401	-10.9604	582.24	FALSE	1
2022-09-14	12:08:40	-2.40838	-10.713	626.963	FALSE	1
2022-09-14	12:08:40	-1.94899	-8.6695	582.24	FALSE	1
2022-09-14	12:08:40	-2.59418	-11.5394	626.963	FALSE	1
2022-09-14	12:08:40	-2.56604	-11.4143	582.24	FALSE	1
2022-09-14	12:08:41	-2.47459	-11.0075	626.963	FALSE	1
2022-09-14	12:08:41	-1.70843	-7.59944	582.24	FALSE	1
2022-09-14	12:08:41	-1.83464	-8.16085	626.963	FALSE	1
2022-09-14	12:08:42	-2.15072	-9.56683	582.24	FALSE	1
2022-09-14	12:08:42	-2.08635	-9.2805	626.963	FALSE	1
2022-09-14	12:08:42	-2.23103	-9.92407	582.24	FALSE	1
2022-09-14	12:08:43	-2.20075	-9.78938	626.963	FALSE	1
2022-09-14	12:08:43	-2.1491	-9.55963	582.24	FALSE	1
2022-09-14	12:08:43	-2.20034	-9.78755	626.963	FALSE	1
2022-09-14	12:08:43	-2.23072	-9.92269	582.24	FALSE	1
2022-09-14	12:08:43	-2.28324	-10.1563	626.963	FALSE	1
2022-09-14	12:08:44	-2.30319	-10.245	582.24	FALSE	1
2022-09-14	12:08:44	-2.32782	-10.3546	626.963	FALSE	1
2022-09-14	12:08:44	-2.34426	-10.4277	582.24	FALSE	1
2022-09-14	12:08:45	-2.3465	-10.4377	626.963	FALSE	1
2022-09-14	12:08:45	-2.37083	-10.5459	582.24	FALSE	1
2022-09-14	12:08:45	-2.38167	-10.5941	626.963	FALSE	1
2022-09-14	12:08:45	-2.37861	-10.5805	582.24	FALSE	1
2022-09-14	12:08:46	-2.36553	-10.5224	626.963	FALSE	1
2022-09-14	12:08:46	-2.40915	-10.7164	582.24	FALSE	1
2022-09-14	12:08:46	-2.38793	-10.622	626.963	FALSE	1
2022-09-14	12:08:46	-2.39877	-10.6702	582.24	FALSE	1
2022-09-14	12:08:47	-2.38752	-10.6202	626.963	FALSE	1
2022-09-14	12:08:47	-2.37978	-10.5857	582.24	FALSE	1
2022-09-14	12:08:47	-2.38762	-10.6206	626.963	FALSE	1
2022-09-14	12:08:47	-2.40065	-10.6786	582.24	FALSE	1
2022-09-14	12:08:48	-2.42523	-10.7879	626.963	FALSE	1
2022-09-14	12:08:48	-2.44355	-10.8694	582.24	FALSE	1
2022-09-14	12:08:48	-2.43851	-10.847	626.963	FALSE	1
2022-09-14	12:08:49	-2.44889	-10.8932	582.24	FALSE	1
2022-09-14	12:08:49	-2.46798	-10.9781	626.963	FALSE	1
2022-09-14	12:08:49	-2.4634	-10.9577	582.24	FALSE	1
2022-09-14	12:08:49	-2.48309	-11.0453	626.963	FALSE	1
2022-09-14	12:08:50	-2.48507	-11.0541	582.24	FALSE	1
2022-09-14	12:08:50	-2.50467	-11.1413	626.963	FALSE	1
2022-09-14	12:08:50	-2.54131	-11.3043	582.24	FALSE	1
2022-09-14	12:08:50	-2.54777	-11.333	626.963	FALSE	1
2022-09-14	12:08:51	-2.57943	-11.4738	582.24	FALSE	1
2022-09-14	12:08:51	-2.60579	-11.5911	626.963	FALSE	1
2022-09-14	12:08:51	-2.64055	-11.7457	582.24	FALSE	1
2022-09-14	12:08:51	-2.66935	-11.8738	626.963	FALSE	1
2022-09-14	12:08:52	-2.68569	-11.9465	582.24	FALSE	1
2022-09-14	12:08:52	-2.70579	-12.0359	626.963	FALSE	1
2022-09-14	12:08:52	-2.67943	-11.9186	582.24	FALSE	1
2022-09-14	12:08:53	-2.79708	-12.442	626.963	FALSE	1
2022-09-14	12:08:53	-3.08721	-13.7325	582.24	FALSE	1
2022-09-14	12:08:53	-3.32604	-14.7949	626.963	FALSE	1
2022-09-14	12:08:53	-3.4065	-15.1528	582.24	FALSE	1
2022-09-14	12:08:54	-3.53083	-15.7058	626.963	FALSE	1
2022-09-14	12:08:54	-3.55887	-15.8306	582.24	FALSE	1
2022-09-14	12:08:54	-3.46457	-15.4111	626.963	FALSE	1
2022-09-14	12:08:54	-3.7953	-16.8823	582.24	FALSE	1
2022-09-14	12:08:55	-4.38869	-19.5218	626.963	FALSE	1
2022-09-14	12:08:55	-4.8751	-21.6854	582.24	FALSE	1
2022-09-14	12:08:55	-5.09495	-22.6634	626.963	FALSE	1
2022-09-14	12:08:55	-5.29312	-23.5449	582.24	FALSE	1
2022-09-14	12:08:56	-5.13113	-22.8243	626.963	FALSE	1
2022-09-14	12:08:56	-5.02991	-22.374	582.24	FALSE	1
2022-09-14	12:08:56	-5.29612	-23.5582	626.963	FALSE	1
2022-09-14	12:08:57	-5.81932	-25.8855	582.24	FALSE	1
2022-09-14	12:08:57	-6.37047	-28.3371	626.963	FALSE	1
2022-09-14	12:08:57	-6.76772	-30.1042	582.24	FALSE	1
2022-09-14	12:08:57	-7.30935	-32.5135	626.963	FALSE	1
2022-09-14	12:08:58	-7.59897	-33.8017	582.24	FALSE	1
2022-09-14	12:08:58	-8.09128	-35.9916	626.963	FALSE	1
2022-09-14	12:08:58	-8.46034	-37.6333	582.24	FALSE	1
2022-09-14	12:08:58	-9.1811	-40.8394	626.963	FALSE	1
2022-09-14	12:08:59	-9.5438	-42.4527	582.24	FALSE	1
2022-09-14	12:08:59	-9.92385	-44.1433	626.963	FALSE	1
2022-09-14	12:08:59	-9.86711	-43.8909	582.24	FALSE	1
2022-09-14	12:08:59	-10.0568	-44.7347	626.963	FALSE	1
2022-09-14	12:09:00	-10.1111	-44.9762	582.24	FALSE	1
2022-09-14	12:09:00	-10.0665	-44.7778	626.963	FALSE	1
2022-09-14	12:09:00	-10.1068	-44.9571	582.24	FALSE	1
2022-09-14	12:09:01	-10.1641	-45.2119	626.963	FALSE	1
2022-09-14	12:09:01	-10.4251	-46.3729	582.24	FALSE	1
2022-09-14	12:09:01	-10.5636	-46.989	626.963	FALSE	1
2022-09-14	12:09:01	-10.8324	-48.1847	582.24	FALSE	1
2022-09-14	12:09:02	-10.7301	-47.7296	626.963	FALSE	1
2022-09-14	12:09:02	-11.0069	-48.9609	582.24	FALSE	1
2022-09-14	12:09:02	-10.9398	-48.6624	626.963	FALSE	1
2022-09-14	12:09:02	-10.8677	-48.3417	582.24	FALSE	1
2022-09-14	12:09:03	-10.8654	-48.3315	626.963	FALSE	1
2022-09-14	12:09:03	-10.5988	-47.1456	582.24	FALSE	1
2022-09-14	12:09:03	-10.5011	-46.711	626.963	FALSE	1
2022-09-14	12:09:03	-10.2007	-45.3748	582.24	FALSE	1
2022-09-14	12:09:04	-10.1457	-45.1301	626.963	FALSE	1
2022-09-14	12:09:04	-9.89306	-44.0063	582.24	FALSE	1
2022-09-14	12:09:04	-9.91627	-44.1096	626.963	FALSE	1
2022-09-14	12:09:05	-9.88848	-43.9859	582.24	FALSE	1
2022-09-14	12:09:05	-10.0299	-44.615	626.963	FALSE	1
2022-09-14	12:09:05	-9.81948	-43.679	582.24	FALSE	1
2022-09-14	12:09:05	-9.70553	-43.1721	626.963	FALSE	1
2022-09-14	12:09:06	-9.48756	-42.2026	582.24	FALSE	1
2022-09-14	12:09:06	-9.1554	-40.7251	626.963	FALSE	1
2022-09-14	12:09:06	-9.01535	-40.1021	582.24	FALSE	1
2022-09-14	12:09:06	-8.73632	-38.8609	626.963	FALSE	1
2022-09-14	12:09:07	-8.8954	-39.5685	582.24	FALSE	1
2022-09-14	12:09:07	-8.67011	-38.5664	626.963	FALSE	1
2022-09-14	12:09:07	-8.72691	-38.819	582.24	FALSE	1
2022-09-14	12:09:07	-8.37337	-37.2464	626.963	FALSE	1
2022-09-14	12:09:08	-8.5211	-37.9036	582.24	FALSE	1
2022-09-14	12:09:08	-8.48294	-37.7338	626.963	FALSE	1
2022-09-14	12:09:08	-8.63255	-38.3993	582.24	FALSE	1
2022-09-14	12:09:09	-8.59754	-38.2436	626.963	FALSE	1
2022-09-14	12:09:09	-8.59897	-38.2499	582.24	FALSE	1
2022-09-14	12:09:09	-8.39795	-37.3558	626.963	FALSE	1
2022-09-14	12:09:09	-8.07586	-35.923	582.24	FALSE	1
2022-09-14	12:09:10	-7.86767	-34.997	626.963	FALSE	1
2022-09-14	12:09:10	-7.68808	-34.1981	582.24	FALSE	1
2022-09-14	12:09:10	-7.5924	-33.7725	626.963	FALSE	1
2022-09-14	12:09:10	-7.38044	-32.8297	582.24	FALSE	1
2022-09-14	12:09:11	-7.20222	-32.0369	626.963	FALSE	1
2022-09-14	12:09:11	-6.51729	-28.9902	582.24	FALSE	1
2022-09-14	12:09:11	-5.21199	-23.184	626.963	FALSE	1
2022-09-14	12:09:11	-3.44095	-15.306	582.24	FALSE	1
2022-09-14	12:09:12	-4.93749	-21.9629	626.963	FALSE	1
2022-09-14	12:09:12	-3.87856	-17.2526	582.24	FALSE	1
2022-09-14	12:09:12	-4.06304	-18.0732	626.963	FALSE	1
2022-09-14	12:09:13	-1.8695	-8.31591	582.24	FALSE	1
2022-09-14	12:09:13	-2.89673	-12.8852	626.963	FALSE	1
2022-09-14	12:09:13	-4.9296	-21.9278	582.24	FALSE	1
2022-09-14	12:09:13	-4.75261	-21.1406	626.963	FALSE	1
2022-09-14	12:09:14	-5.14986	-22.9076	582.24	FALSE	1
2022-09-14	12:09:14	-4.83484	-21.5063	626.963	FALSE	1
2022-09-14	12:09:14	-4.80441	-21.371	582.24	FALSE	1
2022-09-14	12:09:14	-3.39785	-15.1143	626.963	FALSE	1
2022-09-14	12:09:15	-4.13103	-18.3756	582.24	FALSE	1
2022-09-14	12:09:15	-4.93322	-21.9439	626.963	FALSE	1
2022-09-14	12:09:15	-3.31093	-14.7277	582.24	FALSE	1
2022-09-14	12:09:15	-1.73907	-7.73573	626.963	FALSE	1
2022-09-14	12:09:16	-2.22044	-9.87696	582.24	FALSE	1
2022-09-14	12:09:16	-2.25449	-10.0284	626.963	FALSE	1
2022-09-14	12:09:16	-3.42289	-15.2257	582.24	FALSE	1
2022-09-14	12:09:17	-4.03591	-17.9525	626.963	FALSE	1
2022-09-14	12:09:17	-4.56742	-20.3168	582.24	FALSE	1
2022-09-14	12:09:17	-4.20288	-18.6953	626.963	FALSE	1
2022-09-14	12:09:17	-4.08665	-18.1782	582.24	FALSE	1
2022-09-14	12:09:18	-4.24884	-18.8997	626.963	FALSE	1
2022-09-14	12:09:18	-4.28589	-19.0645	582.24	FALSE	1
2022-09-14	12:09:18	-4.68395	-20.8351	626.963	FALSE	1
2022-09-14	12:09:18	-5.33795	-23.7443	582.24	FALSE	1
2022-09-14	12:09:19	-5.33067	-23.7119	626.963	FALSE	1
2022-09-14	12:09:19	-5.45072	-24.2459	582.24	FALSE	1
2022-09-14	12:09:19	-5.38757	-23.965	626.963	FALSE	1
2022-09-14	12:09:19	-5.34706	-23.7848	582.24	FALSE	1
2022-09-14	12:09:20	-5.29586	-23.557	626.963	FALSE	1
2022-09-14	12:09:20	-5.27042	-23.4439	582.24	FALSE	1
2022-09-14	12:09:20	-5.24004	-23.3087	626.963	FALSE	1
2022-09-14	12:09:21	-5.21571	-23.2005	582.24	FALSE	1
2022-09-14	12:09:21	-5.01016	-22.2862	626.963	FALSE	1
2022-09-14	12:09:21	-5.03785	-22.4094	582.24	FALSE	1
2022-09-14	12:09:21	-5.16462	-22.9733	626.963	FALSE	1
2022-09-14	12:09:22	-0.939987	-4.18125	582.24	FALSE	1
2022-09-14	12:09:22	0.718232	3.19484	630.158	FALSE	1
2022-09-14	12:09:22	1.53803	6.84147	589.082	FALSE	1
2022-09-14	12:09:22	1.86159	8.28072	638.439	FALSE	1
2022-09-14	12:09:23	1.35614	6.03238	595.114	FALSE	1
2022-09-14	12:09:23	1.6163	7.18963	645.629	FALSE	1
2022-09-14	12:09:23	1.48464	6.60398	601.718	FALSE	1
2022-09-14	12:09:24	1.50378	6.68911	652.318	FALSE	1
2022-09-14	12:09:24	1.85406	8.24723	609.965	FALSE	1
2022-09-14	12:09:24	1.70846	7.59957	659.917	FALSE	1
2022-09-14	12:09:24	1.54938	6.89195	616.857	FALSE	1
2022-09-14	12:09:25	1.66607	7.41101	667.328	FALSE	1
2022-09-14	12:09:25	1.27375	5.66589	622.523	FALSE	1
2022-09-14	12:09:25	0.962913	4.28323	671.612	FALSE	1
2022-09-14	12:09:25	0.860013	3.82551	626.349	FALSE	1
2022-09-14	12:09:26	0.982862	4.37197	675.983	FALSE	1
2022-09-14	12:09:26	0.850954	3.78521	630.134	FALSE	1
2022-09-14	12:09:26	1.06022	4.71607	680.7	FALSE	1
2022-09-14	12:09:26	0.785356	3.49342	633.627	FALSE	1
2022-09-14	12:09:27	0.597468	2.65766	683.357	FALSE	1
2022-09-14	12:09:27	0.520216	2.31402	635.941	FALSE	1
2022-09-14	12:09:27	0.472125	2.10011	685.457	FALSE	1
2022-09-14	12:09:27	0.446527	1.98624	637.928	FALSE	1
2022-09-14	12:09:28	0.439911	1.95681	687.414	FALSE	1
2022-09-14	12:09:28	0.453193	2.01589	639.944	FALSE	1
2022-09-14	12:09:28	0.506323	2.25223	689.666	FALSE	1
2022-09-14	12:09:29	0.583575	2.59586	642.539	FALSE	1
2022-09-14	12:09:29	0.668461	2.97345	692.64	FALSE	1
2022-09-14	12:09:29	0.654109	2.90961	645.449	FALSE	1
2022-09-14	12:09:29	0.651463	2.89784	695.538	FALSE	1
2022-09-14	12:09:30	0.680929	3.02891	648.478	FALSE	1
2022-09-14	12:09:30	0.597214	2.65653	698.194	FALSE	1
2022-09-14	12:09:30	0.460929	2.0503	650.528	FALSE	1
2022-09-14	12:09:30	0.440878	1.96111	700.155	FALSE	1
2022-09-14	12:09:31	0.401641	1.78658	652.315	FALSE	1
2022-09-14	12:09:31	0.212837	0.946742	701.102	FALSE	1
2022-09-14	12:09:31	0.15416	0.685735	653.001	FALSE	1
2022-09-14	12:09:31	0.167239	0.743913	701.846	FALSE	1
2022-09-14	12:09:32	0.179453	0.798243	653.799	FALSE	1
2022-09-14	12:09:32	0.126832	0.564174	702.41	FALSE	1
2022-09-14	12:09:32	0.0791478	0.352065	654.151	FALSE	1
2022-09-14	12:09:33	0.114059	0.507357	702.917	FALSE	1
2022-09-14	12:09:33	0.416858	1.85427	656.005	FALSE	1
2022-09-14	12:09:33	0.819351	3.64464	706.562	FALSE	1
2022-09-14	12:09:33	1.80739	8.03963	664.045	FALSE	1
2022-09-14	12:09:34	3.83782	17.0714	723.633	1	2
2022-09-14	12:09:34	3.29955	14.6771	678.722	1	3
2022-09-14	12:09:34	3.80281	16.9157	740.549	1	4
2022-09-14	12:09:34	3.38546	15.0592	693.781	1	5
2022-09-14	12:09:35	1.93609	8.61212	749.161	FALSE	5
2022-09-14	12:09:35	1.2622	5.61452	699.396	FALSE	5
2022-09-14	12:09:35	0.453601	2.01771	751.179	FALSE	5
2022-09-14	12:09:35	0.266883	1.18715	700.583	FALSE	5
2022-09-14	12:09:36	0.383626	1.70645	752.885	FALSE	5
2022-09-14	12:09:36	0.286527	1.27453	701.857	FALSE	5
2022-09-14	12:09:36	0.428664	1.90678	754.792	FALSE	5
2022-09-14	12:09:37	0.36673	1.63129	703.489	FALSE	5
2022-09-14	12:09:37	0.510445	2.27056	757.063	FALSE	5
2022-09-14	12:09:37	0.623575	2.77379	706.262	FALSE	5
2022-09-14	12:09:37	1.29894	5.77794	762.841	FALSE	5
2022-09-14	12:09:38	-1.67179	-7.43646	706.262	FALSE	5
2022-09-14	12:09:38	-1.20823	-5.37445	762.841	FALSE	5
2022-09-14	12:09:38	-0.0164756	-0.0732868	706.262	FALSE	5
2022-09-14	12:09:38	0.574618	2.55602	765.397	FALSE	5
2022-09-14	12:09:39	1.97065	8.76585	715.028	FALSE	5
2022-09-14	12:09:39	1.9395	8.62728	774.024	FALSE	5
2022-09-14	12:09:39	-1.66787	-7.41902	715.028	FALSE	5
2022-09-14	12:09:39	-2.26426	-10.0719	774.024	FALSE	5
2022-09-14	12:09:40	-2.17118	-9.65784	715.028	FALSE	5
2022-09-14	12:09:40	-2.1836	-9.71309	774.024	FALSE	5
2022-09-14	12:09:40	-2.6207	-11.6574	715.028	FALSE	5
2022-09-14	12:09:41	-2.08106	-9.25697	774.024	FALSE	5
2022-09-14	12:09:41	-2.86065	-12.7247	715.028	FALSE	5
2022-09-14	12:09:41	-2.85637	-12.7057	774.024	FALSE	5
2022-09-14	12:09:41	-2.95505	-13.1447	715.028	FALSE	5
2022-09-14	12:09:42	-2.91312	-12.9581	774.024	FALSE	5
2022-09-14	12:09:42	-2.03245	-9.04074	715.028	FALSE	5
2022-09-14	12:09:42	-2.98965	-13.2986	774.024	FALSE	5
2022-09-14	12:09:42	-2.86385	-12.739	715.028	FALSE	5
2022-09-14	12:09:43	-2.94375	-13.0944	774.024	FALSE	5
2022-09-14	12:09:43	-2.75352	-12.2482	715.028	FALSE	5
2022-09-14	12:09:43	-2.69184	-11.9738	774.024	FALSE	5
2022-09-14	12:09:43	-2.27286	-10.1101	715.028	FALSE	5
2022-09-14	12:09:44	-2.38675	-10.6167	774.024	FALSE	5
2022-09-14	12:09:44	-1.28508	-5.71629	715.028	FALSE	5
2022-09-14	12:09:44	1.38017	6.13927	780.163	FALSE	5
2022-09-14	12:09:45	1.4165	6.30088	721.329	FALSE	5
2022-09-14	12:09:45	-0.625585	-2.78273	780.163	FALSE	5
2022-09-14	12:09:45	-0.32533	-1.44713	721.329	FALSE	5
2022-09-14	12:09:45	-1.10905	-4.93328	780.163	FALSE	5
2022-09-14	12:09:46	-1.85693	-8.26	721.329	FALSE	5
2022-09-14	12:09:46	-2.15235	-9.57408	780.163	FALSE	5
2022-09-14	12:09:46	-1.58055	-7.0306	721.329	FALSE	5
2022-09-14	12:09:46	-2.28492	-10.1638	780.163	FALSE	5
2022-09-14	12:09:47	-2.42253	-10.7759	721.329	FALSE	5
2022-09-14	12:09:47	-2.54055	-11.3009	780.163	FALSE	5
2022-09-14	12:09:47	-2.68487	-11.9428	721.329	FALSE	5
2022-09-14	12:09:47	-2.73256	-12.155	780.163	FALSE	5
2022-09-14	12:09:48	-2.58156	-11.4833	721.329	FALSE	5
2022-09-14	12:09:48	-2.74909	-12.2285	780.163	FALSE	5
2022-09-14	12:09:48	-2.60497	-11.5874	721.329	FALSE	5
2022-09-14	12:09:49	-2.62294	-11.6674	780.163	FALSE	5
2022-09-14	12:09:49	-2.53999	-11.2984	721.329	FALSE	5
2022-09-14	12:09:49	-2.57724	-11.4641	780.163	FALSE	5
2022-09-14	12:09:49	-2.54681	-11.3287	721.329	FALSE	5
2022-09-14	12:09:50	-2.34808	-10.4447	780.163	FALSE	5
2022-09-14	12:09:50	-2.42314	-10.7786	721.329	FALSE	5
2022-09-14	12:09:50	-1.83724	-8.17241	780.163	FALSE	5
2022-09-14	12:09:50	-1.7977	-7.99653	721.329	FALSE	5
2022-09-14	12:09:51	-1.67546	-7.45278	780.163	FALSE	5
2022-09-14	12:09:51	-1.9549	-8.69579	721.329	FALSE	5
2022-09-14	12:09:51	-2.11536	-9.40954	780.163	FALSE	5
2022-09-14	12:09:51	-2.1149	-9.4075	721.329	FALSE	5
2022-09-14	12:09:52	-2.24569	-9.98928	780.163	FALSE	5
2022-09-14	12:09:52	-2.18981	-9.74071	721.329	FALSE	5
2022-09-14	12:09:52	-2.26981	-10.0966	780.163	FALSE	5
2022-09-14	12:09:53	-2.16187	-9.61643	721.329	FALSE	5
2022-09-14	12:09:53	-2.41515	-10.7431	780.163	FALSE	5
2022-09-14	12:09:53	-2.30034	-10.2324	721.329	FALSE	5
2022-09-14	12:09:53	-2.41022	-10.7211	780.163	FALSE	5
2022-09-14	12:09:54	-2.48782	-11.0663	721.329	FALSE	5
2022-09-14	12:09:54	-2.5491	-11.3389	780.163	FALSE	5
2022-09-14	12:09:54	-2.47541	-11.0111	721.329	FALSE	5
2022-09-14	12:09:54	-2.36279	-10.5102	780.163	FALSE	5
2022-09-14	12:09:55	-2.24446	-9.98381	721.329	FALSE	5
2022-09-14	12:09:55	-1.82676	-8.12579	780.163	FALSE	5
2022-09-14	12:09:55	-1.58538	-7.05209	721.329	FALSE	5
2022-09-14	12:09:55	-1.83164	-8.1475	780.163	FALSE	5
2022-09-14	12:09:56	-1.93042	-8.58689	721.329	FALSE	5
2022-09-14	12:09:56	-2.05434	-9.13812	780.163	FALSE	5
2022-09-14	12:09:56	-2.18263	-9.70877	721.329	FALSE	5
2022-09-14	12:09:57	-2.26192	-10.0615	780.163	FALSE	5
2022-09-14	12:09:57	-2.18991	-9.74116	721.329	FALSE	5
2022-09-14	12:09:57	-2.40182	-10.6838	780.163	FALSE	5
2022-09-14	12:09:57	-2.70065	-12.013	721.329	FALSE	5
2022-09-14	12:09:58	-2.59922	-11.5619	780.163	FALSE	5
2022-09-14	12:09:58	-2.71245	-12.0655	721.329	FALSE	5
2022-09-14	12:09:58	-2.77383	-12.3386	780.163	FALSE	5
2022-09-14	12:09:58	-2.88278	-12.8232	721.329	FALSE	5
2022-09-14	12:09:59	-2.74574	-12.2136	780.163	FALSE	5
2022-09-14	12:09:59	-2.74441	-12.2077	721.329	FALSE	5
2022-09-14	12:09:59	0.369733	1.64465	781.808	FALSE	5
2022-09-14	12:09:59	-1.93179	-8.59299	721.329	FALSE	5
2022-09-14	12:10:00	-2.67418	-11.8953	781.808	FALSE	5
2022-09-14	12:10:00	-2.89281	-12.8678	721.329	FALSE	5
2022-09-14	12:10:00	-2.99189	-13.3085	781.808	FALSE	5
2022-09-14	12:10:01	-3.11892	-13.8736	721.329	FALSE	5
2022-09-14	12:10:01	-3.10126	-13.795	781.808	FALSE	5
2022-09-14	12:10:01	-2.52701	-11.2406	721.329	FALSE	5
2022-09-14	12:10:01	-0.182226	-0.810578	781.808	FALSE	5
2022-09-14	12:10:02	-1.05078	-4.67408	721.329	FALSE	5
2022-09-14	12:10:02	1.28184	5.70188	787.51	FALSE	5
2022-09-14	12:10:02	1.34892	6.00027	727.329	FALSE	5
2022-09-14	12:10:02	-1.30004	-5.78284	787.51	FALSE	5
2022-09-14	12:10:03	-2.78818	-12.4024	727.329	FALSE	5
2022-09-14	12:10:03	-2.87836	-12.8035	787.51	FALSE	5
2022-09-14	12:10:03	-0.143956	-0.640345	727.329	FALSE	5
2022-09-14	12:10:04	0.738384	3.28448	790.794	FALSE	5
2022-09-14	12:10:04	0.591208	2.62981	729.959	FALSE	5
2022-09-14	12:10:04	0.225153	1.00153	791.796	FALSE	5
2022-09-14	12:10:04	0.264491	1.17651	731.136	FALSE	5
2022-09-14	12:10:05	0.208308	0.926596	792.722	FALSE	5
2022-09-14	12:10:05	0.193957	0.86276	731.998	FALSE	5
2022-09-14	12:10:05	0.226374	1.00696	793.729	FALSE	5
2022-09-14	12:10:05	0.203066	0.903278	732.902	FALSE	5
2022-09-14	12:10:06	0.201031	0.894226	794.624	FALSE	5
2022-09-14	12:10:06	0.164695	0.732596	733.634	FALSE	5
2022-09-14	12:10:06	0.318842	1.41827	796.042	FALSE	5
2022-09-14	12:10:06	0.229682	1.02167	734.656	FALSE	5
2022-09-14	12:10:07	0.234313	1.04227	797.084	FALSE	5
2022-09-14	12:10:07	0.224542	0.998808	735.655	FALSE	5
2022-09-14	12:10:07	0.282456	1.25642	798.341	FALSE	5
2022-09-14	12:10:08	0.419911	1.86785	737.523	FALSE	5
2022-09-14	12:10:08	0.322456	1.43435	799.775	FALSE	5
2022-09-14	12:10:08	0.347087	1.54391	739.067	FALSE	5
2022-09-14	12:10:08	0.411667	1.83118	801.606	FALSE	5
2022-09-14	12:10:09	0.444898	1.979	741.046	FALSE	5
2022-09-14	12:10:09	0.470598	2.09331	803.699	FALSE	5
2022-09-14	12:10:09	0.406476	1.80809	742.854	FALSE	5
2022-09-14	12:10:09	0.552939	2.45958	806.159	FALSE	5
2022-09-14	12:10:10	0.464797	2.06751	744.921	FALSE	5
2022-09-14	12:10:10	0.452328	2.01205	808.171	FALSE	5
2022-09-14	12:10:10	0.424288	1.88732	746.808	FALSE	5
2022-09-14	12:10:10	0.511972	2.27735	810.448	FALSE	5
2022-09-14	12:10:11	0.497468	2.21284	749.021	FALSE	5
2022-09-14	12:10:11	0.448461	1.99484	812.443	FALSE	5
2022-09-14	12:10:11	0.446069	1.9842	751.005	FALSE	5
2022-09-14	12:10:12	0.510801	2.27215	814.715	FALSE	5
2022-09-14	12:10:12	0.511616	2.27577	753.281	FALSE	5
2022-09-14	12:10:12	0.433601	1.92874	816.644	FALSE	5
2022-09-14	12:10:12	0.479606	2.13338	755.415	FALSE	5
2022-09-14	12:10:13	0.464033	2.06411	818.708	FALSE	5
2022-09-14	12:10:13	0.545102	2.42472	757.839	FALSE	5
2022-09-14	12:10:13	0.424338	1.88754	820.596	FALSE	5
2022-09-14	12:10:13	0.476705	2.12048	759.96	FALSE	5
2022-09-14	12:10:14	0.457214	2.03378	822.63	FALSE	5
2022-09-14	12:10:14	0.563779	2.5078	762.468	FALSE	5
2022-09-14	12:10:14	0.448308	1.99416	824.624	FALSE	5
2022-09-14	12:10:14	0.477926	2.12591	764.594	FALSE	5
2022-09-14	12:10:15	0.499198	2.22053	826.844	FALSE	5
2022-09-14	12:10:15	0.510649	2.27147	766.865	FALSE	5
2022-09-14	12:10:15	0.509173	2.2649	829.109	FALSE	5
2022-09-14	12:10:16	0.44154	1.96406	768.829	FALSE	5
2022-09-14	12:10:16	0.507035	2.25539	831.365	FALSE	5
2022-09-14	12:10:16	0.4936	2.19563	771.025	FALSE	5
2022-09-14	12:10:16	0.514771	2.2898	833.654	FALSE	5
2022-09-14	12:10:17	0.423982	1.88596	772.911	FALSE	5
2022-09-14	12:10:17	0.551361	2.45256	836.107	FALSE	5
2022-09-14	12:10:17	0.570242	2.53655	775.447	FALSE	5
2022-09-14	12:10:17	0.832735	3.70417	839.811	FALSE	5
2022-09-14	12:10:18	1.33859	5.95432	781.402	FALSE	5
2022-09-14	12:10:18	5.04917	22.4597	862.271	1	6
2022-09-14	12:10:18	9.20474	40.9445	822.346	1	7
2022-09-14	12:10:18	5.67166	25.2287	887.499	1	8
2022-09-14	12:10:19	5.53441	24.6182	846.964	1	9
2022-09-14	12:10:19	7.16627	31.877	919.376	1	10
2022-09-14	12:10:19	5.48088	24.3801	871.344	1	11
2022-09-14	12:10:20	2.04642	9.10289	928.479	FALSE	11
2022-09-14	12:10:20	0.980623	4.36201	875.706	FALSE	11
2022-09-14	12:10:20	0.464898	2.06796	930.547	FALSE	11
2022-09-14	12:10:20	0.515331	2.2923	877.999	FALSE	11
2022-09-14	12:10:21	0.477723	2.12501	932.672	FALSE	11
2022-09-14	12:10:21	0.446832	1.9876	879.986	FALSE	11
2022-09-14	12:10:21	0.425051	1.89071	934.563	FALSE	11
2022-09-14	12:10:21	0.49416	2.19812	882.184	FALSE	11
2022-09-14	12:10:22	0.398741	1.77368	936.337	FALSE	11
2022-09-14	12:10:22	0.5336	2.37356	884.558	FALSE	11
2022-09-14	12:10:22	0.43355	1.92852	938.265	FALSE	11
2022-09-14	12:10:22	0.478333	2.12772	886.686	FALSE	11
2022-09-14	12:10:23	0.514517	2.28867	940.554	FALSE	11
2022-09-14	12:10:23	0.444796	1.97854	888.664	FALSE	11
2022-09-14	12:10:23	0.42271	1.8803	942.434	FALSE	11
2022-09-14	12:10:24	0.476145	2.11799	890.782	FALSE	11
2022-09-14	12:10:24	0.402964	1.79246	944.227	FALSE	11
2022-09-14	12:10:24	0.353855	1.57402	892.356	FALSE	11
2022-09-14	12:10:24	0.311819	1.38703	945.614	FALSE	11
2022-09-14	12:10:25	0.38042	1.69218	894.048	FALSE	11
2022-09-14	12:10:25	0.779962	3.46943	949.083	FALSE	11
2022-09-14	12:10:25	2.52933	11.251	905.299	FALSE	11
2022-09-14	12:10:25	3.59747	16.0023	965.085	1	12
2022-09-14	12:10:26	5.44362	24.2143	929.514	1	13
2022-09-14	12:10:26	3.94083	17.5296	982.615	1	14
2022-09-14	12:10:26	0.717875	3.19325	932.707	FALSE	14
2022-09-14	12:10:26	-0.091132	-0.405373	982.615	FALSE	14
2022-09-14	12:10:27	-0.103448	-0.460157	932.707	FALSE	14
2022-09-14	12:10:27	0.284135	1.26389	983.879	FALSE	14
2022-09-14	12:10:27	0.00209949	0.00933895	932.716	FALSE	14
2022-09-14	12:10:28	0.241132	1.0726	984.951	FALSE	14
2022-09-14	12:10:28	0.773346	3.44	936.156	FALSE	14
2022-09-14	12:10:28	0.832583	3.7035	988.655	FALSE	14
2022-09-14	12:10:28	0.860725	3.82868	939.985	FALSE	14

## Sheet: Richa_star_202291412512 (2)
Date	Time	Lbs	Total force x time			**GoPro Fitting: 1154
2022-09-14	12:05:13	0.555738	0.555738	FALSE	0
2022-09-14	12:05:13	0.508766	1.0645	FALSE	0
2022-09-14	12:05:13	0.632786	1.69729	FALSE	0
2022-09-14	12:05:13	1.39528	3.09257	FALSE	0
2022-09-14	12:05:14	2.77095	5.86352	FALSE	0
2022-09-14	12:05:14	0.518944	6.38246	FALSE	0
2022-09-14	12:05:14	0.442761	6.82522	FALSE	0
2022-09-14	12:05:14	0.623931	7.44916	FALSE	0
2022-09-14	12:05:15	0.597112	8.04627	FALSE	0
2022-09-14	12:05:15	0.814313	8.86058	FALSE	0
2022-09-14	12:05:15	2.28999	11.1506	FALSE	0
2022-09-14	12:05:15	5.38266	16.5332	1	1
2022-09-14	12:05:16	5.69467	22.2279	1	2
2022-09-14	12:05:16	5.64276	27.8707	1	3
2022-09-14	12:05:16	4.18357	32.0542	1	4
2022-09-14	12:05:17	2.61752	34.6718	FALSE	4
2022-09-14	12:05:17	1.15777	35.8295	FALSE	4
2022-09-14	12:05:17	0.748155	36.5777	FALSE	4
2022-09-14	12:05:17	0.819453	37.3971	FALSE	4
2022-09-14	12:05:18	0.916654	38.3138	FALSE	4
2022-09-14	12:05:18	0.752227	39.066	FALSE	4
2022-09-14	12:05:18	0.449835	39.5158	FALSE	4
2022-09-14	12:05:18	0.495178	40.011	FALSE	4
2022-09-14	12:05:19	0.409224	40.4202	FALSE	4
2022-09-14	12:05:19	0.337417	40.7577	FALSE	4
2022-09-14	12:05:19	0.352481	41.1101	FALSE	4
2022-09-14	12:05:19	0.340573	41.4507	FALSE	4
2022-09-14	12:05:20	0.434313	41.885	FALSE	4
2022-09-14	12:05:20	0.352837	42.2379	FALSE	4
2022-09-14	12:05:20	0.964694	43.2026	FALSE	4
2022-09-14	12:05:21	3.01569	46.2183	1	5
2022-09-14	12:05:21	5.16561	51.3839	1	6
2022-09-14	12:05:21	4.7191	56.103	1	7
2022-09-14	12:05:21	6.25202	62.355	1	8
2022-09-14	12:05:22	8.3569	70.7119	1	9
2022-09-14	12:05:22	6.71594	77.4278	1	10
2022-09-14	12:05:22	4.34403	81.7719	1	11
2022-09-14	12:05:22	1.30902	83.0809	FALSE	11
2022-09-14	12:05:23	0.858639	83.9395	FALSE	11
2022-09-14	12:05:23	0.866527	84.806	FALSE	11
2022-09-14	12:05:23	0.834873	85.6409	FALSE	11
2022-09-14	12:05:23	0.803168	86.4441	FALSE	11
2022-09-14	12:05:24	0.688919	87.133	FALSE	11
2022-09-14	12:05:24	0.568563	87.7016	FALSE	11
2022-09-14	12:05:24	0.503168	88.2047	FALSE	11
2022-09-14	12:05:25	0.437672	88.6424	FALSE	11
2022-09-14	12:05:25	0.49869	89.1411	FALSE	11
2022-09-14	12:05:25	0.831972	89.9731	FALSE	11
2022-09-14	12:05:25	0.937265	90.9103	FALSE	11
2022-09-14	12:05:26	0.763168	91.6735	FALSE	11
2022-09-14	12:05:26	0.543015	92.2165	FALSE	11
2022-09-14	12:05:26	0.486578	92.7031	FALSE	11
2022-09-14	12:05:26	0.440878	93.144	FALSE	11
2022-09-14	12:05:27	0.454568	93.5985	FALSE	11
2022-09-14	12:05:27	0.452227	94.0508	FALSE	11
2022-09-14	12:05:27	0.421234	94.472	FALSE	11
2022-09-14	12:05:28	0.447901	94.9199	FALSE	11
2022-09-14	12:05:28	0.437621	95.3575	FALSE	11
2022-09-14	12:05:28	0.396196	95.7537	FALSE	11
2022-09-14	12:05:28	0.479758	96.2335	FALSE	11
2022-09-14	12:05:29	0.412074	96.6455	FALSE	11
2022-09-14	12:05:29	0.439046	97.0846	FALSE	11
2022-09-14	12:05:29	0.466323	97.5509	FALSE	11
2022-09-14	12:05:29	0.453906	98.0048	FALSE	11
2022-09-14	12:05:30	0.447036	98.4519	FALSE	11
2022-09-14	12:05:30	0.464339	98.9162	FALSE	11
2022-09-14	12:05:30	0.447087	99.3633	FALSE	11
2022-09-14	12:05:30	0.460064	99.8233	FALSE	11
2022-09-14	12:05:31	0.457468	100.281	FALSE	11
2022-09-14	12:05:31	0.489478	100.77	FALSE	11
2022-09-14	12:05:31	0.488359	101.259	FALSE	11
2022-09-14	12:05:32	0.481997	101.741	FALSE	11
2022-09-14	12:05:32	0.433651	102.174	FALSE	11
2022-09-14	12:05:32	0.510242	102.685	FALSE	11
2022-09-14	12:05:32	0.457774	103.142	FALSE	11
2022-09-14	12:05:33	0.490751	103.633	FALSE	11
2022-09-14	12:05:33	0.532125	104.165	FALSE	11
2022-09-14	12:05:33	0.455178	104.62	FALSE	11
2022-09-14	12:05:33	0.158842	104.779	FALSE	11
2022-09-14	12:05:34	0.167239	104.946	FALSE	11
2022-09-14	12:05:34	0.48612	105.433	FALSE	11
2022-09-14	12:05:34	0.518842	105.951	FALSE	11
2022-09-14	12:05:34	0.448206	106.4	FALSE	11
2022-09-14	12:05:35	0.416959	106.817	FALSE	11
2022-09-14	12:05:35	0.360216	107.177	FALSE	11
2022-09-14	12:05:35	0.450344	107.627	FALSE	11
2022-09-14	12:05:36	0.420827	108.048	FALSE	11
2022-09-14	12:05:36	0.378232	108.426	FALSE	11
2022-09-14	12:05:36	0.422965	108.849	FALSE	11
2022-09-14	12:05:36	0.448104	109.297	FALSE	11
2022-09-14	12:05:37	0.479657	109.777	FALSE	11
2022-09-14	12:05:37	0.374262	110.151	FALSE	11
2022-09-14	12:05:37	0.402914	110.554	FALSE	11
2022-09-14	12:05:37	0.443677	110.998	FALSE	11
2022-09-14	12:05:38	0.124135	111.122	FALSE	11
2022-09-14	12:05:38	-0.0302669	111.122	FALSE	11
2022-09-14	12:05:38	-0.262989	111.122	FALSE	11
2022-09-14	12:05:38	-0.539071	111.122	FALSE	11
2022-09-14	12:05:39	-0.640546	111.122	FALSE	11
2022-09-14	12:05:39	-0.496068	111.122	FALSE	11
2022-09-14	12:05:39	-0.268486	111.122	FALSE	11
2022-09-14	12:05:40	-0.130114	111.122	FALSE	11
2022-09-14	12:05:40	0.257468	111.379	FALSE	11
2022-09-14	12:05:40	0.279504	111.659	FALSE	11
2022-09-14	12:05:40	0.345611	112.004	FALSE	11
2022-09-14	12:05:41	0.268562	112.273	FALSE	11
2022-09-14	12:05:41	0.534822	112.808	FALSE	11
2022-09-14	12:05:41	0.32159	113.129	FALSE	11
2022-09-14	12:05:41	0.361183	113.491	FALSE	11
2022-09-14	12:05:42	0.29299	113.784	FALSE	11
2022-09-14	12:05:42	0.460776	114.244	FALSE	11
2022-09-14	12:05:42	0.258537	114.503	FALSE	11
2022-09-14	12:05:42	0.305509	114.808	FALSE	11
2022-09-14	12:05:43	0.0709544	114.879	FALSE	11
2022-09-14	12:05:43	0.181794	115.061	FALSE	11
2022-09-14	12:05:43	0.107799	115.169	FALSE	11
2022-09-14	12:05:44	0.257316	115.426	FALSE	11
2022-09-14	12:05:44	0.0778247	115.504	FALSE	11
2022-09-14	12:05:44	0.161641	115.666	FALSE	11
2022-09-14	12:05:44	0.134618	115.8	FALSE	11
2022-09-14	12:05:45	0.225407	116.026	FALSE	11
2022-09-14	12:05:45	0.152074	116.178	FALSE	11
2022-09-14	12:05:45	0.222354	116.4	FALSE	11
2022-09-14	12:05:45	0.187392	116.588	FALSE	11
2022-09-14	12:05:46	0.229122	116.817	FALSE	11
2022-09-14	12:05:46	0.157519	116.974	FALSE	11
2022-09-14	12:05:46	0.256959	117.231	FALSE	11
2022-09-14	12:05:46	0.280522	117.512	FALSE	11
2022-09-14	12:05:47	0.2764	117.788	FALSE	11
2022-09-14	12:05:47	0.258588	118.047	FALSE	11
2022-09-14	12:05:47	0.251311	118.298	FALSE	11
2022-09-14	12:05:48	0.266883	118.565	FALSE	11
2022-09-14	12:05:48	0.282048	118.847	FALSE	11
2022-09-14	12:05:48	0.243626	119.091	FALSE	11
2022-09-14	12:05:48	0.275483	119.366	FALSE	11
2022-09-14	12:05:49	0.277774	119.644	FALSE	11
2022-09-14	12:05:49	0.250547	119.894	FALSE	11
2022-09-14	12:05:49	0.294313	120.189	FALSE	11
2022-09-14	12:05:49	0.257265	120.446	FALSE	11
2022-09-14	12:05:50	0.388257	120.834	FALSE	11
2022-09-14	12:05:50	0.236603	121.071	FALSE	11
2022-09-14	12:05:50	0.369224	121.44	FALSE	11
2022-09-14	12:05:51	0.192634	121.633	FALSE	11
2022-09-14	12:05:51	0.478791	122.112	FALSE	11
2022-09-14	12:05:51	0.197825	122.309	FALSE	11
2022-09-14	12:05:51	0.431565	122.741	FALSE	11
2022-09-14	12:05:52	0.26729	123.008	FALSE	11
2022-09-14	12:05:52	0.455127	123.463	FALSE	11
2022-09-14	12:05:52	0.236959	123.7	FALSE	11
2022-09-14	12:05:52	0.393092	124.093	FALSE	11
2022-09-14	12:05:53	0.279148	124.373	FALSE	11
2022-09-14	12:05:53	0.46388	124.836	FALSE	11
2022-09-14	12:05:53	0.23813	125.075	FALSE	11
2022-09-14	12:05:53	0.432176	125.507	FALSE	11
2022-09-14	12:05:54	0.328511	125.835	FALSE	11
2022-09-14	12:05:54	0.651768	126.487	FALSE	11
2022-09-14	12:05:54	0.394059	126.881	FALSE	11
2022-09-14	12:05:55	0.412176	127.293	FALSE	11
2022-09-14	12:05:55	0.262812	127.556	FALSE	11
2022-09-14	12:05:55	0.433092	127.989	FALSE	11
2022-09-14	12:05:55	0.200013	128.189	FALSE	11
2022-09-14	12:05:56	0.434059	128.623	FALSE	11
2022-09-14	12:05:56	0.308766	128.932	FALSE	11
2022-09-14	12:05:56	0.374771	129.307	FALSE	11
2022-09-14	12:05:56	0.230293	129.537	FALSE	11
2022-09-14	12:05:57	0.358181	129.895	FALSE	11
2022-09-14	12:05:57	0.28444	130.18	FALSE	11
2022-09-14	12:05:57	0.352379	130.532	FALSE	11
2022-09-14	12:05:57	0.286883	130.819	FALSE	11
2022-09-14	12:05:58	0.300725	131.12	FALSE	11
2022-09-14	12:05:58	0.420522	131.54	FALSE	11
2022-09-14	12:05:58	0.90098	132.441	FALSE	11
2022-09-14	12:05:59	2.36632	134.807	FALSE	11
2022-09-14	12:05:59	4.72764	139.535	1	12
2022-09-14	12:05:59	2.02205	141.557	FALSE	12
2022-09-14	12:05:59	1.86174	143.419	FALSE	12
2022-09-14	12:06:00	0.805407	144.224	FALSE	12
2022-09-14	12:06:00	0.377112	144.601	FALSE	12
2022-09-14	12:06:00	0.346425	144.948	FALSE	12
2022-09-14	12:06:00	0.328868	145.277	FALSE	12
2022-09-14	12:06:01	0.354008	145.631	FALSE	12
2022-09-14	12:06:01	0.406221	146.037	FALSE	12
2022-09-14	12:06:01	0.354466	146.391	FALSE	12
2022-09-14	12:06:01	0.340267	146.732	FALSE	12
2022-09-14	12:06:02	0.603931	147.336	FALSE	12
2022-09-14	12:06:02	0.244186	147.58	FALSE	12
2022-09-14	12:06:02	0.328155	147.908	FALSE	12
2022-09-14	12:06:03	0.409936	148.318	FALSE	12
2022-09-14	12:06:03	0.49869	148.817	FALSE	12
2022-09-14	12:06:03	0.515687	149.332	FALSE	12
2022-09-14	12:06:03	0.740267	150.073	FALSE	12
2022-09-14	12:06:04	0.788918	150.861	FALSE	12
2022-09-14	12:06:04	1.90877	152.77	FALSE	12
2022-09-14	12:06:04	1.40927	154.179	FALSE	12
2022-09-14	12:06:04	0.471361	154.651	FALSE	12
2022-09-14	12:06:05	0.43243	155.083	FALSE	12
2022-09-14	12:06:05	0.527036	155.61	FALSE	12
2022-09-14	12:06:05	0.35869	155.969	FALSE	12
2022-09-14	12:06:05	0.5393	156.508	FALSE	12
2022-09-14	12:06:06	0.812481	157.321	FALSE	12
2022-09-14	12:06:06	0.697315	158.018	FALSE	12
2022-09-14	12:06:06	0.614516	158.633	FALSE	12
2022-09-14	12:06:07	0.538384	159.171	FALSE	12
2022-09-14	12:06:07	0.772176	159.943	FALSE	12
2022-09-14	12:06:07	0.647035	160.59	FALSE	12
2022-09-14	12:06:07	0.645916	161.236	FALSE	12
2022-09-14	12:06:08	0.507443	161.744	FALSE	12
2022-09-14	12:06:08	0.470802	162.214	FALSE	12
2022-09-14	12:06:08	0.484288	162.699	FALSE	12
2022-09-14	12:06:08	0.451158	163.15	FALSE	12
2022-09-14	12:06:09	0.708562	163.858	FALSE	12
2022-09-14	12:06:09	0.712634	164.571	FALSE	12
2022-09-14	12:06:09	0.577824	165.149	FALSE	12
2022-09-14	12:06:09	0.601896	165.751	FALSE	12
2022-09-14	12:06:10	0.535433	166.286	FALSE	12
2022-09-14	12:06:10	0.526578	166.813	FALSE	12
2022-09-14	12:06:10	0.44785	167.261	FALSE	12
2022-09-14	12:06:11	0.400624	167.661	FALSE	12
2022-09-14	12:06:11	0.480827	168.142	FALSE	12
2022-09-14	12:06:11	0.399707	168.542	FALSE	12
2022-09-14	12:06:11	0.485305	169.027	FALSE	12
2022-09-14	12:06:12	0.376196	169.403	FALSE	12
2022-09-14	12:06:12	0.333957	169.737	FALSE	12
2022-09-14	12:06:12	0.376756	170.114	FALSE	12
2022-09-14	12:06:12	0.3393	170.453	FALSE	12
2022-09-14	12:06:13	0.474669	170.928	FALSE	12
2022-09-14	12:06:13	0.277468	171.205	FALSE	12
2022-09-14	12:06:13	0.448003	171.653	FALSE	12
2022-09-14	12:06:14	0.293601	171.947	FALSE	12
2022-09-14	12:06:14	0.347799	172.295	FALSE	12
2022-09-14	12:06:14	2.00704	174.302	FALSE	12
2022-09-14	12:06:14	2.22861	176.53	FALSE	12
2022-09-14	12:06:15	2.2791	178.81	FALSE	12
2022-09-14	12:06:15	0.317061	179.127	FALSE	12
2022-09-14	12:06:15	0.443422	179.57	FALSE	12
2022-09-14	12:06:15	0.27925	179.849	FALSE	12
2022-09-14	12:06:16	0.306629	180.156	FALSE	12
2022-09-14	12:06:16	0.375484	180.531	FALSE	12
2022-09-14	12:06:16	0.345509	180.877	FALSE	12
2022-09-14	12:06:16	0.386985	181.264	FALSE	12
2022-09-14	12:06:17	0.269886	181.534	FALSE	12
2022-09-14	12:06:17	0.497774	182.032	FALSE	12
2022-09-14	12:06:17	0.375178	182.407	FALSE	12
2022-09-14	12:06:18	0.567697	182.974	FALSE	12
2022-09-14	12:06:18	0.471819	183.446	FALSE	12
2022-09-14	12:06:18	0.535687	183.982	FALSE	12
2022-09-14	12:06:18	0.334059	184.316	FALSE	12
2022-09-14	12:06:19	0.390445	184.706	FALSE	12
2022-09-14	12:06:19	0.342761	185.049	FALSE	12
2022-09-14	12:06:19	0.294771	185.344	FALSE	12
2022-09-14	12:06:19	0.398944	185.743	FALSE	12
2022-09-14	12:06:20	0.36897	186.112	FALSE	12
2022-09-14	12:06:20	0.553295	186.665	FALSE	12
2022-09-14	12:06:20	1.60668	188.272	FALSE	12
2022-09-14	12:06:20	1.66744	189.939	FALSE	12
2022-09-14	12:06:21	1.86551	191.805	FALSE	12
2022-09-14	12:06:21	1.81711	193.622	FALSE	12
2022-09-14	12:06:21	1.46821	195.09	FALSE	12
2022-09-14	12:06:22	1.51558	196.606	FALSE	12
2022-09-14	12:06:22	1.49401	198.1	FALSE	12
2022-09-14	12:06:22	1.53182	199.632	FALSE	12
2022-09-14	12:06:22	1.5476	201.179	FALSE	12
2022-09-14	12:06:23	1.49492	202.674	FALSE	12
2022-09-14	12:06:23	1.51233	204.186	FALSE	12
2022-09-14	12:06:23	0.919402	205.106	FALSE	12
2022-09-14	12:06:23	0.909173	206.015	FALSE	12
2022-09-14	12:06:24	0.609631	206.625	FALSE	12
2022-09-14	12:06:24	0.968053	207.593	FALSE	12
2022-09-14	12:06:24	0.536705	208.129	FALSE	12
2022-09-14	12:06:24	0.94444	209.074	FALSE	12
2022-09-14	12:06:25	0.465356	209.539	FALSE	12
2022-09-14	12:06:25	0.694669	210.234	FALSE	12
2022-09-14	12:06:25	0.384949	210.619	FALSE	12
2022-09-14	12:06:26	0.528308	211.147	FALSE	12
2022-09-14	12:06:26	0.35584	211.503	FALSE	12
2022-09-14	12:06:26	0.415331	211.918	FALSE	12
2022-09-14	12:06:26	0.360165	212.278	FALSE	12
2022-09-14	12:06:27	0.371361	212.65	FALSE	12
2022-09-14	12:06:27	0.687188	213.337	FALSE	12
2022-09-14	12:06:27	0.922659	214.26	FALSE	12
2022-09-14	12:06:27	0.525662	214.785	FALSE	12
2022-09-14	12:06:28	0.377468	215.163	FALSE	12
2022-09-14	12:06:28	0.486018	215.649	FALSE	12
2022-09-14	12:06:28	0.275483	215.924	FALSE	12
2022-09-14	12:06:28	0.513092	216.437	FALSE	12
2022-09-14	12:06:29	0.365407	216.803	FALSE	12
2022-09-14	12:06:29	0.474924	217.278	FALSE	12
2022-09-14	12:06:29	0.346018	217.624	FALSE	12
2022-09-14	12:06:30	0.412481	218.036	FALSE	12
2022-09-14	12:06:30	0.467799	218.504	FALSE	12
2022-09-14	12:06:30	0.499097	219.003	FALSE	12
2022-09-14	12:06:30	1.00296	220.006	FALSE	12
2022-09-14	12:06:31	0.746425	220.752	FALSE	12
2022-09-14	12:06:31	1.37065	222.123	FALSE	12
2022-09-14	12:06:31	0.828715	222.952	FALSE	12
2022-09-14	12:06:31	1.48602	224.438	FALSE	12
2022-09-14	12:06:32	1.22968	225.667	FALSE	12
2022-09-14	12:06:32	1.04795	226.715	FALSE	12
2022-09-14	12:06:32	1.08688	227.802	FALSE	12
2022-09-14	12:06:32	1.29355	229.096	FALSE	12
2022-09-14	12:06:33	0.908461	230.004	FALSE	12
2022-09-14	12:06:33	1.14098	231.145	FALSE	12
2022-09-14	12:06:33	0.775789	231.921	FALSE	12
2022-09-14	12:06:34	1.43126	233.352	FALSE	12
2022-09-14	12:06:34	0.671768	234.024	FALSE	12
2022-09-14	12:06:34	1.23976	235.264	FALSE	12
2022-09-14	12:06:34	0.730598	235.994	FALSE	12
2022-09-14	12:06:35	0.939809	236.934	FALSE	12
2022-09-14	12:06:35	0.743168	237.677	FALSE	12
2022-09-14	12:06:35	0.882201	238.56	FALSE	12
2022-09-14	12:06:35	0.696654	239.256	FALSE	12
2022-09-14	12:06:36	1.19782	240.454	FALSE	12
2022-09-14	12:06:36	1.00067	241.455	FALSE	12
2022-09-14	12:06:36	1.1535	242.608	FALSE	12
2022-09-14	12:06:37	1.34637	243.955	FALSE	12
2022-09-14	12:06:37	1.18149	245.136	FALSE	12
2022-09-14	12:06:37	1.43487	246.571	FALSE	12
2022-09-14	12:06:37	1.3193	247.89	FALSE	12
2022-09-14	12:06:38	1.33304	249.223	FALSE	12
2022-09-14	12:06:38	0.928562	250.152	FALSE	12
2022-09-14	12:06:38	1.23014	251.382	FALSE	12
2022-09-14	12:06:38	0.686069	252.068	FALSE	12
2022-09-14	12:06:39	0.491361	252.56	FALSE	12
2022-09-14	12:06:39	0.292481	252.852	FALSE	12
2022-09-14	12:06:39	0.369428	253.221	FALSE	12
2022-09-14	12:06:39	0.524898	253.746	FALSE	12
2022-09-14	12:06:40	0.428868	254.175	FALSE	12
2022-09-14	12:06:40	0.440216	254.615	FALSE	12
2022-09-14	12:06:40	0.432277	255.048	FALSE	12
2022-09-14	12:06:41	0.435229	255.483	FALSE	12
2022-09-14	12:06:41	0.436705	255.92	FALSE	12
2022-09-14	12:06:41	0.462608	256.382	FALSE	12
2022-09-14	12:06:41	0.586272	256.968	FALSE	12
2022-09-14	12:06:42	0.151158	257.12	FALSE	12
2022-09-14	12:06:42	-0.382938	257.12	FALSE	12
2022-09-14	12:06:42	-0.448638	257.12	FALSE	12
2022-09-14	12:06:42	-0.116119	257.12	FALSE	12
2022-09-14	12:06:43	0.0598094	257.179	FALSE	12
2022-09-14	12:06:43	0.0936007	257.273	FALSE	12
2022-09-14	12:06:43	0.251056	257.524	FALSE	12
2022-09-14	12:06:43	0.309377	257.834	FALSE	12
2022-09-14	12:06:44	0.260165	258.094	FALSE	12
2022-09-14	12:06:44	0.245102	258.339	FALSE	12
2022-09-14	12:06:44	0.266069	258.605	FALSE	12
2022-09-14	12:06:45	0.279809	258.885	FALSE	12
2022-09-14	12:06:45	0.287697	259.172	FALSE	12
2022-09-14	12:06:45	0.258944	259.431	FALSE	12
2022-09-14	12:06:45	0.256247	259.688	FALSE	12
2022-09-14	12:06:46	0.300318	259.988	FALSE	12
2022-09-14	12:06:46	0.298486	260.286	FALSE	12
2022-09-14	12:06:46	0.278333	260.565	FALSE	12
2022-09-14	12:06:46	0.290242	260.855	FALSE	12
2022-09-14	12:06:47	0.298334	261.153	FALSE	12
2022-09-14	12:06:47	0.320573	261.474	FALSE	12
2022-09-14	12:06:47	0.310445	261.784	FALSE	12
2022-09-14	12:06:47	0.305407	262.09	FALSE	12
2022-09-14	12:06:48	0.316552	262.406	FALSE	12
2022-09-14	12:06:48	0.311819	262.718	FALSE	12
2022-09-14	12:06:48	0.315127	263.033	FALSE	12
2022-09-14	12:06:49	0.275127	263.308	FALSE	12
2022-09-14	12:06:49	0.268054	263.576	FALSE	12
2022-09-14	12:06:49	0.254059	263.83	FALSE	12
2022-09-14	12:06:49	0.277163	264.108	FALSE	12
2022-09-14	12:06:50	0.345763	264.453	FALSE	12
2022-09-14	12:06:50	0.721539	265.175	FALSE	12
2022-09-14	12:06:50	0.726629	265.902	FALSE	12
2022-09-14	12:06:50	0.729478	266.631	FALSE	12
2022-09-14	12:06:51	0.723117	267.354	FALSE	12
2022-09-14	12:06:51	0.725662	268.08	FALSE	12
2022-09-14	12:06:51	0.724847	268.805	FALSE	12
2022-09-14	12:06:51	0.597163	269.402	FALSE	12
2022-09-14	12:06:52	0.251718	269.653	FALSE	12
2022-09-14	12:06:52	0.372583	270.026	FALSE	12
2022-09-14	12:06:52	0.266272	270.292	FALSE	12
2022-09-14	12:06:53	0.375076	270.667	FALSE	12
2022-09-14	12:06:53	0.442812	271.11	FALSE	12
2022-09-14	12:06:53	0.35584	271.466	FALSE	12
2022-09-14	12:06:53	-0.217035	271.466	FALSE	12
2022-09-14	12:06:54	0.372532	271.839	FALSE	12
2022-09-14	12:06:54	0.57472	272.413	FALSE	12
2022-09-14	12:06:54	0.387799	272.801	FALSE	12
2022-09-14	12:06:54	0.613397	273.415	FALSE	12
2022-09-14	12:06:55	-0.115509	273.415	FALSE	12
2022-09-14	12:06:55	-0.488435	273.415	FALSE	12
2022-09-14	12:06:55	0.130954	273.545	FALSE	12
2022-09-14	12:06:55	0.286527	273.832	FALSE	12
2022-09-14	12:06:56	0.474008	274.306	FALSE	12
2022-09-14	12:06:56	0.390089	274.696	FALSE	12
2022-09-14	12:06:56	0.34042	275.037	FALSE	12
2022-09-14	12:06:57	0.318282	275.355	FALSE	12
2022-09-14	12:06:57	0.330802	275.686	FALSE	12
2022-09-14	12:06:57	0.302914	275.989	FALSE	12
2022-09-14	12:06:57	-1.49154	275.989	FALSE	12
2022-09-14	12:06:58	-2.46187	275.989	FALSE	12
2022-09-14	12:06:58	-2.93067	275.989	FALSE	12
2022-09-14	12:06:58	-3.86477	275.989	FALSE	12
2022-09-14	12:06:58	-4.26268	275.989	FALSE	12
2022-09-14	12:06:59	-5.10996	275.989	FALSE	12
2022-09-14	12:06:59	-5.63296	275.989	FALSE	12
2022-09-14	12:06:59	-5.99149	275.989	FALSE	12
2022-09-14	12:07:00	-6.36965	275.989	FALSE	12
2022-09-14	12:07:00	-6.43464	275.989	FALSE	12
2022-09-14	12:07:00	-7.10126	275.989	FALSE	12
2022-09-14	12:07:00	-7.18288	275.989	FALSE	12
2022-09-14	12:07:01	-7.74706	275.989	FALSE	12
2022-09-14	12:07:01	-7.63622	275.989	FALSE	12
2022-09-14	12:07:01	-8.21428	275.989	FALSE	12
2022-09-14	12:07:01	-7.77485	275.989	FALSE	12
2022-09-14	12:07:02	-8.01133	275.989	FALSE	12
2022-09-14	12:07:02	-7.64803	275.989	FALSE	12
2022-09-14	12:07:02	-8.19897	275.989	FALSE	12
2022-09-14	12:07:02	-8.41245	275.989	FALSE	12
2022-09-14	12:07:03	-8.57276	275.989	FALSE	12
2022-09-14	12:07:03	-8.24039	275.989	FALSE	12
2022-09-14	12:07:03	-8.50283	275.989	FALSE	12
2022-09-14	12:07:04	-8.50797	275.989	FALSE	12
2022-09-14	12:07:04	-8.50395	275.989	FALSE	12
2022-09-14	12:07:04	-8.01429	275.989	FALSE	12
2022-09-14	12:07:04	-8.15266	275.989	FALSE	12
2022-09-14	12:07:05	-5.33754	275.989	FALSE	12
2022-09-14	12:07:05	-6.64411	275.989	FALSE	12
2022-09-14	12:07:05	-5.12864	275.989	FALSE	12
2022-09-14	12:07:05	-8.76859	275.989	FALSE	12
2022-09-14	12:07:06	-7.85357	275.989	FALSE	12
2022-09-14	12:07:06	-8.67744	275.989	FALSE	12
2022-09-14	12:07:06	-5.62461	275.989	FALSE	12
2022-09-14	12:07:06	0.242812	276.231	FALSE	12
2022-09-14	12:07:07	0.461692	276.693	FALSE	12
2022-09-14	12:07:07	0.293143	276.986	FALSE	12
2022-09-14	12:07:07	-3.80472	276.986	FALSE	12
2022-09-14	12:07:08	0.244288	277.23	FALSE	12
2022-09-14	12:07:08	0.432074	277.663	FALSE	12
2022-09-14	12:07:08	0.275076	277.938	FALSE	12
2022-09-14	12:07:08	0.422914	278.361	FALSE	12
2022-09-14	12:07:09	0.256349	278.617	FALSE	12
2022-09-14	12:07:09	0.408308	279.025	FALSE	12
2022-09-14	12:07:09	0.212837	279.238	FALSE	12
2022-09-14	12:07:09	0.466578	279.705	FALSE	12
2022-09-14	12:07:10	0.138588	279.843	FALSE	12
2022-09-14	12:07:10	0.398842	280.242	FALSE	12
2022-09-14	12:07:10	0.179249	280.421	FALSE	12
2022-09-14	12:07:10	0.460318	280.882	FALSE	12
2022-09-14	12:07:11	0.165204	281.047	FALSE	12
2022-09-14	12:07:11	0.409478	281.456	FALSE	12
2022-09-14	12:07:11	0.200573	281.657	FALSE	12
2022-09-14	12:07:12	0.401896	282.059	FALSE	12
2022-09-14	12:07:12	0.191616	282.25	FALSE	12
2022-09-14	12:07:12	0.360674	282.611	FALSE	12
2022-09-14	12:07:12	0.217875	282.829	FALSE	12
2022-09-14	12:07:13	0.453652	283.283	FALSE	12
2022-09-14	12:07:13	0.232583	283.515	FALSE	12
2022-09-14	12:07:13	0.373346	283.888	FALSE	12
2022-09-14	12:07:13	0.262405	284.151	FALSE	12
2022-09-14	12:07:14	0.443473	284.594	FALSE	12
2022-09-14	12:07:14	0.245611	284.84	FALSE	12
2022-09-14	12:07:14	0.378181	285.218	FALSE	12
2022-09-14	12:07:14	0.280878	285.499	FALSE	12
2022-09-14	12:07:15	0.418384	285.917	FALSE	12
2022-09-14	12:07:15	0.226069	286.143	FALSE	12
2022-09-14	12:07:15	0.313651	286.457	FALSE	12
2022-09-14	12:07:16	-4.04584	286.457	FALSE	12
2022-09-14	12:07:16	-4.54599	286.457	FALSE	12
2022-09-14	12:07:16	-4.78991	286.457	FALSE	12
2022-09-14	12:07:16	-4.56553	286.457	FALSE	12
2022-09-14	12:07:17	-4.57342	286.457	FALSE	12
2022-09-14	12:07:17	-4.41026	286.457	FALSE	12
2022-09-14	12:07:17	-4.41423	286.457	FALSE	12
2022-09-14	12:07:18	-4.29617	286.457	FALSE	12
2022-09-14	12:07:18	-4.48248	286.457	FALSE	12
2022-09-14	12:07:18	-4.73764	286.457	FALSE	12
2022-09-14	12:07:18	-5.22767	286.457	FALSE	12
2022-09-14	12:07:18	-5.47433	286.457	FALSE	12
2022-09-14	12:07:19	-5.1065	286.457	FALSE	12
2022-09-14	12:07:19	0.586221	287.043	FALSE	12
2022-09-14	12:07:19	0.486221	287.53	FALSE	12
2022-09-14	12:07:20	0.457468	287.987	FALSE	12
2022-09-14	12:07:20	0.425764	288.413	FALSE	12
2022-09-14	12:07:20	0.415585	288.828	FALSE	12
2022-09-14	12:07:20	-2.70731	288.828	FALSE	12
2022-09-14	12:07:21	-4.31113	288.828	FALSE	12
2022-09-14	12:07:21	-4.39586	288.828	FALSE	12
2022-09-14	12:07:21	-2.35408	288.828	FALSE	12
2022-09-14	12:07:21	-2.25266	288.828	FALSE	12
2022-09-14	12:07:22	-3.8209	288.828	FALSE	12
2022-09-14	12:07:22	-5.5181	288.828	FALSE	12
2022-09-14	12:07:22	-5.42029	288.828	FALSE	12
2022-09-14	12:07:22	-5.43546	288.828	FALSE	12
2022-09-14	12:07:23	-5.41128	288.828	FALSE	12
2022-09-14	12:07:23	-5.20502	288.828	FALSE	12
2022-09-14	12:07:23	-5.02044	288.828	FALSE	12
2022-09-14	12:07:24	-4.8893	288.828	FALSE	12
2022-09-14	12:07:24	-4.75403	288.828	FALSE	12
2022-09-14	12:07:24	-4.6066	288.828	FALSE	12
2022-09-14	12:07:24	-4.43378	288.828	FALSE	12
2022-09-14	12:07:25	-4.3008	288.828	FALSE	12
2022-09-14	12:07:25	-4.22548	288.828	FALSE	12
2022-09-14	12:07:25	-4.07357	288.828	FALSE	12
2022-09-14	12:07:25	-3.96945	288.828	FALSE	12
2022-09-14	12:07:26	-3.9292	288.828	FALSE	12
2022-09-14	12:07:26	-3.83154	288.828	FALSE	12
2022-09-14	12:07:26	-3.75632	288.828	FALSE	12
2022-09-14	12:07:27	-3.77352	288.828	FALSE	12
2022-09-14	12:07:27	-3.85592	288.828	FALSE	12
2022-09-14	12:07:27	-3.69708	288.828	FALSE	12
2022-09-14	12:07:27	-3.71658	288.828	FALSE	12
2022-09-14	12:07:28	-3.73938	288.828	FALSE	12
2022-09-14	12:07:28	-3.94935	288.828	FALSE	12
2022-09-14	12:07:28	-4.17174	288.828	FALSE	12
2022-09-14	12:07:28	-4.73266	288.828	FALSE	12
2022-09-14	12:07:29	-4.56172	288.828	FALSE	12
2022-09-14	12:07:29	-4.55464	288.828	FALSE	12
2022-09-14	12:07:29	-4.58823	288.828	FALSE	12
2022-09-14	12:07:29	-4.6292	288.828	FALSE	12
2022-09-14	12:07:30	-4.75256	288.828	FALSE	12
2022-09-14	12:07:30	-4.91174	288.828	FALSE	12
2022-09-14	12:07:30	-5.07632	288.828	FALSE	12
2022-09-14	12:07:31	-5.20533	288.828	FALSE	12
2022-09-14	12:07:31	-5.57637	288.828	FALSE	12
2022-09-14	12:07:31	-5.75256	288.828	FALSE	12
2022-09-14	12:07:31	-5.68584	288.828	FALSE	12
2022-09-14	12:07:32	-5.5407	288.828	FALSE	12
2022-09-14	12:07:32	-5.45683	288.828	FALSE	12
2022-09-14	12:07:32	-5.27322	288.828	FALSE	12
2022-09-14	12:07:32	-5.07709	288.828	FALSE	12
2022-09-14	12:07:33	-5.07998	288.828	FALSE	12
2022-09-14	12:07:33	-5.25154	288.828	FALSE	12
2022-09-14	12:07:33	-5.23566	288.828	FALSE	12
2022-09-14	12:07:33	-5.20477	288.828	FALSE	12
2022-09-14	12:07:34	-5.18589	288.828	FALSE	12
2022-09-14	12:07:34	-5.09423	288.828	FALSE	12
2022-09-14	12:07:34	-4.938	288.828	FALSE	12
2022-09-14	12:07:35	-4.78787	288.828	FALSE	12
2022-09-14	12:07:35	-4.71734	288.828	FALSE	12
2022-09-14	12:07:35	0.574873	289.403	FALSE	12
2022-09-14	12:07:35	0.817112	290.22	FALSE	12
2022-09-14	12:07:36	0.791056	291.011	FALSE	12
2022-09-14	12:07:36	0.681132	291.693	FALSE	12
2022-09-14	12:07:36	0.741641	292.434	FALSE	12
2022-09-14	12:07:36	0.686476	293.121	FALSE	12
2022-09-14	12:07:37	0.656094	293.777	FALSE	12
2022-09-14	12:07:37	0.617621	294.394	FALSE	12
2022-09-14	12:07:37	0.532074	294.926	FALSE	12
2022-09-14	12:07:37	0.492125	295.419	FALSE	12
2022-09-14	12:07:38	0.431769	295.85	FALSE	12
2022-09-14	12:07:38	0.398842	296.249	FALSE	12
2022-09-14	12:07:38	0.38673	296.636	FALSE	12
2022-09-14	12:07:39	0.389021	297.025	FALSE	12
2022-09-14	12:07:39	0.417367	297.442	FALSE	12
2022-09-14	12:07:39	0.439708	297.882	FALSE	12
2022-09-14	12:07:39	-1.96742	297.882	FALSE	12
2022-09-14	12:07:40	-4.37607	297.882	FALSE	12
2022-09-14	12:07:40	-4.36787	297.882	FALSE	12
2022-09-14	12:07:40	-4.53108	297.882	FALSE	12
2022-09-14	12:07:40	-4.48426	297.882	FALSE	12
2022-09-14	12:07:41	-4.34925	297.882	FALSE	12
2022-09-14	12:07:41	-4.21978	297.882	FALSE	12
2022-09-14	12:07:41	-4.30899	297.882	FALSE	12
2022-09-14	12:07:41	-4.70457	297.882	FALSE	12
2022-09-14	12:07:42	-5.10686	297.882	FALSE	12
2022-09-14	12:07:42	0.356705	298.239	FALSE	12
2022-09-14	12:07:42	0.385	298.624	FALSE	12
2022-09-14	12:07:43	0.399504	299.023	FALSE	12
2022-09-14	12:07:43	0.413804	299.437	FALSE	12
2022-09-14	12:07:43	0.404797	299.842	FALSE	12
2022-09-14	12:07:43	0.408308	300.25	FALSE	12
2022-09-14	12:07:44	0.402659	300.653	FALSE	12
2022-09-14	12:07:44	0.41701	301.07	FALSE	12
2022-09-14	12:07:44	0.408003	301.478	FALSE	12
2022-09-14	12:07:44	0.444033	301.922	FALSE	12
2022-09-14	12:07:45	0.440115	302.362	FALSE	12
2022-09-14	12:07:45	0.433193	302.795	FALSE	12
2022-09-14	12:07:45	0.393346	303.189	FALSE	12
2022-09-14	12:07:45	0.374568	303.563	FALSE	12
2022-09-14	12:07:46	0.383524	303.947	FALSE	12
2022-09-14	12:07:46	0.703575	304.65	FALSE	12
2022-09-14	12:07:46	0.203881	304.854	FALSE	12
2022-09-14	12:07:47	-0.536119	304.854	FALSE	12
2022-09-14	12:07:47	-1.04385	304.854	FALSE	12
2022-09-14	12:07:47	-1.40716	304.854	FALSE	12
2022-09-14	12:07:47	-1.89042	304.854	FALSE	12
2022-09-14	12:07:48	-2.12207	304.854	FALSE	12
2022-09-14	12:07:48	-2.25134	304.854	FALSE	12
2022-09-14	12:07:48	-2.42019	304.854	FALSE	12
2022-09-14	12:07:48	-2.59047	304.854	FALSE	12
2022-09-14	12:07:49	-2.83902	304.854	FALSE	12
2022-09-14	12:07:49	-3.13775	304.854	FALSE	12
2022-09-14	12:07:49	-3.27632	304.854	FALSE	12
2022-09-14	12:07:49	-3.53709	304.854	FALSE	12
2022-09-14	12:07:50	-3.70523	304.854	FALSE	12
2022-09-14	12:07:50	-3.82304	304.854	FALSE	12
2022-09-14	12:07:50	-3.64284	304.854	FALSE	12
2022-09-14	12:07:51	-3.42004	304.854	FALSE	12
2022-09-14	12:07:51	-3.46258	304.854	FALSE	12
2022-09-14	12:07:51	-3.49423	304.854	FALSE	12
2022-09-14	12:07:51	-3.48696	304.854	FALSE	12
2022-09-14	12:07:52	-3.47373	304.854	FALSE	12
2022-09-14	12:07:52	-3.61525	304.854	FALSE	12
2022-09-14	12:07:52	-3.65668	304.854	FALSE	12
2022-09-14	12:07:52	-3.63815	304.854	FALSE	12
2022-09-14	12:07:53	-3.5725	304.854	FALSE	12
2022-09-14	12:07:53	-3.46808	304.854	FALSE	12
2022-09-14	12:07:53	-3.41128	304.854	FALSE	12
2022-09-14	12:07:53	-3.34482	304.854	FALSE	12
2022-09-14	12:07:54	-3.21958	304.854	FALSE	12
2022-09-14	12:07:54	-3.20263	304.854	FALSE	12
2022-09-14	12:07:54	-3.44034	304.854	FALSE	12
2022-09-14	12:07:55	-3.52818	304.854	FALSE	12
2022-09-14	12:07:55	-3.62263	304.854	FALSE	12
2022-09-14	12:07:55	-3.70212	304.854	FALSE	12
2022-09-14	12:07:55	-3.74238	304.854	FALSE	12
2022-09-14	12:07:56	-1.91291	304.854	FALSE	12
2022-09-14	12:07:56	0.379911	305.234	FALSE	12
2022-09-14	12:07:56	0.288104	305.522	FALSE	12
2022-09-14	12:07:56	0.176145	305.698	FALSE	12
2022-09-14	12:07:57	0.191616	305.89	FALSE	12
2022-09-14	12:07:57	0.322506	306.212	FALSE	12
2022-09-14	12:07:57	0.311463	306.524	FALSE	12
2022-09-14	12:07:57	0.303117	306.827	FALSE	12
2022-09-14	12:07:58	0.308104	307.135	FALSE	12
2022-09-14	12:07:58	0.310954	307.446	FALSE	12
2022-09-14	12:07:58	0.321387	307.767	FALSE	12
2022-09-14	12:07:59	0.367646	308.135	FALSE	12
2022-09-14	12:07:59	0.514924	308.65	FALSE	12
2022-09-14	12:07:59	0.698995	309.349	FALSE	12
2022-09-14	12:07:59	0.715229	310.064	FALSE	12
2022-09-14	12:08:00	0.780827	310.845	FALSE	12
2022-09-14	12:08:00	0.749682	311.595	FALSE	12
2022-09-14	12:08:00	0.75757	312.352	FALSE	12
2022-09-14	12:08:00	0.422201	312.774	FALSE	12
2022-09-14	12:08:01	0.385254	313.16	FALSE	12
2022-09-14	12:08:01	0.287341	313.447	FALSE	12
2022-09-14	12:08:01	0.357774	313.805	FALSE	12
2022-09-14	12:08:02	0.411718	314.217	FALSE	12
2022-09-14	12:08:02	0.289631	314.506	FALSE	12
2022-09-14	12:08:02	0.273448	314.78	FALSE	12
2022-09-14	12:08:02	0.380827	315.16	FALSE	12
2022-09-14	12:08:03	0.482812	315.643	FALSE	12
2022-09-14	12:08:03	0.479809	316.123	FALSE	12
2022-09-14	12:08:03	0.43813	316.561	FALSE	12
2022-09-14	12:08:03	0.424593	316.986	FALSE	12
2022-09-14	12:08:04	0.505305	317.491	FALSE	12
2022-09-14	12:08:04	0.526374	318.017	FALSE	12
2022-09-14	12:08:04	0.495432	318.513	FALSE	12
2022-09-14	12:08:04	0.431463	318.944	FALSE	12
2022-09-14	12:08:05	0.428206	319.373	FALSE	12
2022-09-14	12:08:05	0.434873	319.807	FALSE	12
2022-09-14	12:08:05	0.449377	320.257	FALSE	12
2022-09-14	12:08:06	0.41757	320.674	FALSE	12
2022-09-14	12:08:06	0.453753	321.128	FALSE	12
2022-09-14	12:08:06	0.436908	321.565	FALSE	12
2022-09-14	12:08:06	0.436094	322.001	FALSE	12
2022-09-14	12:08:07	0.417061	322.418	FALSE	12
2022-09-14	12:08:07	0.468206	322.886	FALSE	12
2022-09-14	12:08:07	0.396145	323.283	FALSE	12
2022-09-14	12:08:07	0.722965	324.006	FALSE	12
2022-09-14	12:08:08	0.714466	324.72	FALSE	12
2022-09-14	12:08:08	0.725407	325.445	FALSE	12
2022-09-14	12:08:08	0.728104	326.173	FALSE	12
2022-09-14	12:08:08	0.729784	326.903	FALSE	12
2022-09-14	12:08:09	0.722404	327.626	FALSE	12
2022-09-14	12:08:09	0.732328	328.358	FALSE	12
2022-09-14	12:08:09	0.726221	329.084	FALSE	12
2022-09-14	12:08:10	0.721997	329.806	FALSE	12
2022-09-14	12:08:10	0.726985	330.533	FALSE	12
2022-09-14	12:08:10	0.727087	331.26	FALSE	12
2022-09-14	12:08:10	0.732023	331.992	FALSE	12
2022-09-14	12:08:11	0.731361	332.724	FALSE	12
2022-09-14	12:08:11	0.720725	333.444	FALSE	12
2022-09-14	12:08:11	0.727952	334.172	FALSE	12
2022-09-14	12:08:11	0.725662	334.898	FALSE	12
2022-09-14	12:08:12	0.725	335.623	FALSE	12
2022-09-14	12:08:12	0.72556	336.349	FALSE	12
2022-09-14	12:08:12	0.73416	337.083	FALSE	12
2022-09-14	12:08:12	0.726832	337.81	FALSE	12
2022-09-14	12:08:13	0.734211	338.544	FALSE	12
2022-09-14	12:08:13	0.726578	339.27	FALSE	12
2022-09-14	12:08:13	0.725712	339.996	FALSE	12
2022-09-14	12:08:14	0.729733	340.726	FALSE	12
2022-09-14	12:08:14	0.725712	341.452	FALSE	12
2022-09-14	12:08:14	0.722862	342.174	FALSE	12
2022-09-14	12:08:14	0.71986	342.894	FALSE	12
2022-09-14	12:08:15	0.717316	343.612	FALSE	12
2022-09-14	12:08:15	0.723931	344.335	FALSE	12
2022-09-14	12:08:15	0.723321	345.059	FALSE	12
2022-09-14	12:08:15	0.72729	345.786	FALSE	12
2022-09-14	12:08:16	0.721387	346.507	FALSE	12
2022-09-14	12:08:16	0.721895	347.229	FALSE	12
2022-09-14	12:08:16	0.724695	347.954	FALSE	12
2022-09-14	12:08:16	0.725712	348.68	FALSE	12
2022-09-14	12:08:17	0.722659	349.402	FALSE	12
2022-09-14	12:08:17	0.727697	350.13	FALSE	12
2022-09-14	12:08:17	0.727646	350.858	FALSE	12
2022-09-14	12:08:18	0.733397	351.591	FALSE	12
2022-09-14	12:08:18	0.727188	352.318	FALSE	12
2022-09-14	12:08:18	0.726272	353.045	FALSE	12
2022-09-14	12:08:18	0.712685	353.757	FALSE	12
2022-09-14	12:08:19	0.734415	354.492	FALSE	12
2022-09-14	12:08:19	0.729275	355.221	FALSE	12
2022-09-14	12:08:19	0.720216	355.941	FALSE	12
2022-09-14	12:08:19	0.726476	356.668	FALSE	12
2022-09-14	12:08:20	0.723931	357.392	FALSE	12
2022-09-14	12:08:20	0.703982	358.096	FALSE	12
2022-09-14	12:08:20	0.705305	358.801	FALSE	12
2022-09-14	12:08:20	0.624847	359.426	FALSE	12
2022-09-14	12:08:21	0.687443	360.113	FALSE	12
2022-09-14	12:08:21	0.692481	360.806	FALSE	12
2022-09-14	12:08:21	0.671463	361.477	FALSE	12
2022-09-14	12:08:22	0.708003	362.185	FALSE	12
2022-09-14	12:08:22	0.455585	362.641	FALSE	12
2022-09-14	12:08:22	0.494771	363.136	FALSE	12
2022-09-14	12:08:22	0.31757	363.453	FALSE	12
2022-09-14	12:08:23	0.597926	364.051	FALSE	12
2022-09-14	12:08:23	0.50271	364.554	FALSE	12
2022-09-14	12:08:23	0.429529	364.983	FALSE	12
2022-09-14	12:08:23	0.647188	365.63	FALSE	12
2022-09-14	12:08:24	0.68271	366.313	FALSE	12
2022-09-14	12:08:24	-1.78731	366.313	FALSE	12
2022-09-14	12:08:24	-2.7779	366.313	FALSE	12
2022-09-14	12:08:24	-3.0235	366.313	FALSE	12
2022-09-14	12:08:25	-2.52024	366.313	FALSE	12
2022-09-14	12:08:25	-2.43943	366.313	FALSE	12
2022-09-14	12:08:25	-2.78207	366.313	FALSE	12
2022-09-14	12:08:26	-2.82792	366.313	FALSE	12
2022-09-14	12:08:26	-2.83663	366.313	FALSE	12
2022-09-14	12:08:26	-2.87688	366.313	FALSE	12
2022-09-14	12:08:26	-3.0152	366.313	FALSE	12
2022-09-14	12:08:27	-2.87205	366.313	FALSE	12
2022-09-14	12:08:27	-2.73775	366.313	FALSE	12
2022-09-14	12:08:27	-2.45856	366.313	FALSE	12
2022-09-14	12:08:27	-2.261	366.313	FALSE	12
2022-09-14	12:08:28	-2.26029	366.313	FALSE	12
2022-09-14	12:08:28	-2.16172	366.313	FALSE	12
2022-09-14	12:08:28	-2.19403	366.313	FALSE	12
2022-09-14	12:08:28	-2.18329	366.313	FALSE	12
2022-09-14	12:08:29	-2.01469	366.313	FALSE	12
2022-09-14	12:08:29	-1.90747	366.313	FALSE	12
2022-09-14	12:08:29	-2.02329	366.313	FALSE	12
2022-09-14	12:08:30	-2.00848	366.313	FALSE	12
2022-09-14	12:08:30	-2.01775	366.313	FALSE	12
2022-09-14	12:08:30	-2.00502	366.313	FALSE	12
2022-09-14	12:08:30	-1.97098	366.313	FALSE	12
2022-09-14	12:08:31	-1.99342	366.313	FALSE	12
2022-09-14	12:08:31	-1.95495	366.313	FALSE	12
2022-09-14	12:08:31	-1.94721	366.313	FALSE	12
2022-09-14	12:08:31	-1.93632	366.313	FALSE	12
2022-09-14	12:08:32	-1.9924	366.313	FALSE	12
2022-09-14	12:08:32	-2.01103	366.313	FALSE	12
2022-09-14	12:08:32	-2.00441	366.313	FALSE	12
2022-09-14	12:08:32	-1.96889	366.313	FALSE	12
2022-09-14	12:08:33	-2.01093	366.313	FALSE	12
2022-09-14	12:08:33	-2.03566	366.313	FALSE	12
2022-09-14	12:08:33	-2.02309	366.313	FALSE	12
2022-09-14	12:08:34	-2.11195	366.313	FALSE	12
2022-09-14	12:08:34	-2.08665	366.313	FALSE	12
2022-09-14	12:08:34	-2.0667	366.313	FALSE	12
2022-09-14	12:08:34	-2.08212	366.313	FALSE	12
2022-09-14	12:08:35	-2.10212	366.313	FALSE	12
2022-09-14	12:08:35	-2.08492	366.313	FALSE	12
2022-09-14	12:08:35	-2.0491	366.313	FALSE	12
2022-09-14	12:08:35	-2.01836	366.313	FALSE	12
2022-09-14	12:08:36	-1.97266	366.313	FALSE	12
2022-09-14	12:08:36	-1.87128	366.313	FALSE	12
2022-09-14	12:08:36	-1.81668	366.313	FALSE	12
2022-09-14	12:08:36	-1.92467	366.313	FALSE	12
2022-09-14	12:08:37	-2.14385	366.313	FALSE	12
2022-09-14	12:08:37	-1.85907	366.313	FALSE	12
2022-09-14	12:08:37	-1.9552	366.313	FALSE	12
2022-09-14	12:08:38	-2.07072	366.313	FALSE	12
2022-09-14	12:08:38	-1.98472	366.313	FALSE	12
2022-09-14	12:08:38	-2.07245	366.313	FALSE	12
2022-09-14	12:08:38	-2.03424	366.313	FALSE	12
2022-09-14	12:08:39	-2.26686	366.313	FALSE	12
2022-09-14	12:08:39	-2.33169	366.313	FALSE	12
2022-09-14	12:08:39	-2.31195	366.313	FALSE	12
2022-09-14	12:08:39	-2.46401	366.313	FALSE	12
2022-09-14	12:08:40	-2.40838	366.313	FALSE	12
2022-09-14	12:08:40	-1.94899	366.313	FALSE	12
2022-09-14	12:08:40	-2.59418	366.313	FALSE	12
2022-09-14	12:08:40	-2.56604	366.313	FALSE	12
2022-09-14	12:08:41	-2.47459	366.313	FALSE	12
2022-09-14	12:08:41	-1.70843	366.313	FALSE	12
2022-09-14	12:08:41	-1.83464	366.313	FALSE	12
2022-09-14	12:08:42	-2.15072	366.313	FALSE	12
2022-09-14	12:08:42	-2.08635	366.313	FALSE	12
2022-09-14	12:08:42	-2.23103	366.313	FALSE	12
2022-09-14	12:08:43	-2.20075	366.313	FALSE	12
2022-09-14	12:08:43	-2.1491	366.313	FALSE	12
2022-09-14	12:08:43	-2.20034	366.313	FALSE	12
2022-09-14	12:08:43	-2.23072	366.313	FALSE	12
2022-09-14	12:08:43	-2.28324	366.313	FALSE	12
2022-09-14	12:08:44	-2.30319	366.313	FALSE	12
2022-09-14	12:08:44	-2.32782	366.313	FALSE	12
2022-09-14	12:08:44	-2.34426	366.313	FALSE	12
2022-09-14	12:08:45	-2.3465	366.313	FALSE	12
2022-09-14	12:08:45	-2.37083	366.313	FALSE	12
2022-09-14	12:08:45	-2.38167	366.313	FALSE	12
2022-09-14	12:08:45	-2.37861	366.313	FALSE	12
2022-09-14	12:08:46	-2.36553	366.313	FALSE	12
2022-09-14	12:08:46	-2.40915	366.313	FALSE	12
2022-09-14	12:08:46	-2.38793	366.313	FALSE	12
2022-09-14	12:08:46	-2.39877	366.313	FALSE	12
2022-09-14	12:08:47	-2.38752	366.313	FALSE	12
2022-09-14	12:08:47	-2.37978	366.313	FALSE	12
2022-09-14	12:08:47	-2.38762	366.313	FALSE	12
2022-09-14	12:08:47	-2.40065	366.313	FALSE	12
2022-09-14	12:08:48	-2.42523	366.313	FALSE	12
2022-09-14	12:08:48	-2.44355	366.313	FALSE	12
2022-09-14	12:08:48	-2.43851	366.313	FALSE	12
2022-09-14	12:08:49	-2.44889	366.313	FALSE	12
2022-09-14	12:08:49	-2.46798	366.313	FALSE	12
2022-09-14	12:08:49	-2.4634	366.313	FALSE	12
2022-09-14	12:08:49	-2.48309	366.313	FALSE	12
2022-09-14	12:08:50	-2.48507	366.313	FALSE	12
2022-09-14	12:08:50	-2.50467	366.313	FALSE	12
2022-09-14	12:08:50	-2.54131	366.313	FALSE	12
2022-09-14	12:08:50	-2.54777	366.313	FALSE	12
2022-09-14	12:08:51	-2.57943	366.313	FALSE	12
2022-09-14	12:08:51	-2.60579	366.313	FALSE	12
2022-09-14	12:08:51	-2.64055	366.313	FALSE	12
2022-09-14	12:08:51	-2.66935	366.313	FALSE	12
2022-09-14	12:08:52	-2.68569	366.313	FALSE	12
2022-09-14	12:08:52	-2.70579	366.313	FALSE	12
2022-09-14	12:08:52	-2.67943	366.313	FALSE	12
2022-09-14	12:08:53	-2.79708	366.313	FALSE	12
2022-09-14	12:08:53	-3.08721	366.313	FALSE	12
2022-09-14	12:08:53	-3.32604	366.313	FALSE	12
2022-09-14	12:08:53	-3.4065	366.313	FALSE	12
2022-09-14	12:08:54	-3.53083	366.313	FALSE	12
2022-09-14	12:08:54	-3.55887	366.313	FALSE	12
2022-09-14	12:08:54	-3.46457	366.313	FALSE	12
2022-09-14	12:08:54	-3.7953	366.313	FALSE	12
2022-09-14	12:08:55	-4.38869	366.313	FALSE	12
2022-09-14	12:08:55	-4.8751	366.313	FALSE	12
2022-09-14	12:08:55	-5.09495	366.313	FALSE	12
2022-09-14	12:08:55	-5.29312	366.313	FALSE	12
2022-09-14	12:08:56	-5.13113	366.313	FALSE	12
2022-09-14	12:08:56	-5.02991	366.313	FALSE	12
2022-09-14	12:08:56	-5.29612	366.313	FALSE	12
2022-09-14	12:08:57	-5.81932	366.313	FALSE	12
2022-09-14	12:08:57	-6.37047	366.313	FALSE	12
2022-09-14	12:08:57	-6.76772	366.313	FALSE	12
2022-09-14	12:08:57	-7.30935	366.313	FALSE	12
2022-09-14	12:08:58	-7.59897	366.313	FALSE	12
2022-09-14	12:08:58	-8.09128	366.313	FALSE	12
2022-09-14	12:08:58	-8.46034	366.313	FALSE	12
2022-09-14	12:08:58	-9.1811	366.313	FALSE	12
2022-09-14	12:08:59	-9.5438	366.313	FALSE	12
2022-09-14	12:08:59	-9.92385	366.313	FALSE	12
2022-09-14	12:08:59	-9.86711	366.313	FALSE	12
2022-09-14	12:08:59	-10.0568	366.313	FALSE	12
2022-09-14	12:09:00	-10.1111	366.313	FALSE	12
2022-09-14	12:09:00	-10.0665	366.313	FALSE	12
2022-09-14	12:09:00	-10.1068	366.313	FALSE	12
2022-09-14	12:09:01	-10.1641	366.313	FALSE	12
2022-09-14	12:09:01	-10.4251	366.313	FALSE	12
2022-09-14	12:09:01	-10.5636	366.313	FALSE	12
2022-09-14	12:09:01	-10.8324	366.313	FALSE	12
2022-09-14	12:09:02	-10.7301	366.313	FALSE	12
2022-09-14	12:09:02	-11.0069	366.313	FALSE	12
2022-09-14	12:09:02	-10.9398	366.313	FALSE	12
2022-09-14	12:09:02	-10.8677	366.313	FALSE	12
2022-09-14	12:09:03	-10.8654	366.313	FALSE	12
2022-09-14	12:09:03	-10.5988	366.313	FALSE	12
2022-09-14	12:09:03	-10.5011	366.313	FALSE	12
2022-09-14	12:09:03	-10.2007	366.313	FALSE	12
2022-09-14	12:09:04	-10.1457	366.313	FALSE	12
2022-09-14	12:09:04	-9.89306	366.313	FALSE	12
2022-09-14	12:09:04	-9.91627	366.313	FALSE	12
2022-09-14	12:09:05	-9.88848	366.313	FALSE	12
2022-09-14	12:09:05	-10.0299	366.313	FALSE	12
2022-09-14	12:09:05	-9.81948	366.313	FALSE	12
2022-09-14	12:09:05	-9.70553	366.313	FALSE	12
2022-09-14	12:09:06	-9.48756	366.313	FALSE	12
2022-09-14	12:09:06	-9.1554	366.313	FALSE	12
2022-09-14	12:09:06	-9.01535	366.313	FALSE	12
2022-09-14	12:09:06	-8.73632	366.313	FALSE	12
2022-09-14	12:09:07	-8.8954	366.313	FALSE	12
2022-09-14	12:09:07	-8.67011	366.313	FALSE	12
2022-09-14	12:09:07	-8.72691	366.313	FALSE	12
2022-09-14	12:09:07	-8.37337	366.313	FALSE	12
2022-09-14	12:09:08	-8.5211	366.313	FALSE	12
2022-09-14	12:09:08	-8.48294	366.313	FALSE	12
2022-09-14	12:09:08	-8.63255	366.313	FALSE	12
2022-09-14	12:09:09	-8.59754	366.313	FALSE	12
2022-09-14	12:09:09	-8.59897	366.313	FALSE	12
2022-09-14	12:09:09	-8.39795	366.313	FALSE	12
2022-09-14	12:09:09	-8.07586	366.313	FALSE	12
2022-09-14	12:09:10	-7.86767	366.313	FALSE	12
2022-09-14	12:09:10	-7.68808	366.313	FALSE	12
2022-09-14	12:09:10	-7.5924	366.313	FALSE	12
2022-09-14	12:09:10	-7.38044	366.313	FALSE	12
2022-09-14	12:09:11	-7.20222	366.313	FALSE	12
2022-09-14	12:09:11	-6.51729	366.313	FALSE	12
2022-09-14	12:09:11	-5.21199	366.313	FALSE	12
2022-09-14	12:09:11	-3.44095	366.313	FALSE	12
2022-09-14	12:09:12	-4.93749	366.313	FALSE	12
2022-09-14	12:09:12	-3.87856	366.313	FALSE	12
2022-09-14	12:09:12	-4.06304	366.313	FALSE	12
2022-09-14	12:09:13	-1.8695	366.313	FALSE	12
2022-09-14	12:09:13	-2.89673	366.313	FALSE	12
2022-09-14	12:09:13	-4.9296	366.313	FALSE	12
2022-09-14	12:09:13	-4.75261	366.313	FALSE	12
2022-09-14	12:09:14	-5.14986	366.313	FALSE	12
2022-09-14	12:09:14	-4.83484	366.313	FALSE	12
2022-09-14	12:09:14	-4.80441	366.313	FALSE	12
2022-09-14	12:09:14	-3.39785	366.313	FALSE	12
2022-09-14	12:09:15	-4.13103	366.313	FALSE	12
2022-09-14	12:09:15	-4.93322	366.313	FALSE	12
2022-09-14	12:09:15	-3.31093	366.313	FALSE	12
2022-09-14	12:09:15	-1.73907	366.313	FALSE	12
2022-09-14	12:09:16	-2.22044	366.313	FALSE	12
2022-09-14	12:09:16	-2.25449	366.313	FALSE	12
2022-09-14	12:09:16	-3.42289	366.313	FALSE	12
2022-09-14	12:09:17	-4.03591	366.313	FALSE	12
2022-09-14	12:09:17	-4.56742	366.313	FALSE	12
2022-09-14	12:09:17	-4.20288	366.313	FALSE	12
2022-09-14	12:09:17	-4.08665	366.313	FALSE	12
2022-09-14	12:09:18	-4.24884	366.313	FALSE	12
2022-09-14	12:09:18	-4.28589	366.313	FALSE	12
2022-09-14	12:09:18	-4.68395	366.313	FALSE	12
2022-09-14	12:09:18	-5.33795	366.313	FALSE	12
2022-09-14	12:09:19	-5.33067	366.313	FALSE	12
2022-09-14	12:09:19	-5.45072	366.313	FALSE	12
2022-09-14	12:09:19	-5.38757	366.313	FALSE	12
2022-09-14	12:09:19	-5.34706	366.313	FALSE	12
2022-09-14	12:09:20	-5.29586	366.313	FALSE	12
2022-09-14	12:09:20	-5.27042	366.313	FALSE	12
2022-09-14	12:09:20	-5.24004	366.313	FALSE	12
2022-09-14	12:09:21	-5.21571	366.313	FALSE	12
2022-09-14	12:09:21	-5.01016	366.313	FALSE	12
2022-09-14	12:09:21	-5.03785	366.313	FALSE	12
2022-09-14	12:09:21	-5.16462	366.313	FALSE	12
2022-09-14	12:09:22	-0.939987	366.313	FALSE	12
2022-09-14	12:09:22	0.718232	367.031	FALSE	12
2022-09-14	12:09:22	1.53803	368.569	FALSE	12
2022-09-14	12:09:22	1.86159	370.431	FALSE	12
2022-09-14	12:09:23	1.35614	371.787	FALSE	12
2022-09-14	12:09:23	1.6163	373.403	FALSE	12
2022-09-14	12:09:23	1.48464	374.888	FALSE	12
2022-09-14	12:09:24	1.50378	376.392	FALSE	12
2022-09-14	12:09:24	1.85406	378.246	FALSE	12
2022-09-14	12:09:24	1.70846	379.954	FALSE	12
2022-09-14	12:09:24	1.54938	381.504	FALSE	12
2022-09-14	12:09:25	1.66607	383.17	FALSE	12
2022-09-14	12:09:25	1.27375	384.444	FALSE	12
2022-09-14	12:09:25	0.962913	385.406	FALSE	12
2022-09-14	12:09:25	0.860013	386.267	FALSE	12
2022-09-14	12:09:26	0.982862	387.249	FALSE	12
2022-09-14	12:09:26	0.850954	388.1	FALSE	12
2022-09-14	12:09:26	1.06022	389.161	FALSE	12
2022-09-14	12:09:26	0.785356	389.946	FALSE	12
2022-09-14	12:09:27	0.597468	390.543	FALSE	12
2022-09-14	12:09:27	0.520216	391.064	FALSE	12
2022-09-14	12:09:27	0.472125	391.536	FALSE	12
2022-09-14	12:09:27	0.446527	391.982	FALSE	12
2022-09-14	12:09:28	0.439911	392.422	FALSE	12
2022-09-14	12:09:28	0.453193	392.875	FALSE	12
2022-09-14	12:09:28	0.506323	393.382	FALSE	12
2022-09-14	12:09:29	0.583575	393.965	FALSE	12
2022-09-14	12:09:29	0.668461	394.634	FALSE	12
2022-09-14	12:09:29	0.654109	395.288	FALSE	12
2022-09-14	12:09:29	0.651463	395.939	FALSE	12
2022-09-14	12:09:30	0.680929	396.62	FALSE	12
2022-09-14	12:09:30	0.597214	397.217	FALSE	12
2022-09-14	12:09:30	0.460929	397.678	FALSE	12
2022-09-14	12:09:30	0.440878	398.119	FALSE	12
2022-09-14	12:09:31	0.401641	398.521	FALSE	12
2022-09-14	12:09:31	0.212837	398.734	FALSE	12
2022-09-14	12:09:31	0.15416	398.888	FALSE	12
2022-09-14	12:09:31	0.167239	399.055	FALSE	12
2022-09-14	12:09:32	0.179453	399.235	FALSE	12
2022-09-14	12:09:32	0.126832	399.361	FALSE	12
2022-09-14	12:09:32	0.0791478	399.441	FALSE	12
2022-09-14	12:09:33	0.114059	399.555	FALSE	12
2022-09-14	12:09:33	0.416858	399.971	FALSE	12
2022-09-14	12:09:33	0.819351	400.791	FALSE	12
2022-09-14	12:09:33	1.80739	402.598	FALSE	12
2022-09-14	12:09:34	3.83782	406.436	1	13
2022-09-14	12:09:34	3.29955	409.736	1	14
2022-09-14	12:09:34	3.80281	413.538	1	15
2022-09-14	12:09:34	3.38546	416.924	1	16
2022-09-14	12:09:35	1.93609	418.86	FALSE	16
2022-09-14	12:09:35	1.2622	420.122	FALSE	16
2022-09-14	12:09:35	0.453601	420.576	FALSE	16
2022-09-14	12:09:35	0.266883	420.843	FALSE	16
2022-09-14	12:09:36	0.383626	421.226	FALSE	16
2022-09-14	12:09:36	0.286527	421.513	FALSE	16
2022-09-14	12:09:36	0.428664	421.941	FALSE	16
2022-09-14	12:09:37	0.36673	422.308	FALSE	16
2022-09-14	12:09:37	0.510445	422.819	FALSE	16
2022-09-14	12:09:37	0.623575	423.442	FALSE	16
2022-09-14	12:09:37	1.29894	424.741	FALSE	16
2022-09-14	12:09:38	-1.67179	424.741	FALSE	16
2022-09-14	12:09:38	-1.20823	424.741	FALSE	16
2022-09-14	12:09:38	-0.0164756	424.741	FALSE	16
2022-09-14	12:09:38	0.574618	425.316	FALSE	16
2022-09-14	12:09:39	1.97065	427.286	FALSE	16
2022-09-14	12:09:39	1.9395	429.226	FALSE	16
2022-09-14	12:09:39	-1.66787	429.226	FALSE	16
2022-09-14	12:09:39	-2.26426	429.226	FALSE	16
2022-09-14	12:09:40	-2.17118	429.226	FALSE	16
2022-09-14	12:09:40	-2.1836	429.226	FALSE	16
2022-09-14	12:09:40	-2.6207	429.226	FALSE	16
2022-09-14	12:09:41	-2.08106	429.226	FALSE	16
2022-09-14	12:09:41	-2.86065	429.226	FALSE	16
2022-09-14	12:09:41	-2.85637	429.226	FALSE	16
2022-09-14	12:09:41	-2.95505	429.226	FALSE	16
2022-09-14	12:09:42	-2.91312	429.226	FALSE	16
2022-09-14	12:09:42	-2.03245	429.226	FALSE	16
2022-09-14	12:09:42	-2.98965	429.226	FALSE	16
2022-09-14	12:09:42	-2.86385	429.226	FALSE	16
2022-09-14	12:09:43	-2.94375	429.226	FALSE	16
2022-09-14	12:09:43	-2.75352	429.226	FALSE	16
2022-09-14	12:09:43	-2.69184	429.226	FALSE	16
2022-09-14	12:09:43	-2.27286	429.226	FALSE	16
2022-09-14	12:09:44	-2.38675	429.226	FALSE	16
2022-09-14	12:09:44	-1.28508	429.226	FALSE	16
2022-09-14	12:09:44	1.38017	430.606	FALSE	16
2022-09-14	12:09:45	1.4165	432.023	FALSE	16
2022-09-14	12:09:45	-0.625585	432.023	FALSE	16
2022-09-14	12:09:45	-0.32533	432.023	FALSE	16
2022-09-14	12:09:45	-1.10905	432.023	FALSE	16
2022-09-14	12:09:46	-1.85693	432.023	FALSE	16
2022-09-14	12:09:46	-2.15235	432.023	FALSE	16
2022-09-14	12:09:46	-1.58055	432.023	FALSE	16
2022-09-14	12:09:46	-2.28492	432.023	FALSE	16
2022-09-14	12:09:47	-2.42253	432.023	FALSE	16
2022-09-14	12:09:47	-2.54055	432.023	FALSE	16
2022-09-14	12:09:47	-2.68487	432.023	FALSE	16
2022-09-14	12:09:47	-2.73256	432.023	FALSE	16
2022-09-14	12:09:48	-2.58156	432.023	FALSE	16
2022-09-14	12:09:48	-2.74909	432.023	FALSE	16
2022-09-14	12:09:48	-2.60497	432.023	FALSE	16
2022-09-14	12:09:49	-2.62294	432.023	FALSE	16
2022-09-14	12:09:49	-2.53999	432.023	FALSE	16
2022-09-14	12:09:49	-2.57724	432.023	FALSE	16
2022-09-14	12:09:49	-2.54681	432.023	FALSE	16
2022-09-14	12:09:50	-2.34808	432.023	FALSE	16
2022-09-14	12:09:50	-2.42314	432.023	FALSE	16
2022-09-14	12:09:50	-1.83724	432.023	FALSE	16
2022-09-14	12:09:50	-1.7977	432.023	FALSE	16
2022-09-14	12:09:51	-1.67546	432.023	FALSE	16
2022-09-14	12:09:51	-1.9549	432.023	FALSE	16
2022-09-14	12:09:51	-2.11536	432.023	FALSE	16
2022-09-14	12:09:51	-2.1149	432.023	FALSE	16
2022-09-14	12:09:52	-2.24569	432.023	FALSE	16
2022-09-14	12:09:52	-2.18981	432.023	FALSE	16
2022-09-14	12:09:52	-2.26981	432.023	FALSE	16
2022-09-14	12:09:53	-2.16187	432.023	FALSE	16
2022-09-14	12:09:53	-2.41515	432.023	FALSE	16
2022-09-14	12:09:53	-2.30034	432.023	FALSE	16
2022-09-14	12:09:53	-2.41022	432.023	FALSE	16
2022-09-14	12:09:54	-2.48782	432.023	FALSE	16
2022-09-14	12:09:54	-2.5491	432.023	FALSE	16
2022-09-14	12:09:54	-2.47541	432.023	FALSE	16
2022-09-14	12:09:54	-2.36279	432.023	FALSE	16
2022-09-14	12:09:55	-2.24446	432.023	FALSE	16
2022-09-14	12:09:55	-1.82676	432.023	FALSE	16
2022-09-14	12:09:55	-1.58538	432.023	FALSE	16
2022-09-14	12:09:55	-1.83164	432.023	FALSE	16
2022-09-14	12:09:56	-1.93042	432.023	FALSE	16
2022-09-14	12:09:56	-2.05434	432.023	FALSE	16
2022-09-14	12:09:56	-2.18263	432.023	FALSE	16
2022-09-14	12:09:57	-2.26192	432.023	FALSE	16
2022-09-14	12:09:57	-2.18991	432.023	FALSE	16
2022-09-14	12:09:57	-2.40182	432.023	FALSE	16
2022-09-14	12:09:57	-2.70065	432.023	FALSE	16
2022-09-14	12:09:58	-2.59922	432.023	FALSE	16
2022-09-14	12:09:58	-2.71245	432.023	FALSE	16
2022-09-14	12:09:58	-2.77383	432.023	FALSE	16
2022-09-14	12:09:58	-2.88278	432.023	FALSE	16
2022-09-14	12:09:59	-2.74574	432.023	FALSE	16
2022-09-14	12:09:59	-2.74441	432.023	FALSE	16
2022-09-14	12:09:59	0.369733	432.392	FALSE	16
2022-09-14	12:09:59	-1.93179	432.392	FALSE	16
2022-09-14	12:10:00	-2.67418	432.392	FALSE	16
2022-09-14	12:10:00	-2.89281	432.392	FALSE	16
2022-09-14	12:10:00	-2.99189	432.392	FALSE	16
2022-09-14	12:10:01	-3.11892	432.392	FALSE	16
2022-09-14	12:10:01	-3.10126	432.392	FALSE	16
2022-09-14	12:10:01	-2.52701	432.392	FALSE	16
2022-09-14	12:10:01	-0.182226	432.392	FALSE	16
2022-09-14	12:10:02	-1.05078	432.392	FALSE	16
2022-09-14	12:10:02	1.28184	433.674	FALSE	16
2022-09-14	12:10:02	1.34892	435.023	FALSE	16
2022-09-14	12:10:02	-1.30004	435.023	FALSE	16
2022-09-14	12:10:03	-2.78818	435.023	FALSE	16
2022-09-14	12:10:03	-2.87836	435.023	FALSE	16
2022-09-14	12:10:03	-0.143956	435.023	FALSE	16
2022-09-14	12:10:04	0.738384	435.761	FALSE	16
2022-09-14	12:10:04	0.591208	436.353	FALSE	16
2022-09-14	12:10:04	0.225153	436.578	FALSE	16
2022-09-14	12:10:04	0.264491	436.842	FALSE	16
2022-09-14	12:10:05	0.208308	437.051	FALSE	16
2022-09-14	12:10:05	0.193957	437.245	FALSE	16
2022-09-14	12:10:05	0.226374	437.471	FALSE	16
2022-09-14	12:10:05	0.203066	437.674	FALSE	16
2022-09-14	12:10:06	0.201031	437.875	FALSE	16
2022-09-14	12:10:06	0.164695	438.04	FALSE	16
2022-09-14	12:10:06	0.318842	438.359	FALSE	16
2022-09-14	12:10:06	0.229682	438.588	FALSE	16
2022-09-14	12:10:07	0.234313	438.823	FALSE	16
2022-09-14	12:10:07	0.224542	439.047	FALSE	16
2022-09-14	12:10:07	0.282456	439.33	FALSE	16
2022-09-14	12:10:08	0.419911	439.749	FALSE	16
2022-09-14	12:10:08	0.322456	440.072	FALSE	16
2022-09-14	12:10:08	0.347087	440.419	FALSE	16
2022-09-14	12:10:08	0.411667	440.831	FALSE	16
2022-09-14	12:10:09	0.444898	441.276	FALSE	16
2022-09-14	12:10:09	0.470598	441.746	FALSE	16
2022-09-14	12:10:09	0.406476	442.153	FALSE	16
2022-09-14	12:10:09	0.552939	442.706	FALSE	16
2022-09-14	12:10:10	0.464797	443.17	FALSE	16
2022-09-14	12:10:10	0.452328	443.623	FALSE	16
2022-09-14	12:10:10	0.424288	444.047	FALSE	16
2022-09-14	12:10:10	0.511972	444.559	FALSE	16
2022-09-14	12:10:11	0.497468	445.056	FALSE	16
2022-09-14	12:10:11	0.448461	445.505	FALSE	16
2022-09-14	12:10:11	0.446069	445.951	FALSE	16
2022-09-14	12:10:12	0.510801	446.462	FALSE	16
2022-09-14	12:10:12	0.511616	446.973	FALSE	16
2022-09-14	12:10:12	0.433601	447.407	FALSE	16
2022-09-14	12:10:12	0.479606	447.887	FALSE	16
2022-09-14	12:10:13	0.464033	448.351	FALSE	16
2022-09-14	12:10:13	0.545102	448.896	FALSE	16
2022-09-14	12:10:13	0.424338	449.32	FALSE	16
2022-09-14	12:10:13	0.476705	449.797	FALSE	16
2022-09-14	12:10:14	0.457214	450.254	FALSE	16
2022-09-14	12:10:14	0.563779	450.818	FALSE	16
2022-09-14	12:10:14	0.448308	451.266	FALSE	16
2022-09-14	12:10:14	0.477926	451.744	FALSE	16
2022-09-14	12:10:15	0.499198	452.243	FALSE	16
2022-09-14	12:10:15	0.510649	452.754	FALSE	16
2022-09-14	12:10:15	0.509173	453.263	FALSE	16
2022-09-14	12:10:16	0.44154	453.705	FALSE	16
2022-09-14	12:10:16	0.507035	454.212	FALSE	16
2022-09-14	12:10:16	0.4936	454.705	FALSE	16
2022-09-14	12:10:16	0.514771	455.22	FALSE	16
2022-09-14	12:10:17	0.423982	455.644	FALSE	16
2022-09-14	12:10:17	0.551361	456.195	FALSE	16
2022-09-14	12:10:17	0.570242	456.766	FALSE	16
2022-09-14	12:10:17	0.832735	457.598	FALSE	16
2022-09-14	12:10:18	1.33859	458.937	FALSE	16
2022-09-14	12:10:18	5.04917	463.986	1	17
2022-09-14	12:10:18	9.20474	473.191	1	18
2022-09-14	12:10:18	5.67166	478.862	1	19
2022-09-14	12:10:19	5.53441	484.397	1	20
2022-09-14	12:10:19	7.16627	491.563	1	21
2022-09-14	12:10:19	5.48088	497.044	1	22
2022-09-14	12:10:20	2.04642	499.09	FALSE	22
2022-09-14	12:10:20	0.980623	500.071	FALSE	22
2022-09-14	12:10:20	0.464898	500.536	FALSE	22
2022-09-14	12:10:20	0.515331	501.051	FALSE	22
2022-09-14	12:10:21	0.477723	501.529	FALSE	22
2022-09-14	12:10:21	0.446832	501.976	FALSE	22
2022-09-14	12:10:21	0.425051	502.401	FALSE	22
2022-09-14	12:10:21	0.49416	502.895	FALSE	22
2022-09-14	12:10:22	0.398741	503.294	FALSE	22
2022-09-14	12:10:22	0.5336	503.827	FALSE	22
2022-09-14	12:10:22	0.43355	504.261	FALSE	22
2022-09-14	12:10:22	0.478333	504.739	FALSE	22
2022-09-14	12:10:23	0.514517	505.254	FALSE	22
2022-09-14	12:10:23	0.444796	505.699	FALSE	22
2022-09-14	12:10:23	0.42271	506.121	FALSE	22
2022-09-14	12:10:24	0.476145	506.597	FALSE	22
2022-09-14	12:10:24	0.402964	507	FALSE	22
2022-09-14	12:10:24	0.353855	507.354	FALSE	22
2022-09-14	12:10:24	0.311819	507.666	FALSE	22
2022-09-14	12:10:25	0.38042	508.046	FALSE	22
2022-09-14	12:10:25	0.779962	508.826	FALSE	22
2022-09-14	12:10:25	2.52933	511.356	FALSE	22
2022-09-14	12:10:25	3.59747	514.953	1	23
2022-09-14	12:10:26	5.44362	520.397	1	24
2022-09-14	12:10:26	3.94083	524.338	1	25
2022-09-14	12:10:26	0.717875	525.056	FALSE	25
2022-09-14	12:10:26	-0.091132	525.056	FALSE	25
2022-09-14	12:10:27	-0.103448	525.056	FALSE	25
2022-09-14	12:10:27	0.284135	525.34	FALSE	25
2022-09-14	12:10:27	0.00209949	525.342	FALSE	25
2022-09-14	12:10:28	0.241132	525.583	FALSE	25
2022-09-14	12:10:28	0.773346	526.356	FALSE	25
2022-09-14	12:10:28	0.832583	527.189	FALSE	25
2022-09-14	12:10:28	0.860725	528.05	FALSE	25
2022-09-14	12:10:29	0.75416	528.804	FALSE	25
2022-09-14	12:10:29	0.474873	529.279	FALSE	25
2022-09-14	12:10:29	0.410344	529.689	FALSE	25
2022-09-14	12:10:29	0.447647	530.137	FALSE	25
2022-09-14	12:10:30	0.499606	530.636	FALSE	25
2022-09-14	12:10:30	0.43126	531.067	FALSE	25
2022-09-14	12:10:30	0.433041	531.501	FALSE	25
2022-09-14	12:10:30	0.436094	531.937	FALSE	25
2022-09-14	12:10:31	0.446476	532.383	FALSE	25
2022-09-14	12:10:31	0.432328	532.815	FALSE	25
2022-09-14	12:10:31	0.467494	533.283	FALSE	25
2022-09-14	12:10:32	0.437723	533.721	FALSE	25
2022-09-14	12:10:32	0.515687	534.236	FALSE	25
2022-09-14	12:10:32	0.529377	534.766	FALSE	25
2022-09-14	12:10:32	0.823524	535.589	FALSE	25
2022-09-14	12:10:33	1.28897	536.878	FALSE	25
2022-09-14	12:10:33	1.65569	538.534	FALSE	25
2022-09-14	12:10:33	1.65508	540.189	FALSE	25
2022-09-14	12:10:33	1.47167	541.661	FALSE	25
2022-09-14	12:10:34	0.961489	542.622	FALSE	25
2022-09-14	12:10:34	0.678181	543.3	FALSE	25
2022-09-14	12:10:34	0.613549	543.914	FALSE	25

## Sheet: Richa_star_202291412512
						**GoPro Fitting: 1154
2022-09-14	12:05:13	0.555738
2022-09-14	12:05:13	0.508766
2022-09-14	12:05:13	0.632786
2022-09-14	12:05:13	1.39528
2022-09-14	12:05:14	2.77095
2022-09-14	12:05:14	0.518944
2022-09-14	12:05:14	0.442761
2022-09-14	12:05:14	0.623931
2022-09-14	12:05:15	0.597112
2022-09-14	12:05:15	0.814313
2022-09-14	12:05:15	2.28999
2022-09-14	12:05:15	5.38266
2022-09-14	12:05:16	5.69467
2022-09-14	12:05:16	5.64276
2022-09-14	12:05:16	4.18357
2022-09-14	12:05:17	2.61752
2022-09-14	12:05:17	1.15777
2022-09-14	12:05:17	0.748155
2022-09-14	12:05:17	0.819453
2022-09-14	12:05:18	0.916654
2022-09-14	12:05:18	0.752227
2022-09-14	12:05:18	0.449835
2022-09-14	12:05:18	0.495178
2022-09-14	12:05:19	0.409224
2022-09-14	12:05:19	0.337417
2022-09-14	12:05:19	0.352481
2022-09-14	12:05:19	0.340573
2022-09-14	12:05:20	0.434313
2022-09-14	12:05:20	0.352837
2022-09-14	12:05:20	0.964694
2022-09-14	12:05:21	3.01569
2022-09-14	12:05:21	5.16561
2022-09-14	12:05:21	4.7191
2022-09-14	12:05:21	6.25202
2022-09-14	12:05:22	8.3569
2022-09-14	12:05:22	6.71594
2022-09-14	12:05:22	4.34403
2022-09-14	12:05:22	1.30902
2022-09-14	12:05:23	0.858639
2022-09-14	12:05:23	0.866527
2022-09-14	12:05:23	0.834873
2022-09-14	12:05:23	0.803168
2022-09-14	12:05:24	0.688919
2022-09-14	12:05:24	0.568563
2022-09-14	12:05:24	0.503168
2022-09-14	12:05:25	0.437672
2022-09-14	12:05:25	0.49869
2022-09-14	12:05:25	0.831972
2022-09-14	12:05:25	0.937265
2022-09-14	12:05:26	0.763168
2022-09-14	12:05:26	0.543015
2022-09-14	12:05:26	0.486578
2022-09-14	12:05:26	0.440878
2022-09-14	12:05:27	0.454568
2022-09-14	12:05:27	0.452227
2022-09-14	12:05:27	0.421234
2022-09-14	12:05:28	0.447901
2022-09-14	12:05:28	0.437621
2022-09-14	12:05:28	0.396196
2022-09-14	12:05:28	0.479758
2022-09-14	12:05:29	0.412074
2022-09-14	12:05:29	0.439046
2022-09-14	12:05:29	0.466323
2022-09-14	12:05:29	0.453906
2022-09-14	12:05:30	0.447036
2022-09-14	12:05:30	0.464339
2022-09-14	12:05:30	0.447087
2022-09-14	12:05:30	0.460064
2022-09-14	12:05:31	0.457468
2022-09-14	12:05:31	0.489478
2022-09-14	12:05:31	0.488359
2022-09-14	12:05:32	0.481997
2022-09-14	12:05:32	0.433651
2022-09-14	12:05:32	0.510242
2022-09-14	12:05:32	0.457774
2022-09-14	12:05:33	0.490751
2022-09-14	12:05:33	0.532125
2022-09-14	12:05:33	0.455178
2022-09-14	12:05:33	0.158842
2022-09-14	12:05:34	0.167239
2022-09-14	12:05:34	0.48612
2022-09-14	12:05:34	0.518842
2022-09-14	12:05:34	0.448206
2022-09-14	12:05:35	0.416959
2022-09-14	12:05:35	0.360216
2022-09-14	12:05:35	0.450344
2022-09-14	12:05:36	0.420827
2022-09-14	12:05:36	0.378232
2022-09-14	12:05:36	0.422965
2022-09-14	12:05:36	0.448104
2022-09-14	12:05:37	0.479657
2022-09-14	12:05:37	0.374262
2022-09-14	12:05:37	0.402914
2022-09-14	12:05:37	0.443677
2022-09-14	12:05:38	0.124135
2022-09-14	12:05:38	-0.0302669
2022-09-14	12:05:38	-0.262989
2022-09-14	12:05:38	-0.539071
2022-09-14	12:05:39	-0.640546
2022-09-14	12:05:39	-0.496068
2022-09-14	12:05:39	-0.268486
2022-09-14	12:05:40	-0.130114
2022-09-14	12:05:40	0.257468
2022-09-14	12:05:40	0.279504
2022-09-14	12:05:40	0.345611
2022-09-14	12:05:41	0.268562
2022-09-14	12:05:41	0.534822
2022-09-14	12:05:41	0.32159
2022-09-14	12:05:41	0.361183
2022-09-14	12:05:42	0.29299
2022-09-14	12:05:42	0.460776
2022-09-14	12:05:42	0.258537
2022-09-14	12:05:42	0.305509
2022-09-14	12:05:43	0.0709544
2022-09-14	12:05:43	0.181794
2022-09-14	12:05:43	0.107799
2022-09-14	12:05:44	0.257316
2022-09-14	12:05:44	0.0778247
2022-09-14	12:05:44	0.161641
2022-09-14	12:05:44	0.134618
2022-09-14	12:05:45	0.225407
2022-09-14	12:05:45	0.152074
2022-09-14	12:05:45	0.222354
2022-09-14	12:05:45	0.187392
2022-09-14	12:05:46	0.229122
2022-09-14	12:05:46	0.157519
2022-09-14	12:05:46	0.256959
2022-09-14	12:05:46	0.280522
2022-09-14	12:05:47	0.2764
2022-09-14	12:05:47	0.258588
2022-09-14	12:05:47	0.251311
2022-09-14	12:05:48	0.266883
2022-09-14	12:05:48	0.282048
2022-09-14	12:05:48	0.243626
2022-09-14	12:05:48	0.275483
2022-09-14	12:05:49	0.277774
2022-09-14	12:05:49	0.250547
2022-09-14	12:05:49	0.294313
2022-09-14	12:05:49	0.257265
2022-09-14	12:05:50	0.388257
2022-09-14	12:05:50	0.236603
2022-09-14	12:05:50	0.369224
2022-09-14	12:05:51	0.192634
2022-09-14	12:05:51	0.478791
2022-09-14	12:05:51	0.197825
2022-09-14	12:05:51	0.431565
2022-09-14	12:05:52	0.26729
2022-09-14	12:05:52	0.455127
2022-09-14	12:05:52	0.236959
2022-09-14	12:05:52	0.393092
2022-09-14	12:05:53	0.279148
2022-09-14	12:05:53	0.46388
2022-09-14	12:05:53	0.23813
2022-09-14	12:05:53	0.432176
2022-09-14	12:05:54	0.328511
2022-09-14	12:05:54	0.651768
2022-09-14	12:05:54	0.394059
2022-09-14	12:05:55	0.412176
2022-09-14	12:05:55	0.262812
2022-09-14	12:05:55	0.433092
2022-09-14	12:05:55	0.200013
2022-09-14	12:05:56	0.434059
2022-09-14	12:05:56	0.308766
2022-09-14	12:05:56	0.374771
2022-09-14	12:05:56	0.230293
2022-09-14	12:05:57	0.358181
2022-09-14	12:05:57	0.28444
2022-09-14	12:05:57	0.352379
2022-09-14	12:05:57	0.286883
2022-09-14	12:05:58	0.300725
2022-09-14	12:05:58	0.420522
2022-09-14	12:05:58	0.90098
2022-09-14	12:05:59	2.36632
2022-09-14	12:05:59	4.72764
2022-09-14	12:05:59	2.02205
2022-09-14	12:05:59	1.86174
2022-09-14	12:06:00	0.805407
2022-09-14	12:06:00	0.377112
2022-09-14	12:06:00	0.346425
2022-09-14	12:06:00	0.328868
2022-09-14	12:06:01	0.354008
2022-09-14	12:06:01	0.406221
2022-09-14	12:06:01	0.354466
2022-09-14	12:06:01	0.340267
2022-09-14	12:06:02	0.603931
2022-09-14	12:06:02	0.244186
2022-09-14	12:06:02	0.328155
2022-09-14	12:06:03	0.409936
2022-09-14	12:06:03	0.49869
2022-09-14	12:06:03	0.515687
2022-09-14	12:06:03	0.740267
2022-09-14	12:06:04	0.788918
2022-09-14	12:06:04	1.90877
2022-09-14	12:06:04	1.40927
2022-09-14	12:06:04	0.471361
2022-09-14	12:06:05	0.43243
2022-09-14	12:06:05	0.527036
2022-09-14	12:06:05	0.35869
2022-09-14	12:06:05	0.5393
2022-09-14	12:06:06	0.812481
2022-09-14	12:06:06	0.697315
2022-09-14	12:06:06	0.614516
2022-09-14	12:06:07	0.538384
2022-09-14	12:06:07	0.772176
2022-09-14	12:06:07	0.647035
2022-09-14	12:06:07	0.645916
2022-09-14	12:06:08	0.507443
2022-09-14	12:06:08	0.470802
2022-09-14	12:06:08	0.484288
2022-09-14	12:06:08	0.451158
2022-09-14	12:06:09	0.708562
2022-09-14	12:06:09	0.712634
2022-09-14	12:06:09	0.577824
2022-09-14	12:06:09	0.601896
2022-09-14	12:06:10	0.535433
2022-09-14	12:06:10	0.526578
2022-09-14	12:06:10	0.44785
2022-09-14	12:06:11	0.400624
2022-09-14	12:06:11	0.480827
2022-09-14	12:06:11	0.399707
2022-09-14	12:06:11	0.485305
2022-09-14	12:06:12	0.376196
2022-09-14	12:06:12	0.333957
2022-09-14	12:06:12	0.376756
2022-09-14	12:06:12	0.3393
2022-09-14	12:06:13	0.474669
2022-09-14	12:06:13	0.277468
2022-09-14	12:06:13	0.448003
2022-09-14	12:06:14	0.293601
2022-09-14	12:06:14	0.347799
2022-09-14	12:06:14	2.00704
2022-09-14	12:06:14	2.22861
2022-09-14	12:06:15	2.2791
2022-09-14	12:06:15	0.317061
2022-09-14	12:06:15	0.443422
2022-09-14	12:06:15	0.27925
2022-09-14	12:06:16	0.306629
2022-09-14	12:06:16	0.375484
2022-09-14	12:06:16	0.345509
2022-09-14	12:06:16	0.386985
2022-09-14	12:06:17	0.269886
2022-09-14	12:06:17	0.497774
2022-09-14	12:06:17	0.375178
2022-09-14	12:06:18	0.567697
2022-09-14	12:06:18	0.471819
2022-09-14	12:06:18	0.535687
2022-09-14	12:06:18	0.334059
2022-09-14	12:06:19	0.390445
2022-09-14	12:06:19	0.342761
2022-09-14	12:06:19	0.294771
2022-09-14	12:06:19	0.398944
2022-09-14	12:06:20	0.36897
2022-09-14	12:06:20	0.553295
2022-09-14	12:06:20	1.60668
2022-09-14	12:06:20	1.66744
2022-09-14	12:06:21	1.86551
2022-09-14	12:06:21	1.81711
2022-09-14	12:06:21	1.46821
2022-09-14	12:06:22	1.51558
2022-09-14	12:06:22	1.49401
2022-09-14	12:06:22	1.53182
2022-09-14	12:06:22	1.5476
2022-09-14	12:06:23	1.49492
2022-09-14	12:06:23	1.51233
2022-09-14	12:06:23	0.919402
2022-09-14	12:06:23	0.909173
2022-09-14	12:06:24	0.609631
2022-09-14	12:06:24	0.968053
2022-09-14	12:06:24	0.536705
2022-09-14	12:06:24	0.94444
2022-09-14	12:06:25	0.465356
2022-09-14	12:06:25	0.694669
2022-09-14	12:06:25	0.384949
2022-09-14	12:06:26	0.528308
2022-09-14	12:06:26	0.35584
2022-09-14	12:06:26	0.415331
2022-09-14	12:06:26	0.360165
2022-09-14	12:06:27	0.371361
2022-09-14	12:06:27	0.687188
2022-09-14	12:06:27	0.922659
2022-09-14	12:06:27	0.525662
2022-09-14	12:06:28	0.377468
2022-09-14	12:06:28	0.486018
2022-09-14	12:06:28	0.275483
2022-09-14	12:06:28	0.513092
2022-09-14	12:06:29	0.365407
2022-09-14	12:06:29	0.474924
2022-09-14	12:06:29	0.346018
2022-09-14	12:06:30	0.412481
2022-09-14	12:06:30	0.467799
2022-09-14	12:06:30	0.499097
2022-09-14	12:06:30	1.00296
2022-09-14	12:06:31	0.746425
2022-09-14	12:06:31	1.37065
2022-09-14	12:06:31	0.828715
2022-09-14	12:06:31	1.48602
2022-09-14	12:06:32	1.22968
2022-09-14	12:06:32	1.04795
2022-09-14	12:06:32	1.08688
2022-09-14	12:06:32	1.29355
2022-09-14	12:06:33	0.908461
2022-09-14	12:06:33	1.14098
2022-09-14	12:06:33	0.775789
2022-09-14	12:06:34	1.43126
2022-09-14	12:06:34	0.671768
2022-09-14	12:06:34	1.23976
2022-09-14	12:06:34	0.730598
2022-09-14	12:06:35	0.939809
2022-09-14	12:06:35	0.743168
2022-09-14	12:06:35	0.882201
2022-09-14	12:06:35	0.696654
2022-09-14	12:06:36	1.19782
2022-09-14	12:06:36	1.00067
2022-09-14	12:06:36	1.1535
2022-09-14	12:06:37	1.34637
2022-09-14	12:06:37	1.18149
2022-09-14	12:06:37	1.43487
2022-09-14	12:06:37	1.3193
2022-09-14	12:06:38	1.33304
2022-09-14	12:06:38	0.928562
2022-09-14	12:06:38	1.23014
2022-09-14	12:06:38	0.686069
2022-09-14	12:06:39	0.491361
2022-09-14	12:06:39	0.292481
2022-09-14	12:06:39	0.369428
2022-09-14	12:06:39	0.524898
2022-09-14	12:06:40	0.428868
2022-09-14	12:06:40	0.440216
2022-09-14	12:06:40	0.432277
2022-09-14	12:06:41	0.435229
2022-09-14	12:06:41	0.436705
2022-09-14	12:06:41	0.462608
2022-09-14	12:06:41	0.586272
2022-09-14	12:06:42	0.151158
2022-09-14	12:06:42	-0.382938
2022-09-14	12:06:42	-0.448638
2022-09-14	12:06:42	-0.116119
2022-09-14	12:06:43	0.0598094
2022-09-14	12:06:43	0.0936007
2022-09-14	12:06:43	0.251056
2022-09-14	12:06:43	0.309377
2022-09-14	12:06:44	0.260165
2022-09-14	12:06:44	0.245102
2022-09-14	12:06:44	0.266069
2022-09-14	12:06:45	0.279809
2022-09-14	12:06:45	0.287697
2022-09-14	12:06:45	0.258944
2022-09-14	12:06:45	0.256247
2022-09-14	12:06:46	0.300318
2022-09-14	12:06:46	0.298486
2022-09-14	12:06:46	0.278333
2022-09-14	12:06:46	0.290242
2022-09-14	12:06:47	0.298334
2022-09-14	12:06:47	0.320573
2022-09-14	12:06:47	0.310445
2022-09-14	12:06:47	0.305407
2022-09-14	12:06:48	0.316552
2022-09-14	12:06:48	0.311819
2022-09-14	12:06:48	0.315127
2022-09-14	12:06:49	0.275127
2022-09-14	12:06:49	0.268054
2022-09-14	12:06:49	0.254059
2022-09-14	12:06:49	0.277163
2022-09-14	12:06:50	0.345763
2022-09-14	12:06:50	0.721539
2022-09-14	12:06:50	0.726629
2022-09-14	12:06:50	0.729478
2022-09-14	12:06:51	0.723117
2022-09-14	12:06:51	0.725662
2022-09-14	12:06:51	0.724847
2022-09-14	12:06:51	0.597163
2022-09-14	12:06:52	0.251718
2022-09-14	12:06:52	0.372583
2022-09-14	12:06:52	0.266272
2022-09-14	12:06:53	0.375076
2022-09-14	12:06:53	0.442812
2022-09-14	12:06:53	0.35584
2022-09-14	12:06:53	-0.217035
2022-09-14	12:06:54	0.372532
2022-09-14	12:06:54	0.57472
2022-09-14	12:06:54	0.387799
2022-09-14	12:06:54	0.613397
2022-09-14	12:06:55	-0.115509
2022-09-14	12:06:55	-0.488435
2022-09-14	12:06:55	0.130954
2022-09-14	12:06:55	0.286527
2022-09-14	12:06:56	0.474008
2022-09-14	12:06:56	0.390089
2022-09-14	12:06:56	0.34042
2022-09-14	12:06:57	0.318282
2022-09-14	12:06:57	0.330802
2022-09-14	12:06:57	0.302914
2022-09-14	12:06:57	-1.49154
2022-09-14	12:06:58	-2.46187
2022-09-14	12:06:58	-2.93067
2022-09-14	12:06:58	-3.86477
2022-09-14	12:06:58	-4.26268
2022-09-14	12:06:59	-5.10996
2022-09-14	12:06:59	-5.63296
2022-09-14	12:06:59	-5.99149
2022-09-14	12:07:00	-6.36965
2022-09-14	12:07:00	-6.43464
2022-09-14	12:07:00	-7.10126
2022-09-14	12:07:00	-7.18288
2022-09-14	12:07:01	-7.74706
2022-09-14	12:07:01	-7.63622
2022-09-14	12:07:01	-8.21428
2022-09-14	12:07:01	-7.77485
2022-09-14	12:07:02	-8.01133
2022-09-14	12:07:02	-7.64803
2022-09-14	12:07:02	-8.19897
2022-09-14	12:07:02	-8.41245
2022-09-14	12:07:03	-8.57276
2022-09-14	12:07:03	-8.24039
2022-09-14	12:07:03	-8.50283
2022-09-14	12:07:04	-8.50797
2022-09-14	12:07:04	-8.50395
2022-09-14	12:07:04	-8.01429
2022-09-14	12:07:04	-8.15266
2022-09-14	12:07:05	-5.33754
2022-09-14	12:07:05	-6.64411
2022-09-14	12:07:05	-5.12864
2022-09-14	12:07:05	-8.76859
2022-09-14	12:07:06	-7.85357
2022-09-14	12:07:06	-8.67744
2022-09-14	12:07:06	-5.62461
2022-09-14	12:07:06	0.242812
2022-09-14	12:07:07	0.461692
2022-09-14	12:07:07	0.293143
2022-09-14	12:07:07	-3.80472
2022-09-14	12:07:08	0.244288
2022-09-14	12:07:08	0.432074
2022-09-14	12:07:08	0.275076
2022-09-14	12:07:08	0.422914
2022-09-14	12:07:09	0.256349
2022-09-14	12:07:09	0.408308
2022-09-14	12:07:09	0.212837
2022-09-14	12:07:09	0.466578
2022-09-14	12:07:10	0.138588
2022-09-14	12:07:10	0.398842
2022-09-14	12:07:10	0.179249
2022-09-14	12:07:10	0.460318
2022-09-14	12:07:11	0.165204
2022-09-14	12:07:11	0.409478
2022-09-14	12:07:11	0.200573
2022-09-14	12:07:12	0.401896
2022-09-14	12:07:12	0.191616
2022-09-14	12:07:12	0.360674
2022-09-14	12:07:12	0.217875
2022-09-14	12:07:13	0.453652
2022-09-14	12:07:13	0.232583
2022-09-14	12:07:13	0.373346
2022-09-14	12:07:13	0.262405
2022-09-14	12:07:14	0.443473
2022-09-14	12:07:14	0.245611
2022-09-14	12:07:14	0.378181
2022-09-14	12:07:14	0.280878
2022-09-14	12:07:15	0.418384
2022-09-14	12:07:15	0.226069
2022-09-14	12:07:15	0.313651
2022-09-14	12:07:16	-4.04584
2022-09-14	12:07:16	-4.54599
2022-09-14	12:07:16	-4.78991
2022-09-14	12:07:16	-4.56553
2022-09-14	12:07:17	-4.57342
2022-09-14	12:07:17	-4.41026
2022-09-14	12:07:17	-4.41423
2022-09-14	12:07:18	-4.29617
2022-09-14	12:07:18	-4.48248
2022-09-14	12:07:18	-4.73764
2022-09-14	12:07:18	-5.22767
2022-09-14	12:07:18	-5.47433
2022-09-14	12:07:19	-5.1065
2022-09-14	12:07:19	0.586221
2022-09-14	12:07:19	0.486221
2022-09-14	12:07:20	0.457468
2022-09-14	12:07:20	0.425764
2022-09-14	12:07:20	0.415585
2022-09-14	12:07:20	-2.70731
2022-09-14	12:07:21	-4.31113
2022-09-14	12:07:21	-4.39586
2022-09-14	12:07:21	-2.35408
2022-09-14	12:07:21	-2.25266
2022-09-14	12:07:22	-3.8209
2022-09-14	12:07:22	-5.5181
2022-09-14	12:07:22	-5.42029
2022-09-14	12:07:22	-5.43546
2022-09-14	12:07:23	-5.41128
2022-09-14	12:07:23	-5.20502
2022-09-14	12:07:23	-5.02044
2022-09-14	12:07:24	-4.8893
2022-09-14	12:07:24	-4.75403
2022-09-14	12:07:24	-4.6066
2022-09-14	12:07:24	-4.43378
2022-09-14	12:07:25	-4.3008
2022-09-14	12:07:25	-4.22548
2022-09-14	12:07:25	-4.07357
2022-09-14	12:07:25	-3.96945
2022-09-14	12:07:26	-3.9292
2022-09-14	12:07:26	-3.83154
2022-09-14	12:07:26	-3.75632
2022-09-14	12:07:27	-3.77352
2022-09-14	12:07:27	-3.85592
2022-09-14	12:07:27	-3.69708
2022-09-14	12:07:27	-3.71658
2022-09-14	12:07:28	-3.73938
2022-09-14	12:07:28	-3.94935
2022-09-14	12:07:28	-4.17174
2022-09-14	12:07:28	-4.73266
2022-09-14	12:07:29	-4.56172
2022-09-14	12:07:29	-4.55464
2022-09-14	12:07:29	-4.58823
2022-09-14	12:07:29	-4.6292
2022-09-14	12:07:30	-4.75256
2022-09-14	12:07:30	-4.91174
2022-09-14	12:07:30	-5.07632
2022-09-14	12:07:31	-5.20533
2022-09-14	12:07:31	-5.57637
2022-09-14	12:07:31	-5.75256
2022-09-14	12:07:31	-5.68584
2022-09-14	12:07:32	-5.5407
2022-09-14	12:07:32	-5.45683
2022-09-14	12:07:32	-5.27322
2022-09-14	12:07:32	-5.07709
2022-09-14	12:07:33	-5.07998
2022-09-14	12:07:33	-5.25154
2022-09-14	12:07:33	-5.23566
2022-09-14	12:07:33	-5.20477
2022-09-14	12:07:34	-5.18589
2022-09-14	12:07:34	-5.09423
2022-09-14	12:07:34	-4.938
2022-09-14	12:07:35	-4.78787
2022-09-14	12:07:35	-4.71734
2022-09-14	12:07:35	0.574873
2022-09-14	12:07:35	0.817112
2022-09-14	12:07:36	0.791056
2022-09-14	12:07:36	0.681132
2022-09-14	12:07:36	0.741641
2022-09-14	12:07:36	0.686476
2022-09-14	12:07:37	0.656094
2022-09-14	12:07:37	0.617621
2022-09-14	12:07:37	0.532074
2022-09-14	12:07:37	0.492125
2022-09-14	12:07:38	0.431769
2022-09-14	12:07:38	0.398842
2022-09-14	12:07:38	0.38673
2022-09-14	12:07:39	0.389021
2022-09-14	12:07:39	0.417367
2022-09-14	12:07:39	0.439708
2022-09-14	12:07:39	-1.96742
2022-09-14	12:07:40	-4.37607
2022-09-14	12:07:40	-4.36787
2022-09-14	12:07:40	-4.53108
2022-09-14	12:07:40	-4.48426
2022-09-14	12:07:41	-4.34925
2022-09-14	12:07:41	-4.21978
2022-09-14	12:07:41	-4.30899
2022-09-14	12:07:41	-4.70457
2022-09-14	12:07:42	-5.10686
2022-09-14	12:07:42	0.356705
2022-09-14	12:07:42	0.385
2022-09-14	12:07:43	0.399504
2022-09-14	12:07:43	0.413804
2022-09-14	12:07:43	0.404797
2022-09-14	12:07:43	0.408308
2022-09-14	12:07:44	0.402659
2022-09-14	12:07:44	0.41701
2022-09-14	12:07:44	0.408003
2022-09-14	12:07:44	0.444033
2022-09-14	12:07:45	0.440115
2022-09-14	12:07:45	0.433193
2022-09-14	12:07:45	0.393346
2022-09-14	12:07:45	0.374568
2022-09-14	12:07:46	0.383524
2022-09-14	12:07:46	0.703575
2022-09-14	12:07:46	0.203881
2022-09-14	12:07:47	-0.536119
2022-09-14	12:07:47	-1.04385
2022-09-14	12:07:47	-1.40716
2022-09-14	12:07:47	-1.89042
2022-09-14	12:07:48	-2.12207
2022-09-14	12:07:48	-2.25134
2022-09-14	12:07:48	-2.42019
2022-09-14	12:07:48	-2.59047
2022-09-14	12:07:49	-2.83902
2022-09-14	12:07:49	-3.13775
2022-09-14	12:07:49	-3.27632
2022-09-14	12:07:49	-3.53709
2022-09-14	12:07:50	-3.70523
2022-09-14	12:07:50	-3.82304
2022-09-14	12:07:50	-3.64284
2022-09-14	12:07:51	-3.42004
2022-09-14	12:07:51	-3.46258
2022-09-14	12:07:51	-3.49423
2022-09-14	12:07:51	-3.48696
2022-09-14	12:07:52	-3.47373
2022-09-14	12:07:52	-3.61525
2022-09-14	12:07:52	-3.65668
2022-09-14	12:07:52	-3.63815
2022-09-14	12:07:53	-3.5725
2022-09-14	12:07:53	-3.46808
2022-09-14	12:07:53	-3.41128
2022-09-14	12:07:53	-3.34482
2022-09-14	12:07:54	-3.21958
2022-09-14	12:07:54	-3.20263
2022-09-14	12:07:54	-3.44034
2022-09-14	12:07:55	-3.52818
2022-09-14	12:07:55	-3.62263
2022-09-14	12:07:55	-3.70212
2022-09-14	12:07:55	-3.74238
2022-09-14	12:07:56	-1.91291
2022-09-14	12:07:56	0.379911
2022-09-14	12:07:56	0.288104
2022-09-14	12:07:56	0.176145
2022-09-14	12:07:57	0.191616
2022-09-14	12:07:57	0.322506
2022-09-14	12:07:57	0.311463
2022-09-14	12:07:57	0.303117
2022-09-14	12:07:58	0.308104
2022-09-14	12:07:58	0.310954
2022-09-14	12:07:58	0.321387
2022-09-14	12:07:59	0.367646
2022-09-14	12:07:59	0.514924
2022-09-14	12:07:59	0.698995
2022-09-14	12:07:59	0.715229
2022-09-14	12:08:00	0.780827
2022-09-14	12:08:00	0.749682
2022-09-14	12:08:00	0.75757
2022-09-14	12:08:00	0.422201
2022-09-14	12:08:01	0.385254
2022-09-14	12:08:01	0.287341
2022-09-14	12:08:01	0.357774
2022-09-14	12:08:02	0.411718
2022-09-14	12:08:02	0.289631
2022-09-14	12:08:02	0.273448
2022-09-14	12:08:02	0.380827
2022-09-14	12:08:03	0.482812
2022-09-14	12:08:03	0.479809
2022-09-14	12:08:03	0.43813
2022-09-14	12:08:03	0.424593
2022-09-14	12:08:04	0.505305
2022-09-14	12:08:04	0.526374
2022-09-14	12:08:04	0.495432
2022-09-14	12:08:04	0.431463
2022-09-14	12:08:05	0.428206
2022-09-14	12:08:05	0.434873
2022-09-14	12:08:05	0.449377
2022-09-14	12:08:06	0.41757
2022-09-14	12:08:06	0.453753
2022-09-14	12:08:06	0.436908
2022-09-14	12:08:06	0.436094
2022-09-14	12:08:07	0.417061
2022-09-14	12:08:07	0.468206
2022-09-14	12:08:07	0.396145
2022-09-14	12:08:07	0.722965
2022-09-14	12:08:08	0.714466
2022-09-14	12:08:08	0.725407
2022-09-14	12:08:08	0.728104
2022-09-14	12:08:08	0.729784
2022-09-14	12:08:09	0.722404
2022-09-14	12:08:09	0.732328
2022-09-14	12:08:09	0.726221
2022-09-14	12:08:10	0.721997
2022-09-14	12:08:10	0.726985
2022-09-14	12:08:10	0.727087
2022-09-14	12:08:10	0.732023
2022-09-14	12:08:11	0.731361
2022-09-14	12:08:11	0.720725
2022-09-14	12:08:11	0.727952
2022-09-14	12:08:11	0.725662
2022-09-14	12:08:12	0.725
2022-09-14	12:08:12	0.72556
2022-09-14	12:08:12	0.73416
2022-09-14	12:08:12	0.726832
2022-09-14	12:08:13	0.734211
2022-09-14	12:08:13	0.726578
2022-09-14	12:08:13	0.725712
2022-09-14	12:08:14	0.729733
2022-09-14	12:08:14	0.725712
2022-09-14	12:08:14	0.722862
2022-09-14	12:08:14	0.71986
2022-09-14	12:08:15	0.717316
2022-09-14	12:08:15	0.723931
2022-09-14	12:08:15	0.723321
2022-09-14	12:08:15	0.72729
2022-09-14	12:08:16	0.721387
2022-09-14	12:08:16	0.721895
2022-09-14	12:08:16	0.724695
2022-09-14	12:08:16	0.725712
2022-09-14	12:08:17	0.722659
2022-09-14	12:08:17	0.727697
2022-09-14	12:08:17	0.727646
2022-09-14	12:08:18	0.733397
2022-09-14	12:08:18	0.727188
2022-09-14	12:08:18	0.726272
2022-09-14	12:08:18	0.712685
2022-09-14	12:08:19	0.734415
2022-09-14	12:08:19	0.729275
2022-09-14	12:08:19	0.720216
2022-09-14	12:08:19	0.726476
2022-09-14	12:08:20	0.723931
2022-09-14	12:08:20	0.703982
2022-09-14	12:08:20	0.705305
2022-09-14	12:08:20	0.624847
2022-09-14	12:08:21	0.687443
2022-09-14	12:08:21	0.692481
2022-09-14	12:08:21	0.671463
2022-09-14	12:08:22	0.708003
2022-09-14	12:08:22	0.455585
2022-09-14	12:08:22	0.494771
2022-09-14	12:08:22	0.31757
2022-09-14	12:08:23	0.597926
2022-09-14	12:08:23	0.50271
2022-09-14	12:08:23	0.429529
2022-09-14	12:08:23	0.647188
2022-09-14	12:08:24	0.68271
2022-09-14	12:08:24	-1.78731
2022-09-14	12:08:24	-2.7779
2022-09-14	12:08:24	-3.0235
2022-09-14	12:08:25	-2.52024
2022-09-14	12:08:25	-2.43943
2022-09-14	12:08:25	-2.78207
2022-09-14	12:08:26	-2.82792
2022-09-14	12:08:26	-2.83663
2022-09-14	12:08:26	-2.87688
2022-09-14	12:08:26	-3.0152
2022-09-14	12:08:27	-2.87205
2022-09-14	12:08:27	-2.73775
2022-09-14	12:08:27	-2.45856
2022-09-14	12:08:27	-2.261
2022-09-14	12:08:28	-2.26029
2022-09-14	12:08:28	-2.16172
2022-09-14	12:08:28	-2.19403
2022-09-14	12:08:28	-2.18329
2022-09-14	12:08:29	-2.01469
2022-09-14	12:08:29	-1.90747
2022-09-14	12:08:29	-2.02329
2022-09-14	12:08:30	-2.00848
2022-09-14	12:08:30	-2.01775
2022-09-14	12:08:30	-2.00502
2022-09-14	12:08:30	-1.97098
2022-09-14	12:08:31	-1.99342
2022-09-14	12:08:31	-1.95495
2022-09-14	12:08:31	-1.94721
2022-09-14	12:08:31	-1.93632
2022-09-14	12:08:32	-1.9924
2022-09-14	12:08:32	-2.01103
2022-09-14	12:08:32	-2.00441
2022-09-14	12:08:32	-1.96889
2022-09-14	12:08:33	-2.01093
2022-09-14	12:08:33	-2.03566
2022-09-14	12:08:33	-2.02309
2022-09-14	12:08:34	-2.11195
2022-09-14	12:08:34	-2.08665
2022-09-14	12:08:34	-2.0667
2022-09-14	12:08:34	-2.08212
2022-09-14	12:08:35	-2.10212
2022-09-14	12:08:35	-2.08492
2022-09-14	12:08:35	-2.0491
2022-09-14	12:08:35	-2.01836
2022-09-14	12:08:36	-1.97266
2022-09-14	12:08:36	-1.87128
2022-09-14	12:08:36	-1.81668
2022-09-14	12:08:36	-1.92467
2022-09-14	12:08:37	-2.14385
2022-09-14	12:08:37	-1.85907
2022-09-14	12:08:37	-1.9552
2022-09-14	12:08:38	-2.07072
2022-09-14	12:08:38	-1.98472
2022-09-14	12:08:38	-2.07245
2022-09-14	12:08:38	-2.03424
2022-09-14	12:08:39	-2.26686
2022-09-14	12:08:39	-2.33169
2022-09-14	12:08:39	-2.31195
2022-09-14	12:08:39	-2.46401
2022-09-14	12:08:40	-2.40838
2022-09-14	12:08:40	-1.94899
2022-09-14	12:08:40	-2.59418
2022-09-14	12:08:40	-2.56604
2022-09-14	12:08:41	-2.47459
2022-09-14	12:08:41	-1.70843
2022-09-14	12:08:41	-1.83464
2022-09-14	12:08:42	-2.15072
2022-09-14	12:08:42	-2.08635
2022-09-14	12:08:42	-2.23103
2022-09-14	12:08:43	-2.20075
2022-09-14	12:08:43	-2.1491
2022-09-14	12:08:43	-2.20034
2022-09-14	12:08:43	-2.23072
2022-09-14	12:08:43	-2.28324
2022-09-14	12:08:44	-2.30319
2022-09-14	12:08:44	-2.32782
2022-09-14	12:08:44	-2.34426
2022-09-14	12:08:45	-2.3465
2022-09-14	12:08:45	-2.37083
2022-09-14	12:08:45	-2.38167
2022-09-14	12:08:45	-2.37861
2022-09-14	12:08:46	-2.36553
2022-09-14	12:08:46	-2.40915
2022-09-14	12:08:46	-2.38793
2022-09-14	12:08:46	-2.39877
2022-09-14	12:08:47	-2.38752
2022-09-14	12:08:47	-2.37978
2022-09-14	12:08:47	-2.38762
2022-09-14	12:08:47	-2.40065
2022-09-14	12:08:48	-2.42523
2022-09-14	12:08:48	-2.44355
2022-09-14	12:08:48	-2.43851
2022-09-14	12:08:49	-2.44889
2022-09-14	12:08:49	-2.46798
2022-09-14	12:08:49	-2.4634
2022-09-14	12:08:49	-2.48309
2022-09-14	12:08:50	-2.48507
2022-09-14	12:08:50	-2.50467
2022-09-14	12:08:50	-2.54131
2022-09-14	12:08:50	-2.54777
2022-09-14	12:08:51	-2.57943
2022-09-14	12:08:51	-2.60579
2022-09-14	12:08:51	-2.64055
2022-09-14	12:08:51	-2.66935
2022-09-14	12:08:52	-2.68569
2022-09-14	12:08:52	-2.70579
2022-09-14	12:08:52	-2.67943
2022-09-14	12:08:53	-2.79708
2022-09-14	12:08:53	-3.08721
2022-09-14	12:08:53	-3.32604
2022-09-14	12:08:53	-3.4065
2022-09-14	12:08:54	-3.53083
2022-09-14	12:08:54	-3.55887
2022-09-14	12:08:54	-3.46457
2022-09-14	12:08:54	-3.7953
2022-09-14	12:08:55	-4.38869
2022-09-14	12:08:55	-4.8751
2022-09-14	12:08:55	-5.09495
2022-09-14	12:08:55	-5.29312
2022-09-14	12:08:56	-5.13113
2022-09-14	12:08:56	-5.02991
2022-09-14	12:08:56	-5.29612
2022-09-14	12:08:57	-5.81932
2022-09-14	12:08:57	-6.37047
2022-09-14	12:08:57	-6.76772
2022-09-14	12:08:57	-7.30935
2022-09-14	12:08:58	-7.59897
2022-09-14	12:08:58	-8.09128
2022-09-14	12:08:58	-8.46034
2022-09-14	12:08:58	-9.1811
2022-09-14	12:08:59	-9.5438
2022-09-14	12:08:59	-9.92385
2022-09-14	12:08:59	-9.86711
2022-09-14	12:08:59	-10.0568
2022-09-14	12:09:00	-10.1111
2022-09-14	12:09:00	-10.0665
2022-09-14	12:09:00	-10.1068
2022-09-14	12:09:01	-10.1641
2022-09-14	12:09:01	-10.4251
2022-09-14	12:09:01	-10.5636
2022-09-14	12:09:01	-10.8324
2022-09-14	12:09:02	-10.7301
2022-09-14	12:09:02	-11.0069
2022-09-14	12:09:02	-10.9398
2022-09-14	12:09:02	-10.8677
2022-09-14	12:09:03	-10.8654
2022-09-14	12:09:03	-10.5988
2022-09-14	12:09:03	-10.5011
2022-09-14	12:09:03	-10.2007
2022-09-14	12:09:04	-10.1457
2022-09-14	12:09:04	-9.89306
2022-09-14	12:09:04	-9.91627
2022-09-14	12:09:05	-9.88848
2022-09-14	12:09:05	-10.0299
2022-09-14	12:09:05	-9.81948
2022-09-14	12:09:05	-9.70553
2022-09-14	12:09:06	-9.48756
2022-09-14	12:09:06	-9.1554
2022-09-14	12:09:06	-9.01535
2022-09-14	12:09:06	-8.73632
2022-09-14	12:09:07	-8.8954
2022-09-14	12:09:07	-8.67011
2022-09-14	12:09:07	-8.72691
2022-09-14	12:09:07	-8.37337
2022-09-14	12:09:08	-8.5211
2022-09-14	12:09:08	-8.48294
2022-09-14	12:09:08	-8.63255
2022-09-14	12:09:09	-8.59754
2022-09-14	12:09:09	-8.59897
2022-09-14	12:09:09	-8.39795
2022-09-14	12:09:09	-8.07586
2022-09-14	12:09:10	-7.86767
2022-09-14	12:09:10	-7.68808
2022-09-14	12:09:10	-7.5924
2022-09-14	12:09:10	-7.38044
2022-09-14	12:09:11	-7.20222
2022-09-14	12:09:11	-6.51729
2022-09-14	12:09:11	-5.21199
2022-09-14	12:09:11	-3.44095
2022-09-14	12:09:12	-4.93749
2022-09-14	12:09:12	-3.87856
2022-09-14	12:09:12	-4.06304
2022-09-14	12:09:13	-1.8695
2022-09-14	12:09:13	-2.89673
2022-09-14	12:09:13	-4.9296
2022-09-14	12:09:13	-4.75261
2022-09-14	12:09:14	-5.14986
2022-09-14	12:09:14	-4.83484
2022-09-14	12:09:14	-4.80441
2022-09-14	12:09:14	-3.39785
2022-09-14	12:09:15	-4.13103
2022-09-14	12:09:15	-4.93322
2022-09-14	12:09:15	-3.31093
2022-09-14	12:09:15	-1.73907
2022-09-14	12:09:16	-2.22044
2022-09-14	12:09:16	-2.25449
2022-09-14	12:09:16	-3.42289
2022-09-14	12:09:17	-4.03591
2022-09-14	12:09:17	-4.56742
2022-09-14	12:09:17	-4.20288
2022-09-14	12:09:17	-4.08665
2022-09-14	12:09:18	-4.24884
2022-09-14	12:09:18	-4.28589
2022-09-14	12:09:18	-4.68395
2022-09-14	12:09:18	-5.33795
2022-09-14	12:09:19	-5.33067
2022-09-14	12:09:19	-5.45072
2022-09-14	12:09:19	-5.38757
2022-09-14	12:09:19	-5.34706
2022-09-14	12:09:20	-5.29586
2022-09-14	12:09:20	-5.27042
2022-09-14	12:09:20	-5.24004
2022-09-14	12:09:21	-5.21571
2022-09-14	12:09:21	-5.01016
2022-09-14	12:09:21	-5.03785
2022-09-14	12:09:21	-5.16462
2022-09-14	12:09:22	-0.939987
2022-09-14	12:09:22	0.718232
2022-09-14	12:09:22	1.53803
2022-09-14	12:09:22	1.86159
2022-09-14	12:09:23	1.35614
2022-09-14	12:09:23	1.6163
2022-09-14	12:09:23	1.48464
2022-09-14	12:09:24	1.50378
2022-09-14	12:09:24	1.85406
2022-09-14	12:09:24	1.70846
2022-09-14	12:09:24	1.54938
2022-09-14	12:09:25	1.66607
2022-09-14	12:09:25	1.27375
2022-09-14	12:09:25	0.962913
2022-09-14	12:09:25	0.860013
2022-09-14	12:09:26	0.982862
2022-09-14	12:09:26	0.850954
2022-09-14	12:09:26	1.06022
2022-09-14	12:09:26	0.785356
2022-09-14	12:09:27	0.597468
2022-09-14	12:09:27	0.520216
2022-09-14	12:09:27	0.472125
2022-09-14	12:09:27	0.446527
2022-09-14	12:09:28	0.439911
2022-09-14	12:09:28	0.453193
2022-09-14	12:09:28	0.506323
2022-09-14	12:09:29	0.583575
2022-09-14	12:09:29	0.668461
2022-09-14	12:09:29	0.654109
2022-09-14	12:09:29	0.651463
2022-09-14	12:09:30	0.680929
2022-09-14	12:09:30	0.597214
2022-09-14	12:09:30	0.460929
2022-09-14	12:09:30	0.440878
2022-09-14	12:09:31	0.401641
2022-09-14	12:09:31	0.212837
2022-09-14	12:09:31	0.15416
2022-09-14	12:09:31	0.167239
2022-09-14	12:09:32	0.179453
2022-09-14	12:09:32	0.126832
2022-09-14	12:09:32	0.0791478
2022-09-14	12:09:33	0.114059
2022-09-14	12:09:33	0.416858
2022-09-14	12:09:33	0.819351
2022-09-14	12:09:33	1.80739
2022-09-14	12:09:34	3.83782
2022-09-14	12:09:34	3.29955
2022-09-14	12:09:34	3.80281
2022-09-14	12:09:34	3.38546
2022-09-14	12:09:35	1.93609
2022-09-14	12:09:35	1.2622
2022-09-14	12:09:35	0.453601
2022-09-14	12:09:35	0.266883
2022-09-14	12:09:36	0.383626
2022-09-14	12:09:36	0.286527
2022-09-14	12:09:36	0.428664
2022-09-14	12:09:37	0.36673
2022-09-14	12:09:37	0.510445
2022-09-14	12:09:37	0.623575
2022-09-14	12:09:37	1.29894
2022-09-14	12:09:38	-1.67179
2022-09-14	12:09:38	-1.20823
2022-09-14	12:09:38	-0.0164756
2022-09-14	12:09:38	0.574618
2022-09-14	12:09:39	1.97065
2022-09-14	12:09:39	1.9395
2022-09-14	12:09:39	-1.66787
2022-09-14	12:09:39	-2.26426
2022-09-14	12:09:40	-2.17118
2022-09-14	12:09:40	-2.1836
2022-09-14	12:09:40	-2.6207
2022-09-14	12:09:41	-2.08106
2022-09-14	12:09:41	-2.86065
2022-09-14	12:09:41	-2.85637
2022-09-14	12:09:41	-2.95505
2022-09-14	12:09:42	-2.91312
2022-09-14	12:09:42	-2.03245
2022-09-14	12:09:42	-2.98965
2022-09-14	12:09:42	-2.86385
2022-09-14	12:09:43	-2.94375
2022-09-14	12:09:43	-2.75352
2022-09-14	12:09:43	-2.69184
2022-09-14	12:09:43	-2.27286
2022-09-14	12:09:44	-2.38675
2022-09-14	12:09:44	-1.28508
2022-09-14	12:09:44	1.38017
2022-09-14	12:09:45	1.4165
2022-09-14	12:09:45	-0.625585
2022-09-14	12:09:45	-0.32533
2022-09-14	12:09:45	-1.10905
2022-09-14	12:09:46	-1.85693
2022-09-14	12:09:46	-2.15235
2022-09-14	12:09:46	-1.58055
2022-09-14	12:09:46	-2.28492
2022-09-14	12:09:47	-2.42253
2022-09-14	12:09:47	-2.54055
2022-09-14	12:09:47	-2.68487
2022-09-14	12:09:47	-2.73256
2022-09-14	12:09:48	-2.58156
2022-09-14	12:09:48	-2.74909
2022-09-14	12:09:48	-2.60497
2022-09-14	12:09:49	-2.62294
2022-09-14	12:09:49	-2.53999
2022-09-14	12:09:49	-2.57724
2022-09-14	12:09:49	-2.54681
2022-09-14	12:09:50	-2.34808
2022-09-14	12:09:50	-2.42314
2022-09-14	12:09:50	-1.83724
2022-09-14	12:09:50	-1.7977
2022-09-14	12:09:51	-1.67546
2022-09-14	12:09:51	-1.9549
2022-09-14	12:09:51	-2.11536
2022-09-14	12:09:51	-2.1149
2022-09-14	12:09:52	-2.24569
2022-09-14	12:09:52	-2.18981
2022-09-14	12:09:52	-2.26981
2022-09-14	12:09:53	-2.16187
2022-09-14	12:09:53	-2.41515
2022-09-14	12:09:53	-2.30034
2022-09-14	12:09:53	-2.41022
2022-09-14	12:09:54	-2.48782
2022-09-14	12:09:54	-2.5491
2022-09-14	12:09:54	-2.47541
2022-09-14	12:09:54	-2.36279
2022-09-14	12:09:55	-2.24446
2022-09-14	12:09:55	-1.82676
2022-09-14	12:09:55	-1.58538
2022-09-14	12:09:55	-1.83164
2022-09-14	12:09:56	-1.93042
2022-09-14	12:09:56	-2.05434
2022-09-14	12:09:56	-2.18263
2022-09-14	12:09:57	-2.26192
2022-09-14	12:09:57	-2.18991
2022-09-14	12:09:57	-2.40182
2022-09-14	12:09:57	-2.70065
2022-09-14	12:09:58	-2.59922
2022-09-14	12:09:58	-2.71245
2022-09-14	12:09:58	-2.77383
2022-09-14	12:09:58	-2.88278
2022-09-14	12:09:59	-2.74574
2022-09-14	12:09:59	-2.74441
2022-09-14	12:09:59	0.369733
2022-09-14	12:09:59	-1.93179
2022-09-14	12:10:00	-2.67418
2022-09-14	12:10:00	-2.89281
2022-09-14	12:10:00	-2.99189
2022-09-14	12:10:01	-3.11892
2022-09-14	12:10:01	-3.10126
2022-09-14	12:10:01	-2.52701
2022-09-14	12:10:01	-0.182226
2022-09-14	12:10:02	-1.05078
2022-09-14	12:10:02	1.28184
2022-09-14	12:10:02	1.34892
2022-09-14	12:10:02	-1.30004
2022-09-14	12:10:03	-2.78818
2022-09-14	12:10:03	-2.87836
2022-09-14	12:10:03	-0.143956
2022-09-14	12:10:04	0.738384
2022-09-14	12:10:04	0.591208
2022-09-14	12:10:04	0.225153
2022-09-14	12:10:04	0.264491
2022-09-14	12:10:05	0.208308
2022-09-14	12:10:05	0.193957
2022-09-14	12:10:05	0.226374
2022-09-14	12:10:05	0.203066
2022-09-14	12:10:06	0.201031
2022-09-14	12:10:06	0.164695
2022-09-14	12:10:06	0.318842
2022-09-14	12:10:06	0.229682
2022-09-14	12:10:07	0.234313
2022-09-14	12:10:07	0.224542
2022-09-14	12:10:07	0.282456
2022-09-14	12:10:08	0.419911
2022-09-14	12:10:08	0.322456
2022-09-14	12:10:08	0.347087
2022-09-14	12:10:08	0.411667
2022-09-14	12:10:09	0.444898
2022-09-14	12:10:09	0.470598
2022-09-14	12:10:09	0.406476
2022-09-14	12:10:09	0.552939
2022-09-14	12:10:10	0.464797
2022-09-14	12:10:10	0.452328
2022-09-14	12:10:10	0.424288
2022-09-14	12:10:10	0.511972
2022-09-14	12:10:11	0.497468
2022-09-14	12:10:11	0.448461
2022-09-14	12:10:11	0.446069
2022-09-14	12:10:12	0.510801
2022-09-14	12:10:12	0.511616
2022-09-14	12:10:12	0.433601
2022-09-14	12:10:12	0.479606
2022-09-14	12:10:13	0.464033
2022-09-14	12:10:13	0.545102
2022-09-14	12:10:13	0.424338
2022-09-14	12:10:13	0.476705
2022-09-14	12:10:14	0.457214
2022-09-14	12:10:14	0.563779
2022-09-14	12:10:14	0.448308
2022-09-14	12:10:14	0.477926
2022-09-14	12:10:15	0.499198
2022-09-14	12:10:15	0.510649
2022-09-14	12:10:15	0.509173
2022-09-14	12:10:16	0.44154
2022-09-14	12:10:16	0.507035
2022-09-14	12:10:16	0.4936
2022-09-14	12:10:16	0.514771
2022-09-14	12:10:17	0.423982
2022-09-14	12:10:17	0.551361
2022-09-14	12:10:17	0.570242
2022-09-14	12:10:17	0.832735
2022-09-14	12:10:18	1.33859
2022-09-14	12:10:18	5.04917
2022-09-14	12:10:18	9.20474
2022-09-14	12:10:18	5.67166
2022-09-14	12:10:19	5.53441
2022-09-14	12:10:19	7.16627
2022-09-14	12:10:19	5.48088
2022-09-14	12:10:20	2.04642
2022-09-14	12:10:20	0.980623
2022-09-14	12:10:20	0.464898
2022-09-14	12:10:20	0.515331
2022-09-14	12:10:21	0.477723
2022-09-14	12:10:21	0.446832
2022-09-14	12:10:21	0.425051
2022-09-14	12:10:21	0.49416
2022-09-14	12:10:22	0.398741
2022-09-14	12:10:22	0.5336
2022-09-14	12:10:22	0.43355
2022-09-14	12:10:22	0.478333
2022-09-14	12:10:23	0.514517
2022-09-14	12:10:23	0.444796
2022-09-14	12:10:23	0.42271
2022-09-14	12:10:24	0.476145
2022-09-14	12:10:24	0.402964
2022-09-14	12:10:24	0.353855
2022-09-14	12:10:24	0.311819
2022-09-14	12:10:25	0.38042
2022-09-14	12:10:25	0.779962
2022-09-14	12:10:25	2.52933
2022-09-14	12:10:25	3.59747
2022-09-14	12:10:26	5.44362
2022-09-14	12:10:26	3.94083
2022-09-14	12:10:26	0.717875
2022-09-14	12:10:26	-0.091132
2022-09-14	12:10:27	-0.103448
2022-09-14	12:10:27	0.284135
2022-09-14	12:10:27	0.00209949
2022-09-14	12:10:28	0.241132
2022-09-14	12:10:28	0.773346
2022-09-14	12:10:28	0.832583
2022-09-14	12:10:28	0.860725
2022-09-14	12:10:29	0.75416
2022-09-14	12:10:29	0.474873
2022-09-14	12:10:29	0.410344
2022-09-14	12:10:29	0.447647
2022-09-14	12:10:30	0.499606
2022-09-14	12:10:30	0.43126
2022-09-14	12:10:30	0.433041
2022-09-14	12:10:30	0.436094
2022-09-14	12:10:31	0.446476
2022-09-14	12:10:31	0.432328
2022-09-14	12:10:31	0.467494
2022-09-14	12:10:32	0.437723
2022-09-14	12:10:32	0.515687
2022-09-14	12:10:32	0.529377
2022-09-14	12:10:32	0.823524
2022-09-14	12:10:33	1.28897
2022-09-14	12:10:33	1.65569
2022-09-14	12:10:33	1.65508
2022-09-14	12:10:33	1.47167
2022-09-14	12:10:34	0.961489
2022-09-14	12:10:34	0.678181
2022-09-14	12:10:34	0.613549
