# Supplementary material for: Comparing efficacy in reducing pulling and welfare impacts of four types of leash walking equipment
Source: PeerJ journal article supplement (doi:10.7717/peerj.18131), 2024-10-24
Supplement: Shelter_2_Tension_files.zip [file Tyr_harness_202291595550 copy.xlsx]

## Sheet: Averaged newtons
Date	Time	Aveaged Newtons	Impulse	Total steps
2022-09-15	09:56:01	0.978058	0.978058	0
2022-09-15	09:56:02	1.01879	1.99684	0		Impulse newtons	1078.94
2022-09-15	09:56:03	1.10158	3.09843	0		Total steps	17
2022-09-15	09:56:04	1.41443	4.51285	0		# > 5 sec	1
2022-09-15	09:56:05	1.10354	5.61639	0
2022-09-15	09:56:06	1.11386	6.73026	0
2022-09-15	09:56:07	0.949175	7.67943	0
2022-09-15	09:56:08	0.615222	8.29465	0
2022-09-15	09:56:09	1.9144	10.2091	0
2022-09-15	09:56:10	6.76659	16.9756	0
2022-09-15	09:56:11	0.590208	17.5659	0
2022-09-15	09:56:12	0.222637	17.7885	0
2022-09-15	09:56:13	1.71482	19.5033	0
2022-09-15	09:56:14	1.31884	20.8221	0
2022-09-15	09:56:15	-0.885789	20.8221	0
2022-09-15	09:56:16	-0.750137	20.8221	0
2022-09-15	09:56:17	1.06793	21.8901	0
2022-09-15	09:56:18	-0.384548	21.8901	0
2022-09-15	09:56:19	-1.37328	21.8901	0
2022-09-15	09:56:20	1.2816	23.1717	0
2022-09-15	09:56:21	-0.106186	23.1717	0
2022-09-15	09:56:22	1.067	24.2387	0
2022-09-15	09:56:23	5.44637	29.6851	0
2022-09-15	09:56:24	6.84275	36.5278	0
2022-09-15	09:56:25	4.78849	41.3163	0
2022-09-15	09:56:26	1.74532	43.0616	0
2022-09-15	09:56:27	4.88396	47.9456	0
2022-09-15	09:56:28	1.15461	49.1002	0
2022-09-15	09:56:29	0.849177	49.9494	0
2022-09-15	09:56:30	0.219412	50.1688	0
2022-09-15	09:56:31	7.1149	57.2837	0
2022-09-15	09:56:32	29.9368	87.2204	1
2022-09-15	09:56:33	30.3302	117.551	2
2022-09-15	09:56:34	17.0917	134.642	3
2022-09-15	09:56:35	20.6989	155.341	4
2022-09-15	09:56:36	6.01525	161.356	4
2022-09-15	09:56:37	52.8362	214.193	5
2022-09-15	09:56:38	42.3123	256.505	6
2022-09-15	09:56:39	18.6054	275.11	7
2022-09-15	09:56:40	0.727164	275.837	7
2022-09-15	09:56:41	-0.024315	275.837	7
2022-09-15	09:56:42	-0.250649	275.837	7
2022-09-15	09:56:43	-0.75772	275.837	7
2022-09-15	09:56:44	-0.732989	275.837	7
2022-09-15	09:56:45	-0.208808	275.837	7
2022-09-15	09:56:46	0.596151	276.434	7
2022-09-15	09:56:47	21.0598	297.493	8
2022-09-15	09:56:48	1.0854	298.579	8
2022-09-15	09:56:49	1.27121	299.85	8
2022-09-15	09:56:50	-0.586867	299.85	8
2022-09-15	09:56:51	0.495189	300.345	8
2022-09-15	09:56:52	2.20718	302.552	8
2022-09-15	09:56:53	14.5234	317.076	9
2022-09-15	09:56:54	15.6552	332.731	10
2022-09-15	09:56:55	2.74119	335.472	10
2022-09-15	09:56:56	0.277249	335.75	10
2022-09-15	09:56:57	8.22369	343.973	10
2022-09-15	09:56:58	23.0437	367.017	11
2022-09-15	09:56:59	1.14159	368.159	11
2022-09-15	09:57:00	-0.0143169	368.159	11
2022-09-15	09:57:01	-1.81008	368.159	11
2022-09-15	09:57:02	-0.210072	368.159	11
2022-09-15	09:57:03	0.123374	368.282	11
2022-09-15	09:57:04	5.10966	373.392	11
2022-09-15	09:57:05	1.2245	374.616	11
2022-09-15	09:57:06	4.61781	379.234	11
2022-09-15	09:57:07	5.15454	384.388	11
2022-09-15	09:57:08	9.78474	394.173	11
2022-09-15	09:57:09	0.854835	395.028	11
2022-09-15	09:57:10	-0.268079	395.028	11
2022-09-15	09:57:11	-1.21318	395.028	11
2022-09-15	09:57:12	-0.287152	395.028	11
2022-09-15	09:57:13	0.761722	395.79	11
2022-09-15	09:57:14	4.06286	399.853	11
2022-09-15	09:57:15	2.60797	402.461	11
2022-09-15	09:57:16	4.11407	406.575	11
2022-09-15	09:57:17	2.53496	409.11	11
2022-09-15	09:57:18	4.71356	413.823	11
2022-09-15	09:57:19	9.40568	423.229	11
2022-09-15	09:57:20	7.04124	430.27	11
2022-09-15	09:57:21	2.474	432.744	11
2022-09-15	09:57:22	5.56036	438.304	11
2022-09-15	09:57:23	4.73767	443.042	11
2022-09-15	09:57:24	2.91385	445.956	11
2022-09-15	09:57:25	3.37005	449.326	11
2022-09-15	09:57:26	3.54724	452.873	11
2022-09-15	09:57:27	3.02183	455.895	11
2022-09-15	09:57:28	6.84399	462.739	11
2022-09-15	09:57:29	4.44757	467.187	11
2022-09-15	09:57:30	5.84288	473.029	11
2022-09-15	09:57:31	2.83746	475.867	11
2022-09-15	09:57:32	3.65318	479.52	11
2022-09-15	09:57:33	4.36155	483.882	11
2022-09-15	09:57:34	1.73785	485.62	11
2022-09-15	09:57:35	-1.29043	485.62	11
2022-09-15	09:57:36	-3.25188	485.62	11
2022-09-15	09:57:37	-1.55836	485.62	11
2022-09-15	09:57:38	-1.7713	485.62	11
2022-09-15	09:57:39	-0.0797385	485.62	11
2022-09-15	09:57:40	1.00792	486.627	11
2022-09-15	09:57:41	2.67365	489.301	11
2022-09-15	09:57:42	4.25086	493.552	11
2022-09-15	09:57:43	1.16219	494.714	11
2022-09-15	09:57:44	1.50197	496.216	11
2022-09-15	09:57:45	1.64978	497.866	11
2022-09-15	09:57:46	1.72863	499.595	11
2022-09-15	09:57:47	0.983585	500.578	11
2022-09-15	09:57:48	6.70666	507.285	11
2022-09-15	09:57:49	4.9508	512.236	11
2022-09-15	09:57:50	-0.447875	512.236	11
2022-09-15	09:57:51	-2.72302	512.236	11
2022-09-15	09:57:52	-2.82149	512.236	11
2022-09-15	09:57:53	2.44049	514.676	11
2022-09-15	09:57:54	9.61463	524.291	11
2022-09-15	09:57:55	4.82391	529.115	11
2022-09-15	09:57:56	2.7855	531.9	11
2022-09-15	09:57:57	3.83644	535.737	11
2022-09-15	09:57:58	5.91157	541.648	11
2022-09-15	09:57:59	5.34639	546.994	11
2022-09-15	09:58:00	2.02801	549.022	11
2022-09-15	09:58:01	1.41352	550.436	11
2022-09-15	09:58:02	5.09733	555.533	11
2022-09-15	09:58:03	11.3988	566.932	11
2022-09-15	09:58:04	8.09113	575.023	11
2022-09-15	09:58:05	4.43301	579.456	11
2022-09-15	09:58:06	6.08249	585.539	11
2022-09-15	09:58:07	5.86398	591.403	11
2022-09-15	09:58:08	4.51436	595.917	11
2022-09-15	09:58:09	0.918522	596.836	11
2022-09-15	09:58:10	1.30633	598.142	11
2022-09-15	09:58:11	1.97928	600.121	11
2022-09-15	09:58:12	1.9026	602.024	11
2022-09-15	09:58:13	1.84529	603.869	11
2022-09-15	09:58:14	1.65223	605.521	11
2022-09-15	09:58:15	6.37032	611.892	11
2022-09-15	09:58:16	4.61431	616.506	11
2022-09-15	09:58:17	0.682793	617.189	11
2022-09-15	09:58:18	1.36266	618.551	11
2022-09-15	09:58:19	0.910184	619.462	11
2022-09-15	09:58:20	0.983698	620.445	11
2022-09-15	09:58:21	0.828973	621.274	11
2022-09-15	09:58:22	0.700526	621.975	11
2022-09-15	09:58:23	-0.875038	621.975	11
2022-09-15	09:58:24	0.560326	622.535	11
2022-09-15	09:58:25	1.40922	623.944	11
2022-09-15	09:58:26	0.71773	624.662	11
2022-09-15	09:58:27	-1.17996	624.662	11
2022-09-15	09:58:28	-0.378662	624.662	11
2022-09-15	09:58:29	7.98837	632.65	11
2022-09-15	09:58:30	4.41845	637.069	11
2022-09-15	09:58:31	0.57057	637.639	11
2022-09-15	09:58:32	1.58919	639.229	11
2022-09-15	09:58:33	1.33231	640.561	11
2022-09-15	09:58:34	0.203112	640.764	11
2022-09-15	09:58:35	-0.773058	640.764	11
2022-09-15	09:58:36	-0.967849	640.764	11
2022-09-15	09:58:37	0.648442	641.413	11
2022-09-15	09:58:38	1.00432	642.417	11
2022-09-15	09:58:39	1.1155	643.532	11
2022-09-15	09:58:40	0.886244	644.419	11
2022-09-15	09:58:41	0.983189	645.402	11
2022-09-15	09:58:42	1.03239	646.434	11
2022-09-15	09:58:43	1.1644	647.599	11
2022-09-15	09:58:44	1.23044	648.829	11
2022-09-15	09:58:45	1.71601	650.545	11
2022-09-15	09:58:46	1.60563	652.151	11
2022-09-15	09:58:47	1.76966	653.92	11
2022-09-15	09:58:48	1.36695	655.287	11
2022-09-15	09:58:49	1.07968	656.367	11
2022-09-15	09:58:50	0.406394	656.773	11
2022-09-15	09:58:51	1.0876	657.861	11
2022-09-15	09:58:52	1.10107	658.962	11
2022-09-15	09:58:53	1.18387	660.146	11
2022-09-15	09:58:54	1.10128	661.247	11
2022-09-15	09:58:55	-0.060779	661.247	11
2022-09-15	09:58:56	-2.56145	661.247	11
2022-09-15	09:58:57	-3.33745	661.247	11
2022-09-15	09:58:58	-1.92101	661.247	11
2022-09-15	09:58:59	0.335483	661.583	11
2022-09-15	09:59:00	0.623145	662.206	11
2022-09-15	09:59:01	-0.309165	662.206	11
2022-09-15	09:59:02	0.174137	662.38	11
2022-09-15	09:59:03	1.64163	664.022	11
2022-09-15	09:59:04	2.00916	666.031	11
2022-09-15	09:59:05	2.13446	668.165	11
2022-09-15	09:59:06	2.14561	670.311	11
2022-09-15	09:59:07	8.27039	678.581	11
2022-09-15	09:59:08	16.7209	695.302	12
2022-09-15	09:59:09	7.67909	702.981	12
2022-09-15	09:59:10	-0.787092	702.981	12
2022-09-15	09:59:11	-1.93346	702.981	12
2022-09-15	09:59:12	-1.09332	702.981	12
2022-09-15	09:59:13	3.63926	706.62	12
2022-09-15	09:59:14	3.20819	709.829	12
2022-09-15	09:59:15	2.03589	711.864	12
2022-09-15	09:59:16	2.53745	714.402	12
2022-09-15	09:59:17	3.33983	717.742	12
2022-09-15	09:59:18	2.73055	720.472	12
2022-09-15	09:59:19	4.41401	724.886	12
2022-09-15	09:59:20	3.77735	728.664	12
2022-09-15	09:59:21	9.58122	738.245	12
2022-09-15	09:59:22	12.3228	750.568	12
2022-09-15	09:59:23	12.1994	762.767	12
2022-09-15	09:59:24	3.43168	766.199	12
2022-09-15	09:59:25	9.86205	776.061	12
2022-09-15	09:59:26	21.3171	797.378	13
2022-09-15	09:59:27	22.3539	819.732	14
2022-09-15	09:59:28	2.41063	822.142	14
2022-09-15	09:59:29	-3.36886	822.142	14
2022-09-15	09:59:30	-1.34459	822.142	14
2022-09-15	09:59:31	0.0363526	822.179	14
2022-09-15	09:59:32	1.59892	823.778	14
2022-09-15	09:59:33	9.86312	833.641	14
2022-09-15	09:59:34	3.43162	837.072	14
2022-09-15	09:59:35	4.30813	841.381	14
2022-09-15	09:59:36	12.4254	853.806	14
2022-09-15	09:59:37	3.73111	857.537	14
2022-09-15	09:59:38	1.37311	858.91	14
2022-09-15	09:59:39	0.836216	859.746	14
2022-09-15	09:59:40	2.99427	862.741	14
2022-09-15	09:59:41	6.50982	869.25	14
2022-09-15	09:59:42	4.17254	873.423	14
2022-09-15	09:59:43	4.24379	877.667	14
2022-09-15	09:59:44	3.00076	880.668	14
2022-09-15	09:59:45	0.63735	881.305	14
2022-09-15	09:59:46	-0.37951	881.305	14
2022-09-15	09:59:47	-0.683584	881.305	14
2022-09-15	09:59:48	-2.08565	881.305	14
2022-09-15	09:59:49	-1.03469	881.305	14
2022-09-15	09:59:50	1.39077	882.696	14
2022-09-15	09:59:51	1.00571	883.701	14
2022-09-15	09:59:52	-0.170852	883.701	14
2022-09-15	09:59:53	-0.0348032	883.701	14
2022-09-15	09:59:54	0.730615	884.432	14
2022-09-15	09:59:55	0.778832	885.211	14
2022-09-15	09:59:56	1.42492	886.636	14
2022-09-15	09:59:57	1.58715	888.223	14
2022-09-15	09:59:58	1.01403	889.237	14
2022-09-15	09:59:59	0.251443	889.488	14
2022-09-15	10:00:00	1.0837	890.572	14
2022-09-15	10:00:01	5.32097	895.893	14
2022-09-15	10:00:02	2.33344	898.226	14
2022-09-15	10:00:03	1.86343	900.09	14
2022-09-15	10:00:04	2.47005	902.56	14
2022-09-15	10:00:05	2.32542	904.885	14
2022-09-15	10:00:06	3.72834	908.614	14
2022-09-15	10:00:07	1.94312	910.557	14
2022-09-15	10:00:08	0.976511	911.533	14
2022-09-15	10:00:09	0.0645735	911.598	14
2022-09-15	10:00:10	-0.425634	911.598	14
2022-09-15	10:00:11	-0.401299	911.598	14
2022-09-15	10:00:12	-0.436953	911.598	14
2022-09-15	10:00:13	-0.331652	911.598	14
2022-09-15	10:00:14	-0.329143	911.598	14
2022-09-15	10:00:15	-0.138312	911.598	14
2022-09-15	10:00:16	0.660779	912.259	14
2022-09-15	10:00:17	3.27798	915.537	14
2022-09-15	10:00:18	2.38386	917.921	14
2022-09-15	10:00:19	1.86247	919.783	14
2022-09-15	10:00:20	4.56037	924.343	14
2022-09-15	10:00:21	7.15694	931.5	14
2022-09-15	10:00:22	4.516	936.016	14
2022-09-15	10:00:23	0.616298	936.633	14
2022-09-15	10:00:24	0.497395	937.13	14
2022-09-15	10:00:25	-0.0212213	937.13	14
2022-09-15	10:00:26	7.82702	944.957	14
2022-09-15	10:00:27	8.09137	953.048	14
2022-09-15	10:00:28	33.5996	986.648	15
2022-09-15	10:00:29	13.6939	1000.34	16
2022-09-15	10:00:30	5.05493	1005.4	16
2022-09-15	10:00:31	5.79873	1011.2	16
2022-09-15	10:00:32	0.123374	1011.32	16
2022-09-15	10:00:33	-0.00990214	1011.32	16
2022-09-15	10:00:34	1.3481	1012.67	16
2022-09-15	10:00:35	3.93185	1016.6	16
2022-09-15	10:00:36	13.1543	1029.75	17
2022-09-15	10:00:37	6.93275	1036.69	17
2022-09-15	10:00:38	1.85132	1038.54	17
2022-09-15	10:00:39	1.56587	1040.1	17
2022-09-15	10:00:40	1.50305	1041.61	17
2022-09-15	10:00:41	2.72981	1044.34	17
2022-09-15	10:00:42	6.14363	1050.48	17
2022-09-15	10:00:43	2.40435	1052.88	17
2022-09-15	10:00:44	6.45906	1059.34	17
2022-09-15	10:00:45	3.26869	1062.61	17
2022-09-15	10:00:46	1.70146	1064.31	17
2022-09-15	10:00:47	1.71052	1066.02	17
2022-09-15	10:00:48	0.548725	1066.57	17
2022-09-15	10:00:49	-0.138312	1066.57	17
2022-09-15	10:00:50	0.781605	1067.35	17
2022-09-15	10:00:51	0.596168	1067.95	17
2022-09-15	10:00:52	0.73616	1068.69	17
2022-09-15	10:00:53	0.931631	1069.62	17
2022-09-15	10:00:54	1.24284	1070.86	17
2022-09-15	10:00:55	2.46857	1073.33	17
2022-09-15	10:00:56	2.70089	1076.03	17
2022-09-15	10:00:57	1.80956	1077.84	17
2022-09-15	10:00:58	0.354046	1078.19	17
2022-09-15	10:00:59	-0.102338	1078.19	17
2022-09-15	10:01:00	0.173968	1078.37	17
2022-09-15	10:01:01	0.570174	1078.94	17

## Sheet: Tyr_harness_202291595550 (4)
Date	Time	Lbs	Newtons	Aveaged Newtons	Total force x time		total steps > 13.345	**GoPro Fitting: 945
2022-09-15	09:56:01	0.224237	0.997451	0.978058	0.997451	FALSE	0
2022-09-15	09:56:01	0.219504	0.976398	0.978058	0.976398	FALSE	0
2022-09-15	09:56:01	0.215891	0.960326	0.978058	1.95778	FALSE	0
2022-09-15	09:56:02	0.264542	1.17674	1.01879	2.15313	FALSE	0
2022-09-15	09:56:02	0.20841	0.927049	1.01879	2.88483	FALSE	0
2022-09-15	09:56:02	0.215331	0.957835	1.01879	3.11097	FALSE	0
2022-09-15	09:56:02	0.22785	1.01352	1.01879	3.89835	FALSE	0
2022-09-15	09:56:03	0.2564	1.14052	1.10158	4.25149	FALSE	0
2022-09-15	09:56:03	0.242761	1.07985	1.10158	4.9782	FALSE	0
2022-09-15	09:56:03	0.247087	1.09909	1.10158	5.35058	FALSE	0
2022-09-15	09:56:03	0.244339	1.08687	1.10158	6.06507	FALSE	0
2022-09-15	09:56:04	0.265763	1.18217	1.41443	6.53275	FALSE	0
2022-09-15	09:56:04	0.183626	0.816805	1.41443	6.88187	FALSE	0
2022-09-15	09:56:04	0.475585	2.1155	1.41443	8.64824	FALSE	0
2022-09-15	09:56:04	0.346934	1.54323	1.41443	8.4251	FALSE	0
2022-09-15	09:56:05	0.229529	1.02099	1.10354	9.66923	FALSE	0
2022-09-15	09:56:05	0.218333	0.971189	1.10354	9.39629	FALSE	0
2022-09-15	09:56:05	0.2964	1.31845	1.10354	10.9877	FALSE	0
2022-09-15	09:56:06	0.285407	1.26955	1.11386	10.6658	FALSE	0
2022-09-15	09:56:06	0.252125	1.1215	1.11386	12.1092	FALSE	0
2022-09-15	09:56:06	0.246374	1.09592	1.11386	11.7618	FALSE	0
2022-09-15	09:56:06	0.217723	0.968475	1.11386	13.0777	FALSE	0
2022-09-15	09:56:07	0.231514	1.02982	0.949175	12.7916	FALSE	0
2022-09-15	09:56:07	0.20673	0.919576	0.949175	13.9972	FALSE	0
2022-09-15	09:56:07	0.18388	0.817935	0.949175	13.6095	FALSE	0
2022-09-15	09:56:07	0.231412	1.02937	0.949175	15.0266	FALSE	0
2022-09-15	09:56:08	0.207952	0.925012	0.615222	14.5345	FALSE	0
2022-09-15	09:56:08	0.155687	0.692527	0.615222	15.7191	FALSE	0
2022-09-15	09:56:08	0.209122	0.930216	0.615222	15.4647	FALSE	0
2022-09-15	09:56:08	-0.019529	-0.0868689	0.615222	15.7191	FALSE	0
2022-09-15	09:56:09	0.391819	1.74289	1.9144	17.2076	FALSE	0
2022-09-15	09:56:09	0.363219	1.61567	1.9144	17.3348	FALSE	0
2022-09-15	09:56:09	0.536094	2.38465	1.9144	19.5923	FALSE	0
2022-09-15	09:56:10	1.04103	4.63071	6.76659	21.9655	FALSE	0
2022-09-15	09:56:10	2.03365	9.04608	6.76659	28.6384	FALSE	0
2022-09-15	09:56:10	0.947646	4.21532	6.76659	26.1808	FALSE	0
2022-09-15	09:56:10	2.06246	9.17423	6.76659	37.8126	FALSE	0
2022-09-15	09:56:11	0.556552	2.47565	0.590208	28.6565	FALSE	0
2022-09-15	09:56:11	0.0441351	0.196322	0.590208	38.0089	FALSE	0
2022-09-15	09:56:11	-0.0528623	-0.235142	0.590208	28.6565	FALSE	0
2022-09-15	09:56:11	-0.0170863	-0.0760033	0.590208	38.0089	FALSE	0
2022-09-15	09:56:12	-0.0596816	-0.265476	0.222637	28.6565	FALSE	0
2022-09-15	09:56:12	0.043219	0.192247	0.222637	38.2012	FALSE	0
2022-09-15	09:56:12	0.137163	0.610128	0.222637	29.2666	FALSE	0
2022-09-15	09:56:12	0.0795041	0.35365	0.222637	38.5548	FALSE	0
2022-09-15	09:56:13	0.503677	2.24046	1.71482	31.5071	FALSE	0
2022-09-15	09:56:13	0.216196	0.961683	1.71482	39.5165	FALSE	0
2022-09-15	09:56:13	0.436654	1.94232	1.71482	33.4494	FALSE	0
2022-09-15	09:56:14	0.334873	1.48958	1.31884	41.0061	FALSE	0
2022-09-15	09:56:14	0.313957	1.39654	1.31884	34.8459	FALSE	0
2022-09-15	09:56:14	0.388817	1.72954	1.31884	42.7356	FALSE	0
2022-09-15	09:56:14	0.148308	0.659704	1.31884	35.5056	FALSE	0
2022-09-15	09:56:15	0.104848	0.466385	-0.885789	43.202	FALSE	0
2022-09-15	09:56:15	-0.320547	-1.42586	-0.885789	35.5056	FALSE	0
2022-09-15	09:56:15	-0.327111	-1.45506	-0.885789	43.202	FALSE	0
2022-09-15	09:56:15	-0.253727	-1.12863	-0.885789	35.5056	FALSE	0
2022-09-15	09:56:16	-0.303956	-1.35206	-0.750137	43.202	FALSE	0
2022-09-15	09:56:16	-0.354745	-1.57798	-0.750137	35.5056	FALSE	0
2022-09-15	09:56:16	-0.354745	-1.57798	-0.750137	43.202	FALSE	0
2022-09-15	09:56:16	0.338893	1.50746	-0.750137	37.0131	FALSE	0
2022-09-15	09:56:17	0.498893	2.21918	1.06793	45.4212	FALSE	0
2022-09-15	09:56:17	0.31299	1.39224	1.06793	38.4053	FALSE	0
2022-09-15	09:56:17	-0.0916409	-0.407637	1.06793	45.4212	FALSE	0
2022-09-15	09:56:18	0.0900893	0.400735	-0.384548	38.8061	FALSE	0
2022-09-15	09:56:18	0.296196	1.31754	-0.384548	46.7387	FALSE	0
2022-09-15	09:56:18	-0.257544	-1.14561	-0.384548	38.8061	FALSE	0
2022-09-15	09:56:18	-0.474542	-2.11086	-0.384548	46.7387	FALSE	0
2022-09-15	09:56:19	-0.322786	-1.43582	-1.37328	38.8061	FALSE	0
2022-09-15	09:56:19	-0.4379	-1.94787	-1.37328	46.7387	FALSE	0
2022-09-15	09:56:19	-0.31556	-1.40367	-1.37328	38.8061	FALSE	0
2022-09-15	09:56:19	-0.158664	-0.705769	-1.37328	46.7387	FALSE	0
2022-09-15	09:56:20	0.569376	2.5327	1.2816	41.3388	FALSE	0
2022-09-15	09:56:20	0.639758	2.84577	1.2816	49.5845	FALSE	0
2022-09-15	09:56:20	0.0230155	0.102378	1.2816	41.4412	FALSE	0
2022-09-15	09:56:20	-0.0796817	-0.35444	1.2816	49.5845	FALSE	0
2022-09-15	09:56:21	-0.0749997	-0.333614	-0.106186	41.4412	FALSE	0
2022-09-15	09:56:21	0.0125321	0.0557453	-0.106186	49.6402	FALSE	0
2022-09-15	09:56:21	-0.00914732	-0.0406891	-0.106186	41.4412	FALSE	0
2022-09-15	09:56:22	0.00423688	0.0188465	1.067	49.6591	FALSE	0
2022-09-15	09:56:22	0.249733	1.11086	1.067	42.552	FALSE	0
2022-09-15	09:56:22	0.142252	0.632765	1.067	50.2919	FALSE	0
2022-09-15	09:56:22	0.56327	2.50554	1.067	45.0576	FALSE	0
2022-09-15	09:56:23	0.613957	2.731	5.44637	53.0229	FALSE	0
2022-09-15	09:56:23	1.31614	5.85445	5.44637	50.912	FALSE	0
2022-09-15	09:56:23	1.68011	7.47347	5.44637	60.4963	FALSE	0
2022-09-15	09:56:23	1.28739	5.72657	5.44637	56.6386	FALSE	0
2022-09-15	09:56:24	2.25004	10.0086	6.84275	70.5049	FALSE	0
2022-09-15	09:56:24	0.889275	3.95567	6.84275	60.5943	FALSE	0
2022-09-15	09:56:24	0.964694	4.29115	6.84275	74.7961	FALSE	0
2022-09-15	09:56:24	2.04927	9.11556	6.84275	69.7098	FALSE	0
2022-09-15	09:56:25	1.36795	6.08492	4.78849	80.881	FALSE	0
2022-09-15	09:56:25	0.920267	4.09353	4.78849	73.8033	FALSE	0
2022-09-15	09:56:25	0.941285	4.18702	4.78849	85.068	FALSE	0
2022-09-15	09:56:26	0.840369	3.73813	1.74532	77.5415	FALSE	0
2022-09-15	09:56:26	0.415636	1.84883	1.74532	86.9169	FALSE	0
2022-09-15	09:56:26	0.220573	0.981153	1.74532	78.5226	FALSE	0
2022-09-15	09:56:26	0.0928883	0.413186	1.74532	87.3301	FALSE	0
2022-09-15	09:56:27	1.34118	5.96584	4.88396	84.4885	FALSE	0
2022-09-15	09:56:27	1.27324	5.66363	4.88396	92.9937	FALSE	0
2022-09-15	09:56:27	0.949071	4.22166	4.88396	88.7101	FALSE	0
2022-09-15	09:56:27	0.828359	3.68471	4.88396	96.6784	FALSE	0
2022-09-15	09:56:28	0.696552	3.0984	1.15461	91.8085	FALSE	0
2022-09-15	09:56:28	0.503321	2.23887	1.15461	98.9173	FALSE	0
2022-09-15	09:56:28	-0.0191219	-0.085058	1.15461	91.8085	FALSE	0
2022-09-15	09:56:28	-0.142481	-0.633784	1.15461	98.9173	FALSE	0
2022-09-15	09:56:29	0.106018	0.471589	0.849177	92.2801	FALSE	0
2022-09-15	09:56:29	0.420115	1.86876	0.849177	100.786	FALSE	0
2022-09-15	09:56:29	0.0465778	0.207187	0.849177	92.4873	FALSE	0
2022-09-15	09:56:30	-0.0143891	-0.0640056	0.219412	100.786	FALSE	0
2022-09-15	09:56:30	-0.0472135	-0.210015	0.219412	92.4873	FALSE	0
2022-09-15	09:56:30	0.228054	1.01443	0.219412	101.8	FALSE	0
2022-09-15	09:56:30	0.0308527	0.137239	0.219412	92.6245	FALSE	0
2022-09-15	09:56:31	0.203422	0.904862	7.1149	102.705	FALSE	0
2022-09-15	09:56:31	-0.00502519	-0.0223531	7.1149	92.6245	FALSE	0
2022-09-15	09:56:31	0.73014	3.24781	7.1149	105.953	FALSE	0
2022-09-15	09:56:31	5.46947	24.3293	7.1149	116.954	1	1
2022-09-15	09:56:32	5.70596	25.3813	29.9368	131.334	1	2
2022-09-15	09:56:32	6.41298	28.5262	29.9368	145.48	1	3
2022-09-15	09:56:32	5.38031	23.9327	29.9368	155.267	1	4
2022-09-15	09:56:32	9.42108	41.9068	29.9368	187.387	1	5
2022-09-15	09:56:33	5.85629	26.0499	30.3302	181.317	1	6
2022-09-15	09:56:33	7.55039	33.5856	30.3302	220.973	1	7
2022-09-15	09:56:33	7.04891	31.355	30.3302	212.672	1	8
2022-09-15	09:56:34	6.40123	28.474	17.0917	249.446	1	9
2022-09-15	09:56:34	3.40703	15.1552	17.0917	227.827	1	10
2022-09-15	09:56:34	3.76668	16.7549	17.0917	266.201	1	11
2022-09-15	09:56:34	1.79462	7.98283	17.0917	235.81	FALSE	11
2022-09-15	09:56:35	1.01406	4.51074	20.6989	270.712	FALSE	11
2022-09-15	09:56:35	2.91177	12.9521	20.6989	248.762	FALSE	11
2022-09-15	09:56:35	8.63222	38.3978	20.6989	309.11	1	12
2022-09-15	09:56:35	6.05523	26.9349	20.6989	275.697	1	13
2022-09-15	09:56:36	2.12011	9.43067	6.01525	318.541	FALSE	13
2022-09-15	09:56:36	1.09899	4.88853	6.01525	280.585	FALSE	13
2022-09-15	09:56:36	0.881692	3.92194	6.01525	322.463	FALSE	13
2022-09-15	09:56:36	1.30836	5.81985	6.01525	286.405	FALSE	13
2022-09-15	09:56:37	6.651	29.585	52.8362	352.048	1	14
2022-09-15	09:56:37	13.253	58.952	52.8362	345.357	1	15
2022-09-15	09:56:37	15.7303	69.9715	52.8362	422.019	1	16
2022-09-15	09:56:38	13.7988	61.3798	42.3123	406.737	1	17
2022-09-15	09:56:38	10.2262	45.4882	42.3123	467.507	1	18
2022-09-15	09:56:38	7.70988	34.2951	42.3123	441.032	1	19
2022-09-15	09:56:38	6.314	28.0859	42.3123	495.593	1	20
2022-09-15	09:56:39	7.89304	35.1098	18.6054	476.142	1	21
2022-09-15	09:56:39	7.93456	35.2945	18.6054	530.888	1	22
2022-09-15	09:56:39	0.65701	2.92251	18.6054	479.065	FALSE	22
2022-09-15	09:56:39	0.24612	1.09479	18.6054	531.983	FALSE	22
2022-09-15	09:56:40	0.0992496	0.441482	0.727164	479.506	FALSE	22
2022-09-15	09:56:40	0.282914	1.25846	0.727164	533.241	FALSE	22
2022-09-15	09:56:40	0.0324812	0.144483	0.727164	479.651	FALSE	22
2022-09-15	09:56:40	0.23925	1.06423	0.727164	534.305	FALSE	22
2022-09-15	09:56:41	0.0310562	0.138144	-0.024315	479.789	FALSE	22
2022-09-15	09:56:41	0.0284608	0.126599	-0.024315	534.432	FALSE	22
2022-09-15	09:56:41	-0.0759158	-0.337689	-0.024315	479.789	FALSE	22
2022-09-15	09:56:42	0.0612343	0.272382	-0.250649	534.704	FALSE	22
2022-09-15	09:56:42	-0.126959	-0.564739	-0.250649	479.789	FALSE	22
2022-09-15	09:56:42	-0.254542	-1.13225	-0.250649	534.704	FALSE	22
2022-09-15	09:56:42	0.094873	0.422014	-0.250649	480.211	FALSE	22
2022-09-15	09:56:43	0.0702419	0.31245	-0.75772	535.017	FALSE	22
2022-09-15	09:56:43	-0.321055	-1.42812	-0.75772	480.211	FALSE	22
2022-09-15	09:56:43	-0.217951	-0.96949	-0.75772	535.017	FALSE	22
2022-09-15	09:56:43	-0.212608	-0.945723	-0.75772	480.211	FALSE	22
2022-09-15	09:56:44	-0.241157	-1.07271	-0.732989	535.017	FALSE	22
2022-09-15	09:56:44	-0.283244	-1.25993	-0.732989	480.211	FALSE	22
2022-09-15	09:56:44	-0.0709793	-0.31573	-0.732989	535.017	FALSE	22
2022-09-15	09:56:44	-0.0637529	-0.283586	-0.732989	480.211	FALSE	22
2022-09-15	09:56:45	-0.146043	-0.649628	-0.208808	535.017	FALSE	22
2022-09-15	09:56:45	-0.0587147	-0.261175	-0.208808	480.211	FALSE	22
2022-09-15	09:56:45	0.0639315	0.28438	-0.208808	535.301	FALSE	22
2022-09-15	09:56:46	0.0756873	0.336672	0.596151	480.547	FALSE	22
2022-09-15	09:56:46	-0.00955446	-0.0425001	0.596151	535.301	FALSE	22
2022-09-15	09:56:46	0.205713	0.915053	0.596151	481.462	FALSE	22
2022-09-15	09:56:46	0.264237	1.17538	0.596151	536.476	FALSE	22
2022-09-15	09:56:47	0.267188	1.18851	21.0598	482.651	FALSE	22
2022-09-15	09:56:47	7.39584	32.8982	21.0598	569.375	1	23
2022-09-15	09:56:47	8.13533	36.1876	21.0598	518.839	1	24
2022-09-15	09:56:47	3.1395	13.9651	21.0598	583.34	1	25
2022-09-15	09:56:48	0.579809	2.57911	1.0854	521.418	FALSE	25
2022-09-15	09:56:48	0.0696312	0.309734	1.0854	583.649	FALSE	25
2022-09-15	09:56:48	-0.0292491	-0.130106	1.0854	521.418	FALSE	25
2022-09-15	09:56:48	0.35584	1.58285	1.0854	585.232	FALSE	25
2022-09-15	09:56:49	0.278893	1.24057	1.27121	522.658	FALSE	25
2022-09-15	09:56:49	0.516552	2.29773	1.27121	587.53	FALSE	25
2022-09-15	09:56:49	0.0618959	0.275325	1.27121	522.934	FALSE	25
2022-09-15	09:56:50	-0.334592	-1.48833	-0.586867	587.53	FALSE	25
2022-09-15	09:56:50	-0.279529	-1.2434	-0.586867	522.934	FALSE	25
2022-09-15	09:56:50	-0.14472	-0.643744	-0.586867	587.53	FALSE	25
2022-09-15	09:56:50	0.231107	1.02801	-0.586867	523.962	FALSE	25
2022-09-15	09:56:51	0.118334	0.526373	0.495189	588.056	FALSE	25
2022-09-15	09:56:51	-0.13561	-0.60322	0.495189	523.962	FALSE	25
2022-09-15	09:56:51	0.253448	1.12739	0.495189	589.184	FALSE	25
2022-09-15	09:56:51	0.209122	0.930216	0.495189	524.892	FALSE	25
2022-09-15	09:56:52	0.507239	2.2563	2.20718	591.44	FALSE	25
2022-09-15	09:56:52	0.184491	0.820653	2.20718	525.712	FALSE	25
2022-09-15	09:56:52	0.499656	2.22257	2.20718	593.663	FALSE	25
2022-09-15	09:56:52	0.793397	3.52919	2.20718	529.242	FALSE	25
2022-09-15	09:56:53	1.67533	7.4522	14.5234	601.115	FALSE	25
2022-09-15	09:56:53	3.92861	17.4752	14.5234	546.717	1	26
2022-09-15	09:56:53	4.1911	18.6429	14.5234	619.758	1	27
2022-09-15	09:56:54	6.27212	27.8996	15.6552	574.616	1	28
2022-09-15	09:56:54	3.6166	16.0874	15.6552	635.845	1	29
2022-09-15	09:56:54	2.53818	11.2903	15.6552	585.907	FALSE	29
2022-09-15	09:56:54	1.6509	7.34353	15.6552	643.189	FALSE	29
2022-09-15	09:56:55	0.747087	3.32319	2.74119	589.23	FALSE	29
2022-09-15	09:56:55	0.862201	3.83524	2.74119	647.024	FALSE	29
2022-09-15	09:56:55	0.370089	1.64623	2.74119	590.876	FALSE	29
2022-09-15	09:56:55	0.485611	2.16009	2.74119	649.184	FALSE	29
2022-09-15	09:56:56	0.102659	0.456648	0.277249	591.333	FALSE	29
2022-09-15	09:56:56	0.185967	0.827218	0.277249	650.011	FALSE	29
2022-09-15	09:56:56	0.0132445	0.0589142	0.277249	591.392	FALSE	29
2022-09-15	09:56:56	-0.052557	-0.233784	0.277249	650.011	FALSE	29
2022-09-15	09:56:57	-0.509198	-2.26501	8.22369	591.392	FALSE	29
2022-09-15	09:56:57	1.37055	6.09648	8.22369	656.108	FALSE	29
2022-09-15	09:56:57	4.68495	20.8396	8.22369	612.231	1	30
2022-09-15	09:56:58	9.21227	40.978	23.0437	697.086	1	31
2022-09-15	09:56:58	6.11441	27.1981	23.0437	639.429	1	32
2022-09-15	09:56:58	3.39105	15.0841	23.0437	712.17	1	33
2022-09-15	09:56:58	2.00408	8.91455	23.0437	648.344	FALSE	33
2022-09-15	09:56:59	0.380369	1.69196	1.14159	713.862	FALSE	33
2022-09-15	09:56:59	0.307596	1.36825	1.14159	649.712	FALSE	33
2022-09-15	09:56:59	0.189733	0.84397	1.14159	714.706	FALSE	33
2022-09-15	09:56:59	0.148868	0.662195	1.14159	650.374	FALSE	33
2022-09-15	09:57:00	0.0496822	0.220996	-0.0143169	714.927	FALSE	33
2022-09-15	09:57:00	-0.110267	-0.49049	-0.0143169	650.374	FALSE	33
2022-09-15	09:57:00	-0.00314226	-0.0139774	-0.0143169	714.927	FALSE	33
2022-09-15	09:57:00	0.0508527	0.226203	-0.0143169	650.601	FALSE	33
2022-09-15	09:57:01	-0.209656	-0.932592	-1.81008	714.927	FALSE	33
2022-09-15	09:57:01	-0.515814	-2.29444	-1.81008	650.601	FALSE	33
2022-09-15	09:57:01	-0.495305	-2.20322	-1.81008	714.927	FALSE	33
2022-09-15	09:57:02	-0.232608	-1.03469	-0.210072	650.601	FALSE	33
2022-09-15	09:57:02	-0.169758	-0.755118	-0.210072	714.927	FALSE	33
2022-09-15	09:57:02	0.121794	0.541764	-0.210072	651.142	FALSE	33
2022-09-15	09:57:02	0.0916669	0.407753	-0.210072	715.334	FALSE	33
2022-09-15	09:57:03	0.044644	0.198585	0.123374	651.341	FALSE	33
2022-09-15	09:57:03	0.0267305	0.118903	0.123374	715.453	FALSE	33
2022-09-15	09:57:03	-0.00899467	-0.0400101	0.123374	651.341	FALSE	33
2022-09-15	09:57:03	0.0485626	0.216016	0.123374	715.669	FALSE	33
2022-09-15	09:57:04	0.314211	1.39767	5.10966	652.739	FALSE	33
2022-09-15	09:57:04	1.81187	8.05956	5.10966	723.729	FALSE	33
2022-09-15	09:57:04	1.8963	8.43512	5.10966	661.174	FALSE	33
2022-09-15	09:57:04	0.57243	2.54628	5.10966	726.275	FALSE	33
2022-09-15	09:57:05	0.271158	1.20617	1.2245	662.38	FALSE	33
2022-09-15	09:57:05	0.243881	1.08483	1.2245	727.36	FALSE	33
2022-09-15	09:57:05	0.310802	1.38251	1.2245	663.763	FALSE	33
2022-09-15	09:57:06	0.350954	1.56111	4.61781	728.921	FALSE	33
2022-09-15	09:57:06	0.254059	1.13011	4.61781	664.893	FALSE	33
2022-09-15	09:57:06	0.224644	0.999261	4.61781	729.92	FALSE	33
2022-09-15	09:57:06	3.32286	14.7807	4.61781	679.673	1	34
2022-09-15	09:57:07	1.34459	5.98101	5.15454	735.901	FALSE	34
2022-09-15	09:57:07	1.13803	5.06219	5.15454	684.736	FALSE	34
2022-09-15	09:57:07	1.04429	4.64521	5.15454	740.547	FALSE	34
2022-09-15	09:57:07	1.10826	4.92976	5.15454	689.665	FALSE	34
2022-09-15	09:57:08	2.0653	9.18687	9.78474	749.733	FALSE	34
2022-09-15	09:57:08	3.31925	14.7647	9.78474	704.43	1	35
2022-09-15	09:57:08	2.33961	10.4071	9.78474	760.141	FALSE	35
2022-09-15	09:57:08	1.07467	4.78035	9.78474	709.21	FALSE	35
2022-09-15	09:57:09	0.392277	1.74493	0.854835	761.885	FALSE	35
2022-09-15	09:57:09	0.148104	0.658796	0.854835	709.869	FALSE	35
2022-09-15	09:57:09	0.0361453	0.160782	0.854835	762.046	FALSE	35
2022-09-15	09:57:10	-0.0588165	-0.261628	-0.268079	709.869	FALSE	35
2022-09-15	09:57:10	-0.0333713	-0.148442	-0.268079	762.046	FALSE	35
2022-09-15	09:57:10	-0.0892491	-0.396998	-0.268079	709.869	FALSE	35
2022-09-15	09:57:10	-0.0596308	-0.26525	-0.268079	762.046	FALSE	35
2022-09-15	09:57:11	-0.0292491	-0.130106	-1.21318	709.869	FALSE	35
2022-09-15	09:57:11	-0.116577	-0.518558	-1.21318	762.046	FALSE	35
2022-09-15	09:57:11	-0.349809	-1.55602	-1.21318	709.869	FALSE	35
2022-09-15	09:57:11	-0.595305	-2.64804	-1.21318	762.046	FALSE	35
2022-09-15	09:57:12	-0.309605	-1.37718	-0.287152	709.869	FALSE	35
2022-09-15	09:57:12	-0.0393763	-0.175154	-0.287152	762.046	FALSE	35
2022-09-15	09:57:12	-0.136883	-0.608883	-0.287152	709.869	FALSE	35
2022-09-15	09:57:12	0.227646	1.01261	-0.287152	763.059	FALSE	35
2022-09-15	09:57:13	-0.0200888	-0.089359	0.761722	709.869	FALSE	35
2022-09-15	09:57:13	0.281794	1.25348	0.761722	764.312	FALSE	35
2022-09-15	09:57:13	0.252023	1.12105	0.761722	710.99	FALSE	35
2022-09-15	09:57:14	-0.068333	-0.303959	4.06286	764.312	FALSE	35
2022-09-15	09:57:14	1.95813	8.71015	4.06286	719.7	FALSE	35
2022-09-15	09:57:14	0.735229	3.27045	4.06286	767.583	FALSE	35
2022-09-15	09:57:14	1.02846	4.5748	4.06286	724.275	FALSE	35
2022-09-15	09:57:15	0.341692	1.51991	2.60797	769.103	FALSE	35
2022-09-15	09:57:15	0.650496	2.89354	2.60797	727.169	FALSE	35
2022-09-15	09:57:15	0.287952	1.28087	2.60797	770.384	FALSE	35
2022-09-15	09:57:15	1.06505	4.73756	2.60797	731.906	FALSE	35
2022-09-15	09:57:16	1.01487	4.51434	4.11407	774.898	FALSE	35
2022-09-15	09:57:16	1.40683	6.25786	4.11407	738.164	FALSE	35
2022-09-15	09:57:16	0.740471	3.29376	4.11407	778.192	FALSE	35
2022-09-15	09:57:16	0.537366	2.39031	4.11407	740.554	FALSE	35
2022-09-15	09:57:17	0.565865	2.51708	2.53496	780.709	FALSE	35
2022-09-15	09:57:17	0.751005	3.34062	2.53496	743.895	FALSE	35
2022-09-15	09:57:17	0.392786	1.74719	2.53496	782.456	FALSE	35
2022-09-15	09:57:18	0.693193	3.08346	4.71356	746.978	FALSE	35
2022-09-15	09:57:18	1.2824	5.70437	4.71356	788.16	FALSE	35
2022-09-15	09:57:18	1.37365	6.11027	4.71356	753.089	FALSE	35
2022-09-15	09:57:18	0.889376	3.95612	4.71356	792.116	FALSE	35
2022-09-15	09:57:19	0.956043	4.25267	9.40568	757.341	FALSE	35
2022-09-15	09:57:19	3.52429	15.6767	9.40568	807.793	1	36
2022-09-15	09:57:19	2.87594	12.7928	9.40568	770.134	FALSE	36
2022-09-15	09:57:19	1.10169	4.90054	9.40568	812.694	FALSE	36
2022-09-15	09:57:20	2.10088	9.34513	7.04124	779.479	FALSE	36
2022-09-15	09:57:20	1.82709	8.12726	7.04124	820.821	FALSE	36
2022-09-15	09:57:20	1.60032	7.11854	7.04124	786.598	FALSE	36
2022-09-15	09:57:20	0.803473	3.57401	7.04124	824.395	FALSE	36
2022-09-15	09:57:21	0.355382	1.58081	2.474	788.179	FALSE	36
2022-09-15	09:57:21	0.42159	1.87532	2.474	826.27	FALSE	36
2022-09-15	09:57:21	0.891565	3.96586	2.474	792.145	FALSE	36
2022-09-15	09:57:22	1.36963	6.09239	5.56036	832.363	FALSE	36
2022-09-15	09:57:22	1.51828	6.75361	5.56036	798.898	FALSE	36
2022-09-15	09:57:22	0.958537	4.26376	5.56036	836.626	FALSE	36
2022-09-15	09:57:22	1.15365	5.13167	5.56036	804.03	FALSE	36
2022-09-15	09:57:23	2.00999	8.94084	4.73767	845.567	FALSE	36
2022-09-15	09:57:23	1.03029	4.58294	4.73767	808.613	FALSE	36
2022-09-15	09:57:23	0.728308	3.23966	4.73767	848.807	FALSE	36
2022-09-15	09:57:23	0.491718	2.18726	4.73767	810.8	FALSE	36
2022-09-15	09:57:24	0.58215	2.58952	2.91385	851.396	FALSE	36
2022-09-15	09:57:24	0.57528	2.55896	2.91385	813.359	FALSE	36
2022-09-15	09:57:24	0.567901	2.52614	2.91385	853.923	FALSE	36
2022-09-15	09:57:24	0.894924	3.9808	2.91385	817.34	FALSE	36
2022-09-15	09:57:25	0.659606	2.93406	3.37005	856.857	FALSE	36
2022-09-15	09:57:25	0.785662	3.49478	3.37005	820.835	FALSE	36
2022-09-15	09:57:25	0.827596	3.68131	3.37005	860.538	FALSE	36
2022-09-15	09:57:26	1.01986	4.53654	3.54724	825.371	FALSE	36
2022-09-15	09:57:26	0.884745	3.93552	3.54724	864.474	FALSE	36
2022-09-15	09:57:26	0.740573	3.29422	3.54724	828.665	FALSE	36
2022-09-15	09:57:26	0.544644	2.42269	3.54724	866.896	FALSE	36
2022-09-15	09:57:27	0.435382	1.93667	3.02183	830.602	FALSE	36
2022-09-15	09:57:27	0.434466	1.93259	3.02183	868.829	FALSE	36
2022-09-15	09:57:27	0.602913	2.68188	3.02183	833.284	FALSE	36
2022-09-15	09:57:27	1.24459	5.53619	3.02183	874.365	FALSE	36
2022-09-15	09:57:28	1.64576	7.32067	6.84399	840.605	FALSE	36
2022-09-15	09:57:28	1.77665	7.90289	6.84399	882.268	FALSE	36
2022-09-15	09:57:28	1.46398	6.51208	6.84399	847.117	FALSE	36
2022-09-15	09:57:28	1.268	5.64032	6.84399	887.908	FALSE	36
2022-09-15	09:57:29	1.30464	5.8033	4.44757	852.92	FALSE	36
2022-09-15	09:57:29	1.01813	4.52885	4.44757	892.437	FALSE	36
2022-09-15	09:57:29	0.676806	3.01057	4.44757	855.93	FALSE	36
2022-09-15	09:57:30	1.2162	5.4099	5.84288	897.847	FALSE	36
2022-09-15	09:57:30	1.48627	6.61123	5.84288	862.542	FALSE	36
2022-09-15	09:57:30	1.3995	6.22526	5.84288	904.072	FALSE	36
2022-09-15	09:57:30	1.15218	5.12513	5.84288	867.667	FALSE	36
2022-09-15	09:57:31	0.861081	3.83026	2.83746	907.902	FALSE	36
2022-09-15	09:57:31	1.00816	4.4845	2.83746	872.151	FALSE	36
2022-09-15	09:57:31	0.329377	1.46513	2.83746	909.368	FALSE	36
2022-09-15	09:57:31	0.352939	1.56994	2.83746	873.721	FALSE	36
2022-09-15	09:57:32	0.549835	2.44578	3.65318	911.813	FALSE	36
2022-09-15	09:57:32	0.666272	2.96371	3.65318	876.685	FALSE	36
2022-09-15	09:57:32	1.1395	5.06872	3.65318	916.882	FALSE	36
2022-09-15	09:57:32	0.929478	4.1345	3.65318	880.819	FALSE	36
2022-09-15	09:57:33	1.12454	5.00218	4.36155	921.884	FALSE	36
2022-09-15	09:57:33	1.0392	4.62257	4.36155	885.442	FALSE	36
2022-09-15	09:57:33	0.777824	3.45992	4.36155	925.344	FALSE	36
2022-09-15	09:57:34	0.974924	4.33666	1.73785	889.779	FALSE	36
2022-09-15	09:57:34	0.268461	1.19417	1.73785	926.538	FALSE	36
2022-09-15	09:57:34	0.228613	1.01692	1.73785	890.796	FALSE	36
2022-09-15	09:57:34	0.0907508	0.403678	1.73785	926.942	FALSE	36
2022-09-15	09:57:35	-0.168028	-0.747422	-1.29043	890.796	FALSE	36
2022-09-15	09:57:35	-0.360852	-1.60514	-1.29043	926.942	FALSE	36
2022-09-15	09:57:35	-0.259529	-1.15444	-1.29043	890.796	FALSE	36
2022-09-15	09:57:35	-0.371997	-1.65472	-1.29043	926.942	FALSE	36
2022-09-15	09:57:36	-0.48243	-2.14595	-3.25188	890.796	FALSE	36
2022-09-15	09:57:36	-0.532557	-2.36892	-3.25188	926.942	FALSE	36
2022-09-15	09:57:36	-1.15108	-5.12023	-3.25188	890.796	FALSE	36
2022-09-15	09:57:36	-0.758155	-3.37243	-3.25188	926.942	FALSE	36
2022-09-15	09:57:37	-0.60762	-2.70282	-1.55836	890.796	FALSE	36
2022-09-15	09:57:37	-0.243702	-1.08404	-1.55836	926.942	FALSE	36
2022-09-15	09:57:37	-0.199682	-0.888225	-1.55836	890.796	FALSE	36
2022-09-15	09:57:38	-0.360954	-1.6056	-1.7713	926.942	FALSE	36
2022-09-15	09:57:38	-0.400903	-1.7833	-1.7713	890.796	FALSE	36
2022-09-15	09:57:38	-0.402073	-1.7885	-1.7713	926.942	FALSE	36
2022-09-15	09:57:38	-0.428893	-1.9078	-1.7713	890.796	FALSE	36
2022-09-15	09:57:39	-0.15388	-0.684489	-0.0797385	926.942	FALSE	36
2022-09-15	09:57:39	-0.064669	-0.287661	-0.0797385	890.796	FALSE	36
2022-09-15	09:57:39	-0.0241601	-0.107469	-0.0797385	926.942	FALSE	36
2022-09-15	09:57:39	0.171005	0.760664	-0.0797385	891.556	FALSE	36
2022-09-15	09:57:40	0.14612	0.649971	1.00792	927.592	FALSE	36
2022-09-15	09:57:40	0.219148	0.974814	1.00792	892.531	FALSE	36
2022-09-15	09:57:40	0.156552	0.696375	1.00792	928.288	FALSE	36
2022-09-15	09:57:40	0.384542	1.71052	1.00792	894.242	FALSE	36
2022-09-15	09:57:41	0.387748	1.72478	2.67365	930.013	FALSE	36
2022-09-15	09:57:41	0.604847	2.69048	2.67365	896.932	FALSE	36
2022-09-15	09:57:41	0.810598	3.6057	2.67365	933.619	FALSE	36
2022-09-15	09:57:42	0.883779	3.93123	4.25086	900.863	FALSE	36
2022-09-15	09:57:42	1.3508	6.00863	4.25086	939.627	FALSE	36
2022-09-15	09:57:42	0.96612	4.29749	4.25086	905.161	FALSE	36
2022-09-15	09:57:42	0.621845	2.76609	4.25086	942.394	FALSE	36
2022-09-15	09:57:43	0.63818	2.83875	1.16219	908	FALSE	36
2022-09-15	09:57:43	0.0606745	0.269892	1.16219	942.663	FALSE	36
2022-09-15	09:57:43	0.0776211	0.345274	1.16219	908.345	FALSE	36
2022-09-15	09:57:43	0.268613	1.19484	1.16219	943.858	FALSE	36
2022-09-15	09:57:44	0.211005	0.938592	1.50197	909.283	FALSE	36
2022-09-15	09:57:44	0.43925	1.95387	1.50197	945.812	FALSE	36
2022-09-15	09:57:44	0.306679	1.36417	1.50197	910.648	FALSE	36
2022-09-15	09:57:44	0.393702	1.75127	1.50197	947.563	FALSE	36
2022-09-15	09:57:45	0.340623	1.51516	1.64978	912.163	FALSE	36
2022-09-15	09:57:45	0.324237	1.44227	1.64978	949.006	FALSE	36
2022-09-15	09:57:45	0.447799	1.9919	1.64978	914.155	FALSE	36
2022-09-15	09:57:46	0.443219	1.97153	1.72863	950.977	FALSE	36
2022-09-15	09:57:46	0.487392	2.16802	1.72863	916.323	FALSE	36
2022-09-15	09:57:46	0.360064	1.60164	1.72863	952.579	FALSE	36
2022-09-15	09:57:46	0.263779	1.17334	1.72863	917.496	FALSE	36
2022-09-15	09:57:47	0.277163	1.23288	0.983585	953.812	FALSE	36
2022-09-15	09:57:47	0.230903	1.0271	0.983585	918.523	FALSE	36
2022-09-15	09:57:47	0.109275	0.486077	0.983585	954.298	FALSE	36
2022-09-15	09:57:47	0.267138	1.18828	0.983585	919.711	FALSE	36
2022-09-15	09:57:48	0.412227	1.83367	6.70666	956.131	FALSE	36
2022-09-15	09:57:48	1.4478	6.4401	6.70666	926.152	FALSE	36
2022-09-15	09:57:48	1.35676	6.03514	6.70666	962.167	FALSE	36
2022-09-15	09:57:48	2.81411	12.5177	6.70666	938.669	FALSE	36
2022-09-15	09:57:49	1.67721	7.46057	4.9508	969.627	FALSE	36
2022-09-15	09:57:49	1.25126	5.56585	4.9508	944.235	FALSE	36
2022-09-15	09:57:49	0.410496	1.82597	4.9508	971.453	FALSE	36
2022-09-15	09:57:50	0.133295	0.592923	-0.447875	944.828	FALSE	36
2022-09-15	09:57:50	-0.0825824	-0.367343	-0.447875	971.453	FALSE	36
2022-09-15	09:57:50	-0.234593	-1.04352	-0.447875	944.828	FALSE	36
2022-09-15	09:57:50	-0.218867	-0.973564	-0.447875	971.453	FALSE	36
2022-09-15	09:57:51	-0.455101	-2.02438	-2.72302	944.828	FALSE	36
2022-09-15	09:57:51	-0.633422	-2.81759	-2.72302	971.453	FALSE	36
2022-09-15	09:57:51	-0.801513	-3.56529	-2.72302	944.828	FALSE	36
2022-09-15	09:57:51	-0.558613	-2.48482	-2.72302	971.453	FALSE	36
2022-09-15	09:57:52	-0.625127	-2.78069	-2.82149	944.828	FALSE	36
2022-09-15	09:57:52	-0.582226	-2.58986	-2.82149	971.453	FALSE	36
2022-09-15	09:57:52	-0.824516	-3.66761	-2.82149	944.828	FALSE	36
2022-09-15	09:57:52	-0.50533	-2.24781	-2.82149	971.453	FALSE	36
2022-09-15	09:57:53	-0.370521	-1.64815	2.44049	944.828	FALSE	36
2022-09-15	09:57:53	0.338079	1.50384	2.44049	972.957	FALSE	36
2022-09-15	09:57:53	1.67838	7.46577	2.44049	952.294	FALSE	36
2022-09-15	09:57:54	1.76078	7.8323	9.61463	980.789	FALSE	36
2022-09-15	09:57:54	4.12139	18.3328	9.61463	970.627	1	37
2022-09-15	09:57:54	1.15116	5.12059	9.61463	985.91	FALSE	37
2022-09-15	09:57:54	1.61253	7.17286	9.61463	977.799	FALSE	37
2022-09-15	09:57:55	1.82276	8.108	4.82391	994.018	FALSE	37
2022-09-15	09:57:55	0.547341	2.43468	4.82391	980.234	FALSE	37
2022-09-15	09:57:55	0.667087	2.96734	4.82391	996.985	FALSE	37
2022-09-15	09:57:55	1.30067	5.78564	4.82391	986.02	FALSE	37
2022-09-15	09:57:56	0.368003	1.63695	2.7855	998.622	FALSE	37
2022-09-15	09:57:56	0.50444	2.24385	2.7855	988.264	FALSE	37
2022-09-15	09:57:56	1.21767	5.41644	2.7855	1004.04	FALSE	37
2022-09-15	09:57:56	0.41472	1.84476	2.7855	990.108	FALSE	37
2022-09-15	09:57:57	1.6509	7.34353	3.83644	1011.38	FALSE	37
2022-09-15	09:57:57	0.550598	2.44917	3.83644	992.558	FALSE	37
2022-09-15	09:57:57	0.385916	1.71663	3.83644	1013.1	FALSE	37
2022-09-15	09:57:58	2.1278	9.46488	5.91157	1002.02	FALSE	37
2022-09-15	09:57:58	0.296705	1.3198	5.91157	1014.42	FALSE	37
2022-09-15	09:57:58	0.31014	1.37956	5.91157	1003.4	FALSE	37
2022-09-15	09:57:58	2.58128	11.482	5.91157	1025.9	FALSE	37
2022-09-15	09:57:59	0.229478	1.02076	5.34639	1004.42	FALSE	37
2022-09-15	09:57:59	1.35101	6.00956	5.34639	1031.91	FALSE	37
2022-09-15	09:57:59	1.93029	8.58632	5.34639	1013.01	FALSE	37
2022-09-15	09:57:59	1.29691	5.76892	5.34639	1037.68	FALSE	37
2022-09-15	09:58:00	0.509275	2.26536	2.02801	1015.27	FALSE	37
2022-09-15	09:58:00	0.829834	3.69127	2.02801	1041.37	FALSE	37
2022-09-15	09:58:00	0.343219	1.52671	2.02801	1016.8	FALSE	37
2022-09-15	09:58:00	0.141336	0.628691	2.02801	1042	FALSE	37
2022-09-15	09:58:01	0.418639	1.86219	1.41352	1018.66	FALSE	37
2022-09-15	09:58:01	0.253244	1.12648	1.41352	1043.13	FALSE	37
2022-09-15	09:58:01	0.281438	1.25189	1.41352	1019.92	FALSE	37
2022-09-15	09:58:02	1.05508	4.69321	5.09733	1047.82	FALSE	37
2022-09-15	09:58:02	0.367341	1.63401	5.09733	1021.55	FALSE	37
2022-09-15	09:58:02	2.23915	9.96019	5.09733	1057.78	FALSE	37
2022-09-15	09:58:02	0.92215	4.10191	5.09733	1025.65	FALSE	37
2022-09-15	09:58:03	1.95365	8.69023	11.3988	1066.47	FALSE	37
2022-09-15	09:58:03	4.70602	20.9333	11.3988	1046.58	1	38
2022-09-15	09:58:03	1.44592	6.43174	11.3988	1072.9	FALSE	38
2022-09-15	09:58:03	2.14464	9.53979	11.3988	1056.12	FALSE	38
2022-09-15	09:58:04	3.22103	14.3278	8.09113	1087.23	1	39
2022-09-15	09:58:04	1.24276	5.52805	8.09113	1061.65	FALSE	39
2022-09-15	09:58:04	1.67487	7.45016	8.09113	1094.68	FALSE	39
2022-09-15	09:58:04	1.13721	5.05854	8.09113	1066.71	FALSE	39
2022-09-15	09:58:05	0.698842	3.10859	4.43301	1097.79	FALSE	39
2022-09-15	09:58:05	1.74276	7.75215	4.43301	1074.46	FALSE	39
2022-09-15	09:58:05	0.548155	2.4383	4.43301	1100.23	FALSE	39
2022-09-15	09:58:06	0.971718	4.3224	6.08249	1078.79	FALSE	39
2022-09-15	09:58:06	2.53614	11.2813	6.08249	1111.51	FALSE	39
2022-09-15	09:58:06	0.339809	1.51154	6.08249	1080.3	FALSE	39
2022-09-15	09:58:06	1.62195	7.21476	6.08249	1118.72	FALSE	39
2022-09-15	09:58:07	1.84413	8.20306	5.86398	1088.5	FALSE	39
2022-09-15	09:58:07	0.741947	3.30033	5.86398	1122.02	FALSE	39
2022-09-15	09:58:07	1.38347	6.15395	5.86398	1094.65	FALSE	39
2022-09-15	09:58:07	1.30358	5.79858	5.86398	1127.82	FALSE	39
2022-09-15	09:58:08	0.674262	2.99925	4.51436	1097.65	FALSE	39
2022-09-15	09:58:08	1.02795	4.57253	4.51436	1132.39	FALSE	39
2022-09-15	09:58:08	2.12032	9.43161	4.51436	1107.08	FALSE	39
2022-09-15	09:58:08	0.236959	1.05404	4.51436	1133.45	FALSE	39
2022-09-15	09:58:09	0.302812	1.34697	0.918522	1108.43	FALSE	39
2022-09-15	09:58:09	0.143982	0.640461	0.918522	1134.09	FALSE	39
2022-09-15	09:58:09	0.172685	0.768137	0.918522	1109.2	FALSE	39
2022-09-15	09:58:10	-0.0166283	-0.073966	1.30633	1134.09	FALSE	39
2022-09-15	09:58:10	0.365713	1.62676	1.30633	1110.83	FALSE	39
2022-09-15	09:58:10	0.3707	1.64895	1.30633	1135.74	FALSE	39
2022-09-15	09:58:10	0.454924	2.02359	1.30633	1112.85	FALSE	39
2022-09-15	09:58:11	0.484339	2.15444	1.97928	1137.89	FALSE	39
2022-09-15	09:58:11	0.402252	1.7893	1.97928	1114.64	FALSE	39
2022-09-15	09:58:11	0.519402	2.3104	1.97928	1140.2	FALSE	39
2022-09-15	09:58:11	0.373855	1.66298	1.97928	1116.3	FALSE	39
2022-09-15	09:58:12	0.444338	1.9765	1.9026	1142.18	FALSE	39
2022-09-15	09:58:12	0.41757	1.85743	1.9026	1118.16	FALSE	39
2022-09-15	09:58:12	0.427697	1.90248	1.9026	1144.08	FALSE	39
2022-09-15	09:58:12	0.421285	1.87396	1.9026	1120.03	FALSE	39
2022-09-15	09:58:13	0.419758	1.86717	1.84529	1145.95	FALSE	39
2022-09-15	09:58:13	0.417316	1.85631	1.84529	1121.89	FALSE	39
2022-09-15	09:58:13	0.407443	1.81239	1.84529	1147.76	FALSE	39
2022-09-15	09:58:14	0.380878	1.69422	1.65223	1123.58	FALSE	39
2022-09-15	09:58:14	0.42042	1.87011	1.65223	1149.63	FALSE	39
2022-09-15	09:58:14	0.339199	1.50882	1.65223	1125.09	FALSE	39
2022-09-15	09:58:14	0.345255	1.53576	1.65223	1151.17	FALSE	39
2022-09-15	09:58:15	0.346985	1.54346	6.37032	1126.64	FALSE	39
2022-09-15	09:58:15	0.752684	3.34809	6.37032	1154.51	FALSE	39
2022-09-15	09:58:15	2.37981	10.5859	6.37032	1137.22	FALSE	39
2022-09-15	09:58:15	2.24897	10.0039	6.37032	1164.52	FALSE	39
2022-09-15	09:58:16	1.61905	7.20186	4.61431	1144.42	FALSE	39
2022-09-15	09:58:16	1.67788	7.46355	4.61431	1171.98	FALSE	39
2022-09-15	09:58:16	0.473397	2.10576	4.61431	1146.53	FALSE	39
2022-09-15	09:58:16	0.379046	1.68607	4.61431	1173.67	FALSE	39
2022-09-15	09:58:17	0.438333	1.94979	0.682793	1148.48	FALSE	39
2022-09-15	09:58:17	0.116705	0.519127	0.682793	1174.19	FALSE	39
2022-09-15	09:58:17	0.00942772	0.0419364	0.682793	1148.52	FALSE	39
2022-09-15	09:58:17	0.0495295	0.220317	0.682793	1174.41	FALSE	39
2022-09-15	09:58:18	0.162099	0.721049	1.36266	1149.24	FALSE	39
2022-09-15	09:58:18	0.345356	1.53621	1.36266	1175.94	FALSE	39
2022-09-15	09:58:18	0.411565	1.83072	1.36266	1151.07	FALSE	39
2022-09-15	09:58:19	0.171005	0.760664	0.910184	1176.7	FALSE	39
2022-09-15	09:58:19	0.251616	1.11924	0.910184	1152.19	FALSE	39
2022-09-15	09:58:19	0.220878	0.98251	0.910184	1177.69	FALSE	39
2022-09-15	09:58:19	0.174975	0.778324	0.910184	1152.97	FALSE	39
2022-09-15	09:58:20	0.278181	1.2374	0.983698	1178.92	FALSE	39
2022-09-15	09:58:20	0.217214	0.966211	0.983698	1153.94	FALSE	39
2022-09-15	09:58:20	0.19126	0.850763	0.983698	1179.77	FALSE	39
2022-09-15	09:58:20	0.197926	0.880414	0.983698	1154.82	FALSE	39
2022-09-15	09:58:21	0.193499	0.860722	0.828973	1180.64	FALSE	39
2022-09-15	09:58:21	0.198028	0.880868	0.828973	1155.7	FALSE	39
2022-09-15	09:58:21	0.183219	0.814995	0.828973	1181.45	FALSE	39
2022-09-15	09:58:21	0.1707	0.759308	0.828973	1156.46	FALSE	39
2022-09-15	09:58:22	0.175382	0.780134	0.700526	1182.23	FALSE	39
2022-09-15	09:58:22	0.153397	0.682341	0.700526	1157.14	FALSE	39
2022-09-15	09:58:22	0.143677	0.639104	0.700526	1182.87	FALSE	39
2022-09-15	09:58:23	-0.0314883	-0.140066	-0.875038	1157.14	FALSE	39
2022-09-15	09:58:23	-0.264364	-1.17594	-0.875038	1182.87	FALSE	39
2022-09-15	09:58:23	-0.31159	-1.38601	-0.875038	1157.14	FALSE	39
2022-09-15	09:58:23	-0.179427	-0.798127	-0.875038	1182.87	FALSE	39
2022-09-15	09:58:24	-0.039987	-0.17787	0.560326	1157.14	FALSE	39
2022-09-15	09:58:24	0.099962	0.444651	0.560326	1183.31	FALSE	39
2022-09-15	09:58:24	0.206679	0.91935	0.560326	1158.06	FALSE	39
2022-09-15	09:58:24	0.237214	1.05518	0.560326	1184.37	FALSE	39
2022-09-15	09:58:25	0.150038	0.667399	1.40922	1158.73	FALSE	39
2022-09-15	09:58:25	0.236603	1.05246	1.40922	1185.42	FALSE	39
2022-09-15	09:58:25	0.518537	2.30656	1.40922	1161.03	FALSE	39
2022-09-15	09:58:25	0.362048	1.61046	1.40922	1187.03	FALSE	39
2022-09-15	09:58:26	0.291819	1.29807	0.71773	1162.33	FALSE	39
2022-09-15	09:58:26	0.138283	0.61511	0.71773	1187.65	FALSE	39
2022-09-15	09:58:26	0.053957	0.240012	0.71773	1162.57	FALSE	39
2022-09-15	09:58:27	-0.0732694	-0.325917	-1.17996	1187.65	FALSE	39
2022-09-15	09:58:27	-0.252506	-1.1232	-1.17996	1162.57	FALSE	39
2022-09-15	09:58:27	-0.37159	-1.65291	-1.17996	1187.65	FALSE	39
2022-09-15	09:58:27	-0.363702	-1.61782	-1.17996	1162.57	FALSE	39
2022-09-15	09:58:28	-0.331132	-1.47294	-0.378662	1187.65	FALSE	39
2022-09-15	09:58:28	-0.390827	-1.73848	-0.378662	1162.57	FALSE	39
2022-09-15	09:58:28	-0.0890964	-0.396319	-0.378662	1187.65	FALSE	39
2022-09-15	09:58:28	0.470547	2.09309	-0.378662	1164.66	FALSE	39
2022-09-15	09:58:29	0.345713	1.5378	7.98837	1189.19	FALSE	39
2022-09-15	09:58:29	2.99696	13.3311	7.98837	1178	FALSE	39
2022-09-15	09:58:29	2.2479	9.99911	7.98837	1199.18	FALSE	39
2022-09-15	09:58:29	1.59289	7.08549	7.98837	1185.08	FALSE	39
2022-09-15	09:58:30	2.48836	11.0687	4.41845	1210.25	FALSE	39
2022-09-15	09:58:30	0.28841	1.28291	4.41845	1186.36	FALSE	39
2022-09-15	09:58:30	0.203168	0.903732	4.41845	1211.16	FALSE	39
2022-09-15	09:58:31	0.27528	1.2245	0.57057	1187.59	FALSE	39
2022-09-15	09:58:31	0.0251529	0.111885	0.57057	1211.27	FALSE	39
2022-09-15	09:58:31	0.166883	0.742329	0.57057	1188.33	FALSE	39
2022-09-15	09:58:31	0.0457636	0.203566	0.57057	1211.47	FALSE	39
2022-09-15	09:58:32	0.247494	1.1009	1.58919	1189.43	FALSE	39
2022-09-15	09:58:32	0.142557	0.634122	1.58919	1212.11	FALSE	39
2022-09-15	09:58:32	0.306476	1.36327	1.58919	1190.8	FALSE	39
2022-09-15	09:58:32	0.732532	3.25845	1.58919	1215.36	FALSE	39
2022-09-15	09:58:33	0.405967	1.80582	1.33231	1192.6	FALSE	39
2022-09-15	09:58:33	0.442354	1.96768	1.33231	1217.33	FALSE	39
2022-09-15	09:58:33	0.129784	0.577305	1.33231	1193.18	FALSE	39
2022-09-15	09:58:33	0.219962	0.978435	1.33231	1218.31	FALSE	39
2022-09-15	09:58:34	0.107239	0.477021	0.203112	1193.66	FALSE	39
2022-09-15	09:58:34	0.145662	0.647934	0.203112	1218.96	FALSE	39
2022-09-15	09:58:34	-0.115916	-0.515618	0.203112	1193.66	FALSE	39
2022-09-15	09:58:35	-0.0842618	-0.374813	-0.773058	1218.96	FALSE	39
2022-09-15	09:58:35	-0.216272	-0.962021	-0.773058	1193.66	FALSE	39
2022-09-15	09:58:35	-0.233524	-1.03876	-0.773058	1218.96	FALSE	39
2022-09-15	09:58:35	-0.161107	-0.716636	-0.773058	1193.66	FALSE	39
2022-09-15	09:58:36	-0.213727	-0.9507	-0.967849	1218.96	FALSE	39
2022-09-15	09:58:36	-0.203549	-0.905427	-0.967849	1193.66	FALSE	39
2022-09-15	09:58:36	-0.365279	-1.62483	-0.967849	1218.96	FALSE	39
2022-09-15	09:58:36	-0.0877733	-0.390433	-0.967849	1193.66	FALSE	39
2022-09-15	09:58:37	-0.0866537	-0.385453	0.648442	1218.96	FALSE	39
2022-09-15	09:58:37	0.135026	0.600623	0.648442	1194.26	FALSE	39
2022-09-15	09:58:37	0.262201	1.16632	0.648442	1220.13	FALSE	39
2022-09-15	09:58:37	0.272532	1.21228	0.648442	1195.47	FALSE	39
2022-09-15	09:58:38	0.170089	0.75659	1.00432	1220.88	FALSE	39
2022-09-15	09:58:38	0.199504	0.887434	1.00432	1196.36	FALSE	39
2022-09-15	09:58:38	0.307748	1.36892	1.00432	1222.25	FALSE	39
2022-09-15	09:58:39	0.261743	1.16429	1.1155	1197.52	FALSE	39
2022-09-15	09:58:39	0.258842	1.15138	1.1155	1223.4	FALSE	39
2022-09-15	09:58:39	0.286476	1.2743	1.1155	1198.79	FALSE	39
2022-09-15	09:58:39	0.196043	0.872038	1.1155	1224.27	FALSE	39
2022-09-15	09:58:40	0.217875	0.969152	0.886244	1199.76	FALSE	39
2022-09-15	09:58:40	0.172023	0.765193	0.886244	1225.04	FALSE	39
2022-09-15	09:58:40	0.206679	0.91935	0.886244	1200.68	FALSE	39
2022-09-15	09:58:40	0.200369	0.891281	0.886244	1225.93	FALSE	39
2022-09-15	09:58:41	0.206171	0.91709	0.983189	1201.6	FALSE	39
2022-09-15	09:58:41	0.220369	0.980245	0.983189	1226.91	FALSE	39
2022-09-15	09:58:41	0.231005	1.02756	0.983189	1202.63	FALSE	39
2022-09-15	09:58:41	0.226578	1.00786	0.983189	1227.92	FALSE	39
2022-09-15	09:58:42	0.229275	1.01986	1.03239	1203.65	FALSE	39
2022-09-15	09:58:42	0.236247	1.05087	1.03239	1228.97	FALSE	39
2022-09-15	09:58:42	0.230751	1.02643	1.03239	1204.67	FALSE	39
2022-09-15	09:58:43	0.24383	1.0846	1.1644	1230.05	FALSE	39
2022-09-15	09:58:43	0.273804	1.21793	1.1644	1205.89	FALSE	39
2022-09-15	09:58:43	0.270293	1.20232	1.1644	1231.26	FALSE	39
2022-09-15	09:58:43	0.259148	1.15274	1.1644	1207.04	FALSE	39
2022-09-15	09:58:44	0.296196	1.31754	1.23044	1232.57	FALSE	39
2022-09-15	09:58:44	0.270445	1.20299	1.23044	1208.25	FALSE	39
2022-09-15	09:58:44	0.233855	1.04023	1.23044	1233.61	FALSE	39
2022-09-15	09:58:44	0.305967	1.361	1.23044	1209.61	FALSE	39
2022-09-15	09:58:45	0.400267	1.78047	1.71601	1235.39	FALSE	39
2022-09-15	09:58:45	0.365763	1.62699	1.71601	1211.24	FALSE	39
2022-09-15	09:58:45	0.418486	1.86151	1.71601	1237.26	FALSE	39
2022-09-15	09:58:45	0.358588	1.59507	1.71601	1212.83	FALSE	39
2022-09-15	09:58:46	0.381336	1.69626	1.60563	1238.95	FALSE	39
2022-09-15	09:58:46	0.322252	1.43344	1.60563	1214.26	FALSE	39
2022-09-15	09:58:46	0.3793	1.6872	1.60563	1240.64	FALSE	39
2022-09-15	09:58:47	0.448155	1.99348	1.76966	1216.26	FALSE	39
2022-09-15	09:58:47	0.493906	2.19699	1.76966	1242.84	FALSE	39
2022-09-15	09:58:47	0.36327	1.6159	1.76966	1217.87	FALSE	39
2022-09-15	09:58:47	0.286018	1.27227	1.76966	1244.11	FALSE	39
2022-09-15	09:58:48	0.318588	1.41714	1.36695	1219.29	FALSE	39
2022-09-15	09:58:48	0.288613	1.28381	1.36695	1245.39	FALSE	39
2022-09-15	09:58:48	0.347545	1.54595	1.36695	1220.84	FALSE	39
2022-09-15	09:58:48	0.274466	1.22088	1.36695	1246.61	FALSE	39
2022-09-15	09:58:49	0.289529	1.28788	1.07968	1222.12	FALSE	39
2022-09-15	09:58:49	0.301082	1.33927	1.07968	1247.95	FALSE	39
2022-09-15	09:58:49	0.25299	1.12535	1.07968	1223.25	FALSE	39
2022-09-15	09:58:49	0.12729	0.566211	1.07968	1248.52	FALSE	39
2022-09-15	09:58:50	0.000165643	0.000736813	0.406394	1223.25	FALSE	39
2022-09-15	09:58:50	0.153499	0.682794	0.406394	1249.2	FALSE	39
2022-09-15	09:58:50	0.12042	0.535652	0.406394	1223.79	FALSE	39
2022-09-15	09:58:51	0.250598	1.11471	1.0876	1250.32	FALSE	39
2022-09-15	09:58:51	0.246679	1.09728	1.0876	1224.88	FALSE	39
2022-09-15	09:58:51	0.256298	1.14006	1.0876	1251.46	FALSE	39
2022-09-15	09:58:51	0.22444	0.998354	1.0876	1225.88	FALSE	39
2022-09-15	09:58:52	0.247443	1.10068	1.10107	1252.56	FALSE	39
2022-09-15	09:58:52	0.244135	1.08596	1.10107	1226.97	FALSE	39
2022-09-15	09:58:52	0.250649	1.11494	1.10107	1253.67	FALSE	39
2022-09-15	09:58:52	0.247901	1.10271	1.10107	1228.07	FALSE	39
2022-09-15	09:58:53	0.258944	1.15183	1.18387	1254.82	FALSE	39
2022-09-15	09:58:53	0.269224	1.19756	1.18387	1229.27	FALSE	39
2022-09-15	09:58:53	0.271311	1.20685	1.18387	1256.03	FALSE	39
2022-09-15	09:58:53	0.265102	1.17923	1.18387	1230.45	FALSE	39
2022-09-15	09:58:54	0.271412	1.20729	1.10128	1257.24	FALSE	39
2022-09-15	09:58:54	0.221387	0.984774	1.10128	1231.43	FALSE	39
2022-09-15	09:58:54	0.249937	1.11177	1.10128	1258.35	FALSE	39
2022-09-15	09:58:55	0.308054	1.37029	-0.060779	1232.8	FALSE	39
2022-09-15	09:58:55	0.0380791	0.169383	-0.060779	1258.52	FALSE	39
2022-09-15	09:58:55	-0.105483	-0.469209	-0.060779	1232.8	FALSE	39
2022-09-15	09:58:55	-0.295305	-1.31358	-0.060779	1258.52	FALSE	39
2022-09-15	09:58:56	-0.423549	-1.88403	-2.56145	1232.8	FALSE	39
2022-09-15	09:58:56	-0.562684	-2.50293	-2.56145	1258.52	FALSE	39
2022-09-15	09:58:56	-0.573626	-2.5516	-2.56145	1232.8	FALSE	39
2022-09-15	09:58:56	-0.743498	-3.30723	-2.56145	1258.52	FALSE	39
2022-09-15	09:58:57	-0.75159	-3.34322	-3.33745	1232.8	FALSE	39
2022-09-15	09:58:57	-0.761462	-3.38714	-3.33745	1258.52	FALSE	39
2022-09-15	09:58:57	-0.693269	-3.0838	-3.33745	1232.8	FALSE	39
2022-09-15	09:58:57	-0.794847	-3.53564	-3.33745	1258.52	FALSE	39
2022-09-15	09:58:58	-0.662938	-2.94888	-1.92101	1232.8	FALSE	39
2022-09-15	09:58:58	-0.421463	-1.87475	-1.92101	1258.52	FALSE	39
2022-09-15	09:58:58	-0.211183	-0.939384	-1.92101	1232.8	FALSE	39
2022-09-15	09:58:59	-0.029758	-0.13237	0.335483	1258.52	FALSE	39
2022-09-15	09:58:59	0.0426592	0.189757	0.335483	1232.99	FALSE	39
2022-09-15	09:58:59	-0.00268423	-0.01194	0.335483	1258.52	FALSE	39
2022-09-15	09:58:59	0.291463	1.29649	0.335483	1234.29	FALSE	39
2022-09-15	09:59:00	0.056247	0.250198	0.623145	1258.77	FALSE	39
2022-09-15	09:59:00	0.148919	0.662421	0.623145	1234.95	FALSE	39
2022-09-15	09:59:00	0.0919213	0.408884	0.623145	1259.18	FALSE	39
2022-09-15	09:59:00	0.26327	1.17108	0.623145	1236.12	FALSE	39
2022-09-15	09:59:01	-0.0894527	-0.397904	-0.309165	1259.18	FALSE	39
2022-09-15	09:59:01	0.0436262	0.194058	-0.309165	1236.32	FALSE	39
2022-09-15	09:59:01	-0.251946	-1.12071	-0.309165	1259.18	FALSE	39
2022-09-15	09:59:01	0.0197585	0.0878898	-0.309165	1236.4	FALSE	39
2022-09-15	09:59:02	-0.0174934	-0.0778141	0.174137	1259.18	FALSE	39
2022-09-15	09:59:02	0.26556	1.18126	0.174137	1237.59	FALSE	39
2022-09-15	09:59:02	0.0438806	0.19519	0.174137	1259.37	FALSE	39
2022-09-15	09:59:02	-0.135356	-0.602091	0.174137	1237.59	FALSE	39
2022-09-15	09:59:03	-0.0304196	-0.135312	1.64163	1259.37	FALSE	39
2022-09-15	09:59:03	0.760267	3.38182	1.64163	1240.97	FALSE	39
2022-09-15	09:59:03	0.377316	1.67838	1.64163	1261.05	FALSE	39
2022-09-15	09:59:04	0.444542	1.97741	2.00916	1242.94	FALSE	39
2022-09-15	09:59:04	0.463015	2.05958	2.00916	1263.11	FALSE	39
2022-09-15	09:59:04	0.447137	1.98895	2.00916	1244.93	FALSE	39
2022-09-15	09:59:04	0.452023	2.01069	2.00916	1265.12	FALSE	39
2022-09-15	09:59:05	0.485763	2.16077	2.13446	1247.09	FALSE	39
2022-09-15	09:59:05	0.497265	2.21193	2.13446	1267.33	FALSE	39
2022-09-15	09:59:05	0.483117	2.149	2.13446	1249.24	FALSE	39
2022-09-15	09:59:05	0.453244	2.01612	2.13446	1269.35	FALSE	39
2022-09-15	09:59:06	0.424949	1.89026	2.14561	1251.13	FALSE	39
2022-09-15	09:59:06	0.412176	1.83344	2.14561	1271.18	FALSE	39
2022-09-15	09:59:06	0.552532	2.45777	2.14561	1253.59	FALSE	39
2022-09-15	09:59:06	0.539758	2.40095	2.14561	1273.58	FALSE	39
2022-09-15	09:59:07	0.911717	4.0555	8.27039	1257.65	FALSE	39
2022-09-15	09:59:07	2.62357	11.6702	8.27039	1285.25	FALSE	39
2022-09-15	09:59:07	2.04251	9.08549	8.27039	1266.73	FALSE	39
2022-09-15	09:59:08	5.78286	25.7233	16.7209	1310.98	1	40
2022-09-15	09:59:08	4.9252	21.9083	16.7209	1288.64	1	41
2022-09-15	09:59:08	2.24128	9.96966	16.7209	1320.95	FALSE	41
2022-09-15	09:59:08	2.08673	9.28219	16.7209	1297.92	FALSE	41
2022-09-15	09:59:09	1.45391	6.46728	7.67909	1327.42	FALSE	41
2022-09-15	09:59:09	1.82663	8.12522	7.67909	1306.05	FALSE	41
2022-09-15	09:59:09	2.24139	9.97015	7.67909	1337.39	FALSE	41
2022-09-15	09:59:09	1.38342	6.15373	7.67909	1312.2	FALSE	41
2022-09-15	09:59:10	-0.0513356	-0.228351	-0.787092	1337.39	FALSE	41
2022-09-15	09:59:10	-0.326348	-1.45166	-0.787092	1312.2	FALSE	41
2022-09-15	09:59:10	0.0057127	0.0254112	-0.787092	1337.41	FALSE	41
2022-09-15	09:59:10	-0.335814	-1.49377	-0.787092	1312.2	FALSE	41
2022-09-15	09:59:11	-0.310369	-1.38058	-1.93346	1337.41	FALSE	41
2022-09-15	09:59:11	-0.4293	-1.90961	-1.93346	1312.2	FALSE	41
2022-09-15	09:59:11	-0.564312	-2.51017	-1.93346	1337.41	FALSE	41
2022-09-15	09:59:12	-0.440292	-1.95851	-1.09332	1312.2	FALSE	41
2022-09-15	09:59:12	-0.326755	-1.45347	-1.09332	1337.41	FALSE	41
2022-09-15	09:59:12	-0.197697	-0.879396	-1.09332	1312.2	FALSE	41
2022-09-15	09:59:12	-0.0184094	-0.0818887	-1.09332	1337.41	FALSE	41
2022-09-15	09:59:13	0.15355	0.683021	3.63926	1312.88	FALSE	41
2022-09-15	09:59:13	0.767646	3.41464	3.63926	1340.83	FALSE	41
2022-09-15	09:59:13	1.92413	8.55892	3.63926	1321.44	FALSE	41
2022-09-15	09:59:13	0.427239	1.90044	3.63926	1342.73	FALSE	41
2022-09-15	09:59:14	0.85701	3.81215	3.20819	1325.26	FALSE	41
2022-09-15	09:59:14	1.09034	4.85005	3.20819	1347.58	FALSE	41
2022-09-15	09:59:14	0.623524	2.77356	3.20819	1328.03	FALSE	41
2022-09-15	09:59:14	0.314059	1.397	3.20819	1348.97	FALSE	41
2022-09-15	09:59:15	0.367545	1.63491	2.03589	1329.66	FALSE	41
2022-09-15	09:59:15	0.459962	2.046	2.03589	1351.02	FALSE	41
2022-09-15	09:59:15	0.54556	2.42676	2.03589	1332.09	FALSE	41
2022-09-15	09:59:16	0.678537	3.01827	2.53745	1354.04	FALSE	41
2022-09-15	09:59:16	0.592379	2.63502	2.53745	1334.73	FALSE	41
2022-09-15	09:59:16	0.52556	2.3378	2.53745	1356.37	FALSE	41
2022-09-15	09:59:16	0.485305	2.15873	2.53745	1336.88	FALSE	41
2022-09-15	09:59:17	0.810903	3.60706	3.33983	1359.98	FALSE	41
2022-09-15	09:59:17	0.998079	4.43966	3.33983	1341.32	FALSE	41
2022-09-15	09:59:17	0.622405	2.76858	3.33983	1362.75	FALSE	41
2022-09-15	09:59:17	0.571921	2.54402	3.33983	1343.87	FALSE	41
2022-09-15	09:59:18	0.490903	2.18363	2.73055	1364.93	FALSE	41
2022-09-15	09:59:18	0.601183	2.67418	2.73055	1346.54	FALSE	41
2022-09-15	09:59:18	0.693906	3.08663	2.73055	1368.02	FALSE	41
2022-09-15	09:59:18	0.669427	2.97775	2.73055	1349.52	FALSE	41
2022-09-15	09:59:19	0.910445	4.04984	4.41401	1372.07	FALSE	41
2022-09-15	09:59:19	1.16419	5.17855	4.41401	1354.7	FALSE	41
2022-09-15	09:59:19	0.902303	4.01362	4.41401	1376.08	FALSE	41
2022-09-15	09:59:20	0.94383	4.19834	3.77735	1358.9	FALSE	41
2022-09-15	09:59:20	0.612837	2.72602	3.77735	1378.81	FALSE	41
2022-09-15	09:59:20	0.896654	3.9885	3.77735	1362.89	FALSE	41
2022-09-15	09:59:20	0.943423	4.19653	3.77735	1383.01	FALSE	41
2022-09-15	09:59:21	1.33197	5.92487	9.58122	1368.81	FALSE	41
2022-09-15	09:59:21	1.57492	7.00556	9.58122	1390.01	FALSE	41
2022-09-15	09:59:21	2.41538	10.7441	9.58122	1379.55	FALSE	41
2022-09-15	09:59:21	3.29355	14.6504	9.58122	1404.66	1	42
2022-09-15	09:59:22	3.61014	16.0586	12.3228	1395.61	1	43
2022-09-15	09:59:22	3.40658	15.1531	12.3228	1419.82	1	44
2022-09-15	09:59:22	1.77609	7.9004	12.3228	1403.51	FALSE	44
2022-09-15	09:59:22	2.28831	10.1789	12.3228	1429.99	FALSE	44
2022-09-15	09:59:23	2.99233	13.3105	12.1994	1416.82	FALSE	44
2022-09-15	09:59:23	3.24714	14.4439	12.1994	1444.44	1	45
2022-09-15	09:59:23	1.98815	8.84369	12.1994	1425.67	FALSE	45
2022-09-15	09:59:24	1.0022	4.45799	3.43168	1448.9	FALSE	45
2022-09-15	09:59:24	0.571514	2.54221	3.43168	1428.21	FALSE	45
2022-09-15	09:59:24	0.652379	2.90191	3.43168	1451.8	FALSE	45
2022-09-15	09:59:24	0.859809	3.8246	3.43168	1432.03	FALSE	45
2022-09-15	09:59:25	1.58892	7.06783	9.86205	1458.87	FALSE	45
2022-09-15	09:59:25	3.28627	14.618	9.86205	1446.65	1	46
2022-09-15	09:59:25	2.6478	11.7779	9.86205	1470.64	FALSE	46
2022-09-15	09:59:25	1.34536	5.98443	9.86205	1452.64	FALSE	46
2022-09-15	09:59:26	2.62602	11.6811	21.3171	1482.33	FALSE	46
2022-09-15	09:59:26	5.78011	25.7111	21.3171	1478.35	1	47
2022-09-15	09:59:26	3.82195	17.0008	21.3171	1499.33	1	48
2022-09-15	09:59:26	6.94113	30.8755	21.3171	1509.22	1	49
2022-09-15	09:59:27	6.73253	29.9476	22.3539	1529.27	1	50
2022-09-15	09:59:27	5.76276	25.6339	22.3539	1534.86	1	51
2022-09-15	09:59:27	2.58088	11.4803	22.3539	1540.75	FALSE	51
2022-09-15	09:59:28	1.74551	7.76438	2.41063	1542.62	FALSE	51
2022-09-15	09:59:28	0.555891	2.47271	2.41063	1543.23	FALSE	51
2022-09-15	09:59:28	0.134568	0.598585	2.41063	1543.22	FALSE	51
2022-09-15	09:59:28	-0.268231	-1.19315	2.41063	1543.23	FALSE	51
2022-09-15	09:59:29	-0.6379	-2.83751	-3.36886	1543.22	FALSE	51
2022-09-15	09:59:29	-0.769503	-3.4229	-3.36886	1543.23	FALSE	51
2022-09-15	09:59:29	-0.891793	-3.96687	-3.36886	1543.22	FALSE	51
2022-09-15	09:59:29	-0.730216	-3.24815	-3.36886	1543.23	FALSE	51
2022-09-15	09:59:30	-0.433778	-1.92953	-1.34459	1543.22	FALSE	51
2022-09-15	09:59:30	-0.431946	-1.92138	-1.34459	1543.23	FALSE	51
2022-09-15	09:59:30	-0.211437	-0.940514	-1.34459	1543.22	FALSE	51
2022-09-15	09:59:30	-0.131946	-0.586922	-1.34459	1543.23	FALSE	51
2022-09-15	09:59:31	-0.0552033	-0.245555	0.0363526	1543.22	FALSE	51
2022-09-15	09:59:31	0.0466287	0.207414	0.0363526	1543.43	FALSE	51
2022-09-15	09:59:31	0.0330919	0.147199	0.0363526	1543.37	FALSE	51
2022-09-15	09:59:32	0.107901	0.479965	1.59892	1543.91	FALSE	51
2022-09-15	09:59:32	0.278792	1.24012	1.59892	1544.61	FALSE	51
2022-09-15	09:59:32	0.328257	1.46015	1.59892	1545.37	FALSE	51
2022-09-15	09:59:32	0.722862	3.21543	1.59892	1547.82	FALSE	51
2022-09-15	09:59:33	1.70958	7.60455	9.86312	1552.98	FALSE	51
2022-09-15	09:59:33	2.59289	11.5337	9.86312	1559.36	FALSE	51
2022-09-15	09:59:33	2.90586	12.9258	9.86312	1565.9	FALSE	51
2022-09-15	09:59:33	1.66098	7.38837	9.86312	1566.75	FALSE	51
2022-09-15	09:59:34	0.725763	3.22834	3.43162	1569.13	FALSE	51
2022-09-15	09:59:34	0.358944	1.59665	3.43162	1568.34	FALSE	51
2022-09-15	09:59:34	1.50006	6.67257	3.43162	1575.81	FALSE	51
2022-09-15	09:59:34	0.501081	2.22891	3.43162	1570.57	FALSE	51
2022-09-15	09:59:35	0.566069	2.51799	4.30813	1578.32	FALSE	51
2022-09-15	09:59:35	0.59243	2.63525	4.30813	1573.21	FALSE	51
2022-09-15	09:59:35	0.655585	2.91617	4.30813	1581.24	FALSE	51
2022-09-15	09:59:35	2.05996	9.16311	4.30813	1582.37	FALSE	51
2022-09-15	09:59:36	2.99869	13.3388	12.4254	1594.58	FALSE	51
2022-09-15	09:59:36	3.30281	14.6916	12.4254	1597.06	1	52
2022-09-15	09:59:36	2.07859	9.24598	12.4254	1603.82	FALSE	52
2022-09-15	09:59:37	1.31268	5.83906	3.73111	1602.9	FALSE	52
2022-09-15	09:59:37	0.8907	3.96201	3.73111	1607.79	FALSE	52
2022-09-15	09:59:37	0.609987	2.71334	3.73111	1605.61	FALSE	52
2022-09-15	09:59:37	0.541794	2.41001	3.73111	1610.2	FALSE	52
2022-09-15	09:59:38	0.292685	1.30192	1.37311	1606.92	FALSE	52
2022-09-15	09:59:38	0.327341	1.45608	1.37311	1611.65	FALSE	52
2022-09-15	09:59:38	0.283677	1.26185	1.37311	1608.18	FALSE	52
2022-09-15	09:59:38	0.331056	1.4726	1.37311	1613.13	FALSE	52
2022-09-15	09:59:39	0.263575	1.17243	0.836216	1609.35	FALSE	52
2022-09-15	09:59:39	0.261081	1.16134	0.836216	1614.29	FALSE	52
2022-09-15	09:59:39	0.209122	0.930216	0.836216	1610.28	FALSE	52
2022-09-15	09:59:39	0.0181809	0.0808723	0.836216	1614.37	FALSE	52
2022-09-15	09:59:40	-0.0219209	-0.0975085	2.99427	1610.28	FALSE	52
2022-09-15	09:59:40	0.194975	0.867288	2.99427	1615.23	FALSE	52
2022-09-15	09:59:40	1.84637	8.21302	2.99427	1618.49	FALSE	52
2022-09-15	09:59:41	1.51375	6.73346	6.50982	1621.97	FALSE	52
2022-09-15	09:59:41	1.89767	8.44122	6.50982	1626.93	FALSE	52
2022-09-15	09:59:41	1.44093	6.40954	6.50982	1628.38	FALSE	52
2022-09-15	09:59:41	1.00154	4.45505	6.50982	1631.39	FALSE	52
2022-09-15	09:59:42	0.953499	4.24135	4.17254	1632.62	FALSE	52
2022-09-15	09:59:42	0.916501	4.07678	4.17254	1635.47	FALSE	52
2022-09-15	09:59:42	0.895585	3.98374	4.17254	1636.6	FALSE	52
2022-09-15	09:59:42	0.986527	4.38827	4.17254	1639.85	FALSE	52
2022-09-15	09:59:43	0.993601	4.41974	4.24379	1641.02	FALSE	52
2022-09-15	09:59:43	1.00933	4.4897	4.24379	1644.34	FALSE	52
2022-09-15	09:59:43	0.952328	4.23615	4.24379	1645.26	FALSE	52
2022-09-15	09:59:43	0.860929	3.82958	4.24379	1648.17	FALSE	52
2022-09-15	09:59:44	0.931921	4.14537	3.00076	1649.4	FALSE	52
2022-09-15	09:59:44	0.563168	2.50508	3.00076	1650.68	FALSE	52
2022-09-15	09:59:44	0.528715	2.35183	3.00076	1651.76	FALSE	52
2022-09-15	09:59:45	0.250394	1.1138	0.63735	1651.79	FALSE	52
2022-09-15	09:59:45	0.0942623	0.419298	0.63735	1652.18	FALSE	52
2022-09-15	09:59:45	0.126069	0.56078	0.63735	1652.35	FALSE	52
2022-09-15	09:59:45	0.102405	0.455518	0.63735	1652.63	FALSE	52
2022-09-15	09:59:46	-0.892251	-3.96891	-0.37951	1652.35	FALSE	52
2022-09-15	09:59:46	0.682252	3.03479	-0.37951	1655.67	FALSE	52
2022-09-15	09:59:46	-0.108638	-0.483244	-0.37951	1652.35	FALSE	52
2022-09-15	09:59:46	-0.0226333	-0.100677	-0.37951	1655.67	FALSE	52
2022-09-15	09:59:47	-0.0257376	-0.114486	-0.683584	1652.35	FALSE	52
2022-09-15	09:59:47	-0.139936	-0.622463	-0.683584	1655.67	FALSE	52
2022-09-15	09:59:47	-0.163346	-0.726596	-0.683584	1652.35	FALSE	52
2022-09-15	09:59:47	-0.285687	-1.27079	-0.683584	1655.67	FALSE	52
2022-09-15	09:59:48	-0.43846	-1.95036	-2.08565	1652.35	FALSE	52
2022-09-15	09:59:48	-0.482786	-2.14753	-2.08565	1655.67	FALSE	52
2022-09-15	09:59:48	-0.485381	-2.15907	-2.08565	1652.35	FALSE	52
2022-09-15	09:59:49	-0.42075	-1.87158	-1.03469	1655.67	FALSE	52
2022-09-15	09:59:49	-0.414847	-1.84532	-1.03469	1652.35	FALSE	52
2022-09-15	09:59:49	-0.152964	-0.680414	-1.03469	1655.67	FALSE	52
2022-09-15	09:59:49	0.05813	0.258574	-1.03469	1652.61	FALSE	52
2022-09-15	09:59:50	0.262405	1.16723	1.39077	1656.83	FALSE	52
2022-09-15	09:59:50	0.330852	1.4717	1.39077	1654.08	FALSE	52
2022-09-15	09:59:50	0.306629	1.36395	1.39077	1658.2	FALSE	52
2022-09-15	09:59:50	0.350751	1.56021	1.39077	1655.64	FALSE	52
2022-09-15	09:59:51	0.356654	1.58647	1.00571	1659.78	FALSE	52
2022-09-15	09:59:51	0.28042	1.24736	1.00571	1656.89	FALSE	52
2022-09-15	09:59:51	0.125814	0.559646	1.00571	1660.34	FALSE	52
2022-09-15	09:59:51	0.141489	0.629371	1.00571	1657.52	FALSE	52
2022-09-15	09:59:52	0.0264252	0.117545	-0.170852	1660.46	FALSE	52
2022-09-15	09:59:52	-0.0352542	-0.156818	-0.170852	1657.52	FALSE	52
2022-09-15	09:59:52	-0.106399	-0.473284	-0.170852	1660.46	FALSE	52
2022-09-15	09:59:53	-0.11617	-0.516747	-0.0348032	1657.52	FALSE	52
2022-09-15	09:59:53	-0.0475697	-0.2116	-0.0348032	1660.46	FALSE	52
2022-09-15	09:59:53	0.0319723	0.142219	-0.0348032	1657.66	FALSE	52
2022-09-15	09:59:53	0.100471	0.446915	-0.0348032	1660.91	FALSE	52
2022-09-15	09:59:54	0.158283	0.704074	0.730615	1658.37	FALSE	52
2022-09-15	09:59:54	0.245916	1.09388	0.730615	1662	FALSE	52
2022-09-15	09:59:54	0.0983844	0.437633	0.730615	1658.8	FALSE	52
2022-09-15	09:59:54	0.154415	0.686869	0.730615	1662.69	FALSE	52
2022-09-15	09:59:55	0.064186	0.285512	0.778832	1659.09	FALSE	52
2022-09-15	09:59:55	0.188105	0.836729	0.778832	1663.52	FALSE	52
2022-09-15	09:59:55	0.268155	1.19281	0.778832	1660.28	FALSE	52
2022-09-15	09:59:55	0.179911	0.80028	0.778832	1664.33	FALSE	52
2022-09-15	09:59:56	0.354262	1.57583	1.42492	1661.86	FALSE	52
2022-09-15	09:59:56	0.21411	0.952404	1.42492	1665.28	FALSE	52
2022-09-15	09:59:56	0.392634	1.74651	1.42492	1663.6	FALSE	52
2022-09-15	09:59:57	0.280674	1.24849	1.58715	1666.53	FALSE	52
2022-09-15	09:59:57	0.436094	1.93983	1.58715	1665.54	FALSE	52
2022-09-15	09:59:57	0.259708	1.15523	1.58715	1667.68	FALSE	52
2022-09-15	09:59:57	0.450751	2.00503	1.58715	1667.55	FALSE	52
2022-09-15	09:59:58	0.218639	0.97255	1.01403	1668.65	FALSE	52
2022-09-15	09:59:58	0.2907	1.29309	1.01403	1668.84	FALSE	52
2022-09-15	09:59:58	0.178435	0.793715	1.01403	1669.45	FALSE	52
2022-09-15	09:59:58	0.224084	0.99677	1.01403	1669.84	FALSE	52
2022-09-15	09:59:59	-0.0425824	-0.189415	0.251443	1669.45	FALSE	52
2022-09-15	09:59:59	0.0475956	0.211715	0.251443	1670.05	FALSE	52
2022-09-15	09:59:59	0.0151783	0.0675161	0.251443	1669.52	FALSE	52
2022-09-15	09:59:59	0.205916	0.915956	0.251443	1670.97	FALSE	52
2022-09-15	10:00:00	-0.104414	-0.464454	1.0837	1669.52	FALSE	52
2022-09-15	10:00:00	-0.053473	-0.237859	1.0837	1670.97	FALSE	52
2022-09-15	10:00:00	0.888766	3.95341	1.0837	1673.47	FALSE	52
2022-09-15	10:00:01	0.305204	1.35761	5.32097	1672.32	FALSE	52
2022-09-15	10:00:01	1.18413	5.26725	5.32097	1678.74	FALSE	52
2022-09-15	10:00:01	3.0422	13.5323	5.32097	1685.86	1	53
2022-09-15	10:00:01	0.253295	1.12671	5.32097	1679.86	FALSE	53
2022-09-15	10:00:02	1.02001	4.53721	2.33344	1690.39	FALSE	53
2022-09-15	10:00:02	0.527952	2.34844	2.33344	1682.21	FALSE	53
2022-09-15	10:00:02	0.233041	1.03661	2.33344	1691.43	FALSE	53
2022-09-15	10:00:02	0.317316	1.41149	2.33344	1683.62	FALSE	53
2022-09-15	10:00:03	0.218893	0.97368	1.86343	1692.4	FALSE	53
2022-09-15	10:00:03	0.161692	0.719238	1.86343	1684.34	FALSE	53
2022-09-15	10:00:03	1.05294	4.68369	1.86343	1697.09	FALSE	53
2022-09-15	10:00:03	0.24215	1.07713	1.86343	1685.42	FALSE	53
2022-09-15	10:00:04	0.241031	1.07215	2.47005	1698.16	FALSE	53
2022-09-15	10:00:04	1.17039	5.20613	2.47005	1690.62	FALSE	53
2022-09-15	10:00:04	0.308868	1.37391	2.47005	1699.53	FALSE	53
2022-09-15	10:00:04	0.500878	2.22801	2.47005	1692.85	FALSE	53
2022-09-15	10:00:05	0.78673	3.49953	2.32542	1703.03	FALSE	53
2022-09-15	10:00:05	0.1193	0.53067	2.32542	1693.38	FALSE	53
2022-09-15	10:00:05	0.662303	2.94606	2.32542	1705.98	FALSE	53
2022-09-15	10:00:06	0.510394	2.27033	3.72834	1695.65	FALSE	53
2022-09-15	10:00:06	0.637112	2.834	3.72834	1708.81	FALSE	53
2022-09-15	10:00:06	1.59055	7.07508	3.72834	1702.73	FALSE	53
2022-09-15	10:00:06	0.614619	2.73395	3.72834	1711.55	FALSE	53
2022-09-15	10:00:07	0.508715	2.26287	1.94312	1704.99	FALSE	53
2022-09-15	10:00:07	0.994975	4.42585	1.94312	1715.97	FALSE	53
2022-09-15	10:00:07	0.218181	0.970513	1.94312	1705.96	FALSE	53
2022-09-15	10:00:07	0.0254582	0.113243	1.94312	1716.09	FALSE	53
2022-09-15	10:00:08	0.411158	1.82891	0.976511	1707.79	FALSE	53
2022-09-15	10:00:08	0.0391987	0.174364	0.976511	1716.26	FALSE	53
2022-09-15	10:00:08	0.114059	0.507357	0.976511	1708.3	FALSE	53
2022-09-15	10:00:08	0.313702	1.39541	0.976511	1717.66	FALSE	53
2022-09-15	10:00:09	0.104135	0.463213	0.0645735	1708.76	FALSE	53
2022-09-15	10:00:09	-0.00298957	-0.0132982	0.0645735	1717.66	FALSE	53
2022-09-15	10:00:09	-0.0575951	-0.256195	0.0645735	1708.76	FALSE	53
2022-09-15	10:00:10	-0.0896562	-0.398809	-0.425634	1717.66	FALSE	53
2022-09-15	10:00:10	-0.142328	-0.633103	-0.425634	1708.76	FALSE	53
2022-09-15	10:00:10	-0.0802923	-0.357156	-0.425634	1717.66	FALSE	53
2022-09-15	10:00:10	-0.0704705	-0.313467	-0.425634	1708.76	FALSE	53
2022-09-15	10:00:11	-0.0842109	-0.374587	-0.401299	1717.66	FALSE	53
2022-09-15	10:00:11	-0.149758	-0.666154	-0.401299	1708.76	FALSE	53
2022-09-15	10:00:11	-0.000241466	-0.00107409	-0.401299	1717.66	FALSE	53
2022-09-15	10:00:11	-0.126654	-0.563382	-0.401299	1708.76	FALSE	53
2022-09-15	10:00:12	-0.0944908	-0.420314	-0.436953	1717.66	FALSE	53
2022-09-15	10:00:12	-0.115509	-0.513807	-0.436953	1708.76	FALSE	53
2022-09-15	10:00:12	-0.129198	-0.574699	-0.436953	1717.66	FALSE	53
2022-09-15	10:00:12	-0.0537275	-0.238991	-0.436953	1708.76	FALSE	53
2022-09-15	10:00:13	-0.00609391	-0.0271069	-0.331652	1717.66	FALSE	53
2022-09-15	10:00:13	-0.068842	-0.306223	-0.331652	1708.76	FALSE	53
2022-09-15	10:00:13	-0.14874	-0.661625	-0.331652	1717.66	FALSE	53
2022-09-15	10:00:14	-0.097646	-0.434349	-0.329143	1708.76	FALSE	53
2022-09-15	10:00:14	-0.195407	-0.869209	-0.329143	1717.66	FALSE	53
2022-09-15	10:00:14	-0.033931	-0.150932	-0.329143	1708.76	FALSE	53
2022-09-15	10:00:14	0.0310053	0.137918	-0.329143	1717.79	FALSE	53
2022-09-15	10:00:15	-0.0589692	-0.262307	-0.138312	1708.76	FALSE	53
2022-09-15	10:00:15	-0.126654	-0.563382	-0.138312	1717.79	FALSE	53
2022-09-15	10:00:15	0.105916	0.471136	-0.138312	1709.23	FALSE	53
2022-09-15	10:00:15	-0.0446689	-0.198696	-0.138312	1717.79	FALSE	53
2022-09-15	10:00:16	0.0110053	0.0489538	0.660779	1709.28	FALSE	53
2022-09-15	10:00:16	0.228003	1.0142	0.660779	1718.81	FALSE	53
2022-09-15	10:00:16	0.0073921	0.0328815	0.660779	1709.31	FALSE	53
2022-09-15	10:00:16	0.347799	1.54708	0.660779	1720.36	FALSE	53
2022-09-15	10:00:17	1.5681	6.97522	3.27798	1716.29	FALSE	53
2022-09-15	10:00:17	0.0550257	0.244765	3.27798	1720.6	FALSE	53
2022-09-15	10:00:17	0.587646	2.61397	3.27798	1718.9	FALSE	53
2022-09-15	10:00:18	0.827188	3.6795	2.38386	1724.28	FALSE	53
2022-09-15	10:00:18	0.074415	0.331013	2.38386	1719.23	FALSE	53
2022-09-15	10:00:18	0.797265	3.54639	2.38386	1727.83	FALSE	53
2022-09-15	10:00:18	0.444796	1.97854	2.38386	1721.21	FALSE	53
2022-09-15	10:00:19	0.285	1.26774	1.86247	1729.09	FALSE	53
2022-09-15	10:00:19	0.662761	2.94809	1.86247	1724.16	FALSE	53
2022-09-15	10:00:19	0.582506	2.5911	1.86247	1731.69	FALSE	53
2022-09-15	10:00:19	0.144542	0.642952	1.86247	1724.8	FALSE	53
2022-09-15	10:00:20	0.781489	3.47622	4.56037	1735.16	FALSE	53
2022-09-15	10:00:20	0.54617	2.42947	4.56037	1727.23	FALSE	53
2022-09-15	10:00:20	0.72617	3.23015	4.56037	1738.39	FALSE	53
2022-09-15	10:00:20	2.04704	9.10564	4.56037	1736.34	FALSE	53
2022-09-15	10:00:21	0.365509	1.62586	7.15694	1740.02	FALSE	53
2022-09-15	10:00:21	0.854364	3.80038	7.15694	1740.14	FALSE	53
2022-09-15	10:00:21	3.60698	16.0446	7.15694	1756.06	1	54
2022-09-15	10:00:22	0.537723	2.3919	4.516	1742.53	FALSE	54
2022-09-15	10:00:22	1.06887	4.75455	4.516	1760.82	FALSE	54
2022-09-15	10:00:22	2.30434	10.2502	4.516	1752.78	FALSE	54
2022-09-15	10:00:22	0.150038	0.667399	4.516	1761.48	FALSE	54
2022-09-15	10:00:23	0.169886	0.755687	0.616298	1753.54	FALSE	54
2022-09-15	10:00:23	0.310344	1.38047	0.616298	1762.86	FALSE	54
2022-09-15	10:00:23	0.0777228	0.345727	0.616298	1753.88	FALSE	54
2022-09-15	10:00:23	-0.00375294	-0.0166938	0.616298	1762.86	FALSE	54
2022-09-15	10:00:24	0.212277	0.944251	0.497395	1754.83	FALSE	54
2022-09-15	10:00:24	0.150344	0.66876	0.497395	1763.53	FALSE	54
2022-09-15	10:00:24	-0.0160175	-0.071249	0.497395	1754.83	FALSE	54
2022-09-15	10:00:24	0.100674	0.447818	0.497395	1763.98	FALSE	54
2022-09-15	10:00:25	-0.0963738	-0.42869	-0.0212213	1754.83	FALSE	54
2022-09-15	10:00:25	0.00449134	0.0199784	-0.0212213	1764	FALSE	54
2022-09-15	10:00:25	0.0775702	0.345048	-0.0212213	1755.17	FALSE	54
2022-09-15	10:00:26	1.41589	6.29816	7.82702	1770.3	FALSE	54
2022-09-15	10:00:26	0.913142	4.06184	7.82702	1759.23	FALSE	54
2022-09-15	10:00:26	2.03701	9.06103	7.82702	1779.36	FALSE	54
2022-09-15	10:00:26	2.67233	11.8871	7.82702	1771.12	FALSE	54
2022-09-15	10:00:27	0.36673	1.63129	8.09137	1780.99	FALSE	54
2022-09-15	10:00:27	0.483473	2.15058	8.09137	1773.27	FALSE	54
2022-09-15	10:00:27	1.8335	8.15577	8.09137	1789.15	FALSE	54
2022-09-15	10:00:27	4.59238	20.4278	8.09137	1793.7	1	55
2022-09-15	10:00:28	4.99105	22.2012	33.5996	1811.35	1	56
2022-09-15	10:00:28	8.60098	38.2589	33.5996	1831.96	1	57
2022-09-15	10:00:28	10.3824	46.183	33.5996	1857.53	1	58
2022-09-15	10:00:28	6.23965	27.7552	33.5996	1859.71	1	59
2022-09-15	10:00:29	3.25838	14.4939	13.6939	1872.03	1	60
2022-09-15	10:00:29	2.58307	11.49	13.6939	1871.2	FALSE	60
2022-09-15	10:00:29	3.93253	17.4927	13.6939	1889.52	1	61
2022-09-15	10:00:29	2.54011	11.2989	13.6939	1882.5	FALSE	61
2022-09-15	10:00:30	1.15243	5.12624	5.05493	1894.64	FALSE	61
2022-09-15	10:00:30	0.801997	3.56744	5.05493	1886.07	FALSE	61
2022-09-15	10:00:30	1.45477	6.47111	5.05493	1901.12	FALSE	61
2022-09-15	10:00:31	1.69676	7.54753	5.79873	1893.62	FALSE	61
2022-09-15	10:00:31	1.87482	8.33957	5.79873	1909.46	FALSE	61
2022-09-15	10:00:31	0.924338	4.11164	5.79873	1897.73	FALSE	61
2022-09-15	10:00:31	0.718537	3.1962	5.79873	1912.65	FALSE	61
2022-09-15	10:00:32	0.620776	2.76134	0.123374	1900.49	FALSE	61
2022-09-15	10:00:32	-0.13103	-0.582848	0.123374	1912.65	FALSE	61
2022-09-15	10:00:32	-0.28075	-1.24883	0.123374	1900.49	FALSE	61
2022-09-15	10:00:32	-0.0980532	-0.43616	0.123374	1912.65	FALSE	61
2022-09-15	10:00:33	-0.189503	-0.842947	-0.00990214	1900.49	FALSE	61
2022-09-15	10:00:33	-0.0104196	-0.0463485	-0.00990214	1912.65	FALSE	61
2022-09-15	10:00:33	0.0970612	0.431748	-0.00990214	1900.92	FALSE	61
2022-09-15	10:00:33	0.093957	0.41794	-0.00990214	1913.07	FALSE	61
2022-09-15	10:00:34	0.269428	1.19847	1.3481	1902.12	FALSE	61
2022-09-15	10:00:34	0.216501	0.96304	1.3481	1914.03	FALSE	61
2022-09-15	10:00:34	0.42327	1.88279	1.3481	1904	FALSE	61
2022-09-15	10:00:35	0.432328	1.92308	3.93185	1915.96	FALSE	61
2022-09-15	10:00:35	0.905051	4.02585	3.93185	1908.03	FALSE	61
2022-09-15	10:00:35	0.761896	3.38907	3.93185	1919.34	FALSE	61
2022-09-15	10:00:35	1.4364	6.38939	3.93185	1914.42	FALSE	61
2022-09-15	10:00:36	2.49431	11.0952	13.1543	1930.44	FALSE	61
2022-09-15	10:00:36	5.11828	22.7671	13.1543	1937.19	1	62
2022-09-15	10:00:36	2.25207	10.0177	13.1543	1940.46	FALSE	62
2022-09-15	10:00:36	1.96424	8.73733	13.1543	1945.92	FALSE	62
2022-09-15	10:00:37	2.4479	10.8887	6.93275	1951.35	FALSE	62
2022-09-15	10:00:37	1.96256	8.72986	6.93275	1954.65	FALSE	62
2022-09-15	10:00:37	1.21172	5.38997	6.93275	1956.74	FALSE	62
2022-09-15	10:00:37	0.612023	2.7224	6.93275	1957.38	FALSE	62
2022-09-15	10:00:38	0.470751	2.09399	1.85132	1958.83	FALSE	62
2022-09-15	10:00:38	0.420827	1.87192	1.85132	1959.25	FALSE	62
2022-09-15	10:00:38	0.35701	1.58805	1.85132	1960.42	FALSE	62
2022-09-15	10:00:39	0.362048	1.61046	1.56587	1960.86	FALSE	62
2022-09-15	10:00:39	0.387545	1.72388	1.56587	1962.14	FALSE	62
2022-09-15	10:00:39	0.316858	1.40945	1.56587	1962.27	FALSE	62
2022-09-15	10:00:39	0.341641	1.51969	1.56587	1963.66	FALSE	62
2022-09-15	10:00:40	0.439198	1.95364	1.50305	1964.22	FALSE	62
2022-09-15	10:00:40	0.25472	1.13305	1.50305	1964.79	FALSE	62
2022-09-15	10:00:40	0.418741	1.86264	1.50305	1966.08	FALSE	62
2022-09-15	10:00:40	0.238944	1.06287	1.50305	1965.86	FALSE	62
2022-09-15	10:00:41	0.505305	2.2477	2.72981	1968.33	FALSE	62
2022-09-15	10:00:41	0.233448	1.03842	2.72981	1966.9	FALSE	62
2022-09-15	10:00:41	0.717519	3.19167	2.72981	1971.52	FALSE	62
2022-09-15	10:00:41	0.998486	4.44147	2.72981	1971.34	FALSE	62
2022-09-15	10:00:42	1.29645	5.76687	6.14363	1977.29	FALSE	62
2022-09-15	10:00:42	1.43065	6.36382	6.14363	1977.7	FALSE	62
2022-09-15	10:00:42	1.41635	6.30021	6.14363	1983.59	FALSE	62
2022-09-15	10:00:43	0.567952	2.52636	2.40435	1980.23	FALSE	62
2022-09-15	10:00:43	0.400776	1.78273	2.40435	1985.37	FALSE	62
2022-09-15	10:00:43	0.68841	3.06219	2.40435	1983.29	FALSE	62
2022-09-15	10:00:43	0.504949	2.24611	2.40435	1987.62	FALSE	62
2022-09-15	10:00:44	0.90444	4.02313	6.45906	1987.31	FALSE	62
2022-09-15	10:00:44	0.992786	4.41611	6.45906	1992.04	FALSE	62
2022-09-15	10:00:44	2.75172	12.2402	6.45906	1999.55	FALSE	62
2022-09-15	10:00:44	1.1593	5.1568	6.45906	1997.19	FALSE	62
2022-09-15	10:00:45	1.33401	5.93394	3.26869	2005.49	FALSE	62
2022-09-15	10:00:45	0.603626	2.68505	3.26869	1999.88	FALSE	62
2022-09-15	10:00:45	0.584389	2.59948	3.26869	2008.09	FALSE	62
2022-09-15	10:00:45	0.417316	1.85631	3.26869	2001.73	FALSE	62
2022-09-15	10:00:46	0.44785	1.99213	1.70146	2010.08	FALSE	62
2022-09-15	10:00:46	0.326679	1.45313	1.70146	2003.19	FALSE	62
2022-09-15	10:00:46	0.37299	1.65913	1.70146	2011.74	FALSE	62
2022-09-15	10:00:47	0.4564	2.03016	1.71052	2005.22	FALSE	62
2022-09-15	10:00:47	0.334669	1.48867	1.71052	2013.23	FALSE	62
2022-09-15	10:00:47	0.416959	1.85472	1.71052	2007.07	FALSE	62
2022-09-15	10:00:47	0.33014	1.46853	1.71052	2014.7	FALSE	62
2022-09-15	10:00:48	0.384746	1.71143	0.548725	2008.78	FALSE	62
2022-09-15	10:00:48	0.120776	0.537236	0.548725	2015.23	FALSE	62
2022-09-15	10:00:48	0.0431681	0.19202	0.548725	2008.98	FALSE	62
2022-09-15	10:00:48	-0.0552542	-0.245782	0.548725	2015.23	FALSE	62
2022-09-15	10:00:49	0.0369086	0.164177	-0.138312	2009.14	FALSE	62
2022-09-15	10:00:49	-0.216119	-0.961341	-0.138312	2015.23	FALSE	62
2022-09-15	10:00:49	-0.0176461	-0.0784934	-0.138312	2009.14	FALSE	62
2022-09-15	10:00:49	0.0724811	0.32241	-0.138312	2015.55	FALSE	62
2022-09-15	10:00:50	0.238944	1.06287	0.781605	2010.2	FALSE	62
2022-09-15	10:00:50	0.097672	0.434465	0.781605	2015.99	FALSE	62
2022-09-15	10:00:50	0.189326	0.84216	0.781605	2011.04	FALSE	62
2022-09-15	10:00:50	0.176909	0.786927	0.781605	2016.78	FALSE	62
2022-09-15	10:00:51	0.108155	0.481095	0.596168	2011.53	FALSE	62
2022-09-15	10:00:51	0.218537	0.972096	0.596168	2017.75	FALSE	62
2022-09-15	10:00:51	0.0753819	0.335314	0.596168	2011.86	FALSE	62
2022-09-15	10:00:52	0.320674	1.42642	0.73616	2019.17	FALSE	62
2022-09-15	10:00:52	0.0170613	0.0758921	0.73616	2011.94	FALSE	62
2022-09-15	10:00:52	0.266425	1.18511	0.73616	2020.36	FALSE	62
2022-09-15	10:00:52	0.0578247	0.257216	0.73616	2012.19	FALSE	62
2022-09-15	10:00:53	0.235992	1.04974	0.931631	2021.41	FALSE	62
2022-09-15	10:00:53	0.0595549	0.264912	0.931631	2012.46	FALSE	62
2022-09-15	10:00:53	0.18388	0.817935	0.931631	2022.23	FALSE	62
2022-09-15	10:00:53	0.358333	1.59394	0.931631	2014.05	FALSE	62
2022-09-15	10:00:54	0.1707	0.759308	1.24284	2022.99	FALSE	62
2022-09-15	10:00:54	0.306832	1.36485	1.24284	2015.42	FALSE	62
2022-09-15	10:00:54	0.211412	0.940403	1.24284	2023.93	FALSE	62
2022-09-15	10:00:54	0.428664	1.90678	1.24284	2017.32	FALSE	62
2022-09-15	10:00:55	0.278995	1.24103	2.46857	2025.17	FALSE	62
2022-09-15	10:00:55	1.09503	4.87091	2.46857	2022.2	FALSE	62
2022-09-15	10:00:55	0.290853	1.29377	2.46857	2026.46	FALSE	62
2022-09-15	10:00:56	0.70902	3.15386	2.70089	2025.35	FALSE	62
2022-09-15	10:00:56	0.795076	3.53666	2.70089	2030	FALSE	62
2022-09-15	10:00:56	0.476756	2.12071	2.70089	2027.47	FALSE	62
2022-09-15	10:00:56	0.447901	1.99235	2.70089	2031.99	FALSE	62
2022-09-15	10:00:57	0.697977	3.10474	1.80956	2030.57	FALSE	62
2022-09-15	10:00:57	0.315484	1.40334	1.80956	2033.39	FALSE	62
2022-09-15	10:00:57	0.174975	0.778324	1.80956	2031.35	FALSE	62
2022-09-15	10:00:57	0.438791	1.95183	1.80956	2035.35	FALSE	62
2022-09-15	10:00:58	0.0558908	0.248613	0.354046	2031.6	FALSE	62
2022-09-15	10:00:58	0.0824557	0.366779	0.354046	2035.71	FALSE	62
2022-09-15	10:00:58	-0.000852186	-0.00379069	0.354046	2031.6	FALSE	62
2022-09-15	10:00:58	0.180878	0.804582	0.354046	2036.52	FALSE	62
2022-09-15	10:00:59	-0.0498598	-0.221786	-0.102338	2031.6	FALSE	62
2022-09-15	10:00:59	0.0138552	0.0616307	-0.102338	2036.58	FALSE	62
2022-09-15	10:00:59	-0.033015	-0.146857	-0.102338	2031.6	FALSE	62
2022-09-15	10:01:00	0.0752292	0.334635	0.173968	2036.91	FALSE	62
2022-09-15	10:01:00	-0.076272	-0.339273	0.173968	2031.6	FALSE	62
2022-09-15	10:01:00	0.0899366	0.400056	0.173968	2037.31	FALSE	62
2022-09-15	10:01:00	0.0675448	0.300453	0.173968	2031.9	FALSE	62
2022-09-15	10:01:01	0.0610816	0.271703	0.570174	2037.59	FALSE	62
2022-09-15	10:01:01	0.0194023	0.0863053	0.570174	2031.99	FALSE	62
2022-09-15	10:01:01	0.187239	0.832877	0.570174	2038.42	FALSE	62
2022-09-15	10:01:01	0.245	1.08981	0.570174	2033.08	FALSE	62

## Sheet: Tyr_harness_202291595550 (3)
Date	Time	Lbs	Newtons	Total force x time		total steps > 13.345	**GoPro Fitting: 945
2022-09-15	09:56:01	0.224237	0.997451	0.997451	FALSE	0
2022-09-15	09:56:01	0.219504	0.976398	0.976398	FALSE	0
2022-09-15	09:56:01	0.215891	0.960326	1.95778	FALSE	0
2022-09-15	09:56:02	0.264542	1.17674	2.15313	FALSE	0
2022-09-15	09:56:02	0.20841	0.927049	2.88483	FALSE	0
2022-09-15	09:56:02	0.215331	0.957835	3.11097	FALSE	0
2022-09-15	09:56:02	0.22785	1.01352	3.89835	FALSE	0
2022-09-15	09:56:03	0.2564	1.14052	4.25149	FALSE	0
2022-09-15	09:56:03	0.242761	1.07985	4.9782	FALSE	0
2022-09-15	09:56:03	0.247087	1.09909	5.35058	FALSE	0
2022-09-15	09:56:03	0.244339	1.08687	6.06507	FALSE	0
2022-09-15	09:56:04	0.265763	1.18217	6.53275	FALSE	0
2022-09-15	09:56:04	0.183626	0.816805	6.88187	FALSE	0
2022-09-15	09:56:04	0.475585	2.1155	8.64824	FALSE	0
2022-09-15	09:56:04	0.346934	1.54323	8.4251	FALSE	0
2022-09-15	09:56:05	0.229529	1.02099	9.66923	FALSE	0
2022-09-15	09:56:05	0.218333	0.971189	9.39629	FALSE	0
2022-09-15	09:56:05	0.2964	1.31845	10.9877	FALSE	0
2022-09-15	09:56:06	0.285407	1.26955	10.6658	FALSE	0
2022-09-15	09:56:06	0.252125	1.1215	12.1092	FALSE	0
2022-09-15	09:56:06	0.246374	1.09592	11.7618	FALSE	0
2022-09-15	09:56:06	0.217723	0.968475	13.0777	FALSE	0
2022-09-15	09:56:07	0.231514	1.02982	12.7916	FALSE	0
2022-09-15	09:56:07	0.20673	0.919576	13.9972	FALSE	0
2022-09-15	09:56:07	0.18388	0.817935	13.6095	FALSE	0
2022-09-15	09:56:07	0.231412	1.02937	15.0266	FALSE	0
2022-09-15	09:56:08	0.207952	0.925012	14.5345	FALSE	0
2022-09-15	09:56:08	0.155687	0.692527	15.7191	FALSE	0
2022-09-15	09:56:08	0.209122	0.930216	15.4647	FALSE	0
2022-09-15	09:56:08	-0.019529	-0.0868689	15.7191	FALSE	0
2022-09-15	09:56:09	0.391819	1.74289	17.2076	FALSE	0
2022-09-15	09:56:09	0.363219	1.61567	17.3348	FALSE	0
2022-09-15	09:56:09	0.536094	2.38465	19.5923	FALSE	0
2022-09-15	09:56:10	1.04103	4.63071	21.9655	FALSE	0
2022-09-15	09:56:10	2.03365	9.04608	28.6384	FALSE	0
2022-09-15	09:56:10	0.947646	4.21532	26.1808	FALSE	0
2022-09-15	09:56:10	2.06246	9.17423	37.8126	FALSE	0
2022-09-15	09:56:11	0.556552	2.47565	28.6565	FALSE	0
2022-09-15	09:56:11	0.0441351	0.196322	38.0089	FALSE	0
2022-09-15	09:56:11	-0.0528623	-0.235142	28.6565	FALSE	0
2022-09-15	09:56:11	-0.0170863	-0.0760033	38.0089	FALSE	0
2022-09-15	09:56:12	-0.0596816	-0.265476	28.6565	FALSE	0
2022-09-15	09:56:12	0.043219	0.192247	38.2012	FALSE	0
2022-09-15	09:56:12	0.137163	0.610128	29.2666	FALSE	0
2022-09-15	09:56:12	0.0795041	0.35365	38.5548	FALSE	0
2022-09-15	09:56:13	0.503677	2.24046	31.5071	FALSE	0
2022-09-15	09:56:13	0.216196	0.961683	39.5165	FALSE	0
2022-09-15	09:56:13	0.436654	1.94232	33.4494	FALSE	0
2022-09-15	09:56:14	0.334873	1.48958	41.0061	FALSE	0
2022-09-15	09:56:14	0.313957	1.39654	34.8459	FALSE	0
2022-09-15	09:56:14	0.388817	1.72954	42.7356	FALSE	0
2022-09-15	09:56:14	0.148308	0.659704	35.5056	FALSE	0
2022-09-15	09:56:15	0.104848	0.466385	43.202	FALSE	0
2022-09-15	09:56:15	-0.320547	-1.42586	35.5056	FALSE	0
2022-09-15	09:56:15	-0.327111	-1.45506	43.202	FALSE	0
2022-09-15	09:56:15	-0.253727	-1.12863	35.5056	FALSE	0
2022-09-15	09:56:16	-0.303956	-1.35206	43.202	FALSE	0
2022-09-15	09:56:16	-0.354745	-1.57798	35.5056	FALSE	0
2022-09-15	09:56:16	-0.354745	-1.57798	43.202	FALSE	0
2022-09-15	09:56:16	0.338893	1.50746	37.0131	FALSE	0
2022-09-15	09:56:17	0.498893	2.21918	45.4212	FALSE	0
2022-09-15	09:56:17	0.31299	1.39224	38.4053	FALSE	0
2022-09-15	09:56:17	-0.0916409	-0.407637	45.4212	FALSE	0
2022-09-15	09:56:18	0.0900893	0.400735	38.8061	FALSE	0
2022-09-15	09:56:18	0.296196	1.31754	46.7387	FALSE	0
2022-09-15	09:56:18	-0.257544	-1.14561	38.8061	FALSE	0
2022-09-15	09:56:18	-0.474542	-2.11086	46.7387	FALSE	0
2022-09-15	09:56:19	-0.322786	-1.43582	38.8061	FALSE	0
2022-09-15	09:56:19	-0.4379	-1.94787	46.7387	FALSE	0
2022-09-15	09:56:19	-0.31556	-1.40367	38.8061	FALSE	0
2022-09-15	09:56:19	-0.158664	-0.705769	46.7387	FALSE	0
2022-09-15	09:56:20	0.569376	2.5327	41.3388	FALSE	0
2022-09-15	09:56:20	0.639758	2.84577	49.5845	FALSE	0
2022-09-15	09:56:20	0.0230155	0.102378	41.4412	FALSE	0
2022-09-15	09:56:20	-0.0796817	-0.35444	49.5845	FALSE	0
2022-09-15	09:56:21	-0.0749997	-0.333614	41.4412	FALSE	0
2022-09-15	09:56:21	0.0125321	0.0557453	49.6402	FALSE	0
2022-09-15	09:56:21	-0.00914732	-0.0406891	41.4412	FALSE	0
2022-09-15	09:56:22	0.00423688	0.0188465	49.6591	FALSE	0
2022-09-15	09:56:22	0.249733	1.11086	42.552	FALSE	0
2022-09-15	09:56:22	0.142252	0.632765	50.2919	FALSE	0
2022-09-15	09:56:22	0.56327	2.50554	45.0576	FALSE	0
2022-09-15	09:56:23	0.613957	2.731	53.0229	FALSE	0
2022-09-15	09:56:23	1.31614	5.85445	50.912	FALSE	0
2022-09-15	09:56:23	1.68011	7.47347	60.4963	FALSE	0
2022-09-15	09:56:23	1.28739	5.72657	56.6386	FALSE	0
2022-09-15	09:56:24	2.25004	10.0086	70.5049	FALSE	0
2022-09-15	09:56:24	0.889275	3.95567	60.5943	FALSE	0
2022-09-15	09:56:24	0.964694	4.29115	74.7961	FALSE	0
2022-09-15	09:56:24	2.04927	9.11556	69.7098	FALSE	0
2022-09-15	09:56:25	1.36795	6.08492	80.881	FALSE	0
2022-09-15	09:56:25	0.920267	4.09353	73.8033	FALSE	0
2022-09-15	09:56:25	0.941285	4.18702	85.068	FALSE	0
2022-09-15	09:56:26	0.840369	3.73813	77.5415	FALSE	0
2022-09-15	09:56:26	0.415636	1.84883	86.9169	FALSE	0
2022-09-15	09:56:26	0.220573	0.981153	78.5226	FALSE	0
2022-09-15	09:56:26	0.0928883	0.413186	87.3301	FALSE	0
2022-09-15	09:56:27	1.34118	5.96584	84.4885	FALSE	0
2022-09-15	09:56:27	1.27324	5.66363	92.9937	FALSE	0
2022-09-15	09:56:27	0.949071	4.22166	88.7101	FALSE	0
2022-09-15	09:56:27	0.828359	3.68471	96.6784	FALSE	0
2022-09-15	09:56:28	0.696552	3.0984	91.8085	FALSE	0
2022-09-15	09:56:28	0.503321	2.23887	98.9173	FALSE	0
2022-09-15	09:56:28	-0.0191219	-0.085058	91.8085	FALSE	0
2022-09-15	09:56:28	-0.142481	-0.633784	98.9173	FALSE	0
2022-09-15	09:56:29	0.106018	0.471589	92.2801	FALSE	0
2022-09-15	09:56:29	0.420115	1.86876	100.786	FALSE	0
2022-09-15	09:56:29	0.0465778	0.207187	92.4873	FALSE	0
2022-09-15	09:56:30	-0.0143891	-0.0640056	100.786	FALSE	0
2022-09-15	09:56:30	-0.0472135	-0.210015	92.4873	FALSE	0
2022-09-15	09:56:30	0.228054	1.01443	101.8	FALSE	0
2022-09-15	09:56:30	0.0308527	0.137239	92.6245	FALSE	0
2022-09-15	09:56:31	0.203422	0.904862	102.705	FALSE	0
2022-09-15	09:56:31	-0.00502519	-0.0223531	92.6245	FALSE	0
2022-09-15	09:56:31	0.73014	3.24781	105.953	FALSE	0
2022-09-15	09:56:31	5.46947	24.3293	116.954	1	1
2022-09-15	09:56:32	5.70596	25.3813	131.334	1	2
2022-09-15	09:56:32	6.41298	28.5262	145.48	1	3
2022-09-15	09:56:32	5.38031	23.9327	155.267	1	4
2022-09-15	09:56:32	9.42108	41.9068	187.387	1	5
2022-09-15	09:56:33	5.85629	26.0499	181.317	1	6
2022-09-15	09:56:33	7.55039	33.5856	220.973	1	7
2022-09-15	09:56:33	7.04891	31.355	212.672	1	8
2022-09-15	09:56:34	6.40123	28.474	249.446	1	9
2022-09-15	09:56:34	3.40703	15.1552	227.827	1	10
2022-09-15	09:56:34	3.76668	16.7549	266.201	1	11
2022-09-15	09:56:34	1.79462	7.98283	235.81	FALSE	11
2022-09-15	09:56:35	1.01406	4.51074	270.712	FALSE	11
2022-09-15	09:56:35	2.91177	12.9521	248.762	FALSE	11
2022-09-15	09:56:35	8.63222	38.3978	309.11	1	12
2022-09-15	09:56:35	6.05523	26.9349	275.697	1	13
2022-09-15	09:56:36	2.12011	9.43067	318.541	FALSE	13
2022-09-15	09:56:36	1.09899	4.88853	280.585	FALSE	13
2022-09-15	09:56:36	0.881692	3.92194	322.463	FALSE	13
2022-09-15	09:56:36	1.30836	5.81985	286.405	FALSE	13
2022-09-15	09:56:37	6.651	29.585	352.048	1	14
2022-09-15	09:56:37	13.253	58.952	345.357	1	15
2022-09-15	09:56:37	15.7303	69.9715	422.019	1	16
2022-09-15	09:56:38	13.7988	61.3798	406.737	1	17
2022-09-15	09:56:38	10.2262	45.4882	467.507	1	18
2022-09-15	09:56:38	7.70988	34.2951	441.032	1	19
2022-09-15	09:56:38	6.314	28.0859	495.593	1	20
2022-09-15	09:56:39	7.89304	35.1098	476.142	1	21
2022-09-15	09:56:39	7.93456	35.2945	530.888	1	22
2022-09-15	09:56:39	0.65701	2.92251	479.065	FALSE	22
2022-09-15	09:56:39	0.24612	1.09479	531.983	FALSE	22
2022-09-15	09:56:40	0.0992496	0.441482	479.506	FALSE	22
2022-09-15	09:56:40	0.282914	1.25846	533.241	FALSE	22
2022-09-15	09:56:40	0.0324812	0.144483	479.651	FALSE	22
2022-09-15	09:56:40	0.23925	1.06423	534.305	FALSE	22
2022-09-15	09:56:41	0.0310562	0.138144	479.789	FALSE	22
2022-09-15	09:56:41	0.0284608	0.126599	534.432	FALSE	22
2022-09-15	09:56:41	-0.0759158	-0.337689	479.789	FALSE	22
2022-09-15	09:56:42	0.0612343	0.272382	534.704	FALSE	22
2022-09-15	09:56:42	-0.126959	-0.564739	479.789	FALSE	22
2022-09-15	09:56:42	-0.254542	-1.13225	534.704	FALSE	22
2022-09-15	09:56:42	0.094873	0.422014	480.211	FALSE	22
2022-09-15	09:56:43	0.0702419	0.31245	535.017	FALSE	22
2022-09-15	09:56:43	-0.321055	-1.42812	480.211	FALSE	22
2022-09-15	09:56:43	-0.217951	-0.96949	535.017	FALSE	22
2022-09-15	09:56:43	-0.212608	-0.945723	480.211	FALSE	22
2022-09-15	09:56:44	-0.241157	-1.07271	535.017	FALSE	22
2022-09-15	09:56:44	-0.283244	-1.25993	480.211	FALSE	22
2022-09-15	09:56:44	-0.0709793	-0.31573	535.017	FALSE	22
2022-09-15	09:56:44	-0.0637529	-0.283586	480.211	FALSE	22
2022-09-15	09:56:45	-0.146043	-0.649628	535.017	FALSE	22
2022-09-15	09:56:45	-0.0587147	-0.261175	480.211	FALSE	22
2022-09-15	09:56:45	0.0639315	0.28438	535.301	FALSE	22
2022-09-15	09:56:46	0.0756873	0.336672	480.547	FALSE	22
2022-09-15	09:56:46	-0.00955446	-0.0425001	535.301	FALSE	22
2022-09-15	09:56:46	0.205713	0.915053	481.462	FALSE	22
2022-09-15	09:56:46	0.264237	1.17538	536.476	FALSE	22
2022-09-15	09:56:47	0.267188	1.18851	482.651	FALSE	22
2022-09-15	09:56:47	7.39584	32.8982	569.375	1	23
2022-09-15	09:56:47	8.13533	36.1876	518.839	1	24
2022-09-15	09:56:47	3.1395	13.9651	583.34	1	25
2022-09-15	09:56:48	0.579809	2.57911	521.418	FALSE	25
2022-09-15	09:56:48	0.0696312	0.309734	583.649	FALSE	25
2022-09-15	09:56:48	-0.0292491	-0.130106	521.418	FALSE	25
2022-09-15	09:56:48	0.35584	1.58285	585.232	FALSE	25
2022-09-15	09:56:49	0.278893	1.24057	522.658	FALSE	25
2022-09-15	09:56:49	0.516552	2.29773	587.53	FALSE	25
2022-09-15	09:56:49	0.0618959	0.275325	522.934	FALSE	25
2022-09-15	09:56:50	-0.334592	-1.48833	587.53	FALSE	25
2022-09-15	09:56:50	-0.279529	-1.2434	522.934	FALSE	25
2022-09-15	09:56:50	-0.14472	-0.643744	587.53	FALSE	25
2022-09-15	09:56:50	0.231107	1.02801	523.962	FALSE	25
2022-09-15	09:56:51	0.118334	0.526373	588.056	FALSE	25
2022-09-15	09:56:51	-0.13561	-0.60322	523.962	FALSE	25
2022-09-15	09:56:51	0.253448	1.12739	589.184	FALSE	25
2022-09-15	09:56:51	0.209122	0.930216	524.892	FALSE	25
2022-09-15	09:56:52	0.507239	2.2563	591.44	FALSE	25
2022-09-15	09:56:52	0.184491	0.820653	525.712	FALSE	25
2022-09-15	09:56:52	0.499656	2.22257	593.663	FALSE	25
2022-09-15	09:56:52	0.793397	3.52919	529.242	FALSE	25
2022-09-15	09:56:53	1.67533	7.4522	601.115	FALSE	25
2022-09-15	09:56:53	3.92861	17.4752	546.717	1	26
2022-09-15	09:56:53	4.1911	18.6429	619.758	1	27
2022-09-15	09:56:54	6.27212	27.8996	574.616	1	28
2022-09-15	09:56:54	3.6166	16.0874	635.845	1	29
2022-09-15	09:56:54	2.53818	11.2903	585.907	FALSE	29
2022-09-15	09:56:54	1.6509	7.34353	643.189	FALSE	29
2022-09-15	09:56:55	0.747087	3.32319	589.23	FALSE	29
2022-09-15	09:56:55	0.862201	3.83524	647.024	FALSE	29
2022-09-15	09:56:55	0.370089	1.64623	590.876	FALSE	29
2022-09-15	09:56:55	0.485611	2.16009	649.184	FALSE	29
2022-09-15	09:56:56	0.102659	0.456648	591.333	FALSE	29
2022-09-15	09:56:56	0.185967	0.827218	650.011	FALSE	29
2022-09-15	09:56:56	0.0132445	0.0589142	591.392	FALSE	29
2022-09-15	09:56:56	-0.052557	-0.233784	650.011	FALSE	29
2022-09-15	09:56:57	-0.509198	-2.26501	591.392	FALSE	29
2022-09-15	09:56:57	1.37055	6.09648	656.108	FALSE	29
2022-09-15	09:56:57	4.68495	20.8396	612.231	1	30
2022-09-15	09:56:58	9.21227	40.978	697.086	1	31
2022-09-15	09:56:58	6.11441	27.1981	639.429	1	32
2022-09-15	09:56:58	3.39105	15.0841	712.17	1	33
2022-09-15	09:56:58	2.00408	8.91455	648.344	FALSE	33
2022-09-15	09:56:59	0.380369	1.69196	713.862	FALSE	33
2022-09-15	09:56:59	0.307596	1.36825	649.712	FALSE	33
2022-09-15	09:56:59	0.189733	0.84397	714.706	FALSE	33
2022-09-15	09:56:59	0.148868	0.662195	650.374	FALSE	33
2022-09-15	09:57:00	0.0496822	0.220996	714.927	FALSE	33
2022-09-15	09:57:00	-0.110267	-0.49049	650.374	FALSE	33
2022-09-15	09:57:00	-0.00314226	-0.0139774	714.927	FALSE	33
2022-09-15	09:57:00	0.0508527	0.226203	650.601	FALSE	33
2022-09-15	09:57:01	-0.209656	-0.932592	714.927	FALSE	33
2022-09-15	09:57:01	-0.515814	-2.29444	650.601	FALSE	33
2022-09-15	09:57:01	-0.495305	-2.20322	714.927	FALSE	33
2022-09-15	09:57:02	-0.232608	-1.03469	650.601	FALSE	33
2022-09-15	09:57:02	-0.169758	-0.755118	714.927	FALSE	33
2022-09-15	09:57:02	0.121794	0.541764	651.142	FALSE	33
2022-09-15	09:57:02	0.0916669	0.407753	715.334	FALSE	33
2022-09-15	09:57:03	0.044644	0.198585	651.341	FALSE	33
2022-09-15	09:57:03	0.0267305	0.118903	715.453	FALSE	33
2022-09-15	09:57:03	-0.00899467	-0.0400101	651.341	FALSE	33
2022-09-15	09:57:03	0.0485626	0.216016	715.669	FALSE	33
2022-09-15	09:57:04	0.314211	1.39767	652.739	FALSE	33
2022-09-15	09:57:04	1.81187	8.05956	723.729	FALSE	33
2022-09-15	09:57:04	1.8963	8.43512	661.174	FALSE	33
2022-09-15	09:57:04	0.57243	2.54628	726.275	FALSE	33
2022-09-15	09:57:05	0.271158	1.20617	662.38	FALSE	33
2022-09-15	09:57:05	0.243881	1.08483	727.36	FALSE	33
2022-09-15	09:57:05	0.310802	1.38251	663.763	FALSE	33
2022-09-15	09:57:06	0.350954	1.56111	728.921	FALSE	33
2022-09-15	09:57:06	0.254059	1.13011	664.893	FALSE	33
2022-09-15	09:57:06	0.224644	0.999261	729.92	FALSE	33
2022-09-15	09:57:06	3.32286	14.7807	679.673	1	34
2022-09-15	09:57:07	1.34459	5.98101	735.901	FALSE	34
2022-09-15	09:57:07	1.13803	5.06219	684.736	FALSE	34
2022-09-15	09:57:07	1.04429	4.64521	740.547	FALSE	34
2022-09-15	09:57:07	1.10826	4.92976	689.665	FALSE	34
2022-09-15	09:57:08	2.0653	9.18687	749.733	FALSE	34
2022-09-15	09:57:08	3.31925	14.7647	704.43	1	35
2022-09-15	09:57:08	2.33961	10.4071	760.141	FALSE	35
2022-09-15	09:57:08	1.07467	4.78035	709.21	FALSE	35
2022-09-15	09:57:09	0.392277	1.74493	761.885	FALSE	35
2022-09-15	09:57:09	0.148104	0.658796	709.869	FALSE	35
2022-09-15	09:57:09	0.0361453	0.160782	762.046	FALSE	35
2022-09-15	09:57:10	-0.0588165	-0.261628	709.869	FALSE	35
2022-09-15	09:57:10	-0.0333713	-0.148442	762.046	FALSE	35
2022-09-15	09:57:10	-0.0892491	-0.396998	709.869	FALSE	35
2022-09-15	09:57:10	-0.0596308	-0.26525	762.046	FALSE	35
2022-09-15	09:57:11	-0.0292491	-0.130106	709.869	FALSE	35
2022-09-15	09:57:11	-0.116577	-0.518558	762.046	FALSE	35
2022-09-15	09:57:11	-0.349809	-1.55602	709.869	FALSE	35
2022-09-15	09:57:11	-0.595305	-2.64804	762.046	FALSE	35
2022-09-15	09:57:12	-0.309605	-1.37718	709.869	FALSE	35
2022-09-15	09:57:12	-0.0393763	-0.175154	762.046	FALSE	35
2022-09-15	09:57:12	-0.136883	-0.608883	709.869	FALSE	35
2022-09-15	09:57:12	0.227646	1.01261	763.059	FALSE	35
2022-09-15	09:57:13	-0.0200888	-0.089359	709.869	FALSE	35
2022-09-15	09:57:13	0.281794	1.25348	764.312	FALSE	35
2022-09-15	09:57:13	0.252023	1.12105	710.99	FALSE	35
2022-09-15	09:57:14	-0.068333	-0.303959	764.312	FALSE	35
2022-09-15	09:57:14	1.95813	8.71015	719.7	FALSE	35
2022-09-15	09:57:14	0.735229	3.27045	767.583	FALSE	35
2022-09-15	09:57:14	1.02846	4.5748	724.275	FALSE	35
2022-09-15	09:57:15	0.341692	1.51991	769.103	FALSE	35
2022-09-15	09:57:15	0.650496	2.89354	727.169	FALSE	35
2022-09-15	09:57:15	0.287952	1.28087	770.384	FALSE	35
2022-09-15	09:57:15	1.06505	4.73756	731.906	FALSE	35
2022-09-15	09:57:16	1.01487	4.51434	774.898	FALSE	35
2022-09-15	09:57:16	1.40683	6.25786	738.164	FALSE	35
2022-09-15	09:57:16	0.740471	3.29376	778.192	FALSE	35
2022-09-15	09:57:16	0.537366	2.39031	740.554	FALSE	35
2022-09-15	09:57:17	0.565865	2.51708	780.709	FALSE	35
2022-09-15	09:57:17	0.751005	3.34062	743.895	FALSE	35
2022-09-15	09:57:17	0.392786	1.74719	782.456	FALSE	35
2022-09-15	09:57:18	0.693193	3.08346	746.978	FALSE	35
2022-09-15	09:57:18	1.2824	5.70437	788.16	FALSE	35
2022-09-15	09:57:18	1.37365	6.11027	753.089	FALSE	35
2022-09-15	09:57:18	0.889376	3.95612	792.116	FALSE	35
2022-09-15	09:57:19	0.956043	4.25267	757.341	FALSE	35
2022-09-15	09:57:19	3.52429	15.6767	807.793	1	36
2022-09-15	09:57:19	2.87594	12.7928	770.134	FALSE	36
2022-09-15	09:57:19	1.10169	4.90054	812.694	FALSE	36
2022-09-15	09:57:20	2.10088	9.34513	779.479	FALSE	36
2022-09-15	09:57:20	1.82709	8.12726	820.821	FALSE	36
2022-09-15	09:57:20	1.60032	7.11854	786.598	FALSE	36
2022-09-15	09:57:20	0.803473	3.57401	824.395	FALSE	36
2022-09-15	09:57:21	0.355382	1.58081	788.179	FALSE	36
2022-09-15	09:57:21	0.42159	1.87532	826.27	FALSE	36
2022-09-15	09:57:21	0.891565	3.96586	792.145	FALSE	36
2022-09-15	09:57:22	1.36963	6.09239	832.363	FALSE	36
2022-09-15	09:57:22	1.51828	6.75361	798.898	FALSE	36
2022-09-15	09:57:22	0.958537	4.26376	836.626	FALSE	36
2022-09-15	09:57:22	1.15365	5.13167	804.03	FALSE	36
2022-09-15	09:57:23	2.00999	8.94084	845.567	FALSE	36
2022-09-15	09:57:23	1.03029	4.58294	808.613	FALSE	36
2022-09-15	09:57:23	0.728308	3.23966	848.807	FALSE	36
2022-09-15	09:57:23	0.491718	2.18726	810.8	FALSE	36
2022-09-15	09:57:24	0.58215	2.58952	851.396	FALSE	36
2022-09-15	09:57:24	0.57528	2.55896	813.359	FALSE	36
2022-09-15	09:57:24	0.567901	2.52614	853.923	FALSE	36
2022-09-15	09:57:24	0.894924	3.9808	817.34	FALSE	36
2022-09-15	09:57:25	0.659606	2.93406	856.857	FALSE	36
2022-09-15	09:57:25	0.785662	3.49478	820.835	FALSE	36
2022-09-15	09:57:25	0.827596	3.68131	860.538	FALSE	36
2022-09-15	09:57:26	1.01986	4.53654	825.371	FALSE	36
2022-09-15	09:57:26	0.884745	3.93552	864.474	FALSE	36
2022-09-15	09:57:26	0.740573	3.29422	828.665	FALSE	36
2022-09-15	09:57:26	0.544644	2.42269	866.896	FALSE	36
2022-09-15	09:57:27	0.435382	1.93667	830.602	FALSE	36
2022-09-15	09:57:27	0.434466	1.93259	868.829	FALSE	36
2022-09-15	09:57:27	0.602913	2.68188	833.284	FALSE	36
2022-09-15	09:57:27	1.24459	5.53619	874.365	FALSE	36
2022-09-15	09:57:28	1.64576	7.32067	840.605	FALSE	36
2022-09-15	09:57:28	1.77665	7.90289	882.268	FALSE	36
2022-09-15	09:57:28	1.46398	6.51208	847.117	FALSE	36
2022-09-15	09:57:28	1.268	5.64032	887.908	FALSE	36
2022-09-15	09:57:29	1.30464	5.8033	852.92	FALSE	36
2022-09-15	09:57:29	1.01813	4.52885	892.437	FALSE	36
2022-09-15	09:57:29	0.676806	3.01057	855.93	FALSE	36
2022-09-15	09:57:30	1.2162	5.4099	897.847	FALSE	36
2022-09-15	09:57:30	1.48627	6.61123	862.542	FALSE	36
2022-09-15	09:57:30	1.3995	6.22526	904.072	FALSE	36
2022-09-15	09:57:30	1.15218	5.12513	867.667	FALSE	36
2022-09-15	09:57:31	0.861081	3.83026	907.902	FALSE	36
2022-09-15	09:57:31	1.00816	4.4845	872.151	FALSE	36
2022-09-15	09:57:31	0.329377	1.46513	909.368	FALSE	36
2022-09-15	09:57:31	0.352939	1.56994	873.721	FALSE	36
2022-09-15	09:57:32	0.549835	2.44578	911.813	FALSE	36
2022-09-15	09:57:32	0.666272	2.96371	876.685	FALSE	36
2022-09-15	09:57:32	1.1395	5.06872	916.882	FALSE	36
2022-09-15	09:57:32	0.929478	4.1345	880.819	FALSE	36
2022-09-15	09:57:33	1.12454	5.00218	921.884	FALSE	36
2022-09-15	09:57:33	1.0392	4.62257	885.442	FALSE	36
2022-09-15	09:57:33	0.777824	3.45992	925.344	FALSE	36
2022-09-15	09:57:34	0.974924	4.33666	889.779	FALSE	36
2022-09-15	09:57:34	0.268461	1.19417	926.538	FALSE	36
2022-09-15	09:57:34	0.228613	1.01692	890.796	FALSE	36
2022-09-15	09:57:34	0.0907508	0.403678	926.942	FALSE	36
2022-09-15	09:57:35	-0.168028	-0.747422	890.796	FALSE	36
2022-09-15	09:57:35	-0.360852	-1.60514	926.942	FALSE	36
2022-09-15	09:57:35	-0.259529	-1.15444	890.796	FALSE	36
2022-09-15	09:57:35	-0.371997	-1.65472	926.942	FALSE	36
2022-09-15	09:57:36	-0.48243	-2.14595	890.796	FALSE	36
2022-09-15	09:57:36	-0.532557	-2.36892	926.942	FALSE	36
2022-09-15	09:57:36	-1.15108	-5.12023	890.796	FALSE	36
2022-09-15	09:57:36	-0.758155	-3.37243	926.942	FALSE	36
2022-09-15	09:57:37	-0.60762	-2.70282	890.796	FALSE	36
2022-09-15	09:57:37	-0.243702	-1.08404	926.942	FALSE	36
2022-09-15	09:57:37	-0.199682	-0.888225	890.796	FALSE	36
2022-09-15	09:57:38	-0.360954	-1.6056	926.942	FALSE	36
2022-09-15	09:57:38	-0.400903	-1.7833	890.796	FALSE	36
2022-09-15	09:57:38	-0.402073	-1.7885	926.942	FALSE	36
2022-09-15	09:57:38	-0.428893	-1.9078	890.796	FALSE	36
2022-09-15	09:57:39	-0.15388	-0.684489	926.942	FALSE	36
2022-09-15	09:57:39	-0.064669	-0.287661	890.796	FALSE	36
2022-09-15	09:57:39	-0.0241601	-0.107469	926.942	FALSE	36
2022-09-15	09:57:39	0.171005	0.760664	891.556	FALSE	36
2022-09-15	09:57:40	0.14612	0.649971	927.592	FALSE	36
2022-09-15	09:57:40	0.219148	0.974814	892.531	FALSE	36
2022-09-15	09:57:40	0.156552	0.696375	928.288	FALSE	36
2022-09-15	09:57:40	0.384542	1.71052	894.242	FALSE	36
2022-09-15	09:57:41	0.387748	1.72478	930.013	FALSE	36
2022-09-15	09:57:41	0.604847	2.69048	896.932	FALSE	36
2022-09-15	09:57:41	0.810598	3.6057	933.619	FALSE	36
2022-09-15	09:57:42	0.883779	3.93123	900.863	FALSE	36
2022-09-15	09:57:42	1.3508	6.00863	939.627	FALSE	36
2022-09-15	09:57:42	0.96612	4.29749	905.161	FALSE	36
2022-09-15	09:57:42	0.621845	2.76609	942.394	FALSE	36
2022-09-15	09:57:43	0.63818	2.83875	908	FALSE	36
2022-09-15	09:57:43	0.0606745	0.269892	942.663	FALSE	36
2022-09-15	09:57:43	0.0776211	0.345274	908.345	FALSE	36
2022-09-15	09:57:43	0.268613	1.19484	943.858	FALSE	36
2022-09-15	09:57:44	0.211005	0.938592	909.283	FALSE	36
2022-09-15	09:57:44	0.43925	1.95387	945.812	FALSE	36
2022-09-15	09:57:44	0.306679	1.36417	910.648	FALSE	36
2022-09-15	09:57:44	0.393702	1.75127	947.563	FALSE	36
2022-09-15	09:57:45	0.340623	1.51516	912.163	FALSE	36
2022-09-15	09:57:45	0.324237	1.44227	949.006	FALSE	36
2022-09-15	09:57:45	0.447799	1.9919	914.155	FALSE	36
2022-09-15	09:57:46	0.443219	1.97153	950.977	FALSE	36
2022-09-15	09:57:46	0.487392	2.16802	916.323	FALSE	36
2022-09-15	09:57:46	0.360064	1.60164	952.579	FALSE	36
2022-09-15	09:57:46	0.263779	1.17334	917.496	FALSE	36
2022-09-15	09:57:47	0.277163	1.23288	953.812	FALSE	36
2022-09-15	09:57:47	0.230903	1.0271	918.523	FALSE	36
2022-09-15	09:57:47	0.109275	0.486077	954.298	FALSE	36
2022-09-15	09:57:47	0.267138	1.18828	919.711	FALSE	36
2022-09-15	09:57:48	0.412227	1.83367	956.131	FALSE	36
2022-09-15	09:57:48	1.4478	6.4401	926.152	FALSE	36
2022-09-15	09:57:48	1.35676	6.03514	962.167	FALSE	36
2022-09-15	09:57:48	2.81411	12.5177	938.669	FALSE	36
2022-09-15	09:57:49	1.67721	7.46057	969.627	FALSE	36
2022-09-15	09:57:49	1.25126	5.56585	944.235	FALSE	36
2022-09-15	09:57:49	0.410496	1.82597	971.453	FALSE	36
2022-09-15	09:57:50	0.133295	0.592923	944.828	FALSE	36
2022-09-15	09:57:50	-0.0825824	-0.367343	971.453	FALSE	36
2022-09-15	09:57:50	-0.234593	-1.04352	944.828	FALSE	36
2022-09-15	09:57:50	-0.218867	-0.973564	971.453	FALSE	36
2022-09-15	09:57:51	-0.455101	-2.02438	944.828	FALSE	36
2022-09-15	09:57:51	-0.633422	-2.81759	971.453	FALSE	36
2022-09-15	09:57:51	-0.801513	-3.56529	944.828	FALSE	36
2022-09-15	09:57:51	-0.558613	-2.48482	971.453	FALSE	36
2022-09-15	09:57:52	-0.625127	-2.78069	944.828	FALSE	36
2022-09-15	09:57:52	-0.582226	-2.58986	971.453	FALSE	36
2022-09-15	09:57:52	-0.824516	-3.66761	944.828	FALSE	36
2022-09-15	09:57:52	-0.50533	-2.24781	971.453	FALSE	36
2022-09-15	09:57:53	-0.370521	-1.64815	944.828	FALSE	36
2022-09-15	09:57:53	0.338079	1.50384	972.957	FALSE	36
2022-09-15	09:57:53	1.67838	7.46577	952.294	FALSE	36
2022-09-15	09:57:54	1.76078	7.8323	980.789	FALSE	36
2022-09-15	09:57:54	4.12139	18.3328	970.627	1	37
2022-09-15	09:57:54	1.15116	5.12059	985.91	FALSE	37
2022-09-15	09:57:54	1.61253	7.17286	977.799	FALSE	37
2022-09-15	09:57:55	1.82276	8.108	994.018	FALSE	37
2022-09-15	09:57:55	0.547341	2.43468	980.234	FALSE	37
2022-09-15	09:57:55	0.667087	2.96734	996.985	FALSE	37
2022-09-15	09:57:55	1.30067	5.78564	986.02	FALSE	37
2022-09-15	09:57:56	0.368003	1.63695	998.622	FALSE	37
2022-09-15	09:57:56	0.50444	2.24385	988.264	FALSE	37
2022-09-15	09:57:56	1.21767	5.41644	1004.04	FALSE	37
2022-09-15	09:57:56	0.41472	1.84476	990.108	FALSE	37
2022-09-15	09:57:57	1.6509	7.34353	1011.38	FALSE	37
2022-09-15	09:57:57	0.550598	2.44917	992.558	FALSE	37
2022-09-15	09:57:57	0.385916	1.71663	1013.1	FALSE	37
2022-09-15	09:57:58	2.1278	9.46488	1002.02	FALSE	37
2022-09-15	09:57:58	0.296705	1.3198	1014.42	FALSE	37
2022-09-15	09:57:58	0.31014	1.37956	1003.4	FALSE	37
2022-09-15	09:57:58	2.58128	11.482	1025.9	FALSE	37
2022-09-15	09:57:59	0.229478	1.02076	1004.42	FALSE	37
2022-09-15	09:57:59	1.35101	6.00956	1031.91	FALSE	37
2022-09-15	09:57:59	1.93029	8.58632	1013.01	FALSE	37
2022-09-15	09:57:59	1.29691	5.76892	1037.68	FALSE	37
2022-09-15	09:58:00	0.509275	2.26536	1015.27	FALSE	37
2022-09-15	09:58:00	0.829834	3.69127	1041.37	FALSE	37
2022-09-15	09:58:00	0.343219	1.52671	1016.8	FALSE	37
2022-09-15	09:58:00	0.141336	0.628691	1042	FALSE	37
2022-09-15	09:58:01	0.418639	1.86219	1018.66	FALSE	37
2022-09-15	09:58:01	0.253244	1.12648	1043.13	FALSE	37
2022-09-15	09:58:01	0.281438	1.25189	1019.92	FALSE	37
2022-09-15	09:58:02	1.05508	4.69321	1047.82	FALSE	37
2022-09-15	09:58:02	0.367341	1.63401	1021.55	FALSE	37
2022-09-15	09:58:02	2.23915	9.96019	1057.78	FALSE	37
2022-09-15	09:58:02	0.92215	4.10191	1025.65	FALSE	37
2022-09-15	09:58:03	1.95365	8.69023	1066.47	FALSE	37
2022-09-15	09:58:03	4.70602	20.9333	1046.58	1	38
2022-09-15	09:58:03	1.44592	6.43174	1072.9	FALSE	38
2022-09-15	09:58:03	2.14464	9.53979	1056.12	FALSE	38
2022-09-15	09:58:04	3.22103	14.3278	1087.23	1	39
2022-09-15	09:58:04	1.24276	5.52805	1061.65	FALSE	39
2022-09-15	09:58:04	1.67487	7.45016	1094.68	FALSE	39
2022-09-15	09:58:04	1.13721	5.05854	1066.71	FALSE	39
2022-09-15	09:58:05	0.698842	3.10859	1097.79	FALSE	39
2022-09-15	09:58:05	1.74276	7.75215	1074.46	FALSE	39
2022-09-15	09:58:05	0.548155	2.4383	1100.23	FALSE	39
2022-09-15	09:58:06	0.971718	4.3224	1078.79	FALSE	39
2022-09-15	09:58:06	2.53614	11.2813	1111.51	FALSE	39
2022-09-15	09:58:06	0.339809	1.51154	1080.3	FALSE	39
2022-09-15	09:58:06	1.62195	7.21476	1118.72	FALSE	39
2022-09-15	09:58:07	1.84413	8.20306	1088.5	FALSE	39
2022-09-15	09:58:07	0.741947	3.30033	1122.02	FALSE	39
2022-09-15	09:58:07	1.38347	6.15395	1094.65	FALSE	39
2022-09-15	09:58:07	1.30358	5.79858	1127.82	FALSE	39
2022-09-15	09:58:08	0.674262	2.99925	1097.65	FALSE	39
2022-09-15	09:58:08	1.02795	4.57253	1132.39	FALSE	39
2022-09-15	09:58:08	2.12032	9.43161	1107.08	FALSE	39
2022-09-15	09:58:08	0.236959	1.05404	1133.45	FALSE	39
2022-09-15	09:58:09	0.302812	1.34697	1108.43	FALSE	39
2022-09-15	09:58:09	0.143982	0.640461	1134.09	FALSE	39
2022-09-15	09:58:09	0.172685	0.768137	1109.2	FALSE	39
2022-09-15	09:58:10	-0.0166283	-0.073966	1134.09	FALSE	39
2022-09-15	09:58:10	0.365713	1.62676	1110.83	FALSE	39
2022-09-15	09:58:10	0.3707	1.64895	1135.74	FALSE	39
2022-09-15	09:58:10	0.454924	2.02359	1112.85	FALSE	39
2022-09-15	09:58:11	0.484339	2.15444	1137.89	FALSE	39
2022-09-15	09:58:11	0.402252	1.7893	1114.64	FALSE	39
2022-09-15	09:58:11	0.519402	2.3104	1140.2	FALSE	39
2022-09-15	09:58:11	0.373855	1.66298	1116.3	FALSE	39
2022-09-15	09:58:12	0.444338	1.9765	1142.18	FALSE	39
2022-09-15	09:58:12	0.41757	1.85743	1118.16	FALSE	39
2022-09-15	09:58:12	0.427697	1.90248	1144.08	FALSE	39
2022-09-15	09:58:12	0.421285	1.87396	1120.03	FALSE	39
2022-09-15	09:58:13	0.419758	1.86717	1145.95	FALSE	39
2022-09-15	09:58:13	0.417316	1.85631	1121.89	FALSE	39
2022-09-15	09:58:13	0.407443	1.81239	1147.76	FALSE	39
2022-09-15	09:58:14	0.380878	1.69422	1123.58	FALSE	39
2022-09-15	09:58:14	0.42042	1.87011	1149.63	FALSE	39
2022-09-15	09:58:14	0.339199	1.50882	1125.09	FALSE	39
2022-09-15	09:58:14	0.345255	1.53576	1151.17	FALSE	39
2022-09-15	09:58:15	0.346985	1.54346	1126.64	FALSE	39
2022-09-15	09:58:15	0.752684	3.34809	1154.51	FALSE	39
2022-09-15	09:58:15	2.37981	10.5859	1137.22	FALSE	39
2022-09-15	09:58:15	2.24897	10.0039	1164.52	FALSE	39
2022-09-15	09:58:16	1.61905	7.20186	1144.42	FALSE	39
2022-09-15	09:58:16	1.67788	7.46355	1171.98	FALSE	39
2022-09-15	09:58:16	0.473397	2.10576	1146.53	FALSE	39
2022-09-15	09:58:16	0.379046	1.68607	1173.67	FALSE	39
2022-09-15	09:58:17	0.438333	1.94979	1148.48	FALSE	39
2022-09-15	09:58:17	0.116705	0.519127	1174.19	FALSE	39
2022-09-15	09:58:17	0.00942772	0.0419364	1148.52	FALSE	39
2022-09-15	09:58:17	0.0495295	0.220317	1174.41	FALSE	39
2022-09-15	09:58:18	0.162099	0.721049	1149.24	FALSE	39
2022-09-15	09:58:18	0.345356	1.53621	1175.94	FALSE	39
2022-09-15	09:58:18	0.411565	1.83072	1151.07	FALSE	39
2022-09-15	09:58:19	0.171005	0.760664	1176.7	FALSE	39
2022-09-15	09:58:19	0.251616	1.11924	1152.19	FALSE	39
2022-09-15	09:58:19	0.220878	0.98251	1177.69	FALSE	39
2022-09-15	09:58:19	0.174975	0.778324	1152.97	FALSE	39
2022-09-15	09:58:20	0.278181	1.2374	1178.92	FALSE	39
2022-09-15	09:58:20	0.217214	0.966211	1153.94	FALSE	39
2022-09-15	09:58:20	0.19126	0.850763	1179.77	FALSE	39
2022-09-15	09:58:20	0.197926	0.880414	1154.82	FALSE	39
2022-09-15	09:58:21	0.193499	0.860722	1180.64	FALSE	39
2022-09-15	09:58:21	0.198028	0.880868	1155.7	FALSE	39
2022-09-15	09:58:21	0.183219	0.814995	1181.45	FALSE	39
2022-09-15	09:58:21	0.1707	0.759308	1156.46	FALSE	39
2022-09-15	09:58:22	0.175382	0.780134	1182.23	FALSE	39
2022-09-15	09:58:22	0.153397	0.682341	1157.14	FALSE	39
2022-09-15	09:58:22	0.143677	0.639104	1182.87	FALSE	39
2022-09-15	09:58:23	-0.0314883	-0.140066	1157.14	FALSE	39
2022-09-15	09:58:23	-0.264364	-1.17594	1182.87	FALSE	39
2022-09-15	09:58:23	-0.31159	-1.38601	1157.14	FALSE	39
2022-09-15	09:58:23	-0.179427	-0.798127	1182.87	FALSE	39
2022-09-15	09:58:24	-0.039987	-0.17787	1157.14	FALSE	39
2022-09-15	09:58:24	0.099962	0.444651	1183.31	FALSE	39
2022-09-15	09:58:24	0.206679	0.91935	1158.06	FALSE	39
2022-09-15	09:58:24	0.237214	1.05518	1184.37	FALSE	39
2022-09-15	09:58:25	0.150038	0.667399	1158.73	FALSE	39
2022-09-15	09:58:25	0.236603	1.05246	1185.42	FALSE	39
2022-09-15	09:58:25	0.518537	2.30656	1161.03	FALSE	39
2022-09-15	09:58:25	0.362048	1.61046	1187.03	FALSE	39
2022-09-15	09:58:26	0.291819	1.29807	1162.33	FALSE	39
2022-09-15	09:58:26	0.138283	0.61511	1187.65	FALSE	39
2022-09-15	09:58:26	0.053957	0.240012	1162.57	FALSE	39
2022-09-15	09:58:27	-0.0732694	-0.325917	1187.65	FALSE	39
2022-09-15	09:58:27	-0.252506	-1.1232	1162.57	FALSE	39
2022-09-15	09:58:27	-0.37159	-1.65291	1187.65	FALSE	39
2022-09-15	09:58:27	-0.363702	-1.61782	1162.57	FALSE	39
2022-09-15	09:58:28	-0.331132	-1.47294	1187.65	FALSE	39
2022-09-15	09:58:28	-0.390827	-1.73848	1162.57	FALSE	39
2022-09-15	09:58:28	-0.0890964	-0.396319	1187.65	FALSE	39
2022-09-15	09:58:28	0.470547	2.09309	1164.66	FALSE	39
2022-09-15	09:58:29	0.345713	1.5378	1189.19	FALSE	39
2022-09-15	09:58:29	2.99696	13.3311	1178	FALSE	39
2022-09-15	09:58:29	2.2479	9.99911	1199.18	FALSE	39
2022-09-15	09:58:29	1.59289	7.08549	1185.08	FALSE	39
2022-09-15	09:58:30	2.48836	11.0687	1210.25	FALSE	39
2022-09-15	09:58:30	0.28841	1.28291	1186.36	FALSE	39
2022-09-15	09:58:30	0.203168	0.903732	1211.16	FALSE	39
2022-09-15	09:58:31	0.27528	1.2245	1187.59	FALSE	39
2022-09-15	09:58:31	0.0251529	0.111885	1211.27	FALSE	39
2022-09-15	09:58:31	0.166883	0.742329	1188.33	FALSE	39
2022-09-15	09:58:31	0.0457636	0.203566	1211.47	FALSE	39
2022-09-15	09:58:32	0.247494	1.1009	1189.43	FALSE	39
2022-09-15	09:58:32	0.142557	0.634122	1212.11	FALSE	39
2022-09-15	09:58:32	0.306476	1.36327	1190.8	FALSE	39
2022-09-15	09:58:32	0.732532	3.25845	1215.36	FALSE	39
2022-09-15	09:58:33	0.405967	1.80582	1192.6	FALSE	39
2022-09-15	09:58:33	0.442354	1.96768	1217.33	FALSE	39
2022-09-15	09:58:33	0.129784	0.577305	1193.18	FALSE	39
2022-09-15	09:58:33	0.219962	0.978435	1218.31	FALSE	39
2022-09-15	09:58:34	0.107239	0.477021	1193.66	FALSE	39
2022-09-15	09:58:34	0.145662	0.647934	1218.96	FALSE	39
2022-09-15	09:58:34	-0.115916	-0.515618	1193.66	FALSE	39
2022-09-15	09:58:35	-0.0842618	-0.374813	1218.96	FALSE	39
2022-09-15	09:58:35	-0.216272	-0.962021	1193.66	FALSE	39
2022-09-15	09:58:35	-0.233524	-1.03876	1218.96	FALSE	39
2022-09-15	09:58:35	-0.161107	-0.716636	1193.66	FALSE	39
2022-09-15	09:58:36	-0.213727	-0.9507	1218.96	FALSE	39
2022-09-15	09:58:36	-0.203549	-0.905427	1193.66	FALSE	39
2022-09-15	09:58:36	-0.365279	-1.62483	1218.96	FALSE	39
2022-09-15	09:58:36	-0.0877733	-0.390433	1193.66	FALSE	39
2022-09-15	09:58:37	-0.0866537	-0.385453	1218.96	FALSE	39
2022-09-15	09:58:37	0.135026	0.600623	1194.26	FALSE	39
2022-09-15	09:58:37	0.262201	1.16632	1220.13	FALSE	39
2022-09-15	09:58:37	0.272532	1.21228	1195.47	FALSE	39
2022-09-15	09:58:38	0.170089	0.75659	1220.88	FALSE	39
2022-09-15	09:58:38	0.199504	0.887434	1196.36	FALSE	39
2022-09-15	09:58:38	0.307748	1.36892	1222.25	FALSE	39
2022-09-15	09:58:39	0.261743	1.16429	1197.52	FALSE	39
2022-09-15	09:58:39	0.258842	1.15138	1223.4	FALSE	39
2022-09-15	09:58:39	0.286476	1.2743	1198.79	FALSE	39
2022-09-15	09:58:39	0.196043	0.872038	1224.27	FALSE	39
2022-09-15	09:58:40	0.217875	0.969152	1199.76	FALSE	39
2022-09-15	09:58:40	0.172023	0.765193	1225.04	FALSE	39
2022-09-15	09:58:40	0.206679	0.91935	1200.68	FALSE	39
2022-09-15	09:58:40	0.200369	0.891281	1225.93	FALSE	39
2022-09-15	09:58:41	0.206171	0.91709	1201.6	FALSE	39
2022-09-15	09:58:41	0.220369	0.980245	1226.91	FALSE	39
2022-09-15	09:58:41	0.231005	1.02756	1202.63	FALSE	39
2022-09-15	09:58:41	0.226578	1.00786	1227.92	FALSE	39
2022-09-15	09:58:42	0.229275	1.01986	1203.65	FALSE	39
2022-09-15	09:58:42	0.236247	1.05087	1228.97	FALSE	39
2022-09-15	09:58:42	0.230751	1.02643	1204.67	FALSE	39
2022-09-15	09:58:43	0.24383	1.0846	1230.05	FALSE	39
2022-09-15	09:58:43	0.273804	1.21793	1205.89	FALSE	39
2022-09-15	09:58:43	0.270293	1.20232	1231.26	FALSE	39
2022-09-15	09:58:43	0.259148	1.15274	1207.04	FALSE	39
2022-09-15	09:58:44	0.296196	1.31754	1232.57	FALSE	39
2022-09-15	09:58:44	0.270445	1.20299	1208.25	FALSE	39
2022-09-15	09:58:44	0.233855	1.04023	1233.61	FALSE	39
2022-09-15	09:58:44	0.305967	1.361	1209.61	FALSE	39
2022-09-15	09:58:45	0.400267	1.78047	1235.39	FALSE	39
2022-09-15	09:58:45	0.365763	1.62699	1211.24	FALSE	39
2022-09-15	09:58:45	0.418486	1.86151	1237.26	FALSE	39
2022-09-15	09:58:45	0.358588	1.59507	1212.83	FALSE	39
2022-09-15	09:58:46	0.381336	1.69626	1238.95	FALSE	39
2022-09-15	09:58:46	0.322252	1.43344	1214.26	FALSE	39
2022-09-15	09:58:46	0.3793	1.6872	1240.64	FALSE	39
2022-09-15	09:58:47	0.448155	1.99348	1216.26	FALSE	39
2022-09-15	09:58:47	0.493906	2.19699	1242.84	FALSE	39
2022-09-15	09:58:47	0.36327	1.6159	1217.87	FALSE	39
2022-09-15	09:58:47	0.286018	1.27227	1244.11	FALSE	39
2022-09-15	09:58:48	0.318588	1.41714	1219.29	FALSE	39
2022-09-15	09:58:48	0.288613	1.28381	1245.39	FALSE	39
2022-09-15	09:58:48	0.347545	1.54595	1220.84	FALSE	39
2022-09-15	09:58:48	0.274466	1.22088	1246.61	FALSE	39
2022-09-15	09:58:49	0.289529	1.28788	1222.12	FALSE	39
2022-09-15	09:58:49	0.301082	1.33927	1247.95	FALSE	39
2022-09-15	09:58:49	0.25299	1.12535	1223.25	FALSE	39
2022-09-15	09:58:49	0.12729	0.566211	1248.52	FALSE	39
2022-09-15	09:58:50	0.000165643	0.000736813	1223.25	FALSE	39
2022-09-15	09:58:50	0.153499	0.682794	1249.2	FALSE	39
2022-09-15	09:58:50	0.12042	0.535652	1223.79	FALSE	39
2022-09-15	09:58:51	0.250598	1.11471	1250.32	FALSE	39
2022-09-15	09:58:51	0.246679	1.09728	1224.88	FALSE	39
2022-09-15	09:58:51	0.256298	1.14006	1251.46	FALSE	39
2022-09-15	09:58:51	0.22444	0.998354	1225.88	FALSE	39
2022-09-15	09:58:52	0.247443	1.10068	1252.56	FALSE	39
2022-09-15	09:58:52	0.244135	1.08596	1226.97	FALSE	39
2022-09-15	09:58:52	0.250649	1.11494	1253.67	FALSE	39
2022-09-15	09:58:52	0.247901	1.10271	1228.07	FALSE	39
2022-09-15	09:58:53	0.258944	1.15183	1254.82	FALSE	39
2022-09-15	09:58:53	0.269224	1.19756	1229.27	FALSE	39
2022-09-15	09:58:53	0.271311	1.20685	1256.03	FALSE	39
2022-09-15	09:58:53	0.265102	1.17923	1230.45	FALSE	39
2022-09-15	09:58:54	0.271412	1.20729	1257.24	FALSE	39
2022-09-15	09:58:54	0.221387	0.984774	1231.43	FALSE	39
2022-09-15	09:58:54	0.249937	1.11177	1258.35	FALSE	39
2022-09-15	09:58:55	0.308054	1.37029	1232.8	FALSE	39
2022-09-15	09:58:55	0.0380791	0.169383	1258.52	FALSE	39
2022-09-15	09:58:55	-0.105483	-0.469209	1232.8	FALSE	39
2022-09-15	09:58:55	-0.295305	-1.31358	1258.52	FALSE	39
2022-09-15	09:58:56	-0.423549	-1.88403	1232.8	FALSE	39
2022-09-15	09:58:56	-0.562684	-2.50293	1258.52	FALSE	39
2022-09-15	09:58:56	-0.573626	-2.5516	1232.8	FALSE	39
2022-09-15	09:58:56	-0.743498	-3.30723	1258.52	FALSE	39
2022-09-15	09:58:57	-0.75159	-3.34322	1232.8	FALSE	39
2022-09-15	09:58:57	-0.761462	-3.38714	1258.52	FALSE	39
2022-09-15	09:58:57	-0.693269	-3.0838	1232.8	FALSE	39
2022-09-15	09:58:57	-0.794847	-3.53564	1258.52	FALSE	39
2022-09-15	09:58:58	-0.662938	-2.94888	1232.8	FALSE	39
2022-09-15	09:58:58	-0.421463	-1.87475	1258.52	FALSE	39
2022-09-15	09:58:58	-0.211183	-0.939384	1232.8	FALSE	39
2022-09-15	09:58:59	-0.029758	-0.13237	1258.52	FALSE	39
2022-09-15	09:58:59	0.0426592	0.189757	1232.99	FALSE	39
2022-09-15	09:58:59	-0.00268423	-0.01194	1258.52	FALSE	39
2022-09-15	09:58:59	0.291463	1.29649	1234.29	FALSE	39
2022-09-15	09:59:00	0.056247	0.250198	1258.77	FALSE	39
2022-09-15	09:59:00	0.148919	0.662421	1234.95	FALSE	39
2022-09-15	09:59:00	0.0919213	0.408884	1259.18	FALSE	39
2022-09-15	09:59:00	0.26327	1.17108	1236.12	FALSE	39
2022-09-15	09:59:01	-0.0894527	-0.397904	1259.18	FALSE	39
2022-09-15	09:59:01	0.0436262	0.194058	1236.32	FALSE	39
2022-09-15	09:59:01	-0.251946	-1.12071	1259.18	FALSE	39
2022-09-15	09:59:01	0.0197585	0.0878898	1236.4	FALSE	39
2022-09-15	09:59:02	-0.0174934	-0.0778141	1259.18	FALSE	39
2022-09-15	09:59:02	0.26556	1.18126	1237.59	FALSE	39
2022-09-15	09:59:02	0.0438806	0.19519	1259.37	FALSE	39
2022-09-15	09:59:02	-0.135356	-0.602091	1237.59	FALSE	39
2022-09-15	09:59:03	-0.0304196	-0.135312	1259.37	FALSE	39
2022-09-15	09:59:03	0.760267	3.38182	1240.97	FALSE	39
2022-09-15	09:59:03	0.377316	1.67838	1261.05	FALSE	39
2022-09-15	09:59:04	0.444542	1.97741	1242.94	FALSE	39
2022-09-15	09:59:04	0.463015	2.05958	1263.11	FALSE	39
2022-09-15	09:59:04	0.447137	1.98895	1244.93	FALSE	39
2022-09-15	09:59:04	0.452023	2.01069	1265.12	FALSE	39
2022-09-15	09:59:05	0.485763	2.16077	1247.09	FALSE	39
2022-09-15	09:59:05	0.497265	2.21193	1267.33	FALSE	39
2022-09-15	09:59:05	0.483117	2.149	1249.24	FALSE	39
2022-09-15	09:59:05	0.453244	2.01612	1269.35	FALSE	39
2022-09-15	09:59:06	0.424949	1.89026	1251.13	FALSE	39
2022-09-15	09:59:06	0.412176	1.83344	1271.18	FALSE	39
2022-09-15	09:59:06	0.552532	2.45777	1253.59	FALSE	39
2022-09-15	09:59:06	0.539758	2.40095	1273.58	FALSE	39
2022-09-15	09:59:07	0.911717	4.0555	1257.65	FALSE	39
2022-09-15	09:59:07	2.62357	11.6702	1285.25	FALSE	39
2022-09-15	09:59:07	2.04251	9.08549	1266.73	FALSE	39
2022-09-15	09:59:08	5.78286	25.7233	1310.98	1	40
2022-09-15	09:59:08	4.9252	21.9083	1288.64	1	41
2022-09-15	09:59:08	2.24128	9.96966	1320.95	FALSE	41
2022-09-15	09:59:08	2.08673	9.28219	1297.92	FALSE	41
2022-09-15	09:59:09	1.45391	6.46728	1327.42	FALSE	41
2022-09-15	09:59:09	1.82663	8.12522	1306.05	FALSE	41
2022-09-15	09:59:09	2.24139	9.97015	1337.39	FALSE	41
2022-09-15	09:59:09	1.38342	6.15373	1312.2	FALSE	41
2022-09-15	09:59:10	-0.0513356	-0.228351	1337.39	FALSE	41
2022-09-15	09:59:10	-0.326348	-1.45166	1312.2	FALSE	41
2022-09-15	09:59:10	0.0057127	0.0254112	1337.41	FALSE	41
2022-09-15	09:59:10	-0.335814	-1.49377	1312.2	FALSE	41
2022-09-15	09:59:11	-0.310369	-1.38058	1337.41	FALSE	41
2022-09-15	09:59:11	-0.4293	-1.90961	1312.2	FALSE	41
2022-09-15	09:59:11	-0.564312	-2.51017	1337.41	FALSE	41
2022-09-15	09:59:12	-0.440292	-1.95851	1312.2	FALSE	41
2022-09-15	09:59:12	-0.326755	-1.45347	1337.41	FALSE	41
2022-09-15	09:59:12	-0.197697	-0.879396	1312.2	FALSE	41
2022-09-15	09:59:12	-0.0184094	-0.0818887	1337.41	FALSE	41
2022-09-15	09:59:13	0.15355	0.683021	1312.88	FALSE	41
2022-09-15	09:59:13	0.767646	3.41464	1340.83	FALSE	41
2022-09-15	09:59:13	1.92413	8.55892	1321.44	FALSE	41
2022-09-15	09:59:13	0.427239	1.90044	1342.73	FALSE	41
2022-09-15	09:59:14	0.85701	3.81215	1325.26	FALSE	41
2022-09-15	09:59:14	1.09034	4.85005	1347.58	FALSE	41
2022-09-15	09:59:14	0.623524	2.77356	1328.03	FALSE	41
2022-09-15	09:59:14	0.314059	1.397	1348.97	FALSE	41
2022-09-15	09:59:15	0.367545	1.63491	1329.66	FALSE	41
2022-09-15	09:59:15	0.459962	2.046	1351.02	FALSE	41
2022-09-15	09:59:15	0.54556	2.42676	1332.09	FALSE	41
2022-09-15	09:59:16	0.678537	3.01827	1354.04	FALSE	41
2022-09-15	09:59:16	0.592379	2.63502	1334.73	FALSE	41
2022-09-15	09:59:16	0.52556	2.3378	1356.37	FALSE	41
2022-09-15	09:59:16	0.485305	2.15873	1336.88	FALSE	41
2022-09-15	09:59:17	0.810903	3.60706	1359.98	FALSE	41
2022-09-15	09:59:17	0.998079	4.43966	1341.32	FALSE	41
2022-09-15	09:59:17	0.622405	2.76858	1362.75	FALSE	41
2022-09-15	09:59:17	0.571921	2.54402	1343.87	FALSE	41
2022-09-15	09:59:18	0.490903	2.18363	1364.93	FALSE	41
2022-09-15	09:59:18	0.601183	2.67418	1346.54	FALSE	41
2022-09-15	09:59:18	0.693906	3.08663	1368.02	FALSE	41
2022-09-15	09:59:18	0.669427	2.97775	1349.52	FALSE	41
2022-09-15	09:59:19	0.910445	4.04984	1372.07	FALSE	41
2022-09-15	09:59:19	1.16419	5.17855	1354.7	FALSE	41
2022-09-15	09:59:19	0.902303	4.01362	1376.08	FALSE	41
2022-09-15	09:59:20	0.94383	4.19834	1358.9	FALSE	41
2022-09-15	09:59:20	0.612837	2.72602	1378.81	FALSE	41
2022-09-15	09:59:20	0.896654	3.9885	1362.89	FALSE	41
2022-09-15	09:59:20	0.943423	4.19653	1383.01	FALSE	41
2022-09-15	09:59:21	1.33197	5.92487	1368.81	FALSE	41
2022-09-15	09:59:21	1.57492	7.00556	1390.01	FALSE	41
2022-09-15	09:59:21	2.41538	10.7441	1379.55	FALSE	41
2022-09-15	09:59:21	3.29355	14.6504	1404.66	1	42
2022-09-15	09:59:22	3.61014	16.0586	1395.61	1	43
2022-09-15	09:59:22	3.40658	15.1531	1419.82	1	44
2022-09-15	09:59:22	1.77609	7.9004	1403.51	FALSE	44
2022-09-15	09:59:22	2.28831	10.1789	1429.99	FALSE	44
2022-09-15	09:59:23	2.99233	13.3105	1416.82	FALSE	44
2022-09-15	09:59:23	3.24714	14.4439	1444.44	1	45
2022-09-15	09:59:23	1.98815	8.84369	1425.67	FALSE	45
2022-09-15	09:59:24	1.0022	4.45799	1448.9	FALSE	45
2022-09-15	09:59:24	0.571514	2.54221	1428.21	FALSE	45
2022-09-15	09:59:24	0.652379	2.90191	1451.8	FALSE	45
2022-09-15	09:59:24	0.859809	3.8246	1432.03	FALSE	45
2022-09-15	09:59:25	1.58892	7.06783	1458.87	FALSE	45
2022-09-15	09:59:25	3.28627	14.618	1446.65	1	46
2022-09-15	09:59:25	2.6478	11.7779	1470.64	FALSE	46
2022-09-15	09:59:25	1.34536	5.98443	1452.64	FALSE	46
2022-09-15	09:59:26	2.62602	11.6811	1482.33	FALSE	46
2022-09-15	09:59:26	5.78011	25.7111	1478.35	1	47
2022-09-15	09:59:26	3.82195	17.0008	1499.33	1	48
2022-09-15	09:59:26	6.94113	30.8755	1509.22	1	49
2022-09-15	09:59:27	6.73253	29.9476	1529.27	1	50
2022-09-15	09:59:27	5.76276	25.6339	1534.86	1	51
2022-09-15	09:59:27	2.58088	11.4803	1540.75	FALSE	51
2022-09-15	09:59:28	1.74551	7.76438	1542.62	FALSE	51
2022-09-15	09:59:28	0.555891	2.47271	1543.23	FALSE	51
2022-09-15	09:59:28	0.134568	0.598585	1543.22	FALSE	51
2022-09-15	09:59:28	-0.268231	-1.19315	1543.23	FALSE	51
2022-09-15	09:59:29	-0.6379	-2.83751	1543.22	FALSE	51
2022-09-15	09:59:29	-0.769503	-3.4229	1543.23	FALSE	51
2022-09-15	09:59:29	-0.891793	-3.96687	1543.22	FALSE	51
2022-09-15	09:59:29	-0.730216	-3.24815	1543.23	FALSE	51
2022-09-15	09:59:30	-0.433778	-1.92953	1543.22	FALSE	51
2022-09-15	09:59:30	-0.431946	-1.92138	1543.23	FALSE	51
2022-09-15	09:59:30	-0.211437	-0.940514	1543.22	FALSE	51
2022-09-15	09:59:30	-0.131946	-0.586922	1543.23	FALSE	51
2022-09-15	09:59:31	-0.0552033	-0.245555	1543.22	FALSE	51
2022-09-15	09:59:31	0.0466287	0.207414	1543.43	FALSE	51
2022-09-15	09:59:31	0.0330919	0.147199	1543.37	FALSE	51
2022-09-15	09:59:32	0.107901	0.479965	1543.91	FALSE	51
2022-09-15	09:59:32	0.278792	1.24012	1544.61	FALSE	51
2022-09-15	09:59:32	0.328257	1.46015	1545.37	FALSE	51
2022-09-15	09:59:32	0.722862	3.21543	1547.82	FALSE	51
2022-09-15	09:59:33	1.70958	7.60455	1552.98	FALSE	51
2022-09-15	09:59:33	2.59289	11.5337	1559.36	FALSE	51
2022-09-15	09:59:33	2.90586	12.9258	1565.9	FALSE	51
2022-09-15	09:59:33	1.66098	7.38837	1566.75	FALSE	51
2022-09-15	09:59:34	0.725763	3.22834	1569.13	FALSE	51
2022-09-15	09:59:34	0.358944	1.59665	1568.34	FALSE	51
2022-09-15	09:59:34	1.50006	6.67257	1575.81	FALSE	51
2022-09-15	09:59:34	0.501081	2.22891	1570.57	FALSE	51
2022-09-15	09:59:35	0.566069	2.51799	1578.32	FALSE	51
2022-09-15	09:59:35	0.59243	2.63525	1573.21	FALSE	51
2022-09-15	09:59:35	0.655585	2.91617	1581.24	FALSE	51
2022-09-15	09:59:35	2.05996	9.16311	1582.37	FALSE	51
2022-09-15	09:59:36	2.99869	13.3388	1594.58	FALSE	51
2022-09-15	09:59:36	3.30281	14.6916	1597.06	1	52
2022-09-15	09:59:36	2.07859	9.24598	1603.82	FALSE	52
2022-09-15	09:59:37	1.31268	5.83906	1602.9	FALSE	52
2022-09-15	09:59:37	0.8907	3.96201	1607.79	FALSE	52
2022-09-15	09:59:37	0.609987	2.71334	1605.61	FALSE	52
2022-09-15	09:59:37	0.541794	2.41001	1610.2	FALSE	52
2022-09-15	09:59:38	0.292685	1.30192	1606.92	FALSE	52
2022-09-15	09:59:38	0.327341	1.45608	1611.65	FALSE	52
2022-09-15	09:59:38	0.283677	1.26185	1608.18	FALSE	52
2022-09-15	09:59:38	0.331056	1.4726	1613.13	FALSE	52
2022-09-15	09:59:39	0.263575	1.17243	1609.35	FALSE	52
2022-09-15	09:59:39	0.261081	1.16134	1614.29	FALSE	52
2022-09-15	09:59:39	0.209122	0.930216	1610.28	FALSE	52
2022-09-15	09:59:39	0.0181809	0.0808723	1614.37	FALSE	52
2022-09-15	09:59:40	-0.0219209	-0.0975085	1610.28	FALSE	52
2022-09-15	09:59:40	0.194975	0.867288	1615.23	FALSE	52
2022-09-15	09:59:40	1.84637	8.21302	1618.49	FALSE	52
2022-09-15	09:59:41	1.51375	6.73346	1621.97	FALSE	52
2022-09-15	09:59:41	1.89767	8.44122	1626.93	FALSE	52
2022-09-15	09:59:41	1.44093	6.40954	1628.38	FALSE	52
2022-09-15	09:59:41	1.00154	4.45505	1631.39	FALSE	52
2022-09-15	09:59:42	0.953499	4.24135	1632.62	FALSE	52
2022-09-15	09:59:42	0.916501	4.07678	1635.47	FALSE	52
2022-09-15	09:59:42	0.895585	3.98374	1636.6	FALSE	52
2022-09-15	09:59:42	0.986527	4.38827	1639.85	FALSE	52
2022-09-15	09:59:43	0.993601	4.41974	1641.02	FALSE	52
2022-09-15	09:59:43	1.00933	4.4897	1644.34	FALSE	52
2022-09-15	09:59:43	0.952328	4.23615	1645.26	FALSE	52
2022-09-15	09:59:43	0.860929	3.82958	1648.17	FALSE	52
2022-09-15	09:59:44	0.931921	4.14537	1649.4	FALSE	52
2022-09-15	09:59:44	0.563168	2.50508	1650.68	FALSE	52
2022-09-15	09:59:44	0.528715	2.35183	1651.76	FALSE	52
2022-09-15	09:59:45	0.250394	1.1138	1651.79	FALSE	52
2022-09-15	09:59:45	0.0942623	0.419298	1652.18	FALSE	52
2022-09-15	09:59:45	0.126069	0.56078	1652.35	FALSE	52
2022-09-15	09:59:45	0.102405	0.455518	1652.63	FALSE	52
2022-09-15	09:59:46	-0.892251	-3.96891	1652.35	FALSE	52
2022-09-15	09:59:46	0.682252	3.03479	1655.67	FALSE	52
2022-09-15	09:59:46	-0.108638	-0.483244	1652.35	FALSE	52
2022-09-15	09:59:46	-0.0226333	-0.100677	1655.67	FALSE	52
2022-09-15	09:59:47	-0.0257376	-0.114486	1652.35	FALSE	52
2022-09-15	09:59:47	-0.139936	-0.622463	1655.67	FALSE	52
2022-09-15	09:59:47	-0.163346	-0.726596	1652.35	FALSE	52
2022-09-15	09:59:47	-0.285687	-1.27079	1655.67	FALSE	52
2022-09-15	09:59:48	-0.43846	-1.95036	1652.35	FALSE	52
2022-09-15	09:59:48	-0.482786	-2.14753	1655.67	FALSE	52
2022-09-15	09:59:48	-0.485381	-2.15907	1652.35	FALSE	52
2022-09-15	09:59:49	-0.42075	-1.87158	1655.67	FALSE	52
2022-09-15	09:59:49	-0.414847	-1.84532	1652.35	FALSE	52
2022-09-15	09:59:49	-0.152964	-0.680414	1655.67	FALSE	52
2022-09-15	09:59:49	0.05813	0.258574	1652.61	FALSE	52
2022-09-15	09:59:50	0.262405	1.16723	1656.83	FALSE	52
2022-09-15	09:59:50	0.330852	1.4717	1654.08	FALSE	52
2022-09-15	09:59:50	0.306629	1.36395	1658.2	FALSE	52
2022-09-15	09:59:50	0.350751	1.56021	1655.64	FALSE	52
2022-09-15	09:59:51	0.356654	1.58647	1659.78	FALSE	52
2022-09-15	09:59:51	0.28042	1.24736	1656.89	FALSE	52
2022-09-15	09:59:51	0.125814	0.559646	1660.34	FALSE	52
2022-09-15	09:59:51	0.141489	0.629371	1657.52	FALSE	52
2022-09-15	09:59:52	0.0264252	0.117545	1660.46	FALSE	52
2022-09-15	09:59:52	-0.0352542	-0.156818	1657.52	FALSE	52
2022-09-15	09:59:52	-0.106399	-0.473284	1660.46	FALSE	52
2022-09-15	09:59:53	-0.11617	-0.516747	1657.52	FALSE	52
2022-09-15	09:59:53	-0.0475697	-0.2116	1660.46	FALSE	52
2022-09-15	09:59:53	0.0319723	0.142219	1657.66	FALSE	52
2022-09-15	09:59:53	0.100471	0.446915	1660.91	FALSE	52
2022-09-15	09:59:54	0.158283	0.704074	1658.37	FALSE	52
2022-09-15	09:59:54	0.245916	1.09388	1662	FALSE	52
2022-09-15	09:59:54	0.0983844	0.437633	1658.8	FALSE	52
2022-09-15	09:59:54	0.154415	0.686869	1662.69	FALSE	52
2022-09-15	09:59:55	0.064186	0.285512	1659.09	FALSE	52
2022-09-15	09:59:55	0.188105	0.836729	1663.52	FALSE	52
2022-09-15	09:59:55	0.268155	1.19281	1660.28	FALSE	52
2022-09-15	09:59:55	0.179911	0.80028	1664.33	FALSE	52
2022-09-15	09:59:56	0.354262	1.57583	1661.86	FALSE	52
2022-09-15	09:59:56	0.21411	0.952404	1665.28	FALSE	52
2022-09-15	09:59:56	0.392634	1.74651	1663.6	FALSE	52
2022-09-15	09:59:57	0.280674	1.24849	1666.53	FALSE	52
2022-09-15	09:59:57	0.436094	1.93983	1665.54	FALSE	52
2022-09-15	09:59:57	0.259708	1.15523	1667.68	FALSE	52
2022-09-15	09:59:57	0.450751	2.00503	1667.55	FALSE	52
2022-09-15	09:59:58	0.218639	0.97255	1668.65	FALSE	52
2022-09-15	09:59:58	0.2907	1.29309	1668.84	FALSE	52
2022-09-15	09:59:58	0.178435	0.793715	1669.45	FALSE	52
2022-09-15	09:59:58	0.224084	0.99677	1669.84	FALSE	52
2022-09-15	09:59:59	-0.0425824	-0.189415	1669.45	FALSE	52
2022-09-15	09:59:59	0.0475956	0.211715	1670.05	FALSE	52
2022-09-15	09:59:59	0.0151783	0.0675161	1669.52	FALSE	52
2022-09-15	09:59:59	0.205916	0.915956	1670.97	FALSE	52
2022-09-15	10:00:00	-0.104414	-0.464454	1669.52	FALSE	52
2022-09-15	10:00:00	-0.053473	-0.237859	1670.97	FALSE	52
2022-09-15	10:00:00	0.888766	3.95341	1673.47	FALSE	52
2022-09-15	10:00:01	0.305204	1.35761	1672.32	FALSE	52
2022-09-15	10:00:01	1.18413	5.26725	1678.74	FALSE	52
2022-09-15	10:00:01	3.0422	13.5323	1685.86	1	53
2022-09-15	10:00:01	0.253295	1.12671	1679.86	FALSE	53
2022-09-15	10:00:02	1.02001	4.53721	1690.39	FALSE	53
2022-09-15	10:00:02	0.527952	2.34844	1682.21	FALSE	53
2022-09-15	10:00:02	0.233041	1.03661	1691.43	FALSE	53
2022-09-15	10:00:02	0.317316	1.41149	1683.62	FALSE	53
2022-09-15	10:00:03	0.218893	0.97368	1692.4	FALSE	53
2022-09-15	10:00:03	0.161692	0.719238	1684.34	FALSE	53
2022-09-15	10:00:03	1.05294	4.68369	1697.09	FALSE	53
2022-09-15	10:00:03	0.24215	1.07713	1685.42	FALSE	53
2022-09-15	10:00:04	0.241031	1.07215	1698.16	FALSE	53
2022-09-15	10:00:04	1.17039	5.20613	1690.62	FALSE	53
2022-09-15	10:00:04	0.308868	1.37391	1699.53	FALSE	53
2022-09-15	10:00:04	0.500878	2.22801	1692.85	FALSE	53
2022-09-15	10:00:05	0.78673	3.49953	1703.03	FALSE	53
2022-09-15	10:00:05	0.1193	0.53067	1693.38	FALSE	53
2022-09-15	10:00:05	0.662303	2.94606	1705.98	FALSE	53
2022-09-15	10:00:06	0.510394	2.27033	1695.65	FALSE	53
2022-09-15	10:00:06	0.637112	2.834	1708.81	FALSE	53
2022-09-15	10:00:06	1.59055	7.07508	1702.73	FALSE	53
2022-09-15	10:00:06	0.614619	2.73395	1711.55	FALSE	53
2022-09-15	10:00:07	0.508715	2.26287	1704.99	FALSE	53
2022-09-15	10:00:07	0.994975	4.42585	1715.97	FALSE	53
2022-09-15	10:00:07	0.218181	0.970513	1705.96	FALSE	53
2022-09-15	10:00:07	0.0254582	0.113243	1716.09	FALSE	53
2022-09-15	10:00:08	0.411158	1.82891	1707.79	FALSE	53
2022-09-15	10:00:08	0.0391987	0.174364	1716.26	FALSE	53
2022-09-15	10:00:08	0.114059	0.507357	1708.3	FALSE	53
2022-09-15	10:00:08	0.313702	1.39541	1717.66	FALSE	53
2022-09-15	10:00:09	0.104135	0.463213	1708.76	FALSE	53
2022-09-15	10:00:09	-0.00298957	-0.0132982	1717.66	FALSE	53
2022-09-15	10:00:09	-0.0575951	-0.256195	1708.76	FALSE	53
2022-09-15	10:00:10	-0.0896562	-0.398809	1717.66	FALSE	53
2022-09-15	10:00:10	-0.142328	-0.633103	1708.76	FALSE	53
2022-09-15	10:00:10	-0.0802923	-0.357156	1717.66	FALSE	53
2022-09-15	10:00:10	-0.0704705	-0.313467	1708.76	FALSE	53
2022-09-15	10:00:11	-0.0842109	-0.374587	1717.66	FALSE	53
2022-09-15	10:00:11	-0.149758	-0.666154	1708.76	FALSE	53
2022-09-15	10:00:11	-0.000241466	-0.00107409	1717.66	FALSE	53
2022-09-15	10:00:11	-0.126654	-0.563382	1708.76	FALSE	53
2022-09-15	10:00:12	-0.0944908	-0.420314	1717.66	FALSE	53
2022-09-15	10:00:12	-0.115509	-0.513807	1708.76	FALSE	53
2022-09-15	10:00:12	-0.129198	-0.574699	1717.66	FALSE	53
2022-09-15	10:00:12	-0.0537275	-0.238991	1708.76	FALSE	53
2022-09-15	10:00:13	-0.00609391	-0.0271069	1717.66	FALSE	53
2022-09-15	10:00:13	-0.068842	-0.306223	1708.76	FALSE	53
2022-09-15	10:00:13	-0.14874	-0.661625	1717.66	FALSE	53
2022-09-15	10:00:14	-0.097646	-0.434349	1708.76	FALSE	53
2022-09-15	10:00:14	-0.195407	-0.869209	1717.66	FALSE	53
2022-09-15	10:00:14	-0.033931	-0.150932	1708.76	FALSE	53
2022-09-15	10:00:14	0.0310053	0.137918	1717.79	FALSE	53
2022-09-15	10:00:15	-0.0589692	-0.262307	1708.76	FALSE	53
2022-09-15	10:00:15	-0.126654	-0.563382	1717.79	FALSE	53
2022-09-15	10:00:15	0.105916	0.471136	1709.23	FALSE	53
2022-09-15	10:00:15	-0.0446689	-0.198696	1717.79	FALSE	53
2022-09-15	10:00:16	0.0110053	0.0489538	1709.28	FALSE	53
2022-09-15	10:00:16	0.228003	1.0142	1718.81	FALSE	53
2022-09-15	10:00:16	0.0073921	0.0328815	1709.31	FALSE	53
2022-09-15	10:00:16	0.347799	1.54708	1720.36	FALSE	53
2022-09-15	10:00:17	1.5681	6.97522	1716.29	FALSE	53
2022-09-15	10:00:17	0.0550257	0.244765	1720.6	FALSE	53
2022-09-15	10:00:17	0.587646	2.61397	1718.9	FALSE	53
2022-09-15	10:00:18	0.827188	3.6795	1724.28	FALSE	53
2022-09-15	10:00:18	0.074415	0.331013	1719.23	FALSE	53
2022-09-15	10:00:18	0.797265	3.54639	1727.83	FALSE	53
2022-09-15	10:00:18	0.444796	1.97854	1721.21	FALSE	53
2022-09-15	10:00:19	0.285	1.26774	1729.09	FALSE	53
2022-09-15	10:00:19	0.662761	2.94809	1724.16	FALSE	53
2022-09-15	10:00:19	0.582506	2.5911	1731.69	FALSE	53
2022-09-15	10:00:19	0.144542	0.642952	1724.8	FALSE	53
2022-09-15	10:00:20	0.781489	3.47622	1735.16	FALSE	53
2022-09-15	10:00:20	0.54617	2.42947	1727.23	FALSE	53
2022-09-15	10:00:20	0.72617	3.23015	1738.39	FALSE	53
2022-09-15	10:00:20	2.04704	9.10564	1736.34	FALSE	53
2022-09-15	10:00:21	0.365509	1.62586	1740.02	FALSE	53
2022-09-15	10:00:21	0.854364	3.80038	1740.14	FALSE	53
2022-09-15	10:00:21	3.60698	16.0446	1756.06	1	54
2022-09-15	10:00:22	0.537723	2.3919	1742.53	FALSE	54
2022-09-15	10:00:22	1.06887	4.75455	1760.82	FALSE	54
2022-09-15	10:00:22	2.30434	10.2502	1752.78	FALSE	54
2022-09-15	10:00:22	0.150038	0.667399	1761.48	FALSE	54
2022-09-15	10:00:23	0.169886	0.755687	1753.54	FALSE	54
2022-09-15	10:00:23	0.310344	1.38047	1762.86	FALSE	54
2022-09-15	10:00:23	0.0777228	0.345727	1753.88	FALSE	54
2022-09-15	10:00:23	-0.00375294	-0.0166938	1762.86	FALSE	54
2022-09-15	10:00:24	0.212277	0.944251	1754.83	FALSE	54
2022-09-15	10:00:24	0.150344	0.66876	1763.53	FALSE	54
2022-09-15	10:00:24	-0.0160175	-0.071249	1754.83	FALSE	54
2022-09-15	10:00:24	0.100674	0.447818	1763.98	FALSE	54
2022-09-15	10:00:25	-0.0963738	-0.42869	1754.83	FALSE	54
2022-09-15	10:00:25	0.00449134	0.0199784	1764	FALSE	54
2022-09-15	10:00:25	0.0775702	0.345048	1755.17	FALSE	54
2022-09-15	10:00:26	1.41589	6.29816	1770.3	FALSE	54
2022-09-15	10:00:26	0.913142	4.06184	1759.23	FALSE	54
2022-09-15	10:00:26	2.03701	9.06103	1779.36	FALSE	54
2022-09-15	10:00:26	2.67233	11.8871	1771.12	FALSE	54
2022-09-15	10:00:27	0.36673	1.63129	1780.99	FALSE	54
2022-09-15	10:00:27	0.483473	2.15058	1773.27	FALSE	54
2022-09-15	10:00:27	1.8335	8.15577	1789.15	FALSE	54
2022-09-15	10:00:27	4.59238	20.4278	1793.7	1	55
2022-09-15	10:00:28	4.99105	22.2012	1811.35	1	56
2022-09-15	10:00:28	8.60098	38.2589	1831.96	1	57
2022-09-15	10:00:28	10.3824	46.183	1857.53	1	58
2022-09-15	10:00:28	6.23965	27.7552	1859.71	1	59
2022-09-15	10:00:29	3.25838	14.4939	1872.03	1	60
2022-09-15	10:00:29	2.58307	11.49	1871.2	FALSE	60
2022-09-15	10:00:29	3.93253	17.4927	1889.52	1	61
2022-09-15	10:00:29	2.54011	11.2989	1882.5	FALSE	61
2022-09-15	10:00:30	1.15243	5.12624	1894.64	FALSE	61
2022-09-15	10:00:30	0.801997	3.56744	1886.07	FALSE	61
2022-09-15	10:00:30	1.45477	6.47111	1901.12	FALSE	61
2022-09-15	10:00:31	1.69676	7.54753	1893.62	FALSE	61
2022-09-15	10:00:31	1.87482	8.33957	1909.46	FALSE	61
2022-09-15	10:00:31	0.924338	4.11164	1897.73	FALSE	61
2022-09-15	10:00:31	0.718537	3.1962	1912.65	FALSE	61
2022-09-15	10:00:32	0.620776	2.76134	1900.49	FALSE	61
2022-09-15	10:00:32	-0.13103	-0.582848	1912.65	FALSE	61
2022-09-15	10:00:32	-0.28075	-1.24883	1900.49	FALSE	61
2022-09-15	10:00:32	-0.0980532	-0.43616	1912.65	FALSE	61
2022-09-15	10:00:33	-0.189503	-0.842947	1900.49	FALSE	61
2022-09-15	10:00:33	-0.0104196	-0.0463485	1912.65	FALSE	61
2022-09-15	10:00:33	0.0970612	0.431748	1900.92	FALSE	61
2022-09-15	10:00:33	0.093957	0.41794	1913.07	FALSE	61
2022-09-15	10:00:34	0.269428	1.19847	1902.12	FALSE	61
2022-09-15	10:00:34	0.216501	0.96304	1914.03	FALSE	61
2022-09-15	10:00:34	0.42327	1.88279	1904	FALSE	61
2022-09-15	10:00:35	0.432328	1.92308	1915.96	FALSE	61
2022-09-15	10:00:35	0.905051	4.02585	1908.03	FALSE	61
2022-09-15	10:00:35	0.761896	3.38907	1919.34	FALSE	61
2022-09-15	10:00:35	1.4364	6.38939	1914.42	FALSE	61
2022-09-15	10:00:36	2.49431	11.0952	1930.44	FALSE	61
2022-09-15	10:00:36	5.11828	22.7671	1937.19	1	62
2022-09-15	10:00:36	2.25207	10.0177	1940.46	FALSE	62
2022-09-15	10:00:36	1.96424	8.73733	1945.92	FALSE	62
2022-09-15	10:00:37	2.4479	10.8887	1951.35	FALSE	62
2022-09-15	10:00:37	1.96256	8.72986	1954.65	FALSE	62
2022-09-15	10:00:37	1.21172	5.38997	1956.74	FALSE	62
2022-09-15	10:00:37	0.612023	2.7224	1957.38	FALSE	62
2022-09-15	10:00:38	0.470751	2.09399	1958.83	FALSE	62
2022-09-15	10:00:38	0.420827	1.87192	1959.25	FALSE	62
2022-09-15	10:00:38	0.35701	1.58805	1960.42	FALSE	62
2022-09-15	10:00:39	0.362048	1.61046	1960.86	FALSE	62
2022-09-15	10:00:39	0.387545	1.72388	1962.14	FALSE	62
2022-09-15	10:00:39	0.316858	1.40945	1962.27	FALSE	62
2022-09-15	10:00:39	0.341641	1.51969	1963.66	FALSE	62
2022-09-15	10:00:40	0.439198	1.95364	1964.22	FALSE	62
2022-09-15	10:00:40	0.25472	1.13305	1964.79	FALSE	62
2022-09-15	10:00:40	0.418741	1.86264	1966.08	FALSE	62
2022-09-15	10:00:40	0.238944	1.06287	1965.86	FALSE	62
2022-09-15	10:00:41	0.505305	2.2477	1968.33	FALSE	62
2022-09-15	10:00:41	0.233448	1.03842	1966.9	FALSE	62
2022-09-15	10:00:41	0.717519	3.19167	1971.52	FALSE	62
2022-09-15	10:00:41	0.998486	4.44147	1971.34	FALSE	62
2022-09-15	10:00:42	1.29645	5.76687	1977.29	FALSE	62
2022-09-15	10:00:42	1.43065	6.36382	1977.7	FALSE	62
2022-09-15	10:00:42	1.41635	6.30021	1983.59	FALSE	62
2022-09-15	10:00:43	0.567952	2.52636	1980.23	FALSE	62
2022-09-15	10:00:43	0.400776	1.78273	1985.37	FALSE	62
2022-09-15	10:00:43	0.68841	3.06219	1983.29	FALSE	62
2022-09-15	10:00:43	0.504949	2.24611	1987.62	FALSE	62
2022-09-15	10:00:44	0.90444	4.02313	1987.31	FALSE	62
2022-09-15	10:00:44	0.992786	4.41611	1992.04	FALSE	62
2022-09-15	10:00:44	2.75172	12.2402	1999.55	FALSE	62
2022-09-15	10:00:44	1.1593	5.1568	1997.19	FALSE	62
2022-09-15	10:00:45	1.33401	5.93394	2005.49	FALSE	62
2022-09-15	10:00:45	0.603626	2.68505	1999.88	FALSE	62
2022-09-15	10:00:45	0.584389	2.59948	2008.09	FALSE	62
2022-09-15	10:00:45	0.417316	1.85631	2001.73	FALSE	62
2022-09-15	10:00:46	0.44785	1.99213	2010.08	FALSE	62
2022-09-15	10:00:46	0.326679	1.45313	2003.19	FALSE	62
2022-09-15	10:00:46	0.37299	1.65913	2011.74	FALSE	62
2022-09-15	10:00:47	0.4564	2.03016	2005.22	FALSE	62
2022-09-15	10:00:47	0.334669	1.48867	2013.23	FALSE	62
2022-09-15	10:00:47	0.416959	1.85472	2007.07	FALSE	62
2022-09-15	10:00:47	0.33014	1.46853	2014.7	FALSE	62
2022-09-15	10:00:48	0.384746	1.71143	2008.78	FALSE	62
2022-09-15	10:00:48	0.120776	0.537236	2015.23	FALSE	62
2022-09-15	10:00:48	0.0431681	0.19202	2008.98	FALSE	62
2022-09-15	10:00:48	-0.0552542	-0.245782	2015.23	FALSE	62
2022-09-15	10:00:49	0.0369086	0.164177	2009.14	FALSE	62
2022-09-15	10:00:49	-0.216119	-0.961341	2015.23	FALSE	62
2022-09-15	10:00:49	-0.0176461	-0.0784934	2009.14	FALSE	62
2022-09-15	10:00:49	0.0724811	0.32241	2015.55	FALSE	62
2022-09-15	10:00:50	0.238944	1.06287	2010.2	FALSE	62
2022-09-15	10:00:50	0.097672	0.434465	2015.99	FALSE	62
2022-09-15	10:00:50	0.189326	0.84216	2011.04	FALSE	62
2022-09-15	10:00:50	0.176909	0.786927	2016.78	FALSE	62
2022-09-15	10:00:51	0.108155	0.481095	2011.53	FALSE	62
2022-09-15	10:00:51	0.218537	0.972096	2017.75	FALSE	62
2022-09-15	10:00:51	0.0753819	0.335314	2011.86	FALSE	62
2022-09-15	10:00:52	0.320674	1.42642	2019.17	FALSE	62
2022-09-15	10:00:52	0.0170613	0.0758921	2011.94	FALSE	62
2022-09-15	10:00:52	0.266425	1.18511	2020.36	FALSE	62
2022-09-15	10:00:52	0.0578247	0.257216	2012.19	FALSE	62
2022-09-15	10:00:53	0.235992	1.04974	2021.41	FALSE	62
2022-09-15	10:00:53	0.0595549	0.264912	2012.46	FALSE	62
2022-09-15	10:00:53	0.18388	0.817935	2022.23	FALSE	62
2022-09-15	10:00:53	0.358333	1.59394	2014.05	FALSE	62
2022-09-15	10:00:54	0.1707	0.759308	2022.99	FALSE	62
2022-09-15	10:00:54	0.306832	1.36485	2015.42	FALSE	62
2022-09-15	10:00:54	0.211412	0.940403	2023.93	FALSE	62
2022-09-15	10:00:54	0.428664	1.90678	2017.32	FALSE	62
2022-09-15	10:00:55	0.278995	1.24103	2025.17	FALSE	62
2022-09-15	10:00:55	1.09503	4.87091	2022.2	FALSE	62
2022-09-15	10:00:55	0.290853	1.29377	2026.46	FALSE	62
2022-09-15	10:00:56	0.70902	3.15386	2025.35	FALSE	62
2022-09-15	10:00:56	0.795076	3.53666	2030	FALSE	62
2022-09-15	10:00:56	0.476756	2.12071	2027.47	FALSE	62
2022-09-15	10:00:56	0.447901	1.99235	2031.99	FALSE	62
2022-09-15	10:00:57	0.697977	3.10474	2030.57	FALSE	62
2022-09-15	10:00:57	0.315484	1.40334	2033.39	FALSE	62
2022-09-15	10:00:57	0.174975	0.778324	2031.35	FALSE	62
2022-09-15	10:00:57	0.438791	1.95183	2035.35	FALSE	62
2022-09-15	10:00:58	0.0558908	0.248613	2031.6	FALSE	62
2022-09-15	10:00:58	0.0824557	0.366779	2035.71	FALSE	62
2022-09-15	10:00:58	-0.000852186	-0.00379069	2031.6	FALSE	62
2022-09-15	10:00:58	0.180878	0.804582	2036.52	FALSE	62
2022-09-15	10:00:59	-0.0498598	-0.221786	2031.6	FALSE	62
2022-09-15	10:00:59	0.0138552	0.0616307	2036.58	FALSE	62
2022-09-15	10:00:59	-0.033015	-0.146857	2031.6	FALSE	62
2022-09-15	10:01:00	0.0752292	0.334635	2036.91	FALSE	62
2022-09-15	10:01:00	-0.076272	-0.339273	2031.6	FALSE	62
2022-09-15	10:01:00	0.0899366	0.400056	2037.31	FALSE	62
2022-09-15	10:01:00	0.0675448	0.300453	2031.9	FALSE	62
2022-09-15	10:01:01	0.0610816	0.271703	2037.59	FALSE	62
2022-09-15	10:01:01	0.0194023	0.0863053	2031.99	FALSE	62
2022-09-15	10:01:01	0.187239	0.832877	2038.42	FALSE	62
2022-09-15	10:01:01	0.245	1.08981	2033.08	FALSE	62

## Sheet: Tyr_harness_202291595550 (2)
Date	Time	Lbs	Total force x time			**GoPro Fitting: 945
2022-09-15	09:55:51	0.265967	0.265967	FALSE	0
2022-09-15	09:55:51	0.244186	0.510153	FALSE	0
2022-09-15	09:55:51	0.240725	0.750878	FALSE	0
2022-09-15	09:55:51	0.225051	0.975929	FALSE	0
2022-09-15	09:55:51	0.232227	1.20816	FALSE	0
2022-09-15	09:55:52	0.186629	1.39478	FALSE	0
2022-09-15	09:55:52	0.182965	1.57775	FALSE	0
2022-09-15	09:55:52	0.149071	1.72682	FALSE	0
2022-09-15	09:55:52	0.15986	1.88668	FALSE	0
2022-09-15	09:55:53	0.212328	2.09901	FALSE	0
2022-09-15	09:55:53	0.197214	2.29622	FALSE	0
2022-09-15	09:55:53	0.24444	2.54066	FALSE	0
2022-09-15	09:55:54	0.20897	2.74963	FALSE	0
2022-09-15	09:55:54	0.258333	3.00797	FALSE	0
2022-09-15	09:55:54	0.296247	3.30421	FALSE	0
2022-09-15	09:55:54	0.329275	3.63349	FALSE	0
2022-09-15	09:55:55	0.33701	3.9705	FALSE	0
2022-09-15	09:55:55	0.112583	4.08308	FALSE	0
2022-09-15	09:55:55	0.236501	4.31958	FALSE	0
2022-09-15	09:55:55	0.296196	4.61578	FALSE	0
2022-09-15	09:55:56	0.287901	4.90368	FALSE	0
2022-09-15	09:55:56	0.294669	5.19835	FALSE	0
2022-09-15	09:55:56	0.271769	5.47012	FALSE	0
2022-09-15	09:55:56	0.291768	5.76188	FALSE	0
2022-09-15	09:55:57	0.272023	6.03391	FALSE	0
2022-09-15	09:55:57	0.289886	6.32379	FALSE	0
2022-09-15	09:55:57	0.242049	6.56584	FALSE	0
2022-09-15	09:55:58	0.261438	6.82728	FALSE	0
2022-09-15	09:55:58	0.243422	7.0707	FALSE	0
2022-09-15	09:55:58	0.245814	7.31652	FALSE	0
2022-09-15	09:55:58	0.237417	7.55393	FALSE	0
2022-09-15	09:55:59	0.192888	7.74682	FALSE	0
2022-09-15	09:55:59	0.222863	7.96968	FALSE	0
2022-09-15	09:55:59	0.222557	8.19224	FALSE	0
2022-09-15	09:55:59	0.157875	8.35012	FALSE	0
2022-09-15	09:56:00	0.163372	8.51349	FALSE	0
2022-09-15	09:56:00	0.248715	8.7622	FALSE	0
2022-09-15	09:56:00	0.249987	9.01219	FALSE	0
2022-09-15	09:56:00	0.329122	9.34131	FALSE	0
2022-09-15	09:56:01	0.224237	9.56555	FALSE	0
2022-09-15	09:56:01	0.219504	9.78505	FALSE	0
2022-09-15	09:56:01	0.215891	10.0009	FALSE	0
2022-09-15	09:56:02	0.264542	10.2655	FALSE	0
2022-09-15	09:56:02	0.20841	10.4739	FALSE	0
2022-09-15	09:56:02	0.215331	10.6892	FALSE	0
2022-09-15	09:56:02	0.22785	10.9171	FALSE	0
2022-09-15	09:56:03	0.2564	11.1735	FALSE	0
2022-09-15	09:56:03	0.242761	11.4162	FALSE	0
2022-09-15	09:56:03	0.247087	11.6633	FALSE	0
2022-09-15	09:56:03	0.244339	11.9077	FALSE	0
2022-09-15	09:56:04	0.265763	12.1734	FALSE	0
2022-09-15	09:56:04	0.183626	12.3571	FALSE	0
2022-09-15	09:56:04	0.475585	12.8326	FALSE	0
2022-09-15	09:56:04	0.346934	13.1796	FALSE	0
2022-09-15	09:56:05	0.229529	13.4091	FALSE	0
2022-09-15	09:56:05	0.218333	13.6274	FALSE	0
2022-09-15	09:56:05	0.2964	13.9238	FALSE	0
2022-09-15	09:56:06	0.285407	14.2092	FALSE	0
2022-09-15	09:56:06	0.252125	14.4614	FALSE	0
2022-09-15	09:56:06	0.246374	14.7077	FALSE	0
2022-09-15	09:56:06	0.217723	14.9255	FALSE	0
2022-09-15	09:56:07	0.231514	15.157	FALSE	0
2022-09-15	09:56:07	0.20673	15.3637	FALSE	0
2022-09-15	09:56:07	0.18388	15.5476	FALSE	0
2022-09-15	09:56:07	0.231412	15.779	FALSE	0
2022-09-15	09:56:08	0.207952	15.987	FALSE	0
2022-09-15	09:56:08	0.155687	16.1426	FALSE	0
2022-09-15	09:56:08	0.209122	16.3518	FALSE	0
2022-09-15	09:56:08	-0.019529	16.3518	FALSE	0
2022-09-15	09:56:09	0.391819	16.7436	FALSE	0
2022-09-15	09:56:09	0.363219	17.1068	FALSE	0
2022-09-15	09:56:09	0.536094	17.6429	FALSE	0
2022-09-15	09:56:10	1.04103	18.6839	FALSE	0
2022-09-15	09:56:10	2.03365	20.7176	FALSE	0
2022-09-15	09:56:10	0.947646	21.6652	FALSE	0
2022-09-15	09:56:10	2.06246	23.7277	FALSE	0
2022-09-15	09:56:11	0.556552	24.2842	FALSE	0
2022-09-15	09:56:11	0.0441351	24.3284	FALSE	0
2022-09-15	09:56:11	-0.0528623	24.3284	FALSE	0
2022-09-15	09:56:11	-0.0170863	24.3284	FALSE	0
2022-09-15	09:56:12	-0.0596816	24.3284	FALSE	0
2022-09-15	09:56:12	0.043219	24.3716	FALSE	0
2022-09-15	09:56:12	0.137163	24.5087	FALSE	0
2022-09-15	09:56:12	0.0795041	24.5883	FALSE	0
2022-09-15	09:56:13	0.503677	25.0919	FALSE	0
2022-09-15	09:56:13	0.216196	25.3081	FALSE	0
2022-09-15	09:56:13	0.436654	25.7448	FALSE	0
2022-09-15	09:56:14	0.334873	26.0797	FALSE	0
2022-09-15	09:56:14	0.313957	26.3936	FALSE	0
2022-09-15	09:56:14	0.388817	26.7824	FALSE	0
2022-09-15	09:56:14	0.148308	26.9307	FALSE	0
2022-09-15	09:56:15	0.104848	27.0356	FALSE	0
2022-09-15	09:56:15	-0.320547	27.0356	FALSE	0
2022-09-15	09:56:15	-0.327111	27.0356	FALSE	0
2022-09-15	09:56:15	-0.253727	27.0356	FALSE	0
2022-09-15	09:56:16	-0.303956	27.0356	FALSE	0
2022-09-15	09:56:16	-0.354745	27.0356	FALSE	0
2022-09-15	09:56:16	-0.354745	27.0356	FALSE	0
2022-09-15	09:56:16	0.338893	27.3745	FALSE	0
2022-09-15	09:56:17	0.498893	27.8734	FALSE	0
2022-09-15	09:56:17	0.31299	28.1864	FALSE	0
2022-09-15	09:56:17	-0.0916409	28.1864	FALSE	0
2022-09-15	09:56:18	0.0900893	28.2764	FALSE	0
2022-09-15	09:56:18	0.296196	28.5726	FALSE	0
2022-09-15	09:56:18	-0.257544	28.5726	FALSE	0
2022-09-15	09:56:18	-0.474542	28.5726	FALSE	0
2022-09-15	09:56:19	-0.322786	28.5726	FALSE	0
2022-09-15	09:56:19	-0.4379	28.5726	FALSE	0
2022-09-15	09:56:19	-0.31556	28.5726	FALSE	0
2022-09-15	09:56:19	-0.158664	28.5726	FALSE	0
2022-09-15	09:56:20	0.569376	29.142	FALSE	0
2022-09-15	09:56:20	0.639758	29.7818	FALSE	0
2022-09-15	09:56:20	0.0230155	29.8048	FALSE	0
2022-09-15	09:56:20	-0.0796817	29.8048	FALSE	0
2022-09-15	09:56:21	-0.0749997	29.8048	FALSE	0
2022-09-15	09:56:21	0.0125321	29.8173	FALSE	0
2022-09-15	09:56:21	-0.00914732	29.8173	FALSE	0
2022-09-15	09:56:22	0.00423688	29.8216	FALSE	0
2022-09-15	09:56:22	0.249733	30.0713	FALSE	0
2022-09-15	09:56:22	0.142252	30.2135	FALSE	0
2022-09-15	09:56:22	0.56327	30.7768	FALSE	0
2022-09-15	09:56:23	0.613957	31.3908	FALSE	0
2022-09-15	09:56:23	1.31614	32.7069	FALSE	0
2022-09-15	09:56:23	1.68011	34.387	FALSE	0
2022-09-15	09:56:23	1.28739	35.6744	FALSE	0
2022-09-15	09:56:24	2.25004	37.9245	FALSE	0
2022-09-15	09:56:24	0.889275	38.8137	FALSE	0
2022-09-15	09:56:24	0.964694	39.7784	FALSE	0
2022-09-15	09:56:24	2.04927	41.8277	FALSE	0
2022-09-15	09:56:25	1.36795	43.1956	FALSE	0
2022-09-15	09:56:25	0.920267	44.1159	FALSE	0
2022-09-15	09:56:25	0.941285	45.0572	FALSE	0
2022-09-15	09:56:26	0.840369	45.8976	FALSE	0
2022-09-15	09:56:26	0.415636	46.3132	FALSE	0
2022-09-15	09:56:26	0.220573	46.5338	FALSE	0
2022-09-15	09:56:26	0.0928883	46.6267	FALSE	0
2022-09-15	09:56:27	1.34118	47.9678	FALSE	0
2022-09-15	09:56:27	1.27324	49.2411	FALSE	0
2022-09-15	09:56:27	0.949071	50.1902	FALSE	0
2022-09-15	09:56:27	0.828359	51.0185	FALSE	0
2022-09-15	09:56:28	0.696552	51.7151	FALSE	0
2022-09-15	09:56:28	0.503321	52.2184	FALSE	0
2022-09-15	09:56:28	-0.0191219	52.2184	FALSE	0
2022-09-15	09:56:28	-0.142481	52.2184	FALSE	0
2022-09-15	09:56:29	0.106018	52.3244	FALSE	0
2022-09-15	09:56:29	0.420115	52.7445	FALSE	0
2022-09-15	09:56:29	0.0465778	52.7911	FALSE	0
2022-09-15	09:56:30	-0.0143891	52.7911	FALSE	0
2022-09-15	09:56:30	-0.0472135	52.7911	FALSE	0
2022-09-15	09:56:30	0.228054	53.0191	FALSE	0
2022-09-15	09:56:30	0.0308527	53.05	FALSE	0
2022-09-15	09:56:31	0.203422	53.2534	FALSE	0
2022-09-15	09:56:31	-0.00502519	53.2534	FALSE	0
2022-09-15	09:56:31	0.73014	53.9836	FALSE	0
2022-09-15	09:56:31	5.46947	59.453	1	1
2022-09-15	09:56:32	5.70596	65.159	1	2
2022-09-15	09:56:32	6.41298	71.572	1	3
2022-09-15	09:56:32	5.38031	76.9523	1	4
2022-09-15	09:56:32	9.42108	86.3734	1	5
2022-09-15	09:56:33	5.85629	92.2297	1	6
2022-09-15	09:56:33	7.55039	99.78	1	7
2022-09-15	09:56:33	7.04891	106.829	1	8
2022-09-15	09:56:34	6.40123	113.23	1	9
2022-09-15	09:56:34	3.40703	116.637	1	10
2022-09-15	09:56:34	3.76668	120.404	1	11
2022-09-15	09:56:34	1.79462	122.199	FALSE	11
2022-09-15	09:56:35	1.01406	123.213	FALSE	11
2022-09-15	09:56:35	2.91177	126.124	FALSE	11
2022-09-15	09:56:35	8.63222	134.757	1	12
2022-09-15	09:56:35	6.05523	140.812	1	13
2022-09-15	09:56:36	2.12011	142.932	FALSE	13
2022-09-15	09:56:36	1.09899	144.031	FALSE	13
2022-09-15	09:56:36	0.881692	144.913	FALSE	13
2022-09-15	09:56:36	1.30836	146.221	FALSE	13
2022-09-15	09:56:37	6.651	152.872	1	14
2022-09-15	09:56:37	13.253	166.125	1	15
2022-09-15	09:56:37	15.7303	181.855	1	16
2022-09-15	09:56:38	13.7988	195.654	1	17
2022-09-15	09:56:38	10.2262	205.88	1	18
2022-09-15	09:56:38	7.70988	213.59	1	19
2022-09-15	09:56:38	6.314	219.904	1	20
2022-09-15	09:56:39	7.89304	227.797	1	21
2022-09-15	09:56:39	7.93456	235.732	1	22
2022-09-15	09:56:39	0.65701	236.389	FALSE	22
2022-09-15	09:56:39	0.24612	236.635	FALSE	22
2022-09-15	09:56:40	0.0992496	236.734	FALSE	22
2022-09-15	09:56:40	0.282914	237.017	FALSE	22
2022-09-15	09:56:40	0.0324812	237.05	FALSE	22
2022-09-15	09:56:40	0.23925	237.289	FALSE	22
2022-09-15	09:56:41	0.0310562	237.32	FALSE	22
2022-09-15	09:56:41	0.0284608	237.348	FALSE	22
2022-09-15	09:56:41	-0.0759158	237.348	FALSE	22
2022-09-15	09:56:42	0.0612343	237.41	FALSE	22
2022-09-15	09:56:42	-0.126959	237.41	FALSE	22
2022-09-15	09:56:42	-0.254542	237.41	FALSE	22
2022-09-15	09:56:42	0.094873	237.504	FALSE	22
2022-09-15	09:56:43	0.0702419	237.575	FALSE	22
2022-09-15	09:56:43	-0.321055	237.575	FALSE	22
2022-09-15	09:56:43	-0.217951	237.575	FALSE	22
2022-09-15	09:56:43	-0.212608	237.575	FALSE	22
2022-09-15	09:56:44	-0.241157	237.575	FALSE	22
2022-09-15	09:56:44	-0.283244	237.575	FALSE	22
2022-09-15	09:56:44	-0.0709793	237.575	FALSE	22
2022-09-15	09:56:44	-0.0637529	237.575	FALSE	22
2022-09-15	09:56:45	-0.146043	237.575	FALSE	22
2022-09-15	09:56:45	-0.0587147	237.575	FALSE	22
2022-09-15	09:56:45	0.0639315	237.639	FALSE	22
2022-09-15	09:56:46	0.0756873	237.714	FALSE	22
2022-09-15	09:56:46	-0.00955446	237.714	FALSE	22
2022-09-15	09:56:46	0.205713	237.92	FALSE	22
2022-09-15	09:56:46	0.264237	238.184	FALSE	22
2022-09-15	09:56:47	0.267188	238.451	FALSE	22
2022-09-15	09:56:47	7.39584	245.847	1	23
2022-09-15	09:56:47	8.13533	253.983	1	24
2022-09-15	09:56:47	3.1395	257.122	1	25
2022-09-15	09:56:48	0.579809	257.702	FALSE	25
2022-09-15	09:56:48	0.0696312	257.771	FALSE	25
2022-09-15	09:56:48	-0.0292491	257.771	FALSE	25
2022-09-15	09:56:48	0.35584	258.127	FALSE	25
2022-09-15	09:56:49	0.278893	258.406	FALSE	25
2022-09-15	09:56:49	0.516552	258.923	FALSE	25
2022-09-15	09:56:49	0.0618959	258.985	FALSE	25
2022-09-15	09:56:50	-0.334592	258.985	FALSE	25
2022-09-15	09:56:50	-0.279529	258.985	FALSE	25
2022-09-15	09:56:50	-0.14472	258.985	FALSE	25
2022-09-15	09:56:50	0.231107	259.216	FALSE	25
2022-09-15	09:56:51	0.118334	259.334	FALSE	25
2022-09-15	09:56:51	-0.13561	259.334	FALSE	25
2022-09-15	09:56:51	0.253448	259.588	FALSE	25
2022-09-15	09:56:51	0.209122	259.797	FALSE	25
2022-09-15	09:56:52	0.507239	260.304	FALSE	25
2022-09-15	09:56:52	0.184491	260.488	FALSE	25
2022-09-15	09:56:52	0.499656	260.988	FALSE	25
2022-09-15	09:56:52	0.793397	261.781	FALSE	25
2022-09-15	09:56:53	1.67533	263.457	FALSE	25
2022-09-15	09:56:53	3.92861	267.385	1	26
2022-09-15	09:56:53	4.1911	271.576	1	27
2022-09-15	09:56:54	6.27212	277.849	1	28
2022-09-15	09:56:54	3.6166	281.465	1	29
2022-09-15	09:56:54	2.53818	284.003	FALSE	29
2022-09-15	09:56:54	1.6509	285.654	FALSE	29
2022-09-15	09:56:55	0.747087	286.401	FALSE	29
2022-09-15	09:56:55	0.862201	287.264	FALSE	29
2022-09-15	09:56:55	0.370089	287.634	FALSE	29
2022-09-15	09:56:55	0.485611	288.119	FALSE	29
2022-09-15	09:56:56	0.102659	288.222	FALSE	29
2022-09-15	09:56:56	0.185967	288.408	FALSE	29
2022-09-15	09:56:56	0.0132445	288.421	FALSE	29
2022-09-15	09:56:56	-0.052557	288.421	FALSE	29
2022-09-15	09:56:57	-0.509198	288.421	FALSE	29
2022-09-15	09:56:57	1.37055	289.792	FALSE	29
2022-09-15	09:56:57	4.68495	294.477	1	30
2022-09-15	09:56:58	9.21227	303.689	1	31
2022-09-15	09:56:58	6.11441	309.803	1	32
2022-09-15	09:56:58	3.39105	313.194	1	33
2022-09-15	09:56:58	2.00408	315.198	FALSE	33
2022-09-15	09:56:59	0.380369	315.579	FALSE	33
2022-09-15	09:56:59	0.307596	315.886	FALSE	33
2022-09-15	09:56:59	0.189733	316.076	FALSE	33
2022-09-15	09:56:59	0.148868	316.225	FALSE	33
2022-09-15	09:57:00	0.0496822	316.275	FALSE	33
2022-09-15	09:57:00	-0.110267	316.275	FALSE	33
2022-09-15	09:57:00	-0.00314226	316.275	FALSE	33
2022-09-15	09:57:00	0.0508527	316.326	FALSE	33
2022-09-15	09:57:01	-0.209656	316.326	FALSE	33
2022-09-15	09:57:01	-0.515814	316.326	FALSE	33
2022-09-15	09:57:01	-0.495305	316.326	FALSE	33
2022-09-15	09:57:02	-0.232608	316.326	FALSE	33
2022-09-15	09:57:02	-0.169758	316.326	FALSE	33
2022-09-15	09:57:02	0.121794	316.447	FALSE	33
2022-09-15	09:57:02	0.0916669	316.539	FALSE	33
2022-09-15	09:57:03	0.044644	316.584	FALSE	33
2022-09-15	09:57:03	0.0267305	316.61	FALSE	33
2022-09-15	09:57:03	-0.00899467	316.61	FALSE	33
2022-09-15	09:57:03	0.0485626	316.659	FALSE	33
2022-09-15	09:57:04	0.314211	316.973	FALSE	33
2022-09-15	09:57:04	1.81187	318.785	FALSE	33
2022-09-15	09:57:04	1.8963	320.681	FALSE	33
2022-09-15	09:57:04	0.57243	321.254	FALSE	33
2022-09-15	09:57:05	0.271158	321.525	FALSE	33
2022-09-15	09:57:05	0.243881	321.769	FALSE	33
2022-09-15	09:57:05	0.310802	322.08	FALSE	33
2022-09-15	09:57:06	0.350954	322.431	FALSE	33
2022-09-15	09:57:06	0.254059	322.685	FALSE	33
2022-09-15	09:57:06	0.224644	322.909	FALSE	33
2022-09-15	09:57:06	3.32286	326.232	1	34
2022-09-15	09:57:07	1.34459	327.577	FALSE	34
2022-09-15	09:57:07	1.13803	328.715	FALSE	34
2022-09-15	09:57:07	1.04429	329.759	FALSE	34
2022-09-15	09:57:07	1.10826	330.867	FALSE	34
2022-09-15	09:57:08	2.0653	332.933	FALSE	34
2022-09-15	09:57:08	3.31925	336.252	1	35
2022-09-15	09:57:08	2.33961	338.591	FALSE	35
2022-09-15	09:57:08	1.07467	339.666	FALSE	35
2022-09-15	09:57:09	0.392277	340.058	FALSE	35
2022-09-15	09:57:09	0.148104	340.207	FALSE	35
2022-09-15	09:57:09	0.0361453	340.243	FALSE	35
2022-09-15	09:57:10	-0.0588165	340.243	FALSE	35
2022-09-15	09:57:10	-0.0333713	340.243	FALSE	35
2022-09-15	09:57:10	-0.0892491	340.243	FALSE	35
2022-09-15	09:57:10	-0.0596308	340.243	FALSE	35
2022-09-15	09:57:11	-0.0292491	340.243	FALSE	35
2022-09-15	09:57:11	-0.116577	340.243	FALSE	35
2022-09-15	09:57:11	-0.349809	340.243	FALSE	35
2022-09-15	09:57:11	-0.595305	340.243	FALSE	35
2022-09-15	09:57:12	-0.309605	340.243	FALSE	35
2022-09-15	09:57:12	-0.0393763	340.243	FALSE	35
2022-09-15	09:57:12	-0.136883	340.243	FALSE	35
2022-09-15	09:57:12	0.227646	340.47	FALSE	35
2022-09-15	09:57:13	-0.0200888	340.47	FALSE	35
2022-09-15	09:57:13	0.281794	340.752	FALSE	35
2022-09-15	09:57:13	0.252023	341.004	FALSE	35
2022-09-15	09:57:14	-0.068333	341.004	FALSE	35
2022-09-15	09:57:14	1.95813	342.962	FALSE	35
2022-09-15	09:57:14	0.735229	343.697	FALSE	35
2022-09-15	09:57:14	1.02846	344.726	FALSE	35
2022-09-15	09:57:15	0.341692	345.068	FALSE	35
2022-09-15	09:57:15	0.650496	345.718	FALSE	35
2022-09-15	09:57:15	0.287952	346.006	FALSE	35
2022-09-15	09:57:15	1.06505	347.071	FALSE	35
2022-09-15	09:57:16	1.01487	348.086	FALSE	35
2022-09-15	09:57:16	1.40683	349.493	FALSE	35
2022-09-15	09:57:16	0.740471	350.233	FALSE	35
2022-09-15	09:57:16	0.537366	350.771	FALSE	35
2022-09-15	09:57:17	0.565865	351.337	FALSE	35
2022-09-15	09:57:17	0.751005	352.088	FALSE	35
2022-09-15	09:57:17	0.392786	352.48	FALSE	35
2022-09-15	09:57:18	0.693193	353.174	FALSE	35
2022-09-15	09:57:18	1.2824	354.456	FALSE	35
2022-09-15	09:57:18	1.37365	355.83	FALSE	35
2022-09-15	09:57:18	0.889376	356.719	FALSE	35
2022-09-15	09:57:19	0.956043	357.675	FALSE	35
2022-09-15	09:57:19	3.52429	361.199	1	36
2022-09-15	09:57:19	2.87594	364.075	FALSE	36
2022-09-15	09:57:19	1.10169	365.177	FALSE	36
2022-09-15	09:57:20	2.10088	367.278	FALSE	36
2022-09-15	09:57:20	1.82709	369.105	FALSE	36
2022-09-15	09:57:20	1.60032	370.705	FALSE	36
2022-09-15	09:57:20	0.803473	371.509	FALSE	36
2022-09-15	09:57:21	0.355382	371.864	FALSE	36
2022-09-15	09:57:21	0.42159	372.286	FALSE	36
2022-09-15	09:57:21	0.891565	373.177	FALSE	36
2022-09-15	09:57:22	1.36963	374.547	FALSE	36
2022-09-15	09:57:22	1.51828	376.065	FALSE	36
2022-09-15	09:57:22	0.958537	377.024	FALSE	36
2022-09-15	09:57:22	1.15365	378.177	FALSE	36
2022-09-15	09:57:23	2.00999	380.187	FALSE	36
2022-09-15	09:57:23	1.03029	381.218	FALSE	36
2022-09-15	09:57:23	0.728308	381.946	FALSE	36
2022-09-15	09:57:23	0.491718	382.438	FALSE	36
2022-09-15	09:57:24	0.58215	383.02	FALSE	36
2022-09-15	09:57:24	0.57528	383.595	FALSE	36
2022-09-15	09:57:24	0.567901	384.163	FALSE	36
2022-09-15	09:57:24	0.894924	385.058	FALSE	36
2022-09-15	09:57:25	0.659606	385.717	FALSE	36
2022-09-15	09:57:25	0.785662	386.503	FALSE	36
2022-09-15	09:57:25	0.827596	387.331	FALSE	36
2022-09-15	09:57:26	1.01986	388.351	FALSE	36
2022-09-15	09:57:26	0.884745	389.235	FALSE	36
2022-09-15	09:57:26	0.740573	389.976	FALSE	36
2022-09-15	09:57:26	0.544644	390.521	FALSE	36
2022-09-15	09:57:27	0.435382	390.956	FALSE	36
2022-09-15	09:57:27	0.434466	391.39	FALSE	36
2022-09-15	09:57:27	0.602913	391.993	FALSE	36
2022-09-15	09:57:27	1.24459	393.238	FALSE	36
2022-09-15	09:57:28	1.64576	394.884	FALSE	36
2022-09-15	09:57:28	1.77665	396.66	FALSE	36
2022-09-15	09:57:28	1.46398	398.124	FALSE	36
2022-09-15	09:57:28	1.268	399.392	FALSE	36
2022-09-15	09:57:29	1.30464	400.697	FALSE	36
2022-09-15	09:57:29	1.01813	401.715	FALSE	36
2022-09-15	09:57:29	0.676806	402.392	FALSE	36
2022-09-15	09:57:30	1.2162	403.608	FALSE	36
2022-09-15	09:57:30	1.48627	405.094	FALSE	36
2022-09-15	09:57:30	1.3995	406.494	FALSE	36
2022-09-15	09:57:30	1.15218	407.646	FALSE	36
2022-09-15	09:57:31	0.861081	408.507	FALSE	36
2022-09-15	09:57:31	1.00816	409.515	FALSE	36
2022-09-15	09:57:31	0.329377	409.845	FALSE	36
2022-09-15	09:57:31	0.352939	410.198	FALSE	36
2022-09-15	09:57:32	0.549835	410.747	FALSE	36
2022-09-15	09:57:32	0.666272	411.414	FALSE	36
2022-09-15	09:57:32	1.1395	412.553	FALSE	36
2022-09-15	09:57:32	0.929478	413.483	FALSE	36
2022-09-15	09:57:33	1.12454	414.607	FALSE	36
2022-09-15	09:57:33	1.0392	415.646	FALSE	36
2022-09-15	09:57:33	0.777824	416.424	FALSE	36
2022-09-15	09:57:34	0.974924	417.399	FALSE	36
2022-09-15	09:57:34	0.268461	417.668	FALSE	36
2022-09-15	09:57:34	0.228613	417.896	FALSE	36
2022-09-15	09:57:34	0.0907508	417.987	FALSE	36
2022-09-15	09:57:35	-0.168028	417.987	FALSE	36
2022-09-15	09:57:35	-0.360852	417.987	FALSE	36
2022-09-15	09:57:35	-0.259529	417.987	FALSE	36
2022-09-15	09:57:35	-0.371997	417.987	FALSE	36
2022-09-15	09:57:36	-0.48243	417.987	FALSE	36
2022-09-15	09:57:36	-0.532557	417.987	FALSE	36
2022-09-15	09:57:36	-1.15108	417.987	FALSE	36
2022-09-15	09:57:36	-0.758155	417.987	FALSE	36
2022-09-15	09:57:37	-0.60762	417.987	FALSE	36
2022-09-15	09:57:37	-0.243702	417.987	FALSE	36
2022-09-15	09:57:37	-0.199682	417.987	FALSE	36
2022-09-15	09:57:38	-0.360954	417.987	FALSE	36
2022-09-15	09:57:38	-0.400903	417.987	FALSE	36
2022-09-15	09:57:38	-0.402073	417.987	FALSE	36
2022-09-15	09:57:38	-0.428893	417.987	FALSE	36
2022-09-15	09:57:39	-0.15388	417.987	FALSE	36
2022-09-15	09:57:39	-0.064669	417.987	FALSE	36
2022-09-15	09:57:39	-0.0241601	417.987	FALSE	36
2022-09-15	09:57:39	0.171005	418.158	FALSE	36
2022-09-15	09:57:40	0.14612	418.304	FALSE	36
2022-09-15	09:57:40	0.219148	418.523	FALSE	36
2022-09-15	09:57:40	0.156552	418.68	FALSE	36
2022-09-15	09:57:40	0.384542	419.064	FALSE	36
2022-09-15	09:57:41	0.387748	419.452	FALSE	36
2022-09-15	09:57:41	0.604847	420.057	FALSE	36
2022-09-15	09:57:41	0.810598	420.868	FALSE	36
2022-09-15	09:57:42	0.883779	421.751	FALSE	36
2022-09-15	09:57:42	1.3508	423.102	FALSE	36
2022-09-15	09:57:42	0.96612	424.068	FALSE	36
2022-09-15	09:57:42	0.621845	424.69	FALSE	36
2022-09-15	09:57:43	0.63818	425.328	FALSE	36
2022-09-15	09:57:43	0.0606745	425.389	FALSE	36
2022-09-15	09:57:43	0.0776211	425.467	FALSE	36
2022-09-15	09:57:43	0.268613	425.735	FALSE	36
2022-09-15	09:57:44	0.211005	425.946	FALSE	36
2022-09-15	09:57:44	0.43925	426.385	FALSE	36
2022-09-15	09:57:44	0.306679	426.692	FALSE	36
2022-09-15	09:57:44	0.393702	427.086	FALSE	36
2022-09-15	09:57:45	0.340623	427.426	FALSE	36
2022-09-15	09:57:45	0.324237	427.751	FALSE	36
2022-09-15	09:57:45	0.447799	428.198	FALSE	36
2022-09-15	09:57:46	0.443219	428.642	FALSE	36
2022-09-15	09:57:46	0.487392	429.129	FALSE	36
2022-09-15	09:57:46	0.360064	429.489	FALSE	36
2022-09-15	09:57:46	0.263779	429.753	FALSE	36
2022-09-15	09:57:47	0.277163	430.03	FALSE	36
2022-09-15	09:57:47	0.230903	430.261	FALSE	36
2022-09-15	09:57:47	0.109275	430.37	FALSE	36
2022-09-15	09:57:47	0.267138	430.637	FALSE	36
2022-09-15	09:57:48	0.412227	431.05	FALSE	36
2022-09-15	09:57:48	1.4478	432.497	FALSE	36
2022-09-15	09:57:48	1.35676	433.854	FALSE	36
2022-09-15	09:57:48	2.81411	436.668	FALSE	36
2022-09-15	09:57:49	1.67721	438.346	FALSE	36
2022-09-15	09:57:49	1.25126	439.597	FALSE	36
2022-09-15	09:57:49	0.410496	440.007	FALSE	36
2022-09-15	09:57:50	0.133295	440.141	FALSE	36
2022-09-15	09:57:50	-0.0825824	440.141	FALSE	36
2022-09-15	09:57:50	-0.234593	440.141	FALSE	36
2022-09-15	09:57:50	-0.218867	440.141	FALSE	36
2022-09-15	09:57:51	-0.455101	440.141	FALSE	36
2022-09-15	09:57:51	-0.633422	440.141	FALSE	36
2022-09-15	09:57:51	-0.801513	440.141	FALSE	36
2022-09-15	09:57:51	-0.558613	440.141	FALSE	36
2022-09-15	09:57:52	-0.625127	440.141	FALSE	36
2022-09-15	09:57:52	-0.582226	440.141	FALSE	36
2022-09-15	09:57:52	-0.824516	440.141	FALSE	36
2022-09-15	09:57:52	-0.50533	440.141	FALSE	36
2022-09-15	09:57:53	-0.370521	440.141	FALSE	36
2022-09-15	09:57:53	0.338079	440.479	FALSE	36
2022-09-15	09:57:53	1.67838	442.157	FALSE	36
2022-09-15	09:57:54	1.76078	443.918	FALSE	36
2022-09-15	09:57:54	4.12139	448.039	1	37
2022-09-15	09:57:54	1.15116	449.19	FALSE	37
2022-09-15	09:57:54	1.61253	450.803	FALSE	37
2022-09-15	09:57:55	1.82276	452.626	FALSE	37
2022-09-15	09:57:55	0.547341	453.173	FALSE	37
2022-09-15	09:57:55	0.667087	453.84	FALSE	37
2022-09-15	09:57:55	1.30067	455.141	FALSE	37
2022-09-15	09:57:56	0.368003	455.509	FALSE	37
2022-09-15	09:57:56	0.50444	456.013	FALSE	37
2022-09-15	09:57:56	1.21767	457.231	FALSE	37
2022-09-15	09:57:56	0.41472	457.646	FALSE	37
2022-09-15	09:57:57	1.6509	459.296	FALSE	37
2022-09-15	09:57:57	0.550598	459.847	FALSE	37
2022-09-15	09:57:57	0.385916	460.233	FALSE	37
2022-09-15	09:57:58	2.1278	462.361	FALSE	37
2022-09-15	09:57:58	0.296705	462.657	FALSE	37
2022-09-15	09:57:58	0.31014	462.968	FALSE	37
2022-09-15	09:57:58	2.58128	465.549	FALSE	37
2022-09-15	09:57:59	0.229478	465.778	FALSE	37
2022-09-15	09:57:59	1.35101	467.129	FALSE	37
2022-09-15	09:57:59	1.93029	469.06	FALSE	37
2022-09-15	09:57:59	1.29691	470.357	FALSE	37
2022-09-15	09:58:00	0.509275	470.866	FALSE	37
2022-09-15	09:58:00	0.829834	471.696	FALSE	37
2022-09-15	09:58:00	0.343219	472.039	FALSE	37
2022-09-15	09:58:00	0.141336	472.18	FALSE	37
2022-09-15	09:58:01	0.418639	472.599	FALSE	37
2022-09-15	09:58:01	0.253244	472.852	FALSE	37
2022-09-15	09:58:01	0.281438	473.134	FALSE	37
2022-09-15	09:58:02	1.05508	474.189	FALSE	37
2022-09-15	09:58:02	0.367341	474.556	FALSE	37
2022-09-15	09:58:02	2.23915	476.795	FALSE	37
2022-09-15	09:58:02	0.92215	477.717	FALSE	37
2022-09-15	09:58:03	1.95365	479.671	FALSE	37
2022-09-15	09:58:03	4.70602	484.377	1	38
2022-09-15	09:58:03	1.44592	485.823	FALSE	38
2022-09-15	09:58:03	2.14464	487.968	FALSE	38
2022-09-15	09:58:04	3.22103	491.189	1	39
2022-09-15	09:58:04	1.24276	492.431	FALSE	39
2022-09-15	09:58:04	1.67487	494.106	FALSE	39
2022-09-15	09:58:04	1.13721	495.243	FALSE	39
2022-09-15	09:58:05	0.698842	495.942	FALSE	39
2022-09-15	09:58:05	1.74276	497.685	FALSE	39
2022-09-15	09:58:05	0.548155	498.233	FALSE	39
2022-09-15	09:58:06	0.971718	499.205	FALSE	39
2022-09-15	09:58:06	2.53614	501.741	FALSE	39
2022-09-15	09:58:06	0.339809	502.081	FALSE	39
2022-09-15	09:58:06	1.62195	503.703	FALSE	39
2022-09-15	09:58:07	1.84413	505.547	FALSE	39
2022-09-15	09:58:07	0.741947	506.289	FALSE	39
2022-09-15	09:58:07	1.38347	507.672	FALSE	39
2022-09-15	09:58:07	1.30358	508.976	FALSE	39
2022-09-15	09:58:08	0.674262	509.65	FALSE	39
2022-09-15	09:58:08	1.02795	510.678	FALSE	39
2022-09-15	09:58:08	2.12032	512.798	FALSE	39
2022-09-15	09:58:08	0.236959	513.035	FALSE	39
2022-09-15	09:58:09	0.302812	513.338	FALSE	39
2022-09-15	09:58:09	0.143982	513.482	FALSE	39
2022-09-15	09:58:09	0.172685	513.655	FALSE	39
2022-09-15	09:58:10	-0.0166283	513.655	FALSE	39
2022-09-15	09:58:10	0.365713	514.021	FALSE	39
2022-09-15	09:58:10	0.3707	514.391	FALSE	39
2022-09-15	09:58:10	0.454924	514.846	FALSE	39
2022-09-15	09:58:11	0.484339	515.331	FALSE	39
2022-09-15	09:58:11	0.402252	515.733	FALSE	39
2022-09-15	09:58:11	0.519402	516.252	FALSE	39
2022-09-15	09:58:11	0.373855	516.626	FALSE	39
2022-09-15	09:58:12	0.444338	517.07	FALSE	39
2022-09-15	09:58:12	0.41757	517.488	FALSE	39
2022-09-15	09:58:12	0.427697	517.916	FALSE	39
2022-09-15	09:58:12	0.421285	518.337	FALSE	39
2022-09-15	09:58:13	0.419758	518.757	FALSE	39
2022-09-15	09:58:13	0.417316	519.174	FALSE	39
2022-09-15	09:58:13	0.407443	519.581	FALSE	39
2022-09-15	09:58:14	0.380878	519.962	FALSE	39
2022-09-15	09:58:14	0.42042	520.383	FALSE	39
2022-09-15	09:58:14	0.339199	520.722	FALSE	39
2022-09-15	09:58:14	0.345255	521.067	FALSE	39
2022-09-15	09:58:15	0.346985	521.414	FALSE	39
2022-09-15	09:58:15	0.752684	522.167	FALSE	39
2022-09-15	09:58:15	2.37981	524.547	FALSE	39
2022-09-15	09:58:15	2.24897	526.796	FALSE	39
2022-09-15	09:58:16	1.61905	528.415	FALSE	39
2022-09-15	09:58:16	1.67788	530.093	FALSE	39
2022-09-15	09:58:16	0.473397	530.566	FALSE	39
2022-09-15	09:58:16	0.379046	530.945	FALSE	39
2022-09-15	09:58:17	0.438333	531.383	FALSE	39
2022-09-15	09:58:17	0.116705	531.5	FALSE	39
2022-09-15	09:58:17	0.00942772	531.509	FALSE	39
2022-09-15	09:58:17	0.0495295	531.559	FALSE	39
2022-09-15	09:58:18	0.162099	531.721	FALSE	39
2022-09-15	09:58:18	0.345356	532.066	FALSE	39
2022-09-15	09:58:18	0.411565	532.478	FALSE	39
2022-09-15	09:58:19	0.171005	532.649	FALSE	39
2022-09-15	09:58:19	0.251616	532.901	FALSE	39
2022-09-15	09:58:19	0.220878	533.122	FALSE	39
2022-09-15	09:58:19	0.174975	533.297	FALSE	39
2022-09-15	09:58:20	0.278181	533.575	FALSE	39
2022-09-15	09:58:20	0.217214	533.792	FALSE	39
2022-09-15	09:58:20	0.19126	533.983	FALSE	39
2022-09-15	09:58:20	0.197926	534.181	FALSE	39
2022-09-15	09:58:21	0.193499	534.375	FALSE	39
2022-09-15	09:58:21	0.198028	534.573	FALSE	39
2022-09-15	09:58:21	0.183219	534.756	FALSE	39
2022-09-15	09:58:21	0.1707	534.927	FALSE	39
2022-09-15	09:58:22	0.175382	535.102	FALSE	39
2022-09-15	09:58:22	0.153397	535.255	FALSE	39
2022-09-15	09:58:22	0.143677	535.399	FALSE	39
2022-09-15	09:58:23	-0.0314883	535.399	FALSE	39
2022-09-15	09:58:23	-0.264364	535.399	FALSE	39
2022-09-15	09:58:23	-0.31159	535.399	FALSE	39
2022-09-15	09:58:23	-0.179427	535.399	FALSE	39
2022-09-15	09:58:24	-0.039987	535.399	FALSE	39
2022-09-15	09:58:24	0.099962	535.499	FALSE	39
2022-09-15	09:58:24	0.206679	535.706	FALSE	39
2022-09-15	09:58:24	0.237214	535.943	FALSE	39
2022-09-15	09:58:25	0.150038	536.093	FALSE	39
2022-09-15	09:58:25	0.236603	536.33	FALSE	39
2022-09-15	09:58:25	0.518537	536.848	FALSE	39
2022-09-15	09:58:25	0.362048	537.21	FALSE	39
2022-09-15	09:58:26	0.291819	537.502	FALSE	39
2022-09-15	09:58:26	0.138283	537.64	FALSE	39
2022-09-15	09:58:26	0.053957	537.694	FALSE	39
2022-09-15	09:58:27	-0.0732694	537.694	FALSE	39
2022-09-15	09:58:27	-0.252506	537.694	FALSE	39
2022-09-15	09:58:27	-0.37159	537.694	FALSE	39
2022-09-15	09:58:27	-0.363702	537.694	FALSE	39
2022-09-15	09:58:28	-0.331132	537.694	FALSE	39
2022-09-15	09:58:28	-0.390827	537.694	FALSE	39
2022-09-15	09:58:28	-0.0890964	537.694	FALSE	39
2022-09-15	09:58:28	0.470547	538.165	FALSE	39
2022-09-15	09:58:29	0.345713	538.51	FALSE	39
2022-09-15	09:58:29	2.99696	541.507	FALSE	39
2022-09-15	09:58:29	2.2479	543.755	FALSE	39
2022-09-15	09:58:29	1.59289	545.348	FALSE	39
2022-09-15	09:58:30	2.48836	547.837	FALSE	39
2022-09-15	09:58:30	0.28841	548.125	FALSE	39
2022-09-15	09:58:30	0.203168	548.328	FALSE	39
2022-09-15	09:58:31	0.27528	548.603	FALSE	39
2022-09-15	09:58:31	0.0251529	548.629	FALSE	39
2022-09-15	09:58:31	0.166883	548.795	FALSE	39
2022-09-15	09:58:31	0.0457636	548.841	FALSE	39
2022-09-15	09:58:32	0.247494	549.089	FALSE	39
2022-09-15	09:58:32	0.142557	549.231	FALSE	39
2022-09-15	09:58:32	0.306476	549.538	FALSE	39
2022-09-15	09:58:32	0.732532	550.27	FALSE	39
2022-09-15	09:58:33	0.405967	550.676	FALSE	39
2022-09-15	09:58:33	0.442354	551.119	FALSE	39
2022-09-15	09:58:33	0.129784	551.248	FALSE	39
2022-09-15	09:58:33	0.219962	551.468	FALSE	39
2022-09-15	09:58:34	0.107239	551.576	FALSE	39
2022-09-15	09:58:34	0.145662	551.721	FALSE	39
2022-09-15	09:58:34	-0.115916	551.721	FALSE	39
2022-09-15	09:58:35	-0.0842618	551.721	FALSE	39
2022-09-15	09:58:35	-0.216272	551.721	FALSE	39
2022-09-15	09:58:35	-0.233524	551.721	FALSE	39
2022-09-15	09:58:35	-0.161107	551.721	FALSE	39
2022-09-15	09:58:36	-0.213727	551.721	FALSE	39
2022-09-15	09:58:36	-0.203549	551.721	FALSE	39
2022-09-15	09:58:36	-0.365279	551.721	FALSE	39
2022-09-15	09:58:36	-0.0877733	551.721	FALSE	39
2022-09-15	09:58:37	-0.0866537	551.721	FALSE	39
2022-09-15	09:58:37	0.135026	551.856	FALSE	39
2022-09-15	09:58:37	0.262201	552.118	FALSE	39
2022-09-15	09:58:37	0.272532	552.391	FALSE	39
2022-09-15	09:58:38	0.170089	552.561	FALSE	39
2022-09-15	09:58:38	0.199504	552.761	FALSE	39
2022-09-15	09:58:38	0.307748	553.068	FALSE	39
2022-09-15	09:58:39	0.261743	553.33	FALSE	39
2022-09-15	09:58:39	0.258842	553.589	FALSE	39
2022-09-15	09:58:39	0.286476	553.875	FALSE	39
2022-09-15	09:58:39	0.196043	554.071	FALSE	39
2022-09-15	09:58:40	0.217875	554.289	FALSE	39
2022-09-15	09:58:40	0.172023	554.461	FALSE	39
2022-09-15	09:58:40	0.206679	554.668	FALSE	39
2022-09-15	09:58:40	0.200369	554.868	FALSE	39
2022-09-15	09:58:41	0.206171	555.075	FALSE	39
2022-09-15	09:58:41	0.220369	555.295	FALSE	39
2022-09-15	09:58:41	0.231005	555.526	FALSE	39
2022-09-15	09:58:41	0.226578	555.752	FALSE	39
2022-09-15	09:58:42	0.229275	555.982	FALSE	39
2022-09-15	09:58:42	0.236247	556.218	FALSE	39
2022-09-15	09:58:42	0.230751	556.449	FALSE	39
2022-09-15	09:58:43	0.24383	556.693	FALSE	39
2022-09-15	09:58:43	0.273804	556.966	FALSE	39
2022-09-15	09:58:43	0.270293	557.237	FALSE	39
2022-09-15	09:58:43	0.259148	557.496	FALSE	39
2022-09-15	09:58:44	0.296196	557.792	FALSE	39
2022-09-15	09:58:44	0.270445	558.062	FALSE	39
2022-09-15	09:58:44	0.233855	558.296	FALSE	39
2022-09-15	09:58:44	0.305967	558.602	FALSE	39
2022-09-15	09:58:45	0.400267	559.003	FALSE	39
2022-09-15	09:58:45	0.365763	559.368	FALSE	39
2022-09-15	09:58:45	0.418486	559.787	FALSE	39
2022-09-15	09:58:45	0.358588	560.145	FALSE	39
2022-09-15	09:58:46	0.381336	560.527	FALSE	39
2022-09-15	09:58:46	0.322252	560.849	FALSE	39
2022-09-15	09:58:46	0.3793	561.228	FALSE	39
2022-09-15	09:58:47	0.448155	561.676	FALSE	39
2022-09-15	09:58:47	0.493906	562.17	FALSE	39
2022-09-15	09:58:47	0.36327	562.534	FALSE	39
2022-09-15	09:58:47	0.286018	562.82	FALSE	39
2022-09-15	09:58:48	0.318588	563.138	FALSE	39
2022-09-15	09:58:48	0.288613	563.427	FALSE	39
2022-09-15	09:58:48	0.347545	563.774	FALSE	39
2022-09-15	09:58:48	0.274466	564.049	FALSE	39
2022-09-15	09:58:49	0.289529	564.338	FALSE	39
2022-09-15	09:58:49	0.301082	564.639	FALSE	39
2022-09-15	09:58:49	0.25299	564.892	FALSE	39
2022-09-15	09:58:49	0.12729	565.02	FALSE	39
2022-09-15	09:58:50	0.000165643	565.02	FALSE	39
2022-09-15	09:58:50	0.153499	565.173	FALSE	39
2022-09-15	09:58:50	0.12042	565.294	FALSE	39
2022-09-15	09:58:51	0.250598	565.544	FALSE	39
2022-09-15	09:58:51	0.246679	565.791	FALSE	39
2022-09-15	09:58:51	0.256298	566.047	FALSE	39
2022-09-15	09:58:51	0.22444	566.272	FALSE	39
2022-09-15	09:58:52	0.247443	566.519	FALSE	39
2022-09-15	09:58:52	0.244135	566.763	FALSE	39
2022-09-15	09:58:52	0.250649	567.014	FALSE	39
2022-09-15	09:58:52	0.247901	567.262	FALSE	39
2022-09-15	09:58:53	0.258944	567.521	FALSE	39
2022-09-15	09:58:53	0.269224	567.79	FALSE	39
2022-09-15	09:58:53	0.271311	568.061	FALSE	39
2022-09-15	09:58:53	0.265102	568.327	FALSE	39
2022-09-15	09:58:54	0.271412	568.598	FALSE	39
2022-09-15	09:58:54	0.221387	568.819	FALSE	39
2022-09-15	09:58:54	0.249937	569.069	FALSE	39
2022-09-15	09:58:55	0.308054	569.377	FALSE	39
2022-09-15	09:58:55	0.0380791	569.415	FALSE	39
2022-09-15	09:58:55	-0.105483	569.415	FALSE	39
2022-09-15	09:58:55	-0.295305	569.415	FALSE	39
2022-09-15	09:58:56	-0.423549	569.415	FALSE	39
2022-09-15	09:58:56	-0.562684	569.415	FALSE	39
2022-09-15	09:58:56	-0.573626	569.415	FALSE	39
2022-09-15	09:58:56	-0.743498	569.415	FALSE	39
2022-09-15	09:58:57	-0.75159	569.415	FALSE	39
2022-09-15	09:58:57	-0.761462	569.415	FALSE	39
2022-09-15	09:58:57	-0.693269	569.415	FALSE	39
2022-09-15	09:58:57	-0.794847	569.415	FALSE	39
2022-09-15	09:58:58	-0.662938	569.415	FALSE	39
2022-09-15	09:58:58	-0.421463	569.415	FALSE	39
2022-09-15	09:58:58	-0.211183	569.415	FALSE	39
2022-09-15	09:58:59	-0.029758	569.415	FALSE	39
2022-09-15	09:58:59	0.0426592	569.458	FALSE	39
2022-09-15	09:58:59	-0.00268423	569.458	FALSE	39
2022-09-15	09:58:59	0.291463	569.75	FALSE	39
2022-09-15	09:59:00	0.056247	569.806	FALSE	39
2022-09-15	09:59:00	0.148919	569.955	FALSE	39
2022-09-15	09:59:00	0.0919213	570.047	FALSE	39
2022-09-15	09:59:00	0.26327	570.31	FALSE	39
2022-09-15	09:59:01	-0.0894527	570.31	FALSE	39
2022-09-15	09:59:01	0.0436262	570.354	FALSE	39
2022-09-15	09:59:01	-0.251946	570.354	FALSE	39
2022-09-15	09:59:01	0.0197585	570.373	FALSE	39
2022-09-15	09:59:02	-0.0174934	570.373	FALSE	39
2022-09-15	09:59:02	0.26556	570.639	FALSE	39
2022-09-15	09:59:02	0.0438806	570.683	FALSE	39
2022-09-15	09:59:02	-0.135356	570.683	FALSE	39
2022-09-15	09:59:03	-0.0304196	570.683	FALSE	39
2022-09-15	09:59:03	0.760267	571.443	FALSE	39
2022-09-15	09:59:03	0.377316	571.82	FALSE	39
2022-09-15	09:59:04	0.444542	572.265	FALSE	39
2022-09-15	09:59:04	0.463015	572.728	FALSE	39
2022-09-15	09:59:04	0.447137	573.175	FALSE	39
2022-09-15	09:59:04	0.452023	573.627	FALSE	39
2022-09-15	09:59:05	0.485763	574.113	FALSE	39
2022-09-15	09:59:05	0.497265	574.61	FALSE	39
2022-09-15	09:59:05	0.483117	575.093	FALSE	39
2022-09-15	09:59:05	0.453244	575.546	FALSE	39
2022-09-15	09:59:06	0.424949	575.971	FALSE	39
2022-09-15	09:59:06	0.412176	576.384	FALSE	39
2022-09-15	09:59:06	0.552532	576.936	FALSE	39
2022-09-15	09:59:06	0.539758	577.476	FALSE	39
2022-09-15	09:59:07	0.911717	578.388	FALSE	39
2022-09-15	09:59:07	2.62357	581.011	FALSE	39
2022-09-15	09:59:07	2.04251	583.054	FALSE	39
2022-09-15	09:59:08	5.78286	588.836	1	40
2022-09-15	09:59:08	4.9252	593.762	1	41
2022-09-15	09:59:08	2.24128	596.003	FALSE	41
2022-09-15	09:59:08	2.08673	598.09	FALSE	41
2022-09-15	09:59:09	1.45391	599.544	FALSE	41
2022-09-15	09:59:09	1.82663	601.37	FALSE	41
2022-09-15	09:59:09	2.24139	603.612	FALSE	41
2022-09-15	09:59:09	1.38342	604.995	FALSE	41
2022-09-15	09:59:10	-0.0513356	604.995	FALSE	41
2022-09-15	09:59:10	-0.326348	604.995	FALSE	41
2022-09-15	09:59:10	0.0057127	605.001	FALSE	41
2022-09-15	09:59:10	-0.335814	605.001	FALSE	41
2022-09-15	09:59:11	-0.310369	605.001	FALSE	41
2022-09-15	09:59:11	-0.4293	605.001	FALSE	41
2022-09-15	09:59:11	-0.564312	605.001	FALSE	41
2022-09-15	09:59:12	-0.440292	605.001	FALSE	41
2022-09-15	09:59:12	-0.326755	605.001	FALSE	41
2022-09-15	09:59:12	-0.197697	605.001	FALSE	41
2022-09-15	09:59:12	-0.0184094	605.001	FALSE	41
2022-09-15	09:59:13	0.15355	605.154	FALSE	41
2022-09-15	09:59:13	0.767646	605.922	FALSE	41
2022-09-15	09:59:13	1.92413	607.846	FALSE	41
2022-09-15	09:59:13	0.427239	608.273	FALSE	41
2022-09-15	09:59:14	0.85701	609.13	FALSE	41
2022-09-15	09:59:14	1.09034	610.221	FALSE	41
2022-09-15	09:59:14	0.623524	610.844	FALSE	41
2022-09-15	09:59:14	0.314059	611.158	FALSE	41
2022-09-15	09:59:15	0.367545	611.526	FALSE	41
2022-09-15	09:59:15	0.459962	611.986	FALSE	41
2022-09-15	09:59:15	0.54556	612.531	FALSE	41
2022-09-15	09:59:16	0.678537	613.21	FALSE	41
2022-09-15	09:59:16	0.592379	613.802	FALSE	41
2022-09-15	09:59:16	0.52556	614.328	FALSE	41
2022-09-15	09:59:16	0.485305	614.813	FALSE	41
2022-09-15	09:59:17	0.810903	615.624	FALSE	41
2022-09-15	09:59:17	0.998079	616.622	FALSE	41
2022-09-15	09:59:17	0.622405	617.244	FALSE	41
2022-09-15	09:59:17	0.571921	617.816	FALSE	41
2022-09-15	09:59:18	0.490903	618.307	FALSE	41
2022-09-15	09:59:18	0.601183	618.908	FALSE	41
2022-09-15	09:59:18	0.693906	619.602	FALSE	41
2022-09-15	09:59:18	0.669427	620.272	FALSE	41
2022-09-15	09:59:19	0.910445	621.182	FALSE	41
2022-09-15	09:59:19	1.16419	622.346	FALSE	41
2022-09-15	09:59:19	0.902303	623.249	FALSE	41
2022-09-15	09:59:20	0.94383	624.193	FALSE	41
2022-09-15	09:59:20	0.612837	624.805	FALSE	41
2022-09-15	09:59:20	0.896654	625.702	FALSE	41
2022-09-15	09:59:20	0.943423	626.645	FALSE	41
2022-09-15	09:59:21	1.33197	627.977	FALSE	41
2022-09-15	09:59:21	1.57492	629.552	FALSE	41
2022-09-15	09:59:21	2.41538	631.968	FALSE	41
2022-09-15	09:59:21	3.29355	635.261	1	42
2022-09-15	09:59:22	3.61014	638.871	1	43
2022-09-15	09:59:22	3.40658	642.278	1	44
2022-09-15	09:59:22	1.77609	644.054	FALSE	44
2022-09-15	09:59:22	2.28831	646.342	FALSE	44
2022-09-15	09:59:23	2.99233	649.335	FALSE	44
2022-09-15	09:59:23	3.24714	652.582	1	45
2022-09-15	09:59:23	1.98815	654.57	FALSE	45
2022-09-15	09:59:24	1.0022	655.572	FALSE	45
2022-09-15	09:59:24	0.571514	656.144	FALSE	45
2022-09-15	09:59:24	0.652379	656.796	FALSE	45
2022-09-15	09:59:24	0.859809	657.656	FALSE	45
2022-09-15	09:59:25	1.58892	659.245	FALSE	45
2022-09-15	09:59:25	3.28627	662.531	1	46
2022-09-15	09:59:25	2.6478	665.179	FALSE	46
2022-09-15	09:59:25	1.34536	666.524	FALSE	46
2022-09-15	09:59:26	2.62602	669.15	FALSE	46
2022-09-15	09:59:26	5.78011	674.93	1	47
2022-09-15	09:59:26	3.82195	678.752	1	48
2022-09-15	09:59:26	6.94113	685.694	1	49
2022-09-15	09:59:27	6.73253	692.426	1	50
2022-09-15	09:59:27	5.76276	698.189	1	51
2022-09-15	09:59:27	2.58088	700.77	FALSE	51
2022-09-15	09:59:28	1.74551	702.515	FALSE	51
2022-09-15	09:59:28	0.555891	703.071	FALSE	51
2022-09-15	09:59:28	0.134568	703.206	FALSE	51
2022-09-15	09:59:28	-0.268231	703.206	FALSE	51
2022-09-15	09:59:29	-0.6379	703.206	FALSE	51
2022-09-15	09:59:29	-0.769503	703.206	FALSE	51
2022-09-15	09:59:29	-0.891793	703.206	FALSE	51
2022-09-15	09:59:29	-0.730216	703.206	FALSE	51
2022-09-15	09:59:30	-0.433778	703.206	FALSE	51
2022-09-15	09:59:30	-0.431946	703.206	FALSE	51
2022-09-15	09:59:30	-0.211437	703.206	FALSE	51
2022-09-15	09:59:30	-0.131946	703.206	FALSE	51
2022-09-15	09:59:31	-0.0552033	703.206	FALSE	51
2022-09-15	09:59:31	0.0466287	703.252	FALSE	51
2022-09-15	09:59:31	0.0330919	703.285	FALSE	51
2022-09-15	09:59:32	0.107901	703.393	FALSE	51
2022-09-15	09:59:32	0.278792	703.672	FALSE	51
2022-09-15	09:59:32	0.328257	704	FALSE	51
2022-09-15	09:59:32	0.722862	704.723	FALSE	51
2022-09-15	09:59:33	1.70958	706.433	FALSE	51
2022-09-15	09:59:33	2.59289	709.026	FALSE	51
2022-09-15	09:59:33	2.90586	711.932	FALSE	51
2022-09-15	09:59:33	1.66098	713.593	FALSE	51
2022-09-15	09:59:34	0.725763	714.318	FALSE	51
2022-09-15	09:59:34	0.358944	714.677	FALSE	51
2022-09-15	09:59:34	1.50006	716.177	FALSE	51
2022-09-15	09:59:34	0.501081	716.678	FALSE	51
2022-09-15	09:59:35	0.566069	717.244	FALSE	51
2022-09-15	09:59:35	0.59243	717.837	FALSE	51
2022-09-15	09:59:35	0.655585	718.492	FALSE	51
2022-09-15	09:59:35	2.05996	720.552	FALSE	51
2022-09-15	09:59:36	2.99869	723.551	FALSE	51
2022-09-15	09:59:36	3.30281	726.854	1	52
2022-09-15	09:59:36	2.07859	728.932	FALSE	52
2022-09-15	09:59:37	1.31268	730.245	FALSE	52
2022-09-15	09:59:37	0.8907	731.136	FALSE	52
2022-09-15	09:59:37	0.609987	731.746	FALSE	52
2022-09-15	09:59:37	0.541794	732.288	FALSE	52
2022-09-15	09:59:38	0.292685	732.58	FALSE	52
2022-09-15	09:59:38	0.327341	732.908	FALSE	52
2022-09-15	09:59:38	0.283677	733.191	FALSE	52
2022-09-15	09:59:38	0.331056	733.522	FALSE	52
2022-09-15	09:59:39	0.263575	733.786	FALSE	52
2022-09-15	09:59:39	0.261081	734.047	FALSE	52
2022-09-15	09:59:39	0.209122	734.256	FALSE	52
2022-09-15	09:59:39	0.0181809	734.274	FALSE	52
2022-09-15	09:59:40	-0.0219209	734.274	FALSE	52
2022-09-15	09:59:40	0.194975	734.469	FALSE	52
2022-09-15	09:59:40	1.84637	736.316	FALSE	52
2022-09-15	09:59:41	1.51375	737.829	FALSE	52
2022-09-15	09:59:41	1.89767	739.727	FALSE	52
2022-09-15	09:59:41	1.44093	741.168	FALSE	52
2022-09-15	09:59:41	1.00154	742.17	FALSE	52
2022-09-15	09:59:42	0.953499	743.123	FALSE	52
2022-09-15	09:59:42	0.916501	744.04	FALSE	52
2022-09-15	09:59:42	0.895585	744.935	FALSE	52
2022-09-15	09:59:42	0.986527	745.922	FALSE	52
2022-09-15	09:59:43	0.993601	746.915	FALSE	52
2022-09-15	09:59:43	1.00933	747.925	FALSE	52
2022-09-15	09:59:43	0.952328	748.877	FALSE	52
2022-09-15	09:59:43	0.860929	749.738	FALSE	52
2022-09-15	09:59:44	0.931921	750.67	FALSE	52
2022-09-15	09:59:44	0.563168	751.233	FALSE	52
2022-09-15	09:59:44	0.528715	751.762	FALSE	52
2022-09-15	09:59:45	0.250394	752.012	FALSE	52
2022-09-15	09:59:45	0.0942623	752.106	FALSE	52
2022-09-15	09:59:45	0.126069	752.232	FALSE	52
2022-09-15	09:59:45	0.102405	752.335	FALSE	52
2022-09-15	09:59:46	-0.892251	752.335	FALSE	52
2022-09-15	09:59:46	0.682252	753.017	FALSE	52
2022-09-15	09:59:46	-0.108638	753.017	FALSE	52
2022-09-15	09:59:46	-0.0226333	753.017	FALSE	52
2022-09-15	09:59:47	-0.0257376	753.017	FALSE	52
2022-09-15	09:59:47	-0.139936	753.017	FALSE	52
2022-09-15	09:59:47	-0.163346	753.017	FALSE	52
2022-09-15	09:59:47	-0.285687	753.017	FALSE	52
2022-09-15	09:59:48	-0.43846	753.017	FALSE	52
2022-09-15	09:59:48	-0.482786	753.017	FALSE	52
2022-09-15	09:59:48	-0.485381	753.017	FALSE	52
2022-09-15	09:59:49	-0.42075	753.017	FALSE	52
2022-09-15	09:59:49	-0.414847	753.017	FALSE	52
2022-09-15	09:59:49	-0.152964	753.017	FALSE	52
2022-09-15	09:59:49	0.05813	753.075	FALSE	52
2022-09-15	09:59:50	0.262405	753.338	FALSE	52
2022-09-15	09:59:50	0.330852	753.668	FALSE	52
2022-09-15	09:59:50	0.306629	753.975	FALSE	52
2022-09-15	09:59:50	0.350751	754.326	FALSE	52
2022-09-15	09:59:51	0.356654	754.683	FALSE	52
2022-09-15	09:59:51	0.28042	754.963	FALSE	52
2022-09-15	09:59:51	0.125814	755.089	FALSE	52
2022-09-15	09:59:51	0.141489	755.23	FALSE	52
2022-09-15	09:59:52	0.0264252	755.257	FALSE	52
2022-09-15	09:59:52	-0.0352542	755.257	FALSE	52
2022-09-15	09:59:52	-0.106399	755.257	FALSE	52
2022-09-15	09:59:53	-0.11617	755.257	FALSE	52
2022-09-15	09:59:53	-0.0475697	755.257	FALSE	52
2022-09-15	09:59:53	0.0319723	755.289	FALSE	52
2022-09-15	09:59:53	0.100471	755.389	FALSE	52
2022-09-15	09:59:54	0.158283	755.547	FALSE	52
2022-09-15	09:59:54	0.245916	755.793	FALSE	52
2022-09-15	09:59:54	0.0983844	755.892	FALSE	52
2022-09-15	09:59:54	0.154415	756.046	FALSE	52
2022-09-15	09:59:55	0.064186	756.11	FALSE	52
2022-09-15	09:59:55	0.188105	756.298	FALSE	52
2022-09-15	09:59:55	0.268155	756.567	FALSE	52
2022-09-15	09:59:55	0.179911	756.746	FALSE	52
2022-09-15	09:59:56	0.354262	757.101	FALSE	52
2022-09-15	09:59:56	0.21411	757.315	FALSE	52
2022-09-15	09:59:56	0.392634	757.707	FALSE	52
2022-09-15	09:59:57	0.280674	757.988	FALSE	52
2022-09-15	09:59:57	0.436094	758.424	FALSE	52
2022-09-15	09:59:57	0.259708	758.684	FALSE	52
2022-09-15	09:59:57	0.450751	759.135	FALSE	52
2022-09-15	09:59:58	0.218639	759.353	FALSE	52
2022-09-15	09:59:58	0.2907	759.644	FALSE	52
2022-09-15	09:59:58	0.178435	759.822	FALSE	52
2022-09-15	09:59:58	0.224084	760.047	FALSE	52
2022-09-15	09:59:59	-0.0425824	760.047	FALSE	52
2022-09-15	09:59:59	0.0475956	760.094	FALSE	52
2022-09-15	09:59:59	0.0151783	760.109	FALSE	52
2022-09-15	09:59:59	0.205916	760.315	FALSE	52
2022-09-15	10:00:00	-0.104414	760.315	FALSE	52
2022-09-15	10:00:00	-0.053473	760.315	FALSE	52
2022-09-15	10:00:00	0.888766	761.204	FALSE	52
2022-09-15	10:00:01	0.305204	761.509	FALSE	52
2022-09-15	10:00:01	1.18413	762.693	FALSE	52
2022-09-15	10:00:01	3.0422	765.736	1	53
2022-09-15	10:00:01	0.253295	765.989	FALSE	53
2022-09-15	10:00:02	1.02001	767.009	FALSE	53
2022-09-15	10:00:02	0.527952	767.537	FALSE	53
2022-09-15	10:00:02	0.233041	767.77	FALSE	53
2022-09-15	10:00:02	0.317316	768.087	FALSE	53
2022-09-15	10:00:03	0.218893	768.306	FALSE	53
2022-09-15	10:00:03	0.161692	768.468	FALSE	53
2022-09-15	10:00:03	1.05294	769.521	FALSE	53
2022-09-15	10:00:03	0.24215	769.763	FALSE	53
2022-09-15	10:00:04	0.241031	770.004	FALSE	53
2022-09-15	10:00:04	1.17039	771.174	FALSE	53
2022-09-15	10:00:04	0.308868	771.483	FALSE	53
2022-09-15	10:00:04	0.500878	771.984	FALSE	53
2022-09-15	10:00:05	0.78673	772.771	FALSE	53
2022-09-15	10:00:05	0.1193	772.89	FALSE	53
2022-09-15	10:00:05	0.662303	773.552	FALSE	53
2022-09-15	10:00:06	0.510394	774.063	FALSE	53
2022-09-15	10:00:06	0.637112	774.7	FALSE	53
2022-09-15	10:00:06	1.59055	776.29	FALSE	53
2022-09-15	10:00:06	0.614619	776.905	FALSE	53
2022-09-15	10:00:07	0.508715	777.414	FALSE	53
2022-09-15	10:00:07	0.994975	778.409	FALSE	53
2022-09-15	10:00:07	0.218181	778.627	FALSE	53
2022-09-15	10:00:07	0.0254582	778.652	FALSE	53
2022-09-15	10:00:08	0.411158	779.063	FALSE	53
2022-09-15	10:00:08	0.0391987	779.103	FALSE	53
2022-09-15	10:00:08	0.114059	779.217	FALSE	53
2022-09-15	10:00:08	0.313702	779.53	FALSE	53
2022-09-15	10:00:09	0.104135	779.635	FALSE	53
2022-09-15	10:00:09	-0.00298957	779.635	FALSE	53
2022-09-15	10:00:09	-0.0575951	779.635	FALSE	53
2022-09-15	10:00:10	-0.0896562	779.635	FALSE	53
2022-09-15	10:00:10	-0.142328	779.635	FALSE	53
2022-09-15	10:00:10	-0.0802923	779.635	FALSE	53
2022-09-15	10:00:10	-0.0704705	779.635	FALSE	53
2022-09-15	10:00:11	-0.0842109	779.635	FALSE	53
2022-09-15	10:00:11	-0.149758	779.635	FALSE	53
2022-09-15	10:00:11	-0.000241466	779.635	FALSE	53
2022-09-15	10:00:11	-0.126654	779.635	FALSE	53
2022-09-15	10:00:12	-0.0944908	779.635	FALSE	53
2022-09-15	10:00:12	-0.115509	779.635	FALSE	53
2022-09-15	10:00:12	-0.129198	779.635	FALSE	53
2022-09-15	10:00:12	-0.0537275	779.635	FALSE	53
2022-09-15	10:00:13	-0.00609391	779.635	FALSE	53
2022-09-15	10:00:13	-0.068842	779.635	FALSE	53
2022-09-15	10:00:13	-0.14874	779.635	FALSE	53
2022-09-15	10:00:14	-0.097646	779.635	FALSE	53
2022-09-15	10:00:14	-0.195407	779.635	FALSE	53
2022-09-15	10:00:14	-0.033931	779.635	FALSE	53
2022-09-15	10:00:14	0.0310053	779.666	FALSE	53
2022-09-15	10:00:15	-0.0589692	779.666	FALSE	53
2022-09-15	10:00:15	-0.126654	779.666	FALSE	53
2022-09-15	10:00:15	0.105916	779.772	FALSE	53
2022-09-15	10:00:15	-0.0446689	779.772	FALSE	53
2022-09-15	10:00:16	0.0110053	779.783	FALSE	53
2022-09-15	10:00:16	0.228003	780.011	FALSE	53
2022-09-15	10:00:16	0.0073921	780.018	FALSE	53
2022-09-15	10:00:16	0.347799	780.366	FALSE	53
2022-09-15	10:00:17	1.5681	781.934	FALSE	53
2022-09-15	10:00:17	0.0550257	781.989	FALSE	53
2022-09-15	10:00:17	0.587646	782.576	FALSE	53
2022-09-15	10:00:18	0.827188	783.404	FALSE	53
2022-09-15	10:00:18	0.074415	783.478	FALSE	53
2022-09-15	10:00:18	0.797265	784.275	FALSE	53
2022-09-15	10:00:18	0.444796	784.72	FALSE	53
2022-09-15	10:00:19	0.285	785.005	FALSE	53
2022-09-15	10:00:19	0.662761	785.668	FALSE	53
2022-09-15	10:00:19	0.582506	786.25	FALSE	53
2022-09-15	10:00:19	0.144542	786.395	FALSE	53
2022-09-15	10:00:20	0.781489	787.176	FALSE	53
2022-09-15	10:00:20	0.54617	787.723	FALSE	53
2022-09-15	10:00:20	0.72617	788.449	FALSE	53
2022-09-15	10:00:20	2.04704	790.496	FALSE	53
2022-09-15	10:00:21	0.365509	790.861	FALSE	53
2022-09-15	10:00:21	0.854364	791.716	FALSE	53
2022-09-15	10:00:21	3.60698	795.323	1	54
2022-09-15	10:00:22	0.537723	795.86	FALSE	54
2022-09-15	10:00:22	1.06887	796.929	FALSE	54
2022-09-15	10:00:22	2.30434	799.234	FALSE	54
2022-09-15	10:00:22	0.150038	799.384	FALSE	54
2022-09-15	10:00:23	0.169886	799.554	FALSE	54
2022-09-15	10:00:23	0.310344	799.864	FALSE	54
2022-09-15	10:00:23	0.0777228	799.942	FALSE	54
2022-09-15	10:00:23	-0.00375294	799.942	FALSE	54
2022-09-15	10:00:24	0.212277	800.154	FALSE	54
2022-09-15	10:00:24	0.150344	800.304	FALSE	54
2022-09-15	10:00:24	-0.0160175	800.304	FALSE	54
2022-09-15	10:00:24	0.100674	800.405	FALSE	54
2022-09-15	10:00:25	-0.0963738	800.405	FALSE	54
2022-09-15	10:00:25	0.00449134	800.409	FALSE	54
2022-09-15	10:00:25	0.0775702	800.487	FALSE	54
2022-09-15	10:00:26	1.41589	801.903	FALSE	54
2022-09-15	10:00:26	0.913142	802.816	FALSE	54
2022-09-15	10:00:26	2.03701	804.853	FALSE	54
2022-09-15	10:00:26	2.67233	807.525	FALSE	54
2022-09-15	10:00:27	0.36673	807.892	FALSE	54
2022-09-15	10:00:27	0.483473	808.376	FALSE	54
2022-09-15	10:00:27	1.8335	810.209	FALSE	54
2022-09-15	10:00:27	4.59238	814.801	1	55
2022-09-15	10:00:28	4.99105	819.792	1	56
2022-09-15	10:00:28	8.60098	828.393	1	57
2022-09-15	10:00:28	10.3824	838.776	1	58
2022-09-15	10:00:28	6.23965	845.015	1	59
2022-09-15	10:00:29	3.25838	848.274	1	60
2022-09-15	10:00:29	2.58307	850.857	FALSE	60
2022-09-15	10:00:29	3.93253	854.789	1	61
2022-09-15	10:00:29	2.54011	857.33	FALSE	61
2022-09-15	10:00:30	1.15243	858.482	FALSE	61
2022-09-15	10:00:30	0.801997	859.284	FALSE	61
2022-09-15	10:00:30	1.45477	860.739	FALSE	61
2022-09-15	10:00:31	1.69676	862.436	FALSE	61
2022-09-15	10:00:31	1.87482	864.31	FALSE	61
2022-09-15	10:00:31	0.924338	865.235	FALSE	61
2022-09-15	10:00:31	0.718537	865.953	FALSE	61
2022-09-15	10:00:32	0.620776	866.574	FALSE	61
2022-09-15	10:00:32	-0.13103	866.574	FALSE	61
2022-09-15	10:00:32	-0.28075	866.574	FALSE	61
2022-09-15	10:00:32	-0.0980532	866.574	FALSE	61
2022-09-15	10:00:33	-0.189503	866.574	FALSE	61
2022-09-15	10:00:33	-0.0104196	866.574	FALSE	61
2022-09-15	10:00:33	0.0970612	866.671	FALSE	61
2022-09-15	10:00:33	0.093957	866.765	FALSE	61
2022-09-15	10:00:34	0.269428	867.034	FALSE	61
2022-09-15	10:00:34	0.216501	867.251	FALSE	61
2022-09-15	10:00:34	0.42327	867.674	FALSE	61
2022-09-15	10:00:35	0.432328	868.107	FALSE	61
2022-09-15	10:00:35	0.905051	869.012	FALSE	61
2022-09-15	10:00:35	0.761896	869.773	FALSE	61
2022-09-15	10:00:35	1.4364	871.21	FALSE	61
2022-09-15	10:00:36	2.49431	873.704	FALSE	61
2022-09-15	10:00:36	5.11828	878.822	1	62
2022-09-15	10:00:36	2.25207	881.075	FALSE	62
2022-09-15	10:00:36	1.96424	883.039	FALSE	62
2022-09-15	10:00:37	2.4479	885.487	FALSE	62
2022-09-15	10:00:37	1.96256	887.449	FALSE	62
2022-09-15	10:00:37	1.21172	888.661	FALSE	62
2022-09-15	10:00:37	0.612023	889.273	FALSE	62
2022-09-15	10:00:38	0.470751	889.744	FALSE	62
2022-09-15	10:00:38	0.420827	890.165	FALSE	62
2022-09-15	10:00:38	0.35701	890.522	FALSE	62
2022-09-15	10:00:39	0.362048	890.884	FALSE	62
2022-09-15	10:00:39	0.387545	891.271	FALSE	62
2022-09-15	10:00:39	0.316858	891.588	FALSE	62
2022-09-15	10:00:39	0.341641	891.93	FALSE	62
2022-09-15	10:00:40	0.439198	892.369	FALSE	62
2022-09-15	10:00:40	0.25472	892.624	FALSE	62
2022-09-15	10:00:40	0.418741	893.042	FALSE	62
2022-09-15	10:00:40	0.238944	893.281	FALSE	62
2022-09-15	10:00:41	0.505305	893.787	FALSE	62
2022-09-15	10:00:41	0.233448	894.02	FALSE	62
2022-09-15	10:00:41	0.717519	894.738	FALSE	62
2022-09-15	10:00:41	0.998486	895.736	FALSE	62
2022-09-15	10:00:42	1.29645	897.032	FALSE	62
2022-09-15	10:00:42	1.43065	898.463	FALSE	62
2022-09-15	10:00:42	1.41635	899.879	FALSE	62
2022-09-15	10:00:43	0.567952	900.447	FALSE	62
2022-09-15	10:00:43	0.400776	900.848	FALSE	62
2022-09-15	10:00:43	0.68841	901.537	FALSE	62
2022-09-15	10:00:43	0.504949	902.042	FALSE	62
2022-09-15	10:00:44	0.90444	902.946	FALSE	62
2022-09-15	10:00:44	0.992786	903.939	FALSE	62
2022-09-15	10:00:44	2.75172	906.691	FALSE	62
2022-09-15	10:00:44	1.1593	907.85	FALSE	62
2022-09-15	10:00:45	1.33401	909.184	FALSE	62
2022-09-15	10:00:45	0.603626	909.787	FALSE	62
2022-09-15	10:00:45	0.584389	910.372	FALSE	62
2022-09-15	10:00:45	0.417316	910.789	FALSE	62
2022-09-15	10:00:46	0.44785	911.237	FALSE	62
2022-09-15	10:00:46	0.326679	911.564	FALSE	62
2022-09-15	10:00:46	0.37299	911.937	FALSE	62
2022-09-15	10:00:47	0.4564	912.393	FALSE	62
2022-09-15	10:00:47	0.334669	912.728	FALSE	62
2022-09-15	10:00:47	0.416959	913.145	FALSE	62
2022-09-15	10:00:47	0.33014	913.475	FALSE	62
2022-09-15	10:00:48	0.384746	913.86	FALSE	62
2022-09-15	10:00:48	0.120776	913.98	FALSE	62
2022-09-15	10:00:48	0.0431681	914.024	FALSE	62
2022-09-15	10:00:48	-0.0552542	914.024	FALSE	62
2022-09-15	10:00:49	0.0369086	914.06	FALSE	62
2022-09-15	10:00:49	-0.216119	914.06	FALSE	62
2022-09-15	10:00:49	-0.0176461	914.06	FALSE	62
2022-09-15	10:00:49	0.0724811	914.133	FALSE	62
2022-09-15	10:00:50	0.238944	914.372	FALSE	62
2022-09-15	10:00:50	0.097672	914.47	FALSE	62
2022-09-15	10:00:50	0.189326	914.659	FALSE	62
2022-09-15	10:00:50	0.176909	914.836	FALSE	62
2022-09-15	10:00:51	0.108155	914.944	FALSE	62
2022-09-15	10:00:51	0.218537	915.162	FALSE	62
2022-09-15	10:00:51	0.0753819	915.238	FALSE	62
2022-09-15	10:00:52	0.320674	915.559	FALSE	62
2022-09-15	10:00:52	0.0170613	915.576	FALSE	62
2022-09-15	10:00:52	0.266425	915.842	FALSE	62
2022-09-15	10:00:52	0.0578247	915.9	FALSE	62
2022-09-15	10:00:53	0.235992	916.136	FALSE	62
2022-09-15	10:00:53	0.0595549	916.195	FALSE	62
2022-09-15	10:00:53	0.18388	916.379	FALSE	62
2022-09-15	10:00:53	0.358333	916.738	FALSE	62
2022-09-15	10:00:54	0.1707	916.908	FALSE	62
2022-09-15	10:00:54	0.306832	917.215	FALSE	62
2022-09-15	10:00:54	0.211412	917.427	FALSE	62
2022-09-15	10:00:54	0.428664	917.855	FALSE	62
2022-09-15	10:00:55	0.278995	918.134	FALSE	62
2022-09-15	10:00:55	1.09503	919.229	FALSE	62
2022-09-15	10:00:55	0.290853	919.52	FALSE	62
2022-09-15	10:00:56	0.70902	920.229	FALSE	62
2022-09-15	10:00:56	0.795076	921.024	FALSE	62
2022-09-15	10:00:56	0.476756	921.501	FALSE	62
2022-09-15	10:00:56	0.447901	921.949	FALSE	62
2022-09-15	10:00:57	0.697977	922.647	FALSE	62
2022-09-15	10:00:57	0.315484	922.962	FALSE	62
2022-09-15	10:00:57	0.174975	923.137	FALSE	62
2022-09-15	10:00:57	0.438791	923.576	FALSE	62
2022-09-15	10:00:58	0.0558908	923.632	FALSE	62
2022-09-15	10:00:58	0.0824557	923.714	FALSE	62
2022-09-15	10:00:58	-0.000852186	923.714	FALSE	62
2022-09-15	10:00:58	0.180878	923.895	FALSE	62
2022-09-15	10:00:59	-0.0498598	923.895	FALSE	62
2022-09-15	10:00:59	0.0138552	923.909	FALSE	62
2022-09-15	10:00:59	-0.033015	923.909	FALSE	62
2022-09-15	10:01:00	0.0752292	923.984	FALSE	62
2022-09-15	10:01:00	-0.076272	923.984	FALSE	62
2022-09-15	10:01:00	0.0899366	924.074	FALSE	62
2022-09-15	10:01:00	0.0675448	924.142	FALSE	62
2022-09-15	10:01:01	0.0610816	924.203	FALSE	62
2022-09-15	10:01:01	0.0194023	924.222	FALSE	62
2022-09-15	10:01:01	0.187239	924.41	FALSE	62
2022-09-15	10:01:01	0.245	924.655	FALSE	62
2022-09-15	10:01:02	0.18673	924.841	FALSE	62
2022-09-15	10:01:02	0.2964	925.138	FALSE	62
2022-09-15	10:01:02	0.323117	925.461	FALSE	62
2022-09-15	10:01:02	0.264695	925.726	FALSE	62
2022-09-15	10:01:03	0.28612	926.012	FALSE	62
2022-09-15	10:01:03	0.46673	926.478	FALSE	62
2022-09-15	10:01:03	0.370598	926.849	FALSE	62
2022-09-15	10:01:04	0.478791	927.328	FALSE	62
2022-09-15	10:01:04	0.51187	927.84	FALSE	62
2022-09-15	10:01:04	0.604491	928.444	FALSE	62
2022-09-15	10:01:04	0.673092	929.117	FALSE	62
2022-09-15	10:01:05	1.70724	930.824	FALSE	62
2022-09-15	10:01:05	1.4019	932.226	FALSE	62
2022-09-15	10:01:05	2.23696	934.463	FALSE	62
2022-09-15	10:01:05	3.98551	938.449	1	63
2022-09-15	10:01:06	2.08704	940.536	FALSE	63
2022-09-15	10:01:06	1.62719	942.163	FALSE	63
2022-09-15	10:01:06	3.44306	945.606	1	64
2022-09-15	10:01:06	1.77579	947.382	FALSE	64
2022-09-15	10:01:07	2.79416	950.176	FALSE	64
2022-09-15	10:01:07	2.57533	952.751	FALSE	64
2022-09-15	10:01:07	1.82459	954.576	FALSE	64
2022-09-15	10:01:08	2.51879	957.095	FALSE	64
2022-09-15	10:01:08	1.91518	959.01	FALSE	64
2022-09-15	10:01:08	1.12983	960.14	FALSE	64
2022-09-15	10:01:08	1.63065	961.77	FALSE	64
2022-09-15	10:01:09	3.1336	964.904	1	65
2022-09-15	10:01:09	2.52658	967.431	FALSE	65
2022-09-15	10:01:09	4.94169	972.372	1	66
2022-09-15	10:01:09	3.08602	975.458	1	67
2022-09-15	10:01:10	2.05589	977.514	FALSE	67
2022-09-15	10:01:10	3.02276	980.537	1	68
2022-09-15	10:01:10	2.45884	982.996	FALSE	68
2022-09-15	10:01:10	2.33385	985.33	FALSE	68
2022-09-15	10:01:11	4.4081	989.738	1	69
2022-09-15	10:01:11	3.31034	993.048	1	70
2022-09-15	10:01:11	2.08047	995.129	FALSE	70
2022-09-15	10:01:11	6.23864	1001.37	1	71
2022-09-15	10:01:12	1.27609	1002.64	FALSE	71
2022-09-15	10:01:12	3.76169	1006.4	1	72
2022-09-15	10:01:12	6.5591	1012.96	1	73
2022-09-15	10:01:13	4.63579	1017.6	1	74
2022-09-15	10:01:13	5.83523	1023.44	1	75
2022-09-15	10:01:13	6.87685	1030.31	1	76
2022-09-15	10:01:13	3.71375	1034.03	1	77
2022-09-15	10:01:14	1.35401	1035.38	FALSE	77
2022-09-15	10:01:14	1.28709	1036.67	FALSE	77
2022-09-15	10:01:14	1.47742	1038.14	FALSE	77
2022-09-15	10:01:14	1.47538	1039.62	FALSE	77
2022-09-15	10:01:15	1.3648	1040.98	FALSE	77
2022-09-15	10:01:15	1.6193	1042.6	FALSE	77
2022-09-15	10:01:15	1.19706	1043.8	FALSE	77
2022-09-15	10:01:15	0.571768	1044.37	FALSE	77
2022-09-15	10:01:16	0.494567	1044.87	FALSE	77
2022-09-15	10:01:16	0.580725	1045.45	FALSE	77
2022-09-15	10:01:16	0.668562	1046.12	FALSE	77

## Sheet: Tyr_harness_202291595550
						**GoPro Fitting: 945
2022-09-15	09:55:51	0.265967
2022-09-15	09:55:51	0.244186
2022-09-15	09:55:51	0.240725
2022-09-15	09:55:51	0.225051
2022-09-15	09:55:51	0.232227
2022-09-15	09:55:52	0.186629
2022-09-15	09:55:52	0.182965
2022-09-15	09:55:52	0.149071
2022-09-15	09:55:52	0.15986
2022-09-15	09:55:53	0.212328
2022-09-15	09:55:53	0.197214
2022-09-15	09:55:53	0.24444
2022-09-15	09:55:54	0.20897
2022-09-15	09:55:54	0.258333
2022-09-15	09:55:54	0.296247
2022-09-15	09:55:54	0.329275
2022-09-15	09:55:55	0.33701
2022-09-15	09:55:55	0.112583
2022-09-15	09:55:55	0.236501
2022-09-15	09:55:55	0.296196
2022-09-15	09:55:56	0.287901
2022-09-15	09:55:56	0.294669
2022-09-15	09:55:56	0.271769
2022-09-15	09:55:56	0.291768
2022-09-15	09:55:57	0.272023
2022-09-15	09:55:57	0.289886
2022-09-15	09:55:57	0.242049
2022-09-15	09:55:58	0.261438
2022-09-15	09:55:58	0.243422
2022-09-15	09:55:58	0.245814
2022-09-15	09:55:58	0.237417
2022-09-15	09:55:59	0.192888
2022-09-15	09:55:59	0.222863
2022-09-15	09:55:59	0.222557
2022-09-15	09:55:59	0.157875
2022-09-15	09:56:00	0.163372
2022-09-15	09:56:00	0.248715
2022-09-15	09:56:00	0.249987
2022-09-15	09:56:00	0.329122
2022-09-15	09:56:01	0.224237
2022-09-15	09:56:01	0.219504
2022-09-15	09:56:01	0.215891
2022-09-15	09:56:02	0.264542
2022-09-15	09:56:02	0.20841
2022-09-15	09:56:02	0.215331
2022-09-15	09:56:02	0.22785
2022-09-15	09:56:03	0.2564
2022-09-15	09:56:03	0.242761
2022-09-15	09:56:03	0.247087
2022-09-15	09:56:03	0.244339
2022-09-15	09:56:04	0.265763
2022-09-15	09:56:04	0.183626
2022-09-15	09:56:04	0.475585
2022-09-15	09:56:04	0.346934
2022-09-15	09:56:05	0.229529
2022-09-15	09:56:05	0.218333
2022-09-15	09:56:05	0.2964
2022-09-15	09:56:06	0.285407
2022-09-15	09:56:06	0.252125
2022-09-15	09:56:06	0.246374
2022-09-15	09:56:06	0.217723
2022-09-15	09:56:07	0.231514
2022-09-15	09:56:07	0.20673
2022-09-15	09:56:07	0.18388
2022-09-15	09:56:07	0.231412
2022-09-15	09:56:08	0.207952
2022-09-15	09:56:08	0.155687
2022-09-15	09:56:08	0.209122
2022-09-15	09:56:08	-0.019529
2022-09-15	09:56:09	0.391819
2022-09-15	09:56:09	0.363219
2022-09-15	09:56:09	0.536094
2022-09-15	09:56:10	1.04103
2022-09-15	09:56:10	2.03365
2022-09-15	09:56:10	0.947646
2022-09-15	09:56:10	2.06246
2022-09-15	09:56:11	0.556552
2022-09-15	09:56:11	0.0441351
2022-09-15	09:56:11	-0.0528623
2022-09-15	09:56:11	-0.0170863
2022-09-15	09:56:12	-0.0596816
2022-09-15	09:56:12	0.043219
2022-09-15	09:56:12	0.137163
2022-09-15	09:56:12	0.0795041
2022-09-15	09:56:13	0.503677
2022-09-15	09:56:13	0.216196
2022-09-15	09:56:13	0.436654
2022-09-15	09:56:14	0.334873
2022-09-15	09:56:14	0.313957
2022-09-15	09:56:14	0.388817
2022-09-15	09:56:14	0.148308
2022-09-15	09:56:15	0.104848
2022-09-15	09:56:15	-0.320547
2022-09-15	09:56:15	-0.327111
2022-09-15	09:56:15	-0.253727
2022-09-15	09:56:16	-0.303956
2022-09-15	09:56:16	-0.354745
2022-09-15	09:56:16	-0.354745
2022-09-15	09:56:16	0.338893
2022-09-15	09:56:17	0.498893
2022-09-15	09:56:17	0.31299
2022-09-15	09:56:17	-0.0916409
2022-09-15	09:56:18	0.0900893
2022-09-15	09:56:18	0.296196
2022-09-15	09:56:18	-0.257544
2022-09-15	09:56:18	-0.474542
2022-09-15	09:56:19	-0.322786
2022-09-15	09:56:19	-0.4379
2022-09-15	09:56:19	-0.31556
2022-09-15	09:56:19	-0.158664
2022-09-15	09:56:20	0.569376
2022-09-15	09:56:20	0.639758
2022-09-15	09:56:20	0.0230155
2022-09-15	09:56:20	-0.0796817
2022-09-15	09:56:21	-0.0749997
2022-09-15	09:56:21	0.0125321
2022-09-15	09:56:21	-0.00914732
2022-09-15	09:56:22	0.00423688
2022-09-15	09:56:22	0.249733
2022-09-15	09:56:22	0.142252
2022-09-15	09:56:22	0.56327
2022-09-15	09:56:23	0.613957
2022-09-15	09:56:23	1.31614
2022-09-15	09:56:23	1.68011
2022-09-15	09:56:23	1.28739
2022-09-15	09:56:24	2.25004
2022-09-15	09:56:24	0.889275
2022-09-15	09:56:24	0.964694
2022-09-15	09:56:24	2.04927
2022-09-15	09:56:25	1.36795
2022-09-15	09:56:25	0.920267
2022-09-15	09:56:25	0.941285
2022-09-15	09:56:26	0.840369
2022-09-15	09:56:26	0.415636
2022-09-15	09:56:26	0.220573
2022-09-15	09:56:26	0.0928883
2022-09-15	09:56:27	1.34118
2022-09-15	09:56:27	1.27324
2022-09-15	09:56:27	0.949071
2022-09-15	09:56:27	0.828359
2022-09-15	09:56:28	0.696552
2022-09-15	09:56:28	0.503321
2022-09-15	09:56:28	-0.0191219
2022-09-15	09:56:28	-0.142481
2022-09-15	09:56:29	0.106018
2022-09-15	09:56:29	0.420115
2022-09-15	09:56:29	0.0465778
2022-09-15	09:56:30	-0.0143891
2022-09-15	09:56:30	-0.0472135
2022-09-15	09:56:30	0.228054
2022-09-15	09:56:30	0.0308527
2022-09-15	09:56:31	0.203422
2022-09-15	09:56:31	-0.00502519
2022-09-15	09:56:31	0.73014
2022-09-15	09:56:31	5.46947
2022-09-15	09:56:32	5.70596
2022-09-15	09:56:32	6.41298
2022-09-15	09:56:32	5.38031
2022-09-15	09:56:32	9.42108
2022-09-15	09:56:33	5.85629
2022-09-15	09:56:33	7.55039
2022-09-15	09:56:33	7.04891
2022-09-15	09:56:34	6.40123
2022-09-15	09:56:34	3.40703
2022-09-15	09:56:34	3.76668
2022-09-15	09:56:34	1.79462
2022-09-15	09:56:35	1.01406
2022-09-15	09:56:35	2.91177
2022-09-15	09:56:35	8.63222
2022-09-15	09:56:35	6.05523
2022-09-15	09:56:36	2.12011
2022-09-15	09:56:36	1.09899
2022-09-15	09:56:36	0.881692
2022-09-15	09:56:36	1.30836
2022-09-15	09:56:37	6.651
2022-09-15	09:56:37	13.253
2022-09-15	09:56:37	15.7303
2022-09-15	09:56:38	13.7988
2022-09-15	09:56:38	10.2262
2022-09-15	09:56:38	7.70988
2022-09-15	09:56:38	6.314
2022-09-15	09:56:39	7.89304
2022-09-15	09:56:39	7.93456
2022-09-15	09:56:39	0.65701
2022-09-15	09:56:39	0.24612
2022-09-15	09:56:40	0.0992496
2022-09-15	09:56:40	0.282914
2022-09-15	09:56:40	0.0324812
2022-09-15	09:56:40	0.23925
2022-09-15	09:56:41	0.0310562
2022-09-15	09:56:41	0.0284608
2022-09-15	09:56:41	-0.0759158
2022-09-15	09:56:42	0.0612343
2022-09-15	09:56:42	-0.126959
2022-09-15	09:56:42	-0.254542
2022-09-15	09:56:42	0.094873
2022-09-15	09:56:43	0.0702419
2022-09-15	09:56:43	-0.321055
2022-09-15	09:56:43	-0.217951
2022-09-15	09:56:43	-0.212608
2022-09-15	09:56:44	-0.241157
2022-09-15	09:56:44	-0.283244
2022-09-15	09:56:44	-0.0709793
2022-09-15	09:56:44	-0.0637529
2022-09-15	09:56:45	-0.146043
2022-09-15	09:56:45	-0.0587147
2022-09-15	09:56:45	0.0639315
2022-09-15	09:56:46	0.0756873
2022-09-15	09:56:46	-0.00955446
2022-09-15	09:56:46	0.205713
2022-09-15	09:56:46	0.264237
2022-09-15	09:56:47	0.267188
2022-09-15	09:56:47	7.39584
2022-09-15	09:56:47	8.13533
2022-09-15	09:56:47	3.1395
2022-09-15	09:56:48	0.579809
2022-09-15	09:56:48	0.0696312
2022-09-15	09:56:48	-0.0292491
2022-09-15	09:56:48	0.35584
2022-09-15	09:56:49	0.278893
2022-09-15	09:56:49	0.516552
2022-09-15	09:56:49	0.0618959
2022-09-15	09:56:50	-0.334592
2022-09-15	09:56:50	-0.279529
2022-09-15	09:56:50	-0.14472
2022-09-15	09:56:50	0.231107
2022-09-15	09:56:51	0.118334
2022-09-15	09:56:51	-0.13561
2022-09-15	09:56:51	0.253448
2022-09-15	09:56:51	0.209122
2022-09-15	09:56:52	0.507239
2022-09-15	09:56:52	0.184491
2022-09-15	09:56:52	0.499656
2022-09-15	09:56:52	0.793397
2022-09-15	09:56:53	1.67533
2022-09-15	09:56:53	3.92861
2022-09-15	09:56:53	4.1911
2022-09-15	09:56:54	6.27212
2022-09-15	09:56:54	3.6166
2022-09-15	09:56:54	2.53818
2022-09-15	09:56:54	1.6509
2022-09-15	09:56:55	0.747087
2022-09-15	09:56:55	0.862201
2022-09-15	09:56:55	0.370089
2022-09-15	09:56:55	0.485611
2022-09-15	09:56:56	0.102659
2022-09-15	09:56:56	0.185967
2022-09-15	09:56:56	0.0132445
2022-09-15	09:56:56	-0.052557
2022-09-15	09:56:57	-0.509198
2022-09-15	09:56:57	1.37055
2022-09-15	09:56:57	4.68495
2022-09-15	09:56:58	9.21227
2022-09-15	09:56:58	6.11441
2022-09-15	09:56:58	3.39105
2022-09-15	09:56:58	2.00408
2022-09-15	09:56:59	0.380369
2022-09-15	09:56:59	0.307596
2022-09-15	09:56:59	0.189733
2022-09-15	09:56:59	0.148868
2022-09-15	09:57:00	0.0496822
2022-09-15	09:57:00	-0.110267
2022-09-15	09:57:00	-0.00314226
2022-09-15	09:57:00	0.0508527
2022-09-15	09:57:01	-0.209656
2022-09-15	09:57:01	-0.515814
2022-09-15	09:57:01	-0.495305
2022-09-15	09:57:02	-0.232608
2022-09-15	09:57:02	-0.169758
2022-09-15	09:57:02	0.121794
2022-09-15	09:57:02	0.0916669
2022-09-15	09:57:03	0.044644
2022-09-15	09:57:03	0.0267305
2022-09-15	09:57:03	-0.00899467
2022-09-15	09:57:03	0.0485626
2022-09-15	09:57:04	0.314211
2022-09-15	09:57:04	1.81187
2022-09-15	09:57:04	1.8963
2022-09-15	09:57:04	0.57243
2022-09-15	09:57:05	0.271158
2022-09-15	09:57:05	0.243881
2022-09-15	09:57:05	0.310802
2022-09-15	09:57:06	0.350954
2022-09-15	09:57:06	0.254059
2022-09-15	09:57:06	0.224644
2022-09-15	09:57:06	3.32286
2022-09-15	09:57:07	1.34459
2022-09-15	09:57:07	1.13803
2022-09-15	09:57:07	1.04429
2022-09-15	09:57:07	1.10826
2022-09-15	09:57:08	2.0653
2022-09-15	09:57:08	3.31925
2022-09-15	09:57:08	2.33961
2022-09-15	09:57:08	1.07467
2022-09-15	09:57:09	0.392277
2022-09-15	09:57:09	0.148104
2022-09-15	09:57:09	0.0361453
2022-09-15	09:57:10	-0.0588165
2022-09-15	09:57:10	-0.0333713
2022-09-15	09:57:10	-0.0892491
2022-09-15	09:57:10	-0.0596308
2022-09-15	09:57:11	-0.0292491
2022-09-15	09:57:11	-0.116577
2022-09-15	09:57:11	-0.349809
2022-09-15	09:57:11	-0.595305
2022-09-15	09:57:12	-0.309605
2022-09-15	09:57:12	-0.0393763
2022-09-15	09:57:12	-0.136883
2022-09-15	09:57:12	0.227646
2022-09-15	09:57:13	-0.0200888
2022-09-15	09:57:13	0.281794
2022-09-15	09:57:13	0.252023
2022-09-15	09:57:14	-0.068333
2022-09-15	09:57:14	1.95813
2022-09-15	09:57:14	0.735229
2022-09-15	09:57:14	1.02846
2022-09-15	09:57:15	0.341692
2022-09-15	09:57:15	0.650496
2022-09-15	09:57:15	0.287952
2022-09-15	09:57:15	1.06505
2022-09-15	09:57:16	1.01487
2022-09-15	09:57:16	1.40683
2022-09-15	09:57:16	0.740471
2022-09-15	09:57:16	0.537366
2022-09-15	09:57:17	0.565865
2022-09-15	09:57:17	0.751005
2022-09-15	09:57:17	0.392786
2022-09-15	09:57:18	0.693193
2022-09-15	09:57:18	1.2824
2022-09-15	09:57:18	1.37365
2022-09-15	09:57:18	0.889376
2022-09-15	09:57:19	0.956043
2022-09-15	09:57:19	3.52429
2022-09-15	09:57:19	2.87594
2022-09-15	09:57:19	1.10169
2022-09-15	09:57:20	2.10088
2022-09-15	09:57:20	1.82709
2022-09-15	09:57:20	1.60032
2022-09-15	09:57:20	0.803473
2022-09-15	09:57:21	0.355382
2022-09-15	09:57:21	0.42159
2022-09-15	09:57:21	0.891565
2022-09-15	09:57:22	1.36963
2022-09-15	09:57:22	1.51828
2022-09-15	09:57:22	0.958537
2022-09-15	09:57:22	1.15365
2022-09-15	09:57:23	2.00999
2022-09-15	09:57:23	1.03029
2022-09-15	09:57:23	0.728308
2022-09-15	09:57:23	0.491718
2022-09-15	09:57:24	0.58215
2022-09-15	09:57:24	0.57528
2022-09-15	09:57:24	0.567901
2022-09-15	09:57:24	0.894924
2022-09-15	09:57:25	0.659606
2022-09-15	09:57:25	0.785662
2022-09-15	09:57:25	0.827596
2022-09-15	09:57:26	1.01986
2022-09-15	09:57:26	0.884745
2022-09-15	09:57:26	0.740573
2022-09-15	09:57:26	0.544644
2022-09-15	09:57:27	0.435382
2022-09-15	09:57:27	0.434466
2022-09-15	09:57:27	0.602913
2022-09-15	09:57:27	1.24459
2022-09-15	09:57:28	1.64576
2022-09-15	09:57:28	1.77665
2022-09-15	09:57:28	1.46398
2022-09-15	09:57:28	1.268
2022-09-15	09:57:29	1.30464
2022-09-15	09:57:29	1.01813
2022-09-15	09:57:29	0.676806
2022-09-15	09:57:30	1.2162
2022-09-15	09:57:30	1.48627
2022-09-15	09:57:30	1.3995
2022-09-15	09:57:30	1.15218
2022-09-15	09:57:31	0.861081
2022-09-15	09:57:31	1.00816
2022-09-15	09:57:31	0.329377
2022-09-15	09:57:31	0.352939
2022-09-15	09:57:32	0.549835
2022-09-15	09:57:32	0.666272
2022-09-15	09:57:32	1.1395
2022-09-15	09:57:32	0.929478
2022-09-15	09:57:33	1.12454
2022-09-15	09:57:33	1.0392
2022-09-15	09:57:33	0.777824
2022-09-15	09:57:34	0.974924
2022-09-15	09:57:34	0.268461
2022-09-15	09:57:34	0.228613
2022-09-15	09:57:34	0.0907508
2022-09-15	09:57:35	-0.168028
2022-09-15	09:57:35	-0.360852
2022-09-15	09:57:35	-0.259529
2022-09-15	09:57:35	-0.371997
2022-09-15	09:57:36	-0.48243
2022-09-15	09:57:36	-0.532557
2022-09-15	09:57:36	-1.15108
2022-09-15	09:57:36	-0.758155
2022-09-15	09:57:37	-0.60762
2022-09-15	09:57:37	-0.243702
2022-09-15	09:57:37	-0.199682
2022-09-15	09:57:38	-0.360954
2022-09-15	09:57:38	-0.400903
2022-09-15	09:57:38	-0.402073
2022-09-15	09:57:38	-0.428893
2022-09-15	09:57:39	-0.15388
2022-09-15	09:57:39	-0.064669
2022-09-15	09:57:39	-0.0241601
2022-09-15	09:57:39	0.171005
2022-09-15	09:57:40	0.14612
2022-09-15	09:57:40	0.219148
2022-09-15	09:57:40	0.156552
2022-09-15	09:57:40	0.384542
2022-09-15	09:57:41	0.387748
2022-09-15	09:57:41	0.604847
2022-09-15	09:57:41	0.810598
2022-09-15	09:57:42	0.883779
2022-09-15	09:57:42	1.3508
2022-09-15	09:57:42	0.96612
2022-09-15	09:57:42	0.621845
2022-09-15	09:57:43	0.63818
2022-09-15	09:57:43	0.0606745
2022-09-15	09:57:43	0.0776211
2022-09-15	09:57:43	0.268613
2022-09-15	09:57:44	0.211005
2022-09-15	09:57:44	0.43925
2022-09-15	09:57:44	0.306679
2022-09-15	09:57:44	0.393702
2022-09-15	09:57:45	0.340623
2022-09-15	09:57:45	0.324237
2022-09-15	09:57:45	0.447799
2022-09-15	09:57:46	0.443219
2022-09-15	09:57:46	0.487392
2022-09-15	09:57:46	0.360064
2022-09-15	09:57:46	0.263779
2022-09-15	09:57:47	0.277163
2022-09-15	09:57:47	0.230903
2022-09-15	09:57:47	0.109275
2022-09-15	09:57:47	0.267138
2022-09-15	09:57:48	0.412227
2022-09-15	09:57:48	1.4478
2022-09-15	09:57:48	1.35676
2022-09-15	09:57:48	2.81411
2022-09-15	09:57:49	1.67721
2022-09-15	09:57:49	1.25126
2022-09-15	09:57:49	0.410496
2022-09-15	09:57:50	0.133295
2022-09-15	09:57:50	-0.0825824
2022-09-15	09:57:50	-0.234593
2022-09-15	09:57:50	-0.218867
2022-09-15	09:57:51	-0.455101
2022-09-15	09:57:51	-0.633422
2022-09-15	09:57:51	-0.801513
2022-09-15	09:57:51	-0.558613
2022-09-15	09:57:52	-0.625127
2022-09-15	09:57:52	-0.582226
2022-09-15	09:57:52	-0.824516
2022-09-15	09:57:52	-0.50533
2022-09-15	09:57:53	-0.370521
2022-09-15	09:57:53	0.338079
2022-09-15	09:57:53	1.67838
2022-09-15	09:57:54	1.76078
2022-09-15	09:57:54	4.12139
2022-09-15	09:57:54	1.15116
2022-09-15	09:57:54	1.61253
2022-09-15	09:57:55	1.82276
2022-09-15	09:57:55	0.547341
2022-09-15	09:57:55	0.667087
2022-09-15	09:57:55	1.30067
2022-09-15	09:57:56	0.368003
2022-09-15	09:57:56	0.50444
2022-09-15	09:57:56	1.21767
2022-09-15	09:57:56	0.41472
2022-09-15	09:57:57	1.6509
2022-09-15	09:57:57	0.550598
2022-09-15	09:57:57	0.385916
2022-09-15	09:57:58	2.1278
2022-09-15	09:57:58	0.296705
2022-09-15	09:57:58	0.31014
2022-09-15	09:57:58	2.58128
2022-09-15	09:57:59	0.229478
2022-09-15	09:57:59	1.35101
2022-09-15	09:57:59	1.93029
2022-09-15	09:57:59	1.29691
2022-09-15	09:58:00	0.509275
2022-09-15	09:58:00	0.829834
2022-09-15	09:58:00	0.343219
2022-09-15	09:58:00	0.141336
2022-09-15	09:58:01	0.418639
2022-09-15	09:58:01	0.253244
2022-09-15	09:58:01	0.281438
2022-09-15	09:58:02	1.05508
2022-09-15	09:58:02	0.367341
2022-09-15	09:58:02	2.23915
2022-09-15	09:58:02	0.92215
2022-09-15	09:58:03	1.95365
2022-09-15	09:58:03	4.70602
2022-09-15	09:58:03	1.44592
2022-09-15	09:58:03	2.14464
2022-09-15	09:58:04	3.22103
2022-09-15	09:58:04	1.24276
2022-09-15	09:58:04	1.67487
2022-09-15	09:58:04	1.13721
2022-09-15	09:58:05	0.698842
2022-09-15	09:58:05	1.74276
2022-09-15	09:58:05	0.548155
2022-09-15	09:58:06	0.971718
2022-09-15	09:58:06	2.53614
2022-09-15	09:58:06	0.339809
2022-09-15	09:58:06	1.62195
2022-09-15	09:58:07	1.84413
2022-09-15	09:58:07	0.741947
2022-09-15	09:58:07	1.38347
2022-09-15	09:58:07	1.30358
2022-09-15	09:58:08	0.674262
2022-09-15	09:58:08	1.02795
2022-09-15	09:58:08	2.12032
2022-09-15	09:58:08	0.236959
2022-09-15	09:58:09	0.302812
2022-09-15	09:58:09	0.143982
2022-09-15	09:58:09	0.172685
2022-09-15	09:58:10	-0.0166283
2022-09-15	09:58:10	0.365713
2022-09-15	09:58:10	0.3707
2022-09-15	09:58:10	0.454924
2022-09-15	09:58:11	0.484339
2022-09-15	09:58:11	0.402252
2022-09-15	09:58:11	0.519402
2022-09-15	09:58:11	0.373855
2022-09-15	09:58:12	0.444338
2022-09-15	09:58:12	0.41757
2022-09-15	09:58:12	0.427697
2022-09-15	09:58:12	0.421285
2022-09-15	09:58:13	0.419758
2022-09-15	09:58:13	0.417316
2022-09-15	09:58:13	0.407443
2022-09-15	09:58:14	0.380878
2022-09-15	09:58:14	0.42042
2022-09-15	09:58:14	0.339199
2022-09-15	09:58:14	0.345255
2022-09-15	09:58:15	0.346985
2022-09-15	09:58:15	0.752684
2022-09-15	09:58:15	2.37981
2022-09-15	09:58:15	2.24897
2022-09-15	09:58:16	1.61905
2022-09-15	09:58:16	1.67788
2022-09-15	09:58:16	0.473397
2022-09-15	09:58:16	0.379046
2022-09-15	09:58:17	0.438333
2022-09-15	09:58:17	0.116705
2022-09-15	09:58:17	0.00942772
2022-09-15	09:58:17	0.0495295
2022-09-15	09:58:18	0.162099
2022-09-15	09:58:18	0.345356
2022-09-15	09:58:18	0.411565
2022-09-15	09:58:19	0.171005
2022-09-15	09:58:19	0.251616
2022-09-15	09:58:19	0.220878
2022-09-15	09:58:19	0.174975
2022-09-15	09:58:20	0.278181
2022-09-15	09:58:20	0.217214
2022-09-15	09:58:20	0.19126
2022-09-15	09:58:20	0.197926
2022-09-15	09:58:21	0.193499
2022-09-15	09:58:21	0.198028
2022-09-15	09:58:21	0.183219
2022-09-15	09:58:21	0.1707
2022-09-15	09:58:22	0.175382
2022-09-15	09:58:22	0.153397
2022-09-15	09:58:22	0.143677
2022-09-15	09:58:23	-0.0314883
2022-09-15	09:58:23	-0.264364
2022-09-15	09:58:23	-0.31159
2022-09-15	09:58:23	-0.179427
2022-09-15	09:58:24	-0.039987
2022-09-15	09:58:24	0.099962
2022-09-15	09:58:24	0.206679
2022-09-15	09:58:24	0.237214
2022-09-15	09:58:25	0.150038
2022-09-15	09:58:25	0.236603
2022-09-15	09:58:25	0.518537
2022-09-15	09:58:25	0.362048
2022-09-15	09:58:26	0.291819
2022-09-15	09:58:26	0.138283
2022-09-15	09:58:26	0.053957
2022-09-15	09:58:27	-0.0732694
2022-09-15	09:58:27	-0.252506
2022-09-15	09:58:27	-0.37159
2022-09-15	09:58:27	-0.363702
2022-09-15	09:58:28	-0.331132
2022-09-15	09:58:28	-0.390827
2022-09-15	09:58:28	-0.0890964
2022-09-15	09:58:28	0.470547
2022-09-15	09:58:29	0.345713
2022-09-15	09:58:29	2.99696
2022-09-15	09:58:29	2.2479
2022-09-15	09:58:29	1.59289
2022-09-15	09:58:30	2.48836
2022-09-15	09:58:30	0.28841
2022-09-15	09:58:30	0.203168
2022-09-15	09:58:31	0.27528
2022-09-15	09:58:31	0.0251529
2022-09-15	09:58:31	0.166883
2022-09-15	09:58:31	0.0457636
2022-09-15	09:58:32	0.247494
2022-09-15	09:58:32	0.142557
2022-09-15	09:58:32	0.306476
2022-09-15	09:58:32	0.732532
2022-09-15	09:58:33	0.405967
2022-09-15	09:58:33	0.442354
2022-09-15	09:58:33	0.129784
2022-09-15	09:58:33	0.219962
2022-09-15	09:58:34	0.107239
2022-09-15	09:58:34	0.145662
2022-09-15	09:58:34	-0.115916
2022-09-15	09:58:35	-0.0842618
2022-09-15	09:58:35	-0.216272
2022-09-15	09:58:35	-0.233524
2022-09-15	09:58:35	-0.161107
2022-09-15	09:58:36	-0.213727
2022-09-15	09:58:36	-0.203549
2022-09-15	09:58:36	-0.365279
2022-09-15	09:58:36	-0.0877733
2022-09-15	09:58:37	-0.0866537
2022-09-15	09:58:37	0.135026
2022-09-15	09:58:37	0.262201
2022-09-15	09:58:37	0.272532
2022-09-15	09:58:38	0.170089
2022-09-15	09:58:38	0.199504
2022-09-15	09:58:38	0.307748
2022-09-15	09:58:39	0.261743
2022-09-15	09:58:39	0.258842
2022-09-15	09:58:39	0.286476
2022-09-15	09:58:39	0.196043
2022-09-15	09:58:40	0.217875
2022-09-15	09:58:40	0.172023
2022-09-15	09:58:40	0.206679
2022-09-15	09:58:40	0.200369
2022-09-15	09:58:41	0.206171
2022-09-15	09:58:41	0.220369
2022-09-15	09:58:41	0.231005
2022-09-15	09:58:41	0.226578
2022-09-15	09:58:42	0.229275
2022-09-15	09:58:42	0.236247
2022-09-15	09:58:42	0.230751
2022-09-15	09:58:43	0.24383
2022-09-15	09:58:43	0.273804
2022-09-15	09:58:43	0.270293
2022-09-15	09:58:43	0.259148
2022-09-15	09:58:44	0.296196
2022-09-15	09:58:44	0.270445
2022-09-15	09:58:44	0.233855
2022-09-15	09:58:44	0.305967
2022-09-15	09:58:45	0.400267
2022-09-15	09:58:45	0.365763
2022-09-15	09:58:45	0.418486
2022-09-15	09:58:45	0.358588
2022-09-15	09:58:46	0.381336
2022-09-15	09:58:46	0.322252
2022-09-15	09:58:46	0.3793
2022-09-15	09:58:47	0.448155
2022-09-15	09:58:47	0.493906
2022-09-15	09:58:47	0.36327
2022-09-15	09:58:47	0.286018
2022-09-15	09:58:48	0.318588
2022-09-15	09:58:48	0.288613
2022-09-15	09:58:48	0.347545
2022-09-15	09:58:48	0.274466
2022-09-15	09:58:49	0.289529
2022-09-15	09:58:49	0.301082
2022-09-15	09:58:49	0.25299
2022-09-15	09:58:49	0.12729
2022-09-15	09:58:50	0.000165643
2022-09-15	09:58:50	0.153499
2022-09-15	09:58:50	0.12042
2022-09-15	09:58:51	0.250598
2022-09-15	09:58:51	0.246679
2022-09-15	09:58:51	0.256298
2022-09-15	09:58:51	0.22444
2022-09-15	09:58:52	0.247443
2022-09-15	09:58:52	0.244135
2022-09-15	09:58:52	0.250649
2022-09-15	09:58:52	0.247901
2022-09-15	09:58:53	0.258944
2022-09-15	09:58:53	0.269224
2022-09-15	09:58:53	0.271311
2022-09-15	09:58:53	0.265102
2022-09-15	09:58:54	0.271412
2022-09-15	09:58:54	0.221387
2022-09-15	09:58:54	0.249937
2022-09-15	09:58:55	0.308054
2022-09-15	09:58:55	0.0380791
2022-09-15	09:58:55	-0.105483
2022-09-15	09:58:55	-0.295305
2022-09-15	09:58:56	-0.423549
2022-09-15	09:58:56	-0.562684
2022-09-15	09:58:56	-0.573626
2022-09-15	09:58:56	-0.743498
2022-09-15	09:58:57	-0.75159
2022-09-15	09:58:57	-0.761462
2022-09-15	09:58:57	-0.693269
2022-09-15	09:58:57	-0.794847
2022-09-15	09:58:58	-0.662938
2022-09-15	09:58:58	-0.421463
2022-09-15	09:58:58	-0.211183
2022-09-15	09:58:59	-0.029758
2022-09-15	09:58:59	0.0426592
2022-09-15	09:58:59	-0.00268423
2022-09-15	09:58:59	0.291463
2022-09-15	09:59:00	0.056247
2022-09-15	09:59:00	0.148919
2022-09-15	09:59:00	0.0919213
2022-09-15	09:59:00	0.26327
2022-09-15	09:59:01	-0.0894527
2022-09-15	09:59:01	0.0436262
2022-09-15	09:59:01	-0.251946
2022-09-15	09:59:01	0.0197585
2022-09-15	09:59:02	-0.0174934
2022-09-15	09:59:02	0.26556
2022-09-15	09:59:02	0.0438806
2022-09-15	09:59:02	-0.135356
2022-09-15	09:59:03	-0.0304196
2022-09-15	09:59:03	0.760267
2022-09-15	09:59:03	0.377316
2022-09-15	09:59:04	0.444542
2022-09-15	09:59:04	0.463015
2022-09-15	09:59:04	0.447137
2022-09-15	09:59:04	0.452023
2022-09-15	09:59:05	0.485763
2022-09-15	09:59:05	0.497265
2022-09-15	09:59:05	0.483117
2022-09-15	09:59:05	0.453244
2022-09-15	09:59:06	0.424949
2022-09-15	09:59:06	0.412176
2022-09-15	09:59:06	0.552532
2022-09-15	09:59:06	0.539758
2022-09-15	09:59:07	0.911717
2022-09-15	09:59:07	2.62357
2022-09-15	09:59:07	2.04251
2022-09-15	09:59:08	5.78286
2022-09-15	09:59:08	4.9252
2022-09-15	09:59:08	2.24128
2022-09-15	09:59:08	2.08673
2022-09-15	09:59:09	1.45391
2022-09-15	09:59:09	1.82663
2022-09-15	09:59:09	2.24139
2022-09-15	09:59:09	1.38342
2022-09-15	09:59:10	-0.0513356
2022-09-15	09:59:10	-0.326348
2022-09-15	09:59:10	0.0057127
2022-09-15	09:59:10	-0.335814
2022-09-15	09:59:11	-0.310369
2022-09-15	09:59:11	-0.4293
2022-09-15	09:59:11	-0.564312
2022-09-15	09:59:12	-0.440292
2022-09-15	09:59:12	-0.326755
2022-09-15	09:59:12	-0.197697
2022-09-15	09:59:12	-0.0184094
2022-09-15	09:59:13	0.15355
2022-09-15	09:59:13	0.767646
2022-09-15	09:59:13	1.92413
2022-09-15	09:59:13	0.427239
2022-09-15	09:59:14	0.85701
2022-09-15	09:59:14	1.09034
2022-09-15	09:59:14	0.623524
2022-09-15	09:59:14	0.314059
2022-09-15	09:59:15	0.367545
2022-09-15	09:59:15	0.459962
2022-09-15	09:59:15	0.54556
2022-09-15	09:59:16	0.678537
2022-09-15	09:59:16	0.592379
2022-09-15	09:59:16	0.52556
2022-09-15	09:59:16	0.485305
2022-09-15	09:59:17	0.810903
2022-09-15	09:59:17	0.998079
2022-09-15	09:59:17	0.622405
2022-09-15	09:59:17	0.571921
2022-09-15	09:59:18	0.490903
2022-09-15	09:59:18	0.601183
2022-09-15	09:59:18	0.693906
2022-09-15	09:59:18	0.669427
2022-09-15	09:59:19	0.910445
2022-09-15	09:59:19	1.16419
2022-09-15	09:59:19	0.902303
2022-09-15	09:59:20	0.94383
2022-09-15	09:59:20	0.612837
2022-09-15	09:59:20	0.896654
2022-09-15	09:59:20	0.943423
2022-09-15	09:59:21	1.33197
2022-09-15	09:59:21	1.57492
2022-09-15	09:59:21	2.41538
2022-09-15	09:59:21	3.29355
2022-09-15	09:59:22	3.61014
2022-09-15	09:59:22	3.40658
2022-09-15	09:59:22	1.77609
2022-09-15	09:59:22	2.28831
2022-09-15	09:59:23	2.99233
2022-09-15	09:59:23	3.24714
2022-09-15	09:59:23	1.98815
2022-09-15	09:59:24	1.0022
2022-09-15	09:59:24	0.571514
2022-09-15	09:59:24	0.652379
2022-09-15	09:59:24	0.859809
2022-09-15	09:59:25	1.58892
2022-09-15	09:59:25	3.28627
2022-09-15	09:59:25	2.6478
2022-09-15	09:59:25	1.34536
2022-09-15	09:59:26	2.62602
2022-09-15	09:59:26	5.78011
2022-09-15	09:59:26	3.82195
2022-09-15	09:59:26	6.94113
2022-09-15	09:59:27	6.73253
2022-09-15	09:59:27	5.76276
2022-09-15	09:59:27	2.58088
2022-09-15	09:59:28	1.74551
2022-09-15	09:59:28	0.555891
2022-09-15	09:59:28	0.134568
2022-09-15	09:59:28	-0.268231
2022-09-15	09:59:29	-0.6379
2022-09-15	09:59:29	-0.769503
2022-09-15	09:59:29	-0.891793
2022-09-15	09:59:29	-0.730216
2022-09-15	09:59:30	-0.433778
2022-09-15	09:59:30	-0.431946
2022-09-15	09:59:30	-0.211437
2022-09-15	09:59:30	-0.131946
2022-09-15	09:59:31	-0.0552033
2022-09-15	09:59:31	0.0466287
2022-09-15	09:59:31	0.0330919
2022-09-15	09:59:32	0.107901
2022-09-15	09:59:32	0.278792
2022-09-15	09:59:32	0.328257
2022-09-15	09:59:32	0.722862
2022-09-15	09:59:33	1.70958
2022-09-15	09:59:33	2.59289
2022-09-15	09:59:33	2.90586
2022-09-15	09:59:33	1.66098
2022-09-15	09:59:34	0.725763
2022-09-15	09:59:34	0.358944
2022-09-15	09:59:34	1.50006
2022-09-15	09:59:34	0.501081
2022-09-15	09:59:35	0.566069
2022-09-15	09:59:35	0.59243
2022-09-15	09:59:35	0.655585
2022-09-15	09:59:35	2.05996
2022-09-15	09:59:36	2.99869
2022-09-15	09:59:36	3.30281
2022-09-15	09:59:36	2.07859
2022-09-15	09:59:37	1.31268
2022-09-15	09:59:37	0.8907
2022-09-15	09:59:37	0.609987
2022-09-15	09:59:37	0.541794
2022-09-15	09:59:38	0.292685
2022-09-15	09:59:38	0.327341
2022-09-15	09:59:38	0.283677
2022-09-15	09:59:38	0.331056
2022-09-15	09:59:39	0.263575
2022-09-15	09:59:39	0.261081
2022-09-15	09:59:39	0.209122
2022-09-15	09:59:39	0.0181809
2022-09-15	09:59:40	-0.0219209
2022-09-15	09:59:40	0.194975
2022-09-15	09:59:40	1.84637
2022-09-15	09:59:41	1.51375
2022-09-15	09:59:41	1.89767
2022-09-15	09:59:41	1.44093
2022-09-15	09:59:41	1.00154
2022-09-15	09:59:42	0.953499
2022-09-15	09:59:42	0.916501
2022-09-15	09:59:42	0.895585
2022-09-15	09:59:42	0.986527
2022-09-15	09:59:43	0.993601
2022-09-15	09:59:43	1.00933
2022-09-15	09:59:43	0.952328
2022-09-15	09:59:43	0.860929
2022-09-15	09:59:44	0.931921
2022-09-15	09:59:44	0.563168
2022-09-15	09:59:44	0.528715
2022-09-15	09:59:45	0.250394
2022-09-15	09:59:45	0.0942623
2022-09-15	09:59:45	0.126069
2022-09-15	09:59:45	0.102405
2022-09-15	09:59:46	-0.892251
2022-09-15	09:59:46	0.682252
2022-09-15	09:59:46	-0.108638
2022-09-15	09:59:46	-0.0226333
2022-09-15	09:59:47	-0.0257376
2022-09-15	09:59:47	-0.139936
2022-09-15	09:59:47	-0.163346
2022-09-15	09:59:47	-0.285687
2022-09-15	09:59:48	-0.43846
2022-09-15	09:59:48	-0.482786
2022-09-15	09:59:48	-0.485381
2022-09-15	09:59:49	-0.42075
2022-09-15	09:59:49	-0.414847
2022-09-15	09:59:49	-0.152964
2022-09-15	09:59:49	0.05813
2022-09-15	09:59:50	0.262405
2022-09-15	09:59:50	0.330852
2022-09-15	09:59:50	0.306629
2022-09-15	09:59:50	0.350751
2022-09-15	09:59:51	0.356654
2022-09-15	09:59:51	0.28042
2022-09-15	09:59:51	0.125814
2022-09-15	09:59:51	0.141489
2022-09-15	09:59:52	0.0264252
2022-09-15	09:59:52	-0.0352542
2022-09-15	09:59:52	-0.106399
2022-09-15	09:59:53	-0.11617
2022-09-15	09:59:53	-0.0475697
2022-09-15	09:59:53	0.0319723
2022-09-15	09:59:53	0.100471
2022-09-15	09:59:54	0.158283
2022-09-15	09:59:54	0.245916
2022-09-15	09:59:54	0.0983844
2022-09-15	09:59:54	0.154415
2022-09-15	09:59:55	0.064186
2022-09-15	09:59:55	0.188105
2022-09-15	09:59:55	0.268155
2022-09-15	09:59:55	0.179911
2022-09-15	09:59:56	0.354262
2022-09-15	09:59:56	0.21411
2022-09-15	09:59:56	0.392634
2022-09-15	09:59:57	0.280674
2022-09-15	09:59:57	0.436094
2022-09-15	09:59:57	0.259708
2022-09-15	09:59:57	0.450751
2022-09-15	09:59:58	0.218639
2022-09-15	09:59:58	0.2907
2022-09-15	09:59:58	0.178435
2022-09-15	09:59:58	0.224084
2022-09-15	09:59:59	-0.0425824
2022-09-15	09:59:59	0.0475956
2022-09-15	09:59:59	0.0151783
2022-09-15	09:59:59	0.205916
2022-09-15	10:00:00	-0.104414
2022-09-15	10:00:00	-0.053473
2022-09-15	10:00:00	0.888766
2022-09-15	10:00:01	0.305204
2022-09-15	10:00:01	1.18413
2022-09-15	10:00:01	3.0422
2022-09-15	10:00:01	0.253295
2022-09-15	10:00:02	1.02001
2022-09-15	10:00:02	0.527952
2022-09-15	10:00:02	0.233041
2022-09-15	10:00:02	0.317316
2022-09-15	10:00:03	0.218893
2022-09-15	10:00:03	0.161692
2022-09-15	10:00:03	1.05294
2022-09-15	10:00:03	0.24215
2022-09-15	10:00:04	0.241031
2022-09-15	10:00:04	1.17039
2022-09-15	10:00:04	0.308868
2022-09-15	10:00:04	0.500878
2022-09-15	10:00:05	0.78673
2022-09-15	10:00:05	0.1193
2022-09-15	10:00:05	0.662303
2022-09-15	10:00:06	0.510394
2022-09-15	10:00:06	0.637112
2022-09-15	10:00:06	1.59055
2022-09-15	10:00:06	0.614619
2022-09-15	10:00:07	0.508715
2022-09-15	10:00:07	0.994975
2022-09-15	10:00:07	0.218181
2022-09-15	10:00:07	0.0254582
2022-09-15	10:00:08	0.411158
2022-09-15	10:00:08	0.0391987
2022-09-15	10:00:08	0.114059
2022-09-15	10:00:08	0.313702
2022-09-15	10:00:09	0.104135
2022-09-15	10:00:09	-0.00298957
2022-09-15	10:00:09	-0.0575951
2022-09-15	10:00:10	-0.0896562
2022-09-15	10:00:10	-0.142328
2022-09-15	10:00:10	-0.0802923
2022-09-15	10:00:10	-0.0704705
2022-09-15	10:00:11	-0.0842109
2022-09-15	10:00:11	-0.149758
2022-09-15	10:00:11	-0.000241466
2022-09-15	10:00:11	-0.126654
2022-09-15	10:00:12	-0.0944908
2022-09-15	10:00:12	-0.115509
2022-09-15	10:00:12	-0.129198
2022-09-15	10:00:12	-0.0537275
2022-09-15	10:00:13	-0.00609391
2022-09-15	10:00:13	-0.068842
2022-09-15	10:00:13	-0.14874
2022-09-15	10:00:14	-0.097646
2022-09-15	10:00:14	-0.195407
2022-09-15	10:00:14	-0.033931
2022-09-15	10:00:14	0.0310053
2022-09-15	10:00:15	-0.0589692
2022-09-15	10:00:15	-0.126654
2022-09-15	10:00:15	0.105916
2022-09-15	10:00:15	-0.0446689
2022-09-15	10:00:16	0.0110053
2022-09-15	10:00:16	0.228003
2022-09-15	10:00:16	0.0073921
2022-09-15	10:00:16	0.347799
2022-09-15	10:00:17	1.5681
2022-09-15	10:00:17	0.0550257
2022-09-15	10:00:17	0.587646
2022-09-15	10:00:18	0.827188
2022-09-15	10:00:18	0.074415
2022-09-15	10:00:18	0.797265
2022-09-15	10:00:18	0.444796
2022-09-15	10:00:19	0.285
2022-09-15	10:00:19	0.662761
2022-09-15	10:00:19	0.582506
2022-09-15	10:00:19	0.144542
2022-09-15	10:00:20	0.781489
2022-09-15	10:00:20	0.54617
2022-09-15	10:00:20	0.72617
2022-09-15	10:00:20	2.04704
2022-09-15	10:00:21	0.365509
2022-09-15	10:00:21	0.854364
2022-09-15	10:00:21	3.60698
2022-09-15	10:00:22	0.537723
2022-09-15	10:00:22	1.06887
2022-09-15	10:00:22	2.30434
2022-09-15	10:00:22	0.150038
2022-09-15	10:00:23	0.169886
2022-09-15	10:00:23	0.310344
2022-09-15	10:00:23	0.0777228
2022-09-15	10:00:23	-0.00375294
2022-09-15	10:00:24	0.212277
2022-09-15	10:00:24	0.150344
2022-09-15	10:00:24	-0.0160175
2022-09-15	10:00:24	0.100674
2022-09-15	10:00:25	-0.0963738
2022-09-15	10:00:25	0.00449134
2022-09-15	10:00:25	0.0775702
2022-09-15	10:00:26	1.41589
2022-09-15	10:00:26	0.913142
2022-09-15	10:00:26	2.03701
2022-09-15	10:00:26	2.67233
2022-09-15	10:00:27	0.36673
2022-09-15	10:00:27	0.483473
2022-09-15	10:00:27	1.8335
2022-09-15	10:00:27	4.59238
2022-09-15	10:00:28	4.99105
2022-09-15	10:00:28	8.60098
2022-09-15	10:00:28	10.3824
2022-09-15	10:00:28	6.23965
2022-09-15	10:00:29	3.25838
2022-09-15	10:00:29	2.58307
2022-09-15	10:00:29	3.93253
2022-09-15	10:00:29	2.54011
2022-09-15	10:00:30	1.15243
2022-09-15	10:00:30	0.801997
2022-09-15	10:00:30	1.45477
2022-09-15	10:00:31	1.69676
2022-09-15	10:00:31	1.87482
2022-09-15	10:00:31	0.924338
2022-09-15	10:00:31	0.718537
2022-09-15	10:00:32	0.620776
2022-09-15	10:00:32	-0.13103
2022-09-15	10:00:32	-0.28075
2022-09-15	10:00:32	-0.0980532
2022-09-15	10:00:33	-0.189503
2022-09-15	10:00:33	-0.0104196
2022-09-15	10:00:33	0.0970612
2022-09-15	10:00:33	0.093957
2022-09-15	10:00:34	0.269428
2022-09-15	10:00:34	0.216501
2022-09-15	10:00:34	0.42327
2022-09-15	10:00:35	0.432328
2022-09-15	10:00:35	0.905051
2022-09-15	10:00:35	0.761896
2022-09-15	10:00:35	1.4364
2022-09-15	10:00:36	2.49431
2022-09-15	10:00:36	5.11828
2022-09-15	10:00:36	2.25207
2022-09-15	10:00:36	1.96424
2022-09-15	10:00:37	2.4479
2022-09-15	10:00:37	1.96256
2022-09-15	10:00:37	1.21172
2022-09-15	10:00:37	0.612023
2022-09-15	10:00:38	0.470751
2022-09-15	10:00:38	0.420827
2022-09-15	10:00:38	0.35701
2022-09-15	10:00:39	0.362048
2022-09-15	10:00:39	0.387545
2022-09-15	10:00:39	0.316858
2022-09-15	10:00:39	0.341641
2022-09-15	10:00:40	0.439198
2022-09-15	10:00:40	0.25472
2022-09-15	10:00:40	0.418741
2022-09-15	10:00:40	0.238944
2022-09-15	10:00:41	0.505305
2022-09-15	10:00:41	0.233448
2022-09-15	10:00:41	0.717519
2022-09-15	10:00:41	0.998486
2022-09-15	10:00:42	1.29645
2022-09-15	10:00:42	1.43065
2022-09-15	10:00:42	1.41635
2022-09-15	10:00:43	0.567952
2022-09-15	10:00:43	0.400776
2022-09-15	10:00:43	0.68841
2022-09-15	10:00:43	0.504949
2022-09-15	10:00:44	0.90444
2022-09-15	10:00:44	0.992786
2022-09-15	10:00:44	2.75172
2022-09-15	10:00:44	1.1593
2022-09-15	10:00:45	1.33401
2022-09-15	10:00:45	0.603626
2022-09-15	10:00:45	0.584389
2022-09-15	10:00:45	0.417316
2022-09-15	10:00:46	0.44785
2022-09-15	10:00:46	0.326679
2022-09-15	10:00:46	0.37299
2022-09-15	10:00:47	0.4564
2022-09-15	10:00:47	0.334669
2022-09-15	10:00:47	0.416959
2022-09-15	10:00:47	0.33014
2022-09-15	10:00:48	0.384746
2022-09-15	10:00:48	0.120776
2022-09-15	10:00:48	0.0431681
2022-09-15	10:00:48	-0.0552542
2022-09-15	10:00:49	0.0369086
2022-09-15	10:00:49	-0.216119
2022-09-15	10:00:49	-0.0176461
2022-09-15	10:00:49	0.0724811
2022-09-15	10:00:50	0.238944
2022-09-15	10:00:50	0.097672
2022-09-15	10:00:50	0.189326
2022-09-15	10:00:50	0.176909
2022-09-15	10:00:51	0.108155
2022-09-15	10:00:51	0.218537
2022-09-15	10:00:51	0.0753819
2022-09-15	10:00:52	0.320674
2022-09-15	10:00:52	0.0170613
2022-09-15	10:00:52	0.266425
2022-09-15	10:00:52	0.0578247
2022-09-15	10:00:53	0.235992
2022-09-15	10:00:53	0.0595549
2022-09-15	10:00:53	0.18388
2022-09-15	10:00:53	0.358333
2022-09-15	10:00:54	0.1707
2022-09-15	10:00:54	0.306832
2022-09-15	10:00:54	0.211412
2022-09-15	10:00:54	0.428664
2022-09-15	10:00:55	0.278995
2022-09-15	10:00:55	1.09503
2022-09-15	10:00:55	0.290853
2022-09-15	10:00:56	0.70902
2022-09-15	10:00:56	0.795076
2022-09-15	10:00:56	0.476756
2022-09-15	10:00:56	0.447901
2022-09-15	10:00:57	0.697977
2022-09-15	10:00:57	0.315484
2022-09-15	10:00:57	0.174975
2022-09-15	10:00:57	0.438791
2022-09-15	10:00:58	0.0558908
2022-09-15	10:00:58	0.0824557
2022-09-15	10:00:58	-0.000852186
2022-09-15	10:00:58	0.180878
2022-09-15	10:00:59	-0.0498598
2022-09-15	10:00:59	0.0138552
2022-09-15	10:00:59	-0.033015
2022-09-15	10:01:00	0.0752292
2022-09-15	10:01:00	-0.076272
2022-09-15	10:01:00	0.0899366
2022-09-15	10:01:00	0.0675448
2022-09-15	10:01:01	0.0610816
2022-09-15	10:01:01	0.0194023
2022-09-15	10:01:01	0.187239
2022-09-15	10:01:01	0.245
2022-09-15	10:01:02	0.18673
2022-09-15	10:01:02	0.2964
2022-09-15	10:01:02	0.323117
2022-09-15	10:01:02	0.264695
2022-09-15	10:01:03	0.28612
2022-09-15	10:01:03	0.46673
2022-09-15	10:01:03	0.370598
2022-09-15	10:01:04	0.478791
2022-09-15	10:01:04	0.51187
2022-09-15	10:01:04	0.604491
2022-09-15	10:01:04	0.673092
2022-09-15	10:01:05	1.70724
2022-09-15	10:01:05	1.4019
2022-09-15	10:01:05	2.23696
2022-09-15	10:01:05	3.98551
2022-09-15	10:01:06	2.08704
2022-09-15	10:01:06	1.62719
2022-09-15	10:01:06	3.44306
2022-09-15	10:01:06	1.77579
2022-09-15	10:01:07	2.79416
2022-09-15	10:01:07	2.57533
2022-09-15	10:01:07	1.82459
2022-09-15	10:01:08	2.51879
2022-09-15	10:01:08	1.91518
2022-09-15	10:01:08	1.12983
2022-09-15	10:01:08	1.63065
2022-09-15	10:01:09	3.1336
2022-09-15	10:01:09	2.52658
2022-09-15	10:01:09	4.94169
2022-09-15	10:01:09	3.08602
2022-09-15	10:01:10	2.05589
2022-09-15	10:01:10	3.02276
2022-09-15	10:01:10	2.45884
2022-09-15	10:01:10	2.33385
2022-09-15	10:01:11	4.4081
2022-09-15	10:01:11	3.31034
2022-09-15	10:01:11	2.08047
2022-09-15	10:01:11	6.23864
2022-09-15	10:01:12	1.27609
2022-09-15	10:01:12	3.76169
2022-09-15	10:01:12	6.5591
2022-09-15	10:01:13	4.63579
2022-09-15	10:01:13	5.83523
2022-09-15	10:01:13	6.87685
2022-09-15	10:01:13	3.71375
2022-09-15	10:01:14	1.35401
2022-09-15	10:01:14	1.28709
2022-09-15	10:01:14	1.47742
2022-09-15	10:01:14	1.47538
2022-09-15	10:01:15	1.3648
2022-09-15	10:01:15	1.6193
2022-09-15	10:01:15	1.19706
2022-09-15	10:01:15	0.571768
2022-09-15	10:01:16	0.494567
2022-09-15	10:01:16	0.580725
2022-09-15	10:01:16	0.668562
