# Supplementary material for: Comparing efficacy in reducing pulling and welfare impacts of four types of leash walking equipment
Source: PeerJ journal article supplement (doi:10.7717/peerj.18131), 2024-10-24
Supplement: Shelter_2_Tension_files.zip [file Tyr_martin_20229159059 copy.xlsx]

## Sheet: Averaged Newtons
Date	Time	Averaged Newtons	Impulse	Total steps
2022-09-15	09:00:59	1.36176	1.36176	0		impulse newtons	3830.78
2022-09-15	09:01:00	0.752214	2.11397	0		Total steps	97
2022-09-15	09:01:01	0.873004	2.98697	0		# > 5sec	5
2022-09-15	09:01:02	0.821617	3.80859	0
2022-09-15	09:01:03	0.78019	4.58878	0
2022-09-15	09:01:04	0.894678	5.48346	0
2022-09-15	09:01:05	0.925162	6.40862	0
2022-09-15	09:01:06	0.906052	7.31467	0
2022-09-15	09:01:07	1.03661	8.35128	0
2022-09-15	09:01:08	1.1292	9.48048	0
2022-09-15	09:01:09	1.26004	10.7405	0
2022-09-15	09:01:10	1.48375	12.2243	0
2022-09-15	09:01:11	1.02354	13.2478	0
2022-09-15	09:01:12	1.02077	14.2686	0
2022-09-15	09:01:13	0.895583	15.1642	0
2022-09-15	09:01:14	1.39162	16.5558	0
2022-09-15	09:01:15	1.29377	17.8496	0
2022-09-15	09:01:16	0.602149	18.4517	0
2022-09-15	09:01:17	-1.88782	18.4517	0
2022-09-15	09:01:18	0.544858	18.9966	0
2022-09-15	09:01:19	0.650705	19.6473	0
2022-09-15	09:01:20	3.92069	23.568	0
2022-09-15	09:01:21	9.39831	32.9663	0
2022-09-15	09:01:22	2.34549	35.3118	0
2022-09-15	09:01:23	2.96173	38.2735	0
2022-09-15	09:01:24	1.53452	39.808	0
2022-09-15	09:01:25	0.249009	40.057	0
2022-09-15	09:01:26	0.474834	40.5319	0
2022-09-15	09:01:27	0.491397	41.0233	0
2022-09-15	09:01:28	0.417372	41.4406	0
2022-09-15	09:01:29	1.09258	42.5332	0
2022-09-15	09:01:30	1.14567	43.6789	0
2022-09-15	09:01:31	1.59107	45.2699	0
2022-09-15	09:01:32	8.47364	53.7436	0
2022-09-15	09:01:33	1.71386	55.4574	0
2022-09-15	09:01:34	6.78407	62.2415	0
2022-09-15	09:01:35	1.7435	63.985	0
2022-09-15	09:01:36	0.0656482	64.0507	0
2022-09-15	09:01:37	6.21242	70.2631	0
2022-09-15	09:01:38	23.4083	93.6714	1
2022-09-15	09:01:39	43.5768	137.248	2
2022-09-15	09:01:40	33.8662	171.114	3
2022-09-15	09:01:41	26.3193	197.434	4
2022-09-15	09:01:42	9.28213	206.716	4
2022-09-15	09:01:43	-0.25246	206.716	4
2022-09-15	09:01:44	-2.12746	206.716	4
2022-09-15	09:01:45	-3.56037	206.716	4
2022-09-15	09:01:46	-2.99252	206.716	4
2022-09-15	09:01:47	-2.02959	206.716	4
2022-09-15	09:01:48	-0.698676	206.716	4
2022-09-15	09:01:49	10.5306	217.246	4
2022-09-15	09:01:50	30.3065	247.553	5
2022-09-15	09:01:51	2.59173	250.145	5
2022-09-15	09:01:52	3.71391	253.859	5
2022-09-15	09:01:53	20.0187	273.877	6
2022-09-15	09:01:54	31.1574	305.035	7
2022-09-15	09:01:55	37.579	342.614	8
2022-09-15	09:01:56	33.3656	375.979	9
2022-09-15	09:01:57	9.82179	385.801	9
2022-09-15	09:01:58	3.70373	389.505	9
2022-09-15	09:01:59	-0.371588	389.505	9
2022-09-15	09:02:00	0.879511	390.384	9
2022-09-15	09:02:01	1.11411	391.498	9
2022-09-15	09:02:02	2.22614	393.725	9
2022-09-15	09:02:03	11.5202	405.245	9
2022-09-15	09:02:04	5.56822	410.813	9
2022-09-15	09:02:05	-0.0213346	410.813	9
2022-09-15	09:02:06	0.264686	411.078	9
2022-09-15	09:02:07	-1.45828	411.078	9
2022-09-15	09:02:08	0.736387	411.814	9
2022-09-15	09:02:09	2.72551	414.54	9
2022-09-15	09:02:10	1.93086	416.47	9
2022-09-15	09:02:11	1.38222	417.853	9
2022-09-15	09:02:12	0.760666	418.613	9
2022-09-15	09:02:13	0.727164	419.34	9
2022-09-15	09:02:14	0.797225	420.138	9
2022-09-15	09:02:15	0.773625	420.911	9
2022-09-15	09:02:16	0.621334	421.533	9
2022-09-15	09:02:17	-0.213411	421.533	9
2022-09-15	09:02:18	2.26309	423.796	9
2022-09-15	09:02:19	2.89248	426.688	9
2022-09-15	09:02:20	1.04408	427.732	9
2022-09-15	09:02:21	-1.86603	427.732	9
2022-09-15	09:02:22	1.51453	429.247	9
2022-09-15	09:02:23	18.7561	448.003	10
2022-09-15	09:02:24	18.7879	466.791	11
2022-09-15	09:02:25	4.91435	471.705	11
2022-09-15	09:02:26	0.7468	472.452	11
2022-09-15	09:02:27	1.3724	473.824	11
2022-09-15	09:02:28	3.84644	477.671	11
2022-09-15	09:02:29	9.27478	486.946	11
2022-09-15	09:02:30	17.0113	503.957	12
2022-09-15	09:02:31	15.7346	519.692	13
2022-09-15	09:02:32	2.89399	522.586	13
2022-09-15	09:02:33	0.993318	523.579	13
2022-09-15	09:02:34	9.34485	532.924	13
2022-09-15	09:02:35	26.8346	559.758	14
2022-09-15	09:02:36	27.5724	587.331	15
2022-09-15	09:02:37	11.6492	598.98	15
2022-09-15	09:02:38	13.9598	612.94	16
2022-09-15	09:02:39	9.54207	622.482	16
2022-09-15	09:02:40	20.0872	642.569	17
2022-09-15	09:02:41	29.4049	671.974	18
2022-09-15	09:02:42	15.0961	687.07	19
2022-09-15	09:02:43	9.24517	696.315	19
2022-09-15	09:02:44	3.77055	700.086	19
2022-09-15	09:02:45	3.27686	703.363	19
2022-09-15	09:02:46	2.30129	705.664	19
2022-09-15	09:02:47	1.0653	706.729	19
2022-09-15	09:02:48	0.982735	707.712	19
2022-09-15	09:02:49	0.741273	708.453	19
2022-09-15	09:02:50	0.782342	709.236	19
2022-09-15	09:02:51	0.746234	709.982	19
2022-09-15	09:02:52	0.749743	710.731	19
2022-09-15	09:02:53	0.476852	711.208	19
2022-09-15	09:02:54	11.5856	722.794	19
2022-09-15	09:02:55	52.0844	774.878	20
2022-09-15	09:02:56	27.6564	802.535	21
2022-09-15	09:02:57	14.1519	816.687	22
2022-09-15	09:02:58	3.5464	820.233	22
2022-09-15	09:02:59	1.59694	821.83	22
2022-09-15	09:03:00	1.13808	822.968	22
2022-09-15	09:03:01	1.35761	824.326	22
2022-09-15	09:03:02	1.27906	825.605	22
2022-09-15	09:03:03	1.7945	827.399	22
2022-09-15	09:03:04	1.95579	829.355	22
2022-09-15	09:03:05	2.10605	831.461	22
2022-09-15	09:03:06	2.47899	833.94	22
2022-09-15	09:03:07	2.19601	836.136	22
2022-09-15	09:03:08	2.04204	838.178	22
2022-09-15	09:03:09	2.34345	840.522	22
2022-09-15	09:03:10	2.95149	843.473	22
2022-09-15	09:03:11	2.22302	845.696	22
2022-09-15	09:03:12	3.97197	849.668	22
2022-09-15	09:03:13	8.73068	858.399	22
2022-09-15	09:03:14	16.1913	874.59	23
2022-09-15	09:03:15	10.7493	885.339	23
2022-09-15	09:03:16	15.0233	900.363	24
2022-09-15	09:03:17	18.9874	919.35	25
2022-09-15	09:03:18	3.12053	922.471	25
2022-09-15	09:03:19	0.877756	923.348	25
2022-09-15	09:03:20	1.18956	924.538	25
2022-09-15	09:03:21	16.6485	941.186	26
2022-09-15	09:03:22	19.8622	961.049	27
2022-09-15	09:03:23	3.67712	964.726	27
2022-09-15	09:03:24	4.22769	968.953	27
2022-09-15	09:03:25	23.8694	992.823	28
2022-09-15	09:03:26	6.33586	999.159	28
2022-09-15	09:03:27	16.3716	1015.53	29
2022-09-15	09:03:28	14.7176	1030.25	30
2022-09-15	09:03:29	13.2295	1043.48	31
2022-09-15	09:03:30	18.3125	1061.79	32
2022-09-15	09:03:31	23.3279	1085.12	33
2022-09-15	09:03:32	4.10631	1089.22	33
2022-09-15	09:03:33	1.1793	1090.4	33
2022-09-15	09:03:34	1.14521	1091.55	33
2022-09-15	09:03:35	1.49558	1093.04	33
2022-09-15	09:03:36	8.28638	1101.33	33
2022-09-15	09:03:37	25.4611	1126.79	34
2022-09-15	09:03:38	1.30516	1128.1	34
2022-09-15	09:03:39	0.99264	1129.09	34
2022-09-15	09:03:40	1.46757	1130.56	34
2022-09-15	09:03:41	2.16898	1132.73	34
2022-09-15	09:03:42	1.75195	1134.48	34
2022-09-15	09:03:43	4.95776	1139.44	34
2022-09-15	09:03:44	4.20529	1143.64	34
2022-09-15	09:03:45	1.70056	1145.34	34
2022-09-15	09:03:46	1.65408	1147	34
2022-09-15	09:03:47	1.86694	1148.86	34
2022-09-15	09:03:48	2.56026	1151.42	34
2022-09-15	09:03:49	6.74508	1158.17	34
2022-09-15	09:03:50	9.33912	1167.51	34
2022-09-15	09:03:51	20.2674	1187.77	35
2022-09-15	09:03:52	22.6494	1210.42	36
2022-09-15	09:03:53	25.3753	1235.8	37
2022-09-15	09:03:54	8.45395	1244.25	37
2022-09-15	09:03:55	7.17942	1251.43	37
2022-09-15	09:03:56	6.72748	1258.16	37
2022-09-15	09:03:57	6.74316	1264.9	37
2022-09-15	09:03:58	7.47841	1272.38	37
2022-09-15	09:03:59	9.36199	1281.74	37
2022-09-15	09:04:00	7.70771	1289.45	37
2022-09-15	09:04:01	5.9727	1295.42	37
2022-09-15	09:04:02	7.20541	1302.63	37
2022-09-15	09:04:03	8.24858	1310.88	37
2022-09-15	09:04:04	3.04263	1313.92	37
2022-09-15	09:04:05	0.265422	1314.19	37
2022-09-15	09:04:06	-0.469945	1314.19	37
2022-09-15	09:04:07	1.0258	1315.21	37
2022-09-15	09:04:08	48.8294	1364.04	38
2022-09-15	09:04:09	45.8032	1409.84	39
2022-09-15	09:04:10	7.18423	1417.03	39
2022-09-15	09:04:11	6.69323	1423.72	39
2022-09-15	09:04:12	12.9715	1436.69	39
2022-09-15	09:04:13	5.55084	1442.24	39
2022-09-15	09:04:14	3.33779	1445.58	39
2022-09-15	09:04:15	15.7583	1461.34	40
2022-09-15	09:04:16	15.9966	1477.34	41
2022-09-15	09:04:17	14.6196	1491.96	42
2022-09-15	09:04:18	19.4	1511.36	43
2022-09-15	09:04:19	19.7428	1531.1	44
2022-09-15	09:04:20	18.2976	1549.4	45
2022-09-15	09:04:21	16.7195	1566.12	46
2022-09-15	09:04:22	16.6689	1582.79	47
2022-09-15	09:04:23	31.5536	1614.34	48
2022-09-15	09:04:24	11.5213	1625.86	48
2022-09-15	09:04:25	-0.983753	1625.86	48
2022-09-15	09:04:26	-2.25264	1625.86	48
2022-09-15	09:04:27	-1.30384	1625.86	48
2022-09-15	09:04:28	-0.495356	1625.86	48
2022-09-15	09:04:29	-0.0805306	1625.86	48
2022-09-15	09:04:30	16.3801	1642.24	49
2022-09-15	09:04:31	3.42133	1645.66	49
2022-09-15	09:04:32	26.8515	1672.51	50
2022-09-15	09:04:33	2.1541	1674.67	50
2022-09-15	09:04:34	0.901865	1675.57	50
2022-09-15	09:04:35	36.7951	1712.36	51
2022-09-15	09:04:36	41.9391	1754.3	52
2022-09-15	09:04:37	23.9185	1778.22	53
2022-09-15	09:04:38	2.06009	1780.28	53
2022-09-15	09:04:39	1.05706	1781.34	53
2022-09-15	09:04:40	0.479117	1781.82	53
2022-09-15	09:04:41	29.6865	1811.5	54
2022-09-15	09:04:42	40.3434	1851.85	55
2022-09-15	09:04:43	48.4778	1900.33	56
2022-09-15	09:04:44	59.3047	1959.63	57
2022-09-15	09:04:45	42.1303	2001.76	58
2022-09-15	09:04:46	60.3434	2062.1	59
2022-09-15	09:04:47	49.8867	2111.99	60
2022-09-15	09:04:48	79.16	2191.15	61
2022-09-15	09:04:49	60.2833	2251.43	62
2022-09-15	09:04:50	52.23	2303.66	63
2022-09-15	09:04:51	54.7371	2358.4	64
2022-09-15	09:04:52	51.5004	2409.9	65
2022-09-15	09:04:53	46.2819	2456.18	66
2022-09-15	09:04:54	51.9122	2508.1	67
2022-09-15	09:04:55	31.0938	2539.19	68
2022-09-15	09:04:56	33.8459	2573.04	69
2022-09-15	09:04:57	51.6781	2624.71	70
2022-09-15	09:04:58	43.4381	2668.15	71
2022-09-15	09:04:59	40.6121	2708.76	72
2022-09-15	09:05:00	30.8444	2739.61	73
2022-09-15	09:05:01	7.07099	2746.68	73
2022-09-15	09:05:02	0.824163	2747.5	73
2022-09-15	09:05:03	1.62699	2749.13	73
2022-09-15	09:05:04	1.09513	2750.23	73
2022-09-15	09:05:05	1.391	2751.62	73
2022-09-15	09:05:06	0.784131	2752.4	73
2022-09-15	09:05:07	0.711204	2753.11	73
2022-09-15	09:05:08	3.65822	2756.77	73
2022-09-15	09:05:09	23.5122	2780.28	74
2022-09-15	09:05:10	37.492	2817.77	75
2022-09-15	09:05:11	47.737	2865.51	76
2022-09-15	09:05:12	35.111	2900.62	77
2022-09-15	09:05:13	53.9898	2954.61	78
2022-09-15	09:05:14	35.2565	2989.87	79
2022-09-15	09:05:15	53.3459	3043.21	80
2022-09-15	09:05:16	83.2147	3126.43	81
2022-09-15	09:05:17	28.4832	3154.91	82
2022-09-15	09:05:18	46.2048	3201.12	83
2022-09-15	09:05:19	48.7479	3249.87	84
2022-09-15	09:05:20	44.2664	3294.13	85
2022-09-15	09:05:21	38.1349	3332.27	86
2022-09-15	09:05:22	2.99839	3335.26	86
2022-09-15	09:05:23	-3.21957	3335.26	86
2022-09-15	09:05:24	-3.53873	3335.26	86
2022-09-15	09:05:25	-0.832875	3335.26	86
2022-09-15	09:05:26	3.14815	3338.41	86
2022-09-15	09:05:27	3.83263	3342.25	86
2022-09-15	09:05:28	2.10614	3344.35	86
2022-09-15	09:05:29	0.549858	3344.9	86
2022-09-15	09:05:30	0.570457	3345.47	86
2022-09-15	09:05:31	0.789076	3346.26	86
2022-09-15	09:05:32	0.975643	3347.24	86
2022-09-15	09:05:33	1.50486	3348.74	86
2022-09-15	09:05:34	1.05387	3349.8	86
2022-09-15	09:05:35	0.96587	3350.76	86
2022-09-15	09:05:36	1.20152	3351.96	86
2022-09-15	09:05:37	0.626956	3352.59	86
2022-09-15	09:05:38	-1.03989	3352.59	86
2022-09-15	09:05:39	-0.878044	3352.59	86
2022-09-15	09:05:40	6.19007	3358.78	86
2022-09-15	09:05:41	4.07799	3362.86	86
2022-09-15	09:05:42	2.01369	3364.87	86
2022-09-15	09:05:43	1.24555	3366.12	86
2022-09-15	09:05:44	0.901921	3367.02	86
2022-09-15	09:05:45	0.986357	3368.01	86
2022-09-15	09:05:46	1.02024	3369.03	86
2022-09-15	09:05:47	1.55981	3370.59	86
2022-09-15	09:05:48	5.05895	3375.64	86
2022-09-15	09:05:49	28.4358	3404.08	87
2022-09-15	09:05:50	17.5819	3421.66	88
2022-09-15	09:05:51	36.5397	3458.2	89
2022-09-15	09:05:52	50.884	3509.09	90
2022-09-15	09:05:53	50.6116	3559.7	91
2022-09-15	09:05:54	38.8904	3598.59	92
2022-09-15	09:05:55	37.9373	3636.53	93
2022-09-15	09:05:56	77.6907	3714.22	94
2022-09-15	09:05:57	47.4574	3761.67	95
2022-09-15	09:05:58	34.2674	3795.94	96
2022-09-15	09:05:59	34.8355	3830.78	97

## Sheet: Tyr_martin_20229159059 (4)
Date	Time	Lbs	Newtons	Averaged Newtons	Total force x time		total steps > 13.345	**GoPro Fitting: 849
2022-09-15	09:00:59	0.256043	1.13893	1.36176	1.13893	FALSE	0
2022-09-15	09:00:59	0.184084	0.818842	1.36176	0.818842	FALSE	0
2022-09-15	09:00:59	0.478282	2.12749	1.36176	3.26642	FALSE	0
2022-09-15	09:01:00	0.174364	0.775606	0.752214	1.59445	FALSE	0
2022-09-15	09:01:00	0.150445	0.669209	0.752214	3.93563	FALSE	0
2022-09-15	09:01:00	0.182507	0.811828	0.752214	2.40628	FALSE	0
2022-09-15	09:01:01	0.277825	1.23582	0.873004	5.17146	FALSE	0
2022-09-15	09:01:01	0.265153	1.17945	0.873004	3.58573	FALSE	0
2022-09-15	09:01:01	0.145255	0.646123	0.873004	5.81758	FALSE	0
2022-09-15	09:01:01	0.0968069	0.430616	0.873004	4.01635	FALSE	0
2022-09-15	09:01:02	0.135891	0.60447	0.821617	6.42205	FALSE	0
2022-09-15	09:01:02	0.208308	0.926596	0.821617	4.94294	FALSE	0
2022-09-15	09:01:02	0.225255	1.00198	0.821617	7.42403	FALSE	0
2022-09-15	09:01:02	0.169377	0.753423	0.821617	5.69636	FALSE	0
2022-09-15	09:01:03	0.141082	0.627561	0.78019	8.05159	FALSE	0
2022-09-15	09:01:03	0.115433	0.513469	0.78019	6.20983	FALSE	0
2022-09-15	09:01:03	0.192786	0.857551	0.78019	8.90914	FALSE	0
2022-09-15	09:01:03	0.252277	1.12218	0.78019	7.33201	FALSE	0
2022-09-15	09:01:04	0.155891	0.693434	0.894678	9.60257	FALSE	0
2022-09-15	09:01:04	0.243931	1.08505	0.894678	8.41707	FALSE	0
2022-09-15	09:01:04	0.210649	0.937009	0.894678	10.5396	FALSE	0
2022-09-15	09:01:04	0.194059	0.863213	0.894678	9.28028	FALSE	0
2022-09-15	09:01:05	0.191158	0.850309	0.925162	11.3899	FALSE	0
2022-09-15	09:01:05	0.211107	0.939046	0.925162	10.2193	FALSE	0
2022-09-15	09:01:05	0.221692	0.98613	0.925162	12.376	FALSE	0
2022-09-15	09:01:06	0.195636	0.870228	0.906052	11.0896	FALSE	0
2022-09-15	09:01:06	0.204593	0.910071	0.906052	13.2861	FALSE	0
2022-09-15	09:01:06	0.207392	0.922521	0.906052	12.0121	FALSE	0
2022-09-15	09:01:06	0.207137	0.921387	0.906052	14.2075	FALSE	0
2022-09-15	09:01:07	0.216196	0.961683	1.03661	12.9738	FALSE	0
2022-09-15	09:01:07	0.228257	1.01533	1.03661	15.2228	FALSE	0
2022-09-15	09:01:07	0.245153	1.09049	1.03661	14.0642	FALSE	0
2022-09-15	09:01:07	0.242557	1.07894	1.03661	16.3018	FALSE	0
2022-09-15	09:01:08	0.243524	1.08324	1.1292	15.1475	FALSE	0
2022-09-15	09:01:08	0.243626	1.0837	1.1292	17.3855	FALSE	0
2022-09-15	09:01:08	0.259809	1.15568	1.1292	16.3032	FALSE	0
2022-09-15	09:01:08	0.268461	1.19417	1.1292	18.5796	FALSE	0
2022-09-15	09:01:09	0.285204	1.26864	1.26004	17.5718	FALSE	0
2022-09-15	09:01:09	0.271107	1.20594	1.26004	19.7856	FALSE	0
2022-09-15	09:01:09	0.293499	1.30554	1.26004	18.8774	FALSE	0
2022-09-15	09:01:10	0.273346	1.2159	1.48375	21.0015	FALSE	0
2022-09-15	09:01:10	0.288257	1.28222	1.48375	20.1596	FALSE	0
2022-09-15	09:01:10	0.463015	2.05958	1.48375	23.061	FALSE	0
2022-09-15	09:01:10	0.309631	1.3773	1.48375	21.5369	FALSE	0
2022-09-15	09:01:11	0.361845	1.60956	1.02354	24.6706	FALSE	0
2022-09-15	09:01:11	0.14841	0.660157	1.02354	22.197	FALSE	0
2022-09-15	09:01:11	0.181234	0.806165	1.02354	25.4768	FALSE	0
2022-09-15	09:01:11	0.228919	1.01828	1.02354	23.2153	FALSE	0
2022-09-15	09:01:12	0.280827	1.24917	1.02077	26.7259	FALSE	0
2022-09-15	09:01:12	0.230547	1.02552	1.02077	24.2408	FALSE	0
2022-09-15	09:01:12	0.192634	0.856875	1.02077	27.5828	FALSE	0
2022-09-15	09:01:12	0.213906	0.951497	1.02077	25.1923	FALSE	0
2022-09-15	09:01:13	0.20383	0.906677	0.895583	28.4895	FALSE	0
2022-09-15	09:01:13	0.198079	0.881095	0.895583	26.0734	FALSE	0
2022-09-15	09:01:13	0.202099	0.898977	0.895583	29.3885	FALSE	0
2022-09-15	09:01:14	0.205713	0.915053	1.39162	26.9885	FALSE	0
2022-09-15	09:01:14	0.35472	1.57787	1.39162	30.9663	FALSE	0
2022-09-15	09:01:14	0.519402	2.3104	1.39162	29.2989	FALSE	0
2022-09-15	09:01:14	0.171565	0.763155	1.39162	31.7295	FALSE	0
2022-09-15	09:01:15	0.0693259	0.308375	1.29377	29.6073	FALSE	0
2022-09-15	09:01:15	0.263372	1.17153	1.29377	32.901	FALSE	0
2022-09-15	09:01:15	0.27187	1.20933	1.29377	30.8166	FALSE	0
2022-09-15	09:01:15	0.558842	2.48584	1.29377	35.3869	FALSE	0
2022-09-15	09:01:16	0.243728	1.08415	0.602149	31.9007	FALSE	0
2022-09-15	09:01:16	0.310089	1.37934	0.602149	36.7662	FALSE	0
2022-09-15	09:01:16	0.119097	0.529767	0.602149	32.4305	FALSE	0
2022-09-15	09:01:16	-0.131437	-0.584658	0.602149	36.7662	FALSE	0
2022-09-15	09:01:17	-0.445941	-1.98363	-1.88782	32.4305	FALSE	0
2022-09-15	09:01:17	-0.50533	-2.24781	-1.88782	36.7662	FALSE	0
2022-09-15	09:01:17	-0.51103	-2.27316	-1.88782	32.4305	FALSE	0
2022-09-15	09:01:17	-0.235305	-1.04668	-1.88782	36.7662	FALSE	0
2022-09-15	09:01:18	-0.0370863	-0.164967	0.544858	32.4305	FALSE	0
2022-09-15	09:01:18	0.201336	0.895583	0.544858	37.6618	FALSE	0
2022-09-15	09:01:18	0.203219	0.903959	0.544858	33.3345	FALSE	0
2022-09-15	09:01:19	0.214618	0.954664	0.650705	38.6164	FALSE	0
2022-09-15	09:01:19	0.15813	0.703394	0.650705	34.0379	FALSE	0
2022-09-15	09:01:19	0.142303	0.632992	0.650705	39.2494	FALSE	0
2022-09-15	09:01:19	0.0700893	0.311771	0.650705	34.3496	FALSE	0
2022-09-15	09:01:20	0.0926846	0.41228	3.92069	39.6617	FALSE	0
2022-09-15	09:01:20	0.465763	2.07181	3.92069	36.4214	FALSE	0
2022-09-15	09:01:20	0.381947	1.69898	3.92069	41.3607	FALSE	0
2022-09-15	09:01:20	2.58525	11.4997	3.92069	47.9212	FALSE	0
2022-09-15	09:01:21	2.83268	12.6003	9.39831	53.961	FALSE	0
2022-09-15	09:01:21	1.66047	7.3861	9.39831	55.3073	FALSE	0
2022-09-15	09:01:21	2.27182	10.1055	9.39831	64.0665	FALSE	0
2022-09-15	09:01:21	1.68637	7.50131	9.39831	62.8086	FALSE	0
2022-09-15	09:01:22	0.636858	2.83287	2.34549	66.8994	FALSE	0
2022-09-15	09:01:22	0.413601	1.83978	2.34549	64.6483	FALSE	0
2022-09-15	09:01:22	0.531412	2.36383	2.34549	69.2632	FALSE	0
2022-09-15	09:01:23	0.605	2.69116	2.96173	67.3395	FALSE	0
2022-09-15	09:01:23	0.672277	2.99042	2.96173	72.2536	FALSE	0
2022-09-15	09:01:23	0.908562	4.04147	2.96173	71.381	FALSE	0
2022-09-15	09:01:23	0.477468	2.12387	2.96173	74.3775	FALSE	0
2022-09-15	09:01:24	0.515636	2.29365	1.53452	73.6746	FALSE	0
2022-09-15	09:01:24	0.387595	1.7241	1.53452	76.1016	FALSE	0
2022-09-15	09:01:24	0.279402	1.24284	1.53452	74.9175	FALSE	0
2022-09-15	09:01:24	0.197265	0.877474	1.53452	76.9791	FALSE	0
2022-09-15	09:01:25	0.178893	0.795752	0.249009	75.7132	FALSE	0
2022-09-15	09:01:25	0.0183336	0.0815515	0.249009	77.0606	FALSE	0
2022-09-15	09:01:25	0.0248984	0.110753	0.249009	75.824	FALSE	0
2022-09-15	09:01:25	0.00179415	0.00798074	0.249009	77.0686	FALSE	0
2022-09-15	09:01:26	0.0992496	0.441482	0.474834	76.2654	FALSE	0
2022-09-15	09:01:26	0.160522	0.714034	0.474834	77.7827	FALSE	0
2022-09-15	09:01:26	0.0604709	0.268987	0.474834	76.5344	FALSE	0
2022-09-15	09:01:27	0.112125	0.498754	0.491397	78.2814	FALSE	0
2022-09-15	09:01:27	0.0707	0.314488	0.491397	76.8489	FALSE	0
2022-09-15	09:01:27	0.254262	1.13101	0.491397	79.4124	FALSE	0
2022-09-15	09:01:27	0.00479668	0.0213366	0.491397	76.8703	FALSE	0
2022-09-15	09:01:28	0.272226	1.21092	0.417372	80.6233	FALSE	0
2022-09-15	09:01:28	-0.0134731	-0.059931	0.417372	76.8703	FALSE	0
2022-09-15	09:01:28	0.104491	0.464797	0.417372	81.0881	FALSE	0
2022-09-15	09:01:28	0.012074	0.0537076	0.417372	76.924	FALSE	0
2022-09-15	09:01:29	0.16444	0.731462	1.09258	81.8196	FALSE	0
2022-09-15	09:01:29	0.309427	1.37639	1.09258	78.3004	FALSE	0
2022-09-15	09:01:29	0.186578	0.829936	1.09258	82.6495	FALSE	0
2022-09-15	09:01:29	0.322048	1.43253	1.09258	79.7329	FALSE	0
2022-09-15	09:01:30	0.15243	0.678039	1.14567	83.3276	FALSE	0
2022-09-15	09:01:30	0.380013	1.69037	1.14567	81.4233	FALSE	0
2022-09-15	09:01:30	0.129733	0.577078	1.14567	83.9047	FALSE	0
2022-09-15	09:01:30	0.368053	1.63717	1.14567	83.0604	FALSE	0
2022-09-15	09:01:31	0.264338	1.17583	1.59107	85.0805	FALSE	0
2022-09-15	09:01:31	0.30902	1.37458	1.59107	84.435	FALSE	0
2022-09-15	09:01:31	0.499707	2.2228	1.59107	87.3033	FALSE	0
2022-09-15	09:01:32	1.74922	7.78088	8.47364	92.2159	FALSE	0
2022-09-15	09:01:32	3.33192	14.821	8.47364	102.124	1	1
2022-09-15	09:01:32	2.12734	9.46283	8.47364	101.679	FALSE	1
2022-09-15	09:01:32	0.411361	1.82982	8.47364	103.954	FALSE	1
2022-09-15	09:01:33	0.132379	0.588848	1.71386	102.268	FALSE	1
2022-09-15	09:01:33	0.270547	1.20345	1.71386	105.158	FALSE	1
2022-09-15	09:01:33	0.199657	0.888114	1.71386	103.156	FALSE	1
2022-09-15	09:01:33	0.938588	4.17503	1.71386	109.333	FALSE	1
2022-09-15	09:01:34	1.88892	8.40229	6.78407	111.558	FALSE	1
2022-09-15	09:01:34	2.39569	10.6565	6.78407	119.989	FALSE	1
2022-09-15	09:01:34	1.37538	6.11797	6.78407	117.676	FALSE	1
2022-09-15	09:01:34	0.440522	1.95953	6.78407	121.949	FALSE	1
2022-09-15	09:01:35	0.610802	2.71697	1.7435	120.393	FALSE	1
2022-09-15	09:01:35	0.589835	2.6237	1.7435	124.572	FALSE	1
2022-09-15	09:01:35	-0.0247707	-0.110185	1.7435	120.393	FALSE	1
2022-09-15	09:01:36	-0.0675697	-0.300564	0.0656482	124.572	FALSE	1
2022-09-15	09:01:36	0.180216	0.801637	0.0656482	121.195	FALSE	1
2022-09-15	09:01:36	-0.112608	-0.500903	0.0656482	124.572	FALSE	1
2022-09-15	09:01:36	0.0589952	0.262422	0.0656482	121.457	FALSE	1
2022-09-15	09:01:37	0.0171631	0.0763449	6.21242	124.649	FALSE	1
2022-09-15	09:01:37	1.10128	4.89871	6.21242	126.356	FALSE	1
2022-09-15	09:01:37	1.38622	6.16618	6.21242	130.815	FALSE	1
2022-09-15	09:01:37	3.08179	13.7084	6.21242	140.064	1	2
2022-09-15	09:01:38	5.15334	22.9231	23.4083	153.738	1	3
2022-09-15	09:01:38	4.30719	19.1592	23.4083	159.223	1	4
2022-09-15	09:01:38	5.68169	25.2733	23.4083	179.011	1	5
2022-09-15	09:01:38	5.90744	26.2775	23.4083	185.501	1	6
2022-09-15	09:01:39	10.3126	45.8725	43.5768	224.884	1	7
2022-09-15	09:01:39	6.30591	28.0499	43.5768	213.551	1	8
2022-09-15	09:01:39	13.0454	58.0285	43.5768	282.912	1	9
2022-09-15	09:01:39	9.52209	42.3562	43.5768	255.907	1	10
2022-09-15	09:01:40	7.18235	31.9485	33.8662	314.861	1	11
2022-09-15	09:01:40	7.64841	34.0217	33.8662	289.929	1	12
2022-09-15	09:01:40	8.00963	35.6284	33.8662	350.489	1	13
2022-09-15	09:01:41	6.81125	30.2978	26.3193	320.226	1	14
2022-09-15	09:01:41	5.72367	25.46	26.3193	375.949	1	15
2022-09-15	09:01:41	5.30958	23.6181	26.3193	343.844	1	16
2022-09-15	09:01:41	5.82291	25.9015	26.3193	401.851	1	17
2022-09-15	09:01:42	4.77513	21.2407	9.28213	365.085	1	18
2022-09-15	09:01:42	2.64474	11.7643	9.28213	413.615	FALSE	18
2022-09-15	09:01:42	0.610394	2.71515	9.28213	367.8	FALSE	18
2022-09-15	09:01:42	0.316603	1.40831	9.28213	415.023	FALSE	18
2022-09-15	09:01:43	0.0746694	0.332144	-0.25246	368.133	FALSE	18
2022-09-15	09:01:43	-0.0143382	-0.0637792	-0.25246	415.023	FALSE	18
2022-09-15	09:01:43	-0.0892491	-0.396998	-0.25246	368.133	FALSE	18
2022-09-15	09:01:43	-0.198104	-0.881206	-0.25246	415.023	FALSE	18
2022-09-15	09:01:44	-0.287112	-1.27713	-2.12746	368.133	FALSE	18
2022-09-15	09:01:44	-0.551386	-2.45268	-2.12746	415.023	FALSE	18
2022-09-15	09:01:44	-0.596323	-2.65256	-2.12746	368.133	FALSE	18
2022-09-15	09:01:45	-0.829147	-3.68821	-3.56037	415.023	FALSE	18
2022-09-15	09:01:45	-0.756068	-3.36314	-3.56037	368.133	FALSE	18
2022-09-15	09:01:45	-0.910775	-4.05131	-3.56037	415.023	FALSE	18
2022-09-15	09:01:45	-0.705636	-3.13881	-3.56037	368.133	FALSE	18
2022-09-15	09:01:46	-0.762124	-3.39008	-2.99252	415.023	FALSE	18
2022-09-15	09:01:46	-0.736933	-3.27803	-2.99252	368.133	FALSE	18
2022-09-15	09:01:46	-0.593015	-2.63785	-2.99252	415.023	FALSE	18
2022-09-15	09:01:46	-0.598918	-2.66411	-2.99252	368.133	FALSE	18
2022-09-15	09:01:47	-0.50701	-2.25528	-2.02959	415.023	FALSE	18
2022-09-15	09:01:47	-0.550368	-2.44815	-2.02959	368.133	FALSE	18
2022-09-15	09:01:47	-0.382888	-1.70316	-2.02959	415.023	FALSE	18
2022-09-15	09:01:47	-0.384821	-1.71176	-2.02959	368.133	FALSE	18
2022-09-15	09:01:48	-0.243091	-1.08132	-0.698676	415.023	FALSE	18
2022-09-15	09:01:48	-0.108537	-0.482794	-0.698676	368.133	FALSE	18
2022-09-15	09:01:48	-0.11958	-0.531916	-0.698676	415.023	FALSE	18
2022-09-15	09:01:49	0.711412	3.1645	10.5306	371.297	FALSE	18
2022-09-15	09:01:49	2.28327	10.1564	10.5306	425.18	FALSE	18
2022-09-15	09:01:49	3.38709	15.0665	10.5306	386.363	1	19
2022-09-15	09:01:49	3.0878	13.7352	10.5306	438.915	1	20
2022-09-15	09:01:50	8.23787	36.6437	30.3065	423.007	1	21
2022-09-15	09:01:50	10.0575	44.7378	30.3065	483.653	1	22
2022-09-15	09:01:50	5.84377	25.9943	30.3065	449.001	1	23
2022-09-15	09:01:50	3.11365	13.8501	30.3065	497.503	1	24
2022-09-15	09:01:51	0.962964	4.28346	2.59173	453.285	FALSE	24
2022-09-15	09:01:51	0.472227	2.10056	2.59173	499.603	FALSE	24
2022-09-15	09:01:51	0.159809	0.710862	2.59173	453.996	FALSE	24
2022-09-15	09:01:51	0.735585	3.27203	2.59173	502.876	FALSE	24
2022-09-15	09:01:52	0.678842	3.01962	3.71391	457.015	FALSE	24
2022-09-15	09:01:52	0.315687	1.40424	3.71391	504.28	FALSE	24
2022-09-15	09:01:52	0.950445	4.22777	3.71391	461.243	FALSE	24
2022-09-15	09:01:52	1.39472	6.20399	3.71391	510.484	FALSE	24
2022-09-15	09:01:53	2.09569	9.32205	20.0187	470.565	FALSE	24
2022-09-15	09:01:53	3.15228	14.022	20.0187	524.506	1	25
2022-09-15	09:01:53	8.25324	36.7121	20.0187	507.277	1	26
2022-09-15	09:01:54	6.37884	28.3744	31.1574	552.88	1	27
2022-09-15	09:01:54	9.49716	42.2453	31.1574	549.523	1	28
2022-09-15	09:01:54	7.08245	31.5042	31.1574	584.384	1	29
2022-09-15	09:01:54	5.0595	22.5057	31.1574	572.028	1	30
2022-09-15	09:01:55	4.80139	21.3575	37.579	605.742	1	31
2022-09-15	09:01:55	7.96754	35.4412	37.579	607.469	1	32
2022-09-15	09:01:55	13.0894	58.2243	37.579	663.966	1	33
2022-09-15	09:01:55	7.93426	35.2932	37.579	642.763	1	34
2022-09-15	09:01:56	6.95115	30.9201	33.3656	694.886	1	35
2022-09-15	09:01:56	9.56627	42.5527	33.3656	685.315	1	36
2022-09-15	09:01:56	7.82194	34.7936	33.3656	729.68	1	37
2022-09-15	09:01:56	5.66434	25.1961	33.3656	710.511	1	38
2022-09-15	09:01:57	2.85324	12.6918	9.82179	742.371	FALSE	38
2022-09-15	09:01:57	2.52154	11.2163	9.82179	721.728	FALSE	38
2022-09-15	09:01:57	1.24933	5.55727	9.82179	747.929	FALSE	38
2022-09-15	09:01:58	2.36592	10.5241	3.70373	732.252	FALSE	38
2022-09-15	09:01:58	0.465153	2.06909	3.70373	749.998	FALSE	38
2022-09-15	09:01:58	0.316858	1.40945	3.70373	733.661	FALSE	38
2022-09-15	09:01:58	0.182608	0.812277	3.70373	750.81	FALSE	38
2022-09-15	09:01:59	0.269682	1.1996	-0.371588	734.861	FALSE	38
2022-09-15	09:01:59	-0.237595	-1.05687	-0.371588	750.81	FALSE	38
2022-09-15	09:01:59	-0.183397	-0.815787	-0.371588	734.861	FALSE	38
2022-09-15	09:01:59	-0.182837	-0.813296	-0.371588	750.81	FALSE	38
2022-09-15	09:02:00	0.165611	0.736671	0.879511	735.597	FALSE	38
2022-09-15	09:02:00	0.0853564	0.379682	0.879511	751.19	FALSE	38
2022-09-15	09:02:00	0.314415	1.39858	0.879511	736.996	FALSE	38
2022-09-15	09:02:00	0.225509	1.00311	0.879511	752.193	FALSE	38
2022-09-15	09:02:01	0.325916	1.44974	1.11411	738.446	FALSE	38
2022-09-15	09:02:01	0.196603	0.874529	1.11411	753.067	FALSE	38
2022-09-15	09:02:01	0.228868	1.01805	1.11411	739.464	FALSE	38
2022-09-15	09:02:02	0.276807	1.23129	2.22614	754.299	FALSE	38
2022-09-15	09:02:02	0.250394	1.1138	2.22614	740.578	FALSE	38
2022-09-15	09:02:02	0.175992	0.782848	2.22614	755.082	FALSE	38
2022-09-15	09:02:02	1.29864	5.77661	2.22614	746.354	FALSE	38
2022-09-15	09:02:03	1.63676	7.28064	11.5202	762.362	FALSE	38
2022-09-15	09:02:03	4.08994	18.1929	11.5202	764.547	1	39
2022-09-15	09:02:03	1.93879	8.62413	11.5202	770.986	FALSE	39
2022-09-15	09:02:03	2.69396	11.9833	11.5202	776.53	FALSE	39
2022-09-15	09:02:04	3.22357	14.3391	5.56822	785.325	1	40
2022-09-15	09:02:04	1.35711	6.0367	5.56822	782.567	FALSE	40
2022-09-15	09:02:04	0.347188	1.54436	5.56822	786.87	FALSE	40
2022-09-15	09:02:04	0.0793005	0.352744	5.56822	782.92	FALSE	40
2022-09-15	09:02:05	-0.0304705	-0.135539	-0.0213346	786.87	FALSE	40
2022-09-15	09:02:05	-0.133473	-0.593715	-0.0213346	782.92	FALSE	40
2022-09-15	09:02:05	0.0643386	0.286191	-0.0213346	787.156	FALSE	40
2022-09-15	09:02:05	0.08042	0.357724	-0.0213346	783.278	FALSE	40
2022-09-15	09:02:06	0.0554837	0.246803	0.264686	787.403	FALSE	40
2022-09-15	09:02:06	0.122659	0.545612	0.264686	783.823	FALSE	40
2022-09-15	09:02:06	0.000369216	0.00164235	0.264686	787.404	FALSE	40
2022-09-15	09:02:07	-0.242328	-1.07792	-1.45828	783.823	FALSE	40
2022-09-15	09:02:07	-0.408028	-1.81499	-1.45828	787.404	FALSE	40
2022-09-15	09:02:07	-0.409809	-1.82291	-1.45828	783.823	FALSE	40
2022-09-15	09:02:07	-0.251183	-1.11731	-1.45828	787.404	FALSE	40
2022-09-15	09:02:08	-0.0732185	-0.325691	0.736387	783.823	FALSE	40
2022-09-15	09:02:08	0.0603183	0.268308	0.736387	787.673	FALSE	40
2022-09-15	09:02:08	0.213193	0.948325	0.736387	784.772	FALSE	40
2022-09-15	09:02:08	0.461896	2.05461	0.736387	789.727	FALSE	40
2022-09-15	09:02:09	0.535585	2.38239	2.72551	787.154	FALSE	40
2022-09-15	09:02:09	0.536654	2.38714	2.72551	792.114	FALSE	40
2022-09-15	09:02:09	0.707595	3.14752	2.72551	790.301	FALSE	40
2022-09-15	09:02:09	0.671056	2.98499	2.72551	795.099	FALSE	40
2022-09-15	09:02:10	0.481081	2.13994	1.93086	792.441	FALSE	40
2022-09-15	09:02:10	0.480573	2.13768	1.93086	797.237	FALSE	40
2022-09-15	09:02:10	0.340573	1.51494	1.93086	793.956	FALSE	40
2022-09-15	09:02:11	0.362303	1.6116	1.38222	798.849	FALSE	40
2022-09-15	09:02:11	0.355178	1.5799	1.38222	795.536	FALSE	40
2022-09-15	09:02:11	0.342608	1.52399	1.38222	800.373	FALSE	40
2022-09-15	09:02:11	0.182863	0.813411	1.38222	796.35	FALSE	40
2022-09-15	09:02:12	0.148461	0.660384	0.760666	801.033	FALSE	40
2022-09-15	09:02:12	0.191107	0.850082	0.760666	797.2	FALSE	40
2022-09-15	09:02:12	0.172888	0.76904	0.760666	801.802	FALSE	40
2022-09-15	09:02:12	0.171565	0.763155	0.760666	797.963	FALSE	40
2022-09-15	09:02:13	0.165458	0.73599	0.727164	802.538	FALSE	40
2022-09-15	09:02:13	0.161998	0.7206	0.727164	798.683	FALSE	40
2022-09-15	09:02:13	0.162965	0.724901	0.727164	803.263	FALSE	40
2022-09-15	09:02:14	0.166171	0.739162	0.797225	799.423	FALSE	40
2022-09-15	09:02:14	0.169377	0.753423	0.797225	804.016	FALSE	40
2022-09-15	09:02:14	0.193448	0.860495	0.797225	800.283	FALSE	40
2022-09-15	09:02:14	0.187901	0.835821	0.797225	804.852	FALSE	40
2022-09-15	09:02:15	0.188715	0.839442	0.773625	801.123	FALSE	40
2022-09-15	09:02:15	0.186629	0.830163	0.773625	805.682	FALSE	40
2022-09-15	09:02:15	0.178842	0.795525	0.773625	801.918	FALSE	40
2022-09-15	09:02:15	0.141489	0.629371	0.773625	806.312	FALSE	40
2022-09-15	09:02:16	0.0674429	0.3	0.621334	802.218	FALSE	40
2022-09-15	09:02:16	0.10729	0.477247	0.621334	806.789	FALSE	40
2022-09-15	09:02:16	0.161133	0.716752	0.621334	802.935	FALSE	40
2022-09-15	09:02:16	0.222863	0.991339	0.621334	807.78	FALSE	40
2022-09-15	09:02:17	0.129122	0.57436	-0.213411	803.509	FALSE	40
2022-09-15	09:02:17	-0.0916409	-0.407637	-0.213411	807.78	FALSE	40
2022-09-15	09:02:17	-0.144516	-0.642836	-0.213411	803.509	FALSE	40
2022-09-15	09:02:17	-0.0848725	-0.37753	-0.213411	807.78	FALSE	40
2022-09-15	09:02:18	0.491718	2.18726	2.26309	805.696	FALSE	40
2022-09-15	09:02:18	0.312888	1.39179	2.26309	809.172	FALSE	40
2022-09-15	09:02:18	0.590649	2.62732	2.26309	808.324	FALSE	40
2022-09-15	09:02:18	0.639809	2.846	2.26309	812.018	FALSE	40
2022-09-15	09:02:19	1.30057	5.7852	2.89248	814.109	FALSE	40
2022-09-15	09:02:19	0.317468	1.41216	2.89248	813.43	FALSE	40
2022-09-15	09:02:19	0.332736	1.48008	2.89248	815.589	FALSE	40
2022-09-15	09:02:20	0.325356	1.44725	1.04408	814.878	FALSE	40
2022-09-15	09:02:20	0.238741	1.06197	1.04408	816.651	FALSE	40
2022-09-15	09:02:20	0.192786	0.857551	1.04408	815.735	FALSE	40
2022-09-15	09:02:20	0.181998	0.809564	1.04408	817.461	FALSE	40
2022-09-15	09:02:21	-0.136832	-0.608656	-1.86603	815.735	FALSE	40
2022-09-15	09:02:21	-0.35103	-1.56145	-1.86603	817.461	FALSE	40
2022-09-15	09:02:21	-0.510928	-2.27271	-1.86603	815.735	FALSE	40
2022-09-15	09:02:21	-0.679223	-3.02132	-1.86603	817.461	FALSE	40
2022-09-15	09:02:22	-0.283702	-1.26196	1.51453	815.735	FALSE	40
2022-09-15	09:02:22	-0.0560684	-0.249403	1.51453	817.461	FALSE	40
2022-09-15	09:02:22	0.23813	1.05925	1.51453	816.794	FALSE	40
2022-09-15	09:02:22	1.46357	6.51025	1.51453	823.971	FALSE	40
2022-09-15	09:02:23	3.06683	13.6419	18.7561	830.436	1	41
2022-09-15	09:02:23	4.82342	21.4555	18.7561	845.426	1	42
2022-09-15	09:02:23	4.75945	21.171	18.7561	851.607	1	43
2022-09-15	09:02:24	4.46556	19.8637	18.7879	865.29	1	44
2022-09-15	09:02:24	7.29029	32.4287	18.7879	884.036	1	45
2022-09-15	09:02:24	2.38892	10.6264	18.7879	875.916	FALSE	45
2022-09-15	09:02:24	2.75004	12.2327	18.7879	896.269	FALSE	45
2022-09-15	09:02:25	2.01182	8.94898	4.91435	884.865	FALSE	45
2022-09-15	09:02:25	1.20851	5.37569	4.91435	901.644	FALSE	45
2022-09-15	09:02:25	0.728104	3.23875	4.91435	888.104	FALSE	45
2022-09-15	09:02:25	0.470751	2.09399	4.91435	903.738	FALSE	45
2022-09-15	09:02:26	0.116094	0.516409	0.7468	888.621	FALSE	45
2022-09-15	09:02:26	0.294975	1.31211	0.7468	905.05	FALSE	45
2022-09-15	09:02:26	-0.0226333	-0.100677	0.7468	888.621	FALSE	45
2022-09-15	09:02:26	0.283117	1.25936	0.7468	906.31	FALSE	45
2022-09-15	09:02:27	0.400573	1.78183	1.3724	890.402	FALSE	45
2022-09-15	09:02:27	0.223015	0.992015	1.3724	907.302	FALSE	45
2022-09-15	09:02:27	0.301998	1.34335	1.3724	891.746	FALSE	45
2022-09-15	09:02:28	0.496756	2.20967	3.84644	909.512	FALSE	45
2022-09-15	09:02:28	0.554771	2.46773	3.84644	894.214	FALSE	45
2022-09-15	09:02:28	1.01752	4.52613	3.84644	914.038	FALSE	45
2022-09-15	09:02:28	1.38983	6.18224	3.84644	900.396	FALSE	45
2022-09-15	09:02:29	1.34215	5.97015	9.27478	920.008	FALSE	45
2022-09-15	09:02:29	2.04347	9.08976	9.27478	909.486	FALSE	45
2022-09-15	09:02:29	1.9395	8.62728	9.27478	928.635	FALSE	45
2022-09-15	09:02:29	3.01513	13.4119	9.27478	922.897	1	46
2022-09-15	09:02:30	1.68271	7.48503	17.0113	936.12	FALSE	46
2022-09-15	09:02:30	3.53126	15.7078	17.0113	938.605	1	47
2022-09-15	09:02:30	6.96983	31.0032	17.0113	967.123	1	48
2022-09-15	09:02:30	3.11345	13.8492	17.0113	952.454	1	49
2022-09-15	09:02:31	4.328	19.2518	15.7346	986.375	1	50
2022-09-15	09:02:31	4.22882	18.8106	15.7346	971.265	1	51
2022-09-15	09:02:31	3.82902	17.0322	15.7346	1003.41	1	52
2022-09-15	09:02:31	1.76337	7.84382	15.7346	979.109	FALSE	52
2022-09-15	09:02:32	0.446272	1.98511	2.89399	1005.39	FALSE	52
2022-09-15	09:02:32	1.04164	4.63342	2.89399	983.742	FALSE	52
2022-09-15	09:02:32	0.46388	2.06343	2.89399	1007.46	FALSE	52
2022-09-15	09:02:33	0.375229	1.66909	0.993318	985.411	FALSE	52
2022-09-15	09:02:33	0.243066	1.08121	0.993318	1008.54	FALSE	52
2022-09-15	09:02:33	0.211616	0.94131	0.993318	986.353	FALSE	52
2022-09-15	09:02:33	0.0633208	0.281664	0.993318	1008.82	FALSE	52
2022-09-15	09:02:34	0.264796	1.17787	9.34485	987.531	FALSE	52
2022-09-15	09:02:34	0.393804	1.75172	9.34485	1010.57	FALSE	52
2022-09-15	09:02:34	1.51569	6.74209	9.34485	994.273	FALSE	52
2022-09-15	09:02:34	6.22897	27.7077	9.34485	1038.28	1	53
2022-09-15	09:02:35	5.3392	23.7498	26.8346	1018.02	1	54
2022-09-15	09:02:35	8.00444	35.6054	26.8346	1073.88	1	55
2022-09-15	09:02:35	4.62749	20.584	26.8346	1038.61	1	56
2022-09-15	09:02:35	6.1596	27.3991	26.8346	1101.28	1	57
2022-09-15	09:02:36	9.14393	40.674	27.5724	1079.28	1	58
2022-09-15	09:02:36	3.98826	17.7406	27.5724	1119.02	1	59
2022-09-15	09:02:36	5.46347	24.3026	27.5724	1103.58	1	60
2022-09-15	09:02:37	3.70556	16.4831	11.6492	1135.51	1	61
2022-09-15	09:02:37	1.85279	8.24158	11.6492	1111.82	FALSE	61
2022-09-15	09:02:37	3.24988	14.4561	11.6492	1149.96	1	62
2022-09-15	09:02:37	1.66724	7.41622	11.6492	1119.24	FALSE	62
2022-09-15	09:02:38	2.26541	10.077	13.9598	1160.04	FALSE	62
2022-09-15	09:02:38	3.86088	17.174	13.9598	1136.41	1	63
2022-09-15	09:02:38	1.70403	7.57987	13.9598	1167.62	FALSE	63
2022-09-15	09:02:38	4.72286	21.0082	13.9598	1157.42	1	64
2022-09-15	09:02:39	2.28327	10.1564	9.54207	1177.78	FALSE	64
2022-09-15	09:02:39	1.33813	5.95227	9.54207	1163.38	FALSE	64
2022-09-15	09:02:39	2.4106	10.7228	9.54207	1188.5	FALSE	64
2022-09-15	09:02:39	2.54861	11.3367	9.54207	1174.71	FALSE	64
2022-09-15	09:02:40	3.70642	16.4869	20.0872	1204.99	1	65
2022-09-15	09:02:40	5.81792	25.8793	20.0872	1200.59	1	66
2022-09-15	09:02:40	4.02307	17.8954	20.0872	1222.88	1	67
2022-09-15	09:02:41	7.23685	32.191	29.4049	1232.78	1	68
2022-09-15	09:02:41	8.15044	36.2548	29.4049	1259.14	1	69
2022-09-15	09:02:41	4.24698	18.8914	29.4049	1251.67	1	70
2022-09-15	09:02:41	6.80779	30.2824	29.4049	1289.42	1	71
2022-09-15	09:02:42	3.4708	15.4388	15.0961	1267.11	1	72
2022-09-15	09:02:42	4.6907	20.8652	15.0961	1310.28	1	73
2022-09-15	09:02:42	4.04703	18.002	15.0961	1285.11	1	74
2022-09-15	09:02:42	1.36648	6.07838	15.0961	1316.36	FALSE	74
2022-09-15	09:02:43	1.37701	6.12522	9.24517	1291.24	FALSE	74
2022-09-15	09:02:43	1.24637	5.5441	9.24517	1321.91	FALSE	74
2022-09-15	09:02:43	2.76724	12.3092	9.24517	1303.55	FALSE	74
2022-09-15	09:02:43	2.92301	13.0021	9.24517	1334.91	FALSE	74
2022-09-15	09:02:44	1.428	6.35203	3.77055	1309.9	FALSE	74
2022-09-15	09:02:44	0.670038	2.98046	3.77055	1337.89	FALSE	74
2022-09-15	09:02:44	0.56556	2.51572	3.77055	1312.42	FALSE	74
2022-09-15	09:02:44	0.727036	3.234	3.77055	1341.12	FALSE	74
2022-09-15	09:02:45	0.734517	3.26728	3.27686	1315.68	FALSE	74
2022-09-15	09:02:45	0.737214	3.27928	3.27686	1344.4	FALSE	74
2022-09-15	09:02:45	0.738282	3.28403	3.27686	1318.97	FALSE	74
2022-09-15	09:02:46	0.712837	3.17084	2.30129	1347.57	FALSE	74
2022-09-15	09:02:46	0.392023	1.7438	2.30129	1320.71	FALSE	74
2022-09-15	09:02:46	0.541845	2.41023	2.30129	1349.98	FALSE	74
2022-09-15	09:02:46	0.42271	1.8803	2.30129	1322.59	FALSE	74
2022-09-15	09:02:47	0.197774	0.879738	1.0653	1350.86	FALSE	74
2022-09-15	09:02:47	0.244491	1.08754	1.0653	1323.68	FALSE	74
2022-09-15	09:02:47	0.217468	0.967341	1.0653	1351.83	FALSE	74
2022-09-15	09:02:47	0.298232	1.3266	1.0653	1325.01	FALSE	74
2022-09-15	09:02:48	0.143575	0.63865	0.982735	1352.47	FALSE	74
2022-09-15	09:02:48	0.287646	1.27951	0.982735	1326.29	FALSE	74
2022-09-15	09:02:48	0.173346	0.771078	0.982735	1353.24	FALSE	74
2022-09-15	09:02:48	0.279148	1.24171	0.982735	1327.53	FALSE	74
2022-09-15	09:02:49	0.0371631	0.165309	0.741273	1353.4	FALSE	74
2022-09-15	09:02:49	0.225713	1.00402	0.741273	1328.53	FALSE	74
2022-09-15	09:02:49	0.237061	1.05449	0.741273	1354.46	FALSE	74
2022-09-15	09:02:50	0.156349	0.695472	0.782342	1329.23	FALSE	74
2022-09-15	09:02:50	0.100115	0.445332	0.782342	1354.9	FALSE	74
2022-09-15	09:02:50	0.119962	0.533615	0.782342	1329.76	FALSE	74
2022-09-15	09:02:50	0.327087	1.45495	0.782342	1356.36	FALSE	74
2022-09-15	09:02:51	0.0446949	0.198812	0.746234	1329.96	FALSE	74
2022-09-15	09:02:51	0.277774	1.23559	0.746234	1357.6	FALSE	74
2022-09-15	09:02:51	0.127748	0.568249	0.746234	1330.53	FALSE	74
2022-09-15	09:02:51	0.220827	0.982283	0.746234	1358.58	FALSE	74
2022-09-15	09:02:52	0.0620994	0.276231	0.749743	1330.8	FALSE	74
2022-09-15	09:02:52	0.228817	1.01782	0.749743	1359.6	FALSE	74
2022-09-15	09:02:52	0.202354	0.900111	0.749743	1331.7	FALSE	74
2022-09-15	09:02:52	0.180929	0.804808	0.749743	1360.4	FALSE	74
2022-09-15	09:02:53	0.0545676	0.242728	0.476852	1331.95	FALSE	74
2022-09-15	09:02:53	0.0938551	0.417486	0.476852	1360.82	FALSE	74
2022-09-15	09:02:53	0.229173	1.01941	0.476852	1332.97	FALSE	74
2022-09-15	09:02:53	0.0512089	0.227787	0.476852	1361.05	FALSE	74
2022-09-15	09:02:54	0.349326	1.55387	11.5856	1334.52	FALSE	74
2022-09-15	09:02:54	1.40256	6.23887	11.5856	1367.28	FALSE	74
2022-09-15	09:02:54	6.06179	26.9641	11.5856	1361.48	1	75
2022-09-15	09:02:55	11.3561	50.5142	52.0844	1417.8	1	76
2022-09-15	09:02:55	15.7597	70.1023	52.0844	1431.59	1	77
2022-09-15	09:02:55	12.4329	55.304	52.0844	1473.1	1	78
2022-09-15	09:02:55	7.28764	32.4169	52.0844	1464	1	79
2022-09-15	09:02:56	9.42464	41.9227	27.6564	1515.03	1	80
2022-09-15	09:02:56	3.89706	17.3349	27.6564	1481.34	1	81
2022-09-15	09:02:56	7.65925	34.0699	27.6564	1549.1	1	82
2022-09-15	09:02:56	3.88876	17.298	27.6564	1498.64	1	83
2022-09-15	09:02:57	2.38978	10.6302	14.1519	1559.73	FALSE	83
2022-09-15	09:02:57	3.705	16.4806	14.1519	1515.12	1	84
2022-09-15	09:02:57	4.30632	19.1554	14.1519	1578.88	1	85
2022-09-15	09:02:57	2.3249	10.3416	14.1519	1525.46	FALSE	85
2022-09-15	09:02:58	1.22816	5.4631	3.5464	1584.34	FALSE	85
2022-09-15	09:02:58	0.572786	2.54787	3.5464	1528.01	FALSE	85
2022-09-15	09:02:58	0.590852	2.62823	3.5464	1586.97	FALSE	85
2022-09-15	09:02:59	0.627799	2.79258	1.59694	1530.8	FALSE	85
2022-09-15	09:02:59	0.246272	1.09547	1.59694	1588.07	FALSE	85
2022-09-15	09:02:59	0.399657	1.77775	1.59694	1532.58	FALSE	85
2022-09-15	09:02:59	0.162303	0.721956	1.59694	1588.79	FALSE	85
2022-09-15	09:03:00	0.368359	1.63853	1.13808	1534.22	FALSE	85
2022-09-15	09:03:00	0.120573	0.536333	1.13808	1589.33	FALSE	85
2022-09-15	09:03:00	0.318384	1.41624	1.13808	1535.63	FALSE	85
2022-09-15	09:03:00	0.216094	0.961229	1.13808	1590.29	FALSE	85
2022-09-15	09:03:01	0.367799	1.63604	1.35761	1537.27	FALSE	85
2022-09-15	09:03:01	0.272176	1.21069	1.35761	1591.5	FALSE	85
2022-09-15	09:03:01	0.277977	1.2365	1.35761	1538.5	FALSE	85
2022-09-15	09:03:01	0.302863	1.3472	1.35761	1592.84	FALSE	85
2022-09-15	09:03:02	0.198944	0.884943	1.27906	1539.39	FALSE	85
2022-09-15	09:03:02	0.349428	1.55433	1.27906	1594.4	FALSE	85
2022-09-15	09:03:02	0.314262	1.3979	1.27906	1540.79	FALSE	85
2022-09-15	09:03:03	0.364186	1.61997	1.7945	1596.02	FALSE	85
2022-09-15	09:03:03	0.403881	1.79654	1.7945	1542.58	FALSE	85
2022-09-15	09:03:03	0.410954	1.82801	1.7945	1597.85	FALSE	85
2022-09-15	09:03:03	0.434669	1.93349	1.7945	1544.52	FALSE	85
2022-09-15	09:03:04	0.646527	2.87588	1.95579	1600.72	FALSE	85
2022-09-15	09:03:04	0.356501	1.58579	1.95579	1546.1	FALSE	85
2022-09-15	09:03:04	0.422812	1.88075	1.95579	1602.6	FALSE	85
2022-09-15	09:03:04	0.332888	1.48075	1.95579	1547.58	FALSE	85
2022-09-15	09:03:05	0.366934	1.6322	2.10605	1604.24	FALSE	85
2022-09-15	09:03:05	0.428664	1.90678	2.10605	1549.49	FALSE	85
2022-09-15	09:03:05	0.510751	2.27192	2.10605	1606.51	FALSE	85
2022-09-15	09:03:05	0.587494	2.61329	2.10605	1552.1	FALSE	85
2022-09-15	09:03:06	0.516705	2.29841	2.47899	1608.81	FALSE	85
2022-09-15	09:03:06	0.519962	2.31289	2.47899	1554.42	FALSE	85
2022-09-15	09:03:06	0.602964	2.6821	2.47899	1611.49	FALSE	85
2022-09-15	09:03:06	0.58958	2.62257	2.47899	1557.04	FALSE	85
2022-09-15	09:03:07	0.541845	2.41023	2.19601	1613.9	FALSE	85
2022-09-15	09:03:07	0.486425	2.16372	2.19601	1559.2	FALSE	85
2022-09-15	09:03:07	0.452786	2.01408	2.19601	1615.91	FALSE	85
2022-09-15	09:03:08	0.410242	1.82484	2.04204	1561.03	FALSE	85
2022-09-15	09:03:08	0.449936	2.00141	2.04204	1617.91	FALSE	85
2022-09-15	09:03:08	0.505102	2.24679	2.04204	1563.27	FALSE	85
2022-09-15	09:03:08	0.471005	2.09512	2.04204	1620.01	FALSE	85
2022-09-15	09:03:09	0.472379	2.10124	2.34345	1565.38	FALSE	85
2022-09-15	09:03:09	0.502812	2.23661	2.34345	1622.25	FALSE	85
2022-09-15	09:03:09	0.551972	2.45528	2.34345	1567.83	FALSE	85
2022-09-15	09:03:09	0.580165	2.58069	2.34345	1624.83	FALSE	85
2022-09-15	09:03:10	0.659657	2.93429	2.95149	1570.76	FALSE	85
2022-09-15	09:03:10	0.71472	3.17922	2.95149	1628.01	FALSE	85
2022-09-15	09:03:10	0.633906	2.81974	2.95149	1573.58	FALSE	85
2022-09-15	09:03:10	0.645814	2.87271	2.95149	1630.88	FALSE	85
2022-09-15	09:03:11	0.538282	2.39439	2.22302	1575.98	FALSE	85
2022-09-15	09:03:11	0.481081	2.13994	2.22302	1633.02	FALSE	85
2022-09-15	09:03:11	0.479911	2.13474	2.22302	1578.11	FALSE	85
2022-09-15	09:03:12	0.77126	3.43072	3.97197	1636.45	FALSE	85
2022-09-15	09:03:12	0.945712	4.20672	3.97197	1582.32	FALSE	85
2022-09-15	09:03:12	0.881437	3.92081	3.97197	1640.37	FALSE	85
2022-09-15	09:03:12	0.973346	4.32964	3.97197	1586.65	FALSE	85
2022-09-15	09:03:13	1.30072	5.78586	8.73068	1646.16	FALSE	85
2022-09-15	09:03:13	1.91818	8.53245	8.73068	1595.18	FALSE	85
2022-09-15	09:03:13	2.28062	10.1447	8.73068	1656.3	FALSE	85
2022-09-15	09:03:13	2.35146	10.4598	8.73068	1605.64	FALSE	85
2022-09-15	09:03:14	3.4506	15.349	16.1913	1671.65	1	86
2022-09-15	09:03:14	4.60841	20.4991	16.1913	1626.14	1	87
2022-09-15	09:03:14	3.65757	16.2696	16.1913	1687.92	1	88
2022-09-15	09:03:14	2.84332	12.6477	16.1913	1638.79	FALSE	88
2022-09-15	09:03:15	2.3366	10.3937	10.7493	1698.31	FALSE	88
2022-09-15	09:03:15	2.05594	9.14523	10.7493	1647.93	FALSE	88
2022-09-15	09:03:15	2.85711	12.709	10.7493	1711.02	FALSE	88
2022-09-15	09:03:16	3.02067	13.4365	15.0233	1661.37	1	89
2022-09-15	09:03:16	3.3848	15.0563	15.0233	1726.08	1	90
2022-09-15	09:03:16	3.64459	16.2119	15.0233	1677.58	1	91
2022-09-15	09:03:16	3.4595	15.3885	15.0233	1741.47	1	92
2022-09-15	09:03:17	3.35849	14.9392	18.9874	1692.52	1	93
2022-09-15	09:03:17	4.72703	21.0268	18.9874	1762.49	1	94
2022-09-15	09:03:17	5.26698	23.4286	18.9874	1715.95	1	95
2022-09-15	09:03:17	3.72174	16.555	18.9874	1779.05	1	96
2022-09-15	09:03:18	1.80617	8.03421	3.12053	1723.98	FALSE	96
2022-09-15	09:03:18	0.439148	1.95342	3.12053	1781	FALSE	96
2022-09-15	09:03:18	0.395178	1.75783	3.12053	1725.74	FALSE	96
2022-09-15	09:03:18	0.165611	0.736671	3.12053	1781.74	FALSE	96
2022-09-15	09:03:19	0.208359	0.926823	0.877756	1726.67	FALSE	96
2022-09-15	09:03:19	0.165407	0.735763	0.877756	1782.47	FALSE	96
2022-09-15	09:03:19	0.220674	0.981602	0.877756	1727.65	FALSE	96
2022-09-15	09:03:19	0.194873	0.866834	0.877756	1783.34	FALSE	96
2022-09-15	09:03:20	0.216451	0.962817	1.18956	1728.61	FALSE	96
2022-09-15	09:03:20	0.317061	1.41035	1.18956	1784.75	FALSE	96
2022-09-15	09:03:20	0.268766	1.19552	1.18956	1729.81	FALSE	96
2022-09-15	09:03:21	0.517773	2.30316	16.6485	1787.05	FALSE	96
2022-09-15	09:03:21	1.7307	7.6985	16.6485	1737.51	FALSE	96
2022-09-15	09:03:21	3.50734	15.6013	16.6485	1802.66	1	97
2022-09-15	09:03:21	9.21523	40.9912	16.6485	1778.5	1	98
2022-09-15	09:03:22	7.94708	35.3502	19.8622	1838.01	1	99
2022-09-15	09:03:22	6.42596	28.584	19.8622	1807.08	1	100
2022-09-15	09:03:22	2.01335	8.95578	19.8622	1846.96	FALSE	100
2022-09-15	09:03:22	1.47447	6.55874	19.8622	1813.64	FALSE	100
2022-09-15	09:03:23	2.03879	9.06895	3.67712	1856.03	FALSE	100
2022-09-15	09:03:23	0.417977	1.85925	3.67712	1815.5	FALSE	100
2022-09-15	09:03:23	0.359351	1.59847	3.67712	1857.63	FALSE	100
2022-09-15	09:03:23	0.490496	2.18182	3.67712	1817.68	FALSE	100
2022-09-15	09:03:24	0.191921	0.853703	4.22769	1858.48	FALSE	100
2022-09-15	09:03:24	0.457061	2.0331	4.22769	1819.72	FALSE	100
2022-09-15	09:03:24	2.2023	9.79627	4.22769	1868.28	FALSE	100
2022-09-15	09:03:25	6.29909	28.0196	23.8694	1847.74	1	101
2022-09-15	09:03:25	5.49324	24.435	23.8694	1892.71	1	102
2022-09-15	09:03:25	4.59029	20.4185	23.8694	1868.15	1	103
2022-09-15	09:03:25	5.08169	22.6044	23.8694	1915.32	1	104
2022-09-15	09:03:26	1.29823	5.77479	6.33586	1873.93	FALSE	104
2022-09-15	09:03:26	0.8907	3.96201	6.33586	1919.28	FALSE	104
2022-09-15	09:03:26	1.32312	5.8855	6.33586	1879.81	FALSE	104
2022-09-15	09:03:26	2.18541	9.72114	6.33586	1929	FALSE	104
2022-09-15	09:03:27	1.61452	7.18171	16.3716	1887	FALSE	104
2022-09-15	09:03:27	2.32027	10.321	16.3716	1939.32	FALSE	104
2022-09-15	09:03:27	5.71232	25.4095	16.3716	1912.41	1	105
2022-09-15	09:03:27	5.07492	22.5743	16.3716	1961.9	1	106
2022-09-15	09:03:28	5.34683	23.7838	14.7176	1936.19	1	107
2022-09-15	09:03:28	3.78571	16.8396	14.7176	1978.74	1	108
2022-09-15	09:03:28	1.54123	6.8557	14.7176	1943.05	FALSE	108
2022-09-15	09:03:28	2.56093	11.3915	14.7176	1990.13	FALSE	108
2022-09-15	09:03:29	3.76703	16.7565	13.2295	1959.8	1	109
2022-09-15	09:03:29	3.81284	16.9603	13.2295	2007.09	1	110
2022-09-15	09:03:29	1.34251	5.97175	13.2295	1965.77	FALSE	110
2022-09-15	09:03:30	1.34281	5.97309	18.3125	2013.06	FALSE	110
2022-09-15	09:03:30	5.17309	23.0109	18.3125	1988.78	1	111
2022-09-15	09:03:30	3.83782	17.0714	18.3125	2030.13	1	112
2022-09-15	09:03:30	6.1136	27.1945	18.3125	2015.98	1	113
2022-09-15	09:03:31	7.65818	34.0651	23.3279	2064.2	1	114
2022-09-15	09:03:31	5.18561	23.0666	23.3279	2039.05	1	115
2022-09-15	09:03:31	5.44825	24.2349	23.3279	2088.43	1	116
2022-09-15	09:03:31	2.6853	11.9448	23.3279	2050.99	FALSE	116
2022-09-15	09:03:32	2.04525	9.09768	4.10631	2097.53	FALSE	116
2022-09-15	09:03:32	1.12861	5.02028	4.10631	2056.01	FALSE	116
2022-09-15	09:03:32	0.184847	0.822236	4.10631	2098.35	FALSE	116
2022-09-15	09:03:32	0.333855	1.48505	4.10631	2057.5	FALSE	116
2022-09-15	09:03:33	0.234364	1.0425	1.1793	2099.4	FALSE	116
2022-09-15	09:03:33	0.269173	1.19734	1.1793	2058.69	FALSE	116
2022-09-15	09:03:33	0.291819	1.29807	1.1793	2100.69	FALSE	116
2022-09-15	09:03:34	0.126018	0.560553	1.14521	2059.25	FALSE	116
2022-09-15	09:03:34	0.334568	1.48823	1.14521	2102.18	FALSE	116
2022-09-15	09:03:34	0.23528	1.04657	1.14521	2060.3	FALSE	116
2022-09-15	09:03:34	0.333957	1.48551	1.14521	2103.67	FALSE	116
2022-09-15	09:03:35	0.287545	1.27906	1.49558	2061.58	FALSE	116
2022-09-15	09:03:35	0.317977	1.41443	1.49558	2105.08	FALSE	116
2022-09-15	09:03:35	0.359707	1.60005	1.49558	2063.18	FALSE	116
2022-09-15	09:03:35	0.379657	1.68879	1.49558	2106.77	FALSE	116
2022-09-15	09:03:36	0.407494	1.81261	8.28638	2064.99	FALSE	116
2022-09-15	09:03:36	0.689886	3.06875	8.28638	2109.84	FALSE	116
2022-09-15	09:03:36	1.7906	7.96495	8.28638	2072.96	FALSE	116
2022-09-15	09:03:36	4.56347	20.2992	8.28638	2130.14	1	117
2022-09-15	09:03:37	9.27299	41.2481	25.4611	2114.2	1	118
2022-09-15	09:03:37	8.34647	37.1268	25.4611	2167.27	1	119
2022-09-15	09:03:37	4.03467	17.947	25.4611	2132.15	1	120
2022-09-15	09:03:37	1.24149	5.5224	25.4611	2172.79	FALSE	120
2022-09-15	09:03:38	0.333041	1.48143	1.30516	2133.63	FALSE	120
2022-09-15	09:03:38	0.351616	1.56406	1.30516	2174.35	FALSE	120
2022-09-15	09:03:38	0.195585	0.870001	1.30516	2134.5	FALSE	120
2022-09-15	09:03:39	0.302863	1.3472	0.99264	2175.7	FALSE	120
2022-09-15	09:03:39	0.168512	0.749575	0.99264	2135.25	FALSE	120
2022-09-15	09:03:39	0.205	0.911881	0.99264	2176.61	FALSE	120
2022-09-15	09:03:39	0.216247	0.96191	0.99264	2136.21	FALSE	120
2022-09-15	09:03:40	0.186425	0.829256	1.46757	2177.44	FALSE	120
2022-09-15	09:03:40	0.322048	1.43253	1.46757	2137.65	FALSE	120
2022-09-15	09:03:40	0.419962	1.86807	1.46757	2179.31	FALSE	120
2022-09-15	09:03:40	0.39126	1.7404	1.46757	2139.39	FALSE	120
2022-09-15	09:03:41	0.600064	2.6692	2.16898	2181.98	FALSE	120
2022-09-15	09:03:41	0.534008	2.37537	2.16898	2141.76	FALSE	120
2022-09-15	09:03:41	0.422863	1.88098	2.16898	2183.86	FALSE	120
2022-09-15	09:03:41	0.393499	1.75036	2.16898	2143.51	FALSE	120
2022-09-15	09:03:42	0.351667	1.56429	1.75195	2185.42	FALSE	120
2022-09-15	09:03:42	0.402303	1.78952	1.75195	2145.3	FALSE	120
2022-09-15	09:03:42	0.427596	1.90203	1.75195	2187.32	FALSE	120
2022-09-15	09:03:43	0.601183	2.67418	4.95776	2147.98	FALSE	120
2022-09-15	09:03:43	1.12469	5.00285	4.95776	2192.33	FALSE	120
2022-09-15	09:03:43	1.14851	5.1088	4.95776	2153.09	FALSE	120
2022-09-15	09:03:43	1.58383	7.04519	4.95776	2199.37	FALSE	120
2022-09-15	09:03:44	1.26698	5.63578	4.20529	2158.72	FALSE	120
2022-09-15	09:03:44	1.20301	5.35123	4.20529	2204.72	FALSE	120
2022-09-15	09:03:44	0.783371	3.48459	4.20529	2162.21	FALSE	120
2022-09-15	09:03:44	0.528206	2.34957	4.20529	2207.07	FALSE	120
2022-09-15	09:03:45	0.397061	1.76621	1.70056	2163.97	FALSE	120
2022-09-15	09:03:45	0.427596	1.90203	1.70056	2208.98	FALSE	120
2022-09-15	09:03:45	0.344491	1.53236	1.70056	2165.5	FALSE	120
2022-09-15	09:03:45	0.360064	1.60164	1.70056	2210.58	FALSE	120
2022-09-15	09:03:46	0.389326	1.7318	1.65408	2167.24	FALSE	120
2022-09-15	09:03:46	0.358944	1.59665	1.65408	2212.17	FALSE	120
2022-09-15	09:03:46	0.36729	1.63378	1.65408	2168.87	FALSE	120
2022-09-15	09:03:47	0.392888	1.74764	1.86694	2213.92	FALSE	120
2022-09-15	09:03:47	0.385916	1.71663	1.86694	2170.59	FALSE	120
2022-09-15	09:03:47	0.412379	1.83434	1.86694	2215.76	FALSE	120
2022-09-15	09:03:47	0.487646	2.16915	1.86694	2172.76	FALSE	120
2022-09-15	09:03:48	0.559555	2.48901	2.56026	2218.24	FALSE	120
2022-09-15	09:03:48	0.598435	2.66196	2.56026	2175.42	FALSE	120
2022-09-15	09:03:48	0.546934	2.43287	2.56026	2220.68	FALSE	120
2022-09-15	09:03:48	0.597366	2.6572	2.56026	2178.08	FALSE	120
2022-09-15	09:03:49	0.878995	3.90995	6.74508	2224.59	FALSE	120
2022-09-15	09:03:49	1.11223	4.94742	6.74508	2183.02	FALSE	120
2022-09-15	09:03:49	1.52622	6.78893	6.74508	2231.38	FALSE	120
2022-09-15	09:03:49	2.548	11.334	6.74508	2194.36	FALSE	120
2022-09-15	09:03:50	2.64754	11.7768	9.33912	2243.15	FALSE	120
2022-09-15	09:03:50	1.98302	8.82087	9.33912	2203.18	FALSE	120
2022-09-15	09:03:50	1.57156	6.99061	9.33912	2250.14	FALSE	120
2022-09-15	09:03:50	2.19599	9.7682	9.33912	2212.95	FALSE	120
2022-09-15	09:03:51	3.51742	15.6462	20.2674	2265.79	1	121
2022-09-15	09:03:51	4.81843	21.4333	20.2674	2234.38	1	122
2022-09-15	09:03:51	5.33309	23.7227	20.2674	2289.51	1	123
2022-09-15	09:03:52	6.08154	27.0519	22.6494	2261.43	1	124
2022-09-15	09:03:52	4.94398	21.9918	22.6494	2311.5	1	125
2022-09-15	09:03:52	4.59797	20.4527	22.6494	2281.88	1	126
2022-09-15	09:03:52	4.74372	21.101	22.6494	2332.61	1	127
2022-09-15	09:03:53	5.06627	22.5358	25.3753	2304.42	1	128
2022-09-15	09:03:53	4.98383	22.1691	25.3753	2354.77	1	129
2022-09-15	09:03:53	6.25767	27.8354	25.3753	2332.26	1	130
2022-09-15	09:03:53	6.5107	28.9609	25.3753	2383.74	1	131
2022-09-15	09:03:54	2.36256	10.5091	8.45395	2342.76	FALSE	131
2022-09-15	09:03:54	2.72815	12.1354	8.45395	2395.87	FALSE	131
2022-09-15	09:03:54	1.34912	6.00116	8.45395	2348.77	FALSE	131
2022-09-15	09:03:54	1.1623	5.17014	8.45395	2401.04	FALSE	131
2022-09-15	09:03:55	1.16449	5.17988	7.17942	2353.95	FALSE	131
2022-09-15	09:03:55	1.66551	7.40852	7.17942	2408.45	FALSE	131
2022-09-15	09:03:55	2.01202	8.94987	7.17942	2362.9	FALSE	131
2022-09-15	09:03:56	1.79187	7.9706	6.72748	2416.42	FALSE	131
2022-09-15	09:03:56	1.47477	6.56007	6.72748	2369.46	FALSE	131
2022-09-15	09:03:56	1.4049	6.24928	6.72748	2422.67	FALSE	131
2022-09-15	09:03:56	1.37808	6.12998	6.72748	2375.59	FALSE	131
2022-09-15	09:03:57	1.23732	5.50385	6.74316	2428.17	FALSE	131
2022-09-15	09:03:57	1.35106	6.00979	6.74316	2381.59	FALSE	131
2022-09-15	09:03:57	1.71182	7.61452	6.74316	2435.79	FALSE	131
2022-09-15	09:03:57	1.76352	7.84449	6.74316	2389.44	FALSE	131
2022-09-15	09:03:58	1.7762	7.90089	7.47841	2443.69	FALSE	131
2022-09-15	09:03:58	1.71879	7.64552	7.47841	2397.08	FALSE	131
2022-09-15	09:03:58	1.47248	6.54989	7.47841	2450.24	FALSE	131
2022-09-15	09:03:58	1.75742	7.81736	7.47841	2404.9	FALSE	131
2022-09-15	09:03:59	2.1249	9.45198	9.36199	2459.69	FALSE	131
2022-09-15	09:03:59	2.04088	9.07824	9.36199	2413.98	FALSE	131
2022-09-15	09:03:59	2.15818	9.60002	9.36199	2469.29	FALSE	131
2022-09-15	09:03:59	2.09472	9.31773	9.36199	2423.3	FALSE	131
2022-09-15	09:04:00	1.85869	8.26782	7.70771	2477.56	FALSE	131
2022-09-15	09:04:00	1.6362	7.27814	7.70771	2430.58	FALSE	131
2022-09-15	09:04:00	1.70342	7.57715	7.70771	2485.14	FALSE	131
2022-09-15	09:04:01	1.45961	6.49264	5.9727	2437.07	FALSE	131
2022-09-15	09:04:01	1.34072	5.96379	5.9727	2491.1	FALSE	131
2022-09-15	09:04:01	1.22078	5.43027	5.9727	2442.5	FALSE	131
2022-09-15	09:04:01	1.34978	6.00409	5.9727	2497.1	FALSE	131
2022-09-15	09:04:02	1.52887	6.80072	7.20541	2449.3	FALSE	131
2022-09-15	09:04:02	1.72444	7.67065	7.20541	2504.77	FALSE	131
2022-09-15	09:04:02	1.66434	7.40332	7.20541	2456.7	FALSE	131
2022-09-15	09:04:02	1.56174	6.94693	7.20541	2511.72	FALSE	131
2022-09-15	09:04:03	2.00454	8.91659	8.24858	2465.62	FALSE	131
2022-09-15	09:04:03	1.84571	8.21009	8.24858	2519.93	FALSE	131
2022-09-15	09:04:03	1.96688	8.74908	8.24858	2474.37	FALSE	131
2022-09-15	09:04:03	1.60032	7.11854	8.24858	2527.05	FALSE	131
2022-09-15	09:04:04	1.06184	4.72328	3.04263	2479.09	FALSE	131
2022-09-15	09:04:04	0.658384	2.92862	3.04263	2529.98	FALSE	131
2022-09-15	09:04:04	0.331819	1.476	3.04263	2480.57	FALSE	131
2022-09-15	09:04:05	0.199148	0.88585	0.265422	2530.86	FALSE	131
2022-09-15	09:04:05	0.0925829	0.411827	0.265422	2480.98	FALSE	131
2022-09-15	09:04:05	0.0147204	0.0654793	0.265422	2530.93	FALSE	131
2022-09-15	09:04:05	-0.0677732	-0.301469	0.265422	2480.98	FALSE	131
2022-09-15	09:04:06	-0.142633	-0.63446	-0.469945	2530.93	FALSE	131
2022-09-15	09:04:06	-0.109147	-0.485508	-0.469945	2480.98	FALSE	131
2022-09-15	09:04:06	-0.074847	-0.332934	-0.469945	2530.93	FALSE	131
2022-09-15	09:04:06	-0.0959666	-0.426879	-0.469945	2480.98	FALSE	131
2022-09-15	09:04:07	-0.117239	-0.521503	1.0258	2530.93	FALSE	131
2022-09-15	09:04:07	-0.22818	-1.01499	1.0258	2480.98	FALSE	131
2022-09-15	09:04:07	0.142659	0.634576	1.0258	2531.56	FALSE	131
2022-09-15	09:04:07	1.1252	5.00511	1.0258	2485.99	FALSE	131
2022-09-15	09:04:08	3.36413	14.9643	48.8294	2546.53	1	132
2022-09-15	09:04:08	10.6021	47.1603	48.8294	2533.15	1	133
2022-09-15	09:04:08	18.9658	84.3637	48.8294	2630.89	1	134
2022-09-15	09:04:09	15.0782	67.0708	45.8032	2600.22	1	135
2022-09-15	09:04:09	12.1219	53.9206	45.8032	2684.81	1	136
2022-09-15	09:04:09	8.08474	35.9625	45.8032	2636.18	1	137
2022-09-15	09:04:09	5.90327	26.2589	45.8032	2711.07	1	138
2022-09-15	09:04:10	2.76617	12.3045	7.18423	2648.48	FALSE	138
2022-09-15	09:04:10	1.63665	7.28015	7.18423	2718.35	FALSE	138
2022-09-15	09:04:10	1.19813	5.32952	7.18423	2653.81	FALSE	138
2022-09-15	09:04:10	0.859402	3.82279	7.18423	2722.17	FALSE	138
2022-09-15	09:04:11	1.15889	5.15497	6.69323	2658.97	FALSE	138
2022-09-15	09:04:11	1.60698	7.14817	6.69323	2729.32	FALSE	138
2022-09-15	09:04:11	1.54383	6.86726	6.69323	2665.84	FALSE	138
2022-09-15	09:04:11	1.70912	7.60251	6.69323	2736.93	FALSE	138
2022-09-15	09:04:12	1.90444	8.47133	12.9715	2674.31	FALSE	138
2022-09-15	09:04:12	2.74032	12.1895	12.9715	2749.11	FALSE	138
2022-09-15	09:04:12	4.21121	18.7323	12.9715	2693.04	1	139
2022-09-15	09:04:12	2.80851	12.4928	12.9715	2761.61	FALSE	139
2022-09-15	09:04:13	2.10373	9.35781	5.55084	2702.4	FALSE	139
2022-09-15	09:04:13	0.918231	4.08448	5.55084	2765.69	FALSE	139
2022-09-15	09:04:13	0.721692	3.21023	5.55084	2705.61	FALSE	139
2022-09-15	09:04:14	0.61472	2.7344	3.33779	2768.43	FALSE	139
2022-09-15	09:04:14	0.669376	2.97752	3.33779	2708.58	FALSE	139
2022-09-15	09:04:14	0.67355	2.99609	3.33779	2771.42	FALSE	139
2022-09-15	09:04:14	1.04383	4.64316	3.33779	2713.23	FALSE	139
2022-09-15	09:04:15	2.81131	12.5053	15.7583	2783.93	FALSE	139
2022-09-15	09:04:15	4.12826	18.3633	15.7583	2731.59	1	140
2022-09-15	09:04:15	3.19044	14.1917	15.7583	2798.12	1	141
2022-09-15	09:04:15	4.04052	17.973	15.7583	2749.56	1	142
2022-09-15	09:04:16	5.65482	25.1538	15.9966	2823.27	1	143
2022-09-15	09:04:16	3.9882	17.7403	15.9966	2767.3	1	144
2022-09-15	09:04:16	2.78057	12.3685	15.9966	2835.64	FALSE	144
2022-09-15	09:04:16	1.96123	8.72394	15.9966	2776.03	FALSE	144
2022-09-15	09:04:17	2.11477	9.40692	14.6196	2845.05	FALSE	144
2022-09-15	09:04:17	3.52123	15.6631	14.6196	2791.69	1	145
2022-09-15	09:04:17	4.22388	18.7887	14.6196	2863.84	1	146
2022-09-15	09:04:18	4.63217	20.6048	19.4	2812.3	1	147
2022-09-15	09:04:18	4.5539	20.2567	19.4	2884.09	1	148
2022-09-15	09:04:18	3.86093	17.1742	19.4	2829.47	1	149
2022-09-15	09:04:18	4.39828	19.5644	19.4	2903.66	1	150
2022-09-15	09:04:19	4.37055	19.4411	19.7428	2848.91	1	151
2022-09-15	09:04:19	4.33803	19.2964	19.7428	2922.95	1	152
2022-09-15	09:04:19	4.49533	19.9961	19.7428	2868.91	1	153
2022-09-15	09:04:19	4.54958	20.2374	19.7428	2943.19	1	154
2022-09-15	09:04:20	4.29268	19.0947	18.2976	2888	1	155
2022-09-15	09:04:20	4.14276	18.4278	18.2976	2961.62	1	156
2022-09-15	09:04:20	4.05589	18.0414	18.2976	2906.04	1	157
2022-09-15	09:04:20	3.96261	17.6265	18.2976	2979.25	1	158
2022-09-15	09:04:21	3.77889	16.8093	16.7195	2922.85	1	159
2022-09-15	09:04:21	3.83798	17.0721	16.7195	2996.32	1	160
2022-09-15	09:04:21	3.77406	16.7878	16.7195	2939.64	1	161
2022-09-15	09:04:21	3.64393	16.2089	16.7195	3012.53	1	162
2022-09-15	09:04:22	3.51696	15.6441	16.6689	2955.28	1	163
2022-09-15	09:04:22	3.6995	16.4561	16.6689	3028.98	1	164
2022-09-15	09:04:22	4.02556	17.9065	16.6689	2973.19	1	165
2022-09-15	09:04:23	4.51502	20.0837	31.5536	3049.07	1	166
2022-09-15	09:04:23	5.35808	23.8338	31.5536	2997.03	1	167
2022-09-15	09:04:23	8.27232	36.7969	31.5536	3085.86	1	168
2022-09-15	09:04:23	10.2288	45.4997	31.5536	3042.52	1	169
2022-09-15	09:04:24	6.87182	30.5672	11.5213	3116.43	1	170
2022-09-15	09:04:24	2.67721	11.9088	11.5213	3054.43	FALSE	170
2022-09-15	09:04:24	0.506781	2.25426	11.5213	3118.69	FALSE	170
2022-09-15	09:04:24	0.304644	1.35512	11.5213	3055.79	FALSE	170
2022-09-15	09:04:25	-0.0479768	-0.21341	-0.983753	3118.69	FALSE	170
2022-09-15	09:04:25	-0.115814	-0.515164	-0.983753	3055.79	FALSE	170
2022-09-15	09:04:25	-0.237086	-1.05461	-0.983753	3118.69	FALSE	170
2022-09-15	09:04:25	-0.483753	-2.15183	-0.983753	3055.79	FALSE	170
2022-09-15	09:04:26	-0.48818	-2.17152	-2.25264	3118.69	FALSE	170
2022-09-15	09:04:26	-0.574185	-2.55409	-2.25264	3055.79	FALSE	170
2022-09-15	09:04:26	-0.456882	-2.0323	-2.25264	3118.69	FALSE	170
2022-09-15	09:04:27	-0.268893	-1.19609	-1.30384	3055.79	FALSE	170
2022-09-15	09:04:27	-0.291234	-1.29547	-1.30384	3118.69	FALSE	170
2022-09-15	09:04:27	-0.202939	-0.902713	-1.30384	3055.79	FALSE	170
2022-09-15	09:04:27	-0.409402	-1.8211	-1.30384	3118.69	FALSE	170
2022-09-15	09:04:28	-0.257799	-1.14674	-0.495356	3055.79	FALSE	170
2022-09-15	09:04:28	-0.176933	-0.787033	-0.495356	3118.69	FALSE	170
2022-09-15	09:04:28	-0.0259921	-0.115618	-0.495356	3055.79	FALSE	170
2022-09-15	09:04:28	0.0152802	0.0679694	-0.495356	3118.75	FALSE	170
2022-09-15	09:04:29	0.0276465	0.122977	-0.0805306	3055.91	FALSE	170
2022-09-15	09:04:29	-0.0433458	-0.192811	-0.0805306	3118.75	FALSE	170
2022-09-15	09:04:29	0.00871527	0.0387673	-0.0805306	3055.95	FALSE	170
2022-09-15	09:04:29	-0.0654323	-0.291056	-0.0805306	3118.75	FALSE	170
2022-09-15	09:04:30	0.538435	2.39507	16.3801	3058.35	FALSE	170
2022-09-15	09:04:30	2.97558	13.236	16.3801	3131.99	FALSE	170
2022-09-15	09:04:30	7.53324	33.5094	16.3801	3091.85	1	171
2022-09-15	09:04:31	2.25564	10.0335	3.42133	3142.02	FALSE	171
2022-09-15	09:04:31	0.707036	3.14504	3.42133	3095	FALSE	171
2022-09-15	09:04:31	0.174975	0.778324	3.42133	3142.8	FALSE	171
2022-09-15	09:04:31	-0.0610557	-0.271588	3.42133	3095	FALSE	171
2022-09-15	09:04:32	1.59528	7.09612	26.8515	3149.9	FALSE	171
2022-09-15	09:04:32	4.96749	22.0964	26.8515	3117.1	1	172
2022-09-15	09:04:32	5.26342	23.4127	26.8515	3173.31	1	173
2022-09-15	09:04:32	12.3198	54.8009	26.8515	3171.9	1	174
2022-09-15	09:04:33	1.84709	8.21623	2.1541	3181.53	FALSE	174
2022-09-15	09:04:33	0.00785013	0.0349189	2.1541	3171.93	FALSE	174
2022-09-15	09:04:33	0.0671376	0.298641	2.1541	3181.83	FALSE	174
2022-09-15	09:04:33	0.0149748	0.0666109	2.1541	3172	FALSE	174
2022-09-15	09:04:34	0.0549239	0.244312	0.901865	3182.07	FALSE	174
2022-09-15	09:04:34	-0.0515901	-0.229483	0.901865	3172	FALSE	174
2022-09-15	09:04:34	0.186679	0.830386	0.901865	3182.9	FALSE	174
2022-09-15	09:04:34	0.62098	2.76224	0.901865	3174.76	FALSE	174
2022-09-15	09:04:35	3.08953	13.7428	36.7951	3196.64	1	175
2022-09-15	09:04:35	8.26968	36.7852	36.7951	3211.55	1	176
2022-09-15	09:04:35	13.4565	59.8572	36.7951	3256.5	1	177
2022-09-15	09:04:36	11.5045	51.1743	41.9391	3262.72	1	178
2022-09-15	09:04:36	9.92836	44.1633	41.9391	3300.66	1	179
2022-09-15	09:04:36	8.36937	37.2286	41.9391	3299.95	1	180
2022-09-15	09:04:36	7.91105	35.1899	41.9391	3335.85	1	181
2022-09-15	09:04:37	6.1197	27.2216	23.9185	3327.17	1	182
2022-09-15	09:04:37	6.74775	30.0153	23.9185	3365.87	1	183
2022-09-15	09:04:37	5.73212	25.4976	23.9185	3352.67	1	184
2022-09-15	09:04:37	2.90892	12.9395	23.9185	3378.81	FALSE	184
2022-09-15	09:04:38	0.986323	4.38736	2.06009	3357.06	FALSE	184
2022-09-15	09:04:38	0.205356	0.913465	2.06009	3379.72	FALSE	184
2022-09-15	09:04:38	0.257468	1.14527	2.06009	3358.2	FALSE	184
2022-09-15	09:04:38	0.403372	1.79428	2.06009	3381.52	FALSE	184
2022-09-15	09:04:39	0.339453	1.50995	1.05706	3359.71	FALSE	184
2022-09-15	09:04:39	0.196145	0.872492	1.05706	3382.39	FALSE	184
2022-09-15	09:04:39	0.177316	0.788737	1.05706	3360.5	FALSE	184
2022-09-15	09:04:40	0.0224048	0.099661	0.479117	3382.49	FALSE	184
2022-09-15	09:04:40	0.136858	0.608772	0.479117	3361.11	FALSE	184
2022-09-15	09:04:40	0.108461	0.482456	0.479117	3382.97	FALSE	184
2022-09-15	09:04:40	0.163117	0.725577	0.479117	3361.83	FALSE	184
2022-09-15	09:04:41	0.111463	0.49581	29.6865	3383.47	FALSE	184
2022-09-15	09:04:41	6.53741	29.0797	29.6865	3390.91	1	185
2022-09-15	09:04:41	10.271	45.6875	29.6865	3429.15	1	186
2022-09-15	09:04:41	9.77543	43.4831	29.6865	3434.4	1	187
2022-09-15	09:04:42	9.57609	42.5964	40.3434	3471.75	1	188
2022-09-15	09:04:42	5.61314	24.9684	40.3434	3459.37	1	189
2022-09-15	09:04:42	11.5779	51.5008	40.3434	3523.25	1	190
2022-09-15	09:04:42	9.51131	42.3082	40.3434	3501.67	1	191
2022-09-15	09:04:43	5.15339	22.9233	48.4778	3546.17	1	192
2022-09-15	09:04:43	15.3759	68.3951	48.4778	3570.07	1	193
2022-09-15	09:04:43	12.8311	57.0753	48.4778	3603.25	1	194
2022-09-15	09:04:43	10.2328	45.5175	48.4778	3615.59	1	195
2022-09-15	09:04:44	14.087	62.6618	59.3047	3665.91	1	196
2022-09-15	09:04:44	12.7714	56.8097	59.3047	3672.4	1	197
2022-09-15	09:04:44	13.1385	58.4427	59.3047	3724.35	1	198
2022-09-15	09:04:45	6.12571	27.2484	42.1303	3699.64	1	199
2022-09-15	09:04:45	9.28357	41.2952	42.1303	3765.65	1	200
2022-09-15	09:04:45	11.1324	49.5191	42.1303	3749.16	1	201
2022-09-15	09:04:45	11.3436	50.4586	42.1303	3816.11	1	202
2022-09-15	09:04:46	15.2746	67.9445	60.3434	3817.11	1	203
2022-09-15	09:04:46	12.0041	53.3966	60.3434	3869.5	1	204
2022-09-15	09:04:46	17.4845	77.7746	60.3434	3894.88	1	205
2022-09-15	09:04:46	9.50001	42.2579	60.3434	3911.76	1	206
2022-09-15	09:04:47	10.1842	45.3014	49.8867	3940.18	1	207
2022-09-15	09:04:47	7.51563	33.431	49.8867	3945.19	1	208
2022-09-15	09:04:47	9.41416	41.8761	49.8867	3982.06	1	209
2022-09-15	09:04:47	17.7461	78.9382	49.8867	4024.13	1	210
2022-09-15	09:04:48	23.4028	104.1	79.16	4086.16	1	211
2022-09-15	09:04:48	20.7058	92.1035	79.16	4116.24	1	212
2022-09-15	09:04:48	9.2793	41.2762	79.16	4127.44	1	213
2022-09-15	09:04:49	12.9307	57.5183	60.2833	4173.75	1	214
2022-09-15	09:04:49	19.5511	86.9672	60.2833	4214.4	1	215
2022-09-15	09:04:49	10.9956	48.9106	60.2833	4222.66	1	216
2022-09-15	09:04:49	10.7318	47.7372	60.2833	4262.14	1	217
2022-09-15	09:04:50	10.8582	48.2994	52.23	4270.96	1	218
2022-09-15	09:04:50	10.1215	45.0225	52.23	4307.16	1	219
2022-09-15	09:04:50	13.3816	59.524	52.23	4330.49	1	220
2022-09-15	09:04:50	12.606	56.074	52.23	4363.24	1	221
2022-09-15	09:04:51	15.0504	66.9472	54.7371	4397.43	1	222
2022-09-15	09:04:51	9.62428	42.8107	54.7371	4406.05	1	223
2022-09-15	09:04:51	10.3657	46.1087	54.7371	4443.54	1	224
2022-09-15	09:04:51	14.1814	63.0817	54.7371	4469.13	1	225
2022-09-15	09:04:52	11.7451	52.2446	51.5004	4495.79	1	226
2022-09-15	09:04:52	16.7773	74.6288	51.5004	4543.76	1	227
2022-09-15	09:04:52	6.86321	30.5289	51.5004	4526.32	1	228
2022-09-15	09:04:52	10.9256	48.5993	51.5004	4592.36	1	229
2022-09-15	09:04:53	7.79838	34.6888	46.2819	4561.01	1	230
2022-09-15	09:04:53	10.871	48.3564	46.2819	4640.71	1	231
2022-09-15	09:04:53	12.5445	55.8004	46.2819	4616.81	1	232
2022-09-15	09:04:54	9.7938	43.5648	51.9122	4684.28	1	233
2022-09-15	09:04:54	17.5915	78.2505	51.9122	4695.06	1	234
2022-09-15	09:04:54	9.99253	44.4488	51.9122	4728.73	1	235
2022-09-15	09:04:54	9.30367	41.3846	51.9122	4736.44	1	236
2022-09-15	09:04:55	5.45624	24.2704	31.0938	4753	1	237
2022-09-15	09:04:55	6.58805	29.305	31.0938	4765.75	1	238
2022-09-15	09:04:55	8.07151	35.9037	31.0938	4788.9	1	239
2022-09-15	09:04:55	7.84495	34.8959	31.0938	4800.64	1	240
2022-09-15	09:04:56	9.15726	40.7333	33.8459	4829.63	1	241
2022-09-15	09:04:56	6.68393	29.7315	33.8459	4830.37	1	242
2022-09-15	09:04:56	7.10047	31.5843	33.8459	4861.22	1	243
2022-09-15	09:04:56	7.49395	33.3346	33.8459	4863.71	1	244
2022-09-15	09:04:57	10.3736	46.1438	51.6781	4907.36	1	245
2022-09-15	09:04:57	14.0456	62.4776	51.6781	4926.19	1	246
2022-09-15	09:04:57	10.4341	46.413	51.6781	4953.78	1	247
2022-09-15	09:04:58	14.034	62.426	43.4381	4988.61	1	248
2022-09-15	09:04:58	5.16439	22.9722	43.4381	4976.75	1	249
2022-09-15	09:04:58	8.14586	36.2344	43.4381	5024.85	1	250
2022-09-15	09:04:58	11.717	52.1196	43.4381	5028.87	1	251
2022-09-15	09:04:59	10.3812	46.1777	40.6121	5071.02	1	252
2022-09-15	09:04:59	11.9687	53.2392	40.6121	5082.11	1	253
2022-09-15	09:04:59	5.805	25.8218	40.6121	5096.85	1	254
2022-09-15	09:04:59	8.3651	37.2096	40.6121	5119.32	1	255
2022-09-15	09:05:00	8.48622	37.7484	30.8444	5134.59	1	256
2022-09-15	09:05:00	8.46642	37.6603	30.8444	5156.98	1	257
2022-09-15	09:05:00	8.79044	39.1016	30.8444	5173.7	1	258
2022-09-15	09:05:00	1.9934	8.86704	30.8444	5165.84	FALSE	258
2022-09-15	09:05:01	1.28296	5.70686	7.07099	5179.4	FALSE	258
2022-09-15	09:05:01	3.05818	13.6034	7.07099	5179.45	1	259
2022-09-15	09:05:01	0.427748	1.90271	7.07099	5181.31	FALSE	259
2022-09-15	09:05:02	0.381896	1.69875	0.824163	5181.15	FALSE	259
2022-09-15	09:05:02	0.0751275	0.334182	0.824163	5181.64	FALSE	259
2022-09-15	09:05:02	0.106832	0.47521	0.824163	5181.62	FALSE	259
2022-09-15	09:05:02	0.177265	0.78851	0.824163	5182.43	FALSE	259
2022-09-15	09:05:03	0.587799	2.61465	1.62699	5184.24	FALSE	259
2022-09-15	09:05:03	0.725763	3.22834	1.62699	5185.66	FALSE	259
2022-09-15	09:05:03	0.201947	0.898301	1.62699	5185.13	FALSE	259
2022-09-15	09:05:03	-0.0524552	-0.233331	1.62699	5185.66	FALSE	259
2022-09-15	09:05:04	0.185814	0.826538	1.09513	5185.96	FALSE	259
2022-09-15	09:05:04	0.304593	1.35489	1.09513	5187.01	FALSE	259
2022-09-15	09:05:04	0.190191	0.846008	1.09513	5186.81	FALSE	259
2022-09-15	09:05:04	0.304186	1.35308	1.09513	5188.36	FALSE	259
2022-09-15	09:05:05	0.193244	0.859588	1.391	5187.67	FALSE	259
2022-09-15	09:05:05	0.394313	1.75398	1.391	5190.12	FALSE	259
2022-09-15	09:05:05	0.159657	0.710186	1.391	5188.38	FALSE	259
2022-09-15	09:05:05	0.503626	2.24023	1.391	5192.36	FALSE	259
2022-09-15	09:05:06	0.16159	0.718785	0.784131	5189.1	FALSE	259
2022-09-15	09:05:06	0.303422	1.34968	0.784131	5193.71	FALSE	259
2022-09-15	09:05:06	0.0638297	0.283927	0.784131	5189.38	FALSE	259
2022-09-15	09:05:07	0.27869	1.23967	0.711204	5194.95	FALSE	259
2022-09-15	09:05:07	0.0637788	0.283701	0.711204	5189.66	FALSE	259
2022-09-15	09:05:07	0.264746	1.17764	0.711204	5196.13	FALSE	259
2022-09-15	09:05:07	0.0323284	0.143803	0.711204	5189.81	FALSE	259
2022-09-15	09:05:08	0.278639	1.23944	3.65822	5197.37	FALSE	259
2022-09-15	09:05:08	0.491463	2.18613	3.65822	5191.99	FALSE	259
2022-09-15	09:05:08	1.48042	6.5852	3.65822	5203.95	FALSE	259
2022-09-15	09:05:08	1.0391	4.62212	3.65822	5196.62	FALSE	259
2022-09-15	09:05:09	1.29899	5.77817	23.5122	5209.73	FALSE	259
2022-09-15	09:05:09	4.73563	21.065	23.5122	5217.68	1	260
2022-09-15	09:05:09	8.92011	39.6784	23.5122	5249.41	1	261
2022-09-15	09:05:09	6.18835	27.527	23.5122	5245.21	1	262
2022-09-15	09:05:10	5.5821	24.8303	37.492	5274.24	1	263
2022-09-15	09:05:10	9.94937	44.2568	37.492	5289.46	1	264
2022-09-15	09:05:10	9.75426	43.3889	37.492	5317.63	1	265
2022-09-15	09:05:11	14.5978	64.9339	47.737	5354.4	1	266
2022-09-15	09:05:11	11.8976	52.9229	47.737	5370.55	1	267
2022-09-15	09:05:11	4.80327	21.3659	47.737	5375.76	1	268
2022-09-15	09:05:11	11.6284	51.7254	47.737	5422.27	1	269
2022-09-15	09:05:12	4.52714	20.1376	35.111	5395.9	1	270
2022-09-15	09:05:12	9.93935	44.2122	35.111	5466.49	1	271
2022-09-15	09:05:12	10.9107	48.533	35.111	5444.43	1	272
2022-09-15	09:05:12	6.19599	27.561	35.111	5494.05	1	273
2022-09-15	09:05:13	14.2873	63.5528	53.9898	5507.99	1	274
2022-09-15	09:05:13	8.11187	36.0832	53.9898	5530.13	1	275
2022-09-15	09:05:13	5.90245	26.2553	53.9898	5534.24	1	276
2022-09-15	09:05:13	20.2482	90.068	53.9898	5620.2	1	277
2022-09-15	09:05:14	8.90622	39.6166	35.2565	5573.86	1	278
2022-09-15	09:05:14	5.70576	25.3804	35.2565	5645.58	1	279
2022-09-15	09:05:14	13.6403	60.6748	35.2565	5634.53	1	280
2022-09-15	09:05:14	3.45177	15.3542	35.2565	5660.93	1	281
2022-09-15	09:05:15	12.7871	56.8796	53.3459	5691.41	1	282
2022-09-15	09:05:15	13.6799	60.8509	53.3459	5721.78	1	283
2022-09-15	09:05:15	9.5111	42.3073	53.3459	5733.72	1	284
2022-09-15	09:05:16	20.1283	89.5347	83.2147	5811.32	1	285
2022-09-15	09:05:16	27.4027	121.893	83.2147	5855.61	1	286
2022-09-15	09:05:16	15.506	68.9738	83.2147	5880.29	1	287
2022-09-15	09:05:16	11.793	52.4576	83.2147	5908.07	1	288
2022-09-15	09:05:17	8.08968	35.9845	28.4832	5916.28	1	289
2022-09-15	09:05:17	6.40785	28.5034	28.4832	5936.57	1	290
2022-09-15	09:05:17	5.86154	26.0733	28.4832	5942.35	1	291
2022-09-15	09:05:17	5.25421	23.3718	28.4832	5959.95	1	292
2022-09-15	09:05:18	6.18174	27.4976	46.2048	5969.85	1	293
2022-09-15	09:05:18	11.1095	49.4173	46.2048	6009.36	1	294
2022-09-15	09:05:18	11.6287	51.7268	46.2048	6021.58	1	295
2022-09-15	09:05:18	12.6293	56.1777	46.2048	6065.54	1	296
2022-09-15	09:05:19	14.8949	66.2555	48.7479	6087.83	1	297
2022-09-15	09:05:19	10.497	46.6928	48.7479	6112.23	1	298
2022-09-15	09:05:19	7.48515	33.2954	48.7479	6121.13	1	299
2022-09-15	09:05:20	3.74296	16.6494	44.2664	6128.88	1	300
2022-09-15	09:05:20	6.83634	30.4094	44.2664	6151.54	1	301
2022-09-15	09:05:20	9.60515	42.7256	44.2664	6171.61	1	302
2022-09-15	09:05:20	19.6217	87.2812	44.2664	6238.82	1	303
2022-09-15	09:05:21	13.9644	62.1164	38.1349	6233.73	1	304
2022-09-15	09:05:21	6.61589	29.4288	38.1349	6268.25	1	305
2022-09-15	09:05:21	5.13904	22.8595	38.1349	6256.58	1	306
2022-09-15	09:05:22	2.72953	12.1415	2.99839	6280.39	FALSE	306
2022-09-15	09:05:22	0.388512	1.72818	2.99839	6258.31	FALSE	306
2022-09-15	09:05:22	0.510852	2.27237	2.99839	6282.66	FALSE	306
2022-09-15	09:05:22	0.140929	0.62688	2.99839	6258.94	FALSE	306
2022-09-15	09:05:22	-0.399478	-1.77696	2.99839	6282.66	FALSE	306
2022-09-15	09:05:23	-0.554949	-2.46852	-3.21957	6258.94	FALSE	306
2022-09-15	09:05:23	-0.850673	-3.78396	-3.21957	6282.66	FALSE	306
2022-09-15	09:05:23	-0.746908	-3.3224	-3.21957	6258.94	FALSE	306
2022-09-15	09:05:23	-0.742633	-3.30338	-3.21957	6282.66	FALSE	306
2022-09-15	09:05:24	-0.83902	-3.73213	-3.53873	6258.94	FALSE	306
2022-09-15	09:05:24	-0.814999	-3.62528	-3.53873	6282.66	FALSE	306
2022-09-15	09:05:24	-0.732607	-3.25878	-3.53873	6258.94	FALSE	306
2022-09-15	09:05:25	-0.64019	-2.84769	-0.832875	6282.66	FALSE	306
2022-09-15	09:05:25	-0.307875	-1.36949	-0.832875	6258.94	FALSE	306
2022-09-15	09:05:25	-0.108893	-0.484378	-0.832875	6282.66	FALSE	306
2022-09-15	09:05:25	0.308003	1.37006	-0.832875	6260.31	FALSE	306
2022-09-15	09:05:26	1.15752	5.14888	3.14815	6287.81	FALSE	306
2022-09-15	09:05:26	0.884186	3.93304	3.14815	6264.24	FALSE	306
2022-09-15	09:05:26	0.480115	2.13565	3.14815	6289.94	FALSE	306
2022-09-15	09:05:26	0.309122	1.37504	3.14815	6265.62	FALSE	306
2022-09-15	09:05:27	1.02688	4.56777	3.83263	6294.51	FALSE	306
2022-09-15	09:05:27	1.08927	4.84529	3.83263	6270.46	FALSE	306
2022-09-15	09:05:27	0.648002	2.88244	3.83263	6297.39	FALSE	306
2022-09-15	09:05:27	0.682303	3.03502	3.83263	6273.5	FALSE	306
2022-09-15	09:05:28	0.847392	3.76937	2.10614	6301.16	FALSE	306
2022-09-15	09:05:28	0.404797	1.80062	2.10614	6275.3	FALSE	306
2022-09-15	09:05:28	0.168257	0.748441	2.10614	6301.91	FALSE	306
2022-09-15	09:05:29	0.156959	0.698185	0.549858	6276	FALSE	306
2022-09-15	09:05:29	0.117214	0.521391	0.549858	6302.43	FALSE	306
2022-09-15	09:05:29	0.111769	0.497171	0.549858	6276.49	FALSE	306
2022-09-15	09:05:29	0.108512	0.482683	0.549858	6302.92	FALSE	306
2022-09-15	09:05:30	0.0901401	0.400961	0.570457	6276.9	FALSE	306
2022-09-15	09:05:30	0.100115	0.445332	0.570457	6303.36	FALSE	306
2022-09-15	09:05:30	0.164542	0.731916	0.570457	6277.63	FALSE	306
2022-09-15	09:05:30	0.158181	0.703621	0.570457	6304.06	FALSE	306
2022-09-15	09:05:31	0.178079	0.792131	0.789076	6278.42	FALSE	306
2022-09-15	09:05:31	0.169428	0.75365	0.789076	6304.82	FALSE	306
2022-09-15	09:05:31	0.178283	0.793038	0.789076	6279.21	FALSE	306
2022-09-15	09:05:31	0.183779	0.817486	0.789076	6305.64	FALSE	306
2022-09-15	09:05:32	0.203779	0.90645	0.975643	6280.12	FALSE	306
2022-09-15	09:05:32	0.224644	0.999261	0.975643	6306.64	FALSE	306
2022-09-15	09:05:32	0.22958	1.02122	0.975643	6281.14	FALSE	306
2022-09-15	09:05:33	0.242099	1.0769	1.50486	6307.71	FALSE	306
2022-09-15	09:05:33	0.388257	1.72704	1.50486	6282.87	FALSE	306
2022-09-15	09:05:33	0.522252	2.32308	1.50486	6310.04	FALSE	306
2022-09-15	09:05:33	0.200624	0.892416	1.50486	6283.76	FALSE	306
2022-09-15	09:05:34	0.1564	0.695698	1.05387	6310.73	FALSE	306
2022-09-15	09:05:34	0.15126	0.672835	1.05387	6284.43	FALSE	306
2022-09-15	09:05:34	0.309987	1.37888	1.05387	6312.11	FALSE	306
2022-09-15	09:05:34	0.330038	1.46808	1.05387	6285.9	FALSE	306
2022-09-15	09:05:35	0.212735	0.946288	0.96587	6313.06	FALSE	306
2022-09-15	09:05:35	0.217061	0.965531	0.96587	6286.87	FALSE	306
2022-09-15	09:05:35	0.223117	0.992469	0.96587	6314.05	FALSE	306
2022-09-15	09:05:35	0.215636	0.959192	0.96587	6287.83	FALSE	306
2022-09-15	09:05:36	0.243881	1.08483	1.20152	6315.13	FALSE	306
2022-09-15	09:05:36	0.29584	1.31596	1.20152	6289.14	FALSE	306
2022-09-15	09:05:36	0.299046	1.33022	1.20152	6316.46	FALSE	306
2022-09-15	09:05:36	0.241692	1.07509	1.20152	6290.22	FALSE	306
2022-09-15	09:05:37	0.172685	0.768137	0.626956	6317.23	FALSE	306
2022-09-15	09:05:37	0.143066	0.636386	0.626956	6290.85	FALSE	306
2022-09-15	09:05:37	0.107087	0.476344	0.626956	6317.71	FALSE	306
2022-09-15	09:05:38	0.0247458	0.110074	-1.03989	6290.96	FALSE	306
2022-09-15	09:05:38	-0.0405977	-0.180587	-1.03989	6317.71	FALSE	306
2022-09-15	09:05:38	-0.303346	-1.34934	-1.03989	6290.96	FALSE	306
2022-09-15	09:05:38	-0.615916	-2.73972	-1.03989	6317.71	FALSE	306
2022-09-15	09:05:39	-1.04752	-4.65958	-0.878044	6290.96	FALSE	306
2022-09-15	09:05:39	-0.918409	-4.08527	-0.878044	6317.71	FALSE	306
2022-09-15	09:05:39	0.0596567	0.265365	-0.878044	6291.23	FALSE	306
2022-09-15	09:05:39	1.1167	4.9673	-0.878044	6322.68	FALSE	306
2022-09-15	09:05:40	1.73187	7.7037	6.19007	6298.93	FALSE	306
2022-09-15	09:05:40	1.07543	4.78373	6.19007	6327.46	FALSE	306
2022-09-15	09:05:40	1.02989	4.58116	6.19007	6303.51	FALSE	306
2022-09-15	09:05:40	1.72917	7.69169	6.19007	6335.15	FALSE	306
2022-09-15	09:05:41	1.20933	5.37934	4.07799	6308.89	FALSE	306
2022-09-15	09:05:41	0.726221	3.23038	4.07799	6338.38	FALSE	306
2022-09-15	09:05:41	0.814771	3.62426	4.07799	6312.52	FALSE	306
2022-09-15	09:05:42	0.508257	2.26083	2.01369	6340.64	FALSE	306
2022-09-15	09:05:42	0.411107	1.82869	2.01369	6314.35	FALSE	306
2022-09-15	09:05:42	0.485458	2.15941	2.01369	6342.8	FALSE	306
2022-09-15	09:05:42	0.405967	1.80582	2.01369	6316.15	FALSE	306
2022-09-15	09:05:43	0.324746	1.44454	1.24555	6344.25	FALSE	306
2022-09-15	09:05:43	0.304797	1.3558	1.24555	6317.51	FALSE	306
2022-09-15	09:05:43	0.260776	1.15998	1.24555	6345.41	FALSE	306
2022-09-15	09:05:43	0.229733	1.0219	1.24555	6318.53	FALSE	306
2022-09-15	09:05:44	0.18098	0.805035	0.901921	6346.21	FALSE	306
2022-09-15	09:05:44	0.220115	0.979116	0.901921	6319.51	FALSE	306
2022-09-15	09:05:44	0.202812	0.902148	0.901921	6347.11	FALSE	306
2022-09-15	09:05:44	0.207137	0.921387	0.901921	6320.43	FALSE	306
2022-09-15	09:05:45	0.211412	0.940403	0.986357	6348.05	FALSE	306
2022-09-15	09:05:45	0.228868	1.01805	0.986357	6321.45	FALSE	306
2022-09-15	09:05:45	0.231107	1.02801	0.986357	6349.08	FALSE	306
2022-09-15	09:05:45	0.215585	0.958965	0.986357	6322.41	FALSE	306
2022-09-15	09:05:46	0.233041	1.03661	1.02024	6350.12	FALSE	306
2022-09-15	09:05:46	0.2393	1.06445	1.02024	6323.47	FALSE	306
2022-09-15	09:05:46	0.215738	0.959646	1.02024	6351.08	FALSE	306
2022-09-15	09:05:47	0.177061	0.787603	1.55981	6324.26	FALSE	306
2022-09-15	09:05:47	0.281845	1.2537	1.55981	6352.33	FALSE	306
2022-09-15	09:05:47	0.414517	1.84385	1.55981	6326.1	FALSE	306
2022-09-15	09:05:47	0.529224	2.35409	1.55981	6354.69	FALSE	306
2022-09-15	09:05:48	0.70729	3.14617	5.05895	6329.25	FALSE	306
2022-09-15	09:05:48	0.649377	2.88856	5.05895	6357.57	FALSE	306
2022-09-15	09:05:48	0.874974	3.89206	5.05895	6333.14	FALSE	306
2022-09-15	09:05:48	2.31757	10.309	5.05895	6367.88	FALSE	306
2022-09-15	09:05:49	4.60571	20.4871	28.4358	6353.63	1	307
2022-09-15	09:05:49	7.28103	32.3875	28.4358	6400.27	1	308
2022-09-15	09:05:49	7.45736	33.1718	28.4358	6386.8	1	309
2022-09-15	09:05:49	6.22652	27.6968	28.4358	6427.97	1	310
2022-09-15	09:05:50	4.56322	20.2981	17.5819	6407.1	1	311
2022-09-15	09:05:50	3.18851	14.1831	17.5819	6442.15	1	312
2022-09-15	09:05:50	4.10602	18.2644	17.5819	6425.36	1	313
2022-09-15	09:05:51	5.25889	23.3926	36.5397	6465.54	1	314
2022-09-15	09:05:51	6.94937	30.9122	36.5397	6456.27	1	315
2022-09-15	09:05:51	11.0828	49.2985	36.5397	6514.84	1	316
2022-09-15	09:05:51	9.56688	42.5554	36.5397	6498.83	1	317
2022-09-15	09:05:52	9.42377	41.9188	50.884	6556.76	1	318
2022-09-15	09:05:52	11.2193	49.9057	50.884	6548.74	1	319
2022-09-15	09:05:52	11.362	50.5404	50.884	6607.3	1	320
2022-09-15	09:05:52	13.7519	61.1712	50.884	6609.91	1	321
2022-09-15	09:05:53	15.5858	69.3288	50.6116	6676.63	1	322
2022-09-15	09:05:53	12.1553	54.0692	50.6116	6663.98	1	323
2022-09-15	09:05:53	9.53955	42.4338	50.6116	6719.06	1	324
2022-09-15	09:05:53	8.23131	36.6145	50.6116	6700.59	1	325
2022-09-15	09:05:54	9.25462	41.1664	38.8904	6760.23	1	326
2022-09-15	09:05:54	10.9857	48.8666	38.8904	6749.46	1	327
2022-09-15	09:05:54	8.7341	38.851	38.8904	6799.08	1	328
2022-09-15	09:05:54	5.99741	26.6777	38.8904	6776.13	1	329
2022-09-15	09:05:55	6.87034	30.5606	37.9373	6829.64	1	330
2022-09-15	09:05:55	8.07813	35.9331	37.9373	6812.07	1	331
2022-09-15	09:05:55	10.6376	47.3182	37.9373	6876.96	1	332
2022-09-15	09:05:56	14.4535	64.2921	77.6907	6876.36	1	333
2022-09-15	09:05:56	18.194	80.9306	77.6907	6957.89	1	334
2022-09-15	09:05:56	21.5674	95.9361	77.6907	6972.3	1	335
2022-09-15	09:05:56	15.6477	69.6041	77.6907	7027.49	1	336
2022-09-15	09:05:57	10.9433	48.678	47.4574	7020.97	1	337
2022-09-15	09:05:57	9.65176	42.933	47.4574	7070.43	1	338
2022-09-15	09:05:57	10.4976	46.6954	47.4574	7067.67	1	339
2022-09-15	09:05:57	11.5829	51.5231	47.4574	7121.95	1	340
2022-09-15	09:05:58	8.07624	35.9247	34.2674	7103.59	1	341
2022-09-15	09:05:58	7.88057	35.0544	34.2674	7157	1	342
2022-09-15	09:05:58	7.36169	32.7463	34.2674	7136.34	1	343
2022-09-15	09:05:58	7.49609	33.3441	34.2674	7190.35	1	344
2022-09-15	09:05:59	7.93314	35.2882	34.8355	7171.63	1	345
2022-09-15	09:05:59	7.72378	34.3569	34.8355	7224.71	1	346
2022-09-15	09:05:59	7.83721	34.8615	34.8355	7206.49	1	347

## Sheet: Tyr_martin_20229159059 (3)
Date	Time	Lbs	Newtons	Total force x time		total steps > 13.345	**GoPro Fitting: 849
2022-09-15	09:00:59	0.256043	1.13893	1.13893	FALSE	0
2022-09-15	09:00:59	0.184084	0.818842	0.818842	FALSE	0
2022-09-15	09:00:59	0.478282	2.12749	3.26642	FALSE	0
2022-09-15	09:01:00	0.174364	0.775606	1.59445	FALSE	0
2022-09-15	09:01:00	0.150445	0.669209	3.93563	FALSE	0
2022-09-15	09:01:00	0.182507	0.811828	2.40628	FALSE	0
2022-09-15	09:01:01	0.277825	1.23582	5.17146	FALSE	0
2022-09-15	09:01:01	0.265153	1.17945	3.58573	FALSE	0
2022-09-15	09:01:01	0.145255	0.646123	5.81758	FALSE	0
2022-09-15	09:01:01	0.0968069	0.430616	4.01635	FALSE	0
2022-09-15	09:01:02	0.135891	0.60447	6.42205	FALSE	0
2022-09-15	09:01:02	0.208308	0.926596	4.94294	FALSE	0
2022-09-15	09:01:02	0.225255	1.00198	7.42403	FALSE	0
2022-09-15	09:01:02	0.169377	0.753423	5.69636	FALSE	0
2022-09-15	09:01:03	0.141082	0.627561	8.05159	FALSE	0
2022-09-15	09:01:03	0.115433	0.513469	6.20983	FALSE	0
2022-09-15	09:01:03	0.192786	0.857551	8.90914	FALSE	0
2022-09-15	09:01:03	0.252277	1.12218	7.33201	FALSE	0
2022-09-15	09:01:04	0.155891	0.693434	9.60257	FALSE	0
2022-09-15	09:01:04	0.243931	1.08505	8.41707	FALSE	0
2022-09-15	09:01:04	0.210649	0.937009	10.5396	FALSE	0
2022-09-15	09:01:04	0.194059	0.863213	9.28028	FALSE	0
2022-09-15	09:01:05	0.191158	0.850309	11.3899	FALSE	0
2022-09-15	09:01:05	0.211107	0.939046	10.2193	FALSE	0
2022-09-15	09:01:05	0.221692	0.98613	12.376	FALSE	0
2022-09-15	09:01:06	0.195636	0.870228	11.0896	FALSE	0
2022-09-15	09:01:06	0.204593	0.910071	13.2861	FALSE	0
2022-09-15	09:01:06	0.207392	0.922521	12.0121	FALSE	0
2022-09-15	09:01:06	0.207137	0.921387	14.2075	FALSE	0
2022-09-15	09:01:07	0.216196	0.961683	12.9738	FALSE	0
2022-09-15	09:01:07	0.228257	1.01533	15.2228	FALSE	0
2022-09-15	09:01:07	0.245153	1.09049	14.0642	FALSE	0
2022-09-15	09:01:07	0.242557	1.07894	16.3018	FALSE	0
2022-09-15	09:01:08	0.243524	1.08324	15.1475	FALSE	0
2022-09-15	09:01:08	0.243626	1.0837	17.3855	FALSE	0
2022-09-15	09:01:08	0.259809	1.15568	16.3032	FALSE	0
2022-09-15	09:01:08	0.268461	1.19417	18.5796	FALSE	0
2022-09-15	09:01:09	0.285204	1.26864	17.5718	FALSE	0
2022-09-15	09:01:09	0.271107	1.20594	19.7856	FALSE	0
2022-09-15	09:01:09	0.293499	1.30554	18.8774	FALSE	0
2022-09-15	09:01:10	0.273346	1.2159	21.0015	FALSE	0
2022-09-15	09:01:10	0.288257	1.28222	20.1596	FALSE	0
2022-09-15	09:01:10	0.463015	2.05958	23.061	FALSE	0
2022-09-15	09:01:10	0.309631	1.3773	21.5369	FALSE	0
2022-09-15	09:01:11	0.361845	1.60956	24.6706	FALSE	0
2022-09-15	09:01:11	0.14841	0.660157	22.197	FALSE	0
2022-09-15	09:01:11	0.181234	0.806165	25.4768	FALSE	0
2022-09-15	09:01:11	0.228919	1.01828	23.2153	FALSE	0
2022-09-15	09:01:12	0.280827	1.24917	26.7259	FALSE	0
2022-09-15	09:01:12	0.230547	1.02552	24.2408	FALSE	0
2022-09-15	09:01:12	0.192634	0.856875	27.5828	FALSE	0
2022-09-15	09:01:12	0.213906	0.951497	25.1923	FALSE	0
2022-09-15	09:01:13	0.20383	0.906677	28.4895	FALSE	0
2022-09-15	09:01:13	0.198079	0.881095	26.0734	FALSE	0
2022-09-15	09:01:13	0.202099	0.898977	29.3885	FALSE	0
2022-09-15	09:01:14	0.205713	0.915053	26.9885	FALSE	0
2022-09-15	09:01:14	0.35472	1.57787	30.9663	FALSE	0
2022-09-15	09:01:14	0.519402	2.3104	29.2989	FALSE	0
2022-09-15	09:01:14	0.171565	0.763155	31.7295	FALSE	0
2022-09-15	09:01:15	0.0693259	0.308375	29.6073	FALSE	0
2022-09-15	09:01:15	0.263372	1.17153	32.901	FALSE	0
2022-09-15	09:01:15	0.27187	1.20933	30.8166	FALSE	0
2022-09-15	09:01:15	0.558842	2.48584	35.3869	FALSE	0
2022-09-15	09:01:16	0.243728	1.08415	31.9007	FALSE	0
2022-09-15	09:01:16	0.310089	1.37934	36.7662	FALSE	0
2022-09-15	09:01:16	0.119097	0.529767	32.4305	FALSE	0
2022-09-15	09:01:16	-0.131437	-0.584658	36.7662	FALSE	0
2022-09-15	09:01:17	-0.445941	-1.98363	32.4305	FALSE	0
2022-09-15	09:01:17	-0.50533	-2.24781	36.7662	FALSE	0
2022-09-15	09:01:17	-0.51103	-2.27316	32.4305	FALSE	0
2022-09-15	09:01:17	-0.235305	-1.04668	36.7662	FALSE	0
2022-09-15	09:01:18	-0.0370863	-0.164967	32.4305	FALSE	0
2022-09-15	09:01:18	0.201336	0.895583	37.6618	FALSE	0
2022-09-15	09:01:18	0.203219	0.903959	33.3345	FALSE	0
2022-09-15	09:01:19	0.214618	0.954664	38.6164	FALSE	0
2022-09-15	09:01:19	0.15813	0.703394	34.0379	FALSE	0
2022-09-15	09:01:19	0.142303	0.632992	39.2494	FALSE	0
2022-09-15	09:01:19	0.0700893	0.311771	34.3496	FALSE	0
2022-09-15	09:01:20	0.0926846	0.41228	39.6617	FALSE	0
2022-09-15	09:01:20	0.465763	2.07181	36.4214	FALSE	0
2022-09-15	09:01:20	0.381947	1.69898	41.3607	FALSE	0
2022-09-15	09:01:20	2.58525	11.4997	47.9212	FALSE	0
2022-09-15	09:01:21	2.83268	12.6003	53.961	FALSE	0
2022-09-15	09:01:21	1.66047	7.3861	55.3073	FALSE	0
2022-09-15	09:01:21	2.27182	10.1055	64.0665	FALSE	0
2022-09-15	09:01:21	1.68637	7.50131	62.8086	FALSE	0
2022-09-15	09:01:22	0.636858	2.83287	66.8994	FALSE	0
2022-09-15	09:01:22	0.413601	1.83978	64.6483	FALSE	0
2022-09-15	09:01:22	0.531412	2.36383	69.2632	FALSE	0
2022-09-15	09:01:23	0.605	2.69116	67.3395	FALSE	0
2022-09-15	09:01:23	0.672277	2.99042	72.2536	FALSE	0
2022-09-15	09:01:23	0.908562	4.04147	71.381	FALSE	0
2022-09-15	09:01:23	0.477468	2.12387	74.3775	FALSE	0
2022-09-15	09:01:24	0.515636	2.29365	73.6746	FALSE	0
2022-09-15	09:01:24	0.387595	1.7241	76.1016	FALSE	0
2022-09-15	09:01:24	0.279402	1.24284	74.9175	FALSE	0
2022-09-15	09:01:24	0.197265	0.877474	76.9791	FALSE	0
2022-09-15	09:01:25	0.178893	0.795752	75.7132	FALSE	0
2022-09-15	09:01:25	0.0183336	0.0815515	77.0606	FALSE	0
2022-09-15	09:01:25	0.0248984	0.110753	75.824	FALSE	0
2022-09-15	09:01:25	0.00179415	0.00798074	77.0686	FALSE	0
2022-09-15	09:01:26	0.0992496	0.441482	76.2654	FALSE	0
2022-09-15	09:01:26	0.160522	0.714034	77.7827	FALSE	0
2022-09-15	09:01:26	0.0604709	0.268987	76.5344	FALSE	0
2022-09-15	09:01:27	0.112125	0.498754	78.2814	FALSE	0
2022-09-15	09:01:27	0.0707	0.314488	76.8489	FALSE	0
2022-09-15	09:01:27	0.254262	1.13101	79.4124	FALSE	0
2022-09-15	09:01:27	0.00479668	0.0213366	76.8703	FALSE	0
2022-09-15	09:01:28	0.272226	1.21092	80.6233	FALSE	0
2022-09-15	09:01:28	-0.0134731	-0.059931	76.8703	FALSE	0
2022-09-15	09:01:28	0.104491	0.464797	81.0881	FALSE	0
2022-09-15	09:01:28	0.012074	0.0537076	76.924	FALSE	0
2022-09-15	09:01:29	0.16444	0.731462	81.8196	FALSE	0
2022-09-15	09:01:29	0.309427	1.37639	78.3004	FALSE	0
2022-09-15	09:01:29	0.186578	0.829936	82.6495	FALSE	0
2022-09-15	09:01:29	0.322048	1.43253	79.7329	FALSE	0
2022-09-15	09:01:30	0.15243	0.678039	83.3276	FALSE	0
2022-09-15	09:01:30	0.380013	1.69037	81.4233	FALSE	0
2022-09-15	09:01:30	0.129733	0.577078	83.9047	FALSE	0
2022-09-15	09:01:30	0.368053	1.63717	83.0604	FALSE	0
2022-09-15	09:01:31	0.264338	1.17583	85.0805	FALSE	0
2022-09-15	09:01:31	0.30902	1.37458	84.435	FALSE	0
2022-09-15	09:01:31	0.499707	2.2228	87.3033	FALSE	0
2022-09-15	09:01:32	1.74922	7.78088	92.2159	FALSE	0
2022-09-15	09:01:32	3.33192	14.821	102.124	1	1
2022-09-15	09:01:32	2.12734	9.46283	101.679	FALSE	1
2022-09-15	09:01:32	0.411361	1.82982	103.954	FALSE	1
2022-09-15	09:01:33	0.132379	0.588848	102.268	FALSE	1
2022-09-15	09:01:33	0.270547	1.20345	105.158	FALSE	1
2022-09-15	09:01:33	0.199657	0.888114	103.156	FALSE	1
2022-09-15	09:01:33	0.938588	4.17503	109.333	FALSE	1
2022-09-15	09:01:34	1.88892	8.40229	111.558	FALSE	1
2022-09-15	09:01:34	2.39569	10.6565	119.989	FALSE	1
2022-09-15	09:01:34	1.37538	6.11797	117.676	FALSE	1
2022-09-15	09:01:34	0.440522	1.95953	121.949	FALSE	1
2022-09-15	09:01:35	0.610802	2.71697	120.393	FALSE	1
2022-09-15	09:01:35	0.589835	2.6237	124.572	FALSE	1
2022-09-15	09:01:35	-0.0247707	-0.110185	120.393	FALSE	1
2022-09-15	09:01:36	-0.0675697	-0.300564	124.572	FALSE	1
2022-09-15	09:01:36	0.180216	0.801637	121.195	FALSE	1
2022-09-15	09:01:36	-0.112608	-0.500903	124.572	FALSE	1
2022-09-15	09:01:36	0.0589952	0.262422	121.457	FALSE	1
2022-09-15	09:01:37	0.0171631	0.0763449	124.649	FALSE	1
2022-09-15	09:01:37	1.10128	4.89871	126.356	FALSE	1
2022-09-15	09:01:37	1.38622	6.16618	130.815	FALSE	1
2022-09-15	09:01:37	3.08179	13.7084	140.064	1	2
2022-09-15	09:01:38	5.15334	22.9231	153.738	1	3
2022-09-15	09:01:38	4.30719	19.1592	159.223	1	4
2022-09-15	09:01:38	5.68169	25.2733	179.011	1	5
2022-09-15	09:01:38	5.90744	26.2775	185.501	1	6
2022-09-15	09:01:39	10.3126	45.8725	224.884	1	7
2022-09-15	09:01:39	6.30591	28.0499	213.551	1	8
2022-09-15	09:01:39	13.0454	58.0285	282.912	1	9
2022-09-15	09:01:39	9.52209	42.3562	255.907	1	10
2022-09-15	09:01:40	7.18235	31.9485	314.861	1	11
2022-09-15	09:01:40	7.64841	34.0217	289.929	1	12
2022-09-15	09:01:40	8.00963	35.6284	350.489	1	13
2022-09-15	09:01:41	6.81125	30.2978	320.226	1	14
2022-09-15	09:01:41	5.72367	25.46	375.949	1	15
2022-09-15	09:01:41	5.30958	23.6181	343.844	1	16
2022-09-15	09:01:41	5.82291	25.9015	401.851	1	17
2022-09-15	09:01:42	4.77513	21.2407	365.085	1	18
2022-09-15	09:01:42	2.64474	11.7643	413.615	FALSE	18
2022-09-15	09:01:42	0.610394	2.71515	367.8	FALSE	18
2022-09-15	09:01:42	0.316603	1.40831	415.023	FALSE	18
2022-09-15	09:01:43	0.0746694	0.332144	368.133	FALSE	18
2022-09-15	09:01:43	-0.0143382	-0.0637792	415.023	FALSE	18
2022-09-15	09:01:43	-0.0892491	-0.396998	368.133	FALSE	18
2022-09-15	09:01:43	-0.198104	-0.881206	415.023	FALSE	18
2022-09-15	09:01:44	-0.287112	-1.27713	368.133	FALSE	18
2022-09-15	09:01:44	-0.551386	-2.45268	415.023	FALSE	18
2022-09-15	09:01:44	-0.596323	-2.65256	368.133	FALSE	18
2022-09-15	09:01:45	-0.829147	-3.68821	415.023	FALSE	18
2022-09-15	09:01:45	-0.756068	-3.36314	368.133	FALSE	18
2022-09-15	09:01:45	-0.910775	-4.05131	415.023	FALSE	18
2022-09-15	09:01:45	-0.705636	-3.13881	368.133	FALSE	18
2022-09-15	09:01:46	-0.762124	-3.39008	415.023	FALSE	18
2022-09-15	09:01:46	-0.736933	-3.27803	368.133	FALSE	18
2022-09-15	09:01:46	-0.593015	-2.63785	415.023	FALSE	18
2022-09-15	09:01:46	-0.598918	-2.66411	368.133	FALSE	18
2022-09-15	09:01:47	-0.50701	-2.25528	415.023	FALSE	18
2022-09-15	09:01:47	-0.550368	-2.44815	368.133	FALSE	18
2022-09-15	09:01:47	-0.382888	-1.70316	415.023	FALSE	18
2022-09-15	09:01:47	-0.384821	-1.71176	368.133	FALSE	18
2022-09-15	09:01:48	-0.243091	-1.08132	415.023	FALSE	18
2022-09-15	09:01:48	-0.108537	-0.482794	368.133	FALSE	18
2022-09-15	09:01:48	-0.11958	-0.531916	415.023	FALSE	18
2022-09-15	09:01:49	0.711412	3.1645	371.297	FALSE	18
2022-09-15	09:01:49	2.28327	10.1564	425.18	FALSE	18
2022-09-15	09:01:49	3.38709	15.0665	386.363	1	19
2022-09-15	09:01:49	3.0878	13.7352	438.915	1	20
2022-09-15	09:01:50	8.23787	36.6437	423.007	1	21
2022-09-15	09:01:50	10.0575	44.7378	483.653	1	22
2022-09-15	09:01:50	5.84377	25.9943	449.001	1	23
2022-09-15	09:01:50	3.11365	13.8501	497.503	1	24
2022-09-15	09:01:51	0.962964	4.28346	453.285	FALSE	24
2022-09-15	09:01:51	0.472227	2.10056	499.603	FALSE	24
2022-09-15	09:01:51	0.159809	0.710862	453.996	FALSE	24
2022-09-15	09:01:51	0.735585	3.27203	502.876	FALSE	24
2022-09-15	09:01:52	0.678842	3.01962	457.015	FALSE	24
2022-09-15	09:01:52	0.315687	1.40424	504.28	FALSE	24
2022-09-15	09:01:52	0.950445	4.22777	461.243	FALSE	24
2022-09-15	09:01:52	1.39472	6.20399	510.484	FALSE	24
2022-09-15	09:01:53	2.09569	9.32205	470.565	FALSE	24
2022-09-15	09:01:53	3.15228	14.022	524.506	1	25
2022-09-15	09:01:53	8.25324	36.7121	507.277	1	26
2022-09-15	09:01:54	6.37884	28.3744	552.88	1	27
2022-09-15	09:01:54	9.49716	42.2453	549.523	1	28
2022-09-15	09:01:54	7.08245	31.5042	584.384	1	29
2022-09-15	09:01:54	5.0595	22.5057	572.028	1	30
2022-09-15	09:01:55	4.80139	21.3575	605.742	1	31
2022-09-15	09:01:55	7.96754	35.4412	607.469	1	32
2022-09-15	09:01:55	13.0894	58.2243	663.966	1	33
2022-09-15	09:01:55	7.93426	35.2932	642.763	1	34
2022-09-15	09:01:56	6.95115	30.9201	694.886	1	35
2022-09-15	09:01:56	9.56627	42.5527	685.315	1	36
2022-09-15	09:01:56	7.82194	34.7936	729.68	1	37
2022-09-15	09:01:56	5.66434	25.1961	710.511	1	38
2022-09-15	09:01:57	2.85324	12.6918	742.371	FALSE	38
2022-09-15	09:01:57	2.52154	11.2163	721.728	FALSE	38
2022-09-15	09:01:57	1.24933	5.55727	747.929	FALSE	38
2022-09-15	09:01:58	2.36592	10.5241	732.252	FALSE	38
2022-09-15	09:01:58	0.465153	2.06909	749.998	FALSE	38
2022-09-15	09:01:58	0.316858	1.40945	733.661	FALSE	38
2022-09-15	09:01:58	0.182608	0.812277	750.81	FALSE	38
2022-09-15	09:01:59	0.269682	1.1996	734.861	FALSE	38
2022-09-15	09:01:59	-0.237595	-1.05687	750.81	FALSE	38
2022-09-15	09:01:59	-0.183397	-0.815787	734.861	FALSE	38
2022-09-15	09:01:59	-0.182837	-0.813296	750.81	FALSE	38
2022-09-15	09:02:00	0.165611	0.736671	735.597	FALSE	38
2022-09-15	09:02:00	0.0853564	0.379682	751.19	FALSE	38
2022-09-15	09:02:00	0.314415	1.39858	736.996	FALSE	38
2022-09-15	09:02:00	0.225509	1.00311	752.193	FALSE	38
2022-09-15	09:02:01	0.325916	1.44974	738.446	FALSE	38
2022-09-15	09:02:01	0.196603	0.874529	753.067	FALSE	38
2022-09-15	09:02:01	0.228868	1.01805	739.464	FALSE	38
2022-09-15	09:02:02	0.276807	1.23129	754.299	FALSE	38
2022-09-15	09:02:02	0.250394	1.1138	740.578	FALSE	38
2022-09-15	09:02:02	0.175992	0.782848	755.082	FALSE	38
2022-09-15	09:02:02	1.29864	5.77661	746.354	FALSE	38
2022-09-15	09:02:03	1.63676	7.28064	762.362	FALSE	38
2022-09-15	09:02:03	4.08994	18.1929	764.547	1	39
2022-09-15	09:02:03	1.93879	8.62413	770.986	FALSE	39
2022-09-15	09:02:03	2.69396	11.9833	776.53	FALSE	39
2022-09-15	09:02:04	3.22357	14.3391	785.325	1	40
2022-09-15	09:02:04	1.35711	6.0367	782.567	FALSE	40
2022-09-15	09:02:04	0.347188	1.54436	786.87	FALSE	40
2022-09-15	09:02:04	0.0793005	0.352744	782.92	FALSE	40
2022-09-15	09:02:05	-0.0304705	-0.135539	786.87	FALSE	40
2022-09-15	09:02:05	-0.133473	-0.593715	782.92	FALSE	40
2022-09-15	09:02:05	0.0643386	0.286191	787.156	FALSE	40
2022-09-15	09:02:05	0.08042	0.357724	783.278	FALSE	40
2022-09-15	09:02:06	0.0554837	0.246803	787.403	FALSE	40
2022-09-15	09:02:06	0.122659	0.545612	783.823	FALSE	40
2022-09-15	09:02:06	0.000369216	0.00164235	787.404	FALSE	40
2022-09-15	09:02:07	-0.242328	-1.07792	783.823	FALSE	40
2022-09-15	09:02:07	-0.408028	-1.81499	787.404	FALSE	40
2022-09-15	09:02:07	-0.409809	-1.82291	783.823	FALSE	40
2022-09-15	09:02:07	-0.251183	-1.11731	787.404	FALSE	40
2022-09-15	09:02:08	-0.0732185	-0.325691	783.823	FALSE	40
2022-09-15	09:02:08	0.0603183	0.268308	787.673	FALSE	40
2022-09-15	09:02:08	0.213193	0.948325	784.772	FALSE	40
2022-09-15	09:02:08	0.461896	2.05461	789.727	FALSE	40
2022-09-15	09:02:09	0.535585	2.38239	787.154	FALSE	40
2022-09-15	09:02:09	0.536654	2.38714	792.114	FALSE	40
2022-09-15	09:02:09	0.707595	3.14752	790.301	FALSE	40
2022-09-15	09:02:09	0.671056	2.98499	795.099	FALSE	40
2022-09-15	09:02:10	0.481081	2.13994	792.441	FALSE	40
2022-09-15	09:02:10	0.480573	2.13768	797.237	FALSE	40
2022-09-15	09:02:10	0.340573	1.51494	793.956	FALSE	40
2022-09-15	09:02:11	0.362303	1.6116	798.849	FALSE	40
2022-09-15	09:02:11	0.355178	1.5799	795.536	FALSE	40
2022-09-15	09:02:11	0.342608	1.52399	800.373	FALSE	40
2022-09-15	09:02:11	0.182863	0.813411	796.35	FALSE	40
2022-09-15	09:02:12	0.148461	0.660384	801.033	FALSE	40
2022-09-15	09:02:12	0.191107	0.850082	797.2	FALSE	40
2022-09-15	09:02:12	0.172888	0.76904	801.802	FALSE	40
2022-09-15	09:02:12	0.171565	0.763155	797.963	FALSE	40
2022-09-15	09:02:13	0.165458	0.73599	802.538	FALSE	40
2022-09-15	09:02:13	0.161998	0.7206	798.683	FALSE	40
2022-09-15	09:02:13	0.162965	0.724901	803.263	FALSE	40
2022-09-15	09:02:14	0.166171	0.739162	799.423	FALSE	40
2022-09-15	09:02:14	0.169377	0.753423	804.016	FALSE	40
2022-09-15	09:02:14	0.193448	0.860495	800.283	FALSE	40
2022-09-15	09:02:14	0.187901	0.835821	804.852	FALSE	40
2022-09-15	09:02:15	0.188715	0.839442	801.123	FALSE	40
2022-09-15	09:02:15	0.186629	0.830163	805.682	FALSE	40
2022-09-15	09:02:15	0.178842	0.795525	801.918	FALSE	40
2022-09-15	09:02:15	0.141489	0.629371	806.312	FALSE	40
2022-09-15	09:02:16	0.0674429	0.3	802.218	FALSE	40
2022-09-15	09:02:16	0.10729	0.477247	806.789	FALSE	40
2022-09-15	09:02:16	0.161133	0.716752	802.935	FALSE	40
2022-09-15	09:02:16	0.222863	0.991339	807.78	FALSE	40
2022-09-15	09:02:17	0.129122	0.57436	803.509	FALSE	40
2022-09-15	09:02:17	-0.0916409	-0.407637	807.78	FALSE	40
2022-09-15	09:02:17	-0.144516	-0.642836	803.509	FALSE	40
2022-09-15	09:02:17	-0.0848725	-0.37753	807.78	FALSE	40
2022-09-15	09:02:18	0.491718	2.18726	805.696	FALSE	40
2022-09-15	09:02:18	0.312888	1.39179	809.172	FALSE	40
2022-09-15	09:02:18	0.590649	2.62732	808.324	FALSE	40
2022-09-15	09:02:18	0.639809	2.846	812.018	FALSE	40
2022-09-15	09:02:19	1.30057	5.7852	814.109	FALSE	40
2022-09-15	09:02:19	0.317468	1.41216	813.43	FALSE	40
2022-09-15	09:02:19	0.332736	1.48008	815.589	FALSE	40
2022-09-15	09:02:20	0.325356	1.44725	814.878	FALSE	40
2022-09-15	09:02:20	0.238741	1.06197	816.651	FALSE	40
2022-09-15	09:02:20	0.192786	0.857551	815.735	FALSE	40
2022-09-15	09:02:20	0.181998	0.809564	817.461	FALSE	40
2022-09-15	09:02:21	-0.136832	-0.608656	815.735	FALSE	40
2022-09-15	09:02:21	-0.35103	-1.56145	817.461	FALSE	40
2022-09-15	09:02:21	-0.510928	-2.27271	815.735	FALSE	40
2022-09-15	09:02:21	-0.679223	-3.02132	817.461	FALSE	40
2022-09-15	09:02:22	-0.283702	-1.26196	815.735	FALSE	40
2022-09-15	09:02:22	-0.0560684	-0.249403	817.461	FALSE	40
2022-09-15	09:02:22	0.23813	1.05925	816.794	FALSE	40
2022-09-15	09:02:22	1.46357	6.51025	823.971	FALSE	40
2022-09-15	09:02:23	3.06683	13.6419	830.436	1	41
2022-09-15	09:02:23	4.82342	21.4555	845.426	1	42
2022-09-15	09:02:23	4.75945	21.171	851.607	1	43
2022-09-15	09:02:24	4.46556	19.8637	865.29	1	44
2022-09-15	09:02:24	7.29029	32.4287	884.036	1	45
2022-09-15	09:02:24	2.38892	10.6264	875.916	FALSE	45
2022-09-15	09:02:24	2.75004	12.2327	896.269	FALSE	45
2022-09-15	09:02:25	2.01182	8.94898	884.865	FALSE	45
2022-09-15	09:02:25	1.20851	5.37569	901.644	FALSE	45
2022-09-15	09:02:25	0.728104	3.23875	888.104	FALSE	45
2022-09-15	09:02:25	0.470751	2.09399	903.738	FALSE	45
2022-09-15	09:02:26	0.116094	0.516409	888.621	FALSE	45
2022-09-15	09:02:26	0.294975	1.31211	905.05	FALSE	45
2022-09-15	09:02:26	-0.0226333	-0.100677	888.621	FALSE	45
2022-09-15	09:02:26	0.283117	1.25936	906.31	FALSE	45
2022-09-15	09:02:27	0.400573	1.78183	890.402	FALSE	45
2022-09-15	09:02:27	0.223015	0.992015	907.302	FALSE	45
2022-09-15	09:02:27	0.301998	1.34335	891.746	FALSE	45
2022-09-15	09:02:28	0.496756	2.20967	909.512	FALSE	45
2022-09-15	09:02:28	0.554771	2.46773	894.214	FALSE	45
2022-09-15	09:02:28	1.01752	4.52613	914.038	FALSE	45
2022-09-15	09:02:28	1.38983	6.18224	900.396	FALSE	45
2022-09-15	09:02:29	1.34215	5.97015	920.008	FALSE	45
2022-09-15	09:02:29	2.04347	9.08976	909.486	FALSE	45
2022-09-15	09:02:29	1.9395	8.62728	928.635	FALSE	45
2022-09-15	09:02:29	3.01513	13.4119	922.897	1	46
2022-09-15	09:02:30	1.68271	7.48503	936.12	FALSE	46
2022-09-15	09:02:30	3.53126	15.7078	938.605	1	47
2022-09-15	09:02:30	6.96983	31.0032	967.123	1	48
2022-09-15	09:02:30	3.11345	13.8492	952.454	1	49
2022-09-15	09:02:31	4.328	19.2518	986.375	1	50
2022-09-15	09:02:31	4.22882	18.8106	971.265	1	51
2022-09-15	09:02:31	3.82902	17.0322	1003.41	1	52
2022-09-15	09:02:31	1.76337	7.84382	979.109	FALSE	52
2022-09-15	09:02:32	0.446272	1.98511	1005.39	FALSE	52
2022-09-15	09:02:32	1.04164	4.63342	983.742	FALSE	52
2022-09-15	09:02:32	0.46388	2.06343	1007.46	FALSE	52
2022-09-15	09:02:33	0.375229	1.66909	985.411	FALSE	52
2022-09-15	09:02:33	0.243066	1.08121	1008.54	FALSE	52
2022-09-15	09:02:33	0.211616	0.94131	986.353	FALSE	52
2022-09-15	09:02:33	0.0633208	0.281664	1008.82	FALSE	52
2022-09-15	09:02:34	0.264796	1.17787	987.531	FALSE	52
2022-09-15	09:02:34	0.393804	1.75172	1010.57	FALSE	52
2022-09-15	09:02:34	1.51569	6.74209	994.273	FALSE	52
2022-09-15	09:02:34	6.22897	27.7077	1038.28	1	53
2022-09-15	09:02:35	5.3392	23.7498	1018.02	1	54
2022-09-15	09:02:35	8.00444	35.6054	1073.88	1	55
2022-09-15	09:02:35	4.62749	20.584	1038.61	1	56
2022-09-15	09:02:35	6.1596	27.3991	1101.28	1	57
2022-09-15	09:02:36	9.14393	40.674	1079.28	1	58
2022-09-15	09:02:36	3.98826	17.7406	1119.02	1	59
2022-09-15	09:02:36	5.46347	24.3026	1103.58	1	60
2022-09-15	09:02:37	3.70556	16.4831	1135.51	1	61
2022-09-15	09:02:37	1.85279	8.24158	1111.82	FALSE	61
2022-09-15	09:02:37	3.24988	14.4561	1149.96	1	62
2022-09-15	09:02:37	1.66724	7.41622	1119.24	FALSE	62
2022-09-15	09:02:38	2.26541	10.077	1160.04	FALSE	62
2022-09-15	09:02:38	3.86088	17.174	1136.41	1	63
2022-09-15	09:02:38	1.70403	7.57987	1167.62	FALSE	63
2022-09-15	09:02:38	4.72286	21.0082	1157.42	1	64
2022-09-15	09:02:39	2.28327	10.1564	1177.78	FALSE	64
2022-09-15	09:02:39	1.33813	5.95227	1163.38	FALSE	64
2022-09-15	09:02:39	2.4106	10.7228	1188.5	FALSE	64
2022-09-15	09:02:39	2.54861	11.3367	1174.71	FALSE	64
2022-09-15	09:02:40	3.70642	16.4869	1204.99	1	65
2022-09-15	09:02:40	5.81792	25.8793	1200.59	1	66
2022-09-15	09:02:40	4.02307	17.8954	1222.88	1	67
2022-09-15	09:02:41	7.23685	32.191	1232.78	1	68
2022-09-15	09:02:41	8.15044	36.2548	1259.14	1	69
2022-09-15	09:02:41	4.24698	18.8914	1251.67	1	70
2022-09-15	09:02:41	6.80779	30.2824	1289.42	1	71
2022-09-15	09:02:42	3.4708	15.4388	1267.11	1	72
2022-09-15	09:02:42	4.6907	20.8652	1310.28	1	73
2022-09-15	09:02:42	4.04703	18.002	1285.11	1	74
2022-09-15	09:02:42	1.36648	6.07838	1316.36	FALSE	74
2022-09-15	09:02:43	1.37701	6.12522	1291.24	FALSE	74
2022-09-15	09:02:43	1.24637	5.5441	1321.91	FALSE	74
2022-09-15	09:02:43	2.76724	12.3092	1303.55	FALSE	74
2022-09-15	09:02:43	2.92301	13.0021	1334.91	FALSE	74
2022-09-15	09:02:44	1.428	6.35203	1309.9	FALSE	74
2022-09-15	09:02:44	0.670038	2.98046	1337.89	FALSE	74
2022-09-15	09:02:44	0.56556	2.51572	1312.42	FALSE	74
2022-09-15	09:02:44	0.727036	3.234	1341.12	FALSE	74
2022-09-15	09:02:45	0.734517	3.26728	1315.68	FALSE	74
2022-09-15	09:02:45	0.737214	3.27928	1344.4	FALSE	74
2022-09-15	09:02:45	0.738282	3.28403	1318.97	FALSE	74
2022-09-15	09:02:46	0.712837	3.17084	1347.57	FALSE	74
2022-09-15	09:02:46	0.392023	1.7438	1320.71	FALSE	74
2022-09-15	09:02:46	0.541845	2.41023	1349.98	FALSE	74
2022-09-15	09:02:46	0.42271	1.8803	1322.59	FALSE	74
2022-09-15	09:02:47	0.197774	0.879738	1350.86	FALSE	74
2022-09-15	09:02:47	0.244491	1.08754	1323.68	FALSE	74
2022-09-15	09:02:47	0.217468	0.967341	1351.83	FALSE	74
2022-09-15	09:02:47	0.298232	1.3266	1325.01	FALSE	74
2022-09-15	09:02:48	0.143575	0.63865	1352.47	FALSE	74
2022-09-15	09:02:48	0.287646	1.27951	1326.29	FALSE	74
2022-09-15	09:02:48	0.173346	0.771078	1353.24	FALSE	74
2022-09-15	09:02:48	0.279148	1.24171	1327.53	FALSE	74
2022-09-15	09:02:49	0.0371631	0.165309	1353.4	FALSE	74
2022-09-15	09:02:49	0.225713	1.00402	1328.53	FALSE	74
2022-09-15	09:02:49	0.237061	1.05449	1354.46	FALSE	74
2022-09-15	09:02:50	0.156349	0.695472	1329.23	FALSE	74
2022-09-15	09:02:50	0.100115	0.445332	1354.9	FALSE	74
2022-09-15	09:02:50	0.119962	0.533615	1329.76	FALSE	74
2022-09-15	09:02:50	0.327087	1.45495	1356.36	FALSE	74
2022-09-15	09:02:51	0.0446949	0.198812	1329.96	FALSE	74
2022-09-15	09:02:51	0.277774	1.23559	1357.6	FALSE	74
2022-09-15	09:02:51	0.127748	0.568249	1330.53	FALSE	74
2022-09-15	09:02:51	0.220827	0.982283	1358.58	FALSE	74
2022-09-15	09:02:52	0.0620994	0.276231	1330.8	FALSE	74
2022-09-15	09:02:52	0.228817	1.01782	1359.6	FALSE	74
2022-09-15	09:02:52	0.202354	0.900111	1331.7	FALSE	74
2022-09-15	09:02:52	0.180929	0.804808	1360.4	FALSE	74
2022-09-15	09:02:53	0.0545676	0.242728	1331.95	FALSE	74
2022-09-15	09:02:53	0.0938551	0.417486	1360.82	FALSE	74
2022-09-15	09:02:53	0.229173	1.01941	1332.97	FALSE	74
2022-09-15	09:02:53	0.0512089	0.227787	1361.05	FALSE	74
2022-09-15	09:02:54	0.349326	1.55387	1334.52	FALSE	74
2022-09-15	09:02:54	1.40256	6.23887	1367.28	FALSE	74
2022-09-15	09:02:54	6.06179	26.9641	1361.48	1	75
2022-09-15	09:02:55	11.3561	50.5142	1417.8	1	76
2022-09-15	09:02:55	15.7597	70.1023	1431.59	1	77
2022-09-15	09:02:55	12.4329	55.304	1473.1	1	78
2022-09-15	09:02:55	7.28764	32.4169	1464	1	79
2022-09-15	09:02:56	9.42464	41.9227	1515.03	1	80
2022-09-15	09:02:56	3.89706	17.3349	1481.34	1	81
2022-09-15	09:02:56	7.65925	34.0699	1549.1	1	82
2022-09-15	09:02:56	3.88876	17.298	1498.64	1	83
2022-09-15	09:02:57	2.38978	10.6302	1559.73	FALSE	83
2022-09-15	09:02:57	3.705	16.4806	1515.12	1	84
2022-09-15	09:02:57	4.30632	19.1554	1578.88	1	85
2022-09-15	09:02:57	2.3249	10.3416	1525.46	FALSE	85
2022-09-15	09:02:58	1.22816	5.4631	1584.34	FALSE	85
2022-09-15	09:02:58	0.572786	2.54787	1528.01	FALSE	85
2022-09-15	09:02:58	0.590852	2.62823	1586.97	FALSE	85
2022-09-15	09:02:59	0.627799	2.79258	1530.8	FALSE	85
2022-09-15	09:02:59	0.246272	1.09547	1588.07	FALSE	85
2022-09-15	09:02:59	0.399657	1.77775	1532.58	FALSE	85
2022-09-15	09:02:59	0.162303	0.721956	1588.79	FALSE	85
2022-09-15	09:03:00	0.368359	1.63853	1534.22	FALSE	85
2022-09-15	09:03:00	0.120573	0.536333	1589.33	FALSE	85
2022-09-15	09:03:00	0.318384	1.41624	1535.63	FALSE	85
2022-09-15	09:03:00	0.216094	0.961229	1590.29	FALSE	85
2022-09-15	09:03:01	0.367799	1.63604	1537.27	FALSE	85
2022-09-15	09:03:01	0.272176	1.21069	1591.5	FALSE	85
2022-09-15	09:03:01	0.277977	1.2365	1538.5	FALSE	85
2022-09-15	09:03:01	0.302863	1.3472	1592.84	FALSE	85
2022-09-15	09:03:02	0.198944	0.884943	1539.39	FALSE	85
2022-09-15	09:03:02	0.349428	1.55433	1594.4	FALSE	85
2022-09-15	09:03:02	0.314262	1.3979	1540.79	FALSE	85
2022-09-15	09:03:03	0.364186	1.61997	1596.02	FALSE	85
2022-09-15	09:03:03	0.403881	1.79654	1542.58	FALSE	85
2022-09-15	09:03:03	0.410954	1.82801	1597.85	FALSE	85
2022-09-15	09:03:03	0.434669	1.93349	1544.52	FALSE	85
2022-09-15	09:03:04	0.646527	2.87588	1600.72	FALSE	85
2022-09-15	09:03:04	0.356501	1.58579	1546.1	FALSE	85
2022-09-15	09:03:04	0.422812	1.88075	1602.6	FALSE	85
2022-09-15	09:03:04	0.332888	1.48075	1547.58	FALSE	85
2022-09-15	09:03:05	0.366934	1.6322	1604.24	FALSE	85
2022-09-15	09:03:05	0.428664	1.90678	1549.49	FALSE	85
2022-09-15	09:03:05	0.510751	2.27192	1606.51	FALSE	85
2022-09-15	09:03:05	0.587494	2.61329	1552.1	FALSE	85
2022-09-15	09:03:06	0.516705	2.29841	1608.81	FALSE	85
2022-09-15	09:03:06	0.519962	2.31289	1554.42	FALSE	85
2022-09-15	09:03:06	0.602964	2.6821	1611.49	FALSE	85
2022-09-15	09:03:06	0.58958	2.62257	1557.04	FALSE	85
2022-09-15	09:03:07	0.541845	2.41023	1613.9	FALSE	85
2022-09-15	09:03:07	0.486425	2.16372	1559.2	FALSE	85
2022-09-15	09:03:07	0.452786	2.01408	1615.91	FALSE	85
2022-09-15	09:03:08	0.410242	1.82484	1561.03	FALSE	85
2022-09-15	09:03:08	0.449936	2.00141	1617.91	FALSE	85
2022-09-15	09:03:08	0.505102	2.24679	1563.27	FALSE	85
2022-09-15	09:03:08	0.471005	2.09512	1620.01	FALSE	85
2022-09-15	09:03:09	0.472379	2.10124	1565.38	FALSE	85
2022-09-15	09:03:09	0.502812	2.23661	1622.25	FALSE	85
2022-09-15	09:03:09	0.551972	2.45528	1567.83	FALSE	85
2022-09-15	09:03:09	0.580165	2.58069	1624.83	FALSE	85
2022-09-15	09:03:10	0.659657	2.93429	1570.76	FALSE	85
2022-09-15	09:03:10	0.71472	3.17922	1628.01	FALSE	85
2022-09-15	09:03:10	0.633906	2.81974	1573.58	FALSE	85
2022-09-15	09:03:10	0.645814	2.87271	1630.88	FALSE	85
2022-09-15	09:03:11	0.538282	2.39439	1575.98	FALSE	85
2022-09-15	09:03:11	0.481081	2.13994	1633.02	FALSE	85
2022-09-15	09:03:11	0.479911	2.13474	1578.11	FALSE	85
2022-09-15	09:03:12	0.77126	3.43072	1636.45	FALSE	85
2022-09-15	09:03:12	0.945712	4.20672	1582.32	FALSE	85
2022-09-15	09:03:12	0.881437	3.92081	1640.37	FALSE	85
2022-09-15	09:03:12	0.973346	4.32964	1586.65	FALSE	85
2022-09-15	09:03:13	1.30072	5.78586	1646.16	FALSE	85
2022-09-15	09:03:13	1.91818	8.53245	1595.18	FALSE	85
2022-09-15	09:03:13	2.28062	10.1447	1656.3	FALSE	85
2022-09-15	09:03:13	2.35146	10.4598	1605.64	FALSE	85
2022-09-15	09:03:14	3.4506	15.349	1671.65	1	86
2022-09-15	09:03:14	4.60841	20.4991	1626.14	1	87
2022-09-15	09:03:14	3.65757	16.2696	1687.92	1	88
2022-09-15	09:03:14	2.84332	12.6477	1638.79	FALSE	88
2022-09-15	09:03:15	2.3366	10.3937	1698.31	FALSE	88
2022-09-15	09:03:15	2.05594	9.14523	1647.93	FALSE	88
2022-09-15	09:03:15	2.85711	12.709	1711.02	FALSE	88
2022-09-15	09:03:16	3.02067	13.4365	1661.37	1	89
2022-09-15	09:03:16	3.3848	15.0563	1726.08	1	90
2022-09-15	09:03:16	3.64459	16.2119	1677.58	1	91
2022-09-15	09:03:16	3.4595	15.3885	1741.47	1	92
2022-09-15	09:03:17	3.35849	14.9392	1692.52	1	93
2022-09-15	09:03:17	4.72703	21.0268	1762.49	1	94
2022-09-15	09:03:17	5.26698	23.4286	1715.95	1	95
2022-09-15	09:03:17	3.72174	16.555	1779.05	1	96
2022-09-15	09:03:18	1.80617	8.03421	1723.98	FALSE	96
2022-09-15	09:03:18	0.439148	1.95342	1781	FALSE	96
2022-09-15	09:03:18	0.395178	1.75783	1725.74	FALSE	96
2022-09-15	09:03:18	0.165611	0.736671	1781.74	FALSE	96
2022-09-15	09:03:19	0.208359	0.926823	1726.67	FALSE	96
2022-09-15	09:03:19	0.165407	0.735763	1782.47	FALSE	96
2022-09-15	09:03:19	0.220674	0.981602	1727.65	FALSE	96
2022-09-15	09:03:19	0.194873	0.866834	1783.34	FALSE	96
2022-09-15	09:03:20	0.216451	0.962817	1728.61	FALSE	96
2022-09-15	09:03:20	0.317061	1.41035	1784.75	FALSE	96
2022-09-15	09:03:20	0.268766	1.19552	1729.81	FALSE	96
2022-09-15	09:03:21	0.517773	2.30316	1787.05	FALSE	96
2022-09-15	09:03:21	1.7307	7.6985	1737.51	FALSE	96
2022-09-15	09:03:21	3.50734	15.6013	1802.66	1	97
2022-09-15	09:03:21	9.21523	40.9912	1778.5	1	98
2022-09-15	09:03:22	7.94708	35.3502	1838.01	1	99
2022-09-15	09:03:22	6.42596	28.584	1807.08	1	100
2022-09-15	09:03:22	2.01335	8.95578	1846.96	FALSE	100
2022-09-15	09:03:22	1.47447	6.55874	1813.64	FALSE	100
2022-09-15	09:03:23	2.03879	9.06895	1856.03	FALSE	100
2022-09-15	09:03:23	0.417977	1.85925	1815.5	FALSE	100
2022-09-15	09:03:23	0.359351	1.59847	1857.63	FALSE	100
2022-09-15	09:03:23	0.490496	2.18182	1817.68	FALSE	100
2022-09-15	09:03:24	0.191921	0.853703	1858.48	FALSE	100
2022-09-15	09:03:24	0.457061	2.0331	1819.72	FALSE	100
2022-09-15	09:03:24	2.2023	9.79627	1868.28	FALSE	100
2022-09-15	09:03:25	6.29909	28.0196	1847.74	1	101
2022-09-15	09:03:25	5.49324	24.435	1892.71	1	102
2022-09-15	09:03:25	4.59029	20.4185	1868.15	1	103
2022-09-15	09:03:25	5.08169	22.6044	1915.32	1	104
2022-09-15	09:03:26	1.29823	5.77479	1873.93	FALSE	104
2022-09-15	09:03:26	0.8907	3.96201	1919.28	FALSE	104
2022-09-15	09:03:26	1.32312	5.8855	1879.81	FALSE	104
2022-09-15	09:03:26	2.18541	9.72114	1929	FALSE	104
2022-09-15	09:03:27	1.61452	7.18171	1887	FALSE	104
2022-09-15	09:03:27	2.32027	10.321	1939.32	FALSE	104
2022-09-15	09:03:27	5.71232	25.4095	1912.41	1	105
2022-09-15	09:03:27	5.07492	22.5743	1961.9	1	106
2022-09-15	09:03:28	5.34683	23.7838	1936.19	1	107
2022-09-15	09:03:28	3.78571	16.8396	1978.74	1	108
2022-09-15	09:03:28	1.54123	6.8557	1943.05	FALSE	108
2022-09-15	09:03:28	2.56093	11.3915	1990.13	FALSE	108
2022-09-15	09:03:29	3.76703	16.7565	1959.8	1	109
2022-09-15	09:03:29	3.81284	16.9603	2007.09	1	110
2022-09-15	09:03:29	1.34251	5.97175	1965.77	FALSE	110
2022-09-15	09:03:30	1.34281	5.97309	2013.06	FALSE	110
2022-09-15	09:03:30	5.17309	23.0109	1988.78	1	111
2022-09-15	09:03:30	3.83782	17.0714	2030.13	1	112
2022-09-15	09:03:30	6.1136	27.1945	2015.98	1	113
2022-09-15	09:03:31	7.65818	34.0651	2064.2	1	114
2022-09-15	09:03:31	5.18561	23.0666	2039.05	1	115
2022-09-15	09:03:31	5.44825	24.2349	2088.43	1	116
2022-09-15	09:03:31	2.6853	11.9448	2050.99	FALSE	116
2022-09-15	09:03:32	2.04525	9.09768	2097.53	FALSE	116
2022-09-15	09:03:32	1.12861	5.02028	2056.01	FALSE	116
2022-09-15	09:03:32	0.184847	0.822236	2098.35	FALSE	116
2022-09-15	09:03:32	0.333855	1.48505	2057.5	FALSE	116
2022-09-15	09:03:33	0.234364	1.0425	2099.4	FALSE	116
2022-09-15	09:03:33	0.269173	1.19734	2058.69	FALSE	116
2022-09-15	09:03:33	0.291819	1.29807	2100.69	FALSE	116
2022-09-15	09:03:34	0.126018	0.560553	2059.25	FALSE	116
2022-09-15	09:03:34	0.334568	1.48823	2102.18	FALSE	116
2022-09-15	09:03:34	0.23528	1.04657	2060.3	FALSE	116
2022-09-15	09:03:34	0.333957	1.48551	2103.67	FALSE	116
2022-09-15	09:03:35	0.287545	1.27906	2061.58	FALSE	116
2022-09-15	09:03:35	0.317977	1.41443	2105.08	FALSE	116
2022-09-15	09:03:35	0.359707	1.60005	2063.18	FALSE	116
2022-09-15	09:03:35	0.379657	1.68879	2106.77	FALSE	116
2022-09-15	09:03:36	0.407494	1.81261	2064.99	FALSE	116
2022-09-15	09:03:36	0.689886	3.06875	2109.84	FALSE	116
2022-09-15	09:03:36	1.7906	7.96495	2072.96	FALSE	116
2022-09-15	09:03:36	4.56347	20.2992	2130.14	1	117
2022-09-15	09:03:37	9.27299	41.2481	2114.2	1	118
2022-09-15	09:03:37	8.34647	37.1268	2167.27	1	119
2022-09-15	09:03:37	4.03467	17.947	2132.15	1	120
2022-09-15	09:03:37	1.24149	5.5224	2172.79	FALSE	120
2022-09-15	09:03:38	0.333041	1.48143	2133.63	FALSE	120
2022-09-15	09:03:38	0.351616	1.56406	2174.35	FALSE	120
2022-09-15	09:03:38	0.195585	0.870001	2134.5	FALSE	120
2022-09-15	09:03:39	0.302863	1.3472	2175.7	FALSE	120
2022-09-15	09:03:39	0.168512	0.749575	2135.25	FALSE	120
2022-09-15	09:03:39	0.205	0.911881	2176.61	FALSE	120
2022-09-15	09:03:39	0.216247	0.96191	2136.21	FALSE	120
2022-09-15	09:03:40	0.186425	0.829256	2177.44	FALSE	120
2022-09-15	09:03:40	0.322048	1.43253	2137.65	FALSE	120
2022-09-15	09:03:40	0.419962	1.86807	2179.31	FALSE	120
2022-09-15	09:03:40	0.39126	1.7404	2139.39	FALSE	120
2022-09-15	09:03:41	0.600064	2.6692	2181.98	FALSE	120
2022-09-15	09:03:41	0.534008	2.37537	2141.76	FALSE	120
2022-09-15	09:03:41	0.422863	1.88098	2183.86	FALSE	120
2022-09-15	09:03:41	0.393499	1.75036	2143.51	FALSE	120
2022-09-15	09:03:42	0.351667	1.56429	2185.42	FALSE	120
2022-09-15	09:03:42	0.402303	1.78952	2145.3	FALSE	120
2022-09-15	09:03:42	0.427596	1.90203	2187.32	FALSE	120
2022-09-15	09:03:43	0.601183	2.67418	2147.98	FALSE	120
2022-09-15	09:03:43	1.12469	5.00285	2192.33	FALSE	120
2022-09-15	09:03:43	1.14851	5.1088	2153.09	FALSE	120
2022-09-15	09:03:43	1.58383	7.04519	2199.37	FALSE	120
2022-09-15	09:03:44	1.26698	5.63578	2158.72	FALSE	120
2022-09-15	09:03:44	1.20301	5.35123	2204.72	FALSE	120
2022-09-15	09:03:44	0.783371	3.48459	2162.21	FALSE	120
2022-09-15	09:03:44	0.528206	2.34957	2207.07	FALSE	120
2022-09-15	09:03:45	0.397061	1.76621	2163.97	FALSE	120
2022-09-15	09:03:45	0.427596	1.90203	2208.98	FALSE	120
2022-09-15	09:03:45	0.344491	1.53236	2165.5	FALSE	120
2022-09-15	09:03:45	0.360064	1.60164	2210.58	FALSE	120
2022-09-15	09:03:46	0.389326	1.7318	2167.24	FALSE	120
2022-09-15	09:03:46	0.358944	1.59665	2212.17	FALSE	120
2022-09-15	09:03:46	0.36729	1.63378	2168.87	FALSE	120
2022-09-15	09:03:47	0.392888	1.74764	2213.92	FALSE	120
2022-09-15	09:03:47	0.385916	1.71663	2170.59	FALSE	120
2022-09-15	09:03:47	0.412379	1.83434	2215.76	FALSE	120
2022-09-15	09:03:47	0.487646	2.16915	2172.76	FALSE	120
2022-09-15	09:03:48	0.559555	2.48901	2218.24	FALSE	120
2022-09-15	09:03:48	0.598435	2.66196	2175.42	FALSE	120
2022-09-15	09:03:48	0.546934	2.43287	2220.68	FALSE	120
2022-09-15	09:03:48	0.597366	2.6572	2178.08	FALSE	120
2022-09-15	09:03:49	0.878995	3.90995	2224.59	FALSE	120
2022-09-15	09:03:49	1.11223	4.94742	2183.02	FALSE	120
2022-09-15	09:03:49	1.52622	6.78893	2231.38	FALSE	120
2022-09-15	09:03:49	2.548	11.334	2194.36	FALSE	120
2022-09-15	09:03:50	2.64754	11.7768	2243.15	FALSE	120
2022-09-15	09:03:50	1.98302	8.82087	2203.18	FALSE	120
2022-09-15	09:03:50	1.57156	6.99061	2250.14	FALSE	120
2022-09-15	09:03:50	2.19599	9.7682	2212.95	FALSE	120
2022-09-15	09:03:51	3.51742	15.6462	2265.79	1	121
2022-09-15	09:03:51	4.81843	21.4333	2234.38	1	122
2022-09-15	09:03:51	5.33309	23.7227	2289.51	1	123
2022-09-15	09:03:52	6.08154	27.0519	2261.43	1	124
2022-09-15	09:03:52	4.94398	21.9918	2311.5	1	125
2022-09-15	09:03:52	4.59797	20.4527	2281.88	1	126
2022-09-15	09:03:52	4.74372	21.101	2332.61	1	127
2022-09-15	09:03:53	5.06627	22.5358	2304.42	1	128
2022-09-15	09:03:53	4.98383	22.1691	2354.77	1	129
2022-09-15	09:03:53	6.25767	27.8354	2332.26	1	130
2022-09-15	09:03:53	6.5107	28.9609	2383.74	1	131
2022-09-15	09:03:54	2.36256	10.5091	2342.76	FALSE	131
2022-09-15	09:03:54	2.72815	12.1354	2395.87	FALSE	131
2022-09-15	09:03:54	1.34912	6.00116	2348.77	FALSE	131
2022-09-15	09:03:54	1.1623	5.17014	2401.04	FALSE	131
2022-09-15	09:03:55	1.16449	5.17988	2353.95	FALSE	131
2022-09-15	09:03:55	1.66551	7.40852	2408.45	FALSE	131
2022-09-15	09:03:55	2.01202	8.94987	2362.9	FALSE	131
2022-09-15	09:03:56	1.79187	7.9706	2416.42	FALSE	131
2022-09-15	09:03:56	1.47477	6.56007	2369.46	FALSE	131
2022-09-15	09:03:56	1.4049	6.24928	2422.67	FALSE	131
2022-09-15	09:03:56	1.37808	6.12998	2375.59	FALSE	131
2022-09-15	09:03:57	1.23732	5.50385	2428.17	FALSE	131
2022-09-15	09:03:57	1.35106	6.00979	2381.59	FALSE	131
2022-09-15	09:03:57	1.71182	7.61452	2435.79	FALSE	131
2022-09-15	09:03:57	1.76352	7.84449	2389.44	FALSE	131
2022-09-15	09:03:58	1.7762	7.90089	2443.69	FALSE	131
2022-09-15	09:03:58	1.71879	7.64552	2397.08	FALSE	131
2022-09-15	09:03:58	1.47248	6.54989	2450.24	FALSE	131
2022-09-15	09:03:58	1.75742	7.81736	2404.9	FALSE	131
2022-09-15	09:03:59	2.1249	9.45198	2459.69	FALSE	131
2022-09-15	09:03:59	2.04088	9.07824	2413.98	FALSE	131
2022-09-15	09:03:59	2.15818	9.60002	2469.29	FALSE	131
2022-09-15	09:03:59	2.09472	9.31773	2423.3	FALSE	131
2022-09-15	09:04:00	1.85869	8.26782	2477.56	FALSE	131
2022-09-15	09:04:00	1.6362	7.27814	2430.58	FALSE	131
2022-09-15	09:04:00	1.70342	7.57715	2485.14	FALSE	131
2022-09-15	09:04:01	1.45961	6.49264	2437.07	FALSE	131
2022-09-15	09:04:01	1.34072	5.96379	2491.1	FALSE	131
2022-09-15	09:04:01	1.22078	5.43027	2442.5	FALSE	131
2022-09-15	09:04:01	1.34978	6.00409	2497.1	FALSE	131
2022-09-15	09:04:02	1.52887	6.80072	2449.3	FALSE	131
2022-09-15	09:04:02	1.72444	7.67065	2504.77	FALSE	131
2022-09-15	09:04:02	1.66434	7.40332	2456.7	FALSE	131
2022-09-15	09:04:02	1.56174	6.94693	2511.72	FALSE	131
2022-09-15	09:04:03	2.00454	8.91659	2465.62	FALSE	131
2022-09-15	09:04:03	1.84571	8.21009	2519.93	FALSE	131
2022-09-15	09:04:03	1.96688	8.74908	2474.37	FALSE	131
2022-09-15	09:04:03	1.60032	7.11854	2527.05	FALSE	131
2022-09-15	09:04:04	1.06184	4.72328	2479.09	FALSE	131
2022-09-15	09:04:04	0.658384	2.92862	2529.98	FALSE	131
2022-09-15	09:04:04	0.331819	1.476	2480.57	FALSE	131
2022-09-15	09:04:05	0.199148	0.88585	2530.86	FALSE	131
2022-09-15	09:04:05	0.0925829	0.411827	2480.98	FALSE	131
2022-09-15	09:04:05	0.0147204	0.0654793	2530.93	FALSE	131
2022-09-15	09:04:05	-0.0677732	-0.301469	2480.98	FALSE	131
2022-09-15	09:04:06	-0.142633	-0.63446	2530.93	FALSE	131
2022-09-15	09:04:06	-0.109147	-0.485508	2480.98	FALSE	131
2022-09-15	09:04:06	-0.074847	-0.332934	2530.93	FALSE	131
2022-09-15	09:04:06	-0.0959666	-0.426879	2480.98	FALSE	131
2022-09-15	09:04:07	-0.117239	-0.521503	2530.93	FALSE	131
2022-09-15	09:04:07	-0.22818	-1.01499	2480.98	FALSE	131
2022-09-15	09:04:07	0.142659	0.634576	2531.56	FALSE	131
2022-09-15	09:04:07	1.1252	5.00511	2485.99	FALSE	131
2022-09-15	09:04:08	3.36413	14.9643	2546.53	1	132
2022-09-15	09:04:08	10.6021	47.1603	2533.15	1	133
2022-09-15	09:04:08	18.9658	84.3637	2630.89	1	134
2022-09-15	09:04:09	15.0782	67.0708	2600.22	1	135
2022-09-15	09:04:09	12.1219	53.9206	2684.81	1	136
2022-09-15	09:04:09	8.08474	35.9625	2636.18	1	137
2022-09-15	09:04:09	5.90327	26.2589	2711.07	1	138
2022-09-15	09:04:10	2.76617	12.3045	2648.48	FALSE	138
2022-09-15	09:04:10	1.63665	7.28015	2718.35	FALSE	138
2022-09-15	09:04:10	1.19813	5.32952	2653.81	FALSE	138
2022-09-15	09:04:10	0.859402	3.82279	2722.17	FALSE	138
2022-09-15	09:04:11	1.15889	5.15497	2658.97	FALSE	138
2022-09-15	09:04:11	1.60698	7.14817	2729.32	FALSE	138
2022-09-15	09:04:11	1.54383	6.86726	2665.84	FALSE	138
2022-09-15	09:04:11	1.70912	7.60251	2736.93	FALSE	138
2022-09-15	09:04:12	1.90444	8.47133	2674.31	FALSE	138
2022-09-15	09:04:12	2.74032	12.1895	2749.11	FALSE	138
2022-09-15	09:04:12	4.21121	18.7323	2693.04	1	139
2022-09-15	09:04:12	2.80851	12.4928	2761.61	FALSE	139
2022-09-15	09:04:13	2.10373	9.35781	2702.4	FALSE	139
2022-09-15	09:04:13	0.918231	4.08448	2765.69	FALSE	139
2022-09-15	09:04:13	0.721692	3.21023	2705.61	FALSE	139
2022-09-15	09:04:14	0.61472	2.7344	2768.43	FALSE	139
2022-09-15	09:04:14	0.669376	2.97752	2708.58	FALSE	139
2022-09-15	09:04:14	0.67355	2.99609	2771.42	FALSE	139
2022-09-15	09:04:14	1.04383	4.64316	2713.23	FALSE	139
2022-09-15	09:04:15	2.81131	12.5053	2783.93	FALSE	139
2022-09-15	09:04:15	4.12826	18.3633	2731.59	1	140
2022-09-15	09:04:15	3.19044	14.1917	2798.12	1	141
2022-09-15	09:04:15	4.04052	17.973	2749.56	1	142
2022-09-15	09:04:16	5.65482	25.1538	2823.27	1	143
2022-09-15	09:04:16	3.9882	17.7403	2767.3	1	144
2022-09-15	09:04:16	2.78057	12.3685	2835.64	FALSE	144
2022-09-15	09:04:16	1.96123	8.72394	2776.03	FALSE	144
2022-09-15	09:04:17	2.11477	9.40692	2845.05	FALSE	144
2022-09-15	09:04:17	3.52123	15.6631	2791.69	1	145
2022-09-15	09:04:17	4.22388	18.7887	2863.84	1	146
2022-09-15	09:04:18	4.63217	20.6048	2812.3	1	147
2022-09-15	09:04:18	4.5539	20.2567	2884.09	1	148
2022-09-15	09:04:18	3.86093	17.1742	2829.47	1	149
2022-09-15	09:04:18	4.39828	19.5644	2903.66	1	150
2022-09-15	09:04:19	4.37055	19.4411	2848.91	1	151
2022-09-15	09:04:19	4.33803	19.2964	2922.95	1	152
2022-09-15	09:04:19	4.49533	19.9961	2868.91	1	153
2022-09-15	09:04:19	4.54958	20.2374	2943.19	1	154
2022-09-15	09:04:20	4.29268	19.0947	2888	1	155
2022-09-15	09:04:20	4.14276	18.4278	2961.62	1	156
2022-09-15	09:04:20	4.05589	18.0414	2906.04	1	157
2022-09-15	09:04:20	3.96261	17.6265	2979.25	1	158
2022-09-15	09:04:21	3.77889	16.8093	2922.85	1	159
2022-09-15	09:04:21	3.83798	17.0721	2996.32	1	160
2022-09-15	09:04:21	3.77406	16.7878	2939.64	1	161
2022-09-15	09:04:21	3.64393	16.2089	3012.53	1	162
2022-09-15	09:04:22	3.51696	15.6441	2955.28	1	163
2022-09-15	09:04:22	3.6995	16.4561	3028.98	1	164
2022-09-15	09:04:22	4.02556	17.9065	2973.19	1	165
2022-09-15	09:04:23	4.51502	20.0837	3049.07	1	166
2022-09-15	09:04:23	5.35808	23.8338	2997.03	1	167
2022-09-15	09:04:23	8.27232	36.7969	3085.86	1	168
2022-09-15	09:04:23	10.2288	45.4997	3042.52	1	169
2022-09-15	09:04:24	6.87182	30.5672	3116.43	1	170
2022-09-15	09:04:24	2.67721	11.9088	3054.43	FALSE	170
2022-09-15	09:04:24	0.506781	2.25426	3118.69	FALSE	170
2022-09-15	09:04:24	0.304644	1.35512	3055.79	FALSE	170
2022-09-15	09:04:25	-0.0479768	-0.21341	3118.69	FALSE	170
2022-09-15	09:04:25	-0.115814	-0.515164	3055.79	FALSE	170
2022-09-15	09:04:25	-0.237086	-1.05461	3118.69	FALSE	170
2022-09-15	09:04:25	-0.483753	-2.15183	3055.79	FALSE	170
2022-09-15	09:04:26	-0.48818	-2.17152	3118.69	FALSE	170
2022-09-15	09:04:26	-0.574185	-2.55409	3055.79	FALSE	170
2022-09-15	09:04:26	-0.456882	-2.0323	3118.69	FALSE	170
2022-09-15	09:04:27	-0.268893	-1.19609	3055.79	FALSE	170
2022-09-15	09:04:27	-0.291234	-1.29547	3118.69	FALSE	170
2022-09-15	09:04:27	-0.202939	-0.902713	3055.79	FALSE	170
2022-09-15	09:04:27	-0.409402	-1.8211	3118.69	FALSE	170
2022-09-15	09:04:28	-0.257799	-1.14674	3055.79	FALSE	170
2022-09-15	09:04:28	-0.176933	-0.787033	3118.69	FALSE	170
2022-09-15	09:04:28	-0.0259921	-0.115618	3055.79	FALSE	170
2022-09-15	09:04:28	0.0152802	0.0679694	3118.75	FALSE	170
2022-09-15	09:04:29	0.0276465	0.122977	3055.91	FALSE	170
2022-09-15	09:04:29	-0.0433458	-0.192811	3118.75	FALSE	170
2022-09-15	09:04:29	0.00871527	0.0387673	3055.95	FALSE	170
2022-09-15	09:04:29	-0.0654323	-0.291056	3118.75	FALSE	170
2022-09-15	09:04:30	0.538435	2.39507	3058.35	FALSE	170
2022-09-15	09:04:30	2.97558	13.236	3131.99	FALSE	170
2022-09-15	09:04:30	7.53324	33.5094	3091.85	1	171
2022-09-15	09:04:31	2.25564	10.0335	3142.02	FALSE	171
2022-09-15	09:04:31	0.707036	3.14504	3095	FALSE	171
2022-09-15	09:04:31	0.174975	0.778324	3142.8	FALSE	171
2022-09-15	09:04:31	-0.0610557	-0.271588	3095	FALSE	171
2022-09-15	09:04:32	1.59528	7.09612	3149.9	FALSE	171
2022-09-15	09:04:32	4.96749	22.0964	3117.1	1	172
2022-09-15	09:04:32	5.26342	23.4127	3173.31	1	173
2022-09-15	09:04:32	12.3198	54.8009	3171.9	1	174
2022-09-15	09:04:33	1.84709	8.21623	3181.53	FALSE	174
2022-09-15	09:04:33	0.00785013	0.0349189	3171.93	FALSE	174
2022-09-15	09:04:33	0.0671376	0.298641	3181.83	FALSE	174
2022-09-15	09:04:33	0.0149748	0.0666109	3172	FALSE	174
2022-09-15	09:04:34	0.0549239	0.244312	3182.07	FALSE	174
2022-09-15	09:04:34	-0.0515901	-0.229483	3172	FALSE	174
2022-09-15	09:04:34	0.186679	0.830386	3182.9	FALSE	174
2022-09-15	09:04:34	0.62098	2.76224	3174.76	FALSE	174
2022-09-15	09:04:35	3.08953	13.7428	3196.64	1	175
2022-09-15	09:04:35	8.26968	36.7852	3211.55	1	176
2022-09-15	09:04:35	13.4565	59.8572	3256.5	1	177
2022-09-15	09:04:36	11.5045	51.1743	3262.72	1	178
2022-09-15	09:04:36	9.92836	44.1633	3300.66	1	179
2022-09-15	09:04:36	8.36937	37.2286	3299.95	1	180
2022-09-15	09:04:36	7.91105	35.1899	3335.85	1	181
2022-09-15	09:04:37	6.1197	27.2216	3327.17	1	182
2022-09-15	09:04:37	6.74775	30.0153	3365.87	1	183
2022-09-15	09:04:37	5.73212	25.4976	3352.67	1	184
2022-09-15	09:04:37	2.90892	12.9395	3378.81	FALSE	184
2022-09-15	09:04:38	0.986323	4.38736	3357.06	FALSE	184
2022-09-15	09:04:38	0.205356	0.913465	3379.72	FALSE	184
2022-09-15	09:04:38	0.257468	1.14527	3358.2	FALSE	184
2022-09-15	09:04:38	0.403372	1.79428	3381.52	FALSE	184
2022-09-15	09:04:39	0.339453	1.50995	3359.71	FALSE	184
2022-09-15	09:04:39	0.196145	0.872492	3382.39	FALSE	184
2022-09-15	09:04:39	0.177316	0.788737	3360.5	FALSE	184
2022-09-15	09:04:40	0.0224048	0.099661	3382.49	FALSE	184
2022-09-15	09:04:40	0.136858	0.608772	3361.11	FALSE	184
2022-09-15	09:04:40	0.108461	0.482456	3382.97	FALSE	184
2022-09-15	09:04:40	0.163117	0.725577	3361.83	FALSE	184
2022-09-15	09:04:41	0.111463	0.49581	3383.47	FALSE	184
2022-09-15	09:04:41	6.53741	29.0797	3390.91	1	185
2022-09-15	09:04:41	10.271	45.6875	3429.15	1	186
2022-09-15	09:04:41	9.77543	43.4831	3434.4	1	187
2022-09-15	09:04:42	9.57609	42.5964	3471.75	1	188
2022-09-15	09:04:42	5.61314	24.9684	3459.37	1	189
2022-09-15	09:04:42	11.5779	51.5008	3523.25	1	190
2022-09-15	09:04:42	9.51131	42.3082	3501.67	1	191
2022-09-15	09:04:43	5.15339	22.9233	3546.17	1	192
2022-09-15	09:04:43	15.3759	68.3951	3570.07	1	193
2022-09-15	09:04:43	12.8311	57.0753	3603.25	1	194
2022-09-15	09:04:43	10.2328	45.5175	3615.59	1	195
2022-09-15	09:04:44	14.087	62.6618	3665.91	1	196
2022-09-15	09:04:44	12.7714	56.8097	3672.4	1	197
2022-09-15	09:04:44	13.1385	58.4427	3724.35	1	198
2022-09-15	09:04:45	6.12571	27.2484	3699.64	1	199
2022-09-15	09:04:45	9.28357	41.2952	3765.65	1	200
2022-09-15	09:04:45	11.1324	49.5191	3749.16	1	201
2022-09-15	09:04:45	11.3436	50.4586	3816.11	1	202
2022-09-15	09:04:46	15.2746	67.9445	3817.11	1	203
2022-09-15	09:04:46	12.0041	53.3966	3869.5	1	204
2022-09-15	09:04:46	17.4845	77.7746	3894.88	1	205
2022-09-15	09:04:46	9.50001	42.2579	3911.76	1	206
2022-09-15	09:04:47	10.1842	45.3014	3940.18	1	207
2022-09-15	09:04:47	7.51563	33.431	3945.19	1	208
2022-09-15	09:04:47	9.41416	41.8761	3982.06	1	209
2022-09-15	09:04:47	17.7461	78.9382	4024.13	1	210
2022-09-15	09:04:48	23.4028	104.1	4086.16	1	211
2022-09-15	09:04:48	20.7058	92.1035	4116.24	1	212
2022-09-15	09:04:48	9.2793	41.2762	4127.44	1	213
2022-09-15	09:04:49	12.9307	57.5183	4173.75	1	214
2022-09-15	09:04:49	19.5511	86.9672	4214.4	1	215
2022-09-15	09:04:49	10.9956	48.9106	4222.66	1	216
2022-09-15	09:04:49	10.7318	47.7372	4262.14	1	217
2022-09-15	09:04:50	10.8582	48.2994	4270.96	1	218
2022-09-15	09:04:50	10.1215	45.0225	4307.16	1	219
2022-09-15	09:04:50	13.3816	59.524	4330.49	1	220
2022-09-15	09:04:50	12.606	56.074	4363.24	1	221
2022-09-15	09:04:51	15.0504	66.9472	4397.43	1	222
2022-09-15	09:04:51	9.62428	42.8107	4406.05	1	223
2022-09-15	09:04:51	10.3657	46.1087	4443.54	1	224
2022-09-15	09:04:51	14.1814	63.0817	4469.13	1	225
2022-09-15	09:04:52	11.7451	52.2446	4495.79	1	226
2022-09-15	09:04:52	16.7773	74.6288	4543.76	1	227
2022-09-15	09:04:52	6.86321	30.5289	4526.32	1	228
2022-09-15	09:04:52	10.9256	48.5993	4592.36	1	229
2022-09-15	09:04:53	7.79838	34.6888	4561.01	1	230
2022-09-15	09:04:53	10.871	48.3564	4640.71	1	231
2022-09-15	09:04:53	12.5445	55.8004	4616.81	1	232
2022-09-15	09:04:54	9.7938	43.5648	4684.28	1	233
2022-09-15	09:04:54	17.5915	78.2505	4695.06	1	234
2022-09-15	09:04:54	9.99253	44.4488	4728.73	1	235
2022-09-15	09:04:54	9.30367	41.3846	4736.44	1	236
2022-09-15	09:04:55	5.45624	24.2704	4753	1	237
2022-09-15	09:04:55	6.58805	29.305	4765.75	1	238
2022-09-15	09:04:55	8.07151	35.9037	4788.9	1	239
2022-09-15	09:04:55	7.84495	34.8959	4800.64	1	240
2022-09-15	09:04:56	9.15726	40.7333	4829.63	1	241
2022-09-15	09:04:56	6.68393	29.7315	4830.37	1	242
2022-09-15	09:04:56	7.10047	31.5843	4861.22	1	243
2022-09-15	09:04:56	7.49395	33.3346	4863.71	1	244
2022-09-15	09:04:57	10.3736	46.1438	4907.36	1	245
2022-09-15	09:04:57	14.0456	62.4776	4926.19	1	246
2022-09-15	09:04:57	10.4341	46.413	4953.78	1	247
2022-09-15	09:04:58	14.034	62.426	4988.61	1	248
2022-09-15	09:04:58	5.16439	22.9722	4976.75	1	249
2022-09-15	09:04:58	8.14586	36.2344	5024.85	1	250
2022-09-15	09:04:58	11.717	52.1196	5028.87	1	251
2022-09-15	09:04:59	10.3812	46.1777	5071.02	1	252
2022-09-15	09:04:59	11.9687	53.2392	5082.11	1	253
2022-09-15	09:04:59	5.805	25.8218	5096.85	1	254
2022-09-15	09:04:59	8.3651	37.2096	5119.32	1	255
2022-09-15	09:05:00	8.48622	37.7484	5134.59	1	256
2022-09-15	09:05:00	8.46642	37.6603	5156.98	1	257
2022-09-15	09:05:00	8.79044	39.1016	5173.7	1	258
2022-09-15	09:05:00	1.9934	8.86704	5165.84	FALSE	258
2022-09-15	09:05:01	1.28296	5.70686	5179.4	FALSE	258
2022-09-15	09:05:01	3.05818	13.6034	5179.45	1	259
2022-09-15	09:05:01	0.427748	1.90271	5181.31	FALSE	259
2022-09-15	09:05:02	0.381896	1.69875	5181.15	FALSE	259
2022-09-15	09:05:02	0.0751275	0.334182	5181.64	FALSE	259
2022-09-15	09:05:02	0.106832	0.47521	5181.62	FALSE	259
2022-09-15	09:05:02	0.177265	0.78851	5182.43	FALSE	259
2022-09-15	09:05:03	0.587799	2.61465	5184.24	FALSE	259
2022-09-15	09:05:03	0.725763	3.22834	5185.66	FALSE	259
2022-09-15	09:05:03	0.201947	0.898301	5185.13	FALSE	259
2022-09-15	09:05:03	-0.0524552	-0.233331	5185.66	FALSE	259
2022-09-15	09:05:04	0.185814	0.826538	5185.96	FALSE	259
2022-09-15	09:05:04	0.304593	1.35489	5187.01	FALSE	259
2022-09-15	09:05:04	0.190191	0.846008	5186.81	FALSE	259
2022-09-15	09:05:04	0.304186	1.35308	5188.36	FALSE	259
2022-09-15	09:05:05	0.193244	0.859588	5187.67	FALSE	259
2022-09-15	09:05:05	0.394313	1.75398	5190.12	FALSE	259
2022-09-15	09:05:05	0.159657	0.710186	5188.38	FALSE	259
2022-09-15	09:05:05	0.503626	2.24023	5192.36	FALSE	259
2022-09-15	09:05:06	0.16159	0.718785	5189.1	FALSE	259
2022-09-15	09:05:06	0.303422	1.34968	5193.71	FALSE	259
2022-09-15	09:05:06	0.0638297	0.283927	5189.38	FALSE	259
2022-09-15	09:05:07	0.27869	1.23967	5194.95	FALSE	259
2022-09-15	09:05:07	0.0637788	0.283701	5189.66	FALSE	259
2022-09-15	09:05:07	0.264746	1.17764	5196.13	FALSE	259
2022-09-15	09:05:07	0.0323284	0.143803	5189.81	FALSE	259
2022-09-15	09:05:08	0.278639	1.23944	5197.37	FALSE	259
2022-09-15	09:05:08	0.491463	2.18613	5191.99	FALSE	259
2022-09-15	09:05:08	1.48042	6.5852	5203.95	FALSE	259
2022-09-15	09:05:08	1.0391	4.62212	5196.62	FALSE	259
2022-09-15	09:05:09	1.29899	5.77817	5209.73	FALSE	259
2022-09-15	09:05:09	4.73563	21.065	5217.68	1	260
2022-09-15	09:05:09	8.92011	39.6784	5249.41	1	261
2022-09-15	09:05:09	6.18835	27.527	5245.21	1	262
2022-09-15	09:05:10	5.5821	24.8303	5274.24	1	263
2022-09-15	09:05:10	9.94937	44.2568	5289.46	1	264
2022-09-15	09:05:10	9.75426	43.3889	5317.63	1	265
2022-09-15	09:05:11	14.5978	64.9339	5354.4	1	266
2022-09-15	09:05:11	11.8976	52.9229	5370.55	1	267
2022-09-15	09:05:11	4.80327	21.3659	5375.76	1	268
2022-09-15	09:05:11	11.6284	51.7254	5422.27	1	269
2022-09-15	09:05:12	4.52714	20.1376	5395.9	1	270
2022-09-15	09:05:12	9.93935	44.2122	5466.49	1	271
2022-09-15	09:05:12	10.9107	48.533	5444.43	1	272
2022-09-15	09:05:12	6.19599	27.561	5494.05	1	273
2022-09-15	09:05:13	14.2873	63.5528	5507.99	1	274
2022-09-15	09:05:13	8.11187	36.0832	5530.13	1	275
2022-09-15	09:05:13	5.90245	26.2553	5534.24	1	276
2022-09-15	09:05:13	20.2482	90.068	5620.2	1	277
2022-09-15	09:05:14	8.90622	39.6166	5573.86	1	278
2022-09-15	09:05:14	5.70576	25.3804	5645.58	1	279
2022-09-15	09:05:14	13.6403	60.6748	5634.53	1	280
2022-09-15	09:05:14	3.45177	15.3542	5660.93	1	281
2022-09-15	09:05:15	12.7871	56.8796	5691.41	1	282
2022-09-15	09:05:15	13.6799	60.8509	5721.78	1	283
2022-09-15	09:05:15	9.5111	42.3073	5733.72	1	284
2022-09-15	09:05:16	20.1283	89.5347	5811.32	1	285
2022-09-15	09:05:16	27.4027	121.893	5855.61	1	286
2022-09-15	09:05:16	15.506	68.9738	5880.29	1	287
2022-09-15	09:05:16	11.793	52.4576	5908.07	1	288
2022-09-15	09:05:17	8.08968	35.9845	5916.28	1	289
2022-09-15	09:05:17	6.40785	28.5034	5936.57	1	290
2022-09-15	09:05:17	5.86154	26.0733	5942.35	1	291
2022-09-15	09:05:17	5.25421	23.3718	5959.95	1	292
2022-09-15	09:05:18	6.18174	27.4976	5969.85	1	293
2022-09-15	09:05:18	11.1095	49.4173	6009.36	1	294
2022-09-15	09:05:18	11.6287	51.7268	6021.58	1	295
2022-09-15	09:05:18	12.6293	56.1777	6065.54	1	296
2022-09-15	09:05:19	14.8949	66.2555	6087.83	1	297
2022-09-15	09:05:19	10.497	46.6928	6112.23	1	298
2022-09-15	09:05:19	7.48515	33.2954	6121.13	1	299
2022-09-15	09:05:20	3.74296	16.6494	6128.88	1	300
2022-09-15	09:05:20	6.83634	30.4094	6151.54	1	301
2022-09-15	09:05:20	9.60515	42.7256	6171.61	1	302
2022-09-15	09:05:20	19.6217	87.2812	6238.82	1	303
2022-09-15	09:05:21	13.9644	62.1164	6233.73	1	304
2022-09-15	09:05:21	6.61589	29.4288	6268.25	1	305
2022-09-15	09:05:21	5.13904	22.8595	6256.58	1	306
2022-09-15	09:05:22	2.72953	12.1415	6280.39	FALSE	306
2022-09-15	09:05:22	0.388512	1.72818	6258.31	FALSE	306
2022-09-15	09:05:22	0.510852	2.27237	6282.66	FALSE	306
2022-09-15	09:05:22	0.140929	0.62688	6258.94	FALSE	306
2022-09-15	09:05:22	-0.399478	-1.77696	6282.66	FALSE	306
2022-09-15	09:05:23	-0.554949	-2.46852	6258.94	FALSE	306
2022-09-15	09:05:23	-0.850673	-3.78396	6282.66	FALSE	306
2022-09-15	09:05:23	-0.746908	-3.3224	6258.94	FALSE	306
2022-09-15	09:05:23	-0.742633	-3.30338	6282.66	FALSE	306
2022-09-15	09:05:24	-0.83902	-3.73213	6258.94	FALSE	306
2022-09-15	09:05:24	-0.814999	-3.62528	6282.66	FALSE	306
2022-09-15	09:05:24	-0.732607	-3.25878	6258.94	FALSE	306
2022-09-15	09:05:25	-0.64019	-2.84769	6282.66	FALSE	306
2022-09-15	09:05:25	-0.307875	-1.36949	6258.94	FALSE	306
2022-09-15	09:05:25	-0.108893	-0.484378	6282.66	FALSE	306
2022-09-15	09:05:25	0.308003	1.37006	6260.31	FALSE	306
2022-09-15	09:05:26	1.15752	5.14888	6287.81	FALSE	306
2022-09-15	09:05:26	0.884186	3.93304	6264.24	FALSE	306
2022-09-15	09:05:26	0.480115	2.13565	6289.94	FALSE	306
2022-09-15	09:05:26	0.309122	1.37504	6265.62	FALSE	306
2022-09-15	09:05:27	1.02688	4.56777	6294.51	FALSE	306
2022-09-15	09:05:27	1.08927	4.84529	6270.46	FALSE	306
2022-09-15	09:05:27	0.648002	2.88244	6297.39	FALSE	306
2022-09-15	09:05:27	0.682303	3.03502	6273.5	FALSE	306
2022-09-15	09:05:28	0.847392	3.76937	6301.16	FALSE	306
2022-09-15	09:05:28	0.404797	1.80062	6275.3	FALSE	306
2022-09-15	09:05:28	0.168257	0.748441	6301.91	FALSE	306
2022-09-15	09:05:29	0.156959	0.698185	6276	FALSE	306
2022-09-15	09:05:29	0.117214	0.521391	6302.43	FALSE	306
2022-09-15	09:05:29	0.111769	0.497171	6276.49	FALSE	306
2022-09-15	09:05:29	0.108512	0.482683	6302.92	FALSE	306
2022-09-15	09:05:30	0.0901401	0.400961	6276.9	FALSE	306
2022-09-15	09:05:30	0.100115	0.445332	6303.36	FALSE	306
2022-09-15	09:05:30	0.164542	0.731916	6277.63	FALSE	306
2022-09-15	09:05:30	0.158181	0.703621	6304.06	FALSE	306
2022-09-15	09:05:31	0.178079	0.792131	6278.42	FALSE	306
2022-09-15	09:05:31	0.169428	0.75365	6304.82	FALSE	306
2022-09-15	09:05:31	0.178283	0.793038	6279.21	FALSE	306
2022-09-15	09:05:31	0.183779	0.817486	6305.64	FALSE	306
2022-09-15	09:05:32	0.203779	0.90645	6280.12	FALSE	306
2022-09-15	09:05:32	0.224644	0.999261	6306.64	FALSE	306
2022-09-15	09:05:32	0.22958	1.02122	6281.14	FALSE	306
2022-09-15	09:05:33	0.242099	1.0769	6307.71	FALSE	306
2022-09-15	09:05:33	0.388257	1.72704	6282.87	FALSE	306
2022-09-15	09:05:33	0.522252	2.32308	6310.04	FALSE	306
2022-09-15	09:05:33	0.200624	0.892416	6283.76	FALSE	306
2022-09-15	09:05:34	0.1564	0.695698	6310.73	FALSE	306
2022-09-15	09:05:34	0.15126	0.672835	6284.43	FALSE	306
2022-09-15	09:05:34	0.309987	1.37888	6312.11	FALSE	306
2022-09-15	09:05:34	0.330038	1.46808	6285.9	FALSE	306
2022-09-15	09:05:35	0.212735	0.946288	6313.06	FALSE	306
2022-09-15	09:05:35	0.217061	0.965531	6286.87	FALSE	306
2022-09-15	09:05:35	0.223117	0.992469	6314.05	FALSE	306
2022-09-15	09:05:35	0.215636	0.959192	6287.83	FALSE	306
2022-09-15	09:05:36	0.243881	1.08483	6315.13	FALSE	306
2022-09-15	09:05:36	0.29584	1.31596	6289.14	FALSE	306
2022-09-15	09:05:36	0.299046	1.33022	6316.46	FALSE	306
2022-09-15	09:05:36	0.241692	1.07509	6290.22	FALSE	306
2022-09-15	09:05:37	0.172685	0.768137	6317.23	FALSE	306
2022-09-15	09:05:37	0.143066	0.636386	6290.85	FALSE	306
2022-09-15	09:05:37	0.107087	0.476344	6317.71	FALSE	306
2022-09-15	09:05:38	0.0247458	0.110074	6290.96	FALSE	306
2022-09-15	09:05:38	-0.0405977	-0.180587	6317.71	FALSE	306
2022-09-15	09:05:38	-0.303346	-1.34934	6290.96	FALSE	306
2022-09-15	09:05:38	-0.615916	-2.73972	6317.71	FALSE	306
2022-09-15	09:05:39	-1.04752	-4.65958	6290.96	FALSE	306
2022-09-15	09:05:39	-0.918409	-4.08527	6317.71	FALSE	306
2022-09-15	09:05:39	0.0596567	0.265365	6291.23	FALSE	306
2022-09-15	09:05:39	1.1167	4.9673	6322.68	FALSE	306
2022-09-15	09:05:40	1.73187	7.7037	6298.93	FALSE	306
2022-09-15	09:05:40	1.07543	4.78373	6327.46	FALSE	306
2022-09-15	09:05:40	1.02989	4.58116	6303.51	FALSE	306
2022-09-15	09:05:40	1.72917	7.69169	6335.15	FALSE	306
2022-09-15	09:05:41	1.20933	5.37934	6308.89	FALSE	306
2022-09-15	09:05:41	0.726221	3.23038	6338.38	FALSE	306
2022-09-15	09:05:41	0.814771	3.62426	6312.52	FALSE	306
2022-09-15	09:05:42	0.508257	2.26083	6340.64	FALSE	306
2022-09-15	09:05:42	0.411107	1.82869	6314.35	FALSE	306
2022-09-15	09:05:42	0.485458	2.15941	6342.8	FALSE	306
2022-09-15	09:05:42	0.405967	1.80582	6316.15	FALSE	306
2022-09-15	09:05:43	0.324746	1.44454	6344.25	FALSE	306
2022-09-15	09:05:43	0.304797	1.3558	6317.51	FALSE	306
2022-09-15	09:05:43	0.260776	1.15998	6345.41	FALSE	306
2022-09-15	09:05:43	0.229733	1.0219	6318.53	FALSE	306
2022-09-15	09:05:44	0.18098	0.805035	6346.21	FALSE	306
2022-09-15	09:05:44	0.220115	0.979116	6319.51	FALSE	306
2022-09-15	09:05:44	0.202812	0.902148	6347.11	FALSE	306
2022-09-15	09:05:44	0.207137	0.921387	6320.43	FALSE	306
2022-09-15	09:05:45	0.211412	0.940403	6348.05	FALSE	306
2022-09-15	09:05:45	0.228868	1.01805	6321.45	FALSE	306
2022-09-15	09:05:45	0.231107	1.02801	6349.08	FALSE	306
2022-09-15	09:05:45	0.215585	0.958965	6322.41	FALSE	306
2022-09-15	09:05:46	0.233041	1.03661	6350.12	FALSE	306
2022-09-15	09:05:46	0.2393	1.06445	6323.47	FALSE	306
2022-09-15	09:05:46	0.215738	0.959646	6351.08	FALSE	306
2022-09-15	09:05:47	0.177061	0.787603	6324.26	FALSE	306
2022-09-15	09:05:47	0.281845	1.2537	6352.33	FALSE	306
2022-09-15	09:05:47	0.414517	1.84385	6326.1	FALSE	306
2022-09-15	09:05:47	0.529224	2.35409	6354.69	FALSE	306
2022-09-15	09:05:48	0.70729	3.14617	6329.25	FALSE	306
2022-09-15	09:05:48	0.649377	2.88856	6357.57	FALSE	306
2022-09-15	09:05:48	0.874974	3.89206	6333.14	FALSE	306
2022-09-15	09:05:48	2.31757	10.309	6367.88	FALSE	306
2022-09-15	09:05:49	4.60571	20.4871	6353.63	1	307
2022-09-15	09:05:49	7.28103	32.3875	6400.27	1	308
2022-09-15	09:05:49	7.45736	33.1718	6386.8	1	309
2022-09-15	09:05:49	6.22652	27.6968	6427.97	1	310
2022-09-15	09:05:50	4.56322	20.2981	6407.1	1	311
2022-09-15	09:05:50	3.18851	14.1831	6442.15	1	312
2022-09-15	09:05:50	4.10602	18.2644	6425.36	1	313
2022-09-15	09:05:51	5.25889	23.3926	6465.54	1	314
2022-09-15	09:05:51	6.94937	30.9122	6456.27	1	315
2022-09-15	09:05:51	11.0828	49.2985	6514.84	1	316
2022-09-15	09:05:51	9.56688	42.5554	6498.83	1	317
2022-09-15	09:05:52	9.42377	41.9188	6556.76	1	318
2022-09-15	09:05:52	11.2193	49.9057	6548.74	1	319
2022-09-15	09:05:52	11.362	50.5404	6607.3	1	320
2022-09-15	09:05:52	13.7519	61.1712	6609.91	1	321
2022-09-15	09:05:53	15.5858	69.3288	6676.63	1	322
2022-09-15	09:05:53	12.1553	54.0692	6663.98	1	323
2022-09-15	09:05:53	9.53955	42.4338	6719.06	1	324
2022-09-15	09:05:53	8.23131	36.6145	6700.59	1	325
2022-09-15	09:05:54	9.25462	41.1664	6760.23	1	326
2022-09-15	09:05:54	10.9857	48.8666	6749.46	1	327
2022-09-15	09:05:54	8.7341	38.851	6799.08	1	328
2022-09-15	09:05:54	5.99741	26.6777	6776.13	1	329
2022-09-15	09:05:55	6.87034	30.5606	6829.64	1	330
2022-09-15	09:05:55	8.07813	35.9331	6812.07	1	331
2022-09-15	09:05:55	10.6376	47.3182	6876.96	1	332
2022-09-15	09:05:56	14.4535	64.2921	6876.36	1	333
2022-09-15	09:05:56	18.194	80.9306	6957.89	1	334
2022-09-15	09:05:56	21.5674	95.9361	6972.3	1	335
2022-09-15	09:05:56	15.6477	69.6041	7027.49	1	336
2022-09-15	09:05:57	10.9433	48.678	7020.97	1	337
2022-09-15	09:05:57	9.65176	42.933	7070.43	1	338
2022-09-15	09:05:57	10.4976	46.6954	7067.67	1	339
2022-09-15	09:05:57	11.5829	51.5231	7121.95	1	340
2022-09-15	09:05:58	8.07624	35.9247	7103.59	1	341
2022-09-15	09:05:58	7.88057	35.0544	7157	1	342
2022-09-15	09:05:58	7.36169	32.7463	7136.34	1	343
2022-09-15	09:05:58	7.49609	33.3441	7190.35	1	344
2022-09-15	09:05:59	7.93314	35.2882	7171.63	1	345
2022-09-15	09:05:59	7.72378	34.3569	7224.71	1	346
2022-09-15	09:05:59	7.83721	34.8615	7206.49	1	347

## Sheet: Tyr_martin_20229159059 (2)
Date	Time	Lbs	Total force x time			**GoPro Fitting: 849
2022-09-15	09:00:59	0.256043	0.256043	FALSE	0
2022-09-15	09:00:59	0.184084	0.440127	FALSE	0
2022-09-15	09:00:59	0.478282	0.918409	FALSE	0
2022-09-15	09:01:00	0.174364	1.09277	FALSE	0
2022-09-15	09:01:00	0.150445	1.24322	FALSE	0
2022-09-15	09:01:00	0.182507	1.42572	FALSE	0
2022-09-15	09:01:01	0.277825	1.70355	FALSE	0
2022-09-15	09:01:01	0.265153	1.9687	FALSE	0
2022-09-15	09:01:01	0.145255	2.11396	FALSE	0
2022-09-15	09:01:01	0.0968069	2.21076	FALSE	0
2022-09-15	09:01:02	0.135891	2.34666	FALSE	0
2022-09-15	09:01:02	0.208308	2.55496	FALSE	0
2022-09-15	09:01:02	0.225255	2.78022	FALSE	0
2022-09-15	09:01:02	0.169377	2.9496	FALSE	0
2022-09-15	09:01:03	0.141082	3.09068	FALSE	0
2022-09-15	09:01:03	0.115433	3.20611	FALSE	0
2022-09-15	09:01:03	0.192786	3.3989	FALSE	0
2022-09-15	09:01:03	0.252277	3.65117	FALSE	0
2022-09-15	09:01:04	0.155891	3.80706	FALSE	0
2022-09-15	09:01:04	0.243931	4.051	FALSE	0
2022-09-15	09:01:04	0.210649	4.26164	FALSE	0
2022-09-15	09:01:04	0.194059	4.4557	FALSE	0
2022-09-15	09:01:05	0.191158	4.64686	FALSE	0
2022-09-15	09:01:05	0.211107	4.85797	FALSE	0
2022-09-15	09:01:05	0.221692	5.07966	FALSE	0
2022-09-15	09:01:06	0.195636	5.2753	FALSE	0
2022-09-15	09:01:06	0.204593	5.47989	FALSE	0
2022-09-15	09:01:06	0.207392	5.68728	FALSE	0
2022-09-15	09:01:06	0.207137	5.89442	FALSE	0
2022-09-15	09:01:07	0.216196	6.11061	FALSE	0
2022-09-15	09:01:07	0.228257	6.33887	FALSE	0
2022-09-15	09:01:07	0.245153	6.58402	FALSE	0
2022-09-15	09:01:07	0.242557	6.82658	FALSE	0
2022-09-15	09:01:08	0.243524	7.07011	FALSE	0
2022-09-15	09:01:08	0.243626	7.31373	FALSE	0
2022-09-15	09:01:08	0.259809	7.57354	FALSE	0
2022-09-15	09:01:08	0.268461	7.842	FALSE	0
2022-09-15	09:01:09	0.285204	8.12721	FALSE	0
2022-09-15	09:01:09	0.271107	8.39831	FALSE	0
2022-09-15	09:01:09	0.293499	8.69181	FALSE	0
2022-09-15	09:01:10	0.273346	8.96516	FALSE	0
2022-09-15	09:01:10	0.288257	9.25341	FALSE	0
2022-09-15	09:01:10	0.463015	9.71643	FALSE	0
2022-09-15	09:01:10	0.309631	10.0261	FALSE	0
2022-09-15	09:01:11	0.361845	10.3879	FALSE	0
2022-09-15	09:01:11	0.14841	10.5363	FALSE	0
2022-09-15	09:01:11	0.181234	10.7175	FALSE	0
2022-09-15	09:01:11	0.228919	10.9465	FALSE	0
2022-09-15	09:01:12	0.280827	11.2273	FALSE	0
2022-09-15	09:01:12	0.230547	11.4578	FALSE	0
2022-09-15	09:01:12	0.192634	11.6505	FALSE	0
2022-09-15	09:01:12	0.213906	11.8644	FALSE	0
2022-09-15	09:01:13	0.20383	12.0682	FALSE	0
2022-09-15	09:01:13	0.198079	12.2663	FALSE	0
2022-09-15	09:01:13	0.202099	12.4684	FALSE	0
2022-09-15	09:01:14	0.205713	12.6741	FALSE	0
2022-09-15	09:01:14	0.35472	13.0288	FALSE	0
2022-09-15	09:01:14	0.519402	13.5482	FALSE	0
2022-09-15	09:01:14	0.171565	13.7198	FALSE	0
2022-09-15	09:01:15	0.0693259	13.7891	FALSE	0
2022-09-15	09:01:15	0.263372	14.0525	FALSE	0
2022-09-15	09:01:15	0.27187	14.3244	FALSE	0
2022-09-15	09:01:15	0.558842	14.8832	FALSE	0
2022-09-15	09:01:16	0.243728	15.1269	FALSE	0
2022-09-15	09:01:16	0.310089	15.437	FALSE	0
2022-09-15	09:01:16	0.119097	15.5561	FALSE	0
2022-09-15	09:01:16	-0.131437	15.5561	FALSE	0
2022-09-15	09:01:17	-0.445941	15.5561	FALSE	0
2022-09-15	09:01:17	-0.50533	15.5561	FALSE	0
2022-09-15	09:01:17	-0.51103	15.5561	FALSE	0
2022-09-15	09:01:17	-0.235305	15.5561	FALSE	0
2022-09-15	09:01:18	-0.0370863	15.5561	FALSE	0
2022-09-15	09:01:18	0.201336	15.7575	FALSE	0
2022-09-15	09:01:18	0.203219	15.9607	FALSE	0
2022-09-15	09:01:19	0.214618	16.1753	FALSE	0
2022-09-15	09:01:19	0.15813	16.3334	FALSE	0
2022-09-15	09:01:19	0.142303	16.4757	FALSE	0
2022-09-15	09:01:19	0.0700893	16.5458	FALSE	0
2022-09-15	09:01:20	0.0926846	16.6385	FALSE	0
2022-09-15	09:01:20	0.465763	17.1043	FALSE	0
2022-09-15	09:01:20	0.381947	17.4862	FALSE	0
2022-09-15	09:01:20	2.58525	20.0715	FALSE	0
2022-09-15	09:01:21	2.83268	22.9041	FALSE	0
2022-09-15	09:01:21	1.66047	24.5646	FALSE	0
2022-09-15	09:01:21	2.27182	26.8364	FALSE	0
2022-09-15	09:01:21	1.68637	28.5228	FALSE	0
2022-09-15	09:01:22	0.636858	29.1597	FALSE	0
2022-09-15	09:01:22	0.413601	29.5733	FALSE	0
2022-09-15	09:01:22	0.531412	30.1047	FALSE	0
2022-09-15	09:01:23	0.605	30.7097	FALSE	0
2022-09-15	09:01:23	0.672277	31.3819	FALSE	0
2022-09-15	09:01:23	0.908562	32.2905	FALSE	0
2022-09-15	09:01:23	0.477468	32.768	FALSE	0
2022-09-15	09:01:24	0.515636	33.2836	FALSE	0
2022-09-15	09:01:24	0.387595	33.6712	FALSE	0
2022-09-15	09:01:24	0.279402	33.9506	FALSE	0
2022-09-15	09:01:24	0.197265	34.1479	FALSE	0
2022-09-15	09:01:25	0.178893	34.3268	FALSE	0
2022-09-15	09:01:25	0.0183336	34.3451	FALSE	0
2022-09-15	09:01:25	0.0248984	34.37	FALSE	0
2022-09-15	09:01:25	0.00179415	34.3718	FALSE	0
2022-09-15	09:01:26	0.0992496	34.471	FALSE	0
2022-09-15	09:01:26	0.160522	34.6316	FALSE	0
2022-09-15	09:01:26	0.0604709	34.692	FALSE	0
2022-09-15	09:01:27	0.112125	34.8042	FALSE	0
2022-09-15	09:01:27	0.0707	34.8749	FALSE	0
2022-09-15	09:01:27	0.254262	35.1291	FALSE	0
2022-09-15	09:01:27	0.00479668	35.1339	FALSE	0
2022-09-15	09:01:28	0.272226	35.4061	FALSE	0
2022-09-15	09:01:28	-0.0134731	35.4061	FALSE	0
2022-09-15	09:01:28	0.104491	35.5106	FALSE	0
2022-09-15	09:01:28	0.012074	35.5227	FALSE	0
2022-09-15	09:01:29	0.16444	35.6871	FALSE	0
2022-09-15	09:01:29	0.309427	35.9966	FALSE	0
2022-09-15	09:01:29	0.186578	36.1832	FALSE	0
2022-09-15	09:01:29	0.322048	36.5052	FALSE	0
2022-09-15	09:01:30	0.15243	36.6576	FALSE	0
2022-09-15	09:01:30	0.380013	37.0376	FALSE	0
2022-09-15	09:01:30	0.129733	37.1674	FALSE	0
2022-09-15	09:01:30	0.368053	37.5354	FALSE	0
2022-09-15	09:01:31	0.264338	37.7998	FALSE	0
2022-09-15	09:01:31	0.30902	38.1088	FALSE	0
2022-09-15	09:01:31	0.499707	38.6085	FALSE	0
2022-09-15	09:01:32	1.74922	40.3577	FALSE	0
2022-09-15	09:01:32	3.33192	43.6896	1	1
2022-09-15	09:01:32	2.12734	45.817	FALSE	1
2022-09-15	09:01:32	0.411361	46.2283	FALSE	1
2022-09-15	09:01:33	0.132379	46.3607	FALSE	1
2022-09-15	09:01:33	0.270547	46.6313	FALSE	1
2022-09-15	09:01:33	0.199657	46.8309	FALSE	1
2022-09-15	09:01:33	0.938588	47.7695	FALSE	1
2022-09-15	09:01:34	1.88892	49.6584	FALSE	1
2022-09-15	09:01:34	2.39569	52.0541	FALSE	1
2022-09-15	09:01:34	1.37538	53.4295	FALSE	1
2022-09-15	09:01:34	0.440522	53.87	FALSE	1
2022-09-15	09:01:35	0.610802	54.4808	FALSE	1
2022-09-15	09:01:35	0.589835	55.0707	FALSE	1
2022-09-15	09:01:35	-0.0247707	55.0707	FALSE	1
2022-09-15	09:01:36	-0.0675697	55.0707	FALSE	1
2022-09-15	09:01:36	0.180216	55.2509	FALSE	1
2022-09-15	09:01:36	-0.112608	55.2509	FALSE	1
2022-09-15	09:01:36	0.0589952	55.3099	FALSE	1
2022-09-15	09:01:37	0.0171631	55.327	FALSE	1
2022-09-15	09:01:37	1.10128	56.4283	FALSE	1
2022-09-15	09:01:37	1.38622	57.8145	FALSE	1
2022-09-15	09:01:37	3.08179	60.8963	1	2
2022-09-15	09:01:38	5.15334	66.0497	1	3
2022-09-15	09:01:38	4.30719	70.3568	1	4
2022-09-15	09:01:38	5.68169	76.0385	1	5
2022-09-15	09:01:38	5.90744	81.946	1	6
2022-09-15	09:01:39	10.3126	92.2586	1	7
2022-09-15	09:01:39	6.30591	98.5645	1	8
2022-09-15	09:01:39	13.0454	111.61	1	9
2022-09-15	09:01:39	9.52209	121.132	1	10
2022-09-15	09:01:40	7.18235	128.314	1	11
2022-09-15	09:01:40	7.64841	135.963	1	12
2022-09-15	09:01:40	8.00963	143.972	1	13
2022-09-15	09:01:41	6.81125	150.784	1	14
2022-09-15	09:01:41	5.72367	156.507	1	15
2022-09-15	09:01:41	5.30958	161.817	1	16
2022-09-15	09:01:41	5.82291	167.64	1	17
2022-09-15	09:01:42	4.77513	172.415	1	18
2022-09-15	09:01:42	2.64474	175.06	FALSE	18
2022-09-15	09:01:42	0.610394	175.67	FALSE	18
2022-09-15	09:01:42	0.316603	175.987	FALSE	18
2022-09-15	09:01:43	0.0746694	176.061	FALSE	18
2022-09-15	09:01:43	-0.0143382	176.061	FALSE	18
2022-09-15	09:01:43	-0.0892491	176.061	FALSE	18
2022-09-15	09:01:43	-0.198104	176.061	FALSE	18
2022-09-15	09:01:44	-0.287112	176.061	FALSE	18
2022-09-15	09:01:44	-0.551386	176.061	FALSE	18
2022-09-15	09:01:44	-0.596323	176.061	FALSE	18
2022-09-15	09:01:45	-0.829147	176.061	FALSE	18
2022-09-15	09:01:45	-0.756068	176.061	FALSE	18
2022-09-15	09:01:45	-0.910775	176.061	FALSE	18
2022-09-15	09:01:45	-0.705636	176.061	FALSE	18
2022-09-15	09:01:46	-0.762124	176.061	FALSE	18
2022-09-15	09:01:46	-0.736933	176.061	FALSE	18
2022-09-15	09:01:46	-0.593015	176.061	FALSE	18
2022-09-15	09:01:46	-0.598918	176.061	FALSE	18
2022-09-15	09:01:47	-0.50701	176.061	FALSE	18
2022-09-15	09:01:47	-0.550368	176.061	FALSE	18
2022-09-15	09:01:47	-0.382888	176.061	FALSE	18
2022-09-15	09:01:47	-0.384821	176.061	FALSE	18
2022-09-15	09:01:48	-0.243091	176.061	FALSE	18
2022-09-15	09:01:48	-0.108537	176.061	FALSE	18
2022-09-15	09:01:48	-0.11958	176.061	FALSE	18
2022-09-15	09:01:49	0.711412	176.773	FALSE	18
2022-09-15	09:01:49	2.28327	179.056	FALSE	18
2022-09-15	09:01:49	3.38709	182.443	1	19
2022-09-15	09:01:49	3.0878	185.531	1	20
2022-09-15	09:01:50	8.23787	193.769	1	21
2022-09-15	09:01:50	10.0575	203.826	1	22
2022-09-15	09:01:50	5.84377	209.67	1	23
2022-09-15	09:01:50	3.11365	212.784	1	24
2022-09-15	09:01:51	0.962964	213.747	FALSE	24
2022-09-15	09:01:51	0.472227	214.219	FALSE	24
2022-09-15	09:01:51	0.159809	214.379	FALSE	24
2022-09-15	09:01:51	0.735585	215.114	FALSE	24
2022-09-15	09:01:52	0.678842	215.793	FALSE	24
2022-09-15	09:01:52	0.315687	216.109	FALSE	24
2022-09-15	09:01:52	0.950445	217.059	FALSE	24
2022-09-15	09:01:52	1.39472	218.454	FALSE	24
2022-09-15	09:01:53	2.09569	220.55	FALSE	24
2022-09-15	09:01:53	3.15228	223.702	1	25
2022-09-15	09:01:53	8.25324	231.955	1	26
2022-09-15	09:01:54	6.37884	238.334	1	27
2022-09-15	09:01:54	9.49716	247.831	1	28
2022-09-15	09:01:54	7.08245	254.914	1	29
2022-09-15	09:01:54	5.0595	259.973	1	30
2022-09-15	09:01:55	4.80139	264.775	1	31
2022-09-15	09:01:55	7.96754	272.742	1	32
2022-09-15	09:01:55	13.0894	285.831	1	33
2022-09-15	09:01:55	7.93426	293.766	1	34
2022-09-15	09:01:56	6.95115	300.717	1	35
2022-09-15	09:01:56	9.56627	310.283	1	36
2022-09-15	09:01:56	7.82194	318.105	1	37
2022-09-15	09:01:56	5.66434	323.769	1	38
2022-09-15	09:01:57	2.85324	326.623	FALSE	38
2022-09-15	09:01:57	2.52154	329.144	FALSE	38
2022-09-15	09:01:57	1.24933	330.394	FALSE	38
2022-09-15	09:01:58	2.36592	332.759	FALSE	38
2022-09-15	09:01:58	0.465153	333.225	FALSE	38
2022-09-15	09:01:58	0.316858	333.541	FALSE	38
2022-09-15	09:01:58	0.182608	333.724	FALSE	38
2022-09-15	09:01:59	0.269682	333.994	FALSE	38
2022-09-15	09:01:59	-0.237595	333.994	FALSE	38
2022-09-15	09:01:59	-0.183397	333.994	FALSE	38
2022-09-15	09:01:59	-0.182837	333.994	FALSE	38
2022-09-15	09:02:00	0.165611	334.159	FALSE	38
2022-09-15	09:02:00	0.0853564	334.245	FALSE	38
2022-09-15	09:02:00	0.314415	334.559	FALSE	38
2022-09-15	09:02:00	0.225509	334.785	FALSE	38
2022-09-15	09:02:01	0.325916	335.111	FALSE	38
2022-09-15	09:02:01	0.196603	335.307	FALSE	38
2022-09-15	09:02:01	0.228868	335.536	FALSE	38
2022-09-15	09:02:02	0.276807	335.813	FALSE	38
2022-09-15	09:02:02	0.250394	336.063	FALSE	38
2022-09-15	09:02:02	0.175992	336.239	FALSE	38
2022-09-15	09:02:02	1.29864	337.538	FALSE	38
2022-09-15	09:02:03	1.63676	339.175	FALSE	38
2022-09-15	09:02:03	4.08994	343.265	1	39
2022-09-15	09:02:03	1.93879	345.203	FALSE	39
2022-09-15	09:02:03	2.69396	347.897	FALSE	39
2022-09-15	09:02:04	3.22357	351.121	1	40
2022-09-15	09:02:04	1.35711	352.478	FALSE	40
2022-09-15	09:02:04	0.347188	352.825	FALSE	40
2022-09-15	09:02:04	0.0793005	352.904	FALSE	40
2022-09-15	09:02:05	-0.0304705	352.904	FALSE	40
2022-09-15	09:02:05	-0.133473	352.904	FALSE	40
2022-09-15	09:02:05	0.0643386	352.969	FALSE	40
2022-09-15	09:02:05	0.08042	353.049	FALSE	40
2022-09-15	09:02:06	0.0554837	353.105	FALSE	40
2022-09-15	09:02:06	0.122659	353.227	FALSE	40
2022-09-15	09:02:06	0.000369216	353.228	FALSE	40
2022-09-15	09:02:07	-0.242328	353.228	FALSE	40
2022-09-15	09:02:07	-0.408028	353.228	FALSE	40
2022-09-15	09:02:07	-0.409809	353.228	FALSE	40
2022-09-15	09:02:07	-0.251183	353.228	FALSE	40
2022-09-15	09:02:08	-0.0732185	353.228	FALSE	40
2022-09-15	09:02:08	0.0603183	353.288	FALSE	40
2022-09-15	09:02:08	0.213193	353.501	FALSE	40
2022-09-15	09:02:08	0.461896	353.963	FALSE	40
2022-09-15	09:02:09	0.535585	354.499	FALSE	40
2022-09-15	09:02:09	0.536654	355.035	FALSE	40
2022-09-15	09:02:09	0.707595	355.743	FALSE	40
2022-09-15	09:02:09	0.671056	356.414	FALSE	40
2022-09-15	09:02:10	0.481081	356.895	FALSE	40
2022-09-15	09:02:10	0.480573	357.376	FALSE	40
2022-09-15	09:02:10	0.340573	357.716	FALSE	40
2022-09-15	09:02:11	0.362303	358.079	FALSE	40
2022-09-15	09:02:11	0.355178	358.434	FALSE	40
2022-09-15	09:02:11	0.342608	358.776	FALSE	40
2022-09-15	09:02:11	0.182863	358.959	FALSE	40
2022-09-15	09:02:12	0.148461	359.108	FALSE	40
2022-09-15	09:02:12	0.191107	359.299	FALSE	40
2022-09-15	09:02:12	0.172888	359.472	FALSE	40
2022-09-15	09:02:12	0.171565	359.643	FALSE	40
2022-09-15	09:02:13	0.165458	359.809	FALSE	40
2022-09-15	09:02:13	0.161998	359.971	FALSE	40
2022-09-15	09:02:13	0.162965	360.134	FALSE	40
2022-09-15	09:02:14	0.166171	360.3	FALSE	40
2022-09-15	09:02:14	0.169377	360.469	FALSE	40
2022-09-15	09:02:14	0.193448	360.663	FALSE	40
2022-09-15	09:02:14	0.187901	360.851	FALSE	40
2022-09-15	09:02:15	0.188715	361.039	FALSE	40
2022-09-15	09:02:15	0.186629	361.226	FALSE	40
2022-09-15	09:02:15	0.178842	361.405	FALSE	40
2022-09-15	09:02:15	0.141489	361.546	FALSE	40
2022-09-15	09:02:16	0.0674429	361.614	FALSE	40
2022-09-15	09:02:16	0.10729	361.721	FALSE	40
2022-09-15	09:02:16	0.161133	361.882	FALSE	40
2022-09-15	09:02:16	0.222863	362.105	FALSE	40
2022-09-15	09:02:17	0.129122	362.234	FALSE	40
2022-09-15	09:02:17	-0.0916409	362.234	FALSE	40
2022-09-15	09:02:17	-0.144516	362.234	FALSE	40
2022-09-15	09:02:17	-0.0848725	362.234	FALSE	40
2022-09-15	09:02:18	0.491718	362.726	FALSE	40
2022-09-15	09:02:18	0.312888	363.039	FALSE	40
2022-09-15	09:02:18	0.590649	363.629	FALSE	40
2022-09-15	09:02:18	0.639809	364.269	FALSE	40
2022-09-15	09:02:19	1.30057	365.57	FALSE	40
2022-09-15	09:02:19	0.317468	365.887	FALSE	40
2022-09-15	09:02:19	0.332736	366.22	FALSE	40
2022-09-15	09:02:20	0.325356	366.545	FALSE	40
2022-09-15	09:02:20	0.238741	366.784	FALSE	40
2022-09-15	09:02:20	0.192786	366.977	FALSE	40
2022-09-15	09:02:20	0.181998	367.159	FALSE	40
2022-09-15	09:02:21	-0.136832	367.159	FALSE	40
2022-09-15	09:02:21	-0.35103	367.159	FALSE	40
2022-09-15	09:02:21	-0.510928	367.159	FALSE	40
2022-09-15	09:02:21	-0.679223	367.159	FALSE	40
2022-09-15	09:02:22	-0.283702	367.159	FALSE	40
2022-09-15	09:02:22	-0.0560684	367.159	FALSE	40
2022-09-15	09:02:22	0.23813	367.397	FALSE	40
2022-09-15	09:02:22	1.46357	368.86	FALSE	40
2022-09-15	09:02:23	3.06683	371.927	1	41
2022-09-15	09:02:23	4.82342	376.751	1	42
2022-09-15	09:02:23	4.75945	381.51	1	43
2022-09-15	09:02:24	4.46556	385.976	1	44
2022-09-15	09:02:24	7.29029	393.266	1	45
2022-09-15	09:02:24	2.38892	395.655	FALSE	45
2022-09-15	09:02:24	2.75004	398.405	FALSE	45
2022-09-15	09:02:25	2.01182	400.417	FALSE	45
2022-09-15	09:02:25	1.20851	401.625	FALSE	45
2022-09-15	09:02:25	0.728104	402.353	FALSE	45
2022-09-15	09:02:25	0.470751	402.824	FALSE	45
2022-09-15	09:02:26	0.116094	402.94	FALSE	45
2022-09-15	09:02:26	0.294975	403.235	FALSE	45
2022-09-15	09:02:26	-0.0226333	403.235	FALSE	45
2022-09-15	09:02:26	0.283117	403.518	FALSE	45
2022-09-15	09:02:27	0.400573	403.919	FALSE	45
2022-09-15	09:02:27	0.223015	404.142	FALSE	45
2022-09-15	09:02:27	0.301998	404.444	FALSE	45
2022-09-15	09:02:28	0.496756	404.941	FALSE	45
2022-09-15	09:02:28	0.554771	405.495	FALSE	45
2022-09-15	09:02:28	1.01752	406.513	FALSE	45
2022-09-15	09:02:28	1.38983	407.903	FALSE	45
2022-09-15	09:02:29	1.34215	409.245	FALSE	45
2022-09-15	09:02:29	2.04347	411.288	FALSE	45
2022-09-15	09:02:29	1.9395	413.228	FALSE	45
2022-09-15	09:02:29	3.01513	416.243	1	46
2022-09-15	09:02:30	1.68271	417.926	FALSE	46
2022-09-15	09:02:30	3.53126	421.457	1	47
2022-09-15	09:02:30	6.96983	428.427	1	48
2022-09-15	09:02:30	3.11345	431.54	1	49
2022-09-15	09:02:31	4.328	435.868	1	50
2022-09-15	09:02:31	4.22882	440.097	1	51
2022-09-15	09:02:31	3.82902	443.926	1	52
2022-09-15	09:02:31	1.76337	445.69	FALSE	52
2022-09-15	09:02:32	0.446272	446.136	FALSE	52
2022-09-15	09:02:32	1.04164	447.177	FALSE	52
2022-09-15	09:02:32	0.46388	447.641	FALSE	52
2022-09-15	09:02:33	0.375229	448.017	FALSE	52
2022-09-15	09:02:33	0.243066	448.26	FALSE	52
2022-09-15	09:02:33	0.211616	448.471	FALSE	52
2022-09-15	09:02:33	0.0633208	448.535	FALSE	52
2022-09-15	09:02:34	0.264796	448.799	FALSE	52
2022-09-15	09:02:34	0.393804	449.193	FALSE	52
2022-09-15	09:02:34	1.51569	450.709	FALSE	52
2022-09-15	09:02:34	6.22897	456.938	1	53
2022-09-15	09:02:35	5.3392	462.277	1	54
2022-09-15	09:02:35	8.00444	470.281	1	55
2022-09-15	09:02:35	4.62749	474.909	1	56
2022-09-15	09:02:35	6.1596	481.069	1	57
2022-09-15	09:02:36	9.14393	490.212	1	58
2022-09-15	09:02:36	3.98826	494.201	1	59
2022-09-15	09:02:36	5.46347	499.664	1	60
2022-09-15	09:02:37	3.70556	503.37	1	61
2022-09-15	09:02:37	1.85279	505.223	FALSE	61
2022-09-15	09:02:37	3.24988	508.472	1	62
2022-09-15	09:02:37	1.66724	510.14	FALSE	62
2022-09-15	09:02:38	2.26541	512.405	FALSE	62
2022-09-15	09:02:38	3.86088	516.266	1	63
2022-09-15	09:02:38	1.70403	517.97	FALSE	63
2022-09-15	09:02:38	4.72286	522.693	1	64
2022-09-15	09:02:39	2.28327	524.976	FALSE	64
2022-09-15	09:02:39	1.33813	526.314	FALSE	64
2022-09-15	09:02:39	2.4106	528.725	FALSE	64
2022-09-15	09:02:39	2.54861	531.273	FALSE	64
2022-09-15	09:02:40	3.70642	534.98	1	65
2022-09-15	09:02:40	5.81792	540.798	1	66
2022-09-15	09:02:40	4.02307	544.821	1	67
2022-09-15	09:02:41	7.23685	552.058	1	68
2022-09-15	09:02:41	8.15044	560.208	1	69
2022-09-15	09:02:41	4.24698	564.455	1	70
2022-09-15	09:02:41	6.80779	571.263	1	71
2022-09-15	09:02:42	3.4708	574.734	1	72
2022-09-15	09:02:42	4.6907	579.424	1	73
2022-09-15	09:02:42	4.04703	583.471	1	74
2022-09-15	09:02:42	1.36648	584.838	FALSE	74
2022-09-15	09:02:43	1.37701	586.215	FALSE	74
2022-09-15	09:02:43	1.24637	587.461	FALSE	74
2022-09-15	09:02:43	2.76724	590.229	FALSE	74
2022-09-15	09:02:43	2.92301	593.152	FALSE	74
2022-09-15	09:02:44	1.428	594.58	FALSE	74
2022-09-15	09:02:44	0.670038	595.25	FALSE	74
2022-09-15	09:02:44	0.56556	595.815	FALSE	74
2022-09-15	09:02:44	0.727036	596.542	FALSE	74
2022-09-15	09:02:45	0.734517	597.277	FALSE	74
2022-09-15	09:02:45	0.737214	598.014	FALSE	74
2022-09-15	09:02:45	0.738282	598.752	FALSE	74
2022-09-15	09:02:46	0.712837	599.465	FALSE	74
2022-09-15	09:02:46	0.392023	599.857	FALSE	74
2022-09-15	09:02:46	0.541845	600.399	FALSE	74
2022-09-15	09:02:46	0.42271	600.822	FALSE	74
2022-09-15	09:02:47	0.197774	601.019	FALSE	74
2022-09-15	09:02:47	0.244491	601.264	FALSE	74
2022-09-15	09:02:47	0.217468	601.481	FALSE	74
2022-09-15	09:02:47	0.298232	601.78	FALSE	74
2022-09-15	09:02:48	0.143575	601.923	FALSE	74
2022-09-15	09:02:48	0.287646	602.211	FALSE	74
2022-09-15	09:02:48	0.173346	602.384	FALSE	74
2022-09-15	09:02:48	0.279148	602.663	FALSE	74
2022-09-15	09:02:49	0.0371631	602.701	FALSE	74
2022-09-15	09:02:49	0.225713	602.926	FALSE	74
2022-09-15	09:02:49	0.237061	603.163	FALSE	74
2022-09-15	09:02:50	0.156349	603.32	FALSE	74
2022-09-15	09:02:50	0.100115	603.42	FALSE	74
2022-09-15	09:02:50	0.119962	603.54	FALSE	74
2022-09-15	09:02:50	0.327087	603.867	FALSE	74
2022-09-15	09:02:51	0.0446949	603.911	FALSE	74
2022-09-15	09:02:51	0.277774	604.189	FALSE	74
2022-09-15	09:02:51	0.127748	604.317	FALSE	74
2022-09-15	09:02:51	0.220827	604.538	FALSE	74
2022-09-15	09:02:52	0.0620994	604.6	FALSE	74
2022-09-15	09:02:52	0.228817	604.829	FALSE	74
2022-09-15	09:02:52	0.202354	605.031	FALSE	74
2022-09-15	09:02:52	0.180929	605.212	FALSE	74
2022-09-15	09:02:53	0.0545676	605.267	FALSE	74
2022-09-15	09:02:53	0.0938551	605.36	FALSE	74
2022-09-15	09:02:53	0.229173	605.59	FALSE	74
2022-09-15	09:02:53	0.0512089	605.641	FALSE	74
2022-09-15	09:02:54	0.349326	605.99	FALSE	74
2022-09-15	09:02:54	1.40256	607.393	FALSE	74
2022-09-15	09:02:54	6.06179	613.455	1	75
2022-09-15	09:02:55	11.3561	624.811	1	76
2022-09-15	09:02:55	15.7597	640.57	1	77
2022-09-15	09:02:55	12.4329	653.003	1	78
2022-09-15	09:02:55	7.28764	660.291	1	79
2022-09-15	09:02:56	9.42464	669.715	1	80
2022-09-15	09:02:56	3.89706	673.613	1	81
2022-09-15	09:02:56	7.65925	681.272	1	82
2022-09-15	09:02:56	3.88876	685.161	1	83
2022-09-15	09:02:57	2.38978	687.55	FALSE	83
2022-09-15	09:02:57	3.705	691.255	1	84
2022-09-15	09:02:57	4.30632	695.562	1	85
2022-09-15	09:02:57	2.3249	697.887	FALSE	85
2022-09-15	09:02:58	1.22816	699.115	FALSE	85
2022-09-15	09:02:58	0.572786	699.688	FALSE	85
2022-09-15	09:02:58	0.590852	700.278	FALSE	85
2022-09-15	09:02:59	0.627799	700.906	FALSE	85
2022-09-15	09:02:59	0.246272	701.152	FALSE	85
2022-09-15	09:02:59	0.399657	701.552	FALSE	85
2022-09-15	09:02:59	0.162303	701.714	FALSE	85
2022-09-15	09:03:00	0.368359	702.083	FALSE	85
2022-09-15	09:03:00	0.120573	702.203	FALSE	85
2022-09-15	09:03:00	0.318384	702.522	FALSE	85
2022-09-15	09:03:00	0.216094	702.738	FALSE	85
2022-09-15	09:03:01	0.367799	703.106	FALSE	85
2022-09-15	09:03:01	0.272176	703.378	FALSE	85
2022-09-15	09:03:01	0.277977	703.656	FALSE	85
2022-09-15	09:03:01	0.302863	703.959	FALSE	85
2022-09-15	09:03:02	0.198944	704.158	FALSE	85
2022-09-15	09:03:02	0.349428	704.507	FALSE	85
2022-09-15	09:03:02	0.314262	704.821	FALSE	85
2022-09-15	09:03:03	0.364186	705.185	FALSE	85
2022-09-15	09:03:03	0.403881	705.589	FALSE	85
2022-09-15	09:03:03	0.410954	706	FALSE	85
2022-09-15	09:03:03	0.434669	706.435	FALSE	85
2022-09-15	09:03:04	0.646527	707.081	FALSE	85
2022-09-15	09:03:04	0.356501	707.438	FALSE	85
2022-09-15	09:03:04	0.422812	707.861	FALSE	85
2022-09-15	09:03:04	0.332888	708.194	FALSE	85
2022-09-15	09:03:05	0.366934	708.561	FALSE	85
2022-09-15	09:03:05	0.428664	708.989	FALSE	85
2022-09-15	09:03:05	0.510751	709.5	FALSE	85
2022-09-15	09:03:05	0.587494	710.088	FALSE	85
2022-09-15	09:03:06	0.516705	710.604	FALSE	85
2022-09-15	09:03:06	0.519962	711.124	FALSE	85
2022-09-15	09:03:06	0.602964	711.727	FALSE	85
2022-09-15	09:03:06	0.58958	712.317	FALSE	85
2022-09-15	09:03:07	0.541845	712.859	FALSE	85
2022-09-15	09:03:07	0.486425	713.345	FALSE	85
2022-09-15	09:03:07	0.452786	713.798	FALSE	85
2022-09-15	09:03:08	0.410242	714.208	FALSE	85
2022-09-15	09:03:08	0.449936	714.658	FALSE	85
2022-09-15	09:03:08	0.505102	715.163	FALSE	85
2022-09-15	09:03:08	0.471005	715.634	FALSE	85
2022-09-15	09:03:09	0.472379	716.106	FALSE	85
2022-09-15	09:03:09	0.502812	716.609	FALSE	85
2022-09-15	09:03:09	0.551972	717.161	FALSE	85
2022-09-15	09:03:09	0.580165	717.741	FALSE	85
2022-09-15	09:03:10	0.659657	718.401	FALSE	85
2022-09-15	09:03:10	0.71472	719.116	FALSE	85
2022-09-15	09:03:10	0.633906	719.75	FALSE	85
2022-09-15	09:03:10	0.645814	720.395	FALSE	85
2022-09-15	09:03:11	0.538282	720.934	FALSE	85
2022-09-15	09:03:11	0.481081	721.415	FALSE	85
2022-09-15	09:03:11	0.479911	721.895	FALSE	85
2022-09-15	09:03:12	0.77126	722.666	FALSE	85
2022-09-15	09:03:12	0.945712	723.612	FALSE	85
2022-09-15	09:03:12	0.881437	724.493	FALSE	85
2022-09-15	09:03:12	0.973346	725.467	FALSE	85
2022-09-15	09:03:13	1.30072	726.767	FALSE	85
2022-09-15	09:03:13	1.91818	728.685	FALSE	85
2022-09-15	09:03:13	2.28062	730.966	FALSE	85
2022-09-15	09:03:13	2.35146	733.317	FALSE	85
2022-09-15	09:03:14	3.4506	736.768	1	86
2022-09-15	09:03:14	4.60841	741.377	1	87
2022-09-15	09:03:14	3.65757	745.034	1	88
2022-09-15	09:03:14	2.84332	747.877	FALSE	88
2022-09-15	09:03:15	2.3366	750.214	FALSE	88
2022-09-15	09:03:15	2.05594	752.27	FALSE	88
2022-09-15	09:03:15	2.85711	755.127	FALSE	88
2022-09-15	09:03:16	3.02067	758.148	1	89
2022-09-15	09:03:16	3.3848	761.533	1	90
2022-09-15	09:03:16	3.64459	765.177	1	91
2022-09-15	09:03:16	3.4595	768.637	1	92
2022-09-15	09:03:17	3.35849	771.995	1	93
2022-09-15	09:03:17	4.72703	776.722	1	94
2022-09-15	09:03:17	5.26698	781.989	1	95
2022-09-15	09:03:17	3.72174	785.711	1	96
2022-09-15	09:03:18	1.80617	787.517	FALSE	96
2022-09-15	09:03:18	0.439148	787.956	FALSE	96
2022-09-15	09:03:18	0.395178	788.351	FALSE	96
2022-09-15	09:03:18	0.165611	788.517	FALSE	96
2022-09-15	09:03:19	0.208359	788.725	FALSE	96
2022-09-15	09:03:19	0.165407	788.891	FALSE	96
2022-09-15	09:03:19	0.220674	789.111	FALSE	96
2022-09-15	09:03:19	0.194873	789.306	FALSE	96
2022-09-15	09:03:20	0.216451	789.523	FALSE	96
2022-09-15	09:03:20	0.317061	789.84	FALSE	96
2022-09-15	09:03:20	0.268766	790.109	FALSE	96
2022-09-15	09:03:21	0.517773	790.626	FALSE	96
2022-09-15	09:03:21	1.7307	792.357	FALSE	96
2022-09-15	09:03:21	3.50734	795.864	1	97
2022-09-15	09:03:21	9.21523	805.08	1	98
2022-09-15	09:03:22	7.94708	813.027	1	99
2022-09-15	09:03:22	6.42596	819.453	1	100
2022-09-15	09:03:22	2.01335	821.466	FALSE	100
2022-09-15	09:03:22	1.47447	822.94	FALSE	100
2022-09-15	09:03:23	2.03879	824.979	FALSE	100
2022-09-15	09:03:23	0.417977	825.397	FALSE	100
2022-09-15	09:03:23	0.359351	825.757	FALSE	100
2022-09-15	09:03:23	0.490496	826.247	FALSE	100
2022-09-15	09:03:24	0.191921	826.439	FALSE	100
2022-09-15	09:03:24	0.457061	826.896	FALSE	100
2022-09-15	09:03:24	2.2023	829.098	FALSE	100
2022-09-15	09:03:25	6.29909	835.397	1	101
2022-09-15	09:03:25	5.49324	840.891	1	102
2022-09-15	09:03:25	4.59029	845.481	1	103
2022-09-15	09:03:25	5.08169	850.563	1	104
2022-09-15	09:03:26	1.29823	851.861	FALSE	104
2022-09-15	09:03:26	0.8907	852.752	FALSE	104
2022-09-15	09:03:26	1.32312	854.075	FALSE	104
2022-09-15	09:03:26	2.18541	856.26	FALSE	104
2022-09-15	09:03:27	1.61452	857.875	FALSE	104
2022-09-15	09:03:27	2.32027	860.195	FALSE	104
2022-09-15	09:03:27	5.71232	865.907	1	105
2022-09-15	09:03:27	5.07492	870.982	1	106
2022-09-15	09:03:28	5.34683	876.329	1	107
2022-09-15	09:03:28	3.78571	880.115	1	108
2022-09-15	09:03:28	1.54123	881.656	FALSE	108
2022-09-15	09:03:28	2.56093	884.217	FALSE	108
2022-09-15	09:03:29	3.76703	887.984	1	109
2022-09-15	09:03:29	3.81284	891.797	1	110
2022-09-15	09:03:29	1.34251	893.139	FALSE	110
2022-09-15	09:03:30	1.34281	894.482	FALSE	110
2022-09-15	09:03:30	5.17309	899.655	1	111
2022-09-15	09:03:30	3.83782	903.493	1	112
2022-09-15	09:03:30	6.1136	909.607	1	113
2022-09-15	09:03:31	7.65818	917.265	1	114
2022-09-15	09:03:31	5.18561	922.45	1	115
2022-09-15	09:03:31	5.44825	927.899	1	116
2022-09-15	09:03:31	2.6853	930.584	FALSE	116
2022-09-15	09:03:32	2.04525	932.629	FALSE	116
2022-09-15	09:03:32	1.12861	933.758	FALSE	116
2022-09-15	09:03:32	0.184847	933.943	FALSE	116
2022-09-15	09:03:32	0.333855	934.276	FALSE	116
2022-09-15	09:03:33	0.234364	934.511	FALSE	116
2022-09-15	09:03:33	0.269173	934.78	FALSE	116
2022-09-15	09:03:33	0.291819	935.072	FALSE	116
2022-09-15	09:03:34	0.126018	935.198	FALSE	116
2022-09-15	09:03:34	0.334568	935.532	FALSE	116
2022-09-15	09:03:34	0.23528	935.768	FALSE	116
2022-09-15	09:03:34	0.333957	936.102	FALSE	116
2022-09-15	09:03:35	0.287545	936.389	FALSE	116
2022-09-15	09:03:35	0.317977	936.707	FALSE	116
2022-09-15	09:03:35	0.359707	937.067	FALSE	116
2022-09-15	09:03:35	0.379657	937.447	FALSE	116
2022-09-15	09:03:36	0.407494	937.854	FALSE	116
2022-09-15	09:03:36	0.689886	938.544	FALSE	116
2022-09-15	09:03:36	1.7906	940.334	FALSE	116
2022-09-15	09:03:36	4.56347	944.898	1	117
2022-09-15	09:03:37	9.27299	954.171	1	118
2022-09-15	09:03:37	8.34647	962.517	1	119
2022-09-15	09:03:37	4.03467	966.552	1	120
2022-09-15	09:03:37	1.24149	967.794	FALSE	120
2022-09-15	09:03:38	0.333041	968.127	FALSE	120
2022-09-15	09:03:38	0.351616	968.478	FALSE	120
2022-09-15	09:03:38	0.195585	968.674	FALSE	120
2022-09-15	09:03:39	0.302863	968.977	FALSE	120
2022-09-15	09:03:39	0.168512	969.145	FALSE	120
2022-09-15	09:03:39	0.205	969.35	FALSE	120
2022-09-15	09:03:39	0.216247	969.566	FALSE	120
2022-09-15	09:03:40	0.186425	969.753	FALSE	120
2022-09-15	09:03:40	0.322048	970.075	FALSE	120
2022-09-15	09:03:40	0.419962	970.495	FALSE	120
2022-09-15	09:03:40	0.39126	970.886	FALSE	120
2022-09-15	09:03:41	0.600064	971.486	FALSE	120
2022-09-15	09:03:41	0.534008	972.02	FALSE	120
2022-09-15	09:03:41	0.422863	972.443	FALSE	120
2022-09-15	09:03:41	0.393499	972.837	FALSE	120
2022-09-15	09:03:42	0.351667	973.188	FALSE	120
2022-09-15	09:03:42	0.402303	973.591	FALSE	120
2022-09-15	09:03:42	0.427596	974.018	FALSE	120
2022-09-15	09:03:43	0.601183	974.619	FALSE	120
2022-09-15	09:03:43	1.12469	975.744	FALSE	120
2022-09-15	09:03:43	1.14851	976.893	FALSE	120
2022-09-15	09:03:43	1.58383	978.476	FALSE	120
2022-09-15	09:03:44	1.26698	979.743	FALSE	120
2022-09-15	09:03:44	1.20301	980.946	FALSE	120
2022-09-15	09:03:44	0.783371	981.73	FALSE	120
2022-09-15	09:03:44	0.528206	982.258	FALSE	120
2022-09-15	09:03:45	0.397061	982.655	FALSE	120
2022-09-15	09:03:45	0.427596	983.083	FALSE	120
2022-09-15	09:03:45	0.344491	983.427	FALSE	120
2022-09-15	09:03:45	0.360064	983.787	FALSE	120
2022-09-15	09:03:46	0.389326	984.176	FALSE	120
2022-09-15	09:03:46	0.358944	984.535	FALSE	120
2022-09-15	09:03:46	0.36729	984.903	FALSE	120
2022-09-15	09:03:47	0.392888	985.296	FALSE	120
2022-09-15	09:03:47	0.385916	985.681	FALSE	120
2022-09-15	09:03:47	0.412379	986.094	FALSE	120
2022-09-15	09:03:47	0.487646	986.582	FALSE	120
2022-09-15	09:03:48	0.559555	987.141	FALSE	120
2022-09-15	09:03:48	0.598435	987.74	FALSE	120
2022-09-15	09:03:48	0.546934	988.286	FALSE	120
2022-09-15	09:03:48	0.597366	988.884	FALSE	120
2022-09-15	09:03:49	0.878995	989.763	FALSE	120
2022-09-15	09:03:49	1.11223	990.875	FALSE	120
2022-09-15	09:03:49	1.52622	992.401	FALSE	120
2022-09-15	09:03:49	2.548	994.949	FALSE	120
2022-09-15	09:03:50	2.64754	997.597	FALSE	120
2022-09-15	09:03:50	1.98302	999.58	FALSE	120
2022-09-15	09:03:50	1.57156	1001.15	FALSE	120
2022-09-15	09:03:50	2.19599	1003.35	FALSE	120
2022-09-15	09:03:51	3.51742	1006.86	1	121
2022-09-15	09:03:51	4.81843	1011.68	1	122
2022-09-15	09:03:51	5.33309	1017.02	1	123
2022-09-15	09:03:52	6.08154	1023.1	1	124
2022-09-15	09:03:52	4.94398	1028.04	1	125
2022-09-15	09:03:52	4.59797	1032.64	1	126
2022-09-15	09:03:52	4.74372	1037.38	1	127
2022-09-15	09:03:53	5.06627	1042.45	1	128
2022-09-15	09:03:53	4.98383	1047.43	1	129
2022-09-15	09:03:53	6.25767	1053.69	1	130
2022-09-15	09:03:53	6.5107	1060.2	1	131
2022-09-15	09:03:54	2.36256	1062.56	FALSE	131
2022-09-15	09:03:54	2.72815	1065.29	FALSE	131
2022-09-15	09:03:54	1.34912	1066.64	FALSE	131
2022-09-15	09:03:54	1.1623	1067.8	FALSE	131
2022-09-15	09:03:55	1.16449	1068.97	FALSE	131
2022-09-15	09:03:55	1.66551	1070.63	FALSE	131
2022-09-15	09:03:55	2.01202	1072.65	FALSE	131
2022-09-15	09:03:56	1.79187	1074.44	FALSE	131
2022-09-15	09:03:56	1.47477	1075.91	FALSE	131
2022-09-15	09:03:56	1.4049	1077.32	FALSE	131
2022-09-15	09:03:56	1.37808	1078.7	FALSE	131
2022-09-15	09:03:57	1.23732	1079.93	FALSE	131
2022-09-15	09:03:57	1.35106	1081.28	FALSE	131
2022-09-15	09:03:57	1.71182	1083	FALSE	131
2022-09-15	09:03:57	1.76352	1084.76	FALSE	131
2022-09-15	09:03:58	1.7762	1086.54	FALSE	131
2022-09-15	09:03:58	1.71879	1088.25	FALSE	131
2022-09-15	09:03:58	1.47248	1089.73	FALSE	131
2022-09-15	09:03:58	1.75742	1091.48	FALSE	131
2022-09-15	09:03:59	2.1249	1093.61	FALSE	131
2022-09-15	09:03:59	2.04088	1095.65	FALSE	131
2022-09-15	09:03:59	2.15818	1097.81	FALSE	131
2022-09-15	09:03:59	2.09472	1099.9	FALSE	131
2022-09-15	09:04:00	1.85869	1101.76	FALSE	131
2022-09-15	09:04:00	1.6362	1103.4	FALSE	131
2022-09-15	09:04:00	1.70342	1105.1	FALSE	131
2022-09-15	09:04:01	1.45961	1106.56	FALSE	131
2022-09-15	09:04:01	1.34072	1107.9	FALSE	131
2022-09-15	09:04:01	1.22078	1109.12	FALSE	131
2022-09-15	09:04:01	1.34978	1110.47	FALSE	131
2022-09-15	09:04:02	1.52887	1112	FALSE	131
2022-09-15	09:04:02	1.72444	1113.73	FALSE	131
2022-09-15	09:04:02	1.66434	1115.39	FALSE	131
2022-09-15	09:04:02	1.56174	1116.95	FALSE	131
2022-09-15	09:04:03	2.00454	1118.96	FALSE	131
2022-09-15	09:04:03	1.84571	1120.8	FALSE	131
2022-09-15	09:04:03	1.96688	1122.77	FALSE	131
2022-09-15	09:04:03	1.60032	1124.37	FALSE	131
2022-09-15	09:04:04	1.06184	1125.43	FALSE	131
2022-09-15	09:04:04	0.658384	1126.09	FALSE	131
2022-09-15	09:04:04	0.331819	1126.42	FALSE	131
2022-09-15	09:04:05	0.199148	1126.62	FALSE	131
2022-09-15	09:04:05	0.0925829	1126.71	FALSE	131
2022-09-15	09:04:05	0.0147204	1126.73	FALSE	131
2022-09-15	09:04:05	-0.0677732	1126.73	FALSE	131
2022-09-15	09:04:06	-0.142633	1126.73	FALSE	131
2022-09-15	09:04:06	-0.109147	1126.73	FALSE	131
2022-09-15	09:04:06	-0.074847	1126.73	FALSE	131
2022-09-15	09:04:06	-0.0959666	1126.73	FALSE	131
2022-09-15	09:04:07	-0.117239	1126.73	FALSE	131
2022-09-15	09:04:07	-0.22818	1126.73	FALSE	131
2022-09-15	09:04:07	0.142659	1126.87	FALSE	131
2022-09-15	09:04:07	1.1252	1128	FALSE	131
2022-09-15	09:04:08	3.36413	1131.36	1	132
2022-09-15	09:04:08	10.6021	1141.96	1	133
2022-09-15	09:04:08	18.9658	1160.93	1	134
2022-09-15	09:04:09	15.0782	1176.01	1	135
2022-09-15	09:04:09	12.1219	1188.13	1	136
2022-09-15	09:04:09	8.08474	1196.21	1	137
2022-09-15	09:04:09	5.90327	1202.12	1	138
2022-09-15	09:04:10	2.76617	1204.88	FALSE	138
2022-09-15	09:04:10	1.63665	1206.52	FALSE	138
2022-09-15	09:04:10	1.19813	1207.72	FALSE	138
2022-09-15	09:04:10	0.859402	1208.58	FALSE	138
2022-09-15	09:04:11	1.15889	1209.73	FALSE	138
2022-09-15	09:04:11	1.60698	1211.34	FALSE	138
2022-09-15	09:04:11	1.54383	1212.89	FALSE	138
2022-09-15	09:04:11	1.70912	1214.59	FALSE	138
2022-09-15	09:04:12	1.90444	1216.5	FALSE	138
2022-09-15	09:04:12	2.74032	1219.24	FALSE	138
2022-09-15	09:04:12	4.21121	1223.45	1	139
2022-09-15	09:04:12	2.80851	1226.26	FALSE	139
2022-09-15	09:04:13	2.10373	1228.36	FALSE	139
2022-09-15	09:04:13	0.918231	1229.28	FALSE	139
2022-09-15	09:04:13	0.721692	1230	FALSE	139
2022-09-15	09:04:14	0.61472	1230.62	FALSE	139
2022-09-15	09:04:14	0.669376	1231.29	FALSE	139
2022-09-15	09:04:14	0.67355	1231.96	FALSE	139
2022-09-15	09:04:14	1.04383	1233	FALSE	139
2022-09-15	09:04:15	2.81131	1235.82	FALSE	139
2022-09-15	09:04:15	4.12826	1239.94	1	140
2022-09-15	09:04:15	3.19044	1243.13	1	141
2022-09-15	09:04:15	4.04052	1247.17	1	142
2022-09-15	09:04:16	5.65482	1252.83	1	143
2022-09-15	09:04:16	3.9882	1256.82	1	144
2022-09-15	09:04:16	2.78057	1259.6	FALSE	144
2022-09-15	09:04:16	1.96123	1261.56	FALSE	144
2022-09-15	09:04:17	2.11477	1263.67	FALSE	144
2022-09-15	09:04:17	3.52123	1267.2	1	145
2022-09-15	09:04:17	4.22388	1271.42	1	146
2022-09-15	09:04:18	4.63217	1276.05	1	147
2022-09-15	09:04:18	4.5539	1280.61	1	148
2022-09-15	09:04:18	3.86093	1284.47	1	149
2022-09-15	09:04:18	4.39828	1288.86	1	150
2022-09-15	09:04:19	4.37055	1293.24	1	151
2022-09-15	09:04:19	4.33803	1297.57	1	152
2022-09-15	09:04:19	4.49533	1302.07	1	153
2022-09-15	09:04:19	4.54958	1306.62	1	154
2022-09-15	09:04:20	4.29268	1310.91	1	155
2022-09-15	09:04:20	4.14276	1315.05	1	156
2022-09-15	09:04:20	4.05589	1319.11	1	157
2022-09-15	09:04:20	3.96261	1323.07	1	158
2022-09-15	09:04:21	3.77889	1326.85	1	159
2022-09-15	09:04:21	3.83798	1330.69	1	160
2022-09-15	09:04:21	3.77406	1334.46	1	161
2022-09-15	09:04:21	3.64393	1338.11	1	162
2022-09-15	09:04:22	3.51696	1341.62	1	163
2022-09-15	09:04:22	3.6995	1345.32	1	164
2022-09-15	09:04:22	4.02556	1349.35	1	165
2022-09-15	09:04:23	4.51502	1353.86	1	166
2022-09-15	09:04:23	5.35808	1359.22	1	167
2022-09-15	09:04:23	8.27232	1367.49	1	168
2022-09-15	09:04:23	10.2288	1377.72	1	169
2022-09-15	09:04:24	6.87182	1384.6	1	170
2022-09-15	09:04:24	2.67721	1387.27	FALSE	170
2022-09-15	09:04:24	0.506781	1387.78	FALSE	170
2022-09-15	09:04:24	0.304644	1388.08	FALSE	170
2022-09-15	09:04:25	-0.0479768	1388.08	FALSE	170
2022-09-15	09:04:25	-0.115814	1388.08	FALSE	170
2022-09-15	09:04:25	-0.237086	1388.08	FALSE	170
2022-09-15	09:04:25	-0.483753	1388.08	FALSE	170
2022-09-15	09:04:26	-0.48818	1388.08	FALSE	170
2022-09-15	09:04:26	-0.574185	1388.08	FALSE	170
2022-09-15	09:04:26	-0.456882	1388.08	FALSE	170
2022-09-15	09:04:27	-0.268893	1388.08	FALSE	170
2022-09-15	09:04:27	-0.291234	1388.08	FALSE	170
2022-09-15	09:04:27	-0.202939	1388.08	FALSE	170
2022-09-15	09:04:27	-0.409402	1388.08	FALSE	170
2022-09-15	09:04:28	-0.257799	1388.08	FALSE	170
2022-09-15	09:04:28	-0.176933	1388.08	FALSE	170
2022-09-15	09:04:28	-0.0259921	1388.08	FALSE	170
2022-09-15	09:04:28	0.0152802	1388.1	FALSE	170
2022-09-15	09:04:29	0.0276465	1388.13	FALSE	170
2022-09-15	09:04:29	-0.0433458	1388.13	FALSE	170
2022-09-15	09:04:29	0.00871527	1388.14	FALSE	170
2022-09-15	09:04:29	-0.0654323	1388.14	FALSE	170
2022-09-15	09:04:30	0.538435	1388.67	FALSE	170
2022-09-15	09:04:30	2.97558	1391.65	FALSE	170
2022-09-15	09:04:30	7.53324	1399.18	1	171
2022-09-15	09:04:31	2.25564	1401.44	FALSE	171
2022-09-15	09:04:31	0.707036	1402.15	FALSE	171
2022-09-15	09:04:31	0.174975	1402.32	FALSE	171
2022-09-15	09:04:31	-0.0610557	1402.32	FALSE	171
2022-09-15	09:04:32	1.59528	1403.92	FALSE	171
2022-09-15	09:04:32	4.96749	1408.88	1	172
2022-09-15	09:04:32	5.26342	1414.15	1	173
2022-09-15	09:04:32	12.3198	1426.47	1	174
2022-09-15	09:04:33	1.84709	1428.31	FALSE	174
2022-09-15	09:04:33	0.00785013	1428.32	FALSE	174
2022-09-15	09:04:33	0.0671376	1428.39	FALSE	174
2022-09-15	09:04:33	0.0149748	1428.4	FALSE	174
2022-09-15	09:04:34	0.0549239	1428.46	FALSE	174
2022-09-15	09:04:34	-0.0515901	1428.46	FALSE	174
2022-09-15	09:04:34	0.186679	1428.65	FALSE	174
2022-09-15	09:04:34	0.62098	1429.27	FALSE	174
2022-09-15	09:04:35	3.08953	1432.36	1	175
2022-09-15	09:04:35	8.26968	1440.63	1	176
2022-09-15	09:04:35	13.4565	1454.08	1	177
2022-09-15	09:04:36	11.5045	1465.59	1	178
2022-09-15	09:04:36	9.92836	1475.51	1	179
2022-09-15	09:04:36	8.36937	1483.88	1	180
2022-09-15	09:04:36	7.91105	1491.8	1	181
2022-09-15	09:04:37	6.1197	1497.91	1	182
2022-09-15	09:04:37	6.74775	1504.66	1	183
2022-09-15	09:04:37	5.73212	1510.39	1	184
2022-09-15	09:04:37	2.90892	1513.3	FALSE	184
2022-09-15	09:04:38	0.986323	1514.29	FALSE	184
2022-09-15	09:04:38	0.205356	1514.5	FALSE	184
2022-09-15	09:04:38	0.257468	1514.75	FALSE	184
2022-09-15	09:04:38	0.403372	1515.16	FALSE	184
2022-09-15	09:04:39	0.339453	1515.5	FALSE	184
2022-09-15	09:04:39	0.196145	1515.69	FALSE	184
2022-09-15	09:04:39	0.177316	1515.87	FALSE	184
2022-09-15	09:04:40	0.0224048	1515.89	FALSE	184
2022-09-15	09:04:40	0.136858	1516.03	FALSE	184
2022-09-15	09:04:40	0.108461	1516.14	FALSE	184
2022-09-15	09:04:40	0.163117	1516.3	FALSE	184
2022-09-15	09:04:41	0.111463	1516.41	FALSE	184
2022-09-15	09:04:41	6.53741	1522.95	1	185
2022-09-15	09:04:41	10.271	1533.22	1	186
2022-09-15	09:04:41	9.77543	1543	1	187
2022-09-15	09:04:42	9.57609	1552.57	1	188
2022-09-15	09:04:42	5.61314	1558.18	1	189
2022-09-15	09:04:42	11.5779	1569.76	1	190
2022-09-15	09:04:42	9.51131	1579.27	1	191
2022-09-15	09:04:43	5.15339	1584.43	1	192
2022-09-15	09:04:43	15.3759	1599.8	1	193
2022-09-15	09:04:43	12.8311	1612.63	1	194
2022-09-15	09:04:43	10.2328	1622.87	1	195
2022-09-15	09:04:44	14.087	1636.95	1	196
2022-09-15	09:04:44	12.7714	1649.73	1	197
2022-09-15	09:04:44	13.1385	1662.86	1	198
2022-09-15	09:04:45	6.12571	1668.99	1	199
2022-09-15	09:04:45	9.28357	1678.27	1	200
2022-09-15	09:04:45	11.1324	1689.41	1	201
2022-09-15	09:04:45	11.3436	1700.75	1	202
2022-09-15	09:04:46	15.2746	1716.02	1	203
2022-09-15	09:04:46	12.0041	1728.03	1	204
2022-09-15	09:04:46	17.4845	1745.51	1	205
2022-09-15	09:04:46	9.50001	1755.01	1	206
2022-09-15	09:04:47	10.1842	1765.2	1	207
2022-09-15	09:04:47	7.51563	1772.71	1	208
2022-09-15	09:04:47	9.41416	1782.13	1	209
2022-09-15	09:04:47	17.7461	1799.87	1	210
2022-09-15	09:04:48	23.4028	1823.27	1	211
2022-09-15	09:04:48	20.7058	1843.98	1	212
2022-09-15	09:04:48	9.2793	1853.26	1	213
2022-09-15	09:04:49	12.9307	1866.19	1	214
2022-09-15	09:04:49	19.5511	1885.74	1	215
2022-09-15	09:04:49	10.9956	1896.74	1	216
2022-09-15	09:04:49	10.7318	1907.47	1	217
2022-09-15	09:04:50	10.8582	1918.33	1	218
2022-09-15	09:04:50	10.1215	1928.45	1	219
2022-09-15	09:04:50	13.3816	1941.83	1	220
2022-09-15	09:04:50	12.606	1954.44	1	221
2022-09-15	09:04:51	15.0504	1969.49	1	222
2022-09-15	09:04:51	9.62428	1979.11	1	223
2022-09-15	09:04:51	10.3657	1989.48	1	224
2022-09-15	09:04:51	14.1814	2003.66	1	225
2022-09-15	09:04:52	11.7451	2015.4	1	226
2022-09-15	09:04:52	16.7773	2032.18	1	227
2022-09-15	09:04:52	6.86321	2039.04	1	228
2022-09-15	09:04:52	10.9256	2049.97	1	229
2022-09-15	09:04:53	7.79838	2057.77	1	230
2022-09-15	09:04:53	10.871	2068.64	1	231
2022-09-15	09:04:53	12.5445	2081.18	1	232
2022-09-15	09:04:54	9.7938	2090.98	1	233
2022-09-15	09:04:54	17.5915	2108.57	1	234
2022-09-15	09:04:54	9.99253	2118.56	1	235
2022-09-15	09:04:54	9.30367	2127.86	1	236
2022-09-15	09:04:55	5.45624	2133.32	1	237
2022-09-15	09:04:55	6.58805	2139.91	1	238
2022-09-15	09:04:55	8.07151	2147.98	1	239
2022-09-15	09:04:55	7.84495	2155.83	1	240
2022-09-15	09:04:56	9.15726	2164.98	1	241
2022-09-15	09:04:56	6.68393	2171.67	1	242
2022-09-15	09:04:56	7.10047	2178.77	1	243
2022-09-15	09:04:56	7.49395	2186.26	1	244
2022-09-15	09:04:57	10.3736	2196.63	1	245
2022-09-15	09:04:57	14.0456	2210.68	1	246
2022-09-15	09:04:57	10.4341	2221.11	1	247
2022-09-15	09:04:58	14.034	2235.15	1	248
2022-09-15	09:04:58	5.16439	2240.31	1	249
2022-09-15	09:04:58	8.14586	2248.46	1	250
2022-09-15	09:04:58	11.717	2260.18	1	251
2022-09-15	09:04:59	10.3812	2270.56	1	252
2022-09-15	09:04:59	11.9687	2282.53	1	253
2022-09-15	09:04:59	5.805	2288.33	1	254
2022-09-15	09:04:59	8.3651	2296.7	1	255
2022-09-15	09:05:00	8.48622	2305.18	1	256
2022-09-15	09:05:00	8.46642	2313.65	1	257
2022-09-15	09:05:00	8.79044	2322.44	1	258
2022-09-15	09:05:00	1.9934	2324.43	FALSE	258
2022-09-15	09:05:01	1.28296	2325.72	FALSE	258
2022-09-15	09:05:01	3.05818	2328.77	1	259
2022-09-15	09:05:01	0.427748	2329.2	FALSE	259
2022-09-15	09:05:02	0.381896	2329.58	FALSE	259
2022-09-15	09:05:02	0.0751275	2329.66	FALSE	259
2022-09-15	09:05:02	0.106832	2329.77	FALSE	259
2022-09-15	09:05:02	0.177265	2329.94	FALSE	259
2022-09-15	09:05:03	0.587799	2330.53	FALSE	259
2022-09-15	09:05:03	0.725763	2331.26	FALSE	259
2022-09-15	09:05:03	0.201947	2331.46	FALSE	259
2022-09-15	09:05:03	-0.0524552	2331.46	FALSE	259
2022-09-15	09:05:04	0.185814	2331.64	FALSE	259
2022-09-15	09:05:04	0.304593	2331.95	FALSE	259
2022-09-15	09:05:04	0.190191	2332.14	FALSE	259
2022-09-15	09:05:04	0.304186	2332.44	FALSE	259
2022-09-15	09:05:05	0.193244	2332.64	FALSE	259
2022-09-15	09:05:05	0.394313	2333.03	FALSE	259
2022-09-15	09:05:05	0.159657	2333.19	FALSE	259
2022-09-15	09:05:05	0.503626	2333.69	FALSE	259
2022-09-15	09:05:06	0.16159	2333.86	FALSE	259
2022-09-15	09:05:06	0.303422	2334.16	FALSE	259
2022-09-15	09:05:06	0.0638297	2334.22	FALSE	259
2022-09-15	09:05:07	0.27869	2334.5	FALSE	259
2022-09-15	09:05:07	0.0637788	2334.56	FALSE	259
2022-09-15	09:05:07	0.264746	2334.83	FALSE	259
2022-09-15	09:05:07	0.0323284	2334.86	FALSE	259
2022-09-15	09:05:08	0.278639	2335.14	FALSE	259
2022-09-15	09:05:08	0.491463	2335.63	FALSE	259
2022-09-15	09:05:08	1.48042	2337.11	FALSE	259
2022-09-15	09:05:08	1.0391	2338.15	FALSE	259
2022-09-15	09:05:09	1.29899	2339.45	FALSE	259
2022-09-15	09:05:09	4.73563	2344.19	1	260
2022-09-15	09:05:09	8.92011	2353.11	1	261
2022-09-15	09:05:09	6.18835	2359.29	1	262
2022-09-15	09:05:10	5.5821	2364.88	1	263
2022-09-15	09:05:10	9.94937	2374.83	1	264
2022-09-15	09:05:10	9.75426	2384.58	1	265
2022-09-15	09:05:11	14.5978	2399.18	1	266
2022-09-15	09:05:11	11.8976	2411.08	1	267
2022-09-15	09:05:11	4.80327	2415.88	1	268
2022-09-15	09:05:11	11.6284	2427.51	1	269
2022-09-15	09:05:12	4.52714	2432.03	1	270
2022-09-15	09:05:12	9.93935	2441.97	1	271
2022-09-15	09:05:12	10.9107	2452.88	1	272
2022-09-15	09:05:12	6.19599	2459.08	1	273
2022-09-15	09:05:13	14.2873	2473.37	1	274
2022-09-15	09:05:13	8.11187	2481.48	1	275
2022-09-15	09:05:13	5.90245	2487.38	1	276
2022-09-15	09:05:13	20.2482	2507.63	1	277
2022-09-15	09:05:14	8.90622	2516.54	1	278
2022-09-15	09:05:14	5.70576	2522.24	1	279
2022-09-15	09:05:14	13.6403	2535.88	1	280
2022-09-15	09:05:14	3.45177	2539.33	1	281
2022-09-15	09:05:15	12.7871	2552.12	1	282
2022-09-15	09:05:15	13.6799	2565.8	1	283
2022-09-15	09:05:15	9.5111	2575.31	1	284
2022-09-15	09:05:16	20.1283	2595.44	1	285
2022-09-15	09:05:16	27.4027	2622.84	1	286
2022-09-15	09:05:16	15.506	2638.35	1	287
2022-09-15	09:05:16	11.793	2650.14	1	288
2022-09-15	09:05:17	8.08968	2658.23	1	289
2022-09-15	09:05:17	6.40785	2664.64	1	290
2022-09-15	09:05:17	5.86154	2670.5	1	291
2022-09-15	09:05:17	5.25421	2675.76	1	292
2022-09-15	09:05:18	6.18174	2681.94	1	293
2022-09-15	09:05:18	11.1095	2693.05	1	294
2022-09-15	09:05:18	11.6287	2704.68	1	295
2022-09-15	09:05:18	12.6293	2717.31	1	296
2022-09-15	09:05:19	14.8949	2732.2	1	297
2022-09-15	09:05:19	10.497	2742.7	1	298
2022-09-15	09:05:19	7.48515	2750.18	1	299
2022-09-15	09:05:20	3.74296	2753.93	1	300
2022-09-15	09:05:20	6.83634	2760.76	1	301
2022-09-15	09:05:20	9.60515	2770.37	1	302
2022-09-15	09:05:20	19.6217	2789.99	1	303
2022-09-15	09:05:21	13.9644	2803.95	1	304
2022-09-15	09:05:21	6.61589	2810.57	1	305
2022-09-15	09:05:21	5.13904	2815.71	1	306
2022-09-15	09:05:22	2.72953	2818.44	FALSE	306
2022-09-15	09:05:22	0.388512	2818.83	FALSE	306
2022-09-15	09:05:22	0.510852	2819.34	FALSE	306
2022-09-15	09:05:22	0.140929	2819.48	FALSE	306
2022-09-15	09:05:22	-0.399478	2819.48	FALSE	306
2022-09-15	09:05:23	-0.554949	2819.48	FALSE	306
2022-09-15	09:05:23	-0.850673	2819.48	FALSE	306
2022-09-15	09:05:23	-0.746908	2819.48	FALSE	306
2022-09-15	09:05:23	-0.742633	2819.48	FALSE	306
2022-09-15	09:05:24	-0.83902	2819.48	FALSE	306
2022-09-15	09:05:24	-0.814999	2819.48	FALSE	306
2022-09-15	09:05:24	-0.732607	2819.48	FALSE	306
2022-09-15	09:05:25	-0.64019	2819.48	FALSE	306
2022-09-15	09:05:25	-0.307875	2819.48	FALSE	306
2022-09-15	09:05:25	-0.108893	2819.48	FALSE	306
2022-09-15	09:05:25	0.308003	2819.79	FALSE	306
2022-09-15	09:05:26	1.15752	2820.94	FALSE	306
2022-09-15	09:05:26	0.884186	2821.83	FALSE	306
2022-09-15	09:05:26	0.480115	2822.31	FALSE	306
2022-09-15	09:05:26	0.309122	2822.62	FALSE	306
2022-09-15	09:05:27	1.02688	2823.64	FALSE	306
2022-09-15	09:05:27	1.08927	2824.73	FALSE	306
2022-09-15	09:05:27	0.648002	2825.38	FALSE	306
2022-09-15	09:05:27	0.682303	2826.06	FALSE	306
2022-09-15	09:05:28	0.847392	2826.91	FALSE	306
2022-09-15	09:05:28	0.404797	2827.31	FALSE	306
2022-09-15	09:05:28	0.168257	2827.48	FALSE	306
2022-09-15	09:05:29	0.156959	2827.64	FALSE	306
2022-09-15	09:05:29	0.117214	2827.76	FALSE	306
2022-09-15	09:05:29	0.111769	2827.87	FALSE	306
2022-09-15	09:05:29	0.108512	2827.98	FALSE	306
2022-09-15	09:05:30	0.0901401	2828.07	FALSE	306
2022-09-15	09:05:30	0.100115	2828.17	FALSE	306
2022-09-15	09:05:30	0.164542	2828.33	FALSE	306
2022-09-15	09:05:30	0.158181	2828.49	FALSE	306
2022-09-15	09:05:31	0.178079	2828.67	FALSE	306
2022-09-15	09:05:31	0.169428	2828.84	FALSE	306
2022-09-15	09:05:31	0.178283	2829.02	FALSE	306
2022-09-15	09:05:31	0.183779	2829.2	FALSE	306
2022-09-15	09:05:32	0.203779	2829.4	FALSE	306
2022-09-15	09:05:32	0.224644	2829.63	FALSE	306
2022-09-15	09:05:32	0.22958	2829.86	FALSE	306
2022-09-15	09:05:33	0.242099	2830.1	FALSE	306
2022-09-15	09:05:33	0.388257	2830.49	FALSE	306
2022-09-15	09:05:33	0.522252	2831.01	FALSE	306
2022-09-15	09:05:33	0.200624	2831.21	FALSE	306
2022-09-15	09:05:34	0.1564	2831.37	FALSE	306
2022-09-15	09:05:34	0.15126	2831.52	FALSE	306
2022-09-15	09:05:34	0.309987	2831.83	FALSE	306
2022-09-15	09:05:34	0.330038	2832.16	FALSE	306
2022-09-15	09:05:35	0.212735	2832.37	FALSE	306
2022-09-15	09:05:35	0.217061	2832.59	FALSE	306
2022-09-15	09:05:35	0.223117	2832.81	FALSE	306
2022-09-15	09:05:35	0.215636	2833.03	FALSE	306
2022-09-15	09:05:36	0.243881	2833.27	FALSE	306
2022-09-15	09:05:36	0.29584	2833.57	FALSE	306
2022-09-15	09:05:36	0.299046	2833.87	FALSE	306
2022-09-15	09:05:36	0.241692	2834.11	FALSE	306
2022-09-15	09:05:37	0.172685	2834.28	FALSE	306
2022-09-15	09:05:37	0.143066	2834.42	FALSE	306
2022-09-15	09:05:37	0.107087	2834.53	FALSE	306
2022-09-15	09:05:38	0.0247458	2834.56	FALSE	306
2022-09-15	09:05:38	-0.0405977	2834.56	FALSE	306
2022-09-15	09:05:38	-0.303346	2834.56	FALSE	306
2022-09-15	09:05:38	-0.615916	2834.56	FALSE	306
2022-09-15	09:05:39	-1.04752	2834.56	FALSE	306
2022-09-15	09:05:39	-0.918409	2834.56	FALSE	306
2022-09-15	09:05:39	0.0596567	2834.62	FALSE	306
2022-09-15	09:05:39	1.1167	2835.73	FALSE	306
2022-09-15	09:05:40	1.73187	2837.46	FALSE	306
2022-09-15	09:05:40	1.07543	2838.54	FALSE	306
2022-09-15	09:05:40	1.02989	2839.57	FALSE	306
2022-09-15	09:05:40	1.72917	2841.3	FALSE	306
2022-09-15	09:05:41	1.20933	2842.51	FALSE	306
2022-09-15	09:05:41	0.726221	2843.23	FALSE	306
2022-09-15	09:05:41	0.814771	2844.05	FALSE	306
2022-09-15	09:05:42	0.508257	2844.56	FALSE	306
2022-09-15	09:05:42	0.411107	2844.97	FALSE	306
2022-09-15	09:05:42	0.485458	2845.45	FALSE	306
2022-09-15	09:05:42	0.405967	2845.86	FALSE	306
2022-09-15	09:05:43	0.324746	2846.18	FALSE	306
2022-09-15	09:05:43	0.304797	2846.49	FALSE	306
2022-09-15	09:05:43	0.260776	2846.75	FALSE	306
2022-09-15	09:05:43	0.229733	2846.98	FALSE	306
2022-09-15	09:05:44	0.18098	2847.16	FALSE	306
2022-09-15	09:05:44	0.220115	2847.38	FALSE	306
2022-09-15	09:05:44	0.202812	2847.58	FALSE	306
2022-09-15	09:05:44	0.207137	2847.79	FALSE	306
2022-09-15	09:05:45	0.211412	2848	FALSE	306
2022-09-15	09:05:45	0.228868	2848.23	FALSE	306
2022-09-15	09:05:45	0.231107	2848.46	FALSE	306
2022-09-15	09:05:45	0.215585	2848.68	FALSE	306
2022-09-15	09:05:46	0.233041	2848.91	FALSE	306
2022-09-15	09:05:46	0.2393	2849.15	FALSE	306
2022-09-15	09:05:46	0.215738	2849.37	FALSE	306
2022-09-15	09:05:47	0.177061	2849.54	FALSE	306
2022-09-15	09:05:47	0.281845	2849.82	FALSE	306
2022-09-15	09:05:47	0.414517	2850.24	FALSE	306
2022-09-15	09:05:47	0.529224	2850.77	FALSE	306
2022-09-15	09:05:48	0.70729	2851.48	FALSE	306
2022-09-15	09:05:48	0.649377	2852.13	FALSE	306
2022-09-15	09:05:48	0.874974	2853	FALSE	306
2022-09-15	09:05:48	2.31757	2855.32	FALSE	306
2022-09-15	09:05:49	4.60571	2859.92	1	307
2022-09-15	09:05:49	7.28103	2867.2	1	308
2022-09-15	09:05:49	7.45736	2874.66	1	309
2022-09-15	09:05:49	6.22652	2880.89	1	310
2022-09-15	09:05:50	4.56322	2885.45	1	311
2022-09-15	09:05:50	3.18851	2888.64	1	312
2022-09-15	09:05:50	4.10602	2892.75	1	313
2022-09-15	09:05:51	5.25889	2898	1	314
2022-09-15	09:05:51	6.94937	2904.95	1	315
2022-09-15	09:05:51	11.0828	2916.04	1	316
2022-09-15	09:05:51	9.56688	2925.6	1	317
2022-09-15	09:05:52	9.42377	2935.03	1	318
2022-09-15	09:05:52	11.2193	2946.25	1	319
2022-09-15	09:05:52	11.362	2957.61	1	320
2022-09-15	09:05:52	13.7519	2971.36	1	321
2022-09-15	09:05:53	15.5858	2986.95	1	322
2022-09-15	09:05:53	12.1553	2999.1	1	323
2022-09-15	09:05:53	9.53955	3008.64	1	324
2022-09-15	09:05:53	8.23131	3016.87	1	325
2022-09-15	09:05:54	9.25462	3026.13	1	326
2022-09-15	09:05:54	10.9857	3037.11	1	327
2022-09-15	09:05:54	8.7341	3045.85	1	328
2022-09-15	09:05:54	5.99741	3051.84	1	329
2022-09-15	09:05:55	6.87034	3058.72	1	330
2022-09-15	09:05:55	8.07813	3066.79	1	331
2022-09-15	09:05:55	10.6376	3077.43	1	332
2022-09-15	09:05:56	14.4535	3091.88	1	333
2022-09-15	09:05:56	18.194	3110.08	1	334
2022-09-15	09:05:56	21.5674	3131.65	1	335
2022-09-15	09:05:56	15.6477	3147.29	1	336
2022-09-15	09:05:57	10.9433	3158.24	1	337
2022-09-15	09:05:57	9.65176	3167.89	1	338
2022-09-15	09:05:57	10.4976	3178.39	1	339
2022-09-15	09:05:57	11.5829	3189.97	1	340
2022-09-15	09:05:58	8.07624	3198.05	1	341
2022-09-15	09:05:58	7.88057	3205.93	1	342
2022-09-15	09:05:58	7.36169	3213.29	1	343
2022-09-15	09:05:58	7.49609	3220.78	1	344
2022-09-15	09:05:59	7.93314	3228.72	1	345
2022-09-15	09:05:59	7.72378	3236.44	1	346
2022-09-15	09:05:59	7.83721	3244.28	1	347
2022-09-15	09:06:00	7.93166	3252.21	1	348
2022-09-15	09:06:00	7.88525	3260.09	1	349
2022-09-15	09:06:00	6.19828	3266.29	1	350
2022-09-15	09:06:00	5.02118	3271.31	1	351
2022-09-15	09:06:01	3.70678	3275.02	1	352
2022-09-15	09:06:01	2.91192	3277.93	FALSE	352
2022-09-15	09:06:01	1.69116	3279.62	FALSE	352
2022-09-15	09:06:01	0.425814	3280.05	FALSE	352
2022-09-15	09:06:02	0.339148	3280.39	FALSE	352
2022-09-15	09:06:02	0.121133	3280.51	FALSE	352
2022-09-15	09:06:02	-0.0421753	3280.51	FALSE	352
2022-09-15	09:06:02	-0.158002	3280.51	FALSE	352
2022-09-15	09:06:03	-0.357798	3280.51	FALSE	352
2022-09-15	09:06:03	-0.571335	3280.51	FALSE	352
2022-09-15	09:06:03	-0.785992	3280.51	FALSE	352
2022-09-15	09:06:04	-0.651844	3280.51	FALSE	352
2022-09-15	09:06:04	-0.361666	3280.51	FALSE	352
2022-09-15	09:06:04	0.00810459	3280.52	FALSE	352
2022-09-15	09:06:04	0.334568	3280.85	FALSE	352
2022-09-15	09:06:05	0.615178	3281.47	FALSE	352
2022-09-15	09:06:05	1.71976	3283.19	FALSE	352
2022-09-15	09:06:05	2.64912	3285.84	FALSE	352
2022-09-15	09:06:05	1.24912	3287.09	FALSE	352
2022-09-15	09:06:06	0.943473	3288.03	FALSE	352
2022-09-15	09:06:06	1.66159	3289.69	FALSE	352
2022-09-15	09:06:06	6.47116	3296.16	1	353
2022-09-15	09:06:06	11.071	3307.23	1	354
2022-09-15	09:06:07	10.6753	3317.91	1	355
2022-09-15	09:06:07	12.8478	3330.76	1	356
2022-09-15	09:06:07	17.1103	3347.87	1	357
2022-09-15	09:06:07	11.9884	3359.85	1	358
2022-09-15	09:06:08	6.87008	3366.72	1	359
2022-09-15	09:06:08	4.79502	3371.52	1	360
2022-09-15	09:06:08	3.06978	3374.59	1	361
2022-09-15	09:06:09	9.42265	3384.01	1	362
2022-09-15	09:06:09	16.6794	3400.69	1	363
2022-09-15	09:06:09	10.6752	3411.37	1	364
2022-09-15	09:06:09	8.71049	3420.08	1	365
2022-09-15	09:06:10	6.90098	3426.98	1	366
2022-09-15	09:06:10	2.87966	3429.86	FALSE	366
2022-09-15	09:06:10	0.615127	3430.47	FALSE	366
2022-09-15	09:06:10	0.811718	3431.28	FALSE	366
2022-09-15	09:06:11	0.435534	3431.72	FALSE	366
2022-09-15	09:06:11	0.435891	3432.16	FALSE	366
2022-09-15	09:06:11	0.429682	3432.59	FALSE	366
2022-09-15	09:06:11	0.323168	3432.91	FALSE	366
2022-09-15	09:06:12	0.409987	3433.32	FALSE	366
2022-09-15	09:06:12	0.395484	3433.71	FALSE	366
2022-09-15	09:06:12	0.437214	3434.15	FALSE	366
2022-09-15	09:06:13	0.404084	3434.56	FALSE	366
2022-09-15	09:06:13	0.857417	3435.41	FALSE	366
2022-09-15	09:06:13	4.23375	3439.65	1	367
2022-09-15	09:06:13	12.1746	3451.82	1	368
2022-09-15	09:06:14	13.2123	3465.03	1	369
2022-09-15	09:06:14	7.7594	3472.79	1	370
2022-09-15	09:06:14	4.32291	3477.12	1	371
2022-09-15	09:06:14	1.6709	3478.79	FALSE	371
2022-09-15	09:06:15	1.47503	3480.26	FALSE	371
2022-09-15	09:06:15	1.20576	3481.47	FALSE	371
2022-09-15	09:06:15	0.676502	3482.14	FALSE	371
2022-09-15	09:06:15	0.500267	3482.64	FALSE	371
2022-09-15	09:06:16	0.438588	3483.08	FALSE	371
2022-09-15	09:06:16	0.447545	3483.53	FALSE	371
2022-09-15	09:06:16	0.387137	3483.92	FALSE	371
2022-09-15	09:06:16	0.388715	3484.31	FALSE	371
2022-09-15	09:06:17	0.339555	3484.65	FALSE	371
2022-09-15	09:06:17	0.517723	3485.16	FALSE	371
2022-09-15	09:06:17	0.413346	3485.58	FALSE	371
2022-09-15	09:06:18	0.440674	3486.02	FALSE	371
2022-09-15	09:06:18	0.435534	3486.45	FALSE	371
2022-09-15	09:06:18	0.397367	3486.85	FALSE	371
2022-09-15	09:06:18	0.430751	3487.28	FALSE	371
2022-09-15	09:06:19	0.527595	3487.81	FALSE	371
2022-09-15	09:06:19	0.431514	3488.24	FALSE	371
2022-09-15	09:06:19	0.0889188	3488.33	FALSE	371
2022-09-15	09:06:19	0.0476465	3488.38	FALSE	371
2022-09-15	09:06:20	0.00846081	3488.39	FALSE	371
2022-09-15	09:06:20	-0.160903	3488.39	FALSE	371
2022-09-15	09:06:20	-0.238664	3488.39	FALSE	371
2022-09-15	09:06:20	0.196705	3488.58	FALSE	371
2022-09-15	09:06:21	0.886069	3489.47	FALSE	371
2022-09-15	09:06:21	2.14561	3491.61	FALSE	371
2022-09-15	09:06:21	2.02474	3493.64	FALSE	371
2022-09-15	09:06:22	2.20561	3495.84	FALSE	371
2022-09-15	09:06:22	6.40169	3502.25	1	372
2022-09-15	09:06:22	9.50433	3511.75	1	373
2022-09-15	09:06:22	1.38083	3513.13	FALSE	373
2022-09-15	09:06:23	5.0425	3518.17	1	374
2022-09-15	09:06:23	11.9191	3530.09	1	375

## Sheet: Tyr_martin_20229159059
						**GoPro Fitting: 849
2022-09-15	09:00:59	0.256043
2022-09-15	09:00:59	0.184084
2022-09-15	09:00:59	0.478282
2022-09-15	09:01:00	0.174364
2022-09-15	09:01:00	0.150445
2022-09-15	09:01:00	0.182507
2022-09-15	09:01:01	0.277825
2022-09-15	09:01:01	0.265153
2022-09-15	09:01:01	0.145255
2022-09-15	09:01:01	0.0968069
2022-09-15	09:01:02	0.135891
2022-09-15	09:01:02	0.208308
2022-09-15	09:01:02	0.225255
2022-09-15	09:01:02	0.169377
2022-09-15	09:01:03	0.141082
2022-09-15	09:01:03	0.115433
2022-09-15	09:01:03	0.192786
2022-09-15	09:01:03	0.252277
2022-09-15	09:01:04	0.155891
2022-09-15	09:01:04	0.243931
2022-09-15	09:01:04	0.210649
2022-09-15	09:01:04	0.194059
2022-09-15	09:01:05	0.191158
2022-09-15	09:01:05	0.211107
2022-09-15	09:01:05	0.221692
2022-09-15	09:01:06	0.195636
2022-09-15	09:01:06	0.204593
2022-09-15	09:01:06	0.207392
2022-09-15	09:01:06	0.207137
2022-09-15	09:01:07	0.216196
2022-09-15	09:01:07	0.228257
2022-09-15	09:01:07	0.245153
2022-09-15	09:01:07	0.242557
2022-09-15	09:01:08	0.243524
2022-09-15	09:01:08	0.243626
2022-09-15	09:01:08	0.259809
2022-09-15	09:01:08	0.268461
2022-09-15	09:01:09	0.285204
2022-09-15	09:01:09	0.271107
2022-09-15	09:01:09	0.293499
2022-09-15	09:01:10	0.273346
2022-09-15	09:01:10	0.288257
2022-09-15	09:01:10	0.463015
2022-09-15	09:01:10	0.309631
2022-09-15	09:01:11	0.361845
2022-09-15	09:01:11	0.14841
2022-09-15	09:01:11	0.181234
2022-09-15	09:01:11	0.228919
2022-09-15	09:01:12	0.280827
2022-09-15	09:01:12	0.230547
2022-09-15	09:01:12	0.192634
2022-09-15	09:01:12	0.213906
2022-09-15	09:01:13	0.20383
2022-09-15	09:01:13	0.198079
2022-09-15	09:01:13	0.202099
2022-09-15	09:01:14	0.205713
2022-09-15	09:01:14	0.35472
2022-09-15	09:01:14	0.519402
2022-09-15	09:01:14	0.171565
2022-09-15	09:01:15	0.0693259
2022-09-15	09:01:15	0.263372
2022-09-15	09:01:15	0.27187
2022-09-15	09:01:15	0.558842
2022-09-15	09:01:16	0.243728
2022-09-15	09:01:16	0.310089
2022-09-15	09:01:16	0.119097
2022-09-15	09:01:16	-0.131437
2022-09-15	09:01:17	-0.445941
2022-09-15	09:01:17	-0.50533
2022-09-15	09:01:17	-0.51103
2022-09-15	09:01:17	-0.235305
2022-09-15	09:01:18	-0.0370863
2022-09-15	09:01:18	0.201336
2022-09-15	09:01:18	0.203219
2022-09-15	09:01:19	0.214618
2022-09-15	09:01:19	0.15813
2022-09-15	09:01:19	0.142303
2022-09-15	09:01:19	0.0700893
2022-09-15	09:01:20	0.0926846
2022-09-15	09:01:20	0.465763
2022-09-15	09:01:20	0.381947
2022-09-15	09:01:20	2.58525
2022-09-15	09:01:21	2.83268
2022-09-15	09:01:21	1.66047
2022-09-15	09:01:21	2.27182
2022-09-15	09:01:21	1.68637
2022-09-15	09:01:22	0.636858
2022-09-15	09:01:22	0.413601
2022-09-15	09:01:22	0.531412
2022-09-15	09:01:23	0.605
2022-09-15	09:01:23	0.672277
2022-09-15	09:01:23	0.908562
2022-09-15	09:01:23	0.477468
2022-09-15	09:01:24	0.515636
2022-09-15	09:01:24	0.387595
2022-09-15	09:01:24	0.279402
2022-09-15	09:01:24	0.197265
2022-09-15	09:01:25	0.178893
2022-09-15	09:01:25	0.0183336
2022-09-15	09:01:25	0.0248984
2022-09-15	09:01:25	0.00179415
2022-09-15	09:01:26	0.0992496
2022-09-15	09:01:26	0.160522
2022-09-15	09:01:26	0.0604709
2022-09-15	09:01:27	0.112125
2022-09-15	09:01:27	0.0707
2022-09-15	09:01:27	0.254262
2022-09-15	09:01:27	0.00479668
2022-09-15	09:01:28	0.272226
2022-09-15	09:01:28	-0.0134731
2022-09-15	09:01:28	0.104491
2022-09-15	09:01:28	0.012074
2022-09-15	09:01:29	0.16444
2022-09-15	09:01:29	0.309427
2022-09-15	09:01:29	0.186578
2022-09-15	09:01:29	0.322048
2022-09-15	09:01:30	0.15243
2022-09-15	09:01:30	0.380013
2022-09-15	09:01:30	0.129733
2022-09-15	09:01:30	0.368053
2022-09-15	09:01:31	0.264338
2022-09-15	09:01:31	0.30902
2022-09-15	09:01:31	0.499707
2022-09-15	09:01:32	1.74922
2022-09-15	09:01:32	3.33192
2022-09-15	09:01:32	2.12734
2022-09-15	09:01:32	0.411361
2022-09-15	09:01:33	0.132379
2022-09-15	09:01:33	0.270547
2022-09-15	09:01:33	0.199657
2022-09-15	09:01:33	0.938588
2022-09-15	09:01:34	1.88892
2022-09-15	09:01:34	2.39569
2022-09-15	09:01:34	1.37538
2022-09-15	09:01:34	0.440522
2022-09-15	09:01:35	0.610802
2022-09-15	09:01:35	0.589835
2022-09-15	09:01:35	-0.0247707
2022-09-15	09:01:36	-0.0675697
2022-09-15	09:01:36	0.180216
2022-09-15	09:01:36	-0.112608
2022-09-15	09:01:36	0.0589952
2022-09-15	09:01:37	0.0171631
2022-09-15	09:01:37	1.10128
2022-09-15	09:01:37	1.38622
2022-09-15	09:01:37	3.08179
2022-09-15	09:01:38	5.15334
2022-09-15	09:01:38	4.30719
2022-09-15	09:01:38	5.68169
2022-09-15	09:01:38	5.90744
2022-09-15	09:01:39	10.3126
2022-09-15	09:01:39	6.30591
2022-09-15	09:01:39	13.0454
2022-09-15	09:01:39	9.52209
2022-09-15	09:01:40	7.18235
2022-09-15	09:01:40	7.64841
2022-09-15	09:01:40	8.00963
2022-09-15	09:01:41	6.81125
2022-09-15	09:01:41	5.72367
2022-09-15	09:01:41	5.30958
2022-09-15	09:01:41	5.82291
2022-09-15	09:01:42	4.77513
2022-09-15	09:01:42	2.64474
2022-09-15	09:01:42	0.610394
2022-09-15	09:01:42	0.316603
2022-09-15	09:01:43	0.0746694
2022-09-15	09:01:43	-0.0143382
2022-09-15	09:01:43	-0.0892491
2022-09-15	09:01:43	-0.198104
2022-09-15	09:01:44	-0.287112
2022-09-15	09:01:44	-0.551386
2022-09-15	09:01:44	-0.596323
2022-09-15	09:01:45	-0.829147
2022-09-15	09:01:45	-0.756068
2022-09-15	09:01:45	-0.910775
2022-09-15	09:01:45	-0.705636
2022-09-15	09:01:46	-0.762124
2022-09-15	09:01:46	-0.736933
2022-09-15	09:01:46	-0.593015
2022-09-15	09:01:46	-0.598918
2022-09-15	09:01:47	-0.50701
2022-09-15	09:01:47	-0.550368
2022-09-15	09:01:47	-0.382888
2022-09-15	09:01:47	-0.384821
2022-09-15	09:01:48	-0.243091
2022-09-15	09:01:48	-0.108537
2022-09-15	09:01:48	-0.11958
2022-09-15	09:01:49	0.711412
2022-09-15	09:01:49	2.28327
2022-09-15	09:01:49	3.38709
2022-09-15	09:01:49	3.0878
2022-09-15	09:01:50	8.23787
2022-09-15	09:01:50	10.0575
2022-09-15	09:01:50	5.84377
2022-09-15	09:01:50	3.11365
2022-09-15	09:01:51	0.962964
2022-09-15	09:01:51	0.472227
2022-09-15	09:01:51	0.159809
2022-09-15	09:01:51	0.735585
2022-09-15	09:01:52	0.678842
2022-09-15	09:01:52	0.315687
2022-09-15	09:01:52	0.950445
2022-09-15	09:01:52	1.39472
2022-09-15	09:01:53	2.09569
2022-09-15	09:01:53	3.15228
2022-09-15	09:01:53	8.25324
2022-09-15	09:01:54	6.37884
2022-09-15	09:01:54	9.49716
2022-09-15	09:01:54	7.08245
2022-09-15	09:01:54	5.0595
2022-09-15	09:01:55	4.80139
2022-09-15	09:01:55	7.96754
2022-09-15	09:01:55	13.0894
2022-09-15	09:01:55	7.93426
2022-09-15	09:01:56	6.95115
2022-09-15	09:01:56	9.56627
2022-09-15	09:01:56	7.82194
2022-09-15	09:01:56	5.66434
2022-09-15	09:01:57	2.85324
2022-09-15	09:01:57	2.52154
2022-09-15	09:01:57	1.24933
2022-09-15	09:01:58	2.36592
2022-09-15	09:01:58	0.465153
2022-09-15	09:01:58	0.316858
2022-09-15	09:01:58	0.182608
2022-09-15	09:01:59	0.269682
2022-09-15	09:01:59	-0.237595
2022-09-15	09:01:59	-0.183397
2022-09-15	09:01:59	-0.182837
2022-09-15	09:02:00	0.165611
2022-09-15	09:02:00	0.0853564
2022-09-15	09:02:00	0.314415
2022-09-15	09:02:00	0.225509
2022-09-15	09:02:01	0.325916
2022-09-15	09:02:01	0.196603
2022-09-15	09:02:01	0.228868
2022-09-15	09:02:02	0.276807
2022-09-15	09:02:02	0.250394
2022-09-15	09:02:02	0.175992
2022-09-15	09:02:02	1.29864
2022-09-15	09:02:03	1.63676
2022-09-15	09:02:03	4.08994
2022-09-15	09:02:03	1.93879
2022-09-15	09:02:03	2.69396
2022-09-15	09:02:04	3.22357
2022-09-15	09:02:04	1.35711
2022-09-15	09:02:04	0.347188
2022-09-15	09:02:04	0.0793005
2022-09-15	09:02:05	-0.0304705
2022-09-15	09:02:05	-0.133473
2022-09-15	09:02:05	0.0643386
2022-09-15	09:02:05	0.08042
2022-09-15	09:02:06	0.0554837
2022-09-15	09:02:06	0.122659
2022-09-15	09:02:06	0.000369216
2022-09-15	09:02:07	-0.242328
2022-09-15	09:02:07	-0.408028
2022-09-15	09:02:07	-0.409809
2022-09-15	09:02:07	-0.251183
2022-09-15	09:02:08	-0.0732185
2022-09-15	09:02:08	0.0603183
2022-09-15	09:02:08	0.213193
2022-09-15	09:02:08	0.461896
2022-09-15	09:02:09	0.535585
2022-09-15	09:02:09	0.536654
2022-09-15	09:02:09	0.707595
2022-09-15	09:02:09	0.671056
2022-09-15	09:02:10	0.481081
2022-09-15	09:02:10	0.480573
2022-09-15	09:02:10	0.340573
2022-09-15	09:02:11	0.362303
2022-09-15	09:02:11	0.355178
2022-09-15	09:02:11	0.342608
2022-09-15	09:02:11	0.182863
2022-09-15	09:02:12	0.148461
2022-09-15	09:02:12	0.191107
2022-09-15	09:02:12	0.172888
2022-09-15	09:02:12	0.171565
2022-09-15	09:02:13	0.165458
2022-09-15	09:02:13	0.161998
2022-09-15	09:02:13	0.162965
2022-09-15	09:02:14	0.166171
2022-09-15	09:02:14	0.169377
2022-09-15	09:02:14	0.193448
2022-09-15	09:02:14	0.187901
2022-09-15	09:02:15	0.188715
2022-09-15	09:02:15	0.186629
2022-09-15	09:02:15	0.178842
2022-09-15	09:02:15	0.141489
2022-09-15	09:02:16	0.0674429
2022-09-15	09:02:16	0.10729
2022-09-15	09:02:16	0.161133
2022-09-15	09:02:16	0.222863
2022-09-15	09:02:17	0.129122
2022-09-15	09:02:17	-0.0916409
2022-09-15	09:02:17	-0.144516
2022-09-15	09:02:17	-0.0848725
2022-09-15	09:02:18	0.491718
2022-09-15	09:02:18	0.312888
2022-09-15	09:02:18	0.590649
2022-09-15	09:02:18	0.639809
2022-09-15	09:02:19	1.30057
2022-09-15	09:02:19	0.317468
2022-09-15	09:02:19	0.332736
2022-09-15	09:02:20	0.325356
2022-09-15	09:02:20	0.238741
2022-09-15	09:02:20	0.192786
2022-09-15	09:02:20	0.181998
2022-09-15	09:02:21	-0.136832
2022-09-15	09:02:21	-0.35103
2022-09-15	09:02:21	-0.510928
2022-09-15	09:02:21	-0.679223
2022-09-15	09:02:22	-0.283702
2022-09-15	09:02:22	-0.0560684
2022-09-15	09:02:22	0.23813
2022-09-15	09:02:22	1.46357
2022-09-15	09:02:23	3.06683
2022-09-15	09:02:23	4.82342
2022-09-15	09:02:23	4.75945
2022-09-15	09:02:24	4.46556
2022-09-15	09:02:24	7.29029
2022-09-15	09:02:24	2.38892
2022-09-15	09:02:24	2.75004
2022-09-15	09:02:25	2.01182
2022-09-15	09:02:25	1.20851
2022-09-15	09:02:25	0.728104
2022-09-15	09:02:25	0.470751
2022-09-15	09:02:26	0.116094
2022-09-15	09:02:26	0.294975
2022-09-15	09:02:26	-0.0226333
2022-09-15	09:02:26	0.283117
2022-09-15	09:02:27	0.400573
2022-09-15	09:02:27	0.223015
2022-09-15	09:02:27	0.301998
2022-09-15	09:02:28	0.496756
2022-09-15	09:02:28	0.554771
2022-09-15	09:02:28	1.01752
2022-09-15	09:02:28	1.38983
2022-09-15	09:02:29	1.34215
2022-09-15	09:02:29	2.04347
2022-09-15	09:02:29	1.9395
2022-09-15	09:02:29	3.01513
2022-09-15	09:02:30	1.68271
2022-09-15	09:02:30	3.53126
2022-09-15	09:02:30	6.96983
2022-09-15	09:02:30	3.11345
2022-09-15	09:02:31	4.328
2022-09-15	09:02:31	4.22882
2022-09-15	09:02:31	3.82902
2022-09-15	09:02:31	1.76337
2022-09-15	09:02:32	0.446272
2022-09-15	09:02:32	1.04164
2022-09-15	09:02:32	0.46388
2022-09-15	09:02:33	0.375229
2022-09-15	09:02:33	0.243066
2022-09-15	09:02:33	0.211616
2022-09-15	09:02:33	0.0633208
2022-09-15	09:02:34	0.264796
2022-09-15	09:02:34	0.393804
2022-09-15	09:02:34	1.51569
2022-09-15	09:02:34	6.22897
2022-09-15	09:02:35	5.3392
2022-09-15	09:02:35	8.00444
2022-09-15	09:02:35	4.62749
2022-09-15	09:02:35	6.1596
2022-09-15	09:02:36	9.14393
2022-09-15	09:02:36	3.98826
2022-09-15	09:02:36	5.46347
2022-09-15	09:02:37	3.70556
2022-09-15	09:02:37	1.85279
2022-09-15	09:02:37	3.24988
2022-09-15	09:02:37	1.66724
2022-09-15	09:02:38	2.26541
2022-09-15	09:02:38	3.86088
2022-09-15	09:02:38	1.70403
2022-09-15	09:02:38	4.72286
2022-09-15	09:02:39	2.28327
2022-09-15	09:02:39	1.33813
2022-09-15	09:02:39	2.4106
2022-09-15	09:02:39	2.54861
2022-09-15	09:02:40	3.70642
2022-09-15	09:02:40	5.81792
2022-09-15	09:02:40	4.02307
2022-09-15	09:02:41	7.23685
2022-09-15	09:02:41	8.15044
2022-09-15	09:02:41	4.24698
2022-09-15	09:02:41	6.80779
2022-09-15	09:02:42	3.4708
2022-09-15	09:02:42	4.6907
2022-09-15	09:02:42	4.04703
2022-09-15	09:02:42	1.36648
2022-09-15	09:02:43	1.37701
2022-09-15	09:02:43	1.24637
2022-09-15	09:02:43	2.76724
2022-09-15	09:02:43	2.92301
2022-09-15	09:02:44	1.428
2022-09-15	09:02:44	0.670038
2022-09-15	09:02:44	0.56556
2022-09-15	09:02:44	0.727036
2022-09-15	09:02:45	0.734517
2022-09-15	09:02:45	0.737214
2022-09-15	09:02:45	0.738282
2022-09-15	09:02:46	0.712837
2022-09-15	09:02:46	0.392023
2022-09-15	09:02:46	0.541845
2022-09-15	09:02:46	0.42271
2022-09-15	09:02:47	0.197774
2022-09-15	09:02:47	0.244491
2022-09-15	09:02:47	0.217468
2022-09-15	09:02:47	0.298232
2022-09-15	09:02:48	0.143575
2022-09-15	09:02:48	0.287646
2022-09-15	09:02:48	0.173346
2022-09-15	09:02:48	0.279148
2022-09-15	09:02:49	0.0371631
2022-09-15	09:02:49	0.225713
2022-09-15	09:02:49	0.237061
2022-09-15	09:02:50	0.156349
2022-09-15	09:02:50	0.100115
2022-09-15	09:02:50	0.119962
2022-09-15	09:02:50	0.327087
2022-09-15	09:02:51	0.0446949
2022-09-15	09:02:51	0.277774
2022-09-15	09:02:51	0.127748
2022-09-15	09:02:51	0.220827
2022-09-15	09:02:52	0.0620994
2022-09-15	09:02:52	0.228817
2022-09-15	09:02:52	0.202354
2022-09-15	09:02:52	0.180929
2022-09-15	09:02:53	0.0545676
2022-09-15	09:02:53	0.0938551
2022-09-15	09:02:53	0.229173
2022-09-15	09:02:53	0.0512089
2022-09-15	09:02:54	0.349326
2022-09-15	09:02:54	1.40256
2022-09-15	09:02:54	6.06179
2022-09-15	09:02:55	11.3561
2022-09-15	09:02:55	15.7597
2022-09-15	09:02:55	12.4329
2022-09-15	09:02:55	7.28764
2022-09-15	09:02:56	9.42464
2022-09-15	09:02:56	3.89706
2022-09-15	09:02:56	7.65925
2022-09-15	09:02:56	3.88876
2022-09-15	09:02:57	2.38978
2022-09-15	09:02:57	3.705
2022-09-15	09:02:57	4.30632
2022-09-15	09:02:57	2.3249
2022-09-15	09:02:58	1.22816
2022-09-15	09:02:58	0.572786
2022-09-15	09:02:58	0.590852
2022-09-15	09:02:59	0.627799
2022-09-15	09:02:59	0.246272
2022-09-15	09:02:59	0.399657
2022-09-15	09:02:59	0.162303
2022-09-15	09:03:00	0.368359
2022-09-15	09:03:00	0.120573
2022-09-15	09:03:00	0.318384
2022-09-15	09:03:00	0.216094
2022-09-15	09:03:01	0.367799
2022-09-15	09:03:01	0.272176
2022-09-15	09:03:01	0.277977
2022-09-15	09:03:01	0.302863
2022-09-15	09:03:02	0.198944
2022-09-15	09:03:02	0.349428
2022-09-15	09:03:02	0.314262
2022-09-15	09:03:03	0.364186
2022-09-15	09:03:03	0.403881
2022-09-15	09:03:03	0.410954
2022-09-15	09:03:03	0.434669
2022-09-15	09:03:04	0.646527
2022-09-15	09:03:04	0.356501
2022-09-15	09:03:04	0.422812
2022-09-15	09:03:04	0.332888
2022-09-15	09:03:05	0.366934
2022-09-15	09:03:05	0.428664
2022-09-15	09:03:05	0.510751
2022-09-15	09:03:05	0.587494
2022-09-15	09:03:06	0.516705
2022-09-15	09:03:06	0.519962
2022-09-15	09:03:06	0.602964
2022-09-15	09:03:06	0.58958
2022-09-15	09:03:07	0.541845
2022-09-15	09:03:07	0.486425
2022-09-15	09:03:07	0.452786
2022-09-15	09:03:08	0.410242
2022-09-15	09:03:08	0.449936
2022-09-15	09:03:08	0.505102
2022-09-15	09:03:08	0.471005
2022-09-15	09:03:09	0.472379
2022-09-15	09:03:09	0.502812
2022-09-15	09:03:09	0.551972
2022-09-15	09:03:09	0.580165
2022-09-15	09:03:10	0.659657
2022-09-15	09:03:10	0.71472
2022-09-15	09:03:10	0.633906
2022-09-15	09:03:10	0.645814
2022-09-15	09:03:11	0.538282
2022-09-15	09:03:11	0.481081
2022-09-15	09:03:11	0.479911
2022-09-15	09:03:12	0.77126
2022-09-15	09:03:12	0.945712
2022-09-15	09:03:12	0.881437
2022-09-15	09:03:12	0.973346
2022-09-15	09:03:13	1.30072
2022-09-15	09:03:13	1.91818
2022-09-15	09:03:13	2.28062
2022-09-15	09:03:13	2.35146
2022-09-15	09:03:14	3.4506
2022-09-15	09:03:14	4.60841
2022-09-15	09:03:14	3.65757
2022-09-15	09:03:14	2.84332
2022-09-15	09:03:15	2.3366
2022-09-15	09:03:15	2.05594
2022-09-15	09:03:15	2.85711
2022-09-15	09:03:16	3.02067
2022-09-15	09:03:16	3.3848
2022-09-15	09:03:16	3.64459
2022-09-15	09:03:16	3.4595
2022-09-15	09:03:17	3.35849
2022-09-15	09:03:17	4.72703
2022-09-15	09:03:17	5.26698
2022-09-15	09:03:17	3.72174
2022-09-15	09:03:18	1.80617
2022-09-15	09:03:18	0.439148
2022-09-15	09:03:18	0.395178
2022-09-15	09:03:18	0.165611
2022-09-15	09:03:19	0.208359
2022-09-15	09:03:19	0.165407
2022-09-15	09:03:19	0.220674
2022-09-15	09:03:19	0.194873
2022-09-15	09:03:20	0.216451
2022-09-15	09:03:20	0.317061
2022-09-15	09:03:20	0.268766
2022-09-15	09:03:21	0.517773
2022-09-15	09:03:21	1.7307
2022-09-15	09:03:21	3.50734
2022-09-15	09:03:21	9.21523
2022-09-15	09:03:22	7.94708
2022-09-15	09:03:22	6.42596
2022-09-15	09:03:22	2.01335
2022-09-15	09:03:22	1.47447
2022-09-15	09:03:23	2.03879
2022-09-15	09:03:23	0.417977
2022-09-15	09:03:23	0.359351
2022-09-15	09:03:23	0.490496
2022-09-15	09:03:24	0.191921
2022-09-15	09:03:24	0.457061
2022-09-15	09:03:24	2.2023
2022-09-15	09:03:25	6.29909
2022-09-15	09:03:25	5.49324
2022-09-15	09:03:25	4.59029
2022-09-15	09:03:25	5.08169
2022-09-15	09:03:26	1.29823
2022-09-15	09:03:26	0.8907
2022-09-15	09:03:26	1.32312
2022-09-15	09:03:26	2.18541
2022-09-15	09:03:27	1.61452
2022-09-15	09:03:27	2.32027
2022-09-15	09:03:27	5.71232
2022-09-15	09:03:27	5.07492
2022-09-15	09:03:28	5.34683
2022-09-15	09:03:28	3.78571
2022-09-15	09:03:28	1.54123
2022-09-15	09:03:28	2.56093
2022-09-15	09:03:29	3.76703
2022-09-15	09:03:29	3.81284
2022-09-15	09:03:29	1.34251
2022-09-15	09:03:30	1.34281
2022-09-15	09:03:30	5.17309
2022-09-15	09:03:30	3.83782
2022-09-15	09:03:30	6.1136
2022-09-15	09:03:31	7.65818
2022-09-15	09:03:31	5.18561
2022-09-15	09:03:31	5.44825
2022-09-15	09:03:31	2.6853
2022-09-15	09:03:32	2.04525
2022-09-15	09:03:32	1.12861
2022-09-15	09:03:32	0.184847
2022-09-15	09:03:32	0.333855
2022-09-15	09:03:33	0.234364
2022-09-15	09:03:33	0.269173
2022-09-15	09:03:33	0.291819
2022-09-15	09:03:34	0.126018
2022-09-15	09:03:34	0.334568
2022-09-15	09:03:34	0.23528
2022-09-15	09:03:34	0.333957
2022-09-15	09:03:35	0.287545
2022-09-15	09:03:35	0.317977
2022-09-15	09:03:35	0.359707
2022-09-15	09:03:35	0.379657
2022-09-15	09:03:36	0.407494
2022-09-15	09:03:36	0.689886
2022-09-15	09:03:36	1.7906
2022-09-15	09:03:36	4.56347
2022-09-15	09:03:37	9.27299
2022-09-15	09:03:37	8.34647
2022-09-15	09:03:37	4.03467
2022-09-15	09:03:37	1.24149
2022-09-15	09:03:38	0.333041
2022-09-15	09:03:38	0.351616
2022-09-15	09:03:38	0.195585
2022-09-15	09:03:39	0.302863
2022-09-15	09:03:39	0.168512
2022-09-15	09:03:39	0.205
2022-09-15	09:03:39	0.216247
2022-09-15	09:03:40	0.186425
2022-09-15	09:03:40	0.322048
2022-09-15	09:03:40	0.419962
2022-09-15	09:03:40	0.39126
2022-09-15	09:03:41	0.600064
2022-09-15	09:03:41	0.534008
2022-09-15	09:03:41	0.422863
2022-09-15	09:03:41	0.393499
2022-09-15	09:03:42	0.351667
2022-09-15	09:03:42	0.402303
2022-09-15	09:03:42	0.427596
2022-09-15	09:03:43	0.601183
2022-09-15	09:03:43	1.12469
2022-09-15	09:03:43	1.14851
2022-09-15	09:03:43	1.58383
2022-09-15	09:03:44	1.26698
2022-09-15	09:03:44	1.20301
2022-09-15	09:03:44	0.783371
2022-09-15	09:03:44	0.528206
2022-09-15	09:03:45	0.397061
2022-09-15	09:03:45	0.427596
2022-09-15	09:03:45	0.344491
2022-09-15	09:03:45	0.360064
2022-09-15	09:03:46	0.389326
2022-09-15	09:03:46	0.358944
2022-09-15	09:03:46	0.36729
2022-09-15	09:03:47	0.392888
2022-09-15	09:03:47	0.385916
2022-09-15	09:03:47	0.412379
2022-09-15	09:03:47	0.487646
2022-09-15	09:03:48	0.559555
2022-09-15	09:03:48	0.598435
2022-09-15	09:03:48	0.546934
2022-09-15	09:03:48	0.597366
2022-09-15	09:03:49	0.878995
2022-09-15	09:03:49	1.11223
2022-09-15	09:03:49	1.52622
2022-09-15	09:03:49	2.548
2022-09-15	09:03:50	2.64754
2022-09-15	09:03:50	1.98302
2022-09-15	09:03:50	1.57156
2022-09-15	09:03:50	2.19599
2022-09-15	09:03:51	3.51742
2022-09-15	09:03:51	4.81843
2022-09-15	09:03:51	5.33309
2022-09-15	09:03:52	6.08154
2022-09-15	09:03:52	4.94398
2022-09-15	09:03:52	4.59797
2022-09-15	09:03:52	4.74372
2022-09-15	09:03:53	5.06627
2022-09-15	09:03:53	4.98383
2022-09-15	09:03:53	6.25767
2022-09-15	09:03:53	6.5107
2022-09-15	09:03:54	2.36256
2022-09-15	09:03:54	2.72815
2022-09-15	09:03:54	1.34912
2022-09-15	09:03:54	1.1623
2022-09-15	09:03:55	1.16449
2022-09-15	09:03:55	1.66551
2022-09-15	09:03:55	2.01202
2022-09-15	09:03:56	1.79187
2022-09-15	09:03:56	1.47477
2022-09-15	09:03:56	1.4049
2022-09-15	09:03:56	1.37808
2022-09-15	09:03:57	1.23732
2022-09-15	09:03:57	1.35106
2022-09-15	09:03:57	1.71182
2022-09-15	09:03:57	1.76352
2022-09-15	09:03:58	1.7762
2022-09-15	09:03:58	1.71879
2022-09-15	09:03:58	1.47248
2022-09-15	09:03:58	1.75742
2022-09-15	09:03:59	2.1249
2022-09-15	09:03:59	2.04088
2022-09-15	09:03:59	2.15818
2022-09-15	09:03:59	2.09472
2022-09-15	09:04:00	1.85869
2022-09-15	09:04:00	1.6362
2022-09-15	09:04:00	1.70342
2022-09-15	09:04:01	1.45961
2022-09-15	09:04:01	1.34072
2022-09-15	09:04:01	1.22078
2022-09-15	09:04:01	1.34978
2022-09-15	09:04:02	1.52887
2022-09-15	09:04:02	1.72444
2022-09-15	09:04:02	1.66434
2022-09-15	09:04:02	1.56174
2022-09-15	09:04:03	2.00454
2022-09-15	09:04:03	1.84571
2022-09-15	09:04:03	1.96688
2022-09-15	09:04:03	1.60032
2022-09-15	09:04:04	1.06184
2022-09-15	09:04:04	0.658384
2022-09-15	09:04:04	0.331819
2022-09-15	09:04:05	0.199148
2022-09-15	09:04:05	0.0925829
2022-09-15	09:04:05	0.0147204
2022-09-15	09:04:05	-0.0677732
2022-09-15	09:04:06	-0.142633
2022-09-15	09:04:06	-0.109147
2022-09-15	09:04:06	-0.074847
2022-09-15	09:04:06	-0.0959666
2022-09-15	09:04:07	-0.117239
2022-09-15	09:04:07	-0.22818
2022-09-15	09:04:07	0.142659
2022-09-15	09:04:07	1.1252
2022-09-15	09:04:08	3.36413
2022-09-15	09:04:08	10.6021
2022-09-15	09:04:08	18.9658
2022-09-15	09:04:09	15.0782
2022-09-15	09:04:09	12.1219
2022-09-15	09:04:09	8.08474
2022-09-15	09:04:09	5.90327
2022-09-15	09:04:10	2.76617
2022-09-15	09:04:10	1.63665
2022-09-15	09:04:10	1.19813
2022-09-15	09:04:10	0.859402
2022-09-15	09:04:11	1.15889
2022-09-15	09:04:11	1.60698
2022-09-15	09:04:11	1.54383
2022-09-15	09:04:11	1.70912
2022-09-15	09:04:12	1.90444
2022-09-15	09:04:12	2.74032
2022-09-15	09:04:12	4.21121
2022-09-15	09:04:12	2.80851
2022-09-15	09:04:13	2.10373
2022-09-15	09:04:13	0.918231
2022-09-15	09:04:13	0.721692
2022-09-15	09:04:14	0.61472
2022-09-15	09:04:14	0.669376
2022-09-15	09:04:14	0.67355
2022-09-15	09:04:14	1.04383
2022-09-15	09:04:15	2.81131
2022-09-15	09:04:15	4.12826
2022-09-15	09:04:15	3.19044
2022-09-15	09:04:15	4.04052
2022-09-15	09:04:16	5.65482
2022-09-15	09:04:16	3.9882
2022-09-15	09:04:16	2.78057
2022-09-15	09:04:16	1.96123
2022-09-15	09:04:17	2.11477
2022-09-15	09:04:17	3.52123
2022-09-15	09:04:17	4.22388
2022-09-15	09:04:18	4.63217
2022-09-15	09:04:18	4.5539
2022-09-15	09:04:18	3.86093
2022-09-15	09:04:18	4.39828
2022-09-15	09:04:19	4.37055
2022-09-15	09:04:19	4.33803
2022-09-15	09:04:19	4.49533
2022-09-15	09:04:19	4.54958
2022-09-15	09:04:20	4.29268
2022-09-15	09:04:20	4.14276
2022-09-15	09:04:20	4.05589
2022-09-15	09:04:20	3.96261
2022-09-15	09:04:21	3.77889
2022-09-15	09:04:21	3.83798
2022-09-15	09:04:21	3.77406
2022-09-15	09:04:21	3.64393
2022-09-15	09:04:22	3.51696
2022-09-15	09:04:22	3.6995
2022-09-15	09:04:22	4.02556
2022-09-15	09:04:23	4.51502
2022-09-15	09:04:23	5.35808
2022-09-15	09:04:23	8.27232
2022-09-15	09:04:23	10.2288
2022-09-15	09:04:24	6.87182
2022-09-15	09:04:24	2.67721
2022-09-15	09:04:24	0.506781
2022-09-15	09:04:24	0.304644
2022-09-15	09:04:25	-0.0479768
2022-09-15	09:04:25	-0.115814
2022-09-15	09:04:25	-0.237086
2022-09-15	09:04:25	-0.483753
2022-09-15	09:04:26	-0.48818
2022-09-15	09:04:26	-0.574185
2022-09-15	09:04:26	-0.456882
2022-09-15	09:04:27	-0.268893
2022-09-15	09:04:27	-0.291234
2022-09-15	09:04:27	-0.202939
2022-09-15	09:04:27	-0.409402
2022-09-15	09:04:28	-0.257799
2022-09-15	09:04:28	-0.176933
2022-09-15	09:04:28	-0.0259921
2022-09-15	09:04:28	0.0152802
2022-09-15	09:04:29	0.0276465
2022-09-15	09:04:29	-0.0433458
2022-09-15	09:04:29	0.00871527
2022-09-15	09:04:29	-0.0654323
2022-09-15	09:04:30	0.538435
2022-09-15	09:04:30	2.97558
2022-09-15	09:04:30	7.53324
2022-09-15	09:04:31	2.25564
2022-09-15	09:04:31	0.707036
2022-09-15	09:04:31	0.174975
2022-09-15	09:04:31	-0.0610557
2022-09-15	09:04:32	1.59528
2022-09-15	09:04:32	4.96749
2022-09-15	09:04:32	5.26342
2022-09-15	09:04:32	12.3198
2022-09-15	09:04:33	1.84709
2022-09-15	09:04:33	0.00785013
2022-09-15	09:04:33	0.0671376
2022-09-15	09:04:33	0.0149748
2022-09-15	09:04:34	0.0549239
2022-09-15	09:04:34	-0.0515901
2022-09-15	09:04:34	0.186679
2022-09-15	09:04:34	0.62098
2022-09-15	09:04:35	3.08953
2022-09-15	09:04:35	8.26968
2022-09-15	09:04:35	13.4565
2022-09-15	09:04:36	11.5045
2022-09-15	09:04:36	9.92836
2022-09-15	09:04:36	8.36937
2022-09-15	09:04:36	7.91105
2022-09-15	09:04:37	6.1197
2022-09-15	09:04:37	6.74775
2022-09-15	09:04:37	5.73212
2022-09-15	09:04:37	2.90892
2022-09-15	09:04:38	0.986323
2022-09-15	09:04:38	0.205356
2022-09-15	09:04:38	0.257468
2022-09-15	09:04:38	0.403372
2022-09-15	09:04:39	0.339453
2022-09-15	09:04:39	0.196145
2022-09-15	09:04:39	0.177316
2022-09-15	09:04:40	0.0224048
2022-09-15	09:04:40	0.136858
2022-09-15	09:04:40	0.108461
2022-09-15	09:04:40	0.163117
2022-09-15	09:04:41	0.111463
2022-09-15	09:04:41	6.53741
2022-09-15	09:04:41	10.271
2022-09-15	09:04:41	9.77543
2022-09-15	09:04:42	9.57609
2022-09-15	09:04:42	5.61314
2022-09-15	09:04:42	11.5779
2022-09-15	09:04:42	9.51131
2022-09-15	09:04:43	5.15339
2022-09-15	09:04:43	15.3759
2022-09-15	09:04:43	12.8311
2022-09-15	09:04:43	10.2328
2022-09-15	09:04:44	14.087
2022-09-15	09:04:44	12.7714
2022-09-15	09:04:44	13.1385
2022-09-15	09:04:45	6.12571
2022-09-15	09:04:45	9.28357
2022-09-15	09:04:45	11.1324
2022-09-15	09:04:45	11.3436
2022-09-15	09:04:46	15.2746
2022-09-15	09:04:46	12.0041
2022-09-15	09:04:46	17.4845
2022-09-15	09:04:46	9.50001
2022-09-15	09:04:47	10.1842
2022-09-15	09:04:47	7.51563
2022-09-15	09:04:47	9.41416
2022-09-15	09:04:47	17.7461
2022-09-15	09:04:48	23.4028
2022-09-15	09:04:48	20.7058
2022-09-15	09:04:48	9.2793
2022-09-15	09:04:49	12.9307
2022-09-15	09:04:49	19.5511
2022-09-15	09:04:49	10.9956
2022-09-15	09:04:49	10.7318
2022-09-15	09:04:50	10.8582
2022-09-15	09:04:50	10.1215
2022-09-15	09:04:50	13.3816
2022-09-15	09:04:50	12.606
2022-09-15	09:04:51	15.0504
2022-09-15	09:04:51	9.62428
2022-09-15	09:04:51	10.3657
2022-09-15	09:04:51	14.1814
2022-09-15	09:04:52	11.7451
2022-09-15	09:04:52	16.7773
2022-09-15	09:04:52	6.86321
2022-09-15	09:04:52	10.9256
2022-09-15	09:04:53	7.79838
2022-09-15	09:04:53	10.871
2022-09-15	09:04:53	12.5445
2022-09-15	09:04:54	9.7938
2022-09-15	09:04:54	17.5915
2022-09-15	09:04:54	9.99253
2022-09-15	09:04:54	9.30367
2022-09-15	09:04:55	5.45624
2022-09-15	09:04:55	6.58805
2022-09-15	09:04:55	8.07151
2022-09-15	09:04:55	7.84495
2022-09-15	09:04:56	9.15726
2022-09-15	09:04:56	6.68393
2022-09-15	09:04:56	7.10047
2022-09-15	09:04:56	7.49395
2022-09-15	09:04:57	10.3736
2022-09-15	09:04:57	14.0456
2022-09-15	09:04:57	10.4341
2022-09-15	09:04:58	14.034
2022-09-15	09:04:58	5.16439
2022-09-15	09:04:58	8.14586
2022-09-15	09:04:58	11.717
2022-09-15	09:04:59	10.3812
2022-09-15	09:04:59	11.9687
2022-09-15	09:04:59	5.805
2022-09-15	09:04:59	8.3651
2022-09-15	09:05:00	8.48622
2022-09-15	09:05:00	8.46642
2022-09-15	09:05:00	8.79044
2022-09-15	09:05:00	1.9934
2022-09-15	09:05:01	1.28296
2022-09-15	09:05:01	3.05818
2022-09-15	09:05:01	0.427748
2022-09-15	09:05:02	0.381896
2022-09-15	09:05:02	0.0751275
2022-09-15	09:05:02	0.106832
2022-09-15	09:05:02	0.177265
2022-09-15	09:05:03	0.587799
2022-09-15	09:05:03	0.725763
2022-09-15	09:05:03	0.201947
2022-09-15	09:05:03	-0.0524552
2022-09-15	09:05:04	0.185814
2022-09-15	09:05:04	0.304593
2022-09-15	09:05:04	0.190191
2022-09-15	09:05:04	0.304186
2022-09-15	09:05:05	0.193244
2022-09-15	09:05:05	0.394313
2022-09-15	09:05:05	0.159657
2022-09-15	09:05:05	0.503626
2022-09-15	09:05:06	0.16159
2022-09-15	09:05:06	0.303422
2022-09-15	09:05:06	0.0638297
2022-09-15	09:05:07	0.27869
2022-09-15	09:05:07	0.0637788
2022-09-15	09:05:07	0.264746
2022-09-15	09:05:07	0.0323284
2022-09-15	09:05:08	0.278639
2022-09-15	09:05:08	0.491463
2022-09-15	09:05:08	1.48042
2022-09-15	09:05:08	1.0391
2022-09-15	09:05:09	1.29899
2022-09-15	09:05:09	4.73563
2022-09-15	09:05:09	8.92011
2022-09-15	09:05:09	6.18835
2022-09-15	09:05:10	5.5821
2022-09-15	09:05:10	9.94937
2022-09-15	09:05:10	9.75426
2022-09-15	09:05:11	14.5978
2022-09-15	09:05:11	11.8976
2022-09-15	09:05:11	4.80327
2022-09-15	09:05:11	11.6284
2022-09-15	09:05:12	4.52714
2022-09-15	09:05:12	9.93935
2022-09-15	09:05:12	10.9107
2022-09-15	09:05:12	6.19599
2022-09-15	09:05:13	14.2873
2022-09-15	09:05:13	8.11187
2022-09-15	09:05:13	5.90245
2022-09-15	09:05:13	20.2482
2022-09-15	09:05:14	8.90622
2022-09-15	09:05:14	5.70576
2022-09-15	09:05:14	13.6403
2022-09-15	09:05:14	3.45177
2022-09-15	09:05:15	12.7871
2022-09-15	09:05:15	13.6799
2022-09-15	09:05:15	9.5111
2022-09-15	09:05:16	20.1283
2022-09-15	09:05:16	27.4027
2022-09-15	09:05:16	15.506
2022-09-15	09:05:16	11.793
2022-09-15	09:05:17	8.08968
2022-09-15	09:05:17	6.40785
2022-09-15	09:05:17	5.86154
2022-09-15	09:05:17	5.25421
2022-09-15	09:05:18	6.18174
2022-09-15	09:05:18	11.1095
2022-09-15	09:05:18	11.6287
2022-09-15	09:05:18	12.6293
2022-09-15	09:05:19	14.8949
2022-09-15	09:05:19	10.497
2022-09-15	09:05:19	7.48515
2022-09-15	09:05:20	3.74296
2022-09-15	09:05:20	6.83634
2022-09-15	09:05:20	9.60515
2022-09-15	09:05:20	19.6217
2022-09-15	09:05:21	13.9644
2022-09-15	09:05:21	6.61589
2022-09-15	09:05:21	5.13904
2022-09-15	09:05:22	2.72953
2022-09-15	09:05:22	0.388512
2022-09-15	09:05:22	0.510852
2022-09-15	09:05:22	0.140929
2022-09-15	09:05:22	-0.399478
2022-09-15	09:05:23	-0.554949
2022-09-15	09:05:23	-0.850673
2022-09-15	09:05:23	-0.746908
2022-09-15	09:05:23	-0.742633
2022-09-15	09:05:24	-0.83902
2022-09-15	09:05:24	-0.814999
2022-09-15	09:05:24	-0.732607
2022-09-15	09:05:25	-0.64019
2022-09-15	09:05:25	-0.307875
2022-09-15	09:05:25	-0.108893
2022-09-15	09:05:25	0.308003
2022-09-15	09:05:26	1.15752
2022-09-15	09:05:26	0.884186
2022-09-15	09:05:26	0.480115
2022-09-15	09:05:26	0.309122
2022-09-15	09:05:27	1.02688
2022-09-15	09:05:27	1.08927
2022-09-15	09:05:27	0.648002
2022-09-15	09:05:27	0.682303
2022-09-15	09:05:28	0.847392
2022-09-15	09:05:28	0.404797
2022-09-15	09:05:28	0.168257
2022-09-15	09:05:29	0.156959
2022-09-15	09:05:29	0.117214
2022-09-15	09:05:29	0.111769
2022-09-15	09:05:29	0.108512
2022-09-15	09:05:30	0.0901401
2022-09-15	09:05:30	0.100115
2022-09-15	09:05:30	0.164542
2022-09-15	09:05:30	0.158181
2022-09-15	09:05:31	0.178079
2022-09-15	09:05:31	0.169428
2022-09-15	09:05:31	0.178283
2022-09-15	09:05:31	0.183779
2022-09-15	09:05:32	0.203779
2022-09-15	09:05:32	0.224644
2022-09-15	09:05:32	0.22958
2022-09-15	09:05:33	0.242099
2022-09-15	09:05:33	0.388257
2022-09-15	09:05:33	0.522252
2022-09-15	09:05:33	0.200624
2022-09-15	09:05:34	0.1564
2022-09-15	09:05:34	0.15126
2022-09-15	09:05:34	0.309987
2022-09-15	09:05:34	0.330038
2022-09-15	09:05:35	0.212735
2022-09-15	09:05:35	0.217061
2022-09-15	09:05:35	0.223117
2022-09-15	09:05:35	0.215636
2022-09-15	09:05:36	0.243881
2022-09-15	09:05:36	0.29584
2022-09-15	09:05:36	0.299046
2022-09-15	09:05:36	0.241692
2022-09-15	09:05:37	0.172685
2022-09-15	09:05:37	0.143066
2022-09-15	09:05:37	0.107087
2022-09-15	09:05:38	0.0247458
2022-09-15	09:05:38	-0.0405977
2022-09-15	09:05:38	-0.303346
2022-09-15	09:05:38	-0.615916
2022-09-15	09:05:39	-1.04752
2022-09-15	09:05:39	-0.918409
2022-09-15	09:05:39	0.0596567
2022-09-15	09:05:39	1.1167
2022-09-15	09:05:40	1.73187
2022-09-15	09:05:40	1.07543
2022-09-15	09:05:40	1.02989
2022-09-15	09:05:40	1.72917
2022-09-15	09:05:41	1.20933
2022-09-15	09:05:41	0.726221
2022-09-15	09:05:41	0.814771
2022-09-15	09:05:42	0.508257
2022-09-15	09:05:42	0.411107
2022-09-15	09:05:42	0.485458
2022-09-15	09:05:42	0.405967
2022-09-15	09:05:43	0.324746
2022-09-15	09:05:43	0.304797
2022-09-15	09:05:43	0.260776
2022-09-15	09:05:43	0.229733
2022-09-15	09:05:44	0.18098
2022-09-15	09:05:44	0.220115
2022-09-15	09:05:44	0.202812
2022-09-15	09:05:44	0.207137
2022-09-15	09:05:45	0.211412
2022-09-15	09:05:45	0.228868
2022-09-15	09:05:45	0.231107
2022-09-15	09:05:45	0.215585
2022-09-15	09:05:46	0.233041
2022-09-15	09:05:46	0.2393
2022-09-15	09:05:46	0.215738
2022-09-15	09:05:47	0.177061
2022-09-15	09:05:47	0.281845
2022-09-15	09:05:47	0.414517
2022-09-15	09:05:47	0.529224
2022-09-15	09:05:48	0.70729
2022-09-15	09:05:48	0.649377
2022-09-15	09:05:48	0.874974
2022-09-15	09:05:48	2.31757
2022-09-15	09:05:49	4.60571
2022-09-15	09:05:49	7.28103
2022-09-15	09:05:49	7.45736
2022-09-15	09:05:49	6.22652
2022-09-15	09:05:50	4.56322
2022-09-15	09:05:50	3.18851
2022-09-15	09:05:50	4.10602
2022-09-15	09:05:51	5.25889
2022-09-15	09:05:51	6.94937
2022-09-15	09:05:51	11.0828
2022-09-15	09:05:51	9.56688
2022-09-15	09:05:52	9.42377
2022-09-15	09:05:52	11.2193
2022-09-15	09:05:52	11.362
2022-09-15	09:05:52	13.7519
2022-09-15	09:05:53	15.5858
2022-09-15	09:05:53	12.1553
2022-09-15	09:05:53	9.53955
2022-09-15	09:05:53	8.23131
2022-09-15	09:05:54	9.25462
2022-09-15	09:05:54	10.9857
2022-09-15	09:05:54	8.7341
2022-09-15	09:05:54	5.99741
2022-09-15	09:05:55	6.87034
2022-09-15	09:05:55	8.07813
2022-09-15	09:05:55	10.6376
2022-09-15	09:05:56	14.4535
2022-09-15	09:05:56	18.194
2022-09-15	09:05:56	21.5674
2022-09-15	09:05:56	15.6477
2022-09-15	09:05:57	10.9433
2022-09-15	09:05:57	9.65176
2022-09-15	09:05:57	10.4976
2022-09-15	09:05:57	11.5829
2022-09-15	09:05:58	8.07624
2022-09-15	09:05:58	7.88057
2022-09-15	09:05:58	7.36169
2022-09-15	09:05:58	7.49609
2022-09-15	09:05:59	7.93314
2022-09-15	09:05:59	7.72378
2022-09-15	09:05:59	7.83721
2022-09-15	09:06:00	7.93166
2022-09-15	09:06:00	7.88525
2022-09-15	09:06:00	6.19828
2022-09-15	09:06:00	5.02118
2022-09-15	09:06:01	3.70678
2022-09-15	09:06:01	2.91192
2022-09-15	09:06:01	1.69116
2022-09-15	09:06:01	0.425814
2022-09-15	09:06:02	0.339148
2022-09-15	09:06:02	0.121133
2022-09-15	09:06:02	-0.0421753
2022-09-15	09:06:02	-0.158002
2022-09-15	09:06:03	-0.357798
2022-09-15	09:06:03	-0.571335
2022-09-15	09:06:03	-0.785992
2022-09-15	09:06:04	-0.651844
2022-09-15	09:06:04	-0.361666
2022-09-15	09:06:04	0.00810459
2022-09-15	09:06:04	0.334568
2022-09-15	09:06:05	0.615178
2022-09-15	09:06:05	1.71976
2022-09-15	09:06:05	2.64912
2022-09-15	09:06:05	1.24912
2022-09-15	09:06:06	0.943473
2022-09-15	09:06:06	1.66159
2022-09-15	09:06:06	6.47116
2022-09-15	09:06:06	11.071
2022-09-15	09:06:07	10.6753
2022-09-15	09:06:07	12.8478
2022-09-15	09:06:07	17.1103
2022-09-15	09:06:07	11.9884
2022-09-15	09:06:08	6.87008
2022-09-15	09:06:08	4.79502
2022-09-15	09:06:08	3.06978
2022-09-15	09:06:09	9.42265
2022-09-15	09:06:09	16.6794
2022-09-15	09:06:09	10.6752
2022-09-15	09:06:09	8.71049
2022-09-15	09:06:10	6.90098
2022-09-15	09:06:10	2.87966
2022-09-15	09:06:10	0.615127
2022-09-15	09:06:10	0.811718
2022-09-15	09:06:11	0.435534
2022-09-15	09:06:11	0.435891
2022-09-15	09:06:11	0.429682
2022-09-15	09:06:11	0.323168
2022-09-15	09:06:12	0.409987
2022-09-15	09:06:12	0.395484
2022-09-15	09:06:12	0.437214
2022-09-15	09:06:13	0.404084
2022-09-15	09:06:13	0.857417
2022-09-15	09:06:13	4.23375
2022-09-15	09:06:13	12.1746
2022-09-15	09:06:14	13.2123
2022-09-15	09:06:14	7.7594
2022-09-15	09:06:14	4.32291
2022-09-15	09:06:14	1.6709
2022-09-15	09:06:15	1.47503
2022-09-15	09:06:15	1.20576
2022-09-15	09:06:15	0.676502
2022-09-15	09:06:15	0.500267
2022-09-15	09:06:16	0.438588
2022-09-15	09:06:16	0.447545
2022-09-15	09:06:16	0.387137
2022-09-15	09:06:16	0.388715
2022-09-15	09:06:17	0.339555
2022-09-15	09:06:17	0.517723
2022-09-15	09:06:17	0.413346
2022-09-15	09:06:18	0.440674
2022-09-15	09:06:18	0.435534
2022-09-15	09:06:18	0.397367
2022-09-15	09:06:18	0.430751
2022-09-15	09:06:19	0.527595
2022-09-15	09:06:19	0.431514
2022-09-15	09:06:19	0.0889188
2022-09-15	09:06:19	0.0476465
2022-09-15	09:06:20	0.00846081
2022-09-15	09:06:20	-0.160903
2022-09-15	09:06:20	-0.238664
2022-09-15	09:06:20	0.196705
2022-09-15	09:06:21	0.886069
2022-09-15	09:06:21	2.14561
2022-09-15	09:06:21	2.02474
2022-09-15	09:06:22	2.20561
2022-09-15	09:06:22	6.40169
2022-09-15	09:06:22	9.50433
2022-09-15	09:06:22	1.38083
2022-09-15	09:06:23	5.0425
2022-09-15	09:06:23	11.9191
